# Supplementary material for: The Chronic Effects of a Single Low-Intensity Blast Exposure on Phosphoproteome Networks and Cognitive Function Influenced by Mutant Tau Overexpression
Source: MDPI journal article supplement (doi:10.3390/ijms25063338), 2024-03-15
Supplement: s1 [file s1]

Supplementary file S9- Blast experiment results

Cohort 1

Table 1. Pressure data

|                                 |   | Stand One |         |       | Stand Two |         |       | Stand Three |         |       |
|---------------------------------|---|-----------|---------|-------|-----------|---------|-------|-------------|---------|-------|
|                                 |   | Pencil    | Pencil' | Flush | Pencil    | Pencil' | Flush | Pencil      | Pencil' | Flush |
| Time of Arrival (ms)            | * | 4.53      | 4.55    | 4.51  | 4.51      | 4.52    | 4.47  | 4.47        | 4.47    |       |
| Peak Pressure (psi)             | * | 6.78      | 23.6    | 6.78  | 6.58      | 23.2    | 6.67  | 6.79        | 24.7    |       |
| Postive Phase Threshold (psi)   | * | 0.2       | 0.2     | 0.2   | 0.2       | 0.2     | 0.2   | 0.2         | 0.2     |       |
| Time of Peak Pressure (ms)      | * | 4.58      | 4.55    | 4.53  | 4.56      | 4.53    | 4.52  | 4.52        | 4.47    |       |
| Time of Positive Phase End (ms) | * | 7.51      | 7.3     | 7.45  | 7.39      | 7.21    | 7.38  | 7.3         | 7.17    |       |
| Rise Time (ms)                  | * | 0.05      | 0.0     | 0.02  | 0.05      | 0.01    | 0.05  | 0.05        | 0.0     |       |
| Positive Phase Duration (ms)    | * | 2.98      | 2.75    | 2.94  | 2.88      | 2.69    | 2.91  | 2.83        | 2.7     |       |
| Incident Impulse (psi-ms)       | * | 8.54      | 9.16    | 8.4   | 8.45      | 8.97    | 8.92  | 8.39        | 9.02    |       |

\* Error in Pencil 1 sensor data

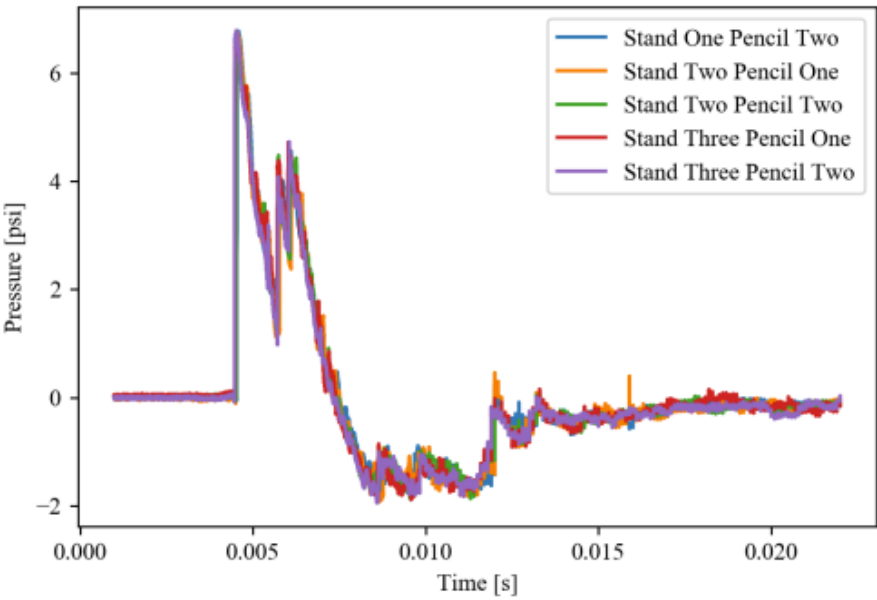

Figure 1. Pressure vs time gathered by pencil sensors

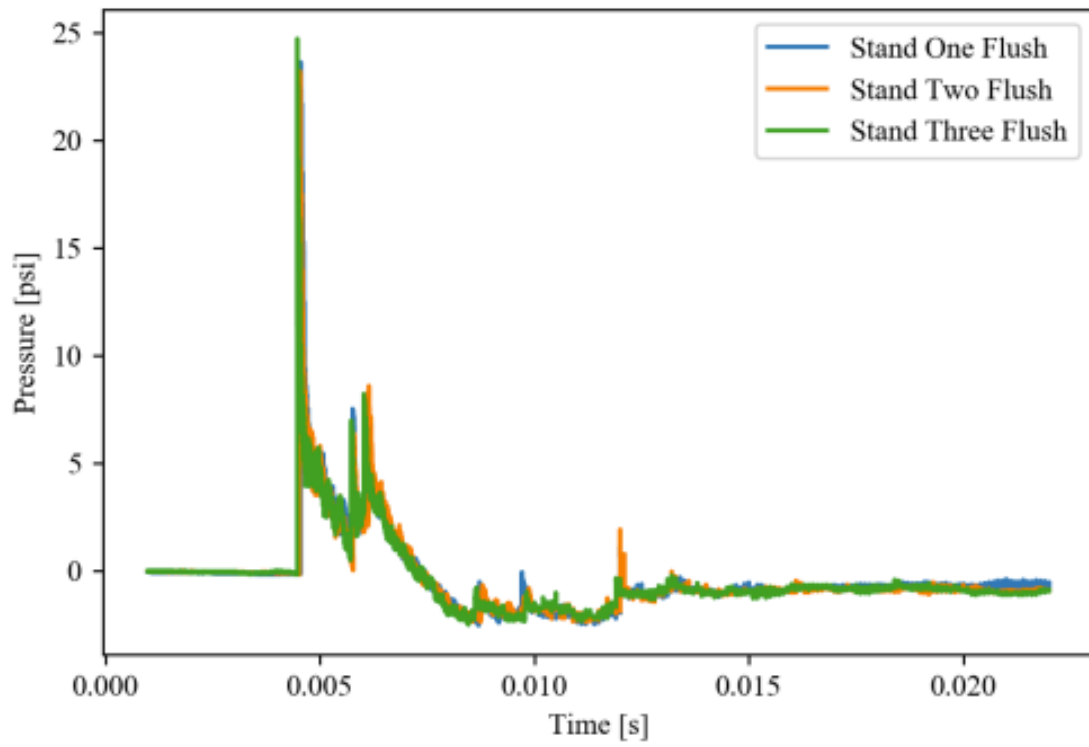

**Figure 2.** Pressure vs time gathered by flush sensors

## Cohort 2

**Table 1.** Pressure data

|                                        | Stand One |         |       | Stand Two |         |       | Stand Three |         |       |
|----------------------------------------|-----------|---------|-------|-----------|---------|-------|-------------|---------|-------|
|                                        | Pencil    | Pencil' | Flush | Pencil    | Pencil' | Flush | Pencil      | Pencil' | Flush |
| <b>Time of Arrival (ms)</b>            | *         | 4.53    | 4.55  | 4.11      | 4.54    | 4.52  | 4.54        | 4.57    | 4.56  |
| <b>Peak Pressure (psi)</b>             | *         | 6.82    | 21.45 | 6.97      | 6.75    | 21.95 | 7.43        | 7.1     | 30.44 |
| <b>Postive Phase Threshold (psi)</b>   | *         | 0.2     | 0.2   | 0.2       | 0.2     | 0.2   | 0.2         | 0.2     | 0.2   |
| <b>Time of Peak Pressure (ms)</b>      | *         | 4.54    | 4.56  | 4.56      | 4.6     | 4.53  | 4.59        | 4.6     | 4.56  |
| <b>Time of Positive Phase End (ms)</b> | *         | 7.39    | 7.07  | 7.35      | 7.25    | 6.98  | 7.4         | 7.24    | 7.01  |
| <b>Rise Time (ms)</b>                  | *         | 0.01    | 0.01  | 0.45      | 0.06    | 0.01  | 0.05        | 0.03    | 0.0   |
| <b>Positive Phase Duration (ms)</b>    | *         | 2.86    | 2.52  | 3.24      | 2.71    | 2.46  | 2.86        | 2.67    | 2.45  |
| <b>Incident Impulse (psi·ms)</b>       | *         | 8.42    | 9.34  | 8.65      | 8.39    | 9.13  | 9.1         | 8.39    | 9.32  |

\* Pencil sensor 1 was not used

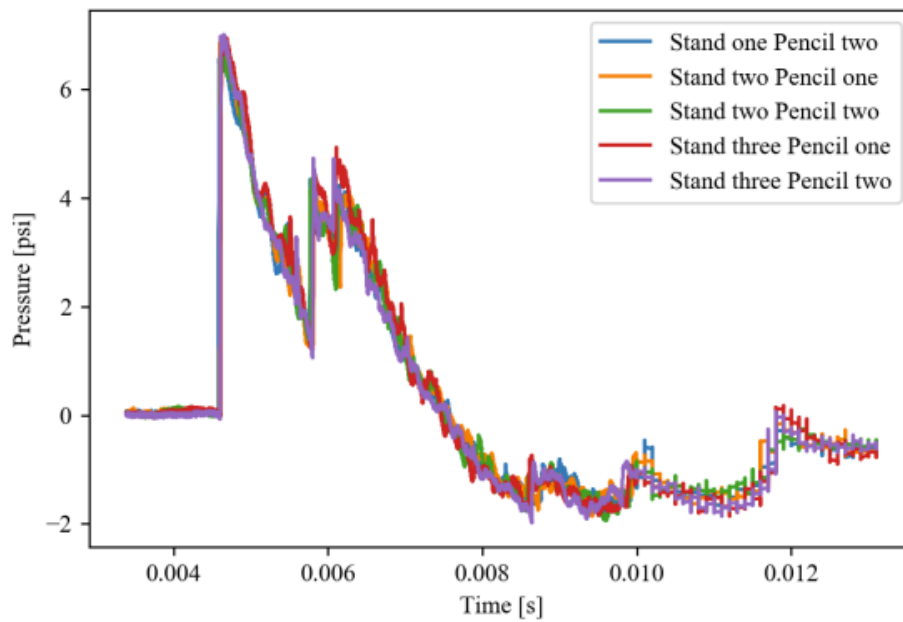

**Figure 1.** Pressure vs time gathered by pencil sensors

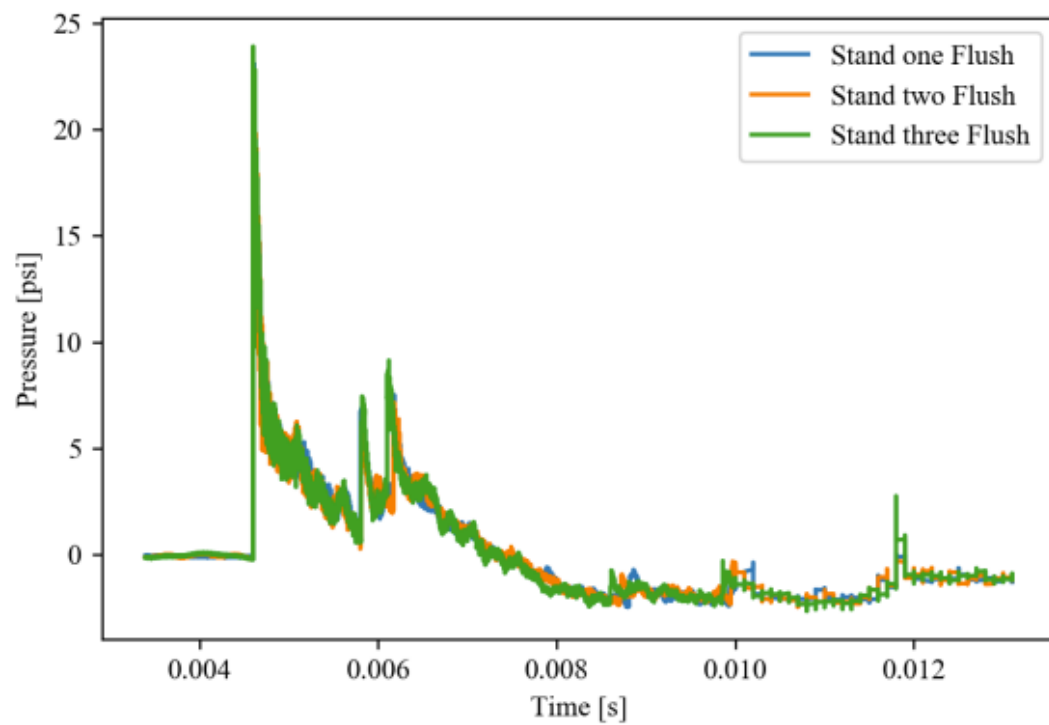

**Figure 2.** Pressure vs time gathered by flush sensors
