# Supplementary material for: The Chronic Effects of a Single Low-Intensity Blast Exposure on Phosphoproteome Networks and Cognitive Function Influenced by Mutant Tau Overexpression
Source: MDPI journal article supplement (doi:10.3390/ijms25063338), 2024-03-15
Supplement: s1 [file s1]

|        |                                                                                 |                       |         |         |         |         |         |         |         |         |         |        |         |         |        |        |        |
|--------|---------------------------------------------------------------------------------|-----------------------|---------|---------|---------|---------|---------|---------|---------|---------|---------|--------|---------|---------|--------|--------|--------|
| Mapk1  | __VADPHOHTGHTVEATV_3                                                            | IN/A                  | 7.1910  | 8.2146  | 7.1592  | 7.5881  | 5.2464  | 7.4831  | 7.7785  | 5.5897  | 7.3458  | 8.2112 | 0.9723  | -0.0405 | 0.7705 | 0.1132 |        |
| Mapk1  | __OFFPHQTYVC[Carbamidomethyl](C)[Q]R_3                                          | IN/A                  | 5.2837  | 5.3296  | 5.5671  | 5.7928  | 5.6671  | 5.5071  | 5.9996  | 5.5384  | 5.4141  | 5.5017 | 0.9702  | -0.0436 | 0.3150 | 0.5017 |        |
| Mapk1  | __YTNLSYGGGAVG[Oxidation(M)]VC[Carbamidomethyl](C)[SAYONAK_N_3                  | IN/A                  | 3.7360  | 3.8185  | 3.1602  | 3.7324  | 3.8306  | 4.2955  | 3.2175  | 4.4837  | 4.1165  | 5.0645 | 0.8631  | -0.2125 | 0.1125 | 0.9487 |        |
| Mapk1  | __APEMANK_N_3                                                                   | IN/A                  | 4.1559  | 4.0118  | 3.8771  | 5.1552  | 5.2820  | 3.9713  | 5.3063  | 4.3816  | 5.3665  | 0.9397 | -0.0897 | 0.6095  | 0.2150 | 0.9487 |        |
| Mapk1  | __YHSAENVLHR_3                                                                  | IN/A                  | 3.7886  | 4.2142  | 4.3249  | 4.5340  | 3.1263  | 3.3504  | 3.4890  | 3.2759  | 2.9730  | 3.9949 | 1.1700  | 0.2266  | 0.0892 | 1.0496 |        |
| Ppp1cc | __GNHCE[Carbamidomethyl](C)[AS]Phospho(STY)INR_2                                | P63087_S129_M1_Ppp1cc | 7.2272  | 6.9819  | 7.0514  | 7.4129  | 6.8893  | 7.0532  | 7.4279  | 7.0719  | 7.1587  | 1.0138 | 0.0198  | 0.3443  | 0.4630 | 0.9487 |        |
| Ppp1cc | __HDLUDLC[Carbamidomethyl](C)[R_2                                               | IN/A                  | 7.0626  | 7.4253  | 7.9647  | 7.2962  | 7.5581  | 7.3277  | 7.2658  | 7.6019  | 7.7380  | 1.0073 | 0.0105  | 0.7446  | 0.1269 | 0.9487 |        |
| Ppp1cc | __HYVCEBER_N_2                                                                  | IN/A                  | 4.7490  | 4.7952  | 4.7952  | 4.7952  | 4.7952  | 4.7952  | 4.7952  | 4.7952  | 4.7952  | 1.0073 | 0.0105  | 0.7446  | 0.1269 | 0.9487 |        |
| Ppp1cc | __HYVCEBER[Carbamidomethyl](C)[R_2                                              | IN/A                  | 7.4259  | 7.2797  | 7.1794  | 7.3892  | 7.2861  | 7.1293  | 7.4086  | 7.2812  | 7.3812  | 1.0073 | 0.0105  | 0.7446  | 0.1269 | 0.9487 |        |
| Ppp1cc | __TTTDC[Carbamidomethyl](C)[HJFAC[Carbamidomethyl](C)[PIAMAVDK_N_3              | IN/A                  | 7.2966  | 7.1367  | 6.6099  | 7.1654  | 6.7778  | 7.0380  | 7.2330  | 6.5981  | 6.8656  | 7.1288 | 1.0035  | 0.0051  | 0.8892 | 0.0510 | 0.9487 |
| Ppp1cc | __EFLSDVLEFLFLR_K_2                                                             | IN/A                  | 5.9046  | 5.4464  | 5.4647  | 5.1405  | 5.5519  | 5.7272  | 5.6131  | 5.3257  | 5.4139  | 0.9717 | -0.0415 | 0.4179  | 0.3789 | 0.9487 |        |
| Ppp1cc | __YENFIFLIR_2                                                                   | IN/A                  | 5.2723  | 4.2826  | 5.0484  | 4.9302  | 4.5133  | 4.5337  | 4.2009  | 4.7124  | 3.6023  | 5.2825 | 1.0768  | 0.1067  | 0.3312 | 0.4799 | 0.9487 |
| Ppp1cc | __Acetyl(Protein N-term)[ADKLINDSHQIR_2                                         | IN/A                  | 5.3973  | 5.0295  | 3.3326  | 5.3016  | 5.0668  | 5.2222  | 4.6254  | 4.0217  | 6.0546  | 3.6066 | 1.0254  | 0.0362  | 0.8411 | 0.0752 | 0.9487 |
| Ppp1cc | __FC[Carbamidomethyl](C)[C][Carbamidomethyl](C)[HGGFLPQLQGM[Oxidation(M)]EQOR_3 | IN/A                  | 5.1477  | 4.7320  | 5.2075  | 5.0248  | 4.9837  | 5.1765  | 4.5876  | 5.3594  | 5.1263  | 5.8079 | 0.9631  | -0.0543 | 0.3937 | 0.4048 | 0.9487 |
| Ppp1cc | __AHQVDEQVEFFAK_2                                                               | IN/A                  | 6.3760  | 6.0139  | 6.1255  | 5.4556  | 5.6206  | 5.4556  | 5.9358  | 6.0516  | 5.6689  | 6.4174 | 1.0314  | 0.0446  | 0.3795 | 0.4048 | 0.9487 |
| Ppp1cc | __GSLTEK[Carbamidomethyl](C)[LLAYK_2                                            | IN/A                  | 3.1677  | 4.1514  | 3.0913  | 4.4166  | 3.7151  | 2.0103  | 3.3755  | 3.3984  | 3.5937  | 3.3442 | 1.1578  | 0.2114  | 0.2436 | 0.6134 | 0.9487 |
| Ppp1cc | __C[Carbamidomethyl](C)[GGHGGGYDLIR_2                                           | IN/A                  | 3.8249  | 4.1833  | 4.3612  | 4.1719  | 3.1626  | 3.6095  | 4.3838  | 3.8793  | 3.8370  | 4.0312 | 1.0189  | 0.0270  | 0.7909 | 0.1019 | 0.9487 |
| Yahaz  | __TETTELK_2                                                                     | IN/A                  | 10.7308 | 10.0862 | 10.1073 | 10.7903 | 10.1589 | 10.1073 | 10.7903 | 10.1589 | 11.0043 | 0.9984 | -0.0023 | 0.7446  | 0.0514 | 0.9487 |        |
| Yahaz  | __GVGDSGAGVGEAFISK_3                                                            | IN/A                  | 9.5427  | 9.8594  | 9.5732  | 9.8594  | 9.4162  | 9.3046  | 9.2099  | 9.2099  | 9.4162  | 1.0209 | 0.0136  | 0.5728  | 0.2378 | 0.9487 |        |
| Yahaz  | __VVSSECK_2                                                                     | IN/A                  | 6.8581  | 7.5506  | 7.6878  | 8.2500  | 7.8516  | 7.9878  | 8.2768  | 8.2295  | 8.0487  | 7.9749 | 0.9940  | -0.0087 | 0.9189 | 0.0367 | 0.9487 |
| Yahaz  | __YLAEVAGDOK_2                                                                  | IN/A                  | 7.1709  | 7.2096  | 7.3905  | 7.4764  | 6.8608  | 7.39    |         |         |         |        |         |         |        |        |        |





|         |                                                              |                        |        |         |        |         |        |         |         |         |        |        |         |         |        |        |
|---------|--------------------------------------------------------------|------------------------|--------|---------|--------|---------|--------|---------|---------|---------|--------|--------|---------|---------|--------|--------|
| Hmt1    | _M(Oxidation) (M)[VWVGAGGGGGVHIVHLVGG_R_4                    | IN/A                   | 3.9634 | 4.0239  | 3.9646 | 3.7104  | 3.3141 | 3.1674  | 5.0507  | 4.0248  | 3.8342 | 4.2386 | 0.2552  | -0.1121 | 0.4568 | 0.3906 |
| Hmt1    | _C[Carbamidomethyl] (C)[LHAFSDPhospho] (STY)[QAPHTFLVPLV_R_3 | P70349_545_M1_Hmt1     | 4.0304 | 3.6007  | 3.8536 | 3.6007  | 3.7418 | 3.6995  | 3.7971  | 3.6807  | 3.8042 | 0.0874 | 0.0746  | 0.1546  | 0.7835 |        |
| Hmt1    | _C[Carbamidomethyl] (C)[AAGDLGL_R_2                          | IN/A                   | 4.1221 | 3.8807  | 3.3175 | 3.3667  | 3.4598 | 3.6839  | 4.0813  | 4.4442  | 4.1404 | 4.3284 | 0.8699  | -0.2011 | 0.0396 | 1.4026 |
| Ufd1    | _FIASFGEQGGPhospho (STY)ILR_2                                | P70362_5299_M1_Ufd1    | 8.2811 | 9.0435  | 8.6074 | 8.1735  | 4.3167 | 8.1067  | 7.7438  | 8.7178  | 7.4588 | 8.7178 | 0.9652  | -0.0511 | 0.7614 | 0.1184 |
| Ncoai   | _LIDGEGPhospho (STY)PSDSTLVEPEKK_3                           | P70365_5702_M1_Ncoai   | 3.9902 | 4.0126  | 4.5265 | 3.6992  | 3.3279 | 3.1562  | 4.2132  | 3.6906  | 4.2723 | 4.1965 | 1.0014  | 0.0020  | 0.9853 | 0.0064 |
| Ncoai   | _KISGPhospho (STY)PC[Carbamidomethyl] (C)[DTLASSTKK_R_3      | IN/A                   | 3.2966 | 3.7769  | 4.5796 | 4.0421  | 4.1352 | 4.3993  | 3.7678  | 4.7475  | 3.5029 | 0.8969 | -0.1570 | 0.3735  | 0.4718 |        |
| Ncoai   | _IHHPhospho (STY)[GSPGSDSDSGAGSP_R_3                         | P70365_5369_M1_Ncoai   | 3.6563 | 4.0666  | 3.3930 | 6.4311  | 3.3688 | 3.4105  | 3.9496  | 3.2374  | 3.7852 | 4.0550 | 1.1886  | 0.2493  | 0.2519 | 0.5988 |
| Ncoai   | _CMSSSGPhospho (STY)PSR_2                                    | P70366_5679_M1_Ncoai   | 3.6777 | 3.4777  | 3.4161 | 5.9065  | 3.4820 | 3.4820  | 3.4820  | 3.4820  | 3.4820 | 1.0114 | 0.1014  | 0.0471  | 0.9677 | 0.5648 |
| Ncoai   | _KISGPhospho (STY)PC[Carbamidomethyl] (C)[DTLASSTKK_R_3      | IN/A                   | 4.2261 | 3.7767  | 3.3633 | 3.4633  | 3.3789 | 3.9734  | 3.9734  | 3.9734  | 4.2329 | 4.4334 | 0.8950  | -0.4009 | 0.0094 | 1.1187 |
| Elavl1  | _LVVQDTGLR_R_2                                               | IN/A                   | 4.5569 | 5.3533  | 5.1149 | 5.3291  | 5.2156 | 5.1316  | 5.9625  | 4.3369  | 4.7179 | 5.2342 | 1.0081  | 0.0117  | 0.8971 | 0.0472 |
| Elavl1  | _JAAMPQNK_R_2                                                | IN/A                   | 5.3035 | 5.1765  | 5.1305 | 5.9984  | 5.1136 | 5.1136  | 5.1136  | 3.7843  | 3.4814 | 3.2440 | 0.3033  | 0.1284  | 0.8813 | 0.8913 |
| Elavl1  | _TLNLNVPLPQNM(Oxidation) (M)[TQELR_R_2                       | IN/A                   | 4.0575 | 3.6538  | 4.1188 | 3.3404  | 3.8488 | 3.9623  | 4.9355  | 5.2656  | 4.3039 | 4.1002 | 0.8428  | -0.2467 | 0.0394 | 1.4041 |
| Rargif2 | _LGSPhospho (STY)SLR_R_2                                     | P70392_5484_M1_Rargif2 | 7.3836 | 7.7260  | 6.9012 | 4.3232  | 3.3399 | 3.3399  | 3.6909  | 3.3999  | 3.6909 | 1.4367 | 0.5227  | 0.1308  | 0.8834 |        |
| Rargif2 | _KFSPhospho (STY)PSPPPLAVLR_R_2                              | P70392_5725_M2_Rargif2 | 3.7174 | 3.6017  | 8.9545 | 3.8668  | 3.9243 | 3.9577  | 8.1238  | 3.9431  | 3.0440 | 3.5280 | 1.0650  | 0.9098  | 0.8373 | 0.0771 |
| Rargif2 | _TLMSPhospho (STY)[C]Carbamidomethyl (C)[VWPQR_R_2           | P70392_5633_M1_Rargif2 | 4.0683 | 4.5486  | 3.8080 | 3.3129  | 3.4060 | 4.6301  | 4.1942  | 4.1942  | 4.2746 | 0.9234 | -0.1149 | 0.2690  | 0.5702 |        |
| Rargif2 | _EHLVDGSGPhospho (STY)PSR_2                                  | IN/A                   | 3.4894 | 3.4334  | 5.9557 | 6.0091  | 5.8157 | 4.0674  | 5.5467  | 5.4905  | 4.4355 | 3.6377 | 1.1953  | 0.2573  | 0.2079 | 0.6822 |
| Rargif2 | _KLSPhospho (STY)TSLR_R_2                                    | P70392_5745_M1_Rargif2 | 6.8281 | 3.4240  | 3.9647 | 3.1105  | 4.0350 | 4.0084  | 6.1445  | 4.2792  | 4.4341 | 3.6387 | 0.7872  | -0.3453 | 0.0770 | 1.1520 |
| Ons     | _VSPPhospho (STY)[AT]Phospho (STY)[G]Phospho (STY)CPKK_R_2   | P70396_51_M1_Ons       | 9.6469 | 9.8603  | 9.8603 | 9.6229  | 9.8603 | 9.8603  | 9.8603  | 9.8603  | 9.8603 | 1.0204 | 0.9033  | 0.2745  | 0.0952 |        |
| Udrp1   | _ADGNGEVEGPhospho (STY)PPK_R_2                               | P70398_5247_M1_Udrp1   | 8.2196 | 8.1895  | 8.2595 | 9.1577  | 8.5805 | 8.5805  | 8.5805  | 8.5805  | 8.3935 | 8.4873 | 0.7572  | -0.3121 | 0.1311 | 0.8824 |
| Tps3bp1 | _STFVPSPhospho (STY)ITFEGGR_R_2                              | P70399_5381_M1_Tps3bp1 | 4.0862 | 10.8912 | 3.6007 | 10.2547 | 4.0404 | 10.2507 | 10.1040 | 10.2503 | 4.1000 | 0.9878 | -0.0177 | 0.9665  | 0.0148 |        |
| Tps3bp1 | _SDRPSPhospho (STY)PDVAVAT                                   |                        |        |         |        |         |        |         |         |         |        |        |         |         |        |        |



|       |  |                                                                                |      |        |        |        |        |         |        |        |        |        |        |        |        |        |        |
|-------|--|--------------------------------------------------------------------------------|------|--------|--------|--------|--------|---------|--------|--------|--------|--------|--------|--------|--------|--------|--------|
|       |  | _L1QC[Carbamidomethyl] (C)DSSAOF_2                                             | IN/A | 6.1204 | 6.4993 | 6.9674 | 6.0751 | 6.2610  | 6.3728 | 6.4626 | 6.3583 | 6.5169 | 6.0754 | 1.0043 | 0.0062 | 0.0829 | 0.0541 |
| Hcpa  |  | _TFTQSDGTFPR_2                                                                 | IN/A | 4.2548 | 4.2121 | 3.5602 | 5.4322 | 5.18625 | 5.4247 | 4.2511 | 4.2551 | 5.8355 | 5.5117 | 0.7607 | 0.3946 | 0.0283 | 1.5485 |
| Hcpa  |  | _EEM[Oxidation] (M)ELVQAVK_2                                                   | IN/A | 5.3013 | 4.1297 | 5.6992 | 5.0916 | 4.0995  | 4.7296 | 4.2038 | 4.8056 | 4.9464 | 4.9341 | 1.0297 | 0.0422 | 0.6981 | 0.1561 |
| Hcpa  |  | _LRPEMLQDLR_2                                                                  | IN/A | 4.0837 | 6.2866 | 5.1221 | 6.4200 | 5.1786  | 5.9746 | 4.1433 | 5.3282 | 3.8943 | 1.1165 | 0.1590 | 0.4679 | 0.3129 | 0.1298 |
| Hcpa  |  | _DC[Carbamidomethyl] (C)PGLVANDFVK_3                                           | IN/A | 3.6061 | 3.7130 | 3.1427 | 3.0665 | 3.8130  | 3.8464 | 2.1003 | 3.8318 | 1.7449 | 3.4167 | 1.1607 | 0.2150 | 0.3375 | 0.4718 |
| Hcpa  |  | _MPFDESTFKR_2                                                                  | IN/A | 4.3782 | 4.9222 | 5.5766 | 4.9222 | 5.0843  | 4.9993 | 5.2165 | 3.8432 | 4.7512 | 4.1888 | 0.9947 | 0.0076 | 0.9618 | 0.0169 |
| Arfs  |  | _VGSASLQK_2                                                                    | IN/A | 5.9000 | 5.9629 | 5.5771 | 5.6278 | 5.6578  | 5.9078 | 5.8121 | 5.0143 | 6.0021 | 5.5462 | 1.0135 | 0.0194 | 0.7104 | 0.1485 |
| Cph2  |  | _ALEQEP[Carbamidomethyl] (C)GK[Phospho] (STY)ITMPK_2                           | IN/A | 8.4199 | 8.4796 | 8.4199 | 8.4796 | 8.4199  | 8.4796 | 8.4199 | 8.4796 | 8.4199 | 8.4796 | 8.4199 | 8.4796 | 8.4199 | 8.4796 |
| Cph2  |  | _APAGC[Carbamidomethyl] (C)GKEEFESLDFVK_3                                      | IN/A | 8.4830 | 8.4830 | 8.4830 | 8.4830 | 8.4830  | 8.4830 | 8.4830 | 8.4830 | 8.4830 | 8.4830 | 8.4830 | 8.4830 | 8.4830 | 8.4830 |
| Cph2  |  | _APAGC[Carbamidomethyl] (C)GKEEFESLDFVK_3                                      | IN/A | 6.1811 | 6.4454 | 6.7774 | 6.4604 | 5.6964  | 5.6449 | 5.5479 | 6.1893 | 6.7174 | 1.0588 | 0.0824 | 0.2564 | 0.5911 |        |
| Cph2  |  | _YLPQFLQDMQK_2                                                                 | IN/A | 3.4622 | 7.4665 | 8.8495 | 5.5981 | 6.2210  | 7.3094 | 7.8303 | 6.1878 | 5.8238 | 1.1508 | 0.1512 | 0.1827 | 0.2346 |        |
| Erh   |  | _I[Acetyl] (Protein N-term)SHTLLVQPK_2                                         | IN/A | 6.2912 | 6.5295 | 6.8937 | 6.8478 | 6.8492  | 6.9544 | 6.1319 | 6.8953 | 6.8788 | 6.9575 | 1.0046 | 0.0066 | 0.8732 | 0.0589 |
| Erh   |  | _TYADVESNEC[Carbamidomethyl] (C)IM[Oxidation] (M)EGVC[Carbamidomethyl] (C)IK_2 | IN/A | 6.0153 | 5.7893 | 4.4087 | 5.0393 | 5.0999  | 4.8644 | 5.4710 | 4.8036 | 5.0676 | 1.0454 | 0.0640 | 0.4793 | 0.3194 |        |
| Erh   |  | _MYEEHK_2                                                                      | IN/A | 5.1463 | 4.8290 | 3.3710 | 3.7498 | 3.8430  | 6.0310 | 3.5754 | 4.0601 | 3.7572 | 5.4857 | 0.9140 | 0.1297 | 0.5295 | 0.2761 |
| Erh   |  | _ADTQYQPPNK_2                                                                  | IN/A | 3.6165 | 4.3863 | 4.1528 | 4.0729 | 2.9542  | 3.5299 | 3.5515 | 3.3168 | 3.4717 | 3.1002 | 1.1304 | 0.1768 | 0.1362 | 0.8659 |
| Ap2m1 |  | _TFTQDQIK_2                                                                    | IN/A | 8.7502 | 8.5748 | 8.7306 | 8.7042 | 8.8471  | 8.5942 | 8.7666 | 9.0250 | 8.4532 | 8.4836 | 1.0070 | 0.0100 | 0.6346 | 0.0375 |
| Ap2m1 |  | _EQSASAEVFNQK_2                                                                | IN/A | 7.6881 | 7.7384 | 8.3126 | 7.5365 | 7.3540  | 7.7286 | 7.6275 | 7.9129 | 8.1268 | 7.4552 | 1.0060 | 0.0086 | 0.8489 | 0.1911 |
| Ap2m1 |  | _VYVWVGK_2                                                                     | IN/A | 7.5654 | 7.5654 | 7.5654 | 7.5654 | 7.5654  | 7.5654 | 7.5654 | 7.5654 | 7.5654 | 7.5654 | 7.5654 | 7.5654 | 7.5654 | 7.5654 |
| Ap2m1 |  | _DQLPFR_2                                                                      | IN/A | 6.1679 | 6.9081 | 6.4004 | 6.8914 | 6.0818  | 6.5612 | 7.0053 | 5.7905 | 6.9562 | 6.6380 | 0.9866 | 0.0195 | 0.7601 | 0.1191 |
| Ap2m1 |  | _VVRQDQIK_2                                                                    | IN/A | 6.5493 | 6.3690 | 6.1770 | 5.9181 | 6.3690  | 6.1770 | 6.4692 | 6.6912 | 6.2403 | 5.8085 | 0.9779 | 0.0322 | 0.5344 | 0.2722 |
| Ap2m1 |  | _TSFHYK_2                                                                      | IN/A | 6.5227 | 5.5499 | 5.1796 | 5.6197 | 6.2383  | 6.0937 | 6.2740 | 6.7193 | 5.5688 | 6.0157 | 0.9491 | 0.0754 | 0.3394 | 0.4693 |
| Ap2m1 |  |                                                                                |      |        |        |        |        |         |        |        |        |        |        |        |        |        |        |

[illegible]





































































[illegible]



















|        |                                                                        |                         |          |          |          |          |          |          |          |          |          |          |          |        |        |        |
|--------|------------------------------------------------------------------------|-------------------------|----------|----------|----------|----------|----------|----------|----------|----------|----------|----------|----------|--------|--------|--------|
|        | _OPAH_VTSP_Hydroxy[STY]_2                                              | Q80735_51336_M1_Adip1_2 | 4.0330   | 4.2958   | 4.0865   | 3.9027   | 2.9996   | 3.3773   | 6.1658   | 3.2747   | 3.8145   | 3.9952   | 0.9360   | 0.0954 | 0.6574 | 0.1832 |
| Adg1r3 | _S[Phospho]_STY[MNPLGSR_2                                              |                         | 3.8415   | 3.4776   | 5.8468   | 6.3262   | 5.4084   | 5.8277   | 4.0672   | 5.1282   | 3.8867   | 0.9724   | 0.0403   | 0.8502 | 0.0705 | 0.1070 |
| Adg1r3 | _CGSDGVPFPPKAGAS[Phospho]_STY[EGTGR_3                                  | IN/A                    | 3.5802   | 4.1312   | 3.9849   | 4.0541   | 3.9079   | 5.6392   | 6.4088   | 5.9261   | 5.5520   | 5.5208   | 0.6766   | 0.5635 | 0.0000 | 5.0178 |
| Adg1r3 | _S[Phospho]_STY[CK_2                                                   | Q80732_51222_M1_Adip3   | 4.4064   | 4.4135   | 3.1778   | 3.1125   | 3.1459   | 3.9356   | 3.1178   | 3.8558   | 4.2170   | 1.0420   | 0.0593   | 0.6810 | 0.1569 | 0.1078 |
| Ddn    | _S[Phospho]_STY[LGOPRRPE_2                                             | IN/A                    | 7.9118   | 8.3356   | 7.6522   | 8.0978   | 7.4721   | 7.8415   | 7.2622   | 7.9288   | 8.1255   | 1.0078   | 0.0112   | 0.7827 | 0.0207 | 0.1084 |
| Ddn    | _LRPGS[Phospho]_STY[PPRR_2                                             | QB0757_517_M1_Ddn       | 9.3594   | 9.3447   | 9.8282   | 9.8680   | 8.8770   | 9.1020   | 9.0810   | 9.3770   | 8.9583   | 9.1718   | 0.9956   | 0.0064 | 0.7625 | 0.1369 |
| Ddn    | _RS[Phospho]_STY[LGOPRRPE_3                                            | IN/A                    | 3.6883   | 3.8212   | 4.2226   | 4.2622   | 3.8821   | 4.5240   | 4.2629   | 3.9415   | 4.5133   | 3.5960   | 0.0787   | 0.6035 | 0.2208 | 0.2708 |
| Dnaip1 | _SGSDTSP[Phospho]_STY[PAKAPR_2                                         | QB0772_5176_M1_Dnaip1   | 11.95013 | 11.74440 | 11.74440 | 11.74440 | 11.74440 | 11.74440 | 11.74440 | 11.74440 | 11.74440 | 11.74440 | 11.74440 | 0.0792 | 0.0392 | 0.1560 |
| Cu9    | _VGLGS[Phospho]_STY[PSVTR_2                                            | QB0778_51775_M1_Cu9     | 8.8183   | 8.6178   | 8.1546   | 8.8671   | 8.1052   | 8.4890   | 8.1993   | 8.8438   | 8.3042   | 8.4274   | 1.0319   | 0.0171 | 0.5898 | 0.0295 |
| Cu9    | _AVLETPTQDQDGS[Phospho]_STY[PSLUR_2                                    | QB0778_5288_M1_Cu9      | 4.3600   | 5.8888   | 3.3955   | 3.3294   | 3.6977   | 3.9218   | 3.8434   | 4.0604   | 3.9024   | 4.5463   | 1.0561   | 0.0231 | 0.8958 | 0.0478 |
| C1asp1 | _NSNSNTGSS[Phospho]_STY[PSNTGR_2                                       | QB07V8_51088_M1_C1asp1  | 11.4155  | 10.1506  | 10.9763  | 4.0104   | 10.5566  | 1.4674   | 10.9436  | 1.0620   | 13.5343  | 10.8239  | 1.2077   | 0.2722 | 0.4933 | 0.3068 |
| C1asp1 | _S[Phospho]_STY[DEIDNEPKR_2                                            | IN/A                    | 8.7647   | 8.8350   | 7.8038   | 8.3975   | 7.7525   | 7.9369   | 7.8367   | 7.3321   | 7.3933   | 8.5144   | 1.0536   | 0.0753 | 0.1850 | 0.7327 |
| C1asp1 | _SFRKS[Phospho]_STY[DEIDNEPKR_3                                        | IN/A                    | 4.5865   | 3.7700   | 3.3508   | 4.4737   | 3.7184   | 4.4951   | 4.0288   | 4.0440   | 4.0288   | 4.0440   | 0.7805   | 0.3575 | 0.1483 | 0.8288 |
| C1asp1 | _DGGAS[Phospho]_STY[PATGR_2                                            | QB07V8_51220_M1_C1asp1  | 9.0661   | 9.0170   | 8.5416   | 8.6193   | 8.2745   | 8.3852   | 8.7945   | 8.5596   | 8.7277   | 8.7642   | 1.0174   | 0.0248 | 0.4364 | 0.3601 |
| C1asp1 | _SRSS[Phospho]_STY[ANPAGAGSR_2                                         | QB07V8_5676_M1_C1asp1   | 3.7086   | 3.6127   | 5.2883   | 4.8927   | 4.3663   | 5.2883   | 4.3663   | 4.7756   | 3.6884   | 0.9339   | 0.0986   | 0.4931 | 0.3071 | 0.1071 |
|        | _TS[Phospho]_STY[PLTSP[Phospho]_STY]PNC[Carbamidomethyl]_C[SHGGLSPSR_2 | QB07V8_51106_M1_C1asp1  | 5.9165   | 3.9125   | 3.9949   | 3.4358   | 3.6598   | 4.1220   | 3.5947   | 4.0344   | 4.3038   | 0.9352   | 0.0517   | 0.7733 | 0.1116 | 0.1010 |
| C1asp1 | _SRSS[Phospho]_STY[ANPAGAGSR_2                                         | QB07V8_5600_M1_C1asp1   | 6.3020   | 6.5923   | 3.7385   | 6.4305   | 5.9754   | 6.3652   | 6.1387   | 5.9450   | 6.2014   | 1.0515   | 0.0722   | 0.5889 | 0.2208 | 0.2208 |
| C1asp1 | _RS[Phospho]_STY[PSLUR_2                                               | QB07V8_5572_M1_C1asp1   | 3.9247   | 3.9478   | 3.9478   | 3.9478   | 3.9478   | 3.9478   | 3.9478   | 3.9478   | 3.9478   | 3.9478   | 3.9478   | 0.0955 | 0.0141 | 0.1441 |
| C1asp1 | _NFGSDG[Phospho]_STY[DEIDNEPKR_3                                       | QB07V8_5246_M1_C1asp1   | 4.4614   | 3.5414   | 2.4969   | 3.2279   | 3.7992   | 4.0232   | 3.7419   | 4.1618   | 3.8010   | 3.1669   | 0.9805   | 0.0284 | 0.7932 | 0.1011 |
| Frlp1  | _TVSP[Phospho]_STY[NGLSDS_2                                            | QB07V8_5296_M1_Frlp1    | 10.0559  | 10.1001  | 10.9841  | 10.1876  | 10.9037  | 10.8580  | 10.6764  | 11.1251  | 10.805   |          |          |        |        |        |



































[illegible]





[illegible]













[illegible]





|       |                                                         |                  |         |         |         |         |         |         |         |         |         |        |         |         |        |        |        |
|-------|---------------------------------------------------------|------------------|---------|---------|---------|---------|---------|---------|---------|---------|---------|--------|---------|---------|--------|--------|--------|
|       |                                                         | Q1FAEKLGLLEAKK_2 | IN/A    | 3.8376  | 4.4422  | 4.4754  | 4.4012  | 4.0741  | 3.5857  | 3.1419  | 3.8293  | 3.4159 | 3.7670  | 1.5968  | 0.2591 | 0.0042 | 2.3776 |
| Rab14 | _FM(Oxidation (M))ADCC(Barbamidomethyl (C))PHITIDVETR_3 | IN/A             | 3.0948  | 4.9912  | 4.8871  | 4.5945  | 3.9072  | 4.1375  | 3.6668  | 4.2961  | 3.6668  | 3.8012 | 1.1299  | 0.1762  | 0.2497 | 0.6026 | 0.6026 |
| Rab14 | _TGENVEDARLEAAKK_3                                      | IN/A             | 3.9914  | 4.0114  | 2.1568  | 3.6980  | 3.3291  | 1.6308  | 4.2119  | 3.6918  | 4.2710  | 4.1977 | 0.9546  | -0.0670 | 0.7954 | 0.0994 | 0.0994 |
| Sfn3  | _ELQVSGPVTEAGDR_2                                       | IN/A             | 9.5570  | 9.3481  | 9.9376  | 9.3430  | 9.0067  | 9.1662  | 9.5872  | 9.4233  | 9.1641  | 0.9993 | 0.0010  | 0.9581  | 0.0186 | 0.0186 | 0.0186 |
| Sfn3  | _NLLSGSEASR_2                                           | IN/A             | 8.2298  | 7.9260  | 7.7636  | 7.8769  | 7.5130  | 7.8330  | 8.1058  | 8.0965  | 7.7293  | 7.9182 | 0.9898  | 0.0017  | 0.5749 | 0.2404 | 0.2404 |
| Sfn3  | _NIVQNR_2                                               | IN/A             | 7.9378  | 7.7140  | 7.2450  | 7.6683  | 7.4242  | 7.8406  | 7.5685  | 7.8406  | 7.2664  | 1.0008 | 0.0012  | 0.9751  | 0.0110 | 0.0110 | 0.0110 |
| Sfn3  | _HFVTVDR_2                                              | IN/A             | 7.1239  | 7.1079  | 6.3909  | 6.9206  | 6.7557  | 6.7120  | 6.8956  | 7.0224  | 6.6050  | 6.9786 | 1.0022  | 0.0032  | 0.9248 | 0.0340 | 0.0340 |
| Sfn3  | _Acetyl (Protein N-term)GDFLWVNGEPR_2                   | IN/A             | 6.9449  | 6.7402  | 6.3803  | 6.9871  | 6.7402  | 6.5897  | 6.7402  | 6.9871  | 6.4096  | 1.0096 | 0.0138  | 0.9681  | 0.0139 | 0.0139 | 0.0139 |
| Sfn3  | _SVWR_2                                                 | IN/A             | 5.3638  | 4.7632  | 4.2050  | 4.1143  | 4.5773  | 5.7430  | 4.2077  | 5.6597  | 4.1879  | 0.0041 | 0.0041  | 0.9644  | 0.0037 | 0.0037 | 0.0037 |
| Sfn3  | _AGVATVLTQDWR_2                                         | IN/A             | 6.7073  | 6.7445  | 7.0190  | 6.7632  | 6.4331  | 6.5188  | 6.1387  | 6.7395  | 6.7424  | 5.6920 | 1.0517  | 0.0728  | 0.1628 | 0.7885 | 0.7885 |
| Sfn3  | _QGIQVYR_2                                              | IN/A             | 5.1359  | 5.0035  | 4.4199  | 4.4133  | 4.4399  | 4.6279  | 4.7991  | 4.5017  | 4.8586  | 4.5093 | 0.4072  | -0.0407 | 0.5405 | 0.2672 | 0.2672 |
| Sfn3  | _VYVSASHPTQEK_2                                         | IN/A             | 7.1953  | 6.8287  | 6.8677  | 6.6970  | 6.6104  | 6.8377  | 7.0571  | 7.1061  | 7.0121  | 6.8310 | 0.9815  | -0.0270 | 0.2951 | 0.3301 | 0.3301 |
| Sfn3  | _AQIQAGNPSSVYVYK_2                                      | IN/A             | 5.8828  | 5.5690  | 5.8330  | 5.5709  | 5.3035  | 5.4482  | 5.6869  | 5.5852  | 5.4141  | 5.3424 | 0.9976  | -0.0035 | 0.9441 | 0.0250 | 0.0250 |
| Sfn3  | _SGDAPYQQLGSLTAYVATGAVATGLK_3                           | IN/A             | 3.7998  | 4.1973  | 3.6314  | 3.6942  | 4.0970  | 3.1848  | 3.4786  | 4.2670  | 4.3721  | 2.8415 | 1.0703  | 0.0980  | 0.4485 | 0.3482 | 0.3482 |
| Acyl  | _TAS(Phospho (STY))SESR_2                               | IN/A             | 12.1113 | 12.1306 | 11.9902 | 12.3101 | 11.4871 | 11.4532 | 11.5248 | 11.4327 | 12.2580 | 1.0256 | 0.0364  | 0.1939  | 0.7124 | 0.7124 | 0.7124 |
| Acyl  | _TAS(Phospho (STY))SESRDEVAFAK_3                        | IN/A             | 8.2237  | 8.4255  | 8.2112  | 8.4779  | 7.7526  | 7.2316  | 7.8638  | 8.2112  | 4.1932  | 8.3448 | 1.1406  | 0.1898  | 0.2368 | 0.6257 | 0.6257 |
| Acyl  | _EADVYPR_2                                              | IN/A             | 6.4379  | 6.3992  | 6.2563  | 6.6504  | 6.2469  | 6.6834  | 6.7293  | 6.5954  | 6.2292  | 0.9718 | -0.0413 | 0.1817  | 0.7407 | 0.7407 | 0.7407 |
| Acyl  | _TSLAGQRLAK_2                                           | IN/A             | 5.7968  | 6.0771  | 6.4498  | 5.7968  | 6.2469  | 6.2149  | 6.8209  | 6.5954  | 5.3784  | 5.6999 | 1.0218  | 0.0197  | 0.9386 | 0.1408 | 0.1408 |
| Acyl  | _LHTEK_2                                                | IN/A             | 6.0228  | 6.1388  | 6.1088  | 5.1149  | 6.3023  | 6.0054  | 6.9756  | 6.0254  | 5.6734  | 0.9745 | 0.1642  | 0.3056  | 0.1535 | 0.1535 | 0.1535 |
| Acyl  | _DLVSSVLTSLGDR_2                                        | IN/A             | 4.1374  | 2.6298  | 4.8054  | 3.8124  | 3.7542  | 3.9954  | 4.7548  | 4.4503  | 4.1418  | 0.8964 | -0.1575 | 0.2841  | 0.5465 | 0.5465 | 0.5465 |
| Acyl  | _DGVVLLEAK_2                                            | IN/A             | 4.6810  | 4.3375  | 4.8400  | 4.2215  | 4.6265  | 5.1275  | 4.7864  | 3.8885  |         |        |         |         |        |        |        |















































|        |                                                        |                      |         |         |         |         |         |         |         |         |         |         |        |         |        |        |
|--------|--------------------------------------------------------|----------------------|---------|---------|---------|---------|---------|---------|---------|---------|---------|---------|--------|---------|--------|--------|
|        | _V(Phospho)STY(EDDSGSPEAD)(Oxidation)M(AVLT)AAEK_3     | QDS97_Y58R_M1_Rn3    | 4.3295  | 3.4678  | 3.3500  | 3.3644  | 3.6672  | 4.2014  | 3.8784  | 4.0299  | 3.9833  | 3.6052  | 0.9343 | -0.0980 | 0.2357 | 0.6276 |
| Rn3    | _S(Phospho)STY(LEGEVSPV)NEVPEK_2                       | QDS97_Y52V_M1_Rn3    | 3.6159  | 3.3879  | 4.1552  | 4.0734  | 2.9537  | 3.1777  | 3.0866  | 3.3163  | 3.2473  | 3.8223  | 0.9131 | 0.2131  | 0.1035 | 0.9852 |
| Rn3    | _SEM(Carbamidomethyl)(C)INSEQPAQDETF(Phospho)STYPTCK_2 | QDS97_T52A_M1_Rn3    | 4.3191  | 5.9094  | 3.3545  | 3.3703  | 3.6568  | 3.8809  | 5.9323  | 4.0194  | 3.9434  | 4.5254  | 0.9242 | -0.1138 | 0.5975 | 0.2236 |
| Rn3    | _QF5HTTAALEVR_3                                        | QDS97_Y52V_M1_Rn3    | 3.9737  | 4.5526  | 3.5103  | 3.6105  | 4.3806  | 3.9277  | 4.1896  | 4.1994  | 3.8965  | 3.7843  | 0.9827 | -0.0251 | 0.7580 | 0.1203 |
| Nckpsd | _AAPTTP(Phospho)STYPPPPV_2                             | IN/A                 | 3.1432  | 3.1588  | 3.6795  | 4.5462  | 3.9817  | 4.0032  | 8.7254  | 4.3444  | 2.9984  | 3.5735  | 0.7913 | -0.3378 | 0.3761 | 0.4247 |
| Nckpsd | _RAAPTTP(Phospho)STYPPPPV_2                            | IN/A                 | 3.9169  | 3.8899  | 3.9187  | 3.7740  | 3.2547  | 3.4787  | 3.6987  | 3.9623  | 3.6988  | 4.1237  | 0.7637 | 0.3456  | 0.3826 | 0.4173 |
| Rb1cc1 | _VYTSAS(Phospho)STYPCASAPAR_2                          | QDS97_S646_M1_Rb1cc1 | 8.3390  | 7.9127  | 7.9013  | 7.9491  | 7.6796  | 7.8362  | 7.4295  | 8.1548  | 7.8870  | 7.7469  | 1.0388 | 0.0268  | 0.3814 | 0.4186 |
| Rb1cc1 | _STELV(Phospho)STY(EDDSGSPEAD)(Oxidation)M(PR)_2       | IN/A                 | 6.9619  | 6.9618  | 6.9618  | 6.1103  | 6.3895  | 6.3895  | 6.1263  | 6.3895  | 6.1263  | 6.1263  | 0.9272 | -0.0086 | 0.9922 | 0.6034 |
| Rb1cc1 | _S(Phospho)STYTVNVSQVPTCK_2                            | QDS97_S261_M1_Rb1cc1 | 3.1064  | 5.1757  | 3.9447  | 4.1830  | 3.9961  | 3.9076  | 4.4625  | 3.9601  | 3.6103  | 4.1018  | 0.9218 | 0.0311  | 0.0885 | 0.0790 |
| Trm2   | _KAcet(Protein N-term)ASGASGAP(Phospho)STYVPPV_2       | QDS96_S102_M1_Trn2   | 11.9436 | 12.1148 | 12.0903 | 11.9795 | 11.3951 | 11.4480 | 11.3381 | 11.5382 | 11.4757 | 12.2096 | 1.0261 | 0.0372  | 0.1748 | 0.7575 |
| Trm2   | _VKS(Phospho)STYVPSGVH_2                               | QDS96_S440_M1_Trn2   | 10.3784 | 10.3910 | 10.3869 | 10.4770 | 10.1796 | 10.0016 | 10.3629 | 10.0911 | 10.3523 | 10.0712 | 0.9272 | 0.0712  | 0.1474 | 0.1474 |
| Trm2   | _VMS(Phospho)STY(ADV)(Phospho)STYPTTEVGR_3             | IN/A                 | 8.8800  | 8.8667  | 8.1556  | 9.0266  | 8.4121  | 8.3496  | 8.3087  | 8.6469  | 8.5389  | 8.8415  | 1.0060 | 0.0086  | 0.9707 | 0.1020 |
| Trm2   | _SADVS(Phospho)STYPTTEVGR_2                            | IN/A                 | 13.0964 | 12.9473 | 13.2664 | 13.2545 | 13.1784 | 12.8325 | 12.9443 | 12.9304 | 13.1083 | 13.0517 | 0.9225 | 0.1831  | 0.7374 | 0.7374 |
| Trm2   | _VLSQSDQLTGQSGSK_2                                     | IN/A                 | 4.1509  | 3.0829  | 4.9074  | 4.6713  | 4.7641  | 4.5397  | 4.1733  | 3.7195  | 4.4295  | 4.6881  | 1.0012 | 0.0018  | 0.9890 | 0.0048 |
| Trm2   | _LGDPTLSLR_2                                           | IN/A                 | 4.5269  | 4.7304  | 4.0635  | 4.5582  | 3.9384  | 4.5577  | 3.9384  | 3.7353  | 5.4544  | 1.0170  | 0.0243 | 0.8465  | 0.0724 | 0.0724 |
| Trm2   | _LYDQHIR_2                                             | IN/A                 | 5.0852  | 5.4559  | 4.5539  | 5.0852  | 5.0055  | 5.6589  | 4.9492  | 4.7434  | 4.9014  | 5.7829  | 0.9316 | -0.1023 | 0.3511 | 0.4546 |
| Trm2   | _VIRS(Phospho)STY(JAS)(Phospho)STYPTTEVGR_2            | IN/A                 | 3.7875  | 10.9875 | 10.9846 | 10.1283 | 9.5834  | 9.3967  | 9.5828  | 9.9742  | 9.8286  | 9.9445  | 0.9502 | -0.0737 | 0.5001 | 0.3010 |
| Trm2   | _LQSDVDSHSTDLCK_2                                      | IN/A                 | 3.6099  | 3.6092  | 3.2275  | 3.2993  | 3.6089  | 3.6089  | 3.6166  | 3.6257  | 3.6271  | 3.6271  | 0.9119 | -0.0212 | 0.9119 | 0.9119 |
| Trm2   | _VLELQSDVDSHSTDLCK_2                                   | IN/A                 | 4.2961  | 4.2961  | 4.2961  | 4.2961  | 4.2961  | 4.2961  | 4.2961  | 4.2961  | 4.2961  | 4.2961  | 1.0043 | 0.0346  | 0.7905 | 0.1021 |
| Trm2   | _SADVS(Phospho)STYPTTEVGR_2                            | IN/A                 | 10.3385 | 10.3708 | 10.3708 | 10.3690 | 10.2071 | 10.1001 | 10.4055 | 10.0464 | 10.3538 | 10.2411 | 0.9140 | 0.0342  | 0.9141 | 0.4619 |
| Trm2   | _TGMATLTAL(Phospho)STYPTDGSVADELQML_3                  | QDS96_S370_M1_Trn2   | 3       |         |         |         |         |         |         |         |         |         |        |         |        |        |





|      |  |                                                |                      |         |         |          |         |         |         |         |         |         |         |         |         |        |        |
|------|--|------------------------------------------------|----------------------|---------|---------|----------|---------|---------|---------|---------|---------|---------|---------|---------|---------|--------|--------|
|      |  | [S]Phospho (STY)ADWTEGLR_2                     | Q9IL04_M1_Fnn2       | 4.2274  | 8.5640  | 3.2628   | 3.4620  | 3.5651  | 3.7892  | 3.9760  | 3.9277  | 4.0351  | 4.4337  | 1.9448  | 0.1951  | 0.5776 | 0.2384 |
| Fnn2 |  | [LIS]SPNHS[Phospho (STY)KQNGPR_3               | Q9IL04_S411_M1_Fnn2  | 4.0329  | 8.4379  | 3.4080   | 4.1484  | 4.2795  | 4.2967  | 4.2967  | 3.8286  | 4.2196  | 4.5048  | 1.9468  | -0.0801 | 0.1468 | 0.8333 |
| Fnn1 |  | [S]KADQSDVEDL[Phospho (STY)I_K_2               | Q9IL26_S189_M1_Fnn1  | 8.7538  | 8.6004  | 8.6014   | 8.6432  | 8.3889  | 7.4589  | 8.1018  | 7.8520  | 3.8360  | 8.8482  | 1.2030  | 0.2667  | 0.1248 | 0.9037 |
| Fnn1 |  | [S]FAADSGKEEPTFKS[Phospho (STY)IPPK_3          | Q9IL26_S1021_M1_Fnn1 | 7.2979  | 4.4096  | 4.0621   | 6.6273  | 6.4309  | 7.2201  | 7.1428  | 7.0639  | 4.0185  | 1.0309  | 0.0157  | 0.9545  | 0.0202 | 0.0002 |
| Fnn1 |  | [G]GVNVSLEPGAAT[Phospho (STY)SGDQAQAR_3        | Q9IL26_T509_M1_Fnn1  | 5.6323  | 5.6381  | 3.9558   | 3.1650  | 3.1253  | 3.1586  | 3.9228  | 3.1440  | 3.8430  | 4.2298  | 1.1759  | 0.2337  | 0.3177 | 0.4880 |
| Gtp  |  | [Acetyl (Protein N-term)]ALIAHLHLPADK_3        | IN/A                 | 5.8248  | 5.9827  | 5.3907   | 5.5303  | 5.7869  | 5.5387  | 6.0585  | 5.7347  | 5.4633  | 5.6580  | 1.0130  | 0.0215  | 0.6123 | 0.2130 |
| Mgp6 |  | [D]SGLEVGTGR_2                                 | IN/A                 | 5.8978  | 6.4755  | 6.1021   | 5.9480  | 6.2934  | 5.7789  | 5.8466  | 5.9198  | 6.0398  | 6.1416  | 1.0563  | 0.0790  | 0.1403 | 0.8331 |
| Mgp6 |  | [S]VNDLHUR_2                                   | IN/A                 | 5.3405  | 5.3805  | 5.7842   | 5.7842  | 5.3805  | 5.3805  | 5.3805  | 5.3805  | 5.3805  | 5.3805  | 0.9978  | 0.8756  | 0.9277 | 0.0023 |
| Mgp6 |  | [N]GFEVGEVEM_K_3                               | IN/A                 | 3.9367  | 3.6547  | 4.4730   | 3.7527  | 3.8168  | 3.7167  | 2.7064  | 3.5706  | 4.1470  | 4.3430  | 1.0068  | 0.0098  | 0.9434 | 0.0006 |
| Mgp6 |  | [L]HSGEYGVNTE_K_3                              | IN/A                 | 4.1938  | 3.8090  | 3.2291   | 3.4955  | 3.5316  | 3.7557  | 4.0095  | 3.8942  | 4.0686  | 4.4002  | 0.9071  | -0.1406 | 0.0930 | 1.0317 |
| Mgp5 |  | [N]DLAS[Phospho (STY)PEIYK_2                   | Q9IL82_S25_M1_Mgp5   | 4.3008  | 8.7773  | 8.5980   | 8.1082  | 7.3253  | 8.6387  | 7.9422  | 8.8337  | 8.2946  | 8.7209  | 0.7534  | -0.1784 | 0.2737 | 0.5426 |
| Cubn |  | [VNVY[Phospho (STY)NEKSGNTM[Oxidation (M)I_K_3 | Q9ILB4_T5331_M1_Cubn | 3.5741  | 9.3518  | 8.8119   | 9.3023  | 3.3515  | 9.2373  | 9.3443  | 8.5396  | 9.0588  | 9.6657  | 0.7343  | -0.4084 | 0.1502 | 0.8233 |
| Sacs |  | [D]AAPTPT[Phospho (STY)PETERGLR_2              | Q9ILC8_S4266_M1_Sacs | 5.4915  | 6.1259  | 4.2345   | 3.8481  | 3.2050  | 3.3380  | 3.9474  | 3.7865  | 4.4578  | 4.7034  | 1.0734  | 0.1035  | 0.6547 | 0.1840 |
| Dck1 |  | [S]SPSPST[Phospho (STY)PGSLR_2                 | IN/A                 | 12.0605 | 12.0672 | 12.4637  | 12.1949 | 11.4179 | 11.4778 | 11.5073 | 11.8043 | 11.5480 | 12.0089 | 1.0318  | -0.0452 | 0.1008 | 0.9967 |
| Dck1 |  | [D]KFNELVYHGDSK_3                              | IN/A                 | 7.6701  | 7.7396  | 7.1533   | 7.5139  | 7.5717  | 7.3664  | 7.6513  | 7.3115  | 8.0002  | 7.9844  | -0.0081 | 0.0953  | 0.0994 | 0.0994 |
| Dck1 |  | [S]FEALADLT_K_2                                | IN/A                 | 5.6427  | 6.4151  | 6.0792   | 5.7347  | 6.0454  | 6.4048  | 6.6929  | 6.5519  | 6.3043  | 5.6970  | 0.9737  | -0.0385 | 0.4771 | 0.3214 |
| Dck1 |  | [S]Phospho (STY)PASTSVNYSQGLSTPR_2             | IN/A                 | 4.3646  | 4.2045  | 4.0212   | 3.0059  | 3.4782  | 5.8928  | 3.3485  | 3.5234  | 3.5494  | 0.9242  | -0.1138 | 0.5735  | 0.2546 | 0.0000 |
| Dck1 |  | [S]DENVNYPQLR_2                                | IN/A                 | 7.8174  | 7.9033  | 7.2485   | 7.5175  | 7.2487  | 7.2587  | 7.2587  | 7.2587  | 7.2587  | 7.2587  | 1.0066  | 0.8606  | 0.9066 | 0.9066 |
| Dck1 |  | [N]NVSNNRWK_2                                  | IN/A                 | 6.2577  | 5.9075  | 5.8075   | 5.8075  | 5.8075  | 5.8075  | 5.8075  | 5.8075  | 5.8075  | 5.8075  | 0.9041  | -0.1455 | 0.3800 | 0.4020 |
| Dck1 |  | [S]EVSSEGGPATTER_3                             | IN/A                 | 8.8126  | 9.0943  | 9.8100   | 9.4519  | 5.5384  | 9.4259  | 9.4539  | 7.0859  | 9.2807  | 9.6871  | 0.9705  | -0.0432 | 0.7873 | 0.0309 |
| Dck1 |  | [L]TGCGNVAIV_K_2                               | IN/A                 | 6.6196  | 6.8513  | 6.4579</ |         |         |         |         |         |         |         |         |         |        |        |



[illegible]



[illegible]
