# Supplementary material for: The Chronic Effects of a Single Low-Intensity Blast Exposure on Phosphoproteome Networks and Cognitive Function Influenced by Mutant Tau Overexpression
Source: MDPI journal article supplement (doi:10.3390/ijms25063338), 2024-03-15
Supplement: s1 [file s1]

Supplementary Table S1b- MS2 significant phosphopeptides (sheet = 'rTg4510 sig LIB vs sham')

| PG.Genes  | PG.ProteinGroups | PG.ProteinDescriptions                                                         | EG.PrecursorId                                                        | Phos site              | Expression Ratio | LOG2FC  | pvalue | (-) Log10 p value |
|-----------|------------------|--------------------------------------------------------------------------------|-----------------------------------------------------------------------|------------------------|------------------|---------|--------|-------------------|
| Tdbk1     | Q6PCN3           | Tau-tubulin kinase 1                                                           | _RVNS[Phospho (STY)]PESER_2                                           | #N/A                   | 0.0698           | -3.8405 | 0.0000 | 6.3618            |
| Hepacam   | Q640R3           | Hepatocyte cell adhesion molecule                                              | _SEADTPRS[Phospho (STY)]GEQER_2                                       | #N/A                   | 2.3820           | 1.2522  | 0.0000 | 4.3240            |
| Vdac3     | Q60931           | Voltage-dependent anion-selective channel protein 3                            | _WNTDNTLGTEISWENK_1                                                   | #N/A                   | 0.4164           | -1.2640 | 0.0001 | 3.8572            |
| Tubb4b    | P68172           | Tubulin beta-4b chain                                                          | _TAVC[Carbamidomethyl (C)]DPPR_2                                      | #N/A                   | 0.6352           | -0.6547 | 0.0002 | 3.6608            |
| Hnrnpcc   | Q9I204           | Heterogeneous nuclear ribonucleoproteins C1/C2                                 | _QADLSPSS[Phospho (STY)]PVVM[Oxidation (M)]IK_2                       | #N/A                   | 0.2549           | -1.9720 | 0.0003 | 3.5822            |
| Smarrc2   | Q6PDG5           | SWI/SNF complex subunit SMARCC2                                                | _TLTDEVNS[Phospho (STY)]PDS[Phospho (STY)]DRBDK_3                     | #N/A                   | 0.7359           | -0.4424 | 0.0003 | 3.5386            |
| Gria2     | P23819           | Glutamate receptor 2                                                           | _YTSALTYDANQVM[Oxidation (M)]TEAFR_2                                  | #N/A                   | 1.8506           | 0.8880  | 0.0003 | 3.4836            |
| Adgrl3    | Q80753           | Adhesion G protein-coupled receptor L3                                         | _GSSDGFVPPNKGAS[Phospho (STY)]PEGTSK_3                                | #N/A                   | 0.2666           | -1.9074 | 0.0004 | 3.3682            |
| Ank3      | G5E8K5           | Ankyrin-3                                                                      | _TEEPVS[Phospho (STY)]PLTAYCK_2                                       | G5E8K5_S1883_M1_Ank3   | 8.1876           | 3.0334  | 0.0006 | 3.2461            |
| Epb413    | Q9WV92           | Band 4.1-like protein 3                                                        | _SSSKLS[Phospho (STY)]RS[Phospho (STY)]PIUK_2                         | #N/A                   | 1.3275           | 0.4087  | 0.0006 | 3.2144            |
| Cntn2     | Q61330           | Contactin-2                                                                    | _TTGPGGGDPAEVHVR_3                                                    | #N/A                   | 0.4419           | -1.1782 | 0.0007 | 3.1712            |
| Zc3h13    | E9Q784           | Zinc finger CCH domain-containing protein 13                                   | _SKLS[Phospho (STY)]PS[Phospho (STY)]PSLRK_2                          | #N/A                   | 0.2158           | -2.2124 | 0.0008 | 3.1110            |
| Paip1     | Q99JF8           | PC4 and SFRS1-interacting protein                                              | _FSSQQASTK_2                                                          | #N/A                   | 0.3788           | -1.4006 | 0.0011 | 2.9717            |
| Cnp       | P16330           | 2',3'-cyclic-nucleotide 3'-phosphodiesterase                                   | _M[Oxidation (M)]VSADAYK_2                                            | #N/A                   | 0.6769           | -0.5630 | 0.0014 | 2.8475            |
| Cct7      | P80313           | T-complex protein 1 subunit eta                                                | _ATISNDGATLK_2                                                        | #N/A                   | 1.7170           | 0.7799  | 0.0015 | 2.8162            |
| Fyb1      | O35601           | PNV-binding protein 1                                                          | _VAGQSS[Phospho (STY)]PSGIQR_2                                        | O35601_S28_M1_Fyb1     | 0.2375           | -2.0738 | 0.0017 | 2.7805            |
| Cyb5a     | P56395           | Cytochrome b5                                                                  | _Acetyl (Protein N-term)[AGQS[Phospho (STY)]DKDVK_2                   | P56395_S5_M1_Cyb5a     | 0.6005           | -0.7358 | 0.0020 | 2.7067            |
| Hsp90aa1  | P07901           | Heat shock protein HSP 90-alpha                                                | _HGLEVYM[Oxidation (M)]EPIDEY[Carbamidomethyl (C)]VQQLK_3             | #N/A                   | 0.4754           | -1.0727 | 0.0021 | 2.6736            |
| Rabep1    | O35551           | Rab GTPase-binding effector protein 1                                          | _RAQS[Phospho (STY)]TDS[Phospho (STY)]LGTSSLSQSK_2                    | #N/A                   | 1.7132           | 0.7767  | 0.0022 | 2.6502            |
| Hsp90b1   | P08113           | Endoglin                                                                       | _LSLTDENALAGNELTVK_2                                                  | #N/A                   | 1.9566           | 0.9684  | 0.0024 | 2.6266            |
| Eno2      | P17183           | Gamma-enolase                                                                  | _NYPVSVSEDPDQDDWAWSK_3                                                | #N/A                   | 2.1240           | 1.0868  | 0.0024 | 2.6176            |
| Scn1a     | A2APX8           | Sodium channel protein type 1 subunit alpha                                    | _QAS[Phospho (STY)]FTYNYK_2                                           | A2APX8_S1939_M1_Scn1a  | 4.5433           | 2.1837  | 0.0029 | 2.5432            |
| Pnt2      | E9PUL5           | Proline-rich transmembrane protein 2                                           | _AELAPETTETPVETPVQATDLSNPEEGSK_3                                      | #N/A                   | 0.4005           | -1.3200 | 0.0029 | 2.5427            |
| Pdhx1     | P35486           | Pyruvate dehydrogenase E1 component subunit alpha, somatic form, mitochondrial | _AAASTDYVVR_2                                                         | #N/A                   | 0.6736           | -0.5701 | 0.0029 | 2.5423            |
| Pdo       | Q9QYK7           | Protein piccolo                                                                | _LPAQCGPQPTAAK_2                                                      | #N/A                   | 0.2916           | -1.7777 | 0.0030 | 2.5263            |
| Gtf2f2    | Q8R0A0           | General transcription factor IIF subunit 2                                     | _HYQTEEKS[Phospho (STY)]D_2                                           | Q8R0A0_S248_M1_Gtf2f2  | 0.3302           | -1.5987 | 0.0031 | 2.5139            |
| Shank2    | Q80Z38           | SH3 and multiple ankyrin repeat domains protein 2                              | _QSNVEDS[Phospho (STY)]PEK_2                                          | #N/A                   | 4.9765           | 2.3151  | 0.0031 | 2.5041            |
| Ubpap2l   | Q80X50           | Ubiquitin-associated protein 2-like                                            | _YPSISSS[Phospho (STY)]PQKDLTQAK_2                                    | #N/A                   | 2.9965           | 1.5833  | 0.0032 | 2.4957            |
| Ndufs1    | Q91V09           | NADH-ubiquinone oxidoreductase 75 kDa subunit, mitochondrial                   | _HSFC[Carbamidomethyl (C)]EVLK_2                                      | #N/A                   | 1.4834           | 0.5689  | 0.0034 | 2.4624            |
| Samn50    | Q8BGH2           | Sorting and assembly machinery component 50 homolog                            | _LELNYC[Carbamidomethyl (C)]IPM[Oxidation (M)]GVGGDGR_2               | #N/A                   | 0.4366           | -1.1958 | 0.0035 | 2.4613            |
| Srsf3     | P84104           | Serine/arginine-rich splicing factor 3                                         | _VYVGNLGNNGNK_2                                                       | #N/A                   | 0.2509           | -1.9949 | 0.0035 | 2.4580            |
| Dennd4b   | Q3U1Y4           | DENN domain-containing protein 4B                                              | _S[Phospho (STY)]APSS[Phospho (STY)]PAPR_2                            | Q3U1Y4_S232_M2_Dennd4b | 3.9846           | 1.9944  | 0.0036 | 2.4496            |
| Sgpl1     | Q8VD37           | SH3-containing GRB2-like protein 3-interacting protein 1                       | _KVAEQTFKDDYLETSS[Phospho (STY)]PK_3                                  | #N/A                   | 1.6840           | 0.7519  | 0.0036 | 2.4392            |
| Kpnb1     | P70168           | Importin subunit beta-1                                                        | _Acetyl (Protein N-term)[M[Oxidation (M)]ELITILEK_2                   | #N/A                   | 0.6113           | -0.7102 | 0.0037 | 2.4303            |
| Srrm1     | Q52K18           | Serine/arginine repetitive matrix protein 1                                    | _RWQSS[Phospho (STY)]PVTK_2                                           | #N/A                   | 0.1629           | -2.6177 | 0.0038 | 2.4198            |
| Pde1b     | Q01065           | Calcium/calmodulin-dependent 3',5'-cyclic nucleotide phosphodiesterase 1B      | _QLDTEDELREL_3                                                        | #N/A                   | 1.9354           | 0.9527  | 0.0038 | 2.4179            |
| Paflah1b1 | P63005           | Platelet-activating factor acetylhydrolase 1B subunit beta                     | _FLSC[Carbamidomethyl (C)]ADKK_2                                      | #N/A                   | 0.7444           | -0.4259 | 0.0040 | 2.4031            |
| Rab14     | Q91V41           | Ras-related protein Rab-14                                                     | _QFAEENGLFEASAK_2                                                     | #N/A                   | 1.6222           | 0.6979  | 0.0040 | 2.4013            |
| Sugt1     | Q9C0X4           | Protein SGT1 homolog                                                           | _ALEONPODAQYVC[Carbamidomethyl (C)]QR_2                               | #N/A                   | 0.5925           | -0.7552 | 0.0040 | 2.3966            |
| Ppia      | P17742           | Peptidyl-prolyl cis-trans isomerase A                                          | _VKEGM[Oxidation (M)]NVEAM[Oxidation (M)]ER_3                         | #N/A                   | 0.6390           | -0.6461 | 0.0041 | 2.3873            |
| Hdgf12    | Q3UMU9           | Hepatoma-derived growth factor-related protein 2                               | _AQEGDGS[Phospho (STY)]EDGPR_2                                        | Q3UMU9_S620_M1_Hdgf12  | 0.3336           | -1.5839 | 0.0042 | 2.3796            |
| Tjp2      | Q9D2U1           | Tight junction protein ZO-2                                                    | _GRS[Phospho (STY)]IRDYDR_3                                           | #N/A                   | 1.5091           | 0.5937  | 0.0043 | 2.3674            |
| Eci1      | P42125           | Enoyl-CoA delta isomerase 1, mitochondrial                                     | _EADQNFTFSK_2                                                         | #N/A                   | 1.5592           | 0.6408  | 0.0044 | 2.3596            |
| Srrm2     | Q8BT18           | Serine/arginine repetitive matrix protein 2                                    | _SGSQELDGKPSAS[Phospho (STY)]PQER_2                                   | Q8BT18_S1508_M1_Srrm2  | 0.0123           | -6.3438 | 0.0044 | 2.3587            |
| Syncrip   | Q77MK9           | Heterogeneous nuclear ribonucleoprotein Q                                      | _TGYTLDTTGGR_2                                                        | #N/A                   | 0.2688           | -1.8951 | 0.0045 | 2.3444            |
| Pmp       | P04925           | Major prion protein                                                            | _PM[Oxidation (M)]HFGNDWEDR_3                                         | #N/A                   | 0.5764           | -0.7950 | 0.0047 | 2.3322            |
| Tpm3      | P21107           | Tropomyosin alpha-3 chain                                                      | _TEERAELAEK_2                                                         | #N/A                   | 1.6208           | 0.6967  | 0.0048 | 2.3208            |
| Atg2b     | Q80XK6           | Autophagy-related protein 2 homolog B                                          | _S[Phospho (STY)]SPVC[Carbamidomethyl (C)]STAPVETEPK_2                | Q80XK6_S239_M1_Atg2b   | 1.7650           | 0.8197  | 0.0048 | 2.3188            |
| Ssr3      | Q9D0F9           | Translocon-associated protein subunit gamma                                    | _QGS[Phospho (STY)]EEDLLQDFSR_2                                       | Q9D0F9_S11_M1_Ssr3     | 0.1160           | -3.1083 | 0.0049 | 2.3088            |
| Flt1      | P35969           | Vascular endothelial growth factor receptor 1                                  | _DGFADPFHSGS[Phospho (STY)]SDVVR_3                                    | P35969_S1207_M1_Flt1   | 1.7968           | 0.8454  | 0.0051 | 2.2954            |
| Vipax39   | Q8BGQ1           | Spermatogenesis-defective protein 39 homolog                                   | _ETAGS[Phospho (STY)]SGSTPEGR_2                                       | Q8BGQ1_S77_M1_Vipax39  | 1.7973           | 0.8458  | 0.0051 | 2.2907            |
| Mtmr7     | Q9Z2C9           | Myotubularin-related protein 7                                                 | _S[Phospho (STY)]PSGGHAPSEDSGKDR_3                                    | #N/A                   | 1.7981           | 0.8465  | 0.0052 | 2.2816            |
| Chchd6    | Q91VN4           | MICOS complex subunit Mic25                                                    | _KXAS[Phospho (STY)]LTSPDQGSAR_2                                      | #N/A                   | 0.4718           | -1.0836 | 0.0053 | 2.2797            |
| Gatad2b   | Q8VHR5           | Transcriptional repressor p66-beta                                             | _S[Phospho (STY)]LDPADEKDDVAK_2                                       | #N/A                   | 1.7984           | 0.8467  | 0.0053 | 2.2785            |
| Ctin      | Q60598           | Src substrate cortactin                                                        | _YQIDKDKK_2                                                           | #N/A                   | 1.7076           | 0.7720  | 0.0053 | 2.2774            |
| Aq3b2     | Q9IMES           | AP-3 complex subunit beta-2                                                    | _QLVPSFEGGALSRL_2                                                     | #N/A                   | 0.6730           | -0.5714 | 0.0053 | 2.2733            |
| Ndufb8    | Q9Q6I5           | NADH dehydrogenase [ubiquinone] 1 beta subcomplex subunit B, mitochondrial     | _DPWYQWDSLELA_2                                                       | #N/A                   | 2.1523           | 1.1059  | 0.0054 | 2.2642            |
| Ef4g1     | Q6NZ16           | Eukaryotic translation initiation factor 4 gamma 1                             | _AAS[Phospho (STY)]LTEDR_2                                            | #N/A                   | 1.8378           | 0.8780  | 0.0056 | 2.2547            |
| Arcp2     | Q9CVB6           | Actin-related protein 2/3 complex subunit 2                                    | _YFQJQEEKEGENR_2                                                      | #N/A                   | 1.6471           | 0.7199  | 0.0056 | 2.2503            |
| Sptbn1    | Q62261           | Spectrin beta chain, non-erythrocytic 1                                        | _RRPPSS[Phospho (STY)]PDNPNTK_2                                       | #N/A                   | 0.0401           | -4.6386 | 0.0057 | 2.2440            |
| ApoE      | P08226           | Apolipoprotein E                                                               | _DAEDLQKR_2                                                           | #N/A                   | 1.8015           | 0.8492  | 0.0057 | 2.2412            |
| Ank2      | Q8CBR3           | Ankyrin-2                                                                      | _HTPVSPSS[Phospho (STY)]KNEKLS[Phospho (STY)]PVS[Phospho (STY)]PSAK_3 | Q8CBR3_S1810_M3_Ank2   | 1.5821           | 0.6619  | 0.0058 | 2.2353            |
| Scp2      | P32020           | Sterol carrier protein 2                                                       | _GSVLPNSDKK_2                                                         | #N/A                   | 0.3998           | -1.3228 | 0.0059 | 2.2319            |
| Snn1      | P97801           | Survival motor neuron protein                                                  | _RGTT[Phospho (STY)]GGSDSDSDWDDTALK_3                                 | P97801_T22_M1_Snn1     | 1.6162           | 0.6926  | 0.0059 | 2.2288            |
| Oxr1      | Q4KMM3           | Oxidation resistance protein 1                                                 | _DQDQGLKRD[Phospho (STY)]ETEVEELR_3                                   | #N/A                   | 1.7574           | 0.8134  | 0.0059 | 2.2270            |
| MAPT      | P10636           | Microtubule-associated protein tau                                             | _SKGSS[Phospho (STY)]TENLK_2                                          | #N/A                   | 2.5561           | 1.3540  | 0.0059 | 2.2267            |
| Sern1     | Q9CZC8           | Secernin-1                                                                     | _DEVQEVEVYFVAVDHAESK_3                                                | #N/A                   | 1.9367           | 0.9536  | 0.0060 | 2.2193            |
| Tlpl11    | Q9ERA6           | Tuftelin-interacting protein 11                                                | _TTQSQDQFVADS[Phospho (STY)]EEEEEEEFQK_3in                            | Q9ERA6_S211_M1_Tlpl11  | 0.6578           | -0.6042 | 0.0062 | 2.2107            |
| Sklc16a7  | O70451           | Monocarboxylate transporter 2                                                  | _VGS[Phospho (STY)]RHDS[Phospho (STY)]TLKK_2                          | #N/A                   | 2.3437           | 1.2288  | 0.0063 | 2.1993            |
| Ubqln1    | Q8R317           | Ubiquilin-1                                                                    | _FQOOLEQLSAM[Oxidation (M)]GLFLNR_2                                   | #N/A                   | 0.6109           | -0.7109 | 0.0065 | 2.1897            |
| Map1b     | P14873           | Microtubule-associated protein 1B                                              | _TLVVSFSPQS[Phospho (STY)]VQSPDTEK_3                                  | #N/A                   | 1.8478           | 0.8858  | 0.0065 | 2.1851            |
| Fam171a2  | A2A699           | Protein FAM171A2                                                               | _RDS[Phospho (STY)]LTPDELGAEVGEAGDK_3                                 | #N/A                   | 1.8060           | 0.8528  | 0.0066 | 2.1811            |
| Agap2     | Q3UH09           | Arl-GAP with GTPase, ANK repeat and PH domain-containing protein 2             | _SCNS[Phospho (STY)]LNKEWK_2                                          | Q3UH09_S684_M1_Agap2   | 0.3512           | -1.5095 | 0.0067 | 2.1745            |
| Ncan      | P55066           | Neurocan core protein                                                          | _HLQAFFEDFGDNC[Carbamidomethyl (C)]DAGWLSDR_3                         | #N/A                   | 0.4223           | -1.2437 | 0.0069 | 2.1619            |

|          |               |                                                                                                              |                                                                             |                         |        |         |        |        |
|----------|---------------|--------------------------------------------------------------------------------------------------------------|-----------------------------------------------------------------------------|-------------------------|--------|---------|--------|--------|
| Nsf      | P46460        | Vesicle-fusing ATPase                                                                                        | _VEVDMEK_2                                                                  | #N/A                    | 1.8074 | 0.8539  | 0.0069 | 2.1608 |
| Hscw1    | Q8K4P8        | E3 ubiquitin-protein ligase HECW1                                                                            | _C[Carbamidomethyl (C)]SPC[Carbamidomethyl (C)]SS[Phospho (STY)]PQNSPGLQR_2 | Q8K4P8_S1203_M1_Hscw1   | 1.6771 | 0.7459  | 0.0070 | 2.1565 |
| Vcp      | Q01853        | Transitional endoplasmic reticulum ATPase                                                                    | _AAINEC[Carbamidomethyl (C)]QANFSGIK_2                                      | #N/A                    | 1.6139 | 0.6905  | 0.0071 | 2.1496 |
| Rpl34    | Q9D189        | 60S ribosomal protein L34                                                                                    | _SAC[Carbamidomethyl (C)]GVC[Carbamidomethyl (C)]PGR_2                      | #N/A                    | 0.5361 | -0.8994 | 0.0073 | 2.1377 |
| Smc3     | Q9CWO3        | Structural maintenance of chromosomes protein 3                                                              | _GOVEGSGS[Phospho (STY)]QDEGGGSESR_2                                        | #N/A                    | 1.8711 | 0.9039  | 0.0073 | 2.1364 |
| Linc7    | Q80TE7        | Leucine-rich repeat-containing protein 7                                                                     | _S[Phospho (STY)]REQQPVGGNNK_2                                              | #N/A                    | 1.5699 | 0.6507  | 0.0074 | 2.1316 |
| Sec16a   | E9QAT4        | Protein transport protein Sec16A                                                                             | _RSS[Phospho (STY)]LS[Phospho (STY)]SHSQSQIYR_3                             | E9QAT4_S1384_M2_Sec16a  | 1.8094 | 0.8555  | 0.0074 | 2.1315 |
| Sorbs1   | Q62417        | Sorbin and SH3 domain-containing protein 1                                                                   | _DS[Phospho (STY)]PEEDLDKEPYYK_2                                            | #N/A                    | 1.5570 | 0.6387  | 0.0075 | 2.1267 |
| Mia3     | Q8BI84        | Transport and Golgi organization protein 1 homolog                                                           | _EEAKPAS[Phospho (STY)]PSSVQDR_2                                            | #N/A                    | 1.7087 | 0.7729  | 0.0075 | 2.1248 |
| Srrm1    | Q52KJ8        | Serine/arginine repetitive matrix protein 1                                                                  | _LS[Phospho (STY)]PSAS[Phospho (STY)]PPR_2                                  | #N/A                    | 1.8103 | 0.8562  | 0.0076 | 2.1169 |
| Ctnna2   | Q61301        | Catenin alpha-2                                                                                              | _SKLDAEVAK_2                                                                | #N/A                    | 0.4258 | -1.2317 | 0.0077 | 2.1143 |
| Ndufa3   | Q9IKL4        | NADH dehydrogenase [ubiquinone] 1 alpha subcomplex assembly factor 3                                         | _VTGAALIPPPGTTALASLGQASE_2                                                  | #N/A                    | 0.5718 | -0.8064 | 0.0077 | 2.1132 |
| Naca     | P70670;Q60817 | olypeptide-associated complex subunit alpha, muscle-specific form;Nascent polypeptide-associated complex sub | _DIEIVMSQANVSR_2                                                            | #N/A                    | 1.8107 | 0.8566  | 0.0078 | 2.1104 |
| Map1a    | Q9QYR6        | Microtubule-associated protein 1A                                                                            | _AKPAS[Phospho (STY)]PAR_2                                                  | #N/A                    | 1.4377 | 0.5237  | 0.0079 | 2.1020 |
| Kcnh7    | Q9ER47        | Potassium voltage-gated channel subfamily H member 7                                                         | _SFS[Phospho (STY)]PSSQC[Carbamidomethyl (C)]PEFLDLK_2                      | Q9ER47_S1103_M1_Kcnh7   | 1.7094 | 0.7735  | 0.0079 | 2.0999 |
| Itsn1    | Q920R4        | Intersectin-1                                                                                                | _SGS[Phospho (STY)]GM[Oxidation (M)]SVSSSSVDQR_2                            | #N/A                    | 2.4167 | 1.2731  | 0.0080 | 2.0992 |
| Parva    | Q9EPC1        | Alpha-parvin                                                                                                 | _Acetyl (Protein N-term))ATS[Phospho (STY)]PKQSPLPVK_2                      | Q9EPC1_S4_M1_Parva      | 2.3086 | 1.2070  | 0.0080 | 2.0957 |
| Alcam    | Q61490        | CD156 antigen                                                                                                | _VLQPVGEVAILFK_2                                                            | #N/A                    | 0.6376 | -0.6492 | 0.0081 | 2.0900 |
| Cars1    | Q9ER72        | Cysteine-18NA ligase, cytoplasmic                                                                            | _ALQEGGDLSS[Phospho (STY)]ADR_2                                             | Q9ER72_S390_M1_Cars1    | 1.6624 | 0.7333  | 0.0081 | 2.0892 |
| C2cd4c   | Q5H022        | C2 calcium-dependent domain-containing protein 4C                                                            | _BAT[Phospho (STY)]PEKPGESGQAPR_3                                           | Q5H022_T282_M1_C2cd4c   | 1.7413 | 0.8002  | 0.0082 | 2.0869 |
| Gpr371f  | Q99JG2        | G-protein coupled receptor 37-like 1                                                                         | _PRES[Phospho (STY)]PPLLPLGTFC[Carbamidomethyl (C)]_2                       | #N/A                    | 0.1230 | -0.3049 | 0.0082 | 2.0865 |
| Cep170b  | Q8OU49        | Centrosomal protein of 170 kDa protein B                                                                     | _AGS[Phospho (STY)]TGTGPGSETAPAR_2                                          | Q8OU49_S1166_M1_Cep170b | 1.4096 | 0.4953  | 0.0082 | 2.0850 |
| Ube2m    | P61082        | NEDD8-conjugating enzyme Ubc12                                                                               | _TC[Carbamidomethyl (C)]DSFSDDPLLNNFK_2                                     | #N/A                    | 0.6743 | -0.5684 | 0.0082 | 2.0844 |
| Pcdo     | Q9QYX7        | Protein piccolo                                                                                              | _TTLVPDEEPLEEM[Oxidation (M)]ESLTS[Phospho (STY)]PEDR_3                     | #N/A                    | 1.8126 | 0.8580  | 0.0083 | 2.0814 |
| Gnao1    | P18872        | Guanine nucleotide-binding protein G(o) subunit alpha                                                        | _PVVYSNTIGSLAAVR_2                                                          | #N/A                    | 1.8129 | 0.8583  | 0.0084 | 2.0763 |
| Psap     | Q61207        | Prosaposin                                                                                                   | _TVTVEAGNLK_2                                                               | #N/A                    | 1.3519 | 0.4350  | 0.0085 | 2.0691 |
| Cap2     | Q9CYT6        | Adenylyl cyclase-associated protein 2                                                                        | _SSEM[Oxidation (M)]NVLVPQDDDDREFPIPEQFK_3                                  | #N/A                    | 0.6899 | -0.5355 | 0.0087 | 2.0627 |
| Cops4    | Q88544        | COP9 signalosome complex subunit 4                                                                           | _ISQTAPETWTAQAM[Oxidation (M)]EAQM[Oxidation (M)]AQ_2                       | #N/A                    | 0.3856 | -1.3748 | 0.0087 | 2.0587 |
| Add2     | Q9QYB8        | Beta-adducin                                                                                                 | _SAGQSQQLASVIAEKS[Phospho (STY)]R_3                                         | #N/A                    | 1.7048 | 0.7696  | 0.0089 | 2.0500 |
| Acat1    | Q8QZT1        | Acetyl-CoA acetyltransferase, mitochondrial                                                                  | _AAFAADAADVDDIPLAPAYAVPK_3                                                  | #N/A                    | 1.5684 | 0.6493  | 0.0090 | 2.0462 |
| Pcdo     | Q9QYX7        | Protein piccolo                                                                                              | _SPVPSQQAAS[Phospho (STY)]PKK_2                                             | #N/A                    | 1.3806 | 0.4653  | 0.0090 | 2.0446 |
| Sgpl1    | Q8VD37        | SH3-containing GRB2-like protein 3-interacting protein 1                                                     | _RS[Phospho (STY)]PGAIIK_2                                                  | #N/A                    | 1.5616 | 0.6430  | 0.0091 | 2.0420 |
| Akt1s1   | Q9D1F4        | Proline-rich AKT1 substrate 1                                                                                | _AATATRPPGPPAPQPS[Phospho (STY)]PAIPS[Phospho (STY)]PPRRPALAR_4             | Q9D1F4_S88_M2_Akt1s1    | 1.7110 | 0.7748  | 0.0092 | 2.0351 |
| Syn1     | Q88935        | Synapsin-1                                                                                                   | _QAS[Phospho (STY)]QAGGPRR_2                                                | #N/A                    | 1.7123 | 0.7759  | 0.0093 | 2.0338 |
| Arfgap1  | Q9EPI9        | ADP-ribosylation factor GTPase-activating protein 1                                                          | _TLQFTAHR_2                                                                 | #N/A                    | 0.7422 | -0.4302 | 0.0094 | 2.0273 |
| Waf1     | Q8RSJ6        | Wiskott-Aldrich syndrome protein family member 1                                                             | _STSIQDQQLFORK_2                                                            | #N/A                    | 1.5445 | 0.6272  | 0.0096 | 2.0194 |
| Fad1     | Q77PM6        | Fibronectin type II and SPRY domain-containing protein 1                                                     | _LQGSTSHQNR_2                                                               | #N/A                    | 0.5850 | -0.7734 | 0.0096 | 2.0183 |
| Cpne1    | Q8C166        | Copine-1                                                                                                     | _APPT[Phospho (STY)]PGKGPAQAPQA_2                                           | Q8C166_T525_M1_Cpne1    | 3.3994 | 1.7653  | 0.0096 | 2.0179 |
| Myo18a   | Q9IMH9        | Unconventional myosin-XVIIIa                                                                                 | _SSPSTSHWPLAPDPS[Phospho (STY)]DDSDHPVDGSRPR_5                              | Q9IMH9_S2016_M1_Myo18a  | 1.7114 | 0.7752  | 0.0096 | 2.0168 |
| Taldo1   | Q93092        | Transaldolase                                                                                                | _M[Oxidation (M)]ESALDQIK_2                                                 | #N/A                    | 0.6455 | -0.6314 | 0.0097 | 2.0134 |
| Chap     | Q86144        | Voltage-dependent calcium channel beta subunit-associated regulatory protein                                 | _ASS[Phospho (STY)]LDRGGS[Phospho (STY)]PK_2                                | #N/A                    | 1.3877 | 0.4727  | 0.0097 | 2.0113 |
| Rbm1     | Q91VM5        | RNA binding motif protein, X-linked-like-1                                                                   | _SDLVSSGR_2                                                                 | #N/A                    | 1.7404 | 0.7994  | 0.0098 | 2.0107 |
| Tjp2     | Q9ZDU1        | Tight junction protein ZO-2                                                                                  | _ERPS[Phospho (STY)]SRRETSGR_3                                              | Q9ZDU1_S420_M1_Tjp2     | 0.7426 | -0.4294 | 0.0100 | 1.9983 |
| Kif2a    | P28740        | Kinesin-like protein KIF2A                                                                                   | _DFRGS[Phospho (STY)]LDVRLPTAOPIDEHR_4                                      | P28740_S206_M1_Kif2a    | 1.6443 | 0.7175  | 0.0101 | 1.9970 |
| Stx1a    | Q35526        | Syntaxin-1A                                                                                                  | _LKS[Phospho (STY)]IEGSEIEEGLNR_3                                           | Q35526_S95_M1_Stx1a     | 1.3214 | 0.4021  | 0.0101 | 1.9949 |
| Syngap1  | F65E14        | Ras/Rap GTPase-activating protein SyngAP                                                                     | _GKS[Phospho (STY)]QLTIVSAAQK_2                                             | #N/A                    | 2.0961 | 1.0677  | 0.0102 | 1.9920 |
| Smg6     | P61406        | Telomerase-binding protein EST1A                                                                             | _NWS[Phospho (STY)]GC[Carbamidomethyl (C)]JGEGEQK_2                         | P61406_S331_M1_Smg6     | 2.1935 | 1.1332  | 0.0103 | 1.9878 |
| Speg     | Q62407        | Striated muscle-specific serine/threonine-protein kinase                                                     | _AAS[Phospho (STY)]VELPQR_2                                                 | #N/A                    | 1.3612 | 0.4449  | 0.0103 | 1.9865 |
| Rad23b   | P54728        | UV excision repair protein RAD23 homolog B                                                                   | _QIIQQNPSSLPAQLQGR_3                                                        | #N/A                    | 1.5698 | 0.6505  | 0.0104 | 1.9847 |
| Vapb     | Q9QY76        | Vesicle-associated membrane protein-associated protein B                                                     | _LTS[Phospho (STY)]PLDDTEVK_2                                               | #N/A                    | 1.7122 | 0.7759  | 0.0104 | 1.9842 |
| Acat13   | Q9CQ84        | Acyl-coenzyme A thioesterase 13                                                                              | _TLAFASVDLTNK_2                                                             | #N/A                    | 1.4059 | 0.4915  | 0.0105 | 1.9790 |
| Actr3b   | Q641P0        | Actin-related protein 3B                                                                                     | _LSQELSGGR_2                                                                | #N/A                    | 1.5251 | 0.6090  | 0.0106 | 1.9756 |
| Ina      | P46660        | Alpha-internein                                                                                              | _VSSAGLSK_2                                                                 | #N/A                    | 0.6252 | -0.6777 | 0.0106 | 1.9740 |
| Creg2    | Q8BG69        | Protein CREG2                                                                                                | _RES[Phospho (STY)]GS[Phospho (STY)]SEASGPRR_2                              | Q8BG69_S109_M2_Creg2    | 1.7339 | 0.7940  | 0.0106 | 1.9738 |
| Chd2     | E9P2M4        | Chromodomain-helicase-DNA-binding protein 2                                                                  | _SPLDHRS[Phospho (STY)]PIER_2                                               | E9P2M4_S1806_M1_Chd2    | 0.6214 | -0.6864 | 0.0107 | 1.9721 |
| Ptpn3    | A2AJK8        | Tyrosine-protein phosphatase non-receptor type 3                                                             | _SSSSVSPSNAPGS[Phospho (STY)]C[Carbamidomethyl (C)]SPQGVQQR_2               | A2AJK8_S467_M1_Ptpn3    | 1.5032 | 0.5880  | 0.0107 | 1.9694 |
| Ndufs1   | Q91V09        | NADH-ubiquinone oxidoreductase 75 kDa subunit, mitochondrial                                                 | _VAGM[Oxidation (M)]LQNFEGNAXAAAGGVDAEALVAK_3                               | #N/A                    | 2.0957 | 1.0674  | 0.0108 | 1.9686 |
| Atp6v1c1 | Q921G3        | V-type proton ATPase subunit C 1                                                                             | _LDAFVEGVVK_2                                                               | #N/A                    | 0.6214 | -0.6863 | 0.0108 | 1.9669 |
| Cit      | P49025        | Citron Rho-interacting kinase                                                                                | _DKMNS[Phospho (STY)]PGLQSK_2                                               | #N/A                    | 0.7433 | -0.4279 | 0.0109 | 1.9630 |
| Cend1    | Q9IKC6        | Cell cycle exit and neuronal differentiation protein 1                                                       | _SASS[Phospho (STY)]PKPOTK_2                                                | #N/A                    | 1.6325 | 0.7071  | 0.0110 | 1.9585 |
| Mett126  | Q9DCS2        | Methyltransferase-like 26                                                                                    | _DTVLEELGQASGLVLR_2                                                         | #N/A                    | 1.3730 | 0.4573  | 0.0110 | 1.9574 |
| Dctn2    | Q99KJ8        | Dynactin subunit 2                                                                                           | _TGYES[Phospho (STY)]GDYEM[Oxidation (M)]LEGLGVK_2                          | Q99KJ8_S83_M1_Dctn2     | 1.6940 | 0.7605  | 0.0110 | 1.9571 |
| Cbx3     | P23198        | Chromobox protein homolog 3                                                                                  | _LSLS[Phospho (STY)]DSESDSSKSK_2                                            | #N/A                    | 1.6549 | 0.7268  | 0.0112 | 1.9527 |
| Kans13   | A2R5Y1        | KAT8 regulatory NSL complex subunit 3                                                                        | _GSRPAS[Phospho (STY)]PAAR_2                                                | A2R5Y1_S515_M1_Kans13   | 0.6216 | -0.6860 | 0.0112 | 1.9522 |
| Ndufa4   | Q9CX21        | NADH dehydrogenase [ubiquinone] iron-sulfur protein 4, mitochondrial                                         | _NNMGSGVNNTKK_2                                                             | #N/A                    | 1.8131 | 0.8585  | 0.0113 | 1.9470 |
| Tpm1     | P58771        | Tropomyosin alpha-1 chain                                                                                    | _C[Carbamidomethyl (C)]AELEELKTVNNLK_3                                      | #N/A                    | 1.6359 | 0.7101  | 0.0113 | 1.9459 |
| Borcs5   | Q80920        | BLOC-1-related complex subunit 5                                                                             | _GLSSGQTS[Phospho (STY)]PTNAKLEK_2                                          | #N/A                    | 3.9173 | 1.9698  | 0.0114 | 1.9420 |
| Glo4a    | Q9CPV4        | Glyoxalase domain-containing protein 4                                                                       | _LELGQIGGAVDHAAAFGR_3                                                       | #N/A                    | 1.3219 | 0.4026  | 0.0114 | 1.9416 |
| Gigyl1   | Q99MR1        | GRB10-interacting GYF protein 1                                                                              | _GLEEEEEEEESS[Phospho (STY)]GVDEERPEAGGK_3                                  | Q99MR1_S343_M1_Gigyl1   | 0.6217 | -0.6857 | 0.0115 | 1.9390 |
| Sic38a3  | Q80CP2        | Sodium-coupled neutral amino acid transporter 3                                                              | _AYELQGYR_2                                                                 | #N/A                    | 0.5446 | -0.8768 | 0.0116 | 1.9339 |
| Acat2    | Q8CAV6        | Acetyl-CoA acetyltransferase, cytosolic                                                                      | _VAVLSQNR_2                                                                 | #N/A                    | 0.6467 | -0.6289 | 0.0117 | 1.9331 |
| Seg2     | Q03517        | Secretogranin-2                                                                                              | _VPSPVSSDDLDQEEQLQAKHEHLGPS[Phospho (STY)]SQEM[Oxidation (M)]ER_4           | #N/A                    | 1.6883 | 0.7556  | 0.0117 | 1.9327 |
| Srrm2    | Q8BT18        | Serine/arginine repetitive matrix protein 2                                                                  | _VSS[Phospho (STY)]PALETYVQQR[Phospho (STY)]PSR_3                           | Q8BT18_S1360_M2_Srrm2   | 1.7343 | 0.7944  | 0.0117 | 1.9316 |
| Exoc1    | Q8R356        | Exocyst complex component 1                                                                                  | _LTGSTSS[Phospho (STY)]LNK_2                                                | Q8R356_S473_M1_Exoc1    | 2.0928 | 1.0655  | 0.0117 | 1.9304 |
| Rab3c    | P62823        | Ras-related protein Rab-3C                                                                                   | _TYSWDNAQZVLGNK_2                                                           | #N/A                    | 1.3144 | 0.3944  | 0.0118 | 1.9293 |
| Cob11    | Q3UMF0        | Cordon-bleu protein-like 1                                                                                   | _GSS[Phospho (STY)]LTGSSDPEHVR_2                                            | #N/A                    | 0.6218 | -0.6855 | 0.0118 | 1.9292 |
| Stub1    | Q9WU01        | STIP1 homology and U box-containing protein 1                                                                | _WNS[Phospho (STY)]IEER_2                                                   | Q9WU01_S150_M1_Stub1    | 0.5447 | -0.8764 | 0.0119 | 1.9239 |
| Tubb4b   | P68372        | Tubulin beta-4B chain                                                                                        | _TLKLTTPYTGDLNLVSA[Oxidation (M)]SGVTTCC[Carbamidomethyl (C)]LR_3           | #N/A                    | 0.4443 | -1.1704 | 0.0122 | 1.9132 |
| Rpl20    | P60867        | 40S ribosomal protein S20                                                                                    | _TPVEEVAIHR_3                                                               | #N/A                    | 2.4748 | 1.3073  | 0.0123 | 1.9116 |

|          |        |                                                                                                             |                                                                                         |                          |         |         |        |        |
|----------|--------|-------------------------------------------------------------------------------------------------------------|-----------------------------------------------------------------------------------------|--------------------------|---------|---------|--------|--------|
| Cs       | Q9CZU6 | Citrate synthase, mitochondrial                                                                             | _EVGKDVSEKLR_3                                                                          | #N/A                     | 0.6311  | -0.6642 | 0.0123 | 1.9093 |
| PsmD9    | Q9CR00 | 26S proteasome non-ATPase regulatory subunit 9                                                              | _ADVDVQVVR_2                                                                            | #N/A                     | 0.6112  | -0.7102 | 0.0127 | 1.8976 |
| Actr1b   | Q8R5C5 | Beta-centractin                                                                                             | _AC[Carbamidomethyl (C)]VLSINPKQDALETEK_3                                               | #N/A                     | 0.4483  | -1.1573 | 0.0127 | 1.8964 |
| Clsap2   | Q8BR71 | CLIP-associating protein 2                                                                                  | _IPRPVS[Phospho (STY)]QG[C]Carbamidomethyl (C)]S[Phospho (STY)]R_2                      | Q8BR71_S531_M2_Clsap2    | 0.2229  | -2.1656 | 0.0127 | 1.8963 |
| Dist     | Q8Q262 | hydrolypolylysine-residue succinyltransferase component of 2-oxoglutarate dehydrogenase complex, mitochondr | _TINELGEK_2                                                                             | #N/A                     | 0.3698  | -1.4354 | 0.0127 | 1.8961 |
| Nsmf     | Q299F2 | NMDA receptor synaptotransmembrane protein 1                                                                | _ERS[Phospho (STY)]FS[Phospho (STY)]RS[Phospho (STY)]WSOPTPMK_2                         | #N/A                     | 1.6295  | 0.7044  | 0.0128 | 1.8930 |
| Ywhaz    | P63101 | 14-3-3 protein zeta/delta                                                                                   | _KGVVQSQQYQEAFFSK_3                                                                     | #N/A                     | 1.5444  | 0.6271  | 0.0128 | 1.8929 |
| Map4k4   | P97820 | Mitogen-activated protein kinase kinase kinase kinase 4                                                     | _DSPLOGGGGQNSQAQGR_2                                                                    | #N/A                     | 0.5563  | -0.8462 | 0.0128 | 1.8918 |
| Ptprz1   | B9EKR1 | Receptor-type tyrosine-protein phosphatase zeta                                                             | _QSPINDEIDLTQVNVNLK_2                                                                   | #N/A                     | 1.4799  | 0.5655  | 0.0129 | 1.8892 |
| Lmnb1    | P14733 | Lamin-B1                                                                                                    | _LSPS[Phospho (STY)]PSSR_2                                                              | P14733_S394_M1_Lmnb1     | 0.2765  | -1.8545 | 0.0129 | 1.8891 |
| Lxn      | P70202 | Latexin                                                                                                     | _AASVAENC[Carbamidomethyl (C)]INVQGTGPHK_2                                              | #N/A                     | 1.5616  | 0.6430  | 0.0130 | 1.8861 |
| Faf1     | P54731 | FAS-associated factor 1                                                                                     | _TPS[Phospho (STY)]GELERL_2                                                             | P54731_S581_M1_Faf1      | 0.6222  | -0.6845 | 0.0130 | 1.8859 |
| Uba1     | Q02053 | Ubiquitin-like modifier-activating enzyme 1                                                                 | _YDODFFQNLGQVANAALNDIAR_3                                                               | #N/A                     | 0.6047  | -0.7258 | 0.0131 | 1.8812 |
| Znf385a  | QBVD12 | Zinc finger protein 385A                                                                                    | _QPQ[S]Phospho (STY)]SPSPSPESQGVTK_2                                                    | QBVD12_S160_M1_Znf385a   | 1.7148  | 0.7780  | 0.0132 | 1.8790 |
| Chtop    | Q9CY57 | Chromatin target of PRMT1 protein                                                                           | _GHLDALDAYM[Oxidation (M)]AQDTPETND_2                                                   | #N/A                     | 0.5249  | -0.9299 | 0.0133 | 1.8777 |
| Hivep3   | A2A884 | Transcription factor HIVEP3                                                                                 | _RSS[Phospho (STY)]VESPK_2                                                              | A2A884_S489_M1_Hivep3    | 0.6554  | -0.6096 | 0.0133 | 1.8776 |
| Tufm     | Q8BRF5 | Elongation factor Tu, mitochondrial                                                                         | _DKPHVNVGTGHVDHGK_4                                                                     | #N/A                     | 0.6223  | -0.6843 | 0.0133 | 1.8774 |
| Icam5    | Q60625 | Intercellular adhesion molecule 5                                                                           | _SFGEPFR_2                                                                              | #N/A                     | 0.4611  | -1.1168 | 0.0134 | 1.8726 |
| Gls      | D3Z7P3 | Glutaminase kidney isoform, mitochondrial                                                                   | _ILQEVQVQYTPQGSQSDGK_2                                                                  | #N/A                     | 0.6224  | -0.6842 | 0.0135 | 1.8693 |
| Epb41l1  | Q9Z2H5 | Band 4.1-like protein 1                                                                                     | _LPSPASPS[Phospho (STY)]PKGT[Phospho (STY)]PEKASER_3                                    | #N/A                     | 12.9846 | 3.6987  | 0.0136 | 1.8674 |
| Ogdh     | Q60597 | 2-oxoglutarate dehydrogenase, mitochondrial                                                                 | _ELEQIFC[Carbamidomethyl (C)]QDFSK_2                                                    | #N/A                     | 1.7738  | 0.8268  | 0.0137 | 1.8624 |
| Nefh     | P19246 | Neurofilament heavy polypeptide                                                                             | _VKS[Phospho (STY)]EEMKRVAK_3                                                           | #N/A                     | 0.6224  | -0.6840 | 0.0138 | 1.8609 |
| Slc25a11 | Q9CR62 | Mitochondrial 2-oxoglutarate/malate carrier protein                                                         | _M[Oxidation (M)]DGGPEYK_2                                                              | #N/A                     | 0.6230  | -0.6828 | 0.0138 | 1.8605 |
| Znf609   | Q8B247 | Zinc finger protein 609                                                                                     | _AEADKHYFTDNAP[Phospho (STY)]PSGGSRR_3                                                  | Q8B247_S803_M1_Znf609    | 1.7153  | 0.7785  | 0.0139 | 1.8569 |
| Camk2g   | Q9Z3T9 | Calcium/calmodulin-dependent protein kinase type II subunit gamma                                           | _QET[Phospho (STY)]VE[C]Carbamidomethyl (C)]LR_2                                        | Q9Z3T9_T287_M1_Camk2g    | 1.6788  | 0.7474  | 0.0139 | 1.8560 |
| Cd99i2   | Q8BIF0 | CD99 antigen-like protein 2                                                                                 | _QETQS[Phospho (STY)]AEPFPPFPR_2                                                        | Q8BIF0_S226_M1_Cd99i2    | 0.6225  | -0.6839 | 0.0140 | 1.8546 |
| Ctcf     | Q68F05 | Clathrin heavy chain 1                                                                                      | _LEKHLEFRR_3                                                                            | #N/A                     | 0.6765  | -0.5638 | 0.0140 | 1.8538 |
| Champ1   | Q8K327 | Chromosome alignment-maintaining phosphoprotein 1                                                           | _LKQDS[Phospho (STY)]QENS[Phospho (STY)]DAELSSSEYR_3                                    | Q8K327_S613_M2_Camp1     | 0.6225  | -0.6838 | 0.0141 | 1.8502 |
| Champ1   | Q8K327 | Chromosome alignment-maintaining phosphoprotein 1                                                           | _GQES[Phospho (STY)]SS[Phospho (STY)]DQEQVDESIDFSK_2                                    | Q8K327_S641_M2_Camp1     | 0.6225  | -0.6838 | 0.0141 | 1.8501 |
| Map1a    | Q9QYR6 | Microtubule-associated protein 1A                                                                           | _AKPAS[Phospho (STY)]PARR_2                                                             | #N/A                     | 1.7492  | 0.8067  | 0.0141 | 1.8496 |
| Camk2g   | Q9Z3T9 | Calcium/calmodulin-dependent protein kinase type II subunit gamma                                           | _KTS[Phospho (STY)]QEVYAK_2                                                             | Q9Z3T9_S36_M1_Camk2g     | 1.8131  | 0.8585  | 0.0142 | 1.8480 |
| Ncoa7    | Q6DFV7 | Nuclear receptor coactivator 7                                                                              | _YYS[Phospho (STY)]VDDNQMK_2                                                            | Q6DFV7_S92_M1_Ncoa7      | 4.9702  | 2.3133  | 0.0142 | 1.8467 |
| Srrm4    | Q8BKA3 | Serine/arginine repetitive matrix protein 4                                                                 | _SRGQEKGS[Phospho (STY)]PGDLSK_3                                                        | #N/A                     | 1.6169  | 0.6932  | 0.0144 | 1.8420 |
| Eci2     | Q9WUR2 | Enoyl-CoA delta isomerase 2                                                                                 | _ASQQDFENALNQVK_2                                                                       | #N/A                     | 1.8638  | 0.8983  | 0.0144 | 1.8405 |
| Ina      | P46660 | Alpha-intensin                                                                                              | _EEIHEVRR_2                                                                             | #N/A                     | 0.6958  | -0.5232 | 0.0144 | 1.8402 |
| Sptbn1   | Q6Z261 | Spectrin beta chain, non-erythrocytic 1                                                                     | _HDTASQDS[Phospho (STY)]T[Phospho (STY)]PASSR_2                                         | Q6Z261_T319_M2_Sptbn1    | 1.4420  | 0.5281  | 0.0147 | 1.8326 |
| Obi1     | Q8K2V0 | ORC ubiquitin ligase 1                                                                                      | _LKAEDVNR[Phospho (STY)]PKK_2                                                           | #N/A                     | 2.3606  | 1.2392  | 0.0148 | 1.8293 |
| Cadm2    | Q8B1Q9 | Cell adhesion molecule 2                                                                                    | _GAEDAPDADTAINAEGS[Phospho (STY)]QVNAEEKK_3                                             | #N/A                     | 1.9006  | 0.9264  | 0.0149 | 1.8275 |
| Tbr1     | Q64336 | T-box brain protein 1                                                                                       | _RIS[Phospho (STY)]PADTPVSESSPLK_3                                                      | Q64336_S640_M1_Tbr1      | 1.6720  | 0.7415  | 0.0150 | 1.8238 |
| Hmnpa2b1 | Q8B569 | Heterogeneous nuclear ribonucleoproteins A2/B1                                                              | _GFGDGTNYGGGGGNGFGGS[Phospho (STY)]PGVGGGR_3                                            | Q8B569_S259_M1_Hmnpa2b1  | 1.6189  | 0.6950  | 0.0150 | 1.8235 |
| Srrm2    | Q8B718 | Serine/arginine repetitive matrix protein 2                                                                 | _S[Phospho (STY)]RS[Phospho (STY)]KTS[Phospho (STY)]PVTR_2                              | Q8B718_S1927_M3_Srrm2    | 2.8693  | 1.5207  | 0.0150 | 1.8234 |
| Dclk1    | Q9JLM8 | Serine/threonine-protein kinase DCLK1                                                                       | _TLQTLSEK_2                                                                             | #N/A                     | 0.5473  | -0.8695 | 0.0150 | 1.8227 |
| Glu1     | P15105 | Glutamine synthetase                                                                                        | _Y[Phospho (STY)]NKRKPAETLR_3                                                           | #N/A                     | 0.7417  | -0.4311 | 0.0153 | 1.8155 |
| Tanc2    | A2A690 | Protein TANC2                                                                                               | _SQS[Phospho (STY)]ASYPVC[Carbamidomethyl (C)]HSK_2                                     | A2A690_S1726_M1_Tanc2    | 1.7237  | 0.7855  | 0.0153 | 1.8142 |
| Trappc2  | Q9CQP2 | Trafficking protein particle complex subunit 2                                                              | _FAMNPFYEPNS[Phospho (STY)]PIR_2                                                        | Q9CQP2_S119_M1_Trappc2   | 2.0438  | 1.0313  | 0.0153 | 1.8141 |
| Glu4d    | Q9CPV4 | Glyoxalase domain-containing protein 4                                                                      | _FRLQDRS[Phospho (STY)]PSGDSPLVK_3                                                      | #N/A                     | 0.6282  | -0.6707 | 0.0156 | 1.8074 |
| Cct8     | P42932 | T-complex protein 1 subunit theta                                                                           | _KDWDDQND_2                                                                             | #N/A                     | 0.7146  | -0.4847 | 0.0156 | 1.8064 |
| Wwc2     | Q6NXX0 | Protein WWC2                                                                                                | _UNRSOS[Phospho (STY)]DSSTLAK_2                                                         | #N/A                     | 1.6421  | 0.7155  | 0.0157 | 1.8048 |
| Nrgn     | P60761 | Neurogranin                                                                                                 | _KGPFGPGPGGAGGAR_2                                                                      | #N/A                     | 1.3255  | 0.4065  | 0.0157 | 1.8046 |
| Stl13    | Q99L47 | Hsc70-interacting protein                                                                                   | _QDPVLUHTEEMR_3                                                                         | #N/A                     | 1.9226  | 0.9430  | 0.0158 | 1.8020 |
| Nefh     | P19246 | Neurofilament heavy polypeptide                                                                             | _SAQEETVRR_3                                                                            | #N/A                     | 1.6477  | 0.7205  | 0.0161 | 1.7942 |
| Wars1    | P32921 | Tryptophan-tRNA ligase, cytoplasmic                                                                         | _DLTEOAYSIVYENAK_2                                                                      | #N/A                     | 1.6085  | 0.6857  | 0.0161 | 1.7924 |
| Arpp21   | Q9DCB4 | cAMP-regulated phosphoprotein 21                                                                            | _AWSS[Phospho (STY)]TDSQSNR_2                                                           | Q9DCB4_S362_M1_Arpp21    | 1.4188  | 0.5047  | 0.0162 | 1.7910 |
| Sh3glb2  | Q8R3V5 | Endophilin-B2                                                                                               | _RLDLAC[Carbamidomethyl (C)]K_2                                                         | #N/A                     | 0.3692  | -1.4376 | 0.0163 | 1.7883 |
| Pkce     | P16054 | Protein kinase C epsilon type                                                                               | _SKS[Phospho (STY)]APTS[Phospho (STY)]PC[Carbamidomethyl (C)]DQLKLENNIR_3               | #N/A                     | 1.7232  | 0.7851  | 0.0163 | 1.7883 |
| Zswim8   | Q3UHH1 | Zinc finger SWIM domain-containing protein 8                                                                | _KQS[Phospho (STY)]AGPNS[Phospho (STY)]PTGGGGGGSGGTR_2                                  | #N/A                     | 0.6791  | -0.5584 | 0.0164 | 1.7856 |
| Ap2a2    | P17427 | AP-2 complex subunit alpha-2                                                                                | _LSTVASTDLATLEEM[Oxidation (M)]PPFPER_3                                                 | #N/A                     | 1.5152  | 0.5995  | 0.0164 | 1.7849 |
| Igfb1    | Q8R366 | Immunoglobulin superfamily member 8                                                                         | _AVLAHVQVTLSSQLAVTVGQER_3                                                               | #N/A                     | 0.6725  | -0.5723 | 0.0164 | 1.7848 |
| Retreg2  | Q6N582 | Reticulophagy regulator 2                                                                                   | _SAPPAAGDEPLATES[Phospho (STY)]ESEALAGFSPVVDVK_3                                        | Q6N582_S276_M1_Retreg2   | 1.5366  | 0.6197  | 0.0165 | 1.7817 |
| Mapk4    | Q6P5G0 | Mitogen-activated protein kinase 4                                                                          | _AGSTT[Phospho (STY)]PLAEDVQVQDR_2                                                      | Q6P5G0_T383_M1_Mapk4     | 0.4488  | -1.1560 | 0.0168 | 1.7756 |
| Ganab    | Q8BHN3 | Neutral alpha-glucosidase AB                                                                                | _DAVHYGGWEHR_3                                                                          | #N/A                     | 1.6410  | 0.7146  | 0.0168 | 1.7734 |
| Uhrf1bp1 | A2R514 | UHRF1-binding protein 1-like                                                                                | _SS[Phospho (STY)]PEISLR_2                                                              | A2R514_S1250_M1_Uhrf1bp1 | 0.4664  | -1.1003 | 0.0171 | 1.7658 |
| Rims2    | Q9EQZ7 | Regulating synaptic membrane exocytosis protein 2                                                           | _RAD[S]Phospho (STY)]LRK_2                                                              | Q9EQZ7_S493_M1_Rims2     | 2.6427  | 1.4020  | 0.0173 | 1.7630 |
| Ap3b2    | Q9JME5 | AP-3 complex subunit beta-2                                                                                 | _TLTVAGSVAM[Oxidation (M)]AFEEVC[Carbamidomethyl (C)]PER_2                              | #N/A                     | 1.8898  | 0.9183  | 0.0173 | 1.7622 |
| Fmnl1    | Q9JL26 | Formin-like protein 1                                                                                       | _SKPLDQSVDEL[S]Phospho (STY)]K_2                                                        | Q9JL26_S189_M1_Fmnl1     | 1.8435  | 0.8825  | 0.0174 | 1.7595 |
| Ogfr1    | QBVE52 | Opioid growth factor receptor-like protein 1                                                                | _DSAADQSOS[Phospho (STY)]PPEK_2                                                         | QBVE52_S406_M1_Ogfr1     | 0.6412  | -0.6411 | 0.0179 | 1.7463 |
| Ranbp2   | Q9ERU9 | E3 SUMO-protein ligase RanBP2                                                                               | _NRPGVYS[Phospho (STY)]EEEEDEDEYEM[Oxidation (M)]AVK_3                                  | Q9ERU9_S2505_M1_Ranbp2   | 0.7280  | -0.4579 | 0.0181 | 1.7424 |
| Cacna1d  | Q99246 | Voltage-dependent L-type calcium channel subunit alpha-1D                                                   | _QT[Phospho (STY)]VLSWQDAIDAAR_2                                                        | Q99246_T49_M1_Cacna1d    | 1.7185  | 0.7811  | 0.0185 | 1.7329 |
| Abi1     | P00520 | Tyrosine-protein kinase Abi1                                                                                | _SC[Carbamidomethyl (C)]S[Phospho (STY)]ASC[Carbamidomethyl (C)]M[Oxidation (M)]PHGAR_2 | #N/A                     | 1.6739  | 0.7433  | 0.0186 | 1.7310 |
| Arhgap23 | Q69Z9H | Rho GTPase-activating protein 23                                                                            | _ARS[Phospho (STY)]DDVLR_2                                                              | Q69Z9H_S351_M1_Arhgap23  | 1.4220  | 0.5080  | 0.0186 | 1.7307 |
| Atrx     | Q61687 | Transcriptional regulator ATRX                                                                              | _VC[Carbamidomethyl (C)]DQTSKS[Phospho (STY)]PK_2                                       | Q61687_S315_M1_Atrx      | 0.4474  | -1.1604 | 0.0187 | 1.7277 |
| Dctn4    | Q8CBY8 | Dynactin subunit 4                                                                                          | _LIEYQGLACK_2                                                                           | #N/A                     | 1.8039  | 0.8511  | 0.0187 | 1.7274 |
| Hmnpk    | P61979 | Heterogeneous nuclear ribonucleoprotein K                                                                   | _GGOLM[Oxidation (M)]AYDRR_2                                                            | #N/A                     | 0.4608  | -1.1179 | 0.0190 | 1.7215 |
| Agap1    | Q8BXX8 | Arf-GAP with GTPase, ANK repeat and PH domain-containing protein 1                                          | _VQDVAQK_2                                                                              | #N/A                     | 1.5428  | 0.6256  | 0.0191 | 1.7183 |
| Safb     | D3YXK2 | Scaffold attachment factor B1                                                                               | _SVVS[Phospho (STY)]FKVK_2                                                              | D3YXK2_S626_M1_Safb      | 1.9536  | 0.9661  | 0.0192 | 1.7173 |
| Iqsec1   | Q8R0S2 | IQ motif and SEC7 domain-containing protein 1                                                               | _VLUNFNAPNQDR_2                                                                         | #N/A                     | 0.4979  | -1.0059 | 0.0193 | 1.7155 |
| Spat18   | Q0P557 | Mitochondria-eating protein                                                                                 | _SKS[Phospho (STY)]PC[Carbamidomethyl (C)]TTVAK_2                                       | Q0P557_S273_M1_Spat18    | 0.4072  | -1.2963 | 0.0193 | 1.7148 |
| Limd2    | Q8BGB5 | LIM domain-containing protein 2                                                                             | _SKS[Phospho (STY)]FSLR_2                                                               | Q8BGB5_S30_M1_Limd2      | 1.3230  | 0.4038  | 0.0193 | 1.7145 |
| Ptdss2   | Q9Z1X2 | Phosphatidylserine synthase 2                                                                               | _RVAGSGSGES[Phospho (STY)]PLK_2                                                         | #N/A                     | 1.6511  | 0.7234  | 0.0194 | 1.7127 |

|           |        |                                                                        |                                                              |                         |        |         |        |        |
|-----------|--------|------------------------------------------------------------------------|--------------------------------------------------------------|-------------------------|--------|---------|--------|--------|
| Rala      | P63321 | Ras-related protein Raf-A                                              | _VIM[Oxidation (M)]VSGGSGVK_2                                | #N/A                    | 0.7477 | -0.4195 | 0.0194 | 1.7124 |
| Caskin1   | Q6P9K8 | Caskin-1                                                               | _RRAS[Phospho (STY)]DIAGSVDTGSAGVK_3                         | #N/A                    | 0.4954 | -1.0132 | 0.0194 | 1.7111 |
| Dck       | P43346 | Deoxytydine kinase                                                     | _FC[Carbamidomethyl (C)]PS[Phospho (STY)]PSTSEGETR_2         | P43346_S31_M1_Dck       | 6.0431 | 2.5953  | 0.0195 | 1.7109 |
| Camk2b    | P28652 | Calcium/calmodulin-dependent protein kinase type II subunit beta       | _QET[Phospho (STY)]VEC[Carbamidomethyl (C)]LKK_2             | #N/A                    | 2.0944 | 1.0665  | 0.0197 | 1.7065 |
| Mctp1     | E9PV66 | Multiple C2 and transmembrane domain-containing protein 1              | _AAS[Phospho (STY)]PSFOAR_2                                  | E9PV66_S16_M1_Mctp1     | 6.1820 | 2.6281  | 0.0200 | 1.7000 |
| Igfb8     | Q8R366 | Immunoglobulin superfamily member 8                                    | _HAAYSVGWEM[Oxidation (M)]APAGAPGGR_3                        | #N/A                    | 0.4406 | -1.1825 | 0.0200 | 1.6995 |
| Tp1       | P17751 | Triosephosphate isomerase                                              | _ELASQPDVDFVLGGASLKPFVDINAK_3                                | #N/A                    | 0.5057 | -0.9837 | 0.0200 | 1.6991 |
| Rnf14     | Q3I90  | E3 ubiquitin-protein ligase RNF14                                      | _LTYHGLS[Phospho (STY)]PC[Carbamidomethyl (C)]KVTAEK_3       | #N/A                    | 1.8895 | 0.9180  | 0.0200 | 1.6991 |
| Adam22    | Q9R1V6 | Disintegrin and metalloproteinase domain-containing protein 22         | _KLAS[Phospho (STY)]GEC[Carbamidomethyl (C)]K_2              | Q9R1V6_S387_M1_Adam22   | 0.6322 | -0.6616 | 0.0200 | 1.6987 |
| Spatn1    | P16546 | Spectrin alpha chain, non-erythrocytic 1                               | _TKGDENVAAAWQR_3                                             | #N/A                    | 0.4252 | -1.2338 | 0.0200 | 1.6980 |
| Mars1     | Q68FL6 | Methionine-tRNA ligase, cytoplasmic                                    | _NNSLELNNGAFINR_2                                            | #N/A                    | 0.5976 | -0.7428 | 0.0200 | 1.6980 |
| Pde7b     | Q9QXQ1 | cAMP-specific 3',5'-cyclic phosphodiesterase 7B                        | _GSGQDLAGAPETLEQTGAT[Phospho (STY)]P_2                       | Q9QXQ1_T445_M1_Pde7b    | 0.2454 | -2.0265 | 0.0202 | 1.6951 |
| Ptprz1    | B9EKR1 | Receptor-type tyrosine-protein phosphatase zeta                        | _QSPINDEDLTQVNVNLKK_3                                        | #N/A                    | 1.3356 | 0.4175  | 0.0202 | 1.6949 |
| Tbr1      | Q64336 | T-box brain protein 1                                                  | _SKLS[Phospho (STY)]PVLGVSP[Phospho (STY)]ELRHSGDGSAAOR_4    | Q64336_S84_M2_Tbr1      | 0.6582 | -0.6035 | 0.0204 | 1.6902 |
| Arfgap2   | Q99X28 | ADP-ribosylation factor GTPase-activating protein 2                    | _LAYQLQIR_2                                                  | #N/A                    | 0.6976 | -0.5195 | 0.0205 | 1.6875 |
| Fasn      | P19096 | Fatty acid synthase                                                    | _TLEAVQDLLEQGR_2                                             | #N/A                    | 0.6449 | -0.6328 | 0.0208 | 1.6816 |
| Atp1a3    | Q6PIC5 | Sodium/potassium-transporting ATPase subunit alpha-3                   | _KADIGVAM[Oxidation (M)]GIAGSDVSK_2                          | #N/A                    | 0.5528 | -0.8552 | 0.0209 | 1.6807 |
| Dnajc5    | P60904 | DnaJ homolog subfamily C member 5                                      | _QRS[Phospho (STY)]LS[Phospho (STY)]TSGESLYHHGLDK_3          | P60904_S10_M2_Dnajc5    | 0.6826 | -0.5509 | 0.0209 | 1.6791 |
| Rassf5    | Q5EBH1 | Ras association domain-containing protein 5                            | _S[Phospho (STY)]PESTLPTLNQNV[Carbamidomethyl (C)]K_2        | Q5EBH1_S177_M1_Rassf5   | 2.2680 | 1.1814  | 0.0210 | 1.6769 |
| Hernpua1  | Q8VDM6 | Heterogeneous nuclear ribonucleoprotein L-like protein 1               | _NLYLDQTNVYGS[Phospho (STY)]AQR_2                            | Q8VDM6_S513_M1_Hernpua1 | 2.0621 | 1.0441  | 0.0211 | 1.6763 |
| Srm2      | Q8BTI8 | Serine/arginine repetitive matrix protein 2                            | _VSSPVLTVQQR[Phospho (STY)]PS[Phospho (STY)]RR_3             | Q8BTI8_S1372_M2_Srm2    | 0.3080 | -1.6990 | 0.0211 | 1.6754 |
| Gap43     | P06837 | Neuromodulin                                                           | _QDEKEKPEADQEHA_2                                            | #N/A                    | 0.4773 | -1.0669 | 0.0211 | 1.6751 |
| Atn1      | O35126 | Atrophin-1                                                             | _TAS[Phospho (STY)]PPGPQVSK_2                                | O35126_S617_M1_Atn1     | 0.4190 | -1.2550 | 0.0214 | 1.6705 |
| Pdk       | Q8K183 | Pyridoxal kinase                                                       | _KPDGSGTVQR_2                                                | #N/A                    | 1.9500 | 0.9634  | 0.0214 | 1.6688 |
| Srm1      | O52X18 | Serine/arginine repetitive matrix protein 1                            | _VSHS[Phospho (STY)]PPPK_2                                   | O52X18_S657_M1_Srm1     | 5.6731 | 2.5041  | 0.0214 | 1.6686 |
| Actn1     | Q7TPR4 | Alpha-actinin-1                                                        | _LLETIDQLYLEYAK_2                                            | #N/A                    | 1.5177 | 0.6019  | 0.0219 | 1.6605 |
| Camk2a    | P11798 | Calcium/calmodulin-dependent protein kinase type II subunit alpha      | _QET[Phospho (STY)]VD[Carbamidomethyl (C)]LK_2               | #N/A                    | 4.8904 | 2.2900  | 0.0219 | 1.6602 |
| Anxa11    | P97384 | Annexin A11                                                            | _SDTSGHFOR_2                                                 | #N/A                    | 0.6064 | -0.7216 | 0.0219 | 1.6594 |
| Rab1A     | P62821 | Ras-related protein Rab-1A                                             | _KQST[Phospho (STY)]PVK_2                                    | P62821_T195_M1_Rab1A    | 2.4522 | 1.2941  | 0.0220 | 1.6572 |
| Cep170b   | Q8OU49 | Centrosomal protein of 170 kDa protein B                               | _SCSQ[Phospho (STY)]FHTPPADPK_2                              | Q8OU49_S421_M1_Cep170b  | 6.3521 | 2.6672  | 0.0223 | 1.6524 |
| Gdap11    | Q8VE33 | Ganglioside-induced differentiation-associated protein 1-like 1        | _LDHEEPQLESEPLSK_3                                           | #N/A                    | 0.6313 | -0.6636 | 0.0224 | 1.6502 |
| Atg6v1b2  | P62814 | V-type proton ATPase subunit B, brain isoform                          | _TVETLDIGWQLLR_2                                             | #N/A                    | 1.6051 | 0.6827  | 0.0225 | 1.6481 |
| Zeb2      | Q9R0G7 | Zinc finger E-box-binding homeobox 2                                   | _S[Phospho (STY)]DHEEDNMEDGME_2                              | #N/A                    | 1.4700 | 0.5559  | 0.0225 | 1.6476 |
| Wdr7      | Q920I9 | WD repeat-containing protein 7                                         | _RQS[Phospho (STY)]REDSDPYR_3                                | Q920I9_S772_M1_Wdr7     | 0.6561 | -0.6081 | 0.0225 | 1.6475 |
| Sorbs1    | Q62417 | Sorbin and SH3 domain-containing protein 1                             | _SKS[Phospho (STY)]EM[Oxidation (M)]NVEGEK_2                 | #N/A                    | 0.4718 | -1.0838 | 0.0225 | 1.6469 |
| Pgam1     | Q9DBU1 | Phosphoglycerate mutase 1                                              | _FSGWYDADSPAGHEAK_2                                          | #N/A                    | 1.3307 | 0.4122  | 0.0226 | 1.6461 |
| Rab11fip5 | Q8R361 | Rab11 family-interacting protein 5                                     | _RTYS[Phospho (STY)]DEASQLR_2                                | #N/A                    | 2.7503 | 1.4596  | 0.0226 | 1.6452 |
| Vars1     | Q92109 | Valine-tRNA ligase                                                     | _DINLDVNR_2                                                  | #N/A                    | 0.5654 | -0.8225 | 0.0227 | 1.6447 |
| Kif2a     | P28740 | Kinesin-like protein KIF2A                                             | _LDIGNSC[Carbamidomethyl (C)]R_2                             | #N/A                    | 0.4390 | -1.1877 | 0.0227 | 1.6436 |
| H1-2      | P15864 | Histone H1.2                                                           | _ASGPPVSELTK_2                                               | #N/A                    | 0.5293 | -0.9177 | 0.0229 | 1.6411 |
| Ndr3      | Q62433 | Protein NDRG1                                                          | _SKT[Phospho (STY)]AS[Phospho (STY)]GSSVTEGTR_2              | #N/A                    | 0.5406 | -0.8874 | 0.0230 | 1.6375 |
| Ptpra     | P18052 | Receptor-type tyrosine-protein phosphatase alpha                       | _QAGSHNS[Phospho (STY)]FR_2                                  | P18052_S180_M1_Ptpra    | 0.7617 | -0.3927 | 0.0230 | 1.6374 |
| Peak1     | Q69238 | Inactive tyrosine-protein kinase PEAK1                                 | _SLFTSQSSGEGEAHQTTES[Phospho (STY)]PT[Phospho (STY)]AK_3     | Q69238_S836_M2_Peak1    | 0.6371 | -0.6504 | 0.0231 | 1.6366 |
| Caskin1   | Q6P9K8 | Caskin-1                                                               | _SLPQS[Phospho (STY)]PTHR_2                                  | Q6P9K8_S828_M1_Caskin1  | 6.0388 | 2.5943  | 0.0231 | 1.6362 |
| Wdr33     | Q8K4P0 | pre-mRNA 3' end processing protein WDR33                               | _Acetyl (Protein N-term)[ATEQS[Phospho (STY)]PPR_2           | Q8K4P0_S7_M1_Wdr33      | 0.1211 | -3.0456 | 0.0233 | 1.6319 |
| Tomm34    | Q9CYG7 | Mitochondrial import receptor subunit TOM34                            | _SSLSDISSLLQIEPR_2                                           | #N/A                    | 1.6687 | 0.7387  | 0.0234 | 1.6303 |
| Ppp3cb    | P48453 | Serine/threonine-protein phosphatase 2B catalytic subunit beta isoform | _VDEIALR_2                                                   | #N/A                    | 1.6547 | 0.7266  | 0.0237 | 1.6260 |
| Gpd11     | Q3ULJ0 | Glycerol 3-phosphate dehydrogenase 1-like protein                      | _VC[Carbamidomethyl (C)]VSGNGWGSAAVK_2                       | #N/A                    | 2.0334 | 1.0239  | 0.0238 | 1.6234 |
| Setd2     | E9Q5F9 | Histone-lysine N-methyltransferase SETD2                               | _TGS[Phospho (STY)]PTPSNOLDSPFTK_2                           | E9Q5F9_S614_M1_Setd2    | 1.7755 | 0.8282  | 0.0238 | 1.6230 |
| Usp11     | Q99K46 | Ubiquitin carboxyl-terminal hydrolase 11                               | _QSQTSSSDTPAS[Phospho (STY)]PVSSSTPNSD[M[Oxidation (M)]DIN_3 | #N/A                    | 1.7624 | 0.8175  | 0.0239 | 1.6213 |
| Add2      | Q9QYB8 | Beta-adducin                                                           | _SPAVS[Phospho (STY)]PSK_2                                   | #N/A                    | 2.5515 | 1.3513  | 0.0240 | 1.6190 |
| Nefh      | P19246 | Neurofilament heavy polypeptide                                        | _JPSSTHK_2                                                   | #N/A                    | 1.4062 | 0.4918  | 0.0241 | 1.6176 |
| Synj1     | Q8CHC4 | Synaptojanin-1                                                         | _FIEAPKS[Phospho (STY)]PGTAR_2                               | #N/A                    | 1.8558 | 0.8920  | 0.0241 | 1.6172 |
| Naa15     | Q80UM3 | N-alpha-acetyltransferase 15, NATA auxiliary subunit                   | _ITVNGDS[Phospho (STY)]SAETEEALNEL_2                         | Q80UM3_S854_M1_Naa15    | 1.3866 | 0.4715  | 0.0242 | 1.6166 |
| Setd7     | Q8VHL1 | Histone-lysine N-methyltransferase SETD7                               | _JAYVYPOQR_2                                                 | #N/A                    | 1.8549 | 0.8914  | 0.0242 | 1.6163 |
| Pold3     | Q9EQ28 | DNA polymerase delta subunit 3                                         | _VDLS[Phospho (STY)]DEAEKETELHK_3                            | Q9EQ28_S306_M1_Pold3    | 0.4019 | -1.3152 | 0.0243 | 1.6143 |
| Pkp4      | Q68FHD | Plakophilin-4                                                          | _S[Phospho (STY)]YEDPYC[Carbamidomethyl (C)]DDR_2            | Q68FHD_S1136_M1_Pkp4    | 2.0300 | 1.0215  | 0.0245 | 1.6103 |
| Dmn       | Q9WV69 | Dematin                                                                | _TSVGGS[Phospho (STY)]PCSK_2                                 | #N/A                    | 1.3356 | 0.4175  | 0.0248 | 1.6057 |
| Pum3      | P14685 | 26S proteasome non-ATPase regulatory subunit 3                         | _LQLDS[Phospho (STY)]PEDAEFAVK_2                             | P14685_S426_M1_Pum3     | 0.6708 | -0.5761 | 0.0249 | 1.6046 |
| Amph      | Q7TQ77 | Amphiphysin                                                            | _LYEVM[Oxidation (M)]TK_2                                    | #N/A                    | 1.6585 | 0.7299  | 0.0249 | 1.6042 |
| Fry       | E9Q8I9 | Protein furry homolog                                                  | _LLPGSSPS[Phospho (STY)]S[Phospho (STY)]PEDEVKDR_2           | E9Q8I9_S1382_M2_Fry     | 1.5102 | 0.5947  | 0.0249 | 1.6034 |
| Scn3b     | Q8BHK2 | Sodium channel subunit beta-3                                          | _AEEAAQENASDY[Phospho (STY)]LAIPSENK_2                       | Q8BHK2_Y198_M1_Scn3b    | 0.2607 | -1.9395 | 0.0249 | 1.6030 |
| Ubqln1    | Q8R317 | Ubiquitin-1                                                            | _ALNLESIPGGYNALR_2                                           | #N/A                    | 1.5529 | 0.6350  | 0.0250 | 1.6021 |
| Ernn      | Q5EBI4 | Ermin                                                                  | _YNTISYR_2                                                   | #N/A                    | 0.7287 | -0.4566 | 0.0250 | 1.6021 |
| Nefh      | P19246 | Neurofilament heavy polypeptide                                        | _S[Phospho (STY)]LEGEAAALR_2                                 | P19246_S122_M1_Nefh     | 0.4641 | -1.1075 | 0.0250 | 1.6014 |
| Stxbp5l   | Q5DQ84 | Syntaxin-binding protein 5-like                                        | _EIKQESLTSYFYQIC[Carbamidomethyl (C)]K_2                     | #N/A                    | 1.7936 | 0.8428  | 0.0253 | 1.5970 |
| Ndufs2    | Q91WDS | NADH dehydrogenase [ubiquinone] iron-sulfur protein 2, mitochondrial   | _TSM[Oxidation (M)]JLSUHHFK_3                                | #N/A                    | 1.7298 | 0.7906  | 0.0256 | 1.5913 |
| Arpp21    | Q9DCB4 | cAMP-regulated phosphoprotein 21                                       | _TGS[Phospho (STY)]JESSSSAGSSLSLR_2                          | Q9DCB4_S408_M1_Arpp21   | 1.5286 | 0.6122  | 0.0256 | 1.5910 |
| Wac       | Q924H7 | WW domain-containing adaptor protein with coiled-coil                  | _S[Phospho (STY)]NS[Phospho (STY)]PENKYSDDSTGHNK_2           | Q924H7_S62_M2_Wac       | 1.4886 | 0.5740  | 0.0257 | 1.5903 |
| Dpyl5     | Q9EQF6 | Dihydropyrimidine-related protein 5                                    | _THC[Carbamidomethyl (C)]PIVLNVSSISAGDVAANK_3                | #N/A                    | 1.7715 | 0.8250  | 0.0257 | 1.5900 |
| Glu       | P15105 | Glutamine synthetase                                                   | _QM[Oxidation (M)]YM[Oxidation (M)]JSLPOGEG_2                | #N/A                    | 0.5559 | -0.8472 | 0.0258 | 1.5886 |
| Rhoa      | Q9QU0D | Transforming protein RhoA                                              | _M[Oxidation (M)]KQEPVKEEGR_3                                | #N/A                    | 0.5696 | -0.8120 | 0.0258 | 1.5878 |
| Trim2     | Q9ESN6 | Tripartite motif-containing protein 2                                  | _ASVODHSTFDLQK_3                                             | #N/A                    | 0.5149 | -0.9575 | 0.0259 | 1.5872 |
| Sptbn1    | Q62261 | Spectrin beta chain, non-erythrocytic 1                                | _EAK[Carbamidomethyl (C)]EVALDYKK_3                          | #N/A                    | 1.5375 | 0.6206  | 0.0259 | 1.5869 |
| Tnr       | Q8BYI9 | Tenascin-R                                                             | _DGOEAVFAYDKFAVEDSR_3                                        | #N/A                    | 0.6938 | -0.5274 | 0.0261 | 1.5835 |
| Kcnq5     | Q9IK45 | Potassium voltage-gated channel subfamily KQT member 5                 | _RSPSTDTTAEGS[Phospho (STY)]PTK_2                            | #N/A                    | 3.3339 | 1.7372  | 0.0262 | 1.5825 |
| Hpc4      | P84075 | Neuron-specific calcium-binding protein hippocalin                     | _TFDTNSDGTIDR_2                                              | #N/A                    | 0.4253 | -1.2333 | 0.0264 | 1.5791 |
| Sptbn1    | Q62261 | Spectrin beta chain, non-erythrocytic 1                                | _DLVIAEK_2                                                   | #N/A                    | 0.4819 | -1.0532 | 0.0265 | 1.5773 |
| CH1       | P70232 | Neural cell adhesion molecule L1-like protein                          | _DETGEYS[Phospho (STY)]DSDEKPLKGS[Phospho (STY)]R_3          | P70232_S1148_M2_CH1     | 1.3802 | 0.4649  | 0.0266 | 1.5754 |

|          |        |                                                                                                   |                                                                                             |                         |        |         |        |        |
|----------|--------|---------------------------------------------------------------------------------------------------|---------------------------------------------------------------------------------------------|-------------------------|--------|---------|--------|--------|
| Lingo1   | Q9D1T0 | Leucine-rich repeat and immunoglobulin-like domain-containing nogo receptor-interacting protein 1 | _S[Phospho (STY)]DAGISSADAPR_2                                                              | #N/A                    | 1.3044 | 0.3834  | 0.0266 | 1.5748 |
| Nos1     | Q9Z0I4 | Nitric oxide synthase, brain                                                                      | _KSS[Phospho (STY)]GQDPDLR_2                                                                | Q9Z0I4_S858_M1_Nos1     | 2.4359 | 1.2844  | 0.0267 | 1.5732 |
| Ociad2   | Q9D8W7 | OIA domain-containing protein 2                                                                   | _FHSFEQLR_2                                                                                 | #N/A                    | 1.6955 | 0.7617  | 0.0269 | 1.5702 |
| Dpp6     | Q9Z2I8 | Dipeptidyl aminopeptidase-like protein 6                                                          | _HLYSANTVDVFNLR_2                                                                           | #N/A                    | 0.6098 | -0.7136 | 0.0270 | 1.5681 |
| Dlgap3   | Q6PFD5 | Disks large-associated protein 3                                                                  | _WRPSGVHGVETIS[Phospho (STY)]SDTENR_3                                                       | Q6PFD5_S641_M1_Dlgap3   | 0.5168 | -0.9523 | 0.0271 | 1.5674 |
| Dcx      | Q88809 | Neuronal migration protein doublecortin                                                           | _GNPSAAGPKAS[Phospho (STY)]PTPKK_2                                                          | Q88809_S287_M1_Dcx      | 0.6862 | -0.5433 | 0.0271 | 1.5673 |
| Eepd1    | Q3TGW2 | Endonuclease/exonuclease/phosphatase family domain-containing protein 1                           | _GNSAQHS[Phospho (STY)]PSSLRR_3                                                             | #N/A                    | 0.2958 | -1.7574 | 0.0271 | 1.5668 |
| Ndg3     | Q9CYF9 | Protein NDRG3                                                                                     | _S[Phospho (STY)]RT[Phospho (STY)]HSTSSGSGSGSPSR_3                                          | Q9CYF9_T329_M2_Ndg3     | 0.6244 | -0.6795 | 0.0272 | 1.5662 |
| Vps26b   | Q8CDE2 | Vacuolar protein sorting-associated protein 26B                                                   | _ETTGTPGVNYHENDIAK_3                                                                        | #N/A                    | 1.6108 | 0.6878  | 0.0273 | 1.5631 |
| Ncbp3    | Q88Z89 | Nuclear cap-binding protein subunit 3                                                             | _AEAPAGPAGLGLPS[Phospho (STY)]PEVESGLER_2                                                   | Q88Z89_S25_M1_Ncbp3     | 0.7255 | -0.4630 | 0.0274 | 1.5629 |
| Phyhlpl  | Q8BGT8 | Phytanoyl-CoA hydroxylase-interacting protein-like                                                | _ISWDMDSK_2                                                                                 | #N/A                    | 1.6052 | 0.6827  | 0.0275 | 1.5610 |
| Ernm     | Q5EBI4 | Ermin                                                                                             | _SRPVDLHS[Phospho (STY)]K_3                                                                 | Q5EBI4_S166_M1_Ermn     | 0.6883 | -0.5389 | 0.0275 | 1.5603 |
| Bsn      | Q88737 | Protein bassoon                                                                                   | _YSS[Phospho (STY)]VSNYSDHR_2                                                               | Q88737_S2068_M1_Bsn     | 1.8226 | 0.8660  | 0.0276 | 1.5598 |
| Pccb     | Q99MN9 | Propionyl-CoA carboxylase beta chain, mitochondrial                                               | _IM[Oxidation (M)]DQAITVGAPVGLNDSGGAR_2                                                     | #N/A                    | 0.7151 | -0.4838 | 0.0277 | 1.5572 |
| Pitpnm1  | Q35954 | Membrane-associated phosphatidylinositol transfer protein 1                                       | _C[Carbamidomethyl (C)]NTGSEGGEAQ[Phospho (STY)]PGK_2                                       | Q35954_T270_M1_Pitpnm1  | 1.6797 | 0.7482  | 0.0278 | 1.5557 |
| Smpd3    | Q9IYF3 | Spingomyelin phosphodiesterase 3                                                                  | _TAS[Phospho (STY)]VEYKGDDGR_2                                                              | Q9IYF3_S208_M1_Smpd3    | 2.2849 | 1.1922  | 0.0280 | 1.5535 |
| Cpe      | Q0Q493 | Carboxypeptidase E                                                                                | _YIGNM[Oxidation (M)]HGNEAVGR_3                                                             | #N/A                    | 0.5597 | -0.8372 | 0.0280 | 1.5525 |
| Nefm     | P08553 | Neurofilament medium polypeptide                                                                  | _KAES[Phospho (STY)]PVKEK_2                                                                 | #N/A                    | 1.3942 | 0.4794  | 0.0281 | 1.5509 |
| Dnm3     | Q88Z98 | Dynamin-3                                                                                         | _LQGQLLSIEVEAFK_3                                                                           | #N/A                    | 1.6896 | 0.7566  | 0.0281 | 1.5507 |
| Prkacb   | P68181 | cAMP-dependent protein kinase catalytic subunit beta                                              | _ATEQYAMK_2                                                                                 | #N/A                    | 0.6905 | -0.5343 | 0.0284 | 1.5463 |
| Vcplp1   | Q8CDG3 | Deubiquitinating protein VCP1P1                                                                   | _S[Phospho (STY)]RESS[Phospho (STY)]PSHGLXK_2                                               | Q8CDG3_S993_M2_Vcplp1   | 0.7131 | -0.4879 | 0.0286 | 1.5441 |
| Pcdc4    | Q61823 | Programmed cell death protein 4                                                                   | _SGVAVPTS[Phospho (STY)]PKGR_2                                                              | #N/A                    | 0.3430 | -1.5435 | 0.0286 | 1.5440 |
| AK1      | Q9R0Y5 | Adenylate kinase isoenzyme 1                                                                      | _AEVSSGSR_2                                                                                 | #N/A                    | 0.4986 | -1.0039 | 0.0287 | 1.5421 |
| Znf318   | Q99P92 | Zinc finger protein 318                                                                           | _RAS[Phospho (STY)]PS[Phospho (STY)]PPRGR_3                                                 | #N/A                    | 1.7009 | 0.7663  | 0.0287 | 1.5416 |
| Mast1    | Q9R1L5 | Microtubule-associated serine/threonine-protein kinase 1                                          | _HFGS[Phospho (STY)]TESTDEDDGR_2                                                            | #N/A                    | 0.6187 | -0.6926 | 0.0288 | 1.5413 |
| Tra2b    | P6Z996 | Transformer-2 protein homolog beta                                                                | _S[Phospho (STY)]RS[Phospho (STY)]YS[Phospho (STY)]ROYR_2                                   | P6Z996_S87_M3_Tra2b     | 0.3582 | -1.4810 | 0.0289 | 1.5398 |
| Gda      | Q9R111 | Guanine deaminase                                                                                 | _AVM[Oxidation (M)]VSNVLLINK_2                                                              | #N/A                    | 0.3728 | -1.4236 | 0.0289 | 1.5388 |
| Arhgef7  | Q9E528 | Rho guanine nucleotide exchange factor 7                                                          | _LETFDANDLVGGQFNKK_2                                                                        | #N/A                    | 1.5517 | 0.6338  | 0.0290 | 1.5381 |
| Ctifa    | P80317 | T-complex protein 1 subunit zeta                                                                  | _VLAQNSGFLQELVK_2                                                                           | #N/A                    | 1.9146 | 0.9370  | 0.0290 | 1.5370 |
| Mtx2     | Q88441 | Metaxin-2                                                                                         | _Acetyl (Protein N-term)[SLVAAFPVQAATPEWPNATLVQQLR_3                                        | #N/A                    | 0.6805 | -0.5553 | 0.0292 | 1.5354 |
| Lin7c    | Q88952 | Protein lin-7 homolog C                                                                           | _VLSGFC[Carbamidomethyl (C)]NAVR_2                                                          | #N/A                    | 1.3246 | 0.4056  | 0.0292 | 1.5347 |
| Atat1    | Q8K341 | Alpha-tubulin N-acetyltransferase 1                                                               | _SS[Phospho (STY)]LGNSPDR_2                                                                 | Q8K341_S272_M1_Atata1   | 4.3407 | 2.1179  | 0.0292 | 1.5345 |
| Ppp4r3a  | Q6PZK6 | Serine/threonine-protein phosphatase 4 regulatory subunit 3A                                      | _TNSGKRS[Phospho (STY)]PSFK_2                                                               | Q6PZK6_S248_M1_Ppp4r3a  | 2.1568 | 1.1089  | 0.0292 | 1.5341 |
| Kcnab2   | P6Z482 | Voltage-gated potassium channel subunit beta-2                                                    | _LQLEYDVVAVNRDPNPTM[Oxidation (M)]EETVR_3                                                   | #N/A                    | 0.6977 | -0.5194 | 0.0294 | 1.5317 |
| Pgrmc1   | O55022 | Membrane-associated progesterone receptor component 1                                             | _GDQPGASGNDODEPPPLR_2                                                                       | #N/A                    | 0.7449 | -0.4248 | 0.0296 | 1.5288 |
| Aco2     | Q99K00 | Aconitate hydratase, mitochondrial                                                                | _HPNGTQETILLNHTNETQIEWFR_4                                                                  | #N/A                    | 0.6534 | -0.6140 | 0.0297 | 1.5273 |
| Fibp15   | Q6P9Q6 | FK506-binding protein 15                                                                          | _VTS[Phospho (STY)]LEELIDR_2                                                                | Q6P9Q6_S722_M1_Fibp15   | 0.6534 | -0.6139 | 0.0297 | 1.5265 |
| Pkc5     | P56812 | Programmed cell death protein 5                                                                   | _KVM[Oxidation (M)]DS[Phospho (STY)]DEDDADY_2                                               | #N/A                    | 1.7967 | 0.8454  | 0.0298 | 1.5252 |
| Sgta     | Q88I00 | Small glutamine-rich tetratricopeptide repeat-containing protein alpha                            | _APORT[Phospho (STY)]PPSEDSAEAR_3                                                           | #N/A                    | 1.8975 | 0.9241  | 0.0299 | 1.5245 |
| Pcm1     | Q9R0L6 | Pericentriolar material 1 protein                                                                 | _HIS[Phospho (STY)]ESDR_2                                                                   | Q9R0L6_S1432_M1_Pcm1    | 0.6535 | -0.6137 | 0.0300 | 1.5229 |
| Cc       | Q9Z4A2 | Protein capicua homolog                                                                           | _SS[Phospho (STY)]PPPLPAEERPTK_2                                                            | Q9Z4A2_S2148_M1_Cc      | 5.4391 | 2.4434  | 0.0301 | 1.5207 |
| Stambpl1 | Q76N33 | AMSH-like protease                                                                                | _SGGSNFANY[Phospho (STY)]PPVNR_2                                                            | Q76N33_S242_M1_Stambpl1 | 1.7472 | 0.8050  | 0.0302 | 1.5194 |
| Napb     | P28663 | Beta-soluble NSF attachment protein                                                               | _LLEAHEEQNEAYTEAVK_3                                                                        | #N/A                    | 1.6082 | 0.6855  | 0.0303 | 1.5187 |
| Actn1    | Q77P84 | Alpha-actinin-1                                                                                   | _AIM[Oxidation (M)]TVYSSYHAFSGAQK_2                                                         | #N/A                    | 1.4152 | 0.5010  | 0.0303 | 1.5186 |
| Znf608   | Q56A10 | Zinc finger protein 608                                                                           | _DRHS[Phospho (STY)]PFSQR_3                                                                 | Q56A10_S1452_M1_Znf608  | 0.5875 | -0.7673 | 0.0304 | 1.5170 |
| Bcar1    | Q61140 | Breast cancer anti-estrogen resistance protein 1                                                  | _GS[Phospho (STY)]GGTFREDLR_2                                                               | Q61140_S572_M1_Bcar1    | 0.6477 | -0.6266 | 0.0306 | 1.5148 |
| Esd      | Q9R0P3 | S-formylglutathione hydrolase                                                                     | _AVDATC[Carbamidomethyl (C)]LVK_2                                                           | #N/A                    | 0.4377 | -1.1920 | 0.0306 | 1.5140 |
| Vps35    | Q9EQH3 | Vacuolar protein sorting-associated protein 35                                                    | _LFDISQQVATVQSR_2                                                                           | #N/A                    | 0.6458 | -0.6308 | 0.0306 | 1.5139 |
| Pdia6    | Q9Z2R8 | Protein disulfide-isomerase A6                                                                    | _LAADVATVNVQLASR_2                                                                          | #N/A                    | 1.8643 | 0.8986  | 0.0307 | 1.5134 |
| Rad23b   | P54728 | UV excision repair protein RAD23 homolog B                                                        | _NENLAANFLQQNFED_2                                                                          | #N/A                    | 0.5387 | -0.8925 | 0.0307 | 1.5132 |
| Elfn1    | Q8C877 | Protein ELFN1                                                                                     | _AVAAAAGS[Phospho (STY)]LKK_2                                                               | Q8C877_S460_M1_Elfn1    | 1.3730 | 0.4573  | 0.0307 | 1.5125 |
| Add2     | Q9QYB8 | Beta-adducin                                                                                      | _EQDHFLSPK_2                                                                                | #N/A                    | 1.4609 | 0.5469  | 0.0307 | 1.5124 |
| Prkaca   | P05132 | cAMP-dependent protein kinase catalytic subunit alpha                                             | _WETPSQNTAQDLQDFDR_2                                                                        | #N/A                    | 2.7659 | 1.4678  | 0.0309 | 1.5104 |
| Top2b    | Q64511 | DNA topoisomerase 2-beta                                                                          | _NETINGS[Phospho (STY)]DSEFGPK_2                                                            | #N/A                    | 1.3269 | 0.4080  | 0.0310 | 1.5080 |
| Speg     | Q6Z407 | Striated muscle-specific serine/threonine-protein kinase                                          | _SR[Phospho (STY)]VQDLR_2                                                                   | Q6Z407_S2396_M1_Speg    | 9.2145 | 3.2039  | 0.0311 | 1.5073 |
| Usp34    | Q6ZQ93 | Ubiquitin carboxyl-terminal hydrolase 34                                                          | _DSSGPGTEQDLP[Phospho (STY)]PENSDVK_2                                                       | Q6ZQ93_S3443_M1_Usp34   | 2.7453 | 1.4570  | 0.0314 | 1.5030 |
| Setd2    | E9Q5F9 | Histone-lysine N-methyltransferase SETD2                                                          | _RRGS[Phospho (STY)][S[Phospho (STY)]PPSSAYER_3                                             | #N/A                    | 0.7034 | -0.5077 | 0.0317 | 1.4991 |
| Dpyl4    | Q35098 | Dihydropyrimidinase-related protein 4                                                             | _C[Carbamidomethyl (C)]Q[C[Carbamidomethyl (C)]TDGQVIFSLIR_2                                | #N/A                    | 0.5737 | -0.8018 | 0.0317 | 1.4991 |
| Ppp1r1b  | Q60829 | Protein phosphatase 1 regulatory subunit 1B                                                       | _ELGYQEDEDEDEDEEEDSGAEVLK_3                                                                 | #N/A                    | 0.7143 | -0.4855 | 0.0318 | 1.4976 |
| Epb41i2  | O70318 | Band 4.1-like protein 2                                                                           | _VTGRTREEQECC[Carbamidomethyl (C)]DEEEEPGGQAK_3                                             | #N/A                    | 0.6879 | -0.5397 | 0.0318 | 1.4970 |
| Ap1b1    | Q35643 | AP-1 complex subunit beta-1                                                                       | _C[Carbamidomethyl (C)]KDEDPVVRK_3                                                          | #N/A                    | 0.6069 | -0.7206 | 0.0320 | 1.4954 |
| Dpyl5    | Q9EQF6 | Dihydropyrimidinase-related protein 5                                                             | _TPLGDVANVHPGK_3                                                                            | #N/A                    | 0.6837 | -0.5486 | 0.0321 | 1.4940 |
| Otud7a   | Q88554 | OTU domain-containing protein 7A                                                                  | _AS[Phospho (STY)]PGPTAAOPTQLVLK_2                                                          | Q88554_S711_M1_Otud7a   | 1.6305 | 0.7053  | 0.0322 | 1.4921 |
| Npm1     | Q61937 | Nucleophosmin                                                                                     | _C[Carbamidomethyl (C)]GSGPVHSGQLHVAVEEDAES[Phospho (STY)]EDEDEEDVKLLGM[Oxidation (M)]SGK_5 | Q61937_S125_M1_Npm1     | 1.6162 | 0.6926  | 0.0323 | 1.4914 |
| Ppfia2   | Q88559 | Liprin-alpha-2                                                                                    | _S[Phospho (STY)]LGDHEWNR_2                                                                 | #N/A                    | 1.6080 | 0.6853  | 0.0323 | 1.4914 |
| Tmem38a  | Q37MP8 | Trimeric intracellular cation channel type A                                                      | _AKEELGEGS[Phospho (STY)]RK_3                                                               | #N/A                    | 1.6150 | 0.6916  | 0.0323 | 1.4912 |
| Ripor2   | Q8OU16 | Rho family-interacting cell polarization regulator 2                                              | _SQS[Phospho (STY)]FAGSGLQER_2                                                              | Q8OU16_S46_M1_Ripor2    | 0.3428 | -1.5444 | 0.0323 | 1.4903 |
| Pkp4     | Q68FH0 | Plakophilin-4                                                                                     | _GLVPGSKSPYI[Phospho (STY)]ISSY[Phospho (STY)]SPAR_3                                        | Q68FH0_S1098_M2_Pkp4    | 0.3631 | -1.4614 | 0.0323 | 1.4902 |
| Ltst3    | A2AHG0 | Leucine zipper putative tumor suppressor 3                                                        | _LFRIES[Phospho (STY)]TEL_2                                                                 | A2AHG0_S687_M1_Ltst3    | 0.6544 | -0.6118 | 0.0324 | 1.4894 |
| Sh3glb2  | Q8R3V5 | Endophilin-B2                                                                                     | _SQTTYAQ[C[Carbamidomethyl (C)]VLR_2                                                        | #N/A                    | 0.4659 | -1.1020 | 0.0324 | 1.4892 |
| Gnl1     | P36916 | Guanine nucleotide-binding protein-like 1                                                         | _GLQDGLRS[Phospho (STY)]SS[Phospho (STY)]NSR_2                                              | P36916_S32_M2_Gnl1      | 0.7185 | -0.4769 | 0.0326 | 1.4869 |
| Ywhaz    | P63101 | 14-3-3 protein zeta/delta                                                                         | _TAFQEAUHLDTLSEESYKOSTUMLQLLR_3                                                             | #N/A                    | 0.6843 | -0.5473 | 0.0326 | 1.4865 |
| Otu4     | B2RKE7 | OTU domain-containing protein 4                                                                   | _LQRPKRES[Phospho (STY)][S[Phospho (STY)]EDENSVNLR_3                                        | #N/A                    | 0.7220 | -0.4699 | 0.0327 | 1.4850 |
| Mical3   | Q8C119 | [F-actin]-monooxygenase MICAL3                                                                    | _SVPS[Phospho (STY)]GVKK_2                                                                  | Q8C119_S1736_M1_Mical3  | 2.2348 | 1.1601  | 0.0327 | 1.4850 |
| Cmpk1    | Q9D8P5 | UMP-CMP kinase                                                                                    | _KNPDSQYGELEK_3                                                                             | #N/A                    | 1.5908 | 0.6698  | 0.0328 | 1.4839 |
| Ubpap2l  | Q8QX50 | Ubiquitin-associated protein 2-like                                                               | _NQDEQ[Carbamidomethyl (C)]VALHDC[Carbamidomethyl (C)]NGDVNR_3                              | #N/A                    | 1.3056 | 0.3847  | 0.0328 | 1.4835 |
| Pnn      | Q35691 | Pinin                                                                                             | _RFGS[Phospho (STY)]DSGGGPAK_2                                                              | #N/A                    | 1.5898 | 0.6688  | 0.0329 | 1.4834 |
| Anxa5    | P48036 | Annexin A5                                                                                        | _DLVDDLKSLTGK_2                                                                             | #N/A                    | 0.7347 | -0.4449 | 0.0329 | 1.4829 |
| Dst      | Q91ZU6 | Dystonin                                                                                          | _QLS[Phospho (STY)]LLDSR_2                                                                  | Q91ZU6_S5407_M1_Dst     | 1.5876 | 0.6668  | 0.0329 | 1.4823 |

|          |        |                                                                                     |                                                                |                         |        |         |        |        |
|----------|--------|-------------------------------------------------------------------------------------|----------------------------------------------------------------|-------------------------|--------|---------|--------|--------|
| Arpp21   | Q9DCB4 | cAMP-regulated phosphoprotein 21                                                    | _TAS[Phospho (STY)]GGGTVLTR_2                                  | Q9DCB4_S381_M1_Arpp21   | 0.2600 | -1.9436 | 0.0329 | 1.4823 |
| Rpl35a   | O55142 | 60S ribosomal protein L35a                                                          | _JEGVYR_2                                                      | #N/A                    | 0.5410 | -0.8864 | 0.0330 | 1.4816 |
| Lcp1     | Q61233 | Plastin-2                                                                           | _GS[Phospho (STY)]VSDDEEMELR_2                                 | Q61233_S5_M1_Lcp1       | 1.5855 | 0.6649  | 0.0330 | 1.4812 |
| Pitpnm1  | Q35954 | Membrane-associated phosphatidylinositol transfer protein 1                         | _SSVSSQGQGV[Phospho (STY)]PQGS[Phospho (STY)]LSEWR_3           | Q35954_S326_M2_Pitpnm1  | 0.6546 | -0.6113 | 0.0331 | 1.4807 |
| Camk2    | Q8C078 | Calcium/calmodulin-dependent protein kinase kinase 2                                | _KMS[Phospho (STY)]LQEPSSQGGPASSSSLSMDMGR_3                    | Q8C078_S99_M1_Camk2     | 0.7145 | -0.4850 | 0.0331 | 1.4804 |
| Gnl1     | P36916 | Guanine nucleotide-binding protein-like 1                                           | _ERREEQTDT[Phospho (STY)]S[Phospho (STY)]DGGSEVTHHR_4          | #N/A                    | 0.1827 | -2.4522 | 0.0331 | 1.4800 |
| Septin7  | O55131 | Septin-7                                                                            | _NLEAQHKEEEK_2                                                 | #N/A                    | 0.5994 | -0.7385 | 0.0333 | 1.4772 |
| Ish3a    | O20682 | Isocitrate dehydrogenase [NAD] subunit alpha, mitochondrial                         | _EVAENC[Carbamidomethyl (C)]KDKI_2                             | #N/A                    | 0.7358 | -0.4427 | 0.0334 | 1.4758 |
| Gatd3a   | Q90172 | Glutamine amidotransferase-like class 1 domain-containing protein 3A, mitochondrial | _YNKVER_2                                                      | #N/A                    | 0.6094 | -0.7146 | 0.0335 | 1.4755 |
| Npr2     | Q6VWV5 | Atrial natriuretic peptide receptor 2                                               | _GSS[Phospho (STY)]VGLSM[Oxidation (M)]TTHGK_2                 | Q6VWV5_S523_M1_Npr2     | 0.2390 | -2.0648 | 0.0338 | 1.4714 |
| Map1b    | P14873 | Microtubule-associated protein 1B                                                   | _ESVVS[Phospho (STY)]QDDR_2                                    | #N/A                    | 0.3075 | -1.7014 | 0.0338 | 1.4712 |
| Tjp2     | Q820U1 | Tight junction protein ZO-2                                                         | _HSHDMLSHS[Phospho (STY)]WEGNR_3                               | #N/A                    | 1.7357 | 0.7955  | 0.0338 | 1.4712 |
| Ak3      | Q9WTP7 | GTP-AMP phosphotransferase AK3, mitochondrial                                       | _GVLETFSGTETNK_2                                               | #N/A                    | 2.3584 | 1.2378  | 0.0339 | 1.4698 |
| Rpl18a   | P62717 | 60S ribosomal protein L18a                                                          | _DLTTAGAVTQC[Carbamidomethyl (C)]YR_2                          | #N/A                    | 1.5426 | 0.6254  | 0.0339 | 1.4694 |
| Ckmt1    | P30275 | Creatine kinase U-type, mitochondrial                                               | _GLSUPPAC[Carbamidomethyl (C)]TR_2                             | #N/A                    | 4.6285 | 2.2105  | 0.0339 | 1.4692 |
| Rcn2     | Q8BP92 | Reticulocalbin-2                                                                    | _HYAMQEAQ_2                                                    | #N/A                    | 1.5681 | 0.6491  | 0.0339 | 1.4692 |
| Nav1     | Q8CH77 | Neuron navigator 1                                                                  | _SLAESGUNWFS[Phospho (STY)]ES[Phospho (STY)]EETKPK_3           | Q8CH77_S477_M2_Nav1     | 1.5435 | 0.6262  | 0.0340 | 1.4691 |
| Aars1    | Q8BGQ7 | Alanine-tRNA ligase, cytoplasmic                                                    | _M[Oxidation (M)]ALELLETFQGPVER_2                              | #N/A                    | 0.4140 | -1.2724 | 0.0340 | 1.4688 |
| Ssh1     | Q76779 | Protein phosphatase Slingshot homolog 1                                             | _SDS[Phospho (STY)]PQVEELK_2                                   | Q76779_S585_M1_Ssh1     | 3.9035 | 1.9648  | 0.0340 | 1.4682 |
| Celsr2   | Q980M0 | Cadherin EGF LAG seven-pass G-type receptor 2                                       | _SLTSSYN[C[Carbamidomethyl (C)]PS[Phospho (STY)]PYADGR_2       | Q980M0_S2648_M1_Celsr2  | 0.5829 | -0.7787 | 0.0340 | 1.4680 |
| Hecw1    | Q8K4P8 | E3 ubiquitin-protein ligase HECW1                                                   | _SYS[Phospho (STY)]AGEASEVSR_2                                 | Q8K4P8_S1073_M1_Hecw1   | 1.4312 | 0.5172  | 0.0340 | 1.4680 |
| Bin1     | O08539 | Myc box-dependent-interacting protein 1                                             | _MANNDDLWM[Oxidation (M)]DYHOK_3                               | #N/A                    | 1.3680 | 0.4521  | 0.0341 | 1.4679 |
| Atxn2    | O70305 | Ataxin-2                                                                            | _MSSEGPPRM[Oxidation (M)]S[Phospho (STY)]PK_2                  | O70305_S593_M1_Atnx2    | 1.8187 | 0.8629  | 0.0341 | 1.4679 |
| Rpl34    | O20189 | 60S ribosomal protein L34                                                           | _LSYNTASK_2                                                    | #N/A                    | 0.6549 | -0.6107 | 0.0341 | 1.4678 |
| Pma6     | Q9QUM9 | Proteasome subunit alpha type-6                                                     | _HTIFSPGR_2                                                    | #N/A                    | 0.4349 | -1.2014 | 0.0342 | 1.4665 |
| Cplx1    | P63040 | Complexin-1                                                                         | _EAEAQAA[M[Oxidation (M)]EANKSEGS[Phospho (STY)]LTRPK_2        | #N/A                    | 2.0642 | 1.0456  | 0.0342 | 1.4662 |
| Gnb5     | P62881 | Guanine nucleotide-binding protein subunit beta-5                                   | _VSPDGTAF[C[Carbamidomethyl (C)]SGSWDHTLR_2                    | #N/A                    | 0.5351 | -0.9021 | 0.0343 | 1.4651 |
| Tmem63c  | Q8CBX0 | Calcium permeable stress-gated cation channel 1                                     | _LALUHNDS[Phospho (STY)]LTSLYGEQEK_3                           | Q8CBX0_S75_M1_Tmem63c   | 1.5456 | 0.6282  | 0.0343 | 1.4647 |
| Rps3a    | P97351 | 40S ribosomal protein S3a                                                           | _EVQTDLKEVKNK_3                                                | #N/A                    | 1.5459 | 0.6284  | 0.0344 | 1.4638 |
| Arhgap21 | Q6DfV3 | Rho GTPase-activating protein 21                                                    | _KISS[Phospho (STY)]SEVSDAAR_2                                 | Q6DfV3_S917_M1_Arhgap21 | 0.5256 | -0.9280 | 0.0345 | 1.4622 |
| Rpl18    | P35980 | 60S ribosomal protein L18                                                           | _ILTFDQLALESK_2                                                | #N/A                    | 0.6130 | -0.7061 | 0.0345 | 1.4618 |
| Atp8a1   | P70704 | Phospholipid-transporting ATPase 1A                                                 | _SESLQOQLLHGAYFGQDGVSGVSEVR_3                                  | #N/A                    | 0.7107 | -0.4927 | 0.0345 | 1.4617 |
| Gigyf2   | Q6Y7W8 | GRB10-interacting GYF protein 2                                                     | _ALSSGGSTIS[Phospho (STY)]PLSPALPK_2                           | Q6Y7W8_S236_M1_Gigyf2   | 0.7020 | -0.5106 | 0.0345 | 1.4617 |
| Atxn7i3  | A2AWT3 | Ataxin-7-like protein 3                                                             | _LQWDGSSDLS[Phospho (STY)]PSDSSGSK_2                           | A2AWT3_S281_M1_Atnx7i3  | 0.3810 | -1.3923 | 0.0346 | 1.4615 |
| Dmx2     | Q8BPX8 | Dmx-like protein 2                                                                  | _LDHELSLDES[Phospho (STY)]EAGTGSSEHDEGEREGS[Phospho (STY)]PR_4 | Q8BPX8_S456_M2_Dmx2     | 1.5465 | 0.6290  | 0.0346 | 1.4612 |
| Cryab    | P23927 | Alpha-crystallin B chain                                                            | _HEERQDEHGFSR_4                                                | #N/A                    | 1.5589 | 0.6405  | 0.0346 | 1.4607 |
| Map1a    | Q9QYR6 | Microtubule-associated protein 1A                                                   | _DEAS[Phospho (STY)]EEKEQVLQK_2                                | #N/A                    | 0.6550 | -0.6103 | 0.0347 | 1.4601 |
| Thrap3   | Q56926 | Thyroid hormone receptor-associated protein 3                                       | _S[Phospho (STY)]YS[Phospho (STY)]PAHNR_2                      | Q56926_S55_M2_Thrap3    | 0.3039 | -1.7183 | 0.0347 | 1.4601 |
| Cser2    | Q3UHD0 | Serine-rich coiled-coil domain-containing protein 2                                 | _HTSSNNLS[Phospho (STY)]POTDYR_2                               | #N/A                    | 0.2614 | -1.9359 | 0.0349 | 1.4567 |
| Palm     | Q9Z0P4 | Paralemnin-1                                                                        | _PQSA[Phospho (STY)]PAKEEQK_2                                  | #N/A                    | 1.4287 | 0.5147  | 0.0350 | 1.4560 |
| Pbx2     | O35984 | Pre-B-cell leukemia transcription factor 2                                          | _TAVSVAQGGHS[Phospho (STY)]JR_2                                | O35984_S330_M1_Pbx2     | 1.9897 | 0.9925  | 0.0350 | 1.4553 |
| Cpne6    | Q92140 | Copine-6                                                                            | _YSVLLVLTDGVVSDM[Oxidation (M)]AETR_2                          | #N/A                    | 0.6806 | -0.5552 | 0.0351 | 1.4548 |
| Apc      | Q61315 | Adenomatous polyposis coli protein                                                  | _T[Phospho (STY)]GSSSSLSASSESEK_2                              | Q61315_T2567_M1_Apc     | 1.5377 | 0.6207  | 0.0351 | 1.4548 |
| Syl3     | Q35681 | Synaptotagmin-3                                                                     | _KLHFS[Phospho (STY)]VYDFR_3                                   | #N/A                    | 0.1973 | -2.3413 | 0.0351 | 1.4546 |
| Dhx30    | Q99PU8 | ATP-dependent RNA helicase DHX30                                                    | _GGS[Phospho (STY)]FEM[Oxidation (M)]TODDSAIR_2                | #N/A                    | 1.7296 | 0.7905  | 0.0351 | 1.4543 |
| Ak1      | Q9R0Y5 | Adenylate kinase isoenzyme 1                                                        | _LETYNATEPVSFYDKR_3                                            | #N/A                    | 1.4484 | 0.5345  | 0.0352 | 1.4535 |
| Atp5pb   | Q9CQQ7 | ATP synthase F(0) complex subunit B1, mitochondrial                                 | _LDYHVSQNM[Oxidation (M)]M[Oxidation (M)]R_3                   | #N/A                    | 1.5503 | 0.6326  | 0.0354 | 1.4514 |
| Klc1     | O88447 | Kinesin light chain 1                                                               | _RS[Phospho (STY)]RES[Phospho (STY)]LNMDVWK_3                  | #N/A                    | 0.6553 | -0.6099 | 0.0354 | 1.4507 |
| Pic2     | Q8K394 | Inactive phospholipase C-like protein 2                                             | _TPS[Phospho (STY)]PAAGVPVR_2                                  | Q8K394_S87_M1_Pic2      | 0.6764 | -0.5640 | 0.0354 | 1.4506 |
| Sptbn1   | Q62261 | Spectrin beta chain, non-erythrocytic 1                                             | _DVSVELLM[Oxidation (M)]NNHQGK_2                               | #N/A                    | 0.7367 | -0.4409 | 0.0356 | 1.4489 |
| Wdr7     | Q92019 | WD repeat-containing protein 7                                                      | _LPASC[Carbamidomethyl (C)]LPASDSFR_2                          | #N/A                    | 0.3916 | -1.3527 | 0.0356 | 1.4487 |
| Kcnab2   | P62482 | Voltage-gated potassium channel subunit beta-2                                      | _QTGS[Phospho (STY)]PGM[Oxidation (M)]YSTR_2                   | #N/A                    | 1.8859 | 0.9152  | 0.0356 | 1.4485 |
| Eef2     | PS8252 | Elongation factor 2                                                                 | _YDFPANGK_2                                                    | #N/A                    | 0.3992 | -1.3249 | 0.0357 | 1.4479 |
| Apeh     | Q8R146 | Acylamino-acid-releasing enzyme                                                     | _ALDVSAS[Phospho (STY)]DEEM[Oxidation (M)]ARPK_2               | #N/A                    | 0.6691 | -0.5796 | 0.0357 | 1.4470 |
| Arhgef17 | Q8OU35 | Rho guanine nucleotide exchange factor 17                                           | _SLS[Phospho (STY)]DRPQR_2                                     | Q8OU35_S728_M1_Arhgef17 | 0.2295 | -2.1235 | 0.0358 | 1.4462 |
| Agap1    | Q88XK8 | Arl-GAP with GTPase, ANK repeat and PH domain-containing protein 1                  | _ATSAC[Carbamidomethyl (C)]APSS[Phospho (STY)]PK_2             | Q88XK8_S422_M1_Agap1    | 4.0272 | 2.0098  | 0.0359 | 1.4450 |
| Cnnm3    | Q32N94 | Metal transporter CNNM3                                                             | _PVYEEER_2                                                     | #N/A                    | 0.5194 | -0.9452 | 0.0359 | 1.4449 |
| Mphosph8 | Q3TYA6 | M-phase phosphoprotein 8                                                            | _GTVAVGDS[Phospho (STY)]EEDGEDVEFER_2                          | Q3TYA6_S51_M1_Mphosph8  | 0.7365 | -0.4412 | 0.0360 | 1.4440 |
| Rnh1     | Q91V17 | Ribonuclease inhibitor                                                              | _ELSLASNELKDEGAR_3                                             | #N/A                    | 0.5148 | -0.9580 | 0.0360 | 1.4436 |
| Dbn1     | Q62418 | Drebrin-like protein                                                                | _VAGTGGEGGEEVEELNSGK_2                                         | #N/A                    | 0.7087 | -0.4967 | 0.0362 | 1.4412 |
| Pdhb     | Q9D051 | Pyruvate dehydrogenase E1 component subunit beta, mitochondrial                     | _EAINOGM[Oxidation (M)]DEELERDEK_3                             | #N/A                    | 0.7507 | -0.4137 | 0.0363 | 1.4405 |
| Cpne1    | Q8C166 | Copine-1                                                                            | _FAAQAAQQR_2                                                   | #N/A                    | 4.8839 | 2.2880  | 0.0363 | 1.4398 |
| Ndufa5   | Q9CP96 | NADH dehydrogenase [ubiquinone] 1 alpha subcomplex subunit 5                        | _LEALLQGGVEEVILQAEK_2                                          | #N/A                    | 0.7147 | -0.4845 | 0.0363 | 1.4395 |
| Elav2    | Q60899 | ELAV-like protein 2                                                                 | _FANNPSOK_2                                                    | #N/A                    | 1.5692 | 0.6500  | 0.0364 | 1.4387 |
| Rbx1     | P62878 | E3 ubiquitin-protein ligase RBX1                                                    | _QVC[Carbamidomethyl (C)]PLDNR_2                               | #N/A                    | 0.5454 | -0.8746 | 0.0364 | 1.4386 |
| Rbbp6    | P97868 | E3 ubiquitin-protein ligase RBBP6                                                   | _PSANREDFS[Phospho (STY)]PER_2                                 | #N/A                    | 0.4450 | -1.1681 | 0.0365 | 1.4383 |
| Pacs1    | Q8K212 | Phosphofurin acidic cluster sorting protein 1                                       | _S[Phospho (STY)]TLPEKR_2                                      | Q8K212_S508_M1_Pacs1    | 0.7237 | -0.4666 | 0.0365 | 1.4382 |
| Samm50   | Q8BGH2 | Sorting and assembly machinery component S0 homolog                                 | _SSLSHAM[Oxidation (M)]VIDSR_2                                 | #N/A                    | 1.5581 | 0.6398  | 0.0365 | 1.4377 |
| Cct3     | P80318 | T-complex protein 1 subunit gamma                                                   | _NLQDAM[Oxidation (M)]QVC[Carbamidomethyl (C)]R_2              | #N/A                    | 0.3339 | -1.5824 | 0.0365 | 1.4377 |
| Ank3     | G5E8K5 | Ankyrin-3                                                                           | _NEDLAELLNGM[Oxidation (M)]DEELDS[Phospho (STY)]PEELGTGR_3     | #N/A                    | 1.5559 | 0.6378  | 0.0365 | 1.4373 |
| Akap5    | D3YVFO | A kinase anchor protein 5                                                           | _QUSM[Oxidation (M)]NEQVQVFNSSDFEGR_3                          | #N/A                    | 1.6526 | 0.7248  | 0.0367 | 1.4353 |
| Armcx3   | Q8BH56 | Armado-like repeat-containing X-linked protein 3                                    | _RAS[Phospho (STY)]PNSDQVLSQLELK_3                             | Q8BH56_S110_M1_Armcx3   | 1.6042 | 0.6819  | 0.0368 | 1.4338 |
| Tcf20    | Q9EPQ8 | Transcription factor 20                                                             | _LSTS[Phospho (STY)]PATRDEAAS[Phospho (STY)]PGAK_3             | Q9EPQ8_S603_M2_Tcf20    | 1.5420 | 0.6248  | 0.0369 | 1.4335 |
| Myh9     | Q8VD05 | Myosin-9                                                                            | _ELETQSELEDELESEK_2                                            | #N/A                    | 1.5410 | 0.6239  | 0.0369 | 1.4331 |
| Abat     | P61922 | 4-aminobutyrate aminotransferase, mitochondrial                                     | _TLTGLDLQAQYPPQPSR_2                                           | #N/A                    | 0.7233 | -0.4673 | 0.0369 | 1.4328 |
| Gfap     | Q93995 | Glial fibrillary acidic protein                                                     | _GTNES[Phospho (STY)]LER_2                                     | P03995_S302_M1_Gfap     | 1.5510 | 0.6332  | 0.0369 | 1.4326 |
| Cit      | P49025 | Citron Rho-interacting kinase                                                       | _S[Phospho (STY)]PENQPSAMSLAPPSR_3                             | P49025_S1348_M1_Cit     | 1.5352 | 0.6184  | 0.0370 | 1.4316 |
| Pde4a    | Q80984 | cAMP-specific 3',5'-cyclic phosphodiesterase 4A                                     | _QSG[Phospho (STY)]PSPITLLEEQVSDPALPDK_2                       | Q80984_S672_M1_Pde4a    | 1.5350 | 0.6182  | 0.0370 | 1.4313 |
| Pkm      | PS2480 | Pyruvate kinase PKM                                                                 | _LNFSGHTHEYHETIK_3                                             | #N/A                    | 1.8210 | 0.8647  | 0.0371 | 1.4312 |

|          |        |                                                                              |                                                                                                       |                         |         |         |        |        |
|----------|--------|------------------------------------------------------------------------------|-------------------------------------------------------------------------------------------------------|-------------------------|---------|---------|--------|--------|
| Tox4     | Q8BU11 | TOX high mobility group box family member 4                                  | _LSTTSP[Phospho (STY)]PT[Phospho (STY)]NSLHEDGVDFRR_3                                                 | Q8BU11_5178_M2_Tox4     | 0.7252  | -0.4636 | 0.0371 | 1.4308 |
| Sowaha   | Q8BL57 | Ankyrin repeat domain-containing protein SOWAHA                              | _QRS[Phospho (STY)]EESPFR_2                                                                           | Q8BL57_5242_M1_Sowaha   | 1.7502  | 0.8075  | 0.0372 | 1.4296 |
| Bca3     | Q8CCN5 | Breast carcinoma-amplified sequence 3 homolog                                | _VKS[Phospho (STY)]PQSPSK_2                                                                           | Q8CCN5_5565_M1_Bca3     | 13.4173 | 3.7460  | 0.0372 | 1.4296 |
| Samn50   | Q8BGH2 | Sorting and assembly machinery component 50 homolog                          | _DVVVQHVFHFDGLGR_3                                                                                    | #N/A                    | 1.5314  | 0.6149  | 0.0372 | 1.4293 |
| H1-2     | P15864 | Histone H1.2                                                                 | _ALAAAGVGVKVNNSR_2                                                                                    | #N/A                    | 1.3597  | 0.4433  | 0.0374 | 1.4276 |
| Znf148   | Q61624 | Zinc finger protein 148                                                      | _AGMTSS[Phospho (STY)]PDATGGTG_2                                                                      | Q61624_5784_M1_Znf148   | 1.3800  | 0.4646  | 0.0375 | 1.4261 |
| Dock7    | Q8RI44 | Dedicator of cytokinesis protein 7                                           | _KGS[Phospho (STY)]WSER_2                                                                             | Q8RI44_5432_M1_Dock7    | 2.2021  | 1.1388  | 0.0375 | 1.4258 |
| Slc25a3  | Q8VEM8 | Phosphate carrier protein, mitochondrial                                     | _YYALC[Carbamidomethyl (C)]GGGVLS[Carbamidomethyl (C)]GLTHTAVVPLDLVK_3                                | #N/A                    | 0.7404  | -0.4336 | 0.0375 | 1.4255 |
| Rem2     | Q8VEL9 | GTP-binding protein REM 2                                                    | _GS[Phospho (STY)]MPVPVK_2                                                                            | #N/A                    | 0.7405  | -0.4334 | 0.0375 | 1.4255 |
| Fam171a2 | A2A699 | Protein FAM171A2                                                             | _TGLC[Carbamidomethyl (C)]SPEDNS[Phospho (STY)]LTPLLDEVVAPEGR_3                                       | A2A699_5744_M1_Fam171a2 | 0.5758  | -0.7964 | 0.0376 | 1.4253 |
| Rbm8a    | Q9CW23 | RNA-binding protein 8A                                                       | _J[Acetyl (Protein N-term)]ADVLDLHEAGGEFAM[Oxidation (M)]DEGDGES[Phospho (STY)]JHK_3                  | Q9CW23_524_M1_Rbm8a     | 0.7396  | -0.4352 | 0.0376 | 1.4249 |
| Grin2b   | Q01097 | Glutamate receptor ionotropic, NMDA 2B                                       | _AGNLVDS[Phospho (STY)]EDNSLQELDQAPAAVAVSSNASTTK_3                                                    | Q01097_51255_M1_Grin2b  | 0.7412  | -0.4321 | 0.0376 | 1.4248 |
| Ernn     | Q5EBI4 | Ermin                                                                        | _EDSLGS[Phospho (STY)]PGSQGTGPDEQPVFGK_3                                                              | #N/A                    | 0.6056  | -0.7236 | 0.0376 | 1.4245 |
| Pich2    | A2AP18 | 1-phosphatidylinositol 4,5-bisphosphate phosphodiesterase eta-2              | _IRDC[Carbamidomethyl (C)]EDPNDFSVSTLS[Phospho (STY)]PSGK_3                                           | A2AP18_5619_M1_Pich2    | 0.7414  | -0.4318 | 0.0376 | 1.4244 |
| Rims1    | Q99NE5 | Regulating synaptic membrane exocytosis protein 1                            | _S[Phospho (STY)]RSVS[Phospho (STY)]PHR_2                                                             | Q99NE5_5786_M2_Rims1    | 0.7130  | -0.4880 | 0.0378 | 1.4228 |
| Cand1    | Q6ZQ38 | Cullin-associated NEDD8-dissociated protein 1                                | _ITSEALLVTQQLVK_2                                                                                     | #N/A                    | 1.3919  | 0.4770  | 0.0378 | 1.4224 |
| Agap1    | Q88XK8 | Arf-GAP with GTPase, ANK repeat and PH domain-containing protein 1           | _LDPPPS[Phospho (STY)]PHANR_2                                                                         | Q88XK8_5521_M1_Agap1    | 1.3501  | 0.4331  | 0.0378 | 1.4222 |
| Dnajc19  | Q9CQV7 | Mitochondrial import inner membrane translocase subunit TIM14                | _EAAULGV[S[Phospho (STY)]ITPANK_2                                                                     | Q9CQV7_570_M1_Dnajc19   | 0.7384  | -0.4376 | 0.0379 | 1.4215 |
| Ehd3     | Q9QXY6 | EH domain-containing protein 3                                               | _IGPEPTTDSFAVM[Oxidation (M)]QGQVEIGIIGNALVDPK_3                                                      | #N/A                    | 0.7423  | -0.4299 | 0.0379 | 1.4212 |
| Snn      | P61807 | Stannin                                                                      | _LM[Oxidation (M)]TANS[Phospho (STY)]PEVHG_2                                                          | #N/A                    | 1.3911  | 0.4762  | 0.0381 | 1.4190 |
| Tnn2     | Q8CG86 | Tennin-2                                                                     | _APHSC[Carbamidomethyl (C)]GS[Phospho (STY)]PSEGR_2                                                   | Q8CG86_5811_M1_Tnn2     | 1.5163  | 0.6006  | 0.0381 | 1.4189 |
| Map1a    | Q9QYR6 | Microtubule-associated protein 1A                                            | _WLAESPVLGPPEEDKLTR_3                                                                                 | #N/A                    | 0.4958  | -1.0121 | 0.0381 | 1.4188 |
| Tp532l2  | Q9CYZ2 | Tumor protein D54                                                            | _S[Phospho (STY)]FEDRVGTIK_2                                                                          | #N/A                    | 1.7244  | 0.7861  | 0.0382 | 1.4181 |
| Map1a    | Q9QYR6 | Microtubule-associated protein 1A                                            | _EQXDEAS[Phospho (STY)]EEKEQVLEQK_3                                                                   | #N/A                    | 0.7430  | -0.4286 | 0.0382 | 1.4180 |
| Ctic     | Q68F05 | Clathrin heavy chain 1                                                       | _NNRPSEGQLTR_2                                                                                        | #N/A                    | 0.5811  | -0.7833 | 0.0382 | 1.4180 |
| Dmxl2    | Q88P88 | Dmx-like protein 2                                                           | _ALLT[Phospho (STY)]PQDEEC[Carbamidomethyl (C)]ADGGTEVDVIAEQIK_3                                      | Q88P88_T2017_M1_Dmxl2   | 1.5137  | 0.5981  | 0.0383 | 1.4168 |
| Hmrnp1h  | Q35737 | Heterogeneous nuclear ribonucleoprotein H                                    | _EGRPSEGAFFVELES[Phospho (STY)]DEEVK_3                                                                | Q35737_563_M1_Hmrnp1h   | 1.5732  | 0.6537  | 0.0384 | 1.4158 |
| Sash3    | Q8K352 | SAM and SH3 domain-containing protein 3                                      | _SSS[Phospho (STY)]KFQFAK_2                                                                           | Q8K352_527_M1_Sash3     | 0.7200  | -0.4740 | 0.0384 | 1.4158 |
| Akap1    | O08715 | A-kinase anchor protein 1, mitochondrial                                     | _S[Phospho (STY)]ESSGNLPSVADTR_2                                                                      | #N/A                    | 1.5247  | 0.6085  | 0.0385 | 1.4151 |
| Slc12a5  | Q91V14 | Solute carrier family 12 member 5                                            | _FTVAQM[Oxidation (M)]DDNSQM[Oxidation (M)]K_2                                                        | #N/A                    | 0.7436  | -0.4274 | 0.0386 | 1.4137 |
|          | Q3UE31 | Uncharacterized protein KIAA0930 homolog                                     | _SHS[Phospho (STY)]ANDSEFFREDDSGADLNHNATNLK_4                                                         | Q3UE31_5324_M1_         | 0.7368  | -0.4407 | 0.0387 | 1.4127 |
| Srsf5    | O35326 | Serine/arginine-rich splicing factor 5                                       | _VS[Phospho (STY)]WQDLK_2                                                                             | Q35326_5120_M1_Srsf5    | 1.6947  | 0.7610  | 0.0387 | 1.4123 |
| Etfb     | Q9DCW4 | Electron transfer flavoprotein subunit beta                                  | _EIIAVSC[Carbamidomethyl (C)]GPSQC[Carbamidomethyl (C)]QIETR_2                                        | #N/A                    | 0.7041  | -0.5061 | 0.0387 | 1.4119 |
| Srx6     | Q6P8X1 | Sorting nexin-6                                                              | _J[Acetyl (Protein N-term)]M[Oxidation (M)]EGLDGGDFLS[Phospho (STY)]IEEDR_2                           | Q6P8X1_513_M1_Srx6      | 0.7439  | -0.4268 | 0.0388 | 1.4116 |
| Daam1    | Q88PM0 | Dishevelled-associated activator of morphogenesis 1                          | _ESS[Phospho (STY)]EESGEFDLVSAIR_2                                                                    | Q88PM0_51026_M1_Daam1   | 0.7442  | -0.4263 | 0.0389 | 1.4096 |
| Hint1    | P70349 | Histidine triad nucleotide-binding protein 1                                 | _C[Carbamidomethyl (C)]AADGLK_2                                                                       | #N/A                    | 0.6989  | -0.5168 | 0.0390 | 1.4090 |
| Alpl     | P09242 | Alkaline phosphatase, tissue-nonspecific isoenzyme                           | _TYNTNAQVPS[Phospho (STY)]AGTATAYLC[Carbamidomethyl (C)]GVK_3                                         | P09242_5110_M1_Alpl     | 0.6693  | -0.5793 | 0.0390 | 1.4088 |
| Mef2c    | Q8CFN5 | Myocyte-specific enhancer factor 2C                                          | _PSPDERES[Phospho (STY)]PSVKR_3                                                                       | Q8CFN5_5460_M1_Mef2c    | 0.6591  | -0.6015 | 0.0390 | 1.4087 |
| Scamp3   | O35609 | Secretory carrier-associated membrane protein 3                              | _TAANAAGAAAGNAFR_2                                                                                    | #N/A                    | 0.4524  | -1.1444 | 0.0390 | 1.4086 |
| ildr2    | B5TVM2 | Immunoglobulin-like domain-containing receptor 2                             | _GWTYS[Phospho (STY)]PAPAR_2                                                                          | B5TVM2_5511_M1_ildr2    | 23.9086 | 4.5795  | 0.0390 | 1.4084 |
| Ddost    | O54734 | Dolichyl-diphosphoglycerate-4-epimerase                                      | _TLVLNDLNVK_2                                                                                         | #N/A                    | 0.5735  | -0.8022 | 0.0391 | 1.4084 |
| Mag3     | Q9EQI9 | Membrane-associated guanylate kinase, WW and PDZ domain-containing protein 3 | _QPEDESHQAFQSONGS[Phospho (STY)]PR_3                                                                  | #N/A                    | 1.4821  | 0.5676  | 0.0391 | 1.4078 |
| Stoml2   | Q99JB2 | Stomatin-like protein 2, mitochondrial                                       | _APVPGAGNSQSR_2                                                                                       | #N/A                    | 0.6407  | -0.6422 | 0.0391 | 1.4076 |
| Thop1    | Q8C1A5 | Thimet oligopeptidase                                                        | _YDQVLHTQTADDAPEAYR_3                                                                                 | #N/A                    | 1.9496  | 0.9632  | 0.0392 | 1.4072 |
| Adcy     | Q91V92 | ATP-citrate synthase                                                         | _SINNPDNR_2                                                                                           | #N/A                    | 0.6905  | -0.5343 | 0.0392 | 1.4065 |
| Prdx1    | P35700 | Peroxisomal protein 1                                                        | _IGVPAPNFK_2                                                                                          | #N/A                    | 0.7354  | -0.4435 | 0.0392 | 1.4063 |
| Prrc2b   | Q77PM1 | Protein PRRC2B                                                               | _LKFS[Phospho (STY)]DDDEEDVVK_2                                                                       | #N/A                    | 0.6532  | -0.6145 | 0.0393 | 1.4054 |
| Srrm2    | Q88T18 | Serine/arginine repetitive matrix protein 2                                  | _DTPQT[Phospho (STY)]PSR_2                                                                            | Q88T18_T1428_M1_Srrm2   | 0.7358  | -0.4426 | 0.0393 | 1.4051 |
| Ndrg3    | Q9QY99 | Protein NDRC3                                                                | _LHQAQDINQENQLFLGSGYNGR_3                                                                             | #N/A                    | 1.5077  | 0.5923  | 0.0394 | 1.4051 |
| Lrp1     | Q912X7 | Prolow-density lipoprotein receptor-related protein 1                        | _FFSDHFGNIQIQNDQSGSR_3                                                                                | #N/A                    | 0.7358  | -0.4427 | 0.0394 | 1.4046 |
| Gnb4     | P29387 | Guanine nucleotide-binding protein subunit beta-4                            | _SGVLAGHNR_2                                                                                          | #N/A                    | 0.0347  | -4.8492 | 0.0395 | 1.4038 |
| Skt      | A2AQ25 | Sickle tail protein                                                          | _VSS[Phospho (STY)]EDGPTPTQTR_2                                                                       | A2AQ25_51087_M1_Skt     | 1.4878  | 0.5732  | 0.0395 | 1.4033 |
| Aagab    | Q8R283 | Alpha- and gamma-adaptin-binding protein p34                                 | _AFWM[Oxidation (M)]AIGGDRDEIGLGS[Phospho (STY)]DDEH_3                                                | Q8R283_5312_M1_Aagab    | 1.5541  | 0.6361  | 0.0396 | 1.4023 |
| Pczb     | Q99MN9 | Propionyl-CoA carboxylase beta chain, mitochondrial                          | _EFFNLFPLSSQDPAPIR_2                                                                                  | #N/A                    | 1.4030  | 0.4885  | 0.0396 | 1.4022 |
| Msl1     | Q61474 | RNA-binding protein Musashi homolog 1                                        | _J[Acetyl (Protein N-term)]M[Oxidation (M)]ETDAPOQGLAS[Phospho (STY)]POSHPDPC[Carbamidomethyl (C)]K_2 | #N/A                    | 1.3802  | 0.4649  | 0.0397 | 1.4014 |
| Hrh1     | P70174 | Histamine H1 receptor                                                        | _RIS[Phospho (STY)]ETSEDTQLVDR_2                                                                      | P70174_5344_M1_Hrh1     | 1.4964  | 0.5815  | 0.0397 | 1.4013 |
| Slc32a1  | O35633 | Vesicular inhibitory amino acid transporter                                  | _LTHVATSVSNK_2                                                                                        | #N/A                    | 0.6010  | -0.7345 | 0.0399 | 1.3990 |
| Omg      | Q63912 | Oligodendrocyte-myelin glycoprotein                                          | _AHVIGTPC[Carbamidomethyl (C)]JSK_2                                                                   | #N/A                    | 1.3104  | 0.3900  | 0.0399 | 1.3990 |
| Pgm2l1   | Q8CAA7 | Glucose 1,6-bisphosphate synthase                                            | _DITTOYDSSQPNKK_2                                                                                     | #N/A                    | 0.6248  | -0.6785 | 0.0399 | 1.3985 |
| Pipa     | P58389 | Serine/threonine-protein phosphatase 2A activator                            | _FGSLPHPVTS_2                                                                                         | #N/A                    | 0.6839  | -0.5482 | 0.0402 | 1.3959 |
| Sptbn1   | Q6Z261 | Spectrin beta chain, non-erythrocytic 1                                      | _IQEKVDSIDOR_3                                                                                        | #N/A                    | 0.7131  | -0.4878 | 0.0402 | 1.3955 |
| Hspd1    | P63038 | 60 kDa heat shock protein, mitochondrial                                     | _DM[Oxidation (M)]AAITGAAGVAGEGGLNLELDVQAHDGLK_3                                                      | #N/A                    | 1.5137  | 0.5981  | 0.0402 | 1.3954 |
| Atg6v1a  | P50516 | V-type proton ATPase catalytic subunit A                                     | _EASVYGTILSEYR_2                                                                                      | #N/A                    | 0.7015  | -0.5115 | 0.0403 | 1.3947 |
| Gad1     | P48318 | Glutamate decarboxylase 1                                                    | _ERQS[Phospho (STY)]SKNLLSC[Carbamidomethyl (C)]ENSDQGAR_3                                            | #N/A                    | 1.4910  | 0.5763  | 0.0403 | 1.3943 |
| Cavin2   | Q63918 | Caveolin-associated protein 2                                                | _S[Phospho (STY)]SPFKVS[Phospho (STY)]PLSGR_2                                                         | Q63918_5287_M2_Cavin2   | 0.6559  | -0.6085 | 0.0404 | 1.3936 |
| Ap2a1    | P17426 | AP-2 complex subunit alpha-1                                                 | _AVEYLTSSVASTDLATVLEEM[Oxidation (M)]PPFFER_3                                                         | #N/A                    | 0.7037  | -0.5069 | 0.0405 | 1.3928 |
| Nfia     | Q02780 | Nuclear factor 1 A-type                                                      | _S[Phospho (STY)]PGSGSQSGSWHEVGLPSPSTLK_3                                                             | Q02780_5323_M1_Nfia     | 0.7455  | -0.4238 | 0.0407 | 1.3906 |
| Sars1    | P26638 | Serine-tRNA ligase, cytoplasmic                                              | _EIGNLHPSPVPSNDEADNKVER_4                                                                             | #N/A                    | 1.4900  | 0.5753  | 0.0407 | 1.3904 |
| Arhgef2  | Q60875 | Rho guanine nucleotide exchange factor 2                                     | _LES[Phospho (STY)]FESLRGER_2                                                                         | #N/A                    | 7.7845  | 2.9606  | 0.0408 | 1.3898 |
| Sphkap   | Q6NSW3 | A-kinase anchor protein SPHKAP                                               | _RAS[Phospho (STY)]ITDLGK_2                                                                           | Q6NSW3_5841_M1_Sphkap   | 0.7045  | -0.5053 | 0.0408 | 1.3898 |
| Hgs      | Q99JL8 | Hepatocyte growth factor-regulated tyrosine kinase substrate                 | _ASSTELPEVLYTSPISQSQS[Phospho (STY)]QLPPK_3                                                           | Q99JL8_5246_M1_Hgs      | 0.7461  | -0.4226 | 0.0408 | 1.3896 |
| Wdr44    | Q6NVE8 | WD repeat-containing protein 44                                              | _S[Phospho (STY)]NSGRELDEILASVNNK_3                                                                   | Q6NVE8_5344_M1_Wdr44    | 0.7341  | -0.4459 | 0.0409 | 1.3882 |
| Rims3    | Q8OU57 | Regulating synaptic membrane exocytosis protein 3                            | _QGSRESTDGSGTNS[Phospho (STY)]NSSEGTFFIPTTR_3                                                         | Q8OU57_5114_M1_Rims3    | 0.7341  | -0.4459 | 0.0409 | 1.3881 |
| Akap12   | Q9WTC5 | A-kinase anchor protein 12                                                   | _RPS[Phospho (STY)]ES[Phospho (STY)]DKEELDLK_2                                                        | Q9WTC5_5613_M2_Akap12   | 1.4886  | 0.5740  | 0.0410 | 1.3872 |
| Chp1     | P61022 | Calcineurin B homologous protein 1                                           | _ETGFSHSQTR_3                                                                                         | #N/A                    | 0.7463  | -0.4222 | 0.0410 | 1.3870 |
| Pcm1     | Q9R0L6 | Pericentriolar material 1 protein                                            | _ILEGDHGS[Phospho (STY)]PAGEIDDEOKKDETETVK_4                                                          | Q9R0L6_51729_M1_Pcm1    | 0.7464  | -0.4219 | 0.0412 | 1.3854 |
| Pgp5c    | Q60676 | Serine/threonine-protein phosphatase 5                                       | _GNHETDNMMQYGFGEVVK_3                                                                                 | #N/A                    | 1.4879  | 0.5733  | 0.0412 | 1.3854 |
| Marcks   | P26645 | Myristoylated alanine-rich C-kinase substrate                                | _AEDGAAPS[Phospho (STY)]PSEST[Phospho (STY)]PKKK_2                                                    | #N/A                    | 0.4393  | -1.1867 | 0.0412 | 1.3853 |
| Actn1    | Q77P84 | Alpha-actinin-1                                                              | _IDQLECC[Carbamidomethyl (C)]DHQLQALFQNK_3                                                            | #N/A                    | 0.6468  | -0.6286 | 0.0412 | 1.3853 |

|          |        |                                                                            |                                                                          |                          |        |         |        |        |
|----------|--------|----------------------------------------------------------------------------|--------------------------------------------------------------------------|--------------------------|--------|---------|--------|--------|
| Ranbp2   | Q9ERU9 | E3 SUMO-protein ligase RanBP2                                              | _SALS[Phospho (STY)]PSKSPAK_2                                            | Q9ERU9_S2113_M1_Ranbp2   | 2.3066 | 1.2058  | 0.0413 | 1.3837 |
| Scn4b    | Q7M729 | Sodium channel subunit beta-4                                              | _EC[Carbamidomethyl (C)]LVSSGNDNTENGLPGSK_2                              | #N/A                     | 1.6856 | 0.7532  | 0.0414 | 1.3832 |
| Cnksr2   | Q80YA9 | Connector enhancer of kinase suppressor of ras 2                           | _GSES[Phospho (STY)]PNSFIDQERYK_2                                        | #N/A                     | 2.9093 | 1.5407  | 0.0414 | 1.3825 |
| Sybu     | Q8BH58 | Syntabulin                                                                 | _SGSS[Phospho (STY)]PPSP[Phospho (STY)]PIR_2                             | Q8BH58_S199_M2_Sybu      | 0.7064 | -0.5014 | 0.0415 | 1.3823 |
| Bcl11b   | Q99PV8 | B-cell lymphoma/leukemia 11B                                               | _SPFLST[Phospho (STY)]PPLPMPAGT[Phospho (STY)]PPPOPPAK_3                 | Q99PV8_T406_M2_Bcl11b    | 0.7467 | -0.4215 | 0.0415 | 1.3822 |
| Gria2    | P23B19 | Glutamate receptor 2                                                       | _ADIAAPLTLTVR_2                                                          | #N/A                     | 1.3381 | 0.4202  | 0.0415 | 1.3819 |
| Tmcc2    | Q80W04 | Transmembrane and coiled-coil domains protein 2                            | _GS[Phospho (STY)]PHLLR_2                                                | Q80W04_S189_M1_Tmcc2     | 1.5659 | 0.6470  | 0.0416 | 1.3811 |
| Ugp2     | Q91ZJ5 | UTP-glucose-1-phosphate uridylyltransferase                                | _NENTFLDLTVQQEHLNK_3                                                     | #N/A                     | 0.7335 | -0.4472 | 0.0417 | 1.3800 |
| Lmtk3    | Q5XV66 | Serine/threonine-protein kinase LMTK3                                      | _AQRPPEGM[Oxidation (M)]SS[Phospho (STY)]PELPPR_3                        | #N/A                     | 0.5929 | -0.7541 | 0.0417 | 1.3796 |
| Rtn4     | Q99P72 | Reticulon-4                                                                | _ESAEFVSLEYSEM[Oxidation (M)]GSSSNGS[Phospho (STY)]PK_3                  | Q99P72_S291_M1_Rtn4      | 1.7369 | 0.7965  | 0.0417 | 1.3796 |
| Ndufb5   | Q9CQH3 | NADH dehydrogenase [ubiquinone] 1 beta subcomplex subunit 5, mitochondrial | _NFDYGPKEK_2                                                             | #N/A                     | 0.6788 | -0.5590 | 0.0418 | 1.3793 |
| Giccl1   | Q8K3I9 | Glucocorticoid-induced transcript 1 protein                                | _TSS[Phospho (STY)]LDTTGTGVLTGQWPR_2                                     | Q8K3I9_S163_M1_Giccl1    | 0.7470 | -0.4209 | 0.0419 | 1.3780 |
| Atp6v1c1 | Q9Z1G3 | V-type proton ATPase subunit C 1                                           | _SRAS[Phospho (STY)]AVNNLK_2                                             | Q9Z1G3_S141_M1_Atp6v1c1  | 1.5251 | 0.6089  | 0.0420 | 1.3767 |
| Syngap1  | F65EU4 | Ras/Rap GTPase-activating protein Syngap                                   | _TVS[Phospho (STY)]VPVEGRPHGEHYHLGR_4                                    | #N/A                     | 0.6885 | -0.5385 | 0.0421 | 1.3755 |
| Ppid     | Q9CR16 | Peptidyl-prolyl cis-trans isomerase D                                      | _I[Acetyl (Protein N-term)]SHASPAAKPSNSK_3                               | #N/A                     | 0.7147 | -0.4846 | 0.0422 | 1.3746 |
| Pdelc    | Q64338 | Calcium/calmodulin-dependent 3',5'-cyclic nucleotide phosphodiesterase 1C  | _I[Acetyl (Protein N-term)]MES[Phospho (STY)]PTKEIEEFSSNSLK_3            | Q64338_S3_M1_Pdelc       | 0.7330 | -0.4482 | 0.0423 | 1.3740 |
| Cttn     | Q60598 | Src substrate cortactin                                                    | _HC[Carbamidomethyl (C)]S[Phospho (STY)]QVDSVR_2                         | Q60598_S113_M1_Cttn      | 0.6403 | -0.6432 | 0.0424 | 1.3730 |
| Prickle2 | Q80Y24 | Prickle-like protein 2                                                     | _S[Phospho (STY)]FQESLGGQGR_2                                            | #N/A                     | 1.4499 | 0.5360  | 0.0424 | 1.3721 |
| Arhgef2  | Q60875 | Rho guanine nucleotide exchange factor 2                                   | _EAQELGSS[Phospho (STY)]PEDR_2                                           | #N/A                     | 1.4136 | 0.4993  | 0.0425 | 1.3720 |
| Stim2    | P83093 | Stromal interaction molecule 2                                             | _S[Phospho (STY)]MIFSPASK_2                                              | P83093_S661_M1_Stim2     | 0.6670 | -0.5843 | 0.0425 | 1.3718 |
| Tecr     | Q9CY27 | Very-long-chain enoyl-CoA reductase                                        | _S[Phospho (STY)]LKHDEVLQK_2                                             | Q9CY27_S58_M1_Tecr       | 1.6419 | 0.7153  | 0.0425 | 1.3717 |
| Chgb     | P16014 | Secretogranin-1                                                            | _ADEFPDPY[Phospho (STY)]DS[Phospho (STY)]EEQM[Oxidation (M)]GPHQEANDEK_3 | P16014_S626_M2_Chgb      | 1.4831 | 0.5686  | 0.0426 | 1.3710 |
| BclA1    | Q9D859 | BclA-like protein 1                                                        | _FEGAM[Oxidation (M)]S[Phospho (STY)]PLQR_2                              | #N/A                     | 1.8563 | 0.8925  | 0.0426 | 1.3707 |
| Vars1    | Q9Z1Q9 | Valine-tRNA ligase                                                         | _LSATVTEAFVR_2                                                           | #N/A                     | 0.7588 | -0.3982 | 0.0426 | 1.3706 |
| Sbtp1    | O08599 | Syntaxin-binding protein 1                                                 | _LDAKYADDPMTGEGGPK_3                                                     | #N/A                     | 1.5093 | 0.5939  | 0.0427 | 1.3700 |
| Camk4    | P08414 | Calcium/calmodulin-dependent protein kinase type IV                        | _DSTDLGKK_2                                                              | #N/A                     | 1.3319 | 0.4135  | 0.0427 | 1.3694 |
| Pgm2     | Q775V4 | Phosphoglucomutase-2                                                       | _I[Acetyl (Protein N-term)]AAAT[Phospho (STY)]PTETPAPEGSGGLMDAR_2        | Q775V4_TS_M1_Pgm2        | 0.7476 | -0.4197 | 0.0428 | 1.3688 |
| Oxblp6   | Q8BX89 | Oxysterol-binding protein-related protein 6                                | _TAS[Phospho (STY)]SSTEPSVR_2                                            | Q8BX89_S44_M1_Oxblp6     | 1.4089 | 0.4946  | 0.0428 | 1.3681 |
| Tuba1b   | P05213 | Tubulin alpha-1B chain                                                     | _RAFVHWYVVGEGMEEGESEAR_3                                                 | #N/A                     | 0.7478 | -0.4194 | 0.0430 | 1.3665 |
| Cacnb2   | Q8CZ27 | Voltage-dependent L-type calcium channel subunit beta-2                    | _SGGNSSS[Phospho (STY)]SLGDVPPSR_2                                       | Q8CZ27_S202_M1_Cacnb2    | 0.0951 | -3.3940 | 0.0430 | 1.3663 |
| Dync1h1  | Q91HU4 | Cytoplasmic dynein 1 heavy chain 1                                         | _LALESXC[Carbamidomethyl (C)]LLGESTDWDK_2                                | #N/A                     | 0.7087 | -0.4967 | 0.0430 | 1.3660 |
| Son      | Q9QX47 | Protein SON                                                                | _RFS[Phospho (STY)]RS[Phospho (STY)]PIR_2                                | #N/A                     | 2.0965 | 1.0680  | 0.0431 | 1.3659 |
| Calcoo1  | Q8CGU1 | Calcium-binding and coiled-coil domain-containing protein 1                | _LPSYGLC[Carbamidomethyl (C)]ESGNTSSS[Phospho (STY)]PPGP_R2              | Q8CGU1_S563_M1_Calcoo1   | 4.8836 | 2.2879  | 0.0431 | 1.3657 |
| Kcnq2    | Q9Z351 | Potassium voltage-gated channel subfamily KQT member 2                     | _VQYQT[Phospho (STY)]WNGR_2                                              | Q9Z351_T287_M1_Kcnq2     | 0.6934 | -0.5282 | 0.0431 | 1.3655 |
| Gab2     | Q9Z158 | GRB2-associated-binding protein 2                                          | _ASS[Phospho (STY)]C[Carbamidomethyl (C)]JETEYPAAR_2                     | Q9Z158_S402_M1_Gab2      | 1.7624 | 0.8175  | 0.0431 | 1.3653 |
| Kiaa1109 | A2AAE1 | Transmembrane protein KIAA1109                                             | _SLQDQS[Phospho (STY)]PSRK_2                                             | A2AAE1_S3835_M1_Kiaa1109 | 0.6702 | -0.5772 | 0.0432 | 1.3648 |
| Hspa12a  | Q8K0U4 | Heat shock 70 kDa protein 12A                                              | _WSS[Phospho (STY)]QGGM_R2                                               | Q8K0U4_S437_M1_Hspa12a   | 1.4813 | 0.5669  | 0.0432 | 1.3648 |
| Abi2     | Q4IIM5 | Tyrosine-protein kinase Abi2                                               | _STQASSGS[Phospho (STY)]PALPR_2                                          | Q4IIM5_S621_M1_Abi2      | 1.3522 | 0.4353  | 0.0432 | 1.3647 |
| Rbm26    | Q6N2N0 | RNA-binding protein 26                                                     | _RLNHS[Phospho (STY)]PPSSSR_3                                            | #N/A                     | 0.4862 | -1.0404 | 0.0432 | 1.3646 |
| Atp2a2   | O55143 | Sarcoplasmic/endoplasmic reticulum calcium ATPase 2                        | _TASEM[Oxidation (M)]VLADONFSTVAAVEGR_3                                  | #N/A                     | 1.4117 | 0.4975  | 0.0432 | 1.3645 |
| Tnrc6b   | Q8BK12 | Trinucleotide repeat-containing gene 6B protein                            | _SSSS[Phospho (STY)]AGSEVGGSQSGSNHK_2                                    | Q8BK12_S601_M1_Tnrc6b    | 0.7479 | -0.4191 | 0.0432 | 1.3643 |
| Hspa2    | P17156 | Heat shock-related 70 kDa protein 2                                        | _QTQTFTTYSNQGSSVQVVEGR_3                                                 | #N/A                     | 0.7322 | -0.4496 | 0.0433 | 1.3640 |
| Cadps    | Q80T11 | Calcium-dependent secretion activator 1                                    | _SLTSNLPNVLPMVNLPK_2                                                     | #N/A                     | 0.6048 | -0.7255 | 0.0433 | 1.3637 |
| Zfyve26  | Q5DUJ7 | Zinc finger FYVE domain-containing protein 26                              | _GPLGLARS[Phospho (STY)]PSES[Phospho (STY)]PQHAATER_3                    | Q5DUJ7_S605_M2_Zfyve26   | 0.7480 | -0.4189 | 0.0433 | 1.3630 |
| Top2b    | Q64511 | DNA topoisomerase 2-beta                                                   | _KTSFQDS[Phospho (STY)]DVIDFSDTSEPPPALPR_3                               | Q64511_S1568_M1_Top2b    | 0.7098 | -0.4946 | 0.0434 | 1.3624 |
| Codc8a   | Q55P85 | Coiled-coil domain-containing protein 85A                                  | _STS[Phospho (STY)]PEHLHKPR_2                                            | #N/A                     | 2.4914 | 1.3169  | 0.0434 | 1.3624 |
| Hecw1    | Q8K4P8 | E3 ubiquitin-protein ligase HECW1                                          | _APS[Phospho (STY)]PYRR_2                                                | Q8K4P8_S1219_M1_Hecw1    | 0.7080 | -0.4982 | 0.0435 | 1.3617 |
| Bclaf1   | Q8K0I9 | Bcl-2-associated transcription factor 1                                    | _LRC[Carbamidomethyl (C)]DS[Phospho (STY)]ADLR_2                         | Q8K0I9_S688_M1_Bclaf1    | 0.7076 | -0.4989 | 0.0435 | 1.3614 |
| Nagk     | Q9QZ08 | N-acetyl-D-glucosamine kinase                                              | _I[Acetyl (Protein N-term)]AALYGGVGGGTR_2                                | #N/A                     | 0.5210 | -0.9406 | 0.0435 | 1.3610 |
| Ndrp2    | Q9QYG0 | Protein NDRP2                                                              | _LTGLTSSPDM[Oxidation (M)]LGLHLSFQSELSGNSLQIK_3                          | #N/A                     | 0.7495 | -0.4161 | 0.0436 | 1.3602 |
| Calb2    | Q08331 | Calretinin                                                                 | _EM[Oxidation (M)]NIQQLTVRR_2                                            | #N/A                     | 0.7508 | -0.4134 | 0.0437 | 1.3597 |
| Srcin1   | Q9QW16 | SRC kinase signaling inhibitor 1                                           | _LGGAPTGGGVSPPSAILER_2                                                   | #N/A                     | 2.0920 | 1.0649  | 0.0437 | 1.3595 |
| Atp6v0d1 | P51863 | V-type proton ATPase subunit d 1                                           | _AGVLSQADYLVNLVQC[Carbamidomethyl (C)]TELEDK_3                           | #N/A                     | 0.7140 | -0.4860 | 0.0438 | 1.3590 |
| Csbr2    | Q3UH0D | Serine-rich coiled-coil domain-containing protein 2                        | _SSS[Phospho (STY)]GESLAQSPONAK_2                                        | Q3UH0D_S198_M1_Csbr2     | 1.5341 | 0.6174  | 0.0438 | 1.3585 |
| Tmem230  | Q8CB86 | Transmembrane protein 230                                                  | _LAS[Phospho (STY)]TDDGVLDQPK_2                                          | Q8CB86_S24_M1_Tmem230    | 0.7498 | -0.4155 | 0.0439 | 1.3577 |
| Kmt2d    | Q6PDK2 | Histone-lysine N-methyltransferase 2D                                      | _LC[Carbamidomethyl (C)]PQFEIPVLS[Phospho (STY)]PQPEPR_2                 | Q6PDK2_S727_M1_Kmt2d     | 0.2509 | -1.9949 | 0.0439 | 1.3575 |
| Cox6     | Q8B6D8 | Cytochrome c oxidase assembly factor 6 homolog                             | _KXFAGGFGSSGSTENS_2                                                      | #N/A                     | 2.5558 | 1.3537  | 0.0440 | 1.3568 |
| Iso2a    | P85094 | Isochorismatase domain-containing protein 2A                               | _QSGAFPLATSESLQLVR_2                                                     | #N/A                     | 0.7107 | -0.4927 | 0.0440 | 1.3565 |
| Six17    | Q9D004 | Syntaxin-17                                                                | _LTS[Phospho (STY)]C[Carbamidomethyl (C)]POLPSQSDK_2                     | Q9D004_S288_M1_Six17     | 5.6961 | 2.5100  | 0.0442 | 1.3548 |
| Prip3    | Q9Z2U1 | U4/U6 small nuclear ribonucleoprotein Prip3                                | _WDEQTSNTKGDDDEES[Phospho (STY)]DEEAVKK_3                                | #N/A                     | 1.7365 | 0.7962  | 0.0442 | 1.3541 |
| Prr13    | Q6PE13 | Proline-rich transmembrane protein                                         | _S[Phospho (STY)]DAALFR_2                                                | Q6PE13_S806_M1_Prr13     | 0.7163 | -0.4813 | 0.0443 | 1.3539 |
| Iqsec2   | Q5DU25 | IQ motif and SEC7 domain-containing protein 2                              | _AAHLPLLTIEPPSDSS[Phospho (STY)]VDSLR_3                                  | Q5DU25_S593_M1_Iqsec2    | 0.5409 | -0.8865 | 0.0443 | 1.3538 |
| Arhgef2  | A2ASR2 | Brefeldin A-inhibited guanine nucleotide-exchange protein 2                | _HLDVLDLRQS[Phospho (STY)]LSSIDR_3                                       | A2ASR2_S1518_M1_Arhgef2  | 0.7315 | -0.4510 | 0.0443 | 1.3537 |
| Atxn1    | P54254 | Ataxin-1                                                                   | _EAS[Phospho (STY)]PSTLNDK_2                                             | P54254_S382_M1_Atxn1     | 0.4111 | -1.2823 | 0.0443 | 1.3535 |
| Calr     | P14211 | Calreticulin                                                               | _VHVIFVNYK_2                                                             | #N/A                     | 0.6589 | -0.6019 | 0.0443 | 1.3534 |
| Ugp2     | Q91ZJ5 | UTP-glucose-1-phosphate uridylyltransferase                                | _AM[Oxidation (M)]S[Phospho (STY)]QDGASQFQEVILQELSLVK_3                  | Q91ZJ5_S13_M1_Ugp2       | 0.7486 | -0.4177 | 0.0444 | 1.3528 |
| Cdk14    | Q35495 | Cyclin-dependent kinase 14                                                 | _TIS[Phospho (STY)]ESFSR_2                                               | Q35495_S24_M1_Cdk14      | 0.7314 | -0.4513 | 0.0445 | 1.3515 |
| Washc2   | Q6PGL7 | WASH complex subunit 2                                                     | _EGLLPASDQEGAGGSPDSIFSSS[Phospho (STY)]PLDK_3                            | Q6PGL7_S783_M1_Washc2    | 1.4927 | 0.5780  | 0.0446 | 1.3506 |
| Nipsnap1 | O55125 | Protein Nipsnap homolog 1                                                  | _JQFHNVPK[C[Carbamidomethyl (C)]DAYSNLTEAVLPK_4                          | #N/A                     | 0.7487 | -0.4175 | 0.0446 | 1.3505 |
| Cadm2    | Q8BLQ9 | Cell adhesion molecule 2                                                   | _GAEDPADTADTAINEAGS[Phospho (STY)]QVNAEEK_3                              | #N/A                     | 1.6072 | 0.6845  | 0.0447 | 1.3501 |
| Gapdh    | P16858 | Glyceraldehyde-3-phosphate dehydrogenase                                   | _LEKPAKYDOK_3                                                            | #N/A                     | 0.5219 | -0.9383 | 0.0448 | 1.3490 |
| Map7f1   | A3AJ0  | MAP7 domain-containing protein 1                                           | _LSTGELS[Phospho (STY)]PK_2                                              | A3AJ0_S460_M1_Map7f1     | 0.7489 | -0.4172 | 0.0448 | 1.3483 |
| Ppp1r14c | Q8R450 | Protein phosphatase 1 regulatory subunit 14C                               | _KLS[Phospho (STY)]PPQKK_2                                               | Q8R450_S157_M1_Ppp1r14c  | 0.6741 | -0.5689 | 0.0449 | 1.3480 |
| Septin2  | P4Z208 | Septin-2                                                                   | _STLNSLFLTDLPPER_2                                                       | #N/A                     | 0.5468 | -0.8708 | 0.0449 | 1.3476 |
| Ipo5     | Q8BKCS | Importin-5                                                                 | _HIVENAVOK_2                                                             | #N/A                     | 1.4337 | 0.5197  | 0.0449 | 1.3474 |
| Hspa8    | P63017 | Heat shock cognate 71 kDa protein                                          | _GLRS[Phospho (STY)]KEDIER_3                                             | P63017_S511_M1_Hspa8     | 1.3371 | 0.4191  | 0.0449 | 1.3473 |
| Sh3bgr3  | Q91VW3 | SH3 domain-binding glutamic acid-rich-like protein 3                       | _VYSTSVTSGR_2                                                            | #N/A                     | 0.3942 | -1.3430 | 0.0451 | 1.3463 |
| Itsn1    | Q9Z0R4 | Intersectin-1                                                              | _AQSS[Phospho (STY)]FDVASAPAAEAWAPQSSR_2                                 | Q9Z0R4_S203_M1_Itsn1     | 0.7310 | -0.4520 | 0.0451 | 1.3458 |
| Dic1     | Q9R0Z9 | Rho GTPase-activating protein 7                                            | _KRSEDS[Phospho (STY)]DEDEPC[Carbamidomethyl (C)]AISGK_3                 | #N/A                     | 1.4344 | 0.5204  | 0.0452 | 1.3449 |



|          |        |                                                                         |                                                                      |                         |         |         |        |        |
|----------|--------|-------------------------------------------------------------------------|----------------------------------------------------------------------|-------------------------|---------|---------|--------|--------|
| Napb     | P28663 | Beta-soluble NSF attachment protein                                     | _AIAHYEQSADYYK_3                                                     | #N/A                    | 1.4903  | 0.5756  | 0.0452 | 1.3448 |
| Trim28   | Q62318 | Transcription intermediary factor 1-beta                                | _VS[Phospho (STY)]LERLDLDTSSQPPVKF_3                                 | Q62318_S489_M1_Trim28   | 0.7524  | -0.4105 | 0.0452 | 1.3445 |
| Ranbp2   | Q9ERU9 | E3 SUMO-protein ligase RanBP2                                           | _LNVNNSAS[Phospho (STY)]PHR_2                                        | Q9ERU9_S837_M1_Ranbp2   | 0.6159  | -0.6993 | 0.0455 | 1.3422 |
| Tmod2    | Q9IKK7 | Tropomodulin-2                                                          | _DREDVPPTGEK_2                                                       | #N/A                    | 0.7407  | -0.4331 | 0.0456 | 1.3414 |
| Atg5f1c  | Q91VR2 | ATP synthase subunit gamma, mitochondrial                               | _EUEIGSAAAID_2                                                       | #N/A                    | 1.4053  | 0.4909  | 0.0456 | 1.3411 |
| Plkm     | P47857 | ATP-dependent 6-phosphofructokinase, muscle type                        | _SSYLVNVLGSLGNDIC[Carbamidomethyl (C)]CTDM[Oxidation (M)]TGTD5ALHR_3 | #N/A                    | 1.5369  | 0.6200  | 0.0458 | 1.3396 |
| Adgrl1   | Q80TR1 | Adhesion G protein-coupled receptor L1                                  | _TOTLTYASWEDYVAAR_2                                                  | #N/A                    | 0.7520  | -0.4112 | 0.0458 | 1.3388 |
| Tbc1d5   | Q80XQ2 | TBC1 domain family member 5                                             | _FTGS[Phospho (STY)]PPPSATKK_2                                       | Q80XQ2_S578_M1_Tbc1d5   | 9.8818  | 3.3048  | 0.0459 | 1.3382 |
| Hecw1    | Q8K4P8 | E3 ubiquitin-protein ligase HECW1                                       | _SGS[Phospho (STY)]VHQMEQLNR_2                                       | Q8K4P8_S871_M1_Hecw1    | 1.6693  | 0.7393  | 0.0459 | 1.3379 |
| Rbm1     | Q91VM5 | RNA binding motif protein, X-linked-like-1                              | _DRDYSDHPSGGSYR_3                                                    | #N/A                    | 0.5660  | -0.8212 | 0.0460 | 1.3370 |
| Ppp3r1   | Q63810 | Calcineurin subunit B type 1                                            | _KLDDNSGSLSEEFM[Oxidation (M)]SLPELQONPLVQR_3                        | #N/A                    | 0.7495  | -0.4159 | 0.0461 | 1.3359 |
| Snap25   | P60879 | Synaptosomal-associated protein 25                                      | _HM[Oxidation (M)]ALDM[Oxidation (M)]GNEIDTQNR_3                     | #N/A                    | 0.6708  | -0.5759 | 0.0462 | 1.3357 |
| Rem2     | Q8VEL9 | GTP-binding protein REM 2                                               | _BRGS[Phospho (STY)]M[Oxidation (M)]PVPYK_3                          | #N/A                    | 0.7213  | -0.4713 | 0.0463 | 1.3347 |
| Eps15l1  | Q60902 | Epidermal growth factor receptor substrate 15-like 1                    | _GIDPPQVLS[Phospho (STY)]PDM[Oxidation (M)]VPPSR_2                   | Q60902_S353_M1_Eps15l1  | 0.4538  | -1.1399 | 0.0463 | 1.3341 |
| Relch    | Q148V7 | RAB11-binding protein RELCH                                             | _AGGSTLSGLDFARY[Phospho (STY)]SDGNNRETDER_3                          | Q148V7_Y192_M1_Relch    | 0.6089  | -0.7158 | 0.0464 | 1.3337 |
| Phactr1  | Q2M3X8 | Phosphatase and actin regulator 1                                       | _RLS[Phospho (STY)]QRPTAELEQR_3                                      | Q2M3X8_S467_M1_Phactr1  | 1.4837  | 0.5692  | 0.0465 | 1.3327 |
| Atg4c    | Q811C2 | Cysteine protease ATG4C                                                 | _DFOFTSTAAS[Phospho (STY)]EEDLFSDEDERK_3                             | Q811C2_S434_M1_At4c     | 1.4736  | 0.5594  | 0.0465 | 1.3322 |
| Arf6ip5  | Q8RSJ9 | PRA1 family protein 3                                                   | _TPMGILDALEQQEDNNK_2                                                 | #N/A                    | 0.6803  | -0.5557 | 0.0465 | 1.3321 |
| Icam5    | Q60625 | Intercellular adhesion molecule 5                                       | _LDDLDC[Carbamidomethyl (C)]PR_2                                     | #N/A                    | 0.7621  | -0.3920 | 0.0466 | 1.3319 |
| Plig     | A2AR02 | Peptidyl-prolyl cis-trans isomerase G                                   | _FGS[Phospho (STY)]PVSK_2                                            | #N/A                    | 0.6154  | -0.7005 | 0.0466 | 1.3318 |
| Necab2   | Q912P9 | N-terminal EF-hand calcium-binding protein 2                            | _TIS[Phospho (STY)]FDLQQR_2                                          | Q912P9_S711_M1_Necab2   | 0.1253  | -2.9969 | 0.0466 | 1.3314 |
| Rap2b    | P61226 | Ras-related protein Rap-2b                                              | _SALTQVYTGSGRIK_2                                                    | #N/A                    | 0.6061  | -0.7223 | 0.0467 | 1.3311 |
| Pnpo     | Q913FO | Pyridoxine-5'-phosphate oxidase                                         | _GLATGDS[Phospho (STY)]LPGPM[Oxidation (M)]THHGDEWVYR_4              | #N/A                    | 1.3566  | 0.4400  | 0.0467 | 1.3303 |
| Kcnma1   | Q08460 | Calcium-activated potassium channel subunit alpha-1                     | _LEDEQPPTLS[Phospho (STY)]PK_2                                       | #N/A                    | 0.4716  | -1.0844 | 0.0468 | 1.3301 |
| Ctic     | Q68F05 | Clathrin heavy chain 1                                                  | _YQAAAC[Carbamidomethyl (C)]K_2                                      | #N/A                    | 0.5737  | -0.8017 | 0.0468 | 1.3294 |
| Rab3b    | Q9CZT8 | Ras-related protein Rab-3b                                              | _LLAELGFGDFEFASAK_2                                                  | #N/A                    | 1.4783  | 0.5639  | 0.0469 | 1.3291 |
| Hmrnpa1  | P49312 | Heterogeneous nuclear ribonucleoprotein A1                              | _GFAVTFDDHDSVDK_2                                                    | #N/A                    | 1.5706  | 0.6513  | 0.0469 | 1.3286 |
| Cep170b  | Q80U49 | Centrosomal protein of 170 kDa protein B                                | _ESPLS[Phospho (STY)]PPTVPDRGGATPGSAR_2                              | Q80U49_S981_M1_Cep170b  | 0.4673  | -1.0975 | 0.0470 | 1.3282 |
| Homer1   | Q9Z2Y3 | Homer protein homolog 1                                                 | _TELNQTVQLELETK_2                                                    | #N/A                    | 1.5600  | 0.6416  | 0.0470 | 1.3282 |
| Ctnna2   | Q61301 | Catenin alpha-2                                                         | _LVYDQVR_2                                                           | #N/A                    | 0.5860  | -0.7710 | 0.0471 | 1.3273 |
| Vat1l    | Q80T88 | Synaptic vesicle membrane protein VAT-1 homolog-like                    | _DSVTHLFR_2                                                          | #N/A                    | 0.6083  | -0.7173 | 0.0471 | 1.3268 |
| Myh9     | Q8VDD5 | Myosin-9                                                                | _GTGDC[Carbamidomethyl (C)]S[Phospho (STY)]DEEDVGK_2                 | #N/A                    | 0.7432  | -0.4282 | 0.0472 | 1.3265 |
| Hk1      | P17710 | Hexokinase-1                                                            | _GAAM[Oxidation (M)]TAVAYR_2                                         | #N/A                    | 1.3871  | 0.4720  | 0.0473 | 1.3252 |
| Prkcb    | P68404 | Protein kinase C beta type                                              | _QPVELT[Phospho (STY)]PTDK_2                                         | P68404_T642_M1_Prkcb    | 0.0697  | -3.8436 | 0.0473 | 1.3251 |
| Wdr1     | O88342 | WD repeat-containing protein 1                                          | _LATGSDONC[Carbamidomethyl (C)]AAFFEGPPFK_2                          | #N/A                    | 0.5275  | -0.9227 | 0.0473 | 1.3247 |
| Sgpl1    | Q8V037 | SH3-containing GRB2-like protein 3-interacting protein 1                | _RNLS[Phospho (STY)]SEEVAPR_3                                        | #N/A                    | 4.0908  | 2.0324  | 0.0474 | 1.3238 |
| Rims2    | Q9EQZ7 | Regulating synaptic membrane exocytosis protein 2                       | _TSHNS[Phospho (STY)]PPTPR_2                                         | Q9EQZ7_S472_M1_Rims2    | 2.4144  | 1.2717  | 0.0475 | 1.3234 |
| Brsk2    | Q69298 | Serine/threonine-protein kinase BRK2                                    | _S[Phospho (STY)]SGASSGLSTS[Phospho (STY)]PLSPSR_2                   | Q69298_S413_M2_Brsk2    | 0.2633  | -1.9254 | 0.0475 | 1.3232 |
| Skabp4   | Q9WV89 | Syntaxin-binding protein 4                                              | _SSS[Phospho (STY)]PLDRAPR_2                                         | Q9WV89_S12_M1_Skabp4    | 0.7502  | -0.4146 | 0.0475 | 1.3229 |
| Snip1    | Q88026 | Smad nuclear-interacting protein 1                                      | _HRS[Phospho (STY)]GDALTYVVK_3                                       | #N/A                    | 1.7784  | 0.8305  | 0.0476 | 1.3228 |
| Grm5     | Q3UVX5 | Metabotropic glutamate receptor 5                                       | _GS[Phospho (STY)]SGETUR_2                                           | #N/A                    | 0.7436  | -0.4274 | 0.0476 | 1.3224 |
| Cow6c    | Q9CPQ1 | Cytochrome c oxidase subunit 6C                                         | _NYDSMKDFEEMR_3                                                      | #N/A                    | 0.7503  | -0.4145 | 0.0477 | 1.3217 |
| Nsf      | P46460 | Vesicle-fusing ATPase                                                   | _KNIDSNPPTDK_2                                                       | #N/A                    | 0.4841  | -1.0466 | 0.0477 | 1.3215 |
| Prkce    | P16054 | Protein kinase C epsilon type                                           | _SAPTS[Phospho (STY)]PC[Carbamidomethyl (C)]DQELKELENRRK_3           | #N/A                    | 0.1857  | -2.4292 | 0.0477 | 1.3209 |
| Aldh1b1  | Q9CZS1 | Aldehyde dehydrogenase X, mitochondrial                                 | _TFVEESYR_2                                                          | #N/A                    | 0.7349  | -0.4443 | 0.0478 | 1.3204 |
| Mast1    | Q9R1L5 | Microtubule-associated serine/threonine-protein kinase 1                | _S[Phospho (STY)]PITQR_2                                             | Q9R1L5_S968_M1_Mast1    | 0.7541  | -0.4072 | 0.0478 | 1.3202 |
| Fei1     | Q8K0X8 | Fasciculation and elongation protein zeta-1                             | _GLS[Phospho (STY)]LGSNR_2                                           | Q8K0X8_S298_M1_Fei1     | 0.1641  | -2.6075 | 0.0479 | 1.3200 |
| Dclk1    | Q9ILM8 | Serine/threonine-protein kinase DCLK1                                   | _Acetyl (Protein N-term)[S[Phospho (STY)]JGRDMLEHFDER_3              | #N/A                    | 0.7156  | -0.4828 | 0.0479 | 1.3197 |
| Pikb1    | Q9Z1B3 | 1-phosphatidylinositol 4,5-bisphosphate phosphodiesterase beta-1        | _LQVTPGR_2                                                           | #N/A                    | 0.6744  | -0.5682 | 0.0479 | 1.3196 |
| Pomb5    | O55234 | Proteasome subunit beta type-5                                          | _DAYSGAVNLVHVR_2                                                     | #N/A                    | 1.7145  | 0.7778  | 0.0479 | 1.3194 |
| Kiaa1107 | Q80TK0 | AP2-interacting clathrin-endocytosis protein                            | _SSVSSROS[Phospho (STY)]DENYR_2                                      | Q80TK0_S353_M1_Kiaa1107 | 0.7195  | -0.4749 | 0.0480 | 1.3188 |
| Aldh6a1  | Q9EQ20 | Methylmalonate-semialdehyde dehydrogenase [acylating], mitochondrial    | _DMDLVSYR_2                                                          | #N/A                    | 1.5003  | 0.5853  | 0.0481 | 1.3178 |
| Znrf2    | Q71F05 | E3 ubiquitin-protein ligase ZNRF2                                       | _AYS[Phospho (STY)]CSDLPSGTGSGGGADGAR_2                              | Q71F05_S18_M1_Znrf2     | 17.9883 | 4.1690  | 0.0482 | 1.3173 |
| Fabp3    | P11404 | Fatty acid-binding protein, heart                                       | _NGOTTIK_2                                                           | #N/A                    | 1.4472  | 0.5332  | 0.0482 | 1.3170 |
| Plec     | Q9QXS1 | Plectin                                                                 | _EEELQQTLQEQNMILDR_2                                                 | #N/A                    | 1.4793  | 0.5649  | 0.0482 | 1.3169 |
| Myo5a    | Q99104 | Unconventional myosin Va                                                | _QLELDNDR_2                                                          | #N/A                    | 0.6442  | -0.6344 | 0.0482 | 1.3168 |
| Dcx      | O88809 | Neuronal migration protein doublecortin                                 | _SKGS[Phospho (STY)]PSTPTS[Phospho (STY)]PGSLRK_3                    | O88809_S332_M2_Dcx      | 0.7416  | -0.4313 | 0.0482 | 1.3166 |
| Oxc11    | Q9D0K2 | Succinyl-CoA:3-ketoacid coenzyme A transferase 1, mitochondrial         | _GM[Oxidation (M)]GGAM[Oxidation (M)]DLVSSK_2                        | #N/A                    | 0.5701  | -0.8108 | 0.0484 | 1.3154 |
| Iso2a    | P85094 | Isochorismatase domain-containing protein 2A                            | _DASHPQFK_2                                                          | #N/A                    | 0.6907  | -0.5338 | 0.0484 | 1.3151 |
| Rhob     | P62746 | Rho-related GTP-binding protein Rhob                                    | _IQAYDYLEC[Carbamidomethyl (C)]SAK_2                                 | #N/A                    | 1.4961  | 0.5812  | 0.0484 | 1.3149 |
| Kif2a    | P28740 | Kinesin-like protein KIF2A                                              | _AVFQESIR_2                                                          | #N/A                    | 0.6980  | -0.5188 | 0.0486 | 1.3137 |
| Vps50    | Q8C71  | Syndetin                                                                | _KKS[Phospho (STY)]DYSLNK_2                                          | Q8C71_S595_M1_Vps50     | 0.3998  | -1.3225 | 0.0487 | 1.3126 |
| Cc2d1a   | Q8K1A6 | Coiled-coil and C2 domain-containing protein 1A                         | _LANHDEGS[Phospho (STY)]DEEETPKK_3                                   | #N/A                    | 0.7688  | -0.3794 | 0.0487 | 1.3124 |
| Ahcy2    | Q68FL4 | Putative adenosylhomocysteinease 3                                      | _QVWC[Carbamidomethyl (C)]GVGEVGK_2                                  | #N/A                    | 0.7508  | -0.4134 | 0.0489 | 1.3106 |
| Qdpr     | Q88V4  | Dihydropyrimidine reductase                                             | _VDAILC[Carbamidomethyl (C)]VAGGWAGGNAK_2                            | #N/A                    | 1.9116  | 0.9347  | 0.0491 | 1.3092 |
| Emi1     | Q058C3 | Echinoderm microtubule-associated protein-like 1                        | _TSSS[Phospho (STY)]ERVS[Phospho (STY)]PGGR_2                        | Q058C3_S135_M2_Emi1     | 1.5377  | 0.6207  | 0.0492 | 1.3078 |
| Sir2     | Q8VDQ8 | NAD-dependent protein deacetylase siruin-2                              | _FFSC[Carbamidomethyl (C)]M[Oxidation (M)]QSDPSK_2                   | #N/A                    | 1.7318  | 0.7923  | 0.0493 | 1.3070 |
| Ptpn12   | P35831 | Tyrosine-protein phosphatase non-receptor type 12                       | _DQITKS[Phospho (STY)]PAEVDIGFGNR_3                                  | #N/A                    | 0.6725  | -0.5723 | 0.0494 | 1.3066 |
| Atf1     | Q88H66 | Atlastin-1                                                              | _VAVLLM[Oxidation (M)]DTGGTFDSQSTUR_2                                | #N/A                    | 1.9197  | 0.9409  | 0.0494 | 1.3064 |
| Tiam3    | Q60610 | T-lymphoma invasion and metastasis-inducing protein 1                   | _RSNATNSSYS[Phospho (STY)]PPTGR_2                                    | #N/A                    | 0.0581  | -4.1060 | 0.0494 | 1.3060 |
| Nduf62   | Q91W05 | NADH dehydrogenase [ubiquinone] iron-sulfur protein 2, mitochondrial    | _APGFAGLAGDK_2                                                       | #N/A                    | 1.3006  | 0.3792  | 0.0494 | 1.3059 |
| Dlg4     | Q62108 | Disks large homolog 4                                                   | _EQLMNSSGSGT[Phospho (STY)]ASLRS[Phospho (STY)]NPKR_3                | Q62108_S425_M2_Dlg4     | 1.5384  | 0.6214  | 0.0496 | 1.3046 |
| Taldo1   | Q93092 | Transaldolase                                                           | _WUHNEDQM[Oxidation (M)]AVEK_3                                       | #N/A                    | 0.5845  | -0.7748 | 0.0496 | 1.3042 |
| Napb     | P28663 | Beta-soluble NSF attachment protein                                     | _ASHS[Phospho (STY)]RLR_2                                            | P28663_S28_M1_Napb      | 0.7512  | -0.4128 | 0.0497 | 1.3037 |
| Spatan1  | P16546 | Spectrin alpha chain, non-erythrocytic 1                                | _ASAFNSWFENAAEDLTPVR_2                                               | #N/A                    | 1.4414  | 0.5274  | 0.0497 | 1.3034 |
| Arvcf    | P98203 | Armadillo repeat protein deleted in velo-cardio-facial syndrome homolog | _NFDT[Phospho (STY)]LDLPK_2                                          | P98203_T643_M1_Arvcf    | 1.4823  | 0.5678  | 0.0498 | 1.3032 |
| Tkt      | P40142 | Transketolase                                                           | _GSDLOGHVPVK_3                                                       | #N/A                    | 1.5197  | 0.6038  | 0.0498 | 1.3024 |
| Wdr47    | Q8CGF6 | WD repeat-containing protein 47                                         | _YQHLQEK_2                                                           | #N/A                    | 1.4800  | 0.5656  | 0.0499 | 1.3022 |
| Ncor1    | Q60974 | Nuclear receptor corepressor 1                                          | _YS[Phospho (STY)]PESGSGTVLHPR_2                                     | Q60974_S2116_M1_Ncor1   | 1.4827  | 0.5682  | 0.0499 | 1.3020 |
