# Supplementary material for: The Chronic Effects of a Single Low-Intensity Blast Exposure on Phosphoproteome Networks and Cognitive Function Influenced by Mutant Tau Overexpression
Source: MDPI journal article supplement (doi:10.3390/ijms25063338), 2024-03-15
Supplement: s1 [file s1]

**Supplementary Table S5. Phospep module assignment**

| PhospepName                                                                                              | Module (color) | Phos site               |
|----------------------------------------------------------------------------------------------------------|----------------|-------------------------|
| _MSS[Phospho (STY)]VEEDSDTKR_2                                                                           | black          | D3YXK2_S406_M1_Safb     |
| _APS[Phospho (STY)]ESS[Phospho (STY)]DDQGQPAAK_2                                                         | black          | E9PZ19_S794_M2_lgsf9b   |
| _ES[Phospho (STY)]RTPEELTILGETQEEDEILPR_3                                                                | black          | O35454_S23_M1_Clc6      |
| _TNS[Phospho (STY)]PSIS[Phospho (STY)]PSMLSNAEHKR_3                                                      | black          | O70305_S832_M2_Atn2     |
| _V SVC[Carbamidomethyl (C)]AETFPNDEEEDNDPR_2                                                             | black          | #N/A                    |
| _IVVQGEPGDDFYIITEGTASVLQR_3                                                                              | black          | #N/A                    |
| _C[Carbamidomethyl (C)]PQVIAFYEER_2                                                                      | black          | #N/A                    |
| _TLDRS[Phospho (STY)]GDLGDMEPLK_3                                                                        | black          | P30999_S920_M1_Ctnnd1   |
| _S[Phospho (STY)]HTGEAAAVR_2                                                                             | black          | P59017_S387_M1_Bcl2l13  |
| _QWC[Carbamidomethyl (C)]NC[Carbamidomethyl (C)]AFLESSAK_2                                               | black          | #N/A                    |
| _S[Phospho (STY)]PPTRKDDAAPNLHSEAR_4                                                                     | black          | Q5NBX1_S982_M1_Cobl     |
| _LNS[Phospho (STY)]DEEGESSGKR_2                                                                          | black          | Q5XJE5_S631_M1_Leo1     |
| _ASDPHLGTL[Phospho (STY)]PEDSELETHDMFPDTIHSR_4                                                           | black          | Q61161_S298_M1_Map4k2   |
| _SLS[Phospho (STY)]TEVEPK_2                                                                              | black          | Q6ZPJ0_S195_M1_Tex2     |
| _S[Phospho (STY)]PDPDPTGQNALDDSAASKM_2                                                                   | black          | Q80WT5_S395_M1_Aftph    |
| _DNSGSHGSPISGK_2                                                                                         | black          | #N/A                    |
| _T[Phospho (STY)]RSLVSQDHR_3                                                                             | black          | Q8C033_T353_M1_Arhgef10 |
| _SDEKDKEGEALVK_3                                                                                         | black          | #N/A                    |
| _MGLAMGGAGGAS[Phospho (STY)]FDR_2                                                                        | black          | Q9D0E1_S617_M1_Hnrnpm   |
| _RNS[Phospho (STY)]TTFPSR_2                                                                              | black          | Q9DB52_S59_M1_Pabir1    |
| _ISALQSAGVVSM[Oxidation (M)]SPAQLGTTIYK_3                                                                | black          | #N/A                    |
| _RKPAGGS[Phospho (STY)]PALAR_3                                                                           | blue           | A2AJI0_S401_M1_Map7d1   |
| _SNS[Phospho (STY)]QENVEASHPSQDGKR_3                                                                     | blue           | B2RUJ5_S573_M1_Apba1    |
| _M[Oxidation (M)]TDIM[Oxidation (M)]TEGITIVEDINKR_3                                                      | blue           | #N/A                    |
| _DSLGFIEHYAQLGPSS[Phospho (STY)]PEQLAAGAEEGGPR_4                                                         | blue           | O35295_S113_M1_Purb     |
| _HTGPNS[Phospho (STY)]PDTANDGFVR_2                                                                       | blue           | O35737_S104_M1_Hnrnph1  |
| _SPS[Phospho (STY)]IDSIQKDP_2                                                                            | blue           | O35927_S531_M1_Ctnnd2   |
| _EIAVGDSGQIVYDVGEQIAVPR_3                                                                                | blue           | #N/A                    |
| _AS[Phospho (STY)]PQAKPLR_2                                                                              | blue           | O88737_S600_M1_Bsn      |
| _GGVVGKVKDK_2                                                                                            | blue           | #N/A                    |
| _RPWFAGDK_2                                                                                              | blue           | #N/A                    |
| _DDKHGS[Phospho (STY)]YENAVHSGALDD_3                                                                     | blue           | P11983_S544_M1_Tcp1     |
| _M[Oxidation (M)]LVDDIGDVTITNDGATILK_2                                                                   | blue           | #N/A                    |
| _ASLSPM[Oxidation (M)]DEVPDSES[Phospho (STY)]PVEK_2                                                      | blue           | P14873_S1384_M1_Map1b   |
| _SAPTS[Phospho (STY)]PC[Carbamidomethyl (C)]DQELK_2                                                      | blue           | P16054_S350_M1_Prke     |
| _VAEDLESEGLM[Oxidation (M)]AEEVQAVQQQEVYGM[Oxidation (M)]PR_3                                            | blue           | #N/A                    |
| _AQALQEEC[Carbamidomethyl (C)]GYLR_2                                                                     | blue           | #N/A                    |
| _GAKEEHGGIIRS[Phospho (STY)]PR_3                                                                         | blue           | P26369_S79_M1_U2af2     |
| _TTEQLIEAVNNGDFEAYAK_2                                                                                   | blue           | #N/A                    |
| _DSNGAILVYDVTDEDSFQK_2                                                                                   | blue           | #N/A                    |
| _NFRPDDPAR_2                                                                                             | blue           | #N/A                    |
| _LQSQLLSIEKEVDEYK_3                                                                                      | blue           | #N/A                    |
| _TVQIEASTVEIEER_2                                                                                        | blue           | #N/A                    |
| _SNVASTAAC[Carbamidomethyl (C)]SSASSLGLGLAYR_2                                                           | blue           | #N/A                    |
| _ALDEYYDKHFTFVPLR_3                                                                                      | blue           | #N/A                    |
| _AGDVLEDS[Phospho (STY)]PKRPK_2                                                                          | blue           | P51859_S165_M1_Hdgf     |
| _VSEQGLIELEK_2                                                                                           | blue           | #N/A                    |
| _C[Carbamidomethyl (C)]PEALFQPSFLGM[Oxidation (M)]ESC[Carbamidomethyl (C)]GIHETTFFNSIM[Oxidation (M)]K_3 | blue           | #N/A                    |
| _RADQLADESLESTRR_3                                                                                       | blue           | #N/A                    |

\_QHSAILAAPNPDEK\_2  
\_VLSVPESTPFPTAVLK\_2  
\_LAPDYDALDVANK\_2  
\_LVDIIC[Carbamidomethyl (C)]DK\_2  
\_HWPFM[Oxidation (M)]VVNDAGRPK\_3  
\_M[Oxidation (M)]SATFIGNSTAIQELFKR\_3  
\_NS[Phospho (STY)]FTPLSSNTIR\_2  
\_NDQWNWDNIR\_2  
\_TLTSDVANLANEKEELNNK\_3  
\_VQDDEVGDGTTSVTVLAAELLR\_2  
\_IDTIAADESFTQVDIGDR\_2  
\_S[Phospho (STY)]GQLGLPDEENRR\_2  
\_FKAFS[Phospho (STY)]GEGQK\_2  
\_AGS[Phospho (STY)]RDAAQERPSGPGGR\_3  
\_TASAVAGKT[Phospho (STY)]PDAS[Phospho (STY)]PEPKDQTLK\_3  
\_QQSSSSKGDS[Phospho (STY)]PELKPR\_3  
\_RGS[Phospho (STY)]LPDNSILHR\_3  
\_DSGLEDGRES[Phospho (STY)]PSFDTPSQR\_3  
\_TLTSGS[Phospho (STY)]RESNISSK\_2  
\_IQPNDGPVFFK\_2  
\_HALGGS[Phospho (STY)]LEHLPR\_3  
\_DPQALSEHLK\_2  
\_[Acetyl (Protein N-term)]C[Carbamidomethyl (C)]NT[Phospho (STY)]PTYC[Carbamidomethyl (C)]DLGK\_2  
\_LTLDTIFVPNTGKK\_2  
\_GLGSDLDSSLASLVGNLGISGTTSK\_2  
\_VGKDELFALEQSC[Carbamidomethyl (C)]AQVVLQAANER\_3  
\_LVSQDNFGFDLPAVEAATK\_2  
\_TLETPAAQM[Oxidation (M)]EGFLNR\_2  
\_GVAPADS[Phospho (STY)]PDAPRR\_2  
\_ALGNS[Phospho (STY)]NRDKEIK\_3  
\_SGFVPNVVHSS[Phospho (STY)]EEVIK\_2  
\_GGLYNS[Phospho (STY)]M[Oxidation (M)]DSLDSNK\_2  
\_LEQEIQALESEESQISAK\_2  
\_LNQSDSIEDPNS[Phospho (STY)]PAGRR\_2  
\_NLETLQQELGIEGENR\_2  
\_QKFHDS[Phospho (STY)]EGDDTEETEDYR\_3  
\_RLS[Phospho (STY)]LPADIR\_2  
\_SYS[Phospho (STY)]PDGKES[Phospho (STY)]PSDKK\_2  
\_S[Phospho (STY)]LEDLRAPK\_2  
\_RST[Phospho (STY)]PT[Phospho (STY)]PELTSK\_2  
\_HVPS[Phospho (STY)]PLNLEEVQKK\_3  
\_GTGDC[Carbamidomethyl (C)]S[Phospho (STY)]DEEVDGKADGADAK\_2  
\_M[Oxidation (M)]TVAHM[Oxidation (M)]WFDNQIHEADTTENQSGVSFDK\_4  
\_AM[Oxidation (M)]VESQQKS[Phospho (STY)]PVKR\_3  
\_SLLNKKS[Phospho (STY)]DGGVK\_2  
\_GHLDNISNNLLIGAINIENGK\_3  
\_VHQLYETIQR\_2  
\_SPPREGS[Phospho (STY)]QGELTPANSQSR\_3  
\_EIDQEAAVEVSQLRDPQHDLDR\_3  
\_S[Phospho (STY)]PSESAEETHLEEK\_2  
\_AVQLYQQTANVFENEER\_2  
\_SQEVDVAYIC[Carbamidomethyl (C)]TESSSHEDYIR\_3

blue #N/A  
blue #N/A  
blue #N/A  
blue #N/A  
blue #N/A  
blue #N/A  
blue P70265\_S469\_M1\_Pfkb2  
blue #N/A  
blue #N/A  
blue #N/A  
blue #N/A  
blue Q03517\_S287\_M1\_Scg2  
blue Q0KL01\_S216\_M1\_Ubxn2b  
blue Q14BB9\_S82\_M1\_Map6d1  
blue Q3TXS7\_S315\_M2\_Psmd1  
blue Q3UHC7\_S978\_M1\_Dab2ip  
blue Q3UTJ2\_S829\_M1\_Sorbs2  
blue Q5DTL9\_S89\_M1\_Slc4a10  
blue Q5DTY9\_S372\_M1\_Kctd16  
blue #N/A  
blue Q5SP85\_S342\_M1\_Ccdc85a  
blue #N/A  
blue Q60931\_T4\_M1\_Vdac3  
blue #N/A  
blue #N/A  
blue #N/A  
blue #N/A  
blue #N/A  
blue Q6ZPS6\_S738\_M1\_Ankib1  
blue Q7TT50\_S481\_M1\_Cdc42bpb  
blue Q8BHC1\_S201\_M1\_Rab39b  
blue Q8BJ42\_S667\_M1\_Dlgap2  
blue #N/A  
blue Q8BUK6\_S238\_M1\_Hook3  
blue #N/A  
blue Q8K019\_S395\_M1\_Bclaf1  
blue Q8K0D0\_S146\_M1\_Cdk17  
blue Q8K310\_S604\_M2\_Matr3  
blue Q8K382\_S592\_M1\_Dennd1a  
blue Q8VD37\_T180\_M2\_Sgip1  
blue Q8VD37\_S371\_M1\_Sgip1  
blue #N/A  
blue #N/A  
blue Q91ZU6\_S1381\_M1\_Dst  
blue Q923T9\_S325\_M1\_Camk2g  
blue #N/A  
blue #N/A  
blue Q99LD4\_S454\_M1\_Gps1  
blue #N/A  
blue Q9CT10\_S146\_M1\_Ranbp3  
blue #N/A  
blue #N/A

\_TDLTDYLNLR\_2  
\_M[Oxidation (M)]VLAAAGGVEHQQLDLAQK\_3  
\_INEILSNALK\_2  
\_GVGDGTVSWGLEDDED[Oxidation (M)]TLTR\_2  
\_LPNGLVIASLENYAPLSR\_2  
\_VNLLSFTGSTQVGK\_2  
\_QIS[Phospho (STY)]QDVKLEPDILLR\_3  
\_M[Oxidation (M)]SSTFIGNSTAIQELFKR\_3  
\_GGLS[Phospho (STY)]DGEGPPGGRGEAQR\_2  
\_VFLDPNTLSDDGTVVALR\_2  
\_LEQEQEGEKDIATEKPGS[Phospho (STY)]PVK\_3  
\_YFDRVDENNPEYLR\_3  
\_ESTFLDEGPNEQEITPLQHTPR\_3  
\_KVALEEEQS[Phospho (STY)]QGSSSYSDWVK\_3  
\_M[Oxidation (M)]AS[Phospho (STY)]PPPSGPPSAAHPTFHQSPVEEK\_4  
\_IVDSGVQT[Phospho (STY)]DDEETADR\_2  
\_DVLIC[Carbamidomethyl (C)]GYLLC[Carbamidomethyl (C)]TNIGNIPR\_2  
\_LQSSDGEIFEVDVEIAK\_2  
\_HLS[Phospho (STY)]AEDFSR\_2  
\_VQENLLASGVDLVTYITR\_3  
\_M[Oxidation (M)]ES[Phospho (STY)]PIPIPLPTDAETEK\_2  
\_LDQPVSAAPS[Phospho (STY)]PR\_2  
\_HPS[Phospho (STY)]SQLAGPGVEGGEGTQKPR\_3  
\_VKEYEEEIHS[Phospho (STY)]LK\_3  
\_SSS[Phospho (STY)]EITLSEC[Carbamidomethyl (C)]DVEEPPGDP\_2  
\_AQGLTEEDIVFLPQPK\_2  
\_GAADMVAQAK\_2  
\_SGLS[Phospho (STY)]PANDTGAKK\_2  
\_NM[Oxidation (M)]GGPYGGGNYGPGGSGGS[Phospho (STY)]GGYGGR\_3  
\_GENHC[Carbamidomethyl (C)]GIESEIVAGIPR\_3  
\_YTEHSTVGLAQQWDQLDQLGM[Oxidation (M)]R\_3  
\_YTVPLPSPVQDSENLSGESGSFYEGTDDKVR\_3  
\_QLLTLSNELSQAR\_2  
\_VGS[Phospho (STY)]TENIK\_2  
\_NAYHAVYK\_2  
\_PAQYIAVHVVPDQLM[Oxidation (M)]TFSGTNDPC[Carbamidomethyl (C)]ALC[Carbamidomethyl (C)]SLHSIGK\_4  
\_LLEAGDFIC[Carbamidomethyl (C)]QALNR\_2  
\_SAS[Phospho (STY)]LENKK\_2  
\_VYC[Carbamidomethyl (C)]M[Oxidation (M)]LGDGEVSEGSVWEAM[Oxidation (M)]AFAGIYK\_3  
\_YLMEEDEDAYKK\_3  
\_AGVLSQADYLNLVQC[Carbamidomethyl (C)]ETLEDLK\_3  
\_SSDVPLPLELLET[Phospho (STY)]GGSPSK\_2  
\_VNEVDVSEVVHSR\_3  
\_S[Phospho (STY)]IDDSEMESPVDDVFYPGTGR\_2  
\_C[Carbamidomethyl (C)]AADLGLK\_2  
\_NVLLDPQLVPGGGASEM[Oxidation (M)]AVAHALTEK\_3  
\_LNNS[Phospho (STY)]LLSR\_2  
\_RM[Oxidation (M)]S[Phospho (STY)]QEHPSQASEAELAQR\_3  
\_SAGS[Phospho (STY)]FKR\_2  
\_EGPEGFAR\_2  
\_SFISSSPSS[Phospho (STY)]PSR\_2

blue #N/A  
blue #N/A  
blue #N/A  
blue #N/A  
blue #N/A  
blue #N/A  
blue Q9DBT5\_S87\_M1\_Ampd2  
blue #N/A  
blue Q9JIS5\_S127\_M1\_Sv2a  
blue #N/A  
blue Q9QYB8\_S594\_M1\_Add2  
blue #N/A  
blue #N/A  
blue Q9QYR6\_S114\_M1\_Map1a  
blue Q9QYR6\_S991\_M1\_Map1a  
blue Q9QYX7\_T3376\_M1\_Pclo  
blue #N/A  
blue #N/A  
blue Q9WV69\_S372\_M1\_Dmtn  
blue #N/A  
blue Q9Z2Q6\_S327\_M1\_Septin5  
brown D3YZP9\_S237\_M1\_Ccdc6  
brown E9PUL5\_S254\_M1\_Prrt2  
brown F6SEU4\_S1201\_M1\_Syngap1  
brown G3X9J0\_S166\_M1\_Sipa113  
brown #N/A  
brown #N/A  
brown O70310\_S47\_M1\_Nmt1  
brown O88569\_S344\_M1\_Hnrnpa2b1  
brown #N/A  
brown P15864\_S2\_M1\_H1-2  
brown #N/A  
brown #N/A  
brown #N/A  
brown P27546\_S914\_M1\_Map4  
brown #N/A  
brown #N/A  
brown #N/A  
brown P39447\_S1277\_M1\_Tjp1  
brown #N/A  
brown #N/A  
brown #N/A  
brown P51954\_T615\_M1\_Nek1  
brown #N/A  
brown P70257\_S280\_M1\_Nfix  
brown #N/A  
brown #N/A  
brown P97292\_S321\_M1\_Hrh2  
brown P97412\_S2614\_M1\_Lyst  
brown Q04690\_S2831\_M1\_Nf1  
brown #N/A  
brown Q3UTJ2\_S382\_M1\_Sorbs2

\_S[Phospho (STY)]KDPGSPQLNQEAMADGVEGTPWSAEKPR\_4  
\_FANNPSQK\_2  
\_[Acetyl (Protein N-term)]SQGDSNPAAIPHAAEDIQGDDRWM[Oxidation (M)]SQHNR\_4  
\_YLEIC[Carbamidomethyl (C)]AADGQDAVFLR\_2  
\_C[Carbamidomethyl (C)]SPGWLADGSVR\_2  
\_FLM[Oxidation (M)]ANGQLVK\_2  
\_AYDATTHFETTC[Carbamidomethyl (C)]DDIKDIYKR\_4  
\_HC[Carbamidomethyl (C)]ILDVSANAVR\_2  
\_YS[Phospho (STY)]FSDDTKSPLSVPR\_3  
\_QNS[Phospho (STY)]LEYM[Oxidation (M)]DQNDDRKL\_3  
\_KTSFDQDS[Phospho (STY)]DVDIFPSDFTSEPPALPR\_3  
\_NDEELNKLKGK\_2  
\_NNSELLNNLGNFINR\_2  
\_RPPAKPR\_2  
\_ESC[Carbamidomethyl (C)]DSS[Phospho (STY)]PGLAEPEAKPQESR\_3  
\_FVDKYSALLS[Phospho (STY)]PSEQEKR\_3  
\_ESEC[Carbamidomethyl (C)]DC[Carbamidomethyl (C)]LQGFQLTHSLGGGTSGSM[Oxidation (M)]GTLISK\_3  
\_QPGM[Oxidation (M)]GPGS[Phospho (STY)]PVSDVDQEEPR\_2  
\_EQM[Oxidation (M)]IQGQDS[Phospho (STY)]PEPDQLLATLEK\_3  
\_SSVSSRQS[Phospho (STY)]DENVTR\_2  
\_S[Phospho (STY)]PTENVNTPVGKDPGLAGR\_2  
\_EPAEGNESSEAPS[Phospho (STY)]PVNAMNSFV\_2  
\_DMC[Carbamidomethyl (C)]LSS[Phospho (STY)]SKK\_2  
\_SGSS[Phospho (STY)]PPS[Phospho (STY)]PR\_2  
\_LIFQSC[Carbamidomethyl (C)]DYK\_2  
\_LTEDEEGNPQLQQHQLITVTM[Oxidation (M)]SSDSR\_3  
\_SS[Phospho (STY)]PELTR\_2  
\_APPT[Phospho (STY)]PGKGPAQAPQA\_2  
\_SALNSES[Phospho (STY)]ASELELVAPAQAR\_2  
\_LTSQDS[Phospho (STY)]YNNFTNNNPGNPR\_2  
\_GSASSGSTTSPT[Phospho (STY)]C[Carbamidomethyl (C)]SPK\_2  
\_DNIISDYDQIIDYVER\_2  
\_RRGS[Phospho (STY)]M[Oxidation (M)]PVPYK\_3  
\_SAAYNPPAS[Phospho (STY)]PSHETGAFAHAR\_3  
\_QVDTEEAGM[Oxidation (M)]VTAATASNVKAS[Phospho (STY)]PKR\_3  
\_SSEM[Oxidation (M)]NVLVPQDDDYREFPIPEQFK\_3  
\_ELQSTFK\_2  
\_NTAGFSELDLPSSKENS[Phospho (STY)]PPR\_3  
\_ASADLM[Oxidation (M)]SYC[Carbamidomethyl (C)]EEHAR\_2  
\_AKGPSESS[Phospho (STY)]KER\_2  
\_LALESIC[Carbamidomethyl (C)]LLGESTTDWK\_2  
\_YEAANWK\_2  
\_M[Oxidation (M)]ADSGGQPQLTQPGK\_2  
\_LETYYNATEPVISFYDKR\_3  
\_ENSAAPS[Phospho (STY)]PGRPQSASPAK\_2  
\_HLYSANTVDDFNR\_2  
\_SVYGVTDQSQS[Phospho (STY)]PVHIPSQPIRK\_3  
\_TQS[Phospho (STY)]SPAAPGSMK\_2  
\_SPSPFHVVAEC[Carbamidomethyl (C)]R\_3  
\_SYDYQSVC[Carbamidomethyl (C)]DPGAAPK\_2  
\_STM[Oxidation (M)]VGTPYWM[Oxidation (M)]APEVVTR\_2  
\_QIAAVM[Oxidation (M)]QR\_2

|       |                         |
|-------|-------------------------|
| brown | Q3UZA1_S211_M1_Rcsd1    |
| brown | #N/A                    |
| brown | Q62417_S254_M1_Sorbs1   |
| brown | Q640R3_S280_M1_Hepacam  |
| brown | Q64511_S1568_M1_Top2b   |
| brown | #N/A                    |
| brown | #N/A                    |
| brown | #N/A                    |
| brown | Q6Y685_S82_M1_Tacc1     |
| brown | Q6ZQK5_S521_M1_Acap2    |
| brown | #N/A                    |
| brown | Q7TPB0_S641_M1_Plppr3   |
| brown | Q7TSI3_S232_M1_Ppp6r1   |
| brown | Q80TK0_S353_M1_Kiaa1107 |
| brown | Q80U28_S1058_M1_Madd    |
| brown | Q810U4_S1247_M1_Nrcam   |
| brown | Q8BG39_S144_M1_Sv2b     |
| brown | Q8BH58_S199_M2_Sybu     |
| brown | #N/A                    |
| brown | #N/A                    |
| brown | Q8BTI8_S1650_M1_Srrm2   |
| brown | Q8C166_T525_M1_Cpne1    |
| brown | Q8C437_S172_M1_Pex5l    |
| brown | Q8CCN5_S503_M1_Bcas3    |
| brown | Q8K070_T258_M1_Samd14   |
| brown | #N/A                    |
| brown | Q8VEL9_S69_M1_Rem2      |
| brown | Q8VHJ5_S633_M1_Mark1    |
| brown | #N/A                    |
| brown | #N/A                    |
| brown | #N/A                    |
| brown | Q9DAI6_S805_M1_Fam135b  |
| brown | #N/A                    |
| brown | Q9DD18_S182_M1_Dtd1     |
| brown | #N/A                    |
| brown | Q9Z0P4_S116_M1_Palm     |
| brown | #N/A                    |
| brown | Q9Z2H2_S244_M1_Rgs6     |
| brown | Q9Z2V6_S650_M1_Hdac5    |
| brown | #N/A                    |
| green | #N/A                    |
| green | #N/A                    |
| green | #N/A                    |



\_TIGISVDPR\_2  
\_EAINVEQAFQTIAR\_2  
\_FT[Phospho (STY)]DTRKDEQER\_2  
\_RDS[Phospho (STY)]LGSFSTR\_2  
\_INVNEIFYDLVR\_2  
\_VIVWDSFTTNK\_2  
\_VC[Carbamidomethyl (C)]NPIITK\_2  
\_IHIDPESQDC[Carbamidomethyl (C)]S[Phospho (STY)]PATSR\_2  
\_TC[Carbamidomethyl (C)]TIILR\_2  
\_VEEVLEEEEEYVVEK\_2  
\_LINSELGS[Phospho (STY)]PSR\_2  
\_KTDPEFSGKLT[Phospho (STY)]PGSSGK\_3  
\_VS[Phospho (STY)]VS[Phospho (STY)]PGR\_2  
\_KSS[Phospho (STY)]LGNETDKEK\_2  
\_ETAQTDS[Phospho (STY)]PQPQER\_2  
\_VAVFGAGGVGK\_2  
\_FQVDISSSEGPEPS[Phospho (STY)]PR\_2  
\_SSM[Oxidation (M)]S[Phospho (STY)]GLHLVK\_2  
\_T[Phospho (STY)]RYGSQEHPIGDK\_3  
\_LTSSVTAYDYS GK\_2  
\_VLHM[Oxidation (M)]DQNPYYGGESASITPLEDLK\_3  
\_EQLM[Oxidation (M)]NSSLGS[Phospho (STY)]GTASLR\_2  
\_VAHM[Oxidation (M)]EFC[Carbamidomethyl (C)]YQELC[Carbamidomethyl (C)]QLAAER\_3  
\_LS[Phospho (STY)]PVPVPR\_2  
\_TLVLSSPTS[Phospho (STY)]PTQEPLAAAK\_2  
\_YGGGGGGGAAGGS[Phospho (STY)]PGDKAAGR\_3  
\_ARS[Phospho (STY)]M[Oxidation (M)]DSSDLSGAVTLQEYLELKK\_3  
\_AAAEAWHDEKPPQS[Phospho (STY)]PR\_3  
\_SDS[Phospho (STY)]EATISR\_2  
\_RAS[Phospho (STY)]TDLGK\_2  
\_FNS[Phospho (STY)]YDISR\_2  
\_LSTIALALGVER\_2  
\_MAGDPVANVR\_2  
\_QQGVLOS[Phospho (STY)]PK\_2  
\_DSESC[Carbamidomethyl (C)]ESLKDSFGS[Phospho (STY)]GDR\_2  
\_ILAGDKNYITEDELRL\_3  
\_ASIHEAWTDGK\_2  
\_KSQS[Phospho (STY)]IDEIDVGTYK\_2  
\_AVLETPSTQGQDGS[Phospho (STY)]PESLIR\_2  
\_SAATS[Phospho (STY)]PTGSSHGTPTHQSK\_3  
\_TALPTSGS[Phospho (STY)]STGELELLAGEVPAR\_2  
\_AILITGC[Carbamidomethyl (C)]DSGFGFSLAK\_2  
\_EGETTNTETSS[Phospho (STY)]PK\_2  
\_EQM[Oxidation (M)]M[Oxidation (M)]NSSVSSGSGS[Phospho (STY)]LR\_2  
\_APS[Phospho (STY)]AS[Phospho (STY)]PLAIHASR\_2  
\_SAS[Phospho (STY)]PLAATR\_2  
\_QHLENDPGS[Phospho (STY)]NEDADIPK\_2  
\_SDLGNLLK\_2  
\_TGTF[Phospho (STY)]PQR\_2  
\_SLS[Phospho (STY)]IESLC[Carbamidomethyl (C)]PDEGR\_2  
\_S[Phospho (STY)]PGPPPPVGK\_2  
\_KAS[Phospho (STY)]EEEEYVIR\_2

grey #N/A  
grey #N/A  
grey P58252\_T57\_M1\_Eef2  
grey P58871\_S866\_M1\_Tnks1bp1  
grey #N/A  
grey #N/A  
grey #N/A  
grey P70271\_S111\_M1\_Pdim4  
grey #N/A  
grey #N/A  
grey Q3UDW8\_S238\_M1\_Hgsnat  
grey Q3UNH4\_T256\_M1\_Gprin1  
grey Q52KI8\_S427\_M2\_Srrm1  
grey Q5NBX1\_S235\_M1\_Cobl  
grey Q5PR69\_S487\_M1\_Crad  
grey #N/A  
grey Q5RIJ5\_S676\_M1\_Brsk1  
grey Q5SWU9\_S79\_M1\_Acaca  
grey Q60790\_T805\_M1\_Rasa3  
grey #N/A  
grey #N/A  
grey Q62108\_S418\_M1\_Dlg4  
grey #N/A  
grey Q64012\_S135\_M1\_Raly  
grey Q68EF0\_S218\_M1\_Rab3ip  
grey Q68EF6\_S463\_M1\_Begain  
grey Q68FF6\_S419\_M1\_Git1  
grey Q69ZB3\_S41\_M1\_Tsply5  
grey Q6A065\_S1157\_M1\_Cep170  
grey Q6NSW3\_S841\_M1\_Sphkap  
grey Q6PAL8\_S193\_M1\_Dennd5a  
grey #N/A  
grey #N/A  
grey Q7TME0\_S594\_M1\_Plppr4  
grey Q7TME0\_S685\_M1\_Plppr4  
grey #N/A  
grey #N/A  
grey Q80TE7\_S949\_M1\_Lrrc7  
grey Q80TT8\_S284\_M1\_Cul9  
grey Q80TZ3\_S683\_M1\_Dnajc6  
grey Q80VP1\_S418\_M1\_Epn1  
grey #N/A  
grey Q80XP9\_S1039\_M1\_Wnk3  
grey Q811D0\_S575\_M1\_Dlg1  
grey Q8BGT6\_S494\_M2\_Micall1  
grey Q8BKA3\_S271\_M1\_Srrm4  
grey Q8CDN6\_S113\_M1\_Txn1  
grey #N/A  
grey Q8JZP9\_S292\_M1\_Gas211  
grey Q8K031\_S234\_M1\_Stard8  
grey Q8K3X4\_S69\_M1\_Irf2bpl  
grey Q8K4I3\_S639\_M1\_Arhgef6

|                                                                                                                                            |                |                           |
|--------------------------------------------------------------------------------------------------------------------------------------------|----------------|---------------------------|
| _HSNHS[Phospho (STY)]TENS[Phospho (STY)]PIERR_3                                                                                            | grey           | Q8R0S4_S443_M2_Cacnb4     |
| _SGT[Phospho (STY)]IQSGPEGNLVR_2                                                                                                           | grey           | Q8R502_T198_M1_Lrrc8c     |
| _KQES[Phospho (STY)]FC[Carbamidomethyl (C)]R_2                                                                                             | grey           | Q8VD04_S237_M1_Gripap1    |
| _GHAGGQRPEPSS[Phospho (STY)]PDGPAPPTRR_4                                                                                                   | grey           | Q8VEL9_S296_M1_Rem2       |
| _HNEETGDNVGPLIK_2                                                                                                                          | grey           | #N/A                      |
| _AGEASAESTGAADGAAPEEGEAKKTEAPAAAGPEAK_4                                                                                                    | grey           | #N/A                      |
| _QVVNFGPGPAK_2                                                                                                                             | grey           | #N/A                      |
| _EVSPDS[Phospho (STY)]SEAEELSDC[Carbamidomethyl (C)]LHR_3                                                                                  | grey           | Q99LI2_S58_M1_Clcc1       |
| _SLEGLLQR_2                                                                                                                                | grey           | #N/A                      |
| _EHGYLGNLSAVASTEGTIEETLNEASR_3                                                                                                             | grey           | #N/A                      |
| _ANKPGDVVR_2                                                                                                                               | grey           | #N/A                      |
| _QTTVSNSQQAYQEAFEISK_2                                                                                                                     | grey           | #N/A                      |
| _NAHVTDPR_2                                                                                                                                | grey           | #N/A                      |
| _IEILDS[Phospho (STY)]PASK_2                                                                                                               | grey           | Q9CX66_S177_M1_D10Wsu102e |
| _HSIS[Phospho (STY)]M[Oxidation (M)]PVM[Oxidation (M)]R_2                                                                                  | grey           | Q9CYZ2_S168_M1_Tpd52l2    |
| _TGQEIPVNLR_2                                                                                                                              | grey           | #N/A                      |
| _[Acetyl (Protein N-term)]SALT[Phospho (STY)]PPTDM[Oxidation (M)]PT[Phospho (STY)]PTTDKITQAAM[Oxidation (M)]ETIYLC[Carbamidomethyl (C)]K_3 | grey           | Q9D394_T12_M2_Rufy3       |
| _AHRPSAPS[Phospho (STY)]PPPR_3                                                                                                             | grey           | Q9D7V2_S24_M1_Lysmd2      |
| _HNS[Phospho (STY)]VEDAEQ GK_2                                                                                                             | grey           | Q9D7X1_S20_M1_Kctd4       |
| _ENM[Oxidation (M)]AYTVEGIR_2                                                                                                              | grey           | #N/A                      |
| _SLIHLSLANNNLQTLPK_3                                                                                                                       | grey           | #N/A                      |
| _LLEAEQAK_2                                                                                                                                | grey           | #N/A                      |
| _EQDHFLLSPK_2                                                                                                                              | grey           | #N/A                      |
| _KSS[Phospho (STY)]TS[Phospho (STY)]FDDDAGR_2                                                                                              | grey           | Q9QYX7_S1551_M2_Pclo      |
| _GSVPAAAES[Phospho (STY)]PSM[Oxidation (M)]HR_2                                                                                            | grey           | Q9QYX7_S75_M1_Pclo        |
| _RAFS[Phospho (STY)]TEK_2                                                                                                                  | grey           | Q9QZB7_S414_M1_Actr10     |
| _SQTDQLVLIFAGK_2                                                                                                                           | grey           | #N/A                      |
| _VTNAIS[Phospho (STY)]PESSPGVGR_2                                                                                                          | grey           | Q9R0L6_S65_M1_Pcm1        |
| _NVRS[Phospho (STY)]DVS[Phospho (STY)]DQEEDEESER_2                                                                                         | grey           | Q9R0L6_S1766_M2_Pcm1      |
| _HLSSGDLR_2                                                                                                                                | grey           | #N/A                      |
| _RVPGSS[Phospho (STY)]GHLHK_3                                                                                                              | grey           | Q9Z1W9_S383_M1_Stk39      |
| _HWEAELATLK_2                                                                                                                              | grey           | #N/A                      |
| PhospepName                                                                                                                                | Module (color) | Phos site                 |
| _SSAIQM[Oxidation (M)]GT[Phospho (STY)]PELEKETK_2                                                                                          | pink           | D3YVF0_T220_M1_Akap5      |
| _TKEQVTNVGGAVVTGVTAVAQK_3                                                                                                                  | pink           | #N/A                      |
| _VVTVFSVADGYSENNVFYGHAK_3                                                                                                                  | pink           | #N/A                      |
| _VKVDNQHDFQDIASVVALTK_3                                                                                                                    | pink           | #N/A                      |
| _TVPPAVPGVTFLSGGQSEEEASLNLNAINR_3                                                                                                          | pink           | #N/A                      |
| _TFTTQETITNAETAKEWFLAAK_3                                                                                                                  | pink           | #N/A                      |
| _SM[Oxidation (M)]S[Phospho (STY)]ADEDLQEPSR_2                                                                                             | pink           | P19426_S115_M1_Nelfe      |
| _DDFLQNGYTPYDR_2                                                                                                                           | pink           | #N/A                      |
| _HGGYQPSDEHKTDLNPDLNQGDDLDPNYVLSSR_5                                                                                                       | pink           | #N/A                      |
| _WNTDNTLGTEITVEDQLAR_2                                                                                                                     | pink           | #N/A                      |
| _IFVGGIKEDTEYNLR_3                                                                                                                         | pink           | #N/A                      |
| _DKEEDM[Oxidation (M)]LEVLLDATKR_3                                                                                                         | pink           | #N/A                      |
| _NHS[Phospho (STY)]LEEEFER_2                                                                                                               | pink           | Q8C437_S202_M1_Pex5l      |
| _S[Phospho (STY)]LPNLSR_2                                                                                                                  | pink           | Q8CI08_S414_M1_Slain2     |
| _ISRP GDS[Phospho (STY)]DDSR_2                                                                                                             | pink           | Q8R081_S182_M1_Hnrnp1     |
| _GAGAYIC[Carbamidomethyl (C)]GEETALIESIEGK_2                                                                                               | pink           | #N/A                      |
| _DAADPS[Phospho (STY)]PPNK_2                                                                                                               | pink           | Q924H7_S53_M1_Wac         |
| _TGALC[Carbamidomethyl (C)]WFLDEAAAR_2                                                                                                     | pink           | #N/A                      |
| _TYYM[Oxidation (M)]SAGLQPVPIVFR_2                                                                                                         | pink           | #N/A                      |

KPS[Phospho (STY)]DEEFAVRK\_3  
\_ITVQVEPVC[Carbamidomethyl (C)]GVGVVPK\_2  
\_SC[Carbamidomethyl (C)]GQVVEWKEFVWNP\_3  
\_SST[Phospho (STY)]PEEVKKR\_2  
\_NM[Oxidation (M)]APGAGC[Carbamidomethyl (C)]S[Phospho (STY)]PGEPR\_2  
\_QGANNINEIR\_2  
\_RRDPS[Phospho (STY)]LEEIQK\_3  
\_EAFEISK\_2  
\_NSRPSS[Phospho (STY)]PVNTPSSQPPAAK\_3  
\_DRT[Phospho (STY)]PPLLYR\_2  
\_ERDSGLEDGRES[Phospho (STY)]PSFDTPSQR\_4  
\_EM[Oxidation (M)]TTS[Phospho (STY)]ADQIAEVK\_2  
\_[Acetyl (Protein N-term)]ADKEAAFDDAVEER\_2  
\_S[Phospho (STY)]KS[Phospho (STY)]PVDLRDK\_2  
\_DTPGFIVNR\_2  
\_GGGGS[Phospho (STY)]GQDNGLEGLSGDGR\_2  
\_S[Phospho (STY)]AESLESTK\_2  
\_LEASYSDS[Phospho (STY)]PPGEEDLLVHVAEGSK\_3  
\_IS[Phospho (STY)]ENPRRSPTHEM[Oxidation (M)]NPR\_4  
\_SYS[Phospho (STY)]TESYGASQTR\_2  
\_RQS[Phospho (STY)]LGGFLK\_2  
\_DKFS[Phospho (STY)]PTQDRPESTVLK\_3  
\_FTQGLEQLS[Phospho (STY)]PPGNR\_2  
\_TNPPTQKPPS[Phospho (STY)]PPVSGR\_2  
\_GRS[Phospho (STY)]LNIADQEGTLLGK\_3  
\_ADAQT[Phospho (STY)]PEEVGPSEASLR\_2  
\_RNS[Phospho (STY)]AETWM[Oxidation (M)]VIHGR\_3  
\_HPDEPVLLEPVVLALEAK\_3  
\_[Acetyl (Protein N-term)]ATDDKSS[Phospho (STY)]PTLDSANDLPR\_2  
\_TDPGS[Phospho (STY)]IENLC[Carbamidomethyl (C)]PGK\_2  
\_TGEGGS[Phospho (STY)]LDEAEAGSKK\_2  
\_KIVEPEVVGES[Phospho (STY)]DS[Phospho (STY)]VEGEDAWR\_3  
\_YAIAVNDLGTVEYVHR\_2  
\_KLS[Phospho (STY)]SQPSTDVSTDKER\_3  
\_DDSLDS[Phospho (STY)]PQGR\_2  
\_HIAEVSQEVTR\_2  
\_JGGVQQDTILAELHFR\_3  
\_FFPLEAWQIGK\_2  
\_EGEPTVYS[Phospho (STY)]DDEEPKDETARK\_4  
\_FLHGVIWAADSR\_3  
\_ALEENNNFSR\_2  
\_[Acetyl (Protein N-term)]S[Phospho (STY)]YTPGIGGDSQAQLAR\_2  
\_S[Phospho (STY)]AAEELETLVK\_2  
\_RFS[Phospho (STY)]GNEYILATK\_2  
\_M[Oxidation (M)]FASFPTTK\_2  
\_VDPVNFK\_2  
\_EGDGSATTDAAPATS[Phospho (STY)]PKAEEPSKAGDAPSEK\_4  
\_QLFALSC[Carbamidomethyl (C)]AAEEQGM[Oxidation (M)]LPEDLSGVIR\_3  
\_NGDTITIK\_2  
\_TNVLGHLQGGGAPTFDR\_3  
\_ERLDQLFEM[Oxidation (M)]ADQYQYQVVLVEPK\_3  
\_PPYTVYFVPR\_2

[illegible]



\_LESIISGAALM[Oxidation (M)]ADSSC[Carbamidomethyl (C)]TR\_2  
\_DDGQSDS[Phospho (STY)]QAVDGDGK\_2  
\_LVVVGAGGVGK\_2  
\_DKGS[Phospho (STY)]PHSEGSRYR\_3  
\_EVSVFGAVSELFTR\_2  
\_TQSIY[Phospho (STY)]DDKNHRESNSQC[Carbamidomethyl (C)]VYAAHNSVVIDEC[Carbamidomethyl (C)]K\_5  
\_ELPVNAQNYVR\_2  
\_LLC[Carbamidomethyl (C)]GGGAAADR\_2  
\_QAWTGSS[Phospho (STY)]QR\_2  
\_[Acetyl (Protein N-term)]ATNFLAHEK\_2  
\_GLTLS[Phospho (STY)]DDLER\_2  
\_NYLSQPR\_2  
\_QTFTGHESDINAIC[Carbamidomethyl (C)]FFPNGNAFATGSDDATC[Carbamidomethyl (C)]R\_3  
\_IPS[Phospho (STY)]S[Phospho (STY)]PDLK\_2  
\_EFTEAVEAK\_2  
\_EWHHFLVVNM[Oxidation (M)]K\_2  
\_ATISNDGATILK\_2  
\_ALIAGGGAPEIELALR\_2  
\_GPGTGGDEASAAGGS[Phospho (STY)]PPQPPR\_2  
\_QHEVEIPSPT[Phospho (STY)]QKEK\_3  
\_NAEPPS[Phospho (STY)]PTPAAHTR\_2  
\_KTS[Phospho (STY)]FDENDS[Phospho (STY)]EELEDKDSK\_3  
\_SESS[Phospho (STY)]DFEVVPK\_2  
\_SAT[Phospho (STY)]PATDGR\_2  
\_S[Phospho (STY)]TQSLSLQR\_2  
\_AKESDLSDTLSPS[Phospho (STY)]KEK\_2  
\_KATGV[S[Phospho (STY)]AEDADPR\_2  
\_KQHRES[Phospho (STY)]GEGEEVADSAR\_3  
\_VNLS[Phospho (STY)]PVTPEAK\_2  
\_QLS[Phospho (STY)]LEGAGLAMEEFK\_2  
\_ELGYPQEDDEDEDEDEDEDSQAEVLK\_3  
\_LM[Oxidation (M)]DVGLAIR\_2  
\_VLATAFDTTLGGR\_2  
\_KVTGTLNDR\_2  
\_LVVPASQC[Carbamidomethyl (C)]GSLIGK\_2  
\_QRS[Phospho (STY)]ATS[Phospho (STY)]DLELR\_2  
\_S[Phospho (STY)]RSPNRFDAHDPR\_4  
\_LESPLAQLP\_2  
\_IHYLDTTTLIEPVAR\_3  
\_S[Phospho (STY)]PPQYC[Carbamidomethyl (C)]GAK\_2  
\_SS[Phospho (STY)]LS[Phospho (STY)]RER\_2  
\_YSGSR[S[Phospho (STY)]PGFSR\_2  
\_M[Oxidation (M)]TVAHM[Oxidation (M)]WFDNQIHEADTTEDQSGATFDKR\_4  
\_SPS[Phospho (STY)]PAVPLR\_2  
\_VKEFC[Carbamidomethyl (C)]ENLSADC[Carbamidomethyl (C)]R\_2  
\_ESNQPPEDSS[Phospho (STY)]PPASSESSSTR\_2  
\_GEGGTTNPHVFPEGSEPK\_3  
\_DLNS[Phospho (STY)]LEDTEGVDLVSSR\_2  
\_SC[Carbamidomethyl (C)]DS[Phospho (STY)]DEDYEAGGTGR\_2  
\_RGT[Phospho (STY)]VEGSVQEVQEEKEAEASAPVVQESSINR\_4  
\_KQES[Phospho (STY)]PLLVTK\_2  
\_ASM[Oxidation (M)]SEFLES[Phospho (STY)]EDGEVEQQR\_2

turquoise #N/A  
turquoise P26339\_S282\_M1\_Chga  
turquoise #N/A  
turquoise P35436\_S1198\_M1\_Grin2a  
turquoise #N/A  
turquoise P43006\_Y522\_M1\_Slc1a2  
turquoise #N/A  
turquoise #N/A  
turquoise P54285\_S418\_M1\_Cacnb3  
turquoise #N/A  
turquoise P59325\_S227\_M1\_Eif5  
turquoise #N/A  
turquoise #N/A  
turquoise P63141\_S440\_M2\_Kcna2  
turquoise #N/A  
turquoise #N/A  
turquoise #N/A  
turquoise #N/A  
turquoise P81122\_S66\_M1\_Irs2  
turquoise Q01063\_T289\_M1\_Pde4d  
turquoise Q01341\_S53\_M1\_Adcy6  
turquoise Q05D44\_S108\_M2\_Eif5b  
turquoise Q3TLH4\_S1222\_M1\_Prrc2c  
turquoise Q3UHL1\_T438\_M1\_Camkv  
turquoise Q3UPL5\_S217\_M1\_Ag2  
turquoise Q3URD3\_S471\_M1\_Slmap  
turquoise Q4KMM3\_S308\_M1\_Oxr1  
turquoise Q505F5\_S293\_M1\_Lrrc47  
turquoise Q5PR69\_S552\_M1\_Crad  
turquoise Q5SV85\_S744\_M1\_Synrg  
turquoise #N/A  
turquoise #N/A  
turquoise #N/A  
turquoise #N/A  
turquoise #N/A  
turquoise Q62407\_S490\_M2\_Speg  
turquoise Q62504\_S188\_M1\_Spen  
turquoise #N/A  
turquoise #N/A  
turquoise Q64336\_S549\_M1\_Tbr1  
turquoise Q6NZJ6\_S1147\_M2\_Eif4g1  
turquoise Q6PGN3\_S307\_M1\_Dclk2  
turquoise #N/A  
turquoise Q6PIJ4\_S228\_M1\_Nfrkb  
turquoise #N/A  
turquoise Q7TMY8\_S2918\_M1\_Huwe1  
turquoise #N/A  
turquoise Q80T23\_S358\_M1\_Syt15  
turquoise Q80TI1\_S739\_M1\_Plekhh1  
turquoise Q80TL4\_T47\_M1\_Phft24  
turquoise Q80U62\_S198\_M1\_Rubcn  
turquoise Q80U70\_S548\_M1\_Suz12

\_TDAGSLYELTVR\_.2  
\_EEDEEAES[Phospho (STY)]PPEKK\_.2  
\_QQS[Phospho (STY)]DGLSVR\_.2  
\_S[Phospho (STY)]AKSEESLSQASGAGLQR\_.3  
\_S[Phospho (STY)]KSM[Oxidation (M)]TAELEELGLSLVDK\_.3  
\_DSTGTYTC[Carbamidomethyl (C)]VAR\_.2  
\_DFDFTSTAAS[Phospho (STY)]EEDLFSEDERK\_.3  
\_EGMTAFVEK\_.2  
\_DGS[Phospho (STY)]WFLK\_.2  
\_HSLDASQGTATGPR\_.2  
\_IAFDAESEPNSSGS[Phospho (STY)]M[Oxidation (M)]EK\_.2  
\_SAS[Phospho (STY)]VPDELGAWGHRS\_.2  
\_EELEQQT[Phospho (STY)]DGGC[Carbamidomethyl (C)]DEEDDDKDGEVPK\_.3  
\_VGVLTVSDSC[Carbamidomethyl (C)]FR\_.2  
\_VGVPETETGALTNR\_.2  
\_LTALPDYTLTLR\_.2  
\_EYGS[Phospho (STY)]TSSIDK\_.2  
\_SKS[Phospho (STY)]ETGDSSIFRK\_.2  
\_GIITDS[Phospho (STY)]FGR\_.2  
\_RRT[Phospho (STY)]EEGPTLSYGR\_.3  
\_VPGGS[Phospho (STY)]PRT[Phospho (STY)]PNR\_.2  
\_VASGDLQVQR\_.2  
\_GKHFY[Phospho (STY)]SS[Phospho (STY)]S[Phospho (STY)]ES[Phospho (STY)]EEEEESHKK\_.3  
\_AS[Phospho (STY)]PVPEDHAEAAAGAEQGGESTEGNAKPK\_.4  
\_[Acetyl (Protein N-term)]MEEGPAVGTL[Phospho (STY)]R\_.2  
\_DLPEHAVLK\_.2  
\_ATNIEVLSNTFQFTNEAR\_.2  
\_AAEAHPQDDHVEEC[Carbamidomethyl (C)]FHDC[Carbamidomethyl (C)]SASFEEEQGAHVAGSK\_.5  
\_AEGSEYQVLYIADDNEIR\_.2  
\_GLLPEELTPLILETQK\_.2  
\_GEVNAADAFDIGS[Phospho (STY)]FDEEDTK\_.2  
\_LSAS[Phospho (STY)]PQEVGKPYLESFQPNLHITK\_.3  
\_VSEPVEIGIQTPEDDHLLS[Phospho (STY)]PTK\_.3  
\_GAQAAIVVYDITNEESFAR\_.2  
\_NSERKT[Phospho (STY)]PEGR\_.2  
\_ELAPYDENWIFYTR\_.2  
\_WKEPGSSGPQNL[Phospho (STY)]GPGGR\_.3  
\_RGS[Phospho (STY)]GHPAYAEVEPVGEK\_.3  
\_KVYDQM[Oxidation (M)]PEPR\_.2  
\_GS[Phospho (STY)]PPVPSGPPMEEDGLR\_.2  
\_IPDSTHAQLESSSSSFES[Phospho (STY)]QK\_.3  
\_LFSSSS[Phospho (STY)]PPPAK\_.2  
\_ELLLC[Carbamidomethyl (C)]NNR\_.2  
\_YDSTHYK\_.2  
\_LLDAQLSTGGIVDPSK\_.2  
\_SSS[Phospho (STY)]LEGFHSQYK\_.2  
\_KAS[Phospho (STY)]AQASLASK\_.2  
\_AEAPLQREDS[Phospho (STY)]GTFSLGK\_.3  
\_QC[Carbamidomethyl (C)]QPTDTC[Carbamidomethyl (C)]ASVR\_.2  
\_DQFS[Phospho (STY)]PDDFLGR\_.2  
\_AIGHVIEEGVK\_.2  
\_NEKS[Phospho (STY)]EEEQSSASVKK\_.3

turquoise #N/A  
turquoise Q80XU3\_S214\_M1\_Nucks1  
turquoise Q80YF9\_S995\_M1\_Arhgap33  
turquoise Q80YF9\_S657\_M1\_Arhgap33  
turquoise Q80Z38\_S370\_M1\_Shank2  
turquoise #N/A  
turquoise Q811C2\_S434\_M1\_Atg4c  
turquoise #N/A  
turquoise Q8BJ42\_S873\_M1\_Dlgap2  
turquoise #N/A  
turquoise Q8BPU7\_S344\_M1\_Elmo1  
turquoise Q8BQS4\_S162\_M1\_Fam102b  
turquoise Q8BU14\_T375\_M1\_Sec62  
turquoise #N/A  
turquoise #N/A  
turquoise #N/A  
turquoise Q8C0T5\_S208\_M1\_Sipa1l1  
turquoise Q8C0T5\_S288\_M1\_Sipa1l1  
turquoise Q8K2Y9\_S393\_M1\_Ccm2  
turquoise Q8K310\_T150\_M1\_Matr3  
turquoise Q8R1Q8\_S405\_M2\_Dync1li1  
turquoise #N/A  
turquoise Q8VD37\_S104\_M3\_Sgip1  
turquoise Q8VE52\_S65\_M1\_Ogfr1  
turquoise Q8VED2\_S11\_M1\_Bloc1s4  
turquoise #N/A  
turquoise #N/A  
turquoise #N/A  
turquoise #N/A  
turquoise #N/A  
turquoise Q99MK8\_S487\_M1\_Grk2  
turquoise Q99P72\_S768\_M1\_Rtn4  
turquoise Q99PV8\_S128\_M1\_Bcl11b  
turquoise #N/A  
turquoise Q9CZW5\_T88\_M1\_Tomm70  
turquoise #N/A  
turquoise Q9DB90\_S32\_M1\_Smg9  
turquoise Q9DC11\_S507\_M1\_Plxdc2  
turquoise #N/A  
turquoise Q9EP97\_S206\_M1\_Senp3  
turquoise Q9EQZ7\_S788\_M1\_Rims2  
turquoise Q9ESN9\_S586\_M1\_Mapk8ip3  
turquoise #N/A  
turquoise #N/A  
turquoise #N/A  
turquoise Q9QYY0\_S420\_M1\_Gab1  
turquoise Q9R0L6\_S1280\_M1\_Pcm1  
turquoise Q9WTX2\_S18\_M1\_Prkra  
turquoise #N/A  
turquoise Q9Z0R4\_S1663\_M1\_Itsn1  
turquoise #N/A  
turquoise Q9Z204\_S241\_M1\_Hnrnpc

\_KAQETPQQPEAAAVTT[Phospho (STY)]PVT[Phospho (STY)]PAGHSHPETNSNEK\_4  
\_ALLEVVQSGGK\_2  
\_S[Phospho (STY)]MDSL[Carbamidomethyl (C)]SVPVEGK\_2  
\_IVNDDQSFYADIYM[Oxidation (M)]EDGLIK\_2  
\_ALIFVSHGAGEHC[Carbamidomethyl (C)]GR\_3  
\_IVEFLQSFDEITAM[Oxidation (M)]TGDGVNDAPALKK\_3  
\_IM[Oxidation (M)]DYSLLGVHNIDQKER\_3  
\_GDEELDSLK\_2  
\_DS[Phospho (STY)]SDDWEIPDGQITVGQR\_2  
\_YAPTTTPS[Phospho (STY)]PEDGFEVQPLHPDK\_3  
\_TC[Carbamidomethyl (C)]DEGSS[Phospho (STY)]PSKPK\_2  
\_SPS[Phospho (STY)]PGRREEDGDELAR\_3  
\_QTSAYNISNS[Phospho (STY)]STFTK\_2  
\_NLLLLANSTEEQQK\_2  
\_VDGDREKS[Phospho (STY)]PR\_2  
\_FDGGVIAADM[Oxidation (M)]LGSYGSLAR\_2  
\_TPVAS[Phospho (STY)]THS[Phospho (STY)]ISSATTPDR\_2  
\_ATSNVFAM[Oxidation (M)]FDQSQIQEFK\_2  
\_C[Carbamidomethyl (C)]GFVGHDLAGS[Phospho (STY)]DES[Phospho (STY)]EMEDEAEPPGAPPAPPPSYGATHSTVQPPRPPPPVR\_5  
\_RRT[Phospho (STY)]AS[Phospho (STY)]PPPPPK\_2  
\_APQASIC[Carbamidomethyl (C)]SDVDGFPTSQAT[Phospho (STY)]SPEPGKKDEEAK\_4  
\_TKEGS[Phospho (STY)]AELVPR\_2  
\_IGKQS[Phospho (STY)]EES[Phospho (STY)]PADDGELRR\_3  
\_QVTITGSAASISLAQYLINVR\_2  
\_NSNS[Phospho (STY)]DS[Phospho (STY)]DDDERPNR\_2  
\_LDLDNSGSLSVVEEFM[Oxidation (M)]SLPELQQNPLVQR\_3  
\_AQPAGS[Phospho (STY)]PSHQIQQR\_2  
\_GS[Phospho (STY)]PLPTPK\_2  
\_RAS[Phospho (STY)]DGGANIQLHAQQLLK\_3  
\_LQLEESC[Carbamidomethyl (C)]SGLGS[Phospho (STY)]TSDDTDVR\_2  
\_MLDAEDIVGTARPDEK\_3  
\_DKES[Phospho (STY)]PSVKR\_2  
\_SSGSSSSGLGTVSSS[Phospho (STY)]PASQR\_2  
\_RS[Phospho (STY)]PTGSTASR\_2  
\_SSS[Phospho (STY)]SSSSGVGSPAFTPTEK\_2  
\_ASTIFLSKSQT[Phospho (STY)]DVR\_2  
\_NAEEEDSAS[Phospho (STY)]DSELWK\_2  
\_KMVSSEGS[Phospho (STY)]TES[Phospho (STY)]EHLEGMEAGQK\_3  
\_MS[Phospho (STY)]C[Carbamidomethyl (C)]FS[Phospho (STY)]RPSM[Oxidation (M)]SPTPLDR\_2  
\_PKPNQNLSEASGK\_3  
\_AAGPGNLVLPGS[Phospho (STY)]LTAS[Phospho (STY)]LEC[Carbamidomethyl (C)]VKEEPPR\_3  
\_APEAAVS[Phospho (STY)]DDGKS[Phospho (STY)]DDELLSSK\_2  
\_GS[Phospho (STY)]LGKDTTSPM[Oxidation (M)]ELAALEK\_3  
\_KEYEEDGSR\_2  
\_EC[Carbamidomethyl (C)]LEDVTAVC[Carbamidomethyl (C)]ILEGFQNEQSM[Oxidation (M)]LLADK\_3  
\_VFNQEGEFMLK\_2  
\_VYYENAYGR\_2  
\_IGLGTDVAGGYSYSM[Oxidation (M)]LDAIR\_2

|           |                         |
|-----------|-------------------------|
| turquoise | Q9Z2H5_T30_M2_Epb4111   |
| turquoise | #N/A                    |
| yellow    | A6X8Z5_S343_M1_Arhgap31 |
| yellow    | #N/A                    |
| yellow    | P28028_S431_M1_Braf     |
| yellow    | P28571_S659_M1_Slc6a9   |
| yellow    | P30415_S1060_M1_Nktr    |
| yellow    | P36552_S101_M1_Cpox     |
| yellow    | P70206_S1611_M1_Plxna1  |
| yellow    | #N/A                    |
| yellow    | P97868_S1053_M1_Rbbp6   |
| yellow    | #N/A                    |
| yellow    | Q03141_S540_M2_Mark3    |
| yellow    | #N/A                    |
| yellow    | Q3TXX4_S519_M2_Slc17a7  |
| yellow    | Q52KI8_S635_M2_Srrm1    |
| yellow    | Q5DTX6_T1164_M1_Jcad    |
| yellow    | Q5GH64_S154_M1_Xkr7     |
| yellow    | Q61687_S1287_M2_Atrx    |
| yellow    | #N/A                    |
| yellow    | Q62018_S1039_M2_Ctr9    |
| yellow    | #N/A                    |
| yellow    | Q64700_S37_M1_Rbl2      |
| yellow    | Q69Z98_S440_M1_Brsk2    |
| yellow    | Q6P4S6_S493_M1_Sik3     |
| yellow    | Q6PAR5_S746_M1_Gapvd1   |
| yellow    | #N/A                    |
| yellow    | Q80TF3_S1134_M1_Pcdh19  |
| yellow    | Q80TJ7_S768_M1_Phfb     |
| yellow    | Q80TV8_S572_M1_Claspl   |
| yellow    | Q812A2_S1070_M1_Srgap3  |
| yellow    | Q8BGU5_T75_M1_Ccny      |
| yellow    | Q8BP78_S285_M1_Fra10ac1 |
| yellow    | Q8BSS9_S236_M2_Ppfia2   |
| yellow    | Q8BTI8_S2067_M2_Srrm2   |
| yellow    | #N/A                    |
| yellow    | Q8CCJ4_S223_M2_Amer2    |
| yellow    | Q8CH77_S197_M2_Nav1     |
| yellow    | Q8K212_S421_M1_Pacs1    |
| yellow    | #N/A                    |
