# Supplementary material for: The Chronic Effects of a Single Low-Intensity Blast Exposure on Phosphoproteome Networks and Cognitive Function Influenced by Mutant Tau Overexpression
Source: MDPI journal article supplement (doi:10.3390/ijms25063338), 2024-03-15
Supplement: s1 [file s1]

**Supplementary Table S4. Standard Peptide screening results**

| PhosPepNames                                                             | PearsonCorrelation | Phos site                |
|--------------------------------------------------------------------------|--------------------|--------------------------|
| _QAS[Phospho (STY)]LDGLQQLR_.2                                           | -0.435532965       | A1A5B6_S560_M1_Tbc1d25   |
| _GQSLS[Phospho (STY)]NPTDDSWK_.2                                         | -0.253155967       | A2A5R2_S1535_M1_Arfgef2  |
| _ERGS[Phospho (STY)]PVSGR_.2                                             | 0.031730342        | A2A5R2_S276_M1_Arfgef2   |
| _PQSPVIQATAGS[Phospho (STY)]PK_.2                                        | -0.055790115       | A2A5R2_S227_M1_Arfgef2   |
| _QSL[Phospho (STY)]SADNLEPDVQGHQVAAR_.3                                  | 0.26961245         | A2A5R2_S355_M1_Arfgef2   |
| _ELEKPM[Oxidation (M)]QSKPQS[Phospho (STY)]PVIQAT[Phospho (STY)]AGSPK_.3 | -0.156981257       | A2A5R2_S218_M2_Arfgef2   |
| _HLDVDLDRQS[Phospho (STY)]LSSIDR_.3                                      | -0.091736215       | A2A5R2_S1518_M1_Arfgef2  |
| _FS[Phospho (STY)]PPPVGGSQSK_.2                                          | -0.00085794        | A2A690_S1521_M1_Tanc2    |
| _QGQTS[Phospho (STY)]PIKPK_.2                                            | 0.118939186        | A2A690_S1981_M1_Tanc2    |
| _SC[Carbamidomethyl (C)]DELSPTS[Phospho (STY)]PTQGGYPSEPTR_.2            | 0.170221241        | A2A690_S1831_M1_Tanc2    |
| _EYPS[Phospho (STY)]PPPSPLR_.2                                           | -0.110855563       | A2A690_S1534_M1_Tanc2    |
| _AS[Phospho (STY)]PPAESMSVYR_.2                                          | 0.134465916        | A2A690_S1549_M1_Tanc2    |
| _QIASDS[Phospho (STY)]PHAS[Phospho (STY)]PK_.2                           | -0.226392502       | A2A690_S400_M2_Tanc2     |
| _DC[Carbamidomethyl (C)]SYGAVTS[Phospho (STY)]PTSTLESR_.2                | 0.111200597        | A2A690_S169_M1_Tanc2     |
| _SQS[Phospho (STY)]ASYYPVC[Carbamidomethyl (C)]HSK_.2                    | 0.066336872        | A2A690_S1726_M1_Tanc2    |
| _SNSSVGS[Phospho (STY)]PTR_.2                                            | -0.220065918       | A2A690_S1480_M1_Tanc2    |
| _SSS[Phospho (STY)]QLGSPDVSHLR_.2                                        | -0.218590358       | A2A690_S1744_M1_Tanc2    |
| _PSQGLPVIQS[Phospho (STY)]PPSS[Phospho (STY)]PAHR_.3                     | -0.147153569       | A2A690_S1446_M2_Tanc2    |
| _[Acetyl (Protein N-term)]MFRNS[Phospho (STY)]LK_.2                      | -0.212209003       | A2A690_S5_M1_Tanc2       |
| _S[Phospho (STY)]VEGPGGLEPSLDEYR_.2                                      | 0.070661014        | A2A699_S445_M1_Fam171a2  |
| _S[Phospho (STY)]VEGPGGLEPSLDEYRR_.3                                     | 0.043642478        | A2A699_S445_M1_Fam171a2  |
| _TGLC[Carbamidomethyl (C)]SPEDNS[Phospho (STY)]LTPLLDEVVAPEGR_.3         | 0.01593021         | A2A699_S744_M1_Fam171a2  |
| _RDS[Phospho (STY)]LTSPPEDELGAEVGDEAGDKK_.3                              | 0.087158463        | A2A699_S785_M1_Fam171a2  |
| _RDS[Phospho (STY)]LTSPPEDELGAEVGDEAGDK_.3                               | 0.089289566        | A2A699_S785_M1_Fam171a2  |
| _DS[Phospho (STY)]LTSPPEDELGAEVGDEAGDKK_.3                               | 0.003110529        | A2A699_S785_M1_Fam171a2  |
| _IYRS[Phospho (STY)]QS[Phospho (STY)]PHYFQSGR_.3                         | -0.18119354        | A2A6A1_S1037_M2_Gpatch8  |
| _SEPPGSGS[Phospho (STY)]PAPPR_.2                                         | -0.058507595       | A2A6A1_S735_M1_Gpatch8   |
| _SQS[Phospho (STY)]PHYFQSGR_.2                                           | -0.175348301       | A2A6A1_S1039_M1_Gpatch8  |
| _KGS[Phospho (STY)]WGHES[Phospho (STY)]PEERR_.3                          | -0.082378511       | A2A6A1_S1013_M2_Gpatch8  |
| _SC[Carbamidomethyl (C)]S[Phospho (STY)]DTALNAIVAK_.2                    | 0.014935243        | A2A6T1_S318_M1_Cdr2I     |
| _DLLGGEES[Phospho (STY)]PGEGK_.2                                         | 0.214296404        | A2A6T1_S407_M1_Cdr2I     |
| _AAHQES[Phospho (STY)]DNENEIQIQNLKK_.3                                   | -0.201445477       | A2A791_S121_M1_Zmym4     |
| _ENS[Phospho (STY)]KETFSQK_.2                                            | -0.275057912       | A2A791_S161_M1_Zmym4     |
| _AAHQES[Phospho (STY)]DNENEIQIQNLK_.3                                    | 0.236003549        | A2A791_S121_M1_Zmym4     |
| _GS[Phospho (STY)]PSGGSTAETSDTASIR_.2                                    | -0.123393278       | A2A7S8_S402_M1_Kiaa1522  |
| _MGS[Phospho (STY)]PGSDPQKK_.2                                           | -0.327641555       | A2A7S8_S1003_M1_Kiaa1522 |
| _GLAVAPAS[Phospho (STY)]PGK_.2                                           | 0.112068132        | A2A7S8_S543_M1_Kiaa1522  |
| _LQLERPVS[Phospho (STY)]PEAQADLQR_.3                                     | -0.147073175       | A2A7S8_S909_M1_Kiaa1522  |
| _M[Oxidation (M)]GS[Phospho (STY)]PGSDPQK_.2                             | -0.087722951       | A2A7S8_S1003_M1_Kiaa1522 |
| _GSYS[Phospho (STY)]FDDHVDPEVPSR_.2                                      | -0.220574082       | A2A884_S555_M1_Hivep3    |
| _RSS[Phospho (STY)]VESPK_.2                                              | -0.337414681       | A2A884_S489_M1_Hivep3    |
| _VVFENEQDNNS[Phospho (STY)]LTK_.2                                        | -0.278940253       | A2AAE1_S2755_M1_Kiaa1109 |
| _SDENVLDS[Phospho (STY)]PK_.2                                            | -0.301030036       | A2AAE1_S1355_M1_Kiaa1109 |
| _TLKTES[Phospho (STY)]PNASR_.2                                           | -0.395006073       | A2AAE1_S3894_M1_Kiaa1109 |

|                                                             |              |                                  |
|-------------------------------------------------------------|--------------|----------------------------------|
| _ALETIPIT[Phospho (STY)]PIER_.2                             | -0.259991344 | A2AAE1_T3996_M1_Kiaa1109         |
| _YTAGSAS[Phospho (STY)]PTPTFK_.2                            | 0.028112507  | A2AAE1_S2603_M1_Kiaa1109         |
| _SLDQDS[Phospho (STY)]PSKK_.2                               | -0.136428781 | A2AAE1_S3835_M1_Kiaa1109         |
| _SSETFGPAGVRS[Phospho (STY)]PTEPTC[Carbamidomethyl (C)]R_.3 | -0.052295231 | A2AAE1_S2737_M1_Kiaa1109         |
| _AS[Phospho (STY)]PGSSSYLK_.2                               | 0.407703412  | A2AAE1_S3196_M1_Kiaa1109         |
| _S[Phospho (STY)]PTEPTC[Carbamidomethyl (C)]R_.2            | -0.174888812 | A2AAE1_S2737_M1_Kiaa1109         |
| _SDENVLDS[Phospho (STY)]PKQR_.2                             | -0.186500833 | A2AAE1_S1355_M1_Kiaa1109         |
| _MVPETGIPAEC[Carbamidomethyl (C)]QS[Phospho (STY)]GQK_.2    | -0.295020925 | A2AAE1_S628_M1_Kiaa1109          |
| _RDDGQASVPTEISGTS[Phospho (STY)]PVS[Phospho (STY)]PNTQDK_.3 | -0.025370189 | A2AAE1_S1287_M2_Kiaa1109         |
| _KES[Phospho (STY)]IIKSEELLER_.3                            | -0.207955878 | A2AAY5_S528_M1_Sh3pxd2b          |
| _LRPAKS[Phospho (STY)]QEK_.2                                | -0.129696203 | A2AAY5_S672_M1_Sh3pxd2b          |
| _AES[Phospho (STY)]PKQVDDPPEPVYANVER_.3                     | -0.133058412 | A2AB59_S215_M1_Arhgap27          |
| _KSS[Phospho (STY)]QDS[Phospho (STY)]DTPAQASPPEEK_.2        | 0.002208889  | A2AB59_S459_M2_Arhgap27          |
| _TQAQHSSPGEM[Oxidation (M)]ASS[Phospho (STY)]PQGLDNPALLR_.3 | -0.166551871 | A2ADY9_S128_M1_Ddi2              |
| _SNS[Phospho (STY)]SEALLVDR_.2                              | -0.366775273 | A2AEV7_S357_M1_Ccdc120           |
| _VVITQS[Phospho (STY)]PGK_.2                                | 0.213038452  | A2AF53_S333_M1_Tmem185a;Tmem185b |
| _EES[Phospho (STY)]LEKR_.2                                  | -0.247548974 | A2AG50_S401_M1_Map7d2            |
| _RLSS[Phospho (STY)]PVK_.2                                  | -0.055102309 | A2AG50_S332_M1_Map7d2            |
| _VATSAASGGHGS[Phospho (STY)]PLR_.2                          | -0.278028477 | A2AG50_S315_M1_Map7d2            |
| _EGAPGQSTVLPREES[Phospho (STY)]LEKR_.3                      | -0.467825137 | A2AG50_S401_M1_Map7d2            |
| _SSYKSS[Phospho (STY)]PTR_.2                                | -0.312762549 | A2AG50_S264_M1_Map7d2            |
| _S[Phospho (STY)]NSLDDSTEDVQSM[Oxidation (M)]DVSPVSK_.2     | 0.083021672  | A2AG50_S683_M1_Map7d2            |
| _NLIEGFNS[Phospho (STY)]PGQETTLNTFC[Carbamidomethyl (C)]_.2 | -0.353588624 | A2AG50_S770_M1_Map7d2            |
| _TAKPTYLGS[Phospho (STY)]PVK_.2                             | -0.245213352 | A2AG50_S357_M1_Map7d2            |
| _HLSSTVAISYS[Phospho (STY)]PDR_.2                           | 0.12206038   | A2AG50_S248_M1_Map7d2            |
| _SYVNRS[Phospho (STY)]PS[Phospho (STY)]PNVKPVEK_.3          | -0.095624206 | A2AG58_S78_M2_Bclaf3             |
| _EVKPPAKEK_.2                                               | -0.107702083 | #N/A                             |
| _TSS[Phospho (STY)]PQPSTSR_.2                               | 0.06183461   | A2AH22_S1206_M1_Ambra1           |
| _S[Phospho (STY)]PSDPGGELPEK_.2                             | -0.138503504 | A2AHC3_S1133_M1_Camsap1          |
| _VES[Phospho (STY)]LEALPILSR_.2                             | -0.311738281 | A2AHC3_S1407_M1_Camsap1          |
| _TDVS[Phospho (STY)]PPSPQMPR_.2                             | 0.254596723  | A2AHC3_S550_M1_Camsap1           |
| _SVHREES[Phospho (STY)]YSDSGTK_.3                           | -0.306060448 | A2AHC3_S1359_M1_Camsap1          |
| _LERIES[Phospho (STY)]TEI_.2                                | -0.179598438 | A2AHG0_S697_M1_Lzts3             |
| _VHHSGS[Phospho (STY)]IQS[Phospho (STY)]FKQQK_.3            | -0.333111808 | A2AHL1_S10_M2_Ano3               |
| _S[Phospho (STY)]LPC[Carbamidomethyl (C)]LAQSYAHSK_.2       | -0.391178995 | A2AHL1_S36_M1_Ano3               |
| _VHHSGS[Phospho (STY)]IQSFK_.3                              | -0.192369115 | A2AHL1_S7_M1_Ano3                |
| _SFLSEPSS[Phospho (STY)]PGR_.2                              | -0.23939333  | A2AIV2_S1578_M1_Virma            |
| _HADGEKEDQFNGS[Phospho (STY)]PPRPQPR_.4                     | 0.221829023  | A2AIV2_S173_M1_Virma             |
| _SC[Carbamidomethyl (C)]S[Phospho (STY)]VPLPSNHGEVDEL_.3    | 0.231527803  | A2AJ88_S379_M1_Pnpla7            |
| _S[Phospho (STY)]PAQAPEPAEGLGR_.2                           | -0.127811308 | A2AJA9_S593_M1_Ajm1              |
| _PYLSEPPRPS[Phospho (STY)]PR_.2                             | -0.285025802 | A2AJA9_S319_M1_Ajm1              |
| _ELATHAAPLGS[Phospho (STY)]YAR_.3                           | -0.116624809 | A2AJA9_S794_M1_Ajm1              |
| _GRS[Phospho (STY)]YENLLGR_.2                               | 0.048012129  | A2AJA9_S468_M1_Ajm1              |
| _S[Phospho (STY)]WDNILAPGPR_.2                              | -0.200159945 | A2AJA9_S448_M1_Ajm1              |
| _S[Phospho (STY)]YENLLGR_.2                                 | -0.40382124  | A2AJA9_S468_M1_Ajm1              |
| _ASQGLATAPAS[Phospho (STY)]PPVLQR_.2                        | -0.413055793 | A2AJA9_S109_M1_Ajm1              |
| _YAALSLSETSLT[Phospho (STY)]EK_.2                           | -0.114656478 | A2AJA9_T514_M1_Ajm1              |

|                                                                                                      |              |                         |
|------------------------------------------------------------------------------------------------------|--------------|-------------------------|
| _S[Phospho (STY)]SPPWADWGPR_.2                                                                       | 0.006911209  | A2AJA9_S397_M1_Ajm1     |
| _RYAALSSET[Phospho (STY)]S[Phospho (STY)]LTEK_.2                                                     | -0.20162085  | A2AJA9_S512_M2_Ajm1     |
| _VALAAGS[Phospho (STY)]PTRPPPAR_.2                                                                   | -0.208185563 | A2AJA9_S854_M1_Ajm1     |
| _HVALS[Phospho (STY)]RT[Phospho (STY)]PT[Phospho (STY)]PSDLYC[Carbamidomethyl (C)]TDPR_.3            | 0.181775989  | A2AJA9_S236_M3_Ajm1     |
| _RSS[Phospho (STY)]QPS[Phospho (STY)]PTTVPASDSPPAK_.2                                                | -0.341443224 | A2AJI0_S115_M2_Map7d1   |
| _SSQPS[Phospho (STY)]PTTVPASDSPPAK_.2                                                                | -0.307490773 | A2AJI0_S118_M1_Map7d1   |
| _SSATLWNS[Phospho (STY)]PSR_.2                                                                       | 0.140304525  | A2AJI0_S282_M1_Map7d1   |
| _RKPAGAGGS[Phospho (STY)]PALAR_.3                                                                    | -0.572860775 | A2AJI0_S401_M1_Map7d1   |
| _KPGAGGS[Phospho (STY)]PALAR_.2                                                                      | -0.124618672 | A2AJI0_S401_M1_Map7d1   |
| _SAS[Phospho (STY)]ASPLTPC[Carbamidomethyl (C)]SAPR_.2                                               | -0.462444526 | A2AJI0_S368_M1_Map7d1   |
| _S[Phospho (STY)]RGPT[Phospho (STY)]PTATGPR_.2                                                       | -0.305933931 | A2AJI0_S95_M2_Map7d1    |
| _AAEEKEPAAPAS[Phospho (STY)]PAPSPVPSPTPAQPQK_.3                                                      | -0.198771516 | A2AJI0_S544_M1_Map7d1   |
| _GPT[Phospho (STY)]PTATGPR_.2                                                                        | 0.06828448   | A2AJI0_T99_M1_Map7d1    |
| _LSTGSELS[Phospho (STY)]PK_.2                                                                        | -0.246439807 | A2AJI0_S460_M1_Map7d1   |
| _QRS[Phospho (STY)]PIALPVK_.2                                                                        | -0.133518034 | A2AJT4_S211_M1_Pnlsr    |
| _SNRSS[Phospho (STY)]IER_.2                                                                          | -0.089727051 | A2AJT4_S601_M1_Pnlsr    |
| _SSSVSPSSNAPGS[Phospho (STY)]C[Carbamidomethyl (C)]SPDGVDQR_.2                                       | 0.252101255  | A2ALK8_S467_M1_Ptpn3    |
| _S[Phospho (STY)]LS[Phospho (STY)]VERLETK_.2                                                         | 0.379731875  | A2ALK8_S357_M2_Ptpn3    |
| _RS[Phospho (STY)]LS[Phospho (STY)]VER_.2                                                            | 0.129913324  | A2ALK8_S357_M2_Ptpn3    |
| _RS[Phospho (STY)]LS[Phospho (STY)]VERLETK_.2                                                        | 0.248065681  | A2ALK8_S357_M2_Ptpn3    |
| _RES[Phospho (STY)]PPAGQK_.2                                                                         | -0.271564563 | A2ALS5_S515_M1_Rap1gap  |
| _DDVPFFGPPLPDAVFR_.2                                                                                 | 0.066717712  | #N/A                    |
| _RSS[Phospho (STY)]AIGIENIQEVQEK_.2                                                                  | -0.041705382 | A2ALS5_S499_M1_Rap1gap  |
| _TEVLQGFS[Phospho (STY)]R_.2                                                                         | 0.188196896  | A2ALS5_S566_M1_Rap1gap  |
| _SENSSTQS[Phospho (STY)]S[Phospho (STY)]PEM[Oxidation (M)]PTTK_.2                                    | 0.144564706  | A2ALS5_S541_M2_Rap1gap  |
| _S[Phospho (STY)]SAIGIENIQEVQEK_.2                                                                   | 0.253200148  | A2ALS5_S498_M1_Rap1gap  |
| _LPYTEGDAQQLQR_.2                                                                                    | 0.133234277  | #N/A                    |
| _SSAIGIENIQEVQEKRES[Phospho (STY)]PPAGQK_.3                                                          | -0.392498426 | A2ALS5_S515_M1_Rap1gap  |
| _TPDS[Phospho (STY)]GHVSQEPK_.2                                                                      | 0.059422249  | A2ALS5_S525_M1_Rap1gap  |
| _SQS[Phospho (STY)]M[Oxidation (M)]DAM[Oxidation (M)]GLSNK_.2                                        | -0.05905648  | A2ALS5_S441_M1_Rap1gap  |
| _RES[Phospho (STY)]PPAGQKT[Phospho (STY)]PDSGHVSQEPK_.3                                              | -0.035355675 | A2ALS5_S515_M2_Rap1gap  |
| _DSC[Carbamidomethyl (C)]SS[Phospho (STY)]PPSLNYGK_.2                                                | -0.247053251 | A2ALU4_S1165_M1_Shroom2 |
| _IVHSES[Phospho (STY)]QPEKESR_.2                                                                     | -0.544621634 | A2ALU4_S1089_M1_Shroom2 |
| _VENALNNLDDNPSPGDR_.2                                                                                | -0.373277363 | #N/A                    |
| _SPS[Phospho (STY)]PQFAPQK_.2                                                                        | 0.118581385  | A2ALU4_S1043_M1_Shroom2 |
| _HVTLPSS[Phospho (STY)]PR_.2                                                                         | -0.001081422 | A2AN08_S2716_M1_Ubr4    |
| _TKEGVGS[Phospho (STY)]PK_.2                                                                         | -0.315486948 | A2AN08_S457_M1_Ubr4     |
| _TLSDVEDQKELAS[Phospho (STY)]PVSPELR_.3                                                              | -0.278837535 | A2AN08_S178_M1_Ubr4     |
| _T[Phospho (STY)]GSTSSKEDDYESDAATIVQK_.3                                                             | 0.082592711  | A2AN08_T360_M1_Ubr4     |
| _GTKPGS[Phospho (STY)]LDSHAAGQPLPR_.3                                                                | -0.325105133 | A2AP18_S987_M1_Plch2    |
| _VAS[Phospho (STY)]VEEGDETLDSPGSQSR_.2                                                               | -0.335485364 | A2AP18_S676_M1_Plch2    |
| _KVAS[Phospho (STY)]VEEGDETLDSPGSQSR_.3                                                              | -0.23783375  | A2AP18_S676_M1_Plch2    |
| _IRDCC[Carbamidomethyl (C)]EDPNDFSVSTLS[Phospho (STY)]PSGK_.3                                        | -0.23230545  | A2AP18_S619_M1_Plch2    |
| _KLPANISEDAAEGEV[S[Phospho (STY)]DEDS[Phospho (STY)]ADEM[Oxidation (M)]EDDC[Carbamidomethyl (C)]K_.3 | 0.180626838  | A2AP18_S561_M2_Plch2    |
| _S[Phospho (STY)]IEDLHR_.2                                                                           | -0.35451446  | A2APV2_S171_M1_Fmnl2    |
| _LLEQEALM[Oxidation (M)]EQQDAKS[Phospho (STY)]PSHK_.3                                                | -0.208982194 | A2APV2_S1015_M1_Fmnl2   |
| _QAS[Phospho (STY)]FTYNK_.2                                                                          | 0.239338198  | A2APX8_S1939_M1_Scn1a   |

|                                                                 |              |                         |
|-----------------------------------------------------------------|--------------|-------------------------|
| _FS[Phospho (STY)]IEGNR_.2                                      | 0.037310346  | A2APX8_S537_M1_Scn1a    |
| _NSNLS[Phospho (STY)]QTSR_.2                                    | -0.16892278  | A2APX8_S623_M1_Scn1a    |
| _RNS[Phospho (STY)]NLSQTSR_.2                                   | 0.146529368  | A2APX8_S620_M1_Scn1a    |
| _RDS[Phospho (STY)]LFVPR_.2                                     | -0.289286477 | A2APX8_S607_M1_Scn1a    |
| _QQEAAQQAATTAS[Phospho (STY)]EHSR_.3                            | -0.289148967 | A2APX8_S467_M1_Scn1a    |
| _RYS[Phospho (STY)]S[Phospho (STY)]PHQSLLSIR_.3                 | -0.409347282 | A2APX8_S550_M2_Scn1a    |
| _VSS[Phospho (STY)]EDPGPTPQTR_.2                                | -0.093543637 | A2AQ25_S1087_M1_Skt     |
| _NRPGS[Phospho (STY)]LDK_.2                                     | -0.356034274 | A2AQ25_S1762_M1_Skt     |
| _IPALS[Phospho (STY)]PSSGK_.2                                   | 0.042193021  | A2AQ25_S1808_M1_Skt     |
| _NVY[Phospho (STY)]YELNDVR_.2                                   | 0.119246598  | A2AQ25_Y244_M1_Skt      |
| _IGGKS[Phospho (STY)]PPPPPPPPR_.3                               | -0.192380679 | A2AQ25_S1049_M1_Skt     |
| _KYPDShLPTLGSKT[Phospho (STY)]PPAS[Phospho (STY)]PHR_.4         | -0.302083587 | A2AQ25_S474_M2_Skt      |
| _RQEQLS[Phospho (STY)]PEGTLPASR_.2                              | -0.065467806 | A2AQ25_S1647_M1_Skt     |
| _HQETAHAPGQPLHC[Carbamidomethyl (C)]STGS[Phospho (STY)]PGDVK_.4 | -0.015626118 | A2AQ25_S869_M1_Skt      |
| _KAGGDC[Carbamidomethyl (C)]KPTS[Phospho (STY)]PSLPASK_.3       | -0.452888149 | A2AQ25_S1796_M1_Skt     |
| _AAPTSSSSPPS[Phospho (STY)]PAS[Phospho (STY)]PTSLNQGAR_.3       | -0.246366544 | A2AQ25_S1902_M2_Skt     |
| _T[Phospho (STY)]PPASPHR_.2                                     | 0.062292852  | A2AQ25_T470_M1_Skt      |
| _SIS[Phospho (STY)]PSPSAILER_.2                                 | -0.217809047 | A2AQ25_S361_M1_Skt      |
| _S[Phospho (STY)]PPPPPPPPRR_.2                                  | -0.07066763  | A2AQ25_S1049_M1_Skt     |
| _FQS[Phospho (STY)]PPHAGK_.2                                    | 0.033007843  | A2AQ25_S1868_M1_Skt     |
| _GDAAGDKLESEDS[Phospho (STY)]PNS[Phospho (STY)]EQELDK_.3        | 0.31100954   | A2AQ25_S1035_M2_Skt     |
| _NEGFYADPYLYHEGR_.3                                             | -0.408268503 | #N/A                    |
| _ADREQS[Phospho (STY)]PVSK_.2                                   | -0.437470408 | A2AR02_S685_M1_Ppig     |
| _FRRS[Phospho (STY)]ET[Phospho (STY)]PPHWR_.3                   | -0.31628019  | A2AR02_S354_M2_Ppig     |
| _S[Phospho (STY)]ET[Phospho (STY)]PPHWR_.2                      | 0.178613395  | A2AR02_S354_M2_Ppig     |
| _SELNEIKENQRS[Phospho (STY)]PVR_.3                              | -0.32290666  | A2AR02_S395_M1_Ppig     |
| _HM[Oxidation (M)]S[Phospho (STY)]ES[Phospho (STY)]PNRKVEK_.3   | -0.321006844 | A2AR02_S411_M2_Ppig     |
| _HMS[Phospho (STY)]ES[Phospho (STY)]PNR_.2                      | -0.00456923  | A2AR02_S411_M2_Ppig     |
| _KADREQS[Phospho (STY)]PVSK_.2                                  | 0.22919744   | A2AR02_S685_M1_Ppig     |
| _ENQRS[Phospho (STY)]PVR_.2                                     | -0.293103569 | A2AR02_S395_M1_Ppig     |
| _RS[Phospho (STY)]ET[Phospho (STY)]PPHWR_.2                     | -0.269164979 | A2AR02_S354_M2_Ppig     |
| _S[Phospho (STY)]PPKADDER_.2                                    | 0.001936413  | A2AR02_S288_M1_Ppig     |
| _T[Phospho (STY)]RSPVEKENQK_.2                                  | -0.038633558 | A2AR02_T712_M1_Ppig     |
| _EQS[Phospho (STY)]PVSK_.2                                      | -0.269119326 | A2AR02_S685_M1_Ppig     |
| _ALQTS[Phospho (STY)]PQPVEGTGLPR_.2                             | -0.241455793 | A2ARP1_S959_M1_Ppip5k1  |
| _TDPGS[Phospho (STY)]IENLC[Carbamidomethyl (C)]PGK_.2           | -0.510232271 | A2ARP1_S939_M1_Ppip5k1  |
| _TLHS[Phospho (STY)]PPLQLR_.2                                   | 0.036590974  | A2ARP1_S1147_M1_Ppip5k1 |
| _GSNSDS[Phospho (STY)]PPGHPAPAPS[Phospho (STY)]PERR_.3          | -0.071105058 | A2ARS0_S193_M2_Ankrd63  |
| _GSNSDS[Phospho (STY)]PPGHPAPAPSPER_.2                          | -0.274456329 | A2ARS0_S193_M1_Ankrd63  |
| _KTTAS[Phospho (STY)]PSVR_.2                                    | 0.063661569  | A2AWA9_S486_M1_Rabgap1  |
| _GVSEDT[Phospho (STY)]DEEKETLK_.2                               | 0.062917554  | A2AWA9_T991_M1_Rabgap1  |
| _QGDETPSTNNGS[Phospho (STY)]DDEKTGLK_.2                         | -0.132853579 | A2AWA9_S42_M1_Rabgap1   |
| _TTAS[Phospho (STY)]PSVR_.2                                     | 0.114426671  | A2AWA9_S486_M1_Rabgap1  |
| _LQWDGSSDLS[Phospho (STY)]PSDSGSSK_.2                           | -0.066165776 | A2AWT3_S281_M1_Atn7l3   |
| _PYVPC[Carbamidomethyl (C)]PTPPRK_.2                            | -0.195370206 | #N/A                    |
| _IELLPS[Phospho (STY)]R_.2                                      | -0.268378807 | A2BH40_S1866_M1_Arid1a  |
| _SNS[Phospho (STY)]VGIQDAFPDGSPTFQK_.2                          | 0.256615063  | A2BH40_S1185_M1_Arid1a  |



|                                                                                                    |              |                           |
|----------------------------------------------------------------------------------------------------|--------------|---------------------------|
| _SHHAPM[Oxidation (M)]S[Phospho (STY)]PGSSGGGGQPLAR_.3                                             | -0.158580532 | A2BH40_S365_M1_Arid1a     |
| _GPS[Phospho (STY)]PSPVGPASVAQSR_.2                                                                | 0.098010687  | A2BH40_S697_M1_Arid1a     |
| _NPQMPQYTSPPGS[Phospho (STY)]ALSPR_.2                                                              | -0.115096907 | A2BH40_S770_M1_Arid1a     |
| _SC[Carbamidomethyl (C)]S[Phospho (STY)]WHTLR_.2                                                   | -0.25038205  | A2CG49_S2374_M1_Kalrn     |
| _ATAAAESSDGS[Phospho (STY)]IKK_.2                                                                  | 0.231215701  | A2CG49_S2368_M1_Kalrn     |
| _TVSKS[Phospho (STY)]PER_.2                                                                        | 0.152914464  | A2CG63_S778_M1_Arid4b     |
| _SAS[Phospho (STY)]DTNLQK_.2                                                                       | -0.258104601 | A2RSJ4_S952_M1_Uhrf1bp1l  |
| _SS[Phospho (STY)]PEISLR_.2                                                                        | -0.014908797 | A2RSJ4_S1250_M1_Uhrf1bp1l |
| _DVASTD[Phospho (STY)]DSVLNRY_.2                                                                   | -0.182683033 | A2RSJ4_S1006_M1_Uhrf1bp1l |
| _SGS[Phospho (STY)]GEMTSEGSHTK_.2                                                                  | 0.25445237   | A2RSJ4_S988_M1_Uhrf1bp1l  |
| _NLGS[Phospho (STY)]PPKSPT[Phospho (STY)]HASPQHTQTEK_.3                                            | -0.237880382 | A2RSJ4_S414_M2_Uhrf1bp1l  |
| _EEKQEHLTDS[Phospho (STY)]PVALGPER_.3                                                              | 0.269019596  | A2RSQ0_S822_M1_Dennd5b    |
| _QEHLTDS[Phospho (STY)]PVALGPER_.2                                                                 | 0.114533706  | A2RSQ0_S822_M1_Dennd5b    |
| _QC[Carbamidomethyl (C)]RT[Phospho (STY)]PPQKKS[Phospho (STY)]PTTTR_.3                             | -0.206684099 | A2RSQ0_S1068_M2_Dennd5b   |
| _LQSDVLATGPANNNR_.2                                                                                | -0.245047958 | #N/A                      |
| _GSRPAS[Phospho (STY)]PAAR_.2                                                                      | -0.287119532 | A2RSY1_S515_M1_Kansl3     |
| _TSGAKDDVS[Phospho (STY)]PEEQGK_.2                                                                 | -0.18426415  | A2TJV2_S601_M1_Palm3      |
| _TGGEGS[Phospho (STY)]LDEEAEGSKK_.2                                                                | -0.697506978 | A2TJV2_S565_M1_Palm3      |
| _QGTSS[Phospho (STY)]PELPTWVK_.2                                                                   | -0.005253907 | A2TJV2_S270_M1_Palm3      |
| _RSS[Phospho (STY)]S[Phospho (STY)]PAEELKDDLQQAHR_.4                                               | -0.274277615 | A3KGS3_S819_M2_Ralgapa2   |
| _DVYTIFDAEVES[Phospho (STY)]PK_.2                                                                  | -0.305661383 | A6H5Z3_S261_M1_Exoc6b     |
| _EVS[Phospho (STY)]PAPATQGESR_.2                                                                   | -0.306911996 | A6H619_S1201_M1_Phrf1     |
| _S[Phospho (STY)]RS[Phospho (STY)]PS[Phospho (STY)]LEHRPR_.3                                       | -0.082149219 | A6H619_S1169_M3_Phrf1     |
| _Acetyl (Protein N-term)]AES[Phospho (STY)]PAFLSAK_.2                                              | -0.025924711 | A6H630_S4_M1_Armt1        |
| _DSVDDNHLS[Phospho (STY)]PSR_.2                                                                    | -0.029052357 | A6H8H5_S488_M1_Kcnb2      |
| _S[Phospho (STY)]M[Oxidation (M)]ELIDVAVEK_.2                                                      | -0.1003136   | A6H8H5_S461_M1_Kcnb2      |
| _RNS[Phospho (STY)]APVSVSAVR_.2                                                                    | -0.385870114 | A6X8Z5_S1163_M1_Arhgap31  |
| _S[Phospho (STY)]MDSLC[Carbamidomethyl (C)]SVPVEGK_.2                                              | -0.576263454 | A6X8Z5_S343_M1_Arhgap31   |
| _SS[Phospho (STY)]PPPLSGASEVDAGELGSR_.2                                                            | -0.166177867 | A6X919_S23_M1_Dpy19l1     |
| _ETS[Phospho (STY)]LDLEPMAESEEQANPC[Carbamidomethyl (C)]R_.2                                       | 0.247891717  | A9Z1V5_S782_M1_Vwa5b1     |
| _SPQGLGAFTAVVR_.2                                                                                  | -0.229165697 | #N/A                      |
| _QVNSTSSPS[Phospho (STY)]PEHLLAEDR_.3                                                              | -0.393842518 | B1AVZ0_S25_M1_Uprt        |
| _SAS[Phospho (STY)]EDS[Phospho (STY)]IRKK_.2                                                       | -0.228011794 | B1AWN6_S528_M2_Scn2a      |
| _KVSS[Phospho (STY)]IYKK_.2                                                                        | -0.409360635 | B1AWN6_S1931_M1_Scn2a     |
| _KSAS[Phospho (STY)]EDSIR_.2                                                                       | -0.147719646 | B1AWN6_S528_M1_Scn2a      |
| _FS[Phospho (STY)]LEGSR_.2                                                                         | -0.2976281   | B1AWN6_S540_M1_Scn2a      |
| _S[Phospho (STY)]AS[Phospho (STY)]EDSIRK_.2                                                        | -0.167622939 | B1AWN6_S526_M2_Scn2a      |
| _QQEEAQAAAAASAES[Phospho (STY)]R_.2                                                                | 0.064775201  | B1AWN6_S471_M1_Scn2a      |
| _LSSKS[Phospho (STY)]JEKELK_.2                                                                     | -0.16719865  | B1AWN6_S497_M1_Scn2a      |
| _GSLFS[Phospho (STY)]PR_.2                                                                         | -0.252043611 | B1AWN6_S568_M1_Scn2a      |
| _Acetyl (Protein N-term)]AQSVLVPPGDSFR_.2                                                          | 0.274093006  | #N/A                      |
| _KQEEAQAAAAASAES[Phospho (STY)]R_.3                                                                | -0.073649174 | B1AWN6_S471_M1_Scn2a      |
| _GFRFS[Phospho (STY)]LEGSR_.2                                                                      | 0.051798004  | B1AWN6_S540_M1_Scn2a      |
| _VKDIGS[Phospho (STY)]ENDFADDEHSTFEDNDSRR_.4                                                       | -0.11255854  | B1AWN6_S589_M1_Scn2a      |
| _KSAS[Phospho (STY)]EDS[Phospho (STY)]IRK_.2                                                       | -0.133818867 | B1AWN6_S528_M2_Scn2a      |
| _DFSGAGGIGVFS[Phospho (STY)]ESSSVASK_.2                                                            | -0.258957299 | B1AWN6_S484_M1_Scn2a      |
| _AM[Oxidation (M)]SM[Oxidation (M)]ASILT[Phospho (STY)]NT[Phospho (STY)]M[Oxidation (M)]EELEESR_.2 | -0.1271879   | B1AWN6_T713_M2_Scn2a      |

|                                                                             |              |                        |
|-----------------------------------------------------------------------------|--------------|------------------------|
| _RPS[Phospho (STY)]NVSQASR_.2                                               | 0.015167049  | B1AWN6_S623_M1_Scn2a   |
| _SSSYHVS[Phospho (STY)]M[Oxidation (M)]DLLEDPTSR_.3                         | -0.247953625 | B1AWN6_S692_M1_Scn2a   |
| _RFS[Phospho (STY)]S[Phospho (STY)]PHQSLLSIR_.3                             | -0.001891409 | B1AWN6_S553_M2_Scn2a   |
| _TLDFDPLLSPAS[Phospho (STY)]PK_.2                                           | -0.022180243 | B1AXD8_S21_M1_Akirin2  |
| _IIAQFS[Phospho (STY)]KDYEPDNPST_.2                                         | -0.081743262 | B1AXH1_S1208_M1_Nhsl2  |
| _SKS[Phospho (STY)]IS[Phospho (STY)]LKK_.2                                  | 0.077645398  | B1AXH1_S557_M2_Nhsl2   |
| _ATPSQLS[Phospho (STY)]IEVEAR_.2                                            | -0.085732958 | B1AXH1_S690_M1_Nhsl2   |
| _RIIAQFS[Phospho (STY)]KDYEPDNPST_.3                                        | 0.070163022  | B1AXH1_S1208_M1_Nhsl2  |
| _S[Phospho (STY)]LSVPTDSGVTSDYDEEQK_.2                                      | -0.006867856 | B1AXH1_S497_M1_Nhsl2   |
| _DQGHSSS[Phospho (STY)]PTGSLAR_.2                                           | 0.310581302  | B1AXH1_S301_M1_Nhsl2   |
| _NPARDEEGVFENNR_.3                                                          | 0.207704513  | #N/A                   |
| _S[Phospho (STY)]PQGFFQSSNK_.2                                              | -0.164232396 | B1AY10_S81_M1_Nfx1     |
| _EHS[Phospho (STY)]PSESEKVVADPR_.3                                          | 0.317606829  | B1AY10_S147_M1_Nfx1    |
| _AQGLSEQT[Phospho (STY)]SDTSSLESVAR_.2                                      | -0.311826795 | B1AY10_T125_M1_Nfx1    |
| _NYSSS[Phospho (STY)]PPC[Carbamidomethyl (C)]HLPR_.2                        | -0.07585534  | B1AY10_S51_M1_Nfx1     |
| _VSDQNS[Phospho (STY)]PVLPK_.2                                              | -0.24068555  | B1AY13_S2044_M1_Usp24  |
| _NMDQGGGGS[Phospho (STY)]PR_.2                                              | 0.251144091  | B1AY13_S1940_M1_Usp24  |
| _TIS[Phospho (STY)]AQDTLAYATALLNEK_.2                                       | -0.07437202  | B1AY13_S2558_M1_Usp24  |
| _VSDQNS[Phospho (STY)]PVLPKK_.2                                             | -0.252961864 | B1AY13_S2044_M1_Usp24  |
| _SSPSSPS[Phospho (STY)]PTLGR_.2                                             | -0.211878167 | B1AZA5_S329_M1_Tmem245 |
| _GGPAEAPS[Phospho (STY)]PR_.2                                               | -0.093582212 | B1AZA5_S12_M1_Tmem245  |
| _GGPAEAPS[Phospho (STY)]PRGS[Phospho (STY)]PRPESR_.3                        | -0.132088441 | B1AZA5_S12_M2_Tmem245  |
| _KIDSHPS[Phospho (STY)]PSHSSTVK_.3                                          | 0.385353585  | B1AZI6_S1417_M1_Thoc2  |
| _ATQQS[Phospho (STY)]LGEQSNPR_.2                                            | 0.050441777  | B1AZP2_S405_M1_Dlgap4  |
| _QNS[Phospho (STY)]ATESADSIEIYVPEAQTR_.2                                    | -0.136074041 | B1AZP2_S973_M1_Dlgap4  |
| _ANSWQLVET[Phospho (STY)]PEK_.2                                             | -0.308145078 | B1AZP2_T915_M1_Dlgap4  |
| _SNISGWWWS[Phospho (STY)]SDDNLDGEGGAFR_.2                                   | -0.203779215 | B1AZP2_S206_M1_Dlgap4  |
| _ANSWQLVET[Phospho (STY)]PEKR_.2                                            | -0.379692544 | B1AZP2_T915_M1_Dlgap4  |
| _APS[Phospho (STY)]M[Oxidation (M)]EGTAGK_.2                                | 0.236818718  | B1AZP2_S156_M1_Dlgap4  |
| _ATQQS[Phospho (STY)]LGEQS[Phospho (STY)]NPRR_.2                            | -0.22887278  | B1AZP2_S405_M2_Dlgap4  |
| _SLPDC[Carbamidomethyl (C)]TSHPNIS[Phospho (STY)]IDAGPR_.3                  | 0.105280846  | B1AZP2_S744_M1_Dlgap4  |
| _AM[Oxidation (M)]GDEDS[Phospho (STY)]DESGGGS[Phospho (STY)]PKPSPK_.2       | -0.27269134  | B1AZP2_S377_M2_Dlgap4  |
| _S[Phospho (STY)]LDRLDSVDM[Oxidation (M)]LLPSK_.2                           | -0.2085244   | B1AZP2_S415_M1_Dlgap4  |
| _RS[Phospho (STY)]LDRLDS[Phospho (STY)]VDM[Oxidation (M)]LLPSK_.3           | 0.204344499  | #N/A                   |
| _RDT[Phospho (STY)]DS[Phospho (STY)]DTQDANDSSC[Carbamidomethyl (C)]K_.2     | -0.349702258 | B1AZP2_S716_M2_Dlgap4  |
| _IHRAS[Phospho (STY)]DPGLPAEEPK_.3                                          | -0.484799345 | B2RQC6_S1859_M1_Cad    |
| _ADGIPNDSS[Phospho (STY)]DSEM[Oxidation (M)]EDR_.2                          | 0.474531659  | B2RR83_S1105_M1_Ythdc2 |
| _STDSSYPSPC[Carbamidomethyl (C)]AS[Phospho (STY)]PS[Phospho (STY)]PPSSGK_.2 | 0.166376469  | B2RR83_S1282_M2_Ythdc2 |
| _TAADVVS[Phospho (STY)]PGANSVDR_.2                                          | -0.194855769 | B2RRE7_S1000_M1_Otud4  |
| _EES[Phospho (STY)]S[Phospho (STY)]EDENEVSNILR_.2                           | -0.094053966 | B2RRE7_S1016_M2_Otud4  |
| _LQRPKEES[Phospho (STY)]S[Phospho (STY)]EDENEVSNILR_.3                      | -0.266282554 | B2RRE7_S1016_M2_Otud4  |
| _LQDPNNPAIIR_.3                                                             | -0.094403646 | #N/A                   |
| _DSGVQAC[Carbamidomethyl (C)]FNR_.2                                         | -0.136940836 | #N/A                   |
| _IAQPNYIPTQQDVLRL_.2                                                        | -0.385382032 | #N/A                   |
| _EYQLNDSAAYYLNLDLR_.2                                                       | -0.1532509   | #N/A                   |
| _IDFGDSAR_.2                                                                | -0.176434608 | #N/A                   |
| _SREYQLNDSAAYYLNLDLR_.3                                                     | -0.344389277 | #N/A                   |

|                                                                                        |              |                              |
|----------------------------------------------------------------------------------------|--------------|------------------------------|
| _AVVYSNTIQSIIAIR_.2                                                                    | -0.301515349 | #N/A                         |
| _VVG[T[Phospho (STY)]PGGSEVGR_.2                                                       | -0.121378593 | B2RUJ5_T333_M1_Apba1         |
| _QDIS[Phospho (STY)]PTR_.2                                                             | -0.248991997 | B2RUJ5_S391_M1_Apba1         |
| _APT[Phospho (STY)]PGGGHPDS[Phospho (STY)]PGLPAPAGQQQR_.3                              | -0.29332715  | B2RUJ5_S317_M2_Apba1         |
| _M[Oxidation (M)]DS[Phospho (STY)]YEQEEDIDQIVAEVK_.2                                   | 0.423334873  | B2RUJ5_S267_M1_Apba1         |
| _QSM[Oxidation (M)]SSQS[Phospho (STY)]LDK_.2                                           | -0.000969638 | B2RUJ5_S289_M1_Apba1         |
| _SNS[Phospho (STY)]QENVEASHPSQDGKR_.3                                                  | -0.583122987 | B2RUJ5_S573_M1_Apba1         |
| _SNS[Phospho (STY)]QENVEASHPSQDGK_.2                                                   | -0.428416503 | B2RUJ5_S573_M1_Apba1         |
| _SDGES[Phospho (STY)]DSPEKEAEFAPYPR_.3                                                 | -0.168618561 | B2RUJ5_S250_M1_Apba1         |
| _SAS[Phospho (STY)]TESGFHNHTDTAEGDVLAAAR_.3                                            | 0.230981389  | B2RUJ5_S84_M1_Apba1          |
| _LHHY[Phospho (STY)]DERSDGEDS[Phospho (STY)]PEKEAEFAPYPR_.4                            | -0.142225441 | B2RUJ5_Y242_M2_Apba1         |
| _AAEDM[Oxidation (M)]PEAEQDLERAPT[Phospho (STY)]PGGGHPDS[Phospho (STY)]PGLPAPAGQQQR_.4 | 0.092956511  | B2RUJ5_S317_M2_Apba1         |
| _LHHYDERS[Phospho (STY)]DGESDSPEK_.3                                                   | -0.026667083 | B2RUJ5_S246_M1_Apba1         |
| _S[Phospho (STY)]LQLVDSR_.2                                                            | -0.176529342 | B2RX88_S4_M1_Cspp1           |
| _LGASNS[Phospho (STY)]PGQPNSVK_.2                                                      | -0.233259613 | B2RY04_S1765_M1_Dock5        |
| _LGASNS[Phospho (STY)]PGQPNSVKR_.2                                                     | -0.246451898 | B2RY56_S672_M1_Rbm25         |
| _GWTYS[Phospho (STY)]PAPAR_.2                                                          | -0.30794816  | B2RY56_S672_M1_Rbm25         |
| _GGS[Phospho (STY)]LETPSK_.2                                                           | -0.092710197 | B5TVM2_S511_M1_Ildr2         |
| _AHGAFYQDGS[Phospho (STY)]LDEYYGR_.2                                                   | -0.215170892 | B5TVM2_S562_M1_Ildr2         |
| _SPSS[Phospho (STY)]PSLGSQQQR_.2                                                       | -0.294378379 | B5TVM2_S487_M1_Ildr2         |
| _KKS[Phospho (STY)]PS[Phospho (STY)]SPSLGSQQQR_.3                                      | 0.15356491   | B9EHT4_S402_M1_Clip3         |
| _VQTELKEETQPLSHS[Phospho (STY)]PK_.3                                                   | 0.219892471  | B9EHT4_S399_M2_Clip3         |
| _VQTELKEETQPLSHS[Phospho (STY)]PKR_.4                                                  | -0.161076127 | B9EJ80_S515_M1_Pdzd8         |
| _KES[Phospho (STY)]LKVQK_.2                                                            | 0.180236417  | B9EJ80_S515_M1_Pdzd8         |
| _GYSSPEPDIQDS[Phospho (STY)]SGSEASVVKPSTR_.3                                           | -0.111813202 | B9EJ86_S120_M1_Osbpl8        |
| _DVS[Phospho (STY)]PTSRLNLVAK_.2                                                       | 0.342797558  | B9EJ86_S807_M1_Osbpl8        |
| _DVS[Phospho (STY)]PTSRL_.2                                                            | 0.067460225  | B9EJA2_S472_M1_Cttnbp2       |
| _QSSHS[Phospho (STY)]DLGPSPTALPSSANR_.3                                                | 0.008203012  | B9EJA2_S472_M1_Cttnbp2       |
| _LSLGS[Phospho (STY)]DDEADLVK_.2                                                       | -0.446373444 | B9EJA2_S362_M1_Cttnbp2       |
| _FQGNANDPDQNGNNTQS[Phospho (STY)]PPSR_.2                                               | -0.165117471 | B9EJA2_S1510_M1_Cttnbp2      |
| _LASISVATEGPVTR_.2                                                                     | -0.17204542  | B9EJA2_S465_M1_Cttnbp2       |
| _YQY[Phospho (STY)]LNTR_.2                                                             | -0.133196311 | #N/A                         |
| _SVSEINS[Phospho (STY)]DDELPGK_.2                                                      | 0.084364045  | B9EJX3_Y114_M1_ATp6v1fnb     |
| _EVSADVS[Phospho (STY)]EEENFLTDFK_.2                                                   | 0.17052862   | B9EKI3_S340_M1_Tmf1          |
| _FAVLYQPLAGNDQAK_.2                                                                    | -0.154177497 | B9EKR1_S576_M1_Ptprz1        |
| _FSSFEEAVK_.2                                                                          | -0.218852557 | #N/A                         |
| _FSEQGLLK_.2                                                                           | -0.233046937 | #N/A                         |
| _QSPINIDEDLTQVNVNLK_.3                                                                 | 0.139206788  | #N/A                         |
| _QSPINIDEDLTQVNVNLK_.2                                                                 | -0.190548209 | #N/A                         |
| _DTDGVLETDDTGIAGPSR_.2                                                                 | 0.184039184  | #N/A                         |
| _ASLENTFIHNTGK_.2                                                                      | 0.23088718   | #N/A                         |
| _C[Carbamidomethyl (C)]MSC[Carbamidomethyl (C)]LPYRES[Phospho (STY)]R_.2               | -0.299967812 | #N/A                         |
| _C[Carbamidomethyl (C)]MSC[Carbamidomethyl (C)]LPYRES[Phospho (STY)]REK_.3             | 0.178569082  | #N/A                         |
| _IVEPEVVGES[Phospho (STY)]DSEVEGDAWR_.3                                                | -0.359376284 | #N/A                         |
| _SLAALDALNTDDENDEEY[Phospho (STY)]EAWK_.3                                              | 0.178591221  | COHKD8_S116_M1_Mfap1a;Mfap1b |
| _KIVEPEVVGES[Phospho (STY)]DS[Phospho (STY)]EVEGDAWR_.3                                | -0.363654439 | COHKD8_Y276_M1_Mfap1a;Mfap1b |
|                                                                                        | -0.533857493 | COHKD8_S116_M2_Mfap1a;Mfap1b |

|                                                                          |              |                             |
|--------------------------------------------------------------------------|--------------|-----------------------------|
| _RPDYAPM[Oxidation (M)]ES[Phospho (STY)]S[Phospho (STY)]DEEDEEFQFIK_3    | -0.016209217 | COHKD8_S52_M2_Mfap1a;Mfap1b |
| _NDEELNKLGR_2                                                            | -0.356200222 | #N/A                        |
| _REDYQEILDS[Phospho (STY)]PIK_2                                          | -0.027716358 | D3YVE8_S409_M1_Slc35g2      |
| _EDYQEILDS[Phospho (STY)]PIK_2                                           | -0.02107422  | D3YVE8_S409_M1_Slc35g2      |
| _GPVAAS[Phospho (STY)]PQK_2                                              | 0.030479289  | D3YVF0_S22_M1_Akap5         |
| _VTVDHAEATVGQAEATVGQAEK_3                                                | -0.48370571  | #N/A                        |
| _VTVDQAEATVGQAEATVGHTEK_3                                                | -0.380358253 | #N/A                        |
| _VQGEADDLEIK_2                                                           | 0.159140656  | #N/A                        |
| _LSQAEETTVAQAK_2                                                         | -0.019289119 | #N/A                        |
| _ASLLESSAAGS[Phospho (STY)]PR_2                                          | -0.311812323 | D3YVF0_S251_M1_Akap5        |
| _ALSQAGEATAGHPPEATVIQAESQAK_3                                            | -0.068414564 | #N/A                        |
| _QPAGAWAS[Phospho (STY)]IK_2                                             | -0.216604389 | D3YVF0_S79_M1_Akap5         |
| _SSAIQM[Oxidation (M)]GT[Phospho (STY)]PELEKETK_2                        | -0.524925296 | D3YVF0_T220_M1_Akap5        |
| _DEKGPVAAS[Phospho (STY)]PQKER_2                                         | -0.395499806 | D3YVF0_S22_M1_Akap5         |
| _AQTQPDDQAIQAGS[Phospho (STY)]TQGLQEGVLVR_3                              | 0.354770178  | D3YVF0_S171_M1_Akap5        |
| _GPVAAS[Phospho (STY)]PQKER_2                                            | -0.21783314  | D3YVF0_S22_M1_Akap5         |
| _KATVGQAEATIDHTEK_3                                                      | 0.0086434    | #N/A                        |
| _TSEQYETLLIETASSLVK_2                                                    | -0.330226739 | #N/A                        |
| _DEKGPVAAS[Phospho (STY)]PQK_2                                           | -0.083925143 | D3YVF0_S22_M1_Akap5         |
| _SSAIQMGT[Phospho (STY)]PELEK_2                                          | 0.300983941  | D3YVF0_T220_M1_Akap5        |
| _HTPEAGGS[Phospho (STY)]GQR_2                                            | -0.017081737 | D3YVF0_S68_M1_Akap5         |
| _EATVVGQAEATVDRAEEATVGQAEATVGHTEK_3                                      | -0.116105129 | #N/A                        |
| _METS[Phospho (STY)]VSEIQVETK_2                                          | 0.004451892  | D3YVF0_S4_M1_Akap5          |
| _TAEETKKHT[Phospho (STY)]PEAGGSGQR_3                                     | -0.327117051 | D3YVF0_T62_M1_Akap5         |
| _VTVDQAEETTUGQAEATVGQAGEAILSQAK_3                                        | 0.001385778  | #N/A                        |
| _METSVSEIQVETKDEKGPVAAS[Phospho (STY)]PQK_3                              | 0.454906438  | D3YVF0_S22_M1_Akap5         |
| _SGETALGQAEAAVGGQADKR_2                                                  | -0.365247743 | #N/A                        |
| _QFLISM[Oxidation (M)]ENEQGVGFANDSDFEGR_3                                | 0.312075354  | #N/A                        |
| _VKKPQNS[Phospho (STY)]LK_2                                              | -0.222015775 | D3YWQ0_S328_M1_Dgki         |
| _VPLHLES[Phospho (STY)]PHEER_3                                           | -0.521142483 | D3YXJ0_S1067_M1_Dgkh        |
| _KVS[Phospho (STY)]TSGQMR_2                                              | -0.057810484 | D3YXJ0_S53_M1_Dgkh          |
| _AAAATAPPS[Phospho (STY)]PGPAQPGPR_2                                     | -0.210832742 | D3YXK1_S150_M1_Samd1        |
| _YLGG[Phospho (STY)]GGASGR_2                                             | 0.04265267   | D3YXK1_S242_M1_Samd1        |
| _APTAALS[Phospho (STY)]PEPQDSK_2                                         | -0.087605788 | D3YXK2_S366_M1_Safb         |
| _APTAALS[Phospho (STY)]PEPQDSKEDVK_2                                     | -0.415774352 | D3YXK2_S366_M1_Safb         |
| _SVVS[Phospho (STY)]FDKVK_2                                              | 0.168468415  | D3YXK2_S626_M1_Safb         |
| _APTAALS[Phospho (STY)]PEPQDSKEDVKK_3                                    | -0.398123025 | D3YXK2_S366_M1_Safb         |
| _ [Acetyl (Protein N-term)]AETLSGLGDASAAGAAVSSAAS[Phospho (STY)]ETGTRR_3 | 0.099252903  | D3YXK2_S24_M1_Safb          |
| _ [Acetyl (Protein N-term)]AETLSGLGDASAAGAAVSSAASETGTR_3                 | 0.058369814  | #N/A                        |
| _AIEDEGGNPDEIEVTSEC[Carbamidomethyl (C)]NK_2                             | 0.025079668  | #N/A                        |
| _MSS[Phospho (STY)]VEEDSDTKR_2                                           | -0.593908977 | D3YXK2_S406_M1_Safb         |
| _SEPVKEEGS[Phospho (STY)]ELEQPFQAQATSSVGPDR_3                            | -0.300442251 | D3YXK2_S235_M1_Safb         |
| _RPYEVDGR_2                                                              | 0.06574937   | #N/A                        |
| _SSS[Phospho (STY)]PDKFK_2                                               | -0.34272035  | D3YZP9_S412_M1_Ccdc6        |
| _RSSS[Phospho (STY)]PDKFK_2                                              | -0.307200968 | D3YZP9_S412_M1_Ccdc6        |
| _LDQPVSAAPS[Phospho (STY)]PR_2                                           | -0.51039039  | D3YZP9_S237_M1_Ccdc6        |
| _QLS[Phospho (STY)]ESESSELM[Oxidation (M)]DDER_2                         | 0.095940157  | D3YZP9_S316_M1_Ccdc6        |

|                                                                                      |              |                        |
|--------------------------------------------------------------------------------------|--------------|------------------------|
| _EQDVVPFQES[Phospho (STY)]PK_.2                                                      | -0.156942798 | D3YZU1_S413_M1_Shank1  |
| _S[Phospho (STY)]IDEGM[Oxidation (M)]FSAEPYLR_.2                                     | -0.330251313 | D3YZU1_S1291_M1_Shank1 |
| _GSST[Phospho (STY)]EDGPGVPPSPR_.2                                                   | 0.236658353  | D3YZU1_T1518_M1_Shank1 |
| _EQDVVPFQES[Phospho (STY)]PKYAAR_.2                                                  | -0.472822276 | D3YZU1_S413_M1_Shank1  |
| _DGPAGGTGGSGGPGGS[Phospho (STY)]LGSR_.2                                              | -0.284303508 | D3YZU1_S540_M1_Shank1  |
| _NHREQDVVPFQES[Phospho (STY)]PK_.3                                                   | -0.326435558 | D3YZU1_S413_M1_Shank1  |
| _GFFATESS[Phospho (STY)]FDPHHR_.2                                                    | 0.243657297  | D3YZU1_S869_M1_Shank1  |
| _ALDPASPLGLAAR_.2                                                                    | -0.434969948 | #N/A                   |
| _QKS[Phospho (STY)]IGAAEDDRPYLAPPAMK_.3                                              | 0.256051215  | D3YZU1_S898_M1_Shank1  |
| _AGLGS[Phospho (STY)]QEK_.2                                                          | -0.147049365 | D3YZU1_S1434_M1_Shank1 |
| _GGSGGS[Phospho (STY)]TDSHHGGASYIPER_.3                                              | 0.058706531  | D3YZU1_S1907_M1_Shank1 |
| _GRPSS[Phospho (STY)]SGTPR_.2                                                        | 0.095233175  | D3YZU1_S519_M1_Shank1  |
| _S[Phospho (STY)]IGAAEDDRPYLAPPAM[Oxidation (M)]K_.3                                 | -0.047994118 | D3YZU1_S898_M1_Shank1  |
| _THS[Phospho (STY)]PATS[Phospho (STY)]EDEER_.2                                       | 0.344891096  | D3YZU1_S4_M2_Shank1    |
| _HS[Phospho (STY)]KSIDEGMFSAEPYLR_.3                                                 | -0.078432876 | D3YZU1_S1289_M1_Shank1 |
| _VGWFPSDC[Carbamidomethyl (C)]LEEVANRS[Phospho (STY)]QEGR_.3                         | 0.065976237  | D3YZU1_S615_M1_Shank1  |
| _LESGGS[Phospho (STY)]SGGYGAYAAAGSR_.2                                               | 0.051665189  | D3YZU1_S1310_M1_Shank1 |
| _RPHS[Phospho (STY)]PDPGAQPAPPR_.3                                                   | -0.24497265  | D3Z2R5_S13_M1_Selenon  |
| _ASGSGSC[Carbamidomethyl (C)]NAPGS[Phospho (STY)]PEGSSQLC[Carbamidomethyl (C)]SPR_.2 | 0.065013675  | D3Z6Q9_S430_M1_Bin2    |
| _AS[Phospho (STY)]PDASSNPEPAETR_.2                                                   | 0.320846788  | D3Z6Q9_S443_M1_Bin2    |
| _IEKGDVS[Phospho (STY)]EEEDFR_.2                                                     | -0.060887657 | D3Z7H4_S274_M1_Gsg1l   |
| _VADYIPQLAK_.2                                                                       | 0.122305982  | #N/A                   |
| _VLSPEAVR_.2                                                                         | 0.219189931  | #N/A                   |
| _LTLQTTSDGVM[Oxidation (M)]LDKDLFK_.3                                                | -0.110744302 | #N/A                   |
| _DSPGETDAFGNSEGK_.2                                                                  | 0.268235406  | #N/A                   |
| _C[Carbamidomethyl (C)]VQSNIVLLTQAFR_.2                                              | 0.213338592  | #N/A                   |
| _YAIAVNDLGTEYVHR_.2                                                                  | -0.511599874 | #N/A                   |
| _M[Oxidation (M)]AGNEYVGFSNATFQSER_.2                                                | -0.434097879 | #N/A                   |
| _ILQEYQVQYTPQGDSDDGKGNQTVHK_.3                                                       | 0.317763923  | #N/A                   |
| _TALHVAAAEGHVEVVK_.2                                                                 | -0.092845078 | #N/A                   |
| _FALSAMDMEQR_.2                                                                      | -0.467872998 | #N/A                   |
| _SVINLLFAAYTGDVSALR_.3                                                               | -0.029726208 | #N/A                   |
| _ILQEYQVQYTPQGDSDDGK_.2                                                              | -0.205241596 | #N/A                   |
| _AS[Phospho (STY)]PSPSPSEAR_.2                                                       | 0.00952271   | E9PUL5_S98_M1_Prnt2    |
| _AHGGHPGS[Phospho (STY)]PRGS[Phospho (STY)]LSR_.3                                    | -0.357200825 | E9PUL5_S244_M2_Prnt2   |
| _HPS[Phospho (STY)]SQLAGPGVEGEGTQKPR_.3                                              | -0.616732495 | E9PUL5_S254_M1_Prnt2   |
| _T[Phospho (STY)]PPANGAPPR_.2                                                        | 0.013874494  | E9PUL5_T214_M1_Prnt2   |
| _QENGAVVPLQAGDGEGPAPQPHS[Phospho (STY)]PPSTK_.3                                      | -0.276573009 | E9PUL5_S208_M1_Prnt2   |
| _Acetyl (Protein N-term)]AASS[Phospho (STY)]SQVSEMK_.2                               | 0.217542625  | E9PUL5_S5_M1_Prnt2     |
| _AELAPETTETPVETPETVQATDLSLNPEEGSKAS[Phospho (STY)]PSPSPSEAR_.4                       | -0.152215792 | E9PUL5_S98_M1_Prnt2    |
| _AHGGHPGS[Phospho (STY)]PR_.2                                                        | -0.303353514 | E9PUL5_S244_M1_Prnt2   |
| _AELAPETTETPVETPETVQATDLSLNPEEGSK_.3                                                 | -0.357616063 | #N/A                   |
| _SLS[Phospho (STY)]EPEELAR_.2                                                        | 0.196412314  | E9PV82_S119_M1_Fam53a  |
| _AAS[Phospho (STY)]PSFQAR_.2                                                         | -0.028297019 | E9PV86_S16_M1_Mctp1    |
| _GSSTATGTGGVT[Phospho (STY)]PPGGR_.2                                                 | -0.124500034 | E9PV86_T145_M1_Mctp1   |
| _S[Phospho (STY)]GS[Phospho (STY)]PAPETTNESVPFAQHSSLDSR_.3                           | 0.249099374  | E9PYH6_S481_M2_Setd1a  |
| _TSS[Phospho (STY)]FHLLR_.2                                                          | -0.271532    | E9PYL2_S1070_M1_Prr12  |

|                                                                                                               |              |                        |
|---------------------------------------------------------------------------------------------------------------|--------------|------------------------|
| _TEDEEFLIQHLLQAPS[Phospho (STY)]PPR_.3                                                                        | 0.08438699   | E9PYL2_S648_M1_Prr12   |
| _ASLAC[Carbamidomethyl (C)]SPLGGGPS[Phospho (STY)]PGAGEPSK_.2                                                 | 0.001032565  | E9PYL2_S338_M1_Prr12   |
| _NLETLPFSF[Phospho (STY)]S[Phospho (STY)]DEEDSVAK_.2                                                          | -0.017688237 | E9PYL2_S1372_M2_Prr12  |
| _TGS[Phospho (STY)]PELAAR_.2                                                                                  | -0.045649881 | E9PZ19_S1215_M1_lgsf9b |
| _AEAEAEATT[Phospho (STY)]PIELISR_.2                                                                           | 0.205518076  | E9PZ19_T845_M1_lgsf9b  |
| _SLES[Phospho (STY)]PLSSGKVS[Phospho (STY)]PESIR_.2                                                           | -0.383217008 | E9PZ19_S775_M2_lgsf9b  |
| _APS[Phospho (STY)]ESS[Phospho (STY)]DDQGQPAAK_.2                                                             | -0.646448848 | E9PZ19_S794_M2_lgsf9b  |
| _LKDEHGLEPAS[Phospho (STY)]PR_.3                                                                              | -0.419941218 | E9PZM4_S1365_M1_Ch2    |
| _KQES[Phospho (STY)]S[Phospho (STY)]DDDDDDDEAPKR_.2                                                           | -0.106139396 | E9PZM4_S207_M2_Ch2     |
| _SPLDHRS[Phospho (STY)]PLER_.3                                                                                | -0.193925347 | E9PZM4_S1806_M1_Ch2    |
| _LEEPPELNQRS[Phospho (STY)]PNPR_.3                                                                            | -0.219988802 | E9Q1P8_S169_M1_lrf2bp2 |
| _S[Phospho (STY)]PTGAQPAAAKPPPLSAK_.2                                                                         | -0.394872336 | E9Q1P8_S71_M1_lrf2bp2  |
| _RKPS[Phospho (STY)]PEPEGEVGPPK_.3                                                                            | -0.025158504 | E9Q1P8_S343_M1_lrf2bp2 |
| _S[Phospho (STY)]PADSLSSAAGASELSAEGAGK_.2                                                                     | -0.487520928 | E9Q1P8_S250_M1_lrf2bp2 |
| _DTLLALHQHGHHS[Phospho (STY)]GPFESK_.3                                                                        | -0.282990828 | E9Q1P8_S300_M1_lrf2bp2 |
| _NSSS[Phospho (STY)]PPSPSSMNQR_.2                                                                             | -0.300887813 | E9Q1P8_S440_M1_lrf2bp2 |
| _RYDS[Phospho (STY)]DDDLPR_.2                                                                                 | 0.098941898  | E9Q343_S351_M1_Gpr137c |
| _TSSVSSISQVS[Phospho (STY)]PER_.2                                                                             | -0.215481492 | E9Q3L2_S268_M1_Pi4ka   |
| _KTSSVSSISQVS[Phospho (STY)]PER_.2                                                                            | -0.052730132 | E9Q3L2_S268_M1_Pi4ka   |
| _EAAVPEEEGGT[Phospho (STY)]PEKEISIEDAK_.3                                                                     | -0.139743821 | E9Q401_T1864_M1_Ryr2   |
| _EAAVPEEEGGT[Phospho (STY)]PEK_.2                                                                             | -0.004108288 | E9Q401_T1864_M1_Ryr2   |
| _SNC[Carbamidomethyl (C)]YM[Oxidation (M)]VC[Carbamidomethyl (C)]AGESM[Oxidation (M)]S[Phospho (STY)]PGQGR_.2 | -0.038492099 | #N/A                   |
| _IAEDPSRDGPS[Phospho (STY)]PTSGSSK_.2                                                                         | -0.196388636 | E9Q401_S2362_M1_Ryr2   |
| _DGPS[Phospho (STY)]PTSGSSK_.2                                                                                | 0.239721838  | E9Q401_S2362_M1_Ryr2   |
| _ISQTSQVS[Phospho (STY)]IDAAHGYSR_.3                                                                          | -0.268109449 | E9Q401_S2813_M1_Ryr2   |
| _APS[Phospho (STY)]PASFQR_.2                                                                                  | -0.344269131 | E9Q4N7_S1550_M1_Arid1b |
| _SS[Phospho (STY)]PALAAPDASVDPK_.2                                                                            | -0.458908879 | E9Q4N7_S1757_M1_Arid1b |
| _RLS[Phospho (STY)]GNEYVFTK_.2                                                                                | -0.132279833 | E9Q4S1_S497_M1_Pde8b   |
| _IHRDS[Phospho (STY)]GDNSQTEPHSFR_.3                                                                          | -0.36259767  | E9Q4S1_S377_M1_Pde8b   |
| _FVNSINKPLAAESEG[S[Phospho (STY)]DC[Carbamidomethyl (C)]EC[Carbamidomethyl (C)]NPTGK_.3                       | 0.328350012  | E9Q4S1_S734_M1_Pde8b   |
| _ASS[Phospho (STY)]PFRR_.2                                                                                    | 0.201413238  | E9Q5C9_S626_M1_Nolc1   |
| _GGISVQVNSVKFDS[Phospho (STY)]E_.2                                                                            | -0.028286376 | E9Q5C9_S701_M1_Nolc1   |
| _AAKES[Phospho (STY)]EEEEEEETEEK_.2                                                                           | -0.180482073 | E9Q5C9_S563_M1_Nolc1   |
| _TGS[Phospho (STY)]PTPSNQLNDSPTFK_.2                                                                          | -0.038656646 | E9Q5F9_S614_M1_Setd2   |
| _RGS[Phospho (STY)]LS[Phospho (STY)]PPSSAYER_.2                                                               | 0.381827246  | E9Q5F9_S2053_M2_Setd2  |
| _RRGS[Phospho (STY)]LS[Phospho (STY)]PPSSAYER_.3                                                              | -0.283854826 | E9Q5F9_S2053_M2_Setd2  |
| _AKS[Phospho (STY)]PT[Phospho (STY)]PDGSR_.2                                                                  | -0.123787423 | E9Q5K9_S146_M2_Ythdc1  |
| _RAKS[Phospho (STY)]PT[Phospho (STY)]PDGSR_.2                                                                 | -0.173411631 | E9Q5K9_S146_M2_Ythdc1  |
| _GIS[Phospho (STY)]PIVFDR_.2                                                                                  | -0.135714468 | E9Q5K9_S309_M1_Ythdc1  |
| _S[Phospho (STY)]LDDLAPPHHR_.2                                                                                | -0.357584029 | E9Q6B2_S247_M1_Ccdc8Sc |
| _EVS[Phospho (STY)]PPGAR_.2                                                                                   | -0.096204234 | E9Q6J5_S3010_M1_Bod1l  |
| _TETDITTVEQSS[Phospho (STY)]PSGK_.2                                                                           | -0.440861308 | E9Q6J5_S2841_M1_Bod1l  |
| _YYS[Phospho (STY)]DSDELTVQQR_.2                                                                              | 0.084089524  | E9Q6J5_S480_M1_Bod1l   |
| _AQLS[Phospho (STY)]PSVKR_.2                                                                                  | -0.206584249 | E9Q6J5_S3000_M1_Bod1l  |
| _KLS[Phospho (STY)]SQPSTDVSTDKER_.3                                                                           | -0.504429499 | E9Q6J5_S236_M1_Bod1l   |
| _GSDDVLVSGEVPEC[Carbamidomethyl (C)]EVGHM[Oxidation (M)]S[Phospho (STY)]PR_.3                                 | -0.110843366 | E9Q6J5_S2001_M1_Bod1l  |
| _LPVSS[Phospho (STY)]TSNLHVDR_.2                                                                              | -0.061032139 | E9Q6P5_S160_M1_Ttc7b   |

|                                                                                       |              |                         |
|---------------------------------------------------------------------------------------|--------------|-------------------------|
| _SC[Carbamidomethyl (C)]YNLTNPDSGRGS[Phospho (STY)]SLLDR_.3                           | 0.07449792   | E9Q6P5_S629_M1_Ttc7b    |
| _GS[Phospho (STY)]SLLDR_.2                                                            | 0.018510823  | E9Q6P5_S629_M1_Ttc7b    |
| _VEQALSEVASS[Phospho (STY)]LQSSAPK_.2                                                 | -0.098053936 | E9Q6P5_S678_M1_Ttc7b    |
| _ [Acetyl (Protein N-term)]S[Phospho (STY)]DTEENPLEESR_.2                             | 0.176211902  | E9Q743_S2_M1_Cfap251    |
| _NTEEPSS[Phospho (STY)]PVRK_.2                                                        | -0.194983406 | E9Q784_S110_M1_Zc3h13   |
| _SKLS[Phospho (STY)]PS[Phospho (STY)]PSLR_.2                                          | 0.132612159  | E9Q784_S207_M2_Zc3h13   |
| _S[Phospho (STY)]PERPTGDLR_.2                                                         | -0.048909424 | E9Q784_S77_M1_Zc3h13    |
| _EVS[Phospho (STY)]PEVVR_.2                                                           | -0.175221721 | E9Q784_S198_M1_Zc3h13   |
| _DQRPSS[Phospho (STY)]PIR_.2                                                          | 0.038750749  | E9Q784_S704_M1_Zc3h13   |
| _AAVVAS[Phospho (STY)]PLLDQQR_.2                                                      | -0.091592215 | E9Q784_S242_M1_Zc3h13   |
| _SLS[Phospho (STY)]PSHLTEDR_.2                                                        | -0.206975308 | E9Q784_S953_M1_Zc3h13   |
| _S[Phospho (STY)]KGDS[Phospho (STY)]DVS[Phospho (STY)]DEEAAPQNK_.2                    | -0.07862454  | E9Q784_S1086_M3_Zc3h13  |
| _RS[Phospho (STY)]PERPTGDLR_.3                                                        | -0.25462919  | E9Q784_S77_M1_Zc3h13    |
| _SSS[Phospho (STY)]PGQHHS[Phospho (STY)]PLSSR_.2                                      | -0.399400594 | E9Q784_S318_M2_Zc3h13   |
| _SKLS[Phospho (STY)]PS[Phospho (STY)]PSLRK_.2                                         | -0.174710885 | E9Q784_S207_M2_Zc3h13   |
| _LRS[Phospho (STY)]PSNDSAHR_.2                                                        | -0.05465481  | E9Q784_S1273_M1_Zc3h13  |
| _S[Phospho (STY)]AS[Phospho (STY)]PYPTHC[Carbamidomethyl (C)]LSS[Phospho (STY)]PQR_.2 | -0.369384973 | E9Q784_S369_M3_Zc3h13   |
| _SQS[Phospho (STY)]C[Carbamidomethyl (C)]SDTVQDR_.2                                   | 0.10888747   | E9Q7F2_S279_M1_Rnf169   |
| _TQPDGTSVGPGEAS[Phospho (STY)]PISQR_.2                                                | 0.242204143  | E9Q7G0_S1739_M1_Numa1   |
| _VSSETHQGGPT[Phospho (STY)]PESK_.2                                                    | -0.421135614 | E9Q7G0_T1982_M1_Numa1   |
| _LQES[Phospho (STY)]PAPEKGEVLGDALQLDTLK_.3                                            | -0.136625193 | E9Q7G0_S398_M1_Numa1    |
| _YEKEFGDGS[Phospho (STY)]DENEVEDQEPR_.3                                               | -0.157413394 | E9Q8D0_S283_M1_Dnajc21  |
| _SFS[Phospho (STY)]VPKK_.2                                                            | -0.090634304 | E9Q8I9_S1991_M1_Fry     |
| _NSDLFTVLS[Phospho (STY)]R_.2                                                         | -0.210670586 | E9Q8I9_S1936_M1_Fry     |
| _AT[Phospho (STY)]FAGGSRDGVITC[Carbamidomethyl (C)]QPGDSEEK_.3                        | 0.063486485  | E9Q8I9_T2810_M1_Fry     |
| _LLPGSSPS[Phospho (STY)]S[Phospho (STY)]PEDEVKDR_.2                                   | 0.416526324  | E9Q8I9_S1382_M2_Fry     |
| _SSS[Phospho (STY)]PDLSSSK_.2                                                         | -0.120090911 | E9Q8I9_S1940_M1_Fry     |
| _S[Phospho (STY)]LDSLDKC[Carbamidomethyl (C)]DM[Oxidation (M)]QILEER_.3               | -0.011418403 | E9Q8I9_S2495_M1_Fry     |
| _EQENMDDTNS[Phospho (STY)]EQQFR_.2                                                    | 0.333358977  | E9Q8I9_S2459_M1_Fry     |
| _NFS[Phospho (STY)]FAKK_.2                                                            | 0.19526132   | E9Q9D5_S147_M1_Rabl2    |
| _STHS[Phospho (STY)]LPSR_.2                                                           | 0.450943763  | E9QAT4_S1377_M1_Sec16a  |
| _APS[Phospho (STY)]LTSDSEGKPAQAVK_.3                                                  | -0.060818034 | E9QAT4_S2101_M1_Sec16a  |
| _ASHYS[Phospho (STY)]DQLAPR_.2                                                        | 0.024874595  | E9QAT4_S1245_M1_Sec16a  |
| _S[Phospho (STY)]IHS[Phospho (STY)]EHSAR_.2                                           | -0.067891563 | E9QAT4_S1362_M2_Sec16a  |
| _FTGS[Phospho (STY)]FDDDAEIHRDPYGEAADRR_.4                                            | -0.430496935 | E9QAT4_S1342_M1_Sec16a  |
| _RSS[Phospho (STY)]LS[Phospho (STY)]SHSHQSQIYR_.3                                     | 0.131341742  | E9QAT4_S1384_M2_Sec16a  |
| _LPS[Phospho (STY)]PTKEKPPPPPPGGGK_.3                                                 | 0.053315779  | F6SEU4_S788_M1_Syngap1  |
| _S[Phospho (STY)]QPKLDR_.2                                                            | -0.246167165 | F6SEU4_S146_M1_Syngap1  |
| _TKS[Phospho (STY)]QPKLDR_.2                                                          | -0.075868248 | F6SEU4_S146_M1_Syngap1  |
| _FRS[Phospho (STY)]ADHDR_.2                                                           | -0.242246661 | F6SEU4_S165_M1_Syngap1  |
| _LLNDISTALR_.2                                                                        | 0.276483806  | #N/A                    |
| _ALYESEENC[Carbamidomethyl (C)]EVDPIK_.2                                              | -0.017592694 | #N/A                    |
| _GKS[Phospho (STY)]QQLTVSAAQKPR_.3                                                    | -0.38119128  | F6SEU4_S1070_M1_Syngap1 |
| _EFAEYVTNHYR_.2                                                                       | -0.164438152 | #N/A                    |
| _QQS[Phospho (STY)]LSKEGS[Phospho (STY)]IGGSGGSGGGGGGLKPSITK_.3                       | -0.269735617 | F6SEU4_S1105_M2_Syngap1 |
| _EYEEIHS[Phospho (STY)]LKER_.2                                                        | -0.402502304 | F6SEU4_S1201_M1_Syngap1 |
| _SSPAYC[Carbamidomethyl (C)]TSSS[Phospho (STY)]DITEPEQK_.2                            | -0.095928289 | F6SEU4_S825_M1_Syngap1  |

|                                                                               |              |                          |
|-------------------------------------------------------------------------------|--------------|--------------------------|
| _TVS[Phospho (STY)]VPVEGR_.2                                                  | 0.188848293  | F6SEU4_S87_M1_Syngap1    |
| _DLNSS[Phospho (STY)]IDLQSFM[Oxidation (M)]AR_.2                              | -0.236589654 | F6SEU4_S766_M1_Syngap1   |
| _ILM[Oxidation (M)]QYQAR_.2                                                   | -0.278175777 | #N/A                     |
| _EGS[Phospho (STY)]IGGSGSGGGGGGGLKPSITK_.3                                    | -0.014739694 | F6SEU4_S1111_M1_Syngap1  |
| _GKS[Phospho (STY)]QQLTVSAAQK_.2                                              | 0.088043121  | F6SEU4_S1070_M1_Syngap1  |
| _QY[Phospho (STY)]SMEAAPAAPFR_.2                                              | -0.254414536 | F6SEU4_Y116_M1_Syngap1   |
| _VKEYEEIHS[Phospho (STY)]LKER_.3                                              | 0.141015933  | F6SEU4_S1201_M1_Syngap1  |
| _LSQM[Oxidation (M)]GVTTDGVPAQQLR_.2                                          | 0.227923613  | #N/A                     |
| _S[Phospho (STY)]VSM[Oxidation (M)]LDLQGDGPGR_.2                              | -0.064984266 | F6SEU4_S840_M1_Syngap1   |
| _DAIGEFIR_.2                                                                  | -0.297493555 | #N/A                     |
| _RLSQEEQTSK_.2                                                                | -0.160596291 | #N/A                     |
| _GPS[Phospho (STY)]AEM[Oxidation (M)]QGYMMR_.2                                | 0.2666657    | F6SEU4_S752_M1_Syngap1   |
| _GLNSS[Phospho (STY)]M[Oxidation (M)]DMAR_.2                                  | 0.11030826   | F6SEU4_S780_M1_Syngap1   |
| _C[Carbamidomethyl (C)]TAS[Phospho (STY)]SLAEHQANLR_.2                        | 0.303563542  | F6SEU4_S534_M1_Syngap1   |
| _QHS[Phospho (STY)]QTPSTLNPTM[Oxidation (M)]PASER_.3                          | -0.180761242 | F6SEU4_S1135_M1_Syngap1  |
| _S[Phospho (STY)]MDESRLDR_.2                                                  | 0.441344851  | F6SEU4_S1183_M1_Syngap1  |
| _TVS[Phospho (STY)]VPVEGRPHGEHEYHLGR_.4                                       | -0.319120381 | F6SEU4_S87_M1_Syngap1    |
| _EYSKS[Phospho (STY)]M[Oxidation (M)]DESRLDR_.3                               | 0.244938245  | F6SEU4_S1183_M1_Syngap1  |
| _EYSKS[Phospho (STY)]MDESRLDR_.2                                              | -0.18427986  | F6SEU4_S1183_M1_Syngap1  |
| _LS[Phospho (STY)]QGGSSSITAAGMR_.2                                            | 0.240168525  | F6SEU4_S892_M1_Syngap1   |
| _VKEYEEIHS[Phospho (STY)]LK_.3                                                | -0.609479283 | F6SEU4_S1201_M1_Syngap1  |
| _TVAWVSNM[Oxidation (M)]PHLS[Phospho (STY)]ADIESAHIER_.3                      | -0.305433085 | F6SEU4_S1162_M1_Syngap1  |
| _S[Phospho (STY)]QPMVLR_.2                                                    | 0.271446685  | F6SEU4_S743_M1_Syngap1   |
| _QTPQAPQS[Phospho (STY)]PR_.2                                                 | -0.177717776 | F6ZDS4_S2141_M1_Tpr      |
| _TDGFAEAIHS[Phospho (STY)]PQVAGVPR_.3                                         | -0.22540726  | F6ZDS4_S2223_M1_Tpr      |
| _GAILSEEEAAM[Oxidation (M)]S[Phospho (STY)]PTAAAVAK_.2                        | 0.066213557  | F6ZDS4_S453_M1_Tpr       |
| _LGAPENSGIST[Phospho (STY)]LER_.2                                             | -0.216333547 | F8VPU2_T24_M1_Farp1      |
| _AC[Carbamidomethyl (C)]TLELGPHQS[Phospho (STY)]PALPK_.2                      | -0.443223493 | F8VPU2_S427_M1_Farp1     |
| _SPDEATAADQES[Phospho (STY)]EDDLSASR_.2                                       | -0.079104516 | F8VPU2_S892_M1_Farp1     |
| _QSPQSASLTFGEGTES[Phospho (STY)]PGGQSC[Carbamidomethyl (C)]QQAK_.3            | -0.034506434 | F8VPU2_S403_M1_Farp1     |
| _SNGPTPELLASS[Phospho (STY)]PPDNK_.2                                          | 0.230682239  | F8VPU2_S875_M1_Farp1     |
| _AC[Carbamidomethyl (C)]TLELGPHQS[Phospho (STY)]PALPKS[Phospho (STY)]PPGSK_.3 | -0.38632885  | F8VPU2_S427_M2_Farp1     |
| _GAGS[Phospho (STY)]PTPLPTK_.2                                                | -0.030492724 | F8VPZ9_S1427_M1_Bicra    |
| _TLS[Phospho (STY)]DESLC[Carbamidomethyl (C)]SGR_.2                           | -0.439600664 | G3X9J0_S1538_M1_Sipa1l3  |
| _SSS[Phospho (STY)]EITLSEC[Carbamidomethyl (C)]DVEEPGDPR_.2                   | -0.549077079 | G3X9J0_S166_M1_Sipa1l3   |
| _EQSNPS[Phospho (STY)]PSQDTDGVK_.2                                            | 0.067135783  | G3X9J0_S94_M1_Sipa1l3    |
| _S[Phospho (STY)]KDVEFQDGWPR_.2                                               | -0.081994952 | G3X9J0_S140_M1_Sipa1l3   |
| _QDAAGKDS[Phospho (STY)]PNR_.2                                                | 0.329611333  | G3X9J0_S1248_M1_Sipa1l3  |
| _LSVSS[Phospho (STY)]NDTQESGNSSGSPGAK_.2                                      | -0.442727831 | G3X9K3_S394_M1_Arfgef1   |
| _GREGS[Phospho (STY)]LTGTK_.2                                                 | -0.184916768 | G3X9K3_S1076_M1_Arfgef1  |
| _S[Phospho (STY)]VDIHDSIQPR_.2                                                | -0.30240835  | G3X9K3_S1566_M1_Arfgef1  |
| _QQQHLLQS[Phospho (STY)]PVSHHEPESPHLR_.5                                      | 0.322060954  | G3X9K3_S234_M1_Arfgef1   |
| _TLS[Phospho (STY)]FDTSK_.2                                                   | -0.202630012 | G3XA57_S277_M1_Rab11fip2 |
| _NSS[Phospho (STY)]PPSPNK_.2                                                  | -0.065924399 | G5E829_S1178_M1_Atp2b1   |
| _SATSSSPGS[Phospho (STY)]PLHSLETSL_.2                                         | -0.352252562 | G5E829_S1211_M1_Atp2b1   |
| _EASDIILTDDNFTSIVK_.2                                                         | -0.223172671 | #N/A                     |
| _VYTFNSVR_.2                                                                  | -0.018496821 | #N/A                     |



|                                                                                 |              |                        |
|---------------------------------------------------------------------------------|--------------|------------------------|
| _TSPNEGLSGNPADLER_.2                                                            | 0.012273311  | #N/A                   |
| _GIIDSTVSEQR_.2                                                                 | -0.149097198 | #N/A                   |
| _QVVAVTGDDTNDGPALK_.2                                                           | -0.148655877 | #N/A                   |
| _YGDLLPADGILIQGNDLK_.2                                                          | -0.324209241 | #N/A                   |
| _IDESSLTGESDHVKK_.3                                                             | -0.184606432 | #N/A                   |
| _ADVGFAM[Oxidation (M)]GIAGTDVAK_.2                                             | -0.224746129 | #N/A                   |
| _EANHDGDFGITLTELR_.3                                                            | -0.021515853 | #N/A                   |
| _KQDGAENR_.2                                                                    | -0.036497245 | #N/A                   |
| _NS[Phospho (STY)]LKEANHDGDFGITLTELR_.3                                         | -0.184569949 | G5E829_S17_M1_Atp2b1   |
| _TIC[Carbamidomethyl (C)]LAFR_.2                                                | 0.291736551  | #N/A                   |
| _M[Oxidation (M)]VTGDNINTAR_.2                                                  | -0.03037507  | #N/A                   |
| _TVIEPM[Oxidation (M)]ASEGLR_.2                                                 | 0.251344022  | #N/A                   |
| _TGTLTMNR_.2                                                                    | 0.104875183  | #N/A                   |
| _KADVGFAM[Oxidation (M)]GIAGTDVAK_.3                                            | -0.135177436 | #N/A                   |
| _FFDIDSGR_.2                                                                    | 0.327942871  | #N/A                   |
| _QVVAVTGDDTNDGPALK_.2                                                           | 0.157509785  | #N/A                   |
| _IQESYGDVYGIC[Carbamidomethyl (C)]TK_.2                                         | 0.072496829  | #N/A                   |
| _SSLYEGLEKPES[Phospho (STY)]R_.2                                                | -0.305145584 | G5E829_S1137_M1_Atp2b1 |
| _EEIPEEELAEDVEIDHAER_.3                                                         | 0.144996605  | #N/A                   |
| _SSPTDKHTLVK_.2                                                                 | 0.097611315  | #N/A                   |
| _NVYDSISK_.2                                                                    | -0.328885954 | #N/A                   |
| _ [Acetyl (Protein N-term)]GDMANNSVAYS[Phospho (STY)]GVKNSLK_.2                 | 0.095739178  | G5E829_S12_M1_Atp2b1   |
| _HLDAC[Carbamidomethyl (C)]ETM[Oxidation (M)]GNATAIC[Carbamidomethyl (C)]SDK_.3 | -0.116736209 | #N/A                   |
| _MTVVQAYINEK_.2                                                                 | -0.224041749 | #N/A                   |
| _IEDS[Phospho (STY)]EPIHLIDDTAEDDAPTKR_.3                                       | 0.267675118  | G5E829_S1155_M1_Atp2b1 |
| _AQDGAAMEMQPLKS[Phospho (STY)]EEGGDGDEKDK_.3                                    | -0.195051182 | G5E829_S338_M1_Atp2b1  |
| _SES[Phospho (STY)]PPAELPSLR_.2                                                 | 0.180482177  | G5E870_S312_M1_Trip12  |
| _AQTAPTKTS[Phospho (STY)]PR_.2                                                  | -0.092273783 | G5E870_S1460_M1_Trip12 |
| _DDSLDLS[Phospho (STY)]PQGR_.2                                                  | 0.611076254  | G5E870_S1024_M1_Trip12 |
| _AAS[Phospho (STY)]KDTISNNR_.2                                                  | 0.080437225  | G5E870_S1111_M1_Trip12 |
| _SAS[Phospho (STY)]PDYNR_.2                                                     | -0.027269645 | G5E870_S77_M1_Trip12   |
| _DFPQYFAVVSRL_.2                                                                | -0.223560466 | #N/A                   |
| _EFDS[Phospho (STY)]DSLRL_.2                                                    | -0.277160141 | G5E8K5_S958_M1_Ank3    |
| _TEEPVS[Phospho (STY)]PLTAYQK_.2                                                | 0.301822047  | G5E8K5_S1883_M1_Ank3   |
| _NEDLAELLNGM[Oxidation (M)]DEELDS[Phospho (STY)]PEELGTKR_.3                     | -0.000311821 | G5E8K5_S1114_M1_Ank3   |
| _YSYLTEPSMS[Phospho (STY)]PQSPC[Carbamidomethyl (C)]ER_.2                       | -0.127171858 | G5E8K5_S1470_M1_Ank3   |
| _IRDTS[Phospho (STY)]QEPC[Carbamidomethyl (C)]GR_.2                             | -0.320527926 | G5E8K5_S1406_M1_Ank3   |
| _NEDLAELLNGM[Oxidation (M)]DEELDS[Phospho (STY)]PEELGTK_.3                      | 0.342789867  | G5E8K5_S1114_M1_Ank3   |
| _GETALHM[Oxidation (M)]AAR_.2                                                   | 0.261848142  | #N/A                   |
| _RQS[Phospho (STY)]FASLALR_.2                                                   | 0.060935366  | G5E8K5_S1451_M1_Ank3   |
| _ADIVQQLLQQGASPNAATTSGYTPLHLAAR_.3                                              | 0.041444204  | #N/A                   |
| _VALLLLDQGAS[Phospho (STY)]PHAAAK_.2                                            | -0.212785318 | G5E8K5_S606_M1_Ank3    |
| _VHGEPAS[Phospho (STY)]DLS[Phospho (STY)]DID_.2                                 | 0.196529311  | G5E8P1_S1052_M2_Brd1   |
| _FVVTGGITR_.2                                                                   | -0.026025891 | #N/A                   |
| _SYDYQSV[C[Carbamidomethyl (C)]DPGAAPK_.2                                       | 0.575578205  | #N/A                   |
| _IIM[Oxidation (M)]LFTDGGEEER_.2                                                | 0.447552496  | #N/A                   |
| _QLVEIAAR_.2                                                                    | -0.194256108 | #N/A                   |

|                                                                       |              |                       |
|-----------------------------------------------------------------------|--------------|-----------------------|
| _VFTFSVGQHNYDR_3                                                      | -0.363625755 | #N/A                  |
| _VNHEPEPASGAS[Phospho (STY)]PGATIPK_2                                 | -0.105185782 | O08539_S324_M1_Bin1   |
| _GVFPENFTER_2                                                         | 0.234104472  | #N/A                  |
| _LNQNLNDVLVSLEK_2                                                     | -0.022032651 | #N/A                  |
| _VQAQHDYTATDTDELQK_3                                                  | -0.271916291 | #N/A                  |
| _GNKS[Phospho (STY)]PS[Phospho (STY)]PPPDGSPAATPEIR_3                 | -0.098494101 | #N/A                  |
| _NQAEEELIK_2                                                          | 0.13117979   | #N/A                  |
| _ADETKDEQFEQC[Carbamidomethyl (C)]VQNFNK_3                            | -0.253416831 | #N/A                  |
| _SPS[Phospho (STY)]PPPDGSPAATPEIR_2                                   | -0.18357261  | O08539_S298_M1_Bin1   |
| _LVDQALLTM[Oxidation (M)]DTYLGQFPDIK_3                                | -0.232434962 | #N/A                  |
| _VNHEPEPASGASPGATIPKS[Phospho (STY)]PSQLR_3                           | -0.332514325 | O08539_S332_M1_Bin1   |
| _AGDVVLVIPFQNPEEQDEGWLM[Oxidation (M)]GVK_3                           | 0.063099805  | #N/A                  |
| _AQPSDNAPEKGNKS[Phospho (STY)]PS[Phospho (STY)]PPPDGSPAATPEIR_4       | -0.218212284 | #N/A                  |
| _HHYESLQTAK_2                                                         | -0.084884642 | #N/A                  |
| _AAPQWC[Carbamidomethyl (C)]QGK_2                                     | -0.05522987  | #N/A                  |
| _IAENNDLLWM[Oxidation (M)]DYHQB_3                                     | -0.05409468  | #N/A                  |
| _QHGSNTFTVK_2                                                         | 0.232222379  | #N/A                  |
| _LQAHLVAQTNLLR_3                                                      | -0.345438827 | #N/A                  |
| _ESDWNQHKELEK_3                                                       | -0.063961295 | #N/A                  |
| _VGFYVNTFQSIAGLEENFHK_3                                               | 0.018151604  | #N/A                  |
| _NLGS[Phospho (STY)]INTELQDVQR_2                                      | -0.237754442 | O08547_S137_M1_Sec22b |
| _DLQQYQSQAK_2                                                         | 0.650672818  | #N/A                  |
| _GSPLVVISQK_2                                                         | 0.008945348  | #N/A                  |
| _M[Oxidation (M)]VIPGGIDVHTR_2                                        | -0.084803562 | #N/A                  |
| _SAAEVIAQAR_2                                                         | 0.153187584  | #N/A                  |
| _QIGENLIVPGGVK_2                                                      | 0.055956635  | #N/A                  |
| _VFNLVPR_2                                                            | 0.223907153  | #N/A                  |
| _KFPDPFVYK_2                                                          | 0.060539443  | #N/A                  |
| _IVLEDGTLHVTEGSGR_3                                                   | 0.064988287  | #N/A                  |
| _ILDLGITGPEGHVLSRPEEVEAEAVNR_4                                        | -0.181753211 | #N/A                  |
| _GTVVYGEPITASLGTGSHYWSK_3                                             | 0.131397504  | #N/A                  |
| _SITIANQTNC[Carbamidomethyl (C)]PLYVTK_2                              | -0.039128873 | #N/A                  |
| _AVGKDNFTLIPEGTNGTEER_3                                               | -0.371837987 | #N/A                  |
| _TIEAHSR_2                                                            | 0.157670242  | #N/A                  |
| _ITS[Phospho (STY)]DRLLIK_2                                           | -0.169055111 | O08553_S14_M1_Dpysl2  |
| _NIPRIT[Phospho (STY)]SDR_2                                           | -0.31376181  | O08553_T13_M1_Dpysl2  |
| _TS[Phospho (STY)]PAKQQAPPVR_2                                        | -0.156403494 | O08553_S522_M1_Dpysl2 |
| _DNFTLIPEGTNGTEER_2                                                   | -0.274053059 | #N/A                  |
| _ISVGSDADLVIWDPDSVK_2                                                 | 0.126376193  | #N/A                  |
| _M[Oxidation (M)]SVIWDK_2                                             | 0.250253282  | #N/A                  |
| _GIQEEM[Oxidation (M)]EALVK_2                                         | 0.304935426  | #N/A                  |
| _TVT[Phospho (STY)]PASS[Phospho (STY)]AKTS[Phospho (STY)]PAK_2        | 0.02706613   | #N/A                  |
| _TVT[Phospho (STY)]PASS[Phospho (STY)]AK_2                            | -0.095097807 | #N/A                  |
| _TVT[Phospho (STY)]PASS[Phospho (STY)]AKTS[Phospho (STY)]PAKQQAPPVR_3 | 0.205280537  | #N/A                  |
| _FQM[Oxidation (M)]PDQGM[Oxidation (M)]TSADDFQGTK_2                   | -0.204220214 | #N/A                  |
| _DHGVNSFLVYM[Oxidation (M)]AFK_2                                      | -0.04353073  | #N/A                  |
| _NLHQSGFSLGAQIDDNIPR_3                                                | -0.266483992 | #N/A                  |

|                                                                                                                            |              |                        |
|----------------------------------------------------------------------------------------------------------------------------|--------------|------------------------|
| _THNSALEYNIFEQM[Oxidation (M)]EC[Carbamidomethyl (C)]R_.3                                                                  | -0.110296354 | #N/A                   |
| _FQLTDSQIYEVLSVIR_.3                                                                                                       | -0.368194146 | #N/A                   |
| _M[Oxidation (M)]DENQFVAVTSTNAAK_.2                                                                                        | 0.039085636  | #N/A                   |
| _IVNDDQSFYADIYM[Oxidation (M)]EDGLIK_.2                                                                                    | -0.511974842 | #N/A                   |
| _NLHQSGFSLGAQIDDNIPRR_.4                                                                                                   | -0.374068817 | #N/A                   |
| _GLYDGPVC[Carbamidomethyl (C)]EVSVT[Phospho (STY)]PK_.2                                                                    | 0.017957161  | O08553_T509_M1_Dpysl2  |
| _GLYDGPVC[Carbamidomethyl (C)]EVSVTPKT[Phospho (STY)]VT[Phospho (STY)]PASSAK_.3                                            | 0.245374752  | O08553_T512_M2_Dpysl2  |
| _DIGAIAQVHAENGDIIEEQQR_.3                                                                                                  | -0.392246361 | #N/A                   |
| _DRFQLTDSQIYEVLSVIR_.3                                                                                                     | -0.489084937 | #N/A                   |
| _SC[Carbamidomethyl (C)]C[Carbamidomethyl (C)]DYSLHVDITEWHK_.3                                                             | -0.44664077  | #N/A                   |
| _GLYDGPVC[Carbamidomethyl (C)]EVSVT[Phospho (STY)]PKT[Phospho (STY)]VT[Phospho (STY)]PAS[Phospho (STY)]S[Phospho (STY)]AKT | 0.11946588   | #N/A                   |
| _GRIS[Phospho (STY)]VGSDADLVIWDPDSVK_.3                                                                                    | -0.187473002 | O08553_S402_M1_Dpysl2  |
| _AALAGGTTM[Oxidation (M)]IIDHVPEPGTSLAAFDQWR_.3                                                                            | -0.377193024 | #N/A                   |
| _AAAFVTSPPSPDPTTPDFLNSLLSC[Carbamidomethyl (C)]GDLQVTGSAHC[Carbamidomethyl (C)]TFNTAQK_.4                                  | -0.168016088 | #N/A                   |
| _FTQSYDYLT[Phospho (STY)]DEEER_.2                                                                                          | 0.169332391  | O08576_T215_M1_Rundc3a |
| _SNEC[Carbamidomethyl (C)]LVSDSPEGSPALS[Phospho (STY)]PS_.2                                                                | 0.116038058  | O08576_S444_M1_Rundc3a |
| _DDIFSS[Phospho (STY)]LEEEGKDR_.2                                                                                          | 0.339660706  | O08579_S142_M1_Emd     |
| _QSEPFVASQSPPY[Phospho (STY)]EDGSADH_.2                                                                                    | -0.186331506 | O08581_Y329_M1_Kcnk1   |
| _LVLVS[Phospho (STY)]PTSEQYDSLRL_.2                                                                                        | -0.269009963 | O08582_S69_M1_Gtpbp1   |
| _SRS[Phospho (STY)]PVDSPVPASM[Oxidation (M)]FAPEPSS[Phospho (STY)]PGAAR_.3                                                 | -0.189487693 | O08582_S25_M2_Gtpbp1   |
| _SPVDSPVPASM[Oxidation (M)]FAPEPSS[Phospho (STY)]PGAAR_.3                                                                  | -0.161526357 | O08582_S25_M1_Gtpbp1   |
| _LLQTTNNS[Phospho (STY)]PMNSKPQIK_.3                                                                                       | 0.06681035   | O08582_S580_M1_Gtpbp1  |
| _QQLS[Phospho (STY)]AEELDAQLDAYNAR_.2                                                                                      | 0.087813926  | O08583_S237_M1_Alyref  |
| _LQS[Phospho (STY)]EPESIR_.2                                                                                               | 0.022739325  | O08585_S104_M1_Clta    |
| _LEALDANSR_.2                                                                                                              | 0.044115326  | #N/A                   |
| _ELEEWYAR_.2                                                                                                               | -0.034579266 | #N/A                   |
| _VADEAFYK_.2                                                                                                               | -0.027078406 | #N/A                   |
| _LC[Carbamidomethyl (C)]DFNPK_.2                                                                                           | 0.564491196  | #N/A                   |
| _KQEAWEK_.2                                                                                                                | 0.086814019  | #N/A                   |
| _QDEQLQK_.2                                                                                                                | 0.011929061  | #N/A                   |
| _WREEQTER_.2                                                                                                               | -0.125475655 | #N/A                   |
| _AIKELEEWYAR_.2                                                                                                            | -0.208707735 | #N/A                   |
| _LQS[Phospho (STY)]EPESIRK_.2                                                                                              | -0.263772074 | O08585_S104_M1_Clta    |
| _NNIDDVVR_.2                                                                                                               | 0.043466718  | #N/A                   |
| _VENGs[Phospho (STY)]LC[Carbamidomethyl (C)]DQEIDSIC[Carbamidomethyl (C)]SIER_.2                                           | -0.09617522  | O08586_S294_M1_Pten    |
| _KLNKTDEEISS[Phospho (STY)]_.2                                                                                             | -0.076729527 | O08599_S594_M1_Stxbp1  |
| _SSAS[Phospho (STY)]FSTTAVSAR_.2                                                                                           | -0.462856801 | O08599_S509_M1_Stxbp1  |
| _LNKTDEEISS[Phospho (STY)]_.2                                                                                              | -0.397071225 | O08599_S594_M1_Stxbp1  |
| _SQLLILDR_.2                                                                                                               | -0.308832928 | #N/A                   |
| _HYPYISTR_.2                                                                                                               | -0.037834737 | #N/A                   |
| _ISEQTYQLSR_.2                                                                                                             | -0.202464545 | #N/A                   |
| _NGITEENLNK_.2                                                                                                             | -0.087720114 | #N/A                   |
| _YETSGIGEAR_.2                                                                                                             | 0.121883001  | #N/A                   |
| _HIAEVSQEVTR_.2                                                                                                            | 0.50927031   | #N/A                   |
| _DNALLAQLIQDK_.2                                                                                                           | 0.366380187  | #N/A                   |
| _AIVPILLDANVSTYDK_.2                                                                                                       | -0.0641294   | #N/A                   |
| _NKAPGEYR_.2                                                                                                               | -0.013151189 | #N/A                   |

|                                                                     |              |                       |
|---------------------------------------------------------------------|--------------|-----------------------|
| _LLDTLKK_2                                                          | 0.480803354  | #N/A                  |
| _EPLPSLEAVYLITPSEK_2                                                | -0.185138879 | #N/A                  |
| _ADDPMT[Oxidation (M)]GEGPDK_2                                      | -0.316391301 | #N/A                  |
| _EVLLDEDDDLWIALR_2                                                  | 0.18265206   | #N/A                  |
| _IM[Oxidation (M)]HDVIK_2                                           | -0.31748837  | #N/A                  |
| _SLKDFSSSK_2                                                        | -0.190059109 | #N/A                  |
| _LAEQIATLC[Carbamidomethyl (C)]ATLK_2                               | 0.011873628  | #N/A                  |
| _DNALLAQLIQDKLDAYK_2                                                | -0.115006528 | #N/A                  |
| _AAHVFFTDSC[Carbamidomethyl (C)]PDALFNELVK_3                        | -0.278698361 | #N/A                  |
| _HYQGTVDK_2                                                         | 0.017140721  | #N/A                  |
| _VLVVDQLSM[Oxidation (M)]R_2                                        | -0.300509561 | #N/A                  |
| _REPLPSLEAVYLITPSEK_3                                               | -0.106275949 | #N/A                  |
| _VEQDLAM[Oxidation (M)]GTDAEGEK_2                                   | -0.263638589 | #N/A                  |
| _SVHSLISDFKDPPTAK_3                                                 | -0.454965147 | #N/A                  |
| _M[Oxidation (M)]LSSC[Carbamidomethyl (C)]C[Carbamidomethyl (C)]K_2 | 0.311125209  | #N/A                  |
| _DFSSEK_2                                                           | -0.010248548 | #N/A                  |
| _KM[Oxidation (M)]PQYQK_2                                           | 0.414553388  | #N/A                  |
| _IM[Oxidation (M)]HDVIK_2                                           | 0.186525728  | #N/A                  |
| _C[Carbamidomethyl (C)]AYEVTQANGK_2                                 | 0.146245844  | #N/A                  |
| _M[Oxidation (M)]TDIM[Oxidation (M)]TEGITIVEDINKR_3                 | -0.553598134 | #N/A                  |
| _WEVLIGSTHILTPQK_2                                                  | -0.331393728 | #N/A                  |
| _M[Oxidation (M)]TDIM[Oxidation (M)]TEGITIVEDINK_2                  | -0.535232521 | #N/A                  |
| _DIM[Oxidation (M)]EDTIEDKLDTK_2                                    | -0.041989906 | #N/A                  |
| _DIMEDTIEDK_2                                                       | 0.470302066  | #N/A                  |
| _YSTHLHLAEDC[Carbamidomethyl (C)]M[Oxidation (M)]K_3                | 0.030366473  | #N/A                  |
| _LIQHAQIPPEDESIITNMAHLGVPIVTDSTLR_4                                 | 0.166104053  | #N/A                  |
| _VEQDLAMGTDAEGEKIKDPMR_3                                            | 0.47146455   | #N/A                  |
| _GFDPPSPVLHELTFQAM[Oxidation (M)]SYDLLPIENDVYK_3                    | -0.311318937 | #N/A                  |
| _LDAYKADDPMTMGEGPDK_3                                               | 0.313248128  | #N/A                  |
| _DLS[Phospho (STY)]QMLKK_2                                          | -0.194593886 | O08599_S328_M1_Stxbp1 |
| _VIENTDGS[Phospho (STY)]EEEM[Oxidation (M)]DAR_2                    | -0.118080076 | O08638_S1954_M1_Myh11 |
| _GTGYTEQLQYSS[Phospho (STY)]PGLGVK_2                                | -0.271828498 | O08644_S630_M1_Ephb6  |
| _ELESGETES[Phospho (STY)]DEEPTSPR_2                                 | 0.235281529  | O08648_S454_M1_Map3k4 |
| _LES[Phospho (STY)]EEDSIGWGTADC[Carbamidomethyl (C)]GPEASR_2        | 0.388448496  | O08648_S492_M1_Map3k4 |
| _AGVAS[Phospho (STY)]PVQR_2                                         | -0.2729979   | O08672_S643_M1_Kifc2  |
| _LSILYPATTGR_2                                                      | 0.14137518   | #N/A                  |
| _LPFPIIDDK_2                                                        | 0.483922961  | #N/A                  |
| _VVFIFGPDKK_2                                                       | -0.139684955 | #N/A                  |
| _DINAYNETPTEK_2                                                     | 0.085306012  | #N/A                  |
| _VVDLSLQGTGKPVATPVDWK_3                                             | -0.141517047 | #N/A                  |
| _DLAILLGM[Oxidation (M)]LDPVEK_2                                    | 0.21955899   | #N/A                  |
| _NFDEILR_2                                                          | 0.174692     | #N/A                  |
| _DFTPVC[Carbamidomethyl (C)]TTELGR_2                                | -0.258998849 | #N/A                  |
| _PGGLLGDEAPNFEANTTIGR_2                                             | -0.029088319 | #N/A                  |
| _VVFIFGPDK_2                                                        | 0.145062294  | #N/A                  |
| _LIALSIDSVEDHLAWSK_2                                                | -0.062989435 | #N/A                  |
| _KGESVM[Oxidation (M)]VVPTLSEEEAK_3                                 | -0.143957623 | #N/A                  |

|                                                                           |              |                       |
|---------------------------------------------------------------------------|--------------|-----------------------|
| _LPFPIIDDKGR_.2                                                           | -0.364621907 | #N/A                  |
| _FHDFLGDSWGILFSHPR_.3                                                     | -0.195272498 | #N/A                  |
| _RRS[Phospho (STY)]ESSGNLPSVADTR_.3                                       | 0.164880719  | O08715_S101_M1_Akap1  |
| _S[Phospho (STY)]ESSGNLPSVADTR_.2                                         | 0.002980787  | O08715_S101_M1_Akap1  |
| _NETLGGTC[Carbamidomethyl (C)]LNVGC[Carbamidomethyl (C)]IPSK_.2           | 0.08269943   | #N/A                  |
| _GIEIPEVR_.2                                                              | -0.009680786 | #N/A                  |
| _IPNIYAIGDVVAGPM[Oxidation (M)]LAHK_.3                                    | -0.146475247 | #N/A                  |
| _ADGSTQVIDTK_.2                                                           | 0.068352598  | #N/A                  |
| _EANLAAAFGKPINF_.2                                                        | -0.205067903 | #N/A                  |
| _IDVSVEAASGGK_.2                                                          | -0.071390744 | #N/A                  |
| _VC[Carbamidomethyl (C)]HAHPTLSEAFR_.3                                    | 0.161271664  | #N/A                  |
| _ALTGGIAHLFK_.2                                                           | -0.101216388 | #N/A                  |
| _SEEQLKEEGIEFK_.2                                                         | -0.331253118 | #N/A                  |
| _RPFTQNLGLEELGIELDPK_.3                                                   | -0.428846806 | #N/A                  |
| _LGADVTAVEFLGHVGGIGIDM[Oxidation (M)]EISK_.3                              | -0.040782042 | #N/A                  |
| _AEVITC[Carbamidomethyl (C)]DVLLVC[Carbamidomethyl (C)]IGR_.2             | -0.002390515 | #N/A                  |
| _VLGAHILGPGAGEM[Oxidation (M)]VNEAALALEYGASC[Carbamidomethyl (C)]EDIAR_.3 | 0.088192146  | #N/A                  |
| _NFLASQVPFPSR_.2                                                          | 0.205557715  | #N/A                  |
| _VVTIAPGLFATPLLTLPEK_.2                                                   | -0.258070556 | #N/A                  |
| _LVAGEM[Oxidation (M)]GQNEPDQGGQR_.2                                      | -0.127214691 | #N/A                  |
| _GVIINTASVAAFEGQVGQAAYSASK_.3                                             | -0.273691869 | #N/A                  |
| _S[Phospho (STY)]PGESQSEDIEASR_.2                                         | -0.09058743  | O08759_S8_M1_Ube3a    |
| _NLDFQALEETTEYDGGYTR_.2                                                   | 0.143963812  | #N/A                  |
| _AASAPAKES[Phospho (STY)]PK_.2                                            | -0.262178035 | O08784_S794_M1_Tcof1  |
| _NSS[Phospho (STY)]PAVPAPTPEGVQAVNTTK_.2                                  | -0.044691789 | O08784_S853_M1_Tcof1  |
| _KLS[Phospho (STY)]GDLEAGAPK_.2                                           | 0.050437414  | O08784_S1191_M1_Tcof1 |
| _AASAPAKES[Phospho (STY)]PKK_.2                                           | 0.06194463   | O08784_S794_M1_Tcof1  |
| _DSAS[Phospho (STY)]PIQKK_.2                                              | 0.137265649  | O08784_S1303_M1_Tcof1 |
| _SAEPLANTVLASET[Phospho (STY)]EEEGNAQALGPTAK_.3                           | -0.19779822  | O08784_T171_M1_Tcof1  |
| _ASAVS[Phospho (STY)]PEKAPMTSK_.2                                         | 0.172546207  | O08784_S1216_M1_Tcof1 |
| _LDETQTLLR_.2                                                             | 0.281627115  | #N/A                  |
| _ASEQIYGSPSSPYEC[Carbamidomethyl (C)]LR_.2                                | -0.172160653 | #N/A                  |
| _QLTAHLQDVNR_.3                                                           | 0.252825767  | #N/A                  |
| _QSQIQVFEDGADTTS[Phospho (STY)]PETPDSSASK_.3                              | 0.105291789  | O08788_S105_M1_Dctn1  |
| _AFLQGGQEATDIALLLR_.2                                                     | 0.10638836   | #N/A                  |
| _LVLTEQLHLHLSR_.3                                                         | -0.04484733  | #N/A                  |
| _LHISQLQHENSILR_.3                                                        | -0.259210635 | #N/A                  |
| _LNQLSTHVVVDITR_.3                                                        | -0.132929209 | #N/A                  |
| _VTFSC[Carbamidomethyl (C)]AAGLGQR_.2                                     | 0.289120528  | #N/A                  |
| _VEAAQETVADYQQTIK_.2                                                      | -0.414084045 | #N/A                  |
| _SLEDQVETLR_.2                                                            | -0.13245514  | #N/A                  |
| _YEQGTGC[Carbamidomethyl (C)]WQGPNR_.2                                    | 0.066808161  | #N/A                  |
| _RHES[Phospho (STY)]DEDS[Phospho (STY)]LGSSGR_.2                          | -0.410145139 | O08796_S469_M2_Eef2k  |
| _VES[Phospho (STY)]PGTYQQDPWAMTDEEK_.2                                    | -0.442191937 | O08915_S159_M1_Aip    |
| _VTGEVLDILSR_.2                                                           | -0.107107227 | #N/A                  |
| _DIHDDQDYLHSLGK_.3                                                        | -0.035230514 | #N/A                  |
| _VASSDLVNM[Oxidation (M)]GISVVSYTLK_.2                                    | -0.036409965 | #N/A                  |

|                                                                                     |              |                        |
|-------------------------------------------------------------------------------------|--------------|------------------------|
| _S[Phospho (STY)]PPVMVAGGR_2                                                        | -0.058253161 | O08917_S19_M1_Flot1    |
| _ITLVSSSGSTM[Oxidation (M)]GAAK_2                                                   | 0.167759384  | #N/A                   |
| _RTPS[Phospho (STY)]EAER_2                                                          | 0.36514059   | O08919_S411_M1_Numbl   |
| _AEAAAAPAVAPGPAQPGHVS[Phospho (STY)]PTPATTS[Phospho (STY)]PGEKGEAGTPVAAGTTAAAIIPR_4 | 0.115077521  | O08919_S270_M2_Numbl   |
| _SVLWVSADGLR_2                                                                      | 0.520831445  | #N/A                   |
| _KAEAAAAPAVAPGPAQPGHVS[Phospho (STY)]PT[Phospho (STY)]PATTSPGKE_4                   | 0.209130792  | O08919_T265_M2_Numbl   |
| _KAEAAAAPAVAPGPAQPGHVS[Phospho (STY)]PT[Phospho (STY)]PATTSPGKEGAGTPVAAGTTAAAIIPR_4 | -0.250161879 | O08919_T265_M2_Numbl   |
| _TPS[Phospho (STY)]EAER_2                                                           | -0.196465434 | O08919_S411_M1_Numbl   |
| _EGS[Phospho (STY)]FRLS[Phospho (STY)]GGGRPAER_3                                    | 0.049577747  | O08919_S224_M2_Numbl   |
| _Acetyl (Protein N-term)]SLYPS[Phospho (STY)]LEDLKVDK_2                             | 0.125973632  | O08992_S6_M1_Sdcbp     |
| _AVSYLGPK_2                                                                         | -0.043305743 | #N/A                   |
| _VC[Carbamidomethyl (C)]IDSEHSSDTLLATLNK_3                                          | 0.018320087  | #N/A                   |
| _S[Phospho (STY)]AGELPGATSDTNDIDTTAASRPGPAR_3                                       | -0.155436701 | O09039_S129_M1_Sh2b3   |
| _ATWGDGGDNS[Phospho (STY)]PSNVVSK_2                                                 | -0.221380669 | O09044_S110_M1_Snap23  |
| _NM[Oxidation (M)]QNVHEVPLTLDR_3                                                    | -0.197629104 | #N/A                   |
| _GAVYSFDPVGSYQR_2                                                                   | 0.295068187  | #N/A                   |
| _AGGSASAM[Oxidation (M)]LQPLLDNQVGFK_2                                              | 0.064051845  | #N/A                   |
| _DVYTGDAIR_2                                                                        | 0.157698501  | #N/A                   |
| _DVFISAAER_2                                                                        | -0.087576645 | #N/A                   |
| _LSEGFSlHTR_2                                                                       | -0.324720446 | #N/A                   |
| _IAC[Carbamidomethyl (C)]EEEEFS[Phospho (STY)]DS[Phospho (STY)]DEEGEGGRK_2          | -0.165610028 | O09106_S421_M2_Hdac1   |
| _MLPHAPGVQM[Oxidation (M)]QAIPEDAIPES[Phospho (STY)]GDEDEEDPDKR_4                   | 0.017042783  | #N/A                   |
| _AVIAPSGVEK_2                                                                       | 0.019325615  | #N/A                   |
| _QREPTMQWQEDPEPEDENVYAK_3                                                           | 0.17919823   | #N/A                   |
| _AQLTEEDIVFLPQPK_2                                                                  | 0.551086951  | #N/A                   |
| _SDFS[Phospho (STY)]DLEQSVK_2                                                       | 0.15376927   | O09126_S782_M1_Sema4d  |
| _VYNVTQHAVGIIVNK_3                                                                  | -0.021496982 | #N/A                   |
| _TLNEWSSQISPDIVR_2                                                                  | -0.082809849 | #N/A                   |
| _LYADS[Phospho (STY)]DS[Phospho (STY)]GEDSDKR_2                                     | 0.263783235  | O35071_S674_M2_Kif1c   |
| _RNS[Phospho (STY)]LDGGS_2                                                          | -0.410560824 | O35071_S1031_M1_Kif1c  |
| _VVLEDGNLLVTPGAGR_2                                                                 | -0.007986524 | #N/A                   |
| _GVPTVVISQGR_2                                                                      | 0.021682963  | #N/A                   |
| _QIGENLIVPGGIK_2                                                                    | 0.138049782  | #N/A                   |
| _M[Oxidation (M)]DENEFAVSTTNAAK_2                                                   | 0.420082818  | #N/A                   |
| _QANC[Carbamidomethyl (C)]PLYVTK_2                                                  | 0.137882893  | #N/A                   |
| _VAVGSDADLVIWNPR_2                                                                  | 0.177921533  | #N/A                   |
| _DLGAVAQVHAENGDIVEEQKR_3                                                            | -0.317942579 | #N/A                   |
| _TIDAHGLM[Oxidation (M)]VLPGGVDVHTR_3                                               | -0.340802652 | #N/A                   |
| _NLHQSGFSLSGS[Phospho (STY)]QADDHIAR_3                                              | -0.16568552  | O35098_S544_M1_Dpysl4  |
| _GAADMVAQAK_2                                                                       | 0.532740834  | #N/A                   |
| _Acetyl (Protein N-term)]S[Phospho (STY)]FQGKKS[Phospho (STY)]IPR_2                 | -0.328010425 | O35098_S2_M2_Dpysl4    |
| _C[Carbamidomethyl (C)]QC[Carbamidomethyl (C)]TDGQIYEIFSLIR_2                       | -0.183287345 | #N/A                   |
| _SHNLNVEYNIFEGVEC[Carbamidomethyl (C)]IR_3                                          | -0.26120855  | #N/A                   |
| _TLFLGIPDENFEDHS[Phospho (STY)]APPSPEEK_3                                           | -0.092394925 | O35099_S1036_M1_Map3k5 |
| _TAS[Phospho (STY)]PPGPPQYSK_2                                                      | -0.127041426 | O35126_S617_M1_Atn1    |
| _RAPSP[Phospho (STY)]PGSYK_2                                                        | 0.35781671   | O35126_S630_M1_Atn1    |
| _SEEIS[Phospho (STY)]ESESEETSAPK_2                                                  | 0.163004226  | O35126_S77_M1_Atn1     |

|                                                                            |              |                       |
|----------------------------------------------------------------------------|--------------|-----------------------|
| _GRAS[Phospho (STY)]PGGVSTSSDGKAEK_.3                                      | -0.164743003 | O35126_S34_M1_Atn1    |
| _TEQELPRPQS[Phospho (STY)]PSDLSLDGR_.3                                     | 0.224957266  | O35126_S101_M1_Atn1   |
| _TGT[Phospho (STY)]PPGYR_.2                                                | 0.181352614  | O35126_T654_M1_Atn1   |
| _GRAS[Phospho (STY)]PGGVSTSSDGK_.2                                         | 0.035664072  | O35126_S34_M1_Atn1    |
| _PHVMS[Phospho (STY)]PGNR_.2                                               | 0.129353568  | O35126_S881_M1_Atn1   |
| _QEPAEEYEPPES[Phospho (STY)]PVPPARS[Phospho (STY)]PS[Phospho (STY)]PPPK_.3 | -0.467250525 | O35126_S724_M3_Atn1   |
| _VLPISIVNEVLK_.2                                                           | -0.000134866 | #N/A                  |
| _ESVFTVEGGHR_.2                                                            | 0.339793977  | #N/A                  |
| _FNASQLITQR_.2                                                             | -0.166130667 | #N/A                  |
| _LGLDYEER_.2                                                               | -0.028610015 | #N/A                  |
| _LLLGAGAVAYGVR_.2                                                          | -0.352347859 | #N/A                  |
| _IGGVQQDTILAEGLHFR_.3                                                      | -0.507685638 | #N/A                  |
| _DLQM[Oxidation (M)]VNISLR_.2                                              | 0.126037417  | #N/A                  |
| _QVAQQEAQR_.2                                                              | 0.260096863  | #N/A                  |
| _AQVSLIR_.2                                                                | -0.270792236 | #N/A                  |
| _IYLTDNLVLNLQDESFR_.2                                                      | 0.084720133  | #N/A                  |
| _IPWFQYPIIYDIR_.2                                                          | 0.08127652   | #N/A                  |
| _AQFLVEK_.2                                                                | -0.163628548 | #N/A                  |
| _ASGSPDPTISWFR_.2                                                          | -0.06685392  | #N/A                  |
| _AAYLKDGS[Phospho (STY)]KEPIVEM[Oxidation (M)]R_.3                         | -0.401387319 | O35136_S765_M1_Ncam2  |
| _IEIFQTLPVR_.2                                                             | -0.08340249  | #N/A                  |
| _ITNHEDGS[Phospho (STY)]PVNEPNETTPLTEPEKLPLKEENGK_.4                       | 0.095824074  | O35136_S786_M1_Ncam2  |
| _DGS[Phospho (STY)]KEPIVEMR_.2                                             | 0.300196751  | O35136_S765_M1_Ncam2  |
| _LTIYNANIEDAGIYR_.2                                                        | -0.074947317 | #N/A                  |
| _ITNHEDGS[Phospho (STY)]PVNEPNETTPLTEPEK_.3                                | 0.06429004   | O35136_S786_M1_Ncam2  |
| _GSNTELTVR_.2                                                              | 0.168069983  | #N/A                  |
| _TKEQLAALR_.2                                                              | 0.282660544  | #N/A                  |
| _EAGGAFGKR_.2                                                              | -0.084894718 | #N/A                  |
| _EQLAALR_.2                                                                | 0.11504613   | #N/A                  |
| _EKAEDRYFR_.3                                                              | -0.136551555 | #N/A                  |
| _AEEDRYFR_.2                                                               | 0.217957029  | #N/A                  |
| _KHHEDEIDHHSKEIER_.4                                                       | -0.253434897 | #N/A                  |
| _KHHEDEIDHHSK_.3                                                           | -0.301264182 | #N/A                  |
| _HHEDEIDHHSK_.3                                                            | -0.025260599 | #N/A                  |
| _NS[Phospho (STY)]PMTISR_.2                                                | 0.073514339  | O35144_S399_M1_Terf2  |
| _DLVLANLASPS[Phospho (STY)]PAHK_.2                                         | -0.503575102 | O35144_S367_M1_Terf2  |
| _SLGS[Phospho (STY)]EEINPVHTDNFQER_.3                                      | -0.104763556 | O35188_S262_M1_Cx3cl1 |
| _IPAGLENR_.2                                                               | 0.304039926  | #N/A                  |
| _FFPLEAWQIGK_.2                                                            | 0.514094792  | #N/A                  |
| _PFVELETNLPASR_.2                                                          | -0.008966303 | #N/A                  |
| _STEP[C[Carbamidomethyl (C)]AHLLVSSIGVVGTAEQNR_.3                          | -0.348576437 | #N/A                  |
| _THSASFFK_.2                                                               | 0.379826177  | #N/A                  |
| _LC[Carbamidomethyl (C)]AATATILDKPEDR_.3                                   | 0.029359303  | #N/A                  |
| _FLTEELSLDQDR_.2                                                           | 0.225185973  | #N/A                  |
| _SGLLNSTS[Phospho (STY)]DSDLVR_.2                                          | 0.070598768  | O35219_S322_M1_Kcnh2  |
| _DTNM[Oxidation (M)]IPGS[Phospho (STY)]PGS[Phospho (STY)]AELESGFNR_.2      | -0.255687818 | O35219_S873_M2_Kcnh2  |
| _RAS[Phospho (STY)]S[Phospho (STY)]ADDIEAMR_.2                             | -0.061960023 | O35219_S285_M2_Kcnh2  |

|                                                                                          |              |                      |
|------------------------------------------------------------------------------------------|--------------|----------------------|
| _VNVDIINFGEEEVNTEK_.2                                                                    | -0.322429811 | #N/A                 |
| _EKNVVDIINFGEEEVNTEK_.3                                                                  | -0.463599946 | #N/A                 |
| _AAAAAAEAGIAT[Phospho (STY)]PGTEDSDDALLK_.2                                              | 0.037120298  | O35226_T250_M1_Psm4  |
| _RAAAASAAEAGIAT[Phospho (STY)]PGTEDSDDALLK_.3                                            | 0.2411736    | O35226_T250_M1_Psm4  |
| _SLDDS[Phospho (STY)]EEEDDEDSGHSSR_.2                                                    | 0.033861853  | O35245_S810_M1_Pkd2  |
| _QYS[Phospho (STY)]QHGLDGK_.2                                                            | 0.019288383  | O35250_S283_M1_Exoc7 |
| _AVEYFQDNSPDS[Phospho (STY)]PELNK_.2                                                     | 0.276733963  | O35250_S133_M1_Exoc7 |
| _GGGSGGGDES[Phospho (STY)]EGEEVDED_.2                                                    | 0.054650812  | O35295_S316_M1_Purb  |
| _VSEVKPSYR_.2                                                                            | 0.213319013  | #N/A                 |
| _RGGSGGGDES[Phospho (STY)]EGEEVDED_.2                                                    | -0.171010506 | O35295_S316_M1_Purb  |
| _GGGGGGGGGPGGFQAPR_.2                                                                    | -0.009924869 | #N/A                 |
| _DSLGDFFIEHYAQLGPSS[Phospho (STY)]PEQLAAGAEEGGPR_.4                                      | 0.143155147  | O35295_S113_M1_Purb  |
| _ [Acetyl (Protein N-term)]ADGDSGS[Phospho (STY)]ERGGGGGGGPGGFQAPR_.3                    | -0.002616344 | O35295_S8_M1_Purb    |
| _DSLGDFFIEHYAQLGPSS[Phospho (STY)]PEQLAAGAEEGGPR_.4                                      | -0.5203922   | O35295_S113_M1_Purb  |
| _GGGGGGGGGPGGEQETQELASK_.2                                                               | 0.021567263  | #N/A                 |
| _ [Acetyl (Protein N-term)]ADGDS[Phospho (STY)]GSR_.2                                    | -0.329491406 | O35295_S6_M1_Purb    |
| _S[Phospho (STY)]GS[Phospho (STY)]RS[Phospho (STY)]PVPEK_.2                              | -0.10468434  | O35326_S226_M3_Srsf5 |
| _SKS[Phospho (STY)]PASVDR_.2                                                             | -0.020493791 | O35326_S247_M1_Srsf5 |
| _VS[Phospho (STY)]WQDLK_.2                                                               | 0.114704479  | O35326_S120_M1_Srsf5 |
| _NVPQEDIC[Carbamidomethyl (C)]EDS[Phospho (STY)]DIDGDYR_.2                               | 0.017063456  | O35343_S60_M1_Kpna4  |
| _EAAWAISNLTISGR_.2                                                                       | 0.063737498  | #N/A                 |
| _VQNTSLEAIVQNASSDNQGIQLSAVQAAR_.3                                                        | -0.079248514 | #N/A                 |
| _NVPQEESLED[Phospho (STY)]DVDADFK_.2                                                     | 0.110450422  | O35344_S60_M1_Kpna3  |
| _ [Acetyl (Protein N-term)]M[Oxidation (M)]ETM[Oxidation (M)]AS[Phospho (STY)]PGKDNYR_.2 | -0.427199119 | #N/A                 |
| _GSS[Phospho (STY)]QLDVNEEVEALIVK_.2                                                     | -0.054163359 | O35379_S290_M1_Abcc1 |
| _KLELSENR_.2                                                                             | -0.204894734 | #N/A                 |
| _ELVLDNC[Carbamidomethyl (C)]K_.2                                                        | 0.146109304  | #N/A                 |
| _NRT[Phospho (STY)]PSDVK_.2                                                              | 0.130016977  | O35381_T15_M1_Anp32a |
| _SLDLFNC[Carbamidomethyl (C)]EVTNLNAYR_.2                                                | 0.079396545  | #N/A                 |
| _ISGDLEVLAEK_.2                                                                          | -0.071092134 | #N/A                 |
| _HLNLSGNK_.2                                                                             | 0.013910159  | #N/A                 |
| _LLPQVM[Oxidation (M)]YLDGYDR_.2                                                         | -0.081103417 | #N/A                 |
| _KREPDEGEEDD_.2                                                                          | -0.050589779 | #N/A                 |
| _S[Phospho (STY)]GELQGGPDDNLIEGGGK_.2                                                    | 0.021279695  | O35382_S469_M1_Exoc4 |
| _GGS[Phospho (STY)]LGLGGGGMGPR_.2                                                        | 0.474623114  | O35393_S274_M1_Efnb3 |
| _LFVVPTDESQAR_.2                                                                         | -0.434788945 | #N/A                 |
| _ALLNVVDSAR_.2                                                                           | -0.17989527  | #N/A                 |
| _SQLEAVFLR_.2                                                                            | 0.20001354   | #N/A                 |
| _S[Phospho (STY)]QENPNTYSEDLDV_.2                                                        | 0.174487314  | O35417_S235_M1_Pdyn  |
| _SYPS[Phospho (STY)]SELR_.2                                                              | -0.177226179 | O35454_S684_M1_Cln6  |
| _ES[Phospho (STY)]RTPEELTILGETQEEDEILPR_.3                                               | -0.625398862 | O35454_S23_M1_Cln6   |
| _VLAQQGEYSEAIPLR_.2                                                                      | 0.241152747  | #N/A                 |
| _S[Phospho (STY)]RS[Phospho (STY)]HDRIPYQR_.3                                            | -0.102270578 | O35492_S197_M2_Clk3  |
| _YRS[Phospho (STY)]PEPDYLSYR_.3                                                          | 0.018368382  | O35492_S157_M1_Clk3  |
| _ADS[Phospho (STY)]YEKLEK_.2                                                             | -0.399863286 | O35495_S134_M1_Cdk14 |
| _SSSAGKES[Phospho (STY)]PKVR_.2                                                          | -0.301122366 | O35495_S112_M1_Cdk14 |
| _HSSPSS[Phospho (STY)]PTS[Phospho (STY)]PK_.2                                            | -0.210824511 | O35495_S123_M2_Cdk14 |



|                                                          |              |                       |
|----------------------------------------------------------|--------------|-----------------------|
| _RVHS[Phospho (STY)]ENNAC[Carbamidomethyl (C)]INFK_.3    | -0.203380766 | O35495_S95_M1_Cdk14   |
| _VHS[Phospho (STY)]ENNAC[Carbamidomethyl (C)]INFK_.2     | -0.498241835 | O35495_S95_M1_Cdk14   |
| _FGKADS[Phospho (STY)]YEKLEK_.2                          | 0.115780124  | O35495_S134_M1_Cdk14  |
| _RHS[Phospho (STY)]SPSS[Phospho (STY)]PTSPK_.2           | -0.081823793 | O35495_S119_M2_Cdk14  |
| _TLS[Phospho (STY)]ESFSR_.2                              | -0.180073075 | O35495_S24_M1_Cdk14   |
| _HSSPSSPT[Phospho (STY)]S[Phospho (STY)]PKFGK_.3         | 0.251909081  | O35495_S126_M2_Cdk14  |
| _HSAILAS[Phospho (STY)]PNPDEK_.2                         | -0.286440622 | O35526_S64_M1_Stx1a   |
| _QALSEIETR_.2                                            | -0.195825346 | #N/A                  |
| _IEYNVEHAVDYVER_.2                                       | -0.142227939 | #N/A                  |
| _FM[Oxidation (M)]DEFFEQVEIR_.2                          | -0.239223203 | #N/A                  |
| _TAKDS[Phospho (STY)]DDDDVTVTVDR_.2                      | -0.347543116 | O35526_S14_M1_Stx1a   |
| _KHSAILAS[Phospho (STY)]PNPDEK_.3                        | -0.151068736 | O35526_S64_M1_Stx1a   |
| _TAKDS[Phospho (STY)]DDDDVTVTVDRDR_.3                    | -0.226475337 | O35526_S14_M1_Stx1a   |
| _SIEQSIEQEEGLNR_.2                                       | -0.212379712 | #N/A                  |
| _DS[Phospho (STY)]DDDDVTVTVDRDR_.2                       | -0.005344743 | O35526_S14_M1_Stx1a   |
| _TKEELEELMSDIK_.3                                        | 0.117135302  | #N/A                  |
| _LKS[Phospho (STY)]IEQSIEQEEGLNR_.3                      | -0.228098978 | O35526_S95_M1_Stx1a   |
| _KFVEVM[Oxidation (M)]SEYNATQSDYR_.3                     | -0.144296951 | #N/A                  |
| _FVEVM[Oxidation (M)]SEYNATQSDYR_.2                      | -0.37488984  | #N/A                  |
| _AQS[Phospho (STY)]TDSLGTSSSLQSK_.2                      | -0.478452748 | O35551_S407_M1_Rabep1 |
| _RAQS[Phospho (STY)]TDS[Phospho (STY)]LGTSSSLQSK_.2      | 0.091214687  | O35551_S407_M2_Rabep1 |
| _QNAVLQAAQDDLGLR_.3                                      | 0.366541936  | #N/A                  |
| _VAGQSS[Phospho (STY)]PSGIQSR_.2                         | -0.227846215 | O35601_S28_M1_Fyb1    |
| _TTAVEIDYDS[Phospho (STY)]LKR_.2                         | -0.03449335  | O35601_S561_M1_Fyb1   |
| _LNINSS[Phospho (STY)]PDEHEPLLR_.2                       | 0.22748516   | O35607_S863_M1_Bmpr2  |
| _LNINSS[Phospho (STY)]PDEHEPLLR_.3                       | -0.130484618 | O35607_S863_M1_Bmpr2  |
| _SVS[Phospho (STY)]PTVNPMTAMQNER_.2                      | 0.066364969  | O35607_S515_M1_Bmpr2  |
| _NLKES[Phospho (STY)]SDENLMEHSLK_.3                      | 0.175477674  | O35607_S680_M1_Bmpr2  |
| _EVDKNLKES[Phospho (STY)]S[Phospho (STY)]DENLMEHSLK_.3   | -0.315819631 | O35607_S680_M2_Bmpr2  |
| _KLS[Phospho (STY)]PTEPR_.2                              | -0.081772713 | O35609_S78_M1_Scamp3  |
| _LS[Phospho (STY)]PTEPR_.2                               | -0.29847352  | O35609_S78_M1_Scamp3  |
| _TAAANAAAGAAENAFR_.2                                     | -0.017412342 | #N/A                  |
| _AGS[Phospho (STY)]PVSATEEKPK_.2                         | -0.021927234 | O35615_S286_M1_Zfpm1  |
| _GSEGSQS[Phospho (STY)]PGSSVDDAEDDPSR_.2                 | 0.110661999  | O35615_S681_M1_Zfpm1  |
| _APRS[Phospho (STY)]PS[Phospho (STY)]PAPENTPSDPADQGAR_.3 | -0.272154292 | O35615_S925_M2_Zfpm1  |
| _TIS[Phospho (STY)]APVVRPK_.2                            | 0.174124571  | O35618_S367_M1_Mdm4   |
| _TVGHSVVS[Phospho (STY)]PQDTVQR_.2                       | -0.386220582 | O35621_S242_M1_Pmm1   |
| _SLS[Phospho (STY)]IEIGHEVK_.2                           | -0.131377277 | O35623_S50_M1_Bet1    |
| _GGAPLPPSGS[Phospho (STY)]KDQAVGAGGEFGGHDKPK_.3          | -0.006694888 | O35633_S97_M1_Slc32a1 |
| _SLFQEGSR_.2                                             | -0.180258451 | #N/A                  |
| _GGAPLPPSGS[Phospho (STY)]K_.2                           | -0.018033653 | O35633_S97_M1_Slc32a1 |
| _LTNVATSVSNK_.2                                          | -0.114338216 | #N/A                  |
| _ILIAC[Carbamidomethyl (C)]LYEENEDGEVVR_.2               | -0.331555079 | #N/A                  |
| _DC[Carbamidomethyl (C)]EDPNPLIR_.2                      | 0.100870353  | #N/A                  |
| _DC[Carbamidomethyl (C)]PLNTEAASNK_.2                    | 0.029115965  | #N/A                  |
| _VDKITEYLC[Carbamidomethyl (C)]EPLRK_.3                  | -0.131080299 | #N/A                  |
| _YNDPIYVK_.2                                             | -0.104914046 | #N/A                  |

|                                                          |              |                        |
|----------------------------------------------------------|--------------|------------------------|
| _KGEIFELK_.2                                             | -0.27849501  | #N/A                   |
| _LASQANIAQVLAELK_.2                                      | 0.159353953  | #N/A                   |
| _VIASMTVGK_.2                                            | -0.154997242 | #N/A                   |
| _NINLIVQK_.2                                             | -0.195025818 | #N/A                   |
| _EYATEVDVDFVR_.2                                         | 0.251315914  | #N/A                   |
| _LSHANSAVVLSAVK_.2                                       | 0.368387314  | #N/A                   |
| _LQSSNIFTVAK_.2                                          | 0.256627686  | #N/A                   |
| _LVYLYLM[Oxidation (M)]NYAK_.2                           | -0.101537364 | #N/A                   |
| _AAM[Oxidation (M)]IWIVGEYAER_.2                         | -0.101245396 | #N/A                   |
| _NVEGQDM[Oxidation (M)]LYQSLK_.2                         | 0.026943786  | #N/A                   |
| _APEVSQHVVYQAYETILKN_.3                                  | -0.314382607 | #N/A                   |
| _ITEYLC[Carbamidomethyl (C)]EPLRK_.2                     | 0.224256816  | #N/A                   |
| _TAAVC[Carbamidomethyl (C)]VAK_.2                        | -0.211973256 | #N/A                   |
| _DDREAQSIC[Carbamidomethyl (C)]ER_.3                     | -0.454430786 | #N/A                   |
| _C[Carbamidomethyl (C)]LKDEDPYVRK_.3                     | 0.102423841  | #N/A                   |
| _KPTETQELVQQVLSLATQDSDNPDLR_.3                           | -0.38357487  | #N/A                   |
| _C[Carbamidomethyl (C)]LKDEDPYVR_.3                      | -0.007166003 | #N/A                   |
| _AFVEFLTDEIKEEK_.2                                       | 0.180081338  | #N/A                   |
| _ATHS[Phospho (STY)]PSAREEEGPSGAT_.2                     | -0.111968982 | O35668_S615_M1_Hap1    |
| _NKS[Phospho (STY)]EVDLYNSDPLVC[Carbamidomethyl (C)]R_.2 | -0.21794936  | O35678_S189_M1_MgII    |
| _LTLPFLLQGSADR_.2                                        | 0.433092615  | #N/A                   |
| _IDSSVLSR_.2                                             | -0.015851521 | #N/A                   |
| _MPEASS[Phospho (STY)]PR_.2                              | -0.486728052 | O35678_S6_M1_MgII      |
| _VC[Carbamidomethyl (C)]FGIQLLNAVAR_.2                   | -0.274632964 | #N/A                   |
| _ALIFVSHGAGEHC[Carbamidomethyl (C)]GR_.3                 | 0.582166197  | #N/A                   |
| _GLSEKENS[Phospho (STY)]E_.2                             | -0.365939056 | O35681_S586_M1_Syt3    |
| _KLHFS[Phospho (STY)]VYDFDR_.3                           | 0.110049641  | O35681_S382_M1_Syt3    |
| _LHFS[Phospho (STY)]VYDFDR_.2                            | 0.072012109  | O35681_S382_M1_Syt3    |
| _GGGS[Phospho (STY)]GEAGAPC[Carbamidomethyl (C)]GR_.2    | -0.122039397 | O35681_S290_M1_Syt3    |
| _LQLEIDQK_.2                                             | 0.253953305  | #N/A                   |
| _WTQTLAELDLAVPFR_.2                                      | 0.057560257  | #N/A                   |
| _GFS[Phospho (STY)]DSGGGPPAK_.2                          | -0.288663873 | O35691_S66_M1_Pnn      |
| _RGFS[Phospho (STY)]DSGGGPPAK_.2                         | 0.190414869  | O35691_S66_M1_Pnn      |
| _SLS[Phospho (STY)]PGKENINSQEVEK_.2                      | 0.477137808  | O35691_S442_M1_Pnn     |
| _QES[Phospho (STY)]DPEDDDVKKPALQSSVVATSK_.3              | 0.155254923  | O35691_S100_M1_Pnn     |
| _C[Carbamidomethyl (C)]VDGNQLS[Phospho (STY)]PVGEPEK_.2  | 0.027872939  | O35711_S405_M1_Ppfibp2 |
| _T[Phospho (STY)]QSGNFNTDAPGM[Oxidation (M)]AEFR_.2      | 0.114267526  | O35711_T516_M1_Ppfibp2 |
| _VHIEIGPDGR_.2                                           | 0.226560775  | #N/A                   |
| _GLPWSC[Carbamidomethyl (C)]SADEVQR_.2                   | -0.067652473 | #N/A                   |
| _STGEAFVQFASQEIAEK_.2                                    | -0.401215913 | #N/A                   |
| _ATENDIYNFFSPLNPVR_.2                                    | 0.070206314  | #N/A                   |
| _HTGPNS[Phospho (STY)]PDTANDGFVR_.2                      | -0.52723376  | O35737_S104_M1_Hnrnph1 |
| _THYDPPRK_.2                                             | 0.320601686  | #N/A                   |
| _THYDPPR_.2                                              | -0.29307396  | #N/A                   |
| _DLNYC[Carbamidomethyl (C)]FSGM[Oxidation (M)]SDHR_.2    | 0.297610624  | #N/A                   |
| _EGRPSGEAFVELES[Phospho (STY)]EDEVK_.3                   | 0.332617725  | O35737_S63_M1_Hnrnph1  |
| _TSEDSSGS[Phospho (STY)]PPK_.2                           | -0.240258629 | O35841_S464_M1_Api5    |

|                                                                                     |              |                        |
|-------------------------------------------------------------------------------------|--------------|------------------------|
| _TSEDTS[Phospho (STY)]PPKK_2                                                        | -0.386609493 | O35841_S464_M1_Api5    |
| _TSEDTS[Phospho (STY)]PPKSPGPK_3                                                    | -0.172828575 | O35841_S464_M1_Api5    |
| _SEETS[Phospho (STY)]PLVTHQNPAGPVIAPELESK_3                                         | -0.237478068 | O35874_S507_M1_Slc1a4  |
| _EQFVEFR_2                                                                          | -0.103294599 | #N/A                   |
| _GGSPLTTQGG[Phospho (STY)]PTK_2                                                     | -0.116061123 | O35927_S273_M1_Ctnnd2  |
| _GGS[Phospho (STY)]APEGAAYAAPR_2                                                    | -0.24502672  | O35927_S282_M1_Ctnnd2  |
| _SPS[Phospho (STY)]IDSIQK_2                                                         | -0.089892728 | O35927_S531_M1_Ctnnd2  |
| _SASAPAS[Phospho (STY)]PR_2                                                         | -0.372083056 | O35927_S1098_M1_Ctnnd2 |
| _ALQS[Phospho (STY)]PEHHIDPIYEDR_3                                                  | -0.448505957 | O35927_S412_M1_Ctnnd2  |
| _T[Phospho (STY)]GSQHGPQNAATFQR_3                                                   | 0.016309024  | O35927_T469_M1_Ctnnd2  |
| _TSTAPSS[Phospho (STY)]PGVDSVPLQR_2                                                 | -0.487990364 | O35927_S458_M1_Ctnnd2  |
| _NS[Phospho (STY)]YGAPAEDIK_2                                                       | 0.20608482   | O35927_S1149_M1_Ctnnd2 |
| _TPSIS[Phospho (STY)]PVR_2                                                          | -0.203884262 | O35927_S1082_M1_Ctnnd2 |
| _NSSLS[Phospho (STY)]PGLNTSNGDGETTSSAILASVK_3                                       | -0.400749385 | O35927_S32_M1_Ctnnd2   |
| _TPSIS[Phospho (STY)]PVRVS[Phospho (STY)]PNNR_2                                     | 0.111180466  | O35927_S1082_M2_Ctnnd2 |
| _QLQYC[Carbamidomethyl (C)]ASVDS[Phospho (STY)]PYSK_2                               | -0.022011828 | O35927_S511_M1_Ctnnd2  |
| _SLSQS[Phospho (STY)]QGDPLPPAHTGTFR_2                                               | 0.019938614  | O35927_S437_M1_Ctnnd2  |
| _SPS[Phospho (STY)]IDSIQKDPR_2                                                      | -0.585653666 | O35927_S531_M1_Ctnnd2  |
| _SGPALPPEGLARS[Phospho (STY)]PS[Phospho (STY)]IDSIQK_3                              | 0.006018315  | #N/A                   |
| _AS[Phospho (STY)]YSSQHGHLAPELR_3                                                   | 0.241448284  | O35927_S395_M1_Ctnnd2  |
| _SGPALPPEGLARS[Phospho (STY)]PS[Phospho (STY)]IDSIQKDPR_3                           | 0.186386638  | #N/A                   |
| _AAGQSFSGTTGR_2                                                                     | -0.230210667 | #N/A                   |
| _C[Carbamidomethyl (C)]NTGSEGPEAQT[Phospho (STY)]PGK_2                              | 7.88E-05     | O35954_T270_M1_Pitpnm1 |
| _PGTSTAGT[Phospho (STY)]PDGPEAPPDPDASPDAS[Phospho (STY)]FGK_3                       | -0.084190336 | O35954_S304_M2_Pitpnm1 |
| _SSYSSQHGGGV[Phospho (STY)]PQS[Phospho (STY)]LSEWR_3                                | -0.200707487 | O35954_S326_M2_Pitpnm1 |
| _RGS[Phospho (STY)]M[Oxidation (M)]NNEM[Oxidation (M)]LSPEVGPVRDPLADGVEVLGR_4       | -0.430901627 | O35954_S593_M1_Pitpnm1 |
| _S[Phospho (STY)]M[Oxidation (M)]VQHYR_2                                            | 0.047056974  | O35963_S98_M1_Rab33b   |
| _Acetyl (Protein N-term)]SSSAAS[Phospho (STY)]PLFAPGEDC[Carbamidomethyl (C)]GPAWR_2 | -0.464131555 | O35969_S7_M1_Gamt      |
| _TAVSVAQGGHS[Phospho (STY)]R_2                                                      | -0.119409178 | O35984_S330_M1_Pbx2    |
| _ATEEPSGTGS[Phospho (STY)]DELIK_2                                                   | 0.270277007  | O54724_S42_M1_Cavin1   |
| _IIGAVDQIQLTQAQLEER_2                                                               | -0.062701339 | #N/A                   |
| _TLVLLDNLNVR_2                                                                      | -0.050641841 | #N/A                   |
| _MVKGS[Phospho (STY)]IDR_2                                                          | -0.148825782 | O54774_S9_M1_Ap3d1     |
| _NAEAVKS[Phospho (STY)]PEKEGVLGVEK_3                                                | -0.154435972 | O54774_S825_M1_Ap3d1   |
| _RHSSLPTES[Phospho (STY)]DEDIAPAQR_3                                                | -0.352053694 | O54774_S760_M1_Ap3d1   |
| _HSSLPTES[Phospho (STY)]DEDIAPAQR_3                                                 | -0.444953435 | O54774_S760_M1_Ap3d1   |
| _NAEAVKS[Phospho (STY)]PEK_2                                                        | -0.113184239 | O54774_S825_M1_Ap3d1   |
| _DLILQC[Carbamidomethyl (C)]LDDKDESIR_3                                             | 0.214139242  | #N/A                   |
| _EQAADTEAAQEVTLQLLVER_2                                                             | -0.193202306 | #N/A                   |
| _NLQDLVR_2                                                                          | 0.052056628  | #N/A                   |
| _LEDPDGPVQSAVNVIC[Carbamidomethyl (C)]ELAR_2                                        | -0.183742375 | #N/A                   |
| _VDIITEEMPENALPS[Phospho (STY)]DEDDKDPNDPYR_4                                       | 0.290467871  | O54774_S784_M1_Ap3d1   |
| _SSS[Phospho (STY)]SERPEPQQK_2                                                      | -0.314106848 | O54781_S10_M1_SrpK2    |
| _TVSASS[Phospho (STY)]TGDLPK_2                                                      | 0.051744313  | O54781_S490_M1_SrpK2   |
| _AADLED[Phospho (STY)]T[Phospho (STY)]EEETAK_2                                      | 0.102184178  | O54781_T331_M2_SrpK2   |
| _Acetyl (Protein N-term)]S[Phospho (STY)]VNS[Phospho (STY)]EKSSSSERPEPQQK_2         | -0.232417114 | O54781_S2_M2_SrpK2     |
| _NTSYAS[Phospho (STY)]FER_2                                                         | -0.060710142 | O54784_S316_M1_DapK3   |

|                                                       |              |                         |
|-------------------------------------------------------|--------------|-------------------------|
| _RS[Phospho (STY)]PLPGEPQRPK_.3                       | -0.326554333 | O54786_S314_M1_Dffa     |
| _S[Phospho (STY)]WHDM[Oxidation (M)]QTTTAYK_.2        | -0.022943216 | O54818_S86_M1_Tpd52l1   |
| _S[Phospho (STY)]WHDM[Oxidation (M)]QTTTAYKK_.3       | -0.428740987 | O54818_S86_M1_Tpd52l1   |
| _NSSTFKS[Phospho (STY)]FEER_.2                        | -0.212376826 | O54818_S149_M1_Tpd52l1  |
| _GC[Carbamidomethyl (C)]LAS[Phospho (STY)]PVFAR_.2    | -0.48523989  | O54828_S588_M1_Rgs9     |
| _FLESEFSSENLR_.2                                      | 0.012267078  | #N/A                    |
| _SHS[Phospho (STY)]PTHTPTPETKPPTDELHQQIK_.4           | 0.038201241  | O54829_S241_M1_Rgs7     |
| _SSAYQELLQAK_.2                                       | 0.03637025   | #N/A                    |
| _YTFEDAQEHYK_.2                                       | -0.202668199 | #N/A                    |
| _S[Phospho (STY)]VYGLQNDIR_.2                         | 0.185642069  | O54829_S229_M1_Rgs7     |
| _EVIC[Carbamidomethyl (C)]QVLYLGNVIDYK_.2             | -0.678225937 | #N/A                    |
| _RQS[Phospho (STY)]SSYEDPWKITDEQR_.3                  | -0.079343631 | O54916_S272_M1_Reps1    |
| _RQS[Phospho (STY)]SSYEDPWK_.2                        | -0.016817677 | O54916_S272_M1_Reps1    |
| _SSS[Phospho (STY)]LDMNR_.2                           | 0.14913901   | O54916_S561_M1_Reps1    |
| _LKS[Phospho (STY)]EDELRPDVDEHTQK_.3                  | -0.313103939 | O54916_S708_M1_Reps1    |
| _KGP GS[Phospho (STY)]HDAVQPR_.3                      | -0.237822917 | O54916_S145_M1_Reps1    |
| _LIDLEDSADVGEQPGVEGY[Phospho (STY)]SGSPA EAPPSK_.3    | 0.361528667  | O54916_Y389_M1_Reps1    |
| _TLS[Phospho (STY)]M[Oxidation (M)]IEEEIR_.2          | 0.267637866  | O54931_S740_M1_Akap2    |
| _KGS[Phospho (STY)]ITEYTATEEK_.2                      | 0.533598461  | O54940_S114_M1_Bnip2    |
| _VDYYEVLGVQR_.2                                       | -0.193999885 | #N/A                    |
| _DC[Carbamidomethyl (C)]FGC[Carbamidomethyl (C)]LR_.2 | 0.142436064  | #N/A                    |
| _SSLLIPPLEAALANFSK_.2                                 | 0.092802779  | #N/A                    |
| _LVYDSWSSGK_.2                                        | -0.035523016 | #N/A                    |
| _QAVLYVDSR_.2                                         | -0.057313559 | #N/A                    |
| _FASTVQGDVR_.2                                        | 0.263808427  | #N/A                    |
| _SLGM[Oxidation (M)]AVEDLVAAK_.2                      | -0.06965965  | #N/A                    |
| _GFLGVM[Oxidation (M)]PAYSAAEDALTTK_.2                | -0.094617394 | #N/A                    |
| _TAAVSAIATK_.2                                        | 0.335912521  | #N/A                    |
| _RAPAFLSAEEVQDHLR_.3                                  | -0.264420689 | #N/A                    |
| _GPDGGVM[Oxidation (M)]QPVR_.2                        | 0.322849601  | #N/A                    |
| _APAFLSAEEVQDHLR_.2                                   | -0.134562608 | #N/A                    |
| _ELDDELMR_.2                                          | 0.33180856   | #N/A                    |
| _LEETLPVIR_.2                                         | 0.337432291  | #N/A                    |
| _LLNFPTIVER_.2                                        | -0.062340688 | #N/A                    |
| _ESVLIISTDPAHNISDAFDQK_.3                             | 0.203583412  | #N/A                    |
| _VITSDRSS[Phospho (STY)]EVGTDEALDDTQK_.3              | -0.088724755 | O54988_S543_M1_Slk      |
| _ATLEQPETDEVEQVSESNS[Phospho (STY)]IEELER_.3          | -0.195546788 | O54988_S647_M1_Slk      |
| _LENLPDTQDQQTVDVNSVSEENENNR_.3                        | 0.175474558  | #N/A                    |
| _DQNL PQILEESRS[Phospho (STY)]E_.2                    | -0.255110852 | O54991_S1384_M1_Cntnap1 |
| _AVATQGAFNSWDWVTR_.2                                  | 0.149740013  | #N/A                    |
| _NSTLS[Phospho (STY)]EEDYIER_.2                       | -0.233239224 | O55003_S88_M1_Bnip3     |
| _SSH C[Carbamidomethyl (C)]DS[Phospho (STY)]PPR_.2    | 0.13318601   | O55003_S60_M1_Bnip3     |
| _AEIDSHS[Phospho (STY)]FGEK_.2                        | -0.042206551 | O55003_S79_M1_Bnip3     |
| _SQT[Phospho (STY)]PQDTNRAEIDSHSFGEK_.3               | 0.048365726  | O55003_T66_M1_Bnip3     |
| _ILLDAQHES[Phospho (STY)]GR_.2                        | -0.250743519 | O55003_S48_M1_Bnip3     |
| _ESLS[Phospho (STY)]WGTQR_.2                          | 0.07428838   | O55017_S1929_M1_Cacna1b |
| _SHS[Phospho (STY)]KETPGADTQVR_.3                     | -0.389077813 | O55017_S892_M1_Cacna1b  |

|                                                                                    |              |                         |
|------------------------------------------------------------------------------------|--------------|-------------------------|
| _AS[Phospho (STY)]C[Carbamidomethyl (C)]EALYSEM[Oxidation (M)]DPEER_.2             | -0.030062294 | O55017_S783_M1_Cacna1b  |
| _GLS[Phospho (STY)]EHNALLQK_.2                                                     | 0.021172171  | O55017_S2221_M1_Cacna1b |
| _RGS[Phospho (STY)]PEEATER_.2                                                      | -0.037943509 | O55017_S915_M1_Cacna1b  |
| _IGS[Phospho (STY)]DPYLGQR_.2                                                      | -0.290411885 | O55017_S2244_M1_Cacna1b |
| _RGS[Phospho (STY)]PEEATEREPR_.3                                                   | 0.18417148   | O55017_S915_M1_Cacna1b  |
| _RSHS[Phospho (STY)]KETPGADTQVR_.3                                                 | -0.174102573 | O55017_S892_M1_Cacna1b  |
| _S[Phospho (STY)]LEKGPSLSVDPEGAPSTAAGPLPHGEGSTAC[Carbamidomethyl (C)]R_.4          | 0.194231143  | O55017_S2056_M1_Cacna1b |
| _EVAEVS[Phospho (STY)]PM[Oxidation (M)]S[Phospho (STY)]AANISIAAR_.2                | 0.229213227  | O55017_S745_M2_Cacna1b  |
| _LQNLRAS[Phospho (STY)]C[Carbamidomethyl (C)]EALYSEM[Oxidation (M)]DPEER_.3        | -0.404474291 | O55017_S783_M1_Cacna1b  |
| _GDQPGASGDNDDEPPPLPR_.2                                                            | -0.027059144 | #N/A                    |
| _RFDGVQDPR_.2                                                                      | 0.047358152  | #N/A                    |
| _FYGPEGPYGVFAGR_.2                                                                 | 0.339159402  | #N/A                    |
| _EGEPTVYS[Phospho (STY)]DDEEPKDETAR_.3                                             | -0.269241003 | O55022_S181_M1_Pgrmc1   |
| _LLKEGEPTVYSDDEEPKDETAR_.4                                                         | 0.09266571   | #N/A                    |
| _DFTPAELR_.2                                                                       | 0.026461083  | #N/A                    |
| _EGEPTVYS[Phospho (STY)]DDEEPKDETARK_.4                                            | -0.663451372 | O55022_S181_M1_Pgrmc1   |
| _SLLVTELGSSR_.2                                                                    | 0.016396272  | #N/A                    |
| _SS[Phospho (STY)]PADLVTVDQKVEK_.2                                                 | -0.005288523 | O55023_S38_M1_Impa1     |
| _EIEIPLQR_.2                                                                       | 0.357482703  | #N/A                    |
| _LC[Carbamidomethyl (C)]SIPIHGIR_.2                                                | -0.081000654 | #N/A                    |
| _LQVSQQEDITK_.2                                                                    | 0.20601772   | #N/A                    |
| _S[Phospho (STY)]SPADLVTVDQK_.2                                                    | -0.052293318 | O55023_S37_M1_Impa1     |
| _IIAANSITLAK_.2                                                                    | 0.498905522  | #N/A                    |
| _I[Acetyl (Protein N-term)]ADPWQEC[Carbamidomethyl (C)]M[Oxidation (M)]DYAVILAR_.2 | 0.334166908  | #N/A                    |
| _S[Phospho (STY)]TSATDTHVELAR_.3                                                   | 0.115940701  | O55028_S31_M1_Bckdk     |
| _DNNQFASASLDR_.2                                                                   | -0.149605821 | #N/A                    |
| _DSESS[Phospho (STY)]PSDFSLSLK_.2                                                  | -0.15513266  | O55033_S316_M1_Nck2     |
| _DAS[Phospho (STY)]PTPSTDAEYPANGSGADR_.2                                           | -0.166693004 | O55033_S90_M1_Nck2      |
| _EQVTNVGGAVVTGVTAVAQK_.2                                                           | -0.290777358 | #N/A                    |
| _AKEGVVAAAEK_.2                                                                    | 0.080299196  | #N/A                    |
| _TVEGAGNIAAATGFVK_.2                                                               | 0.113211274  | #N/A                    |
| _EGVLYVGSKT[Phospho (STY)]K_.2                                                     | 0.203997781  | O55042_T44_M1_Snca      |
| _TKEGVVHGVTTVAEK_.3                                                                | -0.094025887 | #N/A                    |
| _TKEQVTNVGGAVVTGVTAVAQK_.3                                                         | -0.626163976 | #N/A                    |
| _TVEGAGNIAAATGFVKK_.2                                                              | -0.269140356 | #N/A                    |
| _EGVVHGVTTVAEK_.2                                                                  | 0.154698585  | #N/A                    |
| _I[Acetyl (Protein N-term)]S[Phospho (STY)]LDM[Oxidation (M)]KEHPDAEVQK_.2         | -0.080155524 | O55060_S2_M1_Tpmt       |
| _AVQQYLEETQNK_.2                                                                   | -0.304469786 | #N/A                    |
| _TEEEVES[Phospho (STY)]EEDPILEHPPENPVK_.3                                          | -0.169681926 | O55091_S137_M1_Impact   |
| _KKTEEEVES[Phospho (STY)]EEDPILEHPPENPVK_.4                                        | 0.10614519   | O55091_S137_M1_Impact   |
| _KTEEEVES[Phospho (STY)]EEDPILEHPPENPVK_.3                                         | -0.340310311 | O55091_S137_M1_Impact   |
| _AGGAFDPYTLVR_.2                                                                   | -0.088937996 | #N/A                    |
| _LPEQELSR_.2                                                                       | 0.086791802  | #N/A                    |
| _FLESAAADVS[Phospho (STY)]DEDEDEDTDGR_.2                                           | 0.252812031  | O55106_S245_M1_Strn     |
| _EALKEFDLVTSEEGDNESR_.3                                                            | -0.145256452 | #N/A                    |
| _FYDNNTGK_.2                                                                       | 0.176841592  | #N/A                    |
| _VISHPTLPISITAHEDR_.3                                                              | -0.165320081 | #N/A                    |

|                                                                 |              |                        |
|-----------------------------------------------------------------|--------------|------------------------|
| _AGPNIELR_2                                                     | -0.159702785 | #N/A                   |
| _GWDENVYYTVPLVR_2                                               | 0.20222409   | #N/A                   |
| _LKPGTM[Oxidation (M)]IEWGNNWAR_3                               | 0.17246548   | #N/A                   |
| _KETSPLYK_2                                                     | -0.053878256 | #N/A                   |
| _DSEGSWFR_2                                                     | 0.244268544  | #N/A                   |
| _IQFHNVKPEC[Carbamidomethyl (C)]LDAYNSLTEAVLPK_4                | -0.231537543 | #N/A                   |
| _PGPNIELR_2                                                     | -0.330888053 | #N/A                   |
| _LKENQEFVNFR_3                                                  | -0.132996642 | #N/A                   |
| _IC[Carbamidomethyl (C)]QEVLPK_2                                | 0.246871849  | #N/A                   |
| _KETSSLYK_2                                                     | -0.082111292 | #N/A                   |
| _LQFHNVKPEC[Carbamidomethyl (C)]LDAYNK_3                        | -0.131913444 | #N/A                   |
| _SDMLLSR_2                                                      | 0.210367812  | #N/A                   |
| _ILEQQNSSRT[Phospho (STY)]LEK_2                                 | -0.330669365 | O55131_T425_M1_Septin7 |
| _LKDSEAEQR_2                                                    | -0.100404129 | #N/A                   |
| _FEDYLNAESR_2                                                   | 0.124284379  | #N/A                   |
| _NLEGYVGFANLPNQVYR_2                                            | -0.27660613  | #N/A                   |
| _ANWEAQQR_2                                                     | 0.321828184  | #N/A                   |
| _ADTLTPEEC[Carbamidomethyl (C)]QQFK_2                           | 0.199828707  | #N/A                   |
| _ADTLTPEEC[Carbamidomethyl (C)]QQFKK_2                          | 0.210753612  | #N/A                   |
| _LAAVTYNGVDNNK_2                                                | -0.309023129 | #N/A                   |
| _STLINSFLTDLYSPEYGPSPHR_3                                       | 0.083383022  | #N/A                   |
| _IYFPPETDDEEENKLVK_3                                            | -0.324835554 | #N/A                   |
| _DVTNNVHYENYR_2                                                 | 0.056369839  | #N/A                   |
| _GQLTKS[Phospho (STY)]PLAQM[Oxidation (M)]EEERR_3               | -0.332070221 | #N/A                   |
| _IYFPPETDDEEENK_2                                               | -0.144410557 | #N/A                   |
| _S[Phospho (STY)]PLAQM[Oxidation (M)]EEER_2                     | 0.105919675  | #N/A                   |
| _NLEAQHKELEEK_2                                                 | -0.233792291 | #N/A                   |
| _KTVQVEQSK_2                                                    | 0.167210397  | #N/A                   |
| _THMQDLK_2                                                      | 0.224664978  | #N/A                   |
| _S[Phospho (STY)]PLAQM[Oxidation (M)]EEERR_2                    | -0.00695953  | #N/A                   |
| _ILEQQNSSR_2                                                    | 0.145582478  | #N/A                   |
| _QFEEKANWEAQQR_2                                                | -0.346371615 | #N/A                   |
| _YRADS[Phospho (STY)]HGELDLAR_3                                 | -0.140323715 | O55137_S56_M1_Acot1    |
| _QLGSEC[Carbamidomethyl (C)]LHVS[Phospho (STY)]PK_2             | -0.049126827 | O55137_S416_M1_Acot1   |
| _IEGVYAR_2                                                      | -0.132857393 | #N/A                   |
| _NNTVTPGKPNK_2                                                  | 0.209388425  | #N/A                   |
| _EFDELSPS[Phospho (STY)]AQR_2                                   | -0.315840855 | O55143_S663_M1_Atp2a2  |
| _WGS[Phospho (STY)]NELPAEEGK_2                                  | -0.3036179   | O55143_S38_M1_Atp2a2   |
| _VGEATETALTC[Carbamidomethyl (C)]LVEK_2                         | 0.070223712  | #N/A                   |
| _VDQSILTGESVSVIK_2                                              | -0.028657179 | #N/A                   |
| _NM[Oxidation (M)]LFSGTNIAAGK_2                                 | -0.408478697 | #N/A                   |
| _EWGS[Phospho (STY)]GSDTLR_2                                    | 0.07622881   | O55143_S553_M1_Atp2a2  |
| _VIM[Oxidation (M)]ITGDNK_2                                     | -0.156386418 | #N/A                   |
| _SLPSVETLGC[Carbamidomethyl (C)]TSVIC[Carbamidomethyl (C)]SDK_2 | 0.2680838    | #N/A                   |
| _ANAC[Carbamidomethyl (C)]NSVIK_2                               | 0.102365812  | #N/A                   |
| _IGIFGQDEDVTSK_2                                                | 0.073401814  | #N/A                   |
| _DIVPGDIVEIAVGDKVPADIR_3                                        | 0.137099497  | #N/A                   |

|                                                                |              |                        |
|----------------------------------------------------------------|--------------|------------------------|
| _IEVASSVK_.2                                                   | -0.038937477 | #N/A                   |
| _MNVFDTLK_.2                                                   | 0.069294559  | #N/A                   |
| _NYLEQPGKEC[Carbamidomethyl (C)]VQPATK_.3                      | -0.248091028 | #N/A                   |
| _GTAVAIC[Carbamidomethyl (C)]R_.2                              | 0.036783656  | #N/A                   |
| _TASEM[Oxidation (M)]VLADDNFSTIVAAVEEGR_.3                     | -0.217880528 | #N/A                   |
| _TGTLTTNQMSVC[Carbamidomethyl (C)]R_.2                         | 0.16175409   | #N/A                   |
| _IVEFLQSFDEITAM[Oxidation (M)]TGDGVNDAPALK_.3                  | -0.096088477 | #N/A                   |
| _IVEFLQSFDEITAM[Oxidation (M)]TGDGVNDAPALKK_.3                 | -0.586114515 | #N/A                   |
| _YETNLTFVGC[Carbamidomethyl (C)]VGM[Oxidation (M)]LDPPR_.2     | 0.497191249  | #N/A                   |
| _IRDEMVAEQER_.3                                                | -0.260678238 | #N/A                   |
| _SRS[Phospho (STY)]PFASTR_.2                                   | -0.270788686 | O55176_S32_M1_Pja1     |
| _EQPQSSS[Phospho (STY)]GESWELLPGKEELER_.3                      | -0.089821986 | O55176_S341_M1_Pja1    |
| _FTSVNHDAKEEC[Carbamidomethyl (C)]GKVES[Phospho (STY)]PPAAR_.4 | 0.229075896  | O55176_S137_M1_Pja1    |
| _VFFDT[Phospho (STY)]DDDDDDPHSTSR_.2                           | 0.101872104  | O55176_T231_M1_Pja1    |
| _YYEEDS[Phospho (STY)]DSDKEWM[Oxidation (M)]AALR_.3            | -0.259986839 | O55176_S317_M1_Pja1    |
| _GNNS[Phospho (STY)]LER_.2                                     | 0.002568519  | O55176_S175_M1_Pja1    |
| _GPGLYYVDEGSR_.2                                               | -0.35106589  | #N/A                   |
| _RGPLYYVDEGSR_.3                                               | -0.06447847  | #N/A                   |
| _AIYQATYR_.2                                                   | 0.427883834  | #N/A                   |
| _ATAGAYIASQTVK_.2                                              | 0.222155344  | #N/A                   |
| _VEEAYDLAR_.2                                                  | 0.391817119  | #N/A                   |
| _DAYSGGAVNLYHVR_.2                                             | 0.096548971  | #N/A                   |
| _FLHGVIVAADSR_.3                                               | 0.553449321  | #N/A                   |
| _AEENNSGVESGYGS[Phospho (STY)]PGPTWDR_.2                       | 0.484713791  | O70133_S136_M1_Dhx9    |
| _DFVNYLVR_.2                                                   | -0.200845972 | #N/A                   |
| _YTQVGPDHNR_.2                                                 | 0.259285646  | #N/A                   |
| _S[Phospho (STY)]LPSSPELPR_.2                                  | -0.099349317 | O70146_S439_M1_Tesk1   |
| _SSSLKSS[Phospho (STY)]PSK_.2                                  | -0.199144275 | O70161_S453_M1_Pip5k1c |
| _SPS[Phospho (STY)]DTSEQPR_.2                                  | -0.104632359 | O70161_S540_M1_Pip5k1c |
| _ITVQVEPVC[Carbamidomethyl (C)]GVGVVPK_.2                      | -0.592622868 | #N/A                   |
| _RTQS[Phospho (STY)]SGQDGRPQEEPHAEDLQK_.4                      | -0.147644425 | O70161_S554_M1_Pip5k1c |
| _SSS[Phospho (STY)]LKSS[Phospho (STY)]PSKK_.2                  | -0.319991441 | O70161_S449_M2_Pip5k1c |
| _TQS[Phospho (STY)]SGQDGRPQEEPHAEDLQK_.3                       | -0.323213008 | O70161_S554_M1_Pip5k1c |
| _DC[Carbamidomethyl (C)]LVLESFK_.2                             | 0.102206979  | #N/A                   |
| _IM[Oxidation (M)]DYSLLLGVHNIDQQR_.3                           | -0.5591246   | #N/A                   |
| _SWVYSPLHYSARPASDGESDT_.3                                      | -0.064879656 | #N/A                   |
| _DAS[Phospho (STY)]LEELQKR_.2                                  | -0.427286845 | O70166_S81_M1_Stmn3    |
| _DAS[Phospho (STY)]LEELQK_.2                                   | -0.244578028 | O70166_S81_M1_Stmn3    |
| _ALEENNNFSR_.2                                                 | -0.584598147 | #N/A                   |
| _KDAS[Phospho (STY)]LEELQK_.2                                  | -0.121240823 | O70166_S81_M1_Stmn3    |
| _SPSDLSPES[Phospho (STY)]PVLSPPK_.2                            | -0.234893967 | O70166_S68_M1_Stmn3    |
| _ASGQS[Phospho (STY)]FEVILK_.2                                 | 0.028664855  | O70166_S53_M1_Stmn3    |
| _RAS[Phospho (STY)]GQS[Phospho (STY)]FEVILK_.2                 | 0.208813369  | O70166_S50_M2_Stmn3    |
| _RKDAS[Phospho (STY)]LEELQK_.2                                 | 0.326583627  | O70166_S81_M1_Stmn3    |
| _KDAS[Phospho (STY)]LEELQKR_.3                                 | 0.074498192  | O70166_S81_M1_Stmn3    |
| _NKEQREEMS[Phospho (STY)]G_.2                                  | -0.416665653 | O70166_S179_M1_Stmn3   |
| _IYIDNNKK_.2                                                   | 0.086815536  | #N/A                   |

|                                                                                                                    |              |                        |
|--------------------------------------------------------------------------------------------------------------------|--------------|------------------------|
| _DVEFLAQLK_2                                                                                                       | -0.076268738 | #N/A                   |
| _FGIDDDQDFQNSLTR_2                                                                                                 | 0.192728154  | #N/A                   |
| _C[Carbamidomethyl (C)]TC[Carbamidomethyl (C)]KEPS[Phospho (STY)]PVS[Phospho (STY)]PITVLK_3                        | 0.128563201  | O70174_S540_M2_ChRNA4  |
| _IFHTVTTTDDPVIR_3                                                                                                  | -0.365498794 | #N/A                   |
| _TPAGLQVLNDYLADK_2                                                                                                 | 0.222303058  | #N/A                   |
| _SIQADGLVWGSSK_2                                                                                                   | -0.12570569  | #N/A                   |
| _DDDDIDLFGS[Phospho (STY)]DDEEESEEAKK_3                                                                            | 0.198830567  | O70251_S106_M1_Eef1b   |
| _YGPSS[Phospho (STY)]VEDTTGSGAADAK_2                                                                               | 0.202264864  | O70251_S83_M1_Eef1b    |
| _YGPSSVEDTTGSGAADAKDDDDIDLFGS[Phospho (STY)]DDEEESEEAK_4                                                           | -0.360255252 | O70251_S106_M1_Eef1b   |
| _DDDDIDLFGS[Phospho (STY)]DDEEESEEAK_2                                                                             | 0.10625534   | O70251_S106_M1_Eef1b   |
| _QDC[Carbamidomethyl (C)]C[Carbamidomethyl (C)]GNC[Carbamidomethyl (C)]S[Phospho (STY)]DS[Phospho (STY)]EEELPTRL_2 | 0.229812714  | O70293_S566_M2_Grk6    |
| _DVLIDIEQFS[Phospho (STY)]TVK_2                                                                                    | -0.288375177 | O70293_S484_M1_Grk6    |
| _DNS[Phospho (STY)]EEFLKR_2                                                                                        | -0.396023189 | O70305_S400_M1_Atxn2   |
| _VALENDERS[Phospho (STY)]EEEKYTAVQR_3                                                                              | -0.20252164  | O70305_S435_M1_Atxn2   |
| _ASETS[Phospho (STY)]PSFSK_2                                                                                       | -0.255948723 | O70305_S741_M1_Atxn2   |
| _QNS[Phospho (STY)]PAGSKENVK_2                                                                                     | 0.133265602  | O70305_S727_M1_Atxn2   |
| _TNS[Phospho (STY)]PSIS[Phospho (STY)]PSMLSNAEHRK_3                                                                | -0.693305609 | O70305_S832_M2_Atxn2   |
| _TNS[Phospho (STY)]PSIS[Phospho (STY)]PSMLSNAEHK_2                                                                 | -0.096659361 | O70305_S832_M2_Atxn2   |
| _MSSEGPPRM[Oxidation (M)]S[Phospho (STY)]PK_2                                                                      | 0.279909068  | O70305_S593_M1_Atxn2   |
| _DSFIDSSSSSNC[Carbamidomethyl (C)]TSGSSK_2                                                                         | 0.175062134  | #N/A                   |
| _GM[Oxidation (M)]S[Phospho (STY)]PVVSEHRK_3                                                                       | 0.050495558  | O70305_S753_M1_Atxn2   |
| _SGLS[Phospho (STY)]PANDTGAK_2                                                                                     | -0.223893912 | O70310_S47_M1_Nmt1     |
| _SGLS[Phospho (STY)]PANDTGAKK_2                                                                                    | -0.542693387 | O70310_S47_M1_Nmt1     |
| _GS[Phospho (STY)]PGGDLGAK_2                                                                                       | -0.209225659 | O70311_S38_M1_Nmt2     |
| _EKPNSGGTKS[Phospho (STY)]DS[Phospho (STY)]AS[Phospho (STY)]DSQEIK_2                                               | -0.005237765 | O70311_S66_M3_Nmt2     |
| _QRS[Phospho (STY)]YNLVVAK_2                                                                                       | 0.065957522  | O70318_S86_M1_Epb41I2  |
| _LVS[Phospho (STY)]PEQPPK_2                                                                                        | 0.0112525    | O70318_S7_M1_Epb41I2   |
| _EVQTSSELKAEVAS[Phospho (STY)]QK_2                                                                                 | 0.116779881  | O70318_S492_M1_Epb41I2 |
| _EM[Oxidation (M)]S[Phospho (STY)]PGHGPGETR_2                                                                      | 0.150132616  | O70318_S201_M1_Epb41I2 |
| _EPTQADVEDQILGKEES[Phospho (STY)]LPEEESR_3                                                                         | -0.276095972 | O70318_S698_M1_Epb41I2 |
| _S[Phospho (STY)]YNLVVAK_2                                                                                         | 0.223030154  | O70318_S116_M1_Epb41I2 |
| _IVITGDAALDHDQALAQAIR_3                                                                                            | 0.042788393  | O70318_S86_M1_Epb41I2  |
| _AKEVENEQTPVS[Phospho (STY)]EPEEEKGSQPGPPVER_4                                                                     | 0.142840799  | #N/A                   |
| _GLSPAQADSQFLENK_2                                                                                                 | 0.144591225  | O70318_S38_M1_Epb41I2  |
| _VTEGTIREEQEEC[Carbamidomethyl (C)]DEELEEEPGQGAK_3                                                                 | 0.389949302  | #N/A                   |
| _KEPTQADVEDQILGKEES[Phospho (STY)]LPEEESR_4                                                                        | -0.420192064 | #N/A                   |
| _ILAFPC[Carbamidomethyl (C)]NQFGR_2                                                                                | -0.292639355 | O70318_S116_M1_Epb41I2 |
| _YAEK[Carbamidomethyl (C)]GLR_2                                                                                    | -0.344761472 | #N/A                   |
| _IC[Carbamidomethyl (C)]VNGDDAHPLWK_3                                                                              | -0.102135794 | #N/A                   |
| _TDVNYTQLVDLHAR_2                                                                                                  | 0.091098423  | #N/A                   |
| _QHS[Phospho (STY)]PGSTDSLNSDSQR_2                                                                                 | -0.081581744 | #N/A                   |
| _IEQNLQS[Phospho (STY)]PTQQQTAR_2                                                                                  | -0.166523166 | O70374_S400_M1_Cbfa2t2 |
| _VPS[Phospho (STY)]PQGADVR_2                                                                                       | 0.202661891  | O70405_S450_M1_Ulk1    |
| _DIREAEK_2                                                                                                         | 0.096124197  | O70405_S521_M1_Ulk1    |
| _SNFGYNIPLK_2                                                                                                      | 0.047500746  | #N/A                   |
| _L[Acetyl (Protein N-term)]SSIGTGYDLSASTFSPDGR_2                                                                   | 0.29158128   | #N/A                   |
|                                                                                                                    | 0.194610166  | #N/A                   |



|                                                                      |              |                        |
|----------------------------------------------------------------------|--------------|------------------------|
| _AVENSSTAIGIR_.2                                                     | -0.222336239 | #N/A                   |
| _ESLKEEDS[Phospho (STY)]DDDNM[Oxidation (M)]_.2                      | 0.026922108  | O70435_S250_M1_Psma3   |
| _YAKESLKEEDS[Phospho (STY)]DDDNM[Oxidation (M)]_.2                   | -0.199065573 | O70435_S250_M1_Psma3   |
| _EFGSLPTT[Phospho (STY)]PSEQR_.2                                     | -0.266836413 | O70439_T79_M1_Stx7     |
| _TLNQLGT[Phospho (STY)]PQDSPELR_.2                                   | -0.056275619 | O70439_T41_M1_Stx7     |
| _ [Acetyl (Protein N-term)]S[Phospho (STY)]YTPGIGGDSAQLAQR_.2        | -0.570377708 | O70439_S2_M1_Stx7      |
| _ITQC[Carbamidomethyl (C)]SVEIQR_.2                                  | 0.108121656  | #N/A                   |
| _SSEYHLEDNAAYYLNDLER_.3                                              | -0.488013165 | #N/A                   |
| _QFEDLNR_.2                                                          | -0.136019938 | #N/A                   |
| _IAAPDYIPTVEDILR_.2                                                  | -0.019127782 | #N/A                   |
| _GQNTYEEAAVYIQR_.2                                                   | -0.422423533 | #N/A                   |
| _LWADPGAQAC[Carbamidomethyl (C)]FGR_.2                               | -0.369263473 | #N/A                   |
| _VGS[Phospho (STY)]RHDS[Phospho (STY)]TLKK_.2                        | 0.03793373   | O70451_S214_M2_Slc16a7 |
| _VGS[Phospho (STY)]RHDS[Phospho (STY)]TLK_.2                         | 0.050309748  | O70451_S214_M2_Slc16a7 |
| _NLLEDD[Phospho (STY)]DEEEDFFLR_.2                                   | 0.039528957  | O70480_S30_M1_Vamp4    |
| _RNLEDD[Phospho (STY)]DEEEDFFLR_.3                                   | -0.10906567  | O70480_S30_M1_Vamp4    |
| _MDVS[Phospho (STY)]PEPPLAPQR_.2                                     | 0.318648752  | O70481_S15_M1_Ubr1     |
| _FTTYEIR_.2                                                          | 0.123353574  | #N/A                   |
| _YSDFEWLR_.2                                                         | 0.170792349  | #N/A                   |
| _ [Acetyl (Protein N-term)]AETVADTRR_.2                              | 0.113986081  | #N/A                   |
| _ [Acetyl (Protein N-term)]S[Phospho (STY)]DTAVADTRR_.2              | 0.413086489  | O70493_S2_M1_Snx12     |
| _GDEGIFEEFIEER_.2                                                    | -0.372387394 | #N/A                   |
| _FTTYEVR_.2                                                          | 0.138376478  | #N/A                   |
| _RYS[Phospho (STY)]DFEWLK_.2                                         | -0.024722872 | O70493_S73_M1_Snx12    |
| _IAGHPLAQNER_.3                                                      | -0.111015383 | #N/A                   |
| _S[Phospho (STY)]PQAAQPPPPLPGAR_.2                                   | -0.094957925 | O70507_S921_M1_Hcn4    |
| _GGLS[Phospho (STY)]PPGHSPGPPR_.2                                    | -0.11212399  | O70507_S1011_M1_Hcn4   |
| _RAS[Phospho (STY)]PHS[Phospho (STY)]S[Phospho (STY)]GESVAAFSLYPR_.3 | -0.280732776 | O70507_S1090_M3_Hcn4   |
| _ADT[Phospho (STY)]PS[Phospho (STY)]GDEQEPNGALDSK_.2                 | 0.164477706  | O70551_S450_M2_Srp1    |
| _EINGISVANQTVEQLQK_.2                                                | -0.390843962 | #N/A                   |
| _TQSSSC[Carbamidomethyl (C)]ERDS[Phospho (STY)]PSTSR_.2              | -0.451225084 | O70589_S582_M1_Cask    |
| _GAVSAEQVIAGFNR_.2                                                   | -0.237988512 | #N/A                   |
| _IITLSQQLQAK_.2                                                      | 0.243743288  | #N/A                   |
| _EFS[Phospho (STY)]EDEEEETTSQDWGTPR_.2                               | 0.242114503  | O70622_S44_M1_Rtn2     |
| _SSQS[Phospho (STY)]PPLAAAGPSAR_.2                                   | 0.213891233  | O88196_S1903_M1_Ttc3   |
| _RNSDS[Phospho (STY)]AGPFAVPDHLR_.3                                  | -0.113324341 | O88196_S1062_M1_Ttc3   |
| _GASQVS[Phospho (STY)]PSEQS[Phospho (STY)]PEADEK_.2                  | -0.137691931 | O88196_S1794_M2_Ttc3   |
| _KQDS[Phospho (STY)]DEM[Oxidation (M)]PFGC[Carbamidomethyl (C)]IK_.2 | -0.238077071 | O88196_S1009_M1_Ttc3   |
| _IIYSSGGQVK_.2                                                       | -0.390742161 | #N/A                   |
| _EVLASS[Phospho (STY)]QEALVVTTER_.2                                  | -0.313643181 | O88273_S56_M1_Grem2    |
| _MNLSKS[Phospho (STY)]PTK_.2                                         | -0.377173391 | O88291_S270_M1_Znf326  |
| _S[Phospho (STY)]PTKTDPKNEEEK_.2                                     | -0.418164978 | O88291_S270_M1_Znf326  |
| _M[Oxidation (M)]NLSKS[Phospho (STY)]PTKTDPK_.2                      | 0.207097185  | O88291_S270_M1_Znf326  |
| _S[Phospho (STY)]AAEELELTVLK_.2                                      | -0.632019951 | O88327_S373_M1_Ctnnal1 |
| _VFASLPQVER_.2                                                       | -0.196231071 | #N/A                   |
| _YAPSGFYIASGDISGK_.2                                                 | -0.084977135 | #N/A                   |
| _YEYQPFAGK_.2                                                        | 0.088663157  | #N/A                   |

|                                                                             |              |                        |
|-----------------------------------------------------------------------------|--------------|------------------------|
| _IAVVGEGR_.2                                                                | 0.168577103  | #N/A                   |
| _SIQC[Carbamidomethyl (C)]LTVHR_.2                                          | 0.302896142  | #N/A                   |
| _DYSQGQGVVK_.2                                                              | -0.116769755 | #N/A                   |
| _DIAWTEDSKR_.2                                                              | 0.017026864  | #N/A                   |
| _GPVTDVAYSHDGAFLAVC[Carbamidomethyl (C)]DASK_.3                             | -0.312653718 | #N/A                   |
| _VINSVDIK_.2                                                                | 0.229763514  | #N/A                   |
| _LATGSDDNC[Carbamidomethyl (C)]AAFFEGPPFK_.2                                | -0.323992212 | #N/A                   |
| _VC[Carbamidomethyl (C)]ALGESK_.2                                           | 0.036234536  | #N/A                   |
| _VYSILASTLKDEGK_.2                                                          | -0.007564849 | #N/A                   |
| _AHDGGIYAIWSWSPDSTHLLSASGDK_.3                                              | -0.158168208 | #N/A                   |
| _VVTVFSVADGYSENNVFGHHAK_.3                                                  | -0.596730162 | #N/A                   |
| _GDHFLYTNGK_.2                                                              | 0.142254169  | #N/A                   |
| _M[Oxidation (M)]TVNESEQLVSC[Carbamidomethyl (C)]SMDDTVR_.2                 | -0.248625878 | #N/A                   |
| _SIYSGSHDGHINYWDESETGENDSFSGK_.4                                            | -0.349430044 | #N/A                   |
| _NIDNPAIADIYTEHAHQVVVAK_.3                                                  | -0.143346201 | #N/A                   |
| _GSLDS[Phospho (STY)]DNDDSDC[Carbamidomethyl (C)]PYSEK_.2                   | 0.301858482  | O88343_S1029_M1_Slc4a4 |
| _NLTSSS[Phospho (STY)]LNDISDKPEKDQLK_.3                                     | -0.182204202 | O88343_S257_M1_Slc4a4  |
| _LQQAVM[Oxidation (M)]LGALTEVPVPTR_.2                                       | -0.174752885 | #N/A                   |
| _NLTSSS[Phospho (STY)]LNDISDKPEK_.2                                         | 0.170376183  | O88343_S257_M1_Slc4a4  |
| _LADYYPINSDFK_.2                                                            | 0.218764593  | #N/A                   |
| _MFSNPDNGS[Phospho (STY)]PAM[Oxidation (M)]THR_.2                           | 0.345595835  | #N/A                   |
| _ISENYSKDS[Phospho (STY)]DVENADESSSILKPLISPAER_.4                           | -0.350983105 | O88343_S68_M1_Slc4a4   |
| _KGS[Phospho (STY)]LDS[Phospho (STY)]DNDDSDC[Carbamidomethyl (C)]PYSEK_.2   | 0.035676918  | O88343_S1026_M2_Slc4a4 |
| _KKGGS[Phospho (STY)]LDS[Phospho (STY)]DNDDSDC[Carbamidomethyl (C)]PYSEK_.3 | -0.384686641 | O88343_S1026_M2_Slc4a4 |
| _TLDQVLEDDVQDC[Carbamidomethyl (C)]C[Carbamidomethyl (C)]QALSQR_.3          | -0.011320626 | #N/A                   |
| _[Acetyl (Protein N-term)]SLVAEAFVSQIAATEPWPENATLYQQLR_.3                   | -0.245825213 | #N/A                   |
| _VDS[Phospho (STY)]PTVTTLTK_.2                                              | -0.151539128 | O88447_S459_M1_Klc1    |
| _DAANLLNDALAIR_.2                                                           | 0.080412741  | #N/A                   |
| _S[Phospho (STY)]RESLNM[Oxidation (M)]DVVK_.2                               | -0.175395767 | O88447_S520_M1_Klc1    |
| _AC[Carbamidomethyl (C)]KVDS[Phospho (STY)]PTVTTLTK_.2                      | -0.115672305 | O88447_S459_M1_Klc1    |
| _S[Phospho (STY)]RES[Phospho (STY)]LNMDVVKYESGPDGGEEA_.3                    | -0.058146394 | O88447_S520_M2_Klc1    |
| _RS[Phospho (STY)]RES[Phospho (STY)]LNMDVVK_.3                              | -0.474182873 | O88447_S520_M2_Klc1    |
| _VDS[Phospho (STY)]PTVNTTLR_.2                                              | 0.064706144  | O88448_S443_M1_Klc2    |
| _ASS[Phospho (STY)]LNFLNK_.2                                                | -0.457063926 | O88448_S575_M1_Klc2    |
| _YEVAVPLC[Carbamidomethyl (C)]K_.2                                          | -0.176181695 | #N/A                   |
| _S[Phospho (STY)]GS[Phospho (STY)]FGKLR_.2                                  | -0.46514347  | O88448_S537_M2_Klc2    |
| _AC[Carbamidomethyl (C)]KVDS[Phospho (STY)]PTVNTTLR_.2                      | -0.047907373 | O88448_S443_M1_Klc2    |
| _TLHNLVIQYASQGR_.2                                                          | -0.359809366 | #N/A                   |
| _RSS[Phospho (STY)]EMLVR_.2                                                 | 0.470293082  | O88448_S551_M1_Klc2    |
| _YADESGNM[Oxidation (M)]DFDNFISC[Carbamidomethyl (C)]LVR_.2                 | 0.018292123  | #N/A                   |
| _ILGGVISAISEAAQYNPEPPPPR_.3                                                 | -0.356350722 | #N/A                   |
| _ATHVPENS[Phospho (STY)]DTEQDVFTAKPAR_.3                                    | 0.343640237  | O88466_S1381_M1_Znf106 |
| _IGHDS[Phospho (STY)]ELENQEK_.2                                             | -0.048813566 | O88485_S180_M1_Dync1i1 |
| _VTQVDLPR_.2                                                                | -0.157405726 | #N/A                   |
| _ANRADS[Phospho (STY)]EEEGAVELAA_.2                                         | -0.266321071 | O88485_S618_M1_Dync1i1 |
| _KEPVQDDS[Phospho (STY)]DLDR_.2                                             | -0.018574841 | O88485_S50_M1_Dync1i1  |
| _ALAEDSDIFFDYSGR_.2                                                         | -0.075830015 | #N/A                   |

|                                                                             |              |                          |
|-----------------------------------------------------------------------------|--------------|--------------------------|
| _ETQTPLATHQS[Phospho (STY)]EEDEEDEMVEPK_.3                                  | -0.146424227 | O88485_S162_M1_Dync1i1   |
| _SVSTPSDAGS[Phospho (STY)]QDSGDLGPLTR_.2                                    | -0.194583572 | O88485_S94_M1_Dync1i1    |
| _ [Acetyl (Protein N-term)]SDKSDLKAELER_.3                                  | -0.154829357 | #N/A                     |
| _TLQWDTDPSSLVLQSDSELGR_.2                                                   | -0.252240021 | #N/A                     |
| _LDLWNLNSDTEVPTASVAIEGASALNR_.3                                             | -0.100744418 | #N/A                     |
| _SVSTPSEAGS[Phospho (STY)]QDSGDGAVGSR_.2                                    | -0.361722952 | O88487_S95_M1_Dync1i2    |
| _TLAEINANR_.2                                                               | -0.451348955 | #N/A                     |
| _EIAVGDSGQIVYDVGEQIAVPR_.3                                                  | -0.515790355 | #N/A                     |
| _DLEDKEGEIQAGAK_.2                                                          | 0.107414787  | #N/A                     |
| _EAEALLQSM[Oxidation (M)]GLTTDSPIVPPM[Oxidation (M)]S[Phospho (STY)]PSSK_.3 | 0.033160789  | O88487_S81_M1_Dync1i2    |
| _AAS[Phospho (STY)]PQEVTPQADEK_.2                                           | -0.192587847 | O88491_S2369_M1_Nsd1     |
| _RFS[Phospho (STY)]GNEYILATK_.2                                             | 0.508729824  | O88502_S452_M1_Pde8a     |
| _SEPQPEEGS[Phospho (STY)]PAAGQK_.2                                          | -0.045340192 | O88508_S102_M1_Dnmt3a    |
| _S[Phospho (STY)]PPEEPPDFC[Carbamidomethyl (C)]C[Carbamidomethyl (C)]PK_.2  | -0.223091367 | O88522_S380_M1_lkbkg     |
| _RS[Phospho (STY)]PPEEPPDFC[Carbamidomethyl (C)]C[Carbamidomethyl (C)]PK_.2 | -0.016142312 | O88522_S380_M1_lkbkg     |
| _ETIPLQESTLYTEDR_.2                                                         | -0.131029776 | #N/A                     |
| _RDS[Phospho (STY)]DGVGDGFEAEGKK_.3                                         | -0.366785178 | O88532_S1054_M1_Zfr      |
| _RRDS[Phospho (STY)]DGVGDGFEAEGK_.3                                         | -0.377759361 | O88532_S1054_M1_Zfr      |
| _RDS[Phospho (STY)]DGVGDGFEAEGK_.2                                          | -0.023080724 | O88532_S1054_M1_Zfr      |
| _DS[Phospho (STY)]DGVGDGFEAEGK_.2                                           | 0.006648791  | O88532_S1054_M1_Zfr      |
| _ [Acetyl (Protein N-term)]ASALEQFVNSVR_.2                                  | 0.123712885  | #N/A                     |
| _YTSQIVGR_.2                                                                | 0.192043276  | #N/A                     |
| _SM[Oxidation (M)]GS[Phospho (STY)]QEDDSGNKPSSYS_.2                         | -0.372163576 | O88543_S410_M1_Cops3     |
| _YATDTFAGLC[Carbamidomethyl (C)]HQLTNALVER_.3                               | -0.164607241 | #N/A                     |
| _NAAQVLVGIPLETGQK_.2                                                        | 0.179949461  | #N/A                     |
| _ATTADGSSILDR_.2                                                            | 0.240153799  | #N/A                     |
| _LYLEDDDPVQAEAYINR_.2                                                       | 0.302922583  | #N/A                     |
| _VISFEEQVASIR_.2                                                            | -0.030813215 | #N/A                     |
| _ISQTAPEWTAQAM[Oxidation (M)]EAQM[Oxidation (M)]AQ_.2                       | -0.285662168 | #N/A                     |
| _IASQMITEGR_.2                                                              | 0.357552684  | #N/A                     |
| _GGGGNFGPGPGSNFR_.2                                                         | 0.143227874  | #N/A                     |
| _GGNFGFGDSR_.2                                                              | -0.11706142  | #N/A                     |
| _IDTIEITDR_.2                                                               | 0.060939309  | #N/A                     |
| _EDTEEHHLR_.2                                                               | 0.369965776  | #N/A                     |
| _GFGFVTFDDHDPVDK_.2                                                         | -0.113272016 | #N/A                     |
| _NYEQWQK_.2                                                                 | -0.097153113 | #N/A                     |
| _PHS[Phospho (STY)]IDGR_.2                                                  | -0.201943613 | O88569_S85_M1_Hnrnpa2b1  |
| _YHTINGHNAEVR_.3                                                            | 0.374137806  | #N/A                     |
| _QEMQEVQSSR_.2                                                              | 0.320684619  | #N/A                     |
| _LTDC[Carbamidomethyl (C)]VVMR_.2                                           | 0.094816224  | #N/A                     |
| _DYFEEYGKIDTIEIITDR_.3                                                      | -0.34085992  | #N/A                     |
| _DYFEEYGK_.2                                                                | -0.029744814 | #N/A                     |
| _EES[Phospho (STY)]GKPGAHVTVK_.2                                            | -0.059099285 | O88569_S102_M1_Hnrnpa2b1 |
| _LFIGGLSFETTEESLR_.2                                                        | -0.32912841  | #N/A                     |
| _EESGKPGAHVTVKK_.3                                                          | -0.025254227 | #N/A                     |
| _GFGDGYNGYGGPGGGNFGGS[Phospho (STY)]PGYGGGR_.3                              | 0.136458398  | O88569_S259_M1_Hnrnpa2b1 |
| _NM[Oxidation (M)]GGPYGGGNYGPGSGGS[Phospho (STY)]GGYGGGR_.3                 | -0.535582235 | O88569_S344_M1_Hnrnpa2b1 |

|                                                                                            |              |                       |
|--------------------------------------------------------------------------------------------|--------------|-----------------------|
| _GGSDGYGSGR_.2                                                                             | -0.345107658 | #N/A                  |
| _AVYQGPSS[Phospho (STY)]PVKS_.2                                                            | -0.328154952 | O88587_S261_M1_Comt   |
| _DAS[Phospho (STY)]PVGVK_.2                                                                | -0.224331025 | O88602_S253_M1_Cacng2 |
| _STEPSHS[Phospho (STY)]RDAS[Phospho (STY)]PVGVK_.3                                         | -0.37050418  | O88602_S249_M2_Cacng2 |
| _LLQTSNITK_.2                                                                              | 0.068584758  | #N/A                  |
| _STM[Oxidation (M)]VGTPYWM[Oxidation (M)]APEVVTR_.2                                        | -0.536962037 | #N/A                  |
| _ALYLIATNGTPELQNPEK_.2                                                                     | -0.018911218 | #N/A                  |
| _EC[Carbamidomethyl (C)]LQALEFLHSNQVIHR_.3                                                 | -0.475911169 | #N/A                  |
| _SAEDYNS[Phospho (STY)]SNTLNVK_.2                                                          | -0.335358841 | O88643_S155_M1_Pak1   |
| _DVATSPIS[Phospho (STY)]PTENNTTPDALTR_.2                                                   | -0.002890957 | O88643_S223_M1_Pak1   |
| _MSDEEILEK_.2                                                                              | 0.510595087  | #N/A                  |
| _ELIINEILVM[Oxidation (M)]R_.2                                                             | 0.400854412  | #N/A                  |
| _SDNILLGM[Oxidation (M)]DGSVK_.2                                                           | 0.009333429  | #N/A                  |
| _LTDFGFC[Carbamidomethyl (C)]AQITPEQSK_.2                                                  | 0.540009514  | #N/A                  |
| _SVIEPLPVTPTTR_.2                                                                          | 0.005600207  | #N/A                  |
| _LLQTSNITKS[Phospho (STY)]EQK_.2                                                           | -0.254639918 | O88643_S115_M1_Pak1   |
| _ [Acetyl (Protein N-term)]S[Phospho (STY)]NNGVDIQDKPPAPPMR_.2                             | -0.264884677 | O88643_S2_M1_Pak1     |
| _IGQGASGTVYTAMDVATGQEVAIK_.3                                                               | 0.236037129  | #N/A                  |
| _VDILDPALLR_.2                                                                             | 0.476135072  | #N/A                  |
| _DSYLILETLPTDYDR_.2                                                                        | -0.055183109 | #N/A                  |
| _QTYFLPVIGLVDAEK_.2                                                                        | 0.26793351   | #N/A                  |
| _M[Oxidation (M)]ATVWDEAEQDGIGEEVLK_.2                                                     | -0.16933452  | #N/A                  |
| _ [Acetyl (Protein N-term)]M[Oxidation (M)]QEMNLLPTES[Phospho (STY)]PVTR_.2                | 0.218195365  | O88685_S12_M1_Psmc3   |
| _TSPYGVPGS[Phospho (STY)]PATR_.2                                                           | -0.395997839 | O88703_S771_M1_Hcn2   |
| _GEPQC[Carbamidomethyl (C)]S[Phospho (STY)]PEGPAR_.2                                       | -0.112666706 | O88703_S90_M1_Hcn2    |
| _PLVGPLALGS[Phospho (STY)]PR_.2                                                            | -0.237222935 | O88703_S726_M1_Hcn2   |
| _GPKVS[Phospho (STY)]FSC[Carbamidomethyl (C)]R_.2                                          | 0.22455848   | O88703_S101_M1_Hcn2   |
| _GSQAS[Phospho (STY)]FLQR_.2                                                               | -0.282571394 | O88703_S134_M1_Hcn2   |
| _TAAPS[Phospho (STY)]PDRR_.2                                                               | -0.13450865  | O88703_S834_M1_Hcn2   |
| _DSAS[Phospho (STY)]PGAASGLDPLDSAR_.2                                                      | -0.447770371 | O88703_S842_M1_Hcn2   |
| _LC[Carbamidomethyl (C)]S[Phospho (STY)]RDS[Phospho (STY)]AC[Carbamidomethyl (C)]TPGAAK_.2 | -0.190741899 | O88703_S64_M2_Hcn2    |
| _GAASGPSAAEEAGS[Phospho (STY)]EEAGPAGEPR_.2                                                | 0.393329036  | O88703_S119_M1_Hcn2   |
| _RDS[Phospho (STY)]ASPGAASGLDPLDSAR_.3                                                     | 0.256171483  | O88703_S840_M1_Hcn2   |
| _TAAPS[Phospho (STY)]PDRRDS[Phospho (STY)]AS[Phospho (STY)]PGAASGLDPLDSAR_.3               | 0.027181011  | O88703_S834_M3_Hcn2   |
| _RAPPGPLPPAAS[Phospho (STY)]PGPPAAS[Phospho (STY)]PPAAPS[Phospho (STY)]SPR_.3              | 0.273758508  | O88703_S743_M3_Hcn2   |
| _LGT[Phospho (STY)]PPGGGAAGK_.2                                                            | -0.230062216 | O88704_T39_M1_Hcn1    |
| _RLGT[Phospho (STY)]PPGGGAAGK_.2                                                           | -0.189245558 | O88704_T39_M1_Hcn1    |
| _VDGGGGGEEPAGS[Phospho (STY)]FEDAEGPR_.2                                                   | -0.340807127 | O88704_S69_M1_Hcn1    |
| _KNS[Phospho (STY)]ILLQK_.2                                                                | -0.136774746 | O88704_S588_M1_Hcn1   |
| _VDGGGGGEEPAGS[Phospho (STY)]FEDAEGPRR_.3                                                  | -0.279227467 | O88704_S69_M1_Hcn1    |
| _QMSS[Phospho (STY)]GAIPPNR_.2                                                             | -0.345592836 | O88704_S868_M1_Hcn1   |
| _KRS[Phospho (STY)]EPS[Phospho (STY)]PGSSGGVM[Oxidation (M)]EQHLVQHDR_.4                   | -0.257592561 | O88705_S558_M2_Hcn3   |
| _PLVALLDGR_.2                                                                              | 0.245577704  | #N/A                  |
| _IGSGFDNIDIK_.2                                                                            | -0.178591595 | #N/A                  |
| _GAALDVHESEPFSSQGPLK_.3                                                                    | 0.231882213  | #N/A                  |
| _VGQAVLR_.2                                                                                | -0.311145081 | #N/A                  |
| _TTWLHQALR_.2                                                                              | -0.222119539 | #N/A                  |

|                                                                  |              |                     |
|------------------------------------------------------------------|--------------|---------------------|
| _VQSVEQIR_.2                                                     | -0.083075335 | #N/A                |
| _DVATVAFC[Carbamidomethyl (C)]DAQSTQEIHEK_.3                     | -0.435284994 | #N/A                |
| _VLNEAVGALM[Oxidation (M)]YHTITLTR_.2                            | 0.176008455  | #N/A                |
| _LSSSATLLNS[Phospho (STY)]PDR_.2                                 | -0.24598984  | O88735_S209_M1_Map7 |
| _SLS[Phospho (STY)]DPKPLS[Phospho (STY)]PTAEESAKER_.3            | -0.252813051 | O88737_S2860_M2_Bsn |
| _GEEES[Phospho (STY)]EEDSYDPR_.2                                 | -0.463877269 | O88737_S3301_M1_Bsn |
| _DYLS[Phospho (STY)]DSELNQLR_.2                                  | 0.022076395  | O88737_S3022_M1_Bsn |
| _DAC[Carbamidomethyl (C)]EPES[Phospho (STY)]GPD PSTVR_.2         | -0.125545436 | O88737_S2578_M1_Bsn |
| _DST[Phospho (STY)]PTASESQR_.2                                   | 0.240275988  | O88737_T3254_M1_Bsn |
| _ATSVPGPTQATAPPEVGR_.2                                           | -0.027461996 | #N/A                |
| _DPEPPEPLTFR_.2                                                  | 0.107011152  | #N/A                |
| _AS[Phospho (STY)]PQAKPLR_.2                                     | -0.521474749 | O88737_S600_M1_Bsn  |
| _ELQELQTIK_.2                                                    | -0.181575042 | #N/A                |
| _AQGPSGQEAES[Phospho (STY)]PR_.2                                 | -0.188602383 | O88737_S121_M1_Bsn  |
| _YLELGITQR_.2                                                    | 0.142160048  | #N/A                |
| _SQASEEES[Phospho (STY)]PVS[Phospho (STY)]PLGRPR_.2              | -0.235289122 | #N/A                |
| _QTS[Phospho (STY)]LADLEQK_.2                                    | -0.077625176 | O88737_S3158_M1_Bsn |
| _SHGPLLTIEDSS[Phospho (STY)]EEEEELREEELLREQEK_.4                 | -0.247286614 | O88737_S1051_M1_Bsn |
| _LRDAC[Carbamidomethyl (C)]EPES[Phospho (STY)]GPD PSTVR_.3       | 0.003997447  | O88737_S2578_M1_Bsn |
| _SQAS[Phospho (STY)]EEESPVSPLGR_.2                               | -0.347949567 | O88737_S3512_M1_Bsn |
| _IADSSVQT[Phospho (STY)]DDEEGEGR_.2                              | -0.417336897 | O88737_T2595_M1_Bsn |
| _EKPLSGGDSEVGAPQPSR_.3                                           | -0.103190939 | #N/A                |
| _ASPQTTKAS[Phospho (STY)]PQAK_.2                                 | -0.093286968 | O88737_S600_M1_Bsn  |
| _SLS[Phospho (STY)]DPKPLSPTAEESAK_.2                             | -0.308863637 | O88737_S2860_M1_Bsn |
| _SADC[Carbamidomethyl (C)]SVQT[Phospho (STY)]DDEDNADWEQPVRR_.3   | 0.096552646  | O88737_T2622_M1_Bsn |
| _AQGPSGQEAES[Phospho (STY)]PRR_.2                                | -0.277603219 | O88737_S121_M1_Bsn  |
| _YLGQGLQYGS[Phospho (STY)]FTDLR_.2                               | 0.376558715  | O88737_S2046_M1_Bsn |
| _QVEQAVQTAPYR_.2                                                 | 0.265656226  | #N/A                |
| _GLGEHRDYL[Phospho (STY)]DSELNQLR_.3                             | 0.044014368  | O88737_S3022_M1_Bsn |
| _RIADSS[Phospho (STY)]VQTDDEEGEGR_.2                             | -0.253308339 | O88737_S2592_M1_Bsn |
| _EQQDTAESS[Phospho (STY)]DDFGSQLR_.2                             | -0.059964228 | O88737_S818_M1_Bsn  |
| _LLEGLGEPAPLPLTPQPPAGVPHR_.3                                     | 0.170525612  | #N/A                |
| _SQQQLHS[Phospho (STY)]PALS[Phospho (STY)]PAHSPAK_.3             | -0.319136899 | O88737_S241_M2_Bsn  |
| _SSC[Carbamidomethyl (C)]SEYS[Phospho (STY)]PSPSLDSEATLDGGPTR_.3 | -0.308423973 | O88737_S1137_M1_Bsn |
| _EPELEM[Oxidation (M)]ESLTGS[Phospho (STY)]PEDR_.2               | 0.044345794  | O88737_S980_M1_Bsn  |
| _SQGS[Phospho (STY)]FEYQDTQDHDYGGR_.3                            | -0.287375067 | O88737_S1236_M1_Bsn |
| _SHGPLLTIEDSS[Phospho (STY)]EEEEELREEELLR_.4                     | -0.258684104 | O88737_S1051_M1_Bsn |
| _SSS[Phospho (STY)]SAVEDQKR_.2                                   | -0.145906347 | O88737_S767_M1_Bsn  |
| _MASAYS[Phospho (STY)]GEK_.2                                     | 0.04128775   | O88737_S3460_M1_Bsn |
| _LQPQSQPTTR_.2                                                   | 0.158008138  | #N/A                |
| _QASATAPGRES[Phospho (STY)]PR_.2                                 | -0.238649656 | O88737_S105_M1_Bsn  |
| _ASPQATKAS[Phospho (STY)]PQTTK_.2                                | 0.092441084  | O88737_S593_M1_Bsn  |
| _GYM[Oxidation (M)]TPT[Phospho (STY)]SPAGSER_.2                  | 0.31885077   | O88737_T1406_M1_Bsn |
| _LLDTSFAS[Phospho (STY)]SER_.2                                   | -0.216707818 | O88737_S2822_M1_Bsn |
| _GPGATQSGPR_.2                                                   | 0.151398913  | #N/A                |
| _DSAVDLSSLK_.2                                                   | -0.036443525 | #N/A                |
| _SKTPPSNLSPIEDAS[Phospho (STY)]PTEELR_.3                         | -0.113241648 | O88737_S1114_M1_Bsn |

|                                                                              |              |                       |
|------------------------------------------------------------------------------|--------------|-----------------------|
| _DAC[Carbamidomethyl (C)]EPES[Phospho (STY)]GDPSTVRR_3                       | 0.084652591  | O88737_S2578_M1_Bsn   |
| _LHSS[Phospho (STY)]PVSSLTLSK_2                                              | -0.047958474 | O88737_S1370_M1_Bsn   |
| _HSYS[Phospho (STY)]LGFADGR_2                                                | 0.316750096  | O88737_S2029_M1_Bsn   |
| _QPQTQQQQQQQQQGLGQAPQQAPSQAR_3                                               | -0.423811625 | #N/A                  |
| _SPQVLYS[Phospho (STY)]PVS[Phospho (STY)]PLSPHR_2                            | -0.074965619 | O88737_S2805_M2_Bsn   |
| _QAAPGPQQSQPPSSR_2                                                           | 0.052470879  | #N/A                  |
| _YSS[Phospho (STY)]VSNISDHR_2                                                | 0.221284515  | O88737_S2068_M1_Bsn   |
| _AS[Phospho (STY)]GAGGPPR_2                                                  | 0.019385101  | O88737_S2295_M1_Bsn   |
| _LQLEQIQQLQQQLQLEEQK_3                                                       | -0.196279039 | #N/A                  |
| _ISKFS[Phospho (STY)]PIEEAK_2                                                | -0.067504742 | O88737_S3382_M1_Bsn   |
| _ASPQATKAS[Phospho (STY)]PQATK_2                                             | -0.2743793   | O88737_S579_M1_Bsn    |
| _QREQQDTAESS[Phospho (STY)]DDFGSQLR_3                                        | -0.11105198  | O88737_S818_M1_Bsn    |
| _LYSSM[Oxidation (M)]SDT[Phospho (STY)]NLAEAGLNYHAQR_3                       | -0.409010239 | O88737_T1992_M1_Bsn   |
| _HREEEQLLVQR_3                                                               | 0.435935762  | #N/A                  |
| _GYSYFTGSS[Phospho (STY)]PPLSPSTPS[Phospho (STY)]ESPTFSPGK_3                 | -0.223909683 | O88737_S1482_M2_Bsn   |
| _VTQHFAK_2                                                                   | 0.441455371  | #N/A                  |
| _SQQLHLS[Phospho (STY)]PALS[Phospho (STY)]PAHS[Phospho (STY)]PAKQPLGKPEQER_4 | -0.069582554 | O88737_S241_M3_Bsn    |
| _SPSVS[Phospho (STY)]PDR_2                                                   | -0.177462456 | O88737_S142_M1_Bsn    |
| _SSVSQSPARTYPSDSHYTSLEQNVPR_3                                                | -0.020840999 | #N/A                  |
| _HDY[Phospho (STY)]VEDSS[Phospho (STY)]EGGLSPLPPQPPAR_3                      | -0.138638683 | O88737_S834_M2_Bsn    |
| _GEHSSTLPASTPSYTSPTSLSLEEDSDSSPS[Phospho (STY)]RR_4                          | 0.128091342  | O88737_S1021_M1_Bsn   |
| _FS[Phospho (STY)]PIEEAK_2                                                   | -0.021874515 | O88737_S3382_M1_Bsn   |
| _ASQPVAESTPAGLGAAYEEILQTSQSIAR_3                                             | 0.334151578  | #N/A                  |
| _GPANYNTC[Carbamidomethyl (C)]TAC[Carbamidomethyl (C)]K_2                    | 0.152624996  | #N/A                  |
| _S[Phospho (STY)]KSQQQLHSPALSPAHSK_4                                         | 0.003099226  | O88737_S233_M1_Bsn    |
| _ADTQAQPQMQR_2                                                               | -0.199255372 | #N/A                  |
| _SDS[Phospho (STY)]VTGHTSQK_2                                                | -0.135981497 | O88738_S493_M1_Birc6  |
| _ISFVIPC[Carbamidomethyl (C)]NNH_2                                           | -0.342659148 | #N/A                  |
| _QQS[Phospho (STY)]TGAIPATQAR_2                                              | -0.104351875 | O88746_S405_M1_Tom1   |
| _QNS[Phospho (STY)]VSSNTSQR_2                                                | -0.254386348 | O88746_S180_M1_Tom1   |
| _GSS[Phospho (STY)]LADQRK_2                                                  | -0.008225756 | O88746_S376_M1_Tom1   |
| _AADRLPNLAS[Phospho (STY)]PSAEGPPRSPGTAPR_4                                  | 0.126444126  | O88746_S462_M1_Tom1   |
| _SKQS[Phospho (STY)]PISTPTS[Phospho (STY)]PGSLRK_3                           | -0.23289885  | O88809_S332_M2_Dcx    |
| _GNPSAAAGPKAS[Phospho (STY)]PTPQK_2                                          | -0.309550502 | O88809_S287_M1_Dcx    |
| _ATDFVVPGPQK_2                                                               | 0.188104431  | #N/A                  |
| _ALEDVC[Carbamidomethyl (C)]IETIEAGFM[Oxidation (M)]TK_2                     | -0.434767964 | #N/A                  |
| _TVEAEAAHGTVTR_2                                                             | 0.166802329  | #N/A                  |
| _HAYGDQYR_2                                                                  | 0.221814379  | #N/A                  |
| _QSSLAEPVS[Phospho (STY)]PSKR_2                                              | -0.108388819 | O88845_S187_M1_Akap10 |
| _ASVAVHS[Phospho (STY)]PQK_2                                                 | -0.278274646 | O88845_S52_M1_Akap10  |
| _NSC[Carbamidomethyl (C)]SS[Phospho (STY)]PLRELSEK_2                         | 0.184286727  | O88845_S281_M1_Akap10 |
| _ [Acetyl (Protein N-term)]SS[Phospho (STY)]PERDEGTPVPDSR_2                  | 0.18089183   | O88852_S3_M1_Tsyp11   |
| _KPS[Phospho (STY)]PQPS[Phospho (STY)]PPR_2                                  | -0.307917076 | O88874_S325_M2_Ccnk   |
| _AVVVS[Phospho (STY)]PKEENK_2                                                | -0.180211154 | O88874_S341_M1_Ccnk   |
| _M[Oxidation (M)]S[Phospho (STY)]PMGTASGSNSPTSASVQR_2                        | 0.031368959  | O88878_S48_M1_Zfand5  |
| _TTGTLPS[Phospho (STY)]PQNFK_2                                               | -0.365327937 | O88910_S307_M1_Mpp3   |
| _QAS[Phospho (STY)]ISGPAPTK_2                                                | -0.258091772 | O88935_S568_M1_Syn1   |

|                                                                        |              |                          |
|------------------------------------------------------------------------|--------------|--------------------------|
| _SLKPDFVLIR_.2                                                         | -0.25908183  | #N/A                     |
| _TYATAEPFIDAK_.2                                                       | -0.090668032 | #N/A                     |
| _ASGAPPGGQQR_.2                                                        | 0.229230823  | #N/A                     |
| _VLLVIDEPHTDWAK_.2                                                     | -0.199737712 | #N/A                     |
| _TGPPTTQQPR_.2                                                         | 0.229043027  | #N/A                     |
| _VDNQHDFQDIASVVALTK_.3                                                 | -0.001977471 | #N/A                     |
| _KLGTEEFPLIDQTFYPNHK_.3                                                | -0.203417705 | #N/A                     |
| _IHGEIDIK_.2                                                           | -0.031053721 | #N/A                     |
| _QGPPQKPPGPAGPTR_.3                                                    | 0.168040054  | #N/A                     |
| _EM[Oxidation (M)]LSSTYPVVVK_.2                                        | -0.232214782 | #N/A                     |
| _QAGAPQATR_.2                                                          | 0.049836667  | #N/A                     |
| _M[Oxidation (M)]TQALPR_.2                                             | 0.184933485  | #N/A                     |
| _QPQRDAS[Phospho (STY)]PGR_.2                                          | -0.219251301 | O88935_S427_M1_Syn1      |
| _LGTEEFPLIDQTFYPNHK_.3                                                 | -0.309902374 | #N/A                     |
| _ASTAAPVASPAAPSPGSSGGGFFSSLSNAVK_.3                                    | -0.136453169 | #N/A                     |
| _DAS[Phospho (STY)]PGRGSHSQSSSPGALTGR_.3                               | -0.411467871 | O88935_S427_M1_Syn1      |
| _VKVDNQHDFQDIASVVALTK_.3                                               | -0.596097418 | #N/A                     |
| _QLLIVELVVK_.2                                                         | -0.028849518 | #N/A                     |
| _TSVSGNWK_.2                                                           | 0.008654992  | #N/A                     |
| _GSHSQSS[Phospho (STY)]PGALTGR_.2                                      | -0.262103481 | O88935_S438_M1_Syn1      |
| _KIHGEIDIK_.2                                                          | -0.082820546 | #N/A                     |
| _SQSLTNAFNLPEPAPRPSLSQDEVKAETIR_.4                                     | -0.31051157  | #N/A                     |
| _QTAAAAATFSEQVGGSGGAGR_.2                                              | -0.198609692 | #N/A                     |
| _PQPPPPPSAAS[Phospho (STY)]PGATPGSATASAER_.3                           | -0.362172037 | O88935_S39_M1_Syn1       |
| _QAS[Phospho (STY)]QAGPGPR_.2                                          | -0.078591189 | O88935_S605_M1_Syn1      |
| _LPSPT[Phospho (STY)]AAPQQSASQATPVTQGGQR_.3                            | -0.298201425 | O88935_T512_M1_Syn1      |
| _QHAFSMAR_.2                                                           | 0.479928904  | #N/A                     |
| _SQSLTNAFNLPEPAPRPSLSQDEVK_.3                                          | 0.180817996  | #N/A                     |
| _RLS[Phospho (STY)]DSNFM[Oxidation (M)]ANLPNGYM[Oxidation (M)]TDLQR_.3 | 0.10208438   | O88935_S9_M1_Syn1        |
| _PVAGGPGAPPAARPPASPS[Phospho (STY)]PQR_.3                              | -0.196354541 | O88935_S553_M1_Syn1      |
| _QSRPVAGGPGAPPAARPPASPS[Phospho (STY)]PQR_.4                           | -0.262566362 | O88935_S553_M1_Syn1      |
| _DHIEVVGSSM[Oxidation (M)]PLIGDHQDEDK_.3                               | -0.344445872 | #N/A                     |
| _VEQAEFSDLNLVAHANGGFSVDM[Oxidation (M)]EVLRL_.3                        | -0.007081549 | #N/A                     |
| _LWVDT[Carbamidomethyl (C)]SEIFGGLDIC[Carbamidomethyl (C)]AVEALHGK_.3  | 0.058204265  | #N/A                     |
| _HFKDEEEDDEEAS[Phospho (STY)]PDGSGR_.3                                 | -0.016356732 | O88939_S537_M1_Zbtb7a    |
| _Acetyl (Protein N-term)]AALVEPLGLER_.2                                | 0.289169735  | #N/A                     |
| _QQHHSYTS[Phospho (STY)]LESRG_.3                                       | -0.400882535 | O88951_S202_M1_Lin7b     |
| _QQHHSY[Phospho (STY)]TSLESRL_.3                                       | -0.427660737 | O88951_Y200_M1_Lin7b     |
| _VLQSEFC[Carbamidomethyl (C)]NAVR_.2                                   | 0.195489258  | #N/A                     |
| _KSLLSHEFQDET[Phospho (STY)]DT[Phospho (STY)]EEETLYSSKH_.4             | -0.184288587 | O89001_T1365_M2_Cpd      |
| _SLLSHEFQDET[Phospho (STY)]DT[Phospho (STY)]EEETLYSSKH_.3              | 0.057825195  | O89001_T1365_M2_Cpd      |
| _SLLSHEFQDET[Phospho (STY)]DT[Phospho (STY)]EEETLYSSK_.3               | -0.179903004 | O89001_T1365_M2_Cpd      |
| _DYTGEDVTPENFLAVLR_.2                                                  | 0.283136979  | #N/A                     |
| _AAS[Phospho (STY)]QGESPLLPTQR_.2                                      | -0.123811527 | O89032_S1029_M1_Sh3pxd2a |
| _EAENPVGAC[Carbamidomethyl (C)]ESQGS[Phospho (STY)]PLK_.2              | 0.234186694  | O89032_S546_M1_Sh3pxd2a  |
| _GSSGSDSDS[Phospho (STY)]PGSSSLSLAVK_.2                                | 0.096327691  | O89032_S643_M1_Sh3pxd2a  |
| _SAS[Phospho (STY)]DAGIRDTPK_.2                                        | 0.099646104  | O89032_S721_M1_Sh3pxd2a  |

|                                                                                          |              |                          |
|------------------------------------------------------------------------------------------|--------------|--------------------------|
| _RIS[Phospho (STY)]PASSLQR_.2                                                            | 0.039354211  | O89032_S592_M1_Sh3pxd2a  |
| _NSS[Phospho (STY)]FSTAR_.2                                                              | -0.155454991 | O89032_S1008_M1_Sh3pxd2a |
| _PEDVNPPK_.2                                                                             | -0.493785016 | #N/A                     |
| _ATPEPSGTPSSDTVSR_.2                                                                     | 0.271681122  | #N/A                     |
| _DGALIC[Carbamidomethyl (C)]TSC[Carbamidomethyl (C)]R_.2                                 | -0.238250952 | #N/A                     |
| _ILTTGFSR_.2                                                                             | 0.166476911  | #N/A                     |
| _QVALWDTK_.2                                                                             | 0.153915058  | #N/A                     |
| _DAGPLLSLK_.2                                                                            | 0.424033419  | #N/A                     |
| _HVFQGPAK_.2                                                                             | 0.381873166  | #N/A                     |
| _VSQTTWDSGFC[Carbamidomethyl (C)]AVNPK_.2                                                | 0.307714945  | #N/A                     |
| _LDRLEETVQAK_.2                                                                          | 0.325892108  | #N/A                     |
| _NLNAIVQK_.2                                                                             | -0.156353641 | #N/A                     |
| _KSDLFQEDLYPPTAGPDPALTAEEWLGG_.3                                                         | 0.137503571  | #N/A                     |
| _APPVPGAVSGGS[Phospho (STY)]GEVDELFDVK_.2                                                | 0.032035602  | O89079_S13_M1_Cope       |
| _S[Phospho (STY)]PLGGPPSVC[Carbamidomethyl (C)]K_.2                                      | -0.308240453 | O89084_S204_M1_Pde4a     |
| _GYS[Phospho (STY)]DSAER_.2                                                              | 0.002107826  | O89084_S49_M1_Pde4a      |
| _SLS[Phospho (STY)]LSLPGPR_.2                                                            | 0.252433756  | O89084_S13_M1_Pde4a      |
| _QS[Phospho (STY)]PSPTLEEEPGVLSDPALPK_.2                                                 | 0.288889182  | O89084_S672_M1_Pde4a     |
| _S[Phospho (STY)]GNQVSEYISNTFLDK_.2                                                      | 0.316829907  | O89084_S274_M1_Pde4a     |
| _TSLPS[Phospho (STY)]EEAQGLGLPSM[Oxidation (M)]AAEVEAPR_.3                               | -0.412365375 | O89084_S788_M1_Pde4a     |
| _SDS[Phospho (STY)]DYDMSPK_.2                                                            | -0.1559778   | O89084_S147_M1_Pde4a     |
| _YDSRPGGYGYGYGR_.3                                                                       | 0.0326126    | #N/A                     |
| _YSGGNYRDNYDN_.2                                                                         | -0.114573405 | #N/A                     |
| _SLAENYFDSTGR_.2                                                                         | -0.417214985 | #N/A                     |
| _IPQSHIQIC[Carbamidomethyl (C)]ENILTSGENLSR_.3                                           | -0.138101697 | #N/A                     |
| _DVNYGWLIR_.2                                                                            | -0.088246038 | #N/A                     |
| _VVLPM[Oxidation (M)]ELPIR_.2                                                            | 0.069463305  | #N/A                     |
| _LLEVDNR_.2                                                                              | -0.318913408 | #N/A                     |
| _ILYM[Oxidation (M)]M[Oxidation (M)]DEINNPVLTVK_.2                                       | -0.410148485 | #N/A                     |
| _M[Oxidation (M)]LISSEDLHSWAVPSLGLK_.3                                                   | -0.327940317 | #N/A                     |
| _VIGGDDLSTLTGK_.2                                                                        | 0.445240828  | #N/A                     |
| _NVLIVEDIIDTGK_.2                                                                        | 0.120723176  | #N/A                     |
| _SIPM[Oxidation (M)]TVDFIR_.2                                                            | 0.04122304   | #N/A                     |
| _EM[Oxidation (M)]GGHHIVALC[Carbamidomethyl (C)]VLK_.3                                   | 5.13E-05     | #N/A                     |
| _DLNHVC[Carbamidomethyl (C)]VISETGK_.2                                                   | 0.121483001  | #N/A                     |
| _SC[Carbamidomethyl (C)]S[Phospho (STY)]ASC[Carbamidomethyl (C)]M[Oxidation (M)]PHGAR_.2 | -0.092697275 | P00520_S717_M1_Abl1      |
| _DFPIANGDR_.2                                                                            | 0.162486657  | #N/A                     |
| _GGPLSDSYR_.2                                                                            | 0.103280606  | #N/A                     |
| _VLEALHSIK_.2                                                                            | 0.151863109  | #N/A                     |
| _[Acetyl (Protein N-term)]S[Phospho (STY)]HHWGYSK_.2                                     | -0.455097812 | P00920_S2_M1_Ca2         |
| _AVQQPDGLAVLGIFLK_.2                                                                     | 0.112605998  | #N/A                     |
| _IGPASQGLQK_.2                                                                           | 0.159569355  | #N/A                     |
| _SIVNNGHSFNVEFDDSQDNAVLK_.3                                                              | -0.334073347 | #N/A                     |
| _QSPVDIDTATAQHDPALQPLISYDK_.3                                                            | 0.351270245  | #N/A                     |
| _YAAELHLVHWNTK_.3                                                                        | -0.053810084 | #N/A                     |
| _TLNFNEEGDAEEAM[Oxidation (M)]VDNWRPAQPLK_.3                                             | -0.32781695  | #N/A                     |
| _EPITVSSEQM[Oxidation (M)]SHFR_.2                                                        | 0.005225608  | #N/A                     |



|                                                                                                                           |              |                    |
|---------------------------------------------------------------------------------------------------------------------------|--------------|--------------------|
| _HNGPENWHKDFPIANGDR_.4                                                                                                    | -0.062058535 | #N/A               |
| _VTLNQPYIK_.2                                                                                                             | 0.155268203  | #N/A               |
| _DNSIQHEFSLTR_.2                                                                                                          | 0.183330449  | #N/A               |
| _HVLSGTLGIPEHTYR_.3                                                                                                       | -0.168511522 | #N/A               |
| _VTSLTAC[Carbamidomethyl (C)]LVNQNL_.2                                                                                    | 0.229230193  | #N/A               |
| _M[Oxidation (M)]FASFPTTK_.2                                                                                              | 0.526847684  | #N/A               |
| _FLASVSTVLTSK_.2                                                                                                          | 0.460006939  | #N/A               |
| _VDPVNFK_.2                                                                                                               | 0.566234938  | #N/A               |
| _VLSGEDKSNIK_.2                                                                                                           | 0.083333157  | #N/A               |
| _IGGHGAEYGAEALER_.3                                                                                                       | 0.447555175  | #N/A               |
| _TYFPHFDVSHGSAQVK_.3                                                                                                      | 0.430947069  | #N/A               |
| _LLVVYPWTQR_.2                                                                                                            | 0.442627087  | #N/A               |
| _LHVDPENFR_.2                                                                                                             | 0.488948416  | #N/A               |
| _DFTPAAQAAFQK_.2                                                                                                          | 0.462937812  | #N/A               |
| _VHLTDAEK_.2                                                                                                              | 0.427617224  | #N/A               |
| _VNSDEVGGEALGR_.2                                                                                                         | 0.478763373  | #N/A               |
| _VITAFNDGLNHLDL_.3                                                                                                        | 0.458684238  | #N/A               |
| _GTFASLSELHC[Carbamidomethyl (C)]DK_.2                                                                                    | 0.411243258  | #N/A               |
| _YFDSFGDLSSASAIM[Oxidation (M)]GNAK_.2                                                                                    | 0.143154006  | #N/A               |
| _VNPDEVGGEALGR_.2                                                                                                         | 0.443008277  | #N/A               |
| _YRPGTVALR_.2                                                                                                             | 0.049017248  | #N/A               |
| _RVTIM[Oxidation (M)]PK_.2                                                                                                | -0.020663517 | #N/A               |
| _STELLIR_.2                                                                                                               | -0.039954718 | #N/A               |
| _EIAQDFK_.2                                                                                                               | 0.16577165   | #N/A               |
| _EIAQDFKTDLR_.2                                                                                                           | 0.343039053  | #N/A               |
| _FQSAAIGALQEAAYLVGLFEDTNLC[Carbamidomethyl (C)]AIHAK_.3                                                                   | -0.470407209 | #N/A               |
| _SC[Carbamidomethyl (C)]C[Carbamidomethyl (C)]SC[Carbamidomethyl (C)]C[Carbamidomethyl (C)]PVGC[Carbamidomethyl (C)]SK_.2 | 0.113272997  | #N/A               |
| _ANPYEC[Carbamidomethyl (C)]GFDPTSSAR_.2                                                                                  | -0.195313198 | #N/A               |
| _DNNVLQK_.2                                                                                                               | 0.054537252  | #N/A               |
| _IYLPHSLPQQ_.2                                                                                                            | -0.020241062 | #N/A               |
| _FADLTDAASR_.2                                                                                                            | 0.230113069  | #N/A               |
| _LADVYQAELR_.2                                                                                                            | 0.144234575  | #N/A               |
| _ITIPVQTFSNLQIR_.2                                                                                                        | 0.139483841  | #N/A               |
| _ESASYQEALAR_.2                                                                                                           | 0.242072695  | #N/A               |
| _FLEQQNK_.2                                                                                                               | 0.198396484  | #N/A               |
| _KLLERGEENR_.2                                                                                                            | 0.25354526   | #N/A               |
| _ALAAELNQLR_.2                                                                                                            | 0.189856173  | #N/A               |
| _QEADEATLAR_.2                                                                                                            | 0.278289347  | #N/A               |
| _HLQEQDLLNVK_.2                                                                                                           | -0.025134064 | #N/A               |
| _KVESLEEEIQFLR_.3                                                                                                         | -0.037198253 | #N/A               |
| _LEAENNLAAAYR_.2                                                                                                          | 0.399728379  | #N/A               |
| _S[Phospho (STY)]YASETIVVR_.2                                                                                             | 0.024853412  | P03995_S12_M1_Gfap |
| _QLQALTC[Carbamidomethyl (C)]DLESRL_.2                                                                                    | 0.379797617  | #N/A               |
| _DGEVIKDSK_.2                                                                                                             | 0.257108593  | #N/A               |
| _QKLQDETNL_.2                                                                                                             | -0.020538833 | #N/A               |
| _MTPPLPAR_.2                                                                                                              | 0.375548646  | #N/A               |
| _DNFAQDLGTLR_.2                                                                                                           | -0.016897455 | #N/A               |

|                                                             |              |                     |
|-------------------------------------------------------------|--------------|---------------------|
| _LRLDQLTANSAR_.2                                            | 0.394225475  | #N/A                |
| _LEVERDNFAQDLGTLR_.3                                        | -0.288671188 | #N/A                |
| _FASYIEK_.2                                                 | -0.1766868   | #N/A                |
| _TQYEAVATSNM[Oxidation (M)]QETEEWYR_.2                      | -0.192373593 | #N/A                |
| _EQLAQQQVHVEM[Oxidation (M)]DVAKPDLTAAALR_.3                | -0.158820856 | #N/A                |
| _AEMMELNDR_.2                                               | 0.489754135  | #N/A                |
| _LEEEGQSLKEEMAR_.2                                          | 0.221852006  | #N/A                |
| _LALDIEIATYR_.2                                             | 0.107279028  | #N/A                |
| _GTNES[Phospho (STY)]LER_.2                                 | 0.298547913  | P03995_S302_M1_Gfap |
| _FFS[Phospho (STY)]GDRGAPK_.2                               | -0.431963001 | P04370_S178_M1_Mbp  |
| _TQDENPVVHFFK_.2                                            | -0.253893162 | #N/A                |
| _LFS[Phospho (STY)]RDAPGR_.2                                | -0.438532579 | P04370_S96_M1_Mbp   |
| _NIVTPRT[Phospho (STY)]PPPSQGK_.2                           | -0.206528005 | P04370_T229_M1_Mbp  |
| _DTGILDS[Phospho (STY)]IGR_.2                               | 0.259609058  | P04370_S172_M1_Mbp  |
| _TTHYGS[Phospho (STY)]LPQK_.2                               | 0.090639219  | P04370_S201_M1_Mbp  |
| _HRDTGILDSIGR_.3                                            | 0.103330956  | #N/A                |
| _TTHYGSLPQKS[Phospho (STY)]QHGR_.3                          | 0.029244875  | P04370_S206_M1_Mbp  |
| _DSRSGS[Phospho (STY)]PMAR_.2                               | -0.083601559 | P04370_S245_M1_Mbp  |
| _S[Phospho (STY)]KYLATASTM[Oxidation (M)]DHAR_.2            | 0.453482175  | P04370_S144_M1_Mbp  |
| _YLATASTM[Oxidation (M)]DHAR_.2                             | 0.464944447  | #N/A                |
| _T[Phospho (STY)]PPPSQGK_.2                                 | -0.418775547 | P04370_T229_M1_Mbp  |
| _S[Phospho (STY)]QHGR_TQDENPVVHFFK_.4                       | 0.152635994  | P04370_S206_M1_Mbp  |
| _SGS[Phospho (STY)]IPM[Oxidation (M)]AR_.2                  | -0.446125219 | P04370_S245_M1_Mbp  |
| _YPGQGSPGGNR_.2                                             | -0.043829042 | #N/A                |
| _VVEQM[Oxidation (M)]C[Carbamidomethyl (C)]VTQYQK_.2        | 0.033441474  | #N/A                |
| _PM[Oxidation (M)]IHFGNDWEDR_.3                             | 0.097996463  | #N/A                |
| _ESQAYYDGRR_.2                                              | -0.20592427  | #N/A                |
| _HVAGAAAAGAVVGLGGYM[Oxidation (M)]LGSAM[Oxidation (M)]SR_.3 | -0.427420347 | #N/A                |
| _DDNGVPFVR_.2                                               | 0.163122102  | #N/A                |
| _QVLFSADDR_.2                                               | 0.167190356  | #N/A                |
| _ELSDIALR_.2                                                | 0.004094279  | #N/A                |
| _ALQASALNAWR_.2                                             | 0.446095538  | #N/A                |
| _DNAGAATEEFIK_.2                                            | 0.21293587   | #N/A                |
| _PHSYPALSAEQKK_.3                                           | -0.121634666 | #N/A                |
| _LSQIGVENTEENR_.2                                           | 0.185696216  | #N/A                |
| _VDKGVVPLAGTDGETTTQGLDGLLER_.3                              | -0.079321692 | #N/A                |
| _JSDRTPSALAIENANVLAR_.3                                     | -0.309361716 | #N/A                |
| _YEGSGDGGAAAQSLYIANHAY_.2                                   | 0.031664148  | #N/A                |
| _TPSALAIENANVLAR_.2                                         | 0.080643558  | #N/A                |
| _PHSYPALSAEQK_.2                                            | 0.293727769  | #N/A                |
| _TVPPAVPGVTFLSGGQSEEEASLNLNAINR_.3                          | -0.502907214 | #N/A                |
| _GILAADESVGS[Phospho (STY)]M[Oxidation (M)]AK_.2            | -0.076230058 | P05063_S39_M1_Aldoc |
| _GVVPLAGTDGETTTQGLDGLLER_.2                                 | 0.190189046  | #N/A                |
| _YSPEEIAM[Oxidation (M)]ATVTALR_.2                          | 0.143087229  | #N/A                |
| _AEM[Oxidation (M)]NGLAAQGR_.2                              | 0.381479037  | #N/A                |
| _LSQIGVENTEENRR_.3                                          | -0.006598898 | #N/A                |
| _RLS[Phospho (STY)]QIGVENTEENRR_.3                          | -0.293001999 | P05063_S45_M1_Aldoc |

|                                                                    |              |                       |
|--------------------------------------------------------------------|--------------|-----------------------|
| _DNAGAAATEEFIKR_2                                                  | 0.190544831  | #N/A                  |
| _GILAADESUGS[Phospho (STY)]M[Oxidation (M)]AKR_2                   | -0.104035321 | P05063_S39_M1_Aldoc   |
| _GILAADESTGS[Phospho (STY)]IAK_2                                   | 0.243835652  | P05064_S39_M1_Aldoa   |
| _ELSDIAHR_2                                                        | 0.214287289  | #N/A                  |
| _ALANSLAC[Carbamidomethyl (C)]QKG_2                                | 0.158147902  | #N/A                  |
| _PHPYPALTPEQK_2                                                    | 0.065136902  | #N/A                  |
| _DGADFAKWR_2                                                       | -0.179764653 | #N/A                  |
| _AAQEEYIKR_2                                                       | 0.003719231  | #N/A                  |
| _LQSIGTENTEENR_2                                                   | 0.075021543  | #N/A                  |
| _GVVPLAGTNGETTTQGLDGLSER_2                                         | 0.162097436  | #N/A                  |
| _YASIC[Carbamidomethyl (C)]QQNGIVPIVEPEILPDGDHDLKR_4               | 0.185240002  | #N/A                  |
| _PHPYPALTPEQKK_3                                                   | -0.236773929 | #N/A                  |
| _IGEHTPSALAIM[Oxidation (M)]ENANVLAR_3                             | 0.050703807  | #N/A                  |
| _KELSDIAHR_2                                                       | -0.031638629 | #N/A                  |
| _VDKGVVPLAGTNGETTTQGLDGLSER_3                                      | -0.055863903 | #N/A                  |
| _KDGADFAK_2                                                        | -0.066177737 | #N/A                  |
| _AAQEEYIK_2                                                        | 0.13795386   | #N/A                  |
| _GGVVGIVDK_2                                                       | -0.551340404 | #N/A                  |
| _QLLLTADDR_2                                                       | 0.203071481  | #N/A                  |
| _LQSIGTENTEENRR_3                                                  | -0.186360702 | #N/A                  |
| _SKGGVVGIIK_2                                                      | 0.06676437   | #N/A                  |
| _ALQASALK_2                                                        | -0.070267908 | #N/A                  |
| _ADDGRPFQVIK_2                                                     | 0.276197456  | #N/A                  |
| _GILAADESTGS[Phospho (STY)]IAKR_2                                  | -0.140073345 | P05064_S39_M1_Aldoa   |
| _ALSDHHVYLEGTLKPNM[Oxidation (M)]VTPGHAC[Carbamidomethyl (C)]TQK_5 | -0.058767753 | #N/A                  |
| _FSNEEIAM[Oxidation (M)]ATVTALR_2                                  | -0.33105949  | #N/A                  |
| _C[Carbamidomethyl (C)]QYVTEK_2                                    | -0.072477248 | #N/A                  |
| _RLQSIGTENTEENRR_3                                                 | -0.16526793  | #N/A                  |
| _YTPSGQSGAAASESLFISNHAY_2                                          | -0.262308157 | #N/A                  |
| _VNPC[Carbamidomethyl (C)]IGGVILFHETLYQK_2                         | -0.108997159 | #N/A                  |
| _TVPPAVTGVTFSLGGQSEEEASINLNAINK_3                                  | -0.455870359 | #N/A                  |
| _FSNEEIAMATVTALRR_3                                                | 0.340443621  | #N/A                  |
| _FKGPGDTSNFDDEEEIRVS[Phospho (STY)]INEK_4                          | 0.117165639  | P05132_S339_M1_Prkaca |
| _WETPSQNTAQLDQFDR_2                                                | 0.14495341   | #N/A                  |
| _HIYLLPSGR_2                                                       | -0.308649773 | #N/A                  |
| _ITWSNPPAQGAR_2                                                    | -0.242594072 | #N/A                  |
| _NFGLYNER_2                                                        | -0.239727061 | #N/A                  |
| _VGGVQSLGGTGALR_2                                                  | 0.246697947  | #N/A                  |
| _IVAATLSDPELFK_2                                                   | 0.317393781  | #N/A                  |
| _LVLGDNSLAIR_2                                                     | 0.13380145   | #N/A                  |
| _DIRPYC[Carbamidomethyl (C)]YWDAEKR_3                              | -0.048214793 | #N/A                  |
| _QVEYLVNEK_2                                                       | -0.154100437 | #N/A                  |
| _APPSVFAQVPQAPPVLVFK_2                                             | 0.024276706  | #N/A                  |
| _NTPIYVSSPTWENHNAVFSAGFK_3                                         | -0.291724147 | #N/A                  |
| _IGADFLGR_2                                                        | -0.15649059  | #N/A                  |
| _VNLGVGAYR_2                                                       | 0.335155344  | #N/A                  |
| _VGNLTVVGK_2                                                       | -0.046440956 | #N/A                  |

|                                                                        |              |      |
|------------------------------------------------------------------------|--------------|------|
| _IANDNSLNHEYLPILGLAEFR_.3                                              | 0.21561306   | #N/A |
| _IVAATLSDPELFKEWK_.3                                                   | 0.165121735  | #N/A |
| _QIAAVM[Oxidation (M)]QR_.2                                            | 0.519268205  | #N/A |
| _INM[Oxidation (M)]C[Carbamidomethyl (C)]GLTTK_.2                      | 0.217749332  | #N/A |
| _TPGTWSHITEQIGM[Oxidation (M)]FSFTGLNPK_.3                             | -0.28619525  | #N/A |
| _TDESQPWVLPVVR_.2                                                      | 0.265558939  | #N/A |
| _FLPFFDSAYQGFASGDLEK_.2                                                | -0.084943562 | #N/A |
| _LTADFRDDPDPR_.2                                                       | -0.120338749 | #N/A |
| _DIRPYC[Carbamidomethyl (C)]YWDAAEK_.3                                 | -0.211516944 | #N/A |
| _NLDYVATSIHEAVTK_.2                                                    | -0.342803155 | #N/A |
| _WYNGTDNK_.2                                                           | -0.005197815 | #N/A |
| _VLSQMEK_.2                                                            | 0.307206782  | #N/A |
| _YFVSEGFELFC[Carbamidomethyl (C)]AQSFsk_.2                             | -0.080413197 | #N/A |
| _IAATILTSPDLR_.2                                                       | 0.150657986  | #N/A |
| _ASAEALGENNEVLK_.2                                                     | -0.413822788 | #N/A |
| _TQLVSNLKK_.2                                                          | 0.206221932  | #N/A |
| _DDNGKPYVLPsvr_.2                                                      | -0.139695779 | #N/A |
| _PSWGNHTPIFR_.3                                                        | 0.010466556  | #N/A |
| _FVTVQTISGTGALR_.2                                                     | -0.291987525 | #N/A |
| _VGAFTVVC[Carbamidomethyl (C)]K_.2                                     | -0.042620701 | #N/A |
| _VGASFLQR_.2                                                           | -0.063796337 | #N/A |
| _NLDKEYLPIGGLAEFC[Carbamidomethyl (C)]K_.3                             | -0.078180743 | #N/A |
| _KQWLQEVK_.2                                                           | -0.309200981 | #N/A |
| _KAEAQIAAK_.2                                                          | 0.276722289  | #N/A |
| _QWLQEVK_.2                                                            | -0.070461208 | #N/A |
| _TQLVSNLK_.2                                                           | 0.271030406  | #N/A |
| _TC[Carbamidomethyl (C)]GFDFSGALEDISK_.2                               | 0.281739629  | #N/A |
| _M[Oxidation (M)]NLGVGAYR_.2                                           | -0.071289378 | #N/A |
| _DAGM[Oxidation (M)]QLQGYR_.2                                          | -0.066144373 | #N/A |
| _IAATILTSPDLRK_.2                                                      | 0.102619756  | #N/A |
| _NM[Oxidation (M)]GLYGER_.2                                            | 0.296600853  | #N/A |
| _EYLPiGGLAEFC[Carbamidomethyl (C)]K_.2                                 | 0.545577319  | #N/A |
| _EFSVYMTK_.2                                                           | 0.342490734  | #N/A |
| _IPEQSVLLLHAC[Carbamidomethyl (C)]AHNPTGVDPREQWK_.5                    | 0.170922757  | #N/A |
| _ISVAGVTSGNVGYLAHAIHQVTK_.3                                            | -0.198462296 | #N/A |
| _EIIDLVLDR_.2                                                          | 0.031252261  | #N/A |
| _VGINYQPPTVPPGGDLAK_.2                                                 | -0.423701262 | #N/A |
| _IHFPLATYAPVISAek_.2                                                   | -0.148675815 | #N/A |
| _LSVDYGKK_.2                                                           | -0.050317532 | #N/A |
| _DVNAAIATIK_.2                                                         | -0.013278575 | #N/A |
| _QLFHPEQLITGK_.2                                                       | 0.02344821   | #N/A |
| _SIQFVDWC[Carbamidomethyl (C)]PTGFK_.2                                 | -0.010918204 | #N/A |
| _QLFHPEQLITGKEDAANNYAR_.4                                              | -0.285448999 | #N/A |
| _EDAANNYAR_.2                                                          | 0.078700082  | #N/A |
| _RNLDIERPTYTNLNR_.3                                                    | -0.121320124 | #N/A |
| _DVNAAIATIKTK_.2                                                       | -0.095630092 | #N/A |
| _YM[Oxidation (M)]AC[Carbamidomethyl (C)]C[Carbamidomethyl (C)]LLYR_.2 | -0.071912844 | #N/A |

|                                                                        |              |                        |
|------------------------------------------------------------------------|--------------|------------------------|
| _AYHEQLSVAEITNAC[Carbamidomethyl (C)]FEPANQM[Oxidation (M)]VK_3        | -0.360399543 | #N/A                   |
| _DYEEVGVDSVEGEGEEGEEY_2                                                | -0.047207694 | #N/A                   |
| _FDGALNVDLTEFQTNLVYPYPR_3                                              | -0.005418553 | #N/A                   |
| _LDHKFDLM[Oxidation (M)]YAK_2                                          | 0.022158587  | #N/A                   |
| _NLDIERPTYTNLNR_3                                                      | -0.221360492 | #N/A                   |
| _AVFVDLEPTVIDEVR_2                                                     | -0.029501492 | #N/A                   |
| _EDMAALEK_2                                                            | 0.314081228  | #N/A                   |
| _TIGGGDDDS[Phospho (STY)]FNTFFSETGAGK_2                                | 0.0972225    | P05213_S48_M1_Tuba1b   |
| _LISQIVSSITASLR_2                                                      | 0.000868095  | #N/A                   |
| _FDLM[Oxidation (M)]YAK_2                                              | -0.039629845 | #N/A                   |
| _AFVHWYVGEGM[Oxidation (M)]EEGEFSEAR_3                                 | -0.287363295 | #N/A                   |
| _AVC[Carbamidomethyl (C)]M[Oxidation (M)]LSNTTAAEAWAR_3                | -0.046044842 | #N/A                   |
| _GDVVPKDVNAAIATIK_2                                                    | -0.024782073 | #N/A                   |
| _AFVHWYVGEGM[Oxidation (M)]EEGEFSEAREDM[Oxidation (M)]AALEK_4          | -0.115375092 | #N/A                   |
| _LS[Phospho (STY)]VDYGK_2                                              | -0.066909627 | P05213_S158_M1_Tuba1b  |
| _LADQC[Carbamidomethyl (C)]TGLQGFLVFHSFGGGTSGFTSLLM[Oxidation (M)]ER_3 | 0.258807026  | #N/A                   |
| _EDM[Oxidation (M)]AALEKDYEEVGVDSVEGEGEEGEEY_3                         | 0.078337127  | #N/A                   |
| _RAFVHWYVGEGMEEGEFSEAR_3                                               | -0.159848956 | #N/A                   |
| _TIQFVDWC[Carbamidomethyl (C)]PTGFK_2                                  | 0.089621264  | #N/A                   |
| _LIGQIVSSITASLR_2                                                      | 0.143817674  | #N/A                   |
| _S[Phospho (STY)]LEPSENVHGAGGAFPASQTPSKPASADGHR_4                      | 0.004736833  | P05480_S17_M1_Src      |
| _LFGGFNSSDTVTS[Phospho (STY)]PQR_2                                     | -0.382571059 | P05480_S74_M1_Src      |
| _VNS[Phospho (STY)]VGSSASSTQPLLHEDA_2                                  | -0.199845504 | P05532_S962_M1_Kit     |
| _LAS[Phospho (STY)]PELER_2                                             | -0.366099385 | P05627_S73_M1_Jun;Jund |
| _VTLTPEEEAR_2                                                          | -0.000527569 | #N/A                   |
| _LVITAGAR_2                                                            | -0.057956521 | #N/A                   |
| _SADTLWGIQK_2                                                          | -0.20918079  | #N/A                   |
| _VIGSGC[Carbamidomethyl (C)]NLDSAR_2                                   | -0.142347116 | #N/A                   |
| _QVVDSAYEVIK_2                                                         | -0.291138472 | #N/A                   |
| _DQLIVNLLK_2                                                           | 0.329791948  | #N/A                   |
| _DYC[Carbamidomethyl (C)]VTANSK_2                                      | -0.003217167 | #N/A                   |
| _DQLIVNLLKEEQAPQNK_3                                                   | -0.275507817 | #N/A                   |
| _DLADELALVDVM[Oxidation (M)]EDK_2                                      | 0.139078714  | #N/A                   |
| _GEM[Oxidation (M)]M[Oxidation (M)]DLQHGSFLK_3                         | 0.355377656  | #N/A                   |
| _SLNPELGTDADKEQWK_2                                                    | -0.047946289 | #N/A                   |
| _DLADELALVDVM[Oxidation (M)]EDKLK_2                                    | -0.247468965 | #N/A                   |
| _LLIVSNPVDILTYVAWK_2                                                   | -0.293811081 | #N/A                   |
| _SNT[Phospho (STY)]PIKVDGK_2                                           | -0.340735082 | P06745_T109_M1_Gpi     |
| _ELFEADPER_2                                                           | -0.208929786 | #N/A                   |
| _INYTENR_2                                                             | -0.042638643 | #N/A                   |
| _AVLHVALR_2                                                            | 0.147645545  | #N/A                   |
| _VFEGNRPTNSIVFTK_3                                                     | -0.170508829 | #N/A                   |
| _GKLPEEARK_2                                                           | -0.347496051 | #N/A                   |
| _HFVALSTNTAK_2                                                         | 0.326112868  | #N/A                   |
| _TLASLSPETSLFIIASK_2                                                   | -0.197290831 | #N/A                   |
| _EWFLEAAKDPSAVAK_2                                                     | 0.090125143  | #N/A                   |
| _NRS[Phospho (STY)]NTPIK_2                                             | -0.044765852 | P06745_S107_M1_Gpi     |

|                                                               |              |                      |
|---------------------------------------------------------------|--------------|----------------------|
| _LRELFADPER_2                                                 | -0.340385102 | #N/A                 |
| _NRS[Phospho (STY)]NTPIKVDGK_3                                | -0.329348644 | P06745_S107_M1_Gpi   |
| _EWFLEAAK_2                                                   | 0.073522733  | #N/A                 |
| _DVM[Oxidation (M)]PEVNR_2                                    | 0.412145471  | #N/A                 |
| _TFTTQETITNAETAK_2                                            | 0.31133645   | #N/A                 |
| _TFTTQETITNAETAKEWFLEAAK_3                                    | -0.714040487 | #N/A                 |
| _VWVFSNIDGTHIAK_2                                             | -0.272607712 | #N/A                 |
| _M[Oxidation (M)]KS[Phospho (STY)]FC[Carbamidomethyl (C)]QR_2 | 0.278235246  | P06745_S131_M1_Gpi   |
| _KIEPELEGSSAVTSHDSSTNGLISFIK_4                                | -0.141653276 | #N/A                 |
| _EVM[Oxidation (M)]QM[Oxidation (M)]LVELAK_2                  | -0.389599145 | #N/A                 |
| _ILLANFLAQTEALM[Oxidation (M)]K_2                             | 0.330509802  | #N/A                 |
| _FAAYFQQGDMESENGK_2                                           | 0.306796302  | #N/A                 |
| _SPEDLEK_2                                                    | -0.475749622 | #N/A                 |
| _DNM[Oxidation (M)]FSGSK_2                                    | -0.192798014 | #N/A                 |
| _ELQAAGKS[Phospho (STY)]PEDLEK_2                              | 0.198366361  | P06745_S455_M1_Gpi   |
| _NRNS[Phospho (STY)]NVVPYDFNR_2                               | -0.369285192 | P06800_S964_M1_Ptpcr |
| _AIFASGSPFDPVTLPDGR_2                                         | -0.073270624 | #N/A                 |
| _EGDGSATTDAAAPATS[Phospho (STY)]PK_2                          | -0.182910433 | #N/A                 |
| _EKDDAPVADGVEKK_3                                             | -0.231445297 | #N/A                 |
| _AEDGPAKEEPK_2                                                | 0.196680798  | #N/A                 |
| _KGDAPAAEAEAK_2                                               | 0.474408239  | #N/A                 |
| _KGEFDAAPSEK_2                                                | 0.148414364  | #N/A                 |
| _EGDGSATTDAAAPATS[Phospho (STY)]PKAEPSK_3                     | -0.24697033  | #N/A                 |
| _KGEFDAAPSEKAGS[Phospho (STY)]AETESAAG_2                      | -0.297072909 | P06837_S128_M1_Gap43 |
| _QADVPAAVTDAAATT[Phospho (STY)]PAAEDAATK_2                    | -0.372304679 | P06837_T172_M1_Gap43 |
| _NDEQKIEQDGVKPEDK_3                                           | -0.002214897 | #N/A                 |
| _KEGDGSATTDAAAPATS[Phospho (STY)]PK_2                         | -0.039888336 | #N/A                 |
| _ATTDNS[Phospho (STY)]PSSKAEDGPAKEEPK_3                       | 0.017605825  | P06837_S142_M1_Gap43 |
| _QDEGKEDPEADQEHA_2                                            | -0.052912686 | #N/A                 |
| _AGS[Phospho (STY)]AETESAAG_2                                 | 0.245827751  | P06837_S128_M1_Gap43 |
| _AEDGPAKEEPKQADVPAAVTDAAATT[Phospho (STY)]PAAEDAATK_4         | -0.302207863 | P06837_T172_M1_Gap43 |
| _AAQPPTETAESSQAEEKDAVDEAKPK_4                                 | 0.056672975  | #N/A                 |
| _EGDGSATTDAAAPATS[Phospho (STY)]PKAEPSKAGDAPSEK_4             | -0.526514065 | #N/A                 |
| _AGDAPS[Phospho (STY)]EEKKGEGDAAPSEK_3                        | -0.24058365  | P06837_S110_M1_Gap43 |
| _KEGDGSATTDAAAPATS[Phospho (STY)]PKAEPSK_3                    | -0.111688004 | #N/A                 |
| _ATTDNS[Phospho (STY)]PSSKAEDGPAK_2                           | 0.054308389  | P06837_S142_M1_Gap43 |
| _AGSAETESAAGATTDNS[Phospho (STY)]PSSK_2                       | -0.101165499 | P06837_S142_M1_Gap43 |
| _GEGDAAPS[Phospho (STY)]EEKAGSAETESAAG_2                      | 0.304510619  | P06837_S122_M1_Gap43 |
| _AGDAPSEK_2                                                   | 0.459114735  | #N/A                 |
| _AEEPSKAGDAPSEK_3                                             | -0.042285974 | #N/A                 |
| _ESARQDEGKEDPEADQEHA_3                                        | -0.182509086 | #N/A                 |
| _LVQEVTFDAK_2                                                 | 0.347676047  | #N/A                 |
| _APQVSTPTLVEAAR_2                                             | 0.200368483  | #N/A                 |
| _QTALAEVK_2                                                   | -0.135194404 | #N/A                 |
| _TC[Carbamidomethyl (C)]VADESAANC[Carbamidomethyl (C)]DK_2    | 0.487617617  | #N/A                 |
| _DQVANSFAVER_2                                                | 0.210145378  | #N/A                 |
| _NPDDITNEEYGEFYK_2                                            | -0.16063092  | #N/A                 |

|                                                                                   |              |                         |
|-----------------------------------------------------------------------------------|--------------|-------------------------|
| _LGIHEDSQNR_.2                                                                    | 0.040981887  | #N/A                    |
| _ELISNSSDALDK_.2                                                                  | 0.299437254  | #N/A                    |
| _DKEVS[Phospho (STY)]DDEAEEK_.2                                                   | -0.303921673 | P07901_S231_M1_Hsp90aa1 |
| _HIYFITGETK_.2                                                                    | -0.036615225 | #N/A                    |
| _ELHINLIPSK_.2                                                                    | 0.374389494  | #N/A                    |
| _ELHINLIPSKQDR_.3                                                                 | 0.054973877  | #N/A                    |
| _APFDLFENR_.2                                                                     | -0.257011559 | #N/A                    |
| _RAPFDLFENR_.2                                                                    | 0.008843104  | #N/A                    |
| _ESDDKPEIEDVGS[Phospho (STY)]DEEEEEK_.2                                           | 0.275348478  | P07901_S263_M1_Hsp90aa1 |
| _ESDDKPEIEDVGS[Phospho (STY)]DEEEEEKK_.3                                          | -0.35021839  | P07901_S263_M1_Hsp90aa1 |
| _ELISNSSDALDKIR_.2                                                                | -0.473303439 | #N/A                    |
| _HGLEVIYM[Oxidation (M)]IEPIDEYC[Carbamidomethyl (C)]VQQLK_.3                     | -0.075489672 | #N/A                    |
| _DKEVS[Phospho (STY)]DDEAEEKEEK_.2                                                | -0.094091774 | P07901_S231_M1_Hsp90aa1 |
| _FYEQFSK_.2                                                                       | -0.447723121 | #N/A                    |
| _SLTNDWEEHLAVK_.2                                                                 | 0.230266811  | #N/A                    |
| _HLEINPDHSIIETLR_.3                                                               | -0.188731972 | #N/A                    |
| _DNSTM[Oxidation (M)]GYMAAK_.2                                                    | 0.549951318  | #N/A                    |
| _LVTSPC[Carbamidomethyl (C)]C[Carbamidomethyl (C)]IVTSTYGTANM[Oxidation (M)]ER_.3 | -0.499785613 | #N/A                    |
| _KHLEINPDHSIIETLR_.4                                                              | -0.044096221 | #N/A                    |
| _ERDKEVS[Phospho (STY)]DDEAEEK_.2                                                 | -0.158411184 | P07901_S231_M1_Hsp90aa1 |
| _LGLGIDEDDPTVDDTSAAVTEEMPPLEGDDDTSR_.3                                            | 0.176054127  | #N/A                    |
| _LGIHEDSQNRK_.3                                                                   | -0.006574103 | #N/A                    |
| _SILFVPTSAPR_.2                                                                   | -0.146286079 | #N/A                    |
| _TFEINPR_.2                                                                       | 0.210668237  | #N/A                    |
| _FAFQAEVNR_.2                                                                     | 0.123095897  | #N/A                    |
| _GLFDEYGSK_.2                                                                     | 0.323523543  | #N/A                    |
| _TDDEVVQREEEAIQLDGLNASQIR_.3                                                      | -0.315862572 | #N/A                    |
| _GVVDSDDLPLNVSIR_.2                                                               | 0.218589223  | #N/A                    |
| _SGTSEFLNK_.2                                                                     | 0.107278897  | #N/A                    |
| _DISTNYASQK_.2                                                                    | -0.144549807 | #N/A                    |
| _SGYLLPDTK_.2                                                                     | 0.001861616  | #N/A                    |
| _NLLHVTDTGVGM[Oxidation (M)]TR_.2                                                 | -0.328110252 | #N/A                    |
| _FQSSHSTDTISLDQYVER_.3                                                            | -0.410882996 | #N/A                    |
| _LISLTDENALAGNEELTVK_.2                                                           | -0.005646025 | #N/A                    |
| _ELEEQLGPAEETR_.2                                                                 | -0.231822071 | #N/A                    |
| _LQAEIFQAR_.2                                                                     | 0.417069056  | #N/A                    |
| _LGPLVEQGR_.2                                                                     | 0.021934544  | #N/A                    |
| _DRLEEVIR_.2                                                                      | -0.119760658 | #N/A                    |
| _IQASVATNPIITPVAQENQ_.2                                                           | -0.432183801 | #N/A                    |
| _NEVHTM[Oxidation (M)]LGQS[Phospho (STY)]TEEIR_.2                                 | -0.368246339 | P08226_S139_M1_Apoe     |
| _LGADMEDLR_.2                                                                     | 0.3806172    | #N/A                    |
| _DAEDLQKR_.2                                                                      | 0.173159174  | #N/A                    |
| _SKMEEQTQQIR_.2                                                                   | -0.240234503 | #N/A                    |
| _DGVANVSIEDR_.2                                                                   | -0.126625346 | #N/A                    |
| _HVGDLGNVTAGK_.2                                                                  | 0.28488722   | #N/A                    |
| _VISLSGEHSIIGR_.2                                                                 | 0.269280764  | #N/A                    |
| _TM[Oxidation (M)]VVHEK_.2                                                        | 0.178094376  | #N/A                    |

|                                              |              |                      |
|----------------------------------------------|--------------|----------------------|
| _LAC[Carbamidomethyl (C)]GVIGIAQ_.2          | 0.249739497  | #N/A                 |
| _GDGPVQGTIHFEQK_.2                           | 0.310986781  | #N/A                 |
| _KHGGPADEER_.2                               | 0.241184082  | #N/A                 |
| _QDDLKGGNEESTK_.2                            | 0.002725463  | #N/A                 |
| _GC[Carbamidomethyl (C)]DVVVIPAGVPR_.2       | -0.009052892 | #N/A                 |
| _VDFPQDQLATLTGR_.2                           | 0.149894155  | #N/A                 |
| _GYLGPEQLPDC[Carbamidomethyl (C)]LK_.2       | 0.439212608  | #N/A                 |
| _IFGVTTLDIVR_.2                              | 0.026127781  | #N/A                 |
| _M[Oxidation (M)]IAEAIPELK_.2                | 0.137493282  | #N/A                 |
| _TIIP LISQC[Carbamidomethyl (C)]TPK_.2       | 0.351035151  | #N/A                 |
| _IQEAGTEVVK_.2                               | 0.009630297  | #N/A                 |
| _ETEC[Carbamidomethyl (C)]TYFSTPLLGK_.2      | 0.079844284  | #N/A                 |
| _VNVPIVGGHAGK_.2                             | -0.238131539 | #N/A                 |
| _EGVVEC[Carbamidomethyl (C)]SFVQSK_.2        | 0.000197669  | #N/A                 |
| _VAVLGASGGIGQPLSLLK_.2                       | -0.135507418 | #N/A                 |
| _ANTFVAELK_.2                                | 0.088105187  | #N/A                 |
| _KGEDFVK_.2                                  | -0.314500129 | #N/A                 |
| _LTLYDIAHTPGVAADLSHIETR_.3                   | -0.13760134  | #N/A                 |
| _HGVYNPNK_.2                                 | 0.056918284  | #N/A                 |
| _NSPLVS[Phospho (STY)]R_.2                   | 0.342096932  | P08249_S51_M1_Mdh2   |
| _FVFSLV DAM[Oxidation (M)]NGK_.2             | 0.193089087  | #N/A                 |
| _AGAGSATLSM[Oxidation (M)]AYAGAR_.2          | -0.121814263 | #N/A                 |
| _ITPFEEK_.2                                  | -0.085484477 | #N/A                 |
| _ASS[Phospho (STY)]DPPSTQDAK_.2              | 0.448679715  | P08414_S353_M1_Camk4 |
| _DSTDLLGKK_.2                                | 0.328665374  | #N/A                 |
| _RDS[Phospho (STY)]EEKLK_.2                  | -0.126644519 | P08414_S433_M1_Camk4 |
| _TEIGVLLR_.2                                 | -0.038799759 | #N/A                 |
| _LGS[Phospho (STY)]ASSHTSIQENHK_.3           | -0.199515879 | P08414_S337_M1_Camk4 |
| _AQLQDLNDR_.2                                | -0.056735044 | #N/A                 |
| _EYQDLLNVK_.2                                | 0.006801816  | #N/A                 |
| _KLEGEETR_.2                                 | -0.352809242 | #N/A                 |
| _VHELEQQNK_.2                                | 0.032686237  | #N/A                 |
| _YEEEVLSR_.2                                 | 0.25783625   | #N/A                 |
| _ALYEQEIR_.2                                 | -0.047081246 | #N/A                 |
| _FTVLTESAAK_.2                               | 0.124009806  | #N/A                 |
| _TLEIEAC[Carbamidomethyl (C)]R_.2            | -0.002982658 | #N/A                 |
| _VLEAELLVLR_.2                               | 0.314761277  | #N/A                 |
| _KGADEAALAR_.2                               | 0.017786547  | #N/A                 |
| _ [Acetyl (Protein N-term)]SSFGYDPYFSTSYK_.2 | 0.064259632  | #N/A                 |
| _FASFIER_.2                                  | 0.139491075  | #N/A                 |
| _AAKDEVSESR_.2                               | 0.257124481  | #N/A                 |
| _EGLEETLR_.2                                 | 0.321539471  | #N/A                 |
| _KEES[Phospho (STY)]AGEEQVAK_.2              | -0.033774927 | P08551_S532_M1_Nefl  |
| _YLKEYQDLLNVK_.2                             | -0.446247182 | #N/A                 |
| _AEEAKDEPPS[Phospho (STY)]EGEAEEEEK_.2       | -0.138043054 | P08551_S473_M1_Nefl  |
| _LLEGEETR_.2                                 | 0.187655659  | #N/A                 |
| _SFPAYYTSHVQEEQTEVEETIEATK_.3                | -0.262558878 | #N/A                 |



|                                                    |              |                     |
|----------------------------------------------------|--------------|---------------------|
| _EES[Phospho (STY)]AGEEQVAK_.2                     | 0.226362257  | P08551_S532_M1_Nefl |
| _IDSLM[Oxidation (M)]DEIAFLK_.3                    | -0.205135923 | #N/A                |
| _QALQGEREGLEETLR_.3                                | -0.281673099 | #N/A                |
| _RYVETPR_.2                                        | 0.149532812  | #N/A                |
| _NM[Oxidation (M)]QNAEEWFK_.2                      | -0.126575787 | #N/A                |
| _EEEEEEKKEES[Phospho (STY)]AGEEQVAK_.3             | -0.190021529 | P08551_S532_M1_Nefl |
| _IDSLM[Oxidation (M)]DEIAFLK_.2                    | -0.173441347 | #N/A                |
| _SAYSQLQSSSYLM[Oxidation (M)]SAR_.2                | -0.082284016 | #N/A                |
| _M[Oxidation (M)]ALDIEIAAYR_.2                     | 0.068228083  | #N/A                |
| _AAKDEVSESRR_.3                                    | -0.082049249 | #N/A                |
| _SAYSSYSAPVSSSLSVR_.2                              | -0.099166528 | #N/A                |
| _LSFTSVGSITSGYSQSSQVFR_.2                          | -0.35317423  | #N/A                |
| _SYSSSSGSLM[Oxidation (M)]PSLENLDLSQVA AISNDLK_.3  | -0.420565433 | #N/A                |
| _TQEKALQDLNDR_.3                                   | 0.062740343  | #N/A                |
| _YEEEVLSREDAEGR_.3                                 | 0.0320842    | #N/A                |
| _AEEAKDEPPS[Phospho (STY)]EGEAEKEKE_.3             | -0.140013723 | P08551_S473_M1_Nefl |
| _S[Phospho (STY)]PVEEVKPKPEAK_.3                   | -0.103495943 | P08553_S610_M1_Nefm |
| _GVVTNGLDVS[Phospho (STY)]PAEEK_.2                 | -0.098252404 | P08553_S769_M1_Nefm |
| _AES[Phospho (STY)]PVKEK_.2                        | -0.237413583 | P08553_S669_M1_Nefm |
| _QLS[Phospho (STY)]DIEER_.2                        | -0.119473172 | P08553_S344_M1_Nefm |
| _VHYLEQQNK_.2                                      | 0.190059301  | #N/A                |
| _EIEAEIQALR_.2                                     | 0.158493611  | #N/A                |
| _ [Acetyl (Protein N-term)]SYTLDSLGNPSAYR_.2       | 0.315821625  | #N/A                |
| _VQSLQDEVAFLR_.2                                   | 0.22681517   | #N/A                |
| _FSTFSGSITGPLYTHR_.2                               | -0.10902033  | #N/A                |
| _LTEAAEQNK_.2                                      | 0.275856424  | #N/A                |
| _SAKEEIAEYR_.2                                     | 0.180263702  | #N/A                |
| _AVEEVITISK_.2                                     | 0.44919213   | #N/A                |
| _SAKEEIAEYRR_.3                                    | -0.214511239 | #N/A                |
| _VTSHAIVK_.2                                       | 0.299628741  | #N/A                |
| _LRDDTEAAIR_.2                                     | 0.274497136  | #N/A                |
| _SNHEEEVADLLAQIQASHITVER_.3                        | -0.044299649 | #N/A                |
| _GS[Phospho (STY)]PSTVSSSYKR_.2                    | 0.396705832  | P08553_S44_M1_Nefm  |
| _KGEDS[Phospho (STY)]SDDKVVVTK_.2                  | -0.030249792 | P08553_S779_M1_Nefm |
| _KAES[Phospho (STY)]PVKEK_.2                       | 0.038560237  | P08553_S669_M1_Nefm |
| _EEPEAEKS[Phospho (STY)]PVKS[Phospho (STY)]PEAK_.3 | -0.040878108 | P08553_S502_M2_Nefm |
| _HNHDLSSYQDTIQQLENELR_.3                           | 0.27165209   | #N/A                |
| _VSGS[Phospho (STY)]PSSGFR_.2                      | -0.108452336 | P08553_S30_M1_Nefm  |
| _SIELESVR_.2                                       | -0.187546635 | #N/A                |
| _VKEKAEEEGGS[Phospho (STY)]EEEGSDR_.3              | -0.075307552 | #N/A                |
| _ATLEMVNHEK_.2                                     | 0.250057398  | #N/A                |
| _S[Phospho (STY)]PVEEVKPK_.2                       | 0.103686858  | P08553_S610_M1_Nefm |
| _SNEKEQLQGLNDR_.2                                  | -0.191032782 | #N/A                |
| _EEEGVVVTNGLDVS[Phospho (STY)]PAEEK_.3             | 0.002523417  | P08553_S769_M1_Nefm |
| _GS[Phospho (STY)]PSTVSSSYK_.2                     | 0.100763578  | P08553_S44_M1_Nefm  |
| _AEEEGGS[Phospho (STY)]EEEGSDRSPQESK_.3            | 0.086142897  | #N/A                |
| _EEIAEYRR_.2                                       | 0.026162245  | #N/A                |

|                                                                  |              |                        |
|------------------------------------------------------------------|--------------|------------------------|
| _GTKES[Phospho (STY)]LER_.2                                      | 0.421871216  | P08553_S338_M1_Nefm    |
| _ITS[Phospho (STY)]EGGDGATK_.2                                   | -0.084976725 | P08553_S795_M1_Nefm    |
| _QASHAQLGDAYDQEIR_.3                                             | 0.402435871  | #N/A                   |
| _EEKPQPQEK_.2                                                    | 0.356975504  | #N/A                   |
| _AQVQLSDHLEEDIHR_.3                                              | -0.150475062 | #N/A                   |
| _FAGYIEK_.2                                                      | -0.168498798 | #N/A                   |
| _LTEAAEQNKEAIR_.2                                                | 0.348284612  | #N/A                   |
| _LS[Phospho (STY)]RSNEKEQLQGLNDR_.3                              | -0.081018437 | P08553_S95_M1_Nefm     |
| _TDISTALK_.2                                                     | -0.27548765  | #N/A                   |
| _EVTKES[Phospho (STY)]PKEEK_.2                                   | 0.089249954  | P08553_S645_M1_Nefm    |
| _AEEEGGS[Phospho (STY)]EEEGSDR_.2                                | 0.120954127  | #N/A                   |
| _VEEHEETFEK_.2                                                   | 0.36166253   | #N/A                   |
| _SPVKES[Phospho (STY)]PEAK_.2                                    | -0.05865991  | P08553_S506_M1_Nefm    |
| _EKAEEEGGS[Phospho (STY)]EEEGSDR_.2                              | 0.010283626  | #N/A                   |
| _QPSVTISSK_.2                                                    | 0.091306169  | #N/A                   |
| _AKS[Phospho (STY)]PMPK_.2                                       | 0.111748046  | P08553_S605_M1_Nefm    |
| _EGSS[Phospho (STY)]EKDEGEQEEEEGETEAEGEGEAEAKEEK_.4              | -0.1022071   | P08553_S551_M1_Nefm    |
| _SVTVTQKVEEHEETFEK_.3                                            | -0.19022114  | #N/A                   |
| _AEEEGGS[Phospho (STY)]EEEGSDRSPQESK_.3                          | 0.128814812  | #N/A                   |
| _EKAEEEGGS[Phospho (STY)]EEEGSDRSPQESK_.3                        | -0.071671629 | #N/A                   |
| _SQLEC[Carbamidomethyl (C)]HSDQNMHQAEWFK_.3                      | -0.283182151 | #N/A                   |
| _DTKEEKQPQEK_.3                                                  | -0.291733909 | #N/A                   |
| _LFDSIC[Carbamidomethyl (C)]NNK_.2                               | 0.156693     | #N/A                   |
| _IAQSDYIPTQQDVLRL_.2                                             | -0.140416841 | #N/A                   |
| _EYQLNDSAAYYLNDLER_.2                                            | -0.067631989 | #N/A                   |
| _AVVYSNTIQSIM[Oxidation (M)]AIVK_.2                              | -0.362856991 | #N/A                   |
| _NLREDGEK_.2                                                     | 0.099100848  | #N/A                   |
| _NNLKDC[Carbamidomethyl (C)]GLF_.2                               | -0.08689876  | #N/A                   |
| _M[Oxidation (M)]FDVGGQR_.2                                      | -0.012348338 | #N/A                   |
| _YDEAASYIQSK_.2                                                  | 0.32259397   | #N/A                   |
| _SREYQLNDSAAYYLNDLER_.3                                          | -0.285377302 | #N/A                   |
| _IIHEDGYSEEC[Carbamidomethyl (C)]R_.3                            | -0.178194405 | #N/A                   |
| _TTGIVETHFTFK_.2                                                 | -0.135327326 | #N/A                   |
| _MFDVGGQRS[Phospho (STY)]ER_.2                                   | 0.020423838  | P08752_S207_M1_Gnai2   |
| _QLFALSC[Carbamidomethyl (C)]AAEEQGM[Oxidation (M)]LPEDLSGVIR_.3 | 0.500961268  | #N/A                   |
| _LWADHGVQAC[Carbamidomethyl (C)]FGR_.3                           | -0.288655809 | #N/A                   |
| _EIYTHFTC[Carbamidomethyl (C)]ATDTK_.3                           | 0.164328434  | #N/A                   |
| _AMGNLQIDFADPQR_.2                                               | -0.130291828 | #N/A                   |
| _NVQFVFDAVTDVIK_.2                                               | 0.212956132  | #N/A                   |
| _YSPTS[Phospho (STY)]PTYSPTPK_.2                                 | -0.092916503 | P08775_S1878_M1_Polr2a |
| _YSPTS[Phospho (STY)]PTYSPSPK_.2                                 | 0.045741798  | P08775_S1913_M1_Polr2a |
| _YTPTSPSYSPSS[Phospho (STY)]PEYTPASPK_.2                         | -0.097187582 | P08775_S1850_M1_Polr2a |
| _EADDIVNWLK_.2                                                   | 0.390086157  | #N/A                   |
| _NNFEGEITK_.2                                                    | 0.10853112   | #N/A                   |
| _TGPAATTLSDTAAESLVDSEVTVIGFFK_.3                                 | -0.002382331 | #N/A                   |
| _TVIDYNGER_.2                                                    | 0.024502258  | #N/A                   |
| _ILFIFIDSDHTDNQR_.3                                              | 0.046197783  | #N/A                   |

|                                                                                      |              |                              |
|--------------------------------------------------------------------------------------|--------------|------------------------------|
| _NLQSLDPSHR_.2                                                                       | -0.031484379 | #N/A                         |
| _TYNTNAQVPDS[Phospho (STY)]AGTATAYLC[Carbamidomethyl (C)]GVK_.3                      | -0.409682278 | P09242_S110_M1_Alpl          |
| _NDLAVVDVR_.2                                                                        | 0.074156079  | #N/A                         |
| _LELQGSNSR_.2                                                                        | -0.158608093 | #N/A                         |
| _ETLEEVFEK_.2                                                                        | 0.266667826  | #N/A                         |
| _VEGSEPTTFFNLFIGNLNPNK_.2                                                            | 0.105415415  | #N/A                         |
| _NLS[Phospho (STY)]FNITEDELK_.2                                                      | 0.247486674  | P09405_S403_M1_Ncl           |
| _GLS[Phospho (STY)]EDTTEETLK_.2                                                      | 0.102987016  | P09405_S577_M1_Ncl           |
| _NNQITNNQR_.2                                                                        | 0.041898062  | #N/A                         |
| _LTLDKLDVK_.2                                                                        | 0.000709478  | #N/A                         |
| _FHVEEEGKGK_.2                                                                       | 0.194416119  | #N/A                         |
| _ITLPVDFVTADKFDENAK_.2                                                               | -0.255858115 | #N/A                         |
| _YSLEPVAAELK_.2                                                                      | 0.121071142  | #N/A                         |
| _GC[Carbamidomethyl (C)]ITIIGGGDTATC[Carbamidomethyl (C)]C[Carbamidomethyl (C)]AK_.2 | -0.005401246 | #N/A                         |
| _LGDVYVNDAFGTAHR_.3                                                                  | 0.002507345  | #N/A                         |
| _FC[Carbamidomethyl (C)]LDNGAK_.2                                                    | 0.05328952   | #N/A                         |
| _FHVEEEGK_.2                                                                         | 0.028901892  | #N/A                         |
| _KYAEAVGR_.2                                                                         | -0.071774274 | #N/A                         |
| _IQLINNM[Oxidation (M)]LDK_.2                                                        | 0.233033518  | #N/A                         |
| _ELNYFAK_.2                                                                          | -0.243356607 | #N/A                         |
| _VNEM[Oxidation (M)]IIGGGM[Oxidation (M)]AFTFLK_.2                                   | 0.364610261  | #N/A                         |
| _AEPAKIDAFR_.2                                                                       | -0.293725093 | #N/A                         |
| _VLNNM[Oxidation (M)]EIGTSLYDEEGAK_.2                                                | 0.141992494  | #N/A                         |
| _SLM[Oxidation (M)]DEVVK_.2                                                          | 0.175750817  | #N/A                         |
| _VDFNVPMK_.2                                                                         | 0.176051267  | #N/A                         |
| _ALESPPERFLAILGGAK_.3                                                                | 0.105048827  | #N/A                         |
| _AHSSM[Oxidation (M)]VGVNLPQK_.2                                                     | 0.359785806  | #N/A                         |
| _DC[Carbamidomethyl (C)]VGPEVENAC[Carbamidomethyl (C)]ANPAAGTVILLENLR_.3             | 0.19457236   | #N/A                         |
| _VSHVSTGGGASLELLEGGK_.3                                                              | 0.101528334  | #N/A                         |
| _WNTEDKVSHVSTGGGASLELLEGGK_.3                                                        | -0.03733744  | #N/A                         |
| _QIVWNGPVGVFWEAFAR_.2                                                                | -0.187798914 | #N/A                         |
| _ [Acetyl (Protein N-term)]TTAS[Phospho (STY)]PSQVR_.2                               | -0.056317479 | P09528_S5_M1_Fth1            |
| _QNYHQDAEAAINR_.3                                                                    | 0.179125088  | #N/A                         |
| _GELLEAIKR_.2                                                                        | 0.227382843  | #N/A                         |
| _NVRPDYLK_.2                                                                         | 0.211754125  | #N/A                         |
| _GDVTTQVALQPALK_.2                                                                   | 0.318421203  | #N/A                         |
| _AIWNVINWENVTER_.2                                                                   | -0.221199789 | #N/A                         |
| _YHEALAK_.2                                                                          | 0.156790172  | #N/A                         |
| _GELLEAIK_.2                                                                         | 0.05087139   | #N/A                         |
| _HHAAYVNNLNATEEK_.3                                                                  | 0.282130143  | #N/A                         |
| _FNGGGHINHIFWTNLSPK_.3                                                               | -0.176745159 | #N/A                         |
| _DFGSFEK_.2                                                                          | -0.314170696 | #N/A                         |
| _LGG[Phospho (STY)]PTNGNSAAPSPESEP_.2                                                | -0.263233947 | P0C027_S148_M1_Nudt10;Nudt11 |
| _LKLGGSP[Phospho (STY)]NGNSAAPSPESEP_.2                                              | -0.19440801  | P0C027_T150_M1_Nudt10;Nudt11 |
| _SEREDVLLVSSSR_.3                                                                    | -0.141740697 | #N/A                         |
| _T[Phospho (STY)]GDPANLNRLR_.2                                                       | 0.031946467  | P0C090_T341_M1_Rc3h2         |
| _MHQVM[Oxidation (M)]S[Phospho (STY)]IEEVER_.2                                       | 0.14367686   | P0C0A3_S119_M1_Chmp6         |

|                                                                 |              |                                    |
|-----------------------------------------------------------------|--------------|------------------------------------|
| _ATIAGGGVIPHIHK_.3                                              | -0.032492368 | #N/A                               |
| _GDEELDSLIIK_.2                                                 | -0.57627287  | #N/A                               |
| _SGS[Phospho (STY)]KENVQETQI_.2                                 | 0.023493229  | P0C192_S700_M1_Lrrc4b              |
| _RRANS[Phospho (STY)]C[Carbamidomethyl (C)]S[Phospho (STY)]I_.2 | -0.079238449 | P0C5J4_S358_M2_Gpr52               |
| _GSS[Phospho (STY)]PQVLPR_.2                                    | -0.377893283 | P0C673_S378_M1_Igsf11              |
| _AQLVS[Phospho (STY)]PPAPPTK_.2                                 | -0.277110916 | P0C7L0_S211_M1_Wipf3               |
| _TAVAPPPLPGANNSGSET[Phospho (STY)]PPPLPPK_.3                    | -0.218490424 | P0C7L0_T338_M1_Wipf3               |
| _SGS[Phospho (STY)]GYEGSTSWK_.2                                 | -0.569216744 | P0C7M9_S47_M1_Clec2l               |
| _S[Phospho (STY)]PAEAEAR_.2                                     | -0.198212821 | P0C7M9_S29_M1_Clec2l               |
| _PRS[Phospho (STY)]PAEAEAR_.2                                   | 0.066972889  | P0C7M9_S29_M1_Clec2l               |
| _PAPAAPRRPRS[Phospho (STY)]PAEAEAR_.3                           | -0.251558219 | P0C7M9_S29_M1_Clec2l               |
| _DTTEDS[Phospho (STY)]ITEDDKRR_.3                               | -0.111491723 | P0C913_S28_M1_                     |
| _DTTEDS[Phospho (STY)]ITEDDKR_.2                                | 0.193946274  | P0C913_S28_M1_                     |
| _TLDYNIQK_.2                                                    | 0.026703698  | #N/A                               |
| _ESTLHLVLR_.2                                                   | 0.286132129  | #N/A                               |
| _TITLEVPSDTIENVK_.2                                             | 0.169235319  | #N/A                               |
| _QLEDGRTL[Phospho (STY)]DYNIQK_.3                               | -0.283051484 | P0CG49_S57_M1_Ubb;Ubc;Rps27a;Uba52 |
| _FNVGTDIAIEESNAIINDGK_.2                                        | -0.106084454 | #N/A                               |
| _DEGS[Phospho (STY)]YHVDES_.2                                   | 0.313096957  | P0DI97_S423_M1_Nrxn1               |
| _YPAGNNDNER_.2                                                  | 0.207734508  | #N/A                               |
| _NYIS[Phospho (STY)]NSAQSNQAVVK_.2                              | 0.044359894  | P0DI97_S434_M1_Nrxn1               |
| _TLFQLLR_.2                                                     | -0.088706405 | #N/A                               |
| _ELRPNEEVTWK_.2                                                 | -0.064134399 | #N/A                               |
| _EAFSLFDK_.2                                                    | 0.267646563  | #N/A                               |
| _EAFSLFDKDGDTITTK_.3                                            | -0.306105095 | #N/A                               |
| _ELGTVMR_.2                                                     | 0.324686301  | #N/A                               |
| _VFDKDGNGYISAAELR_.3                                            | 0.164127073  | #N/A                               |
| _DGNGYISAAELR_.2                                                | -0.095024864 | #N/A                               |
| _M[Oxidation (M)]KDTDSEEEIREAFR_.3                              | 0.213208373  | #N/A                               |
| _DTDSEEEIREAFR_.2                                               | 0.239227646  | #N/A                               |
| _M[Oxidation (M)]KDTDSEEEIR_.2                                  | 0.165583858  | #N/A                               |
| _ [Acetyl (Protein N-term)]ADQLTEEQIAEFKEAFSLFDKDGDTITTK_.3     | -0.311542492 | #N/A                               |
| _ [Acetyl (Protein N-term)]ADQLTEEQIAEFK_.2                     | 0.068401661  | #N/A                               |
| _DTDSEEEIR_.2                                                   | -0.381054274 | #N/A                               |
| _IGGIGTVPVGR_.2                                                 | -0.073258706 | #N/A                               |
| _RYEEIVK_.2                                                     | -0.031540655 | #N/A                               |
| _LPLQDVYK_.2                                                    | 0.156066696  | #N/A                               |
| _QLIVGVNK_.2                                                    | -0.022136113 | #N/A                               |
| _QTVAVGVIK_.2                                                   | 0.219345961  | #N/A                               |
| _STTTGHLIYK_.2                                                  | 0.117364256  | #N/A                               |
| _TIEKFEK_.2                                                     | 0.087178618  | #N/A                               |
| _EHALLAYTLGVK_.2                                                | -0.253454828 | #N/A                               |
| _M[Oxidation (M)]DSTEPYYSQK_.2                                  | 0.553439876  | #N/A                               |
| _VETGVLPKPGM[Oxidation (M)]VVTFAPVNVTEVK_.3                     | 0.232644665  | #N/A                               |
| _YYVTIIDAPGHR_.2                                                | -0.174376805 | #N/A                               |
| _DGSASGTTLLEALDC[Carbamidomethyl (C)]ILPPTRPDKPLR_.3            | -0.139806222 | #N/A                               |
| _NMITGTSQADC[Carbamidomethyl (C)]AVLIVAAGVGEFEAGISK_.3          | -0.447391196 | #N/A                               |

|                                                                    |              |                       |
|--------------------------------------------------------------------|--------------|-----------------------|
| _THINIVVIGHVDSGK_.3                                                | 0.323193827  | #N/A                  |
| _DAAQSS[Phospho (STY)]PAFGDR_.2                                    | -0.175208739 | P10518_S215_M1_Alalad |
| _DAAQSS[Phospho (STY)]PAFGDRR_.2                                   | -0.21592045  | P10518_S215_M1_Alalad |
| _EQWSNC[Carbamidomethyl (C)]PTIGQIR_.2                             | 0.259425758  | #N/A                  |
| _GENHC[Carbamidomethyl (C)]GIESEIVAGIPR_.3                         | 0.535097447  | #N/A                  |
| _SC[Carbamidomethyl (C)]EAGYSPSYKEDK_.2                            | 0.279344295  | #N/A                  |
| _DQGSC[Carbamidomethyl (C)]GSC[Carbamidomethyl (C)]WAFGAVEAISDR_.2 | -0.286423277 | #N/A                  |
| _NGPVEGAFTVFSDFLTYK_.2                                             | 0.043518672  | #N/A                  |
| _EIMAEIYK_.2                                                       | -0.234872486 | #N/A                  |
| _LQAEAPHIVVGTGPR_.3                                                | -0.147536393 | #N/A                  |
| _ETQALVLAPTR_.2                                                    | -0.136651999 | #N/A                  |
| _SGYSSPGS[Phospho (STY)]PGTPGSR_.2                                 | 0.066095707  | P10636_S519_M1_MAPT   |
| _SKIGS[Phospho (STY)]TENLK_.2                                      | 0.29897526   | P10636_S579_M1_MAPT   |
| _TDHGAEIVYK_.2                                                     | 0.093691152  | #N/A                  |
| _LDLSNVQSK_.2                                                      | 0.049856608  | #N/A                  |
| _SEKLDFKDR_.2                                                      | 0.032192965  | #N/A                  |
| _HVPGGGSVQIVYKPVDSLK_.3                                            | 0.179737518  | #N/A                  |
| _SEKLDFK_.2                                                        | 0.081899281  | #N/A                  |
| _VQIINKK_.2                                                        | 0.098089243  | #N/A                  |
| _LQTAPVPM[Oxidation (M)]PDLK_.2                                    | 0.104808955  | #N/A                  |
| _T[Phospho (STY)]PPKSPSSAK_.2                                      | 0.059963568  | P10636_T548_M1_MAPT   |
| _IGS[Phospho (STY)]LDNITHVPGGGNK_.2                                | -0.121580672 | P10636_S673_M1_MAPT   |
| _IGSTENLK_.2                                                       | 0.015027691  | #N/A                  |
| _VAVVRT[Phospho (STY)]PPKS[Phospho (STY)]PSSAK_.2                  | -0.088134942 | P10636_S552_M2_MAPT   |
| _TPS[Phospho (STY)]LPTPPTR_.2                                      | 0.001003541  | P10636_S531_M1_MAPT   |
| _IGS[Phospho (STY)]LDNITHVPGGGNK_.3                                | -0.110264385 | P10636_S673_M1_MAPT   |
| _SRT[Phospho (STY)]PS[Phospho (STY)]LPTPPPTREPK_.3                 | 0.117273744  | #N/A                  |
| _AKTDHGAEIVYKS[Phospho (STY)]PVVS[Phospho (STY)]GDTSPR_.4          | 0.011205357  | #N/A                  |
| _IGS[Phospho (STY)]TENLKHQPGGGK_.3                                 | -0.128267056 | P10636_S579_M1_MAPT   |
| _SPVVS[Phospho (STY)]GDTs[Phospho (STY)]PR_.2                      | -0.03558995  | #N/A                  |
| _TDHGAEIVYKS[Phospho (STY)]PVVSGDTS[Phospho (STY)]PR_.3            | 0.148836827  | #N/A                  |
| _TPS[Phospho (STY)]LPTPPPTREPK_.2                                  | -0.034118588 | P10636_S531_M1_MAPT   |
| _AKTDHGAEIVYK_.2                                                   | 0.111741295  | #N/A                  |
| _SRT[Phospho (STY)]PS[Phospho (STY)]LPTPPTR_.2                     | 0.205733255  | #N/A                  |
| _KLDLSNVQSK_.2                                                     | 0.044966003  | #N/A                  |
| _IPAKT[Phospho (STY)]PPAPK_.2                                      | 0.057459222  | P10636_T492_M1_MAPT   |
| _T[Phospho (STY)]PPSSGEPPK_.2                                      | 0.060660952  | P10636_T498_M1_MAPT   |
| _TPPAPKT[Phospho (STY)]PPSSGEPPK_.2                                | 0.016675696  | P10636_T498_M1_MAPT   |
| _SKIGS[Phospho (STY)]TENLKHQPGGGK_.3                               | -0.19928527  | P10636_S579_M1_MAPT   |
| _DQGGYTM[Oxidation (M)]HQDQEGDTDAGLK_.3                            | 0.019825394  | #N/A                  |
| _QEFVEM[Oxidation (M)]EDHAGTYGLGDR_.3                              | 0.017128115  | #N/A                  |
| _VQS[Phospho (STY)]KIGS[Phospho (STY)]LDNITHVPGGGNK_.3             | 0.049592273  | P10636_S669_M2_MAPT   |
| _SGDRSGYSSPGS[Phospho (STY)]PGTPGSR_.3                             | -0.178362318 | P10636_S519_M1_MAPT   |
| _IPAKT[Phospho (STY)]PPAPKT[Phospho (STY)]PPSSGEPPK_.3             | 0.04036925   | P10636_T492_M2_MAPT   |
| _TPPAPKT[Phospho (STY)]PPSSGEPPKSGDR_.3                            | 0.063722011  | P10636_T498_M1_MAPT   |
| _C[Carbamidomethyl (C)]GSLGNIHHKPGGGQVEVK_.3                       | 0.072246532  | #N/A                  |
| _T[Phospho (STY)]PPSSGEPPKSGDR_.2                                  | 0.112188041  | P10636_T498_M1_MAPT   |

|                                                                       |              |                      |
|-----------------------------------------------------------------------|--------------|----------------------|
| _HLSNVSTGS[Phospho (STY)]IDM[Oxidation (M)]VDSPQLATLADEVSSASLAK_.4    | 0.213844488  | #N/A                 |
| _QEFEVMEHDHAGTYGLGDRK_.3                                              | 0.044678898  | #N/A                 |
| _IPAKTT[Phospho (STY)]PS[Phospho (STY)]PK_.2                          | -0.018796459 | P10637_S470_M2_Map   |
| _IPAKTT[Phospho (STY)]PS[Phospho (STY)]PKT[Phospho (STY)]PPGSGEPPK_.2 | -0.227629781 | P10637_S470_M3_Map   |
| _T[Phospho (STY)]PPKSPSASK_.2                                         | 0.028294094  | P10637_T523_M1_Map   |
| _ESPPQPPADDGAEEPGS[Phospho (STY)]ETSDAK_.2                            | -0.113213244 | P10637_S50_M1_Map    |
| _VAVVRT[Phospho (STY)]PPKS[Phospho (STY)]PSASK_.2                     | -0.09593295  | P10637_S527_M2_Map   |
| _TTPS[Phospho (STY)]PKT[Phospho (STY)]PPGSGEPPKSGER_.3                | 0.232655697  | P10637_S470_M2_Map   |
| _QEFDTM[Oxidation (M)]EDHAGDYTLQDQEGDM[Oxidation (M)]DHGLK_.4         | -0.215642443 | #N/A                 |
| _TTPS[Phospho (STY)]PKT[Phospho (STY)]PPGSGEPPK_.2                    | -0.190097262 | P10637_S470_M2_Map   |
| _ST[Phospho (STY)]PTAEDVTAPLVDER_.2                                   | 0.209501277  | P10637_T58_M1_Map    |
| _T[Phospho (STY)]PPGSGEPPK_.2                                         | 0.221726218  | P10637_T473_M1_Map   |
| _SGERS[Phospho (STY)]GYSS[Phospho (STY)]PGSPGTPGSR_.2                 | -0.386028115 | P10637_S487_M2_Map   |
| _T[Phospho (STY)]PPGSGEPPKSGER_.2                                     | -0.085461954 | P10637_T473_M1_Map   |
| _EAFQEALAAAGDK_.2                                                     | 0.111403749  | #N/A                 |
| _VGEFSGANK_.2                                                         | 0.49124907   | #N/A                 |
| _VKLIESK_.2                                                           | -0.189123954 | #N/A                 |
| _VGEFSGANKEK_.2                                                       | -0.081387575 | #N/A                 |
| _ITQSNAILR_.2                                                         | -0.024430102 | #N/A                 |
| _YIATPIFSK_.2                                                         | 0.314958087  | #N/A                 |
| _PM[Oxidation (M)]ILGYWNVR_.2                                         | -0.002151807 | #N/A                 |
| _SQWLNEK_.2                                                           | -0.13941502  | #N/A                 |
| _C[Carbamidomethyl (C)]LDAFPNLR_.2                                    | 0.245879103  | #N/A                 |
| _RPWFAGDK_.2                                                          | 0.515519106  | #N/A                 |
| _LYSEFLGK_.2                                                          | 0.120629033  | #N/A                 |
| _YTM[Oxidation (M)]GDAPDFDR_.2                                        | 0.136407306  | #N/A                 |
| _ADIVENQVM[Oxidation (M)]DTR_.2                                       | 0.168066161  | #N/A                 |
| _LGLDFPNLPYLIDGSHK_.3                                                 | -0.044715976 | #N/A                 |
| _MLLEYTDSSYDEK_.2                                                     | 0.213871479  | #N/A                 |
| _M[Oxidation (M)]LLEYTDSSYDEKR_.2                                     | 0.498437512  | #N/A                 |
| _IRADIVENQVM[Oxidation (M)]DTR_.3                                     | -0.150782139 | #N/A                 |
| _VTYVDFLAYDILDQYR_.2                                                  | -0.046268075 | #N/A                 |
| _EPAISSQNS[Phospho (STY)]PEAR_.2                                      | 0.278825569  | P10711_S100_M1_Tcea1 |
| _KKEPAISSQNS[Phospho (STY)]PEAR_.3                                    | 0.007393506  | P10711_S100_M1_Tcea1 |
| _DTYVSSFPR_.2                                                         | 0.340800709  | #N/A                 |
| _LLLSTDSAR_.2                                                         | -0.353315852 | #N/A                 |
| _GQNEDPGSLLTQFR_.2                                                    | -0.225942238 | #N/A                 |
| _LGASNLPAGISLPASAK_.2                                                 | 0.127611195  | #N/A                 |
| _IGDLQAFVGR_.2                                                        | 0.140071343  | #N/A                 |
| _QINPTLGSQEDFKDLLQSAK_.3                                              | 0.12021113   | #N/A                 |
| _EALSSWLQDGVDFGQFR_.2                                                 | -0.055638935 | #N/A                 |
| _SHLEYLSTLK_.2                                                        | -0.018260166 | #N/A                 |
| _HWDQNER_.2                                                           | -0.171828668 | #N/A                 |
| _DAGGIAGLK_.2                                                         | -0.057881004 | #N/A                 |
| _NQKDEINETDLK_.3                                                      | 0.228640278  | #N/A                 |
| _LLPGELAK_.2                                                          | 0.231110253  | #N/A                 |
| _ESYSVYVYK_.2                                                         | 0.057856512  | #N/A                 |

|                                                           |              |                         |
|-----------------------------------------------------------|--------------|-------------------------|
| _EIQTAVR_2                                                | -0.070033113 | #N/A                    |
| _KESYSVYVYK_2                                             | -0.240150309 | #N/A                    |
| _AM[Oxidation (M)]GIM[Oxidation (M)]NSFVNDIFER_2          | -0.044810908 | #N/A                    |
| _QVHPDTGISSK_2                                            | 0.092259195  | #N/A                    |
| _VGENADSQIK_2                                             | 0.177470934  | #N/A                    |
| _ [Acetyl (Protein N-term)]TENS[Phospho (STY)]TSAPAAKPK_2 | -0.127596814 | P10922_S5_M1_H1-0       |
| _GVGASGSFR_2                                              | 0.039695062  | #N/A                    |
| _EQISDIDDAVR_2                                            | -0.005163891 | #N/A                    |
| _QSS[Phospho (STY)]SSRDDNMFQIGK_3                         | 0.157578015  | P11031_S56_M1_Sub1      |
| _TIDIEPDIETLLSQSGNS_2                                     | -0.363686306 | #N/A                    |
| _SLGVGFATR_2                                              | 0.228409017  | #N/A                    |
| _ [Acetyl (Protein N-term)]ADAFVGTWK_2                    | 0.349574626  | #N/A                    |
| _SLVTLDGGK_2                                              | 0.066242857  | #N/A                    |
| _WNGQETTLTR_2                                             | 0.249528592  | #N/A                    |
| _LILTLTHGSVVSTR_2                                         | -0.33439972  | #N/A                    |
| _NGDTITIK_2                                               | 0.5790669    | #N/A                    |
| _IEDVGS[Phospho (STY)]DEEDDSGK_2                          | 0.06390695   | P11499_S255_M1_Hsp90ab1 |
| _TKPIWTR_2                                                | 0.334016197  | #N/A                    |
| _ADLINNLGTIAK_2                                           | 0.261933407  | #N/A                    |
| _IDIIPNPQER_2                                             | 0.448945213  | #N/A                    |
| _YIDQEELNK_2                                              | 0.341796174  | #N/A                    |
| _EDQTEYLEER_2                                             | 0.10508138   | #N/A                    |
| _ELISNASDALDK_2                                           | -0.23146562  | #N/A                    |
| _SIYYITGESK_2                                             | -0.04713747  | #N/A                    |
| _EGLELPEDEEEKK_3                                          | 0.183879738  | #N/A                    |
| _NPDDITQEEYGEFYK_2                                        | 0.246032853  | #N/A                    |
| _ADHGEPIGR_2                                              | -0.097656979 | #N/A                    |
| _EQVANSAFVER_2                                            | 0.07426908   | #N/A                    |
| _ALLFIPR_2                                                | 0.276037916  | #N/A                    |
| _EIS[Phospho (STY)]DDEAEEEEK_2                            | 0.037418379  | P11499_S226_M1_Hsp90ab1 |
| _YESLTDPSK_2                                              | -0.098511567 | #N/A                    |
| _EKEIS[Phospho (STY)]DDEAEEEEK_2                          | -0.120107405 | P11499_S226_M1_Hsp90ab1 |
| _EKYIDQEELNK_2                                            | -0.106520002 | #N/A                    |
| _VFIM[Oxidation (M)]DSC[Carbamidomethyl (C)]DELIPEYLNFR_2 | -0.417856155 | #N/A                    |
| _GVVDSIDLPLNIS[Phospho (STY)]R_2                          | -0.019038806 | P11499_S391_M1_Hsp90ab1 |
| _APFDLFENK_2                                              | 0.242569279  | #N/A                    |
| _LGIHEDSTNR_2                                             | -0.03419932  | #N/A                    |
| _ELISNASDALDKIR_2                                         | -0.316924484 | #N/A                    |
| _EKEIS[Phospho (STY)]DDEAEEEEKGEK_2                       | -0.377667223 | P11499_S226_M1_Hsp90ab1 |
| _EIS[Phospho (STY)]DDEAEEEEKGEK_2                         | -0.206674852 | P11499_S226_M1_Hsp90ab1 |
| _AKFENLC[Carbamidomethyl (C)]K_2                          | -0.442990863 | #N/A                    |
| _IEDVGS[Phospho (STY)]DEEDDSGKDK_2                        | -0.214162378 | P11499_S255_M1_Hsp90ab1 |
| _FYEAFSK_2                                                | 0.048192915  | #N/A                    |
| _IEDVGS[Phospho (STY)]DEEDDSGKDKK_3                       | -0.365845812 | P11499_S255_M1_Hsp90ab1 |
| _EM[Oxidation (M)]LQQSK_2                                 | 0.024545274  | #N/A                    |
| _YESLTDPSKLDGK_2                                          | -0.008889141 | #N/A                    |
| _SLTNDWEDHLAVK_2                                          | 0.081388692  | #N/A                    |

|                                                                                 |              |                       |
|---------------------------------------------------------------------------------|--------------|-----------------------|
| _HLEINPDHPIVETLR_3                                                              | 0.11546274   | #N/A                  |
| _YHTSQSGDEM[Oxidation (M)]TSLSEYVSR_3                                           | -0.220602286 | #N/A                  |
| _HNDDEQYAWESSAGGSFTVR_3                                                         | -0.283731677 | #N/A                  |
| _EGLELPEDEEEKK_3                                                                | -0.096208587 | #N/A                  |
| _VILHLKEDQTEYLEER_3                                                             | -0.071296679 | #N/A                  |
| _KHLEINPDHPIVETLR_4                                                             | 0.068987409  | #N/A                  |
| _LGIHEDSTNRR_3                                                                  | 0.064500348  | #N/A                  |
| _LGLGIDEVTAEEPSAAVPDEIPPLEGDEDASR_3                                             | 0.126828396  | #N/A                  |
| _SDSS[Phospho (STY)]QPMLLR_2                                                    | 0.169690805  | P11531_S3617_M1_Dmd   |
| _NAPGKPMREDT[Phospho (STY)]M_2                                                  | 0.310785887  | P11531_T3677_M1_Dmd   |
| _SLES[Phospho (STY)]DNEEK_2                                                     | -0.009806391 | P11627_S1184_M1_L1cam |
| _EKEAAGGNDSSGAT[Phospho (STY)]SPINPAVALE_2                                      | -0.030222773 | P11627_T1250_M1_L1cam |
| _TLQLLNVGEEDDGEYTC[Carbamidomethyl (C)]LAENSLGSAR_3                             | -0.194522635 | #N/A                  |
| _AQLLVGSGPGVPVPHLELSDR_3                                                        | -0.078018201 | #N/A                  |
| _EAAGGNDSSGATS[Phospho (STY)]PINPAVALE_2                                        | 0.147011478  | P11627_S1251_M1_L1cam |
| _DETFGEYRS[Phospho (STY)]LES[Phospho (STY)]DNEEK_2                              | 0.162754665  | #N/A                  |
| _PM[Oxidation (M)]KDETFGEY[Phospho (STY)]RSLES[Phospho (STY)]DNEEK_3            | -0.157569113 | P11627_Y1179_M2_L1cam |
| _DKEDTQVDS[Phospho (STY)]EARPMK_3                                               | -0.087354847 | P11627_S1166_M1_L1cam |
| _LVALQGQSLILEC[Carbamidomethyl (C)]IAEGFPTPTIK_3                                | -0.173009034 | #N/A                  |
| _ITQYLDAGGIPR_2                                                                 | -0.08315224  | #N/A                  |
| _HPWIS[Phospho (STY)]HR_2                                                       | 0.19179492   | P11798_S272_M1_Camk2a |
| _FTEEYQLFEELGK_2                                                                | -0.127575157 | #N/A                  |
| _VLAQEYAAK_2                                                                    | -0.05169407  | #N/A                  |
| _WQIVHFHR_2                                                                     | -0.12785608  | #N/A                  |
| _FYFENLWSR_2                                                                    | -0.278482931 | #N/A                  |
| _ITAAEALK_2                                                                     | 0.118739186  | #N/A                  |
| _ESSES[Phospho (STY)]TNT[Phospho (STY)]T[Phospho (STY)]IEDEDTKVR_2              | 0.168864642  | #N/A                  |
| _M[Oxidation (M)]C[Carbamidomethyl (C)]DPGM[Oxidation (M)]TAFEPEALGNLVEGLDFHR_3 | -0.060447616 | #N/A                  |
| _ESS[Phospho (STY)]ESTNTTIEDEDTK_2                                              | -0.086464963 | #N/A                  |
| _NFS[Phospho (STY)]GGKSGGNK_2                                                   | 0.099956991  | P11798_S314_M1_Camk2a |
| _Acetyl (Protein N-term)]ATITC[Carbamidomethyl (C)]TR_2                         | 0.080289504  | #N/A                  |
| _S[Phospho (STY)]TVASC[Carbamidomethyl (C)]M[Oxidation (M)]HR_2                 | 0.502025274  | P11798_S275_M1_Camk2a |
| _NDGVKES[Phospho (STY)]SESTNTTIEDEDTK_2                                         | -0.441225267 | P11798_S330_M1_Camk2a |
| _VTEQLIEAISNGDFESYTK_2                                                          | -0.403410726 | #N/A                  |
| _QETVDC[Carbamidomethyl (C)]LKK_2                                               | 0.357883754  | #N/A                  |
| _QET[Phospho (STY)]VDC[Carbamidomethyl (C)]LK_2                                 | 0.365326308  | P11798_T286_M1_Camk2a |
| _SGAPSVLPH_2                                                                    | -0.077422381 | #N/A                  |
| _NDGVKES[Phospho (STY)]ESTNTTIEDEDTKVR_3                                        | 0.14594817   | #N/A                  |
| _KNDGVKES[Phospho (STY)]ESTNTTIEDEDTK_3                                         | -0.305808039 | #N/A                  |
| _VDGKTS[Phospho (STY)]PVQSK_2                                                   | 0.001252768  | P11862_S283_M1_Gas2   |
| _SLLVIPNTLAVNAAQDSTDLVAK_2                                                      | -0.328172556 | #N/A                  |
| _SSFPGVGLDK_2                                                                   | -0.068617426 | #N/A                  |
| _LLEVEHPAAK_2                                                                   | -0.061362304 | #N/A                  |
| _ILATGANVILTTGGIDDM[Oxidation (M)]YLK_2                                         | -0.06487211  | #N/A                  |
| _YINENLIINTDELGR_2                                                              | 0.146130837  | #N/A                  |
| _FATEAAITILR_2                                                                  | -0.138482342 | #N/A                  |
| _IC[Carbamidomethyl (C)]DDELILIK_2                                              | 0.196724279  | #N/A                  |



|                                                                                 |              |                                  |
|---------------------------------------------------------------------------------|--------------|----------------------------------|
| _DDKHGS[Phospho (STY)]YENAVHSGALDD_.3                                           | -0.633937176 | P11983_S544_M1_Tcp1              |
| _M[Oxidation (M)]LVDDIGDVTITNDGATILK_.2                                         | -0.525837976 | #N/A                             |
| _HGSYENAVHS[Phospho (STY)]GALDD_.2                                              | -0.083394398 | P11983_S551_M1_Tcp1              |
| _DC[Carbamidomethyl (C)]LINAAK_.2                                               | 0.201086849  | #N/A                             |
| _SLHDALC[Carbamidomethyl (C)]VVK_.2                                             | -0.20309849  | #N/A                             |
| _IAC[Carbamidomethyl (C)]LDFS LQK_.2                                            | -0.460273384 | #N/A                             |
| _SQNV M[Oxidation (M)]AAASIANIVK_.2                                             | -0.366140957 | #N/A                             |
| _VES[Phospho (STY)]LEQE AANER_.2                                                | -0.056699202 | P12023_S441_M1_App               |
| _C[Carbamidomethyl (C)]LVGEFVSDALLVPDK_.2                                       | 0.234795251  | #N/A                             |
| _QYTSIH HGVVEVDAAVT[Phospho (STY)]PEER_.3                                       | -0.326077983 | P12023_T743_M1_App               |
| _TDEHVIDQGDGDNFV VIER_.3                                                        | -0.270999664 | #N/A                             |
| _SVGQYDNR_.2                                                                    | 0.267723258  | #N/A                             |
| _AATIIATSEGLWGLDR_.2                                                            | -0.19174455  | #N/A                             |
| _GTYDILVTK_.2                                                                   | -0.096294209 | #N/A                             |
| _M[Oxidation (M)]FGS[Phospho (STY)]NLDLM[Oxidation (M)]DPGQ_.2                  | -0.069511732 | P12367_S392_M1_Prkar2a           |
| _NISHYEEQLVK_.2                                                                 | 0.153960556  | #N/A                             |
| _RVS[Phospho (STY)]VC[Carbamidomethyl (C)]AETFPNDEEEEDNDPR_.3                   | 0.187789621  | P12367_S96_M1_Prkar2a            |
| _VSVC[Carbamidomethyl (C)]AETFPNDEEEEDNDPR_.2                                   | -0.704901856 | #N/A                             |
| _RTLS[Phospho (STY)]IDKGF_.2                                                    | -0.522714001 | P12382_S775_M1_Pfkl              |
| _RTLS[Phospho (STY)]IDK_.2                                                      | -0.288996302 | P12382_S775_M1_Pfkl              |
| _GGTPSAFDR_.2                                                                   | -0.359910077 | #N/A                             |
| _VTVLGHVQR_.2                                                                   | -0.061292946 | #N/A                             |
| _TNVLGHLQQGGAPT PFDR_.3                                                         | -0.544640514 | #N/A                             |
| _SFENNWK_.2                                                                     | 0.01040112   | #N/A                             |
| _VFANAPDSAC[Carbamidomethyl (C)]VIGLR_.2                                        | -0.20102498  | #N/A                             |
| _TLS[Phospho (STY)]IDKGF_.2                                                     | -0.45839037  | P12382_S775_M1_Pfkl              |
| _TFVLEVM[Oxidation (M)]GR_.2                                                    | -0.096636776 | #N/A                             |
| _NEWGSLLEELVK_.2                                                                | -0.231624061 | #N/A                             |
| _AIGVLTSGGDAQGM[Oxidation (M)]NAAVR_.2                                          | -0.043948548 | #N/A                             |
| _IM[Oxidation (M)]EVIDAITTTAQSHQR_.2                                            | -0.330024198 | #N/A                             |
| _TGISEGHTVYIVHDGFEGLAK_.3                                                       | 0.229523855  | #N/A                             |
| _SQPGAEGSPES[Phospho (STY)]PPGR_.2                                              | -0.348373294 | P12657_S254_M1_Chrm1             |
| _RPGS[Phospho (STY)]VHRT[Phospho (STY)]PSR_.3                                   | -0.165618381 | P12657_S451_M2_Chrm1             |
| _TDLALILSAGDN_.2                                                                | -0.326229573 | #N/A                             |
| _SFVDQYGQR_.2                                                                   | 0.190984955  | #N/A                             |
| _ELQNLIQELLQAR_.2                                                               | 0.156213582  | #N/A                             |
| _NIMALSDGGK_.2                                                                  | 0.020519021  | #N/A                             |
| _LNDFASAVR_.2                                                                   | 0.113922944  | #N/A                             |
| _ILEVVKDK_.2                                                                    | 0.060331887  | #N/A                             |
| _GM[Oxidation (M)]NTLVGYDLVPEPK_.2                                              | 0.298222701  | #N/A                             |
| _RLNDFASAVR_.2                                                                  | -0.263431016 | #N/A                             |
| _TDS[Phospho (STY)]LKGR_.2                                                      | 0.26444898   | P12813_S344_M1_Nr4a1;Nr4a2;Nr4a3 |
| _LSDQFHDILIR_.2                                                                 | 0.499486325  | #N/A                             |
| _YITDWQNVFR_.2                                                                  | 0.372486072  | #N/A                             |
| _NVLFSLDDNER_.3                                                                 | 0.004179038  | #N/A                             |
| _S[Phospho (STY)]PNEEYVEVGR_.2                                                  | -0.151093553 | P12849_S307_M1_Prkar1b           |
| _Acetyl (Protein N-term)]ASPS[Phospho (STY)]C[Carbamidomethyl (C)]FHSEDEDSLK_.2 | 0.392269831  | P12849_S5_M1_Prkar1b             |

|                                                               |              |                       |
|---------------------------------------------------------------|--------------|-----------------------|
| _SNSQC[Carbamidomethyl (C)]DSHDEEIS[Phospho (STY)]PTPPNPVVK_3 | -0.159392085 | P12849_S83_M1_Prkar1b |
| _GGVSAEVYTEEDAVSYVR_2                                         | -0.45402265  | #N/A                  |
| _IVVQGEPGDDFYIITEGTASVLQR_3                                   | 0.540964779  | #N/A                  |
| _NDGGIYTC[Carbamidomethyl (C)]FAENNR_2                        | -0.154785463 | #N/A                  |
| _M[Oxidation (M)]NNGDVDLTNDR_2                                | -0.110150475 | #N/A                  |
| _GPPGPPGGLR_2                                                 | 0.392627897  | #N/A                  |
| _IKTDGAAPNVAPSDVGGGGGTNR_3                                    | -0.130645601 | #N/A                  |
| _VTVTNPDTGR_2                                                 | 0.286353444  | #N/A                  |
| _FIPLIPER_2                                                   | 0.094987852  | #N/A                  |
| _IVESYQIR_2                                                   | 0.068013561  | #N/A                  |
| _ELITWAPLSR_2                                                 | 0.019863143  | #N/A                  |
| _VQVTSQEYSAR_2                                                | -0.11133793  | #N/A                  |
| _TDGAAPNVAPSDVGGGGGTNR_2                                      | 0.011293962  | #N/A                  |
| _DGEYVVEVR_2                                                  | -0.244088806 | #N/A                  |
| _GM[Oxidation (M)]VLLC[Carbamidomethyl (C)]DPPYHFPDDL SYR_3   | -0.05834751  | #N/A                  |
| _HSIEVPIPR_2                                                  | -0.210861411 | #N/A                  |
| _ILYRPDQGHDGK_3                                               | -0.155535702 | #N/A                  |
| _AHSDDGGDGVVSQVK_2                                            | -0.305736744 | #N/A                  |
| _VVATNTLTGTGPSIPSNR_2                                         | 0.277403215  | #N/A                  |
| _ILALAPTFEM[Oxidation (M)]NPM[Oxidation (M)]K_2               | -0.00312439  | #N/A                  |
| _GSDNHSPISK_2                                                 | -0.269936951 | #N/A                  |
| _STEATLSFGYLDPPPEERPEVK_3                                     | -0.19532363  | #N/A                  |
| _VLEPM[Oxidation (M)]PSTAEISTSGAVLK_2                         | -0.251706723 | #N/A                  |
| _TDPPIIEGNMESAK_2                                             | 0.265880797  | #N/A                  |
| _KVTVTNPDTGR_2                                                | -0.161749677 | #N/A                  |
| _IFNIQLEDEGLYEC[Carbamidomethyl (C)]EAENIR_3                  | -0.016139534 | #N/A                  |
| _FVSQTNGNLYIANVESSDR_2                                        | -0.344005256 | #N/A                  |
| _VLSSEISVHWK_2                                                | -0.236542441 | #N/A                  |
| _DAGVYYC[Carbamidomethyl (C)]LASNNYGM[Oxidation (M)]VR_2      | -0.475287955 | #N/A                  |
| _TADDGC[Carbamidomethyl (C)]LENAPDT[Phospho (STY)]AEFSR_2     | 0.158158085  | P12961_T137_M1_Scg5   |
| _KSVPHFS[Phospho (STY)]EEEKEAE_3                              | -0.422561763 | P12961_S205_M1_Scg5   |
| _SVPHFS[Phospho (STY)]EEEKEAE_2                               | -0.107453008 | P12961_S205_M1_Scg5   |
| _DFSEDQGYDPNPNC[Carbamidomethyl (C)]PLGK_2                    | -0.118608857 | #N/A                  |
| _QTATQLLK_2                                                   | -0.049578825 | #N/A                  |
| _NFGIGQDIQPK_2                                                | 0.143301451  | #N/A                  |
| _HVVVPNEVVVQR_2                                               | -0.229692214 | #N/A                  |
| _DSQEEEKTEALTSK_2                                             | -0.318011868 | #N/A                  |
| _NPPEAATAPAS[Phospho (STY)]PK_2                               | -0.316523422 | P13595_S1005_M1_Ncam1 |
| _GVTASSSS[Phospho (STY)]PASAPK_2                              | -0.242721456 | P13595_S887_M1_Ncam1  |
| _FFLC[Carbamidomethyl (C)]QVAGDAK_2                           | 0.122348936  | #N/A                  |
| _GLGEISAATEFK_2                                               | 0.163233229  | #N/A                  |
| _ALASEWKPEIR_2                                                | 0.007743791  | #N/A                  |
| _NAPTPQEFK_2                                                  | -0.068053285 | #N/A                  |
| _AGEQDASIHLLK_2                                               | -0.043618449 | #N/A                  |
| _FIVLSNNYLQIR_2                                               | -0.20443199  | #N/A                  |
| _NPPEAATAPAS[Phospho (STY)]PKSK_2                             | 0.037824068  | P13595_S1005_M1_Ncam1 |
| _VEPYSSTAQVQFDEPEATGGVPILK_3                                  | 0.120117201  | #N/A                  |

|                                                                 |              |                       |
|-----------------------------------------------------------------|--------------|-----------------------|
| _NVDKNDEAEYVC[Carbamidomethyl (C)]IAENK_.3                      | -0.088302409 | #N/A                  |
| _AAHFVFR_.2                                                     | 0.510256118  | #N/A                  |
| _AAFSKDES[Phospho (STY)]KEPIVEVR_.3                             | -0.369106034 | P13595_S774_M1_Ncam1  |
| _GPDPEPTQPGTVKNPPEAATAPAS[Phospho (STY)]PK_.3                   | 0.105526536  | P13595_S1005_M1_Ncam1 |
| _DES[Phospho (STY)]KEPIVEVR_.2                                  | -0.216966068 | P13595_S774_M1_Ncam1  |
| _EANM[Oxidation (M)]EGIVTIM[Oxidation (M)]GLKPETR_.3            | -0.493141371 | #N/A                  |
| _C[Carbamidomethyl (C)]VVTAEDGTQSEATVNVK_.2                     | -0.332001039 | #N/A                  |
| _LEGQM[Oxidation (M)]GEDGNSIK_.2                                | 0.05310177   | #N/A                  |
| _ASPAPT[Phospho (STY)]PTPAGAASPLAAVAAPATDAPQAK_.3               | -0.345415556 | P13595_T950_M1_Ncam1  |
| _DGEPIENEEEDDEKHIFSDDSSSELTIR_.4                                | -0.365196989 | #N/A                  |
| _SLGEESWHFK_.2                                                  | 0.007036381  | #N/A                  |
| _IGQESLEFILVQADTPSSPSIDR_.3                                     | 0.181988133  | #N/A                  |
| _LPSGSDHVMLK_.2                                                 | 0.205413553  | #N/A                  |
| _TEEERT[Phospho (STY)]PNHDGGK_.2                                | 0.022422389  | P13595_T788_M1_Ncam1  |
| _LISEVIGER_.2                                                   | -0.291165425 | #N/A                  |
| _DLM[Oxidation (M)]QTPNFR_.2                                    | -0.02693992  | #N/A                  |
| _EADDDEEADDDVSEM[Oxidation (M)]PS[Phospho (STY)]PK_.2           | 0.166648227  | P13864_S717_M1_Dnmt1  |
| _S[Phospho (STY)]KSDSDTLSVETSPSSVATR_.3                         | -0.455041666 | P13864_S138_M1_Dnmt1  |
| _YNPNVLPVQC[Carbamidomethyl (C)]TGK_.2                          | 0.031518619  | #N/A                  |
| _SYEAYVLNIIR_.2                                                 | 0.061081509  | #N/A                  |
| _AYGENIGYSEK_.2                                                 | -0.181909175 | #N/A                  |
| _AKEEGSWKK_.2                                                   | -0.165093183 | #N/A                  |
| _EGKPC[Carbamidomethyl (C)]IIIK_.2                              | -0.081965294 | #N/A                  |
| _FIWNSEK_.2                                                     | 0.013967678  | #N/A                  |
| _AKEEGSWK_.2                                                    | -0.222872808 | #N/A                  |
| _VAPPGLTQIPQIQK_.2                                              | -0.057653207 | #N/A                  |
| _AYGENIGYSEKDR_.2                                               | -0.111145342 | #N/A                  |
| _KFIWNSEK_.2                                                    | -0.065399174 | #N/A                  |
| _YKDSAQKDDM[Oxidation (M)]IFEDC[Carbamidomethyl (C)]GNVPSEPK_.4 | -0.313917117 | #N/A                  |
| _DDM[Oxidation (M)]IFEDC[Carbamidomethyl (C)]GNVPSEPK_.2        | 0.094252235  | #N/A                  |
| _DSAQKDDM[Oxidation (M)]IFEDC[Carbamidomethyl (C)]GNVPSEPK_.3   | -0.276232594 | #N/A                  |
| _TEISFRPNDPK_.2                                                 | -0.053278881 | #N/A                  |
| _GDINHER_.2                                                     | -0.319456351 | #N/A                  |
| _TGVAPIIDVVR_.2                                                 | -0.122595509 | #N/A                  |
| _LWTLVSEQTR_.2                                                  | 0.420979085  | #N/A                  |
| _LLEPVLLLGK_.2                                                  | -0.35097054  | #N/A                  |
| _DILIQYDR_.2                                                    | 0.284520472  | #N/A                  |
| _TATAVAHC[Carbamidomethyl (C)]K_.2                              | 0.325100536  | #N/A                  |
| _EIKDILIQYDR_.3                                                 | 0.308700312  | #N/A                  |
| _FVEGLPINDFSR_.2                                                | 0.103327325  | #N/A                  |
| _GEFITTQQR_.2                                                   | 0.183406656  | #N/A                  |
| _VIVVGNPANTNC[Carbamidomethyl (C)]LTASK_.2                      | -0.172279257 | #N/A                  |
| _ENFSC[Carbamidomethyl (C)]LTR_.2                               | 0.333439428  | #N/A                  |
| _DLDVAVLVGSM[Oxidation (M)]PR_.2                                | 0.392769392  | #N/A                  |
| _LGVTADDVK_.2                                                   | -0.021924613 | #N/A                  |
| _EVGVYEALKDDSWLK_.2                                             | -0.050285051 | #N/A                  |
| _SQGTALEK_.2                                                    | 0.202426703  | #N/A                  |

|                                                                               |              |                      |
|-------------------------------------------------------------------------------|--------------|----------------------|
| _ELTEEKETAFFELSSA_.2                                                          | -0.304017564 | #N/A                 |
| _NVIIWGNHSSTQYPDVNHAK_.3                                                      | -0.09629335  | #N/A                 |
| _KLS[Phospho (STY)]SAM[Oxidation (M)]SAAK_.2                                  | 0.148125013  | P14152_S241_M1_Mdh1  |
| _EKM[Oxidation (M)]DLTAK_.2                                                   | 0.179934906  | #N/A                 |
| _IFKS[Phospho (STY)]QGTALEK_.2                                                | 0.458423353  | P14152_S111_M1_Mdh1  |
| _LSSAMSAAK_.2                                                                 | -0.14233264  | #N/A                 |
| _VLVTGAAGQIAYSLLSYSGNGSVFGK_.3                                                | 0.04846542   | #N/A                 |
| _YVDIAIPC[Carbamidomethyl (C)]NNK_.2                                          | 0.087371876  | #N/A                 |
| _FAAATGATPIAGR_.2                                                             | 0.009877665  | #N/A                 |
| _AIVAIENPADVSVISSR_.2                                                         | 0.236174507  | #N/A                 |
| _LLVVTDPK_.2                                                                  | -0.091137315 | #N/A                 |
| _LAcetyl (Protein N-term)]SGALDVLQM[Oxidation (M)]KEEDVLK_.2                  | 0.007388756  | #N/A                 |
| _ADHQPLTEASYVNLPTIALC[Carbamidomethyl (C)]NTDSPLR_.3                          | 0.021223477  | #N/A                 |
| _EQFLDGDWATNR_.2                                                              | -0.111617114 | #N/A                 |
| _LFPSGLDQK_.2                                                                 | -0.202312904 | #N/A                 |
| _FYGDLEKDK_.2                                                                 | -0.036791598 | #N/A                 |
| _QIDNPDK_.2                                                                   | 0.209144963  | #N/A                 |
| _FEPFSNK_.2                                                                   | 0.288314619  | #N/A                 |
| _IDDPDTSKPEDWDKPEHIPDPDAK_.4                                                  | 0.048787895  | #N/A                 |
| _DKGLQTSQDK_.2                                                                | -0.163042088 | #N/A                 |
| _VHVIFNYK_.2                                                                  | -0.268943563 | #N/A                 |
| _HEQNIDC[Carbamidomethyl (C)]GGGYVK_.2                                        | 0.253273883  | #N/A                 |
| _IKDPDAAKPEDWDER_.3                                                           | 0.01731907   | #N/A                 |
| _LKEEEDDK_.2                                                                  | -0.188899651 | #N/A                 |
| _DM[Oxidation (M)]HGDSEYNIM[Oxidation (M)]FGPDIC[Carbamidomethyl (C)]GPGTK_.3 | -0.26335559  | #N/A                 |
| _FLNVTPNVEVNVEC[Carbamidomethyl (C)]R_.2                                      | -0.403352287 | #N/A                 |
| _SC[Carbamidomethyl (C)]GQVVEEWK_.2                                           | 0.248241024  | #N/A                 |
| _NDVC[Carbamidomethyl (C)]RPGR_.2                                             | 0.024016106  | #N/A                 |
| _INAANIATDDERDK_.2                                                            | 0.340471201  | #N/A                 |
| _EFVWNPR_.2                                                                   | -0.122631149 | #N/A                 |
| _YYEQPDNGVLNYPK_.2                                                            | 0.092451727  | #N/A                 |
| _SC[Carbamidomethyl (C)]GQVVEEWKEFVWNPR_.3                                    | -0.535988626 | #N/A                 |
| _INAANIATDDERDKFAGR_.3                                                        | -0.179126404 | #N/A                 |
| _TQLGDC[Carbamidomethyl (C)]SGIGDPHYGYSTGQPC[Carbamidomethyl (C)]VFIK_.3      | -0.326334805 | #N/A                 |
| _QLS[Phospho (STY)]SGVSEIR_.2                                                 | 0.055104039  | P14602_S86_M1_Hspb1  |
| _SPS[Phospho (STY)]WEPFR_.2                                                   | 0.024810895  | P14602_S15_M1_Hspb1  |
| _SVFPEQANNNEWAR_.2                                                            | -0.491195345 | #N/A                 |
| _LQLDS[Phospho (STY)]PEDAEFIVAK_.2                                            | -0.330986365 | P14685_S426_M1_Psmd3 |
| _LAcetyl (Protein N-term)]ATAT[Phospho (STY)]PVQQQR_.2                        | 0.469746998  | P14733_T5_M1_Lmnb1   |
| _ASAPATPLS[Phospho (STY)]PTR_.2                                               | -0.426649849 | P14733_S24_M1_Lmnb1  |
| _LKLS[Phospho (STY)]PSPSSR_.2                                                 | -0.0676054   | P14733_S392_M1_Lmnb1 |
| _LSPS[Phospho (STY)]PSSR_.2                                                   | -0.283126193 | P14733_S394_M1_Lmnb1 |
| _NQNSWGTGEDVK_.2                                                              | -0.008678687 | #N/A                 |
| _AGSRAS[Phospho (STY)]APAT[Phospho (STY)]PLSPTR_.2                            | -0.047508833 | P14733_S17_M2_Lmnb1  |
| _SEIDLLNIR_.2                                                                 | 0.141714936  | #N/A                 |
| _DLESIIIGDTSGHFQK_.2                                                          | -0.204636641 | #N/A                 |
| _TLIEILATR_.2                                                                 | 0.305046187  | #N/A                 |

|                                                              |              |                       |
|--------------------------------------------------------------|--------------|-----------------------|
| _SLEDALSSDTSGHFR_2                                           | 0.11648664   | #N/A                  |
| _M[Oxidation (M)]LVVLLQGTR_2                                 | -0.105019737 | #N/A                  |
| _ENDDVVSEDLVQQQDVQDLYEAGELK_3                                | -0.335070594 | #N/A                  |
| _GIGTDEATIIDIVTHR_2                                          | -0.363667344 | #N/A                  |
| _WGTDEAQFIYLGNR_2                                            | -0.156088103 | #N/A                  |
| _ILISLATGNR_2                                                | -0.080215866 | #N/A                  |
| _AINEAYKEDYHK_3                                              | -0.133037969 | #N/A                  |
| _IAQGAMYR_2                                                  | 0.281881888  | #N/A                  |
| _IIQLDDYPK_2                                                 | 0.252011213  | #N/A                  |
| _GHLENNPALEK_2                                               | 0.113962059  | #N/A                  |
| _TSFFQALGITTK_2                                              | -0.116569242 | #N/A                  |
| _C[Carbamidomethyl (C)]FIVGADNVGSK_2                         | 0.200003257  | #N/A                  |
| _AFLADPSAFAAAAPAAAATTAAPAAAAAPAK_3                           | 0.370030101  | #N/A                  |
| _EDLTEIR_2                                                   | 0.343700535  | #N/A                  |
| _AEAKEES[Phospho (STY)]EESDEDM[Oxidation (M)]GFGFLD_2        | 0.150621558  | P14869_S304_M1_Rplp0  |
| _DLTGQVPT[Phospho (STY)]PPVK_2                               | -0.398867366 | P14873_T527_M1_Map1b  |
| _VLS[Phospho (STY)]PLRS[Phospho (STY)]PPLLGSESPYEDFLSADSK_3  | -0.392495428 | P14873_S1391_M2_Map1b |
| _SKPLAAS[Phospho (STY)]PKPGALK_2                             | -0.372404423 | P14873_S2267_M1_Map1b |
| _T[Phospho (STY)]PEEGGYSYEISEK_2                             | -0.049859981 | P14873_T1945_M1_Map1b |
| _QPGIQS[Phospho (STY)]PSR_2                                  | 0.085785661  | P14873_S1073_M1_Map1b |
| _C[Carbamidomethyl (C)]YTTEKKS[Phospho (STY)]PSEAR_3         | -0.405932498 | P14873_S2068_M1_Map1b |
| _SSYYVVSNGNDPAAEEPSR_2                                       | -0.094948766 | #N/A                  |
| _AVLDALLEGK_2                                                | 0.073887008  | #N/A                  |
| _VLFPGNSTQYNILEGLEK_2                                        | -0.300154393 | #N/A                  |
| _FSPEVPGQK_2                                                 | 0.441912116  | #N/A                  |
| _T[Phospho (STY)]PEDGGYTC[Carbamidomethyl (C)]EITEK_2        | -0.281582158 | P14873_T1928_M1_Map1b |
| _AIGNIELGIR_2                                                | 0.18334525   | #N/A                  |
| _SVGNTIEPVILFQK_2                                            | -0.119663595 | #N/A                  |
| _DVSDERLS[Phospho (STY)]PAK_2                                | 0.02573285   | P14873_S1247_M1_Map1b |
| _TPEVSGYTYEK_2                                               | 0.012368714  | #N/A                  |
| _QGFPDRES[Phospho (STY)]PVSDLTSTGLYQDK_3                     | 0.359140455  | P14873_S1438_M1_Map1b |
| _TTEAAATAVGTAATTAAVVAAAAGIAASGPVK_3                          | -0.287884968 | #N/A                  |
| _SWDTNLIEC[Carbamidomethyl (C)]NLDQELK_2                     | 0.153997107  | #N/A                  |
| _SVNFSLTPNEIK_2                                              | 0.022759946  | #N/A                  |
| _DAYC[Carbamidomethyl (C)]S[Phospho (STY)]EEKELK_2           | -0.096153851 | P14873_S1225_M1_Map1b |
| _SPSLSPSPPS[Phospho (STY)]PIEK_2                             | -0.326222283 | P14873_S1260_M1_Map1b |
| _SDIS[Phospho (STY)]PLTPR_2                                  | -0.381728705 | P14873_S1781_M1_Map1b |
| _S[Phospho (STY)]PPLLGSESPYEDFLSADSK_2                       | -0.071478624 | P14873_S1395_M1_Map1b |
| _TIKS[Phospho (STY)]PC[Carbamidomethyl (C)]DSGYSYETIEK_2     | -0.346134369 | P14873_S1911_M1_Map1b |
| _ESVVS[Phospho (STY)]GDDR_2                                  | -0.225123838 | P14873_S992_M1_Map1b  |
| _ADS[Phospho (STY)]RESLKPATK_3                               | 0.101714853  | P14873_S541_M1_Map1b  |
| _TIKT[Phospho (STY)]PEDGGYTC[Carbamidomethyl (C)]EITEK_2     | -0.222713074 | P14873_T1928_M1_Map1b |
| _ASLTLFC[Carbamidomethyl (C)]PEEGDWK_2                       | -0.375786212 | #N/A                  |
| _KLGGDVS[Phospho (STY)]PTQIDVSQFGSFK_3                       | 0.007918355  | P14873_S1497_M1_Map1b |
| _THDVGGYYEK_2                                                | -0.081488259 | #N/A                  |
| _SVSPGVTQAVVEEHC[Carbamidomethyl (C)]AS[Phospho (STY)]PEEK_3 | -0.471920519 | P14873_S1307_M1_Map1b |
| _FEDEGAGFEES[Phospho (STY)]ETGDYEEK_2                        | 0.168719367  | P14873_S934_M1_Map1b  |

|                                                                             |              |                       |
|-----------------------------------------------------------------------------|--------------|-----------------------|
| _SPC[Carbamidomethyl (C)]DSGYSYETIEK_.2                                     | -0.166272583 | #N/A                  |
| _AAEAGVTEEQYGYLGTSAK_.2                                                     | -0.453811345 | #N/A                  |
| _HNLQDFINIK_.2                                                              | 0.253040129  | #N/A                  |
| _LSPAKS[Phospho (STY)]PS[Phospho (STY)]LSPSPPSPIEK_.2                       | -0.241173851 | P14873_S1251_M2_Map1b |
| _TTRT[Phospho (STY)]PEEGGYSYEISEK_.3                                        | -0.005250215 | P14873_T1945_M1_Map1b |
| _EVSSKEEQS[Phospho (STY)]PVK_.2                                             | 0.18438431   | P14873_S614_M1_Map1b  |
| _ESS[Phospho (STY)]PLYSPGFS DSTSAK_.2                                       | -0.297115075 | P14873_S1789_M1_Map1b |
| _ETAAAHQASS[Phospho (STY)]SPPIDAATAEPYGFR_.3                                | -0.107734009 | P14873_S1814_M1_Map1b |
| _TTRS[Phospho (STY)]PDTSAYC[Carbamidomethyl (C)]YETM[Oxidation (M)]EK_.2    | -0.201377223 | #N/A                  |
| _RES[Phospho (STY)]VVS[Phospho (STY)]GDDR_.2                                | -0.030617124 | P14873_S989_M2_Map1b  |
| _GEAEQS[Phospho (STY)]EEEEGEEDKAEDAR_.3                                     | 0.007620818  | P14873_S1013_M1_Map1b |
| _VDSILLTHIGDDNLPGINSM[Oxidation (M)]LQR_.3                                  | -0.380410963 | #N/A                  |
| _ASLSPM[Oxidation (M)]DEPVPDSES[Phospho (STY)]PVEK_.2                       | -0.523675148 | P14873_S1384_M1_Map1b |
| _SQGSTSNS[Phospho (STY)]DWM[Oxidation (M)]K_.2                              | 0.499015181  | P14873_S343_M1_Map1b  |
| _DLTSS[Phospho (STY)]VEKDSGGK_.2                                            | -0.277592424 | P14873_S1851_M1_Map1b |
| _TPQASTYSYETSDR_.2                                                          | -0.289269413 | #N/A                  |
| _TTEAAATAVGTAATTAAVVAAAGIASGPVKELEAER_.3                                    | -0.313070375 | #N/A                  |
| _ [Acetyl (Protein N-term)]ATVVVEATEPEPSGSIGNPAASTS[Phospho (STY)]PSLSHR_.3 | -0.228115168 | P14873_S25_M1_Map1b   |
| _RSES[Phospho (STY)]PFEGK_.2                                                | -0.571292121 | P14873_S1422_M1_Map1b |
| _TESKPS[Phospho (STY)]VTEK_.2                                               | 0.019371078  | P14873_S601_M1_Map1b  |
| _SLM[Oxidation (M)]S[Phospho (STY)]S[Phospho (STY)]PEDLTK_.2                | 0.132286059  | P14873_S828_M2_Map1b  |
| _SPSLSPSPPS[Phospho (STY)]PIEKTPLGER_.3                                     | -0.377894964 | P14873_S1260_M1_Map1b |
| _LGGDVS[Phospho (STY)]PTQIDVSQFGSFK_.2                                      | -0.103684231 | P14873_S1497_M1_Map1b |
| _KES[Phospho (STY)]KEETPEVTK_.2                                             | -0.433679064 | P14873_S561_M1_Map1b  |
| _MSISEGTVS[Phospho (STY)]DK_.2                                              | 0.231728734  | P14873_S1523_M1_Map1b |
| _VQSLEGEKLS[Phospho (STY)]PK_.2                                             | -0.187215455 | P14873_S1775_M1_Map1b |
| _EKRES[Phospho (STY)]VVS GDDR_.2                                            | -0.041331845 | P14873_S989_M1_Map1b  |
| _HM[Oxidation (M)]DPPAPMQDRS[Phospho (STY)]PS[Phospho (STY)]PR_.3           | 0.154287027  | P14873_S2205_M2_Map1b |
| _SSHLPTEVTEKPQAVPVSEFSEAKDENER_.4                                           | -0.078431066 | #N/A                  |
| _EVSSKEEQS[Phospho (STY)]PVKAEVAEK_.2                                       | -0.142569452 | P14873_S614_M1_Map1b  |
| _SRT[Phospho (STY)]PVQDHR_.2                                                | -0.087778234 | P14873_T1629_M1_Map1b |
| _LM[Oxidation (M)]ITDAAR_.2                                                 | -0.359967489 | #N/A                  |
| _LEMYVLNPVK_.2                                                              | 0.176948606  | #N/A                  |
| _KLGGDVS[Phospho (STY)]PTQIDVSQFGSFKEDTK_.3                                 | -0.357230939 | P14873_S1497_M1_Map1b |
| _T[Phospho (STY)]PVQDHR_.2                                                  | -0.368020004 | P14873_T1629_M1_Map1b |
| _NVDVEFFK_.2                                                                | -0.466824622 | #N/A                  |
| _ITSFPESESYSYETSTK_.2                                                       | 0.022351916  | #N/A                  |
| _VQSLEGEKLS[Phospho (STY)]PKS[Phospho (STY)]DISPLTPR_.3                     | 0.155070756  | P14873_S1775_M2_Map1b |
| _EEQS[Phospho (STY)]PVKAEVAEK_.2                                            | -0.031298073 | P14873_S614_M1_Map1b  |
| _S[Phospho (STY)]PDTSAYC[Carbamidomethyl (C)]YETMEK_.2                      | 0.271153951  | #N/A                  |
| _TSDVETM[Oxidation (M)]SSQSALALDER_.2                                       | -0.25779348  | #N/A                  |
| _EWYQETHEK_.2                                                               | 0.123598663  | #N/A                  |
| _SDVLETVVLINPSDEAVSTEVR_.2                                                  | -0.254643722 | #N/A                  |
| _ESVVS[Phospho (STY)]GDDRAEEDM[Oxidation (M)]DDVLEK_.3                      | 0.119098055  | P14873_S992_M1_Map1b  |
| _AEEDM[Oxidation (M)]DDVLEKGEAEQS[Phospho (STY)]EEEEGEEDKAEDAR_.4           | 0.067256576  | P14873_S1013_M1_Map1b |
| _PMSIS[Phospho (STY)]PPDFS[Phospho (STY)]PK_.2                              | 0.108047442  | P14873_S1616_M2_Map1b |
| _QGFPDRES[Phospho (STY)]PVSDLTSTGLYQDKQEEK_.4                               | 0.269453098  | P14873_S1438_M1_Map1b |

|                                                                                  |              |                       |
|----------------------------------------------------------------------------------|--------------|-----------------------|
| _AETEEAEEPEEDGEDNASGSASK_2                                                       | -0.041794583 | #N/A                  |
| _LGGDVS[Phospho (STY)]PTQIDVSQFGSKEDTK_3                                         | -0.078452313 | P14873_S1497_M1_Map1b |
| _DYNASASTIS[Phospho (STY)]PPSSMEEDKFSK_3                                         | 0.059591488  | #N/A                  |
| _DVM[Oxidation (M)]SDETNNETES[Phospho (STY)]PSQEFVNITK_3                         | -0.446208269 | P14873_S1151_M1_Map1b |
| _IAELEERS[Phospho (STY)]QGSTNSDWM[Oxidation (M)]K_3                              | -0.056756118 | P14873_S336_M1_Map1b  |
| _SSM[Oxidation (M)]LFDTM[Oxidation (M)]QHHLALNR_3                                | -0.12352268  | #N/A                  |
| _ASAELDIKDVS[Phospho (STY)]DER_2                                                 | 0.161754531  | P14873_S1242_M1_Map1b |
| _GEAEQS[Phospho (STY)]EEEEEEEDK_2                                                | 0.433265517  | P14873_S1013_M1_Map1b |
| _TAKS[Phospho (STY)]RT[Phospho (STY)]PVQDHR_3                                    | -0.14589978  | P14873_S1627_M2_Map1b |
| _ASAELDIKDVS[Phospho (STY)]DERLSPAK_3                                            | -0.150043283 | P14873_S1242_M1_Map1b |
| _DENERAS[Phospho (STY)]LS[Phospho (STY)]PM[Oxidation (M)]DEPVDPSESPVEK_3         | -0.320244485 | P14873_S1371_M2_Map1b |
| _ELEAERS[Phospho (STY)]LM[Oxidation (M)]S[Phospho (STY)]S[Phospho (STY)]PEDLTK_2 | 0.156649897  | P14873_S825_M3_Map1b  |
| _TDATDGKDYNASASTIS[Phospho (STY)]PPSSM[Oxidation (M)]EEDKFSK_4                   | -0.122529365 | #N/A                  |
| _QQDLNIM[Oxidation (M)]VLASSSTVVM[Oxidation (M)]QDESFAC[Carbamidomethyl (C)]K_3  | 0.446765267  | #N/A                  |
| _SEQSSM[Oxidation (M)]SIEFGQES[Phospho (STY)]PEHSLAMDFSR_3                       | 0.165877313  | P14873_S1649_M1_Map1b |
| _KIAELEERS[Phospho (STY)]QGSTNSDWM[Oxidation (M)]K_3                             | -0.041865486 | P14873_S336_M1_Map1b  |
| _RES[Phospho (STY)]VVS[Phospho (STY)]GDDRAEEDMDDVLEK_3                           | 0.024970367  | P14873_S989_M2_Map1b  |
| _DIKPQLELIEDEEK_3                                                                | -0.44547692  | #N/A                  |
| _NLISPDLGVVFLNVPENLKDPEPNIK_3                                                    | -0.299982253 | #N/A                  |
| _AQWGSNM[Oxidation (M)]QVTLIPTHDSEVM[Oxidation (M)]R_3                           | 0.030728706  | #N/A                  |
| _EEC[Carbamidomethyl (C)]PRPMSIS[Phospho (STY)]PPDFSPK_3                         | 0.013054621  | P14873_S1616_M1_Map1b |
| _TLEVVSQSVTGSAGHTPPYQSPTDEK_3                                                    | 0.069041774  | #N/A                  |
| _SDISPLTPRES[Phospho (STY)]S[Phospho (STY)]PLYSFGFSDSTSAK_3                      | -0.021588517 | P14873_S1788_M2_Map1b |
| _HSPTEDDES[Phospho (STY)]AKAEADVHLK_3                                            | 0.187906268  | P14873_S974_M1_Map1b  |
| _DIVEAHYR_2                                                                      | 0.069459316  | #N/A                  |
| _Acetyl (Protein N-term)]ATSASSHLNK_2                                            | 0.151849192  | #N/A                  |
| _KPAETNLR_2                                                                      | 0.216179231  | #N/A                  |
| _TC[Carbamidomethyl (C)]LLNETGDEPFQYKN_2                                         | -0.300892337 | #N/A                  |
| _LVLC[Carbamidomethyl (C)]EVFK_2                                                 | 0.349369432  | #N/A                  |
| _TLDC[Carbamidomethyl (C)]EPK_2                                                  | 0.199135106  | #N/A                  |
| _TC[Carbamidomethyl (C)]LLNETGDEPFQYK_2                                          | -0.049868064 | #N/A                  |
| _KGYFEDR_2                                                                       | -0.012775412 | #N/A                  |
| _AC[Carbamidomethyl (C)]LYAGVK_2                                                 | 0.199215814  | #N/A                  |
| _C[Carbamidomethyl (C)]IEEAIDK_2                                                 | -0.074280235 | #N/A                  |
| _M[Oxidation (M)]GDHLWIAR_2                                                      | -0.251025648 | #N/A                  |
| _VQAM[Oxidation (M)]YIWWVDGTGEGLR_2                                              | -0.178988572 | #N/A                  |
| _ITGTNAEVM[Oxidation (M)]PAQWEFQIGPC[Carbamidomethyl (C)]EGIR_3                  | -0.514778621 | #N/A                  |
| _QM[Oxidation (M)]YM[Oxidation (M)]SLPQGEK_2                                     | -0.287246094 | #N/A                  |
| _Y[Phospho (STY)]NRKPAETNLR_3                                                    | -0.301609578 | P15105_Y104_M1_Glul   |
| _RPSANC[Carbamidomethyl (C)]DPYAVTEAIVR_3                                        | 0.311511777  | #N/A                  |
| _AMREENGLK_2                                                                     | -0.203322847 | #N/A                  |
| _C[Carbamidomethyl (C)]IEEAIDKLSK_2                                              | -0.123473742 | #N/A                  |
| _RLTGFHETSNINDFSAGVANR_4                                                         | -0.04515052  | #N/A                  |
| _LTGFHETSNINDFSAGVANR_3                                                          | 0.409490617  | #N/A                  |
| _VC[Carbamidomethyl (C)]EDFGVIATFDPK_2                                           | -0.078728827 | #N/A                  |
| _SAAPHPGDIGDFINEGLK_3                                                            | -0.178590158 | #N/A                  |
| _IWC[Carbamidomethyl (C)]TEPSGIVAFPR_2                                           | 0.173632159  | #N/A                  |

|                                                                          |              |                         |
|--------------------------------------------------------------------------|--------------|-------------------------|
| _LLGSGS[Phospho (STY)]PSSAR_2                                            | 0.284597574  | P15331_S57_M1_Prph      |
| _LAWLAEPDAHS[Phospho (STY)]HFDYDPR_3                                     | -0.242728921 | P15388_S44_M1_Kcnc1     |
| _HIPRPPQLGS[Phospho (STY)]PNYC[Carbamidomethyl (C)]K_3                   | -0.092858335 | P15388_S468_M1_Kcnc1    |
| _ILS[Phospho (STY)]PVDSGNK_2                                             | 0.105620245  | P15508_S1218_M1_Sptb    |
| _LLTS[Phospho (STY)]PDVSYDEAR_2                                          | 0.083797177  | P15508_S1289_M1_Sptb    |
| _NIIHGSDSVK_2                                                            | -0.44585307  | #N/A                    |
| _FLQASEDLK_2                                                             | 0.244383359  | #N/A                    |
| _YM[Oxidation (M)]HSGPVVAM[Oxidation (M)]VWEGLNvvk_3                     | -0.210173804 | #N/A                    |
| _FLQASEDLLKEHYTDLK_3                                                     | -0.063936005 | #N/A                    |
| _EISLWFQPEELVEYK_2                                                       | -0.11025356  | #N/A                    |
| _SC[Carbamidomethyl (C)]AQNWIE_2                                         | 0.035087124  | #N/A                    |
| _Acetyl (Protein N-term)]S[Phospho (STY)]EAAPAAPAAAPPAEK_2               | -0.134074923 | P15864_S2_M1_H1-2       |
| _ALAAAGYDVEK_2                                                           | 0.106998481  | #N/A                    |
| _GTGASGSFK_2                                                             | -0.131875561 | #N/A                    |
| _ASGPPVSELITK_2                                                          | -0.055868819 | #N/A                    |
| _Acetyl (Protein N-term)]S[Phospho (STY)]EAAPAAPAAAPPAEKAPAK_2           | -0.539504927 | P15864_S2_M1_H1-2       |
| _ALAAAGYDVEKNNSR_2                                                       | 0.297361119  | #N/A                    |
| _KDS[Phospho (STY)]EEEEVSLLNQDIEEGNSR_3                                  | 0.056459183  | P15920_S695_M1_Atp6v0a2 |
| _IYHS[Phospho (STY)]EER_2                                                | -0.082730033 | P16014_S155_M1_Chgb     |
| _WASS[Phospho (STY)]REDAGAPVEDSQGQTK_3                                   | 0.005199346  | P16014_S100_M1_Chgb     |
| _SSYEGHPLS[Phospho (STY)]EER_2                                           | 0.074194155  | P16014_S308_M1_Chgb     |
| _WWQEEQLGPEES[Phospho (STY)]REEVRFPR_4                                   | -0.054813362 | P16014_S493_M1_Chgb     |
| _ES[Phospho (STY)]KEADVATVR_2                                            | 0.27745548   | P16014_S318_M1_Chgb     |
| _EGVDDQESLRPSNQAS[Phospho (STY)]KEAK_3                                   | -0.34890696  | P16014_S147_M1_Chgb     |
| _AS[Phospho (STY)]EEEEPEYGEESR_2                                         | -0.321228757 | P16014_S342_M1_Chgb     |
| _WTEGGGHS[Phospho (STY)]R_2                                              | -0.066489103 | P16014_S129_M1_Chgb     |
| _EGVDDQESLRPSNQAS[Phospho (STY)]K_3                                      | -0.368528715 | P16014_S147_M1_Chgb     |
| _KHIEDS[Phospho (STY)]GEKPNTFSNK_3                                       | -0.432341463 | P16014_S190_M1_Chgb     |
| _WWQEEQLGPEES[Phospho (STY)]REEVR_3                                      | 0.163563187  | P16014_S493_M1_Chgb     |
| _SGSNKSS[Phospho (STY)]YEGHPLSEER_3                                      | 0.161002239  | P16014_S301_M1_Chgb     |
| _S[Phospho (STY)]HHLAHYRAEEEEPEYGEESR_4                                  | -0.126978586 | P16014_S333_M1_Chgb     |
| _GRGS[Phospho (STY)]EEDRAPR_2                                            | 0.217914081  | P16014_S365_M1_Chgb     |
| _EDAGAPVEDSQGQTK_2                                                       | -0.312907139 | #N/A                    |
| _WTEGGGHS[Phospho (STY)]REGVDDQESLRPSNQASK_4                             | -0.133198123 | P16014_S129_M1_Chgb     |
| _SSYEGHPLS[Phospho (STY)]EERRPSPK_3                                      | 0.355963586  | P16014_S308_M1_Chgb     |
| _ADAHS[Phospho (STY)]M[Oxidation (M)]ELEEK_2                             | 0.180043797  | P16014_S220_M1_Chgb     |
| _SEES[Phospho (STY)]QEREYKR_3                                            | -0.135621619 | P16014_S378_M1_Chgb     |
| _ADAHS[Phospho (STY)]MELEEKTHS[Phospho (STY)]R_2                         | -0.399344219 | P16014_S220_M2_Chgb     |
| _HIEDS[Phospho (STY)]GEKPNTFSNK_3                                        | 0.025052607  | P16014_S190_M1_Chgb     |
| _ADEFPDFY[Phospho (STY)]DS[Phospho (STY)]EEQM[Oxidation (M)]GPHQEANDEK_3 | 0.423546623  | P16014_S626_M2_Chgb     |
| _LAAGAESPQPASGNS[Phospho (STY)]PSEDDR_2                                  | -0.09153883  | P16054_S337_M1_Prkce    |
| _SAPTS[Phospho (STY)]PC[Carbamidomethyl (C)]DQELK_2                      | 0.608997709  | P16054_S350_M1_Prkce    |
| _ALS[Phospho (STY)]FDNRGEEHR_3                                           | -0.34302582  | P16054_S368_M1_Prkce    |
| _KALS[Phospho (STY)]FDNR_2                                               | -0.157207776 | P16054_S368_M1_Prkce    |
| _ASSATDGLAS[Phospho (STY)]PGENGVRPGQAK_3                                 | -0.268743451 | P16054_S388_M1_Prkce    |
| _KQET[Phospho (STY)]PDEVGSQR_2                                           | -0.350478663 | P16054_T228_M1_Prkce    |
| _SAPTS[Phospho (STY)]PC[Carbamidomethyl (C)]DQELKELENNIRK_3              | 0.098011066  | P16054_S350_M1_Prkce    |



|                                                                             |              |                       |
|-----------------------------------------------------------------------------|--------------|-----------------------|
| _ALS[Phospho (STY)]FDNR_2                                                   | -0.494578956 | P16054_S368_M1_Prkce  |
| _SKS[Phospho (STY)]APTS[Phospho (STY)]PC[Carbamidomethyl (C)]DQELK_2        | -0.02905793  | #N/A                  |
| _KLAAGAESPQPASGNS[Phospho (STY)]PSEDDR_3                                    | -0.014737588 | P16054_S337_M1_Prkce  |
| _LAAGAESPQPASGNS[Phospho (STY)]PSEDDRSK_3                                   | -0.385014181 | P16054_S337_M1_Prkce  |
| _KALS[Phospho (STY)]FDNRGEEHR_3                                             | -0.242368586 | P16054_S368_M1_Prkce  |
| _SAPTS[Phospho (STY)]PC[Carbamidomethyl (C)]DQELKELENNIR_3                  | -0.173239778 | P16054_S350_M1_Prkce  |
| _ASSATDQQLAS[Phospho (STY)]PGENGVRPGQAKR_3                                  | -0.217781912 | P16054_S388_M1_Prkce  |
| _DVILQDDVDVC[Carbamidomethyl (C)]TMTEK_2                                    | -0.353589305 | #N/A                  |
| _SKS[Phospho (STY)]APTS[Phospho (STY)]PC[Carbamidomethyl (C)]DQELKELENNIR_3 | 0.191625962  | #N/A                  |
| _LIASVADDEAAVPNNK_2                                                         | -0.179305812 | #N/A                  |
| _FIIPQIVK_2                                                                 | 0.109744019  | #N/A                  |
| _LKDDEVAQLR_2                                                               | 0.037534877  | #N/A                  |
| _IVVVTAGVR_2                                                                | 0.316951883  | #N/A                  |
| _SADTLWDIQK_2                                                               | -0.321075361 | #N/A                  |
| _GLTSVINQK_2                                                                | 0.021360061  | #N/A                  |
| _LKDDEVAQLRK_3                                                              | -0.460071351 | #N/A                  |
| _SLADELALVDVLEDK_2                                                          | 0.126681588  | #N/A                  |
| _EKLIASVADDEAAVPNNK_3                                                       | -0.302960808 | #N/A                  |
| _KSADTLWDIQK_2                                                              | -0.244894034 | #N/A                  |
| _M[Oxidation (M)]VVDSAYEVIK_2                                               | -0.137522053 | #N/A                  |
| _IHPVSTM[Oxidation (M)]VK_2                                                 | -0.086994701 | #N/A                  |
| _IVADKDYSVTANSK_2                                                           | -0.063143362 | #N/A                  |
| _SLADELALVDVLEDK_2                                                          | -0.066598302 | #N/A                  |
| _ITVVGVGQVGM[Oxidation (M)]AC[Carbamidomethyl (C)]AISILGK_2                 | -0.294230151 | #N/A                  |
| _GEM[Oxidation (M)]M[Oxidation (M)]DLQHGSFLQTPK_3                           | -0.164238424 | #N/A                  |
| _GM[Oxidation (M)]YGIENEVFLSLPC[Carbamidomethyl (C)]ILNAR_3                 | 0.154019498  | #N/A                  |
| _KSS[Phospho (STY)]VEGLEPAENK_2                                             | -0.321062655 | P16254_S45_M1_Srp14   |
| _ALPSVGLQSDQS[Phospho (STY)]PQR_2                                           | -0.273477539 | P16283_S198_M1_Slc4a3 |
| _SYS[Phospho (STY)]ERDFEFHR_3                                               | 0.319533562  | P16283_S67_M1_Slc4a3  |
| _FSIGS[Phospho (STY)]DEDDSPGLPVK_2                                          | 0.007013202  | P16283_S170_M1_Slc4a3 |
| _AKFSIGS[Phospho (STY)]DEDDSPGLPVK_2                                        | 0.04282361   | P16283_S170_M1_Slc4a3 |
| _SRPWS[Phospho (STY)]PSASYDLR_2                                             | -0.097255046 | P16283_S224_M1_Slc4a3 |
| _GS[Phospho (STY)]PSGLAPILR_2                                               | 0.029362481  | P16283_S296_M1_Slc4a3 |
| _IQGGRGS[Phospho (STY)]PSGLAPILR_3                                          | -0.44980638  | P16283_S296_M1_Slc4a3 |
| _NQWQLS[Phospho (STY)]ADDLKK_2                                              | -0.20472733  | P16330_S169_M1_Cnp    |
| _HFISGDEPK_2                                                                | 0.208487841  | #N/A                  |
| _KS[Phospho (STY)]HTFLPK_2                                                  | 0.451136049  | P16330_S9_M1_Cnp      |
| _LDEDLAGYC[Carbamidomethyl (C)]R_2                                          | 0.009666734  | #N/A                  |
| _ADFSEAYKR_2                                                                | 0.110594854  | #N/A                  |
| _LSISALFVTPK_2                                                              | 0.291848099  | #N/A                  |
| _AAGAEYYAQQEVVK_2                                                           | 0.031127726  | #N/A                  |
| _AAGAEYYAQQEVVKR_2                                                          | -0.027540622 | #N/A                  |
| _KAGQVFLEELGNHK_3                                                           | -0.18676219  | #N/A                  |
| _AIFTGYYGK_2                                                                | -0.174068553 | #N/A                  |
| _RPPGVLHC[Carbamidomethyl (C)]TTK_3                                         | 0.351299768  | #N/A                  |
| _EKPELQFPFLQDEDTVATLHEC[Carbamidomethyl (C)]K_4                             | -0.183707013 | #N/A                  |
| _LDC[Carbamidomethyl (C)]AQLK_2                                             | 0.0725519    | #N/A                  |

|                                                                     |              |                        |
|---------------------------------------------------------------------|--------------|------------------------|
| _GKLY[Phospho (STY)]SLGK_.2                                         | 0.242075542  | P16330_Y372_M1_Cnp     |
| _GGSQGEAVGELPR_.2                                                   | -0.160677932 | #N/A                   |
| _VLVLDDTNHER_.2                                                     | 0.047205026  | #N/A                   |
| _[Acetyl (Protein N-term)]M[Oxidation (M)]NTS[Phospho (STY)]FTRK_.2 | 0.083603745  | P16330_S4_M1_Cnp       |
| _NQWQLSADDLK_.2                                                     | 0.053571516  | #N/A                   |
| _EKNQWQLSADDLKK_.3                                                  | 0.085893339  | #N/A                   |
| _S[Phospho (STY)]HTFLPK_.2                                          | 0.257268618  | P16330_S9_M1_Cnp       |
| _RLDEDLAGYC[Carbamidomethyl (C)]R_.3                                | 0.178574088  | #N/A                   |
| _AGQVFLEELGNHK_.2                                                   | -0.05061268  | #N/A                   |
| _AHVTLCG[Carbamidomethyl (C)]AADVQPVQTGLDLLILQQVK_.3                | -0.249346336 | #N/A                   |
| _EKLELVSYFGK_.2                                                     | -0.004468717 | #N/A                   |
| _ADFSEAYK_.2                                                        | 0.019514748  | #N/A                   |
| _SSETLRK_.2                                                         | 0.103030697  | #N/A                   |
| _VLVLDDTNHERER_.3                                                   | -0.175344067 | #N/A                   |
| _HFISGDEPKEK_.2                                                     | 0.030217396  | #N/A                   |
| _M[Oxidation (M)]VSADAYK_.2                                         | -0.183471139 | #N/A                   |
| _LELVSYFGK_.2                                                       | 0.345181603  | #N/A                   |
| _LDQLFEM[Oxidation (M)]ADQYQYQVVLVEPK_.3                            | -0.412663557 | #N/A                   |
| _[Acetyl (Protein N-term)]M[Oxidation (M)]NTS[Phospho (STY)]FTR_.2  | 0.161754613  | P16330_S4_M1_Cnp       |
| _EKNQWQLSADDLK_.3                                                   | 0.271627907  | #N/A                   |
| _ERLDQLFEM[Oxidation (M)]ADQYQYQVVLVEPK_.3                          | -0.604926965 | #N/A                   |
| _IDIVENR_.2                                                         | 0.252010158  | #N/A                   |
| _RQVEIAQR_.2                                                        | 0.489002317  | #N/A                   |
| _TTSLELFM[Oxidation (M)]YLNEVAGK_.2                                 | -0.093190342 | #N/A                   |
| _S[Phospho (STY)]LQQLAEER_.2                                        | -0.228029528 | P16546_S1217_M1_Sptan1 |
| _KLDPAQSAS[Phospho (STY)]R_.2                                       | 0.147443583  | P16546_S1031_M1_Sptan1 |
| _EANQQQQFNR_.2                                                      | -0.153070653 | #N/A                   |
| _EKEPIAASTNR_.2                                                     | 0.021654361  | #N/A                   |
| _DLTGVQNLN_.2                                                       | 0.254774658  | #N/A                   |
| _LSDDNTIGQEEIQQR_.2                                                 | -0.354303627 | #N/A                   |
| _SSEIESAFR_.2                                                       | 0.121839432  | #N/A                   |
| _ELPTAFDYVEFTR_.2                                                   | 0.18574024   | #N/A                   |
| _LFGAAEVQR_.2                                                       | 0.000415584  | #N/A                   |
| _LLVSSDYGR_.2                                                       | -0.419907979 | #N/A                   |
| _EELYQNLTR_.2                                                       | 0.030905405  | #N/A                   |
| _LIQEQHPPEELIK_.2                                                   | 0.126236865  | #N/A                   |
| _ADVVESWIGEK_.2                                                     | 0.035848894  | #N/A                   |
| _WTQLLANSATR_.2                                                     | -0.139709112 | #N/A                   |
| _EANELQQWITEK_.2                                                    | 0.122729617  | #N/A                   |
| _DLAALEDKVK_.2                                                      | 0.032227742  | #N/A                   |
| _DVEDEETWIR_.2                                                      | -0.440003656 | #N/A                   |
| _DLASVQALLR_.2                                                      | 0.268187529  | #N/A                   |
| _DLSSVQTLTK_.2                                                      | 0.003227952  | #N/A                   |
| _ITALDEFATK_.2                                                      | -0.112319249 | #N/A                   |
| _VLETAEDIQER_.2                                                     | 0.072461594  | #N/A                   |
| _WRS[Phospho (STY)]LQQLAEER_.3                                      | -0.360333369 | P16546_S1217_M1_Sptan1 |
| _TATDEAYKDPSNLQGK_.2                                                | -0.141337092 | #N/A                   |

|                                           |              |                        |
|-------------------------------------------|--------------|------------------------|
| _GLVSSDELAK_.2                            | 0.354321635  | #N/A                   |
| _LLEAQSHFR_.2                             | 0.059411216  | #N/A                   |
| _KFEFQTDLAAHEER_.3                        | -0.216201043 | #N/A                   |
| _IDGITIQR_.2                              | 0.338056365  | #N/A                   |
| _LIDVNHYAK_.2                             | 0.250753469  | #N/A                   |
| _VNEVSQFAAK_.2                            | 0.589656678  | #N/A                   |
| _REELITNWEQIR_.3                          | -0.412869543 | #N/A                   |
| _VNSLGETAQR_.2                            | 0.058199895  | #N/A                   |
| _QKLEDSYR_.2                              | -0.135726461 | #N/A                   |
| _LAQFVEHWK_.2                             | 0.015369818  | #N/A                   |
| _DVDEIEAWISEK_.2                          | 0.060183446  | #N/A                   |
| _LDPAQSSAS[Phospho (STY)]RENLEEQGSIALR_.3 | 0.347735685  | P16546_S1031_M1_Sptan1 |
| _DVDETIGWIK_.2                            | -0.002754893 | #N/A                   |
| _NTTGVTEEALK_.2                           | 0.074469895  | #N/A                   |
| _M[Oxidation (M)]NEVISLWK_.2              | -0.324311526 | #N/A                   |
| _LSILSEER_.2                              | 0.063448305  | #N/A                   |
| _LGESQTLQQFSR_.2                          | -0.405564504 | #N/A                   |
| _LDENSAFLQFNWK_.2                         | -0.202379948 | #N/A                   |
| _QDEVNAAWQR_.2                            | 0.314904553  | #N/A                   |
| _DLTNVQNLQK_.2                            | 0.038344948  | #N/A                   |
| _KLEATELK_.2                              | 0.389195969  | #N/A                   |
| _EELITNWEQIR_.2                           | 0.086531869  | #N/A                   |
| _KVEDLFLTFK_.2                            | -0.116055005 | #N/A                   |
| _LGDSHDLQR_.2                             | 0.175356937  | #N/A                   |
| _KFDDFQK_.2                               | 0.115352125  | #N/A                   |
| _LLEATELK_.2                              | -0.178603263 | #N/A                   |
| _QWELLLEK_.2                              | 0.368705728  | #N/A                   |
| _VNDVC[Carbamidomethyl (C)]TNGQDLIK_.2    | 0.084092888  | #N/A                   |
| _DLM[Oxidation (M)]SWINGIR_.2             | 0.063355902  | #N/A                   |
| _C[Carbamidomethyl (C)]TELNQAWTSLGK_.2    | 0.235138517  | #N/A                   |
| _LAALADQWQFLVQK_.2                        | -0.128287717 | #N/A                   |
| _IAALQAFADQLIAVDHYAK_.3                   | 0.046460374  | #N/A                   |
| _KLSDDNTIGQEIQQR_.3                       | 0.034758547  | #N/A                   |
| _QVEELYQSLELGEK_.2                        | 0.396701278  | #N/A                   |
| _DVTGAEALLER_.2                           | -0.413474805 | #N/A                   |
| _EAIVTSEELGQDLEHVEVLQK_.3                 | -0.257167001 | #N/A                   |
| _HQAQAEIAGHEPR_.3                         | 0.24855743   | #N/A                   |
| _LQQSHPLSASQIQVK_.2                       | 0.375062638  | #N/A                   |
| _ENLLEEQGSIALR_.2                         | 0.207035138  | #N/A                   |
| _EAHDAFR_.2                               | 0.125863881  | #N/A                   |
| _TALLELWELR_.2                            | 0.178002643  | #N/A                   |
| _RQQVLDR_.2                               | -0.065977899 | #N/A                   |
| _TALLELWELRR_.2                           | 0.165393327  | #N/A                   |
| _LKDLSQADSLM[Oxidation (M)]TSSAFDTSQVK_.3 | -0.319898334 | #N/A                   |
| _DAEELEKWIQEK_.2                          | -0.051789828 | #N/A                   |
| _C[Carbamidomethyl (C)]NSLEEIK_.2         | 0.225907881  | #N/A                   |
| _KHEGFER_.2                               | -0.078781992 | #N/A                   |

|                                                                       |              |                        |
|-----------------------------------------------------------------------|--------------|------------------------|
| _VAEDLESEGLM[Oxidation (M)]AEEVQAVQQQEVYGM[Oxidation (M)]PR_.3        | -0.602046567 | #N/A                   |
| _ALINADELANDVAGAEALLDR_.2                                             | -0.41350577  | #N/A                   |
| _LNHQEFK_.2                                                           | 0.248765243  | #N/A                   |
| _M[Oxidation (M)]M[Oxidation (M)]LDHC[Carbamidomethyl (C)]LELQLFHR_.3 | -0.420033429 | #N/A                   |
| _GEIDAHEDSF_.2                                                        | 0.137600497  | #N/A                   |
| _DTEQVDNWM[Oxidation (M)]SK_.2                                        | -0.23758782  | #N/A                   |
| _GVIDM[Oxidation (M)]GNSLIER_.2                                       | 0.246832277  | #N/A                   |
| _DLAALGDKVNSLGETAQR_.3                                                | -0.011074433 | #N/A                   |
| _AQLADSFHLQQFFR_.3                                                    | 0.189502697  | #N/A                   |
| _QQVAPM[Oxidation (M)]DDETGKELVLALYDYQEKs[Phospho (STY)]PR_.3         | 0.040765877  | P16546_S982_M1_Sptan1  |
| _SADESGQALLAASHYASDEV_.3                                              | -0.264841922 | #N/A                   |
| _DLIGVQNLLK_.2                                                        | 0.449845777  | #N/A                   |
| _DC[Carbamidomethyl (C)]EQAENWM[Oxidation (M)]AAR_.2                  | 0.577753892  | #N/A                   |
| _DSDELKSWVNEK_.2                                                      | -0.28972127  | #N/A                   |
| _AINVQEEK_.2                                                          | 0.385580797  | #N/A                   |
| _SSLSSAQADFNQLAELDR_.2                                                | -0.316934727 | #N/A                   |
| _GLVSSDELAKDVTGAEALLER_.3                                             | -0.330534417 | #N/A                   |
| _ASAFNSWFENAEEDLTPVR_.2                                               | -0.114815265 | #N/A                   |
| _LIQSHPEAEDLKEK_.3                                                    | 0.279224465  | #N/A                   |
| _DM[Oxidation (M)]DDEESWIK_.2                                         | 0.251753829  | #N/A                   |
| _EKLDILDQERTDLEK_.3                                                   | -0.212409571 | #N/A                   |
| _M[Oxidation (M)]QHNLEQQIQAR_.3                                       | 0.057006698  | #N/A                   |
| _DLNSQADSLM[Oxidation (M)]TSSAFDTSQVK_.2                              | -0.22089691  | #N/A                   |
| _DLTSWVTEMK_.2                                                        | 0.388432128  | #N/A                   |
| _M[Oxidation (M)]TLVASEDYGDTLAAIQGLLK_.2                              | -0.464769888 | #N/A                   |
| _ADVVESWIGEKENSLK_.2                                                  | 0.028972886  | #N/A                   |
| _QQNFNTGIK_.2                                                         | 0.380398411  | #N/A                   |
| _YTEHSTVGLAQQWDQLDQLGM[Oxidation (M)]R_.3                             | -0.568546864 | #N/A                   |
| _LDETGMLM[Oxidation (M)]ISEGHFASSETIR_.3                              | -0.265029288 | #N/A                   |
| _RNEVLDR_.2                                                           | 0.043923866  | #N/A                   |
| _KLLVSSSEDYGR_.2                                                      | 0.106935392  | #N/A                   |
| _EC[Carbamidomethyl (C)]EDVM[Oxidation (M)]DWINDK_.2                  | -0.353306393 | #N/A                   |
| _EAFINTEDKGDSDLDSVEALIK_.3                                            | -0.036145704 | #N/A                   |
| _KLDPAQSAS[Phospho (STY)]RENLEEQGSIALR_.3                             | -0.262756024 | P16546_S1031_M1_Sptan1 |
| _ELVLALYDYQEKs[Phospho (STY)]PR_.2                                    | 0.328105546  | P16546_S982_M1_Sptan1  |
| _SLGYDLPM[Oxidation (M)]VEEGEPDPEFAILDTPVDPNR_.3                      | 0.229955149  | #N/A                   |
| _DEADS[Phospho (STY)]KTAS[Phospho (STY)]PWK_.2                        | -0.418291667 | P16546_S1186_M2_Sptan1 |
| _DLAALEDK_.2                                                          | 0.082374784  | #N/A                   |
| _LQVASDENYKDPTNLQGK_.3                                                | 0.13030929   | #N/A                   |
| _YEALKEPM[Oxidation (M)]VAR_.2                                        | 0.164837422  | #N/A                   |
| _EAALTNEEVGADLEQVEVLQK_.2                                             | 0.194706489  | #N/A                   |
| _SLLGSAHEVQR_.2                                                       | 0.387125405  | #N/A                   |
| _EKEPIVGSTDYKGDEDSAEALLK_.3                                           | -0.090074913 | #N/A                   |
| _QQVAPM[Oxidation (M)]DDETGKELVLALYDYQEK_.3                           | -0.47283367  | #N/A                   |
| _TYLLDGSC[Carbamidomethyl (C)]MVEESGTLESQLEATK_.3                     | 0.290870064  | #N/A                   |
| _NQALNTDNYGHDLASVQALQR_.3                                             | -0.483738278 | #N/A                   |
| _NNHHEENISSK_.2                                                       | -0.249777975 | #N/A                   |

|                                                              |              |      |
|--------------------------------------------------------------|--------------|------|
| _EKLDILDQER_2                                                | -0.174372269 | #N/A |
| _DAETKEWIEEK_2                                               | -0.025017597 | #N/A |
| _HQEHKGEIDAHEDSFK_4                                          | -0.196979508 | #N/A |
| _QFQDAGHFDAENIKK_3                                           | -0.089279538 | #N/A |
| _KIEDLGAAM[Oxidation (M)]EEALILDNK_3                         | -0.283807027 | #N/A |
| _TKQDEVNAAWQR_3                                              | -0.254303842 | #N/A |
| _QEFAQHANAFHQWQETR_3                                         | -0.36478204  | #N/A |
| _EKLILSEER_2                                                 | -0.166059986 | #N/A |
| _SADESGQALLAASHYASDEVREK_3                                   | -0.40548364  | #N/A |
| _GNAM[Oxidation (M)]VEEGHFAAEDVK_2                           | -0.206801635 | #N/A |
| _EQLMASDDFGR_2                                               | 0.399477231  | #N/A |
| _QETFDAGLQAFQQEGIANITALK_3                                   | 0.275194124  | #N/A |
| _HALLEADVAAHQDR_3                                            | -0.46051854  | #N/A |
| _HQLLEADISAHEDR_3                                            | -0.41341622  | #N/A |
| _LIQNNHYAM[Oxidation (M)]EDVATR_3                            | 0.336647221  | #N/A |
| _KHEAFETDFTVHK_3                                             | -0.186472072 | #N/A |
| _AKLGDSHDLQR_3                                               | 0.031620088  | #N/A |
| _DMDDEESWIEK_2                                               | 0.19926397   | #N/A |
| _LM[Oxidation (M)]VHTVATFNSIK_2                              | 0.392123991  | #N/A |
| _AGTFQAFEQFGQQLAHGHYASPEIK_3                                 | 0.144223081  | #N/A |
| _HQAFEAEELHANADR_3                                           | 0.017230594  | #N/A |
| _LIQNNHYAMEDVATRR_3                                          | -0.043492339 | #N/A |
| _HEAFETDFTVHK_3                                              | -0.020546401 | #N/A |
| _QETFDAGLQAFQQEGIANITALKDQLLAAK_3                            | 0.177472734  | #N/A |
| _EKEQLMASDDFGR_3                                             | -0.23273928  | #N/A |
| _IEDLGAAMEEALILDNK_2                                         | 0.296504051  | #N/A |
| _RQDLEDLQAQQYFADANEAESWM[Oxidation (M)]R_3                   | -0.395439506 | #N/A |
| _KHEAFETDFTVHKDR_4                                           | -0.453099341 | #N/A |
| _GAAQNIIPASTGAAK_2                                           | -0.081114681 | #N/A |
| _VPTPNVSVVDLTC[Carbamidomethyl (C)]R_2                       | 0.014746617  | #N/A |
| _VIPELNGK_2                                                  | 0.118015334  | #N/A |
| _LTGM[Oxidation (M)]AFR_2                                    | -0.041408787 | #N/A |
| _VGVNGFGR_2                                                  | 0.158068324  | #N/A |
| _LVINGKPITIFQER_3                                            | 0.066769796  | #N/A |
| _PITIFQER_2                                                  | 0.315648498  | #N/A |
| _VVKQASEGPLK_2                                               | 0.365988943  | #N/A |
| _VIISAPSADAPM[Oxidation (M)]FVM[Oxidation (M)]GVNHEKYDNSLK_4 | -0.455071528 | #N/A |
| _PITIFQERDPTNIK_3                                            | -0.081325634 | #N/A |
| _WGEAGAEYVVESTGVFTTM[Oxidation (M)]EK_2                      | -0.305712691 | #N/A |
| _VIISAPSADAPM[Oxidation (M)]FVM[Oxidation (M)]GVNHEK_3       | 0.163071507  | #N/A |
| _RVIISAPSADAPM[Oxidation (M)]FVM[Oxidation (M)]GVNHEK_3      | -0.387202194 | #N/A |
| _LISWYDNEYGYSNR_2                                            | -0.476029343 | #N/A |
| _DPTNIKWGEAGAEYVVESTGVFTTM[Oxidation (M)]EK_3                | -0.365940565 | #N/A |
| _VVDLM[Oxidation (M)]AYM[Oxidation (M)]ASK_2                 | 0.223495254  | #N/A |
| _VVDLM[Oxidation (M)]AYM[Oxidation (M)]ASKE_2                | 0.062415089  | #N/A |
| _QASEGPLK_2                                                  | -0.159680603 | #N/A |
| _LEKPAKYDDIK_3                                               | -0.26937198  | #N/A |

|                                                                 |              |                      |
|-----------------------------------------------------------------|--------------|----------------------|
| _IVSNASC[Carbamidomethyl (C)]TTNC[Carbamidomethyl (C)]LAPLAK_.2 | 0.0524072    | #N/A                 |
| _TVDGPGSKLWR_.2                                                 | -0.227504529 | #N/A                 |
| _VIHDNFGIVEGLM[Oxidation (M)]TTVHAITATQK_.4                     | -0.172189367 | #N/A                 |
| _FNGTVKAENGK_.2                                                 | 0.279595382  | #N/A                 |
| _VEIVAINDPFIDLNMVYMFQYDSTHGK_.3                                 | -0.048166476 | #N/A                 |
| _NDSVIVADQTPT[Phospho (STY)]PTR_.2                              | -0.155020986 | P16951_T53_M1_At2    |
| _SKIEPSVVETTHQDS[Phospho (STY)]PLPHPESTTSDEK_.4                 | -0.158621579 | P16951_S118_M1_At2   |
| _LAcetyl (Protein N-term)]SESGS[Phospho (STY)]KSSQPLASK_.2      | -0.123026824 | P17095_S6_M1_Hmga1   |
| _KLEKEEEEGISQES[Phospho (STY)]S[Phospho (STY)]EEEE_.2           | -0.191292202 | P17095_S102_M2_Hmga1 |
| _IHSEEQS[Phospho (STY)]EEED_.2                                  | -0.298793699 | P17141_S590_M1_Zfp37 |
| _DAGTITGLNVL_.2                                                 | 0.070302329  | #N/A                 |
| _LYQGGPGGGGSSGGPTIEVD_.2                                        | 0.146097671  | #N/A                 |
| _QTQTFTTYSQSSVLVQVYEGER_.3                                      | 0.04162889   | #N/A                 |
| _YITPDQLADLYK_.2                                                | 0.014701404  | #N/A                 |
| _GVSQAVEHINK_.2                                                 | 0.174886075  | #N/A                 |
| _GNPTVEVDLYTAK_.2                                               | -0.094735861 | #N/A                 |
| _TIAPALVSK_.2                                                   | 0.122272909  | #N/A                 |
| _SC[Carbamidomethyl (C)]NC[Carbamidomethyl (C)]LLLK_.2          | 0.252890732  | #N/A                 |
| _IGAENVYHNLK_.2                                                 | 0.112640961  | #N/A                 |
| _KVVNVVEQEK_.2                                                  | 0.171761833  | #N/A                 |
| _IEEELGSK_.2                                                    | -0.069652591 | #N/A                 |
| _DATNVGDEGGFAPNILENKEALELLK_.3                                  | -0.281380117 | #N/A                 |
| _VNVVEQEK_.2                                                    | 0.138644003  | #N/A                 |
| _HIADLAGNPEVILPVPAFNVINGGSHAGNK_.4                              | 0.008189601  | #N/A                 |
| _AAVPSGASTGIYEALERDNDK_.3                                       | -0.281563731 | #N/A                 |
| _SGKYDLDFK_.2                                                   | 0.110722703  | #N/A                 |
| _KVVNVVEQEKIDK_.2                                               | 0.1968287    | #N/A                 |
| _IEEELGSKAK_.2                                                  | 0.407050873  | #N/A                 |
| _DATNVGDEGGFAPNILENK_.2                                         | -0.413958984 | #N/A                 |
| _LAM[Oxidation (M)]QEFM[Oxidation (M)]ILPVGASSFR_.2             | -0.320230484 | #N/A                 |
| _YGKDATNVGDEGGFAPNILENK_.3                                      | -0.146517097 | #N/A                 |
| _FGANAILGVSLAVC[Carbamidomethyl (C)]K_.2                        | 0.357352912  | #N/A                 |
| _SGKYDLDFKS[Phospho (STY)]PDDPSR_.3                             | -0.382790453 | P17182_S263_M1_Eno1  |
| _LM[Oxidation (M)]IEM[Oxidation (M)]DGTENK_.2                   | -0.369820868 | #N/A                 |
| _AAVPSGASTGIYEALER_.2                                           | -0.152513943 | #N/A                 |
| _YDLDFKS[Phospho (STY)]PDDPSR_.2                                | 0.032499178  | P17182_S263_M1_Eno1  |
| _SGETEDTFIADLVVGLC[Carbamidomethyl (C)]TGQIK_.2                 | -0.018986428 | #N/A                 |
| _FTASAGIQVVGDDLTVTNPK_.2                                        | -0.395870725 | #N/A                 |
| _SFVQNYPPVSIEDPFDQDDWGAWQK_.3                                   | -0.28518357  | #N/A                 |
| _VNVVEQEKIDK_.2                                                 | 0.372001555  | #N/A                 |
| _LAQSNNGWGV[M[Oxidation (M)]VSHR_.2                             | 0.078548229  | #N/A                 |
| _FTASAGIQVVGDDLTVTNPKR_.3                                       | -0.054558201 | #N/A                 |
| _AGYTDQVVIGM[Oxidation (M)]DVAASEFYR_.2                         | -0.087952469 | #N/A                 |
| _IDKLMIEM[Oxidation (M)]DGTENK_.3                               | 0.250087361  | #N/A                 |
| _EALELLK_.2                                                     | 0.109128486  | #N/A                 |
| _IEEELGDEAR_.2                                                  | 0.131412162  | #N/A                 |
| _VNQIGSVTEAIQAC[Carbamidomethyl (C)]K_.2                        | 0.029296459  | #N/A                 |

|                                                               |              |                     |
|---------------------------------------------------------------|--------------|---------------------|
| _AVDHINSR_.2                                                  | 0.195085369  | #N/A                |
| _YITGDQLGALYQDFVR_.2                                          | -0.201741826 | #N/A                |
| _DGKYDLDFK_.2                                                 | -0.299042296 | #N/A                |
| _AC[Carbamidomethyl (C)]NC[Carbamidomethyl (C)]LLK_.2         | 0.374801542  | #N/A                |
| _LGAEVYHTLK_.2                                                | 0.069842506  | #N/A                |
| _DATNVGDEGGFAPNILENSEALELVK_.3                                | -0.109872265 | #N/A                |
| _FAGHNFR_.2                                                   | 0.243768818  | #N/A                |
| _LDNLM[Oxidation (M)]LELDGTENK_.2                             | -0.018690696 | #N/A                |
| _DKYGKDATNVGDEGGFAPNILENSEALELVK_.4                           | -0.086325538 | #N/A                |
| _ [Acetyl (Protein N-term)]S[Phospho (STY)]IEKIWAR_.2         | -0.161360044 | P17183_S2_M1_Eno2   |
| _DGKYDLDFKS[Phospho (STY)]PADPSR_.3                           | -0.15690057  | P17183_S263_M1_Eno2 |
| _IAPALISSGISVVEQEK_.2                                         | 0.007414674  | #N/A                |
| _HIAQLAGNSDLILPVPFNVINGGSHAGNK_.3                             | 0.172077919  | #N/A                |
| _M[Oxidation (M)]VIGM[Oxidation (M)]DVAASEFYR_.2              | -0.420610177 | #N/A                |
| _LAM[Oxidation (M)]QEFM[Oxidation (M)]ILPVGAESFR_.3           | -0.065178905 | #N/A                |
| _YDLDFKS[Phospho (STY)]PADPSR_.2                              | -0.197472189 | P17183_S263_M1_Eno2 |
| _IAPALISSGISVVEQEKLDNLM[Oxidation (M)]LELDGTENK_.4            | -0.220199563 | #N/A                |
| _FTANVGIQIVGDDLTVTNPK_.2                                      | -0.351748255 | #N/A                |
| _LAQENGWGV[M[Oxidation (M)]VSHR_.3                            | -0.305015786 | #N/A                |
| _NYPVVSIEDPFDQDDWAWSK_.3                                      | 0.378362588  | #N/A                |
| _NADVELQQR_.2                                                 | 0.084210991  | #N/A                |
| _DFLTPPLLSVR_.2                                               | 0.070364426  | #N/A                |
| _LLQC[Carbamidomethyl (C)]YPPPEDAAVK_.2                       | -0.121547848 | #N/A                |
| _GLAVFISDIR_.2                                                | -0.12091552  | #N/A                |
| _QLSLPLQEAQK_.2                                               | 0.163154822  | #N/A                |
| _HLC[Carbamidomethyl (C)]ELLAQQF_.2                           | 0.068518311  | #N/A                |
| _QSAALC[Carbamidomethyl (C)]LLR_.2                            | 0.183625791  | #N/A                |
| _ATIQGVLR_.2                                                  | 0.051454532  | #N/A                |
| _LVEC[Carbamidomethyl (C)]LETVLNK_.2                          | -0.075488824 | #N/A                |
| _NSGVLFENQLLQIGVK_.2                                          | -0.334213375 | #N/A                |
| _THIDTVINALK_.2                                               | -0.133887975 | #N/A                |
| _YGGTAQSLTLK_.2                                               | 0.232684601  | #N/A                |
| _IAGDYVSEEVWYR_.2                                             | -0.131506643 | #N/A                |
| _TSKEPVS_.2                                                   | -0.232624837 | #N/A                |
| _LLGFGSALLDNVDPNPENFVGAGIIQTK_.3                              | 0.232926456  | #N/A                |
| _AC[Carbamidomethyl (C)]NQLGQFLQHR_.3                         | -0.055617515 | #N/A                |
| _VGGYILGEFGNLIAGDPR_.2                                        | 0.084863928  | #N/A                |
| _AADLLYAM[Oxidation (M)]C[Carbamidomethyl (C)]DR_.2           | -0.266490778 | #N/A                |
| _FFQPTM[Oxidation (M)]AAQDFFQR_.2                             | -0.042812633 | #N/A                |
| _ILVAGDSMDSVK_.2                                              | 0.121845617  | #N/A                |
| _ANHPMDAEVTK_.2                                               | 0.401688612  | #N/A                |
| _YLALESM[Oxidation (M)]C[Carbamidomethyl (C)]TLASSEFSHEAVK_.3 | -0.471830676 | #N/A                |
| _TSVQFQNFLPTVVHPGDLQTLAVQTK_.3                                | 0.173627002  | #N/A                |
| _ASPDLVPMGEWTAR_.2                                            | 0.436480343  | #N/A                |
| _VAAQVDGGAQQVQLNIEC[Carbamidomethyl (C)]LR_.2                 | -0.008053401 | #N/A                |
| _LEPNAQAQMYR_.2                                               | 0.258655114  | #N/A                |
| _AVEYLTSSVASTDVLATVLEEM[Oxidation (M)]PPFPER_.3               | -0.498846432 | #N/A                |

|                                                |              |      |
|------------------------------------------------|--------------|------|
| _TTQIGC[Carbamidomethyl (C)]LLR_.2             | 0.16223974   | #N/A |
| _LLQC[Carbamidomethyl (C)]YPPDPAVR_.2          | 0.171397443  | #N/A |
| _ATIQDVL_.2                                    | 0.044368173  | #N/A |
| _QLSNPQQEVQNIFK_.2                             | 0.106114068  | #N/A |
| _SSPLIQFNLLHSK_.2                              | -0.029728584 | #N/A |
| _KGPSTVTDLEETKR_.3                             | -0.126158398 | #N/A |
| _LTEC[Carbamidomethyl (C)]LETILNK_.2           | -0.148625164 | #N/A |
| _FFQPTMASQDFFQR_.2                             | -0.303060664 | #N/A |
| _THIETVINALK_.2                                | 0.114103804  | #N/A |
| _YGGTFQNVSVK_.2                                | -0.180639864 | #N/A |
| _LSTVASTDILATVLEEM[Oxidation (M)]PPFPER_.3     | 0.095767104  | #N/A |
| _TVFEALQAPAC[Carbamidomethyl (C)]HENLVK_.3     | -0.286330967 | #N/A |
| _VIQIVINR_.2                                   | -0.176232295 | #N/A |
| _AVDLLYAMC[Carbamidomethyl (C)]DR_.2           | 0.195061491  | #N/A |
| _TSPDLVPMGDWTSR_.2                             | 0.217227641  | #N/A |
| _ILVAGDTMDSVK_.2                               | -0.018600171 | #N/A |
| _SHYEEGPGK_.2                                  | -0.193041846 | #N/A |
| _NLPFSVENK_.2                                  | -0.008578476 | #N/A |
| _FLSQIESDR_.2                                  | -0.232837913 | #N/A |
| _ITPELLTR_.2                                   | 0.017851308  | #N/A |
| _ESLLFEGR_.2                                   | -0.026377567 | #N/A |
| _HIDLVEGDEGR_.2                                | -0.309021953 | #N/A |
| _ASGVEGADVVK_.2                                | -0.249379475 | #N/A |
| _LVPDSVDR_.2                                   | 0.040191439  | #N/A |
| _GAALITAVGVR_.2                                | 0.055158483  | #N/A |
| _SIPDGTGDFLALDLGGTNFR_.3                       | -0.201890189 | #N/A |
| _ATDC[Carbamidomethyl (C)]VGHDVATLLR_.3        | -0.033186949 | #N/A |
| _TTVGVDGSLYK_.2                                | 0.244575     | #N/A |
| _GDFIALDLGGSSFR_.2                             | 0.089815843  | #N/A |
| _LSDEILIDILTR_.2                               | -0.057865395 | #N/A |
| _VVDEYSLNSGK_.2                                | 0.364200395  | #N/A |
| _RLVPDSVDR_.2                                  | 0.263794999  | #N/A |
| _IDEAVLITWTK_.2                                | 0.080266833  | #N/A |
| _GQISEPLK_.2                                   | 0.121696198  | #N/A |
| _AILQQLGLNSTC[Carbamidomethyl (C)]DDSILVK_.2   | -0.220176425 | #N/A |
| _NILIDFTK_.2                                   | 0.119606241  | #N/A |
| _M[Oxidation (M)]HPQYSR_.2                     | -0.137230468 | #N/A |
| _M[Oxidation (M)]LPTFVR_.2                     | 0.020640528  | #N/A |
| _TDFDKVVDEYSLNSGK_.3                           | -0.338019267 | #N/A |
| _M[Oxidation (M)]ISGM[Oxidation (M)]YLGEIVR_.2 | -0.400423383 | #N/A |
| _IM[Oxidation (M)]HQTVK_.2                     | -0.081769965 | #N/A |
| _GAAM[Oxidation (M)]VTAVAYR_.2                 | 0.365644031  | #N/A |
| _LPVGFTFSFPC[Carbamidomethyl (C)]R_.2          | 0.071721349  | #N/A |
| _DYNPTASVK_.2                                  | 0.222104002  | #N/A |
| _C[Carbamidomethyl (C)]TVSFLLSEDSGSK_.2        | -0.033119283 | #N/A |
| _QIEETLSHFR_.2                                 | -0.058509066 | #N/A |
| _FTTSDVAAIETDKEGVQNAK_.3                       | 0.272213182  | #N/A |



|                                                                                                     |              |                       |
|-----------------------------------------------------------------------------------------------------|--------------|-----------------------|
| _SANLVAATLGAILNR_2                                                                                  | -0.21405042  | #N/A                  |
| _M[Oxidation (M)]C[Carbamidomethyl (C)]INTEWGAFGDDGSLEDIR_2                                         | -0.046090217 | #N/A                  |
| _FLLSESGSGK_2                                                                                       | -0.158977415 | #N/A                  |
| _LGVEPSHDDC[Carbamidomethyl (C)]VSVQHVC[Carbamidomethyl (C)]TIVSFR_4                                | 0.005710986  | #N/A                  |
| _QALMEVK_2                                                                                          | 0.006197753  | #N/A                  |
| _AAQLC[Carbamidomethyl (C)]GAGMAAVVEK_2                                                             | 0.043872825  | #N/A                  |
| _TVC[Carbamidomethyl (C)]GVVSK_2                                                                    | -0.178498742 | #N/A                  |
| _SEMEMGLR_2                                                                                         | -0.414988102 | #N/A                  |
| _SIYGEKFEDENFILK_3                                                                                  | -0.166692379 | #N/A                  |
| _VSFELFADK_2                                                                                        | 0.253237878  | #N/A                  |
| _KITISDC[Carbamidomethyl (C)]GQL_2                                                                  | 0.126890843  | #N/A                  |
| _VNPTVFFDITADDEPLGR_2                                                                               | -0.185802608 | #N/A                  |
| _VSFELFADKVPK_2                                                                                     | -0.209376139 | #N/A                  |
| _IIPGFMC[Carbamidomethyl (C)]QGGDFTR_2                                                              | 0.318564775  | #N/A                  |
| _HTGPGILSM[Oxidation (M)]ANAGPNTNGSQFFIC[Carbamidomethyl (C)]TAK_3                                  | -0.446893575 | #N/A                  |
| _FEDENFILK_2                                                                                        | -0.015946864 | #N/A                  |
| _EGM[Oxidation (M)]NIVEAMER_2                                                                       | 0.410666109  | #N/A                  |
| _VKEGM[Oxidation (M)]NIVEAM[Oxidation (M)]ER_3                                                      | -0.393210501 | #N/A                  |
| _TEWLDGK_2                                                                                          | -0.056608833 | #N/A                  |
| _ [Acetyl (Protein N-term)]M[Oxidation (M)]VNPTVFFDITADDEPLGR_2                                     | -0.085108288 | #N/A                  |
| _VVLAYEPVWAIGTGK_2                                                                                  | 0.108843945  | #N/A                  |
| _IYGGSVTGATC[Carbamidomethyl (C)]K_2                                                                | 0.262006676  | #N/A                  |
| _SNVNDGVAQSTR_2                                                                                     | 0.078808975  | #N/A                  |
| _FFVGGNWK_2                                                                                         | -0.196615099 | #N/A                  |
| _IAVAAQNC[Carbamidomethyl (C)]YK_2                                                                  | 0.451722554  | #N/A                  |
| _VSHALAEGLGVAC[Carbamidomethyl (C)]IGEK_3                                                           | -0.103145028 | #N/A                  |
| _VIADNVKDWK_2                                                                                       | -0.120132182 | #N/A                  |
| _DLGATWVVLGHSER_2                                                                                   | 0.232636155  | #N/A                  |
| _VVFQTK_2                                                                                           | -0.00560653  | #N/A                  |
| _VTNGAFTGEISPGM[Oxidation (M)]IK_2                                                                  | 0.105317468  | #N/A                  |
| _TATPQQAQEVHEK_2                                                                                    | 0.478491395  | #N/A                  |
| _HVFGEDELIGQK_2                                                                                     | 0.026186731  | #N/A                  |
| _ELASQPDVDGFLVGGASLKPEFVDIINAK_3                                                                    | -0.298516391 | #N/A                  |
| _C[Carbamidomethyl (C)]LGELIC[Carbamidomethyl (C)]TLNAANVPAGTEVVC[Carbamidomethyl (C)]APPTAYIDFAR_3 | -0.186276659 | #N/A                  |
| _RHVFGESDELIGQK_3                                                                                   | 0.271950312  | #N/A                  |
| _TFDEIASGFR_2                                                                                       | 0.049484243  | #N/A                  |
| _AKS[Phospho (STY)]VLKK_2                                                                           | -0.113812702 | P17809_S226_M1_Slc2a1 |
| _VTILELFR_2                                                                                         | 0.110139373  | #N/A                  |
| _QGGASQSDKT[Phospho (STY)]PEELFHPLGADSQV_3                                                          | 0.204918142  | P17809_T478_M1_Slc2a1 |
| _IINEPTAAAIAYGLDR_2                                                                                 | 0.193817037  | #N/A                  |
| _NQVALNPQNTVFDAK_2                                                                                  | 0.390600539  | #N/A                  |
| _ATAGDTHLGGEDFDNR_3                                                                                 | -0.07576126  | #N/A                  |
| _QAGSHSNS[Phospho (STY)]FR_2                                                                        | 0.343049792  | P18052_S180_M1_Ptpra  |
| _VVQEYIDAFSDY[Phospho (STY)]ANFK_2                                                                  | -0.412611447 | P18052_Y825_M1_Ptpra  |
| _VSSLPTVYLK_2                                                                                       | 0.192669102  | #N/A                  |
| _TTEPVSELLK_2                                                                                       | 0.085573787  | #N/A                  |
| _QPGIVFAAK_2                                                                                        | 0.376433866  | #N/A                  |

|                                                                       |              |                        |
|-----------------------------------------------------------------------|--------------|------------------------|
| _QIFGEATK_2                                                           | 0.141884859  | #N/A                   |
| _ILDIAC[Carbamidomethyl (C)]WVHHK_3                                   | 0.219289141  | #N/A                   |
| _AIGAVPLIQGEYMIPC[Carbamidomethyl (C)]EK_2                            | 0.068176621  | #N/A                   |
| _YIVDADDR_2                                                           | -0.137548355 | #N/A                   |
| _SEINVEGPPR_2                                                         | -0.243174302 | #N/A                   |
| _SGEYSC[Carbamidomethyl (C)]IFLPEPVGR_2                               | 0.287359351  | #N/A                   |
| _YVVVSTPEK_2                                                          | 0.005564833  | #N/A                   |
| _VLQEDTLPLDLHTK_3                                                     | -0.230174492 | #N/A                   |
| _NLS[Phospho (STY)]LPFILHEK_2                                         | -0.319803277 | P18581_S645_M1_Slc7a2  |
| _NQS[Phospho (STY)]PVLEPVGR_2                                         | -0.402399774 | P18654_S715_M1_Rps6ka3 |
| _DLKPENILLDEEGHIK_3                                                   | 0.051369163  | #N/A                   |
| _ [Acetyl (Protein N-term)]AS[Phospho (STY)]GVAVSDGVIK_2              | -0.424113609 | P18760_S3_M1_Cfl1      |
| _YALYDATYETK_2                                                        | 0.00404255   | #N/A                   |
| _KSSTPEEVK_2                                                          | 0.144424152  | #N/A                   |
| _LGGSAVISLEGKPL_2                                                     | -0.154102979 | #N/A                   |
| _SSTPEEVKK_2                                                          | 0.167258148  | #N/A                   |
| _EILVGDVGQTVDDPYTTFVK_2                                               | 0.309910327  | #N/A                   |
| _M[Oxidation (M)]LPDKDC[Carbamidomethyl (C)]R_2                       | 0.393469426  | #N/A                   |
| _NIILEEGKEILVGDVGQTVDDPYTTFVK_3                                       | -0.223908272 | #N/A                   |
| _NIILEEGK_2                                                           | 0.075868175  | #N/A                   |
| _AVLFC[Carbamidomethyl (C)]LSEDKK_2                                   | -0.067010019 | #N/A                   |
| _ [Acetyl (Protein N-term)]ASGVAVSDGVIKVFNDM[Oxidation (M)]K_2        | -0.127998758 | #N/A                   |
| _KEDLVFIFWAPENAPLK_3                                                  | 0.133774309  | #N/A                   |
| _HELQANC[Carbamidomethyl (C)]YEEVKDR_3                                | 0.298999654  | #N/A                   |
| _SST[Phospho (STY)]PEEVKKR_2                                          | 0.562930916  | P18760_T25_M1_Cfl1     |
| _KSST[Phospho (STY)]PEEVKK_2                                          | -0.042220678 | P18760_T25_M1_Cfl1     |
| _LTGIKHELQANC[Carbamidomethyl (C)]YEEVKDR_4                           | -0.124833462 | #N/A                   |
| _MIYASSK_2                                                            | 0.262706833  | #N/A                   |
| _IGAGDYQPTEQDILR_2                                                    | -0.319408602 | #N/A                   |
| _LFDVGGQR_2                                                           | -0.166592427 | #N/A                   |
| _NLKEDGISAAK_2                                                        | -0.250388538 | #N/A                   |
| _LWGDSGIQEC[Carbamidomethyl (C)]FNR_2                                 | -0.304518172 | #N/A                   |
| _EYQLNDSAK_2                                                          | -0.122281341 | #N/A                   |
| _KDLFGEK_2                                                            | -0.070923462 | #N/A                   |
| _YYLDSLDR_2                                                           | -0.222825588 | #N/A                   |
| _M[Oxidation (M)]VC[Carbamidomethyl (C)]DVVSR_2                       | 0.114466285  | #N/A                   |
| _IIHEDGFSGEDVK_3                                                      | -0.061824596 | #N/A                   |
| _QYKPVVYSNTIQSLAAIVR_3                                                | -0.3933139   | #N/A                   |
| _LFDVGGQRS[Phospho (STY)]ER_2                                         | -0.407232989 | P18872_S207_M1_Gnao1   |
| _M[Oxidation (M)]HESLM[Oxidation (M)]LFDSIC[Carbamidomethyl (C)]NNK_3 | -0.412440941 | #N/A                   |
| _M[Oxidation (M)]EDTEPFSAELLSAM[Oxidation (M)]MR_2                    | 0.273354411  | #N/A                   |
| _AM[Oxidation (M)]DTLGVEYGDKER_2                                      | 0.290131318  | #N/A                   |
| _NLKEDGIS[Phospho (STY)]AAKDVK_3                                      | -0.467449695 | P18872_S29_M1_Gnao1    |
| _SREYQLNDSAK_2                                                        | -0.316193037 | #N/A                   |
| _SPLTIC[Carbamidomethyl (C)]FPEYPGSNTYEDAAAYIQTQFESK_3                | 0.365652951  | #N/A                   |
| _PVVYSNTIQSLAAIVR_2                                                   | 0.145595463  | #N/A                   |
| _SRS[Phospho (STY)]DTSLK_2                                            | 0.023603235  | P19096_S2201_M1_Fasn   |

|                                                     |              |                     |
|-----------------------------------------------------|--------------|---------------------|
| _VQEVQQVSTNK_2                                      | 0.038785954  | #N/A                |
| _VTAIYIDPATHR_2                                     | 0.107630452  | #N/A                |
| _TLEAVQDLLEQGR_2                                    | 0.01772528   | #N/A                |
| _GYTVLGVEGR_2                                       | 0.379485263  | #N/A                |
| _LFDHPEVPTPPESASVSR_3                               | 0.339864175  | #N/A                |
| _PPYTIVYFPVR_2                                      | 0.635517918  | #N/A                |
| _YVTLIYTNYENGK_2                                    | 0.16853765   | #N/A                |
| _MLLADQGGQSWK_2                                     | 0.340516802  | #N/A                |
| _EAAQM[Oxidation (M)]DM[Oxidation (M)]VNDGVEDLR_2   | -0.143787774 | #N/A                |
| _ALPGHLKPFETLLSQNQGGK_3                             | -0.362203463 | #N/A                |
| _FEDGDLTYQSNAILR_2                                  | -0.171762182 | #N/A                |
| _EAAQMDMVNDGVEDLRGK_3                               | 0.106465292  | #N/A                |
| _AKPLDVKS[Phospho (STY)]PEAQTPVQEEAK_3              | -0.026423673 | P19246_S834_M1_Nefh |
| _S[Phospho (STY)]PGEAKS[Phospho (STY)]PAEAK_2       | 0.097562633  | #N/A                |
| _SPAEEKS[Phospho (STY)]PIEVK_2                      | 0.051823374  | P19246_S763_M1_Nefh |
| _S[Phospho (STY)]PAEAKS[Phospho (STY)]PAAVK_2       | 0.165221123  | #N/A                |
| _S[Phospho (STY)]PGEAKS[Phospho (STY)]PAAVK_2       | 0.053108987  | P19246_S715_M2_Nefh |
| _TSVSSVSAS[Phospho (STY)]PSR_2                      | -0.373564925 | P19246_S61_M1_Nefh  |
| _S[Phospho (STY)]PAEAKS[Phospho (STY)]PGEAK_2       | 0.086710766  | P19246_S541_M2_Nefh |
| _SPIEVKS[Phospho (STY)]PEK_2                        | 0.044472885  | P19246_S769_M1_Nefh |
| _SEKEQLQALNDR_2                                     | -0.023004629 | #N/A                |
| _S[Phospho (STY)]PGEAKS[Phospho (STY)]PAEPK_2       | 0.058872634  | #N/A                |
| _S[Phospho (STY)]PSEAKS[Phospho (STY)]PAEAK_2       | -0.166157428 | #N/A                |
| _S[Phospho (STY)]PVKEDIKPPAEAK_3                    | 0.135430978  | P19246_S795_M1_Nefh |
| _S[Phospho (STY)]PAEAKS[Phospho (STY)]PAEPK_2       | 0.023448558  | #N/A                |
| _EQLQALNDR_2                                        | 0.305631062  | #N/A                |
| _AVAS[Phospho (STY)]EEETPAK_2                       | -0.060754111 | P19246_S965_M1_Nefh |
| _S[Phospho (STY)]PVKEEVK_2                          | 0.194975711  | P19246_S888_M1_Nefh |
| _IPSISTHIK_2                                        | 0.049660387  | #N/A                |
| _HQADIASYQDAIQQLDSELR_3                             | -0.21900304  | #N/A                |
| _S[Phospho (STY)]PEAQTPVQEEAK_2                     | 0.149156294  | P19246_S834_M1_Nefh |
| _SPIEVKS[Phospho (STY)]PEKAK_2                      | -0.175420936 | P19246_S769_M1_Nefh |
| _S[Phospho (STY)]PAEAKS[Phospho (STY)]PEK_2         | -0.073355693 | P19246_S783_M2_Nefh |
| _C[Carbamidomethyl (C)]DVTSALR_2                    | 0.296546801  | #N/A                |
| _SPAEEKS[Phospho (STY)]PAEAKS[Phospho (STY)]PIEVK_3 | -0.081592985 | #N/A                |
| _S[Phospho (STY)]LEGEAAALR_2                        | -0.400714879 | P19246_S122_M1_Nefh |
| _S[Phospho (STY)]PEKAKS[Phospho (STY)]PVK_2         | 0.071309008  | P19246_S789_M2_Nefh |
| _VKEEAKS[Phospho (STY)]PGEAK_2                      | -0.178132851 | P19246_S523_M1_Nefh |
| _SPAAVKS[Phospho (STY)]PAEAKS[Phospho (STY)]PAAVK_2 | -0.13146042  | #N/A                |
| _SPAEPKS[Phospho (STY)]PAEAKS[Phospho (STY)]PAEVK_2 | -0.08619911  | P19246_S691_M2_Nefh |
| _SPAEEKS[Phospho (STY)]PAEVKS[Phospho (STY)]PAEAK_2 | -0.207371918 | #N/A                |
| _ETVIVEGQTEEIR_2                                    | 0.09606668   | #N/A                |
| _SPAEEKS[Phospho (STY)]PIEVKS[Phospho (STY)]PEK_2   | 0.003518682  | P19246_S769_M2_Nefh |
| _SPAEPKS[Phospho (STY)]PAEAKS[Phospho (STY)]PAEPK_2 | 0.174271879  | #N/A                |
| _SPAEEKS[Phospho (STY)]PAEAKS[Phospho (STY)]PAEVK_2 | -0.046866968 | P19246_S667_M2_Nefh |
| _SPAEEKS[Phospho (STY)]PATVKS[Phospho (STY)]PGEAK_2 | -0.166825023 | P19246_S643_M2_Nefh |
| _AQALQEEC[Carbamidomethyl (C)]GYLR_2                | 0.627630582  | #N/A                |

|                                                                     |              |                     |
|---------------------------------------------------------------------|--------------|---------------------|
| _SPGEAKS[Phospho (STY)]PAAVKS[Phospho (STY)]PAEAK_.2                | -0.006349758 | #N/A                |
| _SPGEAKS[Phospho (STY)]PAEPKS[Phospho (STY)]PAEAK_.2                | 0.043180594  | P19246_S685_M2_Nefh |
| _SPSEAKS[Phospho (STY)]PAEAKS[Phospho (STY)]PAEAK_.2                | -0.181788134 | #N/A                |
| _SPAENVKS[Phospho (STY)]PAEAKS[Phospho (STY)]PAEVK_.2               | 0.02182712   | P19246_S709_M2_Nefh |
| _S[Phospho (STY)]PGEAKS[Phospho (STY)]PAEAKS[Phospho (STY)]PAEAK_.2 | 0.11111561   | P19246_S745_M3_Nefh |
| _SPAEEKS[Phospho (STY)]PAEAKS[Phospho (STY)]PAEAK_.2                | 0.022568115  | P19246_S613_M2_Nefh |
| _S[Phospho (STY)]PAEAKS[Phospho (STY)]PGEAKS[Phospho (STY)]PGEAK_.2 | 0.208731438  | #N/A                |
| _SPAEEKS[Phospho (STY)]PAENVKS[Phospho (STY)]PGEAK_.2               | 0.0463558    | #N/A                |
| _S[Phospho (STY)]PGEAKS[Phospho (STY)]PAEPKS[Phospho (STY)]PAEPK_.2 | 0.068099602  | #N/A                |
| _SPAEEKS[Phospho (STY)]PAEAK_.2                                     | -0.113015975 | P19246_S607_M1_Nefh |
| _S[Phospho (STY)]PGEAKS[Phospho (STY)]PGEAKS[Phospho (STY)]PAEAK_.2 | 0.159752268  | P19246_S523_M3_Nefh |
| _S[Phospho (STY)]PGEAKS[Phospho (STY)]PAEAKS[Phospho (STY)]PGEAK_.2 | 0.167387523  | #N/A                |
| _SPATVKS[Phospho (STY)]PGEAK_.2                                     | -0.157339099 | P19246_S589_M1_Nefh |
| _VKS[Phospho (STY)]EEMIK_.2                                         | 0.078719669  | P19246_S438_M1_Nefh |
| _S[Phospho (STY)]PAEAKS[Phospho (STY)]PATVK_.2                      | -0.02656594  | P19246_S631_M2_Nefh |
| _SPGEAKS[Phospho (STY)]PSEAK_.2                                     | -0.075455083 | P19246_S595_M1_Nefh |
| _SPAEPKS[Phospho (STY)]PAEPKS[Phospho (STY)]PAEAK_.2                | -0.106894892 | #N/A                |
| _SPAEEKS[Phospho (STY)]PAAVKS[Phospho (STY)]PGEAK_.2                | -0.111247688 | #N/A                |
| _SPAENVKS[Phospho (STY)]PGEAKS[Phospho (STY)]PAEPK_.2               | -0.144753804 | P19246_S685_M2_Nefh |
| _TPVKEGAKS[Phospho (STY)]PAEAK_.2                                   | 0.281580924  | P19246_S783_M1_Nefh |
| _SPAENVKS[Phospho (STY)]PGEAK_.2                                    | -0.093197542 | P19246_S679_M1_Nefh |
| _S[Phospho (STY)]PGEAKS[Phospho (STY)]PGEAK_.2                      | -0.029902244 | P19246_S523_M2_Nefh |
| _S[Phospho (STY)]PAEAKS[Phospho (STY)]PAEVK_.2                      | 0.09560107   | P19246_S667_M2_Nefh |
| _SPAAVKS[Phospho (STY)]PAEAK_.2                                     | 0.118378942  | P19246_S727_M1_Nefh |
| _S[Phospho (STY)]PAENVKS[Phospho (STY)]PAEAK_.2                     | 0.109188723  | #N/A                |
| _S[Phospho (STY)]PAEPKS[Phospho (STY)]PAEAK_.2                      | 0.099801813  | #N/A                |
| _SPAAVKS[Phospho (STY)]PGEAK_.2                                     | 0.035681183  | P19246_S739_M1_Nefh |
| _S[Phospho (STY)]PAEPKS[Phospho (STY)]PATVK_.2                      | 0.169370567  | #N/A                |
| _SPATVKS[Phospho (STY)]PGEAKS[Phospho (STY)]PSEAK_.2                | -0.097635078 | #N/A                |
| _SPAENVKS[Phospho (STY)]PGEAKS[Phospho (STY)]PAAVK_.2               | 0.249517089  | P19246_S715_M2_Nefh |
| _SPAEEKS[Phospho (STY)]PAEAKS[Phospho (STY)]PATVK_.2                | -0.045058711 | P19246_S631_M2_Nefh |
| _EEVKS[Phospho (STY)]PVKEEVK_.2                                     | -0.274300103 | P19246_S888_M1_Nefh |
| _AKT[Phospho (STY)]PVKEGAK_.2                                       | 0.040221895  | P19246_T775_M1_Nefh |
| _HPTDIRPPEQVKS[Phospho (STY)]PAK_.3                                 | 0.18317486   | P19246_S859_M1_Nefh |
| _SPAEEKS[Phospho (STY)]PAEPKS[Phospho (STY)]PATVK_.2                | 0.247178025  | #N/A                |
| _S[Phospho (STY)]PGEAKS[Phospho (STY)]PSEAKS[Phospho (STY)]PAEAK_.2 | -0.368268873 | #N/A                |
| _S[Phospho (STY)]PGEAKS[Phospho (STY)]PGEAKS[Phospho (STY)]PGEAK_.2 | -0.115077729 | #N/A                |
| _SPAEPKS[Phospho (STY)]PAEPK_.2                                     | 0.064624615  | P19246_S565_M1_Nefh |
| _S[Phospho (STY)]PAEPKS[Phospho (STY)]PATVKS[Phospho (STY)]PGEAK_.2 | -0.26664821  | #N/A                |
| _QREEEAAAR_.2                                                       | -0.251186466 | #N/A                |
| _EGAKS[Phospho (STY)]PAEAKS[Phospho (STY)]PEK_.2                    | 0.151319142  | P19246_S783_M2_Nefh |
| _S[Phospho (STY)]PVKEGAKPPEK_.2                                     | 0.254764602  | P19246_S815_M1_Nefh |
| _S[Phospho (STY)]PGEAKS[Phospho (STY)]PGEAKS[Phospho (STY)]PAEPK_.2 | 0.214651421  | #N/A                |
| _S[Phospho (STY)]PAEAKS[Phospho (STY)]PEKAK_.2                      | -0.322860576 | P19246_S783_M2_Nefh |
| _LEQEHLLEDIAHVR_.3                                                  | -0.170276843 | #N/A                |
| _SPAAVKS[Phospho (STY)]PGEAKS[Phospho (STY)]PGEAK_.3                | -0.494868599 | P19246_S745_M2_Nefh |
| _EEAKS[Phospho (STY)]PGEAKS[Phospho (STY)]PGEAK_.2                  | 0.355697714  | P19246_S523_M2_Nefh |

|                                                                  |              |                      |
|------------------------------------------------------------------|--------------|----------------------|
| _SAAGSSSGFHSWAR_2                                                | 0.344344772  | #N/A                 |
| _VKS[Phospho (STY)]EEMIKVVEK_3                                   | -0.256110541 | P19246_S438_M1_Nefh  |
| _EGAKS[Phospho (STY)]PAEAK_2                                     | 0.195704032  | P19246_S783_M1_Nefh  |
| _AKS[Phospho (STY)]PEKEEAK_2                                     | 0.395495714  | P19246_S867_M1_Nefh  |
| _VTEGVTEEDKEAQQEGEEAEEGEEKEEEEGAAATS[Phospho (STY)]PPAEAAASPEK_5 | -0.327459151 | P19246_S500_M1_Nefh  |
| _EDIKPPAEAKS[Phospho (STY)]PEK_3                                 | 0.030253201  | P19246_S809_M1_Nefh  |
| _SEKETVIVEGQTEER_3                                               | -0.350667658 | #N/A                 |
| _AQLEGHAVQSTLQSEWFR_3                                            | -0.305728115 | #N/A                 |
| _PPAEAKS[Phospho (STY)]PEK_2                                     | -0.006252425 | P19246_S809_M1_Nefh  |
| _SAQEEITEYRR_3                                                   | 0.192633766  | #N/A                 |
| _YQAVTATLEEK_2                                                   | 0.196715175  | #N/A                 |
| _SLS[Phospho (STY)]EQPVVDATATEQAK_2                              | -0.030189845 | P19426_S51_M1_Nelfe  |
| _SM[Oxidation (M)]S[Phospho (STY)]ADEDLQEPSR_2                   | -0.530882105 | P19426_S115_M1_Nelfe |
| _EDPNLVPSISNK_2                                                  | 0.294465784  | #N/A                 |
| _AASGTKEDPNLVPSISNK_3                                            | -0.150525796 | #N/A                 |
| _EIM[Oxidation (M)]IAAQK_2                                       | 0.087647332  | #N/A                 |
| _LVPHQMAH_2                                                      | 0.515255109  | #N/A                 |
| _AASGTKEDPNLVPSISNKR_3                                           | -0.087406386 | #N/A                 |
| _EDPNLVPSISNKR_2                                                 | 0.177296625  | #N/A                 |
| _C[Carbamidomethyl (C)]PNC[Carbamidomethyl (C)]GTHYK_2           | 0.157695753  | #N/A                 |
| _SEDYAFPTYADR_2                                                  | -0.155328727 | #N/A                 |
| _ANPIQGFSAK_2                                                    | 0.0359255    | #N/A                 |
| _ADWSSLSR_2                                                      | 0.042611734  | #N/A                 |
| _EKADWSSLSR_2                                                    | -0.169020869 | #N/A                 |
| _SEDYAFPTYARR_2                                                  | -0.391804753 | #N/A                 |
| _IQFNESFAEM[Oxidation (M)]NR_2                                   | -0.051902475 | #N/A                 |
| _DWVAM[Oxidation (M)]QTK_2                                       | 0.0751393    | #N/A                 |
| _DYPLPDVAHVMT[Oxidation (M)]LSASQK_3                             | -0.473835405 | #N/A                 |
| _QPS[Phospho (STY)]IELPSMAVASTK_2                                | 0.309734964  | P19973_S243_M1_Lsp1  |
| _ITITNDQNR_2                                                     | -0.016313277 | #N/A                 |
| _ITPSYVAFTPEGER_2                                                | 0.411985071  | #N/A                 |
| _LTPEEIER_2                                                      | 0.182378134  | #N/A                 |
| _NQLTSNPENTVFDAK_2                                               | -0.067838761 | #N/A                 |
| _SQIFSTASDNQPTVTIK_2                                             | -0.047338117 | #N/A                 |
| _TWNDPSPVQQDIK_2                                                 | -0.231209233 | #N/A                 |
| _VYEGERPLTK_2                                                    | 0.296722007  | #N/A                 |
| _NELESYAYSLK_2                                                   | -0.088580986 | #N/A                 |
| _ELEEVQPIISK_2                                                   | -0.212378166 | #N/A                 |
| _NTVVPTKK_2                                                      | -0.120421461 | #N/A                 |
| _IEIESFFEGEDFSETLTR_2                                            | -0.286614905 | #N/A                 |
| _VTHAVVTVPAYFNDAQR_3                                             | -0.246620343 | #N/A                 |
| _NQLTSNPENTVFDAKR_3                                              | 0.087213987  | #N/A                 |
| _IINEPTAAAIAYGLDKR_3                                             | -0.048986835 | #N/A                 |
| _TFAPEEISAM[Oxidation (M)]VLTK_2                                 | 0.45764186   | #N/A                 |
| _KSDIDEIVLVGGSTR_3                                               | 0.233810337  | #N/A                 |
| _ALSSQHQR_2                                                      | 0.074090906  | #N/A                 |
| _IEWLESHQDADIEDFK_3                                              | -0.058059337 | #N/A                 |

|                                          |              |                      |
|------------------------------------------|--------------|----------------------|
| _VLESDLK_.2                              | 0.140326914  | #N/A                 |
| _DAGTIAGLNVMR_.2                         | 0.156176705  | #N/A                 |
| _LYGSGGPPPT[Phospho (STY)]GEEDTSEKDEL_.2 | -0.049238876 | P20029_T644_M1_Hspa5 |
| _AKFEELNM[Oxidation (M)]DLFR_.3          | -0.512207474 | #N/A                 |
| _NPLPSKETIEQEK_.3                        | 0.107821057  | #N/A                 |
| _ETIEQEQAGES[Phospho (STY)]_.2           | -0.119096195 | P20065_S50_M1_Tmsb4x |
| _TETQEKNPLPSKETIEQEK_.3                  | -0.024531455 | #N/A                 |
| _KTETQEKNPLPSK_.3                        | 0.276825874  | #N/A                 |
| _TET[Phospho (STY)]QEKNPLPSK_.2          | 0.054484232  | P20065_T29_M1_Tmsb4x |
| _GLFIIDPNGVVK_.2                         | 0.011801772  | #N/A                 |
| _HLSVNDLPVGR_.2                          | 0.367596976  | #N/A                 |
| _DYGVLLESAGIALR_.2                       | 0.060430538  | #N/A                 |
| _GTAVVNGEFK_.2                           | 0.264327822  | #N/A                 |
| _ELSLDDFK_.2                             | 0.250813105  | #N/A                 |
| _VELQELNDR_.2                            | 0.021432175  | #N/A                 |
| _FADLSEAANR_.2                           | 0.093082829  | #N/A                 |
| _NLQEAEEWYK_.2                           | -0.071524956 | #N/A                 |
| _QDVDNAS[Phospho (STY)]LAR_.2            | 0.067279941  | P20152_S214_M1_Vim   |
| _TNEKVELQELNDR_.3                        | -0.398607512 | #N/A                 |
| _ISLPLPTFSSLNLR_.2                       | 0.326004253  | #N/A                 |
| _ILLAELEQLK_.2                           | 0.284809377  | #N/A                 |
| _SLYSSS[Phospho (STY)]PGGAYVTR_.2        | 0.081708278  | P20152_S56_M1_Vim    |
| _QQYESVAAK_.2                            | 0.264730451  | #N/A                 |
| _EM[Oxidation (M)]EENFALEAANYQDTIGR_.2   | -0.365788719 | #N/A                 |
| _FANYIDK_.2                              | -0.180071932 | #N/A                 |
| _SYVTTSTR_.2                             | -0.34299006  | #N/A                 |
| _DNLAEDIMR_.2                            | -0.452896903 | #N/A                 |
| _ETNLESLPLVDTHSK_.3                      | -0.372227791 | #N/A                 |
| _SVSSSSYR_.2                             | -0.214387884 | #N/A                 |
| _ARVDHGAEIITQS[Phospho (STY)]PSR_.3      | -0.259900755 | P20357_S1783_M1_Map2 |
| _IST[Phospho (STY)]PERK_.2               | -0.369655892 | P20357_T1445_M1_Map2 |
| _KSEVQAHS[Phospho (STY)]PSRK_.3          | -0.139235757 | P20357_S1485_M1_Map2 |
| _GLSS[Phospho (STY)]VPEVAEVEPTTK_.2      | -0.033339401 | P20357_S1023_M1_Map2 |
| _SSVAS[Phospho (STY)]PRR_.2              | -0.151056674 | P20357_S1791_M1_Map2 |
| _DGS[Phospho (STY)]PDAPATPEK_.2          | -0.056908605 | P20357_S1352_M1_Map2 |
| _GRIST[Phospho (STY)]PER_.2              | -0.122826097 | P20357_T1445_M1_Map2 |
| _FAAPAQPEEER_.2                          | 0.275470521  | #N/A                 |
| _LINQPLPDLK_.2                           | 0.001211794  | #N/A                 |
| _NKDDLTLR_.2                             | 0.127530859  | #N/A                 |
| _AEPSQLDIK_.2                            | 0.010630018  | #N/A                 |
| _ADQGLDFAATK_.2                          | 0.288475171  | #N/A                 |
| _ELITTKDTS[Phospho (STY)]PEK_.2          | -0.343832293 | P20357_S1013_M1_Map2 |
| _VKDEFTAEC_.2                            | 0.064721584  | #N/A                 |
| _EIQGLFEK_.2                             | -0.384184643 | #N/A                 |
| _VKIESVK_.2                              | 0.082973415  | #N/A                 |
| _ETSAPSVQEPTLTETEPQTK_.2                 | 0.053003636  | #N/A                 |
| _SDTLQISDLLVSES_.2                       | 0.013757744  | #N/A                 |

|                                                                |              |                      |
|----------------------------------------------------------------|--------------|----------------------|
| _GGQVQIVTK_.2                                                  | -0.286715535 | #N/A                 |
| _SKIGS[Phospho (STY)]TDNIK_.2                                  | -0.075558197 | P20357_S1680_M1_Map2 |
| _VTDGISK[Phospho (STY)]PEK_.2                                  | -0.204593615 | P20357_S1539_M1_Map2 |
| _GSAQESLDTIS[Phospho (STY)]PK_.2                               | -0.408832906 | P20357_S608_M1_Map2  |
| _TPGTPGT[Phospho (STY)]PSYPR_.2                                | -0.23220536  | P20357_T1623_M1_Map2 |
| _VAIIRT[Phospho (STY)]PPKS[Phospho (STY)]PATPK_.2              | -0.281230838 | P20357_S1654_M2_Map2 |
| _LAS[Phospho (STY)]VSADAEVAR_.2                                | 0.33995656   | P20357_S823_M1_Map2  |
| _T[Phospho (STY)]PPKSPATPK_.2                                  | -0.030616224 | P20357_T1650_M1_Map2 |
| _KETS[Phospho (STY)]PETS LIQDEVALK_.2                          | -0.325660334 | P20357_S1161_M1_Map2 |
| _TTAASGDLAQAPGAFK_.2                                           | -0.064526265 | #N/A                 |
| _STVS[Phospho (STY)]IEEAVAK_.2                                 | -0.154469276 | P20357_S447_M1_Map2  |
| _SILTEQLETIPKEER_.2                                            | 0.152327048  | #N/A                 |
| _SILTEQLETIPK_.2                                               | 0.395689969  | #N/A                 |
| _SGILVPSEK_.2                                                  | -0.244107158 | #N/A                 |
| _VELFGLGITYDQASTK_.2                                           | 0.140820298  | #N/A                 |
| _IDLSHVTSK_.2                                                  | -0.169648141 | #N/A                 |
| _KSEVQAHS[Phospho (STY)]PSR_.2                                 | -0.188284654 | P20357_S1485_M1_Map2 |
| _STELGSDYYELSDSR_.2                                            | 0.256754533  | #N/A                 |
| _DLATDLSLIEVK_.2                                               | 0.017444622  | #N/A                 |
| _VTS[Phospho (STY)]EPEAVSERR_.2                                | -0.027092296 | P20357_S520_M1_Map2  |
| _SEVQAHS[Phospho (STY)]PSR_.2                                  | -0.162014578 | P20357_S1485_M1_Map2 |
| _ELITTKDTS[Phospho (STY)]PEKTEK_.3                             | -0.49318694  | P20357_S1013_M1_Map2 |
| _DGS[Phospho (STY)]PDAPATPEKEEVAFSEYK_.3                       | -0.057949656 | P20357_S1352_M1_Map2 |
| _VTS[Phospho (STY)]EPEAVSER_.2                                 | 0.013657007  | P20357_S520_M1_Map2  |
| _DWFIE[M[Oxidation (M)]]PTESK_.2                               | 0.205591162  | #N/A                 |
| _VDHGAEIITQS[Phospho (STY)]PSR_.2                              | -0.294571564 | P20357_S1783_M1_Map2 |
| _VTDGISK[Phospho (STY)]PEKR_.2                                 | -0.063528838 | P20357_S1539_M1_Map2 |
| _VDHGAEIITQSPSRSS[Phospho (STY)]VAS[Phospho (STY)]PR_.3        | -0.081045815 | P20357_S1788_M2_Map2 |
| _S[Phospho (STY)]GILVPSEKK_.2                                  | -0.157826251 | P20357_S1635_M1_Map2 |
| _ETS[Phospho (STY)]PETS LIQDEVALK_.2                           | 0.028859184  | P20357_S1161_M1_Map2 |
| _EKDVLEDIPR_.2                                                 | 0.288498019  | #N/A                 |
| _VSDFGQM[Oxidation (M)]ASGM[Oxidation (M)]NVDAGK_.2            | -0.126205081 | #N/A                 |
| _M[Oxidation (M)]PSKPGEDFEHAALVPDTSK_.4                        | -0.457165029 | #N/A                 |
| _YFETSALKEDM[Oxidation (M)]TR_.2                               | 0.131075503  | #N/A                 |
| _ESS[Phospho (STY)]KDEEPLKDK_.2                                | -0.24021065  | P20357_S365_M1_Map2  |
| _TGVIQTS[Phospho (STY)]TEQSF5K_.2                              | -0.168066531 | P20357_S472_M1_Map2  |
| _VGS[Phospho (STY)]LDNAHHVPGGGNVK_.3                           | -0.358331568 | P20357_S1743_M1_Map2 |
| _SEVQAHS[Phospho (STY)]PSRK_.2                                 | -0.253089629 | P20357_S1485_M1_Map2 |
| _NQHDEKELQAK_.2                                                | -0.082392612 | #N/A                 |
| _GVSGDRENS[Phospho (STY)]FSLNSSISSAR_.3                        | -0.34654867  | P20357_S1567_M1_Map2 |
| _SGTSTPTTPGSTAITPGT[Phospho (STY)]PPSYSSR_.3                   | -0.286269541 | P20357_T1609_M1_Map2 |
| _GRIST[Phospho (STY)]PERK_.2                                   | 0.083316517  | P20357_T1445_M1_Map2 |
| _AGKS[Phospho (STY)]GTSTPTTPGSTAITPGTPPSY[Phospho (STY)]SSR_.3 | -0.049109777 | P20357_S1592_M2_Map2 |
| _VTGGQTIQVETSSESPFAK_.2                                        | 0.072686154  | #N/A                 |
| _MFTIDPK_.2                                                    | 0.308514825  | #N/A                 |
| _EAS[Phospho (STY)]PPTSADK_.2                                  | -0.231811457 | P20357_S938_M1_Map2  |
| _KANDKLDTVLEK_.3                                               | 0.427175349  | #N/A                 |

|                                                                               |              |                      |
|-------------------------------------------------------------------------------|--------------|----------------------|
| _VKDEFTAEEKAS[Phospho (STY)]PPTSADK_.3                                        | -0.311409714 | P20357_S938_M1_Map2  |
| _TGVIQTSTEQS[Phospho (STY)]FSKEDQK_.3                                         | 0.070442152  | P20357_S476_M1_Map2  |
| _DKVTDGISK[Phospho (STY)]PEK_.2                                               | 0.091188621  | P20357_S1539_M1_Map2 |
| _IVQVVTAEAVALKGEQEK_.2                                                        | -0.430588542 | #N/A                 |
| _TPGT[Phospho (STY)]PKS[Phospho (STY)]GILVPSEK_.2                             | -0.049474882 | P20357_S1635_M2_Map2 |
| _APHWTSASLTEAAHPS[Phospho (STY)]PEM[Oxidation (M)]K_.3                        | -0.1822189   | #N/A                 |
| _EEFVETC[Carbamidomethyl (C)]PGELK_.2                                         | 0.495774207  | #N/A                 |
| _LEGAGSATIAEVE[Oxidation (M)]PFYEDK_.2                                        | 0.099756508  | #N/A                 |
| _DQPAALPLAAEETANLPPS[Phospho (STY)]PPPS[Phospho (STY)]PASEQTATVEEDLLTASK_.4   | 0.022797296  | P20357_S136_M2_Map2  |
| _TPGTPGTPSYPR[Phospho (STY)]PGT[Phospho (STY)]PK_.2                           | -0.15409184  | P20357_T1629_M2_Map2 |
| _ARVDHGAEIITQS[Phospho (STY)]PSRSS[Phospho (STY)]VAS[Phospho (STY)]PR_.3      | -0.368273508 | #N/A                 |
| _IGSTDNIK_.2                                                                  | 0.09785413   | #N/A                 |
| _YFETSALK_.2                                                                  | -0.072701811 | #N/A                 |
| _GHDLSPLASDILTNTSGSM[Oxidation (M)]DEGDDY[Phospho (STY)]LPPTTPAVEK_.4         | -0.017204067 | P20357_Y746_M1_Map2  |
| _SM[Oxidation (M)]SINLPM[Oxidation (M)]SC[Carbamidomethyl (C)]LDSIALGFNFGR_.3 | 0.222492451  | #N/A                 |
| _LSNVSS[Phospho (STY)]SGSINLLESPLATLAEDVTAALAK_.3                             | -0.011148573 | P20357_S1800_M1_Map2 |
| _APHWTSASLTEAAHPS[Phospho (STY)]PEM[Oxidation (M)]KDQGGAGEGLSR_.5             | -0.342117751 | #N/A                 |
| _ASQPSPPAQEAGYSTLAQSYTPDHPSELPEEPSS[Phospho (STY)]PQER_.4                     | 0.071557222  | P20357_S655_M1_Map2  |
| _KDEWGLAAPIS[Phospho (STY)]PGPLTPM[Oxidation (M)]R_.3                         | -0.320939879 | P20357_S283_M1_Map2  |
| _DTS[Phospho (STY)]PEKTEK_.2                                                  | -0.259533222 | P20357_S1013_M1_Map2 |
| _ANDKLDTVLEKS[Phospho (STY)]EEHIDSK_.3                                        | -0.329616563 | P20357_S969_M1_Map2  |
| _ESEEM[Oxidation (M)]GGKVELFGLGITYDQASTK_.3                                   | 0.234438969  | #N/A                 |
| _YTVPLPSPVQDSENLSGESGSFYEGTDDKVR_.3                                           | -0.506769826 | #N/A                 |
| _IVQVVTAEAVALK_.2                                                             | 0.261468213  | #N/A                 |
| _VIS[Phospho (STY)]PSEDR_.2                                                   | -0.034732716 | P20444_S319_M1_Prkca |
| _Acetyl (Protein N-term)]ADVYPANDSTASQDVANR_.2                                | -0.054043404 | #N/A                 |
| _VIS[Phospho (STY)]PSEDRKQPSNNLDR_.3                                          | -0.410087988 | P20444_S319_M1_Prkca |
| _VIS[Phospho (STY)]PSEDRK_.2                                                  | 0.087675583  | P20444_S319_M1_Prkca |
| _LTDNFNLM[Oxidation (M)]VLGK_.2                                               | 0.22454561   | #N/A                 |
| _DVVIQDDDDVEC[Carbamidomethyl (C)]TM[Oxidation (M)]VEK_.2                     | -0.085121068 | #N/A                 |
| _T[Phospho (STY)]FC[Carbamidomethyl (C)]GTPDYIAPEIIAYQPYGK_.3                 | -0.032911428 | P20444_T497_M1_Prkca |
| _LKPS[Phospho (STY)]DKDR_.2                                                   | -0.217042105 | P20444_S234_M1_Prkca |
| _LSVEIWDWDR_.2                                                                | -0.147660583 | #N/A                 |
| _NLIPM[Oxidation (M)]DPNGLSDPYVK_.2                                           | -0.359828723 | #N/A                 |
| _DVVIQDDDDVEC[Carbamidomethyl (C)]TM[Oxidation (M)]VEKR_.3                    | -0.368766095 | #N/A                 |
| _KDVVIQDDDDVEC[Carbamidomethyl (C)]TMVEK_.3                                   | -0.340290653 | #N/A                 |
| _LLGDLGLR_.2                                                                  | -0.012327138 | #N/A                 |
| _NLYGTQSLELPFQGAHR_.2                                                         | -0.126749521 | #N/A                 |
| _TQVVHESFQGR_.2                                                               | 0.232861134  | #N/A                 |
| _SGLLLTSILTIR_.2                                                              | 0.050751647  | #N/A                 |
| _GESPELDLSYSHSDLGK_.2                                                         | 0.32769095   | #N/A                 |
| _NVTESSEFS[Phospho (STY)]GGDNPHVLYSPEFR_.3                                    | -0.231643604 | P20917_S549_M1_Mag   |
| _LREDEGTWVQVSLHFVPTR_.3                                                       | -0.307091468 | #N/A                 |
| _IQLVEEELDR_.2                                                                | 0.038377818  | #N/A                 |
| _AADAAEAVASLNR_.2                                                             | 0.04182909   | #N/A                 |
| _KYEEVAR_.2                                                                   | 0.235992827  | #N/A                 |
| _HIAEEADR_.2                                                                  | 0.129022644  | #N/A                 |



|                                                                                        |              |                       |
|----------------------------------------------------------------------------------------|--------------|-----------------------|
| _YSQKEDKYEEIK_.3                                                                       | -0.207370406 | #N/A                  |
| _KLVIIEGDLER_.2                                                                        | 0.166250276  | #N/A                  |
| _IQLVEEELDRAQER_.3                                                                     | -0.353980151 | #N/A                  |
| _LEEAKEAADESER_.2                                                                      | 0.054835617  | #N/A                  |
| _KLVIIEGDLERTEER_.3                                                                    | -0.452686055 | #N/A                  |
| _C[Carbamidomethyl (C)]SELEELKNVTNNLK_.2                                               | -0.407189863 | #N/A                  |
| _ALKDEEKM[Oxidation (M)]ELQEIQLK_.3                                                    | -0.422795148 | #N/A                  |
| _AADAEAEVASLNR_.2                                                                      | 0.119601525  | #N/A                  |
| _TEERAELAESK_.2                                                                        | 0.310841872  | #N/A                  |
| _LVIIEGDLERTEER_.3                                                                     | -0.189074074 | #N/A                  |
| _RIQLVEEELDR_.2                                                                        | 0.029036432  | #N/A                  |
| _HIAEEADRKYEEVAR_.4                                                                    | 0.078616035  | #N/A                  |
| _AISDELDHALNDMTS[Phospho (STY)]I_.2                                                    | 0.035365082  | P21107_S284_M1_Tpm3   |
| _LLLLGTGESGK_.2                                                                        | -0.223315918 | #N/A                  |
| _IATVGYLPTQQDVLR_.2                                                                    | 0.100420256  | #N/A                  |
| _DTILQLNLK_.2                                                                          | 0.414277522  | #N/A                  |
| _MVDVGGQR_.2                                                                           | -0.020840798 | #N/A                  |
| _TLWSDPGVQEC[Carbamidomethyl (C)]YDR_.2                                                | 0.433196368  | #N/A                  |
| _VADPSYLPPTQQDVLR_.2                                                                   | -0.185006249 | #N/A                  |
| _YYLNDLDR_.2                                                                           | 0.113330921  | #N/A                  |
| _VSAFENPYVDAIK_.2                                                                      | -0.031159389 | #N/A                  |
| _ [Acetyl (Protein N-term)]TLESIMAC[Carbamidomethyl (C)]C[Carbamidomethyl (C)]LSEAK_.2 | 0.279212738  | #N/A                  |
| _EVDVEKVS[Phospho (STY)]AFENPYVDAIK_.2                                                 | -0.116079119 | P21279_S122_M1_Gnaq   |
| _VPTTGIIYFPDLQSVIFR_.2                                                                 | -0.326106975 | #N/A                  |
| _S[Phospho (STY)]TRKS[Phospho (STY)]IC[Carbamidomethyl (C)]GPHDQDR_.3                  | 0.114389153  | P21447_S663_M2_Abcb1a |
| _S[Phospho (STY)]IC[Carbamidomethyl (C)]GPHDQDR_.2                                     | -0.091261221 | P21447_S667_M1_Abcb1a |
| _DSGSS[Phospho (STY)]LIR_.2                                                            | -0.172114654 | P21447_S657_M1_Abcb1a |
| _ALDFAVSEYNK_.2                                                                        | 0.295784997  | #N/A                  |
| _SQT[Phospho (STY)]NWGPGESFR_.2                                                        | 0.178686605  | P21619_T528_M1_Lmnb2  |
| _RRLETEDSGS[Phospho (STY)]PSR_.3                                                       | -0.052147488 | P21619_S427_M1_Lmnb2  |
| _RLETEDSGS[Phospho (STY)]PSR_.2                                                        | 0.033307986  | P21619_S427_M1_Lmnb2  |
| _LETEDSGS[Phospho (STY)]PSR_.2                                                         | 0.135661388  | P21619_S427_M1_Lmnb2  |
| _ATSSSSSS[Phospho (STY)]GVGM[Oxidation (M)]SVGQGR_.2                                   | -0.455071711 | P21619_S403_M1_Lmnb2  |
| _WLEETDSSSGS[Phospho (STY)]PTNLDK_.2                                                   | 0.244348328  | P21952_S324_M1_Pou3f1 |
| _SDDS[Phospho (STY)]NGIENNVPR_.2                                                       | -0.057899096 | P21995_S312_M1_Emb    |
| _FAESLPSDEEGENYS[Phospho (STY)]K_.2                                                    | 0.010231541  | P22005_S252_M1_Penk   |
| _ELGTGDN_.2                                                                            | -0.197689482 | #N/A                  |
| _FAESLPSDEEGENY[Phospho (STY)]SKEVPEIEK_.3                                             | 0.276453277  | P22005_Y251_M1_Penk   |
| _FAESLPSDEEGENYS[Phospho (STY)]KEVPEIEKR_.3                                            | -0.150292366 | P22005_S252_M1_Penk   |
| _LVRPGDINFLAC[Carbamidomethyl (C)]TLEC[Carbamidomethyl (C)]EGQLPSFK_.3                 | 0.200627887  | #N/A                  |
| _DADEGDTLANS[Phospho (STY)]SDLK_.2                                                     | 0.098835384  | P22005_S153_M1_Penk   |
| _VPEGDVTILNNLLEGYDNK_.2                                                                | -0.434967248 | #N/A                  |
| _NLIM[Oxidation (M)]SGYS[Phospho (STY)]PEHDVSGISDPFLQVR_.3                             | 0.481579118  | P22892_S232_M1_Ap1g1  |
| _LTWHSC[Carbamidomethyl (C)]PEDEAQ_.2                                                  | -0.253957622 | #N/A                  |
| _KVEEAPEEFVVEK_.2                                                                      | -0.221852557 | #N/A                  |
| _SLS[Phospho (STY)]DSESDDSK_.2                                                         | -0.226959971 | P23198_S95_M1_Cbx3    |
| _KSLS[Phospho (STY)]DSESDDSK_.2                                                        | -0.12527304  | P23198_S95_M1_Cbx3    |

|                                                                                    |              |                      |
|------------------------------------------------------------------------------------|--------------|----------------------|
| _SLS[Phospho (STY)]DSESDDSK_.2                                                     | 0.02158376   | P23198_S95_M1_Cbx3   |
| _RKS[Phospho (STY)]LS[Phospho (STY)]DSESDDSK_.2                                    | -0.064912986 | P23198_S93_M2_Cbx3   |
| _KSL[Phospho (STY)]DSESDDSK_.2                                                     | 0.329290859  | P23198_S95_M1_Cbx3   |
| _C[Carbamidomethyl (C)]PQIVIAFYEER_.2                                              | -0.571054516 | #N/A                 |
| _ASS[Phospho (STY)]RPRPDDLEI_.2                                                    | -0.321615019 | P23242_S373_M1_Gja1  |
| _PRPDDLEI_.2                                                                       | 0.245447244  | #N/A                 |
| _LVTGDRNNS[Phospho (STY)]S[Phospho (STY)]C[Carbamidomethyl (C)]RNYNK_.3            | -0.368883347 | P23242_S296_M2_Gja1  |
| _QASEQNWANYSAEQNR_.2                                                               | -0.161421205 | #N/A                 |
| _SDPY[Phospho (STY)]HATTGPLSPSK_.2                                                 | 0.152825555  | P23242_Y247_M1_Gja1  |
| _LVTGDRNNS[Phospho (STY)]SC[Carbamidomethyl (C)]R_.2                               | 0.058672548  | P23242_S296_M1_Gja1  |
| _VAAGHELQPLAIVDQRPSS[Phospho (STY)]RAS[Phospho (STY)]S[Phospho (STY)]R_.4          | -0.185064878 | P23242_S365_M3_Gja1  |
| _C[Carbamidomethyl (C)]NTQQPGC[Carbamidomethyl (C)]ENVC[Carbamidomethyl (C)]YDK_.2 | -0.256742948 | #N/A                 |
| _VELS[Phospho (STY)]EEELK_.2                                                       | 0.181115133  | P23475_S558_M1_Xrcc6 |
| _ELVDDSIITNVK_.2                                                                   | -0.229534863 | #N/A                 |
| _ALDVGSGSGILTAC[Carbamidomethyl (C)]FAR_.2                                         | -0.072488734 | #N/A                 |
| _LILPVGPAGGNQM[Oxidation (M)]LEQYDKLQDGSVK_.3                                      | -0.492736279 | #N/A                 |
| _VFEVM[Oxidation (M)]LATDR_.2                                                      | -0.098815649 | #N/A                 |
| _SGGASHSELIHNL_.3                                                                  | 0.0241754    | #N/A                 |
| _TDKVFVEM[Oxidation (M)]LATDR_.3                                                   | -0.484356565 | #N/A                 |
| _ELVDDSIITNVKK_.3                                                                  | 0.521456311  | #N/A                 |
| _ADIAIAPLTITLVR_.2                                                                 | 0.338247093  | #N/A                 |
| _NAQNINPSSSQNS[Phospho (STY)]QNFATYK_.2                                            | -0.277383661 | P23819_S863_M1_Gria2 |
| _YAYLLESTM[Oxidation (M)]NEYIEQR_.2                                                | -0.207567873 | #N/A                 |
| _YTSALTYDAVQVM[Oxidation (M)]TEAFR_.2                                              | 0.247645169  | #N/A                 |
| _VLGDVIEVHGK_.2                                                                    | -0.062681095 | #N/A                 |
| _[Acetyl (Protein N-term)]M[Oxidation (M)]DIAIHPWIR_.3                             | -0.173765921 | #N/A                 |
| _QDEHGFISR_.2                                                                      | 0.165052835  | #N/A                 |
| _FSVNLVDK_.2                                                                       | -0.398838664 | #N/A                 |
| _APSWIDTGLSEMR_.2                                                                  | 0.224339409  | #N/A                 |
| _HEERQDEHGFISR_.4                                                                  | 0.291533136  | #N/A                 |
| _LTDIQYGR_.2                                                                       | 0.163182044  | #N/A                 |
| _HLTMT[Oxidation (M)]DDLATALEGNR_.3                                                | 0.066731973  | #N/A                 |
| _QSILELAQQWGEFK_.2                                                                 | -0.189986385 | #N/A                 |
| _TVDNFVALATGEK_.2                                                                  | -0.033283253 | #N/A                 |
| _VLEGMDVVR_.2                                                                      | -0.000433021 | #N/A                 |
| _DTNGSQFFITTVK_.2                                                                  | -0.0856894   | #N/A                 |
| _VYFDLQIGDESVGR_.2                                                                 | -0.344004651 | #N/A                 |
| _FLQPGSQR_.2                                                                       | -0.12227881  | #N/A                 |
| _EKEESYDLILSR_.3                                                                   | -0.03410102  | #N/A                 |
| _PTPSASS[Phospho (STY)]PQPK_.2                                                     | -0.237157287 | P24529_S8_M1_Th      |
| _RQS[Phospho (STY)]LIEDARK_.3                                                      | -0.269706135 | P24529_S40_M1_Th     |
| _RQS[Phospho (STY)]LIEDAR_.2                                                       | -0.1564655   | P24529_S40_M1_Th     |
| _QAEAVTS[Phospho (STY)]PR_.2                                                       | -0.331338466 | P24529_S31_M1_Th     |
| _RAVS[Phospho (STY)]EQDTK_.2                                                       | -0.12525008  | P24529_S19_M1_Th     |
| _FEVPSGDLAALLSSVR_.2                                                               | 0.135259814  | #N/A                 |
| _FDPYTLAIDVLD[Phospho (STY)]PHTIR_.2                                               | 0.167550432  | P24529_S472_M1_Th    |
| _SLEGVQDELHTLTQALSAIS_.2                                                           | 0.001235363  | #N/A                 |

|                                                               |              |                       |
|---------------------------------------------------------------|--------------|-----------------------|
| _VFETFEAK_.2                                                  | 0.293944669  | #N/A                  |
| _GMSG[Phospho (STY)]LDAMDK_.2                                 | 0.385952372  | P24547_S416_M1_Impdh2 |
| _ [Acetyl (Protein N-term)]SS[Phospho (STY)]PAQPAVPAPLADLK_.2 | -0.374977513 | P24549_S3_M1_Aldh1a1  |
| _GFFVQPTVFSNVTDDEM[Oxidation (M)]R_.2                         | -0.265021133 | #N/A                  |
| _IHGQTIPSDGDIITYTR_.3                                         | 0.304490851  | #N/A                  |
| _VFANAYLSDLGGC[Carbamidomethyl (C)]IK_.2                      | 0.1068624    | #N/A                  |
| _VTLELGK_.2                                                   | -0.182938572 | #N/A                  |
| _VAFTGSTQVGK_.2                                               | 0.232947398  | #N/A                  |
| _SFESTVGQSDTYSYIFR_.2                                         | 0.214161598  | #N/A                  |
| _GVGDDQLGEES[Phospho (STY)]EERDDHLLPM[Oxidation (M)]_.3       | 0.341533554  | P24668_S268_M1_M6pr   |
| _S[Phospho (STY)]PLRPPR_.2                                    | -0.026864832 | P24788_S234_M1_Cdk11b |
| _DLLSDLQDIS[Phospho (STY)]DSER_.2                             | 0.469235898  | P24788_S270_M1_Cdk11b |
| _TYSYLTPDLWK_.2                                               | 0.183160885  | #N/A                  |
| _AEDKEWIPVTK_.3                                               | -0.371541652 | #N/A                  |
| _VLVQNAAGS[Phospho (STY)]QEK_.2                               | -0.279064572 | P26039_S2040_M1_Tln1  |
| _APDFVFYAPR_.2                                                | 0.007536065  | #N/A                  |
| _IGFPWSEIR_.2                                                 | -0.181085904 | #N/A                  |
| _NISFNDKK_.2                                                  | -0.411294796 | #N/A                  |
| _QLLTLSNELSQAR_.2                                             | 0.525356518  | #N/A                  |
| _IAQDLEM[Oxidation (M)]YGINYFEIK_.2                           | -0.273217787 | #N/A                  |
| _RKEDEVVEWQHR_.3                                              | -0.290677417 | #N/A                  |
| _GTDLWLGVDALGLNIYEK_.2                                        | 0.343178386  | #N/A                  |
| _LLDGYDNR_.2                                                  | -0.313406866 | #N/A                  |
| _SAAAPSASSTPTAIAS[Phospho (STY)]PK_.2                         | -0.141741677 | P26049_S433_M1_Gabra3 |
| _SRTS[Phospho (STY)]VQTEDDQLIAGQSAR_.3                        | 0.268118624  | P26231_S655_M1_Ctnna1 |
| _QDLLAYLQR_.2                                                 | -0.015586106 | #N/A                  |
| _EYAQVFR_.2                                                   | 0.237364861  | #N/A                  |
| _TS[Phospho (STY)]VQTEDDQLIAGQSAR_.2                          | -0.126597305 | P26231_S655_M1_Ctnna1 |
| _TPEELDDSDFET[Phospho (STY)]EDFDVR_.2                         | 0.015961207  | P26231_T645_M1_Ctnna1 |
| _LESIISGAALM[Oxidation (M)]ADSSC[Carbamidomethyl (C)]TR_.2    | -0.650234966 | #N/A                  |
| _GWRPSS[Phospho (STY)]REDS[Phospho (STY)]VEAR_.2              | 0.020017583  | P26339_S410_M2_Chga   |
| _DDGQSDS[Phospho (STY)]QAVDGDGK_.2                            | -0.539711043 | P26339_S282_M1_Chga   |
| _ [Acetyl (Protein N-term)]SAAVDTSSSEITTK_.2                  | -0.00915456  | #N/A                  |
| _VAEDEDEDDVDTKK_.2                                            | 0.392703236  | #N/A                  |
| _RVAEDEDEDDVDTKK_.3                                           | 0.177239914  | #N/A                  |
| _GAKEEHGGLIRS[Phospho (STY)]PR_.3                             | -0.519601066 | P26369_S79_M1_U2af2   |
| _EEHGGLIRS[Phospho (STY)]PR_.3                                | -0.18166243  | P26369_S79_M1_U2af2   |
| _ [Acetyl (Protein N-term)]S[Phospho (STY)]DFDEFER_.2         | -0.017002714 | P26369_S2_M1_U2af2    |
| _NYTDNELEK_.2                                                 | 0.33919289   | #N/A                  |
| _TAAYVNAIEK_.2                                                | 0.147070782  | #N/A                  |
| _YSTDVSDEVK_.2                                                | -0.003787573 | #N/A                  |
| _C[Carbamidomethyl (C)]AVVDVPFGGAK_.2                         | 0.184159855  | #N/A                  |
| _YNLGLDLR_.2                                                  | 0.300332634  | #N/A                  |
| _HGGTIPVVPTAEFQDR_.2                                          | -0.365885266 | #N/A                  |
| _NLNHVSYGR_.2                                                 | 0.069508376  | #N/A                  |
| _C[Carbamidomethyl (C)]VGVGESDGSIWNPDGIDPK_.2                 | 0.064654166  | #N/A                  |
| _RDDGSWEVIEGYR_.3                                             | 0.309297094  | #N/A                  |

|                                                                        |              |                       |
|------------------------------------------------------------------------|--------------|-----------------------|
| _M[Oxidation (M)]VEGFFDR_2                                             | -0.04522544  | #N/A                  |
| _GFIGPGIDVPAPDM[Oxidation (M)]STGER_2                                  | -0.165193907 | #N/A                  |
| _DDGSWEVIEGYR_2                                                        | 0.057938597  | #N/A                  |
| _IIAEGANGPTTPEADKIFLER_3                                               | -0.071282869 | #N/A                  |
| _TFVVQGFNGVGLHSM[Oxidation (M)]R_2                                     | -0.132254362 | #N/A                  |
| _IIAEGANGPTTPEADK_2                                                    | -0.001175252 | #N/A                  |
| _GASIVEDKLVEDLK_2                                                      | 0.106645958  | #N/A                  |
| _ALASLMTYK_2                                                           | 0.385029221  | #N/A                  |
| _DSNYHLLM[Oxidation (M)]SVQESLER_3                                     | -0.364345865 | #N/A                  |
| _VYEGSILEADC[Carbamidomethyl (C)]DILIPAASEK_2                          | -0.316774073 | #N/A                  |
| _DIVHSGLAYTM[Oxidation (M)]ER_3                                        | 0.288418018  | #N/A                  |
| _FTMELAK_2                                                             | -0.295427251 | #N/A                  |
| _SVVALHNLINNK_2                                                        | -0.233368345 | #N/A                  |
| _LLIDEAIQK_2                                                           | 0.061773887  | #N/A                  |
| _VLDLDFR_2                                                             | 0.066642805  | #N/A                  |
| _YLIATSEQPIAALHR_3                                                     | -0.106373448 | #N/A                  |
| _TIC[Carbamidomethyl (C)]AILENYQAEK_2                                  | -0.041553247 | #N/A                  |
| _YAGLSTC[Carbamidomethyl (C)]FR_2                                      | 0.281150951  | #N/A                  |
| _IEQFVYSSPHDNK_2                                                       | -0.115959903 | #N/A                  |
| _EVPLENQLQS[Phospho (STY)]M[Oxidation (M)]EVTEA_2                      | -0.210773513 | P26638_S506_M1_Sars1  |
| _ELVSC[Carbamidomethyl (C)]SNC[Carbamidomethyl (C)]TDYQAR_2            | 0.505244092  | #N/A                  |
| _AKEVPLENQLQS[Phospho (STY)]MEVTEA_2                                   | -0.405263103 | P26638_S506_M1_Sars1  |
| _EIGNLLHPSVPISNDEDADNKVER_4                                            | 0.43124251   | #N/A                  |
| _AEDGAAPS[Phospho (STY)]PSSETPK_2                                      | -0.114447681 | P26645_S138_M1_Marcks |
| _LSGFS[Phospho (STY)]FKK_2                                             | -0.425236616 | P26645_S163_M1_Marcks |
| _GEATAERPGEAAVASS[Phospho (STY)]PSK_2                                  | -0.022623304 | P26645_S27_M1_Marcks  |
| _VNGDAS[Phospho (STY)]PAAAEPGA_2                                       | -0.02965963  | P26645_S46_M1_Marcks  |
| _FS[Phospho (STY)]FKKS[Phospho (STY)]FK_2                              | -0.246961328 | P26645_S152_M2_Marcks |
| _LSGFS[Phospho (STY)]FKKS[Phospho (STY)]K_2                            | -0.213339601 | P26645_S163_M2_Marcks |
| _DEAAAAEPGAGAADKEAAEAEPSPS[Phospho (STY)]PAAEAEGASASTSSPK_4            | -0.06923714  | P26645_S113_M1_Marcks |
| _ESGEGAEAEAGATAEGAK_2                                                  | 0.165963479  | #N/A                  |
| _PGEAAVASS[Phospho (STY)]PSK_2                                         | -0.12074244  | P26645_S27_M1_Marcks  |
| _SKKES[Phospho (STY)]GEGAEAEAGATAEGAK_3                                | -0.115132793 | #N/A                  |
| _AEDGAAPS[Phospho (STY)]PSSET[Phospho (STY)]PKKK_2                     | -0.216158267 | #N/A                  |
| _EAAEAEPSPS[Phospho (STY)]PAAEAEGASASTSSPK_3                           | -0.077140284 | P26645_S113_M1_Marcks |
| _S[Phospho (STY)]FKLS[Phospho (STY)]GFSFK_2                            | 0.045536705  | P26645_S156_M2_Marcks |
| _AEDGAAPSPSSET[Phospho (STY)]PKK_2                                     | -0.086974604 | P26645_T143_M1_Marcks |
| _GEATAERPGEAAVASS[Phospho (STY)]PSKANGQENGHV_4                         | -0.104508566 | P26645_S27_M1_Marcks  |
| _LSGFS[Phospho (STY)]FK_2                                              | -0.110050864 | P26645_S163_M1_Marcks |
| _TAAKGEATAERPGEAAVASS[Phospho (STY)]PSK_3                              | 0.175085379  | P26645_S27_M1_Marcks  |
| _KES[Phospho (STY)]GEGAEAEAGATAEGAKDEAAAAAGGEGAAAPGEQAGGAGAEGAAGGEPR_4 | -0.344116715 | #N/A                  |
| _ESGEGAEAEAGATAEGAKDEAAAAAGGEGAAAPGEQAGGAGAEGAAGGEPR_4                 | 0.015244116  | #N/A                  |
| _KES[Phospho (STY)]GEGAEAEAGATAEGAK_2                                  | -0.11593584  | #N/A                  |
| _GVQVETISPGDGR_2                                                       | -0.325294514 | #N/A                  |
| _GWEEGV AQM[Oxidation (M)]SVGQR_2                                      | 0.100169158  | #N/A                  |
| _SKVGS[Phospho (STY)]TENIK_2                                           | -0.377719761 | P27546_S914_M1_Map4   |
| _SAS[Phospho (STY)]ADLSR_2                                             | 0.327835729  | P27546_S828_M1_Map4   |

|                                                              |              |                        |
|--------------------------------------------------------------|--------------|------------------------|
| _LATTVS[Phospho (STY)]APDLK_.2                               | -0.165065538 | P27546_S901_M1_Map4    |
| _AAVGVGTGNDITTPPNKEPPPS[Phospho (STY)]PEK_.3                 | 0.07226981   | P27546_S667_M1_Map4    |
| _DM[Oxidation (M)]S[Phospho (STY)]PSAETEAPLAK_.2             | -0.136928768 | P27546_S517_M1_Map4    |
| _TEFIPLLDGDEK_.2                                             | 0.275149126  | #N/A                   |
| _NTT[Phospho (STY)]PTGAAPPAGM[Oxidation (M)]TSTR_.2          | -0.204610321 | P27546_T847_M1_Map4    |
| _ATS[Phospho (STY)]PSTLVSTGPSSR_.2                           | -0.206339563 | P27546_S785_M1_Map4    |
| _DM[Oxidation (M)]S[Phospho (STY)]PLPESEVTLGK_.2             | -0.294693472 | P27546_S475_M1_Map4    |
| _GQSTVPPC[Carbamidomethyl (C)]TAS[Phospho (STY)]PEPVK_.2     | -0.062965142 | P27546_S598_M1_Map4    |
| _SKVGST[Phospho (STY)]ENIKHQPGGGR_.3                         | 0.006211778  | P27546_T915_M1_Map4    |
| _TTSASS[Phospho (STY)]VKR_.2                                 | -0.370516539 | P27546_S841_M1_Map4    |
| _VGS[Phospho (STY)]TENIKHQPGGGR_.3                           | -0.191900949 | P27546_S914_M1_Map4    |
| _DM[Oxidation (M)]S[Phospho (STY)]PLPESEVTLGKDVVILPETK_.3    | -0.271285805 | P27546_S475_M1_Map4    |
| _VGS[Phospho (STY)]LDNVGHLPAAGGAVK_.2                        | -0.13674793  | P27546_S1046_M1_Map4   |
| _VAEFNNVT[Phospho (STY)]PLS[Phospho (STY)]EEEVTSVK_.2        | 0.25343576   | P27546_S506_M2_Map4    |
| _AAVGVGTGNDITT[Phospho (STY)]PPNKEPPPS[Phospho (STY)]PEKK_.3 | -0.388376626 | P27546_S667_M2_Map4    |
| _DFMAALEAEPYDDIVGETVEK_.2                                    | 0.202127002  | #N/A                   |
| _S[Phospho (STY)]PATTLPK_.2                                  | 0.237868179  | P27546_S798_M1_Map4    |
| _VGS[Phospho (STY)]TENIK_.2                                  | -0.538070041 | P27546_S914_M1_Map4    |
| _AAEQM[Oxidation (M)]STLPIDAPS[Phospho (STY)]PLENLEQK_.3     | 0.141525592  | P27546_S617_M1_Map4    |
| _LTESLNIFETIVNRR_.2                                          | -0.144740177 | #N/A                   |
| _ALWEDSGIQNAYDR_.2                                           | 0.474060418  | #N/A                   |
| _NNASTDYDLSDK_.2                                             | 0.004031631  | #N/A                   |
| _LLGGVTIAQGGVLPNIQAVLLPK_.2                                  | 0.290064846  | #N/A                   |
| _LLYGDAPKS[Phospho (STY)]PR_.2                               | 0.104798796  | P27671_S718_M1_Rasgrf1 |
| _AGS[Phospho (STY)]ADDEDSDIKK_.2                             | 0.041302919  | P27671_S199_M1_Rasgrf1 |
| _SEPIPESNEGVPK_.2                                            | 0.18705939   | #N/A                   |
| _LAPEYEAATR_.2                                               | 0.058027345  | #N/A                   |
| _EATNPPIIQEEKPK_.2                                           | 0.155877218  | #N/A                   |
| _ELNDFISYLQR_.2                                              | -0.007391663 | #N/A                   |
| _DLFSDGHSEFLK_.2                                             | -0.185222315 | #N/A                   |
| _TADGIVSHLK_.2                                               | 0.156699314  | #N/A                   |
| _VDC[Carbamidomethyl (C)]TANTNTC[Carbamidomethyl (C)]NK_.2   | -0.023834448 | #N/A                   |
| _FISDKDASVVGFFR_.3                                           | 0.064310751  | #N/A                   |
| _DLLTAYYDVDYEK_.2                                            | -0.038662447 | #N/A                   |
| _TFSHELSDFGLESTTGEPVVAIR_.3                                  | 0.060524453  | #N/A                   |
| _QAGPASVPLR_.2                                               | 0.249909593  | #N/A                   |
| _FVM[Oxidation (M)]QEEFSR_.2                                 | 0.312953181  | #N/A                   |
| _FAHTNIESLVK_.2                                              | 0.083587127  | #N/A                   |
| _DGEEAGAYDGPR_.2                                             | 0.24269843   | #N/A                   |
| _MDATANDVPSPEVK_.2                                           | 0.318082556  | #N/A                   |
| _SAS[Phospho (STY)]EPSLNR_.2                                 | -0.194211953 | P28028_S714_M1_Braf    |
| _NNPKS[Phospho (STY)]PQKPIVR_.3                              | -0.437767525 | P28028_S135_M1_Braf    |
| _S[Phospho (STY)]PQKPIVR_.2                                  | -0.211879461 | P28028_S135_M1_Braf    |
| _SSS[Phospho (STY)]APNVHINTIEPVNIDDLIR_.3                    | 0.068737     | P28028_S348_M1_Braf    |
| _RDS[Phospho (STY)]SDDWEIPDGQITVGQR_.3                       | 0.135171298  | P28028_S431_M1_Braf    |
| _AGFQTEDFSLYAC[Carbamidomethyl (C)]AS[Phospho (STY)]PK_.2    | 0.038589342  | P28028_S735_M1_Braf    |
| _DS[Phospho (STY)]SDDWEIPDGQITVGQR_.2                        | -0.521163238 | P28028_S431_M1_Braf    |

|                                                                                                                               |              |                       |
|-------------------------------------------------------------------------------------------------------------------------------|--------------|-----------------------|
| _SC[Carbamidomethyl (C)]C[Carbamidomethyl (C)]SC[Carbamidomethyl (C)]C[Carbamidomethyl (C)]PAGC[Carbamidomethyl (C)]EK_2      | 0.038631719  | #N/A                  |
| _GEEGAKAEAEK_2                                                                                                                | 0.119240362  | #N/A                  |
| _DC[Carbamidomethyl (C)]VC[Carbamidomethyl (C)]KGEEGAK_2                                                                      | 0.308622235  | #N/A                  |
| _ [Acetyl (Protein N-term)]M[Oxidation (M)]DPETC[Carbamidomethyl (C)]PC[Carbamidomethyl (C)]PTGGSC[Carbamidomethyl (C)]TC[Car | 0.340925227  | #N/A                  |
| _DC[Carbamidomethyl (C)]VC[Carbamidomethyl (C)]KGEEGAKAEAEK_3                                                                 | 0.045264209  | #N/A                  |
| _KGS[Phospho (STY)]GFGHR_2                                                                                                    | -0.021553227 | P28230_S233_M1_Gjb1   |
| _VILQDFTGVPAVVDAAM[Oxidation (M)]R_2                                                                                          | 0.336256161  | #N/A                  |
| _AAADDGEEPKS[Phospho (STY)]EPETKK_3                                                                                           | -0.220069643 | P28352_S18_M1_Apex1   |
| _IDPSAPLDK_2                                                                                                                  | 0.233034812  | #N/A                  |
| _AAVAWEAGKPLSIEEIVAPPK_3                                                                                                      | 0.043588472  | #N/A                  |
| _EFGASEC[Carbamidomethyl (C)]ISPQDFS[Phospho (STY)]K_2                                                                        | -0.192154405 | P28474_S247_M1_Adh5   |
| _AKEFGASEC[Carbamidomethyl (C)]ISPQDFS[Phospho (STY)]K_3                                                                      | 0.054040843  | P28474_S247_M1_Adh5   |
| _LVSEYMSK_2                                                                                                                   | -0.359511875 | #N/A                  |
| _SIQEVLVEM[Oxidation (M)]TDGGVDYSFEC[Carbamidomethyl (C)]IGNVK_3                                                              | 0.185591081  | #N/A                  |
| _YAPTTTPS[Phospho (STY)]PEDGFEVQPLHPDK_3                                                                                      | -0.560206254 | P28571_S659_M1_Slc6a9 |
| _VVDLLATDADIVSR_2                                                                                                             | 0.284551196  | #N/A                  |
| _IC[Carbamidomethyl (C)]DLLSDFDEFSAR_2                                                                                        | -0.047572332 | #N/A                  |
| _ESSDS[Phospho (STY)]TNTTIEDEDAK_2                                                                                            | 0.155542018  | P28652_S397_M1_Camk2b |
| _FTDEYQLYEDIGK_2                                                                                                              | -0.171030731 | #N/A                  |
| _HPWVC[Carbamidomethyl (C)]QR_2                                                                                               | 0.136942597  | #N/A                  |
| _ITAHEALK_2                                                                                                                   | 0.20815775   | #N/A                  |
| _LC[Carbamidomethyl (C)]TGHEYAAK_2                                                                                            | 0.192772505  | #N/A                  |
| _ADGVKPQTNS[Phospho (STY)]TK_2                                                                                                | -0.085809514 | P28652_S358_M1_Camk2b |
| _FYFENLLAK_2                                                                                                                  | 0.201585162  | #N/A                  |
| _AGAYDFPSPEWDTVPEAK_2                                                                                                         | 0.064697409  | #N/A                  |
| _NLINQM[Oxidation (M)]LTINPAK_2                                                                                               | 0.101152457  | #N/A                  |
| _QET[Phospho (STY)]VEC[Carbamidomethyl (C)]LKK_2                                                                              | 0.385353869  | P28652_T287_M1_Camk2b |
| _GAILTTM[Oxidation (M)]LATR_2                                                                                                 | 0.26879743   | #N/A                  |
| _WQNVHFHC[Carbamidomethyl (C)]SGAPVAPLQ_3                                                                                     | 0.145395189  | #N/A                  |
| _LTQYIDGQGR_2                                                                                                                 | 0.238640592  | #N/A                  |
| _QET[Phospho (STY)]VEC[Carbamidomethyl (C)]LK_2                                                                               | 0.27292586   | P28652_T287_M1_Camk2b |
| _ESSDST[Phospho (STY)]NT[Phospho (STY)]T[Phospho (STY)]IEDEDAKAR_2                                                            | -0.179735292 | P28652_T398_M3_Camk2b |
| _DLKPENLLASK_2                                                                                                                | -0.150882395 | #N/A                  |
| _NSSAITS[Phospho (STY)]PK_2                                                                                                   | -0.359947129 | P28652_S367_M1_Camk2b |
| _LTQYIDGQGRPR_2                                                                                                               | 0.198911857  | #N/A                  |
| _S[Phospho (STY)]TVASMMHR_2                                                                                                   | 0.506574533  | P28652_S276_M1_Camk2b |
| _IC[Carbamidomethyl (C)]DPGLTSFEPEALGNLVEGM[Oxidation (M)]DFHR_3                                                              | 0.166199698  | #N/A                  |
| _TTEQLIEAVNNGDFEAYAK_2                                                                                                        | -0.519804693 | #N/A                  |
| _KADGVKPQTNS[Phospho (STY)]TK_2                                                                                               | -0.355214161 | P28652_S358_M1_Camk2b |
| _QTTAPATMSTAASGTTM[Oxidation (M)]GLVEQAK_2                                                                                    | -0.28244148  | #N/A                  |
| _LDGLVDTPGTGYESLPK_2                                                                                                          | -0.100008773 | #N/A                  |
| _NVDLLSDMVQEHDPEILK_3                                                                                                         | -0.23062834  | #N/A                  |
| _TWS[Phospho (STY)]EKDLR_2                                                                                                    | -0.194932948 | P28659_S28_M1_Celf1   |
| _NNNQQLAQLQK_2                                                                                                                | 0.315729781  | #N/A                  |
| _NLSADQWR_2                                                                                                                   | 0.188901738  | #N/A                  |
| _AAEDLFVNIR_2                                                                                                                 | -0.390058897 | #N/A                  |
| _SVLQPSQK_2                                                                                                                   | 0.058349553  | #N/A                  |

|                                                                    |              |                         |
|--------------------------------------------------------------------|--------------|-------------------------|
| _NAYHAVYK_.2                                                       | -0.510142044 | #N/A                    |
| _LVVENVDVLTQM[Oxidation (M)]R_.2                                   | 0.083128901  | #N/A                    |
| _ASLSLADHR_.2                                                      | 0.442111228  | #N/A                    |
| _PQS[Phospho (STY)]PDL[Carbamidomethyl (C)]DDDVEFR_.2              | -0.196726161 | P28661_S68_M1_Septin4   |
| _PRS[Phospho (STY)]PWGK_.2                                         | -0.083643073 | P28661_S107_M1_Septin4  |
| _ESIPFAVIGSNTVVEAR_.2                                              | 0.03376622   | #N/A                    |
| _VARPQILEPRPQS[Phospho (STY)]PDL[Carbamidomethyl (C)]DDDVEFR_.4    | -0.286380746 | P28661_S68_M1_Septin4   |
| _PQILEPRPQS[Phospho (STY)]PDL[Carbamidomethyl (C)]DDDVEFR_.3       | -0.206660377 | P28661_S68_M1_Septin4   |
| _IYQFPDC[Carbamidomethyl (C)]DS[Phospho (STY)]DEDEDFKLQDQALK_.3    | 0.077849919  | P28661_S325_M1_Septin4  |
| _IYQFPDC[Carbamidomethyl (C)]DS[Phospho (STY)]DEDEDFK_.2           | 0.002313085  | P28661_S325_M1_Septin4  |
| _STLVNSLFLTDLYR_.2                                                 | 0.174086445  | #N/A                    |
| _HFLEDS[Phospho (STY)]SDDAELSK_.2                                  | 0.083656611  | P28661_S28_M1_Septin4   |
| _LDPY[Phospho (STY)]DSEDDKEYVGFATLPNQVHR_.3                        | -0.1971778   | P28661_Y115_M1_Septin4  |
| _VAAYAAQLEQYQK_.2                                                  | 0.00654872   | #N/A                    |
| _NWSAAGNAFC[Carbamidomethyl (C)]QAAK_.2                            | -0.152953661 | #N/A                    |
| _KADPQEAINC[Carbamidomethyl (C)]LNAAIDITYTDM[Oxidation (M)]GR_.3   | -0.34632763  | #N/A                    |
| _YEEM[Oxidation (M)]FPAFTDSR_.2                                    | -0.274757112 | #N/A                    |
| _AALC[Carbamidomethyl (C)]HFIVDELNAK_.3                            | -0.140172596 | #N/A                    |
| _SIQGDGEGDGLK_.2                                                   | -0.390901229 | #N/A                    |
| _HDSATSFVDAGNAYK_.2                                                | -0.434472117 | #N/A                    |
| _LDQWLTTM[Oxidation (M)]LLR_.2                                     | 0.033078851  | #N/A                    |
| _LLEAHEEQNSEAYTEAVK_.3                                             | -0.197822653 | #N/A                    |
| _ASHS[Phospho (STY)]FLR_.2                                         | -0.111529387 | P28663_S26_M1_Napb      |
| _AIEIYEQVGANTM[Oxidation (M)]DNPLLK_.2                             | -0.079787459 | #N/A                    |
| _LHMQLQSK_.2                                                       | 0.292699593  | #N/A                    |
| _IEEAC[Carbamidomethyl (C)]EMYTR_.2                                | 0.249134956  | #N/A                    |
| _LLEAHEEQNSEAYTEAVKEFDSISR_.4                                      | -0.121741472 | #N/A                    |
| _AIAHYEQSADYYKGEESNSSANK_.3                                        | -0.334130888 | #N/A                    |
| _EAVQLMAEAEKR_.2                                                   | 0.419251447  | #N/A                    |
| _KLEAHEEQNSEAYTEAVK_.3                                             | -0.218105441 | #N/A                    |
| _AIAHYEQSADYYK_.3                                                  | 0.393419475  | #N/A                    |
| _AAAT[Phospho (STY)]PESQEPQAK_.2                                   | -0.093656922 | P28667_T148_M1_Marcksl1 |
| _GDVTAEEAAGAS[Phospho (STY)]PAK_.2                                 | -0.188114801 | P28667_S22_M1_Marcksl1  |
| _LSGLS[Phospho (STY)]FKR_.2                                        | -0.425238845 | P28667_S104_M1_Marcksl1 |
| _GEVAPKET[Phospho (STY)]PK_.2                                      | -0.061305992 | P28667_T85_M1_Marcksl1  |
| _LSGLS[Phospho (STY)]FK_.2                                         | -0.252012869 | P28667_S104_M1_Marcksl1 |
| _GEVAPKET[Phospho (STY)]PKK_.2                                     | -0.068759796 | P28667_T85_M1_Marcksl1  |
| _SVELDS[Phospho (STY)]DDGGGSAAQK_.2                                | -0.173883771 | P28738_S820_M1_Kif5c    |
| _LYLVDLAGSEK_.2                                                    | -0.050385407 | #N/A                    |
| _ILQDSLGGNC[Carbamidomethyl (C)]R_.2                               | 0.357082078  | #N/A                    |
| _SLEPC[Carbamidomethyl (C)]DNT[Phospho (STY)]PIIDNITPVVDGISAELK_.3 | -0.125102312 | P28738_T396_M1_Kif5c    |
| _SLSALGNVISALAEGTK_.2                                              | -0.199035536 | #N/A                    |
| _ISFLENNLEQLTK_.2                                                  | -0.36393363  | #N/A                    |
| _TTIVIC[Carbamidomethyl (C)]C[Carbamidomethyl (C)]SPSVFNEAETK_.2   | -0.23035929  | #N/A                    |
| _HVAVTNMNEHSSR_.3                                                  | -0.339192438 | #N/A                    |
| _GSLDYRPLTTADPIDEHR_.3                                             | -0.182455954 | #N/A                    |
| _PSQLPEQSSSAQQNGSVSDIS[Phospho (STY)]PVQAAK_.3                     | -0.134601414 | P28740_S139_M1_Kif2a    |

|                                                                          |              |                      |
|--------------------------------------------------------------------------|--------------|----------------------|
| _YLENQTFR_2                                                              | 0.055170626  | #N/A                 |
| _IDILTELR_2                                                              | 0.306786099  | #N/A                 |
| _LIDIGNSC[Carbamidomethyl (C)]R_2                                        | -0.277307839 | #N/A                 |
| _DFRGS[Phospho (STY)]LDYRPLTTADPIDEHR_4                                  | 0.168947159  | P28740_S206_M1_Kif2a |
| _AVFQESIR_2                                                              | -0.203206512 | #N/A                 |
| _S[Phospho (STY)]AKPETVIDSLQ_2                                           | -0.002657019 | P28741_S689_M1_Kif3a |
| _KQT[Phospho (STY)]PVDPDK_2                                              | -0.111047196 | P28741_T635_M1_Kif3a |
| _LLAEALNQVTQR_2                                                          | 0.123577011  | #N/A                 |
| _SPSDYSNFDPEFLNEKPQLS[Phospho (STY)]FSDK_3                               | -0.460269262 | P28867_S643_M1_Prccd |
| _FSPAGPILSR_2                                                            | -0.181699167 | #N/A                 |
| _SLGYAYVNFQQPADAER_2                                                     | -0.225077753 | #N/A                 |
| _ALYDTFSAFGNILSC[Carbamidomethyl (C)]K_2                                 | 0.18109511   | #N/A                 |
| _SKVDEAVAVLQAHQAK_3                                                      | -0.144333015 | #N/A                 |
| _NLDDGIDDERLR_3                                                          | -0.287677483 | #N/A                 |
| _SGVLAGHDNR_2                                                            | -0.255385142 | #N/A                 |
| _QEFSS[Phospho (STY)]EEM[Oxidation (M)]TK_2                              | 0.004293643  | P29533_S166_M1_Vcam1 |
| _EIEIDIEPTDKVER_2                                                        | -0.069353958 | #N/A                 |
| _VM[Oxidation (M)]HTQC[Carbamidomethyl (C)]HSTPDS[Phospho (STY)]AEDVR_3  | 0.107222119  | #N/A                 |
| _VM[Oxidation (M)]HTQC[Carbamidomethyl (C)]HSTPDS[Phospho (STY)]AEDVRK_4 | -0.323767357 | #N/A                 |
| _LPSDVVTSVR_2                                                            | 0.368878677  | #N/A                 |
| _IAIAALEVLEENLAENADK_2                                                   | -0.382149656 | #N/A                 |
| _IVFADGNFWGR_2                                                           | 0.432965591  | #N/A                 |
| _AFYNNVLGEYEEYITK_2                                                      | 0.25323091   | #N/A                 |
| _KTEQGPPSSEYIFER_3                                                       | 0.286540477  | #N/A                 |
| _LYPPSAEYPDLR_2                                                          | 0.035718813  | #N/A                 |
| _VVVDALSGLK_2                                                            | 0.245509829  | #N/A                 |
| _TTPTGWTLDDQC[Carbamidomethyl (C)]IQTGVDNPGHPFIK_3                       | -0.197251866 | #N/A                 |
| _GWEFM[Oxidation (M)]WNER_2                                              | -0.111676493 | #N/A                 |
| _LYPPSAEYPDLRK_3                                                         | 0.01390714   | #N/A                 |
| _TVGM[Oxidation (M)]VAGDEETYEYVFAELFDPVIQER_3                            | -0.121843796 | #N/A                 |
| _HTTDLTASK_2                                                             | 0.019208034  | #N/A                 |
| _GIWHNNEK_2                                                              | 0.288150572  | #N/A                 |
| _HNGYDPR_2                                                               | 0.102817538  | #N/A                 |
| _HTTDLAS[Phospho (STY)]KIR_2                                             | -0.174506283 | P30275_S148_M1_Ckmt1 |
| _GLSLPPAC[Carbamidomethyl (C)]TR_2                                       | 0.431322201  | #N/A                 |
| _GLKEVEK_2                                                               | -0.180299749 | #N/A                 |
| _HNNC[Carbamidomethyl (C)]M[Oxidation (M)]ASHLTPAVYAR_3                  | -0.061787182 | #N/A                 |
| _GTGGVDTAATGSVFDISNLR_2                                                  | -0.16044206  | #N/A                 |
| _GWEFMWNERLGYILTC[Carbamidomethyl (C)]PSNLGTGLR_3                        | 0.252823266  | #N/A                 |
| _SFLIWWNEEDHTR_2                                                         | 0.269883086  | #N/A                 |
| _LGYILTC[Carbamidomethyl (C)]PSNLGTGLR_2                                 | -0.18116198  | #N/A                 |
| _VVVDALSGLKGDLAGR_2                                                      | -0.031629272 | #N/A                 |
| _SGYFDER_2                                                               | -0.04596948  | #N/A                 |
| _IRS[Phospho (STY)]GYFDER_2                                              | -0.191760781 | P30275_S152_M1_Ckmt1 |
| _RGTGGVDTAATGSVFDISNLR_3                                                 | -0.137101619 | #N/A                 |
| _TC[Carbamidomethyl (C)]DEGSS[Phospho (STY)]PSKPK_2                      | -0.555534147 | P30415_S1060_M1_Nktr |
| _QLAVC[Carbamidomethyl (C)]QQR_2                                         | 0.08104412   | #N/A                 |



|                                                                                      |              |                              |
|--------------------------------------------------------------------------------------|--------------|------------------------------|
| _AYS[Phospho (STY)]VEDFQPENLESGGVFR_.2                                               | -0.339241317 | P30873_S364_M1_Sstr1         |
| _VGGS[Phospho (STY)]VDLHR_.2                                                         | -0.180003408 | P30999_S269_M1_Ctnnd1        |
| _HYEDGYPGGSDNYGS[Phospho (STY)]LSR_.3                                                | -0.428665744 | P30999_S230_M1_Ctnnd1        |
| _GSLAS[Phospho (STY)]LDSLRL_.2                                                       | -0.100641841 | P30999_S349_M1_Ctnnd1        |
| _SQSSHSY[Phospho (STY)]DDSTLPLIDR_.3                                                 | -0.030027386 | P30999_Y865_M1_Ctnnd1        |
| _GS[Phospho (STY)]LASLDSLRL_.2                                                       | 0.235248764  | P30999_S346_M1_Ctnnd1        |
| _S[Phospho (STY)]M[Oxidation (M)]GYDDL DYGM[Oxidation (M)]M[Oxidation (M)]SDYGTAR_.2 | -0.011944027 | P30999_S288_M1_Ctnnd1        |
| _TLDRS[Phospho (STY)]GDLGDMEPLK_.3                                                   | -0.627663992 | P30999_S920_M1_Ctnnd1        |
| _AATITATSPGALWGLDR_.2                                                                | 0.019758886  | #N/A                         |
| _TWGDAGAAAGGGIPSK_.2                                                                 | 0.242788059  | #N/A                         |
| _C[Carbamidomethyl (C)]VGN YDNR_.2                                                   | 0.127826257  | #N/A                         |
| _ASVC[Carbamidomethyl (C)]AEAYNPDEEEDDAESR_.2                                        | -0.155779494 | #N/A                         |
| _AASAHAI GTVK_.2                                                                     | 0.132674708  | #N/A                         |
| _VYNDGEQIIAQGDLADSF FIVESGEVK_.3                                                     | -0.187038906 | #N/A                         |
| _LQQENER_.2                                                                          | -0.107344436 | #N/A                         |
| _GSFGELALM[Oxidation (M)]YNTPR_.2                                                    | 0.119102946  | #N/A                         |
| _VVDVIGTK_.2                                                                         | 0.33141576   | #N/A                         |
| _EGEHVIDQGGDDGNFYVIDR_.3                                                             | -0.355015037 | #N/A                         |
| _GTFDIYVK_.2                                                                         | -0.321604858 | #N/A                         |
| _GVNFAEEP[Oxidation (M)]RS[Phospho (STY)]DSENGEEEEAAEAGAFNAPVINR_.4                  | 0.21041039   | P31324_S83_M1_Prkar2b        |
| _HQPADLLEFALQHFR_.3                                                                  | -0.409995842 | #N/A                         |
| _NLDPEQM[Oxidation (M)]SQVLDAMFEK_.2                                                 | 0.322861388  | #N/A                         |
| _RAS[Phospho (STY)]VC[Carbamidomethyl (C)]AEAYNPDEEEDDAESR_.3                        | -0.108215524 | P31324_S112_M1_Prkar2b       |
| _C[Carbamidomethyl (C)]LAMDVQAFER_.2                                                 | 0.086251233  | #N/A                         |
| _WLEEADSSSGS[Phospho (STY)]PTSIDK_.2                                                 | -0.336206176 | P31360_S343_M1_Pou3f2        |
| _WLEEADSS TGS[Phospho (STY)]PTSIDK_.2                                                | -0.067555973 | P31361_S390_M1_Pou3f3;Pou3f4 |
| _QC[Carbamidomethyl (C)]DNPWNTDR_.2                                                  | -0.0781135   | #N/A                         |
| _AGDLPDRDTWK_.2                                                                      | -0.320749713 | #N/A                         |
| _VADGQIS[Phospho (STY)]TEVSEAPVASDKPK_.3                                             | -0.140399512 | P31648_S14_M1_Slc6a1         |
| _GS[Phospho (STY)]ETLGGGGGGAAGTR_.2                                                  | -0.44362527  | P31650_S21_M1_Slc6a11        |
| _LTVPSADLK_.2                                                                        | -0.142420107 | #N/A                         |
| _AAEEARGS[Phospho (STY)]ETLGGGGGGAAGTR_.3                                            | 0.221942244  | P31650_S21_M1_Slc6a11        |
| _VKGDGTISAITEK_.3                                                                    | -0.098542246 | #N/A                         |
| _SGS[Phospho (STY)]PSDNSGAEEM[Oxidation (M)]EVSLAKPK_.3                              | -0.290469972 | P31750_S124_M1_Akt1          |
| _AKWDSWNK_.2                                                                         | 0.03748012   | #N/A                         |
| _TYVEKVDELKK_.3                                                                      | -0.029547164 | #N/A                         |
| _ [Acetyl (Protein N-term)]SQA EFDKAAEEVKR_.3                                        | -0.233100835 | #N/A                         |
| _TQPTDEEM[Oxidation (M)]LFIYSHFK_.3                                                  | -0.026670757 | #N/A                         |
| _QATVGDVNTDRPGLLDLK_.3                                                               | -0.052015647 | #N/A                         |
| _ [Acetyl (Protein N-term)]SQA EFDKAAEEVK_.2                                         | -0.146607865 | #N/A                         |
| _TYVEKVDELK_.2                                                                       | 0.050664955  | #N/A                         |
| _DVKPSNILVNSR_.2                                                                     | 0.056826093  | #N/A                         |
| _KLEELDELDEQQR_.3                                                                    | 0.059142515  | #N/A                         |
| _IPEQILGK_.2                                                                         | 0.063136689  | #N/A                         |
| _LEAFLTQK_.2                                                                         | 0.188545062  | #N/A                         |
| _ISELGAGNGGVVFK_.2                                                                   | -0.364734858 | #N/A                         |
| _LPSGVFSLEFQDFVNK_.2                                                                 | -0.103593899 | #N/A                         |

|                                                                                                 |              |                       |
|-------------------------------------------------------------------------------------------------|--------------|-----------------------|
| _LC[Carbamidomethyl (C)]DFGVSGQLIDSM[Oxidation (M)]ANSFVGTR_.2                                  | -0.275746925 | #N/A                  |
| _KLEELDEQQRK_.3                                                                                 | -0.05983474  | #N/A                  |
| _VGELKDDDFEK_.3                                                                                 | 0.103417951  | #N/A                  |
| _LEELDEQQR_.2                                                                                   | 0.482787868  | #N/A                  |
| _LQGTHYSVQSDIWSM[Oxidation (M)]GLSLVEM[Oxidation (M)]AVGR_.3                                    | -0.378746602 | #N/A                  |
| _KLEEEGEQFVKK_.3                                                                                | 0.059548587  | #N/A                  |
| _GSVLPNSDKK_.2                                                                                  | -0.170951846 | #N/A                  |
| _EATWVVDVK_.2                                                                                   | 0.087234949  | #N/A                  |
| _EEDQATEILQR_.2                                                                                 | -0.271572456 | #N/A                  |
| _QVTVLELFR_.2                                                                                   | -0.014195101 | #N/A                  |
| _LWGTSDDVQEIQEM[Oxidation (M)]KDESVR_.3                                                         | -0.068937173 | #N/A                  |
| _TFEDIAR_.2                                                                                     | 0.059358603  | #N/A                  |
| _S[Phospho (STY)]PSRPLPEVTDEYKNDVK_.3                                                           | -0.491876623 | P32067_S92_M1_Ssb     |
| _KFAS[Phospho (STY)]IAR_.2                                                                      | -0.439022283 | P32211_S379_M1_Chrm4  |
| _LVVVGAGGVGK_.2                                                                                 | 0.559134799  | #N/A                  |
| _SYGIPFIETSAK_.2                                                                                | 0.282902274  | #N/A                  |
| _TGEGLFC[Carbamidomethyl (C)]VFAINNTK_.2                                                        | -0.416139715 | #N/A                  |
| _QVVIDGETC[Carbamidomethyl (C)]LLDILDTAGQEEYSAM[Oxidation (M)]R_.3                              | -0.01033911  | #N/A                  |
| _SFEDIHHYR_.3                                                                                   | -0.167926808 | #N/A                  |
| _ASEDFVDPWTVR_.2                                                                                | 0.420358673  | #N/A                  |
| _TLIDVLQPLIAEHQAR_.2                                                                            | -0.106169526 | #N/A                  |
| _DLTLEQAYSYTVENAK_.2                                                                            | 0.192397966  | #N/A                  |
| _C[Carbamidomethyl (C)]NAIINEDPNNK_.2                                                           | -0.169559008 | #N/A                  |
| _AASVSS[Phospho (STY)]LHER_.2                                                                   | -0.24032321  | P33173_S419_M1_Kif1a  |
| _NLFGSGS[Phospho (STY)]LR_.2                                                                    | -0.330167141 | P33173_S1317_M1_Kif1a |
| _DVLS[Phospho (STY)]PLRPSR_.2                                                                   | -0.346123426 | P33173_S1093_M1_Kif1a |
| _SGTS[Phospho (STY)]QEELR_.2                                                                    | -0.268453746 | P33173_S937_M1_Kif1a  |
| _KTPS[Phospho (STY)]PVR_.2                                                                      | 0.297808277  | P33173_S1553_M1_Kif1a |
| _ISLVDLAGSER_.2                                                                                 | -0.046422924 | #N/A                  |
| _FQSESC[Carbamidomethyl (C)]PVVGMS[Phospho (STY)]R_.2                                           | 0.081753876  | P33173_S932_M1_Kif1a  |
| _IS[Phospho (STY)]FDDQHFEK_.2                                                                   | 0.016945411  | P33173_S912_M1_Kif1a  |
| _S[Phospho (STY)]DSLILDHQWELEK_.2                                                               | 0.211320337  | P33173_S1373_M1_Kif1a |
| _VTGVYELSLC[Carbamidomethyl (C)]HVADAGS[Phospho (STY)]PGM[Oxidation (M)]QR_.3                   | -0.422477017 | P33173_S1342_M1_Kif1a |
| _TPQPC[Carbamidomethyl (C)]S[Phospho (STY)]RPAS[Phospho (STY)]PEPELLPELDSK_.3                   | 0.105667738  | P33173_S1533_M2_Kif1a |
| _PASPEPELLPELDSKKT[Phospho (STY)]PS[Phospho (STY)]PVR_.4                                        | -0.104668655 | P33173_S1553_M2_Kif1a |
| _PAS[Phospho (STY)]PEPELLPELDSK_.2                                                              | -0.116614807 | P33173_S1537_M1_Kif1a |
| _FLNAENAQK_.2                                                                                   | 0.118938525  | #N/A                  |
| _FASENDLPEWK_.2                                                                                 | 0.156900404  | #N/A                  |
| _TLEEDDEELFK_.2                                                                                 | -0.084487419 | #N/A                  |
| _VAEKLEALSVR_.3                                                                                 | -0.141468037 | #N/A                  |
| _YMEDSTY[Phospho (STY)]YK_.2                                                                    | -0.128978333 | P34152_Y576_M1_Ptk2   |
| _LQPQEIS[Phospho (STY)]PPPTANLDR_.2                                                             | -0.354265971 | P34152_S910_M1_Ptk2   |
| _LHISPDR_.2                                                                                     | -0.036631989 | #N/A                  |
| _LLC[Carbamidomethyl (C)]GLLSDR_.2                                                              | -0.089545915 | #N/A                  |
| _ASVPEGFLSELQQLAQATGK_.2                                                                        | 0.078670606  | #N/A                  |
| _PM[Oxidation (M)]FIVNTNVPR_.2                                                                  | 0.130693731  | #N/A                  |
| _PAQYIAVHVVPDQLM[Oxidation (M)]TFSGTNDPC[Carbamidomethyl (C)]ALC[Carbamidomethyl (C)]SLHSIGK_.4 | -0.529769671 | #N/A                  |

|                                                               |              |                            |
|---------------------------------------------------------------|--------------|----------------------------|
| _VYINYYDM[Oxidation (M)]NAANVGWNGSTFA_.2                      | -0.203279305 | #N/A                       |
| _IQNTGDY[Phospho (STY)]YDLYGGEK_.2                            | -0.140255914 | P35235_Y62_M1_Ptpn11       |
| _ESQSHPGDFVLSVR_.3                                            | 0.032180299  | #N/A                       |
| _FEIWDTAGQER_.2                                               | 0.171996173  | #N/A                       |
| _GVDLQESNPASR_.2                                              | -0.070035183 | #N/A                       |
| _LVLLGESAVGK_.2                                               | 0.019339169  | #N/A                       |
| _QASPNIVIALAGNK_.2                                            | -0.299817047 | #N/A                       |
| _YHSLAPM[Oxidation (M)]YYR_.3                                 | 0.374273095  | #N/A                       |
| _GAQAAIVVYDITNTDTFAR_.2                                       | -0.345603692 | #N/A                       |
| _AVEFQEAQAYADDNSLLFM[Oxidation (M)]ETSAK_.3                   | -0.178030258 | #N/A                       |
| _I[Acetyl (Protein N-term)]S[Phospho (STY)]AGGDFGNPLRK_.2     | -0.348059387 | P35279_S2_M1_Rab6a         |
| _TDLADKR_.2                                                   | 0.08772642   | #N/A                       |
| _LVFLGEQSVGK_.2                                               | 0.084415324  | #N/A                       |
| _SREDMIDIK_.2                                                 | -0.044808536 | #N/A                       |
| _VAAALPGMESTQDR_.2                                            | 0.034873474  | #N/A                       |
| _DSNGAILVYDVTDEDSFQK_.2                                       | -0.508736027 | #N/A                       |
| _VNLAIWDTAGQER_.2                                             | -0.450098324 | #N/A                       |
| _FNS[Phospho (STY)]ITSAYYR_.2                                 | -0.154607993 | P35283_S105_M1_Rab12       |
| _IIQTPGLWESENQNK_.2                                           | -0.498794663 | #N/A                       |
| _LAIWDTAGQER_.2                                               | 0.348808355  | #N/A                       |
| _TC[Carbamidomethyl (C)]DGVQC[Carbamidomethyl (C)]AFEELVEK_.2 | -0.090512851 | #N/A                       |
| _AMSIPTS[Phospho (STY)]PTR_.2                                 | 0.004294543  | P35347_S400_M1_Crhr1;Crhr2 |
| _S[Phospho (STY)]IHREPGSYAGR_.3                               | -0.398770344 | P35363_S298_M1_Htr2a       |
| _QHS[Phospho (STY)]YDNILDKPR_.3                               | -0.010921235 | P35436_S1291_M1_Grin2a     |
| _YLPEEVAHS[Phospho (STY)]DIS[Phospho (STY)]ETSSR_.2           | 0.216842928  | P35436_S1059_M2_Grin2a     |
| _KMPS[Phospho (STY)]IESDV_.2                                  | 0.45935592   | P35436_S1459_M1_Grin2a     |
| _SM[Oxidation (M)]ESLRQDS[Phospho (STY)]LNQNPVSQR_.3          | -0.260019496 | P35436_S1025_M1_Grin2a     |
| _SIS[Phospho (STY)]LKDR_.2                                    | -0.110801053 | P35436_S1312_M1_Grin2a     |
| _DKGS[Phospho (STY)]PHSEGSRYR_.3                              | -0.500760175 | P35436_S1198_M1_Grin2a     |
| _SPDFNLTGS[Phospho (STY)]QSNM[Oxidation (M)]LK_.2             | -0.329915238 | P35436_S890_M1_Grin2a      |
| _QDS[Phospho (STY)]LNQNPVSQR_.2                               | 0.022561635  | P35436_S1025_M1_Grin2a     |
| _KKS[Phospho (STY)]PDFNLTGS[Phospho (STY)]QSNMLK_.3           | -0.090987994 | P35436_S882_M2_Grin2a      |
| _STASYC[Carbamidomethyl (C)]SRDS[Phospho (STY)]R_.2           | -0.226021603 | P35436_S1416_M1_Grin2a     |
| _LEEGPPVTTVLTR_.2                                             | -0.190246567 | #N/A                       |
| _AILAELTGR_.2                                                 | 0.078312922  | #N/A                       |
| _FAAAYC[Carbamidomethyl (C)]R_.2                              | 0.009223583  | #N/A                       |
| _TREEIQEVR_.2                                                 | 0.134826162  | #N/A                       |
| _AASTDYYKR_.2                                                 | -0.425122998 | #N/A                       |
| _VDGM[Oxidation (M)]DILC[Carbamidomethyl (C)]VR_.2            | 0.349040265  | #N/A                       |
| _YGM[Oxidation (M)]GTVER_.2                                   | 0.018211128  | #N/A                       |
| _NFYGGNGIVGAQVPLGAGIALAC[Carbamidomethyl (C)]K_.3             | 0.034372898  | #N/A                       |
| _GPILM[Oxidation (M)]ELQTYR_.2                                | 0.447856345  | #N/A                       |
| _M[Oxidation (M)]VNSNLASVEELKEIDVEVR_.3                       | -0.22526237  | #N/A                       |
| _YHGHS[Phospho (STY)]M[Oxidation (M)]SDPGVSYR_.3              | -0.189841741 | P35486_S293_M1_Pdha1       |
| _LPC[Carbamidomethyl (C)]IFIC[Carbamidomethyl (C)]ENNR_.2     | -0.068501386 | #N/A                       |
| _YHGHSMSDPGVS[Phospho (STY)]YRT[Phospho (STY)]REEIQEVR_.4     | -0.296789089 | P35486_T303_M2_Pdha1       |
| _M[Oxidation (M)]VNSNLASVEELKEIDVEVR_.4                       | 0.345017818  | #N/A                       |

|                                                                                               |              |                       |
|-----------------------------------------------------------------------------------------------|--------------|-----------------------|
| _ASLQNLLSASQAR_.2                                                                             | 0.189356484  | #N/A                  |
| _ASSIVVSGTPIR_.2                                                                              | 0.044943991  | #N/A                  |
| _APVPTGEVYFADSFDR_.2                                                                          | -0.10614953  | #N/A                  |
| _TYFTDKK_.2                                                                                   | -0.223284246 | #N/A                  |
| _AEDEILNRS[Phospho (STY)]PR_.2                                                                | -0.310434109 | P35564_S582_M1_Canx   |
| _QKS[Phospho (STY)]DAEEDGVTGS[Phospho (STY)]QDEEDSKPK_.3                                      | -0.234107239 | P35564_S553_M2_Canx   |
| _AEDEILNR_.2                                                                                  | 0.29010543   | #N/A                  |
| _SDAEEDGVTGS[Phospho (STY)]QDEEDSKPK_.3                                                       | -0.106385362 | P35564_S563_M1_Canx   |
| _VVDDWANDGWGLK_.2                                                                             | -0.201673563 | #N/A                  |
| _[Acetyl (Protein N-term)]AS[Phospho (STY)]PPDTDGFSDVRK_.2                                    | -0.071527407 | P35569_S3_M1_Irs1     |
| _[Acetyl (Protein N-term)]AS[Phospho (STY)]PPDTDGFSDVR_.2                                     | -0.034914573 | P35569_S3_M1_Irs1     |
| _VLFDNTGR_.2                                                                                  | 0.023287897  | #N/A                  |
| _IGYPAPNFK_.2                                                                                 | -0.305639364 | #N/A                  |
| _TIAQDYGVLK_.2                                                                                | 0.260556439  | #N/A                  |
| _LVQAFQFTDK_.2                                                                                | 0.204724892  | #N/A                  |
| _ADEGISFR_.2                                                                                  | -0.033082494 | #N/A                  |
| _SKEYFSK_.2                                                                                   | 0.145738111  | #N/A                  |
| _GLFIIDDK_.2                                                                                  | 0.270479025  | #N/A                  |
| _ATAVM[Oxidation (M)]PDGQFK_.2                                                                | 0.388180771  | #N/A                  |
| _DISLSEYK_.2                                                                                  | -0.133714963 | #N/A                  |
| _SVDEIIR_.2                                                                                   | -0.148341092 | #N/A                  |
| _LNC[Carbamidomethyl (C)]QVIGASVDSHFC[Carbamidomethyl (C)]HLAWINTPK_.3                        | -0.061158559 | #N/A                  |
| _QFYDQALQQAVM[Oxidation (M)]DDDANNAK_.3                                                       | -0.33378609  | #N/A                  |
| _NSLC[Carbamidomethyl (C)]PSGGNLTPLLQQDC[Carbamidomethyl (C)]HQK_.3                           | -0.062916201 | #N/A                  |
| _TFHETLNC[Carbamidomethyl (C)]C[Carbamidomethyl (C)]GSNALTTLTITLR_.3                          | -0.147783198 | #N/A                  |
| _QFGIVTIGEEK_.2                                                                               | -0.024928398 | #N/A                  |
| _IC[Carbamidomethyl (C)]TASENFLR_.2                                                           | -0.050381715 | #N/A                  |
| _KIC[Carbamidomethyl (C)]TASENFLR_.2                                                          | -0.169399207 | #N/A                  |
| _SKEEQELHDIHSTR_.3                                                                            | 0.120068961  | #N/A                  |
| _M[Oxidation (M)]QKYEDIK_.2                                                                   | -0.408119045 | #N/A                  |
| _QFGIVTIGEEKK_.2                                                                              | 0.050383762  | #N/A                  |
| _DLYGDFK_.2                                                                                   | -0.089418686 | #N/A                  |
| _EEQELHDIHSTRS[Phospho (STY)]K_.3                                                             | -0.27773697  | P35802_S270_M1_Gpm6a  |
| _S[Phospho (STY)]KERLNAYT_.2                                                                  | -0.097212782 | P35802_S270_M1_Gpm6a  |
| _SKEEQELHDIHSTRS[Phospho (STY)]K_.3                                                           | 0.028781412  | P35802_S270_M1_Gpm6a  |
| _EEQELHDIHSTRS[Phospho (STY)]KER_.3                                                           | -0.206535009 | P35802_S270_M1_Gpm6a  |
| _YEDIKS[Phospho (STY)]KEEQELHDIHSTR_.4                                                        | -0.299804489 | P35802_S256_M1_Gpm6a  |
| _EEQELHDIHSTR_.3                                                                              | 0.14560005   | #N/A                  |
| _[Acetyl (Protein N-term)]MEENMEEGQTQK_.2                                                     | 0.254745821  | #N/A                  |
| _AKEEQELQDIQS[Phospho (STY)]R_.2                                                              | -0.154078095 | P35803_S318_M1_Gpm6b  |
| _EEQELQDIQS[Phospho (STY)]R_.2                                                                | -0.072952    | P35803_S318_M1_Gpm6b  |
| _QYGIIPWNAFPGK_.2                                                                             | -0.209971034 | #N/A                  |
| _ELHGEFK_.2                                                                                   | -0.228065341 | #N/A                  |
| _S[Phospho (STY)]KEQLNSYT_.2                                                                  | -0.377396076 | P35803_S320_M1_Gpm6b  |
| _MQAYQDIK_.2                                                                                  | 0.219273035  | #N/A                  |
| _[Acetyl (Protein N-term)]M[Oxidation (M)]KPAM[Oxidation (M)]ETAAEENTEQS[Phospho (STY)]QER_.2 | 0.078612936  | P35803_S16_M1_Gpm6b   |
| _DADVSEES[Phospho (STY)]PPPLPER_.2                                                            | 0.289315689  | P35831_S673_M1_Ptpn12 |

|                                                               |              |                       |
|---------------------------------------------------------------|--------------|-----------------------|
| _NLS[Phospho (STY)]FEIKK_.2                                   | 0.078137403  | P35831_S434_M1_Ptpn12 |
| _S[Phospho (STY)]PAEVTDIGFGNR_.2                              | -0.197595031 | P35831_S748_M1_Ptpn12 |
| _DQITKS[Phospho (STY)]PAEVTDIGFGNR_.3                         | -0.379882293 | P35831_S748_M1_Ptpn12 |
| _NLS[Phospho (STY)]FEIK_.2                                    | -0.25953002  | P35831_S434_M1_Ptpn12 |
| _DGFADPHFHSGS[Phospho (STY)]SDDVR_.3                          | 0.238296309  | P35969_S1207_M1_Flt1  |
| _EILGTAQSVGC[Carbamidomethyl (C)]NVDGR_.2                     | -0.046733163 | #N/A                  |
| _QAEVPSASALIK_.2                                              | 0.189307323  | #N/A                  |
| _HSGNITFDEIVNIAR_.3                                           | -0.293596024 | #N/A                  |
| _ILTFDQLALES PK_.2                                            | -0.000296305 | #N/A                  |
| _SQDIYLR_.2                                                   | 0.04720731   | #N/A                  |
| _LVFLGLDNAGK_.2                                               | 0.203357239  | #N/A                  |
| _SPS[Phospho (STY)]PGRREEDGDELAR_.3                           | -0.587960333 | P36552_S101_M1_Cpox   |
| _GLQDGLRS[Phospho (STY)]SS[Phospho (STY)]NSR_.2               | -0.329793232 | P36916_S32_M2_Gnl1    |
| _REEQTDTS[Phospho (STY)]DGESVTHHIR_.4                         | -0.276073813 | P36916_S51_M1_Gnl1    |
| _EEQTDTS[Phospho (STY)]DGESVTHHIR_.3                          | -0.109981966 | P36916_S51_M1_Gnl1    |
| _ERREEQTD[Phospho (STY)]S[Phospho (STY)]DGESVTHHIR_.4         | -0.081391862 | #N/A                  |
| _EVYQPGSVLDFPR_.2                                             | 0.138132834  | #N/A                  |
| _LLEAGDFIC[Carbamidomethyl (C)]QALNR_.2                       | 0.510597313  | #N/A                  |
| _EVSFVGAVSELFTR_.2                                            | -0.502111924 | #N/A                  |
| _VKQEPPS[Phospho (STY)]PPHS[Phospho (STY)]PR_.2               | 0.005928837  | P38532_S303_M2_Hsf1   |
| _DAGQISGLNVLR_.2                                              | 0.215131232  | #N/A                  |
| _NAVITVPAYFNDSQR_.2                                           | -0.056552246 | #N/A                  |
| _TTPSVVAFTADGER_.2                                            | 0.095281378  | #N/A                  |
| _VQQTVDLFGFR_.2                                               | 0.013864069  | #N/A                  |
| _AQFEGIVTDLIK_.2                                              | 0.333013903  | #N/A                  |
| _NTTIPTKK_.2                                                  | -0.108474197 | #N/A                  |
| _VINEPTAAALAYGLDK_.2                                          | 0.319659258  | #N/A                  |
| _QAVTNPNNTFYATK_.2                                            | 0.548094599  | #N/A                  |
| _QAASSLQASLK_.2                                               | -0.073488741 | #N/A                  |
| _STNGDTFLGGEDFDQALLR_.2                                       | 0.274282145  | #N/A                  |
| _EQQIVIQSSGGLSKDDIENM[Oxidation (M)]VK_.3                     | -0.370742961 | #N/A                  |
| _LLGQFTLIGIPPAPR_.2                                           | -0.250465378 | #N/A                  |
| _ETAENYLGHTAK_.2                                              | -0.12655824  | #N/A                  |
| _ALLAGKDSETGENIR_.2                                           | -0.273482291 | #N/A                  |
| _ETGVDLTKDNM[Oxidation (M)]ALQR_.3                            | -0.243214287 | #N/A                  |
| _S[Phospho (STY)]DIGEVILVGGMT[Phospho (STY)]R_.2              | -0.154129122 | P38647_S378_M2_Hspa9  |
| _AM[Oxidation (M)]QDAEVSK_.2                                  | -0.010832953 | #N/A                  |
| _RYDDPEVQKDTK_.3                                              | -0.047850994 | #N/A                  |
| _M[Oxidation (M)]EEFKDQLPADEC[Carbamidomethyl (C)]NK_.3       | -0.001215072 | #N/A                  |
| _AM[Oxidation (M)]QDAEVSKSDIGEVILVGGMTR_.3                    | 0.167815759  | #N/A                  |
| _ASNGDAWVEAHGK_.2                                             | 0.269742469  | #N/A                  |
| _VEAVNM[Oxidation (M)]AEGIIHDTETK_.3                          | -0.345973394 | #N/A                  |
| _VINEPTAAALAYGLDKSEDK_.3                                      | -0.49649963  | #N/A                  |
| _TIAPC[Carbamidomethyl (C)]QK_.2                              | 0.003852581  | #N/A                  |
| _MKETAENYLGHTAK_.3                                            | -0.193483831 | #N/A                  |
| _GAVVGIDLGTTNSC[Carbamidomethyl (C)]VAVM[Oxidation (M)]EGK_.2 | 0.027314341  | #N/A                  |
| _SQVFSTAADGQTQVEIK_.2                                         | 0.031613506  | #N/A                  |

|                                                                        |              |                      |
|------------------------------------------------------------------------|--------------|----------------------|
| _S[Phospho (STY)]PTSSPTQR_.2                                           | -0.189925614 | P39053_S774_M1_Dnm1  |
| _GISVPINLR_.2                                                          | 0.177034092  | #N/A                 |
| _SSVLENFVGR_.2                                                         | -0.163234252 | #N/A                 |
| _VPVGDQPPDIEFQIR_.2                                                    | -0.202194124 | #N/A                 |
| _DITAALAAER_.2                                                         | 0.182744151  | #N/A                 |
| _VLNQQLTNHIR_.2                                                        | 0.252104426  | #N/A                 |
| _VYSPHVLNLTLDLPGM[Oxidation (M)]TK_.3                                  | -0.580833921 | #N/A                 |
| _IVTTHIR_.2                                                            | 0.046897032  | #N/A                 |
| _FFLSHPSYR_.2                                                          | 0.019767867  | #N/A                 |
| _NFRPDDPAR_.2                                                          | 0.533907285  | #N/A                 |
| _GYIGVVNR_.2                                                           | -0.02433296  | #N/A                 |
| _LQDAFSAIGQNADLDLPQIAVVGGSAGK_.3                                       | 0.091194053  | #N/A                 |
| _NVYKDYR_.2                                                            | -0.21750287  | #N/A                 |
| _C[Carbamidomethyl (C)]VDM[Oxidation (M)]VISELISTVR_.2                 | -0.128844548 | #N/A                 |
| _GM[Oxidation (M)]EDLIPLVNR_.2                                         | 0.195963103  | #N/A                 |
| _KKTSP[Phospho (STY)]GNQDEILVIR_.3                                     | 0.290295579  | P39053_S512_M1_Dnm1  |
| _EVDEYKNFRPDDPAR_.3                                                    | 0.313130914  | #N/A                 |
| _M[Oxidation (M)]GTPYLQK_.2                                            | -0.397134108 | #N/A                 |
| _FTDFEEVR_.2                                                           | 0.237008114  | #N/A                 |
| _ALLQM[Oxidation (M)]VQQFAVDFEKR_.3                                    | 0.03432256   | #N/A                 |
| _LDLM[Oxidation (M)]DEGTDAR_.2                                         | 0.177728045  | #N/A                 |
| _NLVDSYM[Oxidation (M)]AIVNK_.2                                        | -0.330026829 | #N/A                 |
| _LREEM[Oxidation (M)]ER_.2                                             | 0.357270419  | #N/A                 |
| _EISYAIK_.2                                                            | 0.288632238  | #N/A                 |
| _KDITAALAAER_.2                                                        | -0.174200746 | #N/A                 |
| _TSGNQDEILVIR_.2                                                       | 0.216425149  | #N/A                 |
| _ENC[Carbamidomethyl (C)]LILAVSPANSDLANSALK_.2                         | -0.222211284 | #N/A                 |
| _RSPTSS[Phospho (STY)]PTPQR_.2                                         | -0.314940317 | P39053_S778_M1_Dnm1  |
| _LEIEAETDRVTGTNK_.2                                                    | -0.152963022 | #N/A                 |
| _S[Phospho (STY)]PTSS[Phospho (STY)]PTPQRR_.2                          | -0.282293977 | P39053_S778_M2_Dnm1  |
| _IEGSGDQIDTYELSGGAR_.2                                                 | -0.11309402  | #N/A                 |
| _KTSGNQDEILVIR_.3                                                      | -0.12686336  | #N/A                 |
| _RS[Phospho (STY)]PT[Phospho (STY)]SSPTPQRR_.2                         | 0.092392248  | P39053_T776_M2_Dnm1  |
| _YM[Oxidation (M)]LSVDNLK_.2                                           | 0.225686089  | #N/A                 |
| _TIM[Oxidation (M)]HLM[Oxidation (M)]INNTK_.2                          | -0.016896153 | #N/A                 |
| _LQSLLSIEKEVDEYK_.3                                                    | -0.5269822   | #N/A                 |
| _LDLM[Oxidation (M)]DEGTDARDVLENK_.3                                   | -0.154363912 | #N/A                 |
| _ALLQM[Oxidation (M)]VQQFAVDFEK_.2                                     | 0.201612053  | #N/A                 |
| _HIFALFNTEQR_.2                                                        | -0.17599079  | #N/A                 |
| _RIEGSGDQIDTYELSGGAR_.3                                                | -0.13741013  | #N/A                 |
| _QLELAC[Carbamidomethyl (C)]ETQEEVDSWK_.2                              | 0.058653972  | #N/A                 |
| _RPLVLQLVNSTTEYAEFLHC[Carbamidomethyl (C)]K_.3                         | 0.09629576   | #N/A                 |
| _EALSIIGDINTTTVSTPM[Oxidation (M)]PPPVDDSWLQVQSVAGR_.4                 | 0.055140886  | #N/A                 |
| _EFIFSELLANLYSC[Carbamidomethyl (C)]GDQNTLM[Oxidation (M)]EESAEQAQR_.3 | -0.116728554 | #N/A                 |
| _ASETEENGSDSFMHSMQPQLER_.3                                             | 0.184167027  | #N/A                 |
| _ERS[Phospho (STY)]LS[Phospho (STY)]PR_.2                              | 0.079049636  | P39447_S166_M2_Tjp1  |
| _AVPVS[Phospho (STY)]PSAVEEDEDEGHTVVATAR_.3                            | -0.511985803 | P39447_S1614_M1_Tjp1 |

|                                                                            |              |                      |
|----------------------------------------------------------------------------|--------------|----------------------|
| _EIS[Phospho (STY)]QDSLAAR_2                                               | -0.15312643  | P39447_S212_M1_Tjp1  |
| _S[Phospho (STY)]VAS[Phospho (STY)]SQPAKPTK_2                              | -0.212632113 | P39447_S175_M2_Tjp1  |
| _ADGAT[Phospho (STY)]SDDLHLHDDR_2                                          | 0.219527153  | P39447_T809_M1_Tjp1  |
| _KS[Phospho (STY)]REDLSAQPVQTK_3                                           | -0.001227553 | P39447_S617_M1_Tjp1  |
| _LSYLSAPGSEYSM[Oxidation (M)]YSTDS[Phospho (STY)]R_2                       | -0.091688896 | P39447_S837_M1_Tjp1  |
| _DDISEIQLAS[Phospho (STY)]DHS[Phospho (STY)]GR_2                           | -0.249966293 | P39447_S297_M2_Tjp1  |
| _SAS[Phospho (STY)]LENKK_2                                                 | -0.576533991 | P39447_S1277_M1_Tjp1 |
| _S[Phospho (STY)]REDLSAQPVQTK_2                                            | -0.262292514 | P39447_S617_M1_Tjp1  |
| _IDS[Phospho (STY)]PGLKPASQK_2                                             | 0.408486947  | P39447_S912_M1_Tjp1  |
| _ATLLNVPDLSDSIHS[Phospho (STY)]ANAS[Phospho (STY)]ER_3                     | -0.079303346 | P39447_S280_M2_Tjp1  |
| _VQIPVSHPDPEPVS[Phospho (STY)]DNEDDSYDEEVHDP_4                             | 0.151219338  | P39447_S125_M1_Tjp1  |
| _KVQIPVSHPDPEPVS[Phospho (STY)]DNEDDSY[Phospho (STY)]DEEVHDP_4             | -0.088511193 | P39447_S125_M2_Tjp1  |
| _QAS[Phospho (STY)]RDLEQPSYR_2                                             | -0.329903352 | P39447_S1051_M1_Tjp1 |
| _DGS[Phospho (STY)]LNQSSGYR_2                                              | -0.083802088 | P39688_S21_M1_Fyn    |
| _GAY[Phospho (STY)]SLSIR_2                                                 | -0.317732185 | P39688_Y185_M1_Fyn   |
| _WTAPEAALYGR_2                                                             | -0.059707225 | #N/A                 |
| _LT[Phospho (STY)]EERDGS LNQSSGYR_3                                        | -0.28286256  | P39688_T15_M1_Fyn    |
| _ALLATASQC[Carbamidomethyl (C)]QQPAGNK_2                                   | 0.053901107  | #N/A                 |
| _NSLDC[Carbamidomethyl (C)]EIVSAK_2                                        | -0.236112753 | #N/A                 |
| _VPTISINK_2                                                                | -0.031195111 | #N/A                 |
| _KEPALLELEGKK_3                                                            | -0.266470676 | #N/A                 |
| _TDGC[Carbamidomethyl (C)]HAYLSK_2                                         | 0.00705347   | #N/A                 |
| _INSITVDNC[Carbamidomethyl (C)]KK_2                                        | 0.278825353  | #N/A                 |
| _SALFAQINQGESITHALK_2                                                      | -0.169132518 | #N/A                 |
| _LSDLLAPISEQIEVITFR_2                                                      | -0.182979885 | #N/A                 |
| _TLWNGQK_2                                                                 | 0.279000776  | #N/A                 |
| _ [Acetyl (Protein N-term)]ADMQNLVER_2                                     | 0.133150616  | #N/A                 |
| _LEAVSHTSDM[Oxidation (M)]HC[Carbamidomethyl (C)]GYGDS[Phospho (STY)]PSK_3 | -0.364135682 | #N/A                 |
| _C[Carbamidomethyl (C)]VNTTLQIK_2                                          | 0.442368485  | #N/A                 |
| _VENQENVSNLVIDDELK_2                                                       | -0.176635238 | #N/A                 |
| _EM[Oxidation (M)]NDAAM[Oxidation (M)]FYTNR_2                              | 0.161579049  | #N/A                 |
| _PQTS[Phospho (STY)]PSPKPATK_2                                             | -0.082129083 | P40124_S307_M1_Cap1  |
| _EFHTTGLAWSK_3                                                             | -0.069561331 | #N/A                 |
| _VLDPFTIKPLDR_2                                                            | -0.126112371 | #N/A                 |
| _LAVSQVPR_2                                                                | 0.150417683  | #N/A                 |
| _LDNLVAIFDINR_2                                                            | 0.179901645  | #N/A                 |
| _LGQSDPAPLQHQQVDIYQK_3                                                     | -0.066756321 | #N/A                 |
| _HQPTAIIAK_2                                                               | 0.025710873  | #N/A                 |
| _IIALDGDTK_2                                                               | 0.102880837  | #N/A                 |
| _NSTFSELFK_2                                                               | -0.128362539 | #N/A                 |
| _NM[Oxidation (M)]AEQIIQEISYQVQSK_2                                        | 0.059467468  | #N/A                 |
| _ILATPPQEDAPSVDIANIR_2                                                     | 0.144325783  | #N/A                 |
| _TVPF[Carbamidomethyl (C)]STFAAFFTR_2                                      | 0.42512041   | #N/A                 |
| _SVP[Oxidation (M)]STVFYPSDGVATEK_2                                        | -0.111345708 | #N/A                 |
| _M[Oxidation (M)]PTPPSYK_2                                                 | -0.128734103 | #N/A                 |
| _TSRPENAIISNNEDFQVGQAK_3                                                   | -0.255594815 | #N/A                 |
| _C[Carbamidomethyl (C)]EAFGWHTIIVDGHVSVEELC[Carbamidomethyl (C)]K_3        | 0.010461662  | #N/A                 |

|                                                                                  |              |                        |
|----------------------------------------------------------------------------------|--------------|------------------------|
| _ISSDLGHPVPK_3                                                                   | 0.206510298  | #N/A                   |
| _ILTVEDHYEYEGGIEAVSAAVVGEPGVTVTR_3                                               | -0.071246598 | #N/A                   |
| _VYC[Carbamidomethyl (C)]M[Oxidation (M)]LGDGEVSEGSVWEAM[Oxidation (M)]AFAGIYK_3 | -0.579593793 | #N/A                   |
| _FES[Phospho (STY)]PDSQASAEQPEM_2                                                | 0.099742509  | P40336_S315_M1_Vps26a  |
| _LFTETEKEANS[Phospho (STY)]PESLK_2                                               | -0.006889709 | P40749_S135_M1_Syt4    |
| _QTYSTEPNNLK_2                                                                   | 0.000816274  | #N/A                   |
| _[Acetyl (Protein N-term)]SAHLQWMVVR_2                                           | -0.159997103 | #N/A                   |
| _VSEEDQS[Phospho (STY)]LENS[Phospho (STY)]EADVK_2                                | -0.151566205 | P41234_S1327_M2_Abca2  |
| _QPAEPGTSQEPGLASS[Phospho (STY)]PSGC[Carbamidomethyl (C)]PR_2                    | 0.240709033  | P41234_S1238_M1_Abca2  |
| _VSEEDQS[Phospho (STY)]LENS[Phospho (STY)]EADVKESR_2                             | -0.156020964 | P41234_S1327_M2_Abca2  |
| _DADSS[Phospho (STY)]VEKQVALLK_2                                                 | 0.0518919    | P41539_S76_M1_Tac1     |
| _EADIQNFTSFISK_2                                                                 | 0.235537265  | #N/A                   |
| _QS[Phospho (STY)]PGPALAR_2                                                      | -0.123145023 | P42128_S87_M1_Foxk1    |
| _EGS[Phospho (STY)]PIPHDPDLGSK_2                                                 | -0.432495085 | P42128_S431_M1_Foxk1   |
| _S[Phospho (STY)]APASPT[Phospho (STY)]HPGLM[Oxidation (M)]S[Phospho (STY)]PR_2   | 0.228433334  | P42128_S402_M3_Foxk1   |
| _LTVVDTPGYGDAINC[Carbamidomethyl (C)]R_2                                         | 0.141218028  | #N/A                   |
| _TVQIEASTVEIEER_2                                                                | -0.537902702 | #N/A                   |
| _TIISYIDEQFER_2                                                                  | -0.285887218 | #N/A                   |
| _IYHLPDAES[Phospho (STY)]DEDEDFKEQTR_3                                           | -0.035927815 | P42208_S218_M1_Septin2 |
| _STLINSFLTDLYPER_2                                                               | -0.150806806 | #N/A                   |
| _IYHLPDAES[Phospho (STY)]DEDEDFK_2                                               | 0.11126268   | P42208_S218_M1_Septin2 |
| _QQPTQFINPETPGYVGFANLPNQVHR_3                                                    | 0.166570597  | #N/A                   |
| _AEITSQESQISSYEEELLK_2                                                           | -0.208207914 | #N/A                   |
| _NITGSS[Phospho (STY)]PVADFSIAIK_2                                               | -0.441818711 | P42567_S324_M1_Eps15   |
| _VSEVKPTYR_2                                                                     | 0.072432041  | #N/A                   |
| _IAEVGAGGNK_2                                                                    | -0.026450943 | #N/A                   |
| _FFFDVGSNK_2                                                                     | 0.293434436  | #N/A                   |
| _LIDDYGVEEPAELPEGTSLTVDNKR_3                                                     | 0.105894388  | #N/A                   |
| _GPGLGSTQGQTIALPAQGLIEFR_3                                                       | 0.133854513  | #N/A                   |
| _VDIQNKR_2                                                                       | 0.147200623  | #N/A                   |
| _NSITVPYK_2                                                                      | 0.163253702  | #N/A                   |
| _YSEEMKK_2                                                                       | 0.033001816  | #N/A                   |
| _RHS[Phospho (STY)]LSC[Carbamidomethyl (C)]TK_2                                  | -0.068812628 | P42859_S1841_M1_Htt    |
| _S[Phospho (STY)]GEEEDSGSAAQLGMC[Carbamidomethyl (C)]NR_2                        | 0.356772775  | P42859_S1853_M1_Htt    |
| _DEVAEAS[Phospho (STY)]DPESKPC[Carbamidomethyl (C)]R_2                           | -0.124107415 | P42859_S637_M1_Htt     |
| _SGS[Phospho (STY)]IVELLAGGGSS[Phospho (STY)]C[Carbamidomethyl (C)]SPVLSR_2      | -0.053713844 | P42859_S398_M2_Htt     |
| _SLNPQKS[Phospho (STY)]GEEEDSGSAAQLGM[Oxidation (M)]C[Carbamidomethyl (C)]NR_3   | -0.006724008 | P42859_S1853_M1_Htt    |
| _EFC[Carbamidomethyl (C)]IPTSSSTIEQQNS[Phospho (STY)]AR_2                        | -0.334085876 | P42866_S363_M1_Oprm1   |
| _KDWDDQND_2                                                                      | -0.233466869 | #N/A                   |
| _DVDEVSSLLR_2                                                                    | -0.064667903 | #N/A                   |
| _FAEAFEAIPIR_2                                                                   | 0.238187487  | #N/A                   |
| _LATNAAVTVLR_2                                                                   | 0.231750203  | #N/A                   |
| _AVDDGVNTFK_2                                                                    | -0.419567292 | #N/A                   |
| _LFVTNDAATILR_2                                                                  | -0.493514911 | #N/A                   |
| _LYSVHQEGNK_2                                                                    | 0.207366119  | #N/A                   |
| _EDGAISTIVLR_2                                                                   | 0.235604072  | #N/A                   |
| _AIAGTGANVIVTGGK_2                                                               | 0.235079813  | #N/A                   |



|                                                                                              |              |                       |
|----------------------------------------------------------------------------------------------|--------------|-----------------------|
| _HEKEDGAISTIVLR_3                                                                            | 0.237443381  | #N/A                  |
| _GSTDNLM[Oxidation (M)]DDIER_2                                                               | 0.27101221   | #N/A                  |
| _QYGSETFLAK_2                                                                                | 0.341376825  | #N/A                  |
| _HFSGLEEAVYR_2                                                                               | 0.107277335  | #N/A                  |
| _SADC[Carbamidomethyl (C)]S[Phospho (STY)]VEEEPWK_2                                          | 0.216328314  | P43006_S562_M1_Slc1a2 |
| _NLFPENLVQAC[Carbamidomethyl (C)]FQQIQTVTK_2                                                 | -0.025879422 | #N/A                  |
| _KNDEVSSLDNFLIR_3                                                                            | -0.043642976 | #N/A                  |
| _Acetyl (Protein N-term)]ASTEGANNM[Oxidation (M)]PK_2                                        | 0.269705913  | #N/A                  |
| _TSVNVVGDSEFGAGIVYHLSK_2                                                                     | -0.459125529 | #N/A                  |
| _SELDTIDSQHR_2                                                                               | -0.089261881 | #N/A                  |
| _C[Carbamidomethyl (C)]LEDNLGIDKR_2                                                          | -0.06568115  | #N/A                  |
| _SADC[Carbamidomethyl (C)]S[Phospho (STY)]VEEEPWKR_2                                         | -0.133784304 | P43006_S562_M1_Slc1a2 |
| _M[Oxidation (M)]QEDIEMTK_2                                                                  | 0.338575334  | #N/A                  |
| _TQSIYDDKNHR_2                                                                               | -0.112466061 | #N/A                  |
| _M[Oxidation (M)]HDSHLS[Phospho (STY)]SDEPK_2                                                | -0.107179655 | P43006_S24_M1_Slc1a2  |
| _ESNS[Phospho (STY)]NQC[Carbamidomethyl (C)]VYAAHNSVVIDEC[Carbamidomethyl (C)]K_3            | 0.133316976  | P43006_S532_M1_Slc1a2 |
| _NDEVSSLDNFLIR_2                                                                             | -0.226044306 | #N/A                  |
| _TQSIYDDK_2                                                                                  | -0.098023958 | #N/A                  |
| _M[Oxidation (M)]HDSHLS[Phospho (STY)]S[Phospho (STY)]DEPKHR_3                               | -0.422332945 | #N/A                  |
| _DLEVVAR_2                                                                                   | -0.10749812  | #N/A                  |
| _NHRESNS[Phospho (STY)]NQC[Carbamidomethyl (C)]VYAAHNSVVIDEC[Carbamidomethyl (C)]K_4         | -0.193858521 | P43006_S532_M1_Slc1a2 |
| _TQSIY[Phospho (STY)]DDKNHRESNSNQC[Carbamidomethyl (C)]VYAAHNSVVIDEC[Carbamidomethyl (C)]K_5 | -0.624562514 | P43006_Y522_M1_Slc1a2 |
| _HEEHERPPFVAYPHLR_4                                                                          | -0.027302635 | #N/A                  |
| _ALTYFVALPGVGVSM[Oxidation (M)]LNVFLK_2                                                      | -0.259378404 | #N/A                  |
| _Acetyl (Protein N-term)]S[Phospho (STY)]ETAPAAPAAPAEK_2                                     | -0.024914268 | P43274_S2_M1_H1-4     |
| _TSGPPVSELITK_2                                                                              | 0.24837065   | #N/A                  |
| _Acetyl (Protein N-term)]S[Phospho (STY)]ETAPAAPAAPAEKTPVK_2                                 | 0.051392161  | P43274_S2_M1_H1-4     |
| _Acetyl (Protein N-term)]S[Phospho (STY)]ETAPAETAAPAPVEK_2                                   | 0.165134189  | P43276_S2_M1_H1-5     |
| _Acetyl (Protein N-term)]SETAPAETAAPAPVEKS[Phospho (STY)]PAKK_3                              | -0.175999449 | P43276_S18_M1_H1-5    |
| _ALAAGGYDVEK_2                                                                               | -0.121483098 | #N/A                  |
| _Acetyl (Protein N-term)]SETAPAETAAPAPVEKS[Phospho (STY)]PAK_2                               | -0.277630179 | P43276_S18_M1_H1-5    |
| _Acetyl (Protein N-term)]S[Phospho (STY)]ETAPAAPAAPAPVEK_2                                   | -0.320625806 | P43277_S2_M1_H1-3     |
| _Acetyl (Protein N-term)]SETAPAAPAAPAPVEKT[Phospho (STY)]PVK_2                               | 0.34239402   | P43277_T18_M1_H1-3    |
| _FC[Carbamidomethyl (C)]PS[Phospho (STY)]PSTSSEGTR_2                                         | 0.200328     | P43346_S11_M1_Dck     |
| _EQLQPHENGEGNS[Phospho (STY)]ET_2                                                            | -0.063520562 | P43406_S1042_M1_Ilgav |
| _YNNQLATR_2                                                                                  | -0.243964541 | #N/A                  |
| _TIGVSNFNPLQIER_2                                                                            | 0.416808903  | #N/A                  |
| _Acetyl (Protein N-term)]ASHLELNNGTK_2                                                       | 0.109512344  | #N/A                  |
| _TTAQVLIR_2                                                                                  | 0.428403207  | #N/A                  |
| _VAIDLGYR_2                                                                                  | 0.276187774  | #N/A                  |
| _SPPGQVTEAVK_2                                                                               | 0.345365154  | #N/A                  |
| _LIEYC[Carbamidomethyl (C)]HSK_2                                                             | -0.206961581 | #N/A                  |
| _HIDC[Carbamidomethyl (C)]AQVYQNEK_2                                                         | -0.083200217 | #N/A                  |
| _Acetyl (Protein N-term)]AS[Phospho (STY)]GVTVNDEVIK_2                                       | 0.137310749  | P45591_S3_M1_Cfl2     |
| _QIIVVEAK_2                                                                                  | -0.255830238 | #N/A                  |
| _QILVGDIGDTVEDPYTSFVK_2                                                                      | -0.327974355 | #N/A                  |
| _LLPLNDC[Carbamidomethyl (C)]R_2                                                             | 0.140496054  | #N/A                  |

|                                                        |              |                        |
|--------------------------------------------------------|--------------|------------------------|
| _HEWQVNGLDDIKDR_3                                      | 0.107718794  | #N/A                   |
| _LVIPSELGYGER_2                                        | -0.123094941 | #N/A                   |
| _IPGGATLVFEVELLK_2                                     | -0.072538443 | #N/A                   |
| _GSGEEPAT[Phospho (STY)]PSRK_2                         | -0.393809133 | P46061_T411_M1_Rangap1 |
| _VFGYNSTGAELR_2                                        | -0.16262315  | #N/A                   |
| _HDIIGEFK_2                                            | -0.113047881 | #N/A                   |
| _TLNPVFNEQFTFK_2                                       | -0.06146367  | #N/A                   |
| _VPYSELGGK_2                                           | -0.287506119 | #N/A                   |
| _LTVVILEAK_2                                           | 0.035959922  | #N/A                   |
| _M[Oxidation (M)]DVGGLSDPYVK_2                         | 0.246163066  | #N/A                   |
| _DDDAETGLT[Phospho (STY)]DGEEKKEEPKEEK_3               | 0.1295143    | P46096_T128_M1_Syt1    |
| _HWSDM[Oxidation (M)]LANPR_2                           | 0.258557213  | #N/A                   |
| _DLQSAEKEEQEK_2                                        | -0.218277991 | #N/A                   |
| _VFLLPDK_2                                             | -0.09894975  | #N/A                   |
| _VQVVVTVLDYDK_2                                        | -0.116743631 | #N/A                   |
| _TLVM[Oxidation (M)]AVYDFDR_2                          | -0.006831093 | #N/A                   |
| _VPM[Oxidation (M)]NTVDFGHVTEEWR_3                     | -0.134870197 | #N/A                   |
| _NTLNPPYNESFS[Phospho (STY)]FEVPFEQIQK_3               | -0.362667033 | P46096_S344_M1_Syt1    |
| _VSNGS[Phospho (STY)]PSLER_2                           | -0.355084571 | P46414_S10_M1_Cdkn1b   |
| _TEENVSDGS[Phospho (STY)]PNAGTVEQTPK_2                 | 0.315294061  | P46414_S178_M1_Cdkn1b  |
| _VLAQES[Phospho (STY)]QDVSGSR_2                        | 0.191359881  | P46414_S106_M1_Cdkn1b  |
| _GILLYGPPGC[Carbamidomethyl (C)]GK_2                   | -0.044618406 | #N/A                   |
| _LLDYVPIGPR_2                                          | 0.08399829   | #N/A                   |
| _YVGESEANIR_2                                          | 0.155344857  | #N/A                   |
| _VLDDGELLVQQTK_2                                       | -0.262160545 | #N/A                   |
| _SQLSC[Carbamidomethyl (C)]VVVDDIER_2                  | -0.090126876 | #N/A                   |
| _NFSGALEGLVR_2                                         | -0.122404113 | #N/A                   |
| _LLIIGTTSR_2                                           | -0.247454299 | #N/A                   |
| _NIDSNPYDTDK_2                                         | 0.279148762  | #N/A                   |
| _KLLIIGTTSR_2                                          | 0.160016495  | #N/A                   |
| _IAEESNFPFIK_2                                         | -0.232883579 | #N/A                   |
| _WGDPVTR_2                                             | -0.129374214 | #N/A                   |
| _VVNGPEILNK_2                                          | 0.226213601  | #N/A                   |
| _AENSSLNLIGK_2                                         | 0.004338781  | #N/A                   |
| _AESLQVTR_2                                            | 0.069196891  | #N/A                   |
| _TTIAQQVK_2                                            | -0.255139863 | #N/A                   |
| _TKENRQS[Phospho (STY)]IINPDWNFEK_3                    | -0.378861366 | P46460_S207_M1_Nsf     |
| _YVGESEANIRK_2                                         | 0.065664703  | #N/A                   |
| _M[Oxidation (M)]GIGGLDKEFSDFR_3                       | 0.050730194  | #N/A                   |
| _LQILHIHTAR_3                                          | -0.257259985 | #N/A                   |
| _KIFDDAYK_2                                            | 0.256849468  | #N/A                   |
| _IEVGLVVGNSQVAFK_2                                     | 0.194077968  | #N/A                   |
| _QC[Carbamidomethyl (C)]IGTM[Oxidation (M)]TIEIDFLQK_2 | 0.16901025   | #N/A                   |
| _M[Oxidation (M)]EIGLPDEK_2                            | -0.062723417 | #N/A                   |
| _DIEAM[Oxidation (M)]DPSILK_2                          | 0.242495206  | #N/A                   |
| _TPLVSVLLEGPPHSGK_2                                    | -0.007055543 | #N/A                   |
| _IDGVEQLNNILVIGM[Oxidation (M)]TNRPDLIDEALLRPGR_4      | -0.003572793 | #N/A                   |

|                                                               |              |                       |
|---------------------------------------------------------------|--------------|-----------------------|
| _KLFADAEERQ_3                                                 | 0.494974426  | #N/A                  |
| _M[Oxidation (M)]IGFSETAK_2                                   | 0.472897712  | #N/A                  |
| _AAQSTAMNR_2                                                  | 0.290810647  | #N/A                  |
| _EFSDFR_2                                                     | -0.147742537 | #N/A                  |
| _GHQLSADVDIK_2                                                | -0.201905645 | #N/A                  |
| _ENRQS[Phospho (STY)]IINPDWNFEK_3                             | -0.063470624 | P46460_S207_M1_Nsf    |
| _KLFADAEERQR_3                                                | 0.29647347   | #N/A                  |
| _QSIINPDWNFEK_2                                               | 0.355694725  | #N/A                  |
| _GSM[Oxidation (M)]AGSTGVHDTVVNQLLSK_3                        | -0.497367793 | #N/A                  |
| _VEVDM[Oxidation (M)]EKAESLQVTR_3                             | -0.302803676 | #N/A                  |
| _C[Carbamidomethyl (C)]PTDELSLNC[Carbamidomethyl (C)]AVVNEK_2 | 0.057482435  | #N/A                  |
| _KNIDSNPYDTDK_2                                               | 0.134444508  | #N/A                  |
| _LFADAEERQR_2                                                 | 0.082396604  | #N/A                  |
| _FLALM[Oxidation (M)]REGAS[Phospho (STY)]PLDFD_2              | -0.080404391 | P46460_S739_M1_Nsf    |
| _EEGAS[Phospho (STY)]PLDFD_1                                  | -0.407811283 | P46460_S739_M1_Nsf    |
| _DFQSGQHVM[Oxidation (M)]VR_2                                 | 0.047086266  | #N/A                  |
| _VEVDMEK_2                                                    | 0.126437822  | #N/A                  |
| _GNDS[Phospho (STY)]DGEAESDDPEK_2                             | -0.31376972  | P46467_S102_M1_Vps4b  |
| _GNDS[Phospho (STY)]DGEAESDDPEKKK_2                           | 0.053187499  | P46467_S102_M1_Vps4b  |
| _TM[Oxidation (M)]LELINQLDGFDP_2                              | -0.30678802  | #N/A                  |
| _FVVDLSQVAPTDEEGM[Oxidation (M)]R_2                           | 0.364502729  | #N/A                  |
| _AQIWDTAGQER_2                                                | -0.189870072 | #N/A                  |
| _VVLIGDSGVGK_2                                                | 0.06511882   | #N/A                  |
| _Acetyl (Protein N-term)]GTRDDEYDLFK_2                        | -0.267284311 | #N/A                  |
| _NNLSFIETSALDSTNVEEAFK_2                                      | -0.241159186 | #N/A                  |
| _HLTYENVER_2                                                  | -0.333127271 | #N/A                  |
| _NLTIEYR_2                                                    | -0.25411101  | #N/A                  |
| _STIGVEFATR_2                                                 | -0.060054269 | #N/A                  |
| _AITSAYR_2                                                    | -0.164393893 | #N/A                  |
| _NEFNLESK_2                                                   | -0.524347219 | #N/A                  |
| _AAHDES[Phospho (STY)]PGNNVVDISVPPTDGQR_3                     | -0.411027168 | P46638_S190_M1_Rab11b |
| _TNEKEQLQGLNDR_3                                              | -0.120598993 | #N/A                  |
| _DGLAEVQR_2                                                   | -0.017630767 | #N/A                  |
| _VHQLTQNR_2                                                   | 0.204432384  | #N/A                  |
| _ALEAELALR_2                                                  | 0.207012738  | #N/A                  |
| _QILELEER_2                                                   | 0.095687585  | #N/A                  |
| _AQLEEASSAR_2                                                 | 0.252973974  | #N/A                  |
| _TIEIEGLR_2                                                   | 0.149936731  | #N/A                  |
| _FANLNEQAAR_2                                                 | 0.41260092   | #N/A                  |
| _NLQSAEEWYK_2                                                 | 0.042812578  | #N/A                  |
| _KVESLLDELAFVR_3                                              | 0.080292396  | #N/A                  |
| _RLPASDGLDLSQAAAR_3                                           | 0.095083249  | #N/A                  |
| _DVDGATLAR_2                                                  | -0.090117615 | #N/A                  |
| _LPASDGLDLSQAAAR_2                                            | 0.318440687  | #N/A                  |
| _AQALLER_2                                                    | 0.012297038  | #N/A                  |
| _FAVFIEK_2                                                    | 0.179441364  | #N/A                  |
| _AQYESLAAR_2                                                  | 0.001535101  | #N/A                  |

|                                                                                 |              |                      |
|---------------------------------------------------------------------------------|--------------|----------------------|
| _VGELFQR_2                                                                      | 0.499238806  | #N/A                 |
| _KVFGDSSR_2                                                                     | 0.183286805  | #N/A                 |
| _LSGPGSGSFR_2                                                                   | 0.404588878  | #N/A                 |
| _VESLLDELAQVR_2                                                                 | 0.183962672  | #N/A                 |
| _SNVASTAAC[Carbamidomethyl (C)]SSASSLGLGLAYR_2                                  | -0.504615595 | #N/A                 |
| _GANES[Phospho (STY)]LER_2                                                      | -0.072127249 | P46660_S335_M1_Ina   |
| _Acetyl (Protein N-term)]SFGSEHYLC[Carbamidomethyl (C)]SASSYR_2                 | -0.284409837 | #N/A                 |
| _Acetyl (Protein N-term)]SFGSEHYLC[Carbamidomethyl (C)]SAS[Phospho (STY)]SYRK_3 | -0.172658505 | P46660_S13_M1_Ina    |
| _EEIHEYRR_2                                                                     | -0.047379302 | #N/A                 |
| _VSSAGLSLK_2                                                                    | -0.29940221  | #N/A                 |
| _VGEGFEETLGEAVISTK_2                                                            | -0.256256803 | #N/A                 |
| _KEEEEEEEASKEVSK_3                                                              | -0.221541323 | #N/A                 |
| _SATEESTSS[Phospho (STY)]SQKM_2                                                 | -0.092960436 | P46660_S497_M1_Ina   |
| _HSAEVAGYQDSIGQLESCLR_3                                                         | -0.203224531 | #N/A                 |
| _ILSSTASK_2                                                                     | 0.254073316  | #N/A                 |
| _VVDLLAQDADIVC[Carbamidomethyl (C)]R_2                                          | -0.357488051 | #N/A                 |
| _ELPVNAQNYVR_2                                                                  | 0.608282642  | #N/A                 |
| _RQIS[Phospho (STY)]EDVDGPDNR_2                                                 | 0.068167012  | P46935_S309_M1_Nedd4 |
| _QIS[Phospho (STY)]EDVDGPDNR_2                                                  | -0.249933537 | P46935_S309_M1_Nedd4 |
| _RSPDDDLT[Phospho (STY)]DEDNDDM[Oxidation (M)]QLQAQR_3                          | 0.248243962  | P46935_T287_M1_Nedd4 |
| _QAS[Phospho (STY)]TDAGTAGALTPQHVR_2                                            | 0.163946278  | P46938_S94_M1_Yap1   |
| _GDS[Phospho (STY)]ETDLEALFNAVM[Oxidation (M)]NPK_2                             | 0.157273367  | P46938_S46_M1_Yap1   |
| _EAGALDSLPGIPLATS[Phospho (STY)]SEDLEKS_2                                       | 0.098835259  | P47212_S117_M1_Gal   |
| _LHLLPGASK_2                                                                    | 0.015475435  | #N/A                 |
| _KQEELTDEEKEIINR_3                                                              | 0.094204867  | #N/A                 |
| _TKPQQPAGEPATQEPTPESR_3                                                         | -0.165038406 | #N/A                 |
| _TGPAGGFQAAPHTAAPYSQAAPAR_3                                                     | 0.102723822  | #N/A                 |
| _DSEGWDHAHGGGTGDTSR_3                                                           | -0.210002335 | #N/A                 |
| _WHQLQNENHVSS[Phospho (STY)]D_2                                                 | -0.162553824 | P47708_S680_M1_Rph3a |
| _RANS[Phospho (STY)]VQAAR_2                                                     | -0.487429537 | P47708_S271_M1_Rph3a |
| _DSEGWDHAHGGGTGDTSR[Phospho (STY)]PAGLR_4                                       | -0.080664401 | P47708_S262_M1_Rph3a |
| _ANS[Phospho (STY)]VQAAR_2                                                      | 0.254436062  | P47708_S271_M1_Rph3a |
| _ISVC[Carbamidomethyl (C)]DEDKFGHNEFIGETR_3                                     | -0.304999721 | #N/A                 |
| _TIPIDGDDFFSYTR_2                                                               | 0.103080236  | #N/A                 |
| _AAFQLGSPWR_2                                                                   | -0.241368415 | #N/A                 |
| _VVGPNPFSR_2                                                                    | -0.188317    | #N/A                 |
| _TFVQENVYDEFVER_2                                                               | -0.444050226 | #N/A                 |
| _VAEQTPLTALYVANLIK_2                                                            | -0.117148557 | #N/A                 |
| _TEQGPQVDETQFK_2                                                                | 0.053206969  | #N/A                 |
| _TIEEVVGR_2                                                                     | 0.190738607  | #N/A                 |
| _LLC[Carbamidomethyl (C)]GGGAAADR_2                                             | 0.671215252  | #N/A                 |
| _ELGEYGLQAYTEVK_2                                                               | -0.217709662 | #N/A                 |
| _LADLIER_2                                                                      | -0.302111449 | #N/A                 |
| _EATDPRPYEAENAIESWR_3                                                           | -0.189010816 | #N/A                 |
| _LLLNNNDNLLR_2                                                                  | 0.406827651  | #N/A                 |
| _FTVTPSTTQVVGILK_2                                                              | 0.314861856  | #N/A                 |
| _EHYPNGVC[Carbamidomethyl (C)]TVYVK_2                                           | -0.091031611 | #N/A                 |

|                                                                          |              |                       |
|--------------------------------------------------------------------------|--------------|-----------------------|
| _TSVETALR_2                                                              | -0.111037013 | #N/A                  |
| _EGAAHAFAQYNLDQFTPVK_3                                                   | -0.347963205 | #N/A                  |
| _ [Acetyl (Protein N-term)]ADLEEQLSDEEKVR_2                              | -0.217791954 | #N/A                  |
| _ [Acetyl (Protein N-term)]ADLEEQLSDEEK_2                                | 0.000724504  | #N/A                  |
| _FIIHAPPGEFNEVFNDVR_3                                                    | 0.060829126  | #N/A                  |
| _DIQDSLTVSNEVQTAK_2                                                      | -0.202936922 | #N/A                  |
| _IVEAAENEYQTAISENYQTMSDTTFK_3                                            | 0.000296329  | #N/A                  |
| _DYLLC[Carbamidomethyl (C)]DYNR_2                                        | -0.260314239 | #N/A                  |
| _STLNEIFYGK_2                                                            | 0.02486567   | #N/A                  |
| _ELS[Phospho (STY)]QVLTQR_2                                              | -0.471136887 | P47757_S263_M1_Capzb  |
| _GC[Carbamidomethyl (C)]WDSIHVVEVQEK_2                                   | -0.299729638 | #N/A                  |
| _KLEVEANNAFDQYR_3                                                        | -0.352600307 | #N/A                  |
| _LEVEANNAFDQYR_2                                                         | 0.179075586  | #N/A                  |
| _SGSGTM[Oxidation (M)]NLGGSLTR_2                                         | -0.239075424 | #N/A                  |
| _ [Acetyl (Protein N-term)]SDQQLDC[Carbamidomethyl (C)]ALDLMR_2          | 0.132918771  | #N/A                  |
| _ALLTPVAIAAGR_2                                                          | -0.241061846 | #N/A                  |
| _LC[Carbamidomethyl (C)]DFGISGQLVDSIAK_2                                 | 0.041748913  | #N/A                  |
| _LRTHS[Phospho (STY)]IESSGK_3                                            | -0.243877299 | P47809_S78_M1_Map2k4  |
| _YVYSVLDDVIPEEILGK_2                                                     | 0.043957451  | #N/A                  |
| _FTLNPNTTGVCNPHIER_3                                                     | 0.242385214  | #N/A                  |
| _THS[Phospho (STY)]IESSGK_2                                              | 0.020496876  | P47809_S78_M1_Map2k4  |
| _LKIS[Phospho (STY)]PEQHWDFTAEDLKLGEIGR_4                                | -0.058122883 | P47809_S88_M1_Map2k4  |
| _ILDQM[Oxidation (M)]PATPSS[Phospho (STY)]PM[Oxidation (M)]YVD_2         | -0.343834917 | P47809_S392_M1_Map2k4 |
| _HTDDEM[Oxidation (M)]TGY[Phospho (STY)]VATR_2                           | -0.313685667 | P47811_Y182_M1_Mapk14 |
| _VDS[Phospho (STY)]TTC[Carbamidomethyl (C)]LFPVEEK_2                     | 0.145116152  | P47856_S259_M1_Gfpt1  |
| _KRS[Phospho (STY)]GEAAV_2                                               | -0.333575215 | P47857_S775_M1_Pfkm   |
| _ALVFQPVTELKDQTDFEHR_3                                                   | -0.31890744  | #N/A                  |
| _RFDEAIK_2                                                               | -0.145006259 | #N/A                  |
| _DLQVNVEHLVQK_2                                                          | -0.433123687 | #N/A                  |
| _GQIEEAGWSYVGGWTGQGGSK_2                                                 | -0.377183699 | #N/A                  |
| _ALVFQPVTELK_2                                                           | 0.18299353   | #N/A                  |
| _NLEQISANITK_2                                                           | 0.108107425  | #N/A                  |
| _IVEIVDAITTTAQSHQR_2                                                     | -0.327928541 | #N/A                  |
| _SEWSDLLNDLQK_2                                                          | 0.272030864  | #N/A                  |
| _GITNLC[Carbamidomethyl (C)]VIGGDGSLTGADTFR_2                            | -0.174416299 | #N/A                  |
| _IFANTPDSCG[Carbamidomethyl (C)]VLGM[Oxidation (M)]R_2                   | 0.065502117  | #N/A                  |
| _VLVVHDGFEGLAK_2                                                         | -0.090914707 | #N/A                  |
| _AIAVLTSGGDAQGM[Oxidation (M)]NAAVR_2                                    | 0.029915711  | #N/A                  |
| _NVLGHM[Oxidation (M)]QQGGSPTPFDR_3                                      | -0.48504864  | #N/A                  |
| _LNIIIVAEGAIDK_2                                                         | -0.286833321 | #N/A                  |
| _SSYLNIIVGLVGSIDNDFC[Carbamidomethyl (C)]GTDM[Oxidation (M)]TIGTDSALHR_3 | 0.473197245  | #N/A                  |
| _VFFVHEGYQGLVDGGEHIR_3                                                   | -0.099084207 | #N/A                  |
| _EATWESVSM[Oxidation (M)]M[Oxidation (M)]LQLGGTVIGSAR_3                  | -0.492116885 | #N/A                  |
| _ELS[Phospho (STY)]AERPLNEQIAEAEADK_3                                    | -0.02697076  | P47867_S40_M1_Scg3    |
| _AVPQLQGYLR_2                                                            | -0.248530102 | #N/A                  |
| _QLDSGLLLVTGPLVINR_2                                                     | 0.194261879  | #N/A                  |
| _SSITPGTVLIILTGR_2                                                       | 0.162391585  | #N/A                  |

|                                                                      |              |                      |
|----------------------------------------------------------------------|--------------|----------------------|
| _KAGS[Phospho (STY)]DAAASRPR_2                                       | -0.18125046  | P47911_S21_M1_Rpl6   |
| _HQEGEIFDTEKEKYEITEQR_4                                              | -0.429516008 | #N/A                 |
| _AGS[Phospho (STY)]DAAASRPR_2                                        | 0.188625023  | P47911_S21_M1_Rpl6   |
| _S[Phospho (STY)]PPTSGLQSLR_2                                        | -0.252813306 | P47930_S200_M1_Fosl2 |
| _Y[Phospho (STY)]PSPPVGSVSAPNLPTAEENLEYVR_3                          | 0.331013007  | P47941_Y105_M1_Crkl  |
| _IFDPQNPDDNE_2                                                       | -0.240511991 | #N/A                 |
| _DSS[Phospho (STY)]TC[Carbamidomethyl (C)]PGDYVLSVSENSOR_2           | 0.239339072  | P47941_S42_M1_Crkl   |
| _AAGVSVEPFWPGLFAK_2                                                  | 0.203975446  | #N/A                 |
| _ALANVNIGSLIC[Carbamidomethyl (C)]NVGAGGPAPAAGAAPAGGAAPSTAAAPAEK_4   | -0.388571582 | #N/A                 |
| _KEES[Phospho (STY)]EES[Phospho (STY)]EDDM[Oxidation (M)]GFGLFD_2    | 0.112968938  | P47955_S101_M2_Rplp1 |
| _EFNAEVHRK_2                                                         | 0.061336845  | #N/A                 |
| _VGLTNYAAAYC[Carbamidomethyl (C)]TGLLAR_2                            | -0.131689625 | #N/A                 |
| _YLMEDEDAYKK_3                                                       | -0.513733722 | #N/A                 |
| _VDTWFNQPAR_2                                                        | -0.112786967 | #N/A                 |
| _LATQLTGPVM[Oxidation (M)]PIR_2                                      | -0.232307395 | #N/A                 |
| _GFSLEELR_2                                                          | -0.193371319 | #N/A                 |
| _KGDSS[Phospho (STY)]AEELK_2                                         | -0.074386888 | P47963_S140_M1_Rpl13 |
| _TIGISV DPR_2                                                        | 0.517746077  | #N/A                 |
| _STESLQANVQR_2                                                       | 0.214868062  | #N/A                 |
| _EVC[Carbamidomethyl (C)]GFAPYER_2                                   | -0.101969048 | #N/A                 |
| _GTVTDFPGFDGR_2                                                      | -0.270031968 | #N/A                 |
| _VLTEIIASR_2                                                         | -0.190728767 | #N/A                 |
| _SEIDLFNIR_2                                                         | 0.046006691  | #N/A                 |
| _GLGTDEDSILNLLTSR_2                                                  | 0.18227219   | #N/A                 |
| _GAGTDDHTLIR_2                                                       | -0.139863498 | #N/A                 |
| _QEIAQEFK_2                                                          | 0.44149036   | #N/A                 |
| _ADAEVLRK_2                                                          | -0.089675718 | #N/A                 |
| _DLVDDLKSELTGK_2                                                     | 0.023873783  | #N/A                 |
| _ETSGNLEQLLLAVVK_2                                                   | 0.041887486  | #N/A                 |
| _LYDAYELK_2                                                          | -0.232224859 | #N/A                 |
| _TPEELSAIK_2                                                         | -0.347392958 | #N/A                 |
| _S[Phospho (STY)]LDGAAAESTDR_2                                       | -0.39458658  | P48193_S543_M1_Epb41 |
| _LSTHS[Phospho (STY)]PFR_2                                           | 0.087102265  | P48193_S706_M1_Epb41 |
| _RAS[Phospho (STY)]RS[Phospho (STY)]LDGAAAESTDR_3                    | 0.031872084  | P48193_S541_M2_Epb41 |
| _GVPDS[Phospho (STY)]PERR_2                                          | -0.318342034 | P48318_S527_M1_Gad1  |
| _ANSVTWNPHK_2                                                        | 0.349542985  | #N/A                 |
| _GTVGFENQINK_2                                                       | 0.108213876  | #N/A                 |
| _NLLS[Phospho (STY)]C[Carbamidomethyl (C)]ENSDQGAR_2                 | -0.285122744 | P48318_S77_M1_Gad1   |
| _TNS[Phospho (STY)]LEEKSR_2                                          | -0.457828156 | P48318_S55_M1_Gad1   |
| _ERQS[Phospho (STY)]SKNLLSC[Carbamidomethyl (C)]ENSDQGAR_3           | 0.319202034  | P48318_S71_M1_Gad1   |
| _QSS[Phospho (STY)]KNLLSC[Carbamidomethyl (C)]ENSDQGAR_3             | -0.482915919 | P48318_S72_M1_Gad1   |
| _M[Oxidation (M)]M[Oxidation (M)]GVPLQC[Carbamidomethyl (C)]SALLVR_2 | -0.340132956 | #N/A                 |
| _HYDLSYDTGDK_2                                                       | 0.117463043  | #N/A                 |
| _M[Oxidation (M)]VISNPAATHQDIDFLIEIER_3                              | -0.206047247 | #N/A                 |
| _Acetyl (Protein N-term)]ASPGSGFWFSGS[Phospho (STY)]EDGSADPENPGTAR_3 | -0.099393233 | P48320_S13_M1_Gad2   |
| _DRAS[Phospho (STY)]PESDLTR_2                                        | -0.060553222 | P48437_S511_M1_Prox1 |
| _GMSHS[Phospho (STY)]PSVALR_2                                        | 0.13847954   | P48437_S179_M1_Prox1 |

|                                                                     |              |                       |
|---------------------------------------------------------------------|--------------|-----------------------|
| _GFS[Phospho (STY)]PPHR_.2                                          | -0.490883381 | P48453_S472_M1_Ppp3cb |
| _LFEVGGSPANTR_.2                                                    | -0.381879196 | #N/A                  |
| _IC[Carbamidomethyl (C)]S[Phospho (STY)]FEEAK_.2                    | -0.236247265 | P48453_S479_M1_Ppp3cb |
| _YLFLGDYVDR_.2                                                      | -0.307724563 | #N/A                  |
| _EESVSLTLK_.2                                                       | 0.095816001  | #N/A                  |
| _AHEAQDAGYR_.2                                                      | -0.088162516 | #N/A                  |
| _IINEGAAILR_.2                                                      | 0.191444631  | #N/A                  |
| _YENNVMOxidation (M)]NIR_.2                                         | 0.349928945  | #N/A                  |
| _HLTEYFTFK_.2                                                       | -0.416186652 | #N/A                  |
| _IC[Carbamidomethyl (C)]S[Phospho (STY)]FEEAKGLDR_.2                | -0.479907038 | P48453_S479_M1_Ppp3cb |
| _VDEEIALR_.2                                                        | 0.241495728  | #N/A                  |
| _IRS[Phospho (STY)]FEEAR_.2                                         | -0.037575565 | P48455_S462_M1_Ppp3cc |
| _Acetyl (Protein N-term)]AQENAAFS[Phospho (STY)]PGSEPPR_.2          | -0.30849025  | P48543_S9_M1_Kcnj9    |
| _KLES[Phospho (STY)]SESER_.2                                        | 0.010523398  | P48678_S423_M1_Lmna   |
| _LADALQELR_.2                                                       | 0.210247741  | #N/A                  |
| _LQEKEDLQELNDR_.3                                                   | 0.110907454  | #N/A                  |
| _SGAQASSTPLS[Phospho (STY)]PTR_.2                                   | -0.300235856 | P48678_S22_M1_Lmna    |
| _LSPS[Phospho (STY)]PTSQR_.2                                        | -0.269107729 | P48678_S392_M1_Lmna   |
| _SS[Phospho (STY)]FSQHAR_.2                                         | 0.1942743    | P48678_S429_M1_Lmna   |
| _GSHC[Carbamidomethyl (C)]S[Phospho (STY)]GSGDPAEYNLR_.2            | 0.193035742  | P48678_S573_M1_Lmna   |
| _NSNLVGAAHEELQQSR_.2                                                | -0.400382432 | #N/A                  |
| _SVGGSGGGS[Phospho (STY)]FGDNLVTR_.2                                | 0.413986454  | P48678_S637_M1_Lmna   |
| _LRLS[Phospho (STY)]PS[Phospho (STY)]PTSQR_.2                       | -0.403655488 | P48678_S390_M2_Lmna   |
| _MQQQLDEYQELLDIK_.2                                                 | 0.01571227   | #N/A                  |
| _NKS[Phospho (STY)]NEDQSMOxidation (M)]GNWQIR_.3                    | -0.394381266 | P48678_S458_M1_Lmna   |
| _ASS[Phospho (STY)]HSSQSQGGGSVTK_.2                                 | -0.298071568 | P48678_S404_M1_Lmna   |
| _AQHEDQVEQYK_.3                                                     | 0.138359278  | #N/A                  |
| _LEAALGEAK_.2                                                       | 0.088454169  | #N/A                  |
| _S[Phospho (STY)]FDDPIVQTER_.2                                      | -0.342564727 | P48722_S74_M1_Hspa4l  |
| _LHGRS[Phospho (STY)]FDDPIVQTER_.3                                  | -0.349121466 | P48722_S74_M1_Hspa4l  |
| _QLT[Phospho (STY)]QDLLNSYIENEGK_.2                                 | -0.201539652 | P48722_T593_M1_Hspa4l |
| _SGGIETIANEYSDR_.2                                                  | -0.025520287 | #N/A                  |
| _VLATTFDPYLGGR_.2                                                   | 0.108560395  | #N/A                  |
| _SIDLPIQSSLYR_.2                                                    | -0.059491446 | #N/A                  |
| _SQIVTNVR_.2                                                        | 0.351685442  | #N/A                  |
| _LSLTQDPVVK_.2                                                      | -0.282524498 | #N/A                  |
| _DKLGTVEYK_.2                                                       | 0.462453557  | #N/A                  |
| _QDLPSLDEKPR_.3                                                     | 0.291222921  | #N/A                  |
| _AQFEQLC[Carbamidomethyl (C)]ASLLAR_.2                              | -0.077783287 | #N/A                  |
| _C[Carbamidomethyl (C)]HAEHT[Phospho (STY)]PEEEIDHTGAK_.3           | 0.032446486  | P48722_T545_M1_Hspa4l |
| _GSSQHTDS[Phospho (STY)]GEMEVD_.2                                   | 0.093955889  | P48722_S832_M1_Hspa4l |
| _FITPEDMNK_.2                                                       | 0.292669476  | #N/A                  |
| _TSFEEGTGEC[Carbamidomethyl (C)]EVFSK_.2                            | -0.007529636 | #N/A                  |
| _SVMOxidation (M)]AAAQVAGLNC[Carbamidomethyl (C)]LR_.2              | -0.20052662  | #N/A                  |
| _NHAPFSK_.2                                                         | -0.164596064 | #N/A                  |
| _TGSEHNGPMDGQSGSET[Phospho (STY)]SPDPPK_.3                          | -0.009723325 | P48722_T818_M1_Hspa4l |
| _Acetyl (Protein N-term)]SVVGIDLGFLNC[Carbamidomethyl (C)]YIAVAR_.2 | -0.270410712 | #N/A                  |

|                                                                           |              |                        |
|---------------------------------------------------------------------------|--------------|------------------------|
| _RNS[Phospho (STY)]EIDELK_.2                                              | 0.091898062  | P48725_S1437_M1_Pcnt   |
| _LQAEGLSPR_.2                                                             | 0.282882251  | #N/A                   |
| _ILLNAC[Carbamidomethyl (C)]C[Carbamidomethyl (C)]PGWVR_.2                | 0.294026084  | #N/A                   |
| _FVEDTKK_.2                                                               | 0.389807708  | #N/A                   |
| _FHQLDIDNPQSIR_.3                                                         | -0.152587059 | #N/A                   |
| _GVHAEEGWPNSAYGVTK_.2                                                     | -0.009835689 | #N/A                   |
| _ [Acetyl (Protein N-term)]SS[Phospho (STY)]SRPVALVTGANK_.2               | 0.263105996  | P48758_S3_M1_Cbr1      |
| _FSGDVVLAAR_.2                                                            | -0.402041377 | #N/A                   |
| _GGASDALLYR_.2                                                            | 0.103148565  | #N/A                   |
| _LFQEDNGM[Oxidation (M)]PVHLK_.2                                          | 0.074200889  | #N/A                   |
| _IAAFQSDR_.2                                                              | 0.161235394  | #N/A                   |
| _YIC[Carbamidomethyl (C)]GEAPDYDR_.2                                      | 0.122380223  | #N/A                   |
| _SM[Oxidation (M)]VLGYWDIR_.2                                             | 0.158694746  | #N/A                   |
| _SQWLDVK_.2                                                               | 0.489684682  | #N/A                   |
| _LTFVDFTYDVLQNR_.2                                                        | 0.161081041  | #N/A                   |
| _M[Oxidation (M)]LLEFTDTSYEEKR_.3                                         | 0.235554563  | #N/A                   |
| _QIFLGGVDR_.2                                                             | -0.068309479 | #N/A                   |
| _EQGFLSFWR_.2                                                             | -0.103922684 | #N/A                   |
| _EFNGLGDC[Carbamidomethyl (C)]LTK_.2                                      | 0.019718267  | #N/A                   |
| _ [Acetyl (Protein N-term)]GDQALSFLK_.2                                   | 0.329337911  | #N/A                   |
| _DFLAGGIAAAVSK_.2                                                         | 0.139242505  | #N/A                   |
| _AAYFGVYDTAK_.2                                                           | -0.115955548 | #N/A                   |
| _LAADVKGGS[Phospho (STY)]SQR_.2                                           | 0.127794569  | P48962_S149_M1_Slc25a4 |
| _IAKDEGANAFFK_.3                                                          | 0.194823194  | #N/A                   |
| _GADIM[Oxidation (M)]YTGTLDC[Carbamidomethyl (C)]WR_.2                    | -0.012626667 | #N/A                   |
| _DEGANAFFK_.2                                                             | -0.023806104 | #N/A                   |
| _GSS[Phospho (STY)]QREFNGLGDC[Carbamidomethyl (C)]LTK_.3                  | 0.085490916  | P48962_S150_M1_Slc25a4 |
| _RVS[Phospho (STY)]EVEAVLSQK_.2                                           | -0.137692431 | P49025_S479_M1_Cit     |
| _MNS[Phospho (STY)]PGLQSK_.2                                              | 0.307900479  | P49025_S1458_M1_Cit    |
| _DKS[Phospho (STY)]PGRPLER_.2                                             | -0.232752396 | P49025_S1999_M1_Cit    |
| _DKMNS[Phospho (STY)]PGLQSK_.2                                            | -0.422106502 | P49025_S1458_M1_Cit    |
| _ERS[Phospho (STY)]PGRLFEDSSR_.3                                          | 0.062194171  | P49025_S2021_M1_Cit    |
| _S[Phospho (STY)]PEHQPSAMSLAPPSSR_.3                                      | 0.103536566  | P49025_S1348_M1_Cit    |
| _VVLGDS[Phospho (STY)]VDGGGADQLGGVAEVR_.2                                 | -0.201460198 | P49070_S88_M1_Camlg    |
| _IMGFHRPGS[Phospho (STY)]GS[Phospho (STY)]EEENQTK_.3                      | 0.046735412  | P49070_S53_M2_Camlg    |
| _GFAFVTFDDHDSVDKIVIK_.3                                                   | -0.27180267  | #N/A                   |
| _SES[Phospho (STY)]PKEPEQLRK_.2                                           | -0.369354131 | P49312_S6_M1_Hnrnpa1   |
| _LFIGGLSFETTDESLR_.2                                                      | -0.090063944 | #N/A                   |
| _EDSQRPGAHLTVK_.3                                                         | 0.054827809  | #N/A                   |
| _IEVIEIM[Oxidation (M)]TDR_.2                                             | 0.06905046   | #N/A                   |
| _ [Acetyl (Protein N-term)]S[Phospho (STY)]KSES[Phospho (STY)]PKEPEQLR_.2 | 0.240162317  | P49312_S2_M2_Hnrnpa1   |
| _SES[Phospho (STY)]PKEPEQLR_.2                                            | -0.241453596 | P49312_S6_M1_Hnrnpa1   |
| _NQGGYGSSSSSYGSGR_.2                                                      | -0.039758842 | #N/A                   |
| _GFAFVTFDDHDSVDK_.2                                                       | 0.090078962  | #N/A                   |
| _GFGFVTYATVEEVDAAM[Oxidation (M)]NAR_.2                                   | -0.055208573 | #N/A                   |
| _SHFEQWGTLTDC[Carbamidomethyl (C)]VVM[Oxidation (M)]R_.3                  | -0.196271381 | #N/A                   |
| _YHTVNGHNC[Carbamidomethyl (C)]EVR_.3                                     | 0.269482951  | #N/A                   |



|                                                                  |              |                       |
|------------------------------------------------------------------|--------------|-----------------------|
| _DYFEQYGK_.2                                                     | -0.28711781  | #N/A                  |
| _TLADVLVQEVK_.2                                                  | 0.158136704  | #N/A                  |
| _NVIEAVYNR_.2                                                    | 0.038850881  | #N/A                  |
| _ALGDFDYK_.2                                                     | -0.128741853 | #N/A                  |
| _GPTEQLVSPEPEVHDIER_.3                                           | 0.210285403  | #N/A                  |
| _LNPYKNDDTDSAS[Phospho (STY)]TDDM[Oxidation (M)]W_.2             | -0.075869924 | P49443_S377_M1_Ppm1a  |
| _TS[Phospho (STY)]PSSSPASLSR_.2                                  | 0.359382852  | P49586_S343_M1_Pcyt1a |
| _AVTC[Carbamidomethyl (C)]DIS[Phospho (STY)]EDEED_.2             | -0.380888413 | P49586_S362_M1_Pcyt1a |
| _QS[Phospho (STY)]PSSS[Phospho (STY)]PTHER_.2                    | 0.309426623  | P49586_S319_M2_Pcyt1a |
| _SPS[Phospho (STY)]PSFR_.2                                       | -0.337701832 | P49586_S331_M1_Pcyt1a |
| _MLQAIS[Phospho (STY)]PK_.2                                      | -0.065183037 | P49586_S315_M1_Pcyt1a |
| _HIGLVYSGM[Oxidation (M)]GPDYR_.3                                | 0.052300297  | #N/A                  |
| _LAQQYYLVYQEPIPTAQLVQR_.3                                        | -0.336802205 | #N/A                  |
| _LVQIEYALAAVAGGAPSVGIK_.3                                        | 0.32224561   | #N/A                  |
| _YNEDLELEDAIHTAILTLK_.3                                          | -0.143412723 | #N/A                  |
| _AAVQELSGSILT[Phospho (STY)]SEDPEER_.2                           | -0.205043247 | P49769_T370_M1_Psen1  |
| _NNDPELEEVNINNIR_.2                                              | -0.246270883 | #N/A                  |
| _AM[Oxidation (M)]VALIDVFHQYSGR_.2                               | -0.278986933 | #N/A                  |
| _S[Phospho (STY)]VDEVNYWDK_.2                                    | -0.056148726 | P50136_S344_M1_Bckdha |
| _IGHHS[Phospho (STY)]TSDSSAYR_.2                                 | 0.175725063  | P50136_S334_M1_Bckdha |
| _S[Phospho (STY)]VDEVNYWDKQDHPISR_.3                             | -0.017089475 | P50136_S344_M1_Bckdha |
| _IGHHS[Phospho (STY)]TSDSSAY[Phospho (STY)]RSVDEVNYWDKQDHPISR_.5 | -0.019762703 | P50136_S334_M2_Bckdha |
| _NNGYAISTPTSEQYR_.2                                              | -0.110776919 | #N/A                  |
| _EDPLIIPVPAENPFR_.2                                              | 0.05578912   | #N/A                  |
| _VSQAASDLLAYC[Carbamidomethyl (C)]EAHVR_.2                       | -0.037066523 | #N/A                  |
| _EGMSNNTT[Phospho (STY)]S[Phospho (STY)]ISQAR_.2                 | 0.033631151  | P50153_S12_M2_Gng4    |
| _VAVVAGYGDVVK_.2                                                 | 0.036682693  | #N/A                  |
| _VADIGLAAWGR_.2                                                  | 0.173876839  | #N/A                  |
| _VPAINVNDVTK_.2                                                  | -0.05366629  | #N/A                  |
| _KLDEAVAEHLGK_.3                                                 | -0.205226669 | #N/A                  |
| _GISETTTGVHNLYK_.2                                               | 0.148000608  | #N/A                  |
| _KQNDVFGEADQ_.2                                                  | -0.150811321 | #N/A                  |
| _TDDYLDQPC[Carbamidomethyl (C)]LETINR_.2                         | -0.277861733 | #N/A                  |
| _QLIC[Carbamidomethyl (C)]DPSYIPDR_.2                            | -0.209640241 | #N/A                  |
| _IIC[Carbamidomethyl (C)]ILSHPIK_.2                              | 0.036003409  | #N/A                  |
| _FLVFVANFDENDPK_.2                                               | 0.28854218   | #N/A                  |
| _VVEGSFVYK_.2                                                    | -0.131346137 | #N/A                  |
| _NPYYGGESSITPLEELYKR_.3                                          | -0.067173873 | #N/A                  |
| _NPYYGGESSITPLEELYK_.2                                           | 0.365763497  | #N/A                  |
| _M[Oxidation (M)]LLYTEVTR_.2                                     | -0.1938345   | #N/A                  |
| _TFEGVDPQNTSM[Oxidation (M)]R_.2                                 | 0.005041967  | #N/A                  |
| _QNDVFGEADQ_.2                                                   | -0.024212823 | #N/A                  |
| _YIAIASTTVETAPEKEVEPALELLEPIDQK_.3                               | -0.143038368 | #N/A                  |
| _VPSTETEALASNLM[Oxidation (M)]GM[Oxidation (M)]FEK_.3            | -0.387375285 | #N/A                  |
| _KSDIYVC[Carbamidomethyl (C)]M[Oxidation (M)]ISYAHNVAAQGK_.3     | -0.344093642 | #N/A                  |
| _FDLGQDVIDFTGHALALYR_.3                                          | -0.093147229 | #N/A                  |
| _LPANHPLLTGQR_.2                                                 | 0.383445144  | #N/A                  |

|                                                                 |              |                         |
|-----------------------------------------------------------------|--------------|-------------------------|
| _TVISQSLSK_.2                                                   | 0.281078458  | #N/A                    |
| _VGHSELVGEIIR_.2                                                | -0.213606665 | #N/A                    |
| _LIKDDFLQQNGYTPYDR_.3                                           | -0.037979247 | #N/A                    |
| _YSNSDVIIVVGC[Carbamidomethyl (C)]GER_.2                        | -0.341553327 | #N/A                    |
| _DIKWEFIPSK_.2                                                  | -0.276067218 | #N/A                    |
| _VGSHITGGDIYGIVNENSLIK_.3                                       | -0.397968824 | #N/A                    |
| _GVNVVSALSR_.2                                                  | 0.068111665  | #N/A                    |
| _AVETTAQSDNK_.2                                                 | 0.313000566  | #N/A                    |
| _ALDEYYDKHFTEFVPLR_.3                                           | -0.71882775  | #N/A                    |
| _EILQEEEDLAEIVQLVGK_.2                                          | -0.346926218 | #N/A                    |
| _HFTEFVPLR_.2                                                   | -0.034222764 | #N/A                    |
| _AKEILQEEEDLAEIVQLVGK_.3                                        | -0.321849068 | #N/A                    |
| _IKADYAQLLED[M][Oxidation (M)]QNAFR_.3                          | -0.455549534 | #N/A                    |
| _QVRPVTEK_.2                                                    | -0.055676939 | #N/A                    |
| _LAEM[Oxidation (M)]PADSGYPAYLGAR_.2                            | 0.510845473  | #N/A                    |
| _TALVANTSNM[Oxidation (M)]PVAAR_.2                              | 0.385185613  | #N/A                    |
| _LASFYER_.2                                                     | -0.110443117 | #N/A                    |
| _ITWSIIR_.2                                                     | 0.132711106  | #N/A                    |
| _RAVETTAQSDNK_.2                                                | 0.275672695  | #N/A                    |
| _GNEM[Oxidation (M)]SEVLR_.2                                    | 0.333279253  | #N/A                    |
| _ALDEYYDK_.2                                                    | -0.103157231 | #N/A                    |
| _EHM[Oxidation (M)]GEILYK_.2                                    | -0.013124011 | #N/A                    |
| _LEGDM[Oxidation (M)]ATIQVYEETSGVSVGDPVLR_.3                    | -0.260922804 | #N/A                    |
| _DFPELTM[Oxidation (M)]EVDGK_.2                                 | -0.05712068  | #N/A                    |
| _FSMVQVWPVR_.2                                                  | 0.16262336   | #N/A                    |
| _FKDPVKDGEAK_.3                                                 | -0.269234043 | #N/A                    |
| _DDFLQQNGYTPYDR_.2                                              | 0.50532844   | #N/A                    |
| _ADYAQLLED[M][Oxidation (M)]QNAFR_.2                            | -0.066472993 | #N/A                    |
| _ADYAQLLED[M][Oxidation (M)]QNAFRS[Phospho (STY)]LED_.2         | -0.17923701  | P50516_S614_M1_Atp6v1a  |
| _EASIYTGITLSEYFR_.2                                             | -0.053689562 | #N/A                    |
| _TVGM[Oxidation (M)]LSNM[Oxidation (M)]ISFYDMAR_.2              | 0.292700833  | #N/A                    |
| _ASLAETDKITLEVAK_.3                                             | 0.004441299  | #N/A                    |
| _GSVTYIAPPGNYDASDVVLEFEGVK_.3                                   | -0.105803452 | #N/A                    |
| _GALFGANANR_.2                                                  | 0.237328605  | #N/A                    |
| _KQDFPLVK_.2                                                    | -0.240680225 | #N/A                    |
| _[Acetyl (Protein N-term)]ALSDADVQK_.2                          | 0.25847565   | #N/A                    |
| _VSNTLESR_.2                                                    | -0.00944562  | #N/A                    |
| _AEEEFNIEK_.2                                                   | -0.249811604 | #N/A                    |
| _DDLITDLLNEAK_.2                                                | 0.253161456  | #N/A                    |
| _LDLIAQQM[Oxidation (M)]M[Oxidation (M)]PEVR_.2                 | -0.334969811 | #N/A                    |
| _ARDDLITDLLNEAK_.2                                              | -0.206010812 | #N/A                    |
| _IQM[Oxidation (M)]SNLM[Oxidation (M)]NQAR_.2                   | -0.142352756 | #N/A                    |
| _IMEYYEK_.2                                                     | -0.091707501 | #N/A                    |
| _IKVSNT[Phospho (STY)]LESR_.2                                   | 0.268871093  | P50518_T195_M1_Atp6v1e1 |
| _SGELAVQALDQFATVVEAK_.2                                         | 0.252029404  | #N/A                    |
| _[Acetyl (Protein N-term)]S[Phospho (STY)]GEDEQQEQTIAEDLVVTK_.2 | 0.461709411  | P50580_S2_M1_Pa2g4      |
| _EQKPFTPAS[Phospho (STY)]PVQSTPSKPSDK_.3                        | -0.425660451 | P51125_S219_M1_Cast     |

|                                                                                        |              |                        |
|----------------------------------------------------------------------------------------|--------------|------------------------|
| _SNDTSQT[Phospho (STY)]PPGETVPR_.2                                                     | 0.160189873  | P51125_T479_M1_Cast    |
| _S[Phospho (STY)]NEQM[Oxidation (M)]VSEKPSESK_.2                                       | -0.458107724 | P51125_S165_M1_Cast    |
| _SLSES[Phospho (STY)]ELIGELSADFDR_.2                                                   | 0.313240786  | P51125_S446_M1_Cast    |
| _NNIPYFETSAK_.2                                                                        | -0.2632995   | #N/A                   |
| _VIILGDSGVGK_.2                                                                        | 0.102074343  | #N/A                   |
| _FQSLGVAFYR_.2                                                                         | -0.287751435 | #N/A                   |
| _EAINVEQAFQTIAR_.2                                                                     | -0.501660449 | #N/A                   |
| _ATIGADFLTK_.2                                                                         | 0.420071363  | #N/A                   |
| _TLDSWRDEFLIQASPR_.3                                                                   | -0.172807581 | #N/A                   |
| _LVTM[Oxidation (M)]QIWDTAGQER_.2                                                      | -0.298531925 | #N/A                   |
| _LPANALLGEENK_.2                                                                       | 0.199236098  | #N/A                   |
| _AQDTAELFFEDVR_.2                                                                      | 0.08199234   | #N/A                   |
| _THIC[Carbamidomethyl (C)]VTR_.2                                                       | 0.087850356  | #N/A                   |
| _IFSS[Phospho (STY)]EHDIFR_.2                                                          | -0.129303752 | P51174_S55_M1_Acadl    |
| _TILSNQTVDIPENVEITLK_.2                                                                | 0.178616244  | #N/A                   |
| _FLDGIYVSEK_.2                                                                         | 0.064254709  | #N/A                   |
| _RNNS[Phospho (STY)]ISEAK_.2                                                           | 0.017558961  | P51432_S1105_M1_Plcb3  |
| _VDSEGIS[Phospho (STY)]PNR_.2                                                          | -0.130952165 | P51660_S308_M1_Hsd17b4 |
| _VVLVTGAGGGLGR_.2                                                                      | -0.119478876 | #N/A                   |
| _IDVVVNNAGILR_.2                                                                       | 0.271915488  | #N/A                   |
| _ISDEDWDIIHR_.3                                                                        | -0.199104278 | #N/A                   |
| _ASLGS[Phospho (STY)]DDSTQAK_.2                                                        | -0.00089483  | P51830_S1295_M1_Adcy9  |
| _GQGTAS[Phospho (STY)]PGSVSDLAQTVK_.2                                                  | -0.25737099  | P51830_S610_M1_Adcy9   |
| _AIEKDS[Phospho (STY)]C[Carbamidomethyl (C)]EDIGVEEASELSK_.3                           | 0.18077414   | P51830_S1332_M1_Adcy9  |
| _QGDEES[Phospho (STY)]ENSVKR_.2                                                        | -0.291710221 | P51830_S354_M1_Adcy9   |
| _IIADDLMKQGDEES[Phospho (STY)]ENS[Phospho (STY)]VKR_.3                                 | 0.028794228  | P51830_S354_M2_Adcy9   |
| _QIEINTISASFGGLASR_.2                                                                  | -0.153632979 | #N/A                   |
| _AGDVLEDS[Phospho (STY)]PK_.2                                                          | -0.173427798 | P51859_S165_M1_Hdgf    |
| _RAGDVLEDS[Phospho (STY)]PK_.2                                                         | -0.130757845 | P51859_S165_M1_Hdgf    |
| _AGDVLEDS[Phospho (STY)]PKRPK_.2                                                       | -0.510706207 | P51859_S165_M1_Hdgf    |
| _GSAEGSS[Phospho (STY)]DEEGKLVIDEPAKEK_.3                                              | -0.02051565  | P51859_S133_M1_Hdgf    |
| _GSAEGSS[Phospho (STY)]DEEGKLVIDEPAK_.3                                                | 0.097261151  | P51859_S133_M1_Hdgf    |
| _GFSEGLWEIENNPVK_.2                                                                    | -0.411133027 | #N/A                   |
| _KGSAGS[Phospho (STY)]S[Phospho (STY)]DEEGKLVIDEPAK_.3                                 | 0.246491898  | #N/A                   |
| _SC[Carbamidomethyl (C)]AAEPEVEPEAHEGDGDKKGSAGS[Phospho (STY)]S[Phospho (STY)]DEEGK_.4 | -0.056466737 | #N/A                   |
| _LYPEGLAQLAR_.2                                                                        | -0.095405887 | #N/A                   |
| _NVADYYPEYK_.2                                                                         | -0.253440465 | #N/A                   |
| _FFEHEVK_.2                                                                            | 0.193373351  | #N/A                   |
| _NIVWIAEC[Carbamidomethyl (C)]IAQR_.2                                                  | -0.132587528 | #N/A                   |
| _ADDEYQVK_.2                                                                           | -0.068565748 | #N/A                   |
| _AYLESFYK_.2                                                                           | 0.015929051  | #N/A                   |
| _LKEQEC[Carbamidomethyl (C)]R_.2                                                       | 0.017635316  | #N/A                   |
| _LLFEGAGSNPGDK_.2                                                                      | -0.104405571 | #N/A                   |
| _AFIITINSFGTELSKEDR_.2                                                                 | -0.221455114 | #N/A                   |
| _LHLQSTDYGNFLANEASPLTVSVIDDK_.3                                                        | -0.409200235 | #N/A                   |
| _LLFEGAGSNPGDKTLEDR_.3                                                                 | -0.477007784 | #N/A                   |
| _FC[Carbamidomethyl (C)]TLLGGTTADAM[Oxidation (M)]C[Carbamidomethyl (C)]PILEFEADRR_.3  | -0.037382571 | #N/A                   |

|                                                                   |              |                      |
|-------------------------------------------------------------------|--------------|----------------------|
| _AGVLSQADYLNLVQC[Carbamidomethyl (C)]ETLEDLK_.3                   | -0.538026768 | #N/A                 |
| _NTEINFQLGEEFEETSIDDR_.2                                          | -0.333217749 | #N/A                 |
| _LTDSQNFDEYMK_.2                                                  | -0.162239773 | #N/A                 |
| _GNLANVIR_.2                                                      | -0.051868426 | #N/A                 |
| _TAVAPIER_.2                                                      | -0.076064444 | #N/A                 |
| _YFPTQALNFAFK_.2                                                  | -0.107291386 | #N/A                 |
| _EQGVLSFWR_.2                                                     | -0.115673262 | #N/A                 |
| _LLLQVQHASK_.2                                                    | 0.243094371  | #N/A                 |
| _QIFLGGVDKR_.2                                                    | -0.029727712 | #N/A                 |
| _DFLAGGVAAAIK_.2                                                  | 0.053399535  | #N/A                 |
| _GAWSNVLR_.2                                                      | 0.062022742  | #N/A                 |
| _GLGDC[Carbamidomethyl (C)]LVK_.2                                 | 0.091966212  | #N/A                 |
| _AAYFGIYDTAK_.2                                                   | -0.216571431 | #N/A                 |
| _QIFLGGVDK_.2                                                     | 0.267833637  | #N/A                 |
| _[Acetyl (Protein N-term)]TDAAVSFAK_.2                            | 0.125392824  | #N/A                 |
| _GM[Oxidation (M)]GGAFVLVLYDEIK_.2                                | -0.160226673 | #N/A                 |
| _MM[Oxidation (M)]MQSGR_.2                                        | -0.269095034 | #N/A                 |
| _GTDIMYGTGLDC[Carbamidomethyl (C)]WR_.2                           | 0.156064512  | #N/A                 |
| _GM[Oxidation (M)]GGAFVLVLYDEIK_.2                                | -0.006370188 | #N/A                 |
| _TC[Carbamidomethyl (C)]S[Phospho (STY)]LPDLSK_.2                 | -0.36877844  | P51954_S997_M1_Nek1  |
| _SSDVPLPLELLET[Phospho (STY)]GGSPSK_.2                            | 0.619243325  | P51954_T615_M1_Nek1  |
| _EQPGDEYS[Phospho (STY)]EEEEVLK_.2                                | 0.111289225  | P51954_S1071_M1_Nek1 |
| _VLDASWYSPGTR_.2                                                  | 0.244684599  | #N/A                 |
| _LLS[Phospho (STY)]PTHEK_.2                                       | 0.098042643  | P52479_S541_M1_Usp10 |
| _C[Carbamidomethyl (C)]S[Phospho (STY)]PPVPSPLASEK_.2             | -0.144257047 | P52479_S359_M1_Usp10 |
| _TC[Carbamidomethyl (C)]DS[Phospho (STY)]PQNPVDFISGVPDSPFPR_.3    | -0.390146306 | P52479_S208_M1_Usp10 |
| _LDIDSAPITAR_.2                                                   | 0.076498031  | #N/A                 |
| _NTGIIC[Carbamidomethyl (C)]TIGPASR_.2                            | -0.022019945 | #N/A                 |
| _GDYPLEAVR_.2                                                     | -0.136323204 | #N/A                 |
| _APIIAVTR_.2                                                      | 0.230314128  | #N/A                 |
| _DAVLNAWAEDVDLR_.2                                                | -0.189843491 | #N/A                 |
| _IENHEGVR_.2                                                      | 0.175028802  | #N/A                 |
| _IYVDDGLISLQVK_.2                                                 | -0.087128859 | #N/A                 |
| _C[Carbamidomethyl (C)]DENILWLDYK_.2                              | 0.011476872  | #N/A                 |
| _GVNLPGAAVDLPVASEK_.2                                             | 0.031341823  | #N/A                 |
| _KAADVHEVR_.2                                                     | -0.067047841 | #N/A                 |
| _EKGADFLVTEVENGSGSLGSK_.3                                         | -0.138386894 | #N/A                 |
| _AADVHEVRK_.2                                                     | 0.070911022  | #N/A                 |
| _AADVHEVR_.2                                                      | 0.254969045  | #N/A                 |
| _GDLGIEIPAEK_.2                                                   | -0.420427949 | #N/A                 |
| _M[Oxidation (M)]QHLIAR_.2                                        | 0.409617616  | #N/A                 |
| _ITLDNAYM[Oxidation (M)]EK_.2                                     | -0.422338239 | #N/A                 |
| _GVNLPGAAVDLPVASEKDIQDLK_.3                                       | -0.131159822 | #N/A                 |
| _GADFLVTEVENGSGSLGSK_.3                                           | -0.454340454 | #N/A                 |
| _VNLAM[Oxidation (M)]DVGK_.2                                      | -0.206288024 | #N/A                 |
| _AEGSDVANAVLDGADC[Carbamidomethyl (C)]IM[Oxidation (M)]LSGETAK_.3 | 0.164985305  | #N/A                 |
| _EATESFASDPILYR_.2                                                | 0.378176696  | #N/A                 |

|                                                                            |              |                        |
|----------------------------------------------------------------------------|--------------|------------------------|
| _AEGSDVANAVLDGADC[Carbamidomethyl (C)]IM[Oxidation (M)]LSGETAKGDYPLEAVR_.3 | -0.071567502 | #N/A                   |
| _FGVEQDVIDM[Oxidation (M)]VFASFIR_.2                                       | -0.306943079 | #N/A                   |
| _EATESFASDPILYRPVAVALDTK_.3                                                | -0.223705557 | #N/A                   |
| _LAPITSDPTEAAAVGAVEASFK_.2                                                 | -0.458393264 | #N/A                   |
| _GSGTAEVELKK_.2                                                            | -0.090528826 | #N/A                   |
| _EATESFASDPILYRPVAVALDTKGPEIR_.4                                           | -0.481283472 | #N/A                   |
| _RFDEILEASDGIM[Oxidation (M)]VAR_.3                                        | -0.098744765 | #N/A                   |
| _GADFLVTEVENGGSLGSK_.2                                                     | -0.186377694 | #N/A                   |
| _LNFSHGTHEYHAETIK_.3                                                       | 0.069537696  | #N/A                   |
| _GSGTAEVELK_.2                                                             | 0.009548883  | #N/A                   |
| _FDEILEASDGIMVAR_.2                                                        | 0.282290529  | #N/A                   |
| _TGTC[Carbamidomethyl (C)]GYC[Carbamidomethyl (C)]GLQFK_.2                 | -0.091017499 | #N/A                   |
| _EVNENFAIDLIAQQPVNEVEHR_.3                                                 | -0.022006748 | #N/A                   |
| _ITHTGQVYDEK_.2                                                            | 0.165312504  | #N/A                   |
| _VYINLDKETK_.2                                                             | 0.205166265  | #N/A                   |
| _IIAC[Carbamidomethyl (C)]DGGGGALGHPK_.2                                   | 0.112933488  | #N/A                   |
| _QKEVNENFAIDLIAQQPVNEVEHR_.4                                               | 0.490036648  | #N/A                   |
| _ALRFSY[Phospho (STY)]HLEGS[Phospho (STY)]QPR_.2                           | 0.011486899  | P52734_S98_M2_Fgd1     |
| _SLS[Phospho (STY)]LDPGQSLEPHPEGPQR_.3                                     | -0.338390349 | P52734_S116_M1_Fgd1    |
| _LLNSTNRDDEDT[Phospho (STY)]PPNSPNVDLGK_.3                                 | -0.072817454 | P52734_T710_M1_Fgd1    |
| _QES[Phospho (STY)]VELTVQK_.2                                              | -0.068944879 | P52734_S364_M1_Fgd1    |
| _AAYQVAALPR_.2                                                             | 0.2469672    | #N/A                   |
| _APAAIGPYSQAVQVDR_.2                                                       | 0.120707651  | #N/A                   |
| _AAGC[Carbamidomethyl (C)]DFNNVVK_.2                                       | -0.072247984 | #N/A                   |
| _TYFQGSLPAR_.2                                                             | 0.18176573   | #N/A                   |
| _TTVLLADM[Oxidation (M)]NDFGTVNEIYK_.2                                     | -0.499851372 | #N/A                   |
| _TIYISGQVGLDPSSGQLVPGGVVEEAK_.3                                            | 0.062800395  | #N/A                   |
| _KPAQETEETSSQES[Phospho (STY)]AEED_.2                                      | -0.043279338 | P52927_S104_M1_Hmga2   |
| _LSDIGEGIR_.2                                                              | 0.165679061  | #N/A                   |
| _AAS[Phospho (STY)]REEPIWEF_.2                                             | 0.175922925  | P53564_S1506_M1_Cux1   |
| _SC[Carbamidomethyl (C)]S[Phospho (STY)]IDTSPGTSSLASPASQR_.2               | -0.251505621 | P53668_S298_M1_Limk1   |
| _VQGVDPGC[Carbamidomethyl (C)]M[Oxidation (M)]S[Phospho (STY)]PDVK_.2      | -0.009121157 | P53668_S210_M1_Limk1   |
| _SEPSGS[Phospho (STY)]PPAPASHR_.2                                          | -0.001913362 | P53783_S325_M1_Sox1    |
| _LFTNFHR_.2                                                                | 0.20025742   | #N/A                   |
| _LEPEAWK_.2                                                                | 0.165932215  | #N/A                   |
| _VENFIHK_.2                                                                | 0.204155299  | #N/A                   |
| _VILPVSVEYQVGQLYSVAEASK_.3                                                 | 0.128500453  | #N/A                   |
| _NETGGGEGVEVLNPEPYEKDDGEKGQYTHK_.4                                         | 0.03129791   | #N/A                   |
| _HVEAIYIDIADR_.2                                                           | -0.267298477 | #N/A                   |
| _MLAPEGALNIHEK_.3                                                          | 0.312238588  | #N/A                   |
| _SDANTDLIGGS[Phospho (STY)]PK_.2                                           | -0.194843726 | P53986_S230_M1_Slc16a1 |
| _SKES[Phospho (STY)]LQEAGK_.2                                              | 0.09796186   | P53986_S213_M1_Slc16a1 |
| _EGKEDEAS[Phospho (STY)]T[Phospho (STY)]DVDEKPK_.2                         | -0.077328935 | P53986_S461_M2_Slc16a1 |
| _LKS[Phospho (STY)]KES[Phospho (STY)]LQEAGK_.2                             | -0.138915179 | P53986_S210_M2_Slc16a1 |
| _AAQSPQQHSSGDPTEES[Phospho (STY)]PV_.2                                     | -0.228268288 | P53986_S491_M1_Slc16a1 |
| _SDANTDLIGGS[Phospho (STY)]PKGEK_.2                                        | -0.197410923 | P53986_S230_M1_Slc16a1 |
| _S[Phospho (STY)]KESLQEAGKSDANTDLIGGSPK_.3                                 | -0.001747835 | P53986_S210_M1_Slc16a1 |

|                                                       |              |                       |
|-------------------------------------------------------|--------------|-----------------------|
| _YIIIGDTGVGK_.2                                       | -0.195468142 | #N/A                  |
| _TASNVEEAFINTAK_.2                                    | -0.159530084 | #N/A                  |
| _IQEGVFDINNEANGIK_.2                                  | -0.184767675 | #N/A                  |
| _LQIWDTAGQESFR_.2                                     | -0.150959868 | #N/A                  |
| _DTFNHLTTWLEDAR_.3                                    | -0.224982884 | #N/A                  |
| _SDFEGSLS[Phospho (STY)]PVIAPK_.2                     | -0.102828833 | P53995_S688_M1_Anapc1 |
| _ATDFVVDL_.2                                          | 0.112592103  | #N/A                  |
| _GKLDGNQDLIR_.2                                       | -0.552062865 | #N/A                  |
| _LNEHFLNTDFLDTIK_.3                                   | -0.195893583 | #N/A                  |
| _YFDLGLPNR_.2                                         | 0.410925444  | #N/A                  |
| _DQTNDQVTIDSALATQK_.2                                 | 0.44578825   | #N/A                  |
| _TIEAAAHGTVTR_.2                                      | 0.059172075  | #N/A                  |
| _FAQTLEK_.2                                           | 0.40268915   | #N/A                  |
| _DKHVEEVRK_.2                                         | 0.00872564   | #N/A                  |
| _EHEKEVLQK_.2                                         | -0.140800332 | #N/A                  |
| _SKESVPDFPLS[Phospho (STY)]PPKK_.3                    | -0.135805783 | P54227_S38_M1_Stmn1   |
| _SHEAEVLK_.2                                          | -0.45873203  | #N/A                  |
| _ESVPDFPLS[Phospho (STY)]PPKKK_.3                     | -0.278618651 | P54227_S38_M1_Stmn1   |
| _ASGQAFELILS[Phospho (STY)]PR_.2                      | -0.40476965  | P54227_S25_M1_Stmn1   |
| _SKESVPDFPLS[Phospho (STY)]PPK_.2                     | -0.035319359 | P54227_S38_M1_Stmn1   |
| _RKS[Phospho (STY)]HEAEVLK_.2                         | -0.42737549  | P54227_S63_M1_Stmn1   |
| _KSHEAEVLK_.2                                         | 0.082639098  | #N/A                  |
| _NKES[Phospho (STY)]KDDPADEAD_.2                      | -0.013352567 | P54227_S139_M1_Stmn1  |
| _REHEKEVLQK_.3                                        | -0.277542839 | #N/A                  |
| _ [Acetyl (Protein N-term)]ASSDIQVKELEKR_.3           | -0.074249373 | #N/A                  |
| _RAS[Phospho (STY)]GQAFELILS[Phospho (STY)]PR_.2      | -0.103738381 | P54227_S16_M2_Stmn1   |
| _ [Acetyl (Protein N-term)]ASSDIQVK_.2                | -0.316442875 | #N/A                  |
| _ESVPDFPLS[Phospho (STY)]PPK_.2                       | -0.253407522 | P54227_S38_M1_Stmn1   |
| _EAS[Phospho (STY)]PSTLNDK_.2                         | 0.124501773  | P54254_S382_M1_Atxn1  |
| _RWS[Phospho (STY)]APETR_.2                           | -0.514787755 | P54254_S751_M1_Atxn1  |
| _WS[Phospho (STY)]APETR_.2                            | -0.251139031 | P54254_S751_M1_Atxn1  |
| _ALS[Phospho (STY)]AGLDYSPPSAPR_.2                    | -0.141639081 | P54254_S81_M1_Atxn1   |
| _HGS[Phospho (STY)]AGTSGEHGLQGM[Oxidation (M)]GLHK_.3 | -0.168753632 | P54254_S62_M1_Atxn1   |
| _RRWS[Phospho (STY)]APETR_.3                          | 0.211084257  | P54254_S751_M1_Atxn1  |
| _SAAVSASS[Phospho (STY)]PEAK_.2                       | -0.106801661 | P54276_S63_M1_Msh6    |
| _VEEHS[Phospho (STY)]PLER_.2                          | -0.349661572 | P54285_S393_M1_Cacnb3 |
| _RS[Phospho (STY)]PPPSLAK_.2                          | 0.023381689  | P54285_S152_M1_Cacnb3 |
| _LLAQDS[Phospho (STY)]EHDHNDL_.3                      | -0.252877268 | P54285_S464_M1_Cacnb3 |
| _QAWTGSS[Phospho (STY)]QR_.2                          | -0.616028701 | P54285_S418_M1_Cacnb3 |
| _DSLMPs[Phospho (STY)]DEASESSR_.2                     | 0.125272341  | P54285_S403_M1_Cacnb3 |
| _SVS[Phospho (STY)]EAALAQEGLLGTDTLK_.2                | -0.420145195 | P54310_S559_M1_Lipe   |
| _TTS[Phospho (STY)]PTAESVRPTESMR_.3                   | 0.298695313  | P54310_S542_M1_Lipe   |
| _NENLAANFLLSQNFDDE_.2                                 | 0.001390584  | #N/A                  |
| _IDIDPEETVK_.2                                        | -0.187861683 | #N/A                  |
| _ASFNNPDR_.2                                          | 0.018879092  | #N/A                  |
| _TLQQQTFK_.2                                          | 0.291399701  | #N/A                  |
| _NENLAANFLLQQNFDDE_.2                                 | -0.310965723 | #N/A                  |

|                                                           |              |                        |
|-----------------------------------------------------------|--------------|------------------------|
| _QIIQQNPSSLPALQQIGR_.3                                    | 0.441363876  | #N/A                   |
| _RTS[Phospho (STY)]PVQTR_.2                               | -0.342352453 | P54731_S269_M1_Faf1    |
| _TPS[Phospho (STY)]GEFLER_.2                              | 0.043407698  | P54731_S581_M1_Faf1    |
| _FLEDDPSDPTYTSS[Phospho (STY)]LGGK_.2                     | -0.178836309 | P54754_S790_M1_Ephb3   |
| _FLEDDTS[Phospho (STY)]DPTYTSALGGK_.2                     | 0.257767105  | P54763_S776_M1_Ephb2   |
| _ENAPAIIFIDEIDAIATK_.2                                    | -0.094295753 | #N/A                   |
| _LQQELEFLEVQEEYIKDEQK_.3                                  | -0.234254836 | #N/A                   |
| _GEGTPAAGDGLGRPLGPTPS[Phospho (STY)]QSR_.3                | 0.246068952  | P55012_S74_M1_Slc12a2  |
| _PLGPTPS[Phospho (STY)]QSR_.2                             | 0.192858802  | P55012_S74_M1_Slc12a2  |
| _KES[Phospho (STY)]KGPIVPLNVADQK_.3                       | -0.274305118 | P55012_S987_M1_Slc12a2 |
| _S[Phospho (STY)]PGTKDVVVNVDYSK_.2                        | -0.188828878 | P55012_S937_M1_Slc12a2 |
| _ELGGEVIFYVGPAR_.2                                        | -0.153282291 | #N/A                   |
| _LSSATIAAPR_.2                                            | -0.017425302 | #N/A                   |
| _FDAYC[Carbamidomethyl (C)]FR_.2                          | -0.00952944  | #N/A                   |
| _VSLPAYPR_.2                                              | -0.288853755 | #N/A                   |
| _YPIQTPR_.2                                               | 0.443547174  | #N/A                   |
| _AALAEVALPC[Carbamidomethyl (C)]FFTLQPR_.2                | 0.011695039  | #N/A                   |
| _YPITQSR_.2                                               | 0.376280943  | #N/A                   |
| _YQC[Carbamidomethyl (C)]DEGFSQHR_.2                      | -0.159206671 | #N/A                   |
| _ASDSGLYR_.2                                              | -0.130551322 | #N/A                   |
| _YNVHATVR_.2                                              | 0.06750382   | #N/A                   |
| _DFQWTDNTGLQYENWR_.2                                      | -0.147430133 | #N/A                   |
| _C[Carbamidomethyl (C)]GGPAPGVR_.2                        | 0.104307981  | #N/A                   |
| _HLQAAFEDGFDNC[Carbamidomethyl (C)]DAGWLSDR_.3            | -0.345973932 | #N/A                   |
| _FINSFGHENSWIGLNDR_.3                                     | -0.088972016 | #N/A                   |
| _QDLPIILVAK_.2                                            | 0.288663431  | #N/A                   |
| _AQGM[Oxidation (M)]PTLTSTS[Phospho (STY)]SEGHPEPK_.3     | -0.112027791 | P55066_S869_M1_Ncan    |
| _GSYM[Oxidation (M)]EVEDNR_.2                             | -0.418319157 | #N/A                   |
| _AEQPTESGS[Phospho (STY)]PEVHC[Carbamidomethyl (C)]GER_.2 | -0.481164449 | P55144_S808_M1_Tyro3   |
| _ERTEADLPKPTS[Phospho (STY)]PK_.3                         | -0.440267311 | P55194_S535_M1_Sh3bp1  |
| _DNHSQADHS[Phospho (STY)]PLTTAAPFSR_.3                    | -0.209323559 | P55194_S262_M1_Sh3bp1  |
| _KLEGENS[Phospho (STY)]PQGS[Phospho (STY)]SHGVK_.2        | 0.095822971  | P55258_S181_M2_Rab8a   |
| _LEGNS[Phospho (STY)]PQGS[Phospho (STY)]SHGVK_.2          | 0.021566695  | P55258_S181_M2_Rab8a   |
| _VAQWLIQEPHK_.2                                           | -0.365844067 | #N/A                   |
| _YAAENNR_.2                                               | -0.401607332 | #N/A                   |
| _LADLYGS[Phospho (STY)]KDTFDDDS_.2                        | -0.230320112 | P55288_S788_M1_Cdh11   |
| _PGLRPAPNS[Phospho (STY)]VDVDDFINTR_.3                    | -0.012614088 | P55288_S714_M1_Cdh11   |
| _IQEYNVLLDTLSR_.2                                         | -0.142189404 | #N/A                   |
| _RES[Phospho (STY)]GEEFR_.2                               | -0.115619968 | P55302_S53_M1_Lrpap1   |
| _DLS[Phospho (STY)]LEEIQK_.2                              | -0.458512385 | P55821_S80_M1_Stmn2    |
| _DLS[Phospho (STY)]LEEIQKK_.2                             | -0.360198626 | P55821_S80_M1_Stmn2    |
| _KLEAAEER_.2                                              | -0.066620788 | #N/A                   |
| _KDLS[Phospho (STY)]LEEIQK_.2                             | -0.117119224 | P55821_S80_M1_Stmn2    |
| _KKDLS[Phospho (STY)]LEEIQK_.2                            | -0.211914497 | P55821_S80_M1_Stmn2    |
| _RKS[Phospho (STY)]QEAQVLK_.2                             | -0.407202084 | P55821_S97_M1_Stmn2    |
| _RAS[Phospho (STY)]GQAFELILKPPS[Phospho (STY)]PISEAPR_.3  | 0.006632352  | P55821_S50_M2_Stmn2    |
| _AS[Phospho (STY)]GQAFELILKPPS[Phospho (STY)]PISEAPR_.3   | 0.141833756  | P55821_S50_M2_Stmn2    |

|                                                         |              |                        |
|---------------------------------------------------------|--------------|------------------------|
| _NKEIQVELS[Phospho (STY)]G_.2                           | 0.148869529  | P55821_S178_M1_Stmn2   |
| _KDLS[Phospho (STY)]LEEIQKK_.3                          | 0.414912787  | P55821_S80_M1_Stmn2    |
| _GFKEEGS[Phospho (STY)]PDR_.2                           | -0.374597307 | P55937_S60_M1_Golga3   |
| _LHNQNS[Phospho (STY)]VPR_.2                            | -0.003539154 | P55937_S1479_M1_Golga3 |
| _LHNQNS[Phospho (STY)]VPRDGLGQ_.2                       | -0.36784848  | P55937_S1479_M1_Golga3 |
| _DFTPSGIAGAFR_.2                                        | 0.192372871  | #N/A                   |
| _EAGS[Phospho (STY)]EAESSADPGPGR_.2                     | -0.169702639 | P56183_S434_M1_Rrp1    |
| _VTS[Phospho (STY)]PEKAEK_.2                            | 0.035454617  | P56212_S23_M1_Arpp19   |
| _YFDS[Phospho (STY)]GDYNM[Oxidation (M)]AK_.2           | -0.38373403  | P56212_S62_M1_Arpp19   |
| _KPS[Phospho (STY)]LVASK_.2                             | 0.493681881  | P56212_S104_M1_Arpp19  |
| _GQKYFDS[Phospho (STY)]GDYNM[Oxidation (M)]AK_.2        | -0.137156377 | P56212_S62_M1_Arpp19   |
| _SVDYEVFGTVQGV[C]Carbamidomethyl (C)]FR_.2              | -0.220421472 | #N/A                   |
| _NTS[Phospho (STY)]KGTVTGQVQGPPEK_.2                    | -0.262343928 | P56375_S51_M1_Acyp2    |
| _VQGVFFR_.2                                             | 0.252650549  | #N/A                   |
| _Acetyl (Protein N-term)]AEGDTLSVDYEIFGK_.2             | -0.123914069 | #N/A                   |
| _VIANLDYSDFQIVK_.2                                      | -0.042815441 | #N/A                   |
| _FM[Oxidation (M)]QQWLETR_.2                            | 0.223663794  | #N/A                   |
| _LGLVGWVQNTDR_.2                                        | 0.0416041    | #N/A                   |
| _GTVQGQLQGPVSK_.2                                       | -0.054006519 | #N/A                   |
| _MFQTLIQK_.2                                            | 0.369816509  | #N/A                   |
| _EETGIEASQLTIIEGFR_.2                                   | 0.091441422  | #N/A                   |
| _ATLQEGHQFLC[Carbamidomethyl (C)]ST[Phospho (STY)]PA_.2 | -0.448708686 | P56380_T145_M1_Nudt2   |
| _QAGLSYIR_.2                                            | 0.044453475  | #N/A                   |
| _DALKTEFK_.2                                            | -0.083779798 | #N/A                   |
| _FSQIC[Carbamidomethyl (C)]AK_.2                        | 0.062035752  | #N/A                   |
| _ALDIYSAVDDAS[Phospho (STY)]HEK_.2                      | -0.013596543 | P56388_S48_M1_Cartpt   |
| _ALDIYSAVDDAS[Phospho (STY)]HEKELPR_.3                  | -0.008207831 | P56388_S48_M1_Cartpt   |
| _SLC[Carbamidomethyl (C)]PVSWVSAWDDR_.2                 | 0.044364801  | #N/A                   |
| _IAEGTFPGKI_.2                                          | -0.011507238 | #N/A                   |
| _NC[Carbamidomethyl (C)]WQNYLDFHR_.3                    | 0.114897472  | #N/A                   |
| _IAEGTFPGK_.2                                           | 0.015376149  | #N/A                   |
| _Acetyl (Protein N-term)]AEDIKTK_.2                     | -0.174309426 | #N/A                   |
| _FPNQNTK_.2                                             | 0.099199868  | #N/A                   |
| _GGDVSV[C]Carbamidomethyl (C)]EWYR_.2                   | 0.047609747  | #N/A                   |
| _APSFHDK_.2                                             | 0.007246677  | #N/A                   |
| _FLEEHGPGGEEVLR_.3                                      | -0.007536515 | #N/A                   |
| _YYTLEEIQK_.2                                           | 0.260898468  | #N/A                   |
| _EQAGGDATENFEDVGHSTDAR_.3                               | 0.14467736   | #N/A                   |
| _Acetyl (Protein N-term)]AGQS[Phospho (STY)]DKDKV_.2    | -0.27716476  | P56395_S5_M1_Cyb5a     |
| _TYIIGELHPDDR_.2                                        | 0.442845156  | #N/A                   |
| _GTGLPQGEELPDIAPLVT[Phospho (STY)]PDEPK_.3              | -0.336973693 | P56399_T623_M1_Usp5    |
| _ATNNS[Phospho (STY)]LER_.2                             | 0.041525871  | P56399_S751_M1_Usp5    |
| _DGLGGLPDIVR_.2                                         | -0.039181422 | #N/A                   |
| _IFQNAPTDPTQDFSTQVAK_.2                                 | -0.029472401 | #N/A                   |
| _IVILPDYLEIAR_.2                                        | 0.070227945  | #N/A                   |
| _WVIYNDQK_.2                                            | -0.278764897 | #N/A                   |
| _Acetyl (Protein N-term)]AELSEEALLSVLPTIR_.2            | 0.219775792  | #N/A                   |



|                                                          |              |                     |
|----------------------------------------------------------|--------------|---------------------|
| _DLGYIFYQR_2                                             | 0.023216457  | #N/A                |
| _ENLWLNLTDGSILC[Carbamidomethyl (C)]GR_2                 | 0.058134423  | #N/A                |
| _SSENPNEVFR_2                                            | 0.164614913  | #N/A                |
| _ETGYPLAVK_2                                             | 0.019618916  | #N/A                |
| _AVDWIFSHIDDLDAEAM[Oxidation (M)]DIS[Phospho (STY)]EGR_3 | -0.156721821 | P56399_S775_M1_Usp5 |
| _QAEEEKVPLPELVR_3                                        | -0.321282943 | #N/A                |
| _GHPEFSTNR_2                                             | 0.278602439  | #N/A                |
| _YFDGSGGNNHAVEHYR_3                                      | 0.11592491   | #N/A                |
| _FASFPDYLVIQIK_2                                         | 0.034637977  | #N/A                |
| _KQEVQAWDGEVR_3                                          | 0.074711448  | #N/A                |
| _SAAES[Phospho (STY)]ISESPVGPVK_2                        | -0.048461917 | P56399_S783_M1_Usp5 |
| _VTSAVEALLSADSASR_2                                      | -0.169390928 | #N/A                |
| _VLDSGAPIKIPVGPETLGR_3                                   | -0.210658556 | #N/A                |
| _AIAELGIYPAVDPLDSTR_2                                    | 0.015307481  | #N/A                |
| _IPVGPETLGR_2                                            | 0.341835507  | #N/A                |
| _LVPLKETIK_2                                             | -0.045086374 | #N/A                |
| _VVDLLAPYAK_2                                            | 0.203011266  | #N/A                |
| _VALTGLTVAEYFR_2                                         | 0.111110945  | #N/A                |
| _IGLFGGAGVGK_2                                           | 0.176109938  | #N/A                |
| _ADKLAEEHGS_2                                            | 0.02533501   | #N/A                |
| _VLDSGAPIK_2                                             | 0.107226084  | #N/A                |
| _IM[Oxidation (M)]NVIGEPIDER_2                           | 0.005776223  | #N/A                |
| _TIAM[Oxidation (M)]DGTEGLVR_2                           | 0.233782923  | #N/A                |
| _TVLIM[Oxidation (M)]ELINNVAK_2                          | 0.277309539  | #N/A                |
| _IM[Oxidation (M)]DPNIVGNEHYDVAR_3                       | 0.111552396  | #N/A                |
| _VALVYGQM[Oxidation (M)]NEPPGAR_2                        | -0.116151477 | #N/A                |
| _AHGGYSVFAGVGER_3                                        | 0.168384809  | #N/A                |
| _FLSQPFQVAEVFTGHM[Oxidation (M)]GK_3                     | -0.391717919 | #N/A                |
| _KGSITSVQAIYVPADDLTDPAPATTFAHLDATTVLSR_4                 | 0.179509219  | #N/A                |
| _IPSAVGYQPTLATDM[Oxidation (M)]GTM[Oxidation (M)]QER_3   | -0.288770779 | #N/A                |
| _FTQAGSEVSALLGR_2                                        | -0.468741137 | #N/A                |
| _TREGNDLYHEM[Oxidation (M)]IESGVINLK_4                   | -0.196234099 | #N/A                |
| _EGNDLYHEM[Oxidation (M)]IESGVINLK_3                     | 0.126010173  | #N/A                |
| _DQEGQDVLLFIDNIFR_2                                      | 0.045736068  | #N/A                |
| _IM[Oxidation (M)]NVIGEPIDERGPIK_3                       | -0.016735749 | #N/A                |
| _LVLEVAQHLGESTVR_3                                       | -0.114262543 | #N/A                |
| _QFAPIHAEAPEFIEM[Oxidation (M)]SVEQEILVTGIK_3            | 0.095841555  | #N/A                |
| _SLQDIILGM[Oxidation (M)]DELSEEDKLTISR_3                 | 0.155203081  | #N/A                |
| _GFQQILAGEYDHLPEQAFYM[Oxidation (M)]VGPIEEAVAK_4         | -0.210553084 | #N/A                |
| _IVAVIGAVVDVQFDEGLPPIINALEVQGR_3                         | -0.043739127 | #N/A                |
| _TTTNVLGDSLGAIVEHLSR_2                                   | -0.23212994  | #N/A                |
| _IVQVTAADAFDLIR_2                                        | -0.358732796 | #N/A                |
| _DVEM[Oxidation (M)]GNS[Phospho (STY)]VIEENEMK_2         | 0.178577365  | #N/A                |
| _NRDVEMGNS[Phospho (STY)]VIEENEM[Oxidation (M)]K_3       | 0.270302821  | #N/A                |
| _DLLQTELSGFLDVQK_2                                       | -0.155165488 | #N/A                |
| _LNATAS[Phospho (STY)]LEQDKIEPPR_3                       | -0.386734575 | P56695_S32_M1_Wfs1  |
| _GITS[Phospho (STY)]ENEAEVK_2                            | -0.229459481 | P56695_S158_M1_Wfs1 |

|                                                                    |              |                      |
|--------------------------------------------------------------------|--------------|----------------------|
| _LNATAS[Phospho (STY)]LEQDK_2                                      | 0.018282613  | P56695_S32_M1_Wfs1   |
| _ [Acetyl (Protein N-term)]MNSGT[Phospho (STY)]PPSPSGPPPPAPQPQAR_3 | -0.416007411 | P56695_T5_M1_Wfs1    |
| _KVM[Oxidation (M)]DS[Phospho (STY)]DEDDADY_2                      | 0.287610222  | P56812_S119_M1_Pdcd5 |
| _ [Acetyl (Protein N-term)]ADEELEALRK_2                            | 0.281179297  | #N/A                 |
| _RKVM[Oxidation (M)]DS[Phospho (STY)]DEDDADY_2                     | -0.218022605 | P56812_S119_M1_Pdcd5 |
| _VSEQGLIEILEK_2                                                    | 0.605139017  | #N/A                 |
| _VMDS[Phospho (STY)]DEDDADY_2                                      | 0.206247629  | P56812_S119_M1_Pdcd5 |
| _AAIDWFDGK_2                                                       | 0.06072423   | #N/A                 |
| _GEATVS[Phospho (STY)]FDDPPSAK_2                                   | -0.11255631  | P56959_S333_M1_Fus   |
| _HDSEQDNSDNNTIFVQGLGENVTIESVADYFK_3                                | 0.255486247  | #N/A                 |
| _SDS[Phospho (STY)]PPLC[Carbamidomethyl (C)]PAADSR_2               | -0.15929827  | P56974_S715_M1_Nrg2  |
| _SSS[Phospho (STY)]FGNFDR_2                                        | -0.1377754   | P57725_S23_M1_Samsn1 |
| _FTAGDFSTTVIQNVNK_2                                                | -0.255111533 | #N/A                 |
| _IEIFPSR_2                                                         | -0.010204182 | #N/A                 |
| _VNAIEHVIIPR_2                                                     | -0.222186317 | #N/A                 |
| _EAAFSLAEAK_2                                                      | 0.011733684  | #N/A                 |
| _TLAYIITELDER_2                                                    | 0.425863069  | #N/A                 |
| _SSPETLISDLLM[Oxidation (M)]KES[Phospho (STY)]TENAPR_3             | 0.024755306  | P57774_S82_M1_Npy    |
| _ITSLEVENQNLR_2                                                    | 0.190099838  | #N/A                 |
| _ [Acetyl (Protein N-term)]ATNFLAHEK_2                             | 0.546778905  | #N/A                 |
| _ATAPQTQHVS[Phospho (STY)]PM[Oxidation (M)]R_2                     | -0.045887263 | P57776_S133_M1_Eef1d |
| _LSSLEKSS[Phospho (STY)]PTPR_2                                     | -0.095191693 | P57776_S119_M1_Eef1d |
| _GATPAEDDEDKDIDLFGSDEEEEDKEAAR_4                                   | 0.159349755  | #N/A                 |
| _DIDLFGS[Phospho (STY)]DEEEEDKEAAR_3                               | 0.004921109  | P57776_S162_M1_Eef1d |
| _EAILAIHK_2                                                        | -0.033818103 | #N/A                 |
| _DGLAFNALIHR_2                                                     | 0.192195729  | #N/A                 |
| _M[Oxidation (M)]APYQGPDAAPGALDYK_2                                | -0.281582456 | #N/A                 |
| _AGTQIENIDEDFRDGLK_3                                               | 0.200105514  | #N/A                 |
| _IC[Carbamidomethyl (C)]DQWDNLGSLTHSR_3                            | 0.053841663  | #N/A                 |
| _VLAVNQENEHLMEDYER_3                                               | -0.371189631 | #N/A                 |
| _LTAELIEQAAQYTNVR_2                                                | -0.302867373 | #N/A                 |
| _S[Phospho (STY)]LSASPALGSTK_2                                     | -0.343064456 | P58058_S46_M1_Nadk   |
| _VFS[Phospho (STY)]GVVS[Phospho (STY)]T[Phospho (STY)]GLK_2        | -0.353676888 | P58252_S418_M3_Eef2  |
| _GEGQLSAAER_2                                                      | 0.352797977  | #N/A                 |
| _VNFTVDQIR_2                                                       | -0.14874596  | #N/A                 |
| _FSVSPVVR_2                                                        | 0.242658105  | #N/A                 |
| _YEWVDAEAR_2                                                       | 0.192993477  | #N/A                 |
| _STLTDSLVC[Carbamidomethyl (C)]K_2                                 | 0.080449308  | #N/A                 |
| _DLEEDHAC[Carbamidomethyl (C)]IPIKK_3                              | 0.104405354  | #N/A                 |
| _SDPVVSYR_2                                                        | -0.109132177 | #N/A                 |
| _TFC[Carbamidomethyl (C)]QLILDPIFK_2                               | 0.243987527  | #N/A                 |
| _ETVSEESNVLIC[Carbamidomethyl (C)]LSK_2                            | -0.20966202  | #N/A                 |
| _AYLPVNESFGFTADLR_2                                                | -0.109847579 | #N/A                 |
| _C[Carbamidomethyl (C)]ELLYEGPPDDEAAM[Oxidation (M)]GIK_2          | -0.365342054 | #N/A                 |
| _EGIPALDNFLDKL_2                                                   | 0.232514119  | #N/A                 |
| _FT[Phospho (STY)]DTRKDEQER_2                                      | 0.535116291  | P58252_T57_M1_Eef2   |
| _VFDAIMNFR_2                                                       | 0.27139724   | #N/A                 |

|                                                                |              |                          |
|----------------------------------------------------------------|--------------|--------------------------|
| _AGETRFT[Phospho (STY)]DTR_.2                                  | 0.329844049  | P58252_T57_M1_Eef2       |
| _ALLELQLEPEELYQTFQR_.2                                         | 0.04381472   | #N/A                     |
| _YFDPANGK_.2                                                   | -0.383444905 | #N/A                     |
| _EDLYLKPIQR_.3                                                 | -0.216073776 | #N/A                     |
| _STAISLFYELSENDLNFIK_.2                                        | -0.191990951 | #N/A                     |
| _VVVVGQDSAGK_.2                                                | 0.080861054  | #N/A                     |
| _EVLEDFAEDEGEK_.2                                              | -0.348906621 | #N/A                     |
| _ESVEQQADSFK_.2                                                | -0.405852663 | #N/A                     |
| _AVEVAWETLQEEFSR_.2                                            | -0.245807949 | #N/A                     |
| _EFDLTKEEDLAALR_.3                                             | -0.08518748  | #N/A                     |
| _FNLETEWK_.2                                                   | 0.163633648  | #N/A                     |
| _TSVLEM[Oxidation (M)]IAQAR_.2                                 | -0.285976075 | #N/A                     |
| _DFFTAGSPGETAFR_.2                                             | 0.029220538  | #N/A                     |
| _VNDEHPAYLASDEITTVR_.3                                         | 0.145086715  | #N/A                     |
| _IQQIIEGK_.2                                                   | 0.081900575  | #N/A                     |
| _IDQLQEELLHTQLK_.3                                             | -0.30819619  | #N/A                     |
| _LDAFIEALHQEK_.2                                               | -0.272950413 | #N/A                     |
| _SIVTDLVSQM[Oxidation (M)]DPHGR_.3                             | -0.401922182 | #N/A                     |
| _LVALLDTLDR_.2                                                 | -0.110239021 | #N/A                     |
| _FGSLLPIHPVTSK_.2                                              | -0.250619437 | #N/A                     |
| _LDQEAENLVATVVPTHLAAVPEVAVYLK_.3                               | 0.460652768  | #N/A                     |
| _S[Phospho (STY)]LELNGAGEPVEGAPR_.2                            | -0.196133246 | P58404_S206_M1_Strn4     |
| _AS[Phospho (STY)]PGPGGLSGGSELLVK_.2                           | -0.004372526 | P58404_S223_M1_Strn4     |
| _GSKPSASSAS[Phospho (STY)]LEKR_.3                              | -0.083740258 | P58406_S332_M1_Hrh3      |
| _VQPHGS[Phospho (STY)]LEQC[Carbamidomethyl (C)]WK_.2           | -0.089248803 | P58406_S439_M1_Hrh3      |
| _RDS[Phospho (STY)]SSHEETGASHTLYGHGVC[Carbamidomethyl (C)]K_.4 | -0.456730228 | P58463_S329_M1_Foxp2     |
| _AVEPALPQS[Phospho (STY)]PAGGAGAK_.2                           | -0.456141747 | P58468_S38_M1_Fam207a    |
| _LEFQQQLGEAPGDAS[Phospho (STY)]P_.2                            | 0.023599561  | P58686_S82_M1_           |
| _FS[Phospho (STY)]PVLGR_.2                                     | -0.210932328 | P58742_S495_M1_Aaas      |
| _KLVIESDLERAER_.3                                              | -0.370707478 | #N/A                     |
| _KLVIESDLER_.3                                                 | -0.026276445 | #N/A                     |
| _TVTNNLKS[Phospho (STY)]LEAQAEK_.2                             | 0.010178627  | P58771_S206_M1_Tpm1      |
| _C[Carbamidomethyl (C)]AELEELKTVTNNLK_.3                       | 0.085153585  | #N/A                     |
| _AQKDEEKMEIQEILK_.3                                            | -0.043761557 | #N/A                     |
| _LVIESDLERAER_.3                                               | 0.311408687  | #N/A                     |
| _EPAAGGS[Phospho (STY)]LSGTR_.2                                | -0.414731526 | P58802_S18_M1_Tbc1d10a   |
| _ENYEDQEPLVGHE[Phospho (STY)]PITLAAR_.3                        | 0.179692828  | P58871_S602_M1_Tnks1bp1  |
| _LANISVPASES[Phospho (STY)]PR_.2                               | -0.224057263 | P58871_S300_M1_Tnks1bp1  |
| _VSGAGLS[Phospho (STY)]PSRK_.2                                 | 0.017960042  | P58871_S1131_M1_Tnks1bp1 |
| _DS[Phospho (STY)]LGSFSTR_.2                                   | -0.109602266 | P58871_S866_M1_Tnks1bp1  |
| _VPSS[Phospho (STY)]DEEVVEEPQSR_.2                             | -0.018721707 | P58871_S1612_M1_Tnks1bp1 |
| _VSGAGLSPS[Phospho (STY)]R_.2                                  | 0.104930754  | P58871_S1133_M1_Tnks1bp1 |
| _SLSSGF[Phospho (STY)]PEEAQQQDEEFK_.2                          | -0.141825643 | P58871_S980_M1_Tnks1bp1  |
| _WLDLLAS[Phospho (STY)]PPNSGSAR_.2                             | -0.183552221 | P58871_S692_M1_Tnks1bp1  |
| _M[Oxidation (M)]QAESQS[Phospho (STY)]PTNVDLEDKER_.2           | -0.034734614 | P58871_S1063_M1_Tnks1bp1 |
| _SSGSL[Phospho (STY)]PGLLETEDPLEAR_.2                          | -0.346074463 | P58871_S1375_M1_Tnks1bp1 |
| _GEGVSQVGPGT[Phospho (STY)]PPAPESPR_.2                         | -0.014965207 | P58871_T533_M1_Tnks1bp1  |

|                                                                                      |              |                          |
|--------------------------------------------------------------------------------------|--------------|--------------------------|
| _RFS[Phospho (STY)]EGVLQPPSQDQEK_.2                                                  | 0.115107292  | P58871_S429_M1_Tnks1bp1  |
| _NM[Oxidation (M)]APGAGC[Carbamidomethyl (C)]S[Phospho (STY)]PGEPR_.2                | -0.512535945 | P58871_S1290_M1_Tnks1bp1 |
| _DVGHLEEGASGGLS[Phospho (STY)]PSTPHSR_.3                                             | -0.170054371 | P58871_S1022_M1_Tnks1bp1 |
| _GYSS[Phospho (STY)]QDAEEQDREFEKR_.3                                                 | 0.051957657  | P58871_S912_M1_Tnks1bp1  |
| _ASRVPS[Phospho (STY)]S[Phospho (STY)]DEEVVEEPQSR_.2                                 | 0.08484909   | P58871_S1611_M2_Tnks1bp1 |
| _RDS[Phospho (STY)]LGSFSTR_.2                                                        | -0.551878206 | P58871_S866_M1_Tnks1bp1  |
| _LDS[Phospho (STY)]PPSPITEASEAAEAAEADSWAVSGR_.3                                      | 0.161362569  | P58871_S496_M1_Tnks1bp1  |
| _HS[Phospho (STY)]LGQEVIGIGSQDESEVPVR_.3                                             | -0.177958066 | P58871_S796_M1_Tnks1bp1  |
| _NRS[Phospho (STY)]AEEGEVTESK_.2                                                     | -0.121772259 | P58871_S1657_M1_Tnks1bp1 |
| _S[Phospho (STY)]PPSGSQSLLEGIM[Oxidation (M)]TASSSK_.2                               | -0.370335733 | P58871_S1437_M1_Tnks1bp1 |
| _DRQS[Phospho (STY)]PSTC[Carbamidomethyl (C)]SEGLLGWAQK_.3                           | -0.290248224 | P58871_S713_M1_Tnks1bp1  |
| _S[Phospho (STY)]HTGEAAAVR_.2                                                        | -0.517066384 | P59017_S387_M1_Bcl2l13   |
| _ALQTILSQPVTYEAYR_.2                                                                 | 0.062216041  | #N/A                     |
| _KKSHT[Phospho (STY)]GEAAAVR_.3                                                      | -0.126623802 | P59017_T389_M1_Bcl2l13   |
| _ [Acetyl (Protein N-term)]ANENHGS[Phospho (STY)]PR_.2                               | -0.125264006 | P59114_S8_M1_Pcif1       |
| _QLS[Phospho (STY)]EEQPSGNGVK_.2                                                     | -0.154674933 | P59114_S116_M1_Pcif1     |
| _AFS[Phospho (STY)]EDEALAQQDSK_.2                                                    | -0.337149531 | P59281_S597_M1_Arhgap39  |
| _KPSS[Phospho (STY)]ETDIENWASK_.2                                                    | 0.105866065  | P59281_S683_M1_Arhgap39  |
| _DGST[Phospho (STY)]GSSLEPELEER_.2                                                   | -0.395772111 | P59281_T133_M1_Arhgap39  |
| _QLVYVEQAGS[Phospho (STY)]SPK_.2                                                     | -0.346349188 | P59281_S402_M1_Arhgap39  |
| _EDTSSC[Carbamidomethyl (C)]S[Phospho (STY)]PPGVLLEK_.2                              | -0.203687116 | P59281_S169_M1_Arhgap39  |
| _SVS[Phospho (STY)]DQFYR_.2                                                          | -0.098823347 | P59325_S10_M1_Eif5       |
| _AM[Oxidation (M)]GPLVLTEVLFDEK_.2                                                   | 0.182519094  | #N/A                     |
| _GLTLS[Phospho (STY)]DDLER_.2                                                        | -0.739586976 | P59325_S227_M1_Eif5      |
| _VETVKS[Phospho (STY)]DNKDDIDIDAI_.2                                                 | 0.202448955  | P59325_S417_M1_Eif5      |
| _EEGIIDSSDKEIVAEAR_.3                                                                | -0.230301199 | #N/A                     |
| _AAGPAT[Phospho (STY)]PPR_.2                                                         | 0.038874934  | P59644_S266_M1_Inpp5j    |
| _QLS[Phospho (STY)]PTSVGPK_.2                                                        | -0.247574059 | P59644_S171_M1_Inpp5j    |
| _SRS[Phospho (STY)]PGLAR_.2                                                          | 0.028995713  | P59644_S885_M1_Inpp5j    |
| _VKAPSGGPS[Phospho (STY)]PSGR_.2                                                     | -0.442696488 | P59644_S691_M1_Inpp5j    |
| _HRS[Phospho (STY)]RS[Phospho (STY)]PGLAR_.3                                         | -0.157994665 | P59644_S883_M2_Inpp5j    |
| _GGSRS[Phospho (STY)]PS[Phospho (STY)]PQSR_.2                                        | -0.068442838 | P59644_S909_M2_Inpp5j    |
| _S[Phospho (STY)]C[Carbamidomethyl (C)]KSELPSSAPGGGGV_.2                             | 0.242401577  | P59648_S65_M1_Fxyd7      |
| _SELPSS[Phospho (STY)]APGGGGV_.2                                                     | 0.221821312  | P59648_S73_M1_Fxyd7      |
| _ADSR[Phospho (STY)]ES[Phospho (STY)]PTC[Carbamidomethyl (C)]K_.2                    | -0.482413149 | #N/A                     |
| _SESPTC[Carbamidomethyl (C)]KSC[Carbamidomethyl (C)]KS[Phospho (STY)]ELPSSAPGGGGV_.3 | -0.052168188 | P59648_S68_M1_Fxyd7      |
| _KADS[Phospho (STY)]RSES[Phospho (STY)]PTC[Carbamidomethyl (C)]K_.2                  | 0.269082088  | #N/A                     |
| _SES[Phospho (STY)]LSNC[Carbamidomethyl (C)]SIGK_.2                                  | 0.10263186   | P59672_S663_M1_Anks1a    |
| _SES[Phospho (STY)]LSNC[Carbamidomethyl (C)]SIGKK_.2                                 | 0.435663775  | P59672_S663_M1_Anks1a    |
| _GTESTQDAC[Carbamidomethyl (C)]AK_.2                                                 | -0.177064984 | #N/A                     |
| _S[Phospho (STY)]DPNLSAPEK_.2                                                        | 0.078672007  | P59764_S1759_M1_Dock4    |
| _NSAPASM[Oxidation (M)]S[Phospho (STY)]PDGTR_.2                                      | -0.199896907 | P59764_S1629_M1_Dock4    |
| _AVNPTPSSWS[Phospho (STY)]LDSGK_.2                                                   | 0.109031478  | P59764_S1778_M1_Dock4    |
| _AS[Phospho (STY)]PLLSDK_.2                                                          | -0.125199958 | P59764_S1709_M1_Dock4    |
| _S[Phospho (STY)]LPVSIC[Carbamidomethyl (C)]R_.2                                     | -0.165055589 | P59808_S805_M1_Sash1     |
| _EQS[Phospho (STY)]DDETEDSVK_.2                                                      | -0.149168314 | P59808_S241_M1_Sash1     |
| _AGGS[Phospho (STY)]VESLR_.2                                                         | -0.363930456 | P59808_S500_M1_Sash1     |

|                                                                         |              |                       |
|-------------------------------------------------------------------------|--------------|-----------------------|
| _S[Phospho (STY)]C[Carbamidomethyl (C)]ETLEGPEPVESWPR_2                 | 0.301647937  | P59808_S813_M1_Sash1  |
| _DSGC[Carbamidomethyl (C)]YES[Phospho (STY)]SENLENAK_2                  | -0.343713696 | P59808_S723_M1_Sash1  |
| _LKAGGS[Phospho (STY)]VESLR_2                                           | 0.103063151  | P59808_S500_M1_Sash1  |
| _SHS[Phospho (STY)]LDDLQGDADV GK_2                                      | 0.072887332  | P59808_S831_M1_Sash1  |
| _AVLLTAVELLQEYDS[Phospho (STY)]NSDQSGSQEK_3                             | 0.377601641  | P59808_S692_M1_Sash1  |
| _ELLQPVTISR_2                                                           | -0.096097302 | #N/A                  |
| _VLIEGSINSVR_2                                                          | -0.150257529 | #N/A                  |
| _AENFFILR_2                                                             | 0.124075436  | #N/A                  |
| _IVAEEFLK_2                                                             | 0.114561916  | #N/A                  |
| _ATLQAALC[Carbamidomethyl (C)]LENFSSQVVER_2                             | -0.257668504 | #N/A                  |
| _QASQLS[Phospho (STY)]LESTVGPC[Carbamidomethyl (C)]GERS_2               | -0.408779441 | P60191_S257_M1_Rims4  |
| _QASQLS[Phospho (STY)]LESTVGPC[Carbamidomethyl (C)]GER_2                | 0.12954505   | P60191_S257_M1_Rims4  |
| _TSASIGSLC[Carbamidomethyl (C)]ADAR_2                                   | 0.220545668  | #N/A                  |
| _M[Oxidation (M)]YGVLPWNAFPGK_2                                         | 0.03526936   | #N/A                  |
| _LIETYFSK_2                                                             | 0.017493233  | #N/A                  |
| _VC[Carbamidomethyl (C)]GSNLLSIC[Carbamidomethyl (C)]K_2                | 0.263193992  | #N/A                  |
| _GLLEC[Carbamidomethyl (C)]C[Carbamidomethyl (C)]AR_2                   | 0.038387468  | #N/A                  |
| _QIFGDYK_2                                                              | -0.090437372 | #N/A                  |
| _VC[Carbamidomethyl (C)]HC[Carbamidomethyl (C)]LGK_2                    | 0.286377868  | #N/A                  |
| _WLGHPDK_2                                                              | 0.060292751  | #N/A                  |
| _GQHQAHSLEK_2                                                           | -0.012919783 | #N/A                  |
| _GLSATVTGGQK_2                                                          | 0.131548166  | #N/A                  |
| _LVVPATQC[Carbamidomethyl (C)]GSLIGK_2                                  | 0.12731215   | #N/A                  |
| _AITIAGVPQSVTEC[Carbamidomethyl (C)]VK_2                                | 0.15572272   | #N/A                  |
| _IITLTGPTNAIFK_2                                                        | 0.211534854  | #N/A                  |
| _IANPVEGSSGR_2                                                          | 0.128982506  | #N/A                  |
| _QGANINEIR_2                                                            | -0.573329088 | #N/A                  |
| _QVTITGSAASISLAQYLINAR_2                                                | -0.007578007 | #N/A                  |
| _QIC[Carbamidomethyl (C)]LVM[Oxidation (M)]LETLSQS[Phospho (STY)]PQGR_2 | -0.353411058 | P60335_S173_M1_Pcbp1  |
| _GEGPAVPGDT[Phospho (STY)]PPPTPR_2                                      | -0.421535076 | P60469_T714_M1_Ppfia3 |
| _LAPPS[Phospho (STY)]PAR_2                                              | -0.438709708 | P60469_S683_M1_Ppfia3 |
| _QAQS[Phospho (STY)]PGGVSSEVEVLK_2                                      | -0.338396872 | P60469_S142_M1_Ppfia3 |
| _RGS[Phospho (STY)]ALGPDEAGGELER_3                                      | -0.297207689 | P60469_S17_M1_Ppfia3  |
| _YSQAPTLPSGAPLDPYGAGS[Phospho (STY)]GR_2                                | -0.272503354 | P60469_S537_M1_Ppfia3 |
| _VSSSGLDS[Phospho (STY)]LGR_2                                           | -0.445749852 | P60469_S645_M1_Ppfia3 |
| _ESVSLAGTPSDETLATDPLGLAK_2                                              | -0.306973149 | #N/A                  |
| _GS[Phospho (STY)]ALGPDEAGGELER_2                                       | 0.077429482  | P60469_S17_M1_Ppfia3  |
| _TAELEEALR_2                                                            | -0.280806727 | #N/A                  |
| _S[Phospho (STY)]LPGSALELR_2                                            | -0.21212896  | P60469_S508_M1_Ppfia3 |
| _M[Oxidation (M)]AQALALQAGS[Phospho (STY)]PEDGAPPR_2                    | -0.26560166  | P60469_S737_M1_Ppfia3 |
| _RQAQS[Phospho (STY)]PGGVSSEVEVLK_3                                     | 0.18273429   | P60469_S142_M1_Ppfia3 |
| _QM[Oxidation (M)]S[Phospho (STY)]QLEELGTAHR_3                          | -0.414929696 | P60469_S264_M1_Ppfia3 |
| _WSGAKDESS[Phospho (STY)]KDWDK_3                                        | -0.147193324 | P60469_S554_M1_Ppfia3 |
| _IVPGAPELLQR_2                                                          | 0.293260028  | #N/A                  |
| _NTLFVSNNR_2                                                            | 0.106055544  | #N/A                  |
| _LAGDPGEDPR_2                                                           | 0.140337873  | #N/A                  |
| _AEQLFSSALC[Carbamidomethyl (C)]AAR_2                                   | -0.052309516 | #N/A                  |

|                                                                                                                               |              |                         |
|-------------------------------------------------------------------------------------------------------------------------------|--------------|-------------------------|
| _LSGPPDASGAVFVLGGEGLR_2                                                                                                       | -0.404154161 | #N/A                    |
| _TPGTGSLAAAVETASGR_2                                                                                                          | 0.274716527  | #N/A                    |
| _C[Carbamidomethyl (C)]GM[Oxidation (M)]TTVLTLTGVSSLEEAQAYLTAGQR_3                                                            | 0.16588612   | #N/A                    |
| _AVLVGYDEQFSFSR_2                                                                                                             | -0.218232779 | #N/A                    |
| _EDHS[Phospho (STY)]LEHR_2                                                                                                    | 0.194293969  | P60521_S10_M1_Gabarapl2 |
| _WM[Oxidation (M)]FKEDHS[Phospho (STY)]LEHR_3                                                                                 | -0.261272601 | P60521_S10_M1_Gabarapl2 |
| _VAPEEHPVLLTEAPLNPK_3                                                                                                         | -0.336941439 | #N/A                    |
| _AGFAGDDAPR_2                                                                                                                 | -0.055282214 | #N/A                    |
| _DSYVGDEAQSKR_2                                                                                                               | -0.162871827 | #N/A                    |
| _IIAPPERK_2                                                                                                                   | 0.152473177  | #N/A                    |
| _AVFPSIVGRPR_2                                                                                                                | 0.073452935  | #N/A                    |
| _DSYVGDEAQSK_2                                                                                                                | -0.016891545 | #N/A                    |
| _AVFPSIVGR_2                                                                                                                  | 0.281323375  | #N/A                    |
| _C[Carbamidomethyl (C)]DVDIRK_2                                                                                               | -0.038147018 | #N/A                    |
| _IKIIAPPER_2                                                                                                                  | -0.353050829 | #N/A                    |
| _GYSFTTTAER_2                                                                                                                 | 0.260949165  | #N/A                    |
| _TTGIVM[Oxidation (M)]DSGDGVTHTVPIYEGYALPHAILR_3                                                                              | -0.46152839  | #N/A                    |
| _KDLYANTVLSGGTTM[Oxidation (M)]YPGIADR_3                                                                                      | 0.04355076   | #N/A                    |
| _ [Acetyl (Protein N-term)]DDDIAALVVDNGSGMC[Carbamidomethyl (C)]K_2                                                           | 0.239425055  | #N/A                    |
| _ [Acetyl (Protein N-term)]DDDIAALVVDNGSGM[Oxidation (M)]C[Carbamidomethyl (C)]KAGFAGDDAPR_3                                  | -0.119352009 | #N/A                    |
| _LC[Carbamidomethyl (C)]YVALDFEQEM[Oxidation (M)]ATAASSSSLEK_3                                                                | -0.254029615 | #N/A                    |
| _EKLC[Carbamidomethyl (C)]YVALDFEQEM[Oxidation (M)]ATAASSSSLEK_3                                                              | -0.473494118 | #N/A                    |
| _EITALAPSTM[Oxidation (M)]K_2                                                                                                 | 0.095497873  | #N/A                    |
| _FRC[Carbamidomethyl (C)]PEALFQPSFLGM[Oxidation (M)]ESC[Carbamidomethyl (C)]GIHETTFNSIM[Oxidation (M)]K_4                     | -0.302178995 | #N/A                    |
| _HQGVMM[Oxidation (M)]VGM[Oxidation (M)]GQK_2                                                                                 | 0.017405498  | #N/A                    |
| _DLYANTVLSGGTTM[Oxidation (M)]YPGIADR_2                                                                                       | -0.435028324 | #N/A                    |
| _IWHHTFYNELR_3                                                                                                                | -0.34074075  | #N/A                    |
| _QEYDESGPSIVHR_2                                                                                                              | -0.210630033 | #N/A                    |
| _QEYDESGPSIVHRK_3                                                                                                             | -0.392944512 | #N/A                    |
| _DLTDYLM[Oxidation (M)]K_2                                                                                                    | -0.423877272 | #N/A                    |
| _C[Carbamidomethyl (C)]PEALFQPSFLGM[Oxidation (M)]ESC[Carbamidomethyl (C)]GIHETTFNSIM[Oxidation (M)]K_3                       | -0.63549869  | #N/A                    |
| _DLTDYLM[Oxidation (M)]KILTER_2                                                                                               | 0.201373026  | #N/A                    |
| _S[Phospho (STY)]YELPDGQVITIGNER_2                                                                                            | -0.014938903 | P60710_S239_M1_Actb     |
| _KGPGGPGGPGGAGGAR_2                                                                                                           | 0.429165274  | #N/A                    |
| _ [Acetyl (Protein N-term)]M[Oxidation (M)]DC[Carbamidomethyl (C)]C[Carbamidomethyl (C)]TESAC[Carbamidomethyl (C)]SKPDDDILDIP | -0.302148212 | #N/A                    |
| _GPGPGGPGGAGGAR_2                                                                                                             | 0.035103872  | #N/A                    |
| _IKS[Phospho (STY)]GEC[Carbamidomethyl (C)]GR_2                                                                               | -0.198381479 | P60761_S48_M1_Nrgn      |
| _QKPITPETAEK_2                                                                                                                | 0.064331725  | #N/A                    |
| _WVPEITHHC[Carbamidomethyl (C)]PK_3                                                                                           | 0.122782602  | #N/A                    |
| _TPFLLVGTQIDLRL_2                                                                                                             | 0.081525724  | #N/A                    |
| _TC[Carbamidomethyl (C)]LLISYTTNK_2                                                                                           | -0.304573783 | #N/A                    |
| _TPFLLVGTQIDLRDDPSTIEK_3                                                                                                      | -0.190801497 | #N/A                    |
| _YVEC[Carbamidomethyl (C)]SALTQK_2                                                                                            | -0.039228301 | #N/A                    |
| _LRPLSYPQTDVFLVC[Carbamidomethyl (C)]FSVSPSSFENVK_3                                                                           | -0.005477617 | #N/A                    |
| _S[Phospho (STY)]QGGSYGYR_2                                                                                                   | 0.017230495  | P60824_S146_M1_Cirbp    |
| _KSS[Phospho (STY)]LVTSK_2                                                                                                    | -0.020277283 | P60840_S109_M1_Ensa     |
| _ [Acetyl (Protein N-term)]S[Phospho (STY)]QKQEEENPAEETGEEK_2                                                                 | 0.475956652  | P60840_S2_M1_Ensa       |

|                                                                                                     |              |                       |
|-----------------------------------------------------------------------------------------------------|--------------|-----------------------|
| _ATQALVLAPTR_.2                                                                                     | -0.0878055   | #N/A                  |
| _GYDVIAQAQSGTGK_.2                                                                                  | 0.424657828  | #N/A                  |
| _GIDVQQVSLVINYDLPTNR_.2                                                                             | 0.286115735  | #N/A                  |
| _FGFSQDS[Phospho (STY)]GRGK_.2                                                                      | -0.276235186 | P60853_S50_M1_Lzts1   |
| _ALSFS[Phospho (STY)]DGGSK_.2                                                                       | -0.331779879 | P60853_S233_M1_Lzts1  |
| _S[Phospho (STY)]FDEKEFASGQTFEERPR_.3                                                               | -0.329666992 | P60853_S283_M1_Lzts1  |
| _DTGKTPVEPEVAIHR_.3                                                                                 | 0.081417745  | #N/A                  |
| _LIDLHSPSEIVK_.2                                                                                    | -0.181716618 | #N/A                  |
| _VC[Carbamidomethyl (C)]ADLIR_.2                                                                    | 0.115566389  | #N/A                  |
| _TPVEPEVAIHR_.3                                                                                     | -0.113958606 | #N/A                  |
| _RADQLADESLESTR_.3                                                                                  | -0.56875102  | #N/A                  |
| _FC[Carbamidomethyl (C)]GLC[Carbamidomethyl (C)]VC[Carbamidomethyl (C)]PC[Carbamidomethyl (C)]NK_.2 | 0.332325584  | #N/A                  |
| _ADQLADESLESTR_.2                                                                                   | 0.323214847  | #N/A                  |
| _IEEGM[Oxidation (M)]DQINK_.2                                                                       | 0.353627409  | #N/A                  |
| _TLVM[Oxidation (M)]LDEQGEQLER_.2                                                                   | -0.224942863 | #N/A                  |
| _IDEANQR_.2                                                                                         | 0.098043048  | #N/A                  |
| _EQM[Oxidation (M)]AISGGFIR_.2                                                                      | -0.208490504 | #N/A                  |
| _MLQLVEESK_.2                                                                                       | 0.388638999  | #N/A                  |
| _AWGNNQDGVVASQPAR_.2                                                                                | -0.040562828 | #N/A                  |
| _RADQLADESLESTR_.3                                                                                  | -0.268063951 | #N/A                  |
| _ENEM[Oxidation (M)]DENLEQVSGIIGNLR_.2                                                              | -0.258994641 | #N/A                  |
| _NELEEMQR_.2                                                                                        | 0.013041271  | #N/A                  |
| _ADQLADESLESTR_.2                                                                                   | 0.0586256    | #N/A                  |
| _HM[Oxidation (M)]ALDM[Oxidation (M)]GNEIDTQNR_.3                                                   | -0.246486193 | #N/A                  |
| _M[Oxidation (M)]LQLVEESKDAGIR_.2                                                                   | -0.435107869 | #N/A                  |
| _[Acetyl (Protein N-term)]AEDADM[Oxidation (M)]RNELEEMQR_.2                                         | -0.287164539 | #N/A                  |
| _VVDEREQM[Oxidation (M)]AISGGFIR_.3                                                                 | -0.25796057  | #N/A                  |
| _EINNAHAILTDATK_.3                                                                                  | 0.201900625  | #N/A                  |
| _SLS[Phospho (STY)]TSGESLYHVLGLDKNATSDDIKK_.4                                                       | -0.201938375 | P60904_S10_M1_Dnajc5  |
| _NATSDDIKK_.2                                                                                       | -0.302436405 | #N/A                  |
| _SLS[Phospho (STY)]TSGESLYHVLGLDK_.2                                                                | -0.3042665   | P60904_S10_M1_Dnajc5  |
| _EINNAHAILTDATK_.2                                                                                  | 0.412513197  | #N/A                  |
| _APEGEETEFYVS[Phospho (STY)]PEDLEAQLQSDER_.3                                                        | -0.21616067  | P60904_S151_M1_Dnajc5 |
| _QRS[Phospho (STY)]LS[Phospho (STY)]TSGESLYHVLGLDK_.3                                               | -0.298831976 | P60904_S10_M2_Dnajc5  |
| _YHPDKNPDNPEAADKFK_.4                                                                               | 0.028811752  | #N/A                  |
| _GVDLHEQSQQNK_.2                                                                                    | -0.255980814 | #N/A                  |
| _GAQAAIVVYDITNQETFAR_.2                                                                             | -0.242042548 | #N/A                  |
| _DELLQVLR_.2                                                                                        | -0.142840088 | #N/A                  |
| _IINAFSEGEDQVNFR_.2                                                                                 | 0.267287808  | #N/A                  |
| _ETGFHSQITR_.3                                                                                      | -0.183576762 | #N/A                  |
| _AFLTAEIDILR_.2                                                                                     | -0.167250804 | #N/A                  |
| _GKGEQIAR_.2                                                                                        | 0.148486361  | #N/A                  |
| _EPNSENVDISS[Phospho (STY)]GGGVTGWK_.2                                                              | -0.09654251  | P61027_S188_M1_Rab10  |
| _KTPVKEPNSENVDISS[Phospho (STY)]GGGVTGWK_.3                                                         | 0.039446952  | P61027_S188_M1_Rab10  |
| _ANINIEK_.2                                                                                         | 0.239950002  | #N/A                  |
| _NIDEHANEDVER_.2                                                                                    | 0.151928376  | #N/A                  |
| _TPVKEPNSENVDISS[Phospho (STY)]GGGVTGWK_.3                                                          | 0.021728334  | P61027_S188_M1_Rab10  |

|                                                        |              |                      |
|--------------------------------------------------------|--------------|----------------------|
| _SSTNVEEAFFTLAR_2                                      | 0.213023204  | #N/A                 |
| _SQWSPALTISK_2                                         | 0.24241755   | #N/A                 |
| _ELS[Phospho (STY)]DLAR_2                              | 0.127632791  | P61079_S11_M1_Ube2d3 |
| _ELS[Phospho (STY)]DLQR_2                              | -0.015948351 | P61080_S11_M1_Ube2d1 |
| _EAAEVLQNNR_2                                          | -0.236155973 | #N/A                 |
| _GGYIGSTYFER_2                                         | 0.160769054  | #N/A                 |
| _DINELNLPK_2                                           | 0.02486422   | #N/A                 |
| _TC[Carbamidomethyl (C)]DISFSDPDDLNFK_2                | -0.300464366 | #N/A                 |
| _LLAEPVPGIK_2                                          | 0.188716802  | #N/A                 |
| _TNEAQAIETAR_2                                         | 0.044766632  | #N/A                 |
| _IYHPNVDK_2                                            | 0.216000981  | #N/A                 |
| _WSPALQIR_2                                            | 0.218235116  | #N/A                 |
| _YFHVVIAGPQDSPFEGGTFK_3                                | 0.067146459  | #N/A                 |
| _LLAEPVPGIKAEPDESAR_3                                  | -0.356616675 | #N/A                 |
| _LELFLPEEYPM[Oxidation (M)]AAPK_2                      | 0.075757496  | #N/A                 |
| _AEPDESAR_2                                            | 0.296385352  | #N/A                 |
| _TVLLSIQALLSAPNPDDPLANDVAEQWK_3                        | -0.411672365 | #N/A                 |
| _ILLTEPPM[Oxidation (M)]NPTK_2                         | -0.155997554 | #N/A                 |
| _HLWDYTFGPEK_2                                         | -0.084823528 | #N/A                 |
| _DLM[Oxidation (M)]VGDEASELR_2                         | -0.096786935 | #N/A                 |
| _LC[Carbamidomethyl (C)]YVGYNIEQEQK_2                  | 0.278799694  | #N/A                 |
| _GYAFNHSADFETVR_3                                      | -0.111795123 | #N/A                 |
| _HIVLSGGSTM[Oxidation (M)]YPGLPSR_2                    | 0.071111978  | #N/A                 |
| _LALETTVLVESYTLPDGR_2                                  | -0.284935941 | #N/A                 |
| _AQYYLPDGSTIEIGPSR_2                                   | -0.255197135 | #N/A                 |
| _DQLQTFSEHPVLLTEAPLNPR_3                               | 0.108932569  | #N/A                 |
| _AC[Carbamidomethyl (C)]YLSINPQKDETLETEK_3             | 0.077448246  | #N/A                 |
| _KEYEEDGAR_2                                           | 0.002113242  | #N/A                 |
| _NISFTVWDVGGQDK_2                                      | -0.17663035  | #N/A                 |
| _DAVLLVFANK_2                                          | 0.17555482   | #N/A                 |
| _LGEIVTTIPTIGFNVETVEYK_2                               | -0.239422549 | #N/A                 |
| _M[Oxidation (M)]LADELRLDAVLLVFANK_3                   | 0.152723475  | #N/A                 |
| _M[Oxidation (M)]LADELRL_2                             | 0.234961343  | #N/A                 |
| _QDLPNAM[Oxidation (M)]NAAEITDK_2                      | 0.210848064  | #N/A                 |
| _ILM[Oxidation (M)]VGLDAAGK_2                          | 0.230176189  | #N/A                 |
| _HYFQNTQGLIFVVDSDNRER_3                                | -0.420521129 | #N/A                 |
| _HYFQNTQGLIFVVDSDNR_3                                  | 0.136777559  | #N/A                 |
| _YDPTIEDFYR_2                                          | 0.112065712  | #N/A                 |
| _VVVLGSGGVGK_2                                         | 0.225098775  | #N/A                 |
| _ALAEWSC[Carbamidomethyl (C)]PFM[Oxidation (M)]ETSAK_2 | 0.040814382  | #N/A                 |
| _ASVDELFAEIVR_2                                        | -0.147014983 | #N/A                 |
| _SALTQVFVTGSFIEK_2                                     | -0.490843635 | #N/A                 |
| _EIEVDSSPSVLEILDATAGTEQFASM[Oxidation (M)]R_3          | 0.277778949  | #N/A                 |
| _FNPVTSR_2                                             | 0.259061487  | #N/A                 |
| _YVIYIER_2                                             | -0.126903395 | #N/A                 |
| _TKQELEDLTADIKK_3                                      | 0.003024293  | #N/A                 |
| _LAIFTDDIK_2                                           | -0.06490126  | #N/A                 |



|                                                                                  |              |                      |
|----------------------------------------------------------------------------------|--------------|----------------------|
| _QLEITGR_2                                                                       | -0.036619729 | #N/A                 |
| _LSEDVEQVKK_2                                                                    | 0.128852839  | #N/A                 |
| _QALNEIETR_2                                                                     | 0.074712805  | #N/A                 |
| _LSEDVEQVK_2                                                                     | -0.063026998 | #N/A                 |
| _TQHSTLSR_2                                                                      | 0.107261713  | #N/A                 |
| _DHFM[Oxidation (M)]DEFFEQVEEIR_3                                                | -0.351338049 | #N/A                 |
| _TTTNEELEDM[Oxidation (M)]LESGK_2                                                | -0.164845006 | #N/A                 |
| _IEYNVEHSVDYVER_3                                                                | -0.148706102 | #N/A                 |
| _SAKDS[Phospho (STY)]DDEEEVVHVDR_3                                               | -0.243092516 | P61264_S14_M1_Stx1b  |
| _AIEQSIEQEEGLNRS[Phospho (STY)]SADLR_3                                           | -0.235453983 | P61264_S108_M1_Stx1b |
| _KQHS[Phospho (STY)]AIIAAPNPDEK_3                                                | -0.180461435 | P61264_S58_M1_Stx1b  |
| _AIEQSIEQEEGLNR_2                                                                | -0.098362909 | #N/A                 |
| _LKAIEQSIEQEEGLNR_3                                                              | -0.053597652 | #N/A                 |
| _QHSAILAAPNPDEK_2                                                                | 0.533967972  | #N/A                 |
| _DS[Phospho (STY)]DDEEEVVHVDR_2                                                  | -0.100181168 | P61264_S14_M1_Stx1b  |
| _TQELRS[Phospho (STY)]AKDS[Phospho (STY)]DDEEEVVHVDR_4                           | -0.178329629 | P61264_S10_M2_Stx1b  |
| _FVEVM[Oxidation (M)]TEYNATQSK_2                                                 | 0.042336803  | #N/A                 |
| _KFVEVM[Oxidation (M)]TEYNATQSK_3                                                | 0.412158639  | #N/A                 |
| _EPS[Phospho (STY)]LHEIGEK_2                                                     | -0.200280213 | P61329_S212_M1_Fgf12 |
| _VVAIQGVK_2                                                                      | -0.007623976 | #N/A                 |
| _KS[Phospho (STY)]SGTPTMNGGK_2                                                   | 0.034237051  | P61329_S226_M1_Fgf12 |
| _SRKS[Phospho (STY)]S[Phospho (STY)]GTPTMNGGK_2                                  | 0.351977031  | P61329_S226_M2_Fgf12 |
| _YSVDIPLDK_2                                                                     | -0.050192322 | #N/A                 |
| _NIDDGTSDRPYSHALVAGIDR_3                                                         | 0.178837173  | #N/A                 |
| _NWS[Phospho (STY)]GC[Carbamidomethyl (C)]GEGEQK_2                               | 0.342587406  | P61406_S331_M1_Smg6  |
| _LM[Oxidation (M)]TANS[Phospho (STY)]PEVHG_2                                     | -0.119617707 | P61807_S83_M1_Snn    |
| _GNYLVDVDGMR_2                                                                   | -0.337802991 | #N/A                 |
| _GTFC[Carbamidomethyl (C)]SFDTPDEAIR_2                                           | -0.357752246 | #N/A                 |
| _GVVLGGC[Carbamidomethyl (C)]GDK_2                                               | 0.055721531  | #N/A                 |
| _TVAGIIVEPIQSEGGDNHASDDFFR_3                                                     | -0.424201879 | #N/A                 |
| _EDLLNNVAR_2                                                                     | 0.266296151  | #N/A                 |
| _IFNTWLGDPK_2                                                                    | 0.087244304  | #N/A                 |
| _IDIPSFWDPIAPFPR_2                                                               | -0.094303011 | #N/A                 |
| _LKYPLEEFSTDNQEEAR_3                                                             | 0.40499009   | #N/A                 |
| _M[Oxidation (M)]LDLYSQISSVPIGYNHPALAK_3                                         | -0.088752487 | #N/A                 |
| _NLLAEVINIHK_2                                                                   | 0.325781778  | #N/A                 |
| _C[Carbamidomethyl (C)]LEEVEDLIVK_2                                              | 0.252763454  | #N/A                 |
| _TLLTGLLDLQAQYPQFISR_2                                                           | -0.056486775 | #N/A                 |
| _EEFRPSAPYR_3                                                                    | 0.061543952  | #N/A                 |
| _REDLLNNVAR_2                                                                    | -0.044386246 | #N/A                 |
| _QLNTIQNAEAVHFFC[Carbamidomethyl (C)]NYEESR_3                                    | -0.384434652 | #N/A                 |
| _TM[Oxidation (M)]GC[Carbamidomethyl (C)]LATTHSK_2                               | 0.391959608  | #N/A                 |
| _VDIEFDYDGPLM[Oxidation (M)]K_2                                                  | -0.031387479 | #N/A                 |
| _YPLEEFSTDNQEEAR_2                                                               | 0.333889667  | #N/A                 |
| _GM[Oxidation (M)]SQLITMAC[Carbamidomethyl (C)]GSC[Carbamidomethyl (C)]SNENAFK_2 | 0.318614742  | #N/A                 |
| _VLSVPESTPFTAVLK_2                                                               | 0.598688093  | #N/A                 |
| _ITLTSDPR_2                                                                      | -0.02146816  | #N/A                 |

|                                                                             |              |                        |
|-----------------------------------------------------------------------------|--------------|------------------------|
| _LEC[Carbamidomethyl (C)]LLNNNK_.2                                          | -0.251866836 | #N/A                   |
| _LALGSFVEEYNNK_.2                                                           | -0.468083455 | #N/A                   |
| _AIEQADLLQEEDES[Phospho (STY)]PR_.2                                         | -0.092674236 | P61967_S147_M1_Ap1s1   |
| _TDYNASVSPDSSGPER_.2                                                        | 0.129047294  | #N/A                   |
| _IILDISESPIK_.2                                                             | 0.068186929  | #N/A                   |
| _GSDFDC[Carbamidomethyl (C)]ELR_.2                                          | -0.203022116 | #N/A                   |
| _IITITGTQDQIQNAQYLLQNSVK_.3                                                 | -0.371295338 | #N/A                   |
| _DYDDM[Oxidation (M)]S[Phospho (STY)]PR_.2                                  | -0.448214647 | P61979_S284_M1_Hnrrnpk |
| _LFQEC[Carbamidomethyl (C)]C[Carbamidomethyl (C)]PHSTDR_.3                  | 0.084914558  | #N/A                   |
| _DLAGSIIGK_.2                                                               | -0.033271772 | #N/A                   |
| _RDYDDM[Oxidation (M)]S[Phospho (STY)]PR_.2                                 | 0.130256482  | P61979_S284_M1_Hnrrnpk |
| _RPAEDM[Oxidation (M)]EEEEQAFKR_.3                                          | 0.460838726  | #N/A                   |
| _GSYGDGPGIITTQVTIPK_.2                                                      | -0.127843215 | #N/A                   |
| _LLIHQSLAGGIIGVK_.3                                                         | 0.005727083  | #N/A                   |
| _IIPLEEGLQLPS[Phospho (STY)]PTATSQPLLESDAVEC[Carbamidomethyl (C)]LNYQHYK_.4 | -0.220392204 | P61979_S116_M1_Hnrrnpk |
| _NTDEMVELR_.2                                                               | 0.158790489  | #N/A                   |
| _GGDLM[Oxidation (M)]AYDRR_.2                                               | -0.192591866 | #N/A                   |
| _ILSISADIETIGEILKK_.2                                                       | -0.24232712  | #N/A                   |
| _ILSISADIETIGEILK_.2                                                        | -0.086695314 | #N/A                   |
| _[Acetyl (Protein N-term)]VDREQLVQK_.2                                      | -0.075427143 | #N/A                   |
| _MKGDYYR_.2                                                                 | 0.328824415  | #N/A                   |
| _AYSEAHEISK_.2                                                              | 0.102005908  | #N/A                   |
| _ATVVESSEKAYSEAHEISK_.3                                                     | -0.44620785  | #N/A                   |
| _RATVVESSEK_.2                                                              | 0.244440606  | #N/A                   |
| _NC[Carbamidomethyl (C)]SETQYESK_.2                                         | 0.120395087  | #N/A                   |
| _EHM[Oxidation (M)]QPTHPH_.2                                                | 0.076627023  | #N/A                   |
| _NVTELNEPLSNEER_.2                                                          | -0.309829481 | #N/A                   |
| _YLAEVATGEK_.2                                                              | 0.075615135  | #N/A                   |
| _NC[Carbamidomethyl (C)]SETQYES[Phospho (STY)]KV FYLK_.2                    | -0.18513537  | P61982_S119_M1_Ywhag   |
| _DNLTLTWT[Phospho (STY)]SDQQDDGGEGNN_.2                                     | 0.365499163  | P61982_T234_M1_Ywhag   |
| _TAFDDAIAELDTLNEDSYK_.2                                                     | -0.278399423 | #N/A                   |
| _YLAEVATGEKR_.2                                                             | -0.085152452 | #N/A                   |
| _ELEAVC[Carbamidomethyl (C)]QDVLSLLDNYLIK_.2                                | 0.175662141  | #N/A                   |
| _VISSIEQKTS[Phospho (STY)]ADGNEKK_.2                                        | -0.100967324 | P61982_S71_M1_Ywhag    |
| _VISSIEQKTS[Phospho (STY)]ADGNEK_.2                                         | 0.294102964  | P61982_S71_M1_Ywhag    |
| _FQEQEC[Carbamidomethyl (C)]PPS[Phospho (STY)]PEPTR_.2                      | -0.143736523 | #N/A                   |
| _KFQEQEC[Carbamidomethyl (C)]PPS[Phospho (STY)]PEPTRK_.3                    | -0.230492772 | #N/A                   |
| _FQEQEC[Carbamidomethyl (C)]PPS[Phospho (STY)]PEPTR_.2                      | 0.003985158  | #N/A                   |
| _KFQEQEC[Carbamidomethyl (C)]PPS[Phospho (STY)]PEPTR_.2                     | 0.102184575  | #N/A                   |
| _[Acetyl (Protein N-term)]AAAGWRDGS[Phospho (STY)]GQEK_.2                   | -0.17702936  | P62071_S10_M1_Rras2    |
| _YLDIHER_.2                                                                 | -0.111845285 | #N/A                   |
| _GESVC[Carbamidomethyl (C)]LDR_.2                                           | 0.169304011  | #N/A                   |
| _EAELSKGESVC[Carbamidomethyl (C)]LDR_.2                                     | 0.206197178  | #N/A                   |
| _VQIAVANAQELLQR_.2                                                          | -0.215632083 | #N/A                   |
| _YM[Oxidation (M)]DAWNNTVSR_.2                                              | -0.186156261 | #N/A                   |
| _LDPGAIMEQVK_.2                                                             | 0.220311277  | #N/A                   |
| _FIDTTLAITGR_.2                                                             | 0.287313072  | #N/A                   |

|                                                                       |              |                      |
|-----------------------------------------------------------------------|--------------|----------------------|
| _HVVFIAQR_2                                                           | 0.453480326  | #N/A                 |
| _AIIIFVPVPQLK_2                                                       | -0.108025528 | #N/A                 |
| _LLEVQGS[Phospho (STY)]RPGK_2                                         | 0.043840299  | P62137_S22_M1_Ppp1ca |
| _ [Acetyl (Protein N-term)]SDSEKLNLDISIIGR_2                          | 0.291184834  | #N/A                 |
| _ [Acetyl (Protein N-term)]ADGELNVDSLITR_2                            | 0.215938558  | #N/A                 |
| _VAEEHAPSIVFIDEIDAIGTK_3                                              | 0.365428882  | #N/A                 |
| _AVANQTSATFLR_2                                                       | 0.185440608  | #N/A                 |
| _APQETYADIGGLDNQIQEIK_2                                               | -0.03548922  | #N/A                 |
| _NDSYTLHK_2                                                           | -0.214603153 | #N/A                 |
| _LTPEEEEILNK_2                                                        | 0.099054147  | #N/A                 |
| _IIDVVYNASNNELVR_2                                                    | -0.106656379 | #N/A                 |
| _NC[Carbamidomethyl (C)]IVLIDSTPYR_2                                  | 0.053304635  | #N/A                 |
| _ISSLLEEQFQQGK_2                                                      | 0.013039152  | #N/A                 |
| _LDVGNFSWGSEC[Carbamidomethyl (C)]C[Carbamidomethyl (C)]TR_2          | 0.277598184  | #N/A                 |
| _IVVNLTGR_2                                                           | -0.046221185 | #N/A                 |
| _M[Oxidation (M)]NVLADALK_2                                           | -0.355349589 | #N/A                 |
| _HGYIGEFEIIDDHR_3                                                     | 0.072587753  | #N/A                 |
| _EALQDVEDENQ_2                                                        | -0.11332613  | #N/A                 |
| _YLAEFATGNDR_2                                                        | -0.125726066 | #N/A                 |
| _LIC[Carbamidomethyl (C)]C[Carbamidomethyl (C)]DILDVLDK_2             | 0.311913368  | #N/A                 |
| _VAGM[Oxidation (M)]DVELTVEER_2                                       | -0.357320279 | #N/A                 |
| _EAAENSLVAYK_2                                                        | 0.096961158  | #N/A                 |
| _IISIEQK_2                                                            | 0.021876236  | #N/A                 |
| _LIC[Carbamidomethyl (C)]C[Carbamidomethyl (C)]DILDVLDKHLIPAANTGESK_4 | -0.435019222 | #N/A                 |
| _HLIPAANTGESK_2                                                       | 0.34382967   | #N/A                 |
| _QM[Oxidation (M)]VETELK_2                                            | 0.358876862  | #N/A                 |
| _YLAEFATGNDRK_2                                                       | -0.023508113 | #N/A                 |
| _AAFDDAIAELDTLSEESYK_2                                                | -0.232680743 | #N/A                 |
| _ [Acetyl (Protein N-term)]M[Oxidation (M)]DDREDLVYQAK_2              | 0.029920084  | #N/A                 |
| _M[Oxidation (M)]KGDYHR_2                                             | -0.027940715 | #N/A                 |
| _KEAAENSLVAYK_2                                                       | 0.060856062  | #N/A                 |
| _AASDIAM[Oxidation (M)]TELPPTHPIR_2                                   | -0.033651061 | #N/A                 |
| _YDEM[Oxidation (M)]VESM[Oxidation (M)]KK_2                           | 0.204638441  | #N/A                 |
| _EENKGGEDK_2                                                          | 0.035907978  | #N/A                 |
| _IISIEQKEENK_2                                                        | -0.209080507 | #N/A                 |
| _KVAGM[Oxidation (M)]DVELTVEER_3                                      | -0.337046148 | #N/A                 |
| _YDEM[Oxidation (M)]VESMK_2                                           | 0.149355753  | #N/A                 |
| _LAEQAERYDEM[Oxidation (M)]VESM[Oxidation (M)]KK_3                    | -0.406898559 | #N/A                 |
| _IISIEQKEENKGGEDK_3                                                   | 0.030574858  | #N/A                 |
| _DNLTWTSMDMQGDGEEQNK_2                                                | 0.285688566  | #N/A                 |
| _AAFDDAIAELDTLSEESYKDSTLIMQLLR_3                                      | -0.15698933  | #N/A                 |
| _LAEQAERYDEMVESMK_3                                                   | 0.027970901  | #N/A                 |
| _IEDVTPIPSDSTR_2                                                      | 0.168669221  | #N/A                 |
| _TPGPGAQSALR_2                                                        | 0.068105763  | #N/A                 |
| _ANPFGGASHAK_2                                                        | 0.302680191  | #N/A                 |
| _VLNTNIDGR_2                                                          | -0.264657636 | #N/A                 |
| _IPDWFLNR_2                                                           | 0.262505315  | #N/A                 |

|                                                                                     |              |                       |
|-------------------------------------------------------------------------------------|--------------|-----------------------|
| _YSQVLANGLDNK_.2                                                                    | -0.013951663 | #N/A                  |
| _LREDLER_.2                                                                         | 0.273674081  | #N/A                  |
| _GHQQLYWSHPR_.3                                                                     | -0.138173361 | #N/A                  |
| _DIGFIKLD_.2                                                                        | 0.10443553   | #N/A                  |
| _DYLHYIR_.2                                                                         | -0.053604363 | #N/A                  |
| _EAIEGTIDKK_.2                                                                      | -0.475475957 | #N/A                  |
| _DSHGVAQVR_.2                                                                       | -0.131659129 | #N/A                  |
| _LILIESR_.2                                                                         | 0.038530507  | #N/A                  |
| _NNTQVLINC[Carbamidomethyl (C)]R_.2                                                 | -0.09550528  | #N/A                  |
| _VAQLEQVYIR_.2                                                                      | -0.11172386  | #N/A                  |
| _FLILPDM[Oxidation (M)]LK_.2                                                        | 0.252085274  | #N/A                  |
| _ [Acetyl (Protein N-term)]AANATTNPSQLPLELVDK_.2                                    | -0.118804261 | #N/A                  |
| _FNVWDVGGQDK_.2                                                                     | -0.312025762 | #N/A                  |
| _EVIELPLTNPELFQR_.2                                                                 | 0.344123986  | #N/A                  |
| _ALQSVGQIVGEVLK_.2                                                                  | -0.33679955  | #N/A                  |
| _ADHDFVQEDFM[Oxidation (M)]K_.3                                                     | 0.161014429  | #N/A                  |
| _RSS[Phospho (STY)]LVITTK_.2                                                        | -0.379930255 | P62482_S112_M1_Kcnab2 |
| _QTGS[Phospho (STY)]PGM[Oxidation (M)]IYSTR_.2                                      | 0.08418626   | P62482_S20_M1_Kcnab2  |
| _AEVVLGNIK_.2                                                                       | 0.104773174  | #N/A                  |
| _SS[Phospho (STY)]LVITTK_.2                                                         | -0.29997778  | P62482_S112_M1_Kcnab2 |
| _YPESTTGS[Phospho (STY)]PAR_.2                                                      | 0.186426941  | P62482_S9_M1_Kcnab2   |
| _ [Acetyl (Protein N-term)]M[Oxidation (M)]YPESTTGS[Phospho (STY)]PAR_.2            | 0.029913642  | P62482_S9_M1_Kcnab2   |
| _ [Acetyl (Protein N-term)]MYPESTTGS[Phospho (STY)]PARLS[Phospho (STY)]LR_.2        | -0.148788342 | P62482_S14_M2_Kcnab2  |
| _NEGSSVLLGASNAEQLM[Oxidation (M)]ENIGAIQVLPK_.3                                     | 0.190360877  | #N/A                  |
| _LQLEYVDVVFANRPDPNTPM[Oxidation (M)]EETVR_.3                                        | -0.305798655 | #N/A                  |
| _EIGILTTNK_.2                                                                       | 0.050196537  | #N/A                  |
| _ALFDSYTNLER_.2                                                                     | -0.07354452  | #N/A                  |
| _VADYC[Carbamidomethyl (C)]ENNYIQSPDK_.2                                            | -0.07707052  | #N/A                  |
| _VADYC[Carbamidomethyl (C)]ENNYIQS[Phospho (STY)]PDKQR_.3                           | -0.116817714 | P62484_S40_M1_Abi2    |
| _NMAPSQQS[Phospho (STY)]PVR_.2                                                      | 0.317092047  | P62484_S221_M1_Abi2   |
| _HTPPTIGGS[Phospho (STY)]LPYR_.2                                                    | -0.101053922 | P62484_S301_M1_Abi2   |
| _ [Acetyl (Protein N-term)]AELQM[Oxidation (M)]LLEEEIPGGR_.2                        | 0.091635719  | #N/A                  |
| _TTPPTQKPPS[Phospho (STY)]PPM[Oxidation (M)]SGK_.2                                  | 0.047677241  | P62484_S177_M1_Abi2   |
| _ENDM[Oxidation (M)]S[Phospho (STY)]PSNNVVPIHVPPTTENKPK_.3                          | -0.337180213 | P62492_S190_M1_Rab11a |
| _NSQLEQENNLLK_.2                                                                    | 0.053723756  | #N/A                  |
| _EEVEVLK_.2                                                                         | -0.056130344 | #N/A                  |
| _ [Acetyl (Protein N-term)]AEVEETLKR_.2                                             | 0.329646879  | #N/A                  |
| _EIDPQNDLTFLR_.2                                                                    | -0.026741392 | #N/A                  |
| _GVQGIIVNTEGIPIK_.2                                                                 | -0.06238703  | #N/A                  |
| _RYDEIVK_.2                                                                         | -0.251245898 | #N/A                  |
| _KLEDNPK_.2                                                                         | 0.074455138  | #N/A                  |
| _VETGILRPGM[Oxidation (M)]VVTFAPVNITTEVK_.3                                         | 0.073635079  | #N/A                  |
| _YYITIIDAPGHR_.2                                                                    | -0.037471348 | #N/A                  |
| _EVSAYIKK_.2                                                                        | 0.378880226  | #N/A                  |
| _SGDAAIVEM[Oxidation (M)]VPGKPM[Oxidation (M)]C[Carbamidomethyl (C)]VESFSQYPPLGR_.3 | -0.490415697 | #N/A                  |
| _LSNIFVIGK_.2                                                                       | -0.020617229 | #N/A                  |
| _EC[Carbamidomethyl (C)]LPLIIFLR_.2                                                 | -0.01925839  | #N/A                  |

|                                                              |              |                      |
|--------------------------------------------------------------|--------------|----------------------|
| _TDITYPAGFM[Oxidation (M)]DVISIDK_.2                         | -0.415175385 | #N/A                 |
| _FDTGNLC[Carbamidomethyl (C)]M[Oxidation (M)]VTGGANLGR_.2    | -0.291089383 | #N/A                 |
| _YSFLQFDPAPR_.2                                              | -0.062500541 | #N/A                 |
| _NVVTIFSAPNYC[Carbamidomethyl (C)]YR_.2                      | 0.033195329  | #N/A                 |
| _ELDQWVEQLNEC[Carbamidomethyl (C)]K_.2                       | -0.200564079 | #N/A                 |
| _GAGYTFGQDISETFNHANGTLVSR_.3                                 | -0.366283771 | #N/A                 |
| _QITQVYGFYDEC[Carbamidomethyl (C)]LR_.2                      | -0.009665931 | #N/A                 |
| _SPDTNYLFM[Oxidation (M)]GDYVDR_.2                           | -0.076327594 | #N/A                 |
| _LQEVPHGPM[Oxidation (M)]C[Carbamidomethyl (C)]DLLWSDPDDR_.3 | 0.24712264   | #N/A                 |
| _AHQLVM[Oxidation (M)]EGYNWC[Carbamidomethyl (C)]HDR_.3      | 0.01530295   | #N/A                 |
| _SSGEIVYC[Carbamidomethyl (C)]GQVFEKS[Phospho (STY)]PLR_.3   | 0.244026252  | P62717_S71_M1_Rpl18a |
| _DLTTAGAVTQC[Carbamidomethyl (C)]YR_.2                       | 0.223949926  | #N/A                 |
| _YPIEHGIITNWDDM[Oxidation (M)]EK_.3                          | -0.126118999 | #N/A                 |
| _VAPEEHPTLLTEAPLNPK_.2                                       | -0.272314578 | #N/A                 |
| _DLYANNVLSGGTTM[Oxidation (M)]YPGIADR_.2                     | 0.441994695  | #N/A                 |
| _FILIQNR_.2                                                  | -0.148339311 | #N/A                 |
| _HTNFVEFR_.2                                                 | 0.204883795  | #N/A                 |
| _VYTVVDEM[Oxidation (M)]FLAGEIR_.2                           | -0.157826432 | #N/A                 |
| _LVVVGDGAC[Carbamidomethyl (C)]GK_.2                         | 0.075244507  | #N/A                 |
| _EVFETATR_.2                                                 | 0.017744225  | #N/A                 |
| _IQAYDYLEC[Carbamidomethyl (C)]SAK_.2                        | 0.260045513  | #N/A                 |
| _DLRS[Phospho (STY)]DEHVR_.2                                 | -0.051091191 | P62746_S123_M1_Rhob  |
| _EHTEFTDHELQEWYK_.3                                          | -0.134517156 | #N/A                 |
| _LAPDYDALDVANK_.2                                            | -0.518741852 | #N/A                 |
| _IRTS[Phospho (STY)]PTFR_.2                                  | -0.32260126  | P62751_S43_M1_Rpl23a |
| _KLYDIDVAK_.2                                                | 0.354560636  | #N/A                 |
| _DIPGLTDTTVPR_.2                                             | -0.319984008 | #N/A                 |
| _LIEVDDER_.2                                                 | 0.033637882  | #N/A                 |
| _FFPYGDASK_.2                                                | 0.015149318  | #N/A                 |
| _FAQHAFR_.2                                                  | 0.178994969  | #N/A                 |
| _STEFNEHELK_.2                                               | -0.02942434  | #N/A                 |
| _EFIC[Carbamidomethyl (C)]ALSITSR_.2                         | 0.118747737  | #N/A                 |
| _NKDDQITLDEFKEAAK_.3                                         | -0.351154819 | #N/A                 |
| _LNLEEFQQLYVK_.2                                             | 0.159877477  | #N/A                 |
| _NGDGTIDFR_.2                                                | 0.252045553  | #N/A                 |
| _LAPEVM[Oxidation (M)]EDLVK_.2                               | 0.308703297  | #N/A                 |
| _MNEDGLTPEQR_.2                                              | 0.281336464  | #N/A                 |
| _LNWAFNM[Oxidation (M)]YDLGDGK_.2                            | 0.001302684  | #N/A                 |
| _M[Oxidation (M)]DKNKDDQITLDEFK_.3                           | 0.330603447  | #N/A                 |
| _VEM[Oxidation (M)]LEIEAIYK_.2                               | 0.257260573  | #N/A                 |
| _TFDKNGDGTIDFR_.3                                            | -0.015404634 | #N/A                 |
| _NKDDQITLDEFK_.2                                             | 0.144915788  | #N/A                 |
| _SDPSIVLLQC[Carbamidomethyl (C)]DIQK_.2                      | 0.125048797  | #N/A                 |
| _GPDGLTALEATDNQAIK_.2                                        | -0.16009495  | #N/A                 |
| _GEDVNRT[Phospho (STY)]LEGGR_.2                              | -0.081878159 | P62774_T31_M1_Mtpn   |
| _NGDLDEVKDYVAK_.2                                            | -0.216290128 | #N/A                 |
| _VFLENVIR_.2                                                 | -0.033661865 | #N/A                 |

|                                                                   |              |                       |
|-------------------------------------------------------------------|--------------|-----------------------|
| _DAVYTEHAK_.2                                                     | -0.066083604 | #N/A                  |
| _ISGLIYEETR_.2                                                    | -0.003403943 | #N/A                  |
| _TVTAM[Oxidation (M)]DVVYALK_.2                                   | 0.244888129  | #N/A                  |
| _DNIQGITKPAIR_.2                                                  | -0.141081929 | #N/A                  |
| _TVTAM[Oxidation (M)]DVVYALKR_.2                                  | -0.317979247 | #N/A                  |
| _RIS[Phospho (STY)]GLIYEETR_.2                                    | 0.262972921  | P62806_S48_M1_H4c1    |
| _DAVYTEHAKR_.3                                                    | -0.009079623 | #N/A                  |
| _DNIQGITK_.2                                                      | 0.024198161  | #N/A                  |
| _NNTYAPTATSY[Phospho (STY)]TPNLAR_.2                              | 0.157583932  | P62812_Y374_M1_Gabra1 |
| _NFITQGPYENR_.2                                                   | -0.406526265 | #N/A                  |
| _NYLSQPR_.2                                                       | 0.544870949  | #N/A                  |
| _QIYPPINVLPSLSR_.2                                                | -0.088847508 | #N/A                  |
| _EQALAVSR_.2                                                      | 0.196373355  | #N/A                  |
| _IPQSTLSEFYPR_.2                                                  | 0.296474592  | #N/A                  |
| _AVVQVFEGTSGIDAK_.2                                               | 0.120932716  | #N/A                  |
| _GFPGYM[Oxidation (M)]YTDLATIYER_.2                               | -0.333966106 | #N/A                  |
| _SGQVLEVSGSK_.2                                                   | -0.15884372  | #N/A                  |
| _AVVGEEALTSDDLLEFLQK_.2                                           | -0.283118403 | #N/A                  |
| _EEVPGRR_.2                                                       | -0.011053644 | #N/A                  |
| _PIFSAAGLPHNEIAAQIC[Carbamidomethyl (C)]R_.3                      | 0.025026246  | #N/A                  |
| _GPVVLAEDFLDIM[Oxidation (M)]GQPINPQC[Carbamidomethyl (C)]R_.3    | 0.135233086  | #N/A                  |
| _TSC[Carbamidomethyl (C)]EFTGDILR_.2                              | 0.353413726  | #N/A                  |
| _TPVSEDMLGR_.2                                                    | 0.326816697  | #N/A                  |
| _KTSC[Carbamidomethyl (C)]EFTGDILR_.3                             | 0.169438321  | #N/A                  |
| _IYPEEM[Oxidation (M)]IQTGISAIDGM[Oxidation (M)]NSIAR_.3          | 0.135161282  | #N/A                  |
| _SAIGEGMTR_.2                                                     | 0.136821343  | #N/A                  |
| _YAEIVHLTLPDGTKR_.3                                               | -0.499851165 | #N/A                  |
| _LALTAEFLAYQC[Carbamidomethyl (C)]EK_.2                           | -0.168978904 | #N/A                  |
| _YAEIVHLTLPDGTK_.2                                                | 0.419418201  | #N/A                  |
| _TVSGVNGPLVILDHVK_.3                                              | -0.022607865 | #N/A                  |
| _TVYETLDIGWQLLR_.2                                                | 0.330083123  | #N/A                  |
| _HVLVILTDM[Oxidation (M)]SSYAEALR_.3                              | -0.306971479 | #N/A                  |
| _SDFEENGSM[Oxidation (M)]DNVC[Carbamidomethyl (C)]LFLNLANPTIER_.3 | -0.011287644 | #N/A                  |
| _QWLQEIDR_.2                                                      | -0.142849883 | #N/A                  |
| _EFADSLGIPFLETSK_.2                                               | 0.079852183  | #N/A                  |
| _IQST[Phospho (STY)]PVK_.2                                        | 0.098202859  | P62821_T195_M1_Rab1A  |
| _KVVDYTTAK_.2                                                     | 0.203098771  | #N/A                  |
| _TITS[Phospho (STY)]SYR_.2                                        | 0.081831168  | P62821_S78_M1_Rab1A   |
| _GAHGIIVVYDVTQESFNNVK_.3                                          | -0.422959755 | #N/A                  |
| _YASENVNK_.2                                                      | -0.10687658  | #N/A                  |
| _FADDTYTESYISTIGVDFK_.2                                           | -0.343075405 | #N/A                  |
| _QWLQEIDRYAS[Phospho (STY)]ENVNK_.3                               | 0.235471988  | P62821_S114_M1_Rab1A  |
| _MGPGATAGGAEK_.2                                                  | 0.176075449  | #N/A                  |
| _TITTAYR_.2                                                       | -0.288049354 | #N/A                  |
| _TYSWDNAQVILAGNK_.2                                               | -0.031494384 | #N/A                  |
| _LVDIIC[Carbamidomethyl (C)]DK_.2                                 | 0.557860132  | #N/A                  |
| _MSESLETPAITAAK_.2                                                | -0.406305128 | #N/A                  |

|                                                                                                                   |              |                     |
|-------------------------------------------------------------------------------------------------------------------|--------------|---------------------|
| _LGEQLGFEFFETSAK_.2                                                                                               | -0.164491253 | #N/A                |
| _DNINVKQTFER_.3                                                                                                   | 0.164646351  | #N/A                |
| _VC[Carbamidomethyl (C)]ENIPIVLC[Carbamidomethyl (C)]GNK_.2                                                       | 0.234763072  | #N/A                |
| _LVLVGDDGGTGK_.2                                                                                                  | -0.223155148 | #N/A                |
| _ [Acetyl (Protein N-term)]AAQGEPQVQFK_.2                                                                         | 0.10741133   | #N/A                |
| _NLQYYDISAK_.2                                                                                                    | 0.298540938  | #N/A                |
| _FNVWDTAGQEK_.2                                                                                                   | -0.143307635 | #N/A                |
| _HLTGEFEK_.2                                                                                                      | 0.053506885  | #N/A                |
| _YVATLGVEVHPLVFHTNR_.3                                                                                            | 0.021480682  | #N/A                |
| _ISLGLPVGAVINC[Carbamidomethyl (C)]ADNTGAK_.2                                                                     | -0.286183582 | #N/A                |
| _GSAITGPVAK_.2                                                                                                    | -0.172885322 | #N/A                |
| _YDPTIEDSYR_.2                                                                                                    | -0.490057509 | #N/A                |
| _YDPTIEDSYRK_.2                                                                                                   | 0.293323667  | #N/A                |
| _LVVLGSGGVGK_.2                                                                                                   | -0.066265374 | #N/A                |
| _EQGQNLAR_.2                                                                                                      | -0.122344689 | #N/A                |
| _INVNEIFYDLVR_.2                                                                                                  | 0.520028482  | #N/A                |
| _QVEVDC[Carbamidomethyl (C)]QQC[Carbamidomethyl (C)]M[Oxidation (M)]LEILDAGTEQFTAM[Oxidation (M)]R_.3             | -0.445265611 | #N/A                |
| _QWC[Carbamidomethyl (C)]NC[Carbamidomethyl (C)]AFLESSAK_.2                                                       | -0.583579284 | #N/A                |
| _TTPDVIFVFGFR_.2                                                                                                  | -0.078882361 | #N/A                |
| _LITPAVVSER_.2                                                                                                    | 0.356245482  | #N/A                |
| _AALQELLSK_.2                                                                                                     | 0.335656865  | #N/A                |
| _AQVIYTR_.2                                                                                                       | -0.187117802 | #N/A                |
| _DISEASVFDAYVLPK_.2                                                                                               | 0.15962984   | #N/A                |
| _EGDVLTLLESER_.2                                                                                                  | -0.312278652 | #N/A                |
| _TGS[Phospho (STY)]QGQC[Carbamidomethyl (C)]TQVR_.2                                                               | 0.060715289  | P62858_S23_M1_Rps28 |
| _ADDTFEALR_.2                                                                                                     | 0.087719854  | #N/A                |
| _ESSTVFELK_.2                                                                                                     | -0.029685313 | #N/A                |
| _TTIFTDAK_.2                                                                                                      | 0.27145647   | #N/A                |
| _VHAIPLR_.2                                                                                                       | 0.259184277  | #N/A                |
| _LLVSASQDGK_.2                                                                                                    | 0.197639251  | #N/A                |
| _AGVLAGHDNR_.2                                                                                                    | -0.068762042 | #N/A                |
| _LIIWDSYTTNK_.2                                                                                                   | -0.122972229 | #N/A                |
| _ELAGHTGYLSC[Carbamidomethyl (C)]C[Carbamidomethyl (C)]R_.3                                                       | 0.417716823  | #N/A                |
| _LFVSGAC[Carbamidomethyl (C)]DASAK_.2                                                                             | 0.287726556  | #N/A                |
| _KAC[Carbamidomethyl (C)]ADATLSQITNNIDPVGR_.3                                                                     | -0.287221254 | #N/A                |
| _VSC[Carbamidomethyl (C)]LGVTDGGM[Oxidation (M)]AVATGSWDSFLK_.3                                                   | -0.411538719 | #N/A                |
| _LLLAGYDDFNC[Carbamidomethyl (C)]NVWDALK_.2                                                                       | -0.09378251  | #N/A                |
| _ADQELM[Oxidation (M)]TYSHDNIIC[Carbamidomethyl (C)]GITSVSFSK_.3                                                  | -0.404698236 | #N/A                |
| _ [Acetyl (Protein N-term)]SELDQLRQEAELK_.2                                                                       | -0.164767751 | #N/A                |
| _ [Acetyl (Protein N-term)]SELDQLRQEAELKNQIR_.3                                                                   | -0.351254842 | #N/A                |
| _IYAM[Oxidation (M)]HWGTDSR_.2                                                                                    | 0.257232507  | #N/A                |
| _AC[Carbamidomethyl (C)]ADATLSQITNNIDPVGR_.2                                                                      | 0.219136684  | #N/A                |
| _ [Acetyl (Protein N-term)]SELDQLR_.2                                                                             | -0.269111737 | #N/A                |
| _SSWVM[Oxidation (M)]TC[Carbamidomethyl (C)]AYAPSGNYVAC[Carbamidomethyl (C)]GGLDNIC[Carbamidomethyl (C)]SIYNLK_.3 | 0.153249914  | #N/A                |
| _QFTFGHESDINAIC[Carbamidomethyl (C)]FFPNGNAFATGSDDATC[Carbamidomethyl (C)]R_.3                                    | -0.533816554 | #N/A                |
| _QVC[Carbamidomethyl (C)]PLDNR_.2                                                                                 | 0.097308115  | #N/A                |
| _ [Acetyl (Protein N-term)]AAAMDVDTPSGTNSGAGK_.2                                                                  | 0.603081141  | #N/A                |

|                                                                                             |              |                       |
|---------------------------------------------------------------------------------------------|--------------|-----------------------|
| _TFVSGAC[Carbamidomethyl (C)]DASIK_.2                                                       | 0.081302081  | #N/A                  |
| _KAC[Carbamidomethyl (C)]GDSTLTQITAGLDPVGR_.3                                               | 0.045498814  | #N/A                  |
| _AC[Carbamidomethyl (C)]GDSTLTQITAGLDPVGR_.2                                                | 0.036613876  | #N/A                  |
| _ [Acetyl (Protein N-term)]S[Phospho (STY)]ELEQLRQEAEQLR_.2                                 | -0.323591922 | P62880_S2_M1_Gnb2     |
| _LLLAGYDDFNC[Carbamidomethyl (C)]NIWDAM[Oxidation (M)]K_.2                                  | -0.382918741 | #N/A                  |
| _ELPGHTGYLSC[Carbamidomethyl (C)]C[Carbamidomethyl (C)]R_.3                                 | 0.337537917  | #N/A                  |
| _ [Acetyl (Protein N-term)]SELEQLR_.2                                                       | 0.232094759  | #N/A                  |
| _ADQELLM[Oxidation (M)]YSHDNIIC[Carbamidomethyl (C)]GITSVAFSR_.3                            | -0.144823862 | #N/A                  |
| _QTFIGHESDINAVAFFPNGYAFTTGSDDATC[Carbamidomethyl (C)]R_.3                                   | -0.323461294 | #N/A                  |
| _SEAES[Phospho (STY)]LKGGK_.2                                                               | 0.242588141  | P62881_S63_M1_Gnb5    |
| _VIVWDSFTTNK_.2                                                                             | -0.521128779 | #N/A                  |
| _SEAES[Phospho (STY)]LKGGLEER_.2                                                            | 0.11266057   | P62881_S63_M1_Gnb5    |
| _SGQC[Carbamidomethyl (C)]VQAFETHESDVNSVR_.3                                                | -0.23979893  | #N/A                  |
| _LHDVELHQVAER_.3                                                                            | -0.051133404 | #N/A                  |
| _VSPDGTAF[C[Carbamidomethyl (C)]SGSWDHTLR_.2                                                | 0.022881546  | #N/A                  |
| _VC[Carbamidomethyl (C)]TLAIIDPGDSDIIR_.2                                                   | -0.159772732 | #N/A                  |
| _LVILANNC[Carbamidomethyl (C)]PALR_.2                                                       | 0.03434431   | #N/A                  |
| _TGPNLHGLFGR_.2                                                                             | -0.130230561 | #N/A                  |
| _TGQAAGFSYTDANK_.2                                                                          | 0.194473071  | #N/A                  |
| _GITWGEDTLM[Oxidation (M)]EYLENPKK_.3                                                       | -0.24617636  | #N/A                  |
| _ADLIAYLK_.2                                                                                | 0.277334371  | #N/A                  |
| _KTGQAAGFSYTDANK_.3                                                                         | 0.099552267  | #N/A                  |
| _SAINEVVTR_.2                                                                               | 0.373136629  | #N/A                  |
| _EYTINIHK_.2                                                                                | -0.192961308 | #N/A                  |
| _LYTLVTYVPVTTFK_.2                                                                          | -0.012516488 | #N/A                  |
| _NLQTVNVNEN_.2                                                                              | 0.206034075  | #N/A                  |
| _DEILPTT[Phospho (STY)]PISEQK_.2                                                            | -0.205627898 | P62908_T221_M1_Rps3   |
| _AELNEFLTR_.2                                                                               | -0.092047377 | #N/A                  |
| _GLC[Carbamidomethyl (C)]AIAQAESLR_.2                                                       | 0.091727498  | #N/A                  |
| _SYC[Carbamidomethyl (C)]AEIAHNVSSK_.2                                                      | 0.437685522  | #N/A                  |
| _DIIHDPGR_.2                                                                                | -0.155007811 | #N/A                  |
| _AVVGVVAGGGR_.2                                                                             | 0.112903125  | #N/A                  |
| _YPDHLHISTS[Phospho (STY)]PC[Carbamidomethyl (C)]_.2                                        | 0.217998339  | P62956_S273_M1_Cacng7 |
| _LS[Phospho (STY)]DC[Carbamidomethyl (C)]SDYSGQLQPEAWR_.2                                   | 0.13586893   | P62956_S222_M1_Cacng7 |
| _AADPPAENSS[Phospho (STY)]APEAEQGGAE_.2                                                     | 0.012830336  | P62960_S312_M1_Ybx1   |
| _DPSVWAAVPGK_.2                                                                             | 0.056540992  | #N/A                  |
| _TFVSITPAEVLVVGK_.2                                                                         | -0.074838774 | #N/A                  |
| _STGGAPTFFNVVTM[Oxidation (M)]TAK_.2                                                        | 0.024732815  | #N/A                  |
| _DSLLQDGEFTM[Oxidation (M)]DLR_.2                                                           | -0.28079143  | #N/A                  |
| _ [Acetyl (Protein N-term)]AGWNAVIDSLM[Oxidation (M)]ADGTC[Carbamidomethyl (C)]QDAAIVGYK_.3 | 0.184708469  | #N/A                  |
| _C[Carbamidomethyl (C)]YEM[Oxidation (M)]ASHLR_.2                                           | 0.481989149  | #N/A                  |
| _ [Acetyl (Protein N-term)]S[Phospho (STY)]DSGEQNYGER_.2                                    | -0.194413618 | P62996_S2_M1_Tra2b    |
| _ [Acetyl (Protein N-term)]SDSGEQNYGERES[Phospho (STY)]R_.2                                 | -0.008416064 | P62996_S14_M1_Tra2b   |
| _S[Phospho (STY)]RS[Phospho (STY)]YS[Phospho (STY)]RDYR_.2                                  | -0.132318848 | P62996_S83_M3_Tra2b   |
| _RPHT[Phospho (STY)]PTPGIYMGR_.3                                                            | -0.003987669 | P62996_T201_M1_Tra2b  |
| _RHS[Phospho (STY)]HS[Phospho (STY)]HS[Phospho (STY)]PMSTR_.3                               | 0.281790601  | #N/A                  |
| _RRHS[Phospho (STY)]HS[Phospho (STY)]HS[Phospho (STY)]PM[Oxidation (M)]STR_.3               | 0.01021138   | #N/A                  |



|                                                                 |              |                        |
|-----------------------------------------------------------------|--------------|------------------------|
| _HSHS[Phospho (STY)]HS[Phospho (STY)]PMSTR_2                    | 0.200709799  | P62996_S97_M2_Tra2b    |
| _C[Carbamidomethyl (C)]VVVG DGAVGK_2                            | 0.247290834  | #N/A                   |
| _YLEC[Carbamidomethyl (C)]SALTQR_2                              | -0.126534736 | #N/A                   |
| _AVLC[Carbamidomethyl (C)]PPPVK_2                               | -0.146362349 | #N/A                   |
| _HHC[Carbamidomethyl (C)]PNTPIILVGK_3                           | -0.250767022 | #N/A                   |
| _TVFDEAIR_2                                                     | 0.122203718  | #N/A                   |
| _LCLRDDKDTIEK_3                                                 | -0.317800234 | #N/A                   |
| _LTPITYPQGLAM[Oxidation (M)]AK_2                                | -0.175228654 | #N/A                   |
| _DDKDTIEK_2                                                     | -0.159966705 | #N/A                   |
| _LRPLSYPQTDVFLIC[Carbamidomethyl (C)]FSLVSPASFENVR_3            | -0.09051476  | #N/A                   |
| _TAPYVVTGSVDQTVK_2                                              | 0.381402411  | #N/A                   |
| _VWDYETGDFER_2                                                  | -0.103733874 | #N/A                   |
| _KWTS[Phospho (STY)]VIR_2                                       | -0.011350596 | P63005_S57_M1_Pafah1b1 |
| _FILSC[Carbamidomethyl (C)]ADDK_2                               | 0.055201966  | #N/A                   |
| _YALSGHR_2                                                      | 0.314602118  | #N/A                   |
| _LWDFQGFEC[Carbamidomethyl (C)]IR_2                             | -0.286043003 | #N/A                   |
| _QRDELNR_2                                                      | -0.285366377 | #N/A                   |
| _GHTDSVQDISFDHSGK_3                                             | -0.477466393 | #N/A                   |
| _M[Oxidation (M)]S[Phospho (STY)]ESLDTADPAVTGAK_2               | -0.108591134 | P63011_S188_M1_Rab3a   |
| _LVDVIC[Carbamidomethyl (C)]EK_2                                | -0.029142843 | #N/A                   |
| _YADDSFTPAFVSTVGIDFK_2                                          | -0.043014211 | #N/A                   |
| _QLADHLGFEFFASAK_3                                              | -0.084144838 | #N/A                   |
| _ESSDQNFDFYMFK_2                                                | 0.416031624  | #N/A                   |
| _LVDVIC[Carbamidomethyl (C)]EKMS[Phospho (STY)]ESLDTADPAVTGAK_3 | 0.022454989  | P63011_S188_M1_Rab3a   |
| _VEIANDQGNR_2                                                   | -0.045648777 | #N/A                   |
| _TTPSYVAFTDTER_2                                                | -0.101141406 | #N/A                   |
| _TVTNAVVTVPAYFNDSQR_2                                           | 0.065216783  | #N/A                   |
| _LSKEDIER_2                                                     | -0.089835211 | #N/A                   |
| _DAGTIAGLNVLR_2                                                 | 0.202224107  | #N/A                   |
| _IINEPTAAAIAYGLDKK_2                                            | 0.2921726    | #N/A                   |
| _GTLDPVEK_2                                                     | -0.020100896 | #N/A                   |
| _ITITNDKGR_2                                                    | -0.088503795 | #N/A                   |
| _SQIHDIIVLVGGSTR_3                                              | 0.046507877  | #N/A                   |
| _LLQDFFNGK_2                                                    | 0.314935552  | #N/A                   |
| _VC[Carbamidomethyl (C)]NPIITK_2                                | 0.655096318  | #N/A                   |
| _FEELNADLFR_2                                                   | 0.151362028  | #N/A                   |
| _VQVEYKGETK_2                                                   | 0.003339355  | #N/A                   |
| _EIAEAYLGK_2                                                    | 0.216990553  | #N/A                   |
| _C[Carbamidomethyl (C)]NEIISWLDK_2                              | 0.100162946  | #N/A                   |
| _YKAEDEKQR_2                                                    | -0.0872828   | #N/A                   |
| _SFYPEEVSSM[Oxidation (M)]VLTK_2                                | 0.312045454  | #N/A                   |
| _DIS[Phospho (STY)]ENKR_2                                       | -0.439025761 | P63017_S254_M1_Hspa8   |
| _ARFEELNADLFR_2                                                 | 0.10945481   | #N/A                   |
| _NQTAEEKFEHQK_3                                                 | 0.362625173  | #N/A                   |
| _ITITNDK_2                                                      | -0.013176432 | #N/A                   |
| _NSLESYAFNM[Oxidation (M)]K_2                                   | -0.060704146 | #N/A                   |
| _GPAVGIDLGTTYSC[Carbamidomethyl (C)]VGVFQHGK_3                  | -0.154291205 | #N/A                   |

|                                                                       |              |                       |
|-----------------------------------------------------------------------|--------------|-----------------------|
| _NQAEKEEFEHQKELEK_.4                                                  | -0.353235237 | #N/A                  |
| _HWPFFM[Oxidation (M)]VVNDAGRPK_.3                                    | -0.534338475 | #N/A                  |
| _NQVAM[Oxidation (M)]NPTNTVFDAK_.2                                    | -0.024895873 | #N/A                  |
| _SINPDEAVAYGA AVQAAILSGDK_.2                                          | -0.030130395 | #N/A                  |
| _FDDAVVQSDM[Oxidation (M)]K_.2                                        | 0.353996882  | #N/A                  |
| _QTQTFTTYS DNQPGVLIQVYEGER_.3                                         | -0.173513483 | #N/A                  |
| _NQVAM[Oxidation (M)]NPTNTVFD AKR_.3                                  | -0.170613712 | #N/A                  |
| _GRLS[Phospho (STY)]KEDIER_.3                                         | -0.167857955 | P63017_S511_M1_Hspa8  |
| _STAGDTHLGGEDFDNR_.3                                                  | -0.181517941 | #N/A                  |
| _RFDDAVVQSDM[Oxidation (M)]K_.2                                       | 0.498041091  | #N/A                  |
| _M[Oxidation (M)]KEIAEAYLGK_.2                                        | -0.018719331 | #N/A                  |
| _MVNHFI AEFK_.2                                                       | 0.3668774    | #N/A                  |
| _IINEPTAAAIAYGLDK_.2                                                  | -0.013758914 | #N/A                  |
| _MVQEA EK YK_.2                                                       | 0.339570481  | #N/A                  |
| _LDKSIHDI VLVGGSTR_.3                                                 | -0.475225439 | #N/A                  |
| _LYQSAGGM[Oxidation (M)]PGGM[Oxidation (M)]PGGFPGGGAPSGGASSGPTIEVD_.3 | -0.257615481 | #N/A                  |
| _YKAEDEK_.2                                                           | -0.21549379  | #N/A                  |
| _DLISHDELFSDIYK_.2                                                    | 0.047345465  | #N/A                  |
| _LEEQKPER_.2                                                          | -0.021141854 | #N/A                  |
| _GKLEEQKPER_.3                                                        | 0.166949602  | #N/A                  |
| _EIADGLC[Carbamidomethyl (C)]LEVEGK_.2                                | 0.188246838  | #N/A                  |
| _KAADYVR_.2                                                           | -0.034663936 | #N/A                  |
| _TIVITSHPGQIVK_.2                                                     | -0.06461355  | #N/A                  |
| _QISQAYEVLADSK_.2                                                     | 0.331449042  | #N/A                  |
| _DHA VFTR_.2                                                          | 0.124802617  | #N/A                  |
| _ITFHGE GDQEPGLEPGDIIIVLDQK_.3                                        | 0.01552691   | #N/A                  |
| _NVVHQLS[Phospho (STY)]VTLEDLYNGATR_.3                                | -0.130934622 | P63037_S112_M1_Dnaja1 |
| _VTDALNATR_.2                                                         | 0.169391675  | #N/A                  |
| _APGF GDNRK_.2                                                        | 0.236435979  | #N/A                  |
| _APGF GDNR_.2                                                         | 0.069333885  | #N/A                  |
| _AAVEEGIVLGGGC[Carbamidomethyl (C)]ALLR_.2                            | 0.077155621  | #N/A                  |
| _GANPVEIR_.2                                                          | 0.129031263  | #N/A                  |
| _LVQDVANNTNEEAGD GTTTATVLAR_.3                                        | -0.191394762 | #N/A                  |
| _GYISPYFINTSK_.2                                                      | 0.08057141   | #N/A                  |
| _ISSVQSIVPALEIAN AHR_.3                                               | 0.063998594  | #N/A                  |
| _LSDGVAVLK_.2                                                         | -0.140288577 | #N/A                  |
| _VGLQVVAVK_.2                                                         | 0.392428344  | #N/A                  |
| _IQEITEQLDITTSEYEK_.2                                                 | -0.260087659 | #N/A                  |
| _C[Carbamidomethyl (C)]EFQDAYVLLSEK_.2                                | -0.023702834 | #N/A                  |
| _TVIIEQSWGSPK_.2                                                      | -0.081152572 | #N/A                  |
| _NAGVEGSLIVEK_.2                                                      | 0.120196978  | #N/A                  |
| _KPLVIAEDVDGEALSTLVLNR_.3                                             | 0.140140111  | #N/A                  |
| _SIDLKDK_.2                                                           | -0.15120181  | #N/A                  |
| _VGEVIVTK_.2                                                          | -0.176259854 | #N/A                  |
| _IQEITEQLDITTSEYEKEK_.3                                               | -0.334199952 | #N/A                  |
| _C[Carbamidomethyl (C)]IPALDSLKPANEDQK_.2                             | 0.254827781  | #N/A                  |
| _TLNDELEII EGM[Oxidation (M)]K_.2                                     | 0.220642657  | #N/A                  |

|                                                                                                                    |              |                       |
|--------------------------------------------------------------------------------------------------------------------|--------------|-----------------------|
| _VGGTSDVEVNEKK_.2                                                                                                  | 0.114004007  | #N/A                  |
| _ALMLQGVDLLADAVAVTM[Oxidation (M)]GPK_.3                                                                           | 0.181328528  | #N/A                  |
| _TALLDAAGVASLLTTAEAVVTEIPKEEKDPGM[Oxidation (M)]GAM[Oxidation (M)]GGM[Oxidation (M)]GGGM[Oxidation (M)]GGGM[Oxidat | -0.165989711 | #N/A                  |
| _ILQSSSEVGVDAM[Oxidation (M)]LGDFVNM[Oxidation (M)]VEK_.3                                                          | -0.336107143 | #N/A                  |
| _DM[Oxidation (M)]AIATGGAVFGEEGLNLNLEDVQAHDLGK_.3                                                                  | 0.062103485  | #N/A                  |
| _KAIPPGC[Carbamidomethyl (C)]GDEPEEEDESILDTVIK_.3                                                                  | -0.257227437 | #N/A                  |
| _EAEAQAM[Oxidation (M)]EANSEGS[Phospho (STY)]LTRPK_.2                                                              | 0.30165839   | P63040_S93_M1_Cplx1   |
| _RRDPS[Phospho (STY)]LEEIQK_.3                                                                                     | -0.591094704 | P63042_S90_M1_Stmn4   |
| _DQKLS[Phospho (STY)]ELDDR_.2                                                                                      | -0.323961632 | P63044_S61_M1_Vamp2   |
| _LSELDDR_.2                                                                                                        | 0.035075079  | #N/A                  |
| _ADALQAGASQFETSAAK_.2                                                                                              | -0.343010625 | #N/A                  |
| _Acetyl (Protein N-term))SATAATVPPAAPAGEGGPPAPPNLTNSNR_.3                                                          | 0.33486254   | #N/A                  |
| _LQQTQAQVDEVVDIM[Oxidation (M)]R_.2                                                                                | -0.23939078  | #N/A                  |
| _LSELDDRADALQAGASQFETSAAK_.3                                                                                       | -0.150443577 | #N/A                  |
| _Acetyl (Protein N-term))AESEAETPGT[Phospho (STY)]PGEFESK_.2                                                       | -0.12304695  | P63046_T11_M1_Sult4a1 |
| _AAVAIQSQFR_.2                                                                                                     | 0.178910419  | #N/A                  |
| _VQEEFDIDM[Oxidation (M)]DAPETER_.2                                                                                | -0.021620386 | #N/A                  |
| _KVQEEFDIDM[Oxidation (M)]DAPETER_.3                                                                               | 0.031107342  | #N/A                  |
| _VEC[Carbamidomethyl (C)]GS[Phospho (STY)]DPEENSAR_.2                                                              | -0.17819301  | P63058_S12_M1_Thra    |
| _DAVTHIGR_.2                                                                                                       | 0.260735282  | #N/A                  |
| _IAIWTTEC[Carbamidomethyl (C)]ENR_.2                                                                               | -0.040188705 | #N/A                  |
| _NSAIS[Phospho (STY)]FDNSGIQYR_.2                                                                                  | 0.101734661  | P63080_S394_M1_Gabrb3 |
| _KQS[Phospho (STY)]MPKEGHGR_.3                                                                                     | -0.414530523 | P63080_S406_M1_Gabrb3 |
| _Acetyl (Protein N-term))AAAAAAGPEM[Oxidation (M)]VR_.2                                                            | -0.183992444 | #N/A                  |
| _GQVFDVGPGR_.2                                                                                                     | -0.010547619 | #N/A                  |
| _NYLLSLPHK_.2                                                                                                      | 0.180418533  | #N/A                  |
| _ELIFEETAR_.2                                                                                                      | 0.32012826   | #N/A                  |
| _LKELIFEETAR_.3                                                                                                    | 0.26927825   | #N/A                  |
| _DVYIVQDLM[Oxidation (M)]ETDLYK_.2                                                                                 | -0.013897676 | #N/A                  |
| _VADPDHDHTGFLTEYVATR_.3                                                                                            | -0.276168578 | #N/A                  |
| _ISPFEHQTYC[Carbamidomethyl (C)]QR_.3                                                                              | -0.017139376 | #N/A                  |
| _YTNLSYIGEGAYGM[Oxidation (M)]VC[Carbamidomethyl (C)]SAYDNLNK_.3                                                   | -0.462215936 | #N/A                  |
| _APEIMLNSK_.2                                                                                                      | -0.044296981 | #N/A                  |
| _YIHSANVLHR_.3                                                                                                     | -0.018598423 | #N/A                  |
| _GNHEC[Carbamidomethyl (C)]AS[Phospho (STY)]INR_.2                                                                 | -0.004761057 | P63087_S129_M1_Ppp1cc |
| _HDLDLIC[Carbamidomethyl (C)]R_.2                                                                                  | 0.050116068  | #N/A                  |
| _NVQLQENEIR_.2                                                                                                     | 0.123483668  | #N/A                  |
| _IYGFYDEC[Carbamidomethyl (C)]K_.2                                                                                 | 0.03803918   | #N/A                  |
| _TFTDC[Carbamidomethyl (C)]FNC[Carbamidomethyl (C)]LPIAAIVDEK_.2                                                   | -0.189145775 | #N/A                  |
| _EIFLSQPILLEEAPLK_.2                                                                                               | -0.310832039 | #N/A                  |
| _YPENFFLLR_.2                                                                                                      | -0.249444253 | #N/A                  |
| _Acetyl (Protein N-term))ADIDKLNIDSIIQR_.2                                                                         | 0.053444427  | #N/A                  |
| _IFC[Carbamidomethyl (C)]C[Carbamidomethyl (C)]HGGLSPDLQSM[Oxidation (M)]EQIR_.3                                   | -0.421735516 | #N/A                  |
| _AHQVVEDGYEFFAK_.2                                                                                                 | -0.399917216 | #N/A                  |
| _QSLETIC[Carbamidomethyl (C)]LLLAYK_.2                                                                             | 0.005756401  | #N/A                  |
| _IC[Carbamidomethyl (C)]GDIHGQYYDLLR_.3                                                                            | 0.129646021  | #N/A                  |
| _EKIETELR_.2                                                                                                       | 0.20160314   | #N/A                  |

|                                                                                                |              |                      |
|------------------------------------------------------------------------------------------------|--------------|----------------------|
| _GIVDQSQQAYQEAFEISKK_3                                                                         | -0.37659828  | #N/A                 |
| _VVSSIEQK_2                                                                                    | 0.188678988  | #N/A                 |
| _YLAEVAAGDDK_2                                                                                 | 0.223723017  | #N/A                 |
| _FLIPNASQPESK_2                                                                                | 0.02640745   | #N/A                 |
| _ [Acetyl (Protein N-term)]M [Oxidation (M)]DKNELVQK_2                                         | 0.459441914  | #N/A                 |
| _SVTEQGAELSNEER_2                                                                              | -0.053703522 | #N/A                 |
| _KGIVDQSQQAYQEAFEISK_3                                                                         | -0.08012404  | #N/A                 |
| _YDDM [Oxidation (M)]AAC [Carbamidomethyl (C)]M [Oxidation (M)]K_2                             | 0.542548018  | #N/A                 |
| _DIC [Carbamidomethyl (C)]NDVLSLLEK_2                                                          | 0.360490149  | #N/A                 |
| _TAFDEAIAELDTLSEESYK_2                                                                         | -0.211767882 | #N/A                 |
| _YLAEVAAGDDKK_2                                                                                | 0.145505609  | #N/A                 |
| _VVSS [Phospho (STY)]IEQKTEGAEEK_3                                                             | 0.262916878  | P63101_S64_M1_Ywhaz  |
| _GIVDQSQQAYQEAFEISK_2                                                                          | 0.076808359  | #N/A                 |
| _VVSS [Phospho (STY)]IEQKTEGAEK_2                                                              | -0.219171745 | P63101_S64_M1_Ywhaz  |
| _TAFDEAIAELDTLSEESYKDLIMQLLR_3                                                                 | -0.265464051 | #N/A                 |
| _IPS [Phospho (STY)]S [Phospho (STY)]PDLKK_2                                                   | -0.105605914 | P63141_S440_M2_Kcna2 |
| _ETEGEEQAQYLQVTS [Phospho (STY)]C [Carbamidomethyl (C)]PK_2                                    | -0.133054279 | P63141_S434_M1_Kcna2 |
| _IPS [Phospho (STY)]S [Phospho (STY)]PDLKKS [Phospho (STY)]R_2                                 | -0.182655265 | P63141_S440_M3_Kcna2 |
| _SDYMEIQEGVNNS [Phospho (STY)]NEDFREENLK_3                                                     | 0.276683435  | P63141_S468_M1_Kcna2 |
| _IPS [Phospho (STY)]S [Phospho (STY)]PDLK_2                                                    | -0.610379766 | P63141_S440_M2_Kcna2 |
| _VSAIVEQSWNDS_2                                                                                | 0.435109929  | #N/A                 |
| _GKFEDMAK_2                                                                                    | -0.340534868 | #N/A                 |
| _M [Oxidation (M)]SSYAFFVQTC [Carbamidomethyl (C)]R_2                                          | -0.373255704 | #N/A                 |
| _ [Acetyl (Protein N-term)]S [Phospho (STY)]DQEAKPSTEDLGDK_2                                   | -0.179483165 | P63166_S2_M1_Sumo1   |
| _ [Acetyl (Protein N-term)]S [Phospho (STY)]DQEAKPSTEDLGDKK_2                                  | -0.106309734 | P63166_S2_M1_Sumo1   |
| _NADM [Oxidation (M)]SEEM [Oxidation (M)]QQDSVEC [Carbamidomethyl (C)]ATQALEK_3                | -0.428575893 | #N/A                 |
| _ [Acetyl (Protein N-term)]ASNNTAS [Phospho (STY)]IAQAR_2                                      | -0.173651143 | P63213_S8_M1_Gng2    |
| _EDPLLPVPASENPFR_2                                                                             | 0.312434806  | #N/A                 |
| _KLVEQLK_2                                                                                     | 0.293723577  | #N/A                 |
| _IEASLC [Carbamidomethyl (C)]R_2                                                               | 0.215698029  | #N/A                 |
| _GETPVNSTM [Oxidation (M)]S [Phospho (STY)]IGQAR_2                                             | -0.207472634 | P63216_S12_M1_Gng3   |
| _MKGET [Phospho (STY)]PVNSTM [Oxidation (M)]SIGQAR_3                                           | -0.20672635  | #N/A                 |
| _VHLVGIDFTGK_3                                                                                 | -0.047366531 | #N/A                 |
| _EDLRLPEGDLGK_3                                                                                | 0.179662848  | #N/A                 |
| _EDLRLPEGDLGKEIEQK_3                                                                           | 0.10272367   | #N/A                 |
| _RNDFQLIGIQDGYLSLLQDSGEVR_3                                                                    | -0.345456655 | #N/A                 |
| _IVEMSTSK_2                                                                                    | 0.289980857  | #N/A                 |
| _ [Acetyl (Protein N-term)]TDVETTYADFIASGR_2                                                   | 0.082004769  | #N/A                 |
| _SSTEQSGEAQGEEAAK_2                                                                            | -0.201921419 | #N/A                 |
| _SSTEQSGEAQGEEAAKS [Phospho (STY)]ES_2                                                         | -0.419999062 | P63248_S74_M1_Pkia   |
| _ERHNS [Phospho (STY)]VEC [Carbamidomethyl (C)]LDGLDDISTK_3                                    | -0.024848968 | P63250_S385_M1_Kcnj3 |
| _HNS [Phospho (STY)]VEC [Carbamidomethyl (C)]LDGLDDISTK_2                                      | -0.409200684 | P63250_S385_M1_Kcnj3 |
| _ [Acetyl (Protein N-term)]EEEIAALVIDNGSGM [Oxidation (M)]C [Carbamidomethyl (C)]K_2           | -0.352157297 | #N/A                 |
| _ [Acetyl (Protein N-term)]EEEIAALVIDNGSGM [Oxidation (M)]C [Carbamidomethyl (C)]KAGFAGDDAPR_3 | -0.37645572  | #N/A                 |
| _AAPALT [Phospho (STY)]PPDR_2                                                                  | -0.34287885  | P63318_T655_M1_Prkcg |
| _ENVFPGSTTR_2                                                                                  | -0.025237575 | #N/A                 |
| _DVIVQDDVDVC [Carbamidomethyl (C)]TLVEK_2                                                      | -0.29534253  | #N/A                 |

|                                                                       |              |                       |
|-----------------------------------------------------------------------|--------------|-----------------------|
| _RGS[Phospho (STY)]DELYAIK_.2                                         | 0.23936096   | P63318_S373_M1_Prkcg  |
| _FEAC[Carbamidomethyl (C)]NYPLELYER_.2                                | -0.096366266 | #N/A                  |
| _C[Carbamidomethyl (C)]FFGAS[Phospho (STY)]PGR_.2                     | -0.370622791 | P63318_S342_M1_Prkcg  |
| _APVDGWYK_.2                                                          | -0.039446436 | #N/A                  |
| _LSVEVWDWDR_.2                                                        | 0.197596499  | #N/A                  |
| _S[Phospho (STY)]GENFDKFFTR_.2                                        | -0.134151942 | P63318_S639_M1_Prkcg  |
| _DVIVQDDDDVDC[Carbamidomethyl (C)]TLVEKR_.3                           | -0.418045363 | #N/A                  |
| _KDVIQDDDDVDC[Carbamidomethyl (C)]TLVEK_.3                            | 0.170662695  | #N/A                  |
| _S[Phospho (STY)]PTSPVPVPVM_.2                                        | 0.370564947  | P63318_S687_M1_Prkcg  |
| _SVPSLC[Carbamidomethyl (C)]GVDHTER_.2                                | -0.168399146 | #N/A                  |
| _M[Oxidation (M)]GPSSSPIPSPS[Phospho (STY)]PS[Phospho (STY)]PTDSKR_.3 | -0.108010338 | #N/A                  |
| _NDFM[Oxidation (M)]GAM[Oxidation (M)]SFGVSELLK_.2                    | -0.328326863 | #N/A                  |
| _APTS[Phospho (STY)]DEIHITVGEAR_.2                                    | -0.113677797 | P63318_S170_M1_Prkcg  |
| _DLKLDNVMLDAEGHIK_.3                                                  | 0.250940813  | #N/A                  |
| _S[Phospho (STY)]VPSLC[Carbamidomethyl (C)]GVDHTERR_.3                | -0.335990834 | P63318_S145_M1_Prkcg  |
| _LLNQEEGEYYNVPVADADNC[Carbamidomethyl (C)]SLLQK_.3                    | -0.152579538 | #N/A                  |
| _GSDELYAIK_.2                                                         | 0.342557954  | #N/A                  |
| _LGSGBPGEPTIR_.2                                                      | 0.045297183  | #N/A                  |
| _MGPSSSIPSPSPS[Phospho (STY)]PTDSK_.2                                 | -0.300925184 | P63318_S330_M1_Prkcg  |
| _VIM[Oxidation (M)]VGS GGVGK_.2                                       | -0.416971051 | #N/A                  |
| _ADQWNVNVVETSAK_.2                                                    | -0.078502682 | #N/A                  |
| _SDLEDKR_.2                                                           | 0.030921891  | #N/A                  |
| _VKEDENVPFLLVGNK_.3                                                   | 0.326807942  | #N/A                  |
| _GQNSLALHK_.2                                                         | 0.310892549  | #N/A                  |
| _VVLDGEEVQIDILDTAGQEDYAAIR_.3                                         | -0.27041125  | #N/A                  |
| _TALIHDGLAR_.2                                                        | 0.316001031  | #N/A                  |
| _Acetyl (Protein N-term)]AEEGIAAGGVM[Oxidation (M)]DVNTALQEVLK_.2     | -0.031932106 | #N/A                  |
| _DVIEEYFK_.2                                                          | -0.039613589 | #N/A                  |
| _AEAGAGS[Phospho (STY)]ATEFQFR_.2                                     | 0.171898919  | P63325_S146_M1_Rps10  |
| _IAIYELLFK_.2                                                         | -0.070287301 | #N/A                  |
| _IITEGASILR_.2                                                        | 0.081890649  | #N/A                  |
| _EVFDNDGKPR_.2                                                        | -0.149660883 | #N/A                  |
| _QTLQSATVEAIEADEAIK_.2                                                | -0.341625864 | #N/A                  |
| _GFS[Phospho (STY)]PQHK_.2                                            | -0.13670199  | P63328_S462_M1_Ppp3ca |
| _ITSFEEAK_.2                                                          | -0.033549876 | #N/A                  |
| _TQEHFTHNTVR_.2                                                       | -0.028738955 | #N/A                  |
| _GLTPTGMLPSGVLGGK_.2                                                  | 0.288454915  | #N/A                  |
| _DAM[Oxidation (M)]PSDANLNSINK_.2                                     | 0.294353803  | #N/A                  |
| _ALASETNGTDSNGSNSSNIQ_.2                                              | -0.191647775 | #N/A                  |
| _LEESVALR_.2                                                          | 0.081709217  | #N/A                  |
| _ITS[Phospho (STY)]FEEAKGLDR_.2                                       | 0.024936677  | P63328_S469_M1_Ppp3ca |
| _VTEMLVNVNLNIC[Carbamidomethyl (C)]SDDELGSEEDGFDGATAAAR_.3            | 0.016887551  | #N/A                  |
| _QTLQSATVEAIEADEAIKGFS[Phospho (STY)]PQHK_.3                          | 0.259449997  | P63328_S462_M1_Ppp3ca |
| _ELDQWIEQLNEC[Carbamidomethyl (C)]K_.2                                | 0.057916694  | #N/A                  |
| _VLPSITTEILK_.2                                                       | 0.053000345  | #N/A                  |
| _DLQNVNITLR_.2                                                        | 0.269670595  | #N/A                  |
| _FDAGELITQR_.2                                                        | -0.085159499 | #N/A                  |

|                                                      |              |                       |
|------------------------------------------------------|--------------|-----------------------|
| _IYTSIGEDYDER_2                                      | 0.243397862  | #N/A                  |
| _NVPVITGSK_2                                         | -0.07339375  | #N/A                  |
| _NITYLPAGQSVLLQLPQ_2                                 | -0.084588386 | #N/A                  |
| _QVSDDLTER_2                                         | 0.106765693  | #N/A                  |
| _AAIISAEGDSK_2                                       | -0.149548487 | #N/A                  |
| _EFTEAVEAK_2                                         | 0.500877806  | #N/A                  |
| _AAELIANSLATAGDGLIELR_3                              | 0.023129772  | #N/A                  |
| _YQQGDFGYC[Carbamidomethyl (C)]PR_2                  | 0.25676624   | #N/A                  |
| _GNEFFC[Carbamidomethyl (C)]EVEDDYIQDK_2             | -0.134641991 | #N/A                  |
| _ITVTSEVPFSK_2                                       | 0.065024498  | #N/A                  |
| _AGNLGGGVVTIER_2                                     | 0.154063371  | #N/A                  |
| _YFQINQDEEEEEDED_2                                   | 0.141188136  | #N/A                  |
| _TDQVIQSLIALVNDPQPEHPLR_3                            | -0.346385584 | #N/A                  |
| _NIQVDEANLLTWQGLIVPDNPPYDK_3                         | 0.07742231   | #N/A                  |
| _FSPNSSNPIIVSC[Carbamidomethyl (C)]GWDK_2            | 0.024920465  | #N/A                  |
| _IIVDELKQEVISTSSK_3                                  | -0.172029993 | #N/A                  |
| _DVLSVAFSSDNR_2                                      | -0.436200223 | #N/A                  |
| _VWNLANC[Carbamidomethyl (C)]K_2                     | 0.175101014  | #N/A                  |
| _YWLC[Carbamidomethyl (C)]AATGPSIK_2                 | 0.307076109  | #N/A                  |
| _AEPPQC[Carbamidomethyl (C)]TSLAWSADGQTLFAGYTDNLVR_3 | -0.172011243 | #N/A                  |
| _YTVQDESHSEWVSC[Carbamidomethyl (C)]VR_3             | -0.221638833 | #N/A                  |
| _AKEDFLR_2                                           | -0.177865715 | #N/A                  |
| _TLGTGSFGR_2                                         | 0.005042082  | #N/A                  |
| _ILQAVEFPFLVR_2                                      | 0.003331248  | #N/A                  |
| _TWTLC[Carbamidomethyl (C)]GTPEYLAPEIILSK_2          | -0.058672497 | #N/A                  |
| _FRGS[Phospho (STY)]GDTSNFDDYEEEEIR_3                | 0.108898214  | P68181_S322_M1_Prkach |
| _GS[Phospho (STY)]GDTSNFDDYEEEEIR_2                  | -0.221863107 | P68181_S322_M1_Prkach |
| _ATEQYYAMK_2                                         | -0.222014625 | #N/A                  |
| _AVTEQGAELSNEER_2                                    | 0.05846036   | #N/A                  |
| _EKVESELR_2                                          | 0.102968199  | #N/A                  |
| _YLAEVAC[Carbamidomethyl (C)]GDDR_2                  | -0.242820313 | #N/A                  |
| _YLIANATNPESK_2                                      | 0.092577604  | #N/A                  |
| _SIC[Carbamidomethyl (C)]TTVLELLDK_2                 | 0.409494828  | #N/A                  |
| _YLAEVAC[Carbamidomethyl (C)]GDDRK_2                 | 0.22534741   | #N/A                  |
| _KQTIENSQGAYQEAFDISK_3                               | -0.291481565 | #N/A                  |
| _TAFDEAIAELDTLNEDSYK_2                               | -0.267580966 | #N/A                  |
| _KQTIENSQGAYQEAFDISKK_3                              | -0.149283085 | #N/A                  |
| _YDDMATC[Carbamidomethyl (C)]MK_2                    | 0.086484793  | #N/A                  |
| _QTIENSQGAYQEAFDISK_2                                | 0.216321528  | #N/A                  |
| _DVNAIAIAIK_2                                        | 0.16452938   | #N/A                  |
| _EIIDPVLDR_2                                         | -0.413754461 | #N/A                  |
| _AVFVDLEPTVIDEIR_2                                   | -0.070389008 | #N/A                  |
| _TIGGGDDSFSTFFC[Carbamidomethyl (C)]ETGAGK_2         | -0.039835587 | #N/A                  |
| _FPGQLNADLR_2                                        | 0.168986278  | #N/A                  |
| _EVDEQM[Oxidation (M)]LNVQNK_2                       | -0.188305391 | #N/A                  |
| _AVLVDLEPGTM[Oxidation (M)]DSVR_2                    | -0.091457292 | #N/A                  |
| _LAVNM[Oxidation (M)]VPFPR_2                         | 0.066393482  | #N/A                  |

|                                                                                              |              |                     |
|----------------------------------------------------------------------------------------------|--------------|---------------------|
| _LHFFM[Oxidation (M)]PGFAPLTSR_3                                                             | -0.09724786  | #N/A                |
| _TAVC[Carbamidomethyl (C)]DIPPR_2                                                            | 0.089885575  | #N/A                |
| _FPGQLNADLRK_2                                                                               | 0.080816663  | #N/A                |
| _IREEYPDR_2                                                                                  | -0.004635006 | #N/A                |
| _YLTVAAVFR_2                                                                                 | 0.000475949  | #N/A                |
| _GHYTEGAELVDSVLDVVR_2                                                                        | -0.239775168 | #N/A                |
| _INVYYNEATGGK_2                                                                              | 0.160883747  | #N/A                |
| _IM[Oxidation (M)]NTFSVVPSPK_2                                                               | -0.052304291 | #N/A                |
| _ALTVPELTQQM[Oxidation (M)]FDAK_2                                                            | -0.001553593 | #N/A                |
| _M[Oxidation (M)]SATFIGNSTAIQELFKR_3                                                         | -0.522777811 | #N/A                |
| _KLAVNM[Oxidation (M)]VPFPR_3                                                                | -0.30148618  | #N/A                |
| _NM[Oxidation (M)]M[Oxidation (M)]AAC[Carbamidomethyl (C)]DPR_2                              | 0.272827007  | #N/A                |
| _SGPFGQIFRPDNFVFGQSGAGNNWAK_3                                                                | -0.476522673 | #N/A                |
| _NSSYFVEWIPNNVK_2                                                                            | -0.089876445 | #N/A                |
| _GHYTEGAELVDSVLDVVRK_3                                                                       | -0.477991773 | #N/A                |
| _LTTPTYGDLNHLVSATMSGVTTC[Carbamidomethyl (C)]LR_3                                            | 0.165640137  | #N/A                |
| _KEAESC[Carbamidomethyl (C)]DC[Carbamidomethyl (C)]LQGFQLTHSLGGGTGSGM[Oxidation (M)]GTLISK_4 | -0.073443335 | #N/A                |
| _EAESC[Carbamidomethyl (C)]DC[Carbamidomethyl (C)]LQGFQLTHSLGGGTGSGM[Oxidation (M)]GTLISK_3  | -0.071402916 | #N/A                |
| _FWEVISDEHGIDPTGTYHGSDQLER_4                                                                 | -0.108779982 | #N/A                |
| _ISEQFTAM[Oxidation (M)]FR_2                                                                 | -0.252823663 | #N/A                |
| _TLKLTTPTYGDLNHLVSATM[Oxidation (M)]SGVTTC[Carbamidomethyl (C)]LR_3                          | -0.264938044 | #N/A                |
| _MSATFIGNSTAIQELFK_2                                                                         | -0.27137103  | #N/A                |
| _Acetyl (Protein N-term))ADPAAGPPPS[Phospho (STY)]EGEESTVR_2                                 | -0.050710289 | P68404_S11_M1_Prkc  |
| _LIPDPKS[Phospho (STY)]ESK_2                                                                 | -0.455501375 | P68404_S206_M1_Prkc |
| _ENIWDGVTTK_2                                                                                | -0.347146797 | #N/A                |
| _QPVELT[Phospho (STY)]PTDK_2                                                                 | -0.273289959 | P68404_T642_M1_Prkc |
| _KGTDELYAVK_2                                                                                | 0.118835341  | #N/A                |
| _C[Carbamidomethyl (C)]SLNPEWNETFR_2                                                         | 0.186925518  | #N/A                |
| _LSVEIWDWDLTSR_2                                                                             | -0.14322916  | #N/A                |
| _DLKLDNVM[Oxidation (M)]LDSEGHK_3                                                            | -0.295774015 | #N/A                |
| _AGVDGWFK_2                                                                                  | -0.026266064 | #N/A                |
| _NLVPM[Oxidation (M)]DPNGLSDPY[Phospho (STY)]VK_2                                            | -0.357839876 | P68404_Y195_M1_Prkc |
| _C[Carbamidomethyl (C)]VM[Oxidation (M)]NVPSLC[Carbamidomethyl (C)]GTDHTER_3                 | -0.227169392 | #N/A                |
| _FQLKES[Phospho (STY)]DKDR_3                                                                 | -0.133431275 | P68404_S234_M1_Prkc |
| _AVTELNEPLSNEDR_2                                                                            | -0.253716181 | #N/A                |
| _NSVVEASEAAYK_2                                                                              | 0.04629059   | #N/A                |
| _YLAEVASGEK_2                                                                                | -0.118528144 | #N/A                |
| _YLAEVASGEKK_2                                                                               | 0.041969328  | #N/A                |
| _NC[Carbamidomethyl (C)]NDFQYESK_2                                                           | 0.196453938  | #N/A                |
| _Acetyl (Protein N-term))GDREQLLQR_2                                                         | 0.046294127  | #N/A                |
| _ELETVC[Carbamidomethyl (C)]NDVLALLDK_2                                                      | -0.001001749 | #N/A                |
| _QAFDDAIAELDTLNEDSYK_2                                                                       | -0.027248755 | #N/A                |
| _AVTELNEPLSNEDRNLLSVAYK_3                                                                    | 0.099726758  | #N/A                |
| _NSVVEASEAAYKEAFEISK_3                                                                       | -0.417993284 | #N/A                |
| _EAFEISK_2                                                                                   | -0.509807961 | #N/A                |
| _DNLTWTSQQDEEAGEGN_2                                                                         | 0.164476131  | #N/A                |
| _YDDMASAMK_2                                                                                 | -0.068317896 | #N/A                |

|                                                             |              |                               |
|-------------------------------------------------------------|--------------|-------------------------------|
| _AAVENLPTFLVELSR_.2                                         | -0.006872185 | #N/A                          |
| _LAATNALLNSLEFTK_.2                                         | 0.078061426  | #N/A                          |
| _VLANPGNSQVAR_.2                                            | -0.150693704 | #N/A                          |
| _WLAIIDANAR_.2                                              | 0.112035279  | #N/A                          |
| _SNEILTAIIQGM[Oxidation (M)]R_.2                            | 0.388676518  | #N/A                          |
| _ [Acetyl (Protein N-term)]M[Oxidation (M)]ELITILEK_.2      | -0.345140678 | #N/A                          |
| _WHTLTNELPGAVLS[Phospho (STY)]D_.2                          | -0.111718342 | P70169_S411_M1_Doc2b          |
| _SRS[Phospho (STY)]NS[Phospho (STY)]GLDYIK_.2               | -0.204448485 | P70174_S381_M2_Hrh1           |
| _SNS[Phospho (STY)]GLDYIK_.2                                | 0.224642679  | P70174_S383_M1_Hrh1           |
| _RIS[Phospho (STY)]ETSEDQTLVDR_.2                           | 0.42298594   | P70174_S344_M1_Hrh1           |
| _GVTSNTS[Phospho (STY)]DSESSK_.2                            | 0.219548827  | P70175_S632_M1_Dlg3           |
| _LLAVNNTNLQDVR_.2                                           | 0.192599781  | #N/A                          |
| _EQMMNSSMS[Phospho (STY)]SGS[Phospho (STY)]GSLR_.2          | -0.12083718  | P70175_S508_M2_Dlg3           |
| _FIEAGQFNDNLYGTSIQSVR_.2                                    | -0.269669516 | #N/A                          |
| _VNDDLISEFPHK_.3                                            | -0.051125981 | #N/A                          |
| _ALFDYDR_.2                                                 | 0.175496358  | #N/A                          |
| _NATHEQAAAALKR_.3                                           | -0.203953815 | #N/A                          |
| _VNEVDVSEVVHSR_.3                                           | -0.554249423 | #N/A                          |
| _IQALKASPS[Phospho (STY)]K_.2                               | -0.495259762 | P70181_S407_M1_Pip5k1b        |
| _IPLKPS[Phospho (STY)]PTK_.2                                | -0.097529785 | P70182_S443_M1_Pip5k1a        |
| _S[Phospho (STY)]GPSGNSC[Carbamidomethyl (C)]TSQLMASGEHR_.3 | 0.264769356  | P70182_S458_M1_Pip5k1a        |
| _RDS[Phospho (STY)]LPGK_.2                                  | -0.340700179 | P70188_S102_M1_Kifap3         |
| _RDS[Phospho (STY)]LPGKEK_.2                                | -0.157846846 | P70188_S102_M1_Kifap3         |
| _DGIVLGADTR_.2                                              | 0.211902734  | #N/A                          |
| _VTPLEIEVLEETVQTM[Oxidation (M)]DTS_.2                      | -0.364962464 | #N/A                          |
| _ATEGMVVADKNC[Carbamidomethyl (C)]SK_.2                     | -0.462833799 | #N/A                          |
| _LFLVQTVQQASK_.2                                            | 0.292134698  | #N/A                          |
| _FSVEEIIQK_.2                                               | -0.03966498  | #N/A                          |
| _AASVAENC[Carbamidomethyl (C)]INYQQGTPHK_.2                 | 0.139928302  | #N/A                          |
| _TASS[Phospho (STY)]PDSLR_.2                                | -0.267025195 | P70206_S1630_M1_Plxna1        |
| _QTSAYNISNS[Phospho (STY)]STFTK_.2                          | -0.570782821 | P70206_S1611_M1_Plxna1        |
| _LGKDS[Phospho (STY)]PSNK_.2                                | -0.497256215 | P70206_S1793_M1_Plxna1        |
| _YTGS[Phospho (STY)]PDSLR_.2                                | -0.440395088 | P70207_S1630_M1_Plxna2;Plxna4 |
| _YTGS[Phospho (STY)]PDS[Phospho (STY)]LRSR_.2               | -0.468876351 | P70207_S1630_M2_Plxna2;Plxna4 |
| _S[Phospho (STY)]LSDLTSQK_.2                                | -0.068481296 | P70213_S244_M1_Fv1            |
| _DETFGEYS[Phospho (STY)]DSEKPLKGS[Phospho (STY)]LR_.3       | 0.099139047  | P70232_S1138_M2_Ch11          |
| _SPFNSPS[Phospho (STY)]PQDSPR_.2                            | -0.160737425 | P70255_S339_M1_Nfic           |
| _NWTEDIEGGISS[Phospho (STY)]PVKK_.2                         | -0.224236077 | P70255_S323_M1_Nfic           |
| _S[Phospho (STY)]IDSEMPVDDVFYPGTGR_.2                       | -0.602179742 | P70257_S280_M1_Nfix           |
| _S[Phospho (STY)]PAAGSSQSSGWPNDVDAGPASLKK_.3                | 0.017411798  | P70257_S301_M1_Nfix           |
| _S[Phospho (STY)]PAAGSSQSSGWPNDVDAGPASLK_.2                 | -0.079978769 | P70257_S301_M1_Nfix           |
| _NS[Phospho (STY)]FTPLSSNTIR_.2                             | -0.557651639 | P70265_S469_M1_Pfkfb2         |
| _RNS[Phospho (STY)]FTPLSSNTIR_.3                            | 0.218656577  | P70265_S469_M1_Pfkfb2         |
| _TDVSNFDEEFTGEAPTLS[Phospho (STY)]PPR_.2                    | -0.072637912 | P70268_S920_M1_Pkn1           |
| _RSS[Phospho (STY)]VSGISLEDNR_.2                            | -0.080718252 | P70271_S119_M1_Pdlim4         |
| _S[Phospho (STY)]SVSGISLEDNR_.2                             | -0.257364496 | P70271_S118_M1_Pdlim4         |
| _IHIDPESQDC[Carbamidomethyl (C)]S[Phospho (STY)]PATSR_.2    | -0.553190875 | P70271_S111_M1_Pdlim4         |



|                                                                                   |              |                        |
|-----------------------------------------------------------------------------------|--------------|------------------------|
| _IAC[Carbamidomethyl (C)]DEEFS[Phospho (STY)]DS[Phospho (STY)]EDEGEGRR_.2         | -0.104292086 | P70288_S422_M2_Hdac2   |
| _M[Oxidation (M)]LPHAPGVQM[Oxidation (M)]QAIPEDAVHEDS[Phospho (STY)]GDEGEDPDKR_.4 | 0.097125339  | #N/A                   |
| _LYTLVLTDPDAPSR_.2                                                                | 0.086336949  | #N/A                   |
| _VDYAGVTVDELGK_.2                                                                 | -0.03387625  | #N/A                   |
| _FKVETFR_.2                                                                       | 0.009688755  | #N/A                   |
| _VLTPTQVM[Oxidation (M)]NRPSSISWDGLDPGK_.3                                        | -0.406306426 | #N/A                   |
| _LYEQLSGK_.2                                                                      | 0.120138729  | #N/A                   |
| _L[Acetyl (Protein N-term)]AADISQWAGPLC[Carbamidomethyl (C)]LQEVDEPPQHALR_.3      | -0.048871394 | #N/A                   |
| _GNDISSGTVLSDYVVGSGPPSGTGLHR_.3                                                   | 0.034365372  | #N/A                   |
| _YVWLVYEQEQPLSC[Carbamidomethyl (C)]DEPILSNK_.3                                   | 0.030077147  | #N/A                   |
| _YNLGAPVAGTC[Carbamidomethyl (C)]YQAEWDDYVVK_.3                                   | -0.198351652 | #N/A                   |
| _EWHHFLVVNM[Oxidation (M)]K_.2                                                    | -0.589772998 | #N/A                   |
| _AS[Phospho (STY)]PALVAK_.2                                                       | -0.043680472 | P70297_S156_M1_Stam    |
| _NTGASSGATS[Phospho (STY)]EESTEAEFC[Carbamidomethyl (C)]R_.2                      | -0.207589808 | P70302_S40_M1_Stim1    |
| _DLTHS[Phospho (STY)]DSESSLHMSDR_.3                                               | 0.254863738  | P70302_S519_M1_Stim1   |
| _IQNGTSGVR_.2                                                                     | -0.054450786 | #N/A                   |
| _NDQWNWDNIR_.2                                                                    | -0.505263754 | #N/A                   |
| _TLTSDVANLANEKEELNNK_.3                                                           | -0.5181193   | #N/A                   |
| _QIQQLESNNR_.2                                                                    | -0.066554827 | #N/A                   |
| _ENLLS[Phospho (STY)]PPC[Carbamidomethyl (C)]RENDAIQTR_.3                         | -0.031771222 | P70336_S425_M1_Rock2   |
| _NLLLLANSTEEQQK_.2                                                                | 0.576080725  | #N/A                   |
| _KS[Phospho (STY)]EESQEIQKK_.2                                                    | -0.057285935 | P70336_S439_M1_Rock2   |
| _DSDIEQLR_.2                                                                      | -0.472956837 | #N/A                   |
| _AAC[Carbamidomethyl (C)]S[Phospho (STY)]DPGAFMGR_.2                              | 0.209209646  | P70339_S252_M1_Frat1   |
| _AQVAQPGGDTIFGK_.2                                                                | -0.142200489 | #N/A                   |
| _IIFEDDR_.2                                                                       | 0.028751074  | #N/A                   |
| _M[Oxidation (M)]VVNEGADGGQSVYHIHLHVLGGR_.4                                       | -0.449082709 | #N/A                   |
| _C[Carbamidomethyl (C)]LAFHDIS[Phospho (STY)]PQAPTHFLVIPK_.3                      | -0.014163577 | P70349_S45_M1_Hint1    |
| _C[Carbamidomethyl (C)]AADLGLK_.2                                                 | -0.591156858 | #N/A                   |
| _FIAFSGEGQS[Phospho (STY)]LR_.2                                                   | -0.211624203 | P70362_S299_M1_Ufd1    |
| _LLQEGS[Phospho (STY)]PSDITTLSEPEKK_.3                                            | -0.05949399  | P70365_S702_M1_Ncoa1   |
| _KGS[Phospho (STY)]PC[Carbamidomethyl (C)]DTLASSTEKR_.3                           | 0.319395568  | P70365_S22_M1_Ncoa1    |
| _EHS[Phospho (STY)]GLSPQDDNSGMSIPR_.3                                             | 0.216351574  | P70365_S369_M1_Ncoa1   |
| _QMSSQNS[Phospho (STY)]PSR_.2                                                     | 0.015428303  | P70365_S570_M1_Ncoa1   |
| _KGS[Phospho (STY)]PC[Carbamidomethyl (C)]DTLASSTEK_.2                            | -0.355507412 | P70365_S22_M1_Ncoa1    |
| _VLVDQTTGLSR_.2                                                                   | 0.180852631  | #N/A                   |
| _FAANPNQNK_.2                                                                     | 0.468511904  | #N/A                   |
| _TNLIVNYLPQNM[Oxidation (M)]TQEELR_.2                                             | -0.021731896 | #N/A                   |
| _LGS[Phospho (STY)]LSLKK_.2                                                       | -0.1566995   | P70392_S484_M1_Rasgrf2 |
| _KFS[Phospho (STY)]S[Phospho (STY)]PPPLAVSR_.2                                    | 0.286050906  | P70392_S725_M2_Rasgrf2 |
| _TLNS[Phospho (STY)]C[Carbamidomethyl (C)]KVPQIR_.2                               | -0.380985204 | P70392_S633_M1_Rasgrf2 |
| _EHLVDGKS[Phospho (STY)]PR_.2                                                     | 0.210253391  | P70392_S717_M1_Rasgrf2 |
| _KLS[Phospho (STY)]LTSSLNSR_.2                                                    | -0.022887367 | P70392_S745_M1_Rasgrf2 |
| _VPS[Phospho (STY)]AT[Phospho (STY)]S[Phospho (STY)]QPEK_.2                       | -0.100027861 | P70396_S113_M3_Dlx5    |
| _AQENYEGGEEVS[Phospho (STY)]PPQTK_.2                                              | -0.044587547 | P70398_S2547_M1_Usp9x  |
| _STPFIVPS[Phospho (STY)]SPTEQGGR_.2                                               | 0.178213187  | P70399_S381_M1_Tp53bp1 |
| _SEDRPSS[Phospho (STY)]PQVSVAAVETK_.3                                             | 0.176283399  | P70399_S268_M1_Tp53bp1 |

|                                                                                            |              |                         |
|--------------------------------------------------------------------------------------------|--------------|-------------------------|
| _MESLGS[Phospho (STY)]PR_2                                                                 | 0.142618299  | P70399_S533_M1_Tp53bp1  |
| _AETTEKDAVTEDS[Phospho (STY)]PQPPLPSVR_3                                                   | -0.236696703 | P70399_S822_M1_Tp53bp1  |
| _DAVTEDS[Phospho (STY)]PQPPLPSVR_2                                                         | -0.086148184 | P70399_S822_M1_Tp53bp1  |
| _GGPGKLS[Phospho (STY)]PR_2                                                                | -0.370400049 | P70399_S1359_M1_Tp53bp1 |
| _ENTQIDDEPLS[Phospho (STY)]PVSNSK_2                                                        | 0.072558251  | P70399_S552_M1_Tp53bp1  |
| _KLPTSEEERS[Phospho (STY)]PAK_3                                                            | -0.000403315 | P70399_S1675_M1_Tp53bp1 |
| _ASQEPFS[Phospho (STY)]PAEDVM[Oxidation (M)]ETDLLEGLAANQDRPSK_3                            | -0.116942845 | P70399_S1115_M1_Tp53bp1 |
| _EAPKEEC[Carbamidomethyl (C)]PEAM[Oxidation (M)]EVETSVISIDS[Phospho (STY)]PQK_3            | -0.187119406 | P70399_S719_M1_Tp53bp1  |
| _EHHPEEGFS[Phospho (STY)]GSEVEVPETPC[Carbamidomethyl (C)]GSHR_4                            | -0.116012673 | P70399_S652_M1_Tp53bp1  |
| _S[Phospho (STY)]NISSPVTPTAASSSSTTPTR_2                                                    | 0.094784374  | P70399_S1628_M1_Tp53bp1 |
| _GSGEKPASAPVDDTES[Phospho (STY)]LHS[Phospho (STY)]QGEEEFEM[Oxidation (M)]PQPPHGHVLR_5      | 0.106880675  | P70399_S1213_M2_Tp53bp1 |
| _TEEDRENTQIDDEPLS[Phospho (STY)]PVSNSK_3                                                   | 0.034960491  | P70399_S552_M1_Tp53bp1  |
| _SEALS[Phospho (STY)]S[Phospho (STY)]VLDQEEAM[Oxidation (M)]DTK_2                          | 0.456911864  | P70399_S631_M2_Tp53bp1  |
| _ENTEGEYSSLEHESVAGVVESLK_3                                                                 | -0.4230179   | #N/A                    |
| _LHSYATSIR_2                                                                               | -0.006932005 | #N/A                    |
| _LGDGLFLQC[Carbamidomethyl (C)]C[Carbamidomethyl (C)]R_2                                   | 0.03507295   | #N/A                    |
| _HKDIDILIVR_3                                                                              | -0.004354698 | #N/A                    |
| _HAC[Carbamidomethyl (C)]VPVDFEEVHVSSNADEDIR_4                                             | -0.103989664 | #N/A                    |
| _TSLDLYANVIHC[Carbamidomethyl (C)]K_2                                                      | 0.116475968  | #N/A                    |
| _DIDILIVR_2                                                                                | -0.320819752 | #N/A                    |
| _AVLASM[Oxidation (M)]DNENM[Oxidation (M)]HTPDIGGQGTTSQAIQDIIR_3                           | 0.108485433  | #N/A                    |
| _LAEMYGGGES[Phospho (STY)]DKDA_2                                                           | 0.198571882  | P70408_S784_M1_Cdh10    |
| _TPSVAKS[Phospho (STY)]PEAK_2                                                              | 0.019411714  | P70429_S347_M1_Evl      |
| _SNS[Phospho (STY)]VEKPVSSLLSR_2                                                           | -0.494407042 | P70429_S329_M1_Evl      |
| _QVQNGPS[Phospho (STY)]PEEM[Oxidation (M)]DIQR_2                                           | 0.03765223   | P70429_S130_M1_Evl      |
| _KEDESQTEDPSTS[Phospho (STY)]PSPGTR_2                                                      | -0.275880554 | P70429_S302_M1_Evl      |
| _VQRPEDAS[Phospho (STY)]GGSSPSGTSK_2                                                       | -0.393804355 | P70429_S240_M1_Evl      |
| _VKPAGS[Phospho (STY)]VNDVGLDALDLDR_2                                                      | -0.342805312 | P70429_S367_M1_Evl      |
| _SAS[Phospho (STY)]SDTSEELNSQDSPK_2                                                        | -0.051350556 | P70441_S285_M1_Slc9a3r1 |
| _ [Acetyl (Protein N-term)]S[Phospho (STY)]ADAAAGEPLPR_2                                   | -0.373302922 | P70441_S2_M1_Slc9a3r1   |
| _LLVDPETDER_2                                                                              | -0.023729024 | #N/A                    |
| _AVDPDSPAASGLR_2                                                                           | 0.414751487  | #N/A                    |
| _EALVEPASES[Phospho (STY)]PRPALAR_3                                                        | -0.388209932 | P70441_S275_M1_Slc9a3r1 |
| _SEQAEPAAADTHEAGDQNEAEK_3                                                                  | -0.073032519 | #N/A                    |
| _LVEVNGENVEKETHQQVVSIR_3                                                                   | -0.080112514 | #N/A                    |
| _SASSDTSEELNSQDS[Phospho (STY)]PKR_2                                                       | -0.33606708  | P70441_S297_M1_Slc9a3r1 |
| _QGDNIS[Phospho (STY)]DDEDEVIR_2                                                           | -0.2674493   | P70452_S15_M1_Stx4      |
| _RGS[Phospho (STY)]HPYIDFR_3                                                               | -0.098096256 | P70453_S58_M1_Pde7a     |
| _KVS[Phospho (STY)]KQEEASGGPLAPK_3                                                         | -0.173325829 | P70460_S235_M1_Vasp     |
| _KAESSPNAEPSDEGNS[Phospho (STY)]REHSAGSC[Carbamidomethyl (C)]TNFQC[Carbamidomethyl (C)]K_4 | 0.09267876   | P70663_S411_M1_Sparcl1  |
| _HGAGDDY[Phospho (STY)]FIPS[Phospho (STY)]QEFLEAER_2                                       | 0.002525133  | P70663_S353_M2_Sparcl1  |
| _AAGS[Phospho (STY)]KEHIPHTEQQDQEGK_3                                                      | 0.184137915  | P70663_S283_M1_Sparcl1  |
| _KAESSPNAEPSDEGNS[Phospho (STY)]R_2                                                        | 0.205237975  | P70663_S411_M1_Sparcl1  |
| _HQSEQGNQGSDESDSEAGEDKAAGSKEHIPHT[Phospho (STY)]EQQDQEGK_5                                 | -0.319966579 | P70663_T290_M1_Sparcl1  |
| _AEKPSALNS[Phospho (STY)]EEETHEQSTEQDK_3                                                   | -0.023672999 | P70663_S70_M1_Sparcl1   |
| _SPASDTYIVFGEAK_2                                                                          | 0.064954407  | #N/A                    |
| _NNSNDIVNAIM[Oxidation (M)]ELTM[Oxidation (M)]_2                                           | 0.3037374    | #N/A                    |

|                                                                   |              |                      |
|-------------------------------------------------------------------|--------------|----------------------|
| _DIELVMSQANVSR_2                                                  | 0.002615977  | #N/A                 |
| _SSLPHS[Phospho (STY)]QENLPK_2                                    | 0.178318926  | P70671_S135_M1_Irf3  |
| _S[Phospho (STY)]VDSGIYLDSSYK_2                                   | 0.125739741  | P70677_S26_M1_Casp3  |
| _SGSSS[Phospho (STY)]PDSEITELKFPSISQD_2                           | 0.377146154  | P70698_S575_M1_Ctps1 |
| _SGSSS[Phospho (STY)]PDSEITELK_2                                  | 0.24650123   | P70698_S575_M1_Ctps1 |
| _GC[Carbamidomethyl (C)]RLS[Phospho (STY)]PR_2                    | -0.384989684 | P70698_S562_M1_Ctps1 |
| _RTVS[Phospho (STY)]EIR_2                                         | -0.135003794 | P70704_S9_M1_Atp8a1  |
| _IIYQAASPDEGALVR_2                                                | 0.054311991  | #N/A                 |
| _LDGHGTVPLGADQILLR_3                                              | -0.020889504 | #N/A                 |
| _T[Phospho (STY)]SLADQEEVR_2                                      | -0.39013357  | P70704_T28_M1_Atp8a1 |
| _TDDVS[Phospho (STY)]EKT[Phospho (STY)]S[Phospho (STY)]LADQEEVR_2 | 0.011745181  | P70704_S25_M3_Atp8a1 |
| _SESLQQNLLHGAFSQDENQVSEVIR_3                                      | -0.275603224 | #N/A                 |
| _TC[Carbamidomethyl (C)]TIILR_2                                   | -0.519035561 | #N/A                 |
| _LLDVVHPAAK_2                                                     | 0.108854984  | #N/A                 |
| _ATISNDGATILK_2                                                   | 0.509564865  | #N/A                 |
| _LPIGDVATQYFADR_2                                                 | 0.376658723  | #N/A                 |
| _SLHDAIM[Oxidation (M)]IVR_2                                      | -0.212889612 | #N/A                 |
| _SQDAEVGDGTTSVTLAAEFK_2                                           | -0.425912613 | #N/A                 |
| _QLC[Carbamidomethyl (C)]DNAGFDATNILNK_2                          | -0.138338428 | #N/A                 |
| _TATQLAVNK_2                                                      | -0.289862472 | #N/A                 |
| _ALEIIPR_2                                                        | -0.375386137 | #N/A                 |
| _INALTAASEAAC[Carbamidomethyl (C)]LIVSVDETINKPR_3                 | -0.202934296 | #N/A                 |
| _INALTAASEAAC[Carbamidomethyl (C)]LIVSVDETIK_3                    | 0.334199063  | #N/A                 |
| _GATQQILDEAER_2                                                   | -0.055081783 | #N/A                 |
| _ [Acetyl (Protein N-term)]ASLSLAPVNIFK_2                         | 0.389506743  | #N/A                 |
| _LSSFIGAIAIGDLVK_2                                                | -0.02514051  | #N/A                 |
| _EALLSSAVDHGSDEAR_2                                               | -0.121235278 | #N/A                 |
| _VQDDEVGDGTTSVTLAAELLR_2                                          | -0.63480208  | #N/A                 |
| _LAVEAVLR_2                                                       | -0.028899124 | #N/A                 |
| _FWQDLM[Oxidation (M)]NIAGTTLSSK_2                                | -0.081837992 | #N/A                 |
| _NIGVDNPAK_2                                                      | 0.029847632  | #N/A                 |
| _M[Oxidation (M)]LPTIADNAGYDSADLVAQLR_2                           | -0.342825872 | #N/A                 |
| _LALVTGGEIASTFDHPELVK_3                                           | 0.046080217  | #N/A                 |
| _VAEIEHAEKEK_3                                                    | -0.16483194  | #N/A                 |
| _IDDVVNTR_2                                                       | -0.009131224 | #N/A                 |
| _VIDPATATSVDLR_2                                                  | 0.009946156  | #N/A                 |
| _LVIEEAER_2                                                       | -0.221965389 | #N/A                 |
| _DALSDLALHFLNK_2                                                  | 0.263797405  | #N/A                 |
| _ALIAGGGAPEIELALR_2                                               | 0.546480432  | #N/A                 |
| _AQDIEAGDGTTSVVILAGSLDSC[Carbamidomethyl (C)]TK_3                 | 0.037487149  | #N/A                 |
| _ITGC[Carbamidomethyl (C)]TSPGK_2                                 | -0.07303048  | #N/A                 |
| _VANSGITR_2                                                       | 0.326717613  | #N/A                 |
| _AFADAM[Oxidation (M)]EVIPSTLAENAGLNPISTVTELR_3                   | 0.048421749  | #N/A                 |
| _DVEREDIEFIC[Carbamidomethyl (C)]K_3                              | -0.447657769 | #N/A                 |
| _VLVDINNPEPLIQTA_2                                                | 0.063795749  | #N/A                 |
| _LGFAGVVQEISFGTTK_2                                               | -0.449875717 | #N/A                 |
| _ [Acetyl (Protein N-term)]ASVGTALAFDEYGRPFLIK_2                  | -0.144747882 | #N/A                 |

|                                                                      |              |                       |
|----------------------------------------------------------------------|--------------|-----------------------|
| _TSLGPNGLDK_.2                                                       | 0.135933512  | #N/A                  |
| _WVGGPEIELIAIATGGR_.2                                                | -0.137683884 | #N/A                  |
| _ESNPALGIDC[Carbamidomethyl (C)]LHK_.2                               | 0.286875335  | #N/A                  |
| _DVDFELIK_.2                                                         | 0.235284712  | #N/A                  |
| _DVDFELIKVEGK_.3                                                     | -0.122754038 | #N/A                  |
| _GLVLDHGAR_.2                                                        | 0.368423342  | #N/A                  |
| _GIDPFSLDALAK_.2                                                     | 0.322670505  | #N/A                  |
| _IITEGFEEAAK_.2                                                      | 0.198923007  | #N/A                  |
| _VLAQNSGFDLQETLVK_.2                                                 | 0.045201948  | #N/A                  |
| _GLQDVLR_.2                                                          | 0.245325528  | #N/A                  |
| _VATAQDDITGDGTTSNVLIIGELLK_.3                                        | -0.399126071 | #N/A                  |
| _EMDRETIDVAR_.3                                                      | 0.006285165  | #N/A                  |
| _QADLYISEGLHPR_.2                                                    | -0.152889756 | #N/A                  |
| _ISTPVDVNNR_.2                                                       | -0.38891657  | #N/A                  |
| _AVAQALEVIPR_.2                                                      | 0.130953601  | #N/A                  |
| _IPGGIIEDSC[Carbamidomethyl (C)]VLR_.2                               | 0.44072292   | #N/A                  |
| _ELGIWEPLAVK_.2                                                      | -0.030948372 | #N/A                  |
| _EIQVQHPPAK_.2                                                       | -0.291464169 | #N/A                  |
| _EILSEVER_.2                                                         | 0.117648362  | #N/A                  |
| _TAVETAVLLR_.2                                                       | 0.276758681  | #N/A                  |
| _IVLLDSSLEYK_.2                                                      | 0.0614237    | #N/A                  |
| _NVLLDPQLVPGGGASEM[Oxidation (M)]AVAHALTEK_.3                        | -0.51320197  | #N/A                  |
| _TLIQNC[Carbamidomethyl (C)]GASTIR_.2                                | 0.274218867  | #N/A                  |
| _WSSLAC[Carbamidomethyl (C)]NIALDAVK_.2                              | 0.027377025  | #N/A                  |
| _NLQDAM[Oxidation (M)]QVC[Carbamidomethyl (C)]R_.2                   | -0.011644677 | #N/A                  |
| _QTGAPDAGQE_.1                                                       | 0.24666262   | #N/A                  |
| _KGESQTDIEITREEDFTR_.4                                               | -0.105887183 | #N/A                  |
| _ADSVAGAIQSDPAEGS[Phospho (STY)]QESHGR_.3                            | -0.147938994 | P80560_S339_M1_Ptprn2 |
| _SEQPEEVLS[Phospho (STY)]EEETAGVEHVR_.3                              | 0.055675869  | P80560_S423_M1_Ptprn2 |
| _INSVSSQFS[Phospho (STY)]DGPM[Oxidation (M)]PS[Phospho (STY)]PSAR_.2 | 0.085588966  | P80560_S684_M2_Ptprn2 |
| _SLQQNADNEKWFS[Phospho (STY)]LER_.3                                  | -0.128191971 | P80560_S139_M1_Ptprn2 |
| _KSEQPEEVL[Phospho (STY)]S[Phospho (STY)]EEETAGVEHVR_.3              | -0.053229961 | P80560_S422_M2_Ptprn2 |
| _SGRLS[Phospho (STY)]QELDLVSHK_.3                                    | 0.081102235  | P81117_S89_M1_Nucb2   |
| _VAS[Phospho (STY)]PTSGLKR_.2                                        | 0.443624287  | P81122_S1089_M1_Irs2  |
| _RVS[Phospho (STY)]GDGAQDLDR_.2                                      | -0.449371314 | P81122_S556_M1_Irs2   |
| _HNSAS[Phospho (STY)]VENVSLRK_.3                                     | -0.10132638  | P81122_S1165_M1_Irs2  |
| _TYS[Phospho (STY)]LTTPAR_.2                                         | -0.115385024 | P81122_S573_M1_Irs2   |
| _SNT[Phospho (STY)]PESIAETPPAR_.2                                    | -0.020888107 | P81122_T517_M1_Irs2   |
| _ASSPAESS[Phospho (STY)]PEDSGYMR_.2                                  | -0.4135107   | P81122_S728_M1_Irs2   |
| _QVPQPSSAS[Phospho (STY)]LDEYTLMR_.2                                 | 0.227158135  | P81122_S590_M1_Irs2   |
| _GPGTGGDEASAAGGS[Phospho (STY)]PPQPPR_.2                             | -0.509562753 | P81122_S66_M1_Irs2    |
| _SIVPSS[Phospho (STY)]PQSQR_.2                                       | 0.112234431  | P83093_S523_M1_Stim2  |
| _GS[Phospho (STY)]PEC[Carbamidomethyl (C)]VGLTETK_.2                 | 0.167300898  | P83093_S650_M1_Stim2  |
| _GESPVTADVSRGS[Phospho (STY)]PEC[Carbamidomethyl (C)]VGLTETK_.3      | 0.097458973  | P83093_S650_M1_Stim2  |
| _DELS[Phospho (STY)]LEDSSR_.2                                        | -0.144800735 | P83093_S631_M1_Stim2  |
| _DELSLEDSSRGES[Phospho (STY)]PVTADVSR_.3                             | -0.182803435 | P83093_S640_M1_Stim2  |
| _RAS[Phospho (STY)]GSAGAAASPSAAAAGER_.2                              | 0.002397238  | P83093_S28_M1_Stim2   |

|                                                                                |              |                      |
|--------------------------------------------------------------------------------|--------------|----------------------|
| _S[Phospho (STY)]MIFSPASR_.2                                                   | -0.002768518 | P83093_S661_M1_Stim2 |
| _QNS[Phospho (STY)]DPTSENPLPTR_.2                                              | -0.36142169  | P83510_S611_M1_Tnik  |
| _TTSIS[Phospho (STY)]PALAR_.2                                                  | -0.447212568 | P83510_S651_M1_Tnik  |
| _ANS[Phospho (STY)]KSEGS[Phospho (STY)]PVLPEPSK_.2                             | 0.10250046   | #N/A                 |
| _VRANS[Phospho (STY)]KSEGS[Phospho (STY)]PVLPEPSK_.3                           | -0.005397481 | #N/A                 |
| _SES[Phospho (STY)]FSISGVQPAR_.2                                               | 0.206347441  | P83510_S541_M1_Tnik  |
| _KNS[Phospho (STY)]PGNGSALGPR_.2                                               | -0.358217538 | P83510_S659_M1_Tnik  |
| _SEGS[Phospho (STY)]PVLPEPSK_.2                                                | -0.269314173 | P83510_S740_M1_Tnik  |
| _VYQTSPT[Phospho (STY)]DEDEEDESSAALFTSELLR_.3                                  | -0.084922934 | P83510_T950_M1_Tnik  |
| _AS[Phospho (STY)]NPDLR_.2                                                     | 0.215510516  | P83510_S678_M1_Tnik  |
| _LGSQPIRAS[Phospho (STY)]NPDLR_.3                                              | 0.24176428   | P83510_S678_M1_Tnik  |
| _GTEDGSGSPHS[Phospho (STY)]PPHLC[Carbamidomethyl (C)]SK_.3                     | -0.07512731  | P83741_S2027_M1_Wnk1 |
| _LEC[Carbamidomethyl (C)]VEPNC[Carbamidomethyl (C)]R_.2                        | 0.011260238  | #N/A                 |
| _KKVEEVLEEEEEYVVEK_.3                                                          | -0.253445829 | #N/A                 |
| _VEEVLEEEEEYVVEK_.2                                                            | -0.575824163 | #N/A                 |
| _ADS[Phospho (STY)]DSEDKGEESKPK_.2                                             | 0.237653719  | P83917_S89_M1_Cbx1   |
| _EIPSHVLSK_.2                                                                  | 0.041068954  | #N/A                 |
| _LISSDGHEFIVK_.2                                                               | 0.087799791  | #N/A                 |
| _EHALTSGTIK_.2                                                                 | -0.164040359 | #N/A                 |
| _GAKS[Phospho (STY)]DPSIVR_.2                                                  | -0.271000545 | P84075_S175_M1_Hpca  |
| _LSLEEFIR_.2                                                                   | 0.436539861  | #N/A                 |
| _FAEHVFR_.2                                                                    | 0.215811457  | #N/A                 |
| _IYANFFPYGDASK_.2                                                              | 0.180816876  | #N/A                 |
| _ENTEFSELELQEWYK_.2                                                            | -0.084818894 | #N/A                 |
| _LLQC[Carbamidomethyl (C)]DPSSASQF_.2                                          | 0.173885435  | #N/A                 |
| _TFDTNSDGTIDFR_.2                                                              | -0.071796887 | #N/A                 |
| _EEM[Oxidation (M)]LEIVQAIYK_.2                                                | -0.064460039 | #N/A                 |
| _LRPEMLQDLR_.2                                                                 | 0.237916804  | #N/A                 |
| _DC[Carbamidomethyl (C)]PTGILNVDEFKK_.3                                        | -0.130203409 | #N/A                 |
| _MPDESTPEKR_.2                                                                 | 0.154965752  | #N/A                 |
| _VQESADELQK_.2                                                                 | -0.004020317 | #N/A                 |
| _AALEQPC[Carbamidomethyl (C)]EGS[Phospho (STY)]LTRPK_.2                        | -0.009002091 | P84086_S93_M1_Cplx2  |
| _KAIPAGC[Carbamidomethyl (C)]GDEEEEEESILDTVLK_.3                               | -0.066865846 | #N/A                 |
| _AIPAGC[Carbamidomethyl (C)]GDEEEEEESILDTVLK_.3                                | -0.16148307  | #N/A                 |
| _YLPGLQDMFK_.2                                                                 | 0.427031951  | #N/A                 |
| _[Acetyl (Protein N-term)]SHTILLVQPTK_.2                                       | 0.308503995  | #N/A                 |
| _TYADYESVNEC[Carbamidomethyl (C)]M[Oxidation (M)]EGVC[Carbamidomethyl (C)]K_.2 | -0.414881293 | #N/A                 |
| _MYEEHLK_.2                                                                    | -0.267345576 | #N/A                 |
| _ADTQTYQPYNK_.2                                                                | 0.213798222  | #N/A                 |
| _TFITQQGIK_.2                                                                  | 0.143636242  | #N/A                 |
| _ESQISAEIELPTNDK_.2                                                            | -0.001375257 | #N/A                 |
| _VNVIHAR_.2                                                                    | 0.113819612  | #N/A                 |
| _DIILPFR_.2                                                                    | 0.021645591  | #N/A                 |
| _VYRDDIGR_.2                                                                   | -0.221472789 | #N/A                 |
| _TSFFHVK_.2                                                                    | -0.23147514  | #N/A                 |
| _M[Oxidation (M)]IGGLFIYNHK_.2                                                 | -0.265117729 | #N/A                 |
| _ASENAIVWK_.2                                                                  | -0.039175228 | #N/A                 |

|                                                                                                    |              |                      |
|----------------------------------------------------------------------------------------------------|--------------|----------------------|
| _SNIWLAAVTK_.2                                                                                     | 0.099124299  | #N/A                 |
| _S[Phospho (STY)]PVTNIAR_.2                                                                        | 0.139882333  | P84091_S45_M1_Ap2m1  |
| _SGIYETR_.2                                                                                        | -0.135505262 | #N/A                 |
| _QSIAIDDC[Carbamidomethyl (C)]TFHQC[Carbamidomethyl (C)]VR_.3                                      | 0.043473044  | #N/A                 |
| _LNYSDDHVIK_.2                                                                                     | -0.188451428 | #N/A                 |
| _LS[Phospho (STY)]KFDSE_.2                                                                         | 0.292092068  | P84091_S255_M1_Ap2m1 |
| _EEQSQITSQVTGQIGWR_.2                                                                              | -0.006868468 | #N/A                 |
| _EYIPTVFDNYSQSAVDGR_.2                                                                             | 0.08982114   | #N/A                 |
| _YLEC[Carbamidomethyl (C)]SALQQDGVK_.2                                                             | 0.062357729  | #N/A                 |
| _VWLDPNETNEIANANSR_.2                                                                              | -0.480056173 | #N/A                 |
| _LLADQAEAR_.2                                                                                      | 0.160783709  | #N/A                 |
| _TLS[Phospho (STY)]KEEETKK_.2                                                                      | -0.094574607 | P84099_S189_M1_Rpl19 |
| _S[Phospho (STY)]RS[Phospho (STY)]LS[Phospho (STY)]RDR_.2                                          | -0.45983858  | P84104_S126_M3_Srsf3 |
| _RRS[Phospho (STY)]PPPR_.2                                                                         | -0.189135028 | P84104_S108_M1_Srsf3 |
| _NPPGFADFVEFEDPRDAADAVR_.3                                                                         | -0.113335299 | #N/A                 |
| _NPPGFADFVEFEDPR_.2                                                                                | 0.13277614   | #N/A                 |
| _ERS[Phospho (STY)]LS[Phospho (STY)]RER_.2                                                         | -0.041344133 | P84104_S138_M2_Srsf3 |
| _VYVGNLGNNGNK_.2                                                                                   | -0.034355018 | #N/A                 |
| _NHKPS[Phospho (STY)]RS[Phospho (STY)]FSR_.3                                                       | -0.161443452 | P84104_S148_M2_Srsf3 |
| _ [Acetyl (Protein N-term)]MHRDS[Phospho (STY)]C[Carbamidomethyl (C)]PLDC[Carbamidomethyl (C)]K_.2 | -0.094999133 | P84104_S5_M1_Srsf3   |
| _SVS[Phospho (STY)]PPGYAAQTAASPAPR_.2                                                              | -0.375094423 | P84309_S8_M1_Adcy5   |
| _SGGAVT[Phospho (STY)]PQQQQR_.2                                                                    | -0.059298849 | P84309_T62_M1_Adcy5  |
| _S[Phospho (STY)]VELGLEER_.2                                                                       | 0.175791195  | P84309_S156_M1_Adcy5 |
| _DVAAHFLAR_.2                                                                                      | -0.251979233 | #N/A                 |
| _ILGDC[Carbamidomethyl (C)]YYC[Carbamidomethyl (C)]VSGLPEAR_.2                                     | 0.041473289  | #N/A                 |
| _DASHPQFK_.2                                                                                       | -0.062754208 | #N/A                 |
| _QSGAFLATSESLILQLVR_.2                                                                             | -0.421977046 | #N/A                 |
| _LIPDGC[Carbamidomethyl (C)]GVK_.2                                                                 | 0.242691211  | #N/A                 |
| _LGELYSVGES[Phospho (STY)]DKET_.2                                                                  | -0.090043616 | P97291_S795_M1_Cdh8  |
| _LNNS[Phospho (STY)]LLSR_.2                                                                        | -0.521111753 | P97292_S321_M1_Hrh2  |
| _QNPSITWIR_.2                                                                                      | -0.237917246 | #N/A                 |
| _IVTSEEVIR_.2                                                                                      | 0.202366855  | #N/A                 |
| _AAPDITGHK_.2                                                                                      | 0.166544931  | #N/A                 |
| _SVGYPHPEWIWR_.2                                                                                   | 0.103284193  | #N/A                 |
| _VTVNTAYGSNGVSVLR_.2                                                                               | -0.138159284 | #N/A                 |
| _QLWDGAR_.2                                                                                        | 0.039963284  | #N/A                 |
| _LTLEDSTYEC[Carbamidomethyl (C)]R_.2                                                               | 0.171913452  | #N/A                 |
| _NGVELTATR_.2                                                                                      | 0.141853195  | #N/A                 |
| _AEDSGEYHC[Carbamidomethyl (C)]VYHFVSAPK_.3                                                        | -0.408160226 | #N/A                 |
| _SENKNEGQDAMMYC[Carbamidomethyl (C)]K_.3                                                           | -0.146715    | #N/A                 |
| _C[Carbamidomethyl (C)]SQAVYAAEK_.2                                                                | 0.279725589  | #N/A                 |
| _GFGFGQGAGALVHSE_.2                                                                                | -0.103567206 | #N/A                 |
| _GYGYGQGAGTLSTDKGESLGK_.3                                                                          | -0.219786428 | #N/A                 |
| _TVYFAEEVQC[Carbamidomethyl (C)]EGNSFHK_.2                                                         | -0.184250812 | #N/A                 |
| _HEEAPGHRPTTPNASK_.4                                                                               | 0.090779187  | #N/A                 |
| _LADMYGGM[Oxidation (M)]DS[Phospho (STY)]DKDS_.2                                                   | 0.319043955  | P97326_S786_M1_Cdh6  |
| _LITEDVQGK_.2                                                                                      | -0.117090418 | #N/A                 |

|                                                                   |              |                         |
|-------------------------------------------------------------------|--------------|-------------------------|
| _TTDGYLLR_.2                                                      | -0.104862685 | #N/A                    |
| _ADGYEPPVQES[Phospho (STY)]V_.2                                   | -0.174221179 | P97351_S263_M1_Rps3a    |
| _VFEVSLADLQNDEVAFR_.2                                             | -0.216223673 | #N/A                    |
| _KDWYDVK_.2                                                       | 0.031769669  | #N/A                    |
| _EVQTNDLKEVVNK_.3                                                 | 0.240512101  | #N/A                    |
| _LIPDSIGKDIEK_.3                                                  | -0.067824427 | #N/A                    |
| _KGS[Phospho (STY)]LNINEFK_.2                                     | 0.072471769  | P97352_S32_M1_S100a13   |
| _SDS[Phospho (STY)]NQYIR_.2                                       | -0.054193688 | P97366_S689_M1_Evi5     |
| _LFIYNPSSGEFLGR_.2                                                | -0.02377269  | #N/A                    |
| _FDSGLNKK_.2                                                      | -0.320390958 | #N/A                    |
| _SAT[Phospho (STY)]PPPAEPASLPQEPPK_.2                             | -0.29935842  | P97379_T227_M1_G3bp2    |
| _LPNFGFVVFDDSEPVQR_.2                                             | 0.198271908  | #N/A                    |
| _VDAKPEVQSQPPR_.3                                                 | -0.472432322 | #N/A                    |
| _HLEELEES[Phospho (STY)]AT[Phospho (STY)]PPPAEPASLPQEPPK_.3       | 0.099836446  | P97379_S225_M2_G3bp2    |
| _GDMEQNDSNRR_.2                                                   | -0.16737473  | #N/A                    |
| _DVQELYAAGENR_.2                                                  | -0.192854128 | #N/A                    |
| _SDTSGHFQR_.2                                                     | -0.317204198 | #N/A                    |
| _GSEEDPLLS[Phospho (STY)]PVETWK_.2                                | 0.073805551  | P97393_S1201_M1_Arhgap5 |
| _GGIDNPAITS[Phospho (STY)]DQEVDDKK_.2                             | -0.139080787 | P97393_S1217_M1_Arhgap5 |
| _HRGSEEDPLLS[Phospho (STY)]PVETWK_.3                              | -0.014138259 | P97393_S1201_M1_Arhgap5 |
| _QPEPFS[Phospho (STY)]PR_.2                                       | -0.177891879 | P97412_S375_M1_Lyst     |
| _RM[Oxidation (M)]S[Phospho (STY)]QEHPSQASEAELAQ_.3               | -0.508307717 | P97412_S2614_M1_Lyst    |
| _STANHDSSES[Phospho (STY)]PVHS[Phospho (STY)]PSAHR_.3             | -0.32692124  | P97412_S2560_M2_Lyst    |
| _MFLAYQDQS[Phospho (STY)]FDIPDR_.2                                | 0.366505082  | P97412_S3251_M1_Lyst    |
| _KS[Phospho (STY)]IPHITSDR_.2                                     | -0.055671348 | P97427_S8_M1_Crmp1      |
| _DNFTLIPEGVNGIEER_.2                                              | -0.057760753 | #N/A                    |
| _VFGLHSVSR_.2                                                     | -0.181518845 | #N/A                    |
| _SAADIILAR_.2                                                     | -0.105555808 | #N/A                    |
| _IFNLYPR_.2                                                       | -0.208162118 | #N/A                    |
| _INC[Carbamidomethyl (C)]PVYITK_.2                                | 0.024591099  | #N/A                    |
| _IVFEDGNISVSK_.2                                                  | -0.046549793 | #N/A                    |
| _KPFPEHLYQR_.3                                                    | 0.205435579  | #N/A                    |
| _AALAGGTTM[Oxidation (M)]IIDHVVPEPGSSLLTSFEK_.3                   | -0.080337162 | #N/A                    |
| _WHEAADTK_.2                                                      | 0.063809432  | #N/A                    |
| _DLYQM[Oxidation (M)]SDSQLYEAFTHLK_.2                             | -0.384154482 | #N/A                    |
| _IINDDQSFYADVLEDGLIK_.2                                           | -0.240562912 | #N/A                    |
| _STVEYNIFEGM[Oxidation (M)]EC[Carbamidomethyl (C)]HGSPLVVISQGK_.3 | -0.344151056 | #N/A                    |
| _HAAPAPS[Phospho (STY)]AK_.2                                      | -0.059972197 | P97427_S518_M1_Crmp1    |
| _S[Phospho (STY)]IPHITSDR_.2                                      | -0.186748701 | P97427_S8_M1_Crmp1      |
| _GM[Oxidation (M)]YDGPVYEVPAT[Phospho (STY)]PK_.2                 | -0.171690419 | P97427_T509_M1_Crmp1    |
| _HAAPAPS[Phospho (STY)]AKSS[Phospho (STY)]PSK_.2                  | 0.023408336  | #N/A                    |
| _HAAPAPSAKS[Phospho (STY)]S[Phospho (STY)]PSKHQPPPIR_.4           | -0.086439484 | #N/A                    |
| _M[Oxidation (M)]TVVWVK_.2                                        | 0.250645555  | #N/A                    |
| _IVAPPGGRS[Phospho (STY)]NITS[Phospho (STY)]LG_.2                 | -0.266394067 | P97427_S566_M2_Crmp1    |
| _SS[Phospho (STY)]PSKHQPPPIR_.2                                   | 0.041370082  | P97427_S522_M1_Crmp1    |
| _EELEVLVQDK_.2                                                    | 0.291762966  | #N/A                    |
| _GLGAVILVHAENGDLIAQEQK_.3                                         | -0.008322547 | #N/A                    |

|                                                                             |              |                         |
|-----------------------------------------------------------------------------|--------------|-------------------------|
| _NLHQSNSFSL[Phospho (STY)]GAQIDNNPR_.3                                      | -0.411166658 | P97427_S542_M1_Crmp1    |
| _NLHQSNSFSLGAQIDNNPRR_.4                                                    | -0.02913067  | #N/A                    |
| _HQPPPIR_.2                                                                 | -0.019137562 | #N/A                    |
| _IAVGSDADVVIWDPDKM[Oxidation (M)]K_.2                                       | -0.135805379 | #N/A                    |
| _ILEM[Oxidation (M)]GITGPEGHALSRPEELEAEAVFR_.4                              | -0.017284037 | #N/A                    |
| _ [Acetyl (Protein N-term)]S[Phospho (STY)]HQGKKS[Phospho (STY)]IPHITSDR_.3 | -0.089981482 | P97427_S2_M2_Crmp1      |
| _SKS[Phospho (STY)]NPDFLK_.2                                                | 0.283930736  | P97434_S992_M1_Mprip    |
| _SKS[Phospho (STY)]NPDFLKK_.2                                               | -0.159277972 | P97434_S992_M1_Mprip    |
| _AEEQLPPLLS[Phospho (STY)]PPS[Phospho (STY)]PSTPHSR_.3                      | 0.322825899  | P97434_S289_M2_Mprip    |
| _DFASEAPTAPLSDAC[Carbamidomethyl (C)]PLS[Phospho (STY)]PHRR_.3              | 0.139428504  | P97434_S364_M1_Mprip    |
| _AATEALGEKS[Phospho (STY)]PEGTTVSGYDIM[Oxidation (M)]K_.3                   | -0.057313758 | P97434_S976_M1_Mprip    |
| _DFASEAPTAPLS[Phospho (STY)]DAC[Carbamidomethyl (C)]PLSPHR_.3               | -0.025635793 | P97434_S358_M1_Mprip    |
| _RLS[Phospho (STY)]VEIYDK_.2                                                | 0.123672478  | P97438_S348_M1_Kcnk2    |
| _DPVPQSGLS[Phospho (STY)]PER_.2                                             | -0.261547859 | P97441_S66_M1_Slc30a3   |
| _DRSS[Phospho (STY)]AGGGLR_.2                                               | -0.112481549 | P97441_S23_M1_Slc30a3   |
| _SLFTEPS[Phospho (STY)]EPLPEEPK_.2                                          | 0.242945326  | P97441_S38_M1_Slc30a3   |
| _ESPS[Phospho (STY)]WVTQR_.2                                                | -0.24061512  | P97445_S1981_M1_Cacna1a |
| _RAWPGS[Phospho (STY)]PER_.2                                                | -0.228475245 | P97445_S867_M1_Cacna1a  |
| _WSRS[Phospho (STY)]PSEGR_.2                                                | -0.065919724 | P97445_S2200_M1_Cacna1a |
| _M[Oxidation (M)]AGPAAPPGGS[Phospho (STY)]PR_.2                             | -0.110117377 | P97445_S2273_M1_Cacna1a |
| _KQNLLAS[Phospho (STY)]R_.2                                                 | -0.113781812 | P97445_S792_M1_Cacna1a  |
| _PLVSYS[Phospho (STY)]PAPR_.2                                               | -0.07556307  | P97445_S2252_M1_Cacna1a |
| _AWPGS[Phospho (STY)]PER_.2                                                 | 0.179069036  | P97445_S867_M1_Cacna1a  |
| _KQNLLAS[Phospho (STY)]REALYGDAER_.3                                        | -0.261690841 | P97445_S792_M1_Cacna1a  |
| _GADYTEPDS[Phospho (STY)]PREPPGGAHDPAPR_.3                                  | -0.028297484 | P97445_S2303_M1_Cacna1a |
| _GADYTEPDSPREPPGGAHDPAPRS[Phospho (STY)]PR_.4                               | 0.110731336  | P97445_S2318_M1_Cacna1a |
| _EEQNRT[Phospho (STY)]PLM[Oxidation (M)]FQR_.3                              | -0.382853686 | P97445_T1935_M1_Cacna1a |
| _GNDLSTISDTS[Phospho (STY)]PM[Oxidation (M)]KR_.2                           | -0.257957746 | P97445_S2071_M1_Cacna1a |
| _QGSSSVSGS[Phospho (STY)]PAPSTSGTSTPR_.2                                    | -0.365848051 | P97445_S2220_M1_Cacna1a |
| _AS[Phospho (STY)]IKS[Phospho (STY)]AKLENSTFFHK_.3                          | -0.046074147 | P97445_S459_M2_Cacna1a  |
| _EVAEVS[Phospho (STY)]PLS[Phospho (STY)]AANM[Oxidation (M)]SIIVK_.2         | 0.21353739   | P97445_S755_M2_Cacna1a  |
| _RMAGPAAPPGGS[Phospho (STY)]PR_.2                                           | 0.056648449  | P97445_S2273_M1_Cacna1a |
| _AKEVAEVS[Phospho (STY)]PLS[Phospho (STY)]AANM[Oxidation (M)]SIIVK_.3       | -0.195254126 | P97445_S755_M2_Cacna1a  |
| _WSRS[Phospho (STY)]PS[Phospho (STY)]EGREHTTHR_.4                           | -0.149877164 | P97445_S2200_M2_Cacna1a |
| _EM[Oxidation (M)]GTDGYSDSEHY[Phospho (STY)]LPMEGQTR_.3                     | -0.418323201 | P97445_Y2033_M1_Cacna1a |
| _FEVIDKPQS_.2                                                               | 0.118314096  | #N/A                    |
| _QASGGPVDIGPEYQQDLRELYK_.3                                                  | -0.046743563 | #N/A                    |
| _QASGGPVDIGPEYQQDLDR_.2                                                     | 0.040108267  | #N/A                    |
| _GEM[Oxidation (M)]DTFPTFK_.2                                               | 0.001550335  | #N/A                    |
| _FDDPKFEVIDKPQS_.2                                                          | -0.143792257 | #N/A                    |
| _VNQAIWLLC[Carbamidomethyl (C)]TGAR_.2                                      | -0.112229    | #N/A                    |
| _GSSNSYAIK_.2                                                               | 0.205574102  | #N/A                    |
| _WSTDDVQINDISLQDYIAVK_.2                                                    | 0.175910948  | #N/A                    |
| _PLREPGSSHLGS[Phospho (STY)]PDTAR_.3                                        | -0.234876262 | P97492_S203_M1_Rgs14    |
| _EPGSSHLGS[Phospho (STY)]PDTAR_.2                                           | -0.335264146 | P97492_S203_M1_Rgs14    |
| _S[Phospho (STY)]LGSGESESESRPGK_.2                                          | -0.250532805 | P97492_S289_M1_Rgs14    |
| _S[Phospho (STY)]LPLGVEELGQLPLAEGPC[Carbamidomethyl (C)]GR_.2               | -0.351276101 | P97492_S218_M1_Rgs14    |



|                                                                                                |              |                        |
|------------------------------------------------------------------------------------------------|--------------|------------------------|
| _SPLYQEC[Carbamidomethyl (C)]LLAEAEGRPLREPGSSHLGS[Phospho (STY)]PDTAR_.4                       | 0.041219506  | P97492_S203_M1_Rgs14   |
| _GLS[Phospho (STY)]LPDIK_.2                                                                    | -0.352680437 | P97492_S339_M1_Rgs14   |
| _S[Phospho (STY)]LGSGESESESR_.2                                                                | -0.358657795 | P97492_S289_M1_Rgs14   |
| _GLLSQGS[Phospho (STY)]PLSWEETQR_.2                                                            | -0.443175944 | P97494_S8_M1_GclC      |
| _RKPS[Phospho (STY)]PS[Phospho (STY)]PPPPTATESR_.3                                             | -0.037545075 | P97496_S327_M2_Smarcc1 |
| _NEEPVRS[Phospho (STY)]PERR_.2                                                                 | -0.066522573 | P97496_S309_M1_Smarcc1 |
| _LEEQLS[Phospho (STY)]PR_.2                                                                    | -0.404788949 | P97500_S391_M1_Myt1I   |
| _KLS[Phospho (STY)]ETNPQDR_.2                                                                  | 0.273322974  | P97500_S343_M1_Myt1I   |
| _M[Oxidation (M)]VEES[Phospho (STY)]DEEVC[Carbamidomethyl (C)]LSSLEC[Carbamidomethyl (C)]LR_.2 | -0.352714884 | P97500_S319_M1_Myt1I   |
| _SAFTTS[Phospho (STY)]DVVR_.2                                                                  | -0.2319276   | P97772_S853_M1_Grm1    |
| _APIASIHS[Phospho (STY)]VDLDDL_.2                                                              | -0.286327634 | P97783_S84_M1_Mlt11    |
| _APQS[Phospho (STY)]PTLAPAK_.2                                                                 | -0.181810116 | P97792_S332_M1_Cxadr   |
| _TQYNQVPSEDFERAPQS[Phospho (STY)]PTLAPAK_.3                                                    | -0.160742169 | P97792_S332_M1_Cxadr   |
| _HDQQPAITR_.2                                                                                  | 0.052396195  | #N/A                   |
| _LLIYSFAGEYVPR_.2                                                                              | -0.163533081 | #N/A                   |
| _PSPPEVSGPADR_.2                                                                               | 0.271067474  | #N/A                   |
| _NNM[Oxidation (M)]DFSIR_.2                                                                    | -0.404829198 | #N/A                   |
| _GSTSS[Phospho (STY)]TRLHEPEK_.3                                                               | 0.06475906   | P97797_S409_M1_Sirpa   |
| _DGQELHPLETTVNPSGK_.3                                                                          | -0.332684715 | #N/A                   |
| _VIC[Carbamidomethyl (C)]EVAHITLDR_.2                                                          | -0.350841785 | #N/A                   |
| _VPRPEDTLTYADLDMVHLSR_.4                                                                       | -0.408842164 | #N/A                   |
| _NS[Phospho (STY)]QDITPVDNSM[Oxidation (M)]DSNIHQR_.3                                          | -0.326436117 | P97798_S1225_M1_Neo1   |
| _GTGQSDDS[Phospho (STY)]DIWDDTALIK_.2                                                          | 0.116233873  | P97801_S28_M1_Smn1     |
| _ [Acetyl (Protein N-term)]AM[Oxidation (M)]GSGGAGS[Phospho (STY)]EQEDTVLFR_.2                 | -0.393637821 | #N/A                   |
| _ [Acetyl (Protein N-term)]M[Oxidation (M)]AM[Oxidation (M)]GSGGAGSEQEDTVLFR_.2                | -0.42200006  | #N/A                   |
| _RGT[Phospho (STY)]GQSDSDSIWDDTALIK_.3                                                         | 0.150429512  | P97801_T22_M1_Smn1     |
| _SGLGELILPENEPGSSIM[Oxidation (M)]PGK_.2                                                       | -0.354514267 | #N/A                   |
| _IYELAAGGTAVGTGLNTR_.2                                                                         | -0.031592176 | #N/A                   |
| _LHDALSAK_.2                                                                                   | -0.116077711 | #N/A                   |
| _AAAEVNQEYGLDPK_.2                                                                             | 0.296424158  | #N/A                   |
| _YYGAQTVR_.2                                                                                   | -0.328322785 | #N/A                   |
| _VEFDTFGELK_.2                                                                                 | 0.043701531  | #N/A                   |
| _AIEM[Oxidation (M)]LGELGSK_.2                                                                 | 0.418205012  | #N/A                   |
| _MPIPVIQAFGILK_.2                                                                              | 0.190249861  | #N/A                   |
| _ETAIELGYLTAEQFDEWVKPK_.3                                                                      | -0.059555671 | #N/A                   |
| _LNDHFPLVVWQTGSGTQTNM[Oxidation (M)]NVNEVISNR_.3                                               | 0.146042496  | #N/A                   |
| _SQSSNDTFPTAM[Oxidation (M)]HIAAAVEVHK_.3                                                      | 0.164748201  | #N/A                   |
| _THTQDAVPLTLGQFSGYVQVQYAMVR_.3                                                                 | 0.169625604  | #N/A                   |
| _AASS[Phospho (STY)]PNLSNGETESVK_.2                                                            | -0.057034048 | P97820_S795_M1_Map4k4  |
| _TTSRS[Phospho (STY)]PVLRS_.2                                                                  | 0.269367653  | P97820_S621_M1_Map4k4  |
| _RDS[Phospho (STY)]PLQGGGQNSQAGQR_.3                                                           | -0.10839904  | P97820_S629_M1_Map4k4  |
| _SSS[Phospho (STY)]KSEGPSPR_.2                                                                 | -0.074016777 | P97820_S701_M1_Map4k4  |
| _DSPLQGGGQNSQAGQR_.2                                                                           | -0.222206582 | #N/A                   |
| _S[Phospho (STY)]EGSPSPR_.2                                                                    | 0.138121896  | P97820_S703_M1_Map4k4  |
| _SSGGREDS[Phospho (STY)]PGTQR_.2                                                               | -0.101822556 | P97825_S79_M1_Jpt1     |
| _SNS[Phospho (STY)]SEASSGDFLDLK_.2                                                             | 0.213009549  | P97825_S87_M1_Jpt1     |
| _STS[Phospho (STY)]PAPADVAPAQEDLR_.2                                                           | -0.3256655   | P97855_S231_M1_G3bp1   |

|                                                                                             |              |                       |
|---------------------------------------------------------------------------------------------|--------------|-----------------------|
| _YQDEVFGGFVTEPQEE[Phospho (STY)]EEEEPEER_.3                                                 | -0.130053162 | P97855_S149_M1_G3bp1  |
| _KPEKPLFSST[Phospho (STY)]PQDSSPR_.3                                                        | 0.284395876  | P97863_S328_M1_Nfib   |
| _VEGTEIVKPS[Phospho (STY)]PK_.2                                                             | -0.18831832  | P97868_S1179_M1_Rbbp6 |
| _SRS[Phospho (STY)]PQAFR_.2                                                                 | 0.121837139  | P97868_S773_M1_Rbbp6  |
| _YHS[Phospho (STY)]RS[Phospho (STY)]RS[Phospho (STY)]PQAFR_.3                               | 0.116845537  | P97868_S769_M3_Rbbp6  |
| _WDKDDFES[Phospho (STY)]EEEDVK_.2                                                           | 0.02834459   | P97868_S1329_M1_Rbbp6 |
| _PSANREDFS[Phospho (STY)]PER_.2                                                             | -0.3739059   | P97868_S862_M1_Rbbp6  |
| _VDGDREKS[Phospho (STY)]PR_.2                                                               | -0.602908248 | P97868_S1053_M1_Rbbp6 |
| _S[Phospho (STY)]MVEHYR_.2                                                                  | 0.395293863  | P97950_S101_M1_Rab33a |
| _SAS[Phospho (STY)]QDC[Carbamidomethyl (C)]IETPGAQEGK_.2                                    | -0.203321219 | P98084_S481_M1_Apba2  |
| _SAS[Phospho (STY)]QDC[Carbamidomethyl (C)]IETPGAQEGKK_.2                                   | -0.216310692 | P98084_S481_M1_Apba2  |
| _DLSFSNTNNK_.2                                                                              | -0.076320489 | #N/A                  |
| _GDS[Phospho (STY)]DVPEVPPSSDR_.2                                                           | 0.057825849  | P98191_S56_M1_Cds1    |
| _ATS[Phospho (STY)]VGDQLEAPAR_.2                                                            | -0.275983741 | P98200_S6_M1_Atp8a2   |
| _EQS[Phospho (STY)]SDDFC[Carbamidomethyl (C)]R_.2                                           | -0.367845236 | P98200_S421_M1_Atp8a2 |
| _L[Acetyl (Protein N-term)]S[Phospho (STY)]RATS[Phospho (STY)]VGDQLEAPAR_.2                 | 0.183736886  | P98200_S2_M2_Atp8a2   |
| _M[Oxidation (M)]TSC[Carbamidomethyl (C)]TNDS[Phospho (STY)]C[Carbamidomethyl (C)]DFNDPR_.2 | -0.125053248 | P98200_S435_M1_Atp8a2 |
| _DIPSYGS[Phospho (STY)]LSR_.2                                                               | 0.060244118  | P98203_S205_M1_Arvcf  |
| _GSLGS[Phospho (STY)]LDR_.2                                                                 | 0.296300308  | P98203_S337_M1_Arvcf  |
| _S[Phospho (STY)]LAADDEGGPDLEPDYSTATR_.2                                                    | -0.012775836 | P98203_S269_M1_Arvcf  |
| _RSPS[Phospho (STY)]VDSTR_.2                                                                | -0.478574194 | P98203_S347_M1_Arvcf  |
| _S[Phospho (STY)]LPEHFQAEPYGLEDDTR_.3                                                       | 0.013899276  | P98203_S251_M1_Arvcf  |
| _S[Phospho (STY)]PSVDSTR_.2                                                                 | -0.220641202 | P98203_S345_M1_Arvcf  |
| _NFDT[Phospho (STY)]LDLPK_.2                                                                | 0.043238931  | P98203_T643_M1_Arvcf  |
| _ISVYYNEATGGK_.2                                                                            | -0.213788243 | #N/A                  |
| _M[Oxidation (M)]AVTFIGNSTAIQELFKR_.3                                                       | -0.033662719 | #N/A                  |
| _MAVTFIGNSTAIQELFK_.2                                                                       | 0.155049321  | #N/A                  |
| _ALTVPELTQQVFDK_.2                                                                          | 0.009558861  | #N/A                  |
| _FWEVISDEHGIDPTGTYHGDSLQLDR_.4                                                              | 0.245549738  | #N/A                  |
| _QPVLSQTEAR_.2                                                                              | 0.030632237  | #N/A                  |
| _FQIATVTEK_.2                                                                               | -0.305126929 | #N/A                  |
| _AIHSWLTR_.2                                                                                | -0.377531621 | #N/A                  |
| _TQNPM[Oxidation (M)]VTGTSVLGVK_.2                                                          | 0.138859529  | #N/A                  |
| _FDGGVVIAADM[Oxidation (M)]LGSYGLAR_.2                                                      | -0.541749603 | #N/A                  |
| _VNDSTM[Oxidation (M)]LGASGDYADFQYLK_.2                                                     | -0.055505334 | #N/A                  |
| _LASVPAGGAVAVSAAPGSAAPAAGSAPAAAEK_.3                                                        | 0.349276021  | #N/A                  |
| _NIEDVIAQGVGK_.2                                                                            | -0.418103162 | #N/A                  |
| _YVASYLLAALGGNSSPSAK_.2                                                                     | -0.253919774 | #N/A                  |
| _ILDSVGIEADDDRNLK_.2                                                                        | -0.130825727 | #N/A                  |
| _KEESES[Phospho (STY)]DDDM[Oxidation (M)]GFGLFD_.2                                          | 0.283419643  | P99027_S105_M1_Rplp2  |
| _LASVPAGGAVAVSAAPGSAAPAAGSAPAAAEKKDEK_.4                                                    | -0.093004351 | #N/A                  |
| _LELC[Carbamidomethyl (C)]DNR_.2                                                            | 0.128635744  | #N/A                  |
| _EHC[Carbamidomethyl (C)]EQLEK_.2                                                           | 0.145337048  | #N/A                  |
| _ERLELC[Carbamidomethyl (C)]DNR_.2                                                          | -0.112100729 | #N/A                  |
| _SQTEEDC[Carbamidomethyl (C)]TEELDFLHAR_.3                                                  | 0.045730907  | #N/A                  |
| _LLADPTGAFGK_.2                                                                             | 0.227392516  | #N/A                  |
| _THLPGFVEQAGALK_.2                                                                          | 0.016469578  | #N/A                  |

|                                                                          |              |                         |
|--------------------------------------------------------------------------|--------------|-------------------------|
| _VGDAIPSVFEGEPGK_.2                                                      | -0.053640321 | #N/A                    |
| _VGDAIPSVFEGEPGKK_.2                                                     | -0.0664882   | #N/A                    |
| _KVNLAELFK_.2                                                            | -0.066190029 | #N/A                    |
| _ALNVEPDGTGLTC[Carbamidomethyl (C)]SLAPNLSQL_.2                          | -0.12716121  | #N/A                    |
| _VNLAELFK_.2                                                             | 0.213117379  | #N/A                    |
| _ATDLLLDDSLVSLFGNR_.2                                                    | 0.211573649  | #N/A                    |
| _ATDLLLDDSLVSLFGNRR_.3                                                   | -0.401593252 | #N/A                    |
| _FSM[Oxidation (M)]VIDNGIVK_.2                                           | 0.462363585  | #N/A                    |
| _SNAQGIDLNR_.2                                                           | 0.18140911   | #N/A                    |
| _LTASAPGYLAITK_.2                                                        | -0.092951272 | #N/A                    |
| _IVYVNEK_.2                                                              | 0.284400159  | #N/A                    |
| _YIGNM[Oxidation (M)]HGNEAVGR_.3                                         | -0.339177816 | #N/A                    |
| _EALVSVWLQC[Carbamidomethyl (C)]TAISR_.2                                 | -0.434203417 | #N/A                    |
| _SHIAQWS[Phospho (STY)]PHT[Phospho (STY)]PPR_.3                          | -0.124475557 | Q00560_S665_M2_I16st    |
| _DVAGDIFHQQC[Carbamidomethyl (C)]K_.2                                    | -0.250430114 | #N/A                    |
| _S[Phospho (STY)]GDETPGSEAPGDK_.2                                        | 0.055312039  | Q00PI9_S159_M1_Hnrnpul2 |
| _DLLVQQASQC[Carbamidomethyl (C)]LSK_.2                                   | 0.016855802  | #N/A                    |
| _YNVLGAETVLTQM[Oxidation (M)]R_.2                                        | -0.452622808 | #N/A                    |
| _NFILDQC[Carbamidomethyl (C)]NVYNSGQR_.2                                 | 0.092963827  | #N/A                    |
| _AVEEQGDDQDS[Phospho (STY)]EK_.2                                         | 0.195100259  | Q00PI9_S183_M1_Hnrnpul2 |
| _S[Phospho (STY)]KSPPPPEEAKDEEEDQTLVNLDITYSDLHFQISK_.5                   | -0.015501194 | Q00PI9_S224_M1_Hnrnpul2 |
| _S[Phospho (STY)]GDETPGSEAPGDKAVEEQGDDQDSEK_.3                           | -0.332351532 | Q00PI9_S159_M1_Hnrnpul2 |
| _AVEEQGDDQDS[Phospho (STY)]EKS[Phospho (STY)]KPAGS[Phospho (STY)]DGER_.3 | -0.31314526  | Q00PI9_S183_M3_Hnrnpul2 |
| _QHEVEIPSPT[Phospho (STY)]QKEK_.3                                        | -0.607579974 | Q01063_T289_M1_Pde4d    |
| _NNFAALTNLQDR_.2                                                         | -0.402743476 | #N/A                    |
| _SDS[Phospho (STY)]DYDLSPK_.2                                            | -0.116821647 | Q01063_S136_M1_Pde4d    |
| _HSVSEMASNK_.2                                                           | -0.015962313 | #N/A                    |
| _QHEVEIPS[Phospho (STY)]PTQK_.2                                          | 0.497986236  | Q01063_S287_M1_Pde4d    |
| _TALQQLER_.2                                                             | 0.147497755  | #N/A                    |
| _TIVFELLTR_.2                                                            | 0.424522114  | #N/A                    |
| _QILDEDELRL_.2                                                           | -0.029369805 | #N/A                    |
| _DWLASTFTQQTR_.2                                                         | -0.423373028 | #N/A                    |
| _S[Phospho (STY)]PPEM[Oxidation (M)]LESDC[Carbamidomethyl (C)]PSPLELK_.2 | -0.074100685 | Q01065_S7_M1_Pde1b      |
| _QILDEDELRELRL_.3                                                        | -0.025476021 | #N/A                    |
| _NLEYTASLLEAVYIDETR_.2                                                   | -0.416075461 | #N/A                    |
| _S[Phospho (STY)]FTHSDC[Carbamidomethyl (C)]K_.2                         | -0.468448212 | Q01097_S940_M1_Grin2b   |
| _YPQS[Phospho (STY)]PTNSK_.2                                             | -0.310547583 | Q01097_S1284_M1_Grin2b  |
| _HSQLSDLY[Phospho (STY)]GK_.2                                            | -0.386541273 | Q01097_Y1039_M1_Grin2b  |
| _SDRYS[Phospho (STY)]GHDDLIR_.3                                          | -0.087270705 | Q01097_S1050_M1_Grin2b  |
| _SVS[Phospho (STY)]LKDK_.2                                               | 0.028372327  | Q01097_S1323_M1_Grin2b  |
| _RQHS[Phospho (STY)]YDTFVDLQKEEAALAPR_.4                                 | -0.245785588 | Q01097_S1303_M1_Grin2b  |
| _ENS[Phospho (STY)]PHWEHVDLTDIYK_.3                                      | 0.189364084  | Q01097_S1143_M1_Grin2b  |
| _RES[Phospho (STY)]S[Phospho (STY)]VYDISEHRR_.3                          | -0.441439592 | Q01097_S929_M2_Grin2b   |
| _QHSY[Phospho (STY)]DTFVDLQKEEAALAPR_.3                                  | 0.291255904  | Q01097_Y1304_M1_Grin2b  |
| _RQHS[Phospho (STY)]YDTFVDLQK_.3                                         | -0.063003739 | Q01097_S1303_M1_Grin2b  |
| _QHSY[Phospho (STY)]DTFVDLQK_.2                                          | -0.054203175 | Q01097_Y1304_M1_Grin2b  |
| _S[Phospho (STY)]DVSDISTHTVTYGNIEGNAK_.3                                 | -0.152589791 | Q01097_S1058_M1_Grin2b  |

|                                                                |              |                         |
|----------------------------------------------------------------|--------------|-------------------------|
| _NM[Oxidation (M)]ANLSGVNGS[Phospho (STY)]PQSALDFIR_.2         | -0.089540981 | Q01097_S917_M1_Grin2b   |
| _AGNLYDIS[Phospho (STY)]EDNSLQELDQPAAPVAVSSNASTTK_.3           | -0.143790049 | Q01097_S1255_M1_Grin2b  |
| _ESSVY[Phospho (STY)]DISEHRR_.3                                | -0.05848238  | Q01097_Y932_M1_Grin2b   |
| _DLYC[Carbamidomethyl (C)]HKS[Phospho (STY)]D_.2               | 0.384480894  | Q01147_S326_M1_Creb1    |
| _ILNDLS[Phospho (STY)]SDAPGVPR_.2                              | -0.00087518  | Q01147_S128_M1_Creb1    |
| _TEVEPDES[Phospho (STY)]SAAER_.2                               | 0.464307909  | Q01337_S286_M1_Adra2c   |
| _RPGGAAGPGASGS[Phospho (STY)]GHGEER_.3                         | 0.400646565  | Q01338_S362_M1_Adra2a   |
| _TRAS[Phospho (STY)]QVKPGDS[Phospho (STY)]LPR_.3               | -0.364744347 | Q01338_S339_M2_Adra2a   |
| _ASQVKPGDS[Phospho (STY)]LPR_.2                                | -0.146650193 | Q01338_S346_M1_Adra2a   |
| _NAEPPS[Phospho (STY)]PTPAAHTR_.2                              | -0.511902322 | Q01341_S53_M1_Adcy6     |
| _GLVGEIIR_.2                                                   | -0.110324689 | #N/A                    |
| _GDFC[Carbamidomethyl (C)]IQVGR_.2                             | 0.275313703  | #N/A                    |
| _DRPFFPGLVK_.2                                                 | -0.286986695 | #N/A                    |
| _SC[Carbamidomethyl (C)]AHDWVVE_.2                             | 0.157201246  | #N/A                    |
| _GLVGEIIR_.2                                                   | 0.2485721    | #N/A                    |
| _TFIAIKPDGVQR_.2                                               | -0.296698042 | #N/A                    |
| _NIIHGSDSVESAER_.2                                             | 0.226774529  | #N/A                    |
| _VM[Oxidation (M)]LGETNPADSKPGTIR_.3                           | -0.381835418 | #N/A                    |
| _SITADGES[Phospho (STY)]PPTTK_.2                               | -0.195745336 | Q01815_S815_M1_Cacna1c  |
| _EAVSAAS[Phospho (STY)]EDDIFR_.2                               | -0.14700993  | Q01815_S1691_M1_Cacna1c |
| _TGNNQADTES[Phospho (STY)]PSHEK_.2                             | -0.446066842 | Q01815_S1742_M1_Cacna1c |
| _EAVSAAS[Phospho (STY)]EDDIFRR_.2                              | 0.182323565  | Q01815_S1691_M1_Cacna1c |
| _EVDIGIPDATGR_.2                                               | -0.014041106 | #N/A                    |
| _SVS[Phospho (STY)]DNDIR_.2                                    | -0.341814168 | Q01853_S748_M1_Vcp      |
| _LDQLIYIPLPEK_.2                                               | 0.092480634  | #N/A                    |
| _GVLFGPPGC[Carbamidomethyl (C)]GK_.2                           | 0.264880282  | #N/A                    |
| _RSVS[Phospho (STY)]DNDIR_.2                                   | -0.31346783  | Q01853_S748_M1_Vcp      |
| _GGNIGDGGGAADR_.2                                              | 0.097727241  | #N/A                    |
| _WALSQSNPSALR_.2                                               | 0.098413322  | #N/A                    |
| _M[Oxidation (M)]DELQLFR_.2                                    | -0.393844839 | #N/A                    |
| _ETVVEVPQVTWEDIGLEDVKR_.3                                      | 0.107986778  | #N/A                    |
| _LGDVISIQPC[Carbamidomethyl (C)]PDVK_.2                        | 0.14616752   | #N/A                    |
| _LEILQIHTK_.2                                                  | 0.264166324  | #N/A                    |
| _ESIESEIR_.2                                                   | 0.060301639  | #N/A                    |
| _AIANEC[Carbamidomethyl (C)]QANFISIK_.2                        | 0.41664912   | #N/A                    |
| _SVS[Phospho (STY)]DNDIR_.2                                    | 0.241153706  | Q01853_S748_M1_Vcp      |
| _LAGESESNLR_.2                                                 | 0.213943884  | #N/A                    |
| _QAAPC[Carbamidomethyl (C)]VLFFDELDSIAK_.2                     | 0.348785865  | #N/A                    |
| _LIVDEAINEDNSVLSQPK_.2                                         | -0.279274959 | #N/A                    |
| _ELQELVQYPVEHPDK_.2                                            | 0.090168899  | #N/A                    |
| _NAPAIIFIDELDAIPK_.2                                           | 0.054169344  | #N/A                    |
| _EM[Oxidation (M)]VELPLR_.2                                    | 0.248810986  | #N/A                    |
| _DHFEEAM[Oxidation (M)]R_.2                                    | 0.113027779  | #N/A                    |
| _IVSQLLTLM[Oxidation (M)]DGLK_.2                               | 0.095596456  | #N/A                    |
| _ESIESEIR_.2                                                   | -0.011602692 | #N/A                    |
| _EAVC[Carbamidomethyl (C)]IVLSDDTC[Carbamidomethyl (C)]SDEK_.2 | -0.288952626 | #N/A                    |
| _Acetyl (Protein N-term)]ASGADSKGDDLSTAILK_.2                  | -0.00833605  | #N/A                    |

|                                                                                 |              |                      |
|---------------------------------------------------------------------------------|--------------|----------------------|
| _M[Oxidation (M)]TNGFSGADLTEIC[Carbamidomethyl (C)]QR_2                         | -0.091262941 | #N/A                 |
| _VINQILITEM[Oxidation (M)]DGM[Oxidation (M)]STK_2                               | -0.404368958 | #N/A                 |
| _EDEEES[Phospho (STY)]LNEVGYYDDIGGC[Carbamidomethyl (C)]R_2                     | -0.028305166 | Q01853_S197_M1_Vcp   |
| _LADDVDLEQVANETHGHVGADLAALC[Carbamidomethyl (C)]SEALQAIR_4                      | -0.218491735 | #N/A                 |
| _DVDLEFLAK_2                                                                    | 0.354821969  | #N/A                 |
| _EAVC[Carbamidomethyl (C)]IVLSDDTC[Carbamidomethyl (C)]SDEKIR_3                 | -0.066734497 | #N/A                 |
| _LAGESESNLRK_3                                                                  | 0.292584007  | #N/A                 |
| _AENYDIS[Phospho (STY)]PADR_2                                                   | -0.248686995 | Q02053_S876_M1_Uba1  |
| _DNPGVVTC[Carbamidomethyl (C)]LDEAR_2                                           | -0.290786766 | #N/A                 |
| _RVS[Phospho (STY)]GPDPK_2                                                      | -0.313439511 | Q02053_S13_M1_Uba1   |
| _YDGQVAVFGSDFQEK_2                                                              | -0.44925929  | #N/A                 |
| _LAcetyl (Protein N-term)]SSS[Phospho (STY)]PLSKK_2                             | -0.33420302  | Q02053_S4_M1_Uba1    |
| _LKSDTAAAVR_2                                                                   | -0.221262642 | #N/A                 |
| _QNSLDEDLIR_2                                                                   | -0.254844544 | #N/A                 |
| _QPAENVNQYLTDISK_2                                                              | -0.389826446 | #N/A                 |
| _SLPASLVEPDFVM[Oxidation (M)]TDFAK_2                                            | -0.323676302 | #N/A                 |
| _AAVASLLQSVQVPEFTPK_2                                                           | -0.183887316 | #N/A                 |
| _SIPIC[Carbamidomethyl (C)]TLK_2                                                | 0.331465029  | #N/A                 |
| _YFLVGAGAIGC[Carbamidomethyl (C)]ELK_2                                          | -0.268017175 | #N/A                 |
| _NEEDATELVGLAQAVNAR_2                                                           | -0.48948826  | #N/A                 |
| _ATLPS[Phospho (STY)]PDKLPGFK_2                                                 | -0.230266949 | Q02053_S835_M1_Uba1  |
| _VGEFC[Carbamidomethyl (C)]HSR_2                                                | 0.091746947  | #N/A                 |
| _LAGTQPLEVLEAVQR_2                                                              | -0.084405892 | #N/A                 |
| _NGS[Phospho (STY)]EADIDESLYSR_2                                                | -0.051009693 | Q02053_S46_M1_Uba1   |
| _VVQGHQQLDSYK_2                                                                 | -0.086929438 | #N/A                 |
| _QFLDYFK_2                                                                      | 0.416114779  | #N/A                 |
| _LDQPM[Oxidation (M)]TEIVSR_2                                                   | -0.033011403 | #N/A                 |
| _M[Oxidation (M)]LQTSSVLVSGLR_2                                                 | 0.056914342  | #N/A                 |
| _NFPNAIEHTLQWAR_2                                                               | -0.149532461 | #N/A                 |
| _LAYVAAGDLAPINAFIGGLAAQEV[Oxidation (M)]K_3                                     | -0.013633241 | #N/A                 |
| _NFAM[Oxidation (M)]IGLGC[Carbamidomethyl (C)]GEGGEVVVTDM[Oxidation (M)]DTIEK_3 | 0.021047396  | #N/A                 |
| _DEFEGFLK_2                                                                     | 0.014245868  | #N/A                 |
| _QM[Oxidation (M)]NPYIQVTSHQNR_3                                                | 0.167583671  | #N/A                 |
| _IHVS[Phospho (STY)]DQELQSANASVDDSRLEELK_3                                      | -0.336333668 | Q02053_S810_M1_Uba1  |
| _IYDDDFQNLGVDANALDNIDAR_3                                                       | -0.253774213 | #N/A                 |
| _VLGPYTFISIC[Carbamidomethyl (C)]DTSNFSYIR_2                                    | 0.319531549  | #N/A                 |
| _QNSLDEDLIRK_3                                                                  | 0.070581452  | #N/A                 |
| _TS[Phospho (STY)]M[Oxidation (M)]GGTQQQFVEGVR_2                                | -0.123463724 | #N/A                 |
| _HAVVNLINYQDDAELATR_3                                                           | -0.329788091 | #N/A                 |
| _RTS[Phospho (STY)]M[Oxidation (M)]GGTQQQFVEGVR_3                               | -0.050124231 | #N/A                 |
| _TMQNTNDVETAR_2                                                                 | -0.172918123 | #N/A                 |
| _GPPETGS[Phospho (STY)]PK_2                                                     | -0.128699937 | Q02357_S1759_M1_Ank1 |
| _LDQVVES[Phospho (STY)]PAIPR_2                                                  | -0.302778617 | Q02357_S852_M1_Ank1  |
| _AEDS[Phospho (STY)]DAIPEWK_2                                                   | -0.047016717 | Q02357_S1589_M1_Ank1 |
| _SVEDEM[Oxidation (M)]DS[Phospho (STY)]PGEEPFTGQGR_2                            | 0.302210278  | Q02780_S310_M1_Nfia  |
| _LKS[Phospho (STY)]VEDEM[Oxidation (M)]DS[Phospho (STY)]PGEEPFTGQGR_3           | -0.313677209 | Q02780_S303_M2_Nfia  |
| _S[Phospho (STY)]PGSGSQSSGWHEVEPGLPSPSTLK_3                                     | -0.196137362 | Q02780_S323_M1_Nfia  |

|                                                        |              |                      |
|--------------------------------------------------------|--------------|----------------------|
| _KVPEQPPELPQLDS[Phospho (STY)]QHL_.3                   | -0.201175527 | Q02819_S456_M1_Nucb1 |
| _SGKLS[Phospho (STY)]QELDFVSHNVR_.3                    | -0.106271878 | Q02819_S85_M1_Nucb1  |
| _AQRLS[Phospho (STY)]QETEALGR_.2                       | -0.372849044 | Q02819_S368_M1_Nucb1 |
| _LSQELDFVSHNVR_.3                                      | -0.142377537 | #N/A                 |
| _NPNS[Phospho (STY)]LKR_.2                             | -0.142504908 | Q03137_S887_M1_Epha4 |
| _IDTIAADESFTQVDIGDR_.2                                 | -0.557046803 | #N/A                 |
| _TYVDPFTYEDPNQAVR_.2                                   | -0.251385995 | #N/A                 |
| _RYS[Phospho (STY)]DHAGPAIPSVVAYPK_.3                  | -0.29940138  | Q03141_S419_M1_Mark3 |
| _SRGS[Phospho (STY)]TNLFSK_.2                          | 0.112690987  | Q03141_S601_M1_Mark3 |
| _SAELDASDSSS[Phospho (STY)]SSNLSLAK_.2                 | 0.15449408   | Q03141_S378_M1_Mark3 |
| _IDIMVGM[Oxidation (M)]GYS[Phospho (STY)]QEEIQESLSK_.2 | 0.156559857  | Q03141_S341_M1_Mark3 |
| _VRPNSDLSNSTGQS[Phospho (STY)]PHHK_.3                  | -0.4259516   | Q03141_S400_M1_Mark3 |
| _TPVAS[Phospho (STY)]THS[Phospho (STY)]ISSATTPDR_.2    | -0.575708659 | Q03141_S540_M2_Mark3 |
| _SFGS[Phospho (STY)]PNR_.2                             | -0.000483848 | Q03147_S164_M1_Cdk7  |
| _PSS[Phospho (STY)]PVNTPSSQPPAAK_.2                    | 0.139201684  | Q03173_S355_M1_Enah  |
| _S[Phospho (STY)]PVISRPK_.2                            | -0.200204244 | Q03173_S740_M1_Enah  |
| _NSRPSS[Phospho (STY)]PVNTPSSQPPAAK_.3                 | -0.516054684 | Q03173_S355_M1_Enah  |
| _AVDSLVPIGR_.2                                         | -0.063030494 | #N/A                 |
| _VVDALGNAIDGK_.2                                       | 0.010627886  | #N/A                 |
| _VLSIGDGIAR_.2                                         | 0.161714485  | #N/A                 |
| _TGAIVDVPVGEELLGR_.2                                   | -0.208970325 | #N/A                 |
| _ELIIGDR_.2                                            | -0.261036279 | #N/A                 |
| _LELAQYR_.2                                            | 0.045540926  | #N/A                 |
| _TSIAIDTIINQK_.2                                       | -0.060221258 | #N/A                 |
| _GYLDKLEPSK_.2                                         | -0.227065326 | #N/A                 |
| _HALIYDDLK_.2                                          | -0.137794438 | #N/A                 |
| _ILGADTSVDLEETGR_.2                                    | -0.059838607 | #N/A                 |
| _VVDALGNAIDKGKPIGSK_.2                                 | -0.167575812 | #N/A                 |
| _STVAQLVK_.2                                           | 0.075917962  | #N/A                 |
| _RTGAIVDVPVGEELLGR_.3                                  | -0.341907132 | #N/A                 |
| _EGDVVKR_.2                                            | 0.036500991  | #N/A                 |
| _LKEIVTNFLAGFEP_.2                                     | -0.020569139 | #N/A                 |
| _RFNDGTDEK_.2                                          | -0.218477183 | #N/A                 |
| _EIVTNFLAGFEP_.2                                       | -0.193487003 | #N/A                 |
| _EAYPGDVFYLSHR_.2                                      | -0.296714508 | #N/A                 |
| _FNDGTDEK_.2                                           | 0.014726721  | #N/A                 |
| _ISEQSDAK_.2                                           | -0.155873008 | #N/A                 |
| _QM[Oxidation (M)]SLLLR_.2                             | -0.293969805 | #N/A                 |
| _RLTDADAM[Oxidation (M)]K_.2                           | 0.325457342  | #N/A                 |
| _FNDGTDEKK_.2                                          | -0.038272654 | #N/A                 |
| _LYC[Carbamidomethyl (C)]IYVAIGQK_.2                   | 0.286991744  | #N/A                 |
| _GM[Oxidation (M)]SLNLEPDNVGVVFGNDK_.2                 | -0.29632128  | #N/A                 |
| _QGQYSPM[Oxidation (M)]AIEEQVAVIYAGVR_.2               | -0.267296419 | #N/A                 |
| _EPMQTGIK_.2                                           | 0.363373735  | #N/A                 |
| _TGTAEM[Oxidation (M)]SSILEER_.2                       | 0.120854399  | #N/A                 |
| _FENAFLSHVISQHQSLGNIR_.3                               | -0.211078806 | #N/A                 |
| _EVAFAQFGSDLAATQQLSR_.3                                | -0.377979764 | #N/A                 |

|                                                                            |              |                        |
|----------------------------------------------------------------------------|--------------|------------------------|
| _LTDADAMK_2                                                                | 0.15307045   | #N/A                   |
| _YTIVVSATASDAAPLQYLAPYSGC[Carbamidomethyl (C)]SM[Oxidation (M)]GEYFR_3     | -0.377451493 | #N/A                   |
| _NVQAEEMVEFSSGLK_2                                                         | -0.360301688 | #N/A                   |
| _S[Phospho (STY)]LEDLSSC[Carbamidomethyl (C)]PR_2                          | -0.125748714 | Q03391_S1258_M1_Grin2d |
| _LAFEDES[Phospho (STY)]PPAPSR_2                                            | 0.013665737  | Q03391_S1049_M1_Grin2d |
| _RGS[Phospho (STY)]AHFSSLESEV_2                                            | -0.039752716 | Q03391_S1313_M1_Grin2d |
| _VAWIPDVESR_2                                                              | 0.188643922  | #N/A                   |
| _IETQTQEEVRDS[Phospho (STY)]KENTEK_3                                       | -0.039269195 | Q03517_S270_M1_Scg2    |
| _IETQTQEEVRDS[Phospho (STY)]K_2                                            | -0.067300139 | Q03517_S270_M1_Scg2    |
| _QAPYENLNDQELGEYLAR_2                                                      | 0.131163917  | #N/A                   |
| _EHLGPGSS[Phospho (STY)]QEM[Oxidation (M)]ER_2                             | -0.224916345 | Q03517_S556_M1_Scg2    |
| _VPSPVS[Phospho (STY)]SEDDLQEEEQLEQAIK_3                                   | -0.115339712 | Q03517_S532_M1_Scg2    |
| _SPYFPNQYSQDK_2                                                            | 0.122801889  | #N/A                   |
| _S[Phospho (STY)]GQLGLPDEENRR_2                                            | -0.502212741 | Q03517_S287_M1_Scg2    |
| _ESKDQLSEDASK_2                                                            | 0.208324859  | #N/A                   |
| _VPSPVSEDDLQEEEQLEQAIKEHLGPGS[Phospho (STY)]SQEM[Oxidation (M)]ER_4        | 0.204390238  | Q03517_S555_M1_Scg2    |
| _FPLMYEENS[Phospho (STY)]RENPFKR_3                                         | -0.194382575 | Q03517_S176_M1_Scg2    |
| _NHFESSPLPTS[Phospho (STY)]PK_2                                            | 0.022656379  | Q03717_S804_M1_Kcnb1   |
| _SLHGSTS[Phospho (STY)]PK_2                                                | -0.028073813 | Q03717_S782_M1_Kcnb1   |
| _VQDNHLS[Phospho (STY)]PNK_2                                               | 0.016274783  | Q03717_S484_M1_Kcnb1   |
| _T[Phospho (STY)]PPRSPEK_2                                                 | -0.176513467 | Q03717_T732_M1_Kcnb1   |
| _TQS[Phospho (STY)]QPILNTK_2                                               | -0.34756995  | Q03717_S541_M1_Kcnb1   |
| _TEKNHFESSPLPTS[Phospho (STY)]PK_3                                         | 0.041118891  | Q03717_S804_M1_Kcnb1   |
| _VQDNHLS[Phospho (STY)]PNKWK_3                                             | -0.453828382 | Q03717_S484_M1_Kcnb1   |
| _DKVQDNHLS[Phospho (STY)]PNKWK_3                                           | 0.038178663  | Q03717_S484_M1_Kcnb1   |
| _SSSS[Phospho (STY)]PQHNLNVQQLQDMYSK_3                                     | 0.00238462   | Q03717_S520_M1_Kcnb1   |
| _S[Phospho (STY)]IEM[Oxidation (M)]M[Oxidation (M)]DIVVEK_2                | -0.405157726 | Q03717_S457_M1_Kcnb1   |
| _STSS[Phospho (STY)]LPPEPMEIVR_2                                           | -0.098796097 | Q03717_S15_M1_Kcnb1    |
| _NGS[Phospho (STY)]IVSMNMK_2                                               | -0.27526435  | Q03717_S444_M1_Kcnb1   |
| _EQGS[Phospho (STY)]PEKAR_2                                                | -0.052641648 | Q03717_S511_M1_Kcnb1   |
| _QNGGLEDSGS[Phospho (STY)]GDGQM[Oxidation (M)]LC[Carbamidomethyl (C)]IVR_2 | 0.126795064  | Q03719_S460_M1_Kcnd1   |
| _ETLAQLQQEFQR_2                                                            | 0.186227001  | #N/A                   |
| _VLTPELYAELR_2                                                             | 0.111631781  | #N/A                   |
| _FSEVLKR_2                                                                 | 0.176037222  | #N/A                   |
| _DLFDPIIEER_2                                                              | 0.092280669  | #N/A                   |
| _GIWHNDNK_2                                                                | 0.189982402  | #N/A                   |
| _LLIEMEQR_2                                                                | 0.314695259  | #N/A                   |
| _HGGYQPSDEHKTDLNPDLQGGDDLPNYVLSSR_5                                        | -0.530581845 | #N/A                   |
| _FC[Carbamidomethyl (C)]TGLTQIETLFK_2                                      | -0.016422872 | #N/A                   |
| _TFLVWINEEDHLR_2                                                           | 0.01260507   | #N/A                   |
| _HEKFS[Phospho (STY)]EVLKR_3                                               | 0.217718658  | Q04447_S309_M1_Ckb     |
| _NYEFM[Oxidation (M)]WNPHLGYILTC[Carbamidomethyl (C)]PSNLGTGLR_3           | 0.062171997  | #N/A                   |
| _LEQGQAIDDLM[Oxidation (M)]PAQK_2                                          | 0.076600915  | #N/A                   |
| _LAVEALSSLDGDLSSGR_2                                                       | -0.065834365 | #N/A                   |
| _HEKFS[Phospho (STY)]EVLK_2                                                | -0.468050436 | Q04447_S309_M1_Ckb     |
| _TDLNPDLQGGDDLPNYVLSSR_3                                                   | -0.239499725 | #N/A                   |
| _FPAEDEFDLSSHNNHM[Oxidation (M)]AK_3                                       | 0.176581474  | #N/A                   |

|                                                                                                   |              |                      |
|---------------------------------------------------------------------------------------------------|--------------|----------------------|
| _LGFSEVELVQM[Oxidation (M)]VVDGVK_.2                                                              | -0.373900702 | #N/A                 |
| _PFSNSHTQK_.2                                                                                     | 0.051260482  | #N/A                 |
| _LRFPAEDEFDLSSHNNHM[Oxidation (M)]AK_.4                                                           | -0.316453681 | #N/A                 |
| _SMTEAEQQQLIDHFLFDKPVSPLLASGM[Oxidation (M)]AR_.4                                                 | 0.353465759  | #N/A                 |
| _GTGGVDTAAVGGVFDVSNADR_.2                                                                         | -0.445550554 | #N/A                 |
| _HGGYQPSDEHK_.3                                                                                   | -7.90E-05    | #N/A                 |
| _RGTGGVDTAAVGGVFDVSNADR_.3                                                                        | -0.163696403 | #N/A                 |
| _QAS[Phospho (STY)]PVAFAK_.2                                                                      | -0.26160088  | Q04573_S367_M1_Npy1r |
| _QAS[Phospho (STY)]PVAFAK_.2                                                                      | -0.194364176 | Q04573_S367_M1_Npy1r |
| _TS[Phospho (STY)]LKQAS[Phospho (STY)]PVAFAK_.2                                                   | -0.082785545 | Q04573_S362_M2_Npy1r |
| _TS[Phospho (STY)]LKQAS[Phospho (STY)]PVAFAK_.3                                                   | 0.286035702  | Q04573_S362_M2_Npy1r |
| _S[Phospho (STY)]FDHLISDTK_.2                                                                     | -0.360408437 | Q04690_S2545_M1_Nf1  |
| _KVS[Phospho (STY)]VSESNVLLDEEVLTDPK_.3                                                           | 0.117423436  | Q04690_S2599_M1_Nf1  |
| _SFS[Phospho (STY)]PGSYER_.2                                                                      | 0.202588317  | Q04690_S2190_M1_Nf1  |
| _SSSGLATYS[Phospho (STY)]PPM[Oxidation (M)]GAVSER_.2                                              | -0.201256852 | Q04690_S866_M1_Nf1   |
| _KS[Phospho (STY)]FDHLISDTK_.2                                                                    | -0.357201678 | Q04690_S2545_M1_Nf1  |
| _SM[Oxidation (M)]S[Phospho (STY)]LDM[Oxidation (M)]GQPSQANTK_.2                                  | 0.073157982  | Q04690_S2525_M1_Nf1  |
| _SAGS[Phospho (STY)]FKR_.2                                                                        | -0.542977212 | Q04690_S2831_M1_Nf1  |
| _GSEGYLAATYPAVGQTS[Phospho (STY)]PR_.2                                                            | 0.138435876  | Q04690_S2517_M1_Nf1  |
| _KS[Phospho (STY)]M[Oxidation (M)]SLDMGQPSQANTK_.2                                                | -0.010833302 | Q04690_S2523_M1_Nf1  |
| _SMS[Phospho (STY)]LDMGQPSQANTKK_.2                                                               | 0.122964622  | Q04690_S2525_M1_Nf1  |
| _KIS[Phospho (STY)]TEDINK_.2                                                                      | -0.000303278 | Q04735_S110_M1_Cdk16 |
| _KIS[Phospho (STY)]TEDINKR_.2                                                                     | -0.112587929 | Q04735_S110_M1_Cdk16 |
| _QLS[Phospho (STY)]JMTLR_.2                                                                       | -0.064129199 | Q04735_S12_M1_Cdk16  |
| _AS[Phospho (STY)]PGPGELGK_.2                                                                     | -0.089455595 | Q04888_S45_M1_Sox10  |
| _[Acetyl (Protein N-term)]AEEQDLS[Phospho (STY)]EVELSPVGSEEP_.2                                   | -0.067035463 | Q04888_S8_M1_Sox10   |
| _RAS[Phospho (STY)]LSDIGFGK_.2                                                                    | -0.029289075 | Q04899_S109_M1_Cdk18 |
| _RFS[Phospho (STY)]M[Oxidation (M)]EDLNKR_.3                                                      | -0.183412211 | Q04899_S66_M1_Cdk18  |
| _RFS[Phospho (STY)]MEDLNK_.2                                                                      | 0.278859122  | Q04899_S66_M1_Cdk18  |
| _AS[Phospho (STY)]LSDIGFGK_.2                                                                     | 0.027283203  | Q04899_S109_M1_Cdk18 |
| _FS[Phospho (STY)]MEDLNK_.2                                                                       | 0.334208385  | Q04899_S66_M1_Cdk18  |
| _SS[Phospho (STY)]DQAVPAIPTSNYSYK_.2                                                              | -0.202869809 | Q05512_S409_M1_Mark2 |
| _SRNS[Phospho (STY)]PLLR_.2                                                                       | -0.234131188 | Q05512_S483_M1_Mark2 |
| _RSS[Phospho (STY)]DQAVPAIPTSNYSYK_.3                                                             | -0.213246075 | Q05512_S409_M1_Mark2 |
| _S[Phospho (STY)]SELEGDTITLKPR_.2                                                                 | 0.031909488  | Q05512_S365_M1_Mark2 |
| _DQQLPYGVTPAS[Phospho (STY)]PSGHSQGR_.3                                                           | 0.199129487  | Q05512_S616_M1_Mark2 |
| _NS[Phospho (STY)]PLLR_.2                                                                         | 0.026764725  | Q05512_S483_M1_Mark2 |
| _PSADLTNSSAPS[Phospho (STY)]PSHK_.2                                                               | -0.154233564 | Q05512_S390_M1_Mark2 |
| _GRNS[Phospho (STY)]ATSADEQPHIGNYR_.3                                                             | 0.218333585  | Q05512_S40_M1_Mark2  |
| _VPVAS[Phospho (STY)]PSAHNISSSSGAPDR_.3                                                           | -0.434038478 | Q05512_S566_M1_Mark2 |
| _NSATS[Phospho (STY)]ADEQPHIGNYR_.2                                                               | -0.362586779 | Q05512_S43_M1_Mark2  |
| _ELGVGLALR_.2                                                                                     | 0.160865577  | #N/A                 |
| _[Acetyl (Protein N-term)]ASLKDLEGK_.2                                                            | -0.187965456 | #N/A                 |
| _M[Oxidation (M)]AAM[Oxidation (M)]AKPDC[Carbamidomethyl (C)]IITC[Carbamidomethyl (C)]DGNNITVK_.3 | -0.283964897 | #N/A                 |
| _M[Oxidation (M)]IVEC[Carbamidomethyl (C)]VM[Oxidation (M)]NNATC[Carbamidomethyl (C)]TR_.2        | 0.006647591  | #N/A                 |
| _TTVFSC[Carbamidomethyl (C)]NLGEKFDETTADGR_.3                                                     | -0.236047261 | #N/A                 |
| _TETVC[Carbamidomethyl (C)]TFQDGalVQHQQWDGK_.3                                                    | -0.374966876 | #N/A                 |



|                                                                       |              |                       |
|-----------------------------------------------------------------------|--------------|-----------------------|
| _KTETVC[Carbamidomethyl (C)]TFQDGLVQHQQWDGK_3                         | -0.015169776 | #N/A                  |
| _LMESHGFEEYMK_2                                                       | -0.141618825 | #N/A                  |
| _HRS[Phospho (STY)]EEENQVNLPK_3                                       | -0.210637623 | Q05915_S51_M1_Gch1    |
| _ALAVSDLNR_2                                                          | -0.410052189 | #N/A                  |
| _DFTATFGPLDSLNR_2                                                     | 0.038121886  | #N/A                  |
| _GANAVGYTNYPDNVVF_2                                                   | 0.231968752  | #N/A                  |
| _FIGPSPEVVR_2                                                         | 0.404816734  | #N/A                  |
| _AC[Carbamidomethyl (C)]TELGR_2                                       | -0.012023095 | #N/A                  |
| _DM[Oxidation (M)]TLEGDDLILEIE_2                                      | -0.039808935 | #N/A                  |
| _VVEIAPATHLDPQLR_2                                                    | 0.088287284  | #N/A                  |
| _DAHQSLATR_2                                                          | 0.473634188  | #N/A                  |
| _VFDYSEYWEGAR_2                                                       | 0.012274186  | #N/A                  |
| _AEAEQAEELSFPR_2                                                      | 0.349616109  | #N/A                  |
| _EGPEGFAR_2                                                           | 0.538023515  | #N/A                  |
| _VVHSYEELEENYTR_3                                                     | -0.185416557 | #N/A                  |
| _ADFAQAC[Carbamidomethyl (C)]QDAGVR_2                                 | -0.375228661 | #N/A                  |
| _LSLS[Phospho (STY)]TNC[Carbamidomethyl (C)]IEK_2                     | -0.309898644 | Q05A62_S56_M1_Dnal1   |
| _GQTT[Phospho (STY)]PDTEVADDVGSK_2                                    | 0.128563904  | Q05AA6_T910_M1_Drp2   |
| _EKGQTT[Phospho (STY)]PDTEVADDVGSK_3                                  | -0.111729594 | Q05AA6_T910_M1_Drp2   |
| _TSSS[Phospho (STY)]ERVS[Phospho (STY)]PGGR_2                         | 0.161788886  | Q05BC3_S135_M2_Eml1   |
| _TAS[Phospho (STY)]EGS[Phospho (STY)]EAETPEAPK_2                      | 0.18569656   | Q05CL8_S253_M2_Larp7  |
| _TAS[Phospho (STY)]EGS[Phospho (STY)]EAETPEAPKQPAK_2                  | -0.293869074 | Q05CL8_S253_M2_Larp7  |
| _DLEFC[Carbamidomethyl (C)]S[Phospho (STY)]T[Phospho (STY)]EEEKETDR_2 | -0.104901192 | Q05CL8_S334_M2_Larp7  |
| _IEPIGES[Phospho (STY)]PK_2                                           | -0.148840148 | Q05D44_S1164_M1_Eif5b |
| _SVPTVDS[Phospho (STY)]GNEDDDSSF_2                                    | -0.373913543 | Q05D44_S215_M1_Eif5b  |
| _TARPNSEAPLS[Phospho (STY)]GSEDADDSNK_3                               | -0.007416997 | Q05D44_S137_M1_Eif5b  |
| _KTARPNSEAPLS[Phospho (STY)]GSEDADDSNK_3                              | -0.132714165 | Q05D44_S137_M1_Eif5b  |
| _PNSEAPLS[Phospho (STY)]GSEDADDSNK_2                                  | -0.123071194 | Q05D44_S137_M1_Eif5b  |
| _TSFDENDS[Phospho (STY)]EELEDKDSK_2                                   | -0.318084658 | Q05D44_S114_M1_Eif5b  |
| _KTS[Phospho (STY)]FDENDS[Phospho (STY)]EELEDKDSK_3                   | -0.742353431 | Q05D44_S108_M2_Eif5b  |
| _DVAQIFNNILR_2                                                        | -0.41129773  | #N/A                  |
| _VPPVQVSPLIK_2                                                        | 0.0625785    | #N/A                  |
| _ELAEAQDDSILK_2                                                       | 0.209791863  | #N/A                  |
| _YSYLKPR_2                                                            | 0.343920917  | #N/A                  |
| _YSALIIGM[Oxidation (M)]AYGAK_2                                       | -0.034615598 | #N/A                  |
| _S[Phospho (STY)]PPDGQSF_2                                            | -0.406254853 | Q06649_S414_M1_Sh3bp2 |
| _ASGIIDTLFQDR_2                                                       | -0.0688791   | #N/A                  |
| _VSTVTTHSSDSEVPSR_3                                                   | -0.042088474 | #N/A                  |
| _QQSQVLDAMQDSFAR_2                                                    | 0.035311105  | #N/A                  |
| _SDTSGHFER_2                                                          | 0.310858052  | #N/A                  |
| _GFGTDEQAIVDVVSNR_2                                                   | -0.178756111 | #N/A                  |
| _LYQAGEGR_2                                                           | -0.499664713 | #N/A                  |
| _AEALSSLHGDDQDS[Phospho (STY)]EDEVLTPEVK_3                            | 0.099537776  | Q07113_S2401_M1_Igf2r |
| _LVSFHDDS[Phospho (STY)]DELLHI_2                                      | -0.386671526 | Q07113_S2476_M1_Igf2r |
| _Acetyl (Protein N-term)]GEHS[Phospho (STY)]PDDNIIFK_2                | 0.09727747   | Q07243_S5_M1_Mtf1     |
| _ESSTNNSVS[Phospho (STY)]PSESLR_2                                     | 0.316950765  | Q08122_S203_M1_Tle3   |
| _DAPTS[Phospho (STY)]PASVASSSTPSSK_2                                  | 0.137895704  | Q08122_S286_M1_Tle3   |

|                                                                        |              |                        |
|------------------------------------------------------------------------|--------------|------------------------|
| _VS[Phospho (STY)]PAHS[Phospho (STY)]PPENGLDK_.2                       | 0.066687897  | Q08122_S263_M2_Tle3    |
| _SVVEGISSQPGSS[Phospho (STY)]PSGTVV_.2                                 | 0.027011168  | Q08274_S659_M1_Dmwd    |
| _YHS[Phospho (STY)]LGNISR_.2                                           | -0.400262323 | Q08274_S537_M1_Dmwd    |
| _TLPGT[Phospho (STY)]PGAT[Phospho (STY)]PPASGSSR_.2                    | -0.366622881 | Q08274_T457_M2_Dmwd    |
| _RYHS[Phospho (STY)]LGNISR_.3                                          | -0.491403214 | Q08274_S537_M1_Dmwd    |
| _AFTDEETEAQAGQASWPRS[Phospho (STY)]PSK_.3                              | 0.207303204  | Q08274_S643_M1_Dmwd    |
| _LGDPDGAGEPPST[Phospho (STY)]PSGLGAGGDR_.2                             | 0.036481786  | Q08274_T112_M1_Dmwd    |
| _GGSGGNSS[Phospho (STY)]NDKLSGPAPR_.2                                  | -0.050495953 | Q08274_S551_M1_Dmwd    |
| _SNS[Phospho (STY)]LPHPAGGGK_.2                                        | -0.060132878 | Q08274_S487_M1_Dmwd    |
| _S[Phospho (STY)]IDLNKPIDKR_.3                                         | 0.015618989  | Q08274_S145_M1_Dmwd    |
| _LLPVQENFLK_.2                                                         | 0.100986097  | #N/A                   |
| _SGYIEANELK_.2                                                         | -0.273319664 | #N/A                   |
| _EM[Oxidation (M)]NIQQLTTYR_.2                                         | -0.30774141  | #N/A                   |
| _ELENFFQELEK_.2                                                        | 0.068282107  | #N/A                   |
| _SVMSLAEAGK_.2                                                         | -0.31386247  | #N/A                   |
| _GGYST[Phospho (STY)]PQTLANR_.2                                        | -0.276541648 | Q08460_T1061_M1_Kcnma1 |
| _LEDEQPPTLS[Phospho (STY)]PK_.2                                        | 0.174041156  | Q08460_S711_M1_Kcnma1  |
| _RLEDEQPPTLS[Phospho (STY)]PK_.2                                       | 0.030811112  | Q08460_S711_M1_Kcnma1  |
| _SS[Phospho (STY)]PDNSPVHGMLR_.2                                       | 0.407668186  | Q08460_S924_M1_Kcnma1  |
| _DSVSS[Phospho (STY)]VSDVSQYR_.2                                       | -0.036585727 | Q08509_S58_M1_Eps8     |
| _QNSSSS[Phospho (STY)]DSGGSIVR_.2                                      | 0.393459721  | Q08509_S661_M1_Eps8    |
| _RKS[Phospho (STY)]QMEEVQDELFR_.3                                      | -0.403292054 | Q08509_S684_M1_Eps8    |
| _EGINPGYDDY[Phospho (STY)]ADSDEDQHDAYLER_.3                            | 0.109066874  | Q08943_Y441_M1_Ssrp1   |
| _SQTAPEAGNDTGNEAIGGNVNK_.2                                             | -0.046178011 | #N/A                   |
| _TAS[Phospho (STY)]PSPLRPDAPVEK_.2                                     | -0.348872254 | Q09XV5_S1997_M1_Ch8    |
| _GT[Phospho (STY)]PQT[Phospho (STY)]PKDDPVLTLNLR_.3                    | -0.035415128 | Q0GA42_T821_M2_Cnnm1   |
| _SDGLRS[Phospho (STY)]PGEVVYLR_.3                                      | 0.016123264  | Q0GA42_S850_M1_Cnnm1   |
| _SFSEDAVTDSS[Phospho (STY)]GSGTLPR_.2                                  | 0.194528754  | Q0GNC1_S1226_M1_Inf2   |
| _AVLLASDAQAC[Carbamidomethyl (C)]TLEEVVER_.2                           | -0.161254553 | #N/A                   |
| _ALS[Phospho (STY)]LPETLTSK_.2                                         | -0.12758641  | Q0KK59_S1242_M1_Unc79  |
| _VDS[Phospho (STY)]PGKPAPR_.2                                          | 0.168253011  | Q0KK59_S1596_M1_Unc79  |
| _FKAFS[Phospho (STY)]GEGQK_.2                                          | -0.540756858 | Q0KL01_S216_M1_Ubxn2b  |
| _STPATC[Carbamidomethyl (C)]RS[Phospho (STY)]PRT[Phospho (STY)]PPHR_.3 | -0.170375632 | Q0KL01_S56_M2_Ubxn2b   |
| _AFS[Phospho (STY)]GEGQK_.2                                            | -0.163578367 | Q0KL01_S216_M1_Ubxn2b  |
| _SDDSAAT[Phospho (STY)]PQDETIEER_.2                                    | -0.044243499 | Q0KL02_T1824_M1_Trio   |
| _NFLNALTS[Phospho (STY)]PIEYQR_.2                                      | -0.312665588 | Q0KL02_S2282_M1_Trio   |
| _SADAGSQKDS[Phospho (STY)]DDSAATPQDETIEER_.3                           | -0.193411939 | Q0KL02_S1818_M1_Trio   |
| _SARS[Phospho (STY)]PS[Phospho (STY)]PSTGTR_.2                         | -0.403792246 | Q0P557_S244_M2_Spata18 |
| _SNS[Phospho (STY)]PC[Carbamidomethyl (C)]TTVAK_.2                     | -0.242836342 | Q0P557_S273_M1_Spata18 |
| _SADS[Phospho (STY)]PPGSSGQALSLAPAER_.2                                | 0.000922625  | Q0P5V2_S597_M1_Sobp    |
| _GS[Phospho (STY)]PPINSLR_.2                                           | 0.001866883  | Q0P5V9_S408_M1_Slc45a4 |
| _S[Phospho (STY)]M[Oxidation (M)]SDLYDLQQR_.2                          | -0.124786899 | Q0P5V9_S472_M1_Slc45a4 |
| _LGVSVS[Phospho (STY)]PSR_.2                                           | 0.289036547  | Q0P678_S530_M1_Zc3h18  |
| _KRPLS[Phospho (STY)]PQSK_.2                                           | -0.041665585 | Q0P678_S888_M1_Zc3h18  |
| _KANLS[Phospho (STY)]PDR_.2                                            | -0.374535012 | Q0P678_S847_M1_Zc3h18  |
| _ANLS[Phospho (STY)]PDRGSR_.2                                          | 0.301748212  | Q0P678_S847_M1_Zc3h18  |
| _M[Oxidation (M)]GS[Phospho (STY)]PKPER_.2                             | 0.183894487  | Q0P678_S863_M1_Zc3h18  |

|                                                                                        |              |                       |
|----------------------------------------------------------------------------------------|--------------|-----------------------|
| _ANLS[Phospho (STY)]PDR_.2                                                             | 0.132626615  | Q0P678_S847_M1_Zc3h18 |
| _S[Phospho (STY)]PQPPSR_.2                                                             | -0.048756816 | Q0P678_S483_M1_Zc3h18 |
| _SQDQDS[Phospho (STY)]EAHELRS_.2                                                       | 0.166957049  | Q0P678_S80_M1_Zc3h18  |
| _VQSQEETRS[Phospho (STY)]DEEDRASEPK_.3                                                 | 0.325376313  | Q0P678_S64_M1_Zc3h18  |
| _S[Phospho (STY)]LGDASPSAPESVGAR_.2                                                    | -0.233096996 | Q0PHV7_S165_M1_Dact3  |
| _GRS[Phospho (STY)]VEQS[Phospho (STY)]PPR_.2                                           | -0.23625083  | Q0PHV7_S370_M2_Dact3  |
| _SQS[Phospho (STY)]ETSLGR_.2                                                           | -0.024591651 | Q0PHV7_S409_M1_Dact3  |
| _AFSFPVS[Phospho (STY)]PER_.2                                                          | -0.019161198 | Q0PHV7_S10_M1_Dact3   |
| _PRPPEAS[Phospho (STY)]PPPGGAR_.2                                                      | -0.257235491 | Q0PHV7_S290_M1_Dact3  |
| _SFS[Phospho (STY)]APYPTAAAGAETC[Carbamidomethyl (C)]SSAER_.2                          | -0.297452505 | Q0PHV7_S188_M1_Dact3  |
| _GRS[Phospho (STY)]VEQS[Phospho (STY)]PPRER_.3                                         | -0.48924208  | Q0PHV7_S370_M2_Dact3  |
| _GASSSS[Phospho (STY)]GVVVQVR_.2                                                       | -0.116960412 | Q0VBF8_S29_M1_Stum    |
| _DAETAAAAAVALAADPR_.2                                                                  | -0.278183435 | #N/A                  |
| _SLS[Phospho (STY)]PGGAALGYR_.2                                                        | -0.373300427 | Q0VBL3_S293_M1_Rbm15  |
| _LHSYSS[Phospho (STY)]PSTK_.2                                                          | -0.164092788 | Q0VBL3_S127_M1_Rbm15  |
| _HLDRS[Phospho (STY)]PESERPR_.3                                                        | 0.099182947  | Q0VBL3_S655_M1_Rbm15  |
| _S[Phospho (STY)]RS[Phospho (STY)]PLDKDAYAPSSSVVGTSVGSHR_.3                            | 0.240913139  | Q0VBL3_S256_M2_Rbm15  |
| _HC[Carbamidomethyl (C)]T[Phospho (STY)]PS[Phospho (STY)]PDRS[Phospho (STY)]PELSSNR_.3 | -0.334836976 | Q0VBL3_S670_M3_Rbm15  |
| _DRT[Phospho (STY)]PPLLYR_.2                                                           | -0.59683948  | Q0VBL3_T567_M1_Rbm15  |
| _KSEPKVDSS[Phospho (STY)]PR_.2                                                         | 0.12727496   | Q0VBM2_S827_M1_Fam83b |
| _TS[Phospho (STY)]APEPR_.2                                                             | -0.28791749  | Q0VGB7_S63_M1_Ppp4r2  |
| _LLQQGLAQVEAGR_.2                                                                      | -0.316429443 | #N/A                  |
| _S[Phospho (STY)]QEEAPGHR_.2                                                           | -0.259615443 | Q0VGU4_S423_M1_Vgf    |
| _QNALLFAEEEDGEAGAEDKRS[Phospho (STY)]QEEAPGHR_.4                                       | -0.083844041 | Q0VGU4_S423_M1_Vgf    |
| _SPC[Carbamidomethyl (C)]ETISS[Phospho (STY)]PSSTLESK_.2                               | 0.006617246  | Q0VGY8_S211_M1_Tanc1  |
| _QQGPPAPANDS[Phospho (STY)]DNEEDAPASSLK_.3                                             | -0.076777238 | Q0VGY8_S1436_M1_Tanc1 |
| _VLGATLSPELIQK_.2                                                                      | 0.15476093   | #N/A                  |
| _DNWEELHNR_.2                                                                          | -0.310857495 | #N/A                  |
| _LSVEGFAVDK_.2                                                                         | -0.211666083 | #N/A                  |
| _LGLQNDLFSLAR_.2                                                                       | -0.027639499 | #N/A                  |
| _AGIISTVEVLK_.2                                                                        | 0.012634379  | #N/A                  |
| _QILSADLR_.2                                                                           | 0.037904926  | #N/A                  |
| _IDFVGELNDK_.2                                                                         | -0.024707121 | #N/A                  |
| _YQGGFLISR_.2                                                                          | 0.195166259  | #N/A                  |
| _YAAVTQFEATDAR_.2                                                                      | 0.342721282  | #N/A                  |
| _DVFSPIGER_.2                                                                          | 0.081406399  | #N/A                  |
| _ETALLIDPK_.2                                                                          | 0.104853249  | #N/A                  |
| _DADSIHQYLLQR_.2                                                                       | -0.275701785 | #N/A                  |
| _AFFESHAPSAER_.2                                                                       | 0.196144475  | #N/A                  |
| _S[Phospho (STY)]PVYLTVLK_.2                                                           | 0.184846231  | Q11011_S746_M1_Npepps |
| _VALSNMNVDR_.2                                                                         | 0.046796242  | #N/A                  |
| _QM[Oxidation (M)]GFPLIYVEAEQVEDDR_.2                                                  | -0.4191791   | #N/A                  |
| _ATFDISLVVPK_.2                                                                        | 0.197634625  | #N/A                  |
| _EAS[Phospho (STY)]FEGISK_.2                                                           | -0.198252147 | Q11136_S162_M1_Pepd   |
| _YAVDDVQYTDEIASVLTSR_.2                                                                | -0.154753062 | #N/A                  |
| _NYKSS[Phospho (STY)]PEIQEPIKPLEK_.3                                                   | 0.24208188   | Q148V7_S244_M1_Relch  |
| _YS[Phospho (STY)]DDGNRETDER_.2                                                        | -0.15376389  | Q148V7_S193_M1_Relch  |

|                                                                                                |              |                         |
|------------------------------------------------------------------------------------------------|--------------|-------------------------|
| _SS[Phospho (STY)]PEIQEPIKPLEK_.2                                                              | -0.097880836 | Q148V7_S244_M1_Relch    |
| _AGS[Phospho (STY)]ISTLDSLDFAR_.2                                                              | -0.281887238 | Q148V7_S180_M1_Relch    |
| _VVPALITLSSDPEISVR_.2                                                                          | 0.091092783  | #N/A                    |
| _AGSISTLDSLDFARY[Phospho (STY)]SDDGNRETDER_.3                                                  | -0.137663934 | Q148V7_Y192_M1_Relch    |
| _ [Acetyl (Protein N-term)]AAMAPGGGGSGGVNPFLS[Phospho (STY)]DSDEDDDEVAATEDRR_.3                | 0.396522568  | Q148V7_S20_M1_Relch     |
| _QES[Phospho (STY)]TETLVVDR_.2                                                                 | 0.011429967  | Q149C2_S409_M1_Traf3ip1 |
| _RQES[Phospho (STY)]TETLVVDR_.2                                                                | 0.156224354  | Q149C2_S409_M1_Traf3ip1 |
| _NNS[Phospho (STY)]PAPPQPAPVK_.2                                                               | 0.140718323  | Q14AX6_S1079_M1_Cdk12   |
| _ETTSGTAEVPKNN[Phospho (STY)]PAPPQPAPVK_.3                                                     | -0.070256107 | Q14AX6_S1079_M1_Cdk12   |
| _RRS[Phospho (STY)]S[Phospho (STY)]SPFLSK_.2                                                   | 0.260105729  | Q14AX6_S331_M2_Cdk12    |
| _RQS[Phospho (STY)]IS[Phospho (STY)]PPYKEPSAYQSSTR_.3                                          | 0.143972099  | Q14AX6_S273_M2_Cdk12    |
| _S[Phospho (STY)]RS[Phospho (STY)]PAYSR_.2                                                     | 0.05883084   | Q14AX6_S356_M2_Cdk12    |
| _SVLSGDDSTGSEPPLS[Phospho (STY)]PPER_.2                                                        | -0.340650863 | Q14B80_S557_M1_Kcnc2    |
| _TELNM[Oxidation (M)]AC[Carbamidomethyl (C)]NSTQS[Phospho (STY)]DTC[Carbamidomethyl (C)]LGK_.2 | -0.28564656  | Q14B80_S526_M1_Kcnc2    |
| _AGS[Phospho (STY)]RDAAQERPSGPGGR_.3                                                           | -0.697561091 | Q14BB9_S82_M1_Map6d1    |
| _TVYVLPVGDAADAVVATTSYR_.2                                                                      | -0.324863268 | #N/A                    |
| _VVTTHS[Phospho (STY)]SGWDPS[Phospho (STY)]PGASFQVPEVR_.3                                      | -0.086010974 | Q14BB9_S154_M2_Map6d1   |
| _SDVAVPLTLHGYS[Phospho (STY)]DPGSEESGADC[Carbamidomethyl (C)]SVSR_.3                           | 0.012379491  | Q14BB9_S34_M1_Map6d1    |
| _STVEDFEANTS[Phospho (STY)]PTK_.2                                                              | -0.27546684  | Q14CH0_S792_M1_Fam171b  |
| _RDS[Phospho (STY)]KTNIWK_.2                                                                   | 0.024637427  | Q14CH0_S808_M1_Fam171b  |
| _DQTTS[Phospho (STY)]TTHINHISVK_.3                                                             | -0.228467691 | Q14CH0_S405_M1_Fam171b  |
| _HILEGGSGVIIHPGEES[Phospho (STY)]PGRK_.3                                                       | 0.275814149  | Q14CH0_S777_M1_Fam171b  |
| _KSTVEDFEANTS[Phospho (STY)]PTK_.2                                                             | -0.19850038  | Q14CH0_S792_M1_Fam171b  |
| _STVEDFEANTSPT[Phospho (STY)]KK_.2                                                             | 0.227803672  | Q14CH0_T794_M1_Fam171b  |
| _FQQPPQPEGEEDAS[Phospho (STY)]DGGR_.2                                                          | -0.150818899 | Q1HFZ0_S23_M1_Nsun2     |
| _EGVILTNEENAS[Phospho (STY)]PEQPGDEDAK_.2                                                      | 0.290802408  | Q1HFZ0_S723_M1_Nsun2    |
| _KKEGVILTNEENAS[Phospho (STY)]PEQPGDEDAK_.3                                                    | 0.202614746  | Q1HFZ0_S723_M1_Nsun2    |
| _RSS[Phospho (STY)]TSSEPTPTVK_.2                                                               | -0.366068559 | Q2KN98_S833_M1_Specc1l  |
| _SKS[Phospho (STY)]DNQISDK_.2                                                                  | 0.089300999  | Q2KN98_S171_M1_Specc1l  |
| _KGS[Phospho (STY)]SGNASEVSVAC[Carbamidomethyl (C)]LTER_.3                                     | 0.295647173  | Q2KN98_S385_M1_Specc1l  |
| _S[Phospho (STY)]KFANLGR_.2                                                                    | -0.032754536 | Q2M3X8_S111_M1_Phactr1  |
| _KLS[Phospho (STY)]QRPTVEELR_.3                                                                | -0.338397102 | Q2M3X8_S505_M1_Phactr1  |
| _SDSLVPGTHT[Phospho (STY)]PPIR_.3                                                              | -0.189113538 | Q2M3X8_T104_M1_Phactr1  |
| _RLS[Phospho (STY)]QRPTAELEQR_.3                                                               | 0.233941545  | Q2M3X8_S467_M1_Phactr1  |
| _SKS[Phospho (STY)]DTPYLAEAR_.2                                                                | -0.198786997 | Q2M3X8_S67_M1_Phactr1   |
| _SDT[Phospho (STY)]PYLAEAR_.2                                                                  | 0.192240177  | Q2M3X8_T69_M1_Phactr1   |
| _NEQEEQEEKR_.2                                                                                 | -0.191683709 | #N/A                    |
| _GEPNVSY[Phospho (STY)]IC[Carbamidomethyl (C)]SR_.2                                            | -0.422261909 | Q2NL51_Y279_M1_Gsk3a    |
| _ [Acetyl (Protein N-term)]S[Phospho (STY)]GGGPGGGPGGSGR_.2                                    | -0.14275237  | Q2NL51_S2_M1_Gsk3a      |
| _T[Phospho (STY)]SSFAEPGGGGGGGGPGGSASGPGGTGGGK_.3                                              | -0.301784036 | Q2NL51_T19_M1_Gsk3a     |
| _KSHS[Phospho (STY)]SPSLNPDASPVTAK_.3                                                          | -0.414038332 | Q2PFD7_S1000_M1_Psd3    |
| _VLLFQTQSPEEM[Oxidation (M)]QGWINK_.2                                                          | -0.09855218  | #N/A                    |
| _IGS[Phospho (STY)]TTNPFLDIPHDPAAYK_.3                                                         | -0.381494882 | Q2PFD7_S759_M1_Psd3     |
| _DHYLEFEK_.2                                                                                   | 0.101725842  | #N/A                    |
| _SHS[Phospho (STY)]SPSLNPDASPVTAK_.2                                                           | -0.49562736  | Q2PFD7_S1000_M1_Psd3    |
| _ALYNS[Phospho (STY)]IKNEK_.2                                                                  | -0.430200585 | Q2PFD7_S719_M1_Psd3     |
| _INC[Carbamidomethyl (C)]VAAVFSAPPFPAAIGSQK_.2                                                 | -0.23667551  | #N/A                    |

|                                                                                                      |              |                         |
|------------------------------------------------------------------------------------------------------|--------------|-------------------------|
| _KDHRPET[Phospho (STY)]PGIK_.3                                                                       | 0.261489535  | Q2PFD7_T1029_M1_Psd3    |
| _LEWAVDDEEKKK_.3                                                                                     | 0.005275247  | #N/A                    |
| _DEYKPEKS[Phospho (STY)]LSDEDLK_.2                                                                   | -0.104971895 | Q2PFD7_S825_M1_Psd3     |
| _VAAAAGSGPS[Phospho (STY)]PPC[Carbamidomethyl (C)]S[Phospho (STY)]PGHDRER_.3                         | 0.053832785  | Q2TBE6_S47_M2_Pi4k2a    |
| _SAS[Phospho (STY)]ESYTSQSFQSR_.2                                                                    | -0.192149268 | Q2TBE6_S462_M1_Pi4k2a   |
| _ [Acetyl (Protein N-term)]M[Oxidation (M)]DETS[Phospho (STY)]PLVS[Phospho (STY)]PER_.2              | 0.175916756  | Q2TBE6_S5_M2_Pi4k2a     |
| _VAAAAGSGPS[Phospho (STY)]PPC[Carbamidomethyl (C)]S[Phospho (STY)]PGHDR_.2                           | -0.196717769 | Q2TBE6_S47_M2_Pi4k2a    |
| _M[Oxidation (M)]AEDEES[Phospho (STY)]PGELC[Carbamidomethyl (C)]PDVLYR_.2                            | 0.126851579  | Q2YDW2_S41_M1_Msto1     |
| _DSYIEVLLPLGTDPELR_.2                                                                                | 0.142424623  | #N/A                    |
| _IPVYEEER_.2                                                                                         | -0.222719504 | #N/A                    |
| _SLS[Phospho (STY)]ELESCLKPAESNEK_.2                                                                 | -0.275310102 | Q3B7Z2_S238_M1_Osbp     |
| _M[Oxidation (M)]LAES[Phospho (STY)]DDS[Phospho (STY)]GDEESVSQTDK_.2                                 | -7.25E-06    | Q3B7Z2_S188_M2_Osbp     |
| _TGS[Phospho (STY)]NIS[Phospho (STY)]GASSDVSLDEQYK_.2                                                | 0.205025556  | Q3B7Z2_S377_M2_Osbp     |
| _SLS[Phospho (STY)]ELESK_.2                                                                          | -0.103743632 | Q3B7Z2_S238_M1_Osbp     |
| _GATVLPANPPGS[Phospho (STY)]AGS[Phospho (STY)]GKDQC[Carbamidomethyl (C)]C[Carbamidomethyl (C)]SGK_.3 | -0.021283641 | Q3B7Z2_S333_M2_Osbp     |
| _DSGETQASSSTS[Phospho (STY)]PR_.2                                                                    | -0.195455063 | Q3KNJ2_S245_M1_Nhej1    |
| _ELYELWEEYETQSSEEAK_.2                                                                               | -0.31837981  | #N/A                    |
| _YDFEPYVSNNSWS[Phospho (STY)]PIM[Oxidation (M)]R_.2                                                  | -0.407529763 | Q3TBD2_S568_M1_Arhgap45 |
| _T[Phospho (STY)]PDSEAPDVESR_.2                                                                      | -0.209492619 | Q3TDD9_T652_M1_Ppp1r21  |
| _SGESSQLS[Phospho (STY)]QEQQ_.2                                                                      | -0.186217738 | Q3TDD9_S101_M1_Ppp1r21  |
| _T[Phospho (STY)]PDSEAPDVESREDLIK_.2                                                                 | -0.317654806 | Q3TDD9_T652_M1_Ppp1r21  |
| _LTPATLTLPEIAASGLTR_.2                                                                               | -0.066397329 | #N/A                    |
| _ENPPVEDS[Phospho (STY)]S[Phospho (STY)]DEDDKR_.2                                                    | 0.163446731  | Q3TDQ1_S495_M2_Stt3b    |
| _ENPPVEDS[Phospho (STY)]S[Phospho (STY)]DEDDKRNPGNLYDK_.3                                            | 0.297484726  | Q3TDQ1_S495_M2_Stt3b    |
| _EASYSILIR_.2                                                                                        | -0.403237451 | #N/A                    |
| _TLS[Phospho (STY)]PLDR_.2                                                                           | -0.177010421 | Q3TEL6_S414_M1_Rnf157   |
| _AQAPELQEEERPGAVGS[Phospho (STY)]PR_.3                                                               | -0.394172553 | Q3TES0_S256_M1_Iqsec3   |
| _LQTSQHS[Phospho (STY)]PK_.2                                                                         | -0.207396638 | Q3TES0_S1055_M1_Iqsec3  |
| _VQTPQS[Phospho (STY)]PHQHVPAPGAIADKEK_.4                                                            | -0.389416275 | Q3TES0_S132_M1_Iqsec3   |
| _VQTPQS[Phospho (STY)]PHQHVPAPGAIADK_.3                                                              | -0.11426473  | Q3TES0_S132_M1_Iqsec3   |
| _S[Phospho (STY)]PTLSTDTLR_.2                                                                        | -0.001412824 | Q3TES0_S646_M1_Iqsec3   |
| _GNSAQHS[Phospho (STY)]PSSLR_.2                                                                      | -0.054887553 | Q3TGW2_S110_M1_Eepd1    |
| _GNSAQHS[Phospho (STY)]PSSLRR_.3                                                                     | -0.126695705 | Q3TGW2_S110_M1_Eepd1    |
| _EHGPFRRS[Phospho (STY)]VEDLVR_.3                                                                    | -0.131316632 | Q3TGW2_S173_M1_Eepd1    |
| _S[Phospho (STY)]VEDLVR_.2                                                                           | 0.079826838  | Q3TGW2_S173_M1_Eepd1    |
| _LNGTDPEDVIR_.2                                                                                      | 0.171526475  | #N/A                    |
| _GNFNYIEFTR_.2                                                                                       | -0.136293088 | #N/A                    |
| _FTDEEVDELYR_.2                                                                                      | -0.009333569 | #N/A                    |
| _ATSNVFAM[Oxidation (M)]FDQSQIQEFK_.2                                                                | -0.607348676 | #N/A                    |
| _EAFNMIDQNR_.2                                                                                       | 0.28923922   | #N/A                    |
| _RAEAQALLQDYVSTQS[Phospho (STY)]AEE_.2                                                               | 0.198512325  | Q3THG9_S409_M1_Aarsd1   |
| _ELS[Phospho (STY)]LDDPEVEQVR_.2                                                                     | 0.226604881  | Q3THG9_S174_M1_Aarsd1   |
| _GAQADHFTESPLS[Phospho (STY)]PGSQVQVR_.3                                                             | -0.168345545 | Q3THG9_S88_M1_Aarsd1    |
| _AEAQALLQDYVSTQS[Phospho (STY)]AEE_.2                                                                | -0.053265605 | Q3THG9_S409_M1_Aarsd1   |
| _TLNM[Oxidation (M)]TTS[Phospho (STY)]PEEK_.2                                                        | -0.317991416 | Q3THK7_S332_M1_Gmps     |
| _TLNMTTS[Phospho (STY)]PEEK_.2                                                                       | -0.015979783 | Q3THK7_S332_M1_Gmps     |
| _NFLYDIAGC[Carbamidomethyl (C)]SGNFTVQNR_.2                                                          | -0.347667344 | #N/A                    |

|                                                                                   |              |                         |
|-----------------------------------------------------------------------------------|--------------|-------------------------|
| _VIC[Carbamidomethyl (C)]AEEPYIC[Carbamidomethyl (C)]K_.2                         | -0.230867565 | #N/A                    |
| _QADFEAHNLR_.3                                                                    | -0.418206348 | #N/A                    |
| _FVIGGPQGDAGLTGR_.2                                                               | 0.080371979  | #N/A                    |
| _TQVTVQYMQDR_.2                                                                   | 0.006493928  | #N/A                    |
| _EADEDS[Phospho (STY)]EPEREVR_.2                                                  | -0.268522051 | Q3TIX9_S81_M1_Usp39     |
| _EREADEDS[Phospho (STY)]EPEREVR_.3                                                | -0.470147676 | Q3TIX9_S81_M1_Usp39     |
| _EADEDS[Phospho (STY)]EPER_.2                                                     | -0.178289669 | Q3TIX9_S81_M1_Usp39     |
| _EREADEDS[Phospho (STY)]EPER_.2                                                   | -0.32394161  | Q3TIX9_S81_M1_Usp39     |
| _DSEAGSST[Phospho (STY)]PTTSTR_.2                                                 | -0.418317119 | Q3TKT4_T1390_M1_Smarca4 |
| _NFSLLSFGEEAEEEEVENR_.2                                                           | 0.344426631  | #N/A                    |
| _S[Phospho (STY)]LEDVKPR_.2                                                       | -0.439000772 | Q3TLH4_S853_M1_Prrc2c   |
| _SFS[Phospho (STY)]SQRPGVDR_.2                                                    | -0.218308497 | Q3TLH4_S1516_M1_Prrc2c  |
| _SESS[Phospho (STY)]DFEVVPK_.2                                                    | -0.548283145 | Q3TLH4_S1222_M1_Prrc2c  |
| _S[Phospho (STY)]VSHGSNHAQNAEEQR_.3                                               | 0.077641025  | Q3TLH4_S899_M1_Prrc2c   |
| _SPS[Phospho (STY)]DNSLNTTGII[Carbamidomethyl (C)]R_.2                            | -0.004006429 | Q3TLI0_S684_M1_Trappc10 |
| _AKEELGEGS[Phospho (STY)]R_.2                                                     | 0.195075825  | Q3TMP8_S289_M1_Tmem38a  |
| _AKEELGEGS[Phospho (STY)]RK_.3                                                    | 0.30216044   | Q3TMP8_S289_M1_Tmem38a  |
| _VC[Carbamidomethyl (C)]HLGDQLEGVNT[Phospho (STY)]PR_.3                           | -0.27211942  | Q3TPX4_T122_M1_Exoc5    |
| _ADS[Phospho (STY)]ES[Phospho (STY)]EEDEQESEEV_.2                                 | -0.370951123 | Q3TQI7_S15_M2_          |
| _VGDTKEPEPERS[Phospho (STY)]PPNR_.3                                               | -0.43386319  | Q3TQI7_S261_M1_         |
| _RRADS[Phospho (STY)]ES[Phospho (STY)]EEDEQESEEV_.2                               | 0.016806967  | Q3TQI7_S15_M2_          |
| _RADS[Phospho (STY)]ES[Phospho (STY)]EEDEQESEEV_.2                                | -0.252315934 | Q3TQI7_S15_M2_          |
| _GKGPEQS[Phospho (STY)]PQGRPVGTTR_.3                                              | -0.222849627 | Q3TR08_S209_M1_Fndc4    |
| _DEGGS[Phospho (STY)]PEGASPSTASEVEEEK_.2                                          | -0.387274513 | Q3TRM4_S1319_M1_Pnpla6  |
| _ESPGGC[Carbamidomethyl (C)]TS[Phospho (STY)]PGSQEK_.2                            | 0.222406874  | Q3TRR0_S257_M1_Map9     |
| _S[Phospho (STY)]PSAATSSHYLGLK_.2                                                 | -0.219323109 | Q3TRR0_S389_M1_Map9     |
| _KQS[Phospho (STY)]LEPDKADHIR_.3                                                  | -0.276545053 | Q3TRR0_S414_M1_Map9     |
| _STS[Phospho (STY)]SGETSSGLDADGHFKPSPQPR_.3                                       | -0.085067364 | Q3TRR0_S160_M1_Map9     |
| _RTS[Phospho (STY)]FQDELIR_.2                                                     | -0.167849336 | Q3TRR0_S23_M1_Map9      |
| _M[Oxidation (M)]NDFHIS[Phospho (STY)]DDEEKNSPR_.3                                | -0.060783023 | Q3TRR0_S79_M1_Map9      |
| _QNSPVT[Phospho (STY)]PGSS[Phospho (STY)]PLAQR_.2                                 | 0.069508338  | Q3TTA7_S480_M2_Cblb     |
| _GLS[Phospho (STY)]LTETELEELR_.2                                                  | -0.246504042 | Q3TVA9_S50_M1_Ccdc136   |
| _TQS[Phospho (STY)]PGGC[Carbamidomethyl (C)]SVEAVLAR_.2                           | -0.163060419 | Q3TVI4_S75_M1_Hexim2    |
| _GREPS[Phospho (STY)]SSQPVVPVDVEDQAK_.3                                           | 0.170917983  | Q3TVI8_S164_M1_Pbxip1   |
| _LTSVSS[Phospho (STY)]S[Phospho (STY)]VDFDQR_.2                                   | 0.07714202   | Q3TWI9_S114_M2_Tmem63b  |
| _SHS[Phospho (STY)]PLPAPPSK_.2                                                    | -0.428852444 | Q3TWW8_S303_M1_Srsf6    |
| _LIVENLSSR_.2                                                                     | -0.2432197   | #N/A                    |
| _ARS[Phospho (STY)]MS[Phospho (STY)]PPPK_.2                                       | 0.073598121  | Q3TWW8_S314_M2_Srsf6    |
| _S[Phospho (STY)]M[Oxidation (M)]S[Phospho (STY)]PPPK_.2                          | -0.280790413 | Q3TWW8_S314_M2_Srsf6    |
| _SRS[Phospho (STY)]QS[Phospho (STY)]RS[Phospho (STY)]HS[Phospho (STY)]PLPAPPSK_.3 | 0.020799709  | Q3TWW8_S297_M3_Srsf6    |
| _ARS[Phospho (STY)]MS[Phospho (STY)]PPPKR_.3                                      | -0.024452466 | Q3TWW8_S314_M2_Srsf6    |
| _TVGT[Phospho (STY)]PIASVPGSTNTGTVPGSEK_.2                                        | -0.025406577 | Q3TXS7_T273_M1_Psmd1    |
| _TPDAS[Phospho (STY)]PEPK_.2                                                      | 0.12401198   | Q3TXS7_S315_M1_Psmd1    |
| _TASAVAGKT[Phospho (STY)]PDAS[Phospho (STY)]PEPKDQTLK_.3                          | -0.54017531  | Q3TXS7_S315_M2_Psmd1    |
| _IEEEQEPEPPEPFEYIDD_.2                                                            | 0.082304353  | #N/A                    |
| _TASAVAGKT[Phospho (STY)]PDAS[Phospho (STY)]PEPK_.2                               | -0.221030473 | Q3TXS7_S315_M2_Psmd1    |
| _AAVESLGFILFR_.2                                                                  | -0.420596251 | #N/A                    |

|                                                                                                            |              |                        |
|------------------------------------------------------------------------------------------------------------|--------------|------------------------|
| _TPEQC[Carbamidomethyl (C)]PSVVSLSESYNPHVR_.3                                                              | -0.119493193 | #N/A                   |
| _WAPPLER_.2                                                                                                | -0.071906111 | #N/A                   |
| _DPPVVD[Carbamidomethyl (C)]TC[Carbamidomethyl (C)]FGLPR_.2                                                | -0.058822989 | #N/A                   |
| _YIEDAIGESAK_.2                                                                                            | 0.142060046  | #N/A                   |
| _GGHVVVQK_.2                                                                                               | -0.185598459 | #N/A                   |
| _KYIEDAIGESAK_.2                                                                                           | -0.182200127 | #N/A                   |
| _HIM[Oxidation (M)]STTNVR_.2                                                                               | 0.121988301  | #N/A                   |
| _QPWAEPEEM[Oxidation (M)]S[Phospho (STY)]EEK_.2                                                            | -0.218626365 | Q3TXX4_S504_M1_Slc17a7 |
| _C[Carbamidomethyl (C)]GFVGHDLQAGS[Phospho (STY)]DES[Phospho (STY)]EMEDEAEPPGAPPAPPPSYGATHSTVQPPRPPPPVR_.5 | -0.55212968  | Q3TXX4_S519_M2_Slc17a7 |
| _RQEGAETLELS[Phospho (STY)]ADGRPVTTHTTR_.4                                                                 | 0.167124768  | Q3TXX4_S36_M1_Slc17a7  |
| _DTDAYSDL[Phospho (STY)]DGEK_.2                                                                            | 0.117436422  | Q3TY60_S117_M1_Fam131b |
| _NS[Phospho (STY)]NAYGIGALAK_.2                                                                            | 0.114691791  | Q3TY60_S47_M1_Fam131b  |
| _RNS[Phospho (STY)]NAYGIGALAK_.2                                                                           | -0.354778422 | Q3TY60_S47_M1_Fam131b  |
| _VSDVTSSGVQSFDEEEGDANN_.2                                                                                  | 0.082368009  | #N/A                   |
| _DLESLS[Phospho (STY)]PR_.2                                                                                | -0.005304589 | Q3TY60_S297_M1_Fam131b |
| _DTDAYSDL[Phospho (STY)]DGEKEAR_.2                                                                         | -0.296971251 | Q3TY60_S117_M1_Fam131b |
| _RDTAYSDL[Phospho (STY)]DGEKEAR_.3                                                                         | -0.212304021 | Q3TY60_S117_M1_Fam131b |
| _KVSDVTSSGVQS[Phospho (STY)]FDEEEGDANN_.2                                                                  | -0.153637172 | Q3TY60_S322_M1_Fam131b |
| _APTIQQHS[Phospho (STY)]HEAVRR_.3                                                                          | -0.27359638  | Q3TY60_S102_M1_Fam131b |
| _RDTAYSDL[Phospho (STY)]DGEK_.2                                                                            | 0.151366196  | Q3TY60_S117_M1_Fam131b |
| _DLESLS[Phospho (STY)]PREDP[Oxidation (M)]STALSR_.3                                                        | 0.253586902  | Q3TY60_S297_M1_Fam131b |
| _VALS[Phospho (STY)]EEEEERFER_.2                                                                           | -0.424920262 | Q3TY65_S294_M1_Ica1    |
| _ALPRDS[Phospho (STY)]LEGDDFEK_.3                                                                          | -0.323586305 | Q3TY65_S316_M1_Ica1    |
| _GKEELSASGKGS[Phospho (STY)]PR_.2                                                                          | -0.247948532 | Q3TY86_S36_M1_Aifm3    |
| _LTPQPYP[Phospho (STY)]PQDC[Carbamidomethyl (C)]VEATVC[Carbamidomethyl (C)]HVK_.3                          | 0.086829569  | Q3TY86_S63_M1_Aifm3    |
| _EELSASGKGS[Phospho (STY)]PR_.2                                                                            | 0.233265665  | Q3TY86_S36_M1_Aifm3    |
| _GTVAVGDS[Phospho (STY)]EEDGEDVFEVER_.2                                                                    | -0.245196396 | Q3TYA6_S51_M1_Mphosph8 |
| _GQS[Phospho (STY)]PPESVPEESSDVR_.2                                                                        | -0.483925669 | Q3TYD6_S1104_M1_Lmtk2  |
| _YFS[Phospho (STY)]PPPPAR_.2                                                                               | -0.047874151 | Q3TYD6_S1418_M1_Lmtk2  |
| _HSGTSPQASPALLEGS[Phospho (STY)]PTAPTDPILKPEETK_.4                                                         | 0.352699551  | Q3TYD6_S797_M1_Lmtk2   |
| _NAGFTSALLES[Phospho (STY)]PQR_.2                                                                          | -0.440122374 | Q3TYD6_S742_M1_Lmtk2   |
| _SSS[Phospho (STY)]SLLASPSHIAAK_.2                                                                         | 0.104845263  | Q3TZZ7_S662_M1_Esyt2   |
| _DTSPDKGELVS[Phospho (STY)]DEEEDT_.2                                                                       | 0.043722073  | Q3U0J8_S959_M1_Tbc1d2b |
| _FNFESVPES[Phospho (STY)]PGEK_.2                                                                           | -0.168091906 | Q3U0M1_S953_M1_Trappc9 |
| _VESRPTNPS[Phospho (STY)]EGS[Phospho (STY)]KTGDLGHVK_.3                                                    | 0.00303606   | Q3U0M1_S840_M2_Trappc9 |
| _AAS[Phospho (STY)]GGAALASPGPGSGSGTPTGSGGK_.2                                                              | 0.027739339  | Q3U0S6_S286_M1_Rasip1  |
| _SVS[Phospho (STY)]ELSLQGR_.2                                                                              | 0.205239185  | Q3U0S6_S322_M1_Rasip1  |
| _GS[Phospho (STY)]PQQIDHAK_.2                                                                              | 0.070540652  | Q3U0V1_S481_M1_Khsrp   |
| _IINDLLQSLR_.2                                                                                             | 0.04385867   | #N/A                   |
| _SVSLTGAPESVQK_.2                                                                                          | 0.241782694  | #N/A                   |
| _VQIS[Phospho (STY)]PDSGGLPER_.2                                                                           | -0.280047811 | Q3U0V1_S182_M1_Khsrp   |
| _IGGDAATTVNNNTPDFGFGGQK_.2                                                                                 | -0.046330613 | #N/A                   |
| _SSSS[Phospho (STY)]C[Carbamidomethyl (C)]NDLYATVK_.2                                                      | -0.002586259 | Q3U1F9_S351_M1_Pag1    |
| _RPS[Phospho (STY)]JEEPEPDYEAQTLNR_.3                                                                      | -0.317705111 | Q3U1F9_S379_M1_Pag1    |
| _HSANAEISLGT[Phospho (STY)]C[Carbamidomethyl (C)]SDLDEESPPVPVK_.3                                          | 0.17623068   | Q3U1F9_T245_M1_Pag1    |
| _TTATLDPTS[Phospho (STY)]PAPGEGPSGR_.2                                                                     | -0.224896635 | Q3U1J1_S180_M1_Tfpt    |
| _EGLS[Phospho (STY)]PSQR_.2                                                                                | -0.162272933 | Q3U1J1_S167_M1_Tfpt    |

|                                                                               |              |                         |
|-------------------------------------------------------------------------------|--------------|-------------------------|
| _LLPYPTLAS[Phospho (STY)]PPFD_.2                                              | 0.215861543  | Q3U1J1_S255_M1_Tfpt     |
| _ASKIS[Phospho (STY)]S[Phospho (STY)]EDGEETR_.2                               | 0.077022724  | Q3U1T9_S516_M2_Dennd1b  |
| _DGVLS[Phospho (STY)]PSSQAQLSSR_.2                                            | -0.291448322 | Q3U1V6_S365_M1_Uevld    |
| _SS[Phospho (STY)]PPASPTIIPR_.2                                               | -0.206924801 | Q3U1V8_S541_M1_Map3k9   |
| _S[Phospho (STY)]APSS[Phospho (STY)]PAPR_.2                                   | 0.198721748  | Q3U1Y4_S732_M2_Dennd4b  |
| _SGS[Phospho (STY)]LGSAR_.2                                                   | 0.475752557  | Q3U1Y4_S961_M1_Dennd4b  |
| _SAPPS[Phospho (STY)]PPPPGTR_.2                                               | 0.100967107  | Q3U1Z5_S38_M1_Gpsm3     |
| _RLS[Phospho (STY)]ADLR_.2                                                    | -0.201069424 | Q3U214_S769_M1_Mast3    |
| _RGQS[Phospho (STY)]ADKLGLGTSE_.3                                             | -0.431708021 | Q3U214_S1237_M1_Mast3   |
| _DPLEEIQLNDLDESQPPAPGS[Phospho (STY)]PESR_.3                                  | -0.091455028 | Q3U214_S370_M1_Mast3    |
| _KQEAQVEVS[Phospho (STY)]FDEEPGPPR_.2                                         | -0.166682877 | Q3U214_S1289_M1_Mast3   |
| _GQS[Phospho (STY)]ADKLGLGTSE_.2                                              | -0.392374359 | Q3U214_S1237_M1_Mast3   |
| _QEAQVEVS[Phospho (STY)]FDEEPGPPR_.2                                          | 0.076277766  | Q3U214_S1289_M1_Mast3   |
| _SFS[Phospho (STY)]EDREDGWGQSLGDR_.3                                          | -0.137742619 | Q3U214_S750_M1_Mast3    |
| _S[Phospho (STY)]SESVVDEDGGR_.2                                               | -0.043912774 | Q3U214_S156_M1_Mast3    |
| _HLGS[Phospho (STY)]EDDETNDDESSTEIPQFSSC[Carbamidomethyl (C)]SHR_.4           | 0.075568449  | Q3U214_S702_M1_Mast3    |
| _VY[Phospho (STY)]SSSEFLAVQPTPTFAER_.2                                        | -0.168875553 | Q3U214_Y730_M1_Mast3    |
| _QQS[Phospho (STY)]LGGSESPGPVPR_.2                                            | -0.105784269 | Q3U2I3_S510_M1_Fam160a2 |
| _ERS[Phospho (STY)]PS[Phospho (STY)]PPAVQC[Carbamidomethyl (C)]K_.2           | -0.306654277 | Q3U3C9_S826_M2_Gse1     |
| _YSPDEM[Oxidation (M)]NNS[Phospho (STY)]PNFEEK_.2                             | 0.027389112  | Q3U3C9_S857_M1_Gse1     |
| _RQT[Phospho (STY)]PS[Phospho (STY)]PR_.2                                     | -0.025289024 | Q3U3C9_S840_M2_Gse1     |
| _SSS[Phospho (STY)]WGSTEQLK_.2                                                | 0.182301037  | Q3U3E2_S268_M1_Fam117b  |
| _TS[Phospho (STY)]PTVATQTGASVTSTR_.2                                          | 0.093987272  | Q3U3E2_S102_M1_Fam117b  |
| _SPS[Phospho (STY)]APVC[Carbamidomethyl (C)]K_.2                              | -0.205623684 | Q3U3E2_S190_M1_Fam117b  |
| _SSS[Phospho (STY)]WGSTEQLKEIAK_.2                                            | -0.14216008  | Q3U3E2_S268_M1_Fam117b  |
| _RSPS[Phospho (STY)]APVC[Carbamidomethyl (C)]K_.2                             | -0.43191467  | Q3U3E2_S190_M1_Fam117b  |
| _S[Phospho (STY)]PEQGRPSAEKR_.3                                               | -0.018506817 | Q3U3E2_S176_M1_Fam117b  |
| _SIDTQTPGGADKGS[Phospho (STY)]NNSSR_.3                                        | -0.41154752  | Q3U3E2_S399_M1_Fam117b  |
| _QQLQELGAGS[Phospho (STY)]PGPVTNK_.2                                          | -0.448188072 | Q3U3N6_S400_M1_Tepsin   |
| _S[Phospho (STY)]AESLQSLNSGLC[Carbamidomethyl (C)]PEK_.2                      | -0.404541906 | Q3U5C7_S592_M1_Prickle1 |
| _NLFQQQS[Phospho (STY)]SEVDPR_.2                                              | -0.484796102 | Q3U5C7_S433_M1_Prickle1 |
| _KS[Phospho (STY)]RSDNALNLVTER_.3                                             | -0.284002518 | Q3U5C7_S682_M1_Prickle1 |
| _SKS[Phospho (STY)]QSRPQQVK_.2                                                | -0.164298034 | Q3U5C7_S625_M1_Prickle1 |
| _S[Phospho (STY)]QSRPQQVK_.2                                                  | -0.126946756 | Q3U5C7_S625_M1_Prickle1 |
| _S[Phospho (STY)]RSDNALNLVTER_.2                                              | -0.355978313 | Q3U5C7_S682_M1_Prickle1 |
| _EGS[Phospho (STY)]PAPLEPEPGASQPK_.2                                          | -0.216425793 | Q3UCQ1_S389_M1_Foxk2    |
| _ [Acetyl (Protein N-term)]M[Oxidation (M)]EIQSGPQPGS[Phospho (STY)]PGR_.2    | -0.246292235 | #N/A                    |
| _ [Acetyl (Protein N-term)]M[Oxidation (M)]EIQSGPQPGS[Phospho (STY)]PGRAER_.2 | -0.492045269 | #N/A                    |
| _LEENGDLYPES[Phospho (STY)]P_.2                                               | 0.021487876  | Q3UDP0_S459_M1_Wdr41    |
| _LINSELGS[Phospho (STY)]PSR_.2                                                | -0.53845351  | Q3UDW8_S238_M1_Hgsnat   |
| _VTSFS[Phospho (STY)]TPPT[Phospho (STY)]PER_.2                                | -0.275445757 | Q3UE31_S289_M2_         |
| _SRS[Phospho (STY)]LS[Phospho (STY)]GTGR_.2                                   | -0.091527116 | Q3UE31_S351_M2_         |
| _SLVGS[Phospho (STY)]WLK_.2                                                   | -0.365106982 | Q3UE31_S362_M1_         |
| _SHS[Phospho (STY)]ANDSEEFFREDDSGADLHNATNLR_.4                                | -0.246851269 | Q3UE31_S324_M1_         |
| _SS[Phospho (STY)]VSS[Phospho (STY)]VGAR_.2                                   | -0.241240929 | Q3UFK8_S21_M2_Frmd8     |
| _SHRSS[Phospho (STY)]VSS[Phospho (STY)]VGAR_.2                                | -0.010516472 | Q3UFK8_S21_M2_Frmd8     |
| _TDWNEDC[Carbamidomethyl (C)]KS[Phospho (STY)]PK_.2                           | -0.341259484 | Q3UFT3_S356_M1_Garem1   |



|                                                                                       |              |                         |
|---------------------------------------------------------------------------------------|--------------|-------------------------|
| _STC[Carbamidomethyl (C)]APSS[Phospho (STY)]PPTPATLGATIK_.2                           | -0.144037365 | Q3UFT3_S493_M1_Garem1   |
| _Acetyl (Protein N-term))AAAAAAAAGDS[Phospho (STY)]DSWDADTFSM[Oxidation (M)]EDPVRK_.3 | -0.06103986  | Q3UGC7_S14_M1_Eif3j1    |
| _TFFLEALR_.2                                                                          | -0.050636037 | #N/A                    |
| _FVTNTTK_.2                                                                           | 0.140727683  | #N/A                    |
| _S[Phospho (STY)]PTNSSEIFTPAHEENV_.2                                                  | 0.067476185  | Q3UGS4_S21_M1_Mcrip1    |
| _EHL[Phospho (STY)]EPQSLR_.2                                                          | -0.440212099 | Q3UGY8_S1966_M1_Arfgef3 |
| _VAAPSSS[Phospho (STY)]PSAEAEYWR_.2                                                   | -0.045732082 | Q3UGY8_S1646_M1_Arfgef3 |
| _SGS[Phospho (STY)]TGSSLSVSVR_.2                                                      | 0.041358894  | Q3UGY8_S2090_M1_Arfgef3 |
| _YSESNFS[Phospho (STY)]VDDQDLSR_.2                                                    | 0.253286776  | Q3UGY8_S593_M1_Arfgef3  |
| _DGAESSRDS[Phospho (STY)]M[Oxidation (M)]EINEADFR_.3                                  | -0.165721734 | Q3UGY8_S471_M1_Arfgef3  |
| _SDVSDIGS[Phospho (STY)]DNC[Carbamidomethyl (C)]SLADEEQTPR_.2                         | -0.235070284 | Q3UGY8_S628_M1_Arfgef3  |
| _HSFS[Phospho (STY)]AGPELLR_.2                                                        | -0.188648539 | Q3UGY8_S2074_M1_Arfgef3 |
| _LLSPYSPQT[Phospho (STY)]QETDSIGQK_.2                                                 | -0.13979733  | Q3UH60_T56_M1_Dip2b     |
| _AGS[Phospho (STY)]LGPETPSR_.2                                                        | 0.065874154  | Q3UH66_S1797_M1_Wnk2    |
| _QSS[Phospho (STY)]LPGTGGVASDFVK_.2                                                   | -0.488278206 | Q3UH66_S1770_M1_Wnk2    |
| _YS[Phospho (STY)]APPDVYLDEIPSSPEVK_.2                                                | -0.254966089 | Q3UH66_S1713_M1_Wnk2    |
| _TSVPESIASAGTGS[Phospho (STY)]PSK_.2                                                  | 0.096047484  | Q3UH68_S523_M1_Limch1   |
| _S[Phospho (STY)]PEPEATLTFPFLDK_.2                                                    | 0.173771938  | Q3UH68_S719_M1_Limch1   |
| _QTPS[Phospho (STY)]PDVVLR_.2                                                         | 0.349109869  | Q3UH68_S217_M1_Limch1   |
| _S[Phospho (STY)]ASQDLIKK_.2                                                          | 0.200275556  | Q3UH68_S377_M1_Limch1   |
| _SRQT[Phospho (STY)]PS[Phospho (STY)]PDVVLR_.2                                        | 0.034754303  | Q3UH68_S217_M2_Limch1   |
| _DDS[Phospho (STY)]FDSLDSFGSR_.2                                                      | -0.026095317 | Q3UH68_S201_M1_Limch1   |
| _SAS[Phospho (STY)]QDLIKKEER_.3                                                       | -0.145543949 | Q3UH68_S379_M1_Limch1   |
| _SDSL[Phospho (STY)]PPR_.2                                                            | -0.08464399  | Q3UH68_S192_M1_Limch1   |
| _KETDDIDS[Phospho (STY)]PKR_.3                                                        | -0.338014295 | Q3UH68_S169_M1_Limch1   |
| _GSSDGRGS[Phospho (STY)]DSESDLPHR_.3                                                  | -0.134597535 | Q3UH68_S231_M1_Limch1   |
| _TINHQM[Oxidation (M)]ES[Phospho (STY)]PGER_.2                                        | -0.003736638 | Q3UH68_S973_M1_Limch1   |
| _HGRDDS[Phospho (STY)]FDSLDSFGSR_.3                                                   | -0.049417746 | Q3UH68_S201_M1_Limch1   |
| _LHSQDPLLS[Phospho (STY)]PER_.2                                                       | -0.307249403 | Q3UH99_S434_M1-Shisa6   |
| _ETISAIDS[Phospho (STY)]PKENTPVR_.2                                                   | 0.412799432  | Q3UH99_S247_M1-Shisa6   |
| _ILSDEQLLS[Phospho (STY)]TER_.2                                                       | -0.360384425 | Q3UH99_S422_M1-Shisa6   |
| _YVLT[Phospho (STY)]PR_.2                                                             | -0.163427462 | Q3UHB8_S90_M1_Ccdc177   |
| _SHS[Phospho (STY)]LDSLRS_.2                                                          | -0.38597531  | Q3UHB8_S231_M1_Ccdc177  |
| _RTS[Phospho (STY)]PS[Phospho (STY)]PPAR_.2                                           | 0.027058     | Q3UHB8_S209_M2_Ccdc177  |
| _NSC[Carbamidomethyl (C)]PAGSASS[Phospho (STY)]APNPLGR_.2                             | -0.075006152 | Q3UHB8_S281_M1_Ccdc177  |
| _KSHS[Phospho (STY)]LDS[Phospho (STY)]LSR_.2                                          | -0.377513983 | Q3UHB8_S231_M2_Ccdc177  |
| _SFSLGDLSHS[Phospho (STY)]PQTAQHVER_.3                                                | 0.157827162  | Q3UHB8_S310_M1_Ccdc177  |
| _DGALSSGESGASSSY[Phospho (STY)]SGESLR_.2                                              | 0.395609818  | Q3UHB8_Y254_M1_Ccdc177  |
| _DSSEATGWEEPS[Phospho (STY)]PPSIR_.2                                                  | -0.116040299 | Q3UHC0_S714_M1_Tnrc6c   |
| _AET[Phospho (STY)]PPSHQAGTQLNR_.3                                                    | 0.348929605  | Q3UHC0_T776_M1_Tnrc6c   |
| _QKDSSEATGWEEPS[Phospho (STY)]PPSIR_.3                                                | -0.106248279 | Q3UHC0_S714_M1_Tnrc6c   |
| _GDS[Phospho (STY)]PELKPR_.2                                                          | -0.343911877 | Q3UHC7_S978_M1_Dab2ip   |
| _LPS[Phospho (STY)]PTPENK_.2                                                          | 0.030689397  | Q3UHC7_S702_M1_Dab2ip   |
| _RQMS[Phospho (STY)]LTEK_.2                                                           | 0.125909166  | Q3UHC7_S895_M1_Dab2ip   |
| _QQSSSSKGDS[Phospho (STY)]PELKPR_.3                                                   | -0.562727756 | Q3UHC7_S978_M1_Dab2ip   |
| _LHLHGS[Phospho (STY)]PR_.2                                                           | -0.123456423 | Q3UHD1_S1289_M1_Adgrb1  |
| _NENVATLSVSS[Phospho (STY)]LERR_.2                                                    | -0.204636921 | Q3UHD1_S1467_M1_Adgrb1  |

|                                                                  |              |                        |
|------------------------------------------------------------------|--------------|------------------------|
| _NENVATLSVSS[Phospho (STY)]LER_.2                                | -0.260866549 | Q3UHD1_S1467_M1_Adgrb1 |
| _RPS[Phospho (STY)]LPEEEKMK_.3                                   | 0.285319642  | Q3UHD1_S1257_M1_Adgrb1 |
| _QLS[Phospho (STY)]EENANLQEYVEK_.2                               | 0.011626909  | Q3UHD3_S1286_M1_Mtus2  |
| _QLS[Phospho (STY)]EEHAVKR_.3                                    | -0.240663571 | Q3UHD3_S109_M1_Mtus2   |
| _SM[Oxidation (M)]S[Phospho (STY)]PVER_.2                        | 0.028534175  | Q3UHD3_S332_M1_Mtus2   |
| _SES[Phospho (STY)]GYGFNVR_.2                                    | -0.402744187 | Q3UHD6_S49_M1_Snx27    |
| _IVKSES[Phospho (STY)]GYGFNVR_.2                                 | -0.216517406 | Q3UHD6_S49_M1_Snx27    |
| _ALS[Phospho (STY)]TDC[Carbamidomethyl (C)]TPSGDLSPLSR_.2        | -0.20804226  | Q3UHD9_S802_M1_Agap2   |
| _GSEPRDPGS[Phospho (STY)]PR_.2                                   | -0.41242887  | Q3UHD9_S54_M1_Agap2    |
| _GAGSRLS[Phospho (STY)]WPESEGKPR_.3                              | 0.048707504  | Q3UHD9_S211_M1_Agap2   |
| _RSS[Phospho (STY)]AASLGR_.2                                     | -0.191930332 | Q3UHD9_S1172_M1_Agap2  |
| _ELLGAELRTS[Phospho (STY)]PK_.2                                  | 0.058591394  | Q3UHD9_S382_M1_Agap2   |
| _LRTDS[Phospho (STY)]QSEAVAIQAIR_.3                              | -0.013669558 | Q3UHD9_S921_M1_Agap2   |
| _FLTGS[Phospho (STY)]YQVLEK_.2                                   | -0.037198602 | Q3UHD9_S424_M1_Agap2   |
| _LKS[Phospho (STY)]FGS[Phospho (STY)]LR_.2                       | 0.002845282  | Q3UHD9_S856_M2_Agap2   |
| _SGNS[Phospho (STY)]LNKEWK_.2                                    | -0.279033509 | Q3UHD9_S684_M1_Agap2   |
| _TDS[Phospho (STY)]QSEAVAIQAIR_.2                                | 0.034217169  | Q3UHD9_S921_M1_Agap2   |
| _RTS[Phospho (STY)]LFANR_.2                                      | 0.095304984  | Q3UHD9_S642_M1_Agap2   |
| _RRS[Phospho (STY)]S[Phospho (STY)]AASLGR_.2                     | -0.133734979 | Q3UHD9_S1171_M2_Agap2  |
| _ELTLVLTaigndTANR_.2                                             | -0.033745079 | #N/A                   |
| _LS[Phospho (STY)]WPESEGKPR_.2                                   | 0.024559663  | Q3UHD9_S211_M1_Agap2   |
| _SS[Phospho (STY)]AASLGR_.2                                      | -0.273629471 | Q3UHD9_S1172_M1_Agap2  |
| _AEAAVAGLSTPGS[Phospho (STY)]LHR_.2                              | -0.040966394 | Q3UHD9_S632_M1_Agap2   |
| _AVVNSQEWTLR_.2                                                  | -0.388185667 | #N/A                   |
| _AQS[Phospho (STY)]QPESDKDHERPLPALSWAR_.4                        | 0.094687891  | Q3UHE1_S946_M1_Pitpnm3 |
| _NVLSDS[Phospho (STY)]VESSDDEFFDAR_.2                            | -0.08670353  | Q3UHE1_S27_M1_Pitpnm3  |
| _GS[Phospho (STY)]PPLLDAPAS[Phospho (STY)]PPQAPR_.2              | -0.030603093 | Q3UHE1_S495_M2_Pitpnm3 |
| _KGS[Phospho (STY)]ISSTQDTPVVVEEDC[Carbamidomethyl (C)]SLASSK_.3 | 0.089008952  | Q3UHE1_S295_M1_Pitpnm3 |
| _GSHS[Phospho (STY)]FDER_.2                                      | 0.102518265  | Q3UHF7_S565_M1_Hivep2  |
| _QASFSGS[Phospho (STY)]PEIAQGEAGVDPSVK_.2                        | 0.056332348  | Q3UHF7_S1081_M1_Hivep2 |
| _ELSLS[Phospho (STY)]TEEGNEPSPEK_.2                              | 0.221668763  | Q3UHF7_S2415_M1_Hivep2 |
| _SPS[Phospho (STY)]LGSEDLPLAADPK_.2                              | 0.029850473  | Q3UHF7_S764_M1_Hivep2  |
| _EM[Oxidation (M)]S[Phospho (STY)]QGDASPR_.2                     | -0.437809433 | Q3UHF7_S2085_M1_Hivep2 |
| _LADLEHSSGESS[Phospho (STY)]FESTGTGLSR_.3                        | -0.329557659 | Q3UHF7_S947_M1_Hivep2  |
| _SES[Phospho (STY)]TEMVAC[Carbamidomethyl (C)]PQDK_.2            | 0.085973655  | Q3UHF7_S811_M1_Hivep2  |
| _S[Phospho (STY)]IEQAEDAHKK_.2                                   | -0.169928995 | Q3UHF7_S169_M1_Hivep2  |
| _MSTFSS[Phospho (STY)]QEGPR_.2                                   | -0.351917372 | Q3UHF7_S41_M1_Hivep2   |
| _QSTS[Phospho (STY)]EDSLNSTER_.2                                 | 0.013187282  | Q3UHF7_S2295_M1_Hivep2 |
| _GWGS[Phospho (STY)]PGRPK_.2                                     | 0.109486568  | Q3UHH1_S1132_M1_Zswim8 |
| _QSAGPNS[Phospho (STY)]PTGGGGGGSGGTR_.2                          | 0.072580623  | Q3UHH1_S53_M1_Zswim8   |
| _RLS[Phospho (STY)]AEGGDK_.2                                     | -0.462020702 | Q3UHH1_S564_M1_Zswim8  |
| _KQS[Phospho (STY)]AGPNS[Phospho (STY)]PTGGGGGGSGGTR_.2          | -0.365136617 | Q3UHH1_S48_M2_Zswim8   |
| _SSS[Phospho (STY)]GESLAQSPDNAK_.2                               | -0.054143224 | Q3UHI0_S198_M1_Ccser2  |
| _HTSGNNLIS[Phospho (STY)]PDTDYR_.2                               | -0.172652685 | Q3UHI0_S487_M1_Ccser2  |
| _RGS[Phospho (STY)]AGGVGDRR_.2                                   | -0.123392474 | Q3UHI4_S21_M1_Tmed8    |
| _RGS[Phospho (STY)]AGGVGDR_.2                                    | -0.079544234 | Q3UHI4_S21_M1_Tmed8    |
| _VGSLT[Phospho (STY)]PPSS[Phospho (STY)]PK_.2                    | -0.306584946 | Q3UHI0_S622_M2_Aak1    |

|                                                                       |              |                        |
|-----------------------------------------------------------------------|--------------|------------------------|
| _VQTT[Phospho (STY)]PPPTIQGQK_.2                                      | -0.370818034 | Q3UHQ6_T604_M1_Aak1    |
| _EQGSSGLGSGSS[Phospho (STY)]GGGSSSGLSGYIGR_.3                         | -0.208857087 | Q3UHQ6_S21_M1_Aak1     |
| _LTDPIPTTETSIAPR_.2                                                   | -0.169479969 | #N/A                   |
| _VAEDEFDPIPVLIK_.2                                                    | 0.134181057  | #N/A                   |
| _AAEDSNLISGFGVAEGSEK_.2                                               | -0.180803489 | #N/A                   |
| _DLKVENILLHDR_.3                                                      | -0.079489836 | #N/A                   |
| _FQNPQAEGVNAVEDEIKK_.3                                                | 0.031259868  | #N/A                   |
| _SKS[Phospho (STY)]ATTT[Phospho (STY)]PSGS[Phospho (STY)]PR_.2        | -0.307676136 | Q3UHQ6_S668_M3_Aak1    |
| _LPSQTESVTSNR_.2                                                      | 0.28937104   | #N/A                   |
| _NSS[Phospho (STY)]GSSESLPNLAR_.2                                     | -0.233928634 | Q3UHQ6_S936_M1_Aak1    |
| _AQATPSQPLQSSQPK_.2                                                   | 0.289802303  | #N/A                   |
| _SATTTPSGS[Phospho (STY)]PR_.2                                        | -0.181072193 | Q3UHQ6_S676_M1_Aak1    |
| _VGSLT[Phospho (STY)]PPSS[Phospho (STY)]PKTQR_.2                      | -0.107473125 | Q3UHQ6_S622_M2_Aak1    |
| _REQGSSGLGSGSS[Phospho (STY)]GGGSSSGLSGYIGR_.3                        | 0.046852719  | Q3UHQ6_S21_M1_Aak1     |
| _ILSDVTHSAVFGVPASK_.2                                                 | -0.255000892 | #N/A                   |
| _STQLLQAAAAEASLNK_.2                                                  | -0.269700755 | #N/A                   |
| _YTLSYR_.2                                                            | -0.331727589 | #N/A                   |
| _GHYVLC[Carbamidomethyl (C)]DFGSATNK_.3                               | 0.054819394  | #N/A                   |
| _LQTGFTENEVLQIFC[Carbamidomethyl (C)]DTC[Carbamidomethyl (C)]EAVAR_.3 | 0.331471708  | #N/A                   |
| _GSNYHLSNDAS[Phospho (STY)]DVE_.2                                     | -0.138753343 | Q3UHK1_S634_M1_Slc2a13 |
| _KAS[Phospho (STY)]EDVEYTLR_.2                                        | 0.170018092  | Q3UHK1_S6_M1_Slc2a13   |
| _VKGSNYHLS[Phospho (STY)]DNDASDVE_.2                                  | -0.140763302 | Q3UHK1_S629_M1_Slc2a13 |
| _SLSS[Phospho (STY)]LMGER_.2                                          | -0.14403415  | Q3UHK1_S18_M1_Slc2a13  |
| _SLLAAESAAS[Phospho (STY)]LQGAELER_.2                                 | -0.217587022 | Q3UHK1_S47_M1_Slc2a13  |
| _AAAT[Phospho (STY)]PEPAVAQPDSTALEGATGQAPPSSK_.3                      | -0.264678776 | Q3UHL1_T470_M1_Camkv   |
| _TEEFC[Carbamidomethyl (C)]EIFR_.2                                    | 0.164981265  | #N/A                   |
| _EPC[Carbamidomethyl (C)]GTPEYLAPEVVGR_.2                             | -0.173526025 | #N/A                   |
| _LENLVYYNR_.2                                                         | -0.300468097 | #N/A                   |
| _IVISDFHLAK_.2                                                        | 0.00027354   | #N/A                   |
| _AT[Phospho (STY)]PATEESTVPATQSSALPAK_.2                              | -0.115710975 | Q3UHL1_T446_M1_Camkv   |
| _EVFDWILDQGYYSER_.2                                                   | 0.236104773  | #N/A                   |
| _SDDIAS[Phospho (STY)]ADR_.1                                          | -0.000539755 | Q3UHL1_S392_M1_Camkv   |
| _ITAEEAISHEWISGNAASDK_.3                                              | -0.246031893 | #N/A                   |
| _LMEVEQDQR_.2                                                         | 0.194956383  | #N/A                   |
| _GEEATGC[Carbamidomethyl (C)]AQESQR_.2                                | 0.078433313  | #N/A                   |
| _SAT[Phospho (STY)]PATDGR_.2                                          | -0.673559068 | Q3UHL1_T438_M1_Camkv   |
| _NYNQPSEVTDR_.2                                                       | -0.481716899 | #N/A                   |
| _S[Phospho (STY)]DLSEEDLPYYVDLPDR_.2                                  | 0.067079043  | Q3UHQ6_S1080_M1_Dop1b  |
| _AALLAAFQPE[Phospho (STY)]PR_.2                                       | -0.15335147  | Q3UHQ6_S1167_M1_Dop1b  |
| _SEDSIGLSASS[Phospho (STY)]PELSEHLR_.3                                | -0.35646685  | Q3UHQ6_S597_M1_Dop1b   |
| _QELGPGQETGTSS[Phospho (STY)]R_.2                                     | -0.155071556 | Q3UHU5_S1795_M1_Mtcl1  |
| _EDVTPPLS[Phospho (STY)]PDDLK_.2                                      | 0.180624872  | Q3UHU5_S1407_M1_Mtcl1  |
| _GLPSAGSKEDVT[Phospho (STY)]PPLS[Phospho (STY)]PDDLK_.3               | -0.0107086   | Q3UHU5_S1407_M2_Mtcl1  |
| _GRS[Phospho (STY)]PS[Phospho (STY)]PLGVGSETFR_.3                     | 0.254732645  | Q3UHU5_S1799_M2_Mtcl1  |
| _SLDS[Phospho (STY)]DES[Phospho (STY)]EDEDYQK_.2                      | -0.167494437 | Q3UHX2_S60_M2_Pdap1    |
| _GVEGLIDIENPNR_.2                                                     | 0.106164006  | #N/A                   |
| _M[Oxidation (M)]QSL[Phospho (STY)]LNK_.2                             | -0.369817502 | Q3UHX2_S178_M1_Pdap1   |

|                                                                                 |              |                         |
|---------------------------------------------------------------------------------|--------------|-------------------------|
| _QYTS[Phospho (STY)]PEEIDAQLQAEK_.2                                             | 0.060662517  | Q3UHX2_S19_M1_Pdap1     |
| _SLDS[Phospho (STY)]DESEDEDDYQQKR_.2                                            | -0.209904809 | #N/A                    |
| _KSLDS[Phospho (STY)]DES[Phospho (STY)]EDEDYQK_.2                               | 0.114587566  | Q3UHX2_S60_M2_Pdap1     |
| _KSLDS[Phospho (STY)]DESEDEDDYQQKR_.2                                           | -0.411287196 | #N/A                    |
| _LGEQGPEPGPTPPQTPT[Phospho (STY)]PPST[Phospho (STY)]PPLAK_.3                    | -0.015483219 | Q3UIA2_T736_M2_Arhgap17 |
| _SVDISLGG[Phospho (STY)]PR_.2                                                   | -0.14179474  | Q3UIL6_S609_M1_Plekha7  |
| _KVM[Phospho (STY)]PLQS[Phospho (STY)]PTK_.2                                    | 0.011524551  | Q3UIL6_S900_M2_Plekha7  |
| _HLSGSS[Phospho (STY)]PPPR_.2                                                   | 0.040303556  | Q3UIL6_S482_M1_Plekha7  |
| _IEDVM[Oxidation (M)]AGLS[Phospho (STY)]ANKENY[Phospho (STY)]R_.3               | 0.231806999  | Q3UIL6_S820_M2_Plekha7  |
| _DSQDTSAEQS[Phospho (STY)]DHDDEVASLASAGGFGSK_.3                                 | 0.001279766  | Q3UJB9_S884_M1_Edc4     |
| _Acetyl (Protein N-term)ASC[Carbamidomethyl (C)]AS[Phospho (STY)]IDIEDATQHRL_.2 | -0.302507761 | Q3UJB9_S6_M1_Edc4       |
| _RNS[Phospho (STY)]PVER_.2                                                      | 0.119538167  | Q3UJD6_S1258_M1_Usp19   |
| _SHS[Phospho (STY)]LPNSLDYAQASER_.2                                             | -0.45693308  | Q3UJU9_S46_M1_Rmdn3     |
| _SLQGLAGEIVGEVR_.2                                                              | 0.358253172  | #N/A                    |
| _AIPGEAGDAAILPS[Phospho (STY)]LSQEGQEK_.2                                       | 0.049843312  | Q3UJU9_S81_M1_Rmdn3     |
| _DSDKES[Phospho (STY)]GDADEVSC[Carbamidomethyl (C)]ETVR_.2                      | -0.04344185  | Q3UJU9_S193_M1_Rmdn3    |
| _KDS[Phospho (STY)]LDLDVEAASSPAAAALEEDDSSGR_.3                                  | -0.217299009 | Q3UJU9_S212_M1_Rmdn3    |
| _KLEGQS[Phospho (STY)]PQQVSR_.2                                                 | -0.326144316 | Q3UKC1_S632_M1_Tax1bp1  |
| _VPS[Phospho (STY)]WEDNVVC[Carbamidomethyl (C)]SQPAR_.2                         | -0.394072721 | Q3UKC1_S693_M1_Tax1bp1  |
| _AAS[Phospho (STY)]PVEELLTM[Oxidation (M)]EDEGNSDM[Oxidation (M)]LVVTTK_.3      | -0.220922929 | Q3UKC1_S124_M1_Tax1bp1  |
| _LSNAS[Phospho (STY)]PNPNEGK_.2                                                 | -0.420452796 | Q3UKU1_S501_M1_EI2      |
| _ASS[Phospho (STY)]PPDRIDIFGR_.2                                                | -0.020900169 | Q3UL36_S75_M1_Arglu1    |
| _ERASS[Phospho (STY)]PPDR_.2                                                    | 0.060375729  | Q3UL36_S75_M1_Arglu1    |
| _ELLQTPNFR_.2                                                                   | 0.281303301  | #N/A                    |
| _IC[Carbamidomethyl (C)]DEITGR_.2                                               | 0.195193897  | #N/A                    |
| _GIDEGPDGLK_.2                                                                  | 0.168989268  | #N/A                    |
| _KLTDIINNDHENVK_.3                                                              | 0.069320004  | #N/A                    |
| _FC[Carbamidomethyl (C)]ETTIGSK_.2                                              | 0.067164507  | #N/A                    |
| _LISDIIR_.2                                                                     | 0.311772632  | #N/A                    |
| _LQGPQTSAEVYR_.2                                                                | -0.410184178 | #N/A                    |
| _VC[Carbamidomethyl (C)]IVGSGNWGSAAVAK_.2                                       | 0.158537989  | #N/A                    |
| _TIEELEKELLNGQK_.3                                                              | 0.135105861  | #N/A                    |
| _ELYLSNNGIEVIEGLENNK_.2                                                         | -0.423152702 | #N/A                    |
| _ELDLYDNQIK_.2                                                                  | -0.404340801 | #N/A                    |
| _IEGLQSLVNL_.2                                                                  | 0.018984596  | #N/A                    |
| _QIDATYVR_.2                                                                    | 0.207769744  | #N/A                    |
| _SLETVYLER_.2                                                                   | -0.168989053 | #N/A                    |
| _C[Carbamidomethyl (C)]IENLEELQSLR_.2                                           | -0.063688935 | #N/A                    |
| _HGGGGIVANLS[Phospho (STY)]EQSLKGVDR_.3                                         | 0.10861373   | Q3UM45_S45_M1_Ppp1r7    |
| _LQNLDALTNLTVLSVQSNR_.2                                                         | -0.37246269  | #N/A                    |
| _RVES[Phospho (STY)]EES[Phospho (STY)]GDEEGKK_.2                                | 0.034992988  | #N/A                    |
| _LTMLDIASNR_.2                                                                  | 0.297897912  | #N/A                    |
| _IENISNLHQLQM[Oxidation (M)]LELGSNR_.3                                          | -0.101033462 | #N/A                    |
| _KHGGGGIVANLS[Phospho (STY)]EQS[Phospho (STY)]LKDGVDR_.3                        | -0.009408797 | Q3UM45_S45_M2_Ppp1r7    |
| _VES[Phospho (STY)]EES[Phospho (STY)]GDEEGKK_.2                                 | 0.112571197  | #N/A                    |
| _VESEES[Phospho (STY)]GDEEGKKHGGGGIVANLSEQLK_.4                                 | 0.165136285  | Q3UM45_S27_M1_Ppp1r7    |
| _HGGGGIVANLS[Phospho (STY)]EQSLK_.2                                             | 0.450876276  | Q3UM45_S45_M1_Ppp1r7    |

|                                                                     |              |                         |
|---------------------------------------------------------------------|--------------|-------------------------|
| _RVES[Phospho (STY)]EES[Phospho (STY)]GDEEGK_.2                     | 0.06072481   | #N/A                    |
| _GAGQQQS[Phospho (STY)]QEMM[Oxidation (M)]EVDR_.2                   | 0.050605203  | #N/A                    |
| _GAGQQQS[Phospho (STY)]QEM[Oxidation (M)]M[Oxidation (M)]EVDRR_.3   | -0.194284603 | #N/A                    |
| _DAEDVDLTHYR_.3                                                     | 0.21707852   | #N/A                    |
| _ELDLYDNQIKK_.3                                                     | -0.172634485 | #N/A                    |
| _GAEDPEEEHELAVDMETINLDR_.3                                          | 0.027480222  | #N/A                    |
| _VAS[Phospho (STY)]PANVGLTLHLR_.2                                   | -0.299417647 | Q3UMB5_S788_M1_Smcr8    |
| _SS[Phospho (STY)]VESVLIK_.2                                        | 0.117504821  | Q3UMB5_S420_M1_Smcr8    |
| _SDS[Phospho (STY)]QASLTVPSPHVVR_.2                                 | -0.116375903 | Q3UMB5_S488_M1_Smcr8    |
| _[Acetyl (Protein N-term)]AVDTLS[Phospho (STY)]PDWDFDRVDDGSQK_.3    | -0.025022835 | Q3UMB9_S7_M1_Washc4     |
| _RQSS[Phospho (STY)]LTFQSSDPEHVR_.3                                 | 0.026072108  | Q3UMF0_S1215_M1_Cobll1  |
| _TLS[Phospho (STY)]SPTGTETNPPK_.2                                   | -0.280020416 | Q3UMF0_S896_M1_Cobll1   |
| _QDS[Phospho (STY)]NPKPKPSNEITR_.3                                  | 0.022768755  | Q3UMF0_S794_M1_Cobll1   |
| _ITVEKDPDSALGIS[Phospho (STY)]DGETSPSSK_.3                          | 0.148449387  | Q3UMF0_S546_M1_Cobll1   |
| _QSS[Phospho (STY)]LTFQSSDPEHVR_.2                                  | -0.251781428 | Q3UMF0_S1215_M1_Cobll1  |
| _TETFEDEGAENS[Phospho (STY)]FSR_.2                                  | 0.189010567  | Q3UMF9_S378_M1_Faxc     |
| _PSEVPAQS[Phospho (STY)]PTR_.2                                      | -0.268481534 | Q3UMR0_S634_M1_Ankrd27  |
| _VAIYSPDGVR_.2                                                      | 0.313361271  | #N/A                    |
| _DLLSHEDAATLNDVK_.3                                                 | -0.061728233 | #N/A                    |
| _TGS[Phospho (STY)]TGALGPSE_.2                                      | -0.226819403 | Q3UMT1_S431_M1_Ppp1r12c |
| _ALNGVSS[Phospho (STY)]PVSSNPK_.2                                   | -0.290185983 | Q3UMT1_S403_M1_Ppp1r12c |
| _GGSSEELHDS[Phospho (STY)]PR_.2                                     | 0.037374155  | Q3UMU9_S635_M1_Hdgfl2   |
| _GGS[Phospho (STY)]S[Phospho (STY)]GEELEDEEPVKK_.2                  | 0.038022209  | #N/A                    |
| _TRLAS[Phospho (STY)]ESANDDNEDS_.2                                  | -0.328992508 | Q3UMU9_S659_M1_Hdgfl2   |
| _AERGGG[Phospho (STY)]S[Phospho (STY)]GEELEDEEPVKK_.2               | -0.114395612 | #N/A                    |
| _AQEDGQDS[Phospho (STY)]EDGPR_.2                                    | -0.471612919 | Q3UMU9_S620_M1_Hdgfl2   |
| _LAS[Phospho (STY)]ESANDDNEDS_.2                                    | -0.346993725 | Q3UMU9_S659_M1_Hdgfl2   |
| _GGS[Phospho (STY)]S[Phospho (STY)]GEELEDEEPVKK_.3                  | -0.325872154 | #N/A                    |
| _GGS[Phospho (STY)]SGEELEDEEPVKK_.2                                 | 0.128260318  | Q3UMU9_S366_M1_Hdgfl2   |
| _KRS[Phospho (STY)]EGLSLR_.3                                        | -0.292931976 | Q3UMU9_S450_M1_Hdgfl2   |
| _AERGGG[Phospho (STY)]S[Phospho (STY)]GEELEDEEPVKK_.3               | -0.195539827 | #N/A                    |
| _RLS[Phospho (STY)]HDETNIIFSTPR_.3                                  | -0.066709453 | Q3UN16_S413_M1_Gpr162   |
| _RSS[Phospho (STY)]LDGSESAK_.2                                      | -0.305763053 | Q3UN16_S256_M1_Gpr162   |
| _C[Carbamidomethyl (C)]SLTGS[Phospho (STY)]EGSSR_.2                 | 0.122034969  | Q3UN16_S565_M1_Gpr162   |
| _RLS[Phospho (STY)]LGSPDSR_.2                                       | -0.216936105 | Q3UN16_S539_M1_Gpr162   |
| _RC[Carbamidomethyl (C)]S[Phospho (STY)]LT[Phospho (STY)]GSEGSSR_.2 | -0.174616129 | Q3UN16_S561_M2_Gpr162   |
| _DLAAAAQKS[Phospho (STY)]PSAEAAAPPPGPR_.3                           | -0.147716916 | Q3UNH4_S691_M1_Gprin1   |
| _KAS[Phospho (STY)]LPASEK_.2                                        | -0.144624356 | Q3UNH4_S468_M1_Gprin1   |
| _SLGTWGS[Phospho (STY)]LSAAK_.2                                     | -0.047950737 | Q3UNH4_S446_M1_Gprin1   |
| _RERPGS[Phospho (STY)]TGEGLVSLR_.3                                  | 0.032620608  | Q3UNH4_S219_M1_Gprin1   |
| _VITQIPGATSPGKVETPS[Phospho (STY)]LQK_.3                            | 0.488955042  | Q3UNH4_S584_M1_Gprin1   |
| _VDIVS[Phospho (STY)]PGGDNAGSLR_.2                                  | -0.276626733 | Q3UNH4_S182_M1_Gprin1   |
| _ERPGS[Phospho (STY)]TGEGLVSLR_.2                                   | 0.112995163  | Q3UNH4_S219_M1_Gprin1   |
| _AETVS[Phospho (STY)]PGEVDAM[Oxidation (M)]TLGK_.2                  | -0.297325426 | Q3UNH4_S495_M1_Gprin1   |
| _KAS[Phospho (STY)]LPASEKTDPLASSK_.3                                | -0.375679301 | Q3UNH4_S468_M1_Gprin1   |
| _VDIVSPGGDNAGS[Phospho (STY)]LRK_.2                                 | -0.311587303 | Q3UNH4_S190_M1_Gprin1   |
| _NSELVS[Phospho (STY)]PVKPER_.2                                     | -0.301600315 | Q3UNH4_S369_M1_Gprin1   |

|                                                                                |              |                         |
|--------------------------------------------------------------------------------|--------------|-------------------------|
| _KTDPEFSGKLT[Phospho (STY)]PGSSGK_.3                                           | 0.530269531  | Q3UNH4_T256_M1_Gprin1   |
| _ADSASPS[Phospho (STY)]PR_.2                                                   | -0.256061291 | Q3UNH4_S622_M1_Gprin1   |
| _APS[Phospho (STY)]PAPRPPSR_.2                                                 | -0.249781835 | Q3UNH4_S764_M1_Gprin1   |
| _SVATGPM[Oxidation (M)]T[Phospho (STY)]PQAAAPPAVPPVFPEVR_.3                    | -0.292177357 | Q3UNH4_T795_M1_Gprin1   |
| _APS[Phospho (STY)]WDAGAPPPR_.2                                                | -0.400779208 | Q3UNH4_S714_M1_Gprin1   |
| _S[Phospho (STY)]PSAEAAAPPPGPR_.2                                              | -0.059614213 | Q3UNH4_S691_M1_Gprin1   |
| _MDGNS[Phospho (STY)]LKQADSTSTR_.2                                             | -0.218675498 | Q3UNH4_S110_M1_Gprin1   |
| _IQQQLGEEAS[Phospho (STY)]PR_.2                                                | -0.388901559 | Q3UPH7_S959_M1_Arhgef40 |
| _LVTFSVAVPLQQGAEQQR_.2                                                         | -0.121231197 | #N/A                    |
| _DSDQVAQS[Phospho (STY)]DGEESPAEEQLLGER_.3                                     | 0.13869923   | Q3UPL0_S526_M1_Sec31a   |
| _AQDGSS[Phospho (STY)]PLSLQDLIEK_.2                                            | 0.245316798  | Q3UPL0_S712_M1_Sec31a   |
| _VDGPDVALKDSQVAQS[Phospho (STY)]DGEESPAEEQLLGER_.4                             | -0.130624139 | Q3UPL0_S526_M1_Sec31a   |
| _S[Phospho (STY)]TQSLSLQR_.2                                                   | -0.589621996 | Q3UPL5_S217_M1_Ag2      |
| _TQPVTFDEIQVEEEGV[S[Phospho (STY)]PM[Oxidation (M)]EEEE_.3                     | 0.105328928  | Q3UPL5_S196_M1_Ag2      |
| _NS[Phospho (STY)]SNEELTK_.2                                                   | 0.101641474  | Q3UQN2_S402_M1_Fcho2    |
| _HS[Phospho (STY)]PVQMNR_.2                                                    | 0.2320592    | Q3UQN2_S394_M1_Fcho2    |
| _SGS[Phospho (STY)]PGPLHSVSGYK_.2                                              | -0.018946556 | Q3UQS8_S728_M1_Rbm20    |
| _EKEHC[Carbamidomethyl (C)]DS[Phospho (STY)]EGEADAFDPGKK_.3                    | 0.076299658  | Q3UQU0_S103_M1_Brd9     |
| _EKEHC[Carbamidomethyl (C)]DS[Phospho (STY)]EGEADAFDPGK_.3                     | -0.090342683 | Q3UQU0_S103_M1_Brd9     |
| _HTAPS[Phospho (STY)]SPSPGTR_.2                                                | 0.31344019   | Q3UR70_S852_M1_Tgfbra1  |
| _HTAPSS[Phospho (STY)]PSPGTRT_.2                                               | -0.235050883 | Q3UR70_S853_M1_Tgfbra1  |
| _ESDLSDTLS[Phospho (STY)]PSKEK_.2                                              | 0.43464119   | Q3URD3_S469_M1_Slmap    |
| _SDVIHAPLPS[Phospho (STY)]PVDK_.2                                              | 0.249567165  | Q3URD3_S148_M1_Slmap    |
| _AKESDLSDTLSPS[Phospho (STY)]KEK_.2                                            | -0.615507236 | Q3URD3_S471_M1_Slmap    |
| _HKNS[Phospho (STY)]IDLEYVPR_.3                                                | 0.014091494  | Q3URE9_S576_M1_Lingo2   |
| _RSS[Phospho (STY)]IIKDPNSNQK_.2                                               | 0.11886223   | Q3USB7_S78_M1_Plc1      |
| _TVS[Phospho (STY)]FSSM[Oxidation (M)]PSEK_.2                                  | 0.064008925  | Q3USB7_S96_M1_Plc1      |
| _S[Phospho (STY)]GVALPGAAGVPADSEAGLLEAAR_.2                                    | 0.068861703  | Q3USB7_S48_M1_Plc1      |
| _RM[Oxidation (M)]S[Phospho (STY)]GDYNGEQK_.2                                  | -0.390386984 | Q3USB7_S570_M1_Plc1     |
| _KKT[Phospho (STY)]VS[Phospho (STY)]FSSMPSEK_.2                                | 0.113950024  | Q3USB7_S96_M2_Plc1      |
| _KLPESEDLLGEVET[Phospho (STY)]DEDEEAEM[Oxidation (M)]SR_.3                     | -0.144702355 | Q3USB7_T557_M1_Plc1     |
| _STGVQTS[Phospho (STY)]PDLRK_.2                                                | 0.287159947  | Q3USH1_S108_M1_Insyn2a  |
| _STGVQTS[Phospho (STY)]PDLR_.2                                                 | 0.109173268  | Q3USH1_S108_M1_Insyn2a  |
| _GVS[Phospho (STY)]QEKDQGQISSAIVSSVQSK_.3                                      | 0.11506305   | Q3USH5_S903_M1_Sfswap   |
| _VKLDDDS[Phospho (STY)]JEDEESR_.2                                              | -0.178427051 | Q3USH5_S601_M1_Sfswap   |
| _RKS[Phospho (STY)]EPAVGPLR_.3                                                 | -0.328072409 | Q3UTJ2_S339_M1_Sorbs2   |
| _RGS[Phospho (STY)]LPDNSILHR_.3                                                | -0.540181333 | Q3UTJ2_S829_M1_Sorbs2   |
| _ESQS[Phospho (STY)]PDSAWR_.2                                                  | -0.41748678  | Q3UTJ2_S40_M1_Sorbs2    |
| _S[Phospho (STY)]EPAVGPLR_.2                                                   | -0.154276129 | Q3UTJ2_S339_M1_Sorbs2   |
| _GAEDYPDPPLPHSYS[Phospho (STY)]SDR_.2                                          | -0.144606606 | Q3UTJ2_S1097_M1_Sorbs2  |
| _VQS[Phospho (STY)]SPNLLAAGR_.2                                                | 0.469323651  | Q3UTJ2_S27_M1_Sorbs2    |
| _SFISSPSS[Phospho (STY)]PSR_.2                                                 | -0.562142894 | Q3UTJ2_S382_M1_Sorbs2   |
| _TS[Phospho (STY)]PGRADLPGSSSTFTK_.3                                           | -0.314764701 | Q3UTJ2_S358_M1_Sorbs2   |
| _APHYPGIGPVDESIGPTAIR_.3                                                       | 0.003815412  | #N/A                    |
| _SC[Carbamidomethyl (C)]DDLLNDDC[Carbamidomethyl (C)]DS[Phospho (STY)]FPDPK_.2 | 0.205330718  | Q3UTJ2_S474_M1_Sorbs2   |
| _GLLHGWSQSS[Phospho (STY)]TEEVPR_.2                                            | -0.331893437 | Q3UTJ2_S577_M1_Sorbs2   |
| _QNAEIWSSTEETVS[Phospho (STY)]PK_.2                                            | -0.053684458 | Q3UTJ2_S456_M1_Sorbs2   |

|                                                                                 |              |                         |
|---------------------------------------------------------------------------------|--------------|-------------------------|
| _SRS[Phospho (STY)]C[Carbamidomethyl (C)]DDLNDDC[Carbamidomethyl (C)]DSFPDPK_.3 | -0.299904521 | Q3UTJ2_S463_M1_Sorbs2   |
| _GS[Phospho (STY)]LPDNSILHR_.2                                                  | -0.451783821 | Q3UTJ2_S829_M1_Sorbs2   |
| _RFS[Phospho (STY)]IESLLEETQVR_.3                                               | -0.471988412 | Q3UTJ2_S630_M1_Sorbs2   |
| _RRGS[Phospho (STY)]LPDNSILHR_.4                                                | -0.445918472 | Q3UTJ2_S829_M1_Sorbs2   |
| _LLDRS[Phospho (STY)]PSR_.2                                                     | 0.225931998  | Q3UTQ8_S306_M1_CdkI5    |
| _SNS[Phospho (STY)]KDIQNLVGLPR_.3                                               | -0.007367107 | Q3UTQ8_S343_M1_CdkI5    |
| _NLSEGNANYTEY[Phospho (STY)]VATR_.2                                             | -0.192008495 | Q3UTQ8_Y171_M1_CdkI5    |
| _VSS[Phospho (STY)]LPDSSSGTNHNSK_.2                                             | -0.009372935 | Q3UTQ8_S738_M1_CdkI5    |
| _DLTNNNIPHLLS[Phospho (STY)]PK_.2                                               | 0.067483417  | Q3UTQ8_S407_M1_CdkI5    |
| _KSS[Phospho (STY)]PSSPAVR_.2                                                   | -0.461044657 | Q3UTZ3_S495_M1_Trappc14 |
| _SQS[Phospho (STY)]FSHQQPSR_.2                                                  | -0.108090105 | Q3UTZ3_S517_M1_Trappc14 |
| _VAS[Phospho (STY)]LQEELQDITPEEEIAYK_.2                                         | -0.081812052 | Q3UUF8_S260_M1_Ankrd34b |
| _NSGANHY[Phospho (STY)]SSDSQLAEGVTPPTVEDGK_.3                                   | 0.194468702  | Q3UUF8_Y365_M1_Ankrd34b |
| _HQS[Phospho (STY)]IDVK_.2                                                      | -0.330325526 | Q3UUF8_S293_M1_Ankrd34b |
| _RGS[Phospho (STY)]GAFPLDHSLAQSR_.3                                             | -0.272574601 | Q3UUF8_S426_M1_Ankrd34b |
| _SVS[Phospho (STY)]LSKR_.2                                                      | -0.276269467 | Q3UUG6_S324_M1_Tbc1d24  |
| _QKS[Phospho (STY)]VLSK_.2                                                      | -0.060915959 | Q3UUG6_S322_M1_Tbc1d24  |
| _S[Phospho (STY)]KSEFQLGNSR_.3                                                  | 0.149643432  | Q3UVC0_S312_M1_Ksr2     |
| _TES[Phospho (STY)]VPC[Carbamidomethyl (C)]DINNVR_.2                            | 0.092170287  | Q3UVC0_S484_M1_Ksr2     |
| _TPNIVTTVT[Phospho (STY)]PPGT[Phospho (STY)]PPMR_.2                             | 0.041393791  | Q3UVC0_T273_M2_Ksr2     |
| _KLS[Phospho (STY)]EASDER_.2                                                    | -0.242203395 | Q3UVG3_S671_M1_Fam91a1  |
| _ [Acetyl (Protein N-term)]AAAAAVGPGLGSGPGDS[Phospho (STY)]PEGPEADAPER_.3       | 0.114566641  | Q3UVL4_S18_M1_Vps51     |
| _ [Acetyl (Protein N-term)]AAAAAVGPGLGSGPGDS[Phospho (STY)]PEGPEADAPERR_.3      | -0.130589808 | Q3UVL4_S18_M1_Vps51     |
| _IDVS[Phospho (STY)]PVEFNK_.2                                                   | 0.205637207  | Q3UVL4_S690_M1_Vps51    |
| _SIHS[Phospho (STY)]FELEKR_.3                                                   | -0.378969252 | Q3UVR3_S448_M1_Ttbk2    |
| _RGS[Phospho (STY)]SGETLR_.2                                                    | -0.313759641 | Q3UVX5_S870_M1_Grm5     |
| _TDDDAPS[Phospho (STY)]LHS[Phospho (STY)]ETAAR_.2                               | -0.112359869 | Q3UVX5_S1037_M2_Grm5    |
| _SVTWAQNEKST[Phospho (STY)]R_.2                                                 | -0.306843703 | Q3UVX5_T923_M1_Grm5     |
| _DSVDSGSTTPNS[Phospho (STY)]PVSEALC[Carbamidomethyl (C)]IPSSPK_.3               | 0.034099274  | Q3UVX5_S1173_M1_Grm5    |
| _SSS[Phospho (STY)]LVNLWK_.2                                                    | 0.290322301  | Q3UVX5_S860_M1_Grm5     |
| _S[Phospho (STY)]PS[Phospho (STY)]PISTLSHLGSAGR_.2                              | -0.019468763 | Q3UVX5_S1014_M2_Grm5    |
| _GS[Phospho (STY)]SGETLR_.2                                                     | -0.28790752  | Q3UVX5_S870_M1_Grm5     |
| _SFGGGTGSGFSLLM[Oxidation (M)]ER_.2                                             | -0.090315299 | #N/A                    |
| _AVC[Carbamidomethyl (C)]M[Oxidation (M)]LSNTTAIVEAWAR_.2                       | 0.117133388  | #N/A                    |
| _IKDDIVSS[Phospho (STY)]LQK_.2                                                  | 0.122798227  | Q3UXZ6_S58_M1_Fam81a    |
| _GGVGAPGS[Phospho (STY)]PSTPPTR_.2                                              | -0.470458748 | Q3UYC0_S220_M1_Ppm1h    |
| _SS[Phospho (STY)]LPNGEGLQLK_.2                                                 | 0.476248648  | Q3UYC0_S123_M1_Ppm1h    |
| _AGTITST[Phospho (STY)]PNR_.2                                                   | 0.207749002  | Q3UYC0_T113_M1_Ppm1h    |
| _KAGTITST[Phospho (STY)]PNR_.2                                                  | -0.090073363 | Q3UYC0_T113_M1_Ppm1h    |
| _AGTITSTPNRNS[Phospho (STY)]K_.2                                                | -0.180005505 | Q3UYC0_S118_M1_Ppm1h    |
| _RSS[Phospho (STY)]LPNGEGLQLK_.2                                                | -0.385481343 | Q3UYC0_S123_M1_Ppm1h    |
| _GLS[Phospho (STY)]PPHK_.2                                                      | -0.384021868 | Q3UYG8_S266_M1_Macrod2  |
| _GLS[Phospho (STY)]PPHK_.2                                                      | -0.119152877 | Q3UYG8_S266_M1_Macrod2  |
| _VIEPPAASC[Carbamidomethyl (C)]PSS[Phospho (STY)]PR_.2                          | 0.087605137  | Q3UYI5_S510_M1_Rgl3     |
| _RGS[Phospho (STY)]GDTISM[Oxidation (M)]DTEASIR_.3                              | 0.099340645  | Q3UZ39_S88_M1_Lrrfip1   |
| _S[Phospho (STY)]PDANMPPEEGVVR_.2                                               | 0.128904053  | Q3UZA1_S333_M1_Rcsd1    |
| _LGQKS[Phospho (STY)]PDANMPPEEGVVR_.3                                           | 0.402407026  | Q3UZA1_S333_M1_Rcsd1    |

|                                                             |              |                         |
|-------------------------------------------------------------|--------------|-------------------------|
| _S[Phospho (STY)]KDPGSPQLNQEAMADGVEGTPWSAEKPR_4             | -0.527381787 | Q3UZA1_S211_M1_Rcsd1    |
| _SFSDVLPES[Phospho (STY)]PK_2                               | 0.031468574  | Q3V0G7_S455_M1_Garnl3   |
| _IC[Carbamidomethyl (C)]LPYS[Phospho (STY)]PTK_2            | 0.289180251  | Q3V0G7_S179_M1_Garnl3   |
| _GASAHTS[Phospho (STY)]PQT[Phospho (STY)]PPAR_2             | 0.364632814  | Q3V0G7_S848_M2_Garnl3   |
| _ALELEPLELEGLAGS[Phospho (STY)]PPGLAPPPPPHR_3               | 0.094430434  | Q3V0I2_S68_M1_Prr7      |
| _NRTS[Phospho (STY)]VDFK_2                                  | -0.312040115 | Q3V1L4_S511_M1_Nt5c2    |
| _STS[Phospho (STY)]LKER_2                                   | 0.311413531  | Q3V3Q7_S408_M1_Pacs2    |
| _TES[Phospho (STY)]LVIPSTR_2                                | -0.020624452 | Q3V3Q7_S387_M1_Pacs2    |
| _ANS[Phospho (STY)]LDNER_2                                  | 0.11988355   | Q3V3Q7_S424_M1_Pacs2    |
| _ANS[Phospho (STY)]LDNERC[Carbamidomethyl (C)]PDTR_2        | -0.070853657 | Q3V3Q7_S424_M1_Pacs2    |
| _EPSGQPEDS[Phospho (STY)]PEAETSTLDVFTEK_3                   | -0.037513454 | Q3V3Q7_S361_M1_Pacs2    |
| _LQRS[Phospho (STY)]PVLK_2                                  | -0.172629723 | Q3V3V9_S1242_M1_Carmil2 |
| _GPRPDLETS[Phospho (STY)]PGAAAR_2                           | -0.162963765 | Q3V3V9_S1008_M1_Carmil2 |
| _AGS[Phospho (STY)]DGDIM[Oxidation (M)]DSSTETPPISIK_2       | -0.086494683 | #N/A                    |
| _KAGS[Phospho (STY)]DGDIM[Oxidation (M)]DSSTETPPISIK_2      | -0.255366118 | #N/A                    |
| _PLPPYPTEPSSPERSPPS[Phospho (STY)]PAT[Phospho (STY)]DQR_3   | 0.293680968  | Q3V3V9_S1284_M2_Carmil2 |
| _TEYVC[Carbamidomethyl (C)]DS[Phospho (STY)]PTEGPSK_2       | 0.206679518  | Q3ZK22_S667_M1_Vezt     |
| _DLS[Phospho (STY)]PELAPDEGAR_2                             | 0.022039708  | Q497V6_S182_M1_Bahd1    |
| _AHS[Phospho (STY)]PQGEGEIPLHR_3                            | -0.418564202 | Q4ACU6_S482_M1_Shank3   |
| _S[Phospho (STY)]LGEEPVGGLGSLDPAK_2                         | -0.336990519 | Q4ACU6_S1510_M1_Shank3  |
| _S[Phospho (STY)]KLWGDVPESR_2                               | -0.025735767 | Q4ACU6_S1471_M1_Shank3  |
| _STS[Phospho (STY)]M[Oxidation (M)]QDTRV_2                  | -0.009241952 | Q4ACU6_S801_M1_Shank3   |
| _S[Phospho (STY)]M[Oxidation (M)]TAELEELASIR_2              | -0.08270629  | Q4ACU6_S694_M1_Shank3   |
| _SAS[Phospho (STY)]DINLKGDPAAASPGPTLR_3                     | -0.323569048 | Q4ACU6_S375_M1_Shank3   |
| _RAPSPVKPAS[Phospho (STY)]LER_3                             | 0.168991909  | Q4ACU6_S1583_M1_Shank3  |
| _S[Phospho (STY)]KSM[Oxidation (M)]TAELEELASIR_3            | 0.261492525  | Q4ACU6_S692_M1_Shank3   |
| _TKS[Phospho (STY)]VGEDEKLASLLEGR_3                         | -0.221141993 | Q4ACU6_S781_M1_Shank3   |
| _FM[Oxidation (M)]DY[Phospho (STY)]QLHSTDK_2                | -0.040410718 | Q4ACU6_Y122_M1_Shank3   |
| _LFSSLGELSTISAQR_2                                          | 0.321786631  | #N/A                    |
| _S[Phospho (STY)]LGEEPVGGLGSLDPAK_2                         | -0.194855159 | Q4ACU6_S1510_M1_Shank3  |
| _APS[Phospho (STY)]TTLTLR_2                                 | -0.238300047 | Q4ACU6_S685_M1_Shank3   |
| _HYTVGSY[Phospho (STY)]DSLTSYSDYVIDDK_3                     | -0.082026411 | Q4ACU6_Y555_M1_Shank3   |
| _SAS[Phospho (STY)]DINLK_2                                  | 0.487646333  | Q4ACU6_S375_M1_Shank3   |
| _LDEILAVAAEPTLRPDADADR_3                                    | -0.126997679 | #N/A                    |
| _GPRPGSLDY[Phospho (STY)]SSGEGLGLTFGGPSPGPVK_3              | -0.437386439 | Q4ACU6_Y998_M1_Shank3   |
| _SPTPVHS[Phospho (STY)]PDADRPGPLFVDVQTR_3                   | -0.385062938 | Q4ACU6_S1134_M1_Shank3  |
| _VPS[Phospho (STY)]PDHR_2                                   | -0.179058175 | Q4FK66_S209_M1_Prpf38a  |
| _SKS[Phospho (STY)]DPVLHHSEER_3                             | 0.043817812  | Q4FZH1_S114_M1_Fam189a2 |
| _DKS[Phospho (STY)]PSSLLEDAK_2                              | -0.064961132 | Q4JIM5_S632_M1_Abl2     |
| _STQASSGS[Phospho (STY)]PALPR_2                             | 0.0472671    | Q4JIM5_S621_M1_Abl2     |
| _S[Phospho (STY)]NSTSSM[Oxidation (M)]SSGLPEQDR_2           | 0.109695325  | Q4JIM5_S783_M1_Abl2     |
| _TVS[Phospho (STY)]TSSQPEENVDR_2                            | 0.119626547  | Q4JIM5_S819_M1_Abl2     |
| _[Acetyl (Protein N-term)]M[Oxidation (M)]NVEHEVNLLVEEIHR_3 | 0.044543394  | #N/A                    |
| _SQS[Phospho (STY)]VDITAPGFNPLGGAGK_2                       | -0.33738877  | Q4KMM3_S15_M1_Oxr1      |
| _ESLPIELDQLS[Phospho (STY)]GR_2                             | 0.052610273  | Q4KMM3_S294_M1_Oxr1     |
| _DTIQQVSQR_2                                                | 0.365034602  | #N/A                    |
| _GTIEYTVES[Phospho (STY)]R_2                                | -0.321439201 | Q4KMM3_S104_M1_Oxr1     |



|                                                             |              |                        |
|-------------------------------------------------------------|--------------|------------------------|
| _TSSNPGALSHETGLSGLETATK_.3                                  | -0.1988674   | #N/A                   |
| _DSETEVEELRK_.2                                             | -0.207906753 | #N/A                   |
| _DQGNDS[Phospho (STY)]ASTAPR_.2                             | -0.025672061 | Q4KMM3_S323_M1_Oxr1    |
| _DQQGQELKR_.2                                               | -0.224188809 | #N/A                   |
| _DQQGQELKRDS[Phospho (STY)]ETEVEELR_.3                      | 0.048632931  | Q4KMM3_S488_M1_Oxr1    |
| _RM[Oxidation (M)]S[Phospho (STY)]FQKPK_.2                  | 0.131780528  | Q4KMM3_S90_M1_Oxr1     |
| _VVSSTS[Phospho (STY)]EEEEAFTEK_.2                          | -0.222709528 | Q4KMM3_S204_M1_Oxr1    |
| _DSDGQVFGALASEPFK_.2                                        | -0.129945725 | #N/A                   |
| _TPIIEEQNNSANTQK_.2                                         | 0.106871693  | #N/A                   |
| _FDTTPNELVQLNK_.2                                           | -0.231933824 | #N/A                   |
| _KATGVS[Phospho (STY)]AEDADPR_.2                            | -0.563221559 | Q4KMM3_S308_M1_Oxr1    |
| _RDS[Phospho (STY)]ETEVEELRK_.3                             | 0.002292074  | Q4KMM3_S488_M1_Oxr1    |
| _ADLEPESFRPNLSDPSELLPDQIEK_.3                               | -0.049040744 | #N/A                   |
| _M[Oxidation (M)]S[Phospho (STY)]FQKPK_.2                   | 0.0616174    | Q4KMM3_S90_M1_Oxr1     |
| _IKESLPIELDQLSGR_.3                                         | 0.11586452   | #N/A                   |
| _DSLNSIALK_.2                                               | -0.230249983 | #N/A                   |
| _KS[Phospho (STY)]QSVDITAPGFNPLGGAGK_.3                     | -0.26792417  | Q4KMM3_S13_M1_Oxr1     |
| _TFVSQASATM[Oxidation (M)]QQYAQR_.2                         | -0.069396631 | #N/A                   |
| _SSDASSESQTVSQMEVQSLTATSEANVPDR_.3                          | 0.132765702  | #N/A                   |
| _ARDQGNDS[Phospho (STY)]ASTAPR_.2                           | 0.311194455  | Q4KMM3_S323_M1_Oxr1    |
| _HEYWFAVPQER_.2                                             | -0.068101463 | #N/A                   |
| _ALS[Phospho (STY)]PTGSSR_.2                                | -0.109575864 | Q4KUS2_S255_M1_Unc13a  |
| _ESYSDSM[Oxidation (M)]HS[Phospho (STY)]YEEFSEPR_.3         | -0.11594106  | Q4KUS2_S244_M1_Unc13a  |
| _HS[Phospho (STY)]QTDLVSR_.2                                | -0.343543422 | Q4QQM4_S14_M1_Trp53i11 |
| _KHS[Phospho (STY)]QTDLVSR_.2                               | -0.29061292  | Q4QQM4_S14_M1_Trp53i11 |
| _APS[Phospho (STY)]PSQPPKK_.2                               | -0.039396692 | Q4VA53_S1381_M1_Pds5b  |
| _TAS[Phospho (STY)]DSDEQQWPEEK_.2                           | -0.069307409 | Q4VA53_S1255_M1_Pds5b  |
| _M[Oxidation (M)]ETVSNASSSSNPSS[Phospho (STY)]PGR_.2        | 0.057186302  | Q4VA53_S1166_M1_Pds5b  |
| _AES[Phospho (STY)]PETSVESTQSTPQK_.2                        | -0.199285518 | Q4VA53_S1356_M1_Pds5b  |
| _HKEELLENEEQNS[Phospho (STY)]PPKK_.4                        | -0.34262723  | Q4VA53_S1281_M1_Pds5b  |
| _SSS[Phospho (STY)]PVLVEEPPER_.2                            | -0.407780326 | Q501J7_S118_M1_Phactr4 |
| _QHRES[Phospho (STY)]GEGEEEVADSAR_.3                        | -0.017002138 | Q505F5_S293_M1_Lrrc47  |
| _KRQS[Phospho (STY)]VSGLHR_.3                               | -0.296315805 | Q505F5_S430_M1_Lrrc47  |
| _RQS[Phospho (STY)]VSGLHR_.2                                | -0.08386606  | Q505F5_S430_M1_Lrrc47  |
| _KQHRES[Phospho (STY)]GEGEEEVADSAR_.3                       | -0.54548441  | Q505F5_S293_M1_Lrrc47  |
| _IVS[Phospho (STY)]PKQEHEDR_.2                              | -0.515682428 | Q50H33_S331_M1_Kctd8   |
| _RNS[Phospho (STY)]ELFQSLISK_.2                             | -0.056900498 | Q50H33_S413_M1_Kctd8   |
| _SDVGTSELPS[Phospho (STY)]EDDGVEPSR_.2                      | 0.127193147  | Q52KB6_S453_M1_C2cd3   |
| _EVKAEKS[Phospho (STY)]PVSINVK_.3                           | -0.204156887 | Q52KE7_S358_M1_Ccnl1   |
| _QQAS[Phospho (STY)]KSPYNGVR_.3                             | -0.483646387 | Q52KE7_S378_M1_Ccnl1   |
| _LRPVS[Phospho (STY)]PEEIRR_.3                              | -0.380514884 | Q52KF3_S229_M1_Spire1  |
| _S[Phospho (STY)]VDKSDEELQFPK_.2                            | 0.127757994  | Q52KF3_S520_M1_Spire1  |
| _RHS[Phospho (STY)]IEKETPTNVR_.3                            | -0.471209029 | Q52KF3_S365_M1_Spire1  |
| _SRS[Phospho (STY)]VDKSDEELQFPK_.3                          | -0.4758711   | Q52KF3_S520_M1_Spire1  |
| _APTLAELDSS[Phospho (STY)]DS[Phospho (STY)]EEEKS LHK_.3     | -0.030396312 | Q52KF3_S306_M2_Spire1  |
| _HS[Phospho (STY)]IEKETPTNVR_.3                             | 0.256037942  | Q52KF3_S365_M1_Spire1  |
| _RLS[Phospho (STY)]PS[Phospho (STY)]AS[Phospho (STY)]PPR_.2 | -0.227816162 | Q52KI8_S387_M3_Srrm1   |

|                                                                       |              |                      |
|-----------------------------------------------------------------------|--------------|----------------------|
| _TAS[Phospho (STY)]PPPPPKR_.2                                         | -0.096191403 | Q52KI8_S635_M1_Srrm1 |
| _RRT[Phospho (STY)]PS[Phospho (STY)]PPPR_.2                           | -0.166736532 | Q52KI8_S602_M2_Srrm1 |
| _APQTSS[Phospho (STY)]PPPV_.2                                         | 0.173029019  | Q52KI8_S714_M1_Srrm1 |
| _SRVS[Phospho (STY)]VS[Phospho (STY)]PGR_.2                           | -0.207592459 | Q52KI8_S427_M2_Srrm1 |
| _AAS[Phospho (STY)]PSPQSVR_.2                                         | -0.195302346 | Q52KI8_S779_M1_Srrm1 |
| _RVS[Phospho (STY)]HS[Phospho (STY)]PPPK_.2                           | -0.014076651 | Q52KI8_S655_M2_Srrm1 |
| _RRS[Phospho (STY)]PT[Phospho (STY)]PPPR_.2                           | -0.213213171 | Q52KI8_S591_M2_Srrm1 |
| _S[Phospho (STY)]PS[Phospho (STY)]PPPAR_.2                            | -0.245108157 | Q52KI8_S561_M2_Srrm1 |
| _RRS[Phospho (STY)]PS[Phospho (STY)]PPPAR_.2                          | -0.243774559 | Q52KI8_S561_M2_Srrm1 |
| _RYS[Phospho (STY)]PPIQR_.2                                           | -0.100561047 | Q52KI8_S616_M1_Srrm1 |
| _WQS[Phospho (STY)]PVTK_.2                                            | -0.308462225 | Q52KI8_S550_M1_Srrm1 |
| _S[Phospho (STY)]PT[Phospho (STY)]PPPR_.2                             | -0.131211119 | Q52KI8_S591_M2_Srrm1 |
| _RRS[Phospho (STY)]PS[Phospho (STY)]LSSK_.2                           | -0.368781934 | Q52KI8_S672_M2_Srrm1 |
| _RAS[Phospho (STY)]PS[Phospho (STY)]PPPK_.2                           | -0.107479005 | Q52KI8_S645_M2_Srrm1 |
| _S[Phospho (STY)]PELPEPSVR_.2                                         | 0.31795254   | Q52KI8_S220_M1_Srrm1 |
| _S[Phospho (STY)]RS[Phospho (STY)]YS[Phospho (STY)]PR_.2              | -0.06041716  | Q52KI8_S304_M3_Srrm1 |
| _AAS[Phospho (STY)]PS[Phospho (STY)]PQSVRR_.2                         | -0.259397044 | Q52KI8_S779_M2_Srrm1 |
| _KAQVS[Phospho (STY)]PQS_.2                                           | 0.177277378  | Q52KI8_S943_M1_Srrm1 |
| _AKS[Phospho (STY)]PT[Phospho (STY)]PSLS[Phospho (STY)]PAR_.2         | 0.028096893  | Q52KI8_S832_M3_Srrm1 |
| _RWQS[Phospho (STY)]PVTK_.2                                           | -0.106521259 | Q52KI8_S550_M1_Srrm1 |
| _QRS[Phospho (STY)]PTVTK_.2                                           | -0.161314411 | Q52KI8_S664_M1_Srrm1 |
| _S[Phospho (STY)]PS[Phospho (STY)]PPPARR_.2                           | -0.19351054  | Q52KI8_S561_M2_Srrm1 |
| _GAS[Phospho (STY)]AS[Phospho (STY)]PQGRQS[Phospho (STY)]PSPSTRPIR_.3 | -0.313760436 | Q52KI8_S723_M3_Srrm1 |
| _RS[Phospho (STY)]PT[Phospho (STY)]PPPR_.2                            | 0.337917575  | Q52KI8_S591_M2_Srrm1 |
| _RS[Phospho (STY)]PS[Phospho (STY)]PPPAR_.2                           | -0.44342381  | Q52KI8_S561_M2_Srrm1 |
| _APKPEPVPEPKES[Phospho (STY)]PEK_.3                                   | -0.439744577 | Q52KI8_S260_M1_Srrm1 |
| _RVS[Phospho (STY)]HS[Phospho (STY)]PPPKQR_.3                         | -0.167126475 | Q52KI8_S655_M2_Srrm1 |
| _SVS[Phospho (STY)]GS[Phospho (STY)]PEPAAK_.2                         | 0.388920935  | Q52KI8_S795_M2_Srrm1 |
| _TAS[Phospho (STY)]PPPPPK_.2                                          | -0.234463833 | Q52KI8_S635_M1_Srrm1 |
| _AS[Phospho (STY)]PS[Phospho (STY)]PPPKR_.2                           | -0.052120697 | Q52KI8_S645_M2_Srrm1 |
| _RRS[Phospho (STY)]PS[Phospho (STY)]PAPPPPPPPPPR_.3                   | -0.354907246 | #N/A                 |
| _VSHS[Phospho (STY)]PPPK_.2                                           | -0.03823794  | Q52KI8_S657_M1_Srrm1 |
| _KETES[Phospho (STY)]EAEDNLDLDR_.2                                    | 0.34124761   | Q52KI8_S915_M1_Srrm1 |
| _S[Phospho (STY)]PSPAPPPPPPPPPR_.2                                    | 0.222810573  | Q52KI8_S572_M1_Srrm1 |
| _RES[Phospho (STY)]PS[Phospho (STY)]PAPKPR_.2                         | -0.004899511 | Q52KI8_S448_M2_Srrm1 |
| _EKS[Phospho (STY)]PELPEPSVR_.2                                       | -0.444946642 | Q52KI8_S220_M1_Srrm1 |
| _RHS[Phospho (STY)]PS[Phospho (STY)]PRPR_.2                           | -0.199394519 | Q52KI8_S702_M2_Srrm1 |
| _QS[Phospho (STY)]PSPSTRPIR_.2                                        | 0.227426613  | Q52KI8_S731_M1_Srrm1 |
| _RYS[Phospho (STY)]PS[Phospho (STY)]PPPK_.2                           | -0.125100565 | Q52KI8_S624_M2_Srrm1 |
| _Y[Phospho (STY)]SPPIQR_.2                                            | 0.260929749  | Q52KI8_Y615_M1_Srrm1 |
| _S[Phospho (STY)]RS[Phospho (STY)]PS[Phospho (STY)]PAPEKK_.2          | -0.030728532 | Q52KI8_S207_M3_Srrm1 |
| _RVS[Phospho (STY)]RT[Phospho (STY)]PEPK_.2                           | -0.253754021 | Q52KI8_S743_M2_Srrm1 |
| _TRHS[Phospho (STY)]PTPQQSNR_.3                                       | -0.086537634 | Q52KI8_S412_M1_Srrm1 |
| _RES[Phospho (STY)]PSPAPK_.2                                          | -0.173273452 | Q52KI8_S448_M1_Srrm1 |
| _RAS[Phospho (STY)]PS[Phospho (STY)]PPPKR_.2                          | -0.029401004 | Q52KI8_S645_M2_Srrm1 |
| _KSRVS[Phospho (STY)]VS[Phospho (STY)]PGR_.2                          | 0.25890989   | Q52KI8_S427_M2_Srrm1 |
| _RRT[Phospho (STY)]AS[Phospho (STY)]PPPPPK_.2                         | -0.529771893 | Q52KI8_S635_M2_Srrm1 |

|                                                                             |              |                        |
|-----------------------------------------------------------------------------|--------------|------------------------|
| _RYS[Phospho (STY)]PS[Phospho (STY)]PPPKR_.2                                | -0.018948347 | Q52KI8_S624_M2_Srrm1   |
| _S[Phospho (STY)]PS[Phospho (STY)]PAPPPPPPPPPRR_.3                          | 0.062272896  | #N/A                   |
| _RRAS[Phospho (STY)]PS[Phospho (STY)]PPPK_.2                                | 0.104914115  | Q52KI8_S645_M2_Srrm1   |
| _KVELS[Phospho (STY)]ES[Phospho (STY)]EEDKGSK_.2                            | -0.070730446 | Q52KI8_S461_M2_Srrm1   |
| _HRPSS[Phospho (STY)]PAT[Phospho (STY)]PPPK_.2                              | -0.35752045  | Q52KI8_S401_M2_Srrm1   |
| _KPPAPPS[Phospho (STY)]PVQSQS[Phospho (STY)]PSTNWSPAVPAK_.3                 | 0.134741825  | Q52KI8_S810_M2_Srrm1   |
| _KPPAPPS[Phospho (STY)]PVQS[Phospho (STY)]QSPSTNWS[Phospho (STY)]PAVPAKK_.4 | -0.154477555 | Q52KI8_S810_M3_Srrm1   |
| _APQTSS[Phospho (STY)]PPPVRR_.2                                             | -0.032971425 | Q52KI8_S714_M1_Srrm1   |
| _RS[Phospho (STY)]PS[Phospho (STY)]PAPPPPPPPPPRR_.3                         | 0.229582634  | #N/A                   |
| _LS[Phospho (STY)]PSAS[Phospho (STY)]PPR_.2                                 | 0.124652425  | Q52KI8_S387_M2_Srrm1   |
| _VS[Phospho (STY)]VS[Phospho (STY)]PGR_.2                                   | -0.539986884 | Q52KI8_S427_M2_Srrm1   |
| _RGAS[Phospho (STY)]AS[Phospho (STY)]PQGR_.2                                | 0.28737443   | Q52KI8_S723_M2_Srrm1   |
| _EARS[Phospho (STY)]PQPNK_.2                                                | -0.107763299 | Q52KI8_S694_M1_Srrm1   |
| _HS[Phospho (STY)]PS[Phospho (STY)]PRPR_.2                                  | -0.155515539 | Q52KI8_S702_M2_Srrm1   |
| _RRVS[Phospho (STY)]HS[Phospho (STY)]PPPK_.3                                | -0.05862274  | Q52KI8_S655_M2_Srrm1   |
| _RRS[Phospho (STY)]PS[Phospho (STY)]PR_.2                                   | 0.121675379  | Q52KI8_S609_M2_Srrm1   |
| _SSGQESESIPEYTAEEEREDNR_.3                                                  | 0.046738493  | #N/A                   |
| _SSGQESES[Phospho (STY)]IPEYTAEEER_.2                                       | -0.450315132 | Q52KR3_S2850_M1_Prune2 |
| _NLSLTC[Carbamidomethyl (C)]FAGEEPSS[Phospho (STY)]PER_.2                   | 0.033256737  | Q52KR3_S594_M1_Prune2  |
| _DTSLTS[Phospho (STY)]GSPTSDLGQTNNSK_.2                                     | -0.049218041 | Q52KR3_S876_M1_Prune2  |
| _ASVSDLS[Phospho (STY)]PR_.2                                                | -0.295696794 | Q569Z6_S243_M1_Thrap3  |
| _ERS[Phospho (STY)]PALK_.2                                                  | -0.325459501 | Q569Z6_S248_M1_Thrap3  |
| _S[Phospho (STY)]REEWDPEYTPK_.2                                             | -0.377398129 | Q569Z6_S860_M1_Thrap3  |
| _NKKS[Phospho (STY)]PEIHR_.2                                                | -0.18580615  | Q569Z6_S669_M1_Thrap3  |
| _IDIS[Phospho (STY)]PSTFR_.2                                                | -0.414453441 | Q569Z6_S679_M1_Thrap3  |
| _ERS[Phospho (STY)]PALKS[Phospho (STY)]PLQSVVVR_.3                          | -0.096061355 | Q569Z6_S248_M2_Thrap3  |
| _S[Phospho (STY)]YS[Phospho (STY)]PAHNR_.2                                  | 0.113715433  | Q569Z6_S53_M2_Thrap3   |
| _M[Oxidation (M)]DS[Phospho (STY)]FDEDLAR_.2                                | -0.00477529  | Q569Z6_S572_M1_Thrap3  |
| _FSGEEGEIEDGE[Phospho (STY)]ENREEK_.3                                       | -0.311612876 | Q569Z6_T937_M1_Thrap3  |
| _IDIS[Phospho (STY)]PSTFRK_.2                                               | -0.126586032 | Q569Z6_S679_M1_Thrap3  |
| _S[Phospho (STY)]PRPSPVPK_.2                                                | 0.073387187  | Q569Z6_S264_M1_Thrap3  |
| _M[Oxidation (M)]DS[Phospho (STY)]FDEDLARPSGLLAQER_.3                       | -0.022561609 | Q569Z6_S572_M1_Thrap3  |
| _S[Phospho (STY)]RS[Phospho (STY)]YS[Phospho (STY)]PAHNR_.2                 | -0.454614624 | Q569Z6_S51_M3_Thrap3   |
| _WAHDKFS[Phospho (STY)]GEEGEIEDGE[Phospho (STY)]GTENR_.3                    | -0.198743214 | Q569Z6_S924_M1_Thrap3  |
| _SS[Phospho (STY)]FSITR_.2                                                  | 0.099991302  | Q569Z6_S557_M1_Thrap3  |
| _WAHDKFSGEEGEIEDGE[Phospho (STY)]GTENREEK_.4                                | -0.028580704 | Q569Z6_S935_M1_Thrap3  |
| _FSGEEGEIEDGE[Phospho (STY)]GTENR_.2                                        | 0.041748447  | Q569Z6_S935_M1_Thrap3  |
| _EQKLS[Phospho (STY)]TDDLKTEEGK_.3                                          | 0.360524631  | Q56A07_S192_M1_Scn2b   |
| _EQKLS[Phospho (STY)]TDDLK_.2                                               | 0.072812524  | Q56A07_S192_M1_Scn2b   |
| _LS[Phospho (STY)]TDDLKTEEGK_.2                                             | 0.205498567  | Q56A07_S192_M1_Scn2b   |
| _YDVSVTLK_.2                                                                | -0.152353811 | #N/A                   |
| _KHS[Phospho (STY)]PDRQDGPVVK_.3                                            | -0.303311509 | Q56A08_S348_M1_Gpkow   |
| _DRHS[Phospho (STY)]PFSQR_.3                                                | -0.475591565 | Q56A10_S1452_M1_Znf608 |
| _APGS[Phospho (STY)]PGAGNPPGTPK_.2                                          | -0.206584985 | Q56A10_S626_M1_Znf608  |
| _STSFMSVS[Phospho (STY)]PSK_.2                                              | -0.001236526 | Q570Y9_S265_M1_Deptor  |
| _ANS[Phospho (STY)]LPAGTR_.2                                                | -0.375547391 | Q571I4_S40_M1_Prag1    |
| _TLVHSSS[Phospho (STY)]DGHIDPQHTAGK_.3                                      | 0.293400267  | Q571K4_S103_M1_Tab3    |

|                                                                            |              |                         |
|----------------------------------------------------------------------------|--------------|-------------------------|
| _LYLM[Oxidation (M)]EYHS[Phospho (STY)]PEDNR_.2                            | -0.003179941 | Q571K4_S60_M1_Tab3      |
| _SSSGSDDY[Phospho (STY)]AYTQALLHQR_.2                                      | 0.184516351  | Q571K4_Y516_M1_Tab3     |
| _ETDYPAGEELSES[Phospho (STY)]GQVDK_.2                                      | -0.154665296 | Q58A65_S815_M1_Spag9    |
| _SASQSS[Phospho (STY)]LDKLDQELKEQK_.3                                      | 0.136297102  | Q58A65_S733_M1_Spag9    |
| _SASQSS[Phospho (STY)]LDKLDQELK_.2                                         | -0.078566535 | Q58A65_S733_M1_Spag9    |
| _SQS[Phospho (STY)]GEDESLNQPGPIK_.2                                        | -0.389939444 | Q5BL07_S1212_M1_Pex1    |
| _TPS[Phospho (STY)]QEGC[Carbamidomethyl (C)]QDLTQEQR_.2                    | -0.250133934 | Q5BL07_S1182_M1_Pex1    |
| _NTTEEVGS[Phospho (STY)]PAKEK_.2                                           | -0.188281556 | Q5BLK4_S705_M1_Tut7     |
| _SSS[Phospho (STY)]ISS[Phospho (STY)]IDKDSK_.2                             | -0.45089619  | Q5DQR4_S819_M2_Stxbp5l  |
| _RLS[Phospho (STY)]SADVSK_.2                                               | 0.313552521  | Q5DQR4_S770_M1_Stxbp5l  |
| _SLSGSTNTVSS[Phospho (STY)]EGVTK_.2                                        | -0.124077732 | Q5DQR4_S598_M1_Stxbp5l  |
| _TSYQS[Phospho (STY)]LTELNDSVPLELER_.2                                     | -0.314242931 | Q5DQR4_S727_M1_Stxbp5l  |
| _EEIQESLTSDFQIC[Carbamidomethyl (C)]K_.2                                   | -0.142959931 | #N/A                    |
| _SRSS[Phospho (STY)]S[Phospho (STY)]ISS[Phospho (STY)]IDKDSK_.2            | 0.065137124  | Q5DQR4_S818_M3_Stxbp5l  |
| _FPSKSSPS[Phospho (STY)]_.2                                                | -0.307440163 | Q5DTL9_S1118_M1_Slc4a10 |
| _S[Phospho (STY)]FADIGKK_.2                                                | -0.230078634 | Q5DTL9_S238_M1_Slc4a10  |
| _ENS[Phospho (STY)]TVDFSK_.2                                               | -0.188595325 | Q5DTL9_S280_M1_Slc4a10  |
| _NAGQVVS[Phospho (STY)]PQSAPAC[Carbamidomethyl (C)]AENK_.2                 | -0.259521982 | Q5DTL9_S261_M1_Slc4a10  |
| _GHTS[Phospho (STY)]PC[Carbamidomethyl (C)]GMK_.2                          | 0.015163126  | Q5DTL9_S297_M1_Slc4a10  |
| _ERDSGLEDGRES[Phospho (STY)]PSFDTPSQR_.4                                   | -0.707582013 | Q5DTL9_S89_M1_Slc4a10   |
| _DSGLEDGRES[Phospho (STY)]PSFDTPSQR_.3                                     | -0.565308903 | Q5DTL9_S89_M1_Slc4a10   |
| _DDPSVINIS[Phospho (STY)]DEM[Oxidation (M)]SK_.2                           | 0.43524789   | Q5DTL9_S1085_M1_Slc4a10 |
| _ESRFPSKS[Phospho (STY)]SPS_.2                                             | 0.269924093  | Q5DTL9_S1115_M1_Slc4a10 |
| _KQS[Phospho (STY)]EPNSMDK_.2                                              | 0.360928381  | Q5DTL9_S247_M1_Slc4a10  |
| _NDVS[Phospho (STY)]RENSTVDFSK_.2                                          | -0.256746079 | Q5DTL9_S276_M1_Slc4a10  |
| _S[Phospho (STY)]FADIGK_.2                                                 | -0.071581917 | Q5DTL9_S238_M1_Slc4a10  |
| _ALVVPEPEPDS[Phospho (STY)]NQER_.2                                         | 0.199475267  | Q5DTM8_S138_M1_Rnf20    |
| _KALVVPEPEPDS[Phospho (STY)]NQER_.2                                        | -0.448029347 | Q5DTM8_S138_M1_Rnf20    |
| _S[Phospho (STY)]PAINFHHTPFVDGK_.3                                         | 0.012190131  | Q5DTN8_S622_M1_Jakmip3  |
| _RPS[Phospho (STY)]SLNDLDQSQDER_.2                                         | -0.125309588 | Q5DTN8_S383_M1_Jakmip3  |
| _S[Phospho (STY)]LSELADPNPK_.2                                             | -0.15246546  | Q5DTT2_S720_M1_Psd      |
| _FC[Carbamidomethyl (C)]SEGDC[Carbamidomethyl (C)]AIS[Phospho (STY)]PPR_.2 | -0.015430989 | Q5DTT2_S17_M1_Psd       |
| _LEASTS[Phospho (STY)]DPLPAGGGSVLPGR_.2                                    | -0.174831056 | Q5DTT2_S156_M1_Psd      |
| _LALGS[Phospho (STY)]TDTLSNGQK_.2                                          | -0.132765281 | Q5DTT2_S543_M1_Psd      |
| _AQRPGS[Phospho (STY)]ETR_.2                                               | 0.188477965  | Q5DTT2_S1011_M1_Psd     |
| _RQS[Phospho (STY)]DPSIR_.2                                                | -0.077481251 | Q5DTV4_S492_M1_Zc3h12c  |
| _DFS[Phospho (STY)]PRPVSIR_.2                                              | -0.16850937  | Q5DTX6_S954_M1_Jcad     |
| _AAPLYC[Carbamidomethyl (C)]LSEPRGS[Phospho (STY)]QELTK_.3                 | -0.309671593 | Q5DTX6_S980_M1_Jcad     |
| _SADS[Phospho (STY)]VEEPDPLK_.2                                            | -0.014797479 | Q5DTX6_S1248_M1_Jcad    |
| _S[Phospho (STY)]PPQHIPNPYLEDPVPR_.3                                       | -0.252942619 | Q5DTX6_S351_M1_Jcad     |
| _GPT[Phospho (STY)]PS[Phospho (STY)]PVNEQSSAFVHSSPR_.3                     | 0.085318044  | Q5DTX6_S486_M2_Jcad     |
| _DQQTQTS[Phospho (STY)]FHEDSK_.2                                           | 0.008840609  | Q5DTX6_S693_M1_Jcad     |
| _TAQQPAGLALENVAS[Phospho (STY)]PDRR_.3                                     | -0.082541475 | Q5DTX6_S888_M1_Jcad     |
| _SESLVLATDTNNNDFK_.2                                                       | 0.304818258  | #N/A                    |
| _AEGHASS[Phospho (STY)]PQPQSEGTC[Carbamidomethyl (C)]K_.2                  | -0.099588887 | Q5DTX6_S543_M1_Jcad     |
| _APQASIC[Carbamidomethyl (C)]SDVDGFPTSQAT[Phospho (STY)]SPEPGKKDEEAK_.4    | -0.536332469 | Q5DTX6_T1164_M1_Jcad    |
| _RKS[Phospho (STY)]DLLR_.2                                                 | -0.471962711 | Q5DTY9_S362_M1_Kctd16   |

|                                                                                              |              |                        |
|----------------------------------------------------------------------------------------------|--------------|------------------------|
| _TLTSGS[Phospho (STY)]RESNISSKK_.3                                                           | -0.208528084 | Q5DTY9_S372_M1_Kctd16  |
| _WSSS[Phospho (STY)]HC[Carbamidomethyl (C)]DC[Carbamidomethyl (C)]C[Carbamidomethyl (C)]K_.2 | 0.286070335  | Q5DTY9_S286_M1_Kctd16  |
| _TLTSGS[Phospho (STY)]RESNISSK_.2                                                            | -0.535873716 | Q5DTY9_S372_M1_Kctd16  |
| _QSPDEFC[Carbamidomethyl (C)]HS[Phospho (STY)]DFEDASQGS DTR_.3                               | 0.039100815  | Q5DTY9_S137_M1_Kctd16  |
| _EKLS[Phospho (STY)]IEEELEK_.2                                                               | -0.077083382 | Q5DTY9_S389_M1_Kctd16  |
| _QSNIQ[T[Phospho (STY)]LDRPIK_.3                                                             | -0.07560946  | Q5DTY9_T340_M1_Kctd16  |
| _QSNIQ[T[Phospho (STY)]LDRPIK_.2                                                             | -0.361207758 | Q5DTY9_T340_M1_Kctd16  |
| _LLAPEDVKQS[Phospho (STY)]PDEFC[Carbamidomethyl (C)]HSDFEDASQGS DTR_.4                       | -0.302934093 | Q5DTY9_S130_M1_Kctd16  |
| _S[Phospho (STY)]PHIPYK_.2                                                                   | -0.038767672 | Q5DU02_S237_M1_Usp22   |
| _DPLGARDS[Phospho (STY)]PGR_.2                                                               | 0.050030544  | Q5DU25_S82_M1_Iqsec2   |
| _HSWDS[Phospho (STY)]PAFNNDVVQR_.2                                                           | 0.116423638  | Q5DU25_S734_M1_Iqsec2  |
| _SSS[Phospho (STY)]PGAGGGHSTSTSTPATT LQR_.3                                                  | 0.098045788  | Q5DU25_S214_M1_Iqsec2  |
| _SS[Phospho (STY)]LEDTYGAGDGLK_.2                                                            | -0.319008862 | Q5DU25_S1114_M1_Iqsec2 |
| _LIEAFSQR_.2                                                                                 | -0.021827003 | #N/A                   |
| _M[Oxidation (M)]QFS[Phospho (STY)]FEEYEK_.2                                                 | -0.245526273 | Q5DU25_S383_M1_Iqsec2  |
| _GALSSS[Phospho (STY)]LR_.2                                                                  | -0.170039598 | Q5DU25_S1133_M1_Iqsec2 |
| _QLVYEADGC[Carbamidomethyl (C)]S[Phospho (STY)]PHGTLK_.2                                     | 0.191259336  | Q5DU25_S617_M1_Iqsec2  |
| _ESQY[Phospho (STY)]QNLR_.2                                                                  | -0.12663231  | Q5DU25_Y89_M1_Iqsec2   |
| _DPLGARDS[Phospho (STY)]PGRESQYQNLR_.3                                                       | 0.342481784  | Q5DU25_S82_M1_Iqsec2   |
| _ETRHS[Phospho (STY)]WDSPAFNNDVVQR_.3                                                        | 0.003088071  | Q5DU25_S731_M1_Iqsec2  |
| _ [Acetyl (Protein N-term)]M[Oxidation (M)]EAGSGPPGGPGSES[Phospho (STY)]PNR_.2               | 0.095627588  | Q5DU25_S15_M1_Iqsec2   |
| _GELHRDPLGARDS[Phospho (STY)]PGR_.3                                                          | -0.374800789 | Q5DU25_S82_M1_Iqsec2   |
| _SS[Phospho (STY)]LEDTYGAGDGLK_.2                                                            | 0.13156865   | Q5DU25_S1114_M1_Iqsec2 |
| _AAHLPLLTIEPPSDSS[Phospho (STY)]VDLSDR_.3                                                    | -0.163601235 | Q5DU25_S593_M1_Iqsec2  |
| _DS[Phospho (STY)]PGRESQYQNLR_.2                                                             | -0.021649503 | Q5DU25_S82_M1_Iqsec2   |
| _LRSS[Phospho (STY)]ASESR_.2                                                                 | -0.333234035 | Q5DU25_S363_M1_Iqsec2  |
| _ALSDSYELS[Phospho (STY)]TDLQDK_.2                                                           | 0.088049794  | Q5DU25_S316_M1_Iqsec2  |
| _EAS[Phospho (STY)]YQLQD TTGYTAR_.2                                                          | 0.330143082  | Q5DU25_S138_M1_Iqsec2  |
| _AQNPAYFEGKPAS[Phospho (STY)]LDEGAM[Oxidation (M)]AGAR_.3                                    | -0.417077061 | Q5DU25_S402_M1_Iqsec2  |
| _GALSSS[Phospho (STY)]LRDLDAGK_.2                                                            | -0.219649997 | Q5DU25_S1133_M1_Iqsec2 |
| _RNS[Phospho (STY)]VGS[Phospho (STY)]LDSTIEG SVISSPRPHQR_.4                                  | 0.083437237  | Q5DU25_S1148_M2_Iqsec2 |
| _GPLGLRS[Phospho (STY)]PSES[Phospho (STY)]PQHIAATER_.3                                       | -0.148465388 | Q5DU37_S605_M2_Zfyve26 |
| _S[Phospho (STY)]KTLSTSGGSADIDASK_.2                                                         | -0.309504519 | Q5DU41_S186_M1_Lrrc8b  |
| _S[Phospho (STY)]PESTLTPTLNQNV C[Carbamidomethyl (C)]K_.2                                    | 0.340225756  | Q5EBH1_S177_M1_Rassf5  |
| _HREGS[Phospho (STY)]PLKEESLAR_.3                                                            | -0.261681912 | Q5EBJ4_S211_M1_Ermn    |
| _ILNENPEENLFV VHQAIK_.3                                                                      | 0.243034605  | #N/A                   |
| _YNTISYR_.2                                                                                  | -0.117355752 | #N/A                   |
| _EDSPLGS[Phospho (STY)]PGSQPGTPDEQPVFGK_.3                                                   | -0.481349332 | Q5EBJ4_S227_M1_Ermn    |
| _EGS[Phospho (STY)]PLKEESLAR_.2                                                              | -0.258438363 | Q5EBJ4_S211_M1_Ermn    |
| _EDSPLGS[Phospho (STY)]PGSQPGTPDEQPVFGK_.3                                                   | -0.326992127 | Q5EBJ4_S227_M1_Ermn    |
| _SRPVDILHS[Phospho (STY)]K_.3                                                                | -0.306727917 | Q5EBJ4_S166_M1_Ermn    |
| _SGS[Phospho (STY)]ISNYR_.2                                                                  | -0.270791646 | Q5EG47_S496_M1_Prkaa1  |
| _SIDDEITEAKS[Phospho (STY)]GTATPQR_.2                                                        | 0.400726594  | Q5EG47_S486_M1_Prkaa1  |
| _GADNDGS[Phospho (STY)]GSESGYTPK_.2                                                          | -0.102957262 | Q5F2E7_S213_M1_Nufip2  |
| _SLS[Phospho (STY)]SDEATNPISR_.2                                                             | -0.17406278  | Q5F2E7_S113_M1_Nufip2  |
| _KSS[Phospho (STY)]DIKPGLSSK_.2                                                              | -0.005045379 | Q5F2E7_S304_M1_Nufip2  |
| _DYEIQNPLAS[Phospho (STY)]PTNTLLGSAK_.3                                                      | -0.246737109 | Q5F2E7_S626_M1_Nufip2  |

|                                                                                                     |              |                        |
|-----------------------------------------------------------------------------------------------------|--------------|------------------------|
| _NDS[Phospho (STY)]WGSFDLR_.2                                                                       | -0.209027115 | Q5F2E7_S649_M1_Nufip2  |
| _NS[Phospho (STY)]PQALR_.2                                                                          | -0.232265567 | Q5F2E8_S965_M1-Taok1   |
| _NS[Phospho (STY)]PQALRR_.2                                                                         | -0.311033172 | Q5F2E8_S965_M1-Taok1   |
| _ASDPQS[Phospho (STY)]PPQVSR_.2                                                                     | -0.178639625 | Q5F2E8_S421_M1-Taok1   |
| _AGS[Phospho (STY)]LKDP EIAELFFKEDPEK_.3                                                            | -0.188907669 | Q5F2E8_S9_M1-Taok1     |
| _AEYVFIVDS[Phospho (STY)]DGEDEATC[Carbamidomethyl (C)]R_.2                                          | 0.071753557  | Q5FW52_S85_M1_Mlip     |
| _SSS[Phospho (STY)]PEPVTHLK_.2                                                                      | 0.224544446  | Q5FWK3_S51_M1_Arhgap1  |
| _STQKS[Phospho (STY)]PATAPK_.2                                                                      | -0.30031549  | Q5FWK3_S223_M1_Arhgap1 |
| _FLLDHQGELFPSTDAQGV_.2                                                                              | -0.050648849 | #N/A                   |
| _SDDSKSS[Phospho (STY)]S[Phospho (STY)]PEPVTHLK_.2                                                  | -0.23581564  | Q5FWK3_S50_M2_Arhgap1  |
| _LAS[Phospho (STY)]IDEK_.2                                                                          | -0.164715326 | Q5FWK3_S27_M1_Arhgap1  |
| _TKEGS[Phospho (STY)]AELVPR_.2                                                                      | 0.574366678  | Q5GH64_S154_M1_Xkr7    |
| _EGS[Phospho (STY)]AELVPR_.2                                                                        | -0.345890268 | Q5GH64_S154_M1_Xkr7    |
| _GS[Phospho (STY)]GAGSAALC[Carbamidomethyl (C)]LR_.2                                                | 0.282950059  | Q5GH67_S87_M1_Xkr4     |
| _TVVSSGSAAGEGEVRPST[Phospho (STY)]PQR_.3                                                            | 0.191423369  | Q5GH67_T208_M1_Xkr4    |
| _EYTEAS[Phospho (STY)]PLEDKVVELDNIPVR_.3                                                            | 0.030315508  | Q5H8C4_S2581_M1_Vps13a |
| _HGS[Phospho (STY)]LSADDSTPDTSPGVR_.2                                                               | -0.086462804 | Q5HZI2_S259_M1_C2cd4c  |
| _AQTSYGFATLAES[Phospho (STY)]PHTR_.2                                                                | 0.176008027  | Q5HZI2_S153_M1_C2cd4c  |
| _ESLFHSEHGALAQVGS[Phospho (STY)]PGAGR_.3                                                            | -0.419355596 | Q5HZI2_S175_M1_C2cd4c  |
| _RAT[Phospho (STY)]PEPGPESGQAPR_.3                                                                  | 0.046917857  | Q5HZI2_T282_M1_C2cd4c  |
| _IQPNDGPVFFK_.2                                                                                     | -0.503414075 | #N/A                   |
| _VVYTGIDTEGVAPTK_.2                                                                                 | 0.15670018   | #N/A                   |
| _IKPTTLQVENISIGGVLVPLELK_.3                                                                         | 0.284220775  | #N/A                   |
| _ [Acetyl (Protein N-term)]GDLPLGLVR_.2                                                             | 0.256270159  | #N/A                   |
| _DHC[Carbamidomethyl (C)]QWGSFPFSVIEYEC[Carbamidomethyl (C)]KPNETR_.4                               | 0.496990448  | #N/A                   |
| _LLTGSSYK_.2                                                                                        | -0.141879582 | #N/A                   |
| _S[Phospho (STY)]PAS[Phospho (STY)]PLNNQGIPTPAQLTK_.2                                               | 0.006495705  | Q5M956_S12_M2_Kctd1    |
| _TIS[Phospho (STY)]PPSAVVETDTPPIGK_.2                                                               | -0.075655511 | Q5NBX1_S826_M1_Cobl    |
| _AEHLGLSGADS[Phospho (STY)]DEDPK_.2                                                                 | -0.277542831 | Q5NBX1_S272_M1_Cobl    |
| _KEPDPS[Phospho (STY)]PPSQDNR_.2                                                                    | 0.231560924  | Q5NBX1_S676_M1_Cobl    |
| _S[Phospho (STY)]SLGNDETDEK_.2                                                                      | -0.213088157 | Q5NBX1_S234_M1_Cobl    |
| _KSS[Phospho (STY)]LGNETDEK_.2                                                                      | -0.523435999 | Q5NBX1_S235_M1_Cobl    |
| _S[Phospho (STY)]PPTRKDDAAPNLHSEAR_.4                                                               | -0.662014034 | Q5NBX1_S982_M1_Cobl    |
| _GGG[Phospho (STY)]PAPAC[Carbamidomethyl (C)]ESC[Carbamidomethyl (C)]NC[Carbamidomethyl (C)]ADQK_.2 | 0.087331389  | Q5NCQ5_S418_M1_Dph1    |
| _ALS[Phospho (STY)]PEGALRR_.2                                                                       | -0.032607724 | Q5NCX5_S504_M1_Neurl4  |
| _ALS[Phospho (STY)]PEGALR_.2                                                                        | 0.068979477  | Q5NCX5_S504_M1_Neurl4  |
| _S[Phospho (STY)]FPLHS[Phospho (STY)]PVAGVAHR_.3                                                    | 0.054956957  | Q5NCX5_S904_M2_Neurl4  |
| _ESSDNQPPS[Phospho (STY)]PSLPEELK_.2                                                                | 0.237783137  | Q5PR69_S992_M1_Crad    |
| _ETAQTDS[Phospho (STY)]PQPQER_.2                                                                    | 0.544486598  | Q5PR69_S487_M1_Crad    |
| _VNLS[Phospho (STY)]PVTPAK_.2                                                                       | -0.502651379 | Q5PR69_S552_M1_Crad    |
| _ESSDNQPPS[Phospho (STY)]PSLPEELKGQK_.3                                                             | -0.141767211 | Q5PR69_S992_M1_Crad    |
| _DLPSFLVPGLPS[Phospho (STY)]PQK_.2                                                                  | -0.252698141 | Q5PR69_S783_M1_Crad    |
| _PASQT[Phospho (STY)]PPSS[Phospho (STY)]PLSK_.2                                                     | -0.06774436  | Q5PR69_S953_M2_Crad    |
| _C[Carbamidomethyl (C)]DES[Phospho (STY)]PNREVQSSEAEALAR_.3                                         | 0.263247277  | Q5PR73_S126_M1_Diras2  |
| _VAVFGAGGVGK_.2                                                                                     | -0.547392389 | #N/A                   |
| _ELFQELLNLEK_.2                                                                                     | 0.347002149  | #N/A                   |
| _PEQSNDYR_.2                                                                                        | 0.118576717  | #N/A                   |

|                                                                               |              |                         |
|-------------------------------------------------------------------------------|--------------|-------------------------|
| _GTFRES[Phospho (STY)]YIPTVEDTYR_3                                            | -0.048219577 | Q5PR73_S35_M1_Diras2    |
| _VLLAADS[Phospho (STY)]EEEGDFPSGR_2                                           | -0.056159792 | Q5PSV9_S168_M1_Mdc1     |
| _IVHSS[Phospho (STY)]PSSDGR_2                                                 | -0.069987218 | Q5QNNQ6_S760_M1_Osbp2   |
| _STPLPGPPGS[Phospho (STY)]PR_2                                                | -0.309869021 | Q5RJI5_S508_M1_Brsk1    |
| _SRLNS[Phospho (STY)]IR_2                                                     | 0.286895827  | Q5RJI5_S555_M1_Brsk1    |
| _NSFLGS[Phospho (STY)]PR_2                                                    | 0.021479883  | Q5RJI5_S563_M1_Brsk1    |
| _FQVDISSEGEPS[Phospho (STY)]PR_2                                              | -0.507625708 | Q5RJI5_S676_M1_Brsk1    |
| _SSGGT[Phospho (STY)]PLHS[Phospho (STY)]PLHTPR_2                              | -0.390159766 | Q5RJI5_S519_M2_Brsk1    |
| _S[Phospho (STY)]PVFSFSPEPGAGDEAR_2                                           | -0.104811564 | Q5RJI5_S450_M1_Brsk1    |
| _SVSGASTGLSSS[Phospho (STY)]PLSS[Phospho (STY)]PR_2                           | -0.176889894 | Q5RJI5_S443_M2_Brsk1    |
| _S[Phospho (STY)]M[Oxidation (M)]EVLSITDAGSGGSPVPTNR_2                        | -0.398463687 | Q5RJI5_S399_M1_Brsk1    |
| _VDS[Phospho (STY)]PMLSR_2                                                    | 0.367968595  | Q5RJI5_S384_M1_Brsk1    |
| _SLPS[Phospho (STY)]NGELDPDVLESM[Oxidation (M)]ASLGC[Carbamidomethyl (C)]FR_3 | -0.377329958 | Q5RJI5_S311_M1_Brsk1    |
| _EESLAGC[Carbamidomethyl (C)]S[Phospho (STY)]LVESQSK_2                        | -0.063085477 | Q5RKR3_S700_M1_Islr2    |
| _ASYLES[Phospho (STY)]EKS[Phospho (STY)]YPAR_2                                | -0.088531333 | Q5RKR3_S654_M2_Islr2    |
| _SNS[Phospho (STY)]ISVGEVYR_2                                                 | -0.117082269 | Q5S006_S910_M1_Lrrk2    |
| _AGS[Phospho (STY)]PGSEVVTLQQFLEESNK_2                                        | -0.376438394 | Q5SNZ0_S1677_M1_Ccdc88a |
| _FYDPS[Phospho (STY)]PPR_2                                                    | 0.401121709  | Q5SNZ0_S1387_M1_Ccdc88a |
| _RT[Phospho (STY)]SIHDFLSK_3                                                  | -0.196863116 | Q5SNZ0_T1821_M1_Ccdc88a |
| _QKS[Phospho (STY)]LTLTPTNR_2                                                 | -0.126118949 | Q5SNZ0_S1417_M1_Ccdc88a |
| _DT[Phospho (STY)]TSFEDISPGISDDSTGSR_2                                        | 0.032948516  | Q5SNZ0_T1560_M1_Ccdc88a |
| _SVS[Phospho (STY)]GKTPGDFYDRR_3                                              | -0.392205165 | Q5SNZ0_S1738_M1_Ccdc88a |
| _VHASRPAS[Phospho (STY)]LDAGR_3                                               | -0.172436344 | Q5SNZ0_S1588_M1_Ccdc88a |
| _SSS[Phospho (STY)]QENLLDEVMMK_2                                              | 0.031114962  | Q5SNZ0_S1704_M1_Ccdc88a |
| _S[Phospho (STY)]SPMLQHK_2                                                    | 0.160967089  | Q5SNZ0_S1653_M1_Ccdc88a |
| _STS[Phospho (STY)]PEHLHKPR_2                                                 | 0.285314793  | Q5SP85_S250_M1_Ccdc85a  |
| _GTS[Phospho (STY)]PEHLK_2                                                    | 0.271120559  | Q5SP85_S353_M1_Ccdc85a  |
| _HALGGS[Phospho (STY)]LEHLPR_3                                                | -0.545050551 | Q5SP85_S342_M1_Ccdc85a  |
| _ARGTS[Phospho (STY)]PEHLK_2                                                  | -0.390663433 | Q5SP85_S353_M1_Ccdc85a  |
| _HRPGGS[Phospho (STY)]PEHTR_3                                                 | -0.199598674 | Q5SP85_S320_M1_Ccdc85a  |
| _AAGGSAPAAESC[Carbamidomethyl (C)]PSAPAGAST[Phospho (STY)]PTGVDDLK_3          | -0.253818482 | Q5SP85_T24_M1_Ccdc85a   |
| _GS[Phospho (STY)]PEQQRHPHPGSS[Phospho (STY)]PEVLPK_3                         | -0.251515537 | Q5SP85_S284_M2_Ccdc85a  |
| _HASGGSGSGGS[Phospho (STY)]REGTLR_3                                           | 0.309007559  | Q5SP85_S380_M1_Ccdc85a  |
| _HVLGS[Phospho (STY)]PEHFQK_2                                                 | -0.10652828  | Q5SP85_S308_M1_Ccdc85a  |
| _HHASGGS[Phospho (STY)]PEHLQKPR_3                                             | -0.200005863 | Q5SP85_S228_M1_Ccdc85a  |
| _HSGGS[Phospho (STY)]PEHLQK_2                                                 | -0.342182031 | Q5SP85_S330_M1_Ccdc85a  |
| _HPHPGS[Phospho (STY)]SPEVLPK_3                                               | 0.149578198  | Q5SP85_S295_M1_Ccdc85a  |
| _GPS[Phospho (STY)]PEHHKPLC[Carbamidomethyl (C)]K_3                           | 0.170453335  | Q5SP85_S273_M1_Ccdc85a  |
| _SYLQDPIWR_2                                                                  | -0.119365154 | #N/A                    |
| _YAPLHLVPLIER_2                                                               | -0.310730002 | #N/A                    |
| _FISELAR_2                                                                    | 0.158290059  | #N/A                    |
| _QLQVVPLFGDM[Oxidation (M)]QIELAR_2                                           | -0.11377645  | #N/A                    |
| _SLDQAISR_2                                                                   | 0.151031828  | #N/A                    |
| _SVETDSSTVEHVR_2                                                              | -0.166568668 | #N/A                    |
| _LGT[Phospho (STY)]PQQIAIAR_2                                                 | -0.307450023 | Q5SQX6_T1067_M1_Cyfp2   |
| _NAFVTGIAR_2                                                                  | -0.020118852 | #N/A                    |
| _YSNSEVVGTGSLDSQK_2                                                           | 0.363945271  | #N/A                    |

|                                                                                   |              |                         |
|-----------------------------------------------------------------------------------|--------------|-------------------------|
| _M[Oxidation (M)]ESVFNQAIR_.2                                                     | 0.121347163  | #N/A                    |
| _EANHNVSAPYGR_.2                                                                  | -0.067093236 | #N/A                    |
| _NNPPTIVQDK_.2                                                                    | -0.338934082 | #N/A                    |
| _FHLLVANR_.2                                                                      | 0.060190886  | #N/A                    |
| _TVTYEDPQAVGGLASALDNR_.2                                                          | -0.140560271 | #N/A                    |
| _GNS[Phospho (STY)]LAEQR_.2                                                       | -0.288889912 | Q5SRX1_S394_M1_Tom1l2   |
| _GIEFPM[Oxidation (M)]ADLDALS[Phospho (STY)]PIHTPQR_.3                            | -0.386532884 | Q5SRX1_S160_M1_Tom1l2   |
| _IVELISR_.2                                                                       | -0.210365235 | #N/A                    |
| _AAETVPDLPS[Phospho (STY)]PPTEAPAPASNTSTR_.3                                      | 0.066572337  | Q5SRX1_S479_M1_Tom1l2   |
| _DFIDSVLVK_.2                                                                     | -0.114823096 | #N/A                    |
| _EVM[Oxidation (M)]LALTVLETC[Carbamidomethyl (C)]VK_.2                            | -0.140736109 | #N/A                    |
| _VSNEEVTEELLHVNDLNNVFLR_.3                                                        | -0.075391075 | #N/A                    |
| _GDQEEELDRPVSS[Phospho (STY)]PGEAEQK_.3                                           | -0.343050626 | Q5SSH7_S2407_M1_Zzef1   |
| _S[Phospho (STY)]M[Oxidation (M)]EETRPVPTVK_.2                                    | 0.054193724  | Q5SSH7_S1538_M1_Zzef1   |
| _S[Phospho (STY)]PEMDKLK_.2                                                       | 0.327225625  | Q5SSH7_S240_M1_Zzef1    |
| _LLPSSGPC[Carbamidomethyl (C)]VAEVSTAEEPS[Phospho (STY)]PPST[Phospho (STY)]PTR_.3 | -0.150643786 | Q5SSH7_S1515_M2_Zzef1   |
| _TSSVVEEHFQGSAS[Phospho (STY)]PTEAATPAAGDR_.3                                     | -0.348740459 | Q5SSH7_S1475_M1_Zzef1   |
| _QLHGS[Phospho (STY)]S[Phospho (STY)]DES[Phospho (STY)]EVENEAK_.2                 | -0.278858459 | Q5SSI6_S114_M3_Utp18    |
| _SQGGGDSVS[Phospho (STY)]PTPPEGLAPGVEAGK_.2                                       | -0.041003481 | Q5SSL4_S72_M1_Abr       |
| _GIEEVGIYR_.2                                                                     | -0.431541207 | #N/A                    |
| _ISQNFLSSINEDIDPR_.2                                                              | 0.094681537  | #N/A                    |
| _GPPEGSETMPYIDES[Phospho (STY)]PTMSPQLSAR_.3                                      | 0.245639284  | Q5SSL4_S53_M1_Abr       |
| _C[Carbamidomethyl (C)]SQSNNQFQK_.2                                               | -0.417031278 | #N/A                    |
| _HSATDKRDS[Phospho (STY)]EEESESTAL_.3                                             | -0.158591522 | Q5SSM3_S805_M1_Arhgap44 |
| _SKELS[Phospho (STY)]PGSGQK_.2                                                    | 0.304371567  | Q5SSM3_S598_M1_Arhgap44 |
| _RES[Phospho (STY)]PPSAER_.2                                                      | -0.383000548 | Q5SSZ5_S934_M1_Tns3     |
| _VTGS[Phospho (STY)]PAEEDDEETK_.2                                                 | 0.014682122  | Q5SU73_S171_M1_Coil     |
| _VTGS[Phospho (STY)]PAEEDDEETKKK_.3                                               | -0.250009604 | Q5SU73_S171_M1_Coil     |
| _RQEDSGQNEKAS[Phospho (STY)]DLETK_.3                                              | 0.01544388   | Q5SU73_S146_M1_Coil     |
| _QEDSGQNEKAS[Phospho (STY)]DLETK_.2                                               | -0.095453125 | Q5SU73_S146_M1_Coil     |
| _NEVNGTSEDIKSEGDTS[Phospho (STY)]N_.2                                             | -0.452318772 | Q5SUF2_S431_M1_Luc7l3   |
| _SLS[Phospho (STY)]LGDKEISR_.2                                                    | -0.235897461 | Q5SV85_S1067_M1_Synrg   |
| _S[Phospho (STY)]GSIDDSFTDFQEM[Oxidation (M)]PASSK_.2                             | -0.254634764 | Q5SV85_S465_M1_Synrg    |
| _TADSVS[Phospho (STY)]PLEPPTK_.2                                                  | -0.417590727 | Q5SV85_S576_M1_Synrg    |
| _QLS[Phospho (STY)]LEGAGLAMEEFKENTSSTK_.3                                         | -0.384965085 | Q5SV85_S744_M1_Synrg    |
| _QLS[Phospho (STY)]LEGAGLAMEEFK_.2                                                | -0.536422771 | Q5SV85_S744_M1_Synrg    |
| _SETSS[Phospho (STY)]NPSS[Phospho (STY)]PEIC[Carbamidomethyl (C)]PNK_.2           | -0.24292677  | Q5SVL6_S590_M2_Rap1gap2 |
| _NQSRS[Phospho (STY)]PIK_.2                                                       | -0.127877178 | Q5SVL6_S539_M1_Rap1gap2 |
| _TTFS[Phospho (STY)]PPVAAATAK_.2                                                  | -0.213424519 | Q5SVL6_S525_M1_Rap1gap2 |
| _NQSRS[Phospho (STY)]PIKR_.2                                                      | -0.219791873 | Q5SVL6_S539_M1_Rap1gap2 |
| _TPDGGHSS[Phospho (STY)]QEIK_.2                                                   | 0.052135312  | Q5SVL6_S581_M1_Rap1gap2 |
| _SHS[Phospho (STY)]M[Oxidation (M)]ETM[Oxidation (M)]VGSQR_.2                     | -0.127746125 | Q5SVL6_S488_M1_Rap1gap2 |
| _LHS[Phospho (STY)]GSEGGQDSR_.2                                                   | 0.141498378  | Q5SVL6_S553_M1_Rap1gap2 |
| _LSQSSQDSS[Phospho (STY)]PVR_.2                                                   | -0.34055832  | Q5SVQ0_S59_M1_Kat7      |
| _S[Phospho (STY)]SGSETEQVDFSDR_.2                                                 | 0.206496497  | Q5SVQ0_S101_M1_Kat7     |
| _GTS[Phospho (STY)]PPDYR_.2                                                       | 0.098722308  | Q5SVR0_S997_M1_Tbc1d9b  |
| _VFQKNS[Phospho (STY)]PM[Oxidation (M)]EDLGAK_.2                                  | 0.016668854  | Q5SVR0_S464_M1_Tbc1d9b  |



|                                                                  |              |                            |
|------------------------------------------------------------------|--------------|----------------------------|
| _NS[Phospho (STY)]PMEDLGAK_.2                                    | 0.325745437  | Q5SVR0_S464_M1_Tbc1d9b     |
| _AVEDM[Oxidation (M)]GS[Phospho (STY)]PQTAK_.2                   | -0.181967677 | Q5SW19_S1300_M1_Cluh       |
| _IPHSS[Phospho (STY)]SENIR_.2                                    | 0.002103505  | Q5SW75_S1217_M1_Ssh2       |
| _EM[Oxidation (M)]TTS[Phospho (STY)]ADQIAEVK_.2                  | -0.623218196 | Q5SW75_S487_M1_Ssh2        |
| _DEDS[Phospho (STY)]LEEDAQR_.2                                   | -0.094977688 | Q5SWP3_S1268_M1_Nacad      |
| _VSL[Phospho (STY)]PHSTLNPK_.2                                   | -0.090572123 | Q5SWP3_S1216_M1_Nacad      |
| _EFPALQKDEDS[Phospho (STY)]LEEDAQR_.3                            | 0.127416194  | Q5SWP3_S1268_M1_Nacad      |
| _SSM[Oxidation (M)]S[Phospho (STY)]GLHLVK_.2                     | -0.53771479  | Q5SWU9_S79_M1_Acaca        |
| _FIIGSVSEDNS[Phospho (STY)]EDEISNLVK_.2                          | 0.161480579  | Q5SWU9_S29_M1_Acaca        |
| _LNRSDS[Phospho (STY)]DSSTLSK_.2                                 | -0.078508546 | Q5SXA9_S939_M1_Wwc1        |
| _LGSS[Phospho (STY)]PTSSC[Carbamidomethyl (C)]NPTPTK_.2          | 0.117458259  | Q5SXY1_S133_M1_Specc1      |
| _ASS[Phospho (STY)]EDTLNKGSSASSGVAR_.2                           | -0.035279461 | Q5SXY1_S55_M1_Specc1       |
| _SSKGS[Phospho (STY)]PTGSSPNNASELSLASLTK_.3                      | -0.229187004 | Q5SXY1_S355_M1_Specc1      |
| _S[Phospho (STY)]STSLAFESR_.2                                    | 0.07338782   | Q5SXY1_S37_M1_Specc1       |
| _T[Phospho (STY)]SPAPSDSATTVK_.2                                 | -0.066983027 | Q5SXY1_T809_M1_Specc1      |
| _KLGS[Phospho (STY)]PTSSC[Carbamidomethyl (C)]NPTPTK_.2          | 0.052054209  | Q5SXY1_S133_M1_Specc1      |
| _S[Phospho (STY)]PLSGIPVR_.2                                     | -0.01158903  | Q5SXY1_S847_M1_Specc1      |
| _GSPT[Phospho (STY)]GSS[Phospho (STY)]PNNASELSLASLTK_.2          | -0.307005623 | Q5SXY1_S360_M2_Specc1      |
| _IGELGAPEVWGLS[Phospho (STY)]PK_.2                               | -0.322870863 | Q5SZT7_S141_M1_Nkapl;Nkap  |
| _ESS[Phospho (STY)]DEDRDSKLPSK_.2                                | 0.319682376  | Q5U3K5_S638_M1_Rabl6       |
| _VAPQQC[Carbamidomethyl (C)]S[Phospho (STY)]EPETK_.2             | -0.055520277 | Q5U3K5_S502_M1_Rabl6       |
| _EDLS[Phospho (STY)]DVTDEDTGPAQPPPSK_.2                          | 0.413757855  | Q5U3K5_S594_M1_Rabl6       |
| _NISLSS[Phospho (STY)]EEEEAGLAGHPR_.3                            | 0.162386874  | Q5U3K5_S483_M1_Rabl6       |
| _FPVREDLS[Phospho (STY)]DVTDEDTGPAQPPPSK_.3                      | -0.12791271  | Q5U3K5_S594_M1_Rabl6       |
| _NKPGVYTK_.2                                                     | 0.340958864  | #N/A                       |
| _Acetyl (Protein N-term)]ATALS[Phospho (STY)]EEELDNEYYSLNVR_.3   | -0.234728865 | Q5U458_S6_M1_Dnajc11       |
| _RTPAEIR_.2                                                      | 0.392488823  | #N/A                       |
| _VESTS[Phospho (STY)]GSEC[Carbamidomethyl (C)]ENPTK_.2           | 0.329973121  | Q5U4C1_S295_M1_Gprasp1     |
| _APS[Phospho (STY)]PAPAVS[Phospho (STY)]PK_.2                    | -0.233166033 | Q5U4C3_S676_M2_Scaf1       |
| _S[Phospho (STY)]AS[Phospho (STY)]PPPAASSSSSR_.2                 | -0.075882473 | Q5U4C3_S577_M2_Scaf1       |
| _S[Phospho (STY)]AS[Phospho (STY)]PGPPPAR_.2                     | -0.175593295 | Q5U4C3_S491_M2_Scaf1       |
| _S[Phospho (STY)]PFLKPDER_.2                                     | -0.258685833 | Q5U4C3_S821_M1_Scaf1       |
| _FDIYDPFHPTDEAYS[Phospho (STY)]PPPAPEQK_.3                       | -0.123458013 | Q5U4C3_S240_M1_Scaf1       |
| _GTEETSWS[Phospho (STY)]GEER_.2                                  | -0.160854469 | Q5U4C3_S912_M1_Scaf1       |
| _APS[Phospho (STY)]PAPAVS[Phospho (STY)]PKR_.2                   | 0.446911482  | Q5U4C3_S676_M2_Scaf1       |
| _SGDPAPPDS[Phospho (STY)]PSWEAK_.2                               | 0.010011112  | Q5U4C3_S518_M1_Scaf1       |
| _QRS[Phospho (STY)]AS[Phospho (STY)]PGPPPAR_.2                   | 0.197008097  | Q5U4C3_S491_M2_Scaf1       |
| _QRS[Phospho (STY)]GDPAPPDS[Phospho (STY)]PSWEAK_.2              | 0.296000436  | Q5U4C3_S510_M2_Scaf1       |
| _RRS[Phospho (STY)]AS[Phospho (STY)]PPPAASSSSSR_.3               | 0.072369545  | Q5U4C3_S577_M2_Scaf1       |
| _REVL[Phospho (STY)]DSEGLS[Phospho (STY)]ADER_.2                 | -0.399704008 | Q5U4C3_S695_M2_Scaf1       |
| _VYTY[Phospho (STY)]IQSR_.2                                      | 0.083226782  | Q5U4C9_Y380_M1_Dyrk2;Dyrk4 |
| _VGS[Phospho (STY)]AGAAALAAGGAGGAER_.2                           | -0.089540827 | Q5U4F6_S15_M1_Dync2i2      |
| _YMGALS[Phospho (STY)]QSR_.2                                     | -0.298619497 | Q5U5V2_S195_M1_Hykk        |
| _TS[Phospho (STY)]PTASVVK_.2                                     | 0.23572966   | Q5XG69_S359_M1_Fam169a     |
| _HFQDSEFSSS[Phospho (STY)]QGEDENVAK_.3                           | 0.071005284  | Q5XG69_S348_M1_Fam169a     |
| _TLLGS[Phospho (STY)]SDNVATVSNIEK_.2                             | 0.468134902  | Q5XG69_S523_M1_Fam169a     |
| _TSPDTESEM[Oxidation (M)]LIDQSPSDDKGHTENLS[Phospho (STY)]PVSK_.4 | 0.158216041  | Q5XG69_S512_M1_Fam169a     |

|                                                                              |              |                        |
|------------------------------------------------------------------------------|--------------|------------------------|
| _AVDS[Phospho (STY)]S[Phospho (STY)]SEEIEVEVPVDDR_2                          | -0.418153907 | Q5XG69_S630_M2_Fam169a |
| _SQSEEQSEASS[Phospho (STY)]EHLEQFTQSAEK_3                                    | -0.145455361 | Q5XG69_S614_M1_Fam169a |
| _KYVIS[Phospho (STY)]DEEEEDD_2                                               | 0.17367075   | Q5XJE5_S659_M1_Leo1    |
| _YVIS[Phospho (STY)]DEEEEDD_2                                                | -0.14132766  | Q5XJE5_S659_M1_Leo1    |
| _LNS[Phospho (STY)]DEEGESSGKR_2                                              | -0.669747217 | Q5XJE5_S631_M1_Leo1    |
| _KLNS[Phospho (STY)]DEEGESSGKR_3                                             | 0.348608692  | Q5XJE5_S631_M1_Leo1    |
| _ [Acetyl (Protein N-term)]ADM[Oxidation (M)]EDLFGS[Phospho (STY)]EAESEAER_2 | 0.18946749   | Q5XJE5_S10_M1_Leo1     |
| _KLNS[Phospho (STY)]DEEGESSGK_2                                              | 0.365428316  | Q5XJE5_S631_M1_Leo1    |
| _MQNT[Phospho (STY)]DDED_2                                                   | -0.099553077 | Q5XJE5_T189_M1_Leo1    |
| _S[Phospho (STY)]PSVSSEYYIR_2                                                | 0.129652456  | Q5XJV6_S531_M1_Lmtk3   |
| _ALVNGEPM[Oxidation (M)]S[Phospho (STY)]PEAGEK_2                             | -0.271695243 | Q5XJV6_S962_M1_Lmtk3   |
| _AQRPPEGM[Oxidation (M)]S[Phospho (STY)]PELPPR_3                             | -0.265128704 | Q5XJV6_S232_M1_Lmtk3   |
| _VAENGLES[Phospho (STY)]PEKEER_2                                             | -0.218500457 | Q5XJV6_S947_M1_Lmtk3   |
| _QGLPS[Phospho (STY)]PPGTPR_2                                                | -0.079431208 | Q5Y5T5_S672_M1_Zdhhc8  |
| _TPRPGS[Phospho (STY)]AESALSQR_2                                             | -0.357184736 | Q5Y5T5_S335_M1_Zdhhc8  |
| _TS[Phospho (STY)]PPTPAMYK_2                                                 | -0.131889433 | Q5Y5T5_S346_M1_Zdhhc8  |
| _MADTGS[Phospho (STY)]PGM[Oxidation (M)]QR_2                                 | 0.120517782  | Q60575_S1454_M1_Kif1b  |
| _IVEGQGQSEVIS[Phospho (STY)]PPEEVNR_2                                        | -0.013854928 | Q60575_S1075_M1_Kif1b  |
| _SGLS[Phospho (STY)]LEELR_2                                                  | -0.427190533 | Q60575_S1057_M1_Kif1b  |
| _EFSQVHGSIS[Phospho (STY)]DC[Carbamidomethyl (C)]K_2                         | 0.169680638  | Q60575_S1605_M1_Kif1b  |
| _GDS[Phospho (STY)]LILEHQWELEK_2                                             | -0.074151846 | Q60575_S1487_M1_Kif1b  |
| _KLS[Phospho (STY)]NPDIFAPT GK_2                                             | -0.040693775 | Q60592_S14_M1_Mast2    |
| _SLS[Phospho (STY)]EEKEDHSDGLAGLK_3                                          | -0.156298922 | Q60592_S817_M1_Mast2   |
| _TQAAGPS[Phospho (STY)]SPRPPT[Phospho (STY)]PK_2                             | -0.104252428 | Q60596_S445_M2_Xrcc1   |
| _SSPYPTDVAR_2                                                                | 0.042395136  | #N/A                   |
| _LNVLANVIR_2                                                                 | -0.020019481 | #N/A                   |
| _FEEFLQR_2                                                                   | 0.268933793  | #N/A                   |
| _DVVVDLVC[Carbamidomethyl (C)]YR_2                                           | 0.104976761  | #N/A                   |
| _QILLPFR_2                                                                   | 0.325545636  | #N/A                   |
| _IC[Carbamidomethyl (C)]EEAFTR_2                                             | 0.046706768  | #N/A                   |
| _THLTELR_2                                                                   | -0.052970405 | #N/A                   |
| _ELEQIFC[Carbamidomethyl (C)]QFDSK_2                                         | 0.166823884  | #N/A                   |
| _TSFDEM[Oxidation (M)]LPGTHFQR_3                                             | -0.576480192 | #N/A                   |
| _VASSVPVENFTIHGGLSR_3                                                        | 0.134478751  | #N/A                   |
| _SWDIFFR_2                                                                   | -0.241858896 | #N/A                   |
| _LVEDHLAVQSLIR_3                                                             | -0.151846493 | #N/A                   |
| _VVNAPIFHVNSDDPEAVMYVC[Carbamidomethyl (C)]K_3                               | 0.122543229  | #N/A                   |
| _TKAEQFYC[Carbamidomethyl (C)]GDTEGKK_3                                      | -0.379057768 | #N/A                   |
| _VFHLPTTTFIGGQEPALPLR_3                                                      | -0.111713346 | #N/A                   |
| _HHVLHDQNVDKR_3                                                              | -0.126071697 | #N/A                   |
| _TVPIEAVTSK_2                                                                | 0.112633615  | #N/A                   |
| _NAST[Phospho (STY)]FEEVVQVPSAYQK_2                                          | 0.370533931  | Q60598_T323_M1_Cttn    |
| _SAVGFDYQ GK_2                                                               | -0.011104055 | #N/A                   |
| _HC[Carbamidomethyl (C)]S[Phospho (STY)]QVDSVR_2                             | 0.163308373  | Q60598_S113_M1_Cttn    |
| _YGVQADRVDK_2                                                                | -0.061724663 | #N/A                   |
| _SAVGFEYQ GK_2                                                               | 0.15642823   | #N/A                   |
| _TVQGSQHGEHINIHK_3                                                           | 0.113380946  | #N/A                   |

|                                                               |              |                       |
|---------------------------------------------------------------|--------------|-----------------------|
| _KQT[Phospho (STY)]PPASPSQPIEDRPPSSPIYEDAAPFK_.4              | 0.127166372  | Q60598_T401_M1_Cttn   |
| _VDQSAVGFEYQ GK_.2                                            | 0.053039194  | #N/A                  |
| _SAVGHEYQSK_.2                                                | -0.095280284 | #N/A                  |
| _YGIDKDKVDK_.2                                                | 0.152720145  | #N/A                  |
| _DYSSGFGGK_.2                                                 | -0.408791137 | #N/A                  |
| _S[Phospho (STY)]PQDRS[Phospho (STY)]PILAEVK_.2               | -0.350791476 | Q60603_S899_M2_Kcnh1  |
| _ALGQNPTNAEVLK_.2                                             | 0.107361605  | #N/A                  |
| _NKDQGTIEDYVEGLR_.3                                           | 0.02722114   | #N/A                  |
| _EAFQLFDR_.2                                                  | 0.125938052  | #N/A                  |
| _HVLVTLGEK_.2                                                 | 0.113085941  | #N/A                  |
| _ILYSQC[Carbamidomethyl (C)]GDVMR_.2                          | -0.076670899 | #N/A                  |
| _ANS[Phospho (STY)]LGDLYAQK_.2                                | -0.234286903 | Q60610_S231_M1_Tiam1  |
| _TES[Phospho (STY)]LPSAQQYVPFGGK_.2                           | 0.038182787  | Q60610_S1407_M1_Tiam1 |
| _SNATNSSYS[Phospho (STY)]PPTGR_.2                             | -0.185847594 | Q60610_S358_M1_Tiam1  |
| _SKS[Phospho (STY)]ADIWR_.2                                   | -0.099044103 | Q60610_S172_M1_Tiam1  |
| _RSNATNSSYS[Phospho (STY)]PPTGR_.2                            | -0.078696234 | Q60610_S358_M1_Tiam1  |
| _S[Phospho (STY)]LEGIFDDTVPDGK_.2                             | -0.083830531 | Q60610_S726_M1_Tiam1  |
| _FTIDSDAISASS[Phospho (STY)]PEKEPQQPAGGGDTDR_.3               | -0.061982397 | Q60610_S1466_M1_Tiam1 |
| _S[Phospho (STY)]LEGIFDDTVPDGKR_.2                            | -0.124129783 | Q60610_S726_M1_Tiam1  |
| _LEQNGS[Phospho (STY)]PLGR_.2                                 | 0.172186056  | Q60611_S38_M1_Satb1   |
| _LDDLDC[Carbamidomethyl (C)]PR_.2                             | 0.1107284    | #N/A                  |
| _SFVGEPPR_.2                                                  | -0.04544583  | #N/A                  |
| _ASLTLTLR_.2                                                  | 0.170807645  | #N/A                  |
| _QLM[Oxidation (M)]C[Carbamidomethyl (C)]VVTLGGESR_.2         | 0.007426229  | #N/A                  |
| _C[Carbamidomethyl (C)]TAVNGQGQAVK_.2                         | 0.052247065  | #N/A                  |
| _SGKEEVMEGPLR_.3                                              | -0.196678684 | #N/A                  |
| _NYVTPVNR_.2                                                  | 0.159056078  | #N/A                  |
| _NQQIFLR_.2                                                   | 0.096479146  | #N/A                  |
| _FNSLNELVDYHR_.2                                              | 0.190069851  | #N/A                  |
| _ATADELSFK_.2                                                 | 0.250103104  | #N/A                  |
| _NVVLQTLLEGHLR_.2                                             | -0.070978641 | #N/A                  |
| _IFVGGLSPDTPEEK_.2                                            | -0.375539473 | #N/A                  |
| _YHNVGLSK_.2                                                  | 0.315934194  | #N/A                  |
| _IDASKNEEDEGHSNSS[Phospho (STY)]PR_.3                         | -0.195177274 | Q60668_S83_M1_Hnrnpd  |
| _IREYFGGFGEVESIELPM[Oxidation (M)]DNK_.3                      | -0.158610348 | #N/A                  |
| _EYFGGFGEVESIELPM[Oxidation (M)]DNK_.2                        | -0.134045952 | #N/A                  |
| _NEEDEGHSNS[Phospho (STY)]SPR_.2                              | -0.086684114 | Q60668_S82_M1_Hnrnpd  |
| _IDASKNEEDEGHSNS[Phospho (STY)]S[Phospho (STY)]PRHTEAAAAQR_.4 | -0.395744909 | Q60668_S82_M2_Hnrnpd  |
| _AEDS[Phospho (STY)]SEGHEEEVLGGRGEK_.3                        | -0.317721664 | Q60673_S307_M1_Ptprn  |
| _AEDS[Phospho (STY)]SEGHEEEVLGGR_.3                           | 0.006384781  | Q60673_S307_M1_Ptprn  |
| _SVVDSLDIISM[Oxidation (M)]TIEDEYSGPK_.2                      | 0.035464175  | #N/A                  |
| _AEGYEVAGGGR_.2                                               | 0.310609144  | #N/A                  |
| _AFLEENQLDYIIR_.2                                             | -0.011558855 | #N/A                  |
| _FYSQAIELNPGNAIYYGNR_.2                                       | -0.096851458 | #N/A                  |
| _TQANDYFK_.2                                                  | -0.131740761 | #N/A                  |
| _TEC[Carbamidomethyl (C)]YGYALGDATR_.2                        | 0.480279754  | #N/A                  |
| _GNHETDNMNQIYGFEGEVK_.3                                       | 0.431883597  | #N/A                  |

|                                                       |              |                        |
|-------------------------------------------------------|--------------|------------------------|
| _LAAIQESGVER_2                                        | 0.113222731  | #N/A                   |
| _QVLLGDQIPK_2                                         | -0.082659552 | #N/A                   |
| _TTTGSYIANR_2                                         | 0.405988164  | #N/A                   |
| _SSSGSWGTTGGHPS[Phospho (STY)]PSR_2                   | -0.17694222  | Q60722_S66_M1_Tcf4     |
| _NGGQASSS[Phospho (STY)]PNYEGPLHSLQSR_3               | 0.062950381  | Q60722_S371_M1_Tcf4    |
| _DLGSHDNLS[Phospho (STY)]PPFVNSR_3                    | -0.245866593 | Q60722_S92_M1_Tcf4     |
| _QLYQTLTDYDIR_2                                       | 0.084337762  | #N/A                   |
| _FNDILGR_2                                            | 0.018287819  | #N/A                   |
| _FVHSENQHLVSPEALDFLDK_4                               | 0.123493905  | #N/A                   |
| _YSEVFRAINITNNEK_2                                    | 0.235313069  | #N/A                   |
| _VLGTEDLYDYIDKYNIELDPR_3                              | -0.418043166 | #N/A                   |
| _TPALVFEHVNNTDFK_2                                    | 0.239300565  | #N/A                   |
| _EYWDYESHVVEWGNQDDYQLVR_3                             | -0.206759705 | #N/A                   |
| _KDDEENYLDLFSHK_3                                     | -0.176723051 | #N/A                   |
| _DPSGAHPSVR_2                                         | 0.364133772  | #N/A                   |
| _S[Phospho (STY)]C[Carbamidomethyl (C)]SKDPSGAHPSVR_2 | 0.060824671  | Q60749_S18_M1_Khdrbs1  |
| _MGHEPGVAK_2                                          | 0.495894595  | #N/A                   |
| _KM[Oxidation (M)]DELGSK_2                            | 0.392851317  | #N/A                   |
| _FYSSGSSS[Phospho (STY)]PTHAK_2                       | -0.35732483  | Q60771_S198_M1_Cldn11  |
| _FYSSGSSS[Phospho (STY)]PTHAKSAHV_3                   | -0.011956322 | Q60771_S198_M1_Cldn11  |
| _KSTGDSQNLGSSS[Phospho (STY)]PGRK_2                   | -0.232175221 | Q60780_S108_M1_Gas7    |
| _HETDM[Oxidation (M)]FNQSTVEPVDQLLR_3                 | 0.205801896  | #N/A                   |
| _STGDSQNLGSSS[Phospho (STY)]PGR_2                     | -0.14974593  | Q60780_S108_M1_Gas7    |
| _STGDSQNLGSSS[Phospho (STY)]PGRK_2                    | -0.27306514  | Q60780_S108_M1_Gas7    |
| _KSTGDSQNLGS[Phospho (STY)]SSPGR_2                    | -0.062260122 | Q60780_S106_M1_Gas7    |
| _C[Carbamidomethyl (C)]VDLYNQAQSK_2                   | -0.337607698 | #N/A                   |
| _YGS[Phospho (STY)]QEHPIGDK_2                         | 0.092092852  | Q60790_S809_M1_Rasa3   |
| _T[Phospho (STY)]RYGSQEHPIGDK_3                       | -0.510587871 | Q60790_T805_M1_Rasa3   |
| _DGNSDQVEGR_2                                         | -0.012897471 | #N/A                   |
| _ATLSEPGEEPQHPS[Phospho (STY)]PP_2                    | -0.288518208 | Q60829_S192_M1_Ppp1r1b |
| _GLEGPWERPPPLDEPQR_3                                  | -0.084108904 | #N/A                   |
| _GTVGQKPTC[Carbamidomethyl (C)]GR_2                   | 0.364599245  | #N/A                   |
| _VSEHSS[Phospho (STY)]PEEEASPHQR_3                    | -0.3785752   | Q60829_S46_M1_Ppp1r1b  |
| _IQFSVPAPPSQLDPR_2                                    | 0.021640593  | #N/A                   |
| _GLEGPWERPPPLDEPQRDGNSEDQVEGR_4                       | -0.105987857 | #N/A                   |
| _ELGYPQEDDEEDEDEEDEEDSQAEVLK_3                        | -0.523699198 | #N/A                   |
| _FYEAEELEDFQGATEESR_2                                 | -0.352350946 | #N/A                   |
| _LAYINPDLALEEK_2                                      | 0.168768567  | #N/A                   |
| _LDPQNHVLYSNR_3                                       | 0.172147958  | #N/A                   |
| _HDS[Phospho (STY)]PEDVKR_2                           | -0.194575366 | Q60864_S481_M1_Stip1   |
| _ALDLDS[Carbamidomethyl (C)]K_2                       | 0.056136376  | #N/A                   |
| _DPQALSEHLK_2                                         | 0.582280768  | #N/A                   |
| _ALSAGNIDDALQC[Carbamidomethyl (C)]YSEAIK_2           | 0.052673098  | #N/A                   |
| _DPQALSEHLKNPVIAK_3                                   | 0.133987886  | #N/A                   |
| _TPDVLKK_2                                            | 0.42887129   | #N/A                   |
| _HDS[Phospho (STY)]PEDVK_2                            | -0.327346744 | Q60864_S481_M1_Stip1   |
| _ELIEQLQNKPSDLGTK_3                                   | 0.249437242  | #N/A                   |

|                                                                                                         |              |                        |
|---------------------------------------------------------------------------------------------------------|--------------|------------------------|
| _LM[Oxidation (M)]DVGLIAIR_.2                                                                           | 0.616980271  | #N/A                   |
| _HYTEAIKR_.2                                                                                            | 0.185963966  | #N/A                   |
| _HDS[Phospho (STY)]PEDVKRR_.3                                                                           | -0.32408541  | Q60864_S481_M1_Stip1   |
| _HYTEAIK_.2                                                                                             | -0.157805003 | #N/A                   |
| _S[Phospho (STY)]LLSDPTYR_.2                                                                            | -0.293609038 | Q60864_S145_M1_Stip1   |
| _LILEQMVK_.2                                                                                            | -0.027032265 | #N/A                   |
| _DAIHFYNK_.2                                                                                            | 0.077638086  | #N/A                   |
| _TYEEGLKHEANNLQK_.3                                                                                     | -0.253765472 | #N/A                   |
| _IGNSYFKEEK_.2                                                                                          | -0.177973176 | #N/A                   |
| _NKGNEC[Carbamidomethyl (C)]FQK_.2                                                                      | 0.193763994  | #N/A                   |
| _AMDVYQK_.2                                                                                             | -0.210477732 | #N/A                   |
| _AMADPEVQQIMSDPAMR_.2                                                                                   | -0.06566655  | #N/A                   |
| _YQEVTTNNLEFAK_.2                                                                                       | -0.039838505 | #N/A                   |
| _HESQVDSVVK_.2                                                                                          | 0.297782215  | #N/A                   |
| _EAQELGS[Phospho (STY)]PEDR_.2                                                                          | -0.088882291 | Q60875_S931_M1_Arhgef2 |
| _LS[Phospho (STY)]PPHSPR_.2                                                                             | -0.082006239 | Q60875_S955_M1_Arhgef2 |
| _LQDSS[Phospho (STY)]DPDTGSEEEVSSR_.2                                                                   | 0.299515119  | Q60875_S940_M1_Arhgef2 |
| _LES[Phospho (STY)]FESLR_.2                                                                             | 0.007163929  | Q60875_S646_M1_Arhgef2 |
| _SLHRPFDREAQELGS[Phospho (STY)]PEDR_.3                                                                  | 0.176552894  | Q60875_S931_M1_Arhgef2 |
| _LQEIYNR_.2                                                                                             | -0.103654438 | #N/A                   |
| _TFNGS[Phospho (STY)]IELC[Carbamidomethyl (C)]R_.2                                                      | -0.394260822 | Q60875_S710_M1_Arhgef2 |
| _QILSQS[Phospho (STY)]TDSLNMNR_.2                                                                       | 0.345318999  | Q60875_S174_M1_Arhgef2 |
| _S[Phospho (STY)]LPAGDALYLSFNPPQPSR_.2                                                                  | -0.298545575 | Q60875_S885_M1_Arhgef2 |
| _LES[Phospho (STY)]FESLRGER_.2                                                                          | -0.00376195  | Q60875_S646_M1_Arhgef2 |
| _SVSTTNIAGHFNDES[Phospho (STY)]PLGLR_.3                                                                 | 0.042836252  | Q60875_S163_M1_Arhgef2 |
| _LQDSSDPDTGSEEEVSSRLS[Phospho (STY)]PPHSPR_.3                                                           | 0.132568351  | Q60875_S955_M1_Arhgef2 |
| _VSYARPSS[Phospho (STY)]ASIR_.2                                                                         | 0.114109404  | Q60899_S119_M1_Elav12  |
| _ELEQLFSQYGR_.2                                                                                         | 0.155412518  | #N/A                   |
| _IEAEEAIK_.2                                                                                            | -0.218608287 | #N/A                   |
| _TNQAILSQLYQS[Phospho (STY)]PNR_.2                                                                      | -0.430100845 | Q60899_S221_M1_Elav12  |
| _FANNPSQK_.2                                                                                            | 0.585767195  | #N/A                   |
| _LQQEETQLEQSIQAGR_.2                                                                                    | -0.076820486 | #N/A                   |
| _STPSHGSVSSLNSTGS[Phospho (STY)]LS[Phospho (STY)]PK_.2                                                  | 0.123021859  | Q60902_S253_M2_Eps151  |
| _ESDPFHS[Phospho (STY)]SSSDDFFKK_.3                                                                     | 0.338135246  | Q60902_S669_M1_Eps151  |
| _GIDPPQVLS[Phospho (STY)]PDM[Oxidation (M)]VPPSER_.2                                                    | -0.075387269 | Q60902_S353_M1_Eps151  |
| _TVFAGAVPVLPAAS[Phospho (STY)]PPPK_.2                                                                   | -0.21959875  | Q60902_S229_M1_Eps151  |
| _TVFAGAVPVLPAAS[Phospho (STY)]PPPKDSL_.3                                                                | -0.0532496   | Q60902_S229_M1_Eps151  |
| _SEPIS[Phospho (STY)]PPRDR_.2                                                                           | 0.186115797  | Q60929_S406_M1_Mef2a   |
| _YQLDPTASISAK_.2                                                                                        | 0.128041879  | #N/A                   |
| _L[Acetyl (Protein N-term)]AEC[Carbamidomethyl (C)]C[Carbamidomethyl (C)]VPVC[Carbamidomethyl (C)]PR_.2 | 0.299032804  | #N/A                   |
| _SNFAVGYR_.2                                                                                            | -0.134959936 | #N/A                   |
| _LTLALVDGK_.2                                                                                           | 0.235301723  | #N/A                   |
| _WC[Carbamidomethyl (C)]EYGLTFTEK_.2                                                                    | 0.003870378  | #N/A                   |
| _GFGFGLVK_.2                                                                                            | 0.070404309  | #N/A                   |
| _LTFDTTFSPNTGK_.2                                                                                       | 0.260760366  | #N/A                   |
| _SFNAGGHK_.2                                                                                            | -0.013701979 | #N/A                   |
| _VNNSSLIGVGYTQTLRPGVK_.2                                                                                | -0.194946329 | #N/A                   |

|                                                                                                    |              |                        |
|----------------------------------------------------------------------------------------------------|--------------|------------------------|
| _LTFDTTFSPNTGKK_.2                                                                                 | 0.228066869  | #N/A                   |
| _TGDFQLHTNVNNGTEFGGSIYQK_.3                                                                        | -0.012438594 | #N/A                   |
| _WNTDNTLGTEIAIEDQIC[Carbamidomethyl (C)]QGLK_.3                                                    | 0.071695182  | #N/A                   |
| _SC[Carbamidomethyl (C)]SGVEFSTSGSSNTDTGK_.2                                                       | -0.413875641 | #N/A                   |
| _ [Acetyl (Protein N-term)]C[Carbamidomethyl (C)]NT[Phospho (STY)]PTYC[Carbamidomethyl (C)]DLGK_.2 | -0.513444525 | Q60931_T4_M1_Vdac3     |
| _LTLDTIFVPNTGK_.2                                                                                  | 0.112418494  | #N/A                   |
| _LSQNNFALGYK_.2                                                                                    | 0.341993104  | #N/A                   |
| _LTLDTIFVPNTGKK_.2                                                                                 | -0.538353729 | #N/A                   |
| _VC[Carbamidomethyl (C)]NYGLTFTQK_.2                                                               | -0.302809026 | #N/A                   |
| _NFNAGGHK_.2                                                                                       | 0.176954865  | #N/A                   |
| _VNNASLIGLYTQTLRPGVK_.2                                                                            | 0.110090321  | #N/A                   |
| _IETSINLAWTAGSNNT_.2                                                                               | -0.214731036 | #N/A                   |
| _WNTDNTLGTEISWENK_.2                                                                               | -0.058847204 | #N/A                   |
| _YQVDPDAC[Carbamidomethyl (C)]FSAK_.2                                                              | 0.185858858  | #N/A                   |
| _LTFDSSFS[Phospho (STY)]PNTGK_.2                                                                   | 0.118569738  | Q60932_S117_M1_Vdac1   |
| _VTQSNFAVGKYK_.2                                                                                   | 0.086053833  | #N/A                   |
| _WTEYGLTFTEK_.2                                                                                    | -0.135036869 | #N/A                   |
| _TDEFQLHTNVNDGTEFGGSIYQK_.3                                                                        | -0.307679363 | #N/A                   |
| _GYGFGLIK_.2                                                                                       | -0.132741266 | #N/A                   |
| _SENGLEFTSSGSANTETTK_.2                                                                            | 0.120063     | #N/A                   |
| _TKSENGLEFTSSGSANTETTK_.3                                                                          | -0.08430847  | #N/A                   |
| _LTFDSSFS[Phospho (STY)]PNTGKK_.2                                                                  | -0.319498653 | Q60932_S117_M1_Vdac1   |
| _LETAVNLAWTAGNSNTR_.2                                                                              | 0.02134054   | #N/A                   |
| _VNNSSLIGLYTQTLKPGIK_.2                                                                            | -0.185801325 | #N/A                   |
| _EHINLGC[Carbamidomethyl (C)]DVDFDIAGPSIR_.3                                                       | 0.083750843  | #N/A                   |
| _WNTDNTLGTEITVEDQLAR_.2                                                                            | -0.588833132 | #N/A                   |
| _KLETAVNLAWTAGNSNTR_.3                                                                             | -0.24222089  | #N/A                   |
| _KSFS[Phospho (STY)]QPGLR_.2                                                                       | 0.029413416  | Q60949_S231_M1_Tbc1d1  |
| _QSARPST[Phospho (STY)]PEPDC[Carbamidomethyl (C)]TQLEPTGD_.2                                       | -0.367242949 | Q60949_T1242_M1_Tbc1d1 |
| _LNPSAS[Phospho (STY)]SPNFFK_.2                                                                    | -0.223268626 | Q60949_S660_M1_Tbc1d1  |
| _SFS[Phospho (STY)]QPGLR_.2                                                                        | -0.016810376 | Q60949_S231_M1_Tbc1d1  |
| _VPAPPGS[Phospho (STY)]PC[Carbamidomethyl (C)]R_.2                                                 | -0.083460407 | Q60953_S17_M1_Pml      |
| _LATSS[Phospho (STY)]PEQSWPSTFK_.2                                                                 | -0.125710005 | Q60953_S515_M1_Pml     |
| _ [Acetyl (Protein N-term)]ADKEAAFDDAVEER_.2                                                       | -0.618088025 | #N/A                   |
| _AQLS[Phospho (STY)]PGLYDDSSAR_.2                                                                  | -0.262159476 | Q60974_S1481_M1_Ncor1  |
| _VS[Phospho (STY)]PENLVDK_.2                                                                       | -0.254004399 | Q60974_S2134_M1_Ncor1  |
| _SHIPSEPYEPIS[Phospho (STY)]PPQGPVHEK_.3                                                           | 0.180225863  | Q60974_S2165_M1_Ncor1  |
| _EPAPLLSAQYETLS[Phospho (STY)]DSDD_.2                                                              | -0.227978036 | Q60974_S2449_M1_Ncor1  |
| _YS[Phospho (STY)]PESQSQTVLHPR_.2                                                                  | 0.101081366  | Q60974_S2116_M1_Ncor1  |
| _GS[Phospho (STY)]PPAAGGSPSSLK_.2                                                                  | 0.021903552  | #N/A                   |
| _RKS[Phospho (STY)]ELPQDPHTEK_.3                                                                   | -0.23928661  | Q60996_S497_M1_Ppp2r5c |
| _ [Acetyl (Protein N-term)]S[Phospho (STY)]GTNNVAQAR_.2                                            | -0.158583291 | Q61016_S2_M1_Gng7      |
| _KLVEQLR_.2                                                                                        | 0.157245956  | #N/A                   |
| _NDPLLVGVPASENPFK_.2                                                                               | -0.041601121 | #N/A                   |
| _NDPLLVGVPASENPFKDK_.3                                                                             | 0.25599311   | #N/A                   |
| _ASSDLMGYC[Carbamidomethyl (C)]EQHAR_.2                                                            | 0.294614126  | #N/A                   |
| _LLQDSSS[Phospho (STY)]PVDLAK_.2                                                                   | 0.459108173  | Q61026_S699_M1_Ncoa2   |

|                                                                |              |                          |
|----------------------------------------------------------------|--------------|--------------------------|
| _SST[Phospho (STY)]PLPTVSSSAENTR_.2                            | -0.254297223 | Q61029_T159_M1_Tmpo      |
| _EQGTESRSS[Phospho (STY)]T[Phospho (STY)]PLPTVSSSAENTR_.3      | -0.296917346 | Q61029_S158_M2_Tmpo      |
| _QNGSNDSDRYS[Phospho (STY)]DNDEDSKIELK_.3                      | -0.299113113 | Q61029_S183_M1_Tmpo      |
| _DQGGEELSLR_.2                                                 | 0.000657985  | #N/A                     |
| _IFSIVEQR_.2                                                   | -0.008642611 | #N/A                     |
| _AALEELVR_.2                                                   | 0.141148959  | #N/A                     |
| _YDLTVPFAR_.2                                                  | -0.236427818 | #N/A                     |
| _ASAEQIEEEVTK_.2                                               | 0.324061999  | #N/A                     |
| _TIC[Carbamidomethyl (C)]SSVDKLDK_.3                           | -0.39910273  | #N/A                     |
| _L[Acetyl (Protein N-term)]SDS[Phospho (STY)]LDNEEKPPAPPLR_.2  | -0.081671792 | Q61036_S4_M1_Pak3        |
| _STS[Phospho (STY)]LNERPK_.2                                   | -0.065081128 | Q61037_S939_M1_Tsc2      |
| _IDIGRLS[Phospho (STY)]PEAK_.2                                 | -0.014314028 | Q61037_S1412_M1_Tsc2     |
| _S[Phospho (STY)]PSGLRPR_.2                                    | -0.109785425 | Q61037_S1455_M1_Tsc2     |
| _SSS[Phospho (STY)]SPELQTLQDILGDLGDK_.2                        | -0.176210523 | Q61037_S1388_M1_Tsc2     |
| _SQS[Phospho (STY)]GILDGEAATWSATGEESR_.2                       | -0.243422018 | Q61037_S1421_M1_Tsc2     |
| _SIS[Phospho (STY)]VSEHVVR_.2                                  | 0.011889865  | Q61037_S981_M1_Tsc2      |
| _SM[Oxidation (M)]S[Phospho (STY)]GGHGLR_.2                    | -0.22434587  | Q61037_S1132_M1_Tsc2     |
| _LISS[Phospho (STY)]VDDFTEFV_.2                                | 0.28435366   | Q61037_S1806_M1_Tsc2     |
| _S[Phospho (STY)]LDKAKEEEK_.2                                  | -0.24122853  | Q61048_S51_M1_Wbp4       |
| _THPYS[Phospho (STY)]PK_.2                                     | -0.006976584 | Q61069_S186_M1_Usf1;Usf2 |
| _RPQS[Phospho (STY)]VER_.2                                     | -0.293687595 | Q61070_S56_M1_Ei24       |
| _FPS[Phospho (STY)]PHPS[Phospho (STY)]PAK_.2                   | -0.065363927 | Q61070_S326_M2_Ei24      |
| _KLEELST[Phospho (STY)]EGAEDTGNSDK_.2                          | -0.032259091 | Q61074_T525_M1_Ppm1g     |
| _AQS[Phospho (STY)]YPDNHQEFTDYDNPIFEK_.3                       | -0.111150557 | Q61083_S239_M1_Map3k2    |
| _AIDILDRS[Phospho (STY)]S[Phospho (STY)]SM[Oxidation (M)]K_.2  | 0.286990543  | Q61084_S110_M2_Map3k3    |
| _TES[Phospho (STY)]VPSDINNVPDR_.2                              | -0.256158971 | Q61097_S392_M1_Ksr1      |
| _SKS[Phospho (STY)]HESQLGNNR_.2                                | 0.028816262  | Q61097_S297_M1_Ksr1      |
| _VDDDS[Phospho (STY)]LGEFPVNSNR_.2                             | 0.086217202  | Q61103_S142_M1_Dpf2      |
| _QGS[Phospho (STY)]LDIYSTAEGK_.2                               | -0.217936026 | Q61120_S282_M1_Shc3      |
| _AAS[Phospho (STY)]VEC[Carbamidomethyl (C)]ISPVTPR_.2          | -0.220706337 | Q61120_S354_M1_Shc3      |
| _SFS[Phospho (STY)]PKS[Phospho (STY)]PLELGEK_.2                | 0.294660787  | Q61127_S159_M2_Nab2      |
| _KS[Phospho (STY)]KS[Phospho (STY)]PPLR_.2                     | -0.192376351 | Q61136_S240_M2_Prpf4b    |
| _KKS[Phospho (STY)]PIVNER_.2                                   | -0.329268196 | Q61136_S278_M1_Prpf4b    |
| _SKDAS[Phospho (STY)]PINRWS[Phospho (STY)]PTR_.2               | -0.363654595 | Q61136_S431_M2_Prpf4b    |
| _S[Phospho (STY)]RS[Phospho (STY)]PLLNDR_.2                    | -0.228094661 | Q61136_S366_M2_Prpf4b    |
| _RRS[Phospho (STY)]LS[Phospho (STY)]PK_.2                      | -0.201716895 | Q61136_S354_M2_Prpf4b    |
| _S[Phospho (STY)]RS[Phospho (STY)]PLRR_.2                      | -0.13667994  | Q61136_S451_M2_Prpf4b    |
| _AKS[Phospho (STY)]RS[Phospho (STY)]LER_.2                     | -0.001328704 | Q61136_S394_M2_Prpf4b    |
| _TLS[Phospho (STY)]PGRR_.2                                     | -0.298294591 | Q61136_S387_M1_Prpf4b    |
| _SKDAS[Phospho (STY)]PINR_.2                                   | -0.267408732 | Q61136_S431_M1_Prpf4b    |
| _S[Phospho (STY)]KS[Phospho (STY)]PVDLR_.2                     | -0.072111085 | Q61136_S292_M2_Prpf4b    |
| _S[Phospho (STY)]RS[Phospho (STY)]PLLNDRR_.2                   | -0.492604013 | Q61136_S366_M2_Prpf4b    |
| _DAS[Phospho (STY)]PINRWS[Phospho (STY)]PTR_.2                 | -0.253403789 | Q61136_S431_M2_Prpf4b    |
| _EVIEASDKEGLS[Phospho (STY)]PAKR_.3                            | -0.30241102  | Q61136_S94_M1_Prpf4b     |
| _LC[Carbamidomethyl (C)]DFGSASHVADNDITPY[Phospho (STY)]LVSR_.3 | -0.300303873 | Q61136_Y849_M1_Prpf4b    |
| _S[Phospho (STY)]KS[Phospho (STY)]PVDLRDK_.2                   | -0.592284552 | Q61136_S292_M2_Prpf4b    |
| _RS[Phospho (STY)]RS[Phospho (STY)]PLLNDR_.3                   | -0.124737498 | Q61136_S366_M2_Prpf4b    |

|                                                                            |              |                       |
|----------------------------------------------------------------------------|--------------|-----------------------|
| _S[Phospho (STY)]KS[Phospho (STY)]PPLR_.2                                  | 0.393989431  | Q61136_S240_M2_Prpf4b |
| _VGS[Phospho (STY)]PRS[Phospho (STY)]PVNK_.2                               | -0.329303558 | Q61137_S376_M2_Astn1  |
| _SAS[Phospho (STY)]AEAANEIHYIPSVLIGGHGR_.3                                 | -0.372887679 | Q61137_S194_M1_Astn1  |
| _GNSPSDES[Phospho (STY)]EERERDPK_.3                                        | -0.349207062 | Q61137_S906_M1_Astn1  |
| _VQGHNS[Phospho (STY)]SGTSLIR_.2                                           | 0.152055608  | Q61137_S227_M1_Astn1  |
| _GNSPSDES[Phospho (STY)]EERER_.2                                           | 0.106941     | Q61137_S906_M1_Astn1  |
| _GS[Phospho (STY)]PGFTPEDLDR_.2                                            | 0.102024611  | Q61140_S572_M1_Bcar1  |
| _TQES[Phospho (STY)]EEDC[Carbamidomethyl (C)]EEDPDR_.2                     | 0.35244685   | Q61144_S52_M1_Psen2   |
| _TSLMSAES[Phospho (STY)]PTSR_.2                                            | -0.207017221 | Q61144_S25_M1_Psen2   |
| _YSS[Phospho (STY)]NGNLETPSKR_.2                                           | -0.008344062 | Q61146_S369_M1_Ocln   |
| _YSS[Phospho (STY)]NGNLETPSK_.2                                            | 0.053798628  | Q61146_S369_M1_Ocln   |
| _NVS[Phospho (STY)]AGTQDM[Oxidation (M)]PPPPSDYAE_.2                       | -0.006508254 | Q61146_S300_M1_Ocln   |
| _SQS[Phospho (STY)]SSQFR_.2                                                | 0.115633941  | Q61151_S32_M1_Ppp2r5e |
| _TPS[Phospho (STY)]EIQFHQVK_.2                                             | -0.086461397 | Q61161_S328_M1_Map4k2 |
| _ASDPHLGTL[Phospho (STY)]PEDSELETHDMFPDTIHSR_.4                            | -0.637207841 | Q61161_S298_M1_Map4k2 |
| _L[Acetyl (Protein N-term)]M[Oxidation (M)]EGEAVEAIVEESETFIK_.2            | -0.224286771 | #N/A                  |
| _LDS[Phospho (STY)]PTLSR_.2                                                | -0.12302914  | Q61165_S697_M1_Slc9a1 |
| _IGS[Phospho (STY)]DPLAYEPK_.2                                             | -0.263246702 | Q61165_S707_M1_Slc9a1 |
| _ADLPVITIDPAS[Phospho (STY)]PQSPESVDLVNEELK_.3                             | -0.00975302  | Q61165_S727_M1_Slc9a1 |
| _ITNYLTVPAHKLDS[Phospho (STY)]PTLSR_.3                                     | -0.013386432 | Q61165_S697_M1_Slc9a1 |
| _C[Carbamidomethyl (C)]LS[Phospho (STY)]DPGPHPEPGEGEPFIK_.3                | 0.338083145  | Q61165_S801_M1_Slc9a1 |
| _L[Acetyl (Protein N-term)]AVNVYSTSVTSDNLSR_.2                             | -0.179420692 | #N/A                  |
| _NIELIC[Carbamidomethyl (C)]QENEGENDPVLQR_.2                               | -0.107785473 | #N/A                  |
| _LEHEYIQNFK_.3                                                             | -0.123412794 | #N/A                  |
| _LTVEDLEKER_.2                                                             | -0.029722799 | #N/A                  |
| _QITVNDLPVGR_.2                                                            | 0.030962103  | #N/A                  |
| _SLSQNYGVLK_.2                                                             | 0.154761615  | #N/A                  |
| _NDEGIAYR_.2                                                               | -0.047609006 | #N/A                  |
| _EGGLGPLNIPLLDVTK_.2                                                       | -0.181854932 | #N/A                  |
| _GLFIIDAK_.2                                                               | 0.232873482  | #N/A                  |
| _KEGGLGPLNIPLLDVTK_.3                                                      | 0.047979796  | #N/A                  |
| _SAPDFTATAVVDGAFK_.2                                                       | 0.010518206  | #N/A                  |
| _LGC[Carbamidomethyl (C)]EVLGVSVDSQFTHLAWINTPR_.3                          | -0.19485633  | #N/A                  |
| _VSC[Carbamidomethyl (C)]EVEPPGTSDS[Phospho (STY)]PAAR_.2                  | 0.172296014  | Q61193_S518_M1_Rgl2   |
| _SASC[Carbamidomethyl (C)]GS[Phospho (STY)]PLSGNTGEGTSR_.2                 | 0.225383802  | Q61193_S622_M1_Rgl2   |
| _LLAQDQGQGIPLPETAS_.2                                                      | -0.009808352 | #N/A                  |
| _IIVLGLLPR_.2                                                              | 0.224782895  | #N/A                  |
| _GEKPNPLR_.2                                                               | 0.097076344  | #N/A                  |
| _L[Acetyl (Protein N-term)]SQGDSNPAAIPHAAEDIQGDDR_.3                       | -0.045830904 | #N/A                  |
| _ELFSPLHALNFGIGGDTTR_.3                                                    | 0.166178336  | #N/A                  |
| _L[Acetyl (Protein N-term)]SQGDSNPAAIPHAAEDIQGDDRWM[Oxidation (M)]SQHNR_.4 | -0.539708454 | #N/A                  |
| _GC[Carbamidomethyl (C)]SFLPDYQK_.2                                        | 0.114556941  | #N/A                  |
| _SLPC[Carbamidomethyl (C)]DIC[Carbamidomethyl (C)]K_.2                     | 0.22214986   | #N/A                  |
| _TVVTEAGNLLK_.2                                                            | 0.263820932  | #N/A                  |
| _LVSDVQTAVK_.2                                                             | 0.365413428  | #N/A                  |
| _LVLYLEHNLEK_.2                                                            | -0.034021885 | #N/A                  |
| _LPGGVSDIC[Carbamidomethyl (C)]K_.2                                        | -0.315107584 | #N/A                  |



|                                                                                          |              |                         |
|------------------------------------------------------------------------------------------|--------------|-------------------------|
| _EVVDSYLPVILDM[Oxidation (M)]IK_.2                                                       | 0.435791724  | #N/A                    |
| _TC[Carbamidomethyl (C)]EWIHDSSLSASC[Carbamidomethyl (C)]K_.3                            | 0.374963178  | #N/A                    |
| _IYQY[Phospho (STY)]IQSR_.2                                                              | -0.280447004 | Q61214_Y321_M1_Dyrk1a   |
| _FSLVGIAGQDLNEGMR_.2                                                                     | -0.004674501 | #N/A                    |
| _GS[Phospho (STY)]VSDEEMMELR_.2                                                          | 0.26091377   | Q61233_S5_M1_Lcp1       |
| _EGES[Phospho (STY)]LEDLMK_.2                                                            | -0.227069332 | Q61233_S257_M1_Lcp1     |
| _QPSS[Phospho (STY)]PGQPQR_.2                                                            | -0.161465859 | Q61234_S195_M1_Snta1    |
| _NSAGGTSVGWDS[Phospho (STY)]PPASPLQR_.2                                                  | -0.106549696 | Q61234_S183_M1_Snta1    |
| _YLEIC[Carbamidomethyl (C)]AADGQDAVFLR_.2                                                | -0.546980347 | #N/A                    |
| _GPAGEASAS[Phospho (STY)]PPVR_.2                                                         | 0.102425818  | Q61235_S90_M1_Sntb2     |
| _GLGPPS[Phospho (STY)]PPAPPR_.2                                                          | -0.048267974 | Q61235_S75_M1_Sntb2     |
| _GPAGEASAS[Phospho (STY)]PPVRR_.3                                                        | 0.286070025  | Q61235_S90_M1_Sntb2     |
| _ [Acetyl (Protein N-term)]AAS[Phospho (STY)]EDELLPR_.2                                  | -0.211713459 | Q61249_S4_M1_lgpb1      |
| _AEAYS[Phospho (STY)]PAENR_.2                                                            | -0.277261508 | Q61285_S58_M1_Abcd2     |
| _TSS[Phospho (STY)]TNEDEDLNPEQK_.2                                                       | 0.301185218  | Q61286_S583_M1_Tcf12    |
| _GTQADWES[Phospho (STY)]PER_.2                                                           | -0.335728809 | Q61290_S2073_M1_Cacna1e |
| _QGT[Phospho (STY)]PVPASGPAAAYK_.2                                                       | -0.113216308 | Q61290_T29_M1_Cacna1e   |
| _GTQADWES[Phospho (STY)]PERR_.2                                                          | -0.408469567 | Q61290_S2073_M1_Cacna1e |
| _S[Phospho (STY)]YHSSLR_.2                                                               | -0.069353281 | Q61290_S2013_M1_Cacna1e |
| _HLLS[Phospho (STY)]PDVSR_.2                                                             | -0.115732065 | Q61290_S2054_M1_Cacna1e |
| _KHLLS[Phospho (STY)]PDVSR_.2                                                            | -0.355136795 | Q61290_S2054_M1_Cacna1e |
| _AS[Phospho (STY)]IKS[Phospho (STY)]TKVDGASYFR_.3                                        | -0.172275654 | Q61290_S447_M2_Cacna1e  |
| _FGEAVVVGPRGS[Phospho (STY)]GDGSDQSR_.3                                                  | 0.148859792  | Q61290_S15_M1_Cacna1e   |
| _DSSDEHC[Carbamidomethyl (C)]VDISSVGT[Phospho (STY)]PLAR_.3                              | -0.230143453 | Q61290_T441_M1_Cacna1e  |
| _GISQS[Phospho (STY)]EPDLSC[Carbamidomethyl (C)]M[Oxidation (M)]TANM[Oxidation (M)]DK_.2 | -0.198406643 | #N/A                    |
| _SAS[Phospho (STY)]QERS[Phospho (STY)]LDEGVSVGEKEHEPHSSHR_.4                             | -0.033302561 | Q61290_S944_M2_Cacna1e  |
| _TDGEAS[Phospho (STY)]PLKEAETKEEEEEVEK_.3                                                | -0.168401827 | Q61290_S1099_M1_Cacna1e |
| _S[Phospho (STY)]LDEGVSVGEKEHEPHSSHR_.4                                                  | 0.029891171  | Q61290_S948_M1_Cacna1e  |
| _EVS[Phospho (STY)]PM[Oxidation (M)]SAPNM[Oxidation (M)]PSIER_.2                         | -0.22197459  | Q61290_S737_M1_Cacna1e  |
| _GGG[Phospho (STY)]LKGDIGGLTSALDNQR_.3                                                   | -0.354345711 | Q61290_S856_M1_Cacna1e  |
| _HMQMSS[Phospho (STY)]QEALNK_.2                                                          | -0.406524677 | Q61290_S794_M1_Cacna1e  |
| _AKEVS[Phospho (STY)]PMSAPNMPSIER_.3                                                     | 0.057620153  | Q61290_S737_M1_Cacna1e  |
| _VYGTAAVNS[Phospho (STY)]PVVSWK_.2                                                       | -0.232103178 | Q61301_S901_M1_Ctnna2   |
| _NATNEQDLANR_.2                                                                          | 0.020530672  | #N/A                    |
| _GHTGIGELAAALNEFDNK_.3                                                                   | -0.372999353 | #N/A                    |
| _QVQEAIAIGISSAAQATS[Phospho (STY)]PTDEAK_.2                                              | -0.420159291 | Q61301_S262_M1_Ctnna2   |
| _ [Acetyl (Protein N-term)]TSATS[Phospho (STY)]PIILK_.2                                  | -0.207218812 | Q61301_S6_M1_Ctnna2     |
| _LVYDGVR_.2                                                                              | -0.0200821   | #N/A                    |
| _IVEEALEAVK_.2                                                                           | -0.080290394 | #N/A                    |
| _LLEPLVTQVTTLVNTSNK_.2                                                                   | 0.023680919  | #N/A                    |
| _TPEELEDSDFEQEDYDVR_.2                                                                   | 0.154131933  | #N/A                    |
| _SKLDAEVAK_.2                                                                            | -0.429942377 | #N/A                    |
| _NATM[Oxidation (M)]LYTASQAFLR_.2                                                        | 0.187824272  | #N/A                    |
| _LVEVANLAC[Carbamidomethyl (C)]SISNNEEGVK_.2                                             | 0.188160104  | #N/A                    |
| _VLTEAVDDITSVDLFSVSENHILEDVNK_.3                                                         | -0.294149143 | #N/A                    |
| _HIS[Phospho (STY)]PVQALSEFK_.2                                                          | -0.224359542 | Q61301_S939_M1_Ctnna2   |
| _QSVGSGS[Phospho (STY)]PVQTVGLETR_.2                                                     | -0.215074499 | Q61315_S2713_M1_Apc     |

|                                                               |              |                      |
|---------------------------------------------------------------|--------------|----------------------|
| _SELS[Phospho (STY)]PITR_.2                                   | -0.085090367 | Q61315_S2283_M1_Apc  |
| _SGRS[Phospho (STY)]PTGNTPPVIDSVSEK_.3                        | 0.201008614  | Q61315_S2674_M1_Apc  |
| _AVEFSSGAKS[Phospho (STY)]PSK_.2                              | -0.38637485  | Q61315_S1359_M1_Apc  |
| _HSS[Phospho (STY)]PSGTVAAR_.2                                | -0.059599292 | Q61315_S2774_M1_Apc  |
| _SPT[Phospho (STY)]GNTPPVIDSVSEK_.2                           | 0.200818398  | Q61315_T2676_M1_Apc  |
| _YSDEQLNSGRQS[Phospho (STY)]PSQNER_.3                         | 0.011455003  | Q61315_S1040_M1_Apc  |
| _ALAEELDAQHLSETFDNIDNLS[Phospho (STY)]PK_.3                   | 0.068482992  | Q61315_S778_M1_Apc   |
| _T[Phospho (STY)]GSSSSILSASSESEK_.2                           | 0.196619494  | Q61315_T2567_M1_Apc  |
| _QAS[Phospho (STY)]SDSDSILSLK_.2                              | -0.065784743 | Q61315_S2129_M1_Apc  |
| _LKSESEKQS[Phospho (STY)]PR_.2                                | -0.35308962  | Q61315_S2063_M1_Apc  |
| _SHS[Phospho (STY)]ES[Phospho (STY)]PSRLPINR_.2               | -0.212381581 | Q61315_S2533_M2_Apc  |
| _C[Carbamidomethyl (C)]TSVSS[Phospho (STY)]LDSFESR_.2         | 0.144901695  | Q61315_S1391_M1_Apc  |
| _S[Phospho (STY)]PPEHYVQETPLVFSR_.2                           | 0.027947631  | Q61315_S1370_M1_Apc  |
| _NDS[Phospho (STY)]LSSLDFDDDDVDLSR_.2                         | 0.129713725  | Q61315_S1859_M1_Apc  |
| _SKT[Phospho (STY)]PPPPQTVQAK_.2                              | 0.412660945  | Q61315_T1437_M1_Apc  |
| _TPASKS[Phospho (STY)]PSEPGGATTSPR_.2                         | 0.106997133  | Q61315_S2260_M1_Apc  |
| _KPTS[Phospho (STY)]PVKPMQNTSEYR_.3                           | -0.072305363 | Q61315_S1772_M1_Apc  |
| _SFHVEDTPVC[Carbamidomethyl (C)]F5[Phospho (STY)]R_.3         | -0.39711582  | Q61315_S2021_M1_Apc  |
| _GC[Carbamidomethyl (C)]ALQC[Carbamidomethyl (C)]AILSPAFAK_.2 | 0.28861797   | #N/A                 |
| _EFSITDVVPYPISLR_.2                                           | 0.167895225  | #N/A                 |
| _AGGIETIANEYSDR_.2                                            | -0.294136202 | #N/A                 |
| _VLATAFDTTLGGR_.2                                             | 0.508229349  | #N/A                 |
| _QSLTVDPVVK_.2                                                | 0.460967332  | #N/A                 |
| _NHAAPFS[Phospho (STY)]K_.2                                   | -0.307236067 | Q61316_S429_M1_Hspa4 |
| _SNLAYDIVQLPTGLTGIK_.2                                        | -0.195259867 | #N/A                 |
| _LEDTENWLYEDGEDQPK_.2                                         | 0.157398014  | #N/A                 |
| _KPVVDC[Carbamidomethyl (C)]VVSVPSEFYTDAER_.3                 | -0.028859788 | #N/A                 |
| _LFEELGK_.2                                                   | 0.313559144  | #N/A                 |
| _DKLSGEYEK_.2                                                 | -0.177405445 | #N/A                 |
| _FQESEERPK_.2                                                 | -0.131982146 | #N/A                 |
| _LM[Oxidation (M)]NETTAVALAYGIYK_.2                           | -0.06235168  | #N/A                 |
| _LKETAESVLK_.2                                                | -0.126159194 | #N/A                 |
| _QDLPALEEKPR_.3                                               | 0.329714894  | #N/A                 |
| _SVM[Oxidation (M)]DATQIAGLNC[Carbamidomethyl (C)]LR_.2       | 0.26315448   | #N/A                 |
| _AFSDPFVEAEK_.2                                               | -0.314137485 | #N/A                 |
| _NKEDQYEHLDAADVTK_.3                                          | -0.145665496 | #N/A                 |
| _FLEM[Oxidation (M)]C[Carbamidomethyl (C)]DDLLAR_.2           | -0.495257717 | #N/A                 |
| _NAVEEYVYEMR_.2                                               | 0.335981475  | #N/A                 |
| _WNSPAEEGLS[Phospho (STY)]DC[Carbamidomethyl (C)]EVFPK_.2     | 0.039915162  | Q61316_S415_M1_Hspa4 |
| _SQVISNAK_.2                                                  | -0.156284848 | #N/A                 |
| _ELSTTLNADEAVTR_.2                                            | 0.481313346  | #N/A                 |
| _TTGPGGDGIPAIEVHIVR_.3                                        | 0.02092235   | #N/A                 |
| _FAQLNLAAEDPR_.2                                              | -0.050544163 | #N/A                 |
| _S[Phospho (STY)]APPNLWAAQR_.2                                | -0.390774779 | Q61337_S136_M1_Bad   |
| _S[Phospho (STY)]AGTATQMR_.2                                  | 0.313153867  | Q61337_S170_M1_Bad   |
| _RM[Oxidation (M)]S[Phospho (STY)]DEFEGSFK_.2                 | -0.016551078 | Q61337_S155_M1_Bad   |
| _ELETSP[Phospho (STY)]EEK_.2                                  | -0.458243398 | Q61361_S587_M1_Bcan  |

|                                                                                                    |              |                        |
|----------------------------------------------------------------------------------------------------|--------------|------------------------|
| _EYQWIGLNDR_2                                                                                      | -0.200267504 | #N/A                   |
| _EVGGETGS[Phospho (STY)]PELSGVPR_2                                                                 | -0.343462925 | Q61361_S546_M1_Bcan    |
| _SWEEAESQC[Carbamidomethyl (C)]R_2                                                                 | 0.249109596  | #N/A                   |
| _YPIITPSQR_2                                                                                       | 0.201900097  | #N/A                   |
| _FNVYC[Carbamidomethyl (C)]FR_2                                                                    | 0.197474058  | #N/A                   |
| _C[Carbamidomethyl (C)]QENGLWEAPQISC[Carbamidomethyl (C)]VPR_2                                     | 0.297765816  | #N/A                   |
| _LTWEEAR_2                                                                                         | -0.242613927 | #N/A                   |
| _GAIYSIPIS[Phospho (STY)]EDGGGGSSTPEDPAEAPR_3                                                      | -0.175304583 | Q61361_S406_M1_Bcan    |
| _ALGAHLTSIC[Carbamidomethyl (C)]TPEEQDFVNDR_3                                                      | -0.325299718 | #N/A                   |
| _C[Carbamidomethyl (C)]SPGWLADGSVR_2                                                               | 0.513729283  | #N/A                   |
| _ELETPS[Phospho (STY)]EEKSGR_2                                                                     | -0.323023183 | Q61361_S587_M1_Bcan    |
| _DSAHPAS[Phospho (STY)]SEASSPASDGLAIVTVTEK_3                                                       | -0.020909515 | Q61361_S361_M1_Bcan    |
| _ALGAHLTSIC[Carbamidomethyl (C)]TPEEQDFVNDRYR_4                                                    | -0.334391802 | #N/A                   |
| _EVEVLVAR_2                                                                                        | -0.374211696 | #N/A                   |
| _C[Carbamidomethyl (C)]EVQHGIDSSDAVEVK_2                                                           | -0.168003879 | #N/A                   |
| _EAC[Carbamidomethyl (C)]S[Phospho (STY)]GDM[Oxidation (M)]DGYPGVR_2                               | 0.134611334  | Q61361_S224_M1_Bcan    |
| _NKVPELQK_2                                                                                        | -0.189176729 | #N/A                   |
| _LTSSVTAYDYSKG_2                                                                                   | 0.551497332  | #N/A                   |
| _LQDVIHVQGG[Phospho (STY)]PLQAS[Phospho (STY)]PDKVPLDVHR_4                                         | -0.261033431 | Q61410_S92_M2_Prkg2    |
| _ALS[Phospho (STY)]LEMIQLK_2                                                                       | 0.254198547  | Q61410_S431_M1_Prkg2   |
| _SFEDIHQYR_2                                                                                       | -0.348054352 | #N/A                   |
| _QGVEDAFYTLVR_2                                                                                    | -0.374042451 | #N/A                   |
| _GAYSSHDPQGS[Phospho (STY)]RGSR_3                                                                  | 0.115158606  | Q61423_S79_M1_Kcna4    |
| _QSSFPHC[Carbamidomethyl (C)]SDLMP[Phospho (STY)]GSEK_2                                            | -0.051335042 | Q61423_S111_M1_Kcna4   |
| _DTPGFIVNR_2                                                                                       | -0.522465779 | #N/A                   |
| _TFESLVD[Carbamidomethyl (C)]K_2                                                                   | -0.128248605 | #N/A                   |
| _AGDEFVEK_2                                                                                        | -0.298946105 | #N/A                   |
| _FAAEHTIFASNTSSLQITNIANATTR_3                                                                      | 0.115088197  | #N/A                   |
| _SYRS[Phospho (STY)]AS[Phospho (STY)]PER_2                                                         | -0.310457475 | Q61464_S560_M2_Znf638  |
| _GLS[Phospho (STY)]PAQKPK_2                                                                        | 0.115381044  | Q61464_S606_M1_Znf638  |
| _QSSVTQVTEQS[Phospho (STY)]PK_2                                                                    | -0.245442417 | Q61464_S128_M1_Znf638  |
| _HTETVDKGLS[Phospho (STY)]PAQKPK_3                                                                 | -0.229761974 | Q61464_S606_M1_Znf638  |
| _GSTFS[Phospho (STY)]PDLK_2                                                                        | 0.247827784  | Q61464_S1099_M1_Znf638 |
| _Acetyl (Protein N-term)]M[Oxidation (M)]ETDAPQGLAS[Phospho (STY)]PDSPHDPC[Carbamidomethyl (C)]K_2 | -0.277724415 | Q61474_S12_M1_Msi1     |
| _NNLVDIIQQNK_2                                                                                     | -0.385840195 | #N/A                   |
| _NSLQQPEGIDR_2                                                                                     | -0.390671834 | #N/A                   |
| _Acetyl (Protein N-term)]GS[Phospho (STY)]TDTDIEELENATYK_2                                         | 0.091515677  | Q61481_S3_M1_Pde1a     |
| _APFLETDQLK_2                                                                                      | -0.402829071 | #N/A                   |
| _SSNTYTLTDVR_2                                                                                     | -0.327687969 | #N/A                   |
| _EIDPGTQLYTVTSLEYK_2                                                                               | -0.189555577 | #N/A                   |
| _VLQPVEGEVAILFK_2                                                                                  | -0.222145084 | #N/A                   |
| _NM[Oxidation (M)]AASTTITVHYLDLSLNPSGEVTK_3                                                        | 0.008157248  | #N/A                   |
| _KTDPSGLSK_2                                                                                       | -0.373283747 | #N/A                   |
| _SVQYDDVPEYKDR_3                                                                                   | -0.03030474  | #N/A                   |
| _DALEIYKR_2                                                                                        | 0.038354553  | #N/A                   |
| _NTLFNLSNFLDK_2                                                                                    | -0.26780408  | #N/A                   |
| _GLGSDLSSLASLVGNLIGSGTTSK_2                                                                        | -0.56809575  | #N/A                   |

|                                                               |              |                       |
|---------------------------------------------------------------|--------------|-----------------------|
| _DPLADLNKDFL_.2                                               | 0.093397579  | #N/A                  |
| _SSPATTVTS[Phospho (STY)]PNSTPAK_.2                           | -0.413611613 | Q61548_S313_M1_Snap91 |
| _QM[Oxidation (M)]AFDFAR_.2                                   | -0.111761242 | #N/A                  |
| _IAAAQYSVTGSAVAR_.2                                           | 0.166323643  | #N/A                  |
| _ATTHEVM[Oxidation (M)]GPK_.2                                 | 0.098026585  | #N/A                  |
| _LTGGANWQPK_.2                                                | 0.170553037  | #N/A                  |
| _KPGNNEGSGAPS[Phospho (STY)]PLSK_.2                           | -0.392523699 | Q61548_S300_M1_Snap91 |
| _GASPVPESSLTADLLSVDFAAPSPASTASPAK_.3                          | -0.46580208  | #N/A                  |
| _KGDQWNAMEK_.2                                                | 0.002579894  | #N/A                  |
| _TIDTS[Phospho (STY)]PPVDIFATASAAAPVSSAK_.2                   | 0.023492741  | Q61548_S325_M1_Snap91 |
| _PDAAPSIDLFGTDAFSS[Phospho (STY)]PPR_.2                       | -0.142500041 | Q61548_S594_M1_Snap91 |
| _SGSHGYDM[Oxidation (M)]STFIR_.3                              | -0.284273703 | #N/A                  |
| _DALEIYK_.2                                                   | -0.153554354 | #N/A                  |
| _VNASASS[Phospho (STY)]LKK_.2                                 | -0.118796214 | Q61553_S39_M1_Fscn1   |
| _FLVVAHDDGR_.2                                                | 0.227787908  | #N/A                  |
| _YLAPSGPSGTLK_.2                                              | -0.106898288 | #N/A                  |
| _GEHGFIC[Carbamidomethyl (C)]R_.2                             | 0.217706592  | #N/A                  |
| _LSC[Carbamidomethyl (C)]FAQSVSPAEC_.2                        | -0.105328627 | #N/A                  |
| _KVTGTL DANR_.2                                               | 0.502399584  | #N/A                  |
| _VNASASS[Phospho (STY)]LKKK_.2                                | -0.438005414 | Q61553_S39_M1_Fscn1   |
| _YSVQTS DHR_.2                                                | 0.203796865  | #N/A                  |
| _LVARPEPATGFTLEFR_.3                                          | -0.375993246 | #N/A                  |
| _WSLQSE AHR_.2                                                | 0.248555746  | #N/A                  |
| _YFGGTEDR_.2                                                  | -0.19504208  | #N/A                  |
| _YLTAEAFGFK_.2                                                | -0.039414936 | #N/A                  |
| _AC[Carbamidomethyl (C)]AETIDPASLWEY_.2                       | 0.161476858  | #N/A                  |
| _SSYDVFQLEFNDGAYNIK_.2                                        | -0.205622028 | #N/A                  |
| _VGKDELFALEQSC[Carbamidomethyl (C)]AQVVLQAANER_.3             | -0.504576378 | #N/A                  |
| _VTGTL DANR_.2                                                | 0.134721408  | #N/A                  |
| _YLAADKDG NVTC[Carbamidomethyl (C)]ER_.2                      | -0.175621405 | #N/A                  |
| _YAHLSAR_.2                                                   | 0.01090673   | #N/A                  |
| _QIWTLEQPPDEAGSAAVC[Carbamidomethyl (C)]LR_.2                 | 0.265200353  | #N/A                  |
| _DVPWGVDSLITLAFQDQR_.2                                        | -0.144953532 | #N/A                  |
| _VNASASS[Phospho (STY)]LK_.2                                  | 0.119720301  | Q61553_S39_M1_Fscn1   |
| _QGM[Oxidation (M)]DLSANQDEETDQETFQLEIDR_.3                   | -0.384879756 | #N/A                  |
| _EIQNGTLRES[Phospho (STY)]DSEHVPR_.3                          | -0.278998863 | Q61595_S75_M1_Ktn1    |
| _DLLT[Phospho (STY)]ELQK_.2                                   | -0.141333649 | Q61595_T1211_M1_Ktn1  |
| _NTNDANSC[Carbamidomethyl (C)]QIIPQNVNR_.2                    | -0.228228693 | #N/A                  |
| _LYSESLAR_.2                                                  | 0.051702168  | #N/A                  |
| _TDDYLDQPC[Carbamidomethyl (C)]C[Carbamidomethyl (C)]ETINR_.2 | -0.15124566  | #N/A                  |
| _VIC[Carbamidomethyl (C)]ILSHPIK_.2                           | -0.017767503 | #N/A                  |
| _FVSISDLFVPK_.2                                               | -0.093534034 | #N/A                  |
| _DLGTDSQIFISR_.2                                              | 0.229978637  | #N/A                  |
| _M[Oxidation (M)]LLFTEVTR_.2                                  | -0.066065595 | #N/A                  |
| _FLM[Oxidation (M)]ANGQLVK_.2                                 | 0.582000203  | #N/A                  |
| _SPYLYPLYGLGELPQGFAR_.2                                       | -0.309008023 | #N/A                  |
| _AYDATTHFETTC[Carbamidomethyl (C)]DDIKDIYKR_.4                | -0.50134103  | #N/A                  |

|                                                                              |              |                        |
|------------------------------------------------------------------------------|--------------|------------------------|
| _VLHM[Oxidation (M)]DQNPYYGGESASITPLEDLYK_.3                                 | -0.607653623 | #N/A                   |
| _FLVYVANFDEKDPR_.2                                                           | -0.192943748 | #N/A                   |
| _VIEGSFVYK_.2                                                                | -0.050826143 | #N/A                   |
| _FDLGQDVIDFTGHSLALYR_.3                                                      | -0.273232367 | #N/A                   |
| _MTGSEFDFEEMKR_.3                                                            | -0.1596649   | #N/A                   |
| _EVKSS[Phospho (STY)]PSES[Phospho (STY)]PLMEKK_.2                            | -0.313273611 | #N/A                   |
| _EVKSS[Phospho (STY)]PSES[Phospho (STY)]PLM[Oxidation (M)]EK_.2              | 0.188050447  | #N/A                   |
| _SS[Phospho (STY)]PSES[Phospho (STY)]PLMEKK_.2                               | -0.339071969 | #N/A                   |
| _SS[Phospho (STY)]PSESPLMEK_.2                                               | 0.292499499  | Q61609_S269_M1_Slc20a1 |
| _IQPVTHSGQHS[Phospho (STY)]T_.2                                              | 0.234311162  | Q61616_S445_M1_Drd1    |
| _GLLTSEEDS[Phospho (STY)]GFSTSPKDNSLPK_.3                                    | 0.128287673  | Q61624_S301_M1_Znf148  |
| _GLLTSEEDSGFSTS[Phospho (STY)]PK_.2                                          | 0.317713476  | Q61624_S306_M1_Znf148  |
| _AGMTSS[Phospho (STY)]PDATTGQTFG_.2                                          | 0.164398995  | Q61624_S784_M1_Znf148  |
| _VPS[Phospho (STY)]KEDDKIDLEHLHR_.4                                          | -0.261671156 | Q61625_S865_M1_Grid2   |
| _TEQSVT[Phospho (STY)]PEQQK_.2                                               | -0.211003729 | Q61644_T181_M1_Pacsin1 |
| _GPQYGSLEK_.2                                                                | -0.231219751 | #N/A                   |
| _GRLDS[Phospho (STY)]GQLGLYPANYVEAI_.2                                       | -0.468631372 | Q61644_S427_M1_Pacsin1 |
| _EVLLDIKR_.2                                                                 | -0.070379209 | #N/A                   |
| _NSLLNEDLEK_.2                                                               | 0.010320103  | #N/A                   |
| _AYAQLTDWAK_.2                                                               | 0.098215941  | #N/A                   |
| _LGEEDQGW[C[Carbamidomethyl (C)]R_.2                                         | -0.208353239 | #N/A                   |
| _GADAQEDLR_.2                                                                | 0.042302886  | #N/A                   |
| _ALYDYDQEQDELSFK_.2                                                          | -0.284769245 | #N/A                   |
| _EAEDGFRK_.2                                                                 | 0.169618541  | #N/A                   |
| _LDS[Phospho (STY)]GQLGLYPANYVEAI_.2                                         | 0.46238245   | Q61644_S427_M1_Pacsin1 |
| _NSLLNEDLEKVK_.2                                                             | -0.140703031 | #N/A                   |
| _KAEGATLSNATGAVESTSQAGDR_.3                                                  | -0.347544755 | #N/A                   |
| _AYHLAC[Carbamidomethyl (C)]K_.2                                             | 0.251006602  | #N/A                   |
| _LC[Carbamidomethyl (C)]NDLM[Oxidation (M)]SC[Carbamidomethyl (C)]VQER_.2    | 0.310139783  | #N/A                   |
| _AYHLAC[Carbamidomethyl (C)]KEER_.2                                          | -0.174645225 | #N/A                   |
| _GSVSS[Phospho (STY)]YDR_.2                                                  | -0.276179626 | Q61644_S346_M1_Pacsin1 |
| _TEQSVT[Phospho (STY)]PEQQK_.2                                               | -0.184156212 | Q61644_T181_M1_Pacsin1 |
| _HLNLAENS[Phospho (STY)]SYM[Oxidation (M)]HVYR_.3                            | 0.021436216  | Q61644_S259_M1_Pacsin1 |
| _Acetyl (Protein N-term)]SGSYDEASEITDSFWEVGNKYR_.3                           | -0.231780361 | #N/A                   |
| _AWGAM[Oxidation (M)]M[Oxidation (M)]TEADKVSELHQEVK_.3                       | -0.169471924 | #N/A                   |
| _KAEGATLSNATGAVESTS[Phospho (STY)]QAGDRGSVSSYDR_.4                           | -0.098987568 | Q61644_S336_M1_Pacsin1 |
| _AEGATLSNATGAVESTSQAGDR_.2                                                   | -0.457256506 | #N/A                   |
| _TTPQYM[Oxidation (M)]EGM[Oxidation (M)]EQVFEQC[Carbamidomethyl (C)]QQFEK_.3 | -0.402634618 | #N/A                   |
| _STSGPGM[Oxidation (M)]PM[Oxidation (M)]NWPQFEWNPDLPHTTAK_.3                 | 0.17131911   | #N/A                   |
| _APILIATDVASR_.2                                                             | -0.029928293 | #N/A                   |
| _QVSDLISVLR_.2                                                               | 0.201038758  | #N/A                   |
| _LIDFLEC[Carbamidomethyl (C)]GK_.2                                           | -0.272894119 | #N/A                   |
| _GVEIC[Carbamidomethyl (C)]IATPGR_.2                                         | 0.256979363  | #N/A                   |
| _ELAQQVQQVAAEYC[Carbamidomethyl (C)]R_.2                                     | -0.023404323 | #N/A                   |
| _LLQLVEDR_.2                                                                 | -0.113649572 | #N/A                   |
| _STC[Carbamidomethyl (C)]IYGGAPK_.2                                          | -0.056638654 | #N/A                   |
| _NFYQEHPDLAR_.2                                                              | -0.025579058 | #N/A                   |

|                                                                       |              |                       |
|-----------------------------------------------------------------------|--------------|-----------------------|
| _FVINYDYPNSSEDIHR_3                                                   | 0.290419986  | #N/A                  |
| _DWVLNEFK_2                                                           | -0.378290766 | #N/A                  |
| _KSS[Phospho (STY)]FSNSADDIK_2                                        | -0.407368724 | Q61686_S93_M1_Cbx5    |
| _SS[Phospho (STY)]FSNSADDIK_2                                         | 0.356003705  | Q61686_S93_M1_Cbx5    |
| _TADSSSS[Phospho (STY)]EDEEYVVEK_2                                    | 0.126751824  | Q61686_S14_M1_Cbx5    |
| _EENVNS[Phospho (STY)]PEDKR_2                                         | -0.226023565 | Q61687_S912_M1_Atrx   |
| _LTL[Phospho (STY)]DGES[Phospho (STY)]GEEKPTKPK_2                     | -0.160264596 | Q61687_S1335_M2_Atrx  |
| _VC[Carbamidomethyl (C)]DQTSKFS[Phospho (STY)]PK_2                    | -0.225412324 | Q61687_S315_M1_Atrx   |
| _QNYSESSNYDS[Phospho (STY)]ELER_2                                     | 0.133364301  | Q61687_S801_M1_Atrx   |
| _YVES[Phospho (STY)]DDEKPTDENVNEK_2                                   | -0.354616492 | Q61687_S92_M1_Atrx    |
| _TTSTSNPS[Phospho (STY)]S[Phospho (STY)]PAPDWYK_2                     | 0.302489569  | Q61687_S1978_M2_Atrx  |
| _EEIS[Phospho (STY)]DHENNVTTILEDSDLR_3                                | -0.027348828 | Q61687_S626_M1_Atrx   |
| _TTQEGS[Phospho (STY)]S[Phospho (STY)]ADDTGDTEGR_2                    | 0.392307062  | Q61687_S854_M2_Atrx   |
| _AKQPVIGDQNS[Phospho (STY)]DS[Phospho (STY)]DEM[Oxidation (M)]LAVLK_3 | -0.001305303 | Q61687_S717_M2_Atrx   |
| _IGKQS[Phospho (STY)]EES[Phospho (STY)]PADDGELRR_3                    | -0.529479126 | Q61687_S1287_M2_Atrx  |
| _IES[Phospho (STY)]PKLER_2                                            | -0.34139136  | Q61699_S810_M1_Hsph1  |
| _PKIES[Phospho (STY)]PKLER_2                                          | -0.17440599  | Q61699_S810_M1_Hsph1  |
| _SVLDAAQIVGLNC[Carbamidomethyl (C)]LR_2                               | 0.295859006  | #N/A                  |
| _FVVQNVSAQK_2                                                         | -0.141203024 | #N/A                  |
| _AGGIETIANEFSDR_2                                                     | -0.203177617 | #N/A                  |
| _ [Acetyl (Protein N-term)]SVVGLDVGSQSC[Carbamidomethyl (C)]YIAVAR_2  | -0.22979671  | #N/A                  |
| _FIC[Carbamidomethyl (C)]EQEHEK_2                                     | 0.114932903  | #N/A                  |
| _LLTETEDWLYEEGEDQAK_2                                                 | -0.234500518 | #N/A                  |
| _NAVEEC[Carbamidomethyl (C)]VYEFR_2                                   | 0.272171527  | #N/A                  |
| _SQFEELC[Carbamidomethyl (C)]AELLQK_2                                 | -0.235675623 | #N/A                  |
| _S[Phospho (STY)]LDQDPVVR_2                                           | -0.193785629 | Q61699_S774_M1_Hsph1  |
| _VVNVLPVEANLVWQLGR_2                                                  | 0.162273734  | #N/A                  |
| _VLEELGQR_2                                                           | 0.038163345  | #N/A                  |
| _QDLPNAEEKPR_3                                                        | 0.038507357  | #N/A                  |
| _NQQITHANNTVSSFK_2                                                    | -0.184343769 | #N/A                  |
| _T[Phospho (STY)]PNGPNIDKKEDLEGK_3                                    | 0.232694216  | Q61699_T816_M1_Hsph1  |
| _SSQALLSQLYQS[Phospho (STY)]PNR_2                                     | -0.046694691 | Q61701_S233_M1_Elav14 |
| _ILVDQVTGVSR_2                                                        | 0.051339071  | #N/A                  |
| _NC[Carbamidomethyl (C)]PS[Phospho (STY)]PMQTGAATDDSK_2               | 0.272648698  | Q61701_S38_M1_Elav14  |
| _ISVSDLINGIASLK_2                                                     | -0.188007624 | #N/A                  |
| _FVASNQR_2                                                            | -0.078269833 | #N/A                  |
| _NVEAQSTEEMFVK_2                                                      | 0.194756914  | #N/A                  |
| _GTIQVVTQGTSLK_2                                                      | 0.247505774  | #N/A                  |
| _GGIVDEGALLR_2                                                        | -0.040331685 | #N/A                  |
| _VTADVINAEEK_2                                                        | -0.092713829 | #N/A                  |
| _QADVNLVNAK_2                                                         | 0.203817237  | #N/A                  |
| _NAGTC[Carbamidomethyl (C)]LSPAVIVGLLR_2                              | 0.354118121  | #N/A                  |
| _VLISDSLDP[C[Carbamidomethyl (C)]C[Carbamidomethyl (C)]R_2            | 0.387686312  | #N/A                  |
| _ILQDGGGLQVVEK_2                                                      | -0.041020355 | #N/A                  |
| _AGTGVDNVDLEAATR_2                                                    | 0.147589882  | #N/A                  |
| _ALVDHENVISC[Carbamidomethyl (C)]PHLGASTK_3                           | 0.47182093   | #N/A                  |
| _RES[Phospho (STY)]GLDTGGQR_2                                         | -0.105161761 | Q61762_S535_M1_Kcna5  |

|                                           |              |                       |
|-------------------------------------------|--------------|-----------------------|
| _DYEPAIS[Phospho (STY)]PK_.2              | -0.396472891 | Q61771_S681_M1_Kif3b  |
| _SQNQYLVR_.2                              | -0.42568788  | #N/A                  |
| _GFSVVADTPELQR_.2                         | 0.034093299  | #N/A                  |
| _YHEEFK_.2                                | -0.196876251 | #N/A                  |
| _YKEEFK_.2                                | -0.141135374 | #N/A                  |
| _QSFTM[Oxidation (M)]VADTPENLR_.2         | -0.428972612 | #N/A                  |
| _TQDQISNIK_.2                             | 0.166480169  | #N/A                  |
| _IVYPTEK_.2                               | 0.338615658  | #N/A                  |
| _EAQDSSSYR_.2                             | 0.066293885  | #N/A                  |
| _TGD TGMLPANYVEAI_.2                      | -0.238379549 | #N/A                  |
| _MGPSGGEGVEPERR_.3                        | -0.30911239  | #N/A                  |
| _LKQQSELQSQVR_.3                          | -0.045464414 | #N/A                  |
| _S[Phospho (STY)]PALPER_.2                | -0.109729833 | Q61818_S1332_M1_Rai1  |
| _SGVAVPTS[Phospho (STY)]PK_.2             | 0.091737416  | Q61823_S94_M1_Pdcd4   |
| _SGVAVPTS[Phospho (STY)]PKGR_.2           | -0.259458149 | Q61823_S94_M1_Pdcd4   |
| _TSDVNDTQPPQS[Phospho (STY)]E_.2          | -0.203424226 | Q61879_S1975_M1_Myh10 |
| _SDLLEGFNNYR_.2                           | -0.29004665  | #N/A                  |
| _IVFQEFR_.2                               | 0.039631834  | #N/A                  |
| _TQLEELEDELQATEDAK_.2                     | -0.023292053 | #N/A                  |
| _GGPISFS[Phospho (STY)]SSR_.2             | 0.022067665  | Q61879_S1937_M1_Myh10 |
| _EQEVAELKK_.2                             | -0.150969625 | #N/A                  |
| _LQQELDDLTVDLHQQR_.3                      | -0.097939058 | #N/A                  |
| _LDPHLVLDQLR_.2                           | 0.148564266  | #N/A                  |
| _DAAGLESQQLQDTQELLQEETR_.2                | -0.047317156 | #N/A                  |
| _QLLQANPILESFGNAK_.2                      | -0.058431185 | #N/A                  |
| _LVQEQGSHSK_.2                            | -0.140936475 | #N/A                  |
| _DLEAQIEAANK_.2                           | 0.386721541  | #N/A                  |
| _QLHIEGAS[Phospho (STY)]LELSDDDTESK_.3    | 0.191737213  | Q61879_S1952_M1_Myh10 |
| _ELQAQIAELQEDFESEK_.2                     | -0.307903443 | #N/A                  |
| _IAQLEEEEEESNM[Oxidation (M)]ELLNDR_.3    | -0.385564616 | #N/A                  |
| _SLEAEILQLQEELASSER_.2                    | -0.177896204 | #N/A                  |
| _RQLHIEGASLELS[Phospho (STY)]DDDDTESK_.3  | -0.020258597 | Q61879_S1956_M1_Myh10 |
| _VIQYLAHVASSHK_.3                         | -0.296854484 | #N/A                  |
| _IAEC[Carbamidomethyl (C)]SSQLAEEEEKAK_.2 | -0.197786961 | #N/A                  |
| _AVIYNPATQADWTAK_.2                       | -0.314659196 | #N/A                  |
| _NKQEVMSDLEER_.2                          | -0.012254322 | #N/A                  |
| _LQQLFNHTM[Oxidation (M)]FILEQEEYQR_.3    | 0.099345859  | #N/A                  |
| _VIGPGYPIR_.2                             | 0.064212384  | #N/A                  |
| _ALVGDEAELPC[Carbamidomethyl (C)]R_.2     | -0.077680967 | #N/A                  |
| _AEVENLHR_.2                              | 0.095666046  | #N/A                  |
| _TFDPHFLR_.2                              | 0.156408645  | #N/A                  |
| _FSDEGGYTC[Carbamidomethyl (C)]FFR_.2     | 0.163852584  | #N/A                  |
| _LAGQFLEELR_.2                            | 0.393772279  | #N/A                  |
| _LAGQFLEELRNPF_.2                         | 0.171330682  | #N/A                  |
| _DQDAEQAPEYR_.2                           | -0.0172861   | #N/A                  |
| _LRAEVENLHR_.3                            | -0.213194049 | #N/A                  |
| _DHSYQEEAAM[Oxidation (M)]ELK_.2          | -0.276417998 | #N/A                  |

|                                                                                               |              |                        |
|-----------------------------------------------------------------------------------------------|--------------|------------------------|
| _NGKDQDAEQAPEYR_.2                                                                            | 0.429442221  | #N/A                   |
| _STT[Phospho (STY)]PGTPSTIETTPR_.2                                                            | 0.06332051   | Q61909_T565_M1_Runx1t1 |
| _QQS[Phospho (STY)]PVNPDPVALDAHR_.3                                                           | -0.199505453 | Q61909_S390_M1_Runx1t1 |
| _S[Phospho (STY)]LTLAAPGEVR_.2                                                                | -0.060874281 | Q61923_S6_M1_Kcna6     |
| _SEKS[Phospho (STY)]LTLAAPGEVR_.2                                                             | -0.084473353 | Q61923_S6_M1_Kcna6     |
| _MRS[Phospho (STY)]EKS[Phospho (STY)]LTLAAPGEVR_.3                                            | 0.138501101  | Q61923_S3_M2_Kcna6     |
| _M[Oxidation (M)]TDQEAIQDLWQWR_.2                                                             | -0.452521738 | #N/A                   |
| _GPSSVEDIK_.2                                                                                 | 0.394873262  | #N/A                   |
| _VDNDENEHQLSLR_.2                                                                             | 0.235737314  | #N/A                   |
| _DELHIVEAEAM[Oxidation (M)]NYEGSPIK_.3                                                        | 0.179852536  | #N/A                   |
| _MSVQPTVSLGGFEITPPVVL_.2                                                                      | 0.085720222  | #N/A                   |
| _C[Carbamidomethyl (C)]GSGPVHISGQHLVAVEEDAES[Phospho (STY)]EDEDEEDVKLLGM[Oxidation (M)]SGK_.5 | 0.265565874  | Q61937_S125_M1_Npm1    |
| _LVVPASQC[Carbamidomethyl (C)]GSLIGK_.2                                                       | 0.524070961  | #N/A                   |
| _INISEGNC[Carbamidomethyl (C)]PER_.2                                                          | 0.233770488  | #N/A                   |
| _AITIAGIPQSIIEC[Carbamidomethyl (C)]VK_.2                                                     | 0.042096531  | #N/A                   |
| _IITLAGPTNAIFK_.2                                                                             | 0.093326238  | #N/A                   |
| _PSSS[Phospho (STY)]PVIFAGGQDR_.2                                                             | 0.068145371  | Q61990_S185_M1_Pcbp2   |
| _ESTGAQVQVAGDM[Oxidation (M)]LPNSTER_.2                                                       | 0.198508625  | #N/A                   |
| _QVTITGSAASISLAQYLINVR_.2                                                                     | -0.506451174 | #N/A                   |
| _KGGEFDEFVNDDT[Phospho (STY)]DDDLPVSK_.3                                                      | -0.019346451 | Q62018_T925_M1_Ctr9    |
| _GGEFDEFVNDDT[Phospho (STY)]DDDLPVSK_.2                                                       | -0.074500278 | Q62018_T925_M1_Ctr9    |
| _NSNS[Phospho (STY)]DS[Phospho (STY)]DDDERPNR_.2                                              | -0.530533962 | Q62018_S1039_M2_Ctr9   |
| _KGS[Phospho (STY)]GS[Phospho (STY)]EQEGEEEEGGER_.2                                           | -0.306065769 | Q62018_S941_M2_Ctr9    |
| _RKGS[Phospho (STY)]GS[Phospho (STY)]EQEGEEEEGGER_.2                                          | 0.16565397   | Q62018_S941_M2_Ctr9    |
| _SNS[Phospho (STY)]TTQVQNQSWGSPR_.2                                                           | 0.16119528   | Q62036_S78_M1_Cep131   |
| _QPS[Phospho (STY)]EEEEIK_.2                                                                  | -0.254772107 | Q62048_S116_M1_Pea15   |
| _SAC[Carbamidomethyl (C)]KEDIPSEK_.2                                                          | 0.266058608  | #N/A                   |
| _YKDIIHQPS[Phospho (STY)]EEEEIK_.3                                                            | -0.371033776 | Q62048_S116_M1_Pea15   |
| _LTRIPS[Phospho (STY)]AK_.2                                                                   | -0.328807338 | Q62048_S104_M1_Pea15   |
| _DIIRQPS[Phospho (STY)]EEEEIK_.2                                                              | -0.373301502 | Q62048_S116_M1_Pea15   |
| _RPDLLTM[Oxidation (M)]VVDYR_.2                                                               | -0.108056196 | #N/A                   |
| _Acetyl (Protein N-term))AEYGTLLQDLTNNITLEDLEQLK_.3                                           | -0.013688423 | #N/A                   |
| _QPS[Phospho (STY)]EEEEIKLAPPPK_.2                                                            | -0.191502965 | Q62048_S116_M1_Pea15   |
| _SEEITGSAWFSFLESHNK_.2                                                                        | -0.279565679 | #N/A                   |
| _DNLSYIEHIFEISR_.2                                                                            | 0.001697792  | #N/A                   |
| _YEINSLIR_.2                                                                                  | -0.064639408 | #N/A                   |
| _AQC[Carbamidomethyl (C)]GGGLLGVR_.2                                                          | 0.178717514  | #N/A                   |
| _GTVAC[Carbamidomethyl (C)]GQPPVVENAK_.2                                                      | -0.204491124 | #N/A                   |
| _LATVGELQAAR_.2                                                                               | -0.066796443 | #N/A                   |
| _FTFEEAEAC[Carbamidomethyl (C)]TSR_.2                                                         | 0.066390737  | #N/A                   |
| _NGFDQC[Carbamidomethyl (C)]DYGWLSDASVR_.2                                                    | -0.117975908 | #N/A                   |
| _VGHDYQWIGLNDK_.3                                                                             | 0.008859335  | #N/A                   |
| _S[Phospho (STY)]IQDLTVGTGTEPGQVSSR_.2                                                        | -0.019048859 | Q62073_S412_M1_Map3k7  |
| _AREGS[Phospho (STY)]FEAR_.2                                                                  | -0.177437028 | Q62077_S1248_M1_Plcg1  |
| _S[Phospho (STY)]RS[Phospho (STY)]PPPVSK_.2                                                   | -0.050291777 | Q62093_S189_M2_Srsf2   |
| _TS[Phospho (STY)]PDTLRR_.2                                                                   | -0.486020323 | Q62093_S26_M1_Srsf2    |
| _VGDVYIPR_.2                                                                                  | -0.226899624 | #N/A                   |



|                                                                                    |              |                       |
|------------------------------------------------------------------------------------|--------------|-----------------------|
| _S[Phospho (STY)]KS[Phospho (STY)]PPKS[Phospho (STY)]PEEEGAVSS_.2                  | 0.158767055  | Q62093_S206_M3_Srsf2  |
| _VDNLTyrTS[Phospho (STY)]PDTLR_.2                                                  | -0.363237738 | Q62093_S26_M1_Srsf2   |
| _TS[Phospho (STY)]PDTLR_.2                                                         | -0.022157963 | Q62093_S26_M1_Srsf2   |
| _S[Phospho (STY)]RS[Phospho (STY)]RS[Phospho (STY)]PPPVSK_.2                       | -0.078383989 | Q62093_S187_M3_Srsf2  |
| _VDNLTyr_.2                                                                        | -0.055837409 | #N/A                  |
| _YLVLEADR_.2                                                                       | -0.339102514 | #N/A                  |
| _GKPNYFSDRGS[Phospho (STY)]GSR_.3                                                  | 0.114829895  | Q62095_S90_M1_Ddx3y   |
| _FS[Phospho (STY)]GGFGAR_.2                                                        | 0.143712903  | Q62095_S592_M1_Ddx3y  |
| _HVINFDLPDIEEYVHR_.3                                                               | 0.128865532  | #N/A                  |
| _DLLDLLVEAK_.2                                                                     | 0.100618635  | #N/A                  |
| _VGNLGLATSFNER_.2                                                                  | 0.166633479  | #N/A                  |
| _RYS[Phospho (STY)]PVAK_.2                                                         | -0.396532801 | Q62108_S295_M1_Dlg4   |
| _IIPGGAAAQDGR_.2                                                                   | -0.104628494 | #N/A                  |
| _DYHFVSSR_.2                                                                       | 0.125663733  | #N/A                  |
| _VIEDLSGPYIWVPAR_.2                                                                | -0.217913113 | #N/A                  |
| _PIILGPTK_.2                                                                       | 0.318132323  | #N/A                  |
| _EVTHSAAVEALK_.2                                                                   | -0.011431858 | #N/A                  |
| _VHSDS[Phospho (STY)]ETDDIGFIPSKR_.3                                               | 0.216946126  | Q62108_S480_M1_Dlg4   |
| _REYEIDGR_.2                                                                       | -0.364747032 | #N/A                  |
| _VNDSilFVNEVDVR_.2                                                                 | 0.075612811  | #N/A                  |
| _NTYDVVY[Phospho (STY)]LK_.2                                                       | -0.456013458 | Q62108_Y240_M1_Dlg4   |
| _AKDWGS[Phospho (STY)]SSGSQGR_.2                                                   | 0.124705176  | Q62108_S509_M1_Dlg4   |
| _EQLM[Oxidation (M)]NSSLGS[Phospho (STY)]GTASLR_.2                                 | -0.646617007 | Q62108_S418_M1_Dlg4   |
| _RVHSDS[Phospho (STY)]ETDDIGFIPSK_.3                                               | -0.261866182 | Q62108_S480_M1_Dlg4   |
| _VHSDSETDDIGFIPSK_.3                                                               | 0.28323343   | #N/A                  |
| _HC[Carbamidomethyl (C)]ILDVSANAVR_.2                                              | 0.711178159  | #N/A                  |
| _RVHS[Phospho (STY)]DS[Phospho (STY)]ETDDIGFIPSKR_.3                               | 0.022785546  | Q62108_S478_M2_Dlg4   |
| _EVTHSAAVEALKEAGS[Phospho (STY)]IVR_.3                                             | -0.183510233 | Q62108_S142_M1_Dlg4   |
| _DWGSSSGS[Phospho (STY)]QGR_.2                                                     | 0.194457646  | Q62108_S513_M1_Dlg4   |
| _GNS[Phospho (STY)]GLGFSIAGGTDNPHIGDDPSIFITK_.3                                    | 0.31909895   | Q62108_S73_M1_Dlg4    |
| _FIEAGQYNshlyGTSVQSVR_.3                                                           | -0.438048865 | #N/A                  |
| _DLLGEEDIPREPR_.3                                                                  | -0.094742943 | #N/A                  |
| _EQLMNSSLGSGT[Phospho (STY)]ASLRS[Phospho (STY)]NPKR_.3                            | 0.142030992  | Q62108_S425_M2_Dlg4   |
| _S[Phospho (STY)]LENVLEINKR_.2                                                     | -0.125237562 | Q62108_S654_M1_Dlg4   |
| _ILAVNSVGLDVMHEDAVAALK_.3                                                          | -0.233199466 | #N/A                  |
| _IIEGGAHKDGR_.3                                                                    | 0.006106991  | #N/A                  |
| _TNGISDVQIS[Phospho (STY)]PTLQR_.2                                                 | 0.056252066  | Q62120_S523_M1_Jak2   |
| _NQEIHLs[Phospho (STY)]PIAR_.2                                                     | -0.153144272 | Q62132_S271_M1_Ptpr   |
| _TPS[Phospho (STY)]SEESPTK_.2                                                      | -0.023795373 | Q62172_S29_M1_Ralbp1  |
| _ [Acetyl (Protein N-term)]TEC[Carbamidomethyl (C)]FLPPSS[Phospho (STY)]SPSEHR_.2  | -0.211313917 | Q62172_S10_M1_Ralbp1  |
| _ [Acetyl (Protein N-term)]TEC[Carbamidomethyl (C)]FLPPS[Phospho (STY)]SSPSEHRR_.3 | 0.072436787  | Q62172_S9_M1_Ralbp1   |
| _TEGYAAFQEDS[Phospho (STY)]S[Phospho (STY)]GDEAESPSK_.2                            | 0.239741033  | Q62172_S92_M2_Ralbp1  |
| _TPS[Phospho (STY)]SEES[Phospho (STY)]PTKFPGLYR_.2                                 | -0.127126301 | Q62172_S29_M2_Ralbp1  |
| _TGEPS[Phospho (STY)]PPHDLHEPPDT[Phospho (STY)]VSDDDKDHGK_.4                       | 0.15051249   | Q62172_S48_M2_Ralbp1  |
| _RTEGYAAFQEDS[Phospho (STY)]S[Phospho (STY)]GDEAESPSK_.3                           | -0.093241203 | Q62172_S92_M2_Ralbp1  |
| _TSAS[Phospho (STY)]DVDADNNHLGAEVA_.2                                              | -0.18840874  | Q62178_S746_M1_Sema4a |
| _DNFTAIPEGTNGVEER_.2                                                               | -0.074562905 | #N/A                  |

|                                                                           |              |                        |
|---------------------------------------------------------------------------|--------------|------------------------|
| _GAPLVVIC[Carbamidomethyl (C)]QGK_.2                                      | 0.026486694  | #N/A                   |
| _QIGDNLIVPGGVK_.2                                                         | 0.146124231  | #N/A                   |
| _IAVGSDSDLVIWDPDALK_.2                                                    | -0.047488314 | #N/A                   |
| _AITVASQTNC[Carbamidomethyl (C)]PLYVTK_.2                                 | 0.033443731  | #N/A                   |
| _GM[Oxidation (M)]YDGPVFDLTTT[Phospho (STY)]PK_.2                         | -0.042130951 | Q62188_T509_M1_Dpysl3  |
| _SAADLISQAR_.2                                                            | 0.081602307  | #N/A                   |
| _GS[Phospho (STY)]PTRPNPPVR_.2                                            | -0.238748794 | Q62188_S522_M1_Dpysl3  |
| _GGT[Phospho (STY)]PAGSTRGS[Phospho (STY)]PTRPNPPVR_.3                    | -0.079356727 | Q62188_S522_M2_Dpysl3  |
| _IVAPPGGRS[Phospho (STY)]NITS[Phospho (STY)]LS_.2                         | 0.113703689  | Q62188_S564_M2_Dpysl3  |
| _NLHQSGFS[Phospho (STY)]LSGTQVDEGVR_.3                                    | -0.116169109 | Q62188_S539_M1_Dpysl3  |
| _GM[Oxidation (M)]TTVDDFFQGTK_.2                                          | -0.034976425 | #N/A                   |
| _NHQSVAEYNIFEFGM[Oxidation (M)]ELR_.3                                     | -0.027331567 | #N/A                   |
| _GM[Oxidation (M)]YDGPVFDLTTT[Phospho (STY)]PKGGT[Phospho (STY)]PAGSTR_.3 | -0.219094827 | Q62188_T509_M2_Dpysl3  |
| _AALAGGTTM[Oxidation (M)]IIDHVVPEPESSLTEAYEK_.3                           | -0.088935032 | #N/A                   |
| _MADLHAVPR_.2                                                             | 0.380904928  | #N/A                   |
| _IM[Oxidation (M)]LEDGNLHVTQGAGR_.3                                       | 0.126761618  | #N/A                   |
| _SC[Carbamidomethyl (C)]C[Carbamidomethyl (C)]DYALHVDITHWNDSVK_.3         | 0.024009012  | #N/A                   |
| _NLHQSGFS[Phospho (STY)]LSGTQVDEGVRS[Phospho (STY)]ASKR_.4                | 0.178499599  | Q62188_S539_M2_Dpysl3  |
| _S[Phospho (STY)]GS[Phospho (STY)]EES[Phospho (STY)]IRKK_.2               | -0.128100785 | Q62205_S502_M3_Scn9a   |
| _EGC[Carbamidomethyl (C)]PS[Phospho (STY)]PPGQTSK_.2                      | -0.246467421 | Q62219_S194_M1_Tgfb1i1 |
| _IPESETESTASAPNS[Phospho (STY)]PR_.2                                      | -0.31242215  | Q62245_S1082_M1_Sos1   |
| _RLS[Phospho (STY)]ESAC[Carbamidomethyl (C)]R_.2                          | 0.117996055  | Q62245_S401_M1_Sos1    |
| _SAS[Phospho (STY)]VSSISLSK_.2                                            | 0.128943532  | Q62245_S1120_M1_Sos1   |
| _ETWLSENQR_.2                                                             | -0.273721734 | #N/A                   |
| _DVEDEILWVGER_.2                                                          | -0.149070579 | #N/A                   |
| _DQNTVETLQR_.2                                                            | 0.125762801  | #N/A                   |
| _SALPAQSAATLPR_.2                                                         | 0.14400621   | #N/A                   |
| _EIGQSVDEVEK_.2                                                           | -0.313575679 | #N/A                   |
| _VAVVNQIAR_.2                                                             | -0.064656234 | #N/A                   |
| _FM[Oxidation (M)]ELLEPLSER_.2                                            | -0.331236114 | #N/A                   |
| _LLEVLSGER_.2                                                             | -0.173982526 | #N/A                   |
| _IHC[Carbamidomethyl (C)]LENVDK_.2                                        | -0.146381507 | #N/A                   |
| _VLLLSQDYGK_.2                                                            | -0.021894141 | #N/A                   |
| _EVDDLEQWIAER_.2                                                          | -0.239210173 | #N/A                   |
| _EIEELQSQAQALSQEGK_.2                                                     | -0.01056708  | #N/A                   |
| _ENEVLEAWK_.2                                                             | -0.338059604 | #N/A                   |
| _SQNIITDSSSLNAEAIR_.2                                                     | -0.092977102 | #N/A                   |
| _LVSDGNINSR_.2                                                            | 0.034127862  | #N/A                   |
| _KLPEELGR_.2                                                              | -0.151450011 | #N/A                   |
| _LVDTGDKFR_.2                                                             | 0.113469955  | #N/A                   |
| _LTTLELLEVR_.2                                                            | -0.18233733  | #N/A                   |
| _ITDLYTDLR_.2                                                             | -0.15471872  | #N/A                   |
| _VLDNAIETEK_.2                                                            | 0.054290999  | #N/A                   |
| _SLLDAC[Carbamidomethyl (C)]EGR_.2                                        | 0.109322503  | #N/A                   |
| _VQAVVAVAR_.2                                                             | -0.397973991 | #N/A                   |
| _IDDIFER_.2                                                               | -0.167892085 | #N/A                   |
| _LVSQDNFGFDLPAVEAATK_.2                                                   | -0.502064441 | #N/A                   |

|                                                                    |              |                        |
|--------------------------------------------------------------------|--------------|------------------------|
| _LQALDTGWNELHK_.2                                                  | 0.146663419  | #N/A                   |
| _TQTAIASEDM[Oxidation (M)]PNTLTEAEK_.2                             | -0.262203153 | #N/A                   |
| _LQAAYAGDKADDIQR_.3                                                | -0.279202251 | #N/A                   |
| _TAGYPNVNIHNFTTSWR_.3                                              | 0.152938439  | #N/A                   |
| _HLLGVEDLLQK_.2                                                    | -0.29636212  | #N/A                   |
| _LSDGNEYLFQAK_.2                                                   | 0.097612336  | #N/A                   |
| _EQWANLEQLSAIR_.2                                                  | -0.394692664 | #N/A                   |
| _IVSSNDVGHDEYSTQSLVK_.3                                            | -0.037167896 | #N/A                   |
| _EAEKLESEHPDQAQAILSR_.3                                            | -0.097056273 | #N/A                   |
| _LQAAYAGDK_.2                                                      | -0.047764901 | #N/A                   |
| _QLWGLLIEETEK_.2                                                   | -0.298778228 | #N/A                   |
| _RPPS[Phospho (STY)]PDPNTK_.2                                      | -0.263697562 | Q62261_S2102_M1_Sptbn1 |
| _TSS[Phospho (STY)]KESS[Phospho (STY)]PVPS[Phospho (STY)]PTLDRK_.3 | -0.333111182 | #N/A                   |
| _ [Acetyl (Protein N-term)]TTTVATDYDNIEIQQQYSDVNNR_.3              | -0.257432989 | #N/A                   |
| _ESS[Phospho (STY)]PVPSPTLDR_.2                                    | -0.171388423 | Q62261_S2164_M1_Sptbn1 |
| _FQIQDISVETEDNK_.2                                                 | -0.444158997 | #N/A                   |
| _EIQGHQPR_.2                                                       | 0.170016715  | #N/A                   |
| _QIEAQEKPR_.2                                                      | -0.27548903  | #N/A                   |
| _QALQDTLALYK_.2                                                    | 0.330411773  | #N/A                   |
| _DLDDFQSWLSR_.2                                                    | 0.014488296  | #N/A                   |
| _HQILEQAVEDYAETVHQLSK_.3                                           | -0.263635628 | #N/A                   |
| _SAATWDER_.2                                                       | 0.067507316  | #N/A                   |
| _LPEELGR_.2                                                        | 0.248922353  | #N/A                   |
| _AQTLPSTSVVTITSESS[Phospho (STY)]PGKR_.3                           | -0.169554144 | Q62261_S2340_M1_Sptbn1 |
| _FATDGEGYKPC[Carbamidomethyl (C)]DPQVIR_.3                         | 0.042828238  | #N/A                   |
| _EAIC[Carbamidomethyl (C)]EVALDYK_.2                               | -0.271499613 | #N/A                   |
| _ILSSDDYGK_.2                                                      | 0.190337058  | #N/A                   |
| _HRPDLIDFDK_.3                                                     | -0.541052444 | #N/A                   |
| _SAASGIPYHSEVPVSLK_.3                                              | -0.082884264 | #N/A                   |
| _FANSLVGVQQQLQAFNTYR_.2                                            | 0.082632403  | #N/A                   |
| _VIESTQDLGNDLAGVM[Oxidation (M)]ALQR_.3                            | -0.295793871 | #N/A                   |
| _LQAAYAGDKADDIQR_.2                                                | -0.079692212 | #N/A                   |
| _ESS[Phospho (STY)]PVPS[Phospho (STY)]PTLDRK_.2                    | -0.37905063  | #N/A                   |
| _FESLEPEM[Oxidation (M)]NNQASR_.2                                  | -0.059765446 | #N/A                   |
| _DDEEMNTWIAISSDKHDTASTQS[Phospho (STY)]TPASSR_.4                   | 0.055678304  | Q62261_S2318_M1_Sptbn1 |
| _INAVVETGR_.2                                                      | 0.196174844  | #N/A                   |
| _AQTLPSTSVVTITSESSPGK_.2                                           | 0.057000461  | #N/A                   |
| _STDEVDSKR_.2                                                      | 0.121368365  | #N/A                   |
| _TSS[Phospho (STY)]KESS[Phospho (STY)]PVPSPTLDR_.2                 | 0.031925136  | #N/A                   |
| _GDQVSQNGLPAAEQGS[Phospho (STY)]PR_.2                              | -0.356301726 | Q62261_S2137_M1_Sptbn1 |
| _EGM[Oxidation (M)]QLISEKPETEAVVK_.3                               | -0.279292601 | #N/A                   |
| _DLVAIEAK_.2                                                       | -0.409403512 | #N/A                   |
| _ELEAENYHDIKR_.3                                                   | 0.152456696  | #N/A                   |
| _LILEVHQFSR_.2                                                     | -0.430406491 | #N/A                   |
| _LISDINK_.2                                                        | 0.116838454  | #N/A                   |
| _HDTASTQS[Phospho (STY)]T[Phospho (STY)]PASSR_.2                   | 0.008887068  | Q62261_S2318_M2_Sptbn1 |
| _QNLLSQSHAYQQFLR_.3                                                | 0.011574203  | #N/A                   |

|                                                                                                |              |                              |
|------------------------------------------------------------------------------------------------|--------------|------------------------------|
| _DVSSVELLM[Oxidation (M)]NNHQGIK_.2                                                            | -0.240304332 | #N/A                         |
| _VDTVNNM[Oxidation (M)]ADELINSGHSDAATIAEWK_.3                                                  | -0.075033732 | #N/A                         |
| _EAASELLMR_.2                                                                                  | 0.307482107  | #N/A                         |
| _DASVAEAWLLGQEPYLSR_.2                                                                         | 0.179147321  | #N/A                         |
| _MWEVLESTTQTK_.2                                                                               | 0.233174336  | #N/A                         |
| _DALLSALSIGNYHLEC[Carbamidomethyl (C)]NETK_.3                                                  | 0.142206563  | #N/A                         |
| _LAEISDVWEEMK_.2                                                                               | 0.236152376  | #N/A                         |
| _WDVDDWDNENS[Phospho (STY)]SAR_.2                                                              | 0.245738538  | Q62261_S35_M1_Sptbn1         |
| _GNLEVLLFTIQSK_.2                                                                              | -0.228174246 | #N/A                         |
| _RRPPS[Phospho (STY)]PDPNTK_.2                                                                 | -0.412137387 | Q62261_S2102_M1_Sptbn1       |
| _VAHM[Oxidation (M)]EFC[Carbamidomethyl (C)]YQELC[Carbamidomethyl (C)]QLAER_.3                 | -0.686848149 | #N/A                         |
| _TQILAASYELHK_.2                                                                               | -0.036571112 | #N/A                         |
| _FQIQDISVETEDNKEK_.3                                                                           | -0.261000249 | #N/A                         |
| _RPPS[Phospho (STY)]PDPNTKVSEEAESQQWDTSK_.3                                                    | -0.229848912 | Q62261_S2102_M1_Sptbn1       |
| _TLETAAQM[Oxidation (M)]EGFLNR_.2                                                              | -0.599626437 | #N/A                         |
| _LLDPEDISVDHPDEK_.2                                                                            | 0.014565792  | #N/A                         |
| _EVVAGSHELGGDYEHVTM[Oxidation (M)]LQER_.3                                                      | -0.315348801 | #N/A                         |
| _KHEAIETDIAAYEER_.3                                                                            | 0.00951394   | #N/A                         |
| _ITDLYTDLRDGR_.3                                                                               | 0.445724647  | #N/A                         |
| _LEMNLGLQK_.2                                                                                  | -0.386601811 | #N/A                         |
| _M[Oxidation (M)]HTTFEHDIQALGTQVR_.3                                                           | -0.257171589 | #N/A                         |
| _VSEEAESQQWDTSKGQVSNGLPAEQGS[Phospho (STY)]PR_.4                                               | -0.063680835 | Q62261_S2137_M1_Sptbn1       |
| _IQEKVDSIDDR_.3                                                                                | -0.074507771 | #N/A                         |
| _IFQEM[Oxidation (M)]LYIM[Oxidation (M)]DWM[Oxidation (M)]DEM[Oxidation (M)]K_.2               | -0.45466402  | #N/A                         |
| _QAEAFLNQYVLAHTEM[Oxidation (M)]PTTLEGAEAAIK_.3                                                | 0.163451396  | #N/A                         |
| _HYASEEIKEK_.3                                                                                 | -0.276409323 | #N/A                         |
| _SNAHYNLQNAFNLAEQHLGLTK_.3                                                                     | -0.201706424 | #N/A                         |
| _MLTAQDMSYDEAR_.2                                                                              | -0.263379076 | #N/A                         |
| _FFWEM[Oxidation (M)]AEEEGWIR_.2                                                               | -0.012156047 | #N/A                         |
| _EAIC[Carbamidomethyl (C)]EVALDYKK_.3                                                          | 0.26834595   | #N/A                         |
| _AQQYYFDAEAEAWM[Oxidation (M)]SEQELYM[Oxidation (M)]M[Oxidation (M)]SEEK_.3                    | -0.397990386 | #N/A                         |
| _M[Oxidation (M)]ATDPENIIK_.2                                                                  | 0.266711523  | #N/A                         |
| _LHQVY[Phospho (STY)]FDAPSC[Carbamidomethyl (C)]VK_.2                                          | -0.275718849 | Q62277_Y81_M1_Syp            |
| _ETGWAAPFM[Oxidation (M)]R_.2                                                                  | -0.118991015 | #N/A                         |
| _M[Oxidation (M)]LLLADM[Oxidation (M)]DVVNQLVAGGQFR_.2                                         | -0.31704807  | #N/A                         |
| _AVDHSVQR_.2                                                                                   | -0.145954138 | #N/A                         |
| _TYTDAM[Oxidation (M)]QNYNGNDER_.2                                                             | -0.06600581  | #N/A                         |
| _DADS[Phospho (STY)]GDSQNPPNQPSK_.2                                                            | -0.022200278 | Q62313_S28_M1_Tgoln1;Tgoln2  |
| _TES[Phospho (STY)]GETLAGDSDFSLKPEKGDK_.3                                                      | 0.043504735  | Q62313_S210_M1_Tgoln1;Tgoln2 |
| _TES[Phospho (STY)]GETLAGDSDFSLKPEK_.2                                                         | -0.114882732 | Q62313_S210_M1_Tgoln1;Tgoln2 |
| _S[Phospho (STY)]GEGEVSGLLR_.2                                                                 | -0.152155522 | Q62318_S473_M1_Trim28        |
| _SRS[Phospho (STY)]GEGEVSGLLR_.2                                                               | -0.109642026 | Q62318_S473_M1_Trim28        |
| _[Acetyl (Protein N-term)]AASAAATAAASAATAAASAGS[Phospho (STY)]PGSGEGSAGGEK_.3                  | -0.207619072 | Q62318_S23_M1_Trim28         |
| _LSPPYSSPQEFQDVGR_.2                                                                           | -0.039402634 | #N/A                         |
| _VS[Phospho (STY)]LERLDLTLTSDSQPPVFK_.3                                                        | -0.272999212 | Q62318_S489_M1_Trim28        |
| _RPAASSAAAAAASS[Phospho (STY)]PAGGGGEAQELLEHC[Carbamidomethyl (C)]GVC[Carbamidomethyl (C)]R_.4 | -0.144335015 | Q62318_S51_M1_Trim28         |
| _[Acetyl (Protein N-term)]AASAAATAAASAATAAASGSPGSGEGS[Phospho (STY)]AGGEKR_.3                  | -0.037145465 | Q62318_S30_M1_Trim28         |

|                                                                              |              |                         |
|------------------------------------------------------------------------------|--------------|-------------------------|
| _YDERPGPS[Phospho (STY)]PLPHR_.3                                             | 0.014717536  | Q62376_S226_M1_Snrnp70  |
| _GGGS[Phospho (STY)]GQDNGLEGLGSDGR_.2                                        | -0.54521966  | Q62376_S408_M1_Snrnp70  |
| _NSPTFKS[Phospho (STY)]FEEK_.2                                               | -0.426923198 | Q62393_S175_M1_Tpd52    |
| _S[Phospho (STY)]FEEKVENLK_.2                                                | -0.216212766 | Q62393_S175_M1_Tpd52    |
| _NSPTFKS[Phospho (STY)]FEEKVENLK_.3                                          | -0.45730886  | Q62393_S175_M1_Tpd52    |
| _ASAAFSSVGSVITK_.2                                                           | -0.017140835 | #N/A                    |
| _PAGGDFGEVLNSTANATSTM[Oxidation (M)]TTEPPPEQMTEs[Phospho (STY)]P_.4          | -0.207519832 | Q62393_S223_M1_Tpd52    |
| _SSS[Phospho (STY)]FSQGEAEPR_.2                                              | -0.240560926 | Q62407_S2135_M1_Speg    |
| _AAS[Phospho (STY)]VELPQR_.2                                                 | -0.207830675 | Q62407_S2042_M1_Speg    |
| _ARS[Phospho (STY)]LEQPK_.2                                                  | -0.401327132 | Q62407_S439_M1_Speg     |
| _AAS[Phospho (STY)]VELPQR_.2                                                 | -0.035661215 | Q62407_S2042_M1_Speg    |
| _AS[Phospho (STY)]PVLAVR_.2                                                  | -0.207997269 | Q62407_S2451_M1_Speg    |
| _SRS[Phospho (STY)]VQDLR_.2                                                  | 0.305322252  | Q62407_S2396_M1_Speg    |
| _SATS[Phospho (STY)]DLELR_.2                                                 | 0.006510291  | Q62407_S493_M1_Speg     |
| _LSPS[Phospho (STY)]QDHDSDSSSK_.2                                            | 0.023761831  | Q62407_S860_M1_Speg     |
| _ATS[Phospho (STY)]EGESLRR_.2                                                | -0.272448525 | Q62407_S2499_M1_Speg    |
| _SEGGAAWGT[Phospho (STY)]PEASQEELR_.2                                        | 0.126835654  | Q62407_T453_M1_Speg     |
| _SEGGAAWGT[Phospho (STY)]PEAS[Phospho (STY)]QEELRSPR_.3                      | 0.182122454  | Q62407_S457_M2_Speg     |
| _S[Phospho (STY)]TS[Phospho (STY)]REELVR_.2                                  | -0.035554338 | Q62407_S509_M2_Speg     |
| _AAS[Phospho (STY)]SEAAPHHQPPESR_.3                                          | -0.080531951 | Q62407_S2114_M1_Speg    |
| _RGSS[Phospho (STY)]AESALPR_.2                                               | -0.154304487 | Q62407_S2020_M1_Speg    |
| _RLS[Phospho (STY)]STLER_.2                                                  | 0.134712362  | Q62407_S2461_M1_Speg    |
| _MPS[Phospho (STY)]IPEEPEHGDLEL_.3                                           | -0.036201041 | Q62407_S1177_M1_Speg    |
| _QRS[Phospho (STY)]ATS[Phospho (STY)]DLELR_.2                                | -0.673989402 | Q62407_S490_M2_Speg     |
| _SS[Phospho (STY)]ITEPEGPGGPNIQK_.2                                          | -0.398808975 | Q62415_S708_M1_Ppp1r13b |
| _VNGTSSPQS[Phospho (STY)]PLSTSGR_.2                                          | 0.431304869  | Q62415_S335_M1_Ppp1r13b |
| _AGEQDPVPTPAELTS[Phospho (STY)]PGR_.2                                        | -0.193315291 | Q62417_S185_M1_Sorbs1   |
| _SATVS[Phospho (STY)]PQQPQAQQR_.2                                            | 0.046594553  | Q62417_S1209_M1_Sorbs1  |
| _NNNPQSELAAAHGDSSES[Phospho (STY)]PR_.3                                      | -0.090196336 | Q62417_S969_M1_Sorbs1   |
| _S[Phospho (STY)]AESLLESTK_.2                                                | -0.507896723 | Q62417_S722_M1_Sorbs1   |
| _EGS[Phospho (STY)]GGSVHGDGFPK_.2                                            | -0.185619269 | Q62417_S791_M1_Sorbs1   |
| _RAGEQDPVPTPAELTS[Phospho (STY)]PGR_.3                                       | -0.133230173 | Q62417_S185_M1_Sorbs1   |
| _SAT[Phospho (STY)]LPLPAR_.2                                                 | -0.006828489 | Q62417_T286_M1_Sorbs1   |
| _S[Phospho (STY)]M[Oxidation (M)]PSLDFSGR_.2                                 | -0.218791458 | Q62417_S694_M1_Sorbs1   |
| _GTPSSSPVSPQES[Phospho (STY)]PKHESK_.3                                       | -0.458036587 | Q62417_S62_M1_Sorbs1    |
| _SKS[Phospho (STY)]EM[Oxidation (M)]NYIEGK_.2                                | -0.212039936 | Q62417_S270_M1_Sorbs1   |
| _GTPSSSPVS[Phospho (STY)]PQESPK_.2                                           | -0.058631949 | Q62417_S58_M1_Sorbs1    |
| _DIS[Phospho (STY)]PEEIDLK_.2                                                | 0.072342761  | Q62417_S345_M1_Sorbs1   |
| _SVLEGGDIPLQGLSLK_.2                                                         | 0.27019463   | #N/A                    |
| _S[Phospho (STY)]PTPVLSR_.2                                                  | -0.320805479 | Q62417_S707_M1_Sorbs1   |
| _SSS[Phospho (STY)]LKSSPER_.2                                                | -0.0673735   | Q62417_S295_M1_Sorbs1   |
| _RES[Phospho (STY)]DGTGPGGLASLENER_.2                                        | -0.134867806 | Q62417_S432_M1_Sorbs1   |
| _YS[Phospho (STY)]FSDDTKSPLSVPR_.3                                           | -0.54276067  | Q62417_S254_M1_Sorbs1   |
| _AQs[Phospho (STY)]C[Carbamidomethyl (C)]ENLC[Carbamidomethyl (C)]VSLNDSK_.2 | -0.42430728  | Q62417_S554_M1_Sorbs1   |
| _SAQDLSDVST[Phospho (STY)]DEVGIPLR_.2                                        | -0.029963734 | Q62417_T213_M1_Sorbs1   |
| _DDSDVHS[Phospho (STY)]PR_.2                                                 | 0.158665295  | Q62417_S250_M1_Sorbs1   |
| _YS[Phospho (STY)]FSDDTK_.2                                                  | -0.295720804 | Q62417_S254_M1_Sorbs1   |

|                                                                                |              |                        |
|--------------------------------------------------------------------------------|--------------|------------------------|
| _AQ\$[Phospho (STY)]C[Carbamidomethyl (C)]ENLC[Carbamidomethyl (C)]VSLNDSKR_.3 | -0.200068693 | Q62417_S554_M1_Sorbs1  |
| _TPVDYIDLPIYSS\$[Phospho (STY)]PSR_.2                                          | 0.193233844  | Q62417_S1201_M1_Sorbs1 |
| _DDSDVHSPRY\$[Phospho (STY)]FSDDTK_.3                                          | -0.179886602 | Q62417_S254_M1_Sorbs1  |
| _VGGS[Phospho (STY)]IENLLMR_.2                                                 | -0.178822357 | Q62417_S576_M1_Sorbs1  |
| _DIS[Phospho (STY)]PEEIDLKNEPWYK_.3                                            | 0.465852433  | Q62417_S345_M1_Sorbs1  |
| _GELGAS[Phospho (STY)]QEGSEHIK_.2                                              | -0.294674644 | Q62417_S666_M1_Sorbs1  |
| _NGPALQEAYVR_.2                                                                | -0.01625999  | #N/A                   |
| _VAGTGEGGLEELVEELNSGK_.2                                                       | -0.049775743 | #N/A                   |
| _ESTSFQDVGPQAPVGSVYQK_.2                                                       | -0.076082637 | #N/A                   |
| _SPTDWALFTYEGNSNDR_.2                                                          | -0.136865476 | #N/A                   |
| _TRQEWESAGQQAPHPR_.3                                                           | -0.157557665 | #N/A                   |
| _VVTEKS[Phospho (STY)]PTDWALFTYEGNSNDR_.3                                      | -0.049236782 | Q62418_S24_M1_Dbnl     |
| _VKDPNSGLPK_.2                                                                 | 0.119412379  | #N/A                   |
| _FVLINWTGEGVNDVR_.2                                                            | 0.312128007  | #N/A                   |
| _AMS[Phospho (STY)]TTSVTSSQPGK_.2                                              | 0.377942708  | Q62418_S277_M1_Dbnl    |
| _QLT[Phospho (STY)]QPETSYGR_.2                                                 | 0.346487834  | Q62418_T299_M1_Dbnl    |
| _AEEDVEPEC[Carbamidomethyl (C)]IMEK_.2                                         | -0.141683656 | #N/A                   |
| _ASGANYSFHK_.2                                                                 | 0.089492135  | #N/A                   |
| _ITAS[Phospho (STY)]SSFR_.2                                                    | -0.40082434  | Q62419_S286_M1_Sh3gl1  |
| _TIEYLQPNPASR_.2                                                               | 0.062072568  | #N/A                   |
| _IPDEELR_.2                                                                    | 0.123791153  | #N/A                   |
| _ALYDFEPENEGELGFK_.2                                                           | -0.304418264 | #N/A                   |
| _RLDFDYK_.2                                                                    | -0.096709425 | #N/A                   |
| _KVDVTSR_.2                                                                    | 0.139128201  | #N/A                   |
| _ACetyl (Protein N-term)]S[Phospho (STY)]VAGLKK_.2                             | -0.35327449  | Q62420_S2_M1_Sh3gl2    |
| _RLDFDYKK_.2                                                                   | -0.24587199  | #N/A                   |
| _QAVQILQQVTVR_.2                                                               | -0.180023484 | #N/A                   |
| _EIQHHLK_.2                                                                    | -0.068764662 | #N/A                   |
| _EYQPKPR_.2                                                                    | -0.147561521 | #N/A                   |
| _QNFIDPLQNLHDKDLR_.3                                                           | -0.086915046 | #N/A                   |
| _ELGDDC[Carbamidomethyl (C)]NFGPALGEVGEAM[Oxidation (M)]R_.2                   | -0.269844732 | #N/A                   |
| _GPGYPQAEALLAEAM[Oxidation (M)]LK_.2                                           | 0.489887135  | #N/A                   |
| _VGGAEGTKLDDDFKEM[Oxidation (M)]ER_.3                                          | 0.054416132  | #N/A                   |
| _ELSEVKDSLDM[Oxidation (M)]EVK_.2                                              | -0.04203157  | #N/A                   |
| _AVMEIMTK_.2                                                                   | 0.011688666  | #N/A                   |
| _LDDDFKEMER_.3                                                                 | -0.39257119  | #N/A                   |
| _TLSNAEDYLDEDS[Phospho (STY)]D_.2                                              | 0.180109713  | Q62422_S214_M1_Ostf1   |
| _LALFNPVSWDR_.2                                                                | 0.076004825  | #N/A                   |
| _FYSVNVDSYK_.2                                                                 | 0.251266688  | #N/A                   |
| _KNNPEPWNK_.2                                                                  | -0.019035402 | #N/A                   |
| _LGPNEQYK_.2                                                                   | 0.067121861  | #N/A                   |
| _LALFNPVSWDRK_.3                                                               | 0.104200206  | #N/A                   |
| _NNPEPWNK_.2                                                                   | 0.073101323  | #N/A                   |
| _TAS[Phospho (STY)]GSSVTSLEGTR_.2                                              | 0.010039991  | Q62433_S330_M1_Ndrg1   |
| _LNITPNSGATGNNAGPK_.2                                                          | -0.064855975 | #N/A                   |
| _ACetyl (Protein N-term)]S[Phospho (STY)]RELHDVDLAEVKPLVEK_.3                  | -0.408003475 | Q62433_S2_M1_Ndrg1     |
| _SRT[Phospho (STY)]AS[Phospho (STY)]GSSVTSLEGTR_.2                             | -0.040443729 | Q62433_S330_M2_Ndrg1   |

|                                                                                         |              |                       |
|-----------------------------------------------------------------------------------------|--------------|-----------------------|
| _DASGS[Phospho (STY)]PASTASSGSSSLK_.2                                                   | -0.158762081 | Q62440_S284_M1_Tle1   |
| _DAPIS[Phospho (STY)]PASVASSSTPSSK_.2                                                   | 0.382585253  | Q62441_S292_M1_Tle4   |
| _SSSVS[Phospho (STY)]PSASFR_.2                                                          | -0.134236377 | Q62441_S208_M1_Tle4   |
| _FIC[Carbamidomethyl (C)]TSVPVDADM[Oxidation (M)]C[Carbamidomethyl (C)]AASVAAGGAEELR_.3 | -0.146767209 | #N/A                  |
| _FLQDHGSDS[Phospho (STY)]FLAEHK_.3                                                      | -0.153969662 | Q62446_S36_M1_Fkbp3   |
| _TQT[Phospho (STY)]PPLGQTPQLGLK_.2                                                      | -0.366259802 | Q62448_T507_M1_Eif4g2 |
| _LTEAVVTDYLNNGNANDAVSGVR_.2                                                             | 0.004683474  | #N/A                  |
| _FS[Phospho (STY)]PTMGR_.2                                                              | 0.094116607  | Q62448_S394_M1_Eif4g2 |
| _VLLVPGPEKET_.2                                                                         | 0.123837022  | #N/A                  |
| _SQS[Phospho (STY)]PVHLR_.2                                                             | -0.376643958 | Q62504_S749_M1_Spen   |
| _DLEPGEVPS[Phospho (STY)]DS[Phospho (STY)]DEDAEHR_.2                                    | -0.061065959 | Q62504_S1395_M2_Spen  |
| _S[Phospho (STY)]RSPNRFDAHDPR_.4                                                        | -0.650556768 | Q62504_S188_M1_Spen   |
| _EAGPAAAS[Phospho (STY)]PQESESPQK_.2                                                    | -0.264488729 | Q62504_S2128_M1_Spen  |
| _RPQS[Phospho (STY)]PGVS[Phospho (STY)]PAHSER_.3                                        | 0.392039231  | Q62504_S758_M2_Spen   |
| _S[Phospho (STY)]PGGGPPLTLK_.2                                                          | -0.475329884 | Q62523_S336_M1_Zyx    |
| _DTQLQQIVDK_.2                                                                          | 0.290706711  | #N/A                  |
| _VIDIFDTDNGEVDK_.2                                                                      | 0.148027334  | #N/A                  |
| _IYDM[Oxidation (M)]DKDGYISNGELFQVLK_.3                                                 | -0.242852052 | #N/A                  |
| _EFIEGVSQFSVK_.2                                                                        | 0.413427557  | #N/A                  |
| _ISFEEFC[Carbamidomethyl (C)]AVVGGLDIHK_.3                                              | -0.368127683 | #N/A                  |
| _KLDLDNSGSLSVVEEFM[Oxidation (M)]SLPELQQNPLVQR_.3                                       | -0.154656264 | #N/A                  |
| _LDLDNSGSLSVVEEFM[Oxidation (M)]SLPELQQNPLVQR_.3                                        | -0.55289416  | #N/A                  |
| _TIINADKDGGR_.3                                                                         | 0.163523198  | #N/A                  |
| _IADPEHDHTGFLTEY[Phospho (STY)]VATR_.3                                                  | 0.173759115  | #N/A                  |
| _ELEDLS[Phospho (STY)]PLEESVK_.2                                                        | -0.335740485 | Q63844_Y205_M1_Mapk3  |
| _TLDISNNR_.2                                                                            | -0.231383584 | Q63850_S412_M1_Nup62  |
| _LESLPAQLPR_.2                                                                          | 0.02338524   | #N/A                  |
| _LWTVPTNM[Oxidation (M)]PSK_.2                                                          | 0.510704942  | #N/A                  |
| _AHVIGTPC[Carbamidomethyl (C)]SK_.2                                                     | -0.468529924 | #N/A                  |
| _SDTAYQWNLK_.2                                                                          | 0.401053273  | #N/A                  |
| _FTFIPEQSFDQLQLQEITLHNNR_.3                                                             | 0.145941198  | #N/A                  |
| _S[Phospho (STY)]SPFKVS[Phospho (STY)]PLSFGR_.2                                         | -0.348549298 | #N/A                  |
| _LKQPST[Phospho (STY)]PTR_.2                                                            | -0.382188829 | Q63918_S287_M2_Cavin2 |
| _SEPVS[Phospho (STY)]PSRER_.2                                                           | -0.248819127 | Q63932_T395_M1_Map2k2 |
| _LAPLATPPGS[Phospho (STY)]PR_.2                                                         | 0.242625827  | Q63943_S437_M1_Mef2d  |
| _INS[Phospho (STY)]DDKNLYLTASK_.2                                                       | 0.042183015  | Q63959_S754_M1_Kcnc3  |
| _QEAVALLQGQR_.2                                                                         | 0.215868331  | Q64008_S241_M1_Rab34  |
| _QGS[Phospho (STY)]GVILR_.2                                                             | 0.113013724  | #N/A                  |
| _ALFDFNGNDEEDLPFK_.2                                                                    | -0.184691064 | Q64010_S125_M1_Crk    |
| _DSS[Phospho (STY)]TSPGDYVLSVSENSR_.2                                                   | -0.402157092 | #N/A                  |
| _LLDQQNPDEDF_.2                                                                         | 0.000906436  | Q64010_S41_M1_Crk     |
| _IHYLDTTTLIEPVAR_.3                                                                     | -0.037934745 | #N/A                  |
| _GRLS[Phospho (STY)]PVPVPR_.2                                                           | 0.556553756  | #N/A                  |
| _LPAPQEDTAS[Phospho (STY)]EAGTPQGEVQTR_.3                                               | -0.422450221 | Q64012_S135_M1_Raly   |
| _LS[Phospho (STY)]PVPVPR_.2                                                             | 0.089790838  | Q64012_S270_M1_Raly   |
| _RS[Phospho (STY)]SFSMEEES_.2                                                           | -0.616541678 | Q64012_S135_M1_Raly   |
|                                                                                         | 0.207545886  | Q64092_S564_M1_Tfe3   |

|                                                                                             |              |                         |
|---------------------------------------------------------------------------------------------|--------------|-------------------------|
| _TSS[Phospho (STY)]TGEESLAILR_.2                                                            | 0.074858154  | Q64096_S621_M1_Mcf2l    |
| _QLC[Carbamidomethyl (C)]PEPAEILS[Phospho (STY)]PEPV_.2                                     | 0.211352872  | Q64096_S1145_M1_Mcf2l   |
| _SSS[Phospho (STY)]AQC[Carbamidomethyl (C)]LSSSGK_.2                                        | -0.281450721 | Q64096_S1120_M1_Mcf2l   |
| _EALSQQLDS[Phospho (STY)]EDEQDQR_.2                                                         | 0.239564474  | Q640N2_S328_M1_Arl13b   |
| _THTS[Phospho (STY)]PPR_.2                                                                  | -0.170871174 | Q640R3_S379_M1_Hepacam  |
| _QNS[Phospho (STY)]LEYM[Oxidation (M)]DQNDDR_.2                                             | 0.106925832  | Q640R3_S280_M1_Hepacam  |
| _STTEGPPGYSVS[Phospho (STY)]PPVPGR_.2                                                       | -0.400191975 | Q640R3_S345_M1_Hepacam  |
| _SPARS[Phospho (STY)]PATGR_.2                                                               | -0.32801981  | Q640R3_S370_M1_Hepacam  |
| _THTS[Phospho (STY)]PPRAPSS[Phospho (STY)]PGR_.2                                            | 0.22788886   | Q640R3_S379_M2_Hepacam  |
| _QNS[Phospho (STY)]LEYM[Oxidation (M)]DQNDRLK_.3                                            | -0.580936105 | Q640R3_S280_M1_Hepacam  |
| _DKDSS[Phospho (STY)]EPDENPATEPR_.2                                                         | 0.265088613  | Q640R3_S321_M1_Hepacam  |
| _SEADTLPRS[Phospho (STY)]GEQER_.2                                                           | 0.12692389   | Q640R3_S301_M1_Hepacam  |
| _S[Phospho (STY)]PGLPIR_.2                                                                  | -0.102505215 | Q640R3_S352_M1_Hepacam  |
| _ETSKDPELR_.2                                                                               | 0.230185102  | #N/A                    |
| _ALAPQLAR_.2                                                                                | -0.120542572 | #N/A                    |
| _MEADGLGC[Carbamidomethyl (C)]AVC[Carbamidomethyl (C)]VLTGASR_.2                            | -0.461948241 | #N/A                    |
| _LLLINNAATLGDVSK_.2                                                                         | 0.144389655  | #N/A                    |
| _DM[Oxidation (M)]LYQVLAEEPSVR_.2                                                           | -0.054256416 | #N/A                    |
| _LKS[Phospho (STY)]DGALVDC[Carbamidomethyl (C)]GTSAQK_.2                                    | -0.252530363 | Q64105_S228_M1_Spr      |
| _SEWSDASQKS[Phospho (STY)]PVHVGETR_.3                                                       | 0.149141664  | Q64127_S812_M1_Trim24   |
| _HEAEDC[Carbamidomethyl (C)]KFS[Phospho (STY)]DDS[Phospho (STY)]DDDFVQPR_.3                 | -0.32560573  | Q64127_S1026_M2_Trim24  |
| _EIPVDAPWQAR_.2                                                                             | 0.391564579  | #N/A                    |
| _DVPALIEHTFLER_.2                                                                           | -0.3768319   | #N/A                    |
| _VLGSQEALS[Phospho (STY)]PVHYEEK_.2                                                         | -0.455403785 | Q64133_S388_M1_Maoa     |
| _IYFAGTETATQWSGYM[Oxidation (M)]EGAVEAGER_.3                                                | -0.187374872 | #N/A                    |
| _VTS[Phospho (STY)]PTTYVLDEDEPR_.2                                                          | -0.050835565 | Q641K1_S1160_M1_Agtbbp1 |
| _ENDFPQSGQDSVPES[Phospho (STY)]PSK_.2                                                       | -0.245884214 | Q641K5_S389_M1_Nuak1    |
| _SSVC[Carbamidomethyl (C)]DC[Carbamidomethyl (C)]DALPDSSES[Phospho (STY)]PLLAR_.2           | -0.074859383 | Q641K5_S326_M1_Nuak1    |
| _TAIPLPSS[Phospho (STY)]PEADM[Oxidation (M)]SGK_.2                                          | 0.117194079  | Q641K5_S446_M1_Nuak1    |
| _LSQELSGGR_.2                                                                               | 0.170683225  | #N/A                    |
| _TLTGIVIDSGDGVTHVIPVAEGYVIGSC[Carbamidomethyl (C)]IK_.3                                     | -0.120054946 | #N/A                    |
| _TGDLGIPPNPEDRSPSPEIY[Phospho (STY)]NS[Phospho (STY)]EGKR_.4                                | -0.010927636 | Q64213_S89_M2_Sf1       |
| _TGDLGIPPNPEDRSPSPEIY[Phospho (STY)]NS[Phospho (STY)]EGK_.3                                 | 0.114495989  | Q64213_S89_M2_Sf1       |
| _S[Phospho (STY)]C[Carbamidomethyl (C)]TSS[Phospho (STY)]PSPLNLC[Carbamidomethyl (C)]SAR_.2 | -0.000326855 | Q64318_S678_M2_Zeb1     |
| _GPTS[Phospho (STY)]PSTPR_.2                                                                | 0.25125507   | Q64322_S236_M1_Npdc1    |
| _IS[Phospho (STY)]PGDQR_.2                                                                  | -0.072623983 | Q64322_S243_M1_Npdc1    |
| _GPTS[Phospho (STY)]PST[Phospho (STY)]PRIS[Phospho (STY)]PGDQR_.2                           | -0.025391976 | Q64322_S236_M3_Npdc1    |
| _VLLVVDEPHTDWAK_.2                                                                          | -0.08788121  | #N/A                    |
| _FPLIEQTYYPNHR_.3                                                                           | 0.111711974  | #N/A                    |
| _TLGGEKFPLIEQTYYPNHR_.3                                                                     | -0.187338432 | #N/A                    |
| _QLITDLVISK_.2                                                                              | 0.095202195  | #N/A                    |
| _ILGDYDIK_.2                                                                                | -0.038279603 | #N/A                    |
| _SFRPDFVLIR_.2                                                                              | -0.148237761 | #N/A                    |
| _EM[Oxidation (M)]LTLPTFPVVVK_.2                                                            | -0.065300919 | #N/A                    |
| _M[Oxidation (M)]NQLLSR_.2                                                                  | 0.326284623  | #N/A                    |
| _QTAASAGLVDAPAPSAASR_.2                                                                     | 0.024324252  | #N/A                    |
| _KSFASLFSD_.2                                                                               | -0.055328796 | #N/A                    |



|                                                                                   |              |                       |
|-----------------------------------------------------------------------------------|--------------|-----------------------|
| _TNTGSAM[Oxidation (M)]LEQIAM[Oxidation (M)]SDR_.2                                | -0.250048332 | #N/A                  |
| _T[Phospho (STY)]PALS[Phospho (STY)]PQRPLTTQQPQSGTLK_.3                           | 0.034267305  | Q64332_S426_M2_Syn2   |
| _VEQAEFSELNLVAHADGTYAVDM[Oxidation (M)]QVLR_.3                                    | 0.012554975  | #N/A                  |
| _TPALS[Phospho (STY)]PQRPLTTQQPQSGTLKEPDSSK_.4                                    | -0.348188217 | Q64332_S426_M1_Syn2   |
| _SS[Phospho (STY)]ANEDEAKAETIR_.2                                                 | -0.169369695 | Q64332_S562_M1_Syn2   |
| _LWVDAC[Carbamidomethyl (C)]SEM[Oxidation (M)]FGGLDIC[Carbamidomethyl (C)]AVK_.2  | -0.216122376 | #N/A                  |
| _QHAFGM[Oxidation (M)]AENEDFR_.3                                                  | 0.165592253  | #N/A                  |
| _TSISGNWK_.2                                                                      | 0.331101682  | #N/A                  |
| _DGKDYIFEVM[Oxidation (M)]DC[Carbamidomethyl (C)]SM[Oxidation (M)]PLIGE HQVEDR_.4 | -0.139362426 | #N/A                  |
| _SQS[Phospho (STY)]LTNAFSFSESSFFR_.2                                              | -0.133644555 | Q64332_S546_M1_Syn2   |
| _VENHYDFQDIASVVALTQTYATAEPFIDAK_.3                                                | -0.061206589 | #N/A                  |
| _S[Phospho (STY)]PPQYC[Carbamidomethyl (C)]GAK_.2                                 | 0.529452947  | Q64336_S549_M1_Tbr1   |
| _LTPS[Phospho (STY)]PNDSPR_.2                                                     | -0.101057666 | Q64336_S410_M1_Tbr1   |
| _SIDS[Phospho (STY)]SDSGIYEQAK_.2                                                 | -0.019931075 | Q64336_S625_M1_Tbr1   |
| _RIS[Phospho (STY)]PADTPVSESSPLK_.3                                               | 0.013812029  | Q64336_S640_M1_Tbr1   |
| _SKLS[Phospho (STY)]PVL DGV[Phospho (STY)]ELRHSFDGSAADR_.4                        | -0.142209686 | Q64336_S84_M2_Tbr1    |
| _RSS[Phospho (STY)]LNSINSSDAKR_.3                                                 | -0.3411605   | Q64338_S469_M1_Pde1c  |
| _ [Acetyl (Protein N-term)]MES[Phospho (STY)]PTKEIEEFESNSLK_.3                    | -0.161010893 | Q64338_S3_M1_Pde1c    |
| _TLAGDVKTS[Phospho (STY)]PPR_.2                                                   | -0.332998188 | Q64362_S30_M1_Aktip   |
| _VSIASEVESTASS[Phospho (STY)]PSSSSLQK_.2                                          | 0.239177375  | Q64430_S357_M1_Atp7a  |
| _VLLPEYGGTK_.2                                                                    | 0.077309627  | #N/A                  |
| _FLPLFDR_.2                                                                       | 0.196402724  | #N/A                  |
| _KFLPLFDR_.2                                                                      | 0.105491171  | #N/A                  |
| _SGEIEPVSVK_.2                                                                    | 0.007250589  | #N/A                  |
| _VVLDDKDYFLFR_.2                                                                  | -0.043921729 | #N/A                  |
| _VLQATVVAVGSGGK_.2                                                                | 0.301844004  | #N/A                  |
| _GKSGEIEPVSVK_.2                                                                  | 0.267662992  | #N/A                  |
| _GGIM[Oxidation (M)]LPEK_.2                                                       | -0.214404028 | #N/A                  |
| _KSS[Phospho (STY)]LPNSK_.2                                                       | 0.001486015  | Q64487_S1303_M1_Ptprd |
| _DFLPVDTSNNGR_.2                                                                  | -0.308740797 | #N/A                  |
| _YANVIAYDHSR_.2                                                                   | 0.281835689  | #N/A                  |
| _GALQIEQSEESDQGYEC[Carbamidomethyl (C)]VATNSAGTR_.3                               | -0.072938261 | #N/A                  |
| _ASGS[Phospho (STY)]ENEGDYNPGR_.2                                                 | 0.314333738  | Q64511_S1539_M1_Top2b |
| _KAS[Phospho (STY)]GS[Phospho (STY)]ENEGDYNPGR_.2                                 | -0.136376688 | Q64511_S1537_M2_Top2b |
| _YFAES[Phospho (STY)]DEEEDVDFAM[Oxidation (M)]FN_.2                               | 0.188877579  | Q64511_S1600_M1_Top2b |
| _IVETINS[Phospho (STY)]DS[Phospho (STY)]DSEFGIPKK_.2                              | 0.091034022  | #N/A                  |
| _IVETINSDS[Phospho (STY)]DSEFGIPK_.2                                              | 0.177509914  | Q64511_S1511_M1_Top2b |
| _KIVETINS[Phospho (STY)]DS[Phospho (STY)]DSEFGIPKK_.3                             | 0.049565824  | #N/A                  |
| _KTSFDQDS[Phospho (STY)]DVDIFPSDFTSEPPALPR_.3                                     | -0.542586827 | Q64511_S1568_M1_Top2b |
| _KIVETINS[Phospho (STY)]DS[Phospho (STY)]DSEFGIPK_.2                              | -0.468745033 | #N/A                  |
| _AS[Phospho (STY)]PITNDGEDEFVPSDGLDKDEYAFSSGK_.3                                  | 0.057139655  | Q64511_S1387_M1_Top2b |
| _VKAS[Phospho (STY)]PITNDGEDEFVPS[Phospho (STY)]DGLDKDEYAFSSGK_.4                 | 0.134047725  | Q64511_S1387_M2_Top2b |
| _KKDEGS[Phospho (STY)]YTLEPK_.3                                                   | 0.295484047  | Q64519_S418_M1_Sdc3   |
| _QAS[Phospho (STY)]VTYQKPKDKQEEFYA_.3                                             | 0.225076425  | Q64519_S428_M1_Sdc3   |
| _IC[Carbamidomethyl (C)]VLDVLDLQGVR_.2                                            | 0.025762296  | #N/A                  |
| _NYLSSDVEVR_.2                                                                    | -0.096614284 | #N/A                  |
| _ELNWSCLR_.2                                                                      | -0.277728077 | #N/A                  |

|                                                                                        |              |                                |
|----------------------------------------------------------------------------------------|--------------|--------------------------------|
| _TVGLFLQGGK_.2                                                                         | 0.185102851  | #N/A                           |
| _LAFLNVQAAEEALPR_.2                                                                    | 0.191490748  | #N/A                           |
| _KQEELETATR_.2                                                                         | 0.035003008  | #N/A                           |
| _FHNLNAGPSR_.2                                                                         | -0.336608945 | #N/A                           |
| _DWSPTLYIR_.2                                                                          | 0.190681869  | #N/A                           |
| _TEQLTDSTEISLLPSDIDR_.2                                                                | 0.097721802  | #N/A                           |
| _LVQDYGLESEVAQHLAK_.2                                                                  | -0.050118408 | #N/A                           |
| _YGAATANYM[Oxidation (M)]EVVSLLK_.2                                                    | 0.175597146  | #N/A                           |
| _C[Carbamidomethyl (C)]VINASGPFTDSVR_.2                                                | 0.296444197  | #N/A                           |
| _M[Oxidation (M)]NLAIALTAAR_.2                                                         | 0.368629776  | #N/A                           |
| _NTPFEDILVIGGGATGC[Carbamidomethyl (C)]GC[Carbamidomethyl (C)]ALDAVTR_.3               | 0.028060452  | #N/A                           |
| _AIM[Oxidation (M)]NLDVEQYR_.2                                                         | 0.382927673  | #N/A                           |
| _TALVERDDFSSGTSSR_.3                                                                   | -0.198653693 | #N/A                           |
| _LVGAIVYYDQGHNDAR_.2                                                                   | -0.188501453 | #N/A                           |
| _EYAC[Carbamidomethyl (C)]TAVDMISR_.2                                                  | -0.072721695 | #N/A                           |
| _M[Oxidation (M)]TIAGTTDPTDVTTHHPIPSEEDINFILNEVR_.4                                    | -0.061713578 | #N/A                           |
| _AGLQFPVGR_.2                                                                          | -0.087579616 | #N/A                           |
| _HLQLAIR_.2                                                                            | 0.240176189  | #N/A                           |
| _VTIAQGGVLPNIQAVLLPK_.2                                                                | -0.099748083 | #N/A                           |
| _NDEELNKLLGK_.2                                                                        | -0.522022263 | #N/A                           |
| _NDEELNK_.2                                                                            | 0.163938576  | #N/A                           |
| _KGNYAER_.2                                                                            | 0.086142958  | #N/A                           |
| _YQDILVFR_.2                                                                           | -0.221164478 | #N/A                           |
| _AAFVLPEFTR_.2                                                                         | 0.230183552  | #N/A                           |
| _VLIIGGGDGGVLR_.2                                                                      | -0.07091206  | #N/A                           |
| _AQPAGS[Phospho (STY)]PSHQIQQR_.2                                                      | -0.515540572 | Q64700_S37_M1_Rbl2             |
| _GREEDSS[Phospho (STY)]PGPQSQSHR_.3                                                    | 0.212408458  | Q64707_S418_M1_Zrsr1           |
| _ALEAPPEEDDDVS[Phospho (STY)]ANEELAER_.2                                               | 0.163921499  | Q64707_S50_M1_Zrsr1            |
| _GREEDSS[Phospho (STY)]PGPQSQSHRT_.3                                                   | 0.379913481  | Q64707_S418_M1_Zrsr1           |
| _DPNAS[Phospho (STY)]PGDAGEQAIR_.2                                                     | 0.047544803  | Q64727_S290_M1_Vcl             |
| _GWL RDPNAS[Phospho (STY)]PGDAGEQAIR_.3                                                | 0.280959114  | Q64727_S290_M1_Vcl             |
| _GQGAS[Phospho (STY)]PVAMQK_.2                                                         | 0.263471174  | Q64727_S346_M1_Vcl             |
| _KGS[Phospho (STY)]DS[Phospho (STY)]DTDASNLETPR_.2                                     | -0.185584027 | Q64HY3_S424_M2_Sp9             |
| _SES[Phospho (STY)]PDLILHDSGVSAAR_.3                                                   | 0.077497487  | Q64HY3_S440_M1_Sp9             |
| _TPEELEDVS[Phospho (STY)]DLEDDHEVR_.2                                                  | 0.285315103  | Q65CL1_S637_M1_Ctnna3          |
| _TES[Phospho (STY)]PSESC[Carbamidomethyl (C)]PVK_.2                                    | -0.379680075 | Q65Z40_S226_M1_Wapl            |
| _RTES[Phospho (STY)]PSESC[Carbamidomethyl (C)]PVK_.2                                   | -0.073294682 | Q65Z40_S226_M1_Wapl            |
| _[Acetyl (Protein N-term)]AAAAAAAAGDS[Phospho (STY)]DSWDADTFSM[Oxidation (M)]EDPVRK_.3 | -0.395409703 | Q66JS6_S16_M1_Eif3j2           |
| _RVS[Phospho (STY)]VEDLR_.2                                                            | -0.399284975 | Q66JV4_S681_M1_Rbm12b2;Rbm12b1 |
| _S[Phospho (STY)]RS[Phospho (STY)]PLGFYVHLK_.3                                         | 0.001836595  | Q66JV4_S277_M2_Rbm12b2;Rbm12b1 |
| _MRS[Phospho (STY)]EEHS[Phospho (STY)]PSR_.2                                           | -0.160328333 | Q66JV4_S250_M2_Rbm12b2;Rbm12b1 |
| _GSDGAS[Phospho (STY)]PPASPSIIPR_.2                                                    | 0.00384942   | Q66L42_S502_M1_Map3k10         |
| _QWSSS[Phospho (STY)]APNLGK_.2                                                         | 0.132898711  | Q66L42_S583_M1_Map3k10         |
| _KSGDGAS[Phospho (STY)]PPASPSIIPR_.2                                                   | -0.034247559 | Q66L42_S502_M1_Map3k10         |
| _HAS[Phospho (STY)]LDGASPYFK_.2                                                        | -0.255898295 | Q66L44_S290_M1_Cbarp           |
| _ASS[Phospho (STY)]LDTRGS[Phospho (STY)]PK_.2                                          | -0.097276402 | Q66L44_S313_M2_Cbarp           |
| _RDYS[Phospho (STY)]IDEK_.2                                                            | -0.185568466 | Q66L44_S537_M1_Cbarp           |

|                                                                                                     |              |                       |
|-----------------------------------------------------------------------------------------------------|--------------|-----------------------|
| _GAGDEVSELPAPARS[Phospho (STY)]PPR_3                                                                | -0.085140917 | Q66L44_S520_M1_Cbarp  |
| _LAEPVASSQLIVAAAAPTS[Phospho (STY)]PDHSPA_3                                                         | -0.129268542 | Q66L44_S692_M1_Cbarp  |
| _RHAS[Phospho (STY)]LDGASPYFK_3                                                                     | -0.472764837 | Q66L44_S290_M1_Cbarp  |
| _GAGDEVSELPAPARS[Phospho (STY)]PPRS[Phospho (STY)]PR_3                                              | -0.082380398 | Q66L44_S520_M2_Cbarp  |
| _ASS[Phospho (STY)]LDTRGS[Phospho (STY)]PKR_2                                                       | -0.261818905 | Q66L44_S313_M2_Cbarp  |
| _LLQMDSGYAS[Phospho (STY)]IEGR_2                                                                    | 0.318963112  | Q66L44_S501_M1_Cbarp  |
| _RGDS[Phospho (STY)]VDC[Carbamidomethyl (C)]PPEGR_2                                                 | -0.128749924 | Q66L44_S610_M1_Cbarp  |
| _LEAAEAAGGAS[Phospho (STY)]PET[Phospho (STY)]PPEHGISLGEHAQQQDPQQEQDAEHAQC[Carbamidomethyl (C)]SYR_5 | 0.021662877  | Q66L44_S389_M2_Cbarp  |
| _RVS[Phospho (STY)]FNEAALFEQSR_3                                                                    | -0.310025782 | Q66L44_S129_M1_Cbarp  |
| _GHGREEEPGS[Phospho (STY)]PR_3                                                                      | 0.010269926  | Q673H1_S146_M1_Tusc1  |
| _EAPGS[Phospho (STY)]PPLSPR_2                                                                       | -0.197896032 | Q67FY2_S21_M1_Bcl9l   |
| _TAMPS[Phospho (STY)]PGVSQNK_2                                                                      | -0.347975782 | Q67FY2_S1014_M1_Bcl9l |
| _TELC[Carbamidomethyl (C)]ENVDPNs[Phospho (STY)]PAAK_2                                              | -0.254989512 | Q68ED2_S900_M1_Grm7   |
| _RPLS[Phospho (STY)]VDKHGR_3                                                                        | -0.370675791 | Q68ED7_S120_M1_Crtc1  |
| _RPLS[Phospho (STY)]VDK_2                                                                           | -0.114296983 | Q68ED7_S120_M1_Crtc1  |
| _TLVLSSPTS[Phospho (STY)]PTQEPLAAK_2                                                                | -0.537168289 | Q68EF0_S218_M1_Rab3ip |
| _AS[Phospho (STY)]PLYATYK_2                                                                         | -0.165176717 | Q68EF6_S473_M1_Begain |
| _AGDLSLS[Phospho (STY)]PSR_2                                                                        | 0.152671349  | Q68EF6_S510_M1_Begain |
| _VLEKPDPGS[Phospho (STY)]LSSR_2                                                                     | -0.199097902 | Q68EF6_S194_M1_Begain |
| _GDIYC[Carbamidomethyl (C)]S[Phospho (STY)]DPALYC[Carbamidomethyl (C)]PDER_2                        | 0.033458268  | Q68EF6_S229_M1_Begain |
| _YYGGGGGGGAAGGGS[Phospho (STY)]PGDKAEGR_3                                                           | -0.510724656 | Q68EF6_S463_M1_Begain |
| _KPSATYGS[Phospho (STY)]GPR_2                                                                       | 0.015012676  | Q68EF6_S344_M1_Begain |
| _AQNST[Phospho (STY)]DSAAEEEEAEAAAFPEAYR_3                                                          | -0.090917088 | Q68EF6_T263_M1_Begain |
| _SADALAGYAAS[Phospho (STY)]DGDGDRLR_2                                                               | 0.095822737  | Q68EF6_S524_M1_Begain |
| _LS[Phospho (STY)]PQQAFPR_2                                                                         | -0.03112188  | Q68EF6_S570_M1_Begain |
| _VQLC[Carbamidomethyl (C)]GAGS[Phospho (STY)]S[Phospho (STY)]PEPEHGSR_2                             | 0.135408616  | Q68EF6_S540_M2_Begain |
| _ADS[Phospho (STY)]FSEGDDLSQLHAEPC[Carbamidomethyl (C)]FLR_3                                        | 0.308400228  | Q68EF6_S483_M1_Begain |
| _YYGGGGGGGAAGGGS[Phospho (STY)]PGDK_2                                                               | 0.343510692  | Q68EF6_S463_M1_Begain |
| _GDIY[Phospho (STY)]C[Carbamidomethyl (C)]SDPALYC[Carbamidomethyl (C)]PDEREHAR_4                    | -0.158059793 | Q68EF6_Y227_M1_Begain |
| _AASTLGS[Phospho (STY)]PLEAQVAPGFAR_2                                                               | 0.307547425  | Q68EF6_S357_M1_Begain |
| _RPS[Phospho (STY)]VDT[Phospho (STY)]PVTDVGFRLR_2                                                   | 0.123158417  | Q68EF6_S246_M2_Begain |
| _ESLEPS[Phospho (STY)]SMEAS[Phospho (STY)]PEMHPPTR_2                                                | 0.252527118  | Q68EF6_S555_M2_Begain |
| _IYIDSNNNPER_2                                                                                      | -0.250413218 | #N/A                  |
| _LLLPWLEAR_2                                                                                        | -0.01773567  | #N/A                  |
| _NNLAGAEELFAR_2                                                                                     | -0.161108223 | #N/A                  |
| _DPHLAC[Carbamidomethyl (C)]VAYER_2                                                                 | 0.016717743  | #N/A                  |
| _LLYNNVSNFGR_2                                                                                      | -0.045349311 | #N/A                  |
| _ESNC[Carbamidomethyl (C)]YDPER_2                                                                   | -0.051796739 | #N/A                  |
| _LHIIIEVGTPPTGNQFPK_3                                                                               | -0.26332248  | #N/A                  |
| _EVC[Carbamidomethyl (C)]FAC[Carbamidomethyl (C)]VDGK_2                                             | -0.094363487 | #N/A                  |
| _LAELEEFINGPNNAHQQVGDRL_3                                                                           | -0.184082031 | #N/A                  |
| _AHIAQLC[Carbamidomethyl (C)]EK_2                                                                   | 0.349001781  | #N/A                  |
| _GQFSTDELVAEVEKR_2                                                                                  | -0.196974092 | #N/A                  |
| _ENPYYDSR_2                                                                                         | 0.01097161   | #N/A                  |
| _LTDQLPLIIVC[Carbamidomethyl (C)]DR_2                                                               | -0.021623496 | #N/A                  |
| _C[Carbamidomethyl (C)]NEPAVWSQLAK_2                                                                | -0.088891934 | #N/A                  |
| _SVDPTLALSVYLR_2                                                                                    | -0.110093051 | #N/A                  |

|                                                                              |              |                     |
|------------------------------------------------------------------------------|--------------|---------------------|
| _NLQNLLILTAIK_.2                                                             | -0.224408291 | #N/A                |
| _EHLELFWSR_.2                                                                | -0.062372524 | #N/A                |
| _HELIEFR_.2                                                                  | -0.105570586 | #N/A                |
| _WLLLTGISAQQNR_.2                                                            | -0.268490346 | #N/A                |
| _HDVVFLITK_.2                                                                | 0.01856499   | #N/A                |
| _LASTLVHLGEYQAAVDGAR_.3                                                      | -0.162090328 | #N/A                |
| _AFM[Oxidation (M)]TADLPNELIELLEK_.2                                         | -0.199362811 | #N/A                |
| _VIQC[Carbamidomethyl (C)]FAETGQVQK_.2                                       | 0.116156078  | #N/A                |
| _LEKHELIEFR_.3                                                               | -0.351528473 | #N/A                |
| _IAAYLFK_.2                                                                  | -0.180702458 | #N/A                |
| _YIEIYVQK_.2                                                                 | 0.098413864  | #N/A                |
| _SVNESLNNLFITEEDYQALR_.2                                                     | -0.473972697 | #N/A                |
| _ISGETIFVTAPHEATAGIIGVNR_.3                                                  | -0.251805251 | #N/A                |
| _YESLELC[Carbamidomethyl (C)]RPVLQQGR_.3                                     | -0.109402786 | #N/A                |
| _QSVELC[Carbamidomethyl (C)]KK_.2                                            | 0.326259599  | #N/A                |
| _RPLIDQVVQTALSETQDPEEVSVTVK_.3                                               | -0.085600392 | #N/A                |
| _EAIDSYIK_.2                                                                 | -0.050206572 | #N/A                |
| _GQFSTDELVAEVEK_.2                                                           | -0.240315015 | #N/A                |
| _IVLDNSVFSEHR_.2                                                             | -0.159511859 | #N/A                |
| _KFNALFAQGNYSEAAK_.3                                                         | 0.138930202  | #N/A                |
| _AYEFAER_.2                                                                  | -0.06205137  | #N/A                |
| _RDPHLAC[Carbamidomethyl (C)]VAYER_.3                                        | 0.190337954  | #N/A                |
| _VGYTPDWIFLLR_.2                                                             | 0.173100278  | #N/A                |
| _QSVELC[Carbamidomethyl (C)]K_.2                                             | -0.135387137 | #N/A                |
| _VM[Oxidation (M)]EYINR_.2                                                   | -0.06440282  | #N/A                |
| _VANVELYYK_.2                                                                | -0.334362113 | #N/A                |
| _VVGAM[Oxidation (M)]QLYSVDR_.2                                              | -0.023059799 | #N/A                |
| _M[Oxidation (M)]EGNAEESTLFC[Carbamidomethyl (C)]FAVR_.2                     | -0.320908044 | #N/A                |
| _LLEM[Oxidation (M)]NLM[Oxidation (M)]HAPQVADAILGNQM[Oxidation (M)]FTHYDR_.4 | -0.005993118 | #N/A                |
| _FNALFAQGNYSEAAK_.2                                                          | 0.058156859  | #N/A                |
| _TLQIFNIEMK_.2                                                               | 0.276004651  | #N/A                |
| _VDKLDASESLR_.2                                                              | 0.296928917  | #N/A                |
| _VSQPIEGHAASFAQFK_.3                                                         | -0.265385223 | #N/A                |
| _GQC[Carbamidomethyl (C)]DLELINVC[Carbamidomethyl (C)]NENSLFK_.2             | -0.311635153 | #N/A                |
| _AM[Oxidation (M)]LSANIR_.2                                                  | 0.027202452  | #N/A                |
| _ALEHFTDLYDIK_.2                                                             | -0.103473534 | #N/A                |
| _ESYVETELIFALAK_.2                                                           | -0.14069369  | #N/A                |
| _HSSLAGC[Carbamidomethyl (C)]QIINR_.3                                        | -0.069645697 | #N/A                |
| _DAMQYASESK_.2                                                               | 0.314442522  | #N/A                |
| _IHEGC[Carbamidomethyl (C)]EETHNALAK_.3                                      | -0.140732704 | #N/A                |
| _ALEHFTDLYDIKR_.3                                                            | -0.396411608 | #N/A                |
| _LPVVIGGLLDVDC[Carbamidomethyl (C)]SESVIK_.2                                 | -0.283859568 | #N/A                |
| _ADDPSSYM[Oxidation (M)]EYVQAANASGNWEELVK_.3                                 | -0.470346582 | #N/A                |
| _FQSVPAQPGQTSPLLQYFGILLDQGLNK_.3                                             | 0.102367325  | #N/A                |
| _GILRT[Phospho (STY)]PDTIR_.2                                                | 0.167745362  | Q68FD5_T394_M1_Cltc |
| _KFDVNTSAVQVLIEHIGNLDR_.3                                                    | -0.161852865 | #N/A                |
| _TSIDAYDNFDNISLAQR_.2                                                        | -0.197675492 | #N/A                |

|                                                                   |              |                          |
|-------------------------------------------------------------------|--------------|--------------------------|
| _AVNYFSK_.2                                                       | 0.162131802  | #N/A                     |
| _YIQAAC[Carbamidomethyl (C)]K_.2                                  | -0.159972615 | #N/A                     |
| _NNRPSEGPLQTR_.2                                                  | -0.403433345 | #N/A                     |
| _VGEQAVVVIIDM[Oxidation (M)]NDPSNPIR_.2                           | 0.004100954  | #N/A                     |
| _AHM[Oxidation (M)]GM[Oxidation (M)]FTELAILYSK_.2                 | -0.045101263 | #N/A                     |
| _AHTM[Oxidation (M)]TDDVTFWK_.2                                   | -0.045393657 | #N/A                     |
| _RPIS[Phospho (STY)]ADSAIMNPASK_.2                                | 0.273205238  | Q68FD5_S67_M1_Cltc       |
| _FDVNTSAVQVLIEHIGNLDR_.3                                          | 0.267507358  | #N/A                     |
| _YGYIHLVDLETGTC[Carbamidomethyl (C)]IYM[Oxidation (M)]NR_.3       | -0.103127377 | #N/A                     |
| _EDKLEC[Carbamidomethyl (C)]SEELGDLVK_.3                          | 0.074447477  | #N/A                     |
| _NESSDSALGDS[Phospho (STY)]ESEDTPDIR_.2                           | -0.018433865 | Q68FD7_S945_M1_Fnip1     |
| _NESSDSALGDS[Phospho (STY)]ESEDTPDIRR_.3                          | -0.446572023 | Q68FD7_S945_M1_Fnip1     |
| _DHTTPSENGDVPS[Phospho (STY)]PK_.2                                | -0.19918467  | Q68FD9_S1384_M1_Kiaa1549 |
| _LITTD[Phospho (STY)]DGTYK_.2                                     | 0.147234363  | Q68FD9_S1613_M1_Kiaa1549 |
| _GHYEFVVDL[Phospho (STY)]SGDTKER_.3                               | 0.371300388  | Q68FD9_S1543_M1_Kiaa1549 |
| _GLQGPGLGYPTSS[Phospho (STY)]TEDLQPGHSSASLIK_.3                   | -0.402393944 | Q68FD9_S1904_M1_Kiaa1549 |
| _GHYEFVVDL[Phospho (STY)]SGDTK_.2                                 | 0.12310596   | Q68FD9_S1543_M1_Kiaa1549 |
| _RGHYEFVVDL[Phospho (STY)]S[Phospho (STY)]GDTKER_.4               | -0.008607916 | Q68FD9_S1543_M2_Kiaa1549 |
| _LEASYS[Phospho (STY)]PPGEEDLLVHVAEGSK_.3                         | -0.506056758 | Q68FE2_S18_M1_Atg9a      |
| _FSTYSQS[Phospho (STY)]PPDTPSLR_.2                                | -0.167155473 | Q68FE6_S347_M1_Ripor1    |
| _PLTSPAPDS[Phospho (STY)]PEQIPK_.2                                | 0.237927522  | Q68FE6_S748_M1_Ripor1    |
| _HTSS[Phospho (STY)]PEVVAEDR_.2                                   | 0.184275043  | Q68FE6_S875_M1_Ripor1    |
| _SGS[Phospho (STY)]VNEASC[Carbamidomethyl (C)]PTEQTR_.2           | 0.264882591  | Q68FE7_S488_M1_Tmem151b  |
| _SVNS[Phospho (STY)]DAS[Phospho (STY)]DPGSVR_.2                   | -0.407419857 | Q68FE8_S904_M2_Znf280d   |
| _LQAEMLQLR_.2                                                     | 0.232342908  | #N/A                     |
| _SAVPFLPVNPEYSATR_.2                                              | -0.08254604  | #N/A                     |
| _S[Phospho (STY)]M[Oxidation (M)]DSSDLSDGAVTLQEYLELKK_.3          | -0.466427661 | Q68FF6_S419_M1_Git1      |
| _SLSS[Phospho (STY)]PTDNLELSAR_.2                                 | -0.164194838 | Q68FF6_S371_M1_Git1      |
| _ARS[Phospho (STY)]M[Oxidation (M)]DSSDLSDGAVTLQEYLELKK_.3        | -0.508408474 | Q68FF6_S419_M1_Git1      |
| _S[Phospho (STY)]M[Oxidation (M)]DSSDLSDGAVTLQEYLELKK_.2          | 0.232480822  | Q68FF6_S419_M1_Git1      |
| _HGS[Phospho (STY)]GADSDYENTQSGDPLLGLEGK_.3                       | 0.233113511  | Q68FF6_S601_M1_Git1      |
| _HGS[Phospho (STY)]GADSDYENTQSGDPLLGLEGKR_.4                      | -0.09420143  | Q68FF6_S601_M1_Git1      |
| _AEVC[Carbamidomethyl (C)]ADC[Carbamidomethyl (C)]SAPDPGWASISR_.2 | -0.204010753 | #N/A                     |
| _SQSELDDQHDYDSVASDEDT[Phospho (STY)]DQEPLPSAGATR_.4               | 0.064432133  | Q68FF6_T401_M1_Git1      |
| _ENDAVWLATQNHSTLVTER_.3                                           | -0.17484253  | #N/A                     |
| _S[Phospho (STY)]MPNLAR_.2                                        | 0.214794492  | Q68FF7_S401_M1_Slain1    |
| _SSQS[Phospho (STY)]FDSSLHGAGSGVSR_.2                             | 0.265738462  | Q68FF7_S429_M1_Slain1    |
| _VGS[Phospho (STY)]PLTLTDAQTR_.2                                  | -0.429287378 | Q68FH0_S313_M1_Pkp4      |
| _AQ[Phospho (STY)]PSYVTSTGVSPSR_.2                                | -0.021590275 | Q68FH0_S220_M1_Pkp4      |
| _LYLQS[Phospho (STY)]PR_.2                                        | -0.273284942 | Q68FH0_S1133_M1_Pkp4     |
| _TGS[Phospho (STY)]VGIGNLQR_.2                                    | -0.337159766 | Q68FH0_S446_M1_Pkp4      |
| _VAS[Phospho (STY)]PSQGGVGVSSPK_.2                                | -0.462593661 | Q68FH0_S326_M1_Pkp4      |
| _PSPIYISSYSS[Phospho (STY)]PAR_.2                                 | 0.133547374  | Q68FH0_S1099_M1_Pkp4     |
| _TYS[Phospho (STY)]PVYR_.2                                        | -0.032935139 | Q68FH0_S421_M1_Pkp4      |
| _S[Phospho (STY)]YEDPYC[Carbamidomethyl (C)]DDR_.2                | 0.005185897  | Q68FH0_S1136_M1_Pkp4     |
| _PAS[Phospho (STY)]PTAVR_.2                                       | -0.263660171 | Q68FH0_S280_M1_Pkp4      |
| _AAS[Phospho (STY)]PYSQRPAS[Phospho (STY)]PTAVRR_.3               | -0.138420122 | Q68FH0_S272_M2_Pkp4      |

|                                                                          |              |                       |
|--------------------------------------------------------------------------|--------------|-----------------------|
| _TSS[Phospho (STY)]QRS[Phospho (STY)]TLTYQR_.2                           | -0.224551226 | Q68FH0_S457_M2_Pkp4   |
| _AASPYSQRPAS[Phospho (STY)]PTAVR_.3                                      | -0.058423824 | Q68FH0_S280_M1_Pkp4   |
| _GLYPGSSKPSPIY[Phospho (STY)]ISSYS[Phospho (STY)]SPAR_.3                 | -0.118123731 | Q68FH0_S1098_M2_Pkp4  |
| _VASPSQGQVGSSS[Phospho (STY)]PKR_.2                                      | 0.029825902  | Q68FH0_S336_M1_Pkp4   |
| _LQHTGPADDGATRS[Phospho (STY)]PS[Phospho (STY)]IDSIQKDPR_.4              | 0.27398815   | Q68FH0_S509_M2_Pkp4   |
| _SAVS[Phospho (STY)]PDLHITPIYEGR_.2                                      | -0.205293495 | Q68FH0_S405_M1_Pkp4   |
| _LQHTGPADDGATRS[Phospho (STY)]PS[Phospho (STY)]IDSIQK_.3                 | 0.072366394  | Q68FH0_S509_M2_Pkp4   |
| _S[Phospho (STY)]PNHGTVELQGSQTALYR_.3                                    | -0.174223266 | Q68FH0_S426_M1_Pkp4   |
| _AEQYPGS[Phospho (STY)]PDSWV_.2                                          | 0.066081396  | Q68FH0_S1185_M1_Pkp4  |
| _SSYAS[Phospho (STY)]QHS[Phospho (STY)]QLGQELR_.2                        | 0.049648309  | Q68FH0_S391_M2_Pkp4   |
| _DGGEALVS[Phospho (STY)]PDGTVTEAPR_.2                                    | -0.250264082 | Q68FL4_S109_M1_Ahcyl2 |
| _IVLLAEGR_.2                                                             | -0.248022454 | #N/A                  |
| _GESEDDFWWC[Carbamidomethyl (C)]IDR_.2                                   | -0.31471076  | #N/A                  |
| _AQGEKPLAGAK_.2                                                          | -0.041866286 | #N/A                  |
| _TPELTWER_.2                                                             | 0.063126334  | #N/A                  |
| _HRDGGEALVS[Phospho (STY)]PDGTVTEAPR_.3                                  | -0.326795915 | Q68FL4_S109_M1_Ahcyl2 |
| _LC[Carbamidomethyl (C)]VPAM[Oxidation (M)]NVNDSVTK_.2                   | 0.08206017   | #N/A                  |
| _GIVEESVTGVHR_.2                                                         | -0.064951311 | #N/A                  |
| _FDNLYC[Carbamidomethyl (C)]C[Carbamidomethyl (C)]R_.2                   | -0.249700106 | #N/A                  |
| _QVVVC[Carbamidomethyl (C)]GYGEVGK_.2                                    | 0.022876509  | #N/A                  |
| _NSELNNLGNFINR_.2                                                        | -0.710828595 | #N/A                  |
| _DSTYSQLS[Phospho (STY)]PR_.2                                            | -0.169833077 | Q68FM6_S750_M1_Elfn2  |
| _QLS[Phospho (STY)]ADAAVSRK_.2                                           | -0.153182792 | Q68FM6_S622_M1_Elfn2  |
| _QLS[Phospho (STY)]ADAAVSR_.2                                            | -0.170680411 | Q68FM6_S622_M1_Elfn2  |
| _YIEKGS[Phospho (STY)]PLNSPLDR_.2                                        | 0.256129941  | Q68FM6_S671_M1_Elfn2  |
| _GS[Phospho (STY)]PLNSPLDR_.2                                            | -0.335929452 | Q68FM6_S671_M1_Elfn2  |
| _HYSGYSS[Phospho (STY)]S[Phospho (STY)]PEYSSESTHK_.3                     | -0.004679097 | Q68FM6_S760_M2_Elfn2  |
| _SISELVS[Phospho (STY)]EK_.2                                             | -0.292512813 | Q692V3_S1279_M1_Ttc41 |
| _ANTLS[Phospho (STY)]PVR_.2                                              | -0.135568878 | Q69Z38_S282_M1_Peak1  |
| _DPSTKPVT[Phospho (STY)]SPPSK_.2                                         | 0.103137973  | Q69Z38_T851_M1_Peak1  |
| _SYSTHSS[Phospho (STY)]PAK_.2                                            | -0.05992823  | Q69Z38_S727_M1_Peak1  |
| _SLFTSQSSGEGEAHQTTES[Phospho (STY)]PT[Phospho (STY)]AK_.3                | -0.280523975 | Q69Z38_S836_M2_Peak1  |
| _GTPALTSEAAQSS[Phospho (STY)]PPTR_.2                                     | 0.087115223  | Q69Z89_S235_M1_Radil  |
| _S[Phospho (STY)]LLLEFEPDVEDTLQR_.2                                      | 0.188893316  | Q69Z89_S432_M1_Radil  |
| _TRLNS[Phospho (STY)]IK_.2                                               | 0.10352479   | Q69Z98_S482_M1_Brsk2  |
| _VTPHPS[Phospho (STY)]PR_.2                                              | -0.167944896 | Q69Z98_S436_M1_Brsk2  |
| _S[Phospho (STY)]M[Oxidation (M)]EVLSVTDGGSPVAPR_.2                      | -0.28455391  | Q69Z98_S383_M1_Brsk2  |
| _VDS[Phospho (STY)]PMLNR_.2                                              | 0.153733135  | Q69Z98_S368_M1_Brsk2  |
| _S[Phospho (STY)]ISGASSGLSTS[Phospho (STY)]PLSSPR_.2                     | 0.055449674  | Q69Z98_S413_M2_Brsk2  |
| _VTPHPS[Phospho (STY)]PRGS[Phospho (STY)]PLPTPK_.3                       | 0.003401473  | Q69Z98_S436_M2_Brsk2  |
| _GS[Phospho (STY)]PLPTPK_.2                                              | -0.503239519 | Q69Z98_S440_M1_Brsk2  |
| _KLQVPTPEEM[Oxidation (M)]SNLT[Phospho (STY)]PESS[Phospho (STY)]PELAK_.3 | -0.2145249   | #N/A                  |
| _LQVPTPEEM[Oxidation (M)]SNLT[Phospho (STY)]PESS[Phospho (STY)]PELAK_.3  | -0.130784074 | #N/A                  |
| _LQVPTPEEMSNLT[Phospho (STY)]PESS[Phospho (STY)]PELAKK_.3                | -0.13846391  | #N/A                  |
| _RVDS[Phospho (STY)]PMLNR_.2                                             | 0.09729328   | Q69Z98_S368_M1_Brsk2  |
| _GGDVS[Phospho (STY)]PSPYSSSSWR_.2                                       | -0.104713443 | Q69ZA1_S384_M1_Cdk13  |
| _QTD PST[Phospho (STY)]PQESSK_.2                                         | -0.210891494 | Q69ZA1_T1147_M1_Cdk13 |

|                                                                   |              |                         |
|-------------------------------------------------------------------|--------------|-------------------------|
| _TEHAPS[Phospho (STY)]PSSGGTVK_.2                                 | -0.26799231  | Q69ZA1_S526_M1_Cdk13    |
| _HSS[Phospho (STY)]IS[Phospho (STY)]PSTLTlk_.2                    | -0.040326069 | Q69ZA1_S438_M2_Cdk13    |
| _S[Phospho (STY)]LS[Phospho (STY)]PLGGRDES[Phospho (STY)]PVSHR_.3 | 0.130414818  | Q69ZA1_S316_M3_Cdk13    |
| _S[Phospho (STY)]RS[Phospho (STY)]PY[Phospho (STY)]SPVLR_.2       | 0.119867548  | Q69ZA1_S396_M3_Cdk13    |
| _S[Phospho (STY)]RS[Phospho (STY)]PYS[Phospho (STY)]PVLRR_.3      | 0.060094807  | Q69ZA1_S396_M3_Cdk13    |
| _AAAEAWHDEKPPQS[Phospho (STY)]PR_.3                               | -0.557009598 | Q69ZB3_S41_M1_Tspsl5    |
| _NSLLHRAS[Phospho (STY)]EEETI_.2                                  | -0.383871628 | Q69ZF7_S766_M1_Cnnm4    |
| _SYS[Phospho (STY)]PSFQR_.2                                       | 0.055225762  | Q69ZH9_S421_M1_Arhgap23 |
| _RHS[Phospho (STY)]TSDLSDATFSDIR_.3                               | -0.166771777 | Q69ZH9_S673_M1_Arhgap23 |
| _S[Phospho (STY)]AEALGPGALVSPR_.2                                 | -0.431130993 | Q69ZH9_S361_M1_Arhgap23 |
| _SKS[Phospho (STY)]C[Carbamidomethyl (C)]DDGLNTRDEGR_.3           | 0.033397975  | Q69ZH9_S619_M1_Arhgap23 |
| _HYS[Phospho (STY)]QDC[Carbamidomethyl (C)]SSIK_.2                | -0.024269522 | Q69ZH9_S594_M1_Arhgap23 |
| _HS[Phospho (STY)]TSDLSDATFSDIRR_.3                               | -0.102264155 | Q69ZH9_S673_M1_Arhgap23 |
| _QMNLGFGDES[Phospho (STY)]PEPEAR_.2                               | 0.14335831   | Q69ZH9_S515_M1_Arhgap23 |
| _ARS[Phospho (STY)]DDYLSR_.2                                      | -0.211379446 | Q69ZH9_S351_M1_Arhgap23 |
| _SKS[Phospho (STY)]C[Carbamidomethyl (C)]DDGLNTRF_.2              | -0.222255302 | Q69ZH9_S619_M1_Arhgap23 |
| _HS[Phospho (STY)]TSDLSDATFSDIR_.2                                | 0.063092087  | Q69ZH9_S673_M1_Arhgap23 |
| _RS[Phospho (STY)]S[Phospho (STY)]YLLAITTER_.2                    | -0.493589315 | Q69ZH9_S606_M2_Arhgap23 |
| _TSS[Phospho (STY)]LDSAVPIAPPPR_.2                                | -0.355618465 | Q69ZL1_S805_M1_Sh3rf1   |
| _DSVLS[Phospho (STY)]YTSVR_.2                                     | -0.161119734 | Q69ZK0_S1173_M1_Prex1   |
| _LVSRT[Phospho (STY)]PT[Phospho (STY)]PK_.2                       | -0.050217608 | Q69ZK6_T322_M2_Jmjd1c   |
| _RLS[Phospho (STY)]PPGGSGSGVPGGGPLLPTAGR_.3                       | 0.110000514  | Q69ZK9_S714_M1_Nlgn2    |
| _AAS[Phospho (STY)]EELVEK_.2                                      | -0.286177105 | Q69ZL1_S494_M1_Fgd6     |
| _S[Phospho (STY)]LDEDSERKEEVSPLGAK_.3                             | -0.212014147 | Q69ZL1_S1167_M1_Fgd6    |
| _SSS[Phospho (STY)]DNNTNTLGR_.2                                   | -0.368351142 | Q69ZR2_S1576_M1_Hectd1  |
| _RLDS[Phospho (STY)]SGER_.2                                       | 0.022468311  | Q69ZR2_S357_M1_Hectd1   |
| _AS[Phospho (STY)]LALIR_.2                                        | -0.262345618 | Q69ZR2_S545_M1_Hectd1   |
| _NNS[Phospho (STY)]RDETTEPEQQK_.2                                 | -0.287239334 | Q69ZR9_S653_M1_Tasor    |
| _SSQS[Phospho (STY)]ESEIVPK_.2                                    | -0.097570871 | Q69ZS7_S150_M1_Hbs1l    |
| _SSTPSDINS[Phospho (STY)]PR_.2                                    | -0.217340325 | Q69ZS8_S343_M1_Kazn     |
| _VS[Phospho (STY)]PC[Carbamidomethyl (C)]HSR_.2                   | 0.035192676  | Q69ZS8_S314_M1_Kazn     |
| _THSLC[Carbamidomethyl (C)]NGDS[Phospho (STY)]PGPVQK_.2           | 0.015241253  | Q69ZS8_S356_M1_Kazn     |
| _QVRVS[Phospho (STY)]PC[Carbamidomethyl (C)]HSR_.3                | -0.142652694 | Q69ZS8_S314_M1_Kazn     |
| _S[Phospho (STY)]LDPGLFDDSDSQC[Carbamidomethyl (C)]SPTR_.2        | -0.133555207 | Q69ZS8_S404_M1_Kazn     |
| _S[Phospho (STY)]IQEDTKR_.2                                       | -0.250154842 | Q69ZW3_S1038_M1_Ehbp1   |
| _QRS[Phospho (STY)]IQEDTKR_.3                                     | -0.114288901 | Q69ZW3_S1038_M1_Ehbp1   |
| _SRS[Phospho (STY)]LEC[Carbamidomethyl (C)]R_.2                   | 0.091168434  | Q69ZW3_S747_M1_Ehbp1    |
| _T[Phospho (STY)]SGSDDPGLSSSTDSAQALASLGK_.2                       | 0.2735069    | Q69ZW3_T673_M1_Ehbp1    |
| _QRS[Phospho (STY)]IQEDTK_.2                                      | -0.361398587 | Q69ZW3_S1038_M1_Ehbp1   |
| _LDGELAITKPNVSS[Phospho (STY)]PSK_.2                              | -0.254160233 | Q69ZW3_S765_M1_Ehbp1    |
| _VGNYETDTNNS[Phospho (STY)]VDQEK_.2                               | -0.048653647 | Q69ZW3_S588_M1_Ehbp1    |
| _ITEIVNQLNALSS[Phospho (STY)]LDEDQDDC[Carbamidomethyl (C)]IK_.3   | 0.318600116  | Q69ZW3_S222_M1_Ehbp1    |
| _S[Phospho (STY)]PPLPAVIK_.2                                      | -0.237061332 | Q69ZX6_S614_M1_Morc2a   |
| _ASS[Phospho (STY)]PGYIDSPYSR_.2                                  | -0.170398429 | Q69ZX8_S373_M1_Ablim3   |
| _SS[Phospho (STY)]PYHSQLDVR_.2                                    | 0.322086114  | Q69ZX8_S408_M1_Ablim3   |
| _SGPESGRSS[Phospho (STY)]PYHSQLDVR_.3                             | -0.051840671 | Q69ZX8_S408_M1_Ablim3   |
| _RFS[Phospho (STY)]SGGEEEDFDR_.2                                  | -0.1229385   | Q69ZX8_S502_M1_Ablim3   |

|                                                                                   |              |                          |
|-----------------------------------------------------------------------------------|--------------|--------------------------|
| _YTS[Phospho (STY)]DEMLER_.2                                                      | 0.285845959  | Q69ZX8_S337_M1_Ablim3    |
| _TSETIS[Phospho (STY)]PPGSSIGSPNR_.2                                              | -0.457122643 | Q69ZX8_S282_M1_Ablim3    |
| _SAS[Phospho (STY)]LPAYR_.2                                                       | 0.103359214  | Q69ZX8_S584_M1_Ablim3    |
| _SHYLADS[Phospho (STY)]DPLISK_.2                                                  | 0.114019753  | Q69ZX8_S575_M1_Ablim3    |
| _RAS[Phospho (STY)]SPGYDSPTYSR_.2                                                 | 0.026706504  | Q69ZX8_S372_M1_Ablim3    |
| _RTS[Phospho (STY)]ETSIS[Phospho (STY)]PPGSSIGSPNR_.2                             | -0.005907067 | Q69ZX8_S277_M2_Ablim3    |
| _NKFGS[Phospho (STY)]ADNIPNLK_.2                                                  | -0.126591374 | Q69ZZ6_S378_M1_Tmcc1     |
| _FGS[Phospho (STY)]ADNIPNLK_.2                                                    | -0.047428078 | Q69ZZ6_S378_M1_Tmcc1     |
| _GS[Phospho (STY)]PPDC[Carbamidomethyl (C)]TC[Carbamidomethyl (C)]VPAGDTVISEVK_.2 | -0.131789562 | Q69ZZ9_S276_M1_Kiaa0754  |
| _KQFS[Phospho (STY)]LENVPEGELLPDGK_.2                                             | -0.112352269 | Q6A037_S299_M1_N4bp1     |
| _ALLHSGS[Phospho (STY)]SSSK_.2                                                    | 0.073664584  | Q6A065_S717_M1_Cep170    |
| _SKTS[Phospho (STY)]PVASGSTSK_.2                                                  | -0.245489926 | Q6A065_S1069_M1_Cep170   |
| _SRS[Phospho (STY)]ADIGAR_.2                                                      | -0.073763116 | Q6A065_S985_M1_Cep170    |
| _LGEAS[Phospho (STY)]DSELADADK_.2                                                 | 0.020278968  | Q6A065_S1102_M1_Cep170   |
| _LRTS[Phospho (STY)]PALK_.2                                                       | 0.005095128  | Q6A065_S1250_M1_Cep170   |
| _SIKS[Phospho (STY)]DVPVYLKR_.3                                                   | -0.105947291 | Q6A065_S358_M1_Cep170    |
| _S[Phospho (STY)]VDSRPQPAEHPDHLTITR_.4                                            | -0.19391574  | Q6A065_S1384_M1_Cep170   |
| _SIKS[Phospho (STY)]DVPVYLK_.2                                                    | -0.108444168 | Q6A065_S358_M1_Cep170    |
| _TEEDSKS[Phospho (STY)]IKS[Phospho (STY)]DVPVYLK_.2                               | 0.268334387  | Q6A065_S355_M2_Cep170    |
| _QGS[Phospho (STY)]FTIDKPSSNIPIELIPHINK_.3                                        | -0.251034744 | Q6A065_S829_M1_Cep170    |
| _C[Carbamidomethyl (C)]STSS[Phospho (STY)]PSKDVTK_.2                              | -0.237157047 | Q6A065_S963_M1_Cep170    |
| _ALLHSGS[Phospho (STY)]SSSKEK_.2                                                  | 0.295385977  | Q6A065_S717_M1_Cep170    |
| _SDS[Phospho (STY)]EATISR_.2                                                      | -0.503198732 | Q6A065_S1157_M1_Cep170   |
| _SDS[Phospho (STY)]LDTDSSM[Oxidation (M)]DTTLILK_.2                               | 0.043671622  | Q6A065_S872_M1_Cep170    |
| _GNKHDDGTQS[Phospho (STY)]DSENAGahr_.3                                            | 0.137978936  | Q6A065_S378_M1_Cep170    |
| _HDDGTQS[Phospho (STY)]DSENAGahr_.3                                               | -0.359946631 | Q6A065_S378_M1_Cep170    |
| _RFPTDYAS[Phospho (STY)]TS[Phospho (STY)]EDEFSGSNR_.2                             | -0.123784678 | Q6A065_S1229_M2_Cep170   |
| _NQATSASSEKDNDDQSDKGT[Phospho (STY)]TIELEPNSEEVear_.4                             | 0.132070332  | Q6A065_Y499_M1_Cep170    |
| _GNKHDDGTQS[Phospho (STY)]DSENAGahr_.4                                            | -0.083979046 | Q6A065_S378_M1_Cep170    |
| _SPS[Phospho (STY)]PVHLPEDPKVAEK_.3                                               | 0.274313685  | Q6A0A2_S603_M1_Larp4b    |
| _EQNTPPKS[Phospho (STY)]PQ_.2                                                     | -0.318596964 | Q6A0A2_S739_M1_Larp4b    |
| _RAS[Phospho (STY)]PPAAGKR_.2                                                     | -0.282530674 | Q6A0A2_S721_M1_Larp4b    |
| _KNS[Phospho (STY)]FGYR_.2                                                        | 0.066959919  | Q6A0A2_S500_M1_Larp4b    |
| _RAS[Phospho (STY)]PPAAGK_.2                                                      | -0.262597745 | Q6A0A2_S721_M1_Larp4b    |
| _SPS[Phospho (STY)]PVHLPEDPK_.2                                                   | -0.092104286 | Q6A0A2_S603_M1_Larp4b    |
| _DSVALRHS[Phospho (STY)]NPR_.2                                                    | -0.364801756 | Q6A0D4_S536_M1_Rftn1     |
| _SYGSQPNS[Phospho (STY)]PTSEDLAK_.2                                               | -0.208633656 | Q6AW69_S203_M1_Cgn1      |
| _RQDS[Phospho (STY)]AGPILDGAR_.2                                                  | -0.065414626 | Q6AW69_S284_M1_Cgn1      |
| _KVM[Oxidation (M)]LPESYLLVATR_.2                                                 | -0.008925689 | #N/A                     |
| _DQGEVPS[Phospho (STY)]PSEDEPFSWPGPK_.2                                           | 0.468529801  | Q6DFV3_S41_M1_Arhgap21   |
| _NRS[Phospho (STY)]PTLSC[Carbamidomethyl (C)]R_.2                                 | -0.164605878 | Q6DFV3_S1501_M1_Arhgap21 |
| _QLS[Phospho (STY)]HDQESVGPPSLDGQHSSK_.3                                          | -0.288112022 | Q6DFV3_S850_M1_Arhgap21  |
| _VGGG[Phospho (STY)]IRPWK_.2                                                      | -0.29387485  | Q6DFV3_S947_M1_Arhgap21  |
| _LLSKDDTS[Phospho (STY)]PPKDK_.3                                                  | -0.178249305 | Q6DFV3_S1108_M1_Arhgap21 |
| _KGS[Phospho (STY)]SSEVFSDAAR_.2                                                  | 0.319065002  | Q6DFV3_S917_M1_Arhgap21  |
| _SKS[Phospho (STY)]YDEGLDDYREDAK_.3                                               | -0.366212953 | Q6DFV3_S874_M1_Arhgap21  |
| _VRTS[Phospho (STY)]ASDLSR_.2                                                     | 0.263734736  | Q6DFV3_S1847_M1_Arhgap21 |



|                                                                                 |              |                          |
|---------------------------------------------------------------------------------|--------------|--------------------------|
| _EK PQS[Phospho (STY)]GRQTPQPLR_.3                                              | -0.065446123 | Q6DFV3_S736_M1_Arhgap21  |
| _T[Phospho (STY)]SQGF GFTLR_.2                                                  | 0.20333215   | Q6DFV3_T61_M1_Arhgap21   |
| _S[Phospho (STY)]TS[Phospho (STY)]HDRV PQSVQIR_.2                               | 0.088989591  | Q6DFV3_S435_M2_Arhgap21  |
| _RQLS[Phospho (STY)]HDQESVGP PSLDGQHSSK_.4                                      | -0.369388324 | Q6DFV3_S850_M1_Arhgap21  |
| _TQSPHS[Phospho (STY)]PKEESER_.3                                                | -0.221985603 | Q6DFV3_S1092_M1_Arhgap21 |
| _GIPS[Phospho (STY)]IVR_.2                                                      | -0.352771528 | Q6DFV3_S1122_M1_Arhgap21 |
| _SVS[Phospho (STY)]QERLEDSVLMK_.2                                               | 0.411352855  | Q6DFV3_S453_M1_Arhgap21  |
| _EVLDSL GSS[Phospho (STY)]LDK_.2                                                | -0.097354277 | Q6DFV7_S612_M1_Ncoa7     |
| _HSGS[Phospho (STY)]PENLGESTLNIHEDLDKIK_.4                                      | 0.160872062  | Q6DFV7_S500_M1_Ncoa7     |
| _VLS[Phospho (STY)]STSEDEPGVVK_.2                                               | -0.156062709 | Q6DFV7_S211_M1_Ncoa7     |
| _YYS[Phospho (STY)]VDDNQNK_.2                                                   | 0.035231444  | Q6DFV7_S92_M1_Ncoa7      |
| _SVRS[Phospho (STY)]PEESTER_.2                                                  | -0.481261525 | Q6DFV7_S353_M1_Ncoa7     |
| _ [Acetyl (Protein N-term)]STIC[Carbamidomethyl (C)]PPPS[Phospho (STY)]PAVAK_.2 | -0.194491885 | Q6DFW0_S9_M1_            |
| _EEPLS[Phospho (STY)]JEEPC[Carbamidomethyl (C)]TSTAVPS[Phospho (STY)]PEK_.2     | 0.387764851  | Q6DFW4_S509_M2_Nop58     |
| _HIKEEPLS[Phospho (STY)]JEEPC[Carbamidomethyl (C)]TSTAVPS[Phospho (STY)]PEK_.3  | 0.144434311  | Q6DFW4_S509_M2_Nop58     |
| _NTPES[Phospho (STY)]PPYSSGSYDSIK_.2                                            | -0.009365858 | Q6DIB4_S189_M1_Nol4l     |
| _LEIYQS[Phospho (STY)]QEEPIALDK_.2                                              | -0.143463753 | Q6DIB4_S354_M1_Nol4l     |
| _ASEPVKEPVQTAQS[Phospho (STY)]PAPVEK_.3                                         | -0.296919591 | Q6DID3_S617_M1_Scaf8     |
| _WTKPSSF[Phospho (STY)]DSER_.2                                                  | 0.161617918  | Q6DVA0_S507_M1_Lemd2     |
| _AS[Phospho (STY)]VRGS[Phospho (STY)]SEDDEDTRTPDR_.3                            | -0.343710762 | Q6DVA0_S145_M2_Lemd2     |
| _S[Phospho (STY)]KAIMAKY[Phospho (STY)]DPEAR_.2                                 | -0.314665674 | Q6EJB6_S307_M2_Utp14b    |
| _SLS[Phospho (STY)]GGPLGR_.2                                                    | 0.106496354  | Q6GQT5_S423_M1_Tmem151a  |
| _SQT[Phospho (STY)]PS[Phospho (STY)]PSTLSR_.2                                   | -0.322760438 | Q6GYP7_S1003_M2_Ralgapa1 |
| _SSS[Phospho (STY)]TSDILEPFTVER_.2                                              | -0.205164328 | Q6GYP7_S796_M1_Ralgapa1  |
| _SATTTGS[Phospho (STY)]PGTEK_.2                                                 | -0.244795765 | Q6GYP7_S739_M1_Ralgapa1  |
| _RGS[Phospho (STY)]SPGSLEIPK_.2                                                 | 0.134480635  | Q6GYP7_S859_M1_Ralgapa1  |
| _GVGHEFQKVS[Phospho (STY)]VDK_.3                                                | -0.118884292 | Q6GYP7_S710_M1_Ralgapa1  |
| _GWS[Phospho (STY)]RDQPGQAPMR_.2                                                | -0.195795261 | Q6GYP7_S720_M1_Ralgapa1  |
| _ANS[Phospho (STY)]DIDLVTSESR_.2                                                | -0.286855792 | Q6I6G8_S48_M1_Hecw2      |
| _SHS[Phospho (STY)]AGEVGEDSR_.2                                                 | 0.105384846  | Q6I6G8_S1048_M1_Hecw2    |
| _TSSTLEIDTEDLISTSSRNS[Phospho (STY)]PPR_.3                                      | 0.213887697  | Q6I6G8_S406_M1_Hecw2     |
| _SNS[Phospho (STY)]IQQMEQLNR_.2                                                 | 0.304070551  | Q6I6G8_S858_M1_Hecw2     |
| _QRSHS[Phospho (STY)]AGEVGEDSR_.3                                               | 0.044181523  | Q6I6G8_S1048_M1_Hecw2    |
| _DQTEDPASS[Phospho (STY)]PTSK_.2                                                | 0.020846483  | Q6IEE6_S1006_M1_Tmem132e |
| _DQTEDPASS[Phospho (STY)]PTSKR_.2                                               | -0.296440266 | Q6IEE6_S1006_M1_Tmem132e |
| _KSS[Phospho (STY)]C[Carbamidomethyl (C)]DAVLSR_.2                              | -0.130816113 | Q6IFT4_S730_M1_Arhgap20  |
| _S[Phospho (STY)]APSLILDK_.2                                                    | 0.014132067  | Q6IFT4_S46_M1_Arhgap20   |
| _SS[Phospho (STY)]EPSIDYLDTK_.2                                                 | -0.212009797 | Q6IFT4_S704_M1_Arhgap20  |
| _RC[Carbamidomethyl (C)]S[Phospho (STY)]EPSIDQNYK_.2                            | -0.000524954 | Q6IFT4_S847_M1_Arhgap20  |
| _RSS[Phospho (STY)]EPSIDYLDTK_.2                                                | -0.008839933 | Q6IFT4_S704_M1_Arhgap20  |
| _AAQSSVTAS[Phospho (STY)]PQTEEFFDLIASSQSR_.3                                    | -0.069710914 | Q6IR34_S543_M1_Gpsm1     |
| _APS[Phospho (STY)]SDEEC[Carbamidomethyl (C)]FFDLLSK_.2                         | -0.080005257 | Q6IR34_S490_M1_Gpsm1     |
| _AS[Phospho (STY)]VGSLPGLR_.2                                                   | -0.133630085 | Q6IR34_S567_M1_Gpsm1     |
| _EGSHS[Phospho (STY)]PLDSADVR_.2                                                | -0.469331798 | Q6IR34_S469_M1_Gpsm1     |
| _VDLAGS[Phospho (STY)]PEQEASGLPDPQQQC[Carbamidomethyl (C)]PPGAS_.3              | 0.184601197  | Q6IR34_S653_M1_Gpsm1     |
| _DLEEWNR_.2                                                                     | -0.039917404 | #N/A                     |
| _LTQEPESIRK_.2                                                                  | 0.067346761  | #N/A                     |

|                                                                              |              |                        |
|------------------------------------------------------------------------------|--------------|------------------------|
| _VAQLC[Carbamidomethyl (C)]DFNPK_.2                                          | 0.2039613    | #N/A                   |
| _LTQEPESIR_.2                                                                | 0.468518872  | #N/A                   |
| _LQELDAASK_.2                                                                | 0.178657696  | #N/A                   |
| _VTEQEWR_.2                                                                  | -0.193434747 | #N/A                   |
| _KDLEEWNR_.2                                                                 | 0.273701327  | #N/A                   |
| _ESKEETPGTEWEK_.2                                                            | 0.252574684  | #N/A                   |
| _AFYQQPDADTIGYVASEEAFVK_.3                                                   | 0.059508757  | #N/A                   |
| _AITSLLGGGS[Phospho (STY)]PK_.2                                              | -0.106631566 | Q6KCD5_S2652_M1_Nipbl  |
| _FPHSS[Phospho (STY)]PNVK_.2                                                 | -0.172283097 | Q6NS52_S95_M1_Dgkb     |
| _VLAC[Carbamidomethyl (C)]GGDGTGVGWLDC[Carbamidomethyl (C)]IEK_.2            | 0.039377752  | #N/A                   |
| _QDILNQITDFEGFK_.2                                                           | -0.313009806 | #N/A                   |
| _GGGGS[Phospho (STY)]ASGPGVR_.2                                              | 0.241119447  | Q6NS60_S363_M1_Fbxo41  |
| _EHHAGSAVPSTYAVS[Phospho (STY)]R_.3                                          | -0.124856794 | Q6NS60_S391_M1_Fbxo41  |
| _RHS[Phospho (STY)]TEGEEGDVSDVGSR_.3                                         | -0.469291513 | Q6NS60_S476_M1_Fbxo41  |
| _LSARPEGGS[Phospho (STY)]GR_.2                                               | -0.090905723 | Q6NS60_S526_M1_Fbxo41  |
| _LAcetyl (Protein N-term)]AS[Phospho (STY)]LDLPYR_.2                         | 0.297029655  | Q6NS60_S3_M1_Fbxo41    |
| _HGSS[Phospho (STY)]PSTGASSR_.2                                              | -0.31470385  | Q6NS60_S396_M1_Fbxo41  |
| _SSQTS[Phospho (STY)]PC[Carbamidomethyl (C)]SQGYGR_.2                        | -0.167366557 | Q6NS69_S52_M1_Amer3    |
| _DGPEs[Phospho (STY)]PAHS[Phospho (STY)]PQALDC[Carbamidomethyl (C)]K_.2      | -0.188791024 | Q6NS69_S263_M2_Amer3   |
| _SAPPAGDEPLAETES[Phospho (STY)]ESEAELAGFSPVVDVK_.3                           | 0.364505936  | Q6NS82_S276_M1_Retreg2 |
| _ASSC[Carbamidomethyl (C)]ES[Phospho (STY)]IPEEDSEAR_.2                      | -0.256658556 | Q6NSW3_S1070_M1_Sphkap |
| _SNS[Phospho (STY)]LLESTDYWLQNQR_.2                                          | -0.048763299 | Q6NSW3_S50_M1_Sphkap   |
| _ANS[Phospho (STY)]LDGFAQNC[Carbamidomethyl (C)]PQDSVNVQPVSR_.3              | -0.106315774 | Q6NSW3_S1244_M1_Sphkap |
| _QSS[Phospho (STY)]C[Carbamidomethyl (C)]ESITDEFSR_.2                        | 0.2990087    | Q6NSW3_S1106_M1_Sphkap |
| _RAS[Phospho (STY)]TDLGK_.2                                                  | -0.516162914 | Q6NSW3_S841_M1_Sphkap  |
| _LKAS[Phospho (STY)]S[Phospho (STY)]C[Carbamidomethyl (C)]ESIPEEDSEAR_.2     | 0.016012112  | Q6NSW3_S1066_M2_Sphkap |
| _QSS[Phospho (STY)]TESITEEFYR_.2                                             | -0.156332175 | Q6NSW3_S1171_M1_Sphkap |
| _EILKEQS[Phospho (STY)]ES[Phospho (STY)]IKEHASGLPGR_.3                       | -0.172231929 | Q6NSW3_S1574_M2_Sphkap |
| _ASSSGLC[Carbamidomethyl (C)]KS[Phospho (STY)]DSC[Carbamidomethyl (C)]LYR_.3 | -0.086512262 | Q6NSW3_S1273_M1_Sphkap |
| _RVKS[Phospho (STY)]PS[Phospho (STY)]PK_.2                                   | -0.118409953 | Q6NV83_S946_M2_U2surp  |
| _RHS[Phospho (STY)]TS[Phospho (STY)]PS[Phospho (STY)]PSR_.2                  | 0.300384742  | Q6NV83_S930_M3_U2surp  |
| _VKS[Phospho (STY)]PS[Phospho (STY)]PK_.2                                    | -0.169631533 | Q6NV83_S946_M2_U2surp  |
| _EAENTANQAGNES[Phospho (STY)]PVQELR_.2                                       | -0.373167817 | Q6NVE8_S50_M1_Wdr44    |
| _S[Phospho (STY)]NSGRELTDEEILASVMIK_.3                                       | -0.254404193 | Q6NVE8_S344_M1_Wdr44   |
| _EYVSNDATQS[Phospho (STY)]DDEEK_.2                                           | -0.07622135  | Q6NVE8_S405_M1_Wdr44   |
| _TKEYVSN DATQS[Phospho (STY)]DDEEK_.2                                        | -0.430831556 | Q6NVE8_S405_M1_Wdr44   |
| _TKEYVSN DATQS[Phospho (STY)]DDEEKLQSQQTDTDGGR_.4                            | 0.13267449   | Q6NVE8_S405_M1_Wdr44   |
| _S[Phospho (STY)]RDRHDDYYR_.3                                                | -0.255404054 | Q6NVF9_S513_M1_Cpsf6   |
| _VS[Phospho (STY)]SSC[Carbamidomethyl (C)]LDLPDSTEER_.2                      | -0.287357305 | Q6NXI6_S1086_M1_Rprd2  |
| _SFNYS[Phospho (STY)]PSSSTSEVSSTSASK_.2                                      | 0.266240155  | Q6NXI6_S612_M1_Rprd2   |
| _DVEDM[Oxidation (M)]ELS[Phospho (STY)]DVEDDGSK_.2                           | 0.193571355  | Q6NXI6_S392_M1_Rprd2   |
| _ASVGQS[Phospho (STY)]PVLPTSTFK_.2                                           | -0.361153775 | Q6NXI6_S633_M1_Rprd2   |
| _GPTSTSVDSIDGT[Phospho (STY)]PVRDER_.3                                       | -0.445015275 | Q6NXI6_T742_M1_Rprd2   |
| _SDS[Phospho (STY)]DSSTLAKK_.2                                               | -0.087443754 | Q6NXI0_S1017_M1_Wwc2   |
| _LNRSDS[Phospho (STY)]DSSTLAK_.2                                             | 0.161803611  | Q6NXI0_S1017_M1_Wwc2   |
| _AADKS[Phospho (STY)]PESQNLIDGTTK_.3                                         | 0.098996321  | Q6NXX2_S313_M1_Znf532  |
| _KAASDSC[Carbamidomethyl (C)]KEPVANS[Phospho (STY)]R_.3                      | -0.168749418 | Q6NXX2_S293_M1_Znf532  |

|                                                                          |              |                        |
|--------------------------------------------------------------------------|--------------|------------------------|
| _LYASAFSER_2                                                             | -0.038654573 | #N/A                   |
| _ATQSQPADQELGS[Phospho (STY)]NSPPQR_2                                    | -0.166957243 | Q6NXK7_S25_M1_Dpp10    |
| _QNEEPVFSR_2                                                             | -0.353642537 | #N/A                   |
| _ILGSAS[Phospho (STY)]PEEEQEKPIIDRPTR_3                                  | -0.449784446 | Q6NXN1_S107_M1_Szrd1   |
| _KLS[Phospho (STY)]VGAYVSSVR_2                                           | -0.268561462 | Q6NZC7_S748_M1_Sec23ip |
| _EM[Oxidation (M)]AS[Phospho (STY)]PSESNESKR_2                           | -0.463887648 | Q6NZC7_S735_M1_Sec23ip |
| _KLS[Phospho (STY)]VGGSDPPLKR_3                                          | -0.128239513 | Q6NZF1_S289_M1_Zc3h11a |
| _KAAS[Phospho (STY)]LTEDR_2                                              | -0.133398813 | Q6NZJ6_S1211_M1_Eif4g1 |
| _SFS[Phospho (STY)]KEVEER_2                                              | -0.26905533  | Q6NZJ6_S1189_M1_Eif4g1 |
| _EATLPPVS[Phospho (STY)]PPK_2                                            | -0.34060877  | Q6NZJ6_S1231_M1_Eif4g1 |
| _AAS[Phospho (STY)]LTEDR_2                                               | 0.000345326  | Q6NZJ6_S1211_M1_Eif4g1 |
| _SS[Phospho (STY)]LS[Phospho (STY)]RER_2                                 | -0.539682681 | Q6NZJ6_S1147_M2_Eif4g1 |
| _QLSYS[Phospho (STY)]DSDLKR_2                                            | -0.069446891 | Q6NZK8_S394_M1_Ptpdc1  |
| _EQSES[Phospho (STY)]LSELR_2                                             | -0.020773021 | Q6NZL0_S639_M1_Soga3   |
| _RGS[Phospho (STY)]KDLPK_2                                               | -0.27637994  | Q6NZL0_S501_M1_Soga3   |
| _EGPIGGES[Phospho (STY)]DSEEV_2                                          | -0.218082862 | Q6NZL0_S779_M1_Soga3   |
| _MKELS[Phospho (STY)]LK_2                                                | 0.216713794  | Q6NZL0_S495_M1_Soga3   |
| _AQS[Phospho (STY)]PARPR_2                                               | -0.072592333 | Q6NZL0_S41_M1_Soga3    |
| _KREGPIGGES[Phospho (STY)]DSEEV_3                                        | -0.170125819 | Q6NZL0_S779_M1_Soga3   |
| _LIADTSTIITEAR_2                                                         | -0.250658221 | #N/A                   |
| _QEPIES[Phospho (STY)]EEEEAEATR_2                                        | -0.087543936 | Q6NZM9_S562_M1_Hdac4   |
| _RLNHS[Phospho (STY)]PPQSSSR_3                                           | -0.024706143 | Q6NZN0_S127_M1_Rbm26   |
| _LNHS[Phospho (STY)]PPQSSSR_2                                            | 0.269492292  | Q6NZN0_S127_M1_Rbm26   |
| _AGS[Phospho (STY)]PDVLR_2                                               | -0.180273279 | Q6NZQ6_S19_M1_Znf740   |
| _LSVC[Carbamidomethyl (C)]PS[Phospho (STY)]TQDIC[Carbamidomethyl (C)]R_2 | -0.195531056 | Q6NZQ8_S75_M1_Marchf1  |
| _SSNISKASSPT[Phospho (STY)]T[Phospho (STY)]GTAPR_2                       | 0.004822215  | Q6NZQ8_T59_M2_Marchf1  |
| _QHFISFSDSR_3                                                            | -0.321586366 | #N/A                   |
| _ITFDDYIAC[Carbamidomethyl (C)]C[Carbamidomethyl (C)]VK_2                | -0.319990791 | #N/A                   |
| _ALTDSFR_2                                                               | 0.285687053  | #N/A                   |
| _LFEEDPSNR_2                                                             | -0.323892607 | #N/A                   |
| _VVIFQQEQENK_2                                                           | 0.145128124  | #N/A                   |
| _NAAQFLLSTNDK_2                                                          | 0.011095896  | #N/A                   |
| _ENIIAVATTNNLYIFQDK_2                                                    | -0.223307859 | #N/A                   |
| _SFFSEIISISDVK_2                                                         | 0.129867561  | #N/A                   |
| _INLWHLEITDR_3                                                           | 0.024177051  | #N/A                   |
| _ [Acetyl (Protein N-term)]AGAGGGNDIQWC[Carbamidomethyl (C)]FSQVK_2      | 0.090598032  | #N/A                   |
| _GEYNVYSTFQSHEPEFDYK_3                                                   | 0.205342457  | #N/A                   |
| _ENIIAVATTNNLYIFQDKVN_2                                                  | -0.428774525 | #N/A                   |
| _GAVDDDDVAEADIISTVEFNHSGELLATGDK_3                                       | -0.082069617 | #N/A                   |
| _KTHS[Phospho (STY)]S[Phospho (STY)]PALSLGHGPVTGSK_3                     | -0.163838206 | Q6P1I6_S745_M2_Psd2    |
| _KPPS[Phospho (STY)]PNVSTEEK_2                                           | -0.398021092 | Q6P1Y8_S470_M1_Inpp4b  |
| _TNLSGRQS[Phospho (STY)]PSFK_2                                           | 0.100766629  | Q6P2K6_S728_M1_Ppp4r3a |
| _SEKPAQSASS[Phospho (STY)]PEATSGSAGPVEK_3                                | 0.027513072  | Q6P2L6_S561_M1_Nsd3    |
| _FFDENES[Phospho (STY)]PVDPOHGSK_2                                       | 0.029604914  | Q6P2L7_S365_M1_Golm2   |
| _TWC[Carbamidomethyl (C)]GS[Phospho (STY)]PPYAAPELFEGK_2                 | -0.178090235 | Q6P4S6_S167_M1_Sik3    |
| _QLS[Phospho (STY)]ADSAEAHSLNMNR_2                                       | 0.120928814  | Q6P4S6_S856_M1_Sik3    |
| _RAS[Phospho (STY)]DGGANIQLHAQQLK_3                                      | -0.502363596 | Q6P4S6_S493_M1_Sik3    |

|                                                                                                 |              |                         |
|-------------------------------------------------------------------------------------------------|--------------|-------------------------|
| _EEAS[Phospho (STY)]DDDM[Oxidation (M)]EGDEAVVR_2                                               | -0.07555075  | Q6P4T2_S225_M1_Snrnp200 |
| _EAEQGS[Phospho (STY)]GEEKEEGDLK_2                                                              | -0.495392039 | Q6P542_S225_M1_Abcf1    |
| _SKPAAADS[Phospho (STY)]EGEEEEETAKEK_3                                                          | -0.079537571 | Q6P542_S194_M1_Abcf1    |
| _QLSVPAS[Phospho (STY)]DEEDEVPAPIPR_2                                                           | 0.139957422  | Q6P542_S107_M1_Abcf1    |
| _LKQLSVPAS[Phospho (STY)]DEEDEVPAPIPR_3                                                         | -0.021428    | Q6P542_S107_M1_Abcf1    |
| _SKPAAADS[Phospho (STY)]EGEEEEETAKEK_2                                                          | 0.067792326  | Q6P542_S194_M1_Abcf1    |
| _GGNVFEALIQDDS[Phospho (STY)]EEEEEEENR_3                                                        | 0.345048155  | Q6P542_S138_M1_Abcf1    |
| _AKGGNVFEALIQDDS[Phospho (STY)]EEEEEEENR_3                                                      | -0.374894783 | Q6P542_S138_M1_Abcf1    |
| _GDSIEEILADS[Phospho (STY)]EDEDEEEERGR_3                                                        | 0.355974239  | Q6P5B0_S1081_M1_Rrp12   |
| _GDSIEEILADS[Phospho (STY)]EDEDEEEER_2                                                          | -0.062626723 | Q6P5B0_S1081_M1_Rrp12   |
| _TWPGGSGS[Phospho (STY)]PR_2                                                                    | -0.28883853  | Q6P5E8_S17_M1_Dgkq      |
| _LGS[Phospho (STY)]PAGS[Phospho (STY)]PVLGISGR_2                                                | 0.072815832  | Q6P5E8_S22_M2_Dgkq      |
| _YLATSQPRPDS[Phospho (STY)]SGS[Phospho (STY)]GH_2                                               | 0.317612128  | Q6P5F7_S519_M2_Ttyh3    |
| _C[Carbamidomethyl (C)]ENTPLIGRES[Phospho (STY)]PPPSYTSSMR_3                                    | 0.116898641  | Q6P5F7_S496_M1_Ttyh3    |
| _GYLS[Phospho (STY)]EGLVTK_2                                                                    | 0.24887735   | Q6P5G0_S186_M1_Mapk4    |
| _VGS[Phospho (STY)]PSYLDK_2                                                                     | 0.110089994  | Q6P5G0_S430_M1_Mapk4    |
| _AGST[Phospho (STY)]PLAEDVQVDP_2                                                                | -0.312648587 | Q6P5G0_S383_M1_Mapk4    |
| _SESLIDASEDS[Phospho (STY)]QLEAAIR_2                                                            | 0.244315286  | Q6P5G6_S266_M1_Ubxn7    |
| _S[Phospho (STY)]C[Carbamidomethyl (C)]PSITHGPR_2                                               | -0.008936284 | Q6P5H6_S351_M1_Frmd5    |
| _SSS[Phospho (STY)]HGDFTLPHVR_3                                                                 | -0.223923336 | Q6P5H6_S396_M1_Frmd5    |
| _VS[Phospho (STY)]VDC[Carbamidomethyl (C)]LWR_2                                                 | -0.18337948  | Q6P5U7_S1685_M1_Nwd2    |
| _VESTTT[Phospho (STY)]PDGPC[Carbamidomethyl (C)]VVSQETEK_2                                      | -0.149058961 | Q6P6J0_T10_M1_Adat2     |
| _LLEQK_2                                                                                        | -0.121378194 | #N/A                    |
| _T[Phospho (STY)]LSVAAAFNEDESEPEEM[Oxidation (M)]PPEAK_3                                        | 0.177074623  | Q6P8I4_T106_M1_Pcnp     |
| _SLVDYENANK_2                                                                                   | -0.061837615 | #N/A                    |
| _Acetyl (Protein N-term)]M[Oxidation (M)]EGLDDGPDFLS[Phospho (STY)]EEDR_2                       | -0.227339081 | Q6P8X1_S13_M1_Snx6      |
| _AQPGS[Phospho (STY)]PQALGGPHGPATAK_2                                                           | -0.419550556 | Q6P9K8_S791_M1_Caskin1  |
| _KVPLPGPGS[Phospho (STY)]PEVKR_3                                                                | -0.427586271 | Q6P9K8_S1259_M1_Caskin1 |
| _VPLPGPGS[Phospho (STY)]PEVK_2                                                                  | -0.26462196  | Q6P9K8_S1259_M1_Caskin1 |
| _SGS[Phospho (STY)]LSNVAGGR_2                                                                   | 0.088408742  | Q6P9K8_S390_M1_Caskin1  |
| _SLPQS[Phospho (STY)]PTHR_2                                                                     | 0.019409122  | Q6P9K8_S828_M1_Caskin1  |
| _PAS[Phospho (STY)]PEPGR_2                                                                      | -0.261790361 | Q6P9K8_S1036_M1_Caskin1 |
| _VPLPGPGS[Phospho (STY)]PEVKR_2                                                                 | -0.1397515   | Q6P9K8_S1259_M1_Caskin1 |
| _IQGS[Phospho (STY)]PTPASK_2                                                                    | -0.127361201 | Q6P9K8_S1244_M1_Caskin1 |
| _RRAS[Phospho (STY)]DLAGSVDTGSAAGSVK_3                                                          | -0.022513101 | Q6P9K8_S989_M1_Caskin1  |
| _KVPLPGPGS[Phospho (STY)]PEVK_2                                                                 | -0.418401116 | Q6P9K8_S1259_M1_Caskin1 |
| _AAASVVSPPVSDC[Carbamidomethyl (C)]AS[Phospho (STY)]PGDSAR_2                                    | -0.132346614 | Q6P9K8_S1363_M1_Caskin1 |
| _TPLDLAC[Carbamidomethyl (C)]EFGR_2                                                             | 0.436633948  | #N/A                    |
| _TGSEPS[Phospho (STY)]PPQGGSLGPSAPPEIWWLR_3                                                     | 0.036125088  | Q6P9K8_S358_M1_Caskin1  |
| _IQGS[Phospho (STY)]PTPASKK_2                                                                   | -0.27935435  | Q6P9K8_S1244_M1_Caskin1 |
| _RPPEGHPTPRPAS[Phospho (STY)]PEPGR_4                                                            | -0.174925463 | Q6P9K8_S1036_M1_Caskin1 |
| _S[Phospho (STY)]QEYLLDEGM[Oxidation (M)]APGTPPK_2                                              | 0.248772987  | Q6P9K8_S728_M1_Caskin1  |
| _RAS[Phospho (STY)]DLAGSVDTGSAAGSVK_2                                                           | -0.090493726 | Q6P9K8_S989_M1_Caskin1  |
| _SVSESS[Phospho (STY)]PGDSPVKPPEGSSGAAR_3                                                       | -0.113529417 | Q6P9K8_S428_M1_Caskin1  |
| _RGS[Phospho (STY)]GEPAEQSHFMEDGTAR_3                                                           | -0.012116047 | Q6P9K8_S1083_M1_Caskin1 |
| _TPQSLEM[Oxidation (M)]M[Oxidation (M)]AIESPPPSEPAAEC[Carbamidomethyl (C)]QS[Phospho (STY)]PK_3 | -0.363037117 | Q6P9K8_S650_M1_Caskin1  |
| _Y[Phospho (STY)]AASDSEPERDELLVPAAGPYATVQR_3                                                    | 0.188253744  | Q6P9K8_Y888_M1_Caskin1  |

|                                                                      |              |                        |
|----------------------------------------------------------------------|--------------|------------------------|
| _HISST[Phospho (STY)]QELLDGPGPPGSPMSR_.3                             | 0.062247945  | Q6P9K8_S710_M1_Caskin1 |
| _AGDIITVLEQHPDGR_.3                                                  | -0.035147627 | #N/A                   |
| _S[Phospho (STY)]FEQVSGAPVPR_.2                                      | -0.192971644 | Q6P9N1_S453_M1_Fam126a |
| _S[Phospho (STY)]LEGGGC[Carbamidomethyl (C)]PVR_.2                   | -0.18908807  | Q6P9Q4_S370_M1_Fhod1   |
| _S[Phospho (STY)]NSLSEQLTVNSNPDTVK_.2                                | -0.049580908 | Q6P9Q6_S342_M1_Fkbp15  |
| _VTS[Phospho (STY)]LEELTDLR_.2                                       | -0.40622905  | Q6P9Q6_S722_M1_Fkbp15  |
| _ [Acetyl (Protein N-term)]MFGAGDEDDTDFLS[Phospho (STY)]PSGGAK_.2    | 0.215924701  | Q6P9Q6_S14_M1_Fkbp15   |
| _HNQDSQHC[Carbamidomethyl (C)]SLS[Phospho (STY)]GDEEDELFK_.3         | 0.041006712  | Q6P9Q6_S1159_M1_Fkbp15 |
| _TPTVPDSPGY[Phospho (STY)]VGPTR_.2                                   | -0.00565464  | Q6P9S0_Y567_M1_Mtss2   |
| _GLS[Phospho (STY)]LEHQK_.2                                          | -0.243171823 | Q6P9S0_S419_M1_Mtss2   |
| _GSDYSWSYQTTPS[Phospho (STY)]SPSSNSR_.2                              | 0.073186875  | Q6P9S0_S260_M1_Mtss2   |
| _AGS[Phospho (STY)]EEC[Carbamidomethyl (C)]VFYTDENVASPLAPDLAK_.3     | -0.079919767 | Q6P9S0_S575_M1_Mtss2   |
| _ASAPRPPAPADGADPAPVEESEARPDGEGS[Phospho (STY)]PSK_.4                 | 0.239547917  | Q6PAJ1_S122_M1_Bcr     |
| _VS[Phospho (STY)]PSPTTYR_.2                                         | 0.048803619  | Q6PAJ1_S356_M1_Bcr     |
| _RHQDGLPYIDDS[Phospho (STY)]PSSSPHLSSK_.4                            | -0.258265725 | Q6PAJ1_S461_M1_Bcr     |
| _STLVLHDLK_.2                                                        | -0.392368562 | #N/A                   |
| _HQDGLPYIDDS[Phospho (STY)]PSSSPHLSSK_.3                             | -0.020431866 | Q6PAJ1_S461_M1_Bcr     |
| _ANS[Phospho (STY)]EASSSEGQSSLSLEK_.2                                | -0.237846214 | Q6PAL7_S1180_M1_Ahdc1  |
| _AYS[Phospho (STY)]PTC[Carbamidomethyl (C)]S[Phospho (STY)]PTLGFK_.2 | 0.009495014  | Q6PAL7_S1392_M2_Ahdc1  |
| _ASTVS[Phospho (STY)]PGGYM[Oxidation (M)]VPK_.2                      | -0.262226795 | Q6PAL7_S1060_M1_Ahdc1  |
| _FNS[Phospho (STY)]YDISR_.2                                          | -0.513007581 | Q6PAL8_S193_M1_Dennd5a |
| _S[Phospho (STY)]HNDFVAILDLPEGEHQYK_.3                               | -0.280132527 | Q6PAM0_S107_M1_Prkab2  |
| _IM[Oxidation (M)]VGS[Phospho (STY)]TDDPSVFSLPDSK_.2                 | 0.23159959   | Q6PAM0_S38_M1_Prkab2   |
| _DLSS[Phospho (STY)]PPGPYGQEM[Oxidation (M)]YVFR_.2                  | 0.101276995  | Q6PAM0_S183_M1_Prkab2  |
| _EQGVESPGAQPASS[Phospho (STY)]PR_.2                                  | 0.276154444  | Q6PAM1_S523_M1_Txlna   |
| _SRS[Phospho (STY)]SDIVSSVR_.2                                       | -0.366427495 | Q6PAR5_S902_M1_Gapvd1  |
| _S[Phospho (STY)]SDIVSSVR_.2                                         | -0.222560362 | Q6PAR5_S902_M1_Gapvd1  |
| _LQELESC[Carbamidomethyl (C)]SGLGS[Phospho (STY)]TSDDTDVR_.2         | -0.516287378 | Q6PAR5_S746_M1_Gapvd1  |
| _FSLC[Carbamidomethyl (C)]S[Phospho (STY)]DNLEGISEGPSNR_.2           | 0.364691129  | Q6PAR5_S569_M1_Gapvd1  |
| _REEGEAVEAGDT[Phospho (STY)]PEELR_.3                                 | -0.300044219 | Q6PB44_T744_M1_Ptpn23  |
| _ELQEAQEHDAR_.2                                                      | -0.120244671 | #N/A                   |
| _GPS[Phospho (STY)]PPRPGK_.2                                         | 0.015806425  | Q6PB70_S1009_M1_Ano8   |
| _VESIGQWQK_.2                                                        | -0.217046018 | #N/A                   |
| _S[Phospho (STY)]PGLPASTAR_.2                                        | -0.305600816 | Q6PCN3_S1222_M1_Ttbk1  |
| _APPDS[Phospho (STY)]PTTPVR_.2                                       | -0.044904983 | Q6PCN3_S441_M1_Ttbk1   |
| _RVNS[Phospho (STY)]PESER_.2                                         | -0.284879153 | Q6PCN3_S456_M1_Ttbk1   |
| _GVGVPS[Phospho (STY)]PVR_.2                                         | 0.204106778  | Q6PCN3_S433_M1_Ttbk1   |
| _KGTISPS[Phospho (STY)]R_.2                                          | -0.118779626 | Q6PCN3_S1036_M1_Ttbk1  |
| _S[Phospho (STY)]QEGAPSTLLADDQK_.2                                   | -0.212077787 | Q6PCN3_S794_M1_Ttbk1   |
| _AGTDALLSTST[Phospho (STY)]PPQQNTR_.2                                | -0.157065634 | Q6PCN3_T325_M1_Ttbk1   |
| _SETSQPPTPGS[Phospho (STY)]PSHSPLHSGPR_.3                            | 0.0126367    | Q6PCN3_S638_M1_Ttbk1   |
| _VNS[Phospho (STY)]PESER_.2                                          | 0.097833184  | Q6PCN3_S456_M1_Ttbk1   |
| _MDLPGS[Phospho (STY)]PSR_.2                                         | -0.000841784 | Q6PCN3_S484_M1_Ttbk1   |
| _RVNS[Phospho (STY)]PES[Phospho (STY)]ERLSTAADGR_.3                  | -0.425430613 | Q6PCN3_S456_M2_Ttbk1   |
| _SETSQPPTPGSPSHS[Phospho (STY)]PLHS[Phospho (STY)]GPRPR_.3           | -0.070766764 | Q6PCN3_S642_M2_Ttbk1   |
| _GVGVPS[Phospho (STY)]PVRAPPDS[Phospho (STY)]PTTPVR_.3               | 0.266906317  | Q6PCN3_S433_M2_Ttbk1   |
| _SRMDLPGS[Phospho (STY)]PSR_.2                                       | 0.105665442  | Q6PCN3_S484_M1_Ttbk1   |

|                                                             |              |                         |
|-------------------------------------------------------------|--------------|-------------------------|
| _RRES[Phospho (STY)]DPTGPQR_2                               | 0.002547636  | Q6PCN3_S655_M1_Ttbk1    |
| _GRAS[Phospho (STY)]MADGDLEPEEGSK_2                         | 0.077242274  | Q6PCN3_S815_M1_Ttbk1    |
| _NDSIVTPS[Phospho (STY)]PPQAR_2                             | -0.074272352 | Q6PCP5_S151_M1_Mff      |
| _ERS[Phospho (STY)]M[Oxidation (M)]SENAVR_2                 | -0.181548842 | Q6PCP5_S129_M1_Mff      |
| _SM[Oxidation (M)]S[Phospho (STY)]ENAVR_2                   | 0.145078665  | Q6PCP5_S131_M1_Mff      |
| _GPES[Phospho (STY)]PQKT[Phospho (STY)]PPSPAPPSFEEQLR_3     | -0.36321719  | Q6PD24_S552_M2_Ankrd13d |
| _SHS[Phospho (STY)]SSQFR_2                                  | -0.026622289 | Q6PD28_S46_M1_Ppp2r5b   |
| _SNDC[Carbamidomethyl (C)]LASPTTELTS[Phospho (STY)]PGLTPS_2 | -0.134732874 | Q6PDC0_S402_M1_Rundc3b  |
| _FEQSSDSISS[Phospho (STY)]DEEELR_2                          | -0.124037385 | Q6PDC0_S217_M1_Rundc3b  |
| _S[Phospho (STY)]PS[Phospho (STY)]PSPTPEAK_2                | -0.047757011 | Q6PDG5_S302_M2_Smarcc2  |
| _TLTDEVNS[Phospho (STY)]PDSDRR_2                            | -0.222959037 | Q6PDG5_S283_M1_Smarcc2  |
| _RS[Phospho (STY)]PS[Phospho (STY)]PSPTPEAK_2               | -0.304309972 | Q6PDG5_S302_M2_Smarcc2  |
| _KRS[Phospho (STY)]PS[Phospho (STY)]PSPTPEAK_2              | -0.188224709 | Q6PDG5_S302_M2_Smarcc2  |
| _DM[Oxidation (M)]DEPS[Phospho (STY)]PVPNVEEVTLPK_2         | -0.445093828 | Q6PDG5_S347_M1_Smarcc2  |
| _TLTDEVNS[Phospho (STY)]PDS[Phospho (STY)]DRRDK_3           | -0.153144129 | Q6PDG5_S283_M2_Smarcc2  |
| _YYEAAADTVTQFDNVR_2                                         | 0.119930948  | #N/A                    |
| _S[Phospho (STY)]YEDLTELEDR_2                               | -0.02989893  | Q6PDG8_S56_M1_Mon1a     |
| _S[Phospho (STY)]YEDLTELEDREASGDSPK_3                       | 0.269604465  | Q6PDG8_S56_M1_Mon1a     |
| _TLQPPE[Phospho (STY)]PR_2                                  | -0.257501605 | Q6PDH0_S445_M1_Phldb1   |
| _KLS[Phospho (STY)]SGDLR_2                                  | -0.078683657 | Q6PDH0_S565_M1_Phldb1   |
| _SS[Phospho (STY)]PPPLPAK_2                                 | 0.162838132  | Q6PDH0_S951_M1_Phldb1   |
| _SQPASIPGS[Phospho (STY)]PK_2                               | -0.090044701 | Q6PDH0_S382_M1_Phldb1   |
| _SPS[Phospho (STY)]PTLGESLAPR_2                             | -0.11828823  | Q6PDH0_S522_M1_Phldb1   |
| _T[Phospho (STY)]RSPS[Phospho (STY)]PTLGESLAPR_2            | 0.258280352  | Q6PDH0_S522_M2_Phldb1   |
| _KNS[Phospho (STY)]ITEISDNEDELLEYHRR_4                      | -0.244508283 | Q6PDH0_S580_M1_Phldb1   |
| _KNS[Phospho (STY)]ITEIS[Phospho (STY)]DNEDELLEYHR_3        | -0.28663325  | Q6PDH0_S580_M2_Phldb1   |
| _NSITEIS[Phospho (STY)]DNEDELLEYHR_3                        | -0.135837808 | Q6PDH0_S585_M1_Phldb1   |
| _VTAS[Phospho (STY)]PELAEAAAGR_2                            | -0.120740849 | Q6PDI6_S99_M1_Mindy2    |
| _VS[Phospho (STY)]PPEGR_2                                   | -0.179317329 | Q6PDI6_S21_M1_Mindy2    |
| _RGS[Phospho (STY)]LPDQK_2                                  | -0.313325471 | Q6PDI6_S488_M1_Fbxo42   |
| _ASQVEPQS[Phospho (STY)]PGLGLR_2                            | 0.235956179  | Q6PDK2_S2299_M1_Kmt2d   |
| _LC[Carbamidomethyl (C)]PQPEEPYLS[Phospho (STY)]PQPEEP_2    | 0.052573615  | Q6PDK2_S727_M1_Kmt2d    |
| _GGPASVPSAS[Phospho (STY)]PGTSVK_2                          | 0.275973011  | Q6PDL0_S407_M1_Dync1li2 |
| _TGSPGS[Phospho (STY)]PSAGGVQSTAK_2                         | -0.14962958  | Q6PDL0_S446_M1_Dync1li2 |
| _EFQDYIEPEEGC[Carbamidomethyl (C)]QGS[Phospho (STY)]PQRR_3  | -0.320765816 | Q6PDL0_S194_M1_Dync1li2 |
| _EFQDYIEPEEGC[Carbamidomethyl (C)]QGS[Phospho (STY)]PQR_2   | -0.109316001 | Q6PDL0_S194_M1_Dync1li2 |
| _FAVSAESLR_2                                                | 0.214223422  | #N/A                    |
| _KPDMS[Oxidation (M)]VTNSS[Phospho (STY)]TENEA_2            | -0.006855929 | Q6PDL0_S487_M1_Dync1li2 |
| _KTGSPGS[Phospho (STY)]PSAGGVQSTAK_2                        | -0.322747236 | Q6PDL0_S446_M1_Dync1li2 |
| _TSES[Phospho (STY)]PARGPSGSPR_2                            | -0.053512888 | Q6PDL0_S383_M1_Dync1li2 |
| _VKVDGPRS[Phospho (STY)]PS[Phospho (STY)]YGR_3              | -0.151064437 | Q6PDM2_S199_M2_Srsf1    |
| _YS[Phospho (STY)]PRHS[Phospho (STY)]R_2                    | 0.119057104  | Q6PDM2_S238_M2_Srsf1    |
| _DGTGVVEFVR_2                                               | -0.455120368 | #N/A                    |
| _VDGPRS[Phospho (STY)]PSYGRS[Phospho (STY)]R_2              | -0.207357694 | Q6PDM2_S199_M2_Srsf1    |
| _VDGPRS[Phospho (STY)]PSYGR_2                               | -0.13729676  | Q6PDM2_S199_M1_Srsf1    |
| _GS[Phospho (STY)]PRYS[Phospho (STY)]PR_2                   | -0.08936987  | Q6PDM2_S234_M2_Srsf1    |
| _SRGS[Phospho (STY)]PRYS[Phospho (STY)]PR_2                 | -0.028475794 | Q6PDM2_S234_M2_Srsf1    |

|                                                                                        |              |                        |
|----------------------------------------------------------------------------------------|--------------|------------------------|
| _KSS[Phospho (STY)]TGSPTSPINAEK_.2                                                     | -0.03135157  | Q6PDN3_S1795_M1_Mylk   |
| _MSQPGS[Phospho (STY)]PSPK_.2                                                          | 0.118816166  | Q6PDQ2_S1528_M1_Chda4  |
| _KMS[Phospho (STY)]QPGS[Phospho (STY)]PSPK_.2                                          | 0.192694705  | Q6PDQ2_S1524_M2_Chda4  |
| _EM[Oxidation (M)]LHS[Phospho (STY)]PLPC[Carbamidomethyl (C)]TGGK_.2                   | -0.011367221 | Q6PDS3_S548_M1_Sarm1   |
| _S[Phospho (STY)]LTEVC[Carbamidomethyl (C)]LR_.2                                       | -0.073824486 | Q6PE13_S865_M1_Prtr3   |
| _SSESHSAS[Phospho (STY)]SDTIEL_.2                                                      | -0.472204695 | Q6PE13_S965_M1_Prtr3   |
| _RGS[Phospho (STY)]QPDAELDGAGTSLLR_.3                                                  | 0.18450341   | Q6PE13_S845_M1_Prtr3   |
| _C[Carbamidomethyl (C)]RS[Phospho (STY)]LTEVC[Carbamidomethyl (C)]LR_.2                | -0.060933341 | Q6PE13_S865_M1_Prtr3   |
| _GS[Phospho (STY)]QPDAELDGAGTSLLR_.2                                                   | -0.285737889 | Q6PE13_S845_M1_Prtr3   |
| _GLASS[Phospho (STY)]PTGGALRPR_.2                                                      | -0.191569398 | Q6PE13_S833_M1_Prtr3   |
| _TSLPQHVM[Oxidation (M)]EPPVGAAAAGTSGS[Phospho (STY)]SLDSFSK_.3                        | -0.154532077 | Q6PE13_S894_M1_Prtr3   |
| _GSVGPAPSLSELDLRPPS[Phospho (STY)]PINLSR_.3                                            | -0.095983792 | Q6PE13_S799_M1_Prtr3   |
| _S[Phospho (STY)]IDAALFR_.2                                                            | -0.303667194 | Q6PE13_S806_M1_Prtr3   |
| _EVAPLTNFSDS[Phospho (STY)]DDTVVAK_.2                                                  | -0.078655832 | Q6PE65_S88_M1_Gpatch2l |
| _DNLIIVPILEEEVQNSVSGESEA_.2                                                            | -0.496835034 | #N/A                   |
| _HTLDGAAC[Carbamidomethyl (C)]LLNSNK_.3                                                | -0.474238927 | #N/A                   |
| _S[Phospho (STY)]QEIEELER_.2                                                           | -0.24192538  | Q6PEE2_S18_M1_Ctif     |
| _VNPHPFQQFPQS[Phospho (STY)]P_.2                                                       | -0.273379209 | Q6PEM8_S458_M1_Slc46a1 |
| _LSNVAPPC[Carbamidomethyl (C)]ILR_.2                                                   | -0.038944826 | #N/A                   |
| _LEHEYIHNFK_.2                                                                         | 0.077887221  | #N/A                   |
| _FFDANYDGKDYNPLLAR_.3                                                                  | 0.042783346  | #N/A                   |
| _QGQDVAPPNPQDQIFNK_.2                                                                  | 0.034718049  | #N/A                   |
| _FFDANYDGK_.2                                                                          | 0.185537806  | #N/A                   |
| _KLIGTAVPQRT[Phospho (STY)]SPTGPK_.3                                                   | 0.063721663  | Q6PER3_T161_M1_Mapre3  |
| _LTVDGLEK_.2                                                                           | 0.211508639  | #N/A                   |
| _DYNPLLAR_.2                                                                           | 0.242386099  | #N/A                   |
| _Acetyl (Protein N-term))AVNVYSTSVTSENLSR_.2                                           | -0.099630409 | #N/A                   |
| _LIGTAVPQRTS[Phospho (STY)]PTGPK_.2                                                    | -0.403462814 | Q6PER3_S162_M1_Mapre3  |
| _HSSS[Phospho (STY)]APPPPPGR_.2                                                        | 0.199422348  | Q6PEV3_S175_M1_Wipf2   |
| _DGDESS[Phospho (STY)]PILTSFELVK_.2                                                    | -0.319775522 | Q6PF93_S244_M1_Pik3c3  |
| _SHS[Phospho (STY)]LEAPGKR_.2                                                          | -0.426710382 | Q6PFD5_S185_M1_Dlgap3  |
| _S[Phospho (STY)]LDSVDR_.2                                                             | -0.188770637 | Q6PFD5_S930_M1_Dlgap3  |
| _SHS[Phospho (STY)]LEAPGK_.2                                                           | -0.356602956 | Q6PFD5_S185_M1_Dlgap3  |
| _S[Phospho (STY)]LPDS[Phospho (STY)]GRTSPC[Carbamidomethyl (C)]PR_.2                   | -0.11248227  | Q6PFD5_S779_M2_Dlgap3  |
| _LFAKS[Phospho (STY)]HS[Phospho (STY)]LEAPGKR_.3                                       | -0.000500475 | Q6PFD5_S183_M2_Dlgap3  |
| _RDS[Phospho (STY)]WMER_.2                                                             | 0.034904086  | Q6PFD5_S771_M1_Dlgap3  |
| _ERS[Phospho (STY)]LDSVDR_.2                                                           | -0.440129154 | Q6PFD5_S930_M1_Dlgap3  |
| _HAS[Phospho (STY)]EPQGPGR_.2                                                          | 0.027907769  | Q6PFD5_S712_M1_Dlgap3  |
| _WRPSIGVQVETIS[Phospho (STY)]DSDTENR_.3                                                | -0.112159868 | Q6PFD5_S641_M1_Dlgap3  |
| _S[Phospho (STY)]NSVTAGVQADLEGLAGLATVATEDK_.3                                          | -0.017742542 | Q6PFD5_S672_M1_Dlgap3  |
| _HSSATES[Phospho (STY)]ADSIEIYIEAQTR_.3                                                | -0.365150645 | Q6PFD5_S962_M1_Dlgap3  |
| _AMGDEESGDS[Phospho (STY)]DGS[Phospho (STY)]PKTS[Phospho (STY)]PK_.2                   | 0.303200218  | Q6PFD5_S407_M3_Dlgap3  |
| _AIQAGC[Carbamidomethyl (C)]S[Phospho (STY)]QDDDC[Carbamidomethyl (C)]LPLLAAPASVSGR_.3 | -0.282529397 | Q6PFD5_S510_M1_Dlgap3  |
| _RSSS[Phospho (STY)]VDTAR_.2                                                           | 0.215390701  | Q6PFD5_S429_M1_Dlgap3  |
| _S[Phospho (STY)]LPDSGR_.2                                                             | -0.107151637 | Q6PFD5_S779_M1_Dlgap3  |
| _AMGDEESGDSGDS[Phospho (STY)]PK_.2                                                     | -0.039978313 | Q6PFD5_S410_M1_Dlgap3  |
| _EAEDYELPEEILEK_.2                                                                     | 0.303646773  | #N/A                   |

|                                                                          |              |                        |
|--------------------------------------------------------------------------|--------------|------------------------|
| _EGYLPYEPATDGS[Phospho (STY)]PGPTVPAPGPGSGR_.3                           | 0.042893832  | Q6PFD5_S753_M1_Dlgap3  |
| _C[Carbamidomethyl (C)]S[Phospho (STY)]SADGLDGPTMGAR_.2                  | 0.199554169  | Q6PFD5_S578_M1_Dlgap3  |
| _DSWMERGS[Phospho (STY)]RS[Phospho (STY)]LPDSGR_.3                       | 0.085979342  | Q6PFD5_S777_M2_Dlgap3  |
| _YGLQDS[Phospho (STY)]DEEEEEHPPK_.2                                      | 0.112883569  | Q6PFD9_S888_M1_Nup98   |
| _GETVQEIC[Carbamidomethyl (C)]S[Phospho (STY)]PR_.2                      | 0.172561498  | Q6PFD9_S1027_M1_Nup98  |
| _ [Acetyl (Protein N-term)]S[Phospho (STY)]DVEENNFEGR_.2                 | -0.307959968 | Q6PFR5_S2_M1_Tra2a     |
| _S[Phospho (STY)]RS[Phospho (STY)]YT[Phospho (STY)]PEYR_.2               | -0.11767304  | Q6PFR5_S82_M3_Tra2a    |
| _RRS[Phospho (STY)]PS[Phospho (STY)]PYYSR_.2                             | -0.247575622 | Q6PFR5_S259_M2_Tra2a   |
| _S[Phospho (STY)]PSPYYSR_.2                                              | -0.251540223 | Q6PFR5_S259_M1_Tra2a   |
| _RS[Phospho (STY)]PS[Phospho (STY)]PYYSR_.2                              | -0.138372462 | Q6PFR5_S259_M2_Tra2a   |
| _ [Acetyl (Protein N-term)]S[Phospho (STY)]DVEENNFEGR[Phospho (STY)]R_.2 | 0.082029795  | Q6PFR5_S14_M2_Tra2a    |
| _S[Phospho (STY)]RS[Phospho (STY)]HS[Phospho (STY)]PMSNR_.2              | 0.391437375  | Q6PFR5_S94_M3_Tra2a    |
| _S[Phospho (STY)]HS[Phospho (STY)]PMSNR_.2                               | -0.337470051 | Q6PFR5_S96_M2_Tra2a    |
| _AHT[Phospho (STY)]PTPGIYMGR_.2                                          | 0.046951324  | Q6PFR5_T200_M1_Tra2a   |
| _RPPAKPR_.2                                                              | 0.546107677  | #N/A                   |
| _KYGGITSFENT[Phospho (STY)]AIEVDR_.3                                     | -0.229397024 | Q6PGE7_T620_M1_Slc6a7  |
| _NEGLFENNK_.2                                                            | 0.165064669  | #N/A                   |
| _DLS[Phospho (STY)]PEGPAPLTEEELDLR_.2                                    | 0.012145837  | Q6PGG2_S75_M1_Gmip     |
| _S[Phospho (STY)]QGSPEDPPSQASPGSNK_.2                                    | -0.163162756 | Q6PGG2_S235_M1_Gmip    |
| _VS[Phospho (STY)]PEVGSADVASIAQK_.2                                      | -0.193425594 | Q6PGL7_S747_M1_Washc2  |
| _VPLLFS[Phospho (STY)]DEEDSEVP SGVKPEDLK_.3                              | 0.165253903  | Q6PGL7_S723_M1_Washc2  |
| _VDNARVS[Phospho (STY)]PEVGSADVASIAQK_.3                                 | -0.415784574 | Q6PGL7_S747_M1_Washc2  |
| _LAAQESS[Phospho (STY)]EADVTVDL_.2                                       | -0.242225607 | Q6PGL7_S1049_M1_Washc2 |
| _EGLLPASDQEAGGPSDIFSSSS[Phospho (STY)]PLDK_.3                            | 0.267914243  | Q6PGL7_S783_M1_Washc2  |
| _GLFS[Phospho (STY)]DEEDSEDLFSSQSSSKPK_.3                                | 0.130902758  | Q6PGL7_S533_M1_Washc2  |
| _TSALLFSS[Phospho (STY)]DEEDQWNIADSHTK_.3                                | 0.153404966  | Q6PGL7_S614_M1_Washc2  |
| _VASIFDDPLNAFGS[Phospho (STY)]Q_.2                                       | -0.232351666 | Q6PGL7_S1333_M1_Washc2 |
| _GLFS[Phospho (STY)]DEEDSEDLFSSQSSSK_.2                                  | -0.158589436 | Q6PGL7_S533_M1_Washc2  |
| _AGNS[Phospho (STY)]DS[Phospho (STY)]EEDDANER_.2                         | -0.388952724 | Q6PGL7_S157_M2_Washc2  |
| _AGNS[Phospho (STY)]DS[Phospho (STY)]EEDDANERVDLILEPK_.3                 | -0.35950094  | Q6PGL7_S157_M2_Washc2  |
| _SSSSS[Phospho (STY)]PTSPGSFR_.2                                         | -0.383485597 | Q6PGN3_S340_M1_Dclk2   |
| _C[Carbamidomethyl (C)]LS[Phospho (STY)]PEGVNGNR_.2                      | -0.225280954 | Q6PGN3_S374_M1_Dclk2   |
| _SSS[Phospho (STY)]NVNGGPELDR_.2                                         | -0.332398761 | Q6PGN3_S361_M1_Dclk2   |
| _S[Phospho (STY)]IELEHFEER_.2                                            | -0.381155358 | Q6PGN3_S6_M1_Dclk2     |
| _YSGSR[Phospho (STY)]PGFSR_.2                                            | -0.598002055 | Q6PGN3_S307_M1_Dclk2   |
| _TISNLEGS[Phospho (STY)]PSR_.2                                           | -0.001821904 | Q6PH08_S14_M1_Erc2     |
| _S[Phospho (STY)]QLQPEPAK_.2                                             | -0.126316611 | Q6PH08_S364_M1_Erc2    |
| _AAILQTEVDALR_.2                                                         | -0.067655224 | #N/A                   |
| _DLNHLLQQESGNR_.3                                                        | -0.491093615 | #N/A                   |
| _ESELLALQTK_.2                                                           | -0.127232755 | #N/A                   |
| _SQHSNHRPS[Phospho (STY)]PDQDDEEGIWA_.3                                  | -0.012785898 | Q6PH08_S946_M1_Erc2    |
| _IAELESITLR_.2                                                           | 0.17087755   | #N/A                   |
| _TISNLEGS[Phospho (STY)]PSRS[Phospho (STY)]PR_.2                         | -0.387107993 | Q6PH08_S14_M2_Erc2     |
| _DYDHLFK_.2                                                              | -0.175790367 | #N/A                   |
| _QQQQQQNDVVK_.2                                                          | 0.140462456  | #N/A                   |
| _FAGQM[Oxidation (M)]GIQLFETSAK_.2                                       | -0.036653331 | #N/A                   |
| _WLHEINQNC[Carbamidomethyl (C)]DDVC[Carbamidomethyl (C)]R_.3             | 0.350514096  | #N/A                   |



|                                                                                                           |              |                       |
|-----------------------------------------------------------------------------------------------------------|--------------|-----------------------|
| _SGYHDDS[Phospho (STY)]DEDLLE_.2                                                                          | 0.172448882  | Q6PHU5_S819_M1_Sort1  |
| _FTDEYQLFEELGK_.2                                                                                         | -0.326963735 | #N/A                  |
| _FYFENALSK_.2                                                                                             | 0.188249571  | #N/A                  |
| _IPTGQEYAAK_.2                                                                                            | 0.106018563  | #N/A                  |
| _ESTESSNTT[Phospho (STY)]IEDEDVK_.2                                                                       | 0.127299128  | Q6PHZ2_T337_M1_Camk2d |
| _HPWIC[Carbamidomethyl (C)]QR_.2                                                                          | 0.495524181  | #N/A                  |
| _IC[Carbamidomethyl (C)]DPGLTAFEPEALGNLVEGM[Oxidation (M)]DFHR_.3                                         | 0.357679309  | #N/A                  |
| _VTEQLIEAINNGDFEAYTK_.2                                                                                   | -0.112307717 | #N/A                  |
| _ITASEALK_.2                                                                                              | 0.084632922  | #N/A                  |
| _ASGDPGAGGAS[Phospho (STY)]PR_.2                                                                          | -0.100931215 | Q6PHZ5_S107_M1_Rbm15b |
| _TTHS[Phospho (STY)]PYEER_.2                                                                              | -0.07141754  | Q6PHZ5_S606_M1_Rbm15b |
| _QRS[Phospho (STY)]LS[Phospho (STY)]PVAAPPLREPR_.3                                                        | 0.340660045  | Q6PHZ5_S261_M2_Rbm15b |
| _RNS[Phospho (STY)]LEGYSR_.2                                                                              | -0.09609207  | Q6PHZ5_S559_M1_Rbm15b |
| _TSS[Phospho (STY)]PAIQNS[Phospho (STY)]VEDELEM[Oxidation (M)]ATVR_.2                                     | -0.186246969 | Q6PHZ8_S50_M2_Kcnp4   |
| _YQLSIHETEDPNDNR_.3                                                                                       | -0.00351879  | #N/A                  |
| _C[Carbamidomethyl (C)]IELSSGS[Phospho (STY)]VK_.2                                                        | -0.379995639 | Q6PIC6_S456_M1_Atp1a3 |
| _TDKLVNER_.2                                                                                              | -0.005643003 | #N/A                  |
| _GGQDNIPVLK_.2                                                                                            | 0.047324571  | #N/A                  |
| _IATLASGLEVGK_.2                                                                                          | 0.144949617  | #N/A                  |
| _GGQDNIPVLKR_.2                                                                                           | -0.148953823 | #N/A                  |
| _IISAHGC[Carbamidomethyl (C)]K_.2                                                                         | 0.119393819  | #N/A                  |
| _VLGFC[Carbamidomethyl (C)]HYLPEEQFPK_.3                                                                  | -0.175701739 | #N/A                  |
| _GVVVATGDR_.2                                                                                             | 0.07581984   | #N/A                  |
| _AC[Carbamidomethyl (C)]VIHGTDLK_.2                                                                       | 0.120302606  | #N/A                  |
| _C[Carbamidomethyl (C)]ATILLQGK_.2                                                                        | 0.078976185  | #N/A                  |
| _RDLDDLKK_.2                                                                                              | 0.008363278  | #N/A                  |
| _RNPGGWVEK_.2                                                                                             | 0.192775848  | #N/A                  |
| _EAFQNAYLELGGLGER_.2                                                                                      | -0.100042089 | #N/A                  |
| _AQEILAR_.2                                                                                               | -0.080150239 | #N/A                  |
| _NITFFSTNC[Carbamidomethyl (C)]VEGTAR_.2                                                                  | -0.211414393 | #N/A                  |
| _NPGGWVEKETYY_.2                                                                                          | -0.33756484  | #N/A                  |
| _EQPLDEEM[Oxidation (M)]KEAFQNAYLELGGLGER_.3                                                              | -0.449309704 | #N/A                  |
| _NPGGWVEK_.2                                                                                              | 0.22480342   | #N/A                  |
| _M[Oxidation (M)]QVNAEEVVVDLVEIK_.2                                                                       | -0.424215676 | #N/A                  |
| _KYNTDC[Carbamidomethyl (C)]VQGLTHSK_.3                                                                   | 0.029762648  | #N/A                  |
| _DFTSEQIDEILQNHTEIVFAR_.3                                                                                 | -0.049271999 | #N/A                  |
| _S[Phospho (STY)]PDC[Carbamidomethyl (C)]THDNPLETR_.2                                                     | -0.065470158 | Q6PIC6_S218_M1_Atp1a3 |
| _MSVEEVC[Carbamidomethyl (C)]JR_.2                                                                        | 0.229553779  | #N/A                  |
| _EVAMTEHK_.2                                                                                              | 0.396406572  | #N/A                  |
| _GFAFDC[Carbamidomethyl (C)]DDVNFTTDNLC[Carbamidomethyl (C)]FVGLM[Oxidation (M)]SM[Oxidation (M)]IDPPR_.3 | -0.102861841 | #N/A                  |
| _SSHTWVALSHIAGLC[Carbamidomethyl (C)]NR_.3                                                                | -0.384513406 | #N/A                  |
| _DVAGDASESALLK_.2                                                                                         | 0.224865614  | #N/A                  |
| _ADIGVAM[Oxidation (M)]GIAGSDVSK_.2                                                                       | -0.084762472 | #N/A                  |
| _KADIGVAM[Oxidation (M)]GIAGSDVSK_.2                                                                      | -0.041341561 | #N/A                  |
| _MSVEEVC[Carbamidomethyl (C)]RK_.2                                                                        | 0.180778332  | #N/A                  |
| _TVNDLEDYGGQWQTYEQR_.2                                                                                    | -0.442806091 | #N/A                  |
| _YNTDC[Carbamidomethyl (C)]VQGLTHSK_.2                                                                    | -0.063914499 | #N/A                  |

|                                                                        |              |                       |
|------------------------------------------------------------------------|--------------|-----------------------|
| _M[Oxidation (M)]TVAHM[Oxidation (M)]WFDNQIHEADTTEDQSGTSFDK_4          | -0.586464312 | #N/A                  |
| _VDNSSLTGESEPQTRS[Phospho (STY)]PDC[Carbamidomethyl (C)]THDNPLETR_4    | 0.438557764  | Q6PIC6_S218_M1_Atp1a3 |
| _AC[Carbamidomethyl (C)]VIHGTDLKDFTSEQIDEILQNHTEIVFAR_4                | 0.031799994  | #N/A                  |
| _VDNSS[Phospho (STY)]LTGESEPQTR_2                                      | -0.177355486 | Q6PIE5_S215_M1_Atp1a2 |
| _NM[Oxidation (M)]VPQQALVIR_2                                          | -0.052465571 | #N/A                  |
| _LIIVEGC[Carbamidomethyl (C)]QR_2                                      | 0.046237183  | #N/A                  |
| _LIFDNLKK_2                                                            | -0.116275871 | #N/A                  |
| _AAVPDAVGK_2                                                           | -0.046536311 | #N/A                  |
| _C[Carbamidomethyl (C)]IELSC[Carbamidomethyl (C)]GS[Phospho (STY)]VR_2 | -0.202161264 | Q6PIE5_S464_M1_Atp1a2 |
| _TGTLTQNR_2                                                            | -0.099950638 | #N/A                  |
| _IAGLC[Carbamidomethyl (C)]NR_2                                        | 0.161621288  | #N/A                  |
| _DHTEIVFAR_2                                                           | 0.172434228  | #N/A                  |
| _LSLDELGR_2                                                            | 0.020914155  | #N/A                  |
| _FDTDELNFPTEK_2                                                        | -0.016364721 | #N/A                  |
| _VLGFC[Carbamidomethyl (C)]QLNLPSGK_2                                  | 0.03484055   | #N/A                  |
| _KYQVDLSK_2                                                            | 0.085208007  | #N/A                  |
| _YQLSIHER_2                                                            | 0.125650166  | #N/A                  |
| _TTNDLEDYSGQEWTYEQR_2                                                  | 0.013876227  | #N/A                  |
| _NLEAVETLGSTSTIC[Carbamidomethyl (C)]SDKTGTLTQNR_3                     | -0.491315582 | #N/A                  |
| _LIFDNLK_2                                                             | 0.302814488  | #N/A                  |
| _YPGGWVEK_2                                                            | -0.109377265 | #N/A                  |
| _ELDELKK_2                                                             | 0.051948034  | #N/A                  |
| _C[Carbamidomethyl (C)]STILVQGK_2                                      | 0.302685248  | #N/A                  |
| _VIM[Oxidation (M)]VTGDHPITAK_2                                        | -0.06992876  | #N/A                  |
| _NLEAVETLGSTSTIC[Carbamidomethyl (C)]SDK_2                             | -0.29059235  | #N/A                  |
| _AC[Carbamidomethyl (C)]VVHGSCLK_2                                     | 0.065274808  | #N/A                  |
| _DTAGDASESALLK_2                                                       | -0.339666163 | #N/A                  |
| _LC[Carbamidomethyl (C)]FVGLM[Oxidation (M)]SM[Oxidation (M)]IDPPR_2   | -0.132559148 | #N/A                  |
| _AGQENISVSK_2                                                          | 0.127091063  | #N/A                  |
| _NSVFQQGM[Oxidation (M)]K_2                                            | 0.31600664   | #N/A                  |
| _GKFDTDELNFPTEK_3                                                      | 0.109067176  | #N/A                  |
| _QGAIVAVTGDGVNDSPALK_2                                                 | 0.035532025  | #N/A                  |
| _DM[Oxidation (M)]TSEQLDEILR_2                                         | 0.136410893  | #N/A                  |
| _QAADM[Oxidation (M)]ILLDDNFASIVTGVVEGR_3                              | -0.202689833 | #N/A                  |
| _DGNALTPPPTPEWVK_2                                                     | -0.124958088 | #N/A                  |
| _AIAKGVGIISEGNETVEDIAR_3                                               | -0.450235467 | #N/A                  |
| _QGAIVAVTGDGVNDSPALKK_2                                                | 0.177826992  | #N/A                  |
| _NSQTDKLVNER_2                                                         | -0.39578934  | #N/A                  |
| _IISSHGC[Carbamidomethyl (C)]K_2                                       | 0.029267772  | #N/A                  |
| _EIPLDKEM[Oxidation (M)]QDAFQNAYM[Oxidation (M)]ELGGLGER_3             | -0.324811405 | #N/A                  |
| _YQVDLSK_2                                                             | 0.003466364  | #N/A                  |
| _M[Oxidation (M)]QINAEVVVGDLVEVK_2                                     | -0.341137901 | #N/A                  |
| _LNIPVSQVNPR_2                                                         | -0.093977731 | #N/A                  |
| _ADIGIAM[Oxidation (M)]GISGSDVSK_2                                     | -0.111824198 | #N/A                  |
| _VAEIPFNSTNK_2                                                         | -0.218170986 | #N/A                  |
| _SPEFTHENPLETR_2                                                       | -0.091092174 | #N/A                  |
| _AGQENIS[Phospho (STY)]VSKR_2                                          | 0.069907792  | Q6PIE5_S439_M1_Atp1a2 |

|                                                                          |              |                        |
|--------------------------------------------------------------------------|--------------|------------------------|
| _GVGIISEGNETVEDIAAR_.2                                                   | -0.465127819 | #N/A                   |
| _SPTWTALSR_.2                                                            | 0.028195871  | #N/A                   |
| _C[Carbamidomethyl (C)]IELSC[Carbamidomethyl (C)]GS[Phospho (STY)]VRK_.2 | -0.046806381 | Q6PIE5_S464_M1_Atp1a2  |
| _EDSPQSHVLVM[Oxidation (M)]K_.2                                          | 0.357994279  | #N/A                   |
| _NIC[Carbamidomethyl (C)]FFSTNC[Carbamidomethyl (C)]VEGTAR_.2            | 0.187294684  | #N/A                   |
| _YQVDLS[Phospho (STY)]KGLTNQR_.3                                         | -0.065501473 | Q6PIE5_S58_M1_Atp1a2   |
| _M[Oxidation (M)]TVAHM[Oxidation (M)]WFDNQIHEADTTEDQSGATFDKR_.4          | -0.647709304 | #N/A                   |
| _SPS[Phospho (STY)]PAVPLR_.2                                             | -0.560691502 | Q6PIJ4_S228_M1_Nfrkb   |
| _QTS[Phospho (STY)]ITQTIR_.2                                             | -0.094084745 | Q6PIX5_S76_M1_Rhbdf1   |
| _DSS[Phospho (STY)]LKLDVR_.2                                             | -0.147854192 | Q6PNC0_S1904_M1_Dmxl1  |
| _TGS[Phospho (STY)]ESS[Phospho (STY)]LKK_.2                              | 0.185343525  | Q6PNC0_S1426_M2_Dmxl1  |
| _WDS[Phospho (STY)]DNDEENEDPPISMK_.2                                     | 0.2861064    | Q6PNC0_S1965_M1_Dmxl1  |
| _ISEASWLPEEHY[Phospho (STY)]SSSPEK_.2                                    | -0.031370404 | Q6PNC0_Y913_M1_Dmxl1   |
| _GSSFLTskds[Phospho (STY)]S[Phospho (STY)]LKLDVR_.3                      | 0.084646702  | Q6PNC0_S1903_M2_Dmxl1  |
| _TQDGValeIQPLNS[Phospho (STY)]QEGLDSEdKEK_.3                             | -0.335646637 | Q6Q477_S329_M1_Atp2b4  |
| _GIIDSTAGEQR_.2                                                          | 0.139724868  | #N/A                   |
| _EAGHGS[Phospho (STY)]DKEDISR_.3                                         | -0.147004149 | Q6Q477_S1065_M1_Atp2b4 |
| _TQDGValeIQPLNS[Phospho (STY)]QEGLDSEdKEK_.3                             | -0.245860346 | Q6Q477_S329_M1_Atp2b4  |
| _DDFLC[Carbamidomethyl (C)]LEGK_.2                                       | -0.422906714 | #N/A                   |
| _NEKGEVEQEKLdk_.3                                                        | -0.343024848 | #N/A                   |
| _NDS[Phospho (STY)]GEENVPLDLTR_.2                                        | 0.190945194  | Q6QI06_S21_M1_Rictor   |
| _GRNDS[Phospho (STY)]GEENVPLDLTR_.3                                      | 0.329507392  | Q6QI06_S21_M1_Rictor   |
| _LSPYGDGGDVGQIFSC[Carbamidomethyl (C)]R_.2                               | 0.070686515  | Q6QWF9_S2_M1_Camk2n1   |
| _LQDTNNFFGAGQSK_.2                                                       | 0.222293656  | #N/A                   |
| _ISTAS[Phospho (STY)]GDGR_.2                                             | -0.066048308 | #N/A                   |
| _ALWEDEGVR_.2                                                            | -0.161323649 | Q6R0H7_S1091_M1_Gnas   |
| _VLTSGIFETK_.2                                                           | -0.054269115 | #N/A                   |
| _EAAEM[Oxidation (M)]EGS[Phospho (STY)]PTTATAVEGK_.2                     | -0.489345709 | #N/A                   |
| _AQLEQSVEENKER_.2                                                        | -0.305955323 | Q6R0H7_S367_M1_Gnas    |
| _ERPGEQSEVAQLIQQTLEQR_.3                                                 | 0.220594791  | #N/A                   |
| _ASS[Phospho (STY)]LNENVdHSALLK_.2                                       | -0.420814016 | #N/A                   |
| _TVTEGGAHR_.2                                                            | -0.228056701 | Q6R891_S100_M1_Ppp1r9b |
| _ETQAQYQALER_.2                                                          | -0.284840525 | #N/A                   |
| _KDS[Phospho (STY)]QNSSQHSVSSHR_.3                                       | 0.116991532  | #N/A                   |
| _SLHTASPSHGIQVLPEY[Phospho (STY)]LPADAPAPDQTDSSGQK_.4                    | -0.457545243 | Q6RHR9_S733_M1_Magi1   |
| _S[Phospho (STY)]PPRPSPGSLHYS[Phospho (STY)]DEDVTk_.3                    | 0.196420385  | Q6RHR9_Y762_M1_Magi1   |
| _SQDSYPGSPSLs[Phospho (STY)]PR_.2                                        | 0.379342031  | Q6V4S5_S2018_M2_Sdk2   |
| _LKISS[Phospho (STY)]PVR_.2                                              | -0.207682085 | Q6VN19_S369_M1_Ranbp10 |
| _SQS[Phospho (STY)]EYC[Carbamidomethyl (C)]NVGTK_.2                      | -0.178375018 | Q6VNB8_S3483_M1_Wdfy3  |
| _VFLAEC[Carbamidomethyl (C)]YNLS[Phospho (STY)]PTKDK_.2                  | 0.125346114  | Q6VNB8_S1942_M1_Wdfy3  |
| _VFLAEC[Carbamidomethyl (C)]YNLS[Phospho (STY)]PTK_.2                    | 0.02142669   | Q6VNS1_S561_M1_Ntrk3   |
| _GSS[Phospho (STY)]YGSML[Oxidation (M)]TAHGK_.2                          | -0.418967391 | Q6VNS1_S561_M1_Ntrk3   |
| _TPPAANQAS[Phospho (STY)]DPEEK_.2                                        | -0.359733417 | Q6VWV5_S523_M1_Npr2    |
| _TPPAANQAS[Phospho (STY)]DPEEK_.2                                        | -0.066499232 | Q6W8Q3_S16_M1_Pcp4l1   |
| _TPPAANQAS[Phospho (STY)]DPEEK_.2                                        | 0.158856255  | Q6W8Q3_T8_M1_Pcp4l1    |
| _TPPAANQAS[Phospho (STY)]DPEEK_.2                                        | 0.108897748  | Q6W8Q3_S16_M1_Pcp4l1   |
| _KAEEEEIDIDLTAPETEK_.3                                                   | -0.142458873 | #N/A                   |

|                                                                                   |              |                        |
|-----------------------------------------------------------------------------------|--------------|------------------------|
| _TSTPTGHGAS[Phospho (STY)]PTKQDDLVISAR_.3                                         | -0.012974891 | Q6WQJ1_S1032_M1_Dagla  |
| _GS[Phospho (STY)]PSLHAVLER_.2                                                    | 0.455491309  | Q6WQJ1_S808_M1_Dagla   |
| _HSQDTQPLEAALGSGGVTPERPSP[Phospho (STY)]AT[Phospho (STY)]IEEEEAGGSEGGVAPR_.4      | -0.10197168  | Q6WQJ1_S874_M2_Dagla   |
| _DLQLVLPDYFPER_.2                                                                 | 0.111191443  | #N/A                   |
| _EAEYFELPELVR_.2                                                                  | 0.129882948  | #N/A                   |
| _YILDYLR_.2                                                                       | 0.118494061  | #N/A                   |
| _S[Phospho (STY)]PSGGAAGPLLTSPQSLDGSR_.2                                          | -0.112502553 | Q6WVG3_S187_M1_Kctd12  |
| _SPSGGAAGPLLT[Phospho (STY)]PS[Phospho (STY)]QSLDGSR_.3                           | -0.209480278 | Q6WVG3_S200_M2_Kctd12  |
| _MFTQQQPQELAR_.2                                                                  | 0.005643408  | #N/A                   |
| _EADEQLVAEVIKC[Carbamidomethyl (C)]S[Phospho (STY)]PDTC[Carbamidomethyl (C)]SR_.3 | -0.154089157 | Q6Y685_S111_M1_Tacc1   |
| _KYEAPLDDLAC[Carbamidomethyl (C)]S[Phospho (STY)]QDEGAVISK_.3                     | 0.291662537  | Q6Y685_S480_M1_Tacc1   |
| _ESC[Carbamidomethyl (C)]DSS[Phospho (STY)]PGLAEPAKPQESR_.3                       | -0.591859615 | Q6Y685_S82_M1_Tacc1    |
| _SQS[Phospho (STY)]WEER_.2                                                        | -0.105573361 | Q6Y7W8_S161_M1_Gigyf2  |
| _WRPHS[Phospho (STY)]PDGPR_.3                                                     | -0.084076066 | Q6Y7W8_S237_M1_Gigyf2  |
| _S[Phospho (STY)]FDEVEGVFGR_.2                                                    | 0.260187703  | Q6Y7W8_S140_M1_Gigyf2  |
| _SQS[Phospho (STY)]WEERGDR_.2                                                     | -0.09159804  | Q6Y7W8_S161_M1_Gigyf2  |
| _ALSSGGSITS[Phospho (STY)]PPLSPALPK_.2                                            | -0.064822535 | Q6Y7W8_S26_M1_Gigyf2   |
| _QQQQQQQQQQHQQSNR_.3                                                              | 0.36338517   | #N/A                   |
| _GS[Phospho (STY)]GEGQGQILQR_.2                                                   | -0.209405027 | Q6ZPE2_S20_M1_Sbf1     |
| _DKGPS[Phospho (STY)]FR_.2                                                        | -0.311190232 | Q6ZPE2_S1047_M1_Sbf1   |
| _ALYLEPSDGV[Phospho (STY)]PTQETGEAQSDDER_.3                                       | -0.035338991 | Q6ZPE2_S706_M1_Sbf1    |
| _C[Carbamidomethyl (C)]SGPHINS[Phospho (STY)]AR_.2                                | 0.135573415  | Q6ZPE2_S559_M1_Sbf1    |
| _TSSS[Phospho (STY)]SEWPSEPSK_.2                                                  | -0.086532314 | Q6ZPF3_S1524_M1_Tiam2  |
| _QGS[Phospho (STY)]PTKDIEIQFQR_.2                                                 | 0.109914081  | Q6ZPF3_S1604_M1_Tiam2  |
| _HLS[Phospho (STY)]DADR_.2                                                        | -0.222059132 | Q6ZPF3_S1116_M1_Tiam2  |
| _ESDILSDEDEDFHHPLK_.3                                                             | 0.255327938  | #N/A                   |
| _HQS[Phospho (STY)]LDShPETASIDLNLVLER_.3                                          | -0.075321081 | Q6ZPF3_S1672_M1_Tiam2  |
| _TAPSS[Phospho (STY)]PLT[Phospho (STY)]SPSDTR_.2                                  | -0.198845713 | Q6ZPJ0_S265_M2_Tex2    |
| _SLS[Phospho (STY)]TEVEPK_.2                                                      | -0.623634649 | Q6ZPJ0_S195_M1_Tex2    |
| _KEEKPEVQS[Phospho (STY)]PVK_.2                                                   | -0.068631169 | Q6ZPJ3_S893_M1_Ube2o   |
| _LIHGEDS[Phospho (STY)]DS[Phospho (STY)]EGDDDGDR_.2                               | 0.007157185  | Q6ZPJ3_S82_M2_Ube2o    |
| _DSSSLEPMAAAELS[Phospho (STY)]DSGR_.2                                             | -0.100342454 | Q6ZPJ3_S1175_M1_Ube2o  |
| _DHS[Phospho (STY)]M[Oxidation (M)]EDPDKKGEAR_.2                                  | 0.246732538  | Q6ZPJ3_S406_M1_Ube2o   |
| _S[Phospho (STY)]IPLSIK_.2                                                        | -0.166583629 | Q6ZPJ3_S510_M1_Ube2o   |
| _NM[Oxidation (M)]TVEQLLTGSPTS[Phospho (STY)]PTVEPEKPTR_.3                        | -0.351402453 | Q6ZPJ3_S836_M1_Ube2o   |
| _NC[Carbamidomethyl (C)]AQGEGS[Phospho (STY)]M[Oxidation (M)]AKK_.2               | 0.110615101  | Q6ZPJ3_S376_M1_Ube2o   |
| _LKSGS[Phospho (STY)]DEEER_.2                                                     | 0.123243031  | Q6ZPK7_S394_M1_Zfyve28 |
| _TVQLTDLGV[Phospho (STY)]DLEEDS_.2                                                | 0.253786044  | Q6ZPL9_S594_M1_Ddx55   |
| _KQWS[Phospho (STY)]TSSK_.2                                                       | 0.006265469  | Q6ZPQ6_S302_M1_Pitpnm2 |
| _GAS[Phospho (STY)]PSRHS[Phospho (STY)]ISEWR_.3                                   | -0.132049841 | Q6ZPQ6_S316_M2_Pitpnm2 |
| _HS[Phospho (STY)]ISEWR_.2                                                        | -0.054807006 | Q6ZPQ6_S321_M1_Pitpnm2 |
| _TDTGENNNVFNLS[Phospho (STY)]PVEK_.2                                              | -0.106358126 | Q6ZPQ6_S129_M1_Pitpnm2 |
| _WNS[Phospho (STY)]NDLMDK_.2                                                      | 0.213602832  | Q6ZPQ6_S365_M1_Pitpnm2 |
| _RGAS[Phospho (STY)]PSRHS[Phospho (STY)]ISEWR_.3                                  | 0.160027781  | Q6ZPQ6_S316_M2_Pitpnm2 |
| _S[Phospho (STY)]NIDIPIR_.2                                                       | 0.299427926  | Q6ZPQ6_S630_M1_Pitpnm2 |
| _QWSTSSKSS[Phospho (STY)]R_.2                                                     | 0.04279976   | Q6ZPQ6_S308_M1_Pitpnm2 |
| _GGGSVGS[Phospho (STY)]DVGQR_.2                                                   | -0.277425462 | Q6ZPR4_S47_M1_Kcnt1    |

|                                                                          |              |                       |
|--------------------------------------------------------------------------|--------------|-----------------------|
| _GVAPADS[Phospho (STY)]PDAPR_2                                           | -0.266061764 | Q6ZPS6_S738_M1_Ankib1 |
| _GVAPADS[Phospho (STY)]PDAPRR_2                                          | -0.506234343 | Q6ZPS6_S738_M1_Ankib1 |
| _AC[Carbamidomethyl (C)]TLTVFPPEENPGS[Phospho (STY)]PSR_2                | 0.154058058  | Q6ZPT1_S603_M1_Klh9   |
| _TGTGS[Phospho (STY)]PFAGNS[Phospho (STY)]PAR_2                          | -0.261804453 | Q6ZPZ3_S1270_M2_Zc3h4 |
| _S[Phospho (STY)]PSPLQAPEK_2                                             | -0.131515079 | Q6ZQ18_S214_M1_Efr3b  |
| _SVILEAFSSPSEEVK_2                                                       | -0.100103206 | #N/A                  |
| _LTLIDPETLLPR_2                                                          | -0.170689236 | #N/A                  |
| _AVAALLTIPEAEK_2                                                         | 0.173128338  | #N/A                  |
| _EGPAVVGQFIQDVK_2                                                        | -0.190077078 | #N/A                  |
| _ITSEALLVTQQLVK_2                                                        | 0.114782219  | #N/A                  |
| _ [Acetyl (Protein N-term)]ASASYHISNLEK_2                                | -0.139467905 | #N/A                  |
| _ISGSILNELIGLVR_2                                                        | 0.043688314  | #N/A                  |
| _DS[Phospho (STY)]SSTNLESMDS_2                                           | 0.004802388  | Q6ZQ38_S1219_M1_Cand1 |
| _NVVAEC[Carbamidomethyl (C)]LGK_2                                        | -0.395406666 | #N/A                  |
| _QEFKQDELKR_3                                                            | -0.023751443 | #N/A                  |
| _HTVDDGLDIRK_3                                                           | 0.18845311   | #N/A                  |
| _DLLDSVLPPLYNETK_3                                                       | -0.077455374 | #N/A                  |
| _QSYYSIAK_2                                                              | -0.047850121 | #N/A                  |
| _HC[Carbamidomethyl (C)]EC[Carbamidomethyl (C)]AEEGTR_2                  | -0.095007539 | #N/A                  |
| _GLSAS[Phospho (STY)]LPDLDSSEWIEVK_2                                     | -0.202784715 | Q6ZQ58_S525_M1_Larp1  |
| _S[Phospho (STY)]LPTTVPESPNYR_2                                          | -0.313076407 | Q6ZQ58_S743_M1_Larp1  |
| _ETESAPGS[Phospho (STY)]PR_2                                             | -0.157944384 | Q6ZQ58_S498_M1_Larp1  |
| _ESPRPPAAAEAPAGS[Phospho (STY)]DGEDGGRR_3                                | 0.054984697  | Q6ZQ58_S81_M1_Larp1   |
| _NTFTAWSEEDS[Phospho (STY)]DYEIDDRDVNK_3                                 | -0.109188137 | Q6ZQ58_S608_M1_Larp1  |
| _TASISS[Phospho (STY)]PSEGTPAVGSYGC[Carbamidomethyl (C)]TPQSLPK_3        | 0.284440072  | Q6ZQ58_S828_M1_Larp1  |
| _QHYQKET[Phospho (STY)]ESAPGS[Phospho (STY)]PR_2                         | -0.325256291 | Q6ZQ58_S498_M2_Larp1  |
| _KNTFTAWS[Phospho (STY)]EEDSDY[Phospho (STY)]EIDDRDVNK_3                 | -0.319158807 | Q6ZQ58_S604_M2_Larp1  |
| _DSQSEGTAQLDSIGFSIR_2                                                    | -0.099023415 | #N/A                  |
| _NGY[Phospho (STY)]S[Phospho (STY)]C[Carbamidomethyl (C)]VPVALAEGLDIK_3  | -0.024232734 | Q6ZQ88_S573_M2_Kdm1a  |
| _QATPGVPAQQS[Phospho (STY)]PSM_2                                         | -0.134511535 | Q6ZQ88_S850_M1_Kdm1a  |
| _DSSIIDPGTEQDLPS[Phospho (STY)]PENSSVK_2                                 | 0.06332253   | Q6ZQ93_S3443_M1_Usp34 |
| _RVS[Phospho (STY)]S[Phospho (STY)]DEEHTVDSC[Carbamidomethyl (C)]IGDIK_3 | -0.412639442 | Q6ZQ93_S3395_M2_Usp34 |
| _FVDKYSALLS[Phospho (STY)]PSEQEKR_3                                      | -0.51664049  | Q6ZQK5_S521_M1_Acap2  |
| _KS[Phospho (STY)]SPSTGSLDSGNESEK_2                                      | 0.076357133  | Q6ZQK5_S378_M1_Acap2  |
| _YSALLS[Phospho (STY)]PSEQEK_2                                           | 0.128716491  | Q6ZQK5_S521_M1_Acap2  |
| _SSPSTGS[Phospho (STY)]LDSGNESEK_2                                       | -0.229900194 | Q6ZQK5_S384_M1_Acap2  |
| _SSPSTGS[Phospho (STY)]LDSGNESEK_2                                       | -0.038039983 | Q6ZQK5_S384_M1_Acap2  |
| _FVDKYSALLS[Phospho (STY)]PSEQEK_3                                       | 0.097340829  | Q6ZQK5_S521_M1_Acap2  |
| _ESLPSTVS[Phospho (STY)]ANSLEYEPGER_2                                    | -0.069971765 | Q6ZQK5_S573_M1_Acap2  |
| _YSALLS[Phospho (STY)]PSEQEKR_2                                          | -0.051943906 | Q6ZQK5_S521_M1_Acap2  |
| _LIGEYGLR_2                                                              | 0.081896422  | #N/A                  |
| _LFEGNALLR_2                                                             | -0.022367511 | #N/A                  |
| _IEDFLER_2                                                               | -0.288067607 | #N/A                  |
| _ELLTLDEKDPR_3                                                           | -0.084088022 | #N/A                  |
| _SISEGHPWHVPDS[Phospho (STY)]PSHSK_3                                     | -0.111229739 | Q6ZWQ0_S6448_M1_Syne2 |
| _LTSHTPGLDDEKEAS[Phospho (STY)]ENETDIEDPR_3                              | 0.013370465  | Q6ZWQ0_S6348_M1_Syne2 |
| _NPET[Phospho (STY)]PTELQFIEADLR_2                                       | 0.327096725  | Q6ZWR6_T2268_M1_Syne1 |

|                                                                       |              |                       |
|-----------------------------------------------------------------------|--------------|-----------------------|
| _YLFQTGSS[Phospho (STY)]HER_.2                                        | 0.055767195  | Q6ZWR6_S1360_M1_Syne1 |
| _TLPS[Phospho (STY)]EDEEGEEDKEFYLR_.3                                 | -0.124424488 | Q6ZWR6_S8308_M1_Syne1 |
| _LTEGC[Carbamidomethyl (C)]SFR_.2                                     | 0.436522247  | #N/A                  |
| _DLLHPS[Phospho (STY)]PEEEKRK_.3                                      | -0.212442641 | Q6ZWU9_S11_M1_Rps27   |
| _VLTVINQTQK_.2                                                        | 0.171189048  | #N/A                  |
| _QLDDLKVELSQLR_.3                                                     | -0.154882889 | #N/A                  |
| _ADIEVAC[Carbamidomethyl (C)]YGYEGIDAVK_.2                            | 0.110380756  | #N/A                  |
| _ETIEQEKR_.2                                                          | 0.140510743  | #N/A                  |
| _TET[Phospho (STY)]QEKNTLPTK_.2                                       | -0.483860174 | Q6ZWY8_T23_M1_Tmsb10  |
| _NTLPTKETIEQEKR_.3                                                    | -0.012462868 | #N/A                  |
| _ [Acetyl (Protein N-term)]ADKPDM[Oxidation (M)]GEIASFDK_.2           | 0.425374981  | #N/A                  |
| _ [Acetyl (Protein N-term)]ADKPDMGEIAS[Phospho (STY)]FDKAK_.3         | -0.228717541 | Q6ZWY8_S12_M1_Tmsb10  |
| _IDFSTPFQVEEVDVSPS[Phospho (STY)]PK_.2                                | 0.113550917  | Q70IV5_S780_M1_Synm   |
| _QFTQS[Phospho (STY)]PGAEAEATSPDTK_.2                                 | -0.134920071 | Q70IV5_S655_M1_Synm   |
| _S[Phospho (STY)]LGGAVGSASGGR_.2                                      | -0.242133852 | Q71FD5_S75_M1_Znrf2   |
| _AYS[Phospho (STY)]GSDLPSGTGSGGGADGAR_.2                              | 0.261710419  | Q71FD5_S18_M1_Znrf2   |
| _TSS[Phospho (STY)]PEESIR_.2                                          | -0.001783184 | Q71LX4_S2083_M1_Tln2  |
| _DRFGLEGDEESTM[Oxidation (M)]LEESVS[Phospho (STY)]PK_.3               | -0.147557574 | Q71LX4_S428_M1_Tln2   |
| _VSS[Phospho (STY)]PHAR_.2                                            | -0.337549611 | Q71M36_S498_M1_Cspg5  |
| _GDQDDLGVNC[Carbamidomethyl (C)]LQNNLT_.2                             | 0.066880689  | #N/A                  |
| _LEGGKGDQDDLGVNC[Carbamidomethyl (C)]LQNNLT_.2                        | -0.368921452 | #N/A                  |
| _KFC[Carbamidomethyl (C)]DTPRVS[Phospho (STY)]S[Phospho (STY)]PHAR_.3 | 0.125839661  | Q71M36_S497_M2_Cspg5  |
| _LKEEESFNIQNSMS[Phospho (STY)]PK_.2                                   | 0.34929766   | Q71M36_S543_M1_Cspg5  |
| _SSS[Phospho (STY)]SDSIHSVR_.2                                        | 0.084690275  | Q76I79_S929_M1_Ssh1   |
| _SDS[Phospho (STY)]LPQVEELEK_.2                                       | 0.21851719   | Q76I79_S585_M1_Ssh1   |
| _TRAPS[Phospho (STY)]PQGR_.2                                          | -0.338672409 | Q76LS9_S440_M1_Mindy1 |
| _VETAEC[Carbamidomethyl (C)]SRPQELPQS[Phospho (STY)]PR_.3             | 0.08813643   | Q76LS9_S103_M1_Mindy1 |
| _PQELPQS[Phospho (STY)]PR_.2                                          | 0.146035528  | Q76LS9_S103_M1_Mindy1 |
| _LAGGDWFTSR_.2                                                        | -0.004754271 | #N/A                  |
| _DKAVESLR_.2                                                          | -0.17582162  | #N/A                  |
| _IGPILDNSTLQSEVKPILEK_.3                                              | -0.160064236 | #N/A                  |
| _VLELDNVK_.2                                                          | 0.159776866  | #N/A                  |
| _NEDVQLR_.2                                                           | -0.05309734  | #N/A                  |
| _AVGPEITK_.2                                                          | -0.012220349 | #N/A                  |
| _LSTIALALGVER_.2                                                      | -0.522752632 | #N/A                  |
| _EWAHATIIPK_.2                                                        | -0.157510733 | #N/A                  |
| _SALASVIM[Oxidation (M)]GLSPILGK_.2                                   | 0.297322991  | #N/A                  |
| _LTQDQDQDVVK_.2                                                       | 0.026051203  | #N/A                  |
| _TSAC[Carbamidomethyl (C)]GLFSVC[Carbamidomethyl (C)]YPR_.2           | 0.083207319  | #N/A                  |
| _AISHEHSPSDLEAHFVPLVK_.3                                              | 0.339304559  | #N/A                  |
| _QLSQSLLPAIVELAEDAK_.2                                                | -0.216183383 | #N/A                  |
| _SEIIPM[Oxidation (M)]FSNLASDEQDSVR_.2                                | -0.347509177 | #N/A                  |
| _NLC[Carbamidomethyl (C)]SDDTPM[Oxidation (M)]VR_.2                   | 0.054222457  | #N/A                  |
| _MAGDPVANVR_.2                                                        | 0.651456655  | #N/A                  |
| _YFAQEALTVLSLA_.2                                                     | -0.008653848 | #N/A                  |
| _LNIISNLC[Carbamidomethyl (C)]VNEVIGIR_.2                             | -0.012228545 | #N/A                  |
| _HM[Oxidation (M)]LPTVLR_.2                                           | -0.046844028 | #N/A                  |

|                                                                    |              |                         |
|--------------------------------------------------------------------|--------------|-------------------------|
| _ENVIM[Oxidation (M)]TQILPC[Carbamidomethyl (C)]IK_2               | -0.200312067 | #N/A                    |
| _VLAM[Oxidation (M)]SGDPNYLHR_2                                    | 0.218834961  | #N/A                    |
| _ELVSDANQHVK_2                                                     | -0.05442616  | #N/A                    |
| _LNSLC[Carbamidomethyl (C)]M[Oxidation (M)]AWLVDPVYAIR_3           | -0.419833315 | #N/A                    |
| _VKEFC[Carbamidomethyl (C)]ENLSADC[Carbamidomethyl (C)]R_2         | -0.535351356 | #N/A                    |
| _SDGSNFANY[Phospho (STY)]PPVNR_2                                   | 0.422645937  | Q76N33_S242_M1_Stambpl1 |
| _GLS[Phospho (STY)]LDPPKEPSK_2                                     | -0.134934048 | Q78HU3_S168_M1_Mvb12a   |
| _TLS[Phospho (STY)]QDMR_2                                          | 0.036565502  | Q78HU3_S161_M1_Mvb12a   |
| _YFNSYTLTGR_2                                                      | 0.37336707   | #N/A                    |
| _AGAESDGGQFTGIK_2                                                  | 0.468907307  | #N/A                    |
| _VENM[Oxidation (M)]SSNQDGNDS[Phospho (STY)]DEFM[Oxidation (M)]_2  | -0.086198397 | Q78PG9_S204_M1_Ccdc25   |
| _SSS[Phospho (STY)]LSDLTHR_2                                       | -0.146977346 | Q78T81_S252_M1_Fam102a  |
| _FYEEVHDLER_2                                                      | 0.012195261  | #N/A                    |
| _LTDQVM[Oxidation (M)]QNPQVLAALQER_2                               | -0.072553001 | #N/A                    |
| _Acetyl (Protein N-term)]AENSLSDGGPADSVAAK_2                       | 0.108806027  | #N/A                    |
| _FY[Phospho (STY)]EEVHDLERK_3                                      | 0.086025606  | Q78ZA7_Y85_M1_Nap1l4    |
| _EFITGDVEPTDAES[Phospho (STY)]AWHSENEEDK_3                         | 0.022453722  | Q78ZA7_S121_M1_Nap1l4   |
| _EFITGDVEPTDAESAWHS[Phospho (STY)]ENEEEDKLAGDM[Oxidation (M)]K_4   | 0.073880425  | Q78ZA7_S125_M1_Nap1l4   |
| _LDNVSHTPSSYIETLPK_3                                               | -0.030437082 | #N/A                    |
| _REFITGDVEPTDAESAWHS[Phospho (STY)]ENEEEDKLAGDM[Oxidation (M)]K_4  | 0.017262573  | Q78ZA7_S125_M1_Nap1l4   |
| _RVS[Phospho (STY)]SGSC[Carbamidomethyl (C)]FALE_2                 | 0.195604119  | Q791T5_S381_M1_Mtch1    |
| _VLQYYQESEKPEELGSVTQVK_3                                           | 0.117937729  | #N/A                    |
| _TYC[Carbamidomethyl (C)]YDLR_2                                    | -0.158515769 | #N/A                    |
| _EYSSSFDR_2                                                        | -0.206061199 | #N/A                    |
| _ATLSNAVSSLASTGLSLTK_2                                             | -0.09003024  | #N/A                    |
| _EC[Carbamidomethyl (C)]LVSSSGNDNTENGLPGSK_2                       | 0.164937142  | #N/A                    |
| _IS[Phospho (STY)]ENPRRSPTHEM[Oxidation (M)]NPR_4                  | -0.536758561 | Q7M750_S84_M1_Opalin    |
| _RS[Phospho (STY)]PTHEM[Oxidation (M)]NPR_3                        | 0.05021852   | #N/A                    |
| _GS[Phospho (STY)]QEGHIYVK_2                                       | -0.116290864 | Q7M750_S100_M1_Opalin   |
| _TVSGSEEPLDTPRPPEELER_3                                            | 0.066880204  | #N/A                    |
| _S[Phospho (STY)]PTHEMNPR_2                                        | 0.200685567  | #N/A                    |
| _LLHEDLDES[Phospho (STY)]DDDVDEK_2                                 | 0.211602891  | Q7SIG6_S704_M1_Asap2    |
| _LLHEDLDES[Phospho (STY)]DDDVDEKLQSPNRR_4                          | 0.167404339  | Q7SIG6_S704_M1_Asap2    |
| _LLHEDLDES[Phospho (STY)]DDDVDEKLQSPNRR_4                          | -0.017767857 | Q7SIG6_S704_M1_Asap2    |
| _SGDGEST[Phospho (STY)]PVEHVR_2                                    | -0.14707451  | Q7TMB8_T1234_M1_Cyfp1   |
| _PGSSQLVHIPEETQENISTS[Phospho (STY)]PK_3                           | -0.275962896 | Q7TME0_S549_M1_Plppr4   |
| _DASS[Phospho (STY)]LTNLKR_2                                       | -0.284984697 | Q7TME0_S386_M1_Plppr4   |
| _QQGVLOQS[Phospho (STY)]PK_2                                       | -0.566633405 | Q7TME0_S594_M1_Plppr4   |
| _DALRS[Phospho (STY)]LTDLNQDPSR_2                                  | -0.399370423 | Q7TME0_S347_M1_Plppr4   |
| _M[Oxidation (M)]SLQVM[Oxidation (M)]DTEPEGQS[Phospho (STY)]PPR_2  | -0.225294898 | Q7TME0_S474_M1_Plppr4   |
| _TVHTS[Phospho (STY)]PGGGGLGAR_2                                   | 0.143055005  | Q7TME0_S37_M1_Plppr4    |
| _S[Phospho (STY)]LTDLNQDPSR_2                                      | -0.066668908 | Q7TME0_S347_M1_Plppr4   |
| _NASIHAS[Phospho (STY)]M[Oxidation (M)]DSAR_2                      | -0.259149545 | Q7TME0_S439_M1_Plppr4   |
| _KM[Oxidation (M)]SLQVM[Oxidation (M)]DTEPEGQS[Phospho (STY)]PPR_3 | 0.236119738  | Q7TME0_S474_M1_Plppr4   |
| _DSESC[Carbamidomethyl (C)]ESLKDSFGS[Phospho (STY)]GDR_2           | 0.588979841  | Q7TME0_S685_M1_Plppr4   |
| _SNS[Phospho (STY)]PENTR_2                                         | -0.122884121 | Q7TME0_S746_M1_Plppr4   |
| _FNVSATPEQYVPYSTTR_2                                               | -0.210399235 | #N/A                    |

|                                                                                              |              |                         |
|----------------------------------------------------------------------------------------------|--------------|-------------------------|
| _IGTLVGEDK_2                                                                                 | 0.29351916   | #N/A                    |
| _ [Acetyl (Protein N-term)]M[Oxidation (M)]ELVEVLKR_2                                        | -0.106472595 | #N/A                    |
| _GVQQVTGHGGLR_2                                                                              | -0.07323556  | #N/A                    |
| _WLHC[Carbamidomethyl (C)]M[Oxidation (M)]TDDPPTNPPTAR_3                                     | -0.154230415 | #N/A                    |
| _ [Acetyl (Protein N-term)]M[Oxidation (M)]ELVEVLK_2                                         | -0.0653132   | #N/A                    |
| _RPAS[Phospho (STY)]DDEC[Carbamidomethyl (C)]PGDSK_2                                         | 0.271708267  | Q7TMI3_S668_M1_Uhrf2    |
| _NLANTVTTEEILEK_2                                                                            | 0.366868864  | #N/A                    |
| _DLFEDELVLFEK_2                                                                              | 0.037912971  | #N/A                    |
| _DSDLSHVQNK_2                                                                                | -0.255109862 | #N/A                    |
| _LYNNHEIR_2                                                                                  | 0.239785763  | #N/A                    |
| _TGYTLDVTTGQR_2                                                                              | 0.062397202  | #N/A                    |
| _GFC[Carbamidomethyl (C)]FLEYEDHK_3                                                          | -0.312615428 | #N/A                    |
| _VTEGLTDVILYHQDDK_3                                                                          | 0.335932106  | #N/A                    |
| _AILVDLEPGTM[Oxidation (M)]DSVR_2                                                            | 0.019770039  | #N/A                    |
| _ALTVPELTQQM[Oxidation (M)]FDSK_2                                                            | -0.002200436 | #N/A                    |
| _YLTVAAIR_2                                                                                  | 0.004634158  | #N/A                    |
| _INVYYNEAAGNK_2                                                                              | 0.129447427  | #N/A                    |
| _KESESC[Carbamidomethyl (C)]DC[Carbamidomethyl (C)]LQGFQLTHSLGGGTGSGM[Oxidation (M)]GTLISK_4 | 0.153221836  | #N/A                    |
| _IM[Oxidation (M)]NTFSVM[Oxidation (M)]PSPK_2                                                | 0.062546782  | #N/A                    |
| _FWEVISDEHGIDPTGSYHGSDQLQLER_4                                                               | 0.234835869  | #N/A                    |
| _INVYYNEAAGNKYVPR_3                                                                          | -0.306214258 | #N/A                    |
| _ESESC[Carbamidomethyl (C)]DC[Carbamidomethyl (C)]LQGFQLTHSLGGGTGSGM[Oxidation (M)]GTLISK_3  | -0.591619951 | #N/A                    |
| _AES[Phospho (STY)]PEEVAC[Carbamidomethyl (C)]R_2                                            | -0.10927752  | Q7TMY8_S1395_M1_Huwe1   |
| _RAQC[Carbamidomethyl (C)]ETLS[Phospho (STY)]PDGLPEEQPQTTK_3                                 | -0.407305171 | Q7TMY8_S3663_M1_Huwe1   |
| _ESNQPPEDSS[Phospho (STY)]PPASSESSSTR_2                                                      | -0.545441522 | Q7TMY8_S2918_M1_Huwe1   |
| _SGGTAS[Phospho (STY)]DDEFENLR_2                                                             | -0.039926066 | Q7TMY8_S1907_M1_Huwe1   |
| _AQC[Carbamidomethyl (C)]ETLS[Phospho (STY)]PDGLPEEQPQTTK_2                                  | -0.276728736 | Q7TMY8_S3663_M1_Huwe1   |
| _DGG[Phospho (STY)]GNSTIIVSR_2                                                               | 0.475574745  | Q7TMY8_S2362_M1_Huwe1   |
| _AES[Phospho (STY)]PEEVAC[Carbamidomethyl (C)]RK_2                                           | -0.426301129 | Q7TMY8_S1395_M1_Huwe1   |
| _DLS[Phospho (STY)]MSEEDQMMR_2                                                               | -0.074188861 | Q7TMY8_S1368_M1_Huwe1   |
| _DLDLLASVPS[Phospho (STY)]PSSVSR_2                                                           | 0.073678496  | Q7TN29_S219_M1_Smap2    |
| _S[Phospho (STY)]LDINVLR_2                                                                   | -0.178285557 | Q7TN29_S127_M1_Smap2    |
| _KAVGSMPTAGSAGS[Phospho (STY)]VPENLNLFPEPGSK_3                                               | -0.063421047 | Q7TN29_S239_M1_Smap2    |
| _QQLSPS[Phospho (STY)]PGQEAGILPETEK_2                                                        | 0.037358556  | Q7TN98_S99_M1_Cpeb4     |
| _S[Phospho (STY)]PASPHPPPFTHR_3                                                              | -0.028214822 | Q7TN98_S252_M1_Cpeb4    |
| _SPAS[Phospho (STY)]PSQAPYAQR_2                                                              | -0.270477166 | Q7TN99_S197_M1_Cpeb3    |
| _RS[Phospho (STY)]PAS[Phospho (STY)]PSQAPYAQR_2                                              | -0.077442473 | Q7TN99_S194_M2_Cpeb3    |
| _EFAPS[Phospho (STY)]DEELDSYR_2                                                              | 0.040644782  | Q7TNE3_S114_M1_Spag7    |
| _GGGS[Phospho (STY)]PEKLPNR_2                                                                | -0.038025553 | Q7TNF8_S1402_M1_Tspoap1 |
| _LQESFQGAPDVIS[Phospho (STY)]PR_2                                                            | -0.365664856 | Q7TNM2_S627_M1_Trim46   |
| _SVS[Phospho (STY)]TDELGPGR_2                                                                | -0.479236241 | Q7TPB0_S320_M1_Plppr3   |
| _GLGLPDEAS[Phospho (STY)]PVHLR_2                                                             | -0.354671922 | Q7TPB0_S426_M1_Plppr3   |
| _QKS[Phospho (STY)]LEGR_2                                                                    | -0.091817182 | Q7TPB0_S413_M1_Plppr3   |
| _EKTS[Phospho (STY)]LGS[Phospho (STY)]LKR_2                                                  | -0.155355324 | Q7TPB0_S343_M2_Plppr3   |
| _RAS[Phospho (STY)]VDVLLAPR_2                                                                | 0.061059361  | Q7TPB0_S351_M1_Plppr3   |
| _QPGM[Oxidation (M)]GPGS[Phospho (STY)]PVSDVDQEEPR_2                                         | -0.508328791 | Q7TPB0_S641_M1_Plppr3   |
| _EFDYDSPHGLDS[Phospho (STY)]D_2                                                              | 0.187602605  | Q7TPE5_S305_M1_Slc7a6os |



|                                               |              |                        |
|-----------------------------------------------|--------------|------------------------|
| _SKS[Phospho (STY)]DSYTLDPDTLR_.2             | -0.114671572 | Q7TPH6_S2943_M1_Mycbp2 |
| _LISGDAEPT[Phospho (STY)]PEQEEL_.2            | -0.475451169 | Q7TPH6_T3992_M1_Mycbp2 |
| _ALLSS[Phospho (STY)]PEGEEK_.2                | 0.30806912   | Q7TPH6_S4003_M1_Mycbp2 |
| _SSS[Phospho (STY)]PQDKNLPQK_.2               | -0.062924998 | Q7TPH6_S2916_M1_Mycbp2 |
| _STS[Phospho (STY)]PKPKPVPK_.2                | 0.264445189  | Q7TPH6_S2970_M1_Mycbp2 |
| _DPKDSPGS[Phospho (STY)]ENR_.2                | 0.328861942  | Q7TPH6_S2986_M1_Mycbp2 |
| _SLS[Phospho (STY)]PNHNTLQTLK_.2              | -0.322626814 | Q7TPH6_S2861_M1_Mycbp2 |
| _QVS[Phospho (STY)]TENDSTLVHR_.2              | -0.202980786 | Q7TPH6_S1621_M1_Mycbp2 |
| _ESGS[Phospho (STY)]PAQEFSK_.2                | -0.033153422 | Q7TPM1_S621_M1_Prrc2b  |
| _ALS[Phospho (STY)]LSSADSTDAGR_.2             | 0.022873798  | Q7TPM1_S415_M1_Prrc2b  |
| _LKFS[Phospho (STY)]DDEDEEDVVKDGR_.3          | 0.134006176  | Q7TPM1_S387_M1_Prrc2b  |
| _LKFS[Phospho (STY)]DDEDEEDVVK_.2             | -0.370809592 | Q7TPM1_S387_M1_Prrc2b  |
| _S[Phospho (STY)]PDEALPGGLGSHSPYALER_.3       | 0.019645063  | Q7TPM1_S793_M1_Prrc2b  |
| _QQQQQQQQQQQQQQEQLYK_.3                       | 0.004764244  | #N/A                   |
| _TAS[Phospho (STY)]PVNSPAR_.2                 | -0.043985929 | Q7TPM6_S313_M1_Fsd1    |
| _RGS[Phospho (STY)]ATSSNTSLT_.2               | 0.203740895  | Q7TPM6_S486_M1_Fsd1    |
| _LDGSTSHQNL_.2                                | 0.016655086  | #N/A                   |
| _ALESSEELLETANQTLQASDSEDFSQAAL_.3             | -0.421045833 | #N/A                   |
| _IWL[Phospho (STY)]TETLANED_.2                | -0.431106304 | Q7TPM9_S763_M1_Mttr10  |
| _RNS[Phospho (STY)]LVLK_.2                    | 0.210236536  | Q7TPM9_S603_M1_Mttr10  |
| _ATLPDADKER_.2                                | -0.135631774 | #N/A                   |
| _TINEVENQILTR_.2                              | -0.23045208  | #N/A                   |
| _LASDLLEWIR_.2                                | -0.110376019 | #N/A                   |
| _ILAGDKNYTEDEL_.3                             | -0.648418668 | #N/A                   |
| _EGLLWC[Carbamidomethyl (C)]QR_.2             | 0.132893535  | #N/A                   |
| _GYEEWLLNEIR_.2                               | -0.395617138 | #N/A                   |
| _VGWEQLLTTIAR_.2                              | -0.352715562 | #N/A                   |
| _TIPWLENR_.2                                  | 0.361466904  | #N/A                   |
| _IC[Carbamidomethyl (C)]DQWDNLGALTQK_.2       | -0.142760762 | #N/A                   |
| _FAIQDISVEETSAK_.2                            | -0.259787496 | #N/A                   |
| _LAILGIHNEVSK_.2                              | -0.170250703 | #N/A                   |
| _ASFNHFDR_.2                                  | -0.222171305 | #N/A                   |
| _DLLDPAWEK_.2                                 | 0.305609708  | #N/A                   |
| _KDDPLTNLNTAFDVAER_.3                         | -0.089920958 | #N/A                   |
| _LLETIDQLYLEYAK_.2                            | -0.025300619 | #N/A                   |
| _RDQALTEEHAR_.3                               | -0.086411678 | #N/A                   |
| _DDPLTNLNTAFDVAER_.2                          | 0.204787006  | #N/A                   |
| _DGLGFC[Carbamidomethyl (C)]ALIHR_.2          | -0.022865691 | #N/A                   |
| _IDQLEC[Carbamidomethyl (C)]DHQLIQEALIFDNK_.3 | -0.287261509 | #N/A                   |
| _QFGAQANVIGPWQTK_.2                           | 0.168569245  | #N/A                   |
| _HRPELIDYGK_.3                                | -0.2649062   | #N/A                   |
| _VLAVNQENEQLM[Oxidation (M)]EDYEK_.2          | -0.180049161 | #N/A                   |
| _GISQEQM[Oxidation (M)]NEFR_.2                | -0.427480064 | #N/A                   |
| _ALDFIASK_.2                                  | -0.169885988 | #N/A                   |
| _C[Carbamidomethyl (C)]QLEINFNTLQTK_.2        | 0.100520217  | #N/A                   |
| _IMSIVDPNR_.2                                 | 0.456444796  | #N/A                   |
| _NVNIQNFHISWK_.2                              | 0.036192827  | #N/A                   |

|                                                          |              |                         |
|----------------------------------------------------------|--------------|-------------------------|
| _HTNYNM[Oxidation (M)]EHIR_.3                            | -0.151065285 | #N/A                    |
| _MVSDINNAWGC[Carbamidomethyl (C)]LEQAEK_.2               | 0.301574731  | #N/A                    |
| _AIM[Oxidation (M)]TYVSSFYHAFSGAQK_.2                    | -0.158680081 | #N/A                    |
| _ASIHEAWTDGK_.2                                          | 0.510451721  | #N/A                    |
| _KHEAFESDLAAHQDR_.3                                      | 0.345882133  | #N/A                    |
| _VEQIAAIAQELNELDYDPSVNAR_.3                              | 0.234568212  | #N/A                    |
| _QKDYETATLSEIK_.2                                        | 0.072013021  | #N/A                    |
| _LSIEM[Oxidation (M)]HGTLEDQLSHLR_.3                     | -0.413233328 | #N/A                    |
| _MLDAEDIVGTARPDEK_.3                                     | -0.551928098 | #N/A                    |
| _NQTSFS[Phospho (STY)]PSK_.2                             | 0.076613008  | Q7TPS5_S295_M1_C2cd5    |
| _SQS[Phospho (STY)]ESSDEVTELDLSHGKK_.3                   | 0.081100643  | Q7TPS5_S659_M1_C2cd5    |
| _SQSESS[Phospho (STY)]DEVTELDLSHGK_.3                    | 0.245035222  | Q7TPS5_S662_M1_C2cd5    |
| _LSSPAAFLPAC[Carbamidomethyl (C)]S[Phospho (STY)]SPSR_.2 | -0.068256159 | Q7TPS5_S259_M1_C2cd5    |
| _SPAPSNTLS[Phospho (STY)]PSTPAK_.2                       | 0.029797541  | Q7TPV4_S1253_M1_Mybbp1a |
| _TVS[Phospho (STY)]QESLTPGK_.2                           | -0.054567602 | Q7TPW1_S296_M1_Nexn     |
| _EM[Oxidation (M)]LAS[Phospho (STY)]DDEESSPK_.2          | -0.205754793 | Q7TPW1_S16_M1_Nexn      |
| _EMLAS[Phospho (STY)]DDEESSPKIEK_.2                      | -0.018553478 | Q7TPW1_S16_M1_Nexn      |
| _ADS[Phospho (STY)]VPNLEPSEESLVTK_.2                     | -0.435053058 | Q7TQ95_S411_M1_Lnpk     |
| _IVEYLVGDGPQNR_.2                                        | -0.023620867 | #N/A                    |
| _AANKT[Phospho (STY)]PPKS[Phospho (STY)]PGDPAR_.2        | -0.271132857 | Q7TQD2_S19_M2_Tppp      |
| _AVSS[Phospho (STY)]PTVSR_.2                             | -0.233749515 | Q7TQD2_S159_M1_Tppp     |
| _VDLVDESGYVPGYK_.2                                       | -0.105541346 | #N/A                    |
| _APVISGVTK_.2                                            | 0.130548399  | #N/A                    |
| _FAVHGDTR_.2                                             | 0.202240645  | #N/A                    |
| _NVTVDVDIVFSK_.2                                         | -0.051377722 | #N/A                    |
| _TITFEQFQEALEELAK_.2                                     | -0.127063629 | #N/A                    |
| _RLS[Phospho (STY)]LESEGANEGATAAPELSALEEAFR_.3           | -0.363357581 | Q7TQD2_S31_M1_Tppp      |
| _LSLESEGANEGATAAPELSALEEAFR_.3                           | 0.045644252  | #N/A                    |
| _DC[Carbamidomethyl (C)]HVIDGK_.2                        | 0.100956951  | #N/A                    |
| _RLS[Phospho (STY)]LESEGANEGATAAPELSALEEAFRR_.4          | -0.326101375 | Q7TQD2_S31_M1_Tppp      |
| _LSLESEGANEGATAAPELSALEEAFRR_.3                          | -0.214066706 | #N/A                    |
| _TPPKS[Phospho (STY)]PGDPAR_.2                           | -0.234429218 | Q7TQD2_S19_M1_Tppp      |
| _DKSSEEA VR_.2                                           | -0.250629678 | #N/A                    |
| _ [Acetyl (Protein N-term)]ADS[Phospho (STY)]KAKPAK_.2   | -0.167449441 | Q7TQD2_S4_M1_Tppp       |
| _NASGVVNSS[Phospho (STY)]PR_.2                           | -0.412456484 | Q7TQE6_S332_M1_Maco1    |
| _EAEVGS[Phospho (STY)]DGER_.2                            | -0.311159235 | Q7TQF2_S338_M1_Fbxo10   |
| _AALPAGEGGS[Phospho (STY)]PEGAK_.2                       | -0.092189171 | Q7TQF7_S500_M1_Amph     |
| _GLFPENFTR_.2                                            | -0.11685109  | #N/A                    |
| _KLVDYDSAR_.2                                            | 0.273530191  | #N/A                    |
| _ESDWLQYR_.2                                             | -0.18430244  | #N/A                    |
| _EIAVLC[Carbamidomethyl (C)]HK_.2                        | 0.070651278  | #N/A                    |
| _VGFYVNTFK_.2                                            | -0.066498989 | #N/A                    |
| _LVDYDSAR_.2                                             | 0.123580196  | #N/A                    |
| _AETKDEQFEEYVQNFKR_.3                                    | -0.292667291 | #N/A                    |
| _EAAEDVAAQGSAGEK_.2                                      | 0.349431579  | #N/A                    |
| _GDVVLLVPSDSEADQDAGWLVGVK_.3                             | -0.041976155 | #N/A                    |
| _AETKDEQFEEYVQNFK_.3                                     | -0.174308746 | #N/A                    |

|                                                                                   |              |                        |
|-----------------------------------------------------------------------------------|--------------|------------------------|
| _LVDGSLTLDTYLGQFPDIK_.2                                                           | -0.348919943 | #N/A                   |
| _AFSIQGAPSDS[Phospho (STY)]GPLR_.2                                                | 0.050460727  | Q7TQF7_S252_M1_Amph    |
| _TPS[Phospho (STY)]PPEEPSPLPSPTASPNHTLAPASPAPVRPR_.4                              | 0.102431105  | Q7TQF7_S262_M1_Amph    |
| _VETLHDFEAANSDELNLQR_.3                                                           | 0.240369365  | #N/A                   |
| _LTESLHEVYEPDWYGREDVK_.3                                                          | -0.153505585 | #N/A                   |
| _LYEVM[Oxidation (M)]TK_.2                                                        | 0.136227628  | #N/A                   |
| _C[Carbamidomethyl (C)]DVLWEDFHQK_.3                                              | -0.152387855 | #N/A                   |
| _TKS[Phospho (STY)]PAEEELTPSAVVR_.2                                               | -0.157955872 | Q7TQG1_S901_M1_Plekha6 |
| _DPSQTS[Phospho (STY)]PLGTPR_.2                                                   | -0.384651547 | Q7TQG1_S864_M1_Plekha6 |
| _SHSVPRS[Phospho (STY)]PSQGSYSR_.3                                                | -0.448979352 | Q7TQG1_S459_M1_Plekha6 |
| _S[Phospho (STY)]PSQGSYSR_.2                                                      | -0.03657561  | Q7TQG1_S459_M1_Plekha6 |
| _ANGLPSGPETAS[Phospho (STY)]EPGSPYPDGPR_.2                                        | 0.11218207   | Q7TQG1_S247_M1_Plekha6 |
| _QPVFYDELDAASGS[Phospho (STY)]LRR_.3                                              | -0.223216857 | Q7TQG1_S443_M1_Plekha6 |
| _MVENS[Phospho (STY)]PR_.2                                                        | -0.090565994 | Q7TQG1_S574_M1_Plekha6 |
| _KDPSQTS[Phospho (STY)]PLGTPR_.2                                                  | -0.216327512 | Q7TQG1_S864_M1_Plekha6 |
| _SISS[Phospho (STY)]PKYDYLGDR_.2                                                  | -0.229812537 | Q7TQG1_S506_M1_Plekha6 |
| _QDGTWIPS[Phospho (STY)]PSR_.2                                                    | -0.305557614 | Q7TQG1_S426_M1_Plekha6 |
| _IYS[Phospho (STY)]PVRS[Phospho (STY)]PSAR_.2                                     | 0.297143768  | Q7TQG1_S472_M2_Plekha6 |
| _AYVPLES[Phospho (STY)]PPTVPPLPNESR_.2                                            | -0.24704636  | Q7TQG1_S816_M1_Plekha6 |
| _GVPPPEDLRS[Phospho (STY)]PSR_.2                                                  | 0.13148106   | Q7TQG1_S336_M1_Plekha6 |
| _S[Phospho (STY)]LQLPASPAPEPSTRPAYK_.3                                            | -0.008347429 | Q7TQG1_S967_M1_Plekha6 |
| _LQPSSSPET[Phospho (STY)]GLDPFPSR_.2                                              | -0.110804186 | Q7TQH0_T565_M1_Atxn2I  |
| _EVDGLLTSDPM[Oxidation (M)]GS[Phospho (STY)]PVSSK_.2                              | 0.134299638  | #N/A                   |
| _EKEVDGLLTSDPM[Oxidation (M)]GS[Phospho (STY)]PVSSK_.3                            | -0.053764843 | #N/A                   |
| _GPPQS[Phospho (STY)]PVFEGVYNSR_.2                                                | -0.42387935  | Q7TQH0_S109_M1_Atxn2I  |
| _QGSGRES[Phospho (STY)]PSLVSr_.2                                                  | -0.02093076  | Q7TQH0_S337_M1_Atxn2I  |
| _ES[Phospho (STY)]PSLVSr_.2                                                       | -0.152970709 | Q7TQH0_S337_M1_Atxn2I  |
| _IQQEIAVQNPLVSR_.2                                                                | 0.028316441  | #N/A                   |
| _LLTSGYLQR_.2                                                                     | -0.24993087  | #N/A                   |
| _EYAEDDNIYQK_.2                                                                   | -0.474416406 | #N/A                   |
| _FFEHFIEGGR_.3                                                                    | -0.437015356 | #N/A                   |
| _LELSVLYK_.2                                                                      | -0.246872411 | #N/A                   |
| _QEPLGSDS[Phospho (STY)]EGVNC[Carbamidomethyl (C)]LAYDEAIM[Oxidation (M)]AQQDR_.3 | 0.243470978  | Q7TQI3_S18_M1_Otub1    |
| _EFC[Carbamidomethyl (C)]QQEVEPMC[Carbamidomethyl (C)]K_.2                        | 0.166506236  | #N/A                   |
| _AFGFHLEALLDDSKELQR_.3                                                            | 0.43838482   | #N/A                   |
| _GEGGTTNPHVFPEGSEPK_.3                                                            | 0.524906446  | #N/A                   |
| _SPTVDS[Phospho (STY)]GDIR_.2                                                     | -0.19720527  | Q7TQI7_S444_M1_Abtb2   |
| _QSELSAEES[Phospho (STY)]PEKLGTSQLHQR_.3                                          | -0.143938706 | Q7TQK5_S305_M1_Ccdc93  |
| _QSELSAEES[Phospho (STY)]PEK_.2                                                   | -0.151845053 | Q7TQK5_S305_M1_Ccdc93  |
| _KGTS[Phospho (STY)]PGSELPPPK_.2                                                  | -0.144233564 | Q7TSC1_S378_M1_Prrc2a  |
| _SDS[Phospho (STY)]GGSSSEPFER_.2                                                  | 0.051770736  | Q7TSC1_S761_M1_Prrc2a  |
| _GTS[Phospho (STY)]PGSELPPPK_.2                                                   | 0.083120311  | Q7TSC1_S378_M1_Prrc2a  |
| _EGPEPPEEVPPPTT[Phospho (STY)]PPAPK_.2                                            | 0.280642648  | Q7TSC1_T609_M1_Prrc2a  |
| _S[Phospho (STY)]EGSEYEEIPKR_.2                                                   | 0.010585404  | Q7TSC1_S1087_M1_Prrc2a |
| _ETPPGGNLS[Phospho (STY)]PAPR_.2                                                  | -0.15849935  | Q7TSC1_S1002_M1_Prrc2a |
| _KQS[Phospho (STY)]SSEISLAVER_.2                                                  | 0.19139111   | Q7TSC1_S454_M1_Prrc2a  |
| _TASETRS[Phospho (STY)]EGSEYEEIPKR_.3                                             | -0.19664281  | Q7TSC1_S1087_M1_Prrc2a |

|                                                             |              |                        |
|-------------------------------------------------------------|--------------|------------------------|
| _ERS[Phospho (STY)]DS[Phospho (STY)]GGSSSEPFER_.2           | 0.288037626  | Q7TSC1_S759_M2_Prrc2a  |
| _TAS[Phospho (STY)]ETRS[Phospho (STY)]EGSEYEEIPK_.2         | -0.49521018  | Q7TSC1_S1083_M2_Prrc2a |
| _FS[Phospho (STY)]REEFPTLQAAGDQDK_.3                        | 0.093091024  | Q7TSC1_S166_M1_Prrc2a  |
| _S[Phospho (STY)]EGSEYEEIPK_.2                              | 0.245579462  | Q7TSC1_S1087_M1_Prrc2a |
| _GSETGSETHES[Phospho (STY)]DLAPSDK_.2                       | 0.385444829  | Q7TSC1_S1113_M1_Prrc2a |
| _LKFS[Phospho (STY)]DEEDGRDS[Phospho (STY)]DEEGAEGHK_.4     | -0.095668254 | Q7TSC1_S342_M2_Prrc2a  |
| _AS[Phospho (STY)]PGAAPGPR_.2                               | -0.105266852 | Q7TSF4_S15_M1_Lrrc75a  |
| _EGTDQQDPIGS[Phospho (STY)]PVTPAR_.2                        | -0.415177331 | Q7TSF4_S322_M1_Lrrc75a |
| _GSLAERAS[Phospho (STY)]PGAAPGPR_.3                         | -0.337218896 | Q7TSF4_S15_M1_Lrrc75a  |
| _DNS[Phospho (STY)]PAVFPDR_.2                               | -0.472339239 | Q7TSG2_S730_M1_Ctdp1   |
| _[Acetyl (Protein N-term)]ANS[Phospho (STY)]PDAAFSSPALLR_.2 | -0.308896282 | Q7TSH2_S4_M1_Phkb      |
| _QSS[Phospho (STY)]TADAPEAQHEPGITITEWK_.3                   | -0.167773246 | Q7TSH2_S693_M1_Phkb    |
| _LSHS[Phospho (STY)]DTFIPLLTEEK_.2                          | 0.116806443  | Q7TSH7_S472_M1_Kcnf1   |
| _LPS[Phospho (STY)]AETLK_.2                                 | 0.021292206  | Q7TSH8_S664_M1_Tmem94  |
| _VEPPHSS[Phospho (STY)]HEDLTDDLSTR_.3                       | -0.130177191 | Q7TSH8_S445_M1_Tmem94  |
| _NTVDLVNTHLHSSS[Phospho (STY)]DDEDDLRLK_.4                  | -0.280707814 | Q7TSI3_S531_M1_Ppp6r1  |
| _EQM[Oxidation (M)]IQGQDS[Phospho (STY)]PEPDQLLATLEK_.3     | -0.582388517 | Q7TSI3_S232_M1_Ppp6r1  |
| _EADMSSIQIPSS[Phospho (STY)]PPAHGSPQLR_.3                   | 0.153053029  | Q7TSI3_S739_M1_Ppp6r1  |
| _ATGPAPGPS[Phospho (STY)]VDRETVAAPGR_.3                     | -0.362609738 | Q7TSJ2_S86_M1_Map6     |
| _SEYQPSDAPFER_.2                                            | -0.342496945 | #N/A                   |
| _DQSFPTPAPR_.2                                              | -0.036602537 | #N/A                   |
| _DQVPVVGSLK_.2                                              | 0.082519169  | #N/A                   |
| _KDPGPVPEPEKDR_.3                                           | 0.142824842  | #N/A                   |
| _AVADALNR_.2                                                | 0.398439682  | #N/A                   |
| _ADIAVPLVFTK_.2                                             | 0.417734775  | #N/A                   |
| _NQGPVPEPVK_.2                                              | 0.09950009   | #N/A                   |
| _DQGPTAPDPLK_.2                                             | 0.368630438  | #N/A                   |
| _NQGLAGPELVK_.2                                             | 0.374214873  | #N/A                   |
| _NKDSVPLAPAK_.2                                             | 0.355533008  | #N/A                   |
| _DQGAVLLGPVK_.2                                             | 0.214249245  | #N/A                   |
| _NQSPVVPASTK_.2                                             | 0.084740998  | #N/A                   |
| _GHDSVFVAPVK_.2                                             | 0.02666841   | #N/A                   |
| _DTGDTTAPR_.2                                               | 0.018649396  | #N/A                   |
| _DKQVVSGQAAK_.2                                             | -0.414942489 | #N/A                   |
| _FWNQLDK_.2                                                 | 0.159141935  | #N/A                   |
| _DPEGAGGAGVLAAGK_.2                                         | -0.079022616 | #N/A                   |
| _AVAIETQPAQGESDAVAR_.2                                      | -0.079047669 | #N/A                   |
| _ATGPAPGPS[Phospho (STY)]VDR_.2                             | 0.110724375  | Q7TSJ2_S86_M1_Map6     |
| _GQS[Phospho (STY)]PTAPGPTKQGAVLLGPVK_.3                    | -0.374906064 | Q7TSJ2_S632_M1_Map6    |
| _NQS[Phospho (STY)]PVVLGPIK_.2                              | -0.413769449 | Q7TSJ2_S832_M1_Map6    |
| _VQDHIASELLK_.2                                             | -0.304925822 | #N/A                   |
| _AGPAWM[Oxidation (M)]VTR_.2                                | 0.098542497  | #N/A                   |
| _AQS[Phospho (STY)]PLLPEPLKNQSPVVPASTK_.3                   | -0.408368215 | Q7TSJ2_S687_M1_Map6    |
| _RPQS[Phospho (STY)]QERGPM[Oxidation (M)]QLSADAR_.3         | 0.297235668  | Q7TSJ2_S198_M1_Map6    |
| _GPM[Oxidation (M)]QLS[Phospho (STY)]ADAR_.2                | 0.481660976  | Q7TSJ2_S207_M1_Map6    |
| _S[Phospho (STY)]LYSEPFKEC[Carbamidomethyl (C)]PK_.2        | -0.181316523 | Q7TSJ2_S491_M1_Map6    |
| _DQVPVVGSLKGQS[Phospho (STY)]PTAPGPTK_.3                    | -0.061177838 | Q7TSJ2_S632_M1_Map6    |

|                                                                                           |              |                          |
|-------------------------------------------------------------------------------------------|--------------|--------------------------|
| _EPHKDQGSVAPGLPK_.3                                                                       | 0.152659428  | #N/A                     |
| _RSEGHEQT[Phospho (STY)]PAAHAQGTGPEGGK_.3                                                 | -0.178381651 | Q7TSJ2_T392_M1_Map6      |
| _AKPQYKPPDDK_.3                                                                           | -0.110618261 | #N/A                     |
| _EEVASTVSSSYR_.2                                                                          | 0.311073504  | #N/A                     |
| _GQS[Phospho (STY)]PTAPGPTK_.2                                                            | -0.053163758 | Q7TSJ2_S632_M1_Map6      |
| _TEGHEETPLPPAQSQTEGGPAAGK_.3                                                              | -0.096124135 | #N/A                     |
| _TTEGPSATKPDDKEQSK_.3                                                                     | 0.217424737  | #N/A                     |
| _YSEATEHPGAPPQPPAPLQPALAPPSR_.3                                                           | -0.075275429 | #N/A                     |
| _S[Phospho (STY)]EGHEQTAAHAQGTGPEGGK_.3                                                   | -0.225804576 | Q7TSJ2_S386_M1_Map6      |
| _GTQLPTVSPSPVVM[Oxidation (M)]IPTVPHTIEYIEGS[Phospho (STY)]P_.3                           | -0.300201529 | Q7TSJ2_S905_M1_Map6      |
| _GPM[Oxidation (M)]QLS[Phospho (STY)]ADARDPEGAGGAVLAAGK_.3                                | -0.27609453  | Q7TSJ2_S207_M1_Map6      |
| _M[Oxidation (M)]VHETSYSAQFK_.3                                                           | 0.17677906   | #N/A                     |
| _GEANKPSAADNK_.2                                                                          | -0.399408694 | #N/A                     |
| _SEGHEEKPLPPAQSQTEGGPAAGK_.4                                                              | 0.077017063  | #N/A                     |
| _SGLGLGAASASTSGSGPADSVM[Oxidation (M)]R_.2                                                | -0.157572927 | #N/A                     |
| _RRPQS[Phospho (STY)]QER_.2                                                               | 0.385280843  | Q7TSJ2_S198_M1_Map6      |
| _AQ[S[Phospho (STY)]PLLPEPLK_.2                                                           | -0.094934803 | Q7TSJ2_S687_M1_Map6      |
| _NEGHEEKPLPPAQSQTEGGPAAGK_.4                                                              | 0.270933452  | #N/A                     |
| _S[Phospho (STY)]PLQLPR_.2                                                                | -0.122662178 | Q7TSK2_S952_M1_Se26      |
| _EERPGAAGGGAS[Phospho (STY)]APGS[Phospho (STY)]PDETAR_.2                                  | -0.087895578 | Q7TSK3_S798_M2_Pcdh8     |
| _DSGKGDSDFNDS[Phospho (STY)]DSDISGDALKK_.3                                                | -0.315486182 | Q7TSK3_S926_M1_Pcdh8     |
| _Acetyl (Protein N-term)]AAAT[Phospho (STY)]PTETPAPEGSLGMDAR_.2                           | -0.216426294 | Q7TSV4_T5_M1_Pgm2        |
| _NKQEDLNSEALS[Phospho (STY)]PSITC[Carbamidomethyl (C)]DLSSR_.3                            | -0.056026102 | Q7TT18_S112_M1_At7ip     |
| _SKS[Phospho (STY)]EDMDSVESKR_.2                                                          | 0.136379501  | Q7TT18_S593_M1_At7ip     |
| _SKS[Phospho (STY)]EDMDSVESK_.2                                                           | 0.367745264  | Q7TT18_S593_M1_At7ip     |
| _EAFVLVS[Phospho (STY)]DEEDLSC[Carbamidomethyl (C)]GKDESEAVAQSK_.3                        | 0.032044975  | Q7TT18_S533_M1_At7ip     |
| _S[Phospho (STY)]LDEGAPQDTPK_.2                                                           | -0.350728509 | Q7TT28_S487_M1_Rexo1     |
| _ALS[Phospho (STY)]HAELFGDES[Phospho (STY)]EEEDSSLGAGAPR_.3                               | 0.152631138  | Q7TT28_S505_M2_Rexo1     |
| _SSGNSANDLANVAVIDGNR_.2                                                                   | 0.060792879  | #N/A                     |
| _ALGNS[Phospho (STY)]NRDKEIK_.3                                                           | -0.553562226 | Q7TT50_S481_M1_Cdc42bpb  |
| _HSTPSNSSNPSPGPS[Phospho (STY)]PNS[Phospho (STY)]PHR_.3                                   | -0.053600183 | Q7TT50_S1692_M2_Cdc42bpb |
| _SM[Oxidation (M)]S[Phospho (STY)]DPDQDFDKEPDSSTK_.2                                      | -0.068928137 | Q7TT50_S1661_M1_Cdc42bpb |
| _VVLLAEGR_.2                                                                              | 0.168772179  | #N/A                     |
| _Acetyl (Protein N-term)]S[Phospho (STY)]M[Oxidation (M)]PDAM[Oxidation (M)]PLPGVGEEKL_.2 | -0.322960249 | Q80SW1_S2_M1_Ahcyl1      |
| _EIEIAEQDM[Oxidation (M)]SALISLR_.2                                                       | -0.444708857 | #N/A                     |
| _QVDVVITC[Carbamidomethyl (C)]TGKN_.2                                                     | -0.307589863 | #N/A                     |
| _GSSNFC[Carbamidomethyl (C)]VK_.2                                                         | -0.136003794 | #N/A                     |
| _TTDVMFGGK_.2                                                                             | 0.207115488  | #N/A                     |
| _NSC[Carbamidomethyl (C)]IVC[Carbamidomethyl (C)]NM[Oxidation (M)]GHSNTEIDVTSR_.3         | -0.197659045 | #N/A                     |
| _VAPAGSAISNAS[Phospho (STY)]GER_.2                                                        | 0.154026714  | Q80SY4_S411_M1_Mib1      |
| _SYS[Phospho (STY)]LDLDSQNLQSFK_.2                                                        | 0.138106263  | Q80T23_S211_M1_Syt15     |
| _NTSGTPSIASVSGTSL[Phospho (STY)]SER_.2                                                    | -0.073851323 | Q80T23_S319_M1_Syt15     |
| _DLNS[Phospho (STY)]LEDTEGVDLVSSR_.2                                                      | -0.641227262 | Q80T23_S358_M1_Syt15     |
| _TSTS[Phospho (STY)]VTSVNAQSTSR_.2                                                        | -0.106113279 | Q80T41_S775_M1_Gabbr2    |
| _KEDS[Phospho (STY)]KTSTSVTSVNAQSTSR_.3                                                   | 0.197783588  | Q80T41_S770_M1_Gabbr2    |
| _ITELDKDLEEVMT[Oxidation (M)]QLQDT[Phospho (STY)]PEK_.3                                   | -0.146835961 | Q80T41_T818_M1_Gabbr2    |
| _TC[Carbamidomethyl (C)]KDPIEDINS[Phospho (STY)]PEHIQR_.3                                 | -0.355410581 | Q80T41_S883_M1_Gabbr2    |

|                                                                           |              |                         |
|---------------------------------------------------------------------------|--------------|-------------------------|
| _FTQFQDSR_2                                                               | 0.011571222  | #N/A                    |
| _DPIEDINS[Phospho (STY)]PEHIQR_3                                          | 0.202441569  | Q80T41_S883_M1_Gabbr2   |
| _DLEEVTMQLQDT[Phospho (STY)]PEK_2                                         | 0.337816785  | Q80T41_T818_M1_Gabbr2   |
| _QLS[Phospho (STY)]LPLTQSK_2                                              | -0.256245945 | Q80TA6_S564_M1_Mtmr12   |
| _ISAEGVDIVLDC[Carbamidomethyl (C)]LC[Carbamidomethyl (C)]GDNTGK_2         | 0.062831533  | #N/A                    |
| _DSVTHLFDR_2                                                              | 0.388676371  | #N/A                    |
| _TPLVPGFEC[Carbamidomethyl (C)]SGIVEALGDSVK_2                             | 0.204122172  | #N/A                    |
| _AC[Carbamidomethyl (C)]GLNFIDLM[Oxidation (M)]VR_2                       | 0.133408574  | #N/A                    |
| _TPTPLM[Oxidation (M)]ANDS[Phospho (STY)]TETSEAGEEEEDEHGDSENKER_4         | 0.177034994  | Q80TB8_S390_M1_Vat1l    |
| _LILDVEK_2                                                                | -0.111377728 | #N/A                    |
| _ETSKPEAEGGDGSHR_3                                                        | 0.132283021  | #N/A                    |
| _EYGS[Phospho (STY)]TSSIDR_2                                              | -0.036232577 | Q80TE4_S195_M1_Sipa1l2  |
| _TLS[Phospho (STY)]DESV[Carbamidomethyl (C)]SNR_2                         | 0.196080137  | Q80TE4_S1488_M1_Sipa1l2 |
| _YTIGDIFVHS[Phospho (STY)]PQR_2                                           | -0.187204289 | Q80TE4_S149_M1_Sipa1l2  |
| _SEGS[Phospho (STY)]PPPEEPEVTEC[Carbamidomethyl (C)]PR_2                  | -0.220222904 | Q80TE4_S1406_M1_Sipa1l2 |
| _NEFWFS[Phospho (STY)]DGLSLDK_2                                           | 0.080634088  | Q80TE4_S1549_M1_Sipa1l2 |
| _TPS[Phospho (STY)]PFEDR_2                                                | -0.33195572  | Q80TE7_S850_M1_Lrrc7    |
| _GVIAISKS[Phospho (STY)]TER_2                                             | 0.129427685  | Q80TE7_S928_M1_Lrrc7    |
| _S[Phospho (STY)]M[Oxidation (M)]DGYPEQFC[Carbamidomethyl (C)]VR_2        | -0.287200999 | Q80TE7_S1392_M1_Lrrc7   |
| _LETTPTS[Phospho (STY)]PLPER_2                                            | -0.087408113 | Q80TE7_S869_M1_Lrrc7    |
| _VYNIPLENYASGSDHLGS[Phospho (STY)]HERPDK_3                                | 0.222237047  | Q80TE7_S977_M1_Lrrc7    |
| _TAFPSKLETT[Phospho (STY)]PTTS[Phospho (STY)]PLPERK_3                     | 0.407196073  | Q80TE7_S869_M2_Lrrc7    |
| _SQS[Phospho (STY)]IDEIDVGTYK_2                                           | -0.152701975 | Q80TE7_S949_M1_Lrrc7    |
| _KSQS[Phospho (STY)]IDEIDVGTYK_2                                          | 0.529696426  | Q80TE7_S949_M1_Lrrc7    |
| _S[Phospho (STY)]VPAHGR_2                                                 | -0.096309958 | Q80TE7_S801_M1_Lrrc7    |
| _FKKS[Phospho (STY)]QS[Phospho (STY)]IDEIDVGTYK_3                         | 0.340033937  | Q80TE7_S947_M2_Lrrc7    |
| _SYS[Phospho (STY)]TESYGASQTR_2                                           | -0.521196631 | Q80TE7_S1206_M1_Lrrc7   |
| _STERLS[Phospho (STY)]PLM[Oxidation (M)]K_2                               | -0.146836328 | Q80TE7_S933_M1_Lrrc7    |
| _LETT[Phospho (STY)]PTTS[Phospho (STY)]PLPERK_2                           | -0.337438958 | Q80TE7_S869_M2_Lrrc7    |
| _SYS[Phospho (STY)]TESYGASQTRPVSAR_2                                      | -0.376495426 | Q80TE7_S1206_M1_Lrrc7   |
| _TLAVDENFLPELPR_2                                                         | -0.106039002 | #N/A                    |
| _S[Phospho (STY)]REQQPYEGNINK_2                                           | -0.131233309 | Q80TE7_S1343_M1_Lrrc7   |
| _IPS[Phospho (STY)]DYNLGNYGDK_2                                           | -0.071093397 | Q80TE7_S1233_M1_Lrrc7   |
| _S[Phospho (STY)]QSVPMLDDEMLM[Oxidation (M)]YGSSK_2                       | 0.038831799  | Q80TE7_S997_M1_Lrrc7    |
| _RVS[Phospho (STY)]EPHELPPGDR_3                                           | 0.168307627  | Q80TE7_S1132_M1_Lrrc7   |
| _DKES[Phospho (STY)]PSVKR_2                                               | -0.525967746 | Q80TF3_S1134_M1_Pcdh19  |
| _SKS[Phospho (STY)]PEHVR_2                                                | 0.122348796  | Q80TF3_S983_M1_Pcdh19   |
| _EAGNGC[Carbamidomethyl (C)]EAIS[Phospho (STY)]PVTS[Phospho (STY)]PLHLK_2 | -0.06650054  | Q80TF3_S1063_M2_Pcdh19  |
| _SES[Phospho (STY)]AENHSYAK_2                                             | -0.347105438 | Q80TH2_S1013_M1_Erbin   |
| _VRQEDENFNSLLQNGVNLNNS[Phospho (STY)]PEEK_3                               | -0.209398209 | Q80TH2_S712_M1_Erbin    |
| _STEDLS[Phospho (STY)]PQR_2                                               | -0.32925676  | Q80TH2_S854_M1_Erbin    |
| _STPAC[Carbamidomethyl (C)]S[Phospho (STY)]PILR_2                         | 0.126522386  | Q80TI0_S21_M1_Gramd1b   |
| _TESTYLAEIHRQS[Phospho (STY)]PK_3                                         | -0.248449217 | Q80TI0_S550_M1_Gramd1b  |
| _SSIETKPDAS[Phospho (STY)]PQLPKK_3                                        | -0.334467834 | Q80TI0_S274_M1_Gramd1b  |
| _S[Phospho (STY)]RSPTPQNQDGMTMVEK_3                                       | 0.037023916  | Q80TI0_S28_M1_Gramd1b   |
| _SSIETKPDAS[Phospho (STY)]PQLPK_2                                         | -0.482046432 | Q80TI0_S274_M1_Gramd1b  |
| _S[Phospho (STY)]PTPQNQDGMTM[Oxidation (M)]VEK_2                          | 0.240406281  | Q80TI0_S30_M1_Gramd1b   |

|                                                                           |              |                          |
|---------------------------------------------------------------------------|--------------|--------------------------|
| _SC[Carbamidomethyl (C)]DS[Phospho (STY)]DEDYEAGGTGR_.2                   | -0.609772028 | Q80TI1_S739_M1_Plekhh1   |
| _VILHPTPNS[Phospho (STY)]PK_.2                                            | -0.370598525 | Q80TJ1_S486_M1_Cadps     |
| _DIVTPVPQEEVK_.2                                                          | -0.275409196 | #N/A                     |
| _LDALQTFIR_.2                                                             | -0.192288141 | #N/A                     |
| _EGDTVIFASDDEQDR_.2                                                       | -0.236703961 | #N/A                     |
| _S[Phospho (STY)]LPEIDGLSK_.2                                             | -0.41695309  | Q80TJ1_S219_M1_Cadps     |
| _SLTSNLPNVNLPNVNLPK_.2                                                    | -0.223458713 | #N/A                     |
| _LQGVLDSTLNSK_.2                                                          | 0.279175131  | #N/A                     |
| _HSQDVLRL_.2                                                              | -0.312074417 | #N/A                     |
| _ATLSLLER_.2                                                              | -0.21838376  | #N/A                     |
| _LQKEEEER_.2                                                              | 0.116618036  | #N/A                     |
| _EQLYEM[Oxidation (M)]FQNILGIK_.2                                         | 0.078739049  | #N/A                     |
| _VLLENQITHFR_.2                                                           | -0.071195157 | #N/A                     |
| _LFTSTGVLAEDEKELGR_.3                                                     | 0.203659309  | #N/A                     |
| _YVDLM[Oxidation (M)]ESSIAQSIHR_.2                                        | -0.242223918 | #N/A                     |
| _M[Oxidation (M)]VQSGGC[Carbamidomethyl (C)]SANDSR_.2                     | -0.179300433 | #N/A                     |
| _DAEYIYPSLES[Phospho (STY)]DDDDPALK_.2                                    | -0.198943892 | Q80TJ7_S820_M1_Ph8       |
| _SSGSSSSGLGTSSS[Phospho (STY)]PASQR_.2                                    | -0.516638886 | Q80TJ7_S768_M1_Ph8       |
| _S[Phospho (STY)]LDSC[Carbamidomethyl (C)]PSQGLPQEGQVK_.2                 | 0.013698218  | Q80TK0_S1051_M1_Kiaa1107 |
| _SSS[Phospho (STY)]DTSTPEELK_.2                                           | -0.023008313 | Q80TK0_S750_M1_Kiaa1107  |
| _SAPPTLAQAQGSQGESPHS[Phospho (STY)]VK_.2                                  | 0.316731798  | Q80TK0_S343_M1_Kiaa1107  |
| _KQGGGDHQIHS[Phospho (STY)]AS[Phospho (STY)]DDEIPR_.3                     | -0.062521672 | #N/A                     |
| _SEDYDAGGS[Phospho (STY)]QDDEGSHDR_.2                                     | 0.337602651  | Q80TK0_S722_M1_Kiaa1107  |
| _QGGGDHQIHS[Phospho (STY)]AS[Phospho (STY)]DDEIPR_.2                      | -0.334472807 | #N/A                     |
| _SSS[Phospho (STY)]DTSTPEELKVHEGDLR_.3                                    | -0.429697109 | Q80TK0_S750_M1_Kiaa1107  |
| _SSVSSRQS[Phospho (STY)]DENVTR_.2                                         | -0.573481584 | Q80TK0_S353_M1_Kiaa1107  |
| _YNC[Carbamidomethyl (C)]PSFLAAALR_.2                                     | -0.21249619  | #N/A                     |
| _RPWPQHQC[Carbamidomethyl (C)]S[Phospho (STY)]APADLGYEGR_.3               | -0.370563689 | Q80TL0_S532_M1_Ppm1e     |
| _VDS[Phospho (STY)]FTDR_.2                                                | -0.161703595 | Q80TL0_S545_M1_Ppm1e     |
| _AVNVV[Phospho (STY)]EESEWTENSFQGGQEDGGDDKETHGEC[Carbamidomethyl (C)]K_.4 | 0.012339356  | Q80TL0_S495_M1_Ppm1e     |
| _S[Phospho (STY)]PQHFLR_.2                                                | -0.362550879 | Q80TL1_S471_M1_Adcy2     |
| _S[Phospho (STY)]PQHFLFRP_.3                                              | -0.38189548  | Q80TL1_S471_M1_Adcy2     |
| _VIPDC[Carbamidomethyl (C)]SLTLEDFVR_.2                                   | -0.199712268 | #N/A                     |
| _ALLPTEQESR_.2                                                            | -0.078522151 | #N/A                     |
| _GVEPEEFDR_.2                                                             | -0.006546207 | #N/A                     |
| _QFAALDPEQR_.2                                                            | 0.148565924  | #N/A                     |
| _ALTDEQEEQAAR_.2                                                          | -0.330493083 | #N/A                     |
| _YVDWPTFLR_.2                                                             | 0.124494754  | #N/A                     |
| _ENVIYILAR_.2                                                             | 0.319683844  | #N/A                     |
| _KLDDDKPPDIC[Carbamidomethyl (C)]LEPR_.3                                  | -0.321850407 | #N/A                     |
| _VFHDGC[Carbamidomethyl (C)]LR_.2                                         | -0.066096869 | #N/A                     |
| _GSTISEAEC[Carbamidomethyl (C)]HHAR_.3                                    | -0.143567096 | #N/A                     |
| _EAEASAPVVQEES[Phospho (STY)]INR_.2                                       | 0.035998983  | Q80TL4_S73_M1_Ph24       |
| _LTEAPSC[Carbamidomethyl (C)]SVSISHVGPDIADSS[Phospho (STY)]PAASSSK_.3     | -0.140196419 | Q80TL4_S348_M1_Ph24      |
| _RGT[Phospho (STY)]VEGSVQEVQEEKEAEASAPVVQEESINR_.4                        | -0.583214296 | Q80TL4_T47_M1_Ph24       |
| _RGT[Phospho (STY)]VEGSVQEVQEEK_.2                                        | -0.088375663 | Q80TL4_T47_M1_Ph24       |
| _DEQAAS[Phospho (STY)]DPM[Oxidation (M)]DQETVSR_.2                        | -0.07437437  | Q80TL7_S534_M1_Mon2      |

|                                                                                                  |              |                        |
|--------------------------------------------------------------------------------------------------|--------------|------------------------|
| _PWSS[Phospho (STY)]TSDSGSVR_2                                                                   | -0.125834867 | Q80TM6_S362_M1_R3hdm2  |
| _DSS[Phospho (STY)]QEYTDSTGIDLHEFLVNTLK_3                                                        | 0.045742794  | Q80TM6_S143_M1_R3hdm2  |
| _SKS[Phospho (STY)]IEEREEYQR_3                                                                   | -0.145088461 | Q80TM6_S283_M1_R3hdm2  |
| _ASS[Phospho (STY)]FSGISILTR_2                                                                   | -0.088503849 | Q80TM6_S381_M1_R3hdm2  |
| _SLEPRPWSS[Phospho (STY)]TSDSGSVR_2                                                              | 0.134903964  | Q80TM6_S362_M1_R3hdm2  |
| _S[Phospho (STY)]IEEREEYQR_2                                                                     | -0.111011212 | Q80TM6_S283_M1_R3hdm2  |
| _SAS[Phospho (STY)]TDLGTADVVLGR_2                                                                | -0.168703007 | Q80TM6_S923_M1_R3hdm2  |
| _TPS[Phospho (STY)]KEDVEKEGEENGLR_3                                                              | 0.210413615  | Q80TM6_S37_M1_R3hdm2   |
| _SKS[Phospho (STY)]IEER_2                                                                        | 0.202431077  | Q80TM6_S283_M1_R3hdm2  |
| _LEQEILDFINDNNNQFK_2                                                                             | -0.371856496 | #N/A                   |
| _TPS[Phospho (STY)]PEPVDKDFYSEFGDK_3                                                             | -0.095117441 | Q80TM9_S1373_M1_Nisch  |
| _AC[Carbamidomethyl (C)]SDS[Phospho (STY)]LESIPAGQVASDDL_2                                       | -0.120020638 | Q80TM9_S545_M1_Nisch   |
| _SQS[Phospho (STY)]FNSIDK_2                                                                      | 0.15038376   | Q80TN7_S275_M1_Nav3    |
| _S[Phospho (STY)]LPRPSK_2                                                                        | -0.362114207 | Q80TN7_S1140_M1_Nav3   |
| _KTS[Phospho (STY)]LDGSQNNQDDVVLHVSSK_3                                                          | 0.162841719  | Q80TN7_S1116_M1_Nav3   |
| _WLDGAS[Phospho (STY)]FDNER_2                                                                    | 0.004837879  | Q80TP3_S321_M1_Ubr5    |
| _SELFYTLNGSS[Phospho (STY)]VDSQQSK_2                                                             | 0.109586398  | Q80TQ2_S359_M1_Cyld    |
| _VTGSTS[Phospho (STY)]DPGSR_2                                                                    | 0.033849941  | Q80TQ2_S341_M1_Cyld    |
| _YYGTQS[Phospho (STY)]R_2                                                                        | -0.135254411 | Q80TR1_S1141_M1_Adgrl1 |
| _SPPGGTHGS[Phospho (STY)]LK_2                                                                    | 0.219383104  | Q80TR1_S1123_M1_Adgrl1 |
| _PLSS[Phospho (STY)]PPGR_2                                                                       | 0.360127799  | Q80TR1_S1369_M1_Adgrl1 |
| _QTESSFM[Oxidation (M)]AGDINST[Phospho (STY)]PTLNR_2                                             | -0.026206638 | Q80TR1_T1167_M1_Adgrl1 |
| _RPS[Phospho (STY)]HEGYLAAPSLGPGPDGDGM[Oxidation (M)]QLVTS_3                                     | 0.021248453  | Q80TR1_S1439_M1_Adgrl1 |
| _TDLTEYASWEDYVAAR_2                                                                              | -0.221284482 | #N/A                   |
| _SVYVDDSEAAAGNRVDYAFNTNANR_3                                                                     | 0.105815301  | #N/A                   |
| _GPAHLVTS[Phospho (STY)]L_2                                                                      | 0.039291179  | Q80TS3_S1536_M1_Adgrl3 |
| _S[Phospho (STY)]MPNLGSR_2                                                                       | 0.117625889  | Q80TS3_S1485_M1_Adgrl3 |
| _GSSDGFIVPPNKDGAS[Phospho (STY)]PEGTSK_3                                                         | -0.121392813 | Q80TS3_S1522_M1_Adgrl3 |
| _STESSIGS[Phospho (STY)]GK_2                                                                     | -0.313969596 | Q80TS3_S1222_M1_Adgrl3 |
| _S[Phospho (STY)]PLGQRPPEPR_2                                                                    | -0.286356345 | Q80TS7_S138_M1_Ddn     |
| _LRPGS[Phospho (STY)]PEPPPR_2                                                                    | -0.428821616 | Q80TS7_S77_M1_Ddn      |
| _RS[Phospho (STY)]PLGQRPPEPR_3                                                                   | -0.102598999 | Q80TS7_S138_M1_Ddn     |
| _SGS[Phospho (STY)]PAPAEPVDPNR_2                                                                 | -0.027287888 | Q80TT2_S78_M1_Baiap3   |
| _VGLQS[Phospho (STY)]PSVETR_2                                                                    | -0.074763388 | Q80TT8_S1775_M1_Cul9   |
| _AVLETPSTQGQDGS[Phospho (STY)]PESLIR_2                                                           | -0.610012759 | Q80TT8_S284_M1_Cul9    |
| _NSSNTGVGS[Phospho (STY)]PSNTIGR_2                                                               | -0.343968381 | Q80TV8_S1088_M1_Clasp1 |
| _S[Phospho (STY)]QEDLNEPIKR_2                                                                    | -0.280132551 | Q80TV8_S1193_M1_Clasp1 |
| _FSFRS[Phospho (STY)]QEDLNEPIKR_3                                                                | -0.189962103 | Q80TV8_S1193_M1_Clasp1 |
| _DGGAAS[Phospho (STY)]PATEGR_2                                                                   | -0.221529094 | Q80TV8_S1220_M1_Clasp1 |
| _SRS[Phospho (STY)]ANPAGAGSR_2                                                                   | 0.16008524   | Q80TV8_S676_M1_Clasp1  |
| _TS[Phospho (STY)]PLTS[Phospho (STY)]PTNC[Carbamidomethyl (C)]SHGGLSPSR_2                        | -0.173961298 | Q80TV8_S1106_M2_Clasp1 |
| _SRS[Phospho (STY)]DIDVNAAASAK_2                                                                 | -0.159096891 | Q80TV8_S600_M1_Clasp1  |
| _RS[Phospho (STY)]PTGSTASR_2                                                                     | -0.612996535 | Q80TV8_S572_M1_Clasp1  |
| _NFDDSDS[Phospho (STY)]VDGNNRPSSASSSSSK_3                                                        | -0.184398431 | Q80TV8_S246_M1_Clasp1  |
| _TVS[Phospho (STY)]DNSLSSSK_2                                                                    | -0.240435847 | Q80TY0_S296_M1_Fnbp1   |
| _TVS[Phospho (STY)]DNS[Phospho (STY)]LSSSKEGKPELR_3                                              | -0.161276312 | Q80TY0_S296_M2_Fnbp1   |
| _S[Phospho (STY)]EM[Oxidation (M)]PVPES[Phospho (STY)]APQM[Oxidation (M)]PS[Phospho (STY)]PVEK_2 | 0.144363394  | Q80TY5_S2245_M3_Vps13b |



|                                                                                                  |              |                        |
|--------------------------------------------------------------------------------------------------|--------------|------------------------|
| _RKEDELS[Phospho (STY)]IGS[Phospho (STY)]APLGK_.3                                                | -0.225239028 | Q80TY5_S1001_M2_Vps13b |
| _RTATSASAS[Phospho (STY)]PTLR_.2                                                                 | -0.249988278 | Q80TZ3_S595_M1_Dnajc6  |
| _SAATS[Phospho (STY)]PTGSSHGTPHQSK_.3                                                            | -0.596801666 | Q80TZ3_S683_M1_Dnajc6  |
| _VSEC[Carbamidomethyl (C)]SWPIR_.2                                                               | -0.136483314 | #N/A                   |
| _IYSTC[Carbamidomethyl (C)]TDFER_.2                                                              | 0.077125365  | #N/A                   |
| _HLDHYTVYNLS[Phospho (STY)]PK_.3                                                                 | -0.437561588 | Q80TZ3_S137_M1_Dnajc6  |
| _TATSASAS[Phospho (STY)]PTLR_.2                                                                  | -0.417462752 | Q80TZ3_S595_M1_Dnajc6  |
| _GASS[Phospho (STY)]PDM[Oxidation (M)]EPSYGGGLFDMVK_.2                                           | 0.261577146  | Q80TZ3_S36_M1_Dnajc6   |
| _DSENKGASS[Phospho (STY)]PDM[Oxidation (M)]EPSYGGGLFDM[Oxidation (M)]VK_.3                       | 0.074140679  | Q80TZ3_S36_M1_Dnajc6   |
| _AADFEDLLSSQGFNAHK_.2                                                                            | -0.06704193  | #N/A                   |
| _ATGQPYEQYAK_.2                                                                                  | 0.326302542  | #N/A                   |
| _SRC[Carbamidomethyl (C)]EEDHAALVNQES[Phospho (STY)]EQS[Phospho (STY)]DDELLTLSSPHGNAEGDKPHGAK_.5 | 0.12300121   | #N/A                   |
| _C[Carbamidomethyl (C)]EEDHAALVNQES[Phospho (STY)]EQS[Phospho (STY)]DDELLTLSSPHGNAEGDKPHGAK_.5   | 0.239981702  | #N/A                   |
| _EKVAS[Phospho (STY)]DTEDTDR_.2                                                                  | 0.056685879  | Q80TZ9_S656_M1_Rere    |
| _PHVM[Oxidation (M)]S[Phospho (STY)]PTNR_.2                                                      | -0.387169274 | Q80TZ9_S1258_M1_Rere   |
| _KQPTS[Phospho (STY)]PDGRAS[Phospho (STY)]PINEDIR_.3                                             | -0.021630535 | Q80TZ9_S594_M2_Rere    |
| _AS[Phospho (STY)]PINEDIR_.2                                                                     | -0.062138045 | Q80TZ9_S600_M1_Rere    |
| _VAS[Phospho (STY)]DTEDTDR_.2                                                                    | -0.319836885 | Q80TZ9_S656_M1_Rere    |
| _EKVAS[Phospho (STY)]DTEDTDRIITSK_.3                                                             | -0.088629749 | Q80TZ9_S656_M1_Rere    |
| _QPTS[Phospho (STY)]PDGRAS[Phospho (STY)]PINEDIR_.2                                              | -0.408700325 | Q80TZ9_S594_M2_Rere    |
| _ANHHGS[Phospho (STY)]SPEQVVRPK_.4                                                               | -0.119958431 | Q80U04_S305_M1_Pja2    |
| _S[Phospho (STY)]IDVEELGVGR_.2                                                                   | -0.058695483 | Q80U12_S402_M1_Sgsm2   |
| _FSSGSS[Phospho (STY)]IDSHVQR_.2                                                                 | -0.338051817 | Q80U12_S637_M1_Sgsm2   |
| _SQS[Phospho (STY)]FAGFSGLQER_.2                                                                 | -0.068696631 | Q80U16_S46_M1_Ripor2   |
| _ELGS[Phospho (STY)]TEDIYITSR_.2                                                                 | 0.273148856  | Q80U19_S704_M1_Daam2   |
| _LSEGAALAGPAS[Phospho (STY)]PPR_.2                                                               | -0.366339877 | Q80U22_S534_M1_Rusc2   |
| _NAGPEPETSRRPSPLGSYS[Phospho (STY)]PVR_.3                                                        | 0.174304432  | Q80U22_S776_M1_Rusc2   |
| _ASVGDSSQEF5[Phospho (STY)]PIQEAQQDR_.2                                                          | -0.158179379 | Q80U22_S572_M1_Rusc2   |
| _AAGSGS[Phospho (STY)]PPLR_.2                                                                    | -0.028774969 | Q80U22_S557_M1_Rusc2   |
| _RTS[Phospho (STY)]PPVSVR_.2                                                                     | 0.076118107  | Q80U23_S20_M1_Snph     |
| _EEGTGESAGGS[Phospho (STY)]PAR_.2                                                                | -0.163381038 | Q80U23_S204_M1_Snph    |
| _TS[Phospho (STY)]PPVSVR_.2                                                                      | 0.016629593  | Q80U23_S20_M1_Snph     |
| _AIQTDFVQYQPDNTILEK_.2                                                                           | -0.113896712 | #N/A                   |
| _QPGDPSNTS[Phospho (STY)]AEDGADSGYVAADDTLSR_.3                                                   | 0.289358163  | Q80U23_S236_M1_Snph    |
| _SSTYTKLS[Phospho (STY)]DPAVC[Carbamidomethyl (C)]GDR_.2                                         | -0.406142892 | Q80U23_S219_M1_Snph    |
| _EEGTGESAGGS[Phospho (STY)]PARS[Phospho (STY)]LTR_.2                                             | -0.042656054 | Q80U23_S204_M2_Snph    |
| _EKPAGS[Phospho (STY)]PIR_.2                                                                     | -0.320672084 | Q80U28_S1266_M1_Madd   |
| _S[Phospho (STY)]PTENVNTPVGK_.2                                                                  | -0.114616805 | Q80U28_S1058_M1_Madd   |
| _KRS[Phospho (STY)]PTENVNTPVGK_.3                                                                | -0.173183932 | Q80U28_S1058_M1_Madd   |
| _REPSS[Phospho (STY)]PQGR_.2                                                                     | 0.396041723  | Q80U28_S929_M1_Madd    |
| _LAS[Phospho (STY)]DSDAESDSR_.2                                                                  | -0.124680022 | Q80U28_S817_M1_Madd    |
| _S[Phospho (STY)]LKEENFVASVELWNK_.3                                                              | -0.444734849 | Q80U28_S1109_M1_Madd   |
| _LLRPNS[Phospho (STY)]LK_.2                                                                      | -0.451633659 | Q80U28_S812_M1_Madd    |
| _S[Phospho (STY)]PTENVNTPVGKDPGLAGR_.2                                                           | 0.50517385   | Q80U28_S1058_M1_Madd   |
| _SSVIKHS[Phospho (STY)]PTVK_.2                                                                   | -0.027882625 | Q80U28_S920_M1_Madd    |
| _EKPAGS[Phospho (STY)]PIRSSEDSQR_.3                                                              | 0.26921754   | Q80U28_S1266_M1_Madd   |
| _RNGS[Phospho (STY)]ETQLNK_.2                                                                    | -0.047634545 | Q80U28_S1499_M1_Madd   |

|                                                                         |              |                          |
|-------------------------------------------------------------------------|--------------|--------------------------|
| _AT[Phospho (STY)]LS[Phospho (STY)]DSEIETNSATSAIFGK_.2                  | 0.019368785  | Q80U28_S1237_M2_Madd     |
| _RGS[Phospho (STY)]SDPTVQR_.2                                           | 0.231567132  | Q80U30_S848_M1_Clec16a   |
| _LPSLDHRDS[Phospho (STY)]PR_.3                                          | -0.327598579 | Q80U35_S2005_M1_Arhgef17 |
| _SLS[Phospho (STY)]DPIPIQR_.2                                           | -0.279536323 | Q80U35_S728_M1_Arhgef17  |
| _RGTS[Phospho (STY)]VDDFLK_.2                                           | 0.096673016  | Q80U40_S737_M1_Rimbp2    |
| _DHLS[Phospho (STY)]PDFYDESETDPGAEELPAR_.3                              | -0.159937239 | Q80U40_S852_M1_Rimbp2    |
| _GS[Phospho (STY)]LDWPEEER_.2                                           | -0.076344972 | Q80U49_S1032_M1_Cep170b  |
| _SQS[Phospho (STY)]FTHTPPADPK_.2                                        | 0.236962659  | Q80U49_S421_M1_Cep170b   |
| _HEDGTQS[Phospho (STY)]DSEDPLAK_.2                                      | -0.102830224 | Q80U49_S360_M1_Cep170b   |
| _VVQTS[Phospho (STY)]PSAR_.2                                            | -0.004605882 | Q80U49_S819_M1_Cep170b   |
| _AGS[Phospho (STY)]FTGPSDSETAPAR_.2                                     | 0.09275542   | Q80U49_S1166_M1_Cep170b  |
| _ESPLS[Phospho (STY)]PPTVPDPGGATPGSAR_.2                                | -0.142774111 | Q80U49_S981_M1_Cep170b   |
| _LGDAS[Phospho (STY)]DTEAVDGER_.2                                       | -0.004675608 | Q80U49_S1122_M1_Cep170b  |
| _GASPVTPSTT[Phospho (STY)]PPPPTDPQLTK_.2                                | 0.028423448  | Q80U49_T541_M1_Cep170b   |
| _DGPDDRHS[Phospho (STY)]TKS[Phospho (STY)]DLPVHTR_.3                    | 0.040868846  | Q80U49_S337_M2_Cep170b   |
| _QES[Phospho (STY)]FTKEPTSGPPAPGK_.3                                    | 0.13280159   | Q80U49_S862_M1_Cep170b   |
| _EIHDVAGDGDLSGS[Phospho (STY)]PGPTR_.2                                  | 0.052974907  | Q80U49_S1341_M1_Cep170b  |
| _GHGSRGS[Phospho (STY)]LDWPEEER_.3                                      | 0.011238965  | Q80U49_S1032_M1_Cep170b  |
| _GHKHEDGTQS[Phospho (STY)]DSEDPLAK_.3                                   | 0.059729703  | Q80U49_S360_M1_Cep170b   |
| _NGPS[Phospho (STY)]PTTPQTPGPQK_.2                                      | 0.096555927  | Q80U49_S965_M1_Cep170b   |
| _SNS[Phospho (STY)]LSTPRPTR_.2                                          | -0.187089253 | Q80U49_S1101_M1_Cep170b  |
| _RGHGS[Phospho (STY)]RGS[Phospho (STY)]LDWPEEER_.3                      | -0.008177942 | Q80U49_S1029_M2_Cep170b  |
| _S[Phospho (STY)]PSLGNVPNTASTISAR_.2                                    | -0.248860788 | Q80U49_S1347_M1_Cep170b  |
| _SNS[Phospho (STY)]LSTPR_.2                                             | 0.04009997   | Q80U49_S1101_M1_Cep170b  |
| _DSLPSDS[Phospho (STY)]PPITVQPQANNR_.2                                  | -0.209307598 | Q80U56_S368_M1_Avl9      |
| _TEKPYFQVEGNNNK_.2                                                      | -0.041280194 | #N/A                     |
| _RLS[Phospho (STY)]QSS[Phospho (STY)]LESATSPSC[Carbamidomethyl (C)]S_.2 | 0.058675828  | Q80U57_S294_M2_Rims3     |
| _LSQSS[Phospho (STY)]LESATSPSC[Carbamidomethyl (C)]S_.2                 | -0.077982142 | Q80U57_S297_M1_Rims3     |
| _SSS[Phospho (STY)]ISGEIC[Carbamidomethyl (C)]GSQQAGGGAGTTAK_.2         | -0.375914464 | Q80U57_S22_M1_Rims3      |
| _QGSRESTDGSTNS[Phospho (STY)]NSSEGTFIFPTR_.3                            | -0.251203333 | Q80U57_S114_M1_Rims3     |
| _QAS[Phospho (STY)]PTEVVER_.2                                           | -0.330549877 | Q80U58_S181_M1_Pum2      |
| _GKAS[Phospho (STY)]PFEEDQNR_.2                                         | -0.097311217 | Q80U58_S136_M1_Pum2      |
| _SAQTS[Phospho (STY)]LDS[Phospho (STY)]QEEATGILPK_.2                    | -0.118783003 | Q80U59_S1194_M2_Kiaa0232 |
| _KQES[Phospho (STY)]PLLVTK_.2                                           | -0.716769811 | Q80U62_S198_M1_Rubcn     |
| _ASM[Oxidation (M)]SEFLES[Phospho (STY)]EDGEVEQQR_.2                    | -0.571187609 | Q80U70_S548_M1_Suz12     |
| _NS[Phospho (STY)]LESISSIDR_.2                                          | -0.13757471  | Q80U72_S1206_M1_Scrib    |
| _M[Oxidation (M)]QS[Phospho (STY)]PELPAPER_.2                           | -0.462041889 | Q80U72_S1457_M1_Scrib    |
| _VS[Phospho (STY)]PTGAAGR_.2                                            | 0.021981815  | Q80U72_S1126_M1_Scrib    |
| _M[Oxidation (M)]KS[Phospho (STY)]LEQDALR_.2                            | 0.012368089  | Q80U72_S1490_M1_Scrib    |
| _EDGES[Phospho (STY)]EEGQPEAAWPLPSGR_.2                                 | 0.214977524  | Q80U72_S583_M1_Scrib     |
| _RDS[Phospho (STY)]LTGSSDLYKR_.3                                        | -0.481807655 | Q80U78_S710_M1_Pum1      |
| _RDS[Phospho (STY)]LTGSSDLYK_.2                                         | 0.05696725   | Q80U78_S710_M1_Pum1      |
| _S[Phospho (STY)]MDELNHDFQALALEGR_.3                                    | 0.084230234  | Q80U78_S124_M1_Pum1      |
| _SYS[Phospho (STY)]SPDITQALQEEEK_.2                                     | -0.236804388 | Q80U87_S680_M1_Usp8      |
| _SYS[Phospho (STY)]SPDITQALQEEEK_.2                                     | 0.198603133  | Q80U87_S680_M1_Usp8      |
| _RSY[Phospho (STY)]SSPDITQALQEEEK_.3                                    | 0.034859616  | Q80U87_Y679_M1_Usp8      |
| _S[Phospho (STY)]VENLLDSK_.2                                            | 0.147384333  | Q80U87_S153_M1_Usp8      |

|                                                                                                      |              |                         |
|------------------------------------------------------------------------------------------------------|--------------|-------------------------|
| _S[Phospho (STY)]FEVEEIEPPNSTPPR_.2                                                                  | -0.169471856 | Q80UG5_S30_M1_Septin9   |
| _S[Phospho (STY)]PKPSLR_.2                                                                           | 0.003022436  | Q80UG5_S85_M1_Septin9   |
| _YLQEEVNINR_.2                                                                                       | 0.327433601  | #N/A                    |
| _SVQPT[Phospho (STY)]SEERIPK_.2                                                                      | 0.426846681  | Q80UG5_T329_M1_Septin9  |
| _KSVQPTS[Phospho (STY)]EERIPK_.3                                                                     | -0.456388364 | Q80UG5_S330_M1_Septin9  |
| _S[Phospho (STY)]FEVEEIEPPNSTPPRR_.3                                                                 | -0.046499309 | Q80UG5_S30_M1_Septin9   |
| _KTS[Phospho (STY)]LSDSTTSAYPGDAGK_.2                                                                | -0.156846925 | Q80UJ7_S536_M1_Rab3gap1 |
| _FSVTHHYLVQES[Phospho (STY)]PDKER_.3                                                                 | -0.244436287 | Q80UJ7_S83_M1_Rab3gap1  |
| _ITVNGDS[Phospho (STY)]SAETEELANEI_.2                                                                | 0.135260229  | Q80UM3_S854_M1_Naa15    |
| _RPQNTLKAS[Phospho (STY)]K_.2                                                                        | -0.336450571 | Q80UP3_S259_M1_Dgkz     |
| _ESALSRAS[Phospho (STY)]DESLR_.2                                                                     | 0.354583287  | Q80UP8_S256_M1_Slc20a2  |
| _ESALSRAS[Phospho (STY)]DESLRK_.3                                                                    | 0.161760454  | Q80UP8_S256_M1_Slc20a2  |
| _AS[Phospho (STY)]DESLRK_.2                                                                          | -0.312707503 | Q80UP8_S256_M1_Slc20a2  |
| _ALS[Phospho (STY)]MTHGSAK_.2                                                                        | -0.028027346 | Q80UP8_S316_M1_Slc20a2  |
| _AS[Phospho (STY)]DES[Phospho (STY)]LRKVQEAESPGFK_.3                                                 | 0.2007445    | Q80UP8_S256_M2_Slc20a2  |
| _GLC[Carbamidomethyl (C)]SGPGAGEES[Phospho (STY)]PAATLPR_.2                                          | -0.272510465 | Q80UU9_S84_M1_Pgrmc2    |
| _DFS[Phospho (STY)]LEQLR_.2                                                                          | -0.210025282 | Q80UU9_S98_M1_Pgrmc2    |
| _LLKPGEEPSEYT[Phospho (STY)]DEEDTKDHSK_.4                                                            | 0.166285132  | Q80UU9_T205_M1_Pgrmc2   |
| _LLKPGEEPSEYT[Phospho (STY)]DEEDTK_.3                                                                | 0.415051677  | Q80UU9_T205_M1_Pgrmc2   |
| _VLAELPATELVQAC[Carbamidomethyl (C)]R_.2                                                             | -0.142204956 | #N/A                    |
| _TDAGSLYELTVR_.2                                                                                     | 0.528846993  | #N/A                    |
| _NPC[Carbamidomethyl (C)]GEEDLEGWS[Phospho (STY)]DVEHGGDGWR_.3                                       | -0.057639973 | Q80UW2_S141_M1_Fbxo2    |
| _C[Carbamidomethyl (C)]QQEGLVPEGs[Phospho (STY)]ADEERDHWQQFYFLSK_.4                                  | -0.283888114 | Q80UW2_S106_M1_Fbxo2    |
| _EAEAEAEAEVEYLAELPEPLLR_.3                                                                           | 0.46513156   | #N/A                    |
| _FEHGGQDSVYWK_.3                                                                                     | 0.179002441  | #N/A                    |
| _ [Acetyl (Protein N-term)]S[Phospho (STY)]RHEGVSC[Carbamidomethyl (C)]DAC[Carbamidomethyl (C)]LK_.2 | 0.293345041  | Q80UY2_S2_M1_Kcmf1      |
| _IIEQPEC[Carbamidomethyl (C)]SS[Phospho (STY)]PVIETER_.2                                             | -0.13836931  | Q80V94_S962_M1_Ap4e1    |
| _DLPDGHAVS[Phospho (STY)]PR_.2                                                                       | -0.308671546 | Q80VC9_S334_M1_Camsap3  |
| _AVASS[Phospho (STY)]PAANNSEVK_.2                                                                    | -0.19166675  | Q80VC9_S555_M1_Camsap3  |
| _RAS[Phospho (STY)]LLER_.2                                                                           | -0.252506508 | Q80VC9_S903_M1_Camsap3  |
| _NTETVPS[Phospho (STY)]QNNSGSSSPVFNFR_.2                                                             | 0.278677905  | Q80VC9_S343_M1_Camsap3  |
| _KFS[Phospho (STY)]PSQVPVQTR_.2                                                                      | -0.399652403 | Q80VC9_S812_M1_Camsap3  |
| _APSPSGLM[Oxidation (M)]S[Phospho (STY)]PSR_.2                                                       | -0.488885462 | Q80VC9_S1083_M1_Camsap3 |
| _RS[Phospho (STY)]PGPGPSPTPR_.2                                                                      | 0.269513696  | Q80VC9_S767_M1_Camsap3  |
| _SVS[Phospho (STY)]SDSLGPPRPVSTSSR_.3                                                                | -0.121326663 | Q80VC9_S431_M1_Camsap3  |
| _ [Acetyl (Protein N-term)]M[Oxidation (M)]DPQPPPPAQGS[Phospho (STY)]PPHR_.2                         | -0.192742241 | Q80VM4_S12_M1_Znf579    |
| _GSGTESAPSDTDAS[Phospho (STY)]LEVER_.2                                                               | -0.288834938 | Q80VP0_S418_M1_Tecpr1   |
| _TALPTSGS[Phospho (STY)]STGELELLAGEVPAR_.2                                                           | -0.518213067 | Q80VP1_S418_M1_Epn1     |
| _ [Acetyl (Protein N-term)]STSS[Phospho (STY)]LRR_.2                                                 | -0.357069044 | Q80VP1_S5_M1_Epn1       |
| _NIVHNYSEAEIK_.2                                                                                     | -0.131711505 | #N/A                    |
| _T[Phospho (STY)]PESFLGPNAALVDLDSLVSr_.2                                                             | -0.11727706  | Q80VP1_T469_M1_Epn1     |
| _ENMYAVQTLK_.2                                                                                       | -0.20745932  | #N/A                    |
| _HIETPATSS[Phospho (STY)]PK_.2                                                                       | -0.168124756 | Q80VY2_S281_M1_Inka2    |
| _GS[Phospho (STY)]PHLLR_.2                                                                           | -0.086995838 | Q80W04_S189_M1_Tmcc2    |
| _NKFGS[Phospho (STY)]ADNIAHLK_.3                                                                     | -0.279127514 | Q80W04_S435_M1_Tmcc2    |
| _ALSGSATLVSS[Phospho (STY)]PK_.2                                                                     | -0.327344155 | Q80W04_S467_M1_Tmcc2    |
| _NKFGS[Phospho (STY)]ADNIAHLKDPMEDGPPEEAAR_.4                                                        | -0.265841238 | Q80W04_S435_M1_Tmcc2    |

|                                                                                              |              |                       |
|----------------------------------------------------------------------------------------------|--------------|-----------------------|
| _C[Carbamidomethyl (C)]KS[Phospho (STY)]DELQQQQGEEDGAGMEDAAC[Carbamidomethyl (C)]LLPGADLR_.3 | -0.144409849 | Q80W04_S6_M1_Tmcc2    |
| _IRVDILENQLM[Oxidation (M)]DNR_.3                                                            | -0.126667878 | #N/A                  |
| _GAYVPSS[Phospho (STY)]PTR_.2                                                                | -0.237916376 | Q80W47_S395_M1_Wipi2  |
| _ELGGC[Carbamidomethyl (C)]SQAGNR_.2                                                         | -0.438475625 | #N/A                  |
| _SETNWES[Phospho (STY)]PK_.2                                                                 | -0.31028182  | Q80WJ7_S565_M1_Mtdh   |
| _SQEPISNDQKVS[Phospho (STY)]DDDKEK_.3                                                        | -0.025143843 | Q80WJ7_S423_M1_Mtdh   |
| _SETNWES[Phospho (STY)]PKQIK_.2                                                              | -0.303244986 | Q80WJ7_S565_M1_Mtdh   |
| _SETNWES[Phospho (STY)]PKQIKK_.2                                                             | -0.165904271 | Q80WJ7_S565_M1_Mtdh   |
| _S[Phospho (STY)]LDESTLRK_.2                                                                 | -0.058602792 | Q80WQ4_S253_M1_Trmt9b |
| _S[Phospho (STY)]LDESTLR_.2                                                                  | -0.048340135 | Q80WQ4_S253_M1_Trmt9b |
| _S[Phospho (STY)]HSM[Oxidation (M)]DYGSAVAR_.2                                               | -0.180855687 | Q80WQ4_S210_M1_Trmt9b |
| _SFS[Phospho (STY)]PGDFR_.2                                                                  | 0.08981582   | Q80WT5_S151_M1_Aftph  |
| _HLETHSS[Phospho (STY)]PAK_.2                                                                | -0.48154628  | Q80WT5_S680_M1_Aftph  |
| _S[Phospho (STY)]PDPDPTGQNALDDSAASK_.2                                                       | -0.624174382 | Q80WT5_S395_M1_Aftph  |
| _ARPAS[Phospho (STY)]TS[Phospho (STY)]PSPGTR_.2                                              | -0.098122831 | Q80WV7_S464_M2_Srrm3  |
| _RRDS[Phospho (STY)]PSFMEPR_.3                                                               | 0.287423963  | Q80WV7_S562_M1_Srrm3  |
| _RYPSSISS[Phospho (STY)]PQKDLTQAK_.3                                                         | -0.284103723 | Q80X50_S629_M1_Ubap2l |
| _RYPSSISS[Phospho (STY)]PQK_.2                                                               | -0.184715622 | Q80X50_S629_M1_Ubap2l |
| _YPSSISS[Phospho (STY)]PQK_.2                                                                | 0.015493249  | Q80X50_S629_M1_Ubap2l |
| _TATEEWGTEDWNEDLSEK_.2                                                                       | -0.291882583 | #N/A                  |
| _YPSSISS[Phospho (STY)]PQKDLTQAK_.2                                                          | 0.198514765  | Q80X50_S629_M1_Ubap2l |
| _NQDEC[Carbamidomethyl (C)]VIALHDC[Carbamidomethyl (C)]NGDVNR_.3                             | 0.081544424  | #N/A                  |
| _STSAPQMS[Phospho (STY)]PGSSDNQSSSPQAQK_.3                                                   | 0.113901498  | Q80X50_S487_M1_Ubap2l |
| _L[Acetyl (Protein N-term)]AGRPHYPDSNSS[Phospho (STY)]DPENWDR_.3                             | -0.485923701 | Q80X66_S13_M1_Btd10   |
| _NLGT[Phospho (STY)]PTSSTPR_.2                                                               | -0.387201289 | Q80X80_T417_M1_C2cd2l |
| _VDGKLD[Phospho (STY)]PSR_.2                                                                 | -0.072315159 | Q80X80_S464_M1_C2cd2l |
| _LDS[Phospho (STY)]PSRS[Phospho (STY)]PSKVEVTEK_.3                                           | 0.210734566  | Q80X80_S464_M2_C2cd2l |
| _NLGT[Phospho (STY)]PTS[Phospho (STY)]STPRPSITPTKK_.3                                        | 0.020395223  | Q80X80_S420_M2_C2cd2l |
| _LDS[Phospho (STY)]PSRSPSK_.2                                                                | -0.229340622 | Q80X80_S464_M1_C2cd2l |
| _KAGS[Phospho (STY)]FSR_.2                                                                   | -0.06864897  | Q80X80_S681_M1_C2cd2l |
| _EAGLSQS[Phospho (STY)]HDDLSTNTATPSVR_.3                                                     | -0.384758412 | Q80X80_S662_M1_C2cd2l |
| _S[Phospho (STY)]PSKVEVTEK_.2                                                                | -0.426951961 | Q80X80_S468_M1_C2cd2l |
| _TST[Phospho (STY)]PEEAGVR_.2                                                                | -0.031169305 | Q80X80_T79_M1_C2cd2l  |
| _KKAGS[Phospho (STY)]FSR_.2                                                                  | -0.176504884 | Q80X80_S681_M1_C2cd2l |
| _NLGT[Phospho (STY)]PTSSTPRPSIT[Phospho (STY)]PTK_.2                                         | -0.076483258 | Q80X80_T417_M2_C2cd2l |
| _ESHL[Phospho (STY)]NGLDPVAETAIR_.3                                                          | 0.07050228   | Q80X80_S502_M1_C2cd2l |
| _VDGKLD[Phospho (STY)]PSRS[Phospho (STY)]PSK_.2                                              | 0.082318927  | Q80X80_S464_M2_C2cd2l |
| _SLSPAATVTAELHYEQGS[Phospho (STY)]PR_.3                                                      | -0.447867444 | Q80X80_S411_M1_C2cd2l |
| _QKEAGLSQS[Phospho (STY)]HDDLSTNTATPSVR_.3                                                   | 0.243706664  | Q80X80_S662_M1_C2cd2l |
| _SDISERPSVDDVES[Phospho (STY)]ETGSTGALETR_.3                                                 | -0.000265397 | Q80X80_S619_M1_C2cd2l |
| _TSS[Phospho (STY)]PETREPEK_.2                                                               | 0.091336515  | Q80X82_S1276_M1_Sympk |
| _APS[Phospho (STY)]QAAESSPTK_.2                                                              | 0.018892396  | Q80XA6_S405_M1_Reps2  |
| _ASS[Phospho (STY)]LDLNL_.2                                                                  | -0.198075322 | Q80XA6_S354_M1_Reps2  |
| _LNS[Phospho (STY)]ELQQQLK_.2                                                                | -0.372233996 | Q80XA6_S492_M1_Reps2  |
| _VS[Phospho (STY)]LSHGYSK_.2                                                                 | -0.200871379 | Q80XA6_S67_M1_Reps2   |
| _SYS[Phospho (STY)]STSIIEAMK_.2                                                              | 0.018593271  | Q80XA6_S324_M1_Reps2  |
| _SFS[Phospho (STY)]VEREPQENNSNYPDEPWR_.3                                                     | -0.025708416 | Q80XA6_S119_M1_Reps2  |

|                                                                                 |              |                        |
|---------------------------------------------------------------------------------|--------------|------------------------|
| _APSQAAESSPT[Phospho (STY)]KMDAPHAQPPSKPIR_.4                                   | -0.314158337 | Q80XA6_T413_M1_Reps2   |
| _RGEDPPT[Phospho (STY)]PPPRPQK_.3                                               | 0.359672358  | Q80XA6_T340_M1_Reps2   |
| _SVGRPS[Phospho (STY)]PK_.2                                                     | -0.322732872 | Q80XC3_S394_M1_Usp6nl  |
| _GDNWYS[Phospho (STY)]JEDEDTDTEEYK_.2                                           | 0.302059997  | Q80XE1_S468_M1_Ric8b   |
| _AYEAVSIEQDDS[Phospho (STY)]PSLELGR_.2                                          | -0.458399785 | Q80XG9_S560_M1_Lrrtm4  |
| _TSS[Phospho (STY)]PTSLPLAR_.2                                                  | -0.429918668 | Q80XI3_S267_M1_Eif4g3  |
| _NPT[Phospho (STY)]PPIGR_.2                                                     | -0.277363229 | Q80XI3_T168_M1_Eif4g3  |
| _GSS[Phospho (STY)]KDLLDNQSQEEQRR_.3                                            | -0.200198971 | Q80XI3_S1151_M1_Eif4g3 |
| _GSS[Phospho (STY)]KDLLDNQSQEEQR_.2                                             | 0.19755809   | Q80XI3_S1151_M1_Eif4g3 |
| _T[Phospho (STY)]PDEVLEAEAPK_.2                                                 | 0.301329319  | Q80XI3_T513_M1_Eif4g3  |
| _AESES[Phospho (STY)]DGQAEETADPQSLHSGR_.3                                       | -0.133467414 | Q80XI3_S472_M1_Eif4g3  |
| _FGIDDQDYQNSVTR_.2                                                              | 0.059917541  | #N/A                   |
| _DFATAPPTS[Phospho (STY)]PAK_.2                                                 | -0.068083753 | Q80XK6_S1571_M1_Atg2b  |
| _LS[Phospho (STY)]PSWNPk_.2                                                     | -0.226228492 | Q80XK6_S255_M1_Atg2b   |
| _S[Phospho (STY)]SPVC[Carbamidomethyl (C)]STAPVETEPK_.2                         | -0.028020133 | Q80XK6_S239_M1_Atg2b   |
| _S[Phospho (STY)]PGADVTC[Carbamidomethyl (C)]SLPR_.2                            | -0.225802632 | Q80XK6_S1741_M1_Atg2b  |
| _SAS[Phospho (STY)]VDESRLFIC[Carbamidomethyl (C)]R_.2                           | -0.404658305 | Q80XK6_S496_M1_Atg2b   |
| _AFTEVFLDDSHS[Phospho (STY)]PANR_.3                                             | -0.470789323 | Q80XK6_S734_M1_Atg2b   |
| _VSVVEPGNFIAATSLYSPER_.2                                                        | -0.016904504 | #N/A                   |
| _FGIEAFSDC[Carbamidomethyl (C)]LR_.2                                            | 0.028884816  | #N/A                   |
| _AILITGC[Carbamidomethyl (C)]DSGFGFLAK_.2                                       | -0.563612085 | #N/A                   |
| _VNNISSMLGR_.2                                                                  | 0.466445351  | #N/A                   |
| _SPYC[Carbamidomethyl (C)]ITK_.2                                                | -0.350459503 | #N/A                   |
| _VSSL[Phospho (STY)]PEQEQLWK_.2                                                 | 0.008178634  | Q80XP8_S193_M1_Fam76b  |
| _EGETTVNTETSS[Phospho (STY)]PK_.2                                               | -0.516737637 | Q80XP9_S1039_M1_Wnk3   |
| _S[Phospho (STY)]VEM[Oxidation (M)]TEDDKVAESSR_.2                               | 0.268981851  | Q80XP9_S62_M1_Wnk3     |
| _TISSSPS[Phospho (STY)]IESLPGGR_.2                                              | 0.027902366  | Q80XQ2_S565_M1_Tbc1d5  |
| _EFTGS[Phospho (STY)]PPPSATK_.2                                                 | 0.092993698  | Q80XQ2_S578_M1_Tbc1d5  |
| _SES[Phospho (STY)]MPVQLNK_.2                                                   | 0.103585378  | Q80XQ2_S546_M1_Tbc1d5  |
| _Acetyl (Protein N-term)]M[Oxidation (M)]NPVYS[Phospho (STY)]PGSSGVPIYANAK_.2   | -0.358081516 | Q80XQ8_S6_M1_Fam168b   |
| _ATVTPS[Phospho (STY)]PVKGK_.2                                                  | -0.239009584 | Q80XU3_S181_M1_Nucks1  |
| _ATVTPS[Phospho (STY)]PVK_.2                                                    | -0.047749566 | Q80XU3_S181_M1_Nucks1  |
| _LKATVTPS[Phospho (STY)]PVK_.2                                                  | -0.409118982 | Q80XU3_S181_M1_Nucks1  |
| _TPSPKEEDEEAES[Phospho (STY)]PPEKK_.3                                           | -0.048186939 | Q80XU3_S214_M1_Nucks1  |
| _EEDEEAES[Phospho (STY)]PPEKK_.2                                                | -0.57330972  | Q80XU3_S214_M1_Nucks1  |
| _KVVDYSQFQES[Phospho (STY)]DDADEDYGRDSGPPAK_.4                                  | -0.192004497 | #N/A                   |
| _KVVDYSQFQES[Phospho (STY)]DDADEDYGR_.3                                         | 0.176966635  | #N/A                   |
| _VVDYSQFQESDDADEDY[Phospho (STY)]GRDSGPPAK_.3                                   | -0.282218703 | Q80XU3_Y26_M1_Nucks1   |
| _LKATVT[Phospho (STY)]PS[Phospho (STY)]PVKGK_.2                                 | 0.048225537  | Q80XU3_S181_M2_Nucks1  |
| _NSQEDS[Phospho (STY)]EDS[Phospho (STY)]EEKDVK_.2                               | -0.363316077 | Q80XU3_S58_M2_Nucks1   |
| _VVDYSQFQES[Phospho (STY)]DDADEDYGR_.2                                          | 0.272684903  | #N/A                   |
| _VVDYSQFQES[Phospho (STY)]DDADEDYGRDSGPPAK_.4                                   | 0.02723752   | #N/A                   |
| _SGKNS[Phospho (STY)]QEDS[Phospho (STY)]EDS[Phospho (STY)]EEKDVK_.2             | -0.07683433  | Q80XU3_S54_M3_Nucks1   |
| _DDSHS[Phospho (STY)]AEDS[Phospho (STY)]EDEKDDHKNVR_.4                          | 0.129588893  | Q80XU3_S75_M2_Nucks1   |
| _EM[Oxidation (M)]LLEDVGS[Phospho (STY)]EEEPEEDDEAPFQEK_.3                      | -0.09183352  | Q80XU3_S113_M1_Nucks1  |
| _KDDS[Phospho (STY)]HS[Phospho (STY)]AEDS[Phospho (STY)]EDEKDDHK_.4             | -0.054079552 | Q80XU3_S73_M3_Nucks1   |
| _SC[Carbamidomethyl (C)]S[Phospho (STY)]LDLGDGTGGC[Carbamidomethyl (C)]YGYAR_.2 | -0.171707614 | Q80XU8_S585_M1_Lrfrn4  |

|                                                                             |              |                         |
|-----------------------------------------------------------------------------|--------------|-------------------------|
| _GVGGS[Phospho (STY)]AERLEESVV_.2                                           | -0.009406953 | Q80XU8_S627_M1_Lrfn4    |
| _SALVDEKDQDS[Phospho (STY)]K_.2                                             | -0.163760376 | Q80Y14_S151_M1_Glrx5    |
| _S[Phospho (STY)]LRQS[Phospho (STY)]FRR_.2                                  | 0.058889182  | Q80Y17_S658_M2_Llg1     |
| _S[Phospho (STY)]LRQS[Phospho (STY)]FR_.2                                   | -0.26087189  | Q80Y17_S658_M2_Llg1     |
| _DIILAPES[Phospho (STY)]C[Carbamidomethyl (C)]EGS[Phospho (STY)]PSSAHSKR_.3 | -0.474932132 | Q80Y17_S982_M2_Llg1     |
| _DIILAPESC[Carbamidomethyl (C)]EGS[Phospho (STY)]PSSAHSK_.2                 | -0.178396321 | Q80Y17_S986_M1_Llg1     |
| _S[Phospho (STY)]FQESLGQGSR_.2                                              | -0.14487981  | Q80Y24_S732_M1_Prickle2 |
| _YVTS[Phospho (STY)]DELLHK_.2                                               | 0.203854327  | Q80Y24_S807_M1_Prickle2 |
| _AC[Carbamidomethyl (C)]SAGEDPNGS[Phospho (STY)]DSSDSAFQNR_.2               | 0.182236478  | Q80Y24_S319_M1_Prickle2 |
| _S[Phospho (STY)]DNALHLASER_.2                                              | -0.492473874 | Q80Y24_S696_M1_Prickle2 |
| _GHGGS[Phospho (STY)]FIQEC[Carbamidomethyl (C)]R_.2                         | 0.127002499  | Q80Y24_S463_M1_Prickle2 |
| _S[Phospho (STY)]REEPFHYGNK_.3                                              | 0.018180681  | Q80Y24_S396_M1_Prickle2 |
| _SRS[Phospho (STY)]DNALHLASER_.3                                            | 0.033840899  | Q80Y24_S696_M1_Prickle2 |
| _QRS[Phospho (STY)]FQESLGQGSR_.2                                            | -0.092204266 | Q80Y24_S732_M1_Prickle2 |
| _GS[Phospho (STY)]M[Oxidation (M)]ESLALSNTGLSAEGGAK_.2                      | -0.144237296 | Q80Y24_S544_M1_Prickle2 |
| _YTEDM[Oxidation (M)]T[Phospho (STY)]PTEQTPR_.2                             | -0.125209944 | Q80Y24_T535_M1_Prickle2 |
| _TVS[Phospho (STY)]DLALQNAFGER_.2                                           | 0.159239357  | Q80Y24_S754_M1_Prickle2 |
| _M[Oxidation (M)]HQS[Phospho (STY)]FDFDGGIASSK_.2                           | -0.066974776 | Q80Y24_S643_M1_Prickle2 |
| _LMS[Phospho (STY)]QESYSMDSSQSFNETR_.2                                      | 0.404534813  | Q80Y24_S479_M1_Prickle2 |
| _LPGQEGVHIQPMs[Phospho (STY)]ER_.3                                          | 0.293696511  | Q80Y24_S667_M1_Prickle2 |
| _ADQSISEEPGWEEEELEGIVPS[Phospho (STY)]PK_.3                                 | 0.09105359   | Q80Y55_S234_M1_Bsdc1    |
| _DSLSTHTS[Phospho (STY)]PSQS[Phospho (STY)]PNSVHGSR_.3                      | 0.234890804  | Q80Y56_S214_M2_Rbsn     |
| _Acetyl (Protein N-term)]AS[Phospho (STY)]LDDPGEVN_.2                       | -0.052690008 | Q80Y56_S3_M1_Rbsn       |
| _TS[Phospho (STY)]PNRLS[Phospho (STY)]PK_.2                                 | -0.212349635 | Q80Y81_S195_M2_Elac2    |
| _AHTDEPHS[Phospho (STY)]PQSK_.2                                             | 0.002308138  | Q80Y81_S815_M1_Elac2    |
| _QQPS[Phospho (STY)]QSPRTS[Phospho (STY)]PNRLS[Phospho (STY)]PK_.3          | 0.454081041  | Q80Y81_S189_M3_Elac2    |
| _QQPSQS[Phospho (STY)]PR_.2                                                 | 0.209240079  | Q80Y81_S191_M1_Elac2    |
| _TDEPDS[Phospho (STY)]PSSR_.2                                               | -0.273138727 | Q80Y83_S287_M1_Dixdc1   |
| _GSES[Phospho (STY)]PNSFLDQEYR_.2                                           | -0.430566828 | Q80YA9_S390_M1_Cnksr2   |
| _RENS[Phospho (STY)]LLR_.2                                                  | -0.185849888 | Q80YA9_S467_M1_Cnksr2   |
| _LGDS[Phospho (STY)]LQDLR_.2                                                | 0.144407069  | Q80YA9_S906_M1_Cnksr2   |
| _GSES[Phospho (STY)]PNSFLDQEYRK_.2                                          | 0.182737407  | Q80YA9_S390_M1_Cnksr2   |
| _STYDGLHVITGTTENS[Phospho (STY)]PADR_.3                                     | 0.131863536  | Q80YA9_S248_M1_Cnksr2   |
| _QEVTGSSAVS[Phospho (STY)]PIRK_.2                                           | 0.091225695  | Q80YA9_S756_M1_Cnksr2   |
| _QEVTGSSAVS[Phospho (STY)]PIR_.2                                            | -0.357744434 | Q80YA9_S756_M1_Cnksr2   |
| _IKQEQQDYWS[Phospho (STY)]ES[Phospho (STY)]DKEEADTPSTPK_.3                  | -0.253022177 | Q80YA9_S685_M2_Cnksr2   |
| _EEKLGDS[Phospho (STY)]LQDLR_.2                                             | -0.102495619 | Q80YA9_S906_M1_Cnksr2   |
| _SPTSSVATPSSTIS[Phospho (STY)]T[Phospho (STY)]PTKR_.2                       | -0.172096224 | Q80YA9_S338_M2_Cnksr2   |
| _EQDLRS[Phospho (STY)]PPS[Phospho (STY)]PGHQSVQAFPR_.3                      | 0.225918219  | Q80YE4_S1032_M2_Aatk    |
| _AVDSGYDTENYES[Phospho (STY)]PEFVLK_.2                                      | -0.018571379 | Q80YE4_S950_M1_Aatk     |
| _SPPS[Phospho (STY)]PGHQSVQAFPR_.3                                          | 0.037504333  | Q80YE4_S1035_M1_Aatk    |
| _AS[Phospho (STY)]PEVGHLLSQEDPR_.2                                          | -0.402390139 | Q80YE4_S718_M1_Aatk     |
| _QQS[Phospho (STY)]DGSILVR_.2                                               | -0.510322403 | Q80YF9_S995_M1_Arhgap33 |
| _TPAS[Phospho (STY)]PVER_.2                                                 | -0.421796509 | Q80YF9_S594_M1_Arhgap33 |
| _TSAWLDDGDDDFS[Phospho (STY)]PPR_.2                                         | 0.042576667  | Q80YF9_S749_M1_Arhgap33 |
| _S[Phospho (STY)]AKSEESLSSQASGAGLQR_.3                                      | -0.516402731 | Q80YF9_S657_M1_Arhgap33 |
| _AQQVAEQSQEQGGTPPAPHS[Phospho (STY)]PFR_.3                                  | 0.221392175  | Q80YF9_S949_M1_Arhgap33 |

|                                                                                 |              |                        |
|---------------------------------------------------------------------------------|--------------|------------------------|
| _RQS[Phospho (STY)]LGGFLK_.2                                                    | -0.510815528 | Q80YN3_S601_M1_Bcas1   |
| _LGLS[Phospho (STY)]FRK_.2                                                      | -0.265740665 | Q80YN3_S347_M1_Bcas1   |
| _ANFTPQETR_.2                                                                   | -0.001370684 | #N/A                   |
| _AGPTS[Phospho (STY)]LPLGK_.2                                                   | -0.1485699   | Q80YN3_S414_M1_Bcas1   |
| _TLVSPNKTETK_.2                                                                 | -0.261706841 | #N/A                   |
| _ADS[Phospho (STY)]VC[Carbamidomethyl (C)]DGHAAGQK_.2                           | 0.276296078  | Q80YN3_S316_M1_Bcas1   |
| _M[Oxidation (M)]SDAQVQTDVPSIGPVGK_.2                                           | -0.249413648 | #N/A                   |
| _TPS[Phospho (STY)]PPEPEPAGTAQK_.2                                              | 0.077917743  | Q80YN3_S525_M1_Bcas1   |
| _EPAPC[Carbamidomethyl (C)]VQPPTVEANAM[Oxidation (M)]QTGDKT[Phospho (STY)]PK_.3 | -0.337423431 | Q80YN3_T591_M1_Bcas1   |
| _SC[Carbamidomethyl (C)]S[Phospho (STY)]PPPPPEPTSEGR_.2                         | 0.216581181  | Q80YN3_S390_M1_Bcas1   |
| _RM[Oxidation (M)]S[Phospho (STY)]DAQVQTDVPSIGPVGK_.3                           | -0.319836297 | Q80YN3_S615_M1_Bcas1   |
| _S[Phospho (STY)]VKEDTLSTGAEEHAVC[Carbamidomethyl (C)]ESPVETVR_.3               | -0.174798096 | Q80YN3_S425_M1_Bcas1   |
| _KS[Phospho (STY)]VKEDTLSTGAEEHAVC[Carbamidomethyl (C)]ESPVETVR_.3              | -0.041178206 | Q80YN3_S425_M1_Bcas1   |
| _EDTLSTGAEEHAVC[Carbamidomethyl (C)]ES[Phospho (STY)]PVETVR_.3                  | -0.117895483 | Q80YN3_S443_M1_Bcas1   |
| _QS[Phospho (STY)]LGGFLK_.2                                                     | 0.013937902  | Q80YN3_S601_M1_Bcas1   |
| _MEEEGS[Phospho (STY)]EDNGLEEDSR_.2                                             | -0.289520495 | Q80YR5_S95_M1_Safb2    |
| _SGTSSPQS[Phospho (STY)]PVFR_.2                                                 | -0.2952247   | Q80YS6_S669_M1_Afap1   |
| _LC[Carbamidomethyl (C)]SSSS[Phospho (STY)]SDTSPR_.2                            | -0.272296693 | Q80YV2_S409_M1_Zc3hc1  |
| _SQDATVSPGSEQS[Phospho (STY)]EKSPGPVSR_.3                                       | -0.090618954 | Q80YV2_S340_M1_Zc3hc1  |
| _SQDATVS[Phospho (STY)]PGSEQSEK_.2                                              | 0.286087474  | Q80YV2_S334_M1_Zc3hc1  |
| _DTAATFQSVDGS[Phospho (STY)]PQAEQSPLETSK_.3                                     | -0.202773838 | Q80YV2_S62_M1_Zc3hc1   |
| _SWESSSPVDRPELEAAS[Phospho (STY)]PTTR_.3                                        | 0.185518731  | Q80YV2_S369_M1_Zc3hc1  |
| _VRS[Phospho (STY)]FDHPGK_.2                                                    | -0.278302711 | Q80YV4_S63_M1_Pank4    |
| _VIVNFAPTIQEIK_.2                                                               | -0.357851958 | #N/A                   |
| _DQAGEYEC[Carbamidomethyl (C)]SAENDVSFPDVK_.2                                   | -0.034458635 | #N/A                   |
| _LFNGQQGIIQNFSTR_.2                                                             | -0.201787984 | #N/A                   |
| _LQQTVPADAS[Phospho (STY)]PDSK_.2                                               | -0.373920415 | Q80Z37_S99_M1_Topors   |
| _APSPVVS[Phospho (STY)]PTELSK_.2                                                | -0.493786954 | Q80Z38_S1338_M1_Shank2 |
| _NSPAFLS[Phospho (STY)]TDLGDEDVGLGPPAPR_.3                                      | -0.133787923 | Q80Z38_S729_M1_Shank2  |
| _RNSPAFLS[Phospho (STY)]TDLGDEDVGLGPPAPR_.3                                     | -0.127237517 | Q80Z38_S729_M1_Shank2  |
| _QSNVEDS[Phospho (STY)]PEK_.2                                                   | 0.200246367  | Q80Z38_S648_M1_Shank2  |
| _TIVAAGS[Phospho (STY)]VEEAVILPFR_.2                                            | -0.076503689 | Q80Z38_S1005_M1_Shank2 |
| _S[Phospho (STY)]KSM[Oxidation (M)]TAELEELGLSLVVK_.3                            | -0.592720397 | Q80Z38_S370_M1_Shank2  |
| _ELDRFS[Phospho (STY)]LDSEDVYSR_.2                                              | 0.345005453  | Q80Z38_S586_M1_Shank2  |
| _S[Phospho (STY)]NSDNNLNAGAPEWAVC[Carbamidomethyl (C)]SAATSHR_.3                | -0.164238277 | Q80Z38_S41_M1_Shank2   |
| _ANVISELNSILQQM[Oxidation (M)]NR_.2                                             | -0.350236501 | #N/A                   |
| _QSNVEDSPEKTC[Carbamidomethyl (C)]S[Phospho (STY)]IPIPTIIVK_.3                  | -0.229783153 | Q80Z38_S654_M1_Shank2  |
| _DNEGFGFVLR_.2                                                                  | -0.294194932 | #N/A                   |
| _RAPSPVVS[Phospho (STY)]PTELSK_.2                                               | -0.085414979 | Q80Z38_S1338_M1_Shank2 |
| _RELDIFS[Phospho (STY)]LDSEDVYSR_.3                                             | -0.180728241 | Q80Z38_S586_M1_Shank2  |
| _IFLSGITEER_.2                                                                  | -0.266734633 | #N/A                   |
| _SM[Oxidation (M)]T[Phospho (STY)]AELEELGLSLVVK_.2                              | -0.439283864 | Q80Z38_T374_M1_Shank2  |
| _RM[Oxidation (M)]S[Phospho (STY)]DPESVSSVFSPTPIVV_.2                           | -0.186796105 | Q80ZD8_S476_M1_Amigo1  |
| _SETGSTISM[Oxidation (M)]SS[Phospho (STY)]LER_.2                                | -0.109515705 | Q80ZF8_S1411_M1_Adgrb3 |
| _QSPS[Phospho (STY)]AGVHTFC[Carbamidomethyl (C)]DR_.2                           | -0.387840762 | Q80ZK9_S229_M1_Wdtdc1  |
| _KDS[Phospho (STY)]ISEDEM[Oxidation (M)]VLR_.2                                  | -0.522883367 | Q80ZK9_S511_M1_Wdtdc1  |
| _GC[Carbamidomethyl (C)]IS[Phospho (STY)]PQVELPPYLER_.2                         | 0.088659557  | Q80ZK9_S352_M1_Wdtdc1  |

|                                                                      |              |                        |
|----------------------------------------------------------------------|--------------|------------------------|
| _ESGVDP SQVLLS[Phospho (STY)]PDSSEAAR_.2                             | 0.174576716  | Q80ZX8_S703_M1_Spag1   |
| _YM[Oxidation (M)]AENPTAGVVQEEEEEDNLEY[Phospho (STY)]DSDGNPIAPSKK_.4 | 0.402305669  | Q810A7_Y183_M1_Ddx42   |
| _ESGAAEQVDNK_.2                                                      | 0.354955141  | #N/A                   |
| _VYDC[Carbamidomethyl (C)]GSHSL[Phospho (STY)]D_.2                   | -0.033345629 | Q810C1_S695_M1_Slitrk1 |
| _NLILAPGEDGR_.2                                                      | -0.102317345 | #N/A                   |
| _DLELTDLAER_.2                                                       | -0.041067131 | #N/A                   |
| _DNILIEC[Carbamidomethyl (C)]EAK_.2                                  | 0.140050868  | #N/A                   |
| _YVVGQTPVYVPYAIR_.2                                                  | 0.318267071  | #N/A                   |
| _EVAGDTIIFR_.2                                                       | 0.415549093  | #N/A                   |
| _EDDSLTFGVAER_.2                                                     | 0.011764768  | #N/A                   |
| _AYLTVLADQATPTNR_.2                                                  | 0.163006073  | #N/A                   |
| _LDC[Carbamidomethyl (C)]PFFGSPITLR_.2                               | 0.358475149  | #N/A                   |
| _ITNVSEEDSGEYFC[Carbamidomethyl (C)]LASNK_.2                         | -0.09459428  | #N/A                   |
| _VIAVNEVGSSHPSLPSE_.2                                                | 0.116246352  | #N/A                   |
| _GTTVQLEC[Carbamidomethyl (C)]R_.2                                   | 0.000282142  | #N/A                   |
| _SGTLVIDFR_.2                                                        | 0.173273155  | #N/A                   |
| _DQGSYTC[Carbamidomethyl (C)]MASTELDQDLAK_.2                         | -0.319061384 | #N/A                   |
| _DKEETEGNESSEATS[Phospho (STY)]PVNAIYSLA_.3                          | -0.140441198 | Q810U3_S1231_M1_Nfasc  |
| _SVQLTWTPGDDNNSPITK_.2                                               | -0.401265764 | #N/A                   |
| _GFHTPEGVPSAPSSLK_.3                                                 | -0.29973056  | #N/A                   |
| _DNGELPNDER_.2                                                       | 0.047610856  | #N/A                   |
| _ENIVIQ[Carbamidomethyl (C)]EAK_.2                                   | 0.414635368  | #N/A                   |
| _DSTGTYTC[Carbamidomethyl (C)]VAR_.2                                 | 0.550307184  | #N/A                   |
| _EDDGTGFEYS[Phospho (STY)]DAEDHKPLK_.3                               | 0.077753089  | Q810U4_S1178_M1_Nrcam  |
| _NEVHLEIKDPTR_.3                                                     | 0.199218848  | #N/A                   |
| _ISWLTNGVPIEIALDDPSR_.2                                              | -0.400446083 | #N/A                   |
| _TLQITHVSEADSGNYQC[Carbamidomethyl (C)]IAK_.3                        | -0.187113308 | #N/A                   |
| _HQAQVSGTQTAAQLK_.3                                                  | -0.293323256 | #N/A                   |
| _EPAEGNESSEAPS[Phospho (STY)]PVNAMNSFV_.2                            | -0.513153784 | Q810U4_S1247_M1_Nrcam  |
| _EKEPAEGNESSEAPS[Phospho (STY)]PVNAM[Oxidation (M)]NSFV_.3           | -0.11781274  | Q810U4_S1247_M1_Nrcam  |
| _AETYEYVYQC[Carbamidomethyl (C)]TAR_.2                               | 0.182930521  | #N/A                   |
| _RFST[Phospho (STY)]EEFVLL_.2                                        | 0.103673227  | Q811C2_T452_M1_Atg4c   |
| _DFDFTSTAAS[Phospho (STY)]EEDLFSEDERK_.3                             | 0.527466826  | Q811C2_S434_M1_Atg4c   |
| _DYHFVTSR_.2                                                         | -0.370644322 | #N/A                   |
| _AVEALKEAGS[Phospho (STY)]IVR_.2                                     | -0.401751452 | Q811D0_S301_M1_Dlg1    |
| _QVTPDGESDEVGVIPSKR_.3                                               | 0.047192031  | #N/A                   |
| _QIIEEQSGPYIWWPAK_.2                                                 | 0.294965382  | #N/A                   |
| _VNDC[Carbamidomethyl (C)]ILR_.2                                     | 0.340140466  | #N/A                   |
| _IISVNSVDLR_.2                                                       | -0.157217771 | #N/A                   |
| _IIEGGAHK_.2                                                         | 0.196598808  | #N/A                   |
| _IITGGAAQDGR_.2                                                      | 0.103497124  | #N/A                   |
| _EQM[Oxidation (M)]M[Oxidation (M)]NSSVSSGSGS[Phospho (STY)]LR_.2    | -0.582103701 | Q811D0_S575_M1_Dlg1    |
| _ALFDYDK_.2                                                          | -0.196622912 | #N/A                   |
| _NLSEIENVHGFVSHSHIS[Phospho (STY)]PIK_.3                             | -0.009249517 | Q811D0_S158_M1_Dlg1    |
| _T[Phospho (STY)]KDSGLPSQGLNFR_.3                                    | -0.0150333   | Q811D0_T595_M1_Dlg1    |
| _HC[Carbamidomethyl (C)]ILDVSGNAIK_.2                                | -0.154075814 | #N/A                   |
| _HVTSNAS[Phospho (STY)]DSESSYR_.2                                    | 0.000958862  | Q811D0_S688_M1_Dlg1    |



|                                                                      |              |                          |
|----------------------------------------------------------------------|--------------|--------------------------|
| _AASHEQAAAAALK_.2                                                    | 0.346043982  | #N/A                     |
| _TRGDKGEIPDDM[Oxidation (M)]GS[Phospho (STY)]K_.3                    | -0.385667161 | Q811D0_S677_M1_Dlg1      |
| _FIEAGQYNNHLYGTSVQSVR_.3                                             | 0.139885078  | #N/A                     |
| _NAGQAVTIVAQYRPEEYSR_.3                                              | -0.443733212 | #N/A                     |
| _EAGS[Phospho (STY)]IVR_.2                                           | -0.166851355 | Q811D0_S301_M1_Dlg1      |
| _RGS[Phospho (STY)]GLPPEGADGSGVSELEANPFYDR_.3                        | -0.147812874 | Q811I0_S52_M1_Atpaf1     |
| _TPSPTQPTS[Phospho (STY)]PQR_.2                                      | 0.255997738  | Q811L6_S1389_M1_Mast4    |
| _SDS[Phospho (STY)]LPSFR_.2                                          | 0.194814934  | Q811L6_S2517_M1_Mast4    |
| _KHS[Phospho (STY)]LEVTQEEVQR_.3                                     | -0.076713338 | Q811L6_S1465_M1_Mast4    |
| _SLSYSAS[Phospho (STY)]FPEAQGVVR_.2                                  | 0.081302146  | Q811L6_S2461_M1_Mast4    |
| _AVS[Phospho (STY)]PEGDER_.2                                         | -0.437778935 | Q811P8_S1823_M1_Arhgap32 |
| _DVINRS[Phospho (STY)]PTQLQLGK_.2                                    | 0.078704414  | Q811P8_S952_M1_Arhgap32  |
| _S[Phospho (STY)]PTQLQLGK_.2                                         | -0.185389493 | Q811P8_S952_M1_Arhgap32  |
| _TQAQVSS[Phospho (STY)]PIVTENK_.2                                    | 0.055489742  | Q811P8_S613_M1_Arhgap32  |
| _NES[Phospho (STY)]EPSEM[Oxidation (M)]K_.2                          | -0.050825706 | Q811P8_S682_M1_Arhgap32  |
| _KLHDM[Oxidation (M)]GC[Carbamidomethyl (C)]S[Phospho (STY)]LPEHR_.3 | -0.432364946 | Q811P8_S1876_M1_Arhgap32 |
| _LSPFFTLDL[Phospho (STY)]PTDDK_.2                                    | 0.071792065  | Q811P8_S871_M1_Arhgap32  |
| _DAEAGGSQSQTPGSTASSEPV[Phospho (STY)]PVQEK_.3                        | -0.398172901 | Q811P8_S856_M1_Arhgap32  |
| _S[Phospho (STY)]SSDALSFNGDVLGVR_.2                                  | -0.370684909 | Q811P8_S730_M1_Arhgap32  |
| _SAKS[Phospho (STY)]EESLTLHAVDGDGSK_.3                               | -0.37225885  | Q811P8_S706_M1_Arhgap32  |
| _SLLVSS[Phospho (STY)]PSTK_.2                                        | -0.115948155 | Q811P8_S592_M1_Arhgap32  |
| _S[Phospho (STY)]EESLTLHAVDGDGSK_.2                                  | 0.219600992  | Q811P8_S706_M1_Arhgap32  |
| _LSS[Phospho (STY)]RDFAFYNPR_.2                                      | 0.29761903   | Q811P8_S1689_M1_Arhgap32 |
| _S[Phospho (STY)]FFNLGK_.2                                           | 0.060477625  | Q811P8_S662_M1_Arhgap32  |
| _AES[Phospho (STY)]FPGHSC[Carbamidomethyl (C)]GFAAPVPPTR_.3          | 0.041595838  | Q811P8_S1405_M1_Arhgap32 |
| _QS[Phospho (STY)]PVSSPTR_.2                                         | -0.27342491  | Q811Q9_S319_M1_Pcyt1b    |
| _M[Oxidation (M)]LQALS[Phospho (STY)]PK_.2                           | -0.104269659 | Q811Q9_S315_M1_Pcyt1b    |
| _AASASIS[Phospho (STY)]MS[Phospho (STY)]EGDEDEK_.2                   | -0.243341057 | Q811Q9_S360_M2_Pcyt1b    |
| _MLQALS[Phospho (STY)]PKQS[Phospho (STY)]PVSSPTR_.2                  | 0.050238751  | Q811Q9_S315_M2_Pcyt1b    |
| _GRIES[Phospho (STY)]PEK_.2                                          | -0.325670365 | Q812A2_S908_M1_Srgap3    |
| _GRIES[Phospho (STY)]PEKR_.2                                         | -0.163419427 | Q812A2_S908_M1_Srgap3    |
| _SGGDTHS[Phospho (STY)]PPR_.2                                        | -0.154671526 | Q812A2_S874_M1_Srgap3    |
| _ADSEASS[Phospho (STY)]GPLLDDK_.2                                    | 0.084693814  | Q812A2_S821_M1_Srgap3    |
| _SSS[Phospho (STY)]SSSGVGSPAVTPTEK_.2                                | -0.590579623 | Q812A2_S1070_M1_Srgap3   |
| _RRS[Phospho (STY)]GGDTHS[Phospho (STY)]PPR_.2                       | 0.044637362  | Q812A2_S868_M2_Srgap3    |
| _IES[Phospho (STY)]PEKR_.2                                           | -0.094386936 | Q812A2_S908_M1_Srgap3    |
| _NDLQS[Phospho (STY)]PTEHISDYFGGVM[Oxidation (M)]GR_.3               | 0.07616612   | Q812A2_S837_M1_Srgap3    |
| _SGGDTHS[Phospho (STY)]PPRGLGPSIDTPPR_.3                             | -0.094382627 | Q812A2_S874_M1_Srgap3    |
| _MATFGS[Phospho (STY)]AGSINYDPDK_.2                                  | -0.220033999 | Q812A2_S919_M1_Srgap3    |
| _LRS[Phospho (STY)]DGAaipr_.2                                        | -0.223962816 | Q812A2_S858_M1_Srgap3    |
| _AAAC[Carbamidomethyl (C)]PSS[Phospho (STY)]PHKIPLSR_.3              | 0.236822751  | Q812A2_S895_M1_Srgap3    |
| _HSS[Phospho (STY)]LGDHKS[Phospho (STY)]LEAEALAEDIEK_.3              | -0.22841335  | Q812A2_S948_M2_Srgap3    |
| _SLEAEALAEDIEK_.2                                                    | -0.138895658 | #N/A                     |
| _S[Phospho (STY)]SPTPHSGPC[Carbamidomethyl (C)]PSR_.2                | 0.142688687  | Q812A5_S310_M1_Prr5      |
| _LLDAVDYIPVPTR_.2                                                    | 0.217884783  | #N/A                     |
| _GTVVTGTLER_.2                                                       | 0.442259355  | #N/A                     |
| _AEAGDNLGALVR_.2                                                     | -0.204139198 | #N/A                     |

|                                                                                                            |              |                        |
|------------------------------------------------------------------------------------------------------------|--------------|------------------------|
| _TVVTGIEM[Oxidation (M)]FHK_.2                                                                             | -0.118442662 | #N/A                   |
| _TIGTGLVTDVPAM[Oxidation (M)]TEEDKNIK_.3                                                                   | -0.325938431 | #N/A                   |
| _KYEEIDNAPEER_.3                                                                                           | 0.201143943  | #N/A                   |
| _KGDEC[Carbamidomethyl (C)]ELLGHNK_.3                                                                      | 0.08518189   | #N/A                   |
| _TTLTAATK_.2                                                                                               | 0.415142478  | #N/A                   |
| _YEEIDNAPEER_.2                                                                                            | 0.103942854  | #N/A                   |
| _ILAEGGGAK_.2                                                                                              | 0.327160046  | #N/A                   |
| _ELAM[Oxidation (M)]PGEDLK_.2                                                                              | 0.360151906  | #N/A                   |
| _ELLTEFGYKGEETPVIVGSALC[Carbamidomethyl (C)]ALEQR_.3                                                       | -0.120484974 | #N/A                   |
| _GEETPVIVGSALC[Carbamidomethyl (C)]ALEQR_.2                                                                | -0.301996966 | #N/A                   |
| _GDEC[Carbamidomethyl (C)]ELLGHNK_.2                                                                       | -0.179762928 | #N/A                   |
| _NM[Oxidation (M)]ITGTAPLDGC[Carbamidomethyl (C)]ILVVAANDGPM[Oxidation (M)]PQTR_.3                         | -0.094146564 | #N/A                   |
| _GITINAAHVEYSTAAR_.2                                                                                       | 0.168964065  | #N/A                   |
| _ADAVQDSEM[Oxidation (M)]VELVELEIR_.2                                                                      | -0.292153914 | #N/A                   |
| _DKPHVNVGTIGHVDH GK_.4                                                                                     | -0.187679449 | #N/A                   |
| _HYAHTDC[Carbamidomethyl (C)]PGHADYVK_.3                                                                   | -0.113289703 | #N/A                   |
| _QIGVEHV VVYV NK_.2                                                                                        | -0.058070518 | #N/A                   |
| _SEDDAAS[Phospho (STY)]GEHDIQIEGVR_.3                                                                      | -0.007972574 | Q8BFT9_S31_M1_Svop     |
| _RTGESARS[Phospho (STY)]EDDAAS[Phospho (STY)]GEHDIQIEGVR_.4                                                | -0.007740475 | Q8BFT9_S25_M2_Svop     |
| _SDESLPDGLS[Phospho (STY)]PK_.2                                                                            | -0.142814144 | Q8BFU3_S36_M1_Rnf214   |
| _VDQDDDDQS[Phospho (STY)]SSLK_.2                                                                           | -0.188168187 | Q8BFU3_S194_M1_Rnf214  |
| _ [Acetyl (Protein N-term)]AASEVAGLGAGT[Phospho (STY)]PS[Phospho (STY)]PSESSALC[Carbamidomethyl (C)]ASK_.3 | -0.092996083 | Q8BFU3_S15_M2_Rnf214   |
| _NLS[Phospho (STY)]PPSVSSQMITK_.2                                                                          | 0.118904306  | Q8BFU3_S48_M1_Rnf214   |
| _VC[Carbamidomethyl (C)]TQLQVLTEAFR_.2                                                                     | 0.108724545  | #N/A                   |
| _VAPDEHPILLTEAPLNPK_.3                                                                                     | -0.419330472 | #N/A                   |
| _IFVGGIKEDTEYNLR_.3                                                                                        | -0.55374381  | #N/A                   |
| _GFAFVTFDDHDTV DKIVVQK_.3                                                                                  | -0.237262715 | #N/A                   |
| _GFAFVTFDDHDTV DK_.2                                                                                       | -0.1964241   | #N/A                   |
| _EDTEYNLR_.2                                                                                               | 0.382490955  | #N/A                   |
| _IETIEVM[Oxidation (M)]EDR_.2                                                                              | 0.187223606  | #N/A                   |
| _EDSVKPGAHLTVK_.2                                                                                          | 0.035476184  | #N/A                   |
| _SSGS[Phospho (STY)]PYGGGYGSGGGSGGYGSR_.2                                                                  | -0.14925196  | Q8BG05_S359_M1_Hnrnpa3 |
| _LFIGGLSFETDDSLREHFEK_.3                                                                                   | -0.12224061  | #N/A                   |
| _LFIGGLSFETDDSLR_.2                                                                                        | -0.022343856 | #N/A                   |
| _GEEGHDPKEPEQLRK_.4                                                                                        | -0.414352877 | #N/A                   |
| _GFGFVTYSC[Carbamidomethyl (C)]VEEVDAAM[Oxidation (M)]C[Carbamidomethyl (C)]AR_.2                          | -0.47750984  | #N/A                   |
| _WGTLTDC[Carbamidomethyl (C)]VVMR_.2                                                                       | 0.048065337  | #N/A                   |
| _YHTINGHNC[Carbamidomethyl (C)]EVK_.3                                                                      | 0.012605181  | #N/A                   |
| _YGK IETIEVMEDR_.3                                                                                         | 0.293179093  | #N/A                   |
| _QSGS[Phospho (STY)]PTLDTAPNGR_.2                                                                          | -0.444011322 | Q8BG16_S701_M1_Slc6a15 |
| _IPSEMSS[Phospho (STY)]PNFGK_.2                                                                            | -0.384864768 | Q8BG16_S687_M1_Slc6a15 |
| _KQS[Phospho (STY)]GS[Phospho (STY)]PTLDTAPNGR_.2                                                          | -0.486632918 | Q8BG16_S699_M2_Slc6a15 |
| _DTDAEDGS[Phospho (STY)]EADDERPAWNSK_.2                                                                    | 0.069770247  | Q8BG16_S55_M1_Slc6a15  |
| _ETSPSSNNS[Phospho (STY)]SEELSTLQLSK_.2                                                                    | -0.017137941 | Q8BG18_S14_M1_Necab1   |
| _AQS[Phospho (STY)]LLSTDR_.2                                                                               | -0.226764729 | Q8BG32_S14_M1_Psmd11   |
| _LYDNLLEQNLR_.2                                                                                            | -0.170611697 | #N/A                   |
| _YQEALHLGSQLLR_.2                                                                                          | -0.060020252 | #N/A                   |

|                                                                                                  |              |                        |
|--------------------------------------------------------------------------------------------------|--------------|------------------------|
| _TAYSFYEAFFEGYDSIDSPK_.2                                                                         | 0.172836653  | #N/A                   |
| _DNYEGYAPSDGYR_.2                                                                                | -0.107635532 | #N/A                   |
| _YFQDEEYKS[Phospho (STY)]K_.2                                                                    | -0.157243121 | Q8BG39_S425_M1_Sv2b    |
| _YFQDEEYK_.2                                                                                     | -0.088983812 | #N/A                   |
| _HVLFDFTFFDK_.2                                                                                  | -0.403626303 | #N/A                   |
| _QVHDTNMR_.2                                                                                     | 0.154368807  | #N/A                   |
| _DMC[Carbamidomethyl (C)]LSS[Phospho (STY)]SKK_.2                                                | -0.501451404 | Q8BG39_S144_M1_Sv2b    |
| _ADGLGGQADLMAER_.2                                                                               | 0.429668226  | #N/A                   |
| _SNEQNQEEDAQS[Phospho (STY)]DVT[Phospho (STY)]EGHDEEDEIYEGEYQGIPHPDDVK_.5                        | 0.102250298  | Q8BG39_S33_M2_Sv2b     |
| _Acetyl (Protein N-term)]M[Oxidation (M)]EESAPVESQGQLPS[Phospho (STY)]PHHGS[Phospho (STY)]LRR_.3 | -0.34095113  | #N/A                   |
| _KDS[Phospho (STY)]RPESIIYR_.3                                                                   | -0.236970759 | Q8BG50_S47_M1_Tmem169  |
| _Acetyl (Protein N-term)]MEESAPVESQGQLPS[Phospho (STY)]PHHGS[Phospho (STY)]LR_.3                 | -0.227409347 | #N/A                   |
| _NLFLT[Phospho (STY)]NK_.2                                                                       | -0.097209876 | Q8BG67_T660_M1_Efr3a   |
| _LGPPSS[Phospho (STY)]PSAADKEENPAVLAESC[Carbamidomethyl (C)]FR_.3                                | -0.413860149 | Q8BG67_S220_M1_Efr3a   |
| _FLEANKIEFEVDITM[Oxidation (M)]SEEQR_.3                                                          | 0.025006587  | #N/A                   |
| _AIHEPAES[Phospho (STY)]PR_.2                                                                    | -0.049987383 | Q8BG89_S370_M1_Znf365  |
| _ADSLDAPC[Carbamidomethyl (C)]AS[Phospho (STY)]PGLPTQDTK_.2                                      | -0.164522213 | Q8BG89_S146_M1_Znf365  |
| _MVEAVDRT[Phospho (STY)]IEKR_.3                                                                  | 0.19195959   | Q8BG89_T176_M1_Znf365  |
| _MVEAVDRT[Phospho (STY)]IEK_.2                                                                   | -0.081076247 | Q8BG89_T176_M1_Znf365  |
| _DVDKELS[Phospho (STY)]PK_.2                                                                     | -0.285426826 | Q8BG92_S293_M1_Clvs2   |
| _SQS[Phospho (STY)]VVDPTALK_.2                                                                   | -0.176141344 | Q8BG92_S302_M1_Clvs2   |
| _SQS[Phospho (STY)]VVDPTALKR_.2                                                                  | -0.272292125 | Q8BG92_S302_M1_Clvs2   |
| _SKS[Phospho (STY)]FSLR_.2                                                                       | -0.095738531 | Q8BGB5_S30_M1_Limd2    |
| _Acetyl (Protein N-term)]MFQAAGAAQATPSHEAK_.2                                                    | 0.290673588  | #N/A                   |
| _VLDEEGS[Phospho (STY)]ER_.2                                                                     | -0.096450381 | Q8BGC0_S613_M1_Htatsf1 |
| _Acetyl (Protein N-term)]SGNNLSGNDEFDEQLR_.2                                                     | -0.269294218 | #N/A                   |
| _LFDDS[Phospho (STY)]DER_.2                                                                      | -0.257823559 | Q8BGC0_S724_M1_Htatsf1 |
| _AEEGGES[Phospho (STY)]EGDAS[Phospho (STY)]EKDAK_.2                                              | -0.122218513 | Q8BGC0_S441_M2_Htatsf1 |
| _LFDDS[Phospho (STY)]DERGTGVGNVK_.2                                                              | 0.2429065    | Q8BGC0_S724_M1_Htatsf1 |
| _VFDDDS[Phospho (STY)]DDIEEEEEADEK_.2                                                            | -0.02243311  | Q8BGC0_S645_M1_Htatsf1 |
| _QITAQAWDGTDDYQVEETSR_.2                                                                         | 0.316227168  | #N/A                   |
| _RES[Phospho (STY)]GS[Phospho (STY)]SEASPGPR_.2                                                  | 0.091313147  | Q8BGC9_S109_M2_Creg2   |
| _FEAGGFQSSQSTENS_.2                                                                              | 0.139927069  | #N/A                   |
| _EKFEAGGFQSSQSTENS_.2                                                                            | 0.258729606  | #N/A                   |
| _SQSS[Phospho (STY)]DTEQPS[Phospho (STY)]PTSGGGK_.2                                              | 0.037345903  | Q8BGD9_S498_M2_Eif4b   |
| _AFGS[Phospho (STY)]GYRR_.2                                                                      | -0.151118334 | Q8BGD9_S283_M1_Eif4b   |
| _SWSS[Phospho (STY)]RDDYSR_.2                                                                    | 0.034550101  | Q8BGD9_S312_M1_Eif4b   |
| _TGS[Phospho (STY)]ESSQTGASATSGR_.2                                                              | -0.353248685 | Q8BGD9_S422_M1_Eif4b   |
| _ERHPS[Phospho (STY)]WR_.2                                                                       | -0.061392448 | Q8BGD9_S406_M1_Eif4b   |
| _RAFGS[Phospho (STY)]GYR_.2                                                                      | -0.359530005 | Q8BGD9_S283_M1_Eif4b   |
| _YAALS[Phospho (STY)]VDGEDEDEGDDC[Carbamidomethyl (C)]TE_.2                                      | 0.19084912   | Q8BGD9_S597_M1_Eif4b   |
| _ARPTT[Phospho (STY)]DSFDDYPPR_.2                                                                | -0.055776042 | Q8BGD9_T205_M1_Eif4b   |
| _SRTGS[Phospho (STY)]ESSQTGASATSGR_.2                                                            | -0.272431645 | Q8BGD9_S422_M1_Eif4b   |
| _RGDDSGDKYR_.3                                                                                   | 0.140840654  | #N/A                   |
| _ERHPS[Phospho (STY)]WRS[Phospho (STY)]EETQER_.3                                                 | 0.285880518  | Q8BGD9_S406_M2_Eif4b   |
| _SAPKEDDASASTSQSSR_.2                                                                            | -0.232774525 | #N/A                   |
| _FFDS[Phospho (STY)]EDEDFEILSL_.2                                                                | 0.173385805  | Q8BGE6_S383_M1_Atg4b   |

|                                                                              |              |                        |
|------------------------------------------------------------------------------|--------------|------------------------|
| _VPEPESQTS[Phospho (STY)]PK_.2                                               | -0.31220918  | Q8BGF7_S1188_M1_Pan2   |
| _DYL[M[Oxidation (M)]ENEALPS[Phospho (STY)]P_.2                              | -0.163624495 | Q8BGF8_S421_M1_Slc35d3 |
| _KDYLMENEALPS[Phospho (STY)]P_.2                                             | 0.530476961  | Q8BGF8_S421_M1_Slc35d3 |
| _FYLGGPTSVR_.2                                                               | 0.002401629  | #N/A                   |
| _LELNYC[Carbamidomethyl (C)]IPM[Oxidation (M)]GVQGGDR_.2                     | -0.113101982 | #N/A                   |
| _THFFLNAGNLC[Carbamidomethyl (C)]NLNYGEGPK_.3                                | -0.160269188 | #N/A                   |
| _DVVVQHVFHFDGLGR_.3                                                          | 0.144006014  | #N/A                   |
| _SSLSHAM[Oxidation (M)]VIDSR_.2                                              | 0.175560999  | #N/A                   |
| _SFS[Phospho (STY)]MQDLTTIR_.2                                               | -0.084699136 | Q8BGH4_S152_M1_Reep1   |
| _Acetyl (Protein N-term)]M[Oxidation (M)]EAQELGS[Phospho (STY)]PTPTYHLLPK_.2 | -0.344444925 | Q8BGK6_S8_M1_Slc7a6    |
| _EDAGS[Phospho (STY)]PSQGSPEMQLK_.2                                          | -0.071622878 | Q8BGK6_S30_M1_Slc7a6   |
| _VDYLTDPFSL[Phospho (STY)]YPNYYTLM[Oxidation (M)]TGR_.3                      | 0.016994514  | Q8BGN3_S71_M1_Enpp6    |
| _AFT[Phospho (STY)]FDDEDELSQLK_.2                                            | 0.098727422  | Q8BGQ1_T21_M1_Vipas39  |
| _ETAGS[Phospho (STY)]SGSTPEGR_.2                                             | 0.316269635  | Q8BGQ1_S77_M1_Vipas39  |
| _TRPGS[Phospho (STY)]FQSLSDALSDTPAK_.3                                       | -0.439488639 | Q8BGQ1_S119_M1_Vipas39 |
| _IVAVTGAEAQK_.2                                                              | 0.333331938  | #N/A                   |
| _ITC[Carbamidomethyl (C)]LC[Carbamidomethyl (C)]QVPQNAANR_.2                 | 0.182165281  | #N/A                   |
| _QIWQNLGLDEAR_.2                                                             | 0.251149033  | #N/A                   |
| _M[Oxidation (M)]ALELLTQEFGIPVER_.2                                          | -0.271326027 | #N/A                   |
| _LYVTFGGDEAAGLEPDLEC[Carbamidomethyl (C)]R_.2                                | -0.062784115 | #N/A                   |
| _MFVDEVVTGQEC[Carbamidomethyl (C)]GVVLDK_.2                                  | 0.321483804  | #N/A                   |
| _SSS[Phospho (STY)]FSLPAR_.2                                                 | -0.244349769 | Q8BGR5_S168_M1_Fam53b  |
| _S[Phospho (STY)]RSQPC[Carbamidomethyl (C)]VLNDKK_.3                         | -0.337823594 | Q8BGR5_S267_M1_Fam53b  |
| _ETGLS[Phospho (STY)]PQAAQEK_.2                                              | 0.323780478  | Q8BGS3_S13_M1_Zkscan1  |
| _KPS[Phospho (STY)]PSASPTVR_.2                                               | 0.082745289  | Q8BGT6_S647_M1_Micall1 |
| _SLHPWYGITPT[Phospho (STY)]SSPK_.2                                           | -0.125647414 | Q8BGT6_T479_M1_Micall1 |
| _APS[Phospho (STY)]AS[Phospho (STY)]PLAIHASR_.2                              | -0.580793044 | Q8BGT6_S494_M2_Micall1 |
| _DLS[Phospho (STY)]SS[Phospho (STY)]FR_.2                                    | -0.111813095 | Q8BGT6_S28_M2_Micall1  |
| _VHLTQLLEK_.2                                                                | 0.108448696  | #N/A                   |
| _TC[Carbamidomethyl (C)]NIS[Phospho (STY)]VGR_.2                             | 0.190550247  | Q8BGT8_S372_M1_Phyhipl |
| _SQDSGIAEM[Oxidation (M)]EELPVPHNIK_.3                                       | 0.035728661  | #N/A                   |
| _NLSLEAIQLC[Carbamidomethyl (C)]DR_.2                                        | 0.069186311  | #N/A                   |
| _LDHALSSPSS[Phospho (STY)]PC[Carbamidomethyl (C)]EEIK_.2                     | -0.093681725 | Q8BGT8_S15_M1_Phyhipl  |
| _GHWFLSPR_.2                                                                 | -0.001669062 | #N/A                   |
| _TEYTVAVQTASK_.2                                                             | 0.227068978  | #N/A                   |
| _ISWDMDSK_.2                                                                 | 0.094913103  | #N/A                   |
| _DNSGSHGSPISGK_.2                                                            | -0.555797615 | #N/A                   |
| _FEIAAEK_.2                                                                  | -0.176951025 | #N/A                   |
| _NLS[Phospho (STY)]LEAIQLC[Carbamidomethyl (C)]DRDGNK_.3                     | 0.317622607  | Q8BGT8_S24_M1_Phyhipl  |
| _SAS[Phospho (STY)]ADNLILPR_.2                                               | -0.485900135 | Q8BGU5_S326_M1_Ccny    |
| _ASTIFLSKSQT[Phospho (STY)]DVR_.2                                            | -0.539956593 | Q8BGU5_T75_M1_Ccny     |
| _LESYRPDTLS[Phospho (STY)]R_.2                                               | -0.254227659 | Q8BGU5_S33_M1_Ccny     |
| _RSAS[Phospho (STY)]ADNLILPR_.2                                              | -0.086140681 | Q8BGU5_S326_M1_Ccny    |
| _LESYRPDTLS[Phospho (STY)]REDTGC[Carbamidomethyl (C)]NLQHISDR_.4             | 0.166161014  | Q8BGU5_S33_M1_Ccny     |
| _AISAPTS[Phospho (STY)]PTR_.2                                                | -0.211058781 | Q8BGV8_S59_M1_Mief1    |
| _GGVS[Phospho (STY)]PDSSEKTPGR_.2                                            | -0.273506351 | Q8BGW2_S238_M1_Wbp1l   |
| _SSTRPPSVADPQS[Phospho (STY)]PEVPTDR_.3                                      | -0.172144998 | Q8BGW2_S183_M1_Wbp1l   |

|                                                                               |              |                       |
|-------------------------------------------------------------------------------|--------------|-----------------------|
| _ [Acetyl (Protein N-term)]AESGGSSGSSQS[Phospho (STY)]PERPSSLADR_.3           | 0.025621985  | Q8BGY4_S13_M1_Kihl26  |
| _ QS[Phospho (STY)]LTSSTFTNK_.2                                               | -0.139030134 | Q8BGY9_S550_M1_Slc5a7 |
| _ EFC[Carbamidomethyl (C)]ALSVTSR_.2                                          | -0.040229781 | #N/A                  |
| _ SDPSIVLLQC[Carbamidomethyl (C)]DM[Oxidation (M)]QK_.2                       | 0.078866888  | #N/A                  |
| _ LNWAFEM[Oxidation (M)]YDLGDGR_.2                                            | -0.334353055 | #N/A                  |
| _ M[Oxidation (M)]NQDGLTPQQR_.2                                               | 0.075221722  | #N/A                  |
| _ LAPEVLEDLVQNTEFSEQELK_.3                                                    | 0.098904209  | #N/A                  |
| _ LEM[Oxidation (M)]LEIIIAIK_.2                                               | -0.077977063 | #N/A                  |
| _ MDQDKDDQITLEEFK_.3                                                          | -0.182207527 | #N/A                  |
| _ M[Oxidation (M)]DQDKDDQITLEEFKEAAK_.4                                       | -0.191431177 | #N/A                  |
| _ [Acetyl (Protein N-term)]M[Oxidation (M)]NPVYS[Phospho (STY)]PVQPAPYGNPK_.2 | 0.008898511  | Q8BGZ2_S6_M1_Fam168a  |
| _ YVAAAFPS[Phospho (STY)]AC[Carbamidomethyl (C)]GK_.2                         | -0.18910067  | Q8BH04_S304_M1_Pck2   |
| _ [Acetyl (Protein N-term)]ANLGSEAEREPLLPGSPGS[Phospho (STY)]R_.3             | -0.431662345 | Q8BH31_S21_M1_Mfsd8   |
| _ VLS[Phospho (STY)]PPHTK_.2                                                  | -0.014795265 | Q8BH48_S146_M1_Ubap1  |
| _ RDS[Phospho (STY)]SESQLASTESDKPTTGR_.3                                      | -0.273410879 | Q8BH50_S66_M1_        |
| _ DSSQSLASTES[Phospho (STY)]DKPTTGR_.2                                        | -0.195810831 | Q8BH50_S76_M1_        |
| _ S[Phospho (STY)]RSESTSTMAAK_.2                                              | 0.385074918  | Q8BH50_S143_M1_       |
| _ DTNNNVAYWDVLK_.2                                                            | -0.157394775 | #N/A                  |
| _ IDPNPVDST[Phospho (STY)]PSE_.2                                              | 0.005306492  | Q8BH58_T268_M1_Tipr1  |
| _ LTVNDFVR_.2                                                                 | -0.033333198 | #N/A                  |
| _ LLLADENGR_.2                                                                | -0.353362421 | #N/A                  |
| _ YLGLYNDPNSNPK_.2                                                            | -0.15069566  | #N/A                  |
| _ LTLADIER_.2                                                                 | -0.11799572  | #N/A                  |
| _ IAPLAEGALPYNLAELQR_.2                                                       | -0.19927285  | #N/A                  |
| _ IVQLLAGVADQTK_.2                                                            | -0.22175284  | #N/A                  |
| _ LATATFAGIENK_.2                                                             | 0.225993217  | #N/A                  |
| _ YEGFFGLYR_.2                                                                | -0.348245565 | #N/A                  |
| _ SGNGEVTFENVK_.2                                                             | -0.252226156 | #N/A                  |
| _ IYSTLAGTR_.2                                                                | 0.189972917  | #N/A                  |
| _ VGGINLLTAGALAGVPAASLVTPADVIK_.3                                             | -0.16984043  | #N/A                  |
| _ DIEVTKEEFAQSAIR_.3                                                          | -0.109951045 | #N/A                  |
| _ LQVAGEITTGPR_.2                                                             | -0.067604559 | #N/A                  |
| _ EEGPSAFWK_.2                                                                | -0.018983503 | #N/A                  |
| _ AGQTTYSGVVDC[Carbamidomethyl (C)]FR_.2                                      | -0.059452774 | #N/A                  |
| _ FTLGSVAGAVGATAVYPIDLVK_.2                                                   | -0.32335484  | #N/A                  |
| _ SSPQFGVTLVTYELLQR_.2                                                        | -0.334924221 | #N/A                  |
| _ NSFDC[Carbamidomethyl (C)]FK_.2                                             | 0.238302593  | #N/A                  |
| _ NIFLQYASTEVDGEHYM[Oxidation (M)]TPEDFVQR_.3                                 | 0.238164507  | #N/A                  |
| _ ILIPWLLSPER_.2                                                              | 0.128324562  | #N/A                  |
| _ SSDWSS[Phospho (STY)]EEEEPVVR_.2                                            | 0.282882155  | Q8BH66_S23_M1_Atl1    |
| _ SSDWSS[Phospho (STY)]EEEEPVVRK_.2                                           | -0.358887625 | Q8BH66_S23_M1_Atl1    |
| _ DDHSFELDEAALNR_.3                                                           | -0.054621553 | #N/A                  |
| _ DRNS[Phospho (STY)]WGGFSEK_.2                                               | -0.356167957 | Q8BH66_S10_M1_Atl1    |
| _ VAVLLM[Oxidation (M)]DTQGTGFDSTLR_.2                                        | 0.118897003  | #N/A                  |
| _ TS[Phospho (STY)]PLNAEVVQYAK_.2                                             | 0.294398527  | Q8BH70_S45_M1_Fbxl4   |
| _ HPDISYILGTEGRS[Phospho (STY)]PR_.3                                          | -0.122958413 | Q8BH74_S87_M1_Nup107  |
| _ S[Phospho (STY)]FKLDYR_.2                                                   | -0.330375574 | Q8BH82_S43_M1_Napepld |

|                                                                |              |                         |
|----------------------------------------------------------------|--------------|-------------------------|
| _QNS[Phospho (STY)]VQNSGGSVSSR_.2                              | -0.021629411 | Q8BH82_S27_M1_Napepld   |
| _AQFGQPEILLGTIPAGGTQR_.2                                       | 0.083409063  | #N/A                    |
| _LVEEAIQC[Carbamidomethyl (C)]AEK_.2                           | 0.344860488  | #N/A                    |
| _FLSHWDHITR_.3                                                 | -0.004455603 | #N/A                    |
| _AFAAGADIK_.2                                                  | -0.396646429 | #N/A                    |
| _LFYSTFATDDRR_.2                                               | 0.039104644  | #N/A                    |
| _EGMTAFVEK_.2                                                  | -0.511303812 | #N/A                    |
| _SGFVPNVVHSS[Phospho (STY)]EEVIK_.2                            | -0.517394137 | Q8BHC1_S201_M1_Rab39b   |
| _S[Phospho (STY)]LEPPSEKPWER_.2                                | 0.069817356  | Q8BHE1_S181_M1_Gemin8   |
| _LGGAVEDSSS[Phospho (STY)]PPSTLNLSGAHR_.3                      | -0.01070633  | Q8BHE3_S46_M1_Atcay     |
| _IQYVHSLLEELER_.3                                              | -0.154066924 | #N/A                    |
| _AAEATEDQETS[Phospho (STY)]MS_.2                               | -0.384449633 | Q8BHE3_S370_M1_Atcay    |
| _EIQSLETSEDQLS[Phospho (STY)]EPR_.2                            | 0.252951866  | Q8BHE4_S538_M1_Tmem108  |
| _LGADES[Phospho (STY)]EEEGR_.2                                 | -0.450313567 | Q8BHG1_S85_M1_Nrdc      |
| _SSS[Phospho (STY)]DALQSR_.2                                   | -0.324016299 | Q8BHJ6_S339_M1_Serinc5  |
| _LVEQANS[Phospho (STY)]PK_.2                                   | 0.093269475  | Q8BHJ9_S215_M1_Slu7     |
| _AEAAQENASDY[Phospho (STY)]LAIPSENK_.2                         | 0.100699094  | Q8BHK2_Y198_M1_Scn3b    |
| _ASPVPGPGT[Phospho (STY)]PTR_.2                                | 0.122607136  | Q8BHL3_T136_M1_Tbc1d10b |
| _HGAPAAP[Phospho (STY)]PPPR_.2                                 | 0.004231196  | Q8BHL3_S22_M1_Tbc1d10b  |
| _RHGAPAAP[Phospho (STY)]PPPR_.3                                | -0.381891417 | Q8BHL3_S22_M1_Tbc1d10b  |
| _ELLEQNPGKFEELER_.3                                            | 0.188051752  | #N/A                    |
| _KHS[Phospho (STY)]LEGDEGSDFITK_.3                             | -0.066734125 | Q8BHN1_S79_M1_Txlng     |
| _NPEPELLVR_.2                                                  | 0.227773028  | #N/A                    |
| _LDLLED_.2                                                     | 0.087457131  | #N/A                    |
| _IILTAQPFR_.2                                                  | 0.245306783  | #N/A                    |
| _M[Oxidation (M)]LDYLQSGGETPQTDIR_.2                           | 0.279290004  | #N/A                    |
| _DAVHYGGWEHR_.3                                                | 0.054140588  | #N/A                    |
| _KLDAES[Phospho (STY)]DGSTEETDESET_.2                          | -0.315682064 | Q8BHR8_S319_M1_         |
| _YNDWS[Phospho (STY)]DDDDDSNESK_.2                             | -0.245191042 | Q8BHS6_S61_M1_Armcx3    |
| _ASPNSDDTVLS[Phospho (STY)]PQELQK_.2                           | 0.36464895   | Q8BHS6_S119_M1_Armcx3   |
| _RAS[Phospho (STY)]PNSDDTVLSPQELQK_.3                          | 0.402325291  | Q8BHS6_S110_M1_Armcx3   |
| _TPSDTGHSPIGFC[Carbamidomethyl (C)]PGS[Phospho (STY)]DEDFTR_.3 | 0.244198252  | Q8BHS8_S111_M1_Sybu     |
| _SGSS[Phospho (STY)]PPS[Phospho (STY)]PR_.2                    | -0.585807549 | Q8BHS8_S199_M2_Sybu     |
| _DAIQNPNDIQLQEK_.2                                             | 0.039471196  | #N/A                    |
| _EQAPDSVEGLLNALR_.2                                            | 0.127234866  | #N/A                    |
| _EIENYPHFFLDFENAQPTGER_.3                                      | -0.297978478 | #N/A                    |
| _VTLPAGPDILR_.2                                                | 0.067962985  | #N/A                    |
| _ [Acetyl (Protein N-term)]SAGGAVPPPPNPAVSFPAPR_.2             | -0.086086081 | #N/A                    |
| _SAAQQENSS[Phospho (STY)]PSR_.2                                | -0.415327645 | Q8BI72_S169_M1_Cdkn2aip |
| _EEAKPAS[Phospho (STY)]PSSVQDR_.2                              | 0.400655651  | Q8BI84_S1915_M1_Mia3    |
| _DSLPSGPREAKPAS[Phospho (STY)]PSSVQDR_.3                       | -0.434739885 | Q8BI84_S1915_M1_Mia3    |
| _DETAQTGPS[Phospho (STY)]GEAVLSK_.2                            | 0.006731645  | Q8BI84_S820_M1_Mia3     |
| _SEFGS[Phospho (STY)]LDR_.2                                    | -0.25270001  | Q8BI84_S1733_M1_Mia3    |
| _HSAS[Phospho (STY)]DPGPAPVNSSS[Phospho (STY)]R_.2             | 0.216671478  | Q8BI84_S1754_M2_Mia3    |
| _LLGSENDTGS[Phospho (STY)]PDFYTPR_.2                           | -0.05957062  | Q8BIE6_S712_M1_Frmd4a   |
| _MWSESS[Phospho (STY)]LDEPYEK_.2                               | 0.322117148  | Q8BIE6_S601_M1_Frmd4a   |
| _SSS[Phospho (STY)]LESQGK_.2                                   | -0.185023012 | Q8BIE6_S696_M1_Frmd4a   |

|                                                                             |              |                        |
|-----------------------------------------------------------------------------|--------------|------------------------|
| _TSNS[Phospho (STY)]YTAGGLFK_.2                                             | 0.119042825  | Q8BIE6_S854_M1_Frmd4a  |
| _SVDIS[Phospho (STY)]PTR_.2                                                 | -0.131437344 | Q8BIE6_S679_M1_Frmd4a  |
| _IISGSSGSLLS[Phospho (STY)]SGSQESDSSQSAK_.2                                 | -0.289098201 | Q8BIE6_S356_M1_Frmd4a  |
| _QETQS[Phospho (STY)]AEPPPPEPPRI_.2                                         | -0.071631687 | Q8BIF0_S226_M1_Cd99I2  |
| _GENLEAVVC[Carbamidomethyl (C)]EEPQVTYSK_.2                                 | 0.051779669  | #N/A                   |
| _KIEVNNATAR_.2                                                              | -0.076937134 | #N/A                   |
| _VLSELGVDAQSLSAM[Oxidation (M)]EIR_.2                                       | -0.420239488 | #N/A                   |
| _SQLPS[Phospho (STY)]PGELR_.2                                               | -0.189438624 | Q8BIJ7_S52_M1_Rufy1    |
| _GSLISTDS[Phospho (STY)]GNSLPDRNPEK_.3                                      | 0.315782511  | Q8BIK4_S1270_M1_Dock9  |
| _LDKLPVHVYEVDEEADKDEDAAS[Phospho (STY)]LGSQK_.4                             | 0.031405822  | Q8BIK4_S178_M1_Dock9   |
| _SLGTGAPVIESPYGESIS[Phospho (STY)]PEDAPESISK_.3                             | 0.063380875  | Q8BIQ5_S120_M1_Cstf2   |
| _NVSKS[Phospho (STY)]DSDLIAYPSKDK_.3                                        | 0.109347144  | Q8BIZ1_S738_M1_Anks1b  |
| _TLANLPWIVEPGQEA_.2                                                         | 0.051373979  | #N/A                   |
| _NIIAEHEIR_.2                                                               | -0.242014658 | #N/A                   |
| _LIFQSC[Carbamidomethyl (C)]DYK_.2                                          | 0.572562378  | #N/A                   |
| _NVSKS[Phospho (STY)]DSDLIAYPSK_.2                                          | 0.228625892  | Q8BIZ1_S738_M1_Anks1b  |
| _NSSTGPTPDC[Carbamidomethyl (C)]S[Phospho (STY)]PPS[Phospho (STY)]PDTALK_.2 | 0.267682249  | Q8BIZ1_S507_M2_Anks1b  |
| _LS[Phospho (STY)]PEPVAHR_.2                                                | -0.064192037 | Q8BIZ6_S33_M1_Snip1    |
| _QERLS[Phospho (STY)]PEPVAHR_.3                                             | 0.205423798  | Q8BIZ6_S33_M1_Snip1    |
| _S[Phospho (STY)]GDALTTVVVK_.2                                              | -0.049468705 | Q8BIZ6_S18_M1_Snip1    |
| _RPDAPAAS[Phospho (STY)]LS[Phospho (STY)]PPAAEPGHSGHR_.3                    | 0.166847559  | Q8BIZ6_S48_M2_Snip1    |
| _HRS[Phospho (STY)]GDALTTVVVK_.3                                            | -0.04816241  | Q8BIZ6_S18_M1_Snip1    |
| _DLVQPDKPAS[Phospho (STY)]PK_.2                                             | -0.422823477 | Q8BJ05_S515_M1_Zc3h14  |
| _WIRPQS[Phospho (STY)]SE_.2                                                 | -0.03537275  | Q8BJ05_S733_M1_Zc3h14  |
| _IS[Phospho (STY)]PPVKEEEAKGDNTGK_.3                                        | -0.366660433 | Q8BJ05_S409_M1_Zc3h14  |
| _RFS[Phospho (STY)]HDGEEEEDEDYGT_.3                                         | 0.237190098  | Q8BJ05_S309_M1_Zc3h14  |
| _EKS[Phospho (STY)]LDLPDR_.2                                                | -0.470881968 | Q8BJ42_S1012_M1_Dlgap2 |
| _SDVETATDS[Phospho (STY)]DTESR_.2                                           | -0.357453437 | Q8BJ42_S745_M1_Dlgap2  |
| _IIES[Phospho (STY)]PERKEER_.3                                              | -0.499241416 | Q8BJ42_S983_M1_Dlgap2  |
| _IIES[Phospho (STY)]PERK_.2                                                 | -0.358325448 | Q8BJ42_S983_M1_Dlgap2  |
| _S[Phospho (STY)]IDKAVLASK_.2                                               | -0.313564365 | Q8BJ42_S700_M1_Dlgap2  |
| _EKS[Phospho (STY)]LDLPDRQR_.3                                              | -0.290893735 | Q8BJ42_S1012_M1_Dlgap2 |
| _GLQFGSS[Phospho (STY)]FQR_.2                                               | -0.029661149 | Q8BJ42_S806_M1_Dlgap2  |
| _SHS[Phospho (STY)]LEGSSK_.2                                                | -0.216138619 | Q8BJ42_S248_M1_Dlgap2  |
| _C[Carbamidomethyl (C)]SS[Phospho (STY)]IGVQDSEFPDHQPYPR_.3                 | 0.272748124  | Q8BJ42_S720_M1_Dlgap2  |
| _GGLYNS[Phospho (STY)]M[Oxidation (M)]DSLDSNK_.2                            | -0.582191469 | Q8BJ42_S667_M1_Dlgap2  |
| _T[Phospho (STY)]PPPVPPR_.2                                                 | 0.051919532  | Q8BJ42_T616_M1_Dlgap2  |
| _ADS[Phospho (STY)]IEIYIEAQTRL_.2                                           | -0.141235979 | Q8BJ42_S1047_M1_Dlgap2 |
| _EAEENDLLEDILGK_.2                                                          | -0.26617812  | #N/A                   |
| _TTSKPLISVTAQS[Phospho (STY)]STESTQDAYQDSR_.3                               | -0.250617874 | Q8BJ42_S636_M1_Dlgap2  |
| _IIES[Phospho (STY)]PER_.2                                                  | 0.053505807  | Q8BJ42_S983_M1_Dlgap2  |
| _QNSATERADS[Phospho (STY)]IEIYIEAQTR_.3                                     | 0.069704918  | Q8BJ42_S1047_M1_Dlgap2 |
| _HS[Phospho (STY)]EPSTPTQYGALR_.2                                           | -0.115004869 | Q8BJ42_S811_M1_Dlgap2  |
| _SGM[Oxidation (M)]SSWWS[Phospho (STY)]SDDNLDSDSTYR_.2                      | -0.034543086 | Q8BJ42_S301_M1_Dlgap2  |
| _MRS[Phospho (STY)]GSYIK_.2                                                 | -0.24170812  | Q8BJ42_S438_M1_Dlgap2  |
| _AMGDEESGESDSS[Phospho (STY)]PK_.2                                          | -0.472981368 | Q8BJ42_S456_M1_Dlgap2  |
| _ADSIYIEAQTR_.2                                                             | -0.216714276 | #N/A                   |

|                                                                            |              |                        |
|----------------------------------------------------------------------------|--------------|------------------------|
| _S[Phospho (STY)]LDLPDR_2                                                  | -0.123235945 | Q8BJ42_S1012_M1_Dlgap2 |
| _DGS[Phospho (STY)]WFLK_2                                                  | -0.692746397 | Q8BJ42_S873_M1_Dlgap2  |
| _ATIS[Phospho (STY)]DEEIER_2                                               | -0.444977905 | Q8BJF9_S199_M1_Chmp2b  |
| _NTT[Phospho (STY)]PPSLAR_2                                                | -0.123492031 | Q8BJH1_T243_M1_Zc2hc1a |
| _YSGGYLLAST[Phospho (STY)]PESEL_2                                          | -0.243359089 | Q8BJI1_T722_M1_Slc6a17 |
| _DIS[Phospho (STY)]NLEENDETR_2                                             | -0.232198905 | Q8BJI1_S665_M1_Slc6a17 |
| _EHS[Phospho (STY)]NEHVTESVADLLALEEPVDYK_3                                 | -0.475562419 | Q8BJI1_S13_M1_Slc6a17  |
| _SYLPGGSTS[Phospho (STY)]PLDNSNNPNGR_2                                     | -0.205474896 | Q8BJI1_S701_M1_Slc6a17 |
| _ILGYLNSNVLSR_2                                                            | 0.277341828  | #N/A                   |
| _VPS[Phospho (STY)]EAPSPM[Oxidation (M)]PTHR_2                             | -0.052557898 | Q8BJI1_S682_M1_Slc6a17 |
| _ALELDPDNDTYK_2                                                            | 0.235221328  | #N/A                   |
| _TPS[Phospho (STY)]ASHEEQQE_2                                              | -0.077294426 | Q8BJU0_S307_M1_Sgta    |
| _AIELNPANAVYFC[Carbamidomethyl (C)]NR_2                                    | -0.204364605 | #N/A                   |
| _SRTPS[Phospho (STY)]ASHEEQQE_2                                            | 0.013320756  | Q8BJU0_S307_M1_Sgta    |
| _APDRT[Phospho (STY)]PPSEEDSAEAER_3                                        | 0.07329362   | Q8BJU0_T82_M1_Sgta     |
| _HAEAVAYK_2                                                                | -0.220321368 | #N/A                   |
| _VFTAADQPWAQR_2                                                            | 0.228063857  | #N/A                   |
| _IVENSEAVTEILNNAELLK_2                                                     | -0.236341835 | #N/A                   |
| _S[Phospho (STY)]PDGDGVSGYIEENEDASK_2                                      | -0.032512381 | Q8BK06_S126_M1_Fbxo9   |
| _TQSVLKEPEPTDTTTYK_3                                                       | -0.247344766 | #N/A                   |
| _LPQPSSGRES[Phospho (STY)]PRH_3                                            | -0.330532244 | Q8BK30_S101_M1_Ndufv3  |
| _LPQPSSGR_2                                                                | -0.113136739 | #N/A                   |
| _LPQPSSGRES[Phospho (STY)]PR_2                                             | -0.24935717  | Q8BK30_S101_M1_Ndufv3  |
| _EM[Oxidation (M)]C[Carbamidomethyl (C)]EGLLEES[Phospho (STY)]DGEDEHEAGR_3 | -0.235668394 | Q8BK35_S305_M1_Nop53   |
| _AAQQAASSSGQGQQAQT[Phospho (STY)]PTGK_2                                    | 0.015148422  | Q8BK63_T321_M1_Csnk1a1 |
| _ETFLTSPEELYR_2                                                            | 0.128355265  | #N/A                   |
| _VFTTQELVQAFTHAPAALEADR_3                                                  | -0.108420723 | #N/A                   |
| _QTFGYGAR_2                                                                | 0.130362227  | #N/A                   |
| _ADATNVNNNWHWTER_2                                                         | 0.0336077    | #N/A                   |
| _DPT[Phospho (STY)]PPPSSRGK_2                                              | 0.060161209  | Q8BKA3_T101_M1_Srrm4   |
| _SAS[Phospho (STY)]PLAATR_2                                                | -0.536947868 | Q8BKA3_S271_M1_Srrm4   |
| _GQEKGS[Phospho (STY)]PGGDLSK_2                                            | 0.420250465  | Q8BKA3_S309_M1_Srrm4   |
| _SRGQEKGS[Phospho (STY)]PGGDLSK_3                                          | 0.13036747   | Q8BKA3_S309_M1_Srrm4   |
| _NLIDEDGNNQWPEGLK_2                                                        | -0.236053664 | #N/A                   |
| _LVLEQVVTSIASVADTAEEK_3                                                    | -0.096915359 | #N/A                   |
| _HIVENAVQK_2                                                               | 0.340640639  | #N/A                   |
| _S[Phospho (STY)]VENLPEC[Carbamidomethyl (C)]GITHEQR_2                     | -0.248272383 | Q8BKC8_S428_M1_Pi4kb   |
| _RTS[Phospho (STY)]FSFQK_2                                                 | -0.390899339 | Q8BKH7_S510_M1_Mapkap1 |
| _YSS[Phospho (STY)]PGLTSK_2                                                | -0.470590853 | Q8BKH7_S270_M1_Mapkap1 |
| _TS[Phospho (STY)]FSFQK_2                                                  | -0.107695857 | Q8BKH7_S510_M1_Mapkap1 |
| _DDEPSGWEEPS[Phospho (STY)]PQSISR_2                                        | -0.142488136 | Q8BK12_S913_M1_Tnrc6b  |
| _M[Oxidation (M)]GS[Phospho (STY)]PAPLLPGDLLGGGSDSI_2                      | -0.441428239 | Q8BK12_S1793_M1_Tnrc6b |
| _SSSS[Phospho (STY)]AGSEVGGQSTGSNHNK_2                                     | -0.209157028 | Q8BK12_S601_M1_Tnrc6b  |
| _EGDLITLLVPEAR_2                                                           | 0.037016628  | #N/A                   |
| _QIQNQLEETLK_2                                                             | -0.272007071 | #N/A                   |
| _YSDKELQYIDAINK_2                                                          | -0.034431132 | #N/A                   |
| _LSDSYSNTLPVR_2                                                            | 0.094395338  | #N/A                   |



|                                                            |              |                         |
|------------------------------------------------------------|--------------|-------------------------|
| _SLS[Phospho (STY)]PPQSQSK_2                               | -0.120668836 | Q8BKX1_S326_M1_Baiap2   |
| _LPLWQQAC[Carbamidomethyl (C)]ADPNKIPDR_3                  | -0.141217522 | #N/A                    |
| _SFHNELLTQLEQK_3                                           | -0.150149485 | #N/A                    |
| _SSS[Phospho (STY)]M[Oxidation (M)]AAGLER_2                | 0.213235392  | Q8BKX1_S367_M1_Baiap2   |
| _SNLVISDPIPGAKPLVPPELAPFVGR_3                              | 0.241218191  | #N/A                    |
| _TIM[Oxidation (M)]EQFNPSLR_2                              | -0.002049154 | #N/A                    |
| _AIFSHAAGDNSTLLSFK_2                                       | -0.19957479  | #N/A                    |
| _LTENVYK_2                                                 | -0.056427458 | #N/A                    |
| _ELGDVLFQM[Oxidation (M)]AEVHR_3                           | -0.377777759 | #N/A                    |
| _VVDDELATR_2                                               | 0.105784119  | #N/A                    |
| _VSVNDFIIR_2                                               | 0.120484932  | #N/A                    |
| _DLVKDDIK_2                                                | -0.249743295 | #N/A                    |
| _GIQEIADSVK_2                                              | 0.25717155   | #N/A                    |
| _HSLDASQGTATGPR_2                                          | 0.513812587  | #N/A                    |
| _LTEDEEGNPQLQHQHLITVTM[Oxidation (M)]SSDSR_3               | -0.548647762 | #N/A                    |
| _NSSS[Phospho (STY)]PVSLDAAPPDSVNVYR_2                     | 0.060199519  | Q8BL06_S613_M1_Usp54    |
| _S[Phospho (STY)]PQHYSR_2                                  | -0.075409135 | Q8BL65_S383_M1_Ablim2   |
| _IYPYDSLIVTNR_2                                            | -0.15477261  | #N/A                    |
| _TSSSIVSVPASSTSGS[Phospho (STY)]PSR_2                      | -0.305262032 | Q8BL65_S294_M1_Ablim2   |
| _TSS[Phospho (STY)]PSSAGSVSLGHYTPSR_3                      | -0.056244452 | Q8BL65_S365_M1_Ablim2   |
| _S[Phospho (STY)]PQHYSRPGSESGR_3                           | 0.075389849  | Q8BL65_S383_M1_Ablim2   |
| _RLDVEDSS[Phospho (STY)]FDQDSR_2                           | 0.019745298  | Q8BL65_S453_M1_Ablim2   |
| _T[Phospho (STY)]NSPDLDSSQLSSGTDQEPLQR_3                   | -0.154534425 | Q8BL65_T475_M1_Ablim2   |
| _SLGS[Phospho (STY)]ADELFK_2                               | -0.344351942 | Q8BL66_S52_M1_Eea1      |
| _LQQQSSQAAQELAAEK_2                                        | -0.189034925 | #N/A                    |
| _VSS[Phospho (STY)]PTKPK_2                                 | -0.196950253 | Q8BL74_S219_M1_Gtf3c2   |
| _LEEELDQER_2                                               | 0.117277586  | #N/A                    |
| _S[Phospho (STY)]RS[Phospho (STY)]AS[Phospho (STY)]LRR_2   | 0.125408359  | Q8BL97_S200_M3_Srsf7    |
| _S[Phospho (STY)]RS[Phospho (STY)]VSLR_2                   | -0.159418822 | Q8BL97_S192_M2_Srsf7    |
| _S[Phospho (STY)]RS[Phospho (STY)]ASLR_2                   | -0.432618692 | Q8BL97_S200_M2_Srsf7    |
| _S[Phospho (STY)]RS[Phospho (STY)]GS[Phospho (STY)]IIGSR_2 | -0.253221791 | Q8BL97_S208_M3_Srsf7    |
| _SGS[Phospho (STY)]IIGSR_2                                 | -0.231209165 | Q8BL97_S212_M1_Srsf7    |
| _VLNEPGS[Phospho (STY)]PTR_2                               | 0.127380708  | Q8BLB8_S231_M1_Ankrd34c |
| _T[Phospho (STY)]NSIDSKDPTLFPTVQEQLK_3                     | -0.185635527 | Q8BLB8_T299_M1_Ankrd34c |
| _RGS[Phospho (STY)]GTLLDR_2                                | -0.16868995  | Q8BLB8_S446_M1_Ankrd34c |
| _AVES[Phospho (STY)]TDEDHQTDLDK_2                          | -0.301754288 | Q8BLH7_S134_M1_Hirip3   |
| _LNYVFNEGEANT_2                                            | 0.062091744  | #N/A                    |
| _AANEVSSADVK_2                                             | -0.10425742  | #N/A                    |
| _HALEYSLR_2                                                | -0.169866089 | #N/A                    |
| _QGDTAILR_2                                                | -0.180303097 | #N/A                    |
| _C[Carbamidomethyl (C)]EASAVPAPDFEWYR_2                    | 0.072879753  | #N/A                    |
| _EFEGEEEYLEILGTR_2                                         | -0.319717997 | #N/A                    |
| _C[Carbamidomethyl (C)]EASAVPAPDFEWYRDDTR_3                | 0.332560704  | #N/A                    |
| _SGIIFAGHDK_2                                              | -0.082130165 | #N/A                    |
| _VDVYDEGSYTC[Carbamidomethyl (C)]SVQTQHEPK_3               | -0.125337533 | #N/A                    |
| _IQKVDVYDEGSYTC[Carbamidomethyl (C)]SVQTQHEPK_3            | -0.433195151 | #N/A                    |
| _VC[Carbamidomethyl (C)]LQQPSAS[Phospho (STY)]PQGGSSFESR_2 | 0.291103451  | Q8BLK9_S448_M1_Rps6kc1  |

|                                                                                          |              |                        |
|------------------------------------------------------------------------------------------|--------------|------------------------|
| _SS[Phospho (STY)]PDQFLFSSLR_2                                                           | -0.226135198 | Q8BLK9_S779_M1_Rps6kc1 |
| _S[Phospho (STY)]SQESLDIK_2                                                              | -0.086353553 | Q8BLK9_S422_M1_Rps6kc1 |
| _VFSGGEDLEAVSS[Phospho (STY)]PPTSESLR_2                                                  | -0.00081768  | Q8BLK9_S577_M1_Rps6kc1 |
| _GVDLLLEGVQGESS[Phospho (STY)]PTR_2                                                      | -0.01551058  | Q8BLK9_S281_M1_Rps6kc1 |
| _FLNRSS[Phospho (STY)]QES[Phospho (STY)]LDIK_2                                           | -0.033572122 | Q8BLK9_S423_M2_Rps6kc1 |
| _ESEAQDSVSRGS[Phospho (STY)]DDSVPVISFK_3                                                 | 0.147867654  | Q8BLK9_S658_M1_Rps6kc1 |
| _ALFTLEDGDS[Phospho (STY)]PSQSLDPGESK_2                                                  | 0.074264529  | Q8BLK9_S634_M1_Rps6kc1 |
| _ALFTLEDGDS[Phospho (STY)]PSQSLDPGESKR_3                                                 | 0.020864999  | Q8BLK9_S634_M1_Rps6kc1 |
| _GRS[Phospho (STY)]PTVGNKR_2                                                             | -0.247714796 | Q8BLN6_S1261_M1_Unc80  |
| _VAS[Phospho (STY)]IQS[Phospho (STY)]EPGQQNVLLQQPLGR_3                                   | 0.294585783  | Q8BLN6_S3045_M2_Unc80  |
| _ASPPSS[Phospho (STY)]PC[Carbamidomethyl (C)]LAS[Phospho (STY)]PGPTAK_2                  | -0.290268923 | Q8BLQ7_S422_M2_Slc7a4  |
| _FKAS[Phospho (STY)]PPSS[Phospho (STY)]PC[Carbamidomethyl (C)]LAS[Phospho (STY)]PGPTAK_3 | -0.036764958 | Q8BLQ7_S418_M3_Slc7a4  |
| _DGAELPDPDR_2                                                                            | -0.305947604 | #N/A                   |
| _GAEDAPDADTAIINAEGS[Phospho (STY)]QVNAEEKK_3                                             | 0.183784855  | Q8BLQ9_S423_M1_Cadm2   |
| _SDDGVAVIC[Carbamidomethyl (C)]R_2                                                       | 0.237861903  | #N/A                   |
| _TSGSKPAADIR_2                                                                           | -0.000424468 | #N/A                   |
| _TFTVSSTLDFR_2                                                                           | 0.041918575  | #N/A                   |
| _IIPSTFPQEGQALTLTC[Carbamidomethyl (C)]ESK_2                                             | -0.1558265   | #N/A                   |
| _YLKEEDANRK_3                                                                            | -0.107517165 | #N/A                   |
| _GAEDAPDADTAIINAEGS[Phospho (STY)]QVNAEEK_3                                              | -0.077566283 | Q8BLQ9_S423_M1_Cadm2   |
| _GAEDAPDADTAIINAEGS[Phospho (STY)]QVNAEEKKEYFI_3                                         | -0.228994956 | Q8BLQ9_S423_M1_Cadm2   |
| _QRS[Phospho (STY)]EESPR_2                                                               | -0.038752332 | Q8BLS7_S242_M1_Sowaha  |
| _TKS[Phospho (STY)]SSEVLER_2                                                             | -0.494203327 | Q8BLV3_S694_M1_Slc9a7  |
| _VGVEELS[Phospho (STY)]EEDQENNR_2                                                        | -0.145642442 | Q8BLV3_S546_M1_Slc9a7  |
| _S[Phospho (STY)]RSDVTHVDWR_3                                                            | 0.058771532  | Q8BM47_S150_M1_Plekhm3 |
| _LSTS[Phospho (STY)]SETVNSTAASK_2                                                        | -0.093206946 | Q8BM65_S154_M1_Nyap2   |
| _RNPNTQLSTS[Phospho (STY)]FDETYIKK_3                                                     | -0.288877263 | Q8BM65_S238_M1_Nyap2   |
| _FTVPASHS[Phospho (STY)]PPR_2                                                            | -0.139503396 | Q8BM65_S184_M1_Nyap2   |
| _KEEDDQSEAVY[Phospho (STY)]EEM[Oxidation (M)]KYPIFDDLGHDSK_4                             | -0.198549016 | Q8BM65_Y300_M1_Nyap2   |
| _DQTGALGPAPGASILSSS[Phospho (STY)]PPPPSTLYR_3                                            | -0.353866783 | Q8BM65_S442_M1_Nyap2   |
| _TNS[Phospho (STY)]SSSSPVVLK_2                                                           | -0.027892086 | Q8BMB0_S173_M1_Emsy    |
| _VRGEEYDDLDEFM[Oxidation (M)]QAVTDK_3                                                    | -0.190314387 | #N/A                   |
| _TFTPGQGNNAYVFPGVALGVIAGGIR_3                                                            | -0.167570684 | #N/A                   |
| _EMFAQDHPEVNSLEEVR_3                                                                     | -0.147139791 | #N/A                   |
| _ILVPEGTR_2                                                                              | 0.248524782  | #N/A                   |
| _DVPLGAPLC[Carbamidomethyl (C)]IIVEK_2                                                   | 0.21041813   | #N/A                   |
| _GLETIASDVVSLASK_2                                                                       | -0.166298017 | #N/A                   |
| _VPLPSLSPTM[Oxidation (M)]QAGTIAR_2                                                      | -0.290857253 | #N/A                   |
| _DIDSFVPSK_2                                                                             | 0.267457297  | #N/A                   |
| _VFSPLAK_2                                                                               | -0.008574402 | #N/A                   |
| _YLEKPITM[Oxidation (M)]LL_2                                                             | -0.353499346 | #N/A                   |
| _ISVNDFIK_2                                                                              | -0.16330081  | #N/A                   |
| _VAPAPAGVFTDIPISNR_2                                                                     | 0.246294578  | #N/A                   |
| _DVPVGSIC[Carbamidomethyl (C)]ITVEKPQDIEAFK_3                                            | 0.301324013  | #N/A                   |
| _LQPHEFQGGFTISNLGM[Oxidation (M)]FGIK_3                                                  | -0.2758494   | #N/A                   |
| _VPEANSSWM[Oxidation (M)]DTVIR_2                                                         | 0.212709878  | #N/A                   |
| _AAPAAAAAM[Oxidation (M)]APPGPR_2                                                        | 0.032604168  | #N/A                   |

|                                                      |              |                         |
|------------------------------------------------------|--------------|-------------------------|
| _ASALAC[Carbamidomethyl (C)]LK_.2                    | -0.230934997 | #N/A                    |
| _VVDGAVGAQWLAEFK_.2                                  | 0.160449356  | #N/A                    |
| _GGFS[Phospho (STY)]PFGNTQGSPSR_.2                   | -0.347107135 | Q8BMG7_S448_M1_Rab3gap2 |
| _AKS[Phospho (STY)]PRPDSFETIK_.3                     | 0.126898344  | Q8BMG7_S566_M1_Rab3gap2 |
| _TSS[Phospho (STY)]WEDDSWGAWEETPR_.2                 | -0.261970592 | Q8BMG7_S42_M1_Rab3gap2  |
| _LAS[Phospho (STY)]ETEDNDNSLGDILQASDNLSR_.3          | 0.243740403  | Q8BMI3_S267_M1_Gga3     |
| _VGAHGS[Phospho (STY)]EEGAVFK_.2                     | 0.128874786  | Q8BMK4_S367_M1_Ckap4    |
| _FVDLYGAQK_.2                                        | 0.037862194  | #N/A                    |
| _DGPGFYTTR_.2                                        | 0.178137547  | #N/A                    |
| _AGLEQGS DAGYLAESQK_.2                               | -0.216792669 | #N/A                    |
| _SLNSEM[Oxidation (M)]DNILANLR_.2                    | 0.152101584  | #N/A                    |
| _DTTASAVAVGLR_.2                                     | 0.062260711  | #N/A                    |
| _TVLGVPEVLLGILPGAGGTQR_.2                            | 0.271462016  | #N/A                    |
| _LPAKPEVSSDEDVQYR_.3                                 | 0.200858512  | #N/A                    |
| _SPGAS[Phospho (STY)]PLLSR_.2                        | 0.232064176  | Q8BN59_S451_M1_Larp6    |
| _YLSPGWGSAS[Phospho (STY)]EEEEPSR_.2                 | 0.137443732  | Q8BN59_S58_M1_Larp6     |
| _SGDLAPPESPSS[Phospho (STY)]PGQASPR_.2               | -0.285935112 | Q8BNN1_S329_M1_Spata2l  |
| _ASAAEGSEAS[Phospho (STY)]PPSLR_.2                   | -0.20310981  | Q8BNW9_S70_M1_Kbtbd11   |
| _LLLADAYSGR_.2                                       | -0.109973896 | #N/A                    |
| _AC[Carbamidomethyl (C)]LLAAALGTTGER_.2              | 0.234703076  | #N/A                    |
| _SGS[Phospho (STY)]RPQS[Phospho (STY)]PSGDAESR_.2    | -0.125569713 | Q8BNW9_S316_M2_Kbtbd11  |
| _GDAAVYC[Carbamidomethyl (C)]YQAEAGEWR_.2            | -0.299734504 | #N/A                    |
| _PQS[Phospho (STY)]PSGDAESR_.2                       | 0.164347276  | Q8BNW9_S320_M1_Kbtbd11  |
| _ANSKS[Phospho (STY)]PLQR_.2                         | -0.190205985 | Q8BP22_S312_M1_Fam92a   |
| _S[Phospho (STY)]SSHSFC[Carbamidomethyl (C)]SVVK_.2  | 0.029429921  | Q8BP27_S139_M1_Sfr1     |
| _ENPPS[Phospho (STY)]PHSNSSGKQPLSGTPK_.3             | -0.36648917  | Q8BP27_S115_M1_Sfr1     |
| _ENPPS[Phospho (STY)]PPTS[Phospho (STY)]PAAPQPR_.2   | 0.190104262  | Q8BP27_S67_M2_Sfr1      |
| _ENPPS[Phospho (STY)]PHSNSSGK_.2                     | -0.129493955 | Q8BP27_S115_M1_Sfr1     |
| _JSALEGYR_.2                                         | 0.026040143  | #N/A                    |
| _DVC[Carbamidomethyl (C)]LYPR_.2                     | -0.330326609 | #N/A                    |
| _SWDSEEILEGYKR_.3                                    | 0.150278188  | #N/A                    |
| _TTPEC[Carbamidomethyl (C)]DES[Phospho (STY)]PRKK_.2 | -0.100129746 | Q8BP78_S243_M1_Fra10ac1 |
| _S[Phospho (STY)]RSPPEEASK_.2                        | 0.265905535  | Q8BP78_S248_M1_Fra10ac1 |
| _NAEEEDSAS[Phospho (STY)]DSELWK_.2                   | -0.501430244 | Q8BP78_S285_M1_Fra10ac1 |
| _EALLGVQEDVDEYVK_.2                                  | -0.102196392 | #N/A                    |
| _RDPTANEDPEWILVEK_.3                                 | 0.137915724  | #N/A                    |
| _VIDFDENTALDDTEEGSFR_.2                              | -0.429723868 | #N/A                    |
| _LSEEEILENQDLFLTSEATDYGR_.3                          | -0.139085499 | #N/A                    |
| _HYAMQEAK_.2                                         | 0.257340326  | #N/A                    |
| _SSS[Phospho (STY)]ESPSDNQVFQATR_.2                  | 0.172779545  | Q8BP99_S63_M1_          |
| _ESS[Phospho (STY)]EESGEFDDLVSALR_.2                 | -0.152941522 | Q8BPM0_S1026_M1_Daam1   |
| _LDHEL[Phospho (STY)]LDR_.2                          | -0.13661917  | Q8BPN8_S451_M1_Dmxl2    |
| _KQS[Phospho (STY)]EVEADLGYPGGK_.2                   | -0.437934557 | Q8BPN8_S2636_M1_Dmxl2   |
| _NLAS[Phospho (STY)]PEGTLATLGLK_.2                   | -0.473582409 | Q8BPN8_S1856_M1_Dmxl2   |
| _ESKSS[Phospho (STY)]DDIDYR_.2                       | 0.051325679  | Q8BPN8_S2708_M1_Dmxl2   |
| _YLDEYNPGIFR_.2                                      | -0.283848778 | #N/A                    |
| _LVYSQPLDLPEAVEVIR_.2                                | -0.289388985 | #N/A                    |

|                                                                             |              |                        |
|-----------------------------------------------------------------------------|--------------|------------------------|
| _ALLT[Phospho (STY)]PQDEEC[Carbamidomethyl (C)]ADGDTEVDVIAEQLK_.3           | 0.301622584  | Q8BPN8_T2017_M1_Dmxl2  |
| _FGNVDADS[Phospho (STY)]PVEETIQDHSALK_.3                                    | -0.035346865 | Q8BPN8_S1288_M1_Dmxl2  |
| _M[Oxidation (M)]KLDHELS[Phospho (STY)]LDR_.3                               | 0.150457986  | Q8BPN8_S451_M1_Dmxl2   |
| _VDPIGLSYTGGVSELAR_.2                                                       | -0.055962654 | #N/A                   |
| _RQS[Phospho (STY)]ESIAAPPVASEDM[Oxidation (M)]DKHR_.4                      | -0.01058148  | Q8BPN8_S2394_M1_Dmxl2  |
| _QLDHES[Phospho (STY)]DDADREDEER_.3                                         | -0.49250474  | Q8BPN8_S423_M1_Dmxl2   |
| _LYQAVVDAR_.2                                                               | -0.21028082  | #N/A                   |
| _VS[Phospho (STY)]VDSNLFVYSK_.2                                             | -0.181848432 | Q8BPN8_S1141_M1_Dmxl2  |
| _RQS[Phospho (STY)]ESIAAPPVASEDMDK_.2                                       | -0.204285655 | Q8BPN8_S2394_M1_Dmxl2  |
| _RKQS[Phospho (STY)]EVEADLGYPGGK_.3                                         | 0.259952236  | Q8BPN8_S2636_M1_Dmxl2  |
| _SS[Phospho (STY)]DDIDYR_.2                                                 | -0.246212529 | Q8BPN8_S2708_M1_Dmxl2  |
| _LDHELSDRES[Phospho (STY)]EAGTGSSEHDGEREGS[Phospho (STY)]PR_.4              | 0.24604356   | Q8BPN8_S456_M2_Dmxl2   |
| _ESEAGTGSSEHDGEREGS[Phospho (STY)]PR_.3                                     | -0.117109718 | Q8BPN8_S473_M1_Dmxl2   |
| _NIGAGVMQIAISQDNR_.2                                                        | 0.008769524  | #N/A                   |
| _VGSVLDSESV[Phospho (STY)]VDS[Phospho (STY)]NLFVYSK_.3                      | -0.20457859  | Q8BPN8_S1141_M2_Dmxl2  |
| _QLDHES[Phospho (STY)]DDADREDEERSQDER_.4                                    | 0.188638045  | Q8BPN8_S423_M1_Dmxl2   |
| _C[Carbamidomethyl (C)]SSGAS[Phospho (STY)]LDSHLHR_.3                       | -0.129136156 | Q8BPQ7_S633_M1_Sgsm1   |
| _QDS[Phospho (STY)]PTKRPAIC[Carbamidomethyl (C)]IQK_.3                      | -0.183758939 | Q8BPQ7_S215_M1_Sgsm1   |
| _RHS[Phospho (STY)]S[Phospho (STY)]GSM[Oxidation (M)]DDRPSISAR_.3           | -0.292095684 | Q8BPQ7_S230_M2_Sgsm1   |
| _HSSGS[Phospho (STY)]M[Oxidation (M)]DDRPSISAR_.2                           | -0.257941377 | Q8BPQ7_S232_M1_Sgsm1   |
| _SPQGSSESTSS[Phospho (STY)]DKEDDEATDYVFR_.3                                 | -0.080222957 | Q8BPQ7_S407_M1_Sgsm1   |
| _IAFDAESEPNSSSGS[Phospho (STY)]M[Oxidation (M)]EK_.2                        | -0.565816996 | Q8BPU7_S344_M1_Elmo1   |
| _SC[Carbamidomethyl (C)]LVKGS[Phospho (STY)]PER_.2                          | -0.407097208 | Q8BQ30_S510_M1_Ppp1r18 |
| _SSS[Phospho (STY)]FSEFC[Carbamidomethyl (C)]HR_.2                          | 0.013918551  | Q8BQS4_S197_M1_Fam102b |
| _C[Carbamidomethyl (C)]PVKQDS[Phospho (STY)]VESQLKR_.3                      | -0.131188434 | Q8BQS4_S267_M1_Fam102b |
| _SAS[Phospho (STY)]VPDELGAWGHSR_.2                                          | -0.623810885 | Q8BQS4_S162_M1_Fam102b |
| _SDS[Phospho (STY)]APPTPVNR_.2                                              | -0.321127563 | Q8BQZ4_S359_M1_Ralgapb |
| _SGS[Phospho (STY)]LKGPDPR_.2                                               | -0.133396889 | Q8BR07_S548_M1_Bicd1   |
| _RVIHFVSGET[Phospho (STY)]M[Oxidation (M)]EEY[Phospho (STY)]STDEDEVGLDKK_.4 | -0.204074914 | Q8BR63_T60_M2_Fam177a1 |
| _EES[Phospho (STY)]LATDPAPGTQK_.2                                           | 0.109304766  | Q8BR92_S355_M1_Palm2   |
| _LEQEIQALESEESQISAK_.2                                                      | -0.569114123 | #N/A                   |
| _AELVLIDEDDEKS[Phospho (STY)]LREK_.3                                        | -0.221588538 | Q8BR92_S315_M1_Palm2   |
| _AELVLIDEDDEKS[Phospho (STY)]LR_.2                                          | 0.023978557  | Q8BR92_S315_M1_Palm2   |
| _VNLEESTGVENS[Phospho (STY)]PAGARPK_.2                                      | 0.025244093  | Q8BRF7_S300_M1_Scfd1   |
| _SWGS[Phospho (STY)]GGGQEPGGSQAAGGGQPR_.2                                   | 0.248406575  | Q8BRJ3_S195_M1_Rell2   |
| _YGLHEHRDGS[Phospho (STY)]PTDR_.3                                           | -0.221682409 | Q8BRJ3_S187_M1_Rell2   |
| _GS[Phospho (STY)]EPDDAQLQPPEDDDVNEDTVER_.3                                 | -0.182876773 | Q8BRJ3_S52_M1_Rell2    |
| _SC[Carbamidomethyl (C)]S[Phospho (STY)]AAGLHR_.2                           | 0.369669467  | Q8BRK8_S491_M1_Prkaa2  |
| _TSC[Carbamidomethyl (C)]GS[Phospho (STY)]PNYAAPEVISGR_.2                   | 0.069283361  | Q8BRK8_S176_M1_Prkaa2  |
| _MPPLIADS[Phospho (STY)]PK_.2                                               | 0.411942612  | Q8BRK8_S377_M1_Prkaa2  |
| _ESSRDTs[Phospho (STY)]PVR_.2                                               | -0.201610887 | Q8BRT1_S547_M1_Clasp2  |
| _AQT[Phospho (STY)]GSAGADPTADVSGQS_.2                                       | -0.27258599  | Q8BRT1_T1271_M1_Clasp2 |
| _RAQTGS[Phospho (STY)]AGADPTADVSGQS_.2                                      | -0.142614331 | Q8BRT1_S1273_M1_Clasp2 |
| _VLTTTALSTVSSGAQR_.2                                                        | 0.094175533  | #N/A                   |
| _MVSQSQPGS[Phospho (STY)]R_.2                                               | 0.327350275  | Q8BRT1_S465_M1_Clasp2  |
| _SSSSS[Phospho (STY)]QESLNRPFSSK_.2                                         | -0.154776124 | Q8BRT1_S333_M1_Clasp2  |
| _SRS[Phospho (STY)]DIDVNAAAGAK_.2                                           | 0.199103335  | Q8BRT1_S376_M1_Clasp2  |

|                                                                                 |              |                         |
|---------------------------------------------------------------------------------|--------------|-------------------------|
| _IPRPSVS[Phospho (STY)]QGC[Carbamidomethyl (C)]S[Phospho (STY)]R_.2             | -0.142177046 | Q8BRT1_S531_M2_Clasp2   |
| _S[Phospho (STY)]QEDMSEPV_.2                                                    | 0.188124625  | Q8BRT1_S947_M1_Clasp2   |
| _EILSDDKHDWDQR_.3                                                               | -0.2007625   | #N/A                    |
| _IC[Carbamidomethyl (C)]DYKS[Phospho (STY)]FDDEESVDGNRPSAASAFK_.3               | -0.112640729 | Q8BRT1_S14_M1_Clasp2    |
| _RDES[Phospho (STY)]DEEPPRVER_.2                                                | -0.327992236 | Q8BRV5_S205_M1_Kiaa1671 |
| _KNS[Phospho (STY)]AAELGASK_.2                                                  | 0.055223568  | Q8BSD5_S80_M1_She       |
| _C[Carbamidomethyl (C)]ETS[Phospho (STY)]PPPTPR_.2                              | 0.096712726  | Q8BSS9_S774_M1_Ppfia2   |
| _QAQS[Phospho (STY)]PSGVSEVEVLK_.2                                              | -0.414382021 | Q8BSS9_S163_M1_Ppfia2   |
| _S[Phospho (STY)]LGDHEWNR_.2                                                    | 0.147711185  | Q8BSS9_S594_M1_Ppfia2   |
| _VKS[Phospho (STY)]LGDHEWNR_.2                                                  | 0.059003465  | Q8BSS9_S594_M1_Ppfia2   |
| _RQAQS[Phospho (STY)]PSGVSEVEVLK_.3                                             | -0.211717364 | Q8BSS9_S163_M1_Ppfia2   |
| _VAS[Phospho (STY)]VS[Phospho (STY)]LEGLNLR_.2                                  | 0.171118085  | Q8BSS9_S687_M2_Ppfia2   |
| _KMSSEGS[Phospho (STY)]TES[Phospho (STY)]EHLEGMEAGQK_.3                         | -0.682678624 | Q8BSS9_S236_M2_Ppfia2   |
| _VGRPHS[Phospho (STY)]SPAR_.2                                                   | 0.079864446  | Q8BTG3_S55_M1_Tcp11l1   |
| _LDPTTTTFLK_.2                                                                  | 0.045820157  | #N/A                    |
| _TAS[Phospho (STY)]LTSASSVDGSR_.2                                               | 0.101918481  | Q8BTG7_S317_M1_NdrG4    |
| _LSGGAVPSAS[Phospho (STY)]JMTR_.2                                               | 0.319840672  | Q8BTG7_S306_M1_NdrG4    |
| _RLS[Phospho (STY)]GGAVPS[Phospho (STY)]ASMTR_.2                                | 0.172676054  | Q8BTG7_S298_M2_NdrG4    |
| _DLINRPGTVPNK_.2                                                                | 0.216067397  | #N/A                    |
| _SSS[Phospho (STY)]PVTELTAR_.2                                                  | -0.30860845  | Q8BTI8_S1068_M1_Srrm2   |
| _S[Phospho (STY)]RT[Phospho (STY)]PPVTR_.2                                      | -0.144042411 | Q8BTI8_S1878_M2_Srrm2   |
| _S[Phospho (STY)]RTS[Phospho (STY)]PVTR_.2                                      | -0.126954553 | Q8BTI8_S1924_M2_Srrm2   |
| _S[Phospho (STY)]RT[Phospho (STY)]PPAIR_.2                                      | -0.192424752 | Q8BTI8_S1972_M2_Srrm2   |
| _SST[Phospho (STY)]PPRQS[Phospho (STY)]PSR_.2                                   | -0.159768529 | Q8BTI8_S882_M2_Srrm2    |
| _VSS[Phospho (STY)]PVLETVQQR_.2                                                 | -0.352312934 | Q8BTI8_S1360_M1_Srrm2   |
| _S[Phospho (STY)]RS[Phospho (STY)]PLAIR_.2                                      | -0.436125675 | Q8BTI8_S1996_M2_Srrm2   |
| _S[Phospho (STY)]RTS[Phospho (STY)]PAPWK_.2                                     | -0.1973722   | Q8BTI8_S1810_M2_Srrm2   |
| _AAETPAVASC[Carbamidomethyl (C)]WSGPQVS[Phospho (STY)]PEHK_.3                   | -0.456892661 | Q8BTI8_S1269_M1_Srrm2   |
| _SSS[Phospho (STY)]PVTELTARS[Phospho (STY)]PVKQDK_.3                            | -0.173786765 | Q8BTI8_S1077_M2_Srrm2   |
| _SRHS[Phospho (STY)]PRLS[Phospho (STY)]R_.3                                     | -0.058928021 | Q8BTI8_S1548_M2_Srrm2   |
| _S[Phospho (STY)]PVPSAFSDQSR_.2                                                 | -0.128275209 | Q8BTI8_S2404_M1_Srrm2   |
| _S[Phospho (STY)]RTS[Phospho (STY)]PVSR_.2                                      | -0.251236263 | Q8BTI8_S1846_M2_Srrm2   |
| _S[Phospho (STY)]RS[Phospho (STY)]PQRPGWSR_.3                                   | -0.425643648 | Q8BTI8_S531_M2_Srrm2    |
| _S[Phospho (STY)]RS[Phospho (STY)]IS[Phospho (STY)]PC[Carbamidomethyl (C)]PK_.2 | -0.222067523 | Q8BTI8_S924_M3_Srrm2    |
| _NSGPVSEVNTGFS[Phospho (STY)]PEVK_.2                                            | -0.194031888 | Q8BTI8_S1305_M1_Srrm2   |
| _ERAPS[Phospho (STY)]PASR_.2                                                    | -0.314034629 | Q8BTI8_S2381_M1_Srrm2   |
| _ALPQT[Phospho (STY)]PR_.2                                                      | -0.219668902 | Q8BTI8_T1448_M1_Srrm2   |
| _DKFS[Phospho (STY)]PTQDRPESSTVLK_.3                                            | -0.50895423  | Q8BTI8_S1151_M1_Srrm2   |
| _S[Phospho (STY)]RT[Phospho (STY)]PLISR_.2                                      | -0.360732989 | Q8BTI8_S1834_M2_Srrm2   |
| _RVPS[Phospho (STY)]PTPVPK_.2                                                   | -0.286828876 | Q8BTI8_S2535_M1_Srrm2   |
| _REIS[Phospho (STY)]S[Phospho (STY)]SPTSK_.2                                    | -0.021031948 | Q8BTI8_S452_M2_Srrm2    |
| _SGAGS[Phospho (STY)]PPGKR_.2                                                   | -0.153935133 | Q8BTI8_S1179_M1_Srrm2   |
| _T[Phospho (STY)]PPVALSSSR_.2                                                   | 0.102873123  | Q8BTI8_T2056_M1_Srrm2   |
| _S[Phospho (STY)]RSRT[Phospho (STY)]S[Phospho (STY)]PAPWK_.2                    | -0.07104054  | Q8BTI8_S1808_M3_Srrm2   |
| _VPS[Phospho (STY)]PTPVPK_.2                                                    | 0.232775824  | Q8BTI8_S2535_M1_Srrm2   |
| _GHS[Phospho (STY)]RS[Phospho (STY)]RS[Phospho (STY)]PQWR_.3                    | -0.426096278 | Q8BTI8_S503_M3_Srrm2    |
| _S[Phospho (STY)]RS[Phospho (STY)]RTS[Phospho (STY)]PVSR_.2                     | -0.16662587  | Q8BTI8_S1844_M3_Srrm2   |

|                                                                                    |              |                       |
|------------------------------------------------------------------------------------|--------------|-----------------------|
| _S[Phospho (STY)]RS[Phospho (STY)]RS[Phospho (STY)]LVR_.2                          | 0.014141215  | Q8BTI8_S700_M3_Srrm2  |
| _SSS[Phospho (STY)]PVTELTARS[Phospho (STY)]PVK_.2                                  | 0.17114853   | Q8BTI8_S1077_M2_Srrm2 |
| _SRS[Phospho (STY)]T[Phospho (STY)]T[Phospho (STY)]PAPK_.2                         | -0.121791991 | Q8BTI8_S250_M3_Srrm2  |
| _TS[Phospho (STY)]PAPWKR_.2                                                        | -0.18738004  | Q8BTI8_S1813_M1_Srrm2 |
| _ARS[Phospho (STY)]RT[Phospho (STY)]PPSAPSQSR_.3                                   | -0.22423233  | Q8BTI8_S2360_M2_Srrm2 |
| _RKET[Phospho (STY)]PS[Phospho (STY)]PR_.2                                         | -0.233280843 | Q8BTI8_S2691_M2_Srrm2 |
| _HSGST[Phospho (STY)]SPYLK_.2                                                      | -0.259021754 | Q8BTI8_T963_M1_Srrm2  |
| _GRS[Phospho (STY)]PS[Phospho (STY)]PKPR_.2                                        | -0.230471908 | Q8BTI8_S1718_M2_Srrm2 |
| _NNKS[Phospho (STY)]VT[Phospho (STY)]PQR_.2                                        | -0.16209784  | Q8BTI8_S1465_M2_Srrm2 |
| _VSS[Phospho (STY)]PVLETVQQR[Phospho (STY)]PSR_.3                                  | 0.276751307  | Q8BTI8_S1360_M2_Srrm2 |
| _TS[Phospho (STY)]PLM[Oxidation (M)]LDR_.2                                         | 0.019882407  | Q8BTI8_S2351_M1_Srrm2 |
| _SLSYS[Phospho (STY)]PVER_.2                                                       | -0.062053077 | Q8BTI8_S2648_M1_Srrm2 |
| _S[Phospho (STY)]RTS[Phospho (STY)]PAPWKR_.2                                       | -0.021723031 | Q8BTI8_S1810_M2_Srrm2 |
| _GRS[Phospho (STY)]RT[Phospho (STY)]PLTSR_.2                                       | -0.227567225 | Q8BTI8_S1798_M2_Srrm2 |
| _RSS[Phospho (STY)]SELSPEVVEK_.2                                                   | -0.244382248 | Q8BTI8_S1339_M1_Srrm2 |
| _HAS[Phospho (STY)]S[Phospho (STY)]SPESLKPTPAGSR_.3                                | -0.359751915 | Q8BTI8_S433_M2_Srrm2  |
| _LKSGM[Oxidation (M)]S[Phospho (STY)]PEQSK_.2                                      | 0.210181896  | Q8BTI8_S1097_M1_Srrm2 |
| _GRS[Phospho (STY)]EC[Carbamidomethyl (C)]DS[Phospho (STY)]S[Phospho (STY)]PEPK_.2 | -0.068230961 | Q8BTI8_S1434_M3_Srrm2 |
| _SSSELS[Phospho (STY)]PEVVEK_.2                                                    | -0.170727643 | Q8BTI8_S1343_M1_Srrm2 |
| _SM[Oxidation (M)]LQT[Phospho (STY)]PPDQNLGSK_.2                                   | -0.466007865 | Q8BTI8_T973_M1_Srrm2  |
| _PSM[Oxidation (M)]S[Phospho (STY)]PTPLDR_.2                                       | -0.002921458 | Q8BTI8_S2075_M1_Srrm2 |
| _S[Phospho (STY)]PVKQDKSEISTDPK_.2                                                 | -0.403629669 | Q8BTI8_S1077_M1_Srrm2 |
| _VSSPVLETVQQR[Phospho (STY)]PS[Phospho (STY)]RER_.3                                | -0.024598524 | Q8BTI8_S1372_M2_Srrm2 |
| _S[Phospho (STY)]RT[Phospho (STY)]PLLPR_.2                                         | 0.359440968  | Q8BTI8_S1984_M2_Srrm2 |
| _S[Phospho (STY)]RAS[Phospho (STY)]PVSR_.2                                         | -0.209746576 | Q8BTI8_S1866_M2_Srrm2 |
| _QSHSESS[Phospho (STY)]PDGEVK_.2                                                   | 0.002569407  | Q8BTI8_S851_M1_Srrm2  |
| _AQ[Phospho (STY)]GTD[Phospho (STY)]S[Phospho (STY)]PEHKIPAPR_.2                   | -0.104580263 | #N/A                  |
| _NHSGS[Phospho (STY)]RT[Phospho (STY)]PPVALSSSR_.3                                 | 0.296642405  | Q8BTI8_S2054_M2_Srrm2 |
| _SLS[Phospho (STY)]GSS[Phospho (STY)]PC[Carbamidomethyl (C)]PK_.2                  | -0.098373662 | Q8BTI8_S775_M2_Srrm2  |
| _SQTS[Phospho (STY)]PKGS[Phospho (STY)]LSR_.2                                      | 0.042413789  | Q8BTI8_S1058_M2_Srrm2 |
| _EISSS[Phospho (STY)]PTSK_.2                                                       | -0.001771375 | Q8BTI8_S454_M1_Srrm2  |
| _SRSGS[Phospho (STY)]S[Phospho (STY)]PGLR_.2                                       | -0.301242679 | Q8BTI8_S1399_M2_Srrm2 |
| _S[Phospho (STY)]VT[Phospho (STY)]PQRER_.2                                         | 0.257850512  | Q8BTI8_S1465_M2_Srrm2 |
| _SAVRPS[Phospho (STY)]PS[Phospho (STY)]PER_.2                                      | -0.148856142 | Q8BTI8_S349_M2_Srrm2  |
| _RQPS[Phospho (STY)]PQPS[Phospho (STY)]PR_.2                                       | -0.078511632 | Q8BTI8_S2656_M2_Srrm2 |
| _S[Phospho (STY)]PQRPGWSR_.2                                                       | 0.075700962  | Q8BTI8_S533_M1_Srrm2  |
| _GGS[Phospho (STY)]GYHS[Phospho (STY)]RS[Phospho (STY)]PTRQESSR_.3                 | -0.237877327 | Q8BTI8_S1774_M3_Srrm2 |
| _S[Phospho (STY)]RS[Phospho (STY)]RT[Phospho (STY)]PLLPR_.2                        | 0.100475714  | Q8BTI8_S1982_M3_Srrm2 |
| _SS[Phospho (STY)]RSS[Phospho (STY)]PELTR_.2                                       | -0.167595743 | Q8BTI8_S1647_M2_Srrm2 |
| _S[Phospho (STY)]LTRS[Phospho (STY)]PPAIR_.2                                       | -0.010630586 | Q8BTI8_S2019_M2_Srrm2 |
| _S[Phospho (STY)]RS[Phospho (STY)]RT[Phospho (STY)]PLISR_.2                        | -0.239106891 | Q8BTI8_S1832_M3_Srrm2 |
| _S[Phospho (STY)]RS[Phospho (STY)]RS[Phospho (STY)]PLAIR_.2                        | -0.087046805 | Q8BTI8_S1994_M3_Srrm2 |
| _KET[Phospho (STY)]PS[Phospho (STY)]PR_.2                                          | 0.206190099  | Q8BTI8_S2691_M2_Srrm2 |
| _SRT[Phospho (STY)]PPSAPSQSR_.2                                                    | 0.08296373   | Q8BTI8_T2362_M1_Srrm2 |
| _RGS[Phospho (STY)]RSS[Phospho (STY)]IEPK_.2                                       | -0.49406915  | Q8BTI8_S1628_M2_Srrm2 |
| _SSRRS[Phospho (STY)]S[Phospho (STY)]SELS[Phospho (STY)]PEVVEK_.2                  | -0.028495519 | Q8BTI8_S1339_M3_Srrm2 |
| _S[Phospho (STY)]RS[Phospho (STY)]RAS[Phospho (STY)]PVSR_.2                        | -0.259579434 | Q8BTI8_S1864_M3_Srrm2 |

|                                                                                            |              |                        |
|--------------------------------------------------------------------------------------------|--------------|------------------------|
| _SEQPLSQVLPS[Phospho (STY)]LSPEHK_.2                                                       | -0.030595939 | Q8BTI8_S1214_M1_Srrm2  |
| _S[Phospho (STY)]RT[Phospho (STY)]PLTSR_.2                                                 | -0.068547501 | Q8BTI8_S1798_M2_Srrm2  |
| _RRS[Phospho (STY)]PS[Phospho (STY)]VS[Phospho (STY)]S[Phospho (STY)]PEPTEK_.2             | 0.075879776  | Q8BTI8_S1683_M3_Srrm2  |
| _S[Phospho (STY)]SRSS[Phospho (STY)]PELTRK_.2                                              | -0.443920808 | Q8BTI8_S1646_M2_Srrm2  |
| _DTPQT[Phospho (STY)]PSR_.2                                                                | -0.097586265 | Q8BTI8_T1428_M1_Srrm2  |
| _S[Phospho (STY)]RS[Phospho (STY)]RT[Phospho (STY)]PPVTR_.2                                | -0.079231246 | Q8BTI8_S1876_M3_Srrm2  |
| _SRS[Phospho (STY)]PQWR_.2                                                                 | -0.039655945 | Q8BTI8_S507_M1_Srrm2   |
| _S[Phospho (STY)]RS[Phospho (STY)]RT[Phospho (STY)]PPAIR_.2                                | -0.271854202 | Q8BTI8_S1970_M3_Srrm2  |
| _S[Phospho (STY)]RS[Phospho (STY)]RTS[Phospho (STY)]PVTR_.2                                | -0.054541817 | Q8BTI8_S1922_M3_Srrm2  |
| _ELSHS[Phospho (STY)]PPRENSFESSLEFK_.3                                                     | -0.09349474  | Q8BTI8_S1278_M1_Srrm2  |
| _NNKS[Phospho (STY)]VT[Phospho (STY)]PQRER_.2                                              | 0.055405406  | Q8BTI8_S1465_M2_Srrm2  |
| _QSSS[Phospho (STY)]PYEDKDKK_.2                                                            | 0.028768281  | Q8BTI8_S333_M1_Srrm2   |
| _ARS[Phospho (STY)]HS[Phospho (STY)]PS[Phospho (STY)]SPER_.2                               | -0.129239494 | Q8BTI8_S1453_M3_Srrm2  |
| _WGKS[Phospho (STY)]RS[Phospho (STY)]PQR_.2                                                | -0.164104285 | Q8BTI8_S522_M2_Srrm2   |
| _SEC[Carbamidomethyl (C)]DS[Phospho (STY)]S[Phospho (STY)]PEPK_.2                          | 0.092253953  | Q8BTI8_S1438_M2_Srrm2  |
| _SSS[Phospho (STY)]AS[Phospho (STY)]PELKDGLPR_.2                                           | -0.076327144 | Q8BTI8_S1378_M2_Srrm2  |
| _SM[Oxidation (M)]LQT[Phospho (STY)]PPDQNL[Phospho (STY)]GSKSPC[Carbamidomethyl (C)]PQK_.3 | -0.130528047 | Q8BTI8_S980_M2_Srrm2   |
| _SGS[Phospho (STY)]S[Phospho (STY)]PEM[Oxidation (M)]KDKPR_.2                              | -0.227274262 | Q8BTI8_S1556_M2_Srrm2  |
| _RSSRS[Phospho (STY)]S[Phospho (STY)]PELTR_.2                                              | -0.145075799 | Q8BTI8_S1649_M2_Srrm2  |
| _GGSGYHS[Phospho (STY)]RS[Phospho (STY)]PTR_.2                                             | 0.052871261  | Q8BTI8_S1778_M2_Srrm2  |
| _SGMS[Phospho (STY)]PEQSK_.2                                                               | 0.343776313  | Q8BTI8_S1097_M1_Srrm2  |
| _SGT[Phospho (STY)]PPRPGSVTNMQADEC[Carbamidomethyl (C)]TAT[Phospho (STY)]PQR_.3            | -0.112896342 | Q8BTI8_T823_M2_Srrm2   |
| _SGSSQELDGKPSAS[Phospho (STY)]PQER_.2                                                      | -0.171787784 | Q8BTI8_S1508_M1_Srrm2  |
| _MELGT[Phospho (STY)]PLR_.2                                                                | 0.433500821  | Q8BTI8_T955_M1_Srrm2   |
| _S[Phospho (STY)]RS[Phospho (STY)]RAS[Phospho (STY)]PATHR_.2                               | 0.056904371  | Q8BTI8_S1820_M3_Srrm2  |
| _SS[Phospho (STY)]PELTR_.2                                                                 | -0.550467069 | Q8BTI8_S1650_M1_Srrm2  |
| _RGGSGYHS[Phospho (STY)]RS[Phospho (STY)]PTR_.3                                            | -0.172575097 | Q8BTI8_S1778_M2_Srrm2  |
| _C[Carbamidomethyl (C)]RS[Phospho (STY)]PGMLEPLGSAR_.3                                     | -0.184534759 | Q8BTI8_S2084_M1_Srrm2  |
| _SGS[Phospho (STY)]SPGLR_.2                                                                | -0.257889544 | Q8BTI8_S1399_M1_Srrm2  |
| _MS[Phospho (STY)]C[Carbamidomethyl (C)]FS[Phospho (STY)]RPSM[Oxidation (M)]SPTPLDR_.2     | -0.618198963 | Q8BTI8_S2067_M2_Srrm2  |
| _TPAAAAAMNLAS[Phospho (STY)]PR_.2                                                          | 0.362056168  | Q8BTI8_S2224_M1_Srrm2  |
| _S[Phospho (STY)]RS[Phospho (STY)]RT[Phospho (STY)]PAR_.2                                  | -0.250505401 | Q8BTI8_S570_M3_Srrm2   |
| _SSS[Phospho (STY)]TEPPPPVR_.2                                                             | -0.041228964 | Q8BTV2_S48_M1_Cpsf7    |
| _DSSDSADGRAT[Phospho (STY)]PSENLPSSAR_.3                                                   | -0.265415902 | Q8BTV2_T203_M1_Cpsf7   |
| _RES[Phospho (STY)]PPPPAR_.2                                                               | -0.107559041 | Q8BTW9_S104_M1_Pak4    |
| _LYSGPGIVGNVLVDPSAR_.2                                                                     | 0.34807236   | #N/A                   |
| _LSTTPS[Phospho (STY)]PT[Phospho (STY)]NSLHEDGVDDFRR_.3                                    | -0.296585918 | Q8BU11_S178_M2_Tox4    |
| _EDSKEETPGT[Phospho (STY)]PK_.2                                                            | 0.195761787  | Q8BU14_T158_M1_Sec62   |
| _SQHS[Phospho (STY)]SGNGNDFEM[Oxidation (M)]ITK_.2                                         | -0.072859679 | Q8BU14_S356_M1_Sec62   |
| _EELEQQT[Phospho (STY)]DGDGDC[Carbamidomethyl (C)]DEEDDDKDGVEPK_.3                         | -0.540210332 | Q8BU14_T375_M1_Sec62   |
| _LNQSDSIEDPNS[Phospho (STY)]PAGR_.2                                                        | -0.164435054 | Q8BUK6_S238_M1_Hook3   |
| _LNQSDSIEDPNS[Phospho (STY)]PAGRR_.2                                                       | -0.572515543 | Q8BUK6_S238_M1_Hook3   |
| _RLS[Phospho (STY)]NPC[Carbamidomethyl (C)]IQR_.2                                          | -0.103785716 | Q8BUL6_S308_M1_Plekha1 |
| _AQS[Phospho (STY)]QEDSDYINANYIR_.2                                                        | 0.159172612  | Q8BUM3_S143_M1_Ptpn7   |
| _VTLYNADQDGS[Phospho (STY)]PR_.2                                                           | -0.313452158 | Q8BUR3_S223_M1_Foxj3   |
| _ASHS[Phospho (STY)]AVDITK_.2                                                              | -0.330607684 | Q8BUIV3_S338_M1_Gphn   |
| _IPDSIISR_.2                                                                               | 0.091423261  | #N/A                   |

|                                                                                                      |              |                        |
|------------------------------------------------------------------------------------------------------|--------------|------------------------|
| _VLAQDVYAK_.2                                                                                        | 0.422842198  | #N/A                   |
| _DTASLSTTPSES[Phospho (STY)]PR_.2                                                                    | -0.046361208 | Q8BUV3_S270_M1_Gphn    |
| _DLVQDPSLLGGTISAYK_.2                                                                                | -0.115044929 | #N/A                   |
| _VGVLTVSDSC[Carbamidomethyl (C)]FR_.2                                                                | 0.536604916  | #N/A                   |
| _DTASLSTT[Phospho (STY)]PSES[Phospho (STY)]PRAQATSR_.3                                               | 0.105040521  | Q8BUV3_S270_M2_Gphn    |
| _LSTAS[Phospho (STY)]C[Carbamidomethyl (C)]PT[Phospho (STY)]PK_.2                                    | -0.064245396 | Q8BUV3_S283_M2_Gphn    |
| _C[Carbamidomethyl (C)]SS[Phospho (STY)]KENILR_.2                                                    | -0.170620695 | Q8BUV3_S328_M1_Gphn    |
| _AQATSRLS[Phospho (STY)]TAS[Phospho (STY)]C[Carbamidomethyl (C)]PT[Phospho (STY)]PK_.2               | 0.075284897  | Q8BUV3_S280_M3_Gphn    |
| _EVHDELEDLPS[Phospho (STY)]PPPPLS[Phospho (STY)]PPPTTSPHK_.4                                         | 0.163186993  | Q8BUV3_S188_M2_Gphn    |
| _VKEVHDELEDLPS[Phospho (STY)]PPPPLS[Phospho (STY)]PPPT[Phospho (STY)]TSPHKQTEDK_.5                   | -0.171506557 | Q8BUV3_S188_M3_Gphn    |
| _VKEVHDELEDLPS[Phospho (STY)]PPPPLS[Phospho (STY)]PPPTTSPHK_.4                                       | -0.135240826 | Q8BUV3_S188_M2_Gphn    |
| _DSS[Phospho (STY)]LTLTR_.2                                                                          | 0.063073267  | Q8BUV6_S220_M1_Lsm11   |
| _S[Phospho (STY)]VPSSLQASAR_.2                                                                       | 0.258085895  | Q8BUV6_S281_M1_Lsm11   |
| _KVS[Phospho (STY)]NGAVEPQGSWEGTA_.2                                                                 | -0.335267973 | Q8BUV8_S537_M1_Gpr107  |
| _QLQIQIDNQNDPEEQ_.2                                                                                  | 0.345560053  | #N/A                   |
| _QLQSEQPQTAAARS[Phospho (STY)]_.2                                                                    | -0.266725047 | Q8BVE3_S483_M1_Atp6v1h |
| _GAVDAAVPTNIIAAK_.2                                                                                  | -0.24538249  | #N/A                   |
| _LEWSPVHK_.2                                                                                         | -0.416877945 | #N/A                   |
| _LLEVSDDPQVLAVAAHDVGEYVR_.3                                                                          | -0.301530821 | #N/A                   |
| _LGESVQDLSSFDEYSSELK_.2                                                                              | -0.378336067 | #N/A                   |
| _QLQSEQPQTAAAR_.2                                                                                    | 0.152547726  | #N/A                   |
| _YNIIPVLSDILQESVK_.2                                                                                 | -0.202639489 | #N/A                   |
| _QLENLEQQKYDDEDISEDIK_.3                                                                             | -0.126168484 | #N/A                   |
| _RSS[Phospho (STY)]EDKQEM[Oxidation (M)]LQTEGSQC[Carbamidomethyl (C)]AK_.3                           | 0.360687204  | Q8BVE3_S59_M1_Atp6v1h  |
| _VIEQLGGK_.2                                                                                         | 0.207589396  | #N/A                   |
| _SSS[Phospho (STY)]AENQEGDPGTDK_.2                                                                   | 0.083955866  | Q8BVE8_S408_M1_Nsd2    |
| _Acetyl (Protein N-term)]C[Carbamidomethyl (C)]SGVS[Phospho (STY)]PVEQVAAGDM[Oxidation (M)]DDTAAR_.2 | 0.107237739  | Q8BVG4_S6_M1_Dpp9      |
| _EGGLTLAGAK_.2                                                                                       | -0.037701652 | #N/A                   |
| _VDAILC[Carbamidomethyl (C)]VAGGWAGGNAK_.2                                                           | -0.007000189 | #N/A                   |
| _AALDGTGPMIGYGM[Oxidation (M)]AK_.2                                                                  | -0.472402382 | #N/A                   |
| _MTDSFTEQADQVTADV GK_.2                                                                              | 0.214674989  | #N/A                   |
| _GAVHQLC[Carbamidomethyl (C)]QSLAGK_.3                                                               | -0.285293216 | #N/A                   |
| _QSM[Oxidation (M)]WTSTISSHLATK_.2                                                                   | 0.099473463  | #N/A                   |
| _S[Phospho (STY)]PPKWVDGVDEIQYDVGR_.3                                                                | -0.197308951 | Q8BVI5_S74_M1_Stx16    |
| _QLLAEQVSS[Phospho (STY)]HTTSSPLHSR_.3                                                               | -0.18765367  | Q8BVI5_S30_M1_Stx16    |
| _SIAAELDELADDR_.2                                                                                    | -0.155375889 | #N/A                   |
| _VTSSVPLPS[Phospho (STY)]GGTSSPSR_.2                                                                 | 0.298858003  | Q8BVL3_S331_M1_Snx17   |
| _SPPLLES[Phospho (STY)]PDASR_.2                                                                      | -0.16171112  | Q8BVL3_S421_M1_Snx17   |
| _VLVTVLTSDQTEDVLEAVAAK_.2                                                                            | -0.29712506  | #N/A                   |
| _SDSQQAVKS[Phospho (STY)]PPLLES[Phospho (STY)]PDASR_.3                                               | 0.214491213  | Q8BVL3_S415_M2_Snx17   |
| _HTS[Phospho (STY)]LNDLSLTR_.2                                                                       | -0.069919355 | Q8BVL9_S382_M1_Jakmp1  |
| _QC[Carbamidomethyl (C)]EGITS[Phospho (STY)]PEGSK_.2                                                 | 0.038138991  | Q8BVQ5_S243_M1_Ppme1   |
| _SIVEGIIEEEEDEEGSESVNKR_.3                                                                           | -0.373816759 | #N/A                   |
| _SLENAIEWSVK_.2                                                                                      | 0.013994845  | #N/A                   |
| _FAEPIGGFQC[Carbamidomethyl (C)]VFPGC[Carbamidomethyl (C)]_.2                                        | 0.14140087   | #N/A                   |
| _YVDLGGSYVGPTQNR_.2                                                                                  | -0.291594953 | #N/A                   |
| _FIGGSGQVSR_.2                                                                                       | 0.209755128  | #N/A                   |



|                                                                                                     |              |                        |
|-----------------------------------------------------------------------------------------------------|--------------|------------------------|
| _DLKPENLLYSQDEESK_.3                                                                                | 0.417707642  | #N/A                   |
| _AAYDAFNSWK_.2                                                                                      | 0.385960576  | #N/A                   |
| _EVGEVLC[Carbamidomethyl (C)]TDPLVSK_.2                                                             | 0.278649573  | #N/A                   |
| _GIHDSFVTK_.2                                                                                       | -0.069621198 | #N/A                   |
| _NAGQTC[Carbamidomethyl (C)]VC[Carbamidomethyl (C)]SNR_.2                                           | 0.181691202  | #N/A                   |
| _ISFTGSTATGK_.2                                                                                     | 0.342173142  | #N/A                   |
| _LGTVADC[Carbamidomethyl (C)]GVPEAR_.2                                                              | 0.182520644  | #N/A                   |
| _WLPAPATFPVYDPASGAK_.2                                                                              | 0.290085732  | #N/A                   |
| _DM[Oxidation (M)]LC[Carbamidomethyl (C)]ITEETFGPLAPVIK_.2                                          | 0.214715548  | #N/A                   |
| _VAEQLEVGM[Oxidation (M)]VGVNEGLISSVEC[Carbamidomethyl (C)]PFGGVK_.3                                | -0.349419689 | #N/A                   |
| _YGIDEYLEVK_.2                                                                                      | 0.024490851  | #N/A                   |
| _QPVGVAAIITPWNFPSAM[Oxidation (M)]ITR_.2                                                            | 0.12174493   | #N/A                   |
| _HQSGGNFFEPTLLSNVTR_.2                                                                              | -0.135407005 | #N/A                   |
| _DDKDEEDDGTGS[Phospho (STY)]PHLNNR_.2                                                               | -0.108984624 | #N/A                   |
| _GM[Oxidation (M)]KDDKDEEDDGTGS[Phospho (STY)]PHLNNR_.4                                             | -0.424036816 | #N/A                   |
| _S[Phospho (STY)]LNLVDSQPPLLK_.2                                                                    | -0.08862259  | Q8BWJ3_S729_M1_Phka2   |
| _S[Phospho (STY)]VSTS[Phospho (STY)]PSILPAYLK_.2                                                    | -0.366054643 | Q8BWS5_S323_M2_Gprin3  |
| _LEDTLWAGLTDQHVK_.2                                                                                 | -0.253577914 | #N/A                   |
| _VGVPETETGALTNR_.2                                                                                  | 0.570012353  | #N/A                   |
| _TNVSGGAIALGHPLGGSGSR_.2                                                                            | -0.134085146 | #N/A                   |
| _DFSATDLTEFAAR_.2                                                                                   | -0.470177161 | #N/A                   |
| _YALQSQQR_.2                                                                                        | 0.126011991  | #N/A                   |
| _VPPETIDSVIVGNVM[Oxidation (M)]QSSSDAAYLAR_.3                                                       | -0.154100296 | #N/A                   |
| _APSQPPS[Phospho (STY)]PTEER_.2                                                                     | 0.032605475  | Q8BX17_S1414_M1_Gemin5 |
| _EVST[Phospho (STY)]PQDVHTTQGVPAAR_.3                                                               | 0.082302659  | Q8BX70_T1397_M1_Vps13c |
| _LS[Phospho (STY)]FHNDSEFR_.2                                                                       | -0.015949693 | Q8BX70_S1956_M1_Vps13c |
| _ILLENLGEASSQPS[Phospho (STY)]PTQYAQEAA_.3                                                          | -0.400366061 | Q8BX70_S1891_M1_Vps13c |
| _SST[Phospho (STY)]PS[Phospho (STY)]PERQVASIPVLGGTK_.3                                              | -0.085976997 | Q8BX70_S841_M2_Vps13c  |
| _TANAS[Phospho (STY)]LEEIDK_.2                                                                      | -0.221077264 | Q8BX70_S736_M1_Vps13c  |
| _KVS[Phospho (STY)]VEPQDSHQDAQPR_.3                                                                 | 0.018925798  | Q8BxB6_S21_M1_Slco2b1  |
| _VFQDVAQK_.2                                                                                        | 0.15172374   | #N/A                   |
| _ATSAC[Carbamidomethyl (C)]APISS[Phospho (STY)]PK_.2                                                | 0.287975554  | Q8BXX8_S422_M1_Agap1   |
| _LDPPPS[Phospho (STY)]PHANR_.2                                                                      | -0.085056164 | Q8BXX8_S521_M1_Agap1   |
| _YLTGTYYQEEES[Phospho (STY)]PEGGR_.2                                                                | 0.029297976  | Q8BXX8_S101_M1_Agap1   |
| _GNAGGGGPQVPQQS[Phospho (STY)]PPKR_.2                                                               | 0.248741339  | Q8BXQ8_S162_M1_Fam53c  |
| _SRS[Phospho (STY)]QPC[Carbamidomethyl (C)]DLDAR_.2                                                 | 0.211204158  | Q8BXQ8_S273_M1_Fam53c  |
| _S[Phospho (STY)]LSVPVDLSR_.2                                                                       | -0.043836503 | Q8BXQ8_S120_M1_Fam53c  |
| _QNSEALIANDELDC[Carbamidomethyl (C)]S[Phospho (STY)]PE_.2                                           | 0.138025594  | Q8BXR1_S769_M1_Slc7a14 |
| _HKQNSEALIANDELDC[Carbamidomethyl (C)]S[Phospho (STY)]PE_.2                                         | 0.186106033  | Q8BXR1_S769_M1_Slc7a14 |
| _ET[Phospho (STY)]C[Carbamidomethyl (C)]SPVS[Phospho (STY)]EGEEFSSPATNTC[Carbamidomethyl (C)]GAK_.3 | -0.113301059 | Q8BXR1_S468_M2_Slc7a14 |
| _NLPS[Phospho (STY)]LGDNEM[Oxidation (M)]LIGK_.2                                                    | 0.109659877  | Q8BXR1_S488_M1_Slc7a14 |
| _GKS[Phospho (STY)]LETLTQDHSNTVR_.3                                                                 | -0.379506398 | Q8BXR5_S781_M1_Nalcn   |
| _TAS[Phospho (STY)]SSTEPSVSR_.2                                                                     | 0.04105559   | Q8BXR9_S44_M1_Osbpl6   |
| _ [Acetyl (Protein N-term)]S[Phospho (STY)]SDEKGIS[Phospho (STY)]PAHK_.2                            | -0.469336768 | Q8BXR9_S2_M2_Osbpl6    |
| _RLS[Phospho (STY)]TEEATR_.2                                                                        | -0.360611316 | Q8BXT1_S46_M1_Rgs8     |
| _SDS[Phospho (STY)]C[Carbamidomethyl (C)]SDFTAILPDKPNR_.2                                           | 0.169026124  | Q8BXT1_S26_M1_Rgs8     |
| _TPEGPDEEDVS[Phospho (STY)]D_.2                                                                     | -0.186468132 | Q8BY35_S654_M1_Fgd2    |

|                                                                      |              |                         |
|----------------------------------------------------------------------|--------------|-------------------------|
| _STETSDFENIES[Phospho (STY)]PLNER_2                                  | -0.073960344 | Q8BY87_S911_M1_Usp47    |
| _LFVLLPEQS[Phospho (STY)]PGSYSK_2                                    | -0.204696139 | Q8BY87_S832_M1_Usp47    |
| _ELEQHIQTS[Phospho (STY)]DPENFQSEER_3                                | -0.259177234 | Q8BY87_S934_M1_Usp47    |
| _PC[Carbamidomethyl (C)]HY[Phospho (STY)]LRPDAS[Phospho (STY)]LNLR_2 | -0.088817939 | Q8BY98_S236_M2_Sowahd   |
| _PDAS[Phospho (STY)]LNLR_2                                           | -0.136369037 | Q8BY98_S236_M1_Sowahd   |
| _YLLASS[Phospho (STY)]PQDSR_2                                        | -0.276284116 | Q8BYH7_S176_M1_Tbc1d17  |
| _LILNYSR_2                                                           | -0.441673444 | #N/A                    |
| _LYPATEYEISLNSVR_2                                                   | -0.087191642 | #N/A                    |
| _ASGPIDHYR_2                                                         | 0.496919211  | #N/A                    |
| _YEVSISAVR_2                                                         | 0.1365654    | #N/A                    |
| _YGLVGGEGGK_2                                                        | 0.11766188   | #N/A                    |
| _SSLTSTVFTTGGR_2                                                     | 0.107103839  | #N/A                    |
| _AAIENYVLYK_2                                                        | 0.221940633  | #N/A                    |
| _QSALISWQPPR_2                                                       | 0.202945585  | #N/A                    |
| _ELIVDAEDTWIR_2                                                      | 0.002707192  | #N/A                    |
| _LDSSVVPNTVTEFAIR_2                                                  | 0.170787639  | #N/A                    |
| _TATSLDLEWDNSEAEAEQYK_2                                              | -0.338757307 | #N/A                    |
| _DGQEAUFAYYDK_2                                                      | -0.18475121  | #N/A                    |
| _VATHLSTPQGLQFK_3                                                    | 0.434655902  | #N/A                    |
| _DKEEDM[Oxidation (M)]LEVLLDATKR_3                                   | -0.627780649 | #N/A                    |
| _SPPTSASVSTVIDGPTQILVR_2                                             | 0.129969632  | #N/A                    |
| _GHEFSIPFVEM[Oxidation (M)]K_2                                       | -0.033290039 | #N/A                    |
| _LEGLSENTDYTVLLQAAQEATR_3                                            | -0.296177439 | #N/A                    |
| _QSIPATM[Oxidation (M)]NAR_2                                         | 0.38149154   | #N/A                    |
| _KELIVDAEDTWIR_3                                                     | 0.158951548  | #N/A                    |
| _VVYSTLAGEQYHEVLVPK_2                                                | -0.026407458 | #N/A                    |
| _VGFGNLEDEFWLGLDNIHR_3                                               | -0.105601728 | #N/A                    |
| _DVSDTVAFVEWTPPR_2                                                   | 0.060450285  | #N/A                    |
| _ITFTPSSGISSEVTVPK_2                                                 | -0.011542047 | #N/A                    |
| _C[Carbamidomethyl (C)]LNAC[Carbamidomethyl (C)]SGR_2                | -0.058759363 | #N/A                    |
| _DSLTVSWSSPVAPFDYR_2                                                 | -0.200232939 | #N/A                    |
| _LQVYC[Carbamidomethyl (C)]DM[Oxidation (M)]TTDGGGWIVFQR_2           | -0.128354589 | #N/A                    |
| _DGQEAUFAYYDKFAVEDSR_3                                               | -0.300894591 | #N/A                    |
| _RQEPLRQPS[Phospho (STY)]PQR_3                                       | -0.475324818 | Q8BYM5_S722_M1_Nlgn3    |
| _QEPLRQPS[Phospho (STY)]PQR_2                                        | -0.466071068 | Q8BYM5_S722_M1_Nlgn3    |
| _LTALPDYTLTLR_2                                                      | 0.729361502  | #N/A                    |
| _SENGMTGSTSS[Phospho (STY)]LNNVTQ_2                                  | 0.156782515  | Q8BYN5_S501_M1_Fsd1l    |
| _PVSPSPSVLS[Phospho (STY)]EGR_2                                      | -0.348641089 | Q8BYR5_S68_M1_Cadps2    |
| _SKDAPIS[Phospho (STY)]PPAQK_2                                       | 0.029765672  | Q8BYW1_S363_M1_Arhgap25 |
| _S[Phospho (STY)]SVGWDATEDPPLSR_2                                    | -0.216226943 | Q8BYW1_S379_M1_Arhgap25 |
| _DAPIS[Phospho (STY)]PPAQK_2                                         | 0.255846185  | Q8BYW1_S363_M1_Arhgap25 |
| _TNS[Phospho (STY)]M[Oxidation (M)]GSATGPLPGTK_2                     | -0.251096993 | Q8BZ47_S467_M1_Znf609   |
| _LVEPHS[Phospho (STY)]PSPSSK_2                                       | -0.146135142 | Q8BZ47_S575_M1_Znf609   |
| _AEADKIYSFTDNAPS[Phospho (STY)]PSIGGSSR_3                            | 0.346595221  | Q8BZ47_S803_M1_Znf609   |
| _APS[Phospho (STY)]LTDLVK_2                                          | 0.106088011  | Q8BZ47_S1057_M1_Znf609  |
| _FC[Carbamidomethyl (C)]DS[Phospho (STY)]PTSDLEMR_2                  | 0.001136964  | Q8BZ47_S358_M1_Znf609   |
| _S[Phospho (STY)]PPSPPTQR_2                                          | -0.287963147 | Q8BZ98_S763_M1_Dnm3     |

|                                                                                                 |              |                          |
|-------------------------------------------------------------------------------------------------|--------------|--------------------------|
| _ENC[Carbamidomethyl (C)]LILAVTPANTDLANS DALK_.2                                                | 0.224026272  | #N/A                     |
| _STIGNQVIR_.2                                                                                   | -0.325750357 | #N/A                     |
| _VPVGDQPPDIEYQIR_.2                                                                             | 0.162965021  | #N/A                     |
| _FLELAC[Carbamidomethyl (C)]DSQEDVDSWK_.2                                                       | 0.108810913  | #N/A                     |
| _RS[Phospho (STY)]PPPSPTTQR_.2                                                                  | -0.494921618 | Q8BZ98_S763_M1_Dnm3      |
| _APPSVPSR_.2                                                                                    | 0.313040639  | #N/A                     |
| _LQGQLLSIEHEVEAFK_.3                                                                            | 0.359020062  | #N/A                     |
| _RS[Phospho (STY)]PPPS[Phospho (STY)]PTTQRR_.3                                                  | 0.116212788  | Q8BZ98_S763_M2_Dnm3      |
| _LIQGGQVDAPLSETGFR_.2                                                                           | 0.404747221  | #N/A                     |
| _SLDAEPSVPSAAKPS[Phospho (STY)]SPEK_.2                                                          | -0.339223243 | Q8BZH4_S421_M1_Pogz      |
| _SDLAVSNISPPS[Phospho (STY)]PDSK_.2                                                             | -0.072536352 | Q8BZJ8_S111_M1_          |
| _DM[Oxidation (M)]SQS[Phospho (STY)]PTSSFVR_.2                                                  | -0.19355094  | Q8BZN6_S877_M1_Dock10    |
| _ASLASLDS[Phospho (STY)]NPSTTEK_.2                                                              | -0.130636187 | Q8BZN6_S1295_M1_Dock10   |
| _HATS[Phospho (STY)]VDTFSFK_.2                                                                  | -0.204543424 | Q8BZN6_S1257_M1_Dock10   |
| _EKDM[Oxidation (M)]SQS[Phospho (STY)]PTSSFVR_.2                                                | 0.011738362  | Q8BZN6_S877_M1_Dock10    |
| _AEAPAGPALGLPS[Phospho (STY)]PEVESGLER_.2                                                       | -0.262460626 | Q8BZR9_S25_M1_Ncbp3      |
| _VAGPDPS[Phospho (STY)]PEDSPNQR_.2                                                              | 0.031985193  | Q8BZW2_S132_M1_Sowahb    |
| _FTQGLEDDQLS[Phospho (STY)]PPGNR_.2                                                             | -0.506919191 | Q8C008_S768_M1_Dzank1    |
| _S[Phospho (STY)]LVGTPYWM[Oxidation (M)]APEVISR_.2                                              | -0.284153082 | Q8C015_S602_M1_Pak5      |
| _ESPPTPDQGAAS[Phospho (STY)]R_.2                                                                | -0.149084923 | Q8C015_S114_M1_Pak5      |
| _ASSSS[Phospho (STY)]PLDYSFQLTPSR_.2                                                            | -0.253951226 | Q8C015_S226_M1_Pak5      |
| _SNS[Phospho (STY)]LRKES[Phospho (STY)]PPT[Phospho (STY)]PDQGAASR_.3                            | -0.369137214 | Q8C015_S104_M3_Pak5      |
| _KES[Phospho (STY)]PPT[Phospho (STY)]PDQGAASR_.2                                                | -0.290223333 | Q8C015_S104_M2_Pak5      |
| _SSYLHQTS[Phospho (STY)]PQPAMR_.2                                                               | 0.262088399  | Q8C015_S277_M1_Pak5      |
| _AQMVFS[Phospho (STY)]PPLSGSDTYPR_.2                                                            | 0.344622447  | Q8C015_S341_M1_Pak5      |
| _M[Oxidation (M)]NS[Phospho (STY)]KDNVQETQI_.2                                                  | -0.41696305  | Q8C031_S631_M1_Lrrc4c    |
| _NDLSSS[Phospho (STY)]SGS[Phospho (STY)]LNLSHGSSSLEHR_.3                                        | 0.276400286  | Q8C033_S1259_M2_Arhgef10 |
| _T[Phospho (STY)]RSLVSQDHR_.3                                                                   | -0.58130564  | Q8C033_T353_M1_Arhgef10  |
| _TLQPSNPTEGSNPDTLFQFS[Phospho (STY)]D_.2                                                        | -0.135440382 | Q8C050_S862_M1_Rps6ka5   |
| _RPVVTTHDLEAPS[Phospho (STY)]RANS[Phospho (STY)]QDSLASR_.4                                      | 0.046533168  | Q8C052_S458_M2_Map1s     |
| _ANS[Phospho (STY)]QDSLASR_.2                                                                   | -0.137729253 | Q8C052_S462_M1_Map1s     |
| _GGPC[Carbamidomethyl (C)]VESWGAPAPGS[Phospho (STY)]PPR_.2                                      | -0.384431484 | Q8C078_S572_M1_Camkk2    |
| _S[Phospho (STY)]FGNPFEGSR_.2                                                                   | -0.430398347 | Q8C078_S495_M1_Camkk2    |
| _SLS[Phospho (STY)]APGNLLTK_.2                                                                  | -0.398842361 | Q8C078_S511_M1_Camkk2    |
| _DQPPEADGQELPLEAS[Phospho (STY)]DPESR_.2                                                        | -0.370118614 | Q8C078_S85_M1_Camkk2     |
| _C[Carbamidomethyl (C)]IC[Carbamidomethyl (C)]PSLSY[Phospho (STY)]SPASS[Phospho (STY)]PQSSPR_.2 | 0.04844771   | Q8C078_S133_M2_Camkk2    |
| _KRS[Phospho (STY)]FGNPFEGSR_.3                                                                 | -0.361163609 | Q8C078_S495_M1_Camkk2    |
| _KMS[Phospho (STY)]LQEPSQGPGPASSNSLDMNGR_.3                                                     | -0.293866634 | Q8C078_S99_M1_Camkk2     |
| _AAS[Phospho (STY)]PPASASDLIEQQQKR_.3                                                           | 0.096954026  | Q8C079_S335_M1_Strip1    |
| _AAS[Phospho (STY)]PPASASDLIEQQQK_.2                                                            | -0.281858487 | Q8C079_S335_M1_Strip1    |
| _SSS[Phospho (STY)]FGSVTSSTSSK_.2                                                               | -0.269579711 | Q8C080_S29_M1_Snx16      |
| _EFLC[Carbamidomethyl (C)]LDDPPGPFDS[Phospho (STY)]LEESR_.2                                     | 0.213823085  | Q8C080_S222_M1_Snx16     |
| _GES[Phospho (STY)]PLAHAGEPALR_.2                                                               | -0.165305631 | Q8C0C4_S375_M1_Ccser1    |
| _SLQALGEVIEAELR_.2                                                                              | -0.26756415  | #N/A                     |
| _LQLVQAGQAEK_.2                                                                                 | 0.049085672  | #N/A                     |
| _ATT[Phospho (STY)]PPNQGRPDS[Phospho (STY)]PVYANLQELK_.3                                        | 0.069461289  | Q8C0D4_S238_M2_Arhgap12  |
| _TSFSQEQSC[Carbamidomethyl (C)]DS[Phospho (STY)]AGEGSR_.2                                       | -0.324758271 | Q8C0D4_S199_M1_Arhgap12  |

|                                                                        |              |                         |
|------------------------------------------------------------------------|--------------|-------------------------|
| _IQQDSES[Phospho (STY)]GDELSSSSTEQM[Oxidation (M)]R_.2                 | -0.138351653 | Q8C0D4_S213_M1_Arhgap12 |
| _TPGQLSDNNSR_.2                                                        | -0.116229041 | #N/A                    |
| _SM[Oxidation (M)]S[Phospho (STY)]HQAAIASQR_.2                         | -0.215263772 | #N/A                    |
| _KSM[Oxidation (M)]S[Phospho (STY)]HQAAIASQR_.3                        | -0.483091686 | #N/A                    |
| _TPGQLSDNNSRQ_.2                                                       | 0.278714994  | #N/A                    |
| _ETGTGPNVYHENDTIAK_.3                                                  | 0.245811977  | #N/A                    |
| _AASAAGAS[Phospho (STY)]PAATPAAPESGTIPK_.2                             | 0.091720834  | Q8C0I1_S57_M1_Agps      |
| _FC[Carbamidomethyl (C)]TGDS[Phospho (STY)]PPLEAK_.2                   | 0.135043878  | Q8C0J6_S82_M1_Sowahc    |
| _NLVGALDEDDGDS[Phospho (STY)]PAAR_.2                                   | 0.012835882  | Q8C0J6_S391_M1_Sowahc   |
| _EDGAHPADTQDVVEDALR_.3                                                 | 0.02863331   | #N/A                    |
| _VKLTLEGLEEEDDDDDKVS[Phospho (STY)]PTVLHK_.4                           | 0.019258617  | Q8C0L9_S178_M1_Gpcpd1   |
| _LTLEGLEEEDDDDDKVS[Phospho (STY)]PTVLHK_.3                             | 0.119790373  | Q8C0L9_S178_M1_Gpcpd1   |
| _AVS[Phospho (STY)]PTEPTR_.2                                           | 0.307800774  | Q8C0M0_S564_M1_Wdr59    |
| _ETEHISPPWGESS[Phospho (STY)]PEELR_.3                                  | 0.051778088  | Q8C0M0_S840_M1_Wdr59    |
| _LYSGS[Phospho (STY)]PTR_.2                                            | 0.177151161  | Q8C0M0_S603_M1_Wdr59    |
| _LALFHVEQ GK_.2                                                        | -0.105097405 | #N/A                    |
| _DLSAGAVSAVR_.2                                                        | -0.069950655 | #N/A                    |
| _GNLAYATSTGGIVNK_.2                                                    | 0.194121944  | #N/A                    |
| _FAEDMGIPQVPVEK_.2                                                     | 0.336331155  | #N/A                    |
| _TVEEAAQLALDYMK_.2                                                     | -0.180464649 | #N/A                    |
| _HTVDEYS[Phospho (STY)]PQKK_.2                                         | -0.177321681 | Q8C0Q9_S445_M1_Rapgef5  |
| _TLS[Phospho (STY)]DESIYSSQR_.2                                        | -0.398271454 | Q8C0T5_S1564_M1_Sipa1l1 |
| _LIDLES[Phospho (STY)]PTPESQK_.2                                       | -0.440387562 | Q8C0T5_S1528_M1_Sipa1l1 |
| _QDPVVHLS[Phospho (STY)]PNK_.2                                         | -0.231294041 | Q8C0T5_S1249_M1_Sipa1l1 |
| _DLQAS[Phospho (STY)]PKPTSK_.2                                         | 0.177289061  | Q8C0T5_S1507_M1_Sipa1l1 |
| _SIS[Phospho (STY)]SDGRPLER_.2                                         | -0.034857267 | Q8C0T5_S1116_M1_Sipa1l1 |
| _KLIDLES[Phospho (STY)]PTPESQK_.2                                      | -0.098788867 | Q8C0T5_S1528_M1_Sipa1l1 |
| _GSGFS[Phospho (STY)]LDVIDGPISQR_.2                                    | -0.217027402 | Q8C0T5_S258_M1_Sipa1l1  |
| _EYGS[Phospho (STY)]TSSIDK_.2                                          | -0.648733535 | Q8C0T5_S208_M1_Sipa1l1  |
| _RSPAS[Phospho (STY)]IDR_.2                                            | 0.024641078  | Q8C0T5_S1184_M1_Sipa1l1 |
| _HS[Phospho (STY)]AS[Phospho (STY)]PVVFSSAR_.2                         | -0.07698741  | Q8C0T5_S1410_M2_Sipa1l1 |
| _SKS[Phospho (STY)]ETGDSSIFR_.2                                        | -0.37269987  | Q8C0T5_S288_M1_Sipa1l1  |
| _SKS[Phospho (STY)]ETGDSSIFRK_.2                                       | -0.535167973 | Q8C0T5_S288_M1_Sipa1l1  |
| _SYSSKDPS[Phospho (STY)]PTLASK_.2                                      | -0.016852586 | Q8C0T5_S1712_M1_Sipa1l1 |
| _QKS[Phospho (STY)]M[Oxidation (M)]PEGFGVSR_.2                         | 0.288615227  | Q8C0T5_S1170_M1_Sipa1l1 |
| _SLHGEFSAS[Phospho (STY)]DSSLTDIQETR_.3                                | -0.296474069 | Q8C0T5_S1626_M1_Sipa1l1 |
| _S[Phospho (STY)]MPEGFGVSR_.2                                          | 0.103923479  | Q8C0T5_S1170_M1_Sipa1l1 |
| _ISDYFEYQGGNGSS[Phospho (STY)]PVR_.2                                   | -0.007490593 | Q8C0V0_S159_M1_Tlk1     |
| _LSTS[Phospho (STY)]PTPGSAAAAAR_.2                                     | 0.069802842  | Q8C0V0_S22_M1_Tlk1      |
| _HSL[Phospho (STY)]LDDIR_.2                                            | 0.074003812  | Q8C0V9_S544_M1_Frmd6    |
| _LRGQS[Phospho (STY)]TDS[Phospho (STY)]LPQTIC[Carbamidomethyl (C)]R_.2 | -0.291847975 | Q8C0V9_S522_M2_Frmd6    |
| _SQS[Phospho (STY)]FNNAQAFHAK_.2                                       | -0.200221959 | Q8C0Y0_S777_M1_Ppp4r4   |
| _RDS[Phospho (STY)]TPSLK_.2                                            | 0.200288396  | Q8C142_S198_M1_Ldlrap1  |
| _YDSQLS[Phospho (STY)]SNEEK_.2                                         | 0.228653275  | Q8C145_S488_M1_Slc39a6  |
| _NC[Carbamidomethyl (C)]SS[Phospho (STY)]PEFSK_.2                      | 0.199245683  | Q8C166_S54_M1_Cpne1     |
| _APPT[Phospho (STY)]PGKGPAQAPQA_.2                                     | 0.500934027  | Q8C166_T525_M1_Cpne1    |
| _FAAQAAQQR_.2                                                          | 0.270293463  | #N/A                    |

|                                                                   |              |                         |
|-------------------------------------------------------------------|--------------|-------------------------|
| _DWNES[Phospho (STY)]PVR_2                                        | 0.052118738  | Q8C170_S1950_M1_Myo9a   |
| _GNYPSPSS[Phospho (STY)]PVIVR_2                                   | -0.208605373 | Q8C170_S2296_M1_Myo9a   |
| _S[Phospho (STY)]LEDLHQK_2                                        | -0.068813979 | Q8C170_S1259_M1_Myo9a   |
| _S[Phospho (STY)]LEILQR_2                                         | -0.055361733 | Q8C170_S755_M1_Myo9a    |
| _RQS[Phospho (STY)]GTDLQEDVIVR_2                                  | 0.399530153  | Q8C170_S1243_M1_Myo9a   |
| _AAS[Phospho (STY)]AC[Carbamidomethyl (C)]EAQGTEGPLGQAK_2         | -0.105859828 | Q8C170_S2458_M1_Myo9a   |
| _WDLSAQQIR_2                                                      | 0.072109948  | #N/A                    |
| _EELGGLPEDFLSSLEK_2                                               | 0.110191951  | #N/A                    |
| _TSQTVATFLDELAQK_2                                                | -0.411149959 | #N/A                    |
| _VDQVLHTQTDADPAEEYAR_3                                            | 0.479950341  | #N/A                    |
| _NLNEDTTFLPFTR_2                                                  | 0.117818987  | #N/A                    |
| _LLEEAFC[Carbamidomethyl (C)]R_2                                  | -0.191575821 | #N/A                    |
| _SVS[Phospho (STY)]NEGLTLNNSR_2                                   | -0.310638117 | Q8C1B1_S439_M1_Camsap2  |
| _LNQSS[Phospho (STY)]PDNLDTK_2                                    | -0.294784498 | Q8C1B1_S573_M1_Camsap2  |
| _WLKS[Phospho (STY)]PTTPVDPER_2                                   | -0.21076992  | Q8C1B1_S836_M1_Camsap2  |
| _EQQAWVIS[Phospho (STY)]PPQPSPQK_2                                | -0.128721802 | Q8C1B1_S905_M1_Camsap2  |
| _ADVSVEKLDGES[Phospho (STY)]DKEQFDDDQK_3                          | -0.12959323  | Q8C1B1_S1120_M1_Camsap2 |
| _SES[Phospho (STY)]VEGFLSPSR_2                                    | -0.389393867 | Q8C1B1_S1285_M1_Camsap2 |
| _SKS[Phospho (STY)]LADIK_2                                        | -0.253215387 | Q8C1B1_S818_M1_Camsap2  |
| _SSS[Phospho (STY)]MSYVDGFIGTWPK_2                                | 0.481444193  | Q8C1B1_S391_M1_Camsap2  |
| _DHIES[Phospho (STY)]PK_2                                         | 0.082847701  | Q8C1B1_S1248_M1_Camsap2 |
| _LDGES[Phospho (STY)]DKEQFDDDQK_2                                 | -0.172608053 | Q8C1B1_S1120_M1_Camsap2 |
| _SYELQESNVR_2                                                     | 0.051523143  | #N/A                    |
| _ELEEEVSNFQK_2                                                    | 0.199018613  | #N/A                    |
| _STSQGFC[Carbamidomethyl (C)]FNILC[Carbamidomethyl (C)]VGETGIGK_2 | -0.12581646  | #N/A                    |
| _ [Acetyl (Protein N-term)]AVAVGRPS[Phospho (STY)]NEELR_2         | -0.308173226 | Q8C1B7_S9_M1_Septin11   |
| _FESDPATHNEPGVR_3                                                 | 0.122804874  | #N/A                    |
| _SLFNYHDT_2                                                       | 0.060168865  | #N/A                    |
| _AAAQLLSQAQQSGAQQT_2                                              | -0.235819442 | #N/A                    |
| _KKELEEEVSNFQK_3                                                  | 0.071212364  | #N/A                    |
| _NLSLSGHVGFDSLQDQV_3                                              | -0.423132738 | #N/A                    |
| _LTIVDTVGFGDQINK_2                                                | 0.03995832   | #N/A                    |
| _EAEDS[Phospho (STY)]DS[Phospho (STY)]DDNIKR_2                    | -0.193530761 | Q8C1D8_S458_M2_lws1     |
| _VVC[Carbamidomethyl (C)]DADDS[Phospho (STY)]DSDVVSDK_2           | -0.047519558 | Q8C1D8_S366_M1_lws1     |
| _IS[Phospho (STY)]DS[Phospho (STY)]ESEELPKPR_2                    | -0.072532763 | Q8C1D8_S183_M2_lws1     |
| _KAAVLS[Phospho (STY)]DS[Phospho (STY)]EDDAGNASAK_2               | -0.118326845 | Q8C1D8_S343_M2_lws1     |
| _IDS[Phospho (STY)]DDDEEKEGDEEK_2                                 | -0.172455618 | Q8C1D8_S321_M1_lws1     |
| _AAVLS[Phospho (STY)]DS[Phospho (STY)]EDDAGNASAK_2                | -0.207792823 | Q8C1D8_S343_M2_lws1     |
| _ETTVAS[Phospho (STY)]DS[Phospho (STY)]EEEAGKEESSVK_2             | -0.093941907 | Q8C1D8_S384_M2_lws1     |
| _GLHS[Phospho (STY)]S[Phospho (STY)]DS[Phospho (STY)]EEEEPKR_2    | -0.254809488 | Q8C1D8_S306_M3_lws1     |
| _AAVLS[Phospho (STY)]DS[Phospho (STY)]EDDAGNASAKK_2               | -0.204210653 | Q8C1D8_S343_M2_lws1     |
| _QKIDS[Phospho (STY)]DDDEEKEGDEEK_2                               | 0.03920806   | Q8C1D8_S321_M1_lws1     |
| _IDS[Phospho (STY)]DDDEEKEGDEEKVAK_3                              | -0.147151385 | Q8C1D8_S321_M1_lws1     |
| _KGLHS[Phospho (STY)]S[Phospho (STY)]DS[Phospho (STY)]EEEEPKR_2   | 0.304416342  | Q8C1D8_S306_M3_lws1     |
| _GTGPPS[Phospho (STY)]PTKDR_2                                     | 0.017886747  | Q8C1W1_S323_M1_Vash1    |
| _TFS[Phospho (STY)]PSKPAK_2                                       | 0.035153693  | Q8C1Y8_S74_M1_Ccz1      |
| _HIEPELAGRDS[Phospho (STY)]PVR_3                                  | -0.387446978 | Q8C1Y8_S264_M1_Ccz1     |

|                                                                                     |              |                        |
|-------------------------------------------------------------------------------------|--------------|------------------------|
| _TRLS[Phospho (STY)]PPR_.2                                                          | -0.130075341 | Q8C2Q3_S582_M1_Rbm14   |
| _DRS[Phospho (STY)]PLRR_.2                                                          | -0.317847849 | Q8C2Q3_S215_M1_Rbm14   |
| _S[Phospho (STY)]PTKSSLDYR_.2                                                       | -0.429756943 | Q8C2Q3_S627_M1_Rbm14   |
| _QPT[Phospho (STY)]PPFFGR_.2                                                        | -0.2447072   | Q8C2Q3_T206_M1_Rbm14   |
| _LSESQLSFR_.2                                                                       | -0.221024536 | #N/A                   |
| _RLS[Phospho (STY)]ESQLSFR_.2                                                       | -0.108634585 | Q8C2Q3_S618_M1_Rbm14   |
| _IFVGNVSAAC[Carbamidomethyl (C)]TSQELR_.2                                           | 0.014315816  | #N/A                   |
| _SKS[Phospho (STY)]LQFTGK_.2                                                        | -0.177430596 | Q8C341_S1077_M1_Suco   |
| _KQS[Phospho (STY)]EADLAERPDLC_.3                                                   | -0.404777372 | Q8C351_S299_M1_Layn    |
| _QENS[Phospho (STY)]PNLDVYNVIR_.2                                                   | 0.073649245  | Q8C351_S286_M1_Layn    |
| _S[Phospho (STY)]DSPVPTAPTSSGPKPSTTSVAPELATDPELEKK_.4                               | 0.306283629  | Q8C3P7_S48_M1_Mettl3   |
| _EHLLS[Phospho (STY)]PPR_.2                                                         | -0.110357689 | Q8C3Q5_S451_M1_Shisa7  |
| _SSS[Phospho (STY)]LTPGLGGPDSM[Oxidation (M)]APR_.2                                 | 0.391115931  | Q8C3Q5_S250_M1_Shisa7  |
| _RVMS[Phospho (STY)]QEHLGDSR_.3                                                     | 0.006229887  | Q8C3Q5_S405_M1_Shisa7  |
| _EHLLS[Phospho (STY)]PPRS[Phospho (STY)]PALPPDPTTR_.3                               | -0.022071838 | Q8C3Q5_S451_M2_Shisa7  |
| _LVSQEHLLSS[Phospho (STY)]PEALR_.2                                                  | -0.17608349  | Q8C3Q5_S438_M1_Shisa7  |
| _EAS[Phospho (STY)]DDEDEALYQK_.2                                                    | 0.318664887  | Q8C3S2_S561_M1_Tango6  |
| _SSS[Phospho (STY)]LDALGPAR_.2                                                      | -0.203629937 | Q8C3W1_S176_M1_        |
| _SAS[Phospho (STY)]AHNLSSEK_.2                                                      | -0.288656009 | Q8C419_S881_M1_Gpr158  |
| _SLS[Phospho (STY)]VIASAK_.2                                                        | -0.15653626  | Q8C419_S904_M1_Gpr158  |
| _LKEDS[Phospho (STY)]EAESTESVPLVC[Carbamidomethyl (C)]K_.2                          | -0.172474128 | Q8C419_S865_M1_Gpr158  |
| _EQTQDDLQWYQALVR_.2                                                                 | 0.123659425  | #N/A                   |
| _EES[Phospho (STY)]LKNR_.2                                                          | -0.334314195 | Q8C419_S806_M1_Gpr158  |
| _VS[Phospho (STY)]LPTANPDVSSGITQIK_.2                                               | 0.103827943  | Q8C419_S976_M1_Gpr158  |
| _S[Phospho (STY)]IDKTEVC[Carbamidomethyl (C)]PWEIHSQSLEENR_.3                       | 0.08390814   | Q8C419_S1059_M1_Gpr158 |
| _QC[Carbamidomethyl (C)]S[Phospho (STY)]KEDKEGTDHSAK_.3                             | 0.179342798  | Q8C419_S770_M1_Gpr158  |
| _KGS[Phospho (STY)]PGLTR_.2                                                         | -0.480130378 | Q8C437_S378_M1_Pex5l   |
| _S[Phospho (STY)]PVDSSVLEGVK_.2                                                     | 0.009644279  | Q8C437_S388_M1_Pex5l   |
| _TGS[Phospho (STY)]KELLWSAEHR_.2                                                    | -0.474520264 | Q8C437_S146_M1_Pex5l   |
| _SALNSES[Phospho (STY)]ASELELVAPAQAR_.2                                             | -0.635478234 | Q8C437_S172_M1_Pex5l   |
| _NKKGS[Phospho (STY)]PGLTR_.2                                                       | -0.022780441 | Q8C437_S378_M1_Pex5l   |
| _S[Phospho (STY)]QPELSTGK_.2                                                        | -0.157791674 | Q8C437_S157_M1_Pex5l   |
| _GPETS[Phospho (STY)]SLDLDIQTQLEK_.2                                                | 0.27574827   | Q8C437_S105_M1_Pex5l   |
| _KGS[Phospho (STY)]PGLTR_.2                                                         | -0.188982821 | Q8C437_S378_M1_Pex5l   |
| _NHS[Phospho (STY)]LEEEFER_.2                                                       | -0.561721833 | Q8C437_S202_M1_Pex5l   |
| _M[Oxidation (M)]SKS[Phospho (STY)]PVDSSVLEGVK_.2                                   | -0.164994338 | Q8C437_S388_M1_Pex5l   |
| _RM[Oxidation (M)]S[Phospho (STY)]KS[Phospho (STY)]PVDSSVLEGVK_.3                   | 0.156793782  | Q8C437_S386_M2_Pex5l   |
| _VVTM[Oxidation (M)]AEPGAAS[Phospho (STY)]PPPPAR_.2                                 | -0.178598637 | Q8C4U2_S511_M1_Tmem145 |
| _GGRDS[Phospho (STY)]DQDS[Phospho (STY)]AEEGTAEKPK_.3                               | -0.205964136 | Q8C4V4_S12_M2_Fbxl3    |
| _GSTTIPS[Phospho (STY)]PQSDGGDPNQDDR_.2                                             | -0.149681835 | Q8C525_S376_M1_Mb21d2  |
| _TNSMSSSGLGS[Phospho (STY)]PNR_.2                                                   | 0.290533709  | Q8C5L3_S165_M1_Cnot2   |
| _GGGQSS[Phospho (STY)]PQEEPTWK_.2                                                   | -0.051190823 | Q8C5N3_S106_M1_Cwc22   |
| _IKES[Phospho (STY)]PSEQGSR_.2                                                      | -0.474529903 | Q8C5W0_S317_M1_Clmn    |
| _NSHS[Phospho (STY)]DSSIYIR_.2                                                      | 0.203985571  | Q8C5W0_S925_M1_Clmn    |
| _SNS[Phospho (STY)]LPVKK_.2                                                         | -0.110398748 | Q8C5W0_S419_M1_Clmn    |
| _VFVC[Carbamidomethyl (C)]DQLESPT[Phospho (STY)]GFC[Carbamidomethyl (C)]LDSAPSHK_.3 | -0.108444078 | Q8C5W0_T360_M1_Clmn    |
| _YS[Phospho (STY)]PENFPYR_.2                                                        | -0.102738945 | Q8C5W3_S18_M1_Tbcel    |

|                                                                                            |              |                        |
|--------------------------------------------------------------------------------------------|--------------|------------------------|
| _AS[Phospho (STY)]NETLISYGIPDNDEQR_.2                                                      | -0.321137193 | Q8C624_S87_M1_Spata33  |
| _RPSDS[Phospho (STY)]VQPAQHSPC[Carbamidomethyl (C)]R_.3                                    | 0.168391986  | Q8C6B2_S108_M1_Rtkn    |
| _TFS[Phospho (STY)]LDAAPADHSLGPSR_.2                                                       | -0.279441857 | Q8C6B2_S520_M1_Rtkn    |
| _RLS[Phospho (STY)]QSDDEVIR_.2                                                             | -0.264590865 | Q8C6G8_S101_M1_Wdr26   |
| _LSQS[Phospho (STY)]DEDVIR_.2                                                              | 0.28402859   | Q8C6G8_S103_M1_Wdr26   |
| _KRLS[Phospho (STY)]QSDDEVIR_.3                                                            | 0.009406259  | Q8C6G8_S101_M1_Wdr26   |
| _EAQPPS[Phospho (STY)]PR_.2                                                                | -0.15101978  | Q8C6M1_S369_M1_Usp20   |
| _LSEQDS[Phospho (STY)]PPPSHPLK_.2                                                          | 0.017923128  | Q8C6M1_S112_M1_Usp20   |
| _KFS[Phospho (STY)]WGQQR_.2                                                                | -0.256678052 | Q8C6M1_S334_M1_Usp20   |
| _AVPIA VADEGESES[Phospho (STY)]EDDDLKPR_.3                                                 | 0.115767315  | Q8C6M1_S134_M1_Usp20   |
| _STS[Phospho (STY)]PC[Carbamidomethyl (C)]QTPEPDNEAHIR_.3                                  | 0.188944075  | Q8C6M1_S374_M1_Usp20   |
| _LSSPPRAS[Phospho (STY)]PVR_.2                                                             | -0.100052622 | Q8C6M1_S415_M1_Usp20   |
| _TAITTAS[Phospho (STY)]IRR_.2                                                              | 0.055961067  | Q8C729_S321_M1_Fam126b |
| _VEVT[Phospho (STY)]PTVPR_.2                                                               | -0.018455804 | Q8C729_T306_M1_Fam126b |
| _NSLPFDAPDSS[Phospho (STY)]QEGQK_.2                                                        | -0.399712029 | Q8C729_S294_M1_Fam126b |
| _TNS[Phospho (STY)]LSLIR_.2                                                                | 0.016712427  | Q8C729_S442_M1_Fam126b |
| _YSTIS[Phospho (STY)]LQEDR_.2                                                              | 0.012491061  | Q8C729_S491_M1_Fam126b |
| _S[Phospho (STY)]AKDKETALAIK_.3                                                            | 0.061821038  | Q8C729_S383_M1_Fam126b |
| _SKS[Phospho (STY)]DLSDR_.2                                                                | -0.04264479  | Q8C739_S257_M1_Fam110b |
| _ANS[Phospho (STY)]DIISLNR_.2                                                              | 0.156124488  | Q8C739_S297_M1_Fam110b |
| _VYTPPGHGS[Phospho (STY)]PQESSSHVSR_.3                                                     | 0.263769664  | Q8C739_S172_M1_Fam110b |
| _VAAMKS[Phospho (STY)]PEADQVEPAC[Carbamidomethyl (C)]GVSR_.3                               | 0.012259473  | Q8C739_S234_M1_Fam110b |
| _QGGGQPSSF[Phospho (STY)]PGQSQVTPQDQEK_.3                                                  | -0.259552802 | Q8C7E9_S579_M1_Cstf2t  |
| _NILVQTPES[Phospho (STY)]PQSR_.2                                                           | -0.085805304 | Q8C7M3_S46_M1_Trim9    |
| _RAS[Phospho (STY)]GSGVSDYDYLDLK_.2                                                        | 0.064048598  | Q8C7M3_S53_M1_Trim9    |
| _S[Phospho (STY)]KS[Phospho (STY)]LPKR_.2                                                  | -0.109160411 | Q8C8K3_S187_M2_Srsf12  |
| _HC[Carbamidomethyl (C)]DSIARS[Phospho (STY)]PC[Carbamidomethyl (C)]KS[Phospho (STY)]PR_.3 | -0.306615226 | Q8C8K3_S228_M2_Srsf12  |
| _QSTSLRQS[Phospho (STY)]RT[Phospho (STY)]PR_.3                                             | -0.24297367  | Q8C8K3_S172_M2_Srsf12  |
| _VGT[Phospho (STY)]PTDIHSEK_.2                                                             | -0.113931379 | Q8C8R3_T2232_M1_Ank2   |
| _S[Phospho (STY)]YIETETESR_.2                                                              | -0.317339914 | Q8C8R3_S3362_M1_Ank2   |
| _SS[Phospho (STY)]PEDVVVTNSSNR_.2                                                          | 0.189029252  | Q8C8R3_S2924_M1_Ank2   |
| _TEWQPS[Phospho (STY)]PTDIPLQK_.2                                                          | 0.127578588  | Q8C8R3_S3315_M1_Ank2   |
| _QPPIS[Phospho (STY)]PTSK_.2                                                               | -0.110054396 | Q8C8R3_S1936_M1_Ank2   |
| _DSLESS[Phospho (STY)]PVEPK_.2                                                             | 0.224148357  | Q8C8R3_S2431_M1_Ank2   |
| _NERHS[Phospho (STY)]PVSSLK_.2                                                             | 0.112721096  | Q8C8R3_S1851_M1_Ank2   |
| _TQDQQEYVTT[Phospho (STY)]PGAIEVEDPQK_.3                                                   | -0.231324301 | Q8C8R3_T3718_M1_Ank2   |
| _LSPVS[Phospho (STY)]PSAK_.2                                                               | -0.205059184 | Q8C8R3_S1819_M1_Ank2   |
| _VVTEEVTTTTTITEK_.2                                                                        | -0.185554724 | #N/A                   |
| _HTPVS[Phospho (STY)]PSSK_.2                                                               | 0.08286557   | Q8C8R3_S1807_M1_Ank2   |
| _ATFSPIVTLEPR_.2                                                                           | -0.439015748 | #N/A                   |
| _AREEQTPLHIASR_.3                                                                          | 0.340920356  | #N/A                   |
| _FWLIDC[Carbamidomethyl (C)]R_.2                                                           | 0.121428988  | #N/A                   |
| _Y[Phospho (STY)]SLEGG_.2                                                                  | 0.185775824  | Q8C8R3_Y889_M1_Ank2    |
| _HS[Phospho (STY)]PVSSLK_.2                                                                | -0.153483759 | Q8C8R3_S1851_M1_Ank2   |
| _HTPVS[Phospho (STY)]PSSKNEK_.2                                                            | -0.006025049 | Q8C8R3_S1807_M1_Ank2   |
| _ERAEGFES[Phospho (STY)]ESEDGATKPK_.3                                                      | 0.047840833  | Q8C8R3_S3379_M1_Ank2   |
| _SVYSGQDDES[Phospho (STY)]PESS[Phospho (STY)]PEEQK_.2                                      | 0.014114727  | Q8C8R3_S3226_M2_Ank2   |

|                                                                                                                 |              |                      |
|-----------------------------------------------------------------------------------------------------------------|--------------|----------------------|
| _GS[Phospho (STY)]PIVQEPEEASEPK_.2                                                                              | 0.083585107  | Q8C8R3_S3764_M1_Ank2 |
| _ETTQPETC[Carbamidomethyl (C)]DGHGC[Carbamidomethyl (C)]ETVSPSNSATPVSLGVQS[Phospho (STY)]PEHK_.4                | 0.076198774  | Q8C8R3_S2755_M1_Ank2 |
| _ATS[Phospho (STY)]PLIETPIGSIK_.2                                                                               | -0.150213706 | Q8C8R3_S1722_M1_Ank2 |
| _ATAVPDSLCL[Carbamidomethyl (C)]K_.2                                                                            | -0.167320444 | #N/A                 |
| _HLPVS[Phospho (STY)]PGK_.2                                                                                     | -0.36297144  | Q8C8R3_S1925_M1_Ank2 |
| _ELEEEWVIVS[Phospho (STY)]DEEIQEAK_.2                                                                           | -0.140913567 | Q8C8R3_S1562_M1_Ank2 |
| _GADSGLLTEPVIR_.2                                                                                               | -0.15551416  | #N/A                 |
| _TLEQQENFSEVAR_.2                                                                                               | -0.122766225 | #N/A                 |
| _KTS[Phospho (STY)]LVIVESTDDQSQVFER_.3                                                                          | -0.172984676 | Q8C8R3_S3786_M1_Ank2 |
| _TEKHPPVS[Phospho (STY)]PGKTEK_.2                                                                               | -0.195075648 | Q8C8R3_S1889_M1_Ank2 |
| _GAAVDFTAR_.2                                                                                                   | 0.067120593  | #N/A                 |
| _TDADADSWSEIREDDAAFEAR_.3                                                                                       | -0.493909196 | #N/A                 |
| _EGHVGLVQELLGR_.3                                                                                               | 0.001624712  | #N/A                 |
| _ARS[Phospho (STY)]YIETETESR_.2                                                                                 | 0.207184093  | Q8C8R3_S3362_M1_Ank2 |
| _ESPC[Carbamidomethyl (C)]RDSLES[Phospho (STY)]S[Phospho (STY)]PVEPK_.2                                         | 0.168913748  | Q8C8R3_S2430_M2_Ank2 |
| _ATAVPDSLCL[Carbamidomethyl (C)]KTPEDIS[Phospho (STY)]T[Phospho (STY)]PPEGTKPC[Carbamidomethyl (C)]LQTPVTSER_.4 | 0.464214038  | Q8C8R3_S3744_M2_Ank2 |
| _GSPIVQEPEEASEPKKESS[Phospho (STY)]PR_.3                                                                        | -0.129231211 | Q8C8R3_S3781_M1_Ank2 |
| _TERHS[Phospho (STY)]PVFSGKPEK_.3                                                                               | -0.08896431  | Q8C8R3_S1828_M1_Ank2 |
| _GSPIVQEPEEASEPKKESS[Phospho (STY)]PRK_.3                                                                       | -0.272579197 | Q8C8R3_S3781_M1_Ank2 |
| _TELKKGS[Phospho (STY)]S[Phospho (STY)]EESVDEDR_.2                                                              | -0.047839555 | Q8C8R3_S1699_M2_Ank2 |
| _NEKLS[Phospho (STY)]PVS[Phospho (STY)]PSAK_.2                                                                  | -0.263976362 | Q8C8R3_S1816_M2_Ank2 |
| _HLPGS[Phospho (STY)]PSIR_.2                                                                                    | -0.197323287 | Q8C8R3_S1900_M1_Ank2 |
| _NERHS[Phospho (STY)]PVSSLKTER_.4                                                                               | 0.02627423   | Q8C8R3_S1851_M1_Ank2 |
| _MDIVHLLTNTPLQER_.3                                                                                             | 0.371718553  | #N/A                 |
| _KSDSNAS[Phospho (STY)]FLR_.2                                                                                   | 0.127213262  | Q8C8R3_S34_M1_Ank2   |
| _S[Phospho (STY)]PLSPDTPSSEEVSYVTPK_.2                                                                          | 0.030969339  | Q8C8R3_S2493_M1_Ank2 |
| _ETTKVGT[Phospho (STY)]PTDIHSEK_.2                                                                              | -0.198722839 | Q8C8R3_T2232_M1_Ank2 |
| _IVDEQGDM[Oxidation (M)]DFQIS[Phospho (STY)]PDRK_.2                                                             | -0.089134293 | #N/A                 |
| _HPPVS[Phospho (STY)]PGKTEK_.2                                                                                  | -0.013759226 | Q8C8R3_S1889_M1_Ank2 |
| _THPAVS[Phospho (STY)]PSSK_.2                                                                                   | 0.01373719   | Q8C8R3_S1777_M1_Ank2 |
| _VSSSSS[Phospho (STY)]ESEPELTQLSK_.2                                                                            | 0.281142925  | Q8C8R3_S2624_M1_Ank2 |
| _HLPVS[Phospho (STY)]PGKTEK_.2                                                                                  | 0.067114714  | Q8C8R3_S1925_M1_Ank2 |
| _KGS[Phospho (STY)]S[Phospho (STY)]EESVDEDR_.2                                                                  | 0.142832865  | Q8C8R3_S1699_M2_Ank2 |
| _ATS[Phospho (STY)]PLIETPIGSIKDK_.2                                                                             | 0.049686684  | Q8C8R3_S1722_M1_Ank2 |
| _AEGFES[Phospho (STY)]ESEDGATKPK_.2                                                                             | -0.146866113 | Q8C8R3_S3379_M1_Ank2 |
| _SDSNAS[Phospho (STY)]FLR_.2                                                                                    | 0.122750726  | Q8C8R3_S34_M1_Ank2   |
| _IVDEQGDM[Oxidation (M)]DFQIS[Phospho (STY)]PDR_.2                                                              | -0.118716601 | #N/A                 |
| _SKS[Phospho (STY)]ESDASSLDAK_.2                                                                                | -0.306136629 | Q8C8R3_S3343_M1_Ank2 |
| _STSSSGRPGTS[Phospho (STY)]PTR_.2                                                                               | -0.400793775 | Q8C8R3_S3411_M1_Ank2 |
| _RFT[Phospho (STY)]PEEEMFK_.2                                                                                   | 0.018236783  | Q8C8R3_T2542_M1_Ank2 |
| _SHLVNEVPVLAS[Phospho (STY)]PDLLSEVSEM[Oxidation (M)]K_.3                                                       | -0.013980542 | Q8C8R3_S1467_M1_Ank2 |
| _ELDFTEEQIHQIR_.3                                                                                               | -0.35192837  | #N/A                 |
| _HSS[Phospho (STY)]LSSSAKPER_.2                                                                                 | -0.061815381 | Q8C8R3_S1793_M1_Ank2 |
| _KGS[Phospho (STY)]S[Phospho (STY)]EESVDEDRGLVPEPLPTAK_.3                                                       | 0.209162085  | Q8C8R3_S1699_M2_Ank2 |
| _HEGLAETPETSPELSFS[Phospho (STY)]PK_.3                                                                          | -0.297680434 | Q8C8R3_S2213_M1_Ank2 |
| _VGT[Phospho (STY)]PTDIHSEKELPITNDITDSSQK_.3                                                                    | -0.158417725 | Q8C8R3_T2232_M1_Ank2 |
| _SGHDQVVELLER_.2                                                                                                | -0.219980461 | #N/A                 |



|                                                                        |              |                        |
|------------------------------------------------------------------------|--------------|------------------------|
| _ESES[Phospho (STY)]DQEPEEEIGMTSEK_.2                                  | 0.21273819   | Q8C8R3_S1428_M1_Ank2   |
| _TPEDIST[Phospho (STY)]PPEGTKPC[Carbamidomethyl (C)]LQTPVTSER_.3       | -0.413216645 | Q8C8R3_T3745_M1_Ank2   |
| _ASSDVM[Oxidation (M)]LNGFGGDAPTLR_.2                                  | 0.174552533  | #N/A                   |
| _NS[Phospho (STY)]IEFFEEISDEASK_.2                                     | -0.148217704 | Q8C8R3_S3427_M1_Ank2   |
| _IENPNSLQDQSHALLK_.3                                                   | 0.498509132  | #N/A                   |
| _HSPVFSGKPEKHS[Phospho (STY)]PGS[Phospho (STY)]PSTK_.3                 | -0.230809054 | Q8C8R3_S1839_M2_Ank2   |
| _KRFT[Phospho (STY)]PEEEMFK_.3                                         | -0.357289629 | Q8C8R3_T2542_M1_Ank2   |
| _KS[Phospho (STY)]EEQIGEAK_.2                                          | 0.111160627  | Q8C8R3_S2217_M1_Ank2   |
| _TEGDSPAAALS[Phospho (STY)]PQMHQEPVQQDFSGK_.3                          | -0.281749254 | Q8C8R3_S3692_M1_Ank2   |
| _SAALLLQNDHNADVQSK_.3                                                  | 0.1905153    | #N/A                   |
| _NEKLS[Phospho (STY)]PVS[Phospho (STY)]PSAKTER_.2                      | 0.04355222   | Q8C8R3_S1816_M2_Ank2   |
| _DPDGS[Phospho (STY)]AEDDSLEQTSLMESSGK_.2                              | -0.107973463 | Q8C8R3_S2475_M1_Ank2   |
| _TAEGTEPKPQGAIRS[Phospho (STY)]PQGLELPLPNR_.4                          | -0.180564099 | Q8C8R3_S2364_M1_Ank2   |
| _EIASPSS[Phospho (STY)]PVK_.2                                          | -0.468247684 | Q8C8R3_S2827_M1_Ank2   |
| _LLRDPDGS[Phospho (STY)]AEDDSLEQTSLMESSGK_.3                           | -0.111225722 | Q8C8R3_S2475_M1_Ank2   |
| _HTPVSPSS[Phospho (STY)]KNEKLS[Phospho (STY)]PVS[Phospho (STY)]PSAK_.3 | 0.24608822   | Q8C8R3_S1810_M3_Ank2   |
| _S[Phospho (STY)]PQGLELPLPNR_.2                                        | -0.005338797 | Q8C8R3_S2364_M1_Ank2   |
| _VVLKSDT[Phospho (STY)]QQS[Phospho (STY)]EDNNE_.2                      | -0.177985374 | Q8C8R3_S3893_M2_Ank2   |
| _FQVSAATESR_.2                                                         | 0.315779434  | #N/A                   |
| _TPTEEGT[Phospho (STY)]PTSEQNPFLFQEGK_.3                               | 0.261559258  | Q8C8R3_T3050_M1_Ank2   |
| _ELGDDS[Phospho (STY)]LPSSQFLDGM[Oxidation (M)]NYLR_.2                 | -0.17432182  | Q8C8R3_S874_M1_Ank2    |
| _HPPVS[Phospho (STY)]PGK_.2                                            | 0.323779098  | Q8C8R3_S1889_M1_Ank2   |
| _DSEVLSPMADESLAVSHKDS[Phospho (STY)]LEAS[Phospho (STY)]PVLEDNSSHK_.4   | -0.459369772 | Q8C8R3_S2395_M2_Ank2   |
| _PQGAIRS[Phospho (STY)]PQGLELPLPNR_.3                                  | -0.031260778 | Q8C8R3_S2364_M1_Ank2   |
| _AS[Phospho (STY)]PSIWER_.2                                            | 0.086570846  | Q8C8T7_S773_M1_Elfn1   |
| _AVAAAAGS[Phospho (STY)]LKK_.2                                         | -0.068508209 | Q8C8T7_S460_M1_Elfn1   |
| _SSS[Phospho (STY)]LGNLKK_.2                                           | 0.305787466  | Q8C8U0_S435_M1_Ppfibp1 |
| _ISES[Phospho (STY)]GQFSDGLEDR_.2                                      | 0.249507592  | Q8C996_S56_M1_Tmem163  |
| _GHAPSTAAPASPAPM[Oxidation (M)]SSS[Phospho (STY)]VQSDEER_.3            | -0.084856181 | Q8C996_S42_M1_Tmem163  |
| _GHAPSTAAPASPAPM[Oxidation (M)]SSSVQS[Phospho (STY)]DEERQPR_.4         | -0.080915427 | Q8C996_S45_M1_Tmem163  |
| _S[Phospho (STY)]PPGGVPRPPPR_.3                                        | -0.023169585 | Q8C996_S11_M1_Tmem163  |
| _GLS[Phospho (STY)]PSYLGGR_.2                                          | 0.019503203  | Q8C9B9_S1840_M1_Dido1  |
| _AAS[Phospho (STY)]PPSYTLDLGESQLAPPPSK_.2                              | -0.243662461 | Q8C9H6_S328_M1_Strip2  |
| _QDS[Phospho (STY)]LDIYNER_.2                                          | -0.395839317 | Q8C9H6_S364_M1_Strip2  |
| _QLLTKQDS[Phospho (STY)]LDIYNER_.3                                     | 0.170545805  | Q8C9H6_S364_M1_Strip2  |
| _DLTLITER_.2                                                           | 0.316475693  | #N/A                   |
| _ST[Phospho (STY)]PEKLNK_.2                                            | -0.004585859 | Q8CA95_T780_M1_Pde10a  |
| _AYLSLHPQVLDEFVSESVAETVEK_.3                                           | 0.0325033    | #N/A                   |
| _EVDLYTGYTTR_.2                                                        | -0.098073019 | #N/A                   |
| _IVLATDPDADRLAVALQENGR_.3                                              | -0.081725756 | #N/A                   |
| _LIDALIENFLEPSK_.2                                                     | 0.138339353  | #N/A                   |
| _DITGYDSSQPNKK_.2                                                      | 0.115709769  | #N/A                   |
| _AVAGVMITAS[Phospho (STY)]HNR_.2                                       | 0.214171461  | Q8CAA7_S175_M1_Pgm2l1  |
| _RDPEDS[Phospho (STY)]DVFEEDTHL_.2                                     | -0.012989597 | Q8CAE9_S594_M1_Podxl2  |
| _SLS[Phospho (STY)]FSGPR_.2                                            | -0.176208313 | Q8CAF4_S1482_M1_Nhsl1  |
| _KNS[Phospho (STY)]GAGAVLFSEPSAQEQR_.3                                 | -0.167893041 | Q8CAF4_S1079_M1_Nhsl1  |
| _NHS[Phospho (STY)]PS[Phospho (STY)]PPVTPTS AAPNLASPK_.3               | -0.070857737 | Q8CAF4_S1373_M2_Nhsl1  |

|                                                                                                   |              |                       |
|---------------------------------------------------------------------------------------------------|--------------|-----------------------|
| _SEPSADSPDSSSC[Carbamidomethyl (C)]S[Phospho (STY)]PNK_.2                                         | -0.340504032 | Q8CAF4_S1459_M1_Nhsl1 |
| _FHGKVS[Phospho (STY)]PK_.2                                                                       | -0.108964695 | Q8CAK3_S24_M1_Shfl    |
| _EKFHGKVS[Phospho (STY)]PK_.2                                                                     | 0.055863228  | Q8CAK3_S24_M1_Shfl    |
| _SLEDALNR_.2                                                                                      | 0.090956894  | #N/A                  |
| _SEIQAEQDR_.2                                                                                     | -0.012131866 | #N/A                  |
| _ELDSITPDITPGWK_.2                                                                                | 0.186664522  | #N/A                  |
| _LSEQELEFR_.2                                                                                     | -0.13818801  | #N/A                  |
| _AVDEAADALLK_.2                                                                                   | 0.272825601  | #N/A                  |
| _GVYSEETLR_.2                                                                                     | 0.01281085   | #N/A                  |
| _TSSAEM[Oxidation (M)]PTIPLGSAVEAIR_.2                                                            | -0.009836724 | #N/A                  |
| _EIAGATPHITAAEGR_.3                                                                               | 0.207803526  | #N/A                  |
| _TSSVTLQTITAQNAAVQAVK_.2                                                                          | -0.230466806 | #N/A                  |
| _QAAAHTDHLR_.2                                                                                    | 0.088509006  | #N/A                  |
| _STSETTEAFSSSVR_.2                                                                                | -0.072652715 | #N/A                  |
| _QHIELALEK_.2                                                                                     | 0.384488126  | #N/A                  |
| _TFDSAVAK_.2                                                                                      | 0.281259212  | #N/A                  |
| _VVSQYHELVVQAR_.2                                                                                 | -0.157330566 | #N/A                  |
| _GIEQAVQSHAVAEER_.3                                                                               | -0.473926988 | #N/A                  |
| _RIDQLNR_.2                                                                                       | -0.344415314 | #N/A                  |
| _LSTDDLNSLIAHAHR_.3                                                                               | -0.368481218 | #N/A                  |
| _ISSVSEVMK_.2                                                                                     | 0.469913857  | #N/A                  |
| _SQEQM[Oxidation (M)]DSFTLDINTAYAR_.2                                                             | -0.482542188 | #N/A                  |
| _YSTSSSSGLTAGK_.2                                                                                 | -0.237666364 | #N/A                  |
| _VQEQLKYEFQGLSEK_.3                                                                               | 0.010170876  | #N/A                  |
| _VAVLSQNR_.2                                                                                      | -0.052936643 | #N/A                  |
| _AVC[Carbamidomethyl (C)]LAAQSIAM[Oxidation (M)]GDSTIVVAGGM[Oxidation (M)]ENM[Oxidation (M)]SK_.3 | -0.237986639 | #N/A                  |
| _VNIDGGAIALGHPLGASGC[Carbamidomethyl (C)]R_.3                                                     | -0.042003818 | #N/A                  |
| _SYS[Phospho (STY)]PEHR_.2                                                                        | 0.1255006    | Q8CB77_S125_M1_Eloa   |
| _S[Phospho (STY)]PEEDQEPIISHQKPGK_.3                                                              | 0.094458906  | Q8CB77_S195_M1_Eloa   |
| _SHS[Phospho (STY)]LSIR_.2                                                                        | -0.142369298 | Q8CBE3_S22_M1_Wdr37   |
| _STLLELFGQIER_.2                                                                                  | -0.02877758  | #N/A                  |
| _ASHSTSQLS[Phospho (STY)]QK_.2                                                                    | -0.149816138 | Q8CBE3_S119_M1_Wdr37  |
| _KSHS[Phospho (STY)]LSIR_.2                                                                       | 0.173681585  | Q8CBE3_S22_M1_Wdr37   |
| _DPSIHSVNVFQGHTDVTSAVFTVGDNVVSGSDDR_.4                                                            | 0.162428389  | #N/A                  |
| _YLQDDTS[Phospho (STY)]DPTYTSSLGGK_.2                                                             | 0.319881203  | Q8CBF3_S774_M1_Ephb1  |
| _VAILT[Phospho (STY)]DDEEEQKR_.3                                                                  | -0.186069065 | Q8CBH5_T11_M1_Mfsd6   |
| _ [Acetyl (Protein N-term)]AADDKVAILT[Phospho (STY)]DDEEEQKR_.3                                   | 0.158047906  | Q8CBH5_T11_M1_Mfsd6   |
| _ [Acetyl (Protein N-term)]AADDKVAILT[Phospho (STY)]DDEEEQK_.2                                    | 0.183761749  | Q8CBH5_T11_M1_Mfsd6   |
| _IPVPSSPVIAT[Phospho (STY)]IDLVQQQTEDVM[Oxidation (M)]PR_.3                                       | -0.32780303  | Q8CBH5_T653_M1_Mfsd6  |
| _VAILT[Phospho (STY)]DDEEEQK_.2                                                                   | 0.315610192  | Q8CBH5_T11_M1_Mfsd6   |
| _TNPTQKPPS[Phospho (STY)]PPVSGR_.2                                                                | -0.530336404 | Q8CBW3_S183_M1_Abi1   |
| _NDDGWFEFVC[Carbamidomethyl (C)]NR_.2                                                             | -0.195666335 | #N/A                  |
| _TAS[Phospho (STY)]LNQRPR_.2                                                                      | 0.309500084  | Q8CBW3_S231_M1_Abi1   |
| _HNS[Phospho (STY)]TTSSTSSGGYR_.2                                                                 | -0.153630229 | Q8CBW3_S296_M1_Abi1   |
| _ALIESYQNLTR_.2                                                                                   | 0.153618613  | #N/A                  |
| _LGSQHS[Phospho (STY)]PGR_.2                                                                      | -0.230335899 | Q8CBW3_S225_M1_Abi1   |
| _KNDDGWFEFVC[Carbamidomethyl (C)]NR_.3                                                            | 0.225498443  | #N/A                  |

|                                                                                 |              |                       |
|---------------------------------------------------------------------------------|--------------|-----------------------|
| _ [Acetyl (Protein N-term)]AELQM[Oxidation (M)]LLEEEIPSGKR_.2                   | -0.031500602 | #N/A                  |
| _DKDDELSFK_.2                                                                   | 0.086447566  | #N/A                  |
| _VVS[Phospho (STY)]EEHLR_.2                                                     | 0.100887818  | Q8CBW7_S80_M1_Chic1   |
| _S[Phospho (STY)]SPSEVSLEAER_.2                                                 | -0.223245642 | Q8CBX0_S88_M1_Tmem63c |
| _LALLIHND[Phospho (STY)]LTSLIYGEQSEK_.3                                         | 0.239145621  | Q8CBX0_S75_M1_Tmem63c |
| _AYSS[Phospho (STY)]PSTTPEVR_.2                                                 | -0.179948513 | Q8CBY1_S420_M1_Samd4a |
| _LLQPDLPVSASQLYPR_.2                                                            | -0.191925498 | #N/A                  |
| _IQLVAVNYIPEVR_.2                                                               | -0.042720681 | #N/A                  |
| _LIEYYQQLAQK_.2                                                                 | 0.259134778  | #N/A                  |
| _SGGNSSS[Phospho (STY)]SLGDIVPSSR_.2                                            | 0.18252963   | Q8CC27_S202_M1_Cacnb2 |
| _SAS[Phospho (STY)]QAEEEPC[Carbamidomethyl (C)]LEPVKK_.2                        | 0.078398718  | Q8CC27_S510_M1_Cacnb2 |
| _SAS[Phospho (STY)]QAEEEPC[Carbamidomethyl (C)]LEPVK_.2                         | -0.417396818 | Q8CC27_S510_M1_Cacnb2 |
| _VASLS[Phospho (STY)]PAR_.2                                                     | 0.075408886  | Q8CC35_S765_M1_Synpo  |
| _VRSPSY[Phospho (STY)]STLYPSSDPKPSHLK_.4                                        | -0.314134797 | Q8CC35_Y571_M1_Synpo  |
| _VTPNPDLDLVQTADK_.2                                                             | -0.170389148 | #N/A                  |
| _ASPAAEEAVPEWASC[Carbamidomethyl (C)]LK_.2                                      | -0.031726679 | #N/A                  |
| _YTTNAPGGFR_.2                                                                  | -0.133239654 | #N/A                  |
| _HPSPQS[Phospho (STY)]PSR_.2                                                    | -0.269450457 | Q8CC35_S230_M1_Synpo  |
| _VAS[Phospho (STY)]EEEEPLVVYLK_.2                                               | -0.372048208 | Q8CC35_S258_M1_Synpo  |
| _SSPGLYAPVQDSLQPTAVS[Phospho (STY)]PTYSSDISPVSPSR_.3                            | -0.298541971 | Q8CC35_S882_M1_Synpo  |
| _LLQRS[Phospho (STY)]PVLER_.2                                                   | -0.43056725  | Q8CC35_S535_M1_Synpo  |
| _PSLYALS[Phospho (STY)]PVKEPAK_.2                                               | -0.205132948 | Q8CC35_S805_M1_Synpo  |
| _ASPAAEEAVPEWASC[Carbamidomethyl (C)]LKS[Phospho (STY)]PR_.2                    | -0.318742161 | Q8CC35_S689_M1_Synpo  |
| _C[Carbamidomethyl (C)]PS[Phospho (STY)]PTM[Oxidation (M)]SLPSSWK_.2            | -0.332791171 | Q8CC35_S740_M1_Synpo  |
| _AAS[Phospho (STY)]PAKPSSLDLVPNLPR_.3                                           | 0.047562174  | Q8CC35_S833_M1_Synpo  |
| _PKPNQNLSEASGK_.3                                                               | 0.528592781  | #N/A                  |
| _ENAALLTANGLHLSQSR_.2                                                           | 0.043076369  | #N/A                  |
| _DRAS[Phospho (STY)]PAAAEAVPEWASC[Carbamidomethyl (C)]LK_.3                     | 0.141196705  | Q8CC35_S672_M1_Synpo  |
| _AWAPPASSMADRS[Phospho (STY)]PQPQR_.3                                           | 0.089008474  | Q8CC35_S512_M1_Synpo  |
| _S[Phospho (STY)]ST[Phospho (STY)]PKGDMASVNDES_.2                               | -0.30849674  | Q8CC15_S213_M2_Rybp   |
| _TVPLVDSEGG[Phospho (STY)]GR_.2                                                 | -0.095105903 | Q8CC14_S340_M1_Amer2  |
| _IC[Carbamidomethyl (C)]LEAGS[Phospho (STY)]PTGSGDQSSR_.2                       | 0.063978542  | Q8CC14_S280_M1_Amer2  |
| _ASAVDPSSVDPPS[Phospho (STY)]DPSADR_.2                                          | -0.022055755 | Q8CC14_S356_M1_Amer2  |
| _DMSS[Phospho (STY)]VKR_.2                                                      | 0.317223274  | Q8CC14_S488_M1_Amer2  |
| _AAGPGNLVLP[Phospho (STY)]LTAS[Phospho (STY)]LEC[Carbamidomethyl (C)]VKEEPPR_.3 | -0.577964531 | Q8CC14_S223_M2_Amer2  |
| _RPDS[Phospho (STY)]PGQDASR_.2                                                  | -0.27141297  | Q8CC14_S244_M1_Amer2  |
| _S[Phospho (STY)]GGTMPSIFGVK_.2                                                 | 0.12299878   | Q8CC14_S71_M1_Amer2   |
| _HAAGEPAGGEQAPAS[Phospho (STY)]AESAPER_.3                                       | -0.139886012 | Q8CC14_S266_M1_Amer2  |
| _VKS[Phospho (STY)]PPQISPSK_.2                                                  | 0.275963028  | Q8CCN5_S565_M1_Bcas3  |
| _EGS[Phospho (STY)]IETLSNSSGSTSGSIPR_.2                                         | -0.188825994 | Q8CCN5_S886_M1_Bcas3  |
| _DVVGS[Phospho (STY)]GTQLQR_.2                                                  | -0.384497029 | Q8CCN5_S877_M1_Bcas3  |
| _LADAM[Oxidation (M)]AES[Phospho (STY)]PSR_.2                                   | 0.056979563  | Q8CCN5_S869_M1_Bcas3  |
| _LTSQDS[Phospho (STY)]YNNFTNNPNPNR_.2                                           | -0.64464867  | Q8CCN5_S503_M1_Bcas3  |
| _LADAM[Oxidation (M)]AES[Phospho (STY)]PSRDVVGSGTELQR_.3                        | -0.136832102 | Q8CCN5_S869_M1_Bcas3  |
| _HGSY[Phospho (STY)]DSLASDHSGQEDEEWLSQVEIVTHTGPHR_.5                            | 0.386878623  | Q8CCN5_Y707_M1_Bcas3  |
| _C[Carbamidomethyl (C)]SPVPGLS[Phospho (STY)]SSPSGS[Phospho (STY)]PLHGK_.2      | -0.077960426 | Q8CCN5_S486_M2_Bcas3  |
| _QMNMS[Phospho (STY)]PPPGNAGPVIMSLEEK_.3                                        | -0.121386966 | Q8CCS6_S146_M1_Pabpn1 |

|                                                                                             |              |                         |
|---------------------------------------------------------------------------------------------|--------------|-------------------------|
| _RPAEDYVPR_2                                                                                | -0.142897061 | #N/A                    |
| _DAQDALVPR_2                                                                                | 0.07275827   | #N/A                    |
| _TDRGTDDS[Phospho (STY)]PKNSQEDLQDR_3                                                       | -0.436564353 | Q8CCT4_S120_M1_Tceal5   |
| _GTDDS[Phospho (STY)]PKNSQEDLQDR_2                                                          | -0.374615011 | Q8CCT4_S120_M1_Tceal5   |
| _M[Oxidation (M)]GGFWVPR_2                                                                  | -0.007846496 | #N/A                    |
| _ADEDKS[Phospho (STY)]DAEGKPAR_2                                                            | 0.256699992  | Q8CCT4_S35_M1_Tceal5    |
| _S[Phospho (STY)]PSADSIHTR_2                                                                | 0.230548003  | Q8CDA1_S941_M1_Inpp5f   |
| _GLES[Phospho (STY)]PLKK_2                                                                  | -0.235171665 | Q8CDA1_S936_M1_Inpp5f   |
| _IIPS[Phospho (STY)]PDDSK_2                                                                 | -0.2474457   | Q8CDA1_S123_M1_Inpp5f   |
| _VQKS[Phospho (STY)]PAEPEAVNEIQNELK_3                                                       | -0.191413234 | Q8CDA1_S1103_M1_Inpp5f  |
| _SQS[Phospho (STY)]ASSIDVSTHAPSEAAAGPGSELGK_3                                               | -0.166655008 | Q8CDA1_S908_M1_Inpp5f   |
| _GLES[Phospho (STY)]PLKKS[Phospho (STY)]PSADSIHTR_3                                         | -0.26959213  | Q8CDA1_S936_M2_Inpp5f   |
| _KSPS[Phospho (STY)]ADSIHTR_2                                                               | -0.369755511 | Q8CDA1_S943_M1_Inpp5f   |
| _ESS[Phospho (STY)]PSHGLLK_2                                                                | -0.047493092 | Q8CDG3_S997_M1_Vcpip1   |
| _DGPSS[Phospho (STY)]APATPTK_2                                                              | -0.20727969  | Q8CDG3_S756_M1_Vcpip1   |
| _TVS[Phospho (STY)]PSTIR_2                                                                  | -0.091156256 | Q8CDG3_S746_M1_Vcpip1   |
| _APYS[Phospho (STY)]PTTSK_2                                                                 | -0.048087398 | Q8CDG3_S767_M1_Vcpip1   |
| _S[Phospho (STY)]RESS[Phospho (STY)]PSHGLLK_2                                               | -0.446406233 | Q8CDG3_S993_M2_Vcpip1   |
| _TS[Phospho (STY)]PDHPKNDGKTEVHK_3                                                          | -0.244921502 | Q8CDM8_S552_M1_Fam160b1 |
| _QHLENDPGS[Phospho (STY)]NEDADIPK_2                                                         | -0.509020175 | Q8CDN6_S113_M1_Txn1     |
| _IKQHLENDPGS[Phospho (STY)]NEDADIPK_3                                                       | -0.154620709 | Q8CDN6_S113_M1_Txn1     |
| _FQNVNSVTLFVQSNQGEETTR_3                                                                    | -0.041547643 | #N/A                    |
| _DLS[Phospho (STY)]PGAPPAVAAAAPEER_2                                                        | 0.136901749  | Q8CDU6_S9_M1_Hectd2     |
| _RGS[Phospho (STY)]LTLEEK_2                                                                 | -0.41839614  | Q8CFE4_S677_M1_Scyl2    |
| _GS[Phospho (STY)]LTLEEK_2                                                                  | -0.286740038 | Q8CFE4_S677_M1_Scyl2    |
| _TS[Phospho (STY)]PQELSEEVSR_2                                                              | -0.351974311 | Q8CFI0_S332_M1_Nedd4l   |
| _DT[Phospho (STY)]LSNPQSPQSPYNPKPQHK_3                                                      | -0.34591047  | Q8CFI0_T502_M1_Nedd4l   |
| _SLS[Phospho (STY)]SPTVTLAPLEGAKDS[Phospho (STY)]PIRR_3                                     | 0.163008179  | Q8CFI0_S477_M2_Nedd4l   |
| _DTLS[Phospho (STY)]NPQSPQSPYNPK_2                                                          | 0.121862353  | Q8CFI0_S504_M1_Nedd4l   |
| _NS[Phospho (STY)]PGLLVSPGNLNLK_2                                                           | -0.262210737 | Q8CFN5_S222_M1_Mef2c    |
| _PSPDERES[Phospho (STY)]PSVKR_3                                                             | -0.368663374 | Q8CFN5_S460_M1_Mef2c    |
| _S[Phospho (STY)]PPPMNLGMNMR_2                                                              | 0.233707203  | Q8CFN5_S240_M1_Mef2c    |
| _TVC[Carbamidomethyl (C)]TYWEDFHSC[Carbamidomethyl (C)]TVTALTDC[Carbamidomethyl (C)]QEGAK_3 | -0.168593133 | #N/A                    |
| _ALQTTYGTNAPR_2                                                                             | 0.295290404  | #N/A                    |
| _VDLFYLHAPDHSTPVEETLR_3                                                                     | -0.133769536 | #N/A                    |
| _IPRPLS[Phospho (STY)]PTK_2                                                                 | -4.58E-06    | Q8CG79_S697_M1_Tp53bp2  |
| _KNQS[Phospho (STY)]SEDILR_2                                                                | -0.135616166 | Q8CG79_S479_M1_Tp53bp2  |
| _IAEELVAVAR_2                                                                               | 0.38650763   | #N/A                    |
| _GPLDGSPY[Phospho (STY)]AQVQR_2                                                             | 0.194385424  | Q8CGB6_Y483_M1_Tns2     |
| _APHSC[Carbamidomethyl (C)]GS[Phospho (STY)]PSEGR_2                                         | 0.205374373  | Q8CGB6_S811_M1_Tns2     |
| _HLPGS[Phospho (STY)]GQQPSPPAR_2                                                            | 0.093600307  | Q8CGB6_S1082_M1_Tns2    |
| _SFS[Phospho (STY)]LDPLMER_2                                                                | 0.211447171  | Q8CGB6_S120_M1_Tns2     |
| _GYSPGAHS[Phospho (STY)]PR_2                                                                | -0.461359606 | Q8CGB6_S825_M1_Tns2     |
| _WDS[Phospho (STY)]YENFNQHHEDSVDGALAHTR_4                                                   | -0.144126388 | Q8CGB6_S455_M1_Tns2     |
| _TLPDSQQVPSS[Phospho (STY)]PASK_2                                                           | -0.070437849 | Q8CGE9_S850_M1_Rgs12    |
| _S[Phospho (STY)]LNEDVGEEDSEKK_2                                                            | -0.169973306 | Q8CGE9_S879_M1_Rgs12    |
| _S[Phospho (STY)]LNEDVGEEDSEK_2                                                             | -0.178129297 | Q8CGE9_S879_M1_Rgs12    |

|                                                                                              |              |                         |
|----------------------------------------------------------------------------------------------|--------------|-------------------------|
| _QNSAVNSS[Phospho (STY)]PR_.2                                                                | -0.491097267 | Q8CGE9_S1130_M1_Rgs12   |
| _ESQGSVSS[Phospho (STY)]AGSLDLSEAC[Carbamidomethyl (C)]R_.2                                  | 0.296873066  | Q8CGE9_S940_M1_Rgs12    |
| _LPAGSSELALSS[Phospho (STY)]PPPVK_.2                                                         | -0.102220878 | Q8CGE9_S1233_M1_Rgs12   |
| _SKS[Phospho (STY)]GRS[Phospho (STY)]LNEDVGEEDSEK_.2                                         | -0.361025856 | Q8CGE9_S876_M2_Rgs12    |
| _HSISS[Phospho (STY)]DHSNVSTPK_.2                                                            | -0.111391804 | Q8CGE9_S859_M1_Rgs12    |
| _RIS[Phospho (STY)]DLGNK_.2                                                                  | 0.036135605  | Q8CGF6_S332_M1_Wdr47    |
| _LSPYPSS[Phospho (STY)]PMR_.2                                                                | 0.110317068  | Q8CGF6_S297_M1_Wdr47    |
| _RPQS[Phospho (STY)]ADAYM[Oxidation (M)]TR_.2                                                | -0.052407715 | Q8CGF6_S304_M1_Wdr47    |
| _YQQHLEQK_.2                                                                                 | 0.134192516  | #N/A                    |
| _LILAS[Phospho (STY)]PQPK_.2                                                                 | -0.107732179 | Q8CGI1_S1151_M1_Fam193a |
| _VLEFIAVSQLR_.2                                                                              | 0.175165952  | #N/A                    |
| _LALLDNHSSEFNVT_.3                                                                           | -0.22213576  | #N/A                    |
| _VLTSGIFETR_.2                                                                               | 0.106118359  | #N/A                    |
| _ESLDLFESIWNRR_.2                                                                            | -0.234088303 | #N/A                    |
| _IDSVSLVDYTPDQDLLR_.2                                                                        | 0.156600718  | #N/A                    |
| _SNEYQLIDC[Carbamidomethyl (C)]AQYFLER_.2                                                    | 0.305457511  | #N/A                    |
| _LS[Phospho (STY)]LDEDEEPK_.2                                                                | -0.13303596  | Q8CGM1_S1269_M1_Adgrb2  |
| _TDVLC[Carbamidomethyl (C)]TGEDEDC[Carbamidomethyl (C)]QAAS[Phospho (STY)]PLQK_.2            | -0.320248299 | Q8CGN4_S1348_M1_Bcor    |
| _DGG[Phospho (STY)]PPLLEK_.2                                                                 | 0.183067962  | Q8CGN4_S423_M1_Bcor     |
| _PDPS[Phospho (STY)]KSAPAPK_.2                                                               | -0.130709179 | Q8CGP0_S5_M1_H2bu1      |
| _ESYSIYVK_.2                                                                                 | 0.320049301  | #N/A                    |
| _LPSYGLC[Carbamidomethyl (C)]ESGNTSSS[Phospho (STY)]PPGPR_.2                                 | 0.224530291  | Q8CGU1_S563_M1_Calcoco1 |
| _RRS[Phospho (STY)]S[Phospho (STY)]EVEIFVDC[Carbamidomethyl (C)]EC[Carbamidomethyl (C)]GK_.3 | 0.028097761  | Q8CGV2_S101_M2_Tph2     |
| _GLS[Phospho (STY)]LDSAVPEDHQLGSLTQNK_.3                                                     | -0.22207316  | Q8CGV2_S19_M1_Tph2      |
| _DSGNIPEAIASR_.2                                                                             | 0.334031994  | #N/A                    |
| _AIQINPAFADAHSNLASIHK_.3                                                                     | -0.173748705 | #N/A                    |
| _SDLGNLLK_.2                                                                                 | -0.614256137 | #N/A                    |
| _DIDASPS[Phospho (STY)]PLSVQDLK_.2                                                           | 0.193927275  | Q8CH02_S409_M1_Sugp1    |
| _ALQQHQHGYDS[Phospho (STY)]DEEVDSELGTWEHQLR_.4                                               | -0.230818712 | Q8CH02_S483_M1_Sugp1    |
| _GRS[Phospho (STY)]LNIADQEGTLLGK_.3                                                          | -0.651685248 | Q8CH09_S206_M1_Sugp2    |
| _DVQDAIAQS[Phospho (STY)]PEK_.2                                                              | -0.041683406 | Q8CH25_S289_M1_Sltm     |
| _S[Phospho (STY)]PGHM[Oxidation (M)]VILNQTK_.2                                               | -0.115516823 | Q8CH25_S552_M1_Sltm     |
| _DVQDAIAQS[Phospho (STY)]PEKEAK_.2                                                           | -0.340858635 | Q8CH25_S289_M1_Sltm     |
| _ISS[Phospho (STY)]KS[Phospho (STY)]PGHM[Oxidation (M)]VILNQTK_.3                            | -0.419061425 | Q8CH25_S550_M2_Sltm     |
| _AGAGMITQHSSTAS[Phospho (STY)]PVNR_.2                                                        | -0.29369751  | Q8CH25_S999_M1_Sltm     |
| _EM[Oxidation (M)]DM[Oxidation (M)]S[Phospho (STY)]PEEVAPSPR_.2                              | -0.305806885 | Q8CH72_S330_M1_Trim32   |
| _EMDMSPEEVAPS[Phospho (STY)]PRAS[Phospho (STY)]PAK_.2                                        | 0.111518155  | Q8CH72_S337_M2_Trim32   |
| _SIGS[Phospho (STY)]PESTPK_.2                                                                | 0.216941534  | Q8CH77_S762_M1_Nav1     |
| _S[Phospho (STY)]LTNLSFLTDSEKK_.2                                                            | 0.12938959   | Q8CH77_S93_M1_Nav1      |
| _SS[Phospho (STY)]PLSWR_.2                                                                   | 0.030714816  | Q8CH77_S315_M1_Nav1     |
| _LYHLPPPS[Phospho (STY)]VGPSTASPPEDR_.3                                                      | -0.159258801 | Q8CH77_S1816_M1_Nav1    |
| _S[Phospho (STY)]LTNLSFLTDSEK_.2                                                             | 0.454505846  | Q8CH77_S93_M1_Nav1      |
| _RSS[Phospho (STY)]TIVLR_.2                                                                  | -0.114359537 | Q8CH77_S455_M1_Nav1     |
| _VNSNS[Phospho (STY)]LDLPSSSDTHASK_.3                                                        | -0.034762079 | Q8CH77_S810_M1_Nav1     |
| _LELVES[Phospho (STY)]LDSDEVDLK_.2                                                           | 0.111576536  | Q8CH77_S380_M1_Nav1     |
| _SVQPEVELS[Phospho (STY)]GGSGSGGDEGADES_.2                                                   | -0.27789734  | Q8CH77_S16_M1_Nav1      |
| _SLAESGLNWFS[Phospho (STY)]ESEEK_.2                                                          | -0.499853588 | Q8CH77_S477_M1_Nav1     |

|                                                                                |              |                         |
|--------------------------------------------------------------------------------|--------------|-------------------------|
| _APEAAVS[Phospho (STY)]DDGKS[Phospho (STY)]DDELLSSK_.2                         | -0.500293526 | Q8CH77_S197_M2_Nav1     |
| _ERPES[Phospho (STY)]C[Carbamidomethyl (C)]DDASK_.2                            | 0.093955154  | Q8CH77_S510_M1_Nav1     |
| _SGYMS[Phospho (STY)]DSDLMGK_.2                                                | 0.005754666  | Q8CH77_S394_M1_Nav1     |
| _SLAESGLNWFS[Phospho (STY)]ES[Phospho (STY)]EEKTPK_.3                          | 0.228548962  | Q8CH77_S477_M2_Nav1     |
| _EFGGVGAPPS[Phospho (STY)]PGVAR_.2                                             | -0.31704748  | Q8CHC4_S1147_M1_Synj1   |
| _TNC[Carbamidomethyl (C)]LDC[Carbamidomethyl (C)]LDR_.2                        | 0.098993636  | #N/A                    |
| _REIEAPKS[Phospho (STY)]PGTAR_.3                                               | 0.081023284  | Q8CHC4_S1160_M1_Synj1   |
| _IYAGTGALEGK_.2                                                                | 0.123407423  | #N/A                    |
| _GFEANAPAFDR_.2                                                                | -0.09930515  | #N/A                    |
| _AGVISAPQSQAR_.2                                                               | 0.250989519  | #N/A                    |
| _IDLPNEEVK_.2                                                                  | -0.253957868 | #N/A                    |
| _QIVVNLLGSK_.2                                                                 | 0.230658632  | #N/A                    |
| _EVIAVQGPPDGTVLVSIK_.2                                                         | -0.078393774 | #N/A                    |
| _QQNWDSLIIAGDQLINQK_.2                                                         | -0.280114028 | #N/A                    |
| _TPGPPSSQGS[Phospho (STY)]PVDTPQAAQK_.2                                        | -0.246703545 | Q8CHC4_S1084_M1_Synj1   |
| _EIEAPKS[Phospho (STY)]PGTAR_.2                                                | -0.17536511  | Q8CHC4_S1160_M1_Synj1   |
| _VSEQTLQSASSK_.2                                                               | 0.318741483  | #N/A                    |
| _SAEDLDLLNASFQDESK_.2                                                          | -0.061342829 | #N/A                    |
| _ERNEDFVEIAR_.3                                                                | 0.321869166  | #N/A                    |
| _NEDFVEIAR_.2                                                                  | -0.242115227 | #N/A                    |
| _VTSTEFISLR_.2                                                                 | 0.234413798  | #N/A                    |
| _SSAQESTFFDDALIDELLR_.2                                                        | -0.418468815 | #N/A                    |
| _NQPS[Phospho (STY)]PQAGLAGPGPAGYGAAR_.2                                       | -0.111352513 | Q8CHC4_S1175_M1_Synj1   |
| _T[Phospho (STY)]SPC[Carbamidomethyl (C)]QS[Phospho (STY)]PTVPEYSAPSLPIRPSR_.3 | 0.151873959  | Q8CHC4_S1053_M2_Synj1   |
| _QEAI DVLLLGNLTNSDLADK_.2                                                      | -0.28202088  | #N/A                    |
| _TPAWTDR_.2                                                                    | -0.279617389 | #N/A                    |
| _HLEEEEMS[Phospho (STY)]LEK_.2                                                 | -0.214344368 | Q8CHC4_S982_M1_Synj1    |
| _IDLPNEEVKELIR_.3                                                              | 0.068219325  | #N/A                    |
| _FLDYGFFYFDGSEVQR_.2                                                           | -0.388958392 | #N/A                    |
| _RSS[Phospho (STY)]FLNAK_.2                                                    | -0.211954105 | Q8CHG7_S960_M1_Rapgef2  |
| _SETS[Phospho (STY)]PVAPR_.2                                                   | -0.285592111 | Q8CHG7_S1022_M1_Rapgef2 |
| _HIPAALPVSGTLSSS[Phospho (STY)]NPDLLQSHHR_.4                                   | -0.287894925 | Q8CHG7_S585_M1_Rapgef2  |
| _ILS[Phospho (STY)]LSEEGSLER_.2                                                | -0.005472709 | Q8CHG7_S1088_M1_Rapgef2 |
| _QAEDTISNASSQLSS[Phospho (STY)]PPTS[Phospho (STY)]PQSSPR_.3                    | 0.051944994  | Q8CHG7_S1115_M2_Rapgef2 |
| _SSIVSNSS[Phospho (STY)]FDSVPVSLHDERR_.3                                       | 0.090067244  | Q8CHG7_S1158_M1_Rapgef2 |
| _S[Phospho (STY)]LGSLSQGSANATVLDVAQTGGHK_.3                                    | -0.275543426 | Q8CHG7_S930_M1_Rapgef2  |
| _SSIVSNSS[Phospho (STY)]FDSVPVSLHDER_.3                                        | 0.117599689  | Q8CHG7_S1158_M1_Rapgef2 |
| _NNM[Oxidation (M)]JETETLC[Carbamidomethyl (C)]S[Phospho (STY)]DEDAQELLR_.2    | 0.221400806  | Q8CHG7_S698_M1_Rapgef2  |
| _EFLSELQR_.2                                                                   | 0.141098516  | #N/A                    |
| _ELEEEETNAFNC[Carbamidomethyl (C)]R_.2                                         | 0.022387346  | #N/A                    |
| _SLFDYHDTR_.2                                                                  | -0.122369438 | #N/A                    |
| _SVTQGFSGFNILC[Carbamidomethyl (C)]VGETGIGK_.2                                 | -0.258358945 | #N/A                    |
| _LTIVDAVGFGDQINK_.2                                                            | -0.127381341 | #N/A                    |
| _[Acetyl (Protein N-term)]AATDLERVS[Phospho (STY)]NAEPEPR_.2                   | -0.099022074 | Q8CHH9_S10_M1_Septin8   |
| _SLSLGGHVGFDSLPDQLVSK_.3                                                       | -0.349903838 | #N/A                    |
| _S[Phospho (STY)]SPVNRPSATNK_.2                                                | -0.191599678 | Q8CHI8_S720_M1_Ep400    |
| _ISQRDPS[Phospho (STY)]PESK_.2                                                 | -0.229541014 | Q8CHP6_S261_M1_PhC3     |

|                                                                     |              |                        |
|---------------------------------------------------------------------|--------------|------------------------|
| _KGGS[Phospho (STY)]PGLESR_.2                                       | -0.029867142 | Q8CHP6_S269_M1_PhC3    |
| _M[Oxidation (M)]DRT[Phospho (STY)]PPPTLS[Phospho (STY)]PAAVTVGR_.3 | 0.190678716  | Q8CHP6_S614_M2_PhC3    |
| _FIFDC[Carbamidomethyl (C)]VSQEYGINPER_.2                           | 0.172758935  | #N/A                   |
| _GETAVPGAPETLR_.2                                                   | 0.302941838  | #N/A                   |
| _FIAGTGC[Carbamidomethyl (C)]LVR_.2                                 | 0.191634513  | #N/A                   |
| _TILTLTVSSLEDVK_.2                                                  | -0.118688    | #N/A                   |
| _SNQESDC[Carbamidomethyl (C)]MFK_.2                                 | -0.051438783 | #N/A                   |
| _GAGS[Phospho (STY)]PPPASDWGR_.2                                    | -0.134877872 | Q8CHQ0_S11_M1_Fbxo4    |
| _TKFVS[Phospho (STY)]FTSR_.2                                        | -0.219847549 | Q8CHT1_S606_M1_Ngef    |
| _FVS[Phospho (STY)]FTSR_.2                                          | -0.273615354 | Q8CHT1_S606_M1_Ngef    |
| _MEDPQRS[Phospho (STY)]QNKDR_.2                                     | 0.127509781  | Q8CHT1_S696_M1_Ngef    |
| _VEELEDQGQTLANVFILR_.2                                              | 0.067621111  | #N/A                   |
| _MEDPQRS[Phospho (STY)]QNK_.2                                       | 0.251986673  | Q8CHT1_S696_M1_Ngef    |
| _TTS[Phospho (STY)]PDLFESQSLTSASSK_.2                               | -0.425967126 | Q8CHU3_S443_M1_Epn2    |
| _TTS[Phospho (STY)]PDLFESQSLTSASSKPSSAR_.3                          | 0.18220354   | Q8CHU3_S443_M1_Epn2    |
| _AGGS[Phospho (STY)]PASYPHGSTSPR_.2                                 | -0.468966747 | Q8CHU3_S192_M1_Epn2    |
| _GSS[Phospho (STY)]QPNLSTSYSEQYEGK_.2                               | 0.003589516  | Q8CHU3_S173_M1_Epn2    |
| _NSDPWAASQQPASNAGK_.2                                               | 0.112187953  | #N/A                   |
| _AGS[Phospho (STY)]PQLDDIR_.2                                       | -0.328859983 | Q8CHW4_S540_M1_Eif2b5  |
| _NSS[Phospho (STY)]PSYANPK_.2                                       | -0.316342056 | Q8CHX7_S228_M1_Rftn2   |
| _S[Phospho (STY)]LGLDTNASQAAGGR_.2                                  | -0.395049329 | Q8CHX7_S429_M1_Rftn2   |
| _PVTWNSAAQT[Phospho (STY)]PERK_.3                                   | -0.371179467 | Q8CHX7_T408_M1_Rftn2   |
| _PVTWNSAAQT[Phospho (STY)]PER_.2                                    | -0.161860597 | Q8CHX7_T408_M1_Rftn2   |
| _EERPAQSDS[Phospho (STY)]FSGFSSSDSVLR_.3                            | 0.246522987  | Q8CHX7_S469_M1_Rftn2   |
| _RPPS[Phospho (STY)]PDVIVLS[Phospho (STY)]DSEQPSSPR_.3              | 0.147193201  | Q8CHY6_S103_M2_Gatad2a |
| _SHC[Carbamidomethyl (C)]HS[Phospho (STY)]PDIEGLQAR_.3              | -0.127003672 | Q8CI03_S294_M1_Flywch1 |
| _S[Phospho (STY)]LPNLSR_.2                                          | -0.545565935 | Q8CI08_S414_M1_Slain2  |
| _RTS[Phospho (STY)]SEDLR_.2                                         | 0.248897075  | Q8CI08_S87_M1_Slain2   |
| _ELS[Phospho (STY)]PEQSTAGKPSDGSSALDR_.3                            | -0.062252515 | Q8CI11_S505_M1_Gnl3    |
| _RGS[Phospho (STY)]QGDIK_.2                                         | -0.205458699 | Q8CI51_S228_M1_Pdlim5  |
| _S[Phospho (STY)]PGNSPTPMSR_.2                                      | 0.055116808  | Q8CI61_S175_M1_Bag4    |
| _SVS[Phospho (STY)]RETLK_.2                                         | -0.248574747 | Q8CI71_S585_M1_Vps50   |
| _KKS[Phospho (STY)]DYSLNK_.2                                        | -0.090502642 | Q8CI71_S595_M1_Vps50   |
| _SAYQDYDS[Phospho (STY)]DSDVPEELKR_.2                               | 0.171678423  | Q8CI71_S559_M1_Vps50   |
| _FLEQSR[Phospho (STY)]PSVSPSK_.2                                    | -0.447801952 | Q8CI71_S494_M1_Vps50   |
| _SAYQDY[Phospho (STY)]DSDSDVPEELK_.2                                | -0.101994365 | Q8CI71_Y557_M1_Vps50   |
| _S[Phospho (STY)]PSVSPSK_.2                                         | -0.070864051 | Q8CI71_S494_M1_Vps50   |
| _RPGLEKAS[Phospho (STY)]DEEPED_.2                                   | -0.279770144 | Q8CI75_S864_M1_Dis3l2  |
| _QKQIS[Phospho (STY)]VR_.2                                          | -0.426814007 | Q8CI94_S15_M1_Pygb     |
| _Acetyl (Protein N-term))AKPLTDSER_.2                               | 0.174047295  | #N/A                   |
| _GIAGLGDVAEVR_.2                                                    | 0.103506529  | #N/A                   |
| _NLAENISR_.2                                                        | 0.111030309  | #N/A                   |
| _VIFLENYR_.2                                                        | -0.128219697 | #N/A                   |
| _VEDVEALDQK_.2                                                      | 0.235705942  | #N/A                   |
| _DYFFALAHTVR_.2                                                     | 0.001442733  | #N/A                   |
| _DFYELEPEKFQNK_.2                                                   | -0.019734838 | #N/A                   |
| _LLSLVDDEAFIR_.2                                                    | 0.031137539  | #N/A                   |

|                                                                    |              |                        |
|--------------------------------------------------------------------|--------------|------------------------|
| _TC[Carbamidomethyl (C)]AYTNHTVLPEALER_.3                          | -0.089093692 | #N/A                   |
| _YFEGIFNQK_.2                                                      | 0.263288564  | #N/A                   |
| _QAVDQISSGFFSPK_.2                                                 | 0.170646791  | #N/A                   |
| _LVTSGDVVNHDPPVVGDR_.3                                             | -0.306097276 | #N/A                   |
| _HLDHVAALFPGDVDR_.3                                                | -0.067161529 | #N/A                   |
| _IVNGWQVEEADDWLR_.2                                                | 0.317568846  | #N/A                   |
| _LLSLVDDEAFIRDVAK_.3                                               | 0.137228552  | #N/A                   |
| _DFNVGDYIEAVLDR_.2                                                 | 0.067430986  | #N/A                   |
| _VIPAADLSQQISTAGTEASGTGNM[Oxidation (M)]K_.3                       | -0.4294134   | #N/A                   |
| _VFADYEAYIQ[Carbamidomethyl (C)]QAQVDR_.2                          | 0.084386543  | #N/A                   |
| _HLEIYAINQR_.2                                                     | 0.040954662  | #N/A                   |
| _NNTVNTMR_.2                                                       | -0.113598226 | #N/A                   |
| _WLLLC[Carbamidomethyl (C)]NPGLAEIIVER_.2                          | 0.163798525  | #N/A                   |
| _SFLASSGNS[Phospho (STY)]PISQR_.2                                  | -0.437166362 | Q8CI95_S186_M1_Osblp11 |
| _SWS[Phospho (STY)]SSTTAGGLEGTVK_.2                                | -0.133040968 | Q8CI96_S608_M1_Clip4   |
| _LAS[Phospho (STY)]TDDGYIDLQFK_.2                                  | 0.056358265  | Q8CIB6_S24_M1_Tmem230  |
| _NLS[Phospho (STY)]PGAVESDVR_.2                                    | 0.370341902  | Q8CIE6_S173_M1_Copa    |
| _R[Acetyl (Protein N-term)]S[Phospho (STY)]DNGELEDKPPAPPVR_.2      | 0.01227158   | Q8CIN4_S2_M1_Pak2      |
| _KAS[Phospho (STY)]PTSTGDTLKEER_.3                                 | -0.557022588 | Q8CIP4_S438_M1_Mark4   |
| _KAS[Phospho (STY)]C[Carbamidomethyl (C)]SAVGSGSR_.2               | -0.024194489 | Q8CIP4_S458_M1_Mark4   |
| _GS[Phospho (STY)]PSLPDKYR_.2                                      | 0.305061555  | Q8CIQ7_S1763_M1_Dock3  |
| _GNVLASHSPMS[Phospho (STY)]PENIK_.2                                | 0.203789842  | Q8CIQ7_S1655_M1_Dock3  |
| _GTSQVSS[Phospho (STY)]PSQPPEK_.2                                  | 0.498782074  | Q8CJ19_S1154_M1_Mical3 |
| _RKT[Phospho (STY)]SQSEEEPPR_.3                                    | -0.069588368 | Q8CJ19_T684_M1_Mical3  |
| _QVGVS[Phospho (STY)]PAR_.2                                        | -0.273012467 | Q8CJ19_S1167_M1_Mical3 |
| _GRS[Phospho (STY)]EEEEASK_.2                                      | -0.365942004 | Q8CJ19_S977_M1_Mical3  |
| _SVFS[Phospho (STY)]GYKK_.2                                        | -0.023681182 | Q8CJ19_S1736_M1_Mical3 |
| _KTS[Phospho (STY)]QSEEEPPR_.2                                     | 0.075160666  | Q8CJ19_S685_M1_Mical3  |
| _S[Phospho (STY)]PGTEEAKSPLATK_.2                                  | -0.202260639 | Q8CJ19_S1171_M1_Mical3 |
| _AVLS[Phospho (STY)]PIR_.2                                         | -0.04787489  | Q8CJ19_S1216_M1_Mical3 |
| _SAGDQPPLTPKS[Phospho (STY)]PS[Phospho (STY)]DKELR_.3              | 0.066420332  | Q8CJ19_S1404_M2_Mical3 |
| _QGVFSPARS[Phospho (STY)]PGT[Phospho (STY)]EEAK_.3                 | 0.081129796  | Q8CJ19_S1171_M2_Mical3 |
| _VKS[Phospho (STY)]PEEPLFTPLLR_.3                                  | -0.110731814 | Q8CJ19_S1187_M1_Mical3 |
| _RQLS[Phospho (STY)]FSEDSDLSSDILR_.3                               | -0.358544428 | Q8CJ19_S1783_M1_Mical3 |
| _GFSGQRT[Phospho (STY)]PT[Phospho (STY)]PPRHS[Phospho (STY)]PGR_.3 | 0.113260139  | Q8CJ40_S501_M3_Crocc   |
| _EAPAGSGDGLS[Phospho (STY)]SPSPLEYSPR_.2                           | -0.231932534 | Q8CJ40_S1468_M1_Crocc  |
| _DLAQAAALS[Phospho (STY)]DTESGVQLSSER_.2                           | -0.069146019 | Q8CJ40_S464_M1_Crocc   |
| _TPTPPRHS[Phospho (STY)]PGR_.3                                     | -0.104835752 | Q8CJ40_S501_M1_Crocc   |
| _TES[Phospho (STY)]RDVDSRPEIQR_.3                                  | -0.468242843 | Q8CJ61_S194_M1_Cmtm4   |
| _SPGS[Phospho (STY)]PQLSR_.2                                       | -0.231337154 | Q8JZP2_S483_M1_Syn3    |
| _LSPQGGQPVVS[Phospho (STY)]PQSGSPQQQR_.3                           | -0.181881533 | Q8JZP2_S469_M1_Syn3    |
| _SQS[Phospho (STY)]LTNSLSTSDTSHR_.2                                | -0.150887786 | Q8JZP2_S540_M1_Syn3    |
| _STS[Phospho (STY)]QQGEEPQK_.2                                     | -0.30283092  | Q8JZP2_S519_M1_Syn3    |
| _SAS[Phospho (STY)]PHPHLNK_.2                                      | 0.289769569  | Q8JZP2_S530_M1_Syn3    |
| _TGTF[Phospho (STY)]PQR_.2                                         | -0.550366499 | Q8JZP9_S292_M1_Gas2l1  |
| _GSPTSPRPGS[Phospho (STY)]PVPGSR_.3                                | -0.018145241 | Q8JZP9_S306_M1_Gas2l1  |
| _NLETQQELGIEGENR_.2                                                | 0.557886326  | #N/A                   |



|                                                                                                    |              |                        |
|----------------------------------------------------------------------------------------------------|--------------|------------------------|
| _GHPSAGAEEEGGS[Phospho (STY)]DGS[Phospho (STY)]AAEAEPR_.2                                          | -0.06556306  | Q8JZQ9_S120_M2_Eif3b   |
| _AKPAAQSEETATS[Phospho (STY)]PAAS[Phospho (STY)]PTPQSAER_.3                                        | -0.267622436 | Q8JZQ9_S75_M2_Eif3b    |
| _SPS[Phospho (STY)]QEPSAPGK_.2                                                                     | 0.057730339  | Q8JZQ9_S90_M1_Eif3b    |
| _KLLSS[Phospho (STY)]PGK_.2                                                                        | -0.013826998 | Q8JZR6_S1046_M1_Slc4a8 |
| _ALS[Phospho (STY)]INSGNTK_.2                                                                      | -0.066635789 | Q8JZR6_S1076_M1_Slc4a8 |
| _DGQTVS[Phospho (STY)]PQSATNLEVK_.2                                                                | -0.086204875 | Q8JZR6_S259_M1_Slc4a8  |
| _KQS[Phospho (STY)]DPHSMDR_.2                                                                      | -0.155659676 | Q8JZR6_S246_M1_Slc4a8  |
| _EQNS[Phospho (STY)]PIYISR_.2                                                                      | -0.241776681 | Q8JZS0_S130_M1_Lin7a   |
| _ATVAAFAASEGSHPR_.3                                                                                | -0.008956251 | #N/A                   |
| _VLQSEFC[Carbamidomethyl (C)]TAIR_.2                                                               | 0.231123128  | #N/A                   |
| _VLEEMEAR_.2                                                                                       | 0.391143518  | #N/A                   |
| _QQQQLLIQQQQQQQQPQQNHM[Oxidation (M)]S_.3                                                          | -0.349476867 | #N/A                   |
| _LQESGEVPVHK_.3                                                                                    | -0.315500302 | #N/A                   |
| _DIVQFVPFR_.2                                                                                      | 0.266542656  | #N/A                   |
| _ [Acetyl (Protein N-term)]M[Oxidation (M)]EQPEDM[Oxidation (M)]AS[Phospho (STY)]LSEFDSLGSIPATK_.3 | 0.02177146   | Q8JZW4_S9_M1_Cpne5     |
| _FDLYDVDSKS[Phospho (STY)]PDLSK_.2                                                                 | 0.156050824  | Q8JZW4_S103_M1_Cpne5   |
| _PRPPAAPAQS[Phospho (STY)]PPQS[Phospho (STY)]PAHS[Phospho (STY)]PPGSPVHT[Phospho (STY)]HI_.4       | 0.160929019  | Q8JZW4_T591_M3_Cpne5   |
| _AQGIRPRPPAAPAQS[Phospho (STY)]PPQS[Phospho (STY)]PAHS[Phospho (STY)]PPGS[Phospho (STY)]PVHTHI_.5  | -0.221370495 | #N/A                   |
| _LGNPYC[Carbamidomethyl (C)]S[Phospho (STY)]PTLVR_.2                                               | 0.035777828  | Q8JZW5_S237_M1_Sh2d5   |
| _RAS[Phospho (STY)]DC[Carbamidomethyl (C)]GPAPYRPR_.3                                              | 0.025202254  | Q8JZW5_S12_M1_Sh2d5    |
| _RPDPDS[Phospho (STY)]DEDEDYER_.2                                                                  | 0.334767475  | Q8JZX4_S155_M1_Rbm17   |
| _RPDPDS[Phospho (STY)]DEDEDYERER_.3                                                                | -0.282923298 | Q8JZX4_S155_M1_Rbm17   |
| _S[Phospho (STY)]ENEDIYK_.2                                                                        | -0.379223967 | Q8JZZ7_S1428_M1_Adgrl2 |
| _GNS[Phospho (STY)]DGYIIPINK_.2                                                                    | 0.074957459  | Q8JZZ7_S1458_M1_Adgrl2 |
| _S[Phospho (STY)]MPNLGAGR_.2                                                                       | 0.166477029  | Q8JZZ7_S1437_M1_Adgrl2 |
| _S[Phospho (STY)]VDAYDSYWESR_.2                                                                    | -0.230250591 | Q8K004_S247_M1_Spata2  |
| _TIS[Phospho (STY)]DGTISAAK_.2                                                                     | -0.316894561 | Q8K012_S295_M1_Fnbp1l  |
| _ES[Phospho (STY)]PEGSYTDDANQEV_.2                                                                 | -0.420411331 | Q8K012_S501_M1_Fnbp1l  |
| _HSSDINHLVTQGRES[Phospho (STY)]PEGSYTDDANQEV_.4                                                    | 0.086557016  | Q8K012_S501_M1_Fnbp1l  |
| _EVQS[Phospho (STY)]PEQVK_.2                                                                       | -0.086017378 | Q8K019_S494_M1_Bclaf1  |
| _QKS[Phospho (STY)]PEIHR_.2                                                                        | -0.312792432 | Q8K019_S646_M1_Bclaf1  |
| _KEVQS[Phospho (STY)]PEQVK_.2                                                                      | -0.223268814 | Q8K019_S494_M1_Bclaf1  |
| _KAEGEPQEES[Phospho (STY)]PLKSK_.2                                                                 | -0.391807768 | Q8K019_S177_M1_Bclaf1  |
| _KAEGEPQEES[Phospho (STY)]PLK_.2                                                                   | -0.479805174 | Q8K019_S177_M1_Bclaf1  |
| _SATSGDIWPGLSAYDNS[Phospho (STY)]PR_.2                                                             | -0.06254057  | Q8K019_S221_M1_Bclaf1  |
| _AEGEPQEES[Phospho (STY)]PLKSK_.2                                                                  | 0.05658267   | Q8K019_S177_M1_Bclaf1  |
| _TIT[Phospho (STY)]PQNAPR_.2                                                                       | -0.203088041 | Q8K019_T305_M1_Bclaf1  |
| _KEVQS[Phospho (STY)]PEQVKSEK_.3                                                                   | -0.261508788 | Q8K019_S494_M1_Bclaf1  |
| _RIDIS[Phospho (STY)]PSALR_.2                                                                      | -0.058901965 | Q8K019_S656_M1_Bclaf1  |
| _ELFDYS[Phospho (STY)]PPLHK_.2                                                                     | -0.287659758 | Q8K019_S510_M1_Bclaf1  |
| _AEGEPQEES[Phospho (STY)]PLK_.2                                                                    | 0.455650651  | Q8K019_S177_M1_Bclaf1  |
| _QKS[Phospho (STY)]PEIHRR_.2                                                                       | -0.266822153 | Q8K019_S646_M1_Bclaf1  |
| _S[Phospho (STY)]PEIHRR_.2                                                                         | 0.364326572  | Q8K019_S646_M1_Bclaf1  |
| _FHDS[Phospho (STY)]EGDDTEETEDYR_.2                                                                | -0.284047774 | Q8K019_S395_M1_Bclaf1  |
| _YS[Phospho (STY)]PSQNS[Phospho (STY)]PIHHIPSR_.3                                                  | -0.408059004 | Q8K019_S284_M2_Bclaf1  |
| _NTPSQSHSIQHS[Phospho (STY)]PER_.3                                                                 | -0.403086674 | Q8K019_S267_M1_Bclaf1  |
| _LKELFDYS[Phospho (STY)]PPLHK_.3                                                                   | -0.145796462 | Q8K019_S510_M1_Bclaf1  |

|                                                                     |              |                       |
|---------------------------------------------------------------------|--------------|-----------------------|
| _SIFREES[Phospho (STY)]PLR_.2                                       | -0.279184211 | Q8K019_S529_M1_Bclaf1 |
| _QKFHDS[Phospho (STY)]EGDDTEETEDYR_.3                               | -0.706856658 | Q8K019_S395_M1_Bclaf1 |
| _EKSIFREES[Phospho (STY)]PLR_.3                                     | -0.30593661  | Q8K019_S529_M1_Bclaf1 |
| _EVQS[Phospho (STY)]PEQVKSEK_.2                                     | -0.233008239 | Q8K019_S494_M1_Bclaf1 |
| _YS[Phospho (STY)]PSQNS[Phospho (STY)]PIHHIPSRR_.3                  | 0.139792802  | Q8K019_S284_M2_Bclaf1 |
| _GRADGDWDDQEVLDYFS[Phospho (STY)]DKESAK_.4                          | -0.461054663 | Q8K019_S383_M1_Bclaf1 |
| _ADGDWDDQEVLDYFS[Phospho (STY)]DKESAK_.3                            | 0.007043959  | Q8K019_S383_M1_Bclaf1 |
| _SQECPKDTFEHDPSES[Phospho (STY)]IDEFNK_.3                           | -0.220190158 | Q8K019_S198_M1_Bclaf1 |
| _LRC[Carbamidomethyl (C)]DS[Phospho (STY)]ADLR_.2                   | -0.478994033 | Q8K019_S688_M1_Bclaf1 |
| _TVQTAAANAATAATSAAQNAFK_.3                                          | 0.054979462  | #N/A                  |
| _EMQNLS[Phospho (STY)]QHGR_.2                                       | 0.189711126  | Q8K021_S112_M1_Scamp1 |
| _SLS[Phospho (STY)]IESLC[Carbamidomethyl (C)]PDEGR_.2               | -0.546669506 | Q8K031_S234_M1_Stard8 |
| _IQPQLPDEDGNHS[Phospho (STY)]DKEDEQPQVVVLK_.4                       | 0.145098991  | Q8K039_S50_M1_        |
| _KIQPQLPDEDGNHS[Phospho (STY)]DKEDEQPQVVVLK_.4                      | 0.115082522  | Q8K039_S50_M1_        |
| _IQPQLPDEDGNHS[Phospho (STY)]DKEDEQPQVVVLK_.4                       | 0.02802784   | Q8K039_S50_M1_        |
| _NSSLLSFDS[Phospho (STY)]EDENE_.2                                   | 0.322010737  | Q8K039_S150_M1_       |
| _S[Phospho (STY)]LDEDEPPPSPLAR_.2                                   | -0.215377099 | Q8K070_S108_M1_Samd14 |
| _VTDGC[Carbamidomethyl (C)]GS[Phospho (STY)]PLHR_.2                 | 0.039824133  | Q8K070_S77_M1_Samd14  |
| _HEGFS[Phospho (STY)]PK_.2                                          | -0.396695582 | Q8K070_S267_M1_Samd14 |
| _AEPHSEDDSRDAS[Phospho (STY)]PPEPASPTIGLDKK_.4                      | 0.199425208  | Q8K070_S173_M1_Samd14 |
| _GSASSGTTSTPT[Phospho (STY)]C[Carbamidomethyl (C)]SPK_.2            | -0.567102879 | Q8K070_T258_M1_Samd14 |
| _DAS[Phospho (STY)]PPEPASPTIGLDKK_.2                                | 0.098161738  | Q8K070_S173_M1_Samd14 |
| _DAS[Phospho (STY)]PPEPASPTIGLDK_.2                                 | 0.321306884  | Q8K070_S173_M1_Samd14 |
| _DSASSAEDGEGS[Phospho (STY)]DGPGGK_.2                               | -0.061114975 | Q8K070_S64_M1_Samd14  |
| _GSGS[Phospho (STY)]DQESQSVSR_.2                                    | -0.259191396 | Q8K083_S678_M1_Znf536 |
| _RLS[Phospho (STY)]LPADIR_.2                                        | -0.588151683 | Q8K0D0_S146_M1_Cdk17  |
| _RAS[Phospho (STY)]LSEIGFGK_.2                                      | -0.236517052 | Q8K0D0_S180_M1_Cdk17  |
| _RIS[Phospho (STY)]M[Oxidation (M)]EDLNKR_.3                        | -0.325873116 | Q8K0D0_S137_M1_Cdk17  |
| _RIS[Phospho (STY)]MEDLNK_.2                                        | 0.212166912  | Q8K0D0_S137_M1_Cdk17  |
| _MGSDGESDQASGTTSDVEQS[Phospho (STY)]PTGVC[Carbamidomethyl (C)]LR_.3 | 0.197665646  | Q8K0D0_S122_M1_Cdk17  |
| _LQISS[Phospho (STY)]PPFDQPMR_.2                                    | -0.125438216 | Q8K0D0_S165_M1_Cdk17  |
| _ISWAM[Oxidation (M)]EDSDLER_.2                                     | -0.357115515 | #N/A                  |
| _EYFQHAR_.2                                                         | 0.208013417  | #N/A                  |
| _THC[Carbamidomethyl (C)]GNVLQPYLK_.3                               | -0.251862444 | #N/A                  |
| _FLTC[Carbamidomethyl (C)]SVEDGELIFR_.2                             | -0.057285803 | #N/A                  |
| _LSSERDS[Phospho (STY)]PGAPQAGTM[Oxidation (M)]K_.2                 | -0.043428878 | #N/A                  |
| _HQAQVDQYLGLVR_.3                                                   | -0.15647183  | Q8K0S2_S161_M1_Erich5 |
| _THINTVVAK_.2                                                       | -0.110329038 | #N/A                  |
| _TDEGHPFK_.2                                                        | -0.221151841 | #N/A                  |
| _VSLVTAPVK_.2                                                       | 0.006315053  | #N/A                  |
| _APNQAPAVEGK_.2                                                     | 0.341489466  | #N/A                  |
| _ELC[Carbamidomethyl (C)]SGPAR_.2                                   | 0.16811145   | #N/A                  |
| _EQDS[Phospho (STY)]PPM[Oxidation (M)]KPGALDAIR_.2                  | -0.156752396 | #N/A                  |
| _LQISS[Phospho (STY)]PPFDQPMR_.2                                    | -0.185116347 | #N/A                  |
| _LQISS[Phospho (STY)]PPFDQPMR_.2                                    | -0.247891719 | Q8K0T0_S16_M1_Rtn1    |
| _REQDS[Phospho (STY)]PPM[Oxidation (M)]KPGALDAIR_.3                 | -0.396488305 | #N/A                  |
| _GDGEDEATAVMGAR_.2                                                  | 0.131075605  | #N/A                  |

|                                                               |              |                        |
|---------------------------------------------------------------|--------------|------------------------|
| _GS[Phospho (STY)]VSEDELIAAIK_.2                              | -0.171564444 | Q8K0T0_S350_M1_Rtn1    |
| _NAWLSPNDS[Phospho (STY)]DRELESDLSR_.3                        | -0.081583979 | Q8K0T7_S450_M1_Unc13c  |
| _ETAPTSTYSS[Phospho (STY)]PAR_.2                              | -0.301429451 | Q8K0U4_S24_M1_Hspa12a  |
| _LDLTGS[Phospho (STY)]GGTAVPAR_.2                             | 0.113539499  | Q8K0U4_S631_M1_Hspa12a |
| _IIPQDVGLTILK_.2                                              | 0.075538536  | #N/A                   |
| _TPTTILLTPER_.2                                               | -0.028034243 | #N/A                   |
| _[Acetyl (Protein N-term)]ADKEAGGGDAGPR_.2                    | 0.111714976  | #N/A                   |
| _ELSDQAGSDFENSVDVR_.2                                         | -0.075085704 | #N/A                   |
| _GAVLFGLDPAVIK_.2                                             | 0.064165256  | #N/A                   |
| _IFGEDFIEQFK_.2                                               | -0.033032213 | #N/A                   |
| _WEGGDPGVSNQK_.2                                              | 0.253623967  | #N/A                   |
| _ATAVDITTSK_.2                                                | 0.012540881  | #N/A                   |
| _FISADQSVALGELVK_.2                                           | 0.349483335  | #N/A                   |
| _ATGGPYGSLGVDYEFEK_.2                                         | -0.093830841 | #N/A                   |
| _DFYHDLDPSEAK_.3                                              | -0.080284626 | #N/A                   |
| _EIQTIMQFGDTEIK_.2                                            | 0.093539027  | #N/A                   |
| _WSS[Phospho (STY)]QGMLR_.2                                   | 0.152609733  | Q8K0U4_S437_M1_Hspa12a |
| _TNPLNITLPFSFIDYYK_.2                                         | -0.205026892 | #N/A                   |
| _M[Oxidation (M)]SPDAM[Oxidation (M)]NALFKPTIDSIIHLR_.4       | 0.013588107  | #N/A                   |
| _STDSEVSQS[Phospho (STY)]PAK_.2                               | -0.286700243 | Q8K0V4_S299_M1_Cnot3   |
| _KGS[Phospho (STY)]SELGFPR_.2                                 | -0.153108292 | Q8K0W3_S103_M1_Rnf208  |
| _GLS[Phospho (STY)]LQSNR_.2                                   | -0.164649429 | Q8K0X8_S298_M1_Fez1    |
| _S[Phospho (STY)]M[Oxidation (M)]EDLVNEFDEK_.2                | -0.051764865 | Q8K0X8_S58_M1_Fez1     |
| _SSS[Phospho (STY)]LGDLLR_.2                                  | -0.383838321 | Q8K124_S395_M1_Plekho2 |
| _AEAGEGQKPSPAQLELR_.3                                         | -0.189079038 | #N/A                   |
| _VLSIQSHVVR_.2                                                | 0.458620364  | #N/A                   |
| _DKSFLAM[Oxidation (M)]VVDIVR_.2                              | -0.122358237 | #N/A                   |
| _VVPVADIITPNQFEALLSGR_.2                                      | 0.022479176  | #N/A                   |
| _VNDVNKYDYVLTGYTR_.3                                          | -0.073964981 | #N/A                   |
| _SQELHELYEGLK_.2                                              | -0.207163503 | #N/A                   |
| _DKVVPVADIITPNQFEALLSGR_.3                                    | 0.104065161  | #N/A                   |
| _SFLAM[Oxidation (M)]VVDIVR_.2                                | 0.452601914  | #N/A                   |
| _KPDGSTVTQR_.2                                                | 0.357921749  | #N/A                   |
| _TVSAMQHVLQR_.2                                               | 0.231809107  | #N/A                   |
| _DIEDPEIVVQATVL_.2                                            | 0.405614266  | #N/A                   |
| _LANHDEGS[Phospho (STY)]DDEEEETPKK_.3                         | -0.465327025 | Q8K1A6_S435_M1_Cc2d1a  |
| _LANHDEGS[Phospho (STY)]DDEEEETPKKQNTPAATTQLK_.4              | -0.376119728 | Q8K1A6_S435_M1_Cc2d1a  |
| _SSPS[Phospho (STY)]KAPPSGPAPAGK_.2                           | 0.136389235  | Q8K1A6_S461_M1_Cc2d1a  |
| _LANHDEGS[Phospho (STY)]DDEEEETPKK_.2                         | 0.08329268   | Q8K1A6_S435_M1_Cc2d1a  |
| _SADVDS[Phospho (STY)]LSESPNSSPGPC[Carbamidomethyl (C)]PEK_.2 | -0.21529561  | Q8K1D8_S43_M1_Enho     |
| _QC[Carbamidomethyl (C)]VSEDQQS[Phospho (STY)]DSESSR_.2       | 0.169423591  | Q8K1H7_S16_M1_Tcp11l2  |
| _EDGIDAVEVAADRPGS[Phospho (STY)]PR_.2                         | 0.00439526   | Q8K1J5_S269_M1_Sde2    |
| _AFGESSTSEDEEEGC[Carbamidomethyl (C)]S[Phospho (STY)]HK_.3    | 0.209209426  | Q8K1L5_S91_M1_Ppp1r11  |
| _ELPSAGS[Phospho (STY)]RDK_.2                                 | -0.26113702  | Q8K1M6_S535_M1_Dnm1l   |
| _SQLDINNKK_.2                                                 | 0.275898212  | #N/A                   |
| _LYTDFEIRQEIENETER_.3                                         | -0.393168251 | #N/A                   |
| _DTLQSELVGQLYK_.2                                             | -0.12436292  | #N/A                   |

|                                                      |              |                        |
|------------------------------------------------------|--------------|------------------------|
| _VFSPNVNLTLDLPGM[Oxidation (M)]TK_.2                 | -0.304700115 | #N/A                   |
| _ALQGASQIIAEIR_.2                                    | 0.068621313  | #N/A                   |
| _SVTDSIRDEYAFQK_.3                                   | 0.215109337  | #N/A                   |
| _SQLDINN_.2                                          | -0.220658767 | #N/A                   |
| _GHAVNLLDVPVPVAR_.2                                  | -0.124307111 | #N/A                   |
| _RLEEPSLR_.2                                         | -0.155167174 | #N/A                   |
| _VPSALAPASQEPPPAASAEADGK_.2                          | -0.075883283 | #N/A                   |
| _DC[Carbamidomethyl (C)]EVIER_.2                     | -0.033505799 | #N/A                   |
| _SKPIPI[M[Oxidation (M)]PAS[Phospho (STY)]PQK_.2     | -0.219215318 | Q8K1M6_S622_M1_Dnm1l   |
| _TLESVDPLGGLNTIDILTAIR_.2                            | -0.028426889 | #N/A                   |
| _SSLDDLLTESEDM[Oxidation (M)]AQR_.2                  | -0.137389112 | #N/A                   |
| _LQDVFNVTGADIILPQIVVVGTSQSGK_.3                      | -0.203346962 | #N/A                   |
| _YIETSELC[Carbamidomethyl (C)]GGAR_.2                | 0.004994975  | #N/A                   |
| _LIQHC[Carbamidomethyl (C)]SNYSTQELLR_.3             | -0.235670362 | #N/A                   |
| _IC[Carbamidomethyl (C)]YIFHETFG_.2                  | -0.249111553 | #N/A                   |
| _FATEYC[Carbamidomethyl (C)]NTIEGTAK_.2              | 0.035668875  | #N/A                   |
| _FISNPNSIILAVTAANTDM[Oxidation (M)]ATSEALK_.3        | -0.107934155 | #N/A                   |
| _RLS[Phospho (STY)]AGTTVADVQK_.2                     | -0.088874781 | Q8K1N2_S465_M1_Phldb2  |
| _DRS[Phospho (STY)]FSEHDLAQLR_.3                     | 0.28752596   | Q8K1S6_S443_M1_Spire11 |
| _VYISSPHSS[Phospho (STY)]PAHNK_.2                    | -0.169412033 | Q8K1X1_S209_M1_Wdr11   |
| _YTDQS[Phospho (STY)]GEEEDYESEELQHR_.3               | 0.013421039  | Q8K1Z0_S81_M1_Coq9     |
| _LVQLGQAEK_.2                                        | 0.144704595  | #N/A                   |
| _GRDYC[Carbamidomethyl (C)]S[Phospho (STY)]EEEDIT_.2 | -0.358411992 | Q8K207_S115_M1_        |
| _ANM[Oxidation (M)]HIS[Phospho (STY)]ESQQEFR_.3      | -0.226657358 | Q8K207_S93_M1_         |
| _LPISSGS[Phospho (STY)]TSSSR_.2                      | -0.209678769 | Q8K209_S681_M1_Adgrg1  |
| _NNSDS[Phospho (STY)]AKLPISSGSTSSSR_.3               | -0.128017787 | Q8K209_S672_M1_Adgrg1  |
| _QLS[Phospho (STY)]KPLSER_.2                         | -0.237151943 | Q8K212_S517_M1_Pacs1   |
| _DVSVPVAEIK_.2                                       | 0.055688877  | #N/A                   |
| _S[Phospho (STY)]TPLKER_.2                           | -0.202927966 | Q8K212_S508_M1_Pacs1   |
| _ADLQGSAS[Phospho (STY)]PSKVEGTHTPR_.3               | 0.099904959  | Q8K212_S493_M1_Pacs1   |
| _VAAVGSQSYLSSILR_.2                                  | 0.167294413  | #N/A                   |
| _DTTS[Phospho (STY)]PM[Oxidation (M)]ELAALEK_.2      | -0.149772115 | Q8K212_S428_M1_Pacs1   |
| _YSSTFLDSAWR_.2                                      | 0.188434805  | #N/A                   |
| _TNS[Phospho (STY)]SDSERSPDLGHSQIPR_.3               | -0.134244806 | Q8K212_S526_M1_Pacs1   |
| _GSGVAQS[Phospho (STY)]PQQQPQQPPQPPQPTPPK_.3         | -0.027466729 | Q8K212_S28_M1_Pacs1    |
| _GS[Phospho (STY)]LGKDTTSPM[Oxidation (M)]ELAALEK_.3 | -0.513145061 | Q8K212_S421_M1_Pacs1   |
| _HPSHSTS[Phospho (STY)]PSGPGDEVAR_.3                 | 0.244670865  | Q8K221_S76_M1_Arfip2   |
| _GHS[Phospho (STY)]PSC[Carbamidomethyl (C)]LAR_.2    | 0.141735111  | Q8K285_S628_M1_Fcho1   |
| _RSS[Phospho (STY)]DPSLNK_.2                         | -0.034150573 | Q8K296_S633_M1_Mtmr3   |
| _DSNLSAAS[Phospho (STY)]PKPGK_.2                     | -0.103571027 | Q8K298_S637_M1_Anln    |
| _AES[Phospho (STY)]ADS[Phospho (STY)]LGSEDR_.2       | 0.10274934   | Q8K298_S653_M2_Anln    |
| _AESADS[Phospho (STY)]LGSEDRDLLYSIDAYR_.3            | 0.151362138  | Q8K298_S656_M1_Anln    |
| _KDS[Phospho (STY)]LGPDKK_.2                         | 0.272354088  | Q8K298_S887_M1_Anln    |
| _LNQVIVDIR_.2                                        | -0.256679449 | #N/A                   |
| _EVEMS[Phospho (STY)]VDEDEDINSSR_.2                  | -0.076193561 | Q8K298_S548_M1_Anln    |
| _GEGGILINSQGER_.2                                    | -0.249806246 | #N/A                   |
| _NTVIATGGYGR_.2                                      | 0.151459206  | #N/A                   |

|                                                                            |              |                         |
|----------------------------------------------------------------------------|--------------|-------------------------|
| _ISQLYGDLK_.2                                                              | -0.225628658 | #N/A                    |
| _AAFGLSEAGFNTAC[Carbamidomethyl (C)]LTK_.2                                 | -0.042438258 | #N/A                    |
| _VGSVLQEGC[Carbamidomethyl (C)]EK_.2                                       | -0.059794329 | #N/A                    |
| _VSDAISTQYPVVDHEFDVVVGAGGLR_.3                                             | 0.048433631  | #N/A                    |
| _LGANSLDLVVVFR_.2                                                          | -0.146913764 | #N/A                    |
| _WHFYDTVK_.2                                                               | 0.229597619  | #N/A                    |
| _AFGGQSLK_.2                                                               | 0.05725938   | #N/A                    |
| _SM[Oxidation (M)]TLEIR_.2                                                 | -0.374158557 | #N/A                    |
| _SM[Oxidation (M)]QNHAHVFR_.2                                              | -0.379323811 | #N/A                    |
| _ANAGEESVM[Oxidation (M)]NLDK_.2                                           | 0.163748719  | #N/A                    |
| _GVIALC[Carbamidomethyl (C)]IEDGSIHR_.2                                    | 0.288198405  | #N/A                    |
| _VTLEYRPVIDK_.2                                                            | 0.210903921  | #N/A                    |
| _VDEYDYSKPIQGQQK_.3                                                        | 0.063916652  | #N/A                    |
| _TYFSC[Carbamidomethyl (C)]TSAHTSTGDGTAM[Oxidation (M)]VTR_.3              | -0.263416047 | #N/A                    |
| _TGHSLHTLYGR_.3                                                            | -0.189165937 | #N/A                    |
| _SHTVAAQGGINAALGNMEEDNWR_.3                                                | -0.047076545 | #N/A                    |
| _HVNGQDQIVPGLYAC[Carbamidomethyl (C)]GEAAC[Carbamidomethyl (C)]ASVHGANK_.4 | -0.10184105  | #N/A                    |
| _EGS[Phospho (STY)]PETLTNLKK_.2                                            | 0.027341879  | Q8K2C9_S138_M1_Hacd3    |
| _EGS[Phospho (STY)]PETLTNLK_.2                                             | -0.157166119 | Q8K2C9_S138_M1_Hacd3    |
| _WLDES[Phospho (STY)]DAEM[Oxidation (M)]ELR_.2                             | -0.208585108 | Q8K2C9_S114_M1_Hacd3    |
| _SQDVAIS[Phospho (STY)]PQQQQC[Carbamidomethyl (C)]SK_.2                    | -0.205621505 | Q8K2D3_S131_M1_Edc3     |
| _HNS[Phospho (STY)]WSSSSR_.2                                               | -0.190331534 | Q8K2D3_S161_M1_Edc3     |
| _SES[Phospho (STY)]PPPLSEPK_.2                                             | 0.386207026  | Q8K2F0_S262_M1_Brd3     |
| _SS[Phospho (STY)]PQLDPLR_.2                                               | 0.116321623  | Q8K2F8_S183_M1_Lsm14a   |
| _SFFDNIS[Phospho (STY)]C[Carbamidomethyl (C)]DDNRER_.2                     | 0.298635268  | Q8K2F8_S373_M1_Lsm14a   |
| _SS[Phospho (STY)]PQLDPLRK_.2                                              | 0.178430169  | Q8K2F8_S183_M1_Lsm14a   |
| _S[Phospho (STY)]PVPARPLPPTSQK_.2                                          | -0.07225445  | Q8K2F8_S216_M1_Lsm14a   |
| _DAS[Phospho (STY)]PSSSSAVASSK_.2                                          | -0.087743533 | Q8K2H1_S219_M1_Pphln1   |
| _DAPFFRES[Phospho (STY)]PVGR_.2                                            | -0.365957632 | Q8K2H1_S147_M1_Pphln1   |
| _DAPFFRES[Phospho (STY)]PVGRK_.3                                           | -0.209709653 | Q8K2H1_S147_M1_Pphln1   |
| _Acetyl (Protein N-term))MEEVVAEELDDEEQLVR_.2                              | -0.000319415 | #N/A                    |
| _PVPGFEEC[Carbamidomethyl (C)]EDEVTS[Phospho (STY)]DPATD_.2                | -0.147656481 | Q8K2I1_S432_M1_Fntb     |
| _GTPSQS[Phospho (STY)]PVVGR_.2                                             | -0.355945568 | Q8K2K6_S181_M1_Agfg1    |
| _SSS[Phospho (STY)]ADFGTFSTQSHQTASTVSK_.3                                  | 0.048463298  | Q8K2K6_S293_M1_Agfg1    |
| _SISM[Oxidation (M)]TTFTQQEIEFLQK_.2                                       | -0.499214708 | #N/A                    |
| _LSSLTAPVGEKS[Phospho (STY)]PDSTSPSYSTR_.3                                 | -0.365855245 | Q8K2L8_S309_M1_Trappc12 |
| _S[Phospho (STY)]LTNSHLEK_.2                                               | -0.023644056 | Q8K2P7_S52_M1_Slc38a1   |
| _RS[Phospho (STY)]LTNSHLEK_.2                                              | -0.171497633 | Q8K2P7_S52_M1_Slc38a1   |
| _S[Phospho (STY)]LTNSHLEKR_.2                                              | -0.146025086 | Q8K2P7_S52_M1_Slc38a1   |
| _RS[Phospho (STY)]LTNS[Phospho (STY)]HLEKR_.3                              | 0.200385449  | Q8K2P7_S52_M2_Slc38a1   |
| _NFEDSS[Phospho (STY)]PETLEAHK_.2                                          | -0.091563197 | Q8K2V6_S343_M1_lpo11    |
| _LKAEDVNRS[Phospho (STY)]PQK_.2                                            | 0.304199599  | Q8K2Y0_S210_M1_Obi1     |
| _SVEVEGPSKS[Phospho (STY)]PQGR_.2                                          | 0.204354373  | Q8K2Y0_S566_M1_Obi1     |
| _TAQDPGIS[Phospho (STY)]PSQSLC[Carbamidomethyl (C)]AESSR_.2                | -0.421600719 | Q8K2Y9_S164_M1_Ccm2     |
| _GIITDS[Phospho (STY)]FGR_.2                                               | 0.600769491  | Q8K2Y9_S393_M1_Ccm2     |
| _RDS[Phospho (STY)]FDDR_.2                                                 | -0.038171698 | Q8K310_S188_M1_Matr3    |
| _S[Phospho (STY)]ATREPPYR_.2                                               | 0.008120851  | Q8K310_S164_M1_Matr3    |

|                                                        |              |                        |
|--------------------------------------------------------|--------------|------------------------|
| _ITPENLPQILLQLK_.2                                     | 0.12773177   | #N/A                   |
| _GDTDQASNILASFGLSAR_.2                                 | 0.10288665   | #N/A                   |
| _IGPYQPNVPVGIDYVIPK_.2                                 | -0.416360256 | #N/A                   |
| _KRS[Phospho (STY)]YS[Phospho (STY)]PDGK_.2            | -0.357215845 | Q8K310_S596_M2_Matr3   |
| _S[Phospho (STY)]QESGYDR_.2                            | 0.044560645  | Q8K310_S208_M1_Matr3   |
| _TES[Phospho (STY)]PAEGKEQEEK_.2                       | -0.095640749 | Q8K310_S619_M1_Matr3   |
| _SFQQSSLGR_.2                                          | -0.091160014 | #N/A                   |
| _TEEGPTLSYGR_.2                                        | 0.250787445  | #N/A                   |
| _TDAQKT[Phospho (STY)]ESPAEGK_.2                       | -0.293308885 | Q8K310_T617_M1_Matr3   |
| _RDS[Phospho (STY)]FDDRGP SLNPVLDYDHGSR_.4             | 0.058643591  | Q8K310_S188_M1_Matr3   |
| _RSYS[Phospho (STY)]PDGK_.2                            | -0.190216235 | Q8K310_S598_M1_Matr3   |
| _SYS[Phospho (STY)]PDGKES[Phospho (STY)]PSDKK_.2       | -0.50789315  | Q8K310_S604_M2_Matr3   |
| _TDAQKTES[Phospho (STY)]PAEGKEQEEK_.3                  | -0.129417982 | Q8K310_S619_M1_Matr3   |
| _DDWEEKR_.2                                            | -0.075544897 | #N/A                   |
| _LC[Carbamidomethyl (C)]SLFYTNEEVAK_.2                 | 0.022850449  | #N/A                   |
| _SFQQSSLGRDS[Phospho (STY)]QGHGR_.3                    | 0.35040516   | Q8K310_S14_M1_Matr3    |
| _S[Phospho (STY)]ATREPPYRVRP_.3                        | -0.22888318  | Q8K310_S164_M1_Matr3   |
| _RRT[Phospho (STY)]EEGPTLSYGR_.3                       | 0.565096338  | Q8K310_T150_M1_Matr3   |
| _SYS[Phospho (STY)]PDGKESPSDK_.2                       | -0.244177639 | Q8K310_S598_M1_Matr3   |
| _DSFDDRGP SLNPVLDYDHGSR_.4                             | -0.181401795 | #N/A                   |
| _VVHIMDFQR_.2                                          | -0.1384873   | #N/A                   |
| _VIHLSNLPHSGYSDSAVLK_.3                                | -0.319963267 | #N/A                   |
| _GP SLNPVLDYDHGSR_.3                                   | 0.167856618  | #N/A                   |
| _DLAAGIGLLAAATQSLSM[Oxidation (M)]PASLGR_.2            | 0.283652347  | #N/A                   |
| _AVLPAS[Phospho (STY)]PEPR_.2                          | -0.481477332 | Q8K327_S532_M1_Champ1  |
| _KPSSS[Phospho (STY)]PDLWK_.2                          | -0.182068476 | Q8K327_S434_M1_Champ1  |
| _TAS[Phospho (STY)]PEPR_.2                             | 0.055991882  | Q8K327_S265_M1_Champ1  |
| _DSQENS[Phospho (STY)]DAELSSSEYIR_.2                   | 0.191141023  | Q8K327_S617_M1_Champ1  |
| _SSC[Carbamidomethyl (C)]GS[Phospho (STY)]PPDLWK_.2    | 0.110396852  | Q8K327_S464_M1_Champ1  |
| _RPGPPLS[Phospho (STY)]PEIR_.2                         | -0.017299496 | Q8K327_S416_M1_Champ1  |
| _EQPSKDTESGKS[Phospho (STY)]PSPPER_.3                  | -0.161944229 | Q8K327_S108_M1_Champ1  |
| _LM[Oxidation (M)]EALES[Phospho (STY)]PLEEQQL_.2       | 0.123158203  | Q8K327_S795_M1_Champ1  |
| _GQES[Phospho (STY)]SS[Phospho (STY)]DQEQVDVESIDFSK_.2 | -0.184193904 | Q8K327_S641_M2_Champ1  |
| _LKKDS[Phospho (STY)]QENS[Phospho (STY)]DAELSSSEYIR_.3 | -0.264534586 | Q8K327_S613_M2_Champ1  |
| _QAS[Phospho (STY)]VDDSREEDKA_.2                       | -0.21853349  | Q8K330_S639_M1_Ssh3    |
| _S[Phospho (STY)]PPASGHSTPVGPTQDR_.2                   | -0.183998415 | Q8K330_S9_M1_Ssh3      |
| _SSS[Phospho (STY)]LGNSPDR_.2                          | 0.165333119  | Q8K341_S272_M1_Atata1  |
| _LLLATDPGGS[Phospho (STY)]PAQR_.2                      | -0.452161057 | Q8K341_S315_M1_Atata1  |
| _RAT[Phospho (STY)]PPAHPPPR_.3                         | -0.049512867 | Q8K341_T261_M1_Atata1  |
| _SSS[Phospho (STY)]FKDFAK_.2                           | -0.438922987 | Q8K352_S27_M1_Sash3    |
| _FHQLDIDDPQ SIR_.3                                     | -0.018634135 | #N/A                   |
| _EYGG LNVLVNNAGIAFR_.2                                 | -0.101412796 | #N/A                   |
| _S[Phospho (STY)]LEDLRAPK_.2                           | -0.581285296 | Q8K382_S592_M1_Dennd1a |
| _RPKS[Phospho (STY)]NITVEGR_.3                         | 0.191005836  | Q8K382_S510_M1_Dennd1a |
| _TM[Oxidation (M)]PS[Phospho (STY)]PQAETQDPR_.2        | -0.111256757 | Q8K382_S473_M1_Dennd1a |
| _ESDSAEGDETES[Phospho (STY)]PEQLVR_.2                  | -0.051413986 | Q8K382_S546_M1_Dennd1a |
| _RS[Phospho (STY)]LEA IPEK_.2                          | -0.250489495 | Q8K394_S1114_M1_Plc12  |

|                                                                                |              |                        |
|--------------------------------------------------------------------------------|--------------|------------------------|
| _S[Phospho (STY)]LEAIEKASDENG_2                                                | -0.14908091  | Q8K394_S1114_M1_PlcI2  |
| _LSSNC[Carbamidomethyl (C)]SGVEGDVT[Phospho (STY)]DEDEGAEM[Oxidation (M)]SQR_3 | -0.020156797 | Q8K394_T585_M1_PlcI2   |
| _S[Phospho (STY)]LEAIEK_2                                                      | -0.119388616 | Q8K394_S1114_M1_PlcI2  |
| _TPS[Phospho (STY)]PAAGPVPR_2                                                  | -0.27904921  | Q8K394_S87_M1_PlcI2    |
| _RS[Phospho (STY)]LEAIEKASDENG_2                                               | -0.008898706 | Q8K394_S1114_M1_PlcI2  |
| _ALNAET[Phospho (STY)]PKSS[Phospho (STY)]PLPAK_2                               | 0.057964802  | Q8K3A9_S192_M2_Mepce   |
| _ELYPDFDLNLD_2                                                                 | -0.213583565 | #N/A                   |
| _ERS[Phospho (STY)]PPLTPK_2                                                    | -0.096838204 | Q8K3E5_S974_M1_Ahi1    |
| _GKTPTADDS[Phospho (STY)]DDSR_2                                                | 0.283241273  | Q8K3E5_S26_M1_Ahi1     |
| _NLSM[Oxidation (M)]TS[Phospho (STY)]PPGPAK_2                                  | 0.36653395   | Q8K3E5_S856_M1_Ahi1    |
| _AVSNDNEDTNGDGVHEITSRDS[Phospho (STY)]PVHPK_4                                  | 0.303414159  | Q8K3E5_S181_M1_Ahi1    |
| _GKTPTADDS[Phospho (STY)]DDSREK_2                                              | -0.448327452 | Q8K3E5_S26_M1_Ahi1     |
| _TPTADDS[Phospho (STY)]DDSR_2                                                  | 0.301926673  | Q8K3E5_S26_M1_Ahi1     |
| _TPTADDS[Phospho (STY)]DDSR_2                                                  | -0.396120476 | Q8K3E5_S26_M1_Ahi1     |
| _VKERS[Phospho (STY)]PPLT[Phospho (STY)]PK_3                                   | -0.164545223 | Q8K3E5_S974_M2_Ahi1    |
| _ERS[Phospho (STY)]PPLT[Phospho (STY)]PKEK_3                                   | 0.359550285  | Q8K3E5_S974_M2_Ahi1    |
| _GSAFTYPSQQS[Phospho (STY)]PR_2                                                | -0.296863366 | Q8K3F6_S599_M1_Kcnq3   |
| _T[Phospho (STY)]PQGIGLLAK_2                                                   | 0.008663791  | Q8K3F6_T82_M1_Kcnq3    |
| _DLNSSFET[Phospho (STY)]SPK_2                                                  | -0.196421103 | Q8K3G5_T58_M1_Vrk3     |
| _YVLLNDQADDTGGS[Phospho (STY)]PSENR_2                                          | -0.170538773 | Q8K3G9_S651_M1_Apl12   |
| _SESNLSSVC[Carbamidomethyl (C)]YIFESNNEGEK_2                                   | -0.219731343 | #N/A                   |
| _VNQSALEAVTPS[Phospho (STY)]PSFQQR_2                                           | -0.362173216 | Q8K3H0_S401_M1_Apl1    |
| _EVFQIASNDHDAAIR_3                                                             | -0.191247756 | #N/A                   |
| _GLPS[Phospho (STY)]PGAHPR_2                                                   | -0.481326343 | Q8K3I4_S540_M1_Myrip   |
| _GSL[Phospho (STY)]SEENNGVQEELK_2                                              | -0.26528016  | Q8K3I4_S618_M1_Myrip   |
| _SAS[Phospho (STY)]WGSADQLK_2                                                  | -0.168003073 | Q8K3I9_S214_M1_Glcci1  |
| _S[Phospho (STY)]PGS[Phospho (STY)]PVC[Carbamidomethyl (C)]R_2                 | -0.112259364 | Q8K3I9_S136_M2_Glcci1  |
| _VPC[Carbamidomethyl (C)]NVEGIS[Phospho (STY)]PELEK_2                          | -0.426086381 | Q8K3I9_S293_M1_Glcci1  |
| _SAS[Phospho (STY)]WGSADQLKEIAK_2                                              | -0.052744466 | Q8K3I9_S214_M1_Glcci1  |
| _S[Phospho (STY)]IDTQTPSVQER_2                                                 | -0.332292123 | Q8K3I9_S335_M1_Glcci1  |
| _STAGS[Phospho (STY)]PPAAAGSGTGPAGSC[Carbamidomethyl (C)]APAAGAGR_2            | -0.042268693 | Q8K3I9_S26_M1_Glcci1   |
| _TSS[Phospho (STY)]LDTITGPYLGTGWPR_2                                           | -0.128494794 | Q8K3I9_S163_M1_Glcci1  |
| _EPATINYPFEK_2                                                                 | -0.238326931 | #N/A                   |
| _LC[Carbamidomethyl (C)]EAIC[Carbamidomethyl (C)]PAQAITIEAEPR_2                | 0.312336853  | #N/A                   |
| _GLGM[Oxidation (M)]TLSYLFR_2                                                  | 0.297979813  | #N/A                   |
| _RYPAGEER_2                                                                    | -0.132147341 | #N/A                   |
| _ILM[Oxidation (M)]WTELIR_2                                                    | -0.056772516 | #N/A                   |
| _YDIDMTK_2                                                                     | 0.2537611    | #N/A                   |
| _T[Phospho (STY)]SDSDQQTYLFR_2                                                 | -0.075342686 | Q8K3K8_T529_M1_Optn    |
| _SWS[Phospho (STY)]LNTEEVPDFER_2                                               | 0.031473531  | Q8K3V7_S370_M1_Minari  |
| _Acetyl (Protein N-term)]M[Oxidation (M)]S[Phospho (STY)]PEIALNR_2             | -0.421439642 | Q8K3W0_S2_M1_Babam2    |
| _FGSS[Phospho (STY)]PQRDPNWIGDR_3                                              | -0.246087777 | Q8K3W3_S263_M1_Casc3   |
| _GTVTGERQS[Phospho (STY)]GDGQESTEPVENK_3                                       | 0.058114149  | Q8K3W3_S145_M1_Casc3   |
| _NSSS[Phospho (STY)]PVSPASVPGQR_2                                              | -0.031027405 | Q8K3X4_S638_M1_Irf2bpl |
| _S[Phospho (STY)]PGPPPPVGVK_2                                                  | -0.563386218 | Q8K3X4_S69_M1_Irf2bpl  |
| _RKAS[Phospho (STY)]PEPPDAESALK_3                                              | 0.037804752  | Q8K3X4_S526_M1_Irf2bpl |
| _RNS[Phospho (STY)]SS[Phospho (STY)]PVS[Phospho (STY)]PASVPGQR_2               | -0.260799188 | Q8K3X4_S636_M3_Irf2bpl |

|                                                                                                                   |              |                        |
|-------------------------------------------------------------------------------------------------------------------|--------------|------------------------|
| _KAS[Phospho (STY)]PEPPDSAESALK_.2                                                                                | -0.380780425 | Q8K3X4_S526_M1_lrf2bpl |
| _RPGS[Phospho (STY)]VSSTDQER_.2                                                                                   | -0.391977163 | Q8K3X4_S313_M1_lrf2bpl |
| _SGPTSS[Phospho (STY)]PFSSPASSR_.2                                                                                | -0.264501435 | Q8K3Z9_S409_M1_Pom121  |
| _SQT[Phospho (STY)]PERPAKK_.2                                                                                     | 0.092852209  | Q8K3Z9_T421_M1_Pom121  |
| _SSS[Phospho (STY)]VTS[Phospho (STY)]IDKESR_.2                                                                    | -0.327057826 | Q8K400_S783_M2_Stxbp5  |
| _QPS[Phospho (STY)]GAGLC[Carbamidomethyl (C)]DITEGTVVPEDR_.2                                                      | 0.190679654  | Q8K400_S693_M1_Stxbp5  |
| _RPVSVS[Phospho (STY)]PSSSQEISENQYAVIC[Carbamidomethyl (C)]SEK_.3                                                 | 0.048417361  | Q8K400_S903_M1_Stxbp5  |
| _SAPVINNGS[Phospho (STY)]PTILGK_.2                                                                                | -0.260153371 | Q8K4B0_S576_M1_Mta1    |
| _NNM[Oxidation (M)]S[Phospho (STY)]PHGIPAR_.2                                                                     | -0.260109863 | Q8K4B0_S449_M1_Mta1    |
| _ATVVNGTGTPGQS[Phospho (STY)]PGAGR_.2                                                                             | 0.144256861  | Q8K4B0_S386_M1_Mta1    |
| _QSLGES[Phospho (STY)]PR_.2                                                                                       | -0.011537336 | Q8K4G5_S470_M1_Ablim1  |
| _TS[Phospho (STY)]SESIYSR_.2                                                                                      | 0.285103481  | Q8K4G5_S396_M1_Ablim1  |
| _STS[Phospho (STY)]QGSINSPVYSR_.2                                                                                 | -0.199676438 | Q8K4G5_S496_M1_Ablim1  |
| _TSS[Phospho (STY)]LPGYGK_.2                                                                                      | 0.06848238   | Q8K4G5_S738_M1_Ablim1  |
| _DC[Carbamidomethyl (C)]LC[Carbamidomethyl (C)]QLC[Carbamidomethyl (C)]AQPM[Oxidation (M)]SSS[Phospho (STY)]PK_.2 | 0.092912552  | Q8K4G5_S216_M1_Ablim1  |
| _RSS[Phospho (STY)]GREEDEELLR_.3                                                                                  | 0.013377019  | Q8K4G5_S671_M1_Ablim1  |
| _TLS[Phospho (STY)]PTPSAEGYQDVR_.2                                                                                | -0.148721312 | Q8K4G5_S475_M1_Ablim1  |
| _SS[Phospho (STY)]GREEDEELLR_.3                                                                                   | -0.366479497 | Q8K4G5_S671_M1_Ablim1  |
| _YDS[Phospho (STY)]PLHSASHAPSSK_.3                                                                                | -0.057185185 | Q8K4G5_S723_M1_Ablim1  |
| _QERQS[Phospho (STY)]LGES[Phospho (STY)]PR_.2                                                                     | -0.20043818  | Q8K4G5_S466_M2_Ablim1  |
| _TLS[Phospho (STY)]PTPSAEGYQDVRDR_.3                                                                              | -0.233551462 | Q8K4G5_S475_M1_Ablim1  |
| _HSYPTTSR_.2                                                                                                      | 0.339826414  | #N/A                   |
| _GVS[Phospho (STY)]MPNMLEPK_.2                                                                                    | 0.071691107  | Q8K4G5_S789_M1_Ablim1  |
| _KAS[Phospho (STY)]EEEEYVIR_.2                                                                                    | -0.555875215 | Q8K4I3_S639_M1_Arhgef6 |
| _EIKPSERPLS[Phospho (STY)]PK_.2                                                                                   | 0.254755149  | Q8K4I3_S224_M1_Arhgef6 |
| _KAS[Phospho (STY)]EEEEYVIRK_.2                                                                                   | -0.184790777 | Q8K4I3_S639_M1_Arhgef6 |
| _KDS[Phospho (STY)]VPQVLLPEEEKLIEETR_.3                                                                           | 0.039213478  | Q8K4I3_S679_M1_Arhgef6 |
| _MS[Phospho (STY)]GFMYQGK_.2                                                                                      | 0.274222561  | Q8K4I3_S487_M1_Arhgef6 |
| _FGSTGST[Phospho (STY)]PPVSPTPSEER_.2                                                                             | 0.132227681  | Q8K4J6_T488_M1_Mrtfa   |
| _AQQPAPASS[Phospho (STY)]PVKR_.2                                                                                  | 0.146833013  | Q8K4J6_S606_M1_Mrtfa   |
| _ALPSFPTSEC[Carbamidomethyl (C)]VS[Phospho (STY)]DVEPDTR_.2                                                       | -0.428315947 | Q8K4L0_S74_M1_Ddx54    |
| _IDDRDS[Phospho (STY)]EEEGPSNQR_.2                                                                                | 0.224590621  | Q8K4L0_S774_M1_Ddx54   |
| _[Acetyl (Protein N-term)]ATEIGS[Phospho (STY)]PPR_.2                                                             | -0.315964585 | Q8K4P0_S7_M1_Wdr33     |
| _SSS[Phospho (STY)]LDGDHHDGYHR_.3                                                                                 | -0.060235433 | Q8K4P0_S1273_M1_Wdr33  |
| _DAPRPDHPHGDGHS[Phospho (STY)]PASR_.4                                                                             | 0.088501216  | Q8K4P0_S1204_M1_Wdr33  |
| _STS[Phospho (STY)]DIDLVTSDSR_.2                                                                                  | -0.328902663 | Q8K4P8_S68_M1_Hecw1    |
| _SYS[Phospho (STY)]AGEASEVSR_.2                                                                                   | -0.146826798 | Q8K4P8_S1073_M1_Hecw1  |
| _EGSLs[Phospho (STY)]PVNSQK_.2                                                                                    | -0.192875174 | Q8K4P8_S937_M1_Hecw1   |
| _GST[Phospho (STY)]TEEDGLEEEESTLK_.2                                                                              | 0.058318648  | Q8K4P8_T579_M1_Hecw1   |
| _REGSLs[Phospho (STY)]PVNSQK_.2                                                                                   | -0.473064524 | Q8K4P8_S937_M1_Hecw1   |
| _C[Carbamidomethyl (C)]SPC[Carbamidomethyl (C)]SS[Phospho (STY)]PQNSPGLQR_.2                                      | 0.313618717  | Q8K4P8_S1203_M1_Hecw1  |
| _APS[Phospho (STY)]PYRR_.2                                                                                        | -0.478546622 | Q8K4P8_S1219_M1_Hecw1  |
| _SGS[Phospho (STY)]VHQMEQLNR_.2                                                                                   | 0.269135783  | Q8K4P8_S871_M1_Hecw1   |
| _SVSS[Phospho (STY)]YGNIR_.2                                                                                      | 0.103289045  | Q8K4Q0_S722_M1_Rptor   |
| _ILDTSSLTQSAPAS[Phospho (STY)]PTNK_.2                                                                             | -0.321240379 | Q8K4Q0_S863_M1_Rptor   |
| _KKS[Phospho (STY)]APETLTLDPDEK_.3                                                                                | 0.185156457  | Q8K4R4_S299_M1_Pitpnc1 |
| _S[Phospho (STY)]APSSAPSTPLSDAPEFLSIPK_.2                                                                         | -0.199592171 | Q8K4R4_S270_M1_Pitpnc1 |



|                                                                      |              |                        |
|----------------------------------------------------------------------|--------------|------------------------|
| _YEDNKGS[Phospho (STY)]NDSIFDSEAK_.3                                 | 0.249371737  | Q8K4R4_S119_M1_Pitpnc1 |
| _S[Phospho (STY)]APETLTLDPPEKK_.2                                    | -0.079575255 | Q8K4R4_S299_M1_Pitpnc1 |
| _GNPSGIQPDLLISLTAPK_.2                                               | -0.141895503 | #N/A                   |
| _YHYLGGR_.2                                                          | 0.478653747  | #N/A                   |
| _SPPTVLVIC[Carbamidomethyl (C)]GPGNNGDGLVC[Carbamidomethyl (C)]AR_.2 | -0.136698706 | #N/A                   |
| _RGS[Phospho (STY)]ETMAGAAVK_.2                                      | 0.374948532  | Q8K4Z3_S43_M1_Naxe     |
| _GIS[Phospho (STY)]ALLNQGNQGD_.2                                     | -0.323503272 | Q8K596_S622_M1_Slc8a2  |
| _S[Phospho (STY)]GIIIGAEGDPPK_.2                                     | -0.173113951 | Q8K596_S266_M1_Slc8a2  |
| _C[Carbamidomethyl (C)]QPGVLLPVWEPEDPSLGDK_.2                        | -0.370069056 | #N/A                   |
| _TNLALVIGTHSWR_.2                                                    | 0.004864434  | #N/A                   |
| _GIS[Phospho (STY)]ALLNQGNQGD_.2                                     | 0.237422565  | Q8K596_S622_M1_Slc8a2  |
| _GHGHS[Phospho (STY)]DEEDEEQPR_.2                                    | 0.061023439  | Q8N7N5_S100_M1_Dcaf8   |
| _AHSPAEGASSESS[Phospho (STY)]PGPK_.2                                 | -0.138605256 | Q8QZS3_S73_M1_Flcn     |
| _FASEITPITISVK_.2                                                    | 0.119766182  | #N/A                   |
| _QEEDTYALSSYTR_.2                                                    | 0.102649715  | #N/A                   |
| _QATLGAGLPISTPC[Carbamidomethyl (C)]TTVVK_.2                         | 0.262770009  | #N/A                   |
| _LGTAAIQGAIEK_.2                                                     | 0.071358369  | #N/A                   |
| _TPIGSFLGSLASQPATK_.2                                                | 0.192889791  | #N/A                   |
| _SKEAWDAGK_.2                                                        | 0.077551171  | #N/A                   |
| _M[Oxidation (M)]LEIDPQK_.2                                          | 0.00203203   | #N/A                   |
| _LEDLIVK_.2                                                          | 0.082808557  | #N/A                   |
| _EVYM[Oxidation (M)]GNVIQGGEGQAPTR_.2                                | -0.337299567 | #N/A                   |
| _GATPYGGVK_.2                                                        | 0.160394304  | #N/A                   |
| _ENGTTAANASTLNDGAAALVLM[Oxidation (M)]TAEAAQR_.3                     | -0.24350511  | #N/A                   |
| _DGLTDVYNK_.2                                                        | -0.110454858 | #N/A                   |
| _EEVKEVYMGNVIQGGEGQAPTR_.3                                           | -0.219559774 | #N/A                   |
| _IAAFADAADVPIDFLAPAYAVPK_.3                                          | 0.326674157  | #N/A                   |
| _AHS[Phospho (STY)]VDVEK_.2                                          | -0.31803814  | Q8QZT2_S222_M1_Ccsap   |
| _ETDGAPS[Phospho (STY)]GPGPR_.2                                      | 0.045850021  | Q8QZT2_S129_M1_Ccsap   |
| _GALGEP[Phospho (STY)]APS[Phospho (STY)]AREEEQPVGER_.3               | 0.017572254  | Q8QZT2_S76_M2_Ccsap    |
| _QRAHS[Phospho (STY)]VDVEK_.3                                        | -0.216477779 | Q8QZT2_S222_M1_Ccsap   |
| _QMDMGS[Phospho (STY)]QK_.2                                          | -0.131082927 | Q8QZT2_S180_M1_Ccsap   |
| _GSSAAAPPSS[Phospho (STY)]PPPGR_.2                                   | -0.14604053  | Q8QZV4_S18_M1_Stk32c   |
| _RGS[Phospho (STY)]SAAAPPSS[Phospho (STY)]PPPGR_.2                   | -0.245707559 | Q8QZV4_S10_M2_Stk32c   |
| _M[Oxidation (M)]S[Phospho (STY)]MSSISGSGAR_.2                       | 0.243775237  | Q8QZV4_S69_M1_Stk32c   |
| _SS[Phospho (STY)]NPKPR_.2                                           | -0.01411643  | Q8QZV6_S384_M1_Fam161a |
| _SDKDLETQVIQLNEQVHSLK_.3                                             | 0.041301046  | #N/A                   |
| _LALEGVEK_.2                                                         | 0.232477385  | #N/A                   |
| _SSPASKPGSTPSRPSS[Phospho (STY)]AK_.3                                | 0.382968341  | Q8R001_S222_M1_Mapre2  |
| _EIELLC[Carbamidomethyl (C)]QEHGQENDDLVQR_.3                         | -0.384858011 | #N/A                   |
| _SHHANS[Phospho (STY)]PTAGAAK_.2                                     | -0.222384822 | Q8R001_S199_M1_Mapre2  |
| _NLVHSGATK_.2                                                        | 0.019748481  | #N/A                   |
| _VENSWGEGDHGK_.3                                                     | -0.089835596 | #N/A                   |
| _ENLSAAFSR_.2                                                        | 0.168227956  | #N/A                   |
| _DTLEISDFFR_.2                                                       | -0.320924051 | #N/A                   |
| _TTPLPDGQILDHR_.2                                                    | 0.087808625  | #N/A                   |
| _SSSGLLEWDSK_.2                                                      | 0.270268999  | #N/A                   |

|                                                                  |              |                         |
|------------------------------------------------------------------|--------------|-------------------------|
| _FSTPEQAAK_2                                                     | 0.021617228  | #N/A                    |
| _IEYAKPTR_2                                                      | 0.310154078  | #N/A                    |
| _VFNVFC[Carbamidomethyl (C)]LYGNVEK_2                            | 0.284785047  | #N/A                    |
| _YYGGGNEGGR_2                                                    | 0.197613328  | #N/A                    |
| _NDQDTWDYTNPNLSGQGDPSNPNGR_3                                     | 0.008843243  | #N/A                    |
| _ISRPGRS[Phospho (STY)]DDSR_2                                    | -0.521259412 | Q8R081_S182_M1_Hnrnp1   |
| _ASLNGADIYSGC[Carbamidomethyl (C)]C[Carbamidomethyl (C)]TLK_2    | 0.036367134  | #N/A                    |
| _LC[Carbamidomethyl (C)]FSTAQHAS_2                               | -0.45544903  | #N/A                    |
| _SKPGAAMVEMADGYAVDR_3                                            | 0.126733247  | #N/A                    |
| _HYQTEES[Phospho (STY)]D_2                                       | -0.470411028 | Q8R0A0_S248_M1_Gtf2f2   |
| _DGSIS[Phospho (STY)]PVSSEC[Carbamidomethyl (C)]SAVER_2          | -0.248862002 | Q8R0A2_S161_M1_Zbtb44   |
| _Acetyl (Protein N-term)]MEEVRGENEGKLEK_3                        | 0.218614659  | #N/A                    |
| _SANSWLAEK_2                                                     | 0.275983064  | #N/A                    |
| _TVTM[Oxidation (M)]IS[Phospho (STY)]PEDEQK_2                    | -0.206055719 | Q8R0A7_S275_M1_Kiaa0513 |
| _FWNAAFDDAVHC[Carbamidomethyl (C)]ER_2                           | -0.209658757 | #N/A                    |
| _QAVIGNLDEEQYK_2                                                 | -0.196850007 | #N/A                    |
| _TVTM[Oxidation (M)]IS[Phospho (STY)]PEDEQKGEK_2                 | -0.295006243 | Q8R0A7_S275_M1_Kiaa0513 |
| _S[Phospho (STY)]SSNESFSSNQADSAPDEETLALR_3                       | -0.021145252 | Q8R0A7_S72_M1_Kiaa0513  |
| _IFSGGEDLDQEEK_2                                                 | -0.078013767 | #N/A                    |
| _IITLEEGDLILTGTK_2                                               | -0.014819432 | #N/A                    |
| _ESGADGASTS[Phospho (STY)]PR_2                                   | 0.023851124  | Q8R0L9_S298_M1_Tada3    |
| _ETGTEHS[Phospho (STY)]PGVQPADVK_2                               | 0.064248426  | Q8R0P4_S46_M1_Aamdc     |
| _TDSVIIADQTPT[Phospho (STY)]PTR_2                                | -0.124375956 | Q8R0S1_T53_M1_Atf7      |
| _SLGGQQGS[Phospho (STY)]PK_2                                     | -0.186464623 | Q8R0S2_S415_M1_lqsec1   |
| _LQHSTS[Phospho (STY)]VLR_2                                      | 0.03396449   | Q8R0S2_S88_M1_lqsec1    |
| _SALSSS[Phospho (STY)]LRDLSEAGKR_3                               | 0.304956489  | Q8R0S2_S923_M1_lqsec1   |
| _M[Oxidation (M)]QFS[Phospho (STY)]FEGPEK_2                      | -0.346876093 | Q8R0S2_S179_M1_lqsec1   |
| _SALSSS[Phospho (STY)]LR_2                                       | -0.15828619  | Q8R0S2_S923_M1_lqsec1   |
| _SLAES[Phospho (STY)]IDDALNC[Carbamidomethyl (C)]R_2             | 0.314799653  | Q8R0S2_S251_M1_lqsec1   |
| _ETLIGIYER_2                                                     | 0.050063346  | #N/A                    |
| _VLINFNAPNPQDR_2                                                 | -0.145249964 | #N/A                    |
| _ETRNS[Phospho (STY)]WDSPAFSNDVIR_3                              | -0.421493175 | Q8R0S2_S510_M1_lqsec1   |
| _LQHSTS[Phospho (STY)]VLRK_2                                     | -0.457638218 | Q8R0S2_S88_M1_lqsec1    |
| _SALSSS[Phospho (STY)]LRDLSEAGK_2                                | -0.323749228 | Q8R0S2_S923_M1_lqsec1   |
| _GVDDGEDIPR_2                                                    | 0.280269406  | #N/A                    |
| _S[Phospho (STY)]LHSEEVASPTAR_2                                  | -0.284032753 | Q8R0S2_S260_M1_lqsec1   |
| _STPS[Phospho (STY)]LERPEPR_2                                    | -0.095178457 | Q8R0S2_S362_M1_lqsec1   |
| _LRSS[Phospho (STY)]MSENR_2                                      | 0.351032871  | Q8R0S2_S159_M1_lqsec1   |
| _SLS[Phospho (STY)]ESYELSSDLQDK_2                                | -0.11345144  | Q8R0S2_S106_M1_lqsec1   |
| _NSWDS[Phospho (STY)]PAFSNDVIR_2                                 | 0.113452188  | Q8R0S2_S513_M1_lqsec1   |
| _SRS[Phospho (STY)]LS[Phospho (STY)]ESYELSSDLQDK_2               | -0.167943771 | Q8R0S2_S104_M2_lqsec1   |
| _HSNHSTENS[Phospho (STY)]PIER_2                                  | -0.223348869 | Q8R0S4_S447_M1_Cacnb4   |
| _HSNHS[Phospho (STY)]TENS[Phospho (STY)]PIERR_3                  | -0.514842375 | Q8R0S4_S443_M2_Cacnb4   |
| _ATHTSSS[Phospho (STY)]TPM[Oxidation (M)]T[Phospho (STY)]PLLGR_2 | -0.072752663 | Q8R0S4_S406_M2_Cacnb4   |
| _SNTRSS[Phospho (STY)]LAEVQSEIER_3                               | -0.366321834 | Q8R0S4_S287_M1_Cacnb4   |
| _SDGS[Phospho (STY)]TTSTS[Phospho (STY)]FILR_2                   | 0.231102079  | Q8R0S4_S38_M2_Cacnb4    |
| _NRGS[Phospho (STY)]PGGC[Carbamidomethyl (C)]SHDSR_2             | -0.264709591 | Q8R0S4_S507_M1_Cacnb4   |

|                                                           |              |                        |
|-----------------------------------------------------------|--------------|------------------------|
| _NRLS[Phospho (STY)]SSSQHSR_.2                            | 0.121362318  | Q8R0S4_S474_M1_Cacnb4  |
| _ILPNVPEVEDSTDFFK_.2                                      | -0.159005264 | #N/A                   |
| _LIAEGTAPR_.2                                             | -0.165370096 | #N/A                   |
| _KVS[Phospho (STY)]LELGGK_.2                              | 0.012535276  | Q8R0Y6_S671_M1_Aldh1l1 |
| _KLVEYC[Carbamidomethyl (C)]QR_.2                         | -0.083430759 | #N/A                   |
| _EC[Carbamidomethyl (C)]DVLPPDDTVSTLYNR_.2                | 0.224807822  | #N/A                   |
| _AGLILFGNDDR_.2                                           | 0.061614099  | #N/A                   |
| _DLGEAALNEYLR_.2                                          | 0.459133459  | #N/A                   |
| _ANATEFGLASGVFTR_.2                                       | 0.339239097  | #N/A                   |
| _GSASSALELTEEELATAEAVR_.2                                 | -0.111100729 | #N/A                   |
| _LRGEDGESEC[Carbamidomethyl (C)]VINYVEK_.3                | -0.150447925 | #N/A                   |
| _IAVIGQSLFGQEVYC[Carbamidomethyl (C)]QLR_.2               | 0.107514768  | #N/A                   |
| _TYSTINPTDGSVIC[Carbamidomethyl (C)]QVSLAQVSDVDK_.3       | 0.012030676  | #N/A                   |
| _DTNHGQPQNHEAHLR_.4                                       | -0.263534954 | #N/A                   |
| _LALES[Phospho (STY)]PEVQDLQLER_.2                        | 0.02982667   | Q8R105_S29_M1_Vps37c   |
| _C[Carbamidomethyl (C)]LS[Phospho (STY)]PGGHPVYR_.2       | 0.26877131   | Q8R123_S468_M1_Flad1   |
| _ALDVSAS[Phospho (STY)]DEEM[Oxidation (M)]ARPK_.2         | -0.184037072 | Q8R146_S187_M1_Apeh    |
| _VRHDT[Phospho (STY)]PDLS[Phospho (STY)]PPRR_.3           | -0.006802102 | Q8R149_S200_M2_Bud13   |
| _HDT[Phospho (STY)]PDPS[Phospho (STY)]PPRR_.2             | -0.470641091 | Q8R149_S187_M2_Bud13   |
| _AHHES[Phospho (STY)]PDLELHK_.3                           | 0.20310696   | Q8R149_S297_M1_Bud13   |
| _HDLAS[Phospho (STY)]PPRK_.3                              | -0.330609245 | Q8R149_S238_M1_Bud13   |
| _HDT[Phospho (STY)]PDLS[Phospho (STY)]PPRR_.3             | -0.073237911 | Q8R149_S200_M2_Bud13   |
| _VRHDT[Phospho (STY)]PDLS[Phospho (STY)]PPR_.3            | 0.115879678  | Q8R149_S200_M2_Bud13   |
| _TDFAPQLQSLNK_.2                                          | 0.198116102  | #N/A                   |
| _FTLVAWDPR_.2                                             | 0.330242998  | #N/A                   |
| _TC[Carbamidomethyl (C)]EDWVDGISQFK_.2                    | -0.276140069 | #N/A                   |
| _FADEFNR_.2                                               | 0.150129323  | #N/A                   |
| _QVSLLGWSDGGITALIAAAK_.2                                  | 0.373684092  | #N/A                   |
| _AGAAFDPVSFAR_.2                                          | 0.019622385  | #N/A                   |
| _FQQISSVR_.2                                              | 0.002835408  | #N/A                   |
| _TTPGPGTAQAGDAAR_.2                                       | -0.141951418 | #N/A                   |
| _[Acetyl (Protein N-term)]MEGASFGAGR_.2                   | 0.250836035  | #N/A                   |
| _SLSNS[Phospho (STY)]NPDISGTPTSPDDEV_2                    | -0.374195587 | Q8R1A4_S900_M1_Dock7   |
| _SNS[Phospho (STY)]WVNTGPK_.2                             | -0.188671541 | Q8R1A4_S929_M1_Dock7   |
| _SPS[Phospho (STY)]GSAFGSQENLR_.2                         | -0.269572048 | Q8R1A4_S1422_M1_Dock7  |
| _KGS[Phospho (STY)]WSER_.2                                | 0.220048467  | Q8R1A4_S432_M1_Dock7   |
| _TTS[Phospho (STY)]GDDAC[Carbamidomethyl (C)]NLTSFR_.2    | -0.163458761 | Q8R1A4_S452_M1_Dock7   |
| _RNS[Phospho (STY)]SLVGR_.2                               | 0.257479853  | Q8R1A4_S439_M1_Dock7   |
| _M[Oxidation (M)]NS[Phospho (STY)]LTFKK_.2                | -0.127677098 | Q8R1A4_S1382_M1_Dock7  |
| _SMS[Phospho (STY)]IDDTPR_.2                              | -0.131004071 | Q8R1A4_S182_M1_Dock7   |
| _SKS[Phospho (STY)]VENFFLR_.2                             | -0.241433303 | Q8R1B0_S48_M1_Stac2    |
| _QPLLLS[Phospho (STY)]EDEEDTKR_.2                         | -0.222417491 | Q8R1B4_S39_M1_Eif3c    |
| _NETDESQIQLAGDVELPR_.2                                    | -0.046418938 | #N/A                   |
| _AAS[Phospho (STY)]DPNPAEPAR_.2                           | -0.228503731 | Q8R1C6_S120_M1_Mettl22 |
| _AAS[Phospho (STY)]DPNPAEPARDK_.2                         | -0.269933956 | Q8R1C6_S120_M1_Mettl22 |
| _TGS[Phospho (STY)]QEGTSM[Oxidation (M)]EGSRPAAPAEPTLK_.3 | 0.094022736  | Q8R1F6_S593_M1_Hid1    |
| _TGS[Phospho (STY)]QEGTSMEGSR_.2                          | 0.035645506  | Q8R1F6_S593_M1_Hid1    |

|                                                                |              |                          |
|----------------------------------------------------------------|--------------|--------------------------|
| _AFDQGADAIYEHINEGK_.2                                          | -0.223748604 | #N/A                     |
| _NVLLLGEDGAGK_.2                                               | -0.041443503 | #N/A                     |
| _DAVFIPAGWDNDKK_.2                                             | 0.237230551  | #N/A                     |
| _FSLDALSLR_.2                                                  | 0.139705328  | #N/A                     |
| _KPASVSPTPTS[Phospho (STY)]PTEGEAS_.2                          | -0.481136988 | Q8R1Q8_S516_M1_Dync1li1  |
| _DFQEYVEPGEDFPAS[Phospho (STY)]PQRR_.3                         | -0.318095737 | Q8R1Q8_S207_M1_Dync1li1  |
| _DFQEYVEPGEDFPAS[Phospho (STY)]PQR_.2                          | -0.075557192 | Q8R1Q8_S207_M1_Dync1li1  |
| _IPAVVVEK_.2                                                   | -0.148176352 | #N/A                     |
| _SVSS[Phospho (STY)]NVASVSPIPAGSK_.2                           | -0.110252236 | Q8R1Q8_S415_M1_Dync1li1  |
| _VPGGS[Phospho (STY)]PRT[Phospho (STY)]PNR_.2                  | -0.520465293 | Q8R1Q8_S405_M2_Dync1li1  |
| _GLELYLNVHDEDRDDQTR_.3                                         | 0.038994772  | #N/A                     |
| _NIDLVIK_.2                                                    | -0.097214459 | #N/A                     |
| _ATAPS[Phospho (STY)]PERK_.2                                   | 0.227634873  | Q8R1R3_S356_M1_Stard7    |
| _VS[Phospho (STY)]PVNDVDVGVYQLM[Oxidation (M)]QSEQLLSR_.3      | -0.144738722 | Q8R1T1_S232_M1_Chmp7     |
| _S[Phospho (STY)]PEQESVSTAPQR_.2                               | -0.069309855 | Q8R1X6_S126_M1_Spart     |
| _DAC[Carbamidomethyl (C)]KKS[Phospho (STY)]PEQESVSTAPQR_.3     | 0.190628986  | Q8R1X6_S126_M1_Spart     |
| _KS[Phospho (STY)]PEQESVSTAPQR_.2                              | 0.050819966  | Q8R1X6_S126_M1_Spart     |
| _VASAESC[Carbamidomethyl (C)]HSEQQEPS[Phospho (STY)]PTAER_.3   | -0.336276859 | Q8R2R3_S211_M1_Aagab     |
| _AFWM[Oxidation (M)]AIGGDRDEIEGLSS[Phospho (STY)]DDEH_.3       | 0.415855064  | Q8R2R3_S312_M1_Aagab     |
| _RIPVS[Phospho (STY)]PEQTR_.2                                  | 0.308651999  | Q8R2S9_S132_M1_Actr8     |
| _PGS[Phospho (STY)]DTALTVDR_.2                                 | -0.228921404 | Q8R310_S4_M1_Tmcc3       |
| _ALSNLESIPGGYNALR_.2                                           | 0.194646164  | #N/A                     |
| _EANLQALIATGGDINAAIER_.2                                       | 0.023654643  | #N/A                     |
| _FQQQLEQLSAM[Oxidation (M)]GFLNR_.2                            | -0.343730725 | #N/A                     |
| _ [Acetyl (Protein N-term)]AESAESGGPPGAQDSAADGGPAEPK_.2        | -0.073453475 | #N/A                     |
| _LFVGNLPTDITEEDFK_.2                                           | -0.312114521 | #N/A                     |
| _FAQPGTFEFYASR_.2                                              | 0.190168376  | #N/A                     |
| _GQEDSLAS[Phospho (STY)]AVDATTGQEAC[Carbamidomethyl (C)]DSD_.2 | 0.393317824  | Q8R344_S152_M1_Ccdc12    |
| _TYS[Phospho (STY)]DEASQLR_.2                                  | -0.221433184 | Q8R361_S307_M1_Rab11fip5 |
| _S[Phospho (STY)]PSHSSWLSTEGGR_.2                              | -0.04011653  | Q8R361_S278_M1_Rab11fip5 |
| _RTYS[Phospho (STY)]DEASQLR_.2                                 | 0.029875149  | Q8R361_S307_M1_Rab11fip5 |
| _GSPSLGAS[Phospho (STY)]PHHSSTGEEK_.3                          | 0.181215588  | Q8R361_S486_M1_Rab11fip5 |
| _DKPRS[Phospho (STY)]PFSK_.2                                   | -0.008299057 | Q8R361_S188_M1_Rab11fip5 |
| _ATVALDEVFR_.2                                                 | 0.393030919  | #N/A                     |
| _RGS[Phospho (STY)]VGEKGS[Phospho (STY)]PSLGASPHHSSTGEEK_.4    | -0.229601005 | Q8R361_S474_M2_Rab11fip5 |
| _VLPDELQVSAAPPGR_.2                                            | -0.021059104 | #N/A                     |
| _AIEPAPVGR_.2                                                  | 0.096429792  | #N/A                     |
| _LVAQLDTEGIGSLPGYEDR_.2                                        | -0.213973293 | #N/A                     |
| _DSQFSYAVFGPR_.2                                               | 0.166558618  | #N/A                     |
| _VASGDLQVQR_.2                                                 | 0.561210265  | #N/A                     |
| _ATLQEVVGLR_.2                                                 | 0.150944898  | #N/A                     |
| _HAAYSVGWEM[Oxidation (M)]APAGAPGPR_.3                         | -0.107468115 | #N/A                     |
| _LEAAPADAGTYR_.3                                               | -0.17070207  | #N/A                     |
| _LTVHEGQELALGC[Carbamidomethyl (C)]LAQTK_.3                    | -0.460478328 | #N/A                     |
| _AVLAHVDVQTLSSQLAVTVGPGER_.3                                   | -0.296235803 | #N/A                     |
| _EEGVVLEAVAWLAGGTYYR_.2                                        | 0.46376151   | #N/A                     |
| _LVKPSSSSSGS[Phospho (STY)]R_.2                                | 0.088729546  | Q8R373_S293_M1_Clmp      |

|                                                                         |              |                        |
|-------------------------------------------------------------------------|--------------|------------------------|
| _VS[Phospho (STY)]PSTSYTPSR_.2                                          | 0.122363025  | Q8R3C0_S154_M1_Mcmbp   |
| _SGVTNMSS[Phospho (STY)]PHK_.2                                          | -0.137347649 | Q8R3D1_S184_M1_Tbc1d13 |
| _DSS[Phospho (STY)]VAEEGAQEAVAR_.2                                      | -0.466163729 | Q8R3F5_S41_M1_Mcat     |
| _RTS[Phospho (STY)]TQENVHLSQAK_.3                                       | -0.283783782 | Q8R3I2_S472_M1_Mboat2  |
| _KPEPLDES[Phospho (STY)]DNDF_.2                                         | 0.086510993  | Q8R3P7_S409_M1_Cluap1  |
| _IRKPEPLDES[Phospho (STY)]DNDF_.2                                       | 0.38840341   | Q8R3P7_S409_M1_Cluap1  |
| _NVPGLAAPSS[Phospho (STY)]PTQK_.2                                       | 0.188539491  | Q8R3Q2_S670_M1_Ppp6r2  |
| _VGTEGLVDS[Phospho (STY)]FSQGLER_.2                                     | -0.14845343  | Q8R3Q2_S289_M1_Ppp6r2  |
| _LTGSTSS[Phospho (STY)]LNK_.2                                           | 0.172686406  | Q8R3S6_S473_M1_Exoc1   |
| _GKVPVTYLELLS[Phospho (STY)]_.2                                         | -0.403892106 | Q8R3V5_S400_M1_Sh3glb2 |
| _QTEVLLQPNPSAR_.2                                                       | 0.163343115  | #N/A                   |
| _NFLEGDWK_.2                                                            | -0.076670397 | #N/A                   |
| _VAQTEFDR_.2                                                            | 0.126306234  | #N/A                   |
| _VEEFLYEK_.2                                                            | -0.207316753 | #N/A                   |
| _SQTTYAAQC[Carbamidomethyl (C)]YR_.2                                    | -0.171404774 | #N/A                   |
| _LASDAGIFFTR_.2                                                         | 0.227218311  | #N/A                   |
| _DFIHTASLSFLTPLR_.2                                                     | 0.217372172  | #N/A                   |
| _TELDAHFNLLAR_.2                                                        | -0.197605906 | #N/A                   |
| _RLDLDAC[Carbamidomethyl (C)]K_.2                                       | -0.038505834 | #N/A                   |
| _LLEGISSTHVNHLR_.3                                                      | 0.34092756   | #N/A                   |
| _AVQFTEEK_.2                                                            | -0.284320921 | #N/A                   |
| _VPVTYLELLS[Phospho (STY)]_.2                                           | 0.206726751  | Q8R3V5_S400_M1_Sh3glb2 |
| _NVAEALGHS[Phospho (STY)]PKDPPGGGGSVR_.3                                | -0.359562601 | Q8R3Y8_S436_M1_lrf2bp1 |
| _KAS[Phospho (STY)]PEPEGETAGK_.2                                        | -0.250812346 | Q8R3Y8_S384_M1_lrf2bp1 |
| _NVAEALGHS[Phospho (STY)]PK_.2                                          | -0.128069049 | Q8R3Y8_S436_M1_lrf2bp1 |
| _AGGAS[Phospho (STY)]PAASSTTQPPAQHR_.2                                  | -0.478933352 | Q8R3Y8_S453_M1_lrf2bp1 |
| _RKAS[Phospho (STY)]PEPEGETAGK_.2                                       | -0.41436595  | Q8R3Y8_S384_M1_lrf2bp1 |
| _S[Phospho (STY)]PGPPALKHPTSK_.3                                        | -0.170335546 | Q8R3Y8_S66_M1_lrf2bp1  |
| _S[Phospho (STY)]PGPPALK_.2                                             | 0.430837833  | Q8R3Y8_S66_M1_lrf2bp1  |
| _QDT[Phospho (STY)]FDADTPGSR_.2                                         | 0.208099772  | Q8R3Z5_T499_M1_Cacnb1  |
| _SDGS[Phospho (STY)]TSSDTSNSFVR_.2                                      | 0.096268063  | Q8R3Z5_S44_M1_Cacnb1   |
| _LSSSKS[Phospho (STY)]GDNSSSSLGDVVTGTR_.3                               | 0.140588045  | Q8R3Z5_S186_M1_Cacnb1  |
| _S[Phospho (STY)]GDNSSSSLGDVVTGTR_.2                                    | -0.084939831 | Q8R3Z5_S186_M1_Cacnb1  |
| _QGS[Phospho (STY)]WEDEEDYEEEM[Oxidation (M)]TDNR_.2                    | 0.101791527  | Q8R3Z5_S547_M1_Cacnb1  |
| _ATHPPSS[Phospho (STY)]TPPNPLLNR_.3                                     | -0.038716915 | Q8R3Z5_S417_M1_Cacnb1  |
| _ALS[Phospho (STY)]RQDT[Phospho (STY)]FDADTPGSR_.2                      | -0.375695258 | Q8R3Z5_S495_M2_Cacnb1  |
| _GPYPPSQEIPM[Oxidation (M)]EVFDPS[Phospho (STY)]PQGK_.3                 | -0.12078133  | Q8R3Z5_S26_M1_Cacnb1   |
| _DSWNSGIISVM[Oxidation (M)]SALSVAPSK_.2                                 | -0.046100121 | #N/A                   |
| _GSVAGGAVYLVYDQELLGPSDK_.2                                              | -0.159409241 | #N/A                   |
| _VWSVASTVR_.2                                                           | -0.291384295 | #N/A                   |
| _GSYLTHEAS[Phospho (STY)]GLDEQGEAR_.3                                   | 0.034878375  | Q8R464_S361_M1_Cadm4   |
| _FQLEEFSPR_.2                                                           | -0.130554423 | #N/A                   |
| _LHQYDGSIVVIQNPAP_.3                                                    | 0.18273865   | #N/A                   |
| _RAS[Phospho (STY)]GEEQEC[Carbamidomethyl (C)]LD_.2                     | -0.10881777  | Q8R4E6_S342_M1_Purg    |
| _DALVQLIEDYGECDIEER_.2                                                  | -0.155864522 | #N/A                   |
| _HSAPS[Phospho (STY)]PPVSVGS[Phospho (STY)]EEHPSVLK_.3                  | -0.021777304 | Q8R4E6_S159_M2_Purg    |
| _QKHSAPS[Phospho (STY)]PPVS[Phospho (STY)]VGS[Phospho (STY)]EEHPSVLK_.4 | 0.082848483  | #N/A                   |

|                                                                |              |                          |
|----------------------------------------------------------------|--------------|--------------------------|
| _SEGVDQAEPSQLVGS[Phospho (STY)]PSTR_.2                         | -0.133134263 | Q8R4H2_S341_M1_Arhgef12  |
| _TGTGDIATC[Carbamidomethyl (C)]DS[Phospho (STY)]PR_.2          | -0.461851467 | Q8R4H2_S1327_M1_Arhgef12 |
| _ITS[Phospho (STY)]PVLVGEENNVMHNQK_.3                          | 0.144805817  | Q8R4H2_S190_M1_Arhgef12  |
| _HLSTPSSVS[Phospho (STY)]PEPQDPAK_.2                           | -0.063975206 | Q8R4H2_S637_M1_Arhgef12  |
| _TDWSSGDASRPSSDSADS[Phospho (STY)]PK_.3                        | 0.113617285  | Q8R4H2_S309_M1_Arhgef12  |
| _VEHHDLVAGLQS[Phospho (STY)]PDR_.3                             | -0.158018464 | Q8R4H2_S1176_M1_Arhgef12 |
| _SSS[Phospho (STY)]HDFDPTDSSSK_.2                              | 0.27640851   | Q8R4H2_S41_M1_Arhgef12   |
| _SSS[Phospho (STY)]HDFDPTDSSSK_.2                              | 0.063223312  | Q8R4H2_S41_M1_Arhgef12   |
| _LLPGNELR_.2                                                   | 0.152766909  | #N/A                     |
| _GTGATADFADVAEDFENY[Phospho (STY)]HK_.3                        | 0.276727591  | Q8R4I7_Y417_M1_Neto1     |
| _VDC[Carbamidomethyl (C)]AVLDC[Carbamidomethyl (C)]EDGVAENK_.2 | -0.079652144 | #N/A                     |
| _TLGT[Phospho (STY)]PTQSGSTPR_.2                               | -0.065255364 | Q8R4R6_T272_M1_Nup35     |
| _KLS[Phospho (STY)]PPQKK_.2                                    | 0.059050717  | Q8R4S0_S157_M1_Ppp1r14c  |
| _LAPAVS[Phospho (STY)]PEKK_.2                                  | -0.427389317 | Q8R4T1_S95_M1_Cys1       |
| _GNPEDSC[Carbamidomethyl (C)]ASEAPGNS[Phospho (STY)]PK_.2      | 0.116903659  | Q8R4T1_S116_M1_Cys1      |
| _ELS[Phospho (STY)]PQHKR_.2                                    | -0.325190385 | Q8R4U7_S395_M1_Luzp1     |
| _KGS[Phospho (STY)]LDYLK_.2                                    | -0.215110254 | Q8R4U7_S261_M1_Luzp1     |
| _RKGS[Phospho (STY)]LDYLK_.2                                   | -0.491069228 | Q8R4U7_S261_M1_Luzp1     |
| _ELS[Phospho (STY)]PQHK_.2                                     | -0.166199919 | Q8R4U7_S395_M1_Luzp1     |
| _NQRPF[Phospho (STY)]PR_.2                                     | -0.126706754 | Q8R4U7_S746_M1_Luzp1     |
| _S[Phospho (STY)]QENILQGFSLPNK_.2                              | -0.085937114 | Q8R4U7_S612_M1_Luzp1     |
| _EFALS[Phospho (STY)]NEHYSLSSK_.2                              | -0.029782146 | Q8R4U7_S411_M1_Luzp1     |
| _EKPDS[Phospho (STY)]DDDLDIESFVTAK_.2                          | 0.041203885  | Q8R4U7_S660_M1_Luzp1     |
| _TFS[Phospho (STY)]DSTHVPNDIVGK_.2                             | 0.161907794  | Q8R4U7_S513_M1_Luzp1     |
| _SQS[Phospho (STY)]LKS[Phospho (STY)]IPEK_.2                   | -0.142685903 | Q8R502_S212_M2_Lrrc8c    |
| _SGT[Phospho (STY)]IQSGPEGNLVR_.2                              | -0.518411101 | Q8R502_T198_M1_Lrrc8c    |
| _S[Phospho (STY)]QSLKS[Phospho (STY)]IPEKFVVDK_.2              | 0.01334473   | Q8R502_S210_M2_Lrrc8c    |
| _RVS[Phospho (STY)]ADGQPFQR_.2                                 | -0.349111731 | Q8R516_S251_M1_Mib2      |
| _HGS[Phospho (STY)]PSTPDR_.2                                   | -0.237203002 | Q8R516_S44_M1_Mib2       |
| _VS[Phospho (STY)]ADGQPFQR_.2                                  | 0.344078316  | Q8R516_S251_M1_Mib2      |
| _S[Phospho (STY)]IEVENDFLPVEK_.2                               | -0.147742302 | Q8R550_S274_M1_Sh3kbp1   |
| _ELS[Phospho (STY)]GESDELGISQDEQLSK_.2                         | 0.013998764  | Q8R550_S156_M1_Sh3kbp1   |
| _ASS[Phospho (STY)]PSLFSTEGKPK_.2                              | -0.141384414 | Q8R550_S631_M1_Sh3kbp1   |
| _AAGGAAS[Phospho (STY)]PGPGGGGAR_.2                            | -0.294645467 | Q8R554_S749_M1_Otud7a    |
| _AS[Phospho (STY)]PGPTAAQPTQLVLK_.2                            | 0.26703032   | Q8R554_S711_M1_Otud7a    |
| _ELLSQPGTAANIPSHVTR_.3                                         | -0.257680159 | #N/A                     |
| _JELLEDAVLRL_.2                                                | -0.194410331 | #N/A                     |
| _ELPTGGQEGEQLQLK_.2                                            | 0.036258723  | #N/A                     |
| _LGIAVIHGEAQDAESDLVDGRHS[Phospho (STY)]PPM[Oxidation (M)]VR_.4 | -0.133867226 | Q8R574_S227_M1_Prpsap2   |
| _HS[Phospho (STY)]PPMVR_.2                                     | -0.05300668  | Q8R574_S227_M1_Prpsap2   |
| _S[Phospho (STY)]SDTC[Carbamidomethyl (C)]GSPALPSK_.2          | 0.171999131  | Q8R5A3_S531_M1_Apbb1ip   |
| _RSSDT[Phospho (STY)]C[Carbamidomethyl (C)]GSPALPSK_.2         | -0.323383221 | Q8R5A3_T534_M1_Apbb1ip   |
| _QGLGNHS[Phospho (STY)]PGATR_.2                                | -0.227883352 | Q8R5A3_S507_M1_Apbb1ip   |
| _SVS[Phospho (STY)]ESHTPC[Carbamidomethyl (C)]PSESTGDTVPLQR_.3 | -0.135742269 | Q8R5A6_S144_M1_Tbc1d22a  |
| _AGFAGDQIPK_.2                                                 | 0.075541558  | #N/A                     |
| _VQYTLPDGSTLDVGPAR_.2                                          | -0.019020701 | #N/A                     |
| _TLFSNIVLSGGSTLFK_.2                                           | -0.125525862 | #N/A                     |

|                                                                                     |              |                        |
|-------------------------------------------------------------------------------------|--------------|------------------------|
| _DQLQTFSEEHVLLTEAPLNPSK_.3                                                          | -0.156716417 | #N/A                   |
| _TTGVVLDSGDGVTHAVPIYEGFAM[Oxidation (M)]PHSIM[Oxidation (M)]R_.3                    | -0.333661137 | #N/A                   |
| _AC[Carbamidomethyl (C)]YLSINPQKDEALETEK_.3                                         | -0.116410857 | #N/A                   |
| _KEYEEDGSR_.2                                                                       | -0.550306576 | #N/A                   |
| _S[Phospho (STY)]PGASNSTLPK_.2                                                      | 0.061085912  | Q8R5H1_S229_M1_Usp15   |
| _WYYFDDSSVSTASEDQIVSK_.2                                                            | -0.068490221 | #N/A                   |
| _IENDVATILSR_.2                                                                     | -0.031936462 | #N/A                   |
| _LAQGPELAEDDADLLHK_.3                                                               | -0.030346803 | #N/A                   |
| _SSTIQDQQLFDRK_.2                                                                   | -0.071193722 | #N/A                   |
| _AWDDFFPGSDR_.2                                                                     | -0.253804798 | #N/A                   |
| _TPMGIILDALEQQEDNINK_.2                                                             | -0.325600215 | #N/A                   |
| _SDDSVIQLLNPNR_.2                                                                   | -0.00803569  | #N/A                   |
| _C[Carbamidomethyl (C)]EASNIVGK_.2                                                  | -0.093470462 | #N/A                   |
| _GTYFTHEAK_.2                                                                       | 0.069792579  | #N/A                   |
| _GADDAADADTAIINAEGGQNNSEEKKEYFI_.3                                                  | 0.089318771  | #N/A                   |
| _VEEEQEAEEDVS[Phospho (STY)]EEEEADREGASK_.3                                         | -0.029066499 | Q8VBT0_S245_M1_Tmx1    |
| _KVEEEQEAEEDVS[Phospho (STY)]EEEEADR_.3                                             | -0.241011274 | Q8VBT0_S245_M1_Tmx1    |
| _SANSELGGIWSVGQR_.2                                                                 | 0.192351155  | #N/A                   |
| _GVLEQGWQADSTTR_.2                                                                  | 0.178616528  | #N/A                   |
| _GLTTLT[Phospho (STY)]PVS[Phospho (STY)]ESSK_.2                                     | 0.370141319  | Q8VBW1_S628_M2_Slc6a8  |
| _LLQSVGQAPESISEK_.2                                                                 | 0.08693175   | #N/A                   |
| _DNSQTPAVPAPDLEPIPSTS[Phospho (STY)]R_.2                                            | -0.184550613 | Q8VBX6_S1590_M1_Mpdz   |
| _KFS[Phospho (STY)]LQER_.2                                                          | 0.107406954  | Q8VBY2_S74_M1_Camkk1   |
| _S[Phospho (STY)]FGNPFEPQAR_.2                                                      | -0.181434138 | Q8VBY2_S458_M1_Camkk1  |
| _EGC[Carbamidomethyl (C)]GEGC[Carbamidomethyl (C)]KS[Phospho (STY)]PELPGVQEDEAAS_.2 | -0.061569555 | Q8VBY2_S492_M1_Camkk1  |
| _SM[Oxidation (M)]S[Phospho (STY)]APGSLLMK_.2                                       | 0.31061486   | Q8VBY2_S475_M1_Camkk1  |
| _KRS[Phospho (STY)]FGNPFEPQAR_.3                                                    | 0.142046337  | Q8VBY2_S458_M1_Camkk1  |
| _S[Phospho (STY)]M[Oxidation (M)]EKENM[Oxidation (M)]AVEEK_.2                       | -0.293777784 | Q8VC31_S60_M1_Ccdc9    |
| _LENGC[Carbamidomethyl (C)]GNVS[Phospho (STY)]PQTK_.2                               | 0.354334278  | Q8VCC8_S531_M1_Rapgef3 |
| _TETS[Phospho (STY)]EDDLGDKAPK_.2                                                   | 0.019185259  | Q8VCD6_S210_M1_Reep2   |
| _TETS[Phospho (STY)]EDDLGDKAPKR_.3                                                  | 0.077931528  | Q8VCD6_S210_M1_Reep2   |
| _TETS[Phospho (STY)]EDDLGDK_.2                                                      | -0.04360952  | Q8VCD6_S210_M1_Reep2   |
| _GTLDEEDEEADS[Phospho (STY)]DTDDIDHR_.3                                             | 0.041538899  | Q8VCE2_S338_M1_Gpn1    |
| _GNAS[Phospho (STY)]PVLDPDLILTR_.2                                                  | -0.132342735 | Q8VCE2_S314_M1_Gpn1    |
| _Acetyl (Protein N-term)]MEAQAVPEGSGPSTAS[Phospho (STY)]PR_.2                       | -0.020210556 | Q8VCG9_S16_M1_Rfxap    |
| _AKPS[Phospho (STY)]PEHAPTISAPDASGPQK_.3                                            | -0.306306614 | Q8VCI5_S35_M1_Pex19    |
| _IC[Carbamidomethyl (C)]EQFEAET[Phospho (STY)]PTDSEATQR_.2                          | 0.297514531  | Q8VCI5_T236_M1_Pex19   |
| _AKPS[Phospho (STY)]PEHAPTISAPDASGPQKR_.4                                           | -0.328372915 | Q8VCI5_S35_M1_Pex19    |
| _LSPWEDLSQAPTM[Oxidation (M)]DS[Phospho (STY)]PLEK_.2                               | -0.062382919 | Q8VCY8_S312_M1_Plppr2  |
| _KQES[Phospho (STY)]FC[Carbamidomethyl (C)]R_.2                                     | -0.524905751 | Q8VD04_S237_M1_Gripap1 |
| _EC[Carbamidomethyl (C)]VGS[Phospho (STY)]PDPDLEPGEAN_.2                            | -0.116727359 | Q8VD04_S795_M1_Gripap1 |
| _LSKEC[Carbamidomethyl (C)]VGS[Phospho (STY)]PDPDLEPGEAN_.2                         | -0.141153469 | Q8VD04_S795_M1_Gripap1 |
| _TQTGDSSS[Phospho (STY)]VSSFYSR_.2                                                  | -0.420632099 | Q8VD04_S631_M1_Gripap1 |
| _KKQES[Phospho (STY)]FC[Carbamidomethyl (C)]R_.2                                    | -0.031518798 | Q8VD04_S237_M1_Gripap1 |
| _TGLEELVLSEM[Oxidation (M)]NS[Phospho (STY)]PSR_.2                                  | -0.150510872 | Q8VD04_S620_M1_Gripap1 |
| _QPGS[Phospho (STY)]PSPSPVPESGQGVTK_.2                                              | 0.37344857   | Q8VD12_S160_M1_Znf385a |
| _SFS[Phospho (STY)]SSADEHS_.2                                                       | -0.432591838 | Q8VD33_S297_M1_Sgtb    |

|                                                                                     |              |                       |
|-------------------------------------------------------------------------------------|--------------|-----------------------|
| _SRS[Phospho (STY)]FSSSADEHS_.2                                                     | 0.228270871  | Q8VD33_S295_M1_Sgtb   |
| _NDIRPLSNS[Phospho (STY)]VPEDVGK_.3                                                 | -0.419863219 | Q8VD33_S77_M1_Sgtb    |
| _TGS[Phospho (STY)]PLTVATGNDQAATEAK_.2                                              | -0.337785893 | Q8VD37_S265_M1_Sgip1  |
| _AT[Phospho (STY)]PPPPPPPTYR_.2                                                     | -0.275836525 | Q8VD37_T409_M1_Sgip1  |
| _RST[Phospho (STY)]PT[Phospho (STY)]PELTSK_.2                                       | -0.550474528 | Q8VD37_T180_M2_Sgip1  |
| _TVPAT[Phospho (STY)]PPR_.2                                                         | 0.218480961  | Q8VD37_T259_M1_Sgip1  |
| _TVPATPPRT[Phospho (STY)]GS[Phospho (STY)]PLTVATGNDQAATEAK_.3                       | -0.151420127 | Q8VD37_S265_M2_Sgip1  |
| _RS[Phospho (STY)]PGAIR_.2                                                          | -0.257180718 | Q8VD37_S160_M1_Sgip1  |
| _STPT[Phospho (STY)]PELTSK_.2                                                       | -0.281488191 | Q8VD37_T182_M1_Sgip1  |
| _NLS[Phospho (STY)]SEEVAR_.2                                                        | 0.165310029  | Q8VD37_S169_M1_Sgip1  |
| _VAEQTFIKDDYLETLSS[Phospho (STY)]PK_.3                                              | -0.153710455 | #N/A                  |
| _S[Phospho (STY)]PGAIR_.2                                                           | -0.314860536 | Q8VD37_S160_M1_Sgip1  |
| _HVPS[Phospho (STY)]PLNLEEVQKK_.3                                                   | -0.536758691 | Q8VD37_S371_M1_Sgip1  |
| _RS[Phospho (STY)]PGAIR_.2                                                          | -0.078697638 | Q8VD37_S160_M1_Sgip1  |
| _RNLS[Phospho (STY)]SEEVARPR_.3                                                     | 0.224811644  | Q8VD37_S169_M1_Sgip1  |
| _VAEQTFIKDDYLETLSS[Phospho (STY)]PKEC[Carbamidomethyl (C)]GLGQR_.4                  | 0.040574848  | #N/A                  |
| _TVVSS[Phospho (STY)]PGPGSGSGTGTSGASSPAR_.2                                         | 0.086277983  | Q8VD37_S424_M1_Sgip1  |
| _ITGEM[Oxidation (M)]VLSFPAGITR_.2                                                  | -0.10713534  | #N/A                  |
| _IEKLPS[Phospho (STY)]ISDLDSIFGPVLS[Phospho (STY)]PK_.3                             | -0.20974041  | Q8VD37_S287_M2_Sgip1  |
| _YNS[Phospho (STY)]PELDEEGYSIRPEEPGSTK_.3                                           | -0.220951904 | Q8VD37_S78_M1_Sgip1   |
| _KVAEQTFIKDDYLETLSS[Phospho (STY)]PK_.3                                             | 0.183635478  | #N/A                  |
| _IPDISQK_.2                                                                         | -0.268800937 | #N/A                  |
| _NLS[Phospho (STY)]SEEVARPR_.2                                                      | -0.28766961  | Q8VD37_S169_M1_Sgip1  |
| _EC[Carbamidomethyl (C)]GLGQRAT[Phospho (STY)]PPPPPPPTYR_.3                         | 0.282706893  | Q8VD37_T409_M1_Sgip1  |
| _DDYLETLSS[Phospho (STY)]PKEC[Carbamidomethyl (C)]GLGQR_.3                          | 0.473392658  | #N/A                  |
| _WVHFSDAS[Phospho (STY)]PEHVT[Phospho (STY)]PELTPR_.3                               | -0.228935078 | Q8VD37_T324_M2_Sgip1  |
| _HVPS[Phospho (STY)]PLNLEEVQK_.2                                                    | -0.327242415 | Q8VD37_S371_M1_Sgip1  |
| _ASIGNIALSPSPVR_.2                                                                  | 0.090572611  | #N/A                  |
| _DDYLETLSS[Phospho (STY)]PK_.2                                                      | 0.483971793  | #N/A                  |
| _ASIGNIALS[Phospho (STY)]PS[Phospho (STY)]PVRK_.2                                   | -0.354313081 | Q8VD37_S149_M2_Sgip1  |
| _ASIGNIALS[Phospho (STY)]PS[Phospho (STY)]PVRKS[Phospho (STY)]PR_.3                 | 0.062884215  | Q8VD37_S149_M3_Sgip1  |
| _YNTDAM[Oxidation (M)]STAVALLNNVQFLVPIDGGVTK_.3                                     | 0.026120739  | #N/A                  |
| _EQVVT[Phospho (STY)]PPAASDIPADSPAPAPPGPTGSAGPPGPPGPR_.4                            | 0.058407902  | Q8VD37_T335_M1_Sgip1  |
| _GPS[Phospho (STY)]PLTM[Oxidation (M)]GAQDTLPVAAAFETVNAVFK_.3                       | 0.022858104  | Q8VD37_S528_M1_Sgip1  |
| _LPS[Phospho (STY)]ISDLDSIFGPVLSK_.2                                                | 0.239276275  | Q8VD37_S287_M1_Sgip1  |
| _GKHFY[Phospho (STY)]SS[Phospho (STY)]S[Phospho (STY)]ES[Phospho (STY)]EEEEESHKK_.3 | -0.608938734 | Q8VD37_S104_M3_Sgip1  |
| _GLEDAPS[Phospho (STY)]PSKGGDAPSAPVAADDSSK_.3                                       | 0.019337872  | Q8VD63_S87_M1_Tsyp14  |
| _NGC[Carbamidomethyl (C)]QLEGPHS[Phospho (STY)]PAKPK_.2                             | -0.099747294 | Q8VD63_S116_M1_Tsyp14 |
| _GLEDAPS[Phospho (STY)]PSK_.2                                                       | -0.154429021 | Q8VD63_S87_M1_Tsyp14  |
| _VVFQEFR_.2                                                                         | -0.291581139 | #N/A                  |
| _KGTGDC[Carbamidomethyl (C)]S[Phospho (STY)]DEEVDGKADGADAK_.3                       | -0.346771334 | #N/A                  |
| _GTGDC[Carbamidomethyl (C)]S[Phospho (STY)]DEEVDGK_.2                               | -0.178457214 | #N/A                  |
| _GTGDC[Carbamidomethyl (C)]S[Phospho (STY)]DEEVDGKADGADAK_.2                        | -0.652655149 | #N/A                  |
| _LQQELDDLVDLDHQR_.3                                                                 | -0.218143673 | #N/A                  |
| _KGTGDC[Carbamidomethyl (C)]S[Phospho (STY)]DEEVDGK_.2                              | 0.159303854  | #N/A                  |
| _KQEEIEIC[Carbamidomethyl (C)]HDLEAR_.3                                             | -0.002661865 | #N/A                  |
| _DFSALSQLQDTQELLQEENR_.3                                                            | -0.009982244 | #N/A                  |



|                                                                         |              |                         |
|-------------------------------------------------------------------------|--------------|-------------------------|
| _ANLQIDQINTDLNLER_.2                                                    | 0.468954664  | #N/A                    |
| _ELETQISELQEDLESER_.2                                                   | 0.437824853  | #N/A                    |
| _TAFYNEDDS[Phospho (STY)]EEEEQR_.2                                      | -0.395277379 | Q8VDD9_S1783_M1_Phip    |
| _VLS[Phospho (STY)]DS[Phospho (STY)]EEEEKDADVPGTSTR_.2                  | 0.05387889   | Q8VDD9_S1281_M2_Phip    |
| _KVL[Phospho (STY)]DS[Phospho (STY)]EEEEKDADVPGTSTR_.3                  | 0.354322643  | Q8VDD9_S1281_M2_Phip    |
| _TLS[Phospho (STY)]PDPR_.2                                              | -0.434449451 | Q8VDG3_S556_M1_Parn     |
| _ETDPGS[Phospho (STY)]PR_.2                                             | -0.147668854 | Q8VDJ3_S944_M1_Hdlbp    |
| _EAKETDPGS[Phospho (STY)]PR_.2                                          | -0.171614286 | Q8VDJ3_S944_M1_Hdlbp    |
| _ETDPGS[Phospho (STY)]PRR_.2                                            | 0.235055843  | Q8VDJ3_S944_M1_Hdlbp    |
| _VATLNS[Phospho (STY)]EEENDPPTYK_.2                                     | -0.084390688 | Q8VDJ3_S31_M1_Hdlbp     |
| _GKS[Phospho (STY)]LDQC[Carbamidomethyl (C)]AEILQK_.2                   | -0.422463831 | Q8VDM1_S353_M1_Zgpat    |
| _LLSTVDQES[Phospho (STY)]PAQEDAELYAFQK_.3                               | 0.43514344   | Q8VDM1_S70_M1_Zgpat     |
| _TPVQSQQPSATT[Phospho (STY)]PSGADEK_.2                                  | -0.175068561 | Q8VDM4_T20_M1_Psmd2     |
| _DKTPVQSQQPSATT[Phospho (STY)]PSGADEK_.3                                | 0.203149713  | Q8VDM4_T20_M1_Psmd2     |
| _TITGFQTHTPVLLAHGER_.3                                                  | -0.490952929 | #N/A                    |
| _FGGS[Phospho (STY)]GSQVDSAR_.2                                         | 0.003003518  | Q8VDM4_S361_M1_Psmd2    |
| _LVGSQEELASWGHEYVR_.3                                                   | -0.059697404 | #N/A                    |
| _GRS[Phospho (STY)]PQPPAEDEDDFDDTLVAIDTYNC[Carbamidomethyl (C)]DLHFK_.4 | -0.120795383 | Q8VDM6_S195_M1_Hnrnpul1 |
| _NYILDQTNVYGS[Phospho (STY)]AQR_.2                                      | 0.298264003  | Q8VDM6_S513_M1_Hnrnpul1 |
| _S[Phospho (STY)]PQPPAEDEDDFDDTLVAIDTYNC[Carbamidomethyl (C)]DLHFK_.3   | 0.14235726   | Q8VDM6_S195_M1_Hnrnpul1 |
| _S[Phospho (STY)]PDFTNENPLETR_.2                                        | -0.280931416 | Q8VDN2_S228_M1_Atp1a1   |
| _IVEIPFNSTNK_.2                                                         | -0.151490635 | #N/A                    |
| _LNIPVNQVNP_.2                                                          | -0.239176676 | #N/A                    |
| _YHTEIVFAR_.2                                                           | -0.263863226 | #N/A                    |
| _LSDELHR_.2                                                             | -0.13951401  | #N/A                    |
| _AVFQANQENLPILK_.2                                                      | 0.014835173  | #N/A                    |
| _TSATWFALSR_.2                                                          | 0.104665619  | #N/A                    |
| _GIVVYTGDR_.2                                                           | -0.225751856 | #N/A                    |
| _YQLSIHK_.2                                                             | 0.018891946  | #N/A                    |
| _KYGTDLR_.2                                                             | -0.140192643 | #N/A                    |
| _C[Carbamidomethyl (C)]SSILLHGK_.2                                      | 0.174967514  | #N/A                    |
| _YGTDLR_.2                                                              | -0.402117976 | #N/A                    |
| _NIAFFSTNC[Carbamidomethyl (C)]VEGTAR_.2                                | -0.257277282 | #N/A                    |
| _IISANGC[Carbamidomethyl (C)]K_.2                                       | 0.187336826  | #N/A                    |
| _AVAGDASESALLK_.2                                                       | 0.271033245  | #N/A                    |
| _DM[Oxidation (M)]DELKK_.2                                              | 0.293818799  | #N/A                    |
| _EVS[Phospho (STY)]MDDHK_.2                                             | 0.283441232  | Q8VDN2_S40_M1_Atp1a1    |
| _WVNDVEDSYGQWTYEQR_.2                                                   | -0.447179882 | #N/A                    |
| _M[Oxidation (M)]SINAEDVVVGDLVEVK_.2                                    | -0.411006961 | #N/A                    |
| _DM[Oxidation (M)]TSEELDDILR_.2                                         | 0.235843291  | #N/A                    |
| _ADIGVAM[Oxidation (M)]GIVGSDVSK_.2                                     | 0.005702051  | #N/A                    |
| _EQPLDEELKDAFQNAYLELGLGER_.3                                            | -0.079464539 | #N/A                    |
| _DKYEPAVSEHGDKK_.3                                                      | -0.134708151 | #N/A                    |
| _EVS[Phospho (STY)]M[Oxidation (M)]DDHKLSDELHR_.3                       | -0.125541739 | Q8VDN2_S40_M1_Atp1a1    |
| _AC[Carbamidomethyl (C)]VVHGSGLKDM[Oxidation (M)]TSEELDDILR_.4          | -0.128107493 | #N/A                    |
| _M[Oxidation (M)]TVAHM[Oxidation (M)]WFDNQIHEADTTENQSGVSFDK_.4          | -0.528787953 | #N/A                    |
| _EVS[Phospho (STY)]M[Oxidation (M)]DDHKLS[Phospho (STY)]LDELHR_.3       | -0.271621901 | Q8VDN2_S40_M2_Atp1a1    |

|                                                                                    |              |                         |
|------------------------------------------------------------------------------------|--------------|-------------------------|
| _KSL[Phospho (STY)]APLHPEFEEVYR_3                                                  | 0.335522104  | Q8VDN4_S194_M1_Ccdc92   |
| _SATGQHS[Phospho (STY)]PAR_2                                                       | 0.263644281  | Q8VDN4_S261_M1_Ccdc92   |
| _SLS[Phospho (STY)]APLHPEFEEVYR_2                                                  | -0.075331727 | Q8VDN4_S194_M1_Ccdc92   |
| _VS[Phospho (STY)]PVPSPSQPAR_2                                                     | -0.190052906 | Q8VDP3_S777_M1_Mical1   |
| _EAAPDTGAEPS[Phospho (STY)]PEDSDPTYSSK_2                                           | -0.485668119 | Q8VDP4_S298_M1_Ccar2    |
| _HDLS[Phospho (STY)]PYR_2                                                          | 0.302877441  | Q8VDP4_S222_M1_Ccar2    |
| _RPSS[Phospho (STY)]GGEEEEKAR_2                                                    | 0.033364489  | Q8VDP4_S626_M1_Ccar2    |
| _S[Phospho (STY)]VAS[Phospho (STY)]NQSEM[Oxidation (M)]EYSSLQDM[Oxidation (M)]PK_2 | 0.102519039  | Q8VDP4_S674_M2_Ccar2    |
| _VVGIC[Carbamidomethyl (C)]GTQEK_2                                                 | 0.318348992  | #N/A                    |
| _LDELTLGVTR_2                                                                      | 0.28780314   | #N/A                    |
| _IFSEATPR_2                                                                        | 0.135021659  | #N/A                    |
| _NLFTQTLGLGSQK_2                                                                   | 0.203318832  | #N/A                    |
| _SPSTGLYANLEK_2                                                                    | 0.34036998   | #N/A                    |
| _ELEDLVR_2                                                                         | 0.037075998  | #N/A                    |
| _C[Carbamidomethyl (C)]EQC[Carbamidomethyl (C)]QSVVKPDIVFFGENLPSR_3                | 0.013167459  | #N/A                    |
| _VAGLEPQDLVEAHGTFYTSHC[Carbamidomethyl (C)]VNTSC[Carbamidomethyl (C)]R_4           | -0.212279055 | #N/A                    |
| _EHANIDAQSGSQAPNPSTTISPGK_3                                                        | 0.054106201  | #N/A                    |
| _EHANIDAQSGSQAPNPSTTISPGKS[Phospho (STY)]PPPAK_4                                   | -0.147932517 | Q8VDQ8_S372_M1_Sirt2    |
| _FFSC[Carbamidomethyl (C)]M[Oxidation (M)]QSDFSK_2                                 | 0.09586583   | #N/A                    |
| _YVDEDNS[Phospho (STY)]DGETVDHR_2                                                  | 0.002375021  | Q8VDQ9_S142_M1_Kri1     |
| _ILEGDNGLDS[Phospho (STY)]DMEEEADDGC[Carbamidomethyl (C)]K_2                       | 0.007217908  | Q8VDY9_S183_M1_Caap1    |
| _SVNEILGLAESS[Phospho (STY)]PKEPK_2                                                | 0.029166168  | Q8VDY9_S307_M1_Caap1    |
| _GLGS[Phospho (STY)]PEPGTTAPYLGR_2                                                 | -0.261618983 | Q8VDZ4_S621_M1_Zdhhc5   |
| _LSRGDS[Phospho (STY)]LKEPTSIADSSR_3                                               | -0.118172134 | Q8VDZ4_S380_M1_Zdhhc5   |
| _SIGSASPGPGQPPLSS[Phospho (STY)]PTR_2                                              | 0.051554082  | Q8VDZ4_S694_M1_Zdhhc5   |
| _VLC[Carbamidomethyl (C)]SS[Phospho (STY)]PAPR_2                                   | -0.424394953 | Q8VDZ4_S247_M1_Zdhhc5   |
| _GDS[Phospho (STY)]LKEPTSIADSSR_2                                                  | -0.260440032 | Q8VDZ4_S380_M1_Zdhhc5   |
| _SEPS[Phospho (STY)]LEPESFRS[Phospho (STY)]PTFGK_2                                 | -0.076361432 | Q8VDZ4_S401_M2_Zdhhc5   |
| _SFHFDPLSSGS[Phospho (STY)]R_2                                                     | 0.141385836  | Q8VDZ4_S425_M1_Zdhhc5   |
| _LYEVAIDGKEEDLGS[Phospho (STY)]PTGELTSK_3                                          | -0.074897579 | Q8VE18_S469_M1_Smg8     |
| _GFSQYGVSGSPT[Phospho (STY)]K_2                                                    | 0.15149646   | Q8VE19_T768_M1_Mios     |
| _QYTEDNDQKS[Phospho (STY)]PGNK_2                                                   | 0.488968411  | Q8VE19_S444_M1_Mios     |
| _DNIISDYDQIIDYVER_2                                                                | -0.538711105 | #N/A                    |
| _LDHEEPQLSEPYLSK_3                                                                 | -0.249270021 | #N/A                    |
| _LNLGEEVPVIIHR_3                                                                   | 0.032441208  | #N/A                    |
| _TFTGEHVVALM[Oxidation (M)]PEAGS[Phospho (STY)]PQHAR_3                             | -0.265493663 | Q8VE33_S139_M1_Gdap1l1  |
| _KTEDSASEVTVEDSGESLEDMAR_3                                                         | 0.121593644  | #N/A                    |
| _IS[Phospho (STY)]PGASHVNSK_2                                                      | 0.089186034  | Q8VE52_S353_M1_Ogfrl1   |
| _EGGEEADKPS[Phospho (STY)]PEPGSGDPKPR_3                                            | -0.100804976 | Q8VE52_S382_M1_Ogfrl1   |
| _AS[Phospho (STY)]PVPEDHAEAAAGAEQGGESTEGNAKPK_4                                    | -0.585686505 | Q8VE52_S65_M1_Ogfrl1    |
| _DSAADQSDS[Phospho (STY)]PPEK_2                                                    | -0.244122224 | Q8VE52_S406_M1_Ogfrl1   |
| _DSKIS[Phospho (STY)]PGASHVNSK_3                                                   | 0.08004774   | Q8VE52_S353_M1_Ogfrl1   |
| _IAGTPGT[Phospho (STY)]GGRLSPENNQVLTK_3                                            | -0.213379419 | Q8VE65_T46_M1_Taf12     |
| _IPDEINDR_2                                                                        | 0.272752659  | #N/A                    |
| _AETSLGIPS[Phospho (STY)]PTEISAEVK_2                                               | 0.010153687  | Q8VE88_S119_M1_Fam114a2 |
| _ADAQT[Phospho (STY)]PEEVGPSEASLR_2                                                | -0.610448587 | Q8VE99_T90_M1_Ccdc115   |
| _INSNHINSNSTGS[Phospho (STY)]S_2                                                   | -0.267626215 | Q8VEB1_S589_M1_Grk5     |

|                                                                                                                            |              |                       |
|----------------------------------------------------------------------------------------------------------------------------|--------------|-----------------------|
| _S[Phospho (STY)]LDYLNLDK_.2                                                                                               | -0.156443056 | Q8VEB3_S167_M1_MACIR  |
| _ [Acetyl (Protein N-term)]MEEGPAVGTL[Phospho (STY)]R_.2                                                                   | -0.536637962 | Q8VED2_S11_M1_Bloc1s4 |
| _IQTLSAIDTIK_.2                                                                                                            | 0.138454848  | #N/A                  |
| _ [Acetyl (Protein N-term)]AGS[Phospho (STY)]VADSDAVVK_.2                                                                  | -0.143610587 | Q8VED9_S4_M1_Lgalsl   |
| _GEEQSAIPYFPFIPDQPF_.2                                                                                                     | -0.236130013 | #N/A                  |
| _VFVDGHLFDYFHR_.3                                                                                                          | -0.133322128 | #N/A                  |
| _LDDGHLNNS[Phospho (STY)]LGS[Phospho (STY)]PVQADVYFPR_.3                                                                   | 0.034772159  | Q8VED9_S22_M2_Lgalsl  |
| _ [Acetyl (Protein N-term)]AGSVADSDAVVKLDDGHLNNSLGS[Phospho (STY)]PVQADVYFPR_.4                                            | -0.291149578 | Q8VED9_S25_M1_Lgalsl  |
| _C[Carbamidomethyl (C)]AEAGANM[Oxidation (M)]IVS[Phospho (STY)]GS[Phospho (STY)]AIM[Oxidation (M)]RS[Phospho (STY)]DDPR_.3 | 0.063245218  | Q8VEE0_S196_M3_Rpe    |
| _S[Phospho (STY)]SPSSPSLR_.2                                                                                               | 0.086930665  | Q8VEF1_S11_M1_Gramd1a |
| _EIC[Carbamidomethyl (C)]C[Carbamidomethyl (C)]YSISC[Carbamidomethyl (C)]K_.2                                              | -0.31104799  | #N/A                  |
| _M[Oxidation (M)]NLSAIQDR_.2                                                                                               | 0.232560656  | #N/A                  |
| _DLGALDEK_.2                                                                                                               | 0.154269544  | #N/A                  |
| _ENQSEGKGS[Phospho (STY)]DS[Phospho (STY)]DSEGDNPEK_.2                                                                     | -0.140764582 | Q8VEJ9_S95_M2_Vps4a   |
| _EIEDYGTGTEPSS[Phospho (STY)]PC[Carbamidomethyl (C)]NK_.2                                                                  | 0.162532963  | Q8VEK0_S89_M1_Tmem30a |
| _DLPEHAVLK_.2                                                                                                              | 0.52068722   | #N/A                  |
| _SSGPTSLFAVTVAPPGAR_.2                                                                                                     | 0.048640225  | #N/A                  |
| _DIDIHEVR_.2                                                                                                               | -0.249005613 | #N/A                  |
| _LNTLLQR_.2                                                                                                                | 0.353932428  | #N/A                  |
| _EKPYFPIPEDC[Carbamidomethyl (C)]TFIQNVPLEDR_.3                                                                            | -0.315038683 | #N/A                  |
| _NFILDQTNVSAQAAR_.2                                                                                                        | -0.258965771 | #N/A                  |
| _LLEQYKEESKK_.3                                                                                                            | 0.116983523  | #N/A                  |
| _AKS[Phospho (STY)]PQPPVEEEDHFDDTVVC[Carbamidomethyl (C)]LDTYNC[Carbamidomethyl (C)]DLHFK_.4                               | -0.332515913 | #N/A                  |
| _S[Phospho (STY)]PQPPVEEEDHFDDTVVC[Carbamidomethyl (C)]LDTYNC[Carbamidomethyl (C)]DLHFK_.4                                 | 0.233545332  | #N/A                  |
| _GYFEYIEENKYSR_.2                                                                                                          | -0.315029405 | #N/A                  |
| _ [Acetyl (Protein N-term)]SSS[Phospho (STY)]PVNVKK_.2                                                                     | -0.194465468 | Q8VEK3_S4_M1_Hnrnpu   |
| _FIEIAR_.2                                                                                                                 | 0.349719971  | #N/A                  |
| _ [Acetyl (Protein N-term)]SSS[Phospho (STY)]PVNVK_.2                                                                      | -0.317458877 | Q8VEK3_S4_M1_Hnrnpu   |
| _NGQDLGVAFK_.2                                                                                                             | -0.311316484 | #N/A                  |
| _VSELKEELKK_.3                                                                                                             | -0.35053278  | #N/A                  |
| _PAMEPGNGS[Phospho (STY)]LDLGGDAAGR_.2                                                                                     | 0.033107479  | Q8VEK3_S58_M1_Hnrnpu  |
| _LQAALDNEAGGRPAMEPGNGS[Phospho (STY)]LDLGGDAAGR_.3                                                                         | 0.087769014  | Q8VEK3_S58_M1_Hnrnpu  |
| _LSASSLTM[Oxidation (M)]ESFAFLWAGGR_.2                                                                                     | -0.166867892 | #N/A                  |
| _GHAGGQRPEPSS[Phospho (STY)]PDGPAPPTR_.4                                                                                   | -0.678968602 | Q8VEL9_S296_M1_Rem2   |
| _QAS[Phospho (STY)]PLGTPTPEADTTLLK_.2                                                                                      | -0.426963282 | Q8VEL9_S27_M1_Rem2    |
| _GHAGGQRPEPSS[Phospho (STY)]PDGPAPPTR_.3                                                                                   | -0.339977713 | Q8VEL9_S296_M1_Rem2   |
| _RGS[Phospho (STY)]M[Oxidation (M)]PVPYK_.2                                                                                | -0.090507059 | Q8VEL9_S69_M1_Rem2    |
| _SRS[Phospho (STY)]C[Carbamidomethyl (C)]HDLSVL_.2                                                                         | -0.024497882 | Q8VEL9_S334_M1_Rem2   |
| _RRGS[Phospho (STY)]M[Oxidation (M)]PVPYK_.3                                                                               | -0.569640866 | Q8VEL9_S69_M1_Rem2    |
| _GS[Phospho (STY)]MPVPYK_.2                                                                                                | -0.156427971 | Q8VEL9_S69_M1_Rem2    |
| _IQTQPGYANTLR_.2                                                                                                           | 0.049924333  | #N/A                  |
| _GSTASQVLQR_.2                                                                                                             | -0.287727279 | #N/A                  |
| _EEGLNAFYK_.2                                                                                                              | 0.258718021  | #N/A                  |
| _FGFYEVFK_.2                                                                                                               | 0.088530666  | #N/A                  |
| _GIFNGFSITLK_.2                                                                                                            | -0.03192042  | #N/A                  |
| _MYKEEGLNAFYK_.2                                                                                                           | 0.444924777  | #N/A                  |
| _YYALC[Carbamidomethyl (C)]GFGGVLSC[Carbamidomethyl (C)]GLTHTAVVPLDLVK_.3                                                  | -0.179579195 | #N/A                  |

|                                                                         |              |                         |
|-------------------------------------------------------------------------|--------------|-------------------------|
| _YRS[Phospho (STY)]PYSGPK_.2                                            | -0.349676107 | Q8VH51_S97_M1_Rbm39     |
| _DKS[Phospho (STY)]PVREPIDNLTPEER_.3                                    | -0.34144043  | Q8VH51_S136_M1_Rbm39    |
| _S[Phospho (STY)]KS[Phospho (STY)]PFRK_.2                               | -0.063339246 | Q8VH51_S127_M2_Rbm39    |
| _DTTVISHS[Phospho (STY)]PNTSYDTALEAR_.3                                 | 0.237229596  | Q8VHG2_S693_M1_Amot     |
| _IEDLALQNQIR_.2                                                         | 0.248790791  | #N/A                    |
| _LSQSVHHGASSEGLS[Phospho (STY)]PDTR_.3                                  | -0.058393861 | Q8VHI6_S235_M1_Wasf3    |
| _SAAYNGPPAS[Phospho (STY)]PSHETGAFAHAR_.3                               | 0.544376456  | Q8VHJ5_S633_M1_Mark1    |
| _RGT[Phospho (STY)]STGIISK_.2                                           | -0.187285665 | Q8VHJ5_T648_M1_Mark1    |
| _SRPSS[Phospho (STY)]DLNNSTLQSPAHLK_.3                                  | -0.283479799 | Q8VHJ5_S394_M1_Mark1    |
| _RDPS[Phospho (STY)]EGEASGR_.2                                          | -0.193449594 | Q8VHJ5_S666_M1_Mark1    |
| _KPPEFEGGELS[Phospho (STY)]SGSLC[Carbamidomethyl (C)]QR_.3              | -0.258545009 | Q8VHJ5_S382_M1_Mark1    |
| _STAS[Phospho (STY)]PSNNVYSGGSMAR_.2                                    | 0.243194553  | Q8VHJ5_S488_M1_Mark1    |
| _RPQANS[Phospho (STY)]VESEQKEEWGK_.3                                    | -0.043654581 | Q8VHJ5_S444_M1_Mark1    |
| _SIS[Phospho (STY)]ANQK_.2                                              | -0.452672257 | Q8VHJ5_S414_M1_Mark1    |
| _SPS[Phospho (STY)]QES[Phospho (STY)]IGAR_.2                            | -0.444573247 | Q8VHK1_S696_M2_Caskin2  |
| _T[Phospho (STY)]SPSLTPTR_.2                                            | 0.006056194  | Q8VHK1_T840_M1_Caskin2  |
| _IAYVYPDQR_.2                                                           | 0.166593784  | #N/A                    |
| _VYVADSLISSAGEGLFSK_.2                                                  | -0.275175445 | #N/A                    |
| _SGPEAPEWYQVELK_.2                                                      | 0.182700677  | #N/A                    |
| _AFQATQK_.2                                                             | -0.315788962 | #N/A                    |
| _AVEAEEELTVAYGYDHS[Phospho (STY)]PPGK_.3                                | 0.157316557  | Q8VHL1_S340_M1_Setd7    |
| _RAS[Phospho (STY)]LSDR_.2                                              | -0.133184297 | Q8VHQ3_S350_M1_Ppp1r16b |
| _EQS[Phospho (STY)]PQTLLELKR_.3                                         | -0.468370922 | Q8VHQ3_S477_M1_Ppp1r16b |
| _LQQAALS[Phospho (STY)]PTTAPAVSSVK_.2                                   | -0.04525422  | Q8VHQ4_S6_M1_Rab40c     |
| _S[Phospho (STY)]LDPADERDDVLAKR_.3                                      | -0.458735541 | Q8VHR5_S487_M1_Gatad2b  |
| _GRLT[Phospho (STY)]PSPDIIVLS[Phospho (STY)]DNEASSPR_.3                 | 0.02161161   | Q8VHR5_S17_M1_Gatad2b   |
| _VSS[Phospho (STY)]PLPS[Phospho (STY)]PSAM[Oxidation (M)]SDAANSQAAAK_.2 | 0.177437621  | Q8VHR5_S130_M2_Gatad2b  |
| _LTPSPDIIVLS[Phospho (STY)]DNEASS[Phospho (STY)]PR_.2                   | -0.217875486 | Q8VHR5_S335_M2_Gatad2b  |
| _S[Phospho (STY)]LDPADERDDVLAK_.2                                       | -0.126564904 | Q8VHR5_S130_M2_Gatad2b  |
| _AGGGAGGS[Phospho (STY)]GGSGPSAILR_.2                                   | 0.051363486  | Q8VHR5_S17_M1_Gatad2b   |
| _DAS[Phospho (STY)]PGGPGGPGFASTDISM[Oxidation (M)]YTLR_.3               | 0.132220524  | Q8VHW2_S251_M1_Cacng8   |
| _SSS[Phospho (STY)]RGS[Phospho (STY)]SEASPSR_.2                         | -0.068601223 | Q8VHW2_S290_M1_Cacng8   |
| _SGS[Phospho (STY)]PDVKGPPPVK_.2                                        | -0.052232561 | Q8VHW2_S277_M2_Cacng8   |
| _ES[Phospho (STY)]SPPREEAPPPPTEDSC[Carbamidomethyl (C)]AK_.3            | -0.167619151 | Q8VI24_S20_M1_Satb2     |
| _SES[Phospho (STY)]PC[Carbamidomethyl (C)]LRDS[Phospho (STY)]PDRR_.2    | -0.005668877 | Q8VI24_S593_M1_Satb2    |
| _YAHQQPPS[Phospho (STY)]PLPVYSSSAK_.3                                   | -0.045290215 | Q8VI24_S13_M2_Satb2     |
| _RGS[Phospho (STY)]LPDTGWK_.2                                           | -0.078677593 | Q8VI36_S83_M1_Pxn       |
| _GS[Phospho (STY)]LPDTGWK_.2                                            | -0.493658374 | Q8VI56_S1887_M1_Lrp4    |
| _SQAPLDLSLSPDVSSSEAS[Phospho (STY)]PAR_.2                               | 0.094112354  | Q8VI56_S1887_M1_Lrp4    |
| _SSVSS[Phospho (STY)]PANLNNSR_.2                                        | 0.200882287  | Q8VI59_S1980_M1_Pcnx3   |
| _DAEYTDQQNQGS[Phospho (STY)]LSPAK_.2                                    | 0.066585582  | Q8VII8_S299_M1_Nr3c2    |
| _YGEPGEVINK_.2                                                          | -0.294277029 | Q8VII8_S127_M1_Nr3c2    |
| _LFVGNLPADITEDEFKR_.3                                                   | 0.180240173  | #N/A                    |
| _FATHAAALSVR_.2                                                         | 0.037069859  | #N/A                    |
| _FGQGAGPVGGQGPR_.2                                                      | 0.222385954  | #N/A                    |
| _PVIVEPLEQLDDEGLPEK_.2                                                  | 0.154373636  | #N/A                    |
|                                                                         | 0.220471084  | #N/A                    |

|                                                          |              |                         |
|----------------------------------------------------------|--------------|-------------------------|
| _LFVGNLPADITEDEFK_2                                      | 3.05E-05     | #N/A                    |
| _EPVETAENVNDK_2                                          | 0.309588341  | #N/A                    |
| _EALS[Phospho (STY)]PEEVQSVQEHLGYHSDSLR_3                | -0.020517093 | Q8WTY4_S136_M1_Ciapi1   |
| _YGPLS[Phospho (STY)]EPGSAR_2                            | 0.166434718  | Q91V09_S70_M1_Wdr13     |
| _LVVHEGSPVTSISAR_3                                       | -0.050483378 | #N/A                    |
| _LLWAGDDR_2                                              | -0.244252743 | #N/A                    |
| _VLALSFDAPGR_2                                           | 0.252883077  | #N/A                    |
| _ [Acetyl (Protein N-term)]AAVWQQVLAVDAR_2               | 0.31824569   | #N/A                    |
| _Y[Phospho (STY)]EAQKLER_2                               | -0.340471187 | Q91V12_Y195_M1_Acot7    |
| _VLEVPPIVYLR_2                                           | 0.299799109  | #N/A                    |
| _LM[Oxidation (M)]DEVAGIVAAR_2                           | 0.40696677   | #N/A                    |
| _SM[Oxidation (M)]EIEVLVDADPVDNSQK_2                     | 0.065966394  | #N/A                    |
| _AASAFFTYVSLNQEKG_2                                      | -0.067000735 | #N/A                    |
| _M[Oxidation (M)]IEEAGAIISTR_2                           | 0.261484192  | #N/A                    |
| _TNIVTASVDAINFHDK_2                                      | -0.338995115 | #N/A                    |
| _M[Oxidation (M)]TFTSNK_2                                | -0.399002346 | #N/A                    |
| _EIQSITDESR_2                                            | -0.159034027 | #N/A                    |
| _ENLWSSYLTK_2                                            | -0.328397831 | #N/A                    |
| _LNEVIVNK_2                                              | -0.063591494 | #N/A                    |
| _VDQDQNVVHPQLLSLTSQK_3                                   | -0.326986344 | #N/A                    |
| _LVLLNM[Oxidation (M)]PGPPR_2                            | -0.323963103 | #N/A                    |
| _GFC[Carbamidomethyl (C)]QVVISSNLR_2                     | -0.378677013 | #N/A                    |
| _NKGPS[Phospho (STY)]PVSSEGIK_2                          | 0.108464854  | Q91V14_S1044_M1_Slc12a5 |
| _DLTFLYHLR_2                                             | -0.075075858 | #N/A                    |
| _HGFDFVC[Carbamidomethyl (C)]AK_2                        | 0.254287528  | #N/A                    |
| _ESS[Phospho (STY)]PFINSTDTEK_2                          | -0.172797121 | Q91V14_S49_M1_Slc12a5   |
| _EIQSITDES[Phospho (STY)]RGSIRR_3                        | 0.10681302   | Q91V14_S960_M1_Slc12a5  |
| _EREIQSITDESRGS[Phospho (STY)]IR_3                       | -0.21647041  | Q91V14_S963_M1_Slc12a5  |
| _EIQSITDESRGS[Phospho (STY)]IR_2                         | -0.227126495 | Q91V14_S963_M1_Slc12a5  |
| _ESSPFINS[Phospho (STY)]TDTEKGR_2                        | 0.028511037  | Q91V14_S54_M1_Slc12a5   |
| _GLTIVGSLVLEGTFLDNHPQAQR_3                               | -0.121597717 | #N/A                    |
| _TLVMEQR_2                                               | 0.16979895   | #N/A                    |
| _ITAEVEVVEM[Oxidation (M)]HESDISAYTYEK_3                 | -0.314912411 | #N/A                    |
| _NVSMFPGNPER_2                                           | 0.180959211  | #N/A                    |
| _IFTVAQM[Oxidation (M)]DDNSIQM[Oxidation (M)]K_2         | -0.224535351 | #N/A                    |
| _EDES[Phospho (STY)]EDESILEESPC[Carbamidomethyl (C)]GR_2 | 0.29016601   | Q91V36_S20_M1_Nrbp2     |
| _AKT[Phospho (STY)]PT[Phospho (STY)]PEPFDSETR_2          | -0.25184244  | Q91V36_T407_M2_Nrbp2    |
| _AKT[Phospho (STY)]PT[Phospho (STY)]PEPFDSETRK_3         | -0.300323212 | Q91V36_T407_M2_Nrbp2    |
| _NLNPNNTVILIGNK_2                                        | 0.00011164   | #N/A                    |
| _IYQNIQDGSGLDLNAAESGVQHKPSAPQGGR_4                       | -0.081632583 | #N/A                    |
| _STYNHLSSWLTDAR_3                                        | -0.150643698 | #N/A                    |
| _QFAEENGLLFLEASAK_2                                      | 0.266835769  | #N/A                    |
| _FM[Oxidation (M)]ADC[Carbamidomethyl (C)]PHTIGVEFGTR_3  | 0.293123094  | #N/A                    |
| _TGENVEDAFLEAAKK_3                                       | -0.349534712 | #N/A                    |
| _ELQVGIPVTDEAGQR_2                                       | -0.267123494 | #N/A                    |
| _NLLSGEQLEASR_2                                          | -0.329434934 | #N/A                    |
| _NIVQNYR_2                                               | -0.032127201 | #N/A                    |

|                                                      |              |                         |
|------------------------------------------------------|--------------|-------------------------|
| _HFFVTDPDPR_2                                        | -0.135892758 | #N/A                    |
| _ [Acetyl (Protein N-term)]GDLPLNINIQEPR_2           | 0.322372485  | #N/A                    |
| _SSIHVTR_2                                           | -0.223624012 | #N/A                    |
| _AGVATPGLTEDQLWR_2                                   | 0.141745977  | #N/A                    |
| _QGIFQVVISR_2                                        | -0.233434779 | #N/A                    |
| _YVYDSAFHPDTGEK_2                                    | -0.43094775  | #N/A                    |
| _AQIQAQNPSIDVVYVYK_2                                 | -0.043130903 | #N/A                    |
| _SGDAPITVQQLGTAYVSATTGAVATALGLK_3                    | -0.120475362 | #N/A                    |
| _TAS[Phospho (STY)]FSES_2                            | -0.265850909 | Q91V92_S455_M1_Acly     |
| _TAS[Phospho (STY)]FSESRADEVAPAKK_3                  | -0.089122005 | Q91V92_S455_M1_Acly     |
| _EAGVFVPR_2                                          | 0.153861481  | #N/A                    |
| _TIAIIAEGIPEALTR_2                                   | 0.115512613  | #N/A                    |
| _LNTEDIKR_2                                          | -0.303774585 | #N/A                    |
| _DLVSSLTSGLLTIGDR_2                                  | 0.097871699  | #N/A                    |
| _DGVYILDAAK_2                                        | 0.236399391  | #N/A                    |
| _TAS[Phospho (STY)]FSESRADEVAPAK_2                   | -0.41727351  | Q91V92_S455_M1_Acly     |
| _LGLVGVNLSLDGVK_2                                    | 0.357953967  | #N/A                    |
| _SINNPDMR_2                                          | -0.243880204 | #N/A                    |
| _SAYDSTM[Oxidation (M)]ETM[Oxidation (M)]NYAQIR_2    | -0.192163385 | #N/A                    |
| _GPGGS[Phospho (STY)]PSGLQK_2                        | 0.113463393  | Q91VC7_S26_M1_Ppp1r14a  |
| _QPGFPQSPSDDPS[Phospho (STY)]LSPRQDR_3               | 0.306008718  | Q91VC7_S134_M1_Ppp1r14a |
| _QPGFPQSPSDDPS[Phospho (STY)]PR_2                    | -0.1315523   | Q91VC7_S136_M1_Ppp1r14a |
| _ARGPGBS[Phospho (STY)]PSGLQK_2                      | -0.162778903 | Q91VC7_S26_M1_Ppp1r14a  |
| _GPGGS[Phospho (STY)]PSGLQKR_2                       | -0.345088037 | Q91VC7_S26_M1_Ppp1r14a  |
| _VAVTPPGLAR_2                                        | 0.161279277  | #N/A                    |
| _FEAPLFNAR_2                                         | 0.164443334  | #N/A                    |
| _ILQDIASGR_2                                         | -0.018865855 | #N/A                    |
| _FASEIAGVDDLGTGR_2                                   | -0.392144591 | #N/A                    |
| _GWNILTNSEK_2                                        | 0.010401757  | #N/A                    |
| _AVTEGAQAVEEPSIC[Carbamidomethyl (C)]_2              | 0.324839967  | #N/A                    |
| _VALIGSPVDLTYR_2                                     | -0.200597405 | #N/A                    |
| _SATYVNTEGR_2                                        | -0.121108299 | #N/A                    |
| _GNDM[Oxidation (M)]QVGTYIEK_2                       | -0.293319274 | #N/A                    |
| _YDHLGDSPK_2                                         | 0.228932016  | #N/A                    |
| _ALSEIAGITLPYDTLDQVR_2                               | -0.063832402 | #N/A                    |
| _LSVAGNC[Carbamidomethyl (C)]R_2                     | 0.162113891  | #N/A                    |
| _GLLTYTSWEDALSR_2                                    | -0.084687799 | #N/A                    |
| _SWLHNDLK_2                                          | 0.474155893  | #N/A                    |
| _HSFC[Carbamidomethyl (C)]EVLK_2                     | 0.312581138  | #N/A                    |
| _IASQVAALDLGYKPGVEAIR_3                              | -0.017696684 | #N/A                    |
| _M[Oxidation (M)]LFLGADGGC[Carbamidomethyl (C)]ITR_2 | 0.08495755   | #N/A                    |
| _VTTGVAAEWK_2                                        | 0.315701887  | #N/A                    |
| _MC[Carbamidomethyl (C)]LVEIEK_2                     | 0.260675494  | #N/A                    |
| _DFYM[Oxidation (M)]TDSISR_2                         | 0.182138005  | #N/A                    |
| _LTEPMVR_2                                           | 0.217996323  | #N/A                    |
| _NRLEEVSPNLVR_3                                      | 0.10241701   | #N/A                    |
| _M[Oxidation (M)]HEDINEEWISDK_3                      | 0.213335362  | #N/A                    |

|                                                                                 |              |                        |
|---------------------------------------------------------------------------------|--------------|------------------------|
| _VAGM[Oxidation (M)]LQNFEGNAVAAGGLVDAEALVALK_.3                                 | 0.14499069   | #N/A                   |
| _SNYLLNTTIAGVEEADVLLVGTNPR_.3                                                   | -0.467066003 | #N/A                   |
| _ [Acetyl (Protein N-term)]S[Phospho (STY)]LDIQC[Carbamidomethyl (C)]EQLSDAR_.2 | -0.115536463 | Q91VI7_S2_M1_Rnh1      |
| _ELSLASNELKDEGAR_.3                                                             | -0.222306793 | #N/A                   |
| _LLC[Carbamidomethyl (C)]EGLQDPQC[Carbamidomethyl (C)]R_.2                      | 0.237244989  | #N/A                   |
| _AAASGPASASAPAAEILLT[Phospho (STY)]PAR_.2                                       | -0.114164731 | Q91VK4_T39_M1_Itm2c    |
| _YLLGNAPVS[Phospho (STY)]PSSQK_.2                                               | 0.077772817  | Q91VL8_S200_M1_Terf2ip |
| _LST[Phospho (STY)]PKER_.2                                                      | -0.371016694 | Q91VL9_T203_M1_Zbtb1   |
| _DVYLS[Phospho (STY)]PR_.2                                                      | 0.114894916  | Q91VM5_S205_M1_Rbmxl1  |
| _RDVYLS[Phospho (STY)]PR_.2                                                     | 0.128766485  | Q91VM5_S205_M1_Rbmxl1  |
| _ [Acetyl (Protein N-term)]VEADRP GK_.2                                         | 0.050134386  | #N/A                   |
| _LFIGGLNTETNEK_.2                                                               | 0.186303055  | #N/A                   |
| _ST[Phospho (STY)]PSGPVR_.2                                                     | -0.059574225 | Q91VM5_T163_M1_Rbmxl1  |
| _GFAFVTFESPADAK_.2                                                              | 0.042026819  | #N/A                   |
| _VEQATKPS[Phospho (STY)]FESGR_.2                                                | -0.198256959 | Q91VM5_S88_M1_Rbmxl1   |
| _DVYLS[Phospho (STY)]PRDDGYSTK_.2                                               | -0.394037981 | Q91VM5_S205_M1_Rbmxl1  |
| _REPLPSR_.2                                                                     | 0.365000703  | #N/A                   |
| _DSYESYGNSR_.2                                                                  | -0.17471992  | #N/A                   |
| _RST[Phospho (STY)]PSGPVR_.2                                                    | -0.303516412 | Q91VM5_T163_M1_Rbmxl1  |
| _DYSHS[Phospho (STY)]SSRDDYPSR_.3                                               | 0.222777842  | Q91VM5_S246_M1_Rbmxl1  |
| _DRDYSDDHPSGGSYR_.3                                                             | -0.192394553 | #N/A                   |
| _SDLYSSGR_.2                                                                    | 0.273156962  | #N/A                   |
| _ILGTLALIDQSETDWK_.2                                                            | -0.204713802 | #N/A                   |
| _AFALDVINSAHER_.2                                                               | 0.18059354   | #N/A                   |
| _LSES[Phospho (STY)]VVNR_.2                                                     | -0.078349175 | Q91VN4_S33_M1_Chchd6   |
| _KKAS[Phospho (STY)]LTHEQQQSAR_.3                                               | -0.416896731 | Q91VN4_S164_M1_Chchd6  |
| _AYQHC[Carbamidomethyl (C)]VSTAR_.2                                             | 0.180024296  | #N/A                   |
| _KAS[Phospho (STY)]LTHEQQQSAR_.3                                                | -0.244358692 | Q91VN4_S164_M1_Chchd6  |
| _AS[Phospho (STY)]LTHEQQQSAR_.2                                                 | -0.228123363 | Q91VN4_S164_M1_Chchd6  |
| _LSSQQFHEAASK_.2                                                                | -0.291516173 | #N/A                   |
| _HLIIGVSSDR_.2                                                                  | 0.2187412    | #N/A                   |
| _ADIKAPEDK_.2                                                                   | -0.356230091 | #N/A                   |
| _NEVAALTAAGK_.2                                                                 | -0.107404622 | #N/A                   |
| _VYGTGSLALYEK_.2                                                                | -0.024043051 | #N/A                   |
| _ELIEIISGAAALD_.2                                                               | -0.096640881 | #N/A                   |
| _NASDM[Oxidation (M)]IDKLTLTfNR_.3                                              | -0.192875071 | #N/A                   |
| _EVMIVGVGEK_.2                                                                  | 0.319872128  | #N/A                   |
| _THSDQFLVSFK_.2                                                                 | -0.071044089 | #N/A                   |
| _GLC[Carbamidomethyl (C)]GAIHSSVAK_.2                                           | 0.376858458  | #N/A                   |
| _MTAMDNASK_.2                                                                   | 0.163943551  | #N/A                   |
| _NASDMIDK_.2                                                                    | -0.393830935 | #N/A                   |
| _ALIVEPSR_.2                                                                    | 0.434155319  | #N/A                   |
| _ELAEQTLNNVK_.2                                                                 | -0.426176387 | #N/A                   |
| _DQLSVLDNGVDIVVGTPGR_.2                                                         | -0.003406471 | #N/A                   |
| _DNTRPGANS[Phospho (STY)]PEM[Oxidation (M)]WSEAIK_.3                            | -0.268483744 | Q91VR5_S481_M1_Ddx1    |
| _FLVLDEADGLLSQGYSDFINR_.2                                                       | -0.093168446 | #N/A                   |
| _IPVIER_.2                                                                      | 0.123473669  | #N/A                   |

|                                                                           |              |                         |
|---------------------------------------------------------------------------|--------------|-------------------------|
| _QLPVLDK_2                                                                | -0.260326022 | #N/A                    |
| _PS[Phospho (STY)]DRPFK_2                                                 | -0.155706406 | Q91VR7_S3_M1_Map1lc3a   |
| _FLVPDHVNM[Oxidation (M)]SELVK_3                                          | -0.098690641 | #N/A                    |
| _EIQDQWANR_2                                                              | -0.176795929 | #N/A                    |
| _EYIEIITSSIK_2                                                            | 0.271800546  | #N/A                    |
| _RIEYIEAR_2                                                               | 0.389935428  | #N/A                    |
| _ISDFLNSFDM[Oxidation (M)]SC[Carbamidomethyl (C)]R_2                      | 0.0774942    | #N/A                    |
| _VTKGETLT[Phospho (STY)]_2                                                | -0.087986173 | Q91VR8_T75_M1_Brk1      |
| _SRS[Phospho (STY)]WPGGPR_2                                               | -0.356755483 | Q91VU8_S36_M1_Ptov1     |
| _SQQSEVTR_2                                                               | 0.179835307  | #N/A                    |
| _VYSTSVTGSR_2                                                             | -0.330641423 | #N/A                    |
| _IQYQLVDISQDNALRDEM[Oxidation (M)]R_3                                     | 0.251918832  | #N/A                    |
| _IQYQLVDISQDNALR_2                                                        | 0.077614243  | #N/A                    |
| _TSS[Phospho (STY)]FTDQLDDVTPNR_2                                         | -0.331007618 | Q91VW5_S41_M1_Golga4    |
| _NS[Phospho (STY)]VEEWTTEDWTEDLSETK_2                                     | 0.013201324  | Q91VX2_S254_M1_Ubap2    |
| _LLYEANLPENFR_2                                                           | 0.215100829  | #N/A                    |
| _SS[Phospho (STY)]ADSLPGPISR_2                                            | -0.197441791 | Q91W39_S378_M1_Ncoa5    |
| _ [Acetyl (Protein N-term)]M[Oxidation (M)]NTAPSRPS[Phospho (STY)]PTR_2   | -0.263944405 | Q91W39_S9_M1_Ncoa5      |
| _DRS[Phospho (STY)]PIRGS[Phospho (STY)]PR_2                               | 0.042114372  | Q91W39_S29_M2_Ncoa5     |
| _LLRSS[Phospho (STY)]ADS[Phospho (STY)]LPGPISR_3                          | -0.257061676 | Q91W39_S378_M2_Ncoa5    |
| _EAFGFIER_2                                                               | -0.057873423 | #N/A                    |
| _ATNIEVLSNTFQFTNEAR_2                                                     | 0.518336746  | #N/A                    |
| _LLGRNS[Phospho (STY)]NSK_2                                               | 0.126271134  | Q91W50_S514_M1_Csde1    |
| _SPAAPGQS[Phospho (STY)]PTGSVC[Carbamidomethyl (C)]YER_2                  | 0.097978085  | Q91W50_S123_M1_Csde1    |
| _DM[Oxidation (M)]PGGFLFDGLS[Phospho (STY)]DDEDDFHPSTR_3                  | 0.137648297  | Q91W67_S230_M1_Ubl7     |
| _VDDS[Phospho (STY)]PSTSGGSSDGDQR_2                                       | -0.459202301 | Q91W82_S11_M1_Ube2e2    |
| _RSDS[Phospho (STY)]LLSFR_2                                               | -0.465458794 | Q91W92_S207_M1_Cdc42ep1 |
| _AS[Phospho (STY)]WGASR_2                                                 | 0.17337236   | Q91W92_S332_M1_Cdc42ep1 |
| _SDS[Phospho (STY)]LLSFR_2                                                | -0.287675227 | Q91W92_S207_M1_Cdc42ep1 |
| _RQS[Phospho (STY)]QQLPEEDC[Carbamidomethyl (C)]M[Oxidation (M)]QLNPSFK_3 | -0.350886933 | Q91WB2_S62_M1_Plpp7     |
| _S[Phospho (STY)]GTGATATVSPK_2                                            | -0.029695904 | Q91WC0_S12_M1_Setd3     |
| _LVILM[Oxidation (M)]EPFEDALR_2                                           | 0.315163131  | #N/A                    |
| _LPELSDLGQFFR_2                                                           | -0.091959106 | #N/A                    |
| _VGFFQGDIR_2                                                              | -0.024112831 | #N/A                    |
| _LVDAEELNYWTC[Carbamidomethyl (C)]K_2                                     | 0.113203102  | #N/A                    |
| _EALDSDGWLHTGDIGK_3                                                       | -0.35325501  | #N/A                    |
| _VLFGEITR_2                                                               | 0.348063101  | #N/A                    |
| _IIEQC[Carbamidomethyl (C)]LNK_2                                          | 0.282309558  | #N/A                    |
| _TQPYDVYDQVEFDVPIGSR_2                                                    | 0.134325894  | #N/A                    |
| _TYLQALPYFDR_2                                                            | 0.004372531  | #N/A                    |
| _GSGIQWDLR_2                                                              | 0.157983302  | #N/A                    |
| _APGFAHLAGLDK_2                                                           | 0.013411578  | #N/A                    |
| _M[Oxidation (M)]FEFYER_2                                                 | -0.452108593 | #N/A                    |
| _TVDIGVVTAEDALNYGFSGVM[Oxidation (M)]LR_3                                 | -0.426701072 | #N/A                    |
| _IDEVEEM[Oxidation (M)]LTNNR_2                                            | 0.017388609  | #N/A                    |
| _AVTNM[Oxidation (M)]TLNFGPQHAAHGVLRL_4                                   | -0.012194608 | #N/A                    |
| _TSM[Oxidation (M)]ESLIHHFK_3                                             | 0.277386452  | #N/A                    |



|                                                                            |              |                        |
|----------------------------------------------------------------------------|--------------|------------------------|
| _LDYVSM[Oxidation (M)]M[Oxidation (M)]C[Carbamidomethyl (C)]NEQAYSIAVEK_.2 | 0.031900509  | #N/A                   |
| _IYASSS[Phospho (STY)]PPDTGQR_.2                                           | 0.24424046   | Q91WG5_S196_M1_Prka2   |
| _PSS[Phospho (STY)]PVS[Phospho (STY)]APVRPK_.2                             | 0.273775291  | Q91WG5_S87_M2_Prka2    |
| _SSS[Phospho (STY)]KESSPNSNPSTSPGGIR_.2                                    | -0.229210895 | Q91WG5_S131_M1_Prka2   |
| _[Acetyl (Protein N-term)]S[Phospho (STY)]EEQWVSLSEEFQQLQK_.2              | -0.452227628 | Q91WG7_S2_M1_Dgkg      |
| _EGASSSEPNVSDYNS[Phospho (STY)]DNAAK_.2                                    | 0.143750991  | Q91WG7_S107_M1_Dgkg    |
| _QET[Phospho (STY)]PDHPK_.2                                                | 0.086504394  | Q91WG7_T87_M1_Dgkg     |
| _DTGS[Phospho (STY)]PPASEEATGDSR_.2                                        | 0.136193821  | Q91WI7_S219_M1_Itfg2   |
| _SDKQYAENYTRPSS[Phospho (STY)]R_.3                                         | 0.09459013   | Q91WK0_S92_M1_Lrrfp2   |
| _DFS[Phospho (STY)]PEALKK_.2                                               | -0.573677948 | Q91WK2_S183_M1_Eif3h   |
| _LFM[Oxidation (M)]AQALQEYNN_.2                                            | -0.333475013 | #N/A                   |
| _EKDFS[Phospho (STY)]PEALKK_.3                                             | 0.255415846  | Q91WK2_S183_M1_Eif3h   |
| _SC[Carbamidomethyl (C)]YEDGWLIK_.2                                        | 0.224003737  | #N/A                   |
| _RLPVS[Phospho (STY)]PVAGS_.2                                              | 0.026270765  | Q91WM3_S470_M1_Rrp9    |
| _APWELLELR_.2                                                              | 0.012436565  | #N/A                   |
| _TSYENVIK_.2                                                               | 0.11879156   | #N/A                   |
| _VVHAFDM[Oxidation (M)]EDLGDK_.2                                           | -0.120072387 | #N/A                   |
| _AM[Oxidation (M)]VNLQIQK_.2                                               | 0.309155858  | #N/A                   |
| _HNEETGDNVGLIHK_.2                                                         | -0.598164105 | #N/A                   |
| _STPGVS[Phospho (STY)]DDSDQC[Carbamidomethyl (C)]DSTQDI_.2                 | -0.216896943 | Q91WZ8_S340_M1_Dtnbp1  |
| _S[Phospho (STY)]PSAAGPSGGGLR_.2                                           | 0.083089897  | Q91X56_S340_M1_S1pr5   |
| _S[Phospho (STY)]PSAAGPSGGGLRR_.2                                          | 0.189687845  | Q91X56_S340_M1_S1pr5   |
| _TLPSSSS[Phospho (STY)]PSR_.2                                              | 0.013075472  | Q91X58_S173_M1_Zfand2b |
| _IYGNFFPYGDASK_.2                                                          | -0.005671356 | #N/A                   |
| _AEM[Oxidation (M)]LEIVQAIYK_.2                                            | 0.323352452  | #N/A                   |
| _LQEEVPS[Phospho (STY)]EEQM[Oxidation (M)]PQEK_.2                          | -0.098989358 | Q91XA2_S213_M1_Golm1   |
| _AC[Carbamidomethyl (C)]S[Phospho (STY)]PGASEITGLSK_.2                     | -0.179202697 | Q91XB0_S78_M1_Trex1    |
| _[Acetyl (Protein N-term)]SS[Phospho (STY)]PPEGKLETK_.2                    | -0.221420576 | Q91XC8_S3_M1_Dap       |
| _S[Phospho (STY)]SQIGAVVSR_.2                                              | -0.425245995 | Q91XF0_S164_M1_Pnp0    |
| _FFTNYESR_.2                                                               | -0.045423685 | #N/A                   |
| _GLATGDS[Phospho (STY)]PLGPM[Oxidation (M)]THHGEEDWVYER_.4                 | 0.169560238  | Q91XF0_S241_M1_Pnp0    |
| _ITM[Oxidation (M)]PVIFNEPLSLQR_.2                                         | 0.045357842  | #N/A                   |
| _M[Oxidation (M)]QC[Carbamidomethyl (C)]VAAFAVSAVASQWER_.2                 | -0.181648    | #N/A                   |
| _AIS[Phospho (STY)]LEGEPR_.2                                               | -0.45069369  | Q91XM9_S414_M1_Dlg2    |
| _LC[Carbamidomethyl (C)]DKPAS[Phospho (STY)]PR_.2                          | -0.161831462 | Q91XM9_S360_M1_Dlg2    |
| _QPS[Phospho (STY)]VTLQR_.2                                                | -0.345115648 | Q91XM9_S406_M1_Dlg2    |
| _GPELVHVS[Phospho (STY)]EK_.2                                              | -0.315894304 | Q91XM9_S45_M1_Dlg2     |
| _GQEDLILSYEPVTR_.2                                                         | -0.48042165  | #N/A                   |
| _LVIEEQSGPFIWIPSK_.2                                                       | 0.167976489  | #N/A                   |
| _AIS[Phospho (STY)]LEGEPRK_.2                                              | -0.43335899  | Q91XM9_S414_M1_Dlg2    |
| _DYHFVISR_.2                                                               | 0.018980092  | #N/A                   |
| _YQDEGPHDHS[Phospho (STY)]LPR_.3                                           | -0.444863348 | Q91XM9_S28_M1_Dlg2     |
| _YGDILHVINASDDEWWQAR_.3                                                    | -0.172554796 | #N/A                   |
| _TSLPPIS[Phospho (STY)]PGR_.2                                              | -0.053904222 | Q91XM9_S323_M1_Dlg2    |
| _TSLPPIS[Phospho (STY)]PGRYS[Phospho (STY)]PIPK_.2                         | -0.084967556 | Q91XM9_S323_M2_Dlg2    |
| _HYS[Phospho (STY)]PVEC[Carbamidomethyl (C)]DK_.2                          | -0.438215325 | Q91XM9_S365_M1_Dlg2    |
| _NLSQIENVHGYVLQSHIS[Phospho (STY)]PLK_.3                                   | 0.042083541  | Q91XM9_S65_M1_Dlg2     |

|                                                                                |              |                          |
|--------------------------------------------------------------------------------|--------------|--------------------------|
| _FIEAGQYNDNLYGTSVQSVR_2                                                        | -0.111630221 | #N/A                     |
| _DSGLPSQGLSFK_2                                                                | 0.033139215  | #N/A                     |
| _SKDS[Phospho (STY)]GLPSQGLSFK_2                                               | -0.325104576 | Q91XM9_S553_M1_Dlg2      |
| _TSS[Phospho (STY)]DPNLNNHSQEV_2                                               | -0.289429706 | Q91XS1_S629_M1_Mtmr4     |
| _AKGPS[Phospho (STY)]PPGAK_2                                                   | -0.037331007 | Q91XU0_S65_M1_Wrnip1     |
| _RPAAAAAGSAS[Phospho (STY)]PR_2                                                | -0.215937267 | Q91XU0_S153_M1_Wrnip1    |
| _RLS[Phospho (STY)]ESSALK_2                                                    | -0.085356116 | Q91XU0_S75_M1_Wrnip1     |
| _FAIDHDYLVSLTR_3                                                               | 0.286665628  | #N/A                     |
| _ENLPSHFK_2                                                                    | 0.360631745  | #N/A                     |
| _AEGAGTEEEGT[Phospho (STY)]PK_2                                                | -0.029460089 | Q91XV3_T36_M1_Basp1      |
| _ETPAASEAPSSAAK_2                                                              | -0.109012008 | #N/A                     |
| _AGEAS[Phospho (STY)]AES[Phospho (STY)]TGAADGAAPEEGEAK_2                       | -0.247935382 | Q91XV3_S128_M2_Basp1     |
| _ESEPQAAADATEVK_2                                                              | 0.365883254  | #N/A                     |
| _KTEAPAAAGPEAK_2                                                               | 0.138409287  | #N/A                     |
| _APAPAAPAAAEPAEAPAAASS[Phospho (STY)]EQSVAVK_3                                 | 0.350081282  | Q91XV3_S218_M1_Basp1     |
| _GYNVNDEK_2                                                                    | -0.195767653 | #N/A                     |
| _TEAPAAAGPEAK_2                                                                | 0.369918795  | #N/A                     |
| _DAADGEAKAEEK_2                                                                | 0.178099188  | #N/A                     |
| _AAAAKEEAPK_2                                                                  | -0.163328727 | #N/A                     |
| _SDAAPAASDSKPSSAEPAPSSK_3                                                      | 0.033614338  | #N/A                     |
| _SDAAPAASDSKPSSAEPAPSSKET[Phospho (STY)]PAASEAPSSAAK_4                         | 0.224737237  | Q91XV3_T183_M1_Basp1     |
| _APAPAAPAAAEPAEAPAAASS[Phospho (STY)]EQSVAVK_3                                 | 0.352443273  | Q91XV3_S218_M1_Basp1     |
| _GYNVNDEKAK_2                                                                  | -0.070042784 | #N/A                     |
| _ESTEEKPKDAADGEAK_2                                                            | -0.000373855 | #N/A                     |
| _KAEGAGTEEEGT[Phospho (STY)]PKESEPQAAADATEVK_4                                 | -0.206642191 | Q91XV3_T36_M1_Basp1      |
| _AEGAGTEEEGT[Phospho (STY)]PKESEPQAAADATEVK_3                                  | -0.295726567 | Q91XV3_T36_M1_Basp1      |
| _AEPEKS[Phospho (STY)]EGAAEEQPEPAPAEQEAAAPGPAAGGEAPK_4                         | -0.151270708 | Q91XV3_S92_M1_Basp1      |
| _DAADGEAKAEEKEADK_3                                                            | -0.056468231 | #N/A                     |
| _AGEASAESTGAADGAAPEEGEAKKTEAPAAAGPEAK_4                                        | -0.587084684 | #N/A                     |
| _EADKAAAAKEEAPK_2                                                              | -0.143821291 | #N/A                     |
| _KAEGAGTEEEGT[Phospho (STY)]PK_2                                               | 0.198790365  | Q91XV3_T36_M1_Basp1      |
| _AEEKEADKAAAAK_2                                                               | 0.002688849  | #N/A                     |
| _ESEPQAAADATEVKESTEEKPK_3                                                      | 0.13528785   | #N/A                     |
| _KKGYNVNDEK_2                                                                  | 0.207797286  | #N/A                     |
| _DKKAEGAGT[Phospho (STY)]EEEGTPK_2                                             | 0.038793533  | Q91XV3_T31_M1_Basp1      |
| _EEAPKAEPEKS[Phospho (STY)]EGAAEEQPEPAPAEQEAAAPGPAAGGEAPK_4                    | 0.122050104  | Q91XV3_S92_M1_Basp1      |
| _SEGAAEEQPEPAPAEQEAAAPGPAAGGEAPK_3                                             | -0.38686713  | #N/A                     |
| _TAGTSFM[Oxidation (M)]M[Oxidation (M)]T[Phospho (STY)]PY[Phospho (STY)]VVTR_2 | -0.231623756 | Q91Y86_T183_M2_Mapk8     |
| _GSQDS[Phospho (STY)]PENELGLDLR_2                                              | -0.335445218 | Q91YD6_S766_M1_Vill      |
| _VIY[Phospho (STY)]DFIEK_2                                                     | -0.102038835 | Q91YD9_Y253_M1_Wasl      |
| _DYDS[Phospho (STY)]PERER_2                                                    | -0.087100216 | Q91YE7_S59_M1_Rbm5       |
| _YDDYRDYDS[Phospho (STY)]PERER_3                                               | 0.25166842   | Q91YE7_S59_M1_Rbm5       |
| _GLVAAYSGDS[Phospho (STY)]DNEEELVER_2                                          | 0.250614786  | Q91YE7_S624_M1_Rbm5      |
| _AQS[Phospho (STY)]PTPSLPASWK_2                                                | -0.443226435 | Q91YE8_S895_M1_Synpo2    |
| _YFGTDAVPDGS[Phospho (STY)]DDDEAATVG_2                                         | 0.131785184  | Q91YL3_S539_M1_Uckl1     |
| _NEEENIY[Phospho (STY)]SVPHDSTQGK_2                                            | -0.228239748 | Q91YM2_Y1105_M1_Arhgap35 |
| _TSFSVGS[Phospho (STY)]DDELGPIRK_2                                             | -0.181925729 | Q91YM2_S1179_M1_Arhgap35 |

|                                                                                     |              |                          |
|-------------------------------------------------------------------------------------|--------------|--------------------------|
| _NQKNS[Phospho (STY)]LSDLNIDR_.2                                                    | -0.422579675 | Q91YM2_S589_M1_Arhgap35  |
| _NIIEATHM[Oxidation (M)]YDNVAEAC[Carbamidomethyl (C)]STTEEVFNS[Phospho (STY)]PR_.3  | -0.490649017 | Q91YM2_S970_M1_Arhgap35  |
| _TSFSVGS[Phospho (STY)]DDELGPIR_.2                                                  | -0.010036203 | Q91YM2_S1179_M1_Arhgap35 |
| _AQSNNGSGNGS[Phospho (STY)]DSEMDTSSLER_.2                                           | 0.080288715  | Q91YM2_S1134_M1_Arhgap35 |
| _EAAS[Phospho (STY)]PLQAM[Oxidation (M)]SSYTAAGR_.2                                 | -0.156374715 | Q91YP2_S32_M1_Nln        |
| _DLPS[Phospho (STY)]PLPTKR_.2                                                       | -0.447290393 | Q91YQ3_S48_M1_Csdc2      |
| _[_Acetyl (Protein N-term)]TSESTLPPVVPPLHS[Phospho (STY)]PK_.2                      | -0.234355457 | Q91YQ3_S16_M1_Csdc2      |
| _DLPS[Phospho (STY)]PLPTK_.2                                                        | -0.364807079 | Q91YQ3_S48_M1_Csdc2      |
| _AS[Phospho (STY)]AGPVFK_.2                                                         | 0.169307569  | Q91YQ3_S65_M1_Csdc2      |
| _VTAEVVLVHPGGGSTR_.2                                                                | 0.316545791  | #N/A                     |
| _NIQVDSPYDISR_.2                                                                    | 0.266613827  | #N/A                     |
| _SPLLEIVER_.2                                                                       | 0.362089716  | #N/A                     |
| _YLLSQSS[Phospho (STY)]PAPLTAAEEELR_.2                                              | 0.017528267  | Q91YR1_S143_M1_Twf1      |
| _GPDWILGEM[Oxidation (M)]K_.2                                                       | -0.295403967 | #N/A                     |
| _IFTNLYGR_.2                                                                        | 0.346357408  | #N/A                     |
| _LVEGC[Carbamidomethyl (C)]LVGGR_.2                                                 | 0.409944122  | #N/A                     |
| _EAYEAGLIGK_.2                                                                      | -0.160864962 | #N/A                     |
| _NAC[Carbamidomethyl (C)]GSDYDFDFVVR_.2                                             | -0.278779274 | #N/A                     |
| _YLVVNADEGEPTGC[Carbamidomethyl (C)]K_.2                                            | 0.255802857  | #N/A                     |
| _GAGAYIC[Carbamidomethyl (C)]GEETALIESIEGK_.2                                       | -0.530564285 | #N/A                     |
| _HFRPELEDR_.3                                                                       | 0.238371085  | #N/A                     |
| _GEFYNEASNLQVAIR_.2                                                                 | -0.293547504 | #N/A                     |
| _GDARPAEIDSLWEISK_.3                                                                | 0.094000924  | #N/A                     |
| _YLVVNADEGEPTGC[Carbamidomethyl (C)]KDR_.2                                          | -0.309607567 | #N/A                     |
| _KTSFGSLKDEDR_.3                                                                    | 0.122764875  | #N/A                     |
| _EGVDWMNK_.2                                                                        | 0.202835083  | #N/A                     |
| _HESC[Carbamidomethyl (C)]GQC[Carbamidomethyl (C)]TPC[Carbamidomethyl (C)]R_.2      | -0.119599179 | #N/A                     |
| _HAGGVTTGGWDNLLAVIPGGSSTPLIPK_.3                                                    | -0.24841427  | #N/A                     |
| _TSFGSLKDEDR_.3                                                                     | 0.005823704  | #N/A                     |
| _QIEGHTIC[Carbamidomethyl (C)]ALGDGAAWPVQGLIR_.3                                    | -0.087411505 | #N/A                     |
| _DGLNDDDFEPYLS[Phospho (STY)]PQAR_.2                                                | 0.082244745  | Q91YT7_S39_M1_Ythdf2     |
| _DFGNSPLHR_.2                                                                       | -0.12713053  | #N/A                     |
| _LALDGQNIYNAC[Carbamidomethyl (C)]C[Carbamidomethyl (C)]TLR_.2                      | 0.269167502  | #N/A                     |
| _AAEAHPQDDHVEEEEC[Carbamidomethyl (C)]FHDC[Carbamidomethyl (C)]SASFEEEQPGAHVAGSK_.5 | -0.542134014 | #N/A                     |
| _QDSSTGSYSINFVQNPNNR_.2                                                             | 0.180852819  | #N/A                     |
| _LLDAAGANLR_.2                                                                      | -0.276650954 | #N/A                     |
| _VFVTGPLPAEGR_.2                                                                    | 0.313008231  | #N/A                     |
| _NTM[Oxidation (M)]SLLAANNLLAGLR_.2                                                 | -0.068562576 | #N/A                     |
| _VISTLSVGVDHLALDEIK_.3                                                              | -0.007391326 | #N/A                     |
| _S[Phospho (STY)]PDSTANVR_.2                                                        | -0.174421515 | Q91Z67_S206_M1_Srgap2    |
| _ELEGPIYS[Phospho (STY)]R_.2                                                        | -0.007726387 | Q91Z67_S691_M1_Srgap2    |
| _QTPRS[Phospho (STY)]PDSTANVR_.3                                                    | -0.095117101 | Q91Z67_S206_M1_Srgap2    |
| _KQDS[Phospho (STY)]SQAIPLVVESC[Carbamidomethyl (C)]IR_.2                           | 0.242311286  | Q91Z67_S500_M1_Srgap2    |
| _GLNDS[Phospho (STY)]PERR_.2                                                        | -0.050671696 | Q91Z69_S883_M1_Srgap1    |
| _DMNS[Phospho (STY)]PTDR_.2                                                         | -0.091213402 | Q91Z69_S812_M1_Srgap1    |
| _IYTFNQSR_.2                                                                        | 0.303499647  | #N/A                     |
| _AM[Oxidation (M)]S[Phospho (STY)]QDGASQFQEVILQELELSVK_.3                           | -0.173947869 | Q91ZJ5_S13_M1_Ugp2       |

|                                                                                    |              |                         |
|------------------------------------------------------------------------------------|--------------|-------------------------|
| _NENTFLDLTVQQIEHLNK_.3                                                             | -0.16083021  | #N/A                    |
| _ALANDGTS[Phospho (STY)]PGER_.2                                                    | -0.289282115 | Q91ZM2_S219_M1_Sh2b1    |
| _S[Phospho (STY)]SEDLAGPLPSSVPSSTSSKPK_.3                                          | 0.009198102  | Q91ZM2_S126_M1_Sh2b1    |
| _DDFS[Phospho (STY)]DVEQLR_.2                                                      | 0.165801897  | Q91ZP6_S195_M1_Ndfip2   |
| _TLS[Phospho (STY)]FDLQQR_.2                                                       | -0.152573963 | Q91ZP9_S271_M1_Necab2   |
| _VYEGGSNVDQFVTR_.2                                                                 | -0.070300298 | #N/A                    |
| _SES[Phospho (STY)]NSSITATQPTLAK_.2                                                | -0.24064764  | Q91ZU6_S7186_M1_Dst     |
| _QKS[Phospho (STY)]FSEDVISHK_.3                                                    | -0.007447776 | Q91ZU6_S3894_M1_Dst     |
| _LLDPEDVDVSS[Phospho (STY)]PDEK_.2                                                 | 0.166995802  | Q91ZU6_S237_M1_Dst      |
| _AM[Oxidation (M)]VESQQKS[Phospho (STY)]PVKR_.3                                    | -0.522464448 | Q91ZU6_S1381_M1_Dst     |
| _AMVESQQKS[Phospho (STY)]PVK_.2                                                    | 0.314096141  | Q91ZU6_S1381_M1_Dst     |
| _QLS[Phospho (STY)]LLDSR_.2                                                        | 0.261306285  | Q91ZU6_S5407_M1_Dst     |
| _DNLGNSNVPDS[Phospho (STY)]PIPAEC[Carbamidomethyl (C)]EAAGR_.2                     | 0.185933828  | Q91ZV0_S1271_M1_Mia2    |
| _SLS[Phospho (STY)]PPWEQDRR_.2                                                     | -0.240804117 | Q91ZV0_S1190_M1_Mia2    |
| _IDLETGENR_.2                                                                      | 0.10623994   | #N/A                    |
| _AVTDEEPFLIFANR_.2                                                                 | 0.340648637  | #N/A                    |
| _AEGSEYQVLYIADDNEIR_.2                                                             | -0.532385045 | #N/A                    |
| _HS[Phospho (STY)]LAS[Phospho (STY)]TDEKR_.2                                       | -0.044174421 | Q91ZX7_S4521_M2_Lrp1    |
| _IFFSDIHFGNIQQINDDGSGR_.3                                                          | -0.22226237  | #N/A                    |
| _EGVVA AEK_.2                                                                      | -0.188775349 | #N/A                    |
| _TKEQASHLGGAVFSGAGNIAAATGLVK_.3                                                    | -0.421146006 | #N/A                    |
| _QGVTEAEK_.2                                                                       | 0.084797803  | #N/A                    |
| _TKQGVTEAEK_.2                                                                     | 0.206664942  | #N/A                    |
| _TKEGVLYVGSK_.2                                                                    | 0.111199611  | #N/A                    |
| _EGVLYVGSK_.2                                                                      | 0.086210993  | #N/A                    |
| _EQASHLGGAVFSGAGNIAAATGLVK_.3                                                      | -0.387174145 | #N/A                    |
| _TSGVVQGVASVAEK_.2                                                                 | 0.262009111  | #N/A                    |
| _KTDS[Phospho (STY)]C[Carbamidomethyl (C)]DSGITK_.2                                | -0.022508104 | Q920E3_S863_M1_Kcnh5    |
| _AGEARS[Phospho (STY)]PLEHS[Phospho (STY)]PSQADVK_.3                               | 0.081835468  | Q920E3_S883_M2_Kcnh5    |
| _YEEDSYNR_.2                                                                       | -0.127772884 | #N/A                    |
| _TYQVPPVQPAS[Phospho (STY)]PGSHNALK_.3                                             | 0.322780449  | Q920I9_S1455_M1_Wdr7    |
| _GPITAVSFAPDGR_.2                                                                  | 0.368022018  | #N/A                    |
| _ARDS[Phospho (STY)]PPPSNIVQGQIK_.3                                                | -0.247028855 | Q920I9_S935_M1_Wdr7     |
| _LPASC[Carbamidomethyl (C)]LPASDSFR_.2                                             | -0.083430942 | #N/A                    |
| _LAC[Carbamidomethyl (C)]THTGIQFYQFSVGNQQEGR_.3                                    | -0.35677395  | #N/A                    |
| _RQS[Phospho (STY)]RESDPEYR_.3                                                     | -0.268517496 | Q920I9_S772_M1_Wdr7     |
| _RIS[Phospho (STY)]SLDSR_.2                                                        | -0.483613688 | Q920M7_S106_M1_Syt17    |
| _ [Acetyl (Protein N-term)]M[Oxidation (M)]EANGS[Phospho (STY)]PGTSGSANDSQHDPGK_.2 | -0.125081144 | Q920Q6_S6_M1_Msi2       |
| _NS[Phospho (STY)]PQSS[Phospho (STY)]PTSTPK_.2                                     | 0.343641281  | Q920Q8_S322_M2_Ivns1abp |
| _QHKDS[Phospho (STY)]PEILSR_.3                                                     | 0.074083464  | Q920R0_S1329_M1_Als2    |
| _QLGC[Carbamidomethyl (C)]ES[Phospho (STY)]PGQGEVWK_.2                             | -0.077879533 | Q920R0_S1302_M1_Als2    |
| _RQHKDS[Phospho (STY)]PEILSR_.3                                                    | -0.072721413 | Q920R0_S1329_M1_Als2    |
| _SSS[Phospho (STY)]LM[Oxidation (M)]DIREEELEGGR_.3                                 | -0.022354675 | Q920R0_S460_M1_Als2     |
| _RLS[Phospho (STY)]LPGLLSQVS[Phospho (STY)]PR_.2                                   | -0.277546133 | Q920R0_S477_M2_Als2     |
| _S[Phospho (STY)]KDTTDELSVVEAK_.2                                                  | 0.041268455  | Q921C1_S253_M1_Gjc3     |
| _KS[Phospho (STY)]SSDKESNLQVTQK_.3                                                 | -0.171909137 | Q921C3_S1888_M1_Brwd1   |
| _RGPEVEGS[Phospho (STY)]PVSEALR_.3                                                 | -0.229981546 | Q921C3_S1830_M1_Brwd1   |

|                                                                       |              |                       |
|-----------------------------------------------------------------------|--------------|-----------------------|
| _QTS[Phospho (STY)]LDNEKDR_.2                                         | -0.069035884 | Q921C5_S411_M1_Bicd2  |
| _S[Phospho (STY)]PVLLPK_.2                                            | 0.391447148  | Q921C5_S578_M1_Bicd2  |
| _LPNSKQS[Phospho (STY)]PDEPLR_.2                                      | -0.30189485  | Q921F2_S183_M1_Tardbp |
| _FGGNPGGFGNQGGFGNSR_.2                                                | -0.079120746 | #N/A                  |
| _GISVHISNAEPK_.3                                                      | 0.291562642  | #N/A                  |
| _TEEGEIVYS[Phospho (STY)]AEESNR_.2                                    | -0.001820049 | Q921F4_S37_M1_Hnrnpl  |
| _LKTEEGEIVYS[Phospho (STY)]AEESNR_.3                                  | 0.050445598  | Q921F4_S37_M1_Hnrnpl  |
| _ITRPGNTDDPSGGNK_.2                                                   | -0.392505859 | #N/A                  |
| _SYS[Phospho (STY)]LSELSVLQAK_.2                                      | -0.063955746 | Q921I6_S245_M1_Sh3bp4 |
| _IILEAEKIDGAAS[Phospho (STY)]QGK_.2                                   | -0.085358644 | Q921J2_S175_M1_Rheb   |
| _ALAESWNAAFLESSAK_.2                                                  | -0.021598062 | #N/A                  |
| _INNVPAGEGENEVNNELANR_.2                                              | -0.291266276 | #N/A                  |
| _DAEGILEDLQSYR_.2                                                     | 0.088073331  | #N/A                  |
| _EAIQHPADEKLQEK_.3                                                    | -0.274675928 | #N/A                  |
| _RLS[Phospho (STY)]ADGSLGR_.2                                         | -0.021414249 | Q921Q7_S446_M1_Rin1   |
| _EKPSTDPLY[Phospho (STY)]DTPDTR_.2                                    | 0.109856672  | Q921Q7_Y35_M1_Rin1    |
| _SM[Oxidation (M)]S[Phospho (STY)]SAFC[Carbamidomethyl (C)]SLLAPER_.2 | -0.197989979 | Q921Q7_S340_M1_Rin1   |
| _ALPLS[Phospho (STY)]PAQELQR_.2                                       | 0.150222126  | Q921Q7_S590_M1_Rin1   |
| _NNAYLAQS[Phospho (STY)]PQLYK_.2                                      | -0.28869022  | Q922B2_S249_M1_Dars1  |
| _FLEPTLR_.2                                                           | -0.112433597 | #N/A                  |
| _IISAASEGGANVFTVSYFK_.2                                               | 0.184151705  | #N/A                  |
| _C[Carbamidomethyl (C)]TAPLTPSSS[Phospho (STY)]PEQR_.2                | -0.064557077 | Q922D4_S824_M1_Ppp6r3 |
| _IQQFDDGGS[Phospho (STY)]DEEDIWEEK_.2                                 | 0.080239886  | Q922D4_S588_M1_Ppp6r3 |
| _TPVPSDIAISR_.2                                                       | 0.199772603  | #N/A                  |
| _LDIDPETITWQR_.2                                                      | -0.085969317 | #N/A                  |
| _TASESISNLSEAGS[Phospho (STY)]VK_.2                                   | -0.18572905  | Q922J3_S203_M1_Clip1  |
| _TASESISNLS[Phospho (STY)]EAGS[Phospho (STY)]VKKGER_.3                | -0.193233095 | Q922J3_S199_M2_Clip1  |
| _S[Phospho (STY)]VEELQLK_.2                                           | -0.125275589 | Q922J3_S910_M1_Clip1  |
| _HVQSM[Oxidation (M)]YEEAYS DYLKDR_.3                                 | -0.162806712 | #N/A                  |
| _KSPSGPVKS[Phospho (STY)]PPLS[Phospho (STY)]PVGTTVPK_.3               | -0.222220569 | Q922M7_S189_M2_       |
| _KLS[Phospho (STY)]LSEGK_.2                                           | -0.345580165 | Q922P9_S130_M1_Glyr1  |
| _LQQLPADFGR_.2                                                        | 0.367826713  | #N/A                  |
| _LVNLQHLDLLNNR_.2                                                     | -0.160557856 | #N/A                  |
| _GSFSEQGINEFLR_.2                                                     | -0.204385946 | #N/A                  |
| _LAAVDATVNQVLASR_.2                                                   | 0.288392995  | #N/A                  |
| _VETVYTYLLDGESR_.2                                                    | -0.217440702 | #N/A                  |
| _DIILATDLAHLR_.3                                                      | 0.010174732  | #N/A                  |
| _RPEAVQNTS[Phospho (STY)]VDASEDQKDEK_.3                               | 0.009839412  | Q922S4_S204_M1_Pde2a  |
| _GLPS[Phospho (STY)]NNSLDFLDEEYVDPDLGTR_.3                            | -0.160870285 | Q922S4_S908_M1_Pde2a  |
| _LLHDGIQPVA/AIDSNFANFTYTPR_.3                                         | -0.155469425 | #N/A                  |
| _SVLAALYSSEGSVM[Oxidation (M)]ER_.2                                   | 0.024837688  | #N/A                  |
| _SQQYPAAR_.2                                                          | 0.005844397  | #N/A                  |
| _WDEQTSNTKGGDDDEES[Phospho (STY)]DEEAVKK_.3                           | 0.045112881  | Q922U1_S619_M1_Prpf3  |
| _GDDDEES[Phospho (STY)]DEEAVKK_.2                                     | -0.042088908 | Q922U1_S619_M1_Prpf3  |
| _SS[Phospho (STY)]PPATDPGPVPSSPSQEPPTKR_.3                            | -0.30779015  | Q922Y1_S188_M1_Ubxn1  |
| _NQAIYAAVDDGDAS[Phospho (STY)]AE_.2                                   | -0.087240153 | Q923B1_S548_M1_Dbr1   |
| _C[Carbamidomethyl (C)]GETVES[Phospho (STY)]GDEKDLAK_.2               | -0.119060349 | Q923B1_S505_M1_Dbr1   |

|                                                                      |              |                         |
|----------------------------------------------------------------------|--------------|-------------------------|
| _RRDEDM[Oxidation (M)]LYS[Phospho (STY)]PELAQR_.3                    | -0.077067118 | Q923D5_S237_M1_Wbp11    |
| _SVS[Phospho (STY)]YHLSPEENSAPDALVR_.3                               | -0.10490097  | Q923M0_S432_M1_Ppp1r16a |
| _RVS[Phospho (STY)]LTHR_.2                                           | -0.328965216 | Q923M0_S353_M1_Ppp1r16a |
| _KKGDDS[Phospho (STY)]DEEDLC[Carbamidomethyl (C)]ISNK_.3             | 0.02371667   | Q923Q2_S133_M1_Stard13  |
| _QET[Phospho (STY)]VEC[Carbamidomethyl (C)]LR_.2                     | 0.157073432  | Q923T9_T287_M1_Camk2g   |
| _FTDDYQLFEELGK_.2                                                    | -0.186389735 | #N/A                    |
| _FYFENLLSK_.2                                                        | 0.297723896  | #N/A                    |
| _GST[Phospho (STY)]ESC[Carbamidomethyl (C)]NTTTEDEDLK_.2             | 0.365732346  | Q923T9_T382_M1_Camk2g   |
| _SLLNKS[Phospho (STY)]DGGVK_.2                                       | -0.628761762 | Q923T9_S325_M1_Camk2g   |
| _ITEQLIEAINNGDFEAYTK_.2                                              | -0.385870192 | #N/A                    |
| _WLNVHYHC[Carbamidomethyl (C)]SGAPAAPLQ_.3                           | -0.007190174 | #N/A                    |
| _KTS[Phospho (STY)]TQEYAAK_.2                                        | 0.13993228   | Q923T9_S36_M1_Camk2g    |
| _S[Phospho (STY)]SSSVHLM[Oxidation (M)]PQSNNK_.2                     | -0.363139377 | Q923T9_S334_M1_Camk2g   |
| _GSTES[Phospho (STY)]C[Carbamidomethyl (C)]NTTTEDEDLKVR_.2           | 0.427222501  | Q923T9_S384_M1_Camk2g   |
| _SAVGFSNGS[Phospho (STY)]LEQR_.2                                     | -0.024429148 | Q923Z0_S355_M1_Gprc5b   |
| _KNS[Phospho (STY)]TDLDSAPEDPT[Phospho (STY)]SPK_.2                  | -0.177869071 | Q924A2_S2299_M2_Cic     |
| _NSTDLDSAPEDPTS[Phospho (STY)]PK_.2                                  | 0.106884627  | Q924A2_S2311_M1_Cic     |
| _TQS[Phospho (STY)]LSALPK_.2                                         | 0.176820771  | Q924A2_S1080_M1_Cic     |
| _S[Phospho (STY)]SSEAKPASLGLAGGHK_.3                                 | 0.189800999  | Q924A2_S1184_M1_Cic     |
| _SS[Phospho (STY)]PPPLPAEERPGTK_.2                                   | 0.096046854  | Q924A2_S2148_M1_Cic     |
| _EGS[Phospho (STY)]TEFDWGDTSR_.2                                     | 0.438364826  | Q924A2_S553_M1_Cic      |
| _AQSVS[Phospho (STY)]PVQATPSGGSAQLPGK_.2                             | -0.049127073 | Q924A2_S1809_M1_Cic     |
| _AAS[Phospho (STY)]EDMTS[Phospho (STY)]DEER_.2                       | 0.089421712  | Q924A2_S1338_M2_Cic     |
| _QQSHDPVS[Phospho (STY)]PR_.2                                        | 0.053671167  | Q924H7_S511_M1_Wac      |
| _DAADPS[Phospho (STY)]PPNK_.2                                        | -0.622582642 | Q924H7_S53_M1_Wac       |
| _QGPVSHSATQQPVTADKQQSHDPVS[Phospho (STY)]PR_.4                       | -0.210518192 | Q924H7_S511_M1_Wac      |
| _MRDAADPS[Phospho (STY)]PPNK_.2                                      | 0.294196601  | Q924H7_S53_M1_Wac       |
| _S[Phospho (STY)]NS[Phospho (STY)]PENKYSDSTGHNK_.2                   | 0.175110192  | Q924H7_S62_M2_Wac       |
| _QGPVS[Phospho (STY)]HS[Phospho (STY)]ATQQPVT[Phospho (STY)]ADK_.2   | -0.197684396 | Q924H7_S491_M3_Wac      |
| _HAELSGS[Phospho (STY)]PLK_.2                                        | -0.253064357 | Q924K8_S516_M1_Mta3     |
| _S[Phospho (STY)]PPSLQTPATK_.2                                       | -0.00705099  | Q924K8_S547_M1_Mta3     |
| _M[Oxidation (M)]PTQSDEEKS[Phospho (STY)]PS[Phospho (STY)]PTAEDPR_.2 | 0.156755719  | Q924K8_S425_M2_Mta3     |
| _ISQQVFDGNNMEDIYGK_.2                                                | -0.125585453 | #N/A                    |
| _IDDIPGLSDTS[Phospho (STY)]PDLSSR_.2                                 | 0.085469518  | Q924N4_S32_M1_Slc12a6   |
| _LTSIGS[Phospho (STY)]DEDEETETYQEK_.2                                | -0.057396548 | Q924N4_S1032_M1_Slc12a6 |
| _TISS[Phospho (STY)]PTSC[Carbamidomethyl (C)]EHR_.2                  | -0.074607274 | Q924S7_S168_M1_Spred2   |
| _HVS[Phospho (STY)]FQDEDEIVR_.2                                      | -0.063962313 | Q924S8_S239_M1_Spred1   |
| _SVSS[Phospho (STY)]PGSGPAAESLGTR_.2                                 | -0.266024056 | Q924W6_S767_M1_Trim66   |
| _GS[Phospho (STY)]SERGSPIEK_.2                                       | 0.1700254    | Q925H1_S1061_M1_Trps1   |
| _HPNYS[Phospho (STY)]PPGS[Phospho (STY)]PIEK_.2                      | -0.030128349 | Q925H1_S1081_M2_Trps1   |
| _TAGTLLGEGFR_.2                                                      | 0.169841502  | #N/A                    |
| _SQT[Phospho (STY)]PPGVATPPIPK_.2                                    | -0.015713827 | Q925J9_T1051_M1_Med1    |
| _NSSQTGGKPGSS[Phospho (STY)]PITK_.2                                  | -0.224243256 | Q925J9_S1158_M1_Med1    |
| _HDGGS[Phospho (STY)]PSIK_.2                                         | -0.247966764 | Q925J9_S1403_M1_Med1    |
| _EAVQLLEDYK_.2                                                       | 0.362238152  | #N/A                    |
| _HALLETALTR_.2                                                       | -0.127977955 | #N/A                    |
| _YGELEEGIDVLDADGNLVGSSK_.2                                           | -0.26428372  | #N/A                    |

|                                                                                 |              |                         |
|---------------------------------------------------------------------------------|--------------|-------------------------|
| _HFLDIIDPR_2                                                                    | 0.020148617  | #N/A                    |
| _FQQTsfyGR_2                                                                    | -0.182487906 | #N/A                    |
| _RQS[Phospho (STY)]IPEEFK_2                                                     | -0.164898627 | Q925T6_S43_M1_Grip1     |
| _SLYSTS[Phospho (STY)]PR_2                                                      | 0.032683278  | Q925T6_S432_M1_Grip1    |
| _TSLs[Phospho (STY)]PVPKPR_2                                                    | -0.221231634 | Q925T6_S846_M1_Grip1    |
| _QAS[Phospho (STY)]FQER_2                                                       | 0.203523751  | Q925T6_S952_M1_Grip1    |
| _QTDAQSASS[Phospho (STY)]PK_2                                                   | -0.18533278  | Q925T6_S761_M1_Grip1    |
| _KQTDAQSASS[Phospho (STY)]PK_2                                                  | 0.270300724  | Q925T6_S761_M1_Grip1    |
| _SYEPQEDPGVK_2                                                                  | -0.16334203  | #N/A                    |
| _WLHNEDQM[Oxidation (M)]AVEK_3                                                  | -0.077851113 | #N/A                    |
| _LSSTWEGIQAGK_2                                                                 | 0.009686909  | #N/A                    |
| _M[Oxidation (M)]ESALDQLK_2                                                     | -0.259747775 | #N/A                    |
| _[Acetyl (Protein N-term)]SGS[Phospho (STY)]PVKR_2                              | -0.31349817  | Q93092_S4_M1_Taldo1     |
| _TIVM[Oxidation (M)]GAS[Phospho (STY)]FR_2                                      | -0.466973796 | Q93092_S237_M1_Taldo1   |
| _IFVGGLNPEATEEK_2                                                               | -0.056756704 | #N/A                    |
| _EVYQQQYGSgGR_2                                                                 | 0.288572371  | #N/A                    |
| _EYFGQFGEIEAIELPIDPK_2                                                          | -0.018170666 | #N/A                    |
| _AIS[Phospho (STY)]PTSATSSGR_2                                                  | -0.108609935 | Q99104_S600_M1_Myo5a    |
| _SAPEVTAPGAPAYR_2                                                               | 0.291687578  | #N/A                    |
| _YQNLLNEFSR_2                                                                   | -0.107184942 | #N/A                    |
| _M[Oxidation (M)]LPELFQDDEKAIS[Phospho (STY)]PTSATSSGR_3                        | -0.41613007  | Q99104_S600_M1_Myo5a    |
| _AC[Carbamidomethyl (C)]GVLETIR_2                                               | 0.212229005  | #N/A                    |
| _QLELDLNDER_2                                                                   | -0.330325685 | #N/A                    |
| _ETLEPLIQAAQLQVK_2                                                              | 0.047387982  | #N/A                    |
| _TSS[Phospho (STY)]IADEGTYTLDSILR_2                                             | -0.082845391 | Q99104_S1650_M1_Myo5a   |
| _VLNLYTPVNEFEER_2                                                               | -0.231734381 | #N/A                    |
| _SHENEAEALRGEIQSLKEENNR_4                                                       | -0.267531844 | #N/A                    |
| _LHIGMENK_2                                                                     | -0.14132459  | #N/A                    |
| _YNVSQLEEWLR_2                                                                  | -0.025542959 | #N/A                    |
| _YFATVSGSASEANVEEK_2                                                            | -0.246843016 | #N/A                    |
| _IGELEVGMENIS[Phospho (STY)]PGQIIDEPIRPVNIPR_3                                  | -0.210353223 | Q99104_S1450_M1_Myo5a   |
| _VLMEQLTSVSEELDVR_2                                                             | -0.14607519  | #N/A                    |
| _SES[Phospho (STY)]GDEQFPTIC[Carbamidomethyl (C)]R_2                            | 0.405473061  | Q99246_S1833_M1_Cacna1d |
| _QT[Phospho (STY)]VLSWQAAIDAAR_2                                                | 0.284585564  | Q99246_T49_M1_Cacna1d   |
| _RQS[Phospho (STY)]S[Phospho (STY)]QDDVLPSPALPHR_3                              | 0.103795233  | Q99246_S1950_M2_Cacna1d |
| _YS[Phospho (STY)]PSHSTR_2                                                      | 0.272257834  | Q99246_S1991_M1_Cacna1d |
| _RIS[Phospho (STY)]ELNMK_2                                                      | -0.339872526 | Q99246_S869_M1_Cacna1d  |
| _MNQQGADT[Phospho (STY)]PK_2                                                    | -0.075723025 | Q99J08_T401_M1_Sec14I2  |
| _KDT[Phospho (STY)]PPPLVPPAAR_2                                                 | 0.022316277  | Q99J09_T5_M1_Wdr77      |
| _YEHDDIVSTVTVLSSGTQAVSGSK_3                                                     | -0.034600272 | #N/A                    |
| _AGATC[Carbamidomethyl (C)]VSQC[Carbamidomethyl (C)]DLS[Phospho (STY)]PVAE_2    | -0.046930946 | Q99J10_S416_M1_Ctu1     |
| _AGATC[Carbamidomethyl (C)]VSQC[Carbamidomethyl (C)]DLS[Phospho (STY)]PGNGEDR_2 | -0.245517118 | Q99J10_S378_M1_Ctu1     |
| _SELQAYIEQC[Carbamidomethyl (C)]QDS[Phospho (STY)]PTSGK_2                       | 0.028612565  | Q99J21_S547_M1_Mcoln1   |
| _[Acetyl (Protein N-term)]ATTAQQS[Phospho (STY)]PQPVAGKR_2                      | -0.340584382 | Q99J36_S8_M1_Thumpd1    |
| _FIDKDDQPS[Phospho (STY)]GS[Phospho (STY)]EGEDDDAEAAALKK_3                      | 0.177101561  | #N/A                    |
| _[Acetyl (Protein N-term)]ATTAQQS[Phospho (STY)]PQPVAGK_2                       | -0.175943705 | Q99J36_S8_M1_Thumpd1    |
| _DQQPS[Phospho (STY)]GS[Phospho (STY)]EGEDDDAEAAALKK_3                          | -0.112585152 | #N/A                    |

|                                                                       |              |                        |
|-----------------------------------------------------------------------|--------------|------------------------|
| _FIDKDQQPS[Phospho (STY)]GS[Phospho (STY)]EGEDDDAEALK_.3              | 0.128862489  | #N/A                   |
| _Acetyl (Protein N-term)]S[Phospho (STY)]EGESQTVVSSGSDPK_.2           | 0.037793434  | Q99J45_S2_M1_Nrbp1     |
| _TPT[Phospho (STY)]PEPAEVETR_.2                                       | 0.345800793  | Q99J45_T433_M1_Nrbp1   |
| _GSDHSASLEPGELAEVR_.3                                                 | -0.431408275 | #N/A                   |
| _AELLLQSTAEQLR_.2                                                     | 0.02724387   | #N/A                   |
| _FLC[Carbamidomethyl (C)]TPLAAAC[Carbamidomethyl (C)]PSGAEQGDAAGER_.2 | -0.018669296 | #N/A                   |
| _HIPGAFFDIDR_.2                                                       | -0.424981021 | #N/A                   |
| _ALVSAQWVAEALK_.2                                                     | 0.402809666  | #N/A                   |
| _AQPEHIIEGR_.3                                                        | -0.144175451 | #N/A                   |
| _FQGTQPEPR_.2                                                         | 0.309881686  | #N/A                   |
| _THEDILENLDR_.3                                                       | 0.114151726  | #N/A                   |
| _HVLNQNLPISSGK_.2                                                     | 0.292155711  | #N/A                   |
| _DGIEPGHIPGSVNIPFTEFLTNEGLEK_.3                                       | 0.324232448  | #N/A                   |
| _AFGHHSVSLDGGFR_.3                                                    | 0.085718322  | #N/A                   |
| _ILEPGLNVLIPVLR_.2                                                    | -0.167706439 | #N/A                   |
| _NTVILFVPQQEAWVVER_.2                                                 | 0.202838546  | #N/A                   |
| _APVPGAQNSSQSR_.2                                                     | -0.010472486 | #N/A                   |
| _DLQQSIEAAS[Phospho (STY)]DEEDLR_.2                                   | -0.222619519 | Q99JB8_S276_M1_Pacsin3 |
| _DGTAPPPQSPSPSGSQDEEDWS[Phospho (STY)]DEESPR_.3                       | -0.030623289 | Q99JB8_S354_M1_Pacsin3 |
| _GGRS[Phospho (STY)]PDEVTLTSIVPTR_.3                                  | -0.111044958 | Q99JB8_S319_M1_Pacsin3 |
| _ALYDYAGQEADELS[Phospho (STY)]FR_.2                                   | -0.153431104 | Q99JB8_S383_M1_Pacsin3 |
| _QSNASS[Phospho (STY)]DVEVEEK_.2                                      | -0.052558146 | Q99JF8_S106_M1_Psip1   |
| _NLAKPGVTSTS[Phospho (STY)]DS[Phospho (STY)]EDEDQEGEKK_.3             | -0.059124559 | Q99JF8_S272_M2_Psip1   |
| _FSSQQASTK_.2                                                         | -0.064541742 | #N/A                   |
| _QVDTEEAGM[Oxidation (M)]VTAATASNVKAS[Phospho (STY)]PK_.3             | 0.268268959  | #N/A                   |
| _NLAKPGVTSTS[Phospho (STY)]DS[Phospho (STY)]EDEDQEGEKK_.3             | 0.208499093  | Q99JF8_S272_M2_Psip1   |
| _QSNASS[Phospho (STY)]DVEVEEKETNVSK_.2                                | -0.061094983 | Q99JF8_S106_M1_Psip1   |
| _PGVTSTS[Phospho (STY)]DS[Phospho (STY)]EDEDQEGEKK_.2                 | 0.060215243  | Q99JF8_S272_M2_Psip1   |
| _QVDTEEAGM[Oxidation (M)]VTAATASNVKAS[Phospho (STY)]PKR_.3            | -0.52513609  | #N/A                   |
| _ETNVSKEDT[Phospho (STY)]DQEEK_.2                                     | 0.117708716  | Q99JF8_T122_M1_Psip1   |
| _EDTDQEEKAS[Phospho (STY)]NEDVTK_.2                                   | -0.011213059 | Q99JF8_S129_M1_Psip1   |
| _NFQAAHR_.2                                                           | 0.045649927  | #N/A                   |
| _ETNVSKEDT[Phospho (STY)]DQEEKASNEDVTK_.3                             | 0.020219817  | Q99JF8_T122_M1_Psip1   |
| _QSNASS[Phospho (STY)]DVEVEEKETNVSKEDTDQEEK_.4                        | 0.031034466  | Q99JF8_S106_M1_Psip1   |
| _LLGDVSC[Carbamidomethyl (C)]R_.2                                     | -0.060972529 | #N/A                   |
| _ES[Phospho (STY)]PPLLPLGTPC[Carbamidomethyl (C)]_.2                  | 0.102099978  | Q99JG2_S471_M1_Gpr3711 |
| _PRES[Phospho (STY)]PPLLPLGTPC[Carbamidomethyl (C)]_.2                | 0.123864113  | Q99JG2_S471_M1_Gpr3711 |
| _SLLHEQPRGT[Phospho (STY)]PNR_.2                                      | -0.10422603  | Q99JN2_T605_M1_Klhl22  |
| _EDVEGVGTS[Phospho (STY)]DGEAAGLSSDPK_.2                              | -0.113695688 | Q99JP4_S42_M1_Cdc26    |
| _QKEDVEGVGTS[Phospho (STY)]DGEAAGLSSDPK_.3                            | -0.358199059 | Q99JP4_S42_M1_Cdc26    |
| _SQS[Phospho (STY)]ADTPGPTER_.2                                       | -0.175865666 | Q99JP6_S159_M1_Homer3  |
| _LPSSSSEM[Oxidation (M)]GSQDGS[Phospho (STY)]PLRETR_.3                | -0.326486395 | Q99JP7_S83_M1_Ggt7     |
| _LPSSSSEM[Oxidation (M)]GSQDGS[Phospho (STY)]PLR_.2                   | 0.193379515  | Q99JP7_S83_M1_Ggt7     |
| _KDEDAFLGDPDT[Phospho (STY)]DPDSFLK_.3                                | -0.373906649 | Q99JP7_T56_M1_Ggt7     |
| _NILLTNEQLENAR_.2                                                     | -0.01489789  | #N/A                   |
| _QAITQVVISR_.2                                                        | -0.065077447 | #N/A                   |
| _ASHFFTVDPR_.3                                                        | -0.285017859 | #N/A                   |



|                                                                      |              |                        |
|----------------------------------------------------------------------|--------------|------------------------|
| _ADASSLTVDVTS[Phospho (STY)]PASK_.2                                  | -0.109737545 | Q99JX3_S418_M1_Gorasp2 |
| _LYVYNTDTDNC[Carbamidomethyl (C)]R_.2                                | 0.315423691  | #N/A                   |
| _ [Acetyl (Protein N-term)]SVPAFIDISEEDQAAELR_.2                     | -0.470086188 | #N/A                   |
| _AALSGLLHR_.2                                                        | 0.340851388  | #N/A                   |
| _DFIYVSQDPK_.2                                                       | 0.004160546  | #N/A                   |
| _NIVVVEGVR_.2                                                        | 0.345410886  | #N/A                   |
| _DVVDYIIFGTVIQEVK_.2                                                 | -0.40321859  | #N/A                   |
| _EILSPVDIIDR_.2                                                      | 0.194344247  | #N/A                   |
| _NGGS[Phospho (STY)]PALNNNPR_.2                                      | -0.156718049 | Q99JY8_S19_M1_Plpp3    |
| _DYEEIGPSIC[Carbamidomethyl (C)]R_.2                                 | -0.271589585 | #N/A                   |
| _AEPEDHYFLLTEPPLNTPENR_.3                                            | -0.397224209 | #N/A                   |
| _GVDDLDFFIGDEAIEKPTYATK_.3                                           | -0.068843899 | #N/A                   |
| _YSYVC[Carbamidomethyl (C)]PDLVK_.2                                  | 0.170758755  | #N/A                   |
| _QYTGVAISK_.2                                                        | 0.26277101   | #N/A                   |
| _DITYFIQQLR_.2                                                       | -0.228177942 | #N/A                   |
| _LPAC[Carbamidomethyl (C)]VVDC[Carbamidomethyl (C)]GTGYTK_.2         | 0.400459002  | #N/A                   |
| _HNPVFGVM[Oxidation (M)]S[Phospho (STY)]_.2                          | 0.103338322  | Q99JY9_S418_M1_Actr3   |
| _TLTGTVIDSGDGVTHVIPVAEGYVIGSC[Carbamidomethyl (C)]IK_.3              | -0.181622311 | #N/A                   |
| _VSNQS[Phospho (STY)]FTEIER_.2                                       | 0.215407694  | Q99K28_S239_M1_Arfgap2 |
| _AIS[Phospho (STY)]SDM[Oxidation (M)]FFGR_.2                         | -0.256028137 | Q99K28_S431_M1_Arfgap2 |
| _HGTDLWIDSM[Oxidation (M)]NSAPSHS[Phospho (STY)]PEKK_.4              | -0.236656521 | Q99K28_S145_M1_Arfgap2 |
| _ [Acetyl (Protein N-term)]AAS[Phospho (STY)]PSKTEIQTIFK_.2          | -0.153664015 | Q99K28_S4_M1_Arfgap2   |
| _LAYQELQIDR_.2                                                       | -0.228929985 | #N/A                   |
| _YWGPA[Phospho (STY)]PTHK_.2                                         | 0.040704492  | Q99K30_S573_M1_Eps8l2  |
| _RAEDSYTSQHTS[Phospho (STY)]PESEGAPHL_.3                             | -0.499856014 | Q99K30_S720_M1_Eps8l2  |
| _RRES[Phospho (STY)]QDEEPR_.2                                        | -0.070682234 | Q99K30_S242_M1_Eps8l2  |
| _QSQTSSSDTPAS[Phospho (STY)]PVSSSTPNSDIM[Oxidation (M)]DIN_.3        | 0.204758057  | Q99K46_S906_M1_Usp11   |
| _AVVIVDDR_.2                                                         | -0.198720682 | #N/A                   |
| _AGEVFIHK_.2                                                         | -0.21492489  | #N/A                   |
| _VELDNMPLR_.2                                                        | 0.289406186  | #N/A                   |
| _FAC[Carbamidomethyl (C)]HSASLTVR_.3                                 | -0.267346046 | #N/A                   |
| _SC[Carbamidomethyl (C)]SHQTS[Phospho (STY)]APSLK_.2                 | -0.058933724 | Q99K70_S381_M1_Rragc   |
| _ [Acetyl (Protein N-term)]SLQYGAEETPLAGS[Phospho (STY)]YGAADSFPK_.3 | 0.442623769  | Q99K70_S15_M1_Rragc    |
| _MSPNETLFLEST[Phospho (STY)]NK_.2                                    | 0.015560806  | Q99K70_T95_M1_Rragc    |
| _LLS[Phospho (STY)]SSDDANILSSPTDR_.2                                 | -0.026791319 | Q99K74_S860_M1_Med24   |
| _ELLAVPNNYK_.2                                                       | -0.243959721 | #N/A                   |
| _ASLYNAVTTEDVEK_.2                                                   | -0.161679308 | #N/A                   |
| _QVVNFGPGPAK_.2                                                      | 0.548655703  | #N/A                   |
| _EC[Carbamidomethyl (C)]PSVLDYK_.2                                   | 0.360241153  | #N/A                   |
| _DDLGFSLR_.2                                                         | 0.076808146  | #N/A                   |
| _LPHSVLLEIQK_.2                                                      | -0.101469384 | #N/A                   |
| _SQM[Oxidation (M)]IYEIIDNSQGFYVC[Carbamidomethyl (C)]PVER_.3        | -0.311689262 | #N/A                   |
| _SADYVVTGAWSAK_.2                                                    | 0.097188689  | #N/A                   |
| _ALLEVLGR_.2                                                         | 0.248147252  | #N/A                   |
| _HVEPGNAAIQEK_.2                                                     | 0.181634525  | #N/A                   |
| _TVQQHAGETDPVTM[Oxidation (M)]R_.2                                   | 0.225371857  | #N/A                   |
| _VTHLSTLQVGSLSVK_.3                                                  | 0.305684354  | #N/A                   |

|                                                                         |              |                       |
|-------------------------------------------------------------------------|--------------|-----------------------|
| _GLVAAYSGES[Phospho (STY)]DS[Phospho (STY)]EEEQER_.2                    | 0.322698502  | Q99KG3_S736_M2_Rbm10  |
| _LASDDRPS[Phospho (STY)]PPR_.2                                          | 0.213381403  | Q99KG3_S723_M1_Rbm10  |
| _ [Acetyl (Protein N-term)]AHS[Phospho (STY)]PVQSGLPGMQNLK_.2           | -0.174216682 | Q99KH8_S4_M1_Stk24    |
| _SQFTITPGSEQIR_.2                                                       | 0.13659817   | #N/A                  |
| _NAVTQEFGPVPDAR_.2                                                      | -0.172180554 | #N/A                  |
| _VDVSPTSQR_.2                                                           | -0.066800792 | #N/A                  |
| _SDFDPGQDTYQHPPK_.3                                                     | 0.050369468  | #N/A                  |
| _NTIVTSYNR_.2                                                           | -0.03145044  | #N/A                  |
| _FNPETDFLTGK_.2                                                         | -0.145586167 | #N/A                  |
| _EHAALPR_.2                                                             | -0.051283953 | #N/A                  |
| _IVYGHLDLDPANQEIER_.3                                                   | -0.385310315 | #N/A                  |
| _DFAPGKPLK_.2                                                           | 0.302497619  | #N/A                  |
| _FKLEAPDADELPR_.2                                                       | -0.251932079 | #N/A                  |
| _LEAPDADELPR_.2                                                         | 0.127311901  | #N/A                  |
| _LTGSLSGWTSPK_.2                                                        | 0.104836676  | #N/A                  |
| _EGWPLDIR_.2                                                            | 0.143087592  | #N/A                  |
| _IHETNLK_.2                                                             | 0.203116593  | #N/A                  |
| _DVGGIVLANAC[Carbamidomethyl (C)]GPC[Carbamidomethyl (C)]IGQWDR_.2      | 0.463722817  | #N/A                  |
| _QGLPLTFADPSDYNK_.2                                                     | -0.15103748  | #N/A                  |
| _DGYAQILR_.2                                                            | -0.002240033 | #N/A                  |
| _QALAHGLK_.2                                                            | 0.184047327  | #N/A                  |
| _DVGGIVLANAC[Carbamidomethyl (C)]GPC[Carbamidomethyl (C)]IGQWDRK_.3     | 0.048109682  | #N/A                  |
| _TDIANLAEEFK_.2                                                         | 0.104210576  | #N/A                  |
| _NDANPETHAFVTSPEIVTALAIGTLK_.3                                          | 0.190863273  | #N/A                  |
| _WVVGIDENYGEGSSR_.2                                                     | -0.439834215 | #N/A                  |
| _VAGILTVK_.2                                                            | -0.238192939 | #N/A                  |
| _AKDINQEVYNFLATAGAK_.3                                                  | -0.150745847 | #N/A                  |
| _GHLDNISNNLLIGAINIENGK_.3                                               | -0.569642989 | #N/A                  |
| _C[Carbamidomethyl (C)]TTDHISAGPWLK_.2                                  | 0.14525      | #N/A                  |
| _VAM[Oxidation (M)]SHFEPSEYIR_.3                                        | -0.301699695 | #N/A                  |
| _VGLIGSC[Carbamidomethyl (C)]TNSSYEDM[Oxidation (M)]GR_.2               | 0.034630086  | #N/A                  |
| _VAM[Oxidation (M)]QDATAQM[Oxidation (M)]AM[Oxidation (M)]LQFISSGLPK_.3 | -0.278243463 | #N/A                  |
| _SDFDPGQDTYQHPPKDSSGQR_.4                                               | -0.010769401 | #N/A                  |
| _DINQEVYNFLATAGAK_.2                                                    | -0.035247305 | #N/A                  |
| _VAVPSTIHC[Carbamidomethyl (C)]DHLIEAQVGGEK_.3                          | -0.018702899 | #N/A                  |
| _VAVPSTIHC[Carbamidomethyl (C)]DHLIEAQVGGEKDLR_.4                       | 0.070660306  | #N/A                  |
| _HPNGTQETILLNHTFNETQIEWFR_.4                                            | -0.406153453 | #N/A                  |
| _AKS[Phospho (STY)]VEVDNK_.2                                            | -0.182288942 | Q99KJ0_S154_M1_Ubxn2a |
| _C[Carbamidomethyl (C)]LS[Phospho (STY)]PTEQKK_.2                       | 0.463413149  | Q99KJ0_S54_M1_Ubxn2a  |
| _YADLPGIAR_.2                                                           | 0.103117301  | #N/A                  |
| _WSPVASTLPELVQR_.2                                                      | 0.25036219   | #N/A                  |
| _LLGPDAAINLADPDGALAK_.2                                                 | -0.15786943  | #N/A                  |
| _QQLVASHLEK_.2                                                          | 0.287970798  | #N/A                  |
| _ASVEDADTQNK_.2                                                         | 0.183274805  | #N/A                  |
| _VSALDLAVLDQVEAR_.2                                                     | -0.1610889   | #N/A                  |
| _LLHEVQELTTEVEK_.3                                                      | 0.218909972  | #N/A                  |
| _ENLATVEGNFASIDAR_.2                                                    | -0.177881256 | #N/A                  |

|                                                                                          |              |                        |
|------------------------------------------------------------------------------------------|--------------|------------------------|
| _LTELEATVR_.2                                                                            | 0.053826516  | #N/A                   |
| _DNTALLTQVQTTM[Oxidation (M)]R_.2                                                        | 0.157302066  | #N/A                   |
| _VHQLYETIQR_.2                                                                           | 0.620280098  | #N/A                   |
| _GLDFSDR_.2                                                                              | -0.438991089 | #N/A                   |
| _TGYES[Phospho (STY)]GDYEM[Oxidation (M)]LGEGLGVK_.2                                     | -0.002687891 | Q99KJ8_S83_M1_Dctn2    |
| _DLS[Phospho (STY)]PQQMVVR_.2                                                            | 0.274932737  | Q99KK9_S66_M1_Hars2    |
| _TIDLGAAAHYTGDKAS[Phospho (STY)]PDQNASTHTPQSSAK_.4                                       | 0.039561159  | Q99KN9_S307_M1_Clint1  |
| _[Acetyl (Protein N-term)]ASPAAGGVVIVGSGLIGR_.2                                          | -0.297892292 | #N/A                   |
| _SYS[Phospho (STY)]FDEVK_.2                                                              | -0.495652724 | Q99KQ4_S472_M1_Nampt   |
| _GLGSGDDLSSSS[Phospho (STY)]LNSSR_.2                                                     | -0.077810979 | Q99KR6_S163_M1_Rnf34   |
| _AS[Phospho (STY)]LSDLSSLEEVEGMSVR_.2                                                    | 0.194545381  | Q99KR6_S258_M1_Rnf34   |
| _DQHNGS[Phospho (STY)]LTDPSVHEK_.3                                                       | 0.087310116  | Q99KU0_S23_M1_Vmp1     |
| _LAIQGPEDS[Phospho (STY)]PSR_.2                                                          | -0.37678068  | Q99KX1_S237_M1_Mlf2    |
| _DSDS[Phospho (STY)]GLEQMSIGHHIR_.3                                                      | 0.138774294  | Q99KX1_S145_M1_Mlf2    |
| _EPETGLDNTS[Phospho (STY)]PK_.2                                                          | 0.010867193  | Q99KY4_S809_M1_Gak     |
| _YFDNKDDDS[Phospho (STY)]DPETANDLPK_.3                                                   | -0.124876864 | Q99KZ6_S60_M1_Znf639   |
| _DLFSLDSEGPSPTS[Phospho (STY)]PPLR_.2                                                    | -0.17211991  | Q99L02_S236_M1_Pagr1a  |
| _VLPSC[Carbamidomethyl (C)]DLAR_.2                                                       | 0.255424267  | #N/A                   |
| _ATAQEAQSLGGR_.2                                                                         | 0.066894527  | #N/A                   |
| _DLGLAQDSATSTK_.2                                                                        | 0.25658851   | #N/A                   |
| _TPILLGSLAHQIYR_.2                                                                       | 0.237475913  | #N/A                   |
| _VTQQVNPIFSNS[Phospho (STY)]Q_.2                                                         | -0.384932125 | Q99L27_S347_M1_Gmpr2   |
| _AETAPLPTSVDDT[Phospho (STY)]PEVLNR_.2                                                   | 0.167408135  | Q99L43_T50_M1_Cds2     |
| _LDGETAS[Phospho (STY)]DSESR_.2                                                          | -0.040033511 | Q99L43_S32_M1_Cds2     |
| _ESESEAKLDGETAS[Phospho (STY)]DSESR_.2                                                   | 0.206653696  | Q99L43_S32_M1_Cds2     |
| _EDAPPEDKES[Phospho (STY)]ESEAK_.2                                                       | 0.216355481  | Q99L43_S20_M1_Cds2     |
| _ALS[Phospho (STY)]NLSSR_.2                                                              | 0.038854808  | Q99L43_S59_M1_Cds2     |
| _EDAPPEDKESESEAKLDGETAS[Phospho (STY)]DSESR_.4                                           | -0.066170368 | Q99L43_S32_M1_Cds2     |
| _DYTYEELLNR_.2                                                                           | -0.171487883 | #N/A                   |
| _[Acetyl (Protein N-term)]S[Phospho (STY)]GDEM[Oxidation (M)]IFDPTM[Oxidation (M)]SKK_.2 | -0.481982809 | #N/A                   |
| _[Acetyl (Protein N-term)]S[Phospho (STY)]GDEM[Oxidation (M)]IFDPTM[Oxidation (M)]SK_.2  | -0.512603493 | #N/A                   |
| _KKDAS[Phospho (STY)]DDLDDLNFNQK_.3                                                      | -0.214775332 | Q99L45_S67_M1_Eif2s2   |
| _IFDIDEAEEAIKDVK_.3                                                                      | 0.25323665   | #N/A                   |
| _EYVTC[Carbamidomethyl (C)]HTC[Carbamidomethyl (C)]R_.2                                  | 0.04598138   | #N/A                   |
| _IES[Phospho (STY)]DAQEPAEPEDDLDIMLGNK_.3                                                | -0.05649452  | Q99L45_S105_M1_Eif2s2  |
| _AIEINPDSAQPYK_.2                                                                        | 0.117033202  | #N/A                   |
| _GAAIEALNDGELQK_.2                                                                       | 0.006349536  | #N/A                   |
| _AIDLFTDAIK_.2                                                                           | 0.274196809  | #N/A                   |
| _KGAAIEALNDGELQK_.3                                                                      | 0.293046332  | #N/A                   |
| _QDPSVLHTEEMR_.3                                                                         | 0.324842517  | #N/A                   |
| _GSPVSEIGWETPPES[Phospho (STY)]PR_.2                                                     | 0.066195005  | Q99L88_S218_M1_Sntb1   |
| _KGSPVSEIGWETPPES[Phospho (STY)]PR_.3                                                    | 0.122167147  | Q99L88_S218_M1_Sntb1   |
| _GDQVLNFS[Phospho (STY)]DAEDLIDDSK_.2                                                    | -0.017316852 | Q99L90_S282_M1_Mcrs1   |
| _GDQVLNFS[Phospho (STY)]DAEDLIDDSK_.3                                                    | -0.126974093 | Q99L90_S282_M1_Mcrs1   |
| _QAEESHRS[Phospho (STY)]PIPK_.2                                                          | -0.289866079 | Q99LB0_S160_M1_Dnttip1 |
| _VLITGATGLLGR_.2                                                                         | 0.005942103  | #N/A                   |
| _AVLENNLGA AVL R_.2                                                                      | 0.218994907  | #N/A                   |

|                                                                        |              |                          |
|------------------------------------------------------------------------|--------------|--------------------------|
| _LQSWLYASR_2                                                           | 0.116933194  | #N/A                     |
| _QDDWTFHYLR_2                                                          | 0.01247645   | #N/A                     |
| _VITVDGNIC[Carbamidomethyl (C)]SGK_2                                   | 0.031114491  | #N/A                     |
| _VTSAYLQDIENAYKK_3                                                     | -0.066968148 | #N/A                     |
| _LLQYADALEHLLSTGQGVVLER_3                                              | -0.033172357 | #N/A                     |
| _VTSAYLQDIENAYK_2                                                      | 0.016877395  | #N/A                     |
| _TEVLNYTTIPVYLPEITIGAHQGSR_3                                           | -0.198806093 | #N/A                     |
| _YAPGYNAEVGDK_2                                                        | -0.292765039 | #N/A                     |
| _LNVAPVSDIIEIK_2                                                       | 0.287775763  | #N/A                     |
| _GLLPEELTPLILETQK_2                                                    | 0.530466858  | #N/A                     |
| _TIYAGNALC[Carbamidomethyl (C)]TVK_2                                   | 0.431080083  | #N/A                     |
| _VLVAQHDAYK_2                                                          | 0.425460272  | #N/A                     |
| _APSSSSVGISEWLDQK_2                                                    | 0.099411593  | #N/A                     |
| _AAVDAGFVPNDM[Oxidation (M)]QVGQTGK_2                                  | 0.013509302  | #N/A                     |
| _SPDTFVR_2                                                             | 0.124635552  | #N/A                     |
| _VVPENTEILK_2                                                          | 0.268438951  | #N/A                     |
| _SDRPELTGAK_2                                                          | -0.033498579 | #N/A                     |
| _GTSFEAAATSGGSASSEK_2                                                  | -0.146224366 | #N/A                     |
| _LLYDLADQLHAAVGSAR_2                                                   | 0.200526837  | #N/A                     |
| _SPPREGS[Phospho (STY)]QGELTPANSQSR_3                                  | -0.513895479 | Q99LD4_S454_M1_Gps1      |
| _EGS[Phospho (STY)]QGELTPANSQSR_2                                      | -0.027977375 | Q99LD4_S454_M1_Gps1      |
| _LFLELEPQVR_2                                                          | -0.269645945 | #N/A                     |
| _GERDS[Phospho (STY)]QTQAILTK_2                                        | 0.142522613  | Q99LD4_S220_M1_Gps1      |
| _NLDFQDVLDK_2                                                          | -0.108660206 | #N/A                     |
| _MLQADPNKVS[Phospho (STY)]PR_2                                         | -0.253271392 | Q99LF4_S208_M1_Rtcb      |
| _AETETS[Phospho (STY)]PGHAPDR_2                                        | 0.144046598  | Q99LG1_S178_M1_Tmem51    |
| _TYSEC[Carbamidomethyl (C)]EDGTYS[Phospho (STY)]PEISWHHGK_3            | 0.385916477  | Q99LH2_S425_M1_Ptdss1    |
| _TVAS[Phospho (STY)]DLQK_2                                             | -0.124376927 | Q99LH9_S342_M1_Sh3bp5l   |
| _RGS[Phospho (STY)]DIGVR_2                                             | -0.423028428 | Q99LH9_S377_M1_Sh3bp5l   |
| _GLSDHAS[Phospho (STY)]LDGQELGAQSR_2                                   | -0.490674738 | Q99LH9_S361_M1_Sh3bp5l   |
| _TVAS[Phospho (STY)]DLQKC[Carbamidomethyl (C)]DS[Phospho (STY)]VEHLR_3 | 0.08741332   | Q99LH9_S342_M2_Sh3bp5l   |
| _FHSGNKS[Phospho (STY)]PEVLR_3                                         | 0.260169193  | Q99LI2_S433_M1_Clcc1     |
| _KEVSPDS[Phospho (STY)]SEAEELSDC[Carbamidomethyl (C)]LHR_3             | 0.026845811  | Q99LI2_S58_M1_Clcc1      |
| _EVSPDS[Phospho (STY)]SEAEELSDC[Carbamidomethyl (C)]LHR_3              | -0.506331353 | Q99LI2_S58_M1_Clcc1      |
| _RPNEDS[Phospho (STY)]DEDEEKGAVVPPVHDIYR_4                             | 0.213962465  | Q99LI7_S691_M1_Cstf3     |
| _ALQNAVSTFVNR_2                                                        | 0.356107087  | #N/A                     |
| _ASSTTELPPEYLTSPLSQQS[Phospho (STY)]QLPPK_3                            | -0.215741099 | Q99LI8_S246_M1_Hgs       |
| _FQSQADQDQQASGLQS[Phospho (STY)]PPSR_2                                 | 0.222228692  | Q99LI0_S481_M1_Cttnbp2nl |
| _DLS[Phospho (STY)]PTLLDNSAAK_2                                        | -0.166124989 | Q99LI0_S488_M1_Cttnbp2nl |
| _GLSVSGPC[Carbamidomethyl (C)]GSR[Phospho (STY)]PQQTPMES_2             | -0.168491299 | Q99LL5_S493_M1_Pwp1      |
| _GKLQEEGGS[Phospho (STY)]EEEEAGNPSEDGM[Oxidation (M)]QSGPTQAPPR_3      | 0.114245696  | Q99LL5_S49_M1_Pwp1       |
| _DLLEVADILEK_2                                                         | -0.196831531 | #N/A                     |
| _VTVAGLAGKDPVQC[Carbamidomethyl (C)]SR_3                               | 0.25994398   | #N/A                     |
| _VTTHPLAK_2                                                            | 0.170699706  | #N/A                     |
| _DVMIC[Carbamidomethyl (C)]PDTSLDAK_2                                  | 0.384322485  | #N/A                     |
| _VEKDGLILTSR_2                                                         | -0.376412042 | #N/A                     |
| _TQGPYDVVVLPGGNLGAQNLSESPM[Oxidation (M)]VK_3                          | 0.116577735  | #N/A                     |

|                                                              |              |                         |
|--------------------------------------------------------------|--------------|-------------------------|
| _GAEEM[Oxidation (M)]ETVIPVDVMR_2                            | 0.371174745  | #N/A                    |
| _PFLDIQK_2                                                   | 0.063460618  | #N/A                    |
| _IEFDDFEEC[Carbamidomethyl (C)]LLR_2                         | 0.129659987  | #N/A                    |
| _EC[Carbamidomethyl (C)]KIEFDDFEEC[Carbamidomethyl (C)]LLR_3 | -0.030931071 | #N/A                    |
| _HFM[Oxidation (M)]FLSAEQPYK_2                               | -0.163517176 | #N/A                    |
| _EWIEC[Carbamidomethyl (C)]AHGIGGTR_3                        | 0.22245737   | #N/A                    |
| _RGS[Phospho (STY)]FEAGR_2                                   | -0.217547755 | Q99M08_S19_M1_          |
| _RGS[Phospho (STY)]FEAGR_2                                   | 0.008680521  | Q99M08_S19_M1_          |
| _S[Phospho (STY)]PS[Phospho (STY)]PKPTK_2                    | 0.015517152  | Q99M28_S155_M2_Rnps1    |
| _RS[Phospho (STY)]PS[Phospho (STY)]PKPTK_2                   | -0.078345035 | Q99M28_S155_M2_Rnps1    |
| _APS[Phospho (STY)]PTKR_2                                    | -0.101634407 | Q99M28_S27_M1_Rnps1     |
| _SSTRAPS[Phospho (STY)]PTK_2                                 | -0.124982579 | Q99M28_S27_M1_Rnps1     |
| _ALVSYDGLNQR_2                                               | -0.265889984 | #N/A                    |
| _DC[Carbamidomethyl (C)]YPVQETFIR_2                          | 0.075289869  | #N/A                    |
| _SYETWIGVYTAK_2                                              | -0.196254002 | #N/A                    |
| _QVLYQQSSGHNNR_2                                             | -0.015686565 | #N/A                    |
| _GGASGPATPAPPQLS[Phospho (STY)]PVQA_2                        | -0.351160327 | Q99M85_S344_M1_Scrt1    |
| _VTIPVPAGVEDGQTVR_2                                          | 0.197142504  | #N/A                    |
| _NKPRS[Phospho (STY)]PVVELSK_3                               | -0.116953662 | Q99MK8_S670_M1_Grk2     |
| _SLEGLLQR_2                                                  | 0.513479224  | #N/A                    |
| _GEVNAADAFDIGS[Phospho (STY)]FDEEDTK_2                       | -0.54187615  | Q99MK8_S487_M1_Grk2     |
| _EAQQLVQR_2                                                  | 0.192200811  | #N/A                    |
| _S[Phospho (STY)]PVVELSK_2                                   | 0.113328863  | Q99MK8_S670_M1_Grk2     |
| _ETAATTETPESTEASPS[Phospho (STY)]V_2                         | -0.174095924 | Q99MN1_S594_M1_Kars1    |
| _DTSYLFITGPEVVK_2                                            | 0.268294425  | #N/A                    |
| _EFFNFLPLSSQDPAPIR_2                                         | 0.164574196  | #N/A                    |
| _IM[Oxidation (M)]DQAITVGAPVIGLNDSSGAR_2                     | -0.17683978  | #N/A                    |
| _IQEGVESLAGYADIFLR_2                                         | -0.392441607 | #N/A                    |
| _EQSESVNTAPESPS[Phospho (STY)]K_2                            | 0.038052383  | Q99MP8_S118_M1_Brap     |
| _SREQSESVNTAPES[Phospho (STY)]PSK_2                          | -0.438014371 | Q99MP8_S116_M1_Brap     |
| _GEPGS[Phospho (STY)]PGAAGQSGLPQPK_2                         | -0.123716787 | Q99MQ5_S265_M1_Col25a1  |
| _S[Phospho (STY)]IEEGDGAFG_2                                 | -0.445226164 | Q99MR1_S137_M1_Gigyf1   |
| _ISS[Phospho (STY)]PPGPPGDLEDEGLK_2                          | 0.272340244  | Q99MR1_S413_M1_Gigyf1   |
| _SQS[Phospho (STY)]WDDRGER_2                                 | -0.107994938 | Q99MR1_S157_M1_Gigyf1   |
| _STS[Phospho (STY)]PDGGPR_2                                  | -0.151683014 | Q99MR1_S228_M1_Gigyf1   |
| _GLEEEEEEEEPS[Phospho (STY)]EGVDEERPEAGGK_3                  | -0.209453277 | Q99MR1_S343_M1_Gigyf1   |
| _ [Acetyl (Protein N-term)]ASESS[Phospho (STY)]PLLAYR_2      | -0.414010619 | Q99MR3_S6_M1_Slc12a9    |
| _ [Acetyl (Protein N-term)]GDS[Phospho (STY)]DDEYDRR_2       | 0.016073921  | Q99MR6_S4_M1_Srrt       |
| _ERFS[Phospho (STY)]PPRHEL[Phospho (STY)]PPQK_3              | 0.216693453  | Q99MR6_S67_M2_Srrt      |
| _HEL[Phospho (STY)]PPQKR_2                                   | 0.21242768   | Q99MR6_S74_M1_Srrt      |
| _FS[Phospho (STY)]PPRHEL[Phospho (STY)]PPQKR_3               | 0.360846987  | Q99MR6_S67_M2_Srrt      |
| _ [Acetyl (Protein N-term)]GDS[Phospho (STY)]DDEYDR_2        | 0.085951107  | Q99MR6_S4_M1_Srrt       |
| _ERFS[Phospho (STY)]PPR_2                                    | 0.155890833  | Q99MR6_S67_M1_Srrt      |
| _LREC[Carbamidomethyl (C)]ELS[Phospho (STY)]PGVNR_3          | -0.301772771 | Q99MR6_S492_M1_Srrt     |
| _GSWVS[Phospho (STY)]PSR_2                                   | -0.0588102   | Q99MX7_S521_M1_Tmem121b |
| _GHLENEGGPHGYVNTLAVASQN_3                                    | -0.276207964 | #N/A                    |
| _GNPVPQQYVWVK_2                                              | 0.124663293  | #N/A                    |

|                                                                                 |              |                       |
|---------------------------------------------------------------------------------|--------------|-----------------------|
| _LLLHC[Carbamidomethyl (C)]EGR_.2                                               | -0.245113689 | #N/A                  |
| _GTYLTHEAK_.2                                                                   | 0.255271009  | #N/A                  |
| _GTYLTHEAKGS[Phospho (STY)]DDAPDADTAIINAEGGQSGGDDKK_.4                          | -0.211157513 | Q99N28_S368_M1_Cadm3  |
| _GSDDAPDADTAIINAEGGQS[Phospho (STY)]GGDDKK_.3                                   | 0.433220964  | Q99N28_S386_M1_Cadm3  |
| _EDDGANIVC[Carbamidomethyl (C)]SVNHESLK_.2                                      | 0.299446218  | #N/A                  |
| _GSDDAPDADTAIINAEGGQSGGDDKKEYFI_.3                                              | -0.06111482  | #N/A                  |
| _LALQYVPEPS[Phospho (STY)]PGK_.2                                                | -0.449131106 | Q99N50_S799_M1_Sytl2  |
| _LALQYVPEPS[Phospho (STY)]PGKK_.3                                               | 0.116628549  | Q99N50_S799_M1_Sytl2  |
| _SAS[Phospho (STY)]EPSLHR_.2                                                    | -0.40441838  | Q99N57_S621_M1_Raf1   |
| _AAHTEDINAC[Carbamidomethyl (C)]TLTTS[Phospho (STY)]PR_.2                       | -0.161848392 | Q99N57_S642_M1_Raf1   |
| _RAS[Phospho (STY)]DDGKLTDSK_.2                                                 | -0.223876114 | Q99N57_S43_M1_Raf1    |
| _GGDSIGET[Phospho (STY)]PT[Phospho (STY)]PGASK_.2                               | -0.451718944 | Q99NB9_T326_M2_Sf3b1  |
| _AKGSET[Phospho (STY)]PGAT[Phospho (STY)]PGSK_.2                                | -0.048231041 | Q99NB9_T244_M2_Sf3b1  |
| _WDETPASQMGGST[Phospho (STY)]PVLTPGK_.2                                         | -0.211356055 | Q99NB9_T350_M1_Sf3b1  |
| _GSET[Phospho (STY)]PGAT[Phospho (STY)]PGSK_.2                                  | -0.39197101  | Q99NB9_T244_M2_Sf3b1  |
| _DT[Phospho (STY)]PGHSGSWAETPR_.2                                               | -0.332985916 | Q99NB9_T303_M1_Sf3b1  |
| _TM[Oxidation (M)]IIS[Phospho (STY)]PERLDPFADGGKT[Phospho (STY)]PDPK_.3         | -0.478156718 | Q99NB9_S129_M2_Sf3b1  |
| _KLSSWDQAET[Phospho (STY)]PGHT[Phospho (STY)]PSLR_.3                            | -0.268927756 | Q99NB9_T223_M2_Sf3b1  |
| _RWDQTADQT[Phospho (STY)]PGAT[Phospho (STY)]PK_.2                               | 0.337087344  | Q99NB9_T207_M2_Sf3b1  |
| _QGS[Phospho (STY)]PTQSPPADTSFGSR_.2                                            | -0.238252853 | Q99NE5_S1023_M1_Rims1 |
| _GRS[Phospho (STY)]QDYPDRLEK_.3                                                 | -0.361537586 | Q99NE5_S346_M1_Rims1  |
| _S[Phospho (STY)]LDEIHPTRR_.3                                                   | -0.427757531 | Q99NE5_S812_M1_Rims1  |
| _S[Phospho (STY)]LDEIHPTR_.2                                                    | -0.279055518 | Q99NE5_S812_M1_Rims1  |
| _SGS[Phospho (STY)]IEQASLVVEER_.2                                               | -0.314083279 | Q99NE5_S1051_M1_Rims1 |
| _ETS[Phospho (STY)]PISSHVPVTWQPSK_.2                                            | -0.196810212 | Q99NE5_S413_M1_Rims1  |
| _GRS[Phospho (STY)]QDYPDR_.2                                                    | -0.08811266  | Q99NE5_S346_M1_Rims1  |
| _S[Phospho (STY)]QDYPDRLEK_.2                                                   | -0.082967328 | Q99NE5_S346_M1_Rims1  |
| _ETS[Phospho (STY)]PISSHVPVTWQPSKEGDR_.3                                        | -0.050614962 | Q99NE5_S413_M1_Rims1  |
| _IQIQHAS[Phospho (STY)]PENDR_.2                                                 | 0.117132384  | Q99NE5_S927_M1_Rims1  |
| _SS[Phospho (STY)]DSDVSDVSAISR_.2                                               | 0.207779396  | Q99NE5_S1111_M1_Rims1 |
| _SASTNC[Carbamidomethyl (C)]LRPDTSLSHS[Phospho (STY)]PER_.3                     | -0.205861575 | Q99NE5_S899_M1_Rims1  |
| _ASQSS[Phospho (STY)]LESSSGPPC[Carbamidomethyl (C)]IR_.2                        | -0.364624376 | Q99NE5_S1451_M1_Rims1 |
| _RAS[Phospho (STY)]QSSLESSSGPPC[Carbamidomethyl (C)]IR_.3                       | -0.076496608 | Q99NE5_S1448_M1_Rims1 |
| _IPESSHPPLESSSS[Phospho (STY)]SFESQK_.3                                         | 0.487358753  | Q99NE5_S547_M1_Rims1  |
| _SASTNC[Carbamidomethyl (C)]LRPDTSLSHS[Phospho (STY)]PERER_.4                   | -0.037325586 | Q99NE5_S899_M1_Rims1  |
| _S[Phospho (STY)]AEC[Carbamidomethyl (C)]LHM[Oxidation (M)]TSELQPSLDR_.3        | -0.147959299 | Q99NE5_S866_M1_Rims1  |
| _FKQTTGSGSS[Phospho (STY)]QELDHEQYSK_.3                                         | 0.100512507  | Q99NE5_S1082_M1_Rims1 |
| _S[Phospho (STY)]TETGM[Oxidation (M)]AAEMR_.2                                   | 0.171313174  | Q99NE5_S1240_M1_Rims1 |
| _STSQLS[Phospho (STY)]QTESGHKK_.2                                               | 0.160402371  | Q99NE5_S1224_M1_Rims1 |
| _SC[Carbamidomethyl (C)]DNASAKS[Phospho (STY)]SDSDVSDVSAISR_.3                  | -0.11087153  | Q99NE5_S1110_M1_Rims1 |
| _SRS[Phospho (STY)]SEHSSIR_.2                                                   | -0.043109843 | Q99NE5_S988_M1_Rims1  |
| _QPSRESTDGSINSY[Phospho (STY)]SSEGNLIFPGVR_.3                                   | -0.284522386 | Q99NE5_Y1268_M1_Rims1 |
| _S[Phospho (STY)]VS[Phospho (STY)]PHRGDDQGRPR_.3                                | -0.467827988 | Q99NE5_S788_M2_Rims1  |
| _S[Phospho (STY)]RSVS[Phospho (STY)]PHR_.2                                      | -0.108055852 | Q99NE5_S786_M2_Rims1  |
| _LQTHDESSLPLQPS[Phospho (STY)]PFMPR_.3                                          | 0.026727076  | Q99NE5_S716_M1_Rims1  |
| _QGS[Phospho (STY)]KEC[Carbamidomethyl (C)]PGC[Carbamidomethyl (C)]AQLVGPSSR_.3 | -0.088921111 | Q99NF2_S166_M1_Nsmf   |
| _M[Oxidation (M)]YS[Phospho (STY)]VDGVSDDVPIR_.2                                | -0.05737708  | Q99NF2_S206_M1_Nsmf   |

|                                                                                      |              |                         |
|--------------------------------------------------------------------------------------|--------------|-------------------------|
| _SWS[Phospho (STY)]DPTPMK_.2                                                         | 0.193934127  | Q99NF2_S294_M1_Nsmf     |
| _ERS[Phospho (STY)]FS[Phospho (STY)]RS[Phospho (STY)]WSDPTPMK_.2                     | 0.31335668   | Q99NF2_S288_M3_Nsmf     |
| _LEDNDS[Phospho (STY)]AT[Phospho (STY)]SEADAEIAAK_.2                                 | 0.002472788  | Q99NF3_S96_M2_Cep41     |
| _GGQNLPTSC[Carbamidomethyl (C)]PASHSS[Phospho (STY)]PR_.3                            | 0.17091733   | Q99NF3_S358_M1_Cep41    |
| _NS[Phospho (STY)]PLDC[Carbamidomethyl (C)]GSASPNK_.2                                | 0.182946862  | Q99NH0_S2055_M1_Ankrd17 |
| _EHYPVSSPSS[Phospho (STY)]PS[Phospho (STY)]PPAQPGGVSR_.3                             | -0.141290974 | Q99NH0_S2041_M2_Ankrd17 |
| _RSSDPALTGLS[Phospho (STY)]TSVSDNNFSSEEPSR_.3                                        | 0.105902094  | Q99NH2_S152_M1_Pard3    |
| _NNYSPGRFS[Phospho (STY)]PDSHC[Carbamidomethyl (C)]VANR_.3                           | 0.033896706  | Q99NH2_S383_M1_Pard3    |
| _LLQTC[Carbamidomethyl (C)]FSS[Phospho (STY)]PTDDSM[Oxidation (M)]DR_.2              | 0.409852262  | Q99P31_S349_M1_Hspbp1   |
| _KAQIITEKTS[Phospho (STY)]PK_.2                                                      | -0.231453235 | Q99P72_S489_M1_Rtn4     |
| _GSGS[Phospho (STY)]VDETLFALPAASEPVIPSSAEK_.3                                        | -0.238130688 | Q99P72_S167_M1_Rtn4     |
| _LPS[Phospho (STY)]DTEKEDR_.2                                                        | 0.299248724  | Q99P72_S953_M1_Rtn4     |
| _HQAQIDHYLGLANK_.3                                                                   | -0.401397413 | #N/A                    |
| _ [Acetyl (Protein N-term)]M[Oxidation (M)]EDIDQSSLVSSADS[Phospho (STY)]PPRPPPAFK_.3 | -0.357679075 | Q99P72_S16_M1_Rtn4      |
| _TSNPFLVAIHDSEADYVTTDNLSK_.3                                                         | -0.412025129 | #N/A                    |
| _LSTEPS[Phospho (STY)]PEFSNYSEIAK_.2                                                 | 0.349670569  | Q99P72_S690_M1_Rtn4     |
| _GPLPAAPPT[Phospho (STY)]APERQPSWER_.3                                               | -0.19091307  | Q99P72_T98_M1_Rtn4      |
| _EAEEKLPS[Phospho (STY)]DTEKEDR_.2                                                   | -0.213157912 | Q99P72_S953_M1_Rtn4     |
| _VVKEDGVM[Oxidation (M)]S[Phospho (STY)]PEK_.2                                       | -0.003357776 | Q99P72_S344_M1_Rtn4     |
| _DDS[Phospho (STY)]PKEYTDLEVSNK_.2                                                   | -0.081914012 | Q99P72_S857_M1_Rtn4     |
| _RRGS[Phospho (STY)]GSVDETLFALPAASEPVIPSSAEK_.3                                      | -0.396494778 | Q99P72_S165_M1_Rtn4     |
| _EHGYLGNLSAVASTEGTIEETLNEASR_.3                                                      | -0.502287432 | #N/A                    |
| _RGS[Phospho (STY)]GSVDETLFALPAASEPVIPSSAEK_.3                                       | 0.144471471  | Q99P72_S165_M1_Rtn4     |
| _AQIITEKTS[Phospho (STY)]PK_.2                                                       | 0.167504593  | Q99P72_S489_M1_Rtn4     |
| _AYLESEVAISEELVQK_.2                                                                 | -0.022480327 | #N/A                    |
| _ESLTVSETVTQHK_.2                                                                    | 0.032681663  | #N/A                    |
| _SKDKEDLVC[Carbamidomethyl (C)]SAALHNPQES[Phospho (STY)]PATLTK_.4                    | 0.409339464  | Q99P72_S329_M1_Rtn4     |
| _EDGVMS[Phospho (STY)]PEK_.2                                                         | 0.180086955  | Q99P72_S344_M1_Rtn4     |
| _LSAS[Phospho (STY)]PQEVGKPYLESFQPNLHITK_.3                                          | -0.52747269  | Q99P72_S768_M1_Rtn4     |
| _ESAEFVLEYSEM[Oxidation (M)]GSSFNGS[Phospho (STY)]PK_.3                              | 0.016747934  | Q99P72_S291_M1_Rtn4     |
| _AAPQS[Phospho (STY)]PSVPK_.2                                                        | -0.128014901 | Q99P88_S992_M1_Nup155   |
| _IALNLEG[Carbamidomethyl (C)]ALS[Phospho (STY)]PTSQEPR_.2                            | -0.313387677 | Q99PG2_S403_M1_Ogfr     |
| _S[Phospho (STY)]DSELEVKPSESLLR_.2                                                   | 0.171904982  | Q99PI5_S243_M1_Lpin2    |
| _VTVNYPPYISEAK_.2                                                                    | -0.240888658 | #N/A                    |
| _AVGFVSEDEYLEIQGITR_.2                                                               | -0.400997788 | #N/A                    |
| _EQSGEYEC[Carbamidomethyl (C)]SASNDVAAPVVR_.2                                        | 0.180391156  | #N/A                    |
| _GTGVPVGQK_.2                                                                        | -0.285517409 | #N/A                    |
| _VHLIVQVSPK_.2                                                                       | -0.389825152 | #N/A                    |
| _STILYAGNDK_.2                                                                       | -0.345004086 | #N/A                    |
| _AMDNVTVR_.2                                                                         | 0.334910938  | #N/A                    |
| _LASS[Phospho (STY)]PKDR_.2                                                          | 0.199043     | Q99PL5_S135_M1_Rrbp1    |
| _GKS[Phospho (STY)]PQLALR_.2                                                         | -0.219673422 | Q99PL6_S36_M1_Ubxn6     |
| _EALQNDWLFPFLR_.2                                                                    | 0.184887687  | #N/A                    |
| _SVLRPELLAAIEQLS_.2                                                                  | -0.179912752 | #N/A                    |
| _RAS[Phospho (STY)]PS[Phospho (STY)]PPR_.2                                           | -0.069611073 | Q99PP2_S101_M2_Znf318   |
| _RGS[Phospho (STY)]PS[Phospho (STY)]PPR_.2                                           | -0.365856564 | Q99PP2_S79_M2_Znf318    |
| _DQVVGGNVS[Phospho (STY)]PR_.2                                                       | 0.038789627  | Q99PP2_S2206_M1_Znf318  |

|                                                                              |              |                        |
|------------------------------------------------------------------------------|--------------|------------------------|
| _WAS[Phospho (STY)]PS[Phospho (STY)]PPR_.2                                   | -0.165340961 | Q99PP2_S69_M2_Znf318   |
| _LGS[Phospho (STY)]PVDGLQDM[Oxidation (M)]DRDDLTDSDVFTR_.3                   | -0.36308744  | Q99PP2_S205_M1_Znf318  |
| _S[Phospho (STY)]PGLC[Carbamidomethyl (C)]SDSSLEESLR_.2                      | 0.309611015  | Q99PP2_S167_M1_Znf318  |
| _RAS[Phospho (STY)]PS[Phospho (STY)]PPRGR_.3                                 | 0.30835279   | Q99PP2_S101_M2_Znf318  |
| _LKS[Phospho (STY)]DERPVHIK_.3                                               | -0.254016447 | Q99PP7_S1134_M1_Trim33 |
| _VAVSADPNVPNVIVTR_.2                                                         | -0.144288208 | #N/A                   |
| _[Acetyl (Protein N-term)]AEQEPTAEQLAQIAAENEEDEHSVNY[Phospho (STY)]KPPAQK_.4 | 0.169846057  | Q99PT1_Y27_M1_Arhgdia  |
| _TDYM[Oxidation (M)]VGSYGPR_.2                                               | -0.011159353 | #N/A                   |
| _S[Phospho (STY)]IQEIQELDKDDESLRK_.3                                         | -0.351835679 | Q99PT1_S34_M1_Arhgdia  |
| _LTLVC[Carbamidomethyl (C)]STAPGPLELDLTGDLESFKK_.3                           | -0.029196243 | #N/A                   |
| _YIQHTYR_.2                                                                  | 0.16904555   | #N/A                   |
| _SIQEIQELDKDDESLR_.3                                                         | -0.16776256  | #N/A                   |
| _IDKTDYM[Oxidation (M)]VGSYGPR_.3                                            | -0.334641326 | #N/A                   |
| _AEEYFLTPM[Oxidation (M)]EEAPK_.2                                            | -0.093841589 | #N/A                   |
| _ES[Phospho (STY)]PSHGELSAPEK_.2                                             | 0.073598941  | Q99PU5_S53_M1_Acsbg1   |
| _AAS[Phospho (STY)]LDGAEALWTTR_.2                                            | 0.290649625  | Q99PU5_S70_M1_Acsbg1   |
| _DDQQQGASLGTSQDNSQTSSLIDGQTLK_.3                                             | -0.121411483 | #N/A                   |
| _GGS[Phospho (STY)]FEM[Oxidation (M)]TDDDSAIR_.2                             | 0.025214875  | Q99PU8_S249_M1_Dhx30   |
| _ELAGNSST[Phospho (STY)]PPPV[Phospho (STY)]PGR_.2                            | -0.166621674 | Q99PV8_S381_M2_Bcl11b  |
| _FST[Phospho (STY)]PPGDLLDGGLSGR_.2                                          | -0.140097546 | Q99PV8_T744_M1_Bcl11b  |
| _SDDGLSAAS[Phospho (STY)]SPEPGTSELPGLK_.2                                    | 0.086360414  | Q99PV8_S495_M1_Bcl11b  |
| _VLDKSS[Phospho (STY)]PPSSR_.2                                               | 0.062069883  | Q99PV8_S96_M1_Bcl11b   |
| _VSEPVEIGIQVTPDEDDHLLS[Phospho (STY)]PTK_.3                                  | -0.691670073 | Q99PV8_S128_M1_Bcl11b  |
| _SPFLST[Phospho (STY)]PPLPPMPAGT[Phospho (STY)]PPPQPPAK_.3                   | -0.148997602 | Q99PV8_T406_M2_Bcl11b  |
| _TTGLVLAVC[Carbamidomethyl (C)]DTPHER_.2                                     | 0.096423792  | #N/A                   |
| _KYTEQITNEK_.2                                                               | -0.182861408 | #N/A                   |
| _LEALLQGGEVEEVILQAEK_.2                                                      | -0.256252259 | #N/A                   |
| _AGIFQSAK_.2                                                                 | -0.075359264 | #N/A                   |
| _NYDSM[Oxidation (M)]KDFEEMRK_.3                                             | 0.166617859  | #N/A                   |
| _AYAEFYR_.2                                                                  | -0.18018005  | #N/A                   |
| _NYDSMKDFEEMR_.3                                                             | -0.110841394 | #N/A                   |
| _[Acetyl (Protein N-term)]AAAVAAAGAGEPLS[Phospho (STY)]PEELLK_.2             | -0.353258447 | Q9CPQ3_S15_M1_Tomm22   |
| _LWGLTEM[Oxidation (M)]FPER_.2                                               | 0.079042517  | #N/A                   |
| _LQM[Oxidation (M)]EQQQQLQQR_.2                                              | -0.100215319 | #N/A                   |
| _AEAEEEEELEDDDELDLTLSEK_.3                                                   | -0.263829    | #N/A                   |
| _VELVPPTPAEIPAIQSVK_.2                                                       | 0.004709301  | #N/A                   |
| _LATFWHYAK_.2                                                                | -0.258308888 | #N/A                   |
| _TPS[Phospho (STY)]PGEQQVQEVK_.2                                             | 0.242684637  | Q9CPS8_S40_M1_         |
| _TPS[Phospho (STY)]PGEQQVQEVKK_.3                                            | -0.040397732 | Q9CPS8_S40_M1_         |
| _RFEELGVK_.2                                                                 | 0.154863698  | #N/A                   |
| _GLAFIQDPDGYWIEILNPNK_.2                                                     | -0.115102446 | #N/A                   |
| _DFLLQTM[Oxidation (M)]LR_.2                                                 | 0.265534678  | #N/A                   |
| _FEELGVK_.2                                                                  | -0.018546206 | #N/A                   |
| _SLDFYTR_.2                                                                  | -0.270051501 | #N/A                   |
| _GFGHIGIAVPDVYSAC[Carbamidomethyl (C)]K_.2                                   | -0.474238299 | #N/A                   |
| _IASGLGLAWIIGR_.2                                                            | 0.11567313   | #N/A                   |
| _VLYAYGYTGDPSK_.2                                                            | 0.066852171  | #N/A                   |



|                                                              |              |                       |
|--------------------------------------------------------------|--------------|-----------------------|
| _VTLAVSDLQK_.2                                               | 0.326243936  | #N/A                  |
| _VAEGIFETEAPGGYK_.2                                          | 0.187768483  | #N/A                  |
| _FQTVHFFR_.2                                                 | 0.107194553  | #N/A                  |
| _SPSQSDPVLK_.2                                               | 0.142227826  | #N/A                  |
| _IYEQDEEKQR_.2                                               | -0.21980111  | #N/A                  |
| _ALLGYADNQC[Carbamidomethyl (C)]K_.2                         | 0.010828545  | #N/A                  |
| _FYLQDRS[Phospho (STY)]PSQSDPVLK_.3                          | 0.076032964  | Q9CPV4_S131_M1_Glod4  |
| _ESHSILTPLVSLDTPGK_.3                                        | 0.053757159  | #N/A                  |
| _DVLGM[Oxidation (M)]QVLR_.2                                 | -0.097778938 | #N/A                  |
| _LELQGIQGAVDHAAAFGR_.3                                       | 0.275794611  | #N/A                  |
| _LLDDAMEADKSEWFAATR_.3                                       | 0.261884005  | #N/A                  |
| _ALAAGGVGSIVR_.2                                             | 0.092851669  | #N/A                  |
| _QVIDC[Carbamidomethyl (C)]QLADVNNLGK_.2                     | -0.369881639 | #N/A                  |
| _ANKPGDVVR_.2                                                | 0.636347559  | #N/A                  |
| _ADM[Oxidation (M)]GGAATIC[Carbamidomethyl (C)]SAIVSAAK_.2   | -0.27678912  | #N/A                  |
| _SAGAC[Carbamidomethyl (C)]TAAAFRL_.2                        | 0.44982364   | #N/A                  |
| _DKDDDLQPQTSAGESFNK_.3                                       | 0.214518889  | #N/A                  |
| _TLIEFLLR_.2                                                 | -0.098141709 | #N/A                  |
| _FAEIIK_.2                                                   | -0.096348951 | #N/A                  |
| _S[Phospho (STY)]WIEEQEMGSFLSVAK_.2                          | 0.114756425  | Q9CPY7_S238_M1_Lap3   |
| _T[Phospho (STY)]TPAPS[Phospho (STY)]PGSANESFFAPSR_.2        | -0.220206432 | Q9CQ20_S71_M2_Mid1ip1 |
| _LLLDPST[Phospho (STY)]PTK_.2                                | -0.013536493 | Q9CQ22_T28_M1_Lamtor1 |
| _KLLDPST[Phospho (STY)]PTK_.2                                | -0.166871262 | Q9CQ22_T28_M1_Lamtor1 |
| _DHDMFGYIK_.2                                                | 0.123945899  | #N/A                  |
| _TYAEILEPFHPVR_.2                                            | -0.345250656 | #N/A                  |
| _DLPAAAAAPASPASFR_.2                                         | 0.289943336  | #N/A                  |
| _LPIPDQVLTINPALPVEDAAEDYAR_.3                                | 0.252080051  | #N/A                  |
| _TGALC[Carbamidomethyl (C)]WFLDEAAAR_.2                      | -0.504969109 | #N/A                  |
| _VAGHPDVVINNAAGNFISPSER_.3                                   | -0.226188995 | #N/A                  |
| _HVISYSLSPFEQR_.3                                            | 0.07069039   | #N/A                  |
| _EFGNLR_.2                                                   | 0.333612741  | #N/A                  |
| _AFPSYFSK_.2                                                 | 0.172509646  | #N/A                  |
| _KNPAMYENDK_.2                                               | 0.265662329  | #N/A                  |
| _AHPNLPILIR_.2                                               | -0.034581305 | #N/A                  |
| _TVSLNNLSADEVTR_.2                                           | -0.002763162 | #N/A                  |
| _EC[Carbamidomethyl (C)]SEVQPK_.2                            | 0.201864656  | #N/A                  |
| _YAFGQEK_.2                                                  | 0.349620739  | #N/A                  |
| _AM[Oxidation (M)]QNVLSGK_.2                                 | -0.216676351 | #N/A                  |
| _RAS[Phospho (STY)]NGEPVEK_.2                                | 0.123962339  | Q9CQ86_S97_M1_Mien1   |
| _TQSSLVPALTEFVR_.2                                           | 0.293992797  | #N/A                  |
| _GLLQTEPQNNQAK_.2                                            | -0.131072274 | #N/A                  |
| _ [Acetyl (Protein N-term)]M[Oxidation (M)]EAVLNELVSVEDLK_.2 | 0.28134927   | #N/A                  |
| _KFQSEQAAGS[Phospho (STY)]VSK_.2                             | -0.159845605 | Q9CQ92_S29_M1_Fis1    |
| _STQFEYAWC[Carbamidomethyl (C)]LVR_.2                        | -0.022995129 | #N/A                  |
| _LQDPFSVYR_.2                                                | -0.071367081 | #N/A                  |
| _DLVPDLNFIYAQYK_.2                                           | 0.167355237  | #N/A                  |
| _QQYLQSIEDR_.2                                               | 0.067898512  | #N/A                  |

|                                                                                  |              |                       |
|----------------------------------------------------------------------------------|--------------|-----------------------|
| _RIDTDLK_.2                                                                      | -0.116869527 | #N/A                  |
| _WDPDKTGDKPR_.2                                                                  | 0.181635669  | #N/A                  |
| _MQTYEVDLNK_.2                                                                   | 0.417577963  | #N/A                  |
| _SIEPYLK_.2                                                                      | -0.252475851 | #N/A                  |
| _IKNEVDSTLTFR_.2                                                                 | 0.090680959  | #N/A                  |
| _QQYLSIEDREK_.3                                                                  | -0.073555685 | #N/A                  |
| _VVNEINIEDLC[Carbamidomethyl (C)]LTK_.2                                          | -0.008435999 | #N/A                  |
| _NAEEES[Phospho (STY)]ESEAEED_.2                                                 | 0.03046493   | Q9CQC6_S411_M1_Bzw1   |
| _VSHIEDPALIR_.2                                                                  | -0.303062527 | #N/A                  |
| _EYLLQYNDPK_.2                                                                   | -0.208468173 | #N/A                  |
| _EYLLQYNDPKR_.3                                                                  | -0.337413884 | #N/A                  |
| _YKPAPLATLPSTLDPAEYDVSPETR_.3                                                    | 0.187293756  | #N/A                  |
| _QASPNIVIALSGNK_.2                                                               | -0.431555017 | #N/A                  |
| _GAQAAIVVYDITNEESFAR_.2                                                          | -0.630381616 | #N/A                  |
| _WASS[Phospho (STY)]LENLLEDPEGVQR_.2                                             | 0.284645937  | Q9CQE5_S41_M1_Rgs10   |
| _INEAIVAVQAIADPK_.2                                                              | 0.018613927  | #N/A                  |
| _LPGGELNPGEDEVEGLKR_.3                                                           | -0.345216992 | #N/A                  |
| _EADEEDS[Phospho (STY)]DEETSYPER_.2                                              | -0.140834013 | Q9CQF4_S106_M1_Mtres1 |
| _NFYDGPKE_.2                                                                     | -0.150826901 | #N/A                  |
| _EFIDHSPK_.2                                                                     | 0.357265912  | #N/A                  |
| _TLAILQIESEKAELR_.2                                                              | -0.44419324  | #N/A                  |
| _NTEDLTEEWLR_.2                                                                  | 0.214044966  | #N/A                  |
| _LVQTAELTK_.2                                                                    | 0.221668442  | #N/A                  |
| _LVLDEELEGVSPDELKDELPK_.3                                                        | -0.44117657  | #N/A                  |
| _ETHNAIIM[Oxidation (M)]K_.2                                                     | -0.154525891 | #N/A                  |
| _ [Acetyl (Protein N-term)]SESLVVC[Carbamidomethyl (C)]DVAEDLVEK_.2              | -0.315555091 | #N/A                  |
| _KAGGANYDAQS[Phospho (STY)]E_.2                                                  | 0.342037459  | Q9CQI6_S141_M1_Cotl1  |
| _EFVISDRK_.2                                                                     | -0.400756203 | #N/A                  |
| _ELEEDFIR_.2                                                                     | 0.077347193  | #N/A                  |
| _EVVQNFAK_.2                                                                     | 0.220042367  | #N/A                  |
| _EFVISDR_.2                                                                      | -0.171137184 | #N/A                  |
| _YDGATIVPGDQGADYQHFIQQC[Carbamidomethyl (C)]TDDVR_.3                             | -0.288129452 | #N/A                  |
| _AGGANYDAQS[Phospho (STY)]E_.2                                                   | -0.217127802 | Q9CQI6_S141_M1_Cotl1  |
| _FALITWIGEDVSGLQR_.2                                                             | -0.136940512 | #N/A                  |
| _FTTGDAISK_.2                                                                    | 0.243585172  | #N/A                  |
| _LTVENS[Phospho (STY)]PK_.2                                                      | -0.12731035  | Q9CQJ6_S73_M1_Denr    |
| _WPEVDDSDIEDLGEVKK_.3                                                            | -0.331946177 | #N/A                  |
| _LTVENS[Phospho (STY)]PKQETGITEGQGPVGEEEEK_.3                                    | -0.183873889 | Q9CQJ6_S73_M1_Denr    |
| _HLESWC[Carbamidomethyl (C)]IHR_.3                                               | -0.13089137  | #N/A                  |
| _VPEWC[Carbamidomethyl (C)]LDYWHPSEK_.3                                          | 0.07870315   | #N/A                  |
| _ARFEEHKNEK_.3                                                                   | -0.409045046 | #N/A                  |
| _EAEFEFWQNHQPYPIDSPGGTSFER_.3                                                    | 0.297989404  | #N/A                  |
| _S[Phospho (STY)]PSLAFPK_.2                                                      | 0.031002964  | Q9CQM0_S142_M1_Nicn1  |
| _SWC[Carbamidomethyl (C)]PDC[Carbamidomethyl (C)]VEAEPVIR_.2                     | -0.077057376 | #N/A                  |
| _ [Acetyl (Protein N-term)]ATFEEVSVLGFEEDK_.2                                    | -0.112933953 | #N/A                  |
| _LVESEC[Carbamidomethyl (C)]C[Carbamidomethyl (C)]QSSLVEM[Oxidation (M)]IFSED_.2 | -0.499411292 | #N/A                  |
| _HNIQFSSFDIFSDEEVR_.3                                                            | -0.262774709 | #N/A                  |

|                                                                      |              |                        |
|----------------------------------------------------------------------|--------------|------------------------|
| _Acetyl (Protein N-term))AAGAAEAGEAAVAVVEVGSAQQFEELLR_.3             | -0.253841792 | #N/A                   |
| _AFLEALQNQAETSSK_.2                                                  | 0.09114743   | #N/A                   |
| _GVVDESDIPLNLS[Phospho (STY)]R_.2                                    | 0.178720417  | Q9CQN1_S403_M1_Trap1   |
| _NLSIDIDLM[Oxidation (M)]APQPGV_.2                                   | 0.351284683  | #N/A                   |
| _FAMNPFYEPNS[Phospho (STY)]PIR_.2                                    | 0.141959556  | Q9CQP2_S119_M1_Trappc2 |
| _HYLFDVQR_.2                                                         | -0.148617881 | #N/A                   |
| _IAQLEEVK_.2                                                         | 0.12766967   | #N/A                   |
| _AQQALVQK_.2                                                         | 0.144847735  | #N/A                   |
| _QIQDAIDMEK_.2                                                       | 0.299253025  | #N/A                   |
| _SISVQQEKETIAK_.2                                                    | -0.135084571 | #N/A                   |
| _RKEEEHM[Oxidation (M)]IDWVEK_.4                                     | -0.209518537 | #N/A                   |
| _KEEEHMIDWVEK_.3                                                     | 0.2841748    | #N/A                   |
| _LDYHISVQNM[Oxidation (M)]M[Oxidation (M)]R_.3                       | 0.135690087  | #N/A                   |
| _TYGIC[Carbamidomethyl (C)]GAIR_.2                                   | 0.401901167  | #N/A                   |
| _Acetyl (Protein N-term))M[Oxidation (M)]QNDAGEFVDLYVPR_.2           | -0.474113035 | #N/A                   |
| _DHASIQM[Oxidation (M)]NVAEVDR_.2                                    | -0.207351962 | #N/A                   |
| _VTLVSAAPEK_.2                                                       | -0.265598167 | #N/A                   |
| _TLAFASVDLTNK_.2                                                     | 0.089183399  | #N/A                   |
| _Acetyl (Protein N-term))SSMTQNL_.2                                  | -0.26279422  | #N/A                   |
| _APLDDKYVEIAR_.3                                                     | -0.291399441 | #N/A                   |
| _SFGSGTELGHWVTT[Phospho (STY)]PPDIPGSR_.3                            | -0.329252883 | Q9CQS4_T45_M1_Slc25a46 |
| _PGPTPSGTNVGSSGRS[Phospho (STY)]PSK_.2                               | -0.195093404 | Q9CQS8_S17_M1_Sec61b   |
| _S[Phospho (STY)]PSKAVAAR_.2                                         | -0.044892541 | Q9CQS8_S17_M1_Sec61b   |
| _VDPSLM[Oxidation (M)]EDS[Phospho (STY)]DDGPSLPTK_.2                 | 0.092509652  | Q9CQU3_S95_M1_Rer1     |
| _Acetyl (Protein N-term))S[Phospho (STY)]EGDSVGDSVHGKPSVVYR_.3       | 0.105929107  | Q9CQU3_S2_M1_Rer1      |
| _NQS[Phospho (STY)]YLQLLC[Carbamidomethyl (C)]SLQNK_.2               | 0.061594754  | Q9CQU5_S216_M1_Zwint   |
| _AM[Oxidation (M)]S[Phospho (STY)]GSWER_.2                           | -0.442224816 | Q9CQV4_S26_M1_Retreg3  |
| _GQTPLT[Phospho (STY)]EGSEDLDGHSDPES[Phospho (STY)]FAR_.3            | -0.030222076 | Q9CQV4_S325_M2_Retreg3 |
| _S[Phospho (STY)]FEQRVEDVR_.2                                        | -0.202025476 | Q9CQV6_S12_M1_Map1lc3b |
| _EAALILGVS[Phospho (STY)]PTANK_.2                                    | -0.184553772 | Q9CQV7_S70_M1_Dnajc19  |
| _DSTLIM[Oxidation (M)]QLLR_.2                                        | 0.355952833  | #N/A                   |
| _YLSEVASGENK_.2                                                      | 0.141469509  | #N/A                   |
| _LAEQAER_.2                                                          | -0.040785285 | #N/A                   |
| _YLILNATQAESK_.2                                                     | 0.224884933  | #N/A                   |
| _AVTEQGHLSNEER_.3                                                    | -0.12650535  | #N/A                   |
| _AKLAEQAER_.2                                                        | -0.037872644 | #N/A                   |
| _QTTVSNSQQAYQEAFAEISKK_.3                                            | -0.469097644 | #N/A                   |
| _QTTVSNSQQAYQEAFEISK_.2                                              | -0.518479476 | #N/A                   |
| _DNLTWTSENQGDAGEGEN_.2                                               | 0.136249664  | #N/A                   |
| _EM[Oxidation (M)]QPTHPIR_.2                                         | 0.334947156  | #N/A                   |
| _M[Oxidation (M)]KGDYFR_.2                                           | 0.350688807  | #N/A                   |
| _VISS[Phospho (STY)]IEQK_.2                                          | 0.126651769  | Q9CQV8_S66_M1_Ywhab    |
| _Acetyl (Protein N-term))T[Phospho (STY)]M[Oxidation (M)]DKSELVQK_.2 | -0.120191502 | Q9CQV8_T2_M1_Ywhab     |
| _KEM[Oxidation (M)]QPTHPIR_.3                                        | -0.12774956  | #N/A                   |
| _TAFDEAIAELDTLNEESYK_.2                                              | -0.142802634 | #N/A                   |
| _YDDM[Oxidation (M)]AAAM[Oxidation (M)]K_.2                          | 0.074875069  | #N/A                   |
| _NLLSVAYK_.2                                                         | -0.332809773 | #N/A                   |

|                                                                     |              |                       |
|---------------------------------------------------------------------|--------------|-----------------------|
| _IEAELQDIC[Carbamidomethyl (C)]NDVLELLDK_2                          | -0.105201615 | #N/A                  |
| _DLPNALDEK_2                                                        | -0.110753569 | #N/A                  |
| _ [Acetyl (Protein N-term)]AT[Phospho (STY)]PEASGSGEKVEGSEPSVTYYR_3 | -0.410483386 | Q9CQX2_T3_M1_Cyb5b    |
| _RNS[Phospho (STY)]AEETWM[Oxidation (M)]VIHGR_3                     | -0.681185853 | Q9CQX2_S33_M1_Cyb5b   |
| _FLSEHPGGEEVLEQAGADATESFEDVGHSPDAR_4                                | -0.182137826 | #N/A                  |
| _ [Acetyl (Protein N-term)]AT[Phospho (STY)]PEASGSGEK_2             | 0.089763938  | Q9CQX2_T3_M1_Cyb5b    |
| _NSAEETWM[Oxidation (M)]VIHGR_2                                     | 0.166887848  | #N/A                  |
| _LSASEALGSAALPSHSSAISQHSK_3                                         | 0.301381689  | #N/A                  |
| _RPPES[Phospho (STY)]PPIVEEWNSR_3                                   | -0.039405622 | Q9CQY2_S36_M1_Ramac   |
| _ [Acetyl (Protein N-term)]S[Phospho (STY)]DTSEEIPNFEEMFASR_2       | 0.104251324  | Q9CQY2_S2_M1_Ramac    |
| _TM[Oxidation (M)]QDITLVVETLLQQM[Oxidation (M)]QDK_3                | -0.061594471 | #N/A                  |
| _NIADLM[Oxidation (M)]TQAGVEELDPENKIPTAQKS[Phospho (STY)]_3         | -0.278365928 | Q9CQZ1_S76_M1_Hsbp1   |
| _NIADLMTQAGVEELDPENKIPTAQK_3                                        | 0.111102121  | #N/A                  |
| _QAAAAAASVSKPIFSR_2                                                 | 0.216858592  | #N/A                  |
| _NAHVTDPDPR_2                                                       | 0.578159531  | #N/A                  |
| _MELQETIK_2                                                         | 0.222720514  | #N/A                  |
| _VVDLLVIK_2                                                         | -0.111104467 | #N/A                  |
| _EVPNTVHLM[Oxidation (M)]QLDITVK_2                                  | 0.251071785  | #N/A                  |
| _MELPDYR_2                                                          | 0.345144514  | #N/A                  |
| _ [Acetyl (Protein N-term)]S[Phospho (STY)]GEDVPHR_2                | -0.122385338 | Q9CR00_S2_M1_Psmd9    |
| _ADVLDYQVR_2                                                        | 0.081618528  | #N/A                  |
| _LASNS[Phospho (STY)]PVLPAQAFAR_2                                   | -0.130674833 | Q9CR00_S128_M1_Psmd9  |
| _VFFDVDIGGER_2                                                      | 0.114058735  | #N/A                  |
| _ILLISEDLK_2                                                        | 0.310336247  | #N/A                  |
| _AIQAELLK_2                                                         | 0.223355859  | #N/A                  |
| _IVLELFADIVPK_2                                                     | -0.430716446 | #N/A                  |
| _EYDQALADLKK_3                                                      | -0.176894595 | #N/A                  |
| _AQEIAPGDK_2                                                        | 0.207450202  | #N/A                  |
| _ [Acetyl (Protein N-term)]SHASPAAKPSNSK_3                          | -0.355676461 | #N/A                  |
| _LYDKIDPEK_2                                                        | 0.246904654  | #N/A                  |
| _LM[Oxidation (M)]C[Carbamidomethyl (C)]PQEIVDYIADKK_3              | -0.035953921 | #N/A                  |
| _PALPLPVG[S[Phospho (STY)]PSSQPESLER_2                              | -0.082560377 | Q9CR25_S188_M1_Dph2   |
| _YAGSALQYEDVGTAQNQLK_2                                              | -0.299024314 | #N/A                  |
| _LTPEDFAR_2                                                         | 0.063149584  | #N/A                  |
| _DSLRLDES[Phospho (STY)]QR_2                                        | -0.196811335 | Q9CR29_S186_M1_Ccdc43 |
| _AALLAQYADV[T[Phospho (STY)]DEEDEADKKDDAGASTANVSSDR_4               | -0.227549781 | Q9CR29_T137_M1_Ccdc43 |
| _ [Acetyl (Protein N-term)]ASQSQGIQQLLQAEK_2                        | -0.153186482 | #N/A                  |
| _ [Acetyl (Protein N-term)]ASQSQGIQQLLQAEKR_3                       | 0.186122494  | #N/A                  |
| _AAILKAS[Phospho (STY)]PK_2                                         | -0.365814091 | Q9CR57_S139_M1_Rpl14  |
| _LVAIVDVIDQNR_2                                                     | -0.188638823 | #N/A                  |
| _AAIAAAAAAAAAAK_2                                                   | 0.104901847  | #N/A                  |
| _DYC[Carbamidomethyl (C)]AHYLIR_2                                   | -0.064812095 | #N/A                  |
| _DSFPNFLAC[Carbamidomethyl (C)]K_2                                  | 0.239435397  | #N/A                  |
| _VAQQQGEGEVGPEVAL_2                                                 | -0.144662917 | #N/A                  |
| _HEQHDWDYC[Carbamidomethyl (C)]EHLDYVK_4                            | 0.063878561  | #N/A                  |
| _ [Acetyl (Protein N-term)]AATASPGAGR_2                             | 0.296661188  | #N/A                  |
| _NVFNALVR_2                                                         | -0.123797913 | #N/A                  |

|                                                                      |              |                       |
|----------------------------------------------------------------------|--------------|-----------------------|
| _TSFHALTSILK_.2                                                      | -0.010708973 | #N/A                  |
| _LTGADGTTPPGFLK_.2                                                   | 0.498259638  | #N/A                  |
| _AVVVNAAQLASYSQSK_.2                                                 | 0.096462088  | #N/A                  |
| _M[Oxidation (M)]IDGKPEYK_.2                                         | 0.110776692  | #N/A                  |
| _MQLSGEGAK_.2                                                        | 0.316576523  | #N/A                  |
| _LGIYTVLFR_.2                                                        | -0.18802289  | #N/A                  |
| _ALIGN[Oxidation (M)]TAGATGAFVGTPAEVALIR_.2                          | -0.094617819 | #N/A                  |
| _QATYTTTR_.2                                                         | -0.212111797 | #N/A                  |
| _FLFGGLAGM[Oxidation (M)]GATVFVQPLDLVK_.2                            | -0.396162063 | #N/A                  |
| _SGPFAPVLSATSR_.2                                                    | 0.121825643  | #N/A                  |
| _LSDIPEGK_.2                                                         | -0.016615241 | #N/A                  |
| _GVAGALRPLLQGAVPAASEPPVLDVK_.3                                       | -0.185661846 | #N/A                  |
| _RAEVLSTK_.2                                                         | 0.126590208  | #N/A                  |
| _VPDFSDYR_.2                                                         | -0.217048995 | #N/A                  |
| _DPQHDLDR_.2                                                         | 0.228787793  | #N/A                  |
| _PLVATVGLNVPASVR_.2                                                  | -0.005381405 | #N/A                  |
| _EIDQEAAVEVSQLRDPQHDLDR_.3                                           | -0.618848647 | #N/A                  |
| _NVVSQFVSSM[Oxidation (M)]SASADVLAM[Oxidation (M)]SK_.2              | -0.304142168 | #N/A                  |
| _GPAPLNLEVPAYEFTSDDVVVG_.2                                           | -0.250734709 | #N/A                  |
| _EIDQEAAVEVSQLR_.3                                                   | 0.057372925  | #N/A                  |
| _GNVVPS[Phospho (STY)]PLPTR_.2                                       | 0.089482344  | Q9CR86_S42_M1_Carhsp1 |
| _TFS[Phospho (STY)]ATVR_.2                                           | -0.026355421 | Q9CR86_S53_M1_Carhsp1 |
| _DRS[Phospho (STY)]PSPLR_.2                                          | -0.135936963 | Q9CR86_S31_M1_Carhsp1 |
| _TRDRS[Phospho (STY)]PSPLR_.2                                        | -0.167601838 | Q9CR86_S31_M1_Carhsp1 |
| _DRS[Phospho (STY)]PS[Phospho (STY)]PLRGNVVPS[Phospho (STY)]PLPTR_.3 | 0.153429141  | Q9CR86_S31_M3_Carhsp1 |
| _HETWSGHVISN_.2                                                      | 0.171582509  | #N/A                  |
| _ASGTGGLSLLPPPPGK_.2                                                 | 0.123825596  | #N/A                  |
| _LDQPDWTGR_.2                                                        | 0.362156526  | #N/A                  |
| _LSIGNITAK_.2                                                        | -0.093652657 | #N/A                  |
| _VSGELFAQAPVEQYPGIAVETVTDSSR_.3                                      | -0.151880429 | #N/A                  |
| _SAFIGIGFTDR_.2                                                      | 0.16685667   | #N/A                  |
| _ASDWKLDQPDWTGR_.3                                                   | -0.222645134 | #N/A                  |
| _ESQEMDNRPK_.2                                                       | -0.082958677 | #N/A                  |
| _C[Carbamidomethyl (C)]HAPLAQAQALVTSELER_.3                          | -0.193773357 | #N/A                  |
| _AAGGGGGS[Phospho (STY)]GEDEAQR_.2                                   | -0.289238975 | Q9CRA5_S35_M1_Golph3  |
| _ADANLLTDTGTESS[Phospho (STY)]PR_.2                                  | -0.022785007 | Q9CRA8_S20_M1_Exosc5  |
| _AESC[Carbamidomethyl (C)]GS[Phospho (STY)]FDETESEESSK_.2            | -0.147690275 | Q9CRB0_S116_M1_Snx24  |
| _ALEELATKR_.2                                                        | 0.216175567  | #N/A                  |
| _Acetyl (Protein N-term))AASDTAGLEESFRK_.2                           | 0.269364531  | #N/A                  |
| _AVTGTDVDFVSK_.2                                                     | -0.238184016 | #N/A                  |
| _LSENVDR_.2                                                          | 0.092030542  | #N/A                  |
| _YSSVYGASVSDEDLK_.2                                                  | 0.135867269  | #N/A                  |
| _YEYHPVC[Carbamidomethyl (C)]ADLQTK_.3                               | 0.189257006  | #N/A                  |
| _FDSNVSGQSSFGT[Phospho (STY)]SPAADNIEK_.2                            | 0.124131429  | Q9CRD0_T146_M1_Ociad1 |
| _RSS[Phospho (STY)]PPGHYTQKPK_.3                                     | 0.229096958  | Q9CRD0_S123_M1_Ociad1 |
| _TSS[Phospho (STY)]LSSDSSNLR_.2                                      | 0.131856817  | Q9CRD4_S117_M1_Dbndd2 |
| _ENGPS[Phospho (STY)]APQEK_.2                                        | 0.00461105   | Q9CS72_S881_M1_Filip1 |

|                                                                                              |              |                        |
|----------------------------------------------------------------------------------------------|--------------|------------------------|
| _ASS[Phospho (STY)]PEGEESPQQSK_.2                                                            | -0.146215967 | Q9CSB4_S338_M1_Pard3b  |
| _GPPS[Phospho (STY)]PPAPVM[Oxidation (M)]HS[Phospho (STY)]PSR_.2                             | 0.194636941  | #N/A                   |
| _GPPS[Phospho (STY)]PPAPVM[Oxidation (M)]HSPS[Phospho (STY)]RK_.3                            | -0.11302986  | Q9CSN1_S234_M2_Snw1    |
| _TSS[Phospho (STY)]LTHSEEK_.2                                                                | -0.331369465 | Q9CT10_S58_M1_Ranbp3   |
| _S[Phospho (STY)]PSESAEETHLEEKVPQK_.3                                                        | 0.079827823  | Q9CT10_S146_M1_Ranbp3  |
| _VLS[Phospho (STY)]PPKLNEANS DTSR_.3                                                         | 0.236368767  | Q9CT10_S257_M1_Ranbp3  |
| _S[Phospho (STY)]PSESAEETHLEEK_.2                                                            | 0.532872529  | Q9CT10_S146_M1_Ranbp3  |
| _ERTSS[Phospho (STY)]LTHSEEK_.2                                                              | -0.050260853 | Q9CT10_S58_M1_Ranbp3   |
| _SAGSSSPEAGEDS[Phospho (STY)]DHEDGNYC[Carbamidomethyl (C)]PPVKR_.4                           | -0.05994719  | Q9CT10_S40_M1_Ranbp3   |
| _ASHTAPQVLF SHR_.3                                                                           | 0.073175654  | #N/A                   |
| _NC[Carbamidomethyl (C)]FASVFEK_.2                                                           | 0.03139643   | #N/A                   |
| _DYLHYHIK_.2                                                                                 | -0.278698104 | #N/A                   |
| _M[Oxidation (M)]ILLEVNNR_.2                                                                 | 0.119187587  | #N/A                   |
| _IIEETLALK_.2                                                                                | 0.259189481  | #N/A                   |
| _ELQAHGADELLKR_.3                                                                            | -0.034069133 | #N/A                   |
| _VFM[Oxidation (M)]QEFK_.2                                                                   | 0.016805256  | #N/A                   |
| _DNTINLIHTR_.2                                                                               | -0.457851716 | #N/A                   |
| _YQFQEEGKEGENR_.2                                                                            | 0.024246389  | #N/A                   |
| _SLQSLASLHAM[Oxidation (M)]ESTRES[Phospho (STY)]LK_.3                                        | -0.108493792 | Q9CW03_S776_M1_Smc3    |
| _GDVEGSQS[Phospho (STY)]QDEGEGSGESER_.2                                                      | 0.068824002  | Q9CW03_S1067_M1_Smc3   |
| _KGDVEGSQS[Phospho (STY)]QDEGEGSGESER_.3                                                     | 0.209009017  | Q9CW03_S1067_M1_Smc3   |
| _SFS[Phospho (STY)]LPADPILQAAK_.2                                                            | -0.090254237 | Q9CW07_S81_M1_Ppp1r3g  |
| _LLS[Phospho (STY)]PIASNR_.2                                                                 | 0.15346595   | Q9CW46_S576_M1_Raver1  |
| _ESVASM[Oxidation (M)]GADS[Phospho (STY)]GDDFASDGSSSR_.2                                     | 0.076418913  | Q9CW79_S41_M1_Golga1   |
| _GSIRPS[Phospho (STY)]IS[Phospho (STY)]NPR_.2                                                | -0.053820699 | Q9CW79_S749_M2_Golga1  |
| _NAS[Phospho (STY)]VPNLR_.2                                                                  | 0.026328635  | Q9CWE0_S100_M1_Mtfr1l  |
| _AS[Phospho (STY)]FETLPNISDLC[Carbamidomethyl (C)]LK_.2                                      | -0.261104432 | Q9CWE0_S38_M1_Mtfr1l   |
| _TTC[Carbamidomethyl (C)]SS[Phospho (STY)]S[Phospho (STY)]EEDDC[Carbamidomethyl (C)]ISLSK_.2 | -0.077494269 | Q9CWE0_S221_M2_Mtfr1l  |
| _ASS[Phospho (STY)]FADM[Oxidation (M)]M[Oxidation (M)]GILK_.2                                | -0.074884525 | Q9CWE0_S235_M1_Mtfr1l  |
| _TTELQDELSHLR_.3                                                                             | -0.118764846 | #N/A                   |
| _INVYYNEATGNK_.2                                                                             | 0.129332441  | #N/A                   |
| _GTGRPNS[Phospho (STY)]PQRLDR_.3                                                             | 0.293411107  | Q9CWK3_S196_M1_Cd2bp2  |
| _GTGRPNS[Phospho (STY)]PQR_.2                                                                | 0.203808251  | Q9CWK3_S196_M1_Cd2bp2  |
| _GKHS LDS[Phospho (STY)]DEEDDDEEGSSK_.2                                                      | 0.204792916  | Q9CWK3_S49_M1_Cd2bp2   |
| _SIS[Phospho (STY)]APVIFDR_.2                                                                | 0.05183504   | Q9CWK8_S119_M1_Snx2    |
| _ELILSSEPS[Phospho (STY)]PAVT[Phospho (STY)]PVTPTTLIAPR_.3                                   | -0.190969851 | Q9CWK8_S97_M2_Snx2     |
| _EYAENIGDGRS[Phospho (STY)]PEFR_.3                                                           | 0.134504721  | Q9CWL8_S545_M1_Ctnnbl1 |
| _LADIQIEQLNR_.2                                                                              | 0.336273263  | #N/A                   |
| _S[Phospho (STY)]QGEEVD FAR_.2                                                               | -0.299232153 | Q9CWS0_S33_M1_Ddah1    |
| _ [Acetyl (Protein N-term)]AGLGHPSAFGR_.2                                                    | 0.165800167  | #N/A                   |
| _GAELADTFKDYAVSTVPVADSLHLK_.3                                                                | -0.480187326 | #N/A                   |
| _TPEEYPESAK_.2                                                                               | -0.397256841 | #N/A                   |
| _GAELADTFK_.2                                                                                | 0.394691357  | #N/A                   |
| _EFFVGLSK_.2                                                                                 | 0.024767179  | #N/A                   |
| _LQLNIVEM[Oxidation (M)]KDENATLDGGDVLFTGR_.3                                                 | -0.088346509 | #N/A                   |
| _SFC[Carbamidomethyl (C)]SM[Oxidation (M)]AGPNLIAIGSSESAQK_.2                                | -0.1029945   | #N/A                   |
| _QHELYVGVLGSK_.2                                                                             | -0.167233202 | #N/A                   |

|                                                                                       |              |                           |
|---------------------------------------------------------------------------------------|--------------|---------------------------|
| _DYAVSTVPVADSLHLK_3                                                                   | -0.319105105 | #N/A                      |
| _LPEGEETVES[Phospho (STY)]DDDKDER_3                                                   | -0.050907467 | Q9CWU4_S156_M1_           |
| _ [Acetyl (Protein N-term)]AADEEPDSPS[Phospho (STY)]GALQTAAEEETK_3                    | 0.241044004  | Q9CWX9_S11_M1_Ddx47       |
| _ [Acetyl (Protein N-term)]AESSGS[Phospho (STY)]PHR_2                                 | -0.127704945 | Q9CWY9_S7_M1_Rpain        |
| _GFGS[Phospho (STY)]EEGSR_2                                                           | 0.09979769   | Q9CWZ3_S42_M1_Rbm8a       |
| _M[Oxidation (M)]REDYDS[Phospho (STY)]VEQDGDEPGPQR_3                                  | -0.059860321 | Q9CWZ3_S56_M1_Rbm8a       |
| _ [Acetyl (Protein N-term)]ADVLDLHEAGGEDFAM[Oxidation (M)]DEDGDES[Phospho (STY)]IHK_3 | 0.033605836  | Q9CWZ3_S24_M1_Rbm8a       |
| _LIENVDEPK_2                                                                          | -0.057918312 | #N/A                      |
| _AVQLYQQTANVFENEER_2                                                                  | -0.570345912 | #N/A                      |
| _INEGLEHLAK_2                                                                         | 0.301548769  | #N/A                      |
| _FDEAALSQK_2                                                                          | -0.123822146 | #N/A                      |
| _QAVELLGK_2                                                                           | 0.255590893  | #N/A                      |
| _LPEAVQLIEK_2                                                                         | 0.193610268  | #N/A                      |
| _TIAQVLVHLHR_3                                                                        | 0.194781121  | #N/A                      |
| _WKPDPYDAASEYGK_2                                                                     | 0.123492605  | #N/A                      |
| _YMDNDYAK_2                                                                           | -0.334656775 | #N/A                      |
| _KS[Phospho (STY)]PAT[Phospho (STY)]PQAKPDGAAGMAAEEEEDEYSGGLC[Carbamidomethyl (C)]_3  | -0.39256694  | Q9CWZ7_S284_M2_Napg       |
| _KKS[Phospho (STY)]PAT[Phospho (STY)]PQAK_2                                           | 0.120165927  | Q9CWZ7_S284_M2_Napg       |
| _IVADQLC[Carbamidomethyl (C)]AK_2                                                     | 0.189709051  | #N/A                      |
| _ELDSGLAESVSTLIWAAPR_2                                                                | 0.012311517  | #N/A                      |
| _ALEQNPDDAQYYC[Carbamidomethyl (C)]QR_2                                               | 0.134782458  | #N/A                      |
| _ [Acetyl (Protein N-term)]AAAAAGPASSQR_2                                             | -0.022654797 | #N/A                      |
| _LFQQIYSDGSDEVKR_3                                                                    | -0.396024315 | #N/A                      |
| _IEILDS[Phospho (STY)]PASK_2                                                          | -0.550412894 | Q9CX66_S177_M1_D10Wsu102e |
| _SDS[Phospho (STY)]KEEDSPEESSR_2                                                      | 0.283099825  | Q9CX66_S125_M1_D10Wsu102e |
| _LQPLPSC[Carbamidomethyl (C)]EVC[Carbamidomethyl (C)]TPPS[Phospho (STY)]PK_2          | -0.180428724 | Q9CX84_S80_M1_Rgs19       |
| _LMHS[Phospho (STY)]PTGR_2                                                            | -0.04622919  | Q9CX84_S97_M1_Rgs19       |
| _LFIGGLNVQTSSEGLR_2                                                                   | -0.221096478 | #N/A                      |
| _GDVAEGDLIEHFSQFGAVEK_3                                                               | -0.050739608 | #N/A                      |
| _SGGGGGGGGSWGGR_2                                                                     | 0.417088937  | #N/A                      |
| _QENSSNSS[Phospho (STY)]PAPETNPPVPSDGTEAK_3                                           | -0.094948401 | Q9CXE2_S114_M1_Bcl7a      |
| _MKLEASQQNS[Phospho (STY)]EEM[Oxidation (M)]_2                                        | 0.266296878  | Q9CXE2_S207_M1_Bcl7a      |
| _DDS[Phospho (STY)]PTQTLASPNAC[Carbamidomethyl (C)]R_2                                | 0.041300722  | Q9CXF4_S655_M1_Tbc1d15    |
| _SIVNTS[Phospho (STY)]PPC[Carbamidomethyl (C)]R_2                                     | 0.144319746  | Q9CXK9_S792_M1_Rbm33      |
| _ANS[Phospho (STY)]GGGGDGPVSSK_2                                                      | -0.234088121 | Q9CXK9_S1032_M1_Rbm33     |
| _DIKEES[Phospho (STY)]DEEDDDDEESGR_2                                                  | 0.105648946  | Q9CXK9_S243_M1_Rbm33      |
| _ [Acetyl (Protein N-term)]SSGASVS[Phospho (STY)]ALQR_2                               | -0.245490843 | Q9CXP8_S8_M1_Gng10        |
| _LLLDTFEYQGLVK_2                                                                      | 0.079193236  | #N/A                      |
| _SVVTEEFNGS[Phospho (STY)]DWER_2                                                      | -0.054227304 | Q9CXS4_S234_M1_Cenpv      |
| _SNPGGFGIAPHC[Carbamidomethyl (C)]LDEGTVR_2                                           | -0.198569211 | #N/A                      |
| _QRLS[Phospho (STY)]FEGAAK_2                                                          | -0.409969147 | Q9CXS4_S105_M1_Cenpv      |
| _WDYLTQVEK_2                                                                          | 0.244497411  | #N/A                      |
| _ [Acetyl (Protein N-term)]ASVLEELQKDLEEVK_2                                          | 0.227553761  | #N/A                      |
| _VLEQLTGQTPVFSK_2                                                                     | -0.331231348 | #N/A                      |
| _YDGIILPGK_2                                                                          | -0.013404942 | #N/A                      |
| _ [Acetyl (Protein N-term)]AQDQGEKENPM[Oxidation (M)]R_2                              | 0.339077954  | #N/A                      |
| _VLQSALAAIR_2                                                                         | -0.081224063 | #N/A                      |

|                                                                     |              |                       |
|---------------------------------------------------------------------|--------------|-----------------------|
| _NQDLAPNSAEQASILSLVTK_.2                                            | 0.173421749  | #N/A                  |
| _EDAIAFAEK_.2                                                       | 0.260825143  | #N/A                  |
| _DTQLITVDEK_.2                                                      | 0.114635017  | #N/A                  |
| _LDITTLTGVPEEHK_.2                                                  | -0.108356498 | #N/A                  |
| _NNMQSGVNNTK_.2                                                     | 0.110600014  | #N/A                  |
| _DTQLITVDEKLDITTLTGVPEEHK_.3                                        | -0.113198301 | #N/A                  |
| _NNMQSGVNNTKK_.2                                                    | 0.373469918  | #N/A                  |
| _S[Phospho (STY)]LKDEDVLQK_.2                                       | 0.107315268  | Q9CY27_S58_M1_Tecr    |
| _GHLDAELDAYM[Oxidation (M)]AQTDPETND_.2                             | -0.429947698 | #N/A                  |
| _SAAQAAAQTSNAAGK_.2                                                 | 0.392581967  | #N/A                  |
| _GGSGSHNWGTVKDELTES[Phospho (STY)]PK_.3                             | -0.101636889 | Q9CY58_S234_M1_Serbp1 |
| _EFDRLS[Phospho (STY)]GSDR_.2                                       | 0.213821522  | Q9CY58_S197_M1_Serbp1 |
| _TDKSSAS[Phospho (STY)]APDVDDPEAFPALA_.2                            | 0.012754218  | Q9CY58_S393_M1_Serbp1 |
| _SSAS[Phospho (STY)]APDVDDPEAFPALA_.2                               | 0.295935987  | Q9CY58_S393_M1_Serbp1 |
| _DELTES[Phospho (STY)]PKYIQK_.2                                     | 0.382431063  | Q9CY58_S234_M1_Serbp1 |
| _FDQLFDDES[Phospho (STY)]DPFEVLK_.2                                 | 0.250100791  | Q9CY58_S25_M1_Serbp1  |
| _GGSGSHNWGTVKDELTES[Phospho (STY)]PKYIQK_.4                         | -0.093409331 | Q9CY58_S234_M1_Serbp1 |
| _SKS[Phospho (STY)]EEAHAEDSVM[Oxidation (M)]DHHFR_.4                | 0.035581121  | Q9CY58_S329_M1_Serbp1 |
| _S[Phospho (STY)]EEAHAEDSVMDDHHFR_.3                                | 0.186447794  | Q9CY58_S329_M1_Serbp1 |
| _SGS[Phospho (STY)]LEEVPNVGVNK_.2                                   | -0.351473206 | Q9CY64_S236_M1_Blvra  |
| _SQEVDVAYIC[Carbamidomethyl (C)]TESSSHEDYIR_.3                      | -0.501108402 | #N/A                  |
| _QISLEDALR_.2                                                       | -0.077496682 | #N/A                  |
| _DQDIFIQK_.2                                                        | 0.422770695  | #N/A                  |
| _VPS[Phospho (STY)]AGDVER_.2                                        | 0.252594786  | Q9CYG7_S186_M1_Tomm34 |
| _TVLQIDNSVASALEGINR_.2                                              | 0.094263799  | #N/A                  |
| _VSDS[Phospho (STY)]VEQLR_.2                                        | 0.030989604  | Q9CYG7_S8_M1_Tomm34   |
| _SSLSDISLLQIEPR_.2                                                  | 0.081387882  | #N/A                  |
| _YESLLC[Carbamidomethyl (C)]SSLESATYSNR_.2                          | 0.001797734  | #N/A                  |
| _LDELGVPLYAVVK_.2                                                   | 0.096302963  | #N/A                  |
| _LTQNRGDS[Phospho (STY)]DDGR_.2                                     | -0.22499054  | Q9CY10_S55_M1_        |
| _S[Phospho (STY)]LGNDVK_.2                                          | -0.199685448 | Q9CY10_S186_M1_       |
| _RS[Phospho (STY)]EEKEAGEI_.2                                       | -0.258526378 | Q9CY14_S363_M1_Luc7l  |
| _ERS[Phospho (STY)]LREESWEYGR_.3                                    | -0.367958681 | Q9CY14_S331_M1_Luc7l  |
| _S[Phospho (STY)]LREESWEYGR_.2                                      | -0.119902421 | Q9CY14_S331_M1_Luc7l  |
| _QENTQSPYNLAYK_.2                                                   | -0.081410624 | #N/A                  |
| _S[Phospho (STY)]GDSEVYQMGDVQSQK_.2                                 | 0.330780338  | Q9CYR0_S67_M1_Ssbp1   |
| _THTPSPTS[Phospho (STY)]PK_.2                                       | -0.501682095 | Q9CYT6_S311_M1_Cap2   |
| _IQEIQTFR_.2                                                        | -0.336837716 | #N/A                  |
| _LEQLSAGLDGPPR_.2                                                   | 0.038361232  | #N/A                  |
| _TEGC[Carbamidomethyl (C)]HLYLSEDALDC[Carbamidomethyl (C)]EIVSAK_.3 | -0.359866556 | #N/A                  |
| _LINSM[Oxidation (M)]VAEFLK_.2                                      | -0.356787084 | #N/A                  |
| _SNS[Phospho (STY)]PQKHTPVLELEGK_.3                                 | -0.414245255 | Q9CYT6_S316_M1_Cap2   |
| _S[Phospho (STY)]NSPQKHTPVLELEGKK_.3                                | 0.283767138  | Q9CYT6_S314_M1_Cap2   |
| _HTPVLELEGKK_.3                                                     | -0.224980506 | #N/A                  |
| _AQGQIRS[Phospho (STY)]PTKTHTPSPTS[Phospho (STY)]PK_.3              | 0.015501268  | Q9CYT6_S300_M2_Cap2   |
| _EM[Oxidation (M)]NDAATFYTNR_.2                                     | -0.188083094 | #N/A                  |
| _THTPS[Phospho (STY)]PTS[Phospho (STY)]PKSNSPQK_.2                  | -0.059616754 | Q9CYT6_S308_M2_Cap2   |



|                                                                                                               |              |                        |
|---------------------------------------------------------------------------------------------------------------|--------------|------------------------|
| _S[Phospho (STY)]PTKTHTPSPTS[Phospho (STY)]PK_.2                                                              | -0.085062542 | Q9CYT6_S300_M2_Cap2    |
| _VEYQEDRNDLVISETLK_.3                                                                                         | -0.291362462 | #N/A                   |
| _SSEM[Oxidation (M)]NVLVPQDDDYREFPIEQFK_.3                                                                    | -0.503649189 | #N/A                   |
| _AQGQIRS[Phospho (STY)]PTK_.2                                                                                 | -0.243941584 | Q9CYT6_S300_M1_Cap2    |
| _SALFAQLNQGEAITK_.2                                                                                           | -0.197621136 | #N/A                   |
| _VLAGDVETHAEM[Oxidation (M)]VHGAFQAQR_.3                                                                      | 0.120084789  | #N/A                   |
| _TIWDGSK_.2                                                                                                   | 0.170212906  | #N/A                   |
| _DVVLHTFR_.2                                                                                                  | -0.056006388 | #N/A                   |
| _NSATFKS[Phospho (STY)]FEDR_.2                                                                                | -0.43115409  | Q9CYZ2_S180_M1_Tpd52l2 |
| _S[Phospho (STY)]WHDVQVSTAYVK_.2                                                                              | 0.06572272   | Q9CYZ2_S96_M1_Tpd52l2  |
| _ [Acetyl (Protein N-term)]M[Oxidation (M)]DSASQDINLNSPNKGVLS[Phospho (STY)]DFM[Oxidation (M)]TDVPVDPGVVHR_.4 | -0.065119563 | Q9CYZ2_S19_M1_Tpd52l2  |
| _ [Acetyl (Protein N-term)]MDSASQDINLNS[Phospho (STY)]PNK_.2                                                  | 0.327860414  | Q9CYZ2_S12_M1_Tpd52l2  |
| _ENGSDNLPPS[Phospho (STY)]PGSGDQTLDPHAPF_.3                                                                   | -0.371942174 | Q9CYZ2_S206_M1_Tpd52l2 |
| _S[Phospho (STY)]FEDRVGTIK_.2                                                                                 | 0.129346578  | Q9CYZ2_S180_M1_Tpd52l2 |
| _HSIS[Phospho (STY)]M[Oxidation (M)]PVM[Oxidation (M)]R_.2                                                    | -0.516212072 | Q9CYZ2_S168_M1_Tpd52l2 |
| _ [Acetyl (Protein N-term)]M[Oxidation (M)]ES[Phospho (STY)]PEGAGPGEIVK_.2                                    | -0.222396338 | Q9CZ00_S3_M1_Dbndd1    |
| _VYEEDAVPGLTPC[Carbamidomethyl (C)]R_.2                                                                       | -0.136805977 | #N/A                   |
| _TDLTDYLR_.2                                                                                                  | -0.546958776 | #N/A                   |
| _NALVSHLDGTTTPVC[Carbamidomethyl (C)]EDIGR_.3                                                                 | 0.041017099  | #N/A                   |
| _LC[Carbamidomethyl (C)]TSATESEVTR_.2                                                                         | -0.01075396  | #N/A                   |
| _EHTAYLIK_.2                                                                                                  | -0.226352013 | #N/A                   |
| _IPLAEWESR_.2                                                                                                 | -0.091720007 | #N/A                   |
| _RIPLAEWESR_.2                                                                                                | -0.23748513  | #N/A                   |
| _VVELLADIVQNSSLEDSQIEKER_.3                                                                                   | -0.277186322 | #N/A                   |
| _NRPGNALEK_.2                                                                                                 | 0.319250343  | #N/A                   |
| _NNGAGYFLEHLAFK_.2                                                                                            | -0.143300387 | #N/A                   |
| _IQEVDAQM[Oxidation (M)]LR_.2                                                                                 | 0.085905506  | #N/A                   |
| _SLLTYGR_.2                                                                                                   | 0.199259189  | #N/A                   |
| _YFYDQC[Carbamidomethyl (C)]PAVAGYGPIEQLPDYNR_.3                                                              | -0.238193854 | #N/A                   |
| _SGM[Oxidation (M)]FWLR_.2                                                                                    | 0.150550879  | #N/A                   |
| _FTGSEIR_.2                                                                                                   | 0.076469023  | #N/A                   |
| _M[Oxidation (M)]VLAAAGGVEHQQLDLAQK_.3                                                                        | -0.512448902 | #N/A                   |
| _VVELLADIVQNSSLEDSQIEK_.2                                                                                     | -0.34001582  | #N/A                   |
| _VASEQSSHATC[Carbamidomethyl (C)]TVGVWIDAGSR_.3                                                               | -0.348814964 | #N/A                   |
| _EVESIGAHLNAYSTR_.2                                                                                           | -0.402831949 | #N/A                   |
| _IGIVGLPNVGK_.2                                                                                               | -0.065225282 | #N/A                   |
| _IPAFLNVVDIAGLVK_.2                                                                                           | -0.139134265 | #N/A                   |
| _NYIVEDGDIIFFK_.2                                                                                             | 0.150192293  | #N/A                   |
| _DLLLLNNVR_.2                                                                                                 | -0.277855436 | #N/A                   |
| _SYSPELIVHPVLDSSNAVEEVEK_.3                                                                                   | -0.178118788 | #N/A                   |
| _LSQALGNITVVQK_.2                                                                                             | 0.416227999  | #N/A                   |
| _AILTPNHVEFSR_.3                                                                                              | 0.326061879  | #N/A                   |
| _STTTTDMITEVGTAFSR_.2                                                                                         | -0.036654699 | #N/A                   |
| _S[Phospho (STY)]PGETSKPRPFAGGGYR_.3                                                                          | -0.245222254 | Q9CZ44_S140_M1_Nsfl1c  |
| _EANLLNAVIVQR_.2                                                                                              | 0.325766804  | #N/A                   |
| _SYQDPSNAQFLESIR_.2                                                                                           | -0.183324576 | #N/A                   |
| _DLIHDQDEEEEEEGQR_.3                                                                                          | -0.132747943 | #N/A                   |

|                                                                                               |              |                        |
|-----------------------------------------------------------------------------------------------|--------------|------------------------|
| _ASSSILINEAEPPTNIQIR_2                                                                        | -0.305720051 | #N/A                   |
| _RHS[Phospho (STY)]GQDVHVVLK_3                                                                | -0.070173686 | Q9CZ44_S176_M1_Nsfl1c  |
| _S[Phospho (STY)]PNELVDDLK_2                                                                  | -0.017347411 | Q9CZ44_S114_M1_Nsfl1c  |
| _RRHS[Phospho (STY)]GQDVHVVLK_3                                                               | -0.0371221   | Q9CZ44_S176_M1_Nsfl1c  |
| _VTKS[Phospho (STY)]PGETSKPR_2                                                                | -0.112092755 | Q9CZ44_S140_M1_Nsfl1c  |
| _TGFSLDNGDLR_2                                                                                | 0.431112332  | #N/A                   |
| _FYAGGSER_2                                                                                   | -0.336945964 | #N/A                   |
| _S[Phospho (STY)]PGETSKPR_2                                                                   | -0.15134214  | Q9CZ44_S140_M1_Nsfl1c  |
| _HS[Phospho (STY)]GQDVHVVLK_2                                                                 | -0.455513746 | Q9CZ44_S176_M1_Nsfl1c  |
| _KKS[Phospho (STY)]PNELVDDLK_2                                                                | -0.027277252 | Q9CZ44_S114_M1_Nsfl1c  |
| _EVPPPPVEES[Phospho (STY)]EEEDDDGLPK_2                                                        | 0.006943293  | Q9CZ52_S360_M1_Antxr1  |
| _QLM[Oxidation (M)]SQS[Phospho (STY)]QDEELSPLAAVETR_2                                         | 0.065043792  | Q9CZ62_S308_M1_Cep97   |
| _HLLWDLGK_2                                                                                   | 0.091890883  | #N/A                   |
| _LLQGS[Phospho (STY)]PEQGEAVTR_2                                                              | 0.094005191  | Q9CZB3_S172_M1_Thumpd2 |
| _DHGESQEDKLLQGS[Phospho (STY)]PEQGEAVTR_3                                                     | -0.18320836  | Q9CZB3_S172_M1_Thumpd2 |
| _AVIES[Phospho (STY)]DEEQGR_2                                                                 | -0.213183776 | Q9CZC8_S360_M1_Scrn1   |
| _THAIVISR_2                                                                                   | -0.10798711  | #N/A                   |
| _FQEKPR_2                                                                                     | 0.403799109  | #N/A                   |
| _VEC[Carbamidomethyl (C)]TYISIDQVPR_2                                                         | 0.411928429  | #N/A                   |
| _DKASGVC[Carbamidomethyl (C)]IDSESFLTASIVSVLPQNR_3                                            | -0.106983868 | #N/A                   |
| _AQ[S[Phospho (STY)]PC[Carbamidomethyl (C)]FGDDDPK_2                                          | -0.394275998 | Q9CZC8_S322_M1_Scrn1   |
| _ASGVC[Carbamidomethyl (C)]IDSESFLTASIVSVLPQNR_3                                              | -0.298696226 | #N/A                   |
| _SSPC[Carbamidomethyl (C)]IHYFTGTPDPSR_3                                                      | -0.226471287 | #N/A                   |
| _PAWLWGAEM[Oxidation (M)]GANEHGVC[Carbamidomethyl (C)]IANEAINAR_3                             | 0.098870986  | #N/A                   |
| _AQ[S[Phospho (STY)]PC[Carbamidomethyl (C)]FGDDDPK_3                                          | -0.118288048 | Q9CZC8_S322_M1_Scrn1   |
| _EPAAETEALLGM[Oxidation (M)]DLVR_2                                                            | 0.079185508  | #N/A                   |
| _TMLELEK_2                                                                                    | 0.048155218  | #N/A                   |
| _DEVQEVVYFPAVDHDAESK_3                                                                        | 0.142294865  | #N/A                   |
| _YS[Phospho (STY)]PGQLR_2                                                                     | 0.111874112  | Q9CZH7_S118_M1_Mxra7   |
| _VAEPEES[Phospho (STY)]EAEPPAAEGR_2                                                           | -0.256276863 | Q9CZH7_S79_M1_Mxra7    |
| _SPVPS[Phospho (STY)]PPGSPR_2                                                                 | 0.015352887  | Q9CZJ2_S25_M1_Hspa12b  |
| _RSS[Phospho (STY)]VNLVK_2                                                                    | -0.3200573   | Q9CZJ2_S434_M1_Hspa12b |
| _TQESC[Carbamidomethyl (C)]GIAPLTPS[Phospho (STY)]QSPKPEAR_3                                  | 0.138226545  | Q9CZJ2_S44_M1_Hspa12b  |
| _RS[Phospho (STY)]IDSS[Phospho (STY)]FR_2                                                     | -0.244984454 | Q9CZJ2_S276_M2_Hspa12b |
| _S[Phospho (STY)]IDSS[Phospho (STY)]FR_2                                                      | 0.089113745  | Q9CZJ2_S276_M2_Hspa12b |
| _SLQSVAEER_2                                                                                  | 0.11565247   | #N/A                   |
| _NTLQLHR_2                                                                                    | 0.052367877  | #N/A                   |
| _VLNSYWVGEDSTYK_2                                                                             | 0.42575392   | #N/A                   |
| _AVGNSDGDWAVATLKS[Phospho (STY)]PK_3                                                          | -0.218104173 | Q9CZN4_S296_M1_Shisa9  |
| _AFS[Phospho (STY)]PEHGPAQQNGQK_2                                                             | 0.108106619  | Q9CZN4_S337_M1_Shisa9  |
| _TFVEESIYR_2                                                                                  | -0.260151193 | #N/A                   |
| _LLAEQLGDFDFEASAK_2                                                                           | 0.027270491  | #N/A                   |
| _M[Oxidation (M)]SDS[Phospho (STY)]M[Oxidation (M)]DTDPSVLGASK_2                              | -0.127432532 | Q9CZT8_S190_M1_Rab3b   |
| _LVDAlC[Carbamidomethyl (C)]DKM[Oxidation (M)]S[Phospho (STY)]DSM[Oxidation (M)]DTDPSVLGASK_3 | 0.09481173   | Q9CZT8_S188_M1_Rab3b   |
| _VVPGYGHAVLR_2                                                                                | 0.186031337  | #N/A                   |
| _GLVYETSVLDPDEGIR_2                                                                           | -0.23711427  | #N/A                   |
| _EGSSIGAIDSR_2                                                                                | -0.16273363  | #N/A                   |

|                                                                                        |              |                       |
|----------------------------------------------------------------------------------------|--------------|-----------------------|
| _ALGFPLERPK_2                                                                          | -0.051148621 | #N/A                  |
| _IVPNILLEQGK_2                                                                         | 0.134660736  | #N/A                  |
| _GYSIPEC[Carbamidomethyl (C)]QK_2                                                      | -0.077486185 | #N/A                  |
| _DIWNTLNSGR_2                                                                          | 0.056619859  | #N/A                  |
| _LVAQLYK_2                                                                             | 0.023860259  | #N/A                  |
| _EVGKDVSEKLR_3                                                                         | -0.216720129 | #N/A                  |
| _EVGKDVSEK_2                                                                           | 0.288296618  | #N/A                  |
| _ALGVLAQLIWSR_2                                                                        | 0.153066695  | #N/A                  |
| _AYAEGM[Oxidation (M)]NR_2                                                             | 0.350826852  | #N/A                  |
| _LDWSHNFTNM[Oxidation (M)]LGYTDPQFTELM[Oxidation (M)]R_3                               | -0.315692104 | #N/A                  |
| _AALPSHVVTM[Oxidation (M)]LDNFPTNLHPM[Oxidation (M)]SQLSAAITALSESNFAR_4                | -0.108492129 | #N/A                  |
| _TVVGQITVDM[Oxidation (M)]M[Oxidation (M)]YGGM[Oxidation (M)]R_2                       | -0.571229437 | #N/A                  |
| _DVLSNLIPK_2                                                                           | 0.005881976  | #N/A                  |
| _YWELIYEDC[Carbamidomethyl (C)]M[Oxidation (M)]DLIAK_2                                 | -0.246958598 | #N/A                  |
| _SMSTDGLMK_2                                                                           | 0.150010424  | #N/A                  |
| _NVDLSTFYQNR_2                                                                         | -0.164232235 | #N/A                  |
| _AAAFEQLQK_2                                                                           | 0.070939973  | #N/A                  |
| _SYFSSFTDDIISQPM[Oxidation (M)]LK_2                                                    | -0.003153701 | #N/A                  |
| _FALAQAQK_2                                                                            | -0.080456526 | #N/A                  |
| _YEQAQIC[Carbamidomethyl (C)]YTEAISLC[Carbamidomethyl (C)]PTEK_2                       | -0.489200161 | #N/A                  |
| _ATFYLLIGSANAAPDLDK_2                                                                  | -0.084565746 | #N/A                  |
| _C[Carbamidomethyl (C)]IDLEPDNATTYVHK_3                                                | 0.371111244  | #N/A                  |
| _GDASGLKR_2                                                                            | -0.248765423 | #N/A                  |
| _YM[Oxidation (M)]AEALLR_2                                                             | 0.127548268  | #N/A                  |
| _C[Carbamidomethyl (C)]AEGYALYAQALTDQQQFGK_2                                           | 0.419216684  | #N/A                  |
| _AS[Phospho (STY)]PALGSGHHGSGDSLEM[Oxidation (M)]SSLDL_3                               | -0.440772974 | Q9CZW5_S94_M1_Tomm70  |
| _SDEKDKKEGEALVK_3                                                                      | -0.615201009 | #N/A                  |
| _WKEVAQDC[Carbamidomethyl (C)]TK_2                                                     | 0.137574284  | #N/A                  |
| _GFEEIK_2                                                                              | 0.40207348   | #N/A                  |
| _QAYTANSSQVQAAMK_2                                                                     | -0.401939385 | #N/A                  |
| _NSERKT[Phospho (STY)]PEGR_2                                                           | -0.598196628 | Q9CZW5_T88_M1_Tomm70  |
| _EC[Carbamidomethyl (C)]LEDVTAVC[Carbamidomethyl (C)]ILEGFQNEQSM[Oxidation (M)]LLADK_3 | -0.524496759 | #N/A                  |
| _DVNQQEFVR_2                                                                           | -0.226390933 | #N/A                  |
| _ELAPYDENWFYTR_2                                                                       | 0.550777822  | #N/A                  |
| _IAGQVAAANK_2                                                                          | -0.054940446 | #N/A                  |
| _GGAGVGSMTK_2                                                                          | -0.229740619 | #N/A                  |
| _S[Phospho (STY)]DRGSGQGDSLYPVGYLDK_3                                                  | -0.236307395 | Q9CZX9_S32_M1_Emc4    |
| _LPQPPEGQC[Carbamidomethyl (C)]YS[Phospho (STY)]N_2                                    | 0.176314563  | Q9CZY3_S146_M1_Ube2v1 |
| _VNM[Oxidation (M)]SGVSSSNGVVDPR_2                                                     | 0.285728828  | #N/A                  |
| _DNSNIILLGDS[Phospho (STY)]QGDLR_2                                                     | 0.104873806  | Q9D020_S273_M1_Nt5c3a |
| _NS[Phospho (STY)]PNNISGISNPPGTPR_2                                                    | 0.002586989  | Q9D032_S347_M1_Ssbp3  |
| _VLEDNSVPQVK_2                                                                         | -0.014855785 | #N/A                  |
| _VVSPWNSEDAK_2                                                                         | -0.27039914  | #N/A                  |
| _EGIEC[Carbamidomethyl (C)]EVINLR_2                                                    | -0.27226925  | #N/A                  |
| _VFLLGEEVAQYDGAYK_2                                                                    | -0.476193779 | #N/A                  |
| _DFLIPIGK_2                                                                            | 0.158432738  | #N/A                  |
| _TIRPM[Oxidation (M)]DIEAIEASVM[Oxidation (M)]K_3                                      | -0.116210797 | #N/A                  |

|                                                             |              |                       |
|-------------------------------------------------------------|--------------|-----------------------|
| _IM[Oxidation (M)]EGPAFNFLDAPAVR_.2                         | 0.022883023  | #N/A                  |
| _TYYM[Oxidation (M)]SAGLQVPVIVFR_.2                         | -0.518853168 | #N/A                  |
| _EAINQGM[Oxidation (M)]DEELERDEK_.3                         | -0.216498592 | #N/A                  |
| _PVGHC[Carbamidomethyl (C)]LEAAAVLSK_.3                     | 0.344236294  | #N/A                  |
| _ASS[Phospho (STY)]QDGLETLLK_.2                             | -0.099932994 | Q9D067_S556_M1_Mdm1   |
| _VQGTHFS[Phospho (STY)]R_.2                                 | -0.375253247 | Q9D067_S357_M1_Mdm1   |
| _RAS[Phospho (STY)]S[Phospho (STY)]QDGLETLLK_.3             | -0.352814901 | Q9D067_S555_M2_Mdm1   |
| _TQSKS[Phospho (STY)]PDSTLR_.2                              | 0.136961849  | Q9D074_S428_M1_Mgrn1  |
| _ESSS[Phospho (STY)]PESFGTEEGDEPSLK_.2                      | 0.101574727  | Q9D074_S470_M1_Mgrn1  |
| _YKEDADS[Phospho (STY)]PTEDGEKPR_.2                         | -0.117054451 | Q9D074_S106_M1_Mgrn1  |
| _GRDS[Phospho (STY)]PYQSR_.2                                | 0.078643268  | Q9D0B0_S205_M1_Srsf9  |
| _GS[Phospho (STY)]PHYFS[Phospho (STY)]PFRPY_.2              | 0.109686867  | Q9D0B0_S212_M2_Srsf9  |
| _STS[Phospho (STY)]YGYSR_.2                                 | 0.294708822  | Q9D0B0_S190_M1_Srsf9  |
| _EWVTYEISEEKQES_.2                                          | -0.303578019 | #N/A                  |
| _GADS[Phospho (STY)]GGEKEEGANR_.2                           | -0.07160662  | Q9D0B6_S184_M1_Pbdc1  |
| _GADS[Phospho (STY)]GGEKEEGANREGEK_.3                       | -0.150333156 | Q9D0B6_S184_M1_Pbdc1  |
| _AFITNIPFDVK_.2                                             | 0.24936854   | #N/A                  |
| _INEILSNALK_.2                                              | 0.615638005  | #N/A                  |
| _MGLS[Phospho (STY)]MDR_.2                                  | -0.134432821 | Q9D0E1_S527_M1_Hnrnmp |
| _MGLAMGGAGGAS[Phospho (STY)]FDR_.2                          | -0.629362551 | Q9D0E1_S617_M1_Hnrnmp |
| _VGS[Phospho (STY)]EIER_.2                                  | -0.319670958 | Q9D0E1_S431_M1_Hnrnmp |
| _MGS[Phospho (STY)]GVER_.2                                  | 0.268897312  | Q9D0E1_S512_M1_Hnrnmp |
| _S[Phospho (STY)]YGSLVQSSC[Carbamidomethyl (C)]SPVR_.2      | -0.363023303 | Q9D0E3_S23_M1_Lysmd1  |
| _DLFNGLDS[Phospho (STY)]EEENDGEEVVRPSKDEIGSSSGR_.4          | 0.153491993  | Q9D0E3_S99_M1_Lysmd1  |
| _YDYEEVEAEGANK_.2                                           | -0.226203526 | #N/A                  |
| _ADNFEYSDPVDGSISK_.2                                        | -0.18962623  | #N/A                  |
| _ELLSGPNR_.2                                                | 0.358617001  | #N/A                  |
| _TQAYPDQKPGTSGLR_.3                                         | 0.064068396  | #N/A                  |
| _IALYETPTGWK_.2                                             | -0.012917906 | #N/A                  |
| _LIFADGSR_.2                                                | -0.067334153 | #N/A                  |
| _QQFDLENK_.2                                                | -0.444949439 | #N/A                  |
| _AIGGIILTAS[Phospho (STY)]HNPGGPNGDFGIK_.3                  | -0.183371401 | Q9D0F9_S117_M1_Pgm1   |
| _VDLGVLGK_.2                                                | 0.087001898  | #N/A                  |
| _INQDPQVM[Oxidation (M)]LAPLISIALK_.2                       | 0.231256559  | #N/A                  |
| _QEATLVVGGDGR_.2                                            | -0.035686324 | #N/A                  |
| _FFGNLM[Oxidation (M)]DASK_.2                               | 0.003137441  | #N/A                  |
| _FNISNGGPAPEAITDK_.2                                        | -0.060810107 | #N/A                  |
| _DLEALMLDR_.2                                               | 0.291419688  | #N/A                  |
| _LYIDSYEKDVAK_.3                                            | -0.435498129 | #N/A                  |
| _LTS[Phospho (STY)]C[Carbamidomethyl (C)]PDLPSQSDK_.2       | 0.075810542  | Q9D0I4_S288_M1_Stx17  |
| _L[Acetyl (Protein N-term)]S[Phospho (STY)]EKSVEAAAELSAK_.2 | 0.026831092  | Q9D0J8_S2_M1_Ptms     |
| _TAEEDDEADPKR_.3                                            | 0.170217326  | #N/A                  |
| _FYTDPVEAVK_.2                                              | 0.316972189  | #N/A                  |
| _GVFDVDKK_.2                                                | -0.110874479 | #N/A                  |
| _DGSVAIASKPR_.2                                             | -0.04453275  | #N/A                  |
| _YGDLANWM[Oxidation (M)]IPGK_.2                             | -0.082333645 | #N/A                  |
| _AGGAGVPAFYTSTGYGTLVQEGGSPK_.3                              | -0.024270853 | #N/A                  |

|                                                                             |              |                       |
|-----------------------------------------------------------------------------|--------------|-----------------------|
| _GM[Oxidation (M)]GGAM[Oxidation (M)]DLVSSSK_.2                             | -0.426880146 | #N/A                  |
| _C[Carbamidomethyl (C)]TLPLTGK_.2                                           | 0.458057793  | #N/A                  |
| _QFLSGELELEVELTPQGTLAER_.2                                                  | -0.132111089 | #N/A                  |
| _DLTAVSNNAGVDNFGGLLLR_.2                                                    | -0.188217648 | #N/A                  |
| _ETVTVLPGASFFSSDESFAIR_.2                                                   | 0.211923691  | #N/A                  |
| _STGC[Carbamidomethyl (C)]DFAVSPNLM[Oxidation (M)]PM[Oxidation (M)]QQIST_.2 | -0.364505834 | #N/A                  |
| _VVVTMEHSAK_.2                                                              | -0.055414193 | #N/A                  |
| _M[Oxidation (M)]ISSYVGENAEFER_.2                                           | -0.204519953 | #N/A                  |
| _S[Phospho (STY)]AEDLTGSDYDDILNAEQKK_.3                                     | 0.060600283  | Q9D0L7_S43_M1_Armc10  |
| _S[Phospho (STY)]AEDLTGSDYDDILNAEQK_.2                                      | -0.062990122 | Q9D0L7_S43_M1_Armc10  |
| _LLYLLESTDDPVITEK_.2                                                        | -0.252668563 | #N/A                  |
| _ASVASDPES[Phospho (STY)]PPGGNEPAAASGQR_.2                                  | -0.336101023 | Q9D0L8_S15_M1_Rnmt    |
| _GDVS[Phospho (STY)]EDEPSLGR_.2                                             | -0.33555665  | Q9D0L8_S100_M1_Rnmt   |
| _EFGEDLVEQNSSYVQDS[Phospho (STY)]PSKK_.3                                    | -0.269654364 | Q9D0L8_S64_M1_Rnmt    |
| _EFGEDLVEQNSSYVQDS[Phospho (STY)]PSKKR_.3                                   | -0.179273276 | Q9D0L8_S64_M1_Rnmt    |
| _EFGEDLVEQNSSYVQDS[Phospho (STY)]PSK_.2                                     | -0.062865274 | Q9D0L8_S64_M1_Rnmt    |
| _LPENT[Phospho (STY)]PPC[Carbamidomethyl (C)]QQVDQPK_.2                     | 0.498914447  | Q9D0L8_T34_M1_Rnmt    |
| _HLVGVC[Carbamidomethyl (C)]YTEEEAK_.2                                      | 0.107011111  | #N/A                  |
| _LSDYFPKYPNPPEAAR_.3                                                        | -0.123290459 | #N/A                  |
| _HGGEDYVFSLLTGYC[Carbamidomethyl (C)]EPPTGVSLR_.3                           | 0.326499557  | #N/A                  |
| _GLSSLDHTSIR_.2                                                             | 0.048603869  | #N/A                  |
| _DVATFLR_.2                                                                 | 0.182455036  | #N/A                  |
| _ALAEVEVQDGPNDGEM[Oxidation (M)]FM[Oxidation (M)]RPGK_.3                    | -0.46215637  | #N/A                  |
| _WASEPEHDHRK_.3                                                             | 0.140885901  | #N/A                  |
| _DIAAYIKK_.2                                                                | -0.147557778 | #N/A                  |
| _NFGSYVTHETK_.2                                                             | -0.084183621 | #N/A                  |
| _YNPTWHC[Carbamidomethyl (C)]IVGR_.2                                        | -0.016122118 | #N/A                  |
| _NADM[Oxidation (M)]SEDMQQDAVDC[Carbamidomethyl (C)]ATQAMEK_.3              | 0.136016469  | #N/A                  |
| _ISQAEEDDQQLGHLLVAK_.3                                                      | -0.487365124 | #N/A                  |
| _QQIQSIQQS[Phospho (STY)]IER_.2                                             | -0.090824789 | Q9D0T1_S122_M1_Snu13  |
| _KLS[Phospho (STY)]GDQITLPTTVDYSSVPK_.2                                     | 0.049805919  | Q9D0V7_S36_M1_Ebag9   |
| _APGDDEAQVENLITTNAAEPQKAEN_.3                                               | -0.320483844 | #N/A                  |
| _APGDDEAQVENLITTNAAEPQK_.2                                                  | -0.056284029 | #N/A                  |
| _SS[Phospho (STY)]PITVQTSK_.2                                               | -0.205282053 | Q9D168_S127_M1_Ints12 |
| _SVS[Phospho (STY)]C[Carbamidomethyl (C)]DNVSK_.2                           | -0.350029902 | Q9D168_S377_M1_Ints12 |
| _GVTEAHVDQK_.2                                                              | -0.225776492 | #N/A                  |
| _ITSLAQLNAANHDAAIFFGGFGAAK_.3                                               | -0.008178141 | #N/A                  |
| _NLSTFAVDGK_.2                                                              | -0.115791043 | #N/A                  |
| _NVLELTGK_.2                                                                | 0.06675855   | #N/A                  |
| _VNKEVER_.2                                                                 | 0.000336975  | #N/A                  |
| _NVLAESAR_.2                                                                | 0.127091444  | #N/A                  |
| _GGAEVQIFAPDVPQMHVIDHTK_.3                                                  | -0.115740114 | #N/A                  |
| _TVFGVEPDLTR_.2                                                             | 0.216131269  | #N/A                  |
| _AVFQYIDENQDR_.2                                                            | 0.09956144   | #N/A                  |
| _TGQEIPVNLK_.2                                                              | 0.503427048  | #N/A                  |
| _LNYIEGTK_.2                                                                | -0.152451228 | #N/A                  |
| _FAELQSPNK_.2                                                               | 0.205911083  | #N/A                  |

|                                                                |              |                       |
|----------------------------------------------------------------|--------------|-----------------------|
| _EGGSIPVTLTFQEATGK_2                                           | 0.085158986  | #N/A                  |
| _YEIS[Phospho (STY)]PEAYER_2                                   | -0.074868591 | Q9D1E6_S110_M1_Tbcb   |
| _AQQEAEAAQR_2                                                  | 0.325856827  | #N/A                  |
| _AQASAIsvgsr_2                                                 | 0.015448718  | #N/A                  |
| _SSDEENGPPSS[Phospho (STY)]PDLDR_2                             | 0.174026759  | Q9D1F4_S213_M1_Akt1s1 |
| _EDEEDEDEPTETETS[Phospho (STY)]GER_2                           | 0.079354993  | Q9D1F4_S117_M1_Akt1s1 |
| _LNT[Phospho (STY)]SDFQK_2                                     | -0.185800002 | Q9D1F4_T247_M1_Akt1s1 |
| _TEARSS[Phospho (STY)]DEENGPPSS[Phospho (STY)]PDLDR_3          | 0.46457429   | Q9D1F4_S204_M2_Akt1s1 |
| _AATATRPPGPPAPQPPS[Phospho (STY)]PAPS[Phospho (STY)]PPRPALAR_4 | 0.102815728  | Q9D1F4_S88_M2_Akt1s1  |
| _EFADSLGVPFLETSK_2                                             | -0.252095525 | #N/A                  |
| _ [Acetyl (Protein N-term)]M[Oxidation (M)]NPEYDYLFK_2         | -0.051264178 | #N/A                  |
| _GAHGIIVVYDVTQESYANVK_3                                        | -0.394211226 | #N/A                  |
| _MGPGAAS[Phospho (STY)]GGERPNLK_2                              | 0.129162593  | Q9D1G1_S179_M1_Rab1b  |
| _SLSLNNK_2                                                     | 0.400187364  | #N/A                  |
| _DTTINEIEDTFR_2                                                | 0.215314412  | #N/A                  |
| _DDIGIILINQYIAEM[Oxidation (M)]VR_2                            | 0.287741575  | #N/A                  |
| _GM[Oxidation (M)]FTAEDLR_2                                    | -0.001183028 | #N/A                  |
| _LIAVIGDEDVTGFLGGIGELNK_3                                      | -0.025956122 | #N/A                  |
| _LLSVTPTS[Phospho (STY)]EGYSIK_2                               | -0.156089588 | Q9D1K7_S99_M1_        |
| _LC[Carbamidomethyl (C)]EGFNEVLR_2                             | -0.165084355 | #N/A                  |
| _GQGSVSASITEGQQNEQ_2                                           | 0.166174183  | #N/A                  |
| _S[Phospho (STY)]PGRVS[Phospho (STY)]PPTPAR_2                  | -0.221261179 | Q9D1P2_S37_M2_Kat8    |
| _AFLIEEQK_2                                                    | -0.029731773 | #N/A                  |
| _SAC[Carbamidomethyl (C)]GVC[Carbamidomethyl (C)]PGR_2         | 0.172451001  | #N/A                  |
| _LSYNTASNK_2                                                   | -0.433855062 | #N/A                  |
| _S[Phospho (STY)]DAGISSADAPR_2                                 | -0.123401488 | Q9D1T0_S596_M1_Lingo1 |
| _HNIEIEYVPRKS[Phospho (STY)]DAGISSADAPR_4                      | -0.221326793 | Q9D1T0_S596_M1_Lingo1 |
| _FVAVPEGIPTETR_2                                               | -0.217289356 | #N/A                  |
| _LTVFPDGTLEVR_2                                                | -0.055071674 | #N/A                  |
| _KS[Phospho (STY)]DAGISSADAPR_2                                | -0.095823154 | Q9D1T0_S596_M1_Lingo1 |
| _ASEQEEVGGPEGs[Phospho (STY)]EALQPR_2                          | 0.077340159  | Q9D1X0_S142_M1_Nol3   |
| _LVETLQADSGLLLDALVAR_2                                         | -0.15865698  | #N/A                  |
| _IPVEGPLS[Phospho (STY)]PSR_2                                  | -0.076321276 | Q9D219_S686_M1_Bcl9   |
| _SST[Phospho (STY)]PSHGQTPAPEPISAQK_2                          | -0.136941142 | Q9D219_T155_M1_Bcl9   |
| _FSNQKGKPGGSASQSQPS[Phospho (STY)]PC[Carbamidomethyl (C)]DSK_3 | 0.293498427  | Q9D219_S62_M1_Bcl9    |
| _AADS[Phospho (STY)]DDDVPPVPTPSDGGVVK_2                        | 0.069648795  | Q9D2E2_S5_M1_Toe1     |
| _VEGGTPLFTLR_2                                                 | 0.17995027   | #N/A                  |
| _AKPAETPAPAHK_3                                                | -0.000686151 | #N/A                  |
| _NVETM[Oxidation (M)]NYADIER_2                                 | 0.367315084  | #N/A                  |
| _ASAFALQEQPVVNAVIDDATK_2                                       | -0.21699342  | #N/A                  |
| _TINELGEK_2                                                    | 0.086989537  | #N/A                  |
| _NDVITVQTPAFAESVTEGDVR_2                                       | -0.035183674 | #N/A                  |
| _LPQPPEGQTYNN_2                                                | -0.093903566 | #N/A                  |
| _LLEEELEGQK_2                                                  | 0.239144121  | #N/A                  |
| _VILQELR_2                                                     | 0.268748564  | #N/A                  |
| _WTGM[Oxidation (M)]IIGPPR_2                                   | -0.393114727 | #N/A                  |
| _YPEAPPSVR_2                                                   | 0.170809413  | #N/A                  |

|                                                                                                                                                   |              |                        |
|---------------------------------------------------------------------------------------------------------------------------------------------------|--------------|------------------------|
| _ENM[Oxidation (M)]KLPQPPEGQTYNN_.2                                                                                                               | -0.330597028 | #N/A                   |
| _VEC[Carbamidomethyl (C)]GS[Phospho (STY)]KYPEAPPSVR_.3                                                                                           | -0.1556964   | Q9D2M8_S71_M1_Ube2v2   |
| _GVGDGTVSWGLEDEDM[Oxidation (M)]TLTR_.2                                                                                                           | -0.508645747 | #N/A                   |
| _SS[Phospho (STY)]PSHTISR_.2                                                                                                                      | 0.396037893  | Q9D2N4_S568_M1_Dtna    |
| _HQPAAS[Phospho (STY)]PVVVR_.2                                                                                                                    | -0.12639214  | Q9D2P8_S85_M1_Mobp     |
| _ATS[Phospho (STY)]PQRPK_.2                                                                                                                       | -0.12428187  | Q9D2P8_S74_M1_Mobp     |
| _GGS[Phospho (STY)]PTRAPR_.2                                                                                                                      | -0.03608329  | Q9D2P8_S162_M1_Mobp    |
| _S[Phospho (STY)]PPRPAKPR_.2                                                                                                                      | 0.018466983  | Q9D2P8_S107_M1_Mobp    |
| _RATS[Phospho (STY)]PQRPK_.2                                                                                                                      | 0.075487934  | Q9D2P8_S74_M1_Mobp     |
| _SS[Phospho (STY)]PLRGPGRSR_.2                                                                                                                    | -0.499440882 | Q9D2P8_S150_M1_Mobp    |
| _S[Phospho (STY)]PLM[Oxidation (M)]PAKPR_.2                                                                                                       | 0.140258488  | Q9D2P8_S98_M1_Mobp     |
| _PEPSRST[Phospho (STY)]PAKP_.2                                                                                                                    | -0.054316055 | Q9D2U9_T8_M1_Hist3h2ba |
| _IWDLQTGAER_.2                                                                                                                                    | 0.076582855  | #N/A                   |
| _S[Phospho (STY)]LQSLGPPSSK_.2                                                                                                                    | 0.063958489  | Q9D2V7_S459_M1_Coro7   |
| _EDPLPQDS[Phospho (STY)]FEGVDEDEWD_.2                                                                                                             | -0.118015028 | Q9D2V7_S912_M1_Coro7   |
| _LGNREDPLPQDS[Phospho (STY)]FEGVDEDEWD_.3                                                                                                         | -0.452418871 | Q9D2V7_S912_M1_Coro7   |
| _SPIAEAVFR_.2                                                                                                                                     | 0.063804233  | #N/A                   |
| _SVLFVC[Carbamidomethyl (C)]LGNIC[Carbamidomethyl (C)]R_.2                                                                                        | -0.128814326 | #N/A                   |
| _VHFVYDSSEK_.2                                                                                                                                    | -0.098757693 | #N/A                   |
| _NYVEELNR_.2                                                                                                                                      | -0.107321458 | #N/A                   |
| _TAEGQALSEAR_.2                                                                                                                                   | 0.234599884  | #N/A                   |
| _GLIESALNLGR_.2                                                                                                                                   | 0.419089876  | #N/A                   |
| _LQSSDLGVK_.2                                                                                                                                     | 0.082069726  | #N/A                   |
| _VS[Phospho (STY)]M[Oxidation (M)]DGEWLC[Carbamidomethyl (C)]LR_.2                                                                                | -0.363872035 | Q9D394_S34_M1_Rufy3    |
| _ [Acetyl (Protein N-term)]SALT[Phospho (STY)]PPTDM[Oxidation (M)]PT[Phospho (STY)]PTTDKITQAAM[Oxidation (M)]ETIYLC[Carbamidomethyl (C)]PTPTDK_.2 | -0.537067494 | Q9D394_T12_M2_Rufy3    |
| _ [Acetyl (Protein N-term)]SALT[Phospho (STY)]PPTDM[Oxidation (M)]PTPTDK_.2                                                                       | -0.309313167 | Q9D394_T5_M1_Rufy3     |
| _DGNS[Phospho (STY)]SKGSEGDGQITAILDQK_.3                                                                                                          | 0.319443845  | Q9D394_S247_M1_Rufy3   |
| _GEDLDSQGVDFSM[Oxidation (M)]YLK_.2                                                                                                               | -0.03747255  | #N/A                   |
| _VKEESSYLLESNR_.3                                                                                                                                 | 0.048159285  | #N/A                   |
| _IEANEALVK_.2                                                                                                                                     | 0.225254016  | #N/A                   |
| _IEANEALVKALE_.2                                                                                                                                  | 0.463780946  | #N/A                   |
| _AQSELGADEAAR_.2                                                                                                                                  | 0.254220201  | #N/A                   |
| _SES[Phospho (STY)]PTADSDASSLHEQPQQAIAK_.3                                                                                                        | -0.057318004 | Q9D3X9_S298_M1_Mfap3l  |
| _GC[Carbamidomethyl (C)]S[Phospho (STY)]QDDEC[Carbamidomethyl (C)]VSLR_.2                                                                         | -0.357980903 | Q9D415_S509_M1_Dlgap1  |
| _SHS[Phospho (STY)]LEGPSK_.2                                                                                                                      | -0.282727822 | Q9D415_S154_M1_Dlgap1  |
| _ERS[Phospho (STY)]LESSQR_.2                                                                                                                      | -0.301152056 | Q9D415_S947_M1_Dlgap1  |
| _SLDSLDPAGLLTS[Phospho (STY)]PK_.2                                                                                                                | -0.080090421 | Q9D415_S437_M1_Dlgap1  |
| _AVSEVS[Phospho (STY)]INR_.2                                                                                                                      | 0.063616185  | Q9D415_S421_M1_Dlgap1  |
| _AS[Phospho (STY)]PDESQTLR_.2                                                                                                                     | 0.047475079  | Q9D415_S169_M1_Dlgap1  |
| _SRNES[Phospho (STY)]YM[Oxidation (M)]R_.2                                                                                                        | 0.300413501  | Q9D415_S446_M1_Dlgap1  |
| _AM[Oxidation (M)]GDEDS[Phospho (STY)]GDS[Phospho (STY)]DTS[Phospho (STY)]PKPSPK_.2                                                               | -0.163334555 | Q9D415_S365_M3_Dlgap1  |
| _GSVNGGKAS[Phospho (STY)]PDESQTLR_.2                                                                                                              | -0.071288869 | Q9D415_S169_M1_Dlgap1  |
| _AIEKGC[Carbamidomethyl (C)]S[Phospho (STY)]QDDEC[Carbamidomethyl (C)]VSLR_.3                                                                     | -0.306156344 | Q9D415_S509_M1_Dlgap1  |
| _GDMISQSGLSNS[Phospho (STY)]TESLDSM[Oxidation (M)]K_.2                                                                                            | -0.38109883  | Q9D415_S605_M1_Dlgap1  |
| _QNS[Phospho (STY)]ATESAESIEIYIPEAQTR_.3                                                                                                          | 0.04445348   | Q9D415_S973_M1_Dlgap1  |
| _C[Carbamidomethyl (C)]LS[Phospho (STY)]IGIQVDDAEEPEK_.2                                                                                          | 0.118104653  | Q9D415_S666_M1_Dlgap1  |
| _RSAS[Phospho (STY)]LATK_.2                                                                                                                       | -0.405745634 | Q9D428_S16_M1_GOLGA7B  |

|                                                                             |              |                          |
|-----------------------------------------------------------------------------|--------------|--------------------------|
| _DYS[Phospho (STY)]DGTIC[Carbamidomethyl (C)]QFQTK_.2                       | 0.353758316  | Q9D428_S28_M1_GOLGA7B    |
| _SQS[Phospho (STY)]VVEAGTLK_.2                                              | -0.02739606  | Q9D4C9_S329_M1_Clvs1     |
| _HTC[Carbamidomethyl (C)]S[Phospho (STY)]NLER_.2                            | 0.331598707  | Q9D4C9_S313_M1_Clvs1     |
| _SQS[Phospho (STY)]VVEAGTLKHEEK_.2                                          | -0.154044469 | Q9D4C9_S329_M1_Clvs1     |
| _EC[Carbamidomethyl (C)]S[Phospho (STY)]PKPMK_.2                            | 0.24562905   | Q9D4C9_S320_M1_Clvs1     |
| _EC[Carbamidomethyl (C)]S[Phospho (STY)]PKPMKR_.2                           | 0.331345556  | Q9D4C9_S320_M1_Clvs1     |
| _ASDS[Phospho (STY)]PVHR_.2                                                 | -0.042744135 | Q9D4F2_S60_M1_Plpp6      |
| _ASNTADTLFQEVLGR_.2                                                         | 0.297953389  | #N/A                     |
| _GSS[Phospho (STY)]FQSGRDDTWR_.2                                            | -0.144205102 | Q9D4H1_S432_M1_Exoc2     |
| _NSADDEELT[Phospho (STY)]NDS[Phospho (STY)]LTLSQSK_.2                       | -0.168268228 | Q9D4H9_S283_M2_Ph14      |
| _SNS[Phospho (STY)]LPHSAVSNASK_.2                                           | -0.353107036 | Q9D5R2_S432_M1_Wdr20     |
| _EYVNSTSEES[Phospho (STY)]HDEDEIRPVQQDLHR_.4                                | -0.247776241 | Q9D5T0_S322_M1_Atad1     |
| _ESS[Phospho (STY)]PSNSPSPQGFR_.2                                           | -0.244705758 | Q9D620_S340_M1_Rab11fip1 |
| _GPPGC[Carbamidomethyl (C)]SPC[Carbamidomethyl (C)]PES[Phospho (STY)]PSR_.2 | -0.1405582   | Q9D650_S67_M1_Lratd1     |
| _C[Carbamidomethyl (C)]SLQREDS[Phospho (STY)]DGGTGGPAR_.2                   | -0.11898542  | Q9D6E4_S226_M1_Ttc9b     |
| _EDS[Phospho (STY)]DGGTGGPAR_.2                                             | 0.148140947  | Q9D6E4_S226_M1_Ttc9b     |
| _IREFPDR_.2                                                                 | -0.030131006 | #N/A                     |
| _GHYTEGAELVDAVLDVVR_.3                                                      | -0.078582182 | #N/A                     |
| _GHYTEGAELVDAVLDVVRK_.3                                                     | -0.471449945 | #N/A                     |
| _EVDEQM[Oxidation (M)]LSVQSK_.2                                             | 0.051789357  | #N/A                     |
| _M[Oxidation (M)]AATFIGNSTAIQELFK_.2                                        | -0.352705065 | #N/A                     |
| _INVYYNEATGGNYVPR_.2                                                        | -0.094217909 | #N/A                     |
| _RGS[Phospho (STY)]WDSLPTDSSTDR_.2                                          | -0.349741177 | Q9D6I9_S126_M1_Lurap1    |
| _GGDPTKEPEPVVHYDI_.3                                                        | -0.062177913 | #N/A                     |
| _QYPYNLYLER_.2                                                              | -0.284414454 | #N/A                     |
| _DPWYQWDHSELR_.2                                                            | 0.237550362  | #N/A                     |
| _DSDSILETLQR_.2                                                             | -0.062187252 | #N/A                     |
| _DIEEIIDELK_.2                                                              | 0.141805205  | #N/A                     |
| _DTPENNPDPFDFTPENYKR_.3                                                     | -0.135571961 | #N/A                     |
| _DTPENNPDPFDFTPENYK_.2                                                      | -0.161146004 | #N/A                     |
| _NYPEGHQAALVLPVLDLAQR_.3                                                    | -0.253108586 | #N/A                     |
| _FC[Carbamidomethyl (C)]C[Carbamidomethyl (C)]EPAGGLTSLTEPPKGPFGVQAGL_.3    | -0.251459488 | #N/A                     |
| _VYEVATFYTM[Oxidation (M)]YNR_.2                                            | -0.127166049 | #N/A                     |
| _YHIQVC[Carbamidomethyl (C)]TTTPC[Carbamidomethyl (C)]M[Oxidation (M)]LR_.3 | -0.046201501 | #N/A                     |
| _LAANDFFR_.2                                                                | 0.062415951  | #N/A                     |
| _HEGPSAFLK_.2                                                               | 0.351753466  | #N/A                     |
| _NHGIAGLYK_.2                                                               | 8.18E-05     | #N/A                     |
| _GVNEDTYSGLDC[Carbamidomethyl (C)]AR_.2                                     | -0.174614726 | #N/A                     |
| _SEGYFGMYR_.2                                                               | 0.344728551  | #N/A                     |
| _LINGGIAGLIGVTC[Carbamidomethyl (C)]VFPIDLAK_.2                             | -0.179665671 | #N/A                     |
| _SPFYVSFLAGC[Carbamidomethyl (C)]VAGSAAAVAVNPC[Carbamidomethyl (C)]DVVK_.3  | 0.119041098  | #N/A                     |
| _APIQWEER_.2                                                                | 0.224524741  | #N/A                     |
| _TPYTDVNIVTIR_.2                                                            | 0.177695784  | #N/A                     |
| _NVTAIQGPGGK_.2                                                             | 0.122959544  | #N/A                     |
| _LITEEASKR_.2                                                               | 0.242899318  | #N/A                     |
| _IAEFAFEYAR_.2                                                              | -0.390617756 | #N/A                     |
| _SNVTAVHK_.2                                                                | 0.263992849  | #N/A                     |



|                                                                                        |              |                        |
|----------------------------------------------------------------------------------------|--------------|------------------------|
| _ENTEGEYSGIEHVIVDGVVQSIK_.3                                                            | -0.395833919 | #N/A                   |
| _C[Carbamidomethyl (C)]SDFTEEIC[Carbamidomethyl (C)]R_.2                               | 0.396930373  | #N/A                   |
| _IEAAC[Carbamidomethyl (C)]FATIK_.2                                                    | 0.27267056   | #N/A                   |
| _EVAENC[Carbamidomethyl (C)]KDIK_.2                                                    | -0.438104924 | #N/A                   |
| _M[Oxidation (M)]SDGLFLQK_.2                                                           | -0.105372679 | #N/A                   |
| _HM[Oxidation (M)]GLFDHAAK_.2                                                          | -0.16023885  | #N/A                   |
| _TPIAAGHPSM[Oxidation (M)]NLLLR_.2                                                     | -0.351399508 | #N/A                   |
| _C[Carbamidomethyl (C)]SDFTEEIC[Carbamidomethyl (C)]RR_.2                              | -0.078246933 | #N/A                   |
| _ALVEDIISLEEVEDM[Oxidation (M)]K_.2                                                    | -0.256212406 | #N/A                   |
| _TLS[Phospho (STY)]GEEEAESVGVSSR_.2                                                    | -0.086052811 | Q9D6W8_S43_M1_Borcs6   |
| _S[Phospho (STY)]LDGLSGAC[Carbamidomethyl (C)]GGGGSSSSGETGAGGGR_.2                     | 0.03989011   | Q9D6W8_S173_M1_Borcs6  |
| _S[Phospho (STY)]LDGLSGAC[Carbamidomethyl (C)]GGGGSSSSGETGAGGGRR_.3                    | -0.172300091 | Q9D6W8_S173_M1_Borcs6  |
| _RGS[Phospho (STY)]PGGVEMNVELPQQEGDDDDDEDEEAAAGR_.3                                    | -0.486787664 | Q9D6W8_S130_M1_Borcs6  |
| _EEVAS[Phospho (STY)]EPEEAASPTTPK_.2                                                   | -0.286521623 | Q9D6Z1_S536_M1_Nop56   |
| _SSPKEEVAS[Phospho (STY)]EPEEAASPTTPK_.3                                               | -0.17058569  | Q9D6Z1_S536_M1_Nop56   |
| _EELAS[Phospho (STY)]DLEEM[Oxidation (M)]ATSSAK_.2                                     | 0.204325357  | #N/A                   |
| _KSSPKEEVAS[Phospho (STY)]EPEEAASPTTPK_.3                                              | 0.012787643  | Q9D6Z1_S536_M1_Nop56   |
| _APKEELAS[Phospho (STY)]DLEEM[Oxidation (M)]ATSSAK_.2                                  | -0.058533613 | #N/A                   |
| _KAPKEELAS[Phospho (STY)]DLEEMATSSAK_.3                                                | 0.102928849  | #N/A                   |
| _AVDNPPRGS[Phospho (STY)]PK_.2                                                         | -0.208782108 | Q9D706_S429_M1_Rpap3   |
| _NGSM[Oxidation (M)]GS[Phospho (STY)]PVNQPK_.2                                         | 0.073838591  | Q9D772_S44_M1_Fam219a  |
| _ENISEWR_.2                                                                            | 0.099923329  | #N/A                   |
| _VYAILTHGIFSGPAISR_.3                                                                  | -0.309428286 | #N/A                   |
| _INNAC[Carbamidomethyl (C)]FEAVVVTNTIPQEDK_.2                                          | -0.216037621 | #N/A                   |
| _IQVIDISM[Oxidation (M)]ILAEAIR_.2                                                     | 0.044799037  | #N/A                   |
| _VAILVDDMADTC[Carbamidomethyl (C)]GTIC[Carbamidomethyl (C)]HAADK_.3                    | -0.329663512 | #N/A                   |
| _IFSGSSHQDLSQK_.2                                                                      | -0.251749521 | #N/A                   |
| _ELS[Phospho (STY)]APAR_.2                                                             | -0.155679304 | Q9D7P6_S30_M1_Iscu     |
| _AAS[Phospho (STY)]ALLRS[Phospho (STY)]PR_.2                                           | -0.21732831  | Q9D7P6_S15_M2_Iscu     |
| _RAAS[Phospho (STY)]ALLRS[Phospho (STY)]PR_.3                                          | 0.080246349  | Q9D7P6_S15_M2_Iscu     |
| _RAAS[Phospho (STY)]ALLR_.2                                                            | -0.103856437 | Q9D7P6_S15_M1_Iscu     |
| _YFQISQDEDEGS[Phospho (STY)]ESED_.2                                                    | 0.387097297  | Q9D7S7_S118_M1_Rpl22l1 |
| _NKDGVLVDEFGLPQIPAS_.2                                                                 | -0.432920571 | #N/A                   |
| _[Acetyl (Protein N-term)]ADLS[Phospho (STY)]PAPALR_.2                                 | -0.249593999 | Q9D7V2_S5_M1_Lysmd2    |
| _AHRPSAPS[Phospho (STY)]PPPR_.3                                                        | -0.598424088 | Q9D7V2_S24_M1_Lysmd2   |
| _STS[Phospho (STY)]EPEEAELSLSLAR_.2                                                    | -0.218913878 | Q9D7V2_S33_M1_Lysmd2   |
| _HNS[Phospho (STY)]VEDAEQGK_.2                                                         | -0.515860219 | Q9D7X1_S20_M1_Kctd4    |
| _HNS[Phospho (STY)]VEDAEQGKNC[Carbamidomethyl (C)]K_.2                                 | -0.46466379  | Q9D7X1_S20_M1_Kctd4    |
| _VYVGNASVAQDITQLQK_.2                                                                  | 0.256797306  | #N/A                   |
| _ANDTQEFNLSAYFER_.2                                                                    | -0.463479389 | #N/A                   |
| _EIGPNDGFLAQLC[Carbamidomethyl (C)]QLNDR_.2                                            | -0.195295445 | #N/A                   |
| _LGITHVLNAAEGR_.3                                                                      | -0.011968012 | #N/A                   |
| _GKIS[Phospho (STY)]DEM[Oxidation (M)]EDIK_.2                                          | 0.173820234  | Q9D7X8_S173_M1_Ggct    |
| _AAPFTLEYR_.2                                                                          | 0.139162131  | #N/A                   |
| _VIAINVDDPDAANYKDISDVER_.3                                                             | -0.348038513 | #N/A                   |
| _HTGC[Carbamidomethyl (C)]C[Carbamidomethyl (C)]GDNDPIDVC[Carbamidomethyl (C)]EIGSK_.3 | 0.003281124  | #N/A                   |
| _VLGILAM[Oxidation (M)]IDEGETDWK_.2                                                    | 0.274924317  | #N/A                   |

|                                                         |              |                        |
|---------------------------------------------------------|--------------|------------------------|
| _STHDYWK_2                                              | -0.041955263 | #N/A                   |
| _ERDHS[Phospho (STY)]PTPSVFNSDEER_3                     | -0.323387826 | Q9D824_S479_M1_Fip1l1  |
| _ERDHS[Phospho (STY)]PTPSVFNSDEERYR_4                   | -0.327281141 | Q9D824_S479_M1_Fip1l1  |
| _AES[Phospho (STY)]PDLR_2                               | -0.057946943 | Q9D824_S280_M1_Fip1l1  |
| _TTGASQLQGS[Phospho (STY)]PEITK_2                       | 0.331019757  | Q9D842_S149_M1_Aplf    |
| _RLS[Phospho (STY)]PSGNSK_2                             | 0.109997736  | Q9D842_S238_M1_Aplf    |
| _WYYNAAGFNK_2                                           | 0.110653981  | #N/A                   |
| _LPEDLYNDR_2                                            | 0.29805675   | #N/A                   |
| _DDTLHETEDVKEAIR_3                                      | -0.07269888  | #N/A                   |
| _DDTLHETEDVK_2                                          | 0.415838571  | #N/A                   |
| _RLPEDLYNDR_2                                           | 0.024958622  | #N/A                   |
| _YEEDKFYLEPYLK_2                                        | -0.364724677 | #N/A                   |
| _SS[Phospho (STY)]SSQQGFFNR_2                           | -0.04369344  | Q9D882_S27_M1_Fam241b  |
| _AVIDLNNR_2                                             | -0.299978282 | #N/A                   |
| _IDLPEYQGEPEISIQK_2                                     | 0.089601034  | #N/A                   |
| _IVFVTGNAK_2                                            | -0.399323236 | #N/A                   |
| _LQEYFSVAAGAGDH_2                                       | -0.01776598  | #N/A                   |
| _ALAVGGLGSIIR_2                                         | 0.087890624  | #N/A                   |
| _AFHAALRNS[Phospho (STY)]PINTK_3                        | -0.145665317 | Q9D898_S64_M1_Arpc5l   |
| _NS[Phospho (STY)]PINTK_2                               | 0.358145306  | Q9D898_S64_M1_Arpc5l   |
| _SSEIEQAVQSLDR_2                                        | 0.151125511  | #N/A                   |
| _GGPTPQEAIR_2                                           | 0.218739471  | #N/A                   |
| _KIEQELTAAK_2                                           | 0.249724359  | #N/A                   |
| _QLAQIDGTLSTIEFQR_2                                     | 0.038694852  | #N/A                   |
| _FFESYHEVPDGTQC[Carbamidomethyl (C)]HR_3                | 0.265004305  | #N/A                   |
| _EKPDDPLNYFIGGC[Carbamidomethyl (C)]AGGLTLGAR_3         | 0.016259363  | #N/A                   |
| _ILKS[Phospho (STY)]PEIQR_2                             | -0.424678373 | Q9D8E6_S295_M1_Rpl4    |
| _FC[Carbamidomethyl (C)]IWTESAFR_2                      | 0.321094956  | #N/A                   |
| _QPYAVSELAGHQTSAESWGTR_3                                | 0.008608549  | #N/A                   |
| _SGQGAFGNM[Oxidation (M)]C[Carbamidomethyl (C)]R_2      | -0.219750862 | #N/A                   |
| _TAGSSEDHHS[Phospho (STY)]S[Phospho (STY)]QTDNITLA_2    | -0.117689923 | Q9D8I2_S328_M2_P2yr13  |
| _STFVLDEFKR_2                                           | -0.146062905 | #N/A                   |
| _ [Acetyl (Protein N-term)]AAGTLTYPENWR_2               | -0.044964619 | #N/A                   |
| _TFLVGER_2                                              | 0.268291756  | #N/A                   |
| _QVLEPSFR_2                                             | 0.21692025   | #N/A                   |
| _ILGLLDTHLK_2                                           | -0.00457682  | #N/A                   |
| _WFLTC[Carbamidomethyl (C)]INQPQFR_2                    | 0.167096592  | #N/A                   |
| _ALIAAQYSGAQVR_2                                        | 0.242872097  | #N/A                   |
| _KLDPGSEETQTLVR_2                                       | -0.259440285 | #N/A                   |
| _KFAESQPK_2                                             | -0.030849823 | #N/A                   |
| _QATENAKEEVKR_3                                         | 0.118342426  | #N/A                   |
| _LTNTS[Phospho (STY)]FTEIEK_2                           | -0.234571921 | Q9D8S3_S241_M1_Arfgap3 |
| _SSS[Phospho (STY)]FSSWDDGADSYWK_2                      | 0.28695407   | Q9D8S3_S374_M1_Arfgap3 |
| _FEGM[Oxidation (M)]S[Phospho (STY)]PLQR_2              | 0.005766538  | Q9D8S9_S81_M1_Bola1    |
| _ENPQLDIS[Phospho (STY)]PPC[Carbamidomethyl (C)]LGGSK_2 | -0.024263151 | Q9D8S9_S123_M1_Bola1   |
| _AKLEQALS[Phospho (STY)]PEVLELR_3                       | 0.159245033  | Q9D8S9_S45_M1_Bola1    |
| _ALHGAQTS[Phospho (STY)]DEER_2                          | 0.025335725  | Q9D8T7_S105_M1_Slirp   |

|                                                          |              |                        |
|----------------------------------------------------------|--------------|------------------------|
| _ [Acetyl (Protein N-term)]AAVPELLEQQEEDR_.2             | -0.224395599 | #N/A                   |
| _ [Acetyl (Protein N-term)]AAVPELLEQQEEDRSK_.2           | -0.287806631 | #N/A                   |
| _ FHSFEDQLR_.2                                           | 0.301399283  | #N/A                   |
| _ [Acetyl (Protein N-term)]ASVSTHGNQEK_.2                | 0.391867214  | #N/A                   |
| _ GAGFGPEHNR_.2                                          | 0.142118893  | #N/A                   |
| _ ADLNQGIGEPQS[Phospho (STY)]PSR_.2                      | -0.073280202 | Q9D8Y0_S74_M1_Efhd2    |
| _ RADLNQGIGEPQS[Phospho (STY)]PSR_.3                     | -0.343150495 | Q9D8Y0_S74_M1_Efhd2    |
| _ VQAINVSSR_.2                                           | 0.083891935  | #N/A                   |
| _ LSEIDVSTEGVK_.2                                        | 0.208990697  | #N/A                   |
| _ RADLNQGIGEPQS[Phospho (STY)]PSRR_.3                    | -0.32013795  | Q9D8Y0_S74_M1_Efhd2    |
| _ ADLNQGIGEPQS[Phospho (STY)]PSRR_.3                     | -0.428966075 | Q9D8Y0_S74_M1_Efhd2    |
| _ [Acetyl (Protein N-term)]ATDELASKLS[Phospho (STY)]R_.2 | 0.034758536  | Q9D8Y0_S11_M1_Efhd2    |
| _ ELQSTFK_.2                                             | 0.518234251  | #N/A                   |
| _ SMIQEVDEDFDSK_.2                                       | -0.484468973 | #N/A                   |
| _ GLLSGQTS[Phospho (STY)]PTNAK_.2                        | -0.167799627 | Q9D920_S75_M1_Borcs5   |
| _ GLLSGQTS[Phospho (STY)]PTNAKLEK_.2                     | 0.112172261  | Q9D920_S75_M1_Borcs5   |
| _ KLS[Phospho (STY)]DEPSVQAK_.2                          | 0.134630537  | Q9D9S3_S141_M1_Rwdd2a  |
| _ KLS[Phospho (STY)]DEPSVQAKPVK_.2                       | 0.272390782  | Q9D9S3_S141_M1_Rwdd2a  |
| _ SVSAPQIS[Phospho (STY)]SPEESAEGADTIK_.2                | -0.154803147 | Q9DAI6_S775_M1_Fam135b |
| _ NTAGFSEDLDPSSKENS[Phospho (STY)]PPR_.3                 | -0.525216101 | Q9DAI6_S805_M1_Fam135b |
| _ TASTNS[Phospho (STY)]IAQAR_.2                          | -0.303424652 | Q9DAS9_S10_M1_Gng12    |
| _ SDPLLM[Oxidation (M)]GIPTSENPFK_.2                     | -0.403694699 | #N/A                   |
| _ LEASIER_.2                                             | -0.268416818 | #N/A                   |
| _ ASADLM[Oxidation (M)]SYC[Carbamidomethyl (C)]EEHAR_.2  | -0.709333479 | #N/A                   |
| _ VLTANSNPSS[Phospho (STY)]PSAAK_.2                      | -0.229276873 | Q9DAT2_S195_M1_Mrgbp   |
| _ WS[Phospho (STY)]PPQNYK_.2                             | 0.339881983  | Q9DAZ9_S69_M1_Zfyve19  |
| _ VTLQDYHLPDS[Phospho (STY)]DEDEETAIR_.3                 | -0.112914342 | Q9DAZ9_S280_M1_Zfyve19 |
| _ TNS[Phospho (STY)]QGGQASQSLEEKYK_.2                    | 0.086504926  | Q9DAZ9_S219_M1_Zfyve19 |
| _ EHQTS[Phospho (STY)]PYHPR_.2                           | -0.069142231 | Q9DAZ9_S378_M1_Zfyve19 |
| _ YEELFPAFSDSR_.2                                        | 0.007079311  | #N/A                   |
| _ TIQGDEEDLR_.2                                          | 0.089905237  | #N/A                   |
| _ VAGYAAQLEQYQK_.2                                       | 0.031431959  | #N/A                   |
| _ NSQSFFSGLFGGSSK_.2                                     | -0.463352646 | #N/A                   |
| _ LLEAHEEQNVDSYTEAVKEYDSISR_.4                           | -0.246246448 | #N/A                   |
| _ AIDIYEQVGTSAM[Oxidation (M)]DSPLLK_.2                  | 0.178388976  | #N/A                   |
| _ LLEAHEEQNVDSYTEAVK_.3                                  | -0.274916373 | #N/A                   |
| _ AIEIYDMGR_.2                                           | 0.124687965  | #N/A                   |
| _ HDAATC[Carbamidomethyl (C)]FVDAGNAFK_.2                | -0.14352815  | #N/A                   |
| _ NYVQGINLVQAK_.2                                        | 0.047952007  | #N/A                   |
| _ LTEAKPVDK_.2                                           | 0.333520202  | #N/A                   |
| _ LVRPPVQVYGIEGR_.3                                      | -0.051066008 | #N/A                   |
| _ VSLAVLNPIYK_.2                                         | -0.023275077 | #N/A                   |
| _ SFLSPNQILK_.2                                          | 0.065103001  | #N/A                   |
| _ YATALYSAASK_.2                                         | 0.263894531  | #N/A                   |
| _ SLNDITKR_.2                                            | 0.157690347  | #N/A                   |
| _ EKFSPLTANLM[Oxidation (M)]NLLAENGR_.3                  | -0.497790534 | #N/A                   |
| _ FSPLTANLM[Oxidation (M)]NLLAENGR_.2                    | -0.25783532  | #N/A                   |

|                                                                  |              |                        |
|------------------------------------------------------------------|--------------|------------------------|
| _LGNTQGIISAFSTIM[Oxidation (M)]SVHR_.3                           | -0.165493065 | #N/A                   |
| _TDPsimGGMIVR_.2                                                 | 0.295143792  | #N/A                   |
| _GEVPC[Carbamidomethyl (C)]TVTTASPLDDAVLSELK_.2                  | -0.094682546 | #N/A                   |
| _YVDMsAK_.2                                                      | -0.077722051 | #N/A                   |
| _IQLQDAGR_.2                                                     | 0.130421715  | #N/A                   |
| _GAAVNLTLVTPEK_.2                                                | 0.00020879   | #N/A                   |
| _LAANDFLR_.2                                                     | -0.14883261  | #N/A                   |
| _ASFTHSFVAGC[Carbamidomethyl (C)]TAGSVAAVAVTPLDLVK_.3            | 0.326022915  | #N/A                   |
| _VSTTTDSPVS[Phospho (STY)]PAQAASPFIPVDELSSK_.3                   | -0.148345554 | Q9DB52_S267_M1_Pabir1  |
| _RIDFIPVS[Phospho (STY)]PAPS[Phospho (STY)]PTR_.2                | 0.101543134  | Q9DB52_S140_M2_Pabir1  |
| _RNS[Phospho (STY)]TTFPSR_.2                                     | -0.647840844 | Q9DB52_S59_M1_Pabir1   |
| _SNS[Phospho (STY)]APLIHLSDSSPVFQAEAPSAR_.3                      | 0.068637711  | Q9DB52_S34_M1_Pabir1   |
| _SILDQHDVR_.2                                                    | -0.263585906 | #N/A                   |
| _WIAQDLSNLR_.2                                                   | 0.383644329  | #N/A                   |
| _NPPPDYES[Phospho (STY)]DDESYEVLDTLEYAR_.3                       | 0.295072288  | Q9DB70_S13_M1_Fundc1   |
| _ [Acetyl (Protein N-term)]S[Phospho (STY)]NEPPPPYGGPTAPLLEEK_.2 | 0.189260298  | Q9DB75_S2_M1_Cdip1     |
| _TSAAPGGVPLQPQDLEFTK_.2                                          | 0.205793936  | #N/A                   |
| _AVAQGNLSSADVQAAK_.2                                             | 0.465936775  | #N/A                   |
| _GNNTTSLLSQSVAK_.2                                               | 0.225178211  | #N/A                   |
| _AVAFQNSQTR_.2                                                   | 0.148299312  | #N/A                   |
| _NALANPLYC[Carbamidomethyl (C)]PDYR_.2                           | 0.042389268  | #N/A                   |
| _YRGGEIR_.2                                                      | -0.287933113 | #N/A                   |
| _WEVAALR_.2                                                      | -0.460547492 | #N/A                   |
| _LPNGLVIASLENYAPLSR_.2                                           | 0.508844401  | #N/A                   |
| _YEDSNNLGTSHLLR_.2                                               | -0.265247743 | #N/A                   |
| _M[Oxidation (M)]ALVGLGVSHSVLK_.2                                | -0.088929428 | #N/A                   |
| _ENM[Oxidation (M)]AYTVEGIR_.2                                   | 0.543103135  | #N/A                   |
| _IENLHDVAYK_.2                                                   | -0.170083518 | #N/A                   |
| _SM[Oxidation (M)]AASGNLGHPTFLDEL_.2                             | 0.000264731  | #N/A                   |
| _QVAEQFLNM[Oxidation (M)]R_.2                                    | 0.245621543  | #N/A                   |
| _SQLKIDK_.2                                                      | -0.257876569 | #N/A                   |
| _LASSLTTK_.2                                                     | -0.07923813  | #N/A                   |
| _ITSEELHYFVQNHFTSAR_.3                                           | -0.393090387 | #N/A                   |
| _WKEPGSSGPQNLS[Phospho (STY)]GPGGR_.3                            | -0.505132386 | Q9DB90_S32_M1_Smg9     |
| _LEQLS[Phospho (STY)]PSDLQR_.2                                   | 0.029207809  | Q9DBC0_S544_M1_Selenoo |
| _HLS[Phospho (STY)]STSDDEPLSSVNHAAC_.3                           | 0.147199127  | Q9DBC3_S27_M1_Cmtr1    |
| _EDEIS[Phospho (STY)]PPPPNPVVK_.2                                | -0.246064922 | Q9DBC7_S83_M1_Prkar1a  |
| _LTVADALEPVQFEDGQK_.2                                            | -0.090209809 | #N/A                   |
| _TDSREDEIS[Phospho (STY)]PPPPNPVVK_.3                            | -0.165639928 | Q9DBC7_S83_M1_Prkar1a  |
| _FQDEEEVFEWNNEVK_.2                                              | -0.065839618 | #N/A                   |
| _GEVITTYC[Carbamidomethyl (C)]PANNEPIAR_.2                       | -0.339629729 | #N/A                   |
| _VNLLSFTGSTQVQK_.2                                               | 0.536044608  | #N/A                   |
| _DIPNENELQFQIK_.2                                                | -0.015181476 | #N/A                   |
| _IQPGNPNTYLSLK_.2                                                | 0.056825648  | #N/A                   |
| _LLSTDPVTAK_.2                                                   | 0.110806019  | #N/A                   |
| _LQNNNVYTIK_.2                                                   | -0.189509114 | #N/A                   |
| _QVFLATWK_.2                                                     | 0.122097159  | #N/A                   |

|                                                          |              |                         |
|----------------------------------------------------------|--------------|-------------------------|
| _VNYVVQEIVVIR_.2                                         | -0.063852241 | #N/A                    |
| _APEVSQYIYQVYDSILKN_.3                                   | -0.303702521 | #N/A                    |
| _DSDYYNM[Oxidation (M)]LLK_.2                            | 0.140445387  | #N/A                    |
| _KPSETQELVQQVLSLATQSDNPDLR_.3                            | -0.305796105 | #N/A                    |
| _LHDINAQM[Oxidation (M)]VEDQGFLDSL_.3                    | -0.399919333 | #N/A                    |
| _LAPPLVTLLSGEPEVQYVALR_.2                                | 0.198150008  | #N/A                    |
| _GLEISGTFTHR_.2                                          | 0.067565745  | #N/A                    |
| _EC[Carbamidomethyl (C)]HLNADTVSSK_.2                    | -0.063245337 | #N/A                    |
| _DLIADSNPM[Oxidation (M)]VVANAVAALSEISHPNLNLLDLPQNINK_.4 | -0.304382798 | #N/A                    |
| _APEVSQYIYQVYDSILK_.2                                    | -0.029821952 | #N/A                    |
| _LTNGIWILAELR_.2                                         | -0.148964552 | #N/A                    |
| _YHVPVVVVPEGSTSDTQEQAIR_.3                               | -0.063069521 | #N/A                    |
| _TATAASEQS[Phospho (STY)]PGAR_.2                         | -0.356602697 | Q9DBH0_S211_M1_Wwp2     |
| _ALPFWNIEIVPQIK_.2                                       | 0.167722621  | #N/A                    |
| _VLIAAHGNSLR_.2                                          | 0.315285796  | #N/A                    |
| _HYGGLTGLNK_.2                                           | 0.101579413  | #N/A                    |
| _YADLTEDQLPSC[Carbamidomethyl (C)]ESLKDTIAR_.3           | -0.003136057 | #N/A                    |
| _FSGWYDADLSPAGHEEAK_.2                                   | -0.016315329 | #N/A                    |
| _AM[Oxidation (M)]EAVAAQ GK_.2                           | 0.244914178  | #N/A                    |
| _YADLTEDQLPSC[Carbamidomethyl (C)]ESLK_.2                | -0.335562178 | #N/A                    |
| _HGES[Phospho (STY)]AWNLENR_.2                           | -0.323089624 | Q9DBJ1_S14_M1_Pgam1     |
| _KAM[Oxidation (M)]EAVAAQ GK_.2                          | 0.237271547  | #N/A                    |
| _SYDVPPPPM[Oxidation (M)]EPDHPFYSNISK_.3                 | -0.425243024 | #N/A                    |
| _DAGYEFDIC[Carbamidomethyl (C)]FTSVQK_.2                 | -0.41202347  | #N/A                    |
| _FSGWYDADLSPAGHEEAKR_.3                                  | 0.07956342   | #N/A                    |
| _HLEGLSEAIM[Oxidation (M)]ELNLPTGIPIVYELDK_.3            | -0.188978443 | #N/A                    |
| _TLWTVLDAIDQMWLPPVR_.2                                   | -0.418193645 | #N/A                    |
| _YAIGSLNEGR_.2                                           | -0.245186162 | #N/A                    |
| _IFDFQGLQHQAQVATQLEATR_.3                                | -0.060151966 | #N/A                    |
| _ENGPYFASYPPS[Phospho (STY)]PDL_.2                       | -0.260032493 | Q9DBL2_S495_M1_Gdap2    |
| _EEKHPASAQSTPSST[Phospho (STY)]PHAS[Phospho (STY)]PK_.3  | 0.102581693  | Q9DBN4_S183_M2_P33monox |
| _HPASAQSTPSSTPHAS[Phospho (STY)]PK_.3                    | 0.030144585  | Q9DBN4_S183_M1_P33monox |
| _EGEGSLRPSS[Phospho (STY)]PQR_.2                         | 0.310859427  | Q9DBN9_S150_M1_Ddx59    |
| _NQDNLQGWNK_.2                                           | 0.057241479  | #N/A                    |
| _FLIDGFPR_.2                                             | 0.282839404  | #N/A                    |
| _IVPVEITISLLK_.2                                         | 0.121578508  | #N/A                    |
| _IQTYLESTKPIIDLYEEM[Oxidation (M)]GK_.3                  | -0.019807485 | #N/A                    |
| _SVDEVFGEVVK_.2                                          | -0.136249566 | #N/A                    |
| _YGYTHLSAGELLR_.3                                        | -0.062411716 | #N/A                    |
| _KIDASKS[Phospho (STY)]VDEVFGEVVK_.3                     | -0.207090269 | Q9DBP5_S180_M1_Cmpk1    |
| _SDDNRESLEK_.2                                           | -0.171387948 | #N/A                    |
| _KNPDSQYGELIEK_.3                                        | 0.26187685   | #N/A                    |
| _ADS[Phospho (STY)]DGDLS[Phospho (STY)]ENDDGAGDLR_.2     | 0.166399941  | Q9DBR0_S320_M2_Akap8    |
| _S[Phospho (STY)]IEDKTR_.2                               | 0.035419091  | Q9DBR0_S634_M1_Akap8    |
| _SNS[Phospho (STY)]STFIR_.2                              | 0.312873886  | Q9DBR0_S201_M1_Akap8    |
| _AEDS[Phospho (STY)]DS[Phospho (STY)]EPEPEDNVR_.2        | -0.089290104 | Q9DBR1_S499_M2_Xrn2     |
| _NS[Phospho (STY)]PGC[Carbamidomethyl (C)]QVASNPR_.2     | -0.341448905 | Q9DBR1_S448_M1_Xrn2     |

|                                                            |              |                         |
|------------------------------------------------------------|--------------|-------------------------|
| _RKAEDS[Phospho (STY)]DS[Phospho (STY)]EPEPEDNVR_.2        | -0.031143752 | Q9DBR1_S499_M2_Xrn2     |
| _KAEDS[Phospho (STY)]DS[Phospho (STY)]EPEPEDNVR_.2         | -0.246165995 | Q9DBR1_S499_M2_Xrn2     |
| _AGTPAHES[Phospho (STY)]PQSSIFR_.2                         | -0.170939249 | Q9DBR2_S130_M1_Fam13c   |
| _SEAVGPEPGS[Phospho (STY)]S[Phospho (STY)]GEETSDAVVPEKR_.3 | 0.351621348  | Q9DBR2_S405_M2_Fam13c   |
| _SAS[Phospho (STY)]YSYLEDR_.2                              | -0.357799966 | Q9DBR7_S909_M1_Ppp1r12a |
| _T[Phospho (STY)]GSYGALAEISASK_.2                          | -0.161298218 | Q9DBR7_T443_M1_Ppp1r12a |
| _DKKS[Phospho (STY)]PLIESTANMENNQPK_.3                     | 0.030971967  | Q9DBR7_S299_M1_Ppp1r12a |
| _IS[Phospho (STY)]PKEEER_.2                                | -0.243407218 | Q9DBR7_S422_M1_Ppp1r12a |
| _STGVSWTQDS[Phospho (STY)]DENEQER_.2                       | 0.187188709  | Q9DBR7_S861_M1_Ppp1r12a |
| _SPLIESTANM[Oxidation (M)]ENNQPQK_.2                       | -0.21992372  | #N/A                    |
| _KTGS[Phospho (STY)]YGALAEISASK_.2                         | -0.437810728 | Q9DBR7_S445_M1_Ppp1r12a |
| _STGVSWTQDSDENEQERQS[Phospho (STY)]DTEDGSSKR_.4            | -0.000949492 | Q9DBR7_S870_M1_Ppp1r12a |
| _RIS[Phospho (STY)]EMEEELK_.2                              | 0.310698067  | Q9DBR7_S994_M1_Ppp1r12a |
| _YDFISLQC[Carbamidomethyl (C)]QQVVR_.2                     | -0.003119516 | #N/A                    |
| _DTVDSAGTSPT[Phospho (STY)]AVLAAGEDAGAGRPAGATPLR_.3        | 0.331098721  | Q9DBS2_T16_M1_Tprg1l    |
| _VSS[Phospho (STY)]PTVNTTLK_.2                             | -0.496569234 | Q9DBS5_S460_M1_Klc4     |
| _RSS[Phospho (STY)]ELLVR_.2                                | -0.140519316 | Q9DBS5_S566_M1_Klc4     |
| _S[Phospho (STY)]SELLVR_.2                                 | -0.207200614 | Q9DBS5_S565_M1_Klc4     |
| _AAS[Phospho (STY)]LNYLNQPNAAPLQVSR_.2                     | 0.078668416  | Q9DBS5_S590_M1_Klc4     |
| _ALVHQLS[Phospho (STY)]NESR_.2                             | -0.133407982 | Q9DBS9_S405_M1_Osbpl3   |
| _QDS[Phospho (STY)]WEVVEGLR_.2                             | 0.016726551  | Q9DBS9_S33_M1_Osbpl3    |
| _S[Phospho (STY)]LPGNAPC[Carbamidomethyl (C)]LK_.2         | -0.18086145  | Q9DBT5_S19_M1_Ampd2     |
| _QIS[Phospho (STY)]QDVKLEPDILLR_.3                         | -0.513856644 | Q9DBT5_S87_M1_Ampd2     |
| _S[Phospho (STY)]LAESELR_.2                                | 0.009178477  | Q9DBT5_S53_M1_Ampd2     |
| _TDS[Phospho (STY)]DSDLQLYK_.2                             | 0.275390674  | Q9DBT5_S109_M1_Ampd2    |
| _SAPYEFPEES[Phospho (STY)]PIEQLEER_.2                      | 0.385901352  | Q9DBT5_S70_M1_Ampd2     |
| _QIS[Phospho (STY)]QDVK_.2                                 | -0.258517216 | Q9DBT5_S87_M1_Ampd2     |
| _AASFLKDDGS[Phospho (STY)]PPVLSAD_.2                       | -0.38712466  | Q9DBU3_S512_M1_Riok3    |
| _NSATC[Carbamidomethyl (C)]HSEDS[Phospho (STY)]DLEID_.2    | 0.029869667  | Q9DBX2_S296_M1_Pdcl     |
| _ESLPLDLS[Phospho (STY)]DDQSNSK_.2                         | 0.102784018  | Q9DBY8_S190_M1_Nvl      |
| _QSFTTVADTPENLR_.2                                         | -0.246886587 | #N/A                    |
| _GVQPHVEMDR_.3                                             | 0.000178663  | #N/A                    |
| _RGS[Phospho (STY)]GHPAYAEVEPVGEK_.3                       | -0.561433283 | Q9DC11_S507_M1_Plxdc2   |
| _DGEQS[Phospho (STY)]PNVSML[Oxidation (M)]QR_.2            | -0.36085846  | Q9DC22_S336_M1_Dcaf6    |
| _DSALQDTPDS[Phospho (STY)]DDDPVLIPGAR_.2                   | 0.193530319  | Q9DC22_S673_M1_Dcaf6    |
| _GAPVNV[S[Phospho (STY)]SSDLTGR_.2                         | -0.283743303 | Q9DC28_S382_M1_Csnk1d   |
| _AIQASLAK_.2                                               | -0.018792551 | #N/A                    |
| _S[Phospho (STY)]PLTGYVR_.2                                | -0.145859365 | Q9DC33_S104_M1_Hmg20a   |
| _DSNAPKS[Phospho (STY)]PLTGYVR_.3                          | -0.311821734 | Q9DC33_S104_M1_Hmg20a   |
| _ISQTNYIPTQQDVL_.2                                         | -0.309195045 | #N/A                    |
| _EYQLNDSASYLNDLDR_.2                                       | -0.061401411 | #N/A                    |
| _NFDFFEDVFNIPR_.2                                          | -0.255363107 | #N/A                    |
| _QPVYVADVSK_.2                                             | -0.32065611  | #N/A                    |
| _M[Oxidation (M)]GSQVIIPYR_.2                              | -0.272870261 | #N/A                    |
| _SVFPEAIIIRPSDIFGR_.3                                      | -0.143598262 | #N/A                    |
| _SSVSGVVATVFGATGFLGR_.2                                    | -0.114048147 | #N/A                    |
| _AVQHSNVVINLIGR_.3                                         | -0.199366324 | #N/A                    |

|                                                        |              |                        |
|--------------------------------------------------------|--------------|------------------------|
| _IHISDVM[Oxidation (M)]PTDLPGLLEDLGVPPTPLELK_.3        | 0.178551752  | #N/A                   |
| _GIVNATKDPDAVGK_.2                                     | 0.103220282  | #N/A                   |
| _LM[Oxidation (M)]GDLGQLTFLEWDAR_.2                    | -0.259057304 | #N/A                   |
| _WLSSEIETKPAK_.3                                       | -0.230564067 | #N/A                   |
| _C[Carbamidomethyl (C)]DVYDIMHLR_.3                    | -0.127518146 | #N/A                   |
| _LDDLINWAR_.2                                          | 0.064885086  | #N/A                   |
| _SRAEYVVTK_.2                                          | 0.13717658   | #N/A                   |
| _KVYDQM[Oxidation (M)]PEPR_.2                          | -0.645131915 | #N/A                   |
| _QADVM[Oxidation (M)]IVAGTLTNK_.2                      | -0.013449599 | #N/A                   |
| _TES[Phospho (STY)]IEKEGE_.2                           | -0.002406035 | Q9DCB1_S93_M1_Hmgn3    |
| _AWSS[Phospho (STY)]TDSDSNR_.2                         | 0.106598612  | Q9DCB4_S362_M1_Arpp21  |
| _TGS[Phospho (STY)]ESSSSAGSSGSLSR_.2                   | -0.110569525 | Q9DCB4_S408_M1_Arpp21  |
| _SES[Phospho (STY)]LDEEEKLELQRR_.3                     | 0.190464473  | Q9DCB4_S32_M1_Arpp21   |
| _SES[Phospho (STY)]LDEEEKLELQR_.2                      | 0.313932423  | Q9DCB4_S32_M1_Arpp21   |
| _QSS[Phospho (STY)]SETELRWPDHQR_.3                     | -0.454057253 | Q9DCB4_S346_M1_Arpp21  |
| _TAS[Phospho (STY)]FGGITVLR_.2                         | -0.322071355 | Q9DCB4_S381_M1_Arpp21  |
| _DNS[Phospho (STY)]S[Phospho (STY)]IDKEDNQNR_.2        | -0.122071947 | Q9DCB4_S256_M2_Arpp21  |
| _IVS[Phospho (STY)]AQSLAEDDVE_.2                       | 0.022973956  | Q9DCC8_S135_M1_Tomm20  |
| _LVPLLDTGDIIDGGNSEYR_.2                                | 0.064510686  | #N/A                   |
| _VDDFLANEAK_.2                                         | 0.181029399  | #N/A                   |
| _NPELQNLLDDFFK_.2                                      | 0.248090728  | #N/A                   |
| _GILFVGSGVSGGEEGAR_.2                                  | 0.02965662   | #N/A                   |
| _KDS[Phospho (STY)]LTQAQEQGTVLS_.2                     | -0.163396609 | Q9DCD5_S527_M1_Tjap1   |
| _KLS[Phospho (STY)]EADNR_.2                            | 0.077258705  | Q9DCF9_S105_M1_Ssr3    |
| _KLS[Phospho (STY)]EADNRK_.2                           | -0.313756092 | Q9DCF9_S105_M1_Ssr3    |
| _QQS[Phospho (STY)]EEDLLQDFSR_.2                       | -0.278174078 | Q9DCF9_S11_M1_Ssr3     |
| _TC[Carbamidomethyl (C)]FS[Phospho (STY)]PNR_.2        | 0.076825096  | Q9DCH4_S262_M1_Eif3f   |
| _VIGLSSDLQQVGGASAR_.2                                  | -0.485659595 | #N/A                   |
| _ARPEPNPVIEGDLKPAK_.3                                  | -0.000536516 | #N/A                   |
| _TDRPLPENPYHSR_.3                                      | 0.095361122  | #N/A                   |
| _FDQC[Carbamidomethyl (C)]VLDK_.2                      | 0.382601417  | #N/A                   |
| _PGIVELPTLEELKVEEVK_.3                                 | 0.044966722  | #N/A                   |
| _LVNGC[Carbamidomethyl (C)]ALNFFR_.2                   | 0.029492711  | #N/A                   |
| _AAAHHYGAQC[Carbamidomethyl (C)]DK_.3                  | -0.192479824 | #N/A                   |
| _TSAAS[Phospho (STY)]PPVVPSAEQPRPIVEEELSK_.4           | 0.352247579  | Q9DCL8_S23_M1_Ppp1r2   |
| _TSAAS[Phospho (STY)]PPVVPSAEQPRPIVEEELSK_.3           | -0.361421647 | Q9DCL8_S23_M1_Ppp1r2   |
| _EQESS[Phospho (STY)]GEEDNDLSPEER_.2                   | 0.064364162  | Q9DCL8_S123_M1_Ppp1r2  |
| _TREQUES[Phospho (STY)]S[Phospho (STY)]GEEDNDLSPEER_.2 | -0.201793704 | Q9DCL8_S122_M2_Ppp1r2  |
| _EIVLADVIDNDSWR_.2                                     | 0.255212824  | #N/A                   |
| _DDANNDPQWSEEQLIAAK_.2                                 | 0.183224888  | #N/A                   |
| _S[Phospho (STY)]PSKEPHFTDFEGK_.3                      | -0.404923544 | Q9DCP2_S51_M1_Slc38a3  |
| _HLEGLLPVGVPTTDTQR_.3                                  | -0.181294834 | #N/A                   |
| _AYEQLGYR_.2                                           | -0.072753502 | #N/A                   |
| _FYQPY[Phospho (STY)]SEDTRQQIIR_.2                     | 0.345279673  | Q9DCR2_Y23_M1_Ap3s1    |
| _IS[Phospho (STY)]PQSNVDFDLTLR_.2                      | -0.449887135 | Q9DCS2_S149_M1_Mettl26 |
| _DTVLLLEELGQASGLVLER_.2                                | 0.16572889   | #N/A                   |
| _PDSWDKDVPEPPSR_.3                                     | -0.125349012 | #N/A                   |

|                                                                                   |              |                      |
|-----------------------------------------------------------------------------------|--------------|----------------------|
| _YDLGAYYSAR_.2                                                                    | 0.080341043  | #N/A                 |
| _AYDLVVDWPVTLVR_.2                                                                | 0.480108858  | #N/A                 |
| _RVPDITEC[Carbamidomethyl (C)]K_.2                                                | 0.312731231  | #N/A                 |
| _EGDVLC[Carbamidomethyl (C)]IYEAEM[Oxidation (M)]QWR_.2                           | -0.195936715 | #N/A                 |
| _DFKVDQEIM[Oxidation (M)]NIIQER_.3                                                | -0.431924218 | #N/A                 |
| _VDQEIMNIIQER_.2                                                                  | 0.43631872   | #N/A                 |
| _SLADLTAVDVPTR_.2                                                                 | 0.177002035  | #N/A                 |
| _VVAEPVELAQEFR_.2                                                                 | 0.205559936  | #N/A                 |
| _DFPLTGYVELR_.2                                                                   | 0.346924163  | #N/A                 |
| _YDDEVKR_.2                                                                       | 0.045187628  | #N/A                 |
| _DHTNAQFK_.2                                                                      | -0.18608313  | #N/A                 |
| _FEIVYNLLSLR_.2                                                                   | -0.08128413  | #N/A                 |
| _LEAGDKKPETK_.2                                                                   | -0.023502699 | #N/A                 |
| _QLSAFGEYVAEILPK_.2                                                               | 0.375341242  | #N/A                 |
| _ILTDYGFEGHPFR_.2                                                                 | 0.194058163  | #N/A                 |
| _FDLNSPWEAFPAYR_.2                                                                | 0.379864468  | #N/A                 |
| _VYEDSGIPLPAES[Phospho (STY)]PK_.2                                                | -0.062109311 | Q9DCT6_S96_M1_Bap18  |
| _GVNTGAVGSYIYDKDPEGTVQP_.2                                                        | -0.126924041 | #N/A                 |
| _KTS[Phospho (STY)]GPPKGPSPK_.2                                                   | -0.157014415 | Q9DCT8_S104_M1_Crip2 |
| _TVYFAEK_.2                                                                       | 0.201281582  | #N/A                 |
| _VEEILAQADYLYESGETEK_.2                                                           | -0.489507705 | #N/A                 |
| _EIDGGLETLR_.2                                                                    | 0.154823999  | #N/A                 |
| _GIHVEIPGAQAESLGPLQVAR_.3                                                         | -0.065958404 | #N/A                 |
| _EIIAVSC[Carbamidomethyl (C)]GPSQC[Carbamidomethyl (C)]QETIR_.2                   | -0.252482453 | #N/A                 |
| _AGDLGVDLTSK_.2                                                                   | 0.155606652  | #N/A                 |
| _TALAMGADR_.2                                                                     | 0.089066612  | #N/A                 |
| _SC[Carbamidomethyl (C)]AEFVSGSQLR_.2                                             | 0.176343467  | #N/A                 |
| _LASLSEKPPAIDWAYR_.3                                                              | 0.230644937  | #N/A                 |
| _ANVAKPGLVDDFEK_.2                                                                | -0.115262304 | #N/A                 |
| _ANVAKPGLVDDFEKK_.3                                                               | 0.096743905  | #N/A                 |
| _SWNETFHAR_.2                                                                     | 0.4111426    | #N/A                 |
| _IPVPEDKYTALVDQEEKEDVK_.3                                                         | -0.156460149 | #N/A                 |
| _YTALVDQEEKEDVK_.2                                                                | -0.010375907 | #N/A                 |
| _TIDWVSFVEVM[Oxidation (M)]PQNQK_.2                                               | 0.158827628  | #N/A                 |
| _NIIPFDQM[Oxidation (M)]TIDDLNEIFPETK_.3                                          | 0.061307915  | #N/A                 |
| _PGLVDDFEK_.2                                                                     | -0.127140151 | #N/A                 |
| _IDELSLYSVPEGQSK_.2                                                               | -0.330113867 | #N/A                 |
| _LYDWGLR_.2                                                                       | -0.085974199 | #N/A                 |
| _TQLEENISQLR_.2                                                                   | -0.195729244 | #N/A                 |
| _GYIVIEDLWK_.2                                                                    | 0.185882958  | #N/A                 |
| _SASS[Phospho (STY)]GAEGDVSSER_.2                                                 | -0.064709909 | Q9DD18_S197_M1_Dtd1  |
| _SASS[Phospho (STY)]GAEGDVSSEREP_.2                                               | -0.272684824 | Q9DD18_S197_M1_Dtd1  |
| _ASVTVGGEQISAIGR_.2                                                               | -0.032164904 | #N/A                 |
| _AKGPSESS[Phospho (STY)]KER_.2                                                    | -0.558955531 | Q9DD18_S182_M1_Dtd1  |
| _GGFDS[Phospho (STY)]PFYR_.2                                                      | -0.152956739 | Q9EP53_S502_M1_Tsc1  |
| _SPFPGS[Phospho (STY)]PEQTKK_.2                                                   | -0.292223033 | Q9EP82_S397_M1_Wdr4  |
| _NHLS[Phospho (STY)]PQEGGATPQVPSPC[Carbamidomethyl (C)]C[Carbamidomethyl (C)]R_.3 | 0.085716369  | Q9EP97_S163_M1_Senp3 |



|                                                                            |              |                        |
|----------------------------------------------------------------------------|--------------|------------------------|
| _GS[Phospho (STY)]PPVPSGPPMEEDGLR_.2                                       | -0.598073638 | Q9EP97_S206_M1_Senp3   |
| _EIHPYLM[Oxidation (M)]DLEQS[Phospho (STY)]_.2                             | -0.24787508  | Q9EPB4_S193_M1_Pycard  |
| _Acetyl (Protein N-term)ATS[Phospho (STY)]PQKSPLVPK_.2                     | 0.026677759  | Q9EPC1_S4_M1_Parva     |
| _SPTPKS[Phospho (STY)]PPSR_.2                                              | -0.024634475 | Q9EPC1_S19_M1_Parva    |
| _DS[Phospho (STY)]PVLSNSGPR_.2                                             | -0.116391869 | Q9EPE9_S896_M1_Atp13a1 |
| _S[Phospho (STY)]PSSDSWTC[Carbamidomethyl (C)]ADASTGR_.2                   | 0.039441575  | #N/A                   |
| _AAPSTADEGWDNQNW_.2                                                        | 0.034589916  | #N/A                   |
| _TLQFTAHR_.2                                                               | 0.10806622   | #N/A                   |
| _NSNSDGWESWEGASGEGR_.2                                                     | 0.176536611  | #N/A                   |
| _KAAPSTADEGWDNQNW_.2                                                       | -0.278250795 | #N/A                   |
| _AKS[Phospho (STY)]PSSDSWTC[Carbamidomethyl (C)]ADASTGR_.3                 | -0.192419632 | #N/A                   |
| _SS[Phospho (STY)]DSWDVWVGSGSASNNK_.2                                      | 0.248978471  | Q9EPJ9_S360_M1_Arfgap1 |
| _RS[Phospho (STY)]SDSDVWVGSGSASNNK_.3                                      | 0.025083613  | Q9EPJ9_S359_M1_Arfgap1 |
| _AFEDWLNDLGSYQGAQENR_.2                                                    | -0.192006192 | #N/A                   |
| _DVTTFFSGK_.2                                                              | -0.311709022 | #N/A                   |
| _AKS[Phospho (STY)]PSSDS[Phospho (STY)]WTC[Carbamidomethyl (C)]ADASTGRR_.3 | -0.112861717 | #N/A                   |
| _GLGVHLSFVR_.2                                                             | -0.360022785 | #N/A                   |
| _S[Phospho (STY)]PSSDSWTC[Carbamidomethyl (C)]ADASTGRR_.2                  | -0.12983929  | #N/A                   |
| _FGSQASQK_.2                                                               | -0.191576205 | #N/A                   |
| _EWSLESSPAQNWTPPQPK_.2                                                     | 0.185528587  | #N/A                   |
| _ETENDDLTNVIQK_.2                                                          | -0.051916741 | #N/A                   |
| _RQFS[Phospho (STY)]PGPR_.2                                                | -0.253925326 | Q9EPN1_S1311_M1_Nbea   |
| _TPLENVPGNLS[Phospho (STY)]PIKDPDR_.2                                      | -0.370062626 | Q9EPN1_S1519_M1_Nbea   |
| _QFS[Phospho (STY)]PGPR_.2                                                 | -0.270325217 | Q9EPN1_S1311_M1_Nbea   |
| _AVPNVDAGSIIS[Phospho (STY)]DTERSDDGKESGK_.3                               | 0.242600119  | Q9EPN1_S1252_M1_Nbea   |
| _EIEDLSQSQS[Phospho (STY)]PES[Phospho (STY)]ETDYPVSTDTR_.3                 | -0.318539021 | Q9EPN1_S1001_M2_Nbea   |
| _SQAIVNQNS[Phospho (STY)]ETELMLEGDDDAVSLLEK_.3                             | -0.255131049 | Q9EPN1_S2114_M1_Nbea   |
| _AGSS[Phospho (STY)]PTQGAQNEAPR_.2                                         | -0.075526754 | Q9EPQ8_S588_M1_Tcf20   |
| _LSTS[Phospho (STY)]PATR_.2                                                | 0.001647501  | Q9EPQ8_S603_M1_Tcf20   |
| _GSQEDDPAASQRPPSNS[Phospho (STY)]GVK_.3                                    | -0.287612011 | Q9EPQ8_S671_M1_Tcf20   |
| _LSTS[Phospho (STY)]PATRDEAAS[Phospho (STY)]PGAK_.3                        | 0.471495119  | Q9EPQ8_S603_M2_Tcf20   |
| _SSLAETLDSTGS[Phospho (STY)]LDPQR_.2                                       | -0.312235143 | Q9EPR4_S81_M1_Slc23a2  |
| _AS[Phospho (STY)]PTSTEEEQVMRLR_.2                                         | 0.361629848  | Q9EPW0_S488_M1_Inpp4a  |
| _VNAGDQPGADLGPLTPQAK_.2                                                    | 0.128285922  | #N/A                   |
| _TLADAEGDVFR_.2                                                            | -0.137695774 | #N/A                   |
| _EGASILLDGR_.2                                                             | -0.017622242 | #N/A                   |
| _AISFVGSNQAGEYIFER_.2                                                      | -0.127955595 | #N/A                   |
| _DMDLYSYR_.2                                                               | 0.326954765  | #N/A                   |
| _VDLS[Phospho (STY)]DEEAKETEHLK_.3                                         | 0.000467106  | Q9EQ28_S306_M1_Pold3   |
| _IPHGVSQVQDR_.2                                                            | 0.20904538   | #N/A                   |
| _ILNLYPR_.2                                                                | 0.100972968  | #N/A                   |
| _VVNDDC[Carbamidomethyl (C)]THEADVYIESGIIQVQVGR_.3                         | -0.105598829 | #N/A                   |
| _FVAVTSSNAAK_.2                                                            | 0.169856563  | #N/A                   |
| _AEM[Oxidation (M)]ETLVR_.2                                                | -0.114868477 | #N/A                   |
| _C[Carbamidomethyl (C)]HGVPLVTISR_.2                                       | -0.008104448 | #N/A                   |
| _EM[Oxidation (M)]GT[Phospho (STY)]PLADT[Phospho (STY)]PTRPVTR_.2          | -0.457228036 | #N/A                   |
| _KEM[Oxidation (M)]GT[Phospho (STY)]PLADT[Phospho (STY)]PTRPVTR_.3         | 0.145647691  | #N/A                   |

|                                                                     |              |                        |
|---------------------------------------------------------------------|--------------|------------------------|
| _DLHESSFSLSGS[Phospho (STY)]QIDDHVPKR_.4                            | -0.13797347  | Q9EQF6_S538_M1_Dpysl5  |
| _ELM[Oxidation (M)]IPGGAK_.2                                        | 0.047600351  | #N/A                   |
| _VYENGVM[Oxidation (M)]C[Carbamidomethyl (C)]AEGTGK_.2              | 0.228366214  | #N/A                   |
| _M[Oxidation (M)]SVVWER_.2                                          | -0.350014534 | #N/A                   |
| _DLHESSFSLSGS[Phospho (STY)]QIDDHVPK_.3                             | -0.069688491 | Q9EQF6_S538_M1_Dpysl5  |
| _EALDLGITGPEGIEISHPEELEAEATHR_.3                                    | -0.115996973 | #N/A                   |
| _LDTNTSTYLM[Oxidation (M)]SLLANDTLNIVASDHRPFTTK_.4                  | 0.157217204  | #N/A                   |
| _DSELYQVFHAC[Carbamidomethyl (C)]R_.2                               | 0.038514562  | #N/A                   |
| _TISASTQVQGGDFNLNENM[Oxidation (M)]R_.2                             | -0.039946441 | #N/A                   |
| _AMGKEDFTK_.2                                                       | -0.093943362 | #N/A                   |
| _THC[Carbamidomethyl (C)]PIYLVNVSSISAGDVIAAAK_.3                    | 0.077801242  | #N/A                   |
| _TPYLGDAIVVHPGK_.3                                                  | -0.32096222  | #N/A                   |
| _FVQKPYS[Phospho (STY)]R_.2                                         | -0.219541236 | Q9EQG9_S373_M1_Cert1   |
| _SSS[Phospho (STY)]M[Oxidation (M)]SS[Phospho (STY)]IDLVSASDDVHR_.2 | -0.300125607 | Q9EQG9_S377_M2_Cert1   |
| _RES[Phospho (STY)]PESEGPIYEGIL_.2                                  | -0.104336384 | Q9EQH3_S783_M1_Vps35   |
| _SRRES[Phospho (STY)]PESEGPIYEGIL_.3                                | -0.1351882   | Q9EQH3_S783_M1_Vps35   |
| _IREDLPNLESSEETEINK_.3                                              | -0.183800627 | #N/A                   |
| _AELAEPLR_.2                                                        | -0.131592854 | #N/A                   |
| _SDDPDQYILINTAR_.2                                                  | -0.207514945 | #N/A                   |
| _LSQLEGVNVER_.2                                                     | -0.369589819 | #N/A                   |
| _IPVDTYNNILTVLK_.2                                                  | 0.078719317  | #N/A                   |
| _LFDIFSQQVATVIQSR_.2                                                | -0.292729216 | #N/A                   |
| _PTTQQS[Phospho (STY)]PQDEQEKLDEAIQAVK_.3                           | -0.359011322 | Q9EQH3_S7_M1_Vps35     |
| _LLDEAIQAVK_.2                                                      | -0.169881112 | #N/A                   |
| _PTTQQS[Phospho (STY)]PQDEQEKL_.2                                   | 0.024260981  | Q9EQH3_S7_M1_Vps35     |
| _LNLEHIATSSAVSK_.2                                                  | -0.216960079 | #N/A                   |
| _ES[Phospho (STY)]PESEGPIYEGIL_.2                                   | 0.088384079  | Q9EQH3_S783_M1_Vps35   |
| _TQC[Carbamidomethyl (C)]ALAASK_.2                                  | 0.145071757  | #N/A                   |
| _SGS[Phospho (STY)]PKLDPSEVYLK_.2                                   | 0.071887863  | Q9EQJ9_S702_M1_Magi3   |
| _GGPC[Carbamidomethyl (C)]S[Phospho (STY)]PTK_.2                    | -0.149907018 | Q9EQJ9_S662_M1_Magi3   |
| _QPEDESHQAQFSQNGS[Phospho (STY)]PR_.3                               | 0.244591633  | Q9EQJ9_S833_M1_Magi3   |
| _KQEDPSSS[Phospho (STY)]PQASTS_.2                                   | -0.247678648 | Q9EQN9_S492_M1_Slc19a2 |
| _DKPVYDELFTLS[Phospho (STY)]PINGK_.3                                | -0.18263383  | Q9EQP2_S459_M1_Ehd4    |
| _LENEGS[Phospho (STY)]DEDIETDVLYSPQM[Oxidation (M)]ALK_.3           | 0.497627232  | Q9EQQ9_S364_M1_Oga     |
| _PAVTAPEVINYADYTLETTEESAAPAS[Phospho (STY)]PQAQSDSR_.4              | 0.021547673  | Q9EQT6_S113_M1_Syt13   |
| _IDFYFDENPYFENK_.2                                                  | 0.046814495  | #N/A                   |
| _VEVTEFEDIK_.2                                                      | 0.097181756  | #N/A                   |
| _EFHLNESGDPSSK_.2                                                   | 0.317666876  | #N/A                   |
| _TGSVQTS[Phospho (STY)]PSSTPGTGR_.2                                 | -0.184886082 | Q9EQZ7_S1095_M1_Rims2  |
| _TSNHS[Phospho (STY)]PPTPR_.2                                       | -0.138656526 | Q9EQZ7_S472_M1_Rims2   |
| _SWS[Phospho (STY)]PSAPPPQR_.2                                      | 0.083350089  | Q9EQZ7_S1039_M1_Rims2  |
| _ASQSS[Phospho (STY)]LESSTGPSYSR_.2                                 | -0.22966104  | Q9EQZ7_S1518_M1_Rims2  |
| _RHS[Phospho (STY)]DVSLANAELEDSR_.3                                 | 0.397708592  | Q9EQZ7_S409_M1_Rims2   |
| _YRS[Phospho (STY)]DPNLAR_.2                                        | 0.131665103  | Q9EQZ7_S375_M1_Rims2   |
| _SPS[Phospho (STY)]DYADRR_.2                                        | -0.146799212 | Q9EQZ7_S311_M1_Rims2   |
| _S[Phospho (STY)]ASQLSQTEGGKK_.2                                    | -0.175581972 | Q9EQZ7_S1285_M1_Rims2  |
| _NDGSQS[Phospho (STY)]DTAVGALGTSGK_.2                               | -0.167880949 | Q9EQZ7_S1251_M1_Rims2  |

|                                                                                                                   |              |                         |
|-------------------------------------------------------------------------------------------------------------------|--------------|-------------------------|
| _IPDSTHAQLESSSSSFES[Phospho (STY)]QK_.3                                                                           | -0.671616575 | Q9EQZ7_S788_M1_Rims2    |
| _RAS[Phospho (STY)]QSS[Phospho (STY)]LESSTGPSYSR_.2                                                               | -0.045157155 | Q9EQZ7_S1515_M2_Rims2   |
| _RADS[Phospho (STY)]LRK_.2                                                                                        | -0.100550877 | Q9EQZ7_S493_M1_Rims2    |
| _RQLHGES[Phospho (STY)]PTR_.2                                                                                     | -0.003685329 | Q9EQZ7_S965_M1_Rims2    |
| _NDS[Phospho (STY)]LSSDQSESVRPPPPRPHK_.3                                                                          | -0.055261193 | Q9EQZ7_S522_M1_Rims2    |
| _RS[Phospho (STY)]PIPLDRPDMR_.3                                                                                   | -0.230487358 | Q9EQZ7_S479_M1_Rims2    |
| _ELGSLPLPLSASEQR_.2                                                                                               | 0.388217606  | #N/A                    |
| _AGSRLS[Phospho (STY)]AEDR_.2                                                                                     | 0.080679637  | Q9ER00_S142_M1_Stx12    |
| _DFNSIIQTC[Carbamidomethyl (C)]SGNIQR_.2                                                                          | -0.051423135 | #N/A                    |
| _LQENLQQLQHSTNQLAK_.3                                                                                             | -0.111322231 | #N/A                    |
| _ISQATAQIK_.2                                                                                                     | 0.015642601  | #N/A                    |
| _QLEADILDVNQIFK_.2                                                                                                | -0.131883303 | #N/A                    |
| _LM[Oxidation (M)]NDFSSALNNFQVVQR_.2                                                                              | -0.305259525 | #N/A                    |
| _NPGPSGPQPR_.2                                                                                                    | 0.478695052  | #N/A                    |
| _HVS[Phospho (STY)]DPGLPGK_.2                                                                                     | -0.396909156 | Q9ER47_S1188_M1_Kcnh7   |
| _KQS[Phospho (STY)]LPQEDPDVVVIDSSK_.2                                                                             | -0.301623396 | Q9ER47_S174_M1_Kcnh7    |
| _SSLLGSTS[Phospho (STY)]DSNLNK_.2                                                                                 | 0.104736649  | Q9ER47_S319_M1_Kcnh7    |
| _SFS[Phospho (STY)]PSSQC[Carbamidomethyl (C)]PEFLDLEK_.2                                                          | 0.398504418  | Q9ER47_S1103_M1_Kcnh7   |
| _RLS[Phospho (STY)]FES[Phospho (STY)]EGEKDFSK_.3                                                                  | -0.399341704 | Q9ER47_S891_M2_Kcnh7    |
| _LNTAS[Phospho (STY)]EDNLTSLK_.2                                                                                  | 0.040740147  | Q9ER47_S1135_M1_Kcnh7   |
| _SQSVNDS[Phospho (STY)]EGDTGK_.2                                                                                  | 0.015194427  | Q9ER47_S878_M1_Kcnh7    |
| _ETMSGQTTFGLS[Phospho (STY)]PDSR_.2                                                                               | 0.003788406  | Q9ER64_S746_M1_Osbpl5   |
| _ENAEDS[Phospho (STY)]DAETQDHSR_.2                                                                                | -0.153299293 | Q9ER64_S311_M1_Osbpl5   |
| _EGS[Phospho (STY)]TPEDDFPSSSGNGNK_.2                                                                             | -0.008533956 | Q9ER69_S297_M1_Wtap     |
| _VQPQWS[Phospho (STY)]PPAGTEPC[Carbamidomethyl (C)]R_.2                                                           | -0.430299758 | Q9ER72_S102_M1_Cars1    |
| _ALQEGEGDLSIS[Phospho (STY)]ADR_.2                                                                                | 0.140051898  | Q9ER72_S390_M1_Cars1    |
| _TTQSLQDFPVADS[Phospho (STY)]EEEEEEFQK_.3                                                                         | -0.105735935 | Q9ERA6_S211_M1_Tfip11   |
| _EEATYGVWAERDS[Phospho (STY)]DEERPSFGGK_.3                                                                        | -0.134612394 | Q9ERA6_S60_M1_Tfip11    |
| _GAEEADS[Phospho (STY)]EDS[Phospho (STY)]DAEEKPVKQEDFPK_.3                                                        | -0.039651881 | Q9ERA6_S96_M2_Tfip11    |
| _EDLAGPDIGAS[Phospho (STY)]PQGGR_.2                                                                               | -0.203108616 | Q9ERD6_S308_M1_Ralgps2  |
| _YLT VATVFR_.2                                                                                                    | 0.005776814  | #N/A                    |
| _VREEYPDR_.2                                                                                                      | 0.133722687  | #N/A                    |
| _M[Oxidation (M)]SSTFIGNSTAIQELFKR_.3                                                                             | -0.580540789 | #N/A                    |
| _EVDEQM[Oxidation (M)]LAIQSK_.2                                                                                   | -0.045724462 | #N/A                    |
| _LHFFM[Oxidation (M)]PGFAPLTAR_.3                                                                                 | -0.024279002 | #N/A                    |
| _MSSTFIGNSTAIQELFK_.2                                                                                             | -0.43309507  | #N/A                    |
| _ISVYYNEASSHK_.2                                                                                                  | 0.098431993  | #N/A                    |
| _LATPTYGDLNHLVSATM[Oxidation (M)]SGVTTSR_.3                                                                       | -0.174126603 | #N/A                    |
| _ISVYYNEASS[Phospho (STY)]HKYVPR_.3                                                                               | -0.080429606 | Q9ERD7_S56_M1_Tubb3     |
| _VAVC[Carbamidomethyl (C)]DIPPR_.2                                                                                | 0.040204003  | #N/A                    |
| _FWEVISDEHGIDPSGNYVGDSDLQLER_.3                                                                                   | -0.067705411 | #N/A                    |
| _EC[Carbamidomethyl (C)]ENC[Carbamidomethyl (C)]DC[Carbamidomethyl (C)]LQGFQLTHSLGGGTGSGM[Oxidation (M)]GTLISK_.3 | -0.341115973 | #N/A                    |
| _ [Acetyl (Protein N-term)]ASGS[Phospho (STY)]AGKPTGEAASPAGSAVGGAQQPR_.3                                          | -0.424422711 | Q9ERE8_S5_M1_Tlnrd1     |
| _MISEGSS[Phospho (STY)]PIR_.2                                                                                     | 0.315007525  | Q9ERE9_S370_M1_Mapk8ip2 |
| _SSQELSS[Phospho (STY)]PGSDSEDAGGAR_.2                                                                            | -0.184652691 | Q9ERE9_S254_M1_Mapk8ip2 |
| _ENIETVVTGSLDDLK_.2                                                                                               | 0.051969916  | #N/A                    |
| _ELS[Phospho (STY)]VEEQIK_.2                                                                                      | -0.258616842 | Q9ERG0_S735_M1_Lima1    |

|                                                                       |              |                        |
|-----------------------------------------------------------------------|--------------|------------------------|
| _TSS[Phospho (STY)]LPESPSK_.2                                         | -0.258043409 | Q9ERG0_S367_M1_Lima1   |
| _SLLGLSNSEPNES[Phospho (STY)]VEAK_.2                                  | -0.402997982 | Q9ERG2_S214_M1_Strn3   |
| _NLEQILNGGES[Phospho (STY)]PKQK_.2                                    | 0.212205591  | Q9ERG2_S229_M1_Strn3   |
| _VVSHPITLPVITAHEDR_.4                                                 | 0.334957977  | #N/A                   |
| _NLEQILNGGES[Phospho (STY)]PK_.2                                      | -0.194668574 | Q9ERG2_S229_M1_Strn3   |
| _LLQTDDEEEAGLLELLK_.2                                                 | 0.030434139  | #N/A                   |
| _IVEDEPNKIC[Carbamidomethyl (C)]EADR_.3                               | 0.118060678  | #N/A                   |
| _VGESDC[Carbamidomethyl (C)]S[Phospho (STY)]DGEEDFYITEIK_.2           | -0.008091422 | Q9ERQ3_S381_M1_Znf704  |
| _S[Phospho (STY)]APSS[Phospho (STY)]PTLDC[Carbamidomethyl (C)]EK_.2   | -0.096839481 | Q9ERR1_S194_M2_Ndel1   |
| _GTENSFPS[Phospho (STY)]PK_.2                                         | -0.311539549 | Q9ERR1_S231_M1_Ndel1   |
| _KSAPS[Phospho (STY)]SPTLDC[Carbamidomethyl (C)]EK_.2                 | -0.271980579 | Q9ERR1_S197_M1_Ndel1   |
| _M[Oxidation (M)]DSAVQASLS[Phospho (STY)]LPAT[Phospho (STY)]PVGK_.2   | -0.280323204 | Q9ERR1_S215_M2_Ndel1   |
| _ISALNIVGDLLR_.2                                                      | -0.214516263 | #N/A                   |
| _LLIEDLEAR_.2                                                         | 0.040363301  | #N/A                   |
| _VGESVFHTTR_.2                                                        | 0.23235736   | #N/A                   |
| _IALM[Oxidation (M)]PLFQAEK_.2                                        | -0.094015431 | #N/A                   |
| _ENLEEEAIIM[Oxidation (M)]K_.2                                        | 0.265857739  | #N/A                   |
| _SAS[Phospho (STY)]HPGSC[Carbamidomethyl (C)]SSER_.2                  | 0.011792824  | Q9ERS4_S211_M1_Plekha3 |
| _STLSM[Oxidation (M)]S[Phospho (STY)]PR_.2                            | -0.124118549 | Q9ERT9_S67_M1_Ppp1r1a  |
| _ [Acetyl (Protein N-term)]MEPDNS[Phospho (STY)]PRK_.2                | 0.257330884  | Q9ERT9_S6_M1_Ppp1r1a   |
| _ [Acetyl (Protein N-term)]MEPDNS[Phospho (STY)]PR_.2                 | 0.378466834  | Q9ERT9_S6_M1_Ppp1r1a   |
| _TEDSSAHMLPLDSQGASLV_.2                                               | -0.17153492  | #N/A                   |
| _EPDNS[Phospho (STY)]PR_.2                                            | -0.061649793 | Q9ERT9_S6_M1_Ppp1r1a   |
| _SHETDGG[Phospho (STY)]AHGDEEDDGPHFEPVPLPKIEVK_.5                     | -0.303047731 | Q9ERU9_S1154_M1_Ranbp2 |
| _YIASVQGSAPS[Phospho (STY)]PR_.2                                      | -0.176808186 | Q9ERU9_S21_M1_Ranbp2   |
| _HSTPS[Phospho (STY)]PTKYSLS[Phospho (STY)]PSK_.2                     | 0.229471615  | Q9ERU9_S781_M2_Ranbp2  |
| _SALS[Phospho (STY)]PSKSPAK_.2                                        | 0.251184479  | Q9ERU9_S2113_M1_Ranbp2 |
| _LNSNNSAS[Phospho (STY)]PHR_.2                                        | -0.207712901 | Q9ERU9_S837_M1_Ranbp2  |
| _HSTPS[Phospho (STY)]PTK_.2                                           | -0.073457604 | Q9ERU9_S781_M1_Ranbp2  |
| _NRPGYVS[Phospho (STY)]EEEEDEDDYEM[Oxidation (M)]AVK_.3               | -0.219598874 | Q9ERU9_S2505_M1_Ranbp2 |
| _KQLS[Phospho (STY)]SEGTVR_.2                                         | 0.04439205   | Q9ERV1_S365_M1_Mkrn2   |
| _VNNPGGC[Carbamidomethyl (C)]SDPQTS[Phospho (STY)]PEMKPHSYLDAIR_.4    | 0.009420541  | Q9ERV1_S139_M1_Mkrn2   |
| _SC[Carbamidomethyl (C)]SSY[Phospho (STY)]ELQQQGTRK_.2                | -0.349508399 | Q9ERZ3_Y292_M1_Chrm3   |
| _SC[Carbamidomethyl (C)]S[Phospho (STY)]SYELQQQGTRK_.2                | 0.045800069  | Q9ERZ3_S290_M1_Chrm3   |
| _KEPVANQDPVS[Phospho (STY)]PSLVQGR_.3                                 | -0.079663233 | Q9ERZ4_S232_M1_Chrm2   |
| _EPVANQDPVS[Phospho (STY)]PSLVQGR_.2                                  | 0.405940826  | Q9ERZ4_S232_M1_Chrm2   |
| _EKKEPVANQDPVS[Phospho (STY)]PSLVQGR_.3                               | -0.484208466 | Q9ERZ4_S232_M1_Chrm2   |
| _LAGGQTSQPTTPTS[Phospho (STY)]PQR_.2                                  | -0.11545935  | Q9ES00_S31_M1_Ube4b    |
| _TVEDLKNNESQWKDS[Phospho (STY)]PLATR_.3                               | 0.213719707  | Q9ES00_S674_M1_Ube4b   |
| _HLLNS[Phospho (STY)]PTDPFNR_.2                                       | 0.024793186  | Q9ES00_S1136_M1_Ube4b  |
| _SQSSEGVSLS[Phospho (STY)]PSNSLETQSLSR_.3                             | 0.294610144  | Q9ES00_S88_M1_Ube4b    |
| _SQS[Phospho (STY)]JM[Oxidation (M)]DIDGVSC[Carbamidomethyl (C)]EK_.2 | -0.298923503 | Q9ES00_S105_M1_Ube4b   |
| _NNESQWKDS[Phospho (STY)]PLATR_.2                                     | 0.272537985  | Q9ES00_S674_M1_Ube4b   |
| _KPS[Phospho (STY)]DEEFVR_.2                                          | -0.444525049 | Q9ES28_S673_M1_Arhgef7 |
| _EDLSKS[Phospho (STY)]PK_.2                                           | 0.142598517  | Q9ES28_S655_M1_Arhgef7 |
| _EIKPSEKPV[Phospho (STY)]PK_.2                                        | -0.279286611 | Q9ES28_S228_M1_Arhgef7 |
| _M[Oxidation (M)]S[Phospho (STY)]GFIYQGK_.2                           | -0.100149051 | Q9ES28_S497_M1_Arhgef7 |

|                                                                                                          |              |                          |
|----------------------------------------------------------------------------------------------------------|--------------|--------------------------|
| _SFDS[Phospho (STY)]LGSQSSHSR_2                                                                          | -0.058685914 | Q9ES28_S135_M1_Arhgef7   |
| _LETFDANDLYQGQNFNK_2                                                                                     | -0.136190878 | #N/A                     |
| _IKS[Phospho (STY)]FDSLGSQSSHSR_3                                                                        | -0.143201661 | Q9ES28_S132_M1_Arhgef7   |
| _S[Phospho (STY)]LDM[Oxidation (M)]TDNTNSQLVVR_2                                                         | -0.037462918 | Q9ES28_S155_M1_Arhgef7   |
| _KPS[Phospho (STY)]DEEFAVRK_3                                                                            | -0.518406643 | Q9ES28_S673_M1_Arhgef7   |
| _S[Phospho (STY)]TAALEEDAQLK_2                                                                           | -0.115438214 | Q9ES28_S682_M1_Arhgef7   |
| _SGTLKS[Phospho (STY)]PPK_2                                                                              | 0.037880632  | Q9ES28_S236_M1_Arhgef7   |
| _SEEGHPFK_2                                                                                              | -0.091329352 | #N/A                     |
| _ [Acetyl (Protein N-term)]AESSAATQSPSVSSSSGAEPSALGGGGGS[Phospho (STY)]PGAC[Carbamidomethyl (C)]PALGAK_4 | -0.402603806 | Q9ES97_S31_M1_Rtn3       |
| _SALDFGQSK_2                                                                                             | 0.345774958  | #N/A                     |
| _ETTGGAPTM[Oxidation (M)]S[Phospho (STY)]PDLEQEQLTIR_2                                                   | -0.266205397 | Q9ES97_S673_M1_Rtn3      |
| _KLDS[Phospho (STY)]PQGTNK_2                                                                             | -0.034091822 | Q9ES97_S132_M1_Rtn3      |
| _TQIDHYVGIR_2                                                                                            | 0.095232076  | #N/A                     |
| _GIVDKKEEGDVLEAVLEK_3                                                                                    | -0.286127937 | #N/A                     |
| _QTFAPQSGPQSSSDILEHTDVK_3                                                                                | 0.043144629  | #N/A                     |
| _KLDS[Phospho (STY)]PQGTNKDR_2                                                                           | -0.159863032 | Q9ES97_S132_M1_Rtn3      |
| _DQTKSIVEK_2                                                                                             | 0.388847054  | #N/A                     |
| _Y[Phospho (STY)]VEDTDGSSPEDLM[Oxidation (M)]AVLTGAEEK_3                                                 | -0.022042659 | Q9ES97_Y589_M1_Rtn3      |
| _S[Phospho (STY)]LEGEVASQVPNTLNEVTPEK_2                                                                  | 0.077721642  | Q9ES97_S529_M1_Rtn3      |
| _SEMC[Carbamidomethyl (C)]ENSEQPQAQPET[Phospho (STY)]PTQK_2                                              | -0.400983618 | Q9ES97_T524_M1_Rtn3      |
| _QFSHTTAALEEVS_3                                                                                         | -0.272581786 | #N/A                     |
| _AAPTT[Phospho (STY)]PPPPVK_2                                                                            | 0.162489389  | Q9ESJ4_T174_M1_Nckipsd   |
| _RAAPTT[Phospho (STY)]PPPPVK_2                                                                           | 0.281390878  | Q9ESJ4_T174_M1_Nckipsd   |
| _VSTSQAS[Phospho (STY)]PQSAASPR_2                                                                        | -0.161155764 | Q9ESK9_S646_M1_Rb1cc1    |
| _STELVLS[Phospho (STY)]PDM[Oxidation (M)]PR_2                                                            | -0.022921949 | Q9ESK9_S243_M1_Rb1cc1    |
| _S[Phospho (STY)]MEHVAPDPTGTER_2                                                                         | -0.026228653 | Q9ESK9_S261_M1_Rb1cc1    |
| _ [Acetyl (Protein N-term)]ASEGASIPS[Phospho (STY)]PVVR_2                                                | -0.338887772 | Q9ESN6_S10_M1_Trim2      |
| _VKS[Phospho (STY)]PGSGHVK_2                                                                             | -0.181112125 | Q9ESN6_S440_M1_Trim2     |
| _VIRS[Phospho (STY)]ADV[Phospho (STY)]PTTEGVKR_3                                                         | -0.271193979 | #N/A                     |
| _SADVS[Phospho (STY)]PTTEGVK_2                                                                           | -0.074183186 | Q9ESN6_S428_M1_Trim2     |
| _VLQSQLDTLLQGQESIK_2                                                                                     | 0.21891714   | #N/A                     |
| _EGDFTLSLR_2                                                                                             | -0.401517465 | #N/A                     |
| _LYDQHIR_2                                                                                               | 0.037497877  | #N/A                     |
| _VIRS[Phospho (STY)]ADV[Phospho (STY)]PTTEGVK_2                                                          | -0.425962542 | #N/A                     |
| _ASIVDDIHSTFDELQK_3                                                                                      | -0.339451973 | #N/A                     |
| _LNELADQDFPLHPR_2                                                                                        | -0.064501645 | #N/A                     |
| _SADVS[Phospho (STY)]PTTEGVKR_2                                                                          | -0.158001604 | Q9ESN6_S428_M1_Trim2     |
| _TGNAYLTAELS[Phospho (STY)]TPDGSVADGEILDNK_3                                                             | -0.014112833 | Q9ESN6_S370_M1_Trim2     |
| _RVKS[Phospho (STY)]PGS[Phospho (STY)]GHVK_2                                                             | -0.018124423 | Q9ESN6_S440_M2_Trim2     |
| _RPASMYS[Phospho (STY)]TGK_2                                                                             | 0.488820565  | Q9ESN6_S459_M1_Trim2     |
| _VFNQEGEFMLK_2                                                                                           | -0.579377678 | #N/A                     |
| _LFSSSSS[Phospho (STY)]PPPAK_2                                                                           | -0.673708276 | Q9ESN9_S586_M1_Mapk8ip3  |
| _STHPS[Phospho (STY)]PEK_2                                                                               | -0.201443612 | Q9ESN9_S755_M1_Mapk8ip3  |
| _ANKTS[Phospho (STY)]PTSGEGTRPGGIIHVGDDSSDK_4                                                            | 0.221005203  | Q9ESN9_S1192_M1_Mapk8ip3 |
| _QLS[Phospho (STY)]PNGGQEDTR_2                                                                           | 0.081190374  | Q9ESN9_S677_M1_Mapk8ip3  |
| _S[Phospho (STY)]PTAAGFSQR_2                                                                             | 0.321251978  | Q9ESN9_S603_M1_Mapk8ip3  |
| _TGSS[Phospho (STY)]PTQGIVNK_2                                                                           | -0.221045944 | Q9ESN9_S366_M1_Mapk8ip3  |

|                                                                                 |              |                            |
|---------------------------------------------------------------------------------|--------------|----------------------------|
| _YKQLS[Phospho (STY)]PNGGQEDTR_.2                                               | -0.324965637 | Q9ESN9_S677_M1_Mapk8ip3    |
| _AKET[Phospho (STY)]PEADATSSR_.2                                                | 0.17974834   | Q9ESN9_T764_M1_Mapk8ip3    |
| _LFSSSSS[Phospho (STY)]PPPAKR_.2                                                | -0.116250863 | Q9ESN9_S586_M1_Mapk8ip3    |
| _EYNALHQR_.2                                                                    | 0.182257903  | #N/A                       |
| _LMELQEAVR_.2                                                                   | -0.436932894 | #N/A                       |
| _SS[Phospho (STY)]PVESLKK_.2                                                    | -0.424598324 | Q9EST3_S77_M1_Eif4enif1    |
| _SSS[Phospho (STY)]PVGLAK_.2                                                    | 0.485461264  | Q9EST3_S949_M1_Eif4enif1   |
| _SSS[Phospho (STY)]LGSTPHEELER_.2                                               | -0.446982555 | Q9EST3_S352_M1_Eif4enif1   |
| _IHS[Phospho (STY)]PIIR_.2                                                      | -0.477949243 | Q9ESU6_S1153_M1_Brd4       |
| _MPDEPEEPVVTVSS[Phospho (STY)]PAVPPPTK_.2                                       | 0.005125371  | Q9ESU6_S471_M1_Brd4        |
| _AQAVS[Phospho (STY)]EEEEEEGQSSSPK_.2                                           | -0.015638391 | Q9ESV0_S80_M1_Ddx24        |
| _LASFWAQPDASSR_.2                                                               | 0.117181511  | #N/A                       |
| _PIGFIPLGQTSSSLHTLFAESGNK_.3                                                    | 0.04852868   | #N/A                       |
| _TVLES[Phospho (STY)]GGETGDGDNDTTK_.2                                           | -0.14734748  | Q9ESX5_S481_M1_Dkc1        |
| _KRDSSES[Phospho (STY)]ES[Phospho (STY)]DETPTVPQLK_.3                           | 0.160211589  | Q9ESX5_S453_M2_Dkc1        |
| _VKVVEEM[Oxidation (M)]S[Phospho (STY)]E_.2                                     | 0.131532274  | Q9ESX5_S508_M1_Dkc1        |
| _TVLES[Phospho (STY)]GGETGDGDNDTTKK_.2                                          | 0.00172514   | Q9ESX5_S481_M1_Dkc1        |
| _ESTSSKS[Phospho (STY)]PPR_.2                                                   | -0.422249036 | Q9ESZ8_S823_M1_Gtf2i       |
| _TS[Phospho (STY)]INSLR_.2                                                      | -0.332168294 | Q9ET77_S163_M1_Jph3        |
| _TES[Phospho (STY)]PTTFSWTSDDR_.3                                               | -0.422769626 | Q9ET77_S578_M1_Jph3        |
| _SLPVALES[Phospho (STY)]DEETGDELK_.2                                            | -0.129989227 | Q9ET77_S706_M1_Jph3        |
| _S[Phospho (STY)]PLRTS[Phospho (STY)]INSLR_.2                                   | 0.224500837  | Q9ET77_S158_M2_Jph3        |
| _QVS[Phospho (STY)]VDEER_.2                                                     | -0.15938578  | Q9ET77_S506_M1_Jph3        |
| _EFS[Phospho (STY)]PSFQHR_.2                                                    | -0.321466707 | Q9ET77_S420_M1_Jph3        |
| _VLEKPPS[Phospho (STY)]PKES[Phospho (STY)]PHFYR_.3                              | -0.457697361 | Q9ET80_S448_M2_Jph1        |
| _QNPS[Phospho (STY)]PGAR_.2                                                     | -0.25489731  | Q9ET80_S490_M1_Jph1        |
| _KQNPS[Phospho (STY)]PGAR_.2                                                    | -0.234366752 | Q9ET80_S490_M1_Jph1        |
| _QSHS[Phospho (STY)]PQPSS[Phospho (STY)]PEPSK_.2                                | -0.223153697 | Q9ET80_S475_M2_Jph1        |
| _TS[Phospho (STY)]LASLR_.2                                                      | -0.225468738 | Q9ET80_S162_M1_Jph1        |
| _QS[Phospho (STY)]HSPQPSS[Phospho (STY)]PEPSKK_.3                               | -0.26877875  | Q9ET80_S473_M2_Jph1        |
| _RGS[Phospho (STY)]LLGS[Phospho (STY)]MK_.2                                     | 0.017084634  | Q9ET80_S216_M2_Jph1        |
| _QFLIS[Phospho (STY)]PPAS[Phospho (STY)]PPVGWK_.2                               | -0.158012605 | Q9JHG6_S161_M2_Rcan1;Rcan3 |
| _FLQENLAPK_.2                                                                   | 0.061596144  | #N/A                       |
| _LYEIGAGTSEVR_.2                                                                | 0.184363181  | #N/A                       |
| _ELLLC[Carbamidomethyl (C)]NNR_.2                                               | 0.523060386  | #N/A                       |
| _LPENVLLR_.2                                                                    | -0.290256248 | #N/A                       |
| _AQALVQYLEEPLTQVAAS_.2                                                          | 0.050157335  | #N/A                       |
| _SGPQC[Carbamidomethyl (C)]SS[Phospho (STY)]PTC[Carbamidomethyl (C)]QEETEDVR_.2 | -0.318350103 | Q9JHU2_S385_M1_Palmd       |
| _SNGPTHTS[Phospho (STY)]PTRPTQPR_.3                                             | -0.245898391 | Q9JHU2_S321_M1_Palmd       |
| _MELS[Phospho (STY)]PSRAS[Phospho (STY)]PGK_.2                                  | 0.15680423   | Q9JHU2_S370_M2_Palmd       |
| _LVQT[Phospho (STY)]PLTDR_.2                                                    | -0.268336233 | Q9JHU4_T1880_M1_Dync1h1    |
| _VTDFGDKVEDPTFLNQLQSGVNR_.3                                                     | -0.358911661 | #N/A                       |
| _VAAPDVVVPTLDTVR_.2                                                             | -0.034188983 | #N/A                       |
| _EQPVVSVQPR_.2                                                                  | 0.072011192  | #N/A                       |
| _EYQTQLIQR_.2                                                                   | -0.090676413 | #N/A                       |
| _SLLQALNEVK_.2                                                                  | 0.048687095  | #N/A                       |
| _LLNTFLER_.2                                                                    | -0.27015056  | #N/A                       |

|                                                           |              |                         |
|-----------------------------------------------------------|--------------|-------------------------|
| _VTFVNFTVTR_.2                                            | 0.087028952  | #N/A                    |
| _QNLDGLLNQLK_.2                                           | 0.052571442  | #N/A                    |
| _EWTDLGLFTHVLR_.2                                         | -0.296235329 | #N/A                    |
| _TFSEILNR_.2                                              | -0.206082862 | #N/A                    |
| _LNTQEIFDDWAR_.2                                          | 0.04502304   | #N/A                    |
| _LSLSNAISTVLPLTQLR_.2                                     | -0.122657464 | #N/A                    |
| _FLSDPQVHTVLVER_.3                                        | 0.176366485  | #N/A                    |
| _IQGLTVEQAEAVVR_.2                                        | 0.046235096  | #N/A                    |
| _LQGATC[Carbamidomethyl (C)]SNNK_.2                       | 0.301243242  | #N/A                    |
| _SAC[Carbamidomethyl (C)]DTVDTWLDDTAK_.2                  | -0.02366326  | #N/A                    |
| _EVWNTYELDLVNYQNK_.2                                      | -0.334995912 | #N/A                    |
| _VQVALEELQDLK_.2                                          | 0.385285935  | #N/A                    |
| _FNYGFEYLGVDK_.2                                          | -0.335064439 | #N/A                    |
| _ESPEVLLTLDLK_.2                                          | 0.160599255  | #N/A                    |
| _LKQDGDSEFR_.2                                            | 0.412503215  | #N/A                    |
| _LQGEFQLR_.2                                              | -0.321474336 | #N/A                    |
| _IFTIESAR_.2                                              | -0.023393864 | #N/A                    |
| _ENFIPTIVNFSAAEISDAIR_.2                                  | -0.057636684 | #N/A                    |
| _M[Oxidation (M)]LSAVSQVQC[Carbamidomethyl (C)]IQEALR_.2  | -0.275208308 | #N/A                    |
| _TDS[Phospho (STY)]TSDGRPAWMR_.2                          | 0.169706836  | Q9JHU4_S4366_M1_Dync1h1 |
| _SPLVM[Oxidation (M)]DVLNIQGVQR_.2                        | -0.243391514 | #N/A                    |
| _IAFIM[Oxidation (M)]DESNVLDSGFLEFR_.2                    | -0.037299835 | #N/A                    |
| _DHLYGTLDPNTR_.2                                          | -0.343068965 | #N/A                    |
| _DVLLVAQGEM[Oxidation (M)]ALEEFLK_.2                      | -0.299740565 | #N/A                    |
| _QLQNISQAAASGGAK_.2                                       | 0.37171304   | #N/A                    |
| _IQFVGAC[Carbamidomethyl (C)]NPPTDPGR_.2                  | 0.260727776  | #N/A                    |
| _FTQDTQPHYIYSPR_.3                                        | -0.197929647 | #N/A                    |
| _LEDDAKDNQKK_.2                                           | 0.197932092  | #N/A                    |
| _VAEVLFDAADANAIEEVNLAYENVK_.3                             | -0.319653161 | #N/A                    |
| _TFSSIPVSRIC[Carbamidomethyl (C)]K_.2                     | 0.118320902  | #N/A                    |
| _EIVNSC[Carbamidomethyl (C)]VFVHQTLHQANAR_.3              | -0.20852532  | #N/A                    |
| _LALESIC[Carbamidomethyl (C)]LLLGESTTDWK_.2               | -0.526798866 | #N/A                    |
| _SC[Carbamidomethyl (C)]IENIFR_.2                         | 0.112297179  | #N/A                    |
| _VIVLWTANTER_.2                                           | 0.065381934  | #N/A                    |
| _HVFVGDDDFK_.2                                            | 0.493954195  | #N/A                    |
| _AVDNQVYVATASPAR_.2                                       | 0.079267687  | #N/A                    |
| _TLS[Phospho (STY)]PGDSFSTFDTPYC[Carbamidomethyl (C)]K_.2 | 0.005169582  | Q9JHW2_S133_M1_Nit2     |
| _FAELAQIYAQR_.2                                           | -0.034580967 | #N/A                    |
| _EEEEEEENS[Phospho (STY)]DEDELDSHTM[Oxidation (M)]VK_.3   | -0.006524305 | Q9JI10_S316_M1_Stk3     |
| _LVGIFENQER_.2                                            | -0.4978747   | #N/A                    |
| _SESEEEVLLVSSSR_.2                                        | -0.198726065 | #N/A                    |
| _WIVPGGGM[Oxidation (M)]EPEEPSVAAVR_.2                    | -0.217968854 | #N/A                    |
| _LTYHGLS[Phospho (STY)]PC[Carbamidomethyl (C)]K_.2        | -0.316545361 | Q9JI90_S349_M1_Rnf14    |
| _LTYHGLS[Phospho (STY)]PC[Carbamidomethyl (C)]KVTAEK_.3   | 0.221306857  | Q9JI90_S349_M1_Rnf14    |
| _ETADTDTAEQVIASFR_.2                                      | 0.076178532  | #N/A                    |
| _ISSNPYSTVTM[Oxidation (M)]DELR_.2                        | -0.489760355 | #N/A                    |
| _ATLPEADGER_.2                                            | 0.389763542  | #N/A                    |

|                                                                              |              |                       |
|------------------------------------------------------------------------------|--------------|-----------------------|
| _AC[Carbamidomethyl (C)]LISM[Oxidation (M)]GYDLGEAEFAR_.2                    | -0.204567933 | #N/A                  |
| _HTNYTMEHIR_.3                                                               | -0.026638175 | #N/A                  |
| _VEQIAAIAQELNELDYHDAVNVNDR_.3                                                | 0.250117502  | #N/A                  |
| _NS[Phospho (STY)]LTGEEGELVK_.2                                              | -0.081525922 | Q9J199_S101_M1_Sgpp1  |
| _RNS[Phospho (STY)]LTGEEGELVK_.2                                             | -0.309859528 | Q9J199_S101_M1_Sgpp1  |
| _DNALC[Carbamidomethyl (C)]ENAR_.2                                           | 0.298076102  | #N/A                  |
| _FQELNVQAPR_.2                                                               | 0.02432727   | #N/A                  |
| _GLDSLTVNVDLR_.2                                                             | -0.192706325 | #N/A                  |
| _DFDC[Carbamidomethyl (C)]IITEFAK_.2                                         | 0.35568119   | #N/A                  |
| _SLIHLSLANNNLQTLPK_.3                                                        | -0.731001281 | #N/A                  |
| _IQDIEVLK_.2                                                                 | -0.189022815 | #N/A                  |
| _GNAFNC[Carbamidomethyl (C)]DC[Carbamidomethyl (C)]K_.2                      | 0.173878833  | #N/A                  |
| _KPNDIETFK_.2                                                                | 0.06031768   | #N/A                  |
| _WGGSSFQDIQR_.2                                                              | 0.484918788  | #N/A                  |
| _DTDVEYLEIARPPALR_.2                                                         | 0.366645295  | #N/A                  |
| _C[Carbamidomethyl (C)]PAVC[Carbamidomethyl (C)]TC[Carbamidomethyl (C)]SK_.2 | -0.233891662 | #N/A                  |
| _S[Phospho (STY)]SEDVSAHAATK_.2                                              | 0.07604836   | Q9J1D9_S106_M1_Sh2b2  |
| _ALDDFVLGSAR_.2                                                              | 0.151486908  | #N/A                  |
| _TPMGLLLEALGQEQEAGS_.2                                                       | -0.297918048 | #N/A                  |
| _TLS[Phospho (STY)]LDDKGWR_.2                                                | 0.075579055  | Q9J1I1_S89_M1_Inpp5e  |
| _FRGS[Phospho (STY)]QEDLTVQNGASPC[Carbamidomethyl (C)]R_.3                   | 0.277188555  | Q9J1I1_S103_M1_Inpp5e |
| _LFVGGLDWSTTQETLR_.2                                                         | -0.340640434 | #N/A                  |
| _IFVGGIPIHNC[Carbamidomethyl (C)]GETELR_.3                                   | 0.024107593  | #N/A                  |
| _SYFSQYGEVVDC[Carbamidomethyl (C)]VIM[Oxidation (M)]K_.2                     | -0.388920255 | #N/A                  |
| _DAGHPLYPFNDPY_.2                                                            | -0.269016567 | #N/A                  |
| _Acetyl (Protein N-term)]TASSVLLHTGQK_.2                                     | 0.362585016  | #N/A                  |
| _ALGLSNFNSR_.2                                                               | 0.06311715   | #N/A                  |
| _GLEVTAYSPLGSSDR_.2                                                          | -0.225445478 | #N/A                  |
| _ILQNIQVFDFTFSPEEM[Oxidation (M)]K_.2                                        | -0.061608521 | #N/A                  |
| _HALSAGYR_.2                                                                 | 0.133663571  | #N/A                  |
| _HPDEPVLLEPPVLALAEK_.3                                                       | -0.600973944 | #N/A                  |
| _EELFVTSK_.2                                                                 | -0.319887744 | #N/A                  |
| _YDSTHYK_.2                                                                  | -0.583626944 | #N/A                  |
| _EIITEEPS[Phospho (STY)]EEEADM[Oxidation (M)]PKPK_.3                         | 0.373760648  | Q9J1K5_S118_M1_Ddx21  |
| _GGLS[Phospho (STY)]DGEGPPGGR_.2                                             | -0.201112313 | Q9J1S5_S127_M1_Sv2a   |
| _HLQAVDYAAR_.2                                                               | -0.0346157   | #N/A                  |
| _GGLS[Phospho (STY)]DGEGPPGGRGEAQR_.2                                        | -0.512215739 | Q9J1S5_S127_M1_Sv2a   |
| _M[Oxidation (M)]ADGAPLAGVR_.2                                               | 0.350657927  | #N/A                  |
| _FEEEDDDDFPAPADGYR_.2                                                        | 0.204197689  | #N/A                  |
| _VFSVTHIK_.2                                                                 | -0.026682628 | #N/A                  |
| _DREELAQYETILR_.3                                                            | -0.179803848 | #N/A                  |
| _Acetyl (Protein N-term)]MEEGFRDR_.2                                         | -0.193848578 | #N/A                  |
| _GGQYFNDK_.2                                                                 | 0.240522568  | #N/A                  |
| _VQDEYSR_.2                                                                  | 0.132530307  | #N/A                  |
| _TIHQEDELIEIQSDGTWYQR_.3                                                     | -0.381775749 | #N/A                  |
| _TAQVPS[Phospho (STY)]PPR_.2                                                 | -0.276980502 | Q9J1X8_S1003_M1_Acin1 |
| _TAQVPS[Phospho (STY)]PPRGK_.2                                               | -0.434920623 | Q9J1X8_S1003_M1_Acin1 |



|                                                                                                                            |              |                        |
|----------------------------------------------------------------------------------------------------------------------------|--------------|------------------------|
| _LQPEQGS[Phospho (STY)]PK_.2                                                                                               | -0.255004199 | Q9JIX8_S729_M1_Acin1   |
| _SLS[Phospho (STY)]PLSGTTDTK_.2                                                                                            | -0.226609247 | Q9JIX8_S479_M1_Acin1   |
| _GVQAGNS[Phospho (STY)]DTEGGQPGR_.2                                                                                        | -0.123993339 | Q9JIX8_S838_M1_Acin1   |
| _SSSFSEKGES[Phospho (STY)]DDEKPR_.3                                                                                        | -0.391100421 | Q9JIX8_S216_M1_Acin1   |
| _KS[Phospho (STY)]LS[Phospho (STY)]PGVSR_.2                                                                                | 0.49544764   | Q9JIX8_S655_M2_Acin1   |
| _S[Phospho (STY)]RST[Phospho (STY)]PVRDR_.2                                                                                | -0.24164001  | Q9JIX8_S1326_M2_Acin1  |
| _KIS[Phospho (STY)]VVSATK_.2                                                                                               | 0.116037833  | Q9JIX8_S825_M1_Acin1   |
| _SLS[Phospho (STY)]PLSGTTDTKAES[Phospho (STY)]PAGR_.2                                                                      | 0.05475026   | Q9JIX8_S479_M2_Acin1   |
| _SQS[Phospho (STY)]PSPPLPEDLEK_.2                                                                                          | 0.073522934  | Q9JIX8_S389_M1_Acin1   |
| _HLS[Phospho (STY)]HPEPEQQHVIQR_.3                                                                                         | -0.356929873 | Q9JIX8_S710_M1_Acin1   |
| _GVQAGNS[Phospho (STY)]DTEGGQPGRK_.2                                                                                       | 0.041416007  | Q9JIX8_S838_M1_Acin1   |
| _AKDPPQS[Phospho (STY)]PPDSESEQLLLETER_.3                                                                                  | -0.05109426  | Q9JIY0_S341_M1_Plekho1 |
| _DLGGS[Phospho (STY)]YDQLTGHPGPSKK_.3                                                                                      | 0.01315064   | Q9JJ69_S19_M1_Kcnp2    |
| _DLGGS[Phospho (STY)]YDQLTGHPGPSK_.2                                                                                       | -0.294343136 | Q9JJ69_S19_M1_Kcnp2    |
| _RPS[Phospho (STY)]KEVEAVVVGYPY_.2                                                                                         | -0.046719902 | Q9JJ72_S98_M1_Rprm     |
| _NFTQS[Phospho (STY)]PEQQR_.2                                                                                              | 0.195430157  | Q9JJA9_S93_M1_Tamalin  |
| _FIPGLNRS[Phospho (STY)]LEEEESQL_.2                                                                                        | -0.475742491 | Q9JJA9_S384_M1_Tamalin |
| _NFTQS[Phospho (STY)]PEQQRK_.2                                                                                             | 0.023193907  | Q9JJA9_S93_M1_Tamalin  |
| _S[Phospho (STY)]LEEEESQL_.2                                                                                               | 0.081467583  | Q9JJA9_S384_M1_Tamalin |
| _T[Phospho (STY)]SPQPESGIKR_.2                                                                                             | -0.09292596  | Q9JJC6_T348_M1_Rilpl1  |
| _ [Acetyl (Protein N-term)]M[Oxidation (M)]EEPLGS[Phospho (STY)]PPAALSALK_.2                                               | -0.453338566 | Q9JJC6_S7_M1_Rilpl1    |
| _VQNS[Phospho (STY)]PPVGR_.2                                                                                               | -0.238638021 | Q9JJG0_S419_M1_Tacc2   |
| _FNS[Phospho (STY)]PSEELDYR_.2                                                                                             | 0.003040317  | Q9JJG0_S714_M1_Tacc2   |
| _TRPPS[Phospho (STY)]LK_.2                                                                                                 | -0.168902479 | Q9JJG0_S327_M1_Tacc2   |
| _KTRPPS[Phospho (STY)]LK_.2                                                                                                | -0.056937629 | Q9JJG0_S327_M1_Tacc2   |
| _LDNTPASPPRS[Phospho (STY)]PT[Phospho (STY)]EPSDTPIAK_.3                                                                   | -0.293153755 | Q9JJG0_S514_M2_Tacc2   |
| _ETQQEPGEES[Phospho (STY)]PVPSEEHAPETK_.3                                                                                  | -0.144096613 | Q9JJG0_S354_M1_Tacc2   |
| _SGNYPSSLNETDR_.2                                                                                                          | -0.32531093  | #N/A                   |
| _SFPNPFDPYEAASAAGLAAGSAEETGR_.3                                                                                            | -0.466684083 | #N/A                   |
| _GDYDAFFEAR_.2                                                                                                             | 0.007777488  | #N/A                   |
| _QQDVLC[Carbamidomethyl (C)]FLEANK_.2                                                                                      | 0.296361214  | #N/A                   |
| _SQGGPTYNNAVGR_.2                                                                                                          | 0.16313398   | #N/A                   |
| _DSLYVDGDC[Carbamidomethyl (C)]TM[Oxidation (M)]DIR_.2                                                                     | -0.448232782 | #N/A                   |
| _EGVHGGGLNKK_.2                                                                                                            | 0.129083133  | #N/A                   |
| _VLVFMGK_.2                                                                                                                | 0.189463848  | #N/A                   |
| _ [Acetyl (Protein N-term)]AGWQSYVDNLM[Oxidation (M)]C[Carbamidomethyl (C)]DGC[Carbamidomethyl (C)]C[Carbamidomethyl (C)]Q | -0.132931054 | #N/A                   |
| _ASSSS[Phospho (STY)]PYAR_.2                                                                                               | -0.299430587 | Q9JJV4_S228_M1_Cacng4  |
| _STEAS[Phospho (STY)]PSRDAS[Phospho (STY)]PVGLK_.2                                                                         | 0.119494785  | Q9JJV4_S253_M2_Cacng4  |
| _DAS[Phospho (STY)]PVGLK_.2                                                                                                | -0.180617701 | Q9JJV4_S259_M1_Cacng4  |
| _SRDLS[Phospho (STY)]PISK_.2                                                                                               | -0.369653253 | Q9JJV5_S248_M1_Cacng3  |
| _S[Phospho (STY)]HSELLK_.2                                                                                                 | -0.09563141  | Q9JJV5_S211_M1_Cacng3  |
| _DLS[Phospho (STY)]PISK_.2                                                                                                 | -0.15492463  | Q9JJV5_S248_M1_Cacng3  |
| _DGDSGS[Phospho (STY)]LGSPSASR_.2                                                                                          | -0.149825065 | Q9JJY3_S289_M1_Smpd3   |
| _TAS[Phospho (STY)]VEYKGDGGR_.2                                                                                            | 0.362198536  | Q9JJY3_S208_M1_Smpd3   |
| _IY[Phospho (STY)]IDSPTNTSISAASFSSLVSPQGGDGSR_.3                                                                           | -0.291239077 | Q9JJY3_Y170_M1_Smpd3   |
| _DSS[Phospho (STY)]PGSLPK_.2                                                                                               | -0.065063741 | Q9JJY4_S569_M1_Ddx20   |
| _AAMHTYSSPTVATQS[Phospho (STY)]PK_.2                                                                                       | 0.326688755  | Q9JJY4_S472_M1_Ddx20   |

|                                                                                         |              |                       |
|-----------------------------------------------------------------------------------------|--------------|-----------------------|
| _ES[Phospho (STY)]IDLVLDR_2                                                             | 0.164528775  | Q9JJZ2_S114_M1_Tuba8  |
| _NTSMS[Phospho (STY)]PR_2                                                               | 0.131860276  | Q9JJZ4_S251_M1_Ube2j1 |
| _ADLES[Phospho (STY)]PQRK_2                                                             | 0.140293648  | Q9JJZ6_S163_M1_Klf13  |
| _SRADLES[Phospho (STY)]PQRK_3                                                           | 0.152252433  | Q9JJZ6_S163_M1_Klf13  |
| _TLSQFTDALVTIR_2                                                                        | 0.230800167  | #N/A                  |
| _SPSTDITAEGS[Phospho (STY)]PTK_2                                                        | 0.166432719  | Q9JK45_S458_M1_Kcnq5  |
| _SWS[Phospho (STY)]FNDR_2                                                               | 0.073375935  | Q9JK45_S467_M1_Kcnq5  |
| _RSPSTDITAEGS[Phospho (STY)]PTK_2                                                       | 0.317831266  | Q9JK45_S458_M1_Kcnq5  |
| _FLENYDAIR_2                                                                            | 0.315355133  | #N/A                  |
| _WLPLEANPEVTNQFLK_2                                                                     | 0.281487964  | #N/A                  |
| _FLEESVSM[Oxidation (M)]S[Phospho (STY)]PEER_2                                          | -0.197887207 | Q9JKB1_S130_M1_Uchl3  |
| _TSDETLLEDAIEVC[Carbamidomethyl (C)]KK_3                                                | -0.148314552 | #N/A                  |
| _S[Phospho (STY)]RPLNAVSQDGK_2                                                          | -0.129284962 | Q9JKB3_S328_M1_Ybx3   |
| _[Acetyl (Protein N-term)]S[Phospho (STY)]EAGEATTGGTTLQAAADAPAAAPDPAPK_3                | -0.186834866 | Q9JKB3_S2_M1_Ybx3     |
| _PAPTVPAAAPSS[Phospho (STY)]PDATSEPK_2                                                  | 0.149018757  | Q9JKC6_S90_M1_Cend1   |
| _DTQAEKQEQAAPGPAATK_3                                                                   | -0.201441723 | #N/A                  |
| _QEQAAPGPAATK_2                                                                         | 0.263053367  | #N/A                  |
| _DTQAEKQEQAAPGPAATKK_3                                                                  | -0.001535043 | #N/A                  |
| _VPQATAEAK_2                                                                            | -0.051401174 | #N/A                  |
| _SASS[Phospho (STY)]PKPDTK_2                                                            | 0.047992461  | Q9JKC6_S10_M1_Cend1   |
| _SASS[Phospho (STY)]PKPDTKVPQATAEAK_3                                                   | -0.203460535 | Q9JKC6_S10_M1_Cend1   |
| _GPGDGAEEDSNTGGR_2                                                                      | -0.201894655 | #N/A                  |
| _ADPVLLNNHNSNLKPAPTVPAAAPSS[Phospho (STY)]PDATSEPKGPGDGAEEDSNTGGR_5                     | 0.013334288  | Q9JKC6_S90_M1_Cend1   |
| _ADPVLLNNHNSNLKPAPTVPAAAPSS[Phospho (STY)]PDATSEPK_4                                    | 0.187386112  | Q9JKC6_S90_M1_Cend1   |
| _GKS[Phospho (STY)]ASSPKPDTK_2                                                          | -0.375611871 | Q9JKC6_S7_M1_Cend1    |
| _AQEEWTTGAWK_2                                                                          | -0.263849146 | #N/A                  |
| _NPHVQQAQAQNAAM[Oxidation (M)]GAAQGAM[Oxidation (M)]NQPQTQYSATPNYTSNEM[Oxidation (M)]_4 | -0.416114523 | #N/A                  |
| _AGPLGGSS[Phospho (STY)]YEEEEEEGGGGGER_3                                                | 0.072092391  | Q9JF6_S434_M1_Nectin1 |
| _AGPLGGSS[Phospho (STY)]YEEEEEEGGGGGERK_3                                               | -0.1949852   | Q9JF6_S434_M1_Nectin1 |
| _AGIPQHHPMM[Oxidation (M)]AQNLQYPDDS[Phospho (STY)]DDEKK_4                              | 0.035960718  | Q9JF6_S421_M1_Nectin1 |
| _[Acetyl (Protein N-term)]S[Phospho (STY)]M[Oxidation (M)]EDPFFVVK_2                    | -0.331072462 | Q9JJK1_S2_M1_Stx6     |
| _ANDPSLQEVNLNLIK_2                                                                      | -0.37613673  | #N/A                  |
| _SLETNTHVK_2                                                                            | 0.427809767  | #N/A                  |
| _SNDPVALAFAEM[Oxidation (M)]LK_2                                                        | -0.053528423 | #N/A                  |
| _NIDEDELLGK_2                                                                           | 0.150301928  | #N/A                  |
| _QLENVLDLDPESATLPAGFR_2                                                                 | 0.039269178  | #N/A                  |
| _ENDLTEIK_2                                                                             | 0.050920543  | #N/A                  |
| _DREDFVPFTGEK_2                                                                         | -0.12155933  | #N/A                  |
| _SLNVESNFITGTGILALVEALR_2                                                               | -0.354643562 | #N/A                  |
| _VTGAALIPPPGETALASLGQASE_2                                                              | -0.219109925 | #N/A                  |
| _QTLPSSTP[Phospho (STY)]TTK_2                                                           | -0.278114958 | Q9JKN6_T156_M1_Nova1  |
| _IKQTLPSSTP[Phospho (STY)]PTTTK_2                                                       | -0.227117504 | Q9JKN6_S154_M1_Nova1  |
| _TLVEYQELTGAR_2                                                                         | 0.07422168   | #N/A                  |
| _REEEDNEDDGS[Phospho (STY)]DLGEALA_2                                                    | 0.237082245  | Q9JKP8_S122_M1_Chrc1  |
| _DAVIYPILVEFTR_2                                                                        | 0.005632696  | #N/A                  |
| _VLQLINDNTATLSYGVFR_2                                                                   | -0.165633401 | #N/A                  |
| _VESVFETLVEDSPEEESTLTK_2                                                                | 0.150132136  | #N/A                  |

|                                                                           |              |                       |
|---------------------------------------------------------------------------|--------------|-----------------------|
| _ASSEGAQGSVS[Phospho (STY)]PK_.2                                          | 0.356951115  | Q9JKS4_S179_M1_Ldb3   |
| _SLAASGAQQPDS[Phospho (STY)]PGGPQPPGQK_.2                                 | -0.228936986 | Q9JKS5_S108_M1_Habp4  |
| _AFDS[Phospho (STY)]FDQR_.2                                               | -0.190945886 | Q9JKS5_S206_M1_Habp4  |
| _KSLAASGAQQPDS[Phospho (STY)]PGGPQPPGQK_.3                                | 0.36621297   | Q9JKS5_S108_M1_Habp4  |
| _S[Phospho (STY)]PAVASGHRPGAGGR_.3                                        | 0.30626414   | Q9JKS5_S74_M1_Habp4   |
| _RGEQQGWNDNR_.3                                                           | -0.321499686 | #N/A                  |
| _DKKDEEEDM[Oxidation (M)]S[Phospho (STY)]LD_.2                            | 0.397141785  | Q9JKV1_S405_M1_Adrm1  |
| _SQS[Phospho (STY)]AAVTPSSSTSSAR_.2                                       | -0.159011812 | Q9JKV1_S213_M1_Adrm1  |
| _ESTESS[Phospho (STY)]PGKHLVTSEELISEGK_.3                                 | -0.289636269 | Q9JKX6_S10_M1_Nudt5   |
| _GATADDSGGGS[Phospho (STY)]PVLAAK_.2                                      | -0.400299655 | Q9JL04_S493_M1_Fmn2   |
| _SSILES[Phospho (STY)]PKK_.2                                              | -0.406762222 | Q9JL04_S629_M1_Fmn2   |
| _LPEEEPS[Phospho (STY)]PKDVDTEPK_.2                                       | -0.318897388 | Q9JL04_S614_M1_Fmn2   |
| _GS[Phospho (STY)]PGEWVVEVEEASQR_.2                                       | -0.109984617 | Q9JL04_S339_M1_Fmn2   |
| _SIQTS[Phospho (STY)]PTEEGR_.2                                            | -0.381220232 | Q9JL04_S724_M1_Fmn2   |
| _S[Phospho (STY)]ADWTEELGVR_.2                                            | -0.280368141 | Q9JL04_S459_M1_Fmn2   |
| _QLSPNHSPS[Phospho (STY)]QSPNQSPR_.3                                      | -0.214449296 | Q9JL04_S411_M1_Fmn2   |
| _SKPLDQSVEDLS[Phospho (STY)]K_.2                                          | 0.172359298  | Q9JL26_S189_M1_Fmnl1  |
| _EAAADTSGREEPPTPKS[Phospho (STY)]PPK_.3                                   | -0.164587641 | Q9JL26_S1021_M1_Fmnl1 |
| _GPGDVVSIILPGAAAT[Phospho (STY)]PSGDDAQAPR_.3                             | -0.362877549 | Q9JL26_T509_M1_Fmnl1  |
| _ [Acetyl (Protein N-term)]ALLAEHLLKLPADR_.3                              | -0.023904421 | #N/A                  |
| _IDSILEVVQTGR_.2                                                          | 0.050624646  | #N/A                  |
| _VENNDLVIAR_.2                                                            | 0.156337071  | #N/A                  |
| _NAEFDRHEIQIYEEVAK_.3                                                     | -0.112880041 | #N/A                  |
| _YLEHGEYEGNLYGTK_.3                                                       | -0.361685205 | #N/A                  |
| _NLDLAS[Phospho (STY)]PEEYPK_.2                                           | 0.088206236  | Q9JLB2_S25_M1_Mpp5    |
| _VNVVT[Phospho (STY)]NEFKSSGNTM[Oxidation (M)]K_.3                        | 0.061954079  | Q9JLB4_T2533_M1_Cubn  |
| _DSAPTTPTS[Phospho (STY)]PTEFLTGLR_.2                                     | -0.407873654 | Q9JLC8_S4266_M1_Sacs  |
| _SPSPSPTS[Phospho (STY)]PGSLR_.2                                          | 0.120173902  | Q9JLM8_S337_M1_Dcll1  |
| _DIKPENLLVYEHQDQSK_.3                                                     | -0.351317609 | #N/A                  |
| _SFEALLADLTR_.2                                                           | -0.143496893 | #N/A                  |
| _S[Phospho (STY)]PASTSSVNGTPGSQLSTPR_.2                                   | -0.086205335 | Q9JLM8_S307_M1_Dcll1  |
| _T LSDNVNLPQGVR_.2                                                        | -0.430856597 | #N/A                  |
| _NVNPNWVSVNVK_.2                                                          | -0.285499196 | #N/A                  |
| _REESEEGFIIPATITER_.3                                                     | -0.126148112 | #N/A                  |
| _TIGDGNFAVVK_.2                                                           | 0.137270989  | #N/A                  |
| _GIVYAI SPDR_.2                                                           | 0.153639759  | #N/A                  |
| _SKS[Phospho (STY)]PASTSSVNGTPGSQLSTPR_.3                                 | 0.026287691  | Q9JLM8_S307_M1_Dcll1  |
| _SPSPSPTS[Phospho (STY)]PGSLRK_.2                                         | -0.306657901 | Q9JLM8_S337_M1_Dcll1  |
| _SGKS[Phospho (STY)]PSPSPT[Phospho (STY)]SPGSLR_.2                        | -0.056712483 | Q9JLM8_T336_M2_Dcll1  |
| _DM[Oxidation (M)]ELEHFDERDK_.3                                           | -0.256341018 | #N/A                  |
| _AQPAPPELNSESEDYS[Phospho (STY)]PSSSETVR_.3                               | -0.299672269 | Q9JLM8_S742_M1_Dcll1  |
| _ISQHGGGS[Phospho (STY)]STLSSTK_.2                                        | -0.210342071 | Q9JLM8_S352_M1_Dcll1  |
| _VC[Carbamidomethyl (C)]SS[Phospho (STY)]M[Oxidation (M)]DENDGPGEDELGR_.3 | 0.004598693  | #N/A                  |
| _VC[Carbamidomethyl (C)]SS[Phospho (STY)]M[Oxidation (M)]DENDGPGEDELGR_.2 | -0.004651937 | #N/A                  |
| _SGKS[Phospho (STY)]PSPSPTS[Phospho (STY)]PGSLRK_.3                       | -0.12050368  | #N/A                  |
| _TLQTLSEK_.2                                                              | -0.370071054 | #N/A                  |
| _EES[Phospho (STY)]EEGFQIPATITER_.2                                       | 0.098158435  | Q9JLM8_S392_M1_Dcll1  |

|                                                                                           |              |                         |
|-------------------------------------------------------------------------------------------|--------------|-------------------------|
| _ [Acetyl (Protein N-term)]S[Phospho (STY)]FGRDMELEHFDERDK_.3                             | -0.354729211 | Q9JLM8_S2_M1_Dclk1      |
| _ [Acetyl (Protein N-term)]S[Phospho (STY)]FGRDMELEHFDER_.3                               | -0.370319035 | Q9JLM8_S2_M1_Dclk1      |
| _S[Phospho (STY)]VDLDAFVAR_.2                                                             | 0.306765829  | Q9JLQ0_S458_M1_Cd2ap    |
| _ [Acetyl (Protein N-term)]STNTDLSLSSYDEGQGSK_.2                                          | -0.09972466  | #N/A                    |
| _SQS[Phospho (STY)]PAASDC[Carbamidomethyl (C)]SSSSSSASLPSSGR_.2                           | 0.163995273  | Q9JLV1_S179_M1_Bag3     |
| _AASPFR5[Phospho (STY)]PVR_.2                                                             | 0.155114621  | Q9JLV1_S274_M1_Bag3     |
| _FLQESFNDR_.2                                                                             | 0.144392606  | #N/A                    |
| _LAIIPGGGGTQR_.2                                                                          | -0.12300654  | #N/A                    |
| _HLEENR_.2                                                                                | 0.19982503   | #N/A                    |
| _EFLPQGPVAM[Oxidation (M)]R_.2                                                            | 0.058040837  | #N/A                    |
| _SEVPGIFC[Carbamidomethyl (C)]AGADLK_.2                                                   | -0.076930372 | #N/A                    |
| _AVGLISHVLEQNQEGDAAYRK_.3                                                                 | -0.458804939 | #N/A                    |
| _AVGLISHVLEQNQEGDAAYR_.3                                                                  | -0.04147865  | #N/A                    |
| _QTS[Phospho (STY)]IETDR_.2                                                               | 0.351464721  | Q9JM13_S132_M1_Rabgef1  |
| _YM[Oxidation (M)]SGQTS[Phospho (STY)]PR_.2                                               | 0.208657604  | Q9JM13_S390_M1_Rabgef1  |
| _LDAQSLNLSQEDFDRYM[Oxidation (M)]S[Phospho (STY)]GQTSPR_.3                                | -0.098843054 | Q9JM13_S386_M1_Rabgef1  |
| _DTEVFIC[Carbamidomethyl (C)]TT[Phospho (STY)]PLLK_.2                                     | 0.262816651  | Q9JM14_T102_M1_Nt5c     |
| _WVEQNLGPEFVER_.2                                                                         | 0.14585709   | #N/A                    |
| _EM[Oxidation (M)]NDM[Oxidation (M)]KDTEVFIC[Carbamidomethyl (C)]TT[Phospho (STY)]PLLK_.3 | -0.365226974 | Q9JM14_T102_M1_Nt5c     |
| _VLVDM[Oxidation (M)]DGVLADFESGLLQGFR_.2                                                  | -0.18181091  | #N/A                    |
| _SQS[Phospho (STY)]LQDQPTR_.2                                                             | -0.218839834 | Q9JM52_S603_M1_Mink1    |
| _LDSS[Phospho (STY)]PVLSPGNK_.2                                                           | -0.306676573 | Q9JM52_S746_M1_Mink1    |
| _SDSVLPASHGHLPAQAGS[Phospho (STY)]LER_.3                                                  | -0.416921001 | Q9JM52_S729_M1_Mink1    |
| _S[Phospho (STY)]DPGWER_.2                                                                | -0.332048505 | Q9JM52_S706_M1_Mink1    |
| _QQNS[Phospho (STY)]PLAK_.2                                                               | 0.031141779  | Q9JM52_S537_M1_Mink1    |
| _GQS[Phospho (STY)]PPTKDGGS DYQSR_.2                                                      | -0.235482625 | Q9JM52_S903_M1_Mink1    |
| _QQQLQQLQQQR_.2                                                                           | 0.138794765  | #N/A                    |
| _VGASTKLDSS[Phospho (STY)]PVLS[Phospho (STY)]PGNK_.2                                      | -0.243783013 | Q9JM52_S746_M2_Mink1    |
| _VAS[Phospho (STY)]PSGLR_.2                                                               | -0.091822038 | Q9JM63_S338_M1_Kcnj10   |
| _AYLQQLR_.2                                                                               | 0.055177127  | #N/A                    |
| _DTDIVDEAIYYFK_.2                                                                         | 0.134298483  | #N/A                    |
| _LIGNMALLPLR_.2                                                                           | 0.33449274   | #N/A                    |
| _ETKDTDIVDEAIYYFK_.3                                                                      | -0.372022494 | #N/A                    |
| _PAYHSSLM[Oxidation (M)]DPDTK_.3                                                          | -0.066018852 | #N/A                    |
| _VFD PQSDKPSK_.3                                                                          | 0.400194789  | #N/A                    |
| _S[Phospho (STY)]AGEDNDGPVLTDEQK_.2                                                       | -0.300444151 | Q9JM93_S140_M1_Arl6ip4  |
| _SLSSS[Phospho (STY)]PVKK_.2                                                              | -0.212038763 | Q9JM96_S140_M1_Cdc42ep4 |
| _EADDES[Phospho (STY)]LDEQASASK_.2                                                        | -0.231413197 | Q9JM96_S64_M1_Cdc42ep4  |
| _DQWGS[Phospho (STY)]EEEEAGGYR_.2                                                         | 0.19156509   | Q9JM96_S223_M1_Cdc42ep4 |
| _AREADDES[Phospho (STY)]LDEQASASK_.2                                                      | -0.220062008 | Q9JM96_S64_M1_Cdc42ep4  |
| _DQWGS[Phospho (STY)]EEEEAGGYRDK_.3                                                       | -0.034584351 | Q9JM96_S223_M1_Cdc42ep4 |
| _NAMS[Phospho (STY)]LPQLNEK_.2                                                            | 0.014595673  | Q9JM96_S116_M1_Cdc42ep4 |
| _VNQQPNANDKNS[Phospho (STY)]PPKEIK_.3                                                     | -0.26672598  | Q9JMA1_S393_M1_Usp14    |
| _AS[Phospho (STY)]GEM[Oxidation (M)]ASAQYITAALR_.2                                        | -0.30433207  | Q9JMA1_S143_M1_Usp14    |
| _QSPTLQR_.2                                                                               | 0.054842114  | #N/A                    |
| _LEAIEDDSGRETDSSAPAVT[Phospho (STY)]PSK_.3                                                | -0.327559435 | Q9JMA1_T235_M1_Usp14    |
| _ [Acetyl (Protein N-term)]AAVGS[Phospho (STY)]PGSLESAPR_.2                               | -0.108159293 | Q9JMA2_S6_M1_Qtrt1      |

|                                                                            |              |                        |
|----------------------------------------------------------------------------|--------------|------------------------|
| _LISQAYEVLSDPK_.2                                                          | -0.053066408 | #N/A                   |
| _AGGAGGEGS[Phospho (STY)]DDDTSLT_.2                                        | -0.241765088 | Q9JMD3_S284_M1_Stard10 |
| _AFYGS[Phospho (STY)]EEDEAK_.2                                             | 0.085069365  | Q9JME5_S272_M1_Ap3b2   |
| _QLIVPSEQGGALSR_.2                                                         | -0.158039485 | #N/A                   |
| _ATGYQELPDWPEEAPDPSVR_.2                                                   | -0.091898282 | #N/A                   |
| _AFYGS[Phospho (STY)]EEDEAKGPGSEEAATAALPAR_.3                              | -0.237667898 | Q9JME5_S272_M1_Ap3b2   |
| _TQFLS[Phospho (STY)]PTQNESLLEENPEK_.2                                     | -0.473078151 | Q9JME5_S253_M1_Ap3b2   |
| _LEVLTNLANETNIPTVLR_.2                                                     | 0.068281677  | #N/A                   |
| _TTLVAGSVVM[Oxidation (M)]AFEEVC[Carbamidomethyl (C)]PER_.2                | 0.225627819  | #N/A                   |
| _GGGS[Phospho (STY)]ES[Phospho (STY)]EQS[Phospho (STY)]EEEEDEKK_.2         | 0.376927325  | Q9JME5_S731_M3_Ap3b2   |
| _EEAPGAES[Phospho (STY)]PSLR_.2                                            | 0.045366402  | Q9JMG3_S71_M1_Tmub1    |
| _GFNEGLWEIENNPVK_.2                                                        | -0.310098161 | #N/A                   |
| _S[Phospho (STY)]PGDEDDKDC[Carbamidomethyl (C)]KEEENK_.2                   | -0.348041955 | Q9JMG7_S161_M1_Hdgfl3  |
| _FTGYQTIQQSSSETEGEGGNTADAS[Phospho (STY)]S[Phospho (STY)]EEEEGDRVEDGKGK_.4 | 0.066316433  | Q9JMG7_S121_M2_Hdgfl3  |
| _FTGYQTIQQSSSETEGEGGNTADAS[Phospho (STY)]S[Phospho (STY)]EEEEGDRVEDGK_.4   | 0.297138454  | Q9JMG7_S121_M2_Hdgfl3  |
| _VLVLDVFTPTPLGTR_.2                                                        | 0.38652278   | #N/A                   |
| _VTAQSTNSEETIEGFNTVLLAVGR_.3                                               | -0.376895212 | #N/A                   |
| _VVYENAYGR_.2                                                              | -0.527034117 | #N/A                   |
| _RFS[Phospho (STY)]FSQR_.2                                                 | -0.283654499 | Q9JMH9_S140_M1_Myo18a  |
| _S[Phospho (STY)]LAHADEAR_.2                                               | -0.477900033 | Q9JMH9_S865_M1_Myo18a  |
| _FSHSYLSDS[Phospho (STY)]DTEAK_.2                                          | -0.054315592 | Q9JMH9_S2039_M1_Myo18a |
| _SSSPTSHWKPLAPDPS[Phospho (STY)]DDEHDPVDSISRPR_.5                          | 0.375958006  | Q9JMH9_S2016_M1_Myo18a |
| _NELRLS[Phospho (STY)]SDRLETR_.3                                           | -0.04643725  | Q9JMH9_S1279_M1_Myo18a |
| _VASGSDLHLTDIDSDSNR_.3                                                     | 0.010850581  | #N/A                   |
| _NKGPSKAPS[Phospho (STY)]DDGS[Phospho (STY)]LK_.2                          | -0.129131458 | Q9JMH9_S1994_M2_Myo18a |
| _FSHSYLSDS[Phospho (STY)]DTEAKLTETSA_.3                                    | -0.179897748 | Q9JMH9_S2039_M1_Myo18a |
| _NKLEGS[Phospho (STY)]DVDS[Phospho (STY)]ELEDRVDGVK_.3                     | -0.362721356 | Q9JMH9_S1966_M2_Myo18a |
| _APS[Phospho (STY)]DDGSLK_.2                                               | 0.243456889  | Q9JMH9_S1994_M1_Myo18a |
| _GAPANVS[Phospho (STY)]SSDLTGR_.2                                          | 0.230916445  | Q9JMK2_S389_M1_Csnk1e  |
| _IQQTGNTS[Phospho (STY)]PR_.2                                              | -0.379630036 | Q9JMK2_S363_M1_Csnk1e  |
| _LAcetyl (Protein N-term)]AQEFVNC[Carbamidomethyl (C)]K_.2                 | 0.229270276  | #N/A                   |
| _LVIVGDGAC[Carbamidomethyl (C)]GK_.2                                       | 0.127955418  | #N/A                   |
| _TC[Carbamidomethyl (C)]LLIVFSK_.2                                         | 0.226339181  | #N/A                   |
| _M[Oxidation (M)]KQEPVKPEEGR_.3                                            | -0.164452267 | #N/A                   |
| _EVFEMATR_.2                                                               | 0.334650587  | #N/A                   |
| _QVELALWDTAGQEDYDR_.2                                                      | -0.152143009 | #N/A                   |
| _AINQGGLTSVAVR_.2                                                          | -0.064026645 | #N/A                   |
| _LLDSSTVTHLFK_.2                                                           | 0.338931989  | #N/A                   |
| _HITIFSPEGR_.2                                                             | -0.200997331 | #N/A                   |
| _YEAANWK_.2                                                                | 0.514430498  | #N/A                   |
| _ITESIGC[Carbamidomethyl (C)]VM[Oxidation (M)]TGM[Oxidation (M)]TADSR_.2   | -0.248538084 | #N/A                   |
| _ILTEAEIDAHLVALAERD_.3                                                     | -0.452039188 | #N/A                   |
| _PAFVGSHDHS[Phospho (STY)]EESQLPR_.3                                       | 0.128608973  | Q9QUN9_S295_M1_Dkk3    |
| _LLVEAEQAK_.2                                                              | -0.542764435 | #N/A                   |
| _GGSDNDASLVITDLTLEDYGR_.2                                                  | -0.018334711 | #N/A                   |
| _EPC[Carbamidomethyl (C)]GGQNTVPGVR_.2                                     | 0.274645861  | #N/A                   |
| _DPTAFGSGIHK_.2                                                            | -0.274190621 | #N/A                   |

|                                                                 |              |                        |
|-----------------------------------------------------------------|--------------|------------------------|
| _YNLNFHEAR_.2                                                   | -0.066623393 | #N/A                   |
| _C[Carbamidomethyl (C)]SPTEAAVR_.2                              | -0.005490247 | #N/A                   |
| _C[Carbamidomethyl (C)]DAGWLADGSRV_.2                           | 0.47637111   | #N/A                   |
| _LTSYLR_.2                                                      | -0.017584753 | #N/A                   |
| _VFLDPNTLSDDGTVALR_.2                                           | 0.522626534  | #N/A                   |
| _SGEEDFESLASQFSDC[Carbamidomethyl (C)]SSAK_.2                   | -0.296641893 | #N/A                   |
| _TGEM[Oxidation (M)]SGPVFTDSGIHILR_.3                           | -0.219283676 | #N/A                   |
| _RNS[Phospho (STY)]LPQIPTLNLEAR_.3                              | -0.213905344 | Q9QVP9_S375_M1_Ptk2b   |
| _NLLDAVDQAK_.2                                                  | 0.010112633  | #N/A                   |
| _MSGVSEPLSRVK_.2                                                | 0.0025012    | #N/A                   |
| _SHLSESC[Carbamidomethyl (C)]SIES[Phospho (STY)]DIYAEIPDETLR_.3 | -0.357402777 | Q9QVP9_S399_M1_Ptk2b   |
| _NS[Phospho (STY)]LPQIPTLNLEAR_.2                               | 0.194544337  | Q9QVP9_S375_M1_Ptk2b   |
| _LPPSS[Phospho (STY)]PQK_.2                                     | -0.050506152 | Q9QWI6_S540_M1_Srcin1  |
| _KAES[Phospho (STY)]EELEVQKPQVK_.3                              | -0.459046022 | Q9QWI6_S1110_M1_Srcin1 |
| _AES[Phospho (STY)]EELEVQKPQVK_.2                               | -0.35892208  | Q9QWI6_S1110_M1_Srcin1 |
| _RFS[Phospho (STY)]NVGLVHTSER_.3                                | -0.472485978 | Q9QWI6_S79_M1_Srcin1   |
| _AVS[Phospho (STY)]VEAAERDWEER_.3                               | -0.216730247 | Q9QWI6_S974_M1_Srcin1  |
| _AVS[Phospho (STY)]VEAAER_.2                                    | -0.042284423 | Q9QWI6_S974_M1_Srcin1  |
| _GVTDTLAQIR_.2                                                  | 0.170106101  | #N/A                   |
| _TLGGGGGGGS[Phospho (STY)]GRR_.2                                | -0.122370008 | Q9QWI6_S73_M1_Srcin1   |
| _YLNDEELITQQLNDEK_.2                                            | -0.145744695 | #N/A                   |
| _AAQGPAGS[Phospho (STY)]PDKGK_.2                                | -0.202694883 | Q9QWI6_S1185_M1_Srcin1 |
| _FSNVGLVHTS[Phospho (STY)]JERR_.3                               | -0.365512834 | Q9QWI6_S87_M1_Srcin1   |
| _EVSGPNETSS[Phospho (STY)]PGSEKPSGSR_.3                         | 0.308693122  | Q9QWI6_S1222_M1_Srcin1 |
| _QLGETLTELK_.2                                                  | 0.305486043  | #N/A                   |
| _GEGLYADPYGLLHEGR_.3                                            | -0.026666649 | #N/A                   |
| _QIASLTGLVQSALLR_.2                                             | 0.177562302  | #N/A                   |
| _DSGSSVFAES[Phospho (STY)]PGGK_.2                               | -0.283781043 | Q9QWI6_S588_M1_Srcin1  |
| _KDS[Phospho (STY)]GSSSVFAES[Phospho (STY)]PGGK_.2              | -0.338737124 | Q9QWI6_S579_M2_Srcin1  |
| _LSYAGGRPPSYAGS[Phospho (STY)]PVHHAER_.3                        | -0.263010201 | Q9QWI6_S411_M1_Srcin1  |
| _HTQGAQPGLADQAAK_.2                                             | 0.147350648  | #N/A                   |
| _S[Phospho (STY)]SPPM[Oxidation (M)]LSADDAEYPR_.2               | 0.214038338  | Q9QWI6_S46_M1_Srcin1   |
| _AALTQYSK_.2                                                    | 0.410780831  | #N/A                   |
| _GS[Phospho (STY)]DELTVP_.2                                     | -0.177249331 | Q9QWI6_S1054_M1_Srcin1 |
| _GLQNSASDLR_.2                                                  | 0.292867704  | #N/A                   |
| _RQEDPLQR_.2                                                    | 0.109618118  | #N/A                   |
| _RGS[Phospho (STY)]DELTVP_.2                                    | -0.424716021 | Q9QWI6_S1054_M1_Srcin1 |
| _S[Phospho (STY)]PGVLFLQFGEETR_.2                               | 0.027471038  | Q9QWI6_S247_M1_Srcin1  |
| _S[Phospho (STY)]FPSSHGLTTTR_.2                                 | 0.164001028  | Q9QWI6_S1079_M1_Srcin1 |
| _GEPDPERS[Phospho (STY)]SPPM[Oxidation (M)]LSADDAEYPR_.3        | -0.293841249 | Q9QWI6_S46_M1_Srcin1   |
| _RFS[Phospho (STY)]NVGLVHT[Phospho (STY)]SERR_.3                | -0.014852862 | Q9QWI6_S79_M2_Srcin1   |
| _QVDEGM[Oxidation (M)]WPPPNLLNQS[Phospho (STY)]PK_.2            | -0.395461253 | Q9QWI6_S911_M1_Srcin1  |
| _LKAQGPAGS[Phospho (STY)]PDKGK_.3                               | -0.439689518 | Q9QWI6_S1185_M1_Srcin1 |
| _S[Phospho (STY)]PNTAILIKDEAR_.2                                | -0.09524756  | Q9QWI6_S293_M1_Srcin1  |
| _AAQGPAGS[Phospho (STY)]PDK_.2                                  | -0.018440049 | Q9QWI6_S1185_M1_Srcin1 |
| _LGGAPTGGGVSPSPSAILER_.2                                        | 0.059925091  | #N/A                   |
| _VEGSNGAAT[Phospho (STY)]PSAPVC[Carbamidomethyl (C)]GSGSK_.2    | -0.07022089  | Q9QWI6_T675_M1_Srcin1  |

|                                                                           |              |                        |
|---------------------------------------------------------------------------|--------------|------------------------|
| _S[Phospho (STY)]S[Phospho (STY)]GATPVSGPPPPSASSTPAGQPTAVSR_.3            | -0.032008967 | Q9QWI6_S687_M2_Srcin1  |
| _TEKPSKS[Phospho (STY)]PPPPPPR_.3                                         | -0.103094943 | Q9QWI6_S1070_M1_Srcin1 |
| _S[Phospho (STY)]PNTAILIK_.2                                              | 0.125862694  | Q9QWI6_S293_M1_Srcin1  |
| _FRQS[Phospho (STY)]LPLSR_.2                                              | -0.249712746 | Q9QWI6_S233_M1_Srcin1  |
| _DAFMDHLK_.2                                                              | 0.167262931  | #N/A                   |
| _HTVIAAQ[S[Phospho (STY)]LEALSGLQK_.3                                     | -0.395081138 | Q9QWI6_S98_M1_Srcin1   |
| _EMVYASRES[Phospho (STY)]S[Phospho (STY)]PTR_.2                           | 0.167545496  | Q9QWI6_S356_M2_Srcin1  |
| _FSNVGLVHTSER_.2                                                          | -0.140691402 | #N/A                   |
| _KVAETDFSK_.2                                                             | 0.068208583  | #N/A                   |
| _LADVSAPSGGPPPPHSPY[Phospho (STY)]SGPPSRGSPVR_.3                          | 0.029874441  | Q9QWI6_Y561_M1_Srcin1  |
| _QVDEGMWPPPNLLNQ[S[Phospho (STY)]PKK_.3                                   | 0.150001387  | Q9QWI6_S911_M1_Srcin1  |
| _RQVDEGMWPPPNLLNQ[S[Phospho (STY)]PK_.3                                   | -0.086066449 | Q9QWI6_S911_M1_Srcin1  |
| _SHTGDLS[Phospho (STY)]PNVQSR_.2                                          | -0.098281569 | Q9QWY8_S1045_M1_Asap1  |
| _TLS[Phospho (STY)]DPPSPLPHGPPNK_.2                                       | -0.478630843 | Q9QWY8_S854_M1_Asap1   |
| _SPRPQSFC[Carbamidomethyl (C)]HSS[Phospho (STY)]S[Phospho (STY)]ISPQDK_.2 | 0.322395326  | Q9QWY8_S758_M2_Asap1   |
| _QDEM[Oxidation (M)]DES[Phospho (STY)]DDDLDDKPSPIK_.3                     | 0.018301327  | #N/A                   |
| _QDEMD[Phospho (STY)]DDDLDDKPSPIK_.2                                      | 0.319311794  | #N/A                   |
| _ESAQAVAVALS[Phospho (STY)]PK_.2                                          | 0.014408101  | Q9QX47_S1723_M1_Son    |
| _S[Phospho (STY)]RT[Phospho (STY)]PLRR_.2                                 | -0.216582072 | Q9QX47_S2038_M2_Son    |
| _SAAS[Phospho (STY)]PVVISIPER_.2                                          | -0.201557996 | Q9QX47_S1794_M1_Son    |
| _FS[Phospho (STY)]RS[Phospho (STY)]PIR_.2                                 | -0.048101521 | Q9QX47_S2047_M2_Son    |
| _RFS[Phospho (STY)]RS[Phospho (STY)]PIR_.2                                | 0.358518085  | Q9QX47_S2047_M2_Son    |
| _DVEDSLPIKESAQAVAVALS[Phospho (STY)]PK_.3                                 | -0.004567233 | Q9QX47_S1723_M1_Son    |
| _RRS[Phospho (STY)]FS[Phospho (STY)]IS[Phospho (STY)]PVR_.2               | 0.327520376  | Q9QX47_S2027_M3_Son    |
| _ESTVLGDSEEPS[Phospho (STY)]E_.2                                          | -0.400972787 | Q9QXG2_S664_M1_Chm     |
| _VQDNTET[Phospho (STY)]PKR_.2                                             | -0.354808873 | Q9QXG2_T221_M1_Chm     |
| _GWS[Phospho (STY)]PPPEVR_.2                                              | -0.175005675 | Q9QXG4_S30_M1_Acss2    |
| _VRGWS[Phospho (STY)]PPPEVR_.2                                            | -0.418140259 | Q9QXG4_S30_M1_Acss2    |
| _AELGM[Oxidation (M)]NDS[Phospho (STY)]PSQSPPVK_.2                        | -0.140519555 | Q9QXG4_S263_M1_Acss2   |
| _GATDTS[Phospho (STY)]PLTR_.2                                             | -0.233225907 | Q9QXL1_S1217_M1_Kif21b |
| _AVS[Phospho (STY)]AEC[Carbamidomethyl (C)]LGPPLDSTK_.2                   | -0.267361569 | Q9QXL1_S1150_M1_Kif21b |
| _TVS[Phospho (STY)]LPTR_.2                                                | 0.136139089  | Q9QXL1_S1198_M1_Kif21b |
| _VC[Carbamidomethyl (C)]PQTDAENATDNK_.2                                   | -0.055282534 | #N/A                   |
| _DQVLQNLGSVESYSEEK_.2                                                     | -0.367645141 | #N/A                   |
| _ITQLVSEQANQVLAR_.2                                                       | -0.393172783 | #N/A                   |
| _HDSGASETSL[S[Phospho (STY)]PPSS[Phospho (STY)]PPSRPR_.3                  | -0.129319844 | Q9QXL2_S1273_M2_Kif21a |
| _TTASTQM[Oxidation (M)]INVQSS[Phospho (STY)]R_.2                          | 0.257695568  | Q9QXL2_S224_M1_Kif21a  |
| _AHNLQDGLSDTGDGEDIAS[Phospho (STY)]N_.2                                   | 0.054181603  | Q9QXL2_S1671_M1_Kif21a |
| _LISESS[Phospho (STY)]PM[Oxidation (M)]NEFETLTAK_.2                       | -0.248509499 | Q9QXL2_S258_M1_Kif21a  |
| _MTISNMEADMNR_.2                                                          | -0.449117753 | #N/A                   |
| _KSQAWAEGGS[Phospho (STY)]PR_.2                                           | -0.104646691 | Q9QXM1_S108_M1_Jmy     |
| _GPES[Phospho (STY)]PLRS[Phospho (STY)]PAR_.2                             | -0.129945626 | Q9QXM1_S130_M2_Jmy     |
| _IKEASPES[Phospho (STY)]EDEEEALPC[Carbamidomethyl (C)]TDWEN_.3            | 0.252610564  | Q9QXM1_S969_M1_Jmy     |
| _RGS[Phospho (STY)]GQDLAGPAPETLEQTEGATP_.3                                | -0.141068198 | Q9QXQ1_S426_M1_Pde7b   |
| _GSGQDLAGPAPETLEQTEGAT[Phospho (STY)]P_.2                                 | 0.051616833  | Q9QXQ1_T445_M1_Pde7b   |
| _RRGS[Phospho (STY)]GQDLAGPAPETLEQTEGATP_.3                               | 0.238936775  | Q9QXQ1_S426_M1_Pde7b   |
| _AQLEPVAS[Phospho (STY)]PAK_.2                                            | -0.253224114 | Q9QXS1_S1443_M1_Plec   |

|                                                                     |              |                       |
|---------------------------------------------------------------------|--------------|-----------------------|
| _NDESQLS[Phospho (STY)]PATR_.2                                      | -0.380794287 | Q9QXS1_S728_M1_Plec   |
| _RAS[Phospho (STY)]FAEK_.2                                          | -0.287121742 | Q9QXS1_S1729_M1_Plec  |
| _AQLEPVAS[Phospho (STY)]PAKKPK_.2                                   | -0.426279363 | Q9QXS1_S1443_M1_Plec  |
| _LPVDVAYQR_.2                                                       | -0.048982129 | #N/A                  |
| _ARNDESQLS[Phospho (STY)]PATR_.2                                    | 0.095982281  | Q9QXS1_S728_M1_Plec   |
| _SSS[Phospho (STY)]VGSSSYPISSAGPR_.2                                | -0.181489912 | Q9QXS1_S4393_M1_Plec  |
| _WQAVLAQTDVR_.2                                                     | 0.336311123  | #N/A                  |
| _DAPDGPSVEAEPEYTFEGLR_.2                                            | 0.153315797  | #N/A                  |
| _LTVDEAVR_.2                                                        | 0.064440205  | #N/A                  |
| _GYSPYSVSGSGTAGS[Phospho (STY)]R_.2                                 | -0.100293317 | Q9QXS1_S4633_M1_Plec  |
| _VLALPEPSPAAPTLR_.2                                                 | -0.177116686 | #N/A                  |
| _LLDAQLATGGIVDPGR_.2                                                | -0.001974857 | #N/A                  |
| _FLEVQYLTGGLIEPDTGR_.2                                              | -0.480362002 | #N/A                  |
| _VYHDPSTQEPVTYSQLQQR_.3                                             | -0.431332253 | #N/A                  |
| _LLDAQLSTGGIVDPSK_.2                                                | -0.584563408 | #N/A                  |
| _FLEGTSC[Carbamidomethyl (C)]IAGVFVDATE_.2                          | 0.175371909  | #N/A                  |
| _AQAEVEGLGK_.2                                                      | -0.304582508 | #N/A                  |
| _TEVVETTQVYTEETRR_.3                                                | 0.270223613  | #N/A                  |
| _EELQQLQEQNMLDR_.2                                                  | 0.394693803  | #N/A                  |
| _[Acetyl (Protein N-term)]AGVSFSGHR_.2                              | 0.115113282  | #N/A                  |
| _YVLINWVGEDVPDAR_.2                                                 | 0.21697848   | #N/A                  |
| _KQQS[Phospho (STY)]LEAEAK_.2                                       | -0.294381704 | Q9QXS6_S241_M1_Dbn1   |
| _EESAADWALYTYEDGSDDLK_.2                                            | 0.021690852  | #N/A                  |
| _LSS[Phospho (STY)]PVLHR_.2                                         | -0.369438484 | Q9QXS6_S142_M1_Dbn1   |
| _EGTQASEGYFSQS[Phospho (STY)]QEEFAQSEEP[Carbamidomethyl (C)]AK_.3   | -0.436094602 | Q9QXS6_S658_M1_Dbn1   |
| _ASDSGPSSSSSSSS[Phospho (STY)]PPR_.2                                | -0.027162548 | Q9QXS6_S344_M1_Dbn1   |
| _EQFWEQAK_.2                                                        | -0.090655666 | #N/A                  |
| _LREDENAEPVGTTYQK_.3                                                | -0.09760845  | #N/A                  |
| _M[Oxidation (M)]APTPIPTR_.2                                        | 0.03669482   | #N/A                  |
| _SPS[Phospho (STY)]DSSTASTPIAEQIER_.2                               | -0.185877338 | Q9QXS6_S387_M1_Dbn1   |
| _ASDSGPSSSSSSSS[Phospho (STY)]PPRTPFPYITC[Carbamidomethyl (C)]HR_.4 | 0.474027869  | Q9QXS6_S344_M1_Dbn1   |
| _LELLAAYEEVIR_.2                                                    | 0.058339372  | #N/A                  |
| _SESEVEEAAIIAQRPDNPR_.3                                             | 0.356425216  | #N/A                  |
| _LAASGEGGLQELSGHFENQK_.3                                            | 0.293536619  | #N/A                  |
| _KSESEVEEAAIIAQRPDNPR_.3                                            | -0.352319927 | #N/A                  |
| _KQQS[Phospho (STY)]LEAEAKR_.3                                      | 0.07630585   | Q9QXS6_S241_M1_Dbn1   |
| _EREQQIEHR_.3                                                       | 0.251693216  | #N/A                  |
| _VAEFFQGVIVNASSVEDIDAGAIGQR_.3                                      | 0.310480686  | #N/A                  |
| _NGES[Phospho (STY)]SELDLQGR_.2                                     | -0.366007344 | Q9QXT0_S115_M1_Cnpy2  |
| _SEAHLELLEEV[Carbamidomethyl (C)]DR_.3                              | -0.104395159 | #N/A                  |
| _SQDLHC[Carbamidomethyl (C)]GAC[Carbamidomethyl (C)]R_.3            | 0.217890212  | #N/A                  |
| _ILTGS[Phospho (STY)]SEPEAAPAPR_.2                                  | -0.25290206  | Q9QXV0_S204_M1_Pcsk1n |
| _ALAHLEAER_.2                                                       | 0.411833591  | #N/A                  |
| _VLAQLLR_.2                                                         | -0.322705146 | #N/A                  |
| _LDPAAALAAQLVPAPAAAPR_.2                                            | 0.292316778  | #N/A                  |
| _AEAQEAEDQQR_.2                                                     | 0.417234044  | #N/A                  |
| _ASDPPLAPDDDPDAPAAQLAR_.2                                           | -0.027589172 | #N/A                  |



|                                                                                 |              |                        |
|---------------------------------------------------------------------------------|--------------|------------------------|
| _ARAEAEQAEEDQQR_.2                                                              | -0.012705524 | #N/A                   |
| _VDDKPSS[Phospho (STY)]PGDSSK_.2                                                | -0.096426209 | Q9QXV1_S164_M1_Cbx8    |
| _RQDS[Phospho (STY)]DLVQYGVTSPPSAEASSK_.3                                       | -0.365197511 | Q9QXV1_S229_M1_Cbx8    |
| _PTPVKDPDS[Phospho (STY)]EEQP_.2                                                | -0.156748109 | Q9QXW9_S527_M1_Slc7a8  |
| _NHPGSDTS[Phospho (STY)]PEAEASSGGGGVALLK_.3                                     | -0.302135411 | Q9QXW9_S21_M1_Slc7a8   |
| _NHPGSDTS[Phospho (STY)]PEAEASSGGGGVALLK_.3                                     | 0.206302966  | Q9QXW9_S21_M1_Slc7a8   |
| _SKLPNS[Phospho (STY)]VLGK_.2                                                   | -0.175451426 | Q9QXY6_S479_M1_Ehd3    |
| _LLPLEEYR_.2                                                                    | 0.2730839    | #N/A                   |
| _ELVNNLAEIYGR_.2                                                                | -0.04811033  | #N/A                   |
| _IVNTPEVIR_.2                                                                   | 0.130571996  | #N/A                   |
| _DKPM[Oxidation (M)]YDEIFYTL[Phospho (STY)]PVDGK_.3                             | -0.162076573 | Q9QXY6_S456_M1_Ehd3    |
| _EHQIS[Phospho (STY)]PGDFPNLKR_.3                                               | 0.315728333  | Q9QXY6_S349_M1_Ehd3    |
| _LNAFGNAFLNR_.2                                                                 | 0.257020379  | #N/A                   |
| _DIQS[Phospho (STY)]LPR_.2                                                      | 0.105271205  | Q9QXY6_S284_M1_Ehd3    |
| _EHQIS[Phospho (STY)]PGDFPNLK_.3                                                | -0.148702164 | Q9QXY6_S349_M1_Ehd3    |
| _IGPEPTTDSFIAVM[Oxidation (M)]QGDVEGIIPGNALVVDPK_.3                             | 0.027744085  | #N/A                   |
| _LLDAEDVDVPS[Phospho (STY)]PDEK_.2                                              | -0.188782522 | Q9QXZ0_S280_M1_Macf1   |
| _S[Phospho (STY)]QDSVLDPAER_.2                                                  | 0.020400376  | Q9QXZ0_S57_M1_Macf1    |
| _AFVESQQKS[Phospho (STY)]PGKR_.3                                                | -0.257934817 | Q9QXZ0_S1367_M1_Macf1  |
| _DTQDIVHDLES[Phospho (STY)]PGIDPSIHK_.3                                         | -0.171763603 | Q9QXZ0_S5988_M1_Macf1  |
| _RQGS[Phospho (STY)]FSEDVISHK_.3                                                | -0.343860597 | Q9QXZ0_S3889_M1_Macf1  |
| _AFVESQQKS[Phospho (STY)]PGK_.2                                                 | -0.268235031 | Q9QXZ0_S1367_M1_Macf1  |
| _EAEELAAASGGQSPT[Phospho (STY)]GEQIPQFQQR_.3                                    | -0.048518593 | Q9QXZ0_T5553_M1_Macf1  |
| _AFLAELEQNS[Phospho (STY)]PK_.2                                                 | -0.028363171 | Q9QXZ0_S4483_M1_Macf1  |
| _RKS[Phospho (STY)]QDSVLDPAER_.3                                                | -0.035968307 | Q9QXZ0_S57_M1_Macf1    |
| _QGS[Phospho (STY)]FSEDVISHK_.2                                                 | -0.258902178 | Q9QXZ0_S3889_M1_Macf1  |
| _AM[Oxidation (M)]DATLS[Phospho (STY)]PTKTETVK_.2                               | 0.52831535   | Q9QXZ0_S4458_M1_Macf1  |
| _LNSQES[Phospho (STY)]DEEPQISDVPHISK_.3                                         | 0.296553776  | Q9QXZ0_S3085_M1_Macf1  |
| _TPLPTIIGS[Phospho (STY)]PTK_.2                                                 | -0.183690257 | Q9QY01_S600_M1_Ulk2    |
| _AQDKPES[Phospho (STY)]PSGSTQIQR_.2                                             | -0.210674455 | Q9QY06_S1264_M1_Myo9b  |
| _TNS[Phospho (STY)]LLLR_.2                                                      | 0.062271368  | Q9QY40_S1747_M1_Plxnb3 |
| _SLTSPLDDTEVKK_.2                                                               | 0.02810691   | #N/A                   |
| _SLTS[Phospho (STY)]PLDDTEVK_.2                                                 | 0.357483203  | Q9QY76_S159_M1_Vapb    |
| _ELAS[Phospho (STY)]PLALT[Phospho (STY)]PR_.2                                   | 0.161015739  | Q9QY81_S1839_M2_Nup210 |
| _FVNWQVDGEYR_.2                                                                 | -0.330176399 | #N/A                   |
| _MAIQTQQSK_.2                                                                   | -0.058333949 | #N/A                   |
| _TEEVLS[Phospho (STY)]PDGSPSK_.2                                                | -0.091997398 | Q9QYB5_S673_M1_Add3    |
| _EQDHIIIPR_.3                                                                   | 0.051892288  | #N/A                   |
| _TLDNLGYR_.2                                                                    | 0.065337519  | #N/A                   |
| _TEEVLSPDGSPSKS[Phospho (STY)]PSKK_.3                                           | 0.083330806  | Q9QYB5_S681_M1_Add3    |
| _TEEVLSPDGSPSKS[Phospho (STY)]PSK_.2                                            | 0.089303897  | Q9QYB5_S681_M1_Add3    |
| _GLSFSEATASTLVK_.2                                                              | -0.107109931 | #N/A                   |
| _SPERTEEVLSPDGSPSKS[Phospho (STY)]PSK_.3                                        | -0.083856253 | Q9QYB5_S681_M1_Add3    |
| _[Acetyl (Protein N-term)]SSDTSPAVVTT[Phospho (STY)]PPPPSM[Oxidation (M)]PHK_.2 | 0.393387695  | Q9QYB5_T12_M1_Add3     |
| _SDVEIPATVTAFSFEDDSAPLS[Phospho (STY)]PLK_.3                                    | -0.037085083 | Q9QYB5_S423_M1_Add3    |
| _HKSDVEIPATVTAFSFEDDSAPLS[Phospho (STY)]PLK_.3                                  | -0.467101821 | Q9QYB5_S423_M1_Add3    |
| _SPERTEEVLS[Phospho (STY)]PDGSPSK_.2                                            | -0.061353244 | Q9QYB5_S673_M1_Add3    |

|                                                                                          |              |                     |
|------------------------------------------------------------------------------------------|--------------|---------------------|
| _NMS[Phospho (STY)]PDLR_.2                                                               | 0.050061535  | Q9QYB5_S42_M1_Add3  |
| _STPAS[Phospho (STY)]PVQS[Phospho (STY)]PSK_.2                                           | 0.121757298  | Q9QYB8_S602_M2_Add2 |
| _DIATEKPGS[Phospho (STY)]PVK_.2                                                          | 0.089126169  | Q9QYB8_S594_M1_Add2 |
| _VNVAVEVQR_.2                                                                            | 0.47622457   | #N/A                |
| _FSEDDPEYLR_.2                                                                           | -0.185440576 | #N/A                |
| _WLNTPNITYLR_.2                                                                          | -0.337772223 | #N/A                |
| _VNILGEVVEK_.2                                                                           | 0.295345937  | #N/A                |
| _GVSC[Carbamidomethyl (C)]SEVTASSLIK_.2                                                  | 0.049436538  | #N/A                |
| _EQDHFLISPK_.2                                                                           | 0.539538484  | #N/A                |
| _SAGPQSQLLASVIAEK_.2                                                                     | 0.143747629  | #N/A                |
| _[Acetyl (Protein N-term)]SEDTVPEAAS[Phospho (STY)]PPPSQGQHYFDR_.3                       | -0.364048583 | Q9QYB8_S11_M1_Add2  |
| _TESVTSGLSPEGS[Phospho (STY)]PSKS[Phospho (STY)]PSK_.2                                   | -0.315064716 | #N/A                |
| _TESVTSGLS[Phospho (STY)]PEGSPSK_.2                                                      | -0.245251819 | #N/A                |
| _LEQEQEGEKDIATEKPGS[Phospho (STY)]PVK_.3                                                 | 0.517240159  | Q9QYB8_S594_M1_Add2 |
| _HPFVQEK_.2                                                                              | -0.276720371 | #N/A                |
| _TESVTSGLSPEGSPS[Phospho (STY)]KS[Phospho (STY)]PSKK_.3                                  | 0.074887174  | #N/A                |
| _SPAVS[Phospho (STY)]PSKTSEDTK_.2                                                        | -0.257516569 | Q9QYB8_S618_M1_Add2 |
| _NMGS[Phospho (STY)]PRPK_.2                                                              | -0.350944864 | Q9QYB8_S455_M1_Add2 |
| _AGTKS[Phospho (STY)]PAVS[Phospho (STY)]PSK_.2                                           | -0.115867266 | #N/A                |
| _IENPNQFVPLYTDPQEVLDL[M(Oxidation)]R_.3                                                  | -0.317831062 | #N/A                |
| _AGTKS[Phospho (STY)]PAVS[Phospho (STY)]PSKTSEDTK_.2                                     | -0.469837137 | #N/A                |
| _STPAS[Phospho (STY)]PVQS[Phospho (STY)]PSKAGTK_.2                                       | -0.072849815 | Q9QYB8_S602_M2_Add2 |
| _SPS[Phospho (STY)]TESQLMSK_.2                                                           | 0.496022593  | Q9QYB8_S532_M1_Add2 |
| _S[Phospho (STY)]PAVS[Phospho (STY)]PSKTSEDTK_.2                                         | -0.269116202 | #N/A                |
| _DIATEKPGS[Phospho (STY)]PVKS[Phospho (STY)]TPAS[Phospho (STY)]PVQS[Phospho (STY)]PSK_.3 | -0.260549917 | Q9QYB8_S594_M3_Add2 |
| _DKTESVTSGLS[Phospho (STY)]PEGS[Phospho (STY)]PSK_.2                                     | 0.117268857  | #N/A                |
| _DKTESVTSGLSPEGSPS[Phospho (STY)]KSPSK_.3                                                | 0.281242774  | Q9QYB8_S698_M1_Add2 |
| _SRS[Phospho (STY)]PSTESQLM[M(Oxidation)]SK_.2                                           | 0.186861082  | Q9QYB8_S530_M1_Add2 |
| _GLGQM[M(Oxidation)]TTNADTDGDSYKDKTESVTSGLS[Phospho (STY)]PEGSPSK_.4                     | -0.139987325 | #N/A                |
| _C[Carbamidomethyl (C)]LGPTC[Carbamidomethyl (C)]K_.2                                    | 0.039444921  | #N/A                |
| _NHGM[M(Oxidation)]VALGDTVEEAFYK_.3                                                      | -0.356810451 | #N/A                |
| _SPAVS[Phospho (STY)]PSK_.2                                                              | 0.126051608  | Q9QYB8_S618_M1_Add2 |
| _SSSGMPIR_.2                                                                             | 0.001315706  | #N/A                |
| _LGEHEFEALMR_.3                                                                          | -0.124877257 | #N/A                |
| _SAGPQSQLLASVIAEKS[Phospho (STY)]R_.3                                                    | 0.001184202  | Q9QYB8_S528_M1_Add2 |
| _AAVVT[Phospho (STY)]PPPTTAPHK_.2                                                        | -0.466862283 | Q9QYCO_S12_M1_Add1  |
| _TPS[Phospho (STY)]FLKK_.2                                                               | -0.294194271 | Q9QYCO_S724_M1_Add1 |
| _AAVVT[Phospho (STY)]PPPTTAPHKER_.3                                                      | -0.455035637 | Q9QYCO_S12_M1_Add1  |
| _GS[Phospho (STY)]EENLDETR_.2                                                            | -0.271318235 | Q9QYCO_S586_M1_Add1 |
| _LEEDLPQEPTS[Phospho (STY)]R_.2                                                          | -0.194225114 | Q9QYCO_S628_M1_Add1 |
| _VNLQGDIVDR_.2                                                                           | 0.16710278   | #N/A                |
| _TTSAPVNLFPVPLNTNPK_.2                                                                   | -0.179106255 | #N/A                |
| _TLASAGGPDNLVLLDPGK_.2                                                                   | 0.097642327  | #N/A                |
| _YFDRVDENNPEYLR_.3                                                                       | -0.634816272 | #N/A                |
| _GSDSIAYDKGEK_.2                                                                         | -0.210995786 | #N/A                |
| _SLVQGELVTASK_.2                                                                         | 0.071580836  | #N/A                |
| _SPGT[Phospho (STY)]PAGEGSGSPPK_.2                                                       | -0.082832084 | Q9QYCO_T358_M1_Add1 |

|                                                                                                 |              |                       |
|-------------------------------------------------------------------------------------------------|--------------|-----------------------|
| _EKS[Phospho (STY)]PPDQSAVPNT[Phospho (STY)]PPSTPVK_3                                           | 0.054346872  | Q9QYCO_S600_M2_Add1   |
| _EYQPHVIVSTTGPNPNTLDR_3                                                                         | -0.123103879 | #N/A                  |
| _M[Oxidation (M)]LDNLGYR_2                                                                      | 0.478639838  | #N/A                  |
| _KQKGS[Phospho (STY)]EENLDETR_3                                                                 | -0.432712654 | Q9QYCO_S586_M1_Add1   |
| _SPPDQSAVPNT[Phospho (STY)]PPSTPVK_2                                                            | 0.215104435  | Q9QYCO_T610_M1_Add1   |
| _SRS[Phospho (STY)]PGT[Phospho (STY)]PAGEGSGSPPK_2                                              | 0.128463848  | Q9QYCO_S355_M2_Add1   |
| _WQIGEQEFEALM[Oxidation (M)]R_2                                                                 | -0.142303909 | #N/A                  |
| _YSDVEVPAS[Phospho (STY)]VTGHSFASDGDGSGTC[Carbamidomethyl (C)]SPLRHSFQK_4                       | -0.016350225 | Q9QYCO_S415_M1_Add1   |
| _GDDASEEQNGSS[Phospho (STY)]PK_2                                                                | 0.413465919  | Q9QYCO_S465_M1_Add1   |
| _WLHSGRGDDASEEQNGSS[Phospho (STY)]PK_3                                                          | -0.482171058 | Q9QYCO_S465_M1_Add1   |
| _QKGS[Phospho (STY)]EENLDETR_2                                                                  | -0.217403759 | Q9QYCO_S586_M1_Add1   |
| _YSDVEVPASVTGHSFASDGDGSGTC[Carbamidomethyl (C)]S[Phospho (STY)]PLR_3                            | -0.462470306 | Q9QYCO_S431_M1_Add1   |
| _SPPDQSAVPNT[Phospho (STY)]PPST[Phospho (STY)]PVKLEEDLPQEPTSR_4                                 | -0.047260736 | Q9QYCO_T614_M2_Add1   |
| _NMAPDLR_2                                                                                      | -0.219413923 | #N/A                  |
| _KYSDEVPASVTGHSFASDGDGSGTC[Carbamidomethyl (C)]S[Phospho (STY)]PLR_4                            | -0.266641068 | Q9QYCO_S431_M1_Add1   |
| _EKSPDQS[Phospho (STY)]AVPNT[Phospho (STY)]PPSTPVKLEEDLPQEPTSR_4                                | 0.253057602  | Q9QYCO_S605_M2_Add1   |
| _IREQNLQDIK_3                                                                                   | 0.184540398  | #N/A                  |
| _SSS[Phospho (STY)]LIHR_2                                                                       | 0.10023848   | Q9QYCO_S551_M1_Pcnx1  |
| _GC[Carbamidomethyl (C)]S[Phospho (STY)]PGESASGGLSK_2                                           | -0.134937417 | Q9QYCO_S608_M1_Bcl11a |
| _GC[Carbamidomethyl (C)]S[Phospho (STY)]PGESASGGLSKK_2                                          | -0.330090939 | Q9QYCO_S608_M1_Bcl11a |
| _IYLESEHGS[Phospho (STY)]PLTPR_3                                                                | 0.088622627  | Q9QYCO_S205_M1_Bcl11a |
| _FST[Phospho (STY)]PPGELDGGISGR_2                                                               | 0.27394793   | Q9QYCO_T701_M1_Bcl11a |
| _ELAGNTSS[Phospho (STY)]PPLS[Phospho (STY)]PGRSPMQR_3                                           | 0.184826559  | Q9QYCO_S328_M2_Bcl11a |
| _GVDKPPS[Phospho (STY)]PSPIEMK_2                                                                | -0.206102034 | Q9QYCO_S86_M1_Bcl11a  |
| _LLGS[Phospho (STY)]PSSLS[Phospho (STY)]PFSK_2                                                  | 0.244054308  | Q9QYCO_S625_M2_Bcl11a |
| _LDPINTLLK_2                                                                                    | 0.044170354  | #N/A                  |
| _DLEIERPILGQNDNR_3                                                                              | -0.453645225 | #N/A                  |
| _THSTSSS[Phospho (STY)]IGSGESPFSR_2                                                             | -0.327106582 | Q9QYCO_S335_M1_Ndr3   |
| _S[Phospho (STY)]RT[Phospho (STY)]HSTSSSIGSGESPFSR_3                                            | -0.054635181 | Q9QYCO_S327_M2_Ndr3   |
| _HQTMEVS[Phospho (STY)]C[Carbamidomethyl (C)]_2                                                 | 0.527922128  | Q9QYCO_S374_M1_Ndr3   |
| _LHIAQDINQENLQLFLGSYNGR_3                                                                       | 0.318696499  | #N/A                  |
| _SVTSNQSDGTQESC[Carbamidomethyl (C)]ES[Phospho (STY)]PDVLDLDR_3                                 | 0.046336946  | Q9QYCO_S361_M1_Ndr3   |
| _C[Carbamidomethyl (C)]STLLVVGDNPAVEAVVEC[Carbamidomethyl (C)]NSR_3                             | -0.489665165 | #N/A                  |
| _SC[Carbamidomethyl (C)]FQPLFR_2                                                                | 0.470230504  | #N/A                  |
| _Acetyl (Protein N-term))AELQEVQITEEKPLPGQTPETAK_3                                              | 0.150154128  | #N/A                  |
| _GIIQHAPNLENIELYWNSYNNR_3                                                                       | -0.201834988 | #N/A                  |
| _LDPTQTSFLK_2                                                                                   | -0.018428812 | #N/A                  |
| _GWM[Oxidation (M)]DWAHAK_2                                                                     | -0.24213659  | #N/A                  |
| _YALNHPDTVEGLVLINIDPNAK_3                                                                       | 0.28918047   | #N/A                  |
| _M[Oxidation (M)]ADSGGQQLTQPGK_2                                                                | 0.516451986  | #N/A                  |
| _TAS[Phospho (STY)]LTSASIDGSR_2                                                                 | 0.179708864  | Q9QYCO_S332_M1_Ndr2   |
| _FGDM[Oxidation (M)]QEIIQNFR_2                                                                  | -0.399003008 | #N/A                  |
| _TASLTSAAAS[Phospho (STY)]IDGS[Phospho (STY)]RSR_2                                              | 0.025428474  | Q9QYCO_S338_M2_Ndr2   |
| _SRT[Phospho (STY)]AS[Phospho (STY)]LTSASIDGSR_2                                                | 0.040241077  | Q9QYCO_T330_M2_Ndr2   |
| _TSLQSS[Phospho (STY)]ESGTLPSGPPGHTM[Oxidation (M)]EVSC[Carbamidomethyl (C)]_3                  | -0.117904135 | Q9QYCO_S353_M1_Ndr2   |
| _S[Phospho (STY)]RT[Phospho (STY)]LSQSSESGTLPSGPPGHTM[Oxidation (M)]EVSC[Carbamidomethyl (C)]_3 | 0.269000355  | Q9QYCO_S346_M2_Ndr2   |
| _LSRS[Phospho (STY)]RT[Phospho (STY)]AS[Phospho (STY)]LTSASIDGSR_3                              | 0.321844045  | #N/A                  |

|                                                                       |              |                        |
|-----------------------------------------------------------------------|--------------|------------------------|
| _LTGLTSSIPDM[Oxidation (M)]ILGHLFSQEELSGNSELIQK_.3                    | -0.225294868 | #N/A                   |
| _C[Carbamidomethyl (C)]PVMLVVGDAQPHEDAVVEC[Carbamidomethyl (C)]NSK_.3 | -0.015757715 | #N/A                   |
| _SAS[Phospho (STY)]DEDLKK_.2                                          | -0.131827668 | Q9QYI4_S123_M1_Dnajb12 |
| _GEAAKLS[Phospho (STY)]PSSEK_.2                                       | -0.173595798 | Q9QYI5_S311_M1_Dnajb2  |
| _SAS[Phospho (STY)]PDDIKK_.2                                          | -0.101240052 | Q9QYI5_S15_M1_Dnajb2   |
| _LS[Phospho (STY)]PSSEK_.2                                            | 0.196080231  | Q9QYI5_S311_M1_Dnajb2  |
| _GEAAKLS[Phospho (STY)]PS[Phospho (STY)]SEEKASR_.2                    | -0.323701887 | Q9QYI5_S311_M2_Dnajb2  |
| _S[Phospho (STY)]PEEVFR_.2                                            | -0.344570212 | Q9QYI5_S98_M1_Dnajb2   |
| _VIEPGC[Carbamidomethyl (C)]VR_.2                                     | 0.331404914  | #N/A                   |
| _EHEVFQR_.2                                                           | 0.364856419  | #N/A                   |
| _VSLEDLYNGK_.2                                                        | 0.308943039  | #N/A                   |
| _YGEQGLR_.2                                                           | 0.323396527  | #N/A                   |
| _NVLC[Carbamidomethyl (C)]SAC[Carbamidomethyl (C)]SGQGGK_.2           | -0.020795959 | #N/A                   |
| _DGNDLHM[Oxidation (M)]TYK_.2                                         | -0.289346709 | #N/A                   |
| _ITFTGEADQAPGVEPGDIVLLQEK_.3                                          | -0.493272331 | #N/A                   |
| _IGLVEALC[Carbamidomethyl (C)]GFQFTFK_.2                              | -0.237954819 | #N/A                   |
| _GAS[Phospho (STY)]DDEIKR_.2                                          | -0.027743186 | Q9QYJ3_S16_M1_Dnajb1   |
| _HSHPLGTSQS[Phospho (STY)]PKW_.3                                      | -0.287088481 | Q9QYK9_S340_M1_Pnck    |
| _KLGQS[Phospho (STY)]PEGEEASR_.2                                      | 0.16852078   | Q9QYK9_S316_M1_Pnck    |
| _HSHPLGTSQS[Phospho (STY)]PK_.3                                       | 0.284835106  | Q9QYK9_S340_M1_Pnck    |
| _VSPAPGQES[Phospho (STY)]PVPDTKST[Phospho (STY)]PPTR_.3               | 0.253032042  | Q9QYR6_S1789_M2_Map1a  |
| _GEPVPAWEGKS[Phospho (STY)]PEQEVFR_.2                                 | -0.232668883 | Q9QYR6_S1648_M1_Map1a  |
| _EAELT[Phospho (STY)]PENIAAAR_.2                                      | -0.295477433 | Q9QYR6_T633_M1_Map1a   |
| _EQDVVQGWR_.2                                                         | -0.124368621 | #N/A                   |
| _VLFPGNAPQNK_.2                                                       | -0.062742093 | #N/A                   |
| _ASYVVVSGNDPANGEPSR_.2                                                | -0.292036659 | #N/A                   |
| _GVEQQDGAVPEK_.2                                                      | -0.124309713 | #N/A                   |
| _DLAAGAVPANLKPSK_.2                                                   | -0.15569015  | #N/A                   |
| _SSRPDTLLSSEQRPGK_.3                                                  | 0.226067623  | #N/A                   |
| _GAALQQTQAPEPR_.2                                                     | 0.049959701  | #N/A                   |
| _GAAPPPAASGHR_.2                                                      | 0.259406505  | #N/A                   |
| _EVVPDFPEDK_.2                                                        | 0.3678218    | #N/A                   |
| _DTAVELGKGPEPK_.2                                                     | -0.285154245 | #N/A                   |
| _NRAPDS[Phospho (STY)]GAEVER_.2                                       | 0.024387817  | Q9QYR6_S611_M1_Map1a   |
| _DLEQKDEHLELR_.3                                                      | -0.084459594 | #N/A                   |
| _LGIQAEPLYR_.2                                                        | -0.008972157 | #N/A                   |
| _LDM[Oxidation (M)]YVLNPVK_.2                                         | 0.240958611  | #N/A                   |
| _EGEGGAGAPDSSS[Phospho (STY)]FSSK_.2                                  | -0.343527393 | Q9QYR6_S1900_M1_Map1a  |
| _DFQEPLPQK_.2                                                         | -0.053508996 | #N/A                   |
| _NEPTTPSWLAEIPWVPK_.2                                                 | -0.329681471 | #N/A                   |
| _DAEQTEPEQREPTYPDER_.3                                                | 0.317129034  | #N/A                   |
| _VRTES[Phospho (STY)]SEALK_.2                                         | -0.246947273 | Q9QYR6_S384_M1_Map1a   |
| _AQWGENLQVTLIPTHDTEVTR_.3                                             | 0.064178437  | #N/A                   |
| _S[Phospho (STY)]PTPGKGPVDR_.2                                        | -0.267154365 | Q9QYR6_S2603_M1_Map1a  |
| _ELSSEPT[Phospho (STY)]PPAQK_.2                                       | -0.393216419 | Q9QYR6_T504_M1_Map1a   |
| _ALGLEESPEEEGK_.2                                                     | -0.330893433 | #N/A                   |
| _ADS[Phospho (STY)]KESLK_.2                                           | -0.444594851 | Q9QYR6_S319_M1_Map1a   |

|                                                                       |              |                       |
|-----------------------------------------------------------------------|--------------|-----------------------|
| _ALGLEES[Phospho (STY)]PEEEGKAR_.2                                    | -0.40111612  | Q9QYR6_S1606_M1_Map1a |
| _ALALVPGTPTR_.2                                                       | -0.269413738 | #N/A                  |
| _GEKELSSEPRT[Phospho (STY)]PPAQK_.3                                   | 0.267896984  | Q9QYR6_T504_M1_Map1a  |
| _SHWDDGTNDS[Phospho (STY)]DLEKGAR_.3                                  | -0.306759034 | Q9QYR6_S2082_M1_Map1a |
| _APEHIIPQTQTDR_.2                                                     | 0.252049705  | #N/A                  |
| _AKPAS[Phospho (STY)]PARR_.2                                          | 0.008165332  | Q9QYR6_S2591_M1_Map1a |
| _QLS[Phospho (STY)]PESLGTLOFGELSLGK_.2                                | -0.292310148 | Q9QYR6_S1205_M1_Map1a |
| _ESTFLDEGPNEQEITPLQHTPR_.3                                            | -0.564177408 | #N/A                  |
| _VLVLEDR_.2                                                           | -0.201074166 | #N/A                  |
| _EKETWEER_.2                                                          | -0.192992294 | #N/A                  |
| _VVSNTIEPLTLFHK_.2                                                    | 0.14286165   | #N/A                  |
| _APSLDSSLPQLPSPSPGAPLLSNLPR_.3                                        | 0.009052223  | #N/A                  |
| _SPQAQDTLGLSAGGQTGC[Carbamidomethyl (C)]TIQLLPEQDK_.3                 | -0.303322105 | #N/A                  |
| _IDSVLLTHIGADNLPINGILLQR_.3                                           | -0.295148288 | #N/A                  |
| _C[Carbamidomethyl (C)]LS[Phospho (STY)]PDDSTVK_.2                    | -0.216380436 | Q9QYR6_S981_M1_Map1a  |
| _SEPQDFQEDS[Phospho (STY)]WGDTK_.2                                    | -0.054906772 | Q9QYR6_S1023_M1_Map1a |
| _AKPAS[Phospho (STY)]PAR_.2                                           | -0.014555918 | Q9QYR6_S2591_M1_Map1a |
| _YPVATQK_.2                                                           | 0.011514159  | #N/A                  |
| _TQEPAPQKDELLGFTDQSFS[Phospho (STY)]PEDAESLSVSVSPDTAK_.4              | -0.130306714 | Q9QYR6_S1133_M1_Map1a |
| _NLISPELGVVFFNVDPK_.2                                                 | -0.100166865 | #N/A                  |
| _ETS[Phospho (STY)]PTRGEPVPAWEGK_.3                                   | -0.413097289 | Q9QYR6_S1634_M1_Map1a |
| _ELALSS[Phospho (STY)]PEDLTQDFEELKR_.3                                | -0.134981467 | Q9QYR6_S527_M1_Map1a  |
| _EM[Oxidation (M)]TLDQKS[Phospho (STY)]PEKAK_.2                       | -0.358980491 | Q9QYR6_S1580_M1_Map1a |
| _ETS[Phospho (STY)]PTRGEPVPAWEGKSPEQEV_.4                             | -0.274393763 | Q9QYR6_S1634_M1_Map1a |
| _HRADS[Phospho (STY)]KESLK_.2                                         | -0.238948701 | Q9QYR6_S319_M1_Map1a  |
| _TES[Phospho (STY)]SEALKAEK_.2                                        | -0.333811187 | Q9QYR6_S384_M1_Map1a  |
| _ADS[Phospho (STY)]KES[Phospho (STY)]LKAAPK_.2                        | -0.269884468 | Q9QYR6_S319_M2_Map1a  |
| _S[Phospho (STY)]PPC[Carbamidomethyl (C)]EDFSVTGESEK_.2               | 0.300373125  | Q9QYR6_S908_M1_Map1a  |
| _STPSQVTSEEKDGHS[Phospho (STY)]PM[Oxidation (M)]SK_.3                 | -0.31189453  | Q9QYR6_S2637_M1_Map1a |
| _GFKS[Phospho (STY)]PPC[Carbamidomethyl (C)]EDFSVTGESEK_.3            | -0.120448355 | Q9QYR6_S908_M1_Map1a  |
| _LSSFATSVAEDQSVASLTAPQTEETGK_.3                                       | -0.475775121 | #N/A                  |
| _TPS[Phospho (STY)]PKEAGR_.2                                          | -0.304212969 | Q9QYR6_S2066_M1_Map1a |
| _NRAPDS[Phospho (STY)]GAEVEREK_.3                                     | -0.147066126 | Q9QYR6_S611_M1_Map1a  |
| _SSLLDVTISIPSSR_.2                                                    | 0.207223341  | #N/A                  |
| _VPSAPGQES[Phospho (STY)]PVPDTK_.2                                    | -0.44719001  | Q9QYR6_S1789_M1_Map1a |
| _SHWDDGTNDS[Phospho (STY)]DLEK_.2                                     | -0.441960385 | Q9QYR6_S2082_M1_Map1a |
| _VRTES[Phospho (STY)]SEALKAEK_.3                                      | -0.153588586 | Q9QYR6_S384_M1_Map1a  |
| _APDS[Phospho (STY)]GAEVEREK_.2                                       | -0.284638048 | Q9QYR6_S611_M1_Map1a  |
| _AELEEM[Oxidation (M)]EEVHPS[Phospho (STY)]DEEEEETK_.3                | 0.012706715  | Q9QYR6_S667_M1_Map1a  |
| _EM[Oxidation (M)]TLDQKS[Phospho (STY)]PEK_.2                         | -0.101271173 | Q9QYR6_S1580_M1_Map1a |
| _S[Phospho (STY)]PC[Carbamidomethyl (C)]T[Phospho (STY)]PKEQQLHK_.2   | -0.476345797 | #N/A                  |
| _WLAES[Phospho (STY)]PVGLPPEEDK_.2                                    | -0.076108909 | Q9QYR6_S1747_M1_Map1a |
| _TRHDEYLEVTK_.3                                                       | -0.096019057 | #N/A                  |
| _SPFEIIS[Phospho (STY)]PPAS[Phospho (STY)]PPEMTGQR_.2                 | -0.221995025 | Q9QYR6_S1768_M2_Map1a |
| _QLS[Phospho (STY)]PESLGTLOFGELSLGKEEK_.3                             | -0.326825874 | Q9QYR6_S1205_M1_Map1a |
| _S[Phospho (STY)]PESLSSPAM[Oxidation (M)]EDLAM[Oxidation (M)]EWGGK_.2 | -0.428104584 | Q9QYR6_S1310_M1_Map1a |
| _EKEGAALDQDNR_.2                                                      | -0.155477044 | #N/A                  |

|                                                                                     |              |                       |
|-------------------------------------------------------------------------------------|--------------|-----------------------|
| _GKDLYLEDDQGLAEKDK_3                                                                | -0.115101545 | #N/A                  |
| _KVAEEEEQS[Phospho (STY)]QGSSSYSDWVK_3                                              | -0.591698249 | Q9QYR6_S114_M1_Map1a  |
| _VAEEEEQS[Phospho (STY)]QGSSSYSDWVK_2                                               | -0.40157049  | Q9QYR6_S114_M1_Map1a  |
| _M[Oxidation (M)]AS[Phospho (STY)]PPPSGPPSAAHTPFHQSPVEEK_4                          | -0.536339448 | Q9QYR6_S991_M1_Map1a  |
| _PASPALSEGS[Phospho (STY)]S[Phospho (STY)]SEATTPVISSVAER_3                          | 0.31118322   | Q9QYR6_S2233_M2_Map1a |
| _QEPEPGPNVEPSFT[Phospho (STY)]PPAVPPR_2                                             | -0.021400658 | Q9QYR6_T2031_M1_Map1a |
| _VPEVTESHTTR_2                                                                      | -0.141188227 | #N/A                  |
| _APDS[Phospho (STY)]GAEVER_2                                                        | -0.054655348 | Q9QYR6_S611_M1_Map1a  |
| _DEALDEENKPGGQQDK_2                                                                 | -0.124234725 | #N/A                  |
| _GKDLYLEDDQGLAEK_3                                                                  | 0.21010701   | #N/A                  |
| _S[Phospho (STY)]APC[Carbamidomethyl (C)]GSLAFSGDR_2                                | -0.273703244 | Q9QYR6_S2162_M1_Map1a |
| _EES[Phospho (STY)]EPEVKEDVIEK_2                                                    | -0.274907954 | Q9QYR6_S644_M1_Map1a  |
| _QEATPRS[Phospho (STY)]PC[Carbamidomethyl (C)]T[Phospho (STY)]PKEQQLHK_3            | 0.041877292  | #N/A                  |
| _WLAESPVGLPPEEEDKLTR_3                                                              | -0.125751122 | #N/A                  |
| _EKEVVPDFPEDK_2                                                                     | -0.406800335 | #N/A                  |
| _HMQEALK_2                                                                          | 0.202738273  | #N/A                  |
| _TEATQGLDYVPSAGTIS[Phospho (STY)]PTSSLEEDK_3                                        | -0.087051125 | Q9QYR6_S895_M1_Map1a  |
| _APISLSQDPSPLNGSTTSC[Carbamidomethyl (C)]GPDRTT[Phospho (STY)]PS[Phospho (STY)]PK_4 | -0.065234825 | Q9QYR6_S2066_M2_Map1a |
| _RS[Phospho (STY)]PT[Phospho (STY)]PGKGPVDR_2                                       | 0.202218297  | Q9QYR6_S2603_M2_Map1a |
| _EAELTPENIAAAREES[Phospho (STY)]EPEVKEDVIEK_4                                       | 0.106655725  | Q9QYR6_S644_M1_Map1a  |
| _KHS[Phospho (STY)]PGEITGPGGHFM[Oxidation (M)]TSDSSLTK_4                            | -0.185818516 | Q9QYR6_S1289_M1_Map1a |
| _S[Phospho (STY)]IEEAC[Carbamidomethyl (C)]LTLQHHLNR_2                              | 0.036813778  | Q9QYR6_S155_M1_Map1a  |
| _EAELTPENIAAAREES[Phospho (STY)]EPEVK_3                                             | 0.051619824  | Q9QYR6_S644_M1_Map1a  |
| _GDSALFVNGFNILVDGSDR_2                                                              | 0.2393576    | #N/A                  |
| _QEATPRS[Phospho (STY)]PC[Carbamidomethyl (C)]T[Phospho (STY)]PK_2                  | -0.197789933 | #N/A                  |
| _DQILSEK_2                                                                          | 0.030066499  | #N/A                  |
| _PRYS[Phospho (STY)]EER_2                                                           | 0.32206749   | Q9QYR6_S1694_M1_Map1a |
| _ELALS[Phospho (STY)]S[Phospho (STY)]PEDLTQDFEELK_2                                 | -0.415040577 | Q9QYR6_S526_M2_Map1a  |
| _SPEQEV_2                                                                           | -0.232718175 | #N/A                  |
| _APDS[Phospho (STY)]GAEVEREKETWEER_3                                                | -0.122989584 | Q9QYR6_S611_M1_Map1a  |
| _AELEEM[Oxidation (M)]EEVHPS[Phospho (STY)]DEEEEETKAESFYQK_4                        | 0.028389635  | Q9QYR6_S667_M1_Map1a  |
| _DSVMHQKDEALDEENKPGGQQDK_4                                                          | 0.359676564  | #N/A                  |
| _TEATQGLDYVPSAGTIS[Phospho (STY)]PTSSLEEDKGFK_4                                     | -0.232675321 | Q9QYR6_S895_M1_Map1a  |
| _DEAS[Phospho (STY)]EEKEQVLEQK_2                                                    | -0.333003117 | Q9QYR6_S1516_M1_Map1a |
| _FPTSTYDLSGPEGPGPFEASQSAESAVPASSK_3                                                 | -0.29703115  | #N/A                  |
| _SSFLEDK_2                                                                          | 0.102404403  | #N/A                  |
| _DRDITLQQDAYWK_3                                                                    | -0.41165165  | #N/A                  |
| _EQKDEAS[Phospho (STY)]EEKEQVLEQK_3                                                 | -0.15418701  | Q9QYR6_S1516_M1_Map1a |
| _DKT[Phospho (STY)]PEEKDK_2                                                         | 0.284227541  | Q9QYR6_T1472_M1_Map1a |
| _EHKENPELVDDL[Phospho (STY)]PR_3                                                    | -0.313789202 | Q9QYX7_S1439_M1_Pclo  |
| _ENPELVDDL[Phospho (STY)]PR_2                                                       | -0.200006431 | Q9QYX7_S1439_M1_Pclo  |
| _TQPQKVS[Phospho (STY)]PEQPQDQK_2                                                   | -0.290339927 | Q9QYX7_S1378_M1_Pclo  |
| _SPVPSQQAS[Phospho (STY)]PK_2                                                       | 0.028848794  | Q9QYX7_S625_M1_Pclo   |
| _SHSSQNSQQS[Phospho (STY)]PKPSVIK_3                                                 | -0.403472981 | Q9QYX7_S4774_M1_Pclo  |
| _AKS[Phospho (STY)]PGVDPK_2                                                         | -0.324817893 | Q9QYX7_S4544_M1_Pclo  |
| _SLVSVLPEKKPS[Phospho (STY)]EEEE_3                                                  | -0.448201021 | Q9QYX7_S1149_M1_Pclo  |
| _SPVPSQQAS[Phospho (STY)]PKKELPSK_3                                                 | -0.237110669 | Q9QYX7_S625_M1_Pclo   |

|                                                                          |              |                      |
|--------------------------------------------------------------------------|--------------|----------------------|
| _S[Phospho (STY)]QEVTDFLAPLQTSSR_.2                                      | 0.165061729  | Q9QYX7_S4016_M1_Pclo |
| _KSS[Phospho (STY)]TS[Phospho (STY)]FDDDAGR_.2                           | -0.526953221 | Q9QYX7_S1551_M2_Pclo |
| _SEGITKPSLQQPS[Phospho (STY)]PK_.2                                       | -0.321923444 | Q9QYX7_S212_M1_Pclo  |
| _SQPTT[Phospho (STY)]PQETVTGK_.2                                         | -0.025029703 | Q9QYX7_T860_M1_Pclo  |
| _ITQHFSSTEEFEYVTDYTR_.3                                                  | -0.100264346 | #N/A                 |
| _ELPSKQDS[Phospho (STY)]PKAPESK_.2                                       | -0.105497572 | Q9QYX7_S636_M1_Pclo  |
| _YNS[Phospho (STY)]LDLR_.2                                               | -0.062505899 | Q9QYX7_S3936_M1_Pclo |
| _SSTS[Phospho (STY)]FDDDAGR_.2                                           | 0.232861967  | Q9QYX7_S1553_M1_Pclo |
| _KTQPQKVS[Phospho (STY)]PEQPQDQQK_.3                                     | -0.176641001 | Q9QYX7_S1378_M1_Pclo |
| _DSFSQESSPSS[Phospho (STY)]PSDLAK_.2                                     | -0.275685925 | Q9QYX7_S1341_M1_Pclo |
| _KIVDSGVQT[Phospho (STY)]DDEETADR_.2                                     | -0.297927858 | Q9QYX7_T3376_M1_Pclo |
| _FS[Phospho (STY)]PIQESR_.2                                              | -0.053035259 | Q9QYX7_S4132_M1_Pclo |
| _VYKLPTAVSLYS[Phospho (STY)]PTDEQSVM[Oxidation (M)]QK_.3                 | 0.019499092  | Q9QYX7_S1829_M1_Pclo |
| _SSTS[Phospho (STY)]FDDDAGR_.2                                           | -0.343695178 | Q9QYX7_S1553_M1_Pclo |
| _ASYDSVEDSSESENS[Phospho (STY)]PVAR_.2                                   | 0.31988531   | Q9QYX7_S1457_M1_Pclo |
| _TQT[Phospho (STY)]PSETR_.2                                              | 0.062450116  | Q9QYX7_T1390_M1_Pclo |
| _AMPRPAS[Phospho (STY)]DSK_.2                                            | -0.015566312 | Q9QYX7_S769_M1_Pclo  |
| _DQFGSSH5[Phospho (STY)]LPEVQQHM[Oxidation (M)]R_.3                      | 0.064696106  | Q9QYX7_S4325_M1_Pclo |
| _LPAQQPGPQTAAK_.2                                                        | -0.086841131 | #N/A                 |
| _SHGPLLTIEDSS[Phospho (STY)]EEEEELREEEELLKEQEK_.4                        | -0.078844192 | Q9QYX7_S1709_M1_Pclo |
| _SSS[Phospho (STY)]EGHLR_.2                                              | -0.236701331 | Q9QYX7_S4814_M1_Pclo |
| _DQKSEGITKPSLQQPS[Phospho (STY)]PK_.3                                    | -0.251549534 | Q9QYX7_S212_M1_Pclo  |
| _SM[Oxidation (M)]S[Phospho (STY)]DPKPLSPTADESSR_.2                      | -0.358199272 | Q9QYX7_S3610_M1_Pclo |
| _SPVPSQQAS[Phospho (STY)]PKK_.2                                          | 0.023219731  | Q9QYX7_S625_M1_Pclo  |
| _KDS[Phospho (STY)]FSQESSPSS[Phospho (STY)]PSDLAK_.2                     | 0.140575076  | Q9QYX7_S1332_M2_Pclo |
| _GSVPAAAAES[Phospho (STY)]PSM[Oxidation (M)]HR_.2                        | -0.502908907 | Q9QYX7_S75_M1_Pclo   |
| _DISISEEIKESQEK_.2                                                       | -0.029657156 | #N/A                 |
| _TPPSNLSPIEDAS[Phospho (STY)]PTEELR_.2                                   | 0.110968733  | Q9QYX7_S1772_M1_Pclo |
| _M[Oxidation (M)]SKFS[Phospho (STY)]PIQESR_.2                            | 0.138119387  | Q9QYX7_S4132_M1_Pclo |
| _HSWHDEDDETFDES[Phospho (STY)]PELK_.3                                    | 0.269284903  | Q9QYX7_S1575_M1_Pclo |
| _ADPTVQLAPS[Phospho (STY)]PPKS[Phospho (STY)]PK_.2                       | -0.417039453 | Q9QYX7_S3545_M2_Pclo |
| _IVDSGVQT[Phospho (STY)]DDEETADR_.2                                      | -0.532449533 | Q9QYX7_T3376_M1_Pclo |
| _LPTAVSLY[Phospho (STY)]SPTDEQSVM[Oxidation (M)]QK_.2                    | 0.105667032  | Q9QYX7_Y1828_M1_Pclo |
| _ERPKT[Phospho (STY)]PPS[Phospho (STY)]NLSPIEDAS[Phospho (STY)]PTEELR_.3 | 0.078968928  | Q9QYX7_S1763_M3_Pclo |
| _KSS[Phospho (STY)]TS[Phospho (STY)]FDDDAGR_.2                           | -0.159756327 | Q9QYX7_S1551_M2_Pclo |
| _T[Phospho (STY)]PPAVATDQK_.2                                            | 0.26773055   | Q9QYX7_T1120_M1_Pclo |
| _GAHAHSGPTSAGSSSVPS[Phospho (STY)]PGQPGS[Phospho (STY)]PSVSK_.3          | -0.322772289 | Q9QYX7_S4592_M2_Pclo |
| _TSQS[Phospho (STY)]FPPTGDTITPLDSK_.2                                    | -0.178903683 | Q9QYX7_S748_M1_Pclo  |
| _ETGDGIILEVLDAYK_.2                                                      | 0.112071936  | #N/A                 |
| _AYLQGVAEDRDY[Phospho (STY)]M[Oxidation (M)]SDSEVSSTRPSR_.3              | -0.056152953 | Q9QYX7_Y3761_M1_Pclo |
| _S[Phospho (STY)]RSHGIFDPDSK_.3                                          | -0.083728161 | Q9QYX7_S4782_M1_Pclo |
| _GSVPAAAAES[Phospho (STY)]PSMHRK_.2                                      | 0.31476634   | Q9QYX7_S75_M1_Pclo   |
| _S[Phospho (STY)]RTDFKEEYK_.2                                            | 0.196870231  | Q9QYX7_S137_M1_Pclo  |
| _KTTLYFDEEPELEM[Oxidation (M)]ESLTDS[Phospho (STY)]PEDR_.3               | -0.008561389 | Q9QYX7_S1642_M1_Pclo |
| _QAELEEEKEIDAK_.2                                                        | 0.196333428  | #N/A                 |
| _RASVDSVEDSSESENS[Phospho (STY)]PVAR_.3                                  | -0.082645153 | Q9QYX7_S1457_M1_Pclo |
| _SIS[Phospho (STY)]M[Oxidation (M)]EQLMK_.2                              | 0.052107993  | Q9QYX7_S4706_M1_Pclo |

|                                                                               |              |                        |
|-------------------------------------------------------------------------------|--------------|------------------------|
| _DYMS[Phospho (STY)]DSEVSSTRPSR_2                                             | 0.215022327  | Q9QYX7_S3763_M1_Pclo   |
| _DIAFIMDDFQHAM[Oxidation (M)]S[Phospho (STY)]DSEAYHLR_3                       | -0.089866138 | Q9QYX7_S4358_M1_Pclo   |
| _AEEDS[Phospho (STY)]MEDPYELK_2                                               | 0.177507711  | Q9QYX7_S4042_M1_Pclo   |
| _RHS[Phospho (STY)]WHDEDDFDESPELK_4                                           | -0.45562663  | Q9QYX7_S1563_M1_Pclo   |
| _SPSTIS[Phospho (STY)]LK_2                                                    | 0.491906789  | Q9QYX7_S131_M1_Pclo    |
| _TSVAQTHLEDAGAAIAAAEAAVQQLR_3                                                 | -0.355184453 | #N/A                   |
| _TTLYFDEEPELEM[Oxidation (M)]ESLTDS[Phospho (STY)]PEDR_3                      | 0.14571048   | Q9QYX7_S1642_M1_Pclo   |
| _SPS[Phospho (STY)]TIS[Phospho (STY)]LKESK_2                                  | -0.136405393 | Q9QYX7_S128_M2_Pclo    |
| _GGSLGC[Carbamidomethyl (C)]QTETDPDTQS[Phospho (STY)]PPYMGATSPPK_3            | -0.03327654  | Q9QYX7_S3506_M1_Pclo   |
| _KSVDTSVQT[Phospho (STY)]DDEDQDEWDM[Oxidation (M)]PSR_3                       | 0.176336347  | Q9QYX7_T3403_M1_Pclo   |
| _LPS[Phospho (STY)]PT[Phospho (STY)]SPLSPHSNK_2                               | 0.168905381  | Q9QYX7_S2489_M2_Pclo   |
| _LPSPTSPLSPHSNK[Phospho (STY)]S[Phospho (STY)]PR_3                            | -0.215530195 | Q9QYX7_S2501_M2_Pclo   |
| _TPPSNLS[Phospho (STY)]PIEDAS[Phospho (STY)]PTEELRQAAEM[Oxidation (M)]EELHR_4 | 0.234404454  | Q9QYX7_S1766_M2_Pclo   |
| _KQIEM[Oxidation (M)]SAEDAS[Phospho (STY)]GSEDEEFIR_3                         | -0.06054454  | Q9QYX7_S1505_M1_Pclo   |
| _SSSEGLRS[Phospho (STY)]HGSP[Phospho (STY)]R_3                                | -0.176384159 | Q9QYX7_S4820_M2_Pclo   |
| _SYS[Phospho (STY)]HDVLPK_2                                                   | 0.291404188  | Q9QYY0_S266_M1_Gab1    |
| _SSS[Phospho (STY)]LEGFHSQYK_2                                                | -0.510433619 | Q9QYY0_S420_M1_Gab1    |
| _SVLTAGGVSGEELDENVYPM[Oxidation (M)]NPNS[Phospho (STY)]PPR_3                  | 0.018497835  | Q9QYY0_S455_M1_Gab1    |
| _SVS[Phospho (STY)]PQTLAYIR_2                                                 | 0.093212788  | Q9QYY8_S595_M1_Spact   |
| _SSGTAPAPAS[Phospho (STY)]PS[Phospho (STY)]PPEPGPGGEAESVR_3                   | 0.224369705  | Q9QYY8_S101_M2_Spact   |
| _GPVYIGELPQDFLR_2                                                             | -0.230286912 | #N/A                   |
| _LSITVVQAK_2                                                                  | 0.162884438  | #N/A                   |
| _QGQVEDEWYSLSGR_2                                                             | -0.081353667 | #N/A                   |
| _LAcetyl (Protein N-term)]AALYGGVEGGTR_2                                      | -0.219762717 | #N/A                   |
| _LLIEELR_2                                                                    | -0.104007885 | #N/A                   |
| _SLGLSL[Phospho (STY)]GGEQEDAVR_2                                             | -0.054540387 | Q9QZ08_S76_M1_Nagk     |
| _IRPTVQEDGGDVIYR_3                                                            | -0.226382283 | #N/A                   |
| _GFEDGIVR_2                                                                   | -0.278031781 | #N/A                   |
| _IQHILC[Carbamidomethyl (C)]TGNLC[Carbamidomethyl (C)]TK_3                    | -0.163437763 | #N/A                   |
| _VVTVGQFK_2                                                                   | 0.123438788  | #N/A                   |
| _TLAGDVHIVR_2                                                                 | 0.169605554  | #N/A                   |
| _FEAFEHENK_2                                                                  | -0.087116944 | #N/A                   |
| _ARAS[Phospho (STY)]PSASPADPGLPEGSER_3                                        | -0.177428141 | Q9QZB1_S13_M1_Rgs20    |
| _NQEDQRQRAS[Phospho (STY)]HEIR_3                                              | 0.168011133  | Q9QZB1_S86_M1_Rgs20    |
| _RAFS[Phospho (STY)]TEK_2                                                     | -0.606978208 | Q9QZB7_S414_M1_Actr10  |
| _DSVVEILFEQDNEEK_2                                                            | -0.152722977 | #N/A                   |
| _KQS[Phospho (STY)]QQLELLESELRK_3                                             | -0.166044941 | Q9QZC2_S984_M1_Plxnc1  |
| _TSS[Phospho (STY)]PEVQETKK_2                                                 | -0.331543441 | Q9QZD4_S363_M1_Ercc4   |
| _S[Phospho (STY)]SPLEASATPADSLDSASLPK_2                                       | 0.195313256  | Q9QZD5_S122_M1_Chml    |
| _LVVQDS[Phospho (STY)]IEQPKR_2                                                | -0.175635085 | Q9QZD5_S207_M1_Chml    |
| _LTLTS[Phospho (STY)]DESTLIEDGNR_2                                            | 0.161790785  | Q9QZI8_S348_M1_Serinc1 |
| _SDGS[Phospho (STY)]LDDGDGIHR_2                                               | -0.188174022 | Q9QZI8_S364_M1_Serinc1 |
| _GGAREDS[Phospho (STY)]LEDGVHIPQHAK_4                                         | 0.083639142  | Q9QZL9_S200_M1_Dkl1    |
| _GPAAAPGAAS[Phospho (STY)]PPAEPK_2                                            | -0.27311073  | Q9QZM0_S25_M1_Ubqln2   |
| _EKEEFVAVPENSTVQQFK_3                                                         | 0.150022366  | #N/A                   |
| _SQTDQLVLIFAGK_2                                                              | 0.716470679  | #N/A                   |
| _NQDLALSNIPIGGYNALR_2                                                         | -0.001283578 | #N/A                   |



|                                                                             |              |                          |
|-----------------------------------------------------------------------------|--------------|--------------------------|
| _NPEISHLNPDIM[Oxidation (M)]R_.3                                            | 0.137380493  | #N/A                     |
| _YVLSSQHRPDIS[Phospho (STY)]PTER_.3                                         | 0.183118998  | Q9QZQ1_S655_M1_Afdn      |
| _S[Phospho (STY)]QEELREEK_.2                                                | -0.210794356 | Q9QZQ1_S1275_M1_Afdn     |
| _S[Phospho (STY)]QDADLPGSSGAPENLTFK_.2                                      | 0.006566218  | Q9QZQ1_S1770_M1_Afdn     |
| _TSS[Phospho (STY)]VVTLEVAK_.2                                              | 0.020885491  | Q9QZQ1_S1083_M1_Afdn     |
| _TQVLS[Phospho (STY)]PDSLFTAK_.2                                            | 0.173086946  | Q9QZQ1_S1719_M1_Afdn     |
| _SSPNVANQPPS[Phospho (STY)]PGGKGPYTSGTAAK_.3                                | 0.25507722   | Q9QZQ1_S1182_M1_Afdn     |
| _ADHRS[Phospho (STY)]SPNVANQPPS[Phospho (STY)]PGGK_.3                       | -0.08688183  | Q9QZQ1_S1172_M2_Afdn     |
| _SSPNVANQPPS[Phospho (STY)]PGGK_.2                                          | -0.342473407 | Q9QZQ1_S1182_M1_Afdn     |
| _VTRS[Phospho (STY)]QEELREEK_.3                                             | -0.23503882  | Q9QZQ1_S1275_M1_Afdn     |
| _LPYLVELS[Phospho (STY)]PGR_.2                                              | 0.148992818  | Q9QZQ1_S391_M1_Afdn      |
| _TIS[Phospho (STY)]NPEVVMK_.2                                               | 0.085809136  | Q9QZQ1_S216_M1_Afdn      |
| _EYFTFPASKS[Phospho (STY)]QDR_.2                                            | -0.164272874 | Q9QZQ1_S1238_M1_Afdn     |
| _EFVEAVLELR_.2                                                              | 0.374879087  | #N/A                     |
| _AASADSTTEGT[Phospho (STY)]PTDGFTVLSTK_.2                                   | 0.068724586  | Q9QZQ8_T178_M1_Macroh2a1 |
| _AVC[Carbamidomethyl (C)]STY[Phospho (STY)]LQSR_.2                          | 0.049614911  | Q9QZR5_Y361_M1_Hipk2     |
| _NVSTC[Carbamidomethyl (C)]EVTSSQAIS[Phospho (STY)]PQR_.2                   | 0.050693232  | Q9QZR5_S827_M1_Hipk2     |
| _LRQDHADSC[Carbamidomethyl (C)]VVS[Phospho (STY)]S[Phospho (STY)]DDEELSR_.3 | -0.119779162 | Q9QZS2_S98_M2_Rnf4       |
| _TNPS[Phospho (STY)]PTNPFSSDLQK_.2                                          | -0.327193486 | Q9QZS3_S636_M1_Numb      |
| _RTPS[Phospho (STY)]EADR_.2                                                 | 0.414752616  | Q9QZS3_S440_M1_Numb      |
| _TASPAS[Phospho (STY)]PSGSK_.2                                              | 0.220447258  | Q9QZS8_S341_M1_Sh2d3c    |
| _VHAPSATPSTSAQPAS[Phospho (STY)]PVAR_.3                                     | -0.169060126 | Q9QZS8_S435_M1_Sh2d3c    |
| _S[Phospho (STY)]ITMTDGLTTDK_.2                                             | -0.026536067 | Q9QZS8_S354_M1_Sh2d3c    |
| _RAS[Phospho (STY)]DLSAR_.2                                                 | -0.095118243 | Q9QZW0_S1105_M1_Atp11c   |
| _GLIPDT[Phospho (STY)]PEEKPK_.2                                             | -0.23915494  | Q9QZX7_T71_M1_Srr        |
| _DLVDDVFTVTEDEIK_.2                                                         | -0.242684807 | #N/A                     |
| _VYAAEPSNADDC[Carbamidomethyl (C)]YQSK_.2                                   | -0.051569577 | #N/A                     |
| _LAIQAYGASIVYC[Carbamidomethyl (C)]DPSDESR_.2                               | -0.312769959 | #N/A                     |
| _S[Phospho (STY)]RPSS[Phospho (STY)]PAVR_.2                                 | 0.241939554  | Q9R020_S290_M2_Zranb2    |
| _YNLDAS[Phospho (STY)]EEEDSNK_.2                                            | -0.313226818 | Q9R020_S188_M1_Zranb2    |
| _EES[Phospho (STY)]DGEYDEFGR_.2                                             | 0.148259123  | Q9R020_S120_M1_Zranb2    |
| _YNLDAS[Phospho (STY)]EEEDSNKK_.2                                           | -0.38966927  | Q9R020_S188_M1_Zranb2    |
| _S[Phospho (STY)]RPSS[Phospho (STY)]PAVRK_.2                                | 0.086554447  | Q9R020_S290_M2_Zranb2    |
| _ENVEYIEREES[Phospho (STY)]DGEYDEFGR_.3                                     | 0.190568497  | Q9R020_S120_M1_Zranb2    |
| _SRS[Phospho (STY)]RPSS[Phospho (STY)]PAVR_.2                               | -0.371685682 | Q9R020_S290_M2_Zranb2    |
| _ENVEYIEREES[Phospho (STY)]DGEYDEFGRK_.3                                    | 0.325317479  | Q9R020_S120_M1_Zranb2    |
| _YNLDAS[Phospho (STY)]EEEDSNKK_.2                                           | -0.004115846 | Q9R020_S188_M1_Zranb2    |
| _PS[Phospho (STY)]S[Phospho (STY)]PAVRK_.2                                  | 0.081344194  | Q9R020_S293_M2_Zranb2    |
| _S[Phospho (STY)]QNNFVAILDLPEGEHQYK_.3                                      | -0.365565714 | Q9R078_S108_M1_Prkab1    |
| _Acetyl (Protein N-term)]ASSEQAEQPNQPSS[Phospho (STY)]PPGSENVVPR_.3         | 0.194045115  | Q9R0A0_S15_M1_Pex14      |
| _AYLQSIPTQGYSDS[Phospho (STY)]EER_.2                                        | -0.06946685  | Q9R0G7_S1124_M1_Zeb2     |
| _SNT[Phospho (STY)]PS[Phospho (STY)]PLNLSSTSSK_.2                           | -0.079877602 | Q9R0G7_S784_M2_Zeb2      |
| _S[Phospho (STY)]DHEEDNMEDGME_.2                                            | 0.096355286  | Q9R0G7_S1203_M1_Zeb2     |
| _VYQYSNRS[Phospho (STY)]PSLER_.3                                            | 0.342599243  | Q9R0G7_S705_M1_Zeb2      |
| _TSPVEGLPGTAPDLEK_.2                                                        | -0.311603682 | #N/A                     |
| _EIPDPSSINAK_.2                                                             | -0.313834841 | #N/A                     |
| _ILSGAGEAR_.2                                                               | 0.131810026  | #N/A                     |

|                                                                               |              |                        |
|-------------------------------------------------------------------------------|--------------|------------------------|
| _GIIDSTHTQQR_2                                                                | 0.001701649  | #N/A                   |
| _GASEIVLKK_2                                                                  | -0.334622279 | #N/A                   |
| _YGDLLPADGLFIQGNDLK_2                                                         | -0.464510007 | #N/A                   |
| _NNSAIDS[Phospho (STY)]GINLTDTTSK_2                                           | -0.266499464 | Q9R0K7_S1170_M1_Atp2b2 |
| _AFRSS[Phospho (STY)]LYEGLEKPESR_3                                            | 0.062447022  | Q9R0K7_S1105_M1_Atp2b2 |
| _AGQVVQIPVAEIVVGDIQIK_2                                                       | -0.210853249 | #N/A                   |
| _IDESSLTGESDQVR_2                                                             | 0.168061631  | #N/A                   |
| _MPDESFR_2                                                                    | 0.313336187  | #N/A                   |
| _EASDIILTDNFISSIVK_2                                                          | -0.400605516 | #N/A                   |
| _NES[Phospho (STY)]SHGGEFGC[Carbamidomethyl (C)]TM[Oxidation (M)]EELR_3       | 0.183449076  | Q9R0K7_S18_M1_Atp2b2   |
| _T[Phospho (STY)]SIHNFM[Oxidation (M)]AHPEFR_3                                | -0.472628192 | Q9R0K7_T1117_M1_Atp2b2 |
| _QNSS[Phospho (STY)]PPSSLNK_2                                                 | -0.104448971 | Q9R0K7_S1156_M1_Atp2b2 |
| _IDESSLTGESDQVRK_2                                                            | -0.074149061 | #N/A                   |
| _TLELLVNAIAINSAYTTK_2                                                         | 0.20495074   | #N/A                   |
| _VIEPMAC[Carbamidomethyl (C)]DGLR_2                                           | 0.262844576  | #N/A                   |
| _IEDSQPHIPLIDDTLEEDAALKQNSS[Phospho (STY)]PPSSLNK_4                           | -0.382319597 | Q9R0K7_S1156_M1_Atp2b2 |
| _TEC[Carbamidomethyl (C)]GLLGFLDLR_2                                          | -0.324660043 | #N/A                   |
| _EEIPEEELNEDVEEIDHAER_3                                                       | -0.051721366 | #N/A                   |
| _LTQKEEIPPEELNEDVEEIDHAER_4                                                   | -0.01572615  | #N/A                   |
| _M[Oxidation (M)]TVVQAYVGDVHYK_3                                              | 0.02271429   | #N/A                   |
| _SNRPVS[Phospho (STY)]ADGNYRPLAK_3                                            | -0.004568181 | Q9R0L6_S957_M1_Pcm1    |
| _VTNAIS[Phospho (STY)]PESSPGVGR_2                                             | -0.506383818 | Q9R0L6_S65_M1_Pcm1     |
| _ILEGDHGS[Phospho (STY)]PAGEIDEDKDKDETETVK_4                                  | -0.237197511 | Q9R0L6_S1729_M1_Pcm1   |
| _RS[Phospho (STY)]S[Phospho (STY)]LVDEAPEDEFEQK_2                             | 0.167613835  | Q9R0L6_S644_M2_Pcm1    |
| _HIS[Phospho (STY)]ESDER_2                                                    | -0.357418269 | Q9R0L6_S1432_M1_Pcm1   |
| _NVRIS[Phospho (STY)]DVS[Phospho (STY)]DQEEDEESER_2                           | -0.556516666 | Q9R0L6_S1766_M2_Pcm1   |
| _KAS[Phospho (STY)]AQASLASK_2                                                 | -0.694272617 | Q9R0L6_S1280_M1_Pcm1   |
| _STLTSSYNC[Carbamidomethyl (C)]PS[Phospho (STY)]PYADGR_2                      | -0.155200552 | Q9R0M0_S2648_M1_Celsr2 |
| _DYGEELRS[Phospho (STY)]PM[Oxidation (M)]TSLT[Phospho (STY)]PGESK_3           | -0.154491592 | Q9R0N3_S133_M2_Syt11   |
| _NSLETVGT[Phospho (STY)]PDSGR_2                                               | -0.173621547 | Q9R0N7_T58_M1_Syt7     |
| _NSLETVGT[Phospho (STY)]PDS[Phospho (STY)]GRGRGEK_3                           | -0.022028763 | Q9R0N7_S61_M2_Syt7     |
| _YKNSLETVGT[Phospho (STY)]PDS[Phospho (STY)]GRGR_3                            | -0.317436209 | Q9R0N7_S61_M2_Syt7     |
| _YKNSLETVGT[Phospho (STY)]PDSGR_2                                             | 0.278157206  | Q9R0N7_T58_M1_Syt7     |
| _VLYLQVLDYDR_2                                                                | -0.012764563 | #N/A                   |
| _NSLETVGT[Phospho (STY)]PDS[Phospho (STY)]GRGR_2                              | -0.275363587 | Q9R0N7_S61_M2_Syt7     |
| _S[Phospho (STY)]VDGDDAKSEAAK_2                                               | -0.037127695 | Q9R0N8_S217_M1_Syt6    |
| _EASSPSSANPASETLQS[Phospho (STY)]PSSR_2                                       | 0.27250522   | Q9R0N8_S108_M1_Syt6    |
| _QKS[Phospho (STY)]VDGDDAKSEAAK_2                                             | -0.150374199 | Q9R0N8_S217_M1_Syt6    |
| _QKS[Phospho (STY)]VDGDDAK_2                                                  | -0.435047589 | Q9R0N8_S217_M1_Syt6    |
| _AFSGYLGPDSEK_2                                                               | 0.220913068  | #N/A                   |
| _M[Oxidation (M)]YSYVTEELPQLINANFPVDPQR_3                                     | -0.382372357 | #N/A                   |
| _AYDATC[Carbamidomethyl (C)]LVK_2                                             | -0.339104262 | #N/A                   |
| _SAS[Phospho (STY)]PDDDLGSSNWEAADLGNEERK_3                                    | 0.293918943  | Q9R0P4_S17_M1_Smap     |
| _SAS[Phospho (STY)]PDDDLGSSNWEAADLGNEER_3                                     | -0.029777448 | Q9R0P4_S17_M1_Smap     |
| _[Acetyl (Protein N-term)]AS[Phospho (STY)]GVQVADEVLC[Carbamidomethyl (C)]R_2 | -0.389703284 | Q9R0P5_S3_M1_Dstn      |
| _YALYDASFETK_2                                                                | 0.308629699  | #N/A                   |
| _HEYQANGPEDLNR_2                                                              | -0.39746254  | #N/A                   |

|                                                                     |              |                       |
|---------------------------------------------------------------------|--------------|-----------------------|
| _EILVGDVGATITDPFK_2                                                 | 0.196997936  | #N/A                  |
| _HFVGM[Oxidation (M)]LPEKDC[Carbamidomethyl (C)]R_3                 | 0.11946748   | #N/A                  |
| _C[Carbamidomethyl (C)]IVVEEGKEILVGDVGATITDPFK_3                    | -0.124244804 | #N/A                  |
| _M[Oxidation (M)]PPFPVNHGASSEDSSLQDAK_3                             | -0.128635977 | #N/A                  |
| _LGVAGQWR_2                                                         | -0.029005588 | #N/A                  |
| _QFLSETEK_2                                                         | 0.300442     | #N/A                  |
| _NEAIAAHDSVAQEGQC[Carbamidomethyl (C)]R_3                           | 0.167815081  | #N/A                  |
| _FSAVALC[Carbamidomethyl (C)]K_2                                    | 0.265397807  | #N/A                  |
| _QFLSETEKLS[Phospho (STY)]PEDR_2                                    | -0.16826974  | Q9R0P9_S125_M1_Uchl1  |
| _QTIGNSC[Carbamidomethyl (C)]GTIGLIHAVANNQDKLEFEDGSVLK_4            | -0.209039095 | #N/A                  |
| _C[Carbamidomethyl (C)]FEKNEAIAAHDSVAQEGQC[Carbamidomethyl (C)]R_4  | 0.02969114   | #N/A                  |
| _QIEELKGQEVSPK_2                                                    | 0.277170237  | #N/A                  |
| _TLESSIQGLR_2                                                       | 0.135373367  | #N/A                  |
| _WSPLENK_2                                                          | 0.081529257  | #N/A                  |
| _L[Acetyl (Protein N-term)]SLHQFLLEPITC[Carbamidomethyl (C)]HAWNR_3 | 0.411827225  | #N/A                  |
| _FC[Carbamidomethyl (C)]TTGIDGAM[Oxidation (M)]TIWDFK_2             | -0.540723793 | #N/A                  |
| _NAYVWSQK_2                                                         | 0.210488342  | #N/A                  |
| _IVTC[Carbamidomethyl (C)]GADR_2                                    | 0.294005282  | #N/A                  |
| _EVDEKPASTPWGSK_2                                                   | -0.342717605 | #N/A                  |
| _SVQVSTLR_2                                                         | 0.079430252  | #N/A                  |
| _NM[Oxidation (M)]S[Phospho (STY)]AMER_2                            | 0.201881468  | Q9R0Q6_S298_M1_Arpc1a |
| _LAWVSHDSTVSVADASK_2                                                | -0.206245082 | #N/A                  |
| _EHNGHITGIDWAPK_3                                                   | -0.050533054 | #N/A                  |
| _LISVC[Carbamidomethyl (C)]YFESENDWWVSK_2                           | -0.193352206 | #N/A                  |
| _HLNEIDLHC[Carbamidomethyl (C)]IDPNDSK_3                            | -0.104641285 | #N/A                  |
| _DWEDDSDEDM[Oxidation (M)]SNFDR_2                                   | 0.121071861  | #N/A                  |
| _SILC[Carbamidomethyl (C)]C[Carbamidomethyl (C)]LR_2                | -0.089539549 | #N/A                  |
| _LTFSC[Carbamidomethyl (C)]LGGSDNFK_2                               | 0.18870547   | #N/A                  |
| _KGESGQSWPR_2                                                       | -0.034224237 | #N/A                  |
| _S[Phospho (STY)]RS[Phospho (STY)]FDYNYRR_3                         | -0.092216439 | Q9R0U0_S131_M2_Srsf10 |
| _S[Phospho (STY)]RS[Phospho (STY)]FDYNYR_2                          | -0.321444415 | Q9R0U0_S131_M2_Srsf10 |
| _S[Phospho (STY)]FDYNYR_2                                           | 0.110154385  | Q9R0U0_S133_M1_Srsf10 |
| _SRS[Phospho (STY)]WT[Phospho (STY)]SPK_2                           | 0.070286709  | Q9R0U0_S253_M2_Srsf10 |
| _S[Phospho (STY)]RS[Phospho (STY)]RS[Phospho (STY)]FDYNYR_2         | -0.093277638 | Q9R0U0_S129_M3_Srsf10 |
| _S[Phospho (STY)]RS[Phospho (STY)]RS[Phospho (STY)]YER_2            | -0.473196104 | Q9R0U0_S119_M3_Srsf10 |
| _S[Phospho (STY)]RS[Phospho (STY)]HSDNDRFK_3                        | 0.047035074  | Q9R0U0_S156_M2_Srsf10 |
| _SS[Phospho (STY)]SSEILGGNDPTSK_2                                   | 0.005925205  | Q9R0X5_S913_M1_Rpgr   |
| _IIFVVGPGSGK_2                                                      | 0.054043464  | #N/A                  |
| _VDSSNGFLIDGYPR_2                                                   | 0.159923569  | #N/A                  |
| _GELVPLDTVLDM[Oxidation (M)]LR_2                                    | -0.014708928 | #N/A                  |
| _RLEYYNATEPVISFYDKR_3                                               | -0.359987066 | #N/A                  |
| _VDDNEETIKK_2                                                       | -0.37418235  | #N/A                  |
| _LETYYNATEPVISFYDKR_3                                               | 0.562656727  | #N/A                  |
| _YGYTHLSTGDLLR_3                                                    | -0.19673199  | #N/A                  |
| _AEVSSGSR_2                                                         | 0.058482559  | #N/A                  |
| _SEDS[Phospho (STY)]DEDEPC[Carbamidomethyl (C)]AISGK_2              | 0.054642911  | Q9R0Z9_S89_M1_Dlc1    |
| _QDPIPGS[Phospho (STY)]PDNSR_2                                      | 0.066045966  | Q9R0Z9_S129_M1_Dlc1   |

|                                                                  |              |                       |
|------------------------------------------------------------------|--------------|-----------------------|
| _FSDEGSDSALDSVSPC[Carbamidomethyl (C)]PSS[Phospho (STY)]PK_.2    | -0.136676577 | Q9R0Z9_S510_M1_Dlc1   |
| _RSEDS[Phospho (STY)]DEDEPC[Carbamidomethyl (C)]AISGK_.2         | 0.212754319  | Q9R0Z9_S89_M1_Dlc1    |
| _KRSEDS[Phospho (STY)]DEDEPC[Carbamidomethyl (C)]AISGK_.3        | 0.233096477  | Q9R0Z9_S89_M1_Dlc1    |
| _YTFPTEQR_.2                                                     | 0.125356065  | #N/A                  |
| _TPPLALVFR_.2                                                    | 0.150685185  | #N/A                  |
| _DHLLGVSDSGK_.2                                                  | -0.35298051  | #N/A                  |
| _STDVAEEVYTR_.2                                                  | 0.131656856  | #N/A                  |
| _IVFLEESSQKEK_.2                                                 | 0.117115569  | #N/A                  |
| _NIEEVYVGK_.2                                                    | 0.072979108  | #N/A                  |
| _EFDALLINPR_.2                                                   | 0.156763596  | #N/A                  |
| _FLYLGDDR_.2                                                     | 0.058339236  | #N/A                  |
| _ETTEESVKETER_.2                                                 | 0.093674767  | #N/A                  |
| _GTFVHSTWTC[Carbamidomethyl (C)]PM[Oxidation (M)]EVL_.3          | 0.102184151  | #N/A                  |
| _FVSEM[Oxidation (M)]LQK_.2                                      | 0.153480633  | #N/A                  |
| _NYTDVYDKNNLLTNK_.2                                              | 0.206205918  | #N/A                  |
| _TVM[Oxidation (M)]AHGC[Carbamidomethyl (C)]YLSEELNIFSER_.3      | -0.438841391 | #N/A                  |
| _FTLSC[Carbamidomethyl (C)]TETLM[Oxidation (M)]SELGNIK_.2        | -0.455166516 | #N/A                  |
| _AVM[Oxidation (M)]VSNVLLINK_.2                                  | -0.450534494 | #N/A                  |
| _ASDSPIDLFGDFVGDISEAVIQK_.3                                      | -0.024827458 | #N/A                  |
| _IGLGTDVAGGYSYSM[Oxidation (M)]LDAIR_.2                          | -0.539910333 | #N/A                  |
| _THDLYIQSHISENREEIEAVK_.4                                        | -0.467873637 | #N/A                  |
| _ASLQSGQEGPGDS[Phospho (STY)]PGSQFSK_.2                          | -0.173597949 | Q9R1E0_S284_M1_Foxo1  |
| _M[Oxidation (M)]S[Phospho (STY)]PKPELTEDQKQEIR_.3               | -0.22514996  | Q9R1K9_S20_M1_Cetn2   |
| _SRS[Phospho (STY)]LS[Phospho (STY)]PGR_.2                       | -0.191449884 | Q9R1L5_S161_M2_Mast1  |
| _HFGS[Phospho (STY)]TESITDEDGGR_.3                               | -0.30863651  | Q9R1L5_S139_M1_Mast1  |
| _LEEQDS[Phospho (STY)]GGSNTPEQDDTSEGR_.2                         | 0.009819901  | Q9R1L5_S346_M1_Mast1  |
| _GGS[Phospho (STY)]PEIKR_.2                                      | 0.021623215  | Q9R1L5_S772_M1_Mast1  |
| _DSS[Phospho (STY)]PSRDYSPAVSGLR_.3                              | 0.050303092  | Q9R1L5_S954_M1_Mast1  |
| _AALS[Phospho (STY)]PVQEHETGR_.3                                 | -0.463869877 | Q9R1L5_S1414_M1_Mast1 |
| _AALS[Phospho (STY)]PVQEHETGR_.2                                 | 0.05706355   | Q9R1L5_S1414_M1_Mast1 |
| _HFGS[Phospho (STY)]TESITDEDGGR_.2                               | -0.33636269  | Q9R1L5_S139_M1_Mast1  |
| _S[Phospho (STY)]PITIQR_.2                                       | -0.218546538 | Q9R1L5_S968_M1_Mast1  |
| _FSASEASFLEGEAS[Phospho (STY)]PPLGAR_.2                          | -0.048149699 | Q9R1L5_S791_M1_Mast1  |
| _TTIFSPGR_.2                                                     | -0.181585752 | #N/A                  |
| _LLDEVFFSEK_.2                                                   | -0.241005949 | #N/A                  |
| _QAYTQFGGK_.2                                                    | -0.079325233 | #N/A                  |
| _LYIGLAGLATDVQTVAGR_.3                                           | -0.305402559 | #N/A                  |
| _DAVSGM[Oxidation (M)]GVIVHVIEK_.3                               | -0.331264738 | #N/A                  |
| _FILNLPTFSVR_.2                                                  | 0.132437136  | #N/A                  |
| _YYTPTISR_.2                                                     | 0.459553003  | #N/A                  |
| _L[Acetyl (Protein N-term)]M[Oxidation (M)]EYLIGIQGPDYVLVASDR_.2 | 0.180698021  | #N/A                  |
| _NQYDNDVTWVSPQGR_.2                                              | -0.092657504 | #N/A                  |
| _ETLPAEQDLTTK_.2                                                 | -0.400271764 | #N/A                  |
| _TQIPTQR_.2                                                      | -0.335165148 | #N/A                  |
| _AQPS[Phospho (STY)]QAAEEPAEK_.2                                 | 0.115680691  | Q9R1P4_S247_M1_Psma1  |
| _AQPS[Phospho (STY)]QAAEEPAEKADPEMEH_.3                          | 0.155059136  | Q9R1P4_S247_M1_Psma1  |
| _IHQIEYAMEAVK_.2                                                 | 0.119153462  | #N/A                  |

|                                                                    |              |                        |
|--------------------------------------------------------------------|--------------|------------------------|
| _GFS[Phospho (STY)]EEQLR_.2                                        | -0.214717013 | Q9R1Q8_S163_M1_TagIn3  |
| _LINSLYPPGQEPIPK_.2                                                | 0.324198311  | #N/A                   |
| _RGFS[Phospho (STY)]EEQLR_.2                                       | -0.386615029 | Q9R1Q8_S163_M1_TagIn3  |
| _GEPSWFHR_.2                                                       | 0.172580658  | #N/A                   |
| _TTDIFQTVDLWEGK_.2                                                 | 0.09233901   | #N/A                   |
| _GPSYGLSR_.2                                                       | 0.254918349  | #N/A                   |
| _TLM[Oxidation (M)]ALGSVAVTK_.2                                    | 0.093536623  | #N/A                   |
| _AAEVYGVV_.2                                                       | -0.014912906 | #N/A                   |
| _WLM[Oxidation (M)]DGTVLC[Carbamidomethyl (C)]K_.2                 | 0.115501009  | #N/A                   |
| _LVDWIILQC[Carbamidomethyl (C)]AEDIEHPPPGR_.3                      | 0.164633972  | #N/A                   |
| _QM[Oxidation (M)]EQISQFLK_.2                                      | 0.242981742  | #N/A                   |
| _QGQNVIGLQMGSNK_.2                                                 | 0.195575247  | #N/A                   |
| _FY[Phospho (STY)]PVSAR_.2                                         | -0.420297734 | Q9R1Q9_Y326_M1_Atp6ap1 |
| _Y[Phospho (STY)]WFAMER_.2                                         | -0.153298467 | Q9R1Q9_Y332_M1_Atp6ap1 |
| _S[Phospho (STY)]PGGPGSHVR_.2                                      | -0.248872872 | Q9R1R2_S437_M1_Trim3   |
| _TGS[Phospho (STY)]AELC[Carbamidomethyl (C)]AEITGPDGVR_.2          | 0.158956428  | Q9R1R2_S359_M1_Trim3   |
| _EDS[Phospho (STY)]PGPEVQPMDB_.2                                   | 0.208063052  | Q9R1R2_S7_M1_Trim3     |
| _ALRPGDLPPS[Phospho (STY)]PDDVKR_.3                                | 0.191496972  | Q9R1R2_S427_M1_Trim3   |
| _VKS[Phospho (STY)]PGGPGSHVR_.2                                    | -0.170755846 | Q9R1R2_S437_M1_Trim3   |
| _REDS[Phospho (STY)]PGPEVQPMDB_.2                                  | 0.239827955  | Q9R1R2_S7_M1_Trim3     |
| _ALRPGDLPPS[Phospho (STY)]PDDVK_.2                                 | 0.061130859  | Q9R1R2_S427_M1_Trim3   |
| _RNEFLGELQK_.2                                                     | -0.056837339 | #N/A                   |
| _SDAISK[Phospho (STY)]ELAK_.2                                      | -0.047762418 | Q9R1T4_S192_M1_Septin6 |
| _EAELEAEKELHEK_.3                                                  | -0.150330929 | #N/A                   |
| _NEFLGELQK_.2                                                      | 0.147172321  | #N/A                   |
| _AAAEQLQSQAGGS[Phospho (STY)]QTLK_.2                               | -0.030904673 | Q9R1T4_S416_M1_Septin6 |
| _STLM[Oxidation (M)]DTLFNTK_.2                                     | 0.020527107  | #N/A                   |
| _VNMEDLR_.2                                                        | 0.240445724  | #N/A                   |
| _SVSQGFC[Carbamidomethyl (C)]FNILC[Carbamidomethyl (C)]VGETGLGK_.2 | -0.266016232 | #N/A                   |
| _TVPLAGHVGFDLPDQLVVK_.3                                            | -0.306086873 | #N/A                   |
| _DTPDPSKPFSLQETYEAK_.3                                             | 0.34270857   | #N/A                   |
| _QVGEDC[Carbamidomethyl (C)]R_.2                                   | -0.149455153 | #N/A                   |
| _SNS[Phospho (STY)]TETLSPAK_.2                                     | -0.253179341 | Q9R1V6_S855_M1_Adam22  |
| _SPSSS[Phospho (STY)]TGSIASSR_.2                                   | -0.11759859  | Q9R1V6_S868_M1_Adam22  |
| _FAISENPLITLR_.2                                                   | 0.220618271  | #N/A                   |
| _FQPLGTVC[Carbamidomethyl (C)]R_.2                                 | 0.093594757  | #N/A                   |
| _KLAS[Phospho (STY)]GEC[Carbamidomethyl (C)]K_.2                   | -0.191399776 | Q9R1V6_S387_M1_Adam22  |
| _S[Phospho (STY)]NSTETLSPAKS[Phospho (STY)]PSSSTGSIASSR_.3         | -0.119330966 | Q9R1V6_S853_M2_Adam22  |
| _DVLC[Carbamidomethyl (C)]GYLLC[Carbamidomethyl (C)]TNIGNIPR_.2    | -0.605668103 | #N/A                   |
| _LSVYNTNTYAK_.2                                                    | 0.474909351  | #N/A                   |
| _SNS[Phospho (STY)]WQGNMGGNK_.2                                    | 0.303903059  | Q9R1V6_S832_M1_Adam22  |
| _SNGLSHS[Phospho (STY)]WSERIPDTK_.3                                | -0.158580546 | Q9R1V6_S808_M1_Adam22  |
| _SNS[Phospho (STY)]WQGNM[Oxidation (M)]GGNKK_.2                    | -0.182763251 | Q9R1V6_S832_M1_Adam22  |
| _ADAVHLFSGSQFESSR_.3                                               | -0.107278792 | #N/A                   |
| _SNGLSHS[Phospho (STY)]WSER_.2                                     | -0.343058937 | Q9R1V6_S808_M1_Adam22  |
| _DNQC[Carbamidomethyl (C)]QYIWGTK_.2                               | 0.070786137  | #N/A                   |
| _QDGYSC[Carbamidomethyl (C)]NQNQGR_.2                              | -0.016342497 | #N/A                   |

|                                                                |              |                        |
|----------------------------------------------------------------|--------------|------------------------|
| _S[Phospho (STY)]LEC[Carbamidomethyl (C)]QDALETAAR_.2          | 0.04660867   | Q9R1X5_S43_M1_Abcc5    |
| _NATLAWDSSHSSIQNS[Phospho (STY)]PKLT[Phospho (STY)]PK_.3       | -0.008760443 | Q9R1X5_S509_M2_Abcc5   |
| _T[Phospho (STY)]RSEEC[Carbamidomethyl (C)]QDALETAAR_.3        | 0.240599272  | Q9R1X5_T41_M1_Abcc5    |
| _LHS[Phospho (STY)]PSLSDEENLR_.3                               | 0.229363387  | Q9R1Z7_S27_M1_Pts      |
| _VFETDNNIVVYKGE_.2                                             | 0.210367365  | #N/A                   |
| _RS[Phospho (STY)]SF5M[Oxidation (M)]EEGDVL_.2                 | -0.146417762 | Q9R210_S465_M1_Tfeb    |
| _FLIPDYNDEIR_.2                                                | -0.325939725 | #N/A                   |
| _FATVEVTDKPVDEALR_.3                                           | 0.2326216    | #N/A                   |
| _IPNQFQGS[Phospho (STY)]PPAPSDSVK_.2                           | 0.282400432  | Q9R257_S111_M1_Hebp1   |
| _IPNQFQGS[Phospho (STY)]PPAPSDSVKIEER_.3                       | 0.137651774  | Q9R257_S111_M1_Hebp1   |
| _EADYVAHATQLR_.2                                               | 0.012561262  | #N/A                   |
| _HLGY[Phospho (STY)]KPEEY[Phospho (STY)]K_.2                   | -0.144404689 | Q9WTI7_Y703_M2_Myo1c   |
| _DAES[Phospho (STY)]PSWR_.2                                    | -0.239520869 | Q9WTI7_S408_M1_Myo1c   |
| _IDS[Phospho (STY)]TEVIYQPR_.2                                 | -0.310039622 | Q9WTK7_S31_M1_Stk11    |
| _DLAILQC[Carbamidomethyl (C)]HGELDPM[Oxidation (M)]VPVR_.3     | -0.107077219 | #N/A                   |
| _GPSS[Phospho (STY)]PEPDFSVFR_.2                               | -0.039770702 | Q9WTP5_S724_M1_Cdh22   |
| _TVGIDDLTGEPLIQR_.2                                            | 0.427343284  | #N/A                   |
| _HLSSGDLLR_.2                                                  | 0.500380888  | #N/A                   |
| _EDDKPETVIKR_.3                                                | 0.133962778  | #N/A                   |
| _TLTQC[Carbamidomethyl (C)]SWLLDGFPR_.2                        | -0.081584562 | #N/A                   |
| _GVLETFSGTETNK_.2                                              | 0.492216392  | #N/A                   |
| _EGITPWAS[Phospho (STY)]FK_.2                                  | 0.065114858  | Q9WTQ5_S598_M1_Akap12  |
| _GPSEAPQEAEEEGAT[Phospho (STY)]SDGEKKR_.3                      | -0.138271268 | Q9WTQ5_T583_M1_Akap12  |
| _GPSEAPQEAEEEGATS[Phospho (STY)]DGEK_.2                        | -0.088900897 | Q9WTQ5_S584_M1_Akap12  |
| _AEADASGNLTKE[Phospho (STY)]PDTNGPK_.2                         | 0.231612715  | Q9WTQ5_S1645_M1_Akap12 |
| _EGITPWAS[Phospho (STY)]FKK_.2                                 | -0.348066686 | Q9WTQ5_S598_M1_Akap12  |
| _EVC[Carbamidomethyl (C)]VSGGDHTQLTDLS[Phospho (STY)]PEEK_.3   | 0.025094711  | Q9WTQ5_S467_M1_Akap12  |
| _EKEPTKPLES[Phospho (STY)]PTS[Phospho (STY)]PVSNETTSSFK_.3     | 0.111068165  | #N/A                   |
| _VELPLEDQVGDLEALS[Phospho (STY)]EK_.2                          | 0.221792876  | Q9WTQ5_S371_M1_Akap12  |
| _EPTKPLES[Phospho (STY)]PTS[Phospho (STY)]PVSNETTSSFKK_.3      | -0.219416694 | #N/A                   |
| _SATLSSTESTAS[Phospho (STY)]GM[Oxidation (M)]QDEVR_.2          | 0.193866047  | Q9WTQ5_S637_M1_Akap12  |
| _EPT[Phospho (STY)]KPLES[Phospho (STY)]PTSPVSNETTSSFK_.3       | -0.285979902 | Q9WTQ5_T265_M2_Akap12  |
| _LS[Phospho (STY)]ADYEKVELPLEDQVGDLEALSEK_.3                   | 0.278085889  | Q9WTQ5_S350_M1_Akap12  |
| _C[Carbamidomethyl (C)]QETESNEEQSIS[Phospho (STY)]PEKR_.2      | -0.09572591  | Q9WTQ5_S1292_M1_Akap12 |
| _TKEVC[Carbamidomethyl (C)]VSGGDHTQLTDLS[Phospho (STY)]PEEK_.3 | 0.023733032  | Q9WTQ5_S467_M1_Akap12  |
| _AEDSGAEQLASEIEPSREESWVS[Phospho (STY)]IKK_.4                  | -0.026454083 | Q9WTQ5_S786_M1_Akap12  |
| _HPEGIVSEVEM[Oxidation (M)]LSS[Phospho (STY)]QER_.3            | -0.146624405 | Q9WTQ5_S489_M1_Akap12  |
| _RPS[Phospho (STY)]ES[Phospho (STY)]DKEEELDK_.2                | 0.433016201  | Q9WTQ5_S613_M2_Akap12  |
| _LETS[Phospho (STY)]DGDEEGSAEVNK_.2                            | 0.356166752  | Q9WTR1_S15_M1_Trpv2    |
| _NFS[Phospho (STY)]PQIK_.2                                     | -0.073716386 | Q9WTR1_S47_M1_Trpv2    |
| _NSAS[Phospho (STY)]EEDHLPLQLQSH_.3                            | -0.071944974 | Q9WTR1_S743_M1_Trpv2   |
| _INENTGSVSVTR_.2                                               | 0.020789655  | #N/A                   |
| _ETIATYQLYVETTDASGK_.2                                         | 0.185830733  | #N/A                   |
| _ANS[Phospho (STY)]ALS[Phospho (STY)]LTDTDHER_.2               | -0.206542869 | Q9WTS4_S142_M2_Tenm1   |
| _ [Acetyl (Protein N-term)]ASQTQGIQQLLQAEK_.2                  | 0.010508573  | #N/A                   |
| _ [Acetyl (Protein N-term)]ASQTQGIQQLLQAEKR_.3                 | -0.173453933 | #N/A                   |
| _EREQEFQSK_.2                                                  | -0.016163824 | #N/A                   |

|                                                                                                     |              |                        |
|-----------------------------------------------------------------------------------------------------|--------------|------------------------|
| _VLAQLLGM[Oxidation (M)]VC[Carbamidomethyl (C)]EVRPQVHPNYR_3                                        | -0.216536037 | #N/A                   |
| _QVQGM[Oxidation (M)]QSSQQR_2                                                                       | 0.233083346  | #N/A                   |
| _EEAQM[Oxidation (M)]EVEQYRR_3                                                                      | 0.016887987  | #N/A                   |
| _QQAAM[Oxidation (M)]GS[Phospho (STY)]QGNLSAEVEQATR_2                                               | -0.249155737 | Q9WTT4_S65_M1_Atp6v1g2 |
| _QQAAM[Oxidation (M)]GSQGNLSAEVEQATRR_3                                                             | 0.189613179  | #N/A                   |
| _EEAQMEVEQYR_2                                                                                      | 0.311519178  | #N/A                   |
| _RPSASS[Phospho (STY)]PNNTAAK_2                                                                     | 0.348153969  | Q9WTU0_S1060_M1_PhF2   |
| _DSDYVYPSLES[Phospho (STY)]DEDNPVFK_2                                                               | 0.076913228  | Q9WTU0_S876_M1_PhF2    |
| _RKGS[Phospho (STY)]DDAPYSPTAR_3                                                                    | -0.475799055 | Q9WTU0_S893_M1_PhF2    |
| _ELS[Phospho (STY)]EGEEKGDPEK_2                                                                     | 0.105841712  | Q9WTU3_S504_M1_Scn8a   |
| _VFKS[Phospho (STY)]ES[Phospho (STY)]EDGMR_2                                                        | 0.397690857  | Q9WTU3_S518_M2_Scn8a   |
| _FRDPGSENEFADDEHS[Phospho (STY)]T[Phospho (STY)]VEESEGR_4                                           | 0.275961284  | Q9WTU3_S589_M2_Scn8a   |
| _VFKS[Phospho (STY)]ES[Phospho (STY)]EDGMRR_3                                                       | -0.109074261 | Q9WTU3_S518_M2_Scn8a   |
| _NYVENRPK_2                                                                                         | 0.027863821  | #N/A                   |
| _TAC[Carbamidomethyl (C)]TNFM[Oxidation (M)]M[Oxidation (M)]T[Phospho (STY)]PY[Phospho (STY)]VVTR_2 | -0.065591599 | #N/A                   |
| _DYIDQWNK_2                                                                                         | -0.05413329  | #N/A                   |
| _EDS[Phospho (STY)]GTFSLGK_2                                                                        | 0.080980315  | Q9WTX2_S18_M1_Prkra    |
| _AEAPPLQREDS[Phospho (STY)]GTFSLGK_3                                                                | -0.566892716 | Q9WTX2_S18_M1_Prkra    |
| _HRAEAPPLQREDS[Phospho (STY)]GTFSLGK_4                                                              | 0.111060952  | Q9WTX2_S18_M1_Prkra    |
| _GKT[Phospho (STY)]PEEIRK_2                                                                         | -0.180181744 | Q9WTX5_T131_M1_Skp1    |
| _GKT[Phospho (STY)]PEEIR_2                                                                          | -0.075061031 | Q9WTX5_T131_M1_Skp1    |
| _TDDIPVWDQEFLK_2                                                                                    | 0.144999549  | #N/A                   |
| _T[Phospho (STY)]PEEIRK_2                                                                           | 0.14457441   | Q9WTX5_T131_M1_Skp1    |
| _RTDDIPVWDQEFLK_3                                                                                   | 0.162850084  | #N/A                   |
| _LQSSDGEIFEVDVEIAK_2                                                                                | -0.565665792 | #N/A                   |
| _S[Phospho (STY)]PSKPLAR_2                                                                          | 0.02014577   | Q9WU22_S358_M1_Ptpn4   |
| _NSS[Phospho (STY)]FTQEATR_2                                                                        | 0.168132872  | Q9WU22_S403_M1_Ptpn4   |
| _IQPALQEK_2                                                                                         | 0.316197862  | #N/A                   |
| _NQLDQEVFLSTIAQLK_3                                                                                 | 0.324221319  | #N/A                   |
| _VLLGFSSDES[Phospho (STY)]DVEASPR_2                                                                 | -0.121676931 | Q9WU40_S140_M1_Lemd3   |
| _EGT[Phospho (STY)]PPPPPPPR_2                                                                       | -0.207205104 | Q9WU42_T1350_M1_Ncor2  |
| _S[Phospho (STY)]PGNTSQPPAFFSK_2                                                                    | -0.174268483 | Q9WU42_S2215_M1_Ncor2  |
| _SDHALTS[Phospho (STY)]PGGGGK_2                                                                     | -0.360588762 | Q9WU42_S2351_M1_Ncor2  |
| _TDDT[Phospho (STY)]S[Phospho (STY)]GEDNDEKEAVASK_2                                                 | 0.031284679  | Q9WU42_S550_M2_Ncor2   |
| _PASHTHQHS[Phospho (STY)]PIS[Phospho (STY)]PR_3                                                     | -0.310533775 | Q9WU42_S1816_M2_Ncor2  |
| _LEPVS[Phospho (STY)]PPS[Phospho (STY)]PPHADPELELAPSR_3                                             | -0.057371877 | Q9WU42_S149_M2_Ncor2   |
| _EKTDDT[Phospho (STY)]S[Phospho (STY)]GEDNDEKEAVASK_2                                               | -0.129613078 | Q9WU42_S550_M2_Ncor2   |
| _LLDEEATDNDLR_2                                                                                     | 0.141815989  | #N/A                   |
| _STSVVEQGGIQTVDQLIK_2                                                                               | -0.079131643 | #N/A                   |
| _LANQAADYFGDAFK_2                                                                                   | -0.267409702 | #N/A                   |
| _FYNELTEILVR_2                                                                                      | 0.238402172  | #N/A                   |
| _NIQVSHQEFSK_2                                                                                      | 0.090767625  | #N/A                   |
| _Acetyl (Protein N-term)]S[Phospho (STY)]DLDSSSSAYPK_2                                              | -0.286205929 | Q9WUA3_S2_M1_PfKp      |
| _DLLFQPVAELK_2                                                                                      | 0.259812417  | #N/A                   |
| _YLEHLSGDGK_2                                                                                       | -0.200008094 | #N/A                   |
| _NVLGHM[Oxidation (M)]QQGGAPSPFDR_3                                                                 | -0.394992668 | #N/A                   |
| _EIGWADVGGWTGQGSILGTK_2                                                                             | -0.040456928 | #N/A                   |

|                                                                |              |                          |
|----------------------------------------------------------------|--------------|--------------------------|
| _FVSDDSIC[Carbamidomethyl (C)]VLGIC[Carbamidomethyl (C)]K_.2   | 0.026839981  | #N/A                     |
| _LNIIIVSEGAIDM[Oxidation (M)]QNKPIITSEK_.3                     | 0.042808243  | #N/A                     |
| _KVTDFEHR_.2                                                   | 0.225055662  | #N/A                     |
| _IIEVVDAIM[Oxidation (M)]TTAQSHQR_.2                           | -0.448059997 | #N/A                     |
| _LGITNLC[Carbamidomethyl (C)]VIGGDGSLTGANLFR_.2                | -0.191553543 | #N/A                     |
| _WDC[Carbamidomethyl (C)]VSSILQVGGTIIGSAR_.2                   | -0.24197231  | #N/A                     |
| _ALLS[Phospho (STY)]PEDYQR_.2                                  | -0.001602305 | Q9WUB0_S344_M1_Rbck1     |
| _LITAIGDVVNHDPAVGDR_.3                                         | -0.20684757  | #N/A                     |
| _IGEDYISDLQLRK_.3                                              | 0.002880343  | #N/A                     |
| _ [Acetyl (Protein N-term)]SRPLSDQDKR_.3                       | -0.009099727 | #N/A                     |
| _QC[Carbamidomethyl (C)]QPTDTC[Carbamidomethyl (C)]ASVR_.2     | 0.521626324  | #N/A                     |
| _WNS[Phospho (STY)]IEER_.2                                     | -0.337835688 | Q9WUD1_S150_M1_Stub1     |
| _LGTGGGGS[Phospho (STY)]PDKSPSAQELK_.2                         | -0.428838283 | Q9WUD1_S20_M1_Stub1      |
| _KNS[Phospho (STY)]PGVSHSSQK_.2                                | -0.22968501  | Q9WUF3_S1818_M1_Casp8ap2 |
| _TDS[Phospho (STY)]PLPLEEASTPPGK_.2                            | -0.148572548 | Q9WUH1_S320_M1_Tmem115   |
| _EALTYDGALLGDR_.2                                              | 0.165526481  | #N/A                     |
| _ [Acetyl (Protein N-term)]ADFDYDDR_.2                         | -0.05706682  | #N/A                     |
| _TVATPLNQVANPNSAIFGGAR_.2                                      | 0.097685606  | #N/A                     |
| _GSNM[Oxidation (M)]DFREPTEER_.3                               | -0.179397027 | #N/A                     |
| _DKDSDKFK_.2                                                   | 0.177718259  | #N/A                     |
| _AYSSFGGGR_.2                                                  | -0.441022043 | #N/A                     |
| _TVAS[Phospho (STY)]PC[Carbamidomethyl (C)]SSTESLSQR_.2        | -0.47070692  | Q9WUK6_S214_M1_Zbtb18    |
| _ILLGLDNAGK_.2                                                 | 0.166432021  | #N/A                     |
| _LNVWDIGGQR_.2                                                 | 0.011838401  | #N/A                     |
| _QDLLTAAPASEIAEGLNLHTIR_.3                                     | 0.032531027  | #N/A                     |
| _LEEQLGR_.2                                                    | 0.218459896  | #N/A                     |
| _VTWDSTFC[Carbamidomethyl (C)]AVNPK_.2                         | -0.290091903 | #N/A                     |
| _NDQC[Carbamidomethyl (C)]YDDIR_.2                             | 0.28685418   | #N/A                     |
| _VTWDSSTFC[Carbamidomethyl (C)]AVNPR_.2                        | 0.113043083  | #N/A                     |
| _LIGPNC[Carbamidomethyl (C)]PGVINPGEC[Carbamidomethyl (C)]K_.2 | -0.247340838 | #N/A                     |
| _HLGLPVFNTVK_.2                                                | 0.24611167   | #N/A                     |
| _LVGGTTPGK_.2                                                  | 0.076037264  | #N/A                     |
| _IIC[Carbamidomethyl (C)]QGFTGK_.2                             | 0.308386284  | #N/A                     |
| _MGHAGAIAGGK_.2                                                | -0.066835411 | #N/A                     |
| _ISALQSAGVVSM[Oxidation (M)]SPAQLGTTIYK_.3                     | 0.561120742  | #N/A                     |
| _QGTFFHSQQALEYGTK_.3                                           | -0.440812011 | #N/A                     |
| _ASQQDFENALNQVK_.2                                             | 0.002188271  | #N/A                     |
| _IAQNFGQLHLSSGHLLR_.3                                          | 0.317325244  | #N/A                     |
| _YLQDQLS[Phospho (STY)]PLTR_.2                                 | 0.058123379  | Q9WUU8_S416_M1_Tnlp1     |
| _HPPT[Phospho (STY)]PPDPSSGGLPR_.2                             | 0.006012774  | Q9WV18_T929_M1_Gabbr1    |
| _RHPPT[Phospho (STY)]PPDPSSGGLPR_.3                            | -0.16910216  | Q9WV18_T929_M1_Gabbr1    |
| _RSS[Phospho (STY)]PIFQTTK_.2                                  | 0.165400288  | Q9WV30_S618_M1_Nfat5     |
| _TLVLIGAQGVGR_.2                                               | 0.226099661  | #N/A                     |
| _VEGGELVIAR_.2                                                 | 0.034818956  | #N/A                     |
| _DNNLELVQEILR_.2                                               | 0.500067943  | #N/A                     |
| _GIM[Oxidation (M)]ES[Phospho (STY)]PIVR_.2                    | -0.302863639 | Q9WV34_S42_M1_Mpp2       |
| _DLAELAEQSS[Phospho (STY)]TAAELAR_.2                           | 0.25853607   | Q9WV34_S86_M1_Mpp2       |



|                                                                      |              |                        |
|----------------------------------------------------------------------|--------------|------------------------|
| _EGQGYSFVSR_2                                                        | 0.049620501  | #N/A                   |
| _DLELT[Phospho (STY)]PTSGTLC[Carbamidomethyl (C)]GSLSGK_2            | 0.211126244  | Q9WV34_T303_M1_Mpp2    |
| _ALQELLR_2                                                           | -0.010072565 | #N/A                   |
| _TYET[Phospho (STY)]PPPS[Phospho (STY)]PGLDPTFSNQPVPPDAVR_3          | 0.40139426   | Q9WV34_S121_M2_Mpp2    |
| _ILPSYQEPHLPR_3                                                      | -0.029131453 | #N/A                   |
| _NAEFDRHELLIYEEVAR_4                                                 | 0.084349033  | #N/A                   |
| _YLEHGEYEGNLYGTR_3                                                   | 0.220593828  | #N/A                   |
| _VAHSDKPGS[Phospho (STY)]TSAVSFR_3                                   | 0.133444515  | Q9WV55_S214_M1_Vapa    |
| _IQAAAS[Phospho (STY)]PPANATAASDTNAGDR_2                             | -0.258868828 | Q9WV60_S389_M1_Gsk3b   |
| _GQTNNAASASASNST_2                                                   | 0.009430331  | #N/A                   |
| _VTTVVATPGQGPDRPQEVSYTDTK_3                                          | 0.198345098  | #N/A                   |
| _GNS[Phospho (STY)]LPC[Carbamidomethyl (C)]VLEQK_2                   | -0.308018099 | #N/A                   |
| _ESVGGS[Phospho (STY)]PQSK_2                                         | 0.085833754  | Q9WV69_S156_M1_Dmtn    |
| _HLS[Phospho (STY)]AEDFSR_2                                          | -0.547150174 | Q9WV69_S372_M1_Dmtn    |
| _GAEEEEEEEDDS[Phospho (STY)]EEEEIK_2                                 | -0.235833716 | Q9WV69_S226_M1_Dmtn    |
| _QPLTS[Phospho (STY)]PGSVSSSR_2                                      | -0.349823625 | Q9WV69_S11_M1_Dmtn     |
| _SREC[Carbamidomethyl (C)]SLS[Phospho (STY)]PK_2                     | -0.32427839  | Q9WV69_S87_M1_Dmtn     |
| _TLGIISQASTPR_2                                                      | -0.11821587  | #N/A                   |
| _DSSVPGS[Phospho (STY)]PSSIVAK_2                                     | -0.110216584 | Q9WV69_S26_M1_Dmtn     |
| _SSS[Phospho (STY)]LPSYGR_2                                          | 0.005479313  | Q9WV69_S289_M1_Dmtn    |
| _M[Oxidation (M)]DRGNS[Phospho (STY)]LPC[Carbamidomethyl (C)]VLEQK_3 | -0.468272658 | #N/A                   |
| _EC[Carbamidomethyl (C)]SLS[Phospho (STY)]PK_2                       | -0.013808626 | Q9WV69_S87_M1_Dmtn     |
| _STS[Phospho (STY)]PPPSPEVWAESE_2                                    | -0.377421981 | Q9WV69_S92_M1_Dmtn     |
| _KGAEIEEEEDDS[Phospho (STY)]EEEEIK_2                                 | -0.290270158 | Q9WV69_S226_M1_Dmtn    |
| _GAEEEEEEEDDS[Phospho (STY)]EEEEIKAIR_3                              | 0.008154246  | Q9WV69_S226_M1_Dmtn    |
| _QRESVGGG[Phospho (STY)]PQSK_2                                       | 0.095041737  | Q9WV69_S156_M1_Dmtn    |
| _TRS[Phospho (STY)]LPDR_2                                            | -0.241300143 | Q9WV69_S269_M1_Dmtn    |
| _S[Phospho (STY)]LPDRTPFHTSLHSGTSK_3                                 | -0.033149287 | Q9WV69_S269_M1_Dmtn    |
| _VFAM[Oxidation (M)]S[Phospho (STY)]PEEFGK_2                         | 0.120440533  | Q9WV69_S383_M1_Dmtn    |
| _MDNQVLGYK_2                                                         | -0.291842024 | #N/A                   |
| _LQS[Phospho (STY)]TEFSPSGSEAGSPGLQNGEGQR_3                          | -0.121190637 | Q9WV69_S303_M1_Dmtn    |
| _KGAEIEEEEDDS[Phospho (STY)]EEEEIKAIR_3                              | -0.006731659 | Q9WV69_S226_M1_Dmtn    |
| _S[Phospho (STY)]VDVADNR_2                                           | -0.444486764 | Q9WV72_S35_M1_Asb3     |
| _GRS[Phospho (STY)]VDVADNR_2                                         | -0.087524082 | Q9WV72_S35_M1_Asb3     |
| _SSS[Phospho (STY)]PLDRDPAFR_2                                       | -0.14546271  | Q9WV89_S12_M1_Stxbp4   |
| _VESTSVGSIS[Phospho (STY)]PGGAK_2                                    | -0.186153736 | Q9WV92_S804_M1_Epb41I3 |
| _ETEIT[Phospho (STY)]PEDGED_2                                        | 0.26878719   | Q9WV92_T923_M1_Epb41I3 |
| _DSVS[Phospho (STY)]AAEVGTGQYATTK_2                                  | -0.046344173 | Q9WV92_S470_M1_Epb41I3 |
| _KKAEEAT[Phospho (STY)]PVTALR_3                                      | -0.082127992 | Q9WV92_T518_M1_Epb41I3 |
| _RLS[Phospho (STY)]TSPVR_2                                           | -0.430205592 | Q9WV92_S599_M1_Epb41I3 |
| _EVPVHTETK_2                                                         | 0.119002038  | #N/A                   |
| _AEEAT[Phospho (STY)]PVTALR_2                                        | 0.143774286  | Q9WV92_T518_M1_Epb41I3 |
| _ASALIDRPAPYFER_3                                                    | -0.049012038 | #N/A                   |
| _SHFESSTVR_2                                                         | 0.174743739  | #N/A                   |
| _LM[Oxidation (M)]DGSEILSLLESAR_2                                    | -0.264349999 | #N/A                   |
| _KAEAT[Phospho (STY)]PVTALR_2                                        | -0.273363525 | Q9WV92_T518_M1_Epb41I3 |
| _DEVDAAEEST[Phospho (STY)]PTDR_2                                     | 0.005367122  | Q9WV92_T725_M1_Epb41I3 |

|                                                                              |              |                         |
|------------------------------------------------------------------------------|--------------|-------------------------|
| _TEPVAAEVSTPHQPPLS[Phospho (STY)]TEK_.3                                      | 0.010080366  | Q9WV92_S686_M1_Epb41I3  |
| _QLEYQQFEDDKLS[Phospho (STY)]QR_.3                                           | -0.23947651  | Q9WV92_S96_M1_Epb41I3   |
| _TFLETSTETALTNEWK_.2                                                         | 0.114732043  | #N/A                    |
| _VLQETILVEER_.2                                                              | 0.207861837  | #N/A                    |
| _ELEDKVIELHK_.2                                                              | -0.448638973 | #N/A                    |
| _LSTS[Phospho (STY)]PVR_.2                                                   | -0.312713982 | Q9WV92_S601_M1_Epb41I3  |
| _EIGDKDRDFAAAAAK_.3                                                          | 0.185294343  | #N/A                    |
| _VVVHKETEIT[Phospho (STY)]PEDGED_.2                                          | -0.394329649 | Q9WV92_T923_M1_Epb41I3  |
| _S[Phospho (STY)]SSS[Phospho (STY)]KLSR_.2                                   | 0.151635949  | Q9WV92_S102_M2_Epb41I3  |
| _FAPNHTK_.2                                                                  | 0.231388836  | #N/A                    |
| _GKEGSS[Phospho (STY)]VTEAAK_.2                                              | -0.151862732 | Q9WV92_S740_M1_Epb41I3  |
| _QQPALEQFPEAAAHST[Phospho (STY)]PVKR_.4                                      | 0.007470209  | Q9WV92_T64_M1_Epb41I3   |
| _TITYESSQVDPGADLEPGVLM[Oxidation (M)]SAQTITSETSTTTTHITK_.4                   | -0.156729749 | #N/A                    |
| _GIS[Phospho (STY)]QTNLITVT[Phospho (STY)]PEKK_.2                            | -0.282675448 | Q9WV92_S486_M2_Epb41I3  |
| _SSSSKLS[Phospho (STY)]RS[Phospho (STY)]PLK_.2                               | 0.072778744  | Q9WV92_S105_M2_Epb41I3  |
| _VTLLDGSEYGC[Carbamidomethyl (C)]DVDKR_.3                                    | 0.065828877  | #N/A                    |
| _LSRS[Phospho (STY)]PLK_.2                                                   | 0.19039672   | Q9WV92_S107_M1_Epb41I3  |
| _GISQTNLITVT[Phospho (STY)]PEK_.2                                            | -0.065039829 | Q9WV92_T495_M1_Epb41I3  |
| _QLEYQQFEDDKLSQRS[Phospho (STY)]S[Phospho (STY)]SSK_.3                       | 0.064913119  | Q9WV92_S100_M2_Epb41I3  |
| _DEVDAAE[Phospho (STY)]PTDRR_.2                                              | 0.096363318  | Q9WV92_T725_M1_Epb41I3  |
| _NWLDPK_.2                                                                   | -0.230515999 | #N/A                    |
| _EQHPDMSVTK_.2                                                               | 0.011994189  | #N/A                    |
| _IVITGDADIDHDQALAAIK_.3                                                      | -0.251279768 | #N/A                    |
| _S[Phospho (STY)]LDGASVSENHEIYM[Oxidation (M)]K_.2                           | -0.067206293 | Q9WV92_S451_M1_Epb41I3  |
| _AEEERVEEEDRR_.3                                                             | 0.07455885   | #N/A                    |
| _TFLETSTETALTNEWK_.3                                                         | -0.245039321 | #N/A                    |
| _VC[Carbamidomethyl (C)]VEHHTFFR_.3                                          | -0.334100335 | #N/A                    |
| _LTETC[Carbamidomethyl (C)]FLDC[Carbamidomethyl (C)]VK_.2                    | 0.388153404  | #N/A                    |
| _EFLGTYNK_.2                                                                 | -0.080309938 | #N/A                    |
| _EVKPEEVC[Carbamidomethyl (C)]SEHC[Carbamidomethyl (C)]LQK_.3                | 0.180857492  | #N/A                    |
| _FQYHIQQNEALAAK_.2                                                           | 0.228545888  | #N/A                    |
| _FIDTSQFILNR_.2                                                              | -0.003004328 | #N/A                    |
| _SKPVFSESL[Phospho (STY)]D_.2                                                | 0.150577952  | Q9WVA2_S96_M1_Timm8a1   |
| _LDS[Phospho (STY)]RAEAC[Carbamidomethyl (C)]FVNC[Carbamidomethyl (C)]VER_.3 | -0.169175461 | Q9WVA2_S57_M1_Timm8a1   |
| _VAVEYLDPS[Phospho (STY)]PEVQK_.2                                            | 0.114497779  | Q9WVA3_S211_M1_Bub3     |
| _NFS[Phospho (STY)]DNQLQEGK_.2                                               | 0.485839444  | Q9WVA4_S163_M1_TagIn2   |
| _LDSGQVGLYPANYVEAIQ_.2                                                       | -0.133707919 | #N/A                    |
| _AYAQLTEWAR_.2                                                               | 0.265591256  | #N/A                    |
| _SSS[Phospho (STY)]PIPLTPSK_.2                                               | -0.249675742 | Q9WVG9_S404_M1_Msl3     |
| _WPGS[Phospho (STY)]PTSR_.2                                                  | -0.081684514 | Q9WVH4_S293_M1_Foxo3    |
| _PHPSISEDEGFDC[Carbamidomethyl (C)]LSS[Phospho (STY)]PER_.3                  | 0.245748835  | Q9WVI9_S337_M1_MapK8ip1 |
| _GSIDEVDKR_.2                                                                | -0.27426567  | #N/A                    |
| _DKPTYDEIFYTLS[Phospho (STY)]PVNGK_.3                                        | -0.043303376 | Q9WVK4_S456_M1_Ehd1     |
| _S[Phospho (STY)]SFPDSTEAFDPR_.2                                             | -0.126435785 | Q9WVQ1_S725_M1_Magi2    |
| _GGFFS[Phospho (STY)]PWK_.2                                                  | -0.190598781 | Q9WVQ1_S685_M1_Magi2    |
| _IIPQEELNS[Phospho (STY)]PTSAPSSEK_.2                                        | 0.426656944  | Q9WVQ1_S1013_M1_Magi2   |
| _M[Oxidation (M)]DS[Phospho (STY)]SGPDYKELDVHLR_.3                           | -0.10084755  | Q9WVQ1_S768_M1_Magi2    |

|                                                                           |              |                        |
|---------------------------------------------------------------------------|--------------|------------------------|
| _GAQGFGTIADS[Phospho (STY)]PTGQR_2                                        | 0.17686087   | Q9WVQ1_S621_M1_Magi2   |
| _SPGSVSTHSS[Phospho (STY)]PR_2                                            | 0.106426307  | Q9WVQ1_S884_M1_Magi2   |
| _NKS[Phospho (STY)]VTNMEK_2                                               | 0.13790977   | Q9WVQ1_S219_M1_Magi2   |
| _AGPGDRDPPS[Phospho (STY)]RGEESR_3                                        | 0.003363978  | Q9WVR4_S477_M1_Fxr2    |
| _TDGS[Phospho (STY)]ISGDRQPVTVADYISR_3                                    | 0.000425185  | Q9WVR4_S602_M1_Fxr2    |
| _EAEPDLLAVLR_2                                                            | -0.031959597 | #N/A                   |
| _IFDAVGFTFPNR_2                                                           | -0.05919806  | #N/A                   |
| _IPILSTFLTR_2                                                             | -0.152708544 | #N/A                   |
| _GLSEDFQR_2                                                               | 0.161124192  | #N/A                   |
| _EVC[Carbamidomethyl (C)]QLLPFLVR_2                                       | -0.06236649  | #N/A                   |
| _EGAPSLLC[Carbamidomethyl (C)]K_2                                         | -0.088535215 | #N/A                   |
| _DLQAGLAR_2                                                               | 0.160273344  | #N/A                   |
| _TLYEEAEASDISQQVANLAISPTT[Phospho (STY)]PGPSWPGDALR_4                     | -0.255325465 | Q9Z0E0_T451_M1_Ncdn    |
| _NDSEQFAALLLVTK_2                                                         | 0.10080789   | #N/A                   |
| _EAPDGC[Carbamidomethyl (C)]PDHVLRL_2                                     | 0.20565907   | #N/A                   |
| _SM[Oxidation (M)]IDDTYQC[Carbamidomethyl (C)]LTAVAGTPR_2                 | -0.482796107 | #N/A                   |
| _LQAGEETASHYR_2                                                           | 0.477660197  | #N/A                   |
| _LLSTS[Phospho (STY)]PALQGTPASR_2                                         | 0.054458309  | Q9Z0E0_S583_M1_Ncdn    |
| _EAIGAVIHVLLQVGPEK_2                                                      | 0.133963545  | #N/A                   |
| _DGEES[Phospho (STY)]PTVLK_2                                              | 0.1054996    | Q9Z0E8_S548_M1_Slc22a5 |
| _S[Phospho (STY)]FEDLTDHPVTR_2                                            | 0.163940655  | Q9Z0F8_S794_M1_Adam17  |
| _ASENQS[Phospho (STY)]PSSSNYFSPR_2                                        | 0.017668882  | Q9Z0G7_S203_M1_Zbtb22  |
| _ELFEPYGAVYQINVLR_2                                                       | 0.126510178  | #N/A                   |
| _SWS[Phospho (STY)]EKEK_2                                                 | -0.466666312 | Q9Z0H4_S52_M1_Celf2    |
| _VM[Oxidation (M)]FSPFGQIEEC[Carbamidomethyl (C)]R_2                      | -0.174746393 | #N/A                   |
| _IGFPSTS[Phospho (STY)]PAK_2                                              | -0.440065692 | Q9Z0H8_S295_M1_Clip2   |
| _QAS[Phospho (STY)]GPSSSGAATTVSEKPGPK_3                                   | 0.028783848  | Q9Z0H8_S50_M1_Clip2    |
| _YSLIDPAS[Phospho (STY)]PPELLK_2                                          | -0.427688841 | Q9Z0H8_S980_M1_Clip2   |
| _TGNESGSNLS[Phospho (STY)]DSGSVK_2                                        | -0.05321373  | Q9Z0H8_S208_M1_Clip2   |
| _EGS[Phospho (STY)]PLHK_2                                                 | -0.386309221 | Q9Z0H8_S43_M1_Clip2    |
| _VLLLEANRHS[Phospho (STY)]PGPER_3                                         | -0.346325367 | Q9Z0H8_S924_M1_Clip2   |
| _QQHIEQLLAER_3                                                            | 0.139266246  | #N/A                   |
| _TGNESGSNLS[Phospho (STY)]DSGS[Phospho (STY)]VKR_2                        | 0.001648627  | Q9Z0H8_S208_M2_Clip2   |
| _VTQPLGT[Phospho (STY)]PTK_2                                              | -0.058089102 | Q9Z0J4_T128_M1_Nos1    |
| _KSS[Phospho (STY)]GDGPDLR_2                                              | -0.024113037 | Q9Z0J4_S858_M1_Nos1    |
| _GNVPVVLNNPYSENEQSPASGKQS[Phospho (STY)]PTK_3                             | -0.239082389 | Q9Z0J4_S287_M1_Nos1    |
| _SETLVNAQQT[Phospho (STY)]PLGT[Phospho (STY)]PKENR_2                      | -0.325649507 | #N/A                   |
| _EPAPLNGS[Phospho (STY)]AAELPATK_2                                        | -0.148000513 | Q9Z0P4_S345_M1_Palm    |
| _VLGLQDTIK_2                                                              | 0.422334443  | #N/A                   |
| _GLAEDVTR_2                                                               | 0.049476892  | #N/A                   |
| _GLEESITR_2                                                               | 0.042822357  | #N/A                   |
| _ADEVTLS[Phospho (STY)]EAGSTAGPAEPR_2                                     | -0.016223221 | Q9Z0P4_S244_M1_Palm    |
| _SETLVNAQQT[Phospho (STY)]PLGT[Phospho (STY)]PK_2                         | -0.139208962 | #N/A                   |
| _EIDVLEFGESAPAASK_2                                                       | -0.226951247 | #N/A                   |
| _EENQTGPTTT[Phospho (STY)]PS[Phospho (STY)]DTQDLDM[Oxidation (M)]K_2      | -0.16322925  | Q9Z0P4_S365_M2_Palm    |
| _ [Acetyl (Protein N-term)]M[Oxidation (M)]EVLATDTAS[Phospho (STY)]QQER_2 | -0.296255606 | Q9Z0P4_S10_M1_Palm     |
| _AELVIEDAATPR_2                                                           | 0.198192925  | #N/A                   |

|                                                                                              |              |                       |
|----------------------------------------------------------------------------------------------|--------------|-----------------------|
| _EENQTGPTTTPS[Phospho (STY)]DT[Phospho (STY)]QDLDM[Oxidation (M)]KKPR_3                      | 0.117350567  | Q9Z0P4_S365_M2_Palm   |
| _ENSAAPSPGRPQSAS[Phospho (STY)]PAKEEQK_3                                                     | 0.011939872  | Q9Z0P4_S124_M1_Palm   |
| _TST[Phospho (STY)]PVRS[Phospho (STY)]PGGSTMM[Oxidation (M)]K_2                              | 0.304378442  | Q9Z0P4_S157_M2_Palm   |
| _WLLEGTSSASEGDEDMRK_3                                                                        | 0.156136791  | #N/A                  |
| _PQSAS[Phospho (STY)]PAKEEQK_2                                                               | -0.150917343 | Q9Z0P4_S124_M1_Palm   |
| _EEQKSETLVNAQQT[Phospho (STY)]PLGT[Phospho (STY)]PKENR_3                                     | -0.138787601 | #N/A                  |
| _ENSAAPS[Phospho (STY)]PGRPQSASPAK_2                                                         | -0.6897282   | Q9Z0P4_S116_M1_Palm   |
| _S[Phospho (STY)]PGGSTMMK_2                                                                  | 0.352010448  | #N/A                  |
| _ETIELVHTEPTNVAQLPSR_3                                                                       | 0.106358507  | #N/A                  |
| _VIIEDEQLVLGASQEPVGR_2                                                                       | 0.194196497  | #N/A                  |
| _AVLPLDDAQEPC[Carbamidomethyl (C)]YLLFR_2                                                    | -0.314050316 | #N/A                  |
| _KDS[Phospho (STY)]LGSDSSTAIIPHELIR_3                                                        | -0.309438154 | Q9Z0P7_S346_M1_Sufu   |
| _RLS[Phospho (STY)]GKDTEQIR_3                                                                | -0.256193732 | Q9Z0P7_S301_M1_Sufu   |
| _LPEEPSS[Phospho (STY)]EDEQQPEK_2                                                            | -0.164338637 | Q9Z0R4_S335_M1_Itsn1  |
| _STS[Phospho (STY)]IDTGPTESPASLK_2                                                           | -0.03505518  | Q9Z0R4_S971_M1_Itsn1  |
| _QRS[Phospho (STY)]LEAAR_2                                                                   | -0.313060335 | Q9Z0R4_S623_M1_Itsn1  |
| _QVQQNS[Phospho (STY)]LHR_2                                                                  | -0.024027514 | Q9Z0R4_S558_M1_Itsn1  |
| _STS[Phospho (STY)]IDTGPTESPASLKR_2                                                          | -0.388170698 | Q9Z0R4_S971_M1_Itsn1  |
| _KSTS[Phospho (STY)]IDTGPTESPASLKR_3                                                         | -0.318616348 | Q9Z0R4_S971_M1_Itsn1  |
| _SAFTPATATGSSPS[Phospho (STY)]PVLGQGEK_2                                                     | 0.133519836  | Q9Z0R4_S897_M1_Itsn1  |
| _LLS[Phospho (STY)]PGTSKIT[Phospho (STY)]PTELPK_2                                            | 0.181443057  | Q9Z0R4_S1130_M2_Itsn1 |
| _LPEEPSS[Phospho (STY)]EDEQQPEKK_2                                                           | -0.443862941 | Q9Z0R4_S335_M1_Itsn1  |
| _SGS[Phospho (STY)]GM[Oxidation (M)]SVISSSSVDQR_2                                            | 0.44117126   | Q9Z0R4_S315_M1_Itsn1  |
| _LLS[Phospho (STY)]PGTSK_2                                                                   | -0.337424935 | Q9Z0R4_S1130_M1_Itsn1 |
| _SNPYC[Carbamidomethyl (C)]EVTM[Oxidation (M)]GS[Phospho (STY)]QC[Carbamidomethyl (C)]HITK_2 | -0.160531712 | Q9Z0R4_S1620_M1_Itsn1 |
| _DQFS[Phospho (STY)]PDDFLGR_2                                                                | -0.717507081 | Q9Z0R4_S1663_M1_Itsn1 |
| _AQS[Phospho (STY)]FDVASAPPAEWAQSSR_2                                                        | -0.161613548 | Q9Z0R4_S203_M1_Itsn1  |
| _NYEYASHVPESVK_2                                                                             | -0.062780281 | #N/A                  |
| _IIQLIEGK_2                                                                                  | -0.02995071  | #N/A                  |
| _LTDIHGNALQYNK_3                                                                             | 0.146330544  | #N/A                  |
| _SHSNQLVTDC[Carbamidomethyl (C)]ISAMNPDTVLR_3                                                | -0.088948633 | #N/A                  |
| _LVQM[Oxidation (M)]SIC[Carbamidomethyl (C)]SSLAR_2                                          | -0.096282186 | #N/A                  |
| _Acetyl (Protein N-term)]ASSHTVLMR_2                                                         | 0.112387122  | #N/A                  |
| _VLIEDT[Phospho (STY)]DDEANT_2                                                               | 0.301212115  | Q9Z0U0_T689_M1_Xpr1   |
| _GSYGS[Phospho (STY)]DPEEEYR_2                                                               | 0.123628778  | Q9Z0U1_S1136_M1_Tjp2  |
| _AAS[Phospho (STY)]RDQLR_2                                                                   | -0.203430308 | Q9Z0U1_S960_M1_Tjp2   |
| _SNLPATAGSEIPGGST[Phospho (STY)]K_2                                                          | -0.236697466 | Q9Z0U1_T1009_M1_Tjp2  |
| _S[Phospho (STY)]IDRDYDR_2                                                                   | -0.121605245 | Q9Z0U1_S213_M1_Tjp2   |
| _S[Phospho (STY)]IDRDYDRDYER_3                                                               | -0.072084946 | Q9Z0U1_S213_M1_Tjp2   |
| _S[Phospho (STY)]QNREDSFDYSK_2                                                               | 0.15354961   | Q9Z0U1_S982_M1_Tjp2   |
| _S[Phospho (STY)]RGRS[Phospho (STY)]LER_2                                                    | -0.241059942 | Q9Z0U1_S169_M2_Tjp2   |
| _GRS[Phospho (STY)]IDRDYDR_3                                                                 | 0.302963918  | Q9Z0U1_S213_M1_Tjp2   |
| _KVQVAPLQGS[Phospho (STY)]PPLSHDDR_3                                                         | -0.321257474 | Q9Z0U1_S107_M1_Tjp2   |
| _EHLRS[Phospho (STY)]RS[Phospho (STY)]PS[Phospho (STY)]PESR_3                                | -0.178940865 | Q9Z0U1_S263_M3_Tjp2   |
| _DAS[Phospho (STY)]PPPAFKPEPPK_2                                                             | -0.291227607 | Q9Z0U1_S968_M1_Tjp2   |
| _SRS[Phospho (STY)]PS[Phospho (STY)]PESR_2                                                   | 0.01355562   | Q9Z0U1_S265_M2_Tjp2   |
| _RQQYS[Phospho (STY)]DQDYHS[Phospho (STY)]S[Phospho (STY)]TEKLK_3                            | -0.321013697 | Q9Z0U1_S404_M3_Tjp2   |

|                                                                                               |              |                        |
|-----------------------------------------------------------------------------------------------|--------------|------------------------|
| _VQVAPLQGS[Phospho (STY)]PPLSHDDR_3                                                           | 0.104052786  | Q9Z0U1_S107_M1_Tjp2    |
| _GSYGS[Phospho (STY)]DPEEEYRQQLAAHSK_3                                                        | -0.315093321 | Q9Z0U1_S1136_M1_Tjp2   |
| _M[Oxidation (M)]SYLTAM[Oxidation (M)]GADYLS[Phospho (STY)]C[Carbamidomethyl (C)]DSR_2        | -0.48698449  | #N/A                   |
| _SYHEAYEPDYGGGYS[Phospho (STY)]PSYDR_3                                                        | 0.145657413  | Q9Z0U1_S239_M1_Tjp2    |
| _ERPS[Phospho (STY)]SREETSGR_3                                                                | -0.391134466 | Q9Z0U1_S420_M1_Tjp2    |
| _HSSHDMLSHS[Phospho (STY)]WEGNRER_4                                                           | 0.325567618  | Q9Z0U1_S147_M1_Tjp2    |
| _HSSHDMLSHS[Phospho (STY)]WEGNR_3                                                             | -0.072667874 | Q9Z0U1_S147_M1_Tjp2    |
| _RQQYS[Phospho (STY)]DQDYHSSTEK_3                                                             | -0.279112001 | Q9Z0U1_S404_M1_Tjp2    |
| _SRHS[Phospho (STY)]S[Phospho (STY)]HDMLSHSWEGNR_4                                            | -0.349196694 | Q9Z0U1_S139_M2_Tjp2    |
| _LAGGNDVGIFVAGIQEGTSAEQEGLQEGDQILK_3                                                          | -0.043724323 | #N/A                   |
| _GS[Phospho (STY)]VQELSTIQIR_2                                                                | 0.031089573  | Q9Z0V2_S552_M1_Kcnd2   |
| _TPLSNS[Phospho (STY)]RSS[Phospho (STY)]LNAK_2                                                | -0.25588926  | Q9Z0V2_S572_M2_Kcnd2   |
| _IPNANVS[Phospho (STY)]GSHR_2                                                                 | 0.036491562  | Q9Z0V2_S546_M1_Kcnd2   |
| _ADIVESLC[Carbamidomethyl (C)]SESTATS[Phospho (STY)]PV_2                                      | -0.029355521 | Q9Z0W1_S425_M1_Ngfr    |
| _AIASATEGGSVPQIR_2                                                                            | 0.269185427  | #N/A                   |
| _SITVIGGGFLGSELAC[Carbamidomethyl (C)]ALGR_2                                                  | 0.235798374  | #N/A                   |
| _[Acetyl (Protein N-term)]AALTDVQR_2                                                          | 0.276121522  | #N/A                   |
| _VQVALGNIASK_2                                                                                | -0.033226192 | #N/A                   |
| _LAQIHQQDQC[Carbamidomethyl (C)]VAITEESK_3                                                    | 0.049349001  | #N/A                   |
| _LTGPSSVGPPTDPDS[Phospho (STY)]DDDSSDLVIENR_3                                                 | 0.090652508  | Q9Z101_S278_M1_Pard6a  |
| _LM[Oxidation (M)]HDAS[Phospho (STY)]DS[Phospho (STY)]EVDQDDVVEWK_3                           | 0.239199153  | Q9Z103_S959_M2_Adnp    |
| _VFGGLS[Phospho (STY)]PDTSEEQIK_2                                                             | 0.441593306  | Q9Z130_S122_M1_Hnrnpdl |
| _DLTEYLSR_2                                                                                   | -0.229117751 | #N/A                   |
| _YHQIGSGK_2                                                                                   | -0.244350631 | #N/A                   |
| _[Acetyl (Protein N-term)]MEDM[Oxidation (M)]NEYSNIEEFAEGSK_2                                 | 0.02957936   | #N/A                   |
| _NNLNPSWEPFR_2                                                                                | 0.037164206  | #N/A                   |
| _LLDGDDGPLR_2                                                                                 | 0.218114353  | #N/A                   |
| _SC[Carbamidomethyl (C)]SS[Phospho (STY)]PVFSR_2                                              | -0.232129692 | Q9Z140_S68_M1_Cpne6    |
| _C[Carbamidomethyl (C)]VLAEVPR_2                                                              | 0.002122187  | #N/A                   |
| _PSTPAM[Oxidation (M)]TPSPS[Phospho (STY)]P_2                                                 | -0.248478226 | Q9Z140_S556_M1_Cpne6   |
| _SSQSLHC[Carbamidomethyl (C)]LS[Phospho (STY)]PR_2                                            | -0.349439426 | Q9Z140_S330_M1_Cpne6   |
| _[Acetyl (Protein N-term)]S[Phospho (STY)]DPEM[Oxidation (M)]GWVPEPPAM[Oxidation (M)]TLGASR_2 | -0.283924285 | #N/A                   |
| _LYSDEQWVEVER_2                                                                               | -0.144897869 | #N/A                   |
| _YSVLLVLTGVSVD[Oxidation (M)]AETR_2                                                           | -0.263436579 | #N/A                   |
| _TEVLRSC[Carbamidomethyl (C)]S[Phospho (STY)]S[Phospho (STY)]PVFSR_2                          | -0.280507809 | Q9Z140_S67_M2_Cpne6    |
| _VLAIEYFFEEK_2                                                                                | -0.179939452 | #N/A                   |
| _VAGQDGSVVQFK_2                                                                               | 0.027940941  | #N/A                   |
| _[Acetyl (Protein N-term)]S[Phospho (STY)]EEKPKEGVK_2                                         | -0.449962099 | Q9Z172_S2_M1_Sumo3     |
| _NNPS[Phospho (STY)]PPPDSDLER_2                                                               | 0.060889006  | Q9Z191_S338_M1_Eya4    |
| _NDSIPQEDFTPDVYR_2                                                                            | -0.325725398 | #N/A                   |
| _YNEIQNDYLR_2                                                                                 | 0.075622349  | #N/A                   |
| _WDDSTIVTPILR_2                                                                               | 0.196421683  | #N/A                   |
| _SYIQEVVQYIK_2                                                                                | 0.348727522  | #N/A                   |
| _SPVEFVEYNK_2                                                                                 | 0.248254569  | #N/A                   |
| _EVIEAIAEC[Carbamidomethyl (C)]AFK_2                                                          | 0.151876098  | #N/A                   |
| _LQVTPEGR_2                                                                                   | 0.18413658   | #N/A                   |
| _LIFGDALLM[Oxidation (M)]EPLEK_2                                                              | 0.396687273  | #N/A                   |

|                                                                                |              |                         |
|--------------------------------------------------------------------------------|--------------|-------------------------|
| _EADPGETS[Phospho (STY)]SEAPSETR_.2                                            | -0.069731486 | Q9Z1B3_S848_M1_Plcb1    |
| _VGTYVEVDM[Oxidation (M)]FGLPVDTR_.2                                           | 0.055871775  | #N/A                    |
| _TSPFPILLSFENHVDSPK_.2                                                         | 0.062768981  | #N/A                    |
| _SEPSS[Phospho (STY)]PDHGSSAIEQDLAALDAEM[Oxidation (M)]TQK_.3                  | -0.359842942 | Q9Z1B3_S982_M1_Plcb1    |
| _VNLKS[Phospho (STY)]PSSEEIERENPGR_.3                                          | -0.382015829 | Q9Z1B3_S1197_M1_Plcb1   |
| _YVNLM[Oxidation (M)]EQR_.2                                                    | -0.011534835 | #N/A                    |
| _SPS[Phospho (STY)]SEEIER_.2                                                   | -0.040898314 | Q9Z1B3_S1199_M1_Plcb1   |
| _ELLDVGNIGHLEQR_.2                                                             | -0.278253619 | #N/A                    |
| _KSEPSPDPHGSS[Phospho (STY)]AIEQDLAALDAEM[Oxidation (M)]TQK_.4                 | -0.429321312 | Q9Z1B3_S988_M1_Plcb1    |
| _FESFEISK_.2                                                                   | -0.456954923 | #N/A                    |
| _C[Carbamidomethyl (C)]VELDC[Carbamidomethyl (C)]WK_.2                         | -0.263433963 | #N/A                    |
| _VNLKS[Phospho (STY)]PSSEEIER_.2                                               | -0.45034858  | Q9Z1B3_S1197_M1_Plcb1   |
| _LTDVAEEC[Carbamidomethyl (C)]QNNQLKK_.2                                       | -0.111594598 | #N/A                    |
| _KKSEPSPDPHGS[Phospho (STY)]S[Phospho (STY)]AIEQDLAALDAEM[Oxidation (M)]TQK_.4 | 0.014248891  | Q9Z1B3_S987_M2_Plcb1    |
| _SPS[Phospho (STY)]SEEIERENPGR_.2                                              | -0.489200758 | Q9Z1B3_S1199_M1_Plcb1   |
| _DYVPDTYADVIEALSNIPIR_.2                                                       | -0.083958561 | #N/A                    |
| _SPS[Phospho (STY)]SEEIERENPGREFDTPL_.3                                        | 0.21107058   | Q9Z1B3_S1199_M1_Plcb1   |
| _VFLNNLC[Carbamidomethyl (C)]PRPEIDNIFSEFGAK_.3                                | -0.077044101 | #N/A                    |
| _GIPLPTGDTs[Phospho (STY)]PEPELLPGDPLPPPK_.3                                   | -0.071883524 | Q9Z1D1_S42_M1_Eif3g     |
| _HSS[Phospho (STY)]PHQS[Phospho (STY)]EDEEEPR_.2                               | -0.06354663  | Q9Z1E4_S653_M2_Gys1     |
| _GVTQIDNDLK_.2                                                                 | -0.156497946 | #N/A                    |
| _Acetyl (Protein N-term)]TEFWLISAPGEK_.2                                       | -0.111828844 | #N/A                    |
| _GNLQNLER_.2                                                                   | -0.168096915 | #N/A                    |
| _VGTLDLVLVGLSDELAk_.2                                                          | -0.1731409   | #N/A                    |
| _IDC[Carbamidomethyl (C)]NLEFK_.2                                              | -0.035846575 | #N/A                    |
| _SSNVLSEDQDSYLC[Carbamidomethyl (C)]NVTLFR_.2                                  | -0.364652701 | #N/A                    |
| _ASAYNNLK_.2                                                                   | 0.30480772   | #N/A                    |
| _NNNLAVSSK_.2                                                                  | -0.238113015 | #N/A                    |
| _KAVDDFR_.2                                                                    | 0.109508422  | #N/A                    |
| _VQENLLASGVDLVTYITR_.3                                                         | -0.507034884 | #N/A                    |
| _FNIPDLK_.2                                                                    | -0.005769825 | #N/A                    |
| _NISEIIAK_.2                                                                   | 0.278449201  | #N/A                    |
| _TC[Carbamidomethyl (C)]QQTWEK_.2                                              | -0.099410569 | #N/A                    |
| _SRAS[Phospho (STY)]AYNNLK_.2                                                  | 0.469792609  | Q9Z1G3_S141_M1_Atp6v1c1 |
| _LDAFVEGVVK_.2                                                                 | -0.2789594   | #N/A                    |
| _VAQYMADVLEDSKDK_.3                                                            | -0.026336556 | #N/A                    |
| _DLNPDVNVFQR_.2                                                                | -0.243693993 | #N/A                    |
| _FLPFSFEHIR_.2                                                                 | -0.111897627 | #N/A                    |
| _HLGTLNFGGIR_.2                                                                | -0.255112315 | #N/A                    |
| _LGFVAGVINR_.2                                                                 | -0.066740999 | #N/A                    |
| _NFLELTELK_.2                                                                  | 0.129567114  | #N/A                    |
| _FYGTGFK_.2                                                                    | -0.168753758 | #N/A                    |
| _GTEHSGSTVPSILNR_.2                                                            | 0.175452129  | #N/A                    |
| _KANIPIMDTGENPEVPFPR_.3                                                        | 0.503878273  | #N/A                    |
| _ANIPIM[Oxidation (M)]DTGENPEVPFPR_.2                                          | -0.116365261 | #N/A                    |
| _LHWVEFQNK_.2                                                                  | 0.187794785  | #N/A                    |
| _IDDLQM[Oxidation (M)]VLNQTEDHR_.3                                             | -0.132145482 | #N/A                    |

|                                                               |              |                        |
|---------------------------------------------------------------|--------------|------------------------|
| _QAEIENPLEDPVTGDYVHK_.3                                       | -0.095114996 | #N/A                   |
| _FTHGFQNIVDAYGIGTYR_.3                                        | -0.356791768 | #N/A                   |
| _AIYHTLNLC[Carbamidomethyl (C)]NIDVTQK_.2                     | -0.494270311 | #N/A                   |
| _ASLYPC[Carbamidomethyl (C)]PETPQER_.2                        | -0.107586189 | #N/A                   |
| _EINTNQEALKR_.2                                               | 0.34067153   | #N/A                   |
| _DM[Oxidation (M)]IDLEANFEKIENELK_.3                          | -0.121419843 | #N/A                   |
| _M[Oxidation (M)]QTNQTPPTYNK_.2                               | 0.141392956  | #N/A                   |
| _DMIDLEANFEK_.2                                               | 0.249218468  | #N/A                   |
| _ERIPTFER_.2                                                  | 0.244611189  | #N/A                   |
| _SVFIIFQGDQLK_.2                                              | 0.313207786  | #N/A                   |
| _SPAS[Phospho (STY)]LEGHT[Phospho (STY)]GK_.2                 | -0.020283426 | Q9Z1J2_S343_M2_Nek4    |
| _RSSDGGDGEGS[Phospho (STY)]ELVKPLYPSENK_.3                    | 0.195945862  | Q9Z1J2_S438_M1_Nek4    |
| _VSS[Phospho (STY)]PEDSPAGTPQR_.2                             | -0.102584644 | Q9Z1K7_S2143_M1_Apc2   |
| _RGS[Phospho (STY)]DGEARPLPR_.3                               | -0.381873771 | Q9Z1K7_S2099_M1_Apc2   |
| _APS[Phospho (STY)]PEQQR_.2                                   | 0.099965001  | Q9Z1K7_S1805_M1_Apc2   |
| _FHAPALGPEPAART[Phospho (STY)]PEGS[Phospho (STY)]PVHGSGPSK_.4 | 0.121222488  | Q9Z1K7_S108_M2_Apc2    |
| _GLAITFVSDENDAK_.2                                            | 0.337024547  | #N/A                   |
| _DVQEIFR_.2                                                   | 0.005441723  | #N/A                   |
| _NWASGQDLQAK_.2                                               | -0.133449693 | #N/A                   |
| _LSNNYYC[Carbamidomethyl (C)]TR_.2                            | 0.363749396  | #N/A                   |
| _AAESSAM[Oxidation (M)]AATEK_.2                               | 0.139390377  | #N/A                   |
| _YQEIAKR_.2                                                   | 0.370453959  | #N/A                   |
| _DINLDVNR_.2                                                  | -0.427125328 | #N/A                   |
| _[Acetyl (Protein N-term)]SILYVSPHPDAFPSLR_.2                 | -0.016971931 | #N/A                   |
| _LSATVTEAFVR_.2                                               | -0.20649935  | #N/A                   |
| _PLTS[Phospho (STY)]PESLSR_.2                                 | -0.046887847 | Q9Z1R2_S1103_M1_Bag6   |
| _LQEDPNYS[Phospho (STY)]PQR_.2                                | 0.195565346  | Q9Z1R2_S1139_M1_Bag6   |
| _ESFSLVQVQPGVDIIR_.2                                          | 0.152839493  | #N/A                   |
| _TSPEPQRENAS[Phospho (STY)]PAPGTTAEEM[Oxidation (M)]SR_.3     | 0.067387361  | Q9Z1R2_S995_M1_Bag6    |
| _LQEDPNYS[Phospho (STY)]PQRFPNAHR_.3                          | -0.07464173  | Q9Z1R2_S1139_M1_Bag6   |
| _AAGARPLTS[Phospho (STY)]PESLSR_.2                            | 0.275716638  | Q9Z1R2_S1103_M1_Bag6   |
| _ENAS[Phospho (STY)]PAPGTTAEEMSR_.2                           | 0.206466604  | Q9Z1R2_S995_M1_Bag6    |
| _SNHVLAQMDHGDS[Phospho (STY)]A_.2                             | 0.294026996  | Q9Z1S3_S794_M1_Rasgrp1 |
| _VVNIIPVIAK_.2                                                | 0.290750085  | #N/A                   |
| _STLVNTLFK_.2                                                 | 0.158662814  | #N/A                   |
| _KASS[Phospho (STY)]WNR_.2                                    | -0.050641637 | Q9Z1S5_S92_M1_Septin3  |
| _THLQDLK_.2                                                   | 0.183742699  | #N/A                   |
| _YINEQYEK_.2                                                  | 0.140464221  | #N/A                   |
| _EVTHNIHYETYR_.3                                              | 0.270014812  | #N/A                   |
| _LTVIDTPGFGDQINNENC[Carbamidomethyl (C)]WEPIEK_.3             | -0.365365636 | #N/A                   |
| _ADTM[Oxidation (M)]TLEEK_.2                                  | 0.069909264  | #N/A                   |
| _AIGHVIEEGGVK_.2                                              | 0.606425704  | #N/A                   |
| _ASSWNREEK_.2                                                 | -0.186203007 | #N/A                   |
| _ASS[Phospho (STY)]C[Carbamidomethyl (C)]ETYEPAR_.2           | 0.146558337  | Q9Z1S8_S402_M1_Gab2    |
| _SAS[Phospho (STY)]FSQGTR_.2                                  | -0.098893956 | Q9Z1S8_S211_M1_Gab2    |
| _SSLTGS[Phospho (STY)]ETDNEDVYTFK_.2                          | -0.013825608 | Q9Z1S8_S282_M1_Gab2    |
| _EDGGLEDNEKNFYES[Phospho (STY)]EEEEEEKEK_.4                   | -0.434254661 | Q9Z1T1_S276_M1_Ap3b1   |

|                                                                   |              |                        |
|-------------------------------------------------------------------|--------------|------------------------|
| _NFYES[Phospho (STY)]EEEEEEKEK_2                                  | 0.090047643  | Q9Z1T1_S276_M1_Ap3b1   |
| _SAS[Phospho (STY)]ITNLSLDR_2                                     | -0.243724093 | Q9Z1T6_S307_M1_Pikfyve |
| _ [Acetyl (Protein N-term)]ATDDKSS[Phospho (STY)]PTLDSANDLPR_2    | -0.584091965 | Q9Z1T6_S8_M1_Pikfyve   |
| _SGSPMVPSYETSVS[Phospho (STY)]PQANR_2                             | -0.037065698 | Q9Z1T6_S329_M1_Pikfyve |
| _T[Phospho (STY)]PDIAQR_2                                         | -0.202724167 | Q9Z1W9_T366_M1_Stk39   |
| _RVPGSS[Phospho (STY)]GHLHK_3                                     | -0.511448049 | Q9Z1W9_S383_M1_Stk39   |
| _TEDGDWEWS[Phospho (STY)]DDEM[Oxidation (M)]DEKSEEGK_3            | -0.037072121 | Q9Z1W9_S397_M1_Stk39   |
| _TEDGDWEWS[Phospho (STY)]DDEM[Oxidation (M)]DEK_2                 | 0.231343229  | Q9Z1W9_S397_M1_Stk39   |
| _LLTRT[Phospho (STY)]PDIAQR_2                                     | -0.12842719  | Q9Z1W9_T366_M1_Stk39   |
| _VAGGSGSES[Phospho (STY)]PLLK_2                                   | -0.190473674 | Q9Z1X2_S16_M1_Ptdss2   |
| _RVAGGSGSES[Phospho (STY)]PLLK_2                                  | 0.208692606  | Q9Z1X2_S16_M1_Ptdss2   |
| _RPM[Oxidation (M)]EEDGEEKS[Phospho (STY)]PSK_3                   | 0.057783706  | Q9Z1X4_S382_M1_Ilf3    |
| _TVDFQTQDSNYLLTGGQDK_2                                            | 0.106619856  | #N/A                   |
| _C[Carbamidomethyl (C)]VLPEEDS[Phospho (STY)]GELAKPK_2            | -0.003221238 | Q9Z1Z2_S312_M1_Strap   |
| _GFAFVQYVNER_2                                                    | -0.012294941 | #N/A                   |
| _VFIGNLNTLVVK_2                                                   | -0.431317206 | #N/A                   |
| _M[Oxidation (M)]IAGQVLDINLAAEPK_2                                | -0.073807176 | #N/A                   |
| _SEEEQSSASVK_2                                                    | 0.430403036  | #N/A                   |
| _QADLSFSS[Phospho (STY)]PVEM[Oxidation (M)]K_2                    | -0.079094307 | Q9Z204_S232_M1_Hnrnpc  |
| _NEKS[Phospho (STY)]EEEQSSASVKK_3                                 | -0.507626582 | Q9Z204_S241_M1_Hnrnpc  |
| _NEKS[Phospho (STY)]EEEQSSASVK_2                                  | -0.26308884  | Q9Z204_S241_M1_Hnrnpc  |
| _SEEEQSSAS[Phospho (STY)]VKKDETNVK_3                              | 0.343757255  | Q9Z204_S249_M1_Hnrnpc  |
| _SDVEAIFSK_2                                                      | 0.102256051  | #N/A                   |
| _KHEDESEAWLHR_3                                                   | -0.109108232 | #N/A                   |
| _IYFLSTEDLPR_2                                                    | -0.060258465 | #N/A                   |
| _HLYSANTVDDFNR_2                                                  | -0.541247191 | #N/A                   |
| _TGEPDEEEGTFRSS[Phospho (STY)]IR_3                                | 0.138953794  | Q9Z239_S83_M1_Fxyd1    |
| _ [Acetyl (Protein N-term)]AAAGSAAVSGAGT[Phospho (STY)]PVAGPTGR_2 | 0.140654605  | Q9Z266_T14_M1_Snapin   |
| _AMLD\$GVYPPGS[Phospho (STY)]PSK_2                                | 0.110274242  | Q9Z266_S133_M1_Snapin  |
| _VVLVNNILQNAQER_2                                                 | -0.003568786 | #N/A                   |
| _RIS[Phospho (STY)]FKGT[Phospho (STY)]PTEEQVR_3                   | -0.089265598 | Q9Z268_S396_M2_Rasal1  |
| _LLEDSS[Phospho (STY)]LDTEVDPGR_2                                 | -0.369070154 | Q9Z268_S749_M1_Rasal1  |
| _LADDEGDS[Phospho (STY)]DSESVGQSR_2                               | -0.158837425 | Q9Z277_S1464_M1_Baz1b  |
| _EENVLGKVDR_2                                                     | -0.255208364 | #N/A                   |
| _ANS[Phospho (STY)]FVGTAQYVSPPELLTEK_2                            | -0.397447948 | Q9Z2A0_S244_M1_Pdpk1   |
| _KEGS[Phospho (STY)]KEFIHPQSIEEK_3                                | -0.131326841 | Q9Z2A5_S166_M1_Ate1    |
| _EFIHPQS[Phospho (STY)]IEEK_2                                     | -0.17250063  | Q9Z2A5_S174_M1_Ate1    |
| _EGS[Phospho (STY)]KEFIHPQSIEEK_3                                 | -0.415507098 | Q9Z2A5_S166_M1_Ate1    |
| _LEPVYSPAGS[Phospho (STY)]PPPGDPR_2                               | 0.390868905  | Q9Z2B9_S347_M1_Rps6ka4 |
| _RGS[Phospho (STY)]PVPASSGR_2                                     | 0.300004343  | Q9Z2B9_S745_M1_Rps6ka4 |
| _GSS[Phospho (STY)]PTHSATPVHTSV_2                                 | -0.335567088 | Q9Z2C4_S657_M1_Mtmr1   |
| _HPSIETLDS[Phospho (STY)]PTGSHVEWC[Carbamidomethyl (C)]K_3        | -0.147921559 | Q9Z2C4_S53_M1_Mtmr1    |
| _SPS[Phospho (STY)]QGEDSALILTQDNLK_2                              | -0.17236965  | Q9Z2C9_S595_M1_Mtmr7   |
| _S[Phospho (STY)]PSGGEHAPSEDSGKDR_3                               | 0.307266114  | Q9Z2C9_S634_M1_Mtmr7   |
| _S[Phospho (STY)]PSGGEHAPSEDSGK_2                                 | -0.062289945 | Q9Z2C9_S634_M1_Mtmr7   |
| _AS[Phospho (STY)]SPAQC[Carbamidomethyl (C)]VTPVQTVV_2            | 0.194360973  | Q9Z2D1_S630_M1_Mtmr2   |
| _SSS[Phospho (STY)]C[Carbamidomethyl (C)]ESLGAQLPAAR_2            | 0.124024357  | Q9Z2D1_S6_M1_Mtmr2     |



|                                                                        |              |                        |
|------------------------------------------------------------------------|--------------|------------------------|
| _SASAISDSISTSADNFS[Phospho (STY)]PDLR_.2                               | 0.004191106  | Q9Z2D1_S58_M1_Mtmr2    |
| _AETSESSGSAPAVPEASAS[Phospho (STY)]PK_.2                               | -0.191772662 | Q9Z2D6_S80_M1_Mecp2    |
| _VLEKS[Phospho (STY)]PGK_.2                                            | 0.169009119  | Q9Z2D6_S216_M1_Mecp2   |
| _GGGS[Phospho (STY)]LESDGC[Carbamidomethyl (C)]PKEPAK_.2               | -0.193245459 | Q9Z2D6_S421_M1_Mecp2   |
| _EGKHEPLQPSAHHSAEPAEAGKAETSESSGSAPAVPEASAS[Phospho (STY)]PK_.5         | -0.07449111  | Q9Z2D6_S80_M1_Mecp2    |
| _VGDTSLDPNDFDFTVTGR_.2                                                 | -0.053409053 | #N/A                   |
| _MPFQAS[Phospho (STY)]PGGK_.2                                          | -0.027212165 | Q9Z2D6_S229_M1_Mecp2   |
| _VRYDS[Phospho (STY)]SNQVK_.2                                          | -0.095777335 | Q9Z2D8_S85_M1_Mbd3     |
| _YLGGS[Phospho (STY)]M[Oxidation (M)]DLSTFDFR_.2                       | -0.205191068 | Q9Z2D8_S56_M1_Mbd3     |
| _AADTEEVDDIM[Oxidation (M)]DS[Phospho (STY)]GDEA_.2                    | 0.184388217  | Q9Z2E1_S410_M1_Mbd2    |
| _ILLDAQHES[Phospho (STY)]GQSSSR_.2                                     | -0.043033269 | Q9Z2F7_S81_M1_Bnip3l   |
| _DHSSQS[Phospho (STY)]EEEVVEGEKEVEALKK_.4                              | 0.003259868  | Q9Z2F7_S119_M1_Bnip3l  |
| _SVYGVTDETQSQS[Phospho (STY)]PVHIPSQPIR_.3                             | -0.147705646 | Q9Z2H2_S244_M1_Rgs6    |
| _KSVYGVTDETQSQS[Phospho (STY)]PVHIPSQPIRK_.4                           | -0.165693689 | Q9Z2H2_S244_M1_Rgs6    |
| _SVYGVTDETQSQS[Phospho (STY)]PVHIPSQPIRK_.3                            | -0.572235664 | Q9Z2H2_S244_M1_Rgs6    |
| _KSVYGVTDETQSQS[Phospho (STY)]PVHIPSQPIR_.3                            | -0.203530985 | Q9Z2H2_S244_M1_Rgs6    |
| _ETDPS[Phospho (STY)]PEER_.2                                           | -0.356951289 | Q9Z2H5_S868_M1_Epb41l1 |
| _LVS[Phospho (STY)]PEPPPK_.2                                           | -0.260744456 | Q9Z2H5_S378_M1_Epb41l1 |
| _S[Phospho (STY)]LPELDR_.2                                             | -0.227387654 | Q9Z2H5_S639_M1_Epb41l1 |
| _S[Phospho (STY)]LDGAEFR_.2                                            | -0.15149977  | Q9Z2H5_S430_M1_Epb41l1 |
| _IKELKPEQETT[Phospho (STY)]PR_.2                                       | -0.046051703 | Q9Z2H5_T489_M1_Epb41l1 |
| _S[Phospho (STY)]LPELDRDK_.2                                           | -0.32543135  | Q9Z2H5_S639_M1_Epb41l1 |
| _AGLREGS[Phospho (STY)]EEK_.2                                          | -0.37782463  | Q9Z2H5_S564_M1_Epb41l1 |
| _VTLLDASEYEC[Carbamidomethyl (C)]EVEK_.2                               | -0.332195775 | #N/A                   |
| _ETDPS[Phospho (STY)]PEERDK_.2                                         | 0.182888029  | Q9Z2H5_S868_M1_Epb41l1 |
| _DNHLAIER_.2                                                           | 0.065284136  | #N/A                   |
| _FAPNQTR_.2                                                            | -0.06564317  | #N/A                   |
| _KAQEETPQQPEAAAAVT[Phospho (STY)]PVT[Phospho (STY)]PAGHSHPETNSNEK_.4   | -0.546849048 | Q9Z2H5_T30_M2_Epb41l1  |
| _HQAS[Phospho (STY)]INELKR_.2                                          | -0.286407248 | Q9Z2H5_S510_M1_Epb41l1 |
| _S[Phospho (STY)]EAEEGEVR_.2                                           | 0.294210707  | Q9Z2H5_S466_M1_Epb41l1 |
| _S[Phospho (STY)]EAEEGEVRT[Phospho (STY)]PTK_.2                        | -0.155654802 | Q9Z2H5_S466_M2_Epb41l1 |
| _AQEETPQQPEAAAAVT[Phospho (STY)]T[Phospho (STY)]PVTPAGHSHPETNSNEK_.4   | -0.113544443 | Q9Z2H5_T29_M2_Epb41l1  |
| _RLPSSPAS[Phospho (STY)]PS[Phospho (STY)]PKGT[Phospho (STY)]PEK_.2     | -0.105493577 | Q9Z2H5_S544_M3_Epb41l1 |
| _GAC[Carbamidomethyl (C)]ST[Phospho (STY)]PEM[Oxidation (M)]PQFESVK_.2 | -0.251210308 | Q9Z2H5_T685_M1_Epb41l1 |
| _GAAAM[Oxidation (M)]IPGPQTVATEIR_.2                                   | -0.474257566 | #N/A                   |
| _LPSSPAS[Phospho (STY)]PS[Phospho (STY)]PK_.2                          | 0.129834929  | #N/A                   |
| _IITGDEDVDQDQALALAIK_.2                                                | -0.390907198 | #N/A                   |
| _GPSSQEDESGLLED[Phospho (STY)]PDR_.2                                   | 0.011441479  | Q9Z2H5_S677_M1_Epb41l1 |
| _SLS[Phospho (STY)]PIIGK_.2                                            | -0.488018935 | Q9Z2H5_S782_M1_Epb41l1 |
| _RLPSSPAS[Phospho (STY)]PS[Phospho (STY)]PK_.2                         | -0.118503261 | #N/A                   |
| _EDDAES[Phospho (STY)]GGRRS[Phospho (STY)]EAEEGEVR_.3                  | 0.208087262  | Q9Z2H5_S461_M2_Epb41l1 |
| _DVLSTSTYGATAETLSTSTTHVTK_.3                                           | 0.446984372  | #N/A                   |
| _RS[Phospho (STY)]EAEEGEVR_.2                                          | 0.410332562  | Q9Z2H5_S466_M1_Epb41l1 |
| _SLDGAEFRPAS[Phospho (STY)]VSENHADAGPEGDKR_.4                          | 0.231365744  | Q9Z2H5_S441_M1_Epb41l1 |
| _LPSSPASPS[Phospho (STY)]PKGT[Phospho (STY)]PEK_.2                     | -0.012079358 | #N/A                   |
| _RSEAEEGEVRT[Phospho (STY)]PTK_.3                                      | 0.023018374  | Q9Z2H5_T475_M1_Epb41l1 |
| _DYSEADGLS[Phospho (STY)]ERTT[Phospho (STY)]PSK_.2                     | 0.394406093  | Q9Z2H5_S75_M2_Epb41l1  |

|                                                          |              |                        |
|----------------------------------------------------------|--------------|------------------------|
| _ELKPEQETT[Phospho (STY)]PR_.2                           | -0.34301668  | Q9Z2H5_T489_M1_Epb4111 |
| _AETMTVSSLAIR_.2                                         | 0.205149457  | #N/A                   |
| _LPSSPASPS[Phospho (STY)]PKGT[Phospho (STY)]PEKASER_.3   | 0.357015156  | #N/A                   |
| _SLPELDRDKS[Phospho (STY)]DSETEGLVFAQDLK_.3              | -0.025246608 | Q9Z2H5_S648_M1_Epb4111 |
| _DKS[Phospho (STY)]DS[Phospho (STY)]ETEGLVFAQDLK_.2      | 0.254557766  | Q9Z2H5_S648_M2_Epb4111 |
| _APES[Phospho (STY)]DMGDEDQDQER_.2                       | 0.067919399  | Q9Z2H5_S578_M1_Epb4111 |
| _VSAADSTQVDGGTPMVK_.2                                    | 0.094248748  | #N/A                   |
| _PASVSENHDAGPEGDKREDDAES[Phospho (STY)]GGR_.4            | -0.196257623 | Q9Z2H5_S461_M1_Epb4111 |
| _LLELQSIGTNNFLR_.2                                       | -0.445043337 | #N/A                   |
| _VAEVEGEKVDNK_.2                                         | -0.146624443 | #N/A                   |
| _LISLTSALDDNKDGNINIDDLVK_.3                              | 0.459479036  | #N/A                   |
| _FLQDTIEEMALK_.2                                         | 0.149589968  | #N/A                   |
| _INFDS[Phospho (STY)]NSAYR_.2                            | 0.09259634   | Q9Z2I9_S279_M1_Sucla2  |
| _EQAVTLAQK_.2                                            | 0.452200059  | #N/A                   |
| _IVFSPEEAK_.2                                            | -0.172640866 | #N/A                   |
| _ILAC[Carbamidomethyl (C)]DDLDEAAK_.2                    | 0.254901953  | #N/A                   |
| _IC[Carbamidomethyl (C)]NQVLVC[Carbamidomethyl (C)]ER_.2 | 0.025655922  | #N/A                   |
| _LSEIVTLAK_.2                                            | 0.28541478   | #N/A                   |
| _LHGGTPANFLDVGGGATVQQVTEAFK_.3                           | -0.311937812 | #N/A                   |
| _SSDEAYAIK_.2                                            | 0.112173775  | #N/A                   |
| _IFDLQDWSQEDER_.2                                        | 0.08072975   | #N/A                   |
| _VQAILVNIFFGGIM[Oxidation (M)]R_.2                       | -0.134183955 | #N/A                   |
| _AVSSQM[Oxidation (M)]IGQK_.2                            | 0.301894777  | #N/A                   |
| _C[Carbamidomethyl (C)]DVIAQGIVM[Oxidation (M)]AVK_.2    | 0.144527748  | #N/A                   |
| _YDATMVEINPM[Oxidation (M)]VEDSDGK_.2                    | 0.229892185  | #N/A                   |
| _VLC[Carbamidomethyl (C)]MDAK_.2                         | 0.059487141  | #N/A                   |
| _EFLFS[Phospho (STY)]PNDSASDIK_.2                        | -0.142243477 | Q9Z2M6_S27_M1_Ubl3     |
| _EGS[Phospho (STY)]PANWK_.2                              | -0.370683211 | Q9Z2N8_S233_M1_Actl6a  |
| _EGS[Phospho (STY)]PANWKR_.2                             | 0.148563522  | Q9Z2N8_S233_M1_Actl6a  |
| _ATS[Phospho (STY)]PSNNVDEVQIPEISLSK_.2                  | 0.181049259  | Q9Z2Q2_S57_M1_Knop1    |
| _ADC[Carbamidomethyl (C)]LVPSEIR_.2                      | 0.249264578  | #N/A                   |
| _IREEIDK_.2                                              | 0.119226111  | #N/A                   |
| _VNIVPLIAK_.2                                            | 0.274780677  | #N/A                   |
| _KLLSAEER_.2                                             | 0.010077569  | #N/A                   |
| _INQTVIEIK_.2                                            | -0.282436087 | #N/A                   |
| _HTVDIEEK_.2                                             | -0.309341125 | #N/A                   |
| _DVTCT[Carbamidomethyl (C)]DVHYENYR_.2                   | 0.347217967  | #N/A                   |
| _M[Oxidation (M)]KDEELR_.2                               | -0.260923509 | #N/A                   |
| _LATPEDKQDIDKQYVGATLPNQVHR_.4                            | -0.383404797 | #N/A                   |
| _QYVGATLPNQVHR_.2                                        | 0.008353761  | #N/A                   |
| _SKLAT[Phospho (STY)]PEDKQDIDK_.2                        | 0.136188718  | Q9Z2Q6_T13_M1_Septin5  |
| _STLVHSLFLTDLYKDR_.3                                     | 0.004027826  | #N/A                   |
| _M[Oxidation (M)]ES[Phospho (STY)]PIPIPLPTPDAETEK_.2     | -0.522967257 | Q9Z2Q6_S327_M1_Septin5 |
| _STLVHSLFLTDLYK_.2                                       | 0.207430641  | #N/A                   |
| _LYPWGIVEVENQAHC[Carbamidomethyl (C)]DFVK_.2             | -0.392635373 | #N/A                   |
| _FGIHVYQFPEC[Carbamidomethyl (C)]DSDEDEDFKQQDR_.4        | 0.161645524  | #N/A                   |
| _ESAPFAVIGSNTVVVEAK_.2                                   | -0.003626989 | #N/A                   |

|                                                              |              |                        |
|--------------------------------------------------------------|--------------|------------------------|
| _LAT[Phospho (STY)]PEDKQDIDK_.2                              | -0.243809459 | Q9Z2Q6_T13_M1_Septin5  |
| _AHC[Carbamidomethyl (C)]IQQM[Oxidation (M)]TSK_.2           | 0.406245671  | #N/A                   |
| _ADC[Carbamidomethyl (C)]LVPSEIRK_.3                         | -0.317892049 | #N/A                   |
| _THMHDLK_.2                                                  | 0.211529748  | #N/A                   |
| _THM[Oxidation (M)]HDLKDVT[C[Carbamidomethyl (C)]DVHYENYR_.4 | -0.181637627 | #N/A                   |
| _FGIHVYQFPEC[Carbamidomethyl (C)]DS[Phospho (STY)]DEDEDFK_.3 | -0.034989983 | Q9Z2Q6_S225_M1_Septin5 |
| _MKDEELRR_.2                                                 | -0.293204258 | #N/A                   |
| _LSPEEPAPEAPET[Phospho (STY)]PETPEAPGGSAV_.3                 | 0.022170944  | Q9Z2S7_T125_M1_Tsc22d3 |
| _ALLEVVQSGGK_.2                                              | 0.619409331  | #N/A                   |
| _ILNPEEIEK_.2                                                | 0.235900647  | #N/A                   |
| _NYTDDAIETDDTIK_.2                                           | 0.139398084  | #N/A                   |
| _YVAEIEKEKEENEK_.3                                           | -0.030755861 | #N/A                   |
| _AITVFSPDGHLFQVEYAQEA VKK_.3                                 | -0.038549293 | #N/A                   |
| _GPQLFHM[Oxidation (M)]DPSGTFVQC[Carbamidomethyl (C)]DAR_.3  | -0.288391249 | #N/A                   |
| _GVNTFS[Phospho (STY)]PEGR_.2                                | 0.309612314  | Q9Z2U1_S16_M1_Psma5    |
| _ITS[Phospho (STY)]PLM[Oxidation (M)]EPSSIEK_.2              | -0.239644333 | Q9Z2U1_S56_M1_Psma5    |
| _LFQVEYAIEAIK_.2                                             | 0.208792437  | #N/A                   |
| _EELEEVIKDI_.2                                               | 0.049808348  | #N/A                   |
| _AIGSASEGAQSSQLQEVYHK_.3                                     | -0.265183399 | #N/A                   |
| _PFGVALLFGGVDEK_.2                                           | -0.452154475 | #N/A                   |
| _AVLAQGQS[Phospho (STY)]SEQAAK_.2                            | -0.33559432  | Q9Z2V5_S909_M1_Hdac6   |
| _HNPQS[Phospho (STY)]PLQESSATLK_.2                           | -0.057438582 | Q9Z2V5_S21_M1_Hdac6    |
| _KTAS[Phospho (STY)]EPNLK_.2                                 | -0.307699011 | Q9Z2V6_S250_M1_Hdac5   |
| _DEDGES[Phospho (STY)]GPDEGPDLEESSAGYKK_.3                   | -0.101180703 | Q9Z2V6_S600_M1_Hdac5   |
| _DEDGES[Phospho (STY)]GPDEGPDLEESSAGYK_.2                    | 0.355725717  | Q9Z2V6_S600_M1_Hdac5   |
| _RSS[Phospho (STY)]PLLR_.2                                   | 0.141475548  | Q9Z2V6_S270_M1_Hdac5   |
| _VAERRS[Phospho (STY)]S[Phospho (STY)]PLLR_.3                | -0.26810498  | Q9Z2V6_S269_M2_Hdac5   |
| _TQS[Phospho (STY)]SPAAPGSMK_.2                              | -0.504384613 | Q9Z2V6_S650_M1_Hdac5   |
| _ETAC[Carbamidomethyl (C)]TTGVLQTLTLFK_.2                    | -0.134325777 | #N/A                   |
| _SPSPFHVVAEC[Carbamidomethyl (C)]R_.3                        | -0.530354358 | #N/A                   |
| _ITGEAFVQFASQELAEK_.2                                        | -0.093945084 | #N/A                   |
| _LTAALLESTANVK_.2                                            | -0.254389642 | #N/A                   |
| _LQVEIR_.2                                                   | -0.208892833 | #N/A                   |
| _FGQWADSR_.2                                                 | -0.173716126 | #N/A                   |
| _IFELTELK_.2                                                 | 0.266210824  | #N/A                   |
| _TELNQTVQELETLK_.2                                           | 0.332532364  | #N/A                   |
| _Acetyl (Protein N-term)]GEQPIFSTR_.2                        | 0.348699439  | #N/A                   |
| _TLLEILDGK_.2                                                | -0.137262575 | #N/A                   |
| _AIINSTITPNM[Oxidation (M)]TFTK_.2                           | -0.200677215 | #N/A                   |
| _TQALSHASS[Phospho (STY)]AISK_.2                             | 0.309844139  | Q9Z2Y3_S189_M1_Homer1  |
| _IISLDGSK_.2                                                 | 0.35279005   | #N/A                   |
| _NKDLEGQLSDLEQR_.3                                           | 0.14631551   | #N/A                   |
| _AEPTQNALPFPHSAGDR_.3                                        | 0.426245323  | #N/A                   |
| _HWEAELATLK_.2                                               | -0.524578062 | #N/A                   |
| _DLEGQLS[Phospho (STY)]DLEQR_.2                              | -0.053165461 | Q9Z2Y3_S318_M1_Homer1  |
| _NKDLEGQLS[Phospho (STY)]DLEQRLEK_.3                         | -0.217005523 | Q9Z2Y3_S318_M1_Homer1  |
| _ANTVYGLGFSSEHHLSK_.3                                        | 0.130401354  | #N/A                   |

|                                                         |              |                       |
|---------------------------------------------------------|--------------|-----------------------|
| _HAVTVSYFYDSTR_.2                                       | -0.104314729 | #N/A                  |
| _IGS[Phospho (STY)]TIFGER_.2                            | 0.063920974  | Q9Z2Y8_S244_M1_Plpbp  |
| _KGPTEPLK_.2                                            | 0.212583325  | #N/A                  |
| _GKGS[Phospho (STY)]PQAQTVR_.2                          | -0.225300931 | Q9Z351_S429_M1_Kcnq2  |
| _RSPSADQSLDDS[Phospho (STY)]PSKVPK_.3                   | -0.239481521 | Q9Z351_S448_M1_Kcnq2  |
| _SPS[Phospho (STY)]ADQSLDDSPSK_.2                       | 0.053155083  | Q9Z351_S440_M1_Kcnq2  |
| _SWS[Phospho (STY)]FGDR_.2                              | 0.099815377  | Q9Z351_S457_M1_Kcnq2  |
| _YPQT[Phospho (STY)]WNGR_.2                             | -0.264521947 | Q9Z351_T287_M1_Kcnq2  |
| _S[Phospho (STY)]PSADQSLDDSPSKVPK_.2                    | 0.005339074  | Q9Z351_S438_M1_Kcnq2  |
| _QNS[Phospho (STY)]EEASLPGEDIVEDNK_.2                   | -0.176428043 | Q9Z351_S479_M1_Kcnq2  |
| _EPEPAPPYHS[Phospho (STY)]PEDSR_.2                      | 0.202333782  | Q9Z351_S681_M1_Kcnq2  |
| _EPEPAPPYHS[Phospho (STY)]PEDSRDHADK_.3                 | 0.248427789  | Q9Z351_S681_M1_Kcnq2  |
| _RS[Phospho (STY)]PSADQSLDDSPSK_.2                      | -0.281530683 | Q9Z351_S438_M1_Kcnq2  |
| _SSPGSVAAS[Phospho (STY)]PSGGGGR_.2                     | -0.02942375  | S4R1M9_S66_M1_Osbpl10 |
| _ATSAGSS[Phospho (STY)]PSC[Carbamidomethyl (C)]SLAGR_.2 | 0.052734575  | S4R1M9_S32_M1_Osbpl10 |
