# Supplementary material for: The Chronic Effects of a Single Low-Intensity Blast Exposure on Phosphoproteome Networks and Cognitive Function Influenced by Mutant Tau Overexpression
Source: MDPI journal article supplement (doi:10.3390/ijms25063338), 2024-03-15
Supplement: s1 [file s1]

Supplementary Table S1a- MS2 raw data (sheet = 'MS2 raw\_non-carrier')

| PG.Genes | PhosName                                                                | Phos site                | Blast NC 3 | Blast NC 4 | Blast NC 5 | Blast NC 6 | Blast NC 1 | Blast NC 2 | Sham NC 3 | Sham NC 4 | Sham NC 1 | Sham NC 2 | Expression Ratio | LOG2FC  | pvalue | (-) Log10 p value |
|----------|-------------------------------------------------------------------------|--------------------------|------------|------------|------------|------------|------------|------------|-----------|-----------|-----------|-----------|------------------|---------|--------|-------------------|
| Tbc1d25  | _QAS[Phospho (STY)]DLGLQLR_2                                            | A1AS86_S560_M1_Tbc1d25   | 8.9584     | 8.9600     | 9.4783     | 9.2316     | 8.3473     | 9.0666     | 9.2384    | 8.8514    | 9.0263    | 8.9794    | 0.9981           | -0.0027 | 0.9360 | 0.0287            |
| Arfgef2  | _GQSLS[Phospho (STY)]NPTDSDWK_2                                         | A2ASR2_S1535_M1_Arfgef2  | 5.6576     | 8.4948     | 8.8466     | 8.3379     | 5.8936     | 8.5683     | 9.0935    | 8.6862    | 8.4371    | 8.4545    | 0.9366           | -0.0945 | 0.3673 | 0.4350            |
| Arfgef2  | _ERGS[Phospho (STY)]PVSGR_2                                             | A2ASR2_S276_M1_Arfgef2   | 6.6389     | 8.4976     | 9.1067     | 8.1306     | 2.8533     | 7.9172     | 9.0192    | 9.0525    | 8.2180    | 8.2993    | 0.8701           | -0.2007 | 0.3766 | 0.4241            |
| Arfgef2  | _PGSPHQATGS[Phospho (STY)]PK_2                                          | #N/A                     | 0.0610     | 5.4814     | 5.6884     | 5.8783     | 4.8684     | 5.6602     | 6.5364    | 5.9357    | 5.8414    | 6.0118    | 0.9219           | -0.1173 | 0.0872 | 1.0595            |
| Arfgef2  | _QSS[Phospho (STY)]SADNLEPQVGHQVAAAR_3                                  | A2ASR2_S355_M1_Arfgef2   | 6.4102     | 4.0705     | 3.9502     | 4.0384     | 3.8918     | 6.2819     | 3.9997    | 3.6840    | 3.7655    | 3.8093    | 1.2515           | 0.3236  | 0.1633 | 0.7869            |
| Arfgef2  | _ELKKPM[Oxidation (M)]GSKPGS[Phospho (STY)]PVKQAT[Phospho (STY)]AGSPK_3 | A2ASR2_T224_M2_Arfgef2   | 5.7288     | 4.8657     | 5.1527     | 6.2437     | 8.3039     | 4.7142     | 6.8051    | 5.1759    | 4.8042    | 4.5822    | 0.9501           | -0.0739 | 0.6635 | 0.1782            |
| Arfgef2  | _HLDVLDLRGS[Phospho (STY)]SSDR_3                                        | A2ASR2_S1518_M1_Arfgef2  | 3.8739     | 3.1782     | 3.8979     | 3.4416     | 2.9995     | 3.2291     | 3.5899    | 3.5595    | 3.8586    | 3.1189    | 0.9731           | -0.0394 | 0.6860 | 0.1637            |
| Tanc2    | _FS[Phospho (STY)]PPPVGGQSK_2                                           | A2AG60_S1521_M1_Tanc2    | 9.8002     | 9.3381     | 9.3071     | 3.8682     | 3.7345     | 9.1769     | 10.2135   | 9.6977    | 9.5116    | 9.3697    | 0.7772           | -0.3636 | 0.1846 | 0.7338            |
| Tanc2    | _QGQTS[Phospho (STY)]PKPK_2                                             | A2AG60_S1981_M1_Tanc2    | 4.3009     | 3.0415     | 4.0346     | 6.3636     | 4.2184     | 3.3658     | 3.7266    | 3.4229    | 3.7219    | 3.2556    | 1.1951           | 0.2571  | 0.2841 | 0.5465            |
| Tanc2    | _SC[Carbamidomethyl (C)]DELSPV[Phospho (STY)]PTTGGVPSSEPR_2             | A2AG60_S1831_M1_Tanc2    | 2.9332     | 6.1858     | 6.0444     | 5.6663     | 5.2256     | 5.9082     | 6.4362    | 6.2120    | 6.5662    | 6.0853    | 0.9453           | -0.0812 | 0.7165 | 0.1448            |
| Tanc2    | _EYPS[Phospho (STY)]PPPSPLR_2                                           | A2AG60_S1534_M1_Tanc2    | 10.7981    | 10.6644    | 4.0266     | 10.5299    | 9.2770     | 10.6189    | 11.4241   | 10.7681   | 10.5462   | 10.6853   | 0.8584           | -0.2202 | 0.2919 | 0.5348            |
| Tanc2    | _AS[Phospho (STY)]PPAESMSVVR_2                                          | A2AG60_S1549_M1_Tanc2    | 9.7430     | 3.2035     | 3.6818     | 9.8563     | 3.0918     | 3.5328     | 8.6278    | 7.2940    | 7.0406    | 4.4037    | 0.8066           | -0.3101 | 0.4912 | 0.3087            |
| Tanc2    | _QIASDS[Phospho (STY)]PHAS[Phospho (STY)]PK_2                           | A2AG60_S400_M2_Tanc2     | 7.7871     | 7.5338     | 8.3217     | 7.6900     | 6.4591     | 7.3309     | 8.1265    | 8.2614    | 8.0020    | 7.6722    | 0.9382           | -0.0920 | 0.1724 | 0.7636            |
| Tanc2    | _DC[Carbamidomethyl (C)]SVGAVT[Phospho (STY)]PTSTLESR_2                 | A2AG60_S169_M1_Tanc2     | 10.3597    | 10.2530    | 10.7540    | 10.3549    | 3.9047     | 10.1013    | 10.7762   | 10.3510   | 10.0826   | 1.0763    | 0.1061           | 0.7442  | 0.1283 | 0.7636            |
| Tanc2    | _SQS[Phospho (STY)]ASYPPVC[Carbamidomethyl (C)]HSK_2                    | A2AG60_S1726_M1_Tanc2    | 5.8179     | 3.8045     | 3.9916     | 6.0664     | 3.6727     | 4.8121     | 6.0123    | 3.7661    | 4.9443    | 3.7360    | 1.0172           | 0.0247  | 0.9106 | 0.0407            |
| Tanc2    | _SNSVGS[Phospho (STY)]PTR_2                                             | A2AG60_S1480_M1_Tanc2    | 9.3448     | 9.1354     | 9.5684     | 3.4529     | 3.3502     | 9.1198     | 9.5525    | 3.5173    | 9.0411    | 0.9378    | 0.0926           | -0.0926 | 0.8071 | 0.0931            |
| Tanc2    | _SSS[Phospho (STY)]QLGSPDVSHUR_2                                        | A2AG60_S1744_M1_Tanc2    | 5.6003     | 6.3894     | 4.0499     | 6.9786     | 3.4600     | 4.9720     | 3.7420    | 6.5076    | 6.1604    | 3.2710    | 1.0653           | 0.0913  | 0.7436 | 0.1287            |
| Tanc2    | _PSDGLPVCIS[Phospho (STY)]PPSPS[Phospho (STY)]PAHR_3                    | A2AG60_S55_M1_Tanc2      | 4.1279     | 5.5054     | 3.5043     | 6.8161     | 3.9697     | 4.7966     | 3.5381    | 4.1346    | 5.4118    | 2.7777    | 1.0427           | 0.0604  | 0.7911 | 0.1018            |
| Tanc2    | _Acetyl (Protein N-term)[M]RINS[Phospho (STY)]LK_2                      | #N/A                     | 3.2114     | 4.1310     | 4.4459     | 3.9897     | 3.9524     | 3.7771     | 4.1379    | 3.0115    | 3.3106    | 3.6669    | 1.1093           | 0.1497  | 0.2118 | 0.6740            |
| Fam171a2 | _S[Phospho (STY)]VEGPGGLEPGLDEVL_2                                      | A2AG60_SS_1_M1_Tanc2     | 3.1998     | 4.1426     | 4.4343     | 7.3000     | 3.8443     | 5.9759     | 4.1363    | 6.9742    | 7.2118    | 3.6553    | 0.8770           | -0.1894 | 0.5460 | 0.2628            |
| Fam171a2 | _S[Phospho (STY)]VEGPGGLEPGLDEVRR_3                                     | #N/A                     | 3.7736     | 5.4633     | 4.3062     | 6.3417     | 3.6490     | 6.3578     | 6.5094    | 6.4610    | 6.6912    | 6.5408    | 0.7605           | -0.3949 | 0.0383 | 1.4173            |
| Fam171a2 | _TGLC[Carbamidomethyl (C)]SPEDNS[Phospho (STY)]LTPLLOEVVAPEGR_3         | A2AG69_S744_M1_Fam171a2  | 3.9293     | 3.2969     | 3.1152     | 3.6179     | 3.1852     | 3.4394     | 3.3326    | 2.9997    | 4.1492    | 3.5849    | 0.9756           | -0.0357 | 0.7364 | 0.1329            |
| Fam171a2 | _RDS[Phospho (STY)]TSPDELGAEVGDGDKK_2                                   | #N/A                     | 4.0823     | 3.8676     | 3.8609     | 3.7275     | 3.7559     | 4.5483     | 3.7122    | 5.6597    | 3.5315    | 0.9099    | 0.9099           | -0.1362 | 0.3711 | 0.4305            |
| Fam171a2 | _RDS[Phospho (STY)]TSPDELGAEVGDGDKK_3                                   | #N/A                     | 3.6695     | 4.4257     | 3.4031     | 4.4477     | 2.8132     | 3.8114     | 3.7046    | 4.0543    | 4.3533    | 4.1250    | 0.9267           | -0.1098 | 0.4017 | 0.3961            |
| Fam171a2 | _DS[Phospho (STY)]TSPDELGAEVGDGDKK_3                                    | #N/A                     | 3.3872     | 4.1634     | 3.5824     | 3.4544     | 3.3158     | 3.9357     | 3.5949    | 3.9714    | 4.0064    | 4.6699    | 0.9627           | -0.0548 | 0.5528 | 0.2574            |
| Gpatch8  | _VRS[Phospho (STY)]QS[Phospho (STY)]PHYQSGR_3                           | A2AG61_S1037_M2_Gpatch8  | 4.2652     | 3.5695     | 3.4511     | 3.9538     | 3.3909     | 4.3386     | 3.6685    | 4.1647    | 3.8133    | 3.9208    | 0.9837           | -0.0238 | 0.7874 | 0.1082            |
| Gpatch8  | _SEPPGSGS[Phospho (STY)]PAPPR_2                                         | A2AG61_S735_M1_Gpatch8   | 7.7569     | 8.4479     | 4.1049     | 4.3783     | 7.6079     | 4.1851     | 4.2979    | 9.8876    | 9.4158    | 3.9733    | 0.8820           | -0.1812 | 0.6335 | 0.1983            |
| Gpatch8  | _SQS[Phospho (STY)]PHYFQSGR_2                                           | #N/A                     | 7.4257     | 7.6571     | 8.0181     | 8.0143     | 7.2241     | 7.2252     | 8.1066    | 7.7838    | 7.4469    | 7.4588    | 0.9864           | -0.0198 | 0.6507 | 0.1866            |
| Gpatch8  | _KGS[Phospho (STY)]WGHES[Phospho (STY)]PERR_3                           | A2AG61_S1013_M2_Gpatch8  | 3.2987     | 4.0550     | 4.5332     | 4.3607     | 3.9433     | 4.1822     | 4.0753    | 3.7578    | 3.4064    | 3.7277    | 1.0438           | 0.0618  | 0.5457 | 0.1831            |
| Cdr2l    | _SC[Carbamidomethyl (C)]S[Phospho (STY)]DTALNAIVAK_2                    | A2AG61_S318_M1_Cdr2l     | 4.0267     | 3.1995     | 3.2127     | 7.3691     | 3.1524     | 3.3073     | 6.7927    | 4.4032    | 6.2463    | 6.4978    | 0.6694           | -0.5792 | 0.0730 | 1.1365            |
| Cdr2l    | _DLGGES[Phospho (STY)]PGEOK_2                                           | A2AG61_S407_M1_Cdr2l     | 4.0422     | 6.6549     | 3.7758     | 6.0916     | 6.0446     | 6.8828     | 7.1759    | 6.5723    | 6.1005    | 6.6086    | 0.8651           | -0.2091 | 0.2718 | 0.1866            |
| Zmym4    | _AAHQES[Phospho (STY)]DNEENIQIQNLK_3                                    | #N/A                     | 4.0002     | 5.0537     | 4.6440     | 5.6004     | 4.4326     | 4.4654     | 5.0792    | 5.0244    | 4.8614    | 5.1167    | 0.9420           | -0.0862 | 0.3336 | 0.4768            |
| Zmym4    | _ENS[Phospho (STY)]KETFSGK_2                                            | A2A791_S161_M1_Zmym4     | 5.0220     | 3.9049     | 5.4677     | 4.0496     | 4.8341     | 4.3323     | 4.0751    | 3.0743    | 3.3734    | 3.3856    | 1.1571           | 0.2105  | 0.2565 | 0.5910            |
| Zmym4    | _AAHQES[Phospho (STY)]DNEENIQIQNLK_3                                    | #N/A                     | 4.1640     | 4.2622     | 3.6587     | 4.5075     | 3.9097     | 4.1375     | 3.5789    | 5.2060    | 4.6590    | 4.6842    | 0.9061           | -0.1422 | 0.2056 | 0.6871            |
| Kiaa1522 | _MS[Phospho (STY)]PSGGSTAETASIR_2                                       | A2A758_S402_M1_Kiaa1522  | 6.5737     | 6.1312     | 3.8975     | 7.0939     | 3.3076     | 3.2288     | 6.8010    | 3.5599    | 3.8589    | 3.1186    | 1.1625           | 0.2172  | 0.5442 | 0.2642            |
| Kiaa1522 | _MGS[Phospho (STY)]PGSDPOIK_2                                           | #N/A                     | 3.7447     | 3.1690     | 6.2206     | 5.6176     | 3.2737     | 3.4075     | 6.3304    | 5.7197    | 3.9427    | 5.0019    | 0.8076           | -0.3083 | 0.2373 | 0.6247            |
| Kiaa1522 | _GLAVAPAS[Phospho (STY)]PGK_2                                           | A2A758_S543_M1_Kiaa1522  | 3.0792     | 3.4207     | 3.2655     | 3.2360     | 3.2052     | 4.9074     | 3.3842    | 4.3679    | 4.2836    | 4.4916    | 0.8517           | -0.2316 | 0.1682 | 0.7742            |
| Kiaa1522 | _LQLERPVS[Phospho (STY)]PEAQADQLR_3                                     | A2A758_S909_M1_Kiaa1522  | 4.4090     | 4.6156     | 4.4164     | 3.4182     | 3.3849     | 3.2397     | 3.1329    | 4.8927    | 4.5833    | 4.6480    | 0.9072           | -0.1405 | 0.3995 | 0.3985            |
| Kiaa1522 | _M[Oxidation (M)]GS[Phospho (STY)]GSDPQK_2                              | #N/A                     | 3.9250     | 3.4174     | 3.6587     | 3.2024     | 3.2388     | 2.9899     | 3.3507    | 3.7988    | 4.0978    | 3.3805    | 0.8716           | -0.1982 | 0.0754 | 1.1229            |
| Hivep3   | _GSYS[Phospho (STY)]PDHVADEVPSR_3                                       | #N/A                     | 3.3715     | 3.6104     | 3.7057     | 4.7701     | 3.6692     | 3.4503     | 3.7371    | 3.9848    | 4.2763    | 4.2790    | 0.9247           | -0.1130 | 0.3056 | 0.5149            |
| Hivep3   | _RSS[Phospho (STY)]VESPK_2                                              | A2AB84_S489_M1_Hivep3    | 3.5786     | 4.3838     | 4.1931     | 3.7369     | 4.2052     | 3.5243     | 3.8851    | 3.2643    | 3.5634    | 3.4141    | 1.1147           | 0.1567  | 0.0961 | 1.0172            |
| Kiaa1109 | _VVFNEDQNNNS[Phospho (STY)]LTK_2                                        | A2AAE1_S2755_M1_Kiaa1109 | 8.4093     | 8.3601     | 9.0069     | 8.3559     | 6.8427     | 8.0862     | 9.0025    | 8.4516    | 8.4025    | 8.1890    | 0.9607           | -0.0578 | 0.4188 | 0.3780            |
| Kiaa1109 | _SDENVLDS[Phospho (STY)]PK_2                                            | #N/A                     | 7.1435     | 6.8616     | 7.4928     | 7.0079     | 5.1009     | 6.8274     | 7.5410    | 6.9799    | 6.3634    | 6.9452    | 0.9686           | -0.0460 | 0.6532 | 0.1849            |
| Kiaa1109 | _TLKTS[Phospho (STY)]PKASR_2                                            | A2AAE1_S3894_M1_Kiaa1109 | 6.9155     | 4.2841     | 7.6270     | 4.3062     | 4.1274     | 3.9530     | 7.1909    | 4.1959    | 2.9941    | 3.1824    | 1.1348           | 0.1824  | 0.5867 | 0.2186            |
| Kiaa1109 | _ALETPT[Phospho (STY)]PER_2                                             | A2AAE1_T3996_M1_Kiaa1109 | 3.6615     | 3.5647     | 4.3483     | 3.3501     | 2.7872     | 3.4415     | 3.0648    | 3.2675    | 4.4169    | 3.3171    | 1.0025           | 0.0037  | 0.9804 | 0.0086            |
| Kiaa1109 | _YTAGSAS[Phospho (STY)]PTPTFK_2                                         | A2AAE1_S2603_M1_Kiaa1109 | 7.5463     | 7.4177     | 8.2006     | 6.9835     | 5.5678     | 6.9470     | 3.3747    | 8.3838    | 8.1230    | 3.3703    | 1.2232           | 0.2907  | 0.3119 | 0.5059            |
| Kiaa1109 | _SLDQGS[Phospho (STY)]PSOK_2                                            | A2AAE1_S3835_M1_Kiaa1109 | 3.7780     | 3.0823     | 4.4648     | 3.5375     | 2.9037     | 3.3250     | 3.6858    | 3.1510    | 4.3005    | 3.4336    | 0.9650           | -0.0514 | 0.7215 | 0.1418            |
| Kiaa1109 | _SSETGPAGV[Phospho (STY)]PTEPTC[Carbamidomethyl (C)]JR_3                | #N/A                     | 6.2630     | 5.7464     | 6.6138     | 6.2016     | 3.4163     | 4.3132     | 5.9110    | 6.2625    | 3.7878    | 6.2811    | 0.9757           | -0.0354 | 0.8707 | 0.0601            |
| Kiaa1109 | _AS[Phospho (STY)]PGSSSYLK_2                                            | A2AAE1_S3196_M1_Kiaa1109 | 3.0453     | 5.9678     | 3.7321     | 6.1030     | 3.6718     | 5.7556     | 6.2205    | 6.5580    | 6.5001    | 4.2017    | 0.8028           | -0.3169 | 0.2002 | 0.6985            |
| Kiaa1109 | _S[Phospho (STY)]PTEPTC[Carbamidomethyl (C)]JR_2                        | #N/A                     | 6.2231     | 3.5477     | 4.3653     | 6.1893     | 3.4360     | 5.2287     | 6.5130    | 5.6121    | 4.4000    | 3.3341    | 0.9732           | -0.0392 | 0.8780 | 0.0565            |
| Kiaa1109 | _SDENVLDS[Phospho (STY)]PKOR_2                                          | #N/A                     | 6.3750     | 7.1249     | 7.2110     | 7.1989     | 5.7553     | 6.7225     | 7.2582    | 7.5775    | 6.6980    | 6.6912    | 0.9539           | -0.0680 | 0.3710 | 0.4306            |
| Kiaa1109 | _MVPETGIPAC[Carbamidomethyl (C)]QS[Phospho (STY)]GOK_2                  | A2AAE1_S628_M1_Kiaa1109  | 3.7783     | 3.0826     | 3.9935     | 8.7380     | 2.9040     | 3.3247     | 3.6855    | 3.4640    | 3.7630    | 3.2145    | 1.2185           | 0.2851  | 0.5148 | 0.2883            |
| Kiaa1109 | _RDSGASVP[Phospho (STY)]PVS[Phospho (STY)]PNTQDK_3                      | A2AAE1_S1287_M2_Kiaa1109 | 4.1506     | 3.4549     | 3.6211     | 3.1649     | 3.2763     | 2.9524     | 3.3132    | 3.8363    | 4.1353    | 3.4330    | 0.8796           | -0.1850 | 0.1286 | 0.8909            |
| Sh3pxd2b | _KES[Phospho (STY)]IKSEELLER_3                                          | A2AAYS_S528_M1_Sh3pxd2b  | 3.8579     | 4.1456     | 4.5447     | 4.3362     | 2.9836     | 3.9642     | 3.2612    | 4.2669    | 2.2306    | 3.0571    | 1.0731           | 0.1018  | 0.4894 | 0.3103            |
| Sh3pxd2b | _LRPAKS[Phospho (STY)]QEK_2                                             | A2AAYS_S672_M1_Sh3pxd2b  | 3.3334     | 4.1386     | 4.0202     | 4.5228     | 3.9599     | 3.7696     | 4.2375    | 3.5956    | 1.4932    | 2.9890    | 1.2854           | 0.3622  | 0.1206 | 0.9185            |
| Arhgap27 | _AES[Phospho (STY)]PKDVGOPPEPVYANVR_3                                   | A2AB59_S215_M1_Arhgap27  | 3.2191     | 4.0243     | 3.9059     | 4.4086     | 3.8456     | 3.8839     | 6.3067    | 3.7099    | 3.3585    | 4.3756    | 0.8746           | -0.1933 | 0.3460 | 0.4669            |
| Arhgap27 | _KSS[Phospho (STY)]IQDS[Phospho (STY)]DTQAQASPEEK_2                     | A2AB59_S462_M2_Arhgap27  | 4.2852     | 3.1843     | 3.4513     | 3.7368     | 3.1901     | 3.5583     | 3.4514    | 4.0094    | 4.0365    | 3.7038    | 0.9392           | -0.0905 | 0.3575 | 0.4407            |
| Dd12     | _TQAQSHSPGEM[Oxidation (M)]ASS[Phospho (STY)]PGGLDNFALLR_3              | #N/A                     | 4.0005     | 5.6251     | 3.7058     | 5.441      |            |            |           |           |           |           |                  |         |        |                   |



|         |                                                                                              |                         |         |         |         |         |         |         |         |         |         |         |         |         |        |        |
|---------|----------------------------------------------------------------------------------------------|-------------------------|---------|---------|---------|---------|---------|---------|---------|---------|---------|---------|---------|---------|--------|--------|
| Camsap1 | _SVHREE\$Phospho (STY) YSOGTK_3                                                              | A2AHC3_S1359_M1_Camsap1 | 3.2802  | 3.9460  | 3.9670  | 4.4696  | 3.9067  | 3.8228  | 4.1843  | 3.6488  | 3.2974  | 4.4366  | 1.0018  | 0.0026  | 0.9810 | 0.0083 |
| Lts3    | _LERIES\$Phospho (STY) TEI_2                                                                 | A2AHG0_5697_M1_Lts3     | 5.4311  | 4.3743  | 4.2026  | 6.9203  | 3.6126  | 6.6880  | 3.8946  | 6.2654  | 6.8824  | 3.4236  | 1.0173  | 0.0247  | 0.9300 | 0.0315 |
| Ano3    | _VHHS\$Phospho (STY) QIS\$Phospho (STY) FKQK_3                                               | A2AHL1_S10_M2_Ano3      | 4.3685  | 4.3227  | 5.0130  | 4.0930  | 4.2110  | 3.9145  | 3.8076  | 4.0255  | 4.0023  | 4.0220  | 1.0898  | 0.1241  | 0.1080 | 0.9666 |
| Ano3    | _S\$Phospho (STY) PCI\$Carbamidomethyl (C) LAQSAVSK_2                                        | #N/A                    | 8.4752  | 8.5815  | 8.9266  | 8.6046  | 6.7213  | 7.9036  | 8.9071  | 8.6742  | 8.4646  | 8.1506  | 0.9594  | -0.0598 | 0.4397 | 0.3568 |
| Ano3    | _VHSG\$Phospho (STY) QSF_3                                                                   | A2AH1_S7_M1_Ano3        | 3.2932  | 4.0492  | 4.5278  | 4.0715  | 3.9978  | 3.8590  | 4.2198  | 4.4305  | 3.2287  | 3.7488  | 1.0127  | 0.0182  | 0.8704 | 0.0603 |
| Virma   | _SFLSEPS\$Phospho (STY) PGR_2                                                                | A2ANV2_S1578_M1_Virma   | 8.5978  | 4.0195  | 9.0951  | 8.2650  | 7.2604  | 7.9960  | 8.9798  | 8.4236  | 8.3261  | 8.1154  | 0.8910  | -0.1665 | 0.3578 | 0.4464 |
| Virma   | _HADGEKEDQNG\$Phospho (STY) PPRPQPR_4                                                        | A2ANV2_S173_M1_Virma    | 3.7510  | 3.0553  | 4.4378  | 3.5645  | 5.4905  | 3.3520  | 3.7128  | 5.7431  | 3.7357  | 3.2418  | 0.9595  | -0.0597 | 0.7989 | 0.0975 |
| Pnp1a7  | _SC\$Carbamidomethyl (C) S\$Phospho (STY) VPLPSNHGEVDEL_3                                    | A2AIB8_S379_M1_Pnp1a7   | 3.6239  | 3.7185  | 3.1576  | 4.4022  | 3.5398  | 4.1897  | 4.5505  | 5.8029  | 4.3989  | 4.0795  | 0.8083  | -0.3071 | 0.0377 | 1.4236 |
| Ajn1    | _S\$Phospho (STY) PAQAPFAAEGLR_2                                                             | A2AJA9_S593_M1_Ajn1     | 10.0236 | 9.5877  | 9.9652  | 10.1084 | 8.9678  | 9.6698  | 10.2135 | 9.7681  | 9.8626  | 9.8765  | 0.9789  | -0.3008 | 0.3856 | 0.4139 |
| Ajn1    | _PYLSEPRRPS\$Phospho (STY) PR_2                                                              | #N/A                    | 8.4643  | 8.3998  | 8.2041  | 7.8477  | 7.1271  | 8.1302  | 7.8778  | 7.2224  | 7.9918  | 7.9408  | 1.0229  | 0.0326  | 0.5367 | 0.2702 |
| Ajn1    | _ELATHAAPLG\$Phospho (STY) YAR_3                                                             | #N/A                    | 7.3553  | 7.1531  | 7.6817  | 3.2602  | 6.4716  | 7.2657  | 7.5195  | 7.4291  | 6.7064  | 6.9922  | 0.9120  | -0.1330 | 0.4824 | 0.3166 |
| Ajn1    | _GRS\$Phospho (STY) YENLLGR_2                                                                | #N/A                    | 7.2173  | 7.2015  | 7.9122  | 7.4473  | 6.1109  | 7.1472  | 7.7791  | 7.0614  | 7.3853  | 6.6839  | 0.9924  | -0.0110 | 0.8811 | 0.0550 |
| Ajn1    | _S\$Phospho (STY) WDNLLAPGR_2                                                                | A2AJA9_S448_M1_Ajn1     | 7.6168  | 6.6928  | 9.0626  | 10.6261 | 9.0379  | 8.9441  | 10.0118 | 10.3246 | 9.9327  | 9.9807  | 0.9256  | -0.1116 | 0.1903 | 0.7206 |
| Ajn1    | _S\$Phospho (STY) YENLLGR_2                                                                  | #N/A                    | 8.8599  | 8.5676  | 8.7947  | 9.2131  | 7.7805  | 8.6624  | 8.9948  | 8.8493  | 8.6963  | 8.5816  | 0.9847  | -0.0222 | 0.6123 | 0.2130 |
| Ajn1    | _ASQGLATAPAS\$Phospho (STY) PPVLQR_2                                                         | A2AJA9_S109_M1_Ajn1     | 8.8798  | 10.4566 | 10.7692 | 11.4913 | 8.1039  | 8.7158  | 10.4034 | 10.3340 | 9.7561  | 8.7422  | 0.9926  | -0.0107 | 0.9253 | 0.0337 |
| Ajn1    | _YAALSLSLTS\$Phospho (STY) EK_2                                                              | A2AJA9_S514_M1_Ajn1     | 3.4057  | 4.4505  | 3.9607  | 4.3360  | 4.5778  | 3.9604  | 3.9848  | 5.7613  | 4.5024  | 5.6841  | 0.8258  | -0.2761 | 0.0680 | 1.1678 |
| Ajn1    | _S\$Phospho (STY) SPPWADWGR_2                                                                | A2AJA9_S397_M1_Ajn1     | 3.0570  | 4.0086  | 3.9263  | 8.3134  | 3.6926  | 4.2465  | 4.1437  | 8.0990  | 3.3600  | 3.7453  | 0.9387  | -0.0912 | 0.8253 | 0.0834 |
| Ajn1    | _RYAALLSLET\$Phospho (STY) S\$Phospho (STY) LTEK_2                                           | #N/A                    | 3.9924  | 3.2684  | 4.2020  | 3.5375  | 3.1286  | 3.3204  | 3.4744  | 3.4652  | 3.7643  | 3.2148  | 1.0274  | 0.0389  | 0.6983 | 0.1559 |
| Ajn1    | _VALAAS\$Phospho (STY) PTRRPAR_2                                                             | A2AJA9_S854_M1_Ajn1     | 3.2146  | 7.5653  | 8.8143  | 10.2166 | 3.8411  | 3.8883  | 8.6557  | 3.7144  | 3.3630  | 4.3711  | 1.2449  | 0.3160  | 0.5152 | 0.2881 |
| Ajn1    | _HVALS\$Phospho (STY) RT\$Phospho (STY) P\$Phospho (STY) SDVLC\$Carbamidomethyl (C) TDRP_3   | A2AJA9_S236_M1_Ajn1     | 4.0246  | 3.2800  | 3.7583  | 3.3020  | 3.1683  | 3.4563  | 3.4503  | 3.6991  | 3.9982  | 2.9793  | 0.9905  | -0.0137 | 0.8922 | 0.0462 |
| Map7d1  | _RSS\$Phospho (STY) QPS\$Phospho (STY) PTVPASPPAK_2                                          | #N/A                    | 8.7442  | 9.0621  | 6.5695  | 7.0146  | 8.2488  | 9.2748  | 8.4858  | 9.4119  | 8.2240  | 9.4245  | 0.9174  | -0.1244 | 0.2713 | 0.5666 |
| Map7d1  | _SQPS\$Phospho (STY) PTVPASPPAK_2                                                            | A2AJA9_S118_M1_Map7d1   | 7.7505  | 7.7488  | 8.1514  | 8.1830  | 8.2754  | 7.6740  | 8.2182  | 8.2229  | 7.7645  | 6.7968  | 1.1797  | 0.2384  | 0.1874 | 0.7273 |
| Map7d1  | _SSATLWNS\$Phospho (STY) PSR_2                                                               | A2AJA9_S282_M1_Map7d1   | 3.6116  | 7.0713  | 7.7488  | 6.7622  | 6.9379  | 7.9278  | 7.9505  | 7.1156  | 7.5862  | 7.8786  | 0.8747  | -0.1931 | 0.2748 | 0.5610 |
| Map7d1  | _RKPAGAGS\$Phospho (STY) PALAR_3                                                             | #N/A                    | 7.9309  | 8.2943  | 8.6772  | 8.6740  | 7.5502  | 7.7905  | 7.8160  | 8.5546  | 7.9607  | 7.6934  | 1.0221  | 0.0315  | 0.5374 | 0.2697 |
| Map7d1  | _KPGAGGS\$Phospho (STY) PALAR_3                                                              | #N/A                    | 7.4064  | 7.8871  | 7.9494  | 8.1259  | 7.2132  | 7.8664  | 8.3073  | 7.9643  | 7.2680  | 7.8475  | 0.9866  | -0.0195 | 0.6821 | 0.1661 |
| Map7d1  | _SA\$Phospho (STY) ASPLTC\$Carbamidomethyl (C) SAPR_2                                        | A2AJA9_S368_M1_Map7d1   | 7.2405  | 7.0009  | 7.9871  | 7.5001  | 6.4262  | 7.4743  | 7.5177  | 6.9838  | 6.9639  | 7.0437  | 1.0202  | 0.0289  | 0.6308 | 0.2001 |
| Map7d1  | _S\$Phospho (STY) RGP\$Phospho (STY) PTATGPR_2                                               | A2AJA9_S95_M2_Map7d1    | 7.3881  | 7.2156  | 7.0878  | 4.3486  | 6.2286  | 7.4516  | 7.2548  | 7.1663  | 7.2193  | 7.5529  | 0.9071  | -0.1407 | 0.3020 | 0.5200 |
| Map7d1  | _AAEEKPAPAS\$Phospho (STY) PASPVPSPPTAQPK_3                                                  | A2AJA9_S544_M1_Map7d1   | 3.8060  | 5.9400  | 3.9408  | 6.4835  | 4.8371  | 4.8907  | 4.4540  | 5.4424  | 6.0565  | 5.0660  | 0.9483  | -0.0766 | 0.6652 | 0.1771 |
| Map7d1  | _GPT\$Phospho (STY) PTATGPR_2                                                                | #N/A                    | 3.0968  | 4.1294  | 3.7836  | 4.2862  | 3.7233  | 4.1078  | 4.0009  | 3.8322  | 3.4808  | 4.2532  | 0.9904  | -0.0139 | 0.8868 | 0.0522 |
| Map7d1  | _LSTGELS\$Phospho (STY) PK_2                                                                 | A2AJA9_S460_M1_Map7d1   | 3.7233  | 3.0277  | 4.9478  | 3.5922  | 2.8490  | 3.3797  | 3.7404  | 3.2057  | 4.3551  | 3.3789  | 0.9773  | -0.0332 | 0.8509 | 0.0701 |
| Pnir    | _QRS\$Phospho (STY) PALPW_2                                                                  | A2A1T4_S211_M1_Pnir     | 5.6280  | 4.9723  | 5.3550  | 6.3403  | 3.9651  | 5.9842  | 5.6952  | 4.7429  | 4.9321  | 5.9780  | 0.9780  | -0.0721 | 0.8072 | 0.0930 |
| Pnir    | _SNRSS\$Phospho (STY) IER_2                                                                  | A2A1T4_S601_M1_Pnir     | 5.0836  | 3.8904  | 5.4984  | 4.5252  | 3.7787  | 4.3467  | 4.2399  | 5.6515  | 5.1785  | 4.2896  | 0.9340  | -0.0985 | 0.4869 | 0.3125 |
| Ptgn3   | _SSSSVSPSNAPGS\$Phospho (STY) C\$Carbamidomethyl (C) SPOGVQDR_2                              | A2ALK8_S467_M1_Ptgn3    | 3.3810  | 3.6533  | 3.5316  | 4.4693  | 3.4746  | 4.3336  | 4.0346  | 4.0146  | 4.3336  | 4.0346  | 0.9710  | -0.0425 | 0.7285 | 0.0710 |
| Ptgn3   | _S\$Phospho (STY) S\$Phospho (STY) VERLET_2                                                  | #N/A                    | 3.7516  | 4.1232  | 3.4853  | 5.3850  | 4.9818  | 6.0335  | 3.1773  | 4.2372  | 5.6765  | 4.2072  | 1.0699  | 0.0974  | 0.6555 | 0.1834 |
| Ptgn3   | _RS\$Phospho (STY) S\$Phospho (STY) VER_2                                                    | #N/A                    | 5.4121  | 4.3814  | 3.1081  | 5.4749  | 4.4885  | 3.1808  | 5.5716  | 3.0068  | 5.5241  | 3.5778  | 0.9821  | -0.0260 | 0.9177 | 0.0373 |
| Ptgn3   | _RS\$Phospho (STY) S\$Phospho (STY) VERLET_2                                                 | #N/A                    | 3.9733  | 3.9069  | 3.7070  | 3.7687  | 3.6851  | 3.5651  | 3.3715  | 3.8080  | 4.1070  | 3.6463  | 0.9459  | -0.0802 | 0.1849 | 0.7331 |
| Rap1gap | _RES\$Phospho (STY) PPAGQK_3                                                                 | #N/A                    | 10.1122 | 10.0074 | 10.1182 | 10.4890 | 8.5755  | 9.4801  | 10.2639 | 10.0604 | 9.2313  | 10.0586 | 0.9882  | -0.0156 | 0.7927 | 0.1009 |
| Rap1gap | _DOVFFGPPPPAPVFR_2                                                                           | #N/A                    | 5.5173  | 4.8792  | 4.1070  | 5.6419  | 5.2539  | 5.5482  | 5.4621  | 5.4232  | 5.5389  | 5.5839  | 0.9469  | -0.0788 | 0.4016 | 0.9663 |
| Rap1gap | _RSS\$Phospho (STY) AGNIENQEVQEK_2                                                           | #N/A                    | 3.8614  | 3.8357  | 3.8316  | 5.4086  | 4.8874  | 3.6155  | 3.7611  | 5.7710  | 3.6416  | 8.8950  | -0.1600 | 0.4331  | 0.3964 | 0.3634 |
| Rap1gap | _TEVLGGFS\$Phospho (STY) R_2                                                                 | A2ALSS_S566_M1_Rap1gap  | 6.8984  | 3.3612  | 4.5517  | 7.0646  | 5.6255  | 7.0277  | 7.2955  | 6.3919  | 7.1781  | 6.9387  | 0.8279  | -0.2725 | 0.1737 | 0.7602 |
| Rap1gap | _SENSSTQS\$Phospho (STY) S\$Phospho (STY) QEM\$Oxidation (M) PTTK_2                          | #N/A                    | 10.8562 | 10.7310 | 10.7253 | 12.0610 | 10.5995 | 10.5928 | 11.0297 | 10.6233 | 10.6306 | 10.8694 | 1.0129  | 0.0185  | 0.6525 | 0.1854 |
| Rap1gap | _S\$Phospho (STY) SAAGNIQEVQEK_2                                                             | A2ALSS_S498_M1_Rap1gap  | 3.9834  | 3.2389  | 3.7171  | 3.2609  | 3.1272  | 3.4974  | 3.4092  | 4.0393  | 4.4390  | 4.9884  | 0.8884  | -0.1708 | 0.1081 | 0.9642 |
| Rap1gap | _LPYTEAQQLQR_2                                                                               | #N/A                    | 3.8356  | 4.0435  | 3.4183  | 4.5782  | 3.2288  | 4.3255  | 3.2315  | 4.3809  | 3.3508  | 4.3275  | 1.0215  | 0.0307  | 0.8249 | 0.0836 |
| Rap1gap | _SAAGNIQEVQEKRES\$Phospho (STY) PPAGQK_3                                                     | #N/A                    | 6.4067  | 8.0145  | 9.1218  | 8.7764  | 7.5233  | 7.7757  | 8.0317  | 8.4828  | 7.8100  | 7.4938  | 0.9977  | -0.0033 | 0.9729 | 0.0119 |
| Rap1gap | _TPDS\$Phospho (STY) GHVSGEPK_2                                                              | A2ALSS_S525_M1_Rap1gap  | 4.2654  | 5.8053  | 3.5063  | 4.9866  | 3.3911  | 4.3384  | 3.1983  | 3.9511  | 4.2501  | 4.2282  | 1.1216  | 0.1656  | 0.3735 | 0.4277 |
| Rap1gap | _SGS\$Phospho (STY) M\$Oxidation (M) DAM\$Oxidation (M) GLSNK_2                              | #N/A                    | 6.7027  | 6.8425  | 6.7642  | 7.6595  | 3.1870  | 6.9325  | 6.6219  | 6.5383  | 6.9497  | 6.7943  | 0.9438  | -0.0834 | 0.6545 | 0.1841 |
| Rap1gap | _RES\$Phospho (STY) PPAGQK\$Phospho (STY) PDGSHVSGEPK_3                                      | A2ALSS_S515_M2_Rap1gap  | 4.9910  | 4.2910  | 3.7650  | 3.6280  | 4.4036  | 3.4495  | 3.3427  | 5.3621  | 4.1391  | 3.5950  | 0.9947  | -0.0076 | 0.9637 | 0.0160 |
| Shroom2 | _DSC\$Carbamidomethyl (C) SS\$Phospho (STY) PPLSNYKG_2                                       | A2ALU4_S165_M1_Shroom2  | 13.3082 | 13.3565 | 13.8651 | 14.0161 | 13.2100 | 13.7729 | 13.7729 | 13.3341 | 13.4417 | 13.4417 | 1.0048  | 0.0068  | 0.7470 | 0.0267 |
| Shroom2 | _VHSES\$Phospho (STY) QPEKESR_2                                                              | #N/A                    | 5.3250  | 5.4330  | 5.9513  | 5.9007  | 4.1605  | 6.0979  | 5.4644  | 6.0534  | 5.6891  | 5.9865  | 0.9448  | -0.0820 | 0.4238 | 0.3729 |
| Shroom2 | _VENALNLDONPSPGDR_2                                                                          | #N/A                    | 7.0123  | 7.0560  | 7.3869  | 7.7605  | 6.9108  | 6.9372  | 7.7008  | 6.9372  | 7.1441  | 7.4237  | 0.9882  | -0.0171 | 0.6887 | 0.1620 |
| Shroom2 | _SPS\$Phospho (STY) PQAPQK_2                                                                 | A2ALU4_S1043_M1_Shroom2 | 10.7037 | 10.8571 | 11.0674 | 11.3907 | 10.4459 | 10.9138 | 10.8118 | 10.5654 | 10.7144 | 10.9223 | 1.0133  | 0.0191  | 0.4362 | 0.3603 |
| Ubr4    | _HVTLPSS\$Phospho (STY) PR_2                                                                 | A2AN08_S2716_M1_Ubr4    | 10.9185 | 10.8637 | 11.3846 | 3.5896  | 9.5034  | 10.5822 | 11.3629 | 11.2128 | 10.9737 | 10.7022 | 0.8563  | -0.2237 | 0.3233 | 0.4904 |
| Ubr4    | _TKEGVSS\$Phospho (STY) PK_2                                                                 | A2AN08_S457_M1_Ubr4     | 6.4829  | 6.5141  | 6.8892  | 5.8975  | 4.4236  | 5.7913  | 7.0167  | 6.7625  | 6.1187  | 6.0383  | 0.9253  | -0.1120 | 0.3475 | 0.4590 |
| Ubr4    | _TISDVEDQKELAS\$Phospho (STY) PVQPELR_3                                                      | #N/A                    | 6.0780  | 5.8463  | 6.4003  | 5.9679  | 4.7940  | 5.4000  | 6.6037  | 6.8775  | 5.8399  | 5.8830  | 0.9146  | -0.1288 | 0.1786 | 0.7480 |
| Ubr4    | _T\$Phospho (STY) GSTSSKEDEYSDAATNOK_3                                                       | A2AN08_T360_M1_Ubr4     | 3.7925  | 3.5499  | 3.5262  | 4.5708  | 2.9363  | 3.6883  | 3.2183  | 3.9312  | 4.2302  | 4.2481  | 0.9412  | -0.0874 | 0.5068 | 0.2952 |
| Pkh2    | _CTKPS\$Phospho (STY) LD\$HAAGQPLR_3                                                         | A2AP18_S987_M1_Pkh2     | 6.3363  | 6.2721  | 6.5911  | 7.0346  | 5.2400  | 6.0471  | 6.1661  | 6.3742  | 6.1305  | 5.6854  | 1.0270  | 0.0385  | 0.6285 | 0.2017 |
| Pkh2    | _VAS\$Phospho (STY) VEEGDETLDSPGSGSR_2                                                       | #N/A                    | 9.1094  | 9.6439  | 9.9499  | 9.9362  | 8.5063  | 9.4580  | 9.9865  | 9.6380  | 9.4814  | 9.4429  | 0.9789  | -0.0307 | 0.5155 | 0.2878 |
| Pkh2    | _KVAS\$Phospho (STY) VEEGDETLDSPGSGSR_3                                                      | #N/A                    | 6.3102  | 6.3589  | 6.8376  | 7.3604  | 5.9443  | 7.2512  | 6.2678  | 7.2424  | 7.2861  | 7.3351  | 0.9388  | -0.0912 | 0.3228 | 0.4911 |
| Pkh2    | _IRDC\$Carbamidomethyl (C) EDPNDFVSTLS\$Phospho (STY) PSGK_3                                 | A2AP18_S619_M1_Pkh2     | 3.7889  | 3.0933  | 4.4757  | 3.4775  | 2.9146  | 3.3141  | 3.6748  | 3.1401  | 4.2895  | 3.4445  | 0.9652  | -0.0511 | 0.7234 | 0.1406 |
| Pkh2    | UNISEAEVEYS\$Phospho (STY) DEDS\$Phospho (STY) ADEM\$Oxidation (M) EDDC\$Carbamidomethyl (C) | A2AP18_S561_M2_Pkh2     | 4.0360  | 3.3064  | 3.7697  | 3.3134  | 3.1797  | 3.4449  |         |         |         |         |         |         |        |        |



|          |                                                                      |                          |         |         |         |         |         |         |         |         |         |         |         |         |        |        |
|----------|----------------------------------------------------------------------|--------------------------|---------|---------|---------|---------|---------|---------|---------|---------|---------|---------|---------|---------|--------|--------|
| Skt      | _T[Phospho (STY)]PPASPHR_2                                           | A2AQ25_T470_M1_Skt       | 6.7799  | 4.8085  | 4.2148  | 6.8772  | 4.1545  | 6.3530  | 7.0865  | 3.4011  | 3.0496  | 3.1836  | 1.3232  | 0.4040  | 0.2171 | 0.6634 |
| Skt      | _SIS[Phospho (STY)]SPSALER_2                                         | A2AQ25_S361_M1_Skt       | 9.0040  | 9.3908  | 9.3464  | 3.6985  | 8.2129  | 3.0931  | 9.3640  | 8.9732  | 4.0686  | 0.0927  | 0.9047  | -0.1445 | 0.6877 | 0.1626 |
| Skt      | _S[Phospho (STY)]PPPPPPPPRR_2                                        | #N/A                     | 6.4551  | 6.0825  | 4.2578  | 6.7367  | 5.8631  | 6.3832  | 6.0763  | 5.8837  | 5.5359  | 3.4789  | 1.1372  | 0.1855  | 0.3044 | 0.5165 |
| Skt      | _FQS[Phospho (STY)]PPHAGK_2                                          | A2AQ25_S1868_M1_Skt      | 3.5481  | 3.6781  | 4.2349  | 6.2308  | 6.7194  | 3.0582  | 4.4522  | 3.3809  | 3.0295  | 3.2037  | 1.3019  | 0.3806  | 0.2305 | 0.6374 |
| Skt      | _GDAAGDKLSEDS[Phospho (STY)]PNS[Phospho (STY)]EQELD_K_3              | A2AQ25_S1035_M2_Skt      | 4.0505  | 3.3059  | 3.7841  | 3.3279  | 3.4228  | 3.4304  | 3.4762  | 3.6733  | 3.0052  | 1.0062  | 0.0089  | 0.9237  | 0.0345 | 0.0345 |
| Skt      | _NEGFYADPVLVEGR_3                                                    | #N/A                     | 3.6431  | 3.5831  | 4.3299  | 3.3317  | 3.4714  | 3.1533  | 4.5473  | 3.2859  | 4.4353  | 3.2987  | 0.9213  | -0.1183 | 0.3984 | 0.3996 |
| Ppig     | _ADREGS[Phospho (STY)]PVSK_2                                         | #N/A                     | 3.8495  | 3.3767  | 6.0881  | 3.5381  | 3.2650  | 3.3596  | 3.2528  | 3.0795  | 4.2290  | 3.5051  | 1.1127  | 0.1540  | 0.5200 | 0.2840 |
| Ppig     | _FRRS[Phospho (STY)]ET[Phospho (STY)]PPHWR_3                         | #N/A                     | 10.5099 | 10.6495 | 10.8615 | 10.8675 | 9.9738  | 10.5815 | 11.3683 | 10.8309 | 10.7138 | 10.4759 | 0.9748  | -0.3688 | 0.2579 | 0.5886 |
| Ppig     | _S[Phospho (STY)]ET[Phospho (STY)]PPHWR_2                            | #N/A                     | 8.6709  | 7.3053  | 3.9072  | 8.0713  | 7.2168  | 8.1148  | 8.6403  | 7.9537  | 8.0936  | 8.5170  | 0.8691  | -0.1024 | 0.2529 | 0.5971 |
| Ppig     | _SELNEKENQRS[Phospho (STY)]PVR_3                                     | #N/A                     | 7.3060  | 7.0586  | 7.8121  | 7.7249  | 6.8332  | 7.2568  | 7.4433  | 7.0070  | 7.0984  | 0.9942  | -0.0084 | 0.8967  | 0.0474 | 0.0474 |
| Ppig     | _HM[Oxidation (M)]S[Phospho (STY)]ES[Phospho (STY)]PNRKVEK_3         | #N/A                     | 4.1911  | 4.0140  | 4.3776  | 4.9112  | 4.7099  | 4.3423  | 3.8270  | 4.2207  | 3.6473  | 3.7591  | 1.1452  | 0.1956  | 0.0211 | 1.6765 |
| Ppig     | _HMS[Phospho (STY)]ES[Phospho (STY)]PNR_2                            | #N/A                     | 5.0432  | 3.7960  | 3.9287  | 5.3511  | 3.5546  | 3.5008  | 3.7336  | 3.6859  | 3.9672  | 4.1054  | 1.0833  | 0.1155  | 0.4584 | 0.3387 |
| Ppig     | _KADREGS[Phospho (STY)]PVSK_2                                        | #N/A                     | 5.4030  | 6.0845  | 3.1172  | 5.1570  | 4.7961  | 3.4414  | 3.3345  | 6.3922  | 4.1472  | 5.8137  | 0.9481  | -0.0769 | 0.7623 | 0.1179 |
| Ppig     | _ENQRS[Phospho (STY)]PVR_2                                           | #N/A                     | 5.1317  | 2.9902  | 4.0859  | 4.5064  | 2.8115  | 3.4171  | 4.8391  | 3.3715  | 3.6706  | 3.3069  | 1.0071  | 0.0101  | 0.9619 | 0.0169 |
| Ppig     | _RS[Phospho (STY)]ET[Phospho (STY)]PPHWR_2                           | #N/A                     | 9.5046  | 9.3516  | 9.7182  | 9.8089  | 8.6663  | 9.2695  | 9.8695  | 9.4996  | 9.7139  | 9.4279  | 0.9749  | -0.0366 | 0.3117 | 0.5063 |
| Ppig     | _S[Phospho (STY)]PPKADOKER_2                                         | A2AR02_S288_M1_Ppig      | 5.9013  | 5.5595  | 5.8641  | 6.0086  | 3.9549  | 4.1705  | 5.9216  | 5.5064  | 5.0233  | 1.0666  | 0.0930  | 0.6376  | 0.1954 | 0.1954 |
| Ppig     | _T[Phospho (STY)]RSPVEKNQK_2                                         | A2AR02_T712_M1_Ppig      | 3.0896  | 4.1365  | 3.7765  | 4.2791  | 3.7162  | 4.1006  | 3.9938  | 3.8394  | 3.4880  | 4.2461  | 0.9892  | -0.0157 | 0.8723 | 0.0593 |
| Ppig     | _EOS[Phospho (STY)]PVSK_2                                            | #N/A                     | 3.6546  | 3.5715  | 4.3414  | 3.3432  | 3.4598  | 3.1648  | 3.2744  | 4.4238  | 3.3102  | 0.9223  | -0.1168 | 0.4050  | 0.3925 | 0.3925 |
| Ppjp5k1  | _ALQTS[Phospho (STY)]ET[Phospho (STY)]QPVGTGLPR_2                    | A2ARP1_S959_M1_Ppjp5k1   | 8.1488  | 8.1128  | 8.7752  | 3.1349  | 4.1643  | 8.0858  | 8.3217  | 8.2762  | 7.8536  | 4.3130  | 0.9828  | -0.0251 | 0.9378 | 0.0325 |
| Ppjp5k1  | _TDPQS[Phospho (STY)]IEN[C]Carbamidomethyl (C)]PGK_2                 | A2ARP1_S931_M1_Ppjp5k1   | 8.7017  | 3.4845  | 3.5915  | 3.1353  | 3.3059  | 4.4236  | 3.2836  | 4.1649  | 4.3134  | 1.1365  | 0.1847  | 0.6419  | 0.1265 | 0.1265 |
| Ppjp5k1  | _TJHS[Phospho (STY)]PPLQLR_2                                         | A2ARP1_S1147_M1_Ppjp5k1  | 4.1801  | 3.1623  | 3.9138  | 9.5191  | 2.9836  | 3.2450  | 3.6058  | 3.5436  | 3.8427  | 3.1348  | 1.2743  | 0.3498  | 0.4715 | 0.3265 |
| Ankrd63  | _GNSKDS[Phospho (STY)]PPGHAPAPAP[Phospho (STY)]PER_3                 | #N/A                     | 7.0430  | 7.0306  | 6.0299  | 7.2300  | 6.5483  | 7.3064  | 7.1216  | 7.2862  | 6.8377  | 8.6530  | 0.9772  | -0.0332 | 0.5599 | 0.2519 |
| Ankrd63  | _GNSKDS[Phospho (STY)]PPGHAPAPAPSPER_2                               | #N/A                     | 9.6126  | 9.3791  | 10.0744 | 8.4462  | 9.1815  | 9.5798  | 9.5122  | 9.7098  | 9.6941  | 9.5703  | 0.9748  | -0.0369 | 0.4128 | 0.3843 |
| Rabgap1  | _KTTAS[Phospho (STY)]PSVR_2                                          | #N/A                     | 3.5175  | 3.7086  | 7.0199  | 5.9256  | 4.1441  | 3.5854  | 4.4217  | 3.4115  | 5.7463  | 5.9949  | 0.9503  | -0.0736 | 0.7911 | 0.1018 |
| Rabgap1  | _GVSEDT[Phospho (STY)]DEKETLK_2                                      | A2AWA9_T991_M1_Rabgap1   | 4.0632  | 3.0164  | 4.2540  | 4.6421  | 4.0056  | 4.4035  | 4.7710  | 4.0085  | 3.7367  | 3.6224  | 1.0073  | 0.1005  | 0.9354 | 0.0954 |
| Rabgap1  | _QDETPTSTNKS[Phospho (STY)]DDEKTLK_2                                 | #N/A                     | 3.6947  | 3.8426  | 4.4828  | 4.3652  | 3.8487  | 4.2198  | 4.1609  | 4.2347  | 3.4316  | 3.6296  | 1.0245  | 0.0349  | 0.7290 | 0.1373 |
| Rabgap1  | _TTAS[Phospho (STY)]PSVR_2                                           | #N/A                     | 3.3768  | 3.9656  | 3.1105  | 4.1551  | 4.0214  | 4.1041  | 4.3034  | 3.4469  | 3.1451  | 3.8324  | 0.9688  | -0.0443 | 0.7162 | 0.1470 |
| Atxn7i3  | _LQWDGSSDLS[Phospho (STY)]PDSGSSK_2                                  | A2AWT3_S281_M1_Atn7i3    | 3.2872  | 4.0924  | 3.9740  | 6.2952  | 3.9137  | 5.7414  | 4.2577  | 3.7393  | 4.0383  | 3.7092  | 1.1561  | 0.2093  | 0.3453 | 0.4616 |
| Arid1a   | _PYVPC[Carbamidomethyl (C)]PTPPRK_2                                  | #N/A                     | 10.4248 | 11.3359 | 11.5233 | 10.4786 | 11.0066 | 11.0356 | 10.8954 | 10.9618 | 10.9059 | 0.9940  | -0.0087 | 0.7913  | 0.1018 | 0.1018 |
| Arid1a   | _IELLS[Phospho (STY)]R_2                                             | A2BH40_S1866_M1_Arid1a   | 10.9979 | 10.6269 | 11.0896 | 11.3273 | 10.6427 | 11.1178 | 10.8341 | 10.4835 | 10.9453 | 11.1793 | 1.0098  | 0.0141  | 0.5762 | 0.2395 |
| Arid1a   | _SNS[Phospho (STY)]VGQDAFFQSGDPTQK_2                                 | A2BH40_S1185_M1_Arid1a   | 3.9932  | 3.2486  | 3.7269  | 3.2706  | 3.1369  | 3.4877  | 6.7005  | 6.4379  | 4.0296  | 5.7448  | 0.6071  | -0.7201 | 0.0021 | 2.6798 |
| Arid1a   | _SHAPM[Oxidation (M)]S[Phospho (STY)]PGSGGGQGLAR_3                   | #N/A                     | 4.6107  | 5.8763  | 3.8910  | 6.7967  | 5.7378  | 5.7392  | 5.7749  | 5.7541  | 3.7343  | 1.0074  | 0.1006  | 0.9549  | 0.0200 | 0.0200 |
| Arid1a   | _GPS[Phospho (STY)]SPVGSFASVQSR_2                                    | A2BH40_S697_M1_Arid1a    | 5.9699  | 6.7593  | 6.8930  | 4.1782  | 5.7521  | 6.5583  | 6.9437  | 6.6586  | 3.3354  | 7.1482  | 0.9912  | -0.0128 | 0.9529 | 0.2009 |
| Arid1a   | _NQMPQYTSPPQGS[Phospho (STY)]ALSPR_2                                 | A2BH40_S770_M1_Arid1a    | 3.1552  | 3.9604  | 3.8420  | 6.2724  | 3.7817  | 3.9478  | 4.0593  | 3.7738  | 3.4224  | 4.3116  | 1.0689  | 0.0961  | 0.6507 | 0.1866 |
| Kalm     | _SC[Carbamidomethyl (C)]S[Phospho (STY)]WHTLR_2                      | A2CG49_S2374_M1_Kalm     | 3.0476  | 5.7097  | 4.7344  | 4.2371  | 3.6741  | 4.3553  | 3.9517  | 3.8814  | 5.5300  | 4.2041  | 1.0603  | 0.0844  | 0.6345 | 0.1976 |
| Kalm     | _ATAAESDGS[Phospho (STY)]IKK_2                                       | A2CG49_S2368_M1_Kalm     | 3.6024  | 3.0489  | 3.5272  | 4.5718  | 2.9372  | 4.2437  | 4.0062  | 3.8859  | 1.0885  | 4.2491  | 1.1052  | 0.1443  | 0.6198 | 0.2078 |
| Ard4b    | _TVSKS[Phospho (STY)]PER_2                                           | A2CG63_S778_M1_Ard4b     | 4.0286  | 3.2841  | 3.7623  | 3.6307  | 3.1724  | 3.4522  | 3.3454  | 3.2869  | 4.1363  | 3.5977  | 1.0109  | 0.0157  | 0.8817 | 0.0547 |
| Uhrf1bp1 | _SAS[Phospho (STY)]DTNLQK_2                                          | A2RS14_S952_M1_Uhrf1bp1  | 6.1002  | 5.5342  | 5.9986  | 4.2809  | 3.7180  | 4.1024  | 3.9956  | 5.7800  | 3.4861  | 4.2479  | 1.1321  | 0.1790  | 0.3067 | 0.3908 |
| Uhrf1bp1 | _SS[Phospho (STY)]PESLR_2                                            | A2RS14_S1250_M1_Uhrf1bp1 | 4.2613  | 3.0811  | 3.9950  | 3.5387  | 2.9025  | 3.3262  | 3.6870  | 5.4751  | 3.7615  | 3.2160  | 0.8718  | -0.1980 | 0.4075 | 0.5122 |
| Uhrf1bp1 | _DVASTDS[Phospho (STY)]DSVUNVR_2                                     | A2RS14_S1006_M1_Uhrf1bp1 | 3.2561  | 4.0124  | 4.4906  | 4.4032  | 3.9007  | 4.2247  | 4.1179  | 3.7153  | 3.3638  | 4.3702  | 1.0401  | 0.0568  | 0.6025 | 0.2200 |
| Uhrf1bp1 | _SGS[Phospho (STY)]GEMTSESHTR_2                                      | A2RS14_S988_M1_Uhrf1bp1  | 3.7267  | 3.7564  | 3.8823  | 5.7547  | 3.6438  | 3.8170  | 4.1686  | 3.6561  | 3.6644  | 4.2749  | 1.0395  | 0.0559  | 0.7301 | 0.1866 |
| Uhrf1bp1 | _NLGS[Phospho (STY)]PPKSP[Phospho (STY)]HASPQHTQEK_3                 | A2RS14_T420_M2_Uhrf1bp1  | 3.4735  | 3.7529  | 4.1603  | 3.1622  | 3.9076  | 3.3235  | 4.3777  | 4.3761  | 4.8464  | 3.1292  | 0.8679  | -0.2043 | 0.1520 | 0.3161 |
| DennD5b  | _KEQHELTD[Phospho (STY)]PVALGER_3                                    | #N/A                     | 4.1208  | 5.0340  | 3.3068  | 3.8094  | 2.9936  | 3.6310  | 3.5241  | 4.3090  | 3.9576  | 3.7764  | 0.9805  | -0.0284 | 0.8494 | 0.0709 |
| DennD5b  | _QELTDS[Phospho (STY)]PVALGER_2                                      | #N/A                     | 3.4827  | 4.6930  | 3.7832  | 4.0946  | 3.5804  | 3.8962  | 4.0786  | 4.9168  | 5.5034  | 3.4563  | 0.9482  | -0.0768 | 0.5228 | 0.2817 |
| DennD5b  | _QC[Carbamidomethyl (C)]RT[Phospho (STY)]PQDQS[Phospho (STY)]PTTTR_3 | A2RSQ0_S1068_M2_DennD5b  | 2.9741  | 4.2521  | 3.6609  | 4.1636  | 3.6006  | 4.1289  | 3.8782  | 4.2316  | 3.9208  | 4.1305  | 0.9397  | -0.0897 | 0.3715 | 0.4301 |
| DennD5b  | _LQSDVLATGPANNNR_2                                                   | #N/A                     | 3.1529  | 3.9091  | 4.3874  | 3.9510  | 3.7974  | 3.7342  | 4.9279  | 2.8061  | 4.2096  | 3.6084  | 0.9830  | -0.0247 | 0.8762 | 0.0547 |
| Kansl3   | _GSRPAS[Phospho (STY)]PAAR_2                                         | A2RSY1_S515_M1_Kansl3    | 5.7379  | 4.3791  | 4.1978  | 3.7416  | 4.2004  | 3.5291  | 3.8899  | 3.2596  | 3.5586  | 3.4189  | 1.1147  | 0.1567  | 0.0958 | 0.1086 |
| Paln3    | _TSGAKDOVS[Phospho (STY)]PEEQGK_2                                    | A2TIV2_S601_M1_Paln3     | 3.9153  | 3.2197  | 4.6021  | 6.2657  | 3.0410  | 3.1876  | 3.3186  | 5.4969  | 4.1631  | 6.1796  | 0.8432  | -0.2460 | 0.3823 | 0.4176 |
| Paln3    | _TGGEGS[Phospho (STY)]LDEAAEGSK_2                                    | A2TIV2_S565_M1_Paln3     | 4.3716  | 3.6270  | 4.1053  | 3.6490  | 3.5153  | 3.1093  | 3.7973  | 3.3521  | 3.6512  | 3.3263  | 1.0560  | 0.0786  | 0.4442 | 0.3525 |
| Paln3    | _QGTGS[Phospho (STY)]PELPTWVK_2                                      | A2TIV2_S270_M1_Paln3     | 3.8614  | 3.1169  | 3.5951  | 3.1389  | 3.0052  | 3.6195  | 3.2871  | 3.8623  | 4.1614  | 4.3170  | 0.8676  | -0.2050 | 0.0743 | 0.1826 |
| Ralgap2  | _RSS[Phospho (STY)]S[Phospho (STY)]PAEELKXDLQAHGR_4                  | A1KG53_S819_M2_Ralgap2   | 3.7168  | 3.0212  | 4.4036  | 4.9771  | 2.8425  | 3.3861  | 3.1201  | 3.2122  | 4.3616  | 3.3724  | 1.0591  | 0.0829  | 0.6755 | 0.1704 |
| Exoc6b   | _DWTYFDAVESTS[Phospho (STY)]PK_2                                     | A2RSK3_S261_M1_Exoc6b    | 3.2738  | 3.9523  | 3.9606  | 4.4633  | 3.9003  | 3.8291  | 4.1780  | 3.6552  | 3.3038  | 4.4303  | 1.0012  | 0.0018  | 0.9867 | 0.0058 |
| Phrf1    | _EVS[Phospho (STY)]PAPATGESR_2                                       | AGH619_S1201_M1_Phrf1    | 9.5068  | 9.2042  | 10.2017 | 10.0638 | 9.1302  | 9.2187  | 10.0777 | 9.6462  | 9.5898  | 9.4317  | 0.9864  | -0.0198 | 0.6286 | 0.2016 |
| Phrf1    | _S[Phospho (STY)]RS[Phospho (STY)]PS[Phospho (STY)]LEHRPR_3          | AGH619_S1169_M3_Phrf1    | 3.9279  | 3.4145  | 3.6616  | 3.2053  | 3.2358  | 2.9928  | 3.3536  | 3.7958  | 4.0949  | 4.3835  | 0.8719  | -0.1978 | 0.0759 | 1.1197 |
| Arm1i    | _Acetyl (Protein N-term)[AES[Phospho (STY)]PAFLSAK_2                 | AGH630_S4_M1_Arm1i       | 4.0558  | 3.4775  | 3.2417  | 3.7444  | 3.1815  | 3.0472  | 3.4591  | 4.1831  | 4.0227  | 4.8688  | 0.8366  | -0.2574 | 0.0552 | 1.2579 |
| Kcnb2    | _DSVDNHLCS[Phospho (STY)]PSR_2                                       | AGHBH5_S48B_M1_Kcnb2     | 7.3852  | 7.2133  | 7.5827  | 3.6660  | 6.1606  | 3.1256  | 8.1697  | 7.6978  | 7.3450  | 7.0682  | 0.7735  | -0.3705 | 0.1330 | 0.8761 |
| Kcnb2    | _S[Phospho (STY)]M[Oxidation (M)]ELIDVAVEK_2                         | #N/A                     | 3.8121  | 5.7514  | 4.4989  | 6.0620  | 5.0606  | 6.0211  | 6.1773  | 6.6794  | 6.4294  | 6.3981  | 0.8100  | -0.3040 | 0.0325 | 1.4882 |
| Arhgap31 | _RNS[Phospho (STY)]APVSVSAVR_2                                       | A6X8Z5_S1161_M1_Arhgap31 | 4.2648  | 3.0776  | 3.9985  | 3.5423  | 2.8989  | 3.3297  | 3.6905  | 3.4589  | 3.7580  | 3.2195  | 0.9963  | -0.0054 | 0.9647 | 0.0156 |
| Arhgap31 | _S[Phospho (STY)]MDS[C]Carbamidomethyl (C)]SVPVEGK_2                 | A6X8Z5_S343_M1_Arhgap31  | 3.4513  | 4.2565  | 4.1381  | 3.8642  | 4.0778  | 3.6516  | 4.0124  | 3.1370  | 3.4360  | 3.5415  | 1.1061  | 0.1455  | 0.1173 | 0.9308 |
| Dpy19l1  | _SS[Phospho (STY)]PPPLSGASEVDAGELGSR_2                               | A6X919_S23_M1_Dpy19l1    | 8.2593  | 8.4848  | 3.3162  | 8.5792  | 3.7654  | 3.7452  | 4.1120  | 8.6839  | 8.3270  |         |         |         |        |        |



|         |                                                                                      |                        |         |         |         |         |        |         |         |         |         |         |         |         |        |        |
|---------|--------------------------------------------------------------------------------------|------------------------|---------|---------|---------|---------|--------|---------|---------|---------|---------|---------|---------|---------|--------|--------|
| Scn2a   | _SSSYHVS[Phospho (STY)]M[Oxidation (M)]OLLEDPTRS_3                                   | #N/A                   | 3.9474  | 3.3387  | 4.2036  | 3.4312  | 3.0827 | 3.3988  | 3.2920  | 3.4132  | 4.1119  | 3.2714  | 1.0128  | 0.0183  | 0.8700 | 0.0605 |
| Scn2a   | _RFS[Phospho (STY)]S[Phospho (STY)]PHQSLSLR_3                                        | B1AWN6_S553_M2_Scn2a   | 4.0009  | 3.3052  | 1.1868  | 4.7810  | 3.1265 | 3.1021  | 3.4042  | 3.8560  | 4.0776  | 3.6565  | 0.9560  | -0.0649 | 0.6619 | 0.1792 |
| Akirin2 | _TLDFPLLPASP[Phospho (STY)]PK_2                                                      | B1AXDB_S21_M1_Akirin2  | 3.5360  | 4.9413  | 5.7454  | 3.7795  | 4.9693 | 5.1363  | 4.4992  | 4.7164  | 3.5208  | 5.0279  | 1.0548  | 0.0770  | 0.6421 | 0.1924 |
| Nhlh2   | _LIAQFS[Phospho (STY)]KDEYFTDNPMST_2                                                 | #N/A                   | 7.3216  | 6.5557  | 7.6614  | 8.0652  | 3.6155 | 7.7804  | 7.6476  | 7.4878  | 7.7972  | 7.9688  | 0.8845  | -0.1770 | 0.3250 | 0.4881 |
| Nhlh2   | _S[Phospho (STY)]S[Phospho (STY)]LKK_2                                               | B1AXH3_S557_M2_Nhlh2   | 4.8771  | 5.6433  | 5.9008  | 5.8565  | 5.7960 | 6.2929  | 5.3828  | 5.9555  | 3.9164  | 1.0646  | 0.0903  | 0.4042  | 0.3061 |        |
| Nhlh2   | _ATTPQSL[Phospho (STY)]VEVAR_2                                                       | B1AXH1_S690_M1_Nhlh2   | 4.1192  | 3.1069  | 3.3052  | 7.7425  | 3.2449 | 7.7370  | 3.5125  | 4.3106  | 3.9592  | 7.7406  | 0.9861  | -0.2002 | 0.9608 | 0.0174 |
| Nhlh2   | _RIAQFS[Phospho (STY)]KDEYFTDNPMST_3                                                 | #N/A                   | 3.7868  | 3.8303  | 3.5205  | 5.8161  | 3.9248 | 5.1731  | 3.9037  | 4.7437  | 4.3286  | 4.2424  | 1.0087  | 0.0125  | 0.9413 | 0.0263 |
| Nhlh2   | _S[Phospho (STY)]SVPTDSGVSVVDDEQK_2                                                  | B1AXH1_S497_M1_Nhlh2   | 3.5757  | 3.5250  | 3.9049  | 3.8611  | 3.3463 | 3.7328  | 4.0936  | 4.0575  | 3.8346  | 0.9357  | -0.0958 | 0.1032  | 0.9865 |        |
| Nhlh2   | _DGHGSS[Phospho (STY)]PTGSILAR_2                                                     | B1AXH1_S301_M1_Nhlh2   | 4.0449  | 7.7251  | 8.0259  | 8.0536  | 7.3662 | 7.4338  | 7.8200  | 7.6202  | 4.1014  | 7.7490  | 1.0419  | 0.0592  | 0.7944 | 0.1000 |
| Frn1l   | _NPARDDEGVFNNR_3                                                                     | #N/A                   | 5.2673  | 5.4361  | 5.5620  | 5.6977  | 4.6336 | 5.5770  | 5.7619  | 6.0432  | 5.7645  | 6.1163  | 0.9056  | -0.1431 | 0.0287 | 1.5423 |
| Nfk1    | _S[Phospho (STY)]PGGFFQSSNK_2                                                        | B1AY10_S81_M1_Nfk1     | 7.2977  | 6.5920  | 6.6651  | 7.1606  | 6.0477 | 6.7779  | 7.0751  | 6.1072  | 6.4997  | 6.9317  | 1.0155  | 0.0223  | 0.7271 | 0.1384 |
| Nfk1    | _EHS[Phospho (STY)]PSESEKEVVAQPR_3                                                   | B1AY10_S147_M1_Nfk1    | 3.2965  | 4.0723  | 3.4840  | 4.2514  | 3.9340 | 4.0329  | 3.8315  | 4.0652  | 3.3246  | 4.0706  | 1.0058  | 0.0084  | 0.9270 | 0.0329 |
| Nfk1    | _AQLGSEQT[Phospho (STY)]SDTSSLESVAR_2                                                | B1AY10_T125_M1_Nfk1    | 3.6069  | 3.7881  | 4.5471  | 3.9740  | 3.5610 | 3.7702  | 3.6886  | 3.8789  | 3.9022  | 3.6500  | 1.0250  | 0.0357  | 0.6337 | 0.1981 |
| Nfk1    | _NYSSS[Phospho (STY)]PPC[Carbamidomethyl (C)]HLPR_2                                  | B1AY10_S51_M1_Nfk1     | 8.3674  | 4.0708  | 3.9524  | 4.4551  | 3.8921 | 3.8373  | 4.1698  | 3.6634  | 3.3120  | 4.4221  | 1.2237  | 0.2913  | 0.3762 | 0.4245 |
| Usp24   | _VSDQNS[Phospho (STY)]PVLPK_2                                                        | #N/A                   | 10.9816 | 10.8012 | 11.4369 | 10.9645 | 9.5957 | 10.5485 | 11.6124 | 11.0973 | 10.7645 | 10.7476 | 0.9698  | -0.0443 | 0.3756 | 0.4253 |
| Usp24   | _NMDQGGGGS[Phospho (STY)]PR_2                                                        | B1AY13_S1940_M1_Usp24  | 7.3331  | 5.1947  | 4.6040  | 7.3798  | 3.1972 | 3.4274  | 6.2745  | 3.9443  | 4.7514  | 6.1685  | 0.9820  | -0.0263 | 0.9290 | 0.0320 |
| Usp24   | _TIS[Phospho (STY)]AQDTLAYATALLNEK_2                                                 | B1AY13_S2558_M1_Usp24  | 3.9336  | 3.6078  | 4.1029  | 3.3135  | 3.8223 | 3.1351  | 3.9185  | 4.7246  | 3.8495  | 3.2805  | 0.9263  | -0.1105 | 0.3643 | 0.4385 |
| Usp24   | _VSDQNS[Phospho (STY)]PVLPK_2                                                        | #N/A                   | 8.7138  | 8.9779  | 9.6214  | 8.6073  | 7.2846 | 8.4574  | 9.2946  | 9.0244  | 8.8367  | 8.5016  | 0.9659  | -0.0500 | 0.4833 | 0.3158 |
| Tmem245 | _SPSSPS[Phospho (STY)]PTLGR_2                                                        | B1AZA5_S329_M1_Tmem245 | 7.9446  | 8.0079  | 8.5739  | 8.0953  | 6.9651 | 7.6403  | 7.1208  | 8.4020  | 7.9034  | 7.6433  | 1.0134  | 0.0192  | 0.7717 | 0.1126 |
| Tmem245 | _GGPAEAP[Phospho (STY)]PR_2                                                          | B1AZA5_S12_M1_Tmem245  | 9.0923  | 8.8555  | 8.9260  | 8.4745  | 7.3831 | 8.1939  | 5.9864  | 8.9648  | 8.4940  | 8.6496  | 0.9511  | -0.0723 | 0.2783 | 0.5555 |
| Tmem245 | _GGPAEAP[Phospho (STY)]PRGS[Phospho (STY)]PRPESR_3                                   | #N/A                   | 7.7327  | 7.1515  | 7.9107  | 6.9294  | 6.3767 | 7.4075  | 7.8355  | 7.8347  | 7.2386  | 6.7254  | 0.9707  | -0.0479 | 0.5383 | 0.2690 |
| Thoc2   | _KIDSHPS[Phospho (STY)]PSHSSTVK_3                                                    | B1AZH6_S1417_M1_Thoc2  | 4.3902  | 3.6946  | 3.5762  | 4.0789  | 3.5159 | 4.0136  | 3.0735  | 3.6882  | 4.0459  | 1.0538  | 0.0756  | 0.4633  | 0.3342 |        |
| Dlgap4  | _ATQCS[Phospho (STY)]LGEQNP_2                                                        | #N/A                   | 10.4306 | 10.1022 | 10.5518 | 10.8584 | 9.9329 | 10.4516 | 10.5852 | 10.3605 | 10.6164 | 10.6218 | 0.9850  | -0.0218 | 0.3932 | 0.4053 |
| Dlgap4  | _QNS[Phospho (STY)]ATESADSEIYVPEAQTR_2                                               | #N/A                   | 8.2161  | 8.0102  | 4.2463  | 8.9664  | 7.9817 | 8.4109  | 10.9604 | 8.4047  | 8.3338  | 8.4749  | 0.8447  | -0.2436 | 0.1994 | 0.7002 |
| Dlgap4  | _ANSWQLVET[Phospho (STY)]PEK_2                                                       | #N/A                   | 7.5758  | 8.7890  | 7.8472  | 9.1003  | 7.7773 | 8.3359  | 8.7389  | 8.3036  | 4.8814  | 8.5887  | 0.9462  | -0.0798 | 0.1513 | 0.8203 |
| Dlgap4  | _SNSGWWVS[Phospho (STY)]SDONLDGEGGAR_2                                               | B1AZP2_S206_M1_Dlgap4  | 4.3359  | 6.8521  | 4.0695  | 7.4740  | 3.4796 | 3.2622  | 6.6694  | 6.9287  | 3.6871  | 6.1529  | 0.8383  | -0.2544 | 0.4095 | 0.3878 |
| Dlgap4  | _ANSWQLVET[Phospho (STY)]PEK_2                                                       | #N/A                   | 7.0549  | 7.4446  | 7.9022  | 8.2449  | 6.9073 | 7.5109  | 8.0607  | 7.7948  | 7.6761  | 7.5130  | 0.9677  | -0.0473 | 0.3855 | 0.4140 |
| Dlgap4  | _APS[Phospho (STY)]M[Oxidation (M)]EGTAGK_2                                          | #N/A                   | 4.5093  | 6.5924  | 4.0026  | 7.7035  | 6.0794 | 5.9651  | 6.5615  | 6.2053  | 6.1815  | 6.3382  | 0.9189  | -0.1221 | 0.4832 | 0.3159 |
| Dlgap4  | _ATQCS[Phospho (STY)]LGEQNS[Phospho (STY)]NPRR_2                                     | B1AZP2_S405_M2_Dlgap4  | 4.4893  | 5.3918  | 5.1496  | 3.9478  | 5.1310 | 5.0781  | 5.0609  | 5.1327  | 5.7801  | 4.7025  | 0.9411  | -0.0876 | 0.3799 | 0.4203 |
| Dlgap4  | _SLPDC[Carbamidomethyl (C)]TSHPNSS[Phospho (STY)]DAGPR_3                             | #N/A                   | 5.4349  | 5.7308  | 4.3122  | 6.8817  | 5.7695 | 3.4223  | 5.2756  | 6.3687  | 5.1619  | 6.2384  | 0.9128  | -0.1317 | 0.4744 | 0.3238 |
| Dlgap4  | _AM[Oxidation (M)]Oxidation (M)]JESGSGS[Phospho (STY)]PKPSPK_2                       | #N/A                   | 4.9839  | 5.4937  | 5.1884  | 5.1183  | 5.4006 | 5.9413  | 5.2775  | 4.8133  | 5.6794  | 5.2275  | 0.9488  | -0.0758 | 0.3616 | 0.5206 |
| Dlgap4  | _S[Phospho (STY)]LDRLDSVDM[Oxidation (M)]LPSK_2                                      | #N/A                   | 4.1120  | 6.3746  | 6.4433  | 7.7499  | 7.3436 | 5.9594  | 5.7691  | 7.8486  | 6.2206  | 5.6802  | 0.9923  | -0.0112 | 0.9502 | 0.0222 |
| Dlgap4  | _RS[Phospho (STY)]LDRLDS[Phospho (STY)]VDM[Oxidation (M)]LPSK_3                      | #N/A                   | 3.8622  | 3.4802  | 3.5959  | 6.0930  | 4.8933 | 4.4280  | 3.2879  | 6.4837  | 4.9463  | 4.3178  | 0.9229  | -0.1157 | 0.6293 | 0.2011 |
| Dlgap4  | _ROTT[Phospho (STY)]S[Phospho (STY)]DTQDANDSS[Carbamidomethyl (C)]K_2                | B1AZP2_S716_M2_Dlgap4  | 3.1685  | 4.1739  | 4.4030  | 3.9468  | 3.8130 | 4.3124  | 4.0950  | 3.0544  | 3.3535  | 3.6240  | 1.1240  | 0.1686  | 0.1677 | 0.7754 |
| Cad     | _IHRAS[Phospho (STY)]DPLGPAEPK_3                                                     | B2RQCQ_S1859_M1_Cad    | 7.5961  | 7.2058  | 7.7295  | 7.5663  | 6.3176 | 7.2058  | 7.8822  | 7.5989  | 7.5200  | 0.9632  | -0.0691 | 0.2363  | 0.6265 |        |
| Ythdc2  | _ADGPNSS[Phospho (STY)]DSEM[Oxidation (M)]EDR_2                                      | #N/A                   | 7.7902  | 7.9742  | 3.7071  | 7.4008  | 3.9599 | 3.9644  | 3.8863  | 8.3035  | 8.1038  | 7.9685  | 0.8208  | -0.2849 | 0.3817 | 0.4183 |
| Ythdc2  | _STDSSVSPSPC[Carbamidomethyl (C)]AS[Phospho (STY)]PS[Phospho (STY)]PSSGK_2           | B2R8R8_S1282_M2_Ythdc2 | 3.5354  | 3.8070  | 3.2691  | 4.1355  | 3.6284 | 4.1011  | 4.4619  | 4.3539  | 2.9866  | 4.8946  | 0.8974  | -0.1561 | 0.2791 | 0.5542 |
| Otu4    | _EES[Phospho (STY)]S[Phospho (STY)]JGANSVDOR_2                                       | B2RRF7_S1000_M1_Otu4   | 7.1707  | 7.3674  | 7.8637  | 8.7816  | 6.5693 | 7.3239  | 7.6602  | 3.1778  | 7.4850  | 7.3303  | 1.1478  | 0.1989  | 0.3177 | 0.4980 |
| Otu4    | _EES[Phospho (STY)]S[Phospho (STY)]JEDENEVNLR_2                                      | #N/A                   | 3.0075  | 4.3349  | 4.2420  | 8.7471  | 4.1563 | 3.5732  | 3.9340  | 7.3080  | 5.5145  | 3.4630  | 1.0268  | 0.0381  | 0.9364 | 0.0332 |
| Otu4    | _LQRPKEES[Phospho (STY)]S[Phospho (STY)]JEDENEVNLR_3                                 | #N/A                   | 3.8574  | 3.1618  | 4.5442  | 3.5936  | 2.9831 | 3.2456  | 3.6064  | 3.0716  | 4.2210  | 3.5130  | 0.9892  | -0.0156 | 0.9140 | 0.0390 |
| Rm3     | _LQDPNPAIR_3                                                                         | #N/A                   | 6.6560  | 6.5589  | 6.2187  | 6.8317  | 6.5805 | 6.6035  | 5.5153  | 6.6327  | 6.7088  | 6.4657  | 1.0386  | 0.0546  | 0.3410 | 0.4673 |
| Gna1    | _DSGVQAC[Carbamidomethyl (C)]PNR_2                                                   | #N/A                   | 8.7651  | 8.4475  | 8.5906  | 8.3761  | 7.7647 | 8.3226  | 8.9366  | 8.4914  | 8.4326  | 8.5851  | 0.9729  | -0.0397 | 0.2656 | 0.5757 |
| Gna1    | _IAQPNVPTQDQVLR_2                                                                    | #N/A                   | 8.7876  | 5.8565  | 8.9803  | 8.5654  | 8.1609 | 8.5157  | 8.7064  | 8.6035  | 8.6276  | 8.4650  | 0.9999  | -0.0002 | 0.9937 | 0.0027 |
| Gna1    | _EYQLNDSAAAYLNLDLR_2                                                                 | #N/A                   | 6.9271  | 6.8983  | 7.0638  | 6.5054  | 5.9043 | 6.5103  | 6.8676  | 6.7545  | 6.4993  | 6.2734  | 1.0055  | 0.0876  | 0.6079 | 0.5533 |
| Gna1    | _IDFGDSAR_2                                                                          | #N/A                   | 6.7440  | 6.3064  | 6.1839  | 5.9972  | 5.6695 | 5.9623  | 5.8031  | 6.3287  | 6.7698  | 6.2009  | 0.9790  | -0.0306 | 0.6040 | 0.2190 |
| Gna1    | _SREYQLNDSAAAYLNLDLR_3                                                               | #N/A                   | 6.1989  | 5.3157  | 6.7836  | 6.3800  | 5.3260 | 5.8934  | 6.7293  | 6.1223  | 6.1200  | 0.9485  | -0.0763 | 0.3410  | 0.4162 | 0.4296 |
| Gna1    | _AVVSNTQSIHAR_2                                                                      | #N/A                   | 3.5739  | 3.7299  | 3.8947  | 3.8694  | 3.5986 | 3.7517  | 4.1209  | 2.6076  | 3.6539  | 3.6555  | 1.0646  | 0.0904  | 0.4117 | 0.3854 |
| Apb1    | _VVGTP[Phospho (STY)]PGGSEVGQR_2                                                     | B2RUJ5_S733_M1_Apb1    | 7.4222  | 7.4126  | 7.3834  | 7.4244  | 4.2844 | 7.7327  | 4.5261  | 7.0091  | 7.2485  | 7.4343  | 1.0584  | 0.0819  | 0.6695 | 0.1742 |
| Apb1    | _QDIS[Phospho (STY)]PTR_2                                                            | B2RUJ5_S391_M1_Apb1    | 7.0169  | 3.4179  | 3.8961  | 3.4399  | 3.3062 | 3.3184  | 3.5882  | 3.5613  | 6.0755  | 3.1172  | 0.9952  | -0.0069 | 0.9834 | 0.0073 |
| Apb1    | _APT[Phospho (STY)]PGGGHPDS[Phospho (STY)]GLPAPAGQQQR_3                              | #N/A                   | 9.8928  | 9.4289  | 9.3078  | 10.2505 | 9.2004 | 9.6311  | 9.9961  | 9.3647  | 9.6747  | 9.7041  | 0.9932  | -0.0099 | 0.7769 | 0.1097 |
| Apb1    | _M[Oxidation (M)]DIS[Phospho (STY)]VEGEIDQIVAEVK_2                                   | #N/A                   | 3.5116  | 3.8015  | 3.8629  | 4.1550  | 7.9799 | 3.8596  | 7.0559  | 3.7168  | 3.6379  | 4.0220  | 0.9827  | -0.0252 | 0.9432 | 0.0254 |
| Apb1    | _QSM[Oxidation (M)]SQDS[Phospho (STY)]LDK_2                                          | #N/A                   | 6.1512  | 6.4668  | 6.1800  | 6.4283  | 5.9785 | 5.6529  | 6.1664  | 6.2782  | 5.9936  | 6.8218  | 0.9728  | -0.0399 | 0.4342 | 0.3623 |
| Apb1    | _SNS[Phospho (STY)]QENVEASHPSQDGR_3                                                  | #N/A                   | 7.6955  | 7.4476  | 8.3181  | 8.0935  | 7.6092 | 7.8302  | 7.6683  | 7.8985  | 8.0330  | 7.8359  | 0.9966  | -0.0049 | 0.8832 | 0.0539 |
| Apb1    | _SNS[Phospho (STY)]QENVEASHPSQDGR_3                                                  | #N/A                   | 7.1166  | 6.8576  | 6.6266  | 7.4695  | 6.4707 | 7.2777  | 7.1700  | 7.1186  | 7.1177  | 6.9945  | 0.9816  | -0.0267 | 0.5311 | 0.2748 |
| Apb1    | _SDGES[Phospho (STY)]DSPEKEAFAPPR_3                                                  | #N/A                   | 3.9726  | 4.6155  | 3.7062  | 5.7579  | 3.2734 | 4.8078  | 3.9018  | 3.8126  | 5.9179  | 6.1589  | 0.8803  | -0.1839 | 0.4064 | 0.3911 |
| Apb1    | _SA[Phospho (STY)]ITSGFHNHTDAGECHLAAR_3                                              | B2RUJ5_S84_M1_Apb1     | 6.1698  | 3.6666  | 6.7782  | 3.9768  | 5.5022 | 3.3975  | 6.4037  | 6.3528  | 6.2347  | 3.8271  | 0.8616  | -0.2149 | 0.3956 | 0.4028 |
| Apb1    | _UHH[Phospho (STY)]DERSDGGSS[Phospho (STY)]PEKEAFAPPR_4                              | #N/A                   | 3.7066  | 3.8146  | 4.3957  | 3.5789  | 5.3918 | 4.9403  | 3.4727  | 3.1739  | 4.0790  | 3.4433  | 1.2152  | 0.2812  | 0.0969 | 1.0137 |
| Apb1    | _AAEDM[Oxidation (M)]PEARQDLERAPT[Phospho (STY)]PGGGHPDS[Phospho (STY)]GLPAPAGQQQR_3 | #N/A                   | 3.5919  | 7.0027  | 6.6454  | 7.7533  | 7.6843 | 7.8799  | 6.8317  | 8.4045  | 8.2526  | 8.1525  | 0.9545  | -0.2268 | 0.6456 | 0.6456 |
| Apb1    | _UHHYDERS[Phospho (STY)]DGGESPEK_3                                                   | #N/A                   | 3.6355  | 2.9579  | 4.3403  | 3.3422  | 4.2801 | 3.4494  | 4.5577  | 3.2755  | 4.4249  | 3.3092  | 0.9432  | -0.0844 | 0.5868 | 0.2315 |
| Cspp1   | _IAcetyl (Protein N-term)ADS[Phospho (STY)]LDEFIEQK_2                                | B2RXH8_S4_M1_Cspp1     | 3.2487  | 3.9775  | 3.9355  | 4.4382  | 4.0185 | 4.2597  | 4.1528  | 3.6803  | 3.3289  | 4.4052  | 1.0226  | 0.0322  | 0.7628 | 0.1176 |
| Dock5   | _S[Phospho (STY)]LQGLVLR_2                                                           | B2RXH8_S1765_M1_Dock5  | 3.3445  | 5.4897  | 4.5790  |         |        |         |         |         |         |         |         |         |        |        |



|                   |                                                                           |                              |         |         |         |         |         |         |         |         |         |         |        |         |        |        |
|-------------------|---------------------------------------------------------------------------|------------------------------|---------|---------|---------|---------|---------|---------|---------|---------|---------|---------|--------|---------|--------|--------|
| Tmf1              | _SVSEIN[Phospho (STY)]DEELPK_2                                            | B9EKI0_S340_M1_Tmf1          | 4.1123  | 9.1192  | 4.5452  | 9.8887  | 8.9033  | 9.2524  | 9.8583  | 9.1854  | 9.2427  | 9.5352  | 0.8077 | -0.3082 | 0.2074 | 0.6832 |
| Ptptr1            | _EVSDAV[Phospho (STY)]EEENFLTKF_2                                         | B9EKR1_S576_M1_Ptptr1        | 11.7956 | 11.8139 | 12.1736 | 12.6500 | 12.1050 | 12.3520 | 12.2121 | 11.6887 | 12.0608 | 12.1609 | 1.0098 | 0.0140  | 0.5546 | 0.2560 |
| Ptptr1            | _FAVYQPLAGNDQAK_2                                                         | #N/A                         | 8.7068  | 8.5966  | 9.1050  | 9.0485  | 8.6095  | 8.9649  | 8.9025  | 8.7167  | 8.8084  | 8.7560  | 1.0178 | 0.0254  | 0.3499 | 0.4560 |
| Ptptr1            | _SSFEQAVK_2                                                               | #N/A                         | 6.9599  | 6.8177  | 6.5637  | 6.7280  | 6.7271  | 6.1482  | 6.4457  | 6.3103  | 6.1307  | 6.7655  | 1.0390 | 0.0553  | 0.2054 | 0.6875 |
| Ptptr1            | _SSQGLLK_2                                                                | #N/A                         | 5.4809  | 5.4857  | 4.6827  | 6.2081  | 5.7711  | 6.1401  | 5.3592  | 5.7784  | 5.7730  | 6.0553  | 0.9803 | -0.2888 | 0.7209 | 0.1421 |
| Ptptr1            | _QSPINDEDLTQVNVNLIK_3                                                     | #N/A                         | 4.9529  | 5.3358  | 6.3162  | 5.6235  | 5.9473  | 5.8525  | 4.7571  | 5.5965  | 5.8975  | 5.8187  | 1.0279 | 0.0397  | 0.6442 | 0.1910 |
| Ptptr1            | _QSPINDEDLTQVNVNLIK_2                                                     | #N/A                         | 5.2661  | 4.8248  | 5.5419  | 5.9080  | 4.8915  | 5.1940  | 4.9993  | 5.5241  | 4.6702  | 4.4163  | 1.0752 | 0.1046  | 0.2257 | 0.6464 |
| Ptptr1            | _DTDGVLETDGTGAPSPR_2                                                      | #N/A                         | 6.5407  | 6.6218  | 7.0010  | 7.6276  | 7.1176  | 7.0823  | 7.0078  | 6.9649  | 6.6427  | 6.6344  | 1.0273 | 0.0389  | 0.4128 | 0.3443 |
| Ptptr1            | _ASLENTFHNTGK_2                                                           | #N/A                         | 5.6489  | 6.2718  | 6.9961  | 7.2247  | 6.4949  | 6.1377  | 6.9089  | 6.0121  | 6.1636  | 6.6043  | 1.0114 | 0.0164  | 0.8289 | 0.0815 |
| Ptptr1            | _C[Carbamidomethyl (C)]MSC[Carbamidomethyl (C)]LPYRES[Phospho (STY)]R_2   | #N/A                         | 6.1295  | 5.2968  | 4.0344  | 7.0798  | 4.9678  | 3.3738  | 3.9144  | 3.4995  | 4.7831  | 5.8098  | 1.1433 | 0.1933  | 0.4430 | 0.3536 |
| Ptptr1            | _C[Carbamidomethyl (C)]MSC[Carbamidomethyl (C)]LPYRES[Phospho (STY)]REK_3 | #N/A                         | 2.9522  | 4.3902  | 4.1867  | 6.2038  | 3.5967  | 3.0279  | 3.8787  | 3.2707  | 3.5698  | 3.4077  | 1.1495 | 0.0210  | 0.4209 | 0.3758 |
| Mfap1a,Mfap1b     | _KIVEPVGGS[Phospho (STY)]DSEVGDAWR_3                                      | COHKD8_S116_M1_Mfap1a,Mfap1b | 3.0662  | 3.7285  | 4.0739  | 4.0484  | 3.7955  | 3.9636  | 3.9824  | 6.2168  | 4.4790  | 3.8868  | 0.8143 | -0.2964 | 0.1032 | 0.9865 |
| Mfap1a,Mfap1b     | _SLAALDALNTDDEDEEY[Phospho (STY)]EAWK_3                                   | COHKD8_Y276_M1_Mfap1a,Mfap1b | 3.5120  | 4.3172  | 4.1988  | 3.4953  | 4.1385  | 3.5920  | 4.1643  | 3.3497  | 3.3353  | 3.1676  | 1.1060 | 0.1453  | 0.1955 | 0.7089 |
| Mfap1a,Mfap1b     | _KIVEPVGGS[Phospho (STY)]DS[Phospho (STY)]EVEGDAWR_3                      | #N/A                         | 4.3324  | 3.5879  | 4.3251  | 3.3269  | 3.4762  | 3.1485  | 4.5425  | 3.2907  | 4.4401  | 3.2939  | 0.9506 | -0.0731 | 0.6244 | 0.2045 |
| Mfap1a,Mfap1b     | _BPQYAPM[Oxidation (M)]ES[Phospho (STY)]S[Phospho (STY)]DEEDEFQPIK_3      | COHKD8_S52_M2_Mfap1a,Mfap1b  | 3.0876  | 3.8439  | 4.0691  | 4.5718  | 3.7322  | 4.3933  | 4.2864  | 3.5467  | 3.1953  | 3.0379  | 1.1231 | 0.1675  | 0.2486 | 0.6044 |
| H2ac4;H2ac6;H2ac7 | _NDEENKLLGR_2                                                             | #N/A                         | 6.3868  | 7.0851  | 7.8793  | 6.8280  | 6.7741  | 6.9857  | 6.5442  | 6.9233  | 6.3749  | 6.7505  | 1.0514 | 0.0723  | 0.2427 | 0.6150 |
| Skc35g2           | _REDYQELDS[Phospho (STY)]PIK_2                                            | #N/A                         | 4.0672  | 7.2888  | 7.5886  | 7.5538  | 6.3500  | 7.3488  | 7.7060  | 7.6477  | 7.6143  | 7.0188  | 0.8945 | -0.1609 | 0.2979 | 0.5259 |
| Skc35g2           | _EDYQELDS[Phospho (STY)]PIK_2                                             | #N/A                         | 3.0280  | 8.0744  | 7.7588  | 8.9239  | 7.5753  | 8.3221  | 8.7262  | 6.9075  | 8.6004  | 8.3333  | 0.8379 | -0.2552 | 0.2351 | 0.6288 |
| Akap5             | _GPVAAS[Phospho (STY)]POK_2                                               | #N/A                         | 9.9421  | 9.1732  | 8.8120  | 9.8812  | 8.9522  | 9.3397  | 9.2137  | 9.4295  | 9.5253  | 9.8555  | 0.9836 | -0.0239 | 0.5693 | 0.2446 |
| Akap5             | _VTVDHAEATVGQAEATVGQAEK_3                                                 | #N/A                         | 9.2418  | 9.4484  | 8.8008  | 10.0198 | 7.7766  | 8.7787  | 9.4187  | 8.7003  | 8.7311  | 9.0319  | 1.0231 | 0.0329  | 0.6465 | 0.1894 |
| Akap5             | _VTVDQAEATVGQAEATVGHTEK_3                                                 | #N/A                         | 7.3539  | 7.3141  | 8.0903  | 7.7901  | 6.9190  | 7.4476  | 7.8943  | 7.1165  | 7.1968  | 7.6525  | 1.0609 | 0.0098  | 0.8443 | 0.0735 |
| Akap5             | _VQGEADOLEK_2                                                             | #N/A                         | 6.7690  | 6.2707  | 6.3924  | 7.1115  | 6.9542  | 6.5892  | 6.7388  | 6.5955  | 6.4550  | 6.8412  | 1.0039 | 0.0506  | 0.8876 | 0.0518 |
| Akap5             | _LSQAEETTVAQAK_2                                                          | #N/A                         | 5.7398  | 5.6483  | 5.8528  | 6.0643  | 5.9125  | 6.2849  | 5.3543  | 6.0488  | 5.7260  | 6.0932  | 1.0192 | 0.0275  | 0.5510 | 0.2589 |
| Akap5             | _ASLLESSAAGS[Phospho (STY)]PR_2                                           | D3YVFO_S251_M1_Akap5         | 13.3581 | 13.4088 | 14.0096 | 13.6564 | 12.8729 | 13.5381 | 13.6942 | 13.0656 | 13.2665 | 13.5065 | 1.0068 | 0.0098  | 0.6908 | 0.1607 |
| Akap5             | _ALSQAEATGAPHEATVQAEQAK_3                                                 | #N/A                         | 4.2770  | 4.6315  | 3.9782  | 3.4148  | 4.1848  | 4.2129  | 3.4599  | 4.2957  | 3.6459  | 4.6820  | 0.9960 | -0.0508 | 0.9527 | 0.1020 |
| Akap5             | _QPAGAWAS[Phospho (STY)]IK_2                                              | D3YVFO_S79_M1_Akap5          | 8.2836  | 7.8976  | 8.3988  | 8.2914  | 7.1287  | 8.4651  | 8.0016  | 8.4077  | 8.4118  | 8.5282  | 0.9688 | -0.0457 | 0.3696 | 0.4723 |
| Akap5             | _SSAIQM[Oxidation (M)]GT[Phospho (STY)]PELEKET_2                          | #N/A                         | 9.1122  | 9.2745  | 10.0875 | 9.7198  | 8.3757  | 9.3089  | 9.3638  | 9.0500  | 9.0087  | 9.2898  | 1.0147 | 0.0211  | 0.6689 | 0.1346 |
| Akap5             | _DEKGPVAAS[Phospho (STY)]PQKER_2                                          | #N/A                         | 10.2054 | 10.3891 | 10.8944 | 10.9552 | 10.3284 | 10.4603 | 10.4731 | 10.3885 | 10.4125 | 10.5506 | 1.0079 | 0.0114  | 0.6224 | 0.2060 |
| Akap5             | _AQTCDDDDQAIQAGS[Phospho (STY)]TQGLQEGVLVR_3                              | D3YVFO_S171_M1_Akap5         | 5.5792  | 5.8974  | 6.2878  | 6.7417  | 5.0699  | 5.8271  | 5.1859  | 5.6287  | 5.7575  | 5.3638  | 1.0741 | 0.1031  | 0.2303 | 0.6377 |
| Akap5             | _GPVAAS[Phospho (STY)]PQKER_2                                             | #N/A                         | 11.7720 | 11.8775 | 12.0981 | 12.4338 | 11.6641 | 11.9019 | 12.0246 | 11.9011 | 11.7883 | 11.9804 | 1.0029 | 0.0041  | 0.8203 | 0.0860 |
| Akap5             | _KATVGQAEATDHTEK_3                                                        | #N/A                         | 4.7828  | 4.1583  | 4.7759  | 3.8784  | 5.6198  | 4.7274  | 4.0266  | 3.1228  | 3.4218  | 3.5557  | 1.3186 | 0.3991  | 0.0110 | 0.1960 |
| Akap5             | _TSEQETLIETASSLVK_2                                                       | #N/A                         | 5.0443  | 5.4103  | 4.7684  | 6.2727  | 4.8860  | 4.8436  | 4.8944  | 4.5875  | 4.3313  | 5.6797  | 1.0679 | 0.0948  | 0.3995 | 0.9784 |
| Akap5             | _DEKGPVAAS[Phospho (STY)]POK_2                                            | #N/A                         | 10.4011 | 9.9815  | 10.0622 | 10.8338 | 9.8667  | 10.1983 | 10.5286 | 10.0733 | 10.2164 | 10.4254 | 0.9916 | -0.0122 | 0.6698 | 0.1940 |
| Akap5             | _SSAIQMT[Phospho (STY)]PELEK_2                                            | #N/A                         | 9.1748  | 7.2922  | 3.5242  | 10.1268 | 7.3898  | 3.8136  | 7.9287  | 6.2781  | 6.5557  | 7.6957  | 0.9680 | -0.0469 | 0.8769 | 0.0570 |
| Akap5             | _HTPEAGGS[Phospho (STY)]GQR_2                                             | D3YVFO_S68_M1_Akap5          | 6.0273  | 5.4239  | 4.4965  | 5.3857  | 3.9065  | 3.8277  | 4.1885  | 5.7050  | 3.7175  | 3.7175  | 1.1486 | 0.1999  | 0.3435 | 0.4641 |
| Akap5             | _EATVGQAEATVDRAEAEATVGQAEATVGHTEK_3                                       | #N/A                         | 4.1242  | 5.1513  | 5.8254  | 8.2909  | 3.2499  | 2.9788  | 5.7818  | 8.2218  | 4.1089  | 4.2385  | 0.8835 | -0.1787 | 0.6189 | 0.2084 |
| Akap5             | _METS[Phospho (STY)]VSEIQVTK_2                                            | D3YVFO_S4_M1_Akap5           | 3.6893  | 2.9937  | 4.0824  | 2.6262  | 2.8150  | 3.4136  | 3.7744  | 3.3750  | 3.6741  | 3.3034  | 0.9731 | -0.0394 | 0.7198 | 0.1428 |
| Akap5             | _TAEETKH[Phospho (STY)]PEAGSGQR_3                                         | D3YVFO_T62_M1_Akap5          | 3.2740  | 4.0792  | 3.9608  | 4.4634  | 3.9005  | 3.8290  | 4.1781  | 3.6550  | 3.3036  | 4.4304  | 1.0067 | 0.0096  | 0.9287 | 0.0321 |
| Akap5             | _VTVDQAEATVGQAEATVGQAEALSQAK_3                                            | #N/A                         | 4.1453  | 3.1971  | 3.8790  | 3.4227  | 3.0184  | 3.2102  | 3.5710  | 3.5784  | 3.8775  | 3.7910  | 0.9850 | -0.0218 | 0.8427 | 0.0743 |
| Akap5             | _METSVSEIQVETKDEKGPVAAS[Phospho (STY)]POK_3                               | #N/A                         | 3.6413  | 4.3975  | 3.3749  | 4.4195  | 4.7043  | 3.8396  | 3.0670  | 4.0825  | 4.3815  | 4.0958  | 1.0399 | 0.0565  | 0.6676 | 0.1755 |
| Akap5             | _SGEATLGQAEAAVGDQDKR_2                                                    | #N/A                         | 3.7410  | 3.4852  | 4.4278  | 3.4296  | 4.0072  | 3.2511  | 3.1443  | 0.8036  | 4.3375  | 1.0043  | 1.3450 | 0.4276  | 0.4378 | 0.3588 |
| Akap5             | _QFLISM[Oxidation (M)]JENQGVGVFANDSDFEGR_3                                | #N/A                         | 4.2844  | 3.5887  | 3.4873  | 4.5319  | 3.4101  | 4.1394  | 3.3104  | 3.9701  | 4.2691  | 4.2092  | 0.9993 | -0.0010 | 0.9931 | 0.0621 |
| Dgk1              | _VKPQNS[Phospho (STY)]IK_2                                                | D3YVFO_S328_M1_Dgk1          | 5.8740  | 6.4815  | 6.5935  | 6.6344  | 5.5754  | 5.8991  | 5.9081  | 6.2755  | 6.4381  | 5.6182  | 1.0192 | 0.0274  | 0.6795 | 0.1678 |
| Dgk1              | _VPHLES[Phospho (STY)]PHER_3                                              | D3YVFO_S1067_M1_Dgk1         | 8.0795  | 7.9426  | 8.2699  | 8.1051  | 7.3784  | 7.8691  | 7.5288  | 8.1723  | 7.8474  | 7.8563  | 1.0114 | 0.0164  | 0.6477 | 0.1678 |
| Dgk1              | _KVS[Phospho (STY)]TSGQMR_2                                               | D3YVFO_S53_M1_Dgk1           | 3.9887  | 3.3537  | 3.7224  | 3.2662  | 3.1750  | 3.0537  | 3.4145  | 3.7350  | 4.0340  | 4.4443  | 0.8771 | -0.1893 | 0.0925 | 0.1439 |
| Samd1             | _AATAATAPP[Phospho (STY)]PGPAQGPVR_2                                      | D3YXK1_S150_M1_Samd1         | 3.1675  | 3.9727  | 3.8543  | 4.3569  | 3.7940  | 3.9355  | 4.2963  | 3.7615  | 4.1011  | 7.0486  | 0.8310 | -0.2671 | 0.2850 | 0.5051 |
| Samd1             | _YLGG[Phospho (STY)]GGASGR_2                                              | D3YXK1_S242_M1_Samd1         | 4.0627  | 3.3181  | 3.7964  | 3.3401  | 5.8123  | 3.4182  | 3.4884  | 3.6610  | 3.9601  | 3.0174  | 1.1207 | 0.1644  | 0.4289 | 0.3676 |
| Safb              | _APTAALS[Phospho (STY)]PEPDQSK_2                                          | #N/A                         | 9.6856  | 9.6410  | 10.5039 | 9.4132  | 9.5438  | 10.1052 | 9.6494  | 9.6755  | 1.0001  | 0.0002  | 0.9960 | 0.0017  | 0.0000 | 0.0000 |
| Safb              | _APTAALS[Phospho (STY)]PEPDQSKEDVK_2                                      | #N/A                         | 7.9860  | 7.8991  | 8.4503  | 8.3825  | 7.6386  | 7.9080  | 8.2495  | 7.7403  | 7.9628  | 8.0277  | 1.0061 | 0.0088  | 0.7917 | 0.1014 |
| Safb              | _SVGS[Phospho (STY)]FDKVK_2                                               | D3YXK2_S626_M1_Safb          | 8.4315  | 9.1375  | 9.4680  | 8.9913  | 8.0241  | 8.8725  | 8.7863  | 8.3927  | 8.2066  | 8.3688  | 1.0453 | 0.0639  | 0.2112 | 0.6752 |
| Safb              | _APTAALS[Phospho (STY)]PEPDQSKEDVK_3                                      | #N/A                         | 10.1685 | 10.4911 | 11.2994 | 11.0128 | 10.4266 | 10.4620 | 10.7270 | 10.5397 | 10.5009 | 10.5131 | 1.0069 | 0.0100  | 0.7479 | 0.1262 |
| Safb              | _Acetyl (Protein N-term)AETLSGLGDASAAGAAVSSAAS[Phospho (STY)]ETGTRR_3     | #N/A                         | 3.7418  | 4.9165  | 4.2370  | 3.1052  | 3.3016  | 3.4720  | 3.0666  | 2.9850  | 3.4208  | 3.2742  | 1.1911 | 0.2523  | 0.1231 | 0.9099 |
| Safb              | _Acetyl (Protein N-term)AETLSGLGDASAAGAAVSSAAS[Phospho (STY)]ETGTRR_3     | #N/A                         | 4.0229  | 3.2737  | 3.4488  | 4.5589  | 2.3172  | 3.8648  | 3.6787  | 4.0091  | 3.7994  | 3.5197  | 0.9545 | -0.0672 | 0.6806 | 0.1671 |
| Safb              | _AEDEGNNPDIEVTSC[Carbamidomethyl (C)]JNK_2                                | #N/A                         | 4.1498  | 3.1926  | 3.8835  | 3.4273  | 3.2936  | 5.4317  | 3.5755  | 3.5739  | 3.7732  | 3.1046  | 0.9724 | -0.0403 | 0.8669 | 0.0621 |
| Safb              | _MS[Phospho (STY)]NEEDSDTKR_2                                             | D3YXK2_S406_M1_Safb          | 4.2623  | 3.5177  | 4.3952  | 3.3971  | 3.4060  | 3.2186  | 3.1117  | 3.2206  | 4.3700  | 3.3641  | 1.0520 | 0.0731  | 0.6074 | 0.2166 |
| Safb              | _SPKVEEGS[Phospho (STY)]ELEQPPAQATSSVGPDR_3                               | D3YXK2_S235_M1_Safb          | 3.6723  | 3.5539  | 4.3591  | 3.3609  | 3.4422  | 3.1824  | 3.0756  | 4.2640  | 4.4062  | 3.3279  | 0.9540 | -0.0679 | 0.6199 | 0.2077 |
| Safb              | _RPEVQDGR_2                                                               | #N/A                         | 4.3506  | 4.3764  | 3.5366  | 4.0392  | 3.4763  | 3.8607  | 3.7539  | 4.0793  | 3.7278  | 4.0062  | 1.0124 | 0.0177  | 0.8244 | 0.0839 |
| Ccdc6             | _SSS[Phospho (STY)]PDKFK_2                                                | #N/A                         | 8.2217  | 7.9085  | 8.1538  | 8.5360  | 4.1450  | 8.7007  | 8.0636  | 8.0655  | 7.9077  | 8.3904  | 0.9286 | -0.1069 | 0.5175 | 0.2861 |
| Ccdc6             | _RSSS[Phospho (STY)]PDKFK_2                                               | #N/A                         | 3.7014  | 6.6513  | 6.9463  | 7.1176  | 3.2673  | 6.4523  | 3.8975  | 6.5502  | 4.2312  | 3.5504  | 1.2484 | 0.3201  | 0.3049 | 0.5159 |
| Ccdc6             | _LDQPVSAPP[Phospho (STY)]PR_2                                             | D3Y29P_S237_M1_Ccdc6         | 10.3526 | 10.6017 | 10.7240 | 10.9503 | 9.7200  | 10.6543 | 10.6212 | 8.8069  | 10.3066 | 10.6691 | 1.0396 | 0.0560  | 0.3584 | 0.4457 |
| Ccdc6             | _QLS[Phospho (STY)]ESSELEM[Oxidation (M)]JDER_2                           | #N/A                         | 5.4181  | 6.0101  | 3.3117  | 6.2066  | 4.9846  | 6.0320  | 5.9537  | 5.6307  | 5.7953  | 6.2909  | 0.9002 | -0.1516 | 0.3278 | 0.4845 |
| Shank1            | _EQDVPFQES[Phospho (STY)]PK_2                                             | #N/A                         | 12.5969 |         |         |         |         |         |         |         |         |         |        |         |        |        |



|         |                                                                                               |                        |         |         |         |         |         |         |         |         |         |         |        |         |        |        |
|---------|-----------------------------------------------------------------------------------------------|------------------------|---------|---------|---------|---------|---------|---------|---------|---------|---------|---------|--------|---------|--------|--------|
| Bin2    | _ASGSGSC[Carbamidomethyl (C)]NAPGS[Phospho (STY)]PESSQLC[Carbamidomethyl (C)]SPR_2            | D3Z6Q9_S430_M1_Bin2    | 3.6820  | 2.9863  | 4.0897  | 3.6335  | 5.0666  | 3.4210  | 3.7818  | 5.0041  | 3.6667  | 4.7969  | 0.8842 | -0.1775 | 0.3029 | 0.5187 |
| Bin2    | _AS[Phospho (STY)]POASNPPEAETR_2                                                              | D3Z6Q9_S443_M1_Bin2    | 6.3510  | 5.9415  | 3.3962  | 3.8988  | 5.8132  | 5.5511  | 6.1912  | 6.1878  | 6.2263  | 6.0532  | 0.8368 | -0.2570 | 0.1421 | 0.8474 |
| Gcg11   | _IEKGDSV[Phospho (STY)]EEEDFR_1                                                               | D3Z7H4_S274_M1_Gcg1    | 6.2372  | 6.3018  | 6.3874  | 6.2469  | 3.2641  | 5.8439  | 5.9421  | 5.7639  | 6.3397  | 5.6308  | 0.9653 | -0.0510 | 0.7532 | 0.1231 |
| Gk      | _VADVPQIAK_2                                                                                  | #N/A                   | 8.2094  | 8.0834  | 7.6916  | 7.5635  | 8.4271  | 8.1490  | 8.1537  | 8.0563  | 8.2546  | 8.1509  | 0.9837 | -0.0238 | 0.4572 | 0.3399 |
| Gls     | _LSPEARV_2                                                                                    | #N/A                   | 7.8055  | 8.1473  | 7.7799  | 7.5063  | 8.0683  | 7.7199  | 7.2243  | 8.0567  | 7.9120  | 7.6972  | 1.0149 | 0.0214  | 0.5552 | 0.2620 |
| Gls     | _LTQLTSSDGM[Oxidation (M)]LDKDLFK_3                                                           | #N/A                   | 5.7027  | 6.0457  | 6.1718  | 5.4945  | 5.9775  | 6.0504  | 6.2023  | 6.0885  | 5.7853  | 5.9274  | 0.9844 | -0.0227 | 0.5470 | 0.2620 |
| Gls     | _DSPGETDAFGVSEK_2                                                                             | #N/A                   | 8.0331  | 8.3174  | 4.0209  | 8.5178  | 8.3128  | 8.1900  | 8.6437  | 8.3445  | 8.3001  | 8.2944  | 0.9011 | -0.1502 | 0.3793 | 0.4210 |
| Gls     | _C[Carbamidomethyl (C)]VGSNVLTLQAAR_2                                                         | #N/A                   | 3.4329  | 3.2243  | 4.4461  | 4.0660  | 4.0792  | 3.5832  | 4.0762  | 3.9322  | 3.7457  | 3.9322  | 0.9908 | -0.0133 | 0.8930 | 0.0492 |
| Gls     | _YAIADVLDGTYVHR_2                                                                             | #N/A                   | 5.8511  | 4.9814  | 6.3206  | 5.2270  | 5.1768  | 5.0580  | 6.0564  | 5.0294  | 5.4159  | 5.4209  | 1.0101 | 0.0144  | 0.8617 | 0.0646 |
| Gls     | _M[Oxidation (M)]JAGNEYVGFSNATFQSER_2                                                         | #N/A                   | 3.6646  | 4.5182  | 5.0254  | 3.2312  | 3.7070  | 4.4084  | 4.8297  | 4.7933  | 4.4439  | 4.3294  | 0.8898 | -0.1684 | 0.1908 | 0.1908 |
| Gls     | _ILQEYQVQVTPQGDSDGKGNGQTVMK_3                                                                 | #N/A                   | 3.8147  | 3.4066  | 3.2970  | 4.0241  | 4.1080  | 4.6177  | 3.6441  | 4.5508  | 3.8393  | 4.2160  | 0.9546 | -0.0671 | 0.5492 | 0.2603 |
| Gls     | _TALHVAAGEHVEVVK_2                                                                            | #N/A                   | 2.9711  | 3.7887  | 3.9480  | 4.2497  | 3.7047  | 2.8967  | 3.6196  | 2.8215  | 4.4944  | 3.8530  | 0.9719 | -0.0412 | 0.7962 | 0.0990 |
| Gls     | _FALSADMMEQR_2                                                                                | #N/A                   | 2.9461  | 3.7024  | 4.1806  | 3.7244  | 3.5907  | 3.0339  | 3.8727  | 3.2768  | 3.5758  | 3.4017  | 0.9994 | -0.0008 | 0.9939 | 0.0027 |
| Gls     | _SVINLLFAAYTGDVSALA_3                                                                         | #N/A                   | 3.6521  | 3.3665  | 3.9117  | 4.0170  | 3.6782  | 3.6461  | 4.1109  | 3.7101  | 3.7865  | 3.7857  | 0.9646 | -0.0521 | 0.3466 | 0.4601 |
| Gls     | _ILQEYQVQVTPQGDSDGK_2                                                                         | #N/A                   | 3.5510  | 4.3562  | 4.2378  | 3.7645  | 4.1775  | 3.5520  | 3.9128  | 3.3780  | 3.0266  | 3.2066  | 1.1653 | 0.2207  | 0.0470 | 1.3279 |
| Pr12    | _AS[Phospho (STY)]PSPSPSEAR_2                                                                 | #N/A                   | 10.6345 | 10.4949 | 10.1956 | 10.7910 | 9.0860  | 10.1706 | 10.7687 | 10.8157 | 10.5022 | 10.3383 | 0.9644 | -0.0523 | 0.2775 | 0.5568 |
| Pr12    | _AHGHPGS[Phospho (STY)]PRGS[Phospho (STY)]LSR_3                                               | #N/A                   | 8.6776  | 8.5828  | 8.8747  | 8.4741  | 7.0115  | 8.3638  | 8.5127  | 8.7735  | 8.7077  | 8.5740  | 0.9640 | -0.0529 | 0.3933 | 0.4054 |
| Pr12    | _HPS[Phospho (STY)]SQLAGPVGEGGEGTQKPR_3                                                       | E9PUL5_S254_M1_Pr12    | 4.5230  | 5.2538  | 4.7483  | 4.2025  | 3.6230  | 3.6778  | 4.3652  | 4.2837  | 4.3939  | 4.3493  | 0.9977 | -0.0033 | 0.9762 | 0.1003 |
| Pr12    | _T[Phospho (STY)]PPANGAPPR_2                                                                  | E9PUL5_T214_M1_Pr12    | 3.5011  | 3.7251  | 6.4899  | 3.1897  | 5.2006  | 9.5059  | 4.4052  | 9.6542  | 3.0765  | 3.1567  | 1.0385 | 0.0546  | 0.9135 | 0.0393 |
| Pr12    | _QENGAIVPLQAGDEEGPAQPHS[Phospho (STY)]PPSTK_3                                                 | E9PUL5_S208_M1_Pr12    | 3.1102  | 6.9155  | 7.8233  | 8.4437  | 5.1830  | 3.8760  | 7.3559  | 4.4135  | 3.2117  | 3.7658  | 1.2643 | 0.3383  | 0.3706 | 0.4311 |
| Pr12    | _Acetyl (Protein N-term)JAASS[Phospho (STY)]SVMSEK_2                                          | E9PUL5_S5_M1_Pr12      | 3.5735  | 3.8734  | 3.3925  | 5.4198  | 3.7271  | 3.7796  | 3.9666  | 4.2328  | 4.1141  | 3.9418  | 0.9747 | -0.0370 | 0.7928 | 0.1008 |
| Pr12    | _AELAPETTEPVPETVQATDSLNPPEEGKAS[Phospho (STY)]PSPSPSEAR_4                                     | #N/A                   | 8.6924  | 3.9008  | 9.4700  | 9.4698  | 7.9392  | 8.7011  | 9.2002  | 9.3295  | 8.8019  | 8.6441  | 0.8927 | -0.1638 | 0.3978 | 0.4004 |
| Pr12    | _AHGHPGS[Phospho (STY)]PR_2                                                                   | E9PUL5_S244_M1_Pr12    | 3.6931  | 3.5330  | 4.3799  | 3.3818  | 2.8188  | 3.2033  | 3.0964  | 4.8054  | 4.3853  | 3.3487  | 0.8958 | -0.1588 | 0.3803 | 0.4433 |
| Pr12    | _ALAPETTEPVPETVQATDSLNPPEEGK_3                                                                | #N/A                   | 2.5514  | 2.9835  | 4.2744  | 4.0367  | 3.6845  | 3.5852  | 5.3388  | 3.0470  | 3.1476  | 3.9123  | 0.9232 | -0.1153 | 0.5962 | 0.2246 |
| Fam53a  | _SL[S[Phospho (STY)]EPEELR_2                                                                  | E9PV82_S119_M1_Fam53a  | 3.2509  | 4.0561  | 3.9377  | 4.4404  | 3.8775  | 3.8520  | 4.1551  | 7.6737  | 3.3267  | 4.4074  | 0.7979 | -0.2527 | 0.2413 | 0.6175 |
| Mctp1   | _AAS[Phospho (STY)]SFQOAR_2                                                                   | E9PV86_S16_M1_Mctp1    | 7.0140  | 6.6132  | 6.9215  | 6.4927  | 3.3029  | 4.4266  | 6.5989  | 3.8629  | 4.1619  | 4.3164  | 1.2239 | 0.2915  | 0.2890 | 0.5991 |
| Mctp1   | _GSSSTATGGGV[Phospho (STY)]PPGGR_2                                                            | E9PV86_T145_M1_Mctp1   | 3.2457  | 3.9805  | 3.9325  | 4.4351  | 3.8688  | 4.2567  | 4.1498  | 3.6834  | 3.3319  | 4.4021  | 1.0158 | 0.0226  | 0.8326 | 0.3796 |
| Setd1a  | _S[Phospho (STY)]GS[Phospho (STY)]PAPETTESVFPQAHSLSLR_3                                       | E9PYH6_S481_M2_Setd1a  | 4.0084  | 3.3340  | 3.7420  | 4.3075  | 3.1554  | 3.0733  | 3.4341  | 3.7154  | 4.0144  | 2.9631  | 1.0203 | 0.0290  | 0.8223 | 0.0850 |
| Pr12    | _TSS[Phospho (STY)]FHLLR_2                                                                    | E9PYL2_S1070_M1_Pr12   | 6.9217  | 3.2059  | 3.8702  | 7.2271  | 3.2802  | 3.3444  | 7.0293  | 3.5872  | 6.8249  | 8.0379  | 0.7585 | -0.3989 | 0.2451 | 0.5568 |
| Pr12    | _TDEEFILQHLLQAPS[Phospho (STY)]PPR_3                                                          | E9PYL2_S648_M1_Pr12    | 3.8214  | 4.2738  | 4.2023  | 5.1224  | 3.9748  | 3.4869  | 3.2471  | 5.3102  | 3.9456  | 3.9956  | 1.0054 | 0.0078  | 0.9611 | 0.0172 |
| Pr12    | _ASLAC[Carbamidomethyl (C)]SPRGGGGS[Phospho (STY)]PGAGEPSK_2                                  | E9PYL2_S338_M1_Pr12    | 3.7806  | 4.3980  | 4.1012  | 4.0763  | 3.2698  | 3.8759  | 3.1944  | 4.2161  | 4.2759  | 3.8624  | 1.0077 | 0.0110  | 0.9169 | 0.0372 |
| Pr12    | _NLETUP[S[Phospho (STY)]S[Phospho (STY)]DEEDSVAK_2                                            | E9PYL2_S1372_M2_Pr12   | 4.0282  | 3.3325  | 3.2141  | 3.7168  | 3.1538  | 3.0748  | 3.4315  | 4.4017  | 4.0503  | 3.6838  | 0.8788 | -0.1864 | 0.1003 | 0.9988 |
| Igf19b  | _TGS[Phospho (STY)]PELAAR_2                                                                   | E9PZ19_S1215_M1_Igf19b | 7.9512  | 7.4792  | 4.2996  | 7.2929  | 6.6622  | 3.7599  | 3.8509  | 8.0515  | 7.5496  | 3.7921  | 1.1993 | 0.2621  | 0.3603 | 0.4433 |
| Igf19b  | _AEAAEATT[Phospho (STY)]PELISR_2                                                              | E9PZ19_T845_M2_Igf19b  | 4.1342  | 3.0919  | 3.3202  | 7.2993  | 5.6732  | 2.9687  | 7.0435  | 7.2442  | 3.9442  | 6.8024  | 7.0504 | -0.5036 | 0.1252 | 0.9025 |
| Igf19b  | _SL[S[Phospho (STY)]PLSGKVS[Phospho (STY)]PESIR_2                                             | E9PZ19_S775_M2_Igf19b  | 3.5368  | 4.3420  | 4.2236  | 5.9275  | 4.1633  | 3.5662  | 3.9270  | 3.2225  | 5.5215  | 5.4834  | 1.0630 | 0.0882  | 0.6807 | 0.1671 |
| Igf19b  | _APS[Phospho (STY)]ESS[Phospho (STY)]DOOGQPAK_2                                               | E9PZ19_S794_M2_Igf19b  | 4.3087  | 3.5642  | 4.0424  | 3.3506  | 3.4525  | 3.1721  | 3.0653  | 3.2670  | 4.4164  | 3.3176  | 1.0375 | 0.0531  | 0.6984 | 0.1559 |
| Chd2    | _LKDENGLPEAS[Phospho (STY)]PR_3                                                               | E9PZM4_S1365_M1_Chd2   | 6.5389  | 5.3061  | 6.4454  | 5.8639  | 4.8222  | 5.6722  | 6.4524  | 6.2972  | 6.4039  | 5.4927  | 0.9372 | -0.0935 | 0.3399 | 0.4687 |
| Chd2    | _KQES[Phospho (STY)]Phospho (STY)DOODDOEAPKR_2                                                | E9PZM4_S207_M2_Chd2    | 3.2577  | 3.9685  | 3.9445  | 4.4472  | 3.8568  | 4.2687  | 2.0567  | 3.6713  | 3.3199  | 4.4142  | 1.1758 | 0.2337  | 0.2171 | 0.6633 |
| Chd2    | _SPLDHR[S[Phospho (STY)]PLER_3                                                                | E9PZM4_S1806_M1_Chd2   | 3.5796  | 4.3848  | 4.2654  | 3.2682  | 4.2061  | 3.5234  | 3.8842  | 3.3494  | 2.9980  | 3.2352  | 1.1499 | 0.2015  | 0.1109 | 0.9550 |
| Ir12bp2 | _LEPPPELNRS[Phospho (STY)]PMWR_3                                                              | #N/A                   | 8.9434  | 8.9126  | 9.1122  | 9.5064  | 8.7466  | 9.1057  | 8.9857  | 8.5590  | 8.8744  | 9.2254  | 1.0161 | 0.0230  | 0.4284 | 0.3681 |
| Ir12bp2 | _S[Phospho (STY)]PTGAQPAKAAKPPPLSAK_2                                                         | E9Q1P8_S71_M1_Ir12bp2  | 7.3308  | 7.7910  | 7.9788  | 8.6043  | 4.0650  | 7.5343  | 7.8322  | 7.5438  | 7.4680  | 7.5937  | 0.9485 | -0.0763 | 0.6460 | 0.1898 |
| Ir12bp2 | _RKPS[Phospho (STY)]PEPEGEVPPK_3                                                              | E9Q1P8_S343_M1_Ir12bp2 | 5.9679  | 5.5601  | 5.5060  | 6.5525  | 5.7508  | 5.9328  | 4.1109  | 5.4587  | 6.0567  | 5.6501  | 1.0974 | 0.0340  | 0.2216 | 0.5605 |
| Ir12bp2 | _S[Phospho (STY)]PADLSAAGASSELASGAGK_2                                                        | E9Q1P8_S250_M1_Ir12bp2 | 3.0164  | 4.3260  | 4.2509  | 4.9458  | 3.6610  | 2.9637  | 3.9429  | 3.2065  | 4.7073  | 3.4720  | 1.0074 | 0.0107  | 0.9541 | 0.0204 |
| Ir12bp2 | _DTLLALHGHGS[Phospho (STY)]GPFEK_3                                                            | E9Q1P8_S300_M1_Ir12bp2 | 3.4741  | 6.2960  | 4.1609  | 3.1627  | 4.1007  | 2.9843  | 4.3783  | 3.4549  | 3.1035  | 3.1297  | 1.1459 | 0.1965  | 0.4596 | 0.3676 |
| Ir12bp2 | _NSS[S[Phospho (STY)]PPSPSMNQR_2                                                              | E9Q1P8_S440_M1_Ir12bp2 | 5.8185  | 3.9679  | 3.9451  | 4.4477  | 3.8848  | 4.2693  | 4.1624  | 3.6707  | 3.3193  | 4.4147  | 1.1277 | 0.1734  | 0.2723 | 0.5650 |
| Gpr137c | _RYDS[Phospho (STY)]DDDLPR_2                                                                  | E9Q343_S351_M1_Gpr137c | 6.7632  | 6.7407  | 3.2405  | 7.0461  | 4.1514  | 6.7000  | 3.8672  | 3.9660  | 6.7361  | 6.7329  | 1.0841 | 0.1166  | 0.6823 | 0.1660 |
| P44ka   | _TSSVSSGSQVS[Phospho (STY)]PER_2                                                              | #N/A                   | 12.0252 | 11.8288 | 12.5571 | 11.6455 | 10.2541 | 11.6289 | 12.3298 | 11.9641 | 11.7081 | 11.7074 | 0.9773 | -0.0331 | 0.5261 | 0.2879 |
| P44ka   | _KTSVSSGSQVS[Phospho (STY)]PER_2                                                              | #N/A                   | 3.7152  | 6.0281  | 6.2747  | 6.0577  | 3.6525  | 6.0127  | 5.9988  | 6.0555  | 3.6803  | 3.8952  | 1.0780 | 0.1083  | 0.6521 | 0.1785 |
| Ryr2    | _EAAVPEEEGGT[Phospho (STY)]PEKESEDAAK_3                                                       | #N/A                   | 3.0670  | 3.8722  | 8.4083  | 4.2565  | 3.6935  | 4.0360  | 4.3968  | 3.8620  | 3.5106  | 4.2235  | 1.1394 | 0.1883  | 0.5915 | 0.2280 |
| Ryr2    | _EAAVPEEEGGT[Phospho (STY)]PEK_2                                                              | #N/A                   | 7.5180  | 7.4498  | 7.5427  | 7.3112  | 6.2324  | 6.6829  | 8.2476  | 7.3296  | 7.2465  | 7.3968  | 0.9428 | -0.0850 | 0.2287 | 0.6407 |
| Ryr2    | amidomethyl (C)]YM[Oxidation (M)]VC[Carbamidomethyl (C)]JAGESM[Oxidation (M)]S[Phospho (STY)] | #N/A                   | 6.1329  | 5.9116  | 5.5045  | 6.6745  | 5.0629  | 5.5527  | 6.7218  | 6.0595  | 6.2580  | 5.7001  | 0.9221 | -0.1171 | 0.1818 | 0.7405 |
| Ryr2    | _JAEDPSRDGSP[Phospho (STY)]PTSGSSK_2                                                          | #N/A                   | 4.5141  | 3.9750  | 5.9615  | 4.3028  | 3.9208  | 4.1094  | 5.4525  | 4.0609  | 3.2420  | 4.1487  | 1.0563 | 0.0760  | 0.6667 | 0.1761 |
| Ryr2    | _DGP[S[Phospho (STY)]PTSGSSK_2                                                                | #N/A                   | 3.2945  | 4.0508  | 3.8482  | 3.9903  | 3.9391  | 3.5446  | 3.9132  | 3.6319  | 3.5544  | 3.8361  | 1.0118 | 0.0169  | 0.7966 | 0.0988 |
| Ryr2    | _ISQTQSV[Phospho (STY)]DAAHGVSPR_3                                                            | E9Q401_S2813_M1_Ryr2   | 3.0259  | 4.3165  | 4.2605  | 3.8042  | 4.1378  | 3.5917  | 3.9525  | 3.3670  | 3.4960  | 3.4815  | 0.9465 | -0.0794 | 0.6274 | 0.2024 |
| Arid1b  | _APS[Phospho (STY)]PASFOR_2                                                                   | E9Q4N7_S1550_M1_Arid1b | 8.0991  | 3.8099  | 9.2477  | 4.3108  | 4.1771  | 8.1904  | 8.8340  | 4.1912  | 8.0193  | 8.4157  | 0.8562 | -0.2240 | 0.5036 | 0.2979 |
| Arid1b  | _S[Phospho (STY)]PALAAPDAVSOPK_2                                                              | E9Q4N7_S1757_M1_Arid1b | 6.9052  | 4.1295  | 6.6817  | 4.3319  | 4.0178  | 4.1534  | 4.0465  | 6.4088  | 6.3711  | 6.3646  | 0.8654 | -0.2086 | 0.3780 | 0.4225 |
| Pde8b   | _RLS[Phospho (STY)]GNEYVFTK_2                                                                 | E9Q4S1_S497_M1_Pde8b   | 4.9251  | 5.4049  | 3.8150  | 4.3177  | 3.7547  | 5.5056  | 4.0324  | 5.7950  | 5.1651  | 4.7997  | 0.9338 | -0.0988 | 0.5225 | 0.2819 |
| Pde8b   | _IHRDS[Phospho (STY)]GNGQGTTHPSFR_3                                                           | #N/A                   | 3.7909  | 3.8571  | 5.9712  | 6.2207  | 3.7454  | 3.7353  | 3.6708  | 3.8415  | 3.8213  | 3.6557  | 1.2151 | 0.2811  | 0.2247 | 0.6483 |
| Pde8b   | _FVNSINKPLAAESEGS[Phospho (STY)]JC[Carbamidomethyl (C)]JC[Carbamidomethyl (C)]NPCTK_3         | E9Q4S1_S734_M1_Pde8b   | 3.3957  | 4.8197  | 3.1294  | 4.1740  | 4.0403  | 4.0852  | 4.6630  | 5.5459  | 3.1263  | 3.8513  | 0.9172 | -0.1247 | 0.5084 | 0.2938 |
| Nolc1   | _ASS[Phospho (STY)]PPRR_2                                                                     | E9Q5C9_S626_M1_Nolc1   | 3.1355  | 7.6481  | 3.8223  | 7.5256  | 3.7620  | 3.9675  | 4.3283  | 3.7935  | 3.1202  | 4.2919  | 1.2815 | 0.3579  | 0.3349 | 0.4750 |



|         |                                                                                    |                         |         |         |         |         |        |         |         |         |         |         |         |         |        |        |
|---------|------------------------------------------------------------------------------------|-------------------------|---------|---------|---------|---------|--------|---------|---------|---------|---------|---------|---------|---------|--------|--------|
| Cfap251 | _Acetyl (Protein N-term)[S](Phospho (STY))DTEENPLEESR_2                            | E9Q743_S2_M1_Cfap251    | 3.6745  | 7.7489  | 6.6568  | 7.9885  | 7.3438 | 7.8953  | 8.2685  | 7.4592  | 7.8991  | 4.1301  | 0.9921  | -0.0114 | 0.9626 | 0.0166 |
| Zc3h13  | _NTEPSS[Phospho (STY)]PVRK_2                                                       | E9Q784_S110_M1_Zc3h13   | 8.2806  | 8.3508  | 8.9578  | 8.9740  | 8.0196 | 8.3141  | 8.5631  | 8.6371  | 8.3440  | 8.3228  | 1.0019  | 0.0027  | 0.9408 | 0.0265 |
| Zc3h13  | _SK[S](Phospho (STY))[PSLR_2                                                       | #N/A                    | 9.1649  | 9.2027  | 9.6570  | 9.7075  | 3.7690 | 9.1487  | 9.0466  | 9.1043  | 9.4107  | 9.2589  | 1.2571  | 0.0301  | 0.3267 | 0.4858 |
| Zc3h13  | _S[Phospho (STY)]PERPTGDLR_2                                                       | #N/A                    | 8.6665  | 8.7479  | 8.9662  | 9.5610  | 8.3905 | 8.9877  | 9.0436  | 8.8844  | 8.7713  | 8.6875  | 1.0051  | 0.0073  | 0.8374 | 0.0771 |
| Zc3h13  | _EVS[Phospho (STY)]PEVVR_2                                                         | E9Q784_S198_M1_Zc3h13   | 7.4036  | 7.5308  | 7.9380  | 7.7291  | 6.9100 | 7.8400  | 7.5360  | 7.4839  | 7.4670  | 7.7038  | 1.0014  | 0.0021  | 0.9568 | 0.0192 |
| Zc3h13  | _DQRP[S](Phospho (STY)]PR_2                                                        | E9Q784_S704_M1_Zc3h13   | 3.7487  | 7.0088  | 7.3340  | 4.2423  | 6.6600 | 4.0639  | 3.9570  | 7.2001  | 3.5865  | 7.3168  | 0.9908  | -0.0133 | 0.9670 | 0.0146 |
| Zc3h13  | _AAVVAS[Phospho (STY)]PLLDQQR_2                                                    | E9Q784_S242_M1_Zc3h13   | 5.4475  | 4.2069  | 5.5061  | 5.7794  | 5.2413 | 5.7178  | 6.2955  | 5.5107  | 5.4523  | 5.2742  | 0.9438  | -0.0835 | 0.3850 | 0.4145 |
| Zc3h13  | _SL[S](Phospho (STY)]PSHLTEDR_2                                                    | E9Q784_S953_M1_Zc3h13   | 8.2407  | 8.5562  | 9.1404  | 9.1470  | 8.0251 | 8.5707  | 8.9449  | 8.5704  | 8.5688  | 8.5315  | 0.9953  | -0.0068 | 0.8735 | 0.0588 |
| Zc3h13  | _S[Phospho (STY)]GGDS[Phospho (STY)]DVS[Phospho (STY)]DEEAAPNK_2                   | E9Q784_S1086_M3_Zc3h13  | 4.7782  | 4.4730  | 4.9958  | 4.4679  | 4.7200 | 4.5795  | 5.1241  | 4.8095  | 3.4110  | 4.0337  | 1.0747  | 0.1039  | 0.3442 | 0.4632 |
| Zc3h13  | _RS[Phospho (STY)]PERPTGDLR_2                                                      | #N/A                    | 5.2108  | 4.1972  | 5.8332  | 3.5990  | 3.9698 | 3.9788  | 3.8720  | 4.3771  | 5.5860  | 3.9576  | 1.0635  | 0.0888  | 0.5788 | 0.2375 |
| Zc3h13  | _SSS[Phospho (STY)]PGQHS[Phospho (STY)]PLSSR_2                                     | #N/A                    | 6.2319  | 3.0644  | 5.3903  | 3.5065  | 6.2048 | 3.2711  | 3.4622  | 4.0719  | 6.3603  | 6.2682  | 0.9149  | -0.1284 | 0.6682 | 0.1751 |
| Zc3h13  | _SK[S](Phospho (STY)]PS[Phospho (STY)]PSLRK_2                                      | #N/A                    | 7.1145  | 7.4636  | 7.5670  | 4.5617  | 3.9988 | 7.4318  | 4.2764  | 7.4053  | 7.6085  | 3.0279  | 1.1392  | 0.1880  | 0.5441 | 0.2643 |
| Zc3h13  | _LRS[Phospho (STY)]PSNDSAHR_2                                                      | #N/A                    | 4.7886  | 4.6660  | 4.5115  | 5.1560  | 4.1169 | 4.4164  | 4.2580  | 4.9139  | 4.7882  | 4.5114  | 0.9981  | -0.0027 | 0.9688 | 0.0138 |
| Zc3h13  | _S[Phospho (STY)]AS[Phospho (STY)]PYPHC[Carbamidomethyl (C)]LS[Phospho (STY)]PQR_2 | E9Q784_S369_M3_Zc3h13   | 3.4117  | 4.0530  | 4.0985  | 4.2708  | 4.0383 | 3.6916  | 4.1666  | 3.3460  | 3.3091  | 3.0674  | 1.1311  | 0.1777  | 0.1044 | 0.9813 |
| Rnf169  | _SQS[Phospho (STY)]C[Carbamidomethyl (C)]SDTVQDR_2                                 | E9Q772_S279_M1_Rnf169   | 5.2391  | 4.3550  | 5.1189  | 4.2364  | 4.5710 | 4.0238  | 4.3846  | 4.8968  | 3.0639  | 4.2356  | 1.1075  | 0.1473  | 0.2925 | 0.5338 |
| Numa1   | _TQPDGTSVGPAPAS[Phospho (STY)]PQSQR_2                                              | E9Q7G0_S1739_M1_Numa1   | 9.9929  | 10.1327 | 10.7810 | 10.3287 | 9.1895 | 10.0461 | 10.7436 | 10.2385 | 9.8847  | 10.2663 | 0.9815  | -0.0269 | 0.5455 | 0.2632 |
| Numa1   | _VSETHQGPQT[Phospho (STY)]PESK_2                                                   | E9Q7G0_S1982_M1_Numa1   | 3.0326  | 4.3098  | 4.2671  | 3.8109  | 3.6772 | 2.9474  | 3.9591  | 3.1903  | 3.4893  | 3.4882  | 1.0403  | 0.0570  | 0.6720 | 0.1726 |
| Numa1   | _LQES[Phospho (STY)]PAPEKGEVLGDALQLDTLK_3                                          | E9Q7G0_S398_M1_Numa1    | 3.3983  | 3.9441  | 3.1320  | 5.1388  | 4.0429 | 4.0825  | 4.3249  | 4.3185  | 3.1236  | 3.8539  | 1.0131  | 0.0188  | 0.9057 | 0.0430 |
| Dnajc21 | _YKEKFGDS[Phospho (STY)]DENVEDEQEPFR_3                                             | E9QB80_S283_M1_Dnajc21  | 3.5791  | 4.3843  | 4.2659  | 5.0743  | 4.7530 | 4.5214  | 4.1514  | 3.3499  | 2.9985  | 3.2347  | 1.2901  | 0.3675  | 0.0155 | 1.8085 |
| Fry     | _SFS[Phospho (STY)]WPVK_2                                                          | E9QB89_S119_M1_Fry      | 7.9021  | 7.9635  | 8.2885  | 7.2422  | 2.8010 | 7.5497  | 8.1638  | 8.1295  | 7.6051  | 7.5315  | 0.8855  | -0.1754 | 0.4222 | 0.3744 |
| Fry     | _NSDLTVLS[Phospho (STY)]JR_2                                                       | E9QB89_S1936_M1_Fry     | 5.8122  | 5.4591  | 5.5668  | 5.7684  | 3.2651 | 3.3595  | 5.8510  | 6.2305  | 5.2171  | 5.9109  | 0.8396  | -0.2522 | 0.1855 | 0.7316 |
| Fry     | _AT[Phospho (STY)]AGSGRGVITC[Carbamidomethyl (C)]QPGDEEK_3                         | E9QB89_S2810_M1_Fry     | 5.1074  | 4.4196  | 5.2106  | 5.8734  | 2.8071 | 4.4562  | 5.6666  | 5.5656  | 5.5836  | 5.2658  | 0.8416  | -0.2489 | 0.1440 | 0.8417 |
| Fry     | _LLPGSSPS[Phospho (STY)]S[Phospho (STY)]PEDEVDR_2                                  | E9QB89_S1382_M2_Fry     | 3.7493  | 3.3845  | 3.5320  | 4.0346  | 3.4717 | 4.2611  | 3.7493  | 5.1407  | 3.7357  | 4.0016  | 0.8994  | -0.1529 | 0.2245 | 0.6488 |
| Fry     | _SSS[Phospho (STY)]POLSSSSK_2                                                      | E9QB89_S1940_M1_Fry     | 9.3300  | 3.0768  | 9.7067  | 8.9742  | 3.4093 | 3.3153  | 9.7165  | 9.8242  | 9.0082  | 3.2203  | 0.7914  | -0.3376 | 0.4570 | 0.3400 |
| Fry     | _S[Phospho (STY)]LDSLKC[Carbamidomethyl (C)]DM[Oxidation (M)]QILEER_3              | #N/A                    | 4.1530  | 3.8041  | 3.8143  | 4.0738  | 3.8976 | 3.6698  | 4.2220  | 5.3983  | 4.9898  | 3.7510  | 0.8501  | -0.2343 | 0.0556 | 1.2547 |
| Fry     | _EQENMODTNS[Phospho (STY)]EQQFR_2                                                  | E9QB89_S2459_M1_Fry     | 3.7792  | 3.5632  | 3.5129  | 4.5575  | 2.9229 | 3.7017  | 3.2049  | 3.9445  | 4.2436  | 4.2348  | 0.9401  | -0.0891 | 0.5002 | 0.3009 |
| Rab12   | _NFS[Phospho (STY)]FAKK_2                                                          | E9QB05_S147_M1_Rab12    | 5.1008  | 4.7400  | 6.4546  | 5.4328  | 5.3050 | 5.5086  | 5.5431  | 5.9646  | 4.2947  | 1.0977  | 0.1345  | 0.2682  | 0.3716 | 0.3169 |
| Sec16a  | _STHS[Phospho (STY)]LPSR_2                                                         | E9QAT4_S2101_M1_Sec16a  | 7.0211  | 3.9785  | 4.5984  | 7.5035  | 6.6151 | 7.3446  | 6.9336  | 4.3598  | 7.3957  | 7.3300  | 0.9496  | -0.0746 | 0.7409 | 0.1303 |
| Sec16a  | _AS[Phospho (STY)]LTSDSGGKKPAQAVV_3                                                | E9QAT4_S2101_M1_Sec16a  | 3.8066  | 4.8541  | 8.5660  | 8.8940  | 2.9323 | 3.6572  | 3.7913  | 3.1862  | 1.6965  | 0.7626  | 0.1377  | 0.0810  | 0.3610 | 0.0810 |
| Sec16a  | _ASHYS[Phospho (STY)]DQLAPR_2                                                      | E9QAT4_S1245_M1_Sec16a  | 6.7049  | 3.4959  | 3.9742  | 3.5179  | 3.3842 | 3.2404  | 7.2721  | 6.4533  | 3.7823  | 3.1952  | 0.7831  | -0.3528 | 0.3103 | 0.5082 |
| Sec16a  | _S[Phospho (STY)]H[S](Phospho (STY)]H[SAR_2                                        | E9QAT4_S1362_M2_Sec16a  | 4.5441  | 3.7667  | 3.3093  | 4.4966  | 3.5881 | 4.1414  | 4.9574  | 3.7486  | 2.9463  | 4.0312  | 1.0136  | 0.0196  | 0.9009 | 0.0453 |
| Sec16a  | _FTGS[Phospho (STY)]DODAEHRDPYGEAEADR_4                                            | E9QAT4_S1342_M1_Sec16a  | 3.4962  | 4.3014  | 4.1830  | 3.1848  | 4.1227 | 3.6068  | 4.4003  | 3.4328  | 3.0814  | 3.1518  | 1.0851  | 0.1178  | 0.3941 | 0.4044 |
| Sec16a  | _RSS[Phospho (STY)]S[Phospho (STY)]SHGHSQYR_3                                      | E9QAT4_S1384_M2_Sec16a  | 3.6861  | 2.9415  | 3.4198  | 3.9733  | 2.8298 | 3.7948  | 4.1452  | 3.7938  | 4.1417  | 0.8878  | -0.1962 | 0.0860  | 0.1065 | 0.4053 |
| Syngap1 | _LPS[Phospho (STY)]PTKXKPPPPPGGKK_3                                                | F6SEU4_S288_M1_Syngap1  | 11.1021 | 3.7028  | 4.1810  | 3.7248  | 3.5911 | 3.3035  | 11.6613 | 3.2764  | 3.5754  | 3.4021  | 0.8924  | -0.1643 | 0.8007 | 0.3965 |
| Syngap1 | _S[Phospho (STY)]QPKLDR_2                                                          | #N/A                    | 10.2846 | 9.7750  | 10.4107 | 10.0313 | 8.7813 | 9.9861  | 9.7037  | 10.4396 | 10.3850 | 10.0220 | 0.9744  | -0.0374 | 0.4503 | 0.0465 |
| Syngap1 | _TKS[Phospho (STY)]QPKLDR_2                                                        | #N/A                    | 10.1156 | 9.8236  | 10.6747 | 10.2487 | 8.7457 | 9.9197  | 9.9086  | 10.6038 | 10.3783 | 10.0104 | 0.9703  | -0.0435 | 0.4165 | 0.3803 |
| Syngap1 | _FRS[Phospho (STY)]ADHDR_2                                                         | F6SEU4_S165_M1_Syngap1  | 7.7174  | 7.7020  | 8.2103  | 8.2201  | 5.6807 | 7.2245  | 6.7882  | 8.1764  | 7.5707  | 7.3928  | 0.9969  | -0.0044 | 0.9669 | 0.0146 |
| Syngap1 | _LINDISTAIR_2                                                                      | #N/A                    | 6.6486  | 6.9305  | 6.5612  | 6.4875  | 6.5054 | 6.7732  | 7.4630  | 7.3272  | 6.7082  | 6.6978  | 0.9483  | -0.0766 | 0.0867 | 1.0621 |
| Syngap1 | _ALVSEENC[Carbamidomethyl (C)]EVDPK_2                                              | #N/A                    | 5.2994  | 5.2561  | 5.5942  | 6.0081  | 5.6362 | 5.7782  | 3.4668  | 5.6315  | 5.9918  | 5.9331  | 0.9363  | -0.0949 | 0.0754 | 1.1224 |
| Syngap1 | _GKS[Phospho (STY)]QQLYSAAQKPR_3                                                   | #N/A                    | 6.0166  | 5.5056  | 6.6431  | 7.7727  | 3.6167 | 4.9837  | 4.4736  | 6.8314  | 7.0596  | 5.5231  | 0.9639  | -0.0530 | 0.8106 | 0.0912 |
| Syngap1 | _EFAEVTNHYR_2                                                                      | #N/A                    | 5.2602  | 4.9700  | 5.6176  | 5.7387  | 4.4687 | 5.3744  | 5.8609  | 5.8304  | 5.4114  | 5.2740  | 0.9364  | -0.0948 | 0.2149 | 0.6679 |
| Syngap1 | _QQS[Phospho (STY)]LSEGS[Phospho (STY)]GGSGGGGGGGGGLKPSK_3                         | F6SEU4_S1111_M2_Syngap1 | 3.9357  | 4.2465  | 4.0949  | 4.9900  | 3.6911 | 5.0959  | 3.8809  | 4.8778  | 4.8778  | 0.9351  | -0.0969 | 0.4809  | 0.3180 | 0.3180 |
| Syngap1 | _EYEEH[S](Phospho (STY)]LKER_2                                                     | #N/A                    | 5.6060  | 5.3339  | 6.4540  | 5.5632  | 3.6573 | 4.8843  | 6.0387  | 5.3167  | 5.3426  | 5.6633  | 0.9391  | -0.0907 | 0.5105 | 0.2920 |
| Syngap1 | _SPAYC[Carbamidomethyl (C)]TSSS[Phospho (STY)]DITEPEK_2                            | F6SEU4_S825_M1_Syngap1  | 10.3027 | 3.4488  | 10.4717 | 11.2217 | 9.3414 | 9.8792  | 11.1415 | 10.8184 | 10.9867 | 10.8184 | 0.9867  | -0.0193 | 0.9540 | 0.0205 |
| Syngap1 | _TVS[Phospho (STY)]VPVEGR_2                                                        | #N/A                    | 4.3402  | 6.3474  | 3.9567  | 5.0246  | 5.7111 | 6.5033  | 4.5217  | 6.9851  | 4.5327  | 4.5786  | 1.0309  | 0.0439  | 0.8306 | 0.0806 |
| Syngap1 | _DLNSS[Phospho (STY)]DLQDSM[Oxidation (M)]AR_2                                     | #N/A                    | 7.7392  | 7.7763  | 8.5273  | 9.0110  | 6.1789 | 3.0634  | 7.3218  | 8.6795  | 3.6487  | 7.1313  | 1.0404  | 0.0572  | 0.8503 | 0.0704 |
| Syngap1 | _ILM[Oxidation (M)]QYQAR_2                                                         | #N/A                    | 5.2495  | 5.5480  | 5.8525  | 5.6491  | 5.8465 | 5.2496  | 6.3509  | 6.5672  | 5.5651  | 4.8393  | 0.9546  | -0.0670 | 0.4601 | 0.0601 |
| Syngap1 | _EGS[Phospho (STY)]GGSGGGGGGGGGLKPSK_3                                             | #N/A                    | 7.8609  | 6.6434  | 8.2288  | 7.5929  | 6.5576 | 7.5030  | 7.0949  | 7.8651  | 7.6349  | 7.7642  | 0.9747  | -0.0370 | 0.6148 | 0.2113 |
| Syngap1 | _GKS[Phospho (STY)]QQLYSAAQK_2                                                     | #N/A                    | 4.8567  | 3.2225  | 4.5652  | 3.3974  | 3.0438 | 5.1787  | 4.3084  | 3.6038  | 4.6159  | 3.5737  | 1.0046  | 0.0066  | 0.9722 | 0.0122 |
| Syngap1 | _QY[Phospho (STY)]SMEAAAPAPR_2                                                     | F6SEU4_S116_M1_Syngap1  | 3.9961  | 3.8029  | 3.6845  | 5.9907  | 3.6242 | 3.7533  | 3.6185  | 3.8782  | 3.7486  | 3.8744  | 0.8818  | -0.1816 | 0.5350 | 0.0818 |
| Syngap1 | _VKEYEEH[S](Phospho (STY)]LKER_3                                                   | #N/A                    | 7.4602  | 7.5598  | 8.1344  | 8.1228  | 7.0606 | 7.5293  | 7.8564  | 7.8821  | 7.7433  | 7.3022  | 0.9933  | -0.0097 | 0.8338 | 0.0790 |
| Syngap1 | _LSQM[Oxidation (M)]GVITDGVPAQQLR_2                                                | #N/A                    | 5.9716  | 6.2370  | 6.8509  | 5.8879  | 6.1559 | 6.3552  | 6.4305  | 6.1850  | 5.9920  | 1.0008  | 0.0012  | 0.9787  | 0.0093 | 0.0093 |
| Syngap1 | _S[Phospho (STY)]VSM[Oxidation (M)]DLQDGGGGR_2                                     | #N/A                    | 3.3935  | 3.5056  | 4.0803  | 3.8899  | 4.0200 | 3.7569  | 6.3500  | 6.4420  | 6.6472  | 3.8569  | 0.6481  | -0.6258 | 0.0052 | 2.2799 |
| Syngap1 | _DAIGEFR_2                                                                         | #N/A                    | 4.7790  | 4.8394  | 3.2680  | 4.3126  | 1.0007 | 4.1000  | 4.4608  | 4.1894  | 4.6981  | 5.1341  | 0.8044  | -0.1141 | 0.2655 | 0.5759 |
| Syngap1 | _RLSQEEQTSK_2                                                                      | #N/A                    | 2.5304  | 2.7748  | 4.0451  | 3.6871  | 2.9831 | 4.0829  | 2.8927  | 3.4123  | 3.7114  | 2.7797  | 1.0474  | 0.0668  | 0.7043 | 0.1522 |
| Syngap1 | _GPS[Phospho (STY)]AEM[Oxidation (M)]QGYMMR_2                                      | #N/A                    | 7.5649  | 3.9223  | 3.6575  | 7.9873  | 3.7436 | 4.0324  | 4.8191  | 3.9091  | 3.4422  | 1.2878  | 0.3649  | 0.3121  | 0.5057 | 0.0093 |
| Syngap1 | _GLNSS[Phospho (STY)]M[Oxidation (M)]DMAR_2                                        | #N/A                    | 5.6800  | 4.1665  | 4.1690  | 5.8572  | 3.8310 | 3.7452  | 4.6179  | 3.4028  | 4.6648  | 4.0693  | 1.0922  | 0.1272  | 0.4905 | 0.3094 |
| Syngap1 | _C[Carbamidomethyl (C)]TAS[Phospho (STY)]SLAEHQANLR_2                              | F6SEU4_S334_M1_Syngap1  | 3.5730  | 3.9509  | 3.6239  | 4.1266  | 3.5636 | 4.1742  | 4.1681  | 4.0003  | 3.6489  | 4.0936  | 0.9642  | -0.0526 | 0.4282 | 0.3683 |
| Syngap1 | _CHS[Phospho (STY)]QTPSLNPTM[Oxidation (M)]PASER_3                                 | #N/A                    | 4.0226  | 3.3333  | 6.4889  | 3.9132  | 3.2247 | 3.7007  | 3.4483  | 3.7146  | 3.6130  | 5.4985  | 0.9839  | -0.0234 | 0.9328 | 0.0302 |
| Syngap1 | _S[Phospho (STY)]MDESRLDR_2                                                        | #N/A                    | 8.3178  | 7.40    |         |         |        |         |         |         |         |         |         |         |        |        |



|          |                                                                                |                         |          |         |         |         |         |         |         |         |         |         |        |         |        |        |
|----------|--------------------------------------------------------------------------------|-------------------------|----------|---------|---------|---------|---------|---------|---------|---------|---------|---------|--------|---------|--------|--------|
| Sipa13   | _EQSNPS[Phospho (STY)]PSQDQGVK_2                                               | G3X9J_594_M1_Sipa13     | 3.3002   | 4.0422  | 4.5348  | 4.0785  | 3.9448  | 3.8660  | 4.2268  | 5.8864  | 3.2217  | 5.6890  | 0.8329 | -0.2638 | 0.1785 | 0.7483 |
| Sipa13   | _S[Phospho (STY)]KVEFQDQWPR_2                                                  | G3X9J_5140_M1_Sipa13    | 6.5329   | 3.1179  | 3.9581  | 7.4810  | 5.5918  | 6.8579  | 3.6502  | 6.0320  | 6.9667  | 6.9128  | 0.9490 | -0.0755 | 0.7865 | 0.1043 |
| Sipa13   | _QDAAGKGS[Phospho (STY)]PNR_2                                                  | G3X9J_51248_M1_Sipa13   | 3.8064   | 3.0618  | 3.3503  | 3.8530  | 2.9501  | 3.6745  | 3.5677  | 4.2655  | 3.9141  | 3.8200  | 0.8863 | -0.1741 | 0.0886 | 1.0525 |
| Arfge1   | _LSVSS[Phospho (STY)]NIOFSGNSGSPGAK_2                                          | G3X9K3_5394_M1_Arfge1   | 3.7330   | 3.4932  | 4.4198  | 3.4216  | 3.3815  | 3.2432  | 3.1363  | 3.1960  | 4.3454  | 3.3886  | 1.0281 | 0.0400  | 0.7589 | 0.1198 |
| Arfge1   | _GREGS[Phospho (STY)]LTGTK_2                                                   | G3X9K3_51076_M1_Arfge1  | 5.7999   | 3.4249  | 4.4881  | 3.4899  | 3.3132  | 3.2114  | 4.9175  | 3.1277  | 4.2772  | 3.4569  | 1.0067 | 0.0096  | 0.9661 | 0.0150 |
| Arfge1   | _S[Phospho (STY)]VHOSQPR_2                                                     | G3X9K3_51566_M1_Arfge1  | 4.3652   | 2.9772  | 4.0988  | 3.6426  | 3.5089  | 7.0243  | 3.7909  | 3.3586  | 7.0864  | 3.3199  | 0.9728 | -0.0398 | 0.9100 | 0.0410 |
| Arfge1   | _QQQHLLGS[Phospho (STY)]PVSHPEFSPHLR_5                                         | G3X9K3_5234_M1_Arfge1   | 4.6949   | 3.1682  | 3.2439  | 3.7466  | 3.0565  | 3.5681  | 3.4613  | 4.3719  | 4.0205  | 3.7136  | 0.9198 | -0.1206 | 0.3927 | 0.1059 |
| Rab11fp2 | _TSS[Phospho (STY)]FDTSK_2                                                     | G3XA57_5277_M1_Rab11fp2 | 0.0360   | 3.7185  | 4.1967  | 6.7361  | 5.6749  | 3.0178  | 4.4118  | 6.4009  | 6.9506  | 3.1633  | 0.9360 | -0.0955 | 0.7510 | 0.4244 |
| Atp2b1   | _NSS[Phospho (STY)]PPSPFNK_2                                                   | G5ER29_51178_M1_Atp2b1  | 11.6867  | 11.6069 | 12.0028 | 11.6600 | 10.0504 | 11.3250 | 3.8477  | 11.9359 | 11.6390 | 11.4420 | 1.1721 | 0.2291  | 0.3231 | 0.4907 |
| Atp2b1   | _SATSSSPGS[Phospho (STY)]PUSLETS_2                                             | G5ER29_51211_M1_Atp2b1  | 11.9535  | 11.6394 | 12.5569 | 11.7573 | 10.3235 | 11.7845 | 12.3511 | 11.9221 | 11.7805 | 11.5852 | 0.9798 | 0.0794  | 0.5609 | 0.2511 |
| Atp2b1   | _EASDILTDONTFSVK_2                                                             | #N/A                    | 8.2321   | 8.3480  | 9.0009  | 8.7663  | 7.1811  | 8.4153  | 8.9441  | 8.5566  | 8.1189  | 8.3247  | 0.9809 | -0.0278 | 0.6556 | 0.1834 |
| Atp2b1   | _YTTFNVR_2                                                                     | #N/A                    | 8.3760   | 8.2168  | 8.5262  | 7.2356  | 8.0143  | 7.6125  | 8.3811  | 8.6576  | 8.3453  | 7.8083  | 0.9637 | -0.0533 | 0.3242 | 0.4892 |
| Atp2b1   | _TSPNEGSGNPADLER_2                                                             | #N/A                    | 8.3297   | 7.8382  | 7.7237  | 7.5151  | 7.5006  | 5.7562  | 8.1321  | 8.2221  | 8.0704  | 7.6019  | 0.9676 | -0.0475 | 0.2178 | 0.6619 |
| Atp2b1   | _GIDSVSEQR_2                                                                   | #N/A                    | 7.8715   | 7.6583  | 8.4225  | 7.8348  | 7.5167  | 7.5028  | 8.1018  | 8.1101  | 7.6200  | 7.4741  | 0.9968 | -0.0047 | 0.9097 | 0.0411 |
| Atp2b1   | _QIVAVTGGDTNGDPALK_2                                                           | #N/A                    | 7.2245   | 7.4052  | 8.0554  | 7.5850  | 6.8828  | 7.3618  | 7.6767  | 7.8975  | 7.7289  | 7.3869  | 0.9670 | -0.0484 | 0.2748 | 0.5610 |
| Atp2b1   | _YGDLLPADGILQGNOLK_2                                                           | #N/A                    | 7.4077   | 7.5156  | 7.8475  | 7.7736  | 6.8170  | 6.8713  | 7.7472  | 8.0279  | 7.3375  | 7.1096  | 0.9757 | -0.0355 | 0.5265 | 0.2786 |
| Atp2b1   | _IDESSLTGESDHKK_3                                                              | #N/A                    | 5.6457   | 5.3478  | 5.5018  | 4.8030  | 4.8569  | 5.4612  | 5.6480  | 5.4438  | 5.4811  | 5.2632  | 0.9653 | -0.0510 | 0.3501 | 0.4558 |
| Atp2b1   | _ADVGAFM[Oxidation (M)]GIAGTDAVK_2                                             | #N/A                    | 5.9456   | 6.2350  | 6.1441  | 5.2335  | 5.6147  | 6.0801  | 6.5839  | 6.9126  | 6.1611  | 6.2170  | 0.9083 | -0.1388 | 0.0380 | 1.4203 |
| Atp2b1   | _EAMHDGFGITLTEL_3                                                              | #N/A                    | 6.0136   | 5.6423  | 5.9257  | 5.5581  | 5.1401  | 5.6447  | 6.4294  | 5.8057  | 5.5799  | 6.0991  | 0.9457 | -0.0805 | 0.1688 | 0.7726 |
| Atp2b1   | _KQDGAENR_2                                                                    | #N/A                    | 5.6464   | 5.1388  | 5.5432  | 4.5947  | 6.0408  | 5.5103  | 5.7054  | 6.0978  | 5.8894  | 5.4010  | 0.9375 | -0.0932 | 0.2300 | 0.6383 |
| Atp2b1   | _NS[Phospho (STY)]KEAHHOGDGTILTEL_3                                            | #N/A                    | 4.2463   | 3.5218  | 5.0553  | 3.3930  | 4.2805  | 4.9442  | 5.5859  | 6.4175  | 4.3740  | 3.2211  | 0.8661 | -0.2074 | 0.3466 | 0.4602 |
| Atp2b1   | _TIC[Carbamidomethyl (C)]AFR_2                                                 | #N/A                    | 5.3913   | 3.2210  | 5.1654  | 5.3967  | 5.1669  | 5.0044  | 3.8979  | 6.4249  | 5.6438  | 5.2859  | 0.9205 | -0.1194 | 0.4985 | 0.3023 |
| Atp2b1   | _M[Oxidation (M)]VTGONINTAR_2                                                  | #N/A                    | 7.1513   | 7.0414  | 7.0590  | 6.9312  | 7.0602  | 6.5761  | 7.3624  | 7.3302  | 7.0645  | 7.4405  | 0.9549 | -0.0666 | 0.0280 | 1.5525 |
| Atp2b1   | _TVIEPM[Oxidation (M)]ASEGLR_2                                                 | #N/A                    | 7.3381   | 7.4815  | 7.4964  | 6.8901  | 7.1051  | 6.8004  | 7.4833  | 7.6812  | 7.2213  | 7.0929  | 0.9750 | -0.0366 | 0.3484 | 0.4579 |
| Atp2b1   | _TGTLTMNR_2                                                                    | #N/A                    | 4.3889   | 7.0143  | 4.1226  | 7.3415  | 6.0010  | 3.4538  | 3.8146  | 6.3829  | 6.9153  | 6.5538  | 0.9105 | -0.1353 | 0.6109 | 0.2140 |
| Atp2b1   | _KADVGAFM[Oxidation (M)]GIAGTDAVK_3                                            | #N/A                    | 5.4724   | 5.2885  | 6.1103  | 5.1872  | 5.4211  | 5.7033  | 5.2993  | 5.8869  | 5.9446  | 5.7640  | 0.9662 | -0.0496 | 0.3757 | 0.4552 |
| Atp2b1   | _FDDISGR_2                                                                     | #N/A                    | 2.9138   | 5.4865  | 3.6006  | 4.4017  | 4.2307  | 3.8446  | 4.3288  | 4.7434  | 5.0434  | 4.2110  | 0.8904 | -0.1674 | 0.3139 | 0.5032 |
| Atp2b1   | _QIVAVTGGDTNGDPALK_2                                                           | #N/A                    | 4.3028   | 3.3875  | 4.2472  | 3.8894  | 4.0475  | 3.7512  | 4.7835  | 4.2408  | 4.1799  | 3.5054  | 0.9426 | -0.0853 | 0.4011 | 0.3968 |
| Atp2b1   | _IQESYGDVGIC[Carbamidomethyl (C)]ITK_2                                         | #N/A                    | 5.3438   | 3.3189  | 4.7691  | 3.3409  | 3.2072  | 5.6274  | 3.4891  | 3.6603  | 3.9594  | 5.0790  | 1.0546 | 0.0767  | 0.7358 | 0.1368 |
| Atp2b1   | _SSLVEGLEKPE[Phospho (STY)]R_2                                                 | #N/A                    | 5.8866   | 5.8551  | 5.3485  | 6.2201  | 4.6480  | 5.7632  | 6.7404  | 6.0673  | 6.2891  | 5.7101  | 0.9062 | -0.1420 | 0.1155 | 0.9374 |
| Atp2b1   | _EPIPEELADEVEIDHAR_3                                                           | #N/A                    | 3.7656   | 6.6560  | 3.4993  | 6.0085  | 6.5596  | 6.1714  | 6.7444  | 6.5605  | 6.6426  | 6.8146  | 0.9246 | -0.0959 | 0.1274 | 0.8948 |
| Atp2b1   | _SSPTDHTLVK_2                                                                  | #N/A                    | 5.8951   | 6.2094  | 5.9651  | 5.8468  | 6.1147  | 5.5823  | 6.3999  | 6.3946  | 5.8324  | 5.7582  | 0.9736 | -0.0385 | 0.3925 | 0.4061 |
| Atp2b1   | _NVYDSK_2                                                                      | #N/A                    | 3.8892   | 3.1938  | 3.8822  | 3.4260  | 2.8243  | 2.9617  | 3.5743  | 3.4844  | 3.1033  | 0.9792  | 0.9372 | -0.0303 | 0.7808 | 0.0705 |
| Atp2b1   | _Acetyl (Protein N-term)GDMMNSVAVS[Phospho (STY)]GVKNSK_2                      | G5ER29_512_M1_Atp2b1    | 3.7694   | 3.2422  | 4.0617  | 3.7048  | 3.1305  | 3.5264  | 3.4195  | 3.7761  | 4.0944  | 3.8758  | 0.9422 | -0.0858 | 0.3257 | 0.4872 |
| Atp2b1   | _HLDAC[Carbamidomethyl (C)]ETM[Oxidation (M)]GNATAIC[Carbamidomethyl (C)]SDK_3 | #N/A                    | 3.6421   | 2.9464  | 4.3289  | 3.3307  | 4.6489  | 4.4195  | 3.2870  | 4.8013  | 4.8636  | 4.8695  | 0.9207 | -0.2173 | 0.2365 | 0.6263 |
| Atp2b1   | _MTVQVAYNEK_2                                                                  | #N/A                    | 3.1969   | 3.5765  | 3.8837  | 4.3864  | 3.8235  | 3.9060  | 4.1011  | 3.7321  | 3.3807  | 4.3534  | 0.9753 | -0.0361 | 0.7229 | 0.1409 |
| Atp2b1   | _IEDS[Phospho (STY)]EPHPLDQDADAEADPTKR_3                                       | G5ER29_51155_M1_Atp2b1  | 3.5736   | 3.5657  | 3.8894  | 4.1965  | 3.4540  | 4.0180  | 3.9111  | 4.0327  | 3.6813  | 3.3993  | 1.0075 | 0.0108  | 0.8837 | 0.1368 |
| Atp2b1   | _AQDGAAMEMOKPS[Phospho (STY)]EGGQDQDKR_3                                       | G5ER29_5338_M1_Atp2b1   | 3.0431   | 4.1831  | 3.7299  | 4.2326  | 3.6696  | 4.0541  | 3.9472  | 3.8859  | 3.5345  | 4.1996  | 0.9812 | -0.0273 | 0.7790 | 0.1085 |
| Trip12   | _SES[Phospho (STY)]PPAELPSLR_2                                                 | G5ER70_5312_M1_Trip12   | 11.2571  | 10.7696 | 11.4771 | 4.1561  | 3.5932  | 10.7703 | 11.6517 | 11.0768 | 10.8774 | 10.8898 | 0.7795 | -0.3595 | 0.2346 | 0.6297 |
| Trip12   | _AQTAFTKTS[Phospho (STY)]PKR_2                                                 | G5ER70_51460_M1_Trip12  | 7.7075   | 7.6115  | 8.1291  | 7.3523  | 6.2487  | 7.6961  | 8.0478  | 8.0201  | 7.7822  | 7.5130  | 0.9511 | -0.0723 | 0.2956 | 0.5293 |
| Trip12   | _DQSDLS[Phospho (STY)]PGQR_2                                                   | G5ER70_51024_M1_Trip12  | 4.0583   | 7.8252  | 3.2442  | 3.7469  | 6.7081  | 7.9558  | 8.5494  | 8.0635  | 4.0202  | 7.6479  | 0.7901 | -0.3398 | 0.3089 | 0.5102 |
| Trip12   | _AAS[Phospho (STY)]KDTSSNNR_2                                                  | G5ER70_51111_M1_Trip12  | 3.7473   | 4.6646  | 4.4341  | 3.4359  | 2.8730  | 3.3556  | 3.1506  | 3.1817  | 4.3311  | 3.0934  | 1.0669 | 0.0934  | 0.5833 | 0.1021 |
| Trip12   | _SAS[Phospho (STY)]POYNR_2                                                     | G5ER70_577_M1_Trip12    | 3.5611   | 3.6651  | 4.2479  | 3.2497  | 3.5534  | 3.0712  | 4.4652  | 5.4172  | 3.0165  | 3.2167  | 0.8831 | -0.1793 | 0.3653 | 0.4373 |
| Ank3     | _DFPDYFAVSR_2                                                                  | #N/A                    | 7.8731   | 8.0230  | 7.9719  | 7.9875  | 7.3605  | 7.3894  | 7.9918  | 7.9895  | 7.6786  | 7.6559  | 0.9922 | -0.0114 | 0.7330 | 0.1349 |
| Ank3     | _ERFDS[Phospho (STY)]DSL_2                                                     | G5ERK5_5958_M1_Ank3     | 4.0989   | 3.4033  | 3.2849  | 3.7875  | 3.2246  | 7.0094  | 6.0617  | 4.3309  | 6.5999  | 6.9894  | 0.6913 | -0.5126 | 0.0692 | 1.1599 |
| Ank3     | _TEEPKS[Phospho (STY)]PLTAQK_2                                                 | G5ERK5_51883_M1_Ank3    | 7.9964   | 7.9069  | 4.2642  | 3.1288  | 3.6742  | 8.1528  | 4.3444  | 7.9258  | 7.9188  | 8.8537  | 0.8537 | -0.2282 | 0.4935 | 0.3067 |
| Ank3     | _NEDLAELNGM[Oxidation (M)]DEELDS[Phospho (STY)]PEELGTRK_3                      | #N/A                    | 4.2612   | 3.5656  | 6.0458  | 3.9499  | 3.3869  | 4.3426  | 3.6646  | 4.1686  | 5.3101  | 3.9169  | 0.9985 | -0.0022 | 0.9913 | 0.0038 |
| Ank3     | _YSYLTEPSMS[Phospho (STY)]PQSPC[Carbamidomethyl (C)]ER_2                       | G5ERK5_51470_M1_Ank3    | 3.9483   | 3.2527  | 3.8234  | 3.3672  | 3.0740  | 3.1546  | 3.5154  | 3.6340  | 3.9331  | 3.0445  | 0.9731 | -0.0394 | 0.6979 | 0.1534 |
| Ank3     | _IRDTS[Phospho (STY)]QEPIC[Carbamidomethyl (C)]GR_2                            | G5ERK5_51406_M1_Ank3    | 3.9127   | 3.2170  | 4.5995  | 3.6013  | 3.0383  | 3.1903  | 3.5511  | 3.0164  | 4.1658  | 3.5683  | 1.0050 | 0.0072  | 0.9610 | 0.0173 |
| Ank3     | _NEDLAELNGM[Oxidation (M)]DEELDS[Phospho (STY)]PEELGTRK_3                      | #N/A                    | 3.9650   | 3.2204  | 3.1917  | 6.9944  | 3.1087  | 3.5159  | 3.4091  | 4.4241  | 4.0727  | 3.6614  | 0.8863 | -0.1741 | 0.1105 | 0.9567 |
| Ank3     | _GETALHM[Oxidation (M)]AAR_2                                                   | #N/A                    | 3.5161   | 3.5059  | 3.8733  | 3.8122  | 3.3942  | 4.5832  | 3.7627  | 5.2002  | 3.7436  | 3.6397  | 0.9252 | -0.1122 | 0.4311 | 0.3654 |
| Ank3     | _ROS[Phospho (STY)]FASLAR_2                                                    | G5ERK5_51451_M1_Ank3    | 3.6214   | 3.7210  | 3.3550  | 6.1980  | 3.5424  | 4.1871  | 4.5479  | 4.1024  | 4.4014  | 4.0769  | 0.9584 | -0.0613 | 0.7545 | 0.1223 |
| Ank3     | _ADIVQQLIQGASPNAAITSGYTPHLAAR_3                                                | #N/A                    | 3.6505   | 3.6919  | 3.3842  | 4.4288  | 2.7943  | 4.2163  | 3.0762  | 4.0732  | 4.3723  | 4.1061  | 0.9456 | -0.0807 | 0.5859 | 0.2322 |
| Ank3     | _VALLLDQGAS[Phospho (STY)]PHAAAK_2                                             | G5ERK5_5606_M1_Ank3     | 3.2248   | 3.9810  | 4.4593  | 4.0030  | 3.8693  | 4.2561  | 4.1493  | 1.5375  | 3.2972  | 3.6803  | 1.2525 | 0.3248  | 0.1481 | 0.8296 |
| Brd1     | _VHGEPAS[Phospho (STY)]DLS[Phospho (STY)]DID_2                                 | G5EBP1_51052_M2_Brd1    | 3.4511   | 4.2281  | 3.6631  | 8.6127  | 7.5473  | 3.8602  | 3.6843  | 8.3959  | 8.5370  | 8.1996  | 0.7256 | -0.4628 | 0.2175 | 0.6625 |
| Cacna2d1 | _PVVTDGGTR_2                                                                   | #N/A                    | 6.8146   | 6.4518  | 6.7591  | 6.9293  | 6.3551  | 6.7980  | 6.2580  | 7.1415  | 6.7549  | 6.4900  | 0.9905 | -0.0137 | 0.7644 | 0.1167 |
| Cacna2d1 | _SYDQSVIC[Carbamidomethyl (C)]DPGAAPK_2                                        | #N/A                    | 4.9753   | 4.6817  | 4.9317  | 4.9869  | 5.0412  | 4.8955  | 4.2976  | 5.2339  | 3.1509  | 5.1417  | 1.1038 | 0.1425  | 0.2867 | 0.5740 |
| Cacna2d1 | _HM[Oxidation (M)]FTDQGEER_2                                                   | #N/A                    | 4.6909   | 4.5330  | 3.4187  | 4.0751  | 4.9489  | 4.6810  | 3.9904  | 4.2824  | 3.8457  | 4.9675  | 1.0280 | 0.0399  | 0.7380 | 0.1319 |
| Cacna2d1 | _QLEVEAR_2                                                                     | #N/A                    | 3.4246   | 4.2661  | 3.2435  | 4.2881  | 2.0805  | 3.9710  | 4.4364  | 4.6083  | 3.7900  | 3.9654  | 0.8442 | -0.2443 | 0.1871 | 0.7280 |
| Cacna2d1 | _VFTFSVGQHNYDR_3                                                               | #N/A                    | 3.0027   | 3.4113  | 4.1388  | 3.4340  | 3.5912  | 2.2589  | 4.1201  | 3.3993  | 2.6099  | 3.2379  | 0.9893 | -0.0155 | 0.9120 | 0.0306 |
| Bin1     | _VNHEPEFASGAS[Phospho (STY)]PGATPK_2                                           | #N/A                    | 8.5874   | 8.9062  | 9.2760  | 9.1959  | 8.7085  | 8.8725  | 8.7847  | 8.6687  | 8.5209  | 8.8006  | 1.0265 | 0.0378  | 0.1534 | 0.8142 |
| Bin1     | _GVFPEFTTR_2                                                                   | #N/A                    | 8.2766</ |         |         |         |         |         |         |         |         |         |        |         |        |        |



|         |                                                                                              |                        |         |         |         |         |         |         |         |         |         |         |         |         |        |        |
|---------|----------------------------------------------------------------------------------------------|------------------------|---------|---------|---------|---------|---------|---------|---------|---------|---------|---------|---------|---------|--------|--------|
| Sec22b  | _NLGS(Phospho (STY))INTELQOVQR_2                                                             | O08547_5137_M1_Sec22b  | 9.6589  | 9.0786  | 9.8108  | 9.7422  | 8.1728  | 9.4793  | 9.7687  | 9.5412  | 9.7514  | 9.4776  | 0.9677  | -0.0473 | 0.3634 | 0.4396 |
| Sec22b  | _DLQYQSQAK_2                                                                                 | #N/A                   | 5.6589  | 6.1467  | 4.2874  | 5.9319  | 5.7706  | 6.0517  | 5.9294  | 6.3668  | 5.5159  | 5.6424  | 0.9621  | -0.0558 | 0.5753 | 0.2401 |
| Sec22b  | _GSPLVWSGK_2                                                                                 | #N/A                   | 11.4550 | 11.6377 | 11.6812 | 11.7172 | 11.4028 | 11.5199 | 11.4948 | 11.3523 | 11.3921 | 11.5068 | 1.0116  | 0.0166  | 0.1033 | 0.9859 |
| Dpsyl2  | _M[Oxidation (M)]VPGGIDVHR_2                                                                 | #N/A                   | 10.5249 | 10.9339 | 11.1663 | 10.8472 | 10.8976 | 10.8287 | 10.8532 | 10.7658 | 10.7325 | 10.8250 | 1.0067  | 0.0096  | 0.5211 | 0.2831 |
| Dpsyl2  | _SAAAVAGAR_2                                                                                 | #N/A                   | 11.8538 | 12.3772 | 12.2340 | 12.5495 | 12.4380 | 12.0939 | 12.0988 | 12.1789 | 12.2538 | 12.2210 | 1.0026  | 0.0038  | 0.8191 | 0.0867 |
| Dpsyl2  | _QIGENLVPGVJK_2                                                                              | #N/A                   | 11.9634 | 12.2863 | 12.4176 | 12.3983 | 12.4260 | 12.1407 | 12.1810 | 12.1418 | 12.1546 | 12.2030 | 1.0084  | 0.0120  | 0.3178 | 0.4978 |
| Dpsyl2  | _VFNLYPR_2                                                                                   | #N/A                   | 11.0445 | 11.2047 | 10.9714 | 10.5140 | 11.0580 | 11.0906 | 10.7712 | 10.9385 | 11.1953 | 11.2545 | 0.9946  | -0.0078 | 0.7063 | 0.1510 |
| Dpsyl2  | _KPPDPVVK_2                                                                                  | #N/A                   | 10.6591 | 10.7557 | 10.5417 | 10.7213 | 10.6422 | 10.4850 | 10.5629 | 10.5507 | 10.6940 | 1.0046  | 0.0067  | 0.4405  | 0.3561 | 0.9244 |
| Dpsyl2  | _VLVDGTLVHTEGGR_3                                                                            | #N/A                   | 9.0247  | 8.8536  | 9.2892  | 9.3163  | 9.1671  | 9.0714  | 8.8155  | 8.7466  | 9.0444  | 9.0959  | 1.0218  | 0.0311  | 0.1190 | 0.9244 |
| Dpsyl2  | _ILDLGITGEGHLSRPEEVEAEAVNR_4                                                                 | #N/A                   | 8.5599  | 8.8304  | 8.9099  | 9.5409  | 8.7727  | 8.7505  | 8.7731  | 8.9010  | 8.8416  | 9.0130  | 1.0013  | 0.0019  | 0.9481 | 0.0231 |
| Dpsyl2  | _STVYVEGPITASGTDGSHYSWK_3                                                                    | #N/A                   | 9.5293  | 9.2853  | 9.3689  | 9.5735  | 9.6090  | 9.6454  | 9.5345  | 8.9338  | 9.4324  | 9.8041  | 1.0080  | 0.0115  | 0.6513 | 0.1862 |
| Dpsyl2  | _SITIANQTNC[Carbamidomethyl (C)]PLVYTK_2                                                     | #N/A                   | 8.6866  | 9.7249  | 9.2931  | 9.6757  | 9.3643  | 9.5184  | 9.4829  | 8.9692  | 9.1053  | 1.0170  | 0.0244  | 0.4813  | 0.3176 | 0.1862 |
| Dpsyl2  | _AVGKDNTLPEGTNGTEER_3                                                                        | #N/A                   | 8.0804  | 8.6138  | 9.4318  | 8.4380  | 8.0696  | 8.9759  | 8.6400  | 8.4292  | 8.4221  | 8.4996  | 1.0122  | 0.0175  | 0.7145 | 0.1460 |
| Dpsyl2  | _TIEAHSR_2                                                                                   | #N/A                   | 8.2394  | 7.5014  | 6.9985  | 6.7049  | 8.4372  | 7.3810  | 7.8603  | 7.3279  | 7.2537  | 8.0382  | 0.9900  | -0.0145 | 0.8457 | 0.0728 |
| Dpsyl2  | _ITS[Phospho (STY)]DRLLIK_2                                                                  | O08553_514_M1_Dpsyl2   | 7.6959  | 8.0718  | 3.7242  | 8.6048  | 7.5994  | 7.9764  | 8.1204  | 7.9489  | 7.5978  | 8.0435  | 0.9181  | -0.1232 | 0.4967 | 0.3039 |
| Dpsyl2  | _NIPRIT[Phospho (STY)]SDR_2                                                                  | O08553_513_M1_Dpsyl2   | 6.5992  | 7.3267  | 4.2302  | 3.7740  | 3.6403  | 2.9843  | 7.2771  | 7.0442  | 3.5262  | 7.0166  | 0.7656  | -0.3853 | 0.2402 | 0.6194 |
| Dpsyl2  | _TS[Phospho (STY)]PAKQQAAPPVR_2                                                              | #N/A                   | 12.0697 | 13.0298 | 13.9460 | 13.1749 | 12.7743 | 13.0395 | 3.6274  | 12.8480 | 12.7177 | 12.7794 | 1.2394  | 0.3097  | 0.2083 | 0.6813 |
| Dpsyl2  | _DNFTLPEGTNGTEER_2                                                                           | #N/A                   | 7.5493  | 12.5580 | 12.5706 | 13.0454 | 12.6634 | 12.8070 | 12.9732 | 12.3885 | 12.6064 | 12.9019 | 0.9330  | -0.1000 | 0.4563 | 0.3407 |
| Dpsyl2  | _SVSGSDADLVWDPDSVK_2                                                                         | #N/A                   | 9.1054  | 9.4605  | 9.5270  | 9.4656  | 9.6977  | 9.7520  | 9.7325  | 9.3402  | 9.5288  | 9.7250  | 0.9916  | -0.0121 | 0.5771 | 0.2388 |
| Dpsyl2  | _MI[Oxidation (M)]SVWDSK_2                                                                   | #N/A                   | 7.2099  | 7.1812  | 6.3342  | 7.6857  | 7.5792  | 6.5311  | 5.0225  | 6.7434  | 7.4469  | 7.0952  | 1.0775  | 0.1077  | 0.3456 | 0.4614 |
| Dpsyl2  | _GQIEEM[Oxidation (M)]EALVK_2                                                                | #N/A                   | 7.2240  | 7.2316  | 6.7201  | 7.7341  | 7.6126  | 7.2470  | 7.5274  | 7.5313  | 7.1190  | 7.6845  | 0.9771  | -0.0334 | 0.4307 | 0.3658 |
| Dpsyl2  | _TVT[Phospho (STY)]PASS[Phospho (STY)]AKT[Phospho (STY)]PAK_2                                | #N/A                   | 12.3101 | 13.7280 | 14.0251 | 13.4045 | 13.2512 | 13.4004 | 13.6576 | 13.3479 | 13.3283 | 13.6284 | 0.9923  | -0.0112 | 0.7456 | 0.1275 |
| Dpsyl2  | _TVT[Phospho (STY)]PASS[Phospho (STY)]AK_2                                                   | #N/A                   | 10.9995 | 10.9943 | 11.1561 | 11.2299 | 9.7553  | 10.4081 | 11.6092 | 10.8553 | 10.6145 | 11.1745 | 0.9855  | -0.0210 | 0.6190 | 0.2083 |
| Dpsyl2  | _TVT[Phospho (STY)]PASS[Phospho (STY)]AKTS[Phospho (STY)]PAKQQAAPPVR_3                       | #N/A                   | 9.8575  | 10.9701 | 11.8250 | 11.6662 | 11.3911 | 11.0398 | 11.3935 | 11.2534 | 11.2604 | 10.7515 | 0.9964  | -0.0051 | 0.9187 | 0.0368 |
| Dpsyl2  | _FCM[Oxidation (M)]PDGGM[Oxidation (M)]TSADOFFQGTK_2                                         | #N/A                   | 7.4751  | 8.1441  | 8.5886  | 7.2417  | 8.4665  | 8.5029  | 8.2867  | 8.0789  | 8.0656  | 0.9945  | -0.0079 | 0.8847  | 0.1887 | 0.9859 |
| Dpsyl2  | _DHGVNSFLVMY[Oxidation (M)]AFK_3                                                             | #N/A                   | 5.9982  | 5.7723  | 6.3121  | 5.8420  | 5.9645  | 6.2753  | 6.1822  | 5.9840  | 6.0497  | 6.0550  | 0.9934  | -0.0096 | 0.7415 | 0.1299 |
| Dpsyl2  | _NLHGSGFSLGSAQIDNIPR_3                                                                       | #N/A                   | 8.5130  | 8.9606  | 9.3503  | 9.8875  | 8.7641  | 8.7940  | 8.9135  | 8.8242  | 8.8619  | 8.7507  | 1.0235  | 0.0335  | 0.4398 | 0.3567 |
| Dpsyl2  | _THNSALEYNEFGM[Oxidation (M)]EC[Carbamidomethyl (C)]R_3                                      | #N/A                   | 8.6658  | 8.7155  | 9.3118  | 8.9592  | 8.6848  | 8.6344  | 8.7561  | 8.2920  | 8.7063  | 8.9083  | 1.0188  | 0.0269  | 0.3667 | 0.4357 |
| Dpsyl2  | _FQITDSQIEVLSVR_3                                                                            | #N/A                   | 5.7011  | 5.4901  | 6.7395  | 6.2965  | 5.3348  | 5.5428  | 5.1550  | 5.2921  | 5.7712  | 5.8816  | 1.0590  | 0.0827  | 0.3283 | 0.4838 |
| Dpsyl2  | _M[Oxidation (M)]DENGQVAVTSSNAAK_2                                                           | #N/A                   | 9.7116  | 10.1339 | 10.1926 | 10.3586 | 10.2193 | 10.2319 | 10.0780 | 9.9822  | 10.1541 | 10.2508 | 1.0025  | 0.0036  | 0.8431 | 0.0741 |
| Dpsyl2  | _VWDDGSFYADIMY[Oxidation (M)]EDGLK_2                                                         | #N/A                   | 7.3507  | 7.8773  | 7.8634  | 8.3819  | 7.4742  | 7.8634  | 7.6150  | 7.6264  | 7.6585  | 1.0435  | 0.0614  | 0.1781  | 0.7491 | 0.1887 |
| Dpsyl2  | _NLHGSGFSLGSAQIDNIPRR_4                                                                      | #N/A                   | 7.3093  | 7.5940  | 8.1928  | 6.9044  | 7.5064  | 7.4510  | 7.2958  | 6.3698  | 6.7215  | 7.3295  | 1.0764  | 0.1062  | 0.1005 | 0.9977 |
| Dpsyl2  | _GLYDGPVVC[Carbamidomethyl (C)]EVSVT[Phospho (STY)]PK_2                                      | #N/A                   | 9.7579  | 9.8714  | 10.0843 | 11.0986 | 12.5638 | 9.9243  | 13.1528 | 10.3866 | 10.2587 | 12.9558 | 0.9026  | -0.1478 | 0.2123 | 0.6731 |
| Dpsyl2  | _GLYDGPVVC[Carbamidomethyl (C)]EVSVT[Phospho (STY)]VT[Phospho (STY)]PASSAK_3                 | #N/A                   | 3.6234  | 3.6567  | 4.2389  | 10.3311 | 8.5701  | 9.7348  | 3.6645  | 9.5636  | 5.5092  | 5.2510  | 1.0048  | 0.0069  | 0.9873 | 0.0056 |
| Dpsyl2  | _DIGAAGZVHAENGDAIEAQGR_3                                                                     | #N/A                   | 9.0218  | 9.0258  | 8.6823  | 9.3508  | 8.3874  | 8.7144  | 9.2989  | 8.0294  | 8.7058  | 9.1476  | 1.0078  | 0.0112  | 0.8156 | 0.0885 |
| Dpsyl2  | _DRFQLTDSQIEVLSVR_3                                                                          | #N/A                   | 4.1922  | 3.4477  | 3.9259  | 3.4697  | 3.7376  | 3.2886  | 3.4967  | 3.1796  | 3.8305  | 3.1470  | 1.0772  | 0.1073  | 0.2544 | 0.5945 |
| Dpsyl2  | _SC[Carbamidomethyl (C)]IDYSHVDITEWHK_3                                                      | #N/A                   | 6.6940  | 6.8769  | 7.7752  | 8.3852  | 4.8592  | 7.1747  | 7.5545  | 5.4620  | 6.7553  | 7.3455  | 1.0268  | 0.0381  | 0.8067 | 0.0933 |
| Dpsyl2  | idemethyl (C)]EVSVT[Phospho (STY)]PKT[Phospho (STY)]VT[Phospho (STY)]PAS[Phospho (STY)]SPhos | #N/A                   | 3.4251  | 3.8020  | 3.8570  | 4.0031  | 3.5088  | 4.0534  | 4.0488  | 4.0034  | 4.0424  | 4.0620  | 0.9346  | -0.0976 | 0.0794 | 1.1003 |
| Dpsyl2  | _GRS[Phospho (STY)]VSGADLVWDPDSVK_3                                                          | #N/A                   | 3.6813  | 2.9856  | 3.8601  | 3.3699  | 2.8070  | 3.4217  | 3.7825  | 3.2477  | 4.3972  | 3.3369  | 0.9317  | -0.1021 | 0.4926 | 0.1721 |
| Dpsyl2  | _AALAGTTM[Oxidation (M)]IDHVPPEGTSLAAFDQWR_3                                                 | #N/A                   | 3.2945  | 4.0897  | 3.9713  | 2.2454  | 3.9110  | 3.8185  | 4.1793  | 2.9702  | 3.2692  | 3.7083  | 1.0061  | 0.0088  | 0.9595 | 0.0180 |
| Dpsyl2  | AAVTPSPSPDPTPDRFLNLSLSC[Carbamidomethyl (C)]GDLQVTSAGHSC[Carbamidomethyl (C)]TFNTAQK         | #N/A                   | 3.2805  | 4.0559  | 4.5210  | 4.0648  | 3.9311  | 4.1944  | 4.2131  | 4.4372  | 3.2354  | 3.7421  | 1.0261  | 0.0372  | 0.7393 | 0.1312 |
| Rundc3a | _FTQSYDYLT[Phospho (STY)]DEER_2                                                              | O08576_7215_M1_Rundc3a | 3.3999  | 5.1682  | 5.6348  | 7.0091  | 5.6348  | 6.0810  | 5.0906  | 6.8554  | 6.8276  | 6.6785  | 0.7446  | -0.4255 | 0.0849 | 0.1713 |
| Rundc3a | _SNEC[Carbamidomethyl (C)]LVSDSPESGSPALS[Phospho (STY)]PS_2                                  | O08576_5444_M1_Rundc3a | 7.5305  | 7.8828  | 3.2417  | 8.7040  | 6.2881  | 3.9139  | 7.3157  | 8.3655  | 8.7186  | 3.8793  | 0.8855  | -0.1755 | 0.5878 | 0.2308 |
| Emd     | _DQIFSS[Phospho (STY)]LEEGKDR_2                                                              | O08579_5142_M1_Emd     | 3.9538  | 3.2723  | 3.1398  | 3.6425  | 3.1606  | 3.4640  | 3.3571  | 4.1246  | 3.6095  | 0.9779  | -0.0323 | 0.7636  | 0.1721 | 0.9859 |
| Kcnk1   | _QSEPFVASGSP[Phospho (STY)]EDGSADH_2                                                         | O08581_Y329_M1_Kcnk1   | 7.0680  | 7.0991  | 3.7294  | 7.1916  | 3.3216  | 3.6914  | 9.3649  | 8.1576  | 7.5011  | 7.1388  | 0.6654  | -0.5877 | 0.0354 | 1.4506 |
| Gtpb1   | _LVLS[Phospho (STY)]PTSEQYDLSLR_2                                                            | O08582_560_M1_Gtpb1    | 3.8854  | 4.7742  | 5.1188  | 5.6295  | 3.5439  | 3.3955  | 4.6643  | 5.3747  | 4.1931  | 5.0506  | 0.9109  | -0.1346 | 0.4224 | 0.3743 |
| Gtpb1   | _SRS[Phospho (STY)]PVDSPVPASM[Oxidation (M)]IAPEPSS[Phospho (STY)]PGAAR_3                    | O08582_525_M2_Gtpb1    | 3.3344  | 4.1396  | 4.0212  | 3.9811  | 3.9609  | 3.7686  | 4.1294  | 3.2020  | 3.3191  | 3.6584  | 1.0951  | 0.1311  | 0.1970 | 0.7056 |
| Gtpb1   | _SPVDSPVPASM[Oxidation (M)]IAPEPSS[Phospho (STY)]PGAAR_3                                     | O08582_525_M1_Gtpb1    | 3.6988  | 3.0032  | 4.3856  | 6.8819  | 2.8245  | 3.4041  | 3.1021  | 4.3796  | 3.3544  | 1.1469  | 0.1977  | 0.5367  | 0.2702 | 0.9859 |
| Gtpb1   | _LQTTNNS[Phospho (STY)]PMNSKPQIK_3                                                           | O08582_5580_M1_Gtpb1   | 3.0510  | 3.8561  | 3.2199  | 5.9579  | 3.6775  | 4.0520  | 4.4128  | 4.2375  | 3.0357  | 3.9418  | 1.0159  | 0.0228  | 0.9182 | 0.0371 |
| Alyref  | _QQLS[Phospho (STY)]AEELDAQLDAYNAR_2                                                         | #N/A                   | 4.1813  | 5.7988  | 5.2103  | 5.2698  | 5.8350  | 5.3477  | 6.0758  | 5.7337  | 5.9836  | 0.9483  | -0.0766 | 0.5117  | 0.2309 | 0.9859 |
| Cita    | _LQS[Phospho (STY)]EPESIR_2                                                                  | #N/A                   | 9.3605  | 9.2549  | 9.2286  | 9.8387  | 9.5132  | 9.4256  | 9.4398  | 9.0512  | 9.2417  | 9.4188  | 1.0160  | 0.0230  | 0.3005 | 0.5221 |
| Cita    | _LEALDANSR_2                                                                                 | #N/A                   | 9.9447  | 10.2029 | 10.3305 | 10.3556 | 10.6648 | 10.1297 | 9.9802  | 9.9481  | 10.0840 | 10.1405 | 1.0232  | 0.0331  | 0.1090 | 0.9626 |
| Cita    | _ELEEWYAR_2                                                                                  | #N/A                   | 8.8376  | 8.1691  | 8.9036  | 8.7535  | 9.0396  | 8.8461  | 8.0573  | 8.5227  | 8.7492  | 8.8846  | 1.0239  | 0.0341  | 0.3605 | 0.4431 |
| Cita    | _VADEAPYK_2                                                                                  | #N/A                   | 6.7885  | 6.5498  | 7.0333  | 6.8769  | 7.5461  | 7.0984  | 5.5334  | 7.0481  | 7.3862  | 7.4405  | 1.0190  | 0.0271  | 0.7497 | 0.1251 |
| Cita    | _LC[Carbamidomethyl (C)]DFNPK_2                                                              | #N/A                   | 6.1685  | 7.2260  | 6.7446  | 7.1218  | 7.3649  | 6.3893  | 6.1320  | 6.5109  | 6.9144  | 6.3736  | 1.0545  | 0.0765  | 0.2404 | 0.6190 |
| Cita    | _KQAEAWK_2                                                                                   | #N/A                   | 6.6285  | 5.5769  | 6.2757  | 5.9518  | 6.9023  | 6.3026  | 6.2115  | 5.5962  | 6.0103  | 6.5313  | 1.0305  | 0.0433  | 0.5344 | 0.7721 |
| Cita    | _QDQCLQK_2                                                                                   | #N/A                   | 4.7862  | 4.3689  | 5.2548  | 5.7701  | 6.2129  | 5.3917  | 4.4229  | 5.4810  | 5.5986  | 5.2058  | 1.0232  | 0.0332  | 0.7698 | 0.1136 |
| Cita    | _WREEQTER_2                                                                                  | #N/A                   | 5.2076  | 5.5707  | 4.0579  | 5.4808  | 5.8836  | 5.6952  | 4.7374  | 5.2715  | 4.8332  | 5.4722  | 1.0467  | 0.0659  | 0.5308 | 0.2751 |
| Cita    | _AKKEEWYAR_2                                                                                 | #N/A                   | 4.2166  | 6.9237  | 7.4244  | 6.4333  | 6.4140  | 6.8717  | 6.5178  | 2.3349  | 6.0754  | 6.0045  | 1.2193  | 0.2860  | 0.2659 | 0.5754 |
| Cita    | _LQS[Phospho (STY)]EPESIR_2                                                                  | #N/A                   | 9.9846  | 10.0950 | 10.4332 | 10.6195 | 10.3576 | 10.2516 | 10.2029 | 10.0469 | 10.1850 | 10.3584 | 1.0090  | 0.0130  | 0.4933 | 0.3068 |
| Pten    | _NNDDVVR_2                                                                                   | #N/A                   | 3.9025  | 4.7789  | 3.2716  | 5.3279  | 4.5027  | 4.1037  | 4.9486  | 4.4143  | 4.9477  | 4.7160  | 0.9071  | -0.1407 | 0.2782 | 0.5557 |
| Pten    | _VENGS[Phospho (STY)]LC[Carbamidomethyl (C)]DQEIOSC[Carbamidomethyl (C)]SIER_2               | O08586_5294_M1_Pten    | 3.1762  | 3.9324  | 4.4107  | 3.9544  | 3.8207  |         |         |         |         |         |         |         |        |        |



|          |                                                                       |                       |        |         |         |         |         |         |         |         |         |         |        |         |        |        |
|----------|-----------------------------------------------------------------------|-----------------------|--------|---------|---------|---------|---------|---------|---------|---------|---------|---------|--------|---------|--------|--------|
| Stxbp1   | _SKDFSSK_2                                                            | #N/A                  | 6.3178 | 5.9108  | 6.7027  | 6.0041  | 6.4044  | 6.2995  | 5.5816  | 6.4198  | 6.1080  | 6.1398  | 1.0348 | 0.0493  | 0.3245 | 0.4888 |
| Stxbp1   | _LAEQIATLC[Carbamidomethyl (C)]ATLK_2                                 | #N/A                  | 5.9238 | 6.2474  | 5.7393  | 5.3490  | 5.5168  | 5.5288  | 5.8709  | 6.0395  | 6.3097  | 5.9572  | 0.9459 | -0.0802 | 0.1121 | 0.9504 |
| Stxbp1   | _DNALAQKQDKLDAYK_2                                                    | #N/A                  | 5.8607 | 6.1756  | 5.4457  | 6.3430  | 5.1233  | 6.1537  | 5.9839  | 6.0277  | 6.1589  | 5.4698  | 0.9899 | -0.0147 | 0.8310 | 0.0804 |
| Stxbp1   | _AAHVFTDSC[Carbamidomethyl (C)]POLFNLWLK_3                            | #N/A                  | 7.0601 | 7.1131  | 7.6118  | 7.5679  | 6.7780  | 7.2723  | 7.2523  | 7.5450  | 7.4682  | 7.3052  | 0.9785 | -0.0313 | 0.3815 | 0.4185 |
| Stxbp1   | _HYGGTVDK_2                                                           | #N/A                  | 5.3538 | 4.3109  | 4.0609  | 4.7940  | 5.6533  | 5.3184  | 4.6217  | 4.5436  | 4.7737  | 5.0786  | 1.0338 | 0.0480  | 0.6457 | 0.1899 |
| Stxbp1   | _VLVVQGLSM[Oxidation (M)]R_2                                          | #N/A                  | 9.4705 | 9.7145  | 10.1236 | 9.4526  | 8.8930  | 9.5410  | 9.8011  | 9.7201  | 9.6029  | 9.4678  | 0.9880 | -0.0174 | 0.6014 | 0.2208 |
| Stxbp1   | _REPLSLEAVYLTPSEK_3                                                   | #N/A                  | 7.1029 | 6.8109  | 7.5521  | 7.3819  | 6.6565  | 7.0512  | 7.5177  | 7.5082  | 7.6154  | 7.3148  | 0.9471 | -0.0785 | 0.0574 | 1.2408 |
| Stxbp1   | _VEQDLAM[Oxidation (M)]GTDAEAGEK_2                                    | #N/A                  | 7.9359 | 7.7703  | 7.9595  | 7.9993  | 7.8625  | 7.9274  | 8.2940  | 8.1525  | 8.1274  | 8.1053  | 0.9681 | -0.0468 | 0.0012 | 2.9097 |
| Stxbp1   | _SVHSLSDFKDPPTAK_3                                                    | #N/A                  | 8.6660 | 8.7800  | 9.0882  | 8.7234  | 8.4647  | 8.6917  | 9.0221  | 8.7352  | 8.7886  | 8.5581  | 0.9954 | -0.0066 | 0.7614 | 0.1184 |
| Stxbp1   | _M[Oxidation (M)]SSG[Carbamidomethyl (C)]C[Carbamidomethyl (C)]K_2    | #N/A                  | 5.5019 | 4.4771  | 4.6507  | 5.6070  | 5.9818  | 4.5621  | 4.6591  | 4.4551  | 4.7469  | 4.5396  | 1.1152 | 0.1573  | 0.1494 | 0.8257 |
| Stxbp1   | _DFSSSK_2                                                             | #N/A                  | 6.2485 | 5.7681  | 4.5471  | 5.0331  | 3.9571  | 5.0493  | 4.3785  | 5.4699  | 3.2094  | 5.7689  | 1.0837 | 0.1160  | 0.5447 | 0.2639 |
| Stxbp1   | _KM[Oxidation (M)]PQVQK_2                                             | #N/A                  | 6.2751 | 4.9485  | 3.8131  | 6.7125  | 6.1029  | 5.7030  | 5.3704  | 5.8898  | 5.0303  | 5.2736  | 1.0374 | 0.0529  | 0.7271 | 0.1384 |
| Stxbp1   | _M[Oxidation (M)]HDVWK_2                                              | #N/A                  | 6.0710 | 5.9041  | 5.6048  | 6.1794  | 6.1169  | 5.8599  | 5.7509  | 6.1657  | 6.1635  | 5.5348  | 1.0089 | 0.0127  | 0.7588 | 0.1199 |
| Stxbp1   | _C[Carbamidomethyl (C)]AYEVTQANGK_2                                   | #N/A                  | 5.4517 | 5.3614  | 4.4159  | 5.0994  | 3.8260  | 5.3713  | 5.4015  | 5.5346  | 3.3405  | 5.5314  | 0.9937 | -0.0091 | 0.9557 | 0.0197 |
| Stxbp1   | _M[Oxidation (M)]TDM[Oxidation (M)]TEGTTVEDINKR_3                     | #N/A                  | 7.1683 | 7.3890  | 8.4485  | 7.5603  | 6.5623  | 7.5834  | 7.3403  | 7.5716  | 7.5886  | 7.1846  | 1.0041 | 0.0060  | 0.9268 | 0.0330 |
| Stxbp1   | _WEVLGSHILTPQK_2                                                      | #N/A                  | 6.8718 | 6.4026  | 6.6742  | 6.5566  | 5.8754  | 6.4579  | 6.9193  | 6.4828  | 6.7250  | 6.7551  | 0.9632 | -0.0541 | 0.2206 | 0.6565 |
| Stxbp1   | _M[Oxidation (M)]TDM[Oxidation (M)]TEGTTVEDINK_2                      | #N/A                  | 6.1010 | 5.7670  | 6.4564  | 6.2382  | 5.5849  | 6.3545  | 6.1199  | 5.8346  | 5.8173  | 5.9954  | 1.0239 | 0.0340  | 0.4619 | 0.3355 |
| Stxbp1   | _DIM[Oxidation (M)]EETEDKLDTK_2                                       | #N/A                  | 7.6600 | 7.4626  | 7.6731  | 7.6210  | 7.1745  | 7.4147  | 7.8809  | 7.2468  | 7.4337  | 7.6935  | 0.9917 | -0.0120 | 0.6823 | 0.1660 |
| Stxbp1   | _DIMEDTIEDK_2                                                         | #N/A                  | 5.6890 | 3.4381  | 3.3197  | 6.4496  | 5.7159  | 2.9692  | 3.3300  | 3.8194  | 4.1185  | 4.3599  | 1.1766 | 0.2346  | 0.4099 | 0.3873 |
| Stxbp1   | _YSTHLHAEQC[Carbamidomethyl (C)]M[Oxidation (M)]K_3                   | #N/A                  | 4.2700 | 4.7669  | 4.0108  | 5.0584  | 4.8927  | 4.6076  | 3.8162  | 5.4037  | 4.7756  | 3.7781  | 1.0355 | 0.0503  | 0.6824 | 0.1660 |
| Stxbp1   | _LQHQAIPDESEITNAHLGVVPTDSTLR_4                                        | #N/A                  | 4.1003 | 3.4758  | 4.2406  | 4.8697  | 2.7848  | 5.1891  | 3.5181  | 3.8035  | 3.9445  | 3.3449  | 1.1252 | 0.1702  | 0.3534 | 0.4517 |
| Stxbp1   | _VEGDIAAGTDAEAGEKKQPMK_3                                              | #N/A                  | 1.4262 | 3.3399  | 3.7362  | 4.2439  | 3.1462  | 3.4784  | 3.4282  | 3.7212  | 4.0203  | 2.9572  | 0.9141 | -0.1295 | 0.5773 | 0.2386 |
| Stxbp1   | _GFDPSPVHLHFTQAM[Oxidation (M)]STDLPIENDVYK_3                         | #N/A                  | 3.1067 | 0.6207  | 4.3413  | 3.8550  | 4.0570  | 3.6725  | 4.0333  | 3.1161  | 3.4152  | 3.5623  | 0.9289 | -0.1064 | 0.7341 | 0.1342 |
| Stxbp1   | _LDAYKADDPTEGEGPOK_2                                                  | #N/A                  | 2.9125 | 3.7177  | 3.3584  | 4.4030  | 3.5390  | 4.1905  | 4.5513  | 4.0990  | 4.3980  | 4.0803  | 0.8610 | -0.2160 | 0.0773 | 0.1119 |
| Stxbp1   | _DLS[Phospho (STY)]QMLUK_2                                            | O08599_5328_M1_Stxbp1 | 3.7302 | 3.0346  | 4.4170  | 3.5853  | 2.8559  | 3.3728  | 3.7336  | 3.1988  | 3.7149  | 3.3858  | 0.9974 | -0.0037 | 0.9770 | 0.1011 |
| Myh11    | _VIENTGS[Phospho (STY)]EEM[Oxidation (M)]DAR_2                        | #N/A                  | 8.4610 | 8.2473  | 8.6405  | 8.4578  | 3.8615  | 4.0737  | 8.5669  | 8.9119  | 3.2754  | 8.2220  | 0.9604 | -0.0583 | 0.8606 | 0.0652 |
| Ephb6    | _GTGYTEQLQVSS[Phospho (STY)]PGLGVK_2                                  | O08644_5630_M1_Ephb6  | 3.2210 | 4.6137  | 5.0517  | 4.2775  | 3.4997  | 4.0990  | 4.7260  | 3.8413  | 4.6164  | 4.5737  | 0.9297 | -0.1052 | 0.4387 | 0.0578 |
| Map3k4   | _ELSGTES[Phospho (STY)]DEEPTPSR_2                                     | O08648_5454_M1_Map3k4 | 3.4299 | 5.7482  | 4.4467  | 5.8155  | 5.2763  | 5.3471  | 6.5745  | 5.8153  | 5.9095  | 5.5616  | 0.8400 | -0.2516 | 0.0913 | 1.0396 |
| Map3k4   | _LES[Phospho (STY)]EEDSGWGTDQC[Carbamidomethyl (C)]GPEASR_2           | O08648_5492_M1_Map3k4 | 4.2521 | 2.9740  | 3.4381  | 5.0065  | 3.3778  | 3.6742  | 3.6554  | 4.1777  | 3.8263  | 4.1770  | 0.9566 | -0.0641 | 0.6683 | 0.1750 |
| Kilc2    | _AGVAS[Phospho (STY)]PVQR_2                                           | O08672_5643_M1_Kilc2  | 7.9782 | 7.9027  | 8.3076  | 7.5990  | 6.6223  | 7.2525  | 8.2333  | 8.0838  | 7.6072  | 7.7249  | 0.9618 | -0.0561 | 0.3849 | 0.4746 |
| Prdx6    | _LSLVPATGR_2                                                          | #N/A                  | 9.8007 | 10.2212 | 10.4229 | 10.3237 | 10.3009 | 10.1052 | 10.1006 | 10.0873 | 10.0539 | 10.0095 | 0.9136 | 0.0136  | 0.4262 | 0.3103 |
| Prdx6    | _LPPIDDK_2                                                            | #N/A                  | 8.5375 | 8.7174  | 8.1480  | 9.0079  | 9.1299  | 8.2124  | 8.5724  | 8.6940  | 8.6168  | 8.5629  | 1.0057 | 0.0082  | 0.8033 | 0.0951 |
| Prdx6    | _VVFPGDKK_2                                                           | #N/A                  | 8.0654 | 8.6110  | 8.6381  | 8.8932  | 8.6684  | 8.3215  | 8.3712  | 8.5359  | 8.3801  | 8.5328  | 1.0092 | 0.0132  | 0.6258 | 0.2036 |
| Prdx6    | _DINANGETPEK_2                                                        | #N/A                  | 7.9732 | 8.1144  | 7.8011  | 8.3685  | 8.6747  | 8.0618  | 7.8663  | 7.7968  | 8.0321  | 8.1506  | 1.0256 | 0.0365  | 0.2664 | 0.5745 |
| Prdx6    | _VVDSILQITGKPVATPVQWK_3                                               | #N/A                  | 6.5019 | 6.4124  | 6.9053  | 6.8114  | 6.8704  | 6.6295  | 5.9975  | 6.3190  | 6.6552  | 6.5281  | 1.0492 | 0.0693  | 0.0767 | 1.1154 |
| Prdx6    | _DLAILLGM[Oxidation (M)]LDPVK_2                                       | #N/A                  | 6.6637 | 6.9359  | 6.1755  | 5.9234  | 7.4346  | 6.5027  | 7.0959  | 6.8802  | 6.8777  | 7.4795  | 0.9326 | -0.1007 | 0.1475 | 0.8313 |
| Prdx6    | _NFDELR_2                                                             | #N/A                  | 6.1885 | 6.2235  | 7.0166  | 6.7586  | 7.0307  | 5.8936  | 4.5404  | 7.1442  | 6.4689  | 6.3171  | 1.0655 | 0.0916  | 0.4485 | 0.3482 |
| Prdx6    | _DFTPVIC[Carbamidomethyl (C)]TTELGR_2                                 | #N/A                  | 7.5724 | 7.0853  | 7.2427  | 8.0711  | 7.8639  | 6.6436  | 8.0451  | 7.2417  | 7.0284  | 7.1689  | 1.0057 | 0.0082  | 0.8998 | 0.4558 |
| Prdx6    | _PGLLLGGEAPNFANTTGR_2                                                 | #N/A                  | 5.9287 | 5.9007  | 6.2718  | 6.3157  | 6.4360  | 6.0663  | 5.7913  | 5.6181  | 5.9419  | 1.2838  | 0.1160 | 0.0130  | 1.8852 | 0.0482 |
| Prdx6    | _VVFIFGDKK_2                                                          | #N/A                  | 5.5337 | 5.2776  | 5.7841  | 5.9339  | 5.8632  | 6.0819  | 4.9494  | 5.0315  | 5.4457  | 5.7051  | 1.0876 | 0.1212  | 0.0539 | 1.2682 |
| Prdx6    | _LIALSIOVEDHLAWSK_2                                                   | #N/A                  | 4.2373 | 4.6286  | 4.1354  | 5.6053  | 4.6500  | 4.2609  | 4.5041  | 5.0843  | 4.5677  | 5.5546  | 0.9307 | -0.1036 | 0.3428 | 0.4649 |
| Prdx6    | _KGESVM[Oxidation (M)]VVPTLSEEA_3                                     | #N/A                  | 6.9873 | 6.9431  | 7.3552  | 7.3997  | 7.2466  | 6.8377  | 6.5220  | 7.1462  | 7.0554  | 7.1276  | 1.0238 | 0.0339  | 0.3532 | 0.0533 |
| Prdx6    | _LPPIDDKGR_2                                                          | #N/A                  | 6.5260 | 6.7858  | 7.4187  | 7.0950  | 7.0843  | 7.0583  | 6.9327  | 6.9301  | 6.7670  | 7.0303  | 1.0115 | 0.0165  | 0.6352 | 0.1971 |
| Prdx6    | _FHDPLGDSWGILFSHPR_3                                                  | #N/A                  | 3.0458 | 4.1803  | 3.7326  | 4.2353  | 3.6724  | 4.0571  | 3.9500  | 3.8832  | 3.5318  | 4.2023  | 0.9817 | -0.0266 | 0.7845 | 0.1054 |
| Akap1    | _RRS[Phospho (STY)]ESSGNLPSVADTR_3                                    | #N/A                  | 8.7867 | 8.3869  | 9.1896  | 8.8508  | 8.0015  | 8.4784  | 8.2756  | 8.4586  | 8.6698  | 8.3300  | 1.2078 | 0.2723  | 0.2064 | 0.6852 |
| Akap1    | _S[Phospho (STY)]ESSGNLPSVADTR_2                                      | #N/A                  | 7.4203 | 4.3734  | 3.5396  | 4.0422  | 3.4793  | 4.2502  | 3.7569  | 4.0762  | 3.7248  | 4.0092  | 1.1608 | 0.0251  | 0.4298 | 0.0615 |
| Dld      | _NETLGGTC[Carbamidomethyl (C)]NVC[Carbamidomethyl (C)]IPS_2           | #N/A                  | 8.3498 | 8.5803  | 8.5553  | 8.7122  | 8.5432  | 8.3959  | 8.5777  | 8.2281  | 8.3156  | 8.6882  | 1.0083 | 0.0120  | 0.5358 | 0.2710 |
| Dld      | _GIEPEVR_2                                                            | #N/A                  | 8.5495 | 7.8440  | 7.8491  | 7.6707  | 8.1629  | 7.5508  | 8.0648  | 8.7854  | 8.3179  | 0.9875  | 0.0875 | -0.0182 | 0.7812 | 0.1072 |
| Dld      | _IPNIYAIGDVAGPM[Oxidation (M)]LAHK_3                                  | #N/A                  | 6.8664 | 7.2204  | 6.8017  | 7.1360  | 6.9609  | 7.1825  | 6.2688  | 7.4583  | 7.2645  | 7.0224  | 1.0035 | 0.0050  | 0.9159 | 0.0381 |
| Dld      | _ADGSTQVDTK_2                                                         | #N/A                  | 7.6181 | 7.8030  | 7.6445  | 7.8800  | 7.9411  | 7.7255  | 7.4556  | 7.7037  | 7.8530  | 0.9234  | 1.0164 | 0.0234  | 0.2233 | 0.6511 |
| Dld      | _EANLAARQKPIK_2                                                       | #N/A                  | 7.1817 | 7.2688  | 7.4251  | 7.4931  | 7.5439  | 7.6158  | 7.4756  | 7.3033  | 7.4042  | 7.4282  | 1.0025 | 0.0036  | 0.8411 | 0.0752 |
| Dld      | _IDVSEAAASGGK_2                                                       | #N/A                  | 5.4830 | 5.9876  | 5.0356  | 6.5069  | 6.0536  | 4.1759  | 4.5366  | 5.9363  | 6.0408  | 5.9058  | 0.9885 | -0.0167 | 0.9031 | 0.0443 |
| Dld      | _VC[Carbamidomethyl (C)]HAHPTLSEAFR_3                                 | #N/A                  | 6.7515 | 5.4649  | 6.7659  | 7.2852  | 7.0639  | 6.8053  | 6.9107  | 6.4390  | 6.5689  | 6.5879  | 1.0095 | 0.0136  | 0.8555 | 0.0678 |
| Dld      | _ALTGGAHLK_2                                                          | #N/A                  | 3.9073 | 3.3189  | 4.5941  | 1.9133  | 2.1693  | 3.1957  | 3.3106  | 3.0217  | 4.1712  | 2.4903  | 0.9799 | -0.0293 | 0.9144 | 0.0389 |
| Dld      | _SEQLKEEGEPK_2                                                        | #N/A                  | 5.9982 | 5.3385  | 5.7547  | 6.2474  | 5.6002  | 5.9258  | 5.5656  | 5.7909  | 5.4914  | 5.8343  | 1.0241 | 0.0344  | 0.4596 | 0.3377 |
| Dld      | _RPTFNQLGLEELDLPK_3                                                   | #N/A                  | 3.0879 | 4.2545  | 4.3234  | 3.5734  | 3.7164  | 3.6537  | 4.0145  | 4.4684  | 3.4340  | 3.5435  | 0.9749 | -0.0367 | 0.7552 | 0.1230 |
| Dld      | _LGADVTAVERLGHNGGGIDM[Oxidation (M)]ESK_3                             | #N/A                  | 3.6920 | 2.9964  | 4.3788  | 3.3806  | 2.8177  | 5.5070  | 3.7717  | 3.2370  | 4.3864  | 3.3476  | 1.0298 | 0.0423  | 0.8475 | 0.0719 |
| Dld      | _AEVITC[Carbamidomethyl (C)]DVLVC[Carbamidomethyl (C)]GR_2            | #N/A                  | 4.1496 | 3.1928  | 3.8833  | 3.4271  | 3.2934  | 3.3332  | 3.5754  | 3.5741  | 3.8731  | 3.1044  | 1.0041 | 0.0059  | 0.9516 | 0.0215 |
| Dld      | _VLGAHLGPGAGEM[Oxidation (M)]VNEAALAEYGASG[Carbamidomethyl (C)]EDAR_3 | #N/A                  | 3.4091 | 4.1654  | 3.1428  | 4.2502  | 4.0537  | 4.0717  | 3.9649  | 3.8683  | 3.5168  | 3.8647  | 1.0119 | 0.0170  | 0.8589 | 0.0661 |
| Hsd17b10 | _NLASQVPPFSR_2                                                        | #N/A                  | 7.0426 | 7.2074  | 6.7288  | 7.4791  | 6.8867  | 7.2071  | 7.1410  | 6.9425  | 7.2442  | 7.0474  | 0.9997 | -0.0004 | 0.9903 | 0.0042 |
| Hsd17b10 | _VVIAPGLFATPLTLTPEK_2                                                 | #N/A                  | 5.5818 | 5.3289  | 6.0629  | 5.2994  | 4.8945  | 5.5358  | 5.2934  | 4.6606  | 5.3255  | 5.1788  | 1.0657 | 0.0358  | 1.1854 | 0.7318 |
| Hsd17b10 | _LVAGEM[Oxidation (M)]GQNEPQGGQR_2                                    | #N/A                  | 5.9333 | 5.6568  | 5.9835  | 6.9134  | 5.3679  | 5.8504  | 5.6783  | 5.8033  | 5.6079  | 5.6525  | 1.0467 | 0.0658  | 0.3521 | 0.4533 |
| Hsd17b10 | _GVINTASVAARFEGVGQAAYSASK_3                                           | #N/A                  | 3.0611 | 3.3144  | 3.1811  | 4.2119  | 1.9566  | 4.0334  | 3.4811  | 1.5531  | 3.2607  | 4.1892  | 1.0551 | 0.0874  | 0.7828 | 0.1064 |
| Ube3a    | _S[Phospho (STY)]GESGQDEHAR_2                                         | O08759_S8_M1_U        |        |         |         |         |         |         |         |         |         |         |        |         |        |        |



|         |                                                                                  |                        |        |         |         |         |         |         |         |        |         |         |         |         |        |        |
|---------|----------------------------------------------------------------------------------|------------------------|--------|---------|---------|---------|---------|---------|---------|--------|---------|---------|---------|---------|--------|--------|
| Dctn1   | _LNQLSTHTHVVDfTR_3                                                               | #N/A                   | 3.5752 | 4.3804  | 4.1965  | 3.7403  | 4.2017  | 3.5278  | 3.8886  | 3.2609 | 3.5599  | 3.4176  | 1.1147  | 0.1567  | 0.0959 | 1.0183 |
| Dctn1   | _VTFS[Carbamidomethyl (C)]AAGLGQR_2                                              | #N/A                   | 3.8321 | 3.5104  | 3.5657  | 4.6103  | 2.9758  | 3.6488  | 3.2578  | 3.8917 | 4.1907  | 4.2876  | 0.9446  | -0.0822 | 0.5287 | 0.2768 |
| Dctn1   | _VEAQETVADYQOTIK_2                                                               | #N/A                   | 3.2760 | 4.0812  | 3.9628  | 4.4654  | 3.8270  | 4.1801  | 3.6530  | 3.3016 | 4.4324  | 1.0070  | 0.0101  | 0.9252  | 0.0338 |        |
| Pkcsb   | _SLEDQVETLR_2                                                                    | #N/A                   | 6.7264 | 5.9328  | 6.1032  | 6.3042  | 6.5415  | 6.2089  | 6.0361  | 5.4469 | 5.8960  | 6.4533  | 1.0579  | 0.0812  | 0.1575 | 0.8026 |
| Pkcsb   | _YEGGTGC[Carbamidomethyl (C)]WGGPNR_2                                            | #N/A                   | 5.3838 | 5.9918  | 3.3802  | 6.5930  | 6.0636  | 5.8399  | 6.6600  | 4.2356 | 6.1794  | 5.5312  | 0.9806  | -0.2082 | 0.8812 | 0.0549 |
| Eef2k   | _RHE[Phospho (STY)]DEDS[Phospho (STY)]GSSGR_2                                    | O08796_S469_M2_Eef2k   | 3.6984 | 3.5278  | 4.3852  | 3.3870  | 2.6479  | 3.2085  | 3.1017  | 3.2307 | 4.3801  | 1.7386  | 1.1166  | 0.1591  | 0.5033 | 0.2982 |
| Aip     | _VES[Phospho (STY)]PTGYQGPWAMTDEK_2                                              | O08915_S159_M1_Aip     | 3.4540 | 3.7721  | 4.1408  | 5.0078  | 3.6604  | 2.9642  | 4.3582  | 3.4750 | 3.1236  | 3.1096  | 1.0900  | 0.1244  | 0.4756 | 0.3227 |
| Flot1   | _VTGEVLDSL_R_2                                                                   | #N/A                   | 5.0585 | 5.6465  | 5.5429  | 5.6871  | 5.1358  | 5.3699  | 5.5046  | 5.2611 | 5.2900  | 1.0120  | 0.1020  | 0.6613  | 0.1796 |        |
| Flot1   | _DHDDDDYHSLGK_3                                                                  | #N/A                   | 5.9827 | 4.2240  | 3.6941  | 5.4973  | 4.8922  | 5.1769  | 3.9281  | 4.3923 | 4.9445  | 5.6877  | 1.0436  | 0.0615  | 0.7067 | 0.1508 |
| Flot1   | _VASSDLVNM[Oxidation (M)]GVVSYTLK_2                                              | #N/A                   | 3.9157 | 5.7275  | 6.2212  | 3.1932  | 3.0595  | 6.1303  | 5.8341  | 6.0794 | 5.6119  | 7.2282  | 0.7661  | -0.3843 | 0.1184 | 0.9266 |
| Flot1   | _S[Phospho (STY)]PPVMVAGGR_2                                                     | O08917_S19_M1_Flot1    | 6.0081 | 4.2774  | 3.2549  | 6.5692  | 4.1657  | 3.9597  | 3.8529  | 4.9365 | 3.0008  | 3.9767  | 1.1939  | 0.2556  | 0.3249 | 0.4883 |
| Flot1   | _TLVVSGSTM[Oxidation (M)]GAAK_2                                                  | #N/A                   | 3.9390 | 3.2434  | 3.1250  | 3.3765  | 5.9691  | 3.1639  | 3.5247  | 3.6247 | 3.9238  | 3.0537  | 1.0768  | 0.1067  | 0.6528 | 0.1852 |
| Numbl   | _RTPS[Phospho (STY)]EAE_R_2                                                      | #N/A                   | 7.6336 | 7.9992  | 7.9536  | 4.2226  | 6.2373  | 4.0365  | 7.7368  | 7.7001 | 3.0776  | 3.8999  | 1.1327  | 0.1798  | 0.5972 | 0.2239 |
| Numbl   | _AEAAAAPAVAPGAPGHVS[Phospho (STY)]PGEKGAGTPVAAGTTAAAIR_P4                        | #N/A                   | 4.9717 | 3.2540  | 3.7958  | 7.9931  | 2.9816  | 3.5470  | 3.5030  | 8.6710 | 3.9916  | 3.8170  | 0.8855  | -0.1754 | 0.6864 | 0.1634 |
| Numbl   | _SVLWVSADGLR_2                                                                   | #N/A                   | 5.7926 | 5.9541  | 4.4348  | 5.5661  | 5.5895  | 5.2144  | 5.0916  | 5.1718 | 4.3305  | 6.0428  | 1.0245  | 0.0349  | 0.7590 | 0.1198 |
| Numbl   | _KAEAAAAPAVAPGAPGHVS[Phospho (STY)]PT[Phospho (STY)]PATTSPGEK_4                  | #N/A                   | 4.1875 | 3.2425  | 3.6709  | 3.6869  | 3.3222  | 6.3237  | 3.6020  | 3.9291 | 3.8632  | 3.5378  | 1.0909  | 0.1255  | 0.5830 | 0.2343 |
| Numbl   | _KAEAAAAPAVAPGAPGHVS[Phospho (STY)]PT[Phospho (STY)]PATTSPGEKGAGTPVAAGTTAAAIR_P4 | #N/A                   | 3.1629 | 4.7352  | 3.8497  | 4.3524  | 3.7894  | 3.9401  | 4.0671  | 3.7661 | 3.4147  | 4.3194  | 1.0205  | 0.0293  | 0.8055 | 0.0939 |
| Numbl   | _TPS[Phospho (STY)]EAE_R_2                                                       | #N/A                   | 5.4254 | 3.8308  | 4.0822  | 4.5848  | 3.7191  | 4.4064  | 4.6068  | 3.1822 | 4.8611  | 1.0245  | 0.0350  | 0.8161  | 0.0893 |        |
| Numbl   | _EGS[Phospho (STY)]RILS[Phospho (STY)]GGGRPAER_3                                 | O08919_S224_M2_Numbl   | 3.8953 | 3.1997  | 4.5821  | 3.4201  | 3.0210  | 3.2076  | 3.5684  | 3.5810 | 3.8801  | 3.0974  | 1.0064  | 0.0092  | 0.9464 | 0.0239 |
| Sckbp   | _LAcetyl (Protein N-term)[SVPAS[Phospho (STY)]LDLVADK_2                          | O08992_S6_M1_Sckbp     | 4.1806 | 3.0456  | 3.3666  | 3.8692  | 2.9339  | 3.6907  | 7.9731  | 3.8978 | 3.8362  | 6.6125  | -0.7071 | 0.0182  | 0.1481 |        |
| Atox1   | _AVSYLQPK_2                                                                      | #N/A                   | 4.8830 | 5.0150  | 6.1068  | 4.1895  | 6.1390  | 5.1747  | 3.9400  | 4.7647 | 5.4291  | 4.8044  | 1.1162  | 0.1586  | 0.2812 | 0.5509 |
| Atox1   | _VC[Carbamidomethyl (C)]DSHSDTLATLNK_3                                           | #N/A                   | 3.6116 | 3.8041  | 3.8755  | 3.6487  | 3.6442  | 3.6868  | 4.1136  | 3.8158 | 3.4644  | 3.6157  | 0.9892  | -0.0157 | 0.7501 | 0.1249 |
| Sh2b3   | _S[Phospho (STY)]AGELGATSDTNDITTAASRPGPAR_3                                      | O09039_S129_M1_Sh2b3   | 3.9564 | 3.3860  | 3.6901  | 7.3997  | 3.2074  | 3.0213  | 3.3821  | 3.7673 | 4.0664  | 7.1126  | 0.8970  | -0.1568 | 0.6731 | 0.1719 |
| Snap23  | _ATWGGDGDNS[Phospho (STY)]PSNVVSK_2                                              | O09044_S110_M1_Snap23  | 9.4348 | 9.8206  | 10.3525 | 9.8870  | 8.9503  | 9.3631  | 3.1084  | 4.0745 | 9.8436  | 9.6480  | 1.4516  | 0.5376  | 0.0689 | 1.1618 |
| Pomb1   | _NM[Oxidation (M)]QNVEHVLTLDR_3                                                  | #N/A                   | 6.9459 | 6.9331  | 6.6985  | 6.0053  | 7.1040  | 7.2335  | 6.4832  | 6.8304 | 7.1967  | 6.8123  | 0.9984  | -0.0022 | 0.9674 | 0.0144 |
| Pomb1   | _GAVYSFDPVGSYQR_2                                                                | #N/A                   | 6.2956 | 6.1439  | 5.9547  | 5.8743  | 6.0449  | 5.8874  | 6.6232  | 6.3508 | 6.3498  | 6.3288  | 0.9408  | -0.0880 | 0.0053 | 2.2722 |
| Pomb1   | _AGGSASAM[Oxidation (M)]LQPLDNCQVGFK_2                                           | #N/A                   | 4.4640 | 4.7294  | 4.4843  | 4.0281  | 4.0478  | 4.5531  | 4.1763  | 4.7774 | 3.2722  | 4.4296  | 1.0530  | 0.0745  | 0.4729 | 0.3252 |
| Pomb1   | _DVTGQALR_2                                                                      | #N/A                   | 5.9812 | 6.5530  | 4.2030  | 5.8397  | 7.3649  | 6.9357  | 3.8950  | 6.7884 | 6.7369  | 6.0041  | 1.0495  | 0.0698  | 0.7196 | 0.1429 |
| Pomb1   | _DVSASAE_R_2                                                                     | #N/A                   | 2.9243 | 3.6806  | 4.2324  | 4.8493  | 4.8269  | 5.1063  | 4.4497  | 5.7952 | 5.7744  | 5.3524  | 0.7992  | -0.3234 | 0.0618 | 1.2090 |
| Pomb1   | _SSEFSSHTR_2                                                                     | #N/A                   | 4.0753 | 3.3307  | 4.5822  | 3.5840  | 3.2190  | 3.4056  | 3.2987  | 3.0336 | 4.1830  | 3.5510  | 1.0520  | 0.0731  | 0.5965 | 0.2244 |
| Hdac1   | _IAC[Carbamidomethyl (C)]EEFES[Phospho (STY)]DS[Phospho (STY)]DEEGGGRK_2         | #N/A                   | 5.1168 | 5.4948  | 4.4916  | 6.1738  | 5.3965  | 6.0706  | 6.0983  | 6.1145 | 6.0272  | 5.7968  | 0.9082  | -0.1390 | 0.1263 | 0.8896 |
| Hdac1   | _MLPHAGVQM[Oxidation (M)]QAIPEAPES[Phospho (STY)]GDEEDDPDKR_4                    | #N/A                   | 3.7706 | 3.4441  | 4.4574  | 8.0110  | 4.5426  | 3.4056  | 3.7647  | 3.1816 | 3.9050  | 3.4262  | 1.2902  | 0.3676  | 0.2812 | 0.5509 |
| Ndufb11 | _AVAPSQVEK_2                                                                     | #N/A                   | 7.9923 | 8.0243  | 8.1932  | 7.9818  | 8.2339  | 7.8995  | 7.7827  | 8.3128 | 8.1913  | 8.0627  | 0.9959  | -0.0059 | 0.7745 | 0.1110 |
| Ndufb11 | _QREFMTQWQDEPEDEDNYAK_3                                                          | #N/A                   | 2.7481 | 3.5560  | 3.4376  | 3.9402  | 3.3773  | 4.3522  | 3.2122  | 4.1783 | 3.8268  | 3.9072  | 0.9438  | -0.0835 | 0.5265 | 0.2786 |
| Pigd5   | _AQGLTEEDVLPQPK_2                                                                | #N/A                   | 6.9781 | 6.5269  | 6.2369  | 6.8425  | 6.8070  | 6.9624  | 6.4290  | 6.5783 | 6.2225  | 1.0488  | 0.0688  | 0.0837  | 1.0775 |        |
| Sema4d  | _SDFS[Phospho (STY)]DLEGSVK_2                                                    | O09126_S782_M1_Sema4d  | 6.7580 | 8.7585  | 3.4851  | 9.7000  | 8.4197  | 8.7606  | 9.2671  | 9.7402 | 9.3367  | 9.1857  | 0.8134  | -0.2979 | 0.1664 | 0.7787 |
| Rpl21   | _VYNVTQIHAVGVNK_2                                                                | #N/A                   | 3.7404 | 3.5691  | 4.7880  | 4.3348  | 3.4036  | 4.0687  | 3.6283  | 3.5451 | 3.3892  | 3.4810  | 1.1348  | 0.1824  | 0.1151 | 0.9390 |
| Gdm     | _TLNEWSQSQPOLVR_2                                                                | #N/A                   | 4.2580 | 4.0321  | 4.4601  | 7.5267  | 3.8620  | 4.4442  | 3.8411  | 6.7067 | 4.1568  | 4.2207  | 1.0609  | 0.0099  | 0.9713 | 0.0127 |
| Kf1c    | _LYADS[Phospho (STY)]S674_M2_Kf1c                                                | O35071_S674_M2_Kf1c    | 5.8731 | 5.4733  | 3.3186  | 6.0710  | 5.3016  | 5.3034  | 5.8066  | 5.6315 | 5.7930  | 5.4978  | 0.9193  | -0.2124 | 0.3907 | 0.4081 |
| Kf1c    | _RNS[Phospho (STY)]DGGSR_2                                                       | O35071_S1031_M1_Kf1c   | 4.3381 | 3.5935  | 4.0718  | 3.3212  | 3.4818  | 3.1428  | 4.5368  | 3.2964 | 2.9450  | 4.8353  | 0.9372  | -0.0936 | 0.5871 | 0.2313 |
| Dpys14  | _VVLGDNLVTPGAGR_2                                                                | #N/A                   | 8.0735 | 8.0023  | 8.4183  | 8.5549  | 8.1473  | 8.4079  | 8.0199  | 8.1185 | 8.0409  | 8.0559  | 1.0259  | 0.0369  | 0.1067 | 0.9719 |
| Dpys14  | _GVPTVVSQGR_2                                                                    | #N/A                   | 7.2188 | 7.1227  | 7.7806  | 7.7135  | 7.4816  | 7.2742  | 7.1660  | 7.0620 | 7.2241  | 7.2284  | 1.0365  | 0.0517  | 0.1025 | 0.9891 |
| Dpys14  | _QIGENLVPGGK_2                                                                   | #N/A                   | 6.3578 | 6.7142  | 6.1435  | 6.5043  | 6.8590  | 6.2148  | 6.3332  | 6.7994 | 6.6184  | 6.6080  | 0.9812  | -0.0274 | 0.4669 | 0.3307 |
| Dpys14  | _M[Oxidation (M)]DENEFVAVTSTNAAK_2                                               | #N/A                   | 9.8284 | 10.1281 | 10.6388 | 10.2939 | 10.2092 | 10.1874 | 10.0281 | 7.9571 | 10.3463 | 0.9519  | -0.0712 | 0.7484  | 0.1484 |        |
| Dpys14  | _QANC[Carbamidomethyl (C)]PLVYTK_2                                               | #N/A                   | 4.9901 | 5.1133  | 4.0421  | 3.9238  | 5.3385  | 4.5750  | 4.9970  | 4.4419 | 4.3600  | 4.8211  | 1.0019  | 0.0027  | 0.9788 | 0.0093 |
| Dpys14  | _VAVSGADLVVWNR_2                                                                 | #N/A                   | 6.4168 | 6.2864  | 4.0998  | 3.6436  | 6.7203  | 6.2513  | 6.4562  | 5.8964 | 6.5273  | 0.8927  | -0.1637 | 0.3609  | 0.4426 |        |
| Dpys14  | _DLGAVAQHAEVDVEEQKR_3                                                            | #N/A                   | 6.1365 | 5.8011  | 7.1801  | 4.1386  | 5.5645  | 5.5902  | 6.9241  | 3.9799 | 6.1210  | 6.1105  | 0.9916  | -0.0122 | 0.9468 | 0.0237 |
| Dpys14  | _TIDHGLM[Oxidation (M)]VLPGGVQVHTR_3                                             | #N/A                   | 5.2223 | 5.3807  | 6.3997  | 5.5657  | 6.0809  | 6.0442  | 6.0894  | 5.7850 | 6.0933  | 6.0600  | 0.9644  | -0.0524 | 0.4029 | 0.3948 |
| Dpys14  | _NIHQSGFSLSGS[Phospho (STY)]QADQDIAR_3                                           | O35098_S544_M2_Dpys14  | 3.7336 | 5.5520  | 5.9607  | 6.7390  | 4.4381  | 4.6866  | 4.0658  | 5.8961 | 3.4692  | 4.7678  | 1.1396  | 0.1886  | 0.3887 | 0.4104 |
| Dpys14  | _GAADMVAAQAK_2                                                                   | #N/A                   | 5.1665 | 3.6544  | 3.5360  | 4.9365  | 4.4650  | 4.2537  | 4.4942  | 4.0798 | 4.0357  | 1.0252  | 0.0360  | 0.7672  | 0.1151 |        |
| Dpys14  | _LAcetyl (Protein N-term)[S[Phospho (STY)]FGGKXS[Phospho (STY)]IPR_2             | O35098_S2_M2_Dpys14    | 3.8587 | 2.7532  | 4.4696  | 3.5474  | 2.7275  | 2.8188  | 3.2620  | 3.0703 | 4.2197  | 2.5301  | 1.0281  | 0.0400  | 0.8465 | 0.0724 |
| Dpys14  | _C[Carbamidomethyl (C)]QC[Carbamidomethyl (C)]TDGQVGFPSLR_2                      | #N/A                   | 2.2735 | 3.0609  | 3.3512  | 3.6935  | 2.9452  | 3.6754  | 3.5686  | 4.2646 | 3.9132  | 2.7911  | 0.8715  | -0.1984 | 0.2414 | 0.6172 |
| Dpys14  | _SHNLNVEMFEGVE[Carbamidomethyl (C)]IR_3                                          | #N/A                   | 3.3453 | 4.1016  | 4.5799  | 3.3639  | 4.4504  | 4.1355  | 4.2719  | 4.2763 | 3.1766  | 3.8009  | 1.0295  | 0.0420  | 0.7442 | 0.1283 |
| Map3k5  | _TLTGIPDENFEDHS[Phospho (STY)]APPSPEEK_3                                         | O35099_S1036_M1_Map3k5 | 3.8289 | 4.8339  | 3.6979  | 5.0455  | 3.4466  | 4.0221  | 4.3141  | 5.0614 | 4.6907  | 4.1676  | 0.9095  | -0.1369 | 0.2922 | 0.5343 |
| Atn1    | _TAS[Phospho (STY)]PRGPPQYSK_2                                                   | O35126_S617_M1_Atn1    | 9.2144 | 10.0105 | 4.0164  | 3.5601  | 2.8811  | 3.3476  | 3.7084  | 9.8190 | 9.9116  | 10.1643 | 0.6553  | -0.0908 | 0.1963 | 0.7071 |
| Atn1    | _RAS[Phospho (STY)]PG3DK_2                                                       | O35126_S630_M1_Atn1    | 3.7453 | 3.0008  | 3.4790  | 4.5236  | 6.5604  | 6.3995  | 3.6287  | 3.9784 | 4.2774  | 4.2009  | 1.1542  | 0.2069  | 0.4625 | 0.3349 |
| Atn1    | _SEES[Phospho (STY)]ESEEETSAKP_2                                                 | O35126_S77_M1_Atn1     | 4.9848 | 5.9505  | 5.5145  | 6.1104  | 5.1262  | 3.9933  | 5.6933  | 5.5707 | 5.5857  | 5.2786  | 0.9544  | -0.0673 | 0.5449 | 0.2636 |
| Atn1    | _GRAS[Phospho (STY)]PGGVSTSSGQAKK_3                                              | #N/A                   | 3.0754 | 4.2670  | 4.2380  | 3.8537  | 4.8378  | 3.6411  | 3.9340  | 4.3400 | 4.5924  | 3.5310  | 0.9722  | -0.0406 | 0.7598 | 0.1193 |
| Atn1    | _TEGLPRPQS[Phospho (STY)]PSDLSLQGR_3                                             | O35126_S101_M1_Atn1    | 2.9778 | 3.7830  | 3.6646  | 7.3552  | 5.8389  | 4.1252  | 4.4860  | 6.9763 | 6.1042  | 6.4869  | 0.7690  | -0.1790 | 0.1782 | 0.4490 |
| Atn1    | _TGT[Phospho (STY)]PPGYR_2                                                       | O35126_T654_M1_Atn1    | 5.7619 | 2.9809  | 3.4592  | 3.9339  | 2.8692  | 3.7554  | 3.6486  | 3.9983 | 3.8632  | 6.1838  | 0.8590  | -0.2192 | 0.4078 | 0.3896 |
| Atn1    | _GRAS[Phospho (STY)]PGGVSTSSGQK_2                                                | #N/A                   | 6.0970 | 3.8733  | 6.3157  | 6.3352  | 5.3985  | 5.9322  | 6.2165  | 5.8405 | 5.6611  | 5.5727  | 0.9718  | -0.0412 | 0.7476 | 0.1264 |
| Atn1    | _PHVMS[Phospho (STY)]PGNR_2                                                      | O35126_S881_M1_Atn1    | 5.9027 | 3.0604  | 3.5387  | 6.6339  | 2.9487  | 3.6759  | 3.5691  | 4.2641 | 3.9127  | 3.8214  | 1.1032  | 0.1417  | 0.6334 | 0.1883 |
| Atn1    | _DE                                                                              |                        |        |         |         |         |         |         |         |        |         |         |         |         |        |        |



|        |                                                                             |                      |         |         |         |          |         |         |         |         |         |         |         |         |        |        |
|--------|-----------------------------------------------------------------------------|----------------------|---------|---------|---------|----------|---------|---------|---------|---------|---------|---------|---------|---------|--------|--------|
| Ncam2  | _DGS[Phospho (STY)]KEPIVEMR_2                                               | #N/A                 | 10.0865 | 7.9705  | 3.4038  | 10.7071  | 7.0840  | 3.8107  | 8.9918  | 7.4786  | 7.5473  | 8.2686  | 0.8892  | -0.1695 | 0.5895 | 0.2295 |
| Ncam2  | _LTYNMIEDAGNVR_2                                                            | #N/A                 | 6.9469  | 3.3666  | 3.8449  | 3.5482   | 4.1429  | 3.3697  | 3.2628  | 3.0695  | 5.0973  | 3.5152  | 1.1250  | 0.1699  | 0.5719 | 0.2427 |
| Ncam2  | _ITNHEDGS[Phospho (STY)]PNVNPNETTPTLEPK_3                                   | #N/A                 | 3.8246  | 3.1038  | 3.8188  | 3.6687   | 2.9597  | 3.4747  | 3.5986  | 3.6650  | 3.8744  | 3.8813  | 0.9255  | -0.1117 | 0.1931 | 0.7143 |
| Ncam2  | _GSMETLVR_2                                                                 | #N/A                 | 4.0442  | 3.2996  | 3.7778  | 3.6152   | 3.1879  | 5.8190  | 3.3299  | 3.6796  | 4.1519  | 5.7248  | 0.9374  | -0.0933 | 0.6930 | 0.1593 |
| Atp5f1 | _TKEQLAALR_2                                                                | #N/A                 | 9.2344  | 9.9851  | 9.7140  | 9.9717   | 10.6843 | 9.7327  | 9.3990  | 9.7897  | 9.7649  | 9.6753  | 1.0238  | 0.0339  | 0.3901 | 0.4088 |
| Atp5f1 | _FAGGAFGR_2                                                                 | #N/A                 | 7.5896  | 7.9969  | 8.2152  | 7.5026   | 8.6542  | 8.1711  | 7.7257  | 7.9981  | 8.1047  | 7.9399  | 1.0100  | 0.0144  | 0.7357 | 0.1333 |
| Atp5f1 | _EQLAALR_2                                                                  | #N/A                 | 5.7284  | 6.1988  | 6.6156  | 5.9574   | 7.2945  | 6.2076  | 4.0522  | 6.7173  | 6.3296  | 6.0812  | 1.0930  | 0.1282  | 0.3558 | 0.4488 |
| Atp5f1 | _EKAEEDRYFR_3                                                               | #N/A                 | 6.0485  | 5.9013  | 6.4459  | 6.2314   | 7.1063  | 6.8017  | 5.6682  | 5.7863  | 6.1914  | 6.2921  | 1.0749  | 0.1042  | 0.1339 | 0.8739 |
| Atp5f1 | _AEEDRYFR_2                                                                 | #N/A                 | 4.7843  | 3.0411  | 3.9065  | 3.8737   | 4.8312  | 4.7768  | 3.6594  | 4.2448  | 3.8934  | 3.8407  | 1.0749  | 0.1042  | 0.4645 | 0.3330 |
| Atp5f1 | _KHHEDEIDHSHKDER_4                                                          | #N/A                 | 9.8729  | 7.7960  | 10.1685 | 8.8302   | 12.1845 | 11.4137 | 11.1308 | 7.9960  | 11.2616 | 10.8707 | 0.9738  | -0.0383 | 0.7991 | 0.0974 |
| Atp5f1 | _KHHEDEIDHSHK_3                                                             | #N/A                 | 10.9417 | 5.5365  | 8.1126  | 7.0337   | 3.4775  | 8.0768  | 11.2997 | 5.5117  | 7.7583  | 9.8524  | 0.8363  | -0.2580 | 0.4140 | 0.3830 |
| Atp5f1 | _HHEDEIDHSHK_2                                                              | #N/A                 | 3.0321  | 4.1941  | 3.7189  | 4.2215   | 3.6586  | 4.0709  | 3.9362  | 3.8969  | 3.5455  | 4.1885  | 0.9805  | -0.0284 | 0.7723 | 0.1122 |
| Terf2  | _NS[Phospho (STY)]PMTGR_2                                                   | O35144_S399_M1_Terf2 | 7.2673  | 3.3288  | 4.5842  | 8.4913   | 3.0230  | 3.2056  | 3.3007  | 3.0317  | 4.1811  | 6.0762  | 1.2016  | 0.2649  | 0.5422 | 0.2659 |
| Terf2  | _DLVLANLASSPS[Phospho (STY)]PAHK_2                                          |                      | 5.2561  | 5.8444  | 6.0973  | 6.3275   | 3.6672  | 5.3915  | 4.2039  | 5.5780  | 5.6201  | 5.3657  | 1.0460  | 0.0649  | 0.6780 | 0.1687 |
| Cx3c1  | _SLGS[Phospho (STY)]EENPVHTDNFQER_3                                         | #N/A                 | 8.1452  | 7.2630  | 7.3882  | 8.0322   | 7.9087  | 8.3549  | 6.4610  | 7.2471  | 8.4479  | 8.6738  | 1.0185  | 0.0265  | 0.7670 | 0.1152 |
| Ddt    | _IPAGLENR_2                                                                 | #N/A                 | 7.9711  | 8.5941  | 8.8348  | 8.5912   | 9.3593  | 8.6289  | 8.3191  | 8.5147  | 8.5884  | 8.6425  | 1.0173  | 0.0247  | 0.5497 | 0.2599 |
| Ddt    | _FFPLEAWQIGK_2                                                              | #N/A                 | 7.0161  | 7.8462  | 7.2359  | 7.2608   | 7.3789  | 7.3571  | 7.2099  | 7.1696  | 7.0937  | 7.3990  | 1.0182  | 0.0260  | 0.4066 | 0.3908 |
| Ddt    | _PVELETNLPASR_2                                                             | #N/A                 | 6.0801  | 6.3148  | 6.5791  | 6.3097   | 7.1699  | 6.8743  | 6.8784  | 6.6623  | 6.7181  | 6.8569  | 0.9669  | -0.0485 | 0.3195 | 0.4955 |
| Ddt    | _STEP[C]Carbamidomethyl (C)[A]HLLVSSIGVGTAEQNR_3                            | #N/A                 | 6.2140  | 6.2512  | 6.9167  | 6.4562   | 5.7599  | 6.6769  | 6.0972  | 5.4702  | 5.9592  | 6.3229  | 1.0699  | 0.0975  | 0.1342 | 0.8722 |
| Ddt    | _TSSASFFK_2                                                                 | #N/A                 | 4.7797  | 5.7646  | 5.9421  | 5.6048   | 6.7021  | 5.7761  | 5.7892  | 5.1984  | 6.0556  | 6.1210  | 0.9949  | -0.0074 | 0.9161 | 0.0287 |
| Ddt    | _C[C]Carbamidomethyl (C)[A]ATATLAKPEDR_3                                    | #N/A                 | 4.6778  | 3.5928  | 5.5320  | 4.3442   | 5.1378  | 4.9526  | 4.3090  | 4.7843  | 4.3289  | 4.1750  | 1.0698  | 0.0973  | 0.4308 | 0.3759 |
| Ddt    | _F1TEELSDQDR_2                                                              | #N/A                 | 6.0901  | 6.2165  | 6.3817  | 6.7123   | 6.8672  | 6.7350  | 6.2345  | 6.3541  | 6.0576  | 6.5621  | 1.0198  | 0.0282  | 0.4989 | 0.3030 |
| Kcnh2  | _SGLNSTS[Phospho (STY)]SQSLVR_2                                             | O35219_S322_M1_Kcnh2 | 3.0823  | 4.0504  | 3.7691  | 4.2236   | 3.9085  | 4.0284  | 5.3300  | 3.8473  | 3.3260  | 5.0896  | 0.8744  | -0.1936 | 0.2377 | 0.6240 |
| Kcnh2  | _OTNM[Oxidation (M)]PGS[Phospho (STY)]PGS[Phospho (STY)]AELESGFNR_2         | #N/A                 | 3.8467  | 3.1874  | 4.1618  | 6.1922   | 2.9724  | 3.3396  | 3.5523  | 3.0897  | 4.1651  | 3.5023  | 1.1042  | 0.1430  | 0.5695 | 0.2445 |
| Kcnh2  | _RAS[Phospho (STY)]S[Phospho (STY)]JADDEIAMR_2                              | O35219_S285_M2_Kcnh2 | 3.6121  | 4.3683  | 3.3457  | 4.3904   | 4.2566  | 3.8688  | 4.5386  | 4.1117  | 4.4107  | 4.0676  | 0.9280  | -0.1079 | 0.2340 | 0.7143 |
| Psm4   | _VNVVDINGEEEVNTEK_2                                                         | #N/A                 | 4.4568  | 4.5849  | 5.1179  | 4.3802   | 4.3034  | 4.1853  | 4.8062  | 3.7006  | 4.6963  | 3.8813  | 1.0547  | 0.0768  | 0.4256 | 0.3710 |
| Psm4   | _EKVNVVDINGEEEVNTEK_2                                                       | #N/A                 | 4.7687  | 5.5111  | 5.9711  | 5.5914   | 4.1794  | 4.7392  | 5.2906  | 4.7023  | 4.9871  | 4.7768  | 1.0380  | 0.0538  | 0.6144 | 0.2115 |
| Psm4   | _RAAASAAEAGIAT[Phospho (STY)]PGTESDDALLK_2                                  | #N/A                 | 3.3688  | 5.2124  | 3.5414  | 7.1991   | 6.0459  | 4.1891  | 6.0828  | 4.0011  | 5.8000  | 5.7703  | 0.9100  | -0.1361 | 0.5852 | 0.2327 |
| Psm4   | _RAAASAAEAGIAT[Phospho (STY)]PGTESDDALLK_3                                  | #N/A                 | 4.3247  | 4.4024  | 3.5106  | 5.8026   | 3.4503  | 4.2791  | 3.7280  | 5.4815  | 3.7538  | 3.9803  | 1.0139  | 0.0200  | 0.9165 | 0.3779 |
| Pkd2   | _LDDDS[Phospho (STY)]EEEDDEDSHSR_2                                          | O35245_S810_M1_Pkd2  | 2.0045  | 3.1767  | 3.7368  | 4.0765   | 1.9393  | 3.0353  | 3.9542  | 3.4374  | 3.0705  | 2.5157  | 0.9231  | -0.1155 | 0.6363 | 0.1963 |
| Exoc7  | _QYS[Phospho (STY)]QHGLDGK_2                                                | O35250_S283_M1_Exoc7 | 6.0186  | 3.8320  | 4.3102  | 6.3550   | 4.8456  | 6.0176  | 4.2983  | 5.7558  | 5.6958  | 1.0898  | 0.1240  | 0.5522  | 0.2567 | 0.1569 |
| Exoc7  | _AVEYQDNSSDS[Phospho (STY)]PELNK_2                                          | O35250_S133_M1_Exoc7 | 4.1030  | 3.4074  | 3.2890  | 5.5158   | 4.6866  | 5.5599  | 3.3607  | 5.4757  | 5.6655  | 5.1581  | 0.9007  | -0.1509 | 0.4799 | 0.3189 |
| Purb   | _GGSGGGGDS[Phospho (STY)]EGEEVED_2                                          | #N/A                 | 11.5133 | 11.6700 | 11.8260 | 12.0748  | 11.1817 | 11.7308 | 11.9084 | 11.6647 | 11.4053 | 11.8114 | 0.9973  | -0.0039 | 0.8634 | 0.0638 |
| Purb   | _VSEKPSVR_2                                                                 | #N/A                 | 6.9796  | 7.1110  | 6.5593  | 7.2356   | 7.7799  | 7.3482  | 7.0718  | 7.0155  | 6.9415  | 6.9007  | 1.0267  | 0.0380  | 0.3960 | 0.4001 |
| Purb   | _RGGSGGGGDS[Phospho (STY)]EGEEVED_2                                         | #N/A                 | 11.8313 | 12.0060 | 12.3355 | 12.3129  | 11.5784 | 12.1749 | 12.1760 | 11.8057 | 11.9764 | 11.9924 | 1.0044  | 0.0063  | 0.7560 | 0.1215 |
| Purb   | _GGGGGGGGGGPGGQAPAR_2                                                       | #N/A                 | 6.2681  | 6.6463  | 6.9339  | 6.5735   | 6.9250  | 6.6104  | 6.1290  | 6.2654  | 6.5621  | 6.5558  | 1.0441  | 0.0623  | 0.1030 | 0.9871 |
| Purb   | _DSLGDIEHYAQLGPS[Phospho (STY)]PEQLAAGAEEGGPRR_4                            | #N/A                 | 3.9721  | 3.3703  | 3.7058  | 3.2496   | 5.6717  | 3.0370  | 3.3978  | 3.7516  | 4.0507  | 4.4277  | 0.9814  | -0.0270 | 0.8924 | 0.0494 |
| Purb   | _JAcetyl (Protein N-term)[ADGSGS[Phospho (STY)]ERGSGGGGGGGGQAPAR_3          | O35259_S8_M1_Purb    | 3.8777  | 8.6402  | 4.1221  | 9.1286   | 4.8603  | 4.3187  | 9.2403  | 8.1670  | 8.5493  | 8.4818  | 0.6862  | -0.5433 | 0.0558 | 1.2531 |
| Purb   | _DSLGDIEHYAQLGPS[Phospho (STY)]PEQLAAGAEEGGPR_4                             | #N/A                 | 4.2515  | 3.5558  | 7.5078  | 9.9369   | 3.3772  | 4.3523  | 6.8747  | 3.9372  | 7.4272  | 7.2886  | 0.8091  | -0.3056 | 0.3473 | 0.4593 |
| Purb   | _GGGGGGGGGGGQETELAK_2                                                       | #N/A                 | 3.8184  | 7.3542  | 4.5052  | 3.5070   | 3.7973  | 3.2846  | 3.2217  | 3.8642  | 4.2600  | 4.3661  | 1.1145  | 0.1564  | 0.5893 | 0.2297 |
| Purb   | _JAcetyl (Protein N-term)[ADGSGS[Phospho (STY)]GSR_2                        | #N/A                 | 4.1015  | 3.3569  | 4.5560  | 3.5579   | 3.2452  | 3.3794  | 3.2725  | 3.0598  | 4.2092  | 3.5248  | 1.0520  | 0.0731  | 0.5945 | 0.2559 |
| Srsf5  | _S[Phospho (STY)]GS[Phospho (STY)]RS[Phospho (STY)]PVPEK_2                  | O35326_S226_M3_Srsf5 | 9.7665  | 8.9892  | 9.0831  | 9.4003   | 7.7254  | 8.8663  | 9.9099  | 9.5247  | 9.3788  | 9.0874  | 0.9469  | -0.0788 | 0.2196 | 0.5283 |
| Srsf5  | _SKS[Phospho (STY)]PASVDL_2                                                 | O35326_S247_M1_Srsf5 | 4.2676  | 3.5230  | 4.0013  | 6.5889   | 3.6088  | 3.2133  | 3.1064  | 6.3209  | 3.7552  | 5.5908  | 0.8950  | -0.1601 | 0.5847 | 0.2331 |
| Srsf5  | _VS[Phospho (STY)]WQDLK_2                                                   | O35326_S120_M1_Srsf5 | 4.2858  | 2.9404  | 3.4718  | 3.9744   | 3.4400  | 3.7959  | 3.2910  | 3.5648  | 0.9523  | 3.9414  | 1.2431  | 0.3140  | 0.2572 | 0.3881 |
| Kpn4   | _NVPQED[C]Carbamidomethyl (C)[EDS[Phospho (STY)]DIIDGDR_2                   | O35343_S60_M1_Kpn4   | 3.9481  | 3.2525  | 1.1341  | 3.3674   | 3.0738  | 3.1549  | 3.5157  | 3.6338  | 3.9328  | 3.6037  | 0.9047  | -0.1444 | 0.0880 | 1.0555 |
| Kpn4   | _EAAWASNLTSGR_2                                                             | #N/A                 | 4.2195  | 3.1229  | 3.9531  | 3.4969   | 2.9443  | 3.2844  | 3.6452  | 3.5043  | 3.1742  | 0.9920  | -0.0116 | 0.9203  | 0.0361 | 0.3601 |
| Kpn4   | _VQNTSEIAVQNASNDGGQLSAVAQAAR_3                                              | #N/A                 | 3.1625  | 3.9677  | 3.8493  | 4.1530   | 3.7891  | 3.9404  | 4.3012  | 4.3491  | 3.1473  | 3.8302  | 0.9753  | -0.0361 | 0.7397 | 0.1309 |
| Kpn3   | _NVPQEEED[Phospho (STY)]DVAADR_2                                            | O35344_S60_M1_Kpn3   | 3.7704  | 3.5534  | 4.0965  | 10.7008  | 5.7626  | 12.0921 | 3.9037  | 3.7100  | 0.7387  | -0.4368 | 0.4127  | 0.3844  | 0.1309 | 0.3844 |
| Kpn6   | _JAcetyl (Protein N-term)[M][ETM][Oxidation (M)]JAS[Phospho (STY)]PGKDNVR_2 | #N/A                 | 5.5181  | 5.3500  | 5.6202  | 5.4991   | 3.1235  | 5.2118  | 5.3569  | 5.2425  | 5.3171  | 5.0748  | 0.9630  | -0.0544 | 0.7028 | 0.1532 |
| Abcc1  | _GSS[Phospho (STY)]QLDWNEEVAELVK_2                                          | O35379_S290_M1_Abcc1 | 5.7213  | 5.8287  | 6.4985  | 5.7359   | 3.7581  | 5.6574  | 4.0357  | 3.4460  | 4.2880  | 0.2787  | 1.2131  | 0.0277  | 0.2049 | 0.6885 |
| Anp32a | _KLEISENR_2                                                                 | #N/A                 | 7.9259  | 7.9578  | 7.9469  | 8.3140   | 7.9692  | 7.9493  | 7.8609  | 7.6446  | 8.0130  | 7.8745  | 1.0207  | 0.0295  | 0.1332 | 0.8756 |
| Anp32a | _ELVLDNC[Carbamidomethyl (C)]K_2                                            | #N/A                 | 6.3409  | 6.2383  | 6.1529  | 5.9285   | 6.5201  | 5.7927  | 6.2778  | 6.4179  | 5.9051  | 6.1214  | 1.0067  | 0.0097  | 0.8201 | 0.0861 |
| Anp32a | _NRT[Phospho (STY)]PSZVK_2                                                  | O35381_T15_M1_Anp32a | 3.3928  | 4.1491  | 3.1265  | 4.2666   | 4.0374  | 4.0881  | 7.4088  | 7.3163  | 3.1292  | 7.0492  | 0.6173  | -0.6959 | 0.0233 | 1.6317 |
| Anp32a | _SLDLFNC[Carbamidomethyl (C)]IVTNLNAV_2                                     | #N/A                 | 4.6578  | 5.3345  | 6.3435  | 6.0293   | 5.2868  | 5.7527  | 5.8960  | 5.1446  | 4.8483  | 4.7653  | 1.0782  | 0.1087  | 0.3048 | 0.5160 |
| Anp32a | _ISGDLVLAEK_2                                                               | #N/A                 | 5.2802  | 4.2339  | 5.5111  | 5.8188   | 5.7159  | 4.1152  | 5.2612  | 5.1643  | 5.6313  | 4.8774  | 0.9769  | -0.0338 | 0.7712 | 0.1128 |
| Anp32a | _HNLSEGNK_2                                                                 | #N/A                 | 4.8361  | 4.9547  | 4.6687  | 5.4209   | 5.8479  | 5.6033  | 4.3439  | 5.7479  | 5.1736  | 1.0091  | 0.0331  | 0.8930  | 0.0496 | 0.3031 |
| Anp32a | _LLPQVM[Oxidation (M)]TLGGYDR_2                                             | #N/A                 | 2.9892  | 4.2370  | 3.6760  | 4.1787   | 4.9819  | 4.1138  | 6.4745  | 5.2839  | 5.2148  | 4.1457  | 0.7632  | -0.3899 | 0.0385 | 1.4148 |
| Anp32a | _KREPDGEEED_2                                                               | #N/A                 | 4.2708  | 3.5262  | 4.0044  | 3.5482   | 5.8258  | 3.2101  | 5.2714  | 4.7431  | 3.7520  | 3.2255  | 0.9567  | -0.0638 | 0.7689 | 0.1141 |
| Exoc4  | _S[Phospho (STY)]ELGGGPDNLGGGGTGK_2                                         | O35382_S469_M1_Exoc4 | 3.6495  | 5.7275  | 6.0658  | 6.2028   | 4.5852  | 5.4513  | 7.1622  | 6.6004  | 6.2218  | 5.3323  | 0.8343  | -0.2614 | 0.1117 | 0.9519 |
| Efnb3  | _GGS[Phospho (STY)]LGGGGGGMGPR_2                                            | O35393_S274_M1_Efnb3 | 3.8514  | 3.4910  | 3.5850  | 7.3350   | 6.2366  | 3.6295  | 6.5793  | 3.8724  | 4.1714  | 4.3069  | 0.9906  | -0.0136 | 0.9650 | 0.1055 |
| Pkd3   | _LVPVPTDSQAR_2                                                              | #N/A                 | 7.8620  | 7.6749  | 7.9516  | 7.6710   | 7.3575  | 7.7568  | 8.0973  | 7.5826  | 7.7139  | 7.3972  | 1.0019  | 0.0027  | 0.9284 | 0.0323 |
| Pkd3   | _ALLNVDSAR_2                                                                | #N/A                 | 6.6094  | 6.9561  | 7.1676  | 6.6150   | 6.2000  | 6.6232  | 6.7850  | 6.4380  | 6.6636  | 6.7914  | 1.0039  | 0.0056  | 0.8912 | 0.0500 |
| Pkd3   | _SLEAFLR_2                                                                  | #N/A                 | 5.6071  | 5.7283  | 3.6765  | 5.9150</ |         |         |         |         |         |         |         |         |        |        |



|         |                                                        |                      |         |         |         |         |         |         |         |         |         |         |        |         |        |        |
|---------|--------------------------------------------------------|----------------------|---------|---------|---------|---------|---------|---------|---------|---------|---------|---------|--------|---------|--------|--------|
| Stx1a   | _QALSEIETR_2                                           | #N/A                 | 7.7115  | 6.8873  | 7.4533  | 7.0494  | 6.7884  | 6.9200  | 7.6635  | 7.6137  | 7.1174  | 6.8790  | 0.9749 | -0.0366 | 0.4672 | 0.3305 |
| Stx1a   | _JEVNEHAVDVVER_2                                       | #N/A                 | 6.5074  | 6.1959  | 6.1321  | 4.6988  | 4.3700  | 4.7793  | 6.0269  | 5.9134  | 5.6125  | 6.2426  | 0.9157 | -0.1271 | 0.3318 | 0.4791 |
| Stx1a   | _FM[Oxidation (M)]DEFFEQUEER_2                         | #N/A                 | 6.8812  | 6.6361  | 7.4480  | 7.2586  | 6.2379  | 6.9077  | 7.3226  | 6.0889  | 6.8789  | 6.8088  | 0.9826 | -0.0253 | 0.6226 | 0.2058 |
| Stx1a   | _TAKDS[Phospho (STY)]DODDOVTVTVDR_2                    | #N/A                 | 10.6802 | 10.6371 | 10.2029 | 11.1705 | 9.4718  | 10.5702 | 11.1834 | 10.8519 | 10.7766 | 10.6509 | 0.9622 | -0.0555 | 0.2165 | 0.6646 |
| Stx1a   | _KISALAS[Phospho (STY)]PNPOEK_2                        | #N/A                 | 8.4941  | 7.9398  | 8.3712  | 8.1266  | 6.6473  | 6.9825  | 8.5662  | 8.5418  | 8.3413  | 7.8784  | 0.9312 | -0.1029 | 0.1992 | 0.7006 |
| Stx1a   | _TAKDS[Phospho (STY)]DODDOVTVTVDRDR_3                  | #N/A                 | 11.1248 | 11.4642 | 11.5387 | 12.1760 | 10.6627 | 11.4252 | 11.7404 | 12.0353 | 11.5240 | 11.4620 | 0.9750 | -0.0365 | 0.3187 | 0.4966 |
| Stx1a   | _SIEGSECEEGLR_2                                        | #N/A                 | 9.8819  | 9.4883  | 10.4526 | 9.5645  | 8.6771  | 9.5236  | 10.4420 | 9.9363  | 9.7442  | 9.6441  | 0.9654 | -0.0508 | 0.3243 | 0.4891 |
| Stx1a   | _DS[Phospho (STY)]DODDOVTVTVDRDR_2                     | #N/A                 | 3.1956  | 5.5494  | 4.4301  | 5.3807  | 3.8401  | 4.2853  | 5.7163  | 3.3264  | 5.0010  | 0.9792  | 0.7972 | -0.0304 | 0.8818 | 0.4546 |
| Stx1a   | _TKEELELMSDK_2                                         | #N/A                 | 6.1922  | 4.5701  | 4.4581  | 6.5691  | 3.9401  | 3.7894  | 4.9738  | 2.9993  | 4.2991  | 4.8171  | 1.1516 | 0.2036  | 0.3799 | 0.4203 |
| Stx1a   | _LKS[Phospho (STY)]ECQSECEGLNR_3                       | O35526_S95_M1_Stx1a  | 4.3844  | 3.9748  | 4.5648  | 4.4203  | 3.7945  | 3.6817  | 3.7793  | 4.4854  | 4.2573  | 1.0172  | 0.0246 | 0.7749  | 0.1107 | 0.1107 |
| Stx1a   | _KFVEVM[Oxidation (M)]SEYNATQSDYR_2                    | #N/A                 | 4.4199  | 3.9938  | 5.1368  | 3.8845  | 3.8151  | 4.1886  | 4.7587  | 4.4698  | 4.4497  | 3.7199  | 0.9748 | -0.0369 | 0.7290 | 0.1373 |
| Stx1a   | _KFVEVM[Oxidation (M)]SEYNATQSDYR_2                    | #N/A                 | 4.5606  | 3.3640  | 3.5535  | 3.7556  | 3.2168  | 3.2361  | 3.4703  | 5.1287  | 4.0177  | 3.4485  | 0.8999 | -0.1521 | 0.3495 | 0.4565 |
| Rabep1  | _AQ[Phospho (STY)]TDSLGTSSLSQK_2                       | #N/A                 | 9.0675  | 9.0160  | 9.1446  | 9.6830  | 7.9090  | 9.2149  | 9.0980  | 8.7827  | 9.0486  | 8.8502  | 1.0068 | 0.0098  | 0.8471 | 0.0721 |
| Rabep1  | _BAQS[Phospho (STY)]TDS[Phospho (STY)]LGTSSLSQK_2      | #N/A                 | 4.4666  | 4.1285  | 4.4623  | 4.8399  | 4.0138  | 4.0407  | 4.1470  | 4.0372  | 3.8397  | 4.0786  | 1.0744 | 0.1036  | 0.1209 | 0.9176 |
| Rabep1  | _QNAVLAQAQDGLHLR_3                                     | #N/A                 | 2.9529  | 3.7581  | 3.6397  | 4.3626  | 3.5794  | 4.1501  | 4.5109  | 4.1394  | 4.4385  | 4.1094  | 0.8700 | -0.2010 | 0.0670 | 0.1170 |
| Fyb1    | _VAGQS[Phospho (STY)]PSGIQSR_2                         | O35601_S28_M1_Fyb1   | 6.8605  | 7.1701  | 7.5683  | 4.4629  | 2.8284  | 7.1808  | 3.6894  | 7.1827  | 4.3382  | 7.2787  | 1.0693 | 0.0967  | 0.7591 | 0.1949 |
| Fyb1    | _TTAVEIDY[Phospho (STY)]LKR_2                          | O35601_S561_M1_Fyb1  | 3.1228  | 2.6417  | 3.8096  | 4.7087  | 3.5085  | 3.9802  | 4.0269  | 4.9861  | 3.8843  | 3.8894  | 0.8646 | -0.2098 | 0.2147 | 0.6682 |
| Bmpr2   | _LNINSS[Phospho (STY)]POHEPLLR_2                       | #N/A                 | 3.7494  | 6.7635  | 3.9460  | 6.9542  | 4.8733  | 6.1625  | 3.6779  | 6.6389  | 6.2949  | 3.9302  | 1.0531 | 0.0746  | 0.7803 | 0.1077 |
| Bmpr2   | _LNINSS[Phospho (STY)]POHEPLLR_3                       | #N/A                 | 3.8085  | 3.8737  | 3.7553  | 4.2580  | 5.5200  | 3.3808  | 6.4528  | 4.0002  | 2.6212  | 3.5432  | 0.9787 | -0.0310 | 0.9071 | 0.0424 |
| Bmpr2   | _SJS[Phospho (STY)]PTPNPMSTAMQNER_2                    | O35607_S515_M1_Bmpr2 | 2.9235  | 3.7287  | 3.6103  | 7.7537  | 3.3501  | 4.1794  | 4.5402  | 4.0055  | 4.4091  | 4.0800  | 1.0076 | 0.0109  | 0.9721 | 0.0123 |
| Bmpr2   | _NLKES[Phospho (STY)]SDENLMEHSK_2                      | O35607_S680_M1_Bmpr2 | 3.5587  | 3.7837  | 3.2924  | 4.3370  | 4.2033  | 3.9222  | 4.4853  | 4.1650  | 2.9632  | 4.0143  | 0.9853 | -0.0214 | 0.8656 | 0.0627 |
| Bmpr2   | _VOKNLKES[Phospho (STY)]SDENLMEHSK_3                   | O35607_S680_M2_Bmpr2 | 3.9188  | 3.2231  | 4.6056  | 3.6074  | 3.0445  | 3.1842  | 3.5405  | 3.0103  | 4.1597  | 3.5744  | 1.0670 | 0.0100  | 0.9455 | 0.0243 |
| Scamp3  | _LKS[Phospho (STY)]PTPR_2                              | #N/A                 | 9.9693  | 10.0764 | 10.7453 | 9.9186  | 8.7652  | 9.5539  | 10.3180 | 10.5394 | 9.9002  | 9.7875  | 0.9706 | -0.0431 | 0.4333 | 0.3632 |
| Scamp3  | _LS[Phospho (STY)]PTPR_2                               | #N/A                 | 0.6055  | 3.1591  | 5.8700  | 6.1396  | 2.9804  | 6.4006  | 3.6090  | 3.5404  | 3.8394  | 3.1381  | 1.4448 | 0.5308  | 0.0907 | 1.0423 |
| Scamp3  | _TAAANAAGAENAFR_2                                      | #N/A                 | 3.1464  | 3.9516  | 3.1245  | 4.1691  | 3.7729  | 3.9566  | 4.3174  | 4.3329  | 5.5925  | 3.8464  | 0.8153 | -0.2947 | 0.0554 | 0.2562 |
| Zlpm1   | _AGS[Phospho (STY)]PVSAITEPKP_2                        | O35615_S286_M1_Zlpm1 | 4.1602  | 3.4646  | 3.3462  | 3.8489  | 3.2859  | 2.9427  | 3.5636  | 4.2696  | 5.9193  | 3.8159  | 0.7987 | -0.3242 | 0.0989 | 0.1049 |
| Zlpm1   | _GSGGQS[Phospho (STY)]PGSSVDDAEDDPSR_2                 | O35615_S681_M1_Zlpm1 | 3.6212  | 4.2640  | 3.3549  | 4.0381  | 4.2658  | 4.3889  | 3.7528  | 4.0803  | 3.7289  | 3.0591  | 1.0249 | 0.0355  | 0.6737 | 0.1716 |
| Zlpm1   | _APRS[Phospho (STY)]PS[Phospho (STY)]PAPENPSPDAPQGGR_3 | O35615_S925_M2_Zlpm1 | 4.7397  | 5.7777  | 5.6249  | 5.9576  | 3.6841  | 3.3919  | 5.6246  | 5.0015  | 5.765   | 5.5827  | 0.9011 | -0.1502 | 0.3833 | 0.4164 |
| Mdm4    | _TIS[Phospho (STY)]APVVRPK_2                           | O35618_S367_M1_Mdm4  | 4.0982  | 6.7848  | 6.7561  | 3.2172  | 5.7831  | 3.0047  | 3.3655  | 6.5492  | 6.6668  | 4.3954  | 0.9420 | -0.0862 | 0.7872 | 0.1039 |
| Pmm1    | _TVGHSVS[Phospho (STY)]PDTVQR_2                        | #N/A                 | 8.3708  | 8.4033  | 8.9870  | 9.1177  | 8.0166  | 8.4302  | 8.6567  | 8.5153  | 8.4034  | 8.4582  | 1.0054 | 0.0078  | 0.8376 | 0.0769 |
| Bet1    | _SLS[Phospho (STY)]EIGHVK_2                            | O35621_S50_M1_Bet1   | 3.2311  | 5.3321  | 3.9179  | 6.3404  | 3.8576  | 3.8719  | 5.6580  | 6.1777  | 5.9935  | 5.2804  | 0.7659 | -0.3847 | 0.0592 | 0.1275 |
| Slc32a1 | _GGAPLPSSG[Phospho (STY)]KDAQVAGAGGGGHDKPK_3           | #N/A                 | 3.8482  | 7.5251  | 9.5672  | 4.0952  | 5.9600  | 3.8684  | 9.5078  | 3.5055  | 8.4022  | 9.1524  | 0.7604 | -0.3952 | 0.2941 | 0.5314 |
| Slc32a1 | _SLFQEGSR_2                                            | #N/A                 | 6.4360  | 6.4038  | 5.9237  | 4.9001  | 5.6843  | 6.1253  | 6.9301  | 6.2331  | 5.7371  | 5.8941  | 0.9894 | -0.0154 | 0.8393 | 0.0761 |
| Slc32a1 | _GGAPLPSSG[Phospho (STY)]K_2                           | #N/A                 | 4.3821  | 8.5630  | 3.5681  | 7.9177  | 4.2332  | 3.8923  | 3.7854  | 4.0477  | 3.6963  | 8.0320  | 1.1095 | 0.1500  | 0.7118 | 0.1476 |
| Slc32a1 | _LTNATVSYSNK_2                                         | #N/A                 | 4.5515  | 5.3346  | 4.5574  | 4.1011  | 5.1724  | 4.1580  | 4.9413  | 5.5819  | 5.5008  | 4.7941  | 0.8927 | -0.1638 | 0.1031 | 0.9866 |
| Slc32a1 | _LIAC[Carbamidomethyl (C)]YEENDEGEVVR_2                | #N/A                 | 4.1348  | 4.3158  | 5.0421  | 3.9360  | 2.9645  | 4.2105  | 3.9339  | 4.6830  | 4.2020  | 3.7874  | 0.9877 | -0.0178 | 0.8958 | 0.0478 |
| Ap1b1   | _DC[Carbamidomethyl (C)]EDPNPLR_2                      | #N/A                 | 9.6800  | 9.2866  | 8.4771  | 9.2455  | 9.1053  | 9.1026  | 9.6123  | 9.4742  | 9.3386  | 9.2978  | 0.9879 | -0.0176 | 0.3974 | 0.4008 |
| Ap1b1   | _DC[Carbamidomethyl (C)]PUNTEASNK_2                    | #N/A                 | 8.7894  | 8.8091  | 8.4623  | 8.7321  | 7.9137  | 8.8161  | 9.0732  | 8.8064  | 8.6787  | 8.7168  | 0.9655 | -0.0506 | 0.1464 | 0.8346 |
| Ap1b1   | _VOKTEYL[Carbamidomethyl (C)]EPLRK_3                   | #N/A                 | 7.5379  | 7.0619  | 7.3837  | 6.8981  | 6.7420  | 7.5708  | 7.8187  | 7.3903  | 7.4786  | 7.0479  | 0.9684 | -0.0463 | 0.3113 | 0.5068 |
| Ap1b1   | _YNDPIYVK_2                                            | #N/A                 | 7.1500  | 6.7595  | 6.8307  | 6.9944  | 6.8944  | 7.2484  | 6.1966  | 7.2632  | 7.3953  | 7.1943  | 0.9953 | -0.0068 | 0.8939 | 0.0487 |
| Ap1b1   | _KGIEFLK_2                                             | #N/A                 | 6.5145  | 6.6835  | 6.0950  | 6.3222  | 5.7272  | 5.9326  | 7.0556  | 6.4754  | 6.2716  | 6.4300  | 0.9473 | -0.0781 | 0.1694 | 0.7711 |
| Ap1b1   | _LASQANIAQVLAELK_2                                     | #N/A                 | 6.2191  | 5.8509  | 5.5099  | 5.0283  | 5.4204  | 5.1961  | 6.2553  | 5.8870  | 5.9930  | 6.0451  | 0.9160 | -0.1265 | 0.0593 | 1.2272 |
| Ap1b1   | _VIAMTVGK_2                                            | #N/A                 | 5.8032  | 5.8274  | 4.0666  | 5.9669  | 6.1724  | 6.2056  | 5.7696  | 6.3088  | 6.7609  | 6.4751  | 0.8965 | -0.1576 | 0.1773 | 0.7514 |
| Ap1b1   | _NIRNLQK_2                                             | #N/A                 | 5.6737  | 4.7446  | 5.4769  | 3.3495  | 3.6417  | 3.9356  | 3.0094  | 5.6219  | 4.5805  | 5.0443  | 0.9795 | -0.0299 | 0.8917 | 0.0498 |
| Ap1b1   | _ETATEVDVDVR_2                                         | #N/A                 | 5.3749  | 3.9092  | 3.7908  | 4.8647  | 4.5505  | 5.4111  | 5.3769  | 5.1673  | 4.4472  | 4.9590  | 0.9324 | -0.1011 | 0.4125 | 0.3846 |
| Ap1b1   | _LSHANSVASLAVK_2                                       | #N/A                 | 4.7651  | 4.9587  | 3.6814  | 5.1813  | 4.8646  | 5.2279  | 4.9784  | 5.0652  | 5.1114  | 4.8778  | 0.9544 | -0.0673 | 0.4570 | 0.1401 |
| Ap1b1   | _LSSNIFTVAK_2                                          | #N/A                 | 3.6310  | 4.9703  | 3.3068  | 4.2451  | 4.6500  | 2.9821  | 3.5242  | 5.9413  | 4.2524  | 4.6053  | 0.8654 | -0.2086 | 0.3075 | 0.5121 |
| Ap1b1   | _LVLYLM[Oxidation (M)]NYAK_2                           | #N/A                 | 4.5370  | 3.1806  | 5.1488  | 5.0830  | 3.3055  | 3.3191  | 4.7453  | 5.4976  | 5.1534  | 5.1548  | 0.7972 | -0.3270 | 0.0665 | 0.1569 |
| Ap1b1   | _AAM[Oxidation (M)]WVGEVYER_2                          | #N/A                 | 6.5312  | 3.2862  | 7.2047  | 3.3082  | 6.0338  | 6.7260  | 6.8671  | 3.6930  | 6.3448  | 6.5920  | 0.9389 | -0.0910 | 0.7455 | 0.1275 |
| Ap1b1   | _NVEGDM[Oxidation (M)]LYQSLK_2                         | #N/A                 | 4.6289  | 4.5992  | 5.9326  | 4.8284  | 4.7411  | 4.7669  | 4.8731  | 5.1891  | 4.6265  | 1.0269  | 0.0382 | 0.6519  | 0.1858 | 0.1858 |
| Ap1b1   | _APEVSHVQVAYETLKN_3                                    | #N/A                 | 3.4828  | 4.2391  | 4.3773  | 3.9304  | 4.1274  | 3.0757  | 4.4094  | 3.2219  | 3.6904  | 3.9384  | 1.0150 | 0.0214  | 0.8633 | 0.0638 |
| Ap1b1   | _ITEYL[Carbamidomethyl (C)]EPLRK_2                     | #N/A                 | 5.8233  | 5.7246  | 5.1613  | 5.6726  | 5.0944  | 5.0173  | 6.1237  | 5.8799  | 5.6070  | 5.5555  | 0.9351 | -0.0968 | 0.1140 | 0.9431 |
| Ap1b1   | _TAAVC[Carbamidomethyl (C)]VAK_2                       | #N/A                 | 3.5356  | 4.0929  | 3.9745  | 4.4772  | 3.2660  | 3.7028  | 4.4918  | 4.4186  | 3.2899  | 4.4442  | 0.9401 | -0.0891 | 0.4489 | 0.3478 |
| Ap1b1   | _DORBAQSC[Carbamidomethyl (C)]ER_3                     | #N/A                 | 4.0521  | 3.5256  | 4.3388  | 3.7267  | 3.6537  | 3.0513  | 4.0912  | 3.8787  | 4.1608  | 3.5960  | 0.9474 | -0.0780 | 0.4273 | 0.3693 |
| Ap1b1   | _C[Carbamidomethyl (C)]KDEDPPYVK_2                     | #N/A                 | 3.8598  | 3.1641  | 4.5466  | 3.5484  | 2.9855  | 3.2432  | 3.6040  | 3.0692  | 4.2187  | 0.3450  | 1.2665 | 0.3409  | 0.3390 | 0.4698 |
| Ap1b1   | _KPTTEGEVQVLSLATOQSDNPDLR_3                            | #N/A                 | 4.1777  | 3.4321  | 3.3137  | 3.8163  | 3.2534  | 2.9752  | 3.3360  | 2.5756  | 3.9507  | 3.7833  | 1.0220 | 0.0314  | 0.8222 | 0.0850 |
| Ap1b1   | _C[Carbamidomethyl (C)]KDEDPPVR_3                      | #N/A                 | 4.1345  | 3.4388  | 3.3204  | 3.8231  | 3.2602  | 2.9685  | 3.3293  | 4.2954  | 3.9440  | 3.7901  | 0.9092 | -0.1374 | 0.2270 | 0.6439 |
| Clqbp   | _AFVEFTDEEEK_2                                         | #N/A                 | 4.7334  | 3.8034  | 3.8832  | 4.9018  | 3.5233  | 4.1125  | 4.7325  | 4.4354  | 4.4293  | 4.2009  | 0.9348 | -0.0972 | 0.3493 | 0.4568 |
| Hap1    | _ATHS[Phospho (STY)]PSAREEEGPGSGAT_2                   | O35668_S615_M1_Hap1  | 4.8727  | 6.6012  | 4.3855  | 6.0381  | 5.2985  | 5.9691  | 5.4596  | 3.2303  | 5.3198  | 3.3544  | 1.2733 | 0.3486  | 0.0999 | 1.0005 |
| Mgl1    | _NKS[Phospho (STY)]EVLVNSDLRVC[Carbamidomethyl (C)]R_2 | #N/A                 | 7.2804  | 7.0840  | 7.2563  | 7.9546  | 6.4537  | 7.3928  | 7.4920  | 7.3310  | 7.6988  | 7.6037  | 0.9609 | -0.0575 | 0.2824 | 0.5491 |
| Mgl1    | _LTPLLLGSAOR_2                                         | #N/A                 | 4.5838  | 5.3161  | 4.1887  | 4.8758  | 3.8396  | 4.5558  | 4.3622  | 4.3482  | 4.8307  | 4.3584  | 1.0190 | 0.0272  | 0.7684 | 0.1144 |
| Mgl1    | _IDSSVLSR_2                                            | #N/A                 | 5.5440  | 5.1009  | 3.6806  | 2.4944  | 5.0072  | 4.7596  | 3.3401  | 5.4476  | 4.8960  | 5.1411  | 0.9416 | -0.0869 | 0.6997 | 0.1551 |
| Mgl1    | _MPEASS[Phospho (STY)]PR_2                             | O35678_S6_M1_Mgl1    | 4.2621  | 3.5176  | 3.9958  | 6.4534  | 3.4059  | 3.2187  | 3.1119  |         |         |         |        |         |        |        |



|         |                                                                                    |                        |         |         |         |         |         |         |         |         |         |         |         |         |        |        |
|---------|------------------------------------------------------------------------------------|------------------------|---------|---------|---------|---------|---------|---------|---------|---------|---------|---------|---------|---------|--------|--------|
| Hnrrph1 | _STGEAFVQFASQIEAK_2                                                                | #N/A                   | 7.2458  | 7.2530  | 8.3231  | 8.1217  | 6.9472  | 7.5513  | 7.5634  | 6.9063  | 7.1180  | 7.8032  | 1.0308  | 0.0437  | 0.5002 | 0.3008 |
| Hnrrph1 | _ATENDINFFSNLPRV_2                                                                 | #N/A                   | 5.9273  | 5.6398  | 5.9436  | 5.8100  | 5.9547  | 5.8410  | 6.0383  | 5.2056  | 5.2879  | 5.9128  | 1.0431  | 0.0608  | 0.2136 | 0.6704 |
| Hnrrph1 | _HTGPN\$[Phospho (STY)]POTANDGVR_2                                                 | #N/A                   | 9.4193  | 9.6978  | 10.3475 | 10.3712 | 9.5484  | 9.7380  | 9.8100  | 9.6597  | 9.7415  | 9.8076  | 1.0102  | 0.0146  | 0.6497 | 0.1843 |
| Hnrrph1 | _THVDP\$PK_2                                                                       | #N/A                   | 6.4830  | 5.4742  | 3.7990  | 5.2643  | 6.3581  | 3.1302  | 6.2161  | 3.6584  | 4.5651  | 6.2920  | 0.9811  | -0.0276 | 0.9121 | 0.0400 |
| Hnrrph1 | _THVDP\$R_2                                                                        | #N/A                   | 5.3367  | 3.7585  | 4.1544  | 3.5994  | 5.2308  | 2.9778  | 3.4197  | 4.1166  | 4.5774  | 5.4413  | 0.9516  | -0.0716 | 0.7257 | 0.1393 |
| Hnrrph1 | _DLNYC[Carbamidomethyl (C)]PSGM[Oxidation (M)]SDHR_2                               | #N/A                   | 3.9446  | 5.2722  | 3.3433  | 5.5506  | 4.4993  | 5.1190  | 6.5130  | 5.1028  | 5.2844  | 3.9279  | 0.8876  | -0.1721 | 0.3606 | 0.4430 |
| Hnrrph1 | _EGRPSGEAFVELES[Phospho (STY)]EDEVK_3                                              | 035737_563_M1_Hnrrph1  | 4.3875  | 3.6919  | 3.5735  | 4.0761  | 3.5132  | 4.2163  | 3.7908  | 4.0423  | 3.6909  | 4.0431  | 1.0046  | 0.0066  | 0.9305 | 0.0313 |
| Api5    | _TSEDTS\$G\$[Phospho (STY)]PPK_2                                                   | #N/A                   | 8.1691  | 7.6564  | 7.8864  | 7.7199  | 3.1768  | 7.7610  | 8.8123  | 8.0635  | 8.1975  | 7.8748  | 0.8625  | -0.2133 | 0.2855 | 0.5443 |
| Api5    | _TSEDTS\$G\$[Phospho (STY)]PPK_3                                                   | #N/A                   | 6.9131  | 4.8937  | 7.2431  | 7.2885  | 5.6364  | 6.2993  | 7.3477  | 7.4113  | 7.1898  | 6.2750  | 0.9041  | -0.1455 | 0.2401 | 0.6197 |
| Api5    | _TSEDTS\$G\$[Phospho (STY)]PPK\$PGGK_3                                             | #N/A                   | 3.7604  | 3.0647  | 4.4472  | 3.5551  | 2.8860  | 3.3426  | 3.7034  | 3.4460  | 3.6188  | 3.2324  | 1.0026  | 0.0038  | 0.9761 | 0.1059 |
| Slc1a4  | _SEETS[Phospho (STY)]PLVTHQNAGVAIAPELESK_3                                         | 035874_5507_M1_Slc1a4  | 7.9688  | 7.9258  | 8.5959  | 8.6603  | 6.7076  | 7.8949  | 8.6974  | 8.5936  | 7.9097  | 7.5668  | 0.9716  | -0.0416 | 0.5926 | 0.2273 |
| Calu    | _EQVFE\$R_2                                                                        | #N/A                   | 4.5532  | 4.8745  | 5.6483  | 5.6016  | 5.7037  | 5.5268  | 3.9587  | 5.1008  | 5.3660  | 5.6444  | 1.0599  | 0.0839  | 0.4544 | 0.3426 |
| Ctnd2   | _GG\$PLTTTGG\$[Phospho (STY)]PTK_2                                                 | 035927_5273_M1_Ctnd2   | 12.2310 | 12.3910 | 12.7699 | 12.7367 | 11.8111 | 12.3067 | 12.7678 | 12.3899 | 12.2947 | 12.3665 | 0.9936  | -0.0093 | 0.6981 | 0.1561 |
| Ctnd2   | _G\$[Phospho (STY)]AEGGAAYAAPR_2                                                   | 035927_5282_M1_Ctnd2   | 10.3136 | 10.2338 | 10.7238 | 10.7726 | 2.8422  | 10.1956 | 10.5943 | 10.3497 | 10.3851 | 10.2294 | 0.8836  | -0.1785 | 0.4689 | 0.3289 |
| Ctnd2   | _SP\$[Phospho (STY)]DSIQK_2                                                        | #N/A                   | 10.3687 | 9.5159  | 3.5949  | 10.1108 | 8.3816  | 3.6197  | 10.0034 | 9.8111  | 9.7770  | 4.3168  | 0.8964  | -0.1578 | 0.6648 | 0.1773 |
| Ctnd2   | _SASAPAS[Phospho (STY)]PR_2                                                        | 035927_51098_M1_Ctnd2  | 10.8684 | 10.9556 | 11.2774 | 11.0726 | 9.7705  | 10.7748 | 11.1161 | 11.0200 | 10.8334 | 10.8977 | 0.9836  | -0.0239 | 0.5287 | 0.1668 |
| Ctnd2   | _ALQ\$[Phospho (STY)]PEHHIDPIYEDR_3                                                | #N/A                   | 10.9511 | 10.8315 | 11.5737 | 11.2731 | 10.1779 | 10.9360 | 11.2900 | 10.9809 | 11.0444 | 10.8980 | 0.9913  | -0.0126 | 0.7094 | 0.1491 |
| Ctnd2   | _T[Phospho (STY)]G\$GPGQNAATAATQR_3                                                | 035927_7469_M1_Ctnd2   | 6.8581  | 6.9513  | 4.1214  | 3.3676  | 3.5314  | 3.1021  | 5.9982  | 7.1672  | 3.4647  | 3.1777  | 0.9401  | -0.0891 | 0.8091 | 0.0920 |
| Ctnd2   | _T\$TAP\$S[Phospho (STY)]PGVDSVLRQ_2                                               | 035927_5458_M1_Ctnd2   | 11.8892 | 11.9818 | 12.7168 | 12.2352 | 10.9599 | 11.7341 | 12.4276 | 11.7646 | 11.6899 | 0.9983  | -0.0024 | 0.9531  | 0.0749 | 0.1491 |
| Ctnd2   | _NS[Phospho (STY)]YGAPADIK_2                                                       | 035927_51149_M1_Ctnd2  | 3.9377  | 3.1931  | 3.6714  | 3.2151  | 3.0814  | 3.5432  | 3.4364  | 3.7861  | 4.0851  | 4.3932  | 0.8765  | -0.1902 | 0.0724 | 1.1403 |
| Ctnd2   | _TP\$[Phospho (STY)]PVR_2                                                          | 035927_51082_M1_Ctnd2  | 8.9412  | 8.8328  | 9.4253  | 9.1373  | 8.2412  | 8.9671  | 9.3802  | 9.2717  | 9.1303  | 9.2834  | 0.9631  | -0.0543 | 0.1332 | 0.8754 |
| Ctnd2   | _N\$LS[Phospho (STY)]GLNT\$NGD\$G\$TETTSAILASVK_3                                  | 035927_532_M1_Ctnd2    | 3.6574  | 3.6589  | 3.5405  | 4.0011  | 3.4149  | 3.6025  | 3.9633  | 4.3288  | 3.6261  | 4.0101  | 0.9156  | -0.1273 | 0.0573 | 1.2420 |
| Ctnd2   | _TP\$[Phospho (STY)]PVR\$[Phospho (STY)]PNNR_2                                     | #N/A                   | 8.7067  | 8.7655  | 8.8922  | 9.1491  | 8.1205  | 8.8321  | 9.1483  | 8.4830  | 8.7225  | 8.8782  | 0.9928  | -0.0105 | 0.7656 | 0.1160 |
| Ctnd2   | _QLQYC[Carbamidomethyl (C)]ASVS[Phospho (STY)]PSK_2                                | 035927_5511_M1_Ctnd2   | 3.6398  | 3.8122  | 6.6431  | 6.7371  | 3.7005  | 6.3537  | 6.9644  | 5.1585  | 5.5418  | 6.3634  | 0.8627  | -0.2131 | 0.3749 | 0.4261 |
| Ctnd2   | _SLS\$[Phospho (STY)]GGDPLPPAHITGTR_2                                              | 035927_5437_M1_Ctnd2   | 4.7976  | 3.4865  | 3.5350  | 3.9551  | 3.3556  | 3.7693  | 4.5870  | 3.8975  | 3.7634  | 4.0046  | 0.9873  | -0.0903 | 0.4413 | 0.3552 |
| Ctnd2   | _SP\$[Phospho (STY)]DSIQK\$R_2                                                     | #N/A                   | 9.8182  | 9.3527  | 9.8613  | 9.8854  | 8.2272  | 9.3435  | 10.2498 | 9.6160  | 9.5441  | 9.7372  | 0.9620  | -0.0559 | 0.3145 | 0.5024 |
| Ctnd2   | _SGPALPPEGTGLARS[Phospho (STY)]PS[Phospho (STY)]DSIQK_3                            | 035927_5395_M1_Ctnd2   | 3.4252  | 3.6348  | 3.8462  | 9.1256  | 3.9140  | 3.8604  | 4.2212  | 7.9527  | 3.7502  | 0.9657  | -0.0504 | 0.9098  | 0.0411 | 0.2418 |
| Ctnd2   | _AS[Phospho (STY)]PS\$G\$H\$LAPEL_3                                                | #N/A                   | 3.8362  | 3.3504  | 4.1286  | 4.0364  | 3.1717  | 3.9278  | 3.6499  | 3.7317  | 4.1559  | 3.9423  | 0.9669  | -0.0486 | 0.5730 | 0.2889 |
| Ctnd2   | _SGPALPPEGTGLARS[Phospho (STY)]PS[Phospho (STY)]DSIQK\$R_3                         | #N/A                   | 3.6488  | 3.7693  | 3.7498  | 8.1795  | 6.6675  | 3.8712  | 4.0376  | 5.9882  | 3.8486  | 0.8322  | -0.2650 | 0.5261  | 0.2418 | 0.2418 |
| Ctnd2   | _AAG\$G\$TGTRT_2                                                                   | #N/A                   | 5.2866  | 3.8433  | 5.8743  | 3.4730  | 5.3201  | 3.2945  | 3.1877  | 3.1446  | 5.1604  | 5.3387  | 1.0731  | 0.1017  | 0.6882 | 0.1623 |
| Pitpm1  | _C[Carbamidomethyl (C)]NTSGEPEAQIT[Phospho (STY)]PGK_2                             | 035954_7270_M1_Pitpm1  | 5.6465  | 3.8063  | 5.0527  | 4.6093  | 4.0464  | 5.9067  | 5.9067  | 3.9752  | 5.3775  | 4.6333  | 0.9304  | -0.1040 | 0.4894 | 0.0104 |
| Pitpm1  | _PGT\$TAGT[Phospho (STY)]GGGAPP\$G\$DASDAS[Phospho (STY)]FGK_3                     | 035954_5304_M2_Pitpm1  | 3.7331  | 3.7634  | 3.6094  | 3.5619  | 3.5800  | 3.2585  | 3.5720  | 3.3608  | 3.2932  | 3.8929  | 0.9717  | -0.0414 | 0.4806 | 0.3182 |
| Pitpm1  | _SYSSQHG\$G\$[Phospho (STY)]PDS[Phospho (STY)]SEWR_3                               | 035954_5326_M2_Pitpm1  | 2.9728  | 4.3696  | 4.2074  | 3.2142  | 4.1909  | 3.5386  | 3.8994  | 4.9905  | 3.5491  | 3.4284  | 0.9451  | -0.0815 | 0.6101 | 0.2146 |
| Pitpm1  | _RGS[Phospho (STY)]M[Oxidation (M)]N\$N\$M[Oxidation (M)]L\$PEVGPVRDLADG\$VEVLGR_4 | 035954_5593_M1_Pitpm1  | 3.8899  | 3.3363  | 4.5767  | 3.5785  | 3.2246  | 3.4000  | 3.2932  | 3.0391  | 4.1885  | 3.5455  | 1.0430  | 0.0607  | 0.6516 | 0.1861 |
| Rab33b  | _S[Phospho (STY)]M[Oxidation (M)]VCHYR_2                                           | 4.3225                 | 4.3086  | 3.5686  | 5.1696  | 3.9686  | 4.5552  | 4.3541  | 5.1708  | 4.5805  | 4.9996  | 0.9035  | -0.1463 | 0.1799  | 0.7450 | 0.1799 |
| Gamt    | _Acetyl (Protein N-term)]SSASAS[Phospho (STY)]PLFAPGDC[Carbamidomethyl (C)]GPAWR_2 | 035969_57_M1_Gamt      | 3.1967  | 4.0019  | 3.8835  | 4.3862  | 3.8233  | 3.9062  | 4.1009  | 3.7323  | 4.8298  | 4.3532  | 0.9089  | -0.1379 | 0.1858 | 0.7309 |
| Pba2    | _TAV\$VQAGH\$G\$[Phospho (STY)]R_2                                                 | 035984_5330_M1_Pba2    | 4.9352  | 5.0872  | 5.4645  | 5.0790  | 4.1228  | 4.9688  | 4.6495  | 5.1083  | 5.3044  | 3.0617  | 1.0739  | 0.1029  | 0.4970 | 0.3037 |
| Cavin1  | _ATEEP\$GTG\$[Phospho (STY)]DELK_2                                                 | 054724_542_M1_Cavin1   | 7.3485  | 7.7771  | 3.9203  | 8.5834  | 7.0516  | 7.6481  | 8.3637  | 7.6632  | 7.5982  | 7.8141  | 0.9041  | -0.1454 | 0.3960 | 0.4023 |
| Cavin1  | _IGAVDQILQTAQLEER_2                                                                | #N/A                   | 4.0629  | 2.8723  | 2.2489  | 3.7515  | 3.2590  | 3.5730  | 3.4662  | 3.0389  | 4.0155  | 2.6942  | 1.0372  | 0.0527  | 0.7121 | 0.1475 |
| Ddost   | _TVL\$LDNNVR_2                                                                     | #N/A                   | 3.8867  | 4.7638  | 5.0209  | 4.6590  | 4.4347  | 4.3902  | 4.9680  | 4.5084  | 4.7280  | 4.1183  | 0.9880  | -0.0174 | 0.8282 | 0.0819 |
| Ap3d1   | _MVK\$G\$[Phospho (STY)]IOR_2                                                      | #N/A                   | 9.2832  | 8.6773  | 8.6273  | 9.5042  | 5.9261  | 8.2412  | 8.5260  | 8.7694  | 8.5360  | 8.5342  | 0.9750  | -0.0365 | 0.7523 | 0.1236 |
| Ap3d1   | _NAEAVK\$[Phospho (STY)]PEKEGLVEVK_3                                               | #N/A                   | 8.2538  | 7.7584  | 7.8566  | 8.1500  | 6.5110  | 7.8449  | 8.0551  | 8.1620  | 8.0806  | 7.6475  | 0.9678  | -0.0472 | 0.4619 | 0.3555 |
| Ap3d1   | _RH\$SLPTES[Phospho (STY)]DEDIAPQR_3                                               | #N/A                   | 8.5230  | 8.8985  | 9.1228  | 8.7137  | 8.1556  | 9.4123  | 9.161   | 9.4341  | 9.5412  | 9.0737  | 0.9325  | -0.1008 | 0.0348 | 1.5858 |
| Ap3d1   | _RH\$SLPTES[Phospho (STY)]DEDIAPQR_3                                               | #N/A                   | 11.3297 | 11.1896 | 11.9951 | 11.3957 | 10.2398 | 11.3577 | 11.5812 | 11.8263 | 11.6231 | 11.4202 | 0.9689  | -0.0456 | 0.2594 | 0.0429 |
| Ap3d1   | _NAEAVK\$[Phospho (STY)]PEK_2                                                      | #N/A                   | 3.5306  | 3.9838  | 3.6068  | 5.7550  | 3.2906  | 2.9381  | 5.5167  | 5.1566  | 5.3667  | 4.9840  | 0.7904  | -0.3394 | 0.0994 | 1.0028 |
| Ap3d1   | _DLUQC[Carbamidomethyl (C)]LDDKESR_3                                               | #N/A                   | 5.6914  | 4.8826  | 4.6082  | 3.2136  | 4.5806  | 3.5447  | 5.3392  | 5.5170  | 4.7343  | 4.3917  | 0.8839  | -0.1780 | 0.2864 | 0.5430 |
| Ap3d1   | _EQADAEAAQEVQLLVR_2                                                                | #N/A                   | 3.8591  | 4.0971  | 4.5934  | 4.6388  | 3.6141  | 4.5435  | 4.3998  | 4.3653  | 4.4489  | 3.7955  | 0.9934  | -0.0095 | 0.9139 | 0.0391 |
| Ap3d1   | _NLQDLVR_2                                                                         | #N/A                   | 3.1591  | 3.9154  | 3.9976  | 4.5003  | 3.8037  | 3.5646  | 4.2149  | 3.6182  | 2.9664  | 4.2149  | 1.0873  | 0.1207  | 0.3541 | 0.4508 |
| Ap3d1   | _LEDPDG\$V\$AAVNVIC[Carbamidomethyl (C)]ELAR_2                                     | #N/A                   | 2.9934  | 4.2328  | 3.6802  | 4.1829  | 3.6199  | 4.1096  | 3.8975  | 1.4043  | 3.5842  | 4.1499  | 1.1670  | 0.2228  | 0.3540 | 0.4510 |
| Ap3d1   | _VOITEEMPENALPS[Phospho (STY)]DEDDKDPNDPYR_4                                       | 054774_5784_M1_Ap3d1   | 3.7548  | 3.0102  | 3.4885  | 4.5331  | 2.8985  | 3.7261  | 3.6193  | 3.9689  | 4.2680  | 4.2103  | 0.8884  | -0.1707 | 0.2042 | 0.6899 |
| Srpk2   | _SS\$[Phospho (STY)]SERPEPQK_2                                                     | 054781_510_M1_Srpk2    | 7.2026  | 4.2096  | 4.3771  | 7.7465  | 6.8567  | 7.5561  | 7.3976  | 7.4994  | 7.5215  | 7.2826  | 0.8518  | -0.2314 | 0.2161 | 0.6653 |
| Srpk2   | _TV\$ASS\$[Phospho (STY)]TGDLPK_2                                                  | 054781_5490_M1_Srpk2   | 4.0705  | 3.2290  | 3.6827  | 6.8939  | 5.0041  | 6.3764  | 5.5439  | 3.9285  | 4.6629  | 4.3921  | 1.1801  | 0.2389  | 0.3714 | 0.4301 |
| Srpk2   | _AADLEDIT[Phospho (STY)]I[Phospho (STY)]EETAK_2                                    | 054781_7331_M2_Srpk2   | 5.5927  | 4.8299  | 4.7477  | 4.9938  | 4.4058  | 4.8533  | 5.2579  | 4.3429  | 4.6585  | 3.6048  | 1.0980  | 0.1349  | 0.2304 | 0.6375 |
| Srpk2   | _Acetyl (Protein N-term)]S[Phospho (STY)]VNS[Phospho (STY)]EKSSSERPEPQK_2          | 054781_52_M2_Srpk2     | 4.2201  | 3.4073  | 3.8660  | 3.5431  | 3.2956  | 3.3646  | 3.6810  | 3.9356  | 3.5842  | 3.5101  | 0.9832  | -0.0244 | 0.7624 | 0.1178 |
| Dapk3   | _NT\$VAS[Phospho (STY)]FER_2                                                       | 054784_5316_M1_Dapk3   | 3.6267  | 3.7157  | 8.5479  | 4.4050  | 4.2712  | 3.8542  | 8.2277  | 7.9950  | 8.0150  | 7.9964  | 0.5878  | -0.7666 | 0.0089 | 2.0518 |
| Dffa    | _RS[Phospho (STY)]PLGEPQRPK_3                                                      | 054786_5314_M1_Dffa    | 6.2098  | 4.9915  | 7.0862  | 6.6711  | 3.3567  | 5.9364  | 5.6444  | 5.8719  | 6.2162  | 6.3393  | 0.9486  | -0.0761 | 0.6714 | 0.1730 |
| Tpd52l1 | _S[Phospho (STY)]WHDM[Oxidation (M)]QTTTAYK_2                                      | #N/A                   | 6.0474  | 5.7513  | 6.4288  | 4.3263  | 3.5703  | 6.8156  | 4.0068  | 6.0707  | 3.5478  | 6.3671  | 1.0984  | 0.1354  | 0.5827 | 0.2346 |
| Tpd52l1 | _S[Phospho (STY)]WHDM[Oxidation (M)]QTTTAYK_3                                      | #N/A                   | 5.1614  | 5.2258  | 4.0797  | 4.8240  | 4.7724  | 3.8809  | 4.4912  | 4.2429  | 3.4814  | 4.9596  | 1.0847  | 0.1173  | 0.3606 | 0.4429 |
| Tpd52l1 | _N\$S\$TK\$[Phospho (STY)]FEER_2                                                   | 054818_5149_M1_Tpd52l1 | 8.6026  | 8.5217  | 8.6543  | 9.0190  | 7.9466  | 8.8403  | 8.8888  | 8.3813  | 8.6807  | 8.7490  | 0.9911  | -0.0129 | 0.7152 | 0.1456 |
| Rgs9    | _GC[Carbamidomethyl (C)]LAS[Phospho (STY)]PVFAR_2                                  | 054828_5588_M1_Rgs9    | 9.6623  | 9.4304  | 10.1033 | 9.7349  | 8.1501  | 9.2181  |         |         |         |         |         |         |        |        |



|         |                                                                              |                         |         |         |         |         |         |         |         |         |         |         |         |         |        |        |
|---------|------------------------------------------------------------------------------|-------------------------|---------|---------|---------|---------|---------|---------|---------|---------|---------|---------|---------|---------|--------|--------|
| Crym    | _FASTVQGDVR_2                                                                | #N/A                    | 5.8179  | 6.6603  | 6.4340  | 7.0737  | 7.0669  | 6.9343  | 6.5116  | 6.3996  | 6.7747  | 6.5633  | 1.0156  | 0.0223  | 0.6988 | 0.1557 |
| Crym    | _SLGMiOxidation (M)IAVEDLVAAK_2                                              | #N/A                    | 6.6158  | 6.9329  | 7.6653  | 6.5462  | 6.3923  | 7.1650  | 6.8714  | 7.1188  | 7.1713  | 6.8203  | 0.9844  | -0.0227 | 0.6753 | 0.1705 |
| Crym    | _GLGVmOxidation (M)PAYSAEADALT_K_2                                           | #N/A                    | 6.0931  | 6.6085  | 6.3143  | 6.3119  | 6.1779  | 6.8147  | 6.2136  | 6.6295  | 6.3236  | 6.4316  | 0.9980  | -0.0029 | 0.9363 | 0.0286 |
| Crym    | _TAASAAIK_2                                                                  | #N/A                    | 6.1019  | 6.0436  | 5.0752  | 5.5753  | 6.2944  | 6.3840  | 5.1825  | 5.7535  | 6.4152  | 5.6476  | 1.0283  | 0.0403  | 0.6287 | 0.2015 |
| Crym    | _RAPARLSAEVQDHLR_3                                                           | #N/A                    | 7.1148  | 7.1827  | 7.4368  | 7.2383  | 7.0238  | 7.1984  | 7.0311  | 6.9004  | 7.5707  | 7.1208  | 1.0063  | 0.0090  | 0.7471 | 0.1266 |
| Crym    | _GPDGVmOxidation (M)IQPVR_2                                                  | #N/A                    | 6.0165  | 6.0115  | 6.0747  | 6.4259  | 6.6550  | 5.9948  | 6.0213  | 6.2413  | 6.0057  | 6.1169  | 1.0164  | 0.0235  | 0.5176 | 0.2860 |
| Crym    | _APARLSAEVQDHLR_2                                                            | #N/A                    | 5.3922  | 4.3630  | 5.4178  | 4.6506  | 4.6364  | 4.6626  | 5.4117  | 4.6914  | 5.4192  | 5.3480  | 0.9303  | -0.1043 | 0.2067 | 0.6846 |
| Crym    | _ELDELMIR_2                                                                  | #N/A                    | 4.8137  | 3.8857  | 3.1735  | 5.7237  | 4.7982  | 3.1154  | 3.4762  | 4.4099  | 3.6432  | 1.0865  | 0.1197  | 0.5597  | 0.2520 |        |
| Get3    | _LEETLPVR_2                                                                  | #N/A                    | 6.0748  | 6.2248  | 5.8359  | 5.7957  | 6.4092  | 6.1554  | 6.2425  | 5.3842  | 6.3578  | 5.8744  | 1.0198  | 0.0283  | 0.5909 | 0.2285 |
| Get3    | _LINFPTIVER_2                                                                | #N/A                    | 6.6965  | 6.4529  | 6.3704  | 6.8851  | 6.3857  | 6.4474  | 4.4844  | 6.4901  | 6.2703  | 6.5771  | 1.0981  | 0.1350  | 0.1871 | 0.7279 |
| Get3    | _ESLHSTDPAHNSDAFQDK_3                                                        | #N/A                    | 5.3660  | 4.1811  | 3.3936  | 4.4382  | 4.1510  | 3.8209  | 3.0857  | 4.6767  | 5.1546  | 5.2256  | 0.9315  | -0.1023 | 0.5669 | 0.2465 |
| Sik     | _VITSDRS[Phospho (STY)]EVTGDEALDOTQ_K_3                                      | O54988_S543_M1_Sik      | 3.7468  | 3.0023  | 1.4805  | 6.0470  | 2.8906  | 5.9949  | 3.6272  | 4.2059  | 3.8545  | 3.8795  | 1.0776  | 0.1078  | 0.6962 | 0.1573 |
| Sik     | _ATLEQPETDEVEQVSENS[Phospho (STY)]IEELR_3                                    | O54988_S647_M1_Sik      | 4.3801  | 6.6556  | 3.5660  | 4.0687  | 6.1884  | 4.2237  | 3.0837  | 4.0498  | 6.6510  | 5.8859  | 0.9857  | -0.0208 | 0.9403 | 0.0267 |
| Sik     | _LENLPDTQDQTVOVNSVSEENENR_3                                                  | #N/A                    | 3.0544  | 4.1718  | 3.7412  | 6.9731  | 3.6809  | 5.5692  | 5.9755  | 3.5232  | 4.2108  | 0.9033  | -0.1467 | 0.6127  | 0.2127 |        |
| Cntnap1 | _DONLPQILEERS[Phospho (STY)]E_2                                              | O54991_S1384_M1_Cntnap1 | 12.1773 | 12.5295 | 12.9586 | 12.9788 | 11.7242 | 12.5521 | 13.2222 | 12.9358 | 12.8736 | 12.6681 | 0.9661  | -0.0498 | 0.1313 | 0.8816 |
| Cntnap1 | _AVATQGAFNSWOWVTR_2                                                          | #N/A                    | 3.5048  | 3.8376  | 3.2385  | 4.2831  | 4.1494  | 3.9761  | 4.4313  | 3.0171  | 3.9604  | 0.9807  | -0.0281 | 0.8190  | 0.0867 |        |
| Bnip3   | _NSTLS[Phospho (STY)]EEDYIR_2                                                | O55003_S88_M1_Bnip3     | 9.3837  | 9.4983  | 9.7889  | 10.0130 | 8.6175  | 9.8544  | 10.0294 | 9.6279  | 9.5462  | 9.5207  | 0.9840  | -0.0233 | 0.5853 | 0.2326 |
| Bnip3   | _SSH[Carbamidomethyl (C)]QDS[Phospho (STY)]IPPR_2                            | O55003_S60_M1_Bnip3     | 8.2967  | 8.0191  | 7.7354  | 8.1333  | 7.4590  | 8.4004  | 8.6887  | 8.1027  | 8.4509  | 8.1646  | 0.8478  | -0.2382 | 0.1894 | 0.7226 |
| Bnip3   | _AEDHS[Phospho (STY)]FGEK_2                                                  | O55003_S79_M1_Bnip3     | 5.8091  | 6.0474  | 6.4936  | 6.3546  | 4.0215  | 6.6170  | 4.2992  | 5.7361  | 5.5790  | 5.8306  | 1.0987  | 0.1358  | 0.3777 | 0.4029 |
| Bnip3   | _SQ[Phospho (STY)]PDOTNRAEIDSHSGEK_3                                         | O55003_S66_M1_Bnip3     | 3.1131  | 5.0625  | 5.2486  | 3.8914  | 4.4495  | 5.5078  | 5.7876  | 3.1097  | 3.4088  | 5.8504  | 1.0014  | 0.0020  | 0.9934 | 0.0229 |
| Bnip3   | _ILDASH[Phospho (STY)]GR_2                                                   | O55003_S48_M1_Bnip3     | 7.4720  | 6.8018  | 7.1949  | 7.3412  | 6.1467  | 3.8970  | 6.9622  | 6.5325  | 7.0978  | 7.1906  | 0.9323  | -0.1011 | 0.5301 | 0.2839 |
| Cacna1b | _ESLS[Phospho (STY)]HGTQR_2                                                  | O55017_S1929_M1_Cacna1b | 7.6509  | 7.1138  | 4.3465  | 3.8903  | 4.8169  | 7.0709  | 4.0386  | 3.1109  | 6.6921  | 3.5676  | 1.3361  | 0.0480  | 0.2016 | 0.6955 |
| Cacna1b | _SHS[Phospho (STY)]KETPGADTQVR_3                                             | #N/A                    | 5.4594  | 5.2947  | 5.4237  | 5.5785  | 3.5413  | 5.1423  | 4.7760  | 5.2078  | 5.3600  | 5.0335  | 0.9959  | -0.0060 | 0.9597 | 0.0179 |
| Cacna1b | _AS[Phospho (STY)]C[Carbamidomethyl (C)]EALYSEM[Oxidation (M)]DPER_2         | #N/A                    | 8.4447  | 8.0834  | 7.9201  | 7.7343  | 6.4147  | 7.7965  | 8.6440  | 8.6969  | 8.2147  | 8.0800  | 0.9195  | -0.1210 | 0.1083 | 0.9654 |
| Cacna1b | _GLS[Phospho (STY)]EHNAIILQK_2                                               | O55017_S2221_M1_Cacna1b | 9.9219  | 5.4953  | 5.9999  | 5.3698  | 4.1145  | 5.9163  | 6.6787  | 6.3514  | 6.0120  | 5.5904  | 0.9153  | -0.1277 | 0.3329 | 0.4777 |
| Cacna1b | _RGS[Phospho (STY)]PEATER_2                                                  | #N/A                    | 5.9413  | 4.5460  | 3.9539  | 4.2038  | 3.3639  | 3.2607  | 6.2674  | 6.0579  | 5.7603  | 3.1749  | 0.7924  | -0.3357 | 0.1835 | 0.7364 |
| Cacna1b | _IGS[Phospho (STY)]DPVLGQR_2                                                 | O55017_S2444_M1_Cacna1b | 9.0519  | 8.7365  | 9.4374  | 8.7693  | 6.8893  | 8.7225  | 9.2911  | 9.2664  | 8.8708  | 8.6617  | 0.9533  | -0.0690 | 0.3928 | 0.4058 |
| Cacna1b | _RGS[Phospho (STY)]PEATEKPR_3                                                | #N/A                    | 6.7489  | 6.0215  | 4.4189  | 5.7741  | 5.2448  | 5.8971  | 6.5267  | 6.5144  | 6.5822  | 6.3559  | 0.8752  | -0.1923 | 0.0793 | 1.1007 |
| Cacna1b | _RSHS[Phospho (STY)]KETPGADTQVR_3                                            | #N/A                    | 6.0515  | 6.3139  | 6.9393  | 6.1722  | 3.6075  | 5.5158  | 3.9805  | 6.5829  | 2.5706  | 3.8180  | 0.8670  | 0.0444  | 0.1237 | 0.9075 |
| Cacna1b | _S[Phospho (STY)]LEKGPLSDVDFGAPAGPLPHGEGSTAC[Carbamidomethyl (C)]R_4         | O55017_S2056_M1_Cacna1b | 4.3660  | 4.3610  | 3.5520  | 6.5040  | 4.2493  | 3.8762  | 3.7693  | 5.9972  | 3.7124  | 4.0216  | 1.0250  | 0.0357  | 0.8766 | 0.0572 |
| Cacna1b | _EVAEVS[Phospho (STY)]PM[Oxidation (M)]S[Phospho (STY)]AANISIAAR_2           | #N/A                    | 3.7147  | 3.6533  | 3.6100  | 0.0840  | 3.5416  | 3.9342  | 3.8273  | 3.7141  | 3.4512  | 0.9342  | -0.0982 | 0.7772  | 0.1121 |        |
| Cacna1b | _LQNA[Phospho (STY)]C[Carbamidomethyl (C)]EALYSEM[Oxidation (M)]DPER_3       | #N/A                    | 4.3871  | 3.6426  | 4.2704  | 3.2722  | 3.5309  | 3.0938  | 4.4878  | 2.3820  | 2.9940  | 3.2392  | 1.1294  | 0.1755  | 0.3644 | 0.4384 |
| Pgrmc1  | _GDQPGASGDDDDPPPLPR_2                                                        | #N/A                    | 8.5560  | 8.0295  | 7.7504  | 8.9514  | 8.5285  | 8.6937  | 8.9232  | 7.9138  | 8.4730  | 8.3198  | 1.0013  | 0.0019  | 0.9702 | 0.0131 |
| Pgrmc1  | _RFDGVQDPR_2                                                                 | #N/A                    | 7.6113  | 7.7477  | 7.9013  | 7.6164  | 8.3973  | 7.9907  | 7.6401  | 7.9060  | 7.8451  | 7.4500  | 1.0217  | 0.0309  | 0.3598 | 0.4439 |
| Pgrmc1  | _FYGPEPGYGVFAGR_2                                                            | #N/A                    | 7.0175  | 7.1605  | 6.8716  | 7.0795  | 7.0782  | 7.0441  | 7.3594  | 7.6260  | 7.0333  | 7.1987  | 0.9641  | -0.0528 | 0.0460 | 1.3375 |
| Pgrmc1  | _EGEEPVT[Phospho (STY)]DDEPKDETAR_3                                          | #N/A                    | 11.6277 | 11.3913 | 11.7904 | 12.0218 | 11.0030 | 11.4171 | 11.3794 | 11.5384 | 11.1949 | 11.1582 | 1.0198  | 0.0283  | 0.2808 | 0.5517 |
| Pgrmc1  | _LKEGEEPTVSDDEPKDETAR_4                                                      | #N/A                    | 6.6450  | 6.5589  | 7.4186  | 9.7908  | 9.4053  | 9.8342  | 6.7780  | 9.6417  | 9.6144  | 9.7775  | 0.9802  | -0.0289 | 0.8501 | 0.0705 |
| Pgrmc1  | _DTPAELR_2                                                                   | #N/A                    | 5.4704  | 3.2925  | 3.7836  | 5.2116  | 5.0060  | 3.4310  | 3.4756  | 5.1070  | 4.4224  | 5.0617  | 0.9666  | -0.0490 | 0.8012 | 0.0962 |
| Pgrmc1  | _EGEEPVT[Phospho (STY)]DDEPKDETARK_4                                         | #N/A                    | 4.2905  | 3.5459  | 4.0242  | 3.5679  | 3.4342  | 3.1904  | 3.7162  | 3.4323  | 3.7323  | 3.2452  | 1.0407  | 0.0576  | 0.5438 | 0.2645 |
| Impa1   | _SLVLEGSSR_2                                                                 | #N/A                    | 7.6723  | 8.1217  | 8.2481  | 8.3932  | 7.9657  | 7.8220  | 8.0789  | 7.8159  | 7.8597  | 8.0587  | 1.0105  | 0.0151  | 0.5850 | 0.2328 |
| Impa1   | _SS[Phospho (STY)]PAOLVTVTDQKVEK_2                                           | #N/A                    | 5.9018  | 5.9985  | 5.4018  | 4.9705  | 6.0033  | 6.3506  | 6.6511  | 6.0548  | 6.3273  | 6.3637  | 0.9089  | -0.1377 | 0.0658 | 1.1820 |
| Impa1   | _EIEPLQR_2                                                                   | #N/A                    | 7.5667  | 7.2518  | 6.9230  | 8.1057  | 7.4111  | 7.3240  | 7.5083  | 7.7348  | 7.3659  | 7.4624  | 0.9884  | -0.0169 | 0.6884 | 0.1622 |
| Impa1   | _LC[Carbamidomethyl (C)]SIPHGIR_2                                            | #N/A                    | 7.4388  | 7.4617  | 7.2116  | 7.2340  | 7.3231  | 6.7576  | 7.7672  | 7.1725  | 7.2391  | 6.3996  | 1.0130  | 0.0187  | 0.7276 | 0.1381 |
| Impa1   | _LQVSGQEDITK_2                                                               | #N/A                    | 4.9214  | 5.3546  | 4.2445  | 5.2095  | 5.5052  | 5.4529  | 4.8042  | 5.4933  | 5.0632  | 5.1618  | 0.9969  | -0.0045 | 0.9538 | 0.0205 |
| Impa1   | _S[Phospho (STY)]SPADLVTVTDQK_2                                              | #N/A                    | 5.9080  | 6.3708  | 4.2986  | 5.7737  | 5.7748  | 6.7515  | 6.6210  | 5.0176  | 5.6834  | 7.3215  | 0.9435  | -0.0839 | 0.5690 | 0.2449 |
| Impa1   | _IAANSITLAK_2                                                                | #N/A                    | 6.4689  | 3.1548  | 4.5146  | 5.7295  | 5.8844  | 5.5011  | 4.2703  | 5.8535  | 4.4095  | 5.0536  | 1.0018  | 0.0026  | 0.9886 | 0.0050 |
| Impa1   | _Acetyl (Protein N-term)ADPW[C[Carbamidomethyl (C)]M]Oxidation (M)DYAVILAR_2 | #N/A                    | 4.2566  | 5.1163  | 3.3820  | 3.8846  | 4.2934  | 4.2335  | 3.2678  | 3.0092  | 4.3291  | 4.9390  | 1.0793  | 0.1101  | 0.5225 | 0.2819 |
| Bckdk   | _S[Phospho (STY)]TSATDTHVELAR_3                                              | O55028_S31_M1_Bckdk     | 7.8623  | 3.1909  | 8.0232  | 4.1017  | 7.8029  | 3.9052  | 7.7971  | 3.8715  | 8.3989  | 3.8688  | 0.9716  | -0.0415 | 0.9140 | 0.0390 |
| Copb2   | _DNNGFASASLDR_2                                                              | #N/A                    | 7.0153  | 6.9360  | 7.0332  | 7.1509  | 6.3604  | 6.6191  | 7.1315  | 7.0317  | 6.9903  | 6.5790  | 0.9884  | -0.0169 | 0.6679 | 0.1753 |
| Nck2    | _DSESS[Phospho (STY)]PSDFSUSK_2                                              | O55033_S316_M1_Nck2     | 3.5364  | 4.2926  | 3.6203  | 4.1230  | 4.1809  | 3.9445  | 3.8377  | 3.9955  | 3.9242  | 5.6175  | 0.9242  | -0.1138 | 0.4324 | 0.3641 |
| Nck2    | _DAS[Phospho (STY)]PPSTDAAEYFANGSGADR_2                                      | O55033_S90_M1_Nck2      | 3.5135  | 3.7126  | 4.2003  | 3.2021  | 5.0080  | 3.0237  | 4.4177  | 3.4155  | 3.0641  | 3.1691  | 1.0740  | 0.1030  | 0.5755 | 0.2399 |
| Scca    | _EQVTNWGGAVVGTVAQAQK_2                                                       | #N/A                    | 8.6941  | 8.6482  | 8.0816  | 8.1800  | 8.4877  | 8.8233  | 8.9066  | 8.2103  | 8.7096  | 8.8691  | 1.0167  | 0.0240  | 0.4567 | 0.3403 |
| Scca    | _AKEGVAAAEK_2                                                                | #N/A                    | 8.5664  | 8.7611  | 9.2302  | 8.9505  | 9.5421  | 9.3328  | 8.8040  | 8.7996  | 9.0058  | 9.0594  | 1.0164  | 0.0235  | 0.4375 | 0.3232 |
| Scca    | _TVEGAGNAAATGPKV_2                                                           | #N/A                    | 8.4148  | 8.3565  | 8.9930  | 9.1402  | 9.6023  | 8.8632  | 8.3594  | 8.7061  | 8.8283  | 8.8531  | 1.0240  | 0.0342  | 0.4375 | 0.3591 |
| Scca    | _EGVLVGSKT[Phospho (STY)]K_2                                                 | O55042_T44_M1_Scca      | 3.8627  | 3.1181  | 3.5964  | 3.1402  | 3.0064  | 7.2351  | 3.5113  | 3.8610  | 4.3183  | 0.8708  | -0.1995 | 0.5697  | 0.2444 |        |
| Scca    | _TKEGVVHGVTVAEK_3                                                            | #N/A                    | 10.0378 | 8.8945  | 10.6769 | 9.9964  | 7.9978  | 7.3655  | 10.0352 | 7.6205  | 6.8140  | 1.0765  | 0.1064  | 0.5061  | 0.2958 |        |
| Scca    | _TKEQVTNWGGAVVGTVAQAQK_3                                                     | #N/A                    | 9.1858  | 9.3829  | 10.1392 | 9.6541  | 8.9385  | 9.1305  | 9.3721  | 8.7746  | 9.4073  | 9.5483  | 1.0140  | 0.0200  | 0.6311 | 0.1999 |
| Scca    | _TVEGAGNAAATGPKVK_2                                                          | #N/A                    | 5.0936  | 5.8131  | 5.9418  | 6.1532  | 6.2026  | 6.0938  | 5.6659  | 5.3979  | 5.9811  | 6.0077  | 1.0208  | 0.0297  | 0.6302 | 0.2005 |
| Scca    | _EGGVHGVTTVAEK_2                                                             | #N/A                    | 6.7313  | 6.9952  | 6.8449  | 7.3788  | 6.9664  | 6.5222  | 6.8324  | 6.6855  | 6.5659  | 6.8709  | 1.0244  | 0.0348  | 0.3280 | 0.4841 |
| Tpmt    | _Acetyl (Protein N-term)S[Phospho (STY)]LDM[Oxidation (M)]KEHPDAEVQK_2       | #N/A                    | 4.3313  | 4.2772  | 5.0290  | 5.2629  | 4.4847  | 4.9196  | 5.0238  | 4.8673  | 4.9169  | 4.3864  | 0.9831  | -0.0246 | 0.7401 | 0.1307 |
| Akap7   | _AVQQLLETKNK_2                                                               | #N/A                    | 7.3562  | 7.6223  | 7.8409  | 7.4583  | 7.0657  | 7.7111  | 7.7142  | 7.6420  | 7.6593  | 0.9684  | -0.0464 | 0.1560  | 0.8069 |        |
| Impact  | _TTEEVEVS[Phospho (STY)]EEDPLEHPENPVK_3                                      | #N/A                    | 3.2671  | 4.0723  | 3.9539  | 10.3709 | 3.8936  | 8.8851  | 8.4298  | 9.6682  | 9.1535  | 8.7709  | 0.6374  | -0.6496 | 0.0720 | 1.1426 |
| Impact  | _KTKEVEVES[Phospho (STY)]EEDPLEHPENPVK_4                                     | #N/A                    | 3.3598  | 8.7395  | 9.4915  | 10.5446 | 8.6964  | 4.1211  | 4.2863  | 8.8680  | 8.7507  | 8.03    |         |         |        |        |



|          |                                                                  |                       |         |         |         |         |         |         |         |         |         |         |         |         |        |        |
|----------|------------------------------------------------------------------|-----------------------|---------|---------|---------|---------|---------|---------|---------|---------|---------|---------|---------|---------|--------|--------|
| Nipsnap2 | _KETSSLYK_2                                                      | #N/A                  | 5.5914  | 5.1185  | 4.7511  | 5.4446  | 5.6086  | 3.2555  | 3.2508  | 5.2267  | 5.3223  | 5.3158  | 1.0382  | 0.0541  | 0.7722 | 0.1123 |
| Nipsnap2 | _LQFHNVPKE[Carbamidomethyl (C)]LDAYNK_3                          | #N/A                  | 5.1616  | 6.1719  | 5.7011  | 3.6441  | 5.5908  | 4.9261  | 5.7020  | 5.6132  | 5.7616  | 5.3985  | 0.9253  | -0.1120 | 0.3804 | 0.4198 |
| Nipsnap2 | _SDMLLSR_2                                                       | #N/A                  | 4.0090  | 2.0105  | 3.1950  | 3.6976  | 3.1347  | 3.5191  | 3.4123  | 4.4209  | 4.0604  | 3.6646  | 0.8379  | -0.2551 | 0.1488 | 0.8273 |
| Septin7  | _ILEQNSNRT[Phospho (STY)]EK_2                                    | #N/A                  | 8.7109  | 8.6421  | 8.8287  | 9.1454  | 7.3614  | 8.6201  | 8.6451  | 8.2603  | 8.6611  | 8.9047  | 0.9923  | -0.0112 | 0.8458 | 0.0727 |
| Septin7  | _LKQSEAEIQR_2                                                    | #N/A                  | 9.1539  | 9.1381  | 9.0190  | 9.2535  | 9.1603  | 9.1546  | 9.1181  | 9.0154  | 9.2093  | 9.2216  | 1.0006  | 0.0009  | 0.9318 | 0.0054 |
| Septin7  | _FEDYLNACSR_2                                                    | #N/A                  | 8.8254  | 8.2076  | 8.2858  | 8.8925  | 8.8209  | 8.6512  | 8.7734  | 8.5102  | 8.5479  | 8.5226  | 1.0030  | 0.0043  | 0.8773 | 0.0568 |
| Septin7  | _NLEGVGFANLPNQVIR_2                                              | #N/A                  | 8.6147  | 8.4454  | 8.5413  | 8.8411  | 8.4820  | 8.8110  | 8.5105  | 8.4808  | 8.7244  | 8.8550  | 1.0055  | 0.0079  | 0.6345 | 0.1976 |
| Septin7  | _ANWVEAQR_2                                                      | #N/A                  | 8.2541  | 8.1866  | 8.3046  | 8.4701  | 8.6089  | 8.3643  | 8.3296  | 8.2220  | 8.3884  | 8.3749  | 1.0043  | 0.0062  | 0.6791 | 0.1681 |
| Septin7  | _ADLTPEEC[Carbamidomethyl (C)]QQFK_2                             | #N/A                  | 8.1547  | 7.6706  | 7.4893  | 7.8295  | 7.9637  | 7.7853  | 7.9162  | 7.8148  | 7.5345  | 7.6784  | 1.0103  | 0.0148  | 0.5710 | 0.2433 |
| Septin7  | _ADLTPEEC[Carbamidomethyl (C)]QQFK_2                             | #N/A                  | 7.2978  | 7.5008  | 7.6887  | 7.2671  | 7.7680  | 7.7106  | 7.6387  | 7.1201  | 7.1249  | 7.7300  | 1.0183  | 0.0262  | 0.4494 | 0.3474 |
| Septin7  | _LAAVTYNGVGNK_2                                                  | #N/A                  | 6.8236  | 6.7602  | 7.1646  | 7.0013  | 6.5056  | 6.5827  | 7.1155  | 6.3976  | 7.0297  | 6.9873  | 0.9889  | -0.0161 | 0.6855 | 0.1640 |
| Septin7  | _STUNSLFULTDYSPEYPGSPH_3                                         | #N/A                  | 4.7643  | 6.3777  | 6.5058  | 7.7636  | 6.1616  | 5.5475  | 5.4188  | 6.3818  | 5.4722  | 5.9695  | 1.0647  | 0.0905  | 0.5087 | 0.2936 |
| Septin7  | _IYEFPTDEEENKLVK_3                                               | #N/A                  | 0.6072  | 5.8878  | 6.4504  | 6.4760  | 6.8193  | 6.2794  | 5.8744  | 5.7318  | 5.8561  | 6.2718  | 1.0668  | 0.0933  | 0.0727 | 1.1386 |
| Septin7  | _DVTNNVHYENYR_2                                                  | #N/A                  | 6.9587  | 6.8458  | 7.0964  | 7.1471  | 7.1746  | 7.1388  | 6.8072  | 6.7117  | 7.2633  | 7.2639  | 1.0069  | 0.0100  | 0.7249 | 0.1397 |
| Septin7  | _GOLTKS[Phospho (STY)]PLAQ[M]Oxidation (M)]EERR_3                | #N/A                  | 5.9800  | 7.0594  | 7.8003  | 3.4755  | 5.9379  | 6.6120  | 6.3082  | 6.8203  | 6.6024  | 6.5031  | 0.9368  | -0.0941 | 0.6011 | 0.2210 |
| Septin7  | _IYEFPTDEEENK_2                                                  | #N/A                  | 6.6312  | 6.1021  | 4.1389  | 9.0034  | 6.4056  | 6.0074  | 6.7226  | 5.9583  | 6.2885  | 6.7310  | 0.9932  | -0.0098 | 0.9583 | 0.0185 |
| Septin7  | _S[Phospho (STY)]PLAQ[M]Oxidation (M)]EERR_2                     | #N/A                  | 9.0116  | 7.9937  | 7.5165  | 8.8223  | 7.6699  | 8.1179  | 8.1200  | 7.9747  | 8.4109  | 8.1246  | 1.0038  | 0.0055  | 0.9245 | 0.0341 |
| Septin7  | _NLEAQHKELEK_2                                                   | #N/A                  | 4.7883  | 5.4262  | 5.1037  | 4.2905  | 4.2669  | 4.9863  | 4.1070  | 4.7908  | 4.0019  | 5.3939  | 1.0518  | 0.0729  | 0.5154 | 0.2878 |
| Septin7  | _TIVQVEQSK_2                                                     | #N/A                  | 3.1994  | 1.9263  | 3.5925  | 2.5508  | 3.6332  | 3.7683  | 3.2845  | 3.6990  | 3.5123  | 3.6946  | 0.8771  | -0.1891 | 0.2849 | 0.5454 |
| Septin7  | _THMQDKL_2                                                       | #N/A                  | 4.1438  | 3.3170  | 3.8924  | 5.4026  | 4.7548  | 3.1221  | 3.2153  | 3.1170  | 4.2665  | 3.9014  | 1.1426  | 0.1924  | 0.3043 | 0.5167 |
| Septin7  | _S[Phospho (STY)]PLAQ[M]Oxidation (M)]EERR_2                     | #N/A                  | 10.5858 | 10.0524 | 9.7924  | 11.1053 | 9.5364  | 9.8527  | 10.3507 | 10.0609 | 10.0766 | 10.2073 | 0.9987  | -0.0019 | 0.9651 | 0.0154 |
| Septin7  | _LEQONSRR_2                                                      | #N/A                  | 6.8522  | 7.1607  | 7.1715  | 7.2769  | 7.3877  | 7.2754  | 6.8748  | 7.0613  | 6.9079  | 6.8185  | 1.0356  | 0.0504  | 0.0424 | 1.3730 |
| Septin7  | _QTEEKANWEAQR_2                                                  | #N/A                  | 3.5541  | 3.5741  | 3.9817  | 3.2049  | 3.3918  | 3.0091  | 3.9716  | 3.5237  | 3.6584  | 4.0097  | 0.9108  | -0.1348 | 0.1224 | 0.9122 |
| Acot1    | _YRADSS[Phospho (STY)]HGLDLAR_3                                  | O55137_S56_M1_Acot1   | 3.6208  | 3.5993  | 4.3136  | 3.3155  | 4.2534  | 3.1370  | 5.9900  | 3.3022  | 2.9508  | 3.2825  | 0.9552  | -0.0661 | 0.7834 | 0.1060 |
| Acot1    | _QLQSEC[Carbamidomethyl (C)]LHVS[Phospho (STY)]PK_2              | #N/A                  | 4.9308  | 4.6228  | 3.8435  | 5.1171  | 4.1163  | 4.9740  | 4.9148  | 5.1015  | 4.5514  | 0.9570  | -0.0635 | 0.4815  | 0.3174 | 0.1749 |
| Rpl35a   | _IEGVYAR_2                                                       | #N/A                  | 5.1865  | 5.2620  | 4.3490  | 5.2832  | 4.4669  | 4.9514  | 4.1729  | 5.8393  | 5.0164  | 5.2506  | 0.9688  | -0.0443 | 0.6685 | 0.1574 |
| Rpl35a   | _NNTVTPGGKPKK_2                                                  | #N/A                  | 5.2920  | 5.7875  | 5.1297  | 5.3563  | 5.9843  | 5.3127  | 5.6597  | 5.3383  | 5.0311  | 5.0633  | 1.0387  | 0.0547  | 0.3488 | 0.4749 |
| Atp2a2   | _EFDLSP[Phospho (STY)]AQR_2                                      | O55143_S663_M1_Atp2a2 | 12.2176 | 12.0924 | 12.6725 | 11.9788 | 11.1335 | 11.8866 | 12.7909 | 12.2053 | 12.1555 | 11.9503 | 0.9773  | -0.0331 | 0.3716 | 0.4300 |
| Atp2a2   | _VWGS[Phospho (STY)]NELPAEEGK_2                                  | O55143_S38_M1_Atp2a2  | 8.2114  | 7.8609  | 8.1931  | 7.8634  | 7.0975  | 7.9228  | 8.5805  | 7.9188  | 8.0677  | 7.9907  | 0.9654  | -0.0507 | 0.2718 | 0.5657 |
| Atp2a2   | _VGEATETALTC[Carbamidomethyl (C)]LVEK_2                          | #N/A                  | 6.7258  | 6.0947  | 6.7929  | 5.9400  | 6.4280  | 6.2426  | 6.8104  | 6.5504  | 6.9669  | 6.1568  | 0.9622  | -0.0556 | 0.2956 | 0.5293 |
| Atp2a2   | _VDGSLTGESVSIK_2                                                 | #N/A                  | 6.5091  | 6.0510  | 5.6249  | 6.1612  | 5.1997  | 5.6927  | 5.9363  | 6.1398  | 6.0033  | 6.0437  | 0.9739  | -0.0382 | 0.5265 | 0.2786 |
| Atp2a2   | _NM[Oxidation (M)]FSGTNAAGK_2                                    | #N/A                  | 6.0655  | 6.4199  | 6.7073  | 4.3279  | 4.6075  | 5.9814  | 5.5914  | 6.5832  | 6.7074  | 6.1201  | 0.9095  | -0.1368 | 0.3252 | 0.4878 |
| Atp2a2   | _EWGS[Phospho (STY)]GSDTLR_2                                     | O55143_S553_M1_Atp2a2 | 3.5777  | 3.6484  | 4.2645  | 3.2664  | 4.2043  | 6.9221  | 4.4819  | 3.3513  | 2.9999  | 7.5230  | 0.9401  | -0.0892 | 0.8018 | 0.0959 |
| Atp2a2   | _VIM[Oxidation (M)]TGDGNK_2                                      | #N/A                  | 5.9268  | 5.3303  | 5.9377  | 5.1448  | 4.7575  | 6.0719  | 5.8597  | 5.7959  | 5.6989  | 5.2678  | 0.9775  | -0.0329 | 0.6722 | 0.1725 |
| Atp2a2   | _SLPVSVELTGC[Carbamidomethyl (C)]TSVVC[Carbamidomethyl (C)]SDK_2 | #N/A                  | 6.5307  | 6.6515  | 3.8955  | 6.2502  | 6.1428  | 6.2980  | 7.0697  | 6.1799  | 6.5927  | 6.3255  | 0.9113  | -0.1341 | 0.3200 | 0.4948 |
| Atp2a2   | _ANAC[Carbamidomethyl (C)]NSWK_2                                 | #N/A                  | 6.0398  | 6.3691  | 5.6882  | 3.4673  | 6.2009  | 5.9336  | 6.1931  | 6.9399  | 6.5861  | 6.6594  | 0.8517  | -0.2316 | 0.1208 | 0.9179 |
| Atp2a2   | _IGFGQDEEDVTSK_2                                                 | #N/A                  | 6.3757  | 5.7876  | 3.1954  | 6.4305  | 4.7290  | 5.3358  | 6.7974  | 6.6416  | 6.0584  | 6.1222  | 0.8289  | -0.2707 | 0.1247 | 0.9042 |
| Atp2a2   | _DIVPGDVEIAVGDPADIR_3                                            | #N/A                  | 5.9060  | 5.6179  | 5.6636  | 4.4760  | 4.8582  | 5.7330  | 6.0340  | 5.2923  | 4.7017  | 5.0959  | 1.0180  | 0.0257  | 0.8018 | 0.0959 |
| Atp2a2   | _IEVASSWK_2                                                      | #N/A                  | 4.9213  | 4.0743  | 3.8471  | 4.3998  | 4.0566  | 4.1124  | 4.3034  | 4.5611  | 4.4170  | 4.4012  | 0.9577  | -0.0624 | 0.3721 | 0.4294 |
| Atp2a2   | _MNVVFOTEK_2                                                     | #N/A                  | 3.8591  | 3.6643  | 3.8877  | 4.8579  | 3.7575  | 4.2119  | 4.1761  | 3.3092  | 3.3767  | 4.3573  | 1.0617  | 0.0864  | 0.4706 | 0.3273 |
| Atp2a2   | _NYLEQPGKEC[Carbamidomethyl (C)]VQPATK_3                         | #N/A                  | 5.2111  | 5.0920  | 3.9994  | 5.0289  | 4.7112  | 4.7927  | 4.6921  | 5.4724  | 4.8570  | 4.1107  | 1.0048  | 0.0069  | 0.9439 | 0.0251 |
| Atp2a2   | _GTAVAC[Carbamidomethyl (C)]R_2                                  | #N/A                  | 2.9151  | 4.0027  | 4.0179  | 3.6934  | 3.5597  | 4.1235  | 3.3219  | 4.1685  | 4.0674  | 3.9311  | 0.9604  | -0.0584 | 0.5901 | 0.2290 |
| Atp2a2   | _TASEM[Oxidation (M)]VLADONFSTVAAVEGR_3                          | #N/A                  | 5.5345  | 5.5671  | 6.3412  | 5.9564  | 4.5627  | 6.0977  | 5.5508  | 5.5534  | 5.7953  | 5.6298  | 1.0079  | 0.0113  | 0.8946 | 0.0484 |
| Atp2a2   | _TGLTLTNQMSVC[Carbamidomethyl (C)]R_2                            | #N/A                  | 3.2709  | 7.6895  | 8.3535  | 8.2360  | 7.3537  | 7.6358  | 7.8617  | 7.5594  | 7.4270  | 7.6973  | 0.9284  | -0.1071 | 0.5912 | 0.2282 |
| Atp2a2   | _VFLQSFDEITAM[Oxidation (M)]TGDGVNDAPALK_3                       | #N/A                  | 3.5629  | 4.3191  | 3.2965  | 4.0965  | 4.2074  | 3.9180  | 3.8112  | 4.0220  | 3.6706  | 4.0635  | 1.0021  | 0.0031  | 0.9703 | 0.0131 |
| Atp2a2   | _VFLQSFDEITAM[Oxidation (M)]TGDGVNDAPALK_3                       | #N/A                  | 3.4552  | 4.2604  | 4.3166  | 3.8603  | 4.0817  | 3.6478  | 4.0086  | 3.1408  | 3.4399  | 3.5376  | 1.1147  | 0.1567  | 0.1106 | 0.9563 |
| Atp2a2   | _YETNLTVGVC[Carbamidomethyl (C)]VGM[Oxidation (M)]LPPR_2         | #N/A                  | 2.9476  | 4.2786  | 3.6344  | 4.1370  | 3.5741  | 4.1554  | 3.8517  | 3.9814  | 3.6300  | 4.1040  | 0.9733  | -0.0391 | 0.7099 | 0.1488 |
| Atp2a2   | _RDEMVATEQR_3                                                    | #N/A                  | 2.9027  | 3.6590  | 4.1372  | 3.2558  | 3.5473  | 3.0773  | 4.4713  | 3.3618  | 3.0104  | 3.2228  | 0.9753  | -0.0360 | 0.8076 | 0.0928 |
| Pja1     | _SR[Phospho (STY)]PFASR_2                                        | O55176_S32_M1_Pja1    | 6.9584  | 7.1567  | 6.7995  | 7.1402  | 3.5899  | 4.1396  | 7.0778  | 6.9832  | 7.0058  | 6.5688  | 0.8632  | -0.2122 | 0.2944 | 0.5310 |
| Pja1     | _EQPQSS[Phospho (STY)]GESWELPGKEELR_3                            | O55176_S341_M1_Pja1   | 3.9826  | 3.3598  | 3.7162  | 3.2600  | 3.1263  | 3.0475  | 3.7412  | 4.0402  | 3.4083  | 4.4381  | 0.8742  | -0.1940 | 0.0885 | 1.0528 |
| Pja1     | _FTSVNHDAKEEC[Carbamidomethyl (C)]GVES[Phospho (STY)]PPAAR_4     | O55176_S137_M1_Pja1   | 3.3372  | 6.6536  | 4.5718  | 7.7502  | 7.0531  | 7.3170  | 6.5079  | 7.0890  | 5.4684  | 7.1253  | 0.9337  | -0.0989 | 0.6587 | 0.1813 |
| Pja1     | _VFOT[Phospho (STY)]DQDODDVHSTR_2                                | #N/A                  | 3.7237  | 3.6901  | 4.1915  | 8.3740  | 5.9971  | 3.7792  | 3.8836  | 7.4085  | 6.8521  | 6.7654  | 0.7964  | -0.3285 | 0.3025 | 0.5192 |
| Pja1     | _YYEEDS[Phospho (STY)]DQDKVM[Oxidation (M)]AALR_3                | O55176_S317_M1_Pja1   | 4.2206  | 3.4760  | 3.9543  | 3.4388  | 3.3643  | 3.2603  | 3.1534  | 3.1789  | 4.3283  | 3.1753  | 1.0463  | 0.0653  | 0.6082 | 0.2159 |
| Pja1     | _GNNS[Phospho (STY)]LER_2                                        | O55176_S175_M1_Pja1   | 3.0991  | 4.1271  | 3.7859  | 4.2886  | 4.0154  | 4.3172  | 4.0032  | 3.8299  | 3.4785  | 4.2556  | 1.0121  | 0.0173  | 0.8638 | 0.0636 |
| Pmb5     | _GFLGVYVDSGNR_2                                                  | #N/A                  | 7.7982  | 7.9051  | 8.1633  | 7.6265  | 7.0185  | 7.6972  | 8.0024  | 7.4009  | 7.9094  | 7.7982  | 0.9902  | -0.0142 | 0.7400 | 0.1308 |
| Pmb5     | _RGFLGVYVDSGNR_3                                                 | #N/A                  | 7.3648  | 7.0203  | 7.7283  | 6.7316  | 5.9688  | 7.1787  | 6.9554  | 7.3335  | 7.3145  | 6.8857  | 0.9827  | -0.0252 | 0.7117 | 0.1477 |
| Pmb5     | _AHQATYR_2                                                       | #N/A                  | 5.4262  | 5.2835  | 3.3583  | 4.9265  | 5.7223  | 6.0243  | 6.1289  | 5.8124  | 5.8806  | 5.9004  | 0.8639  | -0.2110 | 0.1340 | 0.8728 |
| Pmb5     | _ATAGAVIASQTVK_2                                                 | #N/A                  | 5.0267  | 5.2941  | 3.5113  | 5.5985  | 5.1648  | 4.8392  | 4.7892  | 5.3988  | 5.5869  | 5.6091  | 0.9176  | -0.1240 | 0.3052 | 0.5154 |
| Pmb5     | _VEEAYDLAR_2                                                     | #N/A                  | 5.0262  | 4.5661  | 3.7738  | 4.2563  | 5.2837  | 5.4648  | 3.9911  | 5.4601  | 5.2751  | 4.4456  | 0.9865  | -0.0196 | 0.8843 | 0.0534 |
| Pmb5     | _DAYSGGAVNLVHVR_2                                                | #N/A                  | 4.0557  | 3.7125  | 3.3636  | 4.4082  | 3.3330  | 4.2504  | 3.6681  | 4.0938  | 4.3929  | 4.7977  | 0.9093  | -0.1371 | 0.2351 | 0.6287 |
| Pmb5     | _FLHGVVAASR_3                                                    | #N/A                  | 2.9157  | 3.7209  | 3.6025  | 4.1052  | 3.5422  | 4.1873  | 3.8198  | 4.0133  | 3.5285  | 3.8137  | 0.9697  | -0.0444 | 0.6538 | 0.1845 |
| Dhx9     | _AEENSGVSSGVSG[Phospho (STY)]PGPTWDR_2                           | O70133_S136_M1_Dhx9   | 3.9362  | 3.1916  | 3.2205  | 3.7231  | 3.0799  | 3.5447  | 3.4378  | 6.6590  | 4.0439  | 3.6901  | 0.7738  | -0.3700 | 0.1388 | 0.8577 |
| Dhx9     | _DFNVLVR_2                                                       | #N/A                  | 4.4557  | 3.2902  | 3.7684  | 3.6470  | 3.1785  | 3.4461  | 4.1425  | 3.3393  | 4.1617  | 3.5916  | 0.9533  | -0.0690 | 0.5593 | 0.2597 |
| Dhx9     | _                                                                |                       |         |         |         |         |         |         |         |         |         |         |         |         |        |        |



|         |                                                                                                |                        |         |         |         |         |         |         |         |         |         |         |         |         |        |        |
|---------|------------------------------------------------------------------------------------------------|------------------------|---------|---------|---------|---------|---------|---------|---------|---------|---------|---------|---------|---------|--------|--------|
| Stmn3   | _ASGQS[Phospho (STY)]FEVLK_2                                                                   | 070166_553_M1_Stmn3    | 3.6767  | 3.4526  | 3.9822  | 5.2772  | 3.3037  | 4.3044  | 4.2118  | 5.4417  | 3.8849  | 4.4942  | 0.8872  | -0.1727 | 0.2953 | 0.5298 |
| Stmn3   | _RAS[Phospho (STY)]GG[Phospho (STY)]FEVLK_2                                                    | #N/A                   | 3.5574  | 3.7109  | 3.7176  | 4.7486  | 3.5992  | 3.8795  | 3.7113  | 4.7803  | 3.8329  | 4.3115  | 0.9302  | -0.1043 | 0.3591 | 0.4448 |
| Stmn3   | _RKDAS[Phospho (STY)]LELQK_2                                                                   | #N/A                   | 4.3109  | 4.6030  | 4.6856  | 4.4939  | 4.4759  | 3.8919  | 4.3537  | 5.0308  | 3.3416  | 4.1193  | 1.0472  | 0.0666  | 0.5407 | 0.2670 |
| Stmn3   | _KDA[Phospho (STY)]LELQKR_3                                                                    | #N/A                   | 4.0210  | 3.8380  | 3.4640  | 4.2827  | 3.6594  | 4.0701  | 4.4309  | 2.9892  | 3.4072  | 4.1782  | 1.0367  | 0.0521  | 0.6632 | 0.1783 |
| Stmn3   | _NKEQREEM[Phospho (STY)]G_2                                                                    | 070166_5179_M1_Stmn3   | 3.3813  | 4.1865  | 4.3904  | 3.9342  | 4.0079  | 3.7216  | 4.0824  | 3.0670  | 3.3661  | 3.6114  | 1.1147  | 0.1567  | 0.1409 | 0.8510 |
| Pip4k2a | _IYDGNHKK_2                                                                                    | #N/A                   | 6.5760  | 6.4527  | 6.4374  | 7.0826  | 6.4857  | 6.5602  | 6.9170  | 6.9888  | 6.4560  | 6.8363  | 0.9705  | -0.0432 | 0.2339 | 0.6309 |
| Pip4k2a | _DVEFLAQK_2                                                                                    | #N/A                   | 3.9282  | 3.0862  | 4.4686  | 3.4704  | 4.1164  | 4.1757  | 3.1851  | 4.4546  | 4.6006  | 4.9279  | 0.9027  | -0.1477 | 0.3245 | 0.4888 |
| Pip4k2a | _TGDDQDFQNSLTR_2                                                                               | #N/A                   | 3.0246  | 5.4596  | 3.7114  | 4.2909  | 5.0750  | 4.7406  | 5.4677  | 5.2802  | 5.2133  | 4.1810  | 0.8705  | -0.2000 | 0.2406 | 0.2406 |
| Chrn4   | _C[Carbamidomethyl (C)]T[C[Carbamidomethyl (C)]EP[Phospho (STY)]PV[Phospho (STY)]PTVLK_3       | 070174_5540_M2_Chrn4   | 4.3544  | 4.3726  | 3.5403  | 4.0430  | 4.2609  | 3.8645  | 3.7577  | 4.0755  | 3.7241  | 4.0100  | 1.0465  | 0.0655  | 0.3460 | 0.4609 |
| Eif3d   | _IFHTVTITDQVR_3                                                                                | #N/A                   | 5.1152  | 4.7267  | 4.0388  | 3.3542  | 4.5229  | 3.1758  | 4.4207  | 4.4520  | 5.0438  | 4.7928  | 0.8981  | -0.1551 | 0.2944 | 0.5310 |
| Eef1b   | _TPAGGLVNDYLADK_2                                                                              | #N/A                   | 5.8797  | 6.0685  | 5.8737  | 6.2794  | 6.6386  | 6.2981  | 6.4242  | 6.2193  | 6.3628  | 6.2474  | 0.9778  | -0.0324 | 0.3900 | 0.4090 |
| Eef1b   | _SIQADGLVWGSSK_2                                                                               | #N/A                   | 3.5834  | 5.2512  | 5.5796  | 4.2426  | 5.7317  | 4.7781  | 4.4876  | 4.0417  | 2.9942  | 3.2390  | 1.3172  | 0.3974  | 0.0491 | 1.3092 |
| Eef1b   | _DDDDIDLFG[Phospho (STY)]DDEESEAEK_3                                                           | #N/A                   | 4.3824  | 4.3446  | 3.5684  | 9.5124  | 5.8975  | 3.8926  | 3.7857  | 8.0697  | 3.6960  | 4.0380  | 1.0753  | 0.1048  | 0.8006 | 0.0966 |
| Eef1b   | _VGPS[Phospho (STY)]VEDTTSGGAADAK_2                                                            | 070251_583_M1_Eef1b    | 3.9078  | 3.0373  | 3.9179  | 3.7338  | 3.0335  | 3.5393  | 3.6701  | 5.8407  | 3.8104  | 3.5708  | 0.8355  | -0.2593 | 0.1822 | 0.7395 |
| Eef1b   | _YGPSSVEDTTGGAADAKDDDDIDLFG[Phospho (STY)]DDEESEAEK_4                                          | #N/A                   | 4.3798  | 2.9626  | 4.1135  | 3.6573  | 3.5236  | 3.1010  | 3.8056  | 3.3439  | 3.6429  | 3.3346  | 1.0258  | 0.0368  | 0.7666 | 0.1154 |
| Eef1b   | _DDDDIDLFG[Phospho (STY)]DDEESEAEK_2                                                           | #N/A                   | 3.5329  | 4.2892  | 3.2666  | 9.3351  | 4.1775  | 3.9480  | 4.4595  | 9.0104  | 2.9890  | 3.9885  | 0.9308  | -0.1034 | 0.8274 | 0.0823 |
| Grk6    | ridomethyl (C)[C[Carbamidomethyl (C)]GNC[Carbamidomethyl (C)]S[Phospho (STY)]DS[Phospho (STY)] | 070293_5566_M2_Grk6    | 4.1727  | 3.0534  | 3.3587  | 3.8614  | 2.9417  | 3.6829  | 3.5760  | 4.2571  | 3.9057  | 3.8283  | 0.9024  | -0.1482 | 0.1947 | 0.7106 |
| Grk6    | _DVLDEQ[Phospho (STY)]TWK_2                                                                    | 070293_5484_M1_Grk6    | 3.2252  | 4.1172  | 4.4597  | 4.0035  | 3.8698  | 4.2557  | 4.1518  | 2.9977  | 3.2967  | 3.6808  | 1.1293  | 0.1755  | 0.1583 | 0.8006 |
| Atxn2   | _DNS[Phospho (STY)]EEFLKR_2                                                                    | 070305_5400_M1_Atxn2   | 5.9586  | 9.4772  | 9.7870  | 10.2941 | 8.4958  | 9.5007  | 9.8444  | 9.5169  | 9.3838  | 9.7631  | 0.9895  | -0.0153 | 0.7531 | 0.1232 |
| Atxn2   | _VALENDNR[Phospho (STY)]EEKYTAQVR_3                                                            | 070305_5435_M1_Atxn2   | 3.7895  | 4.2598  | 4.1414  | 3.1432  | 4.0811  | 4.3355  | 4.3587  | 4.7371  | 3.1230  | 3.1102  | 1.0329  | 0.0467  | 0.7614 | 0.1184 |
| Atxn2   | _ASSETS[Phospho (STY)]PSFK_2                                                                   | 070305_5741_M1_Atxn2   | 6.0586  | 3.7701  | 3.3060  | 4.3506  | 4.2169  | 4.1380  | 4.4988  | 5.4583  | 6.0610  | 4.0278  | 0.8594  | -0.2187 | 0.2744 | 0.5616 |
| Atxn2   | _QNS[Phospho (STY)]PAGSKENVK_2                                                                 | 070305_5727_M1_Atxn2   | 5.3861  | 3.2848  | 3.7630  | 4.4200  | 3.1731  | 3.4515  | 3.4551  | 3.6944  | 4.7759  | 2.9841  | 1.0498  | 0.0702  | 0.7336 | 0.1345 |
| Atxn2   | _TNS[Phospho (STY)]PS[Phospho (STY)]PSMLNADHKK_3                                               | #N/A                   | 4.2717  | 3.5271  | 4.0053  | 3.3877  | 3.4154  | 3.2092  | 3.1024  | 3.2300  | 4.3794  | 3.3547  | 1.0340  | 0.0482  | 0.7118 | 0.1477 |
| Atxn2   | _TNS[Phospho (STY)]PS[Phospho (STY)]PSMLNADHKK_2                                               | #N/A                   | 3.9149  | 3.3740  | 3.9114  | 5.4330  | 3.4182  | 4.0657  | 3.7525  | 3.6912  | 3.7315  | 3.7080  | 1.0803  | 0.1114  | 0.4568 | 0.3402 |
| Atxn2   | _MSSGPPRM[Oxidation (M)]S[Phospho (STY)]PK_2                                                   | 070305_5593_M1_Atxn2   | 4.2392  | 3.5435  | 3.4251  | 4.5772  | 3.3649  | 4.3646  | 3.2246  | 4.1907  | 4.2239  | 3.8948  | 1.0092  | 0.0132  | 0.9164 | 0.0964 |
| Atxn2   | _DSFSSSSSSNC[Carbamidomethyl (C)]TSGSSK_2                                                      | #N/A                   | 3.8251  | 3.0805  | 3.5588  | 4.4209  | 2.9688  | 3.6558  | 3.2508  | 3.8986  | 4.1977  | 4.2806  | 0.9176  | -0.1241 | 0.3534 | 0.4517 |
| Atxn2   | _GM[Oxidation (M)]S[Phospho (STY)]PVSEHKK_3                                                    | 070305_5753_M1_Atxn2   | 3.3563  | 4.1125  | 4.5908  | 4.1345  | 4.0008  | 4.1246  | 4.0178  | 4.3675  | 3.1657  | 3.0777  | 1.0553  | 0.0777  | 0.4769 | 0.0731 |
| Nmt1    | _SGLS[Phospho (STY)]PANDTGAK_2                                                                 | #N/A                   | 10.4469 | 10.6201 | 10.9565 | 11.0749 | 9.2975  | 10.5796 | 10.6986 | 10.6946 | 10.3395 | 10.5176 | 0.9937  | -0.0091 | 0.8451 | 0.0791 |
| Nmt1    | _SGLS[Phospho (STY)]PANDTGAK_2                                                                 | #N/A                   | 6.4042  | 6.5999  | 7.5438  | 6.6822  | 5.9926  | 3.6157  | 7.2228  | 3.1729  | 6.3754  | 6.7156  | 1.0457  | 0.0644  | 0.7944 | 0.0939 |
| Nmt2    | _GSL[Phospho (STY)]PGGDLGAK_2                                                                  | 070311_538_M1_Nmt2     | 7.6882  | 6.8675  | 6.7699  | 7.7706  | 7.1699  | 6.6364  | 7.4792  | 3.1206  | 7.2928  | 7.1620  | 1.1437  | 0.1937  | 0.3302 | 0.4812 |
| Nmt2    | _EKXPNGSGTK[Phospho (STY)]DS[Phospho (STY)]AS[Phospho (STY)]DSQEK_2                            | 070311_566_M3_Nmt2     | 3.9958  | 3.7523  | 3.7295  | 3.9256  | 3.6213  | 3.3659  | 3.8344  | 5.2590  | 4.0784  | 3.8004  | 0.8714  | -0.1985 | 0.0981 | 1.0881 |
| Epb412  | _QRS[Phospho (STY)]YNLWAK_2                                                                    | #N/A                   | 6.8577  | 3.8464  | 4.0666  | 4.5692  | 3.7347  | 4.3908  | 4.2839  | 3.5492  | 3.1978  | 3.0354  | 1.3015  | 0.3802  | 0.1314 | 0.8814 |
| Epb412  | _Acetyl (Protein N-term)]TTEVGS[Phospho (STY)]ASEVKK_2                                         | 070318_57_M1_Epb412    | 6.6786  | 6.0861  | 3.7210  | 4.2237  | 4.0802  | 6.1311  | 5.8570  | 6.2664  | 4.1907  | 4.0798  | 0.8798  | -0.1847 | 0.3504 | 0.4555 |
| Epb412  | _LVS[Phospho (STY)]PEQPPK_2                                                                    | 070318_5492_M1_Epb412  | 6.3556  | 5.8055  | 3.7934  | 6.0728  | 3.7331  | 5.3327  | 6.5327  | 5.6193  | 5.8721  | 6.1837  | 0.8563  | -0.2238 | 0.1899 | 0.7215 |
| Epb412  | _EVQTSKLKAEVAS[Phospho (STY)]QK_2                                                              | #N/A                   | 4.9804  | 6.2093  | 5.8704  | 5.7329  | 5.6850  | 6.4431  | 6.4298  | 6.0611  | 5.5353  | 5.8356  | 0.9756  | -0.0356 | 0.6385 | 0.1949 |
| Epb412  | _FM[Oxidation (M)]S[Phospho (STY)]PGHGGQTR_2                                                   | #N/A                   | 6.4730  | 5.5489  | 6.2349  | 6.9475  | 5.0813  | 5.8182  | 5.7868  | 5.3897  | 5.9234  | 5.4628  | 1.0668  | 0.0933  | 0.3226 | 0.4913 |
| Epb412  | _EPTQADVEDQLQKKE[Phospho (STY)]PEESR_3                                                         | #N/A                   | 2.9875  | 3.7927  | 3.6743  | 5.2116  | 3.6140  | 4.4762  | 4.8030  | 3.5901  | 4.1440  | 3.1408  | 0.9168  | -0.1254 | 0.4340 | 0.3625 |
| Epb412  | _S[Phospho (STY)]YNLWAK_2                                                                      | #N/A                   | 3.9509  | 2.2753  | 3.1368  | 3.6395  | 3.0765  | 3.1521  | 3.2542  | 2.9782  | 4.1276  | 3.6065  | 0.9588  | -0.0606 | 0.5939 | 0.2263 |
| Epb412  | _IIVTGAALNDGQALQAIR_3                                                                          | #N/A                   | 4.8323  | 3.2618  | 3.1434  | 3.3581  | 2.6138  | 3.1455  | 3.5063  | 3.6431  | 4.2274  | 3.6130  | 0.9053  | -0.1436 | 0.4055 | 0.3930 |
| Epb412  | _AKEVENQTPVS[Phospho (STY)]EPEEKSGQGPVPR_4                                                     | 070318_538_M1_Epb412   | 3.4666  | 4.2229  | 3.2003  | 4.2449  | 4.1112  | 4.0142  | 4.3932  | 4.2571  | 3.0553  | 3.9222  | 0.9923  | -0.0112 | 0.9284 | 0.0323 |
| Epb412  | _GLSPAQADSQLENAK_2                                                                             | #N/A                   | 3.2740  | 6.4647  | 3.3400  | 7.0427  | 3.9116  | 6.0508  | 5.7977  | 4.1181  | 6.2076  | 6.0020  | 0.9065  | -0.1417 | 0.5983 | 0.2231 |
| Epb412  | _YTEGITREEQEE[Carbamidomethyl (C)]DEELEEEPGGAK_3                                               | #N/A                   | 2.9967  | 3.7530  | 4.2312  | 3.7750  | 3.6413  | 2.9833  | 3.9233  | 3.2262  | 3.5252  | 3.4523  | 1.0090  | 0.0129  | 0.9108 | 0.0408 |
| Epb412  | _KEPTQADVEDQLQKKE[Phospho (STY)]PEESR_4                                                        | #N/A                   | 3.8110  | 3.4152  | 4.4978  | 3.4996  | 3.3035  | 3.3211  | 3.2143  | 3.1180  | 4.2675  | 3.4666  | 1.0355  | 0.0503  | 0.6995 | 0.1552 |
| Gpx4    | _LIAFP[Carbamidomethyl (C)]NQGR_2                                                              | #N/A                   | 6.3990  | 6.3933  | 6.6651  | 6.3824  | 6.4503  | 6.6162  | 6.2786  | 6.9493  | 6.0390  | 6.3490  | 1.0126  | 0.0644  | 0.6404 | 0.1562 |
| Gpx4    | _YAECC[Carbamidomethyl (C)]GLR_2                                                               | #N/A                   | 5.4148  | 4.9274  | 4.8154  | 4.7726  | 5.1783  | 4.4209  | 4.4022  | 5.5498  | 4.5067  | 4.4893  | 1.0390  | 0.0551  | 0.5250 | 0.2799 |
| Gpx4    | _G[Carbamidomethyl (C)]VNGGDOAHPLWK_3                                                          | #N/A                   | 3.3775  | 4.5661  | 4.2354  | 3.2372  | 3.6933  | 3.0587  | 4.4527  | 3.7124  | 3.0290  | 3.8135  | 0.9848  | -0.0222 | 0.8843 | 0.0934 |
| Gpx4    | _TDVNYTLQVDUJAR_2                                                                              | #N/A                   | 3.0301  | 3.7863  | 4.2782  | 3.5887  | 3.6746  | 3.3985  | 3.9131  | 3.2673  | 3.2448  | 3.3845  | 1.0503  | 0.0708  | 0.4992 | 0.3017 |
| Cbfa212 | _QHS[Phospho (STY)]PGSTDSLNDGQR_2                                                              | 070374_5400_M1_Cbfa212 | 3.3371  | 3.8890  | 4.0449  | 4.5266  | 1.8146  | 4.2413  | 3.5919  | 3.2405  | 2.9928  | 1.0398  | 0.0563  | 0.8054  | 0.0940 | 0.2887 |
| Ulk1    | _IEONLQS[Phospho (STY)]PTQDQATR_2                                                              | 070405_5450_M1_Ulk1    | 3.2598  | 7.4309  | 7.3382  | 7.3238  | 5.3294  | 3.8432  | 7.6453  | 7.6361  | 3.3178  | 6.8605  | 0.9041  | -0.1455 | 0.6417 | 0.1927 |
| Ulk1    | _VPS[Phospho (STY)]PGQADVR_2                                                                   | 070405_5521_M1_Ulk1    | 3.7478  | 3.0032  | 3.4814  | 4.5261  | 2.8915  | 3.7331  | 3.6263  | 3.9760  | 4.6147  | 0.8644  | -0.2103 | 0.1445  | 0.8402 | 0.1706 |
| Psm3    | _DIREAEK_2                                                                                     | #N/A                   | 5.7141  | 5.7815  | 5.9124  | 6.1377  | 6.0445  | 5.6929  | 5.3866  | 5.7500  | 5.2876  | 5.5648  | 1.0697  | 0.0972  | 0.0144 | 1.8408 |
| Psm3    | _SNFQYNPLK_2                                                                                   | #N/A                   | 5.9834  | 6.7806  | 6.6690  | 6.4978  | 6.8840  | 6.5616  | 6.6071  | 6.7487  | 6.4827  | 1.0017  | 0.0024  | 0.9519  | 0.0214 | 0.2045 |
| Psm3    | _Acetyl (Protein N-term)]SSGTTGIDLSASTSPDGR_2                                                  | #N/A                   | 5.0831  | 5.3343  | 3.8105  | 4.6022  | 5.5073  | 5.8716  | 5.4559  | 4.3791  | 4.6941  | 4.9593  | 1.0334  | 0.0474  | 0.7060 | 0.1512 |
| Psm3    | _AVENSSAIGR_2                                                                                  | #N/A                   | 3.6441  | 4.7625  | 4.3309  | 4.9298  | 5.1499  | 4.1506  | 3.6049  | 3.2849  | 3.9008  | 4.2694  | 1.1938  | 0.2556  | 0.0578 | 1.2378 |
| Psm3    | _ESLKEEDS[Phospho (STY)]DDDNM[Oxidation (M)]_2                                                 | #N/A                   | 12.1506 | 12.2440 | 12.6894 | 12.8730 | 12.2021 | 12.4247 | 12.4828 | 12.0563 | 12.2228 | 12.2891 | 1.0137  | 0.0196  | 0.3382 | 0.4709 |
| Psm3    | _YAKESLKEEDS[Phospho (STY)]DDDNM[Oxidation (M)]_2                                              | #N/A                   | 4.1377  | 5.0967  | 5.1163  | 3.9903  | 4.3593  | 4.4082  | 4.9942  | 4.2497  | 4.4425  | 3.1987  | 1.0703  | 0.0980  | 0.4629 | 0.3345 |
| Sbx7    | _EFGSPTT[Phospho (STY)]PSEQR_2                                                                 | 070439_779_M1_Sbx7     | 10.7139 | 10.4534 | 11.1909 | 10.5643 | 9.8196  | 10.6214 | 11.2733 | 10.6486 | 10.7741 | 10.5270 | 0.9773  | -0.0331 | 0.3749 | 0.4260 |
| Sbx7    | _TLNQLGT[Phospho (STY)]QDSPELR_2                                                               | 070439_741_M1_Sbx7     | 4.7962  | 7.2650  | 7.5506  | 7.5043  | 6.6395  | 7.2692  | 7.6277  | 7.2897  | 7.7030  | 6.5990  | 0.9360  | -0.0954 | 0.4378 | 0.3587 |
| Sbx7    | _Acetyl (Protein N-term)]S[Phospho (STY)]YTPGGGDSQALQAR_2                                      | 070439_52_M1_Sbx7      | 4.9319  | 4.9920  | 5.0148  | 4.9371  | 4.8999  | 4.6303  | 5.2746  | 4.7896  | 4.7556  | 6.2569  | 0.9301  | -0.1045 | 0.2333 | 0.6320 |
| Sbx7    | _ITQC[Carbamidomethyl (C)]SVEIKR_2                                                             | #N/A                   | 3.4569  | 4.2132  | 3.1906  | 4.2352  | 4.1015  | 4.0239  | 4.3835  | 4.2668  | 3.0650  | 3.9125  | 0.9906  | -0.0136 | 0.9128 | 0.0396 |
| Gnaz    | _SSEHYLEDNAAYLNDLR_3                                                                           | #N/A                   | 7.4403  | 7.2822  | 7.9536  | 7.1758  | 5.9419  | 6.9171  | 7.1647  | 7.0102  | 6.8190  | 0.9952  |         |         |        |        |



|        |                                                                           |                        |         |         |         |         |        |         |         |         |         |         |         |         |        |        |
|--------|---------------------------------------------------------------------------|------------------------|---------|---------|---------|---------|--------|---------|---------|---------|---------|---------|---------|---------|--------|--------|
| Hcn4   | _GGLS[Phospho (STY)]PRGHSGPPR_2                                           | #N/A                   | 3.8938  | 6.8575  | 4.0740  | 4.0227  | 3.6886 | 4.2532  | 7.6801  | 3.6386  | 3.5281  | 3.8532  | 0.9551  | -0.0663 | 0.8386 | 0.0764 |
| Hcn4   | _RAS[Phospho (STY)]PHS[Phospho (STY)]S[Phospho (STY)]GESVAASLYPR_3        | O70507_S1090_M3_Hcn4   | 4.1674  | 3.4228  | 3.9011  | 3.4920  | 3.3111 | 3.3135  | 3.2066  | 3.1257  | 4.2751  | 3.4590  | 1.0241  | 0.0843  | 0.7657 | 0.1160 |
| Srp1   | _ADT[Phospho (STY)]PS[Phospho (STY)]QDEQEPNGALDSK_2                       | O70511_S450_M2_Srp1    | 5.8768  | 6.1697  | 3.6829  | 3.3566  | 3.3229 | 4.8214  | 6.0726  | 5.3509  | 5.7690  | 4.9374  | 0.8203  | -0.2857 | 0.1818 | 0.7404 |
| Cask   | _ENGSWANQVEQLQK_2                                                         | #N/A                   | 3.1901  | 3.6947  | 4.4246  | 3.9684  | 3.1778 | 3.8010  | 3.6137  | 3.0534  | 2.9788  | 3.6549  | 1.1156  | 0.1578  | 0.2099 | 0.6779 |
| Cask   | _TQSSSC[Carbamidomethyl (C)]EROS[Phospho (STY)]PSTSR_2                    | O70589_S582_M1_Cask    | 5.0657  | 4.7201  | 5.5673  | 3.8637  | 4.1990 | 4.4287  | 5.3720  | 5.3970  | 5.5397  | 4.8365  | 0.8779  | -0.1879 | 0.0914 | 1.0389 |
| Phn2   | _GAVSAQVAGFNR_2                                                           | #N/A                   | 5.9132  | 5.7831  | 6.4495  | 4.5772  | 6.2111 | 5.4278  | 6.1130  | 5.2617  | 6.0440  | 5.6479  | 0.9923  | -0.0112 | 0.9079 | 0.0420 |
| Phn2   | _NETLSQQLQAK_2                                                            | #N/A                   | 3.4421  | 3.6533  | 3.2932  | 3.8319  | 4.2347 | 3.5301  | 4.4770  | 3.2353  | 4.3801  | 3.2285  | 0.9567  | -0.0639 | 0.6205 | 0.2073 |
| Rtn2   | _EFS[Phospho (STY)]DEIEEETTSQDWGTPR_2                                     | O70622_S44_M1_Rtn2     | 3.5499  | 3.7925  | 3.2835  | 0.0661  | 4.3960 | 3.9310  | 4.4764  | 6.1919  | 4.7690  | 4.6759  | 0.8293  | -0.2701 | 0.1891 | 0.7234 |
| Tlc3   | _SGQS[Phospho (STY)]PLPAAAGPSAR_2                                         | O8B196_S1903_M1_Tlc3   | 9.2414  | 9.4718  | 9.7846  | 9.7196  | 8.7780 | 9.7279  | 9.9940  | 9.4347  | 9.2500  | 9.1252  | 0.9923  | -0.0112 | 0.7706 | 0.1132 |
| Tlc3   | _RNSDS[Phospho (STY)]AGPFAVVDHLR_2                                        | O8B196_S1062_M1_Tlc3   | 4.0906  | 3.2433  | 4.2820  | 8.8247  | 6.2240 | 3.2015  | 3.5074  | 3.2695  | 7.6949  | 3.3667  | 1.1162  | 0.1586  | 0.7214 | 0.1418 |
| Tlc3   | _GASQVS[Phospho (STY)]PSECS[Phospho (STY)]PEADEK_2                        | O8B196_S1794_M2_Tlc3   | 4.4452  | 3.1998  | 3.9708  | 3.5805  | 3.3809 | 3.2523  | 3.5344  | 4.6631  | 3.9799  | 4.5233  | 0.8714  | -0.1986 | 0.1331 | 0.8758 |
| Tlc3   | _KQDS[Phospho (STY)]DEM[Oxidation (M)]PFGC[Carbamidomethyl (C)]IK_2       | #N/A                   | 4.7394  | 7.1721  | 7.0075  | 6.5993  | 5.9833 | 6.9969  | 7.7965  | 7.4637  | 7.1116  | 6.8760  | 0.8775  | -0.1885 | 0.1104 | 0.9571 |
| Tlc3   | _IIVSSGGQVK_2                                                             | #N/A                   | 4.2679  | 3.0745  | 4.0016  | 3.5453  | 2.8959 | 3.3328  | 3.6936  | 3.4558  | 3.7549  | 3.2226  | 0.9966  | -0.0049 | 0.9676 | 0.0143 |
| Grem2  | _EVLASS[Phospho (STY)]QEALVTVR_2                                          | O8B273_S56_M1_Grem2    | 7.5507  | 7.6833  | 8.0476  | 4.2551  | 7.4605 | 7.5725  | 7.6599  | 7.6375  | 7.5519  | 7.4189  | 0.9376  | -0.0929 | 0.5298 | 0.2759 |
| Znf326 | _MNLKSK[Phospho (STY)]PTK_2                                               | #N/A                   | 3.0852  | 3.8415  | 4.3197  | 3.8635  | 3.7298 | 4.3957  | 4.7173  | 3.1377  | 3.4367  | 3.5454  | 0.9311  | -0.1030 | 0.5657 | 0.2474 |
| Znf326 | _S[Phospho (STY)]PTKTDPKINEEEK_2                                          | #N/A                   | 3.3031  | 4.1083  | 3.9899  | 4.0666  | 3.9297 | 3.8284  | 3.9805  | 3.5488  | 3.4846  | 3.9183  | 1.0370  | 0.0524  | 0.4674 | 0.3303 |
| Znf326 | _M[Oxidation (M)]NLKSK[Phospho (STY)]PTKTDPK_2                            | #N/A                   | 4.1388  | 3.9898  | 3.3248  | 5.7839  | 3.2645 | 3.8521  | 3.3139  | 4.2007  | 4.1575  | 3.7944  | 1.0243  | 0.0346  | 0.8598 | 0.0656 |
| Cttnl1 | _S[Phospho (STY)]AAELELVLK_2                                              | O8B327_S373_M1_Cttnl1  | 4.3107  | 3.5661  | 4.0443  | 4.2999  | 3.4544 | 3.1702  | 3.0634  | 3.4131  | 3.7121  | 3.2654  | 1.1320  | 0.1789  | 0.1343 | 0.8719 |
| Wdr1   | _VFASLQOVER_2                                                             | #N/A                   | 8.2448  | 8.4821  | 8.2759  | 8.3180  | 8.4136 | 8.1564  | 7.9214  | 8.2267  | 8.1366  | 8.0481  | 1.0287  | 0.0408  | 0.0189 | 1.7229 |
| Wdr1   | _YAPSGVIASGDSGK_2                                                         | #N/A                   | 7.9192  | 7.5188  | 8.4908  | 7.7341  | 7.7088 | 8.0579  | 8.1502  | 7.8598  | 7.9001  | 7.8962  | 0.9941  | -0.0085 | 0.8043 | 0.0946 |
| Wdr1   | _YEYDFAGK_2                                                               | #N/A                   | 7.1135  | 7.3551  | 7.5138  | 7.0038  | 7.4796 | 7.2062  | 7.2365  | 7.4166  | 7.3772  | 7.1988  | 0.9965  | -0.0050 | 0.8313 | 0.0803 |
| Wdr1   | _LAVVGGR_2                                                                | #N/A                   | 6.5902  | 6.5917  | 6.2842  | 6.3937  | 7.1657 | 6.6811  | 6.4364  | 6.5759  | 6.7377  | 6.9956  | 0.9897  | -0.0149 | 0.7167 | 0.1447 |
| Wdr1   | _SIQC[Carbamidomethyl (C)]TVHR_2                                          | #N/A                   | 6.3684  | 6.5421  | 6.4213  | 6.7026  | 6.3565 | 6.4871  | 6.2301  | 6.6166  | 6.6958  | 6.6295  | 0.9903  | -0.0140 | 0.5694 | 0.2446 |
| Wdr1   | _DYSQGQVVK_2                                                              | #N/A                   | 6.8746  | 6.6472  | 7.0006  | 6.3519  | 6.9655 | 6.5252  | 5.7430  | 6.5880  | 6.5623  | 6.4508  | 1.0618  | 0.0865  | 0.0949 | 1.0225 |
| Wdr1   | _DIAWTEDSKR_2                                                             | #N/A                   | 6.4770  | 6.0542  | 5.5204  | 6.3744  | 6.0973 | 6.4288  | 6.2272  | 6.0470  | 6.2106  | 6.2786  | 0.9948  | -0.0075 | 0.8679 | 0.0615 |
| Wdr1   | _GPVTDVAYSHDEGAFIAC[Carbamidomethyl (C)]DASK_3                            | #N/A                   | 6.4697  | 6.5301  | 7.8240  | 7.3447  | 5.7069 | 6.5334  | 7.4120  | 5.9196  | 6.6170  | 6.3445  | 1.0246  | 0.0350  | 0.7311 | 0.1360 |
| Wdr1   | _VINSVOIK_2                                                               | #N/A                   | 5.2164  | 4.9319  | 4.7824  | 3.9129  | 5.5825 | 4.7948  | 3.1610  | 5.0966  | 5.2126  | 4.6752  | 1.0736  | 0.1024  | 0.4978 | 0.3029 |
| Wdr1   | _LATGSDNC[Carbamidomethyl (C)]AAFFGPPR_2                                  | #N/A                   | 5.7910  | 5.9363  | 6.1247  | 6.1149  | 5.6116 | 4.0383  | 6.0496  | 4.2512  | 6.1603  | 5.5605  | 1.0177  | 0.0253  | 0.8592 | 0.0659 |
| Wdr1   | _VC[Carbamidomethyl (C)]ALGESK_2                                          | #N/A                   | 4.5232  | 4.5996  | 5.2268  | 4.5736  | 5.6850 | 5.2929  | 4.2883  | 4.7795  | 4.5547  | 4.5547  | 1.0903  | 0.1248  | 0.1521 | 0.1810 |
| Wdr1   | _VVISLTLUDEGK_2                                                           | #N/A                   | 5.7557  | 6.1847  | 6.2210  | 6.4609  | 5.8325 | 6.2529  | 6.1670  | 6.0920  | 5.9745  | 5.8779  | 1.0149  | 0.0214  | 0.5558 | 0.2551 |
| Wdr1   | _AHDGGIAGWSPOSTHLLSAGDK_3                                                 | #N/A                   | 3.5114  | 3.2398  | 4.0298  | 3.5568  | 4.3492 | 4.3995  | 4.2557  | 3.5111  | 4.5827  | 4.4924  | 0.9138  | -0.1300 | 0.2781 | 0.5518 |
| Wdr1   | _VTVFVSADGYSNNVYGHAAK_3                                                   | #N/A                   | 4.4908  | 4.0205  | 5.3082  | 4.5107  | 3.5187 | 4.2476  | 4.1145  | 3.8928  | 4.1807  | 4.4956  | 1.0428  | 0.0605  | 0.5917 | 0.2292 |
| Wdr1   | _GDHFLYTNKG_2                                                             | #N/A                   | 4.2446  | 3.8267  | 3.2494  | 4.2940  | 3.9871 | 3.9652  | 4.4422  | 4.4516  | 3.0063  | 4.8452  | 0.9382  | -0.0920 | 0.5080 | 0.2747 |
| Wdr1   | _M[Oxidation (M)]TVNSESGLVSK[Carbamidomethyl (C)]MSDQTVR_2                | #N/A                   | 3.7844  | 3.5149  | 4.2689  | 4.7230  | 3.3873 | 3.7495  | 4.0269  | 3.1813  | 4.1082  | 3.4007  | 1.0613  | 0.0858  | 0.4931 | 0.3070 |
| Wdr1   | _SYIYSGSDGHINWDSSETGENDSFGSK_4                                            | #N/A                   | 5.5449  | 4.6696  | 6.1612  | 5.1399  | 4.5553 | 3.5113  | 5.2491  | 5.8065  | 5.0344  | 3.1703  | 1.0240  | 0.0342  | 0.8633 | 0.0370 |
| Wdr1   | _NIDNPAAIDYTEHAHQVAVAK_3                                                  | #N/A                   | 3.8962  | 5.8872  | 4.5830  | 3.5848  | 5.7472 | 5.4326  | 5.7782  | 3.0329  | 5.9000  | 5.7844  | 0.9474  | -0.0779 | 0.7268 | 0.1386 |
| Sic4a4 | _GGLS[Phospho (STY)]INDSDSC[Carbamidomethyl (C)]PYSEK_2                   | O8B343_S1029_M1_Sic4a4 | 6.3860  | 5.9402  | 6.1560  | 6.2899  | 4.6232 | 5.9558  | 7.0555  | 6.4156  | 3.0442  | 5.1882  | 1.0403  | 0.0571  | 0.7770 | 0.1096 |
| Sic4a4 | _NLTSSS[Phospho (STY)]INDSDSPEKQDK_2                                      | #N/A                   | 10.1344 | 10.7837 | 10.8349 | 10.6843 | 9.0846 | 10.6000 | 11.2719 | 10.1044 | 10.5946 | 10.5894 | 0.9550  | -0.0664 | 0.2182 | 0.6611 |
| Sic4a4 | _LQQAIVM[Oxidation (M)]GALITVPVTR_2                                       | #N/A                   | 4.3645  | 4.2516  | 4.9913  | 4.4966  | 1.8338 | 3.7432  | 4.7022  | 4.9002  | 3.6038  | 4.4602  | 0.8936  | -0.1622 | 0.4634 | 0.3341 |
| Sic4a4 | _NLTSSS[Phospho (STY)]INDSDSPEK_2                                         | #N/A                   | 10.9259 | 10.7434 | 3.6713  | 11.0856 | 3.3906 | 10.5866 | 11.6093 | 11.1292 | 10.6087 | 10.5348 | 0.7657  | -0.3851 | 0.2213 | 0.6550 |
| Sic4a4 | _LADYPPNSDFK_2                                                            | #N/A                   | 3.0296  | 6.3111  | 4.2641  | 6.1746  | 3.6742 | 5.3462  | 6.6874  | 6.4444  | 6.2520  | 6.0484  | 0.7549  | -0.4056 | 0.0564 | 1.2486 |
| Sic4a4 | _MFNSPONGS[Phospho (STY)]PAM[Oxidation (M)]THR_2                          | #N/A                   | 7.5429  | 6.7369  | 5.6957  | 7.9719  | 5.8008 | 4.6752  | 7.5188  | 6.8891  | 4.5704  | 6.6636  | 0.9990  | -0.0015 | 0.9937 | 0.0571 |
| Sic4a4 | _ISENYSKPS[Phospho (STY)]DVNEADESSSLXPLSPAER_4                            | O8B343_S68_M1_Sic4a4   | 3.3157  | 4.3768  | 3.8241  | 3.9004  | 3.9603 | 3.5127  | 3.8239  | 3.7556  | 3.6440  | 3.7713  | 1.0177  | 0.0253  | 0.7377 | 0.1321 |
| Sic4a4 | _KGS[Phospho (STY)]LDS[Phospho (STY)]INDSDSC[Carbamidomethyl (C)]PYSEK_2  | #N/A                   | 4.4680  | 3.4530  | 3.3346  | 3.1669  | 3.2743 | 2.9544  | 3.3152  | 3.8343  | 3.5711  | 3.8042  | 0.9479  | -0.0773 | 0.5279 | 0.2775 |
| Sic4a4 | _KKGS[Phospho (STY)]LDS[Phospho (STY)]INDSDSC[Carbamidomethyl (C)]PYSEK_3 | #N/A                   | 3.0357  | 3.7920  | 4.2703  | 4.6236  | 3.6803 | 2.9443  | 4.3383  | 3.4949  | 3.1435  | 3.0898  | 1.0591  | 0.0828  | 0.6241 | 0.2047 |
| Mtx2   | _TLQQLVEDVQGC[Carbamidomethyl (C)]C[Carbamidomethyl (C)]QALSQR_3          | #N/A                   | 4.6979  | 5.0765  | 3.9810  | 5.9561  | 4.9556 | 4.7512  | 5.3923  | 4.8885  | 5.1782  | 5.3196  | 0.9439  | -0.0833 | 0.4147 | 0.3243 |
| Mtx2   | _Acetyl (Protein N-term)[SLVAEAFVSQIAAETPWPENATLQGLR_3                    | #N/A                   | 3.5721  | 4.3773  | 4.2589  | 3.2607  | 4.1987 | 3.5108  | 4.4763  | 3.3569  | 3.0055  | 3.2277  | 1.0995  | 0.1368  | 0.3497 | 0.4562 |
| Klc1   | _VDS[Phospho (STY)]PTVTTLK_2                                              | #N/A                   | 10.1141 | 9.9825  | 10.1577 | 10.3661 | 9.4491 | 10.0142 | 10.5233 | 9.9573  | 10.2226 | 0.9843  | -0.0229 | 0.4189  | 0.3779 | 0.1797 |
| Klc1   | _DAANLNDALAIR_2                                                           | #N/A                   | 5.5639  | 5.0245  | 4.3386  | 5.6203  | 5.5753 | 4.8027  | 4.0121  | 5.4555  | 5.6515  | 5.6728  | 0.9916  | -0.0122 | 0.9182 | 0.0371 |
| Klc1   | _S[Phospho (STY)]RESNM[Oxidation (M)]DVVK_2                               | #N/A                   | 8.1070  | 7.7903  | 8.2620  | 8.7993  | 7.2394 | 8.1371  | 8.3059  | 7.8460  | 8.3392  | 0.9950  | -0.0073 | 0.8897  | 0.0507 | 0.3710 |
| Klc1   | _AC[Carbamidomethyl (C)]KVDS[Phospho (STY)]PTVTTLK_2                      | #N/A                   | 4.3726  | 8.1304  | 8.3685  | 8.4683  | 2.7911 | 3.4375  | 8.5128  | 3.3511  | 7.6400  | 8.0956  | 0.8592  | -0.2190 | 0.5744 | 0.2408 |
| Klc1   | _S[Phospho (STY)]RES[Phospho (STY)]UNMDVVK_3                              | #N/A                   | 3.0894  | 4.1368  | 3.7762  | 4.2788  | 3.7159 | 4.0136  | 3.9935  | 3.8396  | 3.4882  | 4.2458  | 0.9854  | -0.0212 | 0.8259 | 0.0831 |
| Klc1   | _RS[Phospho (STY)]RES[Phospho (STY)]UNMDVVK_3                             | #N/A                   | 2.9885  | 4.3539  | 4.2230  | 3.7667  | 3.6330 | 2.9916  | 3.9150  | 3.2344  | 3.5335  | 3.4440  | 1.0362  | 0.0513  | 0.6992 | 0.1554 |
| Klc2   | _VDS[Phospho (STY)]PTVNTTLR_2                                             | #N/A                   | 9.7952  | 6.6910  | 4.4324  | 10.0159 | 6.6180 | 9.6887  | 9.1787  | 9.2135  | 9.3674  | 9.6679  | 0.8949  | -0.1602 | 0.4306 | 0.3659 |
| Klc2   | _ASS[Phospho (STY)]UNLUNK_2                                               | O8B448_S575_M1_Klc2    | 9.7473  | 9.0976  | 9.8404  | 9.9145  | 9.0258 | 9.5413  | 9.0842  | 9.2878  | 9.6900  | 9.6751  | 1.0099  | 0.0142  | 0.6927 | 0.1594 |
| Klc2   | _YEVAVPLC[Carbamidomethyl (C)]K_2                                         | #N/A                   | 5.8302  | 5.5069  | 5.8524  | 5.7793  | 6.2039 | 5.5467  | 4.9355  | 5.8357  | 6.0965  | 5.9249  | 1.0156  | 0.0223  | 0.7337 | 0.1405 |
| Klc2   | _S[Phospho (STY)]GS[Phospho (STY)]FGKLR_2                                 | O8B448_S537_M2_Klc2    | 5.1633  | 5.1352  | 6.3812  | 5.2839  | 4.3564 | 6.0138  | 4.7541  | 4.8413  | 4.1987  | 5.4921  | 1.1177  | 0.1605  | 0.2151 | 0.6674 |
| Klc2   | _AC[Carbamidomethyl (C)]KVDS[Phospho (STY)]PTVNTTLR_2                     | #N/A                   | 3.3519  | 3.9905  | 7.6468  | 7.6189  | 3.9965 | 4.1290  | 6.0150  | 4.3718  | 6.7534  | 3.8075  | 0.9781  | -0.0319 | 0.9224 | 0.0351 |
| Klc2   | _TUNMLVQVYASGR_2                                                          | #N/A                   | 4.6852  | 4.7392  | 5.0049  | 3.8330  | 3.6993 | 5.3102  | 5.1389  | 4.3819  | 5.1108  | 5.8686  | 0.8869  | -0.1732 | 0.1922 | 0.7162 |
| Klc2   | _RS[Phospho (STY)]EMLVR_2                                                 | O8B448_S551_M1_Klc2    | 2.9184  | 3.7236  | 3.6052  | 4.1079  | 3.5449 | 4.1846  | 4.5454  | 4.0106  | 3.6592  | 4.0749  | 0.9038  | -0.1459 | 0.1907 | 0.7197 |
| Capsn1 | _YADESGNM[Oxidation (M)]IDFNFCS[Carbamidomethyl (C)]LVR_2                 | #N/A                   | 2.9216  | 4.3045  | 3.6084  | 4.1111  | 4.1928 | 1.7600  | 3.8258  | 1.3896  | 3.6560  | 3.5647  | 1.1203  | 0.1639  | 0.5967 | 0.2743 |
| Capsn1 | _ILGGSIVASEAAQINPEPPPR_3                                                  | #N/A                   | 4.2909  | 3.0515  | 4.0246  | 3.5683  | 4.0336 | 3.1900  | 3.7166  | 3       |         |         |         |         |        |        |



|           |                                                                         |                          |         |         |         |         |         |         |         |         |         |         |         |         |        |        |
|-----------|-------------------------------------------------------------------------|--------------------------|---------|---------|---------|---------|---------|---------|---------|---------|---------|---------|---------|---------|--------|--------|
| Pde8a     | _RFS(Phospho (STY))GNEYLATK_2                                           | OB8502_5452_M1_Pde8a     | 2.9351  | 3.7403  | 3.6219  | 4.1245  | 3.5616  | 4.1679  | 3.8392  | 3.9940  | 3.6425  | 4.0915  | 0.9486  | -0.0761 | 0.4329 | 0.3636 |
| Dnmt3a    | _SEPQPEGGS(Phospho (STY))PAAGQK_2                                       | OB8508_S102_M1_Dnmt3a    | 9.0766  | 2.9517  | 9.3707  | 9.4141  | 9.3834  | 9.2691  | 9.6069  | 9.1252  | 9.3473  | 9.0889  | 0.8872  | -0.1726 | 0.4529 | 0.3440 |
| Ikbkg     | _S(Phospho (STY))PPEEPDFC(Carbamidomethyl (C))PK_2                      | #N/A                     | 9.4675  | 9.3930  | 9.0500  | 10.0842 | 9.1356  | 9.0680  | 10.1141 | 9.2591  | 9.3043  | 9.5235  | 0.9807  | -0.0280 | 0.4887 | 0.3109 |
| Ikbkg     | _RS(Phospho (STY))PPEEPDFC(Carbamidomethyl (C))PK_2                     | #N/A                     | 3.9417  | 3.2460  | 3.1276  | 3.6303  | 3.0673  | 3.1613  | 3.3450  | 2.9874  | 4.1368  | 3.5973  | 0.9561  | -0.0647 | 0.5703 | 0.2439 |
| Ppt1      | _ETPQLESTYTEDR_2                                                        | #N/A                     | 7.2018  | 7.0769  | 7.5657  | 7.2010  | 7.1716  | 7.3863  | 7.2155  | 6.5118  | 7.2663  | 7.1751  | 1.0320  | 0.0454  | 0.2151 | 0.6673 |
| Zfr       | _RDS(Phospho (STY))DGVGFGEAGK_3                                         | #N/A                     | 7.0107  | 6.8081  | 7.7368  | 7.1703  | 6.7326  | 6.9220  | 7.4305  | 6.8517  | 7.2239  | 7.0587  | 0.9891  | -0.0158 | 0.7202 | 0.1426 |
| Zfr       | _RRDS(Phospho (STY))DGVGFGEAGK_3                                        | #N/A                     | 5.6322  | 5.1343  | 5.8475  | 5.3691  | 4.8401  | 5.1361  | 6.3504  | 6.4162  | 5.4132  | 6.0904  | 0.8779  | -0.1879 | 0.0218 | 1.6616 |
| Zfr       | _RDS(Phospho (STY))DGVGFGEAGK_2                                         | #N/A                     | 3.7187  | 3.6237  | 3.5424  | 4.4970  | 5.7578  | 4.2845  | 3.1444  | 7.0071  | 5.6394  | 4.1743  | 0.8459  | -0.2414 | 0.3630 | 0.4401 |
| Zfr       | _DS(Phospho (STY))DGVGFGEAGK_2                                          | #N/A                     | 3.8199  | 3.4063  | 4.5067  | 3.5085  | 3.2946  | 3.3300  | 6.7926  | 6.3830  | 5.9841  | 6.2925  | 0.5727  | -0.8041 | 0.0000 | 5.0884 |
| Cop3      | _Acetyl (Protein N-term)ASALEQFVNSVR_2                                  | #N/A                     | 5.5346  | 5.7142  | 4.6938  | 4.9463  | 4.7633  | 4.7911  | 4.8702  | 5.4386  | 5.4219  | 5.5679  | 0.9529  | -0.0696 | 0.3540 | 0.5100 |
| Cop3      | _YTSQVGR_2                                                              | #N/A                     | 4.9145  | 3.2002  | 4.7439  | 5.0777  | 4.2915  | 5.6936  | 5.1438  | 4.9793  | 4.6388  | 3.5515  | 1.0164  | 0.0235  | 0.8878 | 0.0517 |
| Cop3      | _SM[Oxidation (M)]GS(Phospho (STY))QEODSGNKPSSYS_2                      | #N/A                     | 7.1634  | 6.8888  | 7.6386  | 7.1876  | 6.2056  | 7.0109  | 7.3035  | 7.3618  | 7.2136  | 6.9516  | 0.9734  | -0.0389 | 0.4669 | 0.3308 |
| Cop3      | _YATDTAGLC(Carbamidomethyl (C))HQLTNALVER_3                             | #N/A                     | 3.2217  | 4.0269  | 3.9085  | 4.0938  | 3.8482  | 3.8813  | 4.2421  | 4.4082  | 3.2064  | 3.7711  | 0.9803  | -0.0287 | 0.7800 | 0.1079 |
| Cop4      | _NAAQVLVGPLETGK_2                                                       | #N/A                     | 5.9000  | 5.7465  | 6.1490  | 6.0526  | 5.6555  | 6.3987  | 6.2638  | 5.9240  | 6.2011  | 6.0136  | 0.9808  | -0.0279 | 0.4672 | 0.3305 |
| Cop4      | _ATTADGSSILDR_2                                                         | #N/A                     | 6.4935  | 6.1306  | 4.1004  | 6.5634  | 6.6062  | 6.5024  | 5.9227  | 6.2629  | 5.6686  | 6.2841  | 1.0052  | 0.0075  | 0.9525 | 0.0212 |
| Cop4      | _LYLEDDDPVQAEAYINR_2                                                    | #N/A                     | 5.3762  | 4.4332  | 4.4454  | 4.6628  | 4.1164  | 4.8975  | 4.4685  | 4.9672  | 4.6009  | 4.4876  | 1.0052  | 0.0075  | 0.9227 | 0.0350 |
| Cop4      | _VSFEQVQASIR_2                                                          | #N/A                     | 3.8611  | 4.9389  | 5.4532  | 5.2840  | 5.2605  | 3.6198  | 5.2939  | 4.8909  | 5.5277  | 4.5907  | 0.9331  | -0.0999 | 0.4593 | 0.3379 |
| Cop4      | _ISQTAPEWTAQAM[Oxidation (M)]EAQM[Oxidation (M)]AQ_2                    | #N/A                     | 4.1475  | 4.8475  | 4.8133  | 5.1411  | 4.9919  | 4.9726  | 5.1576  | 4.9790  | 4.9784  | 4.9784  | 0.9418  | -0.0866 | 0.1584 | 0.8003 |
| Cop4      | _IASQMITETR_2                                                           | #N/A                     | 3.9481  | 3.2036  | 3.6818  | 3.7112  | 3.9743  | 3.5328  | 3.4259  | 4.4072  | 4.0558  | 4.4037  | 0.9023  | -0.1483 | 0.1270 | 0.8962 |
| Hnrnpa2b1 | _GGGNGFGPGPSNFR_2                                                       | #N/A                     | 9.1172  | 9.4002  | 9.7872  | 9.5823  | 9.6528  | 9.1056  | 9.2798  | 9.0217  | 9.0994  | 8.8979  | 1.0403  | 0.0571  | 0.0493 | 1.3069 |
| Hnrnpa2b1 | _GGNGFGGDSR_2                                                           | #N/A                     | 9.0503  | 9.1077  | 9.5078  | 9.1501  | 9.2489  | 8.9606  | 8.8156  | 8.9536  | 8.9729  | 8.9861  | 1.0267  | 0.0381  | 0.0480 | 1.1390 |
| Hnrnpa2b1 | _DTEETDR_2                                                              | #N/A                     | 8.7801  | 8.6542  | 8.6000  | 9.1184  | 8.4937  | 8.5620  | 8.7475  | 8.5146  | 8.4562  | 8.6375  | 1.0135  | 0.0193  | 0.3818 | 0.4182 |
| Hnrnpa2b1 | _EDTEEHILR_2                                                            | #N/A                     | 7.0832  | 6.7010  | 5.7866  | 7.1780  | 7.6331  | 7.1345  | 7.2421  | 7.0492  | 6.2545  | 6.9754  | 1.0057  | 0.0082  | 0.9171 | 0.0376 |
| Hnrnpa2b1 | _GFGVITPDHDPVK_2                                                        | #N/A                     | 7.6039  | 6.5631  | 6.8626  | 7.2184  | 6.3602  | 6.4034  | 6.6321  | 6.1767  | 6.3693  | 6.6844  | 1.0355  | 0.0503  | 0.2603 | 0.5846 |
| Hnrnpa2b1 | _NYYEQWKG_2                                                             | #N/A                     | 7.6835  | 7.5270  | 7.4598  | 7.4183  | 7.9029  | 7.5484  | 5.9702  | 7.4402  | 7.8391  | 7.9428  | 1.0400  | 0.0566  | 0.4547 | 0.3422 |
| Hnrnpa2b1 | _PHS(Phospho (STY))DGR_2                                                | OB8569_S85_M1_Hnrnpa2b1  | 4.2811  | 4.6225  | 4.3194  | 5.7307  | 3.4818  | 5.1431  | 5.2684  | 4.3891  | 4.6416  | 5.2991  | 0.9381  | -0.0921 | 0.5053 | 0.2965 |
| Hnrnpa2b1 | _YHTINGHNAEVR_2                                                         | #N/A                     | 5.9466  | 5.3259  | 4.4730  | 4.0168  | 6.3394  | 5.9884  | 5.2185  | 5.0109  | 5.6827  | 5.0577  | 1.0202  | 0.0289  | 0.8336 | 0.0790 |
| Hnrnpa2b1 | _QEMVEQSSR_2                                                            | #N/A                     | 6.9366  | 5.5361  | 3.5133  | 7.7990  | 6.6587  | 4.2765  | 3.1364  | 5.4292  | 4.6666  | 5.3358  | 1.2467  | 0.3181  | 0.2585 | 0.5875 |
| Hnrnpa2b1 | _LTDC(Carbamidomethyl (C))VMVR_2                                        | #N/A                     | 4.5187  | 4.2788  | 4.2981  | 5.3542  | 4.3552  | 3.6293  | 3.9901  | 3.1593  | 3.4584  | 3.5191  | 1.2475  | 0.3190  | 0.0240 | 1.6202 |
| Hnrnpa2b1 | _DYFEEQKIDTEITDR_3                                                      | #N/A                     | 6.4705  | 7.2864  | 8.3907  | 8.0432  | 7.1315  | 7.6378  | 6.6203  | 6.7358  | 6.4461  | 6.9246  | 1.1215  | 0.1654  | 0.0535 | 1.2719 |
| Hnrnpa2b1 | _DYFEEGK_2                                                              | #N/A                     | 3.9849  | 3.9449  | 4.4231  | 4.5271  | 3.8747  | 4.5651  | 4.1854  | 3.9715  | 3.3333  | 3.6442  | 1.1153  | 0.1575  | 0.0818 | 1.0870 |
| Hnrnpa2b1 | _EES(Phospho (STY))GKPGAHVTVK_2                                         | OB8569_S102_M1_Hnrnpa2b1 | 6.9366  | 7.9957  | 8.5332  | 7.9669  | 7.4091  | 7.9785  | 8.1043  | 6.0228  | 3.8494  | 3.7149  | 1.6699  | 0.7398  | 0.0114 | 1.9430 |
| Hnrnpa2b1 | _FLIGLSFETTESLR_2                                                       | #N/A                     | 4.3453  | 4.1893  | 5.0870  | 5.1437  | 3.5107  | 4.6654  | 4.9562  | 4.0174  | 4.8426  | 4.9741  | 0.9741  | -0.0378 | 0.7451 | 0.1278 |
| Hnrnpa2b1 | _EESGKPGAHVTVKK_3                                                       | #N/A                     | 4.3150  | 2.8065  | 4.4728  | 4.5013  | 4.7447  | 4.2888  | 3.1487  | 4.0007  | 5.3827  | 4.1014  | 1.0072  | 0.0103  | 0.9548 | 0.0201 |
| Hnrnpa2b1 | _GFGDGYGVGGGGGGGGS(Phospho (STY))PGYGGGR_3                              | OB8569_S259_M1_Hnrnpa2b1 | 3.6965  | 3.6459  | 3.4302  | 4.4748  | 2.8402  | 3.7844  | 3.1222  | 4.0272  | 4.3263  | 4.1521  | 0.9330  | -0.1000 | 0.4686 | 0.3292 |
| Hnrnpa2b1 | _NM[Oxidation (M)]GGPGGNGVGGGGS(Phospho (STY))JGJGVGR_3                 | #N/A                     | 3.4697  | 3.7137  | 3.9204  | 4.5958  | 3.6046  | 3.7347  | 4.1015  | 3.8535  | 3.3959  | 3.9486  | 1.0039  | 0.0056  | 0.9512 | 0.0217 |
| Hnrnpa2b1 | _GSGDGVGGR_2                                                            | #N/A                     | 3.9680  | 3.3745  | 3.7016  | 3.2454  | 3.1958  | 3.0329  | 3.3937  | 3.7558  | 4.0548  | 4.4235  | 0.8753  | -0.1922 | 0.0857 | 1.0669 |
| Camt      | _AVQGGSS(Phospho (STY))PVKS_2                                           | OB8587_S261_M1_Camt      | 11.7758 | 11.9327 | 12.5741 | 12.1576 | 11.3748 | 11.8772 | 12.3752 | 11.9356 | 11.8870 | 11.8555 | 0.9939  | -0.0088 | 0.7558 | 0.1216 |
| Cacng2    | _DAS(Phospho (STY))PVGVK_2                                              | OB8602_S253_M1_Cacng2    | 8.4610  | 7.3813  | 7.7348  | 7.4636  | 6.7136  | 7.4454  | 6.8939  | 3.7890  | 8.1504  | 8.0795  | 1.1197  | 0.1631  | 0.3754 | 0.4255 |
| Cacng2    | _STEPHS(Phospho (STY))RDS(Phospho (STY))PVGVK_3                         | OB8602_S249_M1_Cacng2    | 4.8092  | 4.1667  | 5.6914  | 4.5510  | 3.9880  | 3.7414  | 4.2657  | 5.9869  | 4.7954  | 3.0171  | 0.9945  | -0.0080 | 0.9680 | 0.0141 |
| Pak1      | _LLQTSNITK_2                                                            | #N/A                     | 7.4110  | 7.3897  | 7.6764  | 7.5489  | 7.8028  | 7.3241  | 7.3022  | 7.2382  | 7.4559  | 7.0019  | 1.0381  | 0.0539  | 0.0514 | 1.2892 |
| Pak1      | _STM[Oxidation (M)]WGTPWM[Oxidation (M)]APEVVR_2                        | #N/A                     | 7.0704  | 7.5722  | 7.5297  | 7.0372  | 7.2819  | 7.6052  | 7.2618  | 7.4466  | 7.2574  | 7.0584  | 1.0129  | 0.0184  | 0.5372 | 0.2699 |
| Pak1      | _ALYLATNGTPELQNPXK_2                                                    | #N/A                     | 5.7763  | 5.5204  | 6.2295  | 6.2742  | 6.3124  | 6.3165  | 6.0081  | 6.0260  | 5.8671  | 6.0303  | 1.0148  | 0.0212  | 0.6276 | 0.2023 |
| Pak1      | _EC[Carbamidomethyl (C)]LQALEFLHSNQVHR_3                                | #N/A                     | 6.3248  | 6.0993  | 6.5556  | 6.3707  | 5.8365  | 5.9011  | 6.3009  | 5.7441  | 5.8631  | 6.4798  | 1.0318  | 0.0198  | 0.6848 | 0.1684 |
| Pak1      | _SAEDYNS(Phospho (STY))SNTLVVK_2                                        | OB8643_S155_M1_Pak1      | 4.5119  | 6.2681  | 5.9350  | 3.8259  | 5.8705  | 4.5870  | 4.2703  | 4.1409  | 4.1619  | 4.2282  | 1.2300  | 0.2987  | 0.0914 | 1.0390 |
| Pak1      | _DVATSPIS(Phospho (STY))IPTENTTPDALTR_2                                 | #N/A                     | 9.5005  | 13.3047 | 13.8696 | 13.9094 | 12.5771 | 13.2727 | 13.0331 | 13.1162 | 11.0736 | 0.9665  | -0.0492 | 0.6178  | 0.2091 |        |
| Pak1      | _MSDEELEK_2                                                             | #N/A                     | 4.4084  | 4.7126  | 3.6710  | 5.2205  | 4.0960  | 4.1187  | 4.4795  | 4.1708  | 2.9792  | 4.0085  | 1.1437  | 0.1937  | 0.1730 | 0.7618 |
| Pak1      | _ELUNEILVM[Oxidation (M)]R_2                                            | #N/A                     | 3.3132  | 4.5667  | 4.5477  | 4.8127  | 4.3550  | 3.8789  | 4.9653  | 4.4595  | 3.9920  | 0.9439  | -0.0833 | 0.4577  | 0.3394 |        |
| Pak1      | _SDNILGM[Oxidation (M)]DGSVK_2                                          | #N/A                     | 3.9621  | 6.8958  | 6.1495  | 3.6973  | 6.8106  | 6.1344  | 6.8071  | 6.3524  | 7.1119  | 6.6696  | 0.8327  | -0.2642 | 0.1630 | 0.7877 |
| Pak1      | _LTDFGFC(Carbamidomethyl (C))AQITPEQSK_2                                | #N/A                     | 3.4407  | 4.2459  | 4.1275  | 3.1293  | 5.8655  | 3.6623  | 4.3448  | 3.4883  | 3.1369  | 3.0963  | 1.1598  | 0.2139  | 0.3330 | 0.4775 |
| Pak1      | _SVIEPLVPFTR_2                                                          | #N/A                     | 8.3871  | 8.3011  | 8.6251  | 8.5369  | 8.6508  | 8.3223  | 8.0618  | 8.5562  | 8.4010  | 8.4957  | 1.0110  | 0.0157  | 0.4565 | 0.3406 |
| Pak1      | _LLQTSNITKS(Phospho (STY))EQK_2                                         | OB8643_S115_M1_Pak1      | 6.5028  | 6.5692  | 7.3899  | 7.4145  | 6.8818  | 6.6867  | 6.7798  | 6.8327  | 7.0832  | 0.9550  | -0.0073 | 0.8741  | 0.0584 |        |
| Pak1      | _Acetyl (Protein N-term)S(Phospho (STY))NNGVQIQKPPAPMR_2                | OB8643_S2_M1_Pak1        | 3.0759  | 4.2665  | 4.3104  | 6.4244  | 2.9193  | 3.6416  | 5.4306  | 3.1470  | 3.4461  | 3.5314  | 1.0559  | 0.0785  | 0.7846 | 0.1053 |
| Pak1      | _JGGGASGTVTAMDAVATQGEVAK_3                                              | #N/A                     | 3.0367  | 3.8419  | 3.2342  | 4.2788  | 3.6632  | 4.0663  | 4.4271  | 4.2232  | 3.0214  | 3.9561  | 0.9437  | -0.0837 | 0.5429 | 0.2653 |
| Pimc3     | _VOIDPALUR_2                                                            | #N/A                     | 6.5462  | 6.4838  | 6.0381  | 7.0358  | 6.7601  | 6.0829  | 6.2818  | 7.0296  | 6.7411  | 6.5475  | 0.9761  | -0.0349 | 0.5147 | 0.2885 |
| Pimc3     | _DSYLETUPTYDSR_2                                                        | #N/A                     | 7.0006  | 5.8925  | 6.4669  | 6.1991  | 6.7574  | 6.7477  | 6.6224  | 6.1096  | 6.1410  | 7.0045  | 0.9994  | -0.0009 | 0.9877 | 0.0054 |
| Pimc3     | _QTFVPGVLVDAEK_2                                                        | #N/A                     | 5.4553  | 4.8928  | 4.1836  | 5.5810  | 5.3765  | 4.7919  | 5.2075  | 4.8289  | 4.1766  | 5.7749  | 1.0100  | 0.0143  | 0.8983 | 0.0466 |
| Pimc3     | _M[Oxidation (M)]ATWVDEAEGDGGEEVLK_2                                    | #N/A                     | 4.3493  | 5.2613  | 6.0869  | 6.1678  | 4.0755  | 5.3947  | 5.4028  | 5.1799  | 5.1741  | 4.5186  | 1.0303  | 0.0431  | 0.7505 | 0.1247 |
| Pimc3     | _Acetyl (Protein N-term)M[Oxidation (M)]QEMNLTPFES(Phospho (STY))PVTR_2 | #N/A                     | 7.3235  | 3.2764  | 3.5237  | 9.3587  | 3.2773  | 3.9230  | 3.4568  | 6.8746  | 4.0150  | 3.6199  | 1.1385  | 0.1872  | 0.6827 | 0.1658 |
| Hcn2      | _TSPYVPGSS(Phospho (STY))PATR_2                                         | OB8703_S771_M1_Hcn2      | 10.2909 | 9.3380  | 9.5097  | 10.0341 | 7.5736  | 3.9211  | 11.0213 | 10.2502 | 9.7744  | 10.5232 | 0.8126  | -0.2994 | 0.1572 | 0.8035 |
| Hcn2      | _GEPQC(Carbamidomethyl (C))S(Phospho (STY))PEGAR_2                      | OB8703_S90_M1_Hcn2       | 11.9864 | 11.6529 | 11.7096 | 11.8967 | 10.6025 | 11.4381 | 12.4036 | 11.8058 | 11.6311 | 0.9667  | -0.0488 | 0.2040  | 0.6094 |        |
| Hcn2      | _PLVGRLAGS(Phospho (STY))PR_2                                           | OB8703_S726_M1_Hcn2      | 5.2905  | 7.6889  | 5.9885  | 8.5723  | 3.8655  | 4.6349  | 6.5495  | 7.1833  | 5.6170  | 4.4521  | 1.0095  | 0.0136  | 0.9580 | 0.0186 |
| Hcn2      | _GPKVR(Phospho (STY))PSC(Carbamidomethyl (C))R_2                        | OB8703_S101_M1_Hcn2      | 3.04    |         |         |         |         |         |         |         |         |         |         |         |        |        |



|       |                                                                |                     |         |         |         |         |         |         |         |         |         |         |         |         |        |        |
|-------|----------------------------------------------------------------|---------------------|---------|---------|---------|---------|---------|---------|---------|---------|---------|---------|---------|---------|--------|--------|
| Ctpb1 | _IGSGFONDIK_2                                                  | #N/A                | 5.1878  | 5.7224  | 5.7806  | 4.7124  | 4.4578  | 4.0902  | 5.0776  | 5.3174  | 4.9507  | 5.0601  | 0.9785  | -0.0313 | 0.7665 | 0.1155 |
| Ctpb1 | _GALDHESEPSFSGPLK_3                                            | #N/A                | 5.6871  | 5.3932  | 5.8704  | 5.8028  | 5.7750  | 5.4569  | 5.2138  | 4.9900  | 5.6131  | 5.0210  | 1.0873  | 0.1207  | 0.0168 | 1.7757 |
| Ctpb1 | _VGQAVLR_2                                                     | #N/A                | 5.2885  | 5.0545  | 5.5751  | 5.2621  | 5.4285  | 4.8699  | 4.7434  | 5.2479  | 5.4872  | 5.2225  | 1.0137  | 0.0197  | 0.7009 | 0.1543 |
| Ctpb1 | _TWHQALR_2                                                     | #N/A                | 6.2086  | 6.9788  | 6.9287  | 6.5529  | 6.7517  | 6.6631  | 7.3883  | 6.9131  | 6.9376  | 6.5020  | 0.9633  | -0.0540 | 0.2443 | 0.6120 |
| Ctpb1 | _VQSEQR_2                                                      | #N/A                | 6.7654  | 6.7602  | 6.8244  | 7.1255  | 6.9224  | 6.6964  | 6.6221  | 6.6782  | 6.8811  | 6.7850  | 1.0159  | 0.0228  | 0.2734 | 0.5632 |
| Ctpb1 | _DVATVAF(Carbamidomethyl) (C)DAQSGEHEK_3                       | #N/A                | 7.1584  | 6.8382  | 8.1853  | 7.8206  | 6.1338  | 7.0168  | 7.3303  | 6.5949  | 6.5993  | 6.7300  | 1.0556  | 0.0780  | 0.3683 | 0.4338 |
| Ctpb1 | _VNEAVGALM(Oxidation) (M)YHTLTLR_2                             | #N/A                | 3.3166  | 3.0501  | 3.1173  | 4.0705  | 3.0532  | 3.4523  | 3.7852  | 4.0490  | 2.8832  | 4.0375  | 0.9064  | -0.1418 | 0.2755 | 0.5598 |
| Map7  | _LSSSATLNS(Phospho) (STY)IPOR_2                                | 088735_S209_M1_Map7 | 10.2649 | 9.9692  | 10.4756 | 10.7407 | 9.4296  | 10.1575 | 10.4887 | 9.9587  | 9.8935  | 10.3152 | 1.0009  | 0.0013  | 0.9732 | 0.0118 |
| Bsn   | _SLS(Phospho) (STY)DPKPLS(Phospho) (STY)PTAESAKER_3            | #N/A                | 6.3251  | 8.5455  | 8.1678  | 8.5003  | 7.5010  | 8.6977  | 8.1821  | 7.8736  | 7.9086  | 8.6482  | 0.9759  | -0.0353 | 0.6946 | 0.1583 |
| Bsn   | _GEEES(Phospho) (STY)EEESYPR_2                                 | 088737_S3301_M1_Bsn | 10.4232 | 10.9606 | 10.5324 | 11.3352 | 9.7988  | 10.6358 | 10.7462 | 10.4911 | 10.7857 | 0.9958  | -0.0061 | 0.7874  | 0.0593 | 0.5931 |
| Bsn   | _DYL(Phospho) (STY)DSELNQLR_2                                  | #N/A                | 3.8523  | 8.5950  | 4.5391  | 11.1581 | 8.5512  | 9.4155  | 3.2556  | 10.0938 | 9.2499  | 9.6937  | 0.9519  | -0.0711 | 0.8467 | 0.0723 |
| Bsn   | _DAC(Carbamidomethyl) (C)EPES(Phospho) (STY)GPDPSTVR_2         | #N/A                | 9.4514  | 8.9790  | 9.1810  | 10.2052 | 8.7684  | 9.5005  | 9.6884  | 9.1068  | 9.3985  | 9.3939  | 0.9948  | -0.0076 | 0.8616 | 0.0647 |
| Bsn   | _DST(Phospho) (STY)PTASESQR_2                                  | 088737_T3254_M1_Bsn | 3.7410  | 3.4852  | 4.4278  | 9.6339  | 2.8666  | 8.5270  | 3.1443  | 9.0754  | 9.0085  | 9.0841  | 0.7188  | -0.4764 | 0.2892 | 0.5388 |
| Bsn   | _ATSPGPTQATAPPEVGR_2                                           | #N/A                | 8.0229  | 8.4291  | 8.9584  | 8.7093  | 8.6590  | 8.4523  | 8.6422  | 8.2487  | 8.4324  | 8.3186  | 1.0152  | 0.0218  | 0.4875 | 0.3120 |
| Bsn   | _DPEPPELTFR_2                                                  | #N/A                | 7.3640  | 7.1296  | 7.0541  | 7.2038  | 7.0832  | 7.0977  | 7.1492  | 7.0354  | 6.9841  | 7.6920  | 0.9917  | -0.0120 | 0.6833 | 0.1654 |
| Bsn   | _AS(Phospho) (STY)PQAKPLR_2                                    | #N/A                | 6.5782  | 6.2371  | 6.8594  | 6.7062  | 5.9745  | 6.7425  | 6.5620  | 6.5256  | 6.7220  | 6.2389  | 1.0064  | 0.0093  | 0.8271 | 0.0825 |
| Bsn   | _ELQLQTIK_2                                                    | #N/A                | 5.5981  | 6.4090  | 6.5950  | 6.1203  | 6.1576  | 5.6603  | 5.1647  | 5.4740  | 5.9208  | 5.9729  | 1.0811  | 0.1125  | 0.1089 | 0.9631 |
| Bsn   | _AQGPSGGEAES(Phospho) (STY)PR_2                                | #N/A                | 5.5377  | 6.0789  | 5.9484  | 6.5546  | 3.0525  | 6.2601  | 5.9005  | 5.7843  | 5.5311  | 6.2337  | 0.9505  | -0.0733 | 0.6730 | 0.1720 |
| Bsn   | _YLELGTOR_2                                                    | #N/A                | 4.9723  | 5.7188  | 5.6812  | 5.6481  | 4.9950  | 5.4730  | 5.4939  | 5.4466  | 5.3178  | 5.3869  | 1.0006  | 0.0009  | 0.9852 | 0.0065 |
| Bsn   | _SQASEES(Phospho) (STY)IPVPS(Phospho) (STY)PLGR_2              | #N/A                | 8.9323  | 9.5279  | 8.8516  | 10.2336 | 9.4117  | 9.7096  | 9.7726  | 9.5262  | 9.7310  | 9.7175  | 0.9922  | -0.0113 | 0.7484 | 0.1259 |
| Bsn   | _QTS(Phospho) (STY)LAQLQK_2                                    | 088737_S1158_M1_Bsn | 2.9811  | 4.3613  | 4.2156  | 8.4409  | 4.1827  | 3.5468  | 3.9076  | 3.2418  | 3.5409  | 3.4366  | 1.3085  | 0.3879  | 0.3063 | 0.5138 |
| Bsn   | _SHGPLPTIEDS(Phospho) (STY)EEEELEEELEEEQK_4                    | #N/A                | 3.4238  | 3.8873  | 3.6387  | 4.3905  | 5.9210  | 4.0649  | 4.3409  | 3.9303  | 3.9782  | 4.2180  | 1.0253  | 0.0061  | 0.8282 | 0.0519 |
| Bsn   | _LRDAC(Carbamidomethyl) (C)EPES(Phospho) (STY)GPDPSTVR_3       | #N/A                | 4.0813  | 2.9802  | 5.4460  | 3.5304  | 3.2182  | 5.3247  | 4.6060  | 3.2865  | 4.0570  | 5.3580  | 0.9468  | -0.0788 | 0.7302 | 0.1366 |
| Bsn   | _SQAS(Phospho) (STY)EEESPVSPLGR_2                              | #N/A                | 12.1586 | 12.0561 | 12.6443 | 12.7590 | 11.6427 | 12.2531 | 12.5375 | 11.9312 | 12.1509 | 12.3502 | 1.0008  | 0.0012  | 0.9671 | 0.0145 |
| Bsn   | _ADSSVQT(Phospho) (STY)DDEEGGR_2                               | #N/A                | 9.3918  | 9.7547  | 10.0452 | 10.6012 | 9.0538  | 9.7567  | 9.8586  | 9.6441  | 9.4975  | 9.7771  | 1.0075  | 0.0108  | 0.8007 | 0.0965 |
| Bsn   | _EKPLSGGSEVGAPQPSR_3                                           | #N/A                | 7.0014  | 6.9220  | 6.8845  | 7.2758  | 7.0854  | 6.8090  | 6.2662  | 6.8647  | 6.8119  | 6.5486  | 1.0544  | 0.0764  | 0.0353 | 1.4525 |
| Bsn   | _ASPTKTAS(Phospho) (STY)PQAK_2                                 | #N/A                | 5.2035  | 4.0985  | 3.8105  | 6.2303  | 3.9868  | 4.1386  | 5.3078  | 3.8014  | 3.4499  | 5.8390  | 0.9955  | -0.0605 | 0.9758 | 0.0107 |
| Bsn   | _LS(Phospho) (STY)DPKPLSTAEESAK_2                              | #N/A                | 13.1305 | 13.2754 | 13.8438 | 13.7764 | 12.6337 | 13.3149 | 13.6239 | 13.0601 | 13.2207 | 13.4276 | 0.9997  | -0.0004 | 0.9876 | 0.0054 |
| Bsn   | _SADC(Carbamidomethyl) (C)SVQTI(Phospho) (STY)DDEDNADWEQVRR_3  | 088737_T2622_M1_Bsn | 3.7256  | 3.6168  | 3.4593  | 7.6901  | 2.8693  | 4.2914  | 3.1513  | 4.2972  | 7.2487  | 0.9148  | 0.9981  | -0.1285 | 0.7339 | 0.1344 |
| Bsn   | _AGGPSGGEAES(Phospho) (STY)PRR_2                               | #N/A                | 7.4976  | 7.9907  | 8.3197  | 8.3684  | 7.6304  | 8.0588  | 7.9280  | 7.8977  | 7.8769  | 7.9314  | 1.0087  | 0.0125  | 0.7127 | 0.1471 |
| Bsn   | _VLGGGLQVGS(Phospho) (STY)ITDLR_2                              | 088737_S2046_M1_Bsn | 4.3164  | 3.7884  | 4.0501  | 4.4545  | 3.7060  | 4.0910  | 4.5354  | 4.9287  | 4.8366  | 4.8588  | 0.8492  | -0.2358 | 0.0022 | 2.6533 |
| Bsn   | _QVEAQVATPYR_2                                                 | #N/A                | 4.5388  | 5.1052  | 4.0410  | 3.5848  | 5.4968  | 5.1409  | 5.4635  | 5.3679  | 5.6040  | 4.7608  | 0.8778  | -0.1881 | 0.1455 | 0.8373 |
| Bsn   | _GLGEHRYLS(Phospho) (STY)DSELNQLR_3                            | #N/A                | 3.3790  | 4.0687  | 3.1127  | 7.0456  | 4.0236  | 4.1018  | 3.9950  | 6.2532  | 4.6058  | 3.8346  | 0.9179  | -0.1236 | 0.6610 | 0.1798 |
| Bsn   | _RIADSS(Phospho) (STY)VGTDDEEGGR_2                             | 088737_S2592_M1_Bsn | 3.7526  | 3.7376  | 5.5707  | 5.8255  | 4.0992  | 5.2378  | 4.7778  | 4.9076  | 3.8939  | 5.0824  | 1.0082  | 0.0119  | 0.9436 | 0.0252 |
| Bsn   | _LQQDTAES(Phospho) (STY)DOFGSQLR_2                             | #N/A                | 4.4256  | 3.7484  | 4.1610  | 4.3304  | 3.9831  | 3.8544  | 3.9208  | 3.4678  | 4.5481  | 3.9403  | 1.0289  | 0.0411  | 0.6201 | 0.2075 |
| Bsn   | _LLEGLGEPALPLPTPQQPPAPVPHR_3                                   | #N/A                | 4.6799  | 3.9036  | 3.1725  | 4.1343  | 3.6754  | 4.2545  | 4.3653  | 4.1652  | 4.2949  | 5.3313  | 0.8746  | -0.1933 | 0.1309 | 0.8830 |
| Bsn   | _SQOQLHS(Phospho) (STY)PALS(Phospho) (STY)PAHSPAK_3            | #N/A                | 4.9742  | 5.2020  | 3.9929  | 4.7412  | 3.4911  | 4.4918  | 3.9956  | 5.0173  | 5.9827  | 0.9222  | -0.1169 | 0.3823  | 0.4676 | 0.1798 |
| Bsn   | _SSC(Carbamidomethyl) (C)SES(Phospho) (STY)PSPSLDSEALTLOGPFR_3 | 088737_S1137_M1_Bsn | 7.8925  | 2.7650  | 3.6466  | 4.1493  | 3.5864  | 4.1431  | 3.8640  | 3.9692  | 3.6178  | 8.2199  | 0.9213  | -0.1183 | 0.7586 | 0.1200 |
| Bsn   | _EPLEMOxidation) (M)ESLTGS(Phospho) (STY)PEDR_2                | #N/A                | 4.5763  | 7.6720  | 6.3691  | 8.1139  | 7.4404  | 7.9050  | 8.2393  | 8.0075  | 8.4028  | 8.3829  | 0.8512  | -0.2324 | 0.1037 | 0.9844 |
| Bsn   | _SQGSS(Phospho) (STY)FEYQDTQDHDYVGR_3                          | #N/A                | 8.2970  | 7.6866  | 8.1489  | 8.5187  | 6.6123  | 8.3616  | 7.0503  | 7.8181  | 8.2167  | 8.3074  | 1.0114  | 0.0163  | 0.8393 | 0.0761 |
| Bsn   | _SHGPLPTIEDS(Phospho) (STY)EEEELEEELEEEK_4                     | #N/A                | 4.5775  | 3.3996  | 4.0543  | 3.6849  | 3.1219  | 3.1192  | 3.3995  | 3.8173  | 4.0946  | 3.6519  | 0.9783  | -0.0317 | 0.8028 | 0.0954 |
| Bsn   | _SSS(Phospho) (STY)SAVEDQKR_2                                  | 088737_S767_M1_Bsn  | 4.5780  | 3.4891  | 3.8796  | 3.6304  | 4.5178  | 3.8464  | 4.7018  | 3.2902  | 3.8598  | 3.0944  | 1.0679  | 0.0948  | 0.5097 | 0.2927 |
| Bsn   | _MASAYS(Phospho) (STY)GEK_2                                    | 088737_S3460_M1_Bsn | 3.5550  | 3.6711  | 4.2419  | 3.2437  | 3.5594  | 3.0652  | 4.4592  | 3.3740  | 3.0226  | 3.2107  | 1.0112  | 0.0161  | 0.9073 | 0.0423 |
| Bsn   | _LQPGSQPTFR_2                                                  | #N/A                | 3.3993  | 6.1121  | 3.1329  | 6.5392  | 6.9013  | 5.4386  | 5.8550  | 5.9562  | 5.6835  | 5.7762  | 0.9031  | -0.1471 | 0.5144 | 0.2887 |
| Bsn   | _QASATAPGRES(Phospho) (STY)PR_2                                | 088737_S105_M1_Bsn  | 7.7698  | 7.8067  | 7.6520  | 8.3158  | 7.3584  | 7.7069  | 8.2045  | 7.6453  | 7.7262  | 7.8621  | 0.9884  | -0.0168 | 0.6381 | 0.1951 |
| Bsn   | _ASPAQTAS(Phospho) (STY)PQITK_2                                | 088737_S593_M1_Bsn  | 7.1442  | 3.6855  | 3.7160  | 8.2326  | 7.0480  | 3.7937  | 4.1010  | 7.4502  | 7.5600  | 3.6300  | 0.9856  | -0.0209 | 0.9533 | 0.0208 |
| Bsn   | _GYMOxidation) (M)ITPT(Phospho) (STY)SPAGSER_2                 | #N/A                | 3.8292  | 6.4951  | 3.5296  | 3.9544  | 3.3551  | 3.9827  | 4.2850  | 4.0047  | 4.0914  | 3.7335  | 1.0403  | 0.0570  | 0.7924 | 0.1011 |
| Bsn   | _LLOTSFAS(Phospho) (STY)SER_2                                  | 088737_S2822_M1_Bsn | 8.9684  | 8.8455  | 4.9249  | 9.2424  | 7.9627  | 8.9159  | 9.0769  | 8.4766  | 5.0175  | 9.0368  | 1.0305  | 0.0434  | 0.8368 | 0.0774 |
| Bsn   | _LPGATQSGPR_2                                                  | #N/A                | 5.3883  | 3.0614  | 4.0147  | 5.8202  | 6.6565  | 4.5570  | 3.7067  | 5.2073  | 5.5111  | 5.7357  | 0.9754  | -0.0359 | 0.8739 | 0.0585 |
| Bsn   | _DSAVDLSSLK_2                                                  | #N/A                | 5.0637  | 4.3232  | 3.4612  | 4.5058  | 5.2590  | 4.7440  | 3.1532  | 4.3660  | 5.1639  | 5.7372  | 0.9901  | -0.0144 | 0.9360 | 0.0287 |
| Bsn   | _SKTPSNLSPEDAS(Phospho) (STY)PTEELR_3                          | 088737_S1114_M1_Bsn | 7.0123  | 7.5993  | 7.5601  | 7.6961  | 8.2390  | 7.9100  | 6.8831  | 8.1870  | 8.3502  | 8.4088  | 0.9617  | -0.0563 | 0.4038 | 0.3939 |
| Bsn   | _DAC(Carbamidomethyl) (C)EPES(Phospho) (STY)GPDPSTVR_3         | #N/A                | 3.6128  | 3.6133  | 4.2996  | 3.3015  | 4.2394  | 3.4901  | 4.5170  | 3.3162  | 2.9648  | 4.5465  | 0.9800  | -0.0291 | 0.8471 | 0.0720 |
| Bsn   | _LHSS(Phospho) (STY)PVSLTISK_2                                 | 088737_S1370_M1_Bsn | 3.0546  | 4.1715  | 3.7414  | 4.2441  | 3.6812  | 4.0483  | 3.9588  | 3.8744  | 3.5230  | 4.2111  | 0.9825  | -0.0255 | 0.7925 | 0.1010 |
| Bsn   | _HSYS(Phospho) (STY)LGADGR_2                                   | 088737_S2029_M1_Bsn | 3.6084  | 3.7267  | 3.3421  | 4.8404  | 4.1860  | 3.8886  | 3.6003  | 6.5077  | 3.9565  | 4.1936  | 0.8614  | -0.2152 | 0.3121 | 0.5057 |
| Bsn   | _QPQTQQQQQQQQQLGQQAQPAQPSQAR_3                                 | #N/A                | 3.5590  | 3.5838  | 4.0591  | 4.9699  | 3.4951  | 3.9936  | 4.1848  | 3.4732  | 4.3276  | 4.0251  | 0.9852  | -0.0215 | 0.8577 | 0.0666 |
| Bsn   | _SPQVLVS(Phospho) (STY)IPVPS(Phospho) (STY)PLSPHR_2            | #N/A                | 3.7706  | 3.9803  | 3.8576  | 7.4902  | 4.9900  | 4.5433  | 3.8115  | 6.0585  | 4.6877  | 5.9269  | 0.9314  | -0.1026 | 0.6844 | 0.1647 |
| Bsn   | _QAAPGPGQSGPPSR_2                                              | #N/A                | 6.4957  | 6.7175  | 6.7543  | 7.2409  | 6.9911  | 3.8888  | 6.8476  | 6.8008  | 4.4307  | 4.0477  | 1.1476  | 0.1986  | 0.3725 | 0.4289 |
| Bsn   | _YSS(Phospho) (STY)VSNIYSDHR_2                                 | 088737_S2068_M1_Bsn | 6.2024  | 3.9529  | 4.6116  | 6.5421  | 6.0834  | 4.9279  | 3.8257  | 3.4403  | 6.0999  | 6.5858  | 1.0800  | 0.1110  | 0.6395 | 0.1942 |
| Bsn   | _AS(Phospho) (STY)GAGGPPRR_2                                   | 088737_S2295_M1_Bsn | 4.2197  | 3.2189  | 3.1932  | 3.6959  | 3.1330  | 3.9787  | 3.4106  | 4.4226  | 4.0712  | 3.6629  | 0.9181  | -0.1232 | 0.3100 | 0.5086 |
| Bsn   | _LQLQLQQLQQLQLQLEEQK_3                                         | #N/A                | 3.5523  | 2.7034  | 4.2391  | 2.8371  | 2.2642  | 3.8292  | 3.4067  | 3.3767  | 3.4610  | 3.2079  | 0.9627  | -0.0549 | 0.7542 | 0.1225 |
| Bsn   | _SKFS(Phospho) (STY)PIEEK_2                                    | #N/A                | 8.9294  | 3.7510  | 8.5833  | 9.2536  | 7.9840  | 8.7359  | 9.0258  | 8.4364  | 8.7956  | 9.0054  | 0.9627  | -0.1632 | 0.3989 | 0.3991 |
| Bsn   | _ASPAQTAS(Phospho) (STY)PQATK_2                                | 088737_S579_M1_Bsn  | 10.0866 | 10.5797 | 10.9614 | 10.9619 | 9.8766  | 10.5727 | 10.4842 | 10.3688 | 10.1690 | 10.4203 | 1.0149  | 0.      |        |        |



|          |                                                                      |                       |         |         |         |         |         |         |         |         |         |         |         |         |        |        |
|----------|----------------------------------------------------------------------|-----------------------|---------|---------|---------|---------|---------|---------|---------|---------|---------|---------|---------|---------|--------|--------|
| Tom1     | _CQS[Phospho (STY)]TGAIPTQAR_2                                       | O88746_S405_M1_Tom1   | 4.2212  | 7.5156  | 7.6619  | 3.9098  | 3.3469  | 4.3826  | 3.6245  | 4.2086  | 7.3924  | 3.8768  | 1.0832  | 0.1153  | 0.7481 | 0.1260 |
| Tom1     | _QNS[Phospho (STY)]VSSNTSQR_2                                        | O88746_S180_M1_Tom1   | 7.0260  | 7.8432  | 7.7214  | 8.2735  | 3.1724  | 3.5568  | 3.4500  | 7.7309  | 4.0317  | 3.7023  | 1.3250  | 0.4060  | 0.3083 | 0.5110 |
| Tom1     | _GSS[Phospho (STY)]IADQR_2                                           | O88746_S376_M1_Tom1   | 3.1249  | 3.9301  | 3.8117  | 4.3144  | 3.7515  | 3.9780  | 4.0291  | 3.8041  | 4.4311  | 4.2814  | 0.9231  | -0.1154 | 0.2009 | 0.6971 |
| Tom1     | _AADIPNLN[Phospho (STY)]PSAEGPPRPSGTAR_4                             | O88746_S462_M1_Tom1   | 3.9242  | 3.1797  | 3.6579  | 7.0289  | 3.0680  | 3.5566  | 3.4498  | 5.3428  | 4.0320  | 4.3798  | 0.9461  | -0.0800 | 0.7844 | 0.1055 |
| Dcx      | _SKQS[Phospho (STY)]PSITPTS[Phospho (STY)]PGSLRK_3                   | O88809_S332_M2_Dcx    | 3.5398  | 3.6864  | 4.2266  | 3.2284  | 3.5747  | 3.9099  | 4.4439  | 3.3892  | 3.0378  | 3.1954  | 1.0098  | 0.0140  | 0.9186 | 0.0369 |
| Dcx      | _GNPSAAAGPKAS[Phospho (STY)]PTPQK_2                                  | O88809_S287_M1_Dcx    | 3.8403  | 3.1446  | 4.5271  | 3.5289  | 2.9659  | 3.2627  | 3.2436  | 3.0888  | 4.2382  | 3.4959  | 1.0081  | 0.0116  | 0.9382 | 0.0277 |
| Idh1     | _ATDFVVPGRGK_2                                                       | #N/A                  | 6.5729  | 6.9855  | 6.2224  | 7.1054  | 7.3231  | 7.0544  | 6.4195  | 6.8634  | 6.8315  | 6.9599  | 1.0161  | 0.0230  | 0.6444 | 0.1908 |
| Idh1     | _ALEEDVC[Carbamidomethyl (C)]IETIEAGM[Oxidation (M)]TK_2             | #N/A                  | 4.7108  | 5.2850  | 5.8699  | 6.1815  | 4.9372  | 5.6840  | 5.0957  | 5.5560  | 5.1872  | 5.0891  | 1.0407  | 0.0575  | 0.5008 | 0.3003 |
| Idh1     | _TVIAEAHGVTR_2                                                       | #N/A                  | 4.2814  | 4.0885  | 4.1875  | 4.0844  | 4.3473  | 3.9578  | 4.1701  | 4.0290  | 3.9649  | 3.8802  | 1.0366  | 0.0518  | 0.1322 | 0.8788 |
| Idh1     | _HAYGQQVR_2                                                          | #N/A                  | 5.2067  | 4.5829  | 3.7924  | 5.0566  | 5.7953  | 3.9973  | 4.3581  | 4.2450  | 3.1470  | 4.6552  | 1.1329  | 0.1801  | 0.2391 | 0.6213 |
| Akap10   | _QSSLAEVPS[Phospho (STY)]PSKR_2                                      | O88845_S187_M1_Akap10 | 3.6076  | 4.4128  | 4.2944  | 3.2962  | 4.2341  | 6.7649  | 3.8562  | 3.3214  | 2.9700  | 6.3565  | 1.0749  | 0.1042  | 0.7314 | 0.1358 |
| Akap10   | _ASVAHVS[Phospho (STY)]PQK_2                                         | O88845_S52_M1_Akap10  | 6.6058  | 6.5224  | 3.2256  | 3.7283  | 5.4696  | 3.5498  | 6.2281  | 4.3902  | 4.0388  | 3.6953  | 1.0571  | 0.0802  | 0.7791 | 0.1084 |
| Akap10   | _NSC[Carbamidomethyl (C)]SS[Phospho (STY)]PLRELSK_2                  | O88845_S281_M1_Akap10 | 2.8956  | 3.7008  | 3.5824  | 4.0850  | 3.5221  | 4.2074  | 3.7997  | 4.0334  | 3.6820  | 4.0520  | 0.9419  | -0.0864 | 0.3899 | 0.4091 |
| Tsyp1    | _I[Acetyl (Protein N-term)]SS[Phospho (STY)]PERDEGTPVPSQR_2          | O88852_S3_M1_Tsyp1    | 3.5493  | 4.3545  | 4.2361  | 3.7661  | 4.1759  | 3.5536  | 3.9144  | 6.1528  | 3.5341  | 6.6587  | 0.7777  | -0.3626 | 0.1201 | 0.9205 |
| Ccnk     | _KPS[Phospho (STY)]PQPS[Phospho (STY)]PPR_2                          | O88874_S325_M2_Ccnk   | 9.4739  | 9.5617  | 10.0494 | 10.0123 | 8.9025  | 9.7018  | 9.8151  | 10.0152 | 10.0256 | 9.4261  | 0.9793  | -0.0302 | 0.4237 | 0.2739 |
| Ccnk     | _AVVVS[Phospho (STY)]PKKEENK_2                                       | O88874_S341_M1_Ccnk   | 5.6634  | 5.7603  | 5.9906  | 5.8338  | 5.4298  | 5.6272  | 6.2999  | 6.0728  | 6.0600  | 6.0536  | 0.9340  | -0.0985 | 0.0059 | 0.2319 |
| Zland5   | _M[Oxidation (M)]S[Phospho (STY)]PMAGTAGSSNSTSDASVQR_2               | #N/A                  | 3.7686  | 3.7394  | 4.2541  | 4.1487  | 3.6042  | 3.7261  | 3.7945  | 4.0503  | 3.6003  | 3.4751  | 1.0385  | 0.0544  | 0.4140 | 0.3830 |
| Mpp3     | _TGTGLPS[Phospho (STY)]PQNFK_2                                       | O88910_S307_M1_Mpp3   | 12.4398 | 12.3490 | 12.7708 | 12.9848 | 11.6402 | 12.4159 | 12.8204 | 12.0779 | 12.1734 | 12.4504 | 1.0043  | 0.0062  | 0.8489 | 0.0711 |
| Syn1     | _QAS[Phospho (STY)]SGAPATK_2                                         | O88935_S568_M1_Syn1   | 12.5073 | 11.7252 | 12.4779 | 12.8166 | 11.6144 | 12.4583 | 12.0395 | 11.6247 | 12.1069 | 11.9287 | 1.0287  | 0.0408  | 0.2250 | 0.6478 |
| Syn1     | _LSKPDVLR_2                                                          | #N/A                  | 11.2856 | 11.7783 | 11.5917 | 11.7827 | 11.1499 | 11.3461 | 11.4356 | 11.3587 | 11.2680 | 11.3540 | 1.0060  | 0.0087  | 0.5826 | 0.2676 |
| Syn1     | _TYATAEPIDAK_2                                                       | #N/A                  | 11.0154 | 11.0538 | 11.1929 | 11.1389 | 11.1156 | 11.0689 | 11.0542 | 10.9267 | 10.8828 | 11.0782 | 1.0102  | 0.0147  | 0.0550 | 1.2597 |
| Syn1     | _ASGAPPGGQR_2                                                        | #N/A                  | 9.8663  | 10.0476 | 9.5665  | 10.1840 | 10.8963 | 9.8743  | 9.6975  | 9.6422  | 10.0315 | 1.0266  | 0.0378  | 0.3129  | 0.5046 |        |
| Syn1     | _VLVIDEPHTDWAK_2                                                     | #N/A                  | 8.5472  | 8.7237  | 9.0408  | 9.3713  | 8.5375  | 8.6492  | 8.9695  | 8.5686  | 8.7081  | 8.5948  | 1.0116  | 0.0167  | 0.5953 | 0.2252 |
| Syn1     | _TGPTTQQR_2                                                          | #N/A                  | 9.9012  | 9.5931  | 9.4931  | 9.9299  | 10.3077 | 9.7107  | 9.6254  | 9.8665  | 9.6677  | 9.7605  | 1.0095  | 0.0137  | 0.5666 | 0.2467 |
| Syn1     | _VDNOHQHQDIASVALTK_3                                                 | #N/A                  | 7.9306  | 7.6196  | 7.9185  | 8.4622  | 7.6463  | 7.8771  | 7.8617  | 7.7193  | 7.9121  | 8.0317  | 1.0035  | 0.0051  | 0.8686 | 0.0612 |
| Syn1     | _KLGTEEPFDQTFYPNHK_3                                                 | #N/A                  | 8.3492  | 8.2280  | 8.3898  | 8.3973  | 8.2132  | 8.6470  | 8.4015  | 8.2615  | 8.1258  | 8.3772  | 1.0096  | 0.0137  | 0.4251 | 0.3715 |
| Syn1     | _IHGEIDIK_2                                                          | #N/A                  | 7.8392  | 7.2372  | 8.1235  | 7.1939  | 7.4833  | 7.5687  | 7.6155  | 7.7498  | 7.7940  | 0.9668  | -0.0487 | 0.3616  | 0.4418 |        |
| Syn1     | _LGGPQKPPGAPTR_3                                                     | #N/A                  | 7.1802  | 6.7997  | 7.4133  | 6.7585  | 8.1371  | 7.3623  | 7.0924  | 7.0285  | 7.4885  | 7.0763  | 1.0145  | 0.0207  | 0.7116 | 0.1478 |
| Syn1     | _EM[Oxidation (M)]LSSTTTPVWK_2                                       | #N/A                  | 9.1611  | 9.1147  | 9.4971  | 9.3304  | 9.2353  | 9.3036  | 9.1677  | 9.1151  | 9.1016  | 0.0237  | 0.0758  | 1.1201  |        |        |
| Syn1     | _QDAGAPQAR_2                                                         | #N/A                  | 6.8047  | 3.1184  | 7.2084  | 7.0928  | 7.9394  | 7.2924  | 6.6246  | 7.3492  | 7.1570  | 6.9064  | 0.9382  | -0.0920 | 0.6409 | 0.1932 |
| Syn1     | _M[Oxidation (M)]TQALPR_2                                            | #N/A                  | 7.9914  | 8.2938  | 8.2234  | 8.3751  | 8.7354  | 8.0258  | 7.6715  | 8.3835  | 8.4250  | 8.2951  | 1.0098  | 0.0141  | 0.6929 | 0.1593 |
| Syn1     | _QPORDAS[Phospho (STY)]PGR_2                                         | #N/A                  | 7.3914  | 7.6111  | 7.2232  | 7.5813  | 3.9672  | 6.9492  | 7.5383  | 7.1190  | 6.8198  | 7.1519  | 0.9377  | -0.0928 | 0.5564 | 0.2546 |
| Syn1     | _LGTEEPFDQTFYPNHK_3                                                  | #N/A                  | 7.2286  | 7.2192  | 7.3862  | 7.4236  | 7.0609  | 7.2173  | 6.8335  | 7.2787  | 7.2946  | 7.5788  | 1.0013  | 0.0019  | 0.9470 | 0.0237 |
| Syn1     | _ASTAAPSPASPSSGGGGFSSLSNAVK_3                                        | #N/A                  | 5.3650  | 6.9196  | 6.8360  | 8.3815  | 5.5370  | 4.8643  | 5.2728  | 6.3833  | 5.0129  | 5.2915  | 1.1506  | 0.0204  | 0.2765 | 0.5583 |
| Syn1     | _DAS[Phospho (STY)]PGRHSQSSSSGALTGR_3                                | #N/A                  | 8.1115  | 9.7470  | 10.6141 | 8.4662  | 8.9865  | 9.4266  | 9.5475  | 9.0271  | 8.3477  | 1.0390  | 0.0552  | 0.5712  | 0.2432 |        |
| Syn1     | _VKVQNDHQDQIASVALTK_3                                                | #N/A                  | 7.5937  | 7.7571  | 8.3561  | 8.0138  | 7.2239  | 7.6126  | 7.7173  | 7.2812  | 7.6520  | 8.1168  | 1.0088  | 0.0126  | 0.7852 | 0.1050 |
| Syn1     | _QLNVLVNVK_2                                                         | #N/A                  | 4.8485  | 4.5056  | 3.8271  | 4.9096  | 3.8047  | 3.9626  | 3.4993  | 4.0820  | 4.4708  | 5.0823  | 1.0061  | 0.0088  | 0.9454 | 0.0244 |
| Syn1     | _TSVSNWK_2                                                           | #N/A                  | 7.5598  | 7.8354  | 7.7356  | 7.7177  | 8.2819  | 7.8150  | 7.0312  | 7.7375  | 7.8996  | 7.8186  | 1.0266  | 0.0378  | 0.3435 | 0.4641 |
| Syn1     | _GVHSQSSS[Phospho (STY)]PGALTGR_2                                    | #N/A                  | 10.4830 | 10.4804 | 11.1335 | 11.0190 | 10.1750 | 10.4336 | 10.7186 | 10.1915 | 10.5541 | 1.0562  | 0.0789  | 0.1961  | 0.7074 |        |
| Syn1     | _KIHGEIDIK_2                                                         | #N/A                  | 6.7608  | 3.5803  | 6.2750  | 3.9645  | 5.8864  | 5.9926  | 4.3600  | 4.7143  | 5.9749  | 4.9315  | 1.0830  | 0.1151  | 0.5817 | 0.2353 |
| Syn1     | _SQSLTNAPNLEPAPPSPSLSQDEVAETR_4                                      | #N/A                  | 3.8060  | 3.3903  | 4.6783  | 3.9895  | 3.6527  | 4.5341  | 3.5884  | 4.3106  | 3.9906  | 2.9856  | 1.0779  | 0.1082  | 0.4224 | 0.3743 |
| Syn1     | _QTATAAAATFSEQVGGGGGAGR_2                                            | #N/A                  | 7.1742  | 6.5067  | 7.9636  | 6.7837  | 6.2158  | 6.7105  | 6.8059  | 6.7962  | 6.4890  | 1.0611  | 0.0856  | 0.2970  | 0.5273 |        |
| Syn1     | _PQPPPPPPSAAS[Phospho (STY)]PGATPGTASASAR_3                          | O88935_S39_M1_Syn1    | 9.7240  | 10.5340 | 10.2498 | 11.3573 | 8.4133  | 9.6248  | 9.8307  | 10.1433 | 9.6530  | 9.4359  | 1.0223  | 0.0319  | 0.6858 | 0.1638 |
| Syn1     | _QAS[Phospho (STY)]QAGPGR_2                                          | #N/A                  | 9.5168  | 10.6132 | 10.6792 | 9.5147  | 10.8069 | 9.6428  | 9.8307  | 10.0450 | 10.7929 | 10.4663 | 1.0053  | 0.0076  | 0.8858 | 0.1626 |
| Syn1     | _LPSPT[Phospho (STY)]AAPQSSASQATPTVYQGGQR_3                          | O88935_T512_M1_Syn1   | 3.7364  | 4.0169  | 5.9703  | 6.5929  | 3.8904  | 3.7335  | 5.8792  | 6.5459  | 4.6278  | 3.8907  | 0.8894  | -0.1691 | 0.4930 | 0.3072 |
| Syn1     | _QHAFSAMAR_2                                                         | #N/A                  | 3.7471  | 5.9781  | 3.5993  | 4.9500  | 4.6410  | 5.1077  | 4.5512  | 3.7491  | 4.3981  | 4.7689  | 1.0695  | 0.0970  | 0.5504 | 0.2593 |
| Syn1     | _SQSLTNAPNLEPAPPSPSLSQDEVK_3                                         | #N/A                  | 5.0215  | 5.0793  | 5.4322  | 8.7212  | 5.7481  | 5.6942  | 5.9374  | 6.9220  | 5.5483  | 5.5413  | 0.9937  | -0.0091 | 0.9613 | 0.0172 |
| Syn1     | _RLS[Phospho (STY)]DSNFM[Oxidation (M)]ANLNGYM[Oxidation (M)]TDLQR_3 | #N/A                  | 3.6402  | 7.2144  | 8.7728  | 5.8300  | 6.6778  | 5.6779  | 8.3525  | 7.1221  | 4.0678  | 0.9505  | -0.0733 | 0.8098  | 0.0616 |        |
| Syn1     | _PVAAGPGAPPAARPPAS[Phospho (STY)]PQR_3                               | #N/A                  | 3.6758  | 5.5736  | 3.9197  | 8.3179  | 3.8064  | 3.8967  | 4.0883  | 5.2236  | 4.6354  | 3.6174  | 1.1079  | 0.1478  | 0.6398 | 0.1939 |
| Syn1     | _QSRPVAGGAPPAARPPASPS[Phospho (STY)]PQR_4                            | #N/A                  | 3.4998  | 4.0242  | 6.3580  | 4.1900  | 3.6847  | 4.9857  | 3.7720  | 3.7582  | 3.1560  | 3.9680  | 1.2166  | 0.2829  | 0.1947 | 0.7106 |
| Syn1     | _DHIEVGSMM[Oxidation (M)]PLIGHQDEDK_3                                | #N/A                  | 4.5515  | 4.6532  | 4.8443  | 5.0343  | 4.9303  | 5.1037  | 5.0748  | 5.1488  | 4.6250  | 5.0647  | 0.9748  | -0.0368 | 0.4118 | 0.3853 |
| Syn1     | _VEQAEFSQNLNVAHANGGFS[Oxidation (M)]EVLVR_3                          | #N/A                  | 3.2932  | 4.0495  | 4.5278  | 5.0316  | 3.9378  | 4.1876  | 4.2198  | 4.4305  | 3.2287  | 3.7488  | 1.0677  | 0.0944  | 0.4902 | 0.3097 |
| Syn1     | _LWVDTC[Carbamidomethyl (C)]SEFGGLDLC[Carbamidomethyl (C)]JAEALHGK_3 | #N/A                  | 4.2094  | 3.5137  | 3.3954  | 4.6069  | 3.3351  | 4.3944  | 3.2544  | 1.9095  | 4.1941  | 3.8650  | 1.1825  | 0.2419  | 0.2534 | 0.5961 |
| Zhhb7a   | _HFKDEEEDDEAS[Phospho (STY)]PDGSGR_3                                 | O88939_S537_M1_Zhhb7a | 4.3496  | 3.6539  | 8.6492  | 8.0836  | 3.4753  | 7.8861  | 7.4989  | 8.2254  | 7.3289  | 7.6855  | 0.8867  | -0.1734 | 0.6185 | 0.2087 |
| Lin7b    | _I[Acetyl (Protein N-term)]AALVEPIGLER_2                             | #N/A                  | 5.8908  | 6.5664  | 6.1506  | 6.1131  | 6.6621  | 6.1888  | 6.2770  | 6.2049  | 6.0529  | 6.1208  | 1.0154  | 0.0220  | 0.5521 | 0.2580 |
| Lin7b    | _QQHHSYTS[Phospho (STY)]LESRG_3                                      | O88951_S302_M1_Lin7b  | 4.5197  | 3.9263  | 4.9438  | 3.9631  | 4.3591  | 3.7061  | 3.6778  | 4.1724  | 4.8958  | 3.9301  | 1.0161  | 0.0231  | 0.8348 | 0.0784 |
| Lin7b    | _QQHHSY[Phospho (STY)]TLESR_2                                        | O88951_Y200_M1_Lin7b  | 3.3119  | 4.1171  | 3.9987  | 4.0036  | 3.9384  | 3.7911  | 4.1519  | 2.9976  | 3.2966  | 3.6809  | 1.0930  | 0.1283  | 0.2191 | 0.6593 |
| Lin7c    | _VLQSEFC[Carbamidomethyl (C)]NAVR_2                                  | #N/A                  | 3.4518  | 5.2907  | 5.3797  | 5.4285  | 5.5877  | 4.6556  | 5.7910  | 4.8011  | 5.1593  | 5.2584  | 0.9454  | -0.0810 | 0.5355 | 0.2712 |
| Cpd      | _KSLSHFEQDET[Phospho (STY)]DT[Phospho (STY)]EETLYSSKH_4              | #N/A                  | 3.2337  | 3.9899  | 4.4682  | 4.4257  | 3.8782  | 4.2472  | 4.1404  | 2.9892  | 3.3414  | 3.6892  | 1.1414  | 0.1908  | 0.1388 | 0.8755 |
| Cpd      | _SLSHFEQDET[Phospho (STY)]DT[Phospho (STY)]EETLYSSKH_3               | #N/A                  | 3.3570  | 3.9854  | 4.5915  | 4.1353  | 4.0016  | 4.1239  | 4.2835  | 3.4667  | 3.1650  | 3.8126  | 1.0321  | 0.0456  | 0.6846 | 0.1645 |
| Cpd      | _SLSHFEQDET[Phospho (STY)]DT[Phospho (STY)]EETLYSSK_3                | #N/A                  | 4.1661  | 3.4215  | 3.8997  | 3.4435  | 3.3098  | 3.3148  | 3.2080  | 3.5577  | 3.8567  | 3.1208  | 1.0456  | 0.0644  | 0.5063 | 0.2645 |
| Lgmn     | _DYTGEDVTENFLAVLR_2                                                  | #N/A                  | 2.8138  | 3.2731  | 3.8030  | 3.3468  | 3.1071  | 4.3752  | 3.4950  | 3.6544  | 3.5461  | 3.6952  | 0.9598  | -0.0592 | 0.6269 | 0.2028 |
| Sh3pdx2a | _AAS[Phospho                                                         |                       |         |         |         |         |         |         |         |         |         |         |         |         |        |        |



|            |                                                                                                                    |                      |         |         |         |          |         |         |         |         |         |         |        |         |        |        |
|------------|--------------------------------------------------------------------------------------------------------------------|----------------------|---------|---------|---------|----------|---------|---------|---------|---------|---------|---------|--------|---------|--------|--------|
| Cope       | _APPPGAVSGGS[Phospho (STY)]GEVDFDK_2                                                                               | #N/A                 | 3.9906  | 6.2602  | 7.6062  | 6.8464   | 5.9832  | 6.4277  | 3.9185  | 9.0114  | 8.2454  | 3.6462  | 0.9968 | -0.0046 | 0.9881 | 0.0052 |
| Pde4a      | _S[Phospho (STY)]PLGGPPSV[Carbamidomethyl (C)]K_2                                                                  | O89084_S204_M1_Pde4a | 8.5561  | 7.9433  | 8.0214  | 8.5172   | 6.7659  | 8.2014  | 8.3642  | 7.9711  | 8.3281  | 8.2261  | 0.9731 | -0.0394 | 0.5347 | 0.2719 |
| Pde4a      | _G[S[Phospho (STY)]DSDAER_2                                                                                        | O89084_S49_M1_Pde4a  | 3.2725  | 4.0287  | 4.5070  | 4.0508   | 3.9170  | 4.2084  | 4.4016  | 4.4513  | 3.2495  | 3.7280  | 1.0296 | 0.0420  | 0.7044 | 0.1522 |
| Pde4a      | _S[S[Phospho (STY)]SLPGPR_2                                                                                        | O89084_S13_M1_Pde4a  | 3.4474  | 4.2037  | 3.1811  | 8.3462   | 4.0920  | 4.0335  | 3.9266  | 7.3687  | 3.0745  | 3.9030  | 0.9962 | -0.0056 | 0.9889 | 0.0048 |
| Pde4a      | _QS[Phospho (STY)]PSPTEEPGVLSOPALPK_2                                                                              | O89084_S672_M1_Pde4a | 4.3407  | 4.3863  | 5.5267  | 4.0293   | 3.4664  | 4.2631  | 3.7440  | 4.0891  | 3.7377  | 3.9963  | 1.0283 | 0.0403  | 0.6315 | 0.1996 |
| Pde4a      | _S[Phospho (STY)]GNVSEYSENFLDK_2                                                                                   | O89084_S274_M1_Pde4a | 4.1337  | 3.4381  | 3.3197  | 3.1818   | 3.2594  | 2.9693  | 3.3300  | 3.8194  | 4.1184  | 3.7893  | 0.8999 | -0.1538 | 0.1529 | 0.8156 |
| Pde4a      | _TLSP[S[Phospho (STY)]EEAGLLGLPSM[Oxidation (M)]AAVEAPR_3                                                          | O89084_S788_M1_Pde4a | 4.1669  | 3.1755  | 3.9006  | 3.4444   | 3.3107  | 3.3139  | 3.5927  | 5.4496  | 3.8558  | 3.1217  | 0.8869 | -0.1732 | 0.3401 | 0.4685 |
| Pde4a      | _SDS[Phospho (STY)]DYDMSPK_2                                                                                       | O89084_S147_M1_Pde4a | 4.0700  | 3.3254  | 3.8037  | 3.5893   | 3.2137  | 3.4109  | 3.3040  | 3.6537  | 4.1777  | 3.0247  | 1.0081 | 0.0117  | 0.9132 | 0.0394 |
| Rbm3       | _YDRPGGVGYGYGR_3                                                                                                   | #N/A                 | 5.5769  | 4.9645  | 6.0996  | 5.6209   | 6.5156  | 5.2613  | 4.0612  | 5.2967  | 5.4644  | 5.8811  | 1.0961 | 0.1324  | 0.2721 | 0.5653 |
| Rbm3       | _YSGGVRDNYGN_2                                                                                                     | #N/A                 | 5.6160  | 6.3666  | 7.1876  | 6.0396   | 6.1047  | 5.9310  | 6.0981  | 5.5717  | 6.1539  | 5.2562  | 1.0758 | 0.1055  | 0.2131 | 0.6714 |
| Land1      | _SLAENYFSTGR_2                                                                                                     | #N/A                 | 5.7173  | 5.4025  | 6.5752  | 5.2681   | 5.1287  | 4.9348  | 6.3317  | 5.7240  | 6.0501  | 3.9871  | 0.9966 | -0.0049 | 0.9717 | 0.0125 |
| Land1      | _PQSHIQIC[Carbamidomethyl (C)]ENLTSGENLSR_3                                                                        | #N/A                 | 4.5313  | 5.3061  | 3.3269  | 5.6166   | 3.9916  | 5.3737  | 3.7808  | 5.8709  | 4.4641  | 5.0954  | 0.9767 | -0.0340 | 0.8520 | 0.0695 |
| Mt-Cyb     | _DVNYGWLR_2                                                                                                        | #N/A                 | 4.9496  | 2.8694  | 4.9123  | 5.0078   | 4.5117  | 4.8793  | 5.5296  | 4.7568  | 4.8794  | 4.9669  | 0.8984 | -0.1546 | 0.2823 | 0.5492 |
| Mtco2      | _VVLPM[Oxidation (M)]ELPIR_2                                                                                       | #N/A                 | 9.2208  | 10.1823 | 9.2461  | 9.6686   | 9.3167  | 9.7339  | 10.0304 | 9.4624  | 9.0508  | 9.8710  | 0.9956 | -0.0064 | 0.8741 | 0.0584 |
| Mtco2      | _LLEVDNR_2                                                                                                         | #N/A                 | 10.5049 | 10.4991 | 10.7957 | 10.1836  | 10.0195 | 10.1505 | 10.2382 | 10.6884 | 10.5279 | 10.4030 | 0.9899 | -0.0146 | 0.5433 | 0.2650 |
| Mtco2      | _ILYM[Oxidation (M)]M[Oxidation (M)]DEINPVLTWK_2                                                                   | #N/A                 | 6.3554  | 6.7637  | 7.0026  | 6.1194   | 6.1994  | 6.8619  | 7.0379  | 7.2116  | 6.7671  | 6.5821  | 0.9494 | -0.0749 | 0.1509 | 0.8212 |
| Mtco2      | _M[Oxidation (M)]USSEDVHSAWAVSLPK_3                                                                                | #N/A                 | 6.2480  | 6.4299  | 6.6050  | 5.8113   | 5.2542  | 6.4508  | 6.0884  | 6.8346  | 6.5912  | 6.2659  | 0.9516 | -0.0715 | 0.3163 | 0.4999 |
| Hprt1      | _VIGDGLSLTLTK_2                                                                                                    | #N/A                 | 6.9598  | 7.1403  | 7.1302  | 6.9503   | 7.0205  | 6.7231  | 6.5841  | 7.1540  | 6.8790  | 6.7463  | 1.0214 | 0.0306  | 0.2684 | 0.5713 |
| Hprt1      | _NLVVEDIOTGK_2                                                                                                     | #N/A                 | 5.4819  | 6.2043  | 6.0199  | 6.1238   | 5.9276  | 6.3055  | 6.4063  | 5.7977  | 6.1759  | 6.1111  | 0.9851 | -0.0217 | 0.6447 | 0.1906 |
| Hprt1      | _SPM[Oxidation (M)]TVDFIR_2                                                                                        | #N/A                 | 5.6914  | 6.3835  | 4.2029  | 3.7466   | 5.1934  | 6.4752  | 6.7073  | 6.1849  | 5.4547  | 6.1899  | 0.8611 | -0.2157 | 0.1996 | 0.6998 |
| Hprt1      | _EM[Oxidation (M)]GGHHVALC[Carbamidomethyl (C)]VLK_3                                                               | #N/A                 | 2.7669  | 4.0475  | 4.4676  | 4.0732   | 4.1506  | 4.1860  | 4.2214  | 2.7552  | 3.2271  | 3.7505  | 1.1314 | 0.1781  | 0.2814 | 0.5507 |
| Hprt1      | _DLNVHC[Carbamidomethyl (C)]VSGTK_2                                                                                | #N/A                 | 4.0383  | 3.0097  | 3.4032  | 3.9059   | 4.1034  | 4.9046  | 3.6206  | 4.2134  | 3.6686  | 3.8739  | 1.0131 | 0.0188  | 0.8886 | 0.0513 |
| Abi1       | _SC[Carbamidomethyl (C)]S[Phospho (STY)]ASC[Carbamidomethyl (C)]M[Oxidation (M)]PHGAR_2                            | #N/A                 | 3.7695  | 3.7859  | 3.6675  | 4.1702   | 3.6072  | 3.4720  | 3.7936  | 4.0101  | 3.6587  | 4.3046  | 0.9502 | -0.0737 | 0.2674 | 0.5728 |
| Ca2        | _DFPIANGDR_2                                                                                                       | #N/A                 | 9.7881  | 9.5867  | 9.7421  | 10.0332  | 10.1209 | 9.8200  | 9.5845  | 9.5127  | 9.6938  | 10.0616 | 1.0139 | 0.0200  | 0.3589 | 0.4590 |
| Ca2        | _GGPLSDSVR_2                                                                                                       | #N/A                 | 8.0886  | 8.4144  | 8.6754  | 8.5724   | 9.0164  | 8.3951  | 8.0923  | 8.3634  | 8.4007  | 8.4998  | 1.0225 | 0.0322  | 0.3097 | 0.5450 |
| Ca2        | _VLEAHSLK_2                                                                                                        | #N/A                 | 8.5144  | 9.1154  | 9.1083  | 8.9463   | 9.5430  | 8.8455  | 8.9180  | 8.8639  | 8.9449  | 8.8994  | 1.0119 | 0.0170  | 0.5618 | 0.2504 |
| Ca2        | _Acetyl (Protein N-term)[S[Phospho (STY)]HHWGYSK_2                                                                 | P00920_S2_M1_Ca2     | 7.0505  | 7.4864  | 7.8747  | 7.5605   | 7.5297  | 7.2058  | 7.3304  | 7.0942  | 7.3012  | 7.3688  | 1.0244 | 0.0448  | 0.2866 | 0.5428 |
| Ca2        | _AVQGPGLAVGLFK_2                                                                                                   | #N/A                 | 7.2592  | 7.3876  | 7.0829  | 6.9279   | 7.7224  | 7.5581  | 7.0807  | 7.1756  | 7.3675  | 7.5194  | 1.0051 | 0.0073  | 0.8319 | 0.0799 |
| Ca2        | _IGPAGSQGLK_2                                                                                                      | #N/A                 | 5.7807  | 6.5741  | 6.7125  | 6.9172   | 6.9716  | 6.1055  | 6.2415  | 6.7129  | 6.5779  | 6.4353  | 1.0028 | 0.0041  | 0.9441 | 0.0250 |
| Ca2        | _SVNNHGSFNVFEDSQDNVAVLK_3                                                                                          | #N/A                 | 6.2113  | 6.5003  | 6.7537  | 6.7984   | 6.4924  | 6.2845  | 6.7642  | 6.2935  | 6.3440  | 6.6521  | 0.9990 | -0.0015 | 0.9658 | 0.0151 |
| Ca2        | _QSPVDITATAGHPALQPLUSYOK_3                                                                                         | #N/A                 | 5.1086  | 5.5318  | 5.5005  | 6.3198   | 6.0771  | 6.0249  | 6.2502  | 5.6850  | 5.6582  | 5.6838  | 0.9899 | -0.0147 | 0.8251 | 0.0599 |
| Ca2        | _YAEALHLVHWNTK_3                                                                                                   | #N/A                 | 5.1278  | 5.1201  | 6.0839  | 5.1983   | 5.8077  | 5.5324  | 5.2651  | 3.9154  | 4.3953  | 6.1377  | 1.1116 | 0.1526  | 0.2452 | 0.6104 |
| Ca2        | _TLNFEEGDAAEM[Oxidation (M)]VONWRPAQLK_3                                                                           | #N/A                 | 4.1537  | 4.5262  | 5.8817  | 4.4268   | 4.3209  | 4.7210  | 5.5040  | 4.5222  | 4.8765  | 1.0019  | 0.9027 | 0.0845  | 0.0068 | 0.0068 |
| Ca2        | _EPITYSSEQM[Oxidation (M)]SHFR_2                                                                                   | #N/A                 | 3.9987  | 3.8534  | 4.3578  | 4.7371   | 4.5866  | 4.4253  | 4.0021  | 4.7104  | 3.8048  | 4.2717  | 1.0308 | 0.0438  | 0.5937 | 0.2264 |
| Ca2        | _HNGPENWKKDFPIANGDR_4                                                                                              | #N/A                 | 4.1981  | 3.4535  | 3.9318  | 4.9932   | 7.1697  | 6.6264  | 3.6238  | 6.0919  | 5.8344  | 6.3744  | 0.9236 | -0.1147 | 0.6609 | 0.1799 |
| Thy1       | _VTLNKPPIWK_2                                                                                                      | #N/A                 | 8.9259  | 9.0160  | 9.1447  | 9.0105   | 8.6393  | 8.5672  | 8.9660  | 9.3846  | 8.8570  | 8.7639  | 0.9879 | -0.0176 | 0.5138 | 0.2892 |
| Thy1       | _DNSIQHEFSLTR_2                                                                                                    | #N/A                 | 6.2385  | 6.0304  | 5.9416  | 6.8609   | 5.8570  | 5.8631  | 6.3396  | 6.9658  | 6.0928  | 6.2093  | 0.9578 | -0.0622 | 0.3101 | 0.5085 |
| Thy1       | _HVLSTGLGPHETVR_3                                                                                                  | #N/A                 | 9.4622  | 9.3910  | 9.8939  | 9.7052   | 9.2266  | 9.3271  | 9.5508  | 9.7399  | 9.3466  | 9.3895  | 0.9994 | -0.0009 | 0.9698 | 0.0133 |
| Thy1       | _VLSLTAC[Carbamidomethyl (C)]VNVQNLK_2                                                                             | #N/A                 | 7.1270  | 7.5217  | 7.9826  | 7.9333   | 7.6094  | 7.5806  | 8.1417  | 7.9061  | 7.9033  | 7.8728  | 0.9711 | -0.0424 | 0.0695 | 0.1179 |
| Hba        | _M[Oxidation (M)]FASPTTK_2                                                                                         | #N/A                 | 6.7737  | 6.8578  | 7.5786  | 7.0508   | 8.4247  | 6.5012  | 7.2632  | 7.4026  | 6.4022  | 6.4834  | 1.0450 | 0.0635  | 0.4733 | 0.3248 |
| Hba        | _FLASVSVLTSK_2                                                                                                     | #N/A                 | 6.1574  | 5.4502  | 6.6470  | 5.9113   | 7.4055  | 5.8725  | 6.8221  | 6.1736  | 5.5019  | 5.7400  | 1.0299 | 0.0425  | 0.6783 | 0.1686 |
| Hba        | _VDVPVFK_2                                                                                                         | #N/A                 | 5.4376  | 5.9428  | 6.6150  | 5.0817   | 7.8103  | 5.4669  | 5.6083  | 5.8296  | 5.7097  | 5.9250  | 1.0504 | 0.0710  | 0.5893 | 0.2296 |
| Hba        | _VLSGEDSKNK_2                                                                                                      | #N/A                 | 4.7044  | 5.5670  | 6.9190  | 4.9582   | 6.5120  | 5.2586  | 5.9389  | 5.4530  | 5.1427  | 4.4994  | 1.0751 | 0.1044  | 0.4605 | 0.3368 |
| Hba        | _IGGHAEGYGAEALER_3                                                                                                 | #N/A                 | 4.8873  | 5.4868  | 6.3274  | 5.1670   | 6.3432  | 4.8488  | 5.3783  | 6.1288  | 4.6322  | 5.1397  | 1.0358 | 0.0667  | 0.6662 | 0.1764 |
| Hba        | _TYFFHFOVSHGSAQVK_3                                                                                                | #N/A                 | 6.6743  | 6.6447  | 7.5816  | 6.0027   | 7.9490  | 6.5109  | 7.1065  | 6.9069  | 6.2597  | 6.4456  | 1.0321 | 0.0455  | 0.6086 | 0.2157 |
| Hbb-b1     | _LUVVPWTQR_2                                                                                                       | #N/A                 | 9.4886  | 9.8270  | 10.7103 | 9.7108   | 10.6669 | 9.6862  | 10.4803 | 9.4189  | 9.6151  | 1.0032  | 0.0047 | 0.9280  | 0.0320 | 0.1800 |
| Hbb-b1     | _LHVDPENR_2                                                                                                        | #N/A                 | 8.9019  | 8.9976  | 9.4186  | 9.1270   | 10.4746 | 8.6842  | 9.8245  | 9.7165  | 8.7416  | 8.5516  | 1.0064 | 0.0092  | 0.8913 | 0.0500 |
| Hbb-b1     | _DFTPAQAFAFK_2                                                                                                     | #N/A                 | 7.8647  | 8.1478  | 8.7697  | 8.1792   | 9.5301  | 7.6800  | 9.0352  | 8.5609  | 7.9480  | 7.9189  | 0.9998 | -0.0003 | 0.9965 | 0.0015 |
| Hbb-b1     | _VHLTDAEK_2                                                                                                        | #N/A                 | 7.7766  | 7.9314  | 8.6705  | 7.5803   | 9.1999  | 7.8666  | 8.1006  | 8.5334  | 7.8141  | 7.6949  | 1.0168 | 0.0241  | 0.7111 | 0.1481 |
| Hbb-b1     | _VNSDEVGGEALGR_2                                                                                                   | #N/A                 | 7.7565  | 7.8581  | 8.6997  | 8.0729   | 9.2275  | 7.9773  | 8.6984  | 8.1925  | 8.0001  | 7.7330  | 1.0134 | 0.0192  | 0.7527 | 0.1234 |
| Hbb-b1     | _VITAFNDGLNHLDSLK_3                                                                                                | #N/A                 | 5.5907  | 5.9318  | 6.4804  | 6.2727   | 7.1159  | 6.1177  | 6.6528  | 6.4956  | 5.1356  | 5.5267  | 1.0502 | 0.0707  | 0.4706 | 0.3273 |
| Hbb-b1     | _GTFASLSLHLC[Carbamidomethyl (C)]DKK_2                                                                             | #N/A                 | 6.6042  | 6.7127  | 6.5788  | 6.4761   | 7.9218  | 5.6554  | 6.7041  | 6.7546  | 6.5373  | 6.3542  | 1.0107 | 0.0154  | 0.8566 | 0.0672 |
| Hbb-b1     | _YFSGDGLSSASIM[Oxidation (M)]GNAK_2                                                                                | #N/A                 | 3.9129  | 4.3150  | 6.0363  | 4.7605   | 5.4324  | 4.2852  | 5.4600  | 4.6613  | 4.5040  | 4.6361  | 0.9948 | -0.0075 | 0.9565 | 0.0193 |
| Hbb-b2     | _VNPDEVGGEALGR_2                                                                                                   | #N/A                 | 7.8170  | 7.9471  | 8.8133  | 7.9331   | 9.0816  | 8.2488  | 8.5384  | 8.1497  | 8.1686  | 7.9157  | 1.0139 | 0.0199  | 0.7011 | 0.1542 |
| H3-5,H3-3a | _YRPQTVLAR_2                                                                                                       | #N/A                 | 10.0443 | 10.4987 | 10.6065 | 10.4188  | 10.7767 | 10.2027 | 10.3955 | 10.7786 | 10.5108 | 10.1767 | 0.9961 | -0.0056 | 0.8149 | 0.0889 |
| H3-5,H3-3a | _RVTIM[Oxidation (M)]PK_2                                                                                          | #N/A                 | 7.9136  | 8.4028  | 8.7346  | 7.8146   | 9.4405  | 8.6249  | 8.6682  | 9.4885  | 8.8984  | 8.7695  | 0.9478 | -0.0774 | 0.2028 | 0.6930 |
| H3-5,H3-3a | _STELLIR_2                                                                                                         | #N/A                 | 7.8542  | 6.9962  | 8.6620  | 7.5953   | 7.6974  | 8.1441  | 5.1356  | 8.4628  | 8.6133  | 8.1153  | 1.0321 | 0.0455  | 0.7407 | 0.1304 |
| H3-5,H3-3a | _ELAQDFK_2                                                                                                         | #N/A                 | 5.7021  | 5.9809  | 6.0679  | 5.2945   | 6.3837  | 6.1526  | 3.0290  | 6.8353  | 5.9775  | 6.5673  | 1.0586 | 0.0821  | 0.6607 | 0.1800 |
| H3-5,H3-3a | _ELAQDFKDLR_2                                                                                                      | #N/A                 | 3.9332  | 5.4498  | 5.4743  | 4.2064   | 5.4600  | 5.7187  | 4.0814  | 5.2830  | 4.8514  | 4.3766  | 1.0844 | 0.1169  | 0.4008 | 0.3971 |
| H3-5,H3-3a | _FGSAAIGALGEASEAYLVGFEDNLK[Carbamidomethyl (C)]AHAK_3                                                              | #N/A                 | 3.4520  | 4.2572  | 4.1388  | 3.8635   | 4.0785  | 3.6510  | 4.0118  | 3.4770  | 3.1256  | 3.1076  | 1.1388 | 0.1876  | 0.0723 | 1.1407 |
| Mt1        | nethyl (C)[C[Carbamidomethyl (C)]SC[Carbamidomethyl (C)]C[Carbamidomethyl (C)]PVGC[Carbamidomethyl (C)]GFDPTSSAR_2 | #N/A                 | 2.9817  | 4.2445  | 3.6685  | 4.1712   | 6.3316  | 3.9927  | 3.8858  | 3.9473  | 4.5480  | 4.1382  | 1.0247 | 0.0352  | 0.8666 | 0.0622 |
| Mtnd3      | _ANNPYEC[Carbamidomethyl (C)]GFDPTSSAR_2                                                                           | #N/A                 | 7.4389  | 7.6567  | 4.5938  | 4.1376   | 4.4038  | 4.1216  | 8.4730  | 8.0026  | 7.7392  | 7.2130  | 0.6778 | -0.5611 | 0.0238 | 1.6240 |
| Mtnd4      | _DNVVLQK_2                                                                                                         | #N/A                 | 3.3175  | 4.0249  | 3.0380  | 4.4454   | 3.8463  | 3.8832  | 4.2440  | 4.4063  | 3.8658  | 3.7730  | 0.9231 | -0.1154 | 0.3030 | 0.5186 |
| Mtstp8     | _JLPLHSPQK_2                                                                                                       | #N/A                 | 7.8247  | 7.5787  | 8.0845  | 7.3630</ |         |         |         |         |         |         |        |         |        |        |



|       |                                                            |                     |         |         |         |         |         |         |         |         |         |         |         |         |        |        |
|-------|------------------------------------------------------------|---------------------|---------|---------|---------|---------|---------|---------|---------|---------|---------|---------|---------|---------|--------|--------|
| Gfap  | _MTPPLPAR_2                                                | #N/A                | 5.2048  | 4.7579  | 4.1099  | 7.3301  | 6.6150  | 3.7384  | 5.8097  | 5.0476  | 4.7993  | 4.3755  | 1.0568  | 0.0798  | 0.7178 | 0.1440 |
| Gfap  | _DNFAQDQGTUR_2                                             | #N/A                | 6.4732  | 6.4258  | 6.5330  | 7.3116  | 6.3656  | 6.9599  | 6.7003  | 6.8711  | 6.8296  | 6.4914  | 0.9843  | -0.0228 | 0.5948 | 0.2256 |
| Gfap  | _L1DLDQGTANSAR_2                                           | #N/A                | 3.2276  | 3.4323  | 4.4622  | 4.4317  | 4.6775  | 3.9875  | 4.4617  | 3.5381  | 2.9440  | 3.6832  | 1.1038  | 0.1425  | 0.3603 | 0.4433 |
| Gfap  | _LEVERDFAQDGLUR_3                                          | #N/A                | 3.3190  | 4.6492  | 4.8821  | 4.1765  | 5.0189  | 3.8321  | 4.3166  | 4.5825  | 4.7778  | 3.7746  | 0.9886  | -0.0166 | 0.8983 | 0.0466 |
| Gfap  | _FASYIEK_2                                                 | #N/A                | 3.9093  | 3.3520  | 3.6430  | 3.1868  | 4.0375  | 2.1080  | 3.3350  | 3.8144  | 3.6983  | 4.0225  | 0.9073  | -0.1404 | 0.3836 | 0.4161 |
| Gfap  | _TOYEAATSNN[Oxidation (M)]QETEWEYR_2                       | #N/A                | 6.2338  | 6.8678  | 8.6993  | 8.3805  | 6.8729  | 7.2362  | 6.7708  | 6.6690  | 6.3188  | 6.4210  | 1.1279  | 0.1736  | 0.1302 | 0.8954 |
| Gfap  | _EQLAQQQVHVEM[Oxidation (M)]DWAKPDLTAALR_3                 | #N/A                | 4.1111  | 4.3359  | 5.1837  | 3.5482  | 4.6503  | 3.8807  | 5.1003  | 3.6126  | 5.0176  | 3.0659  | 1.0205  | 0.0292  | 0.8677 | 0.0616 |
| Gfap  | _AEMMELNDR_2                                               | #N/A                | 5.3109  | 3.7254  | 3.3507  | 6.5182  | 4.4159  | 4.1828  | 4.5436  | 4.4057  | 4.0726  | 1.0705  | 0.0983  | 0.0626  | 0.7023 | 0.2023 |
| Gfap  | _LEEGGSKEEMAR_2                                            | #N/A                | 3.7609  | 3.5413  | 3.7189  | 3.7012  | 3.4748  | 4.0431  | 3.9363  | 4.0162  | 3.6648  | 3.4165  | 0.9862  | -0.0200 | 0.7358 | 0.1332 |
| Gfap  | _LALDEIATYR_2                                              | #N/A                | 3.7842  | 3.0396  | 3.5179  | 4.5625  | 4.3046  | 3.6967  | 3.2099  | 4.2386  | 4.2398  | 0.9771  | -0.0334 | 0.7989  | 0.0775 | 0.1977 |
| Gfap  | _GTNES[Phospho (STY)]LER_2                                 | P03995_S302_M1_Gfap | 3.6027  | 3.7397  | 3.3364  | 4.3810  | 3.5610  | 4.1684  | 4.5292  | 4.1210  | 4.4201  | 4.0583  | 0.8870  | -0.1730 | 0.0606 | 1.2173 |
| Mbp   | _FFS[Phospho (STY)]GORGAPK_2                               | P04370_S178_M1_Mbp  | 7.0866  | 7.8027  | 7.9607  | 7.6802  | 6.8974  | 7.1145  | 7.9226  | 6.8182  | 7.1270  | 8.6046  | 0.9745  | -0.0373 | 0.6321 | 0.1992 |
| Mbp   | _TQDENPVVFFK_2                                             | #N/A                | 6.3003  | 12.5144 | 12.7552 | 12.7997 | 12.6866 | 12.5117 | 12.5913 | 12.2340 | 12.3141 | 12.4640 | 0.9350  | -0.0970 | 0.5602 | 0.2517 |
| Mbp   | _LFS[Phospho (STY)]RDAPGR_2                                | P04370_S96_M1_Mbp   | 3.4002  | 4.0406  | 5.2308  | 4.7779  | 4.9940  | 4.6375  | 4.7229  | 3.6314  | 4.5481  | 3.8973  | 1.0747  | 0.1039  | 0.4579 | 0.3393 |
| Mbp   | _NIVPRT[Phospho (STY)]PPPSQGR_2                            | #N/A                | 11.1941 | 12.7246 | 13.7178 | 12.7265 | 12.5430 | 12.4849 | 12.5160 | 12.3314 | 12.1015 | 12.0232 | 1.0263  | 0.0375  | 0.4671 | 0.3306 |
| Mbp   | _DTGLDS[Phospho (STY)]IGR_2                                | #N/A                | 3.7308  | 11.2770 | 3.6448  | 9.2282  | 8.8675  | 11.4021 | 11.0723 | 11.1233 | 11.3413 | 8.7582  | 0.7590  | -0.3979 | 0.2071 | 0.6838 |
| Mbp   | _TTHYGS[Phospho (STY)]LPQK_2                               | P04370_S201_M1_Mbp  | 12.7307 | 12.9397 | 13.3709 | 13.3916 | 13.3217 | 13.0060 | 13.0772 | 12.7429 | 12.8678 | 12.9387 | 1.0171  | 0.0245  | 0.1781 | 0.7494 |
| Mbp   | _HJRTGLDQGR_3                                              | #N/A                | 11.5327 | 12.0577 | 12.4725 | 12.0830 | 12.3550 | 12.0842 | 11.8222 | 11.7587 | 11.7674 | 11.8560 | 1.0251  | 0.0358  | 0.1135 | 0.9450 |
| Mbp   | _TTHYGS[PQK][Phospho (STY)]QHGR_3                          | #N/A                | 6.2032  | 5.8499  | 7.1975  | 7.0835  | 6.7841  | 6.2296  | 6.6303  | 5.6841  | 5.9085  | 6.7968  | 1.0485  | 0.0683  | 0.4117 | 0.3854 |
| Mbp   | _DSRGS[Phospho (STY)]PMAR_2                                | #N/A                | 3.8937  | 3.6007  | 3.9923  | 4.0584  | 3.7296  | 3.7601  | 3.5607  | 3.5288  | 3.9236  | 1.0262  | 0.0373  | 0.4584  | 0.3387 | 0.1870 |
| Mbp   | _S[Phospho (STY)]KATASTM[Oxidation (M)]DHAR_2              | #N/A                | 7.2896  | 7.3941  | 6.9204  | 7.9636  | 8.1376  | 7.1981  | 7.7868  | 6.6855  | 6.7515  | 6.7599  | 1.0697  | 0.0972  | 0.1633 | 0.7870 |
| Mbp   | _YLATASTM[Oxidation (M)]DHAR_2                             | #N/A                | 10.3969 | 10.6773 | 10.2836 | 10.9663 | 11.3109 | 10.6791 | 10.3722 | 10.4083 | 10.6087 | 10.4710 | 1.0225  | 0.0321  | 0.2627 | 0.5906 |
| Mbp   | _T[Phospho (STY)]PPPSQGR_2                                 | #N/A                | 5.5125  | 4.2128  | 4.1993  | 3.2011  | 4.1390  | 3.5905  | 4.4166  | 3.4165  | 3.0651  | 3.1681  | 1.0832  | 0.1153  | 0.3994 | 0.3986 |
| Mbp   | _S[Phospho (STY)]QHGRGTQDENPVVHFFK_4                       | #N/A                | 3.4836  | 3.8588  | 3.2173  | 5.9152  | 3.6801  | 4.0493  | 4.4101  | 4.2401  | 3.0384  | 3.9392  | 1.0325  | 0.0462  | 0.8227 | 0.0848 |
| Mbp   | _SGS[Phospho (STY)]PM[Oxidation (M)]AR_2                   | #N/A                | 3.4766  | 3.7496  | 4.1634  | 3.1652  | 3.6379  | 2.9867  | 4.3007  | 3.4524  | 3.1322  | 1.0038  | 0.0054  | 0.9679  | 0.0142 | 0.1484 |
| Pmp   | _YPGQSPGGNR_2                                              | #N/A                | 7.2885  | 6.9330  | 4.0160  | 6.9808  | 6.8318  | 7.0689  | 6.8281  | 7.0803  | 7.2615  | 6.8930  | 0.9293  | -0.1058 | 0.4577 | 0.3394 |
| Pmp   | _VVEQM[Oxidation (M)]C[Carbamidomethyl (C)]VTOYQK_2        | #N/A                | 5.9115  | 6.4452  | 6.4678  | 4.0918  | 6.2630  | 6.5428  | 6.7272  | 6.3315  | 6.1840  | 6.3552  | 0.9303  | -0.1042 | 0.3879 | 0.4113 |
| Pmp   | _PM[Oxidation (M)]HFGNDWEOR_3                              | #N/A                | 4.9527  | 3.5292  | 4.0074  | 4.0090  | 4.4966  | 4.9380  | 4.2464  | 5.3565  | 5.1062  | 3.9853  | 0.9248  | -0.1128 | 0.3956 | 0.4028 |
| Pmp   | _ESQAYDOGR_2                                               | #N/A                | 3.4844  | 3.3778  | 4.5352  | 3.5370  | 3.2660  | 3.3586  | 3.2517  | 3.0806  | 4.2300  | 3.5040  | 1.0390  | 0.0552  | 0.6751 | 1.0706 |
| Pmp   | _HVAGAAAAGVAGVLGGVM[Oxidation (M)]LGSAM[Oxidation (M)]SR_3 | #N/A                | 3.0374  | 3.7936  | 4.2719  | 4.6220  | 3.6819  | 2.9427  | 4.3367  | 3.4965  | 3.1451  | 3.4929  | 1.0296  | 0.0421  | 0.7921 | 0.1012 |
| Aldoc | _DNGVPPVR_2                                                | #N/A                | 10.1361 | 9.5478  | 9.6815  | 9.8202  | 9.9295  | 9.8309  | 9.4201  | 9.7002  | 9.9696  | 10.0869 | 1.0031  | 0.0044  | 0.8521 | 0.0695 |
| Aldoc | _QVFSADOR_2                                                | #N/A                | 9.1607  | 9.2417  | 9.3658  | 9.3467  | 9.3934  | 9.2740  | 9.2693  | 9.0409  | 9.2851  | 9.3949  | 1.0054  | 0.0077  | 0.5222 | 0.2822 |
| Aldoc | _ELSDIALR_2                                                | #N/A                | 9.1939  | 9.2377  | 9.6941  | 9.1985  | 9.6661  | 9.4058  | 8.4869  | 9.4345  | 9.5115  | 9.4913  | 1.0182  | 0.0261  | 0.4837 | 0.3154 |
| Aldoc | _ALQASALNAWR_2                                             | #N/A                | 8.5509  | 8.7195  | 8.4454  | 8.7849  | 9.0437  | 8.7225  | 8.5093  | 8.3492  | 8.5952  | 8.7085  | 1.0200  | 0.0285  | 0.1963 | 0.7070 |
| Aldoc | _DNAGAATEEFK_2                                             | #N/A                | 8.2959  | 8.1824  | 8.0267  | 8.3771  | 8.4310  | 8.4326  | 8.8194  | 7.9211  | 8.2003  | 8.6451  | 0.9874  | -0.0182 | 0.5774 | 0.2386 |
| Aldoc | _PHSYPALSAQK_3                                             | #N/A                | 8.0621  | 8.0910  | 8.2966  | 8.4945  | 8.9641  | 8.4071  | 8.4287  | 8.0507  | 8.2917  | 8.1546  | 1.0188  | 0.0268  | 0.4176 | 0.3793 |
| Aldoc | _LSQIGVENTENR_2                                            | #N/A                | 8.2190  | 8.0239  | 7.8752  | 8.3122  | 7.8318  | 7.9906  | 8.5157  | 7.7484  | 8.1787  | 8.2499  | 0.9840  | -0.0233 | 0.4327 | 0.3639 |
| Aldoc | _VDKGVPLAGTGGTTQGLDGLUR_3                                  | #N/A                | 6.3432  | 6.4341  | 6.7651  | 7.1773  | 6.7927  | 6.6869  | 6.3157  | 6.1295  | 6.6890  | 6.2871  | 1.0542  | 0.0762  | 0.0887 | 1.0522 |
| Aldoc | _ISDRTPSALLENANVLAR_3                                      | #N/A                | 6.1259  | 7.0728  | 6.7129  | 6.6954  | 6.4856  | 6.9978  | 6.4013  | 6.3474  | 6.2507  | 6.4770  | 1.0491  | 0.0691  | 0.1222 | 0.9128 |
| Aldoc | _YEGSGDGGAAASLYANHAY_2                                     | #N/A                | 5.9032  | 6.1829  | 6.3965  | 6.0599  | 6.0786  | 6.3429  | 6.2555  | 5.7455  | 5.7887  | 1.0344  | 0.0487  | 0.1629  | 0.7882 | 0.1739 |
| Aldoc | _TPSALLENANVLAR_2                                          | #N/A                | 5.7630  | 5.7896  | 4.9881  | 5.6013  | 5.1966  | 4.1486  | 4.9161  | 5.3519  | 5.3473  | 6.0263  | 0.9700  | -0.0440 | 0.6700 | 0.1879 |
| Aldoc | _PHSYPALSAEQK_2                                            | #N/A                | 7.4372  | 7.4128  | 6.6384  | 7.6686  | 7.7501  | 7.4326  | 7.1243  | 7.4927  | 7.2605  | 7.4795  | 1.0069  | 0.0099  | 0.8181 | 0.0739 |
| Aldoc | _TVPPAVPGVTLSGGQSEEEASLNAINR_3                             | #N/A                | 5.5754  | 5.7784  | 6.1582  | 6.7972  | 5.4068  | 6.4146  | 6.8227  | 6.1324  | 5.9030  | 6.7111  | 0.9468  | -0.0789 | 0.3074 | 0.5123 |
| Aldoc | _GLAADESVGS[Phospho (STY)]M[Oxidation (M)]AK_2             | #N/A                | 9.1060  | 8.6707  | 8.9248  | 8.6144  | 9.3994  | 8.9470  | 7.6312  | 8.6904  | 8.9085  | 8.7811  | 1.0664  | 0.0928  | 0.1326 | 0.8775 |
| Aldoc | _GVVPLAGTGGTTQGLDGLUR_2                                    | #N/A                | 6.5763  | 6.9344  | 6.8620  | 7.2444  | 7.2569  | 7.1522  | 7.1820  | 6.7861  | 7.0471  | 7.1048  | 0.9964  | -0.0053 | 0.8698 | 0.0606 |
| Aldoc | _YSPEEAM[Oxidation (M)]ATVIALR_2                           | #N/A                | 8.5849  | 8.4409  | 8.5221  | 8.5776  | 8.7194  | 8.5390  | 8.7384  | 8.5569  | 8.6024  | 8.6078  | 0.9928  | -0.0105 | 0.2991 | 0.5242 |
| Aldoc | _AEM[Oxidation (M)]NGLAAQGR_2                              | #N/A                | 6.6400  | 6.8825  | 6.6752  | 7.0187  | 7.5655  | 6.7745  | 6.6145  | 6.5942  | 6.8049  | 6.8068  | 1.0330  | 0.0468  | 0.2565 | 0.5909 |
| Aldoc | _LSQIGVENTENRR_3                                           | #N/A                | 5.2557  | 5.2362  | 6.1681  | 5.3357  | 6.0490  | 5.9675  | 4.5514  | 5.2290  | 5.8725  | 5.8912  | 1.0525  | 0.0738  | 0.4243 | 0.3723 |
| Aldoc | _RLS[Phospho (STY)]QIGVENTENRR_3                           | P05063_S45_M1_Aldoc | 5.3711  | 5.1530  | 5.8818  | 5.9310  | 5.3380  | 5.4009  | 4.5931  | 5.4444  | 5.6062  | 5.6854  | 1.0338  | 0.0480  | 0.5018 | 0.2995 |
| Aldoc | _DNAGAATEFIKR_2                                            | #N/A                | 8.6873  | 9.1312  | 9.2492  | 9.2863  | 9.1845  | 9.2338  | 8.8959  | 8.9048  | 9.0165  | 9.0663  | 1.0176  | 0.0252  | 0.2195 | 0.6586 |
| Aldoc | _GLAADESVGS[Phospho (STY)]M[Oxidation (M)]AKR_2            | #N/A                | 4.7845  | 5.5981  | 6.4997  | 6.4252  | 5.5475  | 6.0877  | 5.6140  | 5.6138  | 5.3073  | 5.7584  | 1.0449  | 0.0634  | 0.4810 | 0.3179 |
| Aldoa | _GLAADESVGS[Phospho (STY)]AK_2                             | #N/A                | 11.1150 | 11.1918 | 10.8321 | 11.8369 | 11.2833 | 11.4708 | 11.6568 | 11.2547 | 11.4044 | 11.5911 | 0.9836  | -0.0239 | 0.3466 | 0.4601 |
| Aldoa | _ELSDAHR_2                                                 | #N/A                | 11.3679 | 11.4695 | 11.3989 | 11.5649 | 11.7814 | 11.4631 | 11.2754 | 11.3808 | 11.3106 | 11.4717 | 1.0130  | 0.0186  | 0.1172 | 0.9312 |
| Aldoa | _ALANSIAC[Carbamidomethyl (C)]QGR_2                        | #N/A                | 10.7869 | 11.1911 | 11.1548 | 11.2139 | 11.6510 | 10.8242 | 11.0334 | 11.0394 | 11.0994 | 10.9367 | 1.0149  | 0.0213  | 0.3576 | 0.4467 |
| Aldoa | _PHYPALTPQK_2                                              | #N/A                | 10.0519 | 10.1560 | 9.9574  | 10.2300 | 10.3704 | 9.9884  | 10.1021 | 10.1369 | 10.0424 | 10.1203 | 1.0025  | 0.0036  | 0.7664 | 0.1155 |
| Aldoa | _DGAQFAKWR_2                                               | #N/A                | 11.0569 | 10.9413 | 11.5774 | 11.3285 | 10.2548 | 10.3471 | 11.5955 | 10.8372 | 10.5860 | 11.0269 | 0.9915  | -0.0123 | 0.7756 | 0.1104 |
| Aldoa | _AAQEYIKR_2                                                | #N/A                | 10.6264 | 10.7813 | 11.0773 | 10.9642 | 11.1136 | 10.9805 | 10.6609 | 10.7431 | 10.7127 | 10.8889 | 1.0160  | 0.0230  | 0.1311 | 0.8824 |
| Aldoa | _LQSIGTENTENR_2                                            | #N/A                | 8.6885  | 8.3272  | 8.3013  | 9.0779  | 8.2921  | 8.6264  | 8.8767  | 8.3507  | 8.4338  | 8.7811  | 0.9932  | -0.0098 | 0.7647 | 0.1165 |
| Aldoa | _GVVPLAGTGGTTQGLDGLSR_2                                    | #N/A                | 8.6542  | 8.5092  | 8.2578  | 9.0538  | 9.0132  | 8.5502  | 8.7145  | 8.5429  | 8.4759  | 8.4250  | 1.0156  | 0.0224  | 0.4421 | 0.3445 |
| Aldoa | _YASIK[Carbamidomethyl (C)]QQQGVNPFEPDLGDKHLR_4            | #N/A                | 8.9833  | 9.3399  | 9.1928  | 9.8114  | 9.6945  | 9.1569  | 9.0941  | 9.4591  | 9.4502  | 9.3122  | 1.0037  | 0.0053  | 0.8531 | 0.0690 |
| Aldoa | _PHYPALTPQK_3                                              | #N/A                | 8.7107  | 9.6243  | 9.7160  | 9.3322  | 9.6358  | 9.3045  | 9.2146  | 9.2223  | 9.2926  | 9.2502  | 1.0154  | 0.0078  | 0.4766 | 0.3219 |
| Aldoa | _IGHTPSALAM[Oxidation (M)]ENANVLAR_3                       | #N/A                | 8.4340  | 8.0691  | 8.3778  | 9.0669  | 8.0110  | 7.7040  | 8.3813  | 8.5017  | 7.9323  | 8.3018  | 0.9997  | -0.0004 | 0.9936 | 0.0028 |
| Aldoa | _KELSDIAHR_2                                               | #N/A                | 8.4094  | 8.1945  | 8.2758  | 8.2751  | 8.7469  | 8.3201  | 8.3487  | 8.1937  | 8.4677  | 8.3561  | 1.0034  | 0.0050  | 0.8005 | 0.0966 |
| Aldoa | _VDKGVPLAGTGGTTQGLDGLSR_3                                  | #N/A                | 8.1297  | 8.6377  | 8.9460  | 8.3666  | 8.8222  | 8.9480  | 8.4163  | 8.2436  | 8.2102  | 8.2621  | 1.0433  | 0.061   |        |        |



|        |                                                                       |                      |         |         |         |         |         |         |         |         |         |         |        |         |        |        |
|--------|-----------------------------------------------------------------------|----------------------|---------|---------|---------|---------|---------|---------|---------|---------|---------|---------|--------|---------|--------|--------|
| Aldoa  | _TVPNAVGTVTLSGGGSEASEASLNNAIK_3                                       | #N/A                 | 4.1503  | 5.2620  | 6.0964  | 6.2525  | 5.4905  | 3.8745  | 5.8753  | 5.5080  | 5.4681  | 4.3082  | 0.9807 | -0.0281 | 0.8622 | 0.0644 |
| Aldoa  | _FSNEIEAMATVTAARR_2                                                   | #N/A                 | 3.7761  | 3.0315  | 3.3806  | 5.4363  | 2.9269  | 3.7048  | 3.5880  | 4.2352  | 3.8838  | 3.5575  | 0.9714 | -0.0419 | 0.8264 | 0.0828 |
| Pkaca  | _FKPGDSTNFDDVEEIRVSPGpho (STY)]INEK_4                                 | POS132_5339_M1_Pkaca | 6.9389  | 4.1473  | 4.0289  | 4.5316  | 4.6131  | 4.5373  | 6.8809  | 3.5869  | 4.4354  | 2.9977  | 0.9647 | -0.0519 | 0.8580 | 0.0665 |
| Pkaca  | _WETSPONATLQDQFOR_2                                                   | #N/A                 | 5.1711  | 3.8362  | 3.2399  | 4.2845  | 3.8354  | 4.0720  | 4.4328  | 5.3158  | 3.0157  | 3.9618  | 0.9741 | -0.0379 | 0.8341 | 0.0788 |
| Got1   | _HYLPSGR_2                                                            | #N/A                 | 9.6870  | 9.7671  | 10.0879 | 9.7923  | 9.6017  | 9.6805  | 9.7260  | 9.6900  | 9.7929  | 9.6296  | 1.0062 | 0.0089  | 0.5295 | 0.2761 |
| Got1   | _ITWSPPAQGAR_2                                                        | #N/A                 | 9.3423  | 9.3391  | 9.5115  | 9.5576  | 9.3007  | 9.3012  | 9.5128  | 9.1733  | 9.3161  | 9.3631  | 1.0052 | 0.0074  | 0.5678 | 0.2458 |
| Got1   | _NFGLYNER_2                                                           | #N/A                 | 9.2912  | 9.6612  | 9.8156  | 9.3964  | 8.9769  | 9.2422  | 9.4813  | 9.5193  | 9.5426  | 9.4527  | 0.9893 | -0.0155 | 0.5301 | 0.2756 |
| Got1   | _VGGVGSLGGTGALR_2                                                     | #N/A                 | 8.3345  | 8.7151  | 8.6207  | 9.0080  | 8.8365  | 8.7525  | 8.4864  | 8.9924  | 8.7409  | 8.7528  | 0.9974 | -0.0038 | 0.8765 | 0.0752 |
| Got1   | _VAATNSDELK_F_2                                                       | #N/A                 | 8.6344  | 8.5164  | 8.7173  | 8.7744  | 8.6745  | 8.7140  | 8.7724  | 8.7875  | 8.8349  | 8.5834  | 0.9917 | -0.0121 | 0.2830 | 0.5483 |
| Got1   | _VLGDSLAIR_2                                                          | #N/A                 | 8.6527  | 9.0581  | 8.9531  | 8.8511  | 8.9001  | 8.7606  | 8.7969  | 8.9195  | 8.8729  | 8.8444  | 1.0005 | 0.0007  | 0.9572 | 0.0190 |
| Got1   | _DIRPYC[Carbamidomethyl (C)]YWDAEKR_3                                 | #N/A                 | 7.9535  | 8.2261  | 8.5016  | 8.3480  | 8.0412  | 8.2807  | 8.2535  | 7.9945  | 8.1760  | 8.0376  | 1.0135 | 0.0194  | 0.3602 | 0.4434 |
| Got1   | _QVEVLVNEK_2                                                          | #N/A                 | 8.0123  | 8.0219  | 8.3972  | 8.1104  | 8.3555  | 8.2833  | 7.8818  | 7.8627  | 8.3206  | 8.2829  | 1.0136 | 0.0194  | 0.4270 | 0.3696 |
| Got1   | _APPSVFAQVPQAPPVLFK_2                                                 | #N/A                 | 6.9271  | 6.8186  | 6.9634  | 7.3142  | 7.1399  | 6.7218  | 6.8426  | 7.1083  | 6.8692  | 7.1665  | 0.9977 | -0.0033 | 0.9044 | 0.0437 |
| Got1   | _NTPYVVSPTWENHNVAVSAAGF_3                                             | #N/A                 | 7.8374  | 7.6268  | 7.7782  | 7.6261  | 7.4914  | 7.2917  | 7.7526  | 7.5940  | 7.5539  | 7.6297  | 0.9969 | -0.0045 | 0.8278 | 0.0821 |
| Got1   | _IGADFLGR_2                                                           | #N/A                 | 7.1615  | 7.2225  | 7.4997  | 6.8399  | 6.5498  | 6.8386  | 7.0246  | 7.2622  | 6.8439  | 7.1280  | 0.9935 | -0.0094 | 0.8119 | 0.0905 |
| Got1   | _VNLVGVGAYR_2                                                         | #N/A                 | 5.3569  | 6.3990  | 5.2104  | 5.7858  | 6.3785  | 5.9161  | 5.6078  | 6.0685  | 5.8636  | 5.5287  | 1.0128 | 0.0184  | 0.7928 | 0.1009 |
| Got1   | _VGNLTVVGK_2                                                          | #N/A                 | 5.9532  | 5.8693  | 6.3452  | 5.3232  | 5.5912  | 4.9705  | 3.9510  | 5.9828  | 5.5733  | 5.6766  | 1.0717 | 0.0998  | 0.4121 | 0.3850 |
| Got1   | _JANDNSLNHEYPLGLAEFR_3                                                | #N/A                 | 5.4528  | 5.0398  | 3.9021  | 5.4270  | 5.0331  | 5.3968  | 4.7481  | 4.5227  | 5.3312  | 4.8037  | 1.0393 | 0.0556  | 0.5799 | 0.2367 |
| Got1   | _JVAATLSDFELKEWK_3                                                    | #N/A                 | 3.6157  | 4.4904  | 5.0245  | 4.1835  | 3.9489  | 4.7984  | 3.4288  | 5.0807  | 4.5540  | 4.7939  | 0.9729 | -0.0396 | 0.7666 | 0.1154 |
| Got1   | _QIAAVM[Oxidation (M)]JOR_2                                           | #N/A                 | 6.9246  | 6.4718  | 6.5431  | 7.3945  | 7.2723  | 6.7553  | 5.9800  | 6.8353  | 7.0349  | 6.6184  | 1.0418 | 0.0590  | 0.3265 | 0.4861 |
| Got1   | _JNM[Oxidation (M)]C[Carbamidomethyl (C)]GLTK_2                       | #N/A                 | 5.8002  | 6.2055  | 6.2755  | 6.1376  | 6.9342  | 5.7090  | 5.8826  | 6.2463  | 6.3948  | 6.0848  | 1.0040 | 0.0058  | 0.9194 | 0.0365 |
| Got1   | _TPGTWSHTQIGM[Oxidation (M)]FSFTGLNPK_3                               | #N/A                 | 6.6055  | 6.6674  | 7.7107  | 7.2696  | 6.0184  | 6.6950  | 6.9470  | 5.6857  | 6.3426  | 7.4139  | 1.0349 | 0.0495  | 0.5992 | 0.2224 |
| Got1   | _TDESQPVWLVVR_2                                                       | #N/A                 | 8.6450  | 8.7444  | 8.9135  | 8.9159  | 8.9255  | 8.9384  | 8.8832  | 8.7893  | 8.7469  | 8.6101  | 1.0102 | 0.0147  | 0.2771 | 0.5574 |
| Got1   | _LFFPPFSAVQGFASGDLK_2                                                 | #N/A                 | 3.8199  | 4.2467  | 3.4405  | 4.6937  | 2.5053  | 4.1599  | 5.2523  | 3.8897  | 4.5223  | 4.7353  | 0.8285 | -0.2714 | 0.1176 | 0.9195 |
| Got1   | _LTADFRDOPDR_2                                                        | #N/A                 | 6.7110  | 6.8384  | 6.9783  | 6.7261  | 7.5333  | 7.9527  | 7.4357  | 6.9831  | 7.3907  | 7.4917  | 0.9724 | -0.0403 | 0.4828 | 0.3262 |
| Got1   | _DIRPYC[Carbamidomethyl (C)]YWDAEK_3                                  | #N/A                 | 3.6916  | 3.4073  | 4.3784  | 4.5521  | 4.4953  | 4.1102  | 2.6431  | 3.2374  | 4.4714  | 3.3472  | 1.1989 | 0.2617  | 0.1141 | 0.9426 |
| Got1   | _NLDVATSHAEAVTK_2                                                     | #N/A                 | 7.2148  | 7.4099  | 8.1573  | 7.6715  | 6.9234  | 7.5634  | 7.5896  | 7.3691  | 7.5765  | 7.5150  | 0.9970 | -0.0043 | 0.9206 | 0.0359 |
| Got1   | _WYNGTDNK_2                                                           | #N/A                 | 4.1712  | 4.9451  | 3.3572  | 4.5495  | 5.3727  | 4.4326  | 3.2926  | 4.6540  | 4.1559  | 3.8268  | 1.1228 | 0.1671  | 0.2759 | 0.5593 |
| Got1   | _VLQMEK_2                                                             | #N/A                 | 4.2420  | 2.9841  | 3.4280  | 4.2210  | 3.3423  | 3.7522  | 3.6453  | 4.1878  | 3.8364  | 3.5500  | 0.9623 | -0.0554 | 0.6234 | 0.2053 |
| Got1   | _YFVSEGFELC[Carbamidomethyl (C)]AQFSK_2                               | #N/A                 | 3.6053  | 4.3615  | 3.3389  | 4.3835  | 4.2498  | 3.8756  | 3.7688  | 4.1185  | 4.4175  | 4.0608  | 0.9701 | -0.0438 | 0.6315 | 0.1996 |
| Got2   | _JAATLTSPLR_2                                                         | #N/A                 | 10.5640 | 10.6937 | 10.8028 | 10.9839 | 10.6145 | 10.8795 | 10.7702 | 10.8573 | 10.9098 | 10.6111 | 1.0702 | -0.0041 | 0.7600 | 0.1192 |
| Got2   | _ASALEAGNNEVLK_2                                                      | #N/A                 | 9.6642  | 9.4990  | 9.9820  | 10.0903 | 9.5174  | 9.7222  | 9.8426  | 9.7055  | 9.7447  | 9.6504  | 1.0010 | 0.0015  | 0.9392 | 0.0272 |
| Got2   | _TLQVSNLKK_2                                                          | #N/A                 | 8.5292  | 8.9458  | 8.9519  | 8.9401  | 8.9129  | 8.7511  | 8.4548  | 8.8957  | 8.9250  | 8.7200  | 1.0102 | 0.0147  | 0.4817 | 0.3172 |
| Got2   | _DONGPPVLPVSR_2                                                       | #N/A                 | 8.9919  | 8.5584  | 8.5883  | 8.8567  | 8.7533  | 8.6494  | 8.6642  | 8.4429  | 8.8179  | 8.6885  | 1.0092 | 0.0132  | 0.4724 | 0.3256 |
| Got2   | _PSWGNHTFPR_3                                                         | #N/A                 | 8.4889  | 8.5962  | 8.6963  | 8.7831  | 8.6180  | 8.5684  | 8.3659  | 8.6728  | 8.5335  | 8.5399  | 1.0114 | 0.0163  | 0.2156 | 0.6664 |
| Got2   | _FVTQVTSIGTALR_2                                                      | #N/A                 | 9.2551  | 9.0368  | 9.7737  | 9.1894  | 9.2082  | 9.2923  | 8.9774  | 9.0740  | 9.4185  | 9.2520  | 1.0122 | 0.0175  | 0.4755 | 0.3229 |
| Got2   | _VGAFTVC[Carbamidomethyl (C)]K_2                                      | #N/A                 | 9.1105  | 9.3368  | 9.1889  | 9.3281  | 8.7809  | 8.8976  | 9.1073  | 9.2338  | 8.9969  | 8.9129  | 1.0049 | 0.0071  | 0.7383 | 0.1318 |
| Got2   | _VGAFLQR_2                                                            | #N/A                 | 8.8960  | 9.0353  | 9.3125  | 8.9682  | 9.0035  | 8.8444  | 9.0527  | 9.1567  | 9.1437  | 9.0082  | 0.9912 | -0.0128 | 0.3898 | 0.4091 |
| Got2   | _NLKEYLPGLGAELF[Carbamidomethyl (C)]K_3                               | #N/A                 | 7.4266  | 7.5221  | 7.9060  | 8.0269  | 7.7798  | 7.7699  | 7.7143  | 7.7121  | 7.6133  | 7.8637  | 0.9987 | -0.0019 | 0.9354 | 0.0290 |
| Got2   | _KQWLQEVK_2                                                           | #N/A                 | 8.2462  | 8.4649  | 8.2039  | 8.6154  | 8.5067  | 8.3933  | 8.6971  | 8.5204  | 8.7998  | 8.5413  | 0.9728 | -0.0397 | 0.0403 | 1.3949 |
| Got2   | _KAEAQIAAK_2                                                          | #N/A                 | 8.0622  | 7.5067  | 7.5862  | 7.5284  | 8.2076  | 8.9308  | 7.7966  | 7.8089  | 7.9194  | 7.5885  | 1.0054 | 0.0078  | 0.8101 | 0.0914 |
| Got2   | _QWLQEVK_2                                                            | #N/A                 | 7.0862  | 7.1102  | 7.1854  | 7.1285  | 7.1325  | 6.8960  | 7.0201  | 7.4413  | 7.2159  | 7.2893  | 0.9790 | -0.0306 | 0.1158 | 0.9364 |
| Got2   | _TLQVSNLK_2                                                           | #N/A                 | 7.3140  | 6.8729  | 6.7641  | 7.0031  | 7.7287  | 7.0656  | 6.0815  | 6.9171  | 7.3850  | 7.1548  | 1.0349 | 0.0495  | 0.4271 | 0.3694 |
| Got2   | _TC[Carbamidomethyl (C)]GFDFSGALEDISK_2                               | #N/A                 | 3.3652  | 6.3427  | 6.3733  | 6.5353  | 6.7723  | 6.6250  | 6.9572  | 6.0385  | 6.3314  | 6.5841  | 1.0038 | 0.0054  | 0.8938 | 0.0488 |
| Got2   | _M[Oxidation (M)]NLGVGAYR_2                                           | #N/A                 | 6.8072  | 6.7409  | 6.4649  | 6.4577  | 6.7604  | 7.2049  | 7.0019  | 6.9685  | 6.9040  | 6.6901  | 0.9780 | -0.0321 | 0.3429 | 0.4648 |
| Got2   | _DAGM[Oxidation (M)]QLQGYR_2                                          | #N/A                 | 9.2886  | 9.4817  | 9.5886  | 9.5546  | 9.5402  | 9.2426  | 9.3885  | 9.3465  | 9.3787  | 9.3177  | 1.0098 | 0.0140  | 0.2640 | 0.5783 |
| Got2   | _JAATLTSPLRK_2                                                        | #N/A                 | 5.9938  | 7.0157  | 7.0733  | 7.1145  | 6.7716  | 6.9723  | 7.0627  | 7.1773  | 6.8208  | 7.1645  | 0.9670 | -0.0484 | 0.3327 | 0.4779 |
| Got2   | _NM[Oxidation (M)]GLYGER_2                                            | #N/A                 | 8.2657  | 9.2623  | 8.1610  | 8.5469  | 8.3558  | 8.1382  | 8.3352  | 8.1965  | 8.1485  | 8.1485  | 1.0407 | 0.0575  | 0.1927 | 0.7151 |
| Got2   | _ELYPIGGLAELF[Carbamidomethyl (C)]K_2                                 | #N/A                 | 5.2606  | 5.5299  | 3.3591  | 5.6007  | 5.2426  | 5.5160  | 5.9063  | 4.9955  | 5.5416  | 5.3632  | 0.9327 | -0.1005 | 0.4510 | 0.3459 |
| Got2   | _EFSVMTK_2                                                            | #N/A                 | 6.5489  | 4.6580  | 4.1009  | 7.0532  | 5.7293  | 3.1136  | 3.7929  | 4.8226  | 3.6555  | 5.1586  | 1.1935 | 0.2552  | 0.3365 | 0.4731 |
| Got2   | _IPEQSVLLHAC[Carbamidomethyl (C)]AHNPTGVDPRPQWK_5                     | #N/A                 | 6.4891  | 5.7454  | 5.8011  | 6.0360  | 6.1417  | 3.8889  | 3.7821  | 6.3081  | 6.3459  | 5.9261  | 1.0167 | 0.0238  | 0.8933 | 0.0490 |
| Got2   | _ISVAGVTSNGVYLAAHQVTK_3                                               | #N/A                 | 5.4223  | 5.3383  | 6.4278  | 5.7674  | 5.3454  | 5.3551  | 5.6583  | 5.2134  | 5.2765  | 5.9283  | 1.0164 | 0.0234  | 0.7353 | 0.1335 |
| Tuba1b | _EIDLVLDR_2                                                           | #N/A                 | 13.9241 | 13.8640 | 13.9029 | 14.0083 | 13.7429 | 13.9567 | 13.8003 | 13.8569 | 13.9395 | 13.8221 | 1.0033 | 0.0047  | 0.4144 | 0.3826 |
| Tuba1b | _VGINYPQTVPPGDLAK_2                                                   | #N/A                 | 13.5861 | 13.5163 | 13.6964 | 13.6863 | 13.1149 | 13.3517 | 13.6239 | 13.4846 | 13.3111 | 13.3770 | 1.0032 | 0.0046  | 0.7437 | 0.1286 |
| Tuba1b | _JHFPLATVAVSAEK_2                                                     | #N/A                 | 11.9568 | 12.0711 | 12.1844 | 12.2778 | 11.6884 | 11.8745 | 12.0020 | 12.0983 | 11.9713 | 11.9605 | 1.0001 | 0.0001  | 0.9944 | 0.0024 |
| Tuba1b | _LSVDYQK_2                                                            | #N/A                 | 11.5471 | 11.7184 | 11.9436 | 11.7549 | 11.9001 | 11.7030 | 11.5898 | 11.7134 | 11.5513 | 11.6830 | 1.0109 | 0.0156  | 0.1498 | 0.8246 |
| Tuba1b | _DVNAAATK_2                                                           | #N/A                 | 12.5266 | 12.4470 | 12.8931 | 12.4720 | 12.5266 | 12.6203 | 11.8031 | 12.5319 | 12.6654 | 12.5156 | 1.0163 | 0.0233  | 0.2828 | 0.5486 |
| Tuba1b | _QLFHPQLUTGK_2                                                        | #N/A                 | 10.7561 | 10.6650 | 10.7759 | 10.9002 | 10.9108 | 10.5935 | 10.9027 | 10.8024 | 10.8400 | 10.8317 | 0.9929 | -0.0103 | 0.2773 | 0.5570 |
| Tuba1b | _SIQFVDWC[Carbamidomethyl (C)]PTGK_2                                  | #N/A                 | 6.8489  | 9.2905  | 9.7839  | 10.2213 | 9.9689  | 9.9600  | 9.7329  | 8.8838  | 9.5274  | 8.9812  | 1.0392 | 0.0555  | 0.3118 | 0.5061 |
| Tuba1b | _QLFHPQLUTGTEADAANNYAR_4                                              | #N/A                 | 9.4318  | 9.7509  | 10.3456 | 9.6351  | 9.6445  | 9.7881  | 9.6783  | 9.3982  | 9.6879  | 9.7617  | 1.0140 | 0.0200  | 0.4525 | 0.3444 |
| Tuba1b | _EDANNYAR_2                                                           | #N/A                 | 10.6657 | 10.3683 | 10.2908 | 10.3211 | 10.9003 | 10.3790 | 10.9644 | 10.4951 | 10.7295 | 10.5466 | 1.0100 | 0.0143  | 0.6329 | 0.1399 |
| Tuba1b | _RNLDIERTYTNLR_3                                                      | #N/A                 | 8.0730  | 7.6746  | 8.5307  | 8.4452  | 7.8943  | 8.1064  | 7.9092  | 8.0100  | 8.0938  | 7.6284  | 1.0266 | 0.0379  | 0.2857 | 0.5440 |
| Tuba1b | _DVNAAATIKK_2                                                         | #N/A                 | 6.5036  | 6.4080  | 6.3905  | 7.6009  | 5.6158  | 6.2460  | 6.8720  | 6.6123  | 6.6083  | 6.3940  | 0.9757 | -0.0355 | 0.6462 | 0.1897 |
| Tuba1b | _YM[Oxidation (M)]AC[Carbamidomethyl (C)]C[Carbamidomethyl (C)]LLYR_2 | #N/A                 | 10.6421 | 11.1726 | 11.2900 | 10.6851 | 10.7665 | 10.7334 | 10.9347 | 11.1076 | 11.0423 | 10.8726 | 0.9902 | -0.0142 | 0.4853 | 0.3140 |
| Tuba1b | _AJHIEQLSVAETNAC[Carbamidomethyl (C)]FEPANQM[Oxidation (M)]VK_3       | #N/A                 | 10.0237 | 9.9657  | 10.7497 | 10.72   |         |         |         |         |         |         |        |         |        |        |



|          |                                                                       |                        |         |         |         |         |         |         |         |         |         |         |        |         |        |        |
|----------|-----------------------------------------------------------------------|------------------------|---------|---------|---------|---------|---------|---------|---------|---------|---------|---------|--------|---------|--------|--------|
| Tuba1b   | _LADQC[Carbamidomethyl (C)]TGLQGLFLVHSGGGTSGSGTSLM[Oxidation (M)]ER_3 | #N/A                   | 4.3443  | 3.6487  | 3.5303  | 4.4720  | 3.4700  | 4.2595  | 3.1195  | 4.0855  | 4.3290  | 3.9999  | 1.0182 | 0.0260  | 0.8261 | 0.0830 |
| Tuba1b   | _EDM[Oxidation (M)]AALEKDKVEEVGDSVEGEGEEY_3                           | #N/A                   | 3.9016  | 3.4408  | 3.6353  | 3.1791  | 3.0454  | 3.5793  | 3.3273  | 3.8221  | 4.1212  | 4.3572  | 0.8865 | -0.1738 | 0.0989 | 1.0050 |
| Tuba1b   | _RAFVHHVYVGMEEGEFS_3                                                  | #N/A                   | 3.7331  | 3.0374  | 4.4199  | 3.5824  | 2.8587  | 3.3699  | 3.7307  | 3.4187  | 3.7178  | 3.3887  | 0.9821 | -0.0260 | 0.8334 | 0.0791 |
| Tuba3a   | _TQFPVOWC[Carbamidomethyl (C)]PTGF_2                                  | #N/A                   | 10.4568 | 10.4638 | 10.7791 | 10.5237 | 10.5818 | 10.4366 | 10.5557 | 10.4198 | 10.6553 | 10.4305 | 1.0024 | 0.0034  | 0.7606 | 0.1189 |
| Tuba3a   | _LGOVSSISATSLR_2                                                      | #N/A                   | 7.2962  | 7.4557  | 7.5628  | 7.3742  | 6.6672  | 6.8852  | 7.7809  | 8.3551  | 7.9436  | 7.3209  | 0.9181 | -0.1233 | 0.0312 | 1.5055 |
| Src      | _S[Phospho (STY)]LPESENWGAGAPASQTPSKPASADGHR_4                        | P05480_S17_M1_Src      | 4.3838  | 9.9849  | 9.8282  | 11.1876 | 4.2315  | 8.9958  | 9.4711  | 10.2948 | 9.8077  | 8.7374  | 0.8459 | -0.2414 | 0.3729 | 0.4285 |
| Src      | _LFGGNSDVTYS[Phospho (STY)]PQR_2                                      | P05480_S74_M1_Src      | 3.8996  | 7.6755  | 8.1337  | 9.0277  | 5.6461  | 7.1897  | 7.0888  | 8.2399  | 7.4381  | 6.9571  | 0.9324 | -0.1010 | 0.6208 | 0.2070 |
| KIT      | _VNS[Phospho (STY)]VGSASSTQPLLVHEDA_2                                 | P05332_S962_M1_KIT     | 3.7851  | 3.0895  | 3.9866  | 3.5304  | 2.9108  | 3.3178  | 3.6786  | 3.4708  | 3.7699  | 4.9135  | 0.9135 | -0.1305 | 0.2055 | 0.6872 |
| Jun/Jund | _LAS[Phospho (STY)]PELER_2                                            | P05627_S73_M1_Jun/Jund | 6.8580  | 5.9242  | 7.3552  | 6.5847  | 5.4639  | 6.7785  | 6.3471  | 6.3849  | 6.4881  | 6.5472  | 1.0081 | 0.0117  | 0.8855 | 0.0528 |
| Ldha     | _VLTPEEAR_2                                                           | #N/A                   | 9.6708  | 9.5499  | 9.9549  | 9.6747  | 9.5883  | 9.6590  | 9.6837  | 9.7855  | 9.6417  | 9.6386  | 0.9995 | -0.0007 | 0.9558 | 0.0196 |
| Ldha     | _LVITAGAR_2                                                           | #N/A                   | 8.7609  | 8.5740  | 8.9552  | 9.1847  | 8.7130  | 8.9339  | 8.4020  | 9.4509  | 9.0979  | 9.0707  | 0.9831 | -0.0245 | 0.4807 | 0.3181 |
| Ldha     | _SADTLWGQIK_2                                                         | #N/A                   | 8.8196  | 8.6741  | 9.0059  | 8.7980  | 8.7206  | 8.8052  | 8.9677  | 8.8375  | 8.7476  | 8.5695  | 1.0027 | 0.0038  | 0.7979 | 0.0981 |
| Ldha     | _VIGSG[Carbamidomethyl (C)]NLD SAR_2                                  | #N/A                   | 4.8961  | 8.7013  | 8.7713  | 8.5809  | 9.1008  | 8.4153  | 8.6569  | 8.7916  | 8.6247  | 8.3585  | 1.0081 | 0.0116  | 0.6414 | 0.1928 |
| Ldha     | _QVQVSAYEVK_2                                                         | #N/A                   | 7.8904  | 7.3557  | 7.2776  | 7.7392  | 7.6646  | 7.8153  | 7.6106  | 7.6380  | 7.8734  | 7.5544  | 0.9941 | -0.0085 | 0.7538 | 0.1277 |
| Ldha     | _DQLVNLK_2                                                            | #N/A                   | 7.6880  | 6.9270  | 6.4301  | 7.1348  | 6.8454  | 7.0986  | 6.5865  | 7.3036  | 7.0996  | 7.3143  | 0.9922 | -0.0113 | 0.8304 | 0.0807 |
| Ldha     | _DYC[Carbamidomethyl (C)]VTANSK_2                                     | #N/A                   | 7.1932  | 6.5725  | 6.7556  | 7.0483  | 7.3558  | 6.4787  | 6.8030  | 6.9877  | 6.7343  | 7.0797  | 0.9999 | -0.0001 | 0.9980 | 0.0009 |
| Ldha     | _DQLVNLKEEQAPQNK_2                                                    | #N/A                   | 6.9103  | 7.2048  | 7.7343  | 7.6386  | 6.3063  | 7.4335  | 7.1664  | 7.5587  | 7.0563  | 7.4882  | 0.9846 | -0.0224 | 0.7057 | 0.1514 |
| Ldha     | _DLADELALVDM[Oxidation (M)]EDK_2                                      | #N/A                   | 7.3658  | 6.7056  | 6.9364  | 6.6445  | 6.6793  | 7.1643  | 7.1553  | 6.8162  | 7.1234  | 7.2952  | 0.9744 | -0.0374 | 0.3190 | 0.4962 |
| Ldha     | _GEM[Oxidation (M)]M[Oxidation (M)]DQHGSFLX_3                         | #N/A                   | 3.3511  | 4.3775  | 3.3237  | 3.6425  | 4.2389  | 5.3137  | 3.0293  | 5.1115  | 4.4709  | 4.5024  | 0.9445 | -0.0823 | 0.6624 | 0.1789 |
| Ldha     | _SLNPELGDADKEQWK_2                                                    | #N/A                   | 7.4634  | 6.9377  | 7.1598  | 7.2303  | 7.1572  | 7.3928  | 7.6861  | 7.3532  | 7.4974  | 7.3612  | 0.9664 | -0.0493 | 0.0588 | 1.2309 |
| Ldha     | _DLADELALVDM[Oxidation (M)]DKLK_2                                     | #N/A                   | 4.8229  | 5.0160  | 4.5783  | 4.5239  | 4.3138  | 4.7453  | 5.0058  | 5.0762  | 5.4009  | 4.8812  | 0.9166 | -0.1256 | 0.0246 | 1.6096 |
| Ldha     | _LIVSNPVDLTVIAWK_2                                                    | #N/A                   | 3.7558  | 3.0112  | 3.4895  | 4.5341  | 2.1193  | 2.6130  | 3.1815  | 1.7428  | 2.2604  | 4.2114  | 1.1421 | 0.1917  | 0.5383 | 0.2771 |
| Gpi      | _SNT[Phospho (STY)]PKVVGK_2                                           | #N/A                   | 8.6860  | 8.4575  | 8.8147  | 8.9418  | 8.4512  | 8.6746  | 8.7856  | 8.7471  | 8.7317  | 8.6326  | 0.9939 | -0.0088 | 0.6164 | 0.2101 |
| Gpi      | _ELFEADPER_2                                                          | #N/A                   | 9.6984  | 9.3549  | 9.4286  | 9.4271  | 9.0657  | 9.1287  | 9.5597  | 9.5506  | 9.1782  | 9.1911  | 0.9979 | -0.0030 | 0.8969 | 0.0473 |
| Gpi      | _INTYENR_2                                                            | #N/A                   | 8.7771  | 8.6763  | 9.1462  | 8.5710  | 8.7422  | 8.6944  | 8.5727  | 9.0268  | 8.7399  | 8.7511  | 0.9995 | -0.0008 | 0.9708 | 0.0129 |
| Gpi      | _AVHVALR_2                                                            | #N/A                   | 8.1546  | 8.4930  | 8.2805  | 8.4382  | 8.2202  | 8.0202  | 8.3231  | 8.8618  | 8.3629  | 8.1995  | 0.9800 | -0.0292 | 0.2815 | 0.5505 |
| Gpi      | _VFEGNRPTNSVTTK_3                                                     | #N/A                   | 8.4284  | 7.7892  | 8.2651  | 7.9596  | 8.2216  | 8.5299  | 7.1399  | 8.0932  | 8.5329  | 8.3731  | 1.0204 | 0.0292  | 0.5804 | 0.2363 |
| Gpi      | _GKLEPEAR_2                                                           | #N/A                   | 8.3252  | 8.0302  | 8.2859  | 7.8746  | 7.5536  | 8.3292  | 8.2059  | 8.0855  | 7.9370  | 8.0256  | 1.0004 | 0.0005  | 0.9863 | 0.0060 |
| Gpi      | _HFAVSTINTAK_2                                                        | #N/A                   | 6.9607  | 7.3558  | 7.2017  | 7.4758  | 7.4938  | 7.7019  | 7.6472  | 7.4814  | 7.6186  | 7.3381  | 0.9792 | -0.0303 | 0.3063 | 0.5138 |
| Gpi      | _TLASLSPETSFIASK_2                                                    | #N/A                   | 7.5964  | 7.4204  | 7.4330  | 6.9447  | 7.2090  | 7.2272  | 7.3578  | 7.7693  | 7.7750  | 7.5193  | 0.9605 | -0.0581 | 0.0665 | 1.1772 |
| Gpi      | _EWFLEAKDPSAVAK_2                                                     | #N/A                   | 6.4119  | 5.6205  | 6.4836  | 5.7811  | 5.8806  | 6.3768  | 6.5288  | 6.1763  | 5.6612  | 5.8929  | 1.0045 | 0.0065  | 0.9119 | 0.0401 |
| Gpi      | _NRS[Phospho (STY)]NTPK_2                                             | #N/A                   | 3.4275  | 3.7986  | 4.1143  | 4.6170  | 3.6869  | 2.9377  | 4.3317  | 3.5015  | 3.1501  | 3.0831  | 1.0703 | 0.0980  | 0.5240 | 0.2807 |
| Gpi      | _KRELEADPER_2                                                         | #N/A                   | 6.4871  | 7.0633  | 7.2432  | 6.8279  | 6.8514  | 7.0580  | 6.6490  | 7.1238  | 6.6014  | 6.6741  | 1.0236 | 0.0337  | 0.3609 | 0.4426 |
| Gpi      | _NRS[Phospho (STY)]NTPKVDGK_3                                         | #N/A                   | 4.8410  | 4.5234  | 3.8413  | 5.0355  | 4.5969  | 4.7275  | 3.8752  | 5.3382  | 4.7164  | 4.5496  | 0.9945 | -0.0080 | 0.9377 | 0.0280 |
| Gpi      | _EWFLEAAK_2                                                           | #N/A                   | 4.8823  | 5.2318  | 3.1082  | 4.5090  | 4.7342  | 4.7236  | 2.6865  | 4.9907  | 5.5274  | 5.5623  | 0.9659 | -0.0501 | 0.8135 | 0.0897 |
| Gpi      | _DVM[Oxidation (M)]PEVNR_2                                            | #N/A                   | 8.6173  | 8.2718  | 9.0858  | 8.7940  | 8.2541  | 8.7385  | 8.3062  | 8.4410  | 7.9963  | 8.2298  | 1.0465 | 0.0656  | 0.0654 | 1.1846 |
| Gpi      | _TFTTQTTINAEATK_2                                                     | #N/A                   | 5.8899  | 5.9218  | 5.9424  | 6.5974  | 5.8863  | 5.9423  | 6.1161  | 6.5199  | 6.0107  | 6.0915  | 0.9750 | -0.0365 | 0.3859 | 0.4135 |
| Gpi      | _TFTTQTTINAEKWELEAK_3                                                 | #N/A                   | 4.7641  | 4.1211  | 5.2373  | 5.3285  | 4.2466  | 4.1477  | 4.5023  | 3.9046  | 5.0688  | 5.2108  | 0.9934 | -0.0095 | 0.9532 | 0.0291 |
| Gpi      | _VMYPSNIDGTHAK_2                                                      | #N/A                   | 7.1462  | 7.1983  | 7.3710  | 7.1546  | 6.4962  | 7.0577  | 7.4256  | 7.0624  | 7.1372  | 7.0435  | 0.9865 | -0.0196 | 0.5821 | 0.2350 |
| Gpi      | _M[Oxidation (M)]KS[Phospho (STY)]C[Carbamidomethyl (C)]QR_2          | #N/A                   | 6.4187  | 5.8858  | 4.1359  | 6.5849  | 6.2231  | 5.7806  | 6.6293  | 6.4243  | 6.3636  | 6.2674  | 0.9092 | -0.1373 | 0.2382 | 0.6230 |
| Gpi      | _KIEPELGSAVTSDDSTNGLSFHK_4                                            | #N/A                   | 5.5151  | 5.8911  | 6.2490  | 6.4410  | 5.8272  | 5.3788  | 5.2944  | 5.5623  | 5.8112  | 5.9118  | 1.0421 | 0.0595  | 0.3416 | 0.4664 |
| Gpi      | _EVM[Oxidation (M)]QM[Oxidation (M)]LVELAK_2                          | #N/A                   | 5.6574  | 5.0557  | 5.5972  | 4.9259  | 4.7423  | 4.9896  | 4.8697  | 5.4169  | 5.5062  | 5.3241  | 0.9777 | -0.0326 | 0.6102 | 0.2145 |
| Gpi      | _ILLANLQAQTEAM[Oxidation (M)]K_2                                      | #N/A                   | 4.8581  | 5.3245  | 4.9106  | 4.9850  | 5.1842  | 5.0519  | 5.7146  | 5.7579  | 5.6744  | 4.8081  | 0.9205 | -0.1195 | 0.0616 | 1.2102 |
| Gpi      | _FAAYQGDGMESNGK_2                                                     | #N/A                   | 5.6992  | 3.3712  | 4.5651  | 5.9920  | 4.8230  | 3.9226  | 3.4082  | 5.4047  | 4.0516  | 4.7105  | 1.0763 | 0.1060  | 0.6010 | 0.2211 |
| Gpi      | _SPDLEK_2                                                             | #N/A                   | 3.3015  | 4.1067  | 3.9883  | 4.4909  | 3.5249  | 3.8015  | 4.2056  | 2.8859  | 4.3299  | 3.2542  | 1.0545 | 0.0766  | 0.5880 | 0.2307 |
| Gpi      | _DNM[Oxidation (M)]JSGSK_2                                            | #N/A                   | 3.9196  | 4.2970  | 3.7030  | 3.7648  | 4.0225  | 3.7741  | 3.4795  | 4.2272  | 4.0770  | 3.6763  | 1.0126 | 0.0180  | 0.7916 | 0.1015 |
| Gpi      | _ELQAAGKS[Phospho (STY)]PDLEK_2                                       | P06745_S455_M1_Gpi     | 6.6300  | 6.6449  | 4.3232  | 7.0446  | 3.7333  | 4.3922  | 4.2853  | 3.5478  | 3.1964  | 3.5443  | 1.4930 | 0.5840  | 0.0455 | 1.3421 |
| Ptpnc    | _NRNS[Phospho (STY)]VVVPYDFNR_2                                       | #N/A                   | 6.8750  | 6.1835  | 7.5089  | 5.4093  | 3.8738  | 5.2532  | 7.1623  | 7.3931  | 5.5334  | 6.6777  | 0.8743 | -0.1938 | 0.2867 | 0.5425 |
| Me1      | _AIFASGFPDPVLDPGR_2                                                   | #N/A                   | 5.2670  | 5.1596  | 5.6941  | 5.8597  | 5.5640  | 4.9724  | 5.4888  | 5.2230  | 5.3152  | 4.8381  | 1.0390 | 0.0551  | 0.3509 | 0.4549 |
| Gap43    | _EGDGSATDDAAPT[Phospho (STY)]PK_2                                     | #N/A                   | 12.9492 | 12.9172 | 13.1247 | 13.4250 | 9.5195  | 12.7992 | 13.2752 | 12.8702 | 12.8363 | 13.0540 | 0.9575 | -0.0627 | 0.4800 | 0.3188 |
| Gap43    | _EKDAPVADGVKK_3                                                       | #N/A                   | 6.9147  | 7.3164  | 7.5094  | 7.1577  | 7.7826  | 7.4536  | 6.7931  | 6.4476  | 7.2742  | 7.4416  | 1.0525 | 0.0738  | 0.1587 | 0.7993 |
| Gap43    | _AEDGPAKEEPK_2                                                        | #N/A                   | 7.0947  | 7.4522  | 7.4868  | 7.6799  | 8.1332  | 7.7602  | 7.3018  | 7.2875  | 7.1094  | 7.1857  | 1.0526 | 0.0740  | 0.0693 | 1.1590 |
| Gap43    | _KGDAPAAEAK_2                                                         | #N/A                   | 7.1059  | 7.3401  | 7.0312  | 6.9331  | 7.3530  | 7.0908  | 7.0592  | 7.2261  | 6.6635  | 7.0205  | 1.0215 | 0.0306  | 0.2728 | 0.5642 |
| Gap43    | _KGEDAAPSEK_2                                                         | #N/A                   | 5.8629  | 6.0106  | 5.1418  | 5.7469  | 7.4693  | 6.2076  | 5.4887  | 6.0936  | 5.3275  | 5.9832  | 1.0611 | 0.0856  | 0.4302 | 0.3664 |
| Gap43    | _EGDGSATDDAAPT[Phospho (STY)]PKAEPK_3                                 | #N/A                   | 11.8132 | 11.9759 | 12.4890 | 11.5583 | 11.6285 | 11.8906 | 12.0947 | 11.8989 | 11.6907 | 12.1962 | 0.9935 | -0.0094 | 0.6953 | 0.1578 |
| Gap43    | _KGEDAAPSEKAGE[Phospho (STY)]JAETSAK_2                                | #N/A                   | 6.1321  | 6.2614  | 6.4802  | 6.8347  | 6.2878  | 6.3810  | 6.7196  | 6.3721  | 6.4514  | 6.1347  | 0.9964 | -0.0052 | 0.8859 | 0.0526 |
| Gap43    | _QADVPAAVTAAATT[Phospho (STY)]PAEDAATK_2                              | #N/A                   | 13.1697 | 13.5047 | 14.1377 | 13.8668 | 13.0964 | 13.4472 | 13.7281 | 13.1803 | 13.2874 | 13.4661 | 1.0091 | 0.0130  | 0.6050 | 0.2183 |
| Gap43    | _NDEQKIEQDGVKPEK_3                                                    | #N/A                   | 6.6909  | 6.3099  | 6.5331  | 6.7349  | 7.0427  | 6.7943  | 6.0925  | 6.1512  | 6.4592  | 6.3792  | 1.0527 | 0.0741  | 0.0743 | 1.1292 |
| Gap43    | _KEGDGSATDDAAPT[Phospho (STY)]PK_2                                    | #N/A                   | 7.3043  | 3.7674  | 6.8052  | 7.6171  | 6.6866  | 7.0428  | 4.2034  | 6.7154  | 7.2770  | 7.2275  | 1.0285 | 0.0406  | 0.8481 | 0.0716 |
| Gap43    | _ATTNS[Phospho (STY)]PSKAEADGPAKEPK_3                                 | #N/A                   | 11.0301 | 11.6592 | 12.4748 | 12.0870 | 11.8027 | 11.6985 | 11.6819 | 11.5694 | 8.7549  | 11.4898 | 1.0844 | 0.1169  | 0.1713 | 0.7662 |
| Gap43    | _QDEKEDPEADQEH_4                                                      | #N/A                   | 4.7648  | 5.3331  | 4.4347  | 4.4592  | 5.9225  | 5.0650  | 4.1739  | 4.5251  | 4.7622  | 4.9202  | 1.0873 | 0.1208  | 0.2435 | 0.6135 |
| Gap43    | _AGS[Phospho (STY)]JAETSAK_2                                          | #N/A                   | 8.6845  | 8.4732  | 8.3491  | 8.8623  | 8.3822  | 7.8486  | 8.5053  | 7.6148  | 3.5226  | 8.8552  | 1.1837 | 0.2433  | 0.2215 | 0.6545 |
| Gap43    | _AEDGPAKEEPKQADVPAAVTDAATAATT[Phospho (STY)]PAEDAATK_4                | #N/A                   | 3.9151  | 3.2245  | 4.6019  | 3.4004  | 3.0408  | 3.1878  | 3.5486  | 3.6008  | 3.8999  | 3.0776  | 1.0085 | 0.0122  | 0.9300 | 0.0315 |
| Gap43    | _AAQPPETAESSQAEKKDAVDEAKPK_4                                          | #N/A                   | 8.6826  | 10.4322 | 9.1230  | 10.2855 | 10.1456 | 8.7451  | 9.5094  | 10.3117 | 9.3297  | 10.1518 | 0.9739 | -0.0382 | 0.5867 | 0.2316 |
| Gap43    | _EGDGSATDDAAPT[Ph                                                     |                        |         |         |         |         |         |         |         |         |         |         |        |         |        |        |



|         |                                                                                    |      |         |         |         |         |         |         |         |         |         |         |         |         |        |        |
|---------|------------------------------------------------------------------------------------|------|---------|---------|---------|---------|---------|---------|---------|---------|---------|---------|---------|---------|--------|--------|
| Hsp90a1 | _LGHEDSQNR_2                                                                       | #N/A | 7.6342  | 7.8700  | 7.7962  | 7.9256  | 7.2811  | 7.7272  | 8.2038  | 7.8278  | 7.7077  | 7.6751  | 0.9812  | -0.0274 | 0.3603 | 0.4433 |
| Hsp90a1 | _ELUSNDDALDK_2                                                                     | #N/A | 8.9322  | 8.6506  | 8.0760  | 8.9677  | 8.5969  | 8.6176  | 8.8184  | 8.6101  | 8.6096  | 8.6025  | 0.9977  | -0.0033 | 0.9087 | 0.0416 |
| Hsp90a1 | _DKEV[Phospho (STY)]DOEAEEK_2                                                      | #N/A | 8.3881  | 7.9722  | 8.3184  | 8.8683  | 7.7740  | 8.1632  | 8.4849  | 8.4475  | 8.3260  | 7.9258  | 0.9941  | -0.0085 | 0.8289 | 0.0815 |
| Hsp90a1 | _LHYHTGETK_2                                                                       | #N/A | 7.8711  | 7.8318  | 8.1074  | 8.1545  | 7.6797  | 8.0380  | 7.9020  | 7.9775  | 7.6821  | 7.7589  | 1.0149  | 0.0214  | 0.3076 | 0.5120 |
| Hsp90a1 | _ELHNNLPSK_2                                                                       | #N/A | 7.9986  | 7.3366  | 7.2358  | 8.0332  | 7.9040  | 7.9534  | 8.2456  | 7.9152  | 8.0983  | 7.6113  | 0.9719  | -0.0411 | 0.3224 | 0.4916 |
| Hsp90a1 | _ELHNNLPSKQDR_3                                                                    | #N/A | 7.8759  | 7.7301  | 8.0068  | 7.9530  | 7.9135  | 8.3409  | 7.5125  | 7.9465  | 8.2170  | 8.2199  | 0.9995  | -0.0007 | 0.9811 | 0.0083 |
| Hsp90a1 | _AFFDLFENR_2                                                                       | #N/A | 6.2854  | 6.1381  | 6.2103  | 6.3911  | 6.2380  | 6.0643  | 5.9297  | 5.8911  | 6.4435  | 5.7893  | 1.0346  | 0.0490  | 0.1474 | 0.8316 |
| Hsp90a1 | _RAPDFLENR_2                                                                       | #N/A | 7.9815  | 8.0919  | 7.4362  | 7.7735  | 7.3411  | 7.5752  | 7.7380  | 7.9251  | 7.9736  | 8.0490  | 0.9720  | -0.0409 | 0.2091 | 0.6796 |
| Hsp90a1 | _ESDDKPEHEDVG[Phospho (STY)]DEEEKK_2                                               | #N/A | 3.3368  | 4.9694  | 4.0236  | 6.6502  | 6.0296  | 5.2809  | 6.1393  | 5.4767  | 6.1238  | 5.2161  | 0.8797  | -0.1850 | 0.3221 | 0.4921 |
| Hsp90a1 | _ESDDKPEHEDVG[Phospho (STY)]DEEEKK_3                                               | #N/A | 8.5287  | 8.1834  | 7.6206  | 9.1993  | 7.9260  | 8.2961  | 8.7298  | 8.4998  | 8.4248  | 8.5648  | 0.9693  | -0.0450 | 0.3792 | 0.4211 |
| Hsp90a1 | _ELUSNDDALDKR_2                                                                    | #N/A | 5.6403  | 5.6588  | 6.3056  | 5.8177  | 5.7897  | 5.5833  | 5.8121  | 5.7459  | 5.6038  | 5.4013  | 1.0281  | 0.0400  | 0.3297 | 0.4818 |
| Hsp90a1 | _HGLEVYIM[Oxidation (M)]EPIDEV[C]Carbamidomethyl (C)IVQQLK_3                       | #N/A | 3.7015  | 3.6711  | 4.9228  | 4.7508  | 4.0530  | 4.3153  | 5.0342  | 4.5022  | 4.6832  | 4.4387  | 0.9081  | -0.1391 | 0.1752 | 0.7565 |
| Hsp90a1 | _DKEV[Phospho (STY)]DOEAEEK_2                                                      | #N/A | 5.4749  | 5.4378  | 4.9533  | 6.4960  | 4.6782  | 4.9395  | 5.6476  | 5.3938  | 5.6302  | 5.4941  | 0.9618  | -0.0561 | 0.5455 | 0.2632 |
| Hsp90a1 | _FYEQFSK_2                                                                         | #N/A | 5.0247  | 4.2838  | 3.9380  | 3.8074  | 4.3820  | 4.3553  | 3.1697  | 4.2323  | 3.9799  | 4.2060  | 1.1030  | 0.1415  | 0.2083 | 0.6814 |
| Hsp90a1 | _SLTNDWEEHLAVK_2                                                                   | #N/A | 5.0591  | 5.6012  | 6.0529  | 5.1209  | 5.8339  | 5.6562  | 5.6432  | 5.6032  | 4.9134  | 4.8238  | 1.0587  | 0.0823  | 0.2781 | 0.5557 |
| Hsp90a1 | _HLEINPDHSIETLR_3                                                                  | #N/A | 6.7200  | 6.8157  | 6.7562  | 6.6504  | 6.5085  | 7.2608  | 6.7913  | 6.2735  | 7.0020  | 6.6206  | 1.0170  | 0.0243  | 0.5428 | 0.2653 |
| Hsp90a1 | _DNSTM[Oxidation (M)]GVMAAK_2                                                      | #N/A | 3.6596  | 3.5751  | 4.0103  | 5.6344  | 5.3625  | 3.6792  | 3.9155  | 5.4843  | 3.7664  | 3.7142  | 1.0237  | 0.0338  | 0.8673 | 0.0618 |
| Hsp90a1 | _LVTSP[C]Carbamidomethyl (C)[C]Carbamidomethyl (C)[Y]VTSTGWATNM[Oxidation (M)]ER_3 | #N/A | 3.8862  | 3.4562  | 6.1099  | 4.6596  | 3.0299  | 3.5947  | 3.3119  | 3.5323  | 4.1366  | 4.3418  | 0.9679  | -0.0470 | 0.7256 | 0.1393 |
| Hsp90a1 | _KHLEINPDHSIETLR_4                                                                 | #N/A | 3.4137  | 4.1700  | 3.1474  | 4.1920  | 4.1964  | 4.0671  | 4.3403  | 4.3100  | 3.1082  | 4.2664  | 0.9646  | -0.0520 | 0.6828 | 0.1657 |
| Hsp90a1 | _ERDKEV[Phospho (STY)]DOEAEEK_2                                                    | #N/A | 3.9765  | 4.0133  | 4.1421  | 3.1377  | 3.8595  | 3.0284  | 3.5161  | 3.3982  | 3.0699  | 2.6607  | 1.1682  | 0.2243  | 0.1031 | 0.9869 |
| Hsp90a1 | _LGLGDIDPVTSDTAAVNTMPLEGGDDTDR_3                                                   | #N/A | 3.8376  | 3.0930  | 3.5713  | 4.6159  | 2.9813  | 3.3433  | 3.2633  | 3.8861  | 4.1852  | 4.2931  | 0.9275  | -0.1086 | 0.4434 | 0.3532 |
| Hsp90a1 | _LGHEDSQNRK_3                                                                      | #N/A | 2.9151  | 2.9265  | 4.1496  | 3.6934  | 4.2486  | 3.4808  | 3.8416  | 3.3078  | 3.6069  | 3.2426  | 1.0198  | 0.0283  | 0.8309 | 0.0804 |
| Hsp90b1 | _SLIVPTSAAPR_2                                                                     | #N/A | 8.0608  | 8.4472  | 8.6292  | 8.9055  | 8.3315  | 8.5527  | 8.5036  | 8.3236  | 8.1487  | 8.4745  | 1.0150  | 0.0214  | 0.4543 | 0.3427 |
| Hsp90b1 | _THEINPR_2                                                                         | #N/A | 6.8921  | 7.1858  | 6.5398  | 6.7884  | 7.2441  | 6.8280  | 6.7665  | 7.0777  | 6.5697  | 7.2421  | 0.9939  | -0.0088 | 0.8331 | 0.0793 |
| Hsp90b1 | _FAFQAEVNR_2                                                                       | #N/A | 6.4245  | 6.6526  | 6.2741  | 6.6079  | 6.4995  | 6.3105  | 6.7089  | 6.6706  | 6.8028  | 6.3857  | 0.9706  | -0.0430 | 0.1094 | 0.9608 |
| Hsp90b1 | _GLFDEYGSK_2                                                                       | #N/A | 6.9162  | 6.4670  | 6.5161  | 7.0811  | 6.6089  | 6.9986  | 6.4669  | 6.5523  | 6.4169  | 7.0128  | 1.0231  | 0.0329  | 0.4044 | 0.3932 |
| Hsp90b1 | _TDDDEVORREEAHLQDLGNASQIR_3                                                        | #N/A | 5.4611  | 6.4480  | 5.9381  | 5.9381  | 5.1653  | 4.7775  | 6.0735  | 5.2644  | 4.3169  | 5.9331  | 0.9825  | -0.0255 | 0.8269 | 0.0826 |
| Hsp90b1 | _GVVSDPLNVS_2                                                                      | #N/A | 6.4444  | 7.6695  | 7.5712  | 8.2402  | 7.8863  | 7.5022  | 7.6989  | 7.7131  | 7.5825  | 7.6267  | 0.9865  | -0.0195 | 0.7479 | 0.1261 |
| Hsp90b1 | _GTSEFLNK_2                                                                        | #N/A | 5.4145  | 4.4471  | 5.5303  | 5.2442  | 5.0065  | 4.4423  | 3.6806  | 5.4309  | 5.5535  | 1.0521  | 0.0733  | 0.5770  | 0.2388 | 0.1688 |
| Hsp90b1 | _DISTNYYASQK_2                                                                     | #N/A | 5.8927  | 5.4018  | 6.3379  | 6.2323  | 5.5998  | 5.9044  | 4.5346  | 5.4318  | 5.1392  | 6.0021  | 1.1171  | 0.1598  | 0.0756 | 1.1216 |
| Hsp90b1 | _SVGLPOTK_2                                                                        | #N/A | 4.8657  | 4.9047  | 5.0634  | 5.2215  | 3.9188  | 4.2067  | 4.9074  | 4.9466  | 4.5335  | 1.0107  | 0.1014  | 0.0598  | 0.8713 | 0.5957 |
| Hsp90b1 | _NLHVDTDTGVG[Oxidation (M)]TTR_2                                                   | #N/A | 4.0773  | 4.7290  | 4.8484  | 4.4166  | 3.5804  | 4.0713  | 4.9799  | 4.6363  | 4.6140  | 4.1213  | 0.9345  | -0.0978 | 0.3121 | 0.5057 |
| Hsp90b1 | _FQSHHSTDTISLQDIYER_3                                                              | #N/A | 5.7052  | 5.6167  | 6.1846  | 5.4487  | 5.5328  | 5.7517  | 5.6066  | 4.7000  | 5.3457  | 5.2431  | 1.1264  | 0.1717  | 0.0654 | 1.1842 |
| Hsp90b1 | _LSTLSDNALAGNIELTVK_2                                                              | #N/A | 4.9060  | 5.1286  | 5.6223  | 4.5342  | 3.9713  | 4.4854  | 4.2489  | 3.5842  | 5.1061  | 5.0840  | 1.0597  | 0.0836  | 0.5323 | 0.2739 |
| Apoe    | _LEELQGLGPAVIAETK_2                                                                | #N/A | 7.4680  | 7.9833  | 7.9949  | 8.1821  | 7.6978  | 8.1664  | 7.6987  | 7.9174  | 7.9517  | 7.9538  | 1.0044  | 0.0064  | 0.8224 | 0.0849 |
| Apoe    | _LQAEIFQAR_2                                                                       | #N/A | 7.0735  | 7.3783  | 7.5537  | 7.4076  | 7.3118  | 7.3127  | 7.5311  | 7.5273  | 7.2437  | 7.1066  | 0.9983  | -0.0025 | 0.9164 | 0.0379 |
| Apoe    | _LGPVEQGR_2                                                                        | #N/A | 7.0740  | 7.4471  | 7.7479  | 7.1785  | 7.1300  | 6.8963  | 7.2008  | 7.4733  | 7.1934  | 7.2333  | 0.9959  | -0.0059 | 0.8643 | 0.0649 |
| Apoe    | _DRLEEV_2                                                                          | #N/A | 6.4748  | 5.7252  | 5.5935  | 6.0799  | 6.5299  | 5.5086  | 5.6801  | 6.1405  | 6.4311  | 5.3917  | 1.0126  | 0.0181  | 0.8054 | 0.0940 |
| Apoe    | _IQASVATNPHTPIAGENO_2                                                              | #N/A | 8.5541  | 8.9189  | 9.0573  | 9.9373  | 8.7218  | 8.4770  | 8.9867  | 9.0129  | 8.6827  | 8.5618  | 1.0151  | 0.0217  | 0.6534 | 0.1848 |
| Apoe    | _NEVHTM[Oxidation (M)]LGGS[Phospho (STY)]TEER_2                                    | #N/A | 5.2103  | 5.1059  | 5.4630  | 5.8201  | 5.0782  | 4.3755  | 3.9183  | 4.4745  | 4.1783  | 4.5572  | 1.2087  | 0.2734  | 0.0109 | 1.9625 |
| Apoe    | _LGAMEDUR_2                                                                        | #N/A | 3.7805  | 3.0282  | 3.5064  | 4.1628  | 4.5018  | 3.7081  | 3.6013  | 2.0440  | 3.8804  | 3.8536  | 1.1305  | 0.1769  | 0.3440 | 0.4634 |
| Apoe    | _DAEDLQKR_2                                                                        | #N/A | 3.6473  | 4.4035  | 3.3809  | 4.0121  | 2.7910  | 3.8336  | 3.7268  | 4.1220  | 3.7550  | 3.9791  | 0.9441  | -0.0829 | 0.4784 | 0.3202 |
| Apoe    | _SKMEIQTQIR_2                                                                      | #N/A | 3.6632  | 2.9675  | 4.1086  | 3.6523  | 2.7889  | 3.4398  | 3.8006  | 3.3488  | 3.6479  | 3.3296  | 0.9731  | -0.0394 | 0.7292 | 0.1371 |
| Sod1    | _DGVANVSIEDR_2                                                                     | #N/A | 9.2411  | 9.4640  | 9.5329  | 9.8061  | 9.3145  | 9.5326  | 9.6688  | 9.2397  | 9.5711  | 1.0037  | 0.0054  | 0.7928  | 0.1008 | 0.5576 |
| Sod1    | _HVGDLGNVTAGK_2                                                                    | #N/A | 8.8497  | 9.4229  | 9.2848  | 9.3987  | 10.1541 | 9.4995  | 9.2240  | 9.0340  | 9.2570  | 9.2046  | 1.0278  | 0.0395  | 0.2770 | 0.5576 |
| Sod1    | _VLSLGEHSIGR_2                                                                     | #N/A | 6.7514  | 6.7285  | 7.2534  | 6.9652  | 8.7903  | 8.2496  | 7.5425  | 7.0691  | 7.8765  | 7.9288  | 0.9806  | -0.0283 | 0.7597 | 0.1194 |
| Sod1    | _TM[Oxidation (M)]VHHEK_2                                                          | #N/A | 6.4017  | 4.2596  | 6.3294  | 6.4332  | 8.0852  | 6.8846  | 5.9264  | 6.0346  | 6.6187  | 6.2600  | 1.0304  | 0.0433  | 0.7763 | 0.1099 |
| Sod1    | _LAC[Carbamidomethyl (C)]GVGIAQ_2                                                  | #N/A | 4.9524  | 4.8788  | 4.8309  | 4.6494  | 5.1847  | 5.3158  | 4.1582  | 5.3054  | 5.0080  | 1.0406  | 0.0574  | 0.4279  | 0.1686 | 0.1686 |
| Sod1    | _GDGPVGTHFEQK_2                                                                    | #N/A | 7.3539  | 7.8390  | 7.7276  | 8.4569  | 8.5853  | 8.1577  | 7.8530  | 8.0012  | 8.0348  | 7.9616  | 1.0072  | 0.0104  | 0.8172 | 0.0877 |
| Sod1    | _KHGGPADEER_2                                                                      | #N/A | 5.8279  | 2.9465  | 3.4656  | 3.9683  | 3.4053  | 5.4511  | 4.8023  | 5.1877  | 3.9353  | 0.8131  | -0.2984 | 0.2360  | 0.6271 | 0.6271 |
| Sod1    | _QDQLGKGGNEESTK_2                                                                  | #N/A | 4.5948  | 5.3498  | 6.3560  | 5.1896  | 6.2975  | 6.2823  | 5.2295  | 5.2513  | 5.5156  | 4.6511  | 1.1000  | 0.1376  | 0.2365 | 0.6262 |
| Mdh2    | _GC[Carbamidomethyl (C)]DVVVPIAGVPR_2                                              | #N/A | 12.7725 | 12.7082 | 12.8435 | 13.1242 | 12.8884 | 12.8174 | 12.8239 | 12.4845 | 12.6431 | 12.7204 | 1.0151  | 0.0216  | 0.0731 | 1.1363 |
| Mdh2    | _VDPPQDIATLGR_2                                                                    | #N/A | 12.2905 | 12.3528 | 12.7091 | 12.6342 | 12.7648 | 12.4153 | 12.4534 | 12.3091 | 12.3639 | 12.4911 | 1.0099  | 0.0143  | 0.2828 | 0.5485 |
| Mdh2    | _GVLGPEQLPQC[Carbamidomethyl (C)]LK_2                                              | #N/A | 11.6265 | 11.7003 | 11.7871 | 11.9189 | 12.0062 | 11.6605 | 11.7449 | 11.6759 | 11.6162 | 11.6894 | 1.0087  | 0.0125  | 0.2399 | 0.6201 |
| Mdh2    | _JFGVTLIDVR_2                                                                      | #N/A | 11.5097 | 11.6704 | 11.7384 | 11.7288 | 11.6184 | 11.6785 | 11.4922 | 11.4833 | 11.5457 | 11.5915 | 1.0112  | 0.0161  | 0.0261 | 1.5829 |
| Mdh2    | _M[Oxidation (M)]JAEAPELK_2                                                        | #N/A | 10.3397 | 10.6949 | 10.6551 | 10.5636 | 10.7132 | 10.4488 | 10.3647 | 10.4459 | 10.3722 | 10.4936 | 1.0144  | 0.0207  | 0.0964 | 1.0160 |
| Mdh2    | _TIPUSQC[Carbamidomethyl (C)]TPK_2                                                 | #N/A | 10.7233 | 10.9988 | 11.0421 | 11.1531 | 11.1393 | 10.7706 | 10.9880 | 11.0490 | 10.8623 | 10.9819 | 1.0001  | 0.0001  | 0.9930 | 0.0030 |
| Mdh2    | _JQEAQTEVVK_2                                                                      | #N/A | 9.8111  | 9.8452  | 9.9801  | 10.0270 | 10.2766 | 10.0502 | 9.7215  | 9.7714  | 9.8145  | 10.0195 | 1.0169  | 0.0242  | 0.1334 | 0.8749 |
| Mdh2    | _ETEC[Carbamidomethyl (C)]TYTSTPLLLGK_2                                            | #N/A | 10.6093 | 10.5194 | 10.8223 | 10.6353 | 10.8613 | 10.6770 | 10.6198 | 10.2512 | 10.5198 | 10.6314 | 1.0173  | 0.0248  | 0.0967 | 1.0147 |
| Mdh2    | _VWNPVIGGHAGK_2                                                                    | #N/A | 10.5532 | 10.7639 | 10.5679 | 9.8710  | 10.9432 | 10.5975 | 10.7651 | 9.9223  | 10.3576 | 10.6500 | 1.0121  | 0.0173  | 0.6116 | 0.2135 |
| Mdh2    | _EGVVEVC[Carbamidomethyl (C)]SFVQSG_2                                              | #N/A | 9.0909  | 9.2203  | 9.2226  | 9.7715  | 9.0362  | 9.0183  | 9.4481  | 9.2120  | 9.0949  | 9.5092  | 0.9904  | -0.0139 | 0.5981 | 0.2232 |
| Mdh2    | _VAVLGASGGIQGLSLLLK_2                                                              | #N/A | 8.9750  | 8.9138  | 9.0836  | 8.9894  | 9.1701  | 9.1516  | 8.8154  | 9.0376  | 9.0652  | 9.2065  | 1.0018  | 0.0026  | 0.8508 | 0.0702 |
| Mdh2    | _ANTFVAELK_2                                                                       | #N/A | 8.7142  | 8.8129  | 8.5344  | 8.8997  | 8.9286  | 9.1286  | 7.0951  | 8.7385  | 8.9196  | 9.0836  | 1.0446  | 0.0629  | 0.3477 | 0.4588 |
| Mdh2    | _KGEDFVK_2                                                                         | #N/A | 8.5562  | 8.1775  | 8.3062  | 8.4984  | 8.4918  | 8.1346  | 7.9747  | 8.1088  | 8.2208  | 8.5679  | 1.0174  | 0.0248  | 0.3249 | 0.4883 |
| Mdh2    | _LTLDYDHTPGVAADLSHIETR                                                             |      |         |         |         |         |         |         |         |         |         |         |         |         |        |        |



|      |  |                                                  |                     |         |         |         |         |         |         |         |         |         |         |        |         |        |        |
|------|--|--------------------------------------------------|---------------------|---------|---------|---------|---------|---------|---------|---------|---------|---------|---------|--------|---------|--------|--------|
| Neff |  | _YEEVLSR_2                                       | #N/A                | 9.2285  | 9.3427  | 8.9982  | 9.6174  | 9.7150  | 9.2359  | 9.2253  | 9.1806  | 9.1704  | 9.4847  | 1.0098 | 0.0141  | 0.5564 | 0.2546 |
| Neff |  | _ALVEQIR_2                                       | #N/A                | 9.5677  | 9.4933  | 9.7113  | 9.4585  | 9.5454  | 9.0721  | 8.7044  | 9.3137  | 9.0970  | 9.3637  | 1.0389 | 0.0551  | 0.0595 | 1.2253 |
| Neff |  | _FTVITESAAK_2                                    | #N/A                | 8.5761  | 8.9539  | 9.0542  | 9.3713  | 9.1740  | 8.8883  | 8.5372  | 8.5747  | 8.9091  | 8.9369  | 1.0301 | 0.0429  | 0.1416 | 0.8490 |
| Neff |  | _TLEIEAC[Carbamidomethyl] (C)R_2                 | #N/A                | 8.3985  | 8.5226  | 8.7132  | 8.9261  | 8.6695  | 8.4594  | 8.2232  | 8.1991  | 8.1903  | 8.6847  | 1.0349 | 0.0495  | 0.0675 | 1.1708 |
| Neff |  | _VIEAEILVLR_2                                    | #N/A                | 8.2594  | 8.7471  | 8.6101  | 8.5975  | 8.8292  | 8.7033  | 8.4588  | 8.5355  | 8.6433  | 8.6433  | 1.0011 | 0.0016  | 0.0314 | 0.9309 |
| Neff |  | _IGADEAALAR_2                                    | #N/A                | 8.1684  | 8.0573  | 7.9291  | 8.0920  | 7.8914  | 7.7847  | 8.1041  | 7.6070  | 7.5326  | 7.9232  | 1.0251 | 0.0357  | 0.1676 | 0.7757 |
| Neff |  | _Acetyl (Protein N-term)[SSFGDPPYSTSYK_2         | #N/A                | 7.4326  | 7.6188  | 7.6648  | 7.4005  | 7.4544  | 7.5024  | 7.6845  | 7.0934  | 7.3336  | 7.7030  | 1.0079 | 0.0113  | 0.6599 | 0.1805 |
| Neff |  | _FASIR_2                                         | #N/A                | 7.5164  | 7.5419  | 7.1432  | 7.3063  | 7.9165  | 7.8370  | 7.7974  | 7.7184  | 7.9446  | 7.9446  | 1.0360 | 0.0511  | 0.5790 | 0.2370 |
| Neff |  | _AAKDEVSESR_2                                    | #N/A                | 7.3097  | 7.2628  | 7.3495  | 7.4296  | 8.3382  | 7.7468  | 6.8412  | 6.6440  | 7.4530  | 6.8241  | 1.0911 | 0.1258  | 0.0368 | 1.4340 |
| Neff |  | _EGLETLR_2                                       | #N/A                | 7.5866  | 6.9544  | 6.4303  | 7.6586  | 7.2741  | 7.1996  | 6.8454  | 7.3819  | 7.2752  | 7.4955  | 0.9910 | -0.0131 | 0.8043 | 0.0946 |
| Neff |  | _KEES[Phospho (STY)]AGEEQVAK_2                   | #N/A                | 7.1509  | 6.9987  | 6.8392  | 7.7056  | 6.6778  | 6.7079  | 7.3079  | 6.6037  | 6.8199  | 7.0979  | 1.0080 | 0.0116  | 0.8143 | 0.0892 |
| Neff |  | _YLKEYQQLNVK_2                                   | #N/A                | 6.5587  | 7.0070  | 7.6223  | 7.2983  | 7.1561  | 6.7197  | 6.4529  | 6.6529  | 6.5092  | 7.1306  | 1.0559 | 0.0785  | 0.1462 | 0.8351 |
| Neff |  | _AEAEKDEPPS[Phospho (STY)]EGAEIEEEK_2            | #N/A                | 7.9800  | 5.4318  | 6.8365  | 8.4562  | 6.8165  | 7.0331  | 7.8161  | 7.0891  | 7.6613  | 7.4091  | 0.9464 | -0.0795 | 0.4878 | 0.3118 |
| Neff |  | _LLEGETR_2                                       | #N/A                | 8.0417  | 8.2202  | 8.0662  | 8.5448  | 8.8031  | 8.3395  | 7.9726  | 7.9159  | 8.0950  | 8.2285  | 1.0351 | 0.0498  | 0.1153 | 0.9383 |
| Neff |  | _SFPAITYTHVQEQTEVEETIATK_3                       | #N/A                | 8.0572  | 8.7422  | 8.8278  | 10.6662 | 7.4884  | 7.8707  | 8.4350  | 8.5572  | 7.5967  | 8.2191  | 1.0496 | 0.0698  | 0.5180 | 0.2856 |
| Neff |  | _ES[Phospho (STY)]AGEEQVAK_2                     | #N/A                | 6.0837  | 6.0345  | 3.2978  | 6.5801  | 5.5326  | 6.1693  | 6.3010  | 5.8995  | 6.2928  | 5.6071  | 0.9322 | -0.1014 | 0.5273 | 0.2779 |
| Neff |  | _IDSLM[Oxidation (M)]DEIAFLK_3                   | #N/A                | 5.3551  | 5.4971  | 5.4391  | 4.3159  | 4.4663  | 4.4713  | 4.1185  | 4.4274  | 4.6917  | 5.1445  | 1.0715 | 0.0996  | 0.3528 | 0.4525 |
| Neff |  | _QAQEGREGLETLR_3                                 | #N/A                | 5.9908  | 6.9211  | 7.7675  | 7.3472  | 7.5050  | 6.9895  | 6.6289  | 6.5646  | 6.9874  | 6.7862  | 1.0512 | 0.0720  | 0.3219 | 0.4923 |
| Neff |  | _RYVTPR_2                                        | #N/A                | 5.0014  | 5.0756  | 3.7052  | 3.6965  | 4.9658  | 4.6409  | 4.3418  | 3.8415  | 4.7917  | 4.7019  | 1.0215 | 0.0307  | 0.8048 | 0.0943 |
| Neff |  | _NM[Oxidation (M)]QNAEWFK_2                      | #N/A                | 6.9291  | 7.1392  | 7.1970  | 7.1197  | 6.9553  | 6.9301  | 7.2711  | 6.9327  | 6.8289  | 7.0686  | 1.0028 | 0.0040  | 0.8444 | 0.0735 |
| Neff |  | _ESEEEKKEES[Phospho (STY)]AGEEQVAK_3             | #N/A                | 4.4982  | 4.0019  | 3.2834  | 4.5443  | 3.6978  | 3.7458  | 4.0821  | 3.6628  | 4.9449  | 4.3328  | 0.9310 | -0.1032 | 0.3969 | 0.4013 |
| Neff |  | _IDSLM[Oxidation (M)]DEIAFLK_3                   | #N/A                | 4.8986  | 5.2443  | 4.9598  | 5.3983  | 5.0106  | 5.2032  | 4.7628  | 4.9044  | 5.0068  | 5.0696  | 1.0366 | 0.0519  | 0.1469 | 0.8331 |
| Neff |  | _SAYSLGQSSYLM[Oxidation (M)]SAR_2                | #N/A                | 6.9303  | 6.9787  | 7.4033  | 7.7417  | 7.1299  | 7.2909  | 6.8711  | 7.1222  | 7.0950  | 7.2083  | 1.0243 | 0.0346  | 0.3271 | 0.4854 |
| Neff |  | _M[Oxidation (M)]ALDIEAAYR_2                     | #N/A                | 6.9229  | 7.2005  | 7.1621  | 7.2635  | 7.2810  | 7.2713  | 7.4795  | 7.1198  | 7.2486  | 7.3235  | 0.9850 | -0.0218 | 0.2655 | 0.5759 |
| Neff |  | _AAKDEVSESR_3                                    | #N/A                | 4.3808  | 3.2293  | 3.9288  | 5.5054  | 5.6981  | 5.1606  | 4.1461  | 3.7962  | 4.6436  | 4.3984  | 1.0952 | 0.1312  | 0.4551 | 0.3419 |
| Neff |  | _SAYSSYAPVSSLSVR_2                               | #N/A                | 7.0689  | 7.6622  | 7.7226  | 7.9239  | 7.7116  | 7.4198  | 7.5656  | 7.1570  | 7.3712  | 7.3133  | 1.0317 | 0.0450  | 0.2002 | 0.6986 |
| Neff |  | _LSFTSVSGISGYSQSQVGR_2                           | #N/A                | 4.9479  | 5.1742  | 6.0750  | 6.5129  | 4.6439  | 5.4972  | 5.3175  | 4.7965  | 5.0096  | 4.9268  | 1.0923 | 0.1273  | 0.2478 | 0.6059 |
| Neff |  | _SYSSSSGSLM[Oxidation (M)]PSLENLDLQVAAINSLK_3    | #N/A                | 3.1126  | 4.2298  | 4.3471  | 3.8909  | 3.7571  | 4.3683  | 4.0391  | 3.1103  | 3.4094  | 3.5681  | 1.1187 | 0.1618  | 0.1850 | 0.7328 |
| Neff |  | _TQEKALQQLNDR_3                                  | #N/A                | 4.4473  | 4.2527  | 3.1696  | 3.6723  | 3.9452  | 4.9523  | 3.3870  | 4.4462  | 5.3108  | 4.9424  | 0.9374 | -0.0933 | 0.5798 | 0.2367 |
| Neff |  | _YEEVESREDAEGR_3                                 | #N/A                | 3.8874  | 4.0859  | 3.6211  | 3.1649  | 4.4352  | 5.1208  | 3.3131  | 3.8363  | 5.1245  | 4.8078  | 0.9490 | -0.0756 | 0.6615 | 0.1794 |
| Neff |  | _AEAEKDEPPS[Phospho (STY)]EGAEIEEEK_3            | #N/A                | 2.9998  | 3.7561  | 4.2343  | 8.6347  | 7.4005  | 2.9803  | 4.3743  | 3.1075  | 3.1075  | 7.9771  | 1.0574 | 0.0805  | 0.0863 | 0.0644 |
| Neff |  | _S[Phospho (STY)]PVVEVKPPEAK_3                   | #N/A                | 13.1248 | 12.7703 | 12.9273 | 13.5524 | 12.9537 | 13.0459 | 12.8866 | 12.7123 | 13.1432 | 13.1531 | 1.0068 | 0.0098  | 0.5967 | 0.2243 |
| Neff |  | _GVVTNGLDV[Phospho (STY)]PAEEK_2                 | #N/A                | 11.0344 | 10.9928 | 10.9433 | 11.8895 | 10.7555 | 11.1485 | 11.6718 | 10.7922 | 11.1198 | 11.3078 | 0.9915 | -0.0123 | 0.7106 | 0.1484 |
| Neff |  | _AES[Phospho (STY)]PVKEK_2                       | #N/A                | 10.2105 | 10.0298 | 10.3544 | 10.0542 | 9.6196  | 9.8053  | 10.2545 | 9.8464  | 9.9118  | 10.2946 | 0.9936 | -0.0093 | 0.7038 | 0.1526 |
| Neff |  | _QLS[Phospho (STY)]DEER_2                        | P08553_S34_M1_Nefm  | 8.5865  | 8.7644  | 9.0893  | 9.1544  | 8.8248  | 8.7435  | 8.8473  | 8.4615  | 8.5993  | 8.9338  | 1.0172 | 0.0246  | 0.3180 | 0.4976 |
| Neff |  | _VHYLEQDNK_2                                     | #N/A                | 8.6784  | 8.8186  | 8.0713  | 9.4207  | 9.0033  | 8.8005  | 8.6416  | 8.6679  | 8.5726  | 8.8256  | 1.0140 | 0.0201  | 0.6090 | 0.2154 |
| Neff |  | _FIEAEQALR_2                                     | #N/A                | 8.3431  | 8.0899  | 8.1999  | 8.7477  | 8.6017  | 8.1550  | 8.1658  | 8.2254  | 8.3957  | 8.5329  | 1.0032 | 0.0045  | 0.8656 | 0.0627 |
| Neff |  | _Acetyl (Protein N-term)[SYDLSLGNPSAYR_2         | #N/A                | 8.2697  | 8.3192  | 8.4047  | 8.4797  | 8.7548  | 8.9300  | 8.6386  | 7.8235  | 7.9781  | 8.1440  | 1.0356 | 0.0505  | 0.1166 | 0.9334 |
| Neff |  | _VQSLQDEIVFLR_2                                  | #N/A                | 7.4758  | 8.0569  | 8.1270  | 8.2207  | 8.4388  | 7.8791  | 8.1051  | 7.8027  | 7.9082  | 7.8308  | 1.0153 | 0.0220  | 0.5117 | 0.2910 |
| Neff |  | _FTSTGSGITGPLYTH_2                               | #N/A                | 6.8199  | 6.7480  | 6.8080  | 6.7136  | 7.0690  | 6.7991  | 6.6615  | 5.9723  | 6.6308  | 6.9561  | 1.0414 | 0.0585  | 0.1626 | 0.7889 |
| Neff |  | _LTEAEQNK_2                                      | #N/A                | 7.4879  | 7.7625  | 7.6543  | 7.9313  | 7.9651  | 7.7590  | 7.7461  | 7.5469  | 7.4528  | 7.9232  | 1.0121 | 0.0173  | 0.4713 | 0.3267 |
| Neff |  | _SAKEEIAEYR_2                                    | #N/A                | 7.2784  | 6.9675  | 7.1022  | 7.4586  | 7.7299  | 7.5125  | 6.5237  | 6.8971  | 7.0987  | 7.2386  | 1.0579 | 0.0812  | 0.0659 | 1.1814 |
| Neff |  | _AVEEVITGK_2                                     | #N/A                | 5.8252  | 6.5438  | 6.2912  | 7.7100  | 7.2810  | 6.6696  | 6.7077  | 6.5955  | 6.8422  | 6.6938  | 1.0015 | 0.0022  | 0.9771 | 0.0101 |
| Neff |  | _SAKEEIAEYR_3                                    | #N/A                | 7.0111  | 6.8090  | 6.3151  | 6.3018  | 7.5210  | 7.4302  | 6.7165  | 6.5620  | 7.0010  | 7.3171  | 0.9998 | -0.0002 | 0.9971 | 0.0013 |
| Neff |  | _VTSHAIVK_2                                      | #N/A                | 5.6490  | 7.0674  | 5.9553  | 6.8115  | 7.0746  | 6.5917  | 6.3265  | 6.5757  | 6.5895  | 6.4543  | 1.0059 | 0.0085  | 0.9038 | 0.0439 |
| Neff |  | _LRDTEAAR_2                                      | #N/A                | 6.0244  | 6.2821  | 5.9610  | 6.2002  | 6.6393  | 6.7832  | 6.4064  | 6.3901  | 6.1191  | 1.0220  | 1.0314 | 0.5217  | 0.2825 | 0.0439 |
| Neff |  | _SNHEEEVADLAQIASHIVTR_3                          | #N/A                | 5.8829  | 5.8159  | 5.7187  | 6.4680  | 6.1678  | 5.9321  | 5.8372  | 4.6696  | 5.7854  | 6.3584  | 1.0591 | 0.0829  | 0.3174 | 0.4984 |
| Neff |  | _GS[Phospho (STY)]PSTVSSYK_2                     | #N/A                | 8.2659  | 8.8110  | 9.0804  | 8.9411  | 8.5690  | 8.4643  | 8.6874  | 8.3726  | 8.3995  | 8.6983  | 1.0210 | 0.0300  | 0.3055 | 0.5150 |
| Neff |  | _KGEIS[Phospho (STY)]SDKVVTK_2                   | #N/A                | 6.0414  | 6.8555  | 7.3516  | 7.4472  | 5.6347  | 6.8615  | 7.2031  | 6.9285  | 6.7135  | 7.0451  | 0.9607 | -0.0578 | 0.4883 | 0.3113 |
| Neff |  | _KAS[Phospho (STY)]PVKEK_2                       | #N/A                | 8.6049  | 3.8588  | 8.6329  | 8.3761  | 8.7898  | 8.8996  | 8.2256  | 8.3795  | 8.9191  | 9.0072  | 1.0072 | -0.1404 | 0.4474 | 0.3493 |
| Neff |  | _EEPEAKS[Phospho (STY)]PVKS[Phospho (STY)]PEAK_3 | #N/A                | 6.1529  | 5.6198  | 5.5565  | 6.3613  | 5.1081  | 5.5376  | 5.6978  | 5.3100  | 5.6079  | 5.6427  | 1.0284 | 0.0404  | 0.5335 | 0.2729 |
| Neff |  | _HMHDSYSDTIQLENELR_3                             | #N/A                | 5.9856  | 6.0746  | 5.2480  | 6.6018  | 5.1568  | 5.4560  | 5.5380  | 5.5885  | 6.0732  | 0.9817  | 0.0267 | 0.7301  | 0.1366 | 0.1679 |
| Neff |  | _VQS[Phospho (STY)]PSSGR_2                       | P08553_S30_M1_Nefm  | 11.4175 | 11.5093 | 11.7964 | 11.8630 | 11.4327 | 11.5496 | 11.5596 | 11.2535 | 11.3636 | 11.7386 | 1.0101 | 0.0145  | 0.3939 | 0.4046 |
| Neff |  | _SIELESVR_2                                      | #N/A                | 6.5096  | 5.3477  | 6.5043  | 6.9368  | 7.0745  | 7.1159  | 5.5298  | 6.8752  | 7.4035  | 7.5906  | 0.9608 | -0.0576 | 0.6056 | 0.2178 |
| Neff |  | _VKEAEIEGGS[Phospho (STY)]IEEGSDR_3              | #N/A                | 4.7726  | 4.6916  | 5.7858  | 5.7693  | 5.8845  | 5.0377  | 4.6147  | 4.6536  | 5.1273  | 4.8924  | 1.1040 | 0.1428  | 0.1285 | 0.8910 |
| Neff |  | _ATLEIMVNHK_2                                    | #N/A                | 5.8607  | 5.1547  | 4.3552  | 7.4189  | 6.0341  | 3.1795  | 5.1156  | 4.3651  | 4.7987  | 5.3662  | 1.0860 | 0.1190  | 0.5972 | 0.2239 |
| Neff |  | _S[Phospho (STY)]PVVEVVK_2                       | #N/A                | 6.0692  | 5.5028  | 3.4175  | 6.2241  | 5.6858  | 5.5719  | 5.8648  | 5.5797  | 6.0651  | 5.8034  | 0.9286 | -0.1069 | 0.4508 | 0.3460 |
| Neff |  | _SNEKEQLQLNDR_2                                  | #N/A                | 8.2294  | 8.6903  | 9.0706  | 9.1633  | 8.6493  | 8.6243  | 8.5662  | 8.4090  | 8.6432  | 8.7349  | 1.0177 | 0.0253  | 0.4259 | 0.3707 |
| Neff |  | _EEKGVVTNGLDV[Phospho (STY)]PAEEK_3              | #N/A                | 3.3418  | 7.4354  | 3.5661  | 8.8470  | 7.9489  | 8.2969  | 6.7438  | 7.9524  | 6.2677  | 8.6004  | 0.8329 | -0.1637 | 0.3387 | 0.4702 |
| Neff |  | _GS[Phospho (STY)]PSTVSSYK_2                     | #N/A                | 8.5281  | 8.4481  | 8.5874  | 8.9874  | 8.6228  | 8.6868  | 8.7164  | 8.2206  | 8.3631  | 8.7192  | 1.0163 | 0.0223  | 0.3452 | 0.4619 |
| Neff |  | _AEIEGGS[Phospho (STY)]IEEGSDRPSQEK_3            | #N/A                | 4.8311  | 5.6171  | 5.5050  | 7.0640  | 5.5788  | 5.5103  | 5.6152  | 5.7412  | 5.8915  | 5.6024  | 1.0032 | 0.0047  | 0.9621 | 0.0168 |
| Neff |  | _EIAEYR_2                                        | #N/A                | 5.0228  | 5.7319  | 5.3278  | 5.7260  | 5.5192  | 5.5476  | 3.0947  | 3.2376  | 5.3162  | 4.9073  | 1.3238 | 0.0407  | 0.0214 | 1.6690 |
| Neff |  | _GTKES[Phospho (STY)]LER_2                       | P08553_S338_M1_Nefm | 4.0217  | 6.0768  | 3.2077  | 3.7104  | 3.0927  | 3.5319  | 5.9685  | 4.4081  | 4.0567  | 3.6774  | 0.8702 | -0.2005 | 0.4178 | 0.3790 |
| Neff |  | _ITS[Phospho (STY)]EGDGAATK_2                    | P08553_S795_M1_Nefm | 4.1152  | 3.3707  | 4.8392  | 3.3927  |         |         |         |         |         |         |        |         |        |        |



|        |                                                                        |                        |         |         |         |         |         |         |         |         |         |         |         |         |        |        |
|--------|------------------------------------------------------------------------|------------------------|---------|---------|---------|---------|---------|---------|---------|---------|---------|---------|---------|---------|--------|--------|
| Nefm   | _SVTVTKQVEHEETFEK_3                                                    | #N/A                   | 7.5389  | 8.1631  | 9.8360  | 5.0141  | 8.0262  | 8.0111  | 7.8301  | 5.0761  | 7.1152  | 7.2465  | 1.1391  | 0.1878  | 0.3368 | 0.4726 |
| Nefm   | _AEEEGGS[Phospho (STY)]EEEGSGRSPOESK_3                                 | #N/A                   | 3.7590  | 3.7769  | 3.4926  | 3.4010  | 3.6736  | 3.7989  | 3.7569  | 3.2478  | 3.9974  | 3.4846  | 1.0079  | 0.0114  | 0.8572 | 0.0669 |
| Nefm   | _EKAEEGGS[Phospho (STY)]EEEGSGRSPOESK_3                                | #N/A                   | 2.7194  | 3.9107  | 4.1697  | 4.1266  | 3.7320  | 4.0086  | 4.3693  | 3.5550  | 3.4209  | 3.9597  | 0.9873  | -0.0184 | 0.8850 | 0.0530 |
| Nefm   | _SQLEC[Carbamidomethyl (C)]HSDQMHHQAEWFK_3                             | #N/A                   | 3.6473  | 4.0025  | 4.2963  | 3.5832  | 3.4174  | 3.3853  | 3.5618  | 4.0584  | 4.0331  | 3.3915  | 0.9896  | -0.0151 | 0.8665 | 0.0622 |
| Nefm   | _DTEKSPQOEK_3                                                          | #N/A                   | 3.6811  | 2.5451  | 4.3679  | 3.3697  | 2.8067  | 3.4219  | 3.0844  | 3.2480  | 4.3974  | 3.3367  | 1.0044  | 0.0063  | 0.9658 | 0.0151 |
| Gna12  | _LFDSIC[Carbamidomethyl (C)]NHK_2                                      | #N/A                   | 8.5569  | 8.8507  | 8.7793  | 8.3256  | 8.0986  | 8.0641  | 9.1734  | 8.5130  | 8.2047  | 8.4040  | 0.9851  | -0.0217 | 0.6070 | 0.2168 |
| Gna12  | _JACSOYPTQGVLR_2                                                       | #N/A                   | 7.9961  | 8.1085  | 8.2059  | 7.8184  | 7.5033  | 7.9841  | 8.2412  | 7.8100  | 7.9208  | 8.0200  | 0.9923  | -0.0112 | 0.6830 | 0.1656 |
| Gna12  | _EYQLNDSAAAYLNDLR_2                                                    | #N/A                   | 5.5559  | 5.2679  | 5.8677  | 5.9383  | 4.6884  | 5.7269  | 5.9926  | 6.2393  | 5.6720  | 5.6634  | 0.9348  | -0.0973 | 0.1817 | 0.7406 |
| Gna12  | _AVVYSHTQSM[Oxidation (M)]AVK_2                                        | #N/A                   | 4.9363  | 3.3659  | 5.6087  | 4.6532  | 2.3908  | 4.0187  | 4.1099  | 4.3502  | 3.9321  | 4.2591  | 0.9963  | -0.0054 | 0.9798 | 0.0088 |
| Gna12  | _NLREDEKX_2                                                            | #N/A                   | 5.6363  | 5.6948  | 4.7171  | 5.7405  | 6.6264  | 5.5491  | 5.5342  | 5.9767  | 5.1598  | 5.0388  | 1.0430  | 0.0607  | 0.5261 | 0.2790 |
| Gna12  | _NLNKDC[Carbamidomethyl (C)]GLF_2                                      | #N/A                   | 5.6955  | 5.3222  | 5.6495  | 4.9865  | 4.5292  | 5.2052  | 5.3612  | 5.1109  | 4.9661  | 4.8500  | 1.0314  | 0.0446  | 0.5240 | 0.2806 |
| Gna12  | _M[Oxidation (M)]FDVGGQR_2                                             | #N/A                   | 6.5675  | 6.5110  | 5.8067  | 6.7208  | 5.7940  | 4.9320  | 6.1053  | 6.3307  | 6.2621  | 6.1912  | 0.9732  | -0.0392 | 0.6447 | 0.1906 |
| Gna12  | _YDEAASYGSK_2                                                          | #N/A                   | 5.4520  | 3.5803  | 5.3818  | 3.3345  | 5.6118  | 5.6781  | 5.4241  | 5.3374  | 5.1997  | 5.3442  | 0.9086  | -0.1382 | 0.4036 | 0.3941 |
| Gna12  | _SREYQLNDSAAAYLNDLR_3                                                  | #N/A                   | 5.2541  | 5.3673  | 5.3295  | 3.2108  | 4.9308  | 3.5475  | 5.9105  | 5.5474  | 4.0894  | 4.6607  | 0.9118  | -0.1331 | 0.4743 | 0.3239 |
| Gna12  | _IHEDGYSEEC[Carbamidomethyl (C)]R_3                                    | #N/A                   | 4.8253  | 3.4493  | 4.0080  | 3.5517  | 2.5456  | 3.3392  | 3.1100  | 4.3834  | 2.0347  | 3.9981  | 1.0705  | 0.0982  | 0.6846 | 0.1646 |
| Gna12  | _TTGIVETHFTFK_2                                                        | #N/A                   | 7.2903  | 6.9176  | 7.2765  | 6.3717  | 6.7911  | 6.8595  | 6.8822  | 6.8707  | 6.9153  | 6.7463  | 1.0094  | 0.0134  | 0.7265 | 0.1388 |
| Gna12  | _MFDVGGQRS[Phospho (STY)]ER_2                                          | P08752_S207_M1_Gna12   | 5.0597  | 4.3711  | 3.3485  | 4.0445  | 4.2594  | 3.8660  | 3.7592  | 4.0740  | 3.7226  | 4.0115  | 1.0685  | 0.0955  | 0.3988 | 0.3992 |
| Gna12  | _QLFALSC[Carbamidomethyl (C)]AAEAGM[Oxidation (M)]LPEDLSGVIR_3         | #N/A                   | 1.8542  | 3.0477  | 4.4536  | 3.8671  | 2.9360  | 3.6886  | 3.5818  | 4.2514  | 3.8999  | 3.8341  | 0.8500  | -0.2345 | 0.2532 | 0.5965 |
| Gna12  | _LVADHGVQAC[Carbamidomethyl (C)]JFGR_3                                 | #N/A                   | 3.6590  | 4.3480  | 4.3906  | 3.6292  | 4.0633  | 3.4325  | 3.5939  | 3.1868  | 3.9506  | 3.3595  | 1.1129  | 0.1543  | 0.1418 | 0.8485 |
| Gna12  | _EYTHFTC[Carbamidomethyl (C)]ATDTK_3                                   | #N/A                   | 3.6225  | 3.6710  | 3.7412  | 3.8800  | 3.5593  | 3.9168  | 3.8099  | 3.8122  | 3.8196  | 4.3322  | 0.9463  | -0.0796 | 0.1306 | 0.8841 |
| Gna12  | _AMGNLQIDFADPOR_2                                                      | #N/A                   | 3.2372  | 3.9935  | 4.4718  | 4.4221  | 3.8818  | 4.2436  | 4.1368  | 3.6964  | 3.3450  | 3.6928  | 1.0871  | 0.1205  | 0.2584 | 0.5877 |
| Gna12  | _NHQFVDADVDWK_2                                                        | #N/A                   | 3.3800  | 3.9624  | 3.1137  | 4.1583  | 4.0245  | 4.1009  | 4.3065  | 4.3437  | 3.1420  | 3.8355  | 0.9701  | -0.0439 | 0.7185 | 0.1436 |
| Polr2a | _YSPTS[Phospho (STY)]PTYSPTTK_2                                        | P08775_S187b_M1_Polr2a | 3.9561  | 3.2115  | 3.6898  | 3.2335  | 3.0998  | 3.5248  | 3.3818  | 3.7676  | 4.0667  | 4.4117  | 0.8837  | -0.1784 | 0.0968 | 1.0139 |
| Polr2a | _YSPTS[Phospho (STY)]PTYSPTSPK_2                                       | P08775_S1913_M1_Polr2a | 4.0089  | 7.2905  | 7.7497  | 4.0435  | 6.2042  | 6.0931  | 4.1918  | 7.1713  | 4.1037  | 3.7208  | 1.2296  | 0.2982  | 0.3137 | 0.5035 |
| Polr2a | _YTPSPSPSPS[Phospho (STY)]PEYTPASPK_2                                  | P08775_S1850_M1_Polr2a | 3.1219  | 4.1043  | 3.8087  | 4.3113  | 3.9926  | 4.1328  | 4.0260  | 3.8072  | 3.4557  | 4.2783  | 1.0052  | 0.0074  | 0.9391 | 0.0740 |
| P4hb   | _EADDVNWUK_2                                                           | #N/A                   | 5.9567  | 6.0496  | 5.4730  | 6.1611  | 6.3089  | 5.9648  | 5.8366  | 6.5354  | 6.1850  | 5.8507  | 0.9810  | -0.0277 | 0.5680 | 0.2456 |
| P4hb   | _NNEGETTK_2                                                            | #N/A                   | 6.1967  | 5.9193  | 6.4090  | 6.6276  | 6.2175  | 6.1606  | 6.5791  | 6.6856  | 0.9797  |         |         | -0.0296 | 0.4479 | 0.3488 |
| P4hb   | _TGPAATLSDTAAEASLVSSVETGVGFK_3                                         | #N/A                   | 3.2077  | 3.7220  | 4.7602  | 5.3370  | 2.4944  | 4.4230  | 3.2272  | 3.6667  | 3.3228  | 3.7645  | 1.1417  | 0.1912  | 0.3906 | 0.4083 |
| P4hb   | _TVIDYNGER_2                                                           | #N/A                   | 5.1993  | 6.6394  | 6.7176  | 7.0541  | 7.0370  | 4.9473  | 6.8474  | 6.1137  | 6.0556  | 6.5183  | 0.9815  | -0.0269 | 0.8303 | 0.0860 |
| P4hb   | _LIFRIDSHTQNR_3                                                        | #N/A                   | 3.1999  | 4.0263  | 3.8867  | 5.0898  | 3.9146  | 4.2109  | 4.1040  | 3.7291  | 3.3777  | 4.3563  | 1.0419  | 0.0591  | 0.6590 | 0.1811 |
| Cck    | _NLQLDSPSHR_2                                                          | #N/A                   | 6.4551  | 6.7597  | 6.8385  | 4.3493  | 7.3398  | 6.7674  | 6.0944  | 6.2322  | 6.5168  | 6.8776  | 0.9981  | -0.0027 | 0.9833 | 0.0073 |
| Alpl   | _TYNTNAQVPDS[Phospho (STY)]AGTATAYC[Carbamidomethyl (C)]GVK_3          | P09242_S110_M1_Alpl    | 3.3743  | 3.3864  | 4.2857  | 5.3181  | 3.2490  | 3.2310  | 3.7960  | 3.2572  | 4.0297  | 3.3751  | 1.0534  | 0.0750  | 0.6803 | 0.1673 |
| Nci    | _NDLAVVDVR_2                                                           | #N/A                   | 5.4015  | 4.8067  | 6.1008  | 4.8128  | 5.2976  | 5.9973  | 5.1346  | 5.3894  | 5.8886  | 5.9799  | 0.9919  | -0.0118 | 0.8902 | 0.0505 |
| Nci    | _LELGGNSR_2                                                            | #N/A                   | 6.2434  | 6.3218  | 5.8580  | 6.1841  | 6.3086  | 5.3382  | 6.0277  | 6.2933  | 6.3524  | 5.6624  | 0.9932  | -0.0099 | 0.8624 | 0.0643 |
| Nci    | _ETLEEVEFK_2                                                           | #N/A                   | 5.8970  | 5.1993  | 5.7382  | 5.6560  | 5.5496  | 5.7831  | 5.7179  | 5.7674  | 5.0135  | 0.9449  | -0.0818 | 0.5140  | 0.2890 | 0.4061 |
| Nci    | _VEGSEPTFFNLGNLNPKN_2                                                  | #N/A                   | 3.4276  | 3.6137  | 4.9513  | 4.2643  | 3.3369  | 2.9857  | 4.1703  | 3.4526  | 2.2199  | 3.4499  | 1.1324  | 0.1794  | 0.3924 | 0.4063 |
| Nci    | _NLS[Phospho (STY)]NITEDELK_2                                          | P09405_S403_M1_Nci     | 3.7386  | 3.0429  | 4.0332  | 3.5769  | 2.8643  | 3.3644  | 6.6033  | 5.6791  | 3.7233  | 3.2542  | 0.7138  | -0.4865 | 0.0724 | 1.1401 |
| Nci    | _GLS[Phospho (STY)]OETTEULK_2                                          | P09405_S577_M1_Nci     | 3.9867  | 3.2421  | 3.7204  | 3.6726  | 3.1304  | 3.4942  | 7.1654  | 4.4458  | 6.1830  | 3.6396  | 0.6608  | -0.5976 | 0.0241 | 1.6172 |
| Pgk1   | _NNGITNQR_2                                                            | #N/A                   | 11.6793 | 12.1436 | 12.0743 | 12.9317 | 12.3335 | 12.1130 | 12.0703 | 12.1152 | 12.0389 | 12.1929 | 0.0185  | 0.4836  | 0.3164 | 0.6594 |
| Pgk1   | _LTLKLDVK_2                                                            | #N/A                   | 8.2153  | 8.9488  | 8.8369  | 8.9785  | 8.8694  | 8.6581  | 8.6885  | 8.4873  | 8.4124  | 8.5978  | 1.0239  | 0.0341  | 0.2191 | 0.6594 |
| Pgk1   | _PHVEEGKGK_2                                                           | #N/A                   | 8.5327  | 7.7703  | 7.9591  | 7.8817  | 8.4969  | 8.6446  | 8.3260  | 8.0283  | 8.3985  | 8.6496  | 0.9837  | -0.0238 | 0.5538 | 0.2567 |
| Pgk1   | _TLPVDFVDADKFDENAK_2                                                   | #N/A                   | 7.0801  | 7.4762  | 8.0472  | 7.9557  | 7.5254  | 7.7002  | 8.0512  | 7.3571  | 7.4728  | 7.2774  | 1.0092  | 0.0132  | 0.7669 | 0.1152 |
| Pgk1   | _LSLEPVAELK_2                                                          | #N/A                   | 8.8124  | 8.3399  | 8.0247  | 8.6829  | 8.5536  | 8.3176  | 8.6410  | 8.4643  | 8.3552  | 8.6133  | 0.9926  | -0.0108 | 0.6935 | 0.1589 |
| Pgk1   | _GC[Carbamidomethyl (C)]TIGGGGTATC[Carbamidomethyl (C)]CAK_2           | #N/A                   | 7.7417  | 8.0930  | 8.1364  | 9.1533  | 7.9303  | 7.5253  | 7.7210  | 8.1168  | 7.8029  | 7.8129  | 1.0298  | 0.0423  | 0.4527 | 0.3442 |
| Pgk1   | _LGDVYNDAFGTAHR_3                                                      | #N/A                   | 7.3991  | 6.8891  | 5.9677  | 6.8722  | 6.8953  | 6.7849  | 7.1640  | 6.7788  | 6.9617  | 6.9602  | 0.9763  | -0.0345 | 0.5194 | 0.2845 |
| Pgk1   | _FC[Carbamidomethyl (C)]LONGAK_2                                       | #N/A                   | 7.8619  | 7.9142  | 7.9290  | 7.9679  | 8.3888  | 7.6094  | 7.2769  | 7.9180  | 7.7675  | 7.9674  | 1.0293  | 0.0416  | 0.2247 | 0.6485 |
| Pgk1   | _FHVEEKGK_2                                                            | #N/A                   | 7.8948  | 7.3870  | 6.9265  | 7.5573  | 7.9844  | 7.6277  | 7.6843  | 7.6906  | 7.7160  | 7.5911  | 0.9860  | -0.0204 | 0.5980 | 0.2233 |
| Pgk1   | _KYAEAVGR_2                                                            | #N/A                   | 7.3218  | 6.8880  | 7.2443  | 6.9700  | 7.5019  | 7.1515  | 7.2482  | 6.7830  | 6.9486  | 7.1561  | 1.0207  | 0.0296  | 0.3364 | 0.4732 |
| Pgk1   | _QLQNNM[Oxidation (M)]LDK_2                                            | #N/A                   | 6.4710  | 6.9750  | 6.3460  | 6.5993  | 6.8745  | 6.5510  | 6.9962  | 6.9714  | 7.1298  | 6.7770  | 0.9523  | -0.0705 | 0.0403 | 1.3947 |
| Pgk1   | _ELNYFAK_2                                                             | #N/A                   | 5.9788  | 5.0983  | 7.1124  | 5.3085  | 5.9757  | 5.6162  | 4.1722  | 6.7151  | 6.4483  | 6.1088  | 0.9978  | -0.0031 | 0.9831 | 0.0074 |
| Pgk1   | _VNEM[Oxidation (M)]GGGM[Oxidation (M)]AFTFLK_2                        | #N/A                   | 6.8294  | 6.0544  | 4.3338  | 5.9731  | 6.7597  | 6.7274  | 6.9837  | 6.4246  | 6.3238  | 7.0268  | 0.9138  | -0.1301 | 0.2867 | 0.5426 |
| Pgk1   | _AEPAKIDAFR_2                                                          | #N/A                   | 5.7509  | 6.5450  | 7.5143  | 6.3272  | 6.1427  | 6.5943  | 6.8993  | 5.2975  | 6.2183  | 5.6914  | 1.0751  | 0.1044  | 0.2998 | 0.5231 |
| Pgk1   | _VLNNM[Oxidation (M)]EIGTSYDEEGAK_2                                    | #N/A                   | 6.4776  | 6.2137  | 6.2555  | 6.8039  | 6.4534  | 5.9004  | 6.5822  | 5.9330  | 6.0981  | 6.3042  | 1.0195  | 0.0278  | 0.5421 | 0.2659 |
| Pgk1   | _SLM[Oxidation (M)]DEVVK_2                                             | #N/A                   | 7.0897  | 6.5120  | 6.6543  | 7.2426  | 7.1001  | 6.7982  | 5.7979  | 6.9138  | 6.8046  | 6.9239  | 1.0438  | 0.0618  | 0.2988 | 0.5246 |
| Pgk1   | _VDNFVNMK_2                                                            | #N/A                   | 6.6998  | 4.6632  | 3.2568  | 7.1962  | 6.4246  | 3.0321  | 3.4741  | 3.4901  | 4.3535  | 5.1854  | 1.2633  | 0.3372  | 0.3006 | 0.5230 |
| Pgk1   | _ALESPPFLALGGAK_3                                                      | #N/A                   | 6.6743  | 7.2605  | 7.5739  | 7.8124  | 7.2094  | 7.0404  | 7.1799  | 7.4948  | 7.3485  | 7.5731  | 0.9815  | -0.0270 | 0.5411 | 0.2667 |
| Pgk1   | _AHSSM[Oxidation (M)]GVNLPQK_2                                         | #N/A                   | 6.8977  | 6.8886  | 6.9969  | 7.1284  | 7.2516  | 7.2679  | 6.7082  | 6.7539  | 7.0225  | 7.1760  | 1.0227  | 0.0323  | 0.2396 | 0.6206 |
| Pgk1   | _DC[Carbamidomethyl (C)]VGPEVNAC[Carbamidomethyl (C)]JANPAAGTVILENLR_3 | #N/A                   | 4.5052  | 3.3422  | 4.3768  | 4.6918  | 5.3956  | 3.4129  | 3.0933  | 3.2390  | 4.3884  | 3.3456  | 1.2192  | 0.2859  | 0.1359 | 0.8667 |
| Pgk1   | _SHVSTGGGASLELEGK_3                                                    | #N/A                   | 5.5655  | 4.6442  | 3.8783  | 5.3496  | 3.8180  | 5.1046  | 5.4603  | 3.7376  | 3.5787  | 5.5543  | 1.0314  | 0.0446  | 0.8067 | 0.0933 |
| Pgk1   | _WNTKEDKSHVSTGGGASLELEGK_3                                             | #N/A                   | 3.3330  | 4.0094  | 4.5675  | 4.1113  | 3.9776  | 4.1479  | 4.2596  | 4.3907  | 3.1889  | 3.2954  | 1.0636  | 0.0890  | 0.4754 | 0.3229 |
| Pgk1   | _QLQVWNGPVGEWEAFAR_2                                                   | #N/A                   | 3.2645  | 3.9617  | 3.9513  | 4.4540  | 3.8910  | 4.2755  | 4.1686  | 3.6645  | 3.3131  | 4.4210  | 1.0191  | 0.0274  | 0.8013 | 0.0962 |
| Fth1   | _Acetyl (Protein N-term)[ITAS[Phospho (STY)]PSQVR_2                    | P09522_S5_M1_Fth1      | 11.1216 | 11.3438 | 11.3896 | 11.7922 | 11.2010 | 11.1980 | 11.4745 | 10.9850 | 11.1419 | 11.2678 | 1.0110  | 0.0158  | 0.4285 | 0.3681 |
| Fth1   | _QNHQDAEAANR_3                                                         | #N/A                   | 3.8989  | 3.1544  | 3.6326  | 3.1764  | 3.0427  | 3.5820  | 3.3246  | 3.8248  | 4.1239  | 4.3545  | 0.8739  | -0.1944 | 0.0807 | 1.0930 |
| Sod2   | _GELLEAKR_2                                                            | #N/A                   | 9.9577  | 10.3127 | 10.4428 | 10.4956 | 10.4657 | 10.3174 | 10.1358 | 10.1068 | 10.0112 |         |         |         |        |        |



|                    |                                                                 |                       |         |         |         |         |         |         |         |         |         |         |         |         |        |        |
|--------------------|-----------------------------------------------------------------|-----------------------|---------|---------|---------|---------|---------|---------|---------|---------|---------|---------|---------|---------|--------|--------|
| Lrrc4b             | _SGS[Phospho (STY)]KENVGQEQ_2                                   | POC192_5700_M1_Lrrc4b | 10.0747 | 10.0564 | 10.8888 | 10.5548 | 9.2502  | 3.8876  | 10.5768 | 10.2343 | 3.2605  | 10.1307 | 1.0664  | 0.0928  | 0.7764 | 0.1099 |
| Gpr52              | _RRANS[Phospho (STY)]C[Carbamidomethyl (C)]S[Phospho (STY)]I_2  | POCS4_5358_M2_Gpr52   | 5.9462  | 6.3168  | 7.1874  | 6.6446  | 5.4365  | 6.1783  | 6.9553  | 6.9605  | 6.5866  | 6.0640  | 0.9463  | -0.0796 | 0.3356 | 0.4741 |
| Igf11              | _GSS[Phospho (STY)]PQVAPR_2                                     | POC673_5378_M1_Igf11  | 9.9322  | 10.1707 | 10.6730 | 10.1147 | 9.1665  | 9.9254  | 10.5025 | 10.1218 | 9.8449  | 9.9502  | 0.9893  | -0.0155 | 0.7052 | 0.1517 |
| Wipf3              | _AQLV[S[Phospho (STY)]PPAPPTK_2                                 | POC710_5211_M1_Wipf3  | 12.7930 | 13.0025 | 13.4765 | 13.3680 | 12.4844 | 12.8472 | 13.2971 | 12.7209 | 12.6768 | 12.9873 | 1.0058  | 0.0083  | 0.7443 | 0.1282 |
|                    | _TAVAPPPPLGANNSSGET[Phospho (STY)]PPPLPPK_3                     | POC710_7338_M1_Wipf3  | 3.2956  | 4.0519  | 4.5301  | 4.3637  | 3.9402  | 4.1853  | 4.0784  | 3.7547  | 3.4003  | 4.3307  | 1.0435  | 0.0614  | 0.5498 | 0.2598 |
| Clec2l             | _SGS[Phospho (STY)]GVGSGTWK_2                                   | POC7M0_547_M1_Clec2l  | 7.9928  | 7.1109  | 8.4211  | 8.4096  | 6.1427  | 6.8259  | 8.8385  | 8.4251  | 7.0974  | 7.2082  | 0.9485  | -0.0762 | 0.5091 | 0.2932 |
| Clec2l             | _S[Phospho (STY)]PAEAEAR_2                                      | #N/A                  | 9.9249  | 9.3917  | 9.6155  | 9.4095  | 8.3844  | 8.8881  | 9.8975  | 9.8324  | 8.9917  | 9.5236  | 0.9694  | -0.0448 | 0.3944 | 0.4041 |
| Clec2l             | _PRS[Phospho (STY)]PAEAEAR_2                                    | #N/A                  | 7.6497  | 7.7705  | 7.8919  | 7.5748  | 7.0443  | 7.6509  | 8.4293  | 8.0126  | 7.6729  | 9.9481  | 0.9481  | -0.0769 | 0.0645 | 1.1903 |
| Clec2l             | _PAPAAPRRPS[Phospho (STY)]PAEAEAR_3                             | #N/A                  | 8.0798  | 8.8299  | 10.2807 | 8.5283  | 7.9192  | 8.7743  | 8.8779  | 9.0778  | 8.4310  | 8.4824  | 1.0021  | 0.0030  | 0.9687 | 0.0138 |
|                    | _DTTEDS[Phospho (STY)]TEDDKRR_3                                 | #N/A                  | 7.4008  | 5.1205  | 7.7567  | 7.3833  | 7.4353  | 5.1168  | 6.6812  | 7.2894  | 7.0850  | 1.0140  | 0.0201  | 0.9001  | 0.0457 | 0.0457 |
|                    | _DTTEDS[Phospho (STY)]TEDDKR_2                                  | #N/A                  | 3.5883  | 3.7541  | 3.3220  | 4.3666  | 4.2329  | 4.1541  | 4.5149  | 4.1354  | 4.4344  | 4.0439  | 0.9115  | -0.1338 | 0.1354 | 0.8683 |
| Ubb;Ubc;Rps27a;Uba | _TLSDYNIQK_2                                                    | #N/A                  | 9.6378  | 9.6343  | 9.6990  | 9.9010  | 10.1502 | 9.8688  | 9.8763  | 9.7357  | 9.7807  | 9.7354  | 1.0034  | 0.0049  | 0.7613 | 0.1184 |
| Ubb;Ubc;Rps27a;Uba | _ESTLHLVLR_2                                                    | #N/A                  | 9.6879  | 9.7428  | 10.1587 | 9.9675  | 10.3636 | 10.0543 | 10.1212 | 10.0176 | 10.3104 | 9.9340  | 0.9901  | -0.0144 | 0.5101 | 0.2924 |
| Ubb;Ubc;Rps27a;Uba | _TITLEVEPSDIENVK_2                                              | #N/A                  | 9.1743  | 9.1189  | 9.4874  | 9.5252  | 9.7161  | 9.4730  | 9.4424  | 9.2143  | 9.2861  | 9.2001  | 1.0140  | 0.0201  | 0.3238 | 0.4898 |
| Ubb;Ubc;Rps27a;Uba | _QLEDGRTL[S[Phospho (STY)]DYNIQK_3                              | #N/A                  | 3.6176  | 3.3747  | 4.1284  | 3.2938  | 3.6437  | 3.3143  | 4.1154  | 3.4220  | 4.3533  | 3.2547  | 0.9408  | -0.0881 | 0.4213 | 0.3754 |
| Nrxn1              | _FNVGTDDIAIESNAINDGK_2                                          | #N/A                  | 3.4599  | 5.8355  | 4.1467  | 3.1485  | 3.6546  | 2.9700  | 4.3640  | 4.2204  | 3.1177  | 5.1690  | 0.9174  | -0.1244 | 0.5952 | 0.2523 |
| Nrxn1              | _DEGS[Phospho (STY)]YHVDSR_2                                    | POD097_5423_M1_Nrxn1  | 3.4742  | 4.2305  | 3.2079  | 4.2525  | 4.1188  | 4.0067  | 3.8998  | 4.2495  | 3.0477  | 3.9298  | 1.0265  | 0.0377  | 0.7485 | 0.1258 |
| Nrxn1              | _YPAIGNNONER_2                                                  | #N/A                  | 4.3187  | 4.4083  | 4.6190  | 4.0073  | 2.7958  | 3.8288  | 4.5986  | 4.4977  | 3.7597  | 4.8110  | 0.9048  | -0.1443 | 0.2995 | 0.5236 |
| Nrxn1              | _NYS[Phospho (STY)]NSAQSGVAVK_2                                 | POD097_5434_M1_Nrxn1  | 4.0171  | 3.3508  | 3.2031  | 3.7058  | 3.1428  | 4.1937  | 4.2294  | 3.8133  | 4.0663  | 3.8065  | 0.9053  | -0.1435 | 0.1532 | 0.8147 |
| Ndufb1             | _TLFQLR_2                                                       | #N/A                  | 7.1186  | 7.4870  | 7.3052  | 6.8065  | 6.9284  | 7.3748  | 6.7969  | 7.4075  | 7.0057  | 7.1037  | 1.0129  | 0.0186  | 0.6020 | 0.2204 |
| Ndufb1             | _ELRPNEEVTWK_2                                                  | #N/A                  | 4.7999  | 4.8775  | 5.1726  | 5.2061  | 5.7084  | 5.1174  | 4.6271  | 5.0453  | 4.7301  | 5.2113  | 1.0497  | 0.0699  | 0.2483 | 0.6049 |
| Calm1;Calm2;Calm3  | _EAFSLFDK_2                                                     | #N/A                  | 6.7835  | 6.3606  | 4.3376  | 6.1725  | 7.1594  | 5.8276  | 5.7185  | 5.8136  | 6.3149  | 0.9991  | -0.0012 | 0.9923  | 0.0034 | 0.0034 |
| Calm1;Calm2;Calm3  | _EAFSLFDKGGDGTITTK_3                                            | #N/A                  | 10.5984 | 10.3415 | 10.3234 | 10.8804 | 11.6011 | 11.1057 | 10.5990 | 10.2062 | 10.9187 | 10.9660 | 1.0127  | 0.0183  | 0.6492 | 0.1876 |
| Calm1;Calm2;Calm3  | _ELGTVMIR_2                                                     | #N/A                  | 8.4477  | 6.9704  | 3.5794  | 9.0751  | 8.8166  | 4.4115  | 5.3629  | 6.3599  | 6.9805  | 7.3561  | 1.0566  | 0.0794  | 0.7767 | 0.1098 |
| Calm1;Calm2;Calm3  | _VFDKDGNGVSAELR_3                                               | #N/A                  | 6.6940  | 8.5475  | 8.4445  | 9.0541  | 9.3916  | 8.8476  | 8.7981  | 8.6094  | 8.7004  | 8.7384  | 1.0136  | 0.0195  | 0.5325 | 0.2737 |
| Calm1;Calm2;Calm3  | _DGNVGSAAELR_2                                                  | #N/A                  | 6.6028  | 3.3860  | 3.8944  | 6.4409  | 4.9281  | 5.1376  | 6.5336  | 6.2487  | 6.5624  | 7.1808  | 0.7838  | -0.3888 | 0.0508 | 1.2945 |
| Calm1;Calm2;Calm3  | _M[Oxidation (M)]KDTDSEEEIREAFR_3                               | #N/A                  | 8.2193  | 8.3552  | 8.2761  | 9.2797  | 9.1044  | 8.2993  | 8.1506  | 8.2362  | 8.4529  | 8.5326  | 1.0295  | 0.0419  | 0.3564 | 0.4480 |
| Calm1;Calm2;Calm3  | _DTDSEEEIREAFR_2                                                | #N/A                  | 4.9684  | 5.6167  | 5.1424  | 6.1386  | 6.5625  | 6.1758  | 6.0563  | 6.0256  | 6.0931  | 6.4235  | 0.9378  | -0.0926 | 0.2801 | 0.5526 |
| Calm1;Calm2;Calm3  | _M[Oxidation (M)]KDTDSEER_2                                     | #N/A                  | 5.6643  | 4.8585  | 4.8326  | 6.1705  | 5.8048  | 4.8358  | 4.6048  | 4.7289  | 4.7810  | 5.1222  | 1.1153  | 0.1575  | 0.1154 | 0.9377 |
| Calm1;Calm2;Calm3  | _Acetyl (Protein N-term)ADQLTEEQAEKFAFSLFKGGDGTITTK_3           | #N/A                  | 3.6036  | 3.2001  | 3.3373  | 5.2866  | 3.2347  | 1.6606  | 3.7704  | 2.7812  | 3.7113  | 2.2194  | 1.0854  | 0.1183  | 0.6974 | 0.1565 |
| Calm1;Calm2;Calm3  | _Acetyl (Protein N-term)ADQLTEEQAEFK_2                          | #N/A                  | 4.6794  | 3.9272  | 3.9858  | 12.1123 | 3.9255  | 4.3099  | 4.2031  | 11.5594 | 3.2786  | 2.9546  | 0.9984  | -0.0023 | 0.9970 | 0.0013 |
| Calm1;Calm2;Calm3  | _DTDSEER_2                                                      | #N/A                  | 2.9810  | 3.7373  | 4.2155  | 3.1775  | 3.6256  | 2.9991  | 4.3930  | 3.4401  | 3.0887  | 5.2184  | 0.8565  | -0.2235 | 0.2389 | 0.6219 |
| Eef1a1             | _LGGDTPVPGR_2                                                   | #N/A                  | 10.5656 | 10.6423 | 10.8153 | 10.3027 | 10.5158 | 10.3522 | 10.7363 | 10.6198 | 10.5965 | 0.9916  | -0.0122 | 0.4072  | 0.3902 | 0.3902 |
| Eef1a1             | _RYEIVK_2                                                       | #N/A                  | 8.9030  | 8.8378  | 8.9087  | 8.8893  | 9.0096  | 8.9901  | 8.7249  | 8.9457  | 8.8505  | 8.8407  | 1.0094  | 0.0134  | 0.1281 | 0.8926 |
| Eef1a1             | _PLLDQVYK_2                                                     | #N/A                  | 8.9691  | 8.8623  | 8.5126  | 8.5220  | 8.9360  | 8.8428  | 8.5930  | 8.8235  | 8.7871  | 8.7429  | 0.9974  | -0.0037 | 0.8613 | 0.0649 |
| Eef1a1             | _QLQGVNKK_2                                                     | #N/A                  | 8.5651  | 8.8980  | 8.8730  | 8.9639  | 8.4787  | 8.5671  | 8.5753  | 8.9376  | 8.8588  | 8.5362  | 0.9997  | -0.0004 | 0.9846 | 0.0068 |
| Eef1a1             | _QTVAVGVK_2                                                     | #N/A                  | 8.8199  | 8.5874  | 8.5361  | 8.6216  | 8.6967  | 8.8428  | 8.2497  | 8.6036  | 8.8257  | 8.7207  | 1.0098  | 0.0141  | 0.4958 | 0.3047 |
| Eef1a1             | _STTGHLYK_2                                                     | #N/A                  | 8.0521  | 8.6917  | 8.5239  | 8.6766  | 8.9531  | 8.5767  | 8.3941  | 8.7156  | 8.8644  | 8.3963  | 0.9984  | -0.0023 | 0.9410 | 0.0264 |
| Eef1a1             | _TIKFEK_2                                                       | #N/A                  | 7.4823  | 7.5650  | 7.6491  | 7.7081  | 7.8768  | 7.6905  | 7.2955  | 7.6850  | 7.7679  | 7.3855  | 1.0201  | 0.0288  | 0.1869 | 0.7283 |
| Eef1a1             | _EHALLAYTLGVK_2                                                 | #N/A                  | 6.7695  | 6.8598  | 7.4679  | 6.4868  | 6.5665  | 6.9716  | 6.3222  | 6.4518  | 6.9116  | 6.6464  | 1.0411  | 0.0581  | 0.2247 | 0.6483 |
| Eef1a1             | _M[Oxidation (M)]DSTEPPYSQK_2                                   | #N/A                  | 7.6942  | 7.4667  | 7.3919  | 7.9123  | 7.6631  | 7.8581  | 7.3462  | 7.4495  | 7.1808  | 7.3883  | 1.0440  | 0.0622  | 0.0226 | 1.6452 |
| Eef1a1             | _VETGVLPKGM[Oxidation (M)]VVTFAPVVVTTEVK_3                      | #N/A                  | 6.1352  | 5.9038  | 6.5488  | 6.6927  | 6.3212  | 6.1862  | 5.9555  | 6.5206  | 6.4552  | 5.9019  | 1.0144  | 0.0207  | 0.6577 | 0.1820 |
| Eef1a1             | _YYVIDAPGHR_2                                                   | #N/A                  | 8.1327  | 8.5430  | 8.5809  | 8.6119  | 8.0370  | 8.6210  | 8.5337  | 8.4575  | 8.4710  | 8.2469  | 0.9993  | -0.0011 | 0.9667 | 0.0147 |
| Eef1a1             | _DGSASGTLLEALDC[Carbamidomethyl (C)]LUPTRPTDKPLR_3              | #N/A                  | 4.2663  | 3.7996  | 3.2765  | 4.1669  | 3.4257  | 2.9806  | 4.1667  | 3.7094  | 1.5996  | 3.9984  | 1.0843  | 0.1168  | 0.6128 | 0.2127 |
| Eef1a1             | _NMNITGSQLDC[Carbamidomethyl (C)]JAVLVAAGVGEFEAGISK_3           | #N/A                  | 3.9056  | 3.9888  | 4.1000  | 3.6146  | 3.8330  | 3.4179  | 3.5793  | 3.2014  | 3.9651  | 3.4326  | 1.0749  | 0.1042  | 0.1798 | 0.7452 |
| Eef1a1             | _THENVIGHVDSGK_3                                                | #N/A                  | 3.7334  | 3.6090  | 3.4671  | 4.5117  | 2.8771  | 3.7475  | 3.1591  | 4.2894  | 4.1889  | 0.9362  | -0.0951 | 0.4808  | 0.3180 | 0.3180 |
| Alad               | _DAAGS[Phospho (STY)]PAFGDR_2                                   | #N/A                  | 10.1417 | 10.1883 | 10.4653 | 10.8431 | 3.2613  | 10.2008 | 10.5584 | 10.0880 | 10.2316 | 10.2429 | 0.8933  | -0.1628 | 0.4823 | 0.3167 |
| Alad               | _DAAGS[Phospho (STY)]PAFGDR_2                                   | #N/A                  | 8.0288  | 8.3108  | 8.6844  | 8.6686  | 8.0075  | 8.3156  | 8.2882  | 8.1591  | 8.1305  | 8.0923  | 1.0203  | 0.0290  | 0.3017 | 0.5204 |
| Ctsb               | _ELQWSNC[Carbamidomethyl (C)]PTIGQR_2                           | #N/A                  | 7.6166  | 7.5913  | 7.1199  | 7.8964  | 7.8267  | 7.6429  | 7.3932  | 7.1045  | 7.1855  | 7.5996  | 1.0403  | 0.0570  | 0.1104 | 0.9571 |
| Ctsb               | _GENHC[Carbamidomethyl (C)]GISEHVAIGPR_3                        | #N/A                  | 6.9498  | 6.3485  | 5.7073  | 7.0891  | 7.3149  | 7.0336  | 6.7793  | 7.0657  | 6.4437  | 7.6623  | 0.9646  | -0.0520 | 0.5209 | 0.2833 |
| Ctsb               | _SC[Carbamidomethyl (C)]EAGVSPYKEDK_2                           | #N/A                  | 4.0708  | 3.9100  | 3.1661  | 4.7550  | 4.9103  | 4.1658  | 3.7319  | 4.8578  | 4.0029  | 3.9878  | 1.0043  | 0.0062  | 0.9631 | 0.0163 |
| Ctsb               | _DQGS[Carbamidomethyl (C)]GSC[Carbamidomethyl (C)]WAFGAVEASDR_2 | #N/A                  | 4.6537  | 5.4262  | 5.4412  | 6.1601  | 4.9322  | 5.1443  | 5.3519  | 4.8479  | 5.2364  | 4.8505  | 1.0436  | 0.0616  | 0.4595 | 0.3377 |
| Ctsb               | _NGPVEGATVSSDLTK_2                                              | #N/A                  | 3.7466  | 3.0020  | 3.4803  | 2.8966  | 2.8903  | 3.7343  | 3.1723  | 3.9771  | 4.2762  | 5.2957  | 0.7874  | -0.3448 | 0.0596 | 1.2250 |
| Ctsb               | _EIMAEYK_2                                                      | #N/A                  | 3.1478  | 3.9530  | 3.8346  | 4.3373  | 3.7744  | 3.9551  | 4.0520  | 1.1239  | 3.4298  | 4.3043  | 1.1878  | 0.2483  | 0.3468 | 0.4600 |
| Eif4a2             | _LQAEAPHVGTGR_3                                                 | #N/A                  | 6.2036  | 5.0800  | 6.4103  | 6.0463  | 6.1412  | 6.5072  | 5.1294  | 6.0849  | 6.4667  | 5.5730  | 1.0432  | 0.0610  | 0.4919 | 0.3082 |
| Eif4a2             | _ETQALVLAPTR_2                                                  | #N/A                  | 5.0338  | 5.5015  | 4.2347  | 6.1146  | 4.2121  | 4.4191  | 4.8806  | 5.7899  | 5.1485  | 5.5226  | 0.9345  | -0.0977 | 0.4181 | 0.3788 |
| MAPT               | _SGVSPFGS[Phospho (STY)]PGTGRSR_2                               | #N/A                  | 14.5840 | 14.8898 | 15.5797 | 15.4325 | 14.6664 | 14.8157 | 15.3150 | 14.6830 | 14.5246 | 14.9746 | 1.0081  | 0.0116  | 0.6453 | 0.1902 |
| MAPT               | _SKIGS[Phospho (STY)]TENLK_2                                    | #N/A                  | 9.5329  | 9.8645  | 9.9427  | 10.3526 | 9.1282  | 9.8960  | 9.4876  | 9.6684  | 9.6567  | 10.1364 | 1.0050  | 0.0072  | 0.8428 | 0.0743 |
| MAPT               | _TDHGAENVK_2                                                    | #N/A                  | 7.4549  | 7.4704  | 7.5006  | 7.5559  | 8.1970  | 7.7003  | 7.9176  | 7.3994  | 7.1673  | 7.6333  | 1.0293  | 0.0416  | 0.2239 | 0.6500 |
| MAPT               | _LDLSNVGSK_2                                                    | #N/A                  | 7.4460  | 7.5619  | 7.6820  | 7.9077  | 8.1559  | 7.7331  | 7.7101  | 7.2750  | 7.5860  | 7.9432  | 1.0156  | 0.0224  | 0.5031 | 0.2984 |
| MAPT               | _SEKLDKDR_2                                                     | #N/A                  | 7.5489  | 7.7220  | 7.9684  | 7.8523  | 8.1390  | 8.1782  | 7.7622  | 7.7838  | 7.4122  | 7.5252  | 1.0368  | 0.0522  | 0.0863 | 1.0638 |
| MAPT               | _HVPGGGVQVYKPVOLSK_3                                            | #N/A                  | 8.8430  | 9.1139  | 9.5888  | 9.4215  | 9.4234  | 8.9175  | 9.1151  | 8.9218  | 9.4478  | 9.2768  | 1.0030  | 0.0043  | 0.8809 | 0.0551 |
| MAPT               | _SEKLDK_2                                                       | #N/A                  | 6.2690  | 5.9122  | 6.0     |         |         |         |         |         |         |         |         |         |        |        |



|                    |                                                                    |                     |         |         |         |         |         |         |         |         |         |         |         |         |        |        |
|--------------------|--------------------------------------------------------------------|---------------------|---------|---------|---------|---------|---------|---------|---------|---------|---------|---------|---------|---------|--------|--------|
| MAPT               | _KLDLSNVQSK_2                                                      | #N/A                | 6.4968  | 6.5098  | 6.9842  | 7.0204  | 7.1532  | 6.4240  | 6.8088  | 6.7029  | 6.4790  | 6.6137  | 1.0171  | 0.0244  | 0.5301 | 0.2756 |
| MAPT               | _IPAKT[Phospho (STY)]PPAPK_2                                       | #N/A                | 3.2345  | 1.6289  | 4.4690  | 4.4249  | 3.8791  | 4.2464  | 4.1395  | 3.6936  | 3.3422  | 5.5239  | 0.8736  | -0.1950 | 0.4552 | 0.3418 |
| MAPT               | _T[Phospho (STY)]PPSGEPKK_2                                        | #N/A                | 3.8656  | 3.4837  | 3.5993  | 4.0319  | 3.0613  | 3.4140  | 3.2913  | 3.8651  | 4.1641  | 4.3211  | 0.9145  | -0.1290 | 0.2195 | 0.6585 |
| MAPT               | _TPAPAKT[Phospho (STY)]PPSGEPKK_2                                  | #N/A                | 6.3606  | 5.1306  | 5.9670  | 5.9803  | 3.5424  | 3.0428  | 6.2365  | 5.6443  | 3.7737  | 7.3292  | 0.8709  | -0.1995 | 0.4448 | 0.3518 |
| MAPT               | _SKIGS[Phospho (STY)]TENLKHQPGGK_3                                 | #N/A                | 4.1160  | 3.2264  | 3.8497  | 6.5815  | 4.8535  | 3.3649  | 3.5417  | 3.6077  | 3.9068  | 3.0707  | 1.2266  | 0.2947  | 0.2537 | 0.5957 |
| MAPT               | _DQSGYTM[Oxidation (M)]HQDQSGDTAGLK_3                              | #N/A                | 4.2517  | 3.5072  | 3.9854  | 3.5292  | 3.3955  | 3.2291  | 3.6774  | 3.4720  | 3.7711  | 3.2065  | 1.0334  | 0.0474  | 0.6084 | 0.2158 |
| MAPT               | _QEFVMM[Oxidation (M)]EHAGTYGLGDR_3                                | #N/A                | 3.7739  | 3.5127  | 4.0363  | 4.1358  | 2.9091  | 3.5244  | 3.1890  | 3.5896  | 4.2827  | 3.9052  | 0.9752  | -0.0363 | 0.7580 | 0.1203 |
| MAPT               | _VQSG[Phospho (STY)]KIGS[Phospho (STY)]LDNTHYVPGGNGK_3             | P10636_5669_M2_MAPT | 3.7267  | 2.9821  | 3.4300  | 3.9326  | 2.8704  | 3.7542  | 3.6473  | 4.1858  | 3.8344  | 5.9045  | 0.7852  | -0.1489 | 0.0770 | 1.1137 |
| MAPT               | _SGDRSGYSPGS[Phospho (STY)]PGTGPGR_2                               | #N/A                | 3.9203  | 3.6248  | 3.6961  | 3.9351  | 3.4648  | 3.9533  | 3.9442  | 4.0085  | 3.6185  | 3.7217  | 0.9850  | -0.0219 | 0.6598 | 0.1806 |
| MAPT               | _IPAKT[Phospho (STY)]PPAPKT[Phospho (STY)]PPSGEPKK_3               | #N/A                | 3.8621  | 3.1378  | 3.2855  | 3.7882  | 2.9961  | 3.6097  | 3.5028  | 4.3415  | 3.9901  | 4.7338  | 0.8321  | -0.1652 | 0.0358 | 1.4465 |
| MAPT               | _TPAPAKT[Phospho (STY)]PPSGEPKKSGDR_2                              | #N/A                | 3.7384  | 3.5949  | 3.9930  | 3.8379  | 3.3718  | 3.6038  | 3.6652  | 3.8400  | 3.8906  | 4.3773  | 0.9358  | -0.0958 | 0.1598 | 0.7965 |
| MAPT               | _C[Carbamidomethyl (C)]GSLGNHHPGGGQVEVK_3                          | #N/A                | 3.4162  | 4.5457  | 4.4344  | 5.6182  | 5.3273  | 5.1432  | 5.1864  | 4.4392  | 3.6728  | 5.4057  | 1.0153  | 0.0219  | 0.8923 | 0.0495 |
| MAPT               | _T[Phospho (STY)]PPSGEPKKSGDR_2                                    | #N/A                | 3.2702  | 4.0817  | 4.0872  | 4.2666  | 3.8967  | 4.0863  | 4.1100  | 4.4901  | 3.3742  | 3.6907  | 1.0081  | 0.0117  | 0.9066 | 0.0426 |
| MAPT               | _HLSNVSTSGS[Phospho (STY)]DM[Oxidation (M)]VDSQLATLADEVSLAK_4      | #N/A                | 3.8578  | 3.5933  | 3.6901  | 6.6018  | 5.3322  | 4.1130  | 3.7815  | 5.7850  | 3.7645  | 4.2470  | 1.0311  | 0.0442  | 0.8534 | 0.0689 |
| MAPT               | _QEFVMMDEHAGTYGLGDRK_3                                             | #N/A                | 3.5206  | 3.5908  | 4.0690  | 4.2989  | 3.4791  | 4.0029  | 3.7610  | 3.5596  | 3.8586  | 3.9762  | 1.0100  | 0.0144  | 0.8445 | 0.0734 |
| Mapt               | _IPAKTT[Phospho (STY)]PS[Phospho (STY)]PK_2                        | #N/A                | 3.9289  | 10.5655 | 10.8449 | 11.1036 | 10.6229 | 3.1741  | 10.6634 | 10.5216 | 10.5647 | 0.7914  | -0.3374 | 0.2819  | 0.5499 |        |
| Mapt               | _IPAKTT[Phospho (STY)]PS[Phospho (STY)]PK[Phospho (STY)]PPSGEPKK_2 | #N/A                | 5.5295  | 3.6084  | 6.4124  | 4.3894  | 3.5511  | 7.5250  | 3.6405  | 4.1312  | 6.5885  | 5.6795  | 1.0318  | 0.0452  | 0.8750 | 0.0580 |
| Mapt               | _T[Phospho (STY)]PPKSFSASK_2                                       | #N/A                | 11.1539 | 10.0484 | 10.8540 | 11.6892 | 9.5793  | 10.1484 | 10.2775 | 10.8994 | 10.5818 | 11.2161 | 0.9847  | -0.0223 | 0.7132 | 0.1468 |
| Mapt               | _ESPQPADGAEFGS[Phospho (STY)]ETSDAK_2                              | #N/A                | 8.6793  | 9.1257  | 9.5120  | 9.8614  | 8.8186  | 9.2618  | 9.4759  | 8.6955  | 8.7093  | 8.9417  | 1.0284  | 0.0404  | 0.3674 | 0.4349 |
| Mapt               | _VAVVRT[Phospho (STY)]PPKS[Phospho (STY)]PSASK_2                   | #N/A                | 10.5527 | 10.6436 | 10.7121 | 11.1933 | 9.5494  | 10.8312 | 10.0755 | 10.1376 | 10.4115 | 10.6116 | 1.0263  | 0.0375  | 0.3898 | 0.4091 |
| Mapt               | _TTPS[Phospho (STY)]PKT[Phospho (STY)]PPSGEPKKSGR_3                | #N/A                | 8.5750  | 6.8016  | 9.3133  | 9.1595  | 8.9001  | 9.9380  | 9.2519  | 8.8674  | 7.0785  | 8.3447  | 1.0365  | 0.0518  | 0.6355 | 0.1969 |
| Mapt               | _QEFDTM[Oxidation (M)]IDHAGDTLLDQGEQGM[Oxidation (M)]DHGLK_4       | #N/A                | 4.3392  | 4.6815  | 4.1385  | 3.3003  | 3.8975  | 5.1006  | 3.3543  | 3.4553  | 4.4003  | 5.2726  | 1.0297  | 0.0422  | 0.8046 | 0.0944 |
| Mapt               | _TTPS[Phospho (STY)]PKT[Phospho (STY)]PPSGEPKK_2                   | #N/A                | 12.0422 | 12.2648 | 12.5913 | 12.8910 | 11.5574 | 12.2992 | 12.5364 | 12.0979 | 12.1453 | 12.3322 | 0.9997  | -0.0004 | 0.9886 | 0.0050 |
| Mapt               | _T[Phospho (STY)]PTAEDVTAPLVDR_2                                   | P10637_T58_M1_MapT  | 9.5682  | 9.5354  | 3.8953  | 10.2993 | 9.4129  | 9.7500  | 10.1046 | 9.3457  | 9.7228  | 9.8995  | 0.8951  | -0.1599 | 0.4287 | 0.3679 |
| Mapt               | _T[Phospho (STY)]PPSGEPKK_2                                        | #N/A                | 11.5996 | 10.1460 | 9.4560  | 11.6561 | 11.3377 | 11.1740 | 11.3916 | 10.8738 | 11.2310 | 11.5160 | 0.9682  | -0.0467 | 0.4665 | 0.3312 |
| Mapt               | _SGERS[Phospho (STY)]GYS[Phospho (STY)]PGSPGTSGR_2                 | P10637_5487_M2_MapT | 3.4474  | 3.7605  | 5.0346  | 3.7259  | 3.6352  | 3.5055  | 4.1930  | 3.7138  | 5.3315  | 3.5651  | 0.9168  | -0.1252 | 0.4476 | 0.3491 |
| Mapt               | _T[Phospho (STY)]PPSGEPKKSGR_2                                     | #N/A                | 9.1498  | 8.9656  | 8.6433  | 10.8446 | 9.7190  | 10.4742 | 10.4367 | 3.3662  | 3.6653  | 10.3529 | 1.3850  | 0.4698  | 0.1398 |        |
| Txn                | _EAFQEALAAAGDK_2                                                   | #N/A                | 8.9934  | 8.8409  | 8.8975  | 9.2962  | 9.5258  | 8.9776  | 9.1372  | 8.9672  | 9.2038  | 9.1780  | 0.9964  | -0.0052 | 0.8222 | 0.0850 |
| Txn                | _VGEFSGANIK_2                                                      | #N/A                | 7.8126  | 7.8892  | 7.8228  | 8.0525  | 8.5293  | 7.8185  | 7.6713  | 7.9905  | 7.6641  | 8.1127  | 1.0163  | 0.0233  | 0.4712 | 0.3268 |
| Txn                | _VKLESK_2                                                          | #N/A                | 6.5843  | 7.0926  | 7.8604  | 6.7941  | 6.8399  | 6.7049  | 7.0211  | 7.0235  | 6.6646  | 7.0968  | 1.0040  | 0.0058  | 0.9136 | 0.0392 |
| Txn                | _VGEFSGANKEK_2                                                     | #N/A                | 5.0531  | 5.6101  | 5.6074  | 4.6745  | 5.6008  | 5.5250  | 5.4100  | 5.0127  | 4.9335  | 5.3746  | 1.0314  | 0.0445  | 0.4862 | 0.3132 |
| Gstm1              | _ITQSNAILR_2                                                       | #N/A                | 9.2725  | 9.6575  | 8.9722  | 9.7082  | 9.8040  | 9.5276  | 9.5070  | 9.6461  | 9.6848  | 9.3977  | 1.0085  | 0.0122  | 0.5231 | 0.2814 |
| Gstm1              | _VIATPFSK_2                                                        | #N/A                | 8.7145  | 9.0763  | 8.8391  | 8.7516  | 9.0192  | 8.7871  | 8.6639  | 8.9538  | 9.0601  | 8.8709  | 0.9975  | -0.0037 | 0.8287 | 0.0816 |
| Gstm1              | _PM[Oxidation (M)]LGWNNVR_2                                        | #N/A                | 7.8625  | 8.1904  | 8.1323  | 7.8774  | 8.0524  | 8.1157  | 8.0807  | 8.2581  | 8.2975  | 8.2020  | 0.9792  | -0.0304 | 0.0639 | 1.1947 |
| Gstm1              | _SQWLNEK_2                                                         | #N/A                | 7.9421  | 7.9134  | 8.0561  | 7.9653  | 8.1722  | 7.8810  | 7.1482  | 8.0088  | 7.9936  | 8.1987  | 1.0193  | 0.0275  | 0.4572 | 0.3399 |
| Gstm1              | _C[Carbamidomethyl (C)]DAFNNLR_2                                   | #N/A                | 7.4743  | 8.0040  | 7.7204  | 7.6280  | 8.0095  | 7.7815  | 7.7668  | 7.6330  | 7.8986  | 7.3755  | 1.0132  | 0.0189  | 0.4882 | 0.3114 |
| Gstm1              | _RPWFAGDK_2                                                        | #N/A                | 7.3923  | 7.6066  | 6.9642  | 7.8575  | 7.8636  | 7.3061  | 7.5554  | 7.6825  | 7.0346  | 7.3540  | 1.0124  | 0.0178  | 0.6738 | 0.1715 |
| Gstm1              | _LYSEFLGK_2                                                        | #N/A                | 6.7259  | 7.1569  | 7.1501  | 6.8554  | 7.2209  | 7.1797  | 5.4975  | 7.0716  | 7.6867  | 7.1984  | 1.0269  | 0.0383  | 0.6480 | 0.1884 |
| Gstm1              | _YTM[Oxidation (M)]CDAPOFDR_2                                      | #N/A                | 8.7407  | 8.6990  | 8.8030  | 8.7539  | 8.7293  | 8.7263  | 8.7127  | 8.6157  | 8.6195  | 8.7959  | 1.0061  | 0.0088  | 0.2081 | 0.6818 |
| Gstm1              | _ADIVENQVM[Oxidation (M)]DTR_2                                     | #N/A                | 8.1224  | 8.1912  | 8.2083  | 8.4750  | 8.4641  | 8.1041  | 8.1288  | 8.1568  | 8.1346  | 8.3418  | 1.0086  | 0.0123  | 0.4755 | 0.3229 |
| Gstm1              | _LGLDFPLPLVDGSHK_3                                                 | #N/A                | 6.1123  | 6.1259  | 5.7842  | 5.9328  | 5.6697  | 5.8688  | 6.5045  | 6.1130  | 6.1145  | 6.0355  | 0.9553  | -0.0659 | 0.0571 | 1.2437 |
| Gstm1              | _MILEYTSYDEK_2                                                     | #N/A                | 3.8484  | 3.1527  | 4.5352  | 5.7727  | 3.6441  | 3.2546  | 3.6154  | 3.0505  | 3.1414  | 3.5040  | 1.2124  | 0.2779  | 0.2063 | 0.6855 |
| Gstm1              | _M[Oxidation (M)]LLEYDSSYDEKR_2                                    | #N/A                | 5.0530  | 5.7430  | 5.9695  | 5.9991  | 6.0955  | 5.9921  | 5.6879  | 5.5048  | 5.5702  | 5.8486  | 1.0276  | 0.0392  | 0.4730 | 0.3252 |
| Gstm1              | _LRADIVENQVM[Oxidation (M)]DTR_3                                   | #N/A                | 3.5247  | 5.1752  | 6.0058  | 4.7811  | 5.5258  | 5.5069  | 4.7659  | 5.3129  | 5.0093  | 5.0877  | 1.0093  | 0.0134  | 0.9196 | 0.3064 |
| Gstm1              | _VTYVDLAYILDQYR_2                                                  | #N/A                | 3.9233  | 3.1787  | 3.6570  | 2.9982  | 1.8323  | 3.5576  | 3.4507  | 4.3824  | 2.2879  | 3.7030  | 0.9234  | -0.1150 | 0.6197 | 0.2078 |
| Tcea1              | _EPAISQNS[Phospho (STY)]PEAR_2                                     | #N/A                | 9.4308  | 9.1973  | 3.2815  | 9.9699  | 9.1109  | 9.4398  | 9.6399  | 8.8690  | 9.3586  | 9.5131  | 0.8994  | -0.1530 | 0.4891 | 0.3106 |
| Tcea1              | _KKEPASPQNS[Phospho (STY)]PEAR_3                                   | #N/A                | 9.6788  | 8.7104  | 10.2024 | 10.3830 | 10.1321 | 10.0628 | 10.0041 | 9.9610  | 9.4484  | 9.9722  | 1.0015  | 0.0022  | 0.9643 | 0.0158 |
| Tcea1              | _DTYVSFFRR_2                                                       | #N/A                | 2.9505  | 4.2757  | 3.6373  | 4.1399  | 3.5770  | 4.1525  | 3.8546  | 3.9786  | 3.6271  | 4.1069  | 0.9735  | -0.0387 | 0.7117 | 0.1477 |
| Slc3a2             | _LLSTDASR_2                                                        | #N/A                | 7.5919  | 7.4582  | 7.6013  | 7.0895  | 7.1156  | 7.4304  | 7.1637  | 7.7806  | 7.7469  | 7.2021  | 0.9877  | -0.0179 | 0.6149 | 0.2112 |
| Slc3a2             | _GONEDPGSLTQFR_2                                                   | #N/A                | 7.2213  | 6.9169  | 6.9376  | 7.1645  | 6.8076  | 6.9710  | 7.4338  | 7.1002  | 6.9653  | 7.0884  | 0.9799  | -0.0293 | 0.2393 | 0.6210 |
| Slc3a2             | _LGASNLPAIGSLPASAK_2                                               | #N/A                | 7.0252  | 6.7252  | 6.2952  | 7.0954  | 6.3664  | 6.0861  | 6.6619  | 7.4207  | 5.9243  | 6.7864  | 0.9852  | -0.0216 | 0.7650 | 0.1163 |
| Slc3a2             | _GDGLQAPVGR_2                                                      | #N/A                | 6.7124  | 6.6978  | 6.3548  | 6.0182  | 6.0729  | 5.8753  | 6.5272  | 6.8946  | 6.2830  | 6.3011  | 0.9672  | -0.0480 | 0.3503 | 0.4555 |
| Slc3a2             | _QINPTLGGSEQDKLLQSAK_3                                             | #N/A                | 5.8971  | 5.3372  | 5.6915  | 5.6392  | 5.8211  | 5.3194  | 5.9061  | 6.1085  | 6.2350  | 5.4815  | 0.9466  | -0.0792 | 0.1172 | 0.9312 |
| Slc3a2             | _EALSSWLQDGVGQFR_2                                                 | #N/A                | 4.8489  | 4.9943  | 4.6117  | 4.7738  | 4.8245  | 4.7567  | 5.4896  | 4.9741  | 4.6465  | 4.0578  | 1.0020  | 0.0029  | 0.9696 | 0.0134 |
| Slc3a2             | _SHLEYSLTK_2                                                       | #N/A                | 4.8032  | 4.6864  | 5.5478  | 4.8116  | 5.0361  | 4.8478  | 4.3044  | 4.5668  | 4.6691  | 4.7140  | 1.0859  | 0.1189  | 0.0552 | 1.2583 |
| Slc3a2             | _HWDQNER_2                                                         | #N/A                | 5.5156  | 4.8505  | 3.4415  | 4.4861  | 2.8515  | 5.0431  | 3.1135  | 4.0159  | 5.4291  | 5.1706  | 0.9836  | -0.0338 | 0.9162 | 0.0380 |
| Slc3a2             | _DAGGIAGUK_2                                                       | #N/A                | 3.9244  | 3.4180  | 3.6581  | 3.2019  | 2.5423  | 2.9894  | 3.3502  | 2.6380  | 4.0983  | 1.6716  | 1.1189  | 0.1621  | 0.4872 | 0.3123 |
| Slc3a2             | _NQKDEINETDK_3                                                     | #N/A                | 3.7964  | 3.0518  | 3.5301  | 3.8630  | 2.9401  | 3.6845  | 3.5776  | 4.2555  | 3.9041  | 3.8300  | 0.8936  | -0.1623 | 0.1072 | 0.9697 |
| H2bc7:H2bc14:H2bc1 | _LLGLGELAK_2                                                       | #N/A                | 11.8504 | 12.1697 | 11.9875 | 11.6559 | 12.2161 | 11.9933 | 11.7994 | 11.9512 | 12.1737 | 12.0438 | 0.9989  | -0.0016 | 0.9167 | 0.0378 |
| H2bc7:H2bc14:H2bc1 | _EYSYSVYVK_2                                                       | #N/A                | 8.0023  | 7.5065  | 8.0621  | 8.4650  | 8.1962  | 8.3475  | 6.0303  | 8.3866  | 8.2450  | 8.3331  | 1.0449  | 0.0634  | 0.4936 | 0.3066 |
| H2bc7:H2bc14:H2bc1 | _EIQTAVR_2                                                         | #N/A                | 7.4531  | 7.2484  | 7.6902  | 6.8500  | 8.2459  | 7.7490  | 5.6903  | 7.5971  | 7.7633  | 7.6580  | 1.0442  | 0.0624  | 0.5089 | 0.2934 |
| H2bc7:H2bc14:H2bc1 | _KEYSYSVYVK_2                                                      | #N/A                | 6.9531  | 6.7446  | 7.7350  | 7.5635  | 7.2153  | 7.5010  | 7.1498  | 7.5052  | 7.2209  | 7.5335  | 0.9909  | -0.0132 | 0.7584 | 0.1201 |
| H2bc7:H2bc14:H2bc1 | _AM[Oxidation (M)]GIM[Oxidation (M)]NSFVNDFR_2                     | #N/A                | 8.5308  | 8.6331  | 8.6956  | 8.0154  | 8.3265  | 8.5893  | 8.4665  | 8.4264  | 8.5418  | 8.3277  | 1.0029  | 0.0042  | 0.8596 | 0.0507 |
| H2bc7:H2bc14:H2bc1 | _QVHPOTGISSK_                                                      |                     |         |         |         |         |         |         |         |         |         |         |         |         |        |        |



|          |                                                                              |                         |         |         |         |         |         |         |         |         |         |         |        |         |        |        |
|----------|------------------------------------------------------------------------------|-------------------------|---------|---------|---------|---------|---------|---------|---------|---------|---------|---------|--------|---------|--------|--------|
| Hsp90ab1 | _DIIPNPQER_2                                                                 | #N/A                    | 10.1778 | 10.2288 | 10.2592 | 10.2501 | 10.1491 | 10.1248 | 10.3599 | 10.2633 | 10.1924 | 10.0099 | 0.9992 | -0.0011 | 0.9038 | 0.0439 |
| Hsp90ab1 | _YIDQEENK_2                                                                  | #N/A                    | 9.8129  | 9.9772  | 10.1884 | 10.1989 | 10.0403 | 9.9346  | 9.9750  | 9.9612  | 9.7806  | 9.8642  | 1.0132 | 0.0188  | 0.1826 | 0.7890 |
| Hsp90ab1 | _EDQTEYLEER_2                                                                | #N/A                    | 9.6293  | 9.2241  | 9.2803  | 9.7129  | 9.3155  | 9.2442  | 9.1296  | 9.2047  | 9.5345  | 9.4354  | 1.0080 | 0.0116  | 0.5863 | 0.2319 |
| Hsp90ab1 | _ELISNASDALK_2                                                               | #N/A                    | 9.5094  | 9.1657  | 9.1798  | 9.5922  | 9.0887  | 9.0976  | 9.3425  | 9.2751  | 9.1463  | 9.1867  | 1.0037 | 0.0054  | 0.7764 | 0.1099 |
| Hsp90ab1 | _SHYITGESK_2                                                                 | #N/A                    | 8.8957  | 8.6079  | 9.0201  | 9.0896  | 8.3841  | 8.8642  | 8.6402  | 8.8031  | 8.7006  | 8.9179  | 1.0051 | 0.0074  | 0.7639 | 0.1169 |
| Hsp90ab1 | _EGLEPEDEEEKK_3                                                              | #N/A                    | 8.6575  | 8.2200  | 8.3027  | 8.3900  | 8.3202  | 8.2410  | 8.0456  | 8.4642  | 8.1433  | 8.5910  | 1.0053 | 0.0077  | 0.7441 | 0.1284 |
| Hsp90ab1 | _NPDDTQEYGEFTK_2                                                             | #N/A                    | 8.2916  | 8.1340  | 7.7506  | 8.2199  | 7.9826  | 8.4544  | 8.4458  | 8.2516  | 7.9321  | 8.2102  | 0.9913 | -0.0125 | 0.6510 | 0.1864 |
| Hsp90ab1 | _ADHGEPGR_2                                                                  | #N/A                    | 8.5119  | 7.9670  | 8.3611  | 8.1210  | 8.3319  | 8.1565  | 7.8883  | 8.3580  | 8.1973  | 8.1707  | 1.0108 | 0.0155  | 0.5063 | 0.2956 |
| Hsp90ab1 | _EQVANSFVER_2                                                                | #N/A                    | 7.3913  | 7.6210  | 8.1192  | 7.8537  | 7.7910  | 7.9244  | 7.6511  | 7.5937  | 7.9883  | 7.8956  | 1.0003 | 0.0005  | 0.9869 | 0.0057 |
| Hsp90ab1 | _ALLFPR_2                                                                    | #N/A                    | 7.1228  | 7.9299  | 7.4205  | 7.1158  | 7.3884  | 7.5990  | 7.64610 | 7.7778  | 7.2141  | 7.0119  | 1.0119 | 0.0170  | 0.7820 | 0.1068 |
| Hsp90ab1 | _EIS(Phospho (STY))DDEAEEEK_2                                                | #N/A                    | 7.3882  | 6.8959  | 7.0496  | 7.6969  | 6.5742  | 7.3135  | 7.6484  | 7.2028  | 6.8881  | 7.2391  | 0.9874 | -0.0183 | 0.7096 | 0.1490 |
| Hsp90ab1 | _YESLTPSK_2                                                                  | #N/A                    | 7.5114  | 6.7849  | 6.6619  | 7.3590  | 7.4489  | 7.2368  | 6.2186  | 7.2913  | 7.3124  | 7.5321  | 1.0111 | 0.0159  | 0.7976 | 0.0982 |
| Hsp90ab1 | _EKES(Phospho (STY))DDEAEEEK_2                                               | #N/A                    | 6.9099  | 6.8497  | 6.2997  | 7.6299  | 6.5693  | 6.5789  | 7.1092  | 6.9609  | 6.4313  | 6.7464  | 0.9992 | -0.0012 | 0.9831 | 0.0074 |
| Hsp90ab1 | _EKYIDQELNK_2                                                                | #N/A                    | 6.8395  | 6.2918  | 6.5733  | 6.7058  | 6.1144  | 6.2811  | 6.7055  | 6.6545  | 6.4510  | 6.0933  | 0.9987 | -0.0019 | 0.9640 | 0.0159 |
| Hsp90ab1 | _VFIM(Oxidation (M))DSC(Carbamidomethyl (C))DELUPELNFIR_2                    | #N/A                    | 5.7985  | 6.2929  | 6.6749  | 6.3579  | 5.0735  | 5.2360  | 4.9915  | 5.7674  | 5.7283  | 5.6806  | 1.0656 | 0.0917  | 0.3436 | 0.4639 |
| Hsp90ab1 | _GVDSDSDPLNIS(Phospho (STY))R_2                                              | P11499_S391_M1_Hsp90ab1 | 6.9487  | 6.5152  | 3.6982  | 7.7949  | 6.6599  | 6.8598  | 6.9008  | 7.3594  | 7.1200  | 6.7477  | 0.9119 | -0.1330 | 0.4170 | 0.3799 |
| Hsp90ab1 | _APFDLENK_2                                                                  | #N/A                    | 5.0915  | 5.0008  | 4.1651  | 3.7262  | 4.2493  | 4.8340  | 4.8450  | 5.0446  | 5.0894  | 5.3992  | 0.8855 | -0.1755 | 0.0812 | 1.0903 |
| Hsp90ab1 | _LGHIEDSTNR_2                                                                | #N/A                    | 7.0557  | 7.4160  | 6.7368  | 7.0256  | 6.2463  | 6.4664  | 7.1256  | 6.9372  | 6.9144  | 7.0350  | 0.9788 | -0.0309 | 0.4977 | 0.3031 |
| Hsp90ab1 | _ELISNASDALKR_2                                                              | #N/A                    | 5.7992  | 6.2351  | 6.3742  | 6.1036  | 6.0665  | 6.3638  | 6.1237  | 5.8739  | 6.1509  | 5.9349  | 1.0226 | 0.0323  | 0.3011 | 0.5213 |
| Hsp90ab1 | _EKES(Phospho (STY))DDEAEAEKEK_2                                             | #N/A                    | 5.4389  | 4.6627  | 5.4161  | 5.8775  | 4.3630  | 4.9734  | 4.9874  | 5.8110  | 5.1171  | 4.9602  | 0.9602 | -0.0586 | 0.5259 | 0.2791 |
| Hsp90ab1 | _EIS(Phospho (STY))DDEAEAEKEK_2                                              | #N/A                    | 5.1188  | 3.9645  | 3.5618  | 4.7426  | 3.8475  | 3.8452  | 4.8388  | 4.2872  | 4.1979  | 3.8583  | 0.9731 | -0.0393 | 0.7496 | 0.1252 |
| Hsp90ab1 | _AKFENLC(Carbamidomethyl (C))K_2                                             | #N/A                    | 7.4486  | 7.4241  | 8.0412  | 7.5460  | 7.4960  | 7.3100  | 7.5575  | 7.5223  | 7.6175  | 7.6233  | 0.9953 | -0.0068 | 0.7928 | 0.1008 |
| Hsp90ab1 | _JEDVGS(Phospho (STY))DEEDDSGDK_2                                            | #N/A                    | 10.9431 | 11.0258 | 11.4497 | 11.6810 | 10.5962 | 10.9159 | 11.3081 | 11.0404 | 10.9206 | 10.9700 | 1.0038 | 0.0055  | 0.8475 | 0.0718 |
| Hsp90ab1 | _FYEAFSK_2                                                                   | #N/A                    | 3.7473  | 3.0027  | 4.9217  | 2.2650  | 5.2405  | 5.0702  | 3.1730  | 5.6455  | 5.3822  | 4.4462  | 0.8669 | -0.2061 | 0.4428 | 0.3538 |
| Hsp90ab1 | _JEDVGS(Phospho (STY))DEEDDSGDKK_3                                           | #N/A                    | 12.9984 | 12.6342 | 13.2042 | 13.0155 | 12.8589 | 12.8652 | 12.8343 | 12.7928 | 13.0644 | 12.7513 | 1.0053 | 0.0077  | 0.5580 | 0.2533 |
| Hsp90ab1 | _EM(Oxidation (M))LQQSK_2                                                    | #N/A                    | 5.3645  | 5.2304  | 5.0455  | 5.4015  | 6.9878  | 6.2308  | 5.1668  | 5.7526  | 5.8430  | 5.4515  | 1.0282 | 0.0401  | 0.7057 | 0.1514 |
| Hsp90ab1 | _YESLTPSKLDSGK_2                                                             | #N/A                    | 7.6205  | 7.6300  | 7.8388  | 7.9735  | 7.5588  | 7.7773  | 7.6456  | 7.6478  | 7.3030  | 7.4044  | 1.0311 | 0.0441  | 0.0591 | 1.2281 |
| Hsp90ab1 | _SLTNDWEDHAKV_2                                                              | #N/A                    | 5.9618  | 5.8932  | 5.7220  | 5.4530  | 5.9336  | 5.4214  | 6.3749  | 5.4491  | 6.1058  | 5.5790  | 0.9751 | -0.0364 | 0.5102 | 0.2923 |
| Hsp90ab1 | _HLEINPHPIVETLR_3                                                            | #N/A                    | 6.7619  | 7.2974  | 4.2356  | 6.6885  | 6.1328  | 6.6538  | 7.1988  | 6.7274  | 6.7566  | 6.7566  | 0.9178 | -0.1237 | 0.3400 | 0.4685 |
| Hsp90ab1 | _YHTSGSGDEM(Oxidation (M))TSLSEYSR_3                                         | #N/A                    | 6.4755  | 6.2555  | 6.1302  | 6.5145  | 5.3199  | 5.2439  | 5.9501  | 4.0682  | 5.6545  | 4.8330  | 1.1684 | 0.2246  | 0.0872 | 1.0596 |
| Hsp90ab1 | _HNDDDEYESSAGSGFTVR_3                                                        | #N/A                    | 5.5992  | 3.5056  | 3.9722  | 6.3350  | 4.8717  | 5.9227  | 6.4055  | 5.6894  | 5.5341  | 5.3712  | 0.8755 | -0.1918 | 0.2672 | 0.5731 |
| Hsp90ab1 | _EGLEPEDEEEKK_3                                                              | #N/A                    | 3.5903  | 3.7521  | 3.3240  | 4.3686  | 4.2349  | 3.9611  | 4.5169  | 4.1334  | 3.2040  | 4.0459  | 0.9740 | -0.0380 | 0.7376 | 0.1322 |
| Hsp90ab1 | _VILHKESQTEYLEER_3                                                           | #N/A                    | 5.1842  | 5.9485  | 6.4294  | 3.8638  | 3.3009  | 5.7972  | 5.2407  | 3.9033  | 1.0852  | 0.1880  | 0.5818 | 0.2353  | 0.5731 | 0.1322 |
| Hsp90ab1 | _KHLEINPHPIVETLR_4                                                           | #N/A                    | 4.9416  | 3.2018  | 3.6800  | 3.2238  | 3.0901  | 3.5345  | 3.3721  | 3.7774  | 5.4960  | 4.4019  | 0.8475 | -0.2387 | 0.2360 | 0.6271 |
| Hsp90ab1 | _LGHIEDSTNRR_3                                                               | #N/A                    | 3.3741  | 4.1303  | 3.1077  | 4.2853  | 4.0186  | 4.1068  | 4.0000  | 3.8332  | 3.4818  | 4.2523  | 0.9860 | -0.0204 | 0.8474 | 0.0719 |
| Hsp90ab1 | _LGLGIDEVTAEPESAAPPDEPPLGEDDASR_3                                            | #N/A                    | 3.3988  | 4.1551  | 3.7579  | 4.2606  | 4.0434  | 4.0821  | 3.9752  | 3.8579  | 3.5065  | 4.2276  | 1.0149 | 0.0213  | 0.7808 | 0.1075 |
| Dmd      | _SDSS(Phospho (STY))QPMILR_2                                                 | P11531_S3617_M1_Dmd     | 3.2966  | 3.9097  | 3.9834  | 4.4861  | 3.7630  | 4.1863  | 4.2923  | 3.6405  | 5.3002  | 3.8370  | 0.9227 | -0.1161 | 0.3828 | 0.4170 |
| Dmd      | _NAPGKPMREDTP(Phospho (STY))M_2                                              | P11531_T3677_M1_Dmd     | 5.9910  | 4.4185  | 4.3001  | 3.3019  | 4.2398  | 3.4897  | 4.5174  | 3.3158  | 2.9643  | 3.2689  | 1.2200 | 0.2869  | 0.2017 | 0.6953 |
| L1cam    | _SLES(Phospho (STY))DNEEK_2                                                  | P11627_S1184_M1_L1cam   | 10.9620 | 10.6834 | 10.7251 | 11.0524 | 9.8418  | 10.3838 | 11.1120 | 11.0151 | 10.7263 | 10.6849 | 0.9746 | -0.0371 | 0.2841 | 0.5466 |
| L1cam    | _EKEAAGDNDSSGAT(Phospho (STY))SPINPAVALE_2                                   | P11627_T1250_M1_L1cam   | 3.1244  | 3.9649  | 4.3589  | 3.9027  | 5.4178  | 6.4656  | 6.7730  | 3.1047  | 3.4038  | 3.5799  | 1.0768 | 0.1067  | 0.7328 | 0.1350 |
| L1cam    | _TLQLLVNGEEDGEYTC(Carbamidomethyl (C))LAENLSGAR_3                            | #N/A                    | 5.0994  | 5.1873  | 5.6325  | 6.4896  | 5.1466  | 5.7921  | 5.5933  | 5.0052  | 5.2164  | 5.5236  | 1.0419 | 0.0592  | 0.4708 | 0.3272 |
| L1cam    | _AQLLVVSGPGVPHELSDR_3                                                        | #N/A                    | 5.2399  | 4.7848  | 4.1237  | 5.4899  | 5.2509  | 3.0908  | 5.4625  | 5.5246  | 5.6222  | 5.0350  | 0.8618 | -0.2146 | 0.1545 | 0.8712 |
| L1cam    | _EAAGGNDSSGATS(Phospho (STY))PINPAVALE_2                                     | #N/A                    | 8.0775  | 7.6923  | 8.2157  | 8.2066  | 8.1433  | 7.7873  | 8.5079  | 9.3903  | 8.4839  | 8.1691  | 0.9303 | -0.1042 | 0.0325 | 1.4880 |
| L1cam    | _DETFGEYRS(Phospho (STY))LES(Phospho (STY))DNEEK_2                           | #N/A                    | 3.4404  | 3.9901  | 4.0656  | 4.1555  | 4.4092  | 3.8240  | 4.3038  | 5.3010  | 4.8549  | 5.3146  | 0.8053 | -0.3125 | 0.0051 | 2.2920 |
| L1cam    | _PM(Oxidation (M))KDETFGEY(Phospho (STY))RLES(Phospho (STY))DNEEK_3          | #N/A                    | 3.6551  | 5.0085  | 4.1242  | 4.1944  | 3.9375  | 4.6743  | 4.3858  | 5.1881  | 5.3823  | 5.0330  | 0.8536 | -0.2284 | 0.0432 | 1.3648 |
| L1cam    | _KDEDTGVDS(Phospho (STY))LEAPPMK_3                                           | P11627_S1166_M1_L1cam   | 3.9955  | 3.3469  | 3.7292  | 3.2729  | 3.1682  | 3.0604  | 3.4212  | 3.7282  | 4.0273  | 4.4511  | 0.8776 | -0.1883 | 0.0950 | 1.0225 |
| L1cam    | _LVALQGSLULEC(Carbamidomethyl (C))IAEGFPPTTK_3                               | #N/A                    | 3.2137  | 4.0189  | 4.5580  | 4.1018  | 3.8402  | 3.8893  | 4.2500  | 4.4002  | 3.1984  | 3.7791  | 1.0077 | 0.0110  | 0.9250 | 0.0339 |
| Camk2a   | _ITQYLDAAGRPR_2                                                              | P11798_S272_M1_Camk2a   | 11.3658 | 11.3895 | 11.7050 | 11.3266 | 11.8402 | 11.2413 | 11.4671 | 11.6615 | 11.3420 | 11.0616 | 0.9987 | -0.0018 | 0.9189 | 0.0367 |
| Camk2a   | _HPWIS(Phospho (STY))HR_2                                                    | #N/A                    | 9.4177  | 9.5061  | 9.8567  | 9.5111  | 9.5300  | 9.3094  | 10.1192 | 10.0538 | 9.8790  | 9.4965  | 0.9631 | -0.0543 | 0.0357 | 1.4470 |
| Camk2a   | _FTEYQLFEELGK_2                                                              | #N/A                    | 6.6980  | 9.4251  | 9.9056  | 9.3540  | 9.0811  | 9.4800  | 9.7517  | 9.3526  | 9.6240  | 9.5852  | 0.9908 | -0.0133 | 0.5976 | 0.2236 |
| Camk2a   | _VLAGEVAAK_2                                                                 | #N/A                    | 9.4268  | 9.6110  | 9.5658  | 9.2668  | 9.5292  | 9.2556  | 9.4423  | 9.9343  | 9.4859  | 9.3417  | 0.9886 | -0.0165 | 0.4276 | 0.3690 |
| Camk2a   | _WQVHFHR_2                                                                   | #N/A                    | 8.1442  | 8.9350  | 9.0479  | 8.7906  | 8.0121  | 8.9507  | 9.1627  | 8.7151  | 8.6775  | 8.1720  | 0.9560 | -0.0058 | 0.9034 | 0.0441 |
| Camk2a   | _FYFENWVR_2                                                                  | #N/A                    | 8.6949  | 9.2476  | 8.9415  | 9.1934  | 8.5280  | 8.6339  | 9.3121  | 9.2052  | 9.1246  | 8.7435  | 0.9755 | -0.0358 | 0.2561 | 0.5915 |
| Camk2a   | _ITAAEALK_2                                                                  | #N/A                    | 6.7985  | 6.8978  | 6.8775  | 5.8309  | 6.9010  | 6.9763  | 4.7187  | 7.0061  | 7.0061  | 7.1950  | 1.0360 | 0.0510  | 0.6631 | 0.1784 |
| Camk2a   | _ESSES(Phospho (STY))TNT(Phospho (STY))T(Phospho (STY))DEEDTKVR_2            | #N/A                    | 10.7444 | 11.1939 | 4.0298  | 8.7838  | 7.8384  | 11.1742 | 11.3703 | 11.2557 | 10.8753 | 8.2886  | 0.8577 | -0.2215 | 0.3600 | 0.4437 |
| Camk2a   | _M(Oxidation (M))C(Carbamidomethyl (C))DPGM(Oxidation (M))TAFEALGNLVGLDFHR_3 | #N/A                    | 4.7136  | 4.0016  | 5.2332  | 4.0225  | 4.5766  | 4.3498  | 4.5108  | 4.3319  | 4.4467  | 4.3569  | 1.0162 | 0.0231  | 0.7740 | 0.1112 |
| Camk2a   | _ESS(Phospho (STY))ESTNTTDEEDTK_2                                            | #N/A                    | 11.6467 | 11.3086 | 11.2422 | 11.6532 | 10.6939 | 10.9227 | 11.8362 | 11.1300 | 11.4098 | 11.5414 | 0.9795 | -0.0298 | 0.3332 | 0.4773 |
| Camk2a   | _NFS(Phospho (STY))GGKSGGNK_2                                                | P11798_S314_M1_Camk2a   | 4.0276  | 3.3319  | 6.1618  | 3.7162  | 3.1533  | 3.0754  | 5.8706  | 6.2578  | 6.1020  | 3.6832  | 0.7139 | -0.4862 | 0.0732 | 1.1356 |
| Camk2a   | _JAcetyl (Protein N-term))ATTC(Carbamidomethyl (C))TR_2                      | #N/A                    | 4.7559  | 5.2506  | 3.1588  | 4.8998  | 4.8019  | 3.9909  | 4.2986  | 4.2986  | 4.9206  | 3.8807  | 1.0501 | 0.0705  | 0.6358 | 0.1966 |
| Camk2a   | _S(Phospho (STY))TVASC(Carbamidomethyl (C))M(Oxidation (M))HR_2              | #N/A                    | 9.4275  | 8.9638  | 9.0118  | 10.0124 | 10.0001 | 8.7256  | 9.7372  | 9.1557  | 9.0310  | 9.1095  | 1.0106 | 0.0153  | 0.7581 | 0.1203 |
| Camk2a   | _NDGVKES(Phospho (STY))ESTNTTDEEDTK_2                                        | #N/A                    | 4.8755  | 4.9482  | 3.9482  | 4.2789  | 3.8808  | 5.4371  | 3.8263  | 4.4357  | 5.1514  | 5.0055  | 0.9906 | -0.0136 | 0.9159 | 0.0381 |
| Camk2a   | _VTEQUELEASNGDFESTYK_2                                                       | #N/A                    | 8.8556  | 8.8936  | 9.7279  | 9.7064  | 8.3062  | 8.9490  | 9.3203  | 8.8961  | 8.7650  | 9.1671  | 1.0040 | 0.0057  | 0.9008 | 0.0425 |
| Camk2a   | _QETVDC(Carbamidomethyl (C))UKK_2                                            | #N/A                    | 6.0396  | 4.7029  | 4.9497  | 5.5850  | 5.2164  | 5.3279  | 5.7427  |         |         |         |        |         |        |        |



|                   |                                                                                |                                  |         |         |         |         |         |         |          |         |         |         |         |         |        |        |
|-------------------|--------------------------------------------------------------------------------|----------------------------------|---------|---------|---------|---------|---------|---------|----------|---------|---------|---------|---------|---------|--------|--------|
| Tcp1              | _LHDAIC[Carbamidomethyl (C)]VVK_2                                              | #N/A                             | 3.5544  | 5.3074  | 4.7349  | 5.4118  | 4.6042  | 4.4880  | 4.5019   | 4.9412  | 5.0591  | 4.5190  | 0.9849  | -0.0220 | 0.8468 | 0.0722 |
| Tcp1              | _JAC[Carbamidomethyl (C)]DFSQK_2                                               | #N/A                             | 3.2675  | 4.0727  | 3.9543  | 4.5771  | 3.8940  | 3.8355  | 4.1963   | 3.6546  | 4.0792  | 3.7253  | 1.0050  | 0.0072  | 0.9365 | 0.0285 |
| Tcp1              | _SQNVMOxidation (M)IAASIANVK_2                                                 | #N/A                             | 2.9584  | 3.0522  | 4.1929  | 3.7367  | 3.1736  | 3.0217  | 3.8849   | 3.6601  | 4.0016  | 3.4139  | 0.8973  | -0.1564 | 0.1986 | 0.7021 |
| App               | _VES[Phospho (STY)]IEGEAANVK_2                                                 | P12023_S441_M1_App               | 8.1671  | 7.5514  | 7.6073  | 7.9822  | 7.3445  | 7.6179  | 8.0805   | 7.1502  | 7.4758  | 7.6948  | 1.0147  | 0.0210  | 0.6243 | 0.2046 |
| App               | _C[Carbamidomethyl (C)]LVGEFVSQALLVPDK_2                                       | #N/A                             | 3.9730  | 4.2591  | 3.1299  | 4.4959  | 4.2453  | 3.4541  | 3.3472   | 2.9851  | 4.1345  | 4.6274  | 1.0405  | 0.0572  | 0.7121 | 0.1475 |
| App               | _QYTSHHGVGEVDAANT[Phospho (STY)]PEER_3                                         | P12023_T743_M1_App               | 3.5291  | 3.6356  | 5.4104  | 3.2177  | 3.5854  | 3.0392  | 4.4332   | 3.3999  | 3.0485  | 3.1847  | 1.0625  | 0.0874  | 0.6726 | 0.1722 |
| Pkar2a            | _TDEHVQGGGGGONFVVER_3                                                          | #N/A                             | 8.0087  | 8.0293  | 8.4588  | 8.8261  | 7.3057  | 8.2420  | 8.1585   | 7.9835  | 8.1428  | 8.4022  | 0.9967  | -0.0047 | 0.9237 | 0.0345 |
| Pkar2a            | _SVQCYDNR_2                                                                    | #N/A                             | 6.1778  | 6.8166  | 6.4968  | 6.1467  | 6.8413  | 6.7032  | 6.2549   | 6.5133  | 6.3849  | 6.3260  | 1.0252  | 0.0359  | 0.3563 | 0.4482 |
| Pkar2a            | _AATBATSGLSLWGLDR_2                                                            | #N/A                             | 6.0909  | 5.9245  | 6.9796  | 6.0598  | 5.1132  | 6.3471  | 6.2576   | 5.9430  | 5.3467  | 6.4489  | 1.0145  | 0.0207  | 0.8173 | 0.0876 |
| Pkar2a            | _GTYDELVK_2                                                                    | #N/A                             | 4.7858  | 5.1464  | 5.2874  | 5.5195  | 5.8155  | 4.9405  | 4.3325   | 5.0981  | 5.4229  | 1.0718  | 0.1000  | 0.2119  | 0.6739 | 0.1475 |
| Pkar2a            | _M[Oxidation (M)]FGS[Phospho (STY)]NLDLM[Oxidation (M)]DPGQ_2                  | #N/A                             | 7.4541  | 7.3745  | 7.9980  | 7.6911  | 7.3691  | 8.1457  | 7.8843   | 7.8012  | 8.0842  | 7.9360  | 0.9679  | -0.0471 | 0.1886 | 0.7245 |
| Pkar2a            | _NISHYEEQLVK_2                                                                 | #N/A                             | 4.2720  | 4.6961  | 5.2746  | 5.0868  | 4.6913  | 5.5566  | 5.5374   | 5.0944  | 5.3111  | 5.2581  | 0.9301  | -0.1046 | 0.1734 | 0.7610 |
| Pkar2a            | _RV5[Phospho (STY)]VC[Carbamidomethyl (C)]AETNPDEEEEDNDR_3                     | P12367_S96_M1_Pkar2a             | 3.9231  | 5.9967  | 4.0352  | 8.4155  | 5.7573  | 6.1041  | 5.6476   | 7.6691  | 6.4684  | 5.2434  | 0.9118  | -0.1332 | 0.5737 | 0.2413 |
| Pkar2a            | _VSV[C[Carbamidomethyl (C)]AETNPDEEEEDNDR_2                                    | #N/A                             | 4.3030  | 3.5584  | 4.0366  | 3.3564  | 3.4467  | 3.1779  | 3.0711   | 3.2612  | 4.4107  | 3.3234  | 1.0369  | 0.0523  | 0.7003 | 0.1547 |
| Pki               | _RTL5[Phospho (STY)]DKGF_2                                                     | #N/A                             | 12.1092 | 11.8140 | 12.6657 | 11.9813 | 10.3404 | 11.9490 | 12.4709  | 12.0317 | 11.9545 | 11.8927 | 0.9770  | -0.0335 | 0.5181 | 0.2856 |
| Pki               | _RTL5[Phospho (STY)]DK_2                                                       | #N/A                             | 9.8842  | 9.2319  | 9.5396  | 9.9207  | 8.0999  | 9.2557  | 9.8136   | 9.7032  | 9.5515  | 9.3290  | 0.9711  | -0.0423 | 0.4518 | 0.3451 |
| Pki               | _GGTSPAFDR_2                                                                   | #N/A                             | 8.7245  | 7.2927  | 8.9247  | 8.8329  | 8.2298  | 7.3165  | 8.8628   | 7.6984  | 8.7476  | 8.7030  | 0.9667  | -0.0488 | 0.5364 | 0.2705 |
| Pki               | _VTVLGHVQR_2                                                                   | #N/A                             | 7.0735  | 7.4872  | 7.4155  | 7.4877  | 7.2232  | 7.0933  | 7.0159   | 7.7744  | 7.6381  | 7.2914  | 0.9821  | -0.0261 | 0.4483 | 0.3485 |
| Pki               | _TNVLQHLQGGGAPTFDR_3                                                           | #N/A                             | 6.7097  | 6.0568  | 6.6097  | 6.7285  | 5.7787  | 6.2733  | 6.5357   | 6.4647  | 6.3266  | 6.4186  | 0.9880  | -0.0173 | 0.7128 | 0.1470 |
| Pki               | _SFENNWK_2                                                                     | #N/A                             | 6.6142  | 5.5802  | 5.4941  | 6.1951  | 4.3264  | 5.5412  | 6.1454   | 5.6430  | 5.5709  | 5.2647  | 0.9525  | -0.0703 | 0.5622 | 0.2501 |
| Pki               | _VFANAFOSAC[Carbamidomethyl (C)]VGLR_2                                         | #N/A                             | 5.3862  | 4.8141  | 5.4163  | 5.2617  | 4.9962  | 4.1988  | 5.6023   | 4.7355  | 5.7863  | 5.2045  | 0.9400  | -0.0893 | 0.3160 | 0.5003 |
| Pki               | _TIS[Phospho (STY)]DKGF_2                                                      | #N/A                             | 2.9462  | 7.9091  | 8.6184  | 7.8812  | 3.5908  | 8.3022  | 3.8728   | 8.1877  | 8.8272  | 8.8323  | 0.8804  | -0.1838 | 0.5964 | 0.2245 |
| Pki               | _TVLEVVM[Oxidation (M)]GR_2                                                    | #N/A                             | 5.6959  | 5.4244  | 5.9014  | 6.1805  | 5.2257  | 5.1691  | 4.0668   | 6.3233  | 5.6981  | 5.4214  | 1.0413  | 0.0584  | 0.6176 | 0.2093 |
| Pki               | _NEWGSLLELVK_2                                                                 | #N/A                             | 4.5939  | 3.9002  | 4.3624  | 3.5278  | 3.8391  | 2.5949  | 3.7968   | 3.9859  | 3.6517  | 3.3258  | 1.0306  | 0.0435  | 0.7716 | 0.1126 |
| Pki               | _AIGVLTSGGDAAGM[Oxidation (M)]NAAVR_2                                          | #N/A                             | 5.0702  | 5.1433  | 5.5644  | 4.6650  | 5.2845  | 5.4174  | 5.4448   | 5.9534  | 5.0245  | 5.4598  | 0.9488  | -0.0757 | 0.2383 | 0.6228 |
| Pki               | _M[Oxidation (M)]EVDIAITTAQSQIR_2                                              | #N/A                             | 3.3717  | 4.7914  | 5.0904  | 4.0946  | 3.6501  | 4.3315  | 5.4716   | 4.7313  | 4.1791  | 4.3411  | 0.9019  | -0.1489 | 0.2899 | 0.5377 |
| Pki               | _TGSEGHVTYVHDGFEGLAK_3                                                         | #N/A                             | 4.2997  | 2.9265  | 3.4856  | 3.9883  | 2.8148  | 3.8098  | 4.4927   | 4.1302  | 3.7788  | 3.9553  | 0.8891  | -0.2023 | 0.1387 | 0.8578 |
| Chrm1             | _SQPAGSGPES[Phospho (STY)]PPGR_2                                               | P12657_S254_M1_Chrm1             | 10.4920 | 10.5310 | 11.3116 | 10.3285 | 9.1056  | 10.1605 | 11.0480  | 10.8792 | 10.5476 | 10.2301 | 0.9668  | -0.0487 | 0.3922 | 0.4065 |
| Chrm1             | _RPGS[Phospho (STY)]VHRT[Phospho (STY)]PSR_3                                   | #N/A                             | 3.4453  | 5.6383  | 5.2180  | 5.2769  | 4.0821  | 5.1741  | 3.9474   | 3.9123  | 6.1039  | 4.1997  | 1.0583  | 0.0818  | 0.6703 | 0.1748 |
| Calb1             | _TDALISAGDN_2                                                                  | #N/A                             | 8.7981  | 8.9861  | 8.8586  | 9.6085  | 9.0622  | 8.9023  | 9.1372   | 9.1235  | 9.2474  | 8.7702  | 0.9963  | -0.0054 | 0.8496 | 0.0708 |
| Calb1             | _SFVDQYVGR_2                                                                   | #N/A                             | 7.0142  | 6.5376  | 6.1339  | 6.7859  | 7.5184  | 7.0172  | 7.1265   | 6.8886  | 7.0010  | 7.0970  | 0.9724  | -0.0403 | 0.4512 | 0.3456 |
| Calb1             | _ELQNQLLEQLAR_2                                                                | #N/A                             | 4.9667  | 5.3232  | 4.0094  | 4.8389  | 4.6429  | 4.8099  | 5.4306   | 5.0361  | 5.3158  | 4.6610  | 0.9324  | -0.1010 | 0.2203 | 0.6570 |
| Calb1             | _NIMLASDGGK_2                                                                  | #N/A                             | 6.0340  | 3.2526  | 3.7308  | 5.9674  | 3.1409  | 3.4837  | 3.3769   | 3.7266  | 4.0256  | 2.9519  | 1.2125  | -0.2780 | 0.3270 | 0.8855 |
| Cox5a             | _LNDFAFAVR_2                                                                   | #N/A                             | 9.7093  | 10.0385 | 9.9978  | 10.0590 | 10.6479 | 9.8809  | 9.8108   | 9.9615  | 9.9334  | 9.9027  | 1.0155  | 0.0222  | 0.3774 | 0.4232 |
| Cox5a             | _ILEVVKDK_2                                                                    | #N/A                             | 8.5839  | 9.4821  | 9.8337  | 9.5540  | 8.8052  | 9.3958  | 9.0807   | 9.0334  | 9.2879  | 9.0466  | 1.0362  | 0.0514  | 0.2013 | 0.6962 |
| Cox5a             | _GM[Oxidation (M)]NTLVGVYDLVPEPK_2                                             | #N/A                             | 8.2898  | 8.4947  | 9.3745  | 8.9717  | 8.7289  | 9.3975  | 8.3506   | 8.1753  | 8.1951  | 8.1563  | 1.0799  | 0.1109  | 0.0235 | 1.6282 |
| Cox5a             | _RLNDFAFAVR_2                                                                  | #N/A                             | 6.0497  | 7.0026  | 6.8493  | 6.8670  | 7.2277  | 7.1299  | 6.6652   | 6.3038  | 6.5603  | 6.2698  | 1.0627  | 0.0878  | 0.1138 | 0.9440 |
| Nr4a1;Nr4a2;Nr4a3 | _TDS[Phospho (STY)]IKGR_2                                                      | P12813_S344_M1_Nr4a1;Nr4a2;Nr4a3 | 3.2823  | 3.9755  | 3.5383  | 4.1452  | 3.9185  | 3.9327  | 6.0235   | 4.3569  | 6.0871  | 3.8225  | 0.7489  | -0.4172 | 0.0305 | 1.5158 |
| Pdc6f             | _ISDGFHOLR_2                                                                   | #N/A                             | 4.3260  | 4.5421  | 4.8325  | 3.4830  | 4.5925  | 4.0041  | 4.6949   | 4.5551  | 5.3740  | 1.8302  | 0.0429  | 0.7012  | 0.1542 | 0.1542 |
| Pdc6f             | _VITDQWQWFR_2                                                                  | #N/A                             | 3.6039  | 5.1036  | 3.3376  | 6.0387  | 4.6912  | 4.1697  | 5.1225   | 4.1198  | 4.6947  | 4.0595  | 0.9981  | -0.0027 | 0.9883 | 0.0051 |
| Pkar1b            | _NLVPSHLDNER_3                                                                 | #N/A                             | 5.6542  | 5.0649  | 4.1594  | 5.1826  | 5.0051  | 5.4071  | 5.3672   | 5.0985  | 4.8945  | 5.0648  | 0.9946  | -0.0078 | 0.9221 | 0.0352 |
| Pkar1b            | _S[Phospho (STY)]PNEEYEVGR_2                                                   | P12849_S307_M1_Pkar1b            | 6.3205  | 3.1103  | 3.9658  | 6.7493  | 3.3759  | 3.2488  | 3.6578   | 6.6572  | 3.7907  | 3.1869  | 1.0321  | 0.0455  | 0.8975 | 0.0470 |
| Pkar1b            | _JAcetyl (Protein N-term)[ASPS[Phospho (STY)]C[Carbamidomethyl (C)]FHSDEDSLK_2 | P12849_S5_M1_Pkar1b              | 3.6830  | 3.8140  | 3.4167  | 3.9875  | 3.7023  | 3.8090  | 4.6989   | 4.1422  | 3.7908  | 3.9545  | 0.9008  | -0.1506 | 0.0558 | 1.2536 |
| Pkar1b            | _SNSQC[Carbamidomethyl (C)]DSDHEES[Phospho (STY)]PTPNPVVK_3                    | P12849_S83_M1_Pkar1b             | 6.1782  | 6.0453  | 7.0199  | 7.7367  | 6.5839  | 6.9565  | 6.7481   | 7.1789  | 7.2956  | 6.0643  | 0.9900  | -0.0145 | 0.8642 | 0.1689 |
| Pkar1b            | _GGVSAETTEDAVSIVR_2                                                            | #N/A                             | 5.6248  | 5.7812  | 6.6624  | 4.1144  | 3.8276  | 3.9019  | 4.2627   | 4.3876  | 3.1858  | 3.7917  | 1.2760  | 0.3517  | 0.1137 | 0.8738 |
| Pkar1b            | _IVVGEPGGDYFITETASVLQR_3                                                       | #N/A                             | 3.1218  | 3.9270  | 3.8087  | 4.1936  | 3.7484  | 3.9811  | 4.3419   | 4.3084  | 3.1066  | 3.8709  | 1.0718  | -0.0413 | 0.7175 | 0.1748 |
| Cntn1             | _NDDGGYTC[Carbamidomethyl (C)]FAENNR_2                                         | #N/A                             | 10.9907 | 10.9571 | 11.6426 | 12.1997 | 10.5209 | 11.0766 | 11.4403  | 11.5923 | 11.3209 | 11.1896 | 0.9864  | -0.0197 | 0.6326 | 0.1989 |
| Cntn1             | _M[Oxidation (M)]NNGOVOLDNDR_2                                                 | #N/A                             | 9.4027  | 9.1579  | 9.5324  | 9.8017  | 8.6980  | 9.0583  | 9.6648   | 9.2917  | 9.2929  | 9.3142  | 0.9877  | -0.0179 | 0.5981 | 0.2283 |
| Cntn1             | _GPPPGPGGLR_2                                                                  | #N/A                             | 8.4274  | 8.8726  | 8.7530  | 8.4735  | 8.7523  | 8.3377  | 8.4852   | 8.9258  | 8.4710  | 8.5522  | 0.9993  | -0.0010 | 0.9677 | 0.0143 |
| Cntn1             | _IKTDGAAPNAPSDVGGGGGCTNR_3                                                     | #N/A                             | 8.2104  | 8.3889  | 8.7696  | 8.4615  | 8.0797  | 8.3712  | 8.4557   | 8.5788  | 8.3550  | 8.3169  | 0.9948  | -0.0075 | 0.7419 | 0.1297 |
| Cntn1             | _VTVTNPTGR_2                                                                   | #N/A                             | 7.8576  | 7.9016  | 8.2132  | 8.1388  | 8.1793  | 7.9283  | 7.9556   | 8.0781  | 8.0052  | 8.3109  | 0.9937  | -0.0091 | 0.6293 | 0.2011 |
| Cntn1             | _FIPURIPER_2                                                                   | #N/A                             | 8.0857  | 8.2184  | 8.1130  | 7.7033  | 7.8052  | 7.9485  | 8.2786   | 8.3930  | 7.7992  | 7.9973  | 0.9830  | -0.0247 | 0.3735 | 0.4277 |
| Cntn1             | _IVESVQR_2                                                                     | #N/A                             | 8.0655  | 7.9931  | 8.3243  | 8.0784  | 7.8687  | 8.1256  | 7.7935   | 8.2681  | 8.0513  | 7.7395  | 1.0142  | 0.0003  | 0.3882 | 0.4109 |
| Cntn1             | _ELTTWAPLSR_2                                                                  | #N/A                             | 7.8144  | 7.7188  | 7.7034  | 7.8421  | 7.4889  | 7.6880  | 8.0038   | 7.8831  | 8.0373  | 7.7346  | 0.9740  | -0.0379 | 0.0395 | 1.4035 |
| Cntn1             | _VQVTSQPSAR_2                                                                  | #N/A                             | 7.1804  | 7.1429  | 7.6999  | 7.0355  | 7.2645  | 7.2845  | 7.4002   | 7.1168  | 7.4977  | 7.5692  | 0.9849  | -0.0219 | 0.4558 | 0.3412 |
| Cntn1             | _TDGAAPNAPSDVGGGGGCTNR_2                                                       | #N/A                             | 7.1575  | 7.2039  | 7.2722  | 7.5854  | 6.7240  | 7.0598  | 7.8126   | 7.3278  | 7.4712  | 6.9325  | 0.9664  | -0.0493 | 0.2852 | 0.5449 |
| Cntn1             | _DGEFVVEVR_2                                                                   | #N/A                             | 7.4674  | 7.3714  | 7.1000  | 7.5735  | 6.1771  | 7.0405  | 7.0966   | 7.6324  | 7.0204  | 7.4158  | 0.9767  | -0.0340 | 0.5643 | 0.2485 |
| Cntn1             | _GM[Oxidation (M)]VLLC[Carbamidomethyl (C)]DPPPHPDLSVR_3                       | #N/A                             | 6.3780  | 6.5704  | 6.6114  | 6.5613  | 6.5767  | 6.7481  | 6.8480   | 7.1270  | 6.7675  | 6.4542  | 0.9669  | -0.0485 | 0.1098 | 0.9594 |
| Cntn1             | _HSIEVPPIR_2                                                                   | #N/A                             | 3.0701  | 6.9496  | 6.4663  | 6.8467  | 6.4439  | 6.1775  | 6.6549   | 6.9767  | 6.3149  | 6.9008  | 0.9732  | -0.0392 | 0.3825 | 0.4174 |
| Cntn1             | _ILYRPGDGHQK_3                                                                 | #N/A                             | 5.7812  | 5.2752  | 5.6455  | 5.5868  | 6.4695  | 5.7671  | 5.2328   | 6.0922  | 6.0031  | 5.9692  | 0.9880  | -0.0175 | 0.7909 | 0.1019 |
| Cntn1             | _AHSDDGGVVSQVK_2                                                               | #N/A                             | 5.9148  | 5.4870  | 5.9396  | 6.2697  | 5.1283  | 6.0515  | 5.9169   | 5.9062  | 5.7183  | 5.8481  | 0.9916  | -0.0121 | 0.8262 | 0.0829 |
| Cntn1             | _VATNTLGTGEPSPSNR_2                                                            | #N/A                             | 8.2503  | 8.6859  | 4.2217  | 8.6353  | 8.8024  | 8.8375  | 9.1075   | 9.1306  | 8.2501  | 8.4013  | 0.9063  | -0.1419 | 0.4125 | 0.3846 |
| Cntn1             | _ILALPTFEM[Oxidation (M)]NPM[Oxidation (M)]K_2                                 | #N/A                             | 6.7289  | 7.6195  | 7.2958  | 6.3580  | 6.7698  | 7.5693  | 7.3983   | 7.8216  | 7.1297  | 0.9451  | -0.0814 | 0.1888  | 0.7239 | 0.1405 |
| Cntn1             | _GSDNHSPISK_2                                                                  | #N/A                             | 5.0918  | 4.4350  | 5.5019  | 5.5019  | 5.6670  | 5.5610  | 5.6141</ |         |         |         |         |         |        |        |



|        |                                                               |                      |         |         |         |         |         |         |         |         |         |         |         |         |        |        |
|--------|---------------------------------------------------------------|----------------------|---------|---------|---------|---------|---------|---------|---------|---------|---------|---------|---------|---------|--------|--------|
| Gsn    | _DSQEEKEKLTLSAK_2                                             | #N/A                 | 3.9016  | 3.7455  | 3.7619  | 4.2646  | 3.3653  | 4.0861  | 3.5465  | 3.6494  | 3.5025  | 3.5036  | 1.0855  | 0.1184  | 0.0961 | 1.0171 |
| Ncam1  | _NPPEAATAPAS[Phospho (STY)]PK_2                               | #N/A                 | 14.4856 | 14.6933 | 15.3196 | 14.9451 | 14.0003 | 14.5969 | 15.1388 | 14.8191 | 14.6494 | 14.5802 | 0.9917  | -0.0121 | 0.6309 | 0.2000 |
| Ncam1  | _GVYASSSS[Phospho (STY)]PASAPK_2                              | P13595_S887_M1_Ncam1 | 11.8316 | 11.8577 | 12.4327 | 11.8849 | 10.9508 | 11.7371 | 12.1094 | 11.9112 | 11.7712 | 0.9788  | -0.0309 | 0.3710  | 0.4306 |        |
| Ncam1  | _FLIC[Carbamidomethyl (C)]QVAGDAK_2                           | #N/A                 | 8.4185  | 8.2449  | 8.1503  | 8.3059  | 7.9956  | 7.8098  | 8.3611  | 8.3258  | 8.2193  | 8.1089  | 0.9879  | -0.0175 | 0.4363 | 0.3603 |
| Ncam1  | _GLGESAITEFK_2                                                | #N/A                 | 7.3871  | 7.3956  | 7.6197  | 7.1378  | 7.5977  | 7.7153  | 7.6062  | 8.0896  | 7.7557  | 7.3480  | 0.9709  | -0.0426 | 0.2057 | 0.6868 |
| Ncam1  | _ALASEWPPER_2                                                 | #N/A                 | 7.8384  | 7.8091  | 7.9640  | 7.7550  | 7.6818  | 7.5475  | 8.1597  | 7.9811  | 7.6680  | 7.6645  | 0.9870  | -0.0189 | 0.4215 | 0.3752 |
| Ncam1  | _NAPTPGEFK_2                                                  | #N/A                 | 7.8070  | 7.1829  | 7.3102  | 7.2631  | 7.2524  | 6.8732  | 7.3917  | 7.1686  | 6.9972  | 7.4540  | 1.0039  | 0.0057  | 0.8741 | 0.0584 |
| Ncam1  | _AGEDDASHHK_2                                                 | #N/A                 | 6.8263  | 6.3889  | 6.0079  | 6.7383  | 6.0736  | 6.0235  | 6.8906  | 6.2283  | 6.0969  | 1.0056  | 0.0080  | 0.8896  | 0.0508 |        |
| Ncam1  | _FVLVNNYLQIR_2                                                | #N/A                 | 6.1703  | 6.1429  | 6.7270  | 6.2452  | 5.6065  | 5.7830  | 7.0509  | 6.4998  | 6.3783  | 6.3370  | 0.9309  | -0.1034 | 0.0933 | 1.0299 |
| Ncam1  | _NPPEAATAPAS[Phospho (STY)]PKSK_2                             | #N/A                 | 7.8079  | 4.3833  | 8.7271  | 3.7373  | 6.5547  | 3.0210  | 3.8856  | 7.9428  | 8.0172  | 3.4146  | 0.9811  | -0.0275 | 0.9451 | 0.0245 |
| Ncam1  | _VEPYSTAQVQFDEPEATGGVPLK_3                                    | #N/A                 | 5.6676  | 5.3221  | 5.3243  | 4.3857  | 5.6651  | 4.7059  | 5.5096  | 5.0012  | 5.0575  | 5.3027  | 0.9925  | -0.0109 | 0.8928 | 0.0492 |
| Ncam1  | _NVOKNKDEAEVYQ[Carbamidomethyl (C)]IAENK_3                    | #N/A                 | 7.5720  | 7.1956  | 8.0855  | 7.9179  | 6.8768  | 7.4354  | 7.3873  | 7.7670  | 7.6028  | 7.5391  | 0.9921  | -0.0115 | 0.8062 | 0.0936 |
| Ncam1  | _AAHFVFR_2                                                    | #N/A                 | 5.0513  | 5.1920  | 4.2850  | 4.7868  | 4.7465  | 4.8390  | 5.0264  | 5.5937  | 5.2603  | 3.5633  | 0.9909  | -0.0132 | 0.9122 | 0.0399 |
| Ncam1  | _AAFSKDSE[Phospho (STY)]KEPIVEVR_3                            | #N/A                 | 12.1176 | 12.3327 | 12.9295 | 12.4540 | 11.2528 | 12.2115 | 12.8983 | 12.6033 | 12.4715 | 12.1947 | 0.9740  | -0.0380 | 0.3152 | 0.5015 |
| Ncam1  | _GDPDEPTQGTGVNPPPEAATAPAS[Phospho (STY)]PK_3                  | #N/A                 | 4.2825  | 6.9623  | 9.4810  | 6.5673  | 3.4150  | 5.5754  | 5.7514  | 7.2089  | 3.7960  | 5.2131  | 1.1010  | 0.1389  | 0.6643 | 0.1776 |
| Ncam1  | _DES[Phospho (STY)]KEPIVEVR_2                                 | #N/A                 | 11.7195 | 11.3057 | 11.8491 | 11.8338 | 10.2905 | 11.1652 | 12.0884 | 11.7328 | 11.5049 | 11.3910 | 0.9727  | -0.0399 | 0.3593 | 0.4445 |
| Ncam1  | _EANM[Oxidation (M)]EGIVTIM[Oxidation (M)]GLKPETR_3           | #N/A                 | 5.5518  | 5.1626  | 5.6422  | 4.4485  | 4.2907  | 5.1169  | 4.9487  | 5.6123  | 5.2332  | 5.1979  | 0.9595  | -0.0597 | 0.5051 | 0.2967 |
| Ncam1  | _C[Carbamidomethyl (C)]VTAEDGTQSSATVNVK_2                     | #N/A                 | 5.6600  | 4.2421  | 6.4683  | 6.9576  | 4.0634  | 3.6661  | 6.0267  | 6.0291  | 3.1407  | 3.0925  | 1.1321  | 0.1790  | 0.5495 | 0.2600 |
| Ncam1  | _LEGQM[Oxidation (M)]GEDGNSK_2                                | #N/A                 | 6.0115  | 6.1106  | 6.4485  | 5.4111  | 6.0868  | 6.0554  | 6.3116  | 6.3178  | 6.0928  | 6.1783  | 0.9671  | -0.0482 | 0.2822 | 0.5494 |
| Ncam1  | _ASPAPT[Phospho (STY)]PTPAGAAAPLAANAATADAPQAK_3               | P13595_T950_M1_Ncam1 | 3.1977  | 6.6296  | 7.2182  | 7.5930  | 4.2717  | 4.1037  | 6.3012  | 6.3111  | 5.8843  | 4.1722  | 0.9709  | -0.0426 | 0.8771 | 0.0570 |
| Ncam1  | _DGEPIENEEDDEHFFSDSSELTIR_4                                   | #N/A                 | 9.3489  | 9.2300  | 9.2270  | 9.6144  | 7.9560  | 8.7647  | 9.4104  | 9.0731  | 8.9060  | 9.5342  | 0.9775  | -0.0328 | 0.5385 | 0.2688 |
| Ncam1  | _JLGESEHWFK_2                                                 | #N/A                 | 6.9039  | 7.0277  | 6.9811  | 7.0163  | 6.3912  | 6.9088  | 7.0907  | 6.8716  | 6.6044  | 1.0052  | 0.0075  | 0.8158  | 0.0884 |        |
| Ncam1  | _JGGSELEFLVQADTPSSPSDR_3                                      | #N/A                 | 3.6133  | 3.2854  | 3.3470  | 4.3916  | 4.2579  | 3.8675  | 4.5399  | 4.0370  | 3.1611  | 3.2279  | 1.0140  | 0.0200  | 0.8858 | 0.0527 |
| Ncam1  | _LPSGSDHVMLEK_2                                               | #N/A                 | 3.5566  | 3.0776  | 3.9985  | 6.5768  | 3.4085  | 3.1297  | 3.6905  | 3.4589  | 3.7580  | 3.2195  | 1.2151  | 0.2810  | 0.3188 | 0.4965 |
| Ncam1  | _TEERT[Phospho (STY)]PNHDGKK_2                                | P13595_T788_M1_Ncam1 | 4.3738  | 5.4776  | 3.5598  | 4.0624  | 3.4995  | 4.2300  | 3.7771  | 6.0242  | 3.7046  | 4.0294  | 0.9582  | -0.0616 | 0.7558 | 0.1216 |
| Gpd1   | _LISEVIGER_2                                                  | #N/A                 | 7.0529  | 6.8044  | 7.2352  | 6.9406  | 6.8541  | 6.8188  | 7.4654  | 6.7761  | 7.4856  | 6.8954  | 0.9714  | -0.0419 | 0.2636 | 0.5790 |
| Gpd1   | _DLM[Oxidation (M)]QTPNFR_2                                   | #N/A                 | 5.8488  | 6.3995  | 3.3768  | 3.8794  | 6.2833  | 6.0777  | 3.5941  | 6.3719  | 6.1301  | 5.8284  | 0.9689  | -0.0455 | 0.8453 | 0.0730 |
| Dnmt1  | _EADDDDEADDVSEM[Oxidation (M)]PS[Phospho (STY)]PK_2           | #N/A                 | 4.9578  | 5.1324  | 5.2684  | 4.6860  | 3.5058  | 5.4862  | 5.4532  | 4.9368  | 3.8604  | 5.1437  | 0.9985  | -0.0022 | 0.9874 | 0.0055 |
| Dnmt1  | _S[Phospho (STY)]KDSOTLSVETSPSSVATR_3                         | P13864_S138_M1_Dnmt1 | 3.4241  | 4.2293  | 4.6135  | 4.0506  | 3.6789  | 4.0397  | 3.5050  | 3.1535  | 3.0797  | 1.1665  | 0.0221  | 0.0706  | 0.1513 |        |
| Atp1b1 | _VNPVLPVQC[Carbamidomethyl (C)]TGK_2                          | #N/A                 | 11.2504 | 11.1104 | 11.2579 | 11.0985 | 11.2067 | 10.7637 | 11.5628 | 11.2791 | 11.0470 | 10.8127 | 0.9946  | -0.0079 | 0.7105 | 0.1484 |
| Atp1b1 | _SEYAYLVNIR_2                                                 | #N/A                 | 10.0109 | 9.9030  | 10.1551 | 9.7996  | 9.6938  | 9.9999  | 10.3178 | 10.2031 | 10.1879 | 9.8478  | 0.9791  | -0.0305 | 0.1052 | 0.4870 |
| Atp1b1 | _AVGENISYSEK_2                                                | #N/A                 | 9.3714  | 9.0092  | 9.4338  | 9.2609  | 9.2985  | 9.0197  | 9.3622  | 9.2801  | 9.1414  | 9.2668  | 0.9967  | -0.0047 | 0.7647 | 0.1165 |
| Atp1b1 | _AKEGESWVK_2                                                  | #N/A                 | 8.0231  | 7.7163  | 8.3165  | 7.6439  | 7.6385  | 7.9456  | 8.3243  | 8.0324  | 7.8428  | 7.6803  | 0.9888  | -0.0163 | 0.6230 | 0.2055 |
| Atp1b1 | _LGKPK[Carbamidomethyl (C)]HK_2                               | #N/A                 | 8.5623  | 8.7434  | 8.8234  | 8.5780  | 8.0099  | 7.9630  | 8.8956  | 8.6707  | 8.2872  | 8.3593  | 0.9875  | -0.0181 | 0.6405 | 0.1935 |
| Atp1b1 | _FIWNSEK_2                                                    | #N/A                 | 9.0251  | 8.5301  | 8.8529  | 8.4320  | 8.5908  | 8.3061  | 7.3607  | 9.0795  | 8.9238  | 8.7165  | 1.0121  | 0.0173  | 0.7703 | 0.1133 |
| Atp1b1 | _AKEGESWVK_2                                                  | #N/A                 | 8.0222  | 7.3543  | 7.6309  | 7.3665  | 7.8534  | 7.6375  | 7.5621  | 7.8777  | 7.8178  | 7.5228  | 0.9934  | -0.0096 | 0.7460 | 0.1273 |
| Atp1b1 | _VAPPGLTQPIQIK_2                                              | #N/A                 | 11.8837 | 11.8213 | 12.1844 | 11.7684 | 11.7713 | 11.6749 | 12.1323 | 12.0421 | 11.8739 | 11.6381 | 0.9940  | -0.0086 | 0.5853 | 0.2327 |
| Atp1b1 | _AVGENISYSEKDR_2                                              | #N/A                 | 8.6160  | 8.5204  | 9.0655  | 8.3705  | 8.5165  | 8.7796  | 8.8129  | 8.5983  | 8.6669  | 8.5476  | 0.9986  | -0.0021 | 0.9283 | 0.0323 |
| Atp1b1 | _KFIWNSEK_2                                                   | #N/A                 | 3.5771  | 6.1425  | 9.8317  | 7.5159  | 6.1318  | 5.3388  | 7.0356  | 7.7947  | 6.3945  | 4.0326  | 1.0172  | 0.0246  | 0.9391 | 0.0301 |
| Atp1b1 | _YKSAQKDDM[Oxidation (M)]IFEDC[Carbamidomethyl (C)]GNVPSEPK_4 | #N/A                 | 8.7145  | 8.0866  | 8.9816  | 8.4826  | 7.9918  | 8.2577  | 8.2068  | 8.3198  | 8.4803  | 8.5900  | 1.0024  | 0.0034  | 0.9255 | 0.0336 |
| Atp1b1 | _DDM[Oxidation (M)]IFEDC[Carbamidomethyl (C)]GNVPSEPK_2       | #N/A                 | 8.0954  | 7.7778  | 8.0021  | 8.0112  | 7.6165  | 7.9045  | 8.5497  | 8.1956  | 8.2338  | 7.9019  | 0.9612  | -0.0571 | 0.0499 | 1.3020 |
| Atp1b1 | _DSAQKDDM[Oxidation (M)]IFEDC[Carbamidomethyl (C)]GNVPSEPK_3  | #N/A                 | 7.8326  | 7.4584  | 7.4493  | 7.8003  | 6.6270  | 7.2915  | 8.0468  | 7.5916  | 7.4146  | 7.2955  | 0.9766  | -0.0341 | 0.5130 | 0.2899 |
| Atp1b1 | _TEISFRPNQK_2                                                 | #N/A                 | 9.2515  | 9.3572  | 9.5918  | 9.3748  | 9.2327  | 9.0708  | 9.5615  | 9.5621  | 9.2179  | 9.1058  | 0.9948  | -0.0075 | 0.7154 | 0.1454 |
| Atp1b1 | _GONHER_2                                                     | #N/A                 | 3.8678  | 3.3583  | 4.5546  | 3.5564  | 3.2466  | 3.3780  | 3.2711  | 3.0612  | 4.2106  | 3.5234  | 1.0409  | 0.0578  | 0.6636 | 0.1781 |
| Rpl27a | _TGVAPIDVVR_2                                                 | #N/A                 | 6.8326  | 6.8337  | 6.9771  | 6.7230  | 6.1506  | 6.2698  | 6.8503  | 6.9434  | 6.3163  | 6.7807  | 0.9864  | -0.0198 | 0.6667 | 0.1761 |
| Rpl27a | _LWTLVSEQTR_2                                                 | #N/A                 | 7.1542  | 6.2059  | 3.9082  | 6.2845  | 6.1137  | 6.0386  | 3.6003  | 6.5893  | 3.8482  | 3.1293  | 1.4099  | 0.4956  | 0.0695 | 0.1579 |
| Rps16  | _LLEPVLILGK_2                                                 | #N/A                 | 6.4660  | 5.7999  | 5.9058  | 5.7363  | 4.7765  | 4.9246  | 5.0489  | 5.8675  | 5.4516  | 5.5065  | 1.0243  | 0.0346  | 0.7153 | 0.1455 |
| Rps16  | _DIUIQYDR_2                                                   | #N/A                 | 5.6037  | 4.7532  | 4.3068  | 3.8672  | 5.5383  | 5.2850  | 4.6102  | 6.0532  | 6.7180  | 4.5945  | 0.8905  | -0.1673 | 0.0395 | 0.5099 |
| Rps16  | _TATAVAHC[Carbamidomethyl (C)]K_2                             | #N/A                 | 3.9048  | 3.1603  | 3.6385  | 3.7545  | 4.9666  | 3.5760  | 3.4692  | 3.3090  | 4.0125  | 4.3604  | 1.0121  | 0.0173  | 0.9036 | 0.0440 |
| Rps16  | _EKDIUIQYDR_3                                                 | #N/A                 | 3.1311  | 3.9363  | 3.8179  | 4.1844  | 1.6732  | 3.9718  | 4.3326  | 4.3176  | 1.7905  | 4.2876  | 0.9376  | -0.0929 | 0.7488 | 0.1256 |
| Mdh1   | _FVEGLPINFQSR_2                                               | #N/A                 | 11.3614 | 11.5961 | 11.6733 | 11.7941 | 11.8228 | 11.5545 | 11.6586 | 11.6738 | 11.5928 | 11.5240 | 1.0018  | 0.0027  | 0.8200 | 0.0862 |
| Mdh1   | _GEFITVQOOR_2                                                 | #N/A                 | 11.2742 | 11.2827 | 11.3117 | 11.6146 | 11.3860 | 11.3178 | 11.4242 | 11.2811 | 11.3964 | 11.2692 | 1.0019  | 0.0028  | 0.7723 | 0.1122 |
| Mdh1   | _VNVGPNPANTNC[Carbamidomethyl (C)]LTASK_2                     | #N/A                 | 10.5741 | 10.6159 | 11.0203 | 10.9761 | 10.7061 | 10.7024 | 10.7616 | 10.5875 | 10.7376 | 10.5130 | 1.0109  | 0.0156  | 0.3092 | 0.5097 |
| Mdh1   | _ENFSC[Carbamidomethyl (C)]LTR_2                              | #N/A                 | 10.1176 | 10.2734 | 10.2120 | 10.4240 | 10.6208 | 10.1525 | 10.0934 | 10.2083 | 10.2490 | 10.1685 | 1.0118  | 0.0169  | 0.2669 | 0.5737 |
| Mdh1   | _DLDAVNLVSGM[Oxidation (M)]PR_2                               | #N/A                 | 8.6677  | 8.7537  | 8.7129  | 8.9201  | 9.0669  | 8.8433  | 8.9942  | 8.8852  | 9.0445  | 9.0143  | 0.9825  | -0.0255 | 0.0870 | 1.0606 |
| Mdh1   | _LGVATADQVK_2                                                 | #N/A                 | 9.3682  | 9.4662  | 9.3521  | 9.4655  | 9.3577  | 9.0232  | 9.1343  | 9.4816  | 9.2782  | 9.4657  | 0.9999  | -0.0002 | 0.9917 | 0.0036 |
| Mdh1   | _EVGVYEAKDDGSWK_2                                             | #N/A                 | 7.2638  | 7.3138  | 6.7650  | 7.5839  | 7.0961  | 7.4042  | 7.3444  | 6.7439  | 7.2427  | 7.2845  | 1.0117  | 0.0168  | 0.6546 | 0.1840 |
| Mdh1   | _SGQTALEK_2                                                   | #N/A                 | 6.5648  | 6.7848  | 6.4461  | 6.4826  | 7.0867  | 6.7595  | 5.8279  | 7.0810  | 6.9265  | 6.7712  | 1.0054  | 0.0077  | 0.8917 | 0.0498 |
| Mdh1   | _ELTEKETAFEFISSA_2                                            | #N/A                 | 10.2733 | 10.8215 | 12.1122 | 11.8609 | 10.6042 | 11.2522 | 11.0501 | 10.4525 | 10.5985 | 10.7679 | 1.0411  | 0.0881  | 0.2865 | 0.5428 |
| Mdh1   | _NVWVONHSSTQYDVNHAK_3                                         | #N/A                 | 8.8658  | 8.9106  | 9.2852  | 9.2794  | 9.0136  | 9.0839  | 9.2047  | 9.0647  | 9.2190  | 9.1017  | 0.9919  | -0.0118 | 0.4615 | 0.3358 |
| Mdh1   | _KLS[Phospho (STY)]SAM[Oxidation (M)]SAAK_2                   | #N/A                 | 8.8550  | 8.7339  | 9.0991  | 9.6639  | 8.6541  | 8.4952  | 9.0496  | 8.8218  | 8.7256  | 8.6310  | 1.0125  | 0.0179  | 0.6383 | 0.1950 |
| Mdh1   | _EKM[Oxidation (M)]DLTAK_2                                    | #N/A                 | 7.2593  | 6.0500  | 6.2699  | 7.2437  | 7.4428  | 6.6935  | 5.9456  | 6.7430  | 6.7035  | 6.4410  | 1.0570  | 0.0800  | 0.2952 | 0.5299 |
| Mdh1   | _JFKS[Phospho (STY)]QGTALEK_2                                 | P14152_S111_M1_Mdh1  | 4.2018  | 5.0566  | 5.8503  | 6.6145  | 5.1400  | 5.4081  | 3.2619  | 5.2683  | 5.0767  | 3.8575  | 1.1555  | 0.2086  | 0.1975 | 0.7045 |
| Mdh1   | _LSSAMSAK_2                                                   | #N/A                 | 3.2823  | 4.0385  | 4.5168  | 4.3771  | 3.9268  | 4.1986  | 4.09    |         |         |         |         |         |        |        |



|        |                                                                            |                       |         |         |         |         |         |         |         |         |         |         |         |         |        |        |
|--------|----------------------------------------------------------------------------|-----------------------|---------|---------|---------|---------|---------|---------|---------|---------|---------|---------|---------|---------|--------|--------|
| Calr   | _HEQNIDC[Carbamidomethyl (C)]GGGVK_2                                       | #N/A                  | 4.8502  | 4.8783  | 3.7365  | 5.1481  | 3.6762  | 5.4461  | 3.9539  | 4.8503  | 3.0564  | 4.6939  | 1.1169  | 0.1595  | 0.3601 | 0.4435 |
| Calr   | _IKPDAAKPEDWDER_3                                                          | #N/A                  | 6.9780  | 6.8405  | 7.3185  | 7.1149  | 7.3075  | 6.9067  | 6.5173  | 6.6595  | 6.7424  | 6.9575  | 1.0534  | 0.0750  | 0.0223 | 1.6513 |
| Calr   | _LKEEEDKK_2                                                                | #N/A                  | 2.7176  | 3.7432  | 3.3329  | 4.3775  | 3.5645  | 4.1650  | 4.5258  | 4.1245  | 4.4236  | 3.2949  | 0.8920  | -0.1649 | 0.2735 | 0.5630 |
| Calr   | _DM[Oxidation (M)]HGSEYNIM[Oxidation (M)]FGDVC[Carbamidomethyl (C)]GPGTK_3 | #N/A                  | 4.0766  | 3.3321  | 3.8103  | 3.5827  | 3.2204  | 3.4042  | 3.2974  | 3.0349  | 4.1843  | 3.5497  | 1.0155  | 0.0022  | 0.8362 | 0.0777 |
| Atp1b2 | _FLVVTNPNVEVNC[Carbamidomethyl (C)]R_2                                     | #N/A                  | 6.5686  | 6.3160  | 7.0398  | 6.6886  | 6.2585  | 6.3086  | 6.9758  | 6.7629  | 6.5698  | 6.0998  | 0.9891  | -0.0158 | 0.7442 | 0.1283 |
| Atp1b2 | _SC[Carbamidomethyl (C)]GQVVEEWK_2                                         | #N/A                  | 6.7889  | 5.7073  | 6.8396  | 6.0421  | 6.3421  | 5.7544  | 6.1574  | 6.1622  | 5.5885  | 6.3874  | 1.0283  | 0.0403  | 0.5655 | 0.2476 |
| Atp1b2 | _NDVC[Carbamidomethyl (C)]RGR_2                                            | #N/A                  | 5.6326  | 5.0413  | 5.8535  | 5.8861  | 6.0661  | 5.3933  | 6.2046  | 6.3636  | 6.3053  | 5.7128  | 0.9185  | -0.1227 | 0.0564 | 1.2486 |
| Atp1b2 | _INAAIATDDEK_2                                                             | #N/A                  | 0.0808  | 5.6102  | 5.4125  | 5.8674  | 5.5693  | 5.3827  | 5.9178  | 5.8288  | 5.2675  | 5.6004  | 1.0002  | 0.0003  | 0.9948 | 0.0023 |
| Atp1b2 | _EFVWNP_2                                                                  | #N/A                  | 5.8380  | 5.6424  | 5.0633  | 6.0062  | 5.1962  | 5.2352  | 5.4593  | 5.7209  | 5.9126  | 5.5188  | 0.9724  | -0.0404 | 0.4849 | 0.3144 |
| Atp1b2 | _YEQGPONGVLNYPK_2                                                          | #N/A                  | 5.7809  | 5.5147  | 4.4767  | 5.3950  | 5.0798  | 4.2387  | 5.7365  | 5.0275  | 5.2012  | 0.9124  | -0.1322 | 0.2417  | 0.6168 | 0.1277 |
| Atp1b2 | _SC[Carbamidomethyl (C)]GQVVEEWKPFVWNP_3                                   | #N/A                  | 4.7777  | 4.7622  | 4.9048  | 5.6754  | 4.7455  | 3.6054  | 4.3800  | 4.6057  | 5.0288  | 5.1233  | 0.9918  | -0.0119 | 0.9170 | 0.0376 |
| Atp1b2 | _INAAIATDDEKDFAGR_3                                                        | #N/A                  | 7.4658  | 7.8618  | 8.3632  | 7.8807  | 7.7582  | 7.6414  | 8.0474  | 7.8392  | 7.7767  | 7.6354  | 1.0005  | 0.0007  | 0.9826 | 0.0076 |
| Atp1b2 | _TLQGDCC[Carbamidomethyl (C)]SGDPTHGYSTGQC[Carbamidomethyl (C)]VFVK_3      | #N/A                  | 2.1850  | 2.7903  | 4.1985  | 3.6979  | 3.6085  | 3.0161  | 1.9409  | 3.2589  | 3.5580  | 3.4195  | 1.0673  | 0.0940  | 0.6762 | 0.1699 |
| Hspb1  | _QLS[Phospho (STY)]SGVSE_2                                                 | P14602_S86_M1_Hspb1   | 9.7332  | 9.7293  | 10.3468 | 10.3867 | 9.8962  | 9.7502  | 9.9416  | 9.3811  | 9.8530  | 10.1176 | 1.0153  | 0.0219  | 0.4770 | 0.3215 |
| Hspb1  | _SPS[Phospho (STY)]WEFPR_2                                                 | P14602_S15_M1_Hspb1   | 3.2813  | 4.0865  | 3.9681  | 9.2076  | 8.1388  | 3.8217  | 8.1890  | 8.5040  | 3.2963  | 8.3360  | 0.7650  | -0.3865 | 0.3411 | 0.4671 |
| Psmd3  | _SVPEQANNNEWAR_2                                                           | #N/A                  | 7.6173  | 3.4790  | 8.1695  | 8.2238  | 3.3003  | 7.5222  | 8.2326  | 8.0060  | 7.7414  | 7.3887  | 0.8140  | -0.2970 | 0.2592 | 0.5864 |
| Psmd3  | _QLDS[Phospho (STY)]PEDAEFVAK_2                                            | P14685_S426_M1_Psmd3  | 3.8749  | 3.1792  | 4.5617  | 3.5635  | 3.0006  | 3.2281  | 3.2782  | 3.0541  | 4.2036  | 3.5305  | 1.0146  | 0.0209  | 0.8883 | 0.0514 |
| Lmnb1  | _Acetyl (Protein N-term)IATAT[Phospho (STY)]PQQQR_2                        | P14731_T5_M1_Lmnb1    | 9.0744  | 9.1895  | 9.5265  | 8.6229  | 9.2631  | 9.0316  | 9.1152  | 8.9753  | 9.0700  | 10.1990 | 0.0272  | 0.3820  | 0.1450 | 0.0680 |
| Lmnb1  | _ASAPATRLS[Phospho (STY)]PTR_2                                             | P14731_S24_M1_Lmnb1   | 7.6731  | 3.8588  | 8.6159  | 4.5568  | 7.7605  | 4.3784  | 4.2715  | 3.5616  | 7.9837  | 7.6899  | 1.0449  | 0.0634  | 0.8551 | 0.1450 |
| Lmnb1  | _KLS[Phospho (STY)]PSPSR_2                                                 | P14731_S392_M1_Lmnb1  | 5.8655  | 7.7939  | 6.3181  | 8.1386  | 7.3940  | 8.2350  | 6.3755  | 7.7992  | 6.0764  | 1.0337  | 0.0479  | 0.7161  | 0.1450 | 0.0680 |
| Lmnb1  | _LSPS[Phospho (STY)]PSSR_2                                                 | P14731_S394_M1_Lmnb1  | 8.1670  | 8.4956  | 8.8958  | 8.6967  | 8.4043  | 8.6057  | 8.6130  | 8.5251  | 8.5236  | 8.4715  | 1.0013  | 0.0018  | 0.9353 | 0.0290 |
| Lmnb1  | _NONSNGTGEDNK_2                                                            | #N/A                  | 5.2635  | 5.2373  | 4.5941  | 6.2122  | 5.1856  | 3.1957  | 5.1914  | 5.6239  | 5.6821  | 5.5843  | 0.8963  | -0.1579 | 0.3027 | 0.5190 |
| Lmnb1  | _AGSRAS[Phospho (STY)]APAT[Phospho (STY)]PLSPTR_2                          | P14731_S17_M2_Lmnb1   | 5.1679  | 3.5589  | 4.0543  | 6.1436  | 4.8893  | 5.7954  | 6.0823  | 5.4049  | 5.5864  | 5.6499  | 0.8687  | -0.2031 | 0.1886 | 0.7244 |
| Anxa6  | _SEIDLNR_2                                                                 | #N/A                  | 7.1535  | 6.8085  | 6.1767  | 7.0488  | 6.5810  | 6.6635  | 6.4176  | 6.7540  | 6.6667  | 6.6931  | 1.0160  | 0.0228  | 0.5906 | 0.2287 |
| Anxa6  | _DLESDIGDTSGHFK_2                                                          | #N/A                  | 6.9760  | 6.4567  | 6.9366  | 6.9476  | 6.4198  | 6.7111  | 6.4767  | 6.6887  | 6.6381  | 5.9410  | 1.0474  | 0.0668  | 0.1416 | 0.8489 |
| Anxa6  | _TLIELATR_2                                                                | #N/A                  | 6.2290  | 5.9763  | 3.4584  | 5.3028  | 6.1274  | 6.3567  | 6.1548  | 6.2472  | 6.4048  | 6.5209  | 0.8805  | -0.1837 | 0.2175 | 0.6625 |
| Anxa6  | _SLEDALSSDTSGHFR_2                                                         | #N/A                  | 5.5102  | 5.1752  | 5.5779  | 5.2865  | 5.5119  | 5.3384  | 5.3151  | 5.0819  | 5.0102  | 4.5889  | 1.0469  | 0.3861  | 0.3365 | 0.4731 |
| Anxa6  | _M[Oxidation (M)]LVLLQGT_2                                                 | #N/A                  | 4.4152  | 4.5057  | 3.3513  | 4.9262  | 4.5872  | 5.2755  | 5.0189  | 5.4482  | 4.9530  | 5.4555  | 0.8642  | -0.2106 | 0.0766 | 1.1155 |
| Anxa6  | _ENDDVSELDVQGDQDLYEAGELK_3                                                 | #N/A                  | 4.8836  | 5.0910  | 4.0096  | 5.1613  | 4.7842  | 4.3168  | 4.4849  | 4.8738  | 3.1376  | 5.1396  | 1.0678  | 0.0946  | 0.4980 | 0.2877 |
| Anxa6  | _GITDEATHDVTNR_2                                                           | #N/A                  | 4.2319  | 3.7881  | 3.2048  | 4.4098  | 4.1021  | 3.6300  | 4.5458  | 3.8116  | 4.8733  | 3.9803  | 0.9051  | -0.1438 | 0.2084 | 0.6811 |
| Anxa6  | _WGTEAQFVYLGNR_2                                                           | #N/A                  | 3.2097  | 4.1137  | 3.9470  | 4.4497  | 3.8542  | 3.9787  | 4.5145  | 3.6688  | 3.3174  | 4.4167  | 0.9865  | -0.0196 | 0.8664 | 0.0623 |
| Anxa6  | _LISATGNR_2                                                                | #N/A                  | 7.8677  | 3.9061  | 3.1699  | 7.3047  | 4.0808  | 4.0446  | 4.3628  | 3.9636  | 3.0857  | 3.8918  | 1.3231  | 0.0440  | 0.2676 | 0.5725 |
| Anxa6  | _AINEAKEDYHK_3                                                             | #N/A                  | 3.3015  | 4.0409  | 4.5361  | 1.3350  | 3.2979  | 4.1407  | 4.2281  | 1.4614  | 2.6281  | 3.7571  | 1.1402  | 0.1893  | 0.5931 | 0.2269 |
| Anxa6  | _IAQGAMYR_2                                                                | #N/A                  | 4.2918  | 3.5961  | 3.4777  | 4.5246  | 3.4175  | 4.3120  | 3.1720  | 4.1381  | 4.2765  | 3.9474  | 1.0137  | 0.0196  | 0.8714 | 0.0598 |
| Rplp0  | _LIQLDDYPK_2                                                               | #N/A                  | 6.2679  | 6.3717  | 6.2759  | 6.4460  | 6.2399  | 6.1327  | 6.1811  | 6.5698  | 6.5191  | 5.6862  | 1.0080  | 0.0115  | 0.7765 | 0.1099 |
| Rplp0  | _GHLHNPALK_2                                                               | #N/A                  | 6.1489  | 5.7354  | 5.1604  | 6.1070  | 6.0379  | 6.3175  | 5.8701  | 5.8696  | 5.9047  | 6.2877  | 0.9891  | -0.0158 | 0.7819 | 0.1068 |
| Rplp0  | _TSFQALGITK_2                                                              | #N/A                  | 5.4448  | 5.3850  | 5.6650  | 5.9602  | 5.2496  | 5.4363  | 5.1673  | 5.1632  | 5.3496  | 5.6985  | 1.0335  | 0.0475  | 0.3037 | 0.5176 |
| Rplp0  | _C[Carbamidomethyl (C)]FVGAQNVGSK_2                                        | #N/A                  | 6.3767  | 5.9868  | 6.1486  | 5.2578  | 6.2625  | 4.2793  | 5.6414  | 5.6369  | 6.2378  | 6.1081  | 0.9683  | -0.0465 | 0.6750 | 0.1707 |
| Rplp0  | _AFLADPSAFAAAAAATAAPAAAAAPAK_3                                             | #N/A                  | 4.4200  | 4.2100  | 3.2865  | 4.0000  | 4.2166  | 3.5310  | 3.9831  | 3.7739  | 3.5568  | 4.4054  | 1.0037  | 0.0053  | 0.9582 | 0.0185 |
| Rplp0  | _EDLTER_2                                                                  | #N/A                  | 3.8660  | 3.4765  | 3.5996  | 3.1434  | 3.5465  | 3.6327  | 3.2917  | 4.7049  | 2.7763  | 3.7412  | 0.9767  | -0.0340 | 0.8131 | 0.0899 |
| Rplp0  | _AEAKES[Phospho (STY)]EESDEDM[Oxidation (M)]GRLFD_2                        | P14869_S304_M1_Rplp0  | 3.5896  | 3.8443  | 3.8057  | 4.6806  | 4.6013  | 3.6589  | 4.0197  | 5.0995  | 3.8457  | 4.1067  | 0.9443  | -0.0827 | 0.4948 | 0.3055 |
| Map1b  | _DLTGQVPT[Phospho (STY)]PPVK_2                                             | P14873_T527_M1_Map1b  | 12.2757 | 11.9935 | 12.8313 | 12.5115 | 11.6024 | 12.2548 | 12.7521 | 12.1885 | 12.1947 | 12.1992 | 0.9928  | -0.0104 | 0.7234 | 0.1406 |
| Map1b  | _VLS[Phospho (STY)]PLRS[Phospho (STY)]PPLGSESPYEDLSADSK_3                  | P14873_S1391_M2_Map1b | 8.8964  | 10.3081 | 10.7741 | 11.1085 | 9.6624  | 9.6634  | 9.6722  | 10.3270 | 10.1461 | 9.5664  | 1.0142  | 0.0203  | 0.7578 | 0.1205 |
| Map1b  | _SKPLAAS[Phospho (STY)]PKPGALK_2                                           | #N/A                  | 6.6550  | 9.1784  | 8.7576  | 9.9463  | 7.9924  | 8.4857  | 9.0553  | 9.2334  | 8.9513  | 8.4484  | 0.9903  | -0.0140 | 0.8194 | 0.0865 |
| Map1b  | _T[Phospho (STY)]PEEGGVSEISK_2                                             | #N/A                  | 9.8986  | 9.4120  | 8.7735  | 10.4057 | 8.6874  | 9.6490  | 9.7536  | 9.6586  | 9.6760  | 9.9204  | 0.9558  | -0.0652 | 0.2327 | 0.6332 |
| Map1b  | _QPGQIS[Phospho (STY)]PSR_2                                                | P14873_S1073_M1_Map1b | 9.6679  | 9.3046  | 9.1560  | 4.3304  | 8.6178  | 9.6925  | 9.7022  | 9.6350  | 9.9188  | -0.1222 | 0.9188  | -0.1222 | 0.7142 | 0.1462 |
| Map1b  | _C[Carbamidomethyl (C)]ITTEKIS[Phospho (STY)]PSEAR_3                       | #N/A                  | 7.8678  | 7.9339  | 8.3850  | 8.2739  | 7.8845  | 7.9362  | 8.2421  | 8.0516  | 8.3165  | 7.9365  | 0.9890  | -0.0160 | 0.5188 | 0.2850 |
| Map1b  | _SSYYVSGNDPAAEPSR_2                                                        | #N/A                  | 8.0553  | 8.1203  | 8.2187  | 8.6274  | 8.2173  | 8.6092  | 8.5211  | 7.9359  | 8.2798  | 8.4419  | 1.0016  | 0.0023  | 0.9368 | 0.0283 |
| Map1b  | _AVLDALLEK_2                                                               | #N/A                  | 7.6175  | 7.8957  | 7.7077  | 7.9894  | 8.1216  | 7.9551  | 7.3654  | 7.9684  | 7.8689  | 8.0540  | 1.0086  | 0.0123  | 0.6768 | 0.1695 |
| Map1b  | _VLFPNGNSTQVILEGLEK_2                                                      | #N/A                  | 7.6792  | 7.7536  | 7.9972  | 7.5800  | 7.6374  | 7.3997  | 7.4554  | 7.7402  | 7.1829  | 7.4990  | 1.0275  | 0.0391  | 0.1686 | 0.7730 |
| Map1b  | _FSPVPGQK_2                                                                | #N/A                  | 7.0067  | 7.2112  | 7.0680  | 7.1142  | 7.4870  | 7.3742  | 7.1520  | 7.4180  | 7.2102  | 7.2676  | 0.9929  | -0.0103 | 0.6371 | 0.1958 |
| Map1b  | _T[Phospho (STY)]PEDGGYTC[Carbamidomethyl (C)]BITEK_2                      | #N/A                  | 6.7012  | 6.4639  | 6.0927  | 7.6984  | 5.7476  | 6.1844  | 5.9907  | 6.6917  | 6.8319  | 0.9646  | -0.0520 | 0.5802  | 0.2364 | 0.1011 |
| Map1b  | _AGNIELGR_2                                                                | #N/A                  | 6.2462  | 6.4671  | 7.0768  | 6.3434  | 6.4045  | 6.4941  | 6.4562  | 6.5430  | 6.4187  | 6.1702  | 1.0169  | 0.0242  | 0.5242 | 0.2805 |
| Map1b  | _SVGNTIEPVLFQK_2                                                           | #N/A                  | 6.3566  | 6.1778  | 7.0093  | 6.2802  | 5.9901  | 6.7180  | 6.4786  | 6.2262  | 6.7390  | 6.2721  | 0.9989  | -0.0016 | 0.9747 | 0.0111 |
| Map1b  | _DVSDERS[Phospho (STY)]PAK_2                                               | #N/A                  | 6.6513  | 6.0420  | 5.6271  | 6.8921  | 5.1792  | 5.4515  | 6.6587  | 6.0774  | 6.0933  | 5.8646  | 0.9677  | -0.0474 | 0.6075 | 0.2164 |
| Map1b  | _TPVSGYTEK_2                                                               | #N/A                  | 6.4933  | 6.5537  | 6.1888  | 7.0734  | 6.1754  | 6.5197  | 6.6698  | 6.4601  | 6.3538  | 6.5449  | 0.9990  | -0.0014 | 0.9716 | 0.0125 |
| Map1b  | _GGFPDRES[Phospho (STY)]PVLSOLTSGLYQDK_3                                   | #N/A                  | 7.2808  | 3.7538  | 3.6354  | 7.9369  | 5.9041  | 6.4861  | 7.1060  | 3.9804  | 6.7300  | 6.4790  | 0.9603  | -0.0584 | 0.8281 | 0.0819 |
| Map1b  | _TTAAATAVGTAAATAAIVAAAGAAAGPVK_3                                           | #N/A                  | 6.4822  | 6.3210  | 6.9696  | 7.4474  | 5.5118  | 6.0307  | 6.7291  | 6.0265  | 6.2896  | 7.2886  | 0.9813  | -0.0272 | 0.7727 | 0.1120 |
| Map1b  | _SWDTNLIEC[Carbamidomethyl (C)]NLQDELK_2                                   | #N/A                  | 6.2291  | 5.9465  | 5.6835  | 6.0304  | 5.7920  | 6.0957  | 5.8320  | 5.4237  | 6.1324  | 5.7170  | 1.0323  | 0.0459  | 0.2616 | 0.5823 |
| Map1b  | _SVNFSLPNEIK_2                                                             | #N/A                  | 5.3644  | 5.6801  | 6.1713  | 5.7478  | 5.9105  | 5.5874  | 5.9822  | 5.9724  | 5.8455  | 6.0395  | 0.9637  | -0.0533 | 0.1738 | 0.2599 |
| Map1b  | _DAYC[Carbamidomethyl (C)]S[Phospho (STY)]EEKEK_2                          | P14873_S1225_M1_Map1b | 3.2315  | 4.0367  | 3.9183  | 7.5432  | 3.8580  | 3.7475  | 4.2323  | 3.6975  | 3.3461  | 4.3880  | 1.1261  | 0.1714  | 0.5631 | 0.7494 |
| Map1b  | _SPSLSPSPS[Phospho (STY)]PEEK_2                                            | #N/A                  | 12.9357 | 13.2123 | 13.6997 | 13.6530 | 12.4118 | 13.3033 | 13.7045 | 13.1547 | 13.2568 | 13.3362 | 0.9880  | -0.0174 | 0.5590 | 0.2526 |
| Map1b  | _SDS[Phospho (STY)]PLTPR_2                                                 | P14873_S1781_M1_Map1b | 10.4422 | 10.7624 | 11.0569 | 10.9045 | 9.8772  | 10.7170 | 11.0507 | 10.6695 | 10.7258 | 10.7534 | 0.9840  |         |        |        |



|       |                                                                                |                       |         |         |         |         |         |         |         |         |         |         |         |         |        |        |
|-------|--------------------------------------------------------------------------------|-----------------------|---------|---------|---------|---------|---------|---------|---------|---------|---------|---------|---------|---------|--------|--------|
| Map1b | _ESS[Phospho (STY)]PLVSPGFSOSTSAAK_2                                           | P14873_S1789_M1_Map1b | 11.7394 | 11.7842 | 12.3663 | 12.1997 | 11.0408 | 11.9316 | 12.2573 | 11.7431 | 11.8912 | 11.8882 | 0.9915  | -0.0123 | 0.6974 | 0.1565 |
| Map1b | _ETAAAHQASS[Phospho (STY)]SPPIIDAETAPYGR_3                                     | P14873_S1814_M1_Map1b | 4.5542  | 6.1836  | 3.4870  | 6.8028  | 4.3301  | 4.6706  | 4.9678  | 6.1425  | 4.5048  | 4.3570  | 1.0021  | 0.0031  | 0.9883 | 0.0051 |
| Map1b | _TTRS[Phospho (STY)]PDTSAVC[Carbamidomethyl (C)]YETM[Oxidation (M)]EK_2        | #N/A                  | 5.6413  | 5.5721  | 6.0917  | 3.9884  | 5.1589  | 5.6965  | 5.6313  | 3.6074  | 3.9064  | 3.6657  | 1.2752  | 0.3507  | 0.0622 | 1.2059 |
| Map1b | _RES[Phospho (STY)]VVS[Phospho (STY)]GDDR_2                                    | #N/A                  | 5.4809  | 5.3325  | 4.9139  | 6.1976  | 4.9341  | 5.6214  | 6.0659  | 5.5278  | 5.9314  | 5.4911  | 0.9408  | -0.0880 | 0.2423 | 0.6157 |
| Map1b | _GEAEQS[Phospho (STY)]EEEGEEDEKADAR_3                                          | #N/A                  | 5.8662  | 4.7577  | 3.8509  | 5.6498  | 4.8098  | 4.6700  | 4.1175  | 5.0101  | 5.0628  | 5.4422  | 1.0053  | 0.0076  | 0.9538 | 0.0205 |
| Map1b | _VDSLLTHIGCDONLPGNSM[Oxidation (M)]GQR_3                                       | #N/A                  | 4.3881  | 5.3757  | 4.0893  | 4.7387  | 4.1050  | 5.2354  | 5.6204  | 4.6458  | 5.7091  | 4.6790  | 0.9016  | -0.1495 | 0.2020 | 0.6947 |
| Map1b | _ASLSPM[Oxidation (M)]DEPVPDSE[Phospho (STY)]PVEK_2                            | #N/A                  | 11.2830 | 11.5367 | 12.5337 | 11.3262 | 9.9899  | 11.6979 | 12.0632 | 11.6055 | 11.6562 | 11.5942 | 0.9714  | -0.0418 | 0.4581 | 0.3390 |
| Map1b | _SGGSTNS[Phospho (STY)]DWM[Oxidation (M)]K_2                                   | #N/A                  | 6.7323  | 3.8819  | 3.8536  | 7.5120  | 5.4710  | 3.9105  | 5.9883  | 4.5045  | 4.6007  | 5.5775  | 1.0115  | 0.0165  | 0.9473 | 0.0235 |
| Map1b | _DLTTS[Phospho (STY)]VEKDSGGK_2                                                | P14873_S1851_M1_Map1b | 5.6242  | 5.3153  | 4.0172  | 5.3750  | 4.5025  | 3.7725  | 5.3240  | 3.0161  | 5.5046  | 5.9156  | 0.9651  | -0.0512 | 0.7981 | 0.0980 |
| Map1b | _TPQASTSYETSDR_2                                                               | #N/A                  | 5.5528  | 6.3527  | 3.9339  | 6.6763  | 6.0343  | 6.0349  | 4.2167  | 6.4019  | 6.0224  | 6.5655  | 0.9935  | -0.0093 | 0.9558 | 0.0197 |
| Map1b | _TTEAAATAGVTAATAAIVAAAGASGPVKELEAR_3                                           | #N/A                  | 3.9750  | 4.3296  | 3.9486  | 4.0459  | 3.9777  | 4.2795  | 4.3548  | 4.5153  | 3.8850  | 4.4155  | 0.9534  | -0.0688 | 0.1909 | 0.7193 |
| Map1b | _Acetyl (Protein N-term)ATVVVEATEPEPGSGIQNPASTS[Phospho (STY)]PSLSHR_3         | #N/A                  | 4.8342  | 9.6601  | 9.8737  | 11.2252 | 7.7821  | 5.9900  | 5.5312  | 10.1059 | 9.1367  | 4.6443  | 1.1187  | 0.1618  | 0.6098 | 0.2148 |
| Map1b | _RSES[Phospho (STY)]PFEGK_2                                                    | P14873_S1422_M1_Map1b | 6.9032  | 7.5198  | 7.7220  | 7.5826  | 6.5592  | 7.4219  | 7.5518  | 7.0832  | 7.4633  | 7.1800  | 0.9952  | -0.0069 | 0.8917 | 0.0498 |
| Map1b | _TESKPS[Phospho (STY)]VTEK_2                                                   | P14873_S601_M1_Map1b  | 5.6315  | 4.9993  | 3.4176  | 5.1667  | 3.3573  | 4.5718  | 3.2322  | 4.8275  | 4.2163  | 3.8872  | 1.1196  | 0.1630  | 0.4042 | 0.3935 |
| Map1b | _SLM[Oxidation (M)]S[Phospho (STY)]S[Phospho (STY)]PEDLT_2                     | #N/A                  | 3.5420  | 10.9762 | 3.3475  | 11.7912 | 10.5333 | 11.0164 | 12.2043 | 10.9481 | 11.1267 | 11.0821 | 0.7529  | -0.4095 | 0.2061 | 0.6859 |
| Map1b | _SPSLSPSPS[Phospho (STY)]PIEXTPLGER_3                                          | #N/A                  | 3.9830  | 6.3733  | 4.2209  | 6.0345  | 3.1187  | 3.3175  | 5.4359  | 4.8080  | 6.1831  | 4.2209  | 0.8550  | -0.2260 | 0.3412 | 0.4670 |
| Map1b | _LGGDVS[Phospho (STY)]PTQIDVVSQGSFK_2                                          | #N/A                  | 4.0619  | 6.5807  | 3.2479  | 7.5275  | 3.1876  | 3.0410  | 3.4652  | 6.3611  | 4.0165  | 3.7175  | 1.0496  | 0.0698  | 0.8516 | 0.0698 |
| Map1b | _KES[Phospho (STY)]KEETPEVTK_2                                                 | #N/A                  | 9.1044  | 9.3712  | 9.7411  | 9.4990  | 8.8689  | 9.1159  | 9.2880  | 9.2619  | 9.4231  | 9.1661  | 0.9999  | -0.0002 | 0.9937 | 0.0217 |
| Map1b | _MSSEGTVS[Phospho (STY)]DK_2                                                   | P14873_S1523_M1_Map1b | 7.3554  | 6.1629  | 3.6329  | 8.2780  | 6.3423  | 3.9596  | 6.7711  | 5.3395  | 5.7625  | 6.6447  | 0.9617  | -0.0564 | 0.8234 | 0.0844 |
| Map1b | _VDSLEGKLS[Phospho (STY)]PK_2                                                  | #N/A                  | 11.4455 | 11.6399 | 12.2468 | 12.0579 | 11.0563 | 11.6175 | 12.0354 | 11.7173 | 11.5925 | 11.6403 | 0.9941  | -0.0085 | 0.7734 | 0.1116 |
| Map1b | _EKRES[Phospho (STY)]VVSDDR_2                                                  | #N/A                  | 5.7784  | 4.1743  | 4.0744  | 5.9200  | 3.8068  | 4.8570  | 4.4985  | 4.5472  | 5.2444  | 4.9494  | 0.9914  | -0.0125 | 0.9339 | 0.0297 |
| Map1b | _HM[Oxidation (M)]OPPPAHMGDRS[Phospho (STY)]PS[Phospho (STY)]PIR_3             | #N/A                  | 6.0562  | 3.9989  | 4.0949  | 7.2214  | 4.6201  | 3.6884  | 5.4114  | 3.5443  | 4.4913  | 4.6025  | 1.0950  | 0.1310  | 0.5944 | 0.2759 |
| Map1b | _SSHPTETVETKPAVPSVFSEACENR_4                                                   | #N/A                  | 5.1353  | 5.6369  | 6.0028  | 5.9773  | 5.4419  | 5.5525  | 6.1307  | 5.6360  | 5.1174  | 5.4327  | 1.0081  | 0.0117  | 0.8539 | 0.0686 |
| Map1b | _VSSKEEDS[Phospho (STY)]PVKAEVAK_2                                             | #N/A                  | 8.8563  | 8.7572  | 9.2252  | 9.3277  | 8.6955  | 8.9467  | 9.1433  | 9.1885  | 9.1341  | 8.9348  | 0.9855  | -0.0211 | 0.3662 | 0.4362 |
| Map1b | _SRT[Phospho (STY)]PVQDHR_2                                                    | #N/A                  | 5.8097  | 6.1000  | 6.2094  | 6.1523  | 6.1501  | 5.9204  | 6.2204  | 5.6218  | 5.8303  | 0.9600  | -0.0589 | 0.6745  | 0.1710 | 0.5643 |
| Map1b | _LM[Oxidation (M)]TDAAR_2                                                      | #N/A                  | 4.7690  | 5.6220  | 5.1369  | 4.5802  | 5.3913  | 4.6138  | 5.2907  | 5.0638  | 5.3348  | 5.5744  | 0.9441  | -0.0830 | 0.2431 | 0.6143 |
| Map1b | _LEMVLNPK_2                                                                    | #N/A                  | 4.5639  | 3.2870  | 3.7891  | 4.6211  | 3.8453  | 3.1203  | 3.4811  | 3.6683  | 3.9674  | 3.0101  | 1.0961  | 0.1324  | 0.3688 | 0.4333 |
| Map1b | _KLGGDVS[Phospho (STY)]PTQIDVVSQGSFKEDT_3                                      | #N/A                  | 3.7376  | 4.7898  | 5.7742  | 6.1250  | 2.8632  | 3.3654  | 3.7262  | 3.1915  | 4.1653  | 3.3932  | 1.2275  | 0.2958  | 0.7235 | 0.5630 |
| Map1b | _T[Phospho (STY)]PVQDHR_2                                                      | #N/A                  | 4.8738  | 4.4544  | 3.7873  | 4.6419  | 3.7270  | 4.1114  | 4.8669  | 3.8286  | 3.6369  | 4.2475  | 1.0292  | 0.0415  | 0.7161 | 0.1450 |
| Map1b | _NVDFEFFK_2                                                                    | #N/A                  | 3.9182  | 3.3915  | 4.6050  | 2.5632  | 3.0439  | 3.4284  | 3.3215  | 1.3826  | 3.8711  | 4.0174  | 1.1091  | 0.1494  | 0.5830 | 0.2344 |
| Map1b | _ITSPESESYETSTK_2                                                              | #N/A                  | 7.5655  | 3.5516  | 3.7162  | 4.0327  | 7.6617  | 7.6152  | 7.6091  | 7.7789  | 7.5213  | 7.5948  | 0.7462  | -0.4224 | 0.1106 | 0.9561 |
| Map1b | _VQSLEGKLS[Phospho (STY)]PKS[Phospho (STY)]DISPLTPR_3                          | P14873_S1778_M2_Map1b | 3.8205  | 3.6794  | 3.5835  | 9.8440  | 5.8137  | 4.0369  | 3.6063  | 9.1728  | 4.2063  | 4.2153  | 0.9242  | -0.1137 | 0.7988 | 0.0975 |
| Map1b | _EQQS[Phospho (STY)]PVKAEVAK_2                                                 | #N/A                  | 10.1166 | 9.8121  | 10.8811 | 9.7876  | 9.8121  | 10.6463 | 10.2194 | 10.2671 | 10.2746 | 0.9687  | -0.0459 | 0.7167  | 0.1213 | 0.5687 |
| Map1b | _S[Phospho (STY)]PDTSAVC[Carbamidomethyl (C)]YETMK_2                           | #N/A                  | 8.3001  | 6.5788  | 5.0397  | 9.2651  | 6.4853  | 4.5917  | 7.6510  | 6.0129  | 6.1534  | 6.9362  | 1.0033  | 0.0047  | 0.9827 | 0.0076 |
| Map1b | _TSDVETM[Oxidation (M)]SSQSALALDER_3                                           | #N/A                  | 4.9395  | 5.4541  | 5.6921  | 6.8489  | 4.9616  | 5.4708  | 5.5120  | 6.1144  | 5.7542  | 5.8441  | 0.9578  | -0.0622 | 0.5263 | 0.2787 |
| Map1b | _EWQTEHEK_2                                                                    | #N/A                  | 5.8035  | 5.0019  | 5.2605  | 6.2181  | 6.5702  | 6.1236  | 5.4289  | 5.6344  | 6.6437  | 6.3973  | 0.9674  | -0.0478 | 0.6235 | 0.2059 |
| Map1b | _SDVLETVLNPNSDEAVSTEV_2                                                        | #N/A                  | 4.7219  | 5.3149  | 5.4043  | 5.3848  | 4.3773  | 5.3402  | 5.0663  | 5.4548  | 4.8181  | 5.2014  | 0.9913  | -0.0126 | 0.8603 | 0.0654 |
| Map1b | _ESVVS[Phospho (STY)]GDDRAEEDM[Oxidation (M)]DOVLEK_3                          | #N/A                  | 3.1745  | 5.6691  | 4.4090  | 7.1426  | 6.4430  | 4.3064  | 4.1996  | 7.1152  | 7.0530  | 2.9511  | 1.0021  | 0.0300  | 0.9926 | 0.0032 |
| Map1b | _AEEDM[Oxidation (M)]DOVLEGEAEQS[Phospho (STY)]EEEGEEDEKADAR_4                 | #N/A                  | 3.5963  | 3.9695  | 3.9836  | 6.4653  | 3.2837  | 4.6332  | 3.9948  | 4.3291  | 4.5869  | 4.0283  | 1.0206  | 0.0294  | 0.8869 | 0.0521 |
| Map1b | _PMS[Phospho (STY)]PPDS[Phospho (STY)]PK_2                                     | P14873_S1616_M2_Map1b | 3.6375  | 3.8746  | 4.3243  | 7.6616  | 5.1675  | 3.4930  | 3.8802  | 3.8783  | 3.8070  | 3.2931  | 1.2634  | 0.3373  | 0.2623 | 0.5812 |
| Map1b | _QGFPRES[Phospho (STY)]PSDLTSLGLVDQDEK_4                                       | #N/A                  | 3.5337  | 3.5223  | 3.6696  | 4.0580  | 3.3704  | 3.8592  | 4.0485  | 4.2859  | 3.6003  | 3.8580  | 0.9293  | -0.1059 | 0.1436 | 0.8429 |
| Map1b | _AETEAEEPEDGEDNAGSAAK_2                                                        | #N/A                  | 4.2378  | 3.1046  | 3.7866  | 1.6016  | 2.9798  | 3.8681  | 4.3330  | 3.4859  | 3.8534  | 3.1925  | 0.8781  | -0.1876 | 0.4085 | 0.3888 |
| Map1b | _LGGDVS[Phospho (STY)]PTQIDVVSQGSFKEDT_3                                       | #N/A                  | 3.7160  | 2.9715  | 3.4497  | 5.6689  | 2.8598  | 3.7648  | 3.1418  | 4.0077  | 4.3067  | 4.1716  | 0.9569  | -0.0636 | 0.7708 | 0.1131 |
| Map1b | _DYNASASTS[Phospho (STY)]PPSSMEEDKFSK_3                                        | #N/A                  | 4.9559  | 3.7419  | 3.8170  | 4.1329  | 4.2805  | 3.6727  | 3.8251  | 3.8987  | 3.9069  | 1.0680  | 0.0949  | 0.3415  | 0.4666 | 0.3666 |
| Map1b | _DVM[Oxidation (M)]SDETNNETES[Phospho (STY)]PQEFVNITK_3                        | #N/A                  | 8.4682  | 9.1451  | 9.7418  | 9.6239  | 8.6651  | 9.3041  | 9.2268  | 9.3801  | 9.3472  | 9.1058  | 0.9885  | -0.0167 | 0.6968 | 0.1569 |
| Map1b | _IAELEERS[Phospho (STY)]GGSTNSDWM[Oxidation (M)]K_3                            | #N/A                  | 7.3045  | 7.1683  | 7.7956  | 8.1541  | 7.1147  | 7.5413  | 7.5377  | 7.4742  | 7.4540  | 7.7518  | 0.9945  | -0.0079 | 0.8509 | 0.0701 |
| Map1b | _SSM[Oxidation (M)]JFDTM[Oxidation (M)]QHHLALNR_3                              | #N/A                  | 3.9605  | 4.2237  | 3.6942  | 3.2379  | 3.1042  | 3.5204  | 6.0865  | 4.9089  | 5.2959  | 4.4160  | 0.6999  | -0.5147 | 0.0023 | 2.6370 |
| Map1b | _ASAELEIKDVS[Phospho (STY)]DER_2                                               | #N/A                  | 4.3605  | 5.5186  | 3.5465  | 6.3741  | 3.4862  | 6.0094  | 5.1145  | 6.6365  | 5.9938  | 5.9973  | 0.8226  | -0.2817 | 0.1642 | 0.7845 |
| Map1b | _GEAEQS[Phospho (STY)]EEEGEEEDK_2                                              | #N/A                  | 4.0316  | 3.1946  | 3.2176  | 6.2681  | 3.0829  | 3.5417  | 3.4349  | 4.3983  | 4.0468  | 3.6872  | 0.9994  | -0.0009 | 0.9971 | 0.0013 |
| Map1b | _TAKS[Phospho (STY)]RT[Phospho (STY)]PVQDHR_3                                  | #N/A                  | 3.5199  | 3.7063  | 4.2067  | 3.2085  | 3.5946  | 3.0300  | 4.4240  | 3.4092  | 3.0577  | 2.3035  | 1.0745  | 0.1037  | 0.5622 | 0.2501 |
| Map1b | _ASAELEIKDVS[Phospho (STY)]DERLSPAK_3                                          | #N/A                  | 4.0092  | 3.3612  | 4.2414  | 4.8879  | 3.1450  | 4.3099  | 3.4250  | 3.3450  | 4.0652  | 3.3154  | 1.1154  | 0.1576  | 0.2765 | 0.5583 |
| Map1b | _DENERAS[Phospho (STY)]LS[Phospho (STY)]PM[Oxidation (M)]DEPVPDSESPVEK_3       | P14873_S137_M2_Map1b  | 3.8945  | 3.3989  | 4.5814  | 3.5832  | 3.0202  | 3.2084  | 3.2979  | 3.0345  | 4.1839  | 3.5502  | 1.0183  | 0.0262  | 0.8605 | 0.0653 |
| Map1b | _ELEERS[Phospho (STY)]LM[Oxidation (M)]S[Phospho (STY)]S[Phospho (STY)]PEDLT_2 | P14873_S825_M3_Map1b  | 3.4028  | 4.1591  | 3.1365  | 10.0890 | 4.0474  | 4.0781  | 3.9712  | 9.5610  | 3.5105  | 4.2235  | 0.9064  | -0.1418 | 0.7827 | 0.1064 |
| Map1b | _TDATDGDYNASASTS[Phospho (STY)]PPSSM[Oxidation (M)]EEDKFSK_4                   | #N/A                  | 3.7718  | 3.3354  | 4.2060  | 6.2884  | 2.9035  | 3.5034  | 3.1826  | 3.4764  | 4.2911  | 3.7450  | 1.0892  | 0.1232  | 0.6231 | 0.2055 |
| Map1b | _QQDLNIM[Oxidation (M)]AASSTVM[Oxidation (M)]QDESFPAC[Carbamidomethyl (C)]K_3  | #N/A                  | 3.7932  | 3.0486  | 3.5269  | 4.5715  | 4.1095  | 5.0673  | 3.2189  | 4.2373  | 1.8440  | 4.2488  | 1.1867  | 0.2469  | 0.3096 | 0.5092 |
| Map1b | _KEQSDM[Oxidation (M)]SEFGES[Phospho (STY)]PHSLAMDPSR_3                        | #N/A                  | 3.9811  | 3.2706  | 3.7148  | 4.4475  | 3.1243  | 3.3204  | 3.2496  | 4.1034  | 4.0358  | 3.3635  | 0.9759  | -0.0352 | 0.7725 | 0.1121 |
| Map1b | _KIAELEERS[Phospho (STY)]GGSTNSDWM[Oxidation (M)]K_3                           | #N/A                  | 3.9460  | 3.8986  | 3.5461  | 4.9324  | 3.4189  | 3.6372  | 3.9317  | 4.4809  | 3.7413  | 3.7265  | 0.9815  | -0.0270 | 0.8196 | 0.0864 |
| Map1b | _RES[Phospho (STY)]VVS[Phospho (STY)]GDDRAEEDMDVLEK_3                          | #N/A                  | 3.9615  | 2.9357  | 3.6952  | 3.8105  | 2.7207  | 3.5213  | 3.4442  | 3.0928  | 3.8685  | 3.8278  | 0.9670  | -0.0485 | 0.6991 | 0.1555 |
| Map1b | _DKPQLEIEDEK_3                                                                 | #N/A                  | 3.7561  | 3.4701  | 4.4429  | 3.4447  | 2.8818  | 3.3469  | 3.1594  | 3.1729  | 3.2158  | 3.4117  | 1.0979  | 0.2718  | 0.5658 | 0.1082 |
| Map1b | _NUSPDGLGVFNLENLKDPEPNK_3                                                      | #N/A                  | 3.2239  | 4.0023  | 3.9107  | 4.4133  | 3.8504  | 3.8791  | 4.1280  | 3.7051  | 3.3537  | 4.3803  | 0.9970  | -0.0044 | 0.9654 | 0.0513 |
| Map1b | _AQWGNM[Oxidation (M)]QVTLPTHOSEVM[Oxidation (M)]R_3                           | #N/A                  | 3.4074  | 4.1637  | 3.1411  | 4.2520  | 7.0703  | 4.0735  | 6.8527  | 3.8665  | 7.290   |         |         |         |        |        |



|         |                                                                          |                         |         |         |         |         |         |         |         |         |         |         |         |         |        |        |
|---------|--------------------------------------------------------------------------|-------------------------|---------|---------|---------|---------|---------|---------|---------|---------|---------|---------|---------|---------|--------|--------|
| Glul    | _Y[Phospho (STY)]NRKPAETNLR_3                                            | #N/A                    | 3.7815  | 3.6512  | 4.9599  | 3.8583  | 4.4981  | 3.8084  | 3.9864  | 4.3134  | 4.5443  | 4.4554  | 0.9464  | -0.0795 | 0.4341 | 0.3624 |
| Glul    | _RPSANC[Carbamidomethyl (C)]DPIVATEAVR_3                                 | #N/A                    | 6.1854  | 5.9662  | 5.8830  | 7.0025  | 6.9502  | 6.4185  | 6.1890  | 6.8140  | 6.8782  | 6.9711  | 0.9535  | -0.0687 | 0.3035 | 0.5179 |
| Glul    | _AMREENGKL_2                                                             | #N/A                    | 4.0082  | 4.2636  | 4.1452  | 3.8097  | 2.9930  | 3.6446  | 1.6947  | 3.4706  | 3.1192  | 3.1140  | 1.3373  | 0.4193  | 0.0389 | 1.4100 |
| Glul    | _C[Carbamidomethyl (C)]IEADIKSL_2                                        | #N/A                    | 5.1727  | 6.0421  | 6.6343  | 5.9292  | 6.4797  | 5.8025  | 5.7037  | 5.5877  | 6.1045  | 5.8376  | 1.0347  | 0.0493  | 0.4924 | 0.3077 |
| Glul    | _RLTGFHETSININDFSAGVANR_4                                                | #N/A                    | 6.7589  | 5.8123  | 6.5785  | 3.6575  | 5.1432  | 6.5884  | 6.6026  | 3.4180  | 5.4546  | 5.5520  | 1.0950  | 0.1310  | 0.5526 | 0.2576 |
| Glul    | _LITGFHETSININDFSAGVANR_3                                                | #N/A                    | 4.1622  | 3.0648  | 3.3482  | 3.8508  | 2.9144  | 4.0733  | 3.7428  | 4.2685  | 3.9170  | 3.9308  | 0.9002  | -0.1517 | 0.2027 | 0.6932 |
| Glul    | _VC[Carbamidomethyl (C)]EDGVATFDPK_2                                     | #N/A                    | 4.1251  | 3.3805  | 3.8588  | 3.4025  | 3.2688  | 3.3558  | 3.5508  | 3.9063  | 3.8977  | 3.0798  | 0.9880  | -0.0175 | 0.8572 | 0.0669 |
| Cdh2    | _SAAPHGDDGDFNEGDK_3                                                      | #N/A                    | 4.3603  | 4.2643  | 4.7388  | 3.9256  | 3.2739  | 3.9467  | 3.3543  | 4.2560  | 4.5818  | 4.0421  | 1.0065  | 0.0094  | 0.9375 | 0.0280 |
| Nlrk2   | _IWC[Carbamidomethyl (C)]TEPSPGVAFPR_2                                   | #N/A                    | 5.9733  | 5.4547  | 3.4807  | 5.5808  | 3.4167  | 5.1949  | 4.9822  | 3.9767  | 5.8594  | 5.3161  | 0.9636  | -0.0535 | 0.7847 | 0.1053 |
| Prph    | _LLGSGS[Phospho (STY)]PSSSAR_2                                           | P15331_S57_M1_Prph      | 3.0790  | 4.1471  | 3.7659  | 4.2685  | 3.7056  | 4.0239  | 3.9832  | 3.8500  | 3.4986  | 4.2355  | 0.9845  | -0.0225 | 0.8157 | 0.0885 |
| Knc1    | _LAWLAEPDAHS[Phospho (STY)]HFDYDPR_3                                     | P15388_S44_M1_Knc1      | 4.3548  | 3.6102  | 4.0885  | 6.5483  | 3.4985  | 3.1261  | 4.5201  | 6.1856  | 2.9617  | 3.2716  | 0.9928  | -0.0104 | 0.9725 | 0.0121 |
| Knc1    | _HIPRPPQLGS[Phospho (STY)]PNYC[Carbamidomethyl (C)]K_3                   | P15388_S468_M1_Knc1     | 4.3452  | 3.6496  | 3.5312  | 4.0338  | 3.4709  | 4.2586  | 3.1186  | 4.0847  | 3.7332  | 4.0008  | 1.0394  | 0.0058  | 0.5868 | 0.2315 |
| Sptb    | _ILS[Phospho (STY)]PVDSGNK_2                                             | P15508_S1218_M1_Sptb    | 5.9974  | 6.2004  | 3.3968  | 5.4179  | 2.8069  | 5.3828  | 6.6170  | 6.2612  | 3.7709  | 5.4280  | 0.8818  | -0.1814 | 0.4795 | 0.3192 |
| Sptb    | _LLTS[Phospho (STY)]POVSYDEAR_2                                          | P15508_S1289_M1_Sptb    | 5.6146  | 5.1358  | 6.0777  | 4.3862  | 4.8739  | 5.5643  | 6.5298  | 6.2011  | 3.3809  | 4.3532  | 1.0311  | 0.0442  | 0.8178 | 0.0874 |
| Nme1    | _NIHSGDSVK_2                                                             | #N/A                    | 7.4491  | 7.5804  | 7.7898  | 7.8730  | 7.9329  | 7.5753  | 7.5126  | 7.5306  | 7.5736  | 7.6950  | 1.0161  | 0.0231  | 0.2714 | 0.5664 |
| Nme1    | _FLQASEDLK_2                                                             | #N/A                    | 8.1378  | 7.9056  | 7.3935  | 8.1839  | 8.2690  | 7.9751  | 7.7524  | 8.0179  | 8.0698  | 8.3307  | 0.9919  | -0.0117 | 0.7357 | 0.1333 |
| Nme1    | _YM[Oxidation (M)]HSGPVVAM[Oxidation (M)]WGLELVVK_3                      | #N/A                    | 7.9639  | 8.0273  | 7.9854  | 7.7205  | 8.0013  | 8.2716  | 8.1569  | 8.1853  | 8.5015  | 8.0036  | 0.9736  | -0.0386 | 0.1130 | 0.9469 |
| Nme1    | _FLQASEDLKHEHYTDK_3                                                      | #N/A                    | 6.9718  | 7.0137  | 7.3159  | 7.4559  | 7.6141  | 7.9887  | 7.1481  | 7.7104  | 7.6076  | 0.9707  | -0.0429 | 0.3031  | 0.5184 | 0.0874 |
| Nme1    | _EISLWFQPEELVEYK_2                                                       | #N/A                    | 6.3004  | 6.1684  | 6.6073  | 6.9778  | 6.2378  | 6.6862  | 6.5993  | 5.9321  | 6.4803  | 6.7535  | 1.0085  | 0.0123  | 0.8033 | 0.0951 |
| Nme1    | _SC[Carbamidomethyl (C)]AQNWVE_2                                         | #N/A                    | 3.1372  | 4.5496  | 4.3717  | 4.5222  | 4.7703  | 4.3838  | 4.3195  | 4.1428  | 4.5818  | 3.5928  | 1.0312  | 0.0444  | 0.7125 | 0.1472 |
| H1-2    | _Acetyl (Protein N-term)[S]Phospho (STY)EAAPAAAPAAAPAEK_2                | #N/A                    | 10.0865 | 9.8123  | 10.4588 | 10.3864 | 10.0604 | 10.0082 | 10.7468 | 10.0951 | 9.8396  | 10.2318 | 0.9909  | -0.0132 | 0.6474 | 0.1888 |
| H1-2    | _ALAAAGYDVEK_2                                                           | #N/A                    | 7.5530  | 7.4612  | 7.9810  | 7.9663  | 8.0968  | 7.5667  | 7.6330  | 7.3919  | 7.6276  | 1.0094  | 0.0315  | 0.7051  | 0.1518 | 0.1888 |
| H1-2    | _GTGASGSFK_2                                                             | #N/A                    | 6.1542  | 5.7447  | 6.5404  | 6.7133  | 6.6560  | 6.5672  | 5.7530  | 6.0577  | 6.0924  | 6.2508  | 1.0592  | 0.0830  | 0.1240 | 0.9065 |
| H1-2    | _ASGPPVSELITK_2                                                          | #N/A                    | 6.0858  | 5.6697  | 6.5530  | 6.4734  | 5.5507  | 6.0399  | 5.7580  | 6.4755  | 5.4570  | 5.7180  | 1.0358  | 0.0507  | 0.4604 | 0.3076 |
| H1-2    | _Acetyl (Protein N-term)[S]Phospho (STY)EAAPAAAPAAAPAKAPAK_2             | #N/A                    | 4.4330  | 5.8812  | 6.2980  | 5.7131  | 5.6521  | 5.8731  | 6.1697  | 5.5923  | 5.6988  | 5.2061  | 1.0250  | 0.0356  | 0.7802 | 0.1369 |
| H1-2    | _ALAAAGYDVENKSR_2                                                        | #N/A                    | 3.6928  | 3.6905  | 3.4259  | 4.0125  | 3.7091  | 2.9235  | 2.9329  | 4.3116  | 3.5991  | 2.9431  | 1.0278  | 0.0396  | 0.7774 | 0.1094 |
| At6v0a2 | _KDS[Phospho (STY)]EEVSLIGNQDIEEGNSR_3                                   | P15920_S695_M1_Atp6v0a2 | 2.9114  | 2.9302  | 4.1459  | 3.6897  | 4.2524  | 3.4771  | 3.8379  | 4.3755  | 3.6106  | 0.8760  | 0.9860  | -0.1910 | 0.3222 | 0.4919 |
| Chgb    | _IWS[Phospho (STY)]IEER_2                                                | P16014_S155_M1_Chgb     | 11.1903 | 11.7133 | 12.1524 | 12.0183 | 12.6141 | 12.0794 | 11.6508 | 11.7149 | 11.9569 | 11.6995 | 1.0175  | 0.0250  | 0.4329 | 0.3636 |
| Chgb    | _WASS[Phospho (STY)]REDAGAPVEDDSGGQTK_3                                  | #N/A                    | 8.7334  | 8.5393  | 9.4108  | 9.0248  | 9.3806  | 9.1308  | 5.4907  | 8.5196  | 9.2704  | 8.6198  | 1.3437  | 0.4262  | 0.0603 | 0.2196 |
| Chgb    | _SSYEGHPS[Phospho (STY)]IEER_2                                           | #N/A                    | 9.1286  | 9.0934  | 9.2588  | 9.8014  | 9.6052  | 9.4770  | 9.3748  | 9.0436  | 9.4596  | 9.5612  | 1.0037  | 0.0053  | 0.8443 | 0.0735 |
| Chgb    | _WWQEEQLGPEES[Phospho (STY)]REEVRFDPD_4                                  | #N/A                    | 6.2678  | 6.7617  | 6.4683  | 7.7402  | 7.7721  | 6.7521  | 6.0298  | 7.4497  | 7.3385  | 6.6716  | 1.0128  | 0.0183  | 0.8390 | 0.0762 |
| Chgb    | _ES[Phospho (STY)]KEADVATR_2                                             | P16014_S318_M1_Chgb     | 7.3745  | 7.3811  | 3.8569  | 8.0361  | 7.6682  | 7.5620  | 7.5095  | 7.3807  | 7.5600  | 7.4805  | 0.9328  | -0.1004 | 0.5427 | 0.2654 |
| Chgb    | _EGVDDQESLRPSNQAS[Phospho (STY)]KEAK_3                                   | #N/A                    | 4.9382  | 3.8253  | 5.6355  | 5.4061  | 5.2550  | 5.2639  | 5.4965  | 5.2322  | 5.4540  | 0.9500  | 0.0740  | -0.0450 | 0.4576 | 0.3950 |
| Chgb    | _AS[Phospho (STY)]EEEPEVEESR_2                                           | #N/A                    | 10.0436 | 10.3335 | 10.0999 | 10.9140 | 10.4319 | 10.6860 | 10.3960 | 10.0217 | 9.9115  | 10.5266 | 1.0200  | 0.0286  | 0.3536 | 0.4515 |
| Chgb    | _WTEGGHGS[Phospho (STY)]IR_2                                             | #N/A                    | 10.0188 | 9.9244  | 8.9908  | 10.4748 | 10.4812 | 10.2524 | 10.1735 | 9.9126  | 10.3373 | 10.0785 | 1.0048  | 0.0069  | 0.7614 | 0.1184 |
| Chgb    | _EGVDDQESLRPSNQAS[Phospho (STY)]K_3                                      | #N/A                    | 4.9444  | 3.8582  | 4.3365  | 3.8803  | 5.1265  | 4.3709  | 4.0285  | 4.5740  | 3.4200  | 5.3941  | 1.0150  | 0.0215  | 0.8822 | 0.0544 |
| Chgb    | _KHEDS[Phospho (STY)]GEKPNTFSNK_3                                        | #N/A                    | 3.5311  | 4.3363  | 4.9170  | 5.3096  | 5.3389  | 4.0840  | 4.5803  | 3.3979  | 5.1730  | 4.5499  | 1.0364  | 0.0515  | 0.7421 | 0.1295 |
| Chgb    | _WVQGEELGPEES[Phospho (STY)]REEV_3                                       | #N/A                    | 4.0217  | 2.2772  | 3.7554  | 6.5411  | 5.5448  | 3.4591  | 3.4475  | 5.0677  | 5.9122  | 5.3325  | 0.8974  | -0.1561 | 0.5384 | 0.2689 |
| Chgb    | _SSGNKSS[Phospho (STY)]YEGHPSER_3                                        | P16014_S301_M1_Chgb     | 3.3504  | 5.3824  | 3.7365  | 5.4523  | 3.7127  | 4.9292  | 4.3607  | 3.8730  | 3.2356  | 3.8609  | 1.1552  | 0.2081  | 0.2775 | 0.5568 |
| Chgb    | _S[Phospho (STY)]HMLAHYRASEEPEVEGEESR_4                                  | P16014_S333_M1_Chgb     | 7.9098  | 3.3873  | 8.6517  | 8.2516  | 3.0258  | 3.4614  | 3.3064  | 3.6036  | 4.1608  | 6.8238  | 1.2923  | 0.3699  | 0.4195 | 0.3773 |
| Chgb    | _GRGS[Phospho (STY)]EEDRAPR_2                                            | #N/A                    | 4.7684  | 4.9821  | 5.0932  | 5.4890  | 6.1481  | 5.7081  | 5.2274  | 5.3505  | 5.7761  | 5.2991  | 0.9910  | -0.0130 | 0.8669 | 0.0620 |
| Chgb    | _EDAGAPVEDDSGGQTK_2                                                      | #N/A                    | 7.8624  | 4.0967  | 3.8162  | 4.3189  | 4.9268  | 5.2849  | 4.0336  | 3.7996  | 5.0821  | 4.2859  | 1.1746  | 0.2321  | 0.3678 | 0.4344 |
| Chgb    | _WTEGGHGS[Phospho (STY)]REGVDDQESLRPSNQASK_4                             | #N/A                    | 7.3781  | 8.1988  | 8.3178  | 8.0841  | 3.3847  | 8.5859  | 3.6667  | 8.1421  | 8.0925  | 8.0104  | 1.0497  | 0.0700  | 0.8011 | 0.0963 |
| Chgb    | _SSYEGHPS[Phospho (STY)]IEERRPSK_3                                       | #N/A                    | 7.0438  | 4.0797  | 8.0862  | 7.9006  | 7.9637  | 7.9014  | 7.7975  | 7.7716  | 3.4311  | 4.3029  | 1.2295  | 0.2980  | 0.2991 | 0.5241 |
| Chgb    | _ADAH[Phospho (STY)]M[Oxidation (M)]ILEEK_2                              | #N/A                    | 9.2454  | 9.4368  | 9.4499  | 9.9475  | 9.4013  | 8.3443  | 9.5816  | 9.2896  | 9.3017  | 9.2492  | 0.9945  | -0.0079 | 0.8569 | 0.0671 |
| Chgb    | _SESS[Phospho (STY)]QREYKR_3                                             | P16014_S378_M1_Chgb     | 3.2568  | 4.0130  | 4.4913  | 4.4026  | 3.9013  | 4.1241  | 4.1173  | 3.7159  | 3.3645  | 3.7123  | 1.0860  | 0.1191  | 0.2504 | 0.0613 |
| Chgb    | _ADAH[Phospho (STY)]MLEEKTHS[Phospho (STY)]R_2                           | P16014_S220_M2_Chgb     | 2.9076  | 2.9339  | 4.1422  | 3.6859  | 3.5522  | 3.0724  | 3.8342  | 3.3152  | 3.6143  | 3.3632  | 0.9577  | -0.0623 | 0.5946 | 0.2258 |
| Chgb    | _HIEDS[Phospho (STY)]GEKPNTFSNK_3                                        | #N/A                    | 3.3858  | 4.1421  | 3.1195  | 4.2735  | 4.0304  | 4.0951  | 3.9882  | 3.8450  | 4.4935  | 4.7626  | 0.9549  | -0.0665 | 0.5866 | 0.2316 |
| Chgb    | _ADEFPDPY[Phospho (STY)]DS[Phospho (STY)]IEQM[Oxidation (M)]GPHQEAENDK_3 | P16014_S626_M2_Chgb     | 4.3680  | 3.6724  | 3.5540  | 4.0567  | 3.4937  | 4.2358  | 3.7713  | 4.0618  | 3.7104  | 4.0237  | 1.0013  | 0.0018  | 0.9810 | 0.0083 |
| Prkce   | _LAAGAESPPASGNS[Phospho (STY)]PSEDDR_2                                   | #N/A                    | 10.0585 | 9.8186  | 9.9611  | 10.4735 | 9.1091  | 9.7577  | 10.3384 | 10.0495 | 9.9690  | 9.8532  | 0.9812  | -0.0274 | 0.4574 | 0.3397 |
| Prkce   | _SAPTS[Phospho (STY)]PC[Carbamidomethyl (C)]DQELK_2                      | #N/A                    | 9.9365  | 9.9882  | 3.6302  | 9.3625  | 9.0332  | 8.3235  | 11.0562 | 10.1669 | 9.5000  | 3.8433  | 0.9679  | -0.0471 | 0.8799 | 0.0556 |
| Prkce   | _ALS[Phospho (STY)]FONRGEEHR_3                                           | #N/A                    | 8.8606  | 8.7414  | 9.5866  | 9.1974  | 8.2098  | 8.8935  | 8.8608  | 9.0032  | 9.0504  | 8.9424  | 0.9945  | -0.0800 | 0.8406 | 0.0754 |
| Prkce   | _KALS[Phospho (STY)]FONR_2                                               | #N/A                    | 9.4413  | 9.0376  | 9.3961  | 9.8178  | 7.9325  | 9.0523  | 9.3126  | 9.3049  | 9.2678  | 8.8795  | 0.9915  | -0.0123 | 0.8236 | 0.0843 |
| Prkce   | _ASSATGGQLAS[Phospho (STY)]PGENGVRPGQAK_3                                | #N/A                    | 8.6067  | 8.9816  | 9.1798  | 9.7710  | 8.1898  | 8.9555  | 9.1479  | 9.2245  | 9.1000  | 8.4458  | 0.9964  | -0.0052 | 0.9193 | 0.0366 |
| Prkce   | _KQET[Phospho (STY)]POEVGSR_2                                            | P16054_T228_M1_Prkce    | 7.5024  | 3.2981  | 8.3531  | 7.9768  | 7.1021  | 7.4520  | 7.7964  | 7.6841  | 7.6296  | 2.9991  | 1.0644  | 0.0900  | 0.7588 | 0.1199 |
| Prkce   | _SAPTS[Phospho (STY)]PC[Carbamidomethyl (C)]DQELKLENNIRK_3               | #N/A                    | 3.4239  | 4.1801  | 4.0593  | 4.2393  | 6.9886  | 4.0608  | 3.9539  | 4.0330  | 7.0998  | 4.1239  | 0.9353  | -0.0965 | 0.7339 | 0.1343 |
| Prkce   | _ALS[Phospho (STY)]FONR_2                                                | #N/A                    | 7.8868  | 4.0255  | 7.1980  | 4.0952  | 6.3847  | 7.6458  | 7.1772  | 4.4069  | 7.7222  | 7.6077  | 0.9223  | -0.1166 | 0.6421 | 0.1924 |
| Prkce   | _SKS[Phospho (STY)]APTS[Phospho (STY)]PC[Carbamidomethyl (C)]DQELK_2     | #N/A                    | 9.3278  | 7.0007  | 9.1425  | 9.8309  | 8.1108  | 8.8707  | 7.4300  | 9.3306  | 7.1560  | 9.1406  | 1.0544  | 0.0764  | 0.5289 | 0.2766 |
| Prkce   | _KLAAGESPPASGNS[Phospho (STY)]PSEDDR_3                                   | #N/A                    | 6.4470  | 5.5377  | 5.7478  | 6.7504  | 6.1648  | 6.1648  | 6.3380  | 6.5709  | 6.6510  | 5.8208  | 0.9532  | -0.0691 | 0.3341 | 0.4761 |
| Prkce   | _LAAGAESPPASGNS[Phospho (STY)]PSEDDRSK_3                                 | #N/A                    | 7.7810  | 7.9792  | 8.6897  | 8.4076  | 7.7151  | 8.0193  | 8.1393  | 8.2891  | 8.0330  | 8.0139  | 0.9975  | -0.0036 | 0.9218 | 0.0353 |
| Prkce   | _KALS[Phospho (STY)]FONRGEEHR_3                                          | #N/A                    | 7.1678  | 6.7914  | 7.7572  | 7.3319  | 7.7024  | 7.2606  | 6.9979  | 7.2285  | 7.5108  | 7.1284  | 0.9934  | -0.0096 | 0.8292 | 0.0814 |
| Prkce   | _SAPTS[Phospho (STY)]PC[Carbamidomethyl (C)]DQELKLENNIR_3                | #N/A                    | 3.2963  | 3.4636  | 4.0090  | 3.9195  | 3.8128  | 3.7136  | 3.8737  | 3.6008  | 3.7295  | 3.7518  |         |         |        |        |



|        |                                                                   |                       |         |         |         |         |         |         |         |         |         |         |         |         |        |        |
|--------|-------------------------------------------------------------------|-----------------------|---------|---------|---------|---------|---------|---------|---------|---------|---------|---------|---------|---------|--------|--------|
| Ldhb   | _ITVVGVGQVM(Oxidation (M))AC[Carbamidomethyl (C)]ASILGK_2         | #N/A                  | 5.1644  | 4.9925  | 5.4336  | 5.8482  | 4.5993  | 5.1155  | 5.7895  | 5.5922  | 4.8832  | 5.1032  | 0.9720  | -0.0410 | 0.5965 | 0.2244 |
| Ldhb   | _GEM(Oxidation (M))M(Oxidation (M))DLQHGSLFLQTPK_3                | #N/A                  | 4.9651  | 4.8742  | 6.5192  | 3.3128  | 6.2521  | 6.1436  | 5.0372  | 5.8884  | 5.7555  | 5.9222  | 0.9458  | -0.0804 | 0.6448 | 0.1906 |
| Ldhb   | _GM(Oxidation (M))YGENEVLSP[Carbamidomethyl (C)]LNAR_3            | #N/A                  | 3.7369  | 2.9924  | 3.4706  | 4.5152  | 2.8807  | 3.7439  | 3.1627  | 3.9868  | 4.2858  | 4.1925  | 0.9103  | -0.1355 | 0.3650 | 0.4377 |
| Srp14  | _KSS(Phospho (STY))VEGLEPAENK_2                                   | P16254_S45_M1_Srp14   | 8.4747  | 3.0309  | 8.8898  | 3.8838  | 8.0809  | 8.3737  | 3.5985  | 3.9482  | 8.6148  | 8.5690  | 1.0981  | 0.1350  | 0.7346 | 0.1339 |
| Sic4a3 | _ALPSVGLQSDSS(Phospho (STY))PQR_2                                 | P16283_S198_M1_Sic4a3 | 10.8730 | 10.8546 | 11.2934 | 11.0782 | 9.5284  | 10.7541 | 11.4804 | 11.4066 | 10.9515 | 10.8182 | 0.9647  | -0.0518 | 0.2781 | 0.5558 |
| Sic4a3 | _SYS(Phospho (STY))RDFEFLR_3                                      | P16283_S67_M1_Sic4a3  | 2.9921  | 3.7973  | 3.6789  | 4.3234  | 3.6186  | 4.1109  | 4.4717  | 4.1786  | 2.9768  | 4.0007  | 0.9607  | -0.0578 | 0.6709 | 0.1733 |
| Sic4a3 | _FSIGS(Phospho (STY))DEDSGGLPVK_2                                 | #N/A                  | 9.1187  | 9.4549  | 4.2896  | 10.4874 | 8.9311  | 9.3737  | 10.0574 | 10.2903 | 9.6145  | 9.5081  | 0.8725  | -0.1968 | 0.2954 | 0.5296 |
| Sic4a3 | _AKFSIGS(Phospho (STY))DEDSGGLPVK_2                               | #N/A                  | 3.7353  | 3.0144  | 4.0029  | 6.8508  | 4.7507  | 3.5635  | 3.6889  | 5.7276  | 4.1770  | 3.8623  | 0.9898  | -0.0147 | 0.9565 | 0.0193 |
| Sic4a3 | _SRPWS(Phospho (STY))PSASVDIR_2                                   | P16283_S224_M1_Sic4a3 | 3.5464  | 4.3516  | 4.2253  | 3.7691  | 4.1730  | 3.5565  | 3.9173  | 6.3450  | 3.5312  | 3.4464  | 0.9135  | -0.1306 | 0.5327 | 0.2735 |
| Sic4a3 | _GS(Phospho (STY))PSGLAPILR_3                                     | #N/A                  | 3.9434  | 3.1988  | 3.6770  | 9.1353  | 3.0871  | 3.5375  | 3.3691  | 3.7804  | 4.0794  | 4.3989  | 1.1338  | 0.1812  | 0.6745 | 0.1710 |
| Sic4a3 | _IQGGRGS(Phospho (STY))PSGLAPILR_3                                | #N/A                  | 3.4038  | 4.2090  | 4.0906  | 4.5932  | 4.0303  | 3.6992  | 4.0600  | 3.5252  | 3.1738  | 3.0594  | 1.1591  | 0.2130  | 0.0811 | 1.0911 |
| Cnp    | _NQWQLS(Phospho (STY))ADOLK_2                                     | #N/A                  | 9.0163  | 9.1853  | 9.3219  | 9.6890  | 8.7133  | 9.0417  | 9.7915  | 9.3066  | 9.2047  | 9.1906  | 0.9774  | -0.0330 | 0.3240 | 0.4895 |
| Cnp    | _HFGSGDEPK_2                                                      | #N/A                  | 8.4939  | 8.1528  | 7.9361  | 8.2791  | 8.2224  | 7.9895  | 8.6459  | 8.3279  | 8.1378  | 8.1976  | 0.9822  | -0.0259 | 0.3108 | 0.5075 |
| Cnp    | _KS(Phospho (STY))HTFLPK_2                                        | #N/A                  | 9.1855  | 9.5083  | 9.5626  | 9.5176  | 8.7519  | 9.0436  | 9.9260  | 9.2786  | 9.1852  | 9.1613  | 0.9866  | -0.0195 | 0.5810 | 0.2358 |
| Cnp    | _LDEDLAGYC[Carbamidomethyl (C)]IR_2                               | #N/A                  | 9.0771  | 9.0267  | 9.2080  | 9.0455  | 9.0076  | 8.7270  | 9.2218  | 8.9773  | 9.0751  | 8.9227  | 0.9962  | -0.0054 | 0.7327 | 0.1350 |
| Cnp    | _ADFSEAYKR_2                                                      | #N/A                  | 8.9485  | 8.7993  | 8.9566  | 8.7069  | 8.7831  | 8.7763  | 8.7969  | 8.8791  | 8.7482  | 8.8106  | 1.0022  | 0.0032  | 0.7325 | 0.1352 |
| Cnp    | _LSISALFVTPK_2                                                    | #N/A                  | 8.2615  | 8.2355  | 8.3218  | 8.0804  | 7.9701  | 7.9983  | 8.2104  | 8.2812  | 8.2163  | 8.3138  | 0.9866  | -0.0195 | 0.1934 | 0.7135 |
| Cnp    | _AAGAEYAQDEVK_2                                                   | #N/A                  | 8.2356  | 8.1690  | 8.1878  | 8.2273  | 7.7424  | 8.1154  | 8.4585  | 7.7584  | 8.3633  | 1.0071  | 0.0102  | 0.7709  | 0.1130 | 0.7135 |
| Cnp    | _AAGAEYAQDEVK_2                                                   | #N/A                  | 6.6402  | 6.8762  | 7.2374  | 7.1175  | 6.3744  | 6.5641  | 6.8379  | 6.8860  | 6.7614  | 6.7436  | 0.9992  | -0.0012 | 0.9749 | 0.0110 |
| Cnp    | _KAGQVLEELGNHK_3                                                  | #N/A                  | 7.9036  | 7.5919  | 7.4681  | 7.2301  | 7.2191  | 7.6102  | 7.9736  | 7.7484  | 7.7933  | 8.0282  | 0.9516  | -0.0716 | 0.0281 | 1.5508 |
| Cnp    | _AIFTQYVGK_2                                                      | #N/A                  | 7.9456  | 7.4254  | 7.9448  | 7.1580  | 7.0246  | 6.8605  | 6.2272  | 8.1414  | 7.4663  | 7.7640  | 0.9991  | -0.0013 | 0.9874 | 0.0055 |
| Cnp    | _RPPGVLC[Carbamidomethyl (C)]ITTK_3                               | #N/A                  | 7.3888  | 7.3904  | 7.3240  | 5.7812  | 7.2073  | 6.4022  | 7.6234  | 7.1491  | 6.9800  | 1.0081  | 0.0116  | 0.8868  | 0.0522 | 0.2289 |
| Cnp    | _EKPELGFPLQDEDTVATUEC[Carbamidomethyl (C)]K_4                     | #N/A                  | 7.2182  | 6.9890  | 6.9392  | 7.2795  | 6.2924  | 6.4451  | 6.0343  | 6.8624  | 7.0216  | 6.9166  | 1.0230  | 0.0328  | 0.5904 | 0.2289 |
| Cnp    | _LDC[Carbamidomethyl (C)]AQK_2                                    | #N/A                  | 5.0571  | 4.8654  | 4.7947  | 3.6196  | 5.5194  | 5.2045  | 4.1816  | 5.1969  | 4.7258  | 4.9663  | 1.0159  | 0.0227  | 0.8450 | 0.0732 |
| Cnp    | _GRLY(Phospho (STY))SLGK_2                                        | P16330_Y372_M1_Cnp    | 3.0601  | 6.4218  | 3.7469  | 4.2495  | 3.6866  | 4.0429  | 3.9642  | 6.1982  | 3.5175  | 4.2165  | 0.9390  | -0.0908 | 0.7272 | 0.1383 |
| Cnp    | _GSGQGAIVGELP_2                                                   | #N/A                  | 10.5242 | 10.5111 | 10.8755 | 10.3921 | 10.1880 | 10.3035 | 10.7143 | 10.4186 | 10.2833 | 10.3828 | 1.0015  | 0.0022  | 0.9130 | 0.0395 |
| Cnp    | _VLVDOTNHER_2                                                     | #N/A                  | 10.1103 | 9.7397  | 9.9650  | 9.7660  | 9.6334  | 9.7841  | 10.1359 | 9.7891  | 9.7476  | 9.7840  | 0.9968  | -0.0046 | 0.7920 | 0.1013 |
| Cnp    | _Acetyl (Protein N-term)[M](Oxidation (M))NTS(Phospho (STY))FRK_2 | #N/A                  | 8.6500  | 9.6725  | 3.9980  | 4.0850  | 9.3698  | 8.8640  | 9.8356  | 9.2025  | 9.1690  | 9.2822  | 0.7938  | -0.3331 | 0.1936 | 0.7131 |
| Cnp    | _NQWLSADOLK_2                                                     | #N/A                  | 7.5614  | 7.9669  | 7.6485  | 8.2756  | 7.5150  | 7.7207  | 8.1973  | 8.1996  | 7.9775  | 8.0392  | 0.9603  | -0.0585 | 0.0704 | 1.1525 |
| Cnp    | _EKNGQWLSADOLK_3                                                  | #N/A                  | 6.2238  | 6.6680  | 6.5431  | 7.0717  | 6.5667  | 6.7342  | 6.6833  | 6.9354  | 6.9364  | 6.6883  | 0.9741  | -0.0378 | 0.2811 | 0.5511 |
| Cnp    | _S(Phospho (STY))HTFLPK_2                                         | #N/A                  | 11.3666 | 11.4686 | 11.8290 | 11.5164 | 10.6583 | 10.7411 | 11.8192 | 11.2613 | 10.7779 | 3.6062  | 1.2026  | 0.0661  | 0.2545 | 0.5943 |
| Cnp    | _RLDEDLAGYC[Carbamidomethyl (C)]IR_3                              | #N/A                  | 8.1619  | 7.5571  | 7.8144  | 7.7888  | 7.9641  | 7.4588  | 7.6682  | 7.6702  | 7.6633  | 7.3967  | 1.0252  | 0.0359  | 0.2155 | 0.6666 |
| Cnp    | _AGQVLEELGNHK_2                                                   | #N/A                  | 6.6071  | 6.8375  | 7.1855  | 6.5744  | 6.2945  | 6.3628  | 7.0068  | 6.9709  | 7.0270  | 6.7399  | 0.9578  | -0.0622 | 0.1340 | 0.8728 |
| Cnp    | _AHVTLGIC[Carbamidomethyl (C)]AADVPQVQTGLDLLBLQQVK_3              | #N/A                  | 4.4054  | 3.0396  | 3.8526  | 4.6578  | 2.8931  | 3.0104  | 4.7655  | 4.2606  | 3.9738  | 2.8811  | 0.9176  | -0.1241 | 0.5348 | 0.2718 |
| Cnp    | _LKLVSUYGK_2                                                      | #N/A                  | 5.9657  | 5.7573  | 6.0998  | 5.9976  | 6.0432  | 6.0836  | 6.3712  | 6.1828  | 6.2059  | 6.3293  | 0.9552  | -0.0662 | 0.0051 | 2.2946 |
| Cnp    | _ADFSEAYK_2                                                       | #N/A                  | 6.0854  | 5.8746  | 5.9626  | 4.4496  | 6.0192  | 6.1234  | 3.9340  | 6.2018  | 5.4060  | 6.0278  | 1.0668  | 0.0932  | 0.5111 | 0.2915 |
| Cnp    | _SSETLRK_2                                                        | #N/A                  | 6.0914  | 4.6189  | 4.0048  | 4.2119  | 4.8478  | 4.1370  | 5.0323  | 4.9918  | 4.2545  | 5.6261  | 0.9349  | -0.0972 | 0.4943 | 0.3060 |
| Cnp    | _VLVDOTNHER_3                                                     | #N/A                  | 6.9971  | 7.9047  | 8.4334  | 7.7716  | 7.5820  | 7.9712  | 7.7445  | 7.8124  | 7.8083  | 7.6988  | 1.0014  | 0.0020  | 0.9660 | 0.0150 |
| Cnp    | _HFGSGDEPK_2                                                      | #N/A                  | 5.8230  | 5.8856  | 5.8971  | 5.6625  | 5.9274  | 6.3523  | 6.2985  | 5.8530  | 5.7595  | 5.5651  | 1.0095  | 0.0136  | 0.7516 | 0.1240 |
| Cnp    | _M(Oxidation (M))VSADATK_2                                        | #N/A                  | 4.7239  | 4.6883  | 5.9235  | 4.9370  | 5.4096  | 5.4067  | 4.9936  | 5.5311  | 4.7900  | 4.3247  | 1.0563  | 0.0791  | 0.4083 | 0.3890 |
| Cnp    | _LELVSPYGK_2                                                      | #N/A                  | 8.1121  | 8.3884  | 8.0209  | 8.1208  | 7.8279  | 8.0801  | 7.7822  | 8.3792  | 8.3410  | 8.0529  | 0.9942  | -0.0084 | 0.7517 | 0.1340 |
| Cnp    | _LDQLFEM(Oxidation (M))ADQYQYVVLVEPK_3                            | #N/A                  | 4.1212  | 2.9331  | 3.8549  | 3.3986  | 2.1293  | 3.1861  | 4.0007  | 2.9974  | 3.9016  | 0.9129  | -0.1314 | 0.4632  | 0.3243 | 0.2440 |
| Cnp    | _Acetyl (Protein N-term)[M](Oxidation (M))NTS(Phospho (STY))ITR_2 | #N/A                  | 7.1417  | 7.8458  | 3.7097  | 4.0993  | 7.5952  | 3.9008  | 8.0910  | 3.8774  | 4.0649  | 3.5907  | 1.1650  | 0.2203  | 0.5580 | 0.2533 |
| Cnp    | _EKNGQWLSADOLK_3                                                  | #N/A                  | 3.6392  | 3.5680  | 3.4496  | 4.5527  | 3.1071  | 4.3402  | 3.2002  | 3.9493  | 4.2483  | 4.2300  | 0.9665  | -0.0491 | 0.7129 | 0.1470 |
| Cnp    | _ERLDQLFEM(Oxidation (M))ADQYQYVVLVEPK_3                          | #N/A                  | 4.3563  | 3.6117  | 4.0900  | 3.6337  | 3.5000  | 3.1246  | 4.5186  | 3.3674  | 3.6665  | 3.3110  | 1.0009  | 0.0014  | 0.9914 | 0.0038 |
| Ass1   | _IDVENR_2                                                         | #N/A                  | 6.3919  | 6.1839  | 6.0387  | 6.0572  | 6.1875  | 6.4971  | 5.3553  | 6.2482  | 5.9865  | 6.4057  | 1.0379  | 0.0536  | 0.3010 | 0.5215 |
| Ass1   | _RQVEIAQR_2                                                       | #N/A                  | 4.3193  | 5.7800  | 3.2751  | 7.7165  | 5.2993  | 4.3449  | 3.4925  | 7.3867  | 3.9893  | 3.7448  | 1.1008  | 0.1386  | 0.6723 | 0.1724 |
| Ass1   | _TTSLELFM(Oxidation (M))YINEVAGK_2                                | #N/A                  | 4.1338  | 3.4382  | 3.6379  | 3.1817  | 3.2595  | 2.9692  | 3.3300  | 3.8195  | 3.8967  | 3.3915  | 0.9522  | -0.0707 | 0.4899 | 0.3099 |
| Sptan1 | _S(Phospho (STY))LQQLAEER_2                                       | #N/A                  | 11.6799 | 11.3927 | 11.7595 | 12.0256 | 11.1954 | 11.5070 | 11.8636 | 11.3096 | 11.5599 | 11.5119 | 1.0028  | 0.0040  | 0.8586 | 0.0662 |
| Sptan1 | _KLDPAQSAS(Phospho (STY))IR_2                                     | #N/A                  | 9.6909  | 9.2808  | 9.0573  | 9.7455  | 9.0592  | 9.4778  | 9.4919  | 9.3454  | 9.4185  | 9.4774  | 0.9949  | -0.0074 | 0.7666 | 0.1154 |
| Sptan1 | _EANGQQQFNR_2                                                     | #N/A                  | 9.5109  | 9.6930  | 10.0886 | 10.0196 | 9.5081  | 9.6120  | 9.7166  | 9.6923  | 9.7740  | 9.7085  | 1.0016  | 0.0023  | 0.9066 | 0.0426 |
| Sptan1 | _EKEPIAASNR_2                                                     | #N/A                  | 9.3759  | 9.4851  | 9.8389  | 9.7095  | 9.6824  | 9.6718  | 9.5301  | 9.6604  | 9.5454  | 9.6687  | 1.0027  | 0.0039  | 0.7797 | 0.1081 |
| Sptan1 | _DLTGVOILR_2                                                      | #N/A                  | 9.2133  | 9.2706  | 9.2298  | 9.2743  | 9.5557  | 8.8908  | 9.1756  | 9.1522  | 9.2279  | 9.1301  | 1.0074  | 0.0106  | 0.5536 | 0.2568 |
| Sptan1 | _LSDONTGQEEIQQR_2                                                 | #N/A                  | 8.9003  | 9.1008  | 9.4054  | 9.3815  | 8.9321  | 9.1695  | 9.4339  | 9.0606  | 9.2599  | 9.1803  | 0.9908  | -0.0134 | 0.5171 | 0.2864 |
| Sptan1 | _SSEIESAFR_2                                                      | #N/A                  | 8.8031  | 8.6814  | 9.1782  | 9.0846  | 9.0036  | 8.5257  | 8.6614  | 8.9190  | 8.6787  | 8.8498  | 1.0116  | 0.0167  | 0.4800 | 0.3187 |
| Sptan1 | _ELPTAYDYVETR_2                                                   | #N/A                  | 8.6349  | 8.6551  | 9.0211  | 8.7717  | 8.9547  | 8.9232  | 8.8745  | 8.6276  | 8.8924  | 8.6757  | 1.0039  | 0.0056  | 0.7556 | 0.1217 |
| Sptan1 | _LFGAAEYGR_2                                                      | #N/A                  | 8.6310  | 8.9874  | 8.7643  | 8.8614  | 8.7999  | 8.5643  | 8.9413  | 8.9243  | 8.6207  | 8.7297  | 0.9959  | -0.0059 | 0.7275 | 0.1382 |
| Sptan1 | _LLVSSDYGR_2                                                      | #N/A                  | 8.8803  | 8.7753  | 8.9217  | 9.1117  | 8.7967  | 8.6738  | 8.7927  | 8.6382  | 8.7902  | 8.8743  | 1.0098  | 0.0141  | 0.3470 | 0.4597 |
| Sptan1 | _LELYQILTR_2                                                      | #N/A                  | 9.0709  | 8.5935  | 8.4808  | 8.9864  | 8.8396  | 8.7130  | 8.6958  | 8.5932  | 8.8445  | 8.8427  | 1.0042  | 0.0060  | 0.7785 | 0.1087 |
| Sptan1 | _LHQEHPHEELK_2                                                    | #N/A                  | 7.7393  | 7.3840  | 7.9530  | 7.4598  | 7.4449  | 7.6673  | 7.4057  | 7.3577  | 7.5889  | 7.6366  | 1.0148  | 0.0212  | 0.3967 | 0.4015 |
| Sptan1 | _ADVVEWIGEK_2                                                     | #N/A                  | 8.7882  | 8.0845  | 8.4889  | 8.6256  | 8.4300  | 8.6336  | 8.8662  | 8.1816  | 8.2892  | 8.6102  | 1.0026  | 0.0037  | 0.9041 | 0.0438 |
| Sptan1 | _VTQLLANSATR_2                                                    | #N/A                  | 8.2770  | 8.4988  | 8.6296  | 8.4346  | 8.4045  | 8.7488  | 8.3884  | 8.4858  | 8.5692  | 8.4017  | 1.0044  | 0.0064  | 0.6936 | 0.1589 |
| Sptan1 | _EANELQQWITEK_2                                                   | #N/A                  | 8.4349  | 8.3130  | 8.5569  | 8.7241  | 8.2198  | 8.5343  | 8.6964  | 8.4516  | 8.5041  | 8.7210  | 1.0049  | -0.0219 | 0.2605 | 0.5841 |
| Sptan1 | _DLALEDKVLK_2                                                     | #N/A                  | 8.0293  | 8.6909  | 8.9825  | 8.4268  | 8.6417  | 8.7515  | 8.3747  | 8.7107  | 8.5504  | 8.7214  | 0.99    |         |        |        |



|        |                                                                      |      |        |        |        |        |        |        |        |        |        |        |        |         |        |        |
|--------|----------------------------------------------------------------------|------|--------|--------|--------|--------|--------|--------|--------|--------|--------|--------|--------|---------|--------|--------|
| Sptan1 | _QKLEDSYR_2                                                          | #N/A | 7.8519 | 7.4659 | 7.7277 | 7.6616 | 8.0254 | 7.5960 | 7.3407 | 7.6609 | 7.6180 | 7.3457 | 1.0307 | 0.0436  | 0.0946 | 1.0242 |
| Sptan1 | _LAQFVEHWK_2                                                         | #N/A | 7.5044 | 7.7165 | 7.8721 | 7.8537 | 7.6602 | 7.7185 | 8.0298 | 7.6091 | 7.6315 | 7.8873 | 0.9912 | -0.0127 | 0.5362 | 0.2706 |
| Sptan1 | _DYDEAWISEK_2                                                        | #N/A | 7.5644 | 6.9342 | 7.8424 | 7.6179 | 7.6108 | 7.8635 | 7.9643 | 7.3357 | 7.7093 | 7.6301 | 0.9886 | -0.0166 | 0.6732 | 0.1719 |
| Sptan1 | _LDPAQSAS(Phospho (STY))RENLEEQSSIALR_3                              | #N/A | 7.6768 | 8.0204 | 8.1911 | 8.4867 | 7.0802 | 7.4135 | 8.0127 | 7.9836 | 7.3737 | 7.4995 | 1.0122 | 0.0175  | 0.7595 | 0.1200 |
| Sptan1 | _DVEDTIGWK_2                                                         | #N/A | 7.7385 | 6.9379 | 7.1003 | 7.8277 | 7.3176 | 7.3517 | 6.9635 | 7.4247 | 7.3619 | 7.7552 | 1.0004 | 0.0005  | 0.9807 | 0.0041 |
| Sptan1 | _NTTQVTEALU_2                                                        | #N/A | 7.7961 | 7.1122 | 7.0442 | 7.4447 | 7.5740 | 7.2934 | 7.1126 | 6.9556 | 7.3793 | 7.4257 | 1.0217 | 0.0310  | 0.3834 | 0.4163 |
| Sptan1 | _M(Oxidation (M))NEVSLWK_2                                           | #N/A | 6.9031 | 7.1781 | 7.4529 | 7.1092 | 7.3031 | 7.7417 | 7.2241 | 7.5254 | 7.4440 | 7.4588 | 0.9822 | -0.0259 | 0.4273 | 0.3692 |
| Sptan1 | _LSLSEER_2                                                           | #N/A | 7.1628 | 7.3008 | 7.5271 | 7.2861 | 7.1102 | 7.6923 | 6.6146 | 7.4176 | 7.5344 | 7.5071 | 1.0107 | 0.0154  | 0.7162 | 0.1460 |
| Sptan1 | _LGEQTLQGFSR_2                                                       | #N/A | 7.1369 | 7.3091 | 7.0701 | 7.5896 | 6.9941 | 6.6158 | 7.1795 | 6.8981 | 7.0057 | 6.9867 | 1.0145 | 0.0208  | 0.5713 | 0.2431 |
| Sptan1 | _LDENSAFLQFNWK_2                                                     | #N/A | 6.6591 | 6.6953 | 7.2079 | 6.4673 | 6.7350 | 6.7253 | 6.4871 | 6.4039 | 7.0815 | 6.9052 | 1.0043 | 0.0062  | 0.8763 | 0.4743 |
| Sptan1 | _QDEVNAAWQR_2                                                        | #N/A | 6.5240 | 6.4668 | 6.1173 | 5.4060 | 6.5613 | 7.0991 | 6.8537 | 5.8797 | 6.6180 | 7.0626 | 0.9635 | -0.0536 | 0.5139 | 0.2891 |
| Sptan1 | _DLTNVQNLQK_2                                                        | #N/A | 6.8726 | 6.4804 | 6.6430 | 6.9885 | 6.6852 | 6.5816 | 6.7255 | 6.6807 | 6.6337 | 6.6726 | 1.0046 | 0.0066  | 0.7630 | 0.1175 |
| Sptan1 | _KLLATELK_2                                                          | #N/A | 6.7567 | 6.4842 | 6.3109 | 6.8065 | 6.7761 | 6.7973 | 6.6217 | 6.1648 | 6.3669 | 6.5011 | 1.0377 | 0.0534  | 0.1029 | 0.9877 |
| Sptan1 | _LELTNWEQIR_2                                                        | #N/A | 6.3306 | 6.2233 | 6.5186 | 6.6028 | 6.6404 | 6.9350 | 6.5831 | 6.3911 | 6.9104 | 6.4178 | 0.9949 | -0.0074 | 0.8371 | 0.0772 |
| Sptan1 | _KVEDFLTFAK_2                                                        | #N/A | 6.0027 | 6.4227 | 6.6929 | 6.8904 | 6.2016 | 6.4213 | 6.1784 | 6.5275 | 6.4388 | 6.3833 | 1.0089 | 0.0127  | 0.7533 | 0.1230 |
| Sptan1 | _LGDSDILQR_2                                                         | #N/A | 6.9396 | 6.3565 | 6.1827 | 5.8746 | 6.5873 | 6.3922 | 6.4580 | 6.5958 | 6.5879 | 6.6090 | 0.9735 | -0.0387 | 0.3778 | 0.4228 |
| Sptan1 | _KFDQFQK_2                                                           | #N/A | 6.4741 | 6.5117 | 5.7226 | 6.4966 | 7.0092 | 6.5036 | 6.2481 | 6.4572 | 6.4031 | 6.1489 | 1.0220 | 0.0313  | 0.5424 | 0.2657 |
| Sptan1 | _LLEATELK_2                                                          | #N/A | 6.3564 | 6.1561 | 7.1751 | 5.8490 | 5.5232 | 6.0039 | 6.4536 | 6.9208 | 6.1580 | 6.3507 | 1.0175 | 0.0251  | 0.8188 | 0.0868 |
| Sptan1 | _QWELLEK_2                                                           | #N/A | 6.3159 | 5.9206 | 5.9866 | 6.7380 | 6.1933 | 6.2669 | 6.2003 | 6.4168 | 6.1681 | 6.3629 | 0.9920 | -0.0115 | 0.7562 | 0.1214 |
| Sptan1 | _VNDVC(Carbamidomethyl (C))TNGQDLK_2                                 | #N/A | 6.2530 | 5.9914 | 6.0290 | 5.9372 | 6.7222 | 6.3721 | 6.5262 | 6.1057 | 6.2352 | 6.1376 | 0.9946 | -0.0078 | 0.8479 | 0.0717 |
| Sptan1 | _DLM(Oxidation (M))DWNIGRL_2                                         | #N/A | 6.3375 | 6.4709 | 5.5485 | 4.8428 | 6.0300 | 6.0150 | 6.1571 | 5.9993 | 6.4912 | 6.2861 | 0.9424 | -0.0857 | 0.2881 | 0.5404 |
| Sptan1 | _C(Carbamidomethyl (C))TFLNQAWTSLGK_2                                | #N/A | 5.3812 | 4.9620 | 6.2191 | 5.8437 | 6.1560 | 5.4451 | 5.5186 | 5.7455 | 5.4212 | 5.5600 | 1.0192 | 0.0274  | 0.6881 | 0.1623 |
| Sptan1 | _LAAALADQWFLVKQ_2                                                    | #N/A | 6.2210 | 6.5303 | 6.5461 | 6.3067 | 5.9455 | 6.2091 | 6.4191 | 5.6339 | 6.0864 | 6.4251 | 1.0247 | 0.0353  | 0.4400 | 0.3565 |
| Sptan1 | _LAALQAFADQLIAVHYAK_3                                                | #N/A | 4.8113 | 5.0846 | 5.2292 | 5.9443 | 4.7361 | 5.2288 | 5.5332 | 5.0860 | 4.9366 | 4.8531 | 1.0137 | 0.0197  | 0.7867 | 0.1042 |
| Sptan1 | _KLSDONTGQEEIQQR_3                                                   | #N/A | 5.9620 | 5.8570 | 6.8039 | 6.3046 | 6.2373 | 5.9182 | 5.3790 | 5.9174 | 6.2370 | 5.1063 | 0.9791 | 0.1876  | 0.7267 | 0.1766 |
| Sptan1 | _QVEELVQSLLEGEK_2                                                    | #N/A | 5.7835 | 5.6426 | 6.0091 | 6.1228 | 5.7108 | 5.4795 | 5.6266 | 5.7136 | 6.0287 | 5.4791 | 1.0139 | 0.0199  | 0.6162 | 0.2103 |
| Sptan1 | _DVTGAEALLER_2                                                       | #N/A | 9.1210 | 8.6243 | 8.6969 | 8.9325 | 8.5376 | 8.3100 | 9.1570 | 8.8265 | 8.5118 | 8.7717 | 0.9872 | -0.0186 | 0.5489 | 0.2605 |
| Sptan1 | _EAVTSEELQGLEHVEVLQK_3                                               | #N/A | 7.3874 | 7.1150 | 7.2818 | 8.3147 | 6.3232 | 7.2123 | 7.5198 | 7.2344 | 7.0610 | 7.4532 | 0.9939 | -0.0088 | 0.8973 | 0.0471 |
| Sptan1 | _HQALQAEIAGHEPR_3                                                    | #N/A | 6.7260 | 6.4199 | 3.3835 | 7.5147 | 7.5234 | 7.1665 | 5.7253 | 7.1717 | 7.2108 | 6.8069 | 0.9594 | 0.0066  | 0.7550 | 0.1221 |
| Sptan1 | _LQDSHPLSASQIQW_2                                                    | #N/A | 6.2140 | 5.8997 | 4.4652 | 6.1813 | 6.2281 | 6.0474 | 6.0215 | 5.9157 | 6.1770 | 6.0238 | 0.9677 | -0.0474 | 0.5943 | 0.2260 |
| Sptan1 | _ENLLEEQSSIALR_2                                                     | #N/A | 6.3947 | 6.4356 | 3.1323 | 6.5094 | 6.7528 | 6.2348 | 6.0613 | 6.4497 | 7.1412 | 6.8159 | 0.8931 | -0.1630 | 0.3571 | 0.4472 |
| Sptan1 | _EAFDAFR_2                                                           | #N/A | 6.4224 | 6.5393 | 3.5670 | 6.1876 | 6.6380 | 6.1394 | 6.1295 | 6.0005 | 6.2183 | 6.3065 | 0.9597 | -0.0593 | 0.6890 | 0.1618 |
| Sptan1 | _TALLELWELR_2                                                        | #N/A | 6.4074 | 5.5048 | 3.3099 | 5.9572 | 5.6679 | 5.3759 | 6.3506 | 5.7437 | 6.0463 | 5.9786 | 0.8907 | -0.1670 | 0.2706 | 0.5676 |
| Sptan1 | _RQQVADR_2                                                           | #N/A | 6.1760 | 6.0986 | 6.5130 | 5.3026 | 6.0653 | 6.0621 | 5.9585 | 5.3929 | 5.8272 | 5.8087 | 1.0504 | 0.0709  | 0.2341 | 0.6307 |
| Sptan1 | _TALLELWELRR_2                                                       | #N/A | 4.4646 | 5.0023 | 4.1245 | 3.6788 | 4.9682 | 4.5948 | 4.4711 | 5.1972 | 5.4403 | 5.2639 | 0.8781 | -0.1876 | 0.0798 | 1.0980 |
| Sptan1 | _KDLNSQADSLM(Oxidation (M))TSSAFDTSQVK_3                             | #N/A | 5.3000 | 6.3515 | 5.9064 | 5.2698 | 4.7048 | 5.0455 | 6.2949 | 5.2085 | 4.6711 | 5.7583 | 0.9902 | -0.0142 | 0.8998 | 0.0458 |
| Sptan1 | _DAEELEKWIQEK_2                                                      | #N/A | 3.3282 | 6.2419 | 7.0379 | 5.4485 | 5.5092 | 5.6944 | 5.3546 | 5.7435 | 5.1346 | 5.2067 | 1.0342 | 0.0486  | 0.7818 | 0.1069 |
| Sptan1 | _C(Carbamidomethyl (C))NSLEEK_2                                      | #N/A | 4.2622 | 4.7770 | 4.6590 | 4.2995 | 5.0138 | 4.7172 | 4.0671 | 4.6591 | 4.6666 | 4.1307 | 1.0549 | 0.0771  | 0.2558 | 0.5921 |
| Sptan1 | _RHEGFER_2                                                           | #N/A | 9.3667 | 7.6638 | 8.0072 | 8.2635 | 8.7874 | 8.7973 | 9.2601 | 7.8014 | 8.7400 | 8.5438 | 0.9877 | -0.0178 | 0.7970 | 0.0985 |
| Sptan1 | _VAEDLESEGLM(Oxidation (M))AEVQAVQGEVYIGAM(Oxidation (M))PR_3        | #N/A | 6.4993 | 7.5277 | 7.9831 | 7.5536 | 6.0121 | 7.3389 | 7.6791 | 7.2956 | 7.2292 | 7.6052 | 0.9598 | -0.0592 | 0.4628 | 0.3346 |
| Sptan1 | _ALINADELANVANGAEALLDR_2                                             | #N/A | 5.5498 | 5.9484 | 6.1048 | 6.1539 | 5.2462 | 5.1643 | 5.2724 | 5.9723 | 6.0461 | 5.7783 | 0.9874 | -0.0183 | 0.7880 | 0.1035 |
| Sptan1 | _LNHQEFK_2                                                           | #N/A | 5.9679 | 5.5550 | 5.6238 | 5.7736 | 6.3793 | 5.6844 | 5.8507 | 6.0329 | 5.9988 | 6.6506 | 0.9911 | -0.0129 | 0.7649 | 0.1164 |
| Sptan1 | _M(Oxidation (M))M(Oxidation (M))DLHC(Carbamidomethyl (C))LELQLFHR_3 | #N/A | 6.2559 | 5.2455 | 6.2634 | 5.5290 | 6.0133 | 6.1523 | 6.1773 | 6.6631 | 6.7059 | 6.0177 | 0.9247 | -0.1129 | 0.0971 | 1.0129 |
| Sptan1 | _GEIDAHEDFSK_2                                                       | #N/A | 5.2773 | 4.8759 | 4.4219 | 4.9622 | 5.5742 | 5.2306 | 5.4367 | 5.4311 | 5.5004 | 5.3023 | 0.9334 | -0.0994 | 0.1176 | 0.9296 |
| Sptan1 | _DTEQVDNWM(Oxidation (M))SK_2                                        | #N/A | 7.7991 | 7.8738 | 7.9848 | 8.0794 | 7.6796 | 7.6789 | 7.9948 | 7.5606 | 7.7840 | 7.9449 | 1.0036 | 0.0052  | 0.8099 | 0.0915 |
| Sptan1 | _QVIDM(Oxidation (M))GNSUER_2                                        | #N/A | 6.9844 | 6.8520 | 6.8644 | 7.4430 | 7.0483 | 6.7435 | 6.9816 | 6.5370 | 6.7525 | 6.7525 | 1.0321 | 0.0456  | 0.1021 | 0.9215 |
| Sptan1 | _DLAALGDVNSGETAQR_3                                                  | #N/A | 5.9501 | 6.1923 | 6.4053 | 6.0401 | 6.2246 | 6.3182 | 5.9210 | 6.3455 | 6.1169 | 6.5941 | 0.9916 | -0.0122 | 0.7240 | 0.1391 |
| Sptan1 | _AQIADSHLQGFRR_3                                                     | #N/A | 5.2212 | 4.9371 | 5.5968 | 5.1377 | 4.9304 | 5.1564 | 5.0523 | 4.9239 | 4.8741 | 5.4873 | 1.0155 | 0.0222  | 0.6680 | 0.1884 |
| Sptan1 | _QQVAPM(Oxidation (M))DDEQKELVLAIVDYQKES(Phospho (STY))PR_3          | #N/A | 3.2948 | 4.3022 | 3.9816 | 5.4859 | 5.3774 | 4.5935 | 4.1989 | 5.7393 | 3.3389 | 4.6516 | 1.0053 | 0.0076  | 0.9685 | 0.0139 |
| Sptan1 | _SADESGQALLASHYASDEVLR_3                                             | #N/A | 5.6661 | 5.5016 | 5.7360 | 6.4166 | 4.8829 | 5.8618 | 5.8546 | 5.4621 | 5.3855 | 5.9975 | 1.0005 | 0.0007  | 0.9929 | 0.2031 |
| Sptan1 | _DUQVGNLLK_2                                                         | #N/A | 5.2183 | 5.0459 | 3.2472 | 5.1096 | 5.7055 | 5.0402 | 5.0477 | 4.8575 | 5.5974 | 5.8049 | 0.9188 | -0.1221 | 0.3804 | 0.4197 |
| Sptan1 | _DC(Carbamidomethyl (C))EQAENWM(Oxidation (M))AAR_2                  | #N/A | 7.2370 | 6.7070 | 5.8495 | 7.1019 | 7.1149 | 6.5603 | 7.1984 | 6.8799 | 6.8343 | 7.2060 | 0.9619 | -0.0561 | 0.3601 | 0.4435 |
| Sptan1 | _DSDSEKSVNNEK_2                                                      | #N/A | 5.3971 | 6.1127 | 6.1003 | 5.6910 | 5.8055 | 6.3963 | 5.7036 | 5.7767 | 6.0162 | 6.2898 | 0.9951 | -0.0072 | 0.8920 | 0.0497 |
| Sptan1 | _AINVQEEK_2                                                          | #N/A | 7.0750 | 6.1864 | 5.6927 | 6.2288 | 6.8766 | 6.8068 | 4.5020 | 5.8738 | 6.6011 | 6.6750 | 1.0955 | 0.1316  | 0.2737 | 0.5627 |
| Sptan1 | _SSLSSAQADFNQAEALDR_2                                                | #N/A | 7.2506 | 7.1899 | 7.3643 | 7.2650 | 7.0338 | 7.1590 | 7.0603 | 6.9846 | 7.0886 | 6.8978 | 1.0289 | 0.0411  | 0.0157 | 1.8037 |
| Sptan1 | _GLVSDGLAKDVYTGAEALLER_3                                             | #N/A | 3.1820 | 3.6739 | 4.6774 | 2.6875 | 3.1251 | 3.9563 | 4.1920 | 3.0408 | 4.1722 | 4.3963 | 0.9072 | -0.1405 | 0.4160 | 0.3809 |
| Sptan1 | _ASAFNSGFWNAEDTQPVIR_2                                               | #N/A | 3.8858 | 3.1114 | 3.1654 | 4.1569 | 3.3958 | 1.2319 | 4.4030 | 3.8810 | 3.2730 | 2.9813 | 0.8688 | -0.2028 | 0.4365 | 0.3600 |
| Sptan1 | _LQSHPSAEALKEK_3                                                     | #N/A | 5.9549 | 6.0409 | 6.3029 | 6.3142 | 6.6343 | 6.3307 | 6.0609 | 6.1931 | 6.1248 | 6.0841 | 1.0241 | 0.0343  | 0.2733 | 0.5633 |
| Sptan1 | _DM(Oxidation (M))DDEESWK_2                                          | #N/A | 6.6881 | 6.5467 | 5.9276 | 6.6525 | 6.2081 | 6.4787 | 6.5269 | 6.4935 | 6.4592 | 6.8186 | 0.9507 | -0.0730 | 0.1520 | 0.8180 |
| Sptan1 | _EKLDLQERTOLEK_3                                                     | #N/A | 6.0687 | 5.6828 | 7.1650 | 6.4622 | 6.3912 | 5.7359 | 6.3418 | 5.8107 | 5.8256 | 3.8531 | 1.1453 | 0.1958  | 0.1637 | 0.7859 |
| Sptan1 | _M(Oxidation (M))QHNLEQIQIAR_3                                       | #N/A | 5.2072 | 5.3739 | 6.0611 | 5.1445 | 5.6494 | 5.9972 | 4.5300 | 5.3911 | 5.7936 | 5.4725 | 1.0520 | 0.0731  | 0.3757 | 0.4251 |
| Sptan1 | _DLNSQADSLM(Oxidation (M))TSSAFDTSQVK_2                              | #N/A | 4.1867 | 4.8868 | 5.0050 | 5.9502 | 4.5776 | 4.9075 | 4.9033 | 4.7185 | 4.2213 | 4.7007 | 1.0610 | 0.0855  | 0.4038 | 0.3939 |
| Sptan1 | _DLTSWVTEMK_2                                                        | #N/A | 5.6778 | 4.0785 | 4.2902 | 6.2586 | 4.3218 | 4.4252 | 4.0321 | 3.5148 | 3.1633 | 3.5911 | 1.3543 | 0.0375  | 0.0297 | 1.5272 |
| Sptan1 | _M(Oxidation (M))TVASEDYGDTLAAQGLLK_2                                | #N/A | 4.6907 | 5.4519 | 5.9053 | 5.6784 | 5.1888 | 5.5780 | 5.4635 | 5.4991 | 5.2834 | 5.3446 | 1.0033 | 0.0048  | 0.9378 | 0.0279 |
| Sptan1 | _ADVESVWGEKENSUK_2                                                   | #N/A | 4.2919 | 3.6605 | 4.7178 | 4.3896 | 4.1923 | 4.6169 | 4.4148 | 4.4103 | 4.4608 | 4.7176 | 0.9579 | -0.0620 | 0.3711 | 0.4305 |
| Sptan1 | _QQNFNTGK_2                                                          | #    |        |        |        |        |        |        |        |        |        |        |        |         |        |        |



|        |                                                              |                      |         |         |         |         |         |         |         |         |         |         |         |         |        |        |
|--------|--------------------------------------------------------------|----------------------|---------|---------|---------|---------|---------|---------|---------|---------|---------|---------|---------|---------|--------|--------|
| Sptan1 | _EAALTNEEVGADLEQVEVLQK_2                                     | #N/A                 | 3.5495  | 3.8008  | 3.2832  | 8.9449  | 3.3343  | 3.9190  | 3.8606  | 8.2231  | 3.8657  | 4.0051  | 0.8964  | -0.1577 | 0.7239 | 0.1403 |
| Sptan1 | _SOLLGSAHEVQR_2                                              | #N/A                 | 7.3007  | 7.2547  | 7.2402  | 7.3496  | 7.8816  | 7.4594  | 7.6555  | 7.5393  | 7.5016  | 7.4849  | 0.9826  | -0.0253 | 0.3335 | 0.4768 |
| Sptan1 | _EKEPIVSTSDYGVDEDSAEALLK_3                                   | #N/A                 | 6.6741  | 6.4490  | 6.7244  | 7.2947  | 6.4350  | 6.5079  | 6.9281  | 6.5940  | 6.0354  | 6.6520  | 1.0196  | 0.0280  | 0.5781 | 0.2380 |
| Sptan1 | _QQVAPM[Oxidation (M)]DOETGKELVALVQYQEK_3                    | #N/A                 | 3.7967  | 5.2232  | 5.7113  | 5.5032  | 4.6100  | 4.3503  | 5.6236  | 4.7035  | 4.5204  | 4.5246  | 1.0047  | 0.0068  | 0.9591 | 0.0181 |
| Sptan1 | _TYLDGSC[Carbamidomethyl (C)]MVEEGSLTESLEATK_3               | #N/A                 | 4.3402  | 4.3868  | 3.5262  | 5.7011  | 2.4659  | 4.2636  | 3.7435  | 3.2423  | 3.7382  | 3.9958  | 1.1632  | 0.2181  | 0.2008 | 0.6972 |
| Sptan1 | _NQALNTDNYGHGLASVQLQR_3                                      | #N/A                 | 6.8298  | 6.6043  | 6.9437  | 7.0400  | 6.7122  | 6.3826  | 7.0667  | 6.5615  | 6.8009  | 6.7932  | 0.9921  | -0.0114 | 0.7253 | 0.1395 |
| Sptan1 | _NNHHEENISSK_2                                               | #N/A                 | 4.7577  | 4.2487  | 4.3591  | 3.9337  | 4.1146  | 4.1361  | 4.9682  | 4.0431  | 4.3099  | 4.3417  | 0.9644  | -0.0524 | 0.4787 | 0.3200 |
| Sptan1 | _EKLDLDQER_2                                                 | #N/A                 | 7.6286  | 7.3388  | 7.4841  | 7.1760  | 7.3947  | 7.1184  | 7.7107  | 6.8892  | 7.2603  | 7.4413  | 1.0041  | 0.0059  | 0.8633 | 0.0638 |
| Sptan1 | _DADETKEWIEEK_2                                              | #N/A                 | 6.0465  | 5.9106  | 5.7235  | 6.2469  | 6.0534  | 6.1043  | 6.4149  | 5.9289  | 6.2299  | 5.9518  | 0.9809  | -0.0278 | 0.3930 | 0.4057 |
| Sptan1 | _HQHKGGEIDAHEDSKF_4                                          | #N/A                 | 5.5904  | 4.2327  | 3.6835  | 4.1862  | 5.3259  | 4.0312  | 3.5831  | 4.0955  | 5.7297  | 4.1532  | 1.0269  | 0.0382  | 0.8113 | 0.0802 |
| Sptan1 | _QFQDAGHFDANIKK_3                                            | #N/A                 | 5.1040  | 5.9248  | 5.0811  | 5.5058  | 4.9671  | 5.3578  | 5.3227  | 6.1847  | 5.4499  | 4.8174  | 0.9779  | -0.0322 | 0.6867 | 0.1632 |
| Sptan1 | _KIEDLGAA[M]Oxidation (M)]EALLDNK_3                          | #N/A                 | 4.4312  | 4.9824  | 5.0936  | 4.4901  | 4.2723  | 4.1161  | 5.2745  | 4.0397  | 5.4024  | 4.8874  | 0.9313  | -0.1027 | 0.3154 | 0.5012 |
| Sptan1 | _TKQDEVNAAWQR_3                                              | #N/A                 | 4.0299  | 4.3574  | 3.1168  | 3.6195  | 4.7767  | 3.1721  | 3.3341  | 4.4555  | 4.1476  | 5.0413  | 0.9059  | -0.1425 | 0.3906 | 0.4082 |
| Sptan1 | _QEFAGHANAFHQWIGETR_3                                        | #N/A                 | 6.4510  | 5.7096  | 6.5923  | 6.8756  | 6.2796  | 5.8147  | 6.8496  | 6.3300  | 6.3448  | 6.5884  | 0.9631  | -0.0543 | 0.3637 | 0.4393 |
| Sptan1 | _EKILSIEER_2                                                 | #N/A                 | 4.0198  | 3.2752  | 3.7535  | 5.8097  | 5.1953  | 3.4611  | 3.3542  | 5.4760  | 5.9071  | 2.9745  | 0.9604  | -0.0584 | 0.8281 | 0.0819 |
| Sptan1 | _SADESQGLAASHYASDEVREK_3                                     | #N/A                 | 4.8040  | 6.0052  | 7.1456  | 5.8980  | 5.7576  | 6.7849  | 6.0057  | 5.2833  | 5.8464  | 6.1820  | 1.0406  | 0.0574  | 0.6120 | 0.2133 |
| Sptan1 | _GNAM[Oxidation (M)]VEEGHFAAEVQK_2                           | #N/A                 | 3.3962  | 4.2902  | 3.8128  | 4.6418  | 4.1853  | 4.5202  | 4.4473  | 4.4854  | 3.8381  | 4.5009  | 0.9590  | -0.0603 | 0.5294 | 0.2762 |
| Sptan1 | _EQLMASDOFGR_2                                               | #N/A                 | 5.3065  | 4.4011  | 4.2827  | 3.2845  | 4.2224  | 3.5071  | 4.5000  | 3.3331  | 2.9817  | 3.2515  | 1.1851  | 0.3450  | 0.1888 | 0.7240 |
| Sptan1 | _QETDAGLQAQDEGIANITALK_3                                     | #N/A                 | 3.4801  | 3.0499  | 3.3623  | 4.6967  | 2.9382  | 3.6865  | 3.5796  | 4.2535  | 3.2759  | 4.0583  | 0.9324  | -0.1009 | 0.5053 | 0.2964 |
| Sptan1 | _HALLADVAAHQDR_3                                             | #N/A                 | 4.5976  | 4.0234  | 4.5016  | 4.3922  | 3.9117  | 4.2138  | 4.1069  | 3.7262  | 3.3748  | 3.7227  | 1.1449  | 0.1952  | 0.0179 | 1.7477 |
| Sptan1 | _HQLLEADISAHER_3                                             | #N/A                 | 5.1143  | 3.6626  | 4.1408  | 3.6846  | 4.5107  | 3.0737  | 4.6375  | 3.1166  | 4.7455  | 4.5058  | 0.9372  | -0.0936 | 0.5659 | 0.2473 |
| Sptan1 | _LIQNNHYAM[Oxidation (M)]EDVATR_3                            | #N/A                 | 3.7439  | 3.7441  | 3.3790  | 4.0611  | 4.0823  | 3.7721  | 3.9534  | 4.0058  | 3.9266  | 3.9611  | 0.9811  | -0.0275 | 0.6404 | 0.1936 |
| Sptan1 | _KHAEFTDFTVHK_3                                              | #N/A                 | 4.9715  | 3.3419  | 3.1317  | 3.6343  | 3.0714  | 3.1572  | 3.5180  | 2.9833  | 4.1327  | 3.6013  | 0.9979  | -0.0030 | 0.9860 | 0.0061 |
| Sptan1 | _AKLGDSHDLQR_3                                               | #N/A                 | 4.3873  | 3.4018  | 4.1210  | 3.6648  | 4.2772  | 3.4522  | 3.8130  | 3.3364  | 4.3487  | 3.3421  | 1.0469  | 0.0661  | 0.5663 | 0.2470 |
| Sptan1 | _DMDOEESWIEK_2                                               | #N/A                 | 3.6965  | 3.5901  | 3.9466  | 4.8950  | 3.5889  | 3.9933  | 3.6856  | 4.0351  | 3.6837  | 3.3966  | 1.0680  | 0.0949  | 0.3828 | 0.4171 |
| Sptan1 | _LM[Oxidation (M)]VHTVATFNSIK_2                              | #N/A                 | 4.0047  | 1.3753  | 3.7383  | 3.2821  | 3.1484  | 3.5847  | 3.3694  | 3.7191  | 4.0181  | 2.9594  | 0.9068  | -0.1411 | 0.5408 | 0.2670 |
| Sptan1 | _AGTQAFQEQGQQLAHGHYASPEIK_3                                  | #N/A                 | 4.1785  | 3.1904  | 3.3644  | 3.8671  | 3.3041  | 4.4254  | 1.4793  | 3.7415  | 0.9639  | 1.7129  | 1.8849  | 0.9345  | 0.0128 | 0.2670 |
| Sptan1 | _HQAEAEUHANADR_3                                             | #N/A                 | 5.2847  | 3.0437  | 4.4261  | 3.5762  | 2.8650  | 3.3636  | 3.7244  | 3.1897  | 3.7241  | 3.3950  | 1.0717  | 0.0999  | 0.6166 | 0.2100 |
| Sptan1 | _LIQNNHYAMEDVATR_3                                           | #N/A                 | 3.6154  | 4.4206  | 4.3022  | 5.4094  | 4.2419  | 3.4876  | 3.8484  | 3.3136  | 3.6001  | 3.2710  | 1.2103  | 0.0774  | 0.0788 | 1.1033 |
| Sptan1 | _HEAFETDFTVHK_3                                              | #N/A                 | 3.4578  | 3.2755  | 3.8005  | 3.3443  | 3.0969  | 3.1318  | 3.4926  | 3.6569  | 3.9559  | 3.0216  | 0.9489  | -0.0757 | 0.3991 | 0.3990 |
| Sptan1 | _QETDAGLQAQDEGIANITALKQQLAAK_3                               | #N/A                 | 3.1104  | 3.9156  | 3.1604  | 4.2051  | 3.7370  | 3.9925  | 4.3533  | 4.2970  | 3.0952  | 3.8823  | 0.9437  | -0.0837 | 0.5183 | 0.2854 |
| Sptan1 | _EKQLMASDOFGR_3                                              | #N/A                 | 4.3874  | 3.6428  | 4.1211  | 3.6648  | 3.5311  | 3.0935  | 3.8131  | 3.3363  | 3.6354  | 3.3421  | 1.0590  | 0.0827  | 0.4297 | 0.3669 |
| Sptan1 | _LEDJGAAMEALLDNK_2                                           | #N/A                 | 3.9909  | 3.2353  | 3.1769  | 3.6795  | 3.3166  | 3.5011  | 3.3942  | 4.4389  | 4.0875  | 3.6465  | 0.8865  | -0.1738 | 0.1184 | 0.9265 |
| Sptan1 | _RQDLESLQAQQYFADANAEWSM[Oxidation (M)]R_3                    | #N/A                 | 3.4215  | 4.2267  | 4.1083  | 4.6109  | 4.0480  | 3.6815  | 4.3256  | 3.5076  | 3.1561  | 3.0771  | 1.1421  | 0.1916  | 0.1463 | 0.8347 |
| Sptan1 | _KHAEFTDFTVHKDR_4                                            | #N/A                 | 3.0551  | 4.2873  | 4.2896  | 3.8334  | 4.1086  | 3.6209  | 3.9817  | 3.1678  | 3.4668  | 3.5107  | 1.0946  | 0.1304  | 0.2624 | 0.5841 |
| Gapdh  | _GAQNIPASTGAAK_2                                             | #N/A                 | 12.9012 | 13.0132 | 13.4463 | 13.0267 | 13.2460 | 12.9031 | 13.1720 | 12.8720 | 13.1715 | 12.8452 | 1.0057  | 0.0082  | 0.5869 | 0.2314 |
| Gapdh  | _VPTPVSVSDIC[Carbamidomethyl (C)]R_2                         | #N/A                 | 10.6705 | 10.6767 | 10.8709 | 11.0485 | 10.8051 | 10.7300 | 10.8554 | 10.4803 | 10.7612 | 10.6194 | 1.0114  | 0.0163  | 0.2514 | 0.5996 |
| Gapdh  | _VPELNGK_2                                                   | #N/A                 | 10.7416 | 10.8409 | 10.7273 | 10.5126 | 11.2720 | 10.5609 | 9.5376  | 10.8172 | 10.8136 | 10.8462 | 1.0259  | 0.0669  | 0.3753 | 0.4256 |
| Gapdh  | _LTGM[Oxidation (M)]AFR_2                                    | #N/A                 | 10.1535 | 10.9091 | 10.7639 | 9.8632  | 11.0173 | 10.6627 | 10.2452 | 11.0055 | 10.9352 | 10.7112 | 0.9847  | -0.0223 | 0.5575 | 0.2538 |
| Gapdh  | _VGWVGFR_2                                                   | #N/A                 | 9.5758  | 9.8844  | 9.6053  | 9.5879  | 10.1851 | 9.3633  | 9.5766  | 9.9563  | 9.6717  | 9.7558  | 0.9959  | -0.0059 | 0.8110 | 0.0910 |
| Gapdh  | _LVWNGKPTIFQER_3                                             | #N/A                 | 8.9613  | 8.6733  | 8.5089  | 9.0940  | 8.6162  | 8.5854  | 8.7837  | 8.8040  | 8.6956  | 9.0183  | 0.9903  | -0.0141 | 0.5308 | 0.2750 |
| Gapdh  | _PTIFQER_2                                                   | #N/A                 | 9.0213  | 8.4576  | 7.8963  | 8.9145  | 8.4980  | 8.7432  | 8.6768  | 8.5138  | 8.8151  | 8.6906  | 0.9901  | -0.0143 | 0.6979 | 0.1562 |
| Gapdh  | _VVKQASEGLPK_2                                               | #N/A                 | 7.5238  | 7.1538  | 7.3163  | 7.2588  | 7.5856  | 7.0445  | 7.5902  | 7.2481  | 6.9609  | 7.2811  | 1.0060  | 0.0087  | 0.7744 | 0.1130 |
| Gapdh  | _VISAPSADAPM[Oxidation (M)]FVM[Oxidation (M)]GVNHEKYNSLK_4   | #N/A                 | 6.9600  | 7.7759  | 8.8448  | 6.2256  | 7.0853  | 8.4788  | 7.1744  | 7.9407  | 7.6569  | 0.9940  | -0.0087 | 0.9325  | 0.0349 | 0.3100 |
| Gapdh  | _PTIFQERDPTNIK_3                                             | #N/A                 | 7.7029  | 7.5178  | 7.5852  | 8.0460  | 7.5191  | 7.7162  | 7.5415  | 7.5039  | 7.5835  | 7.6242  | 1.0156  | 0.0223  | 0.2868 | 0.5424 |
| Gapdh  | _WGEAGAEYVESTGVFTTM[Oxidation (M)]EK_2                       | #N/A                 | 8.5813  | 8.9440  | 10.0467 | 10.0754 | 8.6166  | 9.4332  | 9.1004  | 8.9494  | 8.6465  | 8.9020  | 1.0431  | 0.0608  | 0.3091 | 0.5099 |
| Gapdh  | _VISAPSADAPM[Oxidation (M)]FVM[Oxidation (M)]GVNHEK_3        | #N/A                 | 8.3489  | 7.8000  | 7.4498  | 8.5987  | 7.8208  | 7.7860  | 7.4430  | 7.7575  | 7.2114  | 7.9054  | 1.0512  | 0.0720  | 0.1572 | 0.7206 |
| Gapdh  | _RVISAPSADAPM[Oxidation (M)]FVM[Oxidation (M)]GVNHEK_3       | #N/A                 | 7.9324  | 8.5523  | 9.3912  | 8.2290  | 8.6215  | 8.9633  | 8.2460  | 8.7460  | 8.8250  | 9.0815  | 1.0824  | -0.0257 | 0.6024 | 0.8031 |
| Gapdh  | _LSWVDNEYGSNR_2                                              | #N/A                 | 10.5877 | 10.4349 | 11.1230 | 10.6050 | 10.2385 | 10.6417 | 10.7735 | 10.1679 | 10.5669 | 10.5771 | 1.0080  | 0.0114  | 0.6553 | 0.1836 |
| Gapdh  | _DPTNIKWGEAGAEYVESTGVFTTM[Oxidation (M)]EK_3                 | #N/A                 | 5.1439  | 4.8676  | 6.8277  | 5.2174  | 4.3515  | 5.7609  | 4.5578  | 5.3844  | 5.3772  | 1.0366  | 0.0518  | 0.6945  | 0.1583 | 0.8366 |
| Gapdh  | _VVDLM[Oxidation (M)]AYM[Oxidation (M)]ASK_2                 | #N/A                 | 7.5324  | 7.8607  | 7.9362  | 7.1822  | 7.8849  | 8.0027  | 7.6975  | 7.6133  | 8.0153  | 8.1582  | 0.9825  | -0.0255 | 0.4898 | 0.3100 |
| Gapdh  | _VVDLM[Oxidation (M)]AYM[Oxidation (M)]ASK_2                 | #N/A                 | 7.1458  | 8.5067  | 8.4190  | 8.3508  | 8.4740  | 8.4272  | 8.3111  | 8.8379  | 8.5343  | 8.4303  | 0.9639  | -0.0530 | 0.3106 | 0.5078 |
| Gapdh  | _QASEGLPK_2                                                  | #N/A                 | 10.2872 | 10.5981 | 10.4048 | 10.4406 | 3.5808  | 4.1487  | 3.8584  | 3.9747  | 3.6233  | 10.5641 | 1.4974  | 0.5825  | 0.2461 | 0.6089 |
| Gapdh  | _LEKPAKYDDIK_3                                               | #N/A                 | 4.5608  | 3.6186  | 4.2944  | 4.2203  | 5.2808  | 3.4954  | 2.6841  | 4.9234  | 5.1546  | 4.8733  | 0.9628  | -0.0546 | 0.7795 | 0.1082 |
| Gapdh  | _VSNASC[Carbamidomethyl (C)]TNC[Carbamidomethyl (C)]LAPLAK_2 | #N/A                 | 10.8743 | 10.9210 | 11.1796 | 11.3508 | 11.3452 | 10.9329 | 11.0092 | 10.7727 | 10.9797 | 10.9523 | 1.0157  | 0.0225  | 0.1878 | 0.7263 |
| Gapdh  | _TVGSPSGLWR_2                                                | #N/A                 | 7.0793  | 6.2737  | 6.5861  | 7.1069  | 6.5057  | 6.3692  | 7.2516  | 6.2820  | 6.3051  | 6.7747  | 0.9975  | -0.0036 | 0.9516 | 0.0216 |
| Gapdh  | _VHNGFVGLEGM[Oxidation (M)]TTVNAITATQK_4                     | #N/A                 | 8.1204  | 8.2568  | 8.3734  | 8.2682  | 7.9686  | 8.5799  | 7.0222  | 8.1281  | 8.5642  | 8.3852  | 1.0294  | 0.0419  | 0.4444 | 0.3522 |
| Gapdh  | _FNGTVKAEKGK_2                                               | #N/A                 | 3.8499  | 3.4925  | 3.5836  | 4.6282  | 2.4954  | 4.4156  | 3.2756  | 3.8738  | 4.1729  | 3.1549  | 1.0345  | 0.0489  | 0.7803 | 0.1078 |
| Gapdh  | _VEIVANDPFIDLNMVMIQYDSTHGK_3                                 | #N/A                 | 3.2132  | 3.8318  | 3.9000  | 4.4026  | 3.6872  | 4.2492  | 4.3699  | 3.7392  | 3.3878  | 3.7160  | 1.0204  | 0.0291  | 0.7816 | 0.1070 |
| AIF2   | _NSDIVAQDPTI[Phospho (STY)]PTR_2                             | P16951_T53_M1_AIF2   | 6.4573  | 6.9404  | 7.0893  | 7.6292  | 3.3533  | 7.0595  | 7.4267  | 7.0400  | 6.5198  | 6.8039  | 0.9243  | -0.1136 | 0.5316 | 0.2744 |
| AIF2   | _SKEEPSVETHHQDS[Phospho (STY)]PLPHPESTSDSEK_4                | P16951_S18_M1_AIF2   | 3.8733  | 3.3529  | 4.5601  | 3.5619  | 2.9990  | 3.2767  | 3.2766  | 4.2052  | 3.5289  | 1.0226  | 0.0323  | 0.0857  | 0.8241 | 0.2440 |
| Hmg1a  | _Acetyl (Protein N-term)[SEGS][Phospho (STY)]KSSQPLASK_2     | P17095_S6_M1_Hmg1a   | 4.0174  | 3.2842  | 3.7919  | 3.3356  | 3.1056  | 4.5517  | 4.2724  | 3.6655  | 3.9903  | 3.0129  | 0.9855  | -0.0211 | 0.8812 | 0.0549 |
| Hmg1a  | _KLEKEEESGSGS[Phospho (STY)]S[Phospho (STY)]EEEE_2           | #N/A                 | 7.2594  | 7.4898  | 7.9114  | 7.7922  | 7.2920  | 7.2346  | 8.0881  | 7.7683  | 7.2885  | 0.9859  | -0.0204 | 0.6347  | 0.1974 | 0.5482 |
| Zfp37  | _HISEGGS[Phospho (STY)]EEEE_2                                | P17141_S990_M1_Zfp37 | 7.7748  | 3.4226  | 8.9535  | 8.3937  | 8.3568  | 7.7260  |         |         |         |         |         |         |        |        |



|       |                                                             |                   |         |         |         |         |         |         |         |         |         |         |         |         |        |        |
|-------|-------------------------------------------------------------|-------------------|---------|---------|---------|---------|---------|---------|---------|---------|---------|---------|---------|---------|--------|--------|
| Eno1  | _SGKYDLOFK_2                                                | #N/A              | 8.0237  | 8.0968  | 8.1103  | 8.6625  | 8.1877  | 7.9166  | 8.2658  | 8.0523  | 7.5850  | 8.6045  | 1.0048  | 0.0070  | 0.8590 | 0.0660 |
| Eno1  | _KJNVVEGEKIDK_2                                             | #N/A              | 4.7984  | 4.9323  | 5.4926  | 4.2887  | 5.8886  | 5.7822  | 5.4585  | 4.9919  | 5.4415  | 5.0114  | 0.9945  | -0.0079 | 0.9340 | 0.0297 |
| Eno1  | _JEELGSKAK_2                                                | #N/A              | 5.3669  | 8.3438  | 7.3658  | 8.6504  | 7.3867  | 8.1757  | 8.3002  | 7.7760  | 5.1511  | 7.7120  | 1.0433  | 0.0612  | 0.7138 | 0.1464 |
| Eno1  | _DATNVGDEGGFAPNILENK_2                                      | #N/A              | 11.6144 | 11.4751 | 11.6544 | 11.9924 | 11.3813 | 11.5769 | 11.8794 | 11.2388 | 11.3649 | 11.6577 | 1.0070  | 0.0100  | 0.6206 | 0.2072 |
| Eno1  | _LAM[Oxidation (M)]DEFM[Oxidation (M)]PLVGSFSR_2            | #N/A              | 9.2426  | 9.5277  | 9.5821  | 8.9842  | 9.5832  | 9.7395  | 9.3149  | 9.4887  | 9.5263  | 9.6354  | 0.9949  | -0.0073 | 0.7584 | 0.1201 |
| Eno1  | _YKGDATNVGDEGGFAPNILENK_3                                   | #N/A              | 9.1272  | 8.6960  | 9.2555  | 9.3441  | 8.5521  | 8.6732  | 9.4205  | 8.2203  | 8.5780  | 8.9334  | 1.0174  | 0.0249  | 0.5814 | 0.2355 |
| Eno1  | _FGANAILGSLAVC[Carbamidomethyl (C)]K_2                      | #N/A              | 6.4138  | 6.0907  | 3.4232  | 4.4678  | 5.6008  | 5.7656  | 4.9615  | 4.1037  | 5.4626  | 6.8055  | 0.9926  | -0.0108 | 0.9580 | 0.0186 |
| Eno1  | _SGKYDLOFKS[Phospho (STY)]PDPSR_3                           | #N/A              | 10.1418 | 10.8005 | 11.1808 | 11.3537 | 9.9520  | 10.7623 | 10.9230 | 10.8950 | 10.7143 | 10.9439 | 0.9843  | -0.0228 | 0.5682 | 0.2455 |
| Eno1  | _LM[Oxidation (M)]JEM[Oxidation (M)]DGTENK_2                | #N/A              | 7.4642  | 7.6052  | 7.8662  | 7.5161  | 7.5627  | 7.8842  | 7.6317  | 7.7669  | 7.8719  | 8.5251  | 0.9624  | -0.0553 | 0.1187 | 0.8579 |
| Eno1  | _AAVPSGASTGYALELK_2                                         | #N/A              | 10.4446 | 10.7040 | 10.9852 | 10.7008 | 10.6481 | 10.5053 | 10.3562 | 10.1907 | 10.5493 | 10.5058 | 1.0254  | 0.0362  | 0.0525 | 1.2798 |
| Eno1  | _YDLODKS[Phospho (STY)]PDPSR_2                              | #N/A              | 8.7148  | 10.0418 | 9.2282  | 11.0621 | 10.1196 | 10.1712 | 10.3322 | 10.2336 | 10.3871 | 10.5342 | 0.9535  | -0.0687 | 0.2847 | 0.5456 |
| Eno1  | _SGETEDTFIADLVGLC[Carbamidomethyl (C)]TGQIK_2               | #N/A              | 3.9530  | 4.5022  | 4.9846  | 5.4800  | 3.5821  | 4.2927  | 4.9499  | 3.8574  | 3.8802  | 4.0348  | 1.0682  | 0.0952  | 0.5033 | 0.2981 |
| Eno1  | _FTASAGIQVGGDLTVNPK_2                                       | #N/A              | 7.5043  | 7.7994  | 7.8697  | 8.8849  | 7.1938  | 7.5660  | 7.6918  | 7.8277  | 7.6995  | 8.0675  | 0.9976  | -0.0034 | 0.9529 | 0.0209 |
| Eno1  | _SFVQNPVPSIEDPFDQDOWGAQWK_3                                 | #N/A              | 3.9068  | 2.6888  | 4.5936  | 3.1807  | 3.0325  | 3.1961  | 3.3101  | 3.5128  | 2.5237  | 3.5625  | 1.0638  | 0.0892  | 0.6224 | 0.2060 |
| Eno1  | _JNVNVEGEKIDK_2                                             | #N/A              | 5.4526  | 6.1188  | 3.2453  | 6.3837  | 6.1527  | 5.9723  | 5.3184  | 5.9572  | 5.3920  | 5.8023  | 0.9887  | -0.0163 | 0.9201 | 0.0362 |
| Eno1  | _LAQSNNGWGM[Oxidation (M)]VSHR_2                            | #N/A              | 5.0838  | 5.0707  | 4.4541  | 7.5072  | 4.6960  | 4.2335  | 5.9402  | 5.6228  | 5.4085  | 4.7111  | 0.9545  | -0.0671 | 0.7110 | 0.1481 |
| Eno1  | _FTASAGIQVGGDLTVNPKR_3                                      | #N/A              | 3.0286  | 4.1958  | 4.7281  | 3.8069  | 3.6731  | 3.3573  | 3.3917  | 5.6549  | 5.7185  | 5.5668  | 0.7473  | -0.4203 | 0.0454 | 1.3431 |
| Eno1  | _AGYTQDVVGM[Oxidation (M)]DVAASEFYR_2                       | #N/A              | 6.3687  | 7.0552  | 7.6526  | 8.4543  | 6.2422  | 7.1454  | 7.7778  | 7.2229  | 6.5112  | 7.0819  | 1.0006  | 0.0009  | 0.9924 | 0.0033 |
| Eno1  | _JDKLMEEM[Oxidation (M)]DGTENK_3                            | #N/A              | 3.9664  | 3.2630  | 3.5055  | 3.5239  | 3.1101  | 3.5155  | 3.4379  | 4.0917  | 4.0273  | 3.3755  | 0.9324  | -0.1010 | 0.2659 | 0.5753 |
| Eno1  | _FALELK_2                                                   | #N/A              | 3.8944  | 3.4480  | 3.6281  | 3.1718  | 3.2694  | 2.9593  | 3.3201  | 3.8293  | 3.6235  | 4.3499  | 1.0349  | 0.0495  | 0.8239 | 0.0841 |
| Eno2  | _JEELGDEAR_2                                                | #N/A              | 11.6865 | 11.9035 | 11.9066 | 12.0979 | 12.3634 | 12.1045 | 11.6609 | 11.6072 | 11.6721 | 11.9642 | 1.0242  | 0.0345  | 0.0670 | 1.1736 |
| Eno2  | _VNIQISVTEAQA[Carbamidomethyl (C)]K_2                       | #N/A              | 10.5748 | 10.6496 | 11.1243 | 11.1196 | 11.0550 | 10.7679 | 10.5691 | 10.6058 | 10.7937 | 10.6937 | 1.0195  | 0.0279  | 0.1553 | 0.8089 |
| Eno2  | _AVDHNSR_2                                                  | #N/A              | 10.1881 | 10.2941 | 10.3164 | 10.3840 | 11.0368 | 10.3387 | 9.9659  | 10.0018 | 10.1849 | 10.2685 | 1.0318  | 0.0451  | 0.0898 | 1.0467 |
| Eno2  | _YTQDQIGALYQDFVR_2                                          | #N/A              | 9.3773  | 9.6565  | 9.9313  | 9.8993  | 9.6568  | 9.6533  | 9.4974  | 9.3760  | 9.4207  | 9.5704  | 1.0243  | 0.0346  | 0.0668 | 1.1751 |
| Eno2  | _DGKYDLOFK_2                                                | #N/A              | 9.0389  | 9.2322  | 9.2430  | 9.2923  | 8.9085  | 9.0376  | 9.3806  | 8.8337  | 8.8379  | 9.2151  | 1.0065  | 0.0093  | 0.6724 | 0.1724 |
| Eno2  | _AC[Carbamidomethyl (C)]NJC[Carbamidomethyl (C)]LLK_2       | #N/A              | 8.6709  | 9.1538  | 9.3659  | 9.0742  | 9.4180  | 8.7772  | 8.7514  | 8.7504  | 8.6578  | 8.7534  | 1.0399  | 0.0565  | 0.0560 | 1.2520 |
| Eno2  | _LGAEVHTLK_2                                                | #N/A              | 8.1976  | 8.1872  | 8.4354  | 7.4783  | 8.5692  | 8.2126  | 8.3221  | 7.3502  | 8.3320  | 8.6875  | 1.0009  | 0.0013  | 0.9816 | 0.0081 |
| Eno2  | _DATNVGDEGGFAPNILENSEALEVK_3                                | #N/A              | 7.7272  | 7.9754  | 8.3143  | 8.2196  | 8.3913  | 7.9463  | 8.2496  | 7.7564  | 7.8076  | 8.3142  | 1.0079  | 0.0114  | 0.7225 | 0.1412 |
| Eno2  | _FAGHNSR_2                                                  | #N/A              | 6.9695  | 8.1339  | 7.3956  | 7.5271  | 8.5056  | 7.9657  | 7.4743  | 7.5900  | 7.6478  | 7.4904  | 1.0264  | 0.0375  | 0.5062 | 0.2957 |
| Eno2  | _LDNLM[Oxidation (M)]LELGTENK_2                             | #N/A              | 6.9426  | 6.9751  | 7.1181  | 7.3271  | 7.3802  | 7.4270  | 7.4221  | 7.1682  | 7.3245  | 7.1844  | 0.9890  | -0.0159 | 0.5179 | 0.2857 |
| Eno2  | _DQYKGDATNVGDEGGFAPNILENSEALEVK_4                           | #N/A              | 6.3257  | 5.8680  | 6.4377  | 6.5327  | 7.1192  | 6.6907  | 6.9049  | 5.3211  | 6.5087  | 6.9049  | 1.0296  | 0.0421  | 0.6010 | 0.2111 |
| Eno2  | _JAcetyl (Protein N-term)[S][Phospho (STY)]JEKWAR_2         | P17183_S2_M1_Eno2 | 5.1848  | 6.8049  | 6.7250  | 6.0352  | 6.4355  | 6.1794  | 5.7865  | 6.2503  | 6.0912  | 6.3036  | 1.0196  | 0.0280  | 0.7148 | 0.1458 |
| Eno2  | _DGKYDLOFKS[Phospho (STY)]PADPSR_3                          | #N/A              | 7.7346  | 8.7836  | 8.8316  | 5.5575  | 8.1689  | 8.2835  | 8.9681  | 8.6171  | 8.4599  | 8.7928  | 0.9828  | -0.0250 | 0.6686 | 0.1748 |
| Eno2  | _JAPALSSGIVGEQEK_2                                          | #N/A              | 6.9621  | 6.3395  | 5.9356  | 7.2526  | 6.9683  | 6.8361  | 6.7595  | 5.7243  | 6.3633  | 7.0294  | 1.0381  | 0.0540  | 0.4814 | 0.3175 |
| Eno2  | _HADLAGNSDLPLVPFAFNWNGSGSHAGNK_3                            | #N/A              | 4.9736  | 5.5392  | 6.3806  | 6.0663  | 7.6394  | 6.1187  | 5.2945  | 4.8653  | 7.2001  | 1.0502  | 0.0707  | 0.6474  | 0.1889 | 0.1889 |
| Eno2  | _M[Oxidation (M)]JVM[Oxidation (M)]DVAASEFYR_2              | #N/A              | 7.6142  | 7.8986  | 8.6622  | 7.5402  | 7.9321  | 8.1655  | 7.9162  | 7.8441  | 7.8157  | 7.8262  | 1.0151  | 0.0216  | 0.5877 | 0.2309 |
| Eno2  | _LAM[Oxidation (M)]DEFM[Oxidation (M)]PLVGSFSR_3            | #N/A              | 7.3060  | 7.4027  | 7.4990  | 6.6588  | 7.5002  | 7.7939  | 6.7846  | 7.3683  | 7.4106  | 7.3569  | 1.0180  | 0.0257  | 0.5827 | 0.2346 |
| Eno2  | _YDLODKS[Phospho (STY)]PADPSR_2                             | #N/A              | 6.0415  | 6.7215  | 6.3314  | 7.5962  | 6.4052  | 6.5028  | 6.7201  | 6.4871  | 6.6261  | 6.8959  | 0.9877  | -0.0179 | 0.7773 | 0.1094 |
| Eno2  | _JAPALSSGIVGEQEKLDNLM[Oxidation (M)]LELGTENK_4              | #N/A              | 5.2273  | 6.0189  | 6.3725  | 6.5731  | 5.5030  | 5.9071  | 5.8761  | 5.8318  | 5.8391  | 5.5257  | 1.0287  | 0.0408  | 0.5533 | 0.2570 |
| Eno2  | _FTANVGQVGGDLTVNPK_2                                        | #N/A              | 6.2902  | 6.7818  | 6.9810  | 8.5618  | 5.7586  | 6.4781  | 6.9485  | 7.1776  | 6.5895  | 6.7888  | 0.9902  | -0.0142 | 0.8956 | 0.0479 |
| Eno2  | _LAQENSGWGM[Oxidation (M)]VSHR_3                            | #N/A              | 5.5251  | 5.0409  | 4.2720  | 3.3554  | 5.2707  | 4.8464  | 3.3620  | 3.5539  | 6.1255  | 6.1726  | 0.9823  | -0.0258 | 0.9108 | 0.0406 |
| Eno2  | _NYPVPSIEDPFDQDOWAAWASK_3                                   | #N/A              | 3.6631  | 4.4193  | 3.3967  | 3.9963  | 2.8068  | 3.8178  | 3.7110  | 4.0607  | 3.7708  | 4.1186  | 0.9408  | -0.0881 | 0.9408 | 0.3473 |
| Ap2a1 | _NADVELQR_2                                                 | #N/A              | 8.4571  | 8.7245  | 8.7472  | 8.1078  | 7.9017  | 8.4949  | 8.7128  | 8.7446  | 8.4394  | 8.3490  | 0.9809  | -0.0278 | 0.4108 | 0.3863 |
| Ap2a1 | _DFLTPPLSVR_2                                               | #N/A              | 8.4257  | 8.7066  | 8.3411  | 8.0706  | 7.8141  | 7.7855  | 8.8908  | 8.7247  | 8.6123  | 8.3613  | 0.9472  | -0.0783 | 0.0572 | 1.2426 |
| Ap2a1 | _LLQC[Carbamidomethyl (C)]YPPPEAAVK_2                       | #N/A              | 8.2273  | 8.2354  | 7.9957  | 8.0925  | 8.0346  | 7.3475  | 8.4587  | 8.4006  | 8.1825  | 7.8901  | 0.9703  | -0.0434 | 0.2491 | 0.6036 |
| Ap2a1 | _GLAVFSRDR_2                                                | #N/A              | 7.9604  | 7.6405  | 8.0254  | 7.1989  | 6.6470  | 7.5548  | 7.9259  | 7.7819  | 7.4143  | 0.9722  | 0.0407  | 0.4602  | 0.3371 | 0.6036 |
| Ap2a1 | _LSLPLQEAQK_2                                               | #N/A              | 7.3747  | 7.4499  | 6.2893  | 7.1788  | 7.2928  | 6.9651  | 7.7794  | 7.5251  | 7.4705  | 7.2047  | 0.9462  | -0.0798 | 0.1280 | 0.8927 |
| Ap2a1 | _HLC[Carbamidomethyl (C)]ELLAQDF_2                          | #N/A              | 6.6752  | 7.0472  | 7.0015  | 6.6808  | 6.3312  | 6.7207  | 7.1229  | 6.8788  | 6.7446  | 6.7209  | 0.9819  | -0.0263 | 0.4363 | 0.3622 |
| Ap2a1 | _QSAALC[Carbamidomethyl (C)]LLR_2                           | #N/A              | 6.9187  | 6.8906  | 6.9842  | 5.7982  | 6.7021  | 6.3962  | 7.3509  | 7.2221  | 6.8061  | 6.6024  | 0.9456  | -0.0807 | 0.1959 | 0.7080 |
| Ap2a1 | _ATTQGLVR_2                                                 | #N/A              | 6.9321  | 6.8994  | 6.7776  | 6.6062  | 6.3437  | 5.9308  | 6.8486  | 7.3684  | 6.7310  | 6.6537  | 0.9538  | -0.0682 | 0.2108 | 0.6762 |
| Ap2a1 | _LVEC[Carbamidomethyl (C)]LETYNLK_2                         | #N/A              | 6.3191  | 6.3885  | 5.9193  | 6.2079  | 5.9667  | 6.3350  | 6.6037  | 6.6251  | 6.3156  | 6.0679  | 0.9666  | -0.0490 | 0.1819 | 0.7403 |
| Ap2a1 | _NSGVLFENQLQGVK_2                                           | #N/A              | 6.1902  | 6.2235  | 6.3079  | 5.7508  | 5.6707  | 6.2432  | 6.3853  | 6.5153  | 6.0553  | 6.4236  | 0.9558  | -0.0652 | 0.1225 | 0.9120 |
| Ap2a1 | _THIDTVNAUK_2                                               | #N/A              | 6.5237  | 6.0121  | 6.5381  | 6.5215  | 4.5391  | 5.7431  | 6.7915  | 6.4646  | 5.7840  | 6.6040  | 0.9327  | -0.1005 | 0.3490 | 0.4572 |
| Ap2a1 | _YGGTAQSLTK_2                                               | #N/A              | 5.1116  | 4.9708  | 5.4687  | 5.6669  | 5.5183  | 4.8140  | 6.0547  | 5.4404  | 5.4164  | 0.9482  | -0.0767 | 0.2311  | 0.6362 | 0.3473 |
| Ap2a1 | _JAGDYVSEVWYR_2                                             | #N/A              | 6.0779  | 5.5018  | 7.0285  | 4.0012  | 4.3075  | 5.3982  | 6.4412  | 5.1540  | 5.7517  | 5.6969  | 0.9349  | -0.0971 | 0.5546 | 0.2560 |
| Ap2a1 | _TSKEPYSR_2                                                 | #N/A              | 5.3884  | 4.3711  | 5.1961  | 3.8438  | 5.0979  | 5.1555  | 4.1166  | 4.3669  | 5.4966  | 1.0716  | 0.0998  | 0.4458  | 0.3508 | 0.3508 |
| Ap2a1 | _LLGFGSALLDNVPNPNFVGAGRTK_3                                 | #N/A              | 4.3561  | 4.5966  | 4.9177  | 4.2968  | 4.1869  | 4.7143  | 4.7173  | 4.9058  | 5.4178  | 3.6294  | 0.9665  | -0.0491 | 0.6485 | 0.1881 |
| Ap2a1 | _AC[Carbamidomethyl (C)]NQLGQLQHR_3                         | #N/A              | 6.9126  | 6.6293  | 6.4942  | 6.3043  | 6.0771  | 5.9476  | 6.3870  | 6.5501  | 6.0878  | 6.4298  | 1.0048  | 0.0069  | 0.8819 | 0.0546 |
| Ap2a1 | _YGVYLGFGNLIAGDPR_2                                         | #N/A              | 5.2480  | 4.3364  | 3.9578  | 4.4970  | 4.0049  | 4.2361  | 4.9133  | 5.1291  | 4.6819  | 3.6747  | 0.9522  | -0.0706 | 0.5474 | 0.2617 |
| Ap2a1 | _AADLLYAM[Oxidation (M)]C[Carbamidomethyl (C)]DR_2          | #N/A              | 6.2028  | 6.1908  | 6.2996  | 6.0377  | 5.6740  | 5.8973  | 6.7846  | 6.7352  | 6.3638  | 6.3914  | 0.9211  | -0.1186 | 0.0079 | 2.1008 |
| Ap2a1 | _FFOPTFM[Oxidation (M)]AAGDFFQR_2                           | #N/A              | 6.8889  | 6.4759  | 6.9072  | 6.0595  | 6.0675  | 6.3360  | 7.0986  | 6.8557  | 6.4225  | 6.4395  | 0.9630  | -0.0544 | 0.3176 | 0.4981 |
| Ap2a1 | _ILVAGDSMSVK_2                                              | #N/A              | 5.4562  | 3.4844  | 3.9627  | 5.6463  | 2.9750  | 3.2519  | 3.6547  | 3.4947  | 3.7938  | 3.1837  | 1.1692  | 0.2256  | 0.3451 | 0.4620 |
| Ap2a1 | _ANHPMDAEVTK_2                                              | #N/A              | 5.9548  | 3.3612  | 3.7149  | 6.3436  | 5.1609  | 3.4997  | 3.4069  | 3.7425  | 4.0416  | 4.4368  | 1.1959  | 0.2582  | 0.3024 | 0.5194 |
| Ap2a1 | _YLALEM[Oxidation (M)]C[Carbamidomethyl (C)]TLASSEFSHEAVV_3 | #N/A              | 4.8495  | 4.5163  | 6.2576  |         |         |         |         |         |         |         |         |         |        |        |



|       |                                                                     |      |         |         |         |         |         |         |         |         |         |         |         |         |        |        |
|-------|---------------------------------------------------------------------|------|---------|---------|---------|---------|---------|---------|---------|---------|---------|---------|---------|---------|--------|--------|
| Ap2a2 | _LSTVASTDIATLVEEM[Oxidation (M)]PPFFER_3                            | #N/A | 3.0716  | 4.2172  | 5.2192  | 4.5611  | 3.7427  | 4.7836  | 5.5353  | 4.6553  | 5.0092  | 4.2940  | 0.8753  | -0.1921 | 0.2095 | 0.6787 |
| Ap2a2 | _TVFEALQAPAC[Carbamidomethyl (C)]HENLVK_3                           | #N/A | 4.3340  | 4.0707  | 4.3196  | 3.3214  | 3.4284  | 3.1429  | 4.5369  | 4.0907  | 5.1791  | 3.2884  | 0.8820  | -0.1811 | 0.2595 | 0.5859 |
| Ap2a2 | _VIDQVNR_2                                                          | #N/A | 3.2397  | 4.1027  | 4.4742  | 3.7242  | 3.9241  | 3.8054  | 4.1662  | 4.6422  | 3.2823  | 4.4026  | 0.9406  | -0.0884 | 0.4587 | 0.3385 |
| Ap2a2 | _AVDILLYAMC[Carbamidomethyl (C)]DR_2                                | #N/A | 3.8755  | 3.1799  | 3.8962  | 5.3290  | 3.0012  | 3.2275  | 3.5883  | 3.5612  | 3.4784  | 2.6706  | 1.1284  | 0.1743  | 0.3915 | 0.4072 |
| Ap2a2 | _TSPDLVPMGDWTSR_2                                                   | #N/A | 6.3665  | 3.3989  | 3.6772  | 3.2210  | 3.2202  | 3.0985  | 3.3693  | 3.7802  | 4.0792  | 4.3991  | 0.9766  | -0.0342 | 0.8948 | 0.0483 |
| Ap2a2 | _ILVAGDTMDSVK_2                                                     | #N/A | 3.5521  | 3.7903  | 3.2858  | 4.3304  | 1.9559  | 3.9288  | 4.4787  | 4.1716  | 2.9698  | 4.0077  | 0.8892  | -0.1695 | 0.4056 | 0.3919 |
| Cox7c | _SHYEEGPGK_2                                                        | #N/A | 8.0206  | 7.4161  | 7.7748  | 7.5989  | 8.5953  | 8.0510  | 7.8718  | 7.7207  | 7.8893  | 7.5626  | 1.0191  | 0.0273  | 0.5194 | 0.2845 |
| Cox7c | _NLPPSVENK_2                                                        | #N/A | 6.4445  | 6.7366  | 7.1477  | 6.0742  | 7.1159  | 5.9225  | 6.5494  | 7.0534  | 6.8124  | 6.7542  | 0.9678  | -0.0472 | 0.4518 | 0.3451 |
| HK1   | _FLSGESDR_2                                                         | #N/A | 9.1418  | 9.0393  | 9.1273  | 8.9219  | 8.2436  | 8.5558  | 9.3657  | 8.9938  | 9.0359  | 8.7558  | 0.9779  | -0.0322 | 0.3696 | 0.4323 |
| HK1   | _ITPELLTR_2                                                         | #N/A | 8.9107  | 9.9834  | 8.9978  | 8.1266  | 8.4112  | 8.4732  | 8.6120  | 9.0841  | 8.9167  | 8.7814  | 0.9776  | -0.0327 | 0.3554 | 0.4493 |
| HK1   | _ESLLEFGR_2                                                         | #N/A | 8.9962  | 8.8071  | 8.9307  | 8.4586  | 8.0164  | 8.3766  | 8.8268  | 8.8827  | 8.7111  | 8.6725  | 0.9800  | -0.0292 | 0.3996 | 0.3984 |
| HK1   | _JHIDVEGDGR_2                                                       | #N/A | 8.7818  | 8.4101  | 8.9128  | 8.4239  | 8.1742  | 8.6255  | 8.9689  | 8.6279  | 8.6176  | 8.3522  | 0.9899  | -0.0146 | 0.6242 | 0.2047 |
| HK1   | _ASGVGADVVK_2                                                       | #N/A | 8.8411  | 8.2249  | 6.8886  | 8.3822  | 8.4546  | 8.2056  | 8.5218  | 8.5568  | 8.6120  | 8.5289  | 0.9896  | -0.0150 | 0.5167 | 0.2868 |
| HK1   | _LVPQSDVR_2                                                         | #N/A | 8.5175  | 8.4011  | 8.2616  | 8.2494  | 8.3894  | 8.3187  | 7.9023  | 8.6234  | 8.2849  | 8.2324  | 1.0116  | 0.0166  | 0.4754 | 0.3230 |
| HK1   | _GAALITAVGVR_2                                                      | #N/A | 7.6467  | 7.8987  | 8.3348  | 8.2105  | 7.6529  | 7.9216  | 7.7395  | 8.5383  | 8.4595  | 8.4031  | 0.9589  | -0.0606 | 0.1346 | 0.8709 |
| HK1   | _SIPOGTGHEGDFIALDGGTNR_3                                            | #N/A | 8.1806  | 8.2164  | 8.1850  | 8.3256  | 7.2194  | 8.0232  | 8.3298  | 8.3301  | 7.8906  | 8.1289  | 0.9823  | -0.0258 | 0.5346 | 0.2719 |
| HK1   | _ATDC[Carbamidomethyl (C)]VGHDIATLR_3                               | #N/A | 6.5882  | 6.8948  | 6.6347  | 7.1863  | 6.3397  | 6.7959  | 6.9567  | 6.8815  | 6.8400  | 6.1384  | 1.0053  | 0.0077  | 0.8694 | 0.0608 |
| HK1   | _TTVGVDGSLVK_2                                                      | #N/A | 7.2947  | 7.6435  | 7.6999  | 7.5948  | 7.6608  | 7.6048  | 7.4563  | 8.1801  | 7.5836  | 7.3784  | 0.9913  | -0.0126 | 0.6921 | 0.1598 |
| HK1   | _GDFIALDGGSSFR_2                                                    | #N/A | 7.5468  | 7.2783  | 7.9557  | 7.3727  | 7.4588  | 7.6919  | 7.9576  | 7.3371  | 7.7162  | 7.4043  | 0.9930  | -0.0101 | 0.7611 | 0.1186 |
| HK1   | _LSDELIDILTR_2                                                      | #N/A | 7.5148  | 7.7013  | 7.6067  | 7.7357  | 6.8598  | 7.3594  | 7.9502  | 7.7931  | 7.5767  | 7.5205  | 0.9679  | -0.0470 | 0.2151 | 0.6673 |
| HK1   | _LVQVYLSGK_2                                                        | #N/A | 7.2807  | 6.9777  | 7.1455  | 6.9568  | 7.0255  | 6.8735  | 7.1415  | 7.2174  | 6.8800  | 7.1429  | 0.9925  | -0.0108 | 0.5918 | 0.2278 |
| HK1   | _RLVPOSDVR_2                                                        | #N/A | 7.2823  | 7.0069  | 7.2360  | 7.1860  | 6.9588  | 7.1548  | 7.3483  | 7.1822  | 7.1347  | 7.1293  | 0.9915  | -0.0123 | 0.4500 | 0.3468 |
| HK1   | _DEALVUTWK_2                                                        | #N/A | 6.8614  | 6.6758  | 6.3402  | 6.6846  | 6.4829  | 6.0954  | 6.9394  | 7.1966  | 7.1694  | 6.6708  | 0.9327  | -0.1005 | 0.0249 | 1.6031 |
| HK1   | _GGSEPLK_2                                                          | #N/A | 6.7098  | 6.9802  | 6.1422  | 5.7454  | 6.3417  | 6.3808  | 5.7295  | 6.7866  | 6.7022  | 7.0659  | 0.9714  | -0.0418 | 0.5717 | 0.2428 |
| HK1   | _AILQLGLNST[C]Carbamidomethyl (C)]DOSLVK_2                          | #N/A | 6.7472  | 6.7897  | 7.1659  | 7.2750  | 5.3770  | 6.5116  | 6.4608  | 6.4875  | 6.4266  | 6.3995  | 1.0312  | 0.0443  | 0.5802 | 0.2365 |
| HK1   | _NLIDFTK_2                                                          | #N/A | 6.4820  | 6.5913  | 6.2186  | 6.2062  | 5.7700  | 5.9037  | 5.5671  | 6.8009  | 6.6600  | 6.4323  | 0.9733  | -0.0390 | 0.5504 | 0.2594 |
| HK1   | _MI[Oxidation (M)]HPQYSR_2                                          | #N/A | 6.9847  | 3.2720  | 7.4260  | 6.7071  | 8.3348  | 7.5302  | 6.8609  | 7.4532  | 7.4385  | 7.3836  | 0.9211  | -0.1186 | 0.5459 | 0.2629 |
| HK1   | _MI[Oxidation (M)]LPTFR_2                                           | #N/A | 7.3442  | 8.0224  | 7.9940  | 6.3997  | 7.4137  | 7.6022  | 7.3453  | 8.2439  | 8.8424  | 7.6656  | 0.9300  | -0.1047 | 0.1977 | 0.7039 |
| HK1   | _TDFDKVDEYSLSGK_3                                                   | #N/A | 5.7974  | 6.1129  | 6.6204  | 6.2451  | 6.3935  | 6.8917  | 6.8142  | 6.1525  | 6.5650  | 6.4775  | 0.9756  | -0.0357 | 0.4989 | 0.3020 |
| HK1   | _M[Oxidation (M)]SGM[Oxidation (M)]YGEIVR_2                         | #N/A | 5.5429  | 5.4799  | 6.1170  | 5.3016  | 5.1717  | 5.3857  | 5.7816  | 5.9555  | 5.8799  | 5.8529  | 0.9373  | -0.0934 | 0.0632 | 1.1992 |
| HK1   | _IM[Oxidation (M)]HQTVK_2                                           | #N/A | 4.4516  | 2.9854  | 5.9578  | 5.0181  | 7.0214  | 6.0148  | 5.8093  | 6.4297  | 5.9633  | 0.8511  | 0.4237  | -0.1227 | 0.2469 | 0.6075 |
| HK1   | _GAAM[Oxidation (M)]VTAVAVR_2                                       | #N/A | 5.6269  | 6.5154  | 6.9416  | 6.3997  | 5.6474  | 6.1982  | 6.2500  | 6.7379  | 6.2012  | 6.0032  | 0.9878  | -0.0176 | 0.7983 | 0.0978 |
| HK1   | _LVPVGTTSFPC[Carbamidomethyl (C)]IR_2                               | #N/A | 3.6180  | 4.3742  | 4.8454  | 5.3716  | 4.2625  | 3.8629  | 3.7561  | 5.7099  | 4.8124  | 4.9452  | 0.9133  | -0.1309 | 0.3879 | 0.4113 |
| HK1   | _DYNPTASVK_2                                                        | #N/A | 6.0485  | 5.8082  | 3.4149  | 5.2663  | 5.3425  | 4.9772  | 2.3248  | 5.6803  | 3.8495  | 3.8846  | 1.2356  | 0.3052  | 0.1594 | 0.7976 |
| HK1   | _C[Carbamidomethyl (C)]TVSFLSEGGSGK_2                               | #N/A | 5.8421  | 4.8329  | 3.9341  | 2.8690  | 3.7556  | 5.1431  | 3.9985  | 5.4676  | 5.1908  | 0.8314  | 0.9865  | -0.0664 | 0.2017 | 0.6953 |
| HK1   | _DIETLSHR_2                                                         | #N/A | 6.9349  | 7.1183  | 7.0134  | 6.8851  | 6.4918  | 6.6115  | 7.4178  | 7.1439  | 6.6585  | 6.7511  | 0.9785  | -0.0314 | 0.4428 | 0.3538 |
| HK1   | _FTTSVAAETDKEGVQNAK_3                                               | #N/A | 5.0741  | 5.1749  | 5.5486  | 5.8973  | 5.6180  | 5.3844  | 5.4668  | 5.4337  | 6.0273  | 5.2105  | 0.9846  | -0.0223 | 0.6919 | 0.1599 |
| HK1   | _SANLVAATGAILNR_2                                                   | #N/A | 4.4341  | 3.8070  | 4.0503  | 3.2454  | 3.4604  | 3.0514  | 3.8511  | 2.6138  | 3.7251  | 4.0626  | 1.0271  | 0.0385  | 0.7953 | 0.0995 |
| HK1   | _MI[Oxidation (M)]C[Carbamidomethyl (C)]NTEWGAFGDGSLEDR_2           | #N/A | 3.3346  | 4.1741  | 4.1090  | 4.6174  | 3.2767  | 3.8170  | 3.6480  | 3.5860  | 3.0617  | 4.3337  | 1.0631  | 0.0883  | 0.5114 | 0.2913 |
| HK1   | _FLSEGGSK_2                                                         | #N/A | 7.3986  | 7.4229  | 7.7599  | 7.5782  | 7.0611  | 7.6333  | 7.1969  | 7.8961  | 7.8714  | 7.6868  | 0.9756  | -0.0357 | 0.3253 | 0.4878 |
| HK1   | _LGOVESHOD[Carbamidomethyl (C)]VSVQHV[C]Carbamidomethyl (C)]TVSFR_4 | #N/A | 3.1374  | 5.2133  | 4.3804  | 4.3269  | 3.7640  | 3.9655  | 4.5243  | 3.7916  | 4.3982  | 4.2939  | 0.9716  | -0.0416 | 0.7571 | 0.1209 |
| HK1   | _QALMEVK_2                                                          | #N/A | 3.4819  | 4.2382  | 3.2156  | 4.2602  | 1.9968  | 3.9990  | 3.8921  | 4.2418  | 3.0400  | 2.2640  | 1.0216  | 0.0308  | 0.9145 | 0.0388 |
| HK1   | _AALQL[Carbamidomethyl (C)]GAGMAAVK_2                               | #N/A | 3.1290  | 3.9342  | 3.8158  | 5.5029  | 3.1390  | 3.9740  | 4.3348  | 4.3155  | 3.1137  | 3.8638  | 1.0023  | 0.0033  | 0.9862 | 0.0060 |
| HK1   | _TV[C]Carbamidomethyl (C)]GVSK_2                                    | #N/A | 3.1966  | 3.9529  | 4.4311  | 4.4628  | 4.4848  | 4.2843  | 4.1774  | 3.6557  | 4.8580  | 3.6522  | 1.0121  | 0.0174  | 0.8880 | 0.0516 |
| HK1   | _SEMEMGLR_2                                                         | #N/A | 3.7668  | 3.4594  | 4.4536  | 3.4554  | 2.8924  | 3.2769  | 3.1701  | 3.1623  | 4.3117  | 3.4224  | 1.0097  | 0.0139  | 0.9234 | 0.0346 |
| Ppia  | _SYGKEGFEDENFLK_3                                                   | #N/A | 9.9535  | 10.3205 | 10.6756 | 10.6555 | 10.1776 | 10.4084 | 9.8571  | 10.0222 | 10.1281 | 10.4066 | 1.0259  | 0.0369  | 0.1603 | 0.7951 |
| Ppia  | _VSFLFADK_2                                                         | #N/A | 8.4734  | 8.4775  | 8.1672  | 8.6674  | 8.7934  | 8.3307  | 7.8695  | 8.3754  | 8.4278  | 8.5097  | 1.0228  | 0.0326  | 0.2765 | 0.5584 |
| Ppia  | _KITISDC[Carbamidomethyl (C)]GQL_2                                  | #N/A | 7.8762  | 8.0504  | 7.5985  | 8.6903  | 8.4128  | 7.6585  | 8.0964  | 8.2372  | 7.6422  | 7.9465  | 1.0084  | 0.0121  | 0.7882 | 0.1034 |
| Ppia  | _VNPTVFFDTADDEPLGR_2                                                | #N/A | 9.0207  | 9.3621  | 9.5822  | 9.5437  | 9.5497  | 9.4970  | 9.4202  | 9.1868  | 9.4554  | 9.4565  | 1.0049  | 0.0071  | 0.7110 | 0.1481 |
| Ppia  | _VSFLFADKVPK_2                                                      | #N/A | 9.2231  | 9.4606  | 10.0390 | 9.6044  | 9.7706  | 9.6546  | 9.5327  | 9.4237  | 9.7173  | 9.6998  | 1.0033  | 0.0048  | 0.8381 | 0.0767 |
| Ppia  | _IIPGFM[C]Carbamidomethyl (C)]GGGDFR_2                              | #N/A | 9.4655  | 8.1714  | 3.5208  | 10.4148 | 8.9765  | 3.6938  | 8.5271  | 7.5036  | 7.7830  | 8.5618  | 0.9110  | -0.1344 | 0.6544 | 0.1841 |
| Ppia  | _HTPGILSM[Oxidation (M)]ANAGPNTNGSOFF[C]Carbamidomethyl (C)]TAK_3   | #N/A | 6.4337  | 6.8582  | 7.3094  | 7.4245  | 7.2833  | 7.0130  | 7.0114  | 6.6730  | 7.2203  | 0.9598  | -0.0003 | 0.9947  | 0.0023 | 0.2913 |
| Ppia  | _FEDENFLK_2                                                         | #N/A | 4.3447  | 9.0223  | 9.3392  | 9.7358  | 9.6889  | 9.2063  | 9.4149  | 9.3307  | 9.1663  | 9.2277  | 0.9215  | -0.1179 | 0.5124 | 0.2904 |
| Ppia  | _FGM[Oxidation (M)]NVEAMER_2                                        | #N/A | 5.6338  | 3.3870  | 9.9030  | 8.1654  | 5.4154  | 3.7124  | 6.5157  | 3.7948  | 3.9052  | 5.4808  | 1.0228  | 0.0325  | 0.9177 | 0.0373 |
| Ppia  | _VKEGM[Oxidation (M)]NVEAM[Oxidation (M)]ER_3                       | #N/A | 6.7624  | 7.0050  | 7.6163  | 7.1699  | 7.7782  | 7.7545  | 6.3230  | 7.2024  | 7.4744  | 7.6983  | 1.0241  | 0.0344  | 0.6066 | 0.2171 |
| Ppia  | _TEWIDGK_2                                                          | #N/A | 4.2118  | 3.4672  | 3.9455  | 4.4705  | 3.3555  | 5.8824  | 3.6767  | 3.5119  | 3.8110  | 6.0510  | 0.9905  | -0.0138 | 0.9531 | 0.0209 |
| Ppia  | _JAcetyl (Protein N-term)[M]Oxidation (M)]VNPTVFFDTADDEPLGR_2       | #N/A | 3.5165  | 4.2727  | 3.2501  | 4.2947  | 1.4367  | 3.9644  | 3.8576  | 4.2073  | 3.0055  | 3.9720  | 0.9190  | -0.1219 | 0.6167 | 0.2099 |
| Tp1   | _VVLAYEPWIAIGTK_2                                                   | #N/A | 10.7375 | 10.6616 | 11.0479 | 10.8481 | 11.0383 | 10.9173 | 10.8617 | 10.6153 | 10.8381 | 10.9083 | 1.0064  | 0.0092  | 0.4882 | 0.3114 |
| Tp1   | _IYGGSVTGATC[Carbamidomethyl (C)]K_2                                | #N/A | 8.7437  | 9.9825  | 9.0469  | 9.4451  | 9.1777  | 8.9612  | 9.1511  | 8.9453  | 7.7176  | 9.1511  | 1.0364  | 0.0516  | 0.3166 | 0.4995 |
| Tp1   | _SKNVGQVAGSTR_2                                                     | #N/A | 9.9145  | 10.1177 | 10.2179 | 10.2936 | 10.5856 | 10.2457 | 9.8068  | 10.0180 | 9.9935  | 10.2672 | 1.0207  | 0.0296  | 0.1625 | 0.7891 |
| Tp1   | _TFVGGVWK_2                                                         | #N/A | 9.4486  | 6.9663  | 9.4755  | 9.3716  | 9.3914  | 9.3452  | 9.1513  | 9.5969  | 9.5274  | 9.6818  | 0.9964  | -0.0053 | 0.7678 | 0.1148 |
| Tp1   | _IYVAAQNC[Carbamidomethyl (C)]YK_2                                  | #N/A | 8.0930  | 8.5221  | 8.0523  | 8.7552  | 9.2807  | 8.5314  | 8.5045  | 8.5519  | 8.4476  | 8.7593  | 0.9969  | -0.0045 | 0.9134 | 0.0394 |
| Tp1   | _VSHALAEGLGIAC[Carbamidomethyl (C)]GEK_3                            | #N/A | 6.7681  | 6.7796  | 7.2994  | 6.8947  | 6.7210  | 6.5865  | 7.0758  | 6.3454  | 6.7791  | 7.1203  | 1.0017  | 0.0024  | 0.9533 | 0.0208 |
| Tp1   | _VADNVDKWSK_2                                                       | #N/A | 7.2748  | 8.3974  | 8.8785  | 7.8904  | 8.3878  | 8.0949  | 8.1853  | 8.1272  | 7.9511  | 8.0245  | 1.0101  | 0.0146  | 0.7781 | 0.1089 |
| Tp1   | _DLGATVWVGHGSR_2                                                    | #N/A | 6.6054  | 8.3191  | 7.1460  | 8.3108  | 8.6432  | 8.5428  | 7.9657  | 8.0256  | 8       |         |         |         |        |        |



|         |                                                                      |                        |         |         |         |         |         |         |         |         |         |         |         |         |        |        |
|---------|----------------------------------------------------------------------|------------------------|---------|---------|---------|---------|---------|---------|---------|---------|---------|---------|---------|---------|--------|--------|
| Ptpa    | _QAQSHNS[Phospho (STY)]R_2                                           | P18052_S180_M1_Ptpa    | 4.9812  | 5.2408  | 3.6079  | 5.1624  | 5.2148  | 5.5949  | 5.8431  | 6.5021  | 3.4957  | 5.7186  | 0.9215  | -0.1179 | 0.5192 | 0.2846 |
| Ptpa    | _VVQEDAFSDY[Phospho (STY)]ANFK_2                                     | P18052_Y825_M1_Ptpa    | 6.4517  | 7.4912  | 7.6110  | 7.5723  | 4.7982  | 6.3307  | 6.5928  | 7.3328  | 6.5364  | 6.5043  | 0.9952  | -0.0069 | 0.9570 | 0.0191 |
| Ctd     | _YSSPTVLYK_2                                                         | #N/A                   | 7.3028  | 7.5868  | 7.5722  | 7.5596  | 7.5623  | 7.5344  | 7.4431  | 7.4853  | 7.0745  | 7.5129  | 1.0191  | 0.0273  | 0.1885 | 0.7247 |
| Ctd     | _LTERVSELK_2                                                         | #N/A                   | 6.9073  | 6.7789  | 6.4694  | 6.9469  | 6.9264  | 7.0275  | 6.8118  | 6.3354  | 6.8712  | 7.3585  | 0.9998  | -0.0003 | 0.9940 | 0.0026 |
| Ctd     | _QPGNVVAAK_2                                                         | #N/A                   | 6.0391  | 5.8053  | 5.6259  | 5.7147  | 6.5463  | 5.7344  | 5.8802  | 5.6894  | 5.7534  | 6.1865  | 1.0057  | 0.0082  | 0.8673 | 0.0618 |
| Ctd     | _QIFGEATK_2                                                          | #N/A                   | 4.9290  | 4.9335  | 4.7278  | 5.5607  | 5.9934  | 5.7016  | 4.2220  | 4.8869  | 4.9301  | 5.3032  | 1.0976  | 0.1344  | 0.1734 | 0.7611 |
| Ctd     | _ILDIA[Carbamidomethyl (C)]WVWHK_3                                   | #N/A                   | 3.6437  | 3.8639  | 3.9354  | 3.4080  | 3.3173  | 3.1891  | 4.2152  | 3.1835  | 3.3290  | 4.4695  | 0.9369  | -0.0940 | 0.4414 | 0.3552 |
| Ctd     | _AGAVPLUGGEYMP[Carbamidomethyl (C)]EK_2                              | #N/A                   | 4.1532  | 3.4030  | 3.6602  | 6.1833  | 4.4054  | 3.9844  | 3.8776  | 3.9556  | 3.6042  | 3.9837  | 1.1175  | 0.1603  | 0.4006 | 0.3973 |
| Btg     | _YVDAADR_2                                                           | #N/A                   | 6.9524  | 7.1887  | 6.8756  | 7.1843  | 6.7277  | 6.6250  | 6.7541  | 6.9396  | 6.8208  | 7.0225  | 1.0036  | 0.0052  | 0.8650 | 0.0630 |
| Btg     | _SEINVEGPPR_2                                                        | #N/A                   | 6.7389  | 6.9375  | 6.9784  | 6.9247  | 6.7691  | 6.8700  | 6.4268  | 6.7741  | 6.5431  | 6.5420  | 1.0454  | 0.0640  | 0.0043 | 2.3639 |
| Btg     | _SGEYSC[Carbamidomethyl (C)]FLPEPVG_2                                | #N/A                   | 6.7204  | 6.9311  | 6.5823  | 6.8013  | 6.4181  | 6.4777  | 6.9147  | 6.8075  | 6.4018  | 6.5889  | 0.9965  | -0.0050 | 0.8687 | 0.0611 |
| Btg     | _YVYSTPEK_2                                                          | #N/A                   | 6.8450  | 6.2966  | 6.9892  | 6.9738  | 6.8572  | 6.4144  | 6.3611  | 6.7780  | 6.6253  | 6.1437  | 1.0390  | 0.0551  | 0.2169 | 0.6637 |
| Btg     | _VLQEDTLPDLHTK_3                                                     | #N/A                   | 5.0314  | 3.3002  | 3.1818  | 3.6844  | 4.4668  | 3.1072  | 3.3991  | 4.4340  | 4.0826  | 4.3288  | 0.9345  | -0.0977 | 0.5634 | 0.2492 |
| Sk7a2   | _NLS[Phospho (STY)]LPFLHEK_2                                         | P18581_S645_M1_Sk7a2   | 5.1456  | 7.2343  | 7.1907  | 7.7068  | 4.5565  | 5.1459  | 6.5996  | 7.7613  | 6.4333  | 5.3419  | 0.9433  | -0.0843 | 0.6540 | 0.1844 |
| Rps6ka3 | _NQS[Phospho (STY)]PVLEPVG_2                                         | P18654_S715_M1_Rps6ka3 | 8.6646  | 8.5138  | 8.9965  | 8.6958  | 7.6932  | 8.5504  | 8.7773  | 8.5876  | 8.6146  | 8.5919  | 0.9857  | -0.0208 | 0.6001 | 0.2218 |
| Rps6ka3 | _DLKPENILDEGHIK_3                                                    | #N/A                   | 4.0550  | 4.8788  | 3.2410  | 4.8723  | 3.9993  | 4.5039  | 4.7635  | 4.3193  | 4.2516  | 4.0339  | 0.9807  | -0.0281 | 0.8129 | 0.0900 |
| Cf1     | _JAcetyl (Protein N-term)[AS[Phospho (STY)]GVAVSDGVK_2               | P18760_S3_M1_Cf1       | 14.3716 | 14.2551 | 15.1361 | 14.7036 | 14.1076 | 14.6555 | 14.8877 | 14.2171 | 14.4002 | 14.4701 | 1.0031  | 0.0044  | 0.8452 | 0.0730 |
| Cf1     | _YALYDATETK_2                                                        | #N/A                   | 10.5639 | 10.5577 | 10.7977 | 10.9035 | 10.7943 | 10.9315 | 10.6523 | 10.5974 | 10.7497 | 10.7497 | 1.0138  | 0.0197  | 0.1694 | 0.7711 |
| Cf1     | _YKSTPEVK_2                                                          | #N/A                   | 7.3495  | 7.2695  | 7.1244  | 7.6547  | 7.4026  | 6.8114  | 6.5993  | 7.4719  | 7.5797  | 7.4886  | 0.9978  | -0.0032 | 0.9463 | 0.0240 |
| Cf1     | _LGGSAVSLGKPL_2                                                      | #N/A                   | 8.0513  | 7.9180  | 7.6063  | 7.8950  | 7.7964  | 8.2947  | 7.9483  | 7.9251  | 8.3900  | 0.9640  | -0.0530 | 0.0413  | 1.3840 | 0.0637 |
| Cf1     | _SSTPEVK_2                                                           | #N/A                   | 6.2473  | 6.4777  | 6.1769  | 6.8286  | 7.1918  | 7.0881  | 6.6052  | 6.1905  | 6.7512  | 6.5830  | 1.0208  | 0.0297  | 0.5863 | 0.2319 |
| Cf1     | _ELLVGGVGQTVDDPYTFVK_2                                               | #N/A                   | 6.7146  | 6.1841  | 6.1675  | 6.7239  | 7.1861  | 6.5387  | 6.6426  | 6.9017  | 6.3318  | 6.6422  | 0.9937  | -0.0091 | 0.8521 | 0.0695 |
| Cf1     | _M[Oxidation (M)]LPDKDC[Carbamidomethyl (C)]R_2                      | #N/A                   | 8.6417  | 8.7125  | 7.9560  | 9.2031  | 9.4803  | 8.4133  | 8.4843  | 8.6802  | 8.5991  | 8.5943  | 1.0169  | 0.0242  | 0.6195 | 0.2079 |
| Cf1     | _NILEGKEKLVGGVGQTVDDPYTFVK_3                                         | #N/A                   | 2.7506  | 5.6947  | 6.3628  | 7.4964  | 3.2118  | 4.0435  | 4.8847  | 5.1835  | 4.4526  | 1.7331  | 1.2124  | 0.2779  | 0.4730 | 0.3252 |
| Cf1     | _NILEEK_2                                                            | #N/A                   | 6.3045  | 5.8944  | 5.3998  | 5.4423  | 6.3477  | 5.2885  | 3.2187  | 5.7954  | 6.1212  | 1.1042  | 1.0430  | 0.3795  | 0.4208 | 0.0771 |
| Cf1     | _AVLFC[Carbamidomethyl (C)]SEDK_2                                    | #N/A                   | 6.4891  | 6.9262  | 6.9182  | 7.7076  | 7.1205  | 7.0239  | 7.0159  | 7.2443  | 7.0043  | 7.2000  | 0.9880  | -0.0174 | 0.6926 | 0.1595 |
| Cf1     | _JAcetyl (Protein N-term)[ASGVAVSDGVKWFNDM[Oxidation (M)]K_2         | #N/A                   | 4.0031  | 3.5521  | 5.0528  | 4.0840  | 3.9914  | 4.4733  | 3.6338  | 3.3082  | 2.1914  | 2.5163  | 1.4396  | 0.5257  | 0.0089 | 2.0498 |
| Cf1     | _KEDVFVWAPENAPLK_3                                                   | #N/A                   | 5.5002  | 5.4228  | 5.3388  | 5.4619  | 5.2347  | 4.8879  | 5.0062  | 5.4874  | 5.7123  | 4.9405  | 0.9808  | -0.0280 | 0.5678 | 0.2458 |
| Cf1     | _HELQAN[Carbamidomethyl (C)]YEEVKR_3                                 | #N/A                   | 6.0286  | 5.3782  | 4.3402  | 6.4852  | 7.0430  | 6.4033  | 5.0086  | 6.1739  | 6.6660  | 5.9913  | 0.9977  | -0.0033 | 0.9814 | 0.0782 |
| Cf1     | _SST[Phospho (STY)]PEEVKR_2                                          | #N/A                   | 3.7856  | 3.5568  | 3.5193  | 4.5639  | 3.3781  | 4.3514  | 3.2113  | 3.9381  | 4.2372  | 4.2412  | 0.9878  | -0.0177 | 0.8827 | 0.0542 |
| Cf1     | _KST[Phospho (STY)]PEEVK_2                                           | #N/A                   | 6.2366  | 4.9436  | 5.4906  | 6.0466  | 4.8280  | 4.8552  | 6.3250  | 6.1403  | 6.0520  | 0.9498  | -0.0742 | 0.5859  | 0.2322 | 0.0730 |
| Cf1     | _LTGINKHELQAN[Carbamidomethyl (C)]YEEVKR_4                           | #N/A                   | 5.7175  | 4.3380  | 3.5750  | 4.0777  | 6.2192  | 5.0062  | 3.7923  | 3.9131  | 3.6894  | 4.0447  | 1.2493  | 0.3212  | 0.1016 | 0.9929 |
| Cf1     | _MYASSK_2                                                            | #N/A                   | 4.0679  | 3.2320  | 3.8016  | 3.3453  | 3.2785  | 3.3469  | 3.4936  | 3.6589  | 3.9042  | 3.0226  | 0.9978  | -0.0032 | 0.9735 | 0.0117 |
| Gnao1   | _IAGDGYQPTQDLR_2                                                     | #N/A                   | 11.0458 | 10.8904 | 11.0852 | 11.0718 | 10.3190 | 10.6802 | 11.2169 | 10.8570 | 10.6838 | 10.7214 | 0.9981  | -0.0028 | 0.9105 | 0.0407 |
| Gnao1   | _LFDVGGGR_2                                                          | #N/A                   | 10.3389 | 10.6818 | 10.7110 | 10.1539 | 10.1191 | 9.9414  | 10.4731 | 10.5949 | 10.4037 | 10.1502 | 0.9922  | -0.0113 | 0.6588 | 0.1813 |
| Gnao1   | _NKEDGSAK_2                                                          | #N/A                   | 8.3609  | 8.4069  | 8.3544  | 8.5828  | 8.3008  | 8.5879  | 8.5982  | 8.5157  | 8.4665  | 8.5091  | 0.9894  | -0.0153 | 0.2129 | 0.6719 |
| Gnao1   | _LWGDGSGQEC[Carbamidomethyl (C)]FNR_2                                | #N/A                   | 8.6053  | 8.4925  | 9.1123  | 8.7655  | 8.5682  | 8.3151  | 8.5029  | 8.4701  | 8.6039  | 8.3806  | 1.0181  | 0.0259  | 0.3166 | 0.4995 |
| Gnao1   | _EYQINDSAK_2                                                         | #N/A                   | 8.7920  | 8.4304  | 8.8444  | 8.4935  | 8.7546  | 8.5614  | 8.5150  | 8.8733  | 8.6670  | 8.8431  | 0.9910  | -0.0131 | 0.4958 | 0.3047 |
| Gnao1   | _KDLGFK_2                                                            | #N/A                   | 6.0244  | 5.3449  | 5.2109  | 5.0994  | 5.9712  | 5.7123  | 5.1011  | 5.6089  | 5.5555  | 4.9698  | 1.0474  | 0.0668  | 0.3232 | 0.0925 |
| Gnao1   | _YYLDSLDR_2                                                          | #N/A                   | 9.8620  | 9.6768  | 10.1157 | 9.5613  | 9.4252  | 9.5321  | 9.3948  | 9.8670  | 9.5978  | 9.7172  | 1.0053  | 0.0077  | 0.7437 | 0.1286 |
| Gnao1   | _M[Oxidation (M)]VC[Carbamidomethyl (C)]DVSR_2                       | #N/A                   | 8.4297  | 8.5969  | 8.3980  | 8.4922  | 8.8811  | 9.2171  | 8.3420  | 8.6263  | 8.5701  | 8.3734  | 1.0220  | 0.0314  | 0.3130 | 0.5045 |
| Gnao1   | _IILEDGSGEDVK_3                                                      | #N/A                   | 8.8254  | 8.4566  | 8.7715  | 8.6048  | 8.7447  | 8.6906  | 7.9802  | 8.6785  | 8.8383  | 8.7495  | 1.0141  | 0.0202  | 0.4873 | 0.3034 |
| Gnao1   | _QYKPVVYNTQSLAAVR_3                                                  | #N/A                   | 7.4119  | 7.2203  | 7.7485  | 7.3942  | 6.7248  | 7.1872  | 7.2520  | 7.4199  | 7.3110  | 7.6651  | 0.9823  | -0.0257 | 0.5035 | 0.2980 |
| Gnao1   | _LFDVGGGR[Phospho (STY)]ER_2                                         | #N/A                   | 8.8942  | 8.8473  | 9.7064  | 9.3713  | 8.3453  | 8.9954  | 9.4023  | 9.1231  | 8.9149  | 9.0765  | 0.9888  | -0.0163 | 0.6947 | 0.1582 |
| Gnao1   | _M[Oxidation (M)]HESLM[Oxidation (M)]LFSIC[Carbamidomethyl (C)]NNK_3 | #N/A                   | 6.1830  | 6.1681  | 6.6788  | 6.3140  | 5.1967  | 6.1556  | 6.4073  | 6.0512  | 6.1388  | 6.5425  | 0.9731  | -0.0393 | 0.5444 | 0.2641 |
| Gnao1   | _M[Oxidation (M)]EDTEFFSALLSAM[Oxidation (M)]MR_2                    | #N/A                   | 5.8440  | 4.6758  | 3.9044  | 6.7962  | 3.2910  | 3.9018  | 3.6738  | 3.8562  | 4.1139  | 1.2388  | 0.3090  | 0.2212  | 0.1388 | 0.2522 |
| Gnao1   | _AM[Oxidation (M)]DTLGVGVGDKR_2                                      | #N/A                   | 6.7764  | 6.9288  | 6.5492  | 6.7914  | 6.8591  | 7.2003  | 6.6948  | 7.1108  | 6.8613  | 7.1660  | 0.9846  | -0.0224 | 0.4637 | 0.3338 |
| Gnao1   | _NLKEDGIS[Phospho (STY)]AAKDKV_3                                     | #N/A                   | 4.7185  | 4.7977  | 5.4934  | 5.0017  | 2.9058  | 4.2403  | 4.2575  | 4.5149  | 4.7219  | 3.8467  | 1.0440  | 0.0622  | 0.7006 | 0.1545 |
| Gnao1   | _SREYQLNSAK_2                                                        | #N/A                   | 5.6727  | 6.1071  | 6.0467  | 5.8282  | 5.4198  | 6.1560  | 6.2140  | 5.4074  | 5.6583  | 6.1920  | 1.0006  | 0.0009  | 0.9863 | 0.0070 |
| Gnao1   | _SPLTIC[Carbamidomethyl (C)]PEYPGSNTYEDAAAYIQTFESK_3                 | #N/A                   | 3.7641  | 3.5783  | 3.4978  | 4.1811  | 3.3996  | 4.3299  | 3.1898  | 3.9596  | 4.2197  | 0.9705  | -0.0432 | 0.6879  | 0.1625 | 0.0730 |
| Gnao1   | _PVVYSNTQSLAAVR_2                                                    | #N/A                   | 3.7035  | 2.9590  | 3.4372  | 3.9558  | 2.8473  | 3.7773  | 3.7075  | 4.1627  | 3.8112  | 3.9228  | 0.8856  | -0.1752 | 0.1079 | 0.9668 |
| Fasn    | _SR[Phospho (STY)]DLSL_2                                             | P19096_S2201_M1_Fasn   | 6.7480  | 6.4924  | 4.0778  | 6.1675  | 7.3455  | 5.3800  | 7.9203  | 6.7179  | 6.4958  | 6.3338  | 0.7915  | -0.3373 | 0.0779 | 1.1085 |
| Fasn    | _LVEGVQVSTNK_2                                                       | #N/A                   | 6.1724  | 5.4791  | 5.8351  | 5.4322  | 5.4032  | 5.9878  | 6.2967  | 5.8954  | 5.7025  | 5.5957  | 0.9737  | -0.0384 | 0.4758 | 0.3226 |
| Fasn    | _YTAIYDPAATHR_2                                                      | #N/A                   | 5.3968  | 6.0788  | 4.7229  | 5.0889  | 4.6924  | 5.2307  | 6.1240  | 6.1435  | 6.6790  | 4.7406  | 0.9171  | -0.1248 | 0.2376 | 0.6241 |
| Fasn    | _TLAEVQDLLEGR_2                                                      | #N/A                   | 4.0741  | 5.0778  | 4.5035  | 4.3011  | 5.2719  | 5.2935  | 5.7146  | 5.8695  | 5.2456  | 5.5610  | 0.8492  | -0.2358 | 0.0194 | 1.7129 |
| Fasn    | _DYTLGVYGR_2                                                         | #N/A                   | 5.4719  | 5.2794  | 3.8437  | 3.3875  | 5.5447  | 5.6209  | 5.7467  | 5.9934  | 5.4088  | 5.6438  | 0.8526  | -0.2301 | 0.1375 | 0.8618 |
| Fasn    | _LFDHPEVFPVPESASVSR_3                                                | #N/A                   | 4.1734  | 3.4778  | 3.3594  | 5.1571  | 5.9389  | 5.7060  | 6.3717  | 5.9485  | 5.7960  | 3.8291  | 0.8449  | -0.2431 | 0.2753 | 0.5602 |
| Gatp1   | _PPYTVVPPVR_2                                                        | #N/A                   | 6.1034  | 6.8170  | 6.8625  | 6.7905  | 7.1979  | 6.9685  | 6.7033  | 6.9733  | 6.5969  | 6.7409  | 1.0054  | 0.0078  | 0.8586 | 0.0662 |
| Gatp1   | _YVLYTNYENGK_2                                                       | #N/A                   | 6.7296  | 6.5317  | 6.2486  | 6.8693  | 6.8052  | 6.3343  | 6.7801  | 6.3428  | 6.1698  | 6.7728  | 1.0108  | 0.0154  | 0.7055 | 0.1515 |
| Gatp1   | _MLAADGQGWK_2                                                        | #N/A                   | 5.5886  | 3.6545  | 4.1328  | 6.7818  | 6.4579  | 3.5696  | 5.4346  | 4.9304  | 5.0961  | 5.0815  | 0.9796  | -0.0297 | 0.8903 | 0.0505 |
| Gatp1   | _EAAQM[Oxidation (M)]JDM[Oxidation (M)]VNDGVEDLR_2                   | #N/A                   | 5.8462  | 6.3529  | 6.8154  | 5.7288  | 6.5442  | 6.5314  | 6.2556  | 6.1245  | 6.3855  | 6.2467  | 1.0080  | 0.0115  | 0.8272 | 0.0245 |
| Gatp1   | _ALPHGLKPTETLSQNGGK_3                                                | #N/A                   | 8.0635  | 8.2431  | 8.4422  | 8.7679  | 8.2909  | 8.3498  | 8.3691  | 8.2201  | 8.1286  | 8.5832  | 1.0041  | 0.0059  | 0.8176 | 0.0875 |
| Gatp1   | _FEDGLTYQSNAILR_2                                                    | #N/A                   | 8.0961  | 8.3779  | 8.7379  | 8.6315  | 8.5298  | 8.3704  | 8.3957  | 8.0868  | 8.3237  | 8.3550  | 1.0201  | 0.0288  | 0.2296 | 0.6390 |
| Gatp1   | _EAAQMMDVNDGVEDLRGK_3                                                | #N/A                   | 4.0053  | 3.2208  | 3.1913  | 4.5153  | 3.1091  | 3.5155  | 3.4086  | 4.4245  | 4.0731  | 3.6610  | 0.9232  | -0.1153 | 0.3993 | 0.     |



|      |                                                                    |                     |         |         |         |         |         |         |         |         |         |         |         |         |        |        |
|------|--------------------------------------------------------------------|---------------------|---------|---------|---------|---------|---------|---------|---------|---------|---------|---------|---------|---------|--------|--------|
| Nefh | _S[Phospho (STY)]PWKEEV_2                                          | #N/A                | 6.7191  | 5.6500  | 5.6084  | 6.6598  | 6.0832  | 5.7517  | 5.9492  | 6.1994  | 6.5780  | 6.5045  | 0.9637  | -0.0534 | 0.4379 | 0.3586 |
| Nefh | _IPSGTHIK_2                                                        | #N/A                | 5.9277  | 6.1251  | 5.1048  | 5.4894  | 6.0532  | 5.9255  | 5.2429  | 5.3331  | 6.1442  | 5.8024  | 1.0249  | 0.9355  | 0.6057 | 0.2177 |
| Nefh | _HQADIASYQDAIQSLQELR_3                                             | #N/A                | 5.5010  | 6.2241  | 6.3331  | 6.3402  | 6.1296  | 5.2126  | 5.4553  | 5.3853  | 5.8201  | 5.7998  | 1.0613  | 0.0859  | 0.2240 | 0.6497 |
| Nefh | _S[Phospho (STY)]PEAQTPVQGEAK_2                                    | #N/A                | 8.7454  | 8.1155  | 6.4501  | 9.1144  | 7.8956  | 8.1942  | 8.7120  | 8.0251  | 8.1478  | 8.5681  | 0.9668  | -0.0487 | 0.5841 | 0.2335 |
| Nefh | _SPEVKS[Phospho (STY)]PEKAK_2                                      | #N/A                | 6.5611  | 7.3419  | 8.1886  | 7.7718  | 7.2839  | 7.2794  | 7.5061  | 7.2380  | 7.1467  | 7.1158  | 1.0211  | 0.0801  | 0.6097 | 0.2149 |
| Nefh | _S[Phospho (STY)]PAEAKS[Phospho (STY)]PEK_2                        | #N/A                | 7.7849  | 7.3541  | 7.1446  | 8.0900  | 6.5183  | 6.8481  | 7.8874  | 7.3953  | 7.1254  | 7.3274  | 0.9806  | -0.0282 | 0.6687 | 0.1748 |
| Nefh | _C[Carbamidomethyl (C)]DVTSAIR_2                                   | #N/A                | 5.3351  | 5.3738  | 4.7488  | 3.6787  | 5.5231  | 5.2736  | 4.8896  | 4.4536  | 4.4748  | 1.1686  | 0.2247  | 0.1486  | 0.8281 |        |
| Nefh | _SPAEPKS[Phospho (STY)]PAEAKS[Phospho (STY)]PIEVK_3                | #N/A                | 9.0090  | 9.1233  | 9.1739  | 9.6737  | 9.1894  | 9.2295  | 9.4271  | 8.8539  | 9.1902  | 9.2886  | 1.0047  | 0.0068  | 0.7829 | 0.1063 |
| Nefh | _S[Phospho (STY)]LEGFAALR_2                                        | P19246_S122_M1_Nefh | 6.3788  | 5.7298  | 6.3497  | 6.4162  | 5.7341  | 6.4035  | 6.6104  | 5.7704  | 0.3626  | 6.4413  | 0.9797  | -0.0295 | 0.5870 | 0.2313 |
| Nefh | _S[Phospho (STY)]PEAKS[Phospho (STY)]PVK_2                         | P19246_S795_M2_Nefh | 5.0370  | 3.7257  | 4.3062  | 3.6394  | 4.2459  | 3.4836  | 4.8603  | 3.2791  | 3.6041  | 3.5912  | 1.0624  | 0.0874  | 0.5705 | 0.2437 |
| Nefh | _VKEEAKS[Phospho (STY)]PGEAK_2                                     | #N/A                | 8.3371  | 8.7879  | 8.7506  | 9.1851  | 8.3322  | 8.9968  | 8.7222  | 8.4664  | 8.7155  | 8.7469  | 1.0080  | 0.0114  | 0.7172 | 0.1444 |
| Nefh | _SPAIVKS[Phospho (STY)]PAEAKS[Phospho (STY)]PAIVK_2                | #N/A                | 8.4421  | 8.5249  | 8.5870  | 9.2355  | 8.1916  | 8.6645  | 8.8334  | 8.3128  | 8.3983  | 8.3661  | 1.0153  | 0.0219  | 0.5366 | 0.2704 |
| Nefh | _SPAEPKS[Phospho (STY)]PAEAKS[Phospho (STY)]PAEVK_2                | #N/A                | 7.6970  | 7.8281  | 7.9125  | 8.3985  | 7.9626  | 7.8973  | 8.0666  | 7.4681  | 7.7879  | 7.7261  | 1.0241  | 0.0344  | 0.2637 | 0.5789 |
| Nefh | _SPAEPKS[Phospho (STY)]PAEAKS[Phospho (STY)]PAEAK_2                | #N/A                | 6.9208  | 7.0501  | 7.0405  | 7.5466  | 6.9078  | 7.1930  | 7.3570  | 6.7944  | 6.8955  | 6.9041  | 1.0175  | 0.0250  | 0.4586 | 0.3386 |
| Nefh | _ETVVEGGTEIR_2                                                     | #N/A                | 5.3463  | 5.5280  | 5.9348  | 6.8980  | 3.2549  | 4.8492  | 6.0182  | 2.4822  | 4.5961  | 6.0248  | 1.1091  | 0.1494  | 0.5811 | 0.2358 |
| Nefh | _SPAEPKS[Phospho (STY)]PIEVKS[Phospho (STY)]PEK_2                  | #N/A                | 8.2697  | 7.9618  | 7.4790  | 8.6564  | 7.8672  | 8.0347  | 8.5429  | 7.8555  | 7.9721  | 8.2159  | 0.9875  | -0.0181 | 0.6763 | 0.1699 |
| Nefh | _SPAEPKS[Phospho (STY)]PAEAKS[Phospho (STY)]PAEPK_2                | #N/A                | 7.3343  | 7.8296  | 7.9663  | 8.0634  | 8.0687  | 7.5114  | 8.2084  | 7.5253  | 7.7111  | 7.4295  | 1.0100  | 0.0143  | 0.7207 | 0.1422 |
| Nefh | _SPAEPKS[Phospho (STY)]PAEAKS[Phospho (STY)]PAEVK_2                | #N/A                | 7.1455  | 7.0897  | 7.1537  | 7.7466  | 7.1506  | 7.1107  | 7.4466  | 6.8344  | 6.8735  | 7.1310  | 1.0228  | 0.0326  | 0.3721 | 0.4294 |
| Nefh | _SPAEPKS[Phospho (STY)]PATVKS[Phospho (STY)]PGEAK_2                | #N/A                | 4.7560  | 5.6053  | 5.6542  | 5.9181  | 5.0948  | 5.8332  | 6.0795  | 3.9312  | 4.7901  | 5.3089  | 1.0894  | 0.1236  | 0.3218 | 0.4924 |
| Nefh | _AQAQEEC[Carbamidomethyl (C)]QYLR_2                                | #N/A                | 4.1784  | 4.6710  | 3.8003  | 3.8885  | 5.4687  | 5.0523  | 4.0176  | 4.7037  | 4.4792  | 5.1933  | 0.9807  | -0.0281 | 0.8270 | 0.0825 |
| Nefh | _SPGEAKS[Phospho (STY)]PAIVKS[Phospho (STY)]PAEAK_2                | #N/A                | 8.7791  | 8.5972  | 8.5854  | 9.1328  | 8.2371  | 8.7613  | 8.9987  | 8.3506  | 8.6170  | 8.9185  | 0.9955  | -0.0065 | 0.8427 | 0.0743 |
| Nefh | _SPGEAKS[Phospho (STY)]PAEPKS[Phospho (STY)]PAEAK_2                | #N/A                | 7.9753  | 8.4002  | 8.5983  | 9.0611  | 8.4187  | 8.1610  | 8.6556  | 8.2434  | 8.1923  | 8.2381  | 1.0124  | 0.0178  | 0.6358 | 0.1967 |
| Nefh | _SPSEAKS[Phospho (STY)]PAEAKS[Phospho (STY)]PAEAK_2                | #N/A                | 7.3096  | 7.6304  | 7.7691  | 8.1839  | 7.4027  | 7.2375  | 7.9292  | 7.4765  | 7.7200  | 7.7758  | 0.9823  | -0.0257 | 0.5038 | 0.2977 |
| Nefh | _SPAEPKS[Phospho (STY)]PAEAKS[Phospho (STY)]PAEVK_2                | #N/A                | 7.5148  | 7.6073  | 7.6780  | 8.6289  | 7.7648  | 7.8203  | 8.1322  | 7.6078  | 7.8834  | 7.8121  | 0.9971  | -0.0043 | 0.9198 | 0.0363 |
| Nefh | _S[Phospho (STY)]PGEAKS[Phospho (STY)]PAEAKS[Phospho (STY)]PAEAK_2 | #N/A                | 9.9297  | 9.9643  | 9.8178  | 10.5285 | 9.9522  | 10.0003 | 10.3405 | 9.6691  | 9.9518  | 10.2069 | 0.9990  | -0.0014 | 0.9559 | 0.0196 |
| Nefh | _SPAEPKS[Phospho (STY)]PAEAKS[Phospho (STY)]PAEAK_2                | #N/A                | 9.1709  | 9.5346  | 9.6787  | 9.9039  | 9.4201  | 9.5469  | 9.6667  | 9.3296  | 9.3781  | 9.4922  | 1.0080  | 0.0115  | 0.5995 | 0.2222 |
| Nefh | _S[Phospho (STY)]PAEAKS[Phospho (STY)]PGEAKS[Phospho (STY)]PGEAK_2 | #N/A                | 9.2821  | 9.2787  | 8.9740  | 10.0318 | 9.2108  | 9.1774  | 9.6574  | 8.9147  | 9.3421  | 9.4099  | 0.9994  | -0.0008 | 0.9818 | 0.0220 |
| Nefh | _SPAEPKS[Phospho (STY)]PAEAKS[Phospho (STY)]PGEAK_2                | #N/A                | 8.5259  | 9.0241  | 8.8617  | 9.3823  | 8.8127  | 8.7326  | 9.0565  | 8.6044  | 8.5141  | 8.6986  | 1.0197  | 0.0281  | 0.3582 | 0.4459 |
| Nefh | _S[Phospho (STY)]PGEAKS[Phospho (STY)]PAEPKS[Phospho (STY)]PAEPK_2 | #N/A                | 7.6806  | 7.4889  | 7.4889  | 8.3084  | 7.5882  | 7.6953  | 7.9816  | 7.3892  | 7.8443  | 7.4683  | 1.0105  | 0.0151  | 0.6756 | 0.1703 |
| Nefh | _SPAEPKS[Phospho (STY)]PAEAK_2                                     | #N/A                | 10.5553 | 10.9273 | 11.1400 | 11.3536 | 10.3923 | 10.9078 | 11.0979 | 10.7074 | 10.8094 | 10.8673 | 1.0078  | 0.0012  | 0.9646 | 0.0156 |
| Nefh | _S[Phospho (STY)]PGEAKS[Phospho (STY)]PGEAKS[Phospho (STY)]PAEAK_2 | #N/A                | 9.6696  | 9.7228  | 9.6345  | 10.3435 | 9.7811  | 9.5718  | 10.0170 | 9.3780  | 9.7653  | 9.7174  | 1.0070  | 0.0100  | 0.7123 | 0.0474 |
| Nefh | _S[Phospho (STY)]PGEAKS[Phospho (STY)]PAEAKS[Phospho (STY)]PGEAK_2 | #N/A                | 9.3438  | 9.4285  | 9.2102  | 10.0000 | 9.4673  | 9.2859  | 9.7017  | 9.0181  | 9.4722  | 9.4380  | 1.0052  | 0.0074  | 0.7976 | 0.0982 |
| Nefh | _SPATVKS[Phospho (STY)]PGEAK_2                                     | P19246_S589_M1_Nefh | 8.7149  | 9.2133  | 9.3997  | 9.4611  | 9.1493  | 8.5666  | 9.3614  | 8.5048  | 9.0479  | 9.0812  | 1.0095  | 0.0136  | 0.7249 | 0.1397 |
| Nefh | _VKS[Phospho (STY)]EEMIK_2                                         | #N/A                | 6.2737  | 5.3642  | 4.2674  | 7.3671  | 5.2042  | 2.9471  | 5.6034  | 4.7449  | 4.8588  | 5.3202  | 1.0206  | 0.0293  | 0.8984 | 0.0465 |
| Nefh | _S[Phospho (STY)]PAEAKS[Phospho (STY)]PAEAK_2                      | #N/A                | 7.6601  | 8.1491  | 7.8181  | 8.7534  | 8.0759  | 8.2037  | 8.5212  | 7.9470  | 8.0903  | 8.3318  | 0.9863  | -0.0199 | 0.6188 | 0.2084 |
| Nefh | _SPGEAKS[Phospho (STY)]PGEAK_2                                     | #N/A                | 9.6727  | 10.0877 | 10.1713 | 10.5619 | 9.3966  | 9.9226  | 10.1960 | 9.7919  | 9.7930  | 10.1096 | 0.9996  | -0.0005 | 0.9869 | 0.0057 |
| Nefh | _SPAEPKS[Phospho (STY)]PAEPKS[Phospho (STY)]PAEAK_2                | #N/A                | 7.8951  | 8.2201  | 8.4616  | 8.8277  | 8.3624  | 8.0380  | 7.0696  | 8.0909  | 8.0364  | 7.8643  | 1.0787  | 0.1093  | 0.0350 | 1.4556 |
| Nefh | _SPAEPKS[Phospho (STY)]PAIVKS[Phospho (STY)]PGEAK_2                | #N/A                | 7.5098  | 8.1724  | 8.0273  | 8.4251  | 8.2044  | 8.2709  | 7.8122  | 7.9897  | 7.9516  | 0.9938  | -0.0089 | 0.8304  | 0.0807 |        |
| Nefh | _SPAEPKS[Phospho (STY)]PGEAKS[Phospho (STY)]PAEPK_2                | #N/A                | 7.2919  | 7.2045  | 7.8130  | 7.6116  | 7.8024  | 7.5442  | 7.3429  | 7.2656  | 7.3233  | 7.5010  | 1.0258  | 0.0367  | 0.2055 | 0.6871 |
| Nefh | _TPVKEGAKS[Phospho (STY)]PAEAK_2                                   | #N/A                | 4.6502  | 4.4381  | 4.3926  | 4.6441  | 4.7103  | 3.6171  | 4.5422  | 4.1415  | 3.7254  | 4.4532  | 1.0458  | 0.0646  | 0.4692 | 0.3286 |
| Nefh | _SPAEPKS[Phospho (STY)]PGEAK_2                                     | P19246_S679_M1_Nefh | 11.0511 | 11.4561 | 11.7857 | 11.7969 | 11.3431 | 11.4056 | 11.6353 | 11.1771 | 11.2732 | 11.3620 | 1.0098  | 0.0140  | 0.5180 | 0.2856 |
| Nefh | _S[Phospho (STY)]PGEAKS[Phospho (STY)]PGEAK_2                      | #N/A                | 10.0316 | 10.3746 | 10.4069 | 10.8480 | 9.7500  | 10.1852 | 10.5180 | 10.0255 | 10.3140 | 1.0038  | 0.0055  | 0.8596  | 0.0657 |        |
| Nefh | _S[Phospho (STY)]PAEAKS[Phospho (STY)]PAEVK_2                      | #N/A                | 10.0852 | 10.1493 | 9.8675  | 10.6891 | 9.9912  | 10.1169 | 10.4816 | 9.8602  | 10.0037 | 10.3047 | 0.9988  | -0.0018 | 0.9463 | 0.0240 |
| Nefh | _SPAIVKS[Phospho (STY)]PAEAK_2                                     | P19246_S727_M1_Nefh | 9.8903  | 9.9456  | 10.1125 | 10.4852 | 10.0123 | 9.9575  | 10.1754 | 9.8552  | 9.9617  | 10.0945 | 1.0045  | 0.0065  | 0.7243 | 0.0401 |
| Nefh | _S[Phospho (STY)]PAEVKS[Phospho (STY)]PAEAK_2                      | #N/A                | 9.8273  | 9.9083  | 9.8596  | 10.4612 | 9.7510  | 9.8923  | 10.2778 | 9.6126  | 9.7729  | 10.0618 | 1.0019  | 0.0027  | 0.9179 | 0.0372 |
| Nefh | _S[Phospho (STY)]PAEPKS[Phospho (STY)]PAEAK_2                      | #N/A                | 9.8258  | 9.9548  | 10.0860 | 10.3689 | 9.8476  | 9.9011  | 10.1987 | 9.6713  | 9.8416  | 10.0159 | 1.0066  | 0.0095  | 0.6465 | 0.1894 |
| Nefh | _SPAIVKS[Phospho (STY)]PGEAK_2                                     | P19246_S739_M1_Nefh | 9.5657  | 9.7752  | 9.9565  | 10.1750 | 9.8327  | 9.7573  | 10.0759 | 9.5684  | 9.7032  | 9.8473  | 1.0046  | 0.0066  | 0.7484 | 0.1258 |
| Nefh | _S[Phospho (STY)]PAEPKS[Phospho (STY)]PATV_2                       | #N/A                | 9.8737  | 9.5736  | 9.2790  | 10.2768 | 9.3386  | 9.5957  | 10.0530 | 9.2607  | 9.6816  | 9.8817  | 0.9935  | -0.0094 | 0.7931 | 0.1007 |
| Nefh | _SPATVKS[Phospho (STY)]PGEAKS[Phospho (STY)]PGEAK_2                | #N/A                | 7.4327  | 5.7004  | 8.2326  | 8.3146  | 8.2212  | 8.1155  | 8.3065  | 7.8314  | 7.9420  | 7.7568  | 0.9636  | -0.0535 | 0.5981 | 0.2233 |
| Nefh | _SPAEPKS[Phospho (STY)]PGEAKS[Phospho (STY)]PAEVK_2                | #N/A                | 6.7685  | 7.3924  | 7.5178  | 7.5688  | 7.5422  | 7.1221  | 7.1472  | 7.5428  | 1.0211  | 0.0301  | 0.9612  | 0.0125  | 0.5736 | 0.2414 |
| Nefh | _SPAEPKS[Phospho (STY)]PAEAKS[Phospho (STY)]PATV_2                 | #N/A                | 7.6282  | 7.8711  | 7.6594  | 8.4552  | 7.5874  | 7.7430  | 8.1730  | 7.4797  | 7.7838  | 7.9219  | 0.9980  | -0.0029 | 0.9402 | 0.0268 |
| Nefh | _EVKS[Phospho (STY)]PWKEEV_2                                       | #N/A                | 5.1170  | 4.8067  | 5.4585  | 5.3554  | 4.7291  | 5.3690  | 4.8988  | 4.7594  | 4.4795  | 5.2453  | 1.0606  | 0.0848  | 0.1846 | 0.7338 |
| Nefh | _AKT[Phospho (STY)]PVKEGAK_2                                       | P19246_T775_M1_Nefh | 3.1542  | 3.4972  | 3.4021  | 4.2679  | 3.3418  | 4.3877  | 4.2038  | 2.9257  | 4.2009  | 4.2466  | 0.9437  | -0.0835 | 0.5680 | 0.2456 |
| Nefh | _HPTDRPEQVKS[Phospho (STY)]PAK_3                                   | #N/A                | 8.0579  | 3.6262  | 4.0005  | 8.5367  | 7.4507  | 7.2867  | 8.0221  | 7.6270  | 7.2979  | 7.3734  | 0.8566  | -0.2233 | 0.3490 | 0.4572 |
| Nefh | _SPAEPKS[Phospho (STY)]PAEPKS[Phospho (STY)]PATV_2                 | #N/A                | 7.4573  | 7.7664  | 7.6441  | 8.4749  | 7.4043  | 7.5395  | 8.0123  | 7.3095  | 6.6762  | 7.6978  | 1.0391  | 0.0554  | 0.3670 | 0.4353 |
| Nefh | _S[Phospho (STY)]PGEAKS[Phospho (STY)]PGEAKS[Phospho (STY)]PAEAK_2 | #N/A                | 8.3827  | 8.6637  | 8.6524  | 8.2727  | 7.2576  | 4.5491  | 7.7502  | 6.9659  | 7.7897  | 7.6689  | 1.0114  | 0.0164  | 0.9199 | 0.0363 |
| Nefh | _S[Phospho (STY)]PGEAKS[Phospho (STY)]PGEAKS[Phospho (STY)]PGEAK_2 | #N/A                | 6.3700  | 6.3188  | 6.5766  | 7.0389  | 6.6444  | 5.7287  | 7.0281  | 6.1587  | 6.1499  | 6.6517  | 0.9922  | -0.0113 | 0.8595 | 0.0658 |
| Nefh | _SPAEPKS[Phospho (STY)]PAEPK_2                                     | P19246_S565_M1_Nefh | 7.1124  | 7.3221  | 7.6920  | 7.9109  | 7.8845  | 8.0246  | 7.7437  | 7.4986  | 7.7344  | 8.0949  | 0.9858  | -0.0206 | 0.6132 | 0.2124 |
| Nefh | _S[Phospho (STY)]PAEPKS[Phospho (STY)]PATVKS[Phospho (STY)]PGEAK_2 | #N/A                | 5.1740  | 4.1399  | 5.1990  | 5.9109  | 5.2509  | 4.6945  | 4.2044  | 4.7930  | 5.5453  | 4.3322  | 1.0726  | 0.1012  | 0.4016 | 0.3962 |
| Nefh | _EGAKS[Phospho (STY)]PAEAKS[Phospho (STY)]PEK_2                    | #N/A                | 3.5229  | 4.3281  | 4.2488  | 3.7926  | 3.1473  | 2.3240  | 3.9408  | 3.2086  | 1.7595  | 0.6108  | 1.4961  | 0.5812  | 0.1310 | 0.8828 |
| Nefh | _S[Phospho (STY)]PVKEGAKPEK_2                                      | #N/A                | 7.3931  | 7.6253  | 6.8254  | 8.2999  |         |         |         |         |         |         |         |         |        |        |



|        |                                                        |                      |         |         |         |         |         |         |         |         |         |        |        |         |        |        |
|--------|--------------------------------------------------------|----------------------|---------|---------|---------|---------|---------|---------|---------|---------|---------|--------|--------|---------|--------|--------|
| Nelfe  | _SM[Oxidation (M)]S[Phospho (STY)]ADELDQEPSR_2         | #N/A                 | 8.9830  | 9.0006  | 9.3666  | 9.7837  | 8.7315  | 9.1313  | 9.2081  | 8.7755  | 8.9691  | 9.1185 | 1.0164 | 0.0235  | 0.4829 | 0.3161 |
| Cox5b  | _EDPNLVPSNN_2                                          | #N/A                 | 9.8962  | 9.5487  | 9.3282  | 9.8496  | 10.1034 | 9.8531  | 9.7526  | 9.4052  | 9.5844  | 9.7917 | 1.0135 | 0.0193  | 0.4347 | 0.3618 |
| Cox5b  | _ASGTEKDPNLVPSNNK_3                                    | #N/A                 | 7.5417  | 7.6641  | 8.3008  | 8.1632  | 8.5872  | 8.0723  | 7.4344  | 7.5121  | 7.9641  | 7.9277 | 1.0448 | 0.0632  | 0.1686 | 0.7732 |
| Cox5b  | _EIM[Oxidation (M)]AAQK_2                              | #N/A                 | 7.3103  | 7.2140  | 7.3462  | 7.4708  | 7.8772  | 8.1164  | 6.3042  | 7.0860  | 7.4058  | 7.5066 | 1.0702 | 0.0979  | 0.1244 | 0.9052 |
| Cox5b  | _LVPQMAH_2                                             | #N/A                 | 6.0482  | 6.4620  | 5.5232  | 7.4257  | 6.9442  | 4.3553  | 5.0812  | 4.7531  | 4.5478  | 5.4832 | 1.1665 | 0.2222  | 0.3304 | 0.4809 |
| Cox5b  | _ASGTEKDPNLVPSNNR_3                                    | #N/A                 | 9.4556  | 10.0604 | 10.5635 | 10.0842 | 10.6138 | 10.1712 | 9.7158  | 9.7673  | 9.8669  | 9.7149 | 1.0401 | 0.0567  | 0.1078 | 0.9675 |
| Cox5b  | _EDPNLVPSNNR_2                                         | #N/A                 | 9.7346  | 9.7708  | 9.8144  | 9.9971  | 10.4483 | 9.8500  | 9.8965  | 9.5150  | 9.7131  | 9.5344 | 1.0281 | 0.0399  | 0.1151 | 0.9389 |
| Cox5b  | _C[Carbamidomethyl (C)]PNC[Carbamidomethyl (C)]GTHYK_2 | #N/A                 | 5.2079  | 4.4188  | 3.3962  | 3.9968  | 6.2722  | 3.8183  | 3.7115  | 4.3602  | 4.1181  | 1.0370 | 0.0525 | 0.7936  | 0.1004 |        |
| Cox41i | _SEDYAFPTYADR_2                                        | #N/A                 | 10.3766 | 9.7713  | 9.9332  | 10.1107 | 9.7036  | 9.9073  | 10.3774 | 9.9559  | 10.0207 | 9.9622 | 0.9889 | -0.0161 | 0.4718 | 0.3262 |
| Cox41i | _ANPQGPSAK_2                                           | #N/A                 | 9.4049  | 9.5368  | 9.8673  | 9.1759  | 9.5031  | 9.1055  | 9.3444  | 9.8621  | 9.2282  | 9.2576 | 1.0010 | 0.0014  | 0.9612 | 0.0172 |
| Cox41i | _ADWSSLSR_2                                            | #N/A                 | 9.1215  | 9.0611  | 9.5229  | 8.9138  | 8.9627  | 8.6556  | 8.7008  | 9.1239  | 8.9301  | 8.9050 | 1.0140 | 0.0200  | 0.4621 | 0.3353 |
| Cox41i | _EKADWSSLSR_2                                          | #N/A                 | 7.9849  | 8.2745  | 8.5260  | 8.1453  | 8.0295  | 8.0263  | 8.5029  | 8.2126  | 8.1363  | 8.0415 | 0.9928 | -0.0104 | 0.6660 | 0.1765 |
| Cox41i | _SEDYAFPTYADR_2                                        | #N/A                 | 7.1456  | 7.1294  | 7.4206  | 7.0795  | 7.0372  | 7.3834  | 6.8718  | 7.2250  | 7.1144  | 7.1109 | 1.0168 | 0.0240  | 0.2756 | 0.5597 |
| Cox41i | _IQNFESFAEM[Oxidation (M)]NIR_2                        | #N/A                 | 6.3062  | 6.1542  | 6.6554  | 6.2894  | 6.0547  | 6.1855  | 6.8124  | 6.3203  | 6.7607  | 6.4169 | 0.9539 | -0.0681 | 0.0681 | 1.1667 |
| Cox41i | _DQVWAM[Oxidation (M)]QTK_2                            | #N/A                 | 6.8206  | 6.6690  | 6.6736  | 6.4914  | 6.4496  | 6.3292  | 6.6937  | 7.0184  | 6.6830  | 6.7775 | 0.9675 | -0.0477 | 0.0809 | 1.0921 |
| Cox41i | _DYPDPDVAHVM[Oxidation (M)]LSAQK_3                     | #N/A                 | 7.7820  | 8.1065  | 8.3908  | 7.4072  | 7.3460  | 7.9719  | 7.9238  | 7.9957  | 8.2999  | 7.6967 | 0.9818 | -0.0265 | 0.5455 | 0.2632 |
| Lip1   | _QPS[Phospho (STY)]ELPSMAVASTK_2                       | P19973_S243_M1_Lip1  | 4.1654  | 3.4698  | 3.3514  | 3.1501  | 3.2911  | 2.9375  | 3.2983  | 3.8511  | 4.1501  | 3.8210 | 0.8979 | -0.1554 | 0.1699 | 0.7699 |
| Hsp45  | _ITITDNRR_2                                            | #N/A                 | 9.1633  | 9.3745  | 9.5828  | 9.6071  | 9.4837  | 9.1209  | 9.0929  | 9.1786  | 9.1824  | 9.4753 | 1.0169 | 0.0242  | 0.2469 | 0.6075 |
| Hsp45  | _ITPSVAFTEGER_2                                        | #N/A                 | 8.1862  | 8.7201  | 8.4768  | 8.6012  | 8.6708  | 8.5720  | 8.7906  | 8.2720  | 8.1684  | 8.4043 | 1.0153 | 0.0220  | 0.4006 | 0.3972 |
| Hsp45  | _LTPEIER_2                                             | #N/A                 | 8.1787  | 8.4382  | 8.8154  | 8.5508  | 8.7651  | 8.1266  | 8.1766  | 8.5565  | 8.1546  | 8.5308 | 1.0149 | 0.0213  | 0.4867 | 0.3127 |
| Hsp45  | _NQLTSPENTVFDAM_2                                      | #N/A                 | 8.7166  | 8.0345  | 8.1772  | 8.2805  | 8.2217  | 8.0024  | 8.0161  | 7.6806  | 7.7608  | 8.3246 | 1.0180 | 0.0258  | 0.3498 | 0.4562 |
| Hsp45  | _SQIFSTADONOPTVIK_2                                    | #N/A                 | 7.5478  | 7.2188  | 7.7117  | 7.5179  | 7.9195  | 7.7441  | 7.0718  | 6.9246  | 7.3518  | 7.3172 | 1.0623 | 0.0873  | 0.0165 | 1.7837 |
| Hsp45  | _TWNQPSVQGDHK_2                                        | #N/A                 | 7.5155  | 7.4006  | 7.8556  | 7.8575  | 7.7970  | 7.2326  | 7.1849  | 7.4177  | 7.5351  | 7.6430 | 1.0221 | 0.0316  | 0.3222 | 0.4919 |
| Hsp45  | _LYEGERPLTK_2                                          | #N/A                 | 7.0238  | 7.6573  | 7.2760  | 7.7570  | 7.8514  | 7.2945  | 7.6343  | 7.2917  | 6.9973  | 7.5298 | 1.0154 | 0.0221  | 0.5888 | 0.2315 |
| Hsp45  | _NELESYAYSUK_2                                         | #N/A                 | 7.3660  | 7.2163  | 7.5112  | 7.7679  | 7.3340  | 7.2184  | 6.8960  | 7.0662  | 6.7560  | 7.4573 | 1.0509 | 0.0716  | 0.0563 | 1.2494 |
| Hsp45  | _ELEEVQPIISK_2                                         | #N/A                 | 6.2700  | 6.2648  | 6.3008  | 6.7476  | 6.3736  | 6.7330  | 6.3069  | 5.7950  | 6.5064  | 6.2823 | 1.0363 | 0.0514  | 0.2144 | 0.6867 |
| Hsp45  | _NTVPTIK_2                                             | #N/A                 | 6.2158  | 6.4149  | 6.5802  | 6.1490  | 7.0610  | 6.2879  | 5.7911  | 6.5430  | 6.2020  | 6.6562 | 1.0244 | 0.0347  | 0.5240 | 0.2807 |
| Hsp45  | _LIEISFFEDFSETLR_2                                     | #N/A                 | 4.8845  | 5.9035  | 6.7995  | 7.4019  | 5.5513  | 6.3571  | 5.3562  | 5.6297  | 5.4417  | 4.9841 | 1.1488 | 0.2002  | 0.1297 | 0.8870 |
| Hsp45  | _VTHAVTVPAYNQADR_3                                     | #N/A                 | 6.4795  | 6.3816  | 6.2632  | 7.1486  | 6.3770  | 6.5945  | 6.2592  | 6.4115  | 6.4848  | 6.5900 | 1.0162 | 0.0232  | 0.5592 | 0.2524 |
| Hsp45  | _NQLTSPENTVFDAMR_3                                     | #N/A                 | 5.4087  | 5.9694  | 4.2089  | 4.8008  | 5.3114  | 5.8256  | 5.2485  | 4.7905  | 5.3952  | 6.0092 | 0.9801 | -0.0290 | 0.7914 | 0.1016 |
| Hsp45  | _INIEPTAAIAAYGLDKR_3                                   | #N/A                 | 5.2219  | 5.1274  | 5.2822  | 5.4541  | 5.2101  | 4.9638  | 3.0305  | 4.8889  | 5.3359  | 5.5180 | 1.1101 | 0.1506  | 0.2921 | 0.5344 |
| Hsp45  | _TFAPEISAM[Oxidation (M)]VLT_2                         | #N/A                 | 5.6235  | 6.0385  | 5.5507  | 6.5794  | 6.1055  | 5.6153  | 6.1101  | 5.5839  | 5.7594  | 5.8547 | 1.0157 | 0.0225  | 0.6900 | 0.1612 |
| Hsp45  | _KSDIDIELVGGSTR_3                                      | #N/A                 | 6.2642  | 4.9054  | 5.5068  | 5.9380  | 5.9035  | 5.5842  | 5.4098  | 4.5477  | 4.9100  | 5.5004 | 1.1162 | 0.1586  | 0.0815 | 1.0887 |
| Hsp45  | _ALISQHQAR_2                                           | #N/A                 | 3.7705  | 4.0936  | 2.8636  | 3.7250  | 5.0142  | 3.8146  | 3.8511  | 3.1424  | 4.1085  | 4.7469 | 0.9793 | -0.3002 | 0.8570 | 0.0670 |
| Hsp45  | _LEWLESQDADIEDFK_3                                     | #N/A                 | 4.8852  | 5.3424  | 5.4687  | 6.1560  | 4.3771  | 5.1025  | 5.1018  | 4.8956  | 5.1233  | 5.8575 | 0.9957 | -0.0062 | 0.9498 | 0.0224 |
| Hsp45  | _VLDESQK_2                                             | #N/A                 | 4.6338  | 4.1646  | 3.6755  | 3.2193  | 5.3243  | 3.5390  | 1.7737  | 4.1475  | 4.4884  | 4.6782 | 1.0851 | 0.1178  | 0.6431 | 0.1917 |
| Hsp45  | _DAGTAGLVNWR_2                                         | #N/A                 | 3.4906  | 4.2958  | 4.1774  | 6.8660  | 5.6999  | 3.6124  | 3.9732  | 3.4384  | 3.0870  | 3.6162 | 1.3292 | 0.0106  | 0.1315 | 0.8811 |
| Hsp45  | _LYSGSGPPPT[Phospho (STY)]GEEDTSEKDEL_2                | P20029_T644_M1_Hsp45 | 3.3000  | 4.1052  | 3.9868  | 4.4894  | 3.9265  | 3.8156  | 4.2041  | 5.3288  | 3.2902  | 3.8272 | 0.9459 | -0.0803 | 0.5838 | 0.2338 |
| Hsp45  | _AKFELNM[Oxidation (M)]DLFR_3                          | #N/A                 | 3.7290  | 4.0092  | 4.0269  | 3.3661  | 3.4370  | 4.3776  | 3.0808  | 3.4761  | 3.7295  | 3.8752 | 1.0802 | 0.1113  | 0.2723 | 0.5649 |
| Tmb4x  | _NPLPSKETIEQEK_3                                       | #N/A                 | 6.9510  | 7.1853  | 7.2728  | 7.5985  | 8.5880  | 7.6911  | 7.6820  | 7.1987  | 8.0749  | 7.3721 | 0.9955 | -0.0065 | 0.9206 | 0.0359 |
| Tmb4x  | _ETIEDEKQAGES[Phospho (STY)]_2                         | P20065_S50_M1_Tmb4x  | 6.8796  | 7.3984  | 7.8103  | 7.4311  | 7.9914  | 7.6272  | 7.2413  | 7.1602  | 7.7003  | 7.0977 | 1.0306 | 0.0434  | 0.3510 | 0.4547 |
| Tmb4x  | _TETQEKNPPLPSKETIEQEK_3                                | #N/A                 | 5.8799  | 5.9653  | 6.7173  | 6.4446  | 7.3688  | 6.5253  | 6.6116  | 6.1696  | 7.3256  | 6.1708 | 0.9869 | -0.0190 | 0.8130 | 0.0899 |
| Tmb4x  | _KTETOENPLPSK_3                                        | #N/A                 | 6.3708  | 5.3907  | 5.6044  | 6.9134  | 7.0988  | 6.9302  | 5.7985  | 6.2521  | 7.0604  | 5.6908 | 1.0297 | 0.0422  | 0.6915 | 0.1602 |
| Tmb4x  | _TET[Phospho (STY)]QENKNPLPSK_2                        | #N/A                 | 7.9351  | 7.7411  | 7.6874  | 8.2484  | 8.6030  | 8.3493  | 7.8622  | 8.2724  | 8.0743  | 1.0163 | 0.0234 | 0.5603  | 0.2516 |        |
| Prdx3  | _GLFIDPNQGVK_2                                         | #N/A                 | 8.4808  | 8.6774  | 8.5317  | 8.7330  | 8.6399  | 8.6445  | 8.4330  | 8.5017  | 8.5073  | 8.6407 | 1.0114 | 0.0164  | 0.1181 | 0.8598 |
| Prdx3  | _GLSLNDPLVGR_2                                         | #N/A                 | 8.0017  | 8.3642  | 8.1172  | 8.2672  | 8.7105  | 8.3185  | 8.2225  | 7.9695  | 8.2237  | 7.9926 | 1.0244 | 0.0348  | 0.1847 | 0.7396 |
| Prdx3  | _DYGVLSEAGIALR_2                                       | #N/A                 | 6.3443  | 6.4581  | 7.1656  | 6.7323  | 6.9545  | 7.0028  | 6.8520  | 6.0344  | 6.2690  | 7.1547 | 1.0302 | 0.0429  | 0.4707 | 0.3273 |
| Prdx3  | _GTAVVNGEFL_2                                          | #N/A                 | 6.6196  | 6.4092  | 5.7433  | 6.5752  | 6.8069  | 6.6443  | 6.1418  | 6.4507  | 6.3121  | 6.3481 | 1.0243 | 0.0346  | 0.4629 | 0.3345 |
| Prdx3  | _ELSDOFFK_2                                            | #N/A                 | 6.7634  | 6.6969  | 5.9002  | 5.5091  | 6.4612  | 6.8322  | 5.6464  | 6.3153  | 6.7515  | 7.0762 | 0.9865 | -0.0196 | 0.8190 | 0.0867 |
| Vim    | _VELQELNDR_2                                           | #N/A                 | 7.6976  | 7.3649  | 7.1809  | 7.7969  | 7.1224  | 7.1192  | 7.4985  | 6.7911  | 7.5565  | 7.5296 | 1.0050 | 0.0071  | 0.8677 | 0.0616 |
| Vim    | _FADLSEANR_2                                           | #N/A                 | 6.7902  | 7.3240  | 7.1104  | 7.1623  | 7.1731  | 6.5946  | 6.8328  | 6.5695  | 6.8734  | 6.9061 | 1.0339 | 0.0481  | 0.1703 | 0.7689 |
| Vim    | _NLQEAEEWYK_2                                          | #N/A                 | 5.2110  | 5.7395  | 6.3786  | 5.9366  | 6.2976  | 5.5029  | 6.1115  | 5.5305  | 6.2901  | 6.0069 | 0.9765 | -0.0342 | 0.6101 | 0.2146 |
| Vim    | _QDVDNAS[Phospho (STY)]LAR_2                           | P20152_S214_M1_Vim   | 4.7884  | 5.3754  | 4.8985  | 4.2691  | 4.6057  | 5.1363  | 5.1666  | 4.8001  | 4.9259  | 4.9769 | 0.9755 | -0.0358 | 0.5743 | 0.2409 |
| Vim    | _TNKVELQELNDR_3                                        | #N/A                 | 6.0900  | 6.3111  | 6.5886  | 7.1216  | 5.5757  | 6.0498  | 5.3996  | 6.3786  | 5.7406  | 6.3042 | 1.0560 | 0.0786  | 0.3365 | 0.4730 |
| Vim    | _ISLPPTFSNLNR_2                                        | #N/A                 | 4.2796  | 5.7899  | 6.2116  | 5.2418  | 5.6197  | 5.1219  | 5.5826  | 5.8042  | 5.9467  | 5.8914 | 0.9261 | -0.1017 | 0.2496 | 0.6027 |
| Vim    | _ILAELEQLK_2                                           | #N/A                 | 5.3913  | 5.2207  | 4.5878  | 5.1212  | 5.4762  | 4.7093  | 5.2924  | 5.4175  | 5.0713  | 5.5079 | 0.9552 | -0.0661 | 0.2656 | 0.5758 |
| Vim    | _SLYSSS[Phospho (STY)]PGGAVTR_2                        | P20152_S56_M1_Vim    | 3.9080  | 7.0199  | 7.4575  | 3.4626  | 7.1291  | 5.3608  | 3.5345  | 3.5485  | 3.8475  | 4.8961 | 1.4464 | 0.5325  | 0.0927 | 1.0329 |
| Vim    | _QZQYSEAAK_2                                           | #N/A                 | 4.3312  | 3.5638  | 4.0420  | 4.5842  | 5.4502  | 4.7335  | 3.0657  | 4.0032  | 4.7496  | 3.8368 | 1.1372 | 0.1855  | 0.2438 | 0.6130 |
| Vim    | _EM[Oxidation (M)]EENFALEAANYDGTIGR_2                  | #N/A                 | 3.9845  | 4.5266  | 5.2102  | 5.1453  | 4.0872  | 4.5967  | 4.6743  | 3.9118  | 4.0869  | 4.2781 | 1.0835 | 0.1157  | 0.2601 | 0.5849 |
| Vim    | _FANYIDK_2                                             | #N/A                 | 3.1072  | 3.9124  | 3.7940  | 3.9823  | 4.5912  | 3.9958  | 4.0114  | 3.8218  | 4.0091  | 4.2637 | 0.9679 | -0.0471 | 0.6235 | 0.2052 |
| Vim    | _SVYTTSR_2                                             | #N/A                 | 4.2740  | 3.6814  | 4.0077  | 3.5515  | 4.5742  | 3.3389  | 3.6997  | 3.7751  | 3.7488  | 3.2288 | 1.0807 | 0.1120  | 0.2933 | 0.5327 |
| Vim    | _DNLAEDIMR_2                                           | #N/A                 | 4.6291  | 4.2728  | 4.1545  | 3.8478  | 4.0942  | 3.6353  | 3.9961  | 3.1533  | 3.4524  | 3.5251 | 1.1625 | 0.2172  | 0.0331 | 1.4798 |
| Vim    | _ETNLESLPLVDTHSK_3                                     | #N/A                 | 3.8706  | 3.3556  | 4.5574  | 3.5592  | 3.2439  | 3.3807  | 3.2739  | 3.0585  | 4.2079  | 3.5262 | 1.0411 | 0.0581  | 0.6621 | 0.0791 |
| Vim    | _SVSSSYR_2                                             | #N/A                 | 3.7495  | 3.0538  | 4.4363  | 3.4381  | 2.8752  | 3.3535  | 3.1528  | 3.1795  | 4.3290  | 3.4051 | 0.9908 | -0.0133 | 0.9307 | 0.0312 |
| Map2   | _ARVOHGAERTQS[Phospho (STY)]PSR_3                      | #N/A                 | 11.7462 | 12.3955 | 13.1650 | 13.0039 | 11.9688 | 12.3245 | 12.3331 | 12.4822 | 12.3855 | 1.0043 | 0.0062 | 0.8567  | 0.0672 |        |



|      |                                                                        |                      |         |         |         |         |         |         |         |         |         |         |         |         |        |        |
|------|------------------------------------------------------------------------|----------------------|---------|---------|---------|---------|---------|---------|---------|---------|---------|---------|---------|---------|--------|--------|
| Map2 | _VKIESVK_2                                                             | #N/A                 | 7.4035  | 7.5468  | 7.5816  | 7.6452  | 7.5615  | 7.4721  | 7.0903  | 7.4009  | 7.2173  | 7.5683  | 1.0295  | 0.0420  | 0.0497 | 1.3033 |
| Map2 | _ETSPASVQEPILTETEPQTK_2                                                | #N/A                 | 7.2891  | 7.2112  | 7.2992  | 7.9189  | 7.6296  | 7.6418  | 7.6440  | 7.1851  | 7.0062  | 7.3569  | 1.0274  | 0.0390  | 0.2908 | 0.5364 |
| Map2 | _STLOLSOLUSESR_2                                                       | #N/A                 | 7.0478  | 6.8875  | 7.4507  | 7.1987  | 6.9853  | 7.4479  | 7.2038  | 6.4629  | 6.9785  | 7.1996  | 1.0299  | 0.0426  | 0.2901 | 0.5375 |
| Map2 | _GGQVQVTK_2                                                            | #N/A                 | 6.2521  | 6.2785  | 6.9130  | 7.1675  | 6.8209  | 6.7959  | 6.1526  | 6.2953  | 6.7528  | 6.9018  | 1.0274  | 0.0390  | 0.4662 | 0.3314 |
| Map2 | _SKIGS(Phospho (STY))TDNIK_2                                           | P20357_S1680_M1_Map2 | 7.0187  | 6.8320  | 6.5557  | 7.4626  | 3.0074  | 6.9801  | 5.5071  | 7.0968  | 7.3147  | 7.1805  | 0.9311  | -0.1030 | 0.6192 | 0.2081 |
| Map2 | _VTDGIGS(Phospho (STY))PEK_2                                           | #N/A                 | 6.7973  | 6.5620  | 6.4538  | 7.1969  | 3.6467  | 6.3774  | 7.1836  | 6.8072  | 6.9657  | 6.5290  | 0.8993  | -0.1548 | 0.3193 | 0.4958 |
| Map2 | _GSAQSLDTS(Phospho (STY))PK_2                                          | P20357_S608_M1_Map2  | 12.5142 | 12.4371 | 13.1592 | 12.8675 | 12.2506 | 12.6195 | 13.0519 | 12.2329 | 12.6066 | 12.6361 | 1.0008  | 0.0011  | 0.9655 | 0.0153 |
| Map2 | _TPTGTGT(Phospho (STY))PSYR_2                                          | P20357_T1623_M1_Map2 | 11.2716 | 11.5677 | 11.9970 | 11.7887 | 7.8696  | 11.6818 | 11.0327 | 11.1190 | 10.9251 | 11.4076 | 0.9918  | -0.0119 | 0.9120 | 0.0450 |
| Map2 | _VAIRTK(Phospho (STY))PKKS(Phospho (STY))PATPK_2                       | #N/A                 | 9.1293  | 8.4154  | 10.3843 | 10.7257 | 6.1405  | 9.7297  | 8.8315  | 9.7330  | 8.6760  | 9.0402  | 1.0019  | 0.0027  | 0.9847 | 0.0067 |
| Map2 | _LAS(Phospho (STY))VSADAEVAR_2                                         | P20357_S823_M1_Map2  | 5.7012  | 5.3553  | 10.0061 | 10.7141 | 9.6634  | 9.9777  | 9.7724  | 10.3269 | 10.2353 | 10.2892 | 0.8438  | -0.2450 | 0.2299 | 0.6085 |
| Map2 | _T(Phospho (STY))PKKSPATPK_2                                           | P20357_T1650_M1_Map2 | 9.7559  | 8.9895  | 9.0636  | 10.3913 | 9.4619  | 9.5543  | 9.6259  | 9.2695  | 9.4229  | 9.3324  | 1.0131  | 0.0188  | 0.6576 | 0.1820 |
| Map2 | _KETKS(Phospho (STY))PETSUIQDEVALK_2                                   | #N/A                 | 6.3861  | 6.2339  | 6.8115  | 7.2931  | 5.9853  | 6.6667  | 7.1975  | 6.5589  | 6.7110  | 1.0845  | 0.1171  | 0.4625  | 0.3349 | 0.0171 |
| Map2 | _TTAASGDLAQAPGAFK_2                                                    | #N/A                 | 6.8363  | 6.8792  | 7.3237  | 7.6397  | 7.3804  | 7.0145  | 7.0263  | 6.8741  | 7.1535  | 6.8151  | 1.0304  | 0.0432  | 0.2572 | 0.5897 |
| Map2 | _STVS(Phospho (STY))IEEAVAK_2                                          | P20357_S447_M1_Map2  | 5.2304  | 6.9442  | 5.7542  | 7.9592  | 5.7364  | 5.7597  | 6.8708  | 5.8278  | 5.3335  | 7.4654  | 0.9775  | -0.0329 | 0.8295 | 0.0812 |
| Map2 | _SILTEQLETPKEER_2                                                      | #N/A                 | 5.7877  | 6.3806  | 6.0932  | 6.6275  | 6.0521  | 6.5850  | 6.0340  | 6.5606  | 6.1648  | 6.2496  | 1.0003  | 0.0005  | 0.9916 | 0.0037 |
| Map2 | _SILTEQLETPK_2                                                         | #N/A                 | 3.4816  | 6.1163  | 5.5486  | 6.3447  | 5.8958  | 5.7533  | 6.0656  | 5.9552  | 6.3583  | 6.3909  | 0.8919  | -0.1650 | 0.2476 | 0.6062 |
| Map2 | _SGILVPSSEK_2                                                          | #N/A                 | 7.9652  | 7.5999  | 7.8793  | 7.8823  | 7.2900  | 7.7592  | 7.0714  | 7.7094  | 7.1348  | 7.6601  | 1.0454  | 0.0640  | 0.1066 | 0.9721 |
| Map2 | _VEILGGLGYQOASTK_2                                                     | #N/A                 | 5.2168  | 5.2922  | 3.1734  | 6.1869  | 5.5083  | 5.6326  | 5.8839  | 5.2137  | 5.3029  | 5.8793  | 0.9279  | -0.1080 | 0.4843 | 0.3149 |
| Map2 | _IDLSHVTSK_2                                                           | #N/A                 | 5.4073  | 5.3939  | 5.0862  | 5.7647  | 5.6489  | 5.4488  | 5.1190  | 5.1872  | 5.1085  | 4.2421  | 1.1005  | 0.1382  | 0.0277 | 1.5577 |
| Map2 | _KEVQAHS(Phospho (STY))PSR_2                                           | #N/A                 | 10.7596 | 11.3867 | 11.7420 | 11.7355 | 11.2812 | 11.6416 | 11.1848 | 11.1899 | 11.4145 | 11.2650 | 1.0143  | 0.0205  | 0.4372 | 0.3593 |
| Map2 | _STELGSDYVLSOSR_2                                                      | #N/A                 | 7.2378  | 6.7451  | 6.9479  | 7.2533  | 6.7538  | 7.0277  | 6.7746  | 6.5211  | 6.6550  | 8.8622  | 0.9668  | -0.0487 | 0.6176 | 0.2093 |
| Map2 | _DIATDLSUEVK_2                                                         | #N/A                 | 6.5017  | 6.6916  | 6.7125  | 6.3431  | 6.6719  | 6.6671  | 6.4697  | 6.3299  | 6.3834  | 6.8038  | 1.0179  | 0.0257  | 0.3472 | 0.4594 |
| Map2 | _VTS(Phospho (STY))EPEAVSERR_2                                         | #N/A                 | 3.9526  | 4.1700  | 4.5765  | 6.3203  | 4.1083  | 4.5844  | 5.9415  | 5.6246  | 5.6885  | 5.6406  | 0.8070  | -0.3094 | 0.0393 | 1.4058 |
| Map2 | _SEVQAHS(Phospho (STY))PSR_2                                           | #N/A                 | 11.7737 | 12.0535 | 12.3496 | 12.4889 | 11.9457 | 12.2730 | 11.9704 | 11.9070 | 12.0869 | 12.0796 | 1.0114  | 0.0163  | 0.3639 | 0.4391 |
| Map2 | _ELITKDDTS(Phospho (STY))PEKTEK_3                                      | #N/A                 | 9.1649  | 10.2276 | 11.4056 | 10.4370 | 10.0660 | 9.9639  | 9.6160  | 10.1442 | 10.9415 | 10.0570 | 1.0021  | 0.0030  | 0.9621 | 0.0168 |
| Map2 | _DGS(Phospho (STY))PDAPATPEKEEVAIFSEK_3                                | #N/A                 | 11.2432 | 10.9781 | 11.1578 | 11.7806 | 11.2473 | 11.4707 | 11.4327 | 11.2838 | 11.4863 | 11.6871 | 0.9861  | -0.2002 | 0.3388 | 0.4701 |
| Map2 | _VTS(Phospho (STY))EPEAVSER_2                                          | #N/A                 | 9.3955  | 9.3044  | 9.3947  | 9.9635  | 9.2850  | 9.3502  | 9.6338  | 9.3499  | 9.4837  | 9.6584  | 0.9913  | -0.0126 | 0.5782 | 0.2379 |
| Map2 | _DWFHEM(Oxidation (M))PTEK_2                                           | #N/A                 | 5.7253  | 5.5891  | 5.5428  | 6.4896  | 5.7049  | 5.8355  | 6.2614  | 5.2451  | 5.5686  | 6.1235  | 1.0026  | 0.0037  | 0.9555 | 0.0198 |
| Map2 | _VDHGAIEITS(Phospho (STY))PSR_2                                        | #N/A                 | 14.1043 | 14.0381 | 14.8426 | 14.5128 | 13.7691 | 14.1310 | 14.2598 | 14.2059 | 14.2655 | 1.0042  | 0.0061  | 0.7749  | 0.1107 | 0.0107 |
| Map2 | _VTDGIGS(Phospho (STY))PEK_2                                           | #N/A                 | 9.7008  | 10.3504 | 10.7049 | 10.7503 | 10.1158 | 10.3813 | 10.3800 | 10.4115 | 10.4119 | 0.9936  | -0.0093 | 0.7449  | 0.1279 | 0.0179 |
| Map2 | _VDHGAIEITS(Phospho (STY))VSI(Phospho (STY))PR_3                       | P20357_S1788_M2_Map2 | 3.5899  | 5.9641  | 3.7449  | 6.2692  | 4.7598  | 6.3651  | 5.2422  | 3.7972  | 5.9331  | 6.0276  | 0.9744  | 0.0641  | 0.8641 | 0.0626 |
| Map2 | _S(Phospho (STY))GILVPSSEK_2                                           | #N/A                 | 3.5580  | 6.2676  | 4.2448  | 5.8436  | 4.1845  | 6.1463  | 4.4621  | 5.6284  | 5.6663  | 3.2136  | 1.0628  | 0.0879  | 0.7041 | 0.1524 |
| Map2 | _ETS(Phospho (STY))PETSUIQDEVALK_2                                     | #N/A                 | 9.3712  | 3.8708  | 6.9964  | 12.8506 | 8.6538  | 4.1663  | 9.4116  | 12.0905 | 9.4978  | 9.1177  | 0.9498  | -0.0743 | 0.8556 | 0.0675 |
| Map2 | _EKDVLDPK_2                                                            | #N/A                 | 7.7536  | 7.4085  | 7.4569  | 7.8426  | 7.6873  | 7.7295  | 7.9239  | 7.6088  | 7.6663  | 7.7955  | 0.9868  | -0.0192 | 0.3573 | 0.4469 |
| Map2 | _VSDFGQM(Oxidation (M))ASGM(Oxidation (M))NVDAGK_2                     | #N/A                 | 5.7595  | 6.4805  | 6.3620  | 5.6854  | 6.4821  | 6.7095  | 6.1039  | 6.2380  | 6.3962  | 5.9776  | 1.0109  | 0.0157  | 0.7732 | 0.1117 |
| Map2 | _M(Oxidation (M))PSKPGDEFEHAALVPDTSK_4                                 | #N/A                 | 6.1105  | 5.5960  | 6.8322  | 6.2215  | 6.4410  | 6.0865  | 4.8165  | 6.1721  | 6.3464  | 6.4214  | 1.0464  | 0.0654  | 0.4718 | 0.3263 |
| Map2 | _YFETSAIKEDM(Oxidation (M))ITR_2                                       | #N/A                 | 5.0759  | 4.8730  | 4.4531  | 6.0536  | 5.2786  | 5.2534  | 4.8713  | 5.1324  | 5.1557  | 5.1750  | 1.0159  | 0.0228  | 0.7772 | 0.1094 |
| Map2 | _ESS(Phospho (STY))KDEPELQK_2                                          | #N/A                 | 7.1751  | 5.0143  | 7.1288  | 7.8572  | 6.5788  | 7.2363  | 7.2764  | 7.3940  | 7.2757  | 7.3469  | 0.9329  | -0.1002 | 0.3543 | 0.4506 |
| Map2 | _TGVQTS(Phospho (STY))ITEOSFK_2                                        | #N/A                 | 4.5862  | 3.6140  | 4.0821  | 5.6539  | 3.4553  | 3.8376  | 3.6939  | 4.8409  | 4.4562  | 3.7635  | 1.0079  | 0.0113  | 0.9463 | 0.0240 |
| Map2 | _VGS(Phospho (STY))LDNAHHVPGGGRWK_3                                    | #N/A                 | 8.4347  | 8.1486  | 8.2938  | 8.7546  | 6.9796  | 8.2310  | 7.5746  | 8.3562  | 8.4298  | 8.6425  | 0.9866  | -0.0194 | 0.7673 | 0.1150 |
| Map2 | _SEVQAHS(Phospho (STY))PSRK_2                                          | #N/A                 | 8.5384  | 9.0267  | 9.2661  | 9.3445  | 8.4548  | 9.0615  | 8.7150  | 3.8625  | 8.7600  | 8.9810  | 1.1806  | 0.2396  | 0.2077 | 0.6826 |
| Map2 | _NQHDEKELQAK_2                                                         | #N/A                 | 4.8034  | 4.4707  | 4.0088  | 5.0462  | 5.4409  | 5.3894  | 5.3845  | 4.6858  | 4.3638  | 4.0008  | 1.0005  | 0.0008  | 0.9939 | 0.0027 |
| Map2 | _GVSGDRENS(Phospho (STY))FSLNSSISSAR_3                                 | P20357_S1567_M1_Map2 | 5.0783  | 4.2920  | 5.6338  | 4.0929  | 3.7599  | 4.0447  | 4.0400  | 5.4659  | 4.7396  | 5.5211  | 0.9073  | -0.1403 | 0.3476 | 0.5189 |
| Map2 | _SGTSPPTPGTATPGTAT(Phospho (STY))PPSYSSR_3                             | P20357_T1609_M1_Map2 | 3.7749  | 8.9776  | 9.5061  | 10.6216 | 3.3629  | 7.5069  | 8.6778  | 8.7956  | 3.7789  | 5.7222  | 1.1665  | 0.2222  | 0.6041 | 0.2489 |
| Map2 | _GRIST(Phospho (STY))PEK_2                                             | #N/A                 | 3.0748  | 4.0447  | 3.7616  | 9.6199  | 9.2381  | 9.5867  | 9.2341  | 9.4831  | 9.2297  | 4.2313  | 0.8148  | -0.2956 | 0.4620 | 0.3354 |
| Map2 | _AGKSI(Phospho (STY))GSTPTPTGTATPGTPPSY(Phospho (STY))SSR_3            | P20357_S1592_M2_Map2 | 3.6110  | 4.3673  | 3.3447  | 4.3893  | 4.2556  | 3.8698  | 4.5376  | 4.1127  | 4.4117  | 0.0666  | 0.9278  | -0.1081 | 0.2310 | 0.0676 |
| Map2 | _VTGGGTQIVTSESPPFAK_2                                                  | #N/A                 | 4.3117  | 4.4623  | 4.4602  | 5.0976  | 3.5548  | 4.0921  | 4.0045  | 3.9070  | 4.0979  | 4.6723  | 1.0382  | 0.0541  | 0.6000 | 0.2218 |
| Map2 | _MTTDPK_2                                                              | #N/A                 | 3.0971  | 3.6905  | 3.7839  | 5.4014  | 3.9733  | 4.0058  | 3.0131  | 4.0939  | 3.4805  | 3.9546  | 1.0981  | 0.1350  | 0.4369 | 0.3596 |
| Map2 | _EAS(Phospho (STY))PPTSADIK_2                                          | #N/A                 | 14.0685 | 13.9246 | 14.0690 | 14.7881 | 13.6937 | 13.9784 | 14.1537 | 14.0447 | 14.0202 | 14.1900 | 0.9889  | -0.0015 | 0.9391 | 0.0273 |
| Map2 | _KANDKLDTVLEK_3                                                        | #N/A                 | 2.9008  | 4.1608  | 3.5876  | 4.6481  | 5.7461  | 4.4280  | 3.0621  | 4.7049  | 4.3864  | 4.4950  | 1.0200  | 0.0285  | 0.8887 | 0.0512 |
| Map2 | _VKDEFTAEEKAS(Phospho (STY))PPTSADIK_3                                 | #N/A                 | 11.5521 | 12.0378 | 12.8769 | 12.8805 | 11.8921 | 12.1941 | 12.1737 | 12.1740 | 11.9211 | 12.0285 | 1.0136  | 0.0195  | 0.5720 | 0.2426 |
| Map2 | _TGVQTS(Phospho (STY))PTEK_2                                           | #N/A                 | 5.1925  | 5.2281  | 4.5735  | 3.7133  | 3.6806  | 4.8888  | 4.9505  | 5.1161  | 4.2374  | 5.0647  | 0.9389  | -0.0910 | 0.4715 | 0.3266 |
| Map2 | _DKVTDGIGS(Phospho (STY))PEK_2                                         | #N/A                 | 7.3534  | 7.4442  | 7.5876  | 8.0968  | 7.3149  | 7.3878  | 7.7109  | 7.3296  | 7.3513  | 7.3058  | 1.0143  | 0.0205  | 0.5436 | 0.2647 |
| Map2 | _VQVVTAEAVALKGEQEK_2                                                   | #N/A                 | 4.7143  | 4.1806  | 5.5057  | 5.4028  | 3.7606  | 4.0686  | 4.2439  | 4.3227  | 4.5588  | 0.9824  | -0.0256 | 0.8589  | 0.0661 | 0.0624 |
| Map2 | _TPGT(Phospho (STY))PKS(Phospho (STY))GILVPSSEK_2                      | #N/A                 | 3.8235  | 7.5490  | 3.8805  | 7.8900  | 3.7535  | 8.0726  | 5.5391  | 6.9564  | 7.1951  | 7.2200  | 0.8721  | -0.1974 | 0.4897 | 0.3101 |
| Map2 | _APHWTSASLTAEAAPHHS(Phospho (STY))PEM(Oxidation (M))K_3                | #N/A                 | 7.0857  | 8.7223  | 7.7938  | 10.7063 | 7.1838  | 8.0813  | 7.7895  | 9.1126  | 8.6091  | 8.1742  | 0.9805  | -0.0284 | 0.8256 | 0.0832 |
| Map2 | _EEFVETC(Carbamidomethyl (C))GELUK_2                                   | #N/A                 | 3.9907  | 3.3517  | 3.7244  | 7.7461  | 7.5022  | 7.3318  | 3.4165  | 3.7330  | 6.9384  | 4.4463  | 1.2103  | 0.2753  | 0.4583 | 0.3388 |
| Map2 | _LEGAGSATAEVEIM(Oxidation (M))PYEDK_2                                  | #N/A                 | 5.0453  | 4.8541  | 3.4858  | 5.6453  | 4.8987  | 3.0089  | 5.0205  | 4.3893  | 4.0390  | 4.8949  | 0.9790  | -0.0306 | 0.8650 | 0.0630 |
| Map2 | _DQPAALPLAAETANLPS(Phospho (STY))PPPS(Phospho (STY))PASEQTATVEIDLTSK_4 | #N/A                 | 3.3588  | 4.0203  | 3.7878  | 3.9803  | 3.9914  | 3.8635  | 4.1708  | 3.7231  | 3.9066  | 3.9473  | 0.9738  | -0.0383 | 0.5004 | 0.3007 |
| Map2 | _TPTGTGTPSYPRIT(Phospho (STY))PGT(Phospho (STY))PK_2                   | #N/A                 | 3.3634  | 5.5839  | 3.9096  | 6.1245  | 4.3929  | 6.4810  | 5.3684  | 5.6982  | 3.6664  | 4.7913  | 1.0287  | 0.0409  | 0.8477 | 0.0718 |
| Map2 | _ARVDHGAIEITS(Phospho (STY))PSRS(Phospho (STY))VAS(Phospho (STY))PR_3  | #N/A                 | 3.7595  | 3.6109  | 4.0388  | 3.7510  | 3.4488  | 3.6454  | 3.6529  | 4.0153  | 3.8482  | 6.3213  | 0.8317  | -0.2658 | 0.1751 | 0.5768 |
| Map2 | _IGSTDNIK_2                                                            | #N/A                 | 4.3585  | 3.4041  | 3.1657  | 4.4354  | 4.8280  | 3.5652  | 3.6902  | 3.7415  | 4.2118  | 3.9333  | 1.0168  | 0.0240  | 0.8582 | 0.0664 |
| Map2 | _YFETSAIK_2                                                            | #N/A                 | 4.1281  | 3.1856  | 3.7218  | 4.351   |         |         |         |         |         |         |         |         |        |        |



|        |                                                                                       |                       |        |        |        |         |        |        |        |        |        |        |         |         |        |        |
|--------|---------------------------------------------------------------------------------------|-----------------------|--------|--------|--------|---------|--------|--------|--------|--------|--------|--------|---------|---------|--------|--------|
| Prka   | _DVVIQDDOVC[Carbamidomethyl (C)]TM[Oxidation (M)]VEK_2                                | #N/A                  | 6.4595 | 6.6264 | 7.0454 | 8.6444  | 6.1949 | 6.7217 | 6.8449 | 7.1700 | 6.3553 | 6.7062 | 1.0265  | 0.0378  | 0.7106 | 0.1484 |
| Prka   | _T[Phospho (STY)]C[Carbamidomethyl (C)]GTPDYAPEIAVQPYGK_3                             | P20444_T497_M1_Prka   | 6.0966 | 4.1541 | 4.7974 | 3.9034  | 4.1591 | 6.0697 | 4.4898 | 5.7737 | 4.3349 | 4.5266 | 1.0172  | 0.0246  | 0.8890 | 0.0511 |
| Prka   | _LKPS[Phospho (STY)]DKDR_2                                                            | P20444_S234_M1_Prka   | 3.5771 | 3.7653 | 5.8818 | 4.3553  | 4.2216 | 4.5719 | 5.4538 | 4.7898 | 4.0326 | 0.8774 | -0.1888 | 0.2677  | 0.5724 |        |
| Prka   | _LSVEWDWDR_2                                                                          | #N/A                  | 4.0765 | 3.9240 | 5.3415 | 4.2186  | 3.8123 | 4.1132 | 4.2063 | 3.0552 | 3.2754 | 3.6233 | 1.2093  | 0.2742  | 0.0635 | 1.1972 |
| Prka   | _NIUPM[Oxidation (M)]DRNGLSOPYVK_2                                                    | #N/A                  | 6.9769 | 7.1652 | 7.1350 | 6.1586  | 6.6782 | 7.0422 | 6.8040 | 7.1843 | 7.2072 | 6.9721 | 0.9741  | -0.0379 | 0.4108 | 0.3864 |
| Prka   | _DVVIQDDOVC[Carbamidomethyl (C)]TM[Oxidation (M)]VEKR_3                               | #N/A                  | 4.6235 | 5.5523 | 6.3334 | 6.7962  | 4.5988 | 5.4918 | 5.5534 | 5.8436 | 5.0615 | 5.6591 | 1.0066  | 0.0095  | 0.9400 | 0.0269 |
| Prka   | _KDVVQDDOVC[Carbamidomethyl (C)]TMAVEK_3                                              | #N/A                  | 4.3501 | 3.6055 | 4.0838 | 3.3092  | 3.4938 | 3.1308 | 4.5248 | 3.3084 | 2.9570 | 3.3048 | 1.0393  | 0.0556  | 0.7116 | 0.1478 |
| Mag    | _LGDGLR_2                                                                             | #N/A                  | 8.1318 | 8.2712 | 8.1692 | 7.8268  | 7.4643 | 7.6331 | 8.2367 | 8.0111 | 7.8581 | 8.1894 | 0.9805  | -0.0285 | 0.4053 | 0.3922 |
| Mag    | _NLVGTQSLFPQGAHR_2                                                                    | #N/A                  | 5.2050 | 5.1740 | 4.7761 | 5.2713  | 5.6364 | 4.8362 | 4.4478 | 5.2612 | 5.6963 | 5.2808 | 0.9958  | -0.0061 | 0.9359 | 0.0287 |
| Mag    | _TQVHESFGQR_2                                                                         | #N/A                  | 5.3466 | 5.2666 | 5.2846 | 4.8268  | 5.2670 | 5.4350 | 5.5094 | 5.4266 | 5.2940 | 5.5015 | 0.9641  | -0.0528 | 0.1279 | 0.8933 |
| Mag    | _SGLLTSILTR_2                                                                         | #N/A                  | 4.0983 | 3.5235 | 4.1486 | 3.9230  | 3.4118 | 3.6930 | 5.1767 | 4.4705 | 5.0751 | 3.9714 | 0.8130  | -0.2986 | 0.0122 | 1.9129 |
| Mag    | _GESPELDSYSHDLGK_2                                                                    | #N/A                  | 4.0470 | 4.8764 | 4.2694 | 6.2730  | 4.6312 | 4.0901 | 5.6429 | 5.7015 | 5.0026 | 3.8948 | 0.9283  | -0.1073 | 0.5211 | 0.2831 |
| Mag    | _NVTSSSF[Phospho (STY)]GGDNPHVLSPEFR_3                                                | P20917_S549_M1_Mag    | 6.5982 | 7.2618 | 7.6093 | 7.9254  | 5.4107 | 6.4588 | 6.9210 | 7.2772 | 6.9095 | 6.2268 | 1.0064  | 0.0092  | 0.9322 | 0.0305 |
| Mag    | _LRDEGTWQVSLHFVPTR_3                                                                  | #N/A                  | 2.8970 | 3.6533 | 4.1315 | 3.2615  | 3.5416 | 3.0830 | 4.4770 | 3.3259 | 2.5639 | 3.3526 | 0.9995  | -0.0008 | 0.9963 | 0.0016 |
| Tpm3   | _LIQVEELDR_2                                                                          | #N/A                  | 9.6437 | 9.3730 | 9.3629 | 9.8409  | 9.3893 | 9.4966 | 9.4756 | 9.1986 | 9.2267 | 9.6892 | 1.0128  | 0.0183  | 0.3941 | 0.4043 |
| Tpm3   | _AADAEAEVASLNR_2                                                                      | #N/A                  | 8.4449 | 8.2656 | 8.4063 | 8.5889  | 8.6117 | 8.4180 | 8.2146 | 7.9768 | 8.2846 | 8.4732 | 1.0265  | 0.0378  | 0.0692 | 1.1600 |
| Tpm3   | _KYEEVAR_2                                                                            | #N/A                  | 7.6837 | 7.3077 | 7.8711 | 7.5065  | 8.5786 | 7.4798 | 7.1799 | 7.3117 | 7.4008 | 7.6419 | 1.0477  | 0.0672  | 0.1876 | 0.7267 |
| Tpm3   | _HIAEADOR_2                                                                           | #N/A                  | 7.5106 | 6.9473 | 7.0773 | 7.3845  | 8.3701 | 7.3011 | 6.7318 | 7.0930 | 7.4727 | 7.3064 | 1.0393  | 0.0556  | 0.3553 | 0.4494 |
| Tpm3   | _YSQKEDYEEEK_3                                                                        | #N/A                  | 6.3426 | 6.7240 | 6.7854 | 6.6890  | 7.1444 | 6.5096 | 6.1360 | 6.4380 | 6.5994 | 6.9671 | 1.0251  | 0.0358  | 0.4243 | 0.3724 |
| Tpm3   | _KLIVIEDOLER_2                                                                        | #N/A                  | 5.8720 | 5.7984 | 5.9282 | 6.1827  | 6.4488 | 5.9904 | 6.3502 | 5.5865 | 6.1713 | 6.2379 | 0.9918  | -0.0118 | 0.7920 | 0.1013 |
| Tpm3   | _LIQVEELDRAQR_3                                                                       | #N/A                  | 7.0630 | 6.6386 | 7.6727 | 6.7352  | 6.4503 | 7.0985 | 6.4519 | 6.4802 | 6.4524 | 7.2494 | 1.0427  | 0.0604  | 0.3253 | 0.4877 |
| Tpm3   | _LEAEKAADESER_2                                                                       | #N/A                  | 4.7970 | 5.7994 | 5.4666 | 5.6940  | 5.3655 | 5.4860 | 5.1899 | 5.4743 | 4.7506 |        | 1.0302  | 0.0429  | 0.5363 | 0.7788 |
| Tpm3   | _KLIVIEDLTER_3                                                                        | #N/A                  | 6.2317 | 6.7090 | 7.7523 | 7.0850  | 6.7094 | 6.3034 | 6.3099 | 6.6090 | 6.2020 | 7.2656 | 1.0306  | 0.0435  | 0.5725 | 0.2422 |
| Tpm3   | _C[Carbamidomethyl (C)]SELEEELKXVNNLK_2                                               | #N/A                  | 2.7993 | 4.2094 | 3.8416 | 4.2240  | 3.6249 | 4.3098 | 3.8512 | 3.1223 | 4.0458 | 3.4166 | 1.0709  | 0.0988  | 0.4290 | 0.3675 |
| Tpm3   | _ALKDDEEM[Oxidation (M)]ELQEQLK_3                                                     | #N/A                  | 5.0441 | 5.2866 | 5.9199 | 3.7434  | 4.6259 | 5.6331 | 4.7055 | 4.6859 | 4.7440 | 5.2623 | 1.0397  | 0.0562  | 0.6528 | 0.1852 |
| Tpm3   | _AADAEAVASNNR_2                                                                       | #N/A                  | 3.7744 | 2.9661 | 3.8050 | 3.4229  | 3.2655 | 3.6592 | 3.4901 | 3.9590 | 4.0567 | 3.8878 | 0.9048  | -0.1443 | 0.0959 | 1.0182 |
| Tpm3   | _TEERAEAEK_2                                                                          | #N/A                  | 2.4390 | 3.5699 | 3.2077 | 4.2523  | 3.3421 | 3.7414 | 4.4006 | 4.2497 | 3.9296 |        | 0.8767  | -0.1898 | 0.2528 | 0.5973 |
| Tpm3   | _LVIGIEELTER_3                                                                        | #N/A                  | 4.7668 | 5.0278 | 3.1168 | 3.6195  | 5.0465 | 3.4410 | 3.3341 | 2.9982 | 4.1476 | 3.5865 | 1.1857  | 0.2458  | 0.2147 | 0.6682 |
| Tpm3   | _LIQVEELDR_2                                                                          | #N/A                  | 3.1899 | 4.0363 | 3.8767 | 10.1036 | 3.8164 | 9.3743 | 4.0940 | 3.7391 | 3.3877 | 4.3463 | 1.4731  | 0.5588  | 0.2840 | 0.5467 |
| Tpm3   | _HIAEADRYEEVAR_4                                                                      | #N/A                  | 4.0782 | 3.3826 | 3.2642 | 3.7668  | 3.2039 | 3.0247 | 3.3855 | 4.3516 | 3.3428 | 3.7338 | 0.9325  | -0.1008 | 0.3860 | 0.4135 |
| Tpm3   | _AISDELDAHNDMTS[Phospho (STY)]_L_2                                                    | P21107_S284_M1_Tpm3   | 4.0093 | 3.3136 | 3.1952 | 3.3062  | 3.1350 | 3.0937 | 3.4545 | 3.6950 | 3.9940 | 2.9835 | 0.9463  | -0.0796 | 0.4552 | 0.3418 |
| Gna11  | _LLLLTGESGK_2                                                                         | #N/A                  | 7.6828 | 7.6307 | 7.4247 | 7.3153  | 7.6737 | 7.0720 | 7.4911 | 7.6363 | 7.4957 | 7.5994 | 0.9681  | -0.0467 | 0.2192 | 0.6592 |
| Gna11  | _IATYGVLTQQDVLNR_2                                                                    | #N/A                  | 7.0101 | 6.3105 | 6.9618 | 6.9111  | 6.3272 | 6.8238 | 6.7693 | 6.7150 | 6.8749 | 6.4595 | 1.0029  | 0.0042  | 0.9157 | 0.0383 |
| Gna11  | _DTQLNLK_2                                                                            | #N/A                  | 5.0901 | 3.3108 | 3.4729 | 4.7379  | 4.6767 | 4.4762 | 4.6139 | 5.2298 | 4.7855 | 4.6981 | 0.8887  | -0.1702 | 0.2023 | 0.6940 |
| Gna11  | _MVGVGGR_2                                                                            | #N/A                  | 6.0132 | 5.1541 | 3.5174 | 5.5570  | 6.7142 | 4.3495 | 4.7339 | 4.3628 | 4.8603 | 4.2393 | 1.1470  | 0.1978  | 0.2971 | 0.5271 |
| Gna11  | _TLWSDPGVQEC[Carbamidomethyl (C)]YDR_2                                                | #N/A                  | 3.9898 | 3.3526 | 3.7235 | 3.2672  | 4.7648 | 3.4911 | 3.4155 | 3.7339 | 4.0330 | 5.0195 | 0.9295  | -0.1055 | 0.4896 | 0.3102 |
| Gnaq   | _VADPSYPTQQDVLNR_2                                                                    | #N/A                  | 8.4366 | 8.4326 | 8.4532 | 8.6964  | 8.3689 | 8.6274 | 8.6840 | 8.5966 | 8.6208 | 8.1154 | 0.9998  | -0.0003 | 0.9893 | 0.0047 |
| Gnaq   | _YYINDLR_2                                                                            | #N/A                  | 7.0538 | 6.6819 | 7.3875 | 6.2897  | 6.5595 | 7.0656 | 6.5448 | 7.2483 | 6.9756 | 6.8201 | 0.9917  | -0.0121 | 0.8130 | 0.0899 |
| Gnaq   | _YSAFENPVQDAK_2                                                                       | #N/A                  | 6.6606 | 6.0981 | 6.6572 | 6.3663  | 6.5688 | 6.4290 | 6.3595 | 6.4642 | 6.3796 | 5.6801 | 1.0390  | 0.0552  | 0.2167 | 0.6642 |
| Gnaq   | _L[Acetyl (Protein N-term)]TLESIMAC[Carbamidomethyl (C)]C[Carbamidomethyl (C)]LSEAK_2 | #N/A                  | 2.4097 | 3.1549 | 4.5373 | 3.4395  | 2.9762 | 3.2524 | 3.6132 | 3.0785 | 4.2279 | 3.5061 | 0.9136  | -0.1303 | 0.4638 | 0.3337 |
| Gnaq   | _FVDVEKVS[Phospho (STY)]AFENPVQDAK_2                                                  | #N/A                  | 3.6576 | 3.5802 | 3.7756 | 3.8618  | 3.4660 | 3.6781 | 3.7455 | 3.7673 | 3.7493 | 3.7326 | 0.9790  | -0.0307 | 0.3030 | 0.5185 |
| Gnaq   | _VPTTGIEYFPDQSVIFR_2                                                                  | #N/A                  | 3.8875 | 3.1918 | 4.5743 | 3.5761  | 3.0132 | 3.2155 | 3.1249 | 2.9220 | 4.1910 | 3.5431 | 1.0381  | 0.0539  | 0.7322 | 0.1583 |
| Abcb1a | _S[Phospho (STY)]TRKS[Phospho (STY)]C[Carbamidomethyl (C)]GPHQDDR_3                   | P21447_S663_M2_Abcb1a | 3.0722 | 3.8774 | 3.7590 | 4.2433  | 3.6987 | 4.0308 | 4.3916 | 4.2587 | 3.0569 | 3.9206 | 0.9676  | -0.0476 | 0.6958 | 0.1575 |
| Abcb1a | _S[Phospho (STY)]IC[Carbamidomethyl (C)]GPHQDDR_2                                     | P21447_S667_M1_Abcb1a | 8.8263 | 8.6043 | 8.4723 | 8.8063  | 7.7369 | 8.3044 | 8.9731 | 9.0723 | 8.7819 | 8.4960 | 0.9578  | -0.0622 | 0.1440 | 0.8417 |
| Abcb1a | _DSSG[Phospho (STY)]LIR_2                                                             | P21447_S657_M1_Abcb1a | 3.1889 | 3.9451 | 4.4234 | 4.4705  | 3.8334 | 4.7920 | 4.1852 | 3.6480 | 3.2966 | 4.4375 | 1.0344  | 0.0487  | 0.6871 | 0.1630 |
| Cat3   | _ADFAVSEYNE_2                                                                         | #N/A                  | 6.2994 | 6.7211 | 6.5026 | 7.1202  | 7.0346 | 6.9480 | 7.2803 | 6.7581 | 6.7597 | 7.0089 | 0.9740  | -0.0380 | 0.3732 | 0.4281 |
| Lmnb2  | _SGT[Phospho (STY)]NWGPGEFR_2                                                         | P21619_S28_M1_Lmnb2   | 3.1475 | 5.6948 | 3.9233 | 6.4464  | 3.5765 | 4.3581 | 3.6153 | 5.6301 | 6.2091 | 3.8731 | 0.9457  | -0.0806 | 0.7533 | 0.1231 |
| Lmnb2  | _RLLETDTSGS[Phospho (STY)]PSR_3                                                       | #N/A                  | 3.9316 | 3.7262 | 5.7661 | 5.2532  | 5.5716 | 5.2012 | 4.8109 | 5.3339 | 5.7011 | 5.4413 | 0.9223  | -0.1167 | 0.3999 | 0.3981 |
| Lmnb2  | _RLLETDTSGS[Phospho (STY)]PSR_2                                                       | #N/A                  | 9.2918 | 9.5860 | 9.9633 | 9.9586  | 9.2929 | 9.5694 | 9.6494 | 9.4812 | 9.5659 | 9.4841 | 1.0068  | 0.0098  | 0.6877 | 0.1626 |
| Lmnb2  | _LETEDTSGS[Phospho (STY)]PSR_2                                                        | #N/A                  | 8.3823 | 8.4509 | 8.7290 | 4.4232  | 8.4191 | 8.7258 | 8.6455 | 8.4806 | 8.5014 | 8.5969 | 0.9181  | -0.1233 | 0.4396 | 0.3569 |
| Lmnb2  | _ATSSSSSS[Phospho (STY)]GVGM[Oxidation (M)]SVGGGR_2                                   | #N/A                  | 3.7188 | 4.1877 | 4.0103 | 4.0179  | 3.8668 | 3.8440 | 3.8441 | 3.9920 | 3.5915 | 4.8534 | 0.9682  | -0.0466 | 0.5928 | 0.2271 |
| Pou3f1 | _WLEETDSSGS[Phospho (STY)]PTNLDK_2                                                    | P21952_S324_M1_Pou3f1 | 4.7454 | 3.7127 | 3.6055 | 5.5278  | 4.2947 | 4.2058 | 4.6568 | 4.6933 | 3.7700 | 4.1971 | 1.0045  | 0.0064  | 0.9628 | 0.0165 |
| Emb    | _SDS[Phospho (STY)]NGENNVPR_2                                                         | P21995_S312_M1_Emb    | 3.9802 | 3.4061 | 7.0317 | 3.3701  | 5.9471 | 3.1765 | 3.2938 | 3.4906 | 6.3546 | 6.4489 | 0.9159  | -0.1267 | 0.7110 | 0.1481 |
| Penk   | _FAESLPSDEEGENS[Phospho (STY)]K_2                                                     | #N/A                  | 8.7179 | 7.9170 | 7.3165 | 8.4482  | 8.4345 | 9.3758 | 8.4302 | 7.9179 | 9.3888 | 8.3964 | 0.9807  | -0.0282 | 0.7130 | 0.1469 |
| Penk   | _ELLGTGDMR_2                                                                          | #N/A                  | 8.3989 | 8.4978 | 8.6441 | 8.5978  | 9.2893 | 8.6172 | 8.4893 | 8.6890 | 8.6602 | 8.7359 | 1.0035  | 0.0051  | 0.8586 | 0.0662 |
| Penk   | _FAESLPSDEEGENY[Phospho (STY)]KEVPEEK_3                                               | #N/A                  | 6.3333 | 3.9048 | 6.3902 | 7.3985  | 6.7600 | 6.9614 | 4.1596 | 6.8295 | 3.3087 | 6.9042 | 1.1869  | 0.2472  | 0.3333 | 0.4772 |
| Penk   | _FAESLPSDEEGENS[Phospho (STY)]KEVPEEK_3                                               | #N/A                  | 3.6639 | 3.6640 | 3.9339 | 4.0049  | 3.5261 | 6.7625 | 3.8659 | 4.0704 | 3.7190 | 3.6582 | 1.1125  | 0.1539  | 0.5177 | 0.2859 |
| Penk   | _LVKPGDINFLAC[Carbamidomethyl (C)]TLE[C[Carbamidomethyl (C)]EGQLPSFK_3                | #N/A                  | 3.6572 | 3.8880 | 3.1881 | 4.3057  | 3.6692 | 4.5663 | 4.3810 | 4.4437 | 3.9791 | 3.5441 | 0.9491  | -0.0753 | 0.5100 | 0.2924 |
| Penk   | _DADEGDTLANS[Phospho (STY)]SDLLK_2                                                    | P22005_S153_M1_Penk   | 3.6708 | 5.2385 | 4.1949 | 5.2041  | 4.4086 | 3.8002 | 5.4256 | 4.8651 | 6.4033 | 3.4160 | 0.8791  | -0.1859 | 0.3420 | 0.4660 |
| Gabrg2 | _VPEGDVTLNLLLEGDYNE_2                                                                 | #N/A                  | 3.4561 | 4.9701 | 5.4731 | 5.4770  | 3.1237 | 3.4572 | 4.1762 | 5.0176 | 4.0720 | 3.1370 | 1.0550  | 0.0772  | 0.7325 | 0.1352 |
| Ap1g1  | _NLIM[Oxidation (M)]SGYS[Phospho (STY)]PEHDSVGSDFLQVR_3                               | P22892_S522_M1_Ap1g1  | 4.2094 | 3.0168 | 3.3954 | 3.8980  | 3.3351 | 3.7195 | 3.6127 | 4.8687 | 3.8690 | 0.8870 | -0.1730 | 0.1787  | 0.7479 |        |
| Cbx3   | _LTWHS[C[Carbamidomethyl (C)]PEDEAQ_2                                                 | #N/A                  | 5.2039 | 5.0628 | 5.7703 | 6.0616  | 5.0642 | 4.9390 | 5.7191 | 4.5876 | 4.7404 | 5.8011 | 1.0265  | 0.0378  | 0.6972 | 0.1567 |
| Cbx3   | _KVEEAEPEEFVEK_2                                                                      | #N/A                  | 5.3920 | 5.7423 | 5.9797 | 6.4979  | 6.1172 | 5.9499 | 5.8751 | 5.2283 | 4.3014 | 5.5782 | 1.1336  | 0.1809  | 0.0660 | 1.1804 |
| Cbx3   | _                                                                                     |                       |        |        |        |         |        |        |        |        |        |        |         |         |        |        |



|         |                                                            |                       |         |         |         |         |         |         |         |         |         |         |        |         |        |        |
|---------|------------------------------------------------------------|-----------------------|---------|---------|---------|---------|---------|---------|---------|---------|---------|---------|--------|---------|--------|--------|
| Pcmt1   | _ALDVGSGSGILTAC[Carbamidomethyl (C)]FAR_2                  | #N/A                  | 5.1191  | 6.0124  | 6.9264  | 6.0507  | 6.0543  | 5.9461  | 5.9000  | 5.3343  | 6.2029  | 6.1925  | 1.0187 | 0.0268  | 0.7485 | 0.1258 |
| Pcmt1   | _ULPVGPGAGNOM[Oxidation (M)]LEQYKLDQGSVK_3                 | #N/A                  | 5.5912  | 6.5905  | 6.7785  | 6.6207  | 6.8056  | 5.7087  | 6.5802  | 6.4791  | 6.6097  | 6.5985  | 0.9669 | -0.0486 | 0.4614 | 0.3359 |
| Pcmt1   | _VEFM[Oxidation (M)]LATDR_2                                | #N/A                  | 3.8414  | 5.1722  | 4.6021  | 5.2323  | 4.7699  | 3.4614  | 3.3546  | 5.2530  | 5.5847  | 5.2038  | 0.9307 | -0.1035 | 0.5530 | 0.2573 |
| Pcmt1   | _SGGASSEIHNLR_3                                            | #N/A                  | 4.9250  | 5.0179  | 5.4277  | 4.9580  | 5.1353  | 5.1111  | 5.3053  | 4.1443  | 5.0070  | 5.6238  | 1.0151 | 0.0216  | 0.7847 | 0.1053 |
| Pcmt1   | _TKIVFEVM[Oxidation (M)]LATDR_3                            | #N/A                  | 4.2602  | 3.6433  | 4.6977  | 4.0491  | 3.6803  | 2.9444  | 4.1728  | 4.1400  | 3.1434  | 3.0893  | 1.0667 | 0.0992  | 0.5645 | 0.2600 |
| Pcmt1   | _EIVDSITVKK_3                                              | #N/A                  | 3.8625  | 2.3380  | 3.5962  | 3.1400  | 3.1996  | 3.9461  | 3.2882  | 3.8612  | 2.6812  | 1.7354  | 1.1575 | 0.2110  | 0.3614 | 0.4420 |
| Gria2   | _ADAIAPLTITLVR_2                                           | #N/A                  | 4.5802  | 5.0752  | 4.0346  | 4.6791  | 4.8549  | 3.7457  | 4.8834  | 5.0436  | 3.9999  | 4.6851  | 0.9660 | -0.0499 | 0.6302 | 0.2005 |
| Gria2   | _NAQINNPSSGNS[Phospho (STY)]QNFIATYK_2                     | P23819_S863_M1_Gria2  | 3.3739  | 4.1791  | 4.3978  | 3.9416  | 4.0004  | 3.7291  | 7.2002  | 3.0596  | 3.3586  | 3.6189  | 0.9136 | -0.1304 | 0.6494 | 0.1875 |
| Gria2   | _YAYLESTMI[Oxidation (M)]NEVIEQR_2                         | #N/A                  | 3.2846  | 4.0578  | 5.6852  | 4.0629  | 3.8792  | 3.8503  | 4.2111  | 3.4999  | 3.5093  | 3.7401  | 1.1060 | 0.1454  | 0.3876 | 0.4116 |
| Gria2   | _YTSALTYDAQVM[Oxidation (M)]TEAFR_2                        | #N/A                  | 3.6818  | 2.9372  | 3.1455  | 3.9776  | 7.9033  | 4.2304  | 4.2709  | 4.0570  | 3.7895  | 4.1374  | 1.0723 | 0.1008  | 0.7573 | 0.1207 |
| Cryab   | _VLGDVIEVHK_2                                              | #N/A                  | 5.6728  | 6.0425  | 5.1450  | 6.2106  | 6.4236  | 5.7723  | 6.7080  | 5.3142  | 5.6182  | 6.3881  | 0.9785 | -0.0314 | 0.7180 | 0.1439 |
| Cryab   | _[Acetyl (Protein N-term)]M[Oxidation (M)]DIAHPWIR_3       | #N/A                  | 5.1129  | 6.3012  | 6.0466  | 5.1942  | 6.3052  | 5.6021  | 5.5173  | 5.2049  | 6.2090  | 6.1551  | 0.9981 | -0.0028 | 0.9742 | 0.0114 |
| Cryab   | _QDEHGFGR_2                                                | #N/A                  | 3.4903  | 5.2370  | 4.1771  | 5.7033  | 6.1285  | 4.4729  | 4.4354  | 5.8450  | 5.1193  | 3.1459  | 1.0500 | 0.0704  | 0.7424 | 0.1293 |
| Cryab   | _FSWNLDVK_2                                                | #N/A                  | 3.1499  | 4.1925  | 4.3845  | 3.9282  | 4.2662  | 3.7157  | 3.3012  | 3.8681  | 2.3386  | 3.5168  | 1.2099 | 0.2748  | 0.0854 | 1.0686 |
| Cryab   | _APSWITGLSEMR_2                                            | #N/A                  | 4.2687  | 3.9784  | 3.9345  | 5.4327  | 4.3128  | 4.2587  | 4.1519  | 3.6813  | 3.3299  | 4.1666  | 1.1388 | 0.1875  | 0.1369 | 0.8638 |
| Cryab   | _HEERQDEHGFGR_4                                            | #N/A                  | 4.3110  | 4.4160  | 3.4970  | 3.9997  | 3.4367  | 4.2928  | 3.7143  | 4.1188  | 3.7674  | 3.9667  | 1.0258 | 0.0367  | 0.6761 | 0.1700 |
| Bcat1   | _LTDIQVGR_2                                                | #N/A                  | 5.5651  | 5.7045  | 3.2067  | 5.1599  | 5.8120  | 5.3655  | 4.8147  | 5.5484  | 5.3227  | 5.0715  | 0.9897 | -0.0150 | 0.9191 | 0.0366 |
| Bcat1   | _HLTM[Oxidation (M)]DOLATALEGNR_3                          | #N/A                  | 4.4904  | 4.8130  | 4.1229  | 5.1470  | 4.2221  | 4.5506  | 4.1511  | 5.3037  | 5.0316  | 4.3610  | 0.9673 | -0.0480 | 0.6088 | 0.2155 |
| Bcat1   | _QSLAQAOQGEFK_2                                            | #N/A                  | 3.1624  | 3.9187  | 4.3969  | 3.9407  | 3.8070  | 4.3185  | 4.0889  | 3.3405  | 3.3566  | 3.6180  | 1.0895 | 0.1236  | 0.2569 | 0.5902 |
| Ppib    | _TVNVALVATGEK_2                                            | #N/A                  | 6.8759  | 7.1472  | 7.1662  | 7.5721  | 7.1132  | 7.1885  | 7.0676  | 7.1621  | 7.0441  | 7.0324  | 1.0142 | 0.0204  | 0.4143 | 0.3827 |
| Ppib    | _VLEGMQVRR_2                                               | #N/A                  | 5.3936  | 3.1560  | 4.5384  | 6.0763  | 4.6159  | 3.2514  | 3.2549  | 1.0774  | 4.2268  | 3.5072  | 1.2811 | 0.3574  | 0.1506 | 0.8221 |
| Ppib    | _DTNGSQSFITTVK_2                                           | #N/A                  | 4.2307  | 3.4862  | 3.9644  | 3.4286  | 4.7087  | 4.0564  | 3.1433  | 3.1890  | 4.3384  | 3.3956  | 1.1315 | 0.1783  | 0.1980 | 0.7034 |
| Ppib    | _VYFDLQGDSEVGR_2                                           | #N/A                  | 5.2251  | 4.1377  | 3.7753  | 4.2779  | 3.7150  | 4.0995  | 3.9926  | 3.8405  | 3.4891  | 4.4585  | 1.0659 | 0.0920  | 0.4408 | 0.3558 |
| Gsta4   | _FLQPGSGQR_2                                               | #N/A                  | 5.8749  | 7.0599  | 6.7862  | 6.4289  | 7.2138  | 6.7829  | 6.4789  | 6.6615  | 6.8560  | 6.7380  | 1.0011 | 0.0016  | 0.9772 | 0.0100 |
| Gsta4   | _EKEESYDULSR_3                                             | #N/A                  | 4.1085  | 3.3639  | 3.8421  | 3.3859  | 3.2522  | 3.3724  | 3.5342  | 3.6153  | 3.9143  | 3.0632  | 1.0064 | 0.0091  | 0.9222 | 0.0352 |
| Th      | _PTPSASS[Phospho (STY)]PQPK_2                              | P24529_S8_M1_Th       | 10.8268 | 10.9693 | 11.2740 | 11.0751 | 10.6601 | 11.0752 | 10.8713 | 3.4047  | 10.9186 | 10.9356 | 1.2156 | 0.2817  | 0.2267 | 0.6446 |
| Th      | _RQSS[Phospho (STY)]UEDARK_3                               | #N/A                  | 7.6319  | 8.0404  | 8.0555  | 7.7581  | 7.5512  | 7.7749  | 7.9317  | 7.8396  | 7.6863  | 7.0957  | 1.0057 | 0.0028  | 0.7297 | 0.1368 |
| Th      | _RQSS[Phospho (STY)]UEDAR_2                                | #N/A                  | 5.9100  | 6.7838  | 6.2494  | 6.2917  | 5.4443  | 6.3619  | 6.4663  | 5.7750  | 6.1787  | 5.5960  | 1.0282 | 0.0402  | 0.5600 | 0.2518 |
| Th      | _QAEAVTS[Phospho (STY)]PR_2                                | P24529_S31_M1_Th      | 10.0109 | 10.1156 | 10.2087 | 10.4230 | 9.8484  | 10.0581 | 10.1264 | 10.1044 | 10.0649 | 10.2247 | 0.9981 | -0.0028 | 0.8556 | 0.0677 |
| Th      | _RAVTS[Phospho (STY)]EQDTK_2                               | P24529_S19_M1_Th      | 5.3806  | 3.3523  | 4.5607  | 5.5832  | 3.2406  | 3.3840  | 5.8194  | 5.5480  | 4.7297  | 3.5295  | 0.8662 | -0.2072 | 0.3632 | 0.4399 |
| Th      | _FEVPSDGLAALLSSVR_2                                        | #N/A                  | 5.0155  | 4.7375  | 3.2055  | 4.8296  | 4.8322  | 4.0090  | 4.8223  | 4.2844  | 5.2770  | 5.6189  | 0.8875 | -0.1721 | 0.2205 | 0.6596 |
| Th      | _FDPYTLADVLDS[Phospho (STY)]PHTR_2                         | #N/A                  | 3.3572  | 4.1331  | 3.5460  | 4.3518  | 3.9947  | 3.9710  | 4.5000  | 4.0750  | 4.1344  | 3.7689  | 0.9448 | -0.0819 | 0.3397 | 0.4690 |
| Th      | _SLIEVGDEHLTLQALSAIS_2                                     | #N/A                  | 3.9138  | 3.4286  | 3.6475  | 3.9065  | 4.2680  | 2.9787  | 3.3395  | 3.1049  | 2.5860  | 4.3694  | 1.1017 | 0.1397  | 0.3895 | 0.4095 |
| Th      | _VFETFEAK_2                                                | #N/A                  | 3.7465  | 3.0020  | 3.4802  | 4.5248  | 2.8903  | 3.7344  | 3.1722  | 3.9772  | 4.2763  | 4.2021  | 0.9120 | -0.1329 | 0.3712 | 0.4304 |
| Impdh2  | _GMSG[Phospho (STY)]LDAMDK_2                               | P24547_S416_M1_impdh2 | 4.2988  | 3.6031  | 3.4847  | 4.4526  | 3.4245  | 4.3050  | 3.1650  | 4.1311  | 3.7797  | 3.9544  | 1.0454 | 0.0641  | 0.5755 | 0.2399 |
| Aldh1a1 | _[Acetyl (Protein N-term)]SS[Phospho (STY)]PAQAPVAPLADLK_2 | P24549_S3_M1_Aldh1a1  | 9.2159  | 9.4270  | 9.7027  | 10.0281 | 8.9942  | 9.3008  | 3.9130  | 9.2993  | 9.1546  | 9.0429  | 1.2028 | 0.2664  | 0.1700 | 0.7696 |
| Aldh1a1 | _GFVQPTVFSVNTDEM[Oxidation (M)]R_2                         | #N/A                  | 4.8950  | 6.1675  | 6.1222  | 5.3950  | 6.0009  | 6.1161  | 5.9475  | 5.7429  | 5.7128  | 5.7874  | 0.9974 | -0.0037 | 0.9574 | 0.0189 |
| Aldh1a1 | _HGGTIPSGDIFITVR_3                                         | #N/A                  | 6.1519  | 5.6994  | 3.6183  | 5.2290  | 6.1088  | 6.0852  | 5.8988  | 5.6516  | 5.3431  | 5.9079  | 0.9579 | -0.0621 | 0.6508 | 0.1865 |
| Aldh1a1 | _VFANVLSLDGGC[Carbamidomethyl (C)]IK_2                     | #N/A                  | 5.1615  | 4.9118  | 4.9561  | 4.9053  | 3.1493  | 3.0793  | 5.2617  | 5.1510  | 3.5672  | 4.8961  | 0.9240 | -0.1140 | 0.5563 | 0.2547 |
| Aldh1a1 | _VTELEGK_2                                                 | #N/A                  | 3.7190  | 4.3998  | 4.3984  | 3.8808  | 4.3429  | 5.1883  | 3.4318  | 5.0235  | 4.6288  | 4.9287  | 0.9599 | -0.0591 | 0.6561 | 0.1830 |
| Aldh1a1 | _VAFTGSGQVKK_2                                             | #N/A                  | 4.1130  | 3.2295  | 3.8466  | 5.0811  | 3.2567  | 3.3679  | 3.5387  | 3.6108  | 3.9098  | 3.0677  | 1.0804 | 0.1116  | 0.4866 | 0.3129 |
| M6pr    | _SFESTVGSGDSYTFIR_2                                        | #N/A                  | 4.4677  | 3.3672  | 4.1922  | 4.5902  | 3.9862  | 4.4084  | 4.4904  | 4.3023  | 2.4307  | 4.5037  | 1.0602 | 0.0844  | 0.6191 | 0.0282 |
| M6pr    | _GVGGDQLGEES[Phospho (STY)]EERDHLPM[Oxidation (M)]_3       | P24668_S268_M1_M6pr   | 3.0636  | 1.9783  | 2.3385  | 2.9055  | 1.1304  | 4.0394  | 4.4002  | 4.2501  | 3.0483  | 3.9292  | 0.6593 | -0.6009 | 0.0457 | 1.3399 |
| Cdk11b  | _S[Phospho (STY)]PURPPR_2                                  | P24788_S234_M1_Cdk11b | 9.4551  | 9.2801  | 7.7280  | 9.4299  | 8.0117  | 8.7543  | 9.7398  | 9.5177  | 9.1379  | 8.9131  | 0.9410 | -0.0878 | 0.2169 | 0.0878 |
| Cdk11b  | _DLLSDQDSS[Phospho (STY)]DSEIR_2                           | P24788_S270_M1_Cdk11b | 3.8086  | 3.0641  | 3.5423  | 3.8507  | 6.7572  | 3.6722  | 3.5654  | 3.9151  | 3.9164  | 4.2642  | 1.0512 | 0.0721  | 0.7772 | 0.1095 |
| Rps2    | _TSYTLTPOLWK_2                                             | #N/A                  | 5.6372  | 6.0152  | 6.6159  | 6.1213  | 5.8261  | 6.1037  | 5.7483  | 5.7060  | 5.9941  | 5.4399  | 1.0579 | 0.0812  | 0.1221 | 0.9133 |
| Rps2    | _ADEKIEWPVTK_3                                             | #N/A                  | 3.4881  | 3.4746  | 4.7108  | 3.0990  | 3.9646  | 2.8171  | 3.8860  | 3.9839  | 3.6253  | 3.2057  | 0.9775 | -0.0329 | 0.8282 | 0.0819 |
| Tin1    | _VLVQNAAGS[Phospho (STY)]QEK_2                             | P26039_S2040_M1_Tin1  | 6.5048  | 6.3817  | 6.7999  | 6.5872  | 5.7722  | 6.1743  | 6.9651  | 6.9916  | 6.4345  | 6.4361  | 0.9498 | -0.0743 | 0.1667 | 0.7780 |
| Esr     | _APDFVFPAPR_2                                              | #N/A                  | 6.6123  | 6.9245  | 6.9860  | 7.4162  | 6.9060  | 6.9723  | 6.6044  | 7.1858  | 7.0921  | 7.3764  | 0.9865 | -0.0196 | 0.6212 | 0.2067 |
| Esr     | _IGFWSSEIR_2                                               | #N/A                  | 5.6504  | 6.8141  | 5.6427  | 6.2706  | 5.8162  | 5.9896  | 6.5030  | 6.5511  | 6.6081  | 6.3683  | 0.9880 | -0.0175 | 0.8003 | 0.0968 |
| Esr     | _NISFNCKK_2                                                | #N/A                  | 5.9639  | 5.5395  | 6.2026  | 6.5412  | 6.6722  | 6.1321  | 3.4258  | 5.6764  | 6.0689  | 6.2713  | 1.1520 | 0.2041  | 0.1834 | 0.7367 |
| Esr     | _QLTSLNELSQAR_2                                            | #N/A                  | 4.2547  | 4.4224  | 3.4406  | 35100   | 3.3803  | 4.3491  | 4.2783  | 4.1334  | 3.6500  | 1.0197  | 0.0281 | 0.8192  | 0.0866 | 0.0866 |
| Esr     | _IAQDLKM[Oxidation (M)]YGNFYEK_2                           | #N/A                  | 3.7475  | 3.4656  | 4.5399  | 4.0268  | 3.8541  | 3.7851  | 3.3842  | 3.2770  | 4.3246  | 3.1240  | 1.1065 | 0.1460  | 0.2205 | 0.6566 |
| Esr     | _RKEDEVEEWQHR_3                                            | #N/A                  | 5.5048  | 3.5625  | 4.3523  | 3.3541  | 4.5250  | 5.1030  | 3.2654  | 3.8266  | 4.8360  | 1.0281  | 0.0400 | 0.8336  | 0.0790 | 0.0790 |
| Esr     | _GTDLWLGVDALGNLYEK_2                                       | #N/A                  | 4.1753  | 3.0509  | 3.3612  | 3.8639  | 3.3010  | 4.4285  | 3.5786  | 4.2546  | 3.9032  | 3.8309  | 0.9499 | -0.0742 | 0.5321 | 0.2740 |
| Gabra3  | _LIDGVNRR_2                                                | #N/A                  | 6.5521  | 6.8256  | 6.9206  | 6.5619  | 5.8529  | 5.9348  | 6.7888  | 6.9293  | 6.5766  | 6.7429  | 0.9529 | -0.0695 | 0.2148 | 0.6679 |
| Gabra3  | _SAAAPASSTPTFAAS[Phospho (STY)]PK_2                        | P26049_S433_M1_Gabra3 | 8.6247  | 8.7496  | 9.0921  | 8.3579  | 6.9771  | 8.6878  | 9.3463  | 9.1385  | 8.4495  | 8.6147  | 0.9469 | -0.0788 | 0.2875 | 0.5414 |
| Ctnna1  | _SRTS[Phospho (STY)]VTEDDQQLAGSGAR_3                       | #N/A                  | 3.7867  | 8.8088  | 3.9644  | 9.1518  | 8.6930  | 6.9594  | 8.6820  | 6.9428  | 7.0125  | 9.0014  | 0.8716 | -0.1983 | 0.4658 | 0.3318 |
| Ctnna1  | _DQLLAYLGR_2                                               | #N/A                  | 5.4931  | 3.1568  | 3.1568  | 5.1294  | 4.7462  | 3.1525  | 3.9509  | 5.4585  | 3.0988  | 5.4738  | 1.0135 | 0.0193  | 0.9368 | 0.0283 |
| Ctnna1  | _EYAQVFR_2                                                 | #N/A                  | 5.2685  | 4.5928  | 5.0380  | 3.2049  | 4.9873  | 4.9450  | 4.8789  | 4.8366  | 5.4692  | 3.1719  | 1.0182 | 0.0260  | 0.8824 | 0.0543 |
| Ctnna1  | _TS[Phospho (STY)]VGTEDDQLAGSGAR_2                         | #N/A                  | 7.5561  | 7.1721  | 3.9512  | 7.9708  | 6.8711  | 7.6759  | 8.3170  | 7.4752  | 7.8012  | 7.3084  | 0.8888 | -0.1701 | 0.2998 | 0.5231 |
| Ctnna1  | _TFEELDDSFET[Phospho (STY)]EDFDRV_2                        | P26231_T645_M1_Ctnna1 | 3.8113  | 3.6715  | 3.8837  | 6.4258  | 3.8745  | 3.9607  | 3.6821  | 6.4464  | 3.8866  | 3.9398  | 0.9255 | -0.0717 | 0.7788 | 0.1086 |
| Ctnna1  | _LESBIGAALM[Oxidation (M)]ADSSC[Carbamidomethyl (C)]TR_2   | #N/A                  | 4.3463  | 3.6017  | 4.0800  | 3.1584  | 3.4900  | 3.1346  | 3.7720  | 3.3774  | 3.6765  | 3.3010  | 1.0519 | 0.0416  | 0.7076 | 0.1502 |
| Chga    | _GWRPSS[Phospho (STY)]REDS[Phospho (STY)]VEAR_2            | #N/A                  | 7.1788  | 7.7213  | 7.5527  | 8.2025  | 8.0078  | 7.7776  | 5.4821  | 7       |         |         |        |         |        |        |



|        |                                                                      |                       |         |         |         |         |         |         |         |         |         |         |         |         |        |        |
|--------|----------------------------------------------------------------------|-----------------------|---------|---------|---------|---------|---------|---------|---------|---------|---------|---------|---------|---------|--------|--------|
| Glut1  | _RDOGSWEVGYR_3                                                       | #N/A                  | 4.6856  | 4.7264  | 5.1635  | 3.9150  | 5.3152  | 5.7880  | 5.5563  | 5.2204  | 5.9632  | 5.8871  | 0.8719  | -0.1977 | 0.0755 | 1.1220 |
| Glut1  | _MjOxidation (M) VEGFOR_2                                            | #N/A                  | 7.3167  | 7.8282  | 7.6740  | 7.6419  | 7.4970  | 7.5760  | 7.2895  | 7.8507  | 7.8577  | 7.4075  | 0.9984  | -0.0024 | 0.9348 | 0.0293 |
| Glut1  | _GFIGGIDVPAPMjOxidation (M) STGER_2                                  | #N/A                  | 7.5056  | 7.4557  | 7.4138  | 8.0154  | 7.2450  | 7.3443  | 7.6725  | 7.2063  | 7.4529  | 1.0065  | 0.0094  | 0.7644  | 0.1167 |        |
| Glut1  | _D0GSWEVGYR_2                                                        | #N/A                  | 8.4990  | 8.3937  | 8.7897  | 9.2871  | 8.5254  | 8.6023  | 8.6738  | 8.7699  | 8.8255  | 8.8959  | 0.9877  | -0.0179 | 0.5403 | 0.2673 |
| Glut1  | _IAEGANGPTTPEADKIFLR_3                                               | #N/A                  | 7.4003  | 7.0827  | 7.3096  | 7.4474  | 6.8657  | 6.9843  | 7.1134  | 7.2779  | 6.9645  | 7.0423  | 1.0116  | 0.0166  | 0.5524 | 0.2577 |
| Glut1  | _TFVVGGGFNGVLGMjOxidation (M) R_2                                    | #N/A                  | 4.0415  | 4.5766  | 5.0623  | 2.5466  | 4.8963  | 5.0096  | 3.3835  | 3.4846  | 5.5963  | 5.4152  | 0.9744  | -0.0374 | 0.8711 | 0.0599 |
| Glut1  | _IAEGANGPTTPEADK_2                                                   | #N/A                  | 5.7191  | 3.1667  | 3.6449  | 5.1654  | 5.3241  | 5.1495  | 3.4628  | 4.3704  | 4.0377  | 4.9881  | 1.0516  | 0.0725  | 0.7115 | 0.1478 |
| Glut1  | _GASVEDKIVEDLK_2                                                     | #N/A                  | 5.5909  | 6.0872  | 6.2585  | 5.8418  | 5.0680  | 5.7125  | 6.0184  | 5.7886  | 5.6249  | 5.1852  | 1.0187  | 0.0267  | 0.6893 | 0.1616 |
| Glut1  | _ALASLMTYK_2                                                         | #N/A                  | 3.4235  | 3.9600  | 3.1161  | 5.0745  | 3.1261  | 3.9482  | 4.3090  | 4.3413  | 3.5483  | 2.5560  | 1.0233  | 0.0333  | 0.8682 | 0.0614 |
| Glut1  | _DSNYHLMjOxidation (M) SVQESLER_3                                    | #N/A                  | 4.9029  | 5.4313  | 5.7192  | 5.4889  | 4.7986  | 5.7791  | 4.7952  | 5.1977  | 6.0778  | 5.1542  | 1.0089  | 0.0127  | 0.8796 | 0.0557 |
| Glut1  | _VYEGSILEADC Carbamidomethyl (C) DLIPAASEK_2                         | #N/A                  | 7.7458  | 8.0495  | 8.4082  | 8.3789  | 7.6050  | 7.9877  | 7.8778  | 7.5483  | 7.7493  | 8.0358  | 1.0290  | 0.0413  | 0.2555 | 0.5926 |
| Glut1  | _DIVHSGLAYTMjOxidation (M) ER_3                                      | #N/A                  | 5.2611  | 5.0209  | 4.5693  | 5.1967  | 5.0131  | 5.2882  | 5.6654  | 5.3494  | 5.1240  | 4.8704  | 0.9630  | -0.0543 | 0.3385 | 0.4705 |
| Glut1  | _FTMELAK_2                                                           | #N/A                  | 3.3800  | 3.8461  | 4.0668  | 2.7469  | 1.7826  | 3.7229  | 4.2842  | 3.5490  | 3.1976  | 3.0357  | 0.9263  | -0.1104 | 0.6108 | 0.2141 |
| Psm7   | _SVALHNUNNK_2                                                        | #N/A                  | 3.4156  | 4.7477  | 5.9270  | 4.1275  | 3.5183  | 2.6637  | 4.0481  | 4.8051  | 5.0466  | 5.4030  | 0.8427  | -0.2469 | 0.2623 | 0.5812 |
| Sars1  | _LUDEAIQK_2                                                          | #N/A                  | 5.8352  | 5.9299  | 5.3131  | 5.9932  | 6.4137  | 5.6578  | 3.1754  | 6.3183  | 6.5199  | 6.0774  | 1.0605  | 0.0848  | 0.6209 | 0.2070 |
| Sars1  | _VLDLDFR_2                                                           | #N/A                  | 5.8201  | 5.8387  | 5.6696  | 5.2477  | 5.4358  | 5.5927  | 3.1896  | 5.5717  | 5.8034  | 4.5766  | 1.1704  | 0.2270  | 0.1308 | 0.8833 |
| Sars1  | _YLIATSEQPIAHLHR_3                                                   | #N/A                  | 5.1042  | 5.1730  | 4.7288  | 4.3694  | 5.1225  | 5.5340  | 3.4950  | 5.2079  | 5.7508  | 5.5880  | 0.9990  | -0.0015 | 0.9914 | 0.0038 |
| Sars1  | _TIC Carbamidomethyl (C) ALENYQAEK_2                                 | #N/A                  | 4.9411  | 5.2264  | 4.2623  | 4.4145  | 5.0601  | 4.5647  | 5.2998  | 4.0168  | 4.9075  | 4.9288  | 0.9909  | -0.0131 | 0.8855 | 0.0528 |
| Sars1  | _YAGLSTC Carbamidomethyl (C) FR_2                                    | #N/A                  | 4.8131  | 4.5108  | 4.1282  | 5.1854  | 5.7739  | 4.6320  | 4.1623  | 5.0757  | 5.3654  | 5.0519  | 0.9851  | -0.0217 | 0.8431 | 0.0741 |
| Sars1  | _IFQVYSPHDMK_2                                                       | #N/A                  | 5.5690  | 5.7661  | 5.6579  | 6.1829  | 6.4327  | 6.0143  | 6.1855  | 6.1265  | 6.1390  | 0.9842  | -0.0230 | 0.6359  | 0.1966 |        |
| Sars1  | _EVLPLENQLGS Phospho (STY) MjOxidation (M) EVTEA_2                   | #N/A                  | 3.6307  | 6.6906  | 3.3644  | 7.1171  | 4.0878  | 6.5926  | 4.5572  | 7.1121  | 6.1895  | 4.0863  | 0.9555  | -0.0656 | 0.8310 | 0.0857 |
| Sars1  | _ELVSC Carbamidomethyl (C) SNC Carbamidomethyl (C) TDYQAR_2          | #N/A                  | 3.5230  | 3.8194  | 2.3566  | 4.1900  | 4.5707  | 3.0610  | 4.1714  | 4.2008  | 4.2423  | 3.4961  | 0.9278  | -0.1081 | 0.3960 | 0.4023 |
| Sars1  | _AKEVPLENQLGS Phospho (STY) MEVTEA_2                                 | #N/A                  | 3.6696  | 3.5566  | 4.3564  | 3.3582  | 3.4449  | 3.1797  | 3.0729  | 3.2594  | 4.4089  | 3.3252  | 1.0221  | 0.0315  | 0.8129 | 0.0900 |
| Sars1  | _EIGNLLPSPVNSDEADNKKVER_4                                            | #N/A                  | 4.3462  | 3.6506  | 3.5322  | 4.0835  | 3.4719  | 4.2576  | 3.7495  | 4.0836  | 3.7322  | 4.0018  | 0.9996  | -0.0005 | 0.9945 | 0.0024 |
| Marcks | _AEDGAAPS Phospho (STY) PSSETPK_2                                    | #N/A                  | 14.0336 | 14.2945 | 14.7087 | 13.9131 | 14.0504 | 14.3007 | 14.4121 | 14.0676 | 13.8637 | 14.3347 | 1.0033  | 0.0048  | 0.7956 | 0.0093 |
| Marcks | _LSGFS Phospho (STY) FKK_2                                           | #N/A                  | 14.1200 | 14.1506 | 14.8471 | 14.7197 | 13.5893 | 14.0890 | 14.3619 | 14.0733 | 13.9115 | 14.2690 | 1.0070  | 0.0100  | 0.7020 | 0.0073 |
| Marcks | _GATAERPGAAVASS Phospho (STY) PSK_2                                  | #N/A                  | 10.2629 | 9.7286  | 10.0601 | 10.4658 | 10.3971 | 10.1491 | 9.9082  | 9.7035  | 10.2261 | 9.4048  | 1.0374  | 0.0529  | 0.0936 | 1.0288 |
| Marcks | _VNGDAS Phospho (STY) PAAAEPAK_2                                     | P26645_S46_M1_Marcks  | 10.7822 | 10.7075 | 10.4350 | 11.4679 | 10.5578 | 10.7362 | 10.8834 | 10.5700 | 10.6019 | 10.9357 | 1.0031  | 0.0045  | 0.8706 | 0.0602 |
| Marcks | _FS Phospho (STY) FKKS Phospho (STY) FK_2                            | P26645_S152_M2_Marcks | 9.6443  | 10.0720 | 10.6935 | 10.3471 | 9.8239  | 10.2818 | 10.1044 | 9.7229  | 10.0314 | 10.2491 | 1.0116  | 0.0167  | 0.5977 | 0.2235 |
| Marcks | _LSGFS Phospho (STY) FKKS Phospho (STY) K_2                          | P26645_S163_M2_Marcks | 7.9589  | 7.5291  | 8.0248  | 8.4985  | 7.4064  | 8.2024  | 8.0880  | 7.5308  | 8.1647  | 8.3574  | 0.9881  | -0.0173 | 0.7155 | 0.1454 |
| Marcks | _DEAAAAATPGAGAAKDEAAKDEAAKDEAAAAAGGGAAPGQAGGAAGGASSTSPK_4            | #N/A                  | 6.2755  | 3.8963  | 4.3745  | 3.6505  | 6.6630  | 3.7309  | 4.2674  | 3.2022  | 3.4264  | 3.4261  | 1.3466  | 0.2493  | 0.1250 | 0.9429 |
| Marcks | _ESGEAEGATAEGAK_2                                                    | #N/A                  | 5.6342  | 5.8542  | 4.4573  | 5.3604  | 5.8618  | 5.3687  | 4.3401  | 4.9396  | 5.4659  | 6.2347  | 1.0339  | 0.0481  | 0.6797 | 0.1677 |
| Marcks | _PGEAAVASS Phospho (STY) PSK_2                                       | #N/A                  | 2.8960  | 5.8890  | 4.1305  | 6.7662  | 4.2677  | 3.4618  | 6.4491  | 3.3269  | 5.8832  | 3.3516  | 0.9613  | -0.0570 | 0.8578 | 0.0666 |
| Marcks | _SKES Phospho (STY) GGEAEGATAEGAK_3                                  | #N/A                  | 6.3582  | 6.0621  | 6.5828  | 6.7543  | 6.5301  | 6.1774  | 6.1606  | 6.2593  | 6.6307  | 4.1051  | 1.1074  | 0.1472  | 0.2225 | 0.6528 |
| Marcks | _AEDGAAPS Phospho (STY) PSSET Phospho (STY) PKKK_2                   | #N/A                  | 8.4834  | 9.2770  | 10.1222 | 8.4979  | 8.4102  | 8.2479  | 7.9871  | 9.3372  | 7.1223  | 9.4230  | 1.0440  | 0.0621  | 0.5347 | 0.2719 |
| Marcks | _EAAEAEPAPESP Phospho (STY) PAAEAEGASASSTSPK_3                       | #N/A                  | 12.1611 | 11.8835 | 12.0959 | 12.6404 | 11.9993 | 12.1424 | 12.4967 | 11.7483 | 11.9478 | 12.2270 | 1.0040  | 0.0058  | 0.7986 | 0.0977 |
| Marcks | _S Phospho (STY) FKLS Phospho (STY) GFSFK_2                          | P26645_S160_M2_Marcks | 3.8721  | 3.1764  | 4.5589  | 6.6676  | 5.6743  | 3.2309  | 3.2754  | 5.8239  | 4.2064  | 3.5277  | 1.0764  | 0.1063  | 0.7140 | 0.1463 |
| Marcks | _AEDGAAPSPSET Phospho (STY) PKK_2                                    | #N/A                  | 10.5390 | 10.8773 | 11.3060 | 11.3972 | 10.4512 | 10.9803 | 10.8468 | 10.2922 | 10.7140 | 10.8664 | 1.0230  | 0.0328  | 0.3048 | 0.5160 |
| Marcks | _GATAERPGAAVASS Phospho (STY) PSKNGQENHWK_4                          | #N/A                  | 8.4770  | 3.5784  | 8.6366  | 3.6462  | 8.8140  | 3.4336  | 3.7944  | 7.7906  | 8.8253  | 3.8985  | 1.0034  | 0.0048  | 0.9910 | 0.0039 |
| Marcks | _LSGFS Phospho (STY) FK_2                                            | #N/A                  | 3.9336  | 3.2926  | 3.1195  | 3.6222  | 3.0593  | 3.1694  | 3.3369  | 9.1570  | 4.1449  | 3.5892  | 0.6656  | -0.5872 | 0.1637 | 0.7860 |
| Marcks | _TAAKGATAERPGEAAVASS Phospho (STY) PSK_3                             | #N/A                  | 6.0360  | 6.4348  | 7.1586  | 6.8037  | 6.4943  | 6.8109  | 3.9858  | 6.6810  | 3.7670  | 6.5625  | 1.2618  | 0.3354  | 0.0703 | 1.1530 |
| Marcks | _KES Phospho (STY) GGEAEGATAEGAKDEAAKDEAAAAAGGGAAPGQAGGAAGGASGGEPR_4 | #N/A                  | 3.8087  | 3.8634  | 4.2157  | 3.7174  | 3.6258  | 3.8607  | 3.7049  | 3.9296  | 4.4703  | 0.8908  | -0.1668 | 0.1289  | 0.9491 | 0.0227 |
| Marcks | _ESGEAEGATAEGAKDEAAKDEAAAAAGGGAAPGQAGGAAGGASGGEPR_4                  | #N/A                  | 3.4925  | 4.2488  | 3.2262  | 4.1669  | 4.1371  | 3.9884  | 3.8815  | 3.9516  | 3.6002  | 4.1339  | 0.9961  | -0.0056 | 0.9491 | 0.0227 |
| Marcks | _KES Phospho (STY) GGEAEGATAEGAK_2                                   | #N/A                  | 3.8856  | 3.4568  | 3.6192  | 5.4411  | 3.0293  | 2.9505  | 3.3113  | 4.3382  | 4.1372  | 4.3411  | 0.9548  | -0.0667 | 0.7315 | 0.1358 |
| Fklp1a | _GVQVTFSPGDR_2                                                       | #N/A                  | 10.8937 | 11.1971 | 11.6066 | 11.4672 | 11.4195 | 11.3470 | 11.3802 | 10.9148 | 11.1054 | 11.1846 | 1.0158  | 0.0226  | 0.2705 | 0.5678 |
| Fklp1a | _GWEEGVAQMjOxidation (M) SVQGR_2                                     | #N/A                  | 8.2405  | 8.6108  | 8.8447  | 8.6063  | 8.9376  | 8.4831  | 8.3939  | 8.4961  | 8.3939  | 8.4961  | 1.0307  | 0.0437  | 0.0875 | 1.0580 |
| Map4   | _SKVGS Phospho (STY) TENIK_2                                         | #N/A                  | 9.7403  | 9.7859  | 10.2805 | 10.3939 | 3.9032  | 9.8857  | 10.0814 | 9.9665  | 9.8754  | 9.8878  | 0.9041  | -0.1455 | 0.4777 | 0.3208 |
| Map4   | _SAS Phospho (STY) ADLSR_2                                           | P27546_S828_M1_Map4   | 7.5878  | 7.9200  | 7.8342  | 7.7967  | 6.3403  | 7.7732  | 7.0666  | 7.4958  | 7.8015  | 7.9560  | 0.9950  | -0.0072 | 0.9186 | 0.1086 |
| Map4   | _LATTVS Phospho (STY) APDLK_2                                        | P27546_S901_M1_Map4   | 4.0398  | 7.5041  | 3.7734  | 8.3145  | 7.6165  | 8.2971  | 3.3343  | 7.7121  | 4.1475  | 8.0522  | 1.1341  | 0.1816  | 0.6028 | 0.2198 |
| Map4   | _AAVGVGNDDITPPNKEPPPS Phospho (STY) PEK_3                            | #N/A                  | 8.2432  | 8.2854  | 8.4742  | 4.0493  | 3.9156  | 7.9668  | 8.4500  | 4.4527  | 3.2509  | 8.0320  | 1.1283  | 0.1742  | 0.6236 | 0.2051 |
| Map4   | _DMjOxidation (M) S Phospho (STY) PSATEAPLAK_2                       | #N/A                  | 10.8180 | 10.6776 | 10.9530 | 11.5014 | 10.4441 | 10.6050 | 11.2079 | 10.3348 | 10.7673 | 10.8445 | 1.0041  | 0.0059  | 0.8552 | 0.0679 |
| Map4   | _TEFPLDGDCK_2                                                        | #N/A                  | 7.6884  | 7.3194  | 3.6815  | 7.6133  | 8.1296  | 7.8154  | 7.2109  | 7.4843  | 7.7028  | 0.9671  | -0.0482 | 0.7894  | 0.1027 |        |
| Map4   | _NTT Phospho (STY) PTGAAPRAGMjOxidation (M) JSTR_2                   | #N/A                  | 11.0182 | 11.3427 | 11.8405 | 11.9557 | 10.8851 | 11.3271 | 11.5911 | 11.2125 | 11.0484 | 11.1854 | 1.0120  | 0.0173  | 0.5842 | 0.2335 |
| Map4   | _ATS Phospho (STY) PSTLVSTGSPSR_2                                    | P27546_S785_M1_Map4   | 8.7598  | 9.4980  | 9.9409  | 3.9421  | 8.3908  | 9.1691  | 5.6525  | 4.9557  | 9.0815  | 8.9940  | 1.1551  | 0.2081  | 0.4535 | 0.3435 |
| Map4   | _DMjOxidation (M) S Phospho (STY) LPSESVTLGK_2                       | #N/A                  | 7.7421  | 8.2588  | 7.9623  | 9.6755  | 8.2148  | 8.1994  | 8.6837  | 8.1233  | 8.3668  | 8.4870  | 0.9925  | -0.0109 | 0.8655 | 0.0627 |
| Map4   | _GLSTVPPK Carbamidomethyl (C) TAS Phospho (STY) PEPVK_2              | P27546_S598_M1_Map4   | 8.5795  | 8.6058  | 8.9263  | 10.3152 | 3.9311  | 3.7984  | 4.2087  | 9.4206  | 7.8901  | 2.9602  | 1.2025  | 0.2661  | 0.5336 | 0.2810 |
| Map4   | _SKVGST Phospho (STY) ENKHQGGGR_3                                    | P27546_T915_M1_Map4   | 4.1206  | 3.2218  | 3.8542  | 5.8702  | 5.1670  | 3.3603  | 3.5463  | 3.6032  | 3.9022  | 3.0753  | 1.2078  | 0.2724  | 0.2198 | 0.6579 |
| Map4   | _TTSASS Phospho (STY) VCR_2                                          | P27546_S841_M1_Map4   | 2.9085  | 3.6648  | 4.1430  | 3.2500  | 3.5531  | 3.0716  | 4.4056  | 3.3676  | 3.0162  | 3.3641  | 0.9658  | -0.0502 | 0.7790 | 0.1373 |
| Map4   | _VGS Phospho (STY) TENKHQGGGR_3                                      | #N/A                  | 4.1351  | 3.3905  | 3.8688  | 3.5242  | 3.2788  | 3.3458  | 3.2389  | 3.5886  | 4.2428  | 3.0898  | 1.0143  | 0.0204  | 0.8545 | 0.0683 |
| Map4   | _DMjOxidation (M) S Phospho (STY) LPSESVTLGKDDVLPETK_3               | #N/A                  | 2.8994  | 5.4934  | 4.9300  | 6.3006  | 5.0882  | 3.4652  | 3.8260  | 3.3234  | 3.6225  | 3.3550  | 1.3297  | 0.4111  | 0.1151 | 0.9390 |
| Map4   | _VGS Phospho (STY) LNNVGHLPAGGAVK_2                                  | #N/A                  | 4.9869  | 5.9855  | 6.1470  | 7.0151  | 4.6351  | 5.5312  | 5.9870  | 6.2604  | 5.8166  | 5.8939  | 0.9545  | -0.0672 | 0.5566 | 0.2545 |
| Map4   | _VAEFNNV Phospho (STY) PLS Phospho (STY) EEVTSVK_2                   | P27546_S506_M2_Map4   | 4.1461  | 3.0801  | 3.3321  | 3.8347  | 3.6607  | 3.6563  | 3.5494  | 5.1822  | 3.9323  | 3.8017  | 0.8790  | -0.1861 | 0.1873 |        |



|        |                                                                                               |                       |         |         |         |         |         |         |         |         |         |         |         |         |        |        |
|--------|-----------------------------------------------------------------------------------------------|-----------------------|---------|---------|---------|---------|---------|---------|---------|---------|---------|---------|---------|---------|--------|--------|
| Pdia3  | _VDC[Carbamidomethyl (C)]TANTNT[Carbamidomethyl (C)]NK_2                                      | #N/A                  | 4.3019  | 3.8141  | 4.9947  | 3.6288  | 4.7177  | 4.8187  | 4.2351  | 3.7650  | 4.6309  | 3.7008  | 1.0726  | 0.1011  | 0.4012 | 0.3967 |
| Pdia3  | _RSDKASVVGFR_3                                                                                | #N/A                  | 6.6573  | 6.5376  | 7.0458  | 7.0029  | 7.0591  | 6.5190  | 6.7859  | 6.5452  | 6.8257  | 7.0476  | 1.0004  | 0.0005  | 0.9875 | 0.0055 |
| Pdia3  | _DLTAYDYDEK_2                                                                                 | #N/A                  | 6.0560  | 5.8349  | 6.5614  | 6.1573  | 6.3318  | 6.7835  | 6.0330  | 5.6399  | 6.0429  | 6.6616  | 1.0317  | 0.0450  | 0.4496 | 0.3472 |
| Pdia3  | _TFSHELDSGTEGVPVVAR_3                                                                         | #N/A                  | 5.3132  | 5.7955  | 3.1914  | 6.3983  | 5.1421  | 5.5893  | 5.9096  | 5.9217  | 5.8359  | 5.9246  | 0.8882  | -0.1711 | 0.2715 | 0.5663 |
| Pdia3  | _DAGPASPLR_2                                                                                  | #N/A                  | 4.4994  | 3.5923  | 3.2612  | 4.0015  | 5.4993  | 4.3488  | 4.4541  | 4.7738  | 4.5488  | 4.5518  | 0.9167  | -0.1255 | 0.3732 | 0.4280 |
| Pdia3  | _FVM[Oxidation (M)]QEFSR_2                                                                    | #N/A                  | 5.6135  | 5.7971  | 6.2126  | 6.6583  | 6.3088  | 5.7171  | 5.7140  | 6.1127  | 5.9193  | 5.8980  | 1.0237  | 0.0338  | 0.5372 | 0.2698 |
| Pdia3  | _FAHTNIESLV_2                                                                                 | #N/A                  | 5.5196  | 5.6629  | 5.9213  | 5.7976  | 5.7734  | 5.3416  | 5.7025  | 5.4221  | 5.1933  | 5.3659  | 1.0458  | 0.0646  | 0.1050 | 0.9787 |
| Pdia3  | _DGEAGAYDGR_2                                                                                 | #N/A                  | 7.6740  | 7.5729  | 3.1101  | 3.3914  | 7.1761  | 7.3844  | 7.2371  | 7.3609  | 7.2408  | 7.8871  | 0.8143  | -0.7964 | 0.2521 | 0.5984 |
| Pdia3  | _MDATANOVSPPEVK_2                                                                             | #N/A                  | 3.8704  | 5.4054  | 4.5572  | 7.6280  | 6.7070  | 3.3805  | 3.2737  | 3.0587  | 4.2081  | 3.5260  | 1.4952  | 0.5804  | 0.0794 | 1.1002 |
| Braf   | _SAS[Phospho (STY)]EPSLNR_2                                                                   | P28028_S714_M1_Braf   | 12.4928 | 13.1082 | 12.9632 | 12.1582 | 12.8333 | 12.9489 | 12.8778 | 12.7549 | 12.6122 | 0.9888  | -0.1622 | 0.4898  | 0.3099 |        |
| Braf   | _NNPKS[Phospho (STY)]PQKPIVR_3                                                                | #N/A                  | 9.0006  | 9.3081  | 9.4253  | 9.8572  | 7.3747  | 8.9883  | 8.6761  | 9.2298  | 9.1350  | 9.0289  | 0.9972  | -0.0040 | 0.9565 | 0.0193 |
| Braf   | _S[Phospho (STY)]PQKPIVR_2                                                                    | #N/A                  | 8.1323  | 7.6498  | 6.7797  | 7.9354  | 6.1526  | 7.4985  | 7.5265  | 7.0771  | 7.6919  | 7.4253  | 0.9903  | -0.0141 | 0.8603 | 0.0653 |
| Braf   | _SSS[Phospho (STY)]APNVHINTPEVNIDDIR_3                                                        | P28028_S348_M1_Braf   | 2.9721  | 8.5430  | 4.2066  | 9.0173  | 6.5250  | 6.9246  | 7.5265  | 8.3511  | 3.5499  | 3.4277  | 1.1139  | 0.1557  | 0.6927 | 0.1595 |
| Braf   | _RDS[Phospho (STY)]SDOWEIPDGGITVGR_3                                                          | #N/A                  | 3.4561  | 6.7552  | 9.2153  | 9.1544  | 8.1721  | 7.7280  | 4.3743  | 9.3976  | 8.8375  | 3.6588  | 1.1289  | 0.1749  | 0.6123 | 0.2130 |
| Braf   | _AGQTEDFSLYAC[Carbamidomethyl (C)]AS[Phospho (STY)]PK_2                                       | #N/A                  | 7.2230  | 2.9765  | 3.4209  | 7.1143  | 2.8648  | 6.2423  | 7.2886  | 7.0851  | 3.8288  | 6.2245  | 0.8194  | -0.2873 | 0.4045 | 0.3931 |
| Braf   | _DS[Phospho (STY)]SDOWEIPDGGITVGR_2                                                           | #N/A                  | 3.0881  | 4.2543  | 4.3226  | 3.8664  | 4.0756  | 3.6538  | 4.0146  | 3.1348  | 3.4339  | 3.5437  | 1.0977  | 0.1345  | 0.2451 | 0.6106 |
| Mt3    | nethyl (C)[C]Carbamidomethyl (C)]SC[Carbamidomethyl (C)]K[Carbamidomethyl (C)]PAGC[Carbamido  | #N/A                  | 6.2676  | 6.5508  | 6.9858  | 7.1264  | 7.8409  | 6.1746  | 6.2215  | 6.5882  | 7.0604  | 6.3190  | 1.0423  | 0.0598  | 0.4540 | 0.3429 |
| Mt3    | _GEEGAKAEAK_2                                                                                 | #N/A                  | 3.9509  | 2.9418  | 4.1441  | 4.3013  | 4.8346  | 3.4899  | 4.0446  | 3.1149  | 4.0649  | 3.3553  | 1.0820  | 0.1137  | 0.4620 | 0.3354 |
| Mt3    | _DC[Carbamidomethyl (C)]VC[Carbamidomethyl (C)]KGEAGAK_2                                      | #N/A                  | 4.6153  | 5.5626  | 5.3406  | 5.2645  | 6.2383  | 5.6255  | 5.6867  | 5.5849  | 4.9928  | 5.0108  | 1.0239  | 0.0340  | 0.6916 | 0.1602 |
| Mt3    | _xidation (M)]DPETC[Carbamidomethyl (C)]PC[Carbamidomethyl (C)]PTGGSC[Carbamidomethyl (C)]TTC | #N/A                  | 6.4538  | 6.6882  | 6.8096  | 7.1530  | 7.3354  | 6.7219  | 6.8008  | 6.5126  | 6.7048  | 6.7399  | 1.0255  | 0.0364  | 0.3523 | 0.4530 |
| Mt3    | _DC[Carbamidomethyl (C)]VC[Carbamidomethyl (C)]KGEAGAKAEAK_3                                  | #N/A                  | 4.6998  | 5.3226  | 5.9455  | 5.4363  | 6.0847  | 5.5945  | 5.2760  | 4.9347  | 5.4492  | 5.4480  | 1.0449  | 0.0634  | 0.4059 | 0.3916 |
| Gjb1   | _KGS[Phospho (STY)]GFGHR_2                                                                    | P28230_S233_M1_Gjb1   | 5.6370  | 5.1354  | 5.8245  | 4.0962  | 3.5333  | 4.3216  | 6.0060  | 5.7129  | 5.3742  | 5.1943  | 0.8540  | -0.2727 | 0.1340 | 0.8729 |
| Aco1   | _VLQDFTGVPVVDFAAM[Oxidation (M)]R_2                                                           | #N/A                  | 3.5932  | 2.8752  | 3.3269  | 4.3715  | 3.5705  | 4.1590  | 4.5198  | 4.1305  | 1.6061  | 4.0488  | 1.0204  | 0.0292  | 0.9052 | 0.0432 |
| Apex1  | _AAADGDEEPS[Phospho (STY)]EPETKK_3                                                            | P28352_S18_M1_Apex1   | 3.0010  | 3.8062  | 3.6878  | 5.2659  | 3.6275  | 4.1020  | 3.9051  | 3.9281  | 3.5766  | 4.1574  | 1.0060  | 0.0086  | 0.9547 | 0.0201 |
| Adh5   | _IDSPALDK_2                                                                                   | #N/A                  | 6.4418  | 5.9102  | 5.4268  | 5.8284  | 6.6592  | 5.9096  | 6.4641  | 6.5754  | 6.3391  | 6.1897  | 0.9454  | -0.0811 | 0.1768 | 0.7524 |
| Adh5   | _AAVAWEAGKPLSIEIEVAPK_3                                                                       | #N/A                  | 4.2088  | 4.4044  | 4.3009  | 4.0671  | 4.9006  | 4.4678  | 3.4989  | 4.3985  | 4.4981  | 4.6174  | 1.0325  | 0.0462  | 0.5942 | 0.2261 |
| Adh5   | _EFGASEC[Carbamidomethyl (C)]ISPDQFS[Phospho (STY)]K_2                                        | #N/A                  | 7.6722  | 6.3050  | 7.6965  | 7.6965  | 6.1997  | 6.8944  | 3.9012  | 7.0679  | 6.8265  | 7.0554  | 1.0315  | 0.0448  | 0.8453 | 0.0730 |
| Adh5   | _AKEFGASEC[Carbamidomethyl (C)]SPQDQFS[Phospho (STY)]K_3                                      | #N/A                  | 3.3001  | 4.0564  | 4.5346  | 5.6226  | 3.9447  | 4.1808  | 4.0739  | 5.1819  | 3.4078  | 3.7557  | 1.0410  | 0.0580  | 0.7442 | 0.1283 |
| Adh5   | _LVSEYMSK_2                                                                                   | #N/A                  | 3.6546  | 3.5715  | 4.3414  | 3.3433  | 3.4598  | 3.1648  | 4.5588  | 3.2744  | 4.4238  | 3.3103  | 0.9223  | -0.1168 | 0.4051 | 0.3925 |
| Adh5   | _SIDEVLVE[Oxidation (M)]TGGGVYSFEC[Carbamidomethyl (C)]IGNVK_3                                | #N/A                  | 3.8828  | 3.1382  | 3.6164  | 3.7766  | 3.0265  | 3.5981  | 3.4913  | 4.3419  | 3.9905  | 3.7436  | 0.9010  | -0.1504 | 0.1291 | 0.8892 |
| Slc6a9 | _YAPTTTIPS[Phospho (STY)]PDGFGEVQLPDPK_3                                                      | P28571_S659_M1_Slc6a9 | 3.2621  | 4.3248  | 4.2527  | 3.7965  | 3.8962  | 3.3342  | 3.9447  | 3.2053  | 3.5043  | 3.4737  | 1.0790  | 0.1097  | 0.3106 | 0.1078 |
| Adis1  | _VVOLLATADIVSR_2                                                                              | #N/A                  | 3.9150  | 3.3134  | 3.7916  | 5.1940  | 5.3079  | 4.4026  | 3.3161  | 5.0510  | 5.1998  | 4.3060  | 0.9670  | -0.0484 | 0.7886 | 0.1031 |
| Adis1  | _JC[Carbamidomethyl (C)]DOLLSDIIEFSAR_2                                                       | #N/A                  | 3.7537  | 3.0581  | 4.0180  | 3.5618  | 4.0300  | 3.1357  | 3.7100  | 3.4394  | 3.2391  | 3.1700  | 1.0173  | 0.0248  | 0.8015 | 0.0961 |
| Camk2b | _ESSDS[Phospho (STY)]TNTTIEDEAK_2                                                             | #N/A                  | 10.7724 | 11.1918 | 12.3941 | 12.4352 | 12.2410 | 11.7681 | 12.3065 | 12.4795 | 11.9114 | 11.8572 | 0.9721  | -0.0408 | 0.3895 | 0.4095 |
| Camk2b | _FTDEYQLYDIQK_2                                                                               | #N/A                  | 7.7236  | 7.3735  | 8.1209  | 7.0499  | 6.9743  | 7.9891  | 7.6135  | 7.1886  | 7.2154  | 7.7495  | 1.0130  | 0.0186  | 0.7292 | 0.1371 |
| Camk2b | _HPWVC[Carbamidomethyl (C)]QR_2                                                               | #N/A                  | 7.4712  | 7.3854  | 6.6121  | 7.5234  | 7.8167  | 7.1190  | 7.1416  | 7.7220  | 7.5259  | 7.0416  | 0.9950  | -0.0072 | 0.8860 | 0.0525 |
| Camk2b | _ITAHEALK_2                                                                                   | #N/A                  | 6.5097  | 5.9554  | 5.9875  | 6.1526  | 6.5596  | 6.3030  | 5.9943  | 6.7154  | 6.9359  | 6.1730  | 0.9675  | -0.0477 | 0.3660 | 0.4365 |
| Camk2b | _JC[Carbamidomethyl (C)]TGHEYAAK_2                                                            | #N/A                  | 5.5955  | 5.8010  | 5.4679  | 5.7100  | 6.2732  | 5.5951  | 5.3437  | 6.3484  | 5.4883  | 5.4015  | 1.0276  | 0.0292  | 0.5300 | 0.2758 |
| Camk2b | _ADGVKPKQNS[Phospho (STY)]TK_2                                                                | #N/A                  | 3.6348  | 3.7076  | 3.3685  | 4.4131  | 3.5289  | 4.2006  | 3.0605  | 4.0889  | 5.0745  | 4.0904  | 0.9339  | -0.0987 | 0.5505 | 0.2971 |
| Camk2b | _FYFENLIAK_2                                                                                  | #N/A                  | 5.5036  | 4.4027  | 3.9301  | 3.7994  | 5.3443  | 4.9103  | 4.5452  | 2.6224  | 4.6147  | 6.3549  | 1.0252  | 0.0359  | 0.8755 | 0.0577 |
| Camk2b | _AGAYOFFSPWDVTVPEAK_2                                                                         | #N/A                  | 9.6665  | 9.6935  | 9.6323  | 11.1396 | 9.0496  | 9.3373  | 11.2711 | 11.1676 | 9.2629  | 9.3662  | 0.9500  | -0.0741 | 0.3943 | 0.4042 |
| Camk2b | _NUNQM[Oxidation (M)]TINPAK_2                                                                 | #N/A                  | 5.8732  | 5.7433  | 6.0355  | 5.6920  | 5.9675  | 4.7755  | 5.7345  | 6.3274  | 5.6983  | 6.0505  | 0.9444  | -0.0674 | 0.3326 | 0.4371 |
| Camk2b | _QET[Phospho (STY)]VE[Carbamidomethyl (C)]KK_2                                                | #N/A                  | 5.9068  | 3.5963  | 3.4798  | 5.5170  | 4.4429  | 5.5758  | 5.7341  | 4.9423  | 4.2767  | 5.5878  | 0.9256  | -0.1116 | 0.5441 | 0.2644 |
| Camk2b | _GAILTMT[Oxidation (M)]LATR_2                                                                 | #N/A                  | 6.2775  | 6.2276  | 5.4391  | 6.7631  | 6.3495  | 5.9552  | 6.2442  | 6.8052  | 6.4204  | 6.3514  | 0.9556  | -0.0655 | 0.2768 | 0.5788 |
| Camk2b | _WQVNHHC[Carbamidomethyl (C)]SGAPVAPLQ_3                                                      | #N/A                  | 5.3331  | 4.8150  | 5.0843  | 5.0318  | 5.4622  | 5.8482  | 5.5303  | 5.3598  | 5.0620  | 5.3192  | 0.9896  | -0.0151 | 0.7911 | 0.1018 |
| Camk2b | _LTQYDGGGR_2                                                                                  | #N/A                  | 6.4286  | 5.5833  | 3.3807  | 4.4253  | 5.9589  | 5.7974  | 6.0199  | 5.7473  | 5.2030  | 0.9135  | 0.1305  | -0.0417 | 0.3648 | 0.1637 |
| Camk2b | _QET[Phospho (STY)]VE[Carbamidomethyl (C)]LK_2                                                | #N/A                  | 5.5878  | 3.8676  | 4.3458  | 3.8896  | 3.7559  | 5.5235  | 5.4313  | 3.1116  | 4.6739  | 3.5669  | 1.0713  | 0.0993  | 0.6314 | 0.1997 |
| Camk2b | _ESSDST[Phospho (STY)]NT[Phospho (STY)]T[Phospho (STY)]EDEDADK_2                              | #N/A                  | 3.2570  | 3.9871  | 7.8669  | 7.5132  | 6.5181  | 6.1910  | 7.5193  | 3.6493  | 3.3167  | 3.6705  | 1.2974  | 0.3756  | 0.3079 | 0.5116 |
| Camk2b | _DLKFNELASK_2                                                                                 | #N/A                  | 9.9736  | 10.1006 | 10.3976 | 10.0473 | 9.9273  | 9.9209  | 10.2015 | 10.2142 | 10.0788 | 9.8946  | 0.9964  | -0.0052 | 0.7481 | 0.1260 |
| Camk2b | _NSSAITS[Phospho (STY)]PK_2                                                                   | P28652_S367_M1_Camk2b | 12.9656 | 12.9743 | 13.1273 | 13.1576 | 12.3790 | 12.8694 | 13.0425 | 13.0466 | 12.9942 | 0.9906  | -0.0136 | 0.4678  | 0.3299 |        |
| Camk2b | _LTQYDGGGR_2                                                                                  | #N/A                  | 5.9078  | 6.7673  | 5.6115  | 6.7428  | 6.5737  | 6.1052  | 6.4184  | 6.3948  | 6.4634  | 6.0260  | 0.9935  | -0.0094 | 0.8778 | 0.2586 |
| Camk2b | _S[Phospho (STY)]TVASMMHR_2                                                                   | P28652_S276_M1_Camk2b | 4.4439  | 3.4519  | 3.3942  | 6.2818  | 4.8958  | 3.7421  | 3.8344  | 4.3248  | 3.7399  | 4.0389  | 1.0563  | 0.1327  | 0.5226 | 0.0616 |
| Camk2b | _JC[Carbamidomethyl (C)]DGLTSFEPEALGNLVEGM[Oxidation (M)]DFHR_3                               | #N/A                  | 4.3622  | 4.7884  | 5.4547  | 4.1260  | 4.8295  | 4.3132  | 4.5272  | 3.9925  | 4.4465  | 3.4142  | 1.1344  | 0.1820  | 0.1227 | 0.9113 |
| Camk2b | _TTEQLAEVNNNGDFEAYAK_2                                                                        | #N/A                  | 6.7841  | 6.8080  | 7.2634  | 6.8337  | 5.9831  | 6.8866  | 7.0141  | 6.8937  | 6.6459  | 6.7287  | 0.9911  | -0.0129 | 0.7928 | 0.1008 |
| Camk2b | _KADGVKPKQNS[Phospho (STY)]TK_2                                                               | #N/A                  | 3.6724  | 3.7981  | 3.9018  | 4.4865  | 3.4037  | 3.9378  | 3.7664  | 4.8134  | 3.8048  | 3.6065  | 0.9672  | -0.0481 | 0.6575 | 0.1821 |
| Camk2b | _QTTPATMSTAASGTTM[Oxidation (M)]GLVEQAK_2                                                     | #N/A                  | 3.4846  | 3.9658  | 4.1138  | 3.6362  | 3.6779  | 4.9859  | 3.9549  | 4.5476  | 4.3211  | 4.0479  | 0.9438  | -0.0835 | 0.4494 | 0.3474 |
| Nap11  | _LDGLVDIPTGYHSLPK_2                                                                           | #N/A                  | 5.6835  | 5.3768  | 6.0297  | 5.7527  | 6.1676  | 5.9368  | 5.5905  | 5.3142  | 5.7350  | 5.9007  | 1.0336  | 0.0477  | 0.3089 | 0.5103 |
| Nap11  | _NVDLSDMVGEHDEPLK_3                                                                           | #N/A                  | 3.5175  | 3.7086  | 4.2043  | 3.2061  | 3.5969  | 3.0277  | 4.4217  | 3.4115  | 3.0601  | 3.1731  | 1.0077  | 0.0110  | 0.9356 | 0.0286 |
| Cellf  | _TWS[Phospho (STY)]EKDLR_2                                                                    | P28659_S28_M1_Cellf   | 7.0856  | 7.1076  | 5.4837  | 7.7237  | 3.2176  | 6.9580  | 3.3002  | 7.4676  | 4.1816  | 7.7524  | 1.0770  | 0.1701  | 0.7411 | 0.1301 |
| Nckap1 | _NNNQIQAQLQK_2                                                                                | #N/A                  | 5.0173  | 5.4129  | 3.9856  | 5.9017  | 3.5945  | 5.6082  | 5.8129  | 5.0472  | 5.3545  | 5.4399  | 0.9088  | -0.1379 | 0.3436 | 0.4639 |
| Nckap1 | _NLSADQWR_2                                                                                   | #N/A                  | 5.3463  | 5.6708  | 3.8165  | 4.7831  | 5.9243  | 5.3452  | 5.0415  | 5.4629  | 5.1467  | 4.7362  | 1.0100  | 0.0143  | 0.9029 | 0.4044 |
| Nckap1 | _AAELFVNR_2                                                                                   | #N/A                  | 4.2718  | 4.5957  | 4.2024  | 4.5901  | 3.9837  | 3.5293  | 3.9105  | 4.4893  | 4.8151  | 5.1159  | 0.9155  | -0.1274 | 0.2179 | 0.6618 |
| Nckap1 | _SVLQSPQK_2                                                                                   | #N/A                  | 6.3954  | 6.1991  | 5.7992  | 5.9582  | 5.6670  | 5.7191  | 5.8624  | 6.4997  |         |         |         |         |        |        |



|         |                                                                          |                        |         |         |         |         |         |         |         |         |         |         |         |          |        |        |
|---------|--------------------------------------------------------------------------|------------------------|---------|---------|---------|---------|---------|---------|---------|---------|---------|---------|---------|----------|--------|--------|
| Napb    | _YEEM[Oxidation (M)]FFAFTDSR_2                                           | #N/A                   | 8.3779  | 7.9765  | 8.0466  | 8.3772  | 8.0036  | 8.1214  | 8.0721  | 7.8574  | 8.0212  | 8.1480  | 1.0157  | 0.0224   | 0.2655 | 0.5760 |
| Napb    | _AALC[Carbamidomethyl (C)]HFIVDLNAK_3                                    | #N/A                   | 5.3432  | 6.1415  | 6.2034  | 5.9934  | 5.9947  | 5.8685  | 5.9005  | 6.1600  | 5.7745  | 6.3582  | 0.9795  | -0.2999  | 0.5281 | 0.2773 |
| Napb    | _SIGDGGDGLK_2                                                            | #N/A                   | 7.4411  | 5.0067  | 7.8498  | 7.1566  | 7.7407  | 7.6536  | 7.0731  | 4.7315  | 7.5768  | 7.4567  | 1.0644  | 0.0900   | 0.5860 | 0.2381 |
| Napb    | _HDSATSPVAGNAVX_2                                                        | #N/A                   | 6.1352  | 5.3036  | 5.8472  | 5.8239  | 5.7649  | 5.0017  | 5.1071  | 5.2698  | 5.7632  | 5.0631  | 1.0651  | 0.0910   | 0.1989 | 0.7014 |
| Napb    | _LDQWLTM[Oxidation (M)]ILR_2                                             | #N/A                   | 7.9506  | 8.1023  | 7.7655  | 7.6430  | 7.8839  | 7.7696  | 7.7653  | 7.9271  | 8.2078  | 7.6884  | 0.9943  | -0.0082  | 0.7256 | 0.1393 |
| Napb    | _LLEAEQNSSEAYEAVK_3                                                      | #N/A                   | 5.8294  | 5.9049  | 6.1911  | 6.6653  | 4.3716  | 5.4774  | 5.5544  | 5.7374  | 3.9664  | 5.3258  | 1.1154  | 0.1576   | 0.2770 | 0.5576 |
| Napb    | _ASHS[Phospho (STY)]FIR_2                                                | P28663_S26_M1_Napb     | 3.7029  | 3.0073  | 4.3897  | 3.6126  | 2.8286  | 3.4000  | 4.6423  | 3.3886  | 3.6877  | 3.2898  | 0.9302  | -0.1044  | 0.5040 | 0.2976 |
| Napb    | _AIEYEQVGAN[Oxidation (M)]DNPLLK_2                                       | #N/A                   | 4.5053  | 4.8829  | 5.1970  | 5.3681  | 4.1249  | 4.9314  | 5.2673  | 5.3143  | 4.6419  | 5.0128  | 0.9557  | -0.0654  | 0.4182 | 0.3786 |
| Napb    | _LHMQLGSK_2                                                              | #N/A                   | 5.3405  | 3.0700  | 3.3422  | 6.5227  | 5.0229  | 3.6663  | 3.5595  | 4.2737  | 3.9222  | 3.8118  | 1.1548  | 0.2076   | 0.4148 | 0.3822 |
| Napb    | _IEEAC[Carbamidomethyl (C)]EMYTR_2                                       | #N/A                   | 4.7724  | 4.3075  | 6.6055  | 5.9389  | 4.8502  | 3.9296  | 3.8228  | 3.1415  | 6.3589  | 4.0751  | 1.2430  | 0.3138   | 0.0819 | 1.0865 |
| Napb    | _LLEAEQNSSEAYEAVKEFQDSR_4                                                | #N/A                   | 4.1224  | 4.5281  | 4.3922  | 5.0990  | 4.1088  | 3.9497  | 3.7451  | 4.1793  | 4.6294  | 4.1976  | 1.0427  | 0.0603   | 0.5039 | 0.2977 |
| Napb    | _AIAHYEQSADYYKGEESNSANK_3                                                | #N/A                   | 6.7567  | 7.1111  | 7.3377  | 8.1660  | 6.3436  | 6.7884  | 6.6860  | 7.2942  | 7.0858  | 7.0932  | 1.0063  | 0.0090   | 0.8990 | 0.4662 |
| Napb    | _EAVQLMAEAKR_2                                                           | #N/A                   | 4.2325  | 2.9702  | 3.4419  | 4.9732  | 3.2707  | 3.7661  | 3.6593  | 4.1739  | 3.8225  | 3.9116  | 0.9702  | -0.0437  | 0.7689 | 0.1141 |
| Napb    | _KLEAEQNSSEAYEAVK_3                                                      | #N/A                   | 3.3714  | 2.0764  | 4.0582  | 1.2518  | 3.9979  | 3.7316  | 4.0924  | 3.0571  | 3.3561  | 3.6214  | 0.8724  | -0.1969  | 0.4840 | 0.3152 |
| Napb    | _AIAHYEQSADYYK_2                                                         | #N/A                   | 2.8960  | 3.7012  | 3.5828  | 4.0854  | 3.5225  | 4.2070  | 3.8001  | 4.0331  | 3.8387  | 4.0524  | 0.9325  | -0.1008  | 0.3082 | 0.5111 |
| Marcks1 | _AAAT[Phospho (STY)]PESQEPQAK_2                                          | P28667_T148_M1_Marcks1 | 10.7438 | 11.0448 | 11.7055 | 11.5419 | 11.5143 | 11.2521 | 11.1138 | 11.1428 | 11.2120 | 11.2120 | 1.0100  | 0.0144   | 0.5636 | 0.2491 |
| Marcks1 | _GDVTAEEAAGAS[Phospho (STY)]PAK_2                                        | P28667_S22_M1_Marcks1  | 11.4061 | 11.2238 | 11.5305 | 11.9932 | 11.6198 | 11.7441 | 11.6224 | 11.3573 | 11.7265 | 11.7265 | 0.9974  | -0.0037  | 0.8520 | 0.2696 |
| Marcks1 | _LSGLS[Phospho (STY)]FKR_2                                               | #N/A                   | 10.6817 | 10.9526 | 11.7747 | 11.8605 | 10.7705 | 10.6697 | 11.0616 | 11.0249 | 11.0408 | 10.7318 | 1.0140  | 0.0201   | 0.6087 | 0.0156 |
| Marcks1 | _GEVAPKET[Phospho (STY)]PK_2                                             | #N/A                   | 10.6390 | 10.8067 | 11.0756 | 11.2205 | 11.3148 | 10.8882 | 10.9975 | 10.8660 | 11.0198 | 10.9606 | 1.0027  | 0.0039   | 0.8299 | 0.0810 |
| Marcks1 | _LSGLS[Phospho (STY)]FK_2                                                | #N/A                   | 3.2582  | 4.1714  | 3.9450  | 4.4743  | 3.8562  | 4.2692  | 4.1624  | 3.3194  | 5.9153  | 0.9364  | -0.0947 | 0.6053   | 0.2180 | 0.2810 |
| Marcks1 | _GEVAPKET[Phospho (STY)]PKX_2                                            | #N/A                   | 5.9562  | 6.0903  | 7.0134  | 6.9430  | 7.3579  | 6.6991  | 5.8982  | 6.1880  | 6.2841  | 6.3221  | 1.0816  | 0.1131   | 0.1215 | 0.9156 |
| KIFc    | _SVELDS[Phospho (STY)]OGGGSAAQK_2                                        | P28738_S820_M1_KIFc    | 6.3240  | 6.5096  | 7.1933  | 7.4049  | 6.1626  | 6.4816  | 7.2175  | 6.5974  | 6.6579  | 0.9827  | -0.0251 | 0.6854   | 0.1641 | 0.1566 |
| KIFc    | _LYLVDAASSK_2                                                            | #N/A                   | 5.9323  | 6.0196  | 6.1917  | 6.7367  | 5.6297  | 6.1195  | 6.6757  | 6.2416  | 6.2917  | 6.1272  | 0.9638  | -0.0532  | 0.3051 | 0.5156 |
| KIFc    | _ILQDSLOGNC[Carbamidomethyl (C)]R_2                                      | #N/A                   | 6.5321  | 6.2802  | 5.2000  | 3.1753  | 6.3473  | 5.8708  | 6.2991  | 5.8995  | 5.3650  | 6.1396  | 0.9396  | -0.0899  | 0.6049 | 0.2183 |
| KIFc    | _SLEPC[Carbamidomethyl (C)]DNT[Phospho (STY)]PIDNTPVVDGISAEK_3           | P28738_T396_M1_KIFc    | 4.1631  | 5.3589  | 5.0930  | 6.6431  | 3.3548  | 4.3239  | 3.5888  | 5.6037  | 3.8597  | 4.5579  | 1.0920  | 0.1270   | 0.5711 | 0.2433 |
| KIFc    | _LSLAGGVLSALAEGTK_2                                                      | #N/A                   | 4.9836  | 4.7986  | 4.6358  | 4.5652  | 4.3000  | 4.7312  | 3.4638  | 4.4381  | 4.4790  | 4.9167  | 1.0797  | 0.1106   | 0.2370 | 0.6252 |
| KIFc    | _SLENNLEQLTK_2                                                           | #N/A                   | 4.5142  | 4.1046  | 3.9862  | 4.4889  | 3.2210  | 4.2037  | 3.2782  | 3.6001  | 4.2006  | 4.1005  | 1.0766  | 0.1005   | 0.3548 | 0.4500 |
| KIFc    | _TTWVC[Carbamidomethyl (C)]C[Carbamidomethyl (C)]SPSVNEAETK_2            | #N/A                   | 3.7162  | 3.0205  | 4.4030  | 3.5993  | 3.1681  | 3.3868  | 3.7476  | 3.2128  | 3.7009  | 3.3718  | 1.0116  | 0.0166   | 0.8844 | 0.0534 |
| KIFc    | _HVAVTMMNHSSR_3                                                          | #N/A                   | 4.1590  | 3.4144  | 4.4985  | 4.1736  | 3.3027  | 3.3219  | 3.2150  | 3.1173  | 4.2667  | 3.4673  | 1.0839  | 0.1163   | 0.4083 | 0.3891 |
| KIF2a   | _GSLDYRLTTADPIDEHR_3                                                     | #N/A                   | 6.2098  | 6.0866  | 6.7985  | 6.1127  | 6.3840  | 6.0526  | 6.4968  | 6.1810  | 5.9591  | 6.1523  | 1.0124  | 0.0178   | 0.6624 | 0.1789 |
| KIF2a   | _PSQLPEQSSAQNGVSD[Phospho (STY)]PVQAQK_3                                 | P28740_S139_M1_KIF2a   | 4.2362  | 5.8200  | 6.1201  | 7.2939  | 3.3619  | 5.4181  | 5.8013  | 6.1348  | 5.9754  | 5.7814  | 0.9075  | -0.1401  | 0.4665 | 0.3312 |
| KIF2a   | _YLENTFR_2                                                               | #N/A                   | 5.6034  | 5.8768  | 3.7570  | 5.9324  | 6.1020  | 5.6065  | 5.6277  | 5.5215  | 4.8801  | 5.4807  | 1.0190  | 0.0272   | 0.8303 | 0.0807 |
| KIF2a   | _IDLTELR_2                                                               | #N/A                   | 4.5633  | 4.5149  | 3.4412  | 2.9253  | 4.2053  | 3.4184  | 3.3672  | 4.6934  | 4.7164  | 0.8763  | -0.1906 | 0.2499   | 0.6022 | 0.2180 |
| KIF2a   | _LUDIGNSC[Carbamidomethyl (C)]R_2                                        | #N/A                   | 4.7798  | 4.4970  | 4.3039  | 3.3057  | 4.2584  | 4.0816  | 4.9660  | 4.2863  | 4.1293  | 4.4651  | 0.9423  | -0.0857  | 0.4055 | 0.3920 |
| KIF2a   | _DFRGS[Phospho (STY)]LDYRLTTADPIDEHR_4                                   | P28740_S206_M1_KIF2a   | 3.6718  | 3.6706  | 3.4055  | 4.4501  | 2.8155  | 4.4038  | 3.0975  | 4.0519  | 4.3510  | 4.1274  | 0.9563  | -0.0645  | 0.6690 | 0.1746 |
| KIF2a   | _AVTQESR_2                                                               | #N/A                   | 3.5503  | 3.6759  | 4.2371  | 6.1133  | 3.5642  | 3.3549  | 4.4545  | 3.3787  | 2.9308  | 3.2059  | 1.1690  | 0.2252   | 0.3481 | 0.4583 |
| KIF3a   | _S[Phospho (STY)]AKPTVIDSLQ_2                                            | P28741_S689_M1_KIF3a   | 6.4572  | 3.5018  | 6.5764  | 6.8790  | 6.1630  | 4.4064  | 3.6007  | 6.5121  | 6.0142  | 6.4675  | 1.0027  | 0.0039   | 0.9867 | 0.0058 |
| KIF3a   | _KQT[Phospho (STY)]PVPDKK_2                                              | P28741_T635_M1_KIF3a   | 3.0250  | 3.6789  | 1.9246  | 3.0408  | 3.5672  | 3.0574  | 4.4514  | 2.7482  | 3.0304  | 2.6581  | 0.9468  | -0.0788  | 0.7178 | 0.1440 |
| Prkc    | _LAEALNGVTPR_2                                                           | #N/A                   | 4.3934  | 3.5823  | 3.4408  | 4.5988  | 4.5198  | 3.7650  | 4.2130  | 4.3861  | 4.7021  | 4.2256  | 0.9243  | -0.1136  | 0.2644 | 0.5777 |
| Prkc    | _SPSDSYNDFPEFLNEKPLS[Phospho (STY)]FSDK_3                                | P28867_S643_M1_Prkc    | 3.8929  | 3.3333  | 4.5797  | 3.5815  | 3.2216  | 3.4030  | 3.2962  | 3.0362  | 4.1856  | 3.5485  | 1.0432  | 0.0611   | 0.6500 | 0.1871 |
| Pabpc1  | _FSPAGPLISR_2                                                            | #N/A                   | 7.4136  | 7.2218  | 7.5561  | 7.7611  | 7.3049  | 7.0740  | 7.4701  | 7.3258  | 7.1517  | 7.2227  | 1.0132  | 0.0189   | 0.5024 | 0.2990 |
| Pabpc1  | _SLGVAVYVQQPADAEIR_2                                                     | #N/A                   | 5.7459  | 6.2396  | 6.4122  | 5.9810  | 3.4282  | 5.7667  | 6.0534  | 5.6042  | 5.8686  | 5.6323  | 0.9665  | -0.0492  | 0.7399 | 0.1308 |
| Pabpc1  | _ALVDTFSAGNLSC[Carbamidomethyl (C)]K_2                                   | #N/A                   | 2.9122  | 4.2747  | 3.5990  | 4.1016  | 4.5412  | 3.9577  | 4.2989  | 4.3050  | 3.6654  | 4.0686  | 0.9543  | -0.0675  | 0.5722 | 0.2424 |
| Pabpc1  | _SKVDEAVLQAHQAK_3                                                        | #N/A                   | 4.9921  | 4.5285  | 3.2808  | 4.4548  | 4.8278  | 5.1207  | 3.4981  | 4.9183  | 3.9836  | 5.1810  | 1.0316  | 0.0449   | 0.7710 | 0.1130 |
| Pabpc1  | _NLDDGIDDERL_3                                                           | #N/A                   | 3.2185  | 4.1239  | 4.4530  | 3.9968  | 3.8630  | 4.2624  | 4.1450  | 3.0044  | 3.3035  | 3.6740  | 1.1287  | 0.1747   | 0.1590 | 0.7986 |
| Gnb4    | _SGVLGHONR_2                                                             | #N/A                   | 10.6379 | 3.1265  | 3.2856  | 10.4611 | 5.5971  | 10.2075 | 10.5212 | 10.6128 | 10.3377 | 10.4335 | 0.6891  | -0.05372 | 0.1171 | 0.9315 |
| Vcam1   | _QEFSS[Phospho (STY)]EEM[Oxidation (M)]TK_2                              | #N/A                   | 8.2946  | 8.2440  | 8.8065  | 9.0136  | 8.1357  | 8.2022  | 8.7472  | 8.3043  | 8.2483  | 3.1796  | 1.1867  | 0.2470   | 0.2446 | 0.6115 |
| Nedd8   | _EIEIDPTDKVER_2                                                          | #N/A                   | 5.8102  | 6.1530  | 6.5885  | 6.5798  | 6.7601  | 6.6629  | 6.5330  | 6.4456  | 6.5728  | 6.7762  | 0.9763  | -0.0346  | 0.4464 | 0.3503 |
| Ahg     | _VM[Oxidation (M)]HTQC[Carbamidomethyl (C)]HSTPOS[Phospho (STY)]AEDVR_3  | #N/A                   | 3.1465  | 3.8509  | 4.7193  | 3.5989  | 3.9951  | 3.5629  | 4.5381  | 3.6704  | 4.0748  | 4.0324  | 0.9346  | -0.0975  | 0.4078 | 0.3896 |
| Ahg     | _VM[Oxidation (M)]HTQC[Carbamidomethyl (C)]HSTPOS[Phospho (STY)]AEDVRK_4 | #N/A                   | 3.4536  | 3.5936  | 4.1115  | 4.4296  | 3.4858  | 3.7095  | 4.0403  | 3.5835  | 3.5515  | 3.9681  | 1.0030  | 0.0043   | 0.9604 | 0.0175 |
| Oat     | _LPSDVVTSVR_2                                                            | #N/A                   | 6.4717  | 6.2237  | 6.2130  | 6.2549  | 6.8378  | 6.5429  | 6.4033  | 6.4403  | 6.2613  | 6.2765  | 1.0124  | 0.0178   | 0.5622 | 0.2501 |
| Oat     | _IAAALEEVLEENLAENADK_2                                                   | #N/A                   | 5.3390  | 5.1886  | 5.5384  | 6.1105  | 5.2148  | 4.5458  | 5.3240  | 5.4146  | 4.3858  | 5.2152  | 1.0468  | 0.0660   | 0.4791 | 0.3196 |
| Oat     | _LVFADGNFWGR_2                                                           | #N/A                   | 4.7726  | 5.0680  | 3.1588  | 5.3946  | 4.5200  | 5.3338  | 5.5473  | 5.2443  | 5.1292  | 4.6709  | 0.9145  | -0.1289  | 0.3534 | 0.4518 |
| Oat     | _AFYNNVLGEVEYITK_2                                                       | #N/A                   | 4.1301  | 4.6221  | 4.7185  | 5.0036  | 5.1132  | 4.7400  | 4.7768  | 4.3069  | 3.2209  | 4.9207  | 1.0964  | 0.1327   | 0.2715 | 0.5662 |
| Oat     | _KTEGPPSSEVIFER_3                                                        | #N/A                   | 4.1782  | 5.4285  | 3.9119  | 5.2146  | 5.6522  | 5.2524  | 3.6039  | 5.5221  | 6.2123  | 3.1329  | 1.0697  | 0.0972   | 0.6535 | 0.1847 |
| Ckmt1   | _LYPPSAEYPOUR_2                                                          | #N/A                   | 10.6666 | 10.6123 | 10.5288 | 10.6592 | 10.6365 | 10.5448 | 10.5733 | 10.3859 | 10.3398 | 10.5769 | 1.0133  | 0.0190   | 0.0417 | 1.3800 |
| Ckmt1   | _VVVDAISGLK_2                                                            | #N/A                   | 10.0545 | 10.3955 | 10.2646 | 10.3068 | 10.2668 | 10.1219 | 10.0845 | 10.1641 | 10.0890 | 10.1613 | 1.0109  | 0.0156   | 0.1339 | 0.8731 |
| Ckmt1   | _TTPTGWLTDQC[Carbamidomethyl (C)]QTGVONPGHPIFK_3                         | #N/A                   | 8.6029  | 8.7243  | 9.0827  | 8.8021  | 8.8937  | 8.7362  | 8.5852  | 8.3554  | 8.5644  | 8.6007  | 1.0329  | 0.0467   | 0.0192 | 1.7176 |
| Ckmt1   | _GWIEFM[Oxidation (M)]WNER_2                                             | #N/A                   | 4.9889  | 4.8469  | 8.8984  | 8.3425  | 8.4425  | 8.6204  | 8.6148  | 8.2804  | 8.4002  | 8.7612  | 1.0028  | 0.0041   | 0.8601 | 0.0654 |
| Ckmt1   | _LYPPSAEYPOURK_3                                                         | #N/A                   | 8.1536  | 8.0430  | 8.3886  | 8.0612  | 8.5924  | 8.5642  | 7.3623  | 8.0425  | 8.2884  | 8.5741  | 1.0290  | 0.0412   | 0.3598 | 0.4439 |
| Ckmt1   | _TVGM[Oxidation (M)]VAGDEETYEFAELFDPVQIER_3                              | #N/A                   | 7.4065  | 7.6630  | 8.3459  | 9.2808  | 7.9995  | 8.2275  | 8.1766  | 7.4458  | 7.3921  | 7.7491  | 1.0602  | 0.0843   | 0.2374 | 0.6245 |
| Ckmt1   | _HTTDLDASK_2                                                             | #N/A                   | 7.9700  | 7.6747  | 7.4483  | 7.8858  | 8.4858  | 8.0044  | 7.5100  | 7.3199  | 7.6435  | 7.9491  | 1.0402  | 0.0569   | 0.1780 | 0.7497 |
| Ckmt1   | _GWMNNEX_2                                                               | #N/A                   | 7.8268  | 7.8139  | 7.6601  | 7.9609  | 7.8980  | 7.7341  | 7.5587  | 7.5856  | 7.6831  | 7.0329  | 1.0230  | 0.0329   | 0.0249 | 1.6030 |
| Ckmt1   | _HNGYDPR_2                                                               | #N/A                   | 6.3640  |         |         |         |         |         |         |         |         |         |         |          |        |        |



|               |                                                                                   |                              |         |         |         |         |        |         |         |         |         |         |        |         |        |        |
|---------------|-----------------------------------------------------------------------------------|------------------------------|---------|---------|---------|---------|--------|---------|---------|---------|---------|---------|--------|---------|--------|--------|
| Ctmd1         | _VGGS[Phospho (STY)]VDLHR_2                                                       | P30999_S269_M1_Ctmd1         | 5.7032  | 5.3643  | 4.7903  | 4.9212  | 3.9427 | 5.0388  | 5.3596  | 5.6016  | 6.2379  | 4.9749  | 0.8948 | -0.1604 | 0.1536 | 0.8136 |
| Ctmd1         | _HYEDGYPGSSDNYG[Phospho (STY)]LSR_3                                               | #N/A                         | 6.2279  | 6.3220  | 6.6841  | 3.6737  | 3.5400 | 5.7496  | 5.2397  | 6.5109  | 3.7109  | 5.3472  | 1.0315 | 0.0448  | 0.8509 | 0.0701 |
| Ctmd1         | _GSLAS[Phospho (STY)]LSRLK_2                                                      | P30999_S349_M1_Ctmd1         | 7.8294  | 7.6079  | 7.9333  | 8.8628  | 7.8891 | 7.8492  | 8.1321  | 7.9652  | 8.2573  | 7.9563  | 0.9795 | -0.0299 | 0.5484 | 0.2609 |
| Ctmd1         | _SQSHSY[Phospho (STY)]DOSTLUDR_3                                                  | P30999_Y865_M1_Ctmd1         | 3.1656  | 6.3288  | 6.0496  | 7.7310  | 5.9461 | 3.9420  | 4.3028  | 7.0776  | 7.2426  | 4.1880  | 0.9692 | -0.0451 | 0.8753 | 0.0578 |
| Ctmd1         | _GS[Phospho (STY)]ASLDSLR_2                                                       | #N/A                         | 4.5698  | 4.0087  | 3.8425  | 4.7493  | 3.4785 | 3.8361  | 3.5533  | 5.4909  | 3.7127  | 3.6732  | 0.9930 | -0.0101 | 0.9498 | 0.0224 |
| Ctmd1         | _S[Phospho (STY)]M[Oxidation (M)]GYDLDYGM[Oxidation (M)]M[Oxidation (M)]SOYGTAR_2 | P30999_S388_M1_Ctmd1         | 3.1364  | 3.9416  | 3.1345  | 4.1791  | 3.7630 | 3.9665  | 4.8624  | 5.4788  | 5.1338  | 5.4451  | 0.7016 | -0.1113 | 0.0002 | 3.6377 |
| Ctmd1         | _TLDRS[Phospho (STY)]GOLGOMEPK_3                                                  | P30999_S920_M1_Ctmd1         | 4.2657  | 3.5211  | 3.9993  | 3.3937  | 3.4094 | 3.2152  | 3.1084  | 3.2239  | 4.3734  | 3.2204  | 1.0438 | 0.0619  | 0.6405 | 0.1934 |
| Pkar2b        | _AATITATSPGALWLR_2                                                                | #N/A                         | 7.1107  | 6.7841  | 6.9645  | 7.1222  | 7.2675 | 7.4610  | 7.0927  | 7.0731  | 7.1394  | 7.1146  | 1.0019 | 0.0027  | 0.9142 | 0.0390 |
| Pkar2b        | _TWGDAGAAAGGSPK_2                                                                 | #N/A                         | 6.6593  | 6.2618  | 6.9600  | 6.9645  | 6.7479 | 6.8743  | 6.5692  | 6.1794  | 6.6394  | 6.4169  | 1.0455 | 0.0642  | 0.0995 | 1.0022 |
| Pkar2b        | _C[Carbamidomethyl (C)]VGVYDNR_2                                                  | #N/A                         | 5.6031  | 5.1243  | 4.8337  | 5.9334  | 5.6778 | 5.7381  | 5.4422  | 5.3852  | 5.8867  | 5.6616  | 0.9805 | -0.0283 | 0.6505 | 0.1867 |
| Pkar2b        | _ASVC[Carbamidomethyl (C)]AEAYNPDEEDOAESR_2                                       | #N/A                         | 4.5232  | 5.1299  | 3.9520  | 6.0780  | 5.1254 | 5.5783  | 5.8218  | 4.6682  | 5.6710  | 5.0502  | 0.9551 | -0.0663 | 0.6020 | 0.2204 |
| Pkar2b        | _AASAHAIGTVK_2                                                                    | #N/A                         | 4.6624  | 5.3504  | 4.2552  | 4.8752  | 5.1727 | 5.1233  | 4.9705  | 4.7824  | 4.8274  | 5.1145  | 0.9965 | -0.0050 | 0.9376 | 0.2800 |
| Pkar2b        | _VYNDGEQIAAGDLADSFVSEGVK_3                                                        | #N/A                         | 4.1352  | 5.4330  | 6.0632  | 6.5889  | 4.8559 | 5.6736  | 4.4952  | 4.7372  | 4.1645  | 5.3608  | 1.1640 | 0.2190  | 0.1537 | 0.8133 |
| Pkar2b        | _LQGENER_2                                                                        | #N/A                         | 5.3852  | 5.2128  | 4.3886  | 5.8463  | 3.7986 | 5.1135  | 5.6364  | 3.0688  | 4.7882  | 6.1349  | 1.0103 | 0.0147  | 0.9403 | 0.0268 |
| Pkar2b        | _GSFGLALM[Oxidation (M)]YNTPR_2                                                   | #N/A                         | 5.5090  | 5.1140  | 6.0252  | 5.8502  | 5.9327 | 5.7898  | 5.5331  | 5.4853  | 5.4611  | 5.2109  | 1.0606 | 0.0849  | 0.1067 | 0.9719 |
| Pkar2b        | _VYNDVIGTK_2                                                                      | #N/A                         | 3.7985  | 3.7900  | 3.5171  | 3.8759  | 5.4589 | 4.9458  | 3.5906  | 4.8610  | 5.1299  | 4.6521  | 0.9282 | -0.1075 | 0.5134 | 0.2896 |
| Pkar2b        | _EGEHVDQGDGDGNPFVDR_3                                                             | #N/A                         | 7.8031  | 7.4381  | 7.9106  | 8.0272  | 7.0203 | 7.5428  | 7.7377  | 7.6508  | 7.3375  | 7.7306  | 1.0013 | 0.0018  | 0.9635 | 0.0161 |
| Pkar2b        | _GTFDIYK_2                                                                        | #N/A                         | 3.0718  | 3.8280  | 4.3063  | 2.3239  | 3.5124 | 4.4091  | 3.9983  | 3.6645  | 3.1355  | 3.5273  | 0.9983 | -0.0025 | 0.9888 | 0.0049 |
| Pkar2b        | _GVNFAEPM[Oxidation (M)]RS[Phospho (STY)]DSENEEEEEAAAGAFNAPVINR_4                 | P31324_S83_M1_Pkar2b         | 3.8843  | 3.6127  | 3.4945  | 5.2461  | 4.4748 | 3.9809  | 3.7920  | 7.3276  | 3.8104  | 3.6548  | 0.8858 | -0.1750 | 0.5161 | 0.2873 |
| Pkar2b        | _HQRADLEFLQHFIR_3                                                                 | #N/A                         | 3.7688  | 3.4235  | 4.4894  | 3.4913  | 3.3118 | 3.0923  | 3.2059  | 3.9532  | 3.8925  | 3.4583  | 0.9914 | -0.0125 | 0.9160 | 0.0381 |
| Pkar2b        | _NLDRFQM[Oxidation (M)]SQVLDAMFEK_2                                               | #N/A                         | 3.9141  | 3.1696  | 3.6478  | 3.1916  | 3.0578 | 3.5668  | 3.3398  | 3.8096  | 4.1087  | 4.3697  | 0.8765 | -0.1901 | 0.0842 | 1.0749 |
| Pkar2b        | _RAS[Phospho (STY)]VC[Carbamidomethyl (C)]AEAYNPDEEDOAESR_3                       | P31324_S112_M1_Pkar2b        | 3.1298  | 3.4341  | 3.3158  | 6.0791  | 3.2555 | 2.9732  | 3.5331  | 4.6286  | 5.4323  | 3.7954  | 0.8895 | -0.1690 | 0.4997 | 0.3013 |
| Pkar2b        | _C[Carbamidomethyl (C)]LAMDVQAFER_2                                               | #N/A                         | 3.0969  | 3.9021  | 3.7837  | 4.2186  | 3.7235 | 4.0060  | 4.3668  | 4.2835  | 3.0817  | 4.2534  | 0.9480 | -0.0771 | 0.5220 | 0.2824 |
| Pou3f2        | _WLEEAADSSSG[Phospho (STY)]PTSDK_2                                                | P31360_S343_M1_Pou3f2        | 5.3964  | 5.5276  | 4.2306  | 6.4278  | 3.8577 | 5.8637  | 6.3398  | 4.1362  | 3.3414  | 4.0401  | 1.1686 | 0.2248  | 0.3250 | 0.4881 |
| Pou3f3_Pou3f4 | _WLEEAADSTSG[Phospho (STY)]PTSDK_2                                                | P31361_S390_M1_Pou3f3_Pou3f4 | 6.2149  | 6.2694  | 6.3399  | 6.8940  | 6.0512 | 6.9062  | 3.2254  | 3.9353  | 6.8925  | 6.6162  | 1.2474 | 0.3190  | 0.1301 | 0.8858 |
| Slc6a1        | _QC[Carbamidomethyl (C)]DNPWNTDR_2                                                | #N/A                         | 7.4841  | 7.1637  | 7.6249  | 7.0205  | 6.9277 | 6.7181  | 7.7914  | 7.2893  | 7.4259  | 7.1007  | 0.9669 | -0.0486 | 0.2760 | 0.5590 |
| Slc6a1        | _AGLDPRDRTWK_2                                                                    | #N/A                         | 5.2695  | 5.7583  | 5.2091  | 5.2699  | 2.9445 | 3.6801  | 5.5466  | 5.1989  | 4.7858  | 5.1654  | 0.9062 | -0.1422 | 0.4261 | 0.3705 |
| Slc6a1        | _VADGGS[Phospho (STY)]TEVSEAPVADKPK_3                                             | #N/A                         | 6.5584  | 6.6787  | 7.1389  | 5.2109  | 5.6171 | 5.2875  | 6.9860  | 7.3932  | 7.0895  | 5.6151  | 0.8982 | -0.1548 | 0.2211 | 0.6553 |
| Slc6a11       | _SS[Phospho (STY)]ETLGGGGGGAAGR_2                                                 | #N/A                         | 5.9048  | 6.9672  | 7.1300  | 7.0256  | 5.6731 | 7.1182  | 7.5205  | 5.8638  | 7.1471  | 7.2404  | 0.9560 | -0.0650 | 0.5132 | 0.5930 |
| Slc6a11       | _LTVPSADLK_2                                                                      | #N/A                         | 7.2728  | 7.3034  | 7.6676  | 6.4481  | 7.1280 | 7.1163  | 7.1134  | 7.4801  | 7.2817  | 7.2365  | 0.9833 | -0.0244 | 0.5828 | 0.2345 |
| Slc6a11       | _AAEEARG[Phospho (STY)]ETLGGGGGGAAGR_3                                            | #N/A                         | 4.2009  | 3.4063  | 3.7144  | 3.6772  | 3.2946 | 3.3599  | 3.6166  | 3.9699  | 3.8685  | 3.5121  | 0.9645 | -0.0522 | 0.5075 | 0.2946 |
| Slc6a11       | _LVGDGTISAITEK_3                                                                  | #N/A                         | 4.1461  | 3.1963  | 3.8798  | 3.4236  | 3.2899 | 3.3347  | 3.5719  | 3.5776  | 3.8766  | 3.1009  | 1.0038 | 0.0054  | 0.9555 | 0.0198 |
| Akt1          | _SS[Phospho (STY)]PSDNGAAEM[Oxidation (M)]EVLAKPK_3                               | #N/A                         | 3.5838  | 7.4410  | 4.0346  | 7.0740  | 3.7731 | 3.8526  | 3.8463  | 7.6320  | 3.6855  | 4.3295  | 1.0178 | 0.0254  | 0.9430 | 0.0255 |
| Dbi           | _AKWDSWNK_2                                                                       | #N/A                         | 7.6353  | 7.9438  | 8.4174  | 8.2033  | 8.6857 | 8.0086  | 7.7344  | 7.4922  | 7.9568  | 8.0174  | 1.0447 | 0.0631  | 0.1379 | 0.8605 |
| Dbi           | _TYVEKVDLKK_3                                                                     | #N/A                         | 5.4309  | 6.0812  | 6.8263  | 5.7377  | 7.1385 | 6.2501  | 6.1507  | 5.7452  | 6.5882  | 6.6616  | 0.9933 | -0.0097 | 0.9117 | 0.0401 |
| Dbi           | _Acetyl (Protein N-term)[SQAEFDKAAEEVWR_3                                         | #N/A                         | 7.2971  | 7.7120  | 8.2923  | 7.9688  | 8.0109 | 7.8753  | 7.5014  | 7.4961  | 7.6903  | 7.5918  | 1.0382 | 0.0541  | 0.1360 | 0.8664 |
| Dbi           | _TQPTDEEM[Oxidation (M)]FYLSHFK_3                                                 | #N/A                         | 7.1669  | 7.1106  | 7.0001  | 6.9263  | 7.7634 | 7.5031  | 7.0930  | 6.7682  | 7.7547  | 7.4932  | 0.9566 | -0.0064 | 0.8958 | 0.0478 |
| Dbi           | _QATVGVNTDRPGLDLK_3                                                               | #N/A                         | 7.9616  | 8.1406  | 8.4073  | 8.3418  | 8.9131 | 8.6764  | 8.0869  | 8.0529  | 8.4223  | 8.0354  | 1.0334 | 0.0474  | 0.1943 | 0.7116 |
| Dbi           | _Acetyl (Protein N-term)[SQAEFDKAAEEVVK_2                                         | #N/A                         | 2.8142  | 2.9880  | 3.5448  | 4.5952  | 4.0780 | 4.6347  | 3.7621  | 3.3399  | 4.0047  | 4.1067  | 0.9928 | -0.1055 | 0.9498 | 0.0223 |
| Dbi           | _TYVEKVDLKK_2                                                                     | #N/A                         | 7.8857  | 8.3376  | 8.7841  | 8.3149  | 8.8230 | 8.4703  | 8.0002  | 8.2238  | 8.2136  | 8.1690  | 1.0349 | 0.0494  | 0.1557 | 0.8077 |
| Map2k1        | _DVKPSNLVNSR_2                                                                    | #N/A                         | 8.1456  | 8.4185  | 8.3111  | 8.5955  | 8.7067 | 8.1854  | 8.4092  | 7.8568  | 8.1446  | 8.0343  | 1.0348 | 0.0494  | 0.0897 | 1.0471 |
| Map2k1        | _KLEELDEQQR_3                                                                     | #N/A                         | 6.6177  | 6.8354  | 6.6288  | 6.8842  | 6.8486 | 7.3219  | 6.2960  | 7.0181  | 7.2574  | 6.9380  | 0.9969 | -0.0045 | 0.9212 | 0.0357 |
| Map2k1        | _IPEQLGK_2                                                                        | #N/A                         | 5.1307  | 4.8581  | 2.2775  | 4.6825  | 4.6645 | 5.3378  | 4.2936  | 4.1444  | 4.3421  | 4.2707  | 1.0538 | 0.0755  | 0.6984 | 0.1559 |
| Map2k1        | _LEAFLTQK_2                                                                       | #N/A                         | 5.7836  | 3.9011  | 3.8425  | 4.5530  | 4.0139 | 4.0287  | 4.0598  | 4.9939  | 4.1634  | 4.3121  | 0.9935 | -0.0094 | 0.9469 | 0.0237 |
| Map2k1        | _ISELAGNGGVVKF_2                                                                  | #N/A                         | 5.1662  | 5.8449  | 4.0208  | 5.5838  | 4.3020 | 3.3520  | 3.7128  | 4.9192  | 3.7356  | 5.2189  | 1.0716 | 0.0998  | 0.6057 | 0.2178 |
| Map2k1        | _LPSGVFLEQDFVVK_2                                                                 | #N/A                         | 5.0689  | 4.0069  | 3.9342  | 3.4069  | 2.8531 | 3.3847  | 3.7454  | 3.8297  | 4.8085  | 3.3739  | 0.9585 | -0.0612 | 0.7298 | 0.1368 |
| Map2k1        | _LC[Carbamidomethyl (C)]DRFVSGQLDSM[Oxidation (M)]ANSFVGTNR_2                     | #N/A                         | 3.8516  | 4.1958  | 4.5084  | 3.8839  | 4.3226 | 4.6781  | 4.7184  | 4.8563  | 4.7432  | 4.8342  | 0.8856 | -0.1753 | 0.0127 | 1.8971 |
| Map2k1        | _KLEELDEQQRK_3                                                                    | #N/A                         | 3.6666  | 4.2871  | 3.2645  | 4.1285  | 2.5609 | 3.9501  | 3.8432  | 4.1929  | 2.9911  | 2.3835  | 1.0866 | 0.1198  | 0.5463 | 0.2673 |
| Map2k1        | _VGEIXDDDFEK_3                                                                    | #N/A                         | 4.1288  | 3.4331  | 2.7244  | 3.1867  | 2.5273 | 2.9742  | 3.3350  | 3.8145  | 4.1135  | 3.2410  | 0.8722 | -0.1973 | 0.2028 | 0.6929 |
| Map2k1        | _LEELDEQQR_2                                                                      | #N/A                         | 3.7632  | 3.5792  | 3.4969  | 4.5415  | 3.4005 | 4.3289  | 3.1889  | 3.9605  | 4.2596  | 4.2188  | 0.9859 | -0.0205 | 0.8634 | 0.0638 |
| Map2k1        | _LQGTTHYSVQSDWSM[Oxidation (M)]GLSLVM[Oxidation (M)]AVGR_3                        | #N/A                         | 3.4497  | 3.7765  | 4.1365  | 3.1383  | 3.6648 | 2.9599  | 4.3539  | 3.4793  | 3.1279  | 3.1053  | 1.0012 | 0.0018  | 0.9895 | 0.0046 |
| Scp2          | _KLEEGEGFVVK_3                                                                    | #N/A                         | 4.2957  | 3.6000  | 3.4816  | 3.9843  | 4.9281 | 3.3487  | 6.6990  | 4.1342  | 3.7828  | 3.4810  | 1.0439 | 0.0619  | 0.6221 | 0.2062 |
| Scp2          | _GSVPNSDKK_2                                                                      | #N/A                         | 4.1499  | 3.4053  | 3.8836  | 3.5095  | 5.5458 | 4.9533  | 3.2241  | 3.7936  | 4.9693  | 3.1046  | 1.1241 | 0.1688  | 0.4174 | 0.3795 |
| Scp2          | _EATWVVDVK_2                                                                      | #N/A                         | 3.6188  | 4.4240  | 4.1529  | 2.7816  | 4.2453 | 3.4842  | 3.8449  | 3.4902  | 3.6035  | 3.3740  | 1.0577 | 0.0809  | 0.5407 | 0.2670 |
| Slc2a3        | _EDQATELR_2                                                                       | #N/A                         | 7.2260  | 6.3835  | 6.9407  | 6.3134  | 6.4416 | 6.4725  | 7.0842  | 7.0747  | 6.6382  | 6.7545  | 0.9625 | -0.0551 | 0.2485 | 0.6047 |
| Slc2a3        | _QVTVLELFR_2                                                                      | #N/A                         | 6.2975  | 6.2671  | 6.3808  | 5.9160  | 5.6256 | 6.0354  | 6.7678  | 6.6315  | 6.0733  | 6.2642  | 0.9461 | -0.0800 | 0.1102 | 0.9577 |
| Slc2a3        | _LWGTSDVVGIEDEM[Oxidation (M)]KDESVR_3                                            | #N/A                         | 6.4751  | 6.5211  | 7.0103  | 6.8743  | 6.2569 | 4.1535  | 7.3371  | 6.6904  | 6.7583  | 7.0908  | 0.8921 | -0.1647 | 0.2068 | 0.6845 |
| Slc2a3        | _TFEDAR_2                                                                         | #N/A                         | 4.8241  | 4.7298  | 3.9282  | 4.4309  | 3.8731 | 4.7461  | 4.1456  | 4.3518  | 4.5567  | 4.3979  | 1.0135 | 0.0194  | 0.8016 | 0.0960 |
| Sub           | _S[Phospho (STY)]PSRPLEYDEVYKNVKK_3                                               | P32067_S92_M1_Sub            | 3.8744  | 3.1788  | 4.5612  | 3.4441  | 5.8726 | 3.2286  | 3.5894  | 3.5601  | 5.7810  | 6.5318  | 0.8275 | -0.2732 | 0.3261 | 0.0660 |
| Chrm4         | _KFAS[Phospho (STY)]IAR_2                                                         | P32211_S379_M1_Chrm4         | 10.6613 | 10.5632 | 11.0903 | 10.4251 | 9.3070 | 10.2169 | 10.9918 | 10.7451 | 10.5028 | 10.3505 | 0.9746 | -0.0371 | 0.4305 | 0.3660 |
| Kras          | _LVVWAGGVGK_2                                                                     | #N/A                         | 6.9658  | 7.3945  | 6.9820  | 7.3743  | 7.3743 | 7.0750  | 6.9357  | 7.5699  | 7.3984  | 7.2468  | 0.9872 | -0.0186 | 0.5516 | 0.2883 |
| Kras          | _SYGPIETSAK_2                                                                     | #N/A                         | 7.4023  | 7.5521  | 7.4392  | 7.6894  | 7.5411 | 7.2623  | 7.5550  | 7.3665  | 7.4617  | 6.9457  | 1.0203 | 0.0290  | 0.2856 | 0.5443 |
| Kras          | _TGEGLFC[Carbamidomethyl (C)]VFAINTK_2                                            | #N/A                         | 5.2444  | 4.8588  | 5.8653  | 5.6413  | 4.9782 | 4.9903  | 5.7158  | 4.      |         |         |        |         |        |        |



|           |                                                                                         |                          |         |         |         |         |         |         |         |         |         |         |        |         |        |        |
|-----------|-----------------------------------------------------------------------------------------|--------------------------|---------|---------|---------|---------|---------|---------|---------|---------|---------|---------|--------|---------|--------|--------|
| Kf1a      | _TPQPC[Carbamidomethyl (C)]S[Phospho (STY)]RPAS[Phospho (STY)]PEPELLPELDSK_3            | P33173_S1533_M2_Kf1a     | 3.9204  | 3.4220  | 3.6541  | 6.4947  | 3.0641  | 3.5605  | 3.3461  | 6.3152  | 4.1024  | 4.3759  | 0.8863 | -0.1741 | 0.5414 | 0.2665 |
| Kf1a      | _PASPPELLPELDSKKT[Phospho (STY)]PS[Phospho (STY)]PVR_4                                  | #N/A                     | 3.9185  | 3.1943  | 4.1236  | 3.5935  | 3.8622  | 3.3971  | 3.5534  | 3.2004  | 3.9767  | 3.3898  | 1.0429 | 0.0606  | 0.5126 | 0.2902 |
| Kf1a      | _PAS[Phospho (STY)]PEPELLPELDSK_2                                                       | P33173_S1537_M1_Kf1a     | 4.1170  | 3.7457  | 3.8507  | 3.3944  | 3.0467  | 3.1819  | 3.5427  | 3.6067  | 3.9058  | 3.0717  | 1.0069 | 0.0099  | 0.9254 | 0.0336 |
| Ranbp1    | _FLNENAKQ_2                                                                             | #N/A                     | 6.4732  | 6.7209  | 7.3117  | 7.0267  | 7.3619  | 6.7201  | 6.6174  | 6.9917  | 6.9524  | 6.5450  | 1.0235 | 0.0335  | 0.4564 | 0.3406 |
| Ranbp1    | _FASENDPEWK_2                                                                           | #N/A                     | 6.4387  | 7.5985  | 6.5927  | 8.7243  | 7.6297  | 8.0210  | 7.8566  | 8.0220  | 8.3339  | 8.3625  | 0.9211 | -0.1186 | 0.1930 | 0.7145 |
| Ranbp1    | _TLEDEELFK_2                                                                            | #N/A                     | 3.1672  | 3.9235  | 5.8587  | 5.8438  | 5.8806  | 4.3137  | 4.9011  | 5.5091  | 3.3547  | 3.6228  | 1.1114 | 0.1524  | 0.5353 | 0.2796 |
| Ranbp1    | _VAEKLEASVR_3                                                                           | #N/A                     | 3.9064  | 3.2943  | 5.0606  | 3.6673  | 4.1584  | 4.7001  | 3.4738  | 4.1311  | 3.9072  | 4.2183  | 1.0505 | 0.0711  | 0.5961 | 0.2247 |
| Pk2       | _YMEDSY[Phospho (STY)]YK_2                                                              | P34152_Y576_M1_Pk2       | 5.8749  | 4.1962  | 3.1736  | 5.9628  | 4.0845  | 4.0410  | 3.9341  | 3.8990  | 3.5476  | 4.1865  | 1.1705 | 0.2272  | 0.2854 | 0.5445 |
| Pk2       | _LQPCQES[Phospho (STY)]PPPTANIDR_2                                                      | P34152_S910_M1_Pk2       | 12.8118 | 12.6636 | 13.3519 | 13.1023 | 11.5355 | 12.4682 | 13.3482 | 12.9132 | 12.7205 | 12.5078 | 0.9832 | -0.0245 | 0.5552 | 0.2555 |
| Mif       | _LHSPDR_2                                                                               | #N/A                     | 7.9990  | 9.9594  | 10.0990 | 9.9564  | 10.5548 | 9.8889  | 9.6004  | 9.8541  | 9.9882  | 9.9335  | 1.0202 | 0.0549  | 0.2307 | 0.6370 |
| Mif       | _LL[Carbamidomethyl (C)]GLLSOR_2                                                        | #N/A                     | 9.9109  | 10.3060 | 10.3378 | 10.2502 | 10.0727 | 10.0701 | 9.9412  | 10.0983 | 9.9760  | 10.1180 | 1.0124 | 0.0178  | 0.2120 | 0.6737 |
| Mif       | _ASVPEGLSELTOGLAQTKG_2                                                                  | #N/A                     | 8.0293  | 7.9690  | 7.6448  | 8.8223  | 8.2643  | 8.2793  | 7.9529  | 7.9010  | 8.1461  | 8.0520  | 1.0194 | 0.0277  | 0.4737 | 0.3245 |
| Mif       | _PM[Oxidation (M)]FVNTNVPK_2                                                            | #N/A                     | 9.2074  | 9.5424  | 9.8974  | 10.0777 | 9.7190  | 9.9229  | 9.4206  | 9.4807  | 9.6089  | 9.6837  | 1.0188 | 0.0268  | 0.3150 | 0.5017 |
| Mif       | QYIAVHVVDQLM[Oxidation (M)]TFSGTNDPC[Carbamidomethyl (C)]ALC[Carbamidomethyl (C)]SHUSIG | #N/A                     | 3.0162  | 3.0227  | 3.9303  | 3.7206  | 3.7498  | 3.0377  | 3.8689  | 3.1856  | 3.5796  | 3.4729  | 0.9677 | -0.0473 | 0.6563 | 0.1829 |
| Mif       | _VINYNYDM[Oxidation (M)]NAANVGWNGSFTA_2                                                 | #N/A                     | 4.0845  | 3.3622  | 3.5969  | 4.6804  | 3.2202  | 3.2153  | 3.3540  | 3.0911  | 4.2405  | 5.6315  | 0.9054 | -0.1434 | 0.4964 | 0.3041 |
| Ptpn11    | _IQNTGDY[Phospho (STY)]DLYGGEK_2                                                        | P35235_Y62_M1_Ptpn11     | 4.4810  | 7.1611  | 7.5064  | 7.4720  | 3.3988  | 7.3660  | 4.9318  | 7.3983  | 7.3237  | 6.8203  | 0.9414 | -0.0871 | 0.7166 | 0.1447 |
| Ptpn11    | _ESQSHPGDFVLSVR_3                                                                       | #N/A                     | 3.5975  | 3.6287  | 4.2843  | 3.2861  | 4.2240  | 3.5055  | 4.5016  | 3.5317  | 2.9801  | 3.2531  | 1.0526 | 0.0740  | 0.5894 | 0.2296 |
| Rab5c     | _FEIWDTAGGER_2                                                                          | #N/A                     | 7.2129  | 6.6887  | 6.5367  | 7.0118  | 6.6378  | 6.3443  | 7.1357  | 6.8828  | 6.7577  | 7.1478  | 0.9653 | -0.0510 | 0.2143 | 0.6689 |
| Rab5c     | _GVDLQSNPASR_2                                                                          | #N/A                     | 7.0848  | 7.3209  | 6.9859  | 7.2512  | 6.9762  | 7.2047  | 7.6499  | 7.6794  | 7.2853  | 7.0833  | 0.9613 | -0.0569 | 0.0675 | 1.1707 |
| Rab5c     | _LVLLGESAVGK_2                                                                          | #N/A                     | 6.4659  | 7.0032  | 6.9522  | 7.3433  | 6.0708  | 6.4245  | 7.0231  | 7.6492  | 6.8835  | 6.9485  | 0.9416 | -0.0868 | 0.1711 | 0.7669 |
| Rab5c     | _QASPNVIALAGNK_2                                                                        | #N/A                     | 5.0816  | 4.6163  | 5.9221  | 4.9980  | 4.0998  | 5.0894  | 5.0729  | 5.2000  | 5.1515  | 5.7487  | 0.9385 | -0.0915 | 0.3540 | 0.4509 |
| Rab5c     | _YHSLAPM[Oxidation (M)]YYR_3                                                            | #N/A                     | 4.8144  | 5.0737  | 4.9590  | 4.3435  | 4.0707  | 3.6588  | 4.3483  | 5.8706  | 3.1334  | 3.0998  | 1.0908 | 0.1254  | 0.5442 | 0.2642 |
| Rab5c     | _GQAQAAVYDITNTDTTAR_2                                                                   | #N/A                     | 6.0996  | 6.2420  | 6.9705  | 6.6655  | 4.6837  | 6.0669  | 6.6478  | 6.1180  | 6.0847  | 6.3941  | 0.9699 | -0.0440 | 0.6598 | 0.1806 |
| Rab5c     | _AVEFQEAQAYADONSLLFM[Oxidation (M)]ETSAK_3                                              | #N/A                     | 3.5002  | 4.3054  | 4.1870  | 3.8153  | 4.1267  | 3.6028  | 3.9636  | 3.1859  | 3.4849  | 3.4926  | 1.1108 | 0.1515  | 0.1018 | 0.9924 |
| Rab6a     | _J[Acetyl (Protein N-term)]S[Phospho (STY)]AGGDFGNPLRK_2                                | P35279_S2_M1_Rab6a       | 6.9324  | 6.6820  | 6.7129  | 6.7480  | 4.6160  | 6.9099  | 6.4880  | 6.2917  | 0.9724  |         |        | -0.4003 | 0.7244 | 0.0140 |
| Rab6a     | _TDLADKR_2                                                                              | #N/A                     | 5.9972  | 4.7933  | 4.9202  | 4.8213  | 5.1754  | 6.3375  | 5.0925  | 5.5974  | 5.4910  | 5.4343  | 0.9883 | -0.0169 | 0.8613 | 0.0648 |
| Rab6a     | _LVFLGEGSGVK_2                                                                          | #N/A                     | 6.2548  | 6.1507  | 3.9681  | 6.2052  | 6.9321  | 5.8840  | 6.5077  | 5.1792  | 5.1164  | 1.0721  | 1.0105 | 0.5123  | 0.2905 |        |
| Rab6a     | _SREDMDIK_2                                                                             | #N/A                     | 3.3047  | 1.7651  | 4.2891  | 5.0346  | 4.2288  | 3.1124  | 4.5064  | 3.3267  | 2.9753  | 3.2579  | 1.0301 | 0.0428  | 0.8737 | 0.0586 |
| Rab6a     | _VAAALPGMESTQDR_2                                                                       | #N/A                     | 4.0988  | 3.2436  | 3.8325  | 3.3763  | 3.2426  | 3.3820  | 3.5245  | 3.6249  | 3.9240  | 3.0536  | 0.9993 | -0.0010 | 0.9918 | 0.0036 |
| Rab21     | _DSNGALVYDVTDEDSQK_2                                                                    | #N/A                     | 5.1017  | 5.5907  | 6.5040  | 6.1003  | 4.2168  | 5.2101  | 5.9793  | 5.6028  | 5.4912  | 5.1556  | 0.9814 | -0.0271 | 0.8175 | 0.0875 |
| Rab21     | _VNIAIWDTAGGER_2                                                                        | #N/A                     | 3.8059  | 3.0613  | 4.7080  | 4.0812  | 4.2733  | 3.6750  | 4.3325  | 3.6083  | 3.7072  | 4.1742  | 0.9946 | -0.0078 | 0.9486 | 0.0232 |
| Rab12     | _FNS[Phospho (STY)]TSAYYR_2                                                             | P35283_S105_M1_Rab12     | 8.0562  | 7.8656  | 8.4712  | 4.0927  | 3.9590  | 7.5622  | 8.4735  | 8.2209  | 8.1458  | 7.5865  | 0.8225 | -0.2819 | 0.2139 | 0.6698 |
| Rab18     | _LIQTPGLWESENQNK_2                                                                      | #N/A                     | 6.7096  | 6.7449  | 7.0864  | 7.4330  | 5.7909  | 6.9654  | 7.2238  | 6.9654  | 6.8720  | 6.9314  | 0.9596 | -0.0595 | 0.3583 | 0.4457 |
| Rab18     | _LAIWDTAGGER_2                                                                          | #N/A                     | 6.6693  | 6.5138  | 4.0478  | 6.4473  | 6.4365  | 6.3467  | 7.0827  | 6.5791  | 6.2857  | 6.8739  | 0.9063 | -0.1420 | 0.2684 | 0.5712 |
| Rab18     | _TC[Carbamidomethyl (C)]DGVGC[Carbamidomethyl (C)]AFEELVEK_2                            | #N/A                     | 4.3358  | 4.4174  | 4.2190  | 4.0853  | 4.5775  | 4.3672  | 4.7453  | 4.8115  | 4.6114  |         | 0.8923 | -0.1644 | 0.0981 | 1.0084 |
| Chr1,Chr2 | _AMSPTS[Phospho (STY)]PTR_2                                                             | P35347_S400_M1_Chr1,Chr2 | 3.3411  | 4.0013  | 4.5756  | 4.1194  | 3.9857  | 4.1398  | 4.2676  | 4.3826  | 3.1809  | 3.7967  | 1.0348 | 0.0437  | 0.6961 | 0.1573 |
| Hir2a     | _S[Phospho (STY)]HREPSGVAGR_3                                                           | P35363_S298_M1_Hir2a     | 6.3561  | 4.0441  | 4.5328  | 4.0766  | 4.8640  | 3.8641  | 4.2249  | 6.1036  | 3.2236  | 5.8265  | 0.9502 | -0.0676 | 0.7647 | 0.1165 |
| Grin2a    | _QHS[Phospho (STY)]YONILDKR_3                                                           | #N/A                     | 5.6969  | 3.8759  | 3.8491  | 4.1219  | 3.6721  | 4.3201  | 3.8365  | 6.3892  | 3.7468  | 4.0889  | 0.9647 | -0.0518 | 0.8097 | 0.0917 |
| Grin2a    | _YLPVEVAHS[Phospho (STY)]QES[Phospho (STY)]ETSSR_2                                      | #N/A                     | 3.7959  | 3.4840  | 3.7684  | 6.8425  | 4.9181  | 5.3804  | 6.3136  | 7.5816  | 7.3175  |         | 0.6514 | -0.6185 | 0.0067 | 2.1752 |
| Grin2a    | _KMPS[Phospho (STY)]ESDV_2                                                              | P35436_S1459_M1_Grin2a   | 6.0698  | 4.2312  | 3.2086  | 7.1580  | 4.6464  | 4.0060  | 3.8991  | 4.2488  | 3.0470  | 3.9305  | 1.3161 | 0.3963  | 0.1837 | 0.7359 |
| Grin2a    | _SM[Oxidation (M)]ESUKQDS[Phospho (STY)]LQNPVPSQR_3                                     | #N/A                     | 6.4056  | 5.8336  | 6.6277  | 6.3624  | 4.5248  | 6.0997  | 5.9915  | 6.3613  | 5.9901  | 5.9830  | 0.9826 | -0.0253 | 0.7958 | 0.0992 |
| Grin2a    | _SS[Phospho (STY)]LXDR_2                                                                | P35436_S1312_M1_Grin2a   | 3.3507  | 4.1070  | 4.5852  | 4.3087  | 3.9953  | 4.1302  | 4.0234  | 3.8098  | 3.4584  | 4.2757  | 1.0482 | 0.0680  | 0.4759 | 0.3225 |
| Grin2a    | _DKGS[Phospho (STY)]PHSEGDSRYR_3                                                        | P35436_S1198_M1_Grin2a   | 4.6892  | 4.6478  | 5.5991  | 4.1647  | 4.7279  | 3.8372  | 4.1980  | 5.4252  | 5.2693  | 4.1367  | 0.9692 | -0.0451 | 0.7294 | 0.1371 |
| Grin2a    | _SPDFNLTGS[Phospho (STY)]QSNM[Oxidation (M)]LK_2                                        | #N/A                     | 3.6708  | 6.6984  | 7.1726  | 5.8526  | 3.5102  | 3.9613  | 7.0453  | 7.3736  | 3.6669  |         | 1.1233 | 0.1678  | 0.6072 | 0.1767 |
| Grin2a    | _QDS[Phospho (STY)]LQNPVPSQR_2                                                          | #N/A                     | 3.5227  | 4.3279  | 4.2490  | 6.0018  | 4.1492  | 3.5803  | 6.5320  | 3.2084  | 3.5074  | 3.4701  | 1.0301 | 0.0427  | 0.8749 | 0.0580 |
| Grin2a    | _KKS[Phospho (STY)]PDFNLTKS[Phospho (STY)]QSNMLK_3                                      | P35436_S882_M2_Grin2a    | 3.3249  | 4.0175  | 4.5594  | 5.1563  | 3.8388  | 3.8907  | 4.2514  | 4.3988  | 3.1970  | 3.7805  | 1.0574 | 0.0805  | 0.5810 | 0.2358 |
| Grin2a    | _STASYC[Carbamidomethyl (C)]SRDS[Phospho (STY)]R_2                                      | P35436_S1416_M1_Grin2a   | 3.5895  | 4.1148  | 3.7981  | 4.3008  | 3.7379  | 3.9916  | 4.0155  | 4.2180  | 3.4663  | 4.2678  | 0.9825 | -0.0254 | 0.7331 | 0.1348 |
| Pdha1     | _LEEPPVTVTLTR_2                                                                         | #N/A                     | 10.3383 | 10.3795 | 10.4365 | 10.6009 | 10.5288 | 10.4595 | 10.3483 | 10.2948 | 10.3746 |         | 1.0130 | 0.0187  | 0.0478 | 1.3210 |
| Pdha1     | _AILAELTGR_2                                                                            | #N/A                     | 8.4592  | 8.3426  | 7.9536  | 8.3674  | 8.2914  | 8.4770  | 7.6186  | 8.6193  | 8.5972  | 8.8424  | 0.9876 | -0.0180 | 0.6712 | 0.1731 |
| Pdha1     | _FAAATC[Carbamidomethyl (C)]R_2                                                         | #N/A                     | 7.5729  | 7.5420  | 7.8048  | 7.5726  | 8.0520  | 7.2057  | 7.4606  | 7.8726  | 7.8074  |         | 0.9767 | -0.0340 | 0.3360 | 0.4737 |
| Pdha1     | _TREIEQVR_2                                                                             | #N/A                     | 7.1637  | 7.0858  | 6.5492  | 7.3971  | 7.1473  | 6.9289  | 6.8601  | 6.8323  | 6.5900  | 7.1064  | 1.0289 | 0.0412  | 0.2727 | 0.5644 |
| Pdha1     | _AAASTDYVR_2                                                                            | #N/A                     | 6.3268  | 5.8752  | 6.2877  | 6.1208  | 6.6836  | 6.1780  | 5.7308  | 8.0650  | 6.2077  | 6.0735  | 1.0489 | 0.0689  | 0.1114 | 0.9531 |
| Pdha1     | _VOGM[Oxidation (M)]DL[Carbamidomethyl (C)]VR_2                                         | #N/A                     | 6.7874  | 6.6765  | 6.3578  | 7.5389  | 7.0074  | 6.4892  | 7.2309  | 6.4843  | 6.8973  | 6.9066  | 0.9898 | -0.0148 | 0.7839 | 0.1057 |
| Pdha1     | _YGM[Oxidation (M)]GTSYVR_2                                                             | #N/A                     | 7.0916  | 6.9205  | 6.5767  | 7.2489  | 6.6657  | 6.7254  | 6.6260  | 6.7982  | 6.8592  | 6.9500  | 1.0093 | 0.0133  | 0.6733 | 0.1718 |
| Pdha1     | _NFYGGNGVGAQVPLGAGIALAC[Carbamidomethyl (C)]K_3                                         | #N/A                     | 4.2418  | 3.9183  | 3.5962  | 4.3160  | 3.8084  | 4.2382  | 3.1249  | 3.3589  | 5.0366  | 4.1015  | 1.0374 | 0.0530  | 0.7101 | 0.1487 |
| Pdha1     | _GPIUM[Oxidation (M)]ELQTYR_2                                                           | #N/A                     | 7.0373  | 7.0046  | 6.3831  | 7.2499  | 7.0926  | 6.7492  | 6.8626  | 6.4640  | 6.7628  | 6.8390  | 1.0278 | 0.0396  | 0.3317 | 0.5063 |
| Pdha1     | _M[Oxidation (M)]WGNLASVEELKEQVEVR_3                                                    | #N/A                     | 6.2522  | 6.4625  | 7.2599  | 7.4442  | 6.2341  | 7.2127  | 7.1434  | 7.2878  | 6.6184  | 6.9072  | 0.9745 | -0.0373 | 0.5752 | 0.2402 |
| Pdha1     | _YHGS[Phospho (STY)]M[Oxidation (M)]SOPGVSYR_3                                          | #N/A                     | 10.0654 | 9.5238  | 10.4800 | 10.4200 | 10.1920 | 10.2563 | 10.2294 | 9.6136  | 10.2939 | 9.8967  | 1.0148 | 0.0212  | 0.5124 | 0.2904 |
| Pdha1     | _LPC[Carbamidomethyl (C)]R[Carbamidomethyl (C)]ENNR_2                                   | #N/A                     | 3.1198  | 4.1064  | 3.8066  | 10.6823 | 3.7463  | 3.9832  | 4.0240  | 3.8092  | 3.4578  | 4.2763  | 1.2610 | 0.3345  | 0.5065 | 0.2954 |
| Pdha1     | _YHGSMSDGVGS[Phospho (STY)]YRT[Phospho (STY)]REEIEQVR_4                                 | #N/A                     | 3.8365  | 3.9290  | 3.9129  | 5.6820  | 3.5787  | 3.6758  | 4.2609  | 3.6586  | 3.2804  | 3.8136  | 1.0930 | 0.1283  | 0.4423 | 0.3543 |
| Pdha1     | _M[Oxidation (M)]WNSLASVEELKEQVEVR_4                                                    | #N/A                     | 3.7249  | 3.3472  | 3.4585  | 3.9345  | 3.7784  | 3.0004  | 3.6492  | 3.9989  | 3.8326  | 4.1804  | 0.9043 | -0.1451 | 0.0923 | 1.0355 |
| Fah       | _ASLQNLSSQAR_2                                                                          | #N/A                     | 4.8361  | 5.5278  | 6.0258  | 6.0266  | 6.2923  | 5.4726  | 5.5627  | 6.0412  | 5.9701  | 5.7535  | 0.9769 | -0.0338 | 0.6456 | 0.1900 |
| Fah       | _ASSVWSGTPR_2                                                                           | #N/A                     | 3.      |         |         |         |         |         |         |         |         |         |        |         |        |        |



|            |                                                                                             |                       |         |         |         |         |         |         |         |         |         |         |        |         |        |        |
|------------|---------------------------------------------------------------------------------------------|-----------------------|---------|---------|---------|---------|---------|---------|---------|---------|---------|---------|--------|---------|--------|--------|
| Pdx1       | _ATAVM[Oxidation (M)]PDGQK_2                                                                | #N/A                  | 8.0536  | 8.5577  | 7.9825  | 8.3169  | 8.9391  | 8.1274  | 8.2278  | 8.2562  | 8.2390  | 8.3694  | 1.0068 | 0.0098  | 0.7709 | 0.1130 |
| Pdx1       | _DISSEYK_2                                                                                  | #N/A                  | 5.6581  | 3.4442  | 4.4688  | 2.0233  | 5.2809  | 6.2357  | 3.1853  | 5.4190  | 6.6068  | 5.8255  | 0.8592 | -0.2190 | 0.4742 | 0.3241 |
| Pdx1       | _SVEIR_2                                                                                    | #N/A                  | 5.6093  | 5.5338  | 4.3729  | 5.4683  | 5.3483  | 4.9609  | 3.6955  | 5.5213  | 5.7765  | 5.5411  | 1.0160 | -0.0229 | 0.8603 | 0.0653 |
| Pdx1       | _LNC[Carbamidomethyl (C)]QVGASVQSHRC[Carbamidomethyl (C)]HLAWNTPK_3                         | #N/A                  | 3.3936  | 4.2280  | 3.7909  | 5.4085  | 3.7306  | 4.0285  | 3.9892  | 3.6107  | 3.8959  | 3.3184  | 1.1307 | 0.1773  | 0.1924 | 0.7158 |
| Cd81       | _QFYDQALQQAIVM[Oxidation (M)]DDDANNAK_3                                                     | #N/A                  | 8.5698  | 8.9165  | 10.1544 | 9.1407  | 7.5706  | 8.5359  | 9.3494  | 9.2990  | 8.7405  | 8.5765  | 0.9803 | -0.0286 | 0.7106 | 0.1483 |
| Cd81       | _NSLC[Carbamidomethyl (C)]PSGGLTLRQQDC[Carbamidomethyl (C)]HOK_3                            | #N/A                  | 6.5909  | 6.2939  | 7.0113  | 6.4779  | 6.5683  | 3.6656  | 7.2860  | 6.9590  | 6.7460  | 6.7117  | 0.8810 | -0.1828 | 0.2266 | 0.6447 |
| Cd81       | _THETLNC[Carbamidomethyl (C)]C[Carbamidomethyl (C)]GSNALTTLTLR_3                            | #N/A                  | 3.8858  | 4.5786  | 5.1791  | 4.8496  | 3.6765  | 3.9205  | 5.2947  | 5.2691  | 5.0873  | 4.7802  | 0.8513 | -0.2322 | 0.0469 | 1.3284 |
| Gpm6a      | _QFGVITGEEK_2                                                                               | #N/A                  | 10.0663 | 9.6952  | 10.0326 | 9.9537  | 9.1628  | 9.7393  | 10.1028 | 9.9983  | 9.9762  | 9.6626  | 0.9839 | -0.0234 | 0.4178 | 0.3790 |
| Gpm6a      | _IC[Carbamidomethyl (C)]TASENFLR_2                                                          | #N/A                  | 9.9544  | 9.8293  | 10.0666 | 9.4402  | 9.6430  | 9.4152  | 10.1274 | 10.0541 | 9.8589  | 9.6473  | 0.9801 | -0.0290 | 0.2579 | 0.5885 |
| Gpm6a      | _KIC[Carbamidomethyl (C)]TASENFLR_2                                                         | #N/A                  | 6.1164  | 6.3866  | 6.7064  | 5.9085  | 5.7450  | 5.7679  | 6.4086  | 6.4272  | 6.2312  | 5.9747  | 0.9752 | -0.3862 | 0.4829 | 0.3161 |
| Gpm6a      | _SKEEQLHDHSTR_3                                                                             | #N/A                  | 9.2008  | 8.1188  | 8.6400  | 8.0421  | 8.6661  | 8.6730  | 9.2358  | 8.4753  | 8.9247  | 7.9705  | 0.9890 | -0.0159 | 0.7658 | 0.1159 |
| Gpm6a      | _M[Oxidation (M)]QKYEIK_2                                                                   | #N/A                  | 5.2196  | 6.2180  | 6.3196  | 5.4407  | 5.6227  | 5.9352  | 6.2492  | 6.5365  | 6.4983  | 5.5464  | 0.9331 | -0.0998 | 0.1875 | 0.7271 |
| Gpm6a      | _QFGVITGEEK_2                                                                               | #N/A                  | 5.5326  | 5.6527  | 6.0175  | 5.0422  | 4.8820  | 5.4316  | 5.8201  | 5.5950  | 5.3918  | 5.5709  | 0.9700 | -0.0440 | 0.4713 | 0.3267 |
| Gpm6a      | _DIVGDFK_2                                                                                  | #N/A                  | 5.3863  | 3.8247  | 3.5783  | 4.3825  | 4.5420  | 4.4007  | 3.0714  | 5.3001  | 5.9802  | 4.9910  | 0.9001 | -0.1519 | 0.4353 | 0.3612 |
| Gpm6a      | _EEQELHDHSTRS[Phospho (STY)]K_3                                                             | #N/A                  | 4.0715  | 5.5044  | 7.3131  | 5.4557  | 4.7989  | 5.5410  | 5.5363  | 6.0619  | 3.9292  | 5.0909  | 1.0568 | 0.0797  | 0.6675 | 0.1756 |
| Gpm6a      | _S[Phospho (STY)]KERLNAV_2                                                                  | #N/A                  | 5.7080  | 6.2700  | 6.9458  | 6.5073  | 5.7411  | 6.3351  | 6.4765  | 6.7798  | 6.1452  | 5.9812  | 0.9851 | -0.0216 | 0.7433 | 0.1289 |
| Gpm6a      | _SKEEQLHDHSTRS[Phospho (STY)]K_3                                                            | #N/A                  | 7.0962  | 8.7862  | 9.2870  | 8.5504  | 7.5179  | 8.4370  | 9.0165  | 9.4827  | 9.0924  | 7.7475  | 0.9371 | -0.0937 | 0.3102 | 0.5083 |
| Gpm6a      | _EEQELHDHSTRS[Phospho (STY)]KER_3                                                           | #N/A                  | 3.4886  | 6.1642  | 7.7727  | 5.9478  | 4.6218  | 5.3899  | 6.1458  | 3.9384  | 4.9785  | 1.1879  | 0.2484 | 0.3395  | 0.4692 | 0.1756 |
| Gpm6a      | _YEDIKS[Phospho (STY)]KEEQLHDHSTR_4                                                         | #N/A                  | 9.1584  | 9.1191  | 9.7358  | 9.2329  | 7.9873  | 8.8952  | 9.4788  | 9.5894  | 9.2907  | 9.2081  | 0.9606 | -0.0580 | 0.2560 | 0.5917 |
| Gpm6a      | _EEQELHDHSTR_3                                                                              | #N/A                  | 5.2519  | 4.8113  | 3.9626  | 3.6998  | 4.6245  | 5.0116  | 4.0712  | 5.1293  | 5.0809  | 4.6692  | 0.9626 | -0.0550 | 0.6406 | 0.1934 |
| Gpm6a      | _Acetyl (Protein N-term)[MEENMEEGQTQK_2                                                     | #N/A                  | 5.3210  | 3.6887  | 4.2342  | 6.0230  | 3.5770  | 3.0476  | 4.4416  | 3.3916  | 3.0402  | 3.1930  | 1.2266 | 0.2947  | 0.2432 | 0.6140 |
| Gpm6b      | _AXEEQLQDGCS[Phospho (STY)]R_2                                                              | #N/A                  | 7.8525  | 7.4708  | 7.9722  | 7.8086  | 6.7250  | 7.5309  | 8.0705  | 7.6984  | 7.9867  | 7.3895  | 0.9705 | -0.0432 | 0.4021 | 0.3956 |
| Gpm6b      | _EEQELQDGCS[Phospho (STY)]R_2                                                               | #N/A                  | 8.7442  | 8.0157  | 8.3041  | 8.2434  | 6.9150  | 8.3745  | 8.8466  | 8.2120  | 8.4457  | 8.3565  | 0.9568 | -0.0637 | 0.3100 | 0.5087 |
| Gpm6b      | _QYGPVWNAFQK_2                                                                              | #N/A                  | 7.7753  | 7.8837  | 10.9784 | 6.9878  | 7.5562  | 7.7385  | 7.9827  | 8.0277  | 7.5177  | 7.5172  | 1.0398 | 0.0563  | 0.6935 | 0.1590 |
| Gpm6b      | _ELGFEK_2                                                                                   | #N/A                  | 6.9766  | 6.3673  | 6.3792  | 6.2194  | 6.3711  | 6.5884  | 6.8179  | 6.9937  | 6.7338  | 6.6626  | 0.9532 | -0.0692 | 0.0641 | 1.1935 |
| Gpm6b      | _S[Phospho (STY)]KEQLNST_2                                                                  | #N/A                  | 11.6855 | 11.6241 | 12.3681 | 11.9047 | 10.8770 | 11.4392 | 11.9578 | 11.8602 | 11.7748 | 11.5890 | 0.9876 | -0.0179 | 0.5906 | 0.2287 |
| Gpm6b      | _MQAYQDIK_2                                                                                 | #N/A                  | 5.1213  | 3.2250  | 3.8510  | 3.5684  | 3.9761  | 3.1823  | 4.7509  | 3.6064  | 3.9054  | 3.0721  | 0.9966 | -0.0049 | 0.9780 | 0.0096 |
| Gpm6b      | _Acetyl (Protein N-term)[M[Oxidation (M)]KPM[Oxidation (M)]ETAETAEETQSG[Phospho (STY)]QER_2 | #N/A                  | 3.7286  | 2.8408  | 3.4622  | 5.9757  | 2.8107  | 3.7777  | 3.9977  | 3.8444  | 3.6622  | 4.1841  | 0.9602 | -0.0586 | 0.8010 | 0.0964 |
| Ptpn12     | _DADVSEES[Phospho (STY)]PPPLER_2                                                            | P35831_S673_M1_Ptpn12 | 3.4922  | 3.8502  | 3.2258  | 4.2705  | 3.6716  | 4.0579  | 4.4187  | 7.5112  | 3.0298  | 3.9477  | 0.9577 | -0.3296 | 0.2578 | 0.5887 |
| Ptpn12     | _NLS[Phospho (STY)]FEIK_2                                                                   | #N/A                  | 4.0266  | 4.1616  | 4.2340  | 3.8800  | 3.2141  | 4.3223  | 4.6164  | 4.9911  | 3.0670  | 4.8871  | 0.9050 | -0.1441 | 0.3382 | 0.4708 |
| Ptpn12     | _S[Phospho (STY)]PAEYTDGFGNR_2                                                              | #N/A                  | 3.1826  | 4.1598  | 4.4171  | 3.9609  | 3.8272  | 4.2983  | 5.1482  | 3.0403  | 3.3393  | 3.6382  | 1.0482 | 0.0679  | 0.6847 | 0.1485 |
| Ptpn12     | _DQITKS[Phospho (STY)]PAEYTDGFGNR_3                                                         | #N/A                  | 4.3463  | 3.6018  | 4.0800  | 3.3130  | 3.4901  | 3.1346  | 4.5286  | 3.3046  | 2.9532  | 3.3011  | 1.0395 | 0.0559  | 0.7104 | 0.1485 |
| Ptpn12     | _NLS[Phospho (STY)]FEIK_2                                                                   | #N/A                  | 3.2441  | 3.7110  | 3.9309  | 4.0714  | 3.8706  | 3.8589  | 4.2197  | 0.7267  | 3.2288  | 2.8855  | 1.3674 | 0.0515  | 0.1289 | 0.8897 |
| Flt1       | _DGFADPHFSGS[Phospho (STY)]SDOVR_2                                                          | P35969_S1207_M1_Flt1  | 3.6235  | 4.3798  | 3.3572  | 4.4018  | 4.4558  | 3.8573  | 3.7505  | 4.1002  | 4.3992  | 4.0791  | 0.9829 | -0.0248 | 0.7956 | 0.0993 |
| Rpl12      | _ELGTAGQSVGC[Carbamidomethyl (C)]JNVDR_2                                                    | #N/A                  | 6.3132  | 6.1493  | 5.4216  | 7.1685  | 6.8265  | 6.1383  | 6.5959  | 6.7082  | 5.6429  | 6.4762  | 0.9628 | -0.0546 | 0.4562 | 0.3408 |
| Rpl12      | _QAOEIVPVSALIK_2                                                                            | #N/A                  | 6.0896  | 5.5248  | 5.9842  | 5.3361  | 6.2849  | 5.8857  | 5.7952  | 5.2849  | 6.4427  | 6.4691  | 0.9755 | -0.0358 | 0.6246 | 0.2044 |
| Rpl12      | _HSGNITFDENVNAR_3                                                                           | #N/A                  | 4.3196  | 3.0228  | 4.0532  | 3.5970  | 3.9543  | 3.1613  | 3.7453  | 4.0651  | 4.0383  | 3.2743  | 0.9746 | -0.0371 | 0.7577 | 0.1205 |
| Rpl18      | _ILTDQALAESPK_2                                                                             | #N/A                  | 3.1569  | 4.6855  | 4.3914  | 4.5203  | 3.6710  | 5.0388  | 5.9882  | 5.4923  | 5.0827  | 4.4435  | 0.8081 | -0.3074 | 0.0512 | 1.2903 |
| Rpl18      | _SDQVLR_2                                                                                   | #N/A                  | 4.2054  | 4.2935  | 4.1751  | 3.1770  | 4.1140  | 3.6363  | 4.3925  | 4.4741  | 4.4989  | 4.6761  | 0.8721 | -0.1974 | 0.0353 | 1.4522 |
| Sar1aSar1b | _LVFLGLWAGK_2                                                                               | #N/A                  | 5.5221  | 5.6593  | 4.0833  | 5.8406  | 5.0827  | 6.0020  | 4.1151  | 6.0296  | 5.7262  | 5.5909  | 0.9999 | -0.0001 | 0.9993 | 0.0003 |
| Cpxc       | _SPS[Phospho (STY)]PGRREEDGDELAR_3                                                          | P36552_S101_M1_Cpxc   | 3.4288  | 4.2340  | 4.3429  | 3.8867  | 4.0553  | 3.6742  | 4.0350  | 3.1145  | 3.4135  | 3.5640  | 1.1147 | 0.1567  | 0.1197 | 0.9219 |
| Gnl1       | _GLQDGLRS[Phospho (STY)]GSR[Phospho (STY)]NSR_2                                             | P36916_S32_M2_Gnl1    | 5.3087  | 3.7351  | 4.5555  | 3.5574  | 2.9944  | 3.2342  | 3.5950  | 3.0603  | 5.5748  | 3.5244  | 0.9896 | -0.0151 | 0.9495 | 0.0225 |
| Gnl1       | _REEQTQTS[Phospho (STY)]DGESVTHHR_4                                                         | #N/A                  | 8.9147  | 8.8802  | 9.6091  | 9.1932  | 7.8760  | 9.1711  | 9.1876  | 9.2658  | 9.1355  | 9.0573  | 0.9759 | -0.0352 | 0.4822 | 0.3167 |
| Gnl1       | _ERREETQTS[Phospho (STY)]DGESVTHHR_3                                                        | #N/A                  | 8.2567  | 7.7728  | 7.9765  | 8.2187  | 7.6164  | 7.8880  | 8.2325  | 8.1904  | 7.9661  | 7.9120  | 0.9757 | -0.0355 | 0.3836 | 0.1462 |
| Gnl1       | _ERREETQTS[Phospho (STY)]S[Phospho (STY)]DGESVTHHR_4                                        | #N/A                  | 3.3830  | 4.2122  | 7.9003  | 7.2752  | 4.0335  | 7.3552  | 6.7818  | 7.2433  | 4.1963  | 3.3954  | 1.0535 | 0.0752  | 0.8263 | 0.0829 |
| Gnl1       | _EVYQGVDFPR_2                                                                               | #N/A                  | 5.1641  | 3.1414  | 3.9347  | 3.4785  | 4.4283  | 3.2799  | 3.6267  | 3.5227  | 4.9117  | 3.1557  | 1.0264 | 0.0375  | 0.8457 | 0.0728 |
| Hmgcl      | _LEAGDPR[Carbamidomethyl (C)]QALNR_2                                                        | #N/A                  | 3.6918  | 3.6506  | 5.1663  | 5.0418  | 4.9467  | 5.1046  | 5.6881  | 4.8808  | 5.5768  | 5.6800  | 0.8431 | -0.2462 | 0.0645 | 1.1901 |
| Hmgcl      | _EVSVGAVSEFTR_2                                                                             | #N/A                  | 3.9228  | 3.2272  | 3.6600  | 3.6115  | 3.0485  | 3.1801  | 3.5409  | 3.2402  | 4.1556  | 3.5785  | 0.9484 | -0.0764 | 0.4395 | 0.3570 |
| Hsf1       | _VKQEPSP[Phospho (STY)]PHS[Phospho (STY)]PR_2                                               | #N/A                  | 6.9226  | 7.5014  | 6.8238  | 8.0629  | 6.9186  | 7.3361  | 7.6609  | 7.2364  | 7.4428  | 7.3597  | 0.9779 | -0.0322 | 0.5342 | 0.2723 |
| Hspa9      | _DAGQSGSLNVR_2                                                                              | #N/A                  | 8.5249  | 8.6111  | 8.7163  | 8.9396  | 8.9006  | 8.5809  | 8.4268  | 8.6205  | 8.7299  | 8.5956  | 1.0138 | 0.0198  | 0.2738 | 0.5625 |
| Hspa9      | _NAVITPAYFADSGR_2                                                                           | #N/A                  | 8.0384  | 7.8231  | 8.3633  | 8.4891  | 7.6695  | 7.9745  | 8.3508  | 7.8712  | 7.5334  | 7.9747  | 1.0160 | 0.0229  | 0.5584 | 0.2531 |
| Hspa9      | _TTPSVAFATDGER_2                                                                            | #N/A                  | 7.9097  | 7.5580  | 7.8713  | 7.7561  | 7.8025  | 7.9471  | 7.6786  | 7.6786  | 7.4171  | 8.0467  | 1.0070 | 0.0101  | 0.6707 | 0.1735 |
| Hspa9      | _VQQTQVQLFGR_2                                                                              | #N/A                  | 7.9868  | 8.0412  | 8.1167  | 8.1198  | 8.0795  | 8.1107  | 7.9392  | 7.5131  | 7.8209  | 7.7178  | 1.0423 | 0.0598  | 0.0026 | 2.5799 |
| Hspa9      | _AQFEGVDTUK_2                                                                               | #N/A                  | 6.8525  | 6.3861  | 6.6989  | 7.1285  | 6.9678  | 6.9888  | 6.1069  | 6.6397  | 6.1909  | 6.8566  | 1.0603 | 0.0844  | 0.0821 | 1.0857 |
| Hspa9      | _NTTPIK_2                                                                                   | #N/A                  | 6.2405  | 6.6264  | 7.2285  | 7.2330  | 7.3090  | 6.6017  | 6.5534  | 6.7609  | 6.5365  | 6.7082  | 1.0352 | 0.0498  | 0.3404 | 0.4680 |
| Hspa9      | _VINEPTAAALAYLDK_2                                                                          | #N/A                  | 6.4074  | 6.0058  | 4.8761  | 6.7669  | 6.6847  | 6.2837  | 6.3380  | 5.5108  | 5.9668  | 6.1400  | 1.0308 | 0.0438  | 0.6398 | 0.1940 |
| Hspa9      | _QAVTVPNNTFYATK_2                                                                           | #N/A                  | 5.8960  | 6.0398  | 5.9955  | 6.3855  | 6.4508  | 5.8983  | 6.1287  | 5.9286  | 5.7470  | 5.9398  | 1.0295 | 0.0419  | 0.2452 | 0.6104 |
| Hspa9      | _QAASSLQQAISK_2                                                                             | #N/A                  | 6.4321  | 6.2016  | 5.6916  | 6.0138  | 6.3580  | 6.4995  | 5.8764  | 5.9435  | 6.2852  | 5.9166  | 1.0323 | 0.0459  | 0.2922 | 0.5343 |
| Hspa9      | _STNGDTFLGGEDFDQALLR_2                                                                      | #N/A                  | 4.9919  | 5.4375  | 5.0824  | 4.9928  | 5.5685  | 5.5578  | 5.6264  | 4.9521  | 4.8086  | 4.7444  | 1.0475 | 0.0669  | 0.2972 | 0.5269 |
| Hspa9      | _EQQIVQSSGSLGSDIENM[Oxidation (M)]VK_3                                                      | #N/A                  | 5.6364  | 5.9845  | 6.6437  | 6.2781  | 4.8235  | 5.4717  | 5.4711  | 5.7042  | 5.4682  | 5.9368  | 1.0286 | 0.0406  | 0.6474 | 0.1888 |
| Hspa9      | _LLGGFTLGGPPAPR_2                                                                           | #N/A                  | 5.9732  | 6.2209  | 6.1532  | 6.6570  | 7.3955  | 6.8923  | 6.5827  | 7.2868  | 6.6707  | 7.8225  | 0.9236 | -0.1147 | 0.1677 | 0.7755 |
| Hspa9      | _ETAENVLGHITAK_2                                                                            | #N/A                  | 4.7098  | 4.9573  | 4.2514  | 5.4079  | 5.9705  | 4.9753  | 4.7764  | 3.2060  | 5.3501  | 5.5494  | 1.0688 | 0.0960  | 0.5469 | 0.2621 |
| Hspa9      | _ALLAGKDSSETGENIR_2                                                                         | #N/A                  | 4.0190  | 4.9446  | 4.6813  | 4.0599  | 3.4945  | 3.8336  | 4.0759  | 3.3209  | 4.2266  | 3.5059  | 1.1031 | 0.1415  | 0.2658 | 0.5754 |
| Hspa9      | _ETQGVDTKONM[Oxidation (M)]ALQR_3                                                           | #N/A                  | 5.2608  | 5.9156  | 6.2299  | 3.4965  | 5.4226  |         |         |         |         |         |        |         |        |        |



|        |                                                                     |                      |         |        |         |         |        |        |         |         |        |        |         |         |        |        |
|--------|---------------------------------------------------------------------|----------------------|---------|--------|---------|---------|--------|--------|---------|---------|--------|--------|---------|---------|--------|--------|
| Dnm1   | _VPVGDQPPDIEFQIR_2                                                  | #N/A                 | 9.3405  | 9.4000 | 9.7692  | 9.7207  | 9.2311 | 9.4738 | 9.5197  | 9.3825  | 9.4934 | 9.3035 | 1.0068  | 0.0098  | 0.5942 | 0.2261 |
| Dnm1   | _DITAAALAAER_2                                                      | #N/A                 | 0.9097  | 9.1256 | 9.0106  | 9.5174  | 9.1661 | 9.0713 | 9.1448  | 9.2111  | 9.0692 | 9.0771 | 1.0043  | 0.0062  | 0.6900 | 0.1612 |
| Dnm1   | _VLNQLTNHIR_2                                                       | #N/A                 | 7.7097  | 7.9643 | 7.9545  | 8.0506  | 8.1357 | 7.6934 | 7.7289  | 8.0931  | 7.8960 | 7.8766 | 1.0025  | 0.0035  | 0.8636 | 0.0637 |
| Dnm1   | _VYSPHVLNLTVDLPGM(Oxidation (M))TK_3                                | #N/A                 | 8.8428  | 8.8957 | 9.2225  | 8.9055  | 8.6996 | 9.0644 | 8.9958  | 9.1856  | 9.0345 | 8.9927 | 0.9874  | -0.0182 | 0.2865 | 0.5429 |
| Dnm1   | _ITTHIR_2                                                           | #N/A                 | 8.2910  | 8.8853 | 8.7388  | 8.8136  | 8.9723 | 8.4750 | 8.5865  | 8.7129  | 8.9179 | 8.7719 | 0.9939  | -0.0088 | 0.7121 | 0.1414 |
| Dnm1   | _FLSPSPVR_2                                                         | #N/A                 | 8.6304  | 8.8376 | 8.9409  | 8.6761  | 8.1417 | 8.3723 | 8.6874  | 8.8035  | 8.7360 | 8.7139 | 0.9845  | -0.0225 | 0.4017 | 0.3961 |
| Dnm1   | _NRPDPDPAR_2                                                        | #N/A                 | 8.6676  | 8.1238 | 7.7043  | 8.7076  | 8.6549 | 8.1403 | 8.5329  | 8.4560  | 8.2945 | 8.4480 | 0.9882  | -0.0172 | 0.6503 | 0.1869 |
| Dnm1   | _GYGVNVNR_2                                                         | #N/A                 | 8.4529  | 7.9896 | 8.7717  | 8.2273  | 8.3659 | 8.4471 | 0.5964  | 8.5198  | 8.4991 | 8.2778 | 1.0505  | 0.0710  | 0.3309 | 0.4803 |
| Dnm1   | _LQDASGAGNADLDLPGAVVGGSAGK_3                                        | #N/A                 | 7.4678  | 7.5070 | 7.8415  | 8.0631  | 7.6962 | 7.8023 | 7.8281  | 7.7157  | 7.6505 | 7.6857 | 1.0012  | 0.0018  | 0.9367 | 0.0284 |
| Dnm1   | _NVKYDYR_2                                                          | #N/A                 | 7.4262  | 7.2525 | 7.6148  | 7.3102  | 7.3369 | 7.5231 | 6.9231  | 7.3892  | 7.1276 | 7.3354 | 1.0301  | 0.0428  | 0.0835 | 1.0783 |
| Dnm1   | _C[Carbamidomethyl (C)]VDM(Oxidation (M))VISELTVR_2                 | #N/A                 | 5.2881  | 5.1438 | 5.2813  | 4.6964  | 5.7625 | 5.9824 | 5.3480  | 4.9082  | 5.8197 | 5.3009 | 1.0028  | 0.0040  | 0.9585 | 0.0184 |
| Dnm1   | _GM(Oxidation (M))EDLPVNR_2                                         | #N/A                 | 9.8879  | 9.8267 | 9.8616  | 9.9359  | 9.6208 | 9.5772 | 9.9319  | 10.0173 | 9.8884 | 9.9001 | 0.9850  | -0.0219 | 0.0969 | 1.0136 |
| Dnm1   | _KKT(SPhospho (STY))GNQDELVR_3                                      | #N/A                 | 3.6522  | 3.4686 | 3.4832  | 8.2987  | 3.4229 | 7.5477 | 7.3470  | 7.9852  | 4.2183 | 7.6569 | 0.7320  | -0.4501 | 0.2164 | 0.6647 |
| Dnm1   | _EVDYKRNRPDPAR_3                                                    | #N/A                 | 6.6355  | 6.7127 | 4.4797  | 7.1971  | 7.4740 | 7.4295 | 6.6461  | 6.8228  | 7.1193 | 6.8299 | 0.9709  | -0.0427 | 0.7385 | 0.1316 |
| Dnm1   | _M(Oxidation (M))GTPYLQK_2                                          | #N/A                 | 6.3210  | 7.0518 | 6.9136  | 6.2611  | 6.6768 | 6.6139 | 6.4071  | 7.1249  | 6.2391 | 7.0068 | 0.9918  | -0.0118 | 0.8220 | 0.0851 |
| Dnm1   | _FTDFEEVR_2                                                         | #N/A                 | 6.8343  | 6.0655 | 4.0172  | 6.3139  | 6.3593 | 5.9866 | 6.2157  | 6.3954  | 6.4763 | 5.9605 | 0.9469  | -0.0787 | 0.5324 | 0.2738 |
| Dnm1   | _ALLQM(Oxidation (M))VQGFVDFEKR_3                                   | #N/A                 | 4.5382  | 5.0857 | 4.7236  | 3.8745  | 4.3400 | 4.4855 | 5.0846  | 5.1857  | 3.7997 | 4.1537 | 0.9895  | -0.0153 | 0.8912 | 0.0500 |
| Dnm1   | _LDLM(Oxidation (M))DEGTDAR_2                                       | #N/A                 | 8.3294  | 7.8733 | 7.8411  | 8.6554  | 8.1385 | 7.6158 | 8.3544  | 8.1149  | 7.8590 | 7.8866 | 1.0027  | 0.0039  | 0.9208 | 0.0359 |
| Dnm1   | _NLVDSYM(Oxidation (M))AVNK_2                                       | #N/A                 | 6.8957  | 6.6596 | 6.8315  | 6.8804  | 6.0828 | 6.2014 | 6.4946  | 6.4507  | 6.4012 | 6.8855 | 1.0052  | 0.0074  | 0.8718 | 0.0596 |
| Dnm1   | _LREEM(Oxidation (M))ER_2                                           | #N/A                 | 5.8024  | 4.9484 | 4.6723  | 5.8744  | 5.9044 | 5.4865 | 4.5602  | 4.6519  | 4.2002 | 4.6102 | 1.2092  | 0.2740  | 0.0097 | 2.0127 |
| Dnm1   | _EISYAK_2                                                           | #N/A                 | 6.5211  | 6.2169 | 6.6306  | 5.7852  | 6.8545 | 6.3978 | 4.0636  | 6.6470  | 6.4320 | 7.0912 | 1.0565  | 0.0794  | 0.5639 | 0.2488 |
| Dnm1   | _DITAAALAAER_2                                                      | #N/A                 | 5.5540  | 3.8327 | 4.3110  | 5.0341  | 5.3120 | 5.2412 | 5.8768  | 5.4025  | 8.1925 | 0.8032 | -0.1162 | 0.1139  | 0.9434 |        |
| Dnm1   | _TSGNQDELVR_2                                                       | #N/A                 | 6.7015  | 6.9458 | 6.7897  | 7.9608  | 6.8309 | 7.3380 | 7.4290  | 7.5721  | 7.0185 | 7.6341 | 0.9570  | -0.0635 | 0.2680 | 0.5719 |
| Dnm1   | _ENC[Carbamidomethyl (C)]LAVSPANSGLANSALK_2                         | #N/A                 | 7.1022  | 7.2704 | 7.2804  | 7.5966  | 6.8702 | 7.2158 | 7.2654  | 7.1939  | 7.1691 | 7.2436 | 1.0006  | 0.0009  | 0.9712 | 0.0172 |
| Dnm1   | _RSP(TSS)Phospho (STY))PTPQR_2                                      | #N/A                 | 6.7402  | 3.9514 | 7.3399  | 7.1110  | 7.4900 | 6.5703 | 7.1169  | 6.7995  | 3.8084 | 9.1138 | 0.9738  | -0.0383 | 0.8763 | 0.0573 |
| Dnm1   | _LEIAETDRVGTNKK_2                                                   | #N/A                 | 4.7535  | 3.8346 | 4.2252  | 4.9107  | 3.7198 | 4.6979 | 3.6988  | 4.4246  | 4.4894 | 4.7741 | 1.0023  | 0.0034  | 0.9749 | 0.0110 |
| Dnm1   | _S[Phospho (STY)]PTSP(SPhospho (STY))PTPQR_2                        | #N/A                 | 6.9993  | 7.8255 | 7.8275  | 3.8039  | 4.8693 | 3.4305 | 7.5393  | 7.1149  | 7.1546 | 7.3195 | 0.7955  | -0.3301 | 0.1848 | 0.7339 |
| Dnm1   | _IGGGQDQDTEVLSGAR_2                                                 | #N/A                 | 5.8859  | 6.0593 | 6.2519  | 7.3846  | 6.0165 | 5.9458 | 5.9162  | 6.6923  | 5.8158 | 6.4806 | 1.0050  | 0.0072  | 0.9282 | 0.0324 |
| Dnm1   | _KTSNQDELVR_3                                                       | #N/A                 | 4.6611  | 4.5115 | 3.7489  | 3.9781  | 4.0383 | 4.4229 | 4.7212  | 4.1811  | 5.2680 | 4.8919 | 0.8870  | -0.1731 | 0.0674 | 1.1716 |
| Dnm1   | _RS[Phospho (STY)]PT[Phospho (STY)]SPTPQR_2                         | #N/A                 | 3.4221  | 3.9834 | 3.9085  | 3.6385  | 4.0119 | 3.6784 | 4.1995  | 4.5135  | 4.0930 | 3.5316 | 0.9240  | -0.1141 | 0.1602 | 0.7953 |
| Dnm1   | _YM(Oxidation (M))LSDNLK_2                                          | #N/A                 | 6.7933  | 6.8058 | 6.7635  | 7.0484  | 6.4554 | 6.4300 | 6.4827  | 7.2745  | 6.6902 | 6.5611 | 0.9947  | -0.0077 | 0.8509 | 0.0701 |
| Dnm1   | _TIM(Oxidation (M))LM(Oxidation (M))INNTK_2                         | #N/A                 | 4.1716  | 5.5895 | 5.4546  | 3.8649  | 4.8925 | 5.6930 | 4.9796  | 5.2605  | 5.2093 | 5.0812 | 0.9633  | -0.0539 | 0.6492 | 0.1876 |
| Dnm1   | _LQSLDLSEKEDVEYK_3                                                  | #N/A                 | 3.9156  | 3.8998 | 4.4842  | 4.1734  | 3.7657 | 3.3778 | 4.2433  | 3.6277  | 4.4433 | 3.3063 | 0.9473  | -0.0782 | 0.3847 | 0.4148 |
| Dnm1   | _LDLM(Oxidation (M))DEGTARDADLENK_3                                 | #N/A                 | 5.0221  | 5.4194 | 6.0067  | 5.6680  | 5.0030 | 5.5909 | 4.6166  | 5.1209  | 5.5356 | 5.0705 | 1.0719  | 0.1002  | 0.1792 | 0.7468 |
| Dnm1   | _ALLQM(Oxidation (M))VYVQGFVDFEK_2                                  | #N/A                 | 5.2672  | 4.7778 | 4.8772  | 4.7313  | 4.9000 | 5.4632 | 5.3704  | 4.0742  | 4.2044 |        | 1.0285  | 0.0406  | 0.6701 | 1.7688 |
| Dnm1   | _HFALFNTQR_2                                                        | #N/A                 | 7.1125  | 6.6670 | 7.4962  | 7.3698  | 6.5743 | 6.8073 | 7.0522  | 6.9231  | 7.1414 | 6.6968 | 1.0067  | 0.0096  | 0.8311 | 0.0804 |
| Dnm1   | _RIEGSQDQDTEVLSGAR_3                                                | #N/A                 | 4.6502  | 4.9979 | 5.1381  | 5.4180  | 5.4734 | 4.4006 | 4.7597  | 5.0529  | 4.3341 | 4.7691 | 1.0283  | 0.0403  | 0.5747 | 0.2406 |
| Dnm1   | _QLEAC[Carbamidomethyl (C)]ETQEVDSWK_2                              | #N/A                 | 3.2824  | 4.5679 | 4.5169  | 8.5493  | 3.9269 | 4.1985 | 4.2089  | 7.4491  | 3.2396 | 3.7379 | 1.0389  | 0.0551  | 0.8852 | 0.0529 |
| Dnm1   | _RPVLQLVNSTVEAFK(C)[Carbamidomethyl (C)]K_3                         | #N/A                 | 4.0445  | 3.2979 | 3.7782  | 3.6432  | 3.1192 | 3.1094 | 3.4702  | 3.6792  | 3.9783 | 2.9992 | 0.9907  | -0.0135 | 0.8999 | 0.0458 |
| Dnm1   | _EALSGINDTIVTSPM(Oxidation (M))PPPVDSWLQVQVPAGR_4                   | #N/A                 | 4.0518  | 3.3562 | 3.2378  | 3.2636  | 3.1775 | 3.0511 | 3.4119  | 4.3780  | 2.7729 | 3.7075 | 0.9408  | -0.0880 | 0.5275 | 0.2778 |
| Dnm1   | _EFPSELANLYSC[Carbamidomethyl (C)]GQDQNTLM(Oxidation (M))EESAQAQR_3 | #N/A                 | 4.1780  | 3.1644 | 3.9117  | 3.4555  | 2.9857 | 3.2430 | 3.6038  | 3.5457  | 3.8447 | 3.1328 | 0.9881  | -0.0173 | 0.8774 | 0.0568 |
| Dnm1   | _ASETENGSGDSFMHSDPQLR_3                                             | #N/A                 | 3.7449  | 3.5975 | 4.4786  | 4.5232  | 2.8886 | 4.3107 | 3.1706  | 3.9788  | 4.2779 | 4.2005 | 0.9617  | -0.0564 | 0.6904 | 0.1059 |
| Tjp1   | _ERS[Phospho (STY)]LS[Phospho (STY)]IR_2                            | P39447_S166_M2_Tjp1  | 9.6412  | 9.6951 | 10.0439 | 10.1150 | 9.4127 | 9.7213 | 9.9611  | 9.6007  | 9.7158 | 9.7837 | 1.0006  | 0.0009  | 0.9673 | 0.0144 |
| Tjp1   | _AVPV(SPhospho (STY))PSAVEDEDEGDHTVATAR_3                           | P39447_S1614_M1_Tjp1 | 9.0154  | 9.2447 | 3.6298  | 10.0036 | 3.5695 | 9.5208 | 4.1295  | 9.2152  | 9.0883 | 1.1094 | 0.9489  | 0.7075  | 0.1050 |        |
| Tjp1   | _EIS[Phospho (STY)]QDLSAAR_2                                        | P39447_S212_M1_Tjp1  | 3.0267  | 4.1994 | 3.7135  | 4.2162  | 6.1263 | 4.0377 | 3.9309  | 3.9023  | 3.5509 | 4.1832 | 1.0843  | 0.1168  | 0.5586 | 0.2529 |
| Tjp1   | _S[Phospho (STY)]VAS[Phospho (STY)]SQAPKPTK_2                       | P39447_S175_M2_Tjp1  | 8.1916  | 8.3883 | 8.4531  | 8.9352  | 7.6394 | 8.6468 | 7.7773  | 8.3801  | 8.4531 | 8.3644 | 1.0036  | 0.0022  | 0.9115 | 0.0402 |
| Tjp1   | _ADGAT[Phospho (STY)]SOLDLHQR_2                                     | P39447_T809_M1_Tjp1  | 3.6118  | 3.7418 | 4.4569  | 5.4898  | 3.5632 | 3.5267 | 3.8875  | 3.2974  | 3.5965 | 3.4165 | 1.1452  | 0.1957  | 0.2444 | 0.6119 |
| Tjp1   | _KS[Phospho (STY)]REDLSAQPVQTK_3                                    | #N/A                 | 4.0165  | 4.2512 | 6.7609  | 3.6429  | 3.1602 | 5.5155 | 3.3576  | 5.5342  | 5.6068 | 5.2559 | 0.9229  | -0.1157 | 0.6477 | 0.1886 |
| Tjp1   | _LSYLSAPGSEVSM(Oxidation (M))YSTDS[Phospho (STY)]R_2                | P39447_S837_M1_Tjp1  | 4.1061  | 3.3616 | 3.8398  | 3.5532  | 4.6792 | 3.3747 | 3.2679  | 3.6176  | 4.2139 | 3.0609 | 1.0788  | 0.1095  | 0.4194 | 0.3774 |
| Tjp1   | _DOISEQLGAS[Phospho (STY)]DHS[Phospho (STY)]GR_2                    | P39447_S297_M2_Tjp1  | 3.5518  | 4.3570 | 4.2386  | 6.0216  | 4.6019 | 3.5512 | 3.9120  | 3.9015  | 5.5365 | 3.2074 | 1.2054  | 0.2696  | 0.1601 | 0.7955 |
| Tjp1   | _SAS[Phospho (STY)]LENKK_2                                          | P39447_S1277_M1_Tjp1 | 3.6172  | 3.3235 | 4.5894  | 3.5912  | 3.2118 | 3.4128 | 3.3059  | 3.0264  | 4.1758 | 3.5582 | 1.0306  | 0.0435  | 0.7446 | 0.1281 |
| Tjp1   | _S[Phospho (STY)]REDLSAQPVQTK_2                                     | #N/A                 | 8.3719  | 8.5474 | 8.7753  | 8.9764  | 8.0734 | 8.4462 | 8.7748  | 8.3803  | 8.3475 | 8.6347 | 0.9997  | -0.0004 | 0.9890 | 0.0048 |
| Tjp1   | _IDS[Phospho (STY)]PGLKPSQOK_2                                      | #N/A                 | 5.0943  | 5.8475 | 3.5239  | 5.6649  | 5.3347 | 5.5652 | 6.1692  | 5.3006  | 5.4624 | 4.4948 | 0.9655  | -0.0507 | 0.7269 | 0.1385 |
| Tjp1   | _ATLNVDPDLSHSHS[Phospho (STY)]ANAS[Phospho (STY)]ER_3               | P39447_S284_M2_Tjp1  | 3.3086  | 4.1138 | 3.9954  | 3.8045  | 3.9351 | 3.8250 | 4.3946  | 3.9080  | 3.0705 | 3.7980 | 1.0099  | 0.0142  | 0.8882 | 0.0515 |
| Tjp1   | _VQIPVSHDPFEP(SPhospho (STY))DNEDDSYDEEVHDP_R_4                     | P39447_S125_M1_Tjp1  | 3.2160  | 3.8837 | 4.0404  | 9.2403  | 6.6550 | 4.2808 | 4.2946  | 8.8192  | 4.8486 | 3.5532 | 0.9703  | -0.0434 | 0.9176 | 0.0373 |
| Tjp1   | _KVQIPVSHDPFEP(SPhospho (STY))DNEDDSYPhospho (STY)DEVHDP_R_4        | #N/A                 | 3.3392  | 4.0955 | 4.5737  | 4.3202  | 3.9838 | 4.1417 | 4.0348  | 4.3845  | 3.4469 | 3.7948 | 1.0410  | 0.0579  | 0.5594 | 0.2523 |
| Tjp1   | _QAS[Phospho (STY)]RQLEQFSYR_2                                      | P39447_S1051_M1_Tjp1 | 3.1961  | 4.1463 | 4.4306  | 3.9744  | 3.9677 | 6.3150 | 4.1226  | 3.0268  | 3.3259 | 5.7664 | 1.0684  | 0.0955  | 0.7109 | 0.1482 |
| Fyn    | _DGS[Phospho (STY)]LNGSGGYR_2                                       | #N/A                 | 10.1431 | 9.7928 | 10.1043 | 10.4043 | 9.0640 | 9.7958 | 10.0167 | 10.0722 | 9.9415 | 9.9970 | 0.9877  | -0.0178 | 0.6192 | 0.2082 |
| Fyn    | _GAY[Phospho (STY)]SLIR_2                                           | P39688_Y185_M1_Fyn   | 5.4231  | 5.2505 | 4.1302  | 5.2767  | 4.7317 | 5.7758 | 4.0204  | 3.1290  | 3.4281 | 5.5723 | 1.2627  | 0.1365  | 0.0769 | 1.1138 |
| Fyn    | _WTAPEALYGR_2                                                       | #N/A                 | 5.2654  | 5.8636 | 4.3614  | 3.6475  | 5.4193 | 5.3069 | 5.6494  | 5.9030  | 5.4430 | 5.2151 | 0.8964  | -0.1578 | 0.2194 | 0.6088 |
| Fyn    | _LT[Phospho (STY)]EERDGSNGSGYR_3                                    | P39688_T15_M1_Fyn    | 4.0113  | 3.7237 | 5.1750  | 3.5719  | 4.7538 | 4.0669 | 4.5011  | 3.6610  | 5.0398 | 4.4441 | 0.9559  | -0.0650 | 0.6302 | 0.2585 |
| Cap1   | _ALLATASQC[Carbamidomethyl (C)]QQAPGNK_2                            | #N/A                 | 7.2367  | 7.8820 | 7.2202  | 8.0089  | 7.7457 | 7.3921 | 7.6906  | 7.4566  | 7.6042 | 7.7823 | 0.9931  | -0.0100 | 0.7815 | 0.1071 |
| Cap1   | _NSLDC[Carbamidomethyl (C)]EVSAAK_2                                 | #N/A                 | 7.2180  | 6.8692 | 7.2997  | 7.6872  | 7.2209 | 7.1426 | 7.2558  | 7.1892  | 7.4010 |        | 1.0030  | 0.0044  | 0.8861 | 0.0525 |
| Cap1</ |                                                                     |                      |         |        |         |         |        |        |         |         |        |        |         |         |        |        |



|         |                                                                                  |                       |        |        |        |         |         |        |        |         |         |         |         |         |        |        |
|---------|----------------------------------------------------------------------------------|-----------------------|--------|--------|--------|---------|---------|--------|--------|---------|---------|---------|---------|---------|--------|--------|
|         | _LDNLVAFDMIR_2                                                                   | N/A                   | 7.0699 | 6.9448 | 7.6946 | 7.5036  | 7.8628  | 7.9321 | 8.0040 | 7.7378  | 7.6457  | 7.7852  | 0.9668  | -0.0487 | 0.2353 | 0.6288 |
|         | _GGSDAPRLQHQYDOK_3                                                               | N/A                   | 6.8206 | 6.6261 | 7.6164 | 7.4699  | 7.8056  | 8.0096 | 7.0320 | 6.9671  | 6.7784  | 7.1527  | 0.1027  | 0.0182  | 0.6858 | 0.1638 |
| Tst     | _HOPTAMIAK_2                                                                     | N/A                   | 6.6872 | 7.2212 | 6.6439 | 5.5602  | 7.0027  | 6.8819 | 6.7145 | 6.5880  | 7.0352  | 7.1323  | 1.0022  | 0.0031  | 0.8992 | 0.0272 |
| Tst     | _IILADGOTK_2                                                                     | N/A                   | 6.6317 | 6.7666 | 6.2612 | 6.4630  | 6.9212  | 6.7302 | 5.5532 | 6.2330  | 6.8564  | 6.4690  | 1.0559  | 0.0319  | 0.1940 | 0.7123 |
| Tst     | _NSTITSELFK_2                                                                    | N/A                   | 6.5485 | 6.2586 | 6.2541 | 6.7656  | 6.2455  | 6.2463 | 5.5546 | 6.2019  | 6.0110  | 6.3992  | 1.0571  | 0.0801  | 0.0946 | 1.0241 |
| Tst     | _NM[Oxidation (M)]AEQIQEYSQVSK_2                                                 | N/A                   | 5.8653 | 5.2791 | 4.4817 | 6.1746  | 5.6787  | 6.0396 | 5.5240 | 5.8400  | 5.7493  | 5.7682  | 0.9766  | -0.0342 | 0.6898 | 0.1613 |
| Tst     | _LIATPPGEDAPSVDIAR_2                                                             | N/A                   | 7.3606 | 7.6322 | 7.8290 | 6.1646  | 7.7278  | 8.0536 | 7.7530 | 7.6102  | 7.6057  | 7.5281  | 1.0224  | 0.0319  | 0.2984 | 0.5253 |
| Tst     | _TVYP[C]Carbamidomethyl (C)[STFAAFFR_2                                           | N/A                   | 6.3244 | 5.9992 | 7.2217 | 6.6060  | 6.1361  | 5.7773 | 6.4419 | 5.4120  | 6.1562  | 5.9544  | 0.9833  | -0.0244 | 0.8808 | 0.0551 |
| Tst     | _SVP[M](Oxidation (M))STVFYPSDGVAIEK_2                                           | N/A                   | 8.2156 | 8.3738 | 8.2032 | 8.4931  | 8.1275  | 8.4147 | 8.2217 | 7.7724  | 7.7726  | 7.6883  | 1.0435  | 0.0614  | 0.0167 | 0.7781 |
| Tst     | _M[Oxidation (M)]PTPFPYSK_2                                                      | N/A                   | 4.7136 | 5.6817 | 3.8175 | 5.0908  | 5.8402  | 5.0787 | 5.0381 | 5.3958  | 4.4893  | 5.7191  | 0.9761  | -0.0349 | 0.7794 | 0.1082 |
| Tst     | _TSRPENAIHSNDEFCVGQAQ_3                                                          | N/A                   | 5.2019 | 4.7870 | 6.1282 | 4.8764  | 5.9251  | 4.8764 | 4.8134 | 5.1373  | 5.7208  | 4.8435  | 1.0134  | 0.0322  | 0.8258 | 0.0831 |
| Tst     | _C[Carbamidomethyl (C)]AEGWHTIVGHVSVEEL[C]Carbamidomethyl (C)IK_3                | N/A                   | 3.5333 | 3.8091 | 4.2538 | 4.4698  | 4.1778  | 3.9476 | 4.4598 | 3.6248  | 2.9887  | 2.8861  | 1.1553  | 0.2083  | 0.1433 | 0.8438 |
| Tst     | _ISSDLGDHPVK_3                                                                   | N/A                   | 2.9357 | 1.0214 | 3.6225 | 4.1252  | 2.0148  | 4.1672 | 3.8399 | 3.9933  | 3.6419  | 3.0922  | 0.7660  | -0.3846 | 0.1965 | 0.7067 |
| Tst     | _ILTVDHYHGGEIGAAVAVPGPVITVR_3                                                    | N/A                   | 3.0009 | 1.6861 | 4.2354 | 3.4813  | 3.6455  | 2.9791 | 4.3731 | 3.2220  | 3.5210  | 3.4565  | 0.8705  | -0.2001 | 0.3576 | 0.4466 |
| Tst     | _VYC[Carbamidomethyl (C)](M)(Oxidation (M))LGDGVSEGSWEAM[Oxidation (M)]AFAGIYK_3 | N/A                   | 2.9119 | 3.6681 | 4.1464 | 3.6902  | 3.5564  | 3.0682 | 3.8884 | 3.3110  | 3.6101  | 3.3674  | 0.9930  | -0.0102 | 0.9230 | 0.0348 |
| Vsp26a  | _FES[Phospho (STY)]PDQSQAASEPM_2                                                 | P40336_S315_M1_Vsp26a | 3.4510 | 4.2073 | 3.1847 | 5.5565  | 4.0956  | 4.0298 | 3.9230 | 6.4823  | 3.0709  | 3.9066  | 1.0940  | 0.1296  | 0.7071 | 0.1135 |
| Syrt4   | _LFTETEKEANS[Phospho (STY)]PELSK_2                                               | P40749_S315_M1_Syrt4  | 3.8416 | 3.1459 | 6.5699 | 6.2916  | 4.8289  | 5.6015 | 7.0325 | 6.0901  | 6.5621  | 6.3799  | 0.8747  | -0.3180 | 0.1274 | 0.8044 |
| Rpl28   | _QTYTEFPNNLK_2                                                                   | N/A                   | 4.5455 | 5.8995 | 4.7847 | 5.3467  | 5.7934  | 5.3725 | 5.2104 | 5.5854  | 4.9030  | 5.1315  | 1.0450  | 0.0635  | 0.3392 | 0.4696 |
| Rpl28   | _Acetyl (Protein N-term)[SAHLQWMVMVR_2                                           | N/A                   | 4.1305 | 3.5565 | 4.1873 | 4.0283  | 3.2742  | 3.8560 | 4.4030 | 4.5283  | 3.8950  | 5.0794  | 0.9297  | -0.1051 | 0.2819 | 0.5499 |
| Abca2   | _VSEEDGS[Phospho (STY)]LENS[Phospho (STY)]EADWK_2                                | N/A                   | 6.2352 | 5.7659 | 6.4390 | 5.7957  | 5.1757  | 5.8258 | 6.8174 | 6.4750  | 6.0744  | 5.8164  | 0.9328  | -0.1003 | 0.1738 | 0.7600 |
| Abca2   | _QPAPFGTSGEQGLASS[Phospho (STY)]PSGC[Carbamidomethyl (C)]PR_2                    | P41234_S1238_M1_Abca2 | 3.5094 | 5.0896 | 3.2431 | 4.2877  | 3.3519  | 4.0752 | 4.4360 | 5.4409  | 3.0125  | 3.9650  | 0.9318  | -0.1019 | 0.6070 | 0.2168 |
| Abca2   | _VSEEDGS[Phospho (STY)]LENS[Phospho (STY)]EADWKESR_2                             | N/A                   | 4.2308 | 3.6650 | 4.2583 | 4.5258  | 3.6568  | 4.1578 | 5.2210 | 5.0257  | 4.1561  | 3.8543  | 0.8944  | -0.1610 | 0.1666 | 0.4264 |
| Tac1    | _DADSS[Phospho (STY)]VEKQVALLK_2                                                 | P41539_S76_M1_Tac1    | 4.1095 | 6.0697 | 4.5480 | 6.8088  | 6.8973  | 6.6445 | 6.4176 | 3.0678  | 4.2172  | 6.3055  | 1.1688  | 0.2750  | 0.3746 | 0.4264 |
| Ec1     | _EADIQNTFSISK_2                                                                  | N/A                   | 3.7494 | 3.0049 | 3.4073 | 3.9099  | 3.6369  | 3.7320 | 4.2809 | 3.5163  | 3.7975  | 3.4868  | 0.9478  | -0.0774 | 0.3971 | 0.4011 |
| Foxk1   | _GS[Phospho (STY)]PGPALAR_2                                                      | P41218_S87_M1_Foxk1   | 8.1871 | 8.0479 | 8.2226 | 8.8029  | 7.9613  | 8.1759 | 8.5391 | 8.0255  | 8.2195  | 8.4185  | 0.9918  | -0.0118 | 0.7098 | 0.1489 |
| Foxk1   | _EGS[Phospho (STY)]PIPHDGLGSK_2                                                  | N/A                   | 8.2976 | 8.2019 | 8.7701 | 8.8691  | 7.6815  | 8.2484 | 8.6519 | 8.3196  | 8.2988  | 8.3599  | 0.9926  | -0.0106 | 0.7944 | 0.1000 |
| Foxk1   | _S[Phospho (STY)]APASP[Phospho (STY)]HPLGLM[Oxidation (M)]S[Phospho (STY)]PR_2   | P412128_T408_M1_Foxk1 | 3.3371 | 3.8213 | 3.9271 | 8.0800  | 4.0546  | 3.7200 | 4.0808 | 3.7120  | 3.4128  | 3.5360  | 1.2183  | 0.2849  | 0.4040 | 0.3936 |
| Septin2 | _LTVDTPTGSDGDAINC[Carbamidomethyl (C)]JR_2                                       | N/A                   | 5.4233 | 5.3469 | 3.1857 | 6.1407  | 5.3787  | 5.1121 | 6.0591 | 5.2538  | 5.5500  | 4.3837  | 0.9598  | -0.0593 | 0.7223 | 0.1131 |
| Septin2 | _THQIEASTVEIEER_2                                                                | N/A                   | 7.0543 | 7.6812 | 8.6094 | 8.3164  | 6.7956  | 7.2982 | 7.4292 | 6.6923  | 6.7598  | 6.9882  | 1.0945  | 0.1303  | 0.1288 | 0.8901 |
| Septin2 | _THQIEDEQFER_2                                                                   | N/A                   | 4.7062 | 4.7003 | 5.1036 | 4.1058  | 4.9801  | 3.5274 | 4.3530 | 5.1742  | 4.9104  | 4.4961  | 0.9550  | -0.0664 | 0.5472 | 0.7618 |
| Septin2 | _TYHLPDAES[Phospho (STY)]DEDEDFKEQTR_3                                           | N/A                   | 8.1596 | 9.6779 | 8.6920 | 11.8079 | 10.3699 | 9.8183 | 8.9796 | 10.8948 | 10.7984 | 10.5734 | 0.9460  | -0.0802 | 0.2763 | 0.3218 |
| Septin2 | _STUNSLFIDLTPVER_2                                                               | N/A                   | 3.7074 | 4.3151 | 3.4482 | 3.5983  | 4.1862  | 3.3130 | 2.7501 | 3.5426  | 4.7587  | 1.1430  | 0.1929  | 0.2167  | 0.6649 | 0.6269 |
| Septin2 | _TYHLPDAES[Phospho (STY)]DEDEDFKE_2                                              | N/A                   | 4.1251 | 3.9454 | 3.3110 | 3.7240  | 2.9337  | 3.5321 | 3.6271 | 3.8898  | 3.8419  | 3.5826  | 0.9625  | -0.0552 | 0.5586 | 0.2529 |
| Septin2 | _QQPTQFINPPTGPGVGFANLPNQVHRH_3                                                   | N/A                   | 3.1456 | 4.9895 | 4.3801 | 1.9239  | 3.7902  | 4.3353 | 5.3005 | 3.8407  | 4.1153  | 3.6012  | 0.9714  | -0.0418 | 0.7901 | 0.0237 |
| Eps15   | _AETISQSQSQSYVEEELK_2                                                            | N/A                   | 5.0618 | 5.5773 | 5.9443 | 6.7129  | 4.7664  | 4.9471 | 6.0399 | 5.0360  | 4.1305  | 5.3181  | 1.0722  | 0.1006  | 0.4699 | 0.3280 |
| Eps15   | _NITGS[Phospho (STY)]PVADPSAIK_2                                                 | P42567_S124_M1_Eps15  | 7.3650 | 3.0752 | 7.4619 | 8.2303  | 6.6061  | 3.6611 | 7.7638 | 7.1851  | 7.1941  | 7.2166  | 0.8365  | -0.2749 | 0.2838 | 0.5475 |
| Pura    | _VSEVPPTYR_2                                                                     | N/A                   | 8.7068 | 8.9475 | 8.8804 | 9.2759  | 9.2795  | 8.8825 | 8.6436 | 9.0401  | 9.0560  | 8.8932  | 1.0098  | 0.0141  | 0.5527 | 0.2575 |
| Pura    | _IAEVGAGGNK_2                                                                    | N/A                   | 8.0550 | 8.5163 | 8.8309 | 8.2889  | 8.8378  | 8.5533 | 7.9897 | 8.4796  | 8.6136  | 8.2475  | 1.0217  | 0.0310  | 0.3686 | 0.4335 |
| Pura    | _FFFDVGSNK_2                                                                     | N/A                   | 7.8839 | 8.0362 | 7.9523 | 8.0477  | 7.9192  | 7.8912 | 8.1251 | 7.9463  | 7.8911  | 7.8503  | 1.0002  | 0.0003  | 0.9759 | 0.0106 |
| Pura    | _LIDDYGVGEPEALPEGTSLYONKR_3                                                      | N/A                   | 7.1435 | 7.0550 | 6.7796 | 7.9603  | 7.3800  | 7.5876 | 7.0544 | 6.9684  | 7.1952  | 6.9206  | 1.0402  | 0.0569  | 0.2326 | 0.6334 |
| Pura    | _GPGSGTGQQTALPAQGLEFR_3                                                          | N/A                   | 5.0786 | 5.1927 | 5.5878 | 5.7084  | 5.5579  | 5.8919 | 5.1680 | 5.4340  | 5.3009  | 5.3720  | 1.0346  | 0.0301  | 0.2953 | 0.5298 |
| Pura    | _VDQINKR_2                                                                       | N/A                   | 6.0697 | 5.5561 | 6.5547 | 5.4083  | 6.4190  | 5.7266 | 5.1646 | 5.9254  | 6.3964  | 5.2741  | 1.0203  | 0.0290  | 0.7077 | 0.1502 |
| Pura    | _NSITVPYK_2                                                                      | N/A                   | 4.7263 | 5.2152 | 4.8567 | 4.7356  | 4.8951  | 5.1174 | 4.2872 | 5.4459  | 5.3697  | 0.9615  | -0.0569 | 0.4408  | 0.3557 | 0.4767 |
| Pura    | _VSEENMKX_2                                                                      | N/A                   | 3.2754 | 4.0806 | 3.9622 | 5.9084  | 4.1011  | 3.8276 | 4.1795 | 3.6536  | 3.4160  | 3.5692  | 1.1317  | 0.1785  | 0.3339 | 0.4824 |
| Htt     | _RHS[Phospho (STY)]LSC[Carbamidomethyl (C)]TK_2                                  | P42859_S1841_M1_Htt   | 4.1365 | 4.8129 | 3.6352 | 3.1790  | 4.8149  | 3.2622 | 5.0701 | 4.1213  | 4.0989  | 0.7562  | 0.4023  | -0.0212 | 0.1041 | 0.9761 |
| Htt     | _S[Phospho (STY)]GEEDGSAQAQGM[C]Carbamidomethyl (C)NR_2                          | N/A                   | 3.6081 | 4.4133 | 4.2949 | 3.2967  | 4.2346  | 3.4949 | 3.8557 | 3.3210  | 2.9695  | 3.2637  | 1.1605  | 0.2147  | 0.0952 | 1.0214 |
| Htt     | _DEVAEAS[Phospho (STY)]DPESPK[C]Carbamidomethyl (C)JR_2                          | P42859_S637_M1_Htt    | 3.9207 | 3.4217 | 3.6544 | 3.1982  | 3.0644  | 3.5602 | 3.3464 | 4.1021  | 3.6743  | 0.8881  | 0.1711  | -0.1711 | 0.1012 | 0.9916 |
| Htt     | _SGS[Phospho (STY)]VELLAGSSG[Phospho (STY)]C[Carbamidomethyl (C)]SPVLSR_2        | P42859_S409_M2_Htt    | 3.7502 | 3.5890 | 4.1811 | 3.9444  | 3.4287  | 3.5110 | 3.7379 | 4.8460  | 3.8038  | 3.4876  | 0.9408  | -0.0880 | 0.4238 | 0.3729 |
| Htt     | _SLNPQGS[Phospho (STY)]GEEDGSAQAQGM[Oxidation (M)]C[Carbamidomethyl (C)]NR_3     | N/A                   | 7.2634 | 6.8405 | 7.8858 | 7.0446  | 3.5542  | 3.9598 | 7.1806 | 7.7315  | 7.5817  | 7.1737  | 0.8619  | -0.2144 | 0.2104 | 0.6748 |
| Oprm1   | _EFC[Carbamidomethyl (C)]IPTSSIEQKNS[Phospho (STY)]AR_2                          | P42866_S363_M1_Oprm1  | 8.3693 | 7.7680 | 8.0461 | 8.2156  | 7.0970  | 7.9724 | 8.1611 | 8.5400  | 8.1390  | 8.1224  | 0.9600  | -0.0588 | 0.2114 | 0.7648 |
| Cst8    | _KDWDDQMD_2                                                                      | N/A                   | 6.9889 | 7.2539 | 6.6572 | 7.0077  | 6.6300  | 6.9160 | 7.2998 | 7.0701  | 7.3516  | 7.0700  | 0.9143  | -0.1293 | 0.1953 | 0.6792 |
| Cst8    | _DVEDVSLR_2                                                                      | N/A                   | 6.9883 | 6.8440 | 7.0551 | 7.0401  | 6.4356  | 6.6235 | 6.9136 | 6.5048  | 6.8037  | 6.5475  | 1.0207  | 0.0296  | 0.3842 | 0.4155 |
| Cst8    | _FAEFAEAPR_2                                                                     | N/A                   | 6.0056 | 6.4499 | 5.7694 | 6.2174  | 6.0033  | 6.1323 | 6.9610 | 6.2793  | 6.4006  | 6.1791  | 0.9444  | -0.0825 | 0.0832 | 1.0800 |
| Cst8    | _LATMAAVTLR_2                                                                    | N/A                   | 5.2409 | 5.8256 | 6.5906 | 6.1153  | 5.7443  | 5.5966 | 6.1782 | 6.0969  | 5.9369  | 5.8748  | 0.9469  | -0.0786 | 0.0756 | 1.1214 |
| Cst8    | _AVDDGVNTFK_2                                                                    | N/A                   | 5.6421 | 6.3046 | 6.3764 | 6.0755  | 5.4216  | 6.1101 | 5.0768 | 6.1307  | 6.0162  | 5.6660  | 1.0465  | 0.0655  | 0.3514 | 0.4541 |
| Cst8    | _LFTVINDAATLR_2                                                                  | N/A                   | 5.8896 | 6.3104 | 6.4205 | 5.7977  | 5.6161  | 5.8651 | 5.7738 | 5.8958  | 5.4837  | 5.5975  | 1.0077  | 0.0110  | 0.8415 | 0.0749 |
| Cst8    | _LYSHVGEQNK_2                                                                    | N/A                   | 5.0821 | 5.8081 | 5.8616 | 6.0340  | 5.6590  | 5.6717 | 5.7186 | 5.9531  | 5.7031  | 5.7790  | 0.9823  | -0.0257 | 0.5695 | 0.2445 |
| Cst8    | _EDGEAISTVR_2                                                                    | N/A                   | 4.9194 | 4.7526 | 5.5106 | 5.9565  | 5.1469  | 5.5830 | 5.8372 | 5.5277  | 5.0520  | 5.0612  | 1.0908  | 0.1253  | 0.4406 | 0.3560 |
| Cst8    | _AIAGTGANVVTGGK_2                                                                | N/A                   | 3.3816 | 3.4599 | 3.1152 | 4.3378  | 4.2006  | 3.9905 | 3.9925 | 4.5197  | 4.0763  | 3.0821  | 0.9566  | -0.0640 | 0.6378 | 0.1953 |
| Cst8    | _HKEGDAISTVR_3                                                                   | N/A                   | 3.9519 | 3.3822 | 3.2377 | 4.6879  | 2.9124  | 3.3859 | 4.6634 | 3.9133  | 3.7334  | 0.9105  | -0.1353 | 0.3954  | 0.3954 | 0.1953 |
| Cst8    | _GSTNDLM[Oxidation (M)]DDIER_2                                                   | N/A                   | 4.9123 | 5.3403 | 5.4126 | 5.5702  | 5.3496  | 5.0272 | 5.4749 | 5.3218  | 5.1242  | 4.0496  | 1.0553  | 0.0777  | 0.3605 | 0.4431 |
| Cst8    | _QVGETFLAK_2                                                                     | N/A                   | 4.2907 | 3.8652 | 3.4766 | 3.9793  | 3.6157  | 4.3131 | 3.6940 | 4.1392  | 5.0883  | 5.0823  | 0.9923  | -0.0112 | 0.9531 | 0.0209 |
| Cst8    | _HFGLEEAVR_2                                                                     | N/A                   | 4.0178 | 3.2084 | 3.2037 | 3.7064  | 3.0967  | 3.5279 | 3.4211 | 4.3905  | 4.0499  | 4.8263  | 0.8294  | -0.2699 | 0.0433 | 1.3632 |
| Sk1a2   | _SADC[Carbamidomethyl (C)]S[Phospho (STY)]VEEPPWK_2                              | N/A                   | 6.3161 | 6.8016 | 3.7722 | 7.1423  | 6.8399  | 8.0520 | 7.3620 | 7.3955  | 5.8791  | 0.9209  | 0.8189  | -0.1189 |        |        |



|         |                                                                                     |                        |         |         |         |         |         |         |         |         |         |         |        |         |        |        |
|---------|-------------------------------------------------------------------------------------|------------------------|---------|---------|---------|---------|---------|---------|---------|---------|---------|---------|--------|---------|--------|--------|
| Slc1a2  | _NHRESN[Phospho (STY)]NQ[C]Carbamidomethyl (C)[Y]AAHNSVWDEC[Carbamidomethyl (C)]K_4 | #N/A                   | 3.8264  | 4.3577  | 3.9311  | 3.9158  | 3.5652  | 3.4794  | 3.8452  | 3.7141  | 3.6273  | 3.7574  | 1.0294 | 0.0418  | 0.5198 | 0.2842 |
| Slc1a2  | [SY]Phospho (STY)]DOKNHRESNQC[Carbamidomethyl (C)]YVAAHNSVWDEC[Carbamidomethyl (C)] | P43006_Y522_M1_Slc1a2  | 8.9370  | 4.3925  | 10.3827 | 3.7282  | 3.5944  | 3.5156  | 3.8764  | 3.2730  | 3.5721  | 3.4054  | 1.6305 | 0.7053  | 0.1941 | 0.7119 |
| Com6a1  | _JHEHERPPFVAYPHLR_4                                                                 | #N/A                   | 7.9443  | 8.7959  | 8.1828  | 7.7290  | 8.0476  | 8.8752  | 8.8878  | 7.6412  | 8.2594  | 8.9070  | 0.9808 | -0.0279 | 0.6453 | 0.1903 |
| Com6a1  | _ALTYVALPGVGSM[Oxidation (M)]UNVLK_2                                                | #N/A                   | 4.0617  | 3.3171  | 3.7953  | 3.5977  | 3.2054  | 3.4192  | 3.3124  | 3.0199  | 4.1694  | 3.5647  | 1.0141 | 0.0002  | 0.8499 | 0.0706 |
| H1-4    | _Acetyl (Protein N-term)[S]Phospho (STY)]ETAPAAPAAPAEK_2                            | #N/A                   | 13.1401 | 13.3665 | 14.3193 | 13.6442 | 13.2897 | 13.2790 | 14.0105 | 13.4226 | 11.4903 | 13.3832 | 1.0329 | 0.0467  | 0.4023 | 0.3955 |
| H1-4    | _TSGPPVSELTK_2                                                                      | #N/A                   | 8.7289  | 8.8263  | 9.3149  | 8.9822  | 9.1124  | 8.7221  | 9.1656  | 8.9328  | 8.6147  | 8.5964  | 1.0136 | 0.0195  | 0.4772 | 0.3213 |
| H1-4    | _Acetyl (Protein N-term)[S]Phospho (STY)]ETAPAAPAAPAEKTPVK_2                        | #N/A                   | 6.5423  | 7.4861  | 8.8952  | 7.4891  | 7.2109  | 5.5900  | 7.8903  | 7.5611  | 7.0274  | 6.8734  | 0.9815 | -0.0269 | 0.8244 | 0.0839 |
| H1-5    | _Acetyl (Protein N-term)[S]Phospho (STY)]ETAPAEATAAPAEK_2                           | #N/A                   | 6.0631  | 11.2620 | 11.5447 | 11.5570 | 11.1706 | 11.2203 | 12.0314 | 11.5326 | 11.2090 | 11.2737 | 0.9095 | -0.1369 | 0.3772 | 0.4234 |
| H1-5    | _Acetyl (Protein N-term)[SETAPAEATAAPAEK[S]Phospho (STY)]PAKK_3                     | #N/A                   | 7.1822  | 7.2807  | 8.4873  | 7.9271  | 7.3976  | 6.9729  | 8.0639  | 7.6761  | 7.4682  | 7.1185  | 0.9947 | -0.0077 | 0.9048 | 0.0434 |
| H1-5    | _ALAAAGYDVEK_2                                                                      | #N/A                   | 4.2010  | 4.9849  | 5.0075  | 4.4700  | 4.9487  | 4.2958  | 4.7724  | 3.8323  | 4.0525  | 4.5654  | 1.0803 | 0.1114  | 0.2145 | 0.6685 |
| H1-5    | _Acetyl (Protein N-term)[SETAPAEATAAPAEK[S]Phospho (STY)]PAK_2                      | #N/A                   | 7.9948  | 8.2776  | 9.5822  | 8.7910  | 8.1187  | 8.2045  | 9.0071  | 8.5193  | 8.2418  | 8.0506  | 1.0047 | 0.0068  | 0.9108 | 0.0406 |
| H1-3    | _P43277_S2_M1_H1-3                                                                  | P43277_S2_M1_H1-3      | 12.1714 | 12.1815 | 13.0636 | 12.6091 | 12.2262 | 12.2714 | 12.9852 | 12.2634 | 12.3272 | 12.6091 | 0.9908 | -0.0134 | 0.6165 | 0.2101 |
| H1-3    | _Acetyl (Protein N-term)[SETAPAAPAAPAEK[Phospho (STY)]IPVK_2                        | P43277_T18_M1_H1-3     | 4.4030  | 4.5684  | 6.5417  | 4.9061  | 4.6582  | 4.5610  | 5.3643  | 5.1030  | 4.0506  | 4.4294  | 1.0428 | 0.0605  | 0.6797 | 0.1677 |
| Dck     | _FC[Carbamidomethyl (C)]P[S]Phospho (STY)]PSTSEGR_2                                 | P43446_S11_M1_Dck      | 8.7865  | 3.8266  | 3.2495  | 9.1754  | 8.6751  | 9.0774  | 8.8058  | 8.5926  | 8.7196  | 3.9714  | 0.9481 | -0.0769 | 0.8247 | 0.0837 |
| Itgav   | _EQQLPHENGEGNS[Phospho (STY)]ET_2                                                   | P43406_S1042_M1_Itgav  | 3.4332  | 4.2384  | 4.1200  | 4.6226  | 4.0597  | 3.6698  | 5.4283  | 3.4958  | 3.1444  | 3.0888  | 1.0619 | 0.0867  | 0.6434 | 0.1915 |
| Itgav   | _YNNQLATR_2                                                                         | #N/A                   | 3.7731  | 3.0774  | 4.4599  | 3.5424  | 2.8988  | 3.3299  | 3.6907  | 3.1559  | 3.7578  | 3.4287  | 1.0015 | 0.0022  | 0.9866 | 0.0059 |
| Akr1b1  | _TIGVSNFNPLQER_2                                                                    | #N/A                   | 5.5914  | 6.2490  | 6.2498  | 7.0350  | 6.5029  | 6.7911  | 6.7656  | 6.5223  | 6.5001  | 6.5130  | 0.9992 | -0.0012 | 0.9748 | 0.0111 |
| Akr1b1  | _Acetyl (Protein N-term)[I]ASHLENNNGTK_2                                            | #N/A                   | 6.5434  | 6.6667  | 6.5415  | 6.4175  | 6.7845  | 6.2485  | 6.1272  | 6.2422  | 6.3222  | 6.4752  | 1.0385 | 0.0544  | 0.0623 | 1.2058 |
| Akr1b1  | _TTAQVLR_2                                                                          | #N/A                   | 6.0813  | 5.9245  | 5.4960  | 5.3133  | 6.0704  | 6.5046  | 5.4748  | 6.2299  | 6.5425  | 6.0444  | 0.9713 | -0.0421 | 0.5547 | 0.2559 |
| Akr1b1  | _VADLQVR_2                                                                          | #N/A                   | 6.1098  | 6.4398  | 4.2814  | 6.0623  | 6.2961  | 6.4762  | 4.9578  | 6.5107  | 6.3907  | 6.3465  | 0.9823 | -0.0258 | 0.8400 | 0.0757 |
| Akr1b1  | _SPGQVTEAVK_2                                                                       | #N/A                   | 6.8890  | 6.9146  | 6.8757  | 7.4050  | 7.4453  | 7.3100  | 6.5493  | 7.0078  | 7.2597  | 7.5153  | 1.0080 | 0.0115  | 0.7975 | 0.0982 |
| Akr1b1  | _LIEYC[Carbamidomethyl (C)]HSK_2                                                    | #N/A                   | 5.3352  | 5.1510  | 5.1622  | 5.5024  | 6.0190  | 5.1996  | 5.2945  | 4.7821  | 4.9437  | 4.6214  | 1.0987 | 0.1357  | 0.0455 | 1.3416 |
| Akr1b1  | _HIDC[Carbamidomethyl (C)]AQVYQNEK_2                                                | #N/A                   | 5.6291  | 2.9303  | 3.4819  | 3.9845  | 3.4216  | 4.3079  | 3.6992  | 5.9302  | 3.7825  | 3.9515  | 0.9121 | -0.1328 | 0.5680 | 0.2457 |
| Clf2    | _Acetyl (Protein N-term)[AS]Phospho (STY)]GVTVDEVIR_2                               | P45501_S3_M1_Clf2      | 9.6724  | 9.2934  | 10.0520 | 9.9833  | 9.1139  | 9.9874  | 10.0698 | 9.3730  | 9.6096  | 9.8557  | 0.9955 | -0.0064 | 0.8589 | 0.0661 |
| Clf2    | _QIIVEAK_2                                                                          | #N/A                   | 6.0884  | 6.1877  | 6.8177  | 5.5283  | 6.4241  | 6.7739  | 5.3476  | 5.8401  | 6.2736  | 5.3540  | 1.0905 | 0.1250  | 0.1011 | 0.9951 |
| Clf2    | _QILVGDIGDVEDPYTSVK_2                                                               | #N/A                   | 4.7322  | 4.9085  | 5.2692  | 5.0790  | 4.3521  | 3.5024  | 4.3492  | 4.4476  | 4.7764  | 4.7151  | 1.0150 | 0.0215  | 0.8438 | 0.0738 |
| Clf2    | _LPLNDC[Carbamidomethyl (C)]R_2                                                     | #N/A                   | 7.0234  | 7.4293  | 6.9971  | 6.4712  | 7.2994  | 6.7577  | 7.1519  | 7.3050  | 6.9402  | 6.9411  | 0.9871 | -0.0188 | 0.6462 | 0.1896 |
| Clf2    | _HEWQVGLDDWKDR_3                                                                    | #N/A                   | 5.4454  | 5.6752  | 5.5710  | 5.7714  | 6.6711  | 5.8637  | 4.3467  | 5.6171  | 5.7570  | 5.4589  | 1.1016 | 0.1396  | 0.1501 | 0.8235 |
| Fibp2   | _LVPSELGYGER_2                                                                      | #N/A                   | 6.7505  | 6.9830  | 6.9963  | 7.0673  | 7.3546  | 6.6294  | 6.4582  | 6.8920  | 6.6432  | 6.5531  | 1.0493 | 0.0694  | 0.0596 | 1.2251 |
| Fibp2   | _IPGATLVFVELLK_2                                                                    | #N/A                   | 3.0761  | 3.8324  | 4.0806  | 4.5832  | 3.7207  | 4.4048  | 4.2979  | 3.5352  | 3.1838  | 3.0494  | 1.1231 | 0.1675  | 0.2550 | 0.5934 |
| Rangap1 | _GSGEPAAT[Phospho (STY)]PSRK_2                                                      | P46061_T411_M1_Rangap1 | 5.8958  | 4.9659  | 3.5471  | 3.8459  | 2.9572  | 3.6674  | 3.5066  | 3.9103  | 3.9212  | 3.4690  | 1.0591 | 0.0828  | 0.6918 | 0.1286 |
| Syt1    | _VRFVGNSTGAELR_2                                                                    | #N/A                   | 8.9151  | 8.9511  | 9.4306  | 8.4743  | 8.0436  | 8.5078  | 9.1934  | 9.1976  | 8.8851  | 8.5487  | 0.9737 | -0.0385 | 0.4151 | 0.3819 |
| Syt1    | _HDIGEFK_2                                                                          | #N/A                   | 8.3533  | 8.0684  | 8.3083  | 7.7582  | 7.7466  | 7.6922  | 8.4532  | 8.1835  | 7.9942  | 7.8232  | 0.9845 | -0.0225 | 0.5169 | 0.2869 |
| Syt1    | _TLNPFVNEQFTTK_2                                                                    | #N/A                   | 7.8560  | 7.8632  | 7.8116  | 7.0618  | 7.1222  | 7.3480  | 7.7839  | 8.1474  | 7.9732  | 7.2803  | 0.9634 | -0.0539 | 0.2736 | 0.5630 |
| Syt1    | _VPYSLGGK_2                                                                         | #N/A                   | 8.0557  | 7.7005  | 8.0327  | 7.3113  | 7.2742  | 7.7421  | 7.1139  | 8.1622  | 7.8790  | 7.9373  | 0.9888 | -0.0162 | 0.7361 | 0.1331 |
| Syt1    | _TLVILEAK_2                                                                         | #N/A                   | 6.9044  | 6.6421  | 6.2362  | 5.7356  | 5.2682  | 6.5847  | 6.1410  | 6.5080  | 6.8700  | 6.5986  | 0.9539 | -0.0681 | 0.3993 | 0.3987 |
| Syt1    | _M[Oxidation (M)]DVGGLSOPYVK_2                                                      | #N/A                   | 7.5537  | 7.2659  | 7.3398  | 7.8679  | 6.9112  | 6.6185  | 7.6162  | 7.2803  | 7.1502  | 6.8300  | 1.0056 | 0.0080  | 0.8814 | 0.0549 |
| Syt1    | _DDDAETGL[Phospho (STY)]DGEKEEPKEEK_3                                               | P46096_T128_M1_Syt1    | 3.4609  | 4.2172  | 3.1946  | 4.2392  | 4.1055  | 4.0200  | 3.9131  | 4.2628  | 3.0610  | 3.9165  | 1.0223 | 0.0318  | 0.7862 | 0.1044 |
| Syt1    | _HWSDM[Oxidation (M)]IANPR_2                                                        | #N/A                   | 6.7025  | 6.3304  | 6.3304  | 6.7946  | 5.6855  | 5.5347  | 6.6107  | 5.6732  | 5.5773  | 5.2837  | 1.0225 | 0.0321  | 0.7541 | 0.1226 |
| Syt1    | _DLQSAKEKEGK_2                                                                      | #N/A                   | 6.8919  | 6.7047  | 6.6689  | 6.5378  | 5.5058  | 6.1559  | 6.9098  | 6.8688  | 6.7704  | 6.8164  | 0.9371 | -0.0938 | 0.1361 | 0.8662 |
| Syt1    | _VLPLDK_2                                                                           | #N/A                   | 6.1385  | 6.2275  | 6.2673  | 5.7157  | 4.8679  | 4.8459  | 3.6074  | 6.1934  | 6.0272  | 5.7028  | 1.0547 | 0.0768  | 0.6275 | 0.2024 |
| Syt1    | _VDQVVVLYDYDK_2                                                                     | #N/A                   | 6.6572  | 6.1615  | 6.3810  | 6.4089  | 5.6322  | 5.9525  | 7.1541  | 6.4978  | 3.0276  | 6.6012  | 1.0651 | 0.0909  | 0.6351 | 0.1972 |
| Syt1    | _TLVM[Oxidation (M)]JAVTDFDL_2                                                      | #N/A                   | 7.9093  | 7.6919  | 8.0209  | 7.6014  | 6.8887  | 7.6481  | 8.4124  | 8.1842  | 7.8703  | 7.6362  | 0.9503 | -0.0736 | 0.1395 | 0.8554 |
| Syt1    | _VPM[Oxidation (M)]NTVDFGHVTEWR_3                                                   | #N/A                   | 7.8179  | 7.5412  | 7.9881  | 7.8887  | 7.0943  | 7.1409  | 8.0488  | 7.5337  | 7.2696  | 6.9878  | 0.9878 | -0.0177 | 0.7061 | 0.1761 |
| Syt1    | _NTLNPYYNESF[Phospho (STY)]FEVFPQCK_3                                               | P46096_S344_M1_Syt1    | 3.8341  | 3.1385  | 4.5209  | 3.5227  | 2.9598  | 3.2689  | 3.2374  | 3.0949  | 4.2443  | 3.4897  | 1.0069 | 0.0099  | 0.9472 | 0.0236 |
| Cdkn1b  | _VSNGS[Phospho (STY)]FVPSLER_2                                                      | P46414_S10_M1_Cdkn1b   | 8.7280  | 8.8369  | 4.0148  | 9.9616  | 8.9832  | 9.0514  | 8.7558  | 8.7510  | 8.0076  | 0.9567  | 0.9567 | -0.0639 | 0.7424 | 0.1294 |
| Cdkn1b  | _TEINVSQGS[Phospho (STY)]PNAGTVETQPK_2                                              | P46414_S178_M1_Cdkn1b  | 6.0102  | 3.5286  | 6.5725  | 6.6560  | 5.8034  | 6.3652  | 6.6879  | 6.2448  | 6.2052  | 3.8602  | 1.0127 | 0.0182  | 0.9278 | 0.0325 |
| Cdkn1b  | _VLAQES[Phospho (STY)]QDVVSGSR_2                                                    | P46414_S106_M1_Cdkn1b  | 4.1477  | 3.4521  | 3.3337  | 3.8364  | 3.2734  | 3.6700  | 3.3160  | 6.5257  | 3.9307  | 3.8034  | 0.9412 | -0.0874 | 0.7786 | 0.1087 |
| Nsf     | _GILLYPGGC[Carbamidomethyl (C)]GK_2                                                 | #N/A                   | 8.9163  | 9.7557  | 10.0503 | 9.7654  | 9.6297  | 9.5546  | 9.7128  | 9.8532  | 9.7725  | 9.8333  | 0.9968 | -0.0046 | 0.7423 | 0.1294 |
| Nsf     | _LDLVPIGPR_2                                                                        | #N/A                   | 9.6921  | 10.0806 | 9.9487  | 9.5752  | 9.4397  | 9.7404  | 9.8644  | 10.0919 | 9.9788  | 9.6197  | 0.9856 | -0.0210 | 0.3530 | 0.4520 |
| Nsf     | _VYGSEANIR_2                                                                        | #N/A                   | 9.3970  | 9.3720  | 9.4678  | 9.4729  | 9.4773  | 9.5059  | 9.3873  | 9.2730  | 9.5431  | 9.3103  | 1.0075 | 0.0108  | 0.2306 | 0.6371 |
| Nsf     | _VLDDGELLVQOTK_2                                                                    | #N/A                   | 9.4470  | 9.3634  | 9.6460  | 9.5204  | 9.1307  | 9.3383  | 9.5332  | 9.2925  | 9.4734  | 9.2868  | 1.0012 | 0.0017  | 0.9161 | 0.0381 |
| Nsf     | _SQLSC[Carbamidomethyl (C)]VVVDQIER_2                                               | #N/A                   | 9.2258  | 8.9965  | 9.3584  | 9.1394  | 8.6201  | 8.8809  | 9.4030  | 8.9574  | 9.0339  | 8.9464  | 0.9947 | -0.0077 | 0.7697 | 0.1137 |
| Nsf     | _VFSGAELEGLVR_2                                                                     | #N/A                   | 8.8628  | 9.0839  | 9.1759  | 8.8312  | 8.7767  | 8.7933  | 8.9375  | 8.7902  | 8.9227  | 8.8575  | 1.0049 | 0.0071  | 0.6389 | 0.1945 |
| Nsf     | _LUGITSR_2                                                                          | #N/A                   | 8.6488  | 8.3140  | 8.6126  | 8.6708  | 7.4709  | 8.6949  | 8.5367  | 8.6003  | 8.4810  | 8.6602  | 0.9804 | -0.0285 | 0.5140 | 0.2890 |
| Nsf     | _NDSNPPYDTDK_2                                                                      | #N/A                   | 8.4651  | 8.2988  | 8.2381  | 8.6698  | 8.4518  | 8.5764  | 8.7445  | 8.3912  | 8.4981  | 8.4812  | 0.9908 | -0.0134 | 0.4634 | 0.3340 |
| Nsf     | _KLLUGITSR_2                                                                        | #N/A                   | 7.5654  | 8.2409  | 8.4333  | 8.1293  | 7.9169  | 8.1927  | 8.5002  | 8.2283  | 8.3220  | 8.2600  | 0.9702 | -0.0436 | 0.1636 | 0.7862 |
| Nsf     | _JAESNFPPIK_2                                                                       | #N/A                   | 8.4436  | 8.4252  | 8.4483  | 8.2854  | 8.2386  | 8.1835  | 8.3795  | 8.5222  | 8.3428  | 8.0876  | 1.0005 | 0.0008  | 0.9632 | 0.0163 |
| Nsf     | _WQDPVTR_2                                                                          | #N/A                   | 8.0215  | 8.3816  | 7.9804  | 8.2286  | 8.0292  | 7.7856  | 7.4774  | 8.4029  | 8.0671  | 7.7746  | 1.0177 | 0.0254  | 0.4784 | 0.3202 |
| Nsf     | _VYNGPEILNK_2                                                                       | #N/A                   | 7.9832  | 8.1588  | 8.1545  | 8.0228  | 8.5559  | 7.7730  | 8.2050  | 8.1904  | 8.0452  | 7.7650  | 1.0070 | 0.0101  | 0.7255 | 0.1393 |
| Nsf     | _AENSNSLUKG_2                                                                       | #N/A                   | 7.6525  | 7.6639  | 7.7935  | 7.3579  | 7.7429  | 7.3084  | 7.6766  | 7.5193  | 7.7947  | 7.5446  | 0.9938 | -0.0090 | 0.6931 | 0.1592 |
| Nsf     | _AESLQVTR_2                                                                         | #N/A                   | 7.8419  | 7.2711  | 7.1334  | 7.0295  | 7.4415  | 7.2295  | 6.2101  | 7.3169  | 7.6146  | 7.7928  | 1.0126 | 0.0180  | 0.7816 | 0.1070 |
| Nsf     | _TLIAQQVK_2                                                                         | #N/A                   | 7.1598  | 7.3263  | 7.0733  | 7.1942  | 7.5028  | 7.1447  | 6.4537  | 7.5195  | 7.2548  | 7.0653  | 1.0226 | 0       |        |        |



|        |                                                                                |                       |        |        |        |        |        |        |        |        |        |        |         |         |        |        |
|--------|--------------------------------------------------------------------------------|-----------------------|--------|--------|--------|--------|--------|--------|--------|--------|--------|--------|---------|---------|--------|--------|
| Nsf    | _ENRQS[Phospho (STY)]INPDWNFEK_3                                               | #N/A                  | 6.0715 | 5.6974 | 5.6495 | 6.0651 | 5.1909 | 6.1919 | 5.4783 | 5.7744 | 6.4659 | 6.1969 | 0.9719  | -0.0411 | 0.5337 | 0.2727 |
| Nsf    | _KJFADAEERQR_3                                                                 | #N/A                  | 6.1080 | 5.7320 | 5.6841 | 5.7118 | 6.2290 | 6.0084 | 6.1879 | 6.3196 | 6.5164 | 6.1857 | 0.9381  | -0.0922 | 0.0196 | 1.7071 |
| Nsf    | _OSINPDWNFEK_2                                                                 | #N/A                  | 7.0342 | 6.9761 | 7.3424 | 6.9910 | 6.9307 | 7.0584 | 7.0600 | 7.0517 | 6.9861 | 6.9027 | 1.0063  | 0.0090  | 0.6110 | 0.2139 |
| Nsf    | _GSM[Oxidation (M)]AGSTGVHDTVVNQLSK_3                                          | #N/A                  | 7.9818 | 8.0094 | 8.8747 | 7.7603 | 7.6072 | 7.8707 | 7.8845 | 7.9659 | 7.9949 | 8.0377 | 1.0058  | 0.0084  | 0.8437 | 0.0738 |
| Nsf    | _VEVDM[Oxidation (M)]JEKESLQVTR_3                                              | #N/A                  | 4.1419 | 3.2477 | 3.8756 | 3.3559 | 3.2856 | 3.6158 | 3.2321 | 3.8260 | 4.2496 | 3.0966 | 1.0007  | 0.0011  | 0.9926 | 0.0032 |
| Nsf    | _C[Carbamidomethyl (C)]PTDELSNLC[Carbamidomethyl (C)]AVVNEK_2                  | #N/A                  | 5.0066 | 4.2338 | 4.3431 | 3.8869 | 3.7532 | 4.3722 | 4.1432 | 4.2579 | 3.4113 | 3.5642 | 1.1096  | 0.1500  | 0.1699 | 0.7699 |
| Nsf    | _KNIDSNPYDTDK_2                                                                | #N/A                  | 3.0650 | 3.8212 | 4.2995 | 3.8432 | 3.7095 | 5.6133 | 5.9429 | 5.5386 | 6.0292 | 3.5205 | 0.7719  | -0.3735 | 0.0976 | 1.0107 |
| Nsf    | _LFADEAEERQR_2                                                                 | #N/A                  | 3.8935 | 3.4565 | 3.7039 | 3.4272 | 3.3159 | 4.8653 | 4.2988 | 3.4401 | 4.3721 | 3.6239 | 0.9602  | -0.0586 | 0.6633 | 0.1783 |
| Nsf    | _FLALM[Oxidation (M)]REGAS[Phospho (STY)]PLDFD_2                               | #N/A                  | 3.3998 | 3.4026 | 3.6735 | 3.2172 | 3.0835 | 3.1139 | 3.3655 | 3.7839 | 4.0800 | 4.3953 | 0.8724  | -0.1969 | 0.0758 | 1.1203 |
| Nsf    | _LEGAS[Phospho (STY)]PLDFD_1                                                   | #N/A                  | 3.3320 | 4.1372 | 4.0188 | 3.3205 | 3.9586 | 3.7709 | 4.1317 | 3.3168 | 3.6607 | 1.0636 | 0.0890  | 0.4152  | 0.1817 | 0.1801 |
| Nsf    | _DFQSGQHVM[Oxidation (M)]VR_2                                                  | #N/A                  | 3.7298 | 3.8541 | 3.8536 | 5.3393 | 6.2608 | 3.6348 | 3.7627 | 3.8072 | 4.8862 | 3.6679 | 1.1028  | 0.1412  | 0.5104 | 0.2921 |
| Nsf    | _VEVMEK_2                                                                      | #N/A                  | 3.6764 | 2.9318 | 3.4101 | 3.9829 | 2.8201 | 3.8045 | 3.6976 | 4.0473 | 3.7841 | 4.1320 | 0.8780  | -0.1877 | 0.0988 | 1.0053 |
| Vps4b  | _GNDS[Phospho (STY)]DGEAESDPEK_2                                               | #N/A                  | 7.1729 | 4.1278 | 7.1980 | 9.0155 | 6.4208 | 7.2917 | 8.1002 | 7.7018 | 3.4792 | 8.2387 | 0.9987  | -0.0019 | 0.9943 | 0.0025 |
| Vps4b  | _GNDS[Phospho (STY)]DGEAESDPEKKK_2                                             | #N/A                  | 4.8932 | 5.0443 | 4.6733 | 5.8726 | 5.3829 | 5.1393 | 5.1215 | 4.9492 | 4.7790 | 5.3896 | 1.0213  | 0.0304  | 0.6620 | 0.1792 |
| Pmc2   | _TM[Oxidation (M)]LEUNQLDGFDR_2                                                | #N/A                  | 4.5026 | 4.7765 | 4.4252 | 4.0094 | 4.4780 | 5.4612 | 5.2786 | 4.9868 | 5.2017 | 5.0061 | 0.9005  | -0.1513 | 0.0798 | 1.0980 |
| Pmc2   | _FVVDLSQVAPTDEEGM[Oxidation (M)]R_2                                            | #N/A                  | 3.9028 | 4.5738 | 3.6365 | 3.1803 | 3.9686 | 4.2060 | 3.3285 | 4.2155 | 4.3179 | 0.9347 | -0.0974 | 0.4591  | 0.3381 | 0.0747 |
| Rab11b | _AQIWDTAGQR_2                                                                  | #N/A                  | 7.7280 | 7.7830 | 8.0136 | 7.3269 | 7.1934 | 7.3779 | 7.7997 | 7.7440 | 7.7175 | 7.6145 | 0.9808  | -0.0280 | 0.3947 | 0.4038 |
| Rab11b | _VUUGDSGVK_2                                                                   | #N/A                  | 7.2065 | 7.5713 | 6.7871 | 7.4486 | 7.0381 | 7.2415 | 7.3787 | 7.4177 | 7.3634 | 0.9706 | -0.0430 | 0.1804  | 0.7439 | 0.0747 |
| Rab11b | _Acetyl (Protein N-term)[GTRDDEYOLFK_2                                         | #N/A                  | 5.4048 | 5.4659 | 6.3100 | 5.8511 | 4.9628 | 6.0518 | 6.0735 | 5.7738 | 5.9563 | 6.1177 | 0.9488  | -0.0758 | 0.2685 | 0.5710 |
| Rab11b | _NMLSFETSALDSTNVEAFK_2                                                         | #N/A                  | 4.3470 | 5.1401 | 5.4537 | 6.2330 | 5.2177 | 5.1456 | 5.0100 | 5.3666 | 4.9927 | 5.8175 | 0.9924  | -0.0111 | 0.9097 | 0.0411 |
| Rab11b | _HLTYENVR_2                                                                    | #N/A                  | 6.9787 | 6.5502 | 7.2556 | 6.4869 | 6.7349 | 6.7748 | 7.0050 | 6.7395 | 6.9694 | 6.5918 | 0.9957  | -0.0063 | 0.8619 | 0.0646 |
| Rab11b | _NLTENR_2                                                                      | #N/A                  | 5.5259 | 5.5643 | 5.8494 | 5.6626 | 5.1477 | 4.9826 | 4.4914 | 5.5238 | 5.8137 | 5.3731 | 1.0292  | 0.0416  | 0.5953 | 0.2252 |
| Rab11b | _STGVFEATR_2                                                                   | #N/A                  | 6.1430 | 3.9954 | 4.4736 | 5.5029 | 3.8837 | 5.6177 | 4.1349 | 6.3698 | 6.0959 | 3.6947 | 0.9728  | -0.0397 | 0.8531 | 0.0690 |
| Rab11b | _AITSAYR_2                                                                     | #N/A                  | 4.2124 | 3.6713 | 3.7879 | 4.2906 | 4.6497 | 4.1121 | 4.0052 | 3.9316 | 3.1492 | 4.2575 | 1.0742  | 0.1033  | 0.3086 | 0.5106 |
| Rab11b | _NEFNLEK_2                                                                     | #N/A                  | 4.6092 | 4.1258 | 4.4511 | 3.9948 | 3.8611 | 3.7823 | 4.1431 | 5.1181 | 4.8840 | 5.0641 | 0.8615  | -0.2150 | 0.0265 | 1.5762 |
| Rab11b | _AAHDES[Phospho (STY)]PGNNVVDSVPTTDGQR_3                                       | P46638_S190_M1_Rab11b | 3.2762 | 4.0814 | 3.9630 | 4.4656 | 3.9027 | 3.8268 | 4.1876 | 3.6529 | 3.3014 | 4.4326 | 1.0066  | 0.0095  | 0.9300 | 0.0315 |
| Ina    | _TNEKQLGGLNDR_3                                                                | #N/A                  | 8.7319 | 9.0423 | 9.3208 | 9.2754 | 9.0342 | 9.0796 | 8.9965 | 8.9676 | 9.3161 | 1.0067 | 0.0976  | 0.6690  | 0.1746 | 0.0747 |
| Ina    | _DGLAEVQR_2                                                                    | #N/A                  | 9.4122 | 9.4953 | 9.5856 | 9.6898 | 9.2926 | 9.2865 | 9.3478 | 9.1696 | 9.3383 | 9.7054 | 1.0075  | 0.0107  | 0.5797 | 0.2368 |
| Ina    | _VHOLETONR_2                                                                   | #N/A                  | 9.0561 | 9.4194 | 8.8475 | 9.2600 | 9.7556 | 9.1146 | 9.4794 | 9.0391 | 9.3055 | 9.2043 | 0.9984  | -0.0023 | 0.9351 | 0.0291 |
| Ina    | _ALEAEALAIR_2                                                                  | #N/A                  | 9.0759 | 9.4773 | 9.2567 | 9.4057 | 9.0949 | 9.3143 | 9.1715 | 9.3848 | 9.3270 | 9.3289 | 0.9965  | -0.0050 | 0.7308 | 0.1362 |
| Ina    | _QILELEER_2                                                                    | #N/A                  | 9.2292 | 9.2922 | 9.0029 | 9.1283 | 9.2090 | 9.3741 | 9.0330 | 8.6424 | 9.0453 | 9.4111 | 1.0192  | 0.0274  | 0.2533 | 0.5963 |
| Ina    | _AQLAEASSAR_2                                                                  | #N/A                  | 8.9220 | 9.0041 | 9.0220 | 8.9066 | 9.4014 | 9.2217 | 8.7963 | 8.7604 | 9.0220 | 9.0155 | 1.0203  | 0.0291  | 0.1483 | 0.8289 |
| Ina    | _TIEGLELR_2                                                                    | #N/A                  | 8.8878 | 8.7137 | 8.7255 | 8.7549 | 8.9024 | 9.0955 | 8.1755 | 8.6267 | 8.6435 | 9.1616 | 1.0225  | 0.0321  | 0.3006 | 0.5221 |
| Ina    | _FANNEQAAR_2                                                                   | #N/A                  | 8.3059 | 8.5640 | 8.5556 | 8.9878 | 9.1021 | 8.5248 | 8.7190 | 8.2479 | 8.3668 | 8.6428 | 1.0211  | 0.0301  | 0.3459 | 0.4610 |
| Ina    | _NLQSAEEWYK_2                                                                  | #N/A                  | 8.6380 | 8.7433 | 8.8023 | 8.7557 | 8.6811 | 8.7037 | 8.4479 | 8.3322 | 8.4349 | 8.6200 | 1.0310  | 0.0440  | 0.0016 | 2.8087 |
| Ina    | _KVESLDEIAFVR_2                                                                | #N/A                  | 6.9270 | 7.1400 | 7.1875 | 7.4213 | 7.3962 | 7.1903 | 7.2922 | 7.0830 | 7.2641 | 7.2849 | 0.9971  | -0.0042 | 0.8401 | 0.0757 |
| Ina    | _RLPASDGLDLSQAAR_3                                                             | #N/A                  | 7.2565 | 7.4400 | 7.5934 | 7.5225 | 7.7871 | 7.4187 | 7.6259 | 7.2341 | 7.4840 | 7.5507 | 1.0387  | 0.0547  | 0.1797 | 0.7454 |
| Ina    | _DVGATLAR_2                                                                    | #N/A                  | 7.2140 | 7.4777 | 7.6019 | 7.2441 | 7.8599 | 7.3891 | 6.5605 | 7.4442 | 7.5460 | 7.7588 | 1.0514  | 0.0722  | 0.3940 | 0.4045 |
| Ina    | _LPASDGLDLSQAAR_2                                                              | #N/A                  | 7.4557 | 7.0212 | 6.7979 | 7.6451 | 7.7361 | 7.2896 | 7.2635 | 6.8223 | 7.1155 | 6.7930 | 1.0465  | 0.0656  | 0.1531 | 0.8152 |
| Ina    | _AQALLER_2                                                                     | #N/A                  | 6.3703 | 7.0688 | 6.8263 | 6.4747 | 7.0360 | 6.7787 | 5.3680 | 6.6564 | 6.7525 | 6.9130 | 1.0524  | 0.0737  | 0.3188 | 0.4965 |
| Ina    | _FAVREK_2                                                                      | #N/A                  | 6.5406 | 6.2559 | 6.2592 | 6.6068 | 6.6247 | 6.6918 | 5.8306 | 6.4815 | 6.7686 | 7.1099 | 0.9922  | -0.0113 | 0.8336 | 0.0790 |
| Ina    | _AQVLSAAM_2                                                                    | #N/A                  | 6.5287 | 6.7034 | 6.1873 | 6.3327 | 6.9625 | 6.3503 | 5.2408 | 5.9364 | 6.9248 | 6.5447 | 1.0567  | 0.0795  | 0.3144 | 0.5025 |
| Ina    | _VGELFOR_2                                                                     | #N/A                  | 6.6654 | 6.7596 | 6.2352 | 6.5535 | 6.4791 | 5.9827 | 6.3294 | 6.5661 | 5.9695 | 6.2707 | 1.0258  | 0.0367  | 0.3859 | 0.4135 |
| Ina    | _KVGGSOR_2                                                                     | #N/A                  | 4.6620 | 5.3082 | 5.2343 | 5.3753 | 5.5553 | 4.8286 | 4.8592 | 5.1985 | 5.7050 | 5.5721 | 0.9675  | -0.0476 | 0.4754 | 0.3229 |
| Ina    | _LSGPGSGSFR_2                                                                  | #N/A                  | 8.1278 | 8.4012 | 8.0282 | 8.7816 | 8.2147 | 7.6269 | 8.2728 | 7.8984 | 8.1599 | 8.1662 | 1.0089  | 0.0128  | 0.7348 | 0.1338 |
| Ina    | _VESLDEIAFVR_2                                                                 | #N/A                  | 5.5825 | 5.0688 | 3.3541 | 5.1852 | 5.1269 | 5.1811 | 4.7282 | 4.4001 | 4.8092 | 1.1119 | 0.1530  | 0.2978  | 0.5261 | 0.1686 |
| Ina    | _SNVASTAAC[Carbamidomethyl (C)]SSASSGLGAYR_2                                   | #N/A                  | 5.6705 | 5.0478 | 5.9329 | 5.4753 | 4.7099 | 5.3210 | 6.0242 | 4.4824 | 5.1488 | 5.8065 | 0.9989  | -0.0016 | 0.9871 | 0.0056 |
| Ina    | _GANES[Phospho (STY)]LER_2                                                     | P46660_S335_M1_Ina    | 6.7894 | 7.0362 | 7.2237 | 6.7791 | 7.3379 | 7.0129 | 5.9702 | 6.4985 | 6.7020 | 7.4820 | 0.9550  | -0.0665 | 0.7270 | 0.1385 |
| Ina    | _Acetyl (Protein N-term)[SGSGHYLC[Carbamidomethyl (C)]SASSYR_2                 | #N/A                  | 5.1237 | 4.5893 | 4.9142 | 6.0162 | 5.1300 | 5.0834 | 5.0132 | 4.9314 | 5.0637 | 4.6148 | 1.0483  | 0.0681  | 0.3796 | 0.4207 |
| Ina    | _Acetyl (Protein N-term)[SGSGHYLC[Carbamidomethyl (C)]SAS[Phospho (STY)]SYRK_3 | #N/A                  | 3.6791 | 5.0832 | 6.2273 | 5.9511 | 5.3810 | 3.9480 | 3.7534 | 3.7407 | 3.7534 | 3.7407 | 1.1900  | 0.2509  | 0.2447 | 0.6114 |
| Ina    | _EEHEVRR_2                                                                     | #N/A                  | 5.7096 | 4.9841 | 3.4000 | 5.7124 | 5.3520 | 4.9504 | 5.5212 | 5.6873 | 5.5301 | 4.5726 | 0.9419  | -0.0864 | 0.5390 | 0.2684 |
| Ina    | _VSSAGLSK_2                                                                    | #N/A                  | 4.0950 | 3.7746 | 4.4089 | 4.4857 | 5.2032 | 4.6805 | 3.1254 | 4.3109 | 4.0289 | 4.0289 | 1.2473  | 0.3188  | 0.0497 | 1.3039 |
| Ina    | _VGFEETLGEAVSTK_2                                                              | #N/A                  | 8.1632 | 8.0643 | 8.4650 | 8.4948 | 7.2400 | 8.2747 | 8.3040 | 7.4024 | 7.8045 | 7.9627 | 1.0316  | 0.0449  | 0.3971 | 0.4011 |
| Ina    | _KEEEEEKEYSK_3                                                                 | #N/A                  | 5.0024 | 4.9357 | 5.1256 | 5.7717 | 5.0522 | 5.1541 | 5.3922 | 4.5223 | 5.0959 | 4.9567 | 1.0364  | 0.0516  | 0.4136 | 0.3834 |
| Ina    | _SATESTSS[Phospho (STY)]SQNM_2                                                 | P46660_S497_M1_Ina    | 4.0059 | 3.7238 | 4.2020 | 5.8632 | 3.8691 | 4.1017 | 3.9949 | 3.5022 | 3.7047 | 3.7821 | 1.1464  | 0.1971  | 0.2174 | 0.6627 |
| Ina    | _MSAEVAGYQDSGQLESOLR_3                                                         | #N/A                  | 7.2781 | 7.6818 | 7.3134 | 7.6647 | 7.3259 | 7.3244 | 6.8023 | 6.4095 | 6.9917 | 7.5533 | 1.0664  | 0.0927  | 0.0572 | 1.2423 |
| Ina    | _LISSTASK_2                                                                    | #N/A                  | 4.2890 | 3.5933 | 3.4828 | 4.5274 | 3.4677 | 4.3149 | 3.1748 | 3.9746 | 4.2737 | 4.2778 | 1.0052  | 0.0075  | 0.9503 | 0.0221 |
| Adis2  | _VVDLIAQADADVC[Carbamidomethyl (C)]R_2                                         | #N/A                  | 5.3171 | 5.1038 | 4.2645 | 4.8038 | 5.2104 | 5.0982 | 4.5927 | 4.7770 | 5.4785 | 5.7095 | 0.9663  | -0.0494 | 0.5662 | 0.2470 |
| Adis2  | _ELPVNAQNVYR_2                                                                 | #N/A                  | 3.5424 | 5.8663 | 4.2292 | 5.8686 | 6.1844 | 6.0386 | 5.7363 | 6.1238 | 6.2727 | 5.1570 | 0.9083  | -0.1388 | 0.4005 | 0.3974 |
| Nedd4  | _RQIS[Phospho (STY)]EDVDPGNR_2                                                 | #N/A                  | 7.5291 | 7.5370 | 8.0426 | 8.1266 | 6.6466 | 7.5453 | 7.9733 | 7.8261 | 7.6403 | 7.5832 | 0.9762  | -0.0347 | 0.5256 | 0.2794 |
| Nedd4  | _QIS[Phospho (STY)]EDVDPGNR_2                                                  | #N/A                  | 8.2638 | 8.0996 | 8.6288 | 8.4185 | 7.3351 | 8.1468 | 8.3208 | 8.2291 | 8.1058 | 8.1894 | 0.9924  | -0.0110 | 0.7916 | 0.1015 |
| Nedd4  | _RPSDDDLT[Phospho (STY)]DEDDDM[Oxidation (M)]QLQAQR_3                          | P46935_T287_M1_Nedd4  | 3.5521 | 3.7903 | 3.2857 | 4.3304 | 4.1966 | 4.1178 | 2.6806 | 4.1635 | 2.9699 | 4.0076 | 1.1225  | 0.1668  | 0.2718 | 0.5658 |
| Yap1   | _QAS[Phospho (STY)]TDAGTAGALTPOHVR_2                                           | #N/A                  | 3.4375 | 6.5198 | 6.8776 | 7.0502 | 6.3174 | 6.5930 | 7.0006 | 6.2149 | 6.4782 | 6.5521 | 0.9346  | -0.0975 | 0.5565 | 0.2546 |
| Yap1   | _GDS[Phospho (STY)]ETDLAFLNAVM[Oxidation (M)]NPK_2                             | P46938_S46_M1_Yap1    | 4.0746 | 6.0024 | 3.2606 | 6.5958 | 6.5157 | 4.9515 | 3.4779 | 4.3552 | 5.6611 | 3.7302 | 1.2169  | 0.2832  | 0.2758 | 0.5594 |
| Gal    | _EAGALDSPGIPLATIS[Phospho (STY)]SEDLKS_2                                       | P47212_S117_M1_Gal    | 3.7114 | 3.5147 | 4.3982 | 3.4000 | 3.4030 | 4.8514 | 3.1147 |        |        |        |         |         |        |        |



|        |                                                                        |                      |         |         |         |         |        |         |         |         |         |         |         |         |        |        |
|--------|------------------------------------------------------------------------|----------------------|---------|---------|---------|---------|--------|---------|---------|---------|---------|---------|---------|---------|--------|--------|
| Aldh2  | _VAEQTPLTALYVANLUK_2                                                   | #N/A                 | 4.9715  | 5.1429  | 5.8537  | 5.3815  | 5.8220 | 5.0876  | 4.3398  | 5.5251  | 4.9601  | 5.6543  | 1.0501  | 0.0706  | 0.4277 | 0.3689 |
| Aldh2  | _TEGPGQVDETQFK_2                                                       | #N/A                 | 6.4238  | 6.1830  | 3.3720  | 5.6130  | 6.3675 | 5.9773  | 3.0641  | 5.5658  | 5.6965  | 6.0821  | 1.1086  | 0.1487  | 0.5097 | 0.2927 |
| Aldh2  | _TIEVVGRL_2                                                            | #N/A                 | 5.6139  | 6.1262  | 4.4577  | 3.8905  | 6.7658 | 6.2527  | 4.1497  | 5.9153  | 6.3664  | 6.1500  | 0.9974  | -0.0330 | 0.0658 | 0.3152 |
| Aldh2  | _LLC[Carbamidomethyl (C)]GGGAADR_2                                     | #N/A                 | 5.7579  | 6.5353  | 4.3584  | 6.6223  | 6.8777 | 6.2069  | 6.2970  | 6.5332  | 6.2685  | 6.5266  | 0.9459  | -0.0802 | 0.4839 | 0.3152 |
| Aldh2  | _ELGEYGLQAVTEK_2                                                       | #N/A                 | 5.0040  | 4.6688  | 4.3861  | 3.9298  | 5.0582 | 4.3293  | 4.0781  | 4.9423  | 4.8006  | 4.8006  | 1.0804  | 0.1116  | 0.4352 | 0.3715 |
| Aldh2  | _LADUER_2                                                              | #N/A                 | 4.8681  | 4.0787  | 4.5569  | 3.2748  | 3.4638 | 3.9640  | 4.2490  | 4.3450  | 4.9439  | 4.2359  | 0.9079  | -0.1393 | 0.2632 | 0.5797 |
| Capra2 | _EATDPPRYEADNAIESWR_3                                                  | #N/A                 | 7.9992  | 7.9326  | 8.5001  | 8.3879  | 7.5525 | 8.2792  | 8.0288  | 7.8070  | 8.0470  | 8.2394  | 1.0097  | 0.0140  | 0.6948 | 0.1581 |
| Capra2 | _LLLNNDNLRL_2                                                          | #N/A                 | 7.7371  | 7.6345  | 7.7252  | 7.6219  | 7.7189 | 7.7012  | 7.7155  | 7.9892  | 7.3946  | 7.9997  | -0.0004 | 0.9838  | 0.0071 | 0.2118 |
| Capra2 | _FTYVPTTQVVGILK_2                                                      | #N/A                 | 7.1183  | 6.7360  | 7.4769  | 7.4043  | 7.0304 | 7.3590  | 7.3229  | 6.9321  | 7.4580  | 6.5948  | 1.0156  | 0.0224  | 0.6141 | 0.2118 |
| Capra2 | _EHYPNGVC[Carbamidomethyl (C)]TVYVK_2                                  | #N/A                 | 6.0785  | 5.4953  | 6.4799  | 6.0502  | 6.1855 | 5.8624  | 3.5665  | 6.5858  | 3.8820  | 5.8547  | 1.2118  | 0.2771  | 0.1214 | 0.9159 |
| Capra2 | _TSVETALR_2                                                            | #N/A                 | 5.3908  | 5.1762  | 4.6605  | 4.7218  | 5.2287 | 5.4399  | 4.2822  | 5.8835  | 5.9186  | 5.4903  | 0.9461  | -0.0799 | 0.4272 | 0.3693 |
| Capra2 | _EGAAHAFAQYNLDQFTPVK_3                                                 | #N/A                 | 4.0274  | 3.2387  | 3.8374  | 4.5264  | 3.8688 | 4.5614  | 3.4857  | 6.3105  | 4.4936  | 3.5533  | 1.0578  | 0.0811  | 0.5039 | 0.2976 |
| Capra2 | _Acetyl (Protein N-term))ADLEEQLSDEEKV_R_2                             | #N/A                 | 5.8641  | 5.7107  | 5.6758  | 6.7812  | 6.6179 | 5.7259  | 5.3625  | 6.3384  | 5.5162  | 5.7413  | 1.0563  | 0.0790  | 0.3225 | 0.4915 |
| Capra2 | _Acetyl (Protein N-term))ADLEEQLSDEEK_2                                | #N/A                 | 5.5013  | 5.0321  | 3.7828  | 6.4059  | 5.4869 | 4.7059  | 4.8951  | 6.0804  | 5.7981  | 5.6151  | 0.9205  | -0.1194 | 0.3932 | 0.4054 |
| Capra2 | _RIHAPPGEFNVEVDNR_3                                                    | #N/A                 | 6.4422  | 6.5843  | 6.4118  | 7.0947  | 6.7572 | 6.5432  | 6.6570  | 6.7018  | 6.7472  | 6.4427  | 1.0003  | 0.0004  | 0.9905 | 0.0041 |
| Capra2 | _DIQDSLTVSEVQITAK_2                                                    | #N/A                 | 6.0308  | 5.6718  | 4.2564  | 5.9023  | 4.1419 | 5.3729  | 5.4518  | 3.2010  | 3.5001  | 5.4644  | 1.1873  | 0.2477  | 0.2351 | 0.6288 |
| Capra2 | _IVEAAENEYGTAISENYQTMSTDTTK_3                                          | #N/A                 | 3.5812  | 4.3375  | 3.3149  | 2.6277  | 4.2258 | 3.8997  | 3.7928  | 4.1425  | 4.4416  | 4.0368  | 0.8930  | -0.1632 | 0.2351 | 0.6288 |
| Capzb  | _DYLK[Carbamidomethyl (C)]DIYNR_3                                      | #N/A                 | 9.1510  | 8.8786  | 9.1067  | 9.1475  | 8.5551 | 8.7713  | 9.2020  | 8.7157  | 9.0642  | 9.0885  | 0.9908  | -0.0133 | 0.5952 | 0.2254 |
| Capzb  | _STLNEFKG_2                                                            | #N/A                 | 6.6915  | 6.3230  | 6.4949  | 6.6654  | 6.4563 | 6.6022  | 6.6850  | 6.7600  | 6.8972  | 6.6597  | 0.9687  | -0.0459 | 0.0345 | 1.4623 |
| Capzb  | _EL[Phospho (STY)]QVITQR_2                                             | P47757_S263_M1_Capzb | 10.6586 | 10.4619 | 10.9971 | 10.8526 | 9.7272 | 10.7412 | 10.9551 | 10.4468 | 10.5332 | 10.6597 | 0.9929  | -0.0103 | 0.7671 | 0.1151 |
| Capzb  | _GC[Carbamidomethyl (C)]WDSHWVVEQEK_2                                  | #N/A                 | 4.6944  | 3.2031  | 4.5292  | 4.3663  | 4.4409 | 4.2087  | 4.3570  | 4.2723  | 4.1744  | 4.3860  | 1.0588  | 0.0825  | 0.6891 | 0.1877 |
| Capzb  | _LLEVEANNAFDQVR_3                                                      | #N/A                 | 6.2242  | 6.1175  | 6.6200  | 6.3716  | 6.0808 | 6.2210  | 6.0374  | 5.9849  | 6.3142  | 5.9447  | 1.0333  | 0.0473  | 0.1325 | 0.8776 |
| Capzb  | _LLEVEANNAFDQVR_2                                                      | #N/A                 | 2.9763  | 3.7815  | 3.2945  | 6.1451  | 3.6029 | 4.1266  | 4.4874  | 5.5040  | 2.9611  | 5.1828  | 0.8796  | -0.1851 | 0.4754 | 0.3230 |
| Capzb  | _SGSGTM[Oxidation (M)]NLGGSLTR_2                                       | #N/A                 | 0.0999  | 6.6402  | 6.9290  | 3.9474  | 6.1881 | 6.8350  | 0.5516  | 6.5926  | 6.4729  | 6.2665  | 0.9437  | -0.0836 | 0.5401 | 0.2675 |
| Capzb  | _Acetyl (Protein N-term))SQQLDQ[Carbamidomethyl (C)]ALDLMR_2           | #N/A                 | 3.9726  | 3.3645  | 4.5487  | 4.3043  | 3.5218 | 3.3260  | 3.2652  | 4.2168  | 3.3038  | 1.0375  | 1.1309  | 0.1775  | 0.2312 | 0.6360 |
| Gsr    | _ALLTPVAIAAGR_2                                                        | #N/A                 | 6.0543  | 6.5349  | 6.9814  | 6.1631  | 6.3041 | 6.2166  | 6.4493  | 6.4063  | 6.2449  | 6.7244  | 0.9875  | -0.0181 | 0.6823 | 0.1660 |
| Map2k4 | _LC[Carbamidomethyl (C)]DFGGSGQVDSIAK_2                                | #N/A                 | 4.0488  | 4.9299  | 4.0440  | 4.2604  | 4.3105 | 4.8540  | 4.5764  | 4.3267  | 4.4215  | 1.0435  | 0.0614  | 0.5098  | 0.0262 | 0.2996 |
| Map2k4 | _LRTHS[Phospho (STY)]IESSGK_3                                          | #N/A                 | 4.0600  | 4.0463  | 4.1119  | 4.3826  | 3.6820 | 4.6849  | 3.4633  | 3.7498  | 5.1393  | 3.7156  | 1.0359  | 0.0509  | 0.6882 | 0.1623 |
| Map2k4 | _VYVSLDDVPEELIGK_2                                                     | #N/A                 | 4.3280  | 4.5678  | 4.5214  | 1.2777  | 3.5918 | 3.9204  | 3.8724  | 4.2638  | 3.8193  | 3.4902  | 0.9585  | -0.0612 | 0.8108 | 0.0911 |
| Map2k4 | _FTLNPTTGQVNPHER_3                                                     | #N/A                 | 6.1748  | 5.6064  | 3.4405  | 6.3261  | 5.8565 | 6.4124  | 5.4971  | 5.4859  | 5.5516  | 5.9454  | 1.0029  | 0.0041  | 0.9784 | 0.0095 |
| Map2k4 | _THS[Phospho (STY)]IESSGK_2                                            | #N/A                 | 5.0938  | 4.0306  | 4.5463  | 4.0901  | 3.9564 | 4.1691  | 4.2384  | 4.4119  | 3.2101  | 3.7674  | 1.1043  | 0.1431  | 0.2213 | 0.6550 |
| Map2k4 | _LKIS[Phospho (STY)]PEQHWFDFTAEIDKOLGGEIR_4                            | P47809_S88_M1_Map2k4 | 3.1410  | 4.1702  | 3.7427  | 4.2454  | 4.0585 | 4.0669  | 3.9601  | 3.8731  | 3.5217  | 4.3257  | 1.0075  | 0.0108  | 0.8899 | 0.0506 |
| Map2k4 | _ILDQK[Oxidation (M)]PATPSS[Phospho (STY)]PM[Oxidation (M)]YVD_2       | #N/A                 | 3.7213  | 7.8222  | 12.6936 | 11.3120 | 5.7094 | 3.3439  | 12.1989 | 3.7932  | 3.7061  | 3.7932  | 1.1112  | 0.1522  | 0.7787 | 0.1086 |
| Mapk14 | _HTDDM[Oxidation (M)]TGT[Phospho (STY)]VATR_2                          | #N/A                 | 3.6961  | 3.6983  | 3.7405  | 4.1408  | 3.8974 | 3.8132  | 4.2474  | 4.0133  | 4.5507  | 4.0479  | 0.9090  | -0.1377 | 0.0187 | 1.7280 |
| Gfp11  | _VDS[Phospho (STY)]TTC[Carbamidomethyl (C)]LFPVEEK_2                   | P47856_S259_M1_Gfp11 | 3.7681  | 3.0724  | 4.4549  | 10.0362 | 2.8938 | 3.3349  | 3.7174  | 9.9818  | 4.3104  | 3.4237  | 0.8797  | -0.1850 | 0.7471 | 0.1266 |
| Ptkm   | _KRS[Phospho (STY)]GEAAV_2                                             | P47857_S775_M1_Ptkm  | 9.2888  | 9.0341  | 9.6200  | 9.1475  | 8.8877 | 9.3208  | 9.3908  | 9.3761  | 9.5121  | 9.5286  | 0.9751  | -0.0364 | 0.1167 | 0.9331 |
| Ptkm   | _ALVFPQVTELKQDTQDFEHR_3                                                | #N/A                 | 6.9044  | 7.3410  | 8.0679  | 7.4603  | 7.1763 | 7.1559  | 7.8262  | 7.4592  | 7.5909  | 7.3342  | 0.9733  | -0.0390 | 0.3855 | 0.4140 |
| Ptkm   | _RFDEAK_2                                                              | #N/A                 | 7.6011  | 7.5645  | 7.3255  | 7.1763  | 7.2644 | 7.0983  | 7.4614  | 7.5246  | 7.5098  | 7.4352  | 0.9829  | -0.0248 | 0.2552 | 0.5931 |
| Ptkm   | _DIQWVHELVQK_2                                                         | #N/A                 | 6.8378  | 7.1523  | 7.3002  | 7.0026  | 6.2298 | 6.8428  | 7.0645  | 6.9467  | 7.0388  | 7.2549  | 0.9743  | -0.0376 | 0.3813 | 0.4187 |
| Ptkm   | _GQIEEAGWSYVGGWITGQGGSK_2                                              | #N/A                 | 6.7395  | 6.7837  | 7.5797  | 7.6470  | 6.2645 | 7.2180  | 7.3560  | 6.4698  | 6.6344  | 6.7074  | 1.0363  | 0.0515  | 0.4555 | 0.3415 |
| Ptkm   | _ALVFPQVTELK_2                                                         | #N/A                 | 6.1687  | 5.5468  | 5.7430  | 6.2076  | 6.1641 | 6.1319  | 6.2898  | 6.4172  | 6.3859  | 5.9431  | 0.9576  | -0.0625 | 0.1486 | 0.8279 |
| Ptkm   | _NLEGSANITK_2                                                          | #N/A                 | 5.8586  | 6.3681  | 5.7948  | 5.8466  | 5.5479 | 5.6522  | 5.2736  | 6.4749  | 6.4552  | 5.8943  | 0.9701  | -0.0437 | 0.5199 | 0.2841 |
| Ptkm   | _VEVDAITTTAGSHQR_2                                                     | #N/A                 | 6.2147  | 5.8834  | 6.8073  | 5.8067  | 4.7414 | 5.5193  | 6.6419  | 5.8013  | 5.9970  | 6.2092  | 0.9459  | -0.0803 | 0.4061 | 0.3914 |
| Ptkm   | _SEWSLNDLQK_2                                                          | #N/A                 | 6.2327  | 5.3700  | 3.2507  | 5.9727  | 5.4062 | 5.5611  | 6.2397  | 6.0387  | 5.6411  | 5.8360  | 0.8922  | -0.1645 | 0.2780 | 0.5559 |
| Ptkm   | _GITNLK[Carbamidomethyl (C)]VGGDGSGLTGADTFR_2                          | #N/A                 | 4.9126  | 4.5022  | 5.7800  | 4.9706  | 4.1224 | 4.5067  | 4.0596  | 4.5026  | 4.9995  | 5.0020  | 1.0341  | 0.0483  | 0.6565 | 0.1827 |
| Ptkm   | _IFANTPDSSG[Carbamidomethyl (C)]VLGM[Oxidation (M)]R_2                 | #N/A                 | 5.5043  | 6.1228  | 5.9336  | 6.3880  | 5.6908 | 5.1628  | 5.7754  | 5.0152  | 5.9117  | 5.0521  | 1.0367  | 0.0521  | 0.4757 | 0.1736 |
| Ptkm   | _VLVHWDGFLGAK_2                                                        | #N/A                 | 3.4088  | 4.6356  | 4.9318  | 4.7316  | 4.4671 | 3.7868  | 4.0065  | 4.6731  | 4.3151  | 4.3053  | 1.0004  | 0.0006  | 0.9954 | 0.0020 |
| Ptkm   | _ALIAVLTSGGDAGM[Oxidation (M)]NAAVR_2                                  | #N/A                 | 4.8105  | 5.1276  | 5.4852  | 4.9591  | 4.6155 | 5.6285  | 5.4528  | 5.6751  | 5.2672  | 5.5221  | 0.9316  | -0.1022 | 0.1131 | 0.9464 |
| Ptkm   | _VLVGHM[Oxidation (M)]QQGGSPTPDOR_3                                    | #N/A                 | 5.7376  | 6.0245  | 6.5137  | 5.6859  | 5.9770 | 5.6700  | 6.0691  | 6.0879  | 6.1007  | 6.2013  | 0.9706  | -0.0431 | 0.3087 | 0.5104 |
| Ptkm   | _LNIIVAEGAIDK_2                                                        | #N/A                 | 4.1667  | 3.4222  | 3.9004  | 4.0649  | 3.3105 | 3.3142  | 3.2073  | 4.4047  | 3.4596  | 0.9635  | 0.9635  | 0.6614  | 0.1795 | 0.6614 |
| Ptkm   | _SSYNNVLGVGSDINDRC[Carbamidomethyl (C)]GDTM[Oxidation (M)]TIGTOSALHR_3 | #N/A                 | 4.2012  | 3.5056  | 3.3872  | 3.8899  | 3.3269 | 4.4026  | 4.2286  | 3.8772  | 3.8569  | 0.9727  | -0.0399 | 0.6832  | 0.1655 | 0.6832 |
| Ptkm   | _VFFVHEGYGLGVGGGEHR_3                                                  | #N/A                 | 6.6878  | 5.7790  | 4.3416  | 5.4291  | 3.7516 | 4.3738  | 5.6237  | 3.2147  | 3.5626  | 1.0891  | 0.1232  | 0.6223  | 0.2060 | 0.6223 |
| Ptkm   | _EATWESVM[Oxidation (M)]M[Oxidation (M)]QLGGTVGSSAR_3                  | #N/A                 | 3.4683  | 3.7579  | 4.1551  | 3.1569  | 3.6462 | 2.9784  | 4.3724  | 3.4608  | 3.1093  | 3.1239  | 1.0030  | 0.0043  | 0.9745 | 0.0112 |
| Seq3   | _EL[Phospho (STY)]AERPLNEQIAEAEDK_3                                    | P47867_S40_M1_Seq3   | 5.3120  | 5.5667  | 1.4512  | 7.3051  | 5.0132 | 5.5819  | 4.8645  | 5.7345  | 5.8924  | 5.9835  | 0.9560  | -0.0649 | 0.7190 | 0.1433 |
| Rpl6   | _AVPQLQDYL_2                                                           | #N/A                 | 6.4173  | 6.5385  | 6.2682  | 5.8195  | 6.9444 | 6.6588  | 6.8857  | 6.5629  | 6.5000  | 6.5648  | 0.9714  | -0.0418 | 0.3849 | 0.4147 |
| Rpl6   | _QLDSSLVLTGPRVNR_2                                                     | #N/A                 | 3.9110  | 4.2393  | 5.0900  | 4.4768  | 4.7421 | 4.1097  | 3.2492  | 4.3509  | 4.3251  | 4.2496  | 1.0959  | 0.1321  | 0.2374 | 0.6245 |
| Rpl6   | _SSITPGTVLILTR_2                                                       | #N/A                 | 4.9498  | 3.8880  | 3.1880  | 4.7522  | 5.1396 | 5.2391  | 5.0924  | 4.8861  | 3.8065  | 5.4224  | 0.9426  | -0.0853 | 0.5957 | 0.2250 |
| Rpl6   | _KAGS[Phospho (STY)]DAAASRRP_R_2                                       | #N/A                 | 4.3445  | 4.3222  | 5.2179  | 4.0722  | 4.1436 | 3.5859  | 4.5292  | 5.4358  | 4.2228  | 3.4757  | 0.9695  | -0.0447 | 0.7570 | 0.1209 |
| Rpl6   | _HQEGEIFDTEKEYEITEQR_4                                                 | #N/A                 | 5.3103  | 4.1539  | 6.7616  | 4.5451  | 3.9822 | 5.5298  | 5.2487  | 3.5733  | 5.1843  | 5.9832  | 1.0100  | 0.0143  | 0.9423 | 0.0258 |
| Rpl6   | _AGS[Phospho (STY)]DAAASRRP_R_2                                        | #N/A                 | 3.8618  | 3.1172  | 3.5954  | 3.7976  | 2.3890 | 3.6191  | 3.5123  | 4.3209  | 3.9695  | 4.3173  | 0.8429  | -0.2466 | 0.0853 | 1.0693 |
| Fosl2  | _S[Phospho (STY)]PPTSGLSLR_2                                           | P47930_S200_M1_Fosl2 | 7.3926  | 3.7386  | 3.3375  | 3.5591  | 7.6579 | 7.2767  | 6.7858  | 7.1424  | 7.1424  | 0.8636  | 0.8636  | -0.2115 | 0.5162 | 0.5162 |
| Crk1   | _Y[Phospho (STY)]PSPPGVSGVAPNLPTEAENLEVR_3                             | P47941_Y105_M1_Crk1  | 7.2922  | 8.0995  | 8.5040  | 9.2107  | 7.9010 | 8.0574  | 8.2306  | 7.8465  | 8.1083  | 7.4197  | 1.0350  | 0.0496  | 0.4609 | 0.3364 |
| Crk1   | _IFDPQNPDDNE_2                                                         | #N/A                 | 8.7360  | 8.8064  | 9.3966  | 9.1467  | 8.7976 | 9.0073  | 9.1798  | 8.6012  | 8.8181  | 8.9846  | 1.0096  | 0.0139  | 0.6115 | 0.2136 |
| Crk1   | _DSS[Phospho (STY)]TC[Carbamidomethyl (C)]PGDVLVSNSR_2                 | P47941_S42_M1_Crk1   | 3.5998  | 3.      |         |         |        |         |         |         |         |         |         |         |        |        |



|        |                                                                      |                       |         |         |         |         |         |         |         |         |         |         |         |         |        |        |
|--------|----------------------------------------------------------------------|-----------------------|---------|---------|---------|---------|---------|---------|---------|---------|---------|---------|---------|---------|--------|--------|
| Anxa5  | _SEIDFNIR_2                                                          | #N/A                  | 7.7698  | 7.7619  | 7.3264  | 7.7368  | 7.3677  | 7.6175  | 7.7296  | 7.4708  | 7.5328  | 7.7165  | 0.9979  | -0.0030 | 0.8946 | 0.0484 |
| Anxa5  | _GLUTEDSIDSLNLSR_2                                                   | #N/A                  | 7.2447  | 7.4237  | 7.2907  | 6.9580  | 7.2700  | 7.2997  | 7.3939  | 6.6544  | 6.9964  | 7.1175  | 1.0294  | 0.0419  | 0.1898 | 0.7216 |
| Anxa5  | _GAGTDOMTLUR_2                                                       | #N/A                  | 6.8873  | 6.8312  | 7.3515  | 6.8101  | 7.1751  | 6.2442  | 7.1675  | 7.1728  | 6.7231  | 1.0092  | 0.0132  | 0.0179  | 0.0873 | 0.2736 |
| Anxa5  | _QEAQEFK_2                                                           | #N/A                  | 6.1778  | 6.3387  | 5.8878  | 5.9475  | 6.4949  | 6.2598  | 6.7162  | 6.3252  | 6.2048  | 5.9967  | 0.9800  | -0.0292 | 0.4747 | 0.3236 |
| Anxa5  | _ADAEVLRLK_2                                                         | #N/A                  | 5.6693  | 6.1639  | 6.1911  | 6.0577  | 6.3743  | 6.0225  | 5.9274  | 6.0717  | 6.5070  | 6.2951  | 0.9806  | -0.0283 | 0.4645 | 0.2330 |
| Anxa5  | _DIVODKSELTK_2                                                       | #N/A                  | 5.2578  | 5.1803  | 4.2875  | 5.5970  | 5.2570  | 5.4679  | 5.4593  | 4.8333  | 5.4532  | 4.9796  | 0.9987  | -0.0018 | 0.9812 | 0.0082 |
| Anxa5  | _ETSGNIEQLLAVVK_2                                                    | #N/A                  | 5.3488  | 4.0927  | 4.2613  | 3.2512  | 4.6494  | 4.5676  | 3.8545  | 4.0461  | 4.5359  | 4.5717  | 1.0258  | 0.0368  | 0.7810 | 0.1073 |
| Anxa5  | _LYDAEYK_2                                                           | #N/A                  | 5.7276  | 5.4650  | 6.4027  | 5.4268  | 5.5484  | 5.6877  | 3.5249  | 6.2190  | 5.6433  | 1.0550  | 0.0772  | 0.5976  | 0.2276 | 0.0949 |
| Anxa5  | _TPELSAIK_2                                                          | #N/A                  | 5.7942  | 5.3250  | 5.9879  | 4.2356  | 5.5436  | 5.1489  | 4.0231  | 5.5719  | 5.5837  | 5.7175  | 1.0220  | 0.0315  | 0.8038 | 0.0245 |
| Ep641  | _S[Phospho (STY)](LGAAAAESTDR_2                                      | P48193_5543_M1_Ep641  | 6.6689  | 8.5249  | 8.8077  | 8.9214  | 8.0725  | 8.6160  | 8.8648  | 8.4600  | 8.7397  | 8.7066  | 0.9895  | -0.0152 | 0.5963 | 0.2245 |
| Ep641  | _LSTHS[Phospho (STY)]PFR_2                                           | P48193_5706_M1_Ep641  | 3.5223  | 4.2786  | 3.6344  | 4.1371  | 4.1669  | 5.0660  | 3.8517  | 3.9814  | 3.6300  | 4.1041  | 1.0623  | 0.0872  | 0.4306 | 0.3659 |
| Ep641  | _IRAS[Phospho (STY)]RS[Phospho (STY)](LGAAAAESTDR_3                  | P48193_5519_M1_Ep641  | 3.4851  | 4.2414  | 3.2188  | 4.2634  | 4.1297  | 3.9958  | 4.4117  | 4.2386  | 2.2306  | 3.4266  | 1.0873  | 0.1207  | 0.5090 | 0.2933 |
| Gad1   | _GVPS[Phospho (STY)]PERR_2                                           | P48318_5527_M1_Gad1   | 7.7014  | 7.8155  | 7.9754  | 7.5263  | 7.4149  | 7.7257  | 7.7854  | 8.2573  | 7.8449  | 7.5470  | 0.9789  | -0.0307 | 0.3176 | 0.4981 |
| Gad1   | _ANSVTWNPHK_2                                                        | #N/A                  | 6.8745  | 6.8342  | 7.0135  | 6.9754  | 7.4096  | 7.1002  | 6.7633  | 7.1279  | 6.6823  | 6.9112  | 1.0238  | 0.0339  | 0.2476 | 0.6063 |
| Gad1   | _GTGVFENQWK_2                                                        | #N/A                  | 5.8621  | 5.8094  | 6.0054  | 4.7668  | 5.0789  | 5.6437  | 6.2754  | 5.9148  | 5.5365  | 5.8525  | 0.9377  | -0.0928 | 0.2239 | 0.6500 |
| Gad1   | _NLLS[Phospho (STY)]C[Carbamidomethyl (C)]ENSQDGAR_2                 | P48318_577_M1_Gad1    | 7.9780  | 7.7024  | 8.3007  | 8.1083  | 4.9062  | 7.6776  | 7.7613  | 7.7303  | 7.8881  | 0.9650  | -0.0515 | 0.6885  | 0.1621 | 0.1278 |
| Gad1   | _TNS[Phospho (STY)]LEEKS_2                                           | P48318_555_M1_Gad1    | 4.8295  | 3.7056  | 5.6705  | 4.4151  | 4.2813  | 3.8441  | 5.1352  | 4.0869  | 5.0121  | 5.4157  | 0.9380  | -0.0924 | 0.6128 | 0.2126 |
| Gad1   | _ERQS[Phospho (STY)]SKNLS[Carbamidomethyl (C)]ENSQDGAR_3             | #N/A                  | 3.9395  | 3.4559  | 3.3550  | 3.6606  | 3.5231  | 3.9548  | 3.6546  | 4.1851  | 3.4646  | 3.9477  | 0.9568  | -0.0638 | 0.3860 | 0.4134 |
| Gad1   | _QSS[Phospho (STY)]KNLS[Carbamidomethyl (C)]ENSQDGAR_3               | P48318_572_M1_Gad1    | 4.1783  | 3.4570  | 3.6797  | 3.3894  | 3.3136  | 3.1199  | 3.5377  | 3.6288  | 4.5618  | 3.9274  | 0.9001  | -0.1518 | 0.1751 | 0.7568 |
| Gad2   | _M[Oxidation (M)](M)[GVPLQC[Carbamidomethyl (C)]SALLVR_2             | #N/A                  | 6.4942  | 7.0234  | 7.3626  | 5.2232  | 6.0424  | 7.1630  | 6.7163  | 7.4900  | 6.7251  | 6.9323  | 0.9405  | -0.0885 | 0.3714 | 0.4302 |
| Gad2   | _HYDLYSDTGK_2                                                        | #N/A                  | 5.4882  | 5.9364  | 5.3473  | 5.9043  | 4.7857  | 6.2336  | 6.1696  | 5.6352  | 5.8150  | 6.0141  | 0.9505  | -0.0733 | 0.3271 | 0.4854 |
| Gad2   | _M[Oxidation (M)](M)NSNPAATHQDIDFUEIER_3                             | #N/A                  | 4.4636  | 3.9053  | 3.5042  | 4.6935  | 4.1701  | 5.0683  | 5.1934  | 4.5856  | 4.4315  | 4.1837  | 0.9548  | -0.0667 | 0.6067 | 0.2042 |
| Gad2   | _L[Acetyl (Protein N-term)]ASPGSGFWS[Phospho (STY)]EDGSADPENPGSTAR_3 | P48320_513_M1_Gad2    | 3.2128  | 5.0696  | 5.8414  | 4.0936  | 3.8574  | 4.2751  | 4.1878  | 5.7495  | 3.3798  | 3.8936  | 1.0207  | 0.0295  | 0.8901 | 0.0506 |
| Prox1  | _DRAS[Phospho (STY)]PESLDLTR_2                                       | P48437_5511_M1_Prox1  | 3.2380  | 3.9882  | 3.9248  | 4.4275  | 3.8645  | 3.8650  | 4.1422  | 3.6910  | 3.3396  | 4.3945  | 0.9982  | -0.0027 | 0.9794 | 0.0090 |
| Prox1  | _GMS[Phospho (STY)]PSVALR_2                                          | P48437_5179_M1_Prox1  | 3.5490  | 3.7934  | 3.2827  | 4.3273  | 4.1936  | 3.9319  | 4.4755  | 4.1747  | 2.9730  | 4.0046  | 0.9845  | -0.0226 | 0.8572 | 0.0669 |
| Ppp3cb | _GRS[Phospho (STY)]PFR_2                                             | P48453_5472_M1_Ppp3cb | 10.7047 | 10.5454 | 10.8988 | 10.7346 | 9.9849  | 10.3699 | 10.8733 | 10.5935 | 10.6131 | 10.2348 | 0.9963  | -0.0053 | 0.8474 | 0.0719 |
| Ppp3cb | _LUEVGSGPANTR_2                                                      | #N/A                  | 9.1172  | 8.9684  | 9.3097  | 9.0853  | 8.7823  | 9.3849  | 9.1493  | 9.0399  | 8.9825  | 0.9872  | -0.0186 | 0.3569  | 0.4474 | 0.1728 |
| Ppp3cb | _C[Carbamidomethyl (C)]S[Phospho (STY)]FEAK_2                        | #N/A                  | 8.7050  | 8.0548  | 8.1782  | 8.2853  | 7.0514  | 7.9680  | 7.1799  | 8.1607  | 8.4368  | 8.2765  | 1.0034  | 0.0048  | 0.9419 | 0.0260 |
| Ppp3cb | _LFLGDVYDR_2                                                         | #N/A                  | 9.1204  | 9.1930  | 9.1057  | 9.1070  | 8.0851  | 8.6736  | 9.3097  | 8.9322  | 8.9280  | 8.7724  | 0.9883  | -0.0169 | 0.6717 | 0.1278 |
| Ppp3cb | _EESSEVLTK_2                                                         | #N/A                  | 5.8572  | 8.0571  | 8.1657  | 8.4669  | 8.0230  | 8.5905  | 7.8151  | 7.8964  | 8.4264  | 8.5633  | 1.0171  | 0.0245  | 0.5046 | 0.2971 |
| Ppp3cb | _AHEAQDAGVR_2                                                        | #N/A                  | 7.7678  | 7.5529  | 7.7331  | 7.7488  | 8.2364  | 7.6581  | 7.4367  | 7.7539  | 7.7047  | 7.3589  | 1.0290  | 0.0412  | 0.1635 | 0.7861 |
| Ppp3cb | _LINEGAAILR_2                                                        | #N/A                  | 6.8341  | 6.8277  | 6.9530  | 6.2436  | 6.3529  | 6.6094  | 7.1082  | 6.8880  | 6.7736  | 6.4254  | 0.9762  | -0.0348 | 0.4060 | 0.3915 |
| Ppp3cb | _YENNVAM[Oxidation (M)]NIR_2                                         | #N/A                  | 8.0676  | 7.9997  | 7.7012  | 8.1599  | 8.3054  | 7.5936  | 7.8829  | 7.9687  | 7.8682  | 1.0089  | 0.0128  | 0.6311  | 0.1999 | 0.0097 |
| Ppp3cb | _HLTYFTTK_2                                                          | #N/A                  | 6.7013  | 6.5523  | 6.9427  | 6.6168  | 6.0450  | 6.2948  | 6.7381  | 6.4304  | 7.0487  | 6.4563  | 0.9786  | -0.0312 | 0.4901 | 0.3004 |
| Ppp3cb | _C[Carbamidomethyl (C)]S[Phospho (STY)]FEAKGLDR_2                    | #N/A                  | 6.8585  | 7.3729  | 8.2336  | 7.1409  | 6.2751  | 7.2626  | 6.9641  | 7.1682  | 7.2767  | 7.3479  | 1.0002  | 0.0003  | 0.9969 | 0.0017 |
| Ppp3cb | _VDEEIALR_2                                                          | #N/A                  | 4.2234  | 3.0028  | 3.4093  | 3.9120  | 2.8911  | 3.7335  | 3.6267  | 4.2065  | 2.8626  | 4.3228  | 0.9398  | -0.0895 | 0.5640 | 0.2487 |
| Ppp3cc | _IRS[Phospho (STY)]FEAR_2                                            | P48455_5462_M1_Ppp3cc | 5.6280  | 4.6951  | 3.4762  | 5.5207  | 2.8863  | 5.4764  | 5.6808  | 5.9376  | 5.4770  | 5.3154  | 0.8235  | -0.2802 | 0.1425 | 0.8463 |
| Kcnj8  | _L[Acetyl (Protein N-term)]AQENAAFS[Phospho (STY)]PGSEPPR_2          | P48543_59_M1_Kcnj8    | 2.8997  | 2.9419  | 4.1342  | 8.5540  | 3.5442  | 3.0804  | 3.8262  | 3.3232  | 3.6223  | 3.3552  | 1.1871  | 0.2474  | 0.5716 | 0.2429 |
| Lmna   | _KLS[Phospho (STY)]SES_2                                             | P48678_5423_M1_Lmna   | 8.9142  | 8.9972  | 9.5216  | 4.6243  | 9.6753  | 9.3208  | 9.2048  | 8.7777  | 9.5152  | 9.1297  | 1.0728  | 0.1013  | 0.7016 | 0.1539 |
| Lmna   | _LADALQELR_2                                                         | #N/A                  | 5.6768  | 6.5406  | 6.7462  | 5.8929  | 6.1365  | 5.8376  | 5.9141  | 5.9172  | 6.0739  | 5.9998  | 1.0271  | 0.0386  | 0.4781 | 0.3205 |
| Lmna   | _LQEKEDGELNDR_3                                                      | #N/A                  | 5.8010  | 5.9157  | 6.4174  | 5.9858  | 6.0058  | 5.8810  | 5.6597  | 5.9136  | 6.4042  | 6.3360  | 0.9873  | -0.0185 | 0.6761 | 0.1700 |
| Lmna   | _SGAQASSTPLS[Phospho (STY)]PTR_2                                     | P48678_522_M1_Lmna    | 7.9152  | 8.1352  | 8.2161  | 8.5536  | 7.4994  | 7.7873  | 8.2387  | 6.6370  | 8.0844  | 8.0559  | 1.1053  | 0.0444  | 0.3168 | 0.4903 |
| Lmna   | _LSPS[Phospho (STY)]PTSQR_2                                          | P48678_5392_M1_Lmna   | 10.8002 | 11.0191 | 11.4749 | 11.4832 | 10.6650 | 11.0589 | 11.1697 | 10.8773 | 10.9646 | 11.0910 | 1.0053  | 0.0076  | 0.7563 | 0.1213 |
| Lmna   | _SS[Phospho (STY)]SQHAR_2                                            | P48678_5429_M1_Lmna   | 3.3712  | 3.9712  | 4.6057  | 6.7986  | 7.7516  | 4.1977  | 4.2977  | 4.3526  | 3.1508  | 3.8267  | 1.3057  | 0.3848  | 0.2315 | 0.6355 |
| Lmna   | _GSHC[Carbamidomethyl (C)]S[Phospho (STY)]GSGDPAEYNLR_2              | P48678_5573_M1_Lmna   | 4.0330  | 3.3094  | 3.7667  | 3.3104  | 3.1767  | 3.4479  | 3.4587  | 3.6907  | 3.9898  | 2.9877  | 0.9931  | -0.0100 | 0.9203 | 0.0361 |
| Lmna   | _NSNLVGAHEELQGR_2                                                    | #N/A                  | 2.5396  | 3.5331  | 3.1425  | 4.1733  | 3.1930  | 3.4361  | 4.3354  | 3.5843  | 2.7742  | 4.0930  | 0.9850  | -0.1600 | 0.3497 | 0.0561 |
| Lmna   | _SVGSGGGGS[Phospho (STY)]FGGNLVTR_2                                  | P48678_5637_M1_Lmna   | 3.0017  | 3.8069  | 3.6885  | 4.3138  | 6.0841  | 4.1013  | 6.9149  | 6.5122  | 2.9864  | 4.1582  | 0.8101  | -0.3039 | 0.3165 | 0.4986 |
| Lmna   | _LRLS[Phospho (STY)]PS[Phospho (STY)]PTSQR_2                         | P48678_5390_M2_Lmna   | 9.3653  | 9.5386  | 9.9240  | 10.1401 | 9.3134  | 9.6479  | 9.9447  | 9.5726  | 9.6508  | 9.6912  | 0.9938  | -0.0089 | 0.7432 | 0.1291 |
| Lmna   | _MQQLDEYQELDIK_2                                                     | #N/A                  | 7.0102  | 3.3231  | 3.2047  | 7.0664  | 3.1444  | 3.0842  | 7.4928  | 4.4111  | 4.0597  | 3.6744  | 0.9109  | -0.1346 | 0.7310 | 0.1361 |
| Lmna   | _NKS[Phospho (STY)]NEDSGM[Oxidation (M)]GNQWIR_3                     | #N/A                  | 4.5072  | 4.4757  | 5.0899  | 5.3478  | 4.4530  | 4.5722  | 4.0545  | 4.0273  | 4.8226  | 4.2359  | 1.1066  | 0.1461  | 0.0972 | 0.1022 |
| Lmna   | _ASS[Phospho (STY)]HSSQSGGGGSVTK_2                                   | P48678_5404_M1_Lmna   | 5.3223  | 5.7706  | 6.7076  | 6.4287  | 3.1693  | 5.3333  | 6.1188  | 5.6970  | 4.2876  | 5.8615  | 0.9935  | -0.0095 | 0.9613 | 0.0171 |
| Lmna   | _AQHEDVEQYKX_3                                                       | #N/A                  | 3.8375  | 3.2395  | 3.8366  | 3.3804  | 5.0432  | 3.9371  | 3.5286  | 3.6208  | 3.9199  | 3.0577  | 1.0583  | 0.1353  | 0.3550 | 0.4498 |
| Lmna   | _LEALGEAK_2                                                          | #N/A                  | 4.2245  | 3.5288  | 3.4104  | 4.5919  | 3.3502  | 4.3793  | 3.2393  | 4.2054  | 3.8540  | 3.8801  | 1.0315  | 0.0447  | 0.7195 | 0.1430 |
| Hsp4d  | _S[Phospho (STY)]FDDPVQTR_2                                          | #N/A                  | 13.3737 | 13.1778 | 13.3309 | 13.7670 | 12.7094 | 13.3323 | 13.8470 | 13.2640 | 13.4631 | 13.4523 | 0.9834  | -0.0242 | 0.2934 | 0.5325 |
| Hsp4d  | _LHGRS[Phospho (STY)]FDDPVQTR_3                                      | #N/A                  | 8.6098  | 10.0753 | 10.3945 | 9.7346  | 9.5034  | 9.8925  | 10.1519 | 9.7766  | 9.8861  | 9.6692  | 0.9829  | -0.0250 | 0.6157 | 0.2106 |
| Hsp4d  | _QLT[Phospho (STY)]QDLNSYHENGK_2                                     | P48722_7593_M1_Hsp4d  | 6.3123  | 6.1671  | 6.4155  | 6.3818  | 5.8316  | 6.4186  | 6.4635  | 6.2673  | 6.2985  | 6.4076  | 0.9835  | -0.0240 | 0.4144 | 0.3826 |
| Hsp4d  | _SGGIETIANEYSQR_2                                                    | #N/A                  | 7.2736  | 7.0122  | 7.0269  | 7.2252  | 6.5675  | 7.2111  | 7.4172  | 6.7684  | 6.8688  | 7.0537  | 1.0037  | 0.0053  | 0.8866 | 0.0523 |
| Hsp4d  | _VLATTPDPLGGR_2                                                      | #N/A                  | 6.0435  | 6.4639  | 6.8216  | 6.8584  | 6.1609  | 6.3779  | 6.8840  | 6.8572  | 6.4877  | 6.5479  | 0.9642  | -0.0526 | 0.2401 | 0.6196 |
| Hsp4d  | _SDLPQCSLVR_2                                                        | #N/A                  | 6.3854  | 6.5022  | 6.9964  | 6.9954  | 6.7130  | 6.8031  | 6.7063  | 6.3910  | 6.8478  | 6.7153  | 1.0101  | 0.0145  | 0.6641 | 0.1777 |
| Hsp4d  | _SQVTVNVR_2                                                          | #N/A                  | 6.2939  | 6.2315  | 6.4494  | 6.5689  | 6.8734  | 6.3793  | 6.2378  | 6.3218  | 6.8344  | 6.3797  | 1.0035  | 0.0051  | 0.8901 | 0.0506 |
| Hsp4d  | _LSLTQDPVVK_2                                                        | #N/A                  | 5.7208  | 6.2001  | 6.0653  | 5.8181  | 5.7332  | 5.2649  | 5.9650  | 6.2641  | 6.0141  | 5.8848  | 0.9616  | -0.0565 | 0.6395 | 0.2935 |
| Hsp4d  | _DLKGTVEYK_2                                                         | #N/A                  | 5.9062  | 5.4912  | 6.2390  | 5.6383  | 5.7926  | 5.7850  | 5.6731  | 5.5919  | 5.1858  | 4.8217  | 1.0923  | 0.1273  | 0.0420 | 1.3770 |
| Hsp4d  | _LDLPPLDEKPR_3                                                       | #N/A                  | 5.3678  | 4.8802  | 3.9394  | 3.4831  | 5.3307  | 5.157   |         |         |         |         |         |         |        |        |



|         |                                                                        |                        |         |         |         |         |         |         |         |          |         |         |         |         |        |        |
|---------|------------------------------------------------------------------------|------------------------|---------|---------|---------|---------|---------|---------|---------|----------|---------|---------|---------|---------|--------|--------|
| Cbr1    | _FSGOVVLAAR_2                                                          | #N/A                   | 3.3766  | 4.1818  | 4.0634  | 4.5868  | 4.0031  | 2.9623  | 3.5049  | 3.4702   | 3.3068  | 3.6162  | 1.1116  | 0.1527  | 0.2388 | 0.6220 |
| Cox7a2  | _GGASDALLYR_2                                                          | #N/A                   | 9.0880  | 9.1752  | 9.2576  | 9.2284  | 9.3567  | 8.9795  | 8.7258  | 9.1179   | 9.2653  | 8.9008  | 1.0198  | 0.0283  | 0.1620 | 0.7906 |
| Cox7a2  | _LFGEDNGM[Oxidation (M)]PVHLK_2                                        | #N/A                   | 6.9902  | 6.8849  | 6.9363  | 7.1963  | 7.1916  | 6.7829  | 7.1448  | 6.9693   | 6.8112  | 6.8616  | 1.0072  | 0.0104  | 0.6397 | 0.1940 |
| Gatm5   | _JAARLQSDR_2                                                           | #N/A                   | 7.6072  | 7.6378  | 7.1211  | 7.3914  | 6.5275  | 6.9921  | 7.4384  | 7.9451   | 7.2184  | 6.8321  | 0.9802  | -0.0288 | 0.6212 | 0.2067 |
| Gatm5   | _YIC[Carbamidomethyl (C)]GEAPOYDR_2                                    | #N/A                   | 7.4154  | 7.1926  | 7.0484  | 6.5478  | 6.9090  | 7.1324  | 7.4824  | 7.1032   | 7.2692  | 7.1316  | 0.9716  | -0.0415 | 0.2477 | 0.6061 |
| Gatm5   | _SM[Oxidation (M)]UGYVWDR_2                                            | #N/A                   | 6.3345  | 6.4758  | 5.7156  | 6.3982  | 5.9842  | 6.4330  | 6.9451  | 6.9687   | 6.4761  | 6.4682  | 0.9269  | -0.1095 | 0.0331 | 1.4796 |
| Gatm5   | _SCHLDVK_2                                                             | #N/A                   | 2.3020  | 3.1248  | 3.2873  | 2.5170  | 3.7344  | 3.3731  | 3.5046  | 4.0009   | 3.8989  | 1.9265  | 0.9353  | -0.0965 | 0.6709 | 0.1733 |
| Gatm5   | _LTVDFLTYDVLQNR_2                                                      | #N/A                   | 3.0513  | 4.1749  | 3.7381  | 0.5121  | 4.0622  | 4.0622  | 3.9554  | 3.8778   | 3.5263  | 4.2077  | 0.8394  | -0.2525 | 0.4159 | 0.3810 |
| Gatm5   | _M[Oxidation (M)]LLEFDTSYEKR_3                                         | #N/A                   | 3.8256  | 3.5168  | 3.5593  | 4.6039  | 2.9693  | 3.6553  | 3.2513  | 3.8981   | 4.1972  | 4.2812  | 0.9441  | -0.0831 | 0.5249 | 0.2800 |
| Slc25a4 | _QIFLGGVDVR_2                                                          | #N/A                   | 11.0726 | 11.1794 | 11.2336 | 10.7180 | 10.4698 | 10.7162 | 11.3496 | 11.10317 | 10.7748 | 0.9803  | 0.0287  | 0.2808  | 0.5516 |        |
| Slc25a4 | _EQGLSPWR_2                                                            | #N/A                   | 10.6911 | 10.7856 | 10.9224 | 10.2707 | 9.9852  | 10.2858 | 10.8583 | 10.7836  | 10.5900 | 10.2972 | 0.9866  | -0.0194 | 0.5178 | 0.2858 |
| Slc25a4 | _EFNGLGDC[Carbamidomethyl (C)]LTK_2                                    | #N/A                   | 10.1506 | 9.9560  | 10.0634 | 9.7363  | 9.6789  | 9.5827  | 10.1971 | 10.1562  | 9.9296  | 9.6395  | 0.9881  | -0.0173 | 0.4616 | 0.3358 |
| Slc25a4 | _Acetyl (Protein N-term)GDQALSLK_2                                     | #N/A                   | 8.6440  | 8.7445  | 8.5136  | 8.2063  | 8.3707  | 8.4158  | 8.4096  | 9.1177   | 8.4911  | 8.6465  | 0.9788  | -0.0309 | 0.2831 | 0.5480 |
| Slc25a4 | _DFLAGGIAAAVSK_2                                                       | #N/A                   | 8.2351  | 7.7886  | 7.3523  | 6.9135  | 7.2813  | 7.5386  | 7.9876  | 7.8746   | 7.6903  | 7.6898  | 0.9626  | -0.0550 | 0.2570 | 0.5901 |
| Slc25a4 | _AAYFGVYDTAK_2                                                         | #N/A                   | 6.9786  | 7.0636  | 6.6237  | 7.0874  | 6.2503  | 6.8146  | 6.9132  | 7.4155   | 7.3057  | 6.9025  | 0.9536  | -0.0686 | 0.1275 | 0.8945 |
| Slc25a4 | _LAADVKGIS[Phospho (STY)]ISQR_2                                        | P48962_S149_M1_Slc25a4 | 5.3069  | 5.1006  | 5.2481  | 7.1205  | 6.3752  | 4.3781  | 7.8419  | 4.8642   | 7.1111  | 0.8172  | -0.2912 | 0.1268  | 0.8969 |        |
| Slc25a4 | _IAKDEGANAFFK_3                                                        | #N/A                   | 4.9012  | 5.1081  | 4.5899  | 4.2264  | 3.4202  | 4.5179  | 3.3889  | 5.2260   | 4.1284  | 4.5028  | 1.0346  | 0.0490  | 0.7370 | 0.1325 |
| Slc25a4 | _GADIM[Oxidation (M)]YTGTLDC[Carbamidomethyl (C)]WR_2                  | #N/A                   | 6.1824  | 6.0080  | 6.4494  | 6.9513  | 5.8362  | 6.5998  | 6.5894  | 6.4649   | 6.7798  | 6.0288  | 0.9803  | -0.0286 | 0.6171 | 0.2097 |
| Slc25a4 | _DEGANAFFK_2                                                           | #N/A                   | 3.3870  | 3.9554  | 7.3375  | 5.8604  | 6.0274  | 3.9527  | 4.3135  | 4.3367   | 6.4051  | 6.3832  | 0.9491  | -0.0754 | 0.7745 | 0.1110 |
| Slc25a4 | _GSS[Phospho (STY)]QRFNGDC[Carbamidomethyl (C)]LTK_3                   | P48962_S150_M1_Slc25a4 | 3.6653  | 3.6771  | 3.3990  | 4.4436  | 3.4984  | 4.2310  | 3.0910  | 4.0584   | 4.3575  | 4.1209  | 0.9775  | -0.0328 | 0.7826 | 0.1065 |
| Cit     | _RVS[Phospho (STY)]JEAVLISQK_2                                         | #N/A                   | 6.0613  | 6.0492  | 6.5214  | 7.0513  | 4.5554  | 6.0033  | 5.6454  | 6.4870   | 6.6033  | 5.5065  | 0.9967  | -0.0048 | 0.9674 | 0.0144 |
| Cit     | _MNS[Phospho (STY)]PGLQSK_2                                            | #N/A                   | 5.1503  | 3.9087  | 3.4168  | 5.5380  | 3.6317  | 4.2488  | 4.5004  | 4.3397   | 4.1386  | 1.0143  | 0.0205  | 0.8941  | 0.0486 |        |
| Cit     | _DKS[Phospho (STY)]PGRPLER_2                                           | #N/A                   | 7.0866  | 6.9008  | 7.2369  | 7.4249  | 6.3801  | 6.6890  | 6.8235  | 7.1375   | 6.9889  | 6.9415  | 0.9972  | -0.0041 | 0.9239 | 0.0344 |
| Cit     | _DKMNS[Phospho (STY)]PGLQSK_2                                          | #N/A                   | 4.1000  | 3.3756  | 4.3017  | 3.5601  | 3.2363  | 3.1180  | 3.5165  | 3.2566   | 5.3607  | 3.3836  | 0.9362  | -0.0951 | 0.6037 | 0.2192 |
| Cit     | _ERS[Phospho (STY)]PGRLEDFSSR_3                                        | P49025_S2021_M1_Cit    | 3.4130  | 5.0840  | 4.0998  | 4.6025  | 4.0396  | 3.8899  | 3.9692  | 3.5160   | 4.4780  | 3.0686  | 1.1056  | 0.1448  | 0.3405 | 0.4780 |
| Cit     | _S[Phospho (STY)]PEHQPMSAMSLAPSSR_3                                    | P49025_S1348_M1_Cit    | 4.3404  | 4.3866  | 3.5264  | 6.8276  | 3.4661  | 4.2634  | 3.7437  | 4.0894   | 3.7380  | 3.9961  | 1.1482  | 0.1993  | 0.3867 | 0.4126 |
| Camlig  | _VVLGDS[Phospho (STY)]VGGGADQLGGVAEVR_2                                | P49070_S88_M1_Camlig   | 4.0363  | 3.3406  | 3.2222  | 3.2792  | 3.1619  | 3.0667  | 3.4275  | 4.5485   | 4.8918  | 3.6919  | 0.7673  | -0.3821 | 0.0425 | 1.3717 |
| Camlig  | _IMGFHRPS[Phospho (STY)]GS[Phospho (STY)]EEENQTK_3                     | P49070_S53_M2_Camlig   | 1.3765  | 2.9624  | 4.1137  | 3.6575  | 2.7837  | 3.4449  | 3.8057  | 3.3437   | 3.6428  | 3.3347  | 0.8654  | -0.2085 | 0.3647 | 0.4380 |
| Hnrrnp1 | _GFAVFTDHDSDVKIVK_2                                                    | #N/A                   | 6.6462  | 6.5449  | 8.7273  | 8.6397  | 7.4163  | 7.5291  | 6.9751  | 7.5176   | 7.9465  | 1.0418  | 0.0591  | 0.5809  | 0.2359 |        |
| Hnrrnp1 | _SES[Phospho (STY)]PKEPEQLRK_2                                         | #N/A                   | 11.2521 | 11.5581 | 12.1545 | 12.1427 | 11.5594 | 11.5154 | 11.5923 | 11.5829  | 11.5327 | 11.5817 | 1.0108  | 0.0155  | 0.5262 | 0.2788 |
| Hnrrnp1 | _LFIQLSFETTESLR_2                                                      | #N/A                   | 5.3469  | 4.7643  | 4.2644  | 5.0282  | 5.2934  | 5.0349  | 4.9078  | 4.7442   | 5.4250  | 4.0246  | 1.0172  | 0.0246  | 0.7582 | 0.1282 |
| Hnrrnp1 | _EDSQRGAHLTVK_3                                                        | #N/A                   | 5.5386  | 5.6434  | 5.5033  | 5.6479  | 5.8411  | 6.0316  | 5.1670  | 5.4795   | 5.6955  | 5.6771  | 1.0356  | 0.0505  | 0.2014 | 0.6960 |
| Hnrrnp1 | _JEVEIM[Oxidation (M)]TOR_2                                            | #N/A                   | 6.2313  | 6.6086  | 6.7737  | 7.2087  | 6.5118  | 6.4078  | 6.5312  | 6.5496   | 6.9586  | 0.9903  | -0.0141 | 0.7416  | 0.1298 |        |
| Hnrrnp1 | _Acetyl (Protein N-term)[S[Phospho (STY)]KSES[Phospho (STY)]PKEPEQLR_2 | P49312_S2_M2_Hnrrnp1   | 3.8300  | 6.2345  | 6.5977  | 9.4245  | 3.7321  | 3.5541  | 9.0214  | 8.6399   | 3.6255  | 8.6869  | 0.7423  | -0.4300 | 0.2514 | 0.5996 |
| Hnrrnp1 | _SES[Phospho (STY)]PKEPEQLR_2                                          | #N/A                   | 11.2431 | 11.4126 | 11.7922 | 12.0902 | 11.3604 | 11.6919 | 11.4123 | 11.4223  | 11.4424 | 1.0049  | 0.0070  | 0.7548  | 0.1222 |        |
| Hnrrnp1 | _NGGGGGSSSSSSYGSGR_2                                                   | #N/A                   | 4.4734  | 5.4768  | 4.5889  | 5.0353  | 5.5822  | 5.3935  | 5.3733  | 4.8823   | 5.1067  | 5.2082  | 0.9901  | -0.0144 | 0.8464 | 0.0724 |
| Hnrrnp1 | _GFAVFTDHDSDVKIVK_2                                                    | #N/A                   | 3.6978  | 4.0060  | 3.5189  | 4.2758  | 2.7823  | 4.0799  | 4.2304  | 4.0425   | 3.7369  | 4.0795  | 0.9265  | -0.1101 | 0.3314 | 0.4796 |
| Hnrrnp1 | _GFGFVYATVEVDAAAM[Oxidation (M)]NAR_2                                  | #N/A                   | 3.8162  | 4.3502  | 3.5498  | 4.5945  | 2.9599  | 3.6647  | 4.8324  | 3.5400   | 4.2066  | 4.2717  | 0.9074  | -0.1402 | 0.3163 | 0.4999 |
| Hnrrnp1 | _SHEQWGTLTDC[Carbamidomethyl (C)]VMM[Oxidation (M)]R_3                 | #N/A                   | 5.0916  | 3.6852  | 5.1756  | 3.5434  | 3.4904  | 3.2149  | 5.4665  | 3.4578   | 3.7568  | 5.6236  | 0.8815  | -0.1820 | 0.4126 | 0.3845 |
| Hnrrnp1 | _YHTVNGRNC[Carbamidomethyl (C)]EVR_3                                   | #N/A                   | 4.0182  | 3.2737  | 3.7519  | 3.2957  | 3.1620  | 3.4626  | 3.4439  | 3.7055   | 4.0046  | 2.9730  | 0.9893  | -0.0155 | 0.8794 | 0.0558 |
| Hnrrnp1 | _DYFEQVGK_2                                                            | #N/A                   | 3.2135  | 4.1289  | 4.4480  | 3.9917  | 3.8580  | 4.2674  | 4.1400  | 3.0094   | 3.3085  | 3.6690  | 1.1282  | 0.1741  | 0.1596 | 0.7970 |
| Insp1   | _TADLVQGEVVK_2                                                         | #N/A                   | 2.8399  | 4.7390  | 4.2944  | 4.3888  | 4.6915  | 4.5051  | 4.8322  | 3.7995   | 4.5617  | 5.4002  | 0.9128  | -0.1316 | 0.3910 | 0.4078 |
| Ppm1a   | _NVIEAVYNR_2                                                           | #N/A                   | 5.8855  | 6.4910  | 6.6106  | 6.5406  | 6.5344  | 6.3951  | 6.5594  | 6.7383   | 6.4785  | 6.1034  | 0.9907  | -0.0135 | 0.7349 | 0.1338 |
| Ppm1a   | _ALGDFDK_2                                                             | #N/A                   | 4.2715  | 4.9608  | 5.4778  | 4.9526  | 4.9713  | 5.4364  | 4.8890  | 5.2411   | 4.9404  | 5.1399  | 0.9919  | -0.0117 | 0.8647 | 0.0632 |
| Ppm1a   | _GPTQLVSPFEVHDIR_3                                                     | #N/A                   | 4.8663  | 4.9439  | 5.0237  | 5.3044  | 4.6530  | 3.5429  | 5.0449  | 4.8242   | 4.6455  | 4.7318  | 1.0438  | 0.0618  | 0.2003 | 0.6983 |
| Ppm1a   | _LNPNKNDTDSAS[Phospho (STY)]TDDM[Oxidation (M)]W_2                     | P49443_S377_M1_Ppm1a   | 3.5313  | 4.2875  | 3.5667  | 5.9445  | 3.5591  | 3.8511  | 3.9904  | 5.4457   | 5.1478  | 0.8985  | -0.1543 | 0.4378  | 0.3587 |        |
| Pcy11a  | _TS[Phospho (STY)]PSSPASLR_2                                           | P49586_S343_M1_Pcy11a  | 7.7934  | 7.8958  | 8.3791  | 9.2662  | 7.5558  | 7.9116  | 8.9072  | 7.8681   | 7.9493  | 8.0176  | 0.9937  | -0.0092 | 0.8914 | 0.0499 |
| Pcy11a  | _AVTC[Carbamidomethyl (C)]DIS[Phospho (STY)]DEED_2                     | P49586_S362_M1_Pcy11a  | 9.0333  | 9.2644  | 9.3413  | 8.8592  | 9.1404  | 9.2534  | 9.6619  | 8.9332   | 9.3715  | 9.4611  | 0.9956  | -0.0064 | 0.8326 | 0.0957 |
| Pcy11a  | _OS[Phospho (STY)]PSS[Phospho (STY)]PHER_2                             | P49586_S323_M2_Pcy11a  | 3.9780  | 4.9370  | 3.5979  | 4.5813  | 4.3401  | 4.2548  | 3.5157  | 4.8200   | 3.8979  | 4.3608  | 1.0320  | 0.0455  | 0.6943 | 0.1585 |
| Pcy11a  | _SPS[Phospho (STY)]PSFR_2                                              | P49586_S331_M1_Pcy11a  | 8.1746  | 3.7260  | 8.2739  | 8.7499  | 8.2189  | 8.4434  | 8.5269  | 3.3196   | 8.3525  | 8.7273  | 1.0506  | 0.0713  | 0.8029 | 0.5953 |
| Pcy11a  | _MLQAS[Phospho (STY)]PK_2                                              | P49586_S315_M1_Pcy11a  | 4.0672  | 3.3227  | 3.8009  | 3.3447  | 3.2110  | 3.4136  | 3.3068  | 3.6565   | 3.9555  | 3.0220  | 1.0119  | 0.0171  | 0.8637 | 0.0636 |
| Pma2    | _HGLVYSGM[Oxidation (M)]GPDYR_3                                        | #N/A                   | 3.2453  | 5.8361  | 4.4798  | 6.2652  | 5.9986  | 5.7976  | 4.1718  | 6.0147   | 5.9995  | 6.0309  | 0.9489  | -0.0757 | 0.6955 | 0.1577 |
| Pma2    | _LAQQYLVQEPPTAQLVDR_3                                                  | #N/A                   | 4.2300  | 3.5343  | 3.4159  | 4.1268  | 2.5927  | 3.5191  | 3.2338  | 3.3677   | 3.0193  | 4.5094  | 1.0105  | 0.0151  | 0.9280 | 0.0325 |
| Pma2    | _LVQIEYALAAVAGAPSVGK_3                                                 | #N/A                   | 0.9105  | 3.7368  | 3.7077  | 4.3098  | 3.9941  | 4.1314  | 4.0245  | 3.8086   | 3.4572  | 2.3098  | 1.0191  | 0.0273  | 0.9299 | 0.0316 |
| Pma2    | _NYNELEDDHNTALTK_3                                                     | #N/A                   | 4.2141  | 3.0670  | 3.9478  | 3.4916  | 3.1043  | 3.2667  | 3.6399  | 3.5096   | 3.8086  | 3.1810  | 0.9945  | -0.0080 | 0.9425 | 0.0257 |
| Pten1   | _AAVQELSGSLTTP[Phospho (STY)]SEDPER_2                                  | P49769_T370_M1_Pten1   | 3.0452  | 4.2247  | 3.9152  | 6.3613  | 4.0278  | 3.8556  | 3.9568  | 5.8557   | 5.5600  | 5.1933  | 0.8250  | -0.2776 | 0.2085 | 0.6810 |
| Tmod1   | _NNDPELEEVNINNR_2                                                      | #N/A                   | 7.1719  | 7.1493  | 7.0308  | 7.7963  | 7.0595  | 7.3815  | 7.6242  | 7.0496   | 7.3454  | 7.3964  | 0.9879  | -0.0176 | 0.6231 | 0.2054 |
| S100b   | _AM[Oxidation (M)]VALIDVFHCZYSR_2                                      | #N/A                   | 4.5508  | 4.6766  | 5.1285  | 4.6645  | 4.4391  | 4.5581  | 4.6039  | 4.5585   | 4.8426  | 4.8050  | 0.9930  | -0.0101 | 0.8140 | 0.0894 |
| Bckdha  | _S[Phospho (STY)]DEVNYYWDK_2                                           | #N/A                   | 9.1590  | 8.1872  | 7.7800  | 9.3579  | 8.1735  | 8.6084  | 9.3325  | 8.1406   | 8.7396  | 8.9885  | 0.9709  | -0.0426 | 0.5104 | 0.2921 |
| Bckdha  | _IGHHS[Phospho (STY)]TSOSSAVR_2                                        | #N/A                   | 4.8880  | 4.5419  | 3.3501  | 5.8990  | 4.2486  | 3.7257  | 5.4611  | 5.7202   | 4.2798  | 5.5317  | 0.8464  | -0.2405 | 0.1657 | 0.7807 |
| Bckdha  | _S[Phospho (STY)]DEVNYYWDKQHPISR_3                                     | #N/A                   | 7.7193  | 8.2145  | 7.3611  | 8.9434  | 7.7064  | 8.3090  | 8.4050  | 8.1816   | 8.4890  | 0.9709  | -0.0426 | 0.4059  | 0.3537 |        |
| Bckdha  | _IGHHS[Phospho (STY)]TSOSSAV[Phospho (STY)]RSVDEVNYYWDKQHPISR_5        | P50136_S334_M2_Bckdha  | 3.5403  | 4.2965  | 3.2739  | 4.1191  | 4.1848  | 3.9406  | 3.8338  | 3.9994   | 3.6480  | 4.0861  | 1.0002  | 0.0003  | 0.9974 | 0.0011 |
| Bckdha  | _NNGYAISTPSEQVR_2                                                      | #N/A                   | 4.2699  | 3.2996  | 3.7779  | 5.5330  | 3.1879  | 3.43    |         |          |         |         |         |         |        |        |



|          |                                                              |                         |        |        |        |        |        |        |        |        |        |        |        |         |        |        |
|----------|--------------------------------------------------------------|-------------------------|--------|--------|--------|--------|--------|--------|--------|--------|--------|--------|--------|---------|--------|--------|
| Gd1      | _M(Oxidation (M))LYTVTR_2                                    | #N/A                    | 8.2627 | 8.4271 | 8.8026 | 8.5889 | 7.8309 | 8.5841 | 8.4875 | 8.4533 | 8.4068 | 8.2675 | 1.0015 | 0.0021  | 0.9463 | 0.0240 |
| Gd1      | _TFEGVOPNTMS(Oxidation (M))JR_2                              | #N/A                    | 7.9160 | 7.7583 | 7.6455 | 8.0968 | 7.9189 | 7.1966 | 7.7100 | 7.5767 | 7.4713 | 7.3975 | 1.0287 | 0.0408  | 0.2362 | 0.6266 |
| Gd1      | _ONDVGEADQ_2                                                 | #N/A                    | 5.0768 | 4.5334 | 5.1561 | 4.6703 | 4.1451 | 5.0357 | 4.1956 | 4.6387 | 4.8613 | 4.6596 | 1.0394 | 0.0557  | 0.4526 | 0.3443 |
| Gd1      | _YMASTVETAEPKEVEPALELEPOQK_3                                 | #N/A                    | 3.8867 | 3.2538 | 4.2354 | 3.6205 | 2.6108 | 3.2174 | 3.2900 | 3.8125 | 4.1929 | 3.0306 | 0.9691 | -0.0453 | 0.7644 | 0.1167 |
| Gd1      | _VPSTETAASNLMOxidation (M))GEM(Oxidation (M))FEK_3           | #N/A                    | 3.4232 | 4.2284 | 4.1100 | 3.8923 | 3.0491 | 3.6798 | 4.0406 | 3.5059 | 3.1544 | 3.0788 | 1.0829 | 0.1149  | 0.3453 | 0.4161 |
| Gd1      | _JSDFVC[Carbamidomethyl (C)]M(Oxidation (M))STAHNVAAQGK_3    | #N/A                    | 3.2622 | 4.5104 | 4.5096 | 4.0533 | 3.8887 | 3.8408 | 4.2016 | 4.4487 | 3.2469 | 3.7306 | 1.0266 | 0.0379  | 0.7529 | 0.1233 |
| Gd1      | _FDLGDGVDFTHGHALALYR_3                                       | #N/A                    | 3.8630 | 3.9359 | 3.5967 | 3.1761 | 3.8242 | 3.6587 | 4.0361 | 3.9015 | 4.2006 | 3.6352 | 0.9321 | -0.1014 | 0.1533 | 0.8144 |
| Atp6v1a  | _LPANHPILLTGOR_2                                             | #N/A                    | 7.9220 | 8.2884 | 7.8944 | 8.1046 | 8.5726 | 8.0313 | 7.6870 | 8.3004 | 8.1697 | 8.1114 | 1.0085 | 0.0122  | 0.6943 | 0.1584 |
| Atp6v1a  | _TVSGSLSK_2                                                  | #N/A                    | 8.6410 | 8.8593 | 8.9439 | 8.7141 | 9.1690 | 8.8666 | 8.4314 | 8.9551 | 8.9262 | 8.6854 | 1.0133 | 0.0190  | 0.4150 | 0.3820 |
| Atp6v1a  | _VGHSLVGEIR_2                                                | #N/A                    | 7.9471 | 7.9134 | 8.1758 | 7.9563 | 7.3334 | 7.6645 | 7.7925 | 7.5720 | 7.7766 | 1.0202 | 0.0289 | 0.3535  | 0.4516 |        |
| Atp6v1a  | _LUKDFLQNGGYTPDYR_3                                          | #N/A                    | 8.0595 | 8.0064 | 8.7561 | 8.3167 | 8.6520 | 8.4501 | 8.0292 | 8.0543 | 8.4871 | 8.4548 | 1.0142 | 0.0203  | 0.5427 | 0.2654 |
| Atp6v1a  | _YSNSDVHVVG[C]Carbamidomethyl (C))GER_2                      | #N/A                    | 7.7947 | 7.7705 | 8.5679 | 8.5776 | 7.9991 | 7.7424 | 8.0769 | 7.8967 | 8.1994 | 8.1148 | 1.0004 | 0.0006  | 0.9873 | 0.0056 |
| Atp6v1a  | _DKWEFPSPK_2                                                 | #N/A                    | 7.6264 | 8.2387 | 8.5828 | 8.6098 | 7.9795 | 8.3762 | 8.3696 | 8.3044 | 8.0650 | 8.0713 | 1.0040 | 0.0058  | 0.8750 | 0.0580 |
| Atp6v1a  | _VGSHITGGDYGWVNSLUK_3                                        | #N/A                    | 8.4344 | 8.4305 | 8.9441 | 8.4304 | 7.7964 | 8.1510 | 8.3369 | 7.9926 | 8.2477 | 8.5690 | 1.0094 | 0.0135  | 0.7265 | 0.1388 |
| Atp6v1a  | _GVNVSALS_R_2                                                | #N/A                    | 8.3184 | 8.2391 | 8.4521 | 8.3069 | 8.5273 | 8.2708 | 7.5530 | 8.4503 | 8.4413 | 8.4094 | 1.0169 | 0.0242  | 0.4705 | 0.3274 |
| Atp6v1a  | _AVETTAQSDNK_2                                               | #N/A                    | 7.9730 | 8.1467 | 7.8081 | 8.1145 | 7.9803 | 7.6696 | 7.9451 | 8.1604 | 8.2511 | 7.9084 | 0.9854 | -0.0212 | 0.3316 | 0.4793 |
| Atp6v1a  | _ALDEYDKHFTFVPLR_3                                           | #N/A                    | 7.9135 | 8.0830 | 8.2984 | 8.1284 | 7.7078 | 7.7396 | 8.0161 | 8.0071 | 8.0673 | 8.0739 | 0.9922 | -0.0113 | 0.6141 | 0.2117 |
| Atp6v1a  | _GLQEEEDLAIEQVLVGK_2                                         | #N/A                    | 6.1666 | 6.2709 | 7.2836 | 7.8274 | 6.3899 | 7.0571 | 6.5104 | 6.5007 | 6.7153 | 6.8386 | 1.0288 | 0.0410  | 0.5939 | 0.2263 |
| Atp6v1a  | _HFTFVPLR_2                                                  | #N/A                    | 7.1620 | 7.0522 | 6.8378 | 7.3225 | 6.8285 | 6.8473 | 6.7261 | 6.9198 | 6.8858 | 7.4719 | 1.0011 | 0.0015  | 0.9652 | 0.0154 |
| Atp6v1a  | _AKEILQEEEDLAEIVLQVK_3                                       | #N/A                    | 6.1423 | 7.0774 | 7.5939 | 7.7674 | 6.5215 | 6.1356 | 6.8104 | 6.6668 | 6.2348 | 6.8011 | 1.0369 | 0.0523  | 0.5382 | 0.2690 |
| Atp6v1a  | _KADYAQLLEDM(Oxidation (M))QNAFR_3                           | #N/A                    | 6.0497 | 6.6647 | 6.5880 | 6.0843 | 5.8264 | 6.1964 | 6.0295 | 6.5687 | 6.1244 | 6.3221 | 0.9905 | -0.0138 | 0.7903 | 0.1022 |
| Atp6v1a  | _QVRPVTEK_2                                                  | #N/A                    | 5.3501 | 5.4290 | 4.8115 | 5.4473 | 5.6456 | 5.4313 | 4.8800 | 4.1028 | 4.8666 | 1.1126 | 0.0140 | 0.0911  | 1.0403 | 0.0000 |
| Atp6v1a  | _LAEM(Oxidation (M))PADSGYPATLGAR_2                          | #N/A                    | 8.9542 | 8.8247 | 7.8228 | 9.4510 | 8.8473 | 8.5155 | 9.2143 | 8.5218 | 8.2737 | 8.7905 | 1.0041 | 0.0059  | 0.9133 | 0.0394 |
| Atp6v1a  | _TALVANTSNM(Oxidation (M))PVAAR_2                            | #N/A                    | 7.4218 | 7.6128 | 7.5445 | 7.6940 | 7.4878 | 7.7360 | 7.2656 | 7.5735 | 7.4362 | 7.2367 | 1.0196 | 0.0280  | 0.1343 | 0.8719 |
| Atp6v1a  | _LASFYER_2                                                   | #N/A                    | 6.5192 | 6.8118 | 6.9842 | 6.2878 | 6.4189 | 6.9076 | 4.2274 | 6.6170 | 6.7527 | 6.2240 | 1.1175 | 0.1603  | 0.1880 | 0.7257 |
| Atp6v1a  | _ITWSIR_2                                                    | #N/A                    | 6.5745 | 7.2170 | 5.8045 | 6.3559 | 6.1281 | 6.8555 | 6.0121 | 6.9267 | 6.9730 | 7.0009 | 0.9645 | -0.0522 | 0.4776 | 0.3209 |
| Atp6v1a  | _RAVETASQSDNK_2                                              | #N/A                    | 4.9197 | 4.1159 | 4.6892 | 5.2664 | 5.3474 | 5.6659 | 5.0846 | 4.4826 | 5.2559 | 5.2824 | 0.9949 | -0.0074 | 0.9377 | 0.0280 |
| Atp6v1a  | _GNEM(Oxidation (M))SEVLR_2                                  | #N/A                    | 7.9333 | 8.0798 | 7.6482 | 8.2902 | 8.1735 | 7.7614 | 7.7530 | 7.8943 | 7.6673 | 8.1498 | 1.0146 | 0.0209  | 0.4680 | 0.3297 |
| Atp6v1a  | _ALDEYDK_2                                                   | #N/A                    | 4.9331 | 4.4389 | 3.8205 | 5.0362 | 4.5432 | 4.8549 | 5.4207 | 5.0851 | 4.6619 | 5.0851 | 0.9916 | -0.0122 | 0.9277 | 0.0326 |
| Atp6v1a  | _EHM(Oxidation (M))GELYK_2                                   | #N/A                    | 7.2306 | 6.8508 | 7.0078 | 7.4708 | 7.2785 | 7.1310 | 6.6622 | 6.8447 | 6.8247 | 6.9924 | 1.0484 | 0.0682  | 0.0275 | 1.5607 |
| Atp6v1a  | _LEGDM(Oxidation (M))ATIQVYEETSGVSGDPVLR_3                   | #N/A                    | 7.8159 | 7.9276 | 8.6372 | 9.0220 | 7.8418 | 8.4514 | 8.2814 | 8.6048 | 7.9640 | 8.2077 | 1.0022 | 0.0032  | 0.9488 | 0.1268 |
| Atp6v1a  | _DFPELTM(Oxidation (M))EVDGK_2                               | #N/A                    | 8.0242 | 7.8743 | 7.4692 | 8.0174 | 7.5448 | 7.9590 | 7.9808 | 7.8237 | 7.9430 | 8.0474 | 0.9831 | -0.0245 | 0.3354 | 0.4744 |
| Atp6v1a  | _FSMVQVWPVR_2                                                | #N/A                    | 5.2552 | 4.4284 | 4.2737 | 6.7636 | 4.6454 | 3.6049 | 5.1273 | 3.1837 | 3.9353 | 3.9527 | 1.1923 | 0.0373  | 0.2582 | 0.5880 |
| Atp6v1a  | _FKDPKVDGEAK_3                                               | #N/A                    | 6.5745 | 5.8988 | 6.2998 | 5.1250 | 6.5332 | 5.9640 | 3.8106 | 5.8136 | 5.4182 | 6.0772 | 1.1489 | 0.0202  | 0.1452 | 0.8380 |
| Atp6v1a  | _DDFLQNGGYTPDYR_2                                            | #N/A                    | 7.4450 | 7.1784 | 4.4656 | 4.0094 | 7.1063 | 7.5115 | 7.6301 | 7.0896 | 7.3975 | 3.6867 | 0.9744 | -0.0374 | 0.8843 | 0.0534 |
| Atp6v1a  | _ADYAQLLEDM(Oxidation (M))QNAFR_2                            | #N/A                    | 6.1292 | 5.9954 | 5.8994 | 6.2520 | 5.8768 | 5.8994 | 6.2019 | 6.0751 | 6.0443 | 5.9713 | 0.9894 | -0.0154 | 0.4765 | 0.3219 |
| Atp6v1a  | _ADYAQLLEDM(Oxidation (M))QNAFRS[Phospho (STY)]LED_2         | P50516_S614_M1_Atp6v1a  | 3.6737 | 4.4703 | 5.1262 | 3.6417 | 2.2666 | 3.4292 | 3.5173 | 4.7368 | 3.6585 | 3.3190 | 0.9895 | -0.0152 | 0.9446 | 0.0248 |
| Atp6v1a  | _EASVYGITSEYR_2                                              | #N/A                    | 3.5419 | 4.3471 | 4.2287 | 1.0850 | 4.1684 | 4.1960 | 4.4460 | 3.3872 | 3.6593 | 3.1975 | 0.9788 | -0.0310 | 0.9114 | 0.0403 |
| Atp6v1a  | _TVGM(Oxidation (M))LSNM(Oxidation (M))SPDMAR_2              | #N/A                    | 3.4141 | 3.9284 | 3.1477 | 4.1923 | 3.7497 | 3.9798 | 4.3406 | 4.3097 | 3.1079 | 3.8696 | 0.9561 | -0.0648 | 0.5848 | 0.2230 |
| Atp6v1a  | _ASLAETDKITLVAK_3                                            | #N/A                    | 3.6277 | 3.5985 | 4.3145 | 3.3163 | 4.2542 | 3.4753 | 4.5318 | 3.3013 | 2.9499 | 3.2833 | 1.0705 | 0.0982  | 0.4967 | 0.3039 |
| Atp6v1a  | _GSVTVAPPNGYDASDVILEFEVQK_3                                  | #N/A                    | 3.9580 | 3.2624 | 3.8137 | 3.3575 | 3.0837 | 3.1449 | 3.5057 | 3.2272 | 3.9428 | 3.0348 | 1.0027 | 0.0038  | 0.9709 | 0.0128 |
| Atp6v1e1 | _GALFGANANR_2                                                | #N/A                    | 8.8967 | 9.0581 | 9.1496 | 9.1096 | 9.3656 | 8.7437 | 8.8091 | 8.9595 | 9.0675 | 8.9100 | 1.0131 | 0.0188  | 0.3470 | 0.4597 |
| Atp6v1e1 | _KQDFPLVK_2                                                  | #N/A                    | 7.9427 | 8.2976 | 7.8957 | 8.1835 | 8.5132 | 7.9515 | 7.8348 | 7.9709 | 8.2754 | 8.1276 | 1.0098 | 0.0140  | 0.6053 | 0.2180 |
| Atp6v1e1 | _JAcetyl (Protein N-term))ALSADVQK_2                         | #N/A                    | 5.6010 | 6.3043 | 7.4641 | 6.1311 | 7.1964 | 6.1077 | 5.6898 | 6.3623 | 6.2808 | 6.6697 | 1.0347 | 0.0492  | 0.6012 | 0.2210 |
| Atp6v1e1 | _VSNLTESR_2                                                  | #N/A                    | 7.1031 | 6.9209 | 6.9131 | 6.8990 | 7.8176 | 6.9807 | 6.2659 | 7.1580 | 7.2471 | 7.4228 | 1.0117 | 0.0168  | 0.7713 | 0.1128 |
| Atp6v1e1 | _AEEFENIEK_2                                                 | #N/A                    | 7.1253 | 6.3863 | 7.0495 | 6.9714 | 6.9736 | 6.9928 | 6.0779 | 6.7971 | 6.7808 | 6.9627 | 1.0394 | 0.0557  | 0.2403 | 0.6192 |
| Atp6v1e1 | _ODUTDLNEAK_2                                                | #N/A                    | 5.8177 | 5.3567 | 3.7922 | 5.1202 | 5.4116 | 5.5526 | 5.5159 | 5.7060 | 5.2038 | 5.7538 | 0.9333 | -0.0996 | 0.3569 | 0.4475 |
| Atp6v1e1 | _LDLQAQM(Oxidation (M))M(Oxidation (M))PEVR_2                | #N/A                    | 7.3279 | 8.0627 | 8.3205 | 7.5972 | 7.6714 | 8.0843 | 7.8384 | 8.0514 | 7.9687 | 7.9128 | 0.9876 | 0.0816  | 0.6222 | 0.2061 |
| Atp6v1e1 | _ARDDITDLNEAK_2                                              | #N/A                    | 6.5127 | 6.7790 | 6.6308 | 6.9804 | 6.7094 | 6.5266 | 6.6141 | 6.2505 | 6.2717 | 6.5979 | 1.0398 | 0.0564  | 0.0641 | 1.1934 |
| Atp6v1e1 | _IQM(Oxidation (M))SNLM(Oxidation (M))NQAR_2                 | #N/A                    | 4.8179 | 5.2959 | 5.8009 | 4.042  | 5.4986 | 5.4556 | 5.7377 | 5.7251 | 5.4119 | 5.9992 | 1.0011 | -0.0011 | 0.9936 | 0.0028 |
| Atp6v1e1 | _IMEYEK_2                                                    | #N/A                    | 3.9910 | 3.8793 | 4.3575 | 4.8498 | 4.5815 | 4.3579 | 4.2510 | 2.3917 | 3.3989 | 3.5786 | 1.2734 | 0.3487  | 0.0307 | 0.5134 |
| Atp6v1e1 | _KVSNT[Phospho (STY)]LESR_2                                  | P50518_T195_M1_Atp6v1e1 | 3.7646 | 3.0201 | 3.4983 | 4.5429 | 2.9084 | 3.7162 | 3.1904 | 3.9591 | 4.2581 | 4.2202 | 0.9151 | -0.1281 | 0.3836 | 0.4161 |
| Acad1    | _SGELAVQALDQFATVVEAK_2                                       | #N/A                    | 3.2678 | 4.0730 | 3.9546 | 3.5787 | 3.8943 | 3.8351 | 3.9169 | 3.6612 | 3.6352 | 4.4243 | 0.9637 | -0.0534 | 0.5152 | 0.2880 |
| Pa2g4    | _JAcetyl (Protein N-term))S[Phospho (STY)]GEDEQQEQTEADLVTK_2 | P50580_S2_M1_Pa2g4      | 4.0011 | 7.6950 | 7.7961 | 8.2673 | 6.8328 | 8.6089 | 8.6197 | 8.4437 | 7.6426 | 7.9387 | 0.8823 | -0.1807 | 0.3041 | 0.5170 |
| Cast     | _EQKPTPAS[Phospho (STY)]PVQSTPSKPSDK_3                       | P51125_S219_M1_Cast     | 6.2432 | 5.8207 | 6.7554 | 7.5025 | 5.9193 | 6.4287 | 6.5722 | 6.7234 | 5.8961 | 6.7926 | 0.9921 | -0.0114 | 0.8893 | 0.0510 |
| Cast     | _SNDSSTQ[Phospho (STY)]PPQGETVPR_2                           | P51125_T479_M1_Cast     | 7.9508 | 4.0983 | 9.0619 | 9.1577 | 3.9866 | 8.5239 | 8.8453 | 8.1791 | 3.1799 | 8.7141 | 0.9862 | -0.0200 | 0.9530 | 0.0209 |
| Cast     | _S[Phospho (STY)]NEQM(Oxidation (M))YSEKPSSEK_2              | P51125_S165_M1_Cast     | 3.3016 | 4.1068 | 4.6062 | 4.4911 | 3.9282 | 3.8013 | 4.2058 | 3.2209 | 3.2760 | 2.9573 | 1.1828 | 0.2422  | 0.0915 | 1.0387 |
| Cast     | _SLSES[Phospho (STY)]ELIGLSAQDPR_2                           | P51125_S446_M1_Cast     | 3.8212 | 3.5213 | 3.5548 | 4.5994 | 2.9649 | 3.6597 | 3.2469 | 3.9026 | 4.2016 | 4.2767 | 0.9437 | -0.0836 | 0.5223 | 0.2821 |
| Rab7a    | _NNIPFYETSAK_2                                               | #N/A                    | 7.9322 | 7.9131 | 8.2598 | 7.5640 | 7.3796 | 7.8217 | 8.4545 | 7.7393 | 7.8793 | 7.6690 | 0.9844 | -0.0227 | 0.5738 | 0.2413 |
| Rab7a    | _VILGDSGVQK_2                                                | #N/A                    | 7.6327 | 7.6126 | 7.3225 | 7.2156 | 6.8386 | 7.2830 | 7.4429 | 7.5064 | 7.8003 | 7.2016 | 0.9773 | -0.0332 | 0.3671 | 0.4352 |
| Rab7a    | _FCSGLGAFVPR_2                                               | #N/A                    | 5.6902 | 5.9556 | 6.5597 | 6.1190 | 4.9403 | 5.8280 | 6.0242 | 5.8498 | 6.2499 | 6.2447 | 0.9601 | -0.0588 | 0.4170 | 0.3799 |
| Rab7a    | _EANVEGAQFTIAR_2                                             | #N/A                    | 5.4803 | 5.3856 | 6.6047 | 5.0158 | 5.0280 | 5.6998 | 5.8824 | 5.3563 | 5.8417 | 5.6140 | 0.9757 | -0.0355 | 0.6726 | 0.1722 |
| Rab7a    | _ATIGADFLTK_2                                                | #N/A                    | 6.5696 | 6.0295 | 5.6931 | 6.2531 | 6.1027 | 6.2197 | 6.7124 | 6.4275 | 6.3718 | 6.0227 | 0.9388 | -0.0911 | 0.0538 | 1.2694 |
| Rab7a    | _TLDSWRDEFLQASPR_3                                           | #N/A                    | 3.1268 | 5.9689 | 6.3420 | 5.8987 | 4.9296 | 3.9762 | 4.0309 | 6.     |        |        |        |         |        |        |



|          |                                                                                        |                      |         |         |         |         |         |         |         |         |         |         |        |         |        |        |
|----------|----------------------------------------------------------------------------------------|----------------------|---------|---------|---------|---------|---------|---------|---------|---------|---------|---------|--------|---------|--------|--------|
| Adcy9    | _QGDEE[Phospho (STY)]ENSVKR_2                                                          | P51830_S354_M1_Adcy9 | 4.1225  | 3.3928  | 3.7122  | 3.5795  | 3.2609  | 3.2401  | 3.2522  | 3.7887  | 4.0462  | 3.4590  | 0.9766 | -0.0342 | 0.7087 | 0.1495 |
| Adcy9    | _IADOLMGDEE[Phospho (STY)]ENS[Phospho (STY)]VKR_3                                      | #N/A                 | 3.7953  | 4.9727  | 3.7323  | 6.8604  | 3.8038  | 3.4727  | 4.3502  | 5.8627  | 4.9080  | 3.4951  | 0.9539 | -0.0681 | 0.9875 | 0.1038 |
| Gss      | _OIENTASFGGLASR_2                                                                      | #N/A                 | 3.6485  | 3.5776  | 4.3353  | 4.1511  | 4.2750  | 3.4544  | 4.5527  | 3.2805  | 4.4299  | 3.3041  | 1.0039 | 0.0056  | 0.9653 | 0.0153 |
| Hdgf     | _AGDVLDS[Phospho (STY)]PK_2                                                            | #N/A                 | 10.8949 | 10.4582 | 10.3060 | 11.1575 | 10.2517 | 10.3094 | 10.8953 | 10.3599 | 10.6324 | 10.8012 | 0.9898 | -0.0148 | 0.6211 | 0.2068 |
| Hdgf     | _RAGDVLDS[Phospho (STY)]PK_2                                                           | #N/A                 | 8.4278  | 8.2650  | 7.9118  | 8.9324  | 8.0880  | 8.3138  | 8.5330  | 8.1964  | 8.3159  | 8.4744  | 0.9932 | -0.0098 | 0.7705 | 0.1132 |
| Hdgf     | _AGDVLDS[Phospho (STY)]PKPK_2                                                          | #N/A                 | 9.1105  | 9.5369  | 9.5899  | 9.9323  | 9.1686  | 9.2563  | 9.5754  | 9.3316  | 9.3858  | 9.4907  | 0.9986 | -0.0021 | 0.9371 | 0.0282 |
| Hdgf     | _GSAEGSS[Phospho (STY)]DEEGKLVDEPAKEK_3                                                | #N/A                 | 3.7491  | 7.6737  | 3.6798  | 8.6698  | 7.6614  | 7.8077  | 6.9054  | 6.9244  | 7.6959  | 7.5298  | 0.9004 | -0.1514 | 0.5449 | 0.2637 |
| Hdgf     | _GSAEGSS[Phospho (STY)]DEEGKLVDEPAK_3                                                  | #N/A                 | 3.7844  | 4.0216  | 4.2697  | 9.2107  | 8.6676  | 6.8459  | 4.4192  | 8.1602  | 8.5108  | 8.9236  | 0.8174 | -0.7909 | 0.3858 | 0.4137 |
| Hdgf     | _GFSEGLVEIENPVTK_2                                                                     | #N/A                 | 4.9813  | 5.0783  | 5.3391  | 5.5887  | 5.6431  | 5.4703  | 4.3676  | 4.0223  | 4.6218  | 3.9972  | 1.2582 | 0.3314  | 0.0003 | 3.5081 |
| Hdgf     | _KGSAGE[Phospho (STY)]S[Phospho (STY)]DEEGKLVDEPAK_3                                   | #N/A                 | 3.7980  | 3.3632  | 3.7249  | 7.3759  | 6.2058  | 4.7685  | 3.9638  | 4.7822  | 6.6030  | 6.5072  | 0.9816 | -0.0268 | 0.9236 | 0.0345 |
| Hdgf     | _SC[Carbamidomethyl (C)]AAEPEVEPEAHEGGDGKKGSAEGS[Phospho (STY)]S[Phospho (STY)]DEEGK_4 | #N/A                 | 4.1163  | 3.4206  | 3.3022  | 3.1992  | 3.2419  | 2.9867  | 3.3475  | 3.8019  | 4.1010  | 3.7719  | 0.8994 | -0.1529 | 0.1440 | 0.8417 |
| Atp6v0d1 | _LYPEGLAQLAR_2                                                                         | #N/A                 | 9.7141  | 9.6865  | 9.6084  | 9.4273  | 9.4805  | 9.3901  | 9.6989  | 9.9155  | 9.8252  | 9.4623  | 0.9821 | -0.0261 | 0.1345 | 0.8713 |
| Atp6v0d1 | _NVAOYPEYK_2                                                                           | #N/A                 | 9.2469  | 8.7297  | 9.2674  | 8.6768  | 8.6236  | 8.6777  | 8.9584  | 9.0067  | 8.7403  | 8.7280  | 1.0014 | 0.0020  | 0.9435 | 0.0253 |
| Atp6v0d1 | _FFEHEVK_2                                                                             | #N/A                 | 6.8214  | 7.2936  | 6.7273  | 6.9065  | 6.7927  | 6.3940  | 6.7462  | 7.1568  | 6.3438  | 6.8944  | 1.0055 | 0.0079  | 0.8569 | 0.0670 |
| Atp6v0d1 | _NIVWAE[Carbamidomethyl (C)]IAQR_2                                                     | #N/A                 | 7.0312  | 6.7310  | 7.0856  | 6.5648  | 5.9033  | 6.3993  | 6.8143  | 5.8868  | 6.7164  | 6.4187  | 1.0248 | 0.0353  | 0.5806 | 0.2361 |
| Atp6v0d1 | _ADDEYQVK_2                                                                            | #N/A                 | 5.8314  | 5.8802  | 5.6107  | 5.9471  | 5.8448  | 5.3989  | 5.0917  | 6.0267  | 6.3934  | 5.3202  | 1.0077 | 0.0111  | 0.8701 | 0.0604 |
| Atp6v0d1 | _AYLESYK_2                                                                             | #N/A                 | 6.3929  | 6.1435  | 5.7678  | 4.9969  | 5.8644  | 6.5315  | 3.4602  | 5.6276  | 6.5483  | 7.0266  | 1.0501 | 0.0705  | 0.6896 | 0.1614 |
| Atp6v0d1 | _LKEQEC[Carbamidomethyl (C)]R_2                                                        | #N/A                 | 5.8357  | 5.6349  | 5.6195  | 5.6275  | 5.4714  | 3.7962  | 4.1570  | 6.2714  | 4.9442  | 5.6105  | 1.0162 | 0.0232  | 0.8760 | 0.0575 |
| Atp6v0d1 | _LUFEGASNPGR_2                                                                         | #N/A                 | 8.3046  | 8.3553  | 8.3075  | 8.4238  | 7.9540  | 8.2111  | 8.6886  | 8.3966  | 8.3973  | 8.2369  | 0.9798 | -0.0295 | 0.1678 | 0.7751 |
| Atp6v0d1 | _AFITINSGTLEKDR_2                                                                      | #N/A                 | 4.0774  | 5.3914  | 5.5905  | 6.0343  | 3.9717  | 5.5776  | 4.9322  | 5.2199  | 5.0516  | 5.5247  | 0.9855 | -0.0210 | 0.8727 | 0.0591 |
| Atp6v0d1 | _LHLOSTDYGNLEASPLTVSDQK_3                                                              | #N/A                 | 4.4058  | 3.6203  | 4.3333  | 4.6211  | 4.2324  | 3.4971  | 4.5100  | 3.8488  | 4.3131  | 3.7972  | 0.9857 | -0.0208 | 0.8263 | 0.0829 |
| Atp6v0d1 | _LUFEGASNPQDLEDR_3                                                                     | #N/A                 | 5.7836  | 6.0833  | 6.2042  | 5.9259  | 5.1830  | 5.8915  | 6.0164  | 5.4673  | 6.2692  | 5.4996  | 1.0055 | 0.0080  | 0.8967 | 0.0474 |
| Atp6v0d1 | _FC[Carbamidomethyl (C)]TLGGTTADAM[Oxidation (M)]C[Carbamidomethyl (C)]PLEFADR_3       | #N/A                 | 3.4814  | 4.0432  | 3.2151  | 4.2378  | 4.1260  | 4.0419  | 4.8582  | 4.2426  | 4.2668  | 3.9370  | 0.8917 | -0.1654 | 0.1076 | 0.9682 |
| Atp6v0d1 | _AGVLSQADYLNLVQC[Carbamidomethyl (C)]ETLEDK_3                                          | #N/A                 | 3.0239  | 3.7802  | 4.2584  | 3.8022  | 3.6685  | 2.9561  | 4.3501  | 3.1990  | 3.4980  | 3.4795  | 0.9862 | -0.0200 | 0.8805 | 0.0552 |
| Fabp7    | _NTEINFQLGEEFEETSIDOR_2                                                                | #N/A                 | 4.0156  | 3.3268  | 6.0882  | 4.4196  | 3.3206  | 4.7078  | 3.4413  | 5.2837  | 5.2260  | 2.9703  | 1.0196 | 0.0280  | 0.9100 | 0.0409 |
| Fabp7    | _LTDSONFDEYMK_2                                                                        | #N/A                 | 3.1796  | 4.0466  | 3.8664  | 4.3691  | 3.9349  | 4.1906  | 4.0838  | 3.7494  | 3.3980  | 4.3361  | 1.0101 | 0.0145  | 0.8852 | 0.0530 |
| Slc25a5  | _GNLNVIR_2                                                                             | #N/A                 | 11.1910 | 11.2424 | 11.4927 | 10.5601 | 11.1148 | 10.7224 | 11.0891 | 11.5424 | 11.3033 | 11.0726 | 0.9824 | -0.0256 | 0.3459 | 0.4610 |
| Slc25a5  | _TAVAPIR_2                                                                             | #N/A                 | 10.8174 | 10.6108 | 10.7460 | 10.2159 | 10.4623 | 10.1799 | 10.1327 | 11.1791 | 10.8276 | 10.6696 | 0.9816 | -0.0268 | 0.3962 | 0.4020 |
| Slc25a5  | _YPTPALNFAR_2                                                                          | #N/A                 | 10.3335 | 10.2416 | 10.7411 | 9.7835  | 9.7597  | 9.8290  | 10.5683 | 10.7048 | 10.3793 | 10.2823 | 0.9648 | -0.0517 | 0.1233 | 0.9089 |
| Slc25a5  | _EQGLVSFWR_2                                                                           | #N/A                 | 10.3392 | 10.3428 | 10.2328 | 9.9681  | 9.5519  | 10.0103 | 10.4024 | 10.4439 | 10.1546 | 9.9699  | 0.9835 | -0.0239 | 0.3698 | 0.4321 |
| Slc25a5  | _LLLVQHASK_2                                                                           | #N/A                 | 9.6359  | 9.3496  | 9.7106  | 8.7578  | 8.9817  | 9.1985  | 9.8711  | 9.7184  | 9.3141  | 9.4378  | 0.9673 | -0.0479 | 0.1818 | 0.7405 |
| Slc25a5  | _QIFUGVDKR_2                                                                           | #N/A                 | 9.5538  | 9.7377  | 9.6576  | 9.2059  | 9.2668  | 9.2520  | 9.8376  | 9.6883  | 9.4612  | 9.3715  | 0.9850 | -0.0218 | 0.3499 | 0.4560 |
| Slc25a5  | _DFLAGGVAAASK_2                                                                        | #N/A                 | 8.7093  | 8.4297  | 8.8239  | 8.0059  | 8.0949  | 8.4308  | 9.0087  | 8.7581  | 8.7873  | 8.1361  | 0.9704 | -0.0434 | 0.2805 | 0.5520 |
| Slc25a5  | _GAVSNVLR_2                                                                            | #N/A                 | 8.6606  | 8.3382  | 8.4448  | 7.7950  | 8.2861  | 8.4637  | 7.0587  | 8.1223  | 8.7968  | 8.6926  | 0.9898 | -0.0149 | 0.8326 | 0.0796 |
| Slc25a5  | _GLGDC[Carbamidomethyl (C)]VK_2                                                        | #N/A                 | 7.7054  | 7.4432  | 7.7973  | 6.6835  | 7.2936  | 7.1800  | 6.6200  | 8.1134  | 7.8307  | 7.5112  | 0.9776 | -0.0327 | 0.6221 | 0.2062 |
| Slc25a5  | _AAYGVDYTK_2                                                                           | #N/A                 | 6.5859  | 6.2105  | 6.6780  | 6.2715  | 5.2946  | 6.1759  | 6.5601  | 7.0354  | 6.5901  | 6.5824  | 0.9269 | -0.1095 | 0.1034 | 0.9856 |
| Slc25a5  | _QIFUGVDK_2                                                                            | #N/A                 | 6.1140  | 6.4216  | 6.1183  | 5.7848  | 6.3800  | 6.2258  | 6.3835  | 6.8107  | 6.7023  | 6.0314  | 0.9525 | -0.0702 | 0.1286 | 0.8907 |
| Slc25a5  | _Acetyl (Protein N-term)[DDAAVSAFK_2                                                   | #N/A                 | 6.7778  | 6.0677  | 6.9207  | 3.1335  | 6.3899  | 6.1312  | 4.2185  | 7.2015  | 6.9956  | 6.6261  | 0.9414 | -0.0872 | 0.6936 | 0.1589 |
| Slc25a5  | _GM[Oxidation (M)]GGAPVLVYDEBK_2                                                       | #N/A                 | 3.9931  | 3.8122  | 3.9150  | 3.8396  | 2.8460  | 4.0216  | 3.6618  | 4.0391  | 3.9431  | 3.9441  | 0.9441 | -0.0830 | 0.3896 | 0.4094 |
| Slc25a5  | _MM[Oxidation (M)]MGSGR_2                                                              | #N/A                 | 4.2924  | 4.0649  | 4.1106  | 4.7523  | 3.9433  | 4.1891  | 4.1197  | 4.0309  | 3.3613  | 4.1555  | 1.0788 | 0.1094  | 0.1741 | 0.7592 |
| Slc25a5  | _GTDIMYTGTLDC[Carbamidomethyl (C)]WR_2                                                 | #N/A                 | 4.8844  | 3.2183  | 3.8578  | 3.4015  | 3.2678  | 3.3588  | 3.5498  | 3.5996  | 3.8987  | 3.0788  | 1.0376 | 0.0532  | 0.7166 | 0.1447 |
| Slc25a5  | _GM[Oxidation (M)]GGAPVLVYDEBK_2                                                       | #N/A                 | 3.3714  | 4.1276  | 4.6059  | 4.2880  | 4.0159  | 4.1095  | 4.0027  | 4.3524  | 3.1506  | 3.8269  | 1.0661 | 0.0923  | 0.4050 | 0.3926 |
| Nek1     | _TC[Carbamidomethyl (C)]S[Phospho (STY)]LPDLK_2                                        | P51954_S997_M1_Nek1  | 8.5716  | 8.3066  | 8.6333  | 8.7142  | 7.3178  | 8.1104  | 8.8580  | 8.4583  | 8.6025  | 8.4156  | 0.9641 | -0.0527 | 0.2986 | 0.5249 |
| Nek1     | _SSDVPLLELLET[Phospho (STY)]GGSPK_2                                                    | P51954_T615_M1_Nek1  | 3.7667  | 3.8411  | 3.5004  | 3.8631  | 4.5586  | 5.3656  | 3.6471  | 5.7659  | 6.3139  | 4.2223  | 0.9622 | -0.0556 | 0.7672 | 0.1151 |
| Nek1     | _EQQGDYS[Phospho (STY)]EEESVLK_2                                                       | P51954_S1071_M1_Nek1 | 3.4254  | 4.1817  | 3.1591  | 4.2339  | 4.0700  | 4.0555  | 3.9486  | 4.2983  | 3.0965  | 3.8810  | 1.0127 | 0.0181  | 0.8782 | 0.0564 |
| Tst      | _VLDASWSPGTR_2                                                                         | #N/A                 | 6.6630  | 6.3262  | 6.4268  | 6.5970  | 6.6406  | 6.3725  | 6.8237  | 6.4065  | 6.6435  | 6.3674  | 0.9872 | -0.0185 | 0.4545 | 0.3425 |
| Usp10    | _LS[Phospho (STY)]PHEK_2                                                               | P52479_S541_M1_Usp10 | 4.1440  | 7.5668  | 6.9521  | 3.5154  | 6.3381  | 3.3169  | 7.6508  | 7.5368  | 7.0771  | 3.0987  | 0.8373 | -0.2563 | 0.4439 | 0.3528 |
| Usp10    | _C[Carbamidomethyl (C)]S[Phospho (STY)]PPVPSPLASEK_2                                   | P52479_S359_M1_Usp10 | 3.1682  | 4.0580  | 3.8550  | 4.3576  | 3.7947  | 4.7192  | 7.7338  | 3.7608  | 3.4094  | 7.1837  | 0.7067 | -0.5009 | 0.1147 | 0.9405 |
| Usp10    | _TC[Carbamidomethyl (C)]DS[Phospho (STY)]PONPVDFISGPVPDPSPFR_3                         | P52479_S208_M1_Usp10 | 3.6261  | 4.0673  | 3.9489  | 5.5831  | 3.8886  | 3.8409  | 4.1662  | 3.6669  | 3.3155  | 4.4185  | 1.0531 | 0.0746  | 0.6535 | 0.1848 |
| Pkm      | _LIDISAPITAR_2                                                                         | #N/A                 | 12.1478 | 12.3357 | 12.4573 | 12.2692 | 12.3343 | 12.2102 | 12.3397 | 12.1610 | 12.2486 | 12.0747 | 1.0071 | 0.0102  | 0.2609 | 0.5835 |
| Pkm      | _NTGIC[Carbamidomethyl (C)]TIGPSAR_2                                                   | #N/A                 | 11.5919 | 11.5975 | 11.8819 | 11.6893 | 11.5292 | 11.5752 | 11.7472 | 11.4297 | 11.5928 | 11.4571 | 1.0076 | 0.0109  | 0.3437 | 0.4638 |
| Pkm      | _GDPLEAVR_2                                                                            | #N/A                 | 11.2850 | 10.9565 | 11.3038 | 11.0773 | 11.0984 | 11.0080 | 10.5697 | 11.1205 | 11.0136 | 11.2014 | 1.0132 | 0.0190  | 0.3075 | 0.5121 |
| Pkm      | _APIAVTR_2                                                                             | #N/A                 | 10.8273 | 10.9209 | 10.9318 | 10.8008 | 10.7962 | 10.7072 | 10.4057 | 11.0626 | 10.9985 | 10.7034 | 1.0035 | 0.0051  | 0.7712 | 0.1128 |
| Pkm      | _DAVNANWAEVDLR_2                                                                       | #N/A                 | 10.6907 | 10.4474 | 11.0699 | 10.5894 | 10.5121 | 10.7678 | 10.7160 | 10.3403 | 10.6429 | 10.7288 | 1.0068 | 0.0098  | 0.6056 | 0.2178 |
| Pkm      | _LENHEGVR_2                                                                            | #N/A                 | 9.1133  | 9.0973  | 9.2348  | 9.1094  | 9.8315  | 9.2500  | 8.8978  | 9.2110  | 9.2275  | 9.1524  | 1.0163 | 0.0234  | 0.3682 | 0.4339 |
| Pkm      | _INVDDGSLQVK_2                                                                         | #N/A                 | 8.8093  | 8.5461  | 9.0794  | 9.0444  | 8.6333  | 8.9328  | 8.9170  | 8.7137  | 9.9481  | 8.7389  | 1.0007 | 0.0011  | 0.9587 | 0.0183 |
| Pkm      | _C[Carbamidomethyl (C)]DENLWLDYK_2                                                     | #N/A                 | 8.2985  | 7.8180  | 8.3910  | 8.0368  | 7.9994  | 8.4311  | 8.3541  | 7.9737  | 8.2425  | 8.3516  | 0.9917 | -0.0120 | 0.6501 | 0.1870 |
| Pkm      | _GVNIPGAADVLPVASEK_2                                                                   | #N/A                 | 8.5978  | 7.9200  | 8.1071  | 8.7869  | 8.1272  | 8.0781  | 8.1998  | 8.4262  | 8.3789  | 8.9943  | 0.9943 | -0.0082 | 0.7990 | 0.0975 |
| Pkm      | _KAADVHEVR_2                                                                           | #N/A                 | 9.2470  | 7.9530  | 7.8898  | 8.0599  | 8.3186  | 8.5139  | 8.5989  | 7.8513  | 8.4328  | 8.4019  | 1.0011 | 0.0016  | 0.9756 | 0.0107 |
| Pkm      | _EKGDGLFVTEVNGSGLSK_3                                                                  | #N/A                 | 7.5187  | 7.0598  | 7.2078  | 7.3710  | 7.4379  | 7.5723  | 7.6613  | 7.0381  | 7.4502  | 7.5504  | 0.9914 | -0.0124 | 0.6747 | 0.1709 |
| Pkm      | _AADVHEVRK_2                                                                           | #N/A                 | 7.1622  | 6.4757  | 6.4267  | 7.0224  | 6.8303  | 7.3682  | 6.8557  | 6.3269  | 6.9020  | 6.6475  | 1.0296 | 0.0421  | 0.3913 | 0.4075 |
| Pkm      | _AADVHEVR_2                                                                            | #N/A                 | 6.6095  | 6.2944  | 5.7526  | 6.4516  | 6.9856  | 6.4960  | 6.1261  | 6.3140  | 6.4296  | 6.4727  | 1.0152 | 0.0217  | 0.6684 | 0.1750 |
| Pkm      | _GLDIEIPAEK_2                                                                          | #N/A                 | 11.9571 | 11.8686 | 12.0697 | 11.9100 | 11.7195 | 11.9625 | 11.8883 | 11.7730 | 11.7379 | 11.8323 | 1.0090 | 0.0130  | 0.1402 | 0.8533 |
| Pkm      | _M[Oxidation (M)]QHUIAR_2                                                              | #N/A                 | 8.5748  | 9.044   |         |         |         |         |         |         |         |         |        |         |        |        |



|         |                                                                       |                       |         |         |         |         |         |         |         |         |         |         |         |         |        |        |
|---------|-----------------------------------------------------------------------|-----------------------|---------|---------|---------|---------|---------|---------|---------|---------|---------|---------|---------|---------|--------|--------|
| Pkm     | __GGSTAELVK_2                                                         | #N/A                  | 4.0879  | 3.1382  | 3.2739  | 6.2499  | 3.2136  | 3.5981  | 3.4912  | 4.3419  | 3.9905  | 3.7436  | 1.0090  | 0.0130  | 0.9565 | 0.0193 |
| Pkm     | _FDBLEASDGMVAR_2                                                      | #N/A                  | 3.3762  | 4.1325  | 3.1099  | 4.2831  | 4.0208  | 4.1046  | 3.9978  | 3.8354  | 3.4839  | 4.2501  | 0.9861  | -0.0201 | 0.8489 | 0.0712 |
| Ndfuf6  | _TGTC[Carbamidomethyl (C)]QY[C[Carbamidomethyl (C)]GLQFK_2            | #N/A                  | 5.4200  | 5.3594  | 4.0981  | 5.7014  | 4.0378  | 5.3617  | 4.9384  | 4.7721  | 5.1323  | 5.4561  | 0.9846  | -0.0224 | 0.8460 | 0.0726 |
| Ndfuf6  | _EVNFENAIQIAQPVNEVHR_3                                                | #N/A                  | 3.8833  | 3.5627  | 3.6170  | 3.1608  | 4.2146  | 3.7560  | 4.6363  | 3.0856  | 4.1394  | 3.3822  | 0.9707  | -0.0430 | 0.7449 | 0.1279 |
| Ndfuf6  | _THTQGVDEK_2                                                          | #N/A                  | 5.8505  | 5.6484  | 5.0371  | 5.7206  | 6.3800  | 5.4707  | 5.5796  | 5.3740  | 5.2132  | 5.6443  | 1.0425  | 0.0601  | 0.3602 | 0.4435 |
| Ndfuf6  | __VYINLDEKTK_2                                                        | #N/A                  | 6.4165  | 6.3449  | 6.7965  | 6.7238  | 7.1267  | 6.8371  | 6.4569  | 6.5856  | 6.5747  | 6.5633  | 1.0248  | 0.0354  | 0.3079 | 0.5115 |
| Ndfuf6  | _IIAC[Carbamidomethyl (C)]DGGGALGHPK_2                                | #N/A                  | 5.3612  | 5.4358  | 5.2839  | 5.8487  | 6.4886  | 5.3743  | 5.2639  | 5.5782  | 5.5909  | 5.3260  | 1.0354  | 0.0501  | 0.4577 | 0.3394 |
| Ndfuf6  | _QKEVENENAIQIAQPVNEVHR_4                                              | #N/A                  | 3.7627  | 3.3181  | 3.4963  | 3.8967  | 4.7176  | 4.4667  | 3.6114  | 4.2601  | 4.3485  | 0.9624  | -0.0553 | 0.6705  | 0.1736 | 0.1736 |
| Fgd1    | _ALRFS[Phospho (STY)]HLG[S[Phospho (STY)]QPR_2                        | P52734_S98_M2_Fgd1    | 8.8079  | 8.7414  | 7.8797  | 9.1130  | 8.2800  | 8.1561  | 9.6518  | 8.0519  | 8.3849  | 8.8763  | 0.9720  | -0.0410 | 0.5189 | 0.2849 |
| Fgd1    | _SLS[Phospho (STY)]LPGQSLEPHPEGQPR_3                                  | #N/A                  | 3.9887  | 2.9531  | 6.3109  | 3.9622  | 5.9207  | 3.7837  | 5.6146  | 6.0547  | 3.8053  | 0.7802  | 0.7802  | 0.2010  | 0.6967 | 0.6967 |
| Fgd1    | _LLNSTNRDDEDT[Phospho (STY)]PPNSPNVDLGK_3                             | P52734_T710_M1_Fgd1   | 3.5904  | 3.6357  | 4.2772  | 3.2791  | 3.5240  | 3.1006  | 4.4946  | 3.3386  | 5.3312  | 3.2461  | 0.8697  | -0.2015 | 0.2633 | 0.5796 |
| Fgd1    | _QES[Phospho (STY)]VELTVQK_2                                          | P52734_S364_M1_Fgd1   | 4.0627  | 3.3181  | 3.7963  | 3.3401  | 3.2064  | 3.4182  | 3.4884  | 3.6611  | 3.9601  | 3.0174  | 0.9977  | -0.0033 | 0.9728 | 0.1120 |
| Rida    | __AAYQVAALPR_2                                                        | #N/A                  | 7.4322  | 7.9731  | 7.8490  | 7.6239  | 8.2739  | 7.8522  | 7.6817  | 8.2071  | 7.8792  | 7.9104  | 0.9892  | -0.0157 | 0.6299 | 0.2008 |
| Rida    | _AAPAIGFSQAVQVDR_2                                                    | #N/A                  | 6.9158  | 6.8174  | 7.2820  | 7.8517  | 7.6709  | 7.3711  | 7.5497  | 7.4660  | 7.1274  | 6.9533  | 1.0061  | 0.0087  | 0.8562 | 0.0674 |
| Rida    | _AAGC[Carbamidomethyl (C)]DFNNVVK_2                                   | #N/A                  | 5.9206  | 5.7772  | 6.1404  | 5.6496  | 5.9706  | 5.1303  | 5.3967  | 5.9796  | 5.0867  | 5.2824  | 1.0604  | 0.0846  | 0.2009 | 0.6970 |
| Rida    | _TYFGSLPAR_2                                                          | #N/A                  | 6.6104  | 7.4891  | 7.7253  | 6.8734  | 7.6096  | 7.4222  | 7.4496  | 7.2870  | 7.1797  | 6.7260  | 1.0178  | 0.0255  | 0.6332 | 0.1985 |
| Rida    | _TTVLADM[Oxidation (M)]NDFGTWNEYK_2                                   | #N/A                  | 4.5825  | 5.1319  | 5.3762  | 5.3009  | 5.0893  | 5.3676  | 3.8239  | 4.9688  | 4.4305  | 5.0692  | 1.1243  | 0.1690  | 0.0709 | 1.1491 |
| Rida    | _TIYSGVGVLPGSGQLVPGGVVEAK_3                                           | #N/A                  | 3.5572  | 4.3135  | 3.2909  | 4.3355  | 4.1214  | 3.9236  | 3.8168  | 4.1665  | 2.9647  | 4.0128  | 1.0491  | 0.0691  | 0.5611 | 0.2510 |
| HmgA2   | _KPAQETETSSQES[Phospho (STY)]AEED_2                                   | P52927_S104_M1_HmgA2  | 3.0073  | 3.8125  | 3.4692  | 4.1967  | 3.3050  | 4.0957  | 3.9114  | 3.9217  | 3.5703  | 4.1637  | 0.9373  | -0.0934 | 0.3699 | 0.4319 |
| Dbt     | _SDSGEGR_2                                                            | #N/A                  | 4.2826  | 5.2384  | 4.6599  | 4.8468  | 5.0470  | 3.9099  | 5.2827  | 5.0791  | 4.7426  | 5.1080  | 0.9230  | -0.1156 | 0.1844 | 0.7342 |
| Cux1    | _AAS[Phospho (STY)]KEEFEEWF_2                                         | P53564_S1506_M1_Cux1  | 6.1440  | 6.0309  | 6.3175  | 6.5114  | 6.2890  | 6.4974  | 6.3892  | 6.7157  | 6.6772  | 6.3495  | 0.9641  | -0.0527 | 0.0925 | 1.0340 |
| Limk1   | _SC[Carbamidomethyl (C)]S[Phospho (STY)]DTSPTGSLASPASQR_2             | P53668_S298_M1_Limk1  | 3.7936  | 3.6937  | 6.5044  | 6.1402  | 4.5439  | 5.6489  | 3.7452  | 3.4483  | 5.5810  | 5.2836  | 1.1203  | 0.1638  | 0.4905 | 0.3094 |
| Limk1   | _VGVGDPGSC[Carbamidomethyl (C)]M[Oxidation (M)]S[Phospho (STY)]PDVK_2 | #N/A                  | 6.9744  | 6.5477  | 6.4231  | 7.0728  | 5.7035  | 5.7594  | 6.8179  | 5.6933  | 5.8522  | 6.0724  | 1.0499  | 0.0702  | 0.4180 | 0.3788 |
| Sox1    | _SEPGS[Phospho (STY)]PPAPASR_2                                        | P53783_S325_M1_Sox1   | 8.6372  | 9.3446  | 3.4393  | 9.9810  | 9.0757  | 7.9637  | 9.5146  | 8.9658  | 8.2933  | 4.1612  | 1.0439  | 0.0620  | 0.8314 | 0.0802 |
| Pitpna  | __LFTNFHR_2                                                           | #N/A                  | 6.6372  | 7.0023  | 6.3600  | 6.8172  | 6.8711  | 6.7257  | 6.6685  | 6.5760  | 6.5458  | 6.3977  | 1.0288  | 0.0410  | 0.1603 | 0.7952 |
| Pitpna  | _LEPEAWK_2                                                            | #N/A                  | 5.9297  | 3.2978  | 3.9474  | 5.6231  | 5.8749  | 5.3185  | 4.9102  | 5.8229  | 5.6078  | 5.5836  | 0.9120  | -0.1330 | 0.4341 | 0.3624 |
| Pitpna  | _VENFHK_2                                                             | #N/A                  | 6.0433  | 5.3611  | 3.8049  | 5.1574  | 5.6123  | 5.3512  | 5.2145  | 5.7746  | 5.2905  | 5.1670  | 0.9739  | -0.0381 | 0.7371 | 0.1325 |
| Pitpna  | _VILPVSDEYGVQLYSVAEAK_3                                               | #N/A                  | 3.4172  | 4.9398  | 6.1354  | 5.6549  | 4.0618  | 5.6188  | 5.0235  | 4.9220  | 4.9551  | 5.4672  | 0.9763  | -0.0346 | 0.8300 | 0.0809 |
| Pitpna  | _NETGGGGEVLEVPKEKIDGEGSYTHK_4                                         | #N/A                  | 4.9813  | 5.2935  | 5.1750  | 5.1509  | 5.3046  | 4.7597  | 5.1266  | 4.4407  | 4.9739  | 5.1016  | 1.0316  | 0.0449  | 0.4061 | 0.3914 |
| Pitpna  | _HVEAYDIADR_2                                                         | #N/A                  | 3.1820  | 4.0442  | 3.8688  | 4.2914  | 3.9325  | 4.1929  | 4.0861  | 3.7471  | 4.5140  | 4.3384  | 0.9394  | -0.0902 | 0.3234 | 0.4902 |
| Pitpna  | _MAPEGALNIHEK_3                                                       | #N/A                  | 4.0527  | 3.1735  | 3.2386  | 3.7413  | 3.0618  | 3.5628  | 3.4560  | 4.3772  | 4.0258  | 3.7083  | 0.8921  | -0.1648 | 0.1324 | 0.8781 |
| Slc16a1 | _SDANTDLUGGS[Phospho (STY)]PK_2                                       | #N/A                  | 9.6453  | 9.4567  | 9.6548  | 9.5048  | 8.5570  | 9.4126  | 10.3054 | 9.6558  | 9.5646  | 9.4046  | 0.9629  | -0.0545 | 0.2055 | 0.6873 |
| Slc16a1 | _SKE[Phospho (STY)]LEAGK_2                                            | #N/A                  | 8.9447  | 8.4616  | 8.9026  | 8.9393  | 7.8832  | 8.7420  | 9.2462  | 9.2182  | 8.7377  | 8.5271  | 0.9669  | -0.0485 | 0.2773 | 0.5571 |
| Slc16a1 | _EGKED[AS[Phospho (STY)]T[Phospho (STY)]DVEKPK_2                      | #N/A                  | 6.1740  | 5.4328  | 5.2774  | 5.3262  | 4.5550  | 5.4419  | 5.9037  | 5.3316  | 5.7936  | 4.9689  | 0.9761  | -0.0349 | 0.6859 | 0.1637 |
| Slc16a1 | _LKS[Phospho (STY)]KES[Phospho (STY)]LEAGK_2                          | #N/A                  | 6.8840  | 8.4608  | 8.8567  | 8.8426  | 7.6567  | 8.4647  | 9.1342  | 8.9289  | 8.5615  | 8.4567  | 0.9685  | -0.0461 | 0.3183 | 0.4972 |
| Slc16a1 | _AASQPSHQSSGDPTEES[Phospho (STY)]PV_2                                 | #N/A                  | 8.2545  | 8.3114  | 8.7775  | 8.4917  | 7.0253  | 8.0088  | 8.9271  | 8.6064  | 8.2611  | 8.1520  | 0.9597  | -0.0593 | 0.3426 | 0.4653 |
| Slc16a1 | _SDANTDLUGGS[Phospho (STY)]PKGEK_2                                    | #N/A                  | 6.0224  | 7.0755  | 7.8728  | 7.2541  | 5.3380  | 6.5074  | 7.0902  | 7.0826  | 6.6535  | 6.2720  | 0.9858  | -0.0206 | 0.6708 | 0.0708 |
| Slc16a1 | _S[Phospho (STY)]KESLEAGKSDANTDLUGSPK_3                               | #N/A                  | 4.1312  | 3.2576  | 3.6299  | 4.1341  | 3.2664  | 3.1582  | 3.5463  | 4.0085  | 3.9244  | 3.4618  | 0.9628  | -0.0547 | 0.5954 | 0.2252 |
| Rab2a   | __YIICDTEGVK_2                                                        | #N/A                  | 6.9163  | 6.5425  | 6.8742  | 6.2355  | 5.8248  | 6.5050  | 7.0307  | 6.9475  | 6.5639  | 6.2462  | 0.9680  | -0.0469 | 0.4231 | 0.3735 |
| Rab2a   | _TASNVFAFNTM_2                                                        | #N/A                  | 6.9319  | 6.3216  | 6.7528  | 6.5990  | 6.4180  | 6.3725  | 6.9916  | 6.8715  | 6.6016  | 6.4538  | 0.9757  | -0.0355 | 0.3263 | 0.4864 |
| Rab2a   | _IQEGVDFINNEANGIK_2                                                   | #N/A                  | 6.5274  | 6.4351  | 6.8645  | 6.5714  | 5.9663  | 6.0935  | 6.8601  | 6.8307  | 6.6974  | 5.9835  | 0.9722  | -0.0407 | 0.4569 | 0.3402 |
| Rab2a   | _LQWDWTAGQESFR_2                                                      | #N/A                  | 6.0105  | 5.8264  | 6.3193  | 5.6165  | 4.7252  | 5.9621  | 6.0827  | 6.1844  | 5.8465  | 5.7030  | 0.9642  | -0.0526 | 0.4885 | 0.3112 |
| Rab2a   | _DTNHLTTWLEDAIR_2                                                     | #N/A                  | 6.3702  | 5.9911  | 5.8859  | 6.2804  | 5.1363  | 6.0880  | 6.1726  | 6.4297  | 5.6417  | 5.1803  | 1.0175  | 0.0250  | 0.7530 | 0.1232 |
| Anapc1  | _SFDFEGLS[Phospho (STY)]PVAPK_2                                       | P53995_S688_M1_Anapc1 | 6.1855  | 6.6875  | 7.2038  | 3.6255  | 5.7046  | 6.4552  | 7.1148  | 6.9690  | 6.1272  | 0.8739  | -0.1945 | 0.2329  | 0.2329 | 0.2329 |
| Idh2    | _ATDFVDR_2                                                            | #N/A                  | 6.4080  | 6.5307  | 6.7336  | 6.3961  | 6.5132  | 6.8959  | 5.9051  | 6.9540  | 6.1461  | 6.3518  | 1.0379  | 0.0537  | 0.2722 | 0.5651 |
| Idh2    | _KLDGNGQDUR_2                                                         | #N/A                  | 6.4366  | 6.1287  | 6.3460  | 6.2470  | 6.2380  | 5.9152  | 6.6026  | 6.1705  | 6.5203  | 6.4503  | 0.9686  | -0.0461 | 0.1210 | 0.9171 |
| Idh2    | _LNHFLNTDFLDTIK_3                                                     | #N/A                  | 6.0178  | 6.1564  | 6.3096  | 6.3200  | 5.7664  | 5.0932  | 5.8578  | 5.7518  | 5.6015  | 6.1269  | 1.0188  | 0.0268  | 0.6767 | 0.1696 |
| Idh2    | _YFDGLPKNR_2                                                          | #N/A                  | 5.6608  | 6.2227  | 3.2377  | 6.0277  | 5.5098  | 5.8213  | 4.4306  | 5.7465  | 5.7629  | 4.9013  | 1.0390  | 0.0552  | 0.7504 | 0.1247 |
| Idh2    | _DQTHNQDVIDSALATQK_2                                                  | #N/A                  | 3.0928  | 3.8980  | 3.7796  | 6.1635  | 5.5866  | 5.0240  | 3.9970  | 3.8362  | 5.0901  | 5.9440  | 0.9733  | -0.0391 | 0.8655 | 0.0627 |
| Idh2    | _TIEAEAAHGTVTR_2                                                      | #N/A                  | 4.2900  | 4.8775  | 3.4760  | 4.8585  | 3.2948  | 3.7449  | 3.9959  | 4.5122  | 4.0892  | 0.9977  | -0.0033 | 0.9804  | 0.0866 | 0.0866 |
| Idh2    | _FAQTLEK_2                                                            | #N/A                  | 3.8759  | 3.4665  | 3.6095  | 3.1533  | 3.0196  | 2.9408  | 3.3016  | 3.8479  | 4.1469  | 4.3314  | 0.8560  | -0.2244 | 0.0610 | 1.2149 |
| Stmn1   | _DKHVEEVRIK_2                                                         | #N/A                  | 9.4692  | 7.7074  | 7.5396  | 8.1014  | 7.5280  | 9.1616  | 9.7719  | 7.6205  | 8.4593  | 9.1752  | 0.9423  | -0.0858 | 0.4013 | 0.3966 |
| Stmn1   | _EHKEVELQK_2                                                          | #N/A                  | 6.3501  | 6.9221  | 6.9461  | 6.3658  | 7.4357  | 7.1709  | 5.6053  | 6.2784  | 6.5277  | 6.9239  | 1.0839  | 0.1162  | 0.1265 | 0.8990 |
| Stmn1   | _SKESVPDFPLS[Phospho (STY)]PPKK_3                                     | #N/A                  | 5.4701  | 7.8253  | 7.9931  | 9.0837  | 6.8824  | 6.2201  | 7.4050  | 7.7764  | 6.7694  | 6.5615  | 1.0165  | 0.0236  | 0.8716 | 0.0597 |
| Stmn1   | _SHEAEVLK_2                                                           | #N/A                  | 8.6415  | 8.0949  | 8.3079  | 8.8076  | 8.0535  | 8.5137  | 8.2514  | 7.1103  | 8.5733  | 8.7664  | 1.0279  | 0.0997  | 0.5110 | 0.2916 |
| Stmn1   | _ESVPDFPLS[Phospho (STY)]PPKK_3                                       | #N/A                  | 8.9863  | 9.7467  | 10.2478 | 10.4448 | 9.5253  | 9.3453  | 9.6190  | 9.6608  | 8.9745  | 9.1271  | 1.0397  | 0.0561  | 0.2703 | 0.5682 |
| Stmn1   | _ASGQAFELLS[Phospho (STY)]PR_2                                        | #N/A                  | 10.6309 | 11.6153 | 12.1251 | 12.6777 | 11.3529 | 11.1369 | 11.3730 | 11.6347 | 11.6447 | 10.9526 | 1.0165  | 0.0237  | 0.6443 | 0.1909 |
| Stmn1   | _SKESVPDFPLS[Phospho (STY)]PPK_2                                      | #N/A                  | 5.8179  | 8.1626  | 13.7271 | 13.9568 | 12.9690 | 13.1101 | 13.4681 | 13.1151 | 13.3203 | 13.2491 | 0.8497  | -0.2350 | 0.2873 | 0.5416 |
| Stmn1   | _RKS[Phospho (STY)]HEAEVLK_2                                          | #N/A                  | 10.1311 | 10.0643 | 10.9225 | 11.1175 | 10.3222 | 10.7732 | 9.9709  | 10.3372 | 10.6321 | 10.7519 | 1.0127  | 0.0182  | 0.6301 | 0.2006 |
| Stmn1   | _KSHEAEVLK_2                                                          | #N/A                  | 5.1173  | 4.9734  | 3.1648  | 4.2094  | 5.1295  | 4.7350  | 5.4936  | 4.6317  | 4.9443  | 4.5512  | 0.9286  | -0.1069 | 0.4328 | 0.3637 |
| Stmn1   | _NKE[Phospho (STY)]KQPADETD_2                                         | P54227_S139_M1_Stmn1  | 5.8568  | 7.1428  | 7.5343  | 7.7033  | 7.3115  | 7.0869  | 6.1641  | 6.9544  | 6.3907  | 6.9282  | 1.0749  | 0.1041  | 0.2158 | 0.6659 |
| Stmn1   | _REHEKEVLQK_3                                                         | #N/A                  | 3.4616  | 4.2668  | 4.1484  | 3.1503  | 6.3289  | 3.7375  | 6.3193  | 3.4674  | 6.7304  | 5.4856  | 0.8706  | -0.1999 | 0.5106 | 0.2919 |
| Stmn1   | _Acetyl (Protein N-term)ASSDQVKELEKR_3                                | #N/A                  | 4.2608  | 4.2775  | 3.9462  | 5.6056  | 4.8731  | 4.0863  | 4.7217  | 3.9804  | 3.6289  | 4.7709  | 1.0544  | 0.0765  | 0.5655 | 0.1779 |
| Stmn1   | _RAS[Phospho (STY)]GQAFELLS[Phospho (STY)]PR_2                        | #N/A                  | 5.3     |         |         |         |         |         |         |         |         |         |         |         |        |        |



|         |                                                         |                        |         |         |         |         |         |         |         |         |         |         |        |         |         |        |
|---------|---------------------------------------------------------|------------------------|---------|---------|---------|---------|---------|---------|---------|---------|---------|---------|--------|---------|---------|--------|
| Lipe    | _TTS[Phospho (STY)]PTAESVRPTESMR_3                      | P54310_5542_M1_Lipe    | 4.2443  | 3.5486  | 3.4302  | 4.5721  | 3.3700  | 4.3595  | 3.2195  | 4.1856  | 4.2290  | 3.8999  | 1.0096 | 0.0138  | 0.9121  | 0.0400 |
| Rad23a  | _NENLAAANFLSQNFDDC_2                                    | #N/A                   | 2.9242  | 4.9563  | 4.1587  | 5.7145  | 4.1571  | 3.0559  | 4.0561  | 4.3771  | 4.9150  | 5.1507  | 0.8998 | -0.1524 | 0.4500  | 0.3468 |
| Rad23b  | _LDIDPEETVK_2                                           | #N/A                   | 7.5073  | 7.1036  | 7.6470  | 7.6386  | 7.6634  | 7.2700  | 6.7565  | 6.9627  | 7.0687  | 7.0127  | 1.0750 | 0.1044  | 0.0040  | 2.3558 |
| Rad23b  | _ASNNPDR_2                                              | #N/A                   | 6.7933  | 6.4647  | 5.5881  | 6.3631  | 7.0063  | 6.2723  | 6.0004  | 6.0781  | 6.4639  | 6.6806  | 1.0173 | 0.0247  | 0.7082  | 0.1498 |
| Rad23b  | _TLQOQTK_2                                              | #N/A                   | 4.7801  | 4.9876  | 4.6807  | 4.5681  | 5.5298  | 5.0230  | 4.6240  | 4.8234  | 5.3255  | 4.9874  | 0.9976 | -0.0035 | 0.9564  | 0.0193 |
| Rad23b  | _NENLAAANFLQONFDD_2                                     | #N/A                   | 5.8212  | 3.4537  | 3.3353  | 5.6032  | 6.0356  | 5.2458  | 3.5527  | 3.1505  | 3.9291  | 5.8897  | 1.1901 | 0.2511  | 0.3443  | 0.4631 |
| Rad23b  | _CHIQGNPSLPAQQIGR_3                                     | #N/A                   | 4.0102  | 3.9053  | 3.3828  | 4.0928  | 3.7817  | 3.8291  | 3.5817  | 3.9528  | 3.5398  | 3.8715  | 1.0260 | 0.0371  | 0.5374  | 0.2697 |
| Faf1    | _RTS[Phospho (STY)]PVCITR_2                             | P54731_S269_M1_Faf1    | 9.2024  | 9.3555  | 9.7085  | 9.3460  | 8.3872  | 9.0126  | 9.5579  | 9.4188  | 9.2609  | 9.2267  | 0.9800 | -0.2292 | 0.4624  | 0.3350 |
| Faf1    | _TPS[Phospho (STY)]GEFLR_2                              | P54731_S581_M1_Faf1    | 3.5555  | 4.3607  | 4.2423  | 3.2441  | 4.1820  | 3.5475  | 3.9083  | 6.2137  | 3.0221  | 3.2111  | 0.9429 | -0.0848 | 0.7189  | 0.1433 |
| Ephb3   | _FLEDDPSDPTTYS[Phospho (STY)]LGGK_2                     | P54754_S790_M1_Ephb3   | 4.0262  | 3.3305  | 6.2003  | 3.7148  | 3.1518  | 3.0768  | 3.4295  | 4.4037  | 5.5645  | 3.6818  | 0.8666 | -0.2066 | 0.4843  | 0.3149 |
| Ephb2   | _FLEDDTS[Phospho (STY)]DPTYSAUGKC_2                     | P54763_S776_M1_Ephb2   | 3.6606  | 2.9401  | 3.9370  | 4.0070  | 3.7119  | 3.6400  | 3.9907  | 3.7114  | 3.7982  | 3.7802  | 0.9553 | -0.0660 | 0.4161  | 0.3808 |
| Pumc4   | _ENAPAHIFIDDAATK_2                                      | #N/A                   | 3.7178  | 3.2752  | 3.4515  | 4.4961  | 3.9349  | 3.3384  | 3.1435  | 2.6744  | 4.3050  | 3.6258  | 1.0771 | 0.1072  | 0.4850  | 0.3142 |
| Pumc4   | _LQQLLEFLVEEYKDEQK_3                                    | #N/A                   | 3.8764  | 3.1808  | 6.6112  | 6.2264  | 3.0021  | 3.2265  | 3.5873  | 5.0597  | 3.8612  | 5.3723  | 0.9740 | -0.0380 | 0.9006  | 0.0454 |
| Slc12a2 | _GEGTPAAGDGLRPLGPTPS[Phospho (STY)]QSR_3                | #N/A                   | 3.4175  | 8.4060  | 3.7239  | 4.3635  | 7.3132  | 3.8650  | 8.5684  | 3.8448  | 3.7344  | 7.8815  | 0.8625 | -0.2133 | 0.5940  | 0.2262 |
| Slc12a2 | _PLGPTPS[Phospho (STY)]QSR_2                            | #N/A                   | 3.1644  | 4.0617  | 3.8512  | 4.3539  | 3.7910  | 4.1754  | 4.0686  | 7.7906  | 3.4132  | 7.5592  | 0.6832 | -0.5496 | 0.0876  | 1.0577 |
| Slc12a2 | _KES[Phospho (STY)]KGPIVPLNVADQK_3                      | P55012_S987_M1_Slc12a2 | 5.7134  | 5.1838  | 5.8696  | 5.6571  | 2.9527  | 4.3748  | 6.1145  | 6.1997  | 5.2958  | 5.2903  | 0.8661 | -0.2074 | 0.2416  | 0.6169 |
| Slc12a2 | _S[Phospho (STY)]PGTKDWWVNDYVK_2                        | P55012_S937_M1_Slc12a2 | 4.1157  | 3.1104  | 3.3017  | 3.8043  | 5.2377  | 6.2498  | 3.5190  | 6.5157  | 6.0540  | 6.1307  | 0.7747 | -0.3683 | 0.1670  | 0.7772 |
| Ncan    | _ELGGEVYVGGAR_2                                         | #N/A                   | 6.6621  | 6.9402  | 7.0342  | 7.2729  | 6.8909  | 7.3245  | 6.8241  | 6.8359  | 7.0524  | 6.7248  | 1.0235 | 0.0336  | 0.2753  | 0.5602 |
| Ncan    | _LSSATIAAPR_2                                           | #N/A                   | 6.7031  | 7.1507  | 6.5835  | 7.0161  | 7.5634  | 6.5795  | 6.6297  | 6.6540  | 6.9473  | 6.6309  | 1.0323 | 0.0459  | 0.3249  | 0.4882 |
| Ncan    | _FDAYC[Carbamidomethyl (C)]FR_2                         | #N/A                   | 6.5413  | 6.1850  | 6.5247  | 6.1608  | 6.7310  | 6.0252  | 5.3130  | 6.2634  | 6.4829  | 6.7210  | 1.0268 | 0.0382  | 0.5712  | 0.2432 |
| Ncan    | _YSLPAYPR_2                                             | #N/A                   | 7.4067  | 7.5442  | 7.7851  | 7.6105  | 7.8640  | 7.2552  | 7.1110  | 7.6640  | 7.4756  | 7.4072  | 1.0220 | 0.0314  | 0.3013  | 0.5210 |
| Ncan    | _YPIQTFR_2                                              | #N/A                   | 6.7973  | 7.2861  | 7.1203  | 7.3287  | 7.3012  | 6.9750  | 6.8328  | 7.1131  | 7.0107  | 7.1139  | 1.0167 | 0.0239  | 0.3609  | 0.4427 |
| Ncan    | _AALAEI VALPC[Carbamidomethyl (C)]FTLQPR_2              | #N/A                   | 3.5790  | 4.2775  | 3.0532  | 4.8168  | 3.7451  | 3.8137  | 4.0944  | 4.2662  | 3.9980  | 3.2168  | 0.9967 | -0.0048 | 0.9721  | 0.0123 |
| Ncan    | _YPTQSR_2                                               | #N/A                   | 3.0680  | 5.7833  | 4.3025  | 4.9785  | 6.3834  | 5.7349  | 5.4677  | 5.5323  | 5.7375  | 5.5176  | 0.9062 | -0.1421 | 0.4224  | 0.3743 |
| Ncan    | _YQC[Carbamidomethyl (C)]DEGFSQHR_2                     | #N/A                   | 4.6751  | 4.6598  | 4.9993  | 5.3238  | 5.5429  | 5.7539  | 4.1422  | 4.6915  | 5.1636  | 5.1576  | 1.0416 | 0.0588  | 0.5875  | 0.2310 |
| Ncan    | _ASDGGLYR_2                                             | #N/A                   | 5.4410  | 5.2191  | 4.0334  | 3.5772  | 5.7235  | 3.1811  | 3.0743  | 5.1987  | 5.5327  | 5.0511  | 0.9608 | -0.0577 | 0.7983  | 0.0978 |
| Ncan    | _YNNHATVR_2                                             | #N/A                   | 3.6833  | 6.3376  | 5.3848  | 5.7151  | 6.1442  | 6.2135  | 5.0333  | 5.3396  | 5.4258  | 5.8188  | 1.0325 | 0.0461  | 0.7462  | 0.1271 |
| Ncan    | _DFQWTDNTGLQYENWR_2                                     | #N/A                   | 3.5692  | 3.7732  | 5.1890  | 4.3475  | 3.9832  | 4.1350  | 4.4958  | 4.6152  | 4.2957  | 3.2778  | 0.9988 | -0.0017 | 0.9899  | 0.0044 |
| Ncan    | _C[Carbamidomethyl (C)]GGPAPGVR_2                       | #N/A                   | 3.0066  | 4.4244  | 3.6934  | 4.1960  | 5.4992  | 4.0964  | 3.9107  | 5.0722  | 5.2879  | 5.2508  | 0.8509 | -0.2330 | 0.1794  | 0.7462 |
| Ncan    | _HLQAAEEDGFDC[Carbamidomethyl (C)]DAGWLSDR_3            | #N/A                   | 4.4934  | 5.3015  | 4.4886  | 5.5317  | 4.9627  | 5.3688  | 5.8182  | 2.8175  | 4.7089  | 4.5483  | 1.1232 | 0.1676  | 0.3388  | 0.4700 |
| Ncan    | _FINSFGHNSWGLNDR_3                                      | #N/A                   | 6.1669  | 5.9594  | 6.5037  | 6.0230  | 6.2750  | 5.9556  | 6.1600  | 5.0076  | 6.0530  | 6.4221  | 1.0400 | 0.0566  | 0.50926 | 0.3926 |
| Ncan    | _QDQLVLVAK_2                                            | #N/A                   | 4.0066  | 3.2620  | 3.7402  | 3.2840  | 3.1503  | 3.4743  | 3.4323  | 3.7172  | 4.0162  | 2.9613  | 0.9871 | -0.0187 | 0.8567  | 0.0672 |
| Ncan    | _AQGM(Oxidation (M))PTLST[Phospho (STY)]SEGHPPEK_3      | P55066_S869_M1_Ncan    | 3.3646  | 4.1209  | 4.5991  | 4.2947  | 4.0092  | 4.1163  | 4.0094  | 3.8237  | 3.4723  | 4.0094  | 1.0494 | 0.0696  | 0.4577  | 0.3394 |
| Aqp4    | _GSYM(Oxidation (M))IEVDNR_2                            | #N/A                   | 8.6147  | 8.6905  | 9.2380  | 8.0086  | 7.7629  | 8.3184  | 8.4213  | 8.2636  | 7.9246  | 8.7186  | 1.0128 | 0.0184  | 0.7301  | 0.1366 |
| Tyro3   | _AEQPTESG[Phospho (STY)]PEVHC[Carbamidomethyl (C)]GER_2 | P55144_S808_M1_Tyro3   | 4.0578  | 3.3132  | 3.7914  | 3.6016  | 3.2015  | 3.4231  | 3.3163  | 3.0160  | 4.1655  | 3.5686  | 1.0137 | 0.0196  | 0.8535  | 0.0688 |
| Sh3bp1  | _ERTEADLPKPTS[Phospho (STY)]PK_3                        | P55194_S535_M1_Sh3bp1  | 3.3979  | 7.3580  | 8.8548  | 8.8272  | 4.0244  | 3.7051  | 8.0847  | 3.5311  | 8.6971  | 8.6905  | 0.8313 | -0.1665 | 0.4812  | 0.3177 |
| Sh3bp1  | _DNHSQADHS[Phospho (STY)]PUTAAPFSR_3                    | P55194_S262_M1_Sh3bp1  | 6.8745  | 7.3071  | 7.8568  | 7.7637  | 6.3254  | 7.1471  | 7.3691  | 7.1242  | 6.9596  | 6.9491  | 1.0158 | 0.0226  | 0.7204  | 0.1424 |
| Rab8a   | _KLEGN[Phospho (STY)]PGQS[Phospho (STY)]SHGVK_2         | #N/A                   | 5.7542  | 5.3093  | 6.6035  | 5.2751  | 4.5452  | 5.7462  | 6.0447  | 5.9086  | 6.3673  | 5.9123  | 0.9143 | -0.1293 | 0.1858  | 0.7310 |
| Rab8a   | _LEGNS[Phospho (STY)]PGQS[Phospho (STY)]SHGVK_2         | #N/A                   | 7.6784  | 7.9263  | 8.2434  | 7.8586  | 6.8976  | 7.8592  | 8.2359  | 8.0511  | 7.8252  | 7.8068  | 0.9704 | -0.0433 | 0.3643  | 0.4385 |
| Adk     | _VAQWLQGEPHK_2                                          | #N/A                   | 3.6911  | 4.4087  | 4.0874  | 3.5644  | 3.7025  | 3.6477  | 4.3767  | 4.0631  | 4.3650  | 3.7519  | 0.9302 | -0.1044 | 0.1951  | 0.7098 |
| Adk     | _YAAENNR_2                                              | #N/A                   | 3.2376  | 4.1048  | 4.4721  | 4.0158  | 3.9262  | 3.8033  | 4.1641  | 2.9853  | 3.2844  | 3.6931  | 1.1118 | 0.1529  | 0.2102  | 0.6774 |
| Cdh11   | _LADLYGS[Phospho (STY)]KDTFDDDS_2                       | P55288_S788_M1_Cdh11   | 4.6007  | 7.9078  | 7.5090  | 8.4479  | 6.9260  | 7.5850  | 8.4178  | 8.2346  | 7.7865  | 7.7005  | 0.8915 | -0.1658 | 0.2498  | 0.6024 |
| Cdh11   | _PLGRPAPNS[Phospho (STY)]VDVDFNTR_3                     | P55288_S714_M1_Cdh11   | 3.3618  | 3.8644  | 4.0486  | 5.5435  | 3.7527  | 4.3728  | 4.2659  | 4.4312  | 3.2158  | 3.0174  | 1.1138 | 0.1555  | 0.4016  | 0.3962 |
| Lrpap1  | _LQEVNVLDTLSR_2                                         | #N/A                   | 4.5896  | 4.1481  | 4.1988  | 4.5641  | 4.8223  | 4.4388  | 4.4098  | 4.2220  | 4.4479  | 4.6143  | 1.0083 | 0.0120  | 0.8058  | 0.0938 |
| Lrpap1  | _RES[Phospho (STY)]GEEFR_2                              | P55302_S53_M1_Lrpap1   | 4.6996  | 3.1562  | 4.0642  | 5.0555  | 5.0114  | 4.9863  | 4.4501  | 4.0779  | 4.6954  | 4.5553  | 1.0114 | 0.0164  | 0.9017  | 0.0450 |
| Stmn2   | _DLS[Phospho (STY)]LEEIQK_2                             | #N/A                   | 14.0876 | 13.9763 | 14.7653 | 14.4232 | 13.7861 | 14.2212 | 14.2867 | 14.0970 | 14.1445 | 14.1445 | 1.0089 | 0.0128  | 0.5365  | 0.2705 |
| Stmn2   | _DLS[Phospho (STY)]LEEIQK_2                             | #N/A                   | 13.0628 | 13.2959 | 14.1675 | 13.8552 | 13.1571 | 13.4250 | 13.6132 | 13.1458 | 13.2895 | 13.3660 | 1.0105 | 0.0151  | 0.5638  | 0.2489 |
| Stmn2   | _KLEAAEER_2                                             | #N/A                   | 8.2308  | 8.0236  | 8.4417  | 8.3677  | 9.1397  | 8.4750  | 8.1079  | 8.5294  | 8.4294  | 8.4294  | 1.0075 | 0.0390  | 0.3582  | 0.4459 |
| Stmn2   | _KDS[Phospho (STY)]LEEIQK_2                             | #N/A                   | 3.6973  | 6.4473  | 6.8227  | 7.1636  | 7.1025  | 6.8117  | 6.9977  | 6.2644  | 6.6899  | 6.7883  | 1.0158 | 0.0226  | 0.6175  | 0.2094 |
| Stmn2   | _KKDLS[Phospho (STY)]LEEIQK_2                           | #N/A                   | 6.4670  | 7.0264  | 7.5151  | 7.4067  | 7.2474  | 7.2096  | 7.4401  | 6.9155  | 7.1378  | 6.9100  | 1.0063 | 0.0090  | 0.8405  | 0.0754 |
| Stmn2   | _RKS[Phospho (STY)]QEAQVLK_2                            | P55821_S97_M1_Stmn2    | 4.9769  | 4.4937  | 5.8063  | 5.4547  | 3.7568  | 5.2778  | 5.7817  | 5.7251  | 5.3487  | 4.4583  | 0.9310 | -0.1031 | 0.4355  | 0.3610 |
| Stmn2   | _RAS[Phospho (STY)]GQAFELKPPS[Phospho (STY)]PISEAPR_3   | #N/A                   | 3.4335  | 4.1897  | 3.1672  | 5.2582  | 4.0780  | 4.0474  | 4.3600  | 5.1022  | 3.0885  | 3.8890  | 0.9803 | -0.0287 | 0.8752  | 0.0579 |
| Stmn2   | _AS[Phospho (STY)]GQAFELKPPS[Phospho (STY)]PISEAPR_3    | #N/A                   | 4.0687  | 3.3647  | 3.2547  | 4.6121  | 3.1944  | 3.4046  | 3.4720  | 4.6706  | 4.0160  | 3.7244  | 0.9039 | -0.1457 | 0.3384  | 0.4705 |
| Stmn2   | _NKLQVLS[Phospho (STY)]IG_2                             | P55821_S178_M1_Stmn2   | 3.8696  | 3.1250  | 3.6033  | 3.1470  | 3.0133  | 3.6113  | 3.5045  | 3.8541  | 4.1219  | 3.7013  | 0.8945 | -0.1609 | 0.0852  | 1.0696 |
| Stmn2   | _KDS[Phospho (STY)]LEEIQK_3                             | #N/A                   | 1.4107  | 1.8773  | 3.5155  | 4.5601  | 2.9255  | 2.7148  | 3.2075  | 3.9419  | 4.2410  | 1.4248  | 0.8846 | -0.1770 | 0.6411  | 0.1931 |
| Golga3  | _GPKKEGS[Phospho (STY)]POR_2                            | P55937_S60_M1_Golga3   | 9.8055  | 9.7897  | 10.0624 | 10.2755 | 9.5888  | 9.6763  | 10.0057 | 9.7226  | 9.8295  | 1.0022  | 0.0032 | 0.8806  | 0.0552  |        |
| Golga3  | _LHMQNS[Phospho (STY)]VPR_2                             | #N/A                   | 7.4565  | 7.1858  | 4.4436  | 7.3825  | 6.3941  | 6.9797  | 6.2391  | 7.0633  | 7.1438  | 6.8086  | 0.9746 | -0.0372 | 0.7816  | 0.1070 |
| Golga3  | _LHMQNS[Phospho (STY)]VPRDGLGQ_2                        | #N/A                   | 5.5604  | 5.7084  | 6.0389  | 6.3531  | 3.2977  | 5.8008  | 5.6664  | 5.5932  | 5.8635  | 5.3075  | 0.9754 | -0.0359 | 0.8143  | 0.0892 |
| Atp5mf  | _DFTPSGAGAFR_2                                          | #N/A                   | 9.3302  | 9.3580  | 9.0991  | 8.9773  | 8.9921  | 9.0576  | 9.4812  | 9.5412  | 9.1748  | 9.0941  | 0.9799 | -0.0292 | 0.1647  | 0.7832 |
| Rrp1    | _EAGS[Phospho (STY)]EAESSADPGRR_2                       | P56183_S434_M1_Rrp1    | 8.2594  | 8.4735  | 9.0392  | 8.6321  | 7.7948  | 8.3225  | 8.7365  | 8.7918  | 8.5415  | 8.2194  | 0.9823 | -0.0258 | 0.5353  | 0.2714 |
| Arpp19  | _VTS[Phospho (STY)]PEKAEAK_2                            | P56212_S23_M1_Arpp19   | 7.8067  | 7.1919  | 7.7590  | 7.7983  | 3.3838  | 7.9999  | 7.4482  | 7.4471  | 7.9667  | 3.9138  | 1.0217 | 0.0310  | 0.9020  | 0.4448 |
| Arpp19  | _YFDS[Phospho (STY)]GDYNM(Oxidation (M))AK_2            | #N/A                   | 10.8875 | 11.4349 | 11.7191 | 11.4847 | 11.0412 | 11.3332 | 11.0516 | 11.0905 | 11.2435 | 11.2569 | 1.0140 | 0.0200  | 0.3604  | 0.4432 |
| Arpp19  | _KPS[Phospho (STY)]VASK_2                               | P56212_S104_M1_Arpp19  | 3.5621  | 3       |         |         |         |         |         |         |         |         |        |         |         |        |



|         |                                                          |                     |         |         |         |         |         |         |         |         |         |         |        |         |        |        |
|---------|----------------------------------------------------------|---------------------|---------|---------|---------|---------|---------|---------|---------|---------|---------|---------|--------|---------|--------|--------|
| Carprt  | _ALDIYSAVDDAS[Phospho (STY)]HEKEIPR_3                    | #N/A                | 3.4997  | 4.2560  | 3.2334  | 4.1597  | 4.1443  | 6.2511  | 6.3792  | 3.9588  | 6.4519  | 4.1267  | 0.8142 | -0.2966 | 0.2402 | 0.6193 |
| Cox6b1  | _SLC[Carbamidomethyl (C)]PVSWSVAWDR_2                    | #N/A                | 9.8791  | 10.0127 | 10.3449 | 10.2501 | 10.5363 | 10.0552 | 10.1837 | 9.7397  | 9.9082  | 9.9546  | 1.0234 | 0.0334  | 0.1421 | 0.8474 |
| Cox6b1  | _IAEGTFPGK_2                                             | #N/A                | 9.3354  | 9.6311  | 9.6484  | 9.5215  | 10.2348 | 9.6166  | 9.9231  | 9.4891  | 9.4886  | 9.2578  | 1.0128 | 0.0183  | 0.5388 | 0.2686 |
| Cox6b1  | _NC[Carbamidomethyl (C)]MQVYLFDR_3                       | #N/A                | 8.0441  | 8.3350  | 8.3862  | 8.4066  | 8.6265  | 8.0953  | 8.0474  | 8.2174  | 8.0661  | 8.2782  | 1.0200 | 0.0286  | 0.2065 | 0.6851 |
| Cox6b1  | _IAEGTFPGK_2                                             | #N/A                | 7.8111  | 7.9400  | 7.6846  | 7.6073  | 8.8807  | 7.6793  | 7.4303  | 7.7816  | 8.0895  | 8.5041  | 0.9978 | -0.0032 | 0.9553 | 0.0199 |
| Cox6b1  | _I[Acetyl (Protein N-term)]AEDIKTK_2                     | #N/A                | 4.0583  | 5.4607  | 5.3049  | 4.0247  | 5.8150  | 5.1401  | 3.9857  | 4.5991  | 4.8942  | 4.8099  | 1.0864 | 0.1196  | 0.3703 | 0.4314 |
| Cox6b1  | _FPNQNKTK_2                                              | #N/A                | 9.1783  | 2.9833  | 3.4615  | 9.6344  | 10.5583 | 9.0852  | 3.6462  | 9.3117  | 7.4376  | 8.8964  | 1.0219 | 0.0313  | 0.9376 | 0.0280 |
| Cox6b1  | _GGDVSVC[Carbamidomethyl (C)]EWYR_2                      | #N/A                | 7.8655  | 7.7052  | 8.0206  | 8.2347  | 8.4080  | 7.9674  | 7.8825  | 7.6948  | 7.7679  | 8.0322  | 1.0241 | 0.0344  | 0.2190 | 0.6596 |
| Cox7b   | _APSHDR_2                                                | #N/A                | 5.9016  | 6.0808  | 4.8543  | 6.0689  | 6.0990  | 6.0340  | 6.1118  | 6.5137  | 6.7989  | 5.3777  | 0.9418 | -0.0865 | 0.3309 | 0.4803 |
| Cyb5a   | _FLEEHPGEEVER_3                                          | #N/A                | 6.5142  | 5.7273  | 6.5778  | 6.1802  | 6.6143  | 6.2584  | 6.0023  | 5.9144  | 6.1582  | 6.3777  | 1.0452 | 0.0638  | 0.1601 | 0.7956 |
| Cyb5a   | _LYTLEEIKK_2                                             | #N/A                | 5.9829  | 5.7867  | 5.9641  | 6.3752  | 6.4694  | 6.5516  | 5.7759  | 5.9598  | 6.2610  | 6.1804  | 1.0238 | 0.0340  | 0.4545 | 0.3425 |
| Cyb5a   | _EQAGGDAATENFEDVGHSTDR_3                                 | #N/A                | 5.9308  | 6.6482  | 5.7689  | 6.7179  | 6.1208  | 6.8916  | 5.9735  | 6.1632  | 6.6466  | 6.6472  | 0.9982 | -0.0026 | 0.9681 | 0.0141 |
| Cyb5a   | _I[Acetyl (Protein N-term)]AGQS[Phospho (STY)]DKDKV_2    | P56395_S5_M1_Cyb5a  | 3.0618  | 4.8834  | 3.9633  | 4.5555  | 1.9835  | 4.2798  | 3.6548  | 3.0218  | 3.3209  | 4.4226  | 1.0507 | 0.0714  | 0.7687 | 0.1142 |
| Cyb5a   | _TYIGELHPDDR_2                                           | #N/A                | 5.1897  | 4.8564  | 5.2928  | 5.2816  | 5.4354  | 5.6998  | 5.3046  | 5.5722  | 5.0111  | 5.3721  | 0.9958 | -0.0061 | 0.8979 | 0.0467 |
| Usp5    | _GTGLQPGEEELPDIAPLVTI[Phospho (STY)]POEPK_3              | P56399_T623_M1_Usp5 | 10.3687 | 10.8225 | 11.0623 | 11.4353 | 10.2169 | 10.7873 | 10.7377 | 11.0929 | 10.7705 | 10.3840 | 1.0033 | 0.0048  | 0.8916 | 0.0498 |
| Usp5    | _ATTNNS[Phospho (STY)]LER_2                              | P56399_S751_M1_Usp5 | 10.6035 | 10.6258 | 11.1188 | 11.2358 | 10.4667 | 10.9129 | 10.8587 | 10.8579 | 10.8764 | 10.7573 | 0.9991 | -0.0014 | 0.9502 | 0.0222 |
| Usp5    | _DGLGLPDIVR_2                                            | #N/A                | 7.5836  | 7.6397  | 6.7128  | 7.4483  | 7.0648  | 6.9436  | 7.6922  | 7.4593  | 7.4662  | 7.5853  | 0.9578 | -0.0622 | 0.1465 | 0.8340 |
| Usp5    | _IFQNAPTDPTQDIFSTQVAK_2                                  | #N/A                | 6.7787  | 6.6777  | 6.7685  | 7.5579  | 6.9467  | 7.1519  | 6.8748  | 6.8848  | 6.5355  | 6.6262  | 1.0371 | 0.0526  | 0.2066 | 0.6849 |
| Usp5    | _VILPDIAR_2                                              | #N/A                | 6.2076  | 5.0389  | 5.6295  | 4.9834  | 6.3195  | 5.5703  | 5.6876  | 5.3881  | 5.7507  | 6.6521  | 0.9583 | -0.0614 | 0.5144 | 0.2889 |
| Usp5    | _VVVYNQDK_2                                              | #N/A                | 6.1530  | 6.2392  | 6.6389  | 6.3424  | 6.0738  | 6.0685  | 6.6042  | 6.3633  | 6.2660  | 5.6159  | 1.0065 | 0.0093  | 0.8454 | 0.0787 |
| Usp5    | _I[Acetyl (Protein N-term)]ALSEALLSVPTIR_2               | #N/A                | 6.5156  | 5.8102  | 4.7116  | 4.7808  | 6.1738  | 5.9527  | 5.6972  | 5.2838  | 6.1543  | 6.1933  | 0.9700 | -0.0439 | 0.6859 | 0.1637 |
| Usp5    | _DLGYYFYQR_2                                             | #N/A                | 6.1347  | 6.0957  | 4.9214  | 6.2082  | 5.9047  | 5.7792  | 6.3544  | 5.5066  | 5.5125  | 5.9673  | 1.0012 | 0.0017  | 0.9817 | 0.0080 |
| Usp5    | _ENLWLNLTDGSLC[Carbamidomethyl (C)]GR_2                  | #N/A                | 5.7764  | 5.4059  | 6.1249  | 5.4380  | 5.2239  | 5.5142  | 5.7178  | 5.4138  | 4.8946  | 5.4921  | 1.0374 | 0.0529  | 0.3755 | 0.4254 |
| Usp5    | _SSEPNNEVIR_2                                            | #N/A                | 7.5122  | 7.5016  | 3.3082  | 7.4923  | 7.5702  | 7.4035  | 7.4248  | 7.4560  | 7.4008  | 7.6790  | 0.9076 | -0.1399 | 0.4514 | 0.3454 |
| Usp5    | _ETGVPLAVK_2                                             | #N/A                | 6.0980  | 6.3486  | 3.5037  | 5.9368  | 6.3927  | 6.1901  | 5.2512  | 6.1143  | 6.1751  | 6.0172  | 0.9755 | -0.0358 | 0.8133 | 0.0898 |
| Usp5    | _AVDWIFSHDDLDAAEAM[Oxidation (M)]D[S[Phospho (STY)]EGR_3 | P56399_S775_M1_Usp5 | 4.2294  | 5.6654  | 6.4199  | 6.4789  | 4.9798  | 5.3037  | 3.6327  | 5.7357  | 4.7497  | 3.5905  | 1.2452 | 0.3164  | 0.1077 | 0.9676 |
| Usp5    | _QAEEXVLPPELVR_3                                         | #N/A                | 7.3520  | 6.9930  | 7.4704  | 6.8506  | 7.0752  | 6.9081  | 7.1377  | 6.6649  | 6.8709  | 6.9876  | 1.0279 | 0.0397  | 0.2337 | 0.6313 |
| Usp5    | _GHPEFSTNR_2                                             | #N/A                | 6.7436  | 6.6388  | 6.6664  | 7.0458  | 7.0114  | 6.6775  | 6.6320  | 6.9438  | 6.8989  | 6.6936  | 1.0008 | 0.0011  | 0.9640 | 0.0159 |
| Usp5    | _VDGSGGNNHAEVHR_3                                        | #N/A                | 6.0654  | 6.2564  | 6.6418  | 6.6383  | 6.5500  | 6.3915  | 6.2769  | 5.8382  | 6.1717  | 6.7043  | 1.0282 | -0.0014 | 0.3664 | 0.4360 |
| Usp5    | _FASPDYLVQIK_2                                           | #N/A                | 3.6932  | 4.1102  | 3.5850  | 4.0607  | 3.8348  | 3.4926  | 4.1555  | 3.6314  | 3.9238  | 3.6355  | 0.9895 | -0.0153 | 0.8101 | 0.0915 |
| Usp5    | _KQEDVAOWGEVR_3                                          | #N/A                | 5.7971  | 5.3327  | 3.5978  | 4.9032  | 5.5080  | 5.6530  | 5.4945  | 4.7839  | 5.8194  | 5.9351  | 0.9351 | -0.0968 | 0.4601 | 0.3372 |
| Usp5    | _SAAES[Phospho (STY)]SESVPGVK_2                          | P56399_S783_M1_Usp5 | 10.3332 | 10.3377 | 10.5742 | 11.0338 | 9.9822  | 10.6457 | 10.7999 | 10.3395 | 10.6081 | 10.7187 | 0.9876 | -0.0181 | 0.5237 | 0.2809 |
| Usp5    | _VTSAEVALLSASAR_2                                        | #N/A                | 5.4501  | 5.4790  | 5.8625  | 5.4450  | 5.3735  | 5.4918  | 5.7691  | 5.6528  | 5.6030  | 5.4290  | 0.9828 | -0.0250 | 0.3850 | 0.4145 |
| Atpsf1b | _VLDGAPKIPGPIETLGR_3                                     | #N/A                | 10.4134 | 10.7440 | 10.9561 | 10.9598 | 10.7925 | 10.7300 | 10.5984 | 10.5078 | 10.5677 | 10.6562 | 1.0173 | 0.0248  | 0.1190 | 0.9246 |
| Atpsf1b | _AALGLGYPVAPLDISTSR_2                                    | #N/A                | 10.2547 | 10.2519 | 10.5215 | 10.5086 | 10.7194 | 10.2878 | 10.4735 | 10.1093 | 10.3022 | 1.0099  | 0.0142 | 0.3966  | 0.4246 | 0.0466 |
| Atpsf1b | _VPVGPETLGR_2                                            | #N/A                | 11.0421 | 11.1138 | 10.7340 | 11.0140 | 11.4265 | 10.7126 | 10.8922 | 11.0797 | 11.0353 | 10.9114 | 1.0025 | 0.0036  | 0.8489 | 0.0712 |
| Atpsf1b | _VLPKETIK_2                                              | #N/A                | 10.4594 | 11.2649 | 11.4654 | 10.9919 | 11.2633 | 10.8209 | 10.8663 | 11.0578 | 10.8990 | 10.9204 | 1.0099 | 0.0142  | 0.5831 | 0.2342 |
| Atpsf1b | _VVDLAPYAK_2                                             | #N/A                | 10.5872 | 11.3794 | 10.9061 | 10.7332 | 11.0433 | 10.6647 | 10.9527 | 11.1237 | 11.0659 | 10.8850 | 1.0095 | 0.0136  | 0.6901 | 0.1611 |
| Atpsf1b | _VALTGLTVAEYR_2                                          | #N/A                | 10.4765 | 10.4912 | 10.7769 | 10.4288 | 10.8316 | 10.6375 | 10.5496 | 10.1002 | 10.7480 | 10.7710 | 0.9988 | -0.0017 | 0.9192 | 0.0366 |
| Atpsf1b | _LGLFGGAGVGK_2                                           | #N/A                | 9.0252  | 9.6929  | 9.6792  | 9.7834  | 9.5709  | 9.0781  | 9.3056  | 9.9324  | 9.5984  | 9.8738  | 0.9787 | -0.0310 | 0.3430 | 0.4648 |
| Atpsf1b | _ADKLAEMGS_2                                             | #N/A                | 8.1741  | 8.6304  | 9.0277  | 8.8082  | 9.1896  | 8.8233  | 8.4400  | 8.4403  | 8.5986  | 8.5596  | 1.0312 | 0.0444  | 0.1837 | 0.7558 |
| Atpsf1b | _VLDGSAPIK_2                                             | #N/A                | 7.2990  | 7.2015  | 7.5943  | 7.5613  | 7.8334  | 7.3028  | 5.7843  | 7.3811  | 7.6425  | 7.4040  | 1.0585 | 0.0820  | 0.2837 | 0.3472 |
| Atpsf1b | _IM[Oxidation (M)]NWIGPIDER_2                            | #N/A                | 11.7185 | 11.9168 | 11.8298 | 11.9431 | 11.9822 | 11.7668 | 11.8787 | 11.7220 | 11.7704 | 11.8699 | 1.0042 | 0.0060  | 0.4452 | 0.3514 |
| Atpsf1b | _TIAM[Oxidation (M)]DGTGLVR_2                            | #N/A                | 9.9344  | 10.3298 | 10.4815 | 10.4248 | 10.5403 | 10.0332 | 10.1095 | 10.1463 | 10.1041 | 1.0163  | 0.0233 | 0.2466  | 0.6804 | 0.0380 |
| Atpsf1b | _TVLIM[Oxidation (M)]EUNNVAK_2                           | #N/A                | 8.9766  | 8.7354  | 8.9442  | 8.8927  | 8.9288  | 9.1061  | 9.0630  | 8.8642  | 9.1735  | 8.9556  | 0.9907 | -0.0134 | 0.3338 | 0.4766 |
| Atpsf1b | _IM[Oxidation (M)]DPNVGNHDYVAR_3                         | #N/A                | 8.2687  | 8.5028  | 8.5789  | 9.0995  | 8.9849  | 8.5512  | 8.4664  | 8.6014  | 8.4033  | 8.5331  | 1.0192 | 0.0274  | 0.3487 | 0.4756 |
| Atpsf1b | _VALVQGM[Oxidation (M)]NEPPGAR_2                         | #N/A                | 10.7472 | 11.0394 | 11.0436 | 11.3052 | 11.0774 | 10.9877 | 10.7919 | 10.9562 | 10.9756 | 10.8092 | 1.0138 | 0.0198  | 0.1672 | 0.7767 |
| Atpsf1b | _AHGGYVFAGVGER_3                                         | #N/A                | 6.9459  | 6.7764  | 6.8283  | 5.7062  | 7.1051  | 7.2662  | 6.7534  | 5.7461  | 6.5697  | 6.6400  | 1.0535 | 0.0752  | 0.3351 | 0.3449 |
| Atpsf1b | _FLSQPFQVAEVTGIM[Oxidation (M)]GK_3                      | #N/A                | 8.5685  | 8.8989  | 8.9508  | 8.8613  | 8.6562  | 8.9054  | 8.5461  | 8.9137  | 9.0237  | 8.8755  | 0.9963 | -0.0054 | 0.7795 | 0.1082 |
| Atpsf1b | _KSGTSVQVYVAPDGLTPAPATTFAHLDATTVLSR_4                    | #N/A                | 4.2337  | 4.2295  | 5.0169  | 5.1826  | 3.5650  | 4.6177  | 6.0252  | 4.5426  | 4.0836  | 4.8010  | 0.9344 | -0.0978 | 0.5075 | 0.2945 |
| Atpsf1b | _PSVAVQYQPLATDM[Oxidation (M)]GTM[Oxidation (M)]QER_3    | #N/A                | 6.6117  | 7.1891  | 7.6129  | 6.4030  | 7.2273  | 7.4099  | 7.1389  | 7.1767  | 7.0461  | 6.8672  | 1.0005 | 0.0007  | 0.9893 | 0.0047 |
| Atpsf1b | _FTQAGSEVALLGR_2                                         | #N/A                | 4.9006  | 4.9608  | 6.2565  | 4.5664  | 4.4447  | 5.4160  | 6.0548  | 5.9475  | 5.4038  | 6.0667  | 0.9212 | -0.1184 | 0.3104 | 0.5081 |
| Atpsf1b | _TREGNDLYHEM[Oxidation (M)]JESGVNLK_4                    | #N/A                | 5.8740  | 4.7496  | 6.6455  | 5.8268  | 5.9655  | 5.6515  | 4.7455  | 5.4996  | 5.3739  | 6.0140  | 1.0697 | 0.0973  | 0.3429 | 0.4648 |
| Atpsf1b | _TENDLYHEM[Oxidation (M)]JESGVNLK_3                      | #N/A                | 6.4684  | 5.3568  | 5.5807  | 6.6833  | 5.4710  | 5.2566  | 5.9187  | 5.8400  | 4.5088  | 5.5182  | 1.0654 | 0.0914  | 0.4037 | 0.3940 |
| Atpsf1b | _DQEGDQVLFIONIR_2                                        | #N/A                | 5.7832  | 6.3888  | 6.2489  | 7.0453  | 5.5361  | 5.8662  | 6.4761  | 6.5360  | 6.4927  | 6.1998  | 0.9562 | -0.0646 | 0.3481 | 0.4583 |
| Atpsf1b | _IM[Oxidation (M)]NWIGPDERGPIK_3                         | #N/A                | 3.8919  | 5.1778  | 5.5848  | 5.2708  | 5.2787  | 4.6380  | 4.5739  | 4.9606  | 4.2937  | 4.6705  | 1.0755 | 0.1050  | 0.3228 | 0.4910 |
| Atpsf1b | _LVLEAQHLGESTVR_3                                        | #N/A                | 8.0290  | 7.7710  | 8.0425  | 7.8659  | 8.0197  | 7.9042  | 7.6694  | 7.5878  | 8.0421  | 8.4677  | 0.9996 | -0.0005 | 0.9862 | 0.0061 |
| Atpsf1b | _GFAPHAEPAPIEM[Oxidation (M)]JVEQELVTGK_3                | #N/A                | 4.1862  | 4.3832  | 4.3329  | 6.1346  | 6.1282  | 3.0399  | 5.1891  | 5.4595  | 3.6815  | 4.2768  | 1.0106 | 0.0152  | 0.9457 | 0.0243 |
| Atpsf1b | _SLQDIAILGM[Oxidation (M)]DELSEDKLTVSR_3                 | #N/A                | 2.9765  | 4.4085  | 5.8325  | 5.1942  | 3.9057  | 4.9398  | 5.0645  | 4.8789  | 4.2348  | 4.3768  | 0.9478 | -0.0773 | 0.6118 | 0.2134 |
| Atpsf1b | _GFGQILAGEYDLPEQAFYM[Oxidation (M)]VGPIEAAVK_4           | #N/A                | 3.5241  | 3.8285  | 3.5971  | 3.7586  | 3.8019  | 4.1824  | 3.3132  | 2.7944  | 2.9267  | 3.9441  | 1.1657 | 0.2212  | 0.0516 | 1.2872 |
| Atpsf1b | _JAVAGIVAVDVQFDEGLPPHNALEVGSR_3                          | #N/A                | 3.5308  | 3.8116  | 3.2645  | 4.3091  | 1.4830  | 4.0966  | 4.4574  | 2.9911  | 2.9911  | 3.9641  | 0.8743 | -0.1938 | 0.4205 | 0.3763 |
| Sk1a3   | _TTTNVGDGLGAGIVEHLSR_2                                   | #N/A                | 4.6296  | 4.4131  | 5.3324  | 5.4626  | 4.7756  | 5.0263  | 4.9044  | 6.2576  | 4.8679  | 5.1325  | 0.9337 | -0.0989 | 0.3225 | 0.4915 |
| Sk1a3   | _IVQVTADAFDLUR_2                                         | #N/A                | 5.0064  | 4.4859  | 4.5337  | 4.9089  | 3.8243  | 4.5604  | 5.3638  | 4.6931  | 4.1726  | 4.4118  | 0.9770 | -0.0335 | 0.7255 | 0.     |



|         |                                                             |                       |          |         |         |         |         |         |         |         |         |         |         |         |        |        |
|---------|-------------------------------------------------------------|-----------------------|----------|---------|---------|---------|---------|---------|---------|---------|---------|---------|---------|---------|--------|--------|
| Samsn1  | _SSS(Phospho (STY))FGNFR_2                                  | P57725_S23_M1_Samsn1  | 4.1411   | 3.0851  | 3.3270  | 3.8297  | 2.9734  | 3.6512  | 3.5444  | 4.2888  | 3.9374  | 3.7967  | 0.8996  | -0.1526 | 0.1734 | 0.7609 |
| Atp6v1d | _FTAGDFFSTVQNVKN_2                                          | #N/A                  | 8.2025   | 7.6379  | 8.7918  | 8.2944  | 7.3887  | 8.2455  | 8.1861  | 7.0722  | 7.9111  | 8.2580  | 1.0301  | 0.0428  | 0.5001 | 0.3010 |
| Atp6v1d | _JEFFSR_2                                                   | #N/A                  | 7.7487   | 7.1892  | 7.4486  | 7.1112  | 7.3085  | 7.5836  | 7.3561  | 7.5848  | 7.7940  | 7.4086  | 0.9957  | -0.0062 | 0.8417 | 0.0748 |
| Atp6v1d | _VNAEHVWIR_2                                                | #N/A                  | 5.1858   | 5.6526  | 6.1127  | 5.6775  | 5.4114  | 5.0934  | 5.8314  | 5.5081  | 5.3509  | 5.7659  | 0.9836  | -0.0238 | 0.6740 | 0.1714 |
| Atp6v1d | _EAAFSLAEAK_2                                               | #N/A                  | 6.6363   | 6.0548  | 6.8673  | 6.2552  | 5.8664  | 6.1518  | 5.3753  | 6.5758  | 6.4239  | 6.3200  | 1.0213  | 0.0904  | 0.6597 | 0.1807 |
| Atp6v1d | _TLAVITELDER_2                                              | #N/A                  | 6.1412   | 5.7257  | 5.8171  | 6.1291  | 5.9765  | 5.6559  | 5.3365  | 6.1780  | 5.9132  | 6.1434  | 1.0025  | 0.0036  | 0.9387 | 0.0275 |
| Npy     | _SSPETISOLL[Oxidation (M)]KES(Phospho (STY))TENAPR_3        | #N/A                  | 3.7796   | 3.6168  | 3.8996  | 3.8513  | 3.5912  | 3.6387  | 6.4470  | 6.8686  | 6.7125  | 3.5285  | 0.6333  | -0.6591 | 0.0089 | 2.0486 |
| Eef1d   | _TSLIVENQNLIR_2                                             | #N/A                  | 6.0128   | 5.8327  | 3.4929  | 6.4912  | 6.4897  | 6.0725  | 5.7440  | 5.7473  | 6.2019  | 6.3385  | 0.9541  | -0.0678 | 0.6517 | 0.1860 |
| Eef1d   | _Acetyl (Protein N-term)[ATN]LAHEK_2                        | #N/A                  | 5.6993   | 6.4393  | 6.3134  | 6.2736  | 6.2567  | 5.7095  | 6.3147  | 6.0719  | 5.5966  | 6.4430  | 1.0014  | 0.0021  | 0.9695 | 0.0135 |
| Eef1d   | _ATAPQTQHVS(Phospho (STY))PM[Oxidation (M)]R_2              | #N/A                  | 11.1500  | 11.3141 | 11.7189 | 12.0441 | 11.2054 | 11.2535 | 11.1357 | 11.1976 | 11.1299 | 11.3718 | 1.0123  | 0.0176  | 0.4970 | 0.3036 |
| Eef1d   | _LSSLEKSS(Phospho (STY))PTPR_2                              | P57776_S119_M1_Eef1d  | 3.5170   | 5.6536  | 6.7033  | 6.0802  | 3.6467  | 5.8037  | 4.4436  | 4.2067  | 3.0049  | 5.1821  | 1.2435  | 0.3144  | 0.2183 | 0.6610 |
| Eef1d   | _GATPAEEDDEKDIDFGSDEEEEDKEAAR_4                             | #N/A                  | 3.6391   | 4.5402  | 3.5847  | 10.4756 | 8.9575  | 4.7382  | 3.9238  | 9.8183  | 8.0714  | 5.0348  | 0.8923  | -0.1644 | 0.7068 | 0.1507 |
| Eef1d   | _DIDLFGS(Phospho (STY))DEEEEDKEAAR_3                        | #N/A                  | 3.6878   | 3.6145  | 3.9145  | 4.5171  | 3.3503  | 3.3403  | 3.9433  | 3.6659  | 3.7214  | 3.8479  | 0.9849  | -0.0219 | 0.8095 | 0.0918 |
| Actn4   | _EAILAIHK_2                                                 | #N/A                  | 5.2238   | 4.5394  | 4.4532  | 4.7992  | 3.4001  | 0.9514  | 5.5341  | 4.4400  | 4.5805  | 4.2428  | 0.8287  | -0.2710 | 0.3602 | 0.4434 |
| Actn4   | _DGLAFNALHR_2                                               | #N/A                  | 4.1610   | 4.3214  | 4.5184  | 5.0173  | 3.7818  | 3.5750  | 5.0412  | 4.8511  | 4.9896  | 4.8280  | 0.8583  | -0.2205 | 0.0313 | 1.5042 |
| Actn4   | _M[Oxidation (M)]APIQPGDOAAPGALDVK_2                        | #N/A                  | 6.6053   | 6.3958  | 6.7894  | 6.9414  | 6.6748  | 7.2398  | 6.9378  | 7.2600  | 6.4650  | 7.0403  | 0.9781  | -0.0319 | 0.4697 | 0.3281 |
| Actn4   | _AGTQIENEDDFRDLK_3                                          | #N/A                  | 4.4379   | 3.7984  | 3.2777  | 4.3223  | 3.6197  | 4.4253  | 4.4706  | 4.1797  | 4.5230  | 5.0647  | 0.8729  | -0.1960 | 0.0789 | 1.1029 |
| Actn4   | _IC[Carbamidomethyl (C)]DDOWNLGSLTHSR_3                     | #N/A                  | 5.6100   | 6.0502  | 6.2331  | 6.4431  | 6.2708  | 6.2156  | 4.1605  | 6.4759  | 6.5960  | 6.1411  | 1.0503  | 0.0708  | 0.5520 | 0.2580 |
| Actn4   | _VLAVINENHEHMEYER_3                                         | #N/A                  | 5.2587   | 4.0962  | 4.4807  | 4.9511  | 4.8907  | 4.2347  | 4.1727  | 2.9767  | 3.2758  | 3.7017  | 1.2700  | 0.3448  | 0.0325 | 1.6477 |
| Srpa1   | _LTAIEUQAAQYTNAR_2                                          | #N/A                  | 3.4704   | 3.5787  | 4.1572  | 3.1590  | 3.0969  | 4.1524  | 4.3746  | 3.4586  | 4.1483  | 4.0765  | 0.9389  | -0.0910 | 0.3840 | 0.4157 |
| Nadk    | _S(Phospho (STY))SASPALGSTR_2                               | P58058_S46_M1_Nadk    | 3.6458   | 4.4021  | 8.8195  | 4.4241  | 2.7896  | 3.8350  | 3.0715  | 8.0671  | 4.3769  | 4.1014  | 0.9487  | -0.0760 | 0.8606 | 0.0652 |
| Eef2    | _VFS(Phospho (STY))GVVS(Phospho (STY))T(Phospho (STY))GLK_2 | P58252_S418_M3_Eef2   | 10.3654  | 10.4525 | 10.6259 | 11.1832 | 8.4433  | 10.5771 | 9.9660  | 10.3214 | 10.6063 | 0.9999  | -0.0001 | 0.9985  | 0.0007 | 0.0457 |
| Eef2    | _GEGQLSAER_2                                                | #N/A                  | 7.5643   | 7.8486  | 7.5655  | 7.8946  | 7.8664  | 7.6202  | 7.6158  | 7.8328  | 7.6514  | 7.7597  | 1.0015  | 0.0022  | 0.9001 | 0.5425 |
| Eef2    | _VNFTVQQR_2                                                 | #N/A                  | 7.8539   | 7.6538  | 8.0519  | 7.8701  | 7.6310  | 7.4084  | 7.2841  | 7.7988  | 7.7337  | 7.8480  | 1.0224  | 0.0320  | 0.2867 | 0.5425 |
| Eef2    | _FVSVPVR_2                                                  | #N/A                  | 7.2487   | 7.7178  | 7.0065  | 7.0535  | 7.6192  | 7.2476  | 7.3542  | 7.5438  | 7.4159  | 0.9763  | -0.0346 | 0.2951  | 0.5300 | 0.0748 |
| Eef2    | _YEWDAEAR_2                                                 | #N/A                  | 7.4776   | 7.0568  | 6.9691  | 7.1932  | 6.5526  | 7.3436  | 7.3195  | 7.2211  | 6.8983  | 7.3330  | 0.9869  | -0.0190 | 0.6232 | 0.2054 |
| Eef2    | _STLTDSLVC[Carbamidomethyl (C)]K_2                          | #N/A                  | 6.9529   | 6.7198  | 7.4411  | 6.8073  | 7.2481  | 6.9762  | 7.1608  | 6.7083  | 6.7967  | 6.6289  | 1.0294  | 0.0418  | 0.2646 | 0.5774 |
| Eef2    | _LDEEDHAC[Carbamidomethyl (C)]PKK_3                         | #N/A                  | 7.1181   | 6.7469  | 6.7645  | 6.9697  | 7.0515  | 7.1835  | 6.4149  | 6.7399  | 7.1410  | 6.9564  | 1.0234  | 0.0334  | 0.3324 | 0.4783 |
| Eef2    | _SDPVSVR_2                                                  | #N/A                  | 3.6364   | 6.4841  | 6.6436  | 6.7963  | 6.5260  | 6.5743  | 5.4379  | 6.6256  | 6.5151  | 1.0457  | 0.0644  | 0.2565  | 0.5909 | 0.0748 |
| Eef2    | _TFC[Carbamidomethyl (C)]QLIDRPFK_2                         | #N/A                  | 4.7757   | 5.9256  | 5.9682  | 5.3966  | 5.8618  | 5.8166  | 6.3276  | 5.8307  | 5.7906  | 5.6699  | 0.9525  | -0.0703 | 0.3169 | 0.4991 |
| Eef2    | _FTVSEESNLVC[Carbamidomethyl (C)]LSK_2                      | #N/A                  | 5.7706   | 5.2477  | 5.1301  | 6.4516  | 5.0595  | 5.1634  | 5.8658  | 5.3118  | 5.5950  | 6.0446  | 0.9590  | -0.0604 | 0.4357 | 0.3319 |
| Eef2    | _AYLPNESGFTADR_2                                            | #N/A                  | 5.7384   | 5.6714  | 6.0103  | 5.5647  | 2.9592  | 3.2695  | 3.6303  | 6.2236  | 6.3965  | 3.1593  | 1.0034  | 0.0049  | 0.9868 | 0.0058 |
| Eef2    | _C[Carbamidomethyl (C)]ELLYEGPPDDEAAM[Oxidation (M)]GK_2    | #N/A                  | 5.6281   | 5.3687  | 5.8588  | 5.2592  | 4.8720  | 5.9832  | 3.5512  | 5.6727  | 5.0823  | 5.4731  | 1.1113  | 0.1522  | 0.2407 | 0.6186 |
| Eef2    | _EGIPALDNLK_2                                               | #N/A                  | 4.0830   | 5.4493  | 3.8167  | 3.5763  | 4.3900  | 3.3979  | 3.2910  | 5.6607  | 4.6407  | 3.5433  | 0.9615  | -0.0567 | 0.7807 | 0.1075 |
| Eef2    | _FT(Phospho (STY))DTRKDEQER_2                               | #N/A                  | 3.6682   | 4.4245  | 3.4019  | 4.4465  | 4.5577  | 3.8127  | 3.5556  | 4.0555  | 4.3546  | 4.1238  | 0.9111  | -0.1344 | 0.2657 | 0.5755 |
| Eef2    | _YDAMNRR_2                                                  | #N/A                  | 4.1037   | 3.7611  | 3.8373  | 5.2450  | 4.6016  | 3.1686  | 3.5294  | 3.6201  | 4.6825  | 3.4723  | 1.0767  | 0.1066  | 0.5171 | 0.2865 |
| Eef2    | _AGETRTFT(Phospho (STY))DTR_2                               | #N/A                  | 2.9318   | 5.8713  | 3.6186  | 4.3837  | 3.5583  | 4.1712  | 4.5320  | 6.0096  | 3.6458  | 4.0882  | 0.8950  | -0.1601 | 0.4857 | 0.3136 |
| Eef2    | _ALLELQPEELVOTQR_2                                          | #N/A                  | 4.3010   | 4.3558  | 4.0320  | 5.0832  | 3.4304  | 4.1453  | 4.5188  | 4.4438  | 4.2442  | 3.7954  | 0.9939  | -0.0088 | 0.9336 | 0.0298 |
| Eef2    | _YDPANGK_2                                                  | #N/A                  | 5.8677   | 4.0363  | 4.1403  | 3.1421  | 3.6610  | 4.7074  | 4.3576  | 5.3511  | 5.1893  | 5.1963  | 0.8478  | -0.2382 | 0.1750 | 0.7570 |
| Eef2    | _EDULKPIQR_3                                                | #N/A                  | 3.5274   | 4.3326  | 4.2142  | 3.2160  | 4.1539  | 3.5756  | 4.4915  | 3.4016  | 3.0502  | 3.1830  | 1.0910  | 0.1257  | 0.3739 | 0.4272 |
| Eef2    | _STAIRSYELSELDUNRW_2                                        | #N/A                  | 4.2921   | 3.5053  | 4.0258  | 3.5696  | 2.8716  | 3.3570  | 3.7178  | 3.4316  | 3.7307  | 3.2468  | 0.9989  | -0.0016 | 0.9896 | 0.0046 |
| Opn1    | _VWVVGDSAGK_2                                               | #N/A                  | 6.6744   | 6.7976  | 6.7590  | 6.3293  | 6.8595  | 6.8048  | 6.1934  | 6.6320  | 6.5931  | 6.5896  | 1.0311  | 0.0442  | 0.1535 | 0.8138 |
| Opn1    | _EVLDEAFEDGEK_2                                             | #N/A                  | 6.4976   | 6.4506  | 6.6682  | 6.5017  | 6.5213  | 6.4510  | 6.7455  | 6.0379  | 6.2442  | 6.5048  | 1.0207  | 0.0295  | 0.3344 | 0.4758 |
| Opn1    | _ESVEQDQDSFK_2                                              | #N/A                  | 3.6665   | 6.4264  | 6.9119  | 5.8789  | 6.2228  | 6.5722  | 6.6287  | 6.6688  | 6.2942  | 0.9691  | -0.0453 | 0.3076  | 0.5119 | 0.1579 |
| Opn1    | _AVEVAVETULGEFSR_2                                          | #N/A                  | 6.1768   | 4.8953  | 6.2780  | 5.1512  | 5.3162  | 5.9385  | 5.9787  | 4.9126  | 4.9064  | 5.9535  | 1.0346  | 0.0491  | 0.6353 | 0.1971 |
| Opn1    | _EFDLKEDLAALR_3                                             | #N/A                  | 5.8596   | 5.0144  | 5.3470  | 5.0537  | 5.5163  | 5.7774  | 5.3711  | 5.3873  | 4.9475  | 5.6507  | 1.0167  | 0.0238  | 0.6900 | 0.1611 |
| Opn1    | _FNLETWK_2                                                  | #N/A                  | 4.2707   | 4.6609  | 4.6292  | 4.8565  | 4.5185  | 5.0356  | 4.2231  | 5.5882  | 4.7974  | 4.7179  | 0.9649  | -0.0516 | 0.5339 | 0.2726 |
| Opn1    | _TSVLEM[Oxidation (M)]IAQAR_2                               | #N/A                  | 5.6984   | 5.8029  | 6.0989  | 5.7825  | 5.3234  | 5.8598  | 5.5536  | 5.7168  | 6.3570  | 6.0227  | 0.9744  | -0.0375 | 0.4498 | 0.7470 |
| Opn1    | _OFFTASPGETAFR_2                                            | #N/A                  | 5.4878   | 3.8357  | 3.2404  | 4.2850  | 5.9627  | 5.8765  | 6.2479  | 4.2170  | 4.6651  | 6.1784  | 0.8276  | -0.2729 | 0.2029 | 0.6927 |
| Opn1    | _VNDEHPALYASDEITVR_3                                        | #N/A                  | 5.4434   | 5.1752  | 5.3245  | 5.5695  | 4.9370  | 5.0819  | 5.4900  | 5.4571  | 4.9271  | 5.1520  | 0.9998  | -0.0004 | 0.9937 | 0.0027 |
| Opn1    | _IQQIEGK_2                                                  | #N/A                  | 4.6163   | 2.3271  | 3.5912  | 3.1349  | 3.0012  | 2.9610  | 3.2832  | 3.8898  | 3.1737  | 4.0726  | 0.9077  | -0.1398 | 0.4629 | 0.3345 |
| Opn1    | _IDQLEELHTDLK_3                                             | #N/A                  | 4.0078   | 3.5735  | 3.1938  | 3.6965  | 2.4855  | 3.5180  | 3.4111  | 3.1221  | 3.9008  | 3.6635  | 0.9683  | -0.0465 | 0.7179 | 0.1439 |
| Opn1    | _LDAFEALHQEK_2                                              | #N/A                  | 5.2260   | 4.5403  | 5.6125  | 4.4283  | 5.4070  | 5.0881  | 5.4772  | 5.0435  | 5.3222  | 4.8174  | 0.9778  | -0.0324 | 0.6801 | 0.1674 |
| Opn1    | _SVTDLVSQM[Oxidation (M)]DPHGR_3                            | #N/A                  | 3.1879   | 4.1545  | 4.4224  | 3.9662  | 1.3534  | 3.7537  | 4.1145  | 3.0350  | 3.3340  | 3.5816  | 0.9877  | -0.0178 | 0.9442 | 0.0249 |
| Ptpa    | _LVALDTLDR_2                                                | #N/A                  | 6.8292   | 7.1365  | 6.2722  | 6.9250  | 6.5400  | 6.3410  | 6.2300  | 6.9865  | 7.1709  | 6.8334  | 0.9807  | -0.0201 | 0.5969 | 0.2341 |
| Ptpa    | _FGGLPHPPVTS_2                                              | #N/A                  | 5.3865   | 6.2155  | 6.2938  | 5.8925  | 4.6611  | 5.6694  | 6.2969  | 5.3668  | 5.8543  | 0.9589  | -0.0606 | 0.5966  | 0.2953 | 0.0748 |
| Ptpa    | _LDQEAENLVAVPTTHAAAVPEVIAVLK_3                              | #N/A                  | 3.9481   | 3.2035  | 3.2086  | 3.7113  | 3.0918  | 3.5328  | 3.4260  | 4.4072  | 4.0558  | 3.6783  | 0.8863  | -0.1741 | 0.1051 | 0.9786 |
| Strn4   | _S(Phospho (STY))ELNGAGEPVEGAPR_2                           | P58404_S206_M1_Strn4  | 11.1427  | 11.1450 | 11.2719 | 11.9480 | 10.5332 | 11.4174 | 11.4349 | 11.2591 | 11.5403 | 11.5978 | 0.9812  | -0.0273 | 0.3990 | 0.3991 |
| Strn4   | _AS(Phospho (STY))PGPGGLSGGESLLVK_2                         | P58404_S223_M1_Strn4  | 2.9485   | 9.2128  | 9.7954  | 10.3982 | 9.0040  | 9.4772  | 9.7138  | 9.6182  | 9.0562  | 9.5589  | 1.0608  | 0.0582  | 0.8059 | 0.0937 |
| Hrh3    | _GSKPASASS(Phospho (STY))LEKR_3                             | P58406_S332_M1_Hrh3   | 4.4976   | 3.1573  | 4.5397  | 3.4626  | 2.9786  | 3.2501  | 3.6109  | 4.9760  | 3.8376  | 4.0962  | 0.8832  | -0.1792 | 0.2892 | 0.5387 |
| Hrh3    | _VQPGHSG(Phospho (STY))LEQC[Carbamidomethyl (C)]WK_2        | #N/A                  | 8.2630   | 7.9640  | 8.4287  | 8.2142  | 7.0281  | 8.0921  | 8.8216  | 8.4177  | 8.2704  | 8.2082  | 0.9489  | -0.0757 | 0.1592 | 0.5880 |
| Foxp2   | _BDS(Phospho (STY))SHHETGASHTLVGHGV[Carbamidomethyl (C)]K_4 | P58463_S329_M1_Foxp2  | 3.3488   | 4.1540  | 4.4230  | 3.9667  | 3.9753  | 3.7542  | 4.1150  | 3.0345  | 3.3335  | 3.6440  | 1.1147  | 0.1567  | 0.1586 | 0.7997 |
| Fam207a | _AVEPALQGS(Phospho (STY))PAGGAGAK_2                         | P58468_S38_M1_Fam207a | 8.8463   | 8.6946  | 9.4799  | 9.4209  | 8.5537  | 9.0111  | 9.1639  | 8.7184  | 8.6625  | 8.7198  | 1.0210  | 0.0299  | 0.4146 | 0.3824 |
| Aas     | _LEFQQQGEAPGDAS(Phospho (STY))P_2                           | P58686_S82_M1_Aas     | 4.0013</ |         |         |         |         |         |         |         |         |         |         |         |        |        |



|          |                                                                                   |                          |         |         |         |         |        |         |         |         |         |         |         |         |        |        |
|----------|-----------------------------------------------------------------------------------|--------------------------|---------|---------|---------|---------|--------|---------|---------|---------|---------|---------|---------|---------|--------|--------|
| Tnks1bp1 | _WLDOLAS[Phospho (STY)]PPNYSGSAR_2                                                | P58871_S692_M1_Tnks1bp1  | 3.7223  | 3.5038  | 4.4091  | 9.8764  | 3.3921 | 3.2325  | 3.1256  | 8.7043  | 8.4070  | 7.2683  | 0.6820  | -0.5522 | 0.2247 | 0.6484 |
| Tnks1bp1 | _M[Oxidation (M)]QAESQS[Phospho (STY)]PTNVOLEDKER_2                               | #N/A                     | 5.8737  | 6.4374  | 5.9425  | 6.4634  | 4.9395 | 6.5285  | 5.9240  | 6.4275  | 6.2113  | 5.4280  | 1.0055  | 0.0079  | 0.9274 | 0.0327 |
| Tnks1bp1 | _SSGLS[Phospho (STY)]PGLETFDELEAR_2                                               | P58871_S1375_M1_Tnks1bp1 | 7.5272  | 7.5761  | 7.7465  | 7.7447  | 7.6214 | 7.7808  | 7.9868  | 9.0254  | 7.8284  | 7.8025  | 0.9802  | -0.2088 | 0.7532 | 0.1231 |
| Tnks1bp1 | _GGVSVQVGGGT[Phospho (STY)]PPAPSPR_2                                              | P58871_T533_M1_Tnks1bp1  | 7.1816  | 7.5426  | 8.2582  | 8.5853  | 7.7255 | 3.5683  | 8.6607  | 7.8253  | 7.9129  | 8.0753  | 0.8799  | -0.1846 | 0.3308 | 0.4804 |
| Tnks1bp1 | _RFS[Phospho (STY)]EGVLQPPSQDQEK_2                                                | #N/A                     | 3.6732  | 7.4852  | 8.1059  | 8.5471  | 6.9631 | 7.7776  | 7.9934  | 8.0670  | 7.8781  | 8.1801  | 0.8832  | -0.1791 | 0.3276 | 0.4847 |
| Tnks1bp1 | _NM[Oxidation (M)]APGAGC[Carbamidomethyl (C)]S[Phospho (STY)]PGEPR_2              | #N/A                     | 7.1769  | 6.6290  | 6.8596  | 7.7289  | 5.4625 | 7.0240  | 6.9158  | 6.6611  | 7.0909  | 7.1677  | 0.9791  | -0.0305 | 0.7237 | 0.1404 |
| Tnks1bp1 | _DVGHLEEGASGLS[Phospho (STY)]PSTPHSR_3                                            | P58871_S1022_M1_Tnks1bp1 | 5.9217  | 5.8825  | 6.4273  | 7.2138  | 3.2581 | 5.9675  | 6.0749  | 6.5978  | 6.1348  | 6.2057  | 0.9241  | -0.1139 | 0.5091 | 0.2932 |
| Tnks1bp1 | _OYSS[Phospho (STY)]QDAEEQDREFKR_3                                                | P58871_S912_M1_Tnks1bp1  | 6.6754  | 6.4914  | 3.7928  | 3.8177  | 5.8345 | 6.6732  | 3.7287  | 6.8555  | 6.7980  | 7.0071  | 0.9098  | -0.1363 | 0.5761 | 0.2393 |
| Tnks1bp1 | _ASRPVS[Phospho (STY)]S[Phospho (STY)]DEEVVEE PQSR_2                              | #N/A                     | 3.4878  | 4.8579  | 3.7728  | 6.0815  | 5.1181 | 5.6136  | 6.0061  | 5.9637  | 4.9702  | 3.6003  | 0.9390  | -0.9098 | 0.6598 | 0.1806 |
| Tnks1bp1 | _RDS[Phospho (STY)]LGSFSTR_2                                                      | #N/A                     | 5.8932  | 3.8493  | 4.0637  | 5.9160  | 4.0034 | 3.7261  | 4.2811  | 3.5521  | 3.2007  | 5.1138  | 1.1334  | 0.1806  | 0.4148 | 0.3821 |
| Tnks1bp1 | _LDS[Phospho (STY)]PPSPITEASEAAEAADSVWAVSGR_3                                     | P58871_S496_M1_Tnks1bp1  | 5.6059  | 6.5853  | 6.6312  | 7.1687  | 5.5735 | 5.2432  | 6.3258  | 6.5723  | 3.5680  | 5.9115  | 1.0966  | 0.1330  | 0.4430 | 0.3536 |
| Tnks1bp1 | _HS[Phospho (STY)]GGEVGIGGSQDESEVPVR_3                                            | P58871_S796_M1_Tnks1bp1  | 6.5661  | 6.2368  | 3.9783  | 7.3288  | 4.7677 | 5.7116  | 4.0519  | 4.7812  | 6.5999  | 6.4261  | 1.0549  | 0.0771  | 0.7161 | 0.1450 |
| Tnks1bp1 | _NRS[Phospho (STY)]AEEGVETESK_2                                                   | P58871_S1657_M1_Tnks1bp1 | 3.0900  | 4.0777  | 4.2144  | 4.4240  | 3.7166 | 4.4830  | 4.3737  | 3.3112  | 4.0469  | 3.9027  | 1.0236  | 0.0337  | 0.7803 | 0.1078 |
| Tnks1bp1 | _S[Phospho (STY)]PPSGQSLEGIM[Oxidation (M)]TASSSK_2                               | #N/A                     | 3.3294  | 5.5412  | 5.3871  | 7.2978  | 4.3937 | 4.6231  | 4.6091  | 5.2661  | 4.5394  | 4.5982  | 1.0720  | 0.1003  | 0.6366 | 0.1962 |
| Tnks1bp1 | _DRQSC[Phospho (STY)]PTC[Carbamidomethyl (C)]SEGGLGWAQK_3                         | P58871_S713_M1_Tnks1bp1  | 3.2473  | 4.0951  | 4.4818  | 4.0256  | 3.8919 | 4.2336  | 4.1739  | 2.9756  | 3.2746  | 3.7029  | 1.1314  | 0.1781  | 0.1565 | 0.8054 |
| Bcd2l13  | _S[Phospho (STY)]HJTGEAAAVR_2                                                     | #N/A                     | 6.4087  | 5.8336  | 4.0138  | 3.8854  | 3.5040 | 3.5717  | 3.8677  | 3.8597  | 6.4646  | 3.6912  | 1.0146  | 0.0209  | 0.9391 | 0.0273 |
| Bcd2l13  | _ALQTLSPVTEAYR_2                                                                  | #N/A                     | 4.9787  | 4.4337  | 4.4978  | 4.7642  | 4.4078 | 4.6475  | 4.7892  | 4.9167  | 3.7666  | 5.2522  | 0.9517  | -0.0715 | 0.5525 | 0.2577 |
| Bcd2l13  | _KXSH[Phospho (STY)]GEAAAVR_3                                                     | #N/A                     | 3.7907  | 6.3809  | 4.4877  | 6.3333  | 3.6625 | 3.5702  | 3.7489  | 3.8546  | 3.5751  | 1.3212  | 0.4018  | 0.1353  | 0.6868 | 0.0688 |
| Pcf1     | _Acetyl (Protein N-term)[IleuNHGSS[Phospho (STY)]PR_2                             | P59114_S8_M1_Pcf1        | 7.8055  | 7.5758  | 7.7059  | 7.9876  | 6.8644 | 6.5389  | 8.2611  | 7.8216  | 7.3369  | 7.6353  | 0.9548  | -0.0667 | 0.3211 | 0.4934 |
| Pcf1     | _QLS[Phospho (STY)]EEQPSNGWK_2                                                    | P59114_S116_M1_Pcf1      | 4.0840  | 3.3884  | 3.6877  | 3.2315  | 3.2097 | 3.0189  | 3.3797  | 4.0688  | 4.4096  | 0.8796  | 0.8796  | -0.1850 | 0.1116 | 0.9524 |
| Arhgap39 | _AFS[Phospho (STY)]DEALAQDQSK_2                                                   | P59281_S597_M1_Arhgap39  | 11.0103 | 11.0048 | 11.3935 | 11.1583 | 9.7485 | 10.9808 | 11.4673 | 10.9743 | 11.0872 | 10.9706 | 0.9782  | -0.0317 | 0.4553 | 0.3417 |
| Arhgap39 | _KPS[Phospho (STY)]ETDENHWAK_2                                                    | P59281_S683_M1_Arhgap39  | 3.8667  | 3.1418  | 6.0394  | 3.6759  | 3.0105 | 5.5397  | 3.5738  | 5.5243  | 4.1758  | 1.6761  | 0.9941  | -0.0086 | 0.9737 | 0.0116 |
| Arhgap39 | _DGST[Phospho (STY)]GSSLEPLEER_2                                                  | P59281_T133_M1_Arhgap39  | 3.4237  | 4.2289  | 4.1105  | 4.6131  | 4.0502 | 3.6793  | 4.3278  | 3.5053  | 3.1539  | 3.0793  | 1.1425  | 0.1922  | 0.1459 | 0.8361 |
| Arhgap39 | _QLVYVEGAGS[Phospho (STY)]SPW_2                                                   | P59281_S402_M1_Arhgap39  | 3.6765  | 3.5497  | 4.3633  | 3.3651  | 2.8022 | 3.4265  | 3.0798  | 3.2525  | 5.3403  | 5.5763  | 0.8187  | -0.2885 | 0.2185 | 0.6605 |
| Arhgap39 | _EDTSSC[Carbamidomethyl (C)]S[Phospho (STY)]PGVLEK_2                              | P59281_S169_M1_Arhgap39  | 3.1732  | 4.0530  | 3.8600  | 4.3627  | 3.9413 | 4.1842  | 4.0773  | 3.7558  | 3.4044  | 4.3297  | 1.0096  | 0.0137  | 0.8908 | 0.0502 |
| E1f5     | _SV[S[Phospho (STY)]DQPYR_2                                                       | P59325_S10_M1_E1f5       | 7.2684  | 7.6678  | 7.2653  | 3.6406  | 7.2554 | 7.7286  | 7.2604  | 7.3176  | 7.3238  | 7.7082  | 0.9192  | -0.1215 | 0.4774 | 0.3211 |
| E1f5     | _AM[Oxidation (M)]GPLVLTEVLFDYK_2                                                 | #N/A                     | 3.7595  | 4.2215  | 3.6267  | 3.1705  | 3.8454 | 3.8652  | 3.3187  | 4.1617  | 4.3486  | 1.0392  | 0.0555  | 0.7082  | 0.1488 | 0.3928 |
| E1f5     | _GLTIS[Phospho (STY)]DDLER_2                                                      | P59325_S227_M1_E1f5      | 4.3492  | 3.6047  | 4.0829  | 3.6267  | 3.4930 | 3.3137  | 3.7749  | 3.3745  | 3.6736  | 3.3040  | 1.0518  | 0.0729  | 0.4672 | 0.3305 |
| E1f5     | _VETVKS[Phospho (STY)]DNKDDDDIDAI_2                                               | P59325_S417_M1_E1f5      | 3.9117  | 3.5888  | 3.8756  | 3.6003  | 3.9489 | 4.0029  | 3.8662  | 3.5148  | 3.5673  | 1.0179  | 0.0256  | 0.6525  | 0.1845 | 0.3854 |
| E1f5     | _EEGIDSSKEVAEER_3                                                                 | #N/A                     | 2.9710  | 4.2551  | 3.6578  | 4.1605  | 3.5975 | 3.9820  | 3.8752  | 3.9580  | 3.6066  | 4.1732  | 0.9660  | -0.0499 | 0.6213 | 0.2067 |
| Inpp5j   | _AAGPAT[Phospho (STY)]PPR_2                                                       | P59644_S266_M1_Inpp5j    | 4.0048  | 3.2603  | 3.1519  | 7.9103  | 5.7837 | 3.4760  | 3.3692  | 4.4640  | 4.1126  | 8.0678  | 0.9189  | -0.1219 | 0.7578 | 0.1204 |
| Inpp5j   | _QLS[Phospho (STY)]PTSVGPK_2                                                      | P59644_S171_M1_Inpp5j    | 3.2214  | 4.0266  | 4.6562  | 6.0804  | 3.8479 | 3.8816  | 4.2424  | 4.4079  | 3.2061  | 3.7714  | 1.0969  | 0.1335  | 0.5098 | 0.2926 |
| Inpp5j   | _SR[Phospho (STY)]PGLAR_2                                                         | P59644_S885_M1_Inpp5j    | 4.0845  | 6.5313  | 3.2705  | 3.7732  | 3.2102 | 6.2559  | 6.6347  | 3.4553  | 3.9939  | 3.7402  | 0.9663  | -0.0494 | 0.8687 | 0.0611 |
| Inpp5j   | _VAPSGGS[Phospho (STY)]PQSR_2                                                     | P59644_S691_M1_Inpp5j    | 3.3822  | 3.8439  | 4.0690  | 4.5717  | 4.0088 | 4.3932  | 4.2864  | 3.5468  | 6.3242  | 4.0378  | 0.9409  | -0.0879 | 0.6879 | 0.1624 |
| Inpp5j   | _HRS[Phospho (STY)]RS[Phospho (STY)]PGLAR_3                                       | P59644_S883_M2_Inpp5j    | 4.3512  | 4.7868  | 3.5372  | 4.2684  | 3.4769 | 3.8614  | 3.7545  | 4.0786  | 6.6989  | 4.1922  | 0.8645  | -0.2100 | 0.3191 | 0.4961 |
| Inpp5j   | _GSGS[Phospho (STY)]PS[Phospho (STY)]PQSR_2                                       | P59644_S909_M2_Inpp5j    | 3.2915  | 4.6567  | 4.5260  | 4.0698  | 3.9361 | 3.8573  | 4.2181  | 4.4322  | 3.2304  | 3.7471  | 1.0382  | 0.0541  | 0.6619 | 0.1792 |
| Fxyd7    | _S[Phospho (STY)]K[Carbamidomethyl (C)]KSELPSAPGGGGV_2                            | P59648_S65_M1_Fxyd7      | 10.5573 | 10.0790 | 4.0169  | 10.5126 | 3.8117 | 10.1426 | 10.6340 | 10.2243 | 3.8254  | 0.9411  | -0.0876 | 0.8155  | 0.0886 | 0.0886 |
| Fxyd7    | _SELP[Phospho (STY)]APGGGV_2                                                      | P59648_S73_M1_Fxyd7      | 6.7070  | 5.2933  | 6.3965  | 5.5088  | 5.0760 | 5.1109  | 4.9279  | 5.6217  | 5.3897  | 4.6365  | 1.0158  | 0.0225  | 0.8445 | 0.0734 |
| Fxyd7    | _ADGRS[Phospho (STY)]ES[Phospho (STY)]PTC[Carbamidomethyl (C)]K_2                 | #N/A                     | 5.0157  | 6.4418  | 6.4947  | 6.5236  | 3.2915 | 3.5758  | 5.1753  | 7.2501  | 4.0895  | 5.7958  | 0.9370  | -0.0939 | 0.7145 | 0.1460 |
| Fxyd7    | _SESPTC[Carbamidomethyl (C)]KSC[Carbamidomethyl (C)]KS[Phospho (STY)]ELPSAPGGGV_3 | #N/A                     | 7.3537  | 7.2973  | 4.1534  | 7.5139  | 4.2448 | 3.4847  | 3.8455  | 3.3040  | 3.6030  | 7.2623  | 1.2600  | 0.3334  | 0.3629 | 0.4402 |
| Fxyd7    | _KADS[Phospho (STY)]RSES[Phospho (STY)]PTC[Carbamidomethyl (C)]K_2                | #N/A                     | 3.3159  | 7.7648  | 3.8434  | 4.1911  | 3.9556 | 6.5132  | 4.2125  | 7.9125  | 3.2890  | 8.1932  | 0.8354  | -0.2594 | 0.4912 | 0.3087 |
| Anks1a   | _SES[Phospho (STY)]LSNC[Carbamidomethyl (C)]SIGK_2                                | #N/A                     | 7.7187  | 7.8255  | 3.5096  | 8.3818  | 7.5644 | 7.9208  | 8.3811  | 3.9478  | 4.2469  | 7.8876  | 1.1697  | 0.2261  | 0.4500 | 0.3468 |
| Anks1a   | _SES[Phospho (STY)]LSNC[Carbamidomethyl (C)]SIGOK_2                               | #N/A                     | 6.1216  | 5.9624  | 3.2641  | 6.4954  | 5.8357 | 6.7242  | 3.3856  | 6.3682  | 6.0751  | 5.9909  | 1.0374  | 0.0530  | 0.8101 | 0.0915 |
| Anks1a   | _GTESTQDAC[Carbamidomethyl (C)]IAK_2                                              | #N/A                     | 3.7291  | 3.6133  | 3.4628  | 4.5074  | 3.4346 | 4.2949  | 3.1548  | 4.2937  | 4.1847  | 0.9830  | -0.0248 | 0.8343  | 0.0787 | 0.0817 |
| Dock4    | _S[Phospho (STY)]DPNLSAPEX_2                                                      | P59764_S1759_M1_Dock4    | 7.2023  | 4.0414  | 3.9230  | 4.4257  | 6.2028 | 7.2120  | 8.0136  | 3.6928  | 6.7385  | 7.4116  | 0.8510  | -0.2327 | 0.4060 | 0.3914 |
| Dock4    | _NSAPASM[Oxidation (M)]S[Phospho (STY)]PDGTR_2                                    | #N/A                     | 8.6662  | 9.0123  | 8.9475  | 8.1993  | 7.2711 | 8.3499  | 8.3895  | 5.9650  | 8.3448  | 1.2730  | 0.3482  | 0.0830  | 0.1810 | 0.1810 |
| Dock4    | _AVNPFPSSWS[Phospho (STY)]LDSGK_2                                                 | P59764_S1778_M1_Dock4    | 5.5845  | 4.0910  | 4.2357  | 5.7272  | 4.1754 | 3.2917  | 4.1728  | 3.3810  | 3.0296  | 5.7791  | 1.1044  | 0.1432  | 0.5496 | 0.2600 |
| Dock4    | _AS[Phospho (STY)]PLLSOK_2                                                        | P59764_S1709_M1_Dock4    | 3.1281  | 3.8844  | 3.4262  | 3.9064  | 3.7727 | 4.3527  | 4.0547  | 3.3948  | 3.3938  | 3.5837  | 1.1046  | 0.0625  | 0.2252 | 0.6474 |
| Sash1    | _S[Phospho (STY)]LPVSC[Carbamidomethyl (C)]JR_2                                   | P59808_S805_M1_Sash1     | 8.7718  | 8.5980  | 9.3247  | 9.2903  | 8.0346 | 8.8080  | 8.5363  | 8.7848  | 8.6434  | 8.6802  | 1.0166  | 0.0237  | 0.5781 | 0.2380 |
| Sash1    | _EQS[Phospho (STY)]DOETEDSVK_2                                                    | P59808_S241_M1_Sash1     | 7.3883  | 8.9537  | 9.2133  | 8.5259  | 7.9187 | 7.3346  | 9.2235  | 3.3497  | 8.4878  | 8.7707  | 1.1025  | 0.1408  | 0.5294 | 0.2762 |
| Sash1    | _AGGS[Phospho (STY)]VESLR_2                                                       | #N/A                     | 6.8372  | 3.3241  | 7.2113  | 6.9748  | 3.1454 | 6.5850  | 5.9077  | 4.4101  | 4.0587  | 7.0787  | 1.0674  | 0.0940  | 0.7576 | 0.1206 |
| Sash1    | _S[Phospho (STY)]K[Carbamidomethyl (C)]ILEGPEPVESWPR_2                            | P59808_S813_M1_Sash1     | 5.9971  | 7.0300  | 3.5078  | 8.9696  | 7.6302 | 7.2525  | 8.1170  | 8.1495  | 7.7339  | 0.9679  | -0.0471 | 0.8647  | 0.0631 | 0.0631 |
| Sash1    | _DSGC[Carbamidomethyl (C)]YES[Phospho (STY)]SENLEAK_2                             | P59808_S723_M1_Sash1     | 3.8000  | 4.2401  | 5.4643  | 4.0032  | 3.4403 | 4.2892  | 5.4106  | 4.1153  | 3.7638  | 3.9702  | 0.9748  | -0.0368 | 0.8186 | 0.0869 |
| Sash1    | _LKAGGS[Phospho (STY)]VESLR_2                                                     | #N/A                     | 4.2736  | 2.9526  | 3.4595  | 3.9622  | 2.8409 | 3.7837  | 3.6769  | 4.7577  | 3.8049  | 5.0561  | 0.8200  | -0.2864 | 0.0856 | 1.0674 |
| Sash1    | _SHS[Phospho (STY)]DDQGGADVGR_2                                                   | P59808_S831_M1_Sash1     | 6.3304  | 7.6673  | 7.3523  | 8.4206  | 7.0408 | 7.6666  | 8.0760  | 7.8027  | 3.2201  | 7.8574  | 1.1000  | 0.1375  | 0.5173 | 0.2862 |
| Sash1    | _AVLLTAVELLQYDS[Phospho (STY)]NSDQSGSQEK_3                                        | P59808_S692_M1_Sash1     | 3.4878  | 3.9249  | 6.2535  | 3.7316  | 3.3272 | 3.9024  | 3.6066  | 3.9127  | 3.9085  | 4.2255  | 0.9370  | -0.0940 | 0.1523 | 0.8173 |
| Arpc4    | _ELLQPVTSR_2                                                                      | #N/A                     | 8.9248  | 8.6544  | 8.6894  | 8.7982  | 8.0594 | 8.1647  | 8.9130  | 8.9566  | 8.4948  | 8.4895  | 0.9811  | -0.0276 | 0.4473 | 0.3494 |
| Arpc4    | _VLEGGNSVLR_2                                                                     | #N/A                     | 6.5082  | 6.5613  | 6.6603  | 6.4151  | 5.0898 | 5.9388  | 6.7141  | 6.8580  | 6.5099  | 6.1907  | 0.9433  | -0.0843 | 0.2855 | 0.5444 |
| Arpc4    | _AENFFLR_2                                                                        | #N/A                     | 5.2571  | 6.2365  | 5.8299  | 5.0366  | 4.5407 | 5.0273  | 5.5738  | 6.4705  | 5.5518  | 6.3435  | 0.8891  | -0.1695 | 0.1089 | 0.9629 |
| Arpc4    | _IVAEFLX_2                                                                        | #N/A                     | 3.1131  | 3.3652  | 4.1264  | 3.8096  | 4.     |         |         |         |         |         |         |         |        |        |



|                       |                                                                                                      |                       |         |         |         |         |         |         |         |         |         |         |         |         |        |        |
|-----------------------|------------------------------------------------------------------------------------------------------|-----------------------|---------|---------|---------|---------|---------|---------|---------|---------|---------|---------|---------|---------|--------|--------|
| Pcbp1                 | _O[C](Carbamidomethyl (C))LVM(Oxidation (M))LETLSQ(SPhospho (STY))PQGR_2                             | #N/A                  | 3.6753  | 6.9075  | 7.0478  | 9.1232  | 3.7465  | 3.8469  | 4.1402  | 6.7854  | 6.1141  | 3.1236  | 1.1356  | 0.1835  | 0.6263 | 0.2032 |
| Ppf1a3                | _GEGPAVGG(TPhospho (STY))PPPTPR_2                                                                    | P60469_T714_M1_Ppf1a3 | 13.3072 | 13.2515 | 13.8712 | 13.5811 | 12.5439 | 13.2951 | 13.7672 | 13.1686 | 13.2385 | 13.2137 | 0.9971  | -0.0042 | 0.8817 | 0.0547 |
| P60469_5683_M1_Ppf1a3 | _LAPPSPhospho (STY))PAR_2                                                                            | #N/A                  | 10.3321 | 10.1063 | 10.1798 | 10.3394 | 9.0164  | 10.2625 | 9.9990  | 10.2132 | 10.2544 | 10.1654 | 0.9883  | -0.0169 | 0.6648 | 0.1773 |
| Ppf1a3                | _OAQS(Phospho (STY))PGGVSEVLUK_2                                                                     | #N/A                  | 9.3813  | 9.4288  | 10.1155 | 9.9343  | 8.9692  | 9.5177  | 9.7845  | 9.3748  | 9.4792  | 9.3942  | 1.0052  | 0.0075  | 0.8298 | 0.0810 |
| Ppf1a3                | _RGS(Phospho (STY))ALGPDGAGGELR_3                                                                    | #N/A                  | 8.0918  | 7.7441  | 7.9384  | 8.3468  | 6.5491  | 7.8851  | 7.3704  | 8.0873  | 7.9971  | 8.1629  | 0.9816  | -0.0267 | 0.6898 | 0.1613 |
| Ppf1a3                | _YSQAPLPSGAPLDPGAGS(Phospho (STY))GR_2                                                               | P60469_5537_M1_Ppf1a3 | 6.5932  | 3.6333  | 7.1812  | 8.0223  | 3.5216  | 3.1030  | 4.4970  | 3.3458  | 3.6449  | 3.3326  | 1.4419  | 0.5280  | 0.1835 | 0.7365 |
| Ppf1a3                | _VSSSGDS(Phospho (STY))LR_2                                                                          | P60469_5645_M1_Ppf1a3 | 7.8975  | 7.8548  | 8.3897  | 7.9093  | 6.8406  | 7.8004  | 7.9572  | 7.7493  | 7.5602  | 7.5052  | 1.0116  | 0.0166  | 0.7514 | 0.1241 |
| Ppf1a3                | _ESVSLAGTSPDETATDPLGLAK_2                                                                            | #N/A                  | 4.3208  | 4.5784  | 4.8076  | 4.5996  | 4.3283  | 3.7640  | 4.8596  | 4.6575  | 5.1262  | 4.4132  | 0.9237  | -0.1145 | 0.1369 | 0.8635 |
| Ppf1a3                | _GS(Phospho (STY))ALGPDGAGGELR_2                                                                     | #N/A                  | 5.9801  | 5.4187  | 6.6492  | 4.2079  | 4.0961  | 6.4660  | 3.9225  | 5.8852  | 4.9122  | 6.4050  | 1.0357  | 0.0506  | 0.7980 | 0.0980 |
| Ppf1a3                | _TAELEALER_2                                                                                         | #N/A                  | 5.0514  | 5.6113  | 3.1282  | 4.9304  | 5.3012  | 5.5186  | 5.6472  | 5.4767  | 5.8693  | 0.9240  | -0.1141 | 0.4763  | 0.3222 | 0.3882 |
| Ppf1a3                | _S(Phospho (STY))LPGSALELR_2                                                                         | P60469_5508_M1_Ppf1a3 | 3.2097  | 11.3940 | 11.9953 | 11.9212 | 10.4539 | 11.9456 | 11.7270 | 11.4925 | 11.6883 | 11.6751 | 0.8718  | -0.1979 | 0.4216 | 0.3751 |
| Ppf1a3                | _M(Oxidation (M))AQAALQAGS(Phospho (STY))PEDGAPPR_2                                                  | #N/A                  | 8.4787  | 9.3448  | 9.0813  | 10.4771 | 8.3411  | 9.2179  | 9.6338  | 9.6866  | 9.4655  | 9.2987  | 0.9617  | -0.0563 | 0.3841 | 0.4156 |
| Ppf1a3                | _RQAQS(Phospho (STY))PGGVSEVLUK_3                                                                    | #N/A                  | 3.8777  | 3.1331  | 3.6114  | 3.7817  | 3.2483  | 3.6032  | 3.4963  | 3.8460  | 3.9854  | 5.1473  | 0.8601  | -0.2174 | 0.1097 | 0.9598 |
| Ppf1a3                | _QM(Oxidation (M))S(Phospho (STY))QLEELGTahr_3                                                       | #N/A                  | 5.5408  | 4.6980  | 4.1089  | 5.6523  | 5.0260  | 6.0180  | 4.6072  | 5.7663  | 6.1066  | 6.0400  | 0.9190  | -0.1219 | 0.3424 | 0.4655 |
| Ppf1a3                | _WSGAKDESS(Phospho (STY))KDWDR_3                                                                     | P60469_5554_M1_Ppf1a3 | 3.6871  | 2.9915  | 4.3739  | 3.6284  | 2.8128  | 3.4159  | 3.7766  | 3.3728  | 3.6718  | 3.3057  | 0.9867  | -0.0193 | 0.8792 | 0.0559 |
| Pdp                   | _IVPGAELLQR_2                                                                                        | #N/A                  | 8.1483  | 8.6040  | 8.4022  | 7.9440  | 8.5533  | 8.1555  | 8.1202  | 8.3143  | 7.9712  | 8.0277  | 1.0238  | 0.0339  | 0.2210 | 0.6555 |
| Pdp                   | _NTLFSVMNSR_2                                                                                        | #N/A                  | 7.8403  | 7.5856  | 7.9282  | 8.1355  | 7.6980  | 7.7207  | 7.7590  | 7.6356  | 7.7612  | 7.7498  | 1.0119  | 0.0170  | 0.3982 | 0.3999 |
| Pdp                   | _LAGDPGEDPR_2                                                                                        | #N/A                  | 6.6678  | 6.7140  | 6.9919  | 6.8051  | 7.2804  | 6.8661  | 6.6818  | 7.0726  | 6.6949  | 6.2424  | 1.0322  | 0.0457  | 0.2580 | 0.5883 |
| Pdp                   | _AQFLFSALC(Carbamidomethyl (C))AAR_2                                                                 | #N/A                  | 5.9364  | 6.0116  | 6.2067  | 6.2029  | 6.5705  | 6.5985  | 5.8531  | 6.3766  | 6.5897  | 6.1353  | 1.0025  | 0.0036  | 0.9354 | 0.0290 |
| Pdp                   | _LSGPPDASGAVFLVGEGELR_2                                                                              | #N/A                  | 5.1993  | 5.6381  | 6.0177  | 5.2665  | 4.7899  | 5.4320  | 5.6090  | 5.9134  | 5.8440  | 5.9862  | -0.0201 | 0.8274  | 0.0823 | 0.2593 |
| Pdp                   | _TGTGSLAAAVETASGR_2                                                                                  | #N/A                  | 6.1744  | 6.2985  | 3.1861  | 6.2711  | 6.7027  | 6.106   | 6.5072  | 6.3661  | 5.8282  | 6.3575  | 0.9323  | -0.1011 | 0.5504 | 0.2593 |
| Pdp                   | _C(Carbamidomethyl (C))G(Oxidation (M))TIVTLTGVSLEEAQALTAGQR_3                                       | #N/A                  | 1.6575  | 3.6930  | 3.3831  | 3.9800  | 3.5143  | 4.2152  | 3.6723  | 4.0743  | 4.3714  | 4.1050  | 0.8400  | -0.2516 | 0.2116 | 0.6746 |
| Pdp                   | _AVLVGDEQFSFR_2                                                                                      | #N/A                  | 3.8981  | 3.2025  | 4.5849  | 3.5867  | 3.0238  | 3.2049  | 3.5657  | 3.0309  | 4.1803  | 3.5537  | 1.0002  | 0.0003  | 0.9982 | 0.0008 |
| Gabara2               | _EDHS(Phospho (STY))LEHR_2                                                                           | #N/A                  | 6.0507  | 5.8379  | 5.4602  | 6.3324  | 6.0736  | 6.3058  | 6.1405  | 5.9416  | 6.1898  | 6.1088  | 0.9860  | -0.0203 | 0.6329 | 0.1987 |
| Gabara2               | _WM(Oxidation (M))FKEDHS(Phospho (STY))LEHR_3                                                        | #N/A                  | 3.2593  | 4.0832  | 4.4938  | 4.0375  | 3.9038  | 3.8250  | 4.1858  | 3.2627  | 3.7148  | 1.0069  | 0.0099  | 0.9295  | 0.0585 | 0.3918 |
| Actb                  | _VAPEHPVLLTEAPLNPK_3                                                                                 | #N/A                  | 13.1250 | 13.0598 | 13.5636 | 13.3605 | 13.1999 | 13.2840 | 13.2088 | 13.0046 | 13.1791 | 13.0418 | 1.0120  | 0.0172  | 0.1579 | 0.8016 |
| Actb                  | _AGFAGDOAPR_2                                                                                        | #N/A                  | 13.4706 | 13.5793 | 13.4314 | 13.5474 | 13.4536 | 13.2256 | 13.3666 | 13.2492 | 13.4539 | 1.0037  | 0.0053  | 0.5514  | 0.2585 | 0.3211 |
| Actb                  | _DSVGVDEAQSKR_2                                                                                      | #N/A                  | 11.8883 | 12.2861 | 12.4790 | 12.2355 | 12.2643 | 12.2692 | 12.1400 | 12.2214 | 12.1916 | 12.0961 | 1.0062  | 0.0088  | 0.4775 | 0.6555 |
| Actb                  | _IAPPERK_2                                                                                           | #N/A                  | 11.6736 | 12.5049 | 12.3502 | 12.1754 | 12.6823 | 12.0134 | 12.4405 | 12.2803 | 12.4005 | 12.0797 | 1.0031  | 0.0044  | 0.8544 | 0.0683 |
| Actb                  | _AVFPSVGRPR_2                                                                                        | #N/A                  | 11.1358 | 11.1993 | 11.4019 | 10.7458 | 11.1082 | 11.1503 | 11.1177 | 11.0217 | 11.1143 | 11.1660 | 1.0017  | 0.0024  | 0.8712 | 0.0599 |
| Actb                  | _DSVGVDEAQSK_2                                                                                       | #N/A                  | 11.9535 | 11.9548 | 12.0398 | 12.2185 | 12.1532 | 12.0379 | 12.0251 | 12.1622 | 12.0701 | 0.9988  | -0.0017 | 0.8205  | 0.0859 | 0.2105 |
| Actb                  | _AVFPSVGR_2                                                                                          | #N/A                  | 11.3852 | 11.2781 | 11.2389 | 11.0270 | 11.2501 | 11.0605 | 11.0316 | 11.2822 | 11.3772 | 11.3290 | 0.9957  | -0.0062 | 0.6158 | 0.2105 |
| Actb                  | _C(Carbamidomethyl (C))DVIDRK_2                                                                      | #N/A                  | 10.7105 | 10.7166 | 10.9718 | 10.5456 | 11.3420 | 10.9110 | 10.3464 | 10.6393 | 10.7905 | 10.6689 | 1.0240  | 0.0343  | 0.1511 | 0.6746 |
| Actb                  | _IKIAPPER_2                                                                                          | #N/A                  | 8.6120  | 9.3189  | 8.9309  | 8.9987  | 8.6239  | 9.1724  | 9.2658  | 9.0120  | 9.1538  | 8.8439  | 1.0045  | 0.0064  | 0.8808 | 0.0551 |
| Actb                  | _GYSFTTTAER_2                                                                                        | #N/A                  | 12.2070 | 12.2179 | 12.4274 | 12.6040 | 12.4380 | 12.4615 | 12.1398 | 12.4225 | 12.2500 | 12.3229 | 1.0089  | 0.0127  | 0.2678 | 0.5722 |
| Actb                  | _TGTVM(Oxidation (M))DSGGDVTHTVPIYEGVALPHAILR_3                                                      | #N/A                  | 7.6425  | 8.6579  | 9.0760  | 8.2305  | 8.3425  | 8.7543  | 7.9657  | 8.8081  | 8.7336  | 8.5966  | 0.9912  | -0.0128 | 0.8053 | 0.0940 |
| Actb                  | _KDIYANTVLSGGTMM(Oxidation (M))PGIADR_3                                                              | #N/A                  | 7.7970  | 7.4324  | 7.6310  | 8.3097  | 7.6198  | 8.6814  | 7.2843  | 7.4798  | 7.3898  | 1.0680  | 0.0949  | 0.0769  | 0.1140 | 0.2046 |
| Actb                  | _Acetyl (Protein N-term)DDOIALVVDNGSGMC(Carbamidomethyl (C))K_2                                      | #N/A                  | 10.5113 | 10.6242 | 11.0179 | 11.8073 | 8.7865  | 9.4033  | 11.2382 | 11.4897 | 9.2926  | 10.8011 | 0.9676  | -0.0475 | 0.6244 | 0.1713 |
| Actb                  | Acetyl (Protein N-term)DDOIALVVDNGSGMC(Oxidation (M))C(Carbamidomethyl (C))KAGFAGDOPR_3              | #N/A                  | 8.1378  | 8.2950  | 8.6400  | 8.7659  | 7.6981  | 7.8678  | 8.8866  | 7.8759  | 8.0210  | 7.8535  | 1.0092  | 0.0132  | 0.8022 | 0.0957 |
| Actb                  | _IC(Carbamidomethyl (C))VALDFEQEM(Oxidation (M))ATASSSSLEK_3                                         | #N/A                  | 8.8961  | 8.6230  | 9.5120  | 9.8445  | 8.6474  | 9.2215  | 9.2502  | 8.5656  | 8.9573  | 9.2325  | 1.0136  | 0.0195  | 0.6740 | 0.1713 |
| Actb                  | _EKLC(Carbamidomethyl (C))VALDFEQEM(Oxidation (M))ATASSSSLEK_3                                       | #N/A                  | 6.1453  | 6.4233  | 8.2186  | 7.9029  | 6.0439  | 6.2523  | 7.2990  | 6.5118  | 7.0209  | 7.2501  | 0.9795  | -0.0299 | 0.7808 | 0.1074 |
| Actb                  | _ETIAPLSTM(Oxidation (M))K_2                                                                         | #N/A                  | 12.3587 | 12.5682 | 12.7835 | 12.4544 | 12.7472 | 12.3299 | 12.4237 | 12.5731 | 12.4839 | 12.3085 | 1.0075  | 0.0107  | 0.4145 | 0.3825 |
| Actb                  | bamidomethyl (C)PEALFQPSFLGM(Oxidation (M))JESC(Carbamidomethyl (C))GHETTFNSIM(Oxidation (M))GQK_2   | #N/A                  | 4.6751  | 5.7256  | 7.5630  | 6.6020  | 4.4997  | 5.5638  | 6.0625  | 5.8647  | 5.6290  | 6.2079  | 0.9715  | -0.0418 | 0.7854 | 0.1049 |
| Actb                  | _HQVM(Oxidation (M))YGVGM(Oxidation (M))GQK_2                                                        | #N/A                  | 8.2731  | 8.4724  | 8.2948  | 8.4859  | 8.8786  | 8.4014  | 8.1902  | 8.3531  | 8.4941  | 8.4753  | 1.0107  | 0.0153  | 0.4944 | 0.3059 |
| Actb                  | _DLVANTVLSGGTMM(Oxidation (M))PGIADR_2                                                               | #N/A                  | 10.5195 | 10.6561 | 11.3569 | 10.7965 | 10.6987 | 10.8223 | 10.8419 | 10.6590 | 10.7311 | 10.6593 | 1.0080  | 0.0115  | 0.5885 | 0.2302 |
| Actb                  | _WHHTFYNELR_3                                                                                        | #N/A                  | 9.9643  | 9.8949  | 9.5152  | 6.7291  | 9.1249  | 10.3810 | 9.2251  | 10.0105 | 10.0911 | 0.9337  | -0.0990 | 0.3737  | 0.4275 | 0.1865 |
| Actb                  | _QYDESGPSVHR_2                                                                                       | #N/A                  | 10.6803 | 10.6907 | 10.9754 | 10.8314 | 10.8936 | 10.8350 | 10.5940 | 10.5825 | 10.7425 | 10.7073 | 1.0151  | 0.0217  | 0.0421 | 1.3752 |
| Actb                  | _QYDESGPSVHRK_3                                                                                      | #N/A                  | 4.6696  | 5.5290  | 6.1530  | 5.3563  | 5.2866  | 5.5043  | 4.4591  | 5.0409  | 5.3532  | 5.1276  | 1.0843  | 0.1168  | 0.1797 | 0.1797 |
| Actb                  | _DLTDVLM(Oxidation (M))K_2                                                                           | #N/A                  | 10.6519 | 10.7977 | 11.3648 | 10.2515 | 10.2720 | 10.9831 | 10.4522 | 10.9992 | 10.9202 | 10.9838 | 0.9891  | -0.0159 | 0.6361 | 0.1964 |
| Actb                  | umidomethyl (C)PEALFQPSFLGM(Oxidation (M))JESC(Carbamidomethyl (C))GHETTFNSIM(Oxidation (M))KILTER_2 | #N/A                  | 5.2131  | 5.5780  | 6.4752  | 6.4552  | 5.2578  | 5.5402  | 5.7219  | 5.9794  | 6.0711  | 5.9413  | 0.9705  | -0.0433 | 0.5715 | 0.2430 |
| Actb                  | _DLTDVLM(Oxidation (M))KILTER_2                                                                      | #N/A                  | 3.7621  | 3.7096  | 3.3946  | 3.7519  | 2.9059  | 3.0140  | 4.1663  | 4.2213  | 3.1131  | 3.2660  | 0.9272  | -0.1090 | 0.4011 | 0.3968 |
| Actb                  | _S(Phospho (STY))YELPDGQVITIGNER_2                                                                   | P60710_S239_M1_Actb   | 8.7082  | 8.2140  | 8.3442  | 12.3103 | 8.1401  | 8.5256  | 8.9677  | 11.9406 | 8.5894  | 8.4684  | 0.9525  | -0.0703 | 0.6788 | 0.1682 |
| Nrgn                  | _XGPGGPGGAGGAR_2                                                                                     | #N/A                  | 7.9526  | 8.4679  | 8.2625  | 8.7163  | 9.1300  | 8.5968  | 8.3427  | 8.1782  | 8.1966  | 7.9923  | 1.0428  | 0.0605  | 0.1296 | 0.8874 |
| Nrgn                  | A(Oxidation (M))DC(Carbamidomethyl (C))C(Carbamidomethyl (C))TESAC(Carbamidomethyl (C))SKPDI         | #N/A                  | 4.8632  | 5.4531  | 4.0634  | 4.8814  | 5.6073  | 5.1256  | 5.4150  | 4.6614  | 5.1035  | 5.1346  | 0.9843  | -0.0228 | 0.8009 | 0.0964 |
| Nrgn                  | _GPGPGPGGAGGAR_2                                                                                     | #N/A                  | 4.0252  | 3.3296  | 3.2112  | 3.7138  | 3.1509  | 3.0778  | 3.3886  | 4.4047  | 4.0532  | 3.6808  | 0.8777  | -0.1882 | 0.0970 | 1.0132 |
| Nrgn                  | _KS(Phospho (STY))GEC(Carbamidomethyl (C))GR_2                                                       | P60761_S48_M1_Nrgn    | 3.0570  | 4.1692  | 3.7438  | 4.2465  | 3.6835  | 4.0460  | 3.9611  | 3.8720  | 5.5206  | 4.2135  | 0.9827  | -0.0252 | 0.7947 | 0.0998 |
| Cdk42                 | _QKPTTETAER_2                                                                                        | #N/A                  | 7.7464  | 7.9084  | 7.9061  | 7.4936  | 7.5865  | 7.6133  | 7.7021  | 7.5936  | 7.5755  | 7.6120  | 1.0116  | 0.0166  | 0.3820 | 0.4413 |
| Cdk42                 | _VVVPEITHHC(Carbamidomethyl (C))PK_3                                                                 | #N/A                  | 7.0452  | 4.9202  | 6.5779  | 6.0689  | 7.1115  | 6.6157  | 6.0379  | 6.3011  | 6.0901  | 6.3430  | 1.0318  | 0.0452  | 0.6508 | 0.1865 |
| Cdk42                 | _TFLVLGTQIDUR_2                                                                                      | #N/A                  | 6.3234  | 4.9200  | 3.8948  | 5.6436  | 5.4175  | 5.0609  | 6.0042  | 5.3268  | 5.7605  | 5.3354  | 0.9292  | -0.1059 | 0.3889 | 0.4101 |
| Cdk42                 | _TC(Carbamidomethyl (C))LLSYTNNK_2                                                                   | #N/A                  | 5.2382  | 4.8295  | 5.3869  | 5.6170  | 5.4648  | 5.2268  | 5.6915  | 5.5766  | 5.5083  | 5.2083  | 0.9606  | -0.0580 | 0.2141 | 0.6693 |
| Cdk42                 | _TFLVLGTQIDLRDPSIEK_3                                                                                | #N/A                  | 4.0711  | 3.3266  | 3.8068  | 3.3486  | 3.2149  | 4.7623  | 3.2262  | 4.7623  | 4.8057  | 4.4143  | 0.8930  | -0.1633 | 0.2988 | 0.5246 |
| Cdk42                 | _YVEC(Carbamidomethyl (C))SALTQK_2                                                                   | #N/A                  | 3.6932  | 5.8736  | 3.4269  | 3.9662  | 5.537   |         |         |         |         |         |         |         |        |        |



|           |                                                          |                       |         |         |         |         |         |         |         |         |         |         |        |         |        |        |
|-----------|----------------------------------------------------------|-----------------------|---------|---------|---------|---------|---------|---------|---------|---------|---------|---------|--------|---------|--------|--------|
| Snap25    | _IEEGM(Oxidation (M))DQINR_2                             | #N/A                  | 7.5443  | 7.3456  | 6.9311  | 7.7596  | 7.3324  | 6.9468  | 7.3597  | 7.4048  | 7.0364  | 7.5277  | 0.9970 | -0.0044 | 0.9081 | 0.0419 |
| Snap25    | _TLVM(Oxidation (M))DEQGQLER_2                           | #N/A                  | 7.5916  | 7.3609  | 7.5546  | 8.3072  | 7.3093  | 7.3811  | 7.5184  | 7.4562  | 7.2488  | 7.5303  | 1.0196 | 0.0280  | 0.4796 | 0.3191 |
| Snap25    | _IDENQR_2                                                | #N/A                  | 5.2399  | 6.0324  | 6.2879  | 5.7661  | 6.6144  | 4.2882  | 5.9220  | 6.2561  | 5.8814  | 6.3672  | 0.9342 | -0.0982 | 0.3853 | 0.4142 |
| Snap25    | _FQM(Oxidation (M))AUSGGFR_2                             | #N/A                  | 9.2210  | 9.1582  | 9.3054  | 8.9117  | 8.5099  | 9.1645  | 9.3933  | 9.3517  | 9.1063  | 9.1757  | 0.9771 | -0.0334 | 0.2204 | 0.6567 |
| Snap25    | _MLQVEEK_2                                               | #N/A                  | 6.9235  | 2.9584  | 3.4537  | 6.7823  | 5.9965  | 4.3361  | 5.3551  | 4.1621  | 5.3264  | 6.2555  | 0.9602 | -0.0585 | 0.8389 | 0.0815 |
| Snap25    | _A1WGNNDGVVASOPAR_2                                      | #N/A                  | 8.7045  | 8.9754  | 9.2589  | 9.1035  | 8.8134  | 8.7267  | 9.2908  | 8.9876  | 8.9683  | 8.8848  | 0.9887 | -0.0165 | 0.4640 | 0.3335 |
| Snap25    | _RADQADESLER_2                                           | #N/A                  | 5.5287  | 4.6766  | 3.9917  | 5.5598  | 5.3595  | 5.2045  | 4.2090  | 3.6242  | 5.6071  | 5.7142  | 1.0553 | 0.0777  | 0.6208 | 0.2071 |
| Snap25    | _ENEM(Oxidation (M))DENLEQVSGHGNLR_2                     | #N/A                  | 7.6048  | 7.6892  | 7.7770  | 8.1591  | 7.3120  | 7.5601  | 7.8842  | 7.7215  | 7.7265  | 7.8857  | 0.9845 | -0.0225 | 0.4380 | 0.3586 |
| Snap25    | _NELEEMQR_2                                              | #N/A                  | 4.2148  | 4.3007  | 3.2781  | 8.5868  | 4.1890  | 3.9365  | 7.8151  | 6.8418  | 2.9775  | 1.2251  | 1.0077 | 0.0110  | 0.9823 | 0.0078 |
| Snap25    | _ADQLADESLESTR_2                                         | #N/A                  | 4.7689  | 4.7256  | 5.3765  | 4.8643  | 4.9085  | 4.8073  | 4.5774  | 4.7809  | 4.4763  | 4.7631  | 1.1010 | 0.1388  | 0.0359 | 1.4444 |
| Snap25    | _HM(Oxidation (M))ALDM(Oxidation (M))GNEIDTCNR_3         | #N/A                  | 6.3619  | 6.6827  | 7.2455  | 5.5551  | 6.8583  | 6.7357  | 5.9071  | 6.8151  | 6.7629  | 6.8418  | 0.9987 | -0.0019 | 0.9808 | 0.0084 |
| Snap25    | _MI(Oxidation (M))LQLVESKDAGIR_2                         | #N/A                  | 5.2238  | 5.8368  | 6.7343  | 4.7594  | 5.7470  | 5.8449  | 5.5567  | 5.8453  | 5.2804  | 5.6829  | 1.0178 | 0.0255  | 0.7848 | 0.1053 |
| Snap25    | _Acetyl (Protein N-term)AEADAM(Oxidation (M))RNELEEMQR_2 | #N/A                  | 4.3201  | 3.9426  | 4.0377  | 4.9712  | 3.4477  | 3.2538  | 3.8932  | 3.4967  | 3.7957  | 3.7737  | 1.0684 | 0.0954  | 0.4509 | 0.3459 |
| Snap25    | _VVDEREQM(Oxidation (M))AUSGGFR_3                        | #N/A                  | 3.9423  | 3.2467  | 7.0229  | 3.3732  | 3.0680  | 3.1606  | 3.5214  | 3.6280  | 3.9271  | 3.0504  | 1.1238 | 0.1684  | 0.5963 | 0.2245 |
| Dnajc5    | _ENNAHALTDATKR_3                                         | #N/A                  | 7.9118  | 7.7370  | 7.6006  | 7.4335  | 7.6861  | 7.6675  | 7.5883  | 8.1931  | 7.7287  | 7.4343  | 0.9918 | -0.0119 | 0.6885 | 0.1621 |
| Dnajc5    | _SL5[Phospho (STY)]TSGSLYHVLGDKNNA2DDIKK_4               | #N/A                  | 6.5836  | 8.0604  | 4.2358  | 7.6706  | 3.1352  | 3.3015  | 7.7662  | 8.4070  | 8.1025  | 7.2438  | 0.6977 | -0.5193 | 0.0713 | 1.1472 |
| Dnajc5    | _NATSDQIKK_2                                             | #N/A                  | 5.5047  | 5.1885  | 5.9624  | 4.9077  | 5.7707  | 5.8434  | 5.4573  | 5.7356  | 5.3217  | 6.1431  | 0.9762 | -0.0348 | 0.6103 | 0.2384 |
| Dnajc5    | _SL5[Phospho (STY)]TSGSLYHVLGLDK_2                       | #N/A                  | 11.8230 | 12.0435 | 12.6195 | 8.3275  | 10.9506 | 11.7679 | 12.2277 | 11.8230 | 11.8217 | 11.6020 | 0.9483 | -0.0765 | 0.4591 | 0.3141 |
| Dnajc5    | _ENNAHALTDATK_2                                          | #N/A                  | 4.1080  | 3.7947  | 3.5082  | 3.5205  | 3.6764  | 2.5817  | 4.3129  | 4.6062  | 4.3070  | 4.2860  | 0.8067 | -0.1100 | 0.0138 | 1.8600 |
| Dnajc5    | _APEGETEFYYS[Phospho (STY)]PDLLEAQLQSDER_3               | P60904_S151_M1_Dnajc5 | 5.2211  | 5.5712  | 5.6773  | 5.8814  | 5.2940  | 3.6754  | 5.6432  | 6.3116  | 5.8991  | 5.0804  | 0.9104 | -0.1354 | 0.2908 | 0.5364 |
| Dnajc5    | _QRS[Phospho (STY)]LS[Phospho (STY)]TSGSLYHVLGLDK_3      | P60904_S10_M2_Dnajc5  | 3.6220  | 3.6042  | 4.3088  | 3.3106  | 4.2485  | 3.1321  | 4.5261  | 3.3070  | 2.9556  | 3.2776  | 1.0534 | 0.0750  | 0.6334 | 0.2053 |
| Dnajc5    | _YHPONPONPFAADFK_4                                       | #N/A                  | 4.1269  | 3.0993  | 3.3128  | 3.8155  | 3.2526  | 2.9761  | 3.5302  | 4.3030  | 5.1575  | 3.7825  | 0.8181 | -0.8897 | 0.0695 | 1.1582 |
| Rab5b     | _GVDLHFGSQNR_2                                           | #N/A                  | 4.0921  | 4.4276  | 5.0686  | 3.3943  | 3.5517  | 4.7242  | 5.2282  | 4.3952  | 4.4236  | 3.6970  | 0.9490 | -0.0755 | 0.6021 | 0.2204 |
| Rab5b     | _GAQAIAVVDITQETAR_2                                      | #N/A                  | 6.2322  | 6.2067  | 7.6528  | 7.0709  | 5.3126  | 6.5796  | 7.0170  | 6.6835  | 5.9199  | 6.3786  | 1.0014 | 0.0021  | 0.9839 | 0.0071 |
| Chp1      | _DELQVLR_2                                               | #N/A                  | 4.1316  | 4.1615  | 4.4306  | 3.6278  | 3.5424  | 3.2322  | 3.7200  | 4.0971  | 4.1198  | 4.2236  | 0.9540 | -0.0679 | 0.4759 | 0.3225 |
| Chp1      | _IINAFSEGGDQVNR_2                                        | #N/A                  | 3.5367  | 3.8453  | 3.2704  | 4.3150  | 4.1813  | 3.9442  | 4.4633  | 4.1870  | 2.6169  | 5.1286  | 0.9390 | -0.0908 | 0.6059 | 0.2176 |
| Chp1      | _ETGFSSHQTR_2                                            | #N/A                  | 3.7457  | 3.0501  | 4.4325  | 3.5698  | 2.8714  | 3.3572  | 3.7180  | 3.1833  | 3.7305  | 3.4013  | 0.9989 | -0.0016 | 0.9902 | 0.0043 |
| Rab10     | _AFL1AEDILR_2                                            | #N/A                  | 7.3548  | 7.0928  | 7.0660  | 6.7916  | 7.0484  | 6.6390  | 7.1145  | 7.3523  | 7.6752  | 6.6093  | 0.9737 | -0.0385 | 0.4128 | 0.3842 |
| Rab10     | _KGGEQIAR_2                                              | #N/A                  | 6.6454  | 5.3330  | 5.4690  | 5.5357  | 6.5502  | 6.0182  | 5.4556  | 6.4653  | 6.4172  | 5.7152  | 0.9853 | -0.0213 | 0.8093 | 0.3919 |
| Rab10     | _EPNSENVDSIS[Phospho (STY)]GGGVGWK_2                     | #N/A                  | 3.9757  | 5.9677  | 3.8955  | 3.4393  | 5.3643  | 3.2267  | 7.0563  | 6.9052  | 6.5978  | 3.1165  | 0.7284 | -0.4571 | 0.1226 | 0.9113 |
| Rab10     | _KTPKPEPSNVDSIS[Phospho (STY)]GGGVGWK_3                  | #N/A                  | 3.2714  | 3.9548  | 3.9582  | 4.4608  | 3.8979  | 4.2824  | 4.1755  | 5.4729  | 3.3062  | 4.4278  | 0.9138 | -0.1301 | 0.3869 | 0.4124 |
| Rab10     | _ANINIK_2                                                | #N/A                  | 3.2895  | 3.3868  | 3.2402  | 3.5623  | 2.3124  | 3.7896  | 4.4331  | 3.8642  | 3.8221  | 3.5792  | 0.8315 | -0.2662 | 0.0558 | 1.2534 |
| Rab10     | _NDEHANEDVER_2                                           | #N/A                  | 5.5327  | 3.0415  | 3.3706  | 3.8732  | 5.1116  | 3.6948  | 3.5879  | 4.9692  | 5.0152  | 3.8402  | 0.9428 | -0.0850 | 0.6824 | 0.1660 |
| Rab10     | _TPVKPEPSNVDSIS[Phospho (STY)]GGGVGWK_3                  | #N/A                  | 3.5702  | 4.0777  | 3.8490  | 3.9140  | 4.2060  | 3.8930  | 4.4858  | 4.7863  | 3.8916  | 3.9381  | 0.9165 | -0.1258 | 0.1185 | 0.9263 |
| Rab1b     | _SSTVNEAFFTLAR_2                                         | #N/A                  | 4.1469  | 4.1844  | 3.8806  | 3.4243  | 3.2906  | 3.3340  | 3.9977  | 3.5768  | 3.8759  | 3.6311  | 0.9840 | -0.0232 | 0.7948 | 0.0997 |
| Ube2d3    | _SQWSPALTKR_2                                            | #N/A                  | 7.7411  | 7.8287  | 7.9616  | 7.7614  | 7.8589  | 7.5342  | 7.7050  | 7.6837  | 7.3785  | 7.5751  | 1.0258 | 0.0367  | 0.0721 | 1.1423 |
| Ube2d3    | _EL5[Phospho (STY)]DLAR_2                                | P61079_S11_M1_Ube2d3  | 3.8248  | 3.1291  | 3.9469  | 3.4907  | 2.9505  | 3.2782  | 3.6390  | 5.6756  | 3.8095  | 3.1680  | 0.8438 | -0.2451 | 0.2212 | 0.6553 |
| Ube2d1    | _EL5[Phospho (STY)]DLQR_2                                | P61080_S11_M1_Ube2d1  | 5.6994  | 5.3621  | 3.6416  | 6.0706  | 5.2093  | 5.9265  | 5.8270  | 5.8712  | 5.6741  | 5.7999  | 0.9180 | -0.1234 | 0.3245 | 0.4888 |
| Ube2m     | _EAENVLQNNR_2                                            | #N/A                  | 9.7399  | 9.4938  | 9.7495  | 10.0903 | 9.5615  | 9.8265  | 9.9663  | 9.7457  | 9.8725  | 9.8714  | 0.9878 | -0.0177 | 0.3198 | 0.4951 |
| Ube2m     | _GGYSGTYFER_2                                            | #N/A                  | 5.7021  | 5.2086  | 4.5348  | 5.4628  | 5.6548  | 4.6933  | 5.6196  | 5.1118  | 5.2404  | 5.4932  | 0.9708 | -0.0428 | 0.5756 | 0.2398 |
| Ube2m     | _DINELNPK_2                                              | #N/A                  | 4.7180  | 3.8730  | 4.9544  | 4.5427  | 4.9084  | 3.7003  | 4.2573  | 3.7886  | 3.0410  | 3.0088  | 1.2626 | 0.3364  | 0.0346 | 1.4604 |
| Ube2m     | _TC[Carbamidomethyl (C)]D6SFSDPOLLNFK_2                  | #N/A                  | 3.8226  | 3.1269  | 4.5094  | 3.5112  | 4.1917  | 3.2804  | 3.6412  | 3.1065  | 4.2559  | 3.4782  | 1.0331 | 0.0470  | 0.7282 | 0.1378 |
| Ube2n     | _LIAEPPVGK_2                                             | #N/A                  | 9.2599  | 9.6904  | 9.3424  | 9.2054  | 9.8301  | 9.3857  | 9.4973  | 9.4792  | 9.4481  | 9.3552  | 1.0008 | 0.0011  | 0.9563 | 0.0194 |
| Ube2n     | _TEAQAETAR_2                                             | #N/A                  | 8.8212  | 9.1319  | 9.2095  | 9.2209  | 9.4951  | 9.1394  | 9.9872  | 9.0895  | 8.9534  | 9.1290  | 1.0144 | 0.0206  | 0.2920 | 0.5346 |
| Ube2n     | _YHPNVOK_2                                               | #N/A                  | 8.0271  | 7.9362  | 7.8246  | 8.2701  | 8.6858  | 8.1521  | 7.8101  | 8.0665  | 7.9749  | 8.1960  | 1.0172 | 0.0245  | 0.4390 | 0.3575 |
| Ube2n     | _WSPALQIR_2                                              | #N/A                  | 7.4259  | 8.0293  | 7.9185  | 7.8903  | 7.9559  | 7.8630  | 7.7288  | 7.7375  | 7.7415  | 7.8128  | 1.0119 | 0.0170  | 0.4291 | 0.3674 |
| Ube2n     | _YFHWIAGPQDSFFGGTFK_3                                    | #N/A                  | 5.7789  | 5.6589  | 5.7747  | 6.2340  | 5.9617  | 5.6544  | 5.9498  | 5.7691  | 5.5206  | 6.1129  | 1.0010 | 0.0014  | 0.9710 | 0.0128 |
| Ube2n     | _LIAEPPVGIKAEPDSNAR_3                                    | #N/A                  | 5.1749  | 5.6663  | 7.0440  | 6.0829  | 4.9751  | 5.6500  | 5.3005  | 5.1580  | 5.2347  | 5.0048  | 1.1142 | 0.1560  | 0.1590 | 0.7986 |
| Ube2n     | _LELFLPEEYPM(Oxidation (M))AAPK_2                        | #N/A                  | 7.7651  | 8.0153  | 7.9694  | 7.6050  | 8.0294  | 8.0783  | 7.9412  | 8.0311  | 7.9332  | 8.0291  | 0.9908 | -0.0133 | 0.4710 | 0.3270 |
| Ube2n     | _AEPDSNAR_2                                              | #N/A                  | 6.2978  | 3.1791  | 3.6574  | 3.2011  | 4.6674  | 6.3504  | 3.3494  | 3.8001  | 5.5631  | 5.8969  | 0.9799 | -0.0293 | 0.9199 | 0.0362 |
| Ube2n     | _TVLSIQALLSAPNPDPLOANDVAEQW_3                            | #N/A                  | 4.3453  | 3.6007  | 4.0790  | 3.3141  | 3.4890  | 1.5972  | 4.5296  | 3.3036  | 2.9522  | 3.2810  | 0.9680 | -0.0469 | 0.8470 | 0.0721 |
| Actr2     | _ILLTEPPM(Oxidation (M))NPTK_2                           | #N/A                  | 8.0183  | 8.2612  | 8.6457  | 7.6646  | 7.9802  | 8.1313  | 8.1891  | 8.6592  | 8.3501  | 7.9821  | 0.9785 | -0.0313 | 0.4019 | 0.3959 |
| Actr2     | _H1UWDYTGPEK_2                                           | #N/A                  | 5.7150  | 5.9294  | 6.3560  | 5.9399  | 4.3625  | 6.0232  | 5.0145  | 6.2910  | 5.3621  | 5.6000  | 1.0277 | 0.0394  | 0.7199 | 0.1427 |
| Actr2     | _DLM(Oxidation (M))VGDEASELR_2                           | #N/A                  | 7.4452  | 6.9173  | 7.2978  | 7.0578  | 6.6821  | 7.1172  | 6.9737  | 7.2647  | 6.9512  | 7.0074  | 1.0052 | 0.0075  | 0.8112 | 0.0909 |
| Actr2     | _LC[Carbamidomethyl (C)]VGVNIEQEQK_2                     | #N/A                  | 4.0259  | 5.4556  | 3.7459  | 3.2896  | 5.1655  | 5.7316  | 6.1181  | 6.4099  | 4.0106  | 6.2059  | 0.8035 | -0.1156 | 0.1393 | 0.8560 |
| Actr2     | _GYAFNHSADFTVR_3                                         | #N/A                  | 4.5191  | 3.9292  | 3.9837  | 4.4864  | 4.5395  | 3.8060  | 4.2011  | 3.9899  | 3.2807  | 2.9526  | 1.1677 | 0.2326  | 0.0701 | 1.1542 |
| Actr2     | _H1VSGGSTM(Oxidation (M))YPGUPSR_2                       | #N/A                  | 3.8214  | 3.6555  | 3.4206  | 2.8468  | 3.4768  | 3.5262  | 4.5172  | 4.0368  | 4.3358  | 4.2466  | 0.8071 | -0.3091 | 0.0022 | 2.6529 |
| Actr2     | _LALETTLVESYTLPGDR_2                                     | #N/A                  | 3.8916  | 3.4508  | 3.6253  | 3.1690  | 3.0353  | 2.9565  | 3.3173  | 3.6897  | 4.1312  | 4.3472  | 0.8666 | -0.2066 | 0.0823 | 1.0844 |
| Actr1a    | _AQVYLPDGSIEGPSR_2                                       | #N/A                  | 7.4257  | 7.1222  | 7.8110  | 7.7658  | 7.2272  | 7.4205  | 7.2545  | 7.2907  | 7.3674  | 7.0834  | 1.0294 | 0.0418  | 0.1928 | 0.7150 |
| Actr1a    | _DQLQTSEHPVLLTEAPLNR_3                                   | #N/A                  | 5.0415  | 5.5457  | 5.7529  | 6.1332  | 5.2203  | 5.9612  | 5.1310  | 5.4356  | 5.3574  | 5.4547  | 1.0495 | 0.0697  | 0.2715 | 0.5662 |
| Actr1a    | _AC[Carbamidomethyl (C)]IYLSNPQKDELETEK_3                | #N/A                  | 3.4354  | 4.3508  | 4.1222  | 4.6249  | 5.7560  | 5.3375  | 4.3396  | 5.2448  | 4.2806  | 4.9744  | 0.9776 | -0.0326 | 0.8275 | 0.0822 |
| Actr1a    | _KEYEEDGAR_2                                             | #N/A                  | 4.1153  | 3.2271  | 3.8490  | 3.3928  | 3.0484  | 3.1803  | 3.5410  | 3.6084  | 3.9074  | 3.0701  | 0.9822 | -0.0259 | 0.8112 | 0.0909 |
| Arf3/Arf1 | _NISFTWVDVGGQDK_2                                        | #N/A                  | 7.9012  | 7.6664  | 8.3726  | 7.7020  | 7.1537  | 7.4766  | 8.1604  | 8.0259  | 7.8332  | 7.8232  | 0.9688 | -0.0458 | 0.2891 | 0.5390 |
| Arf3/Arf1 | _DAVLLVFANK_2                                            | #N/A                  | 7.7313  | 6.9418  | 6.6039  | 7.6704  | 6.6676  | 7.2285  | 7.3159  | 7.6256  | 7.5264  | 7.4065  | 0.9561 | -0.0648 | 0.2335 | 0.6317 |
| Arf3/Arf1 | _LGEV                                                    |                       |         |         |         |         |         |         |         |         |         |         |        |         |        |        |



|       |                                                                                 |                      |         |         |         |         |         |         |         |         |         |         |        |         |        |        |
|-------|---------------------------------------------------------------------------------|----------------------|---------|---------|---------|---------|---------|---------|---------|---------|---------|---------|--------|---------|--------|--------|
|       | _TKELELDIAODKX_3                                                                | #N/A                 | 8.9216  | 9.1350  | 9.5974  | 8.6367  | 8.5354  | 8.8450  | 9.3480  | 9.2098  | 8.7911  | 8.9251  | 0.9864 | -0.0198 | 0.5907 | 0.2286 |
| Sx1b  | _LAIATDQIK_2                                                                    | #N/A                 | 8.1854  | 7.2423  | 8.1188  | 7.7935  | 7.6001  | 7.2758  | 7.6379  | 7.9359  | 8.3316  | 8.0437  | 0.9800 | -0.0291 | 0.4878 | 0.3117 |
| Sx1b  | _OLEITGR_2                                                                      | #N/A                 | 7.8002  | 7.7111  | 7.6813  | 6.8795  | 7.3615  | 7.4617  | 7.1327  | 7.9882  | 7.9532  | 7.4597  | 0.9802 | -0.0289 | 0.5415 | 0.2664 |
| Sx1b  | _LSEDEGVQVK_2                                                                   | #N/A                 | 7.4233  | 7.3876  | 7.8749  | 7.2795  | 7.4532  | 7.6108  | 7.7592  | 7.9515  | 7.4248  | 7.6206  | 0.9761 | -0.0350 | 0.2215 | 0.6546 |
| Sx1b  | _QAINEETR_2                                                                     | #N/A                 | 7.8769  | 7.2431  | 7.4446  | 7.3513  | 7.5322  | 7.1651  | 7.8410  | 7.5954  | 7.4737  | 7.3963  | 0.9814 | -0.0271 | 0.3760 | 0.4248 |
| Sx1b  | _LSEDEGVQ_2                                                                     | #N/A                 | 6.5683  | 5.3162  | 5.2322  | 5.2713  | 5.3779  | 4.9880  | 5.4450  | 6.1018  | 5.1758  | 3.8119  | 1.0173 | 0.0247  | 0.8410 | 0.0752 |
| Sx1b  | _TGHSTLSR_2                                                                     | #N/A                 | 6.8621  | 3.3739  | 6.3561  | 5.9054  | 6.1564  | 6.7227  | 6.5653  | 6.7133  | 6.9797  | 6.7554  | 0.8977 | -0.1556 | 0.3596 | 0.4441 |
| Sx1b  | _DHFM(Oxidation (M))JEFFEQVEIR_3                                                | #N/A                 | 5.9283  | 5.9257  | 6.7229  | 6.5088  | 5.1425  | 6.1628  | 6.2357  | 6.1204  | 6.1133  | 0.6062  | 0.9890 | -0.0159 | 0.8186 | 0.0869 |
| Sx1b  | _TTNELEDM(Oxidation (M))LESK_2                                                  | #N/A                 | 5.8518  | 5.9829  | 5.5610  | 5.8146  | 5.2227  | 5.3247  | 6.5982  | 5.8779  | 5.4766  | 5.7958  | 0.9476 | -0.0776 | 0.2387 | 0.6222 |
| Sx1b  | _JENVNHSDVVER_3                                                                 | #N/A                 | 6.0974  | 5.0892  | 5.4997  | 5.1466  | 4.2840  | 5.2876  | 3.9267  | 5.2187  | 5.3936  | 5.1225  | 1.0648 | 0.0906  | 0.4499 | 0.3469 |
| Sx1b  | _SAKDS(Phospho (STY))DOEEEVHVDOR_3                                              | #N/A                 | 13.9647 | 13.7587 | 14.2319 | 13.9901 | 12.7479 | 13.5658 | 14.1970 | 13.9666 | 13.9442 | 13.7301 | 0.9821 | -0.0240 | 0.3939 | 0.4046 |
| Sx1b  | _AIEQSIEQEGLNR(Sphospho (STY))SADLR_3                                           | P61264_S108_M1_Sx1b  | 4.1411  | 4.1928  | 3.6634  | 4.9348  | 3.2770  | 3.3031  | 4.0644  | 3.2126  | 3.9411  | 3.4404  | 1.0693 | 0.0967  | 0.5016 | 0.2996 |
| Sx1b  | _KHSH(Phospho (STY))AILAAPNPDEK_3                                               | #N/A                 | 7.8725  | 7.6054  | 6.6414  | 7.7102  | 6.4673  | 7.6051  | 8.2545  | 8.1535  | 7.8149  | 7.5727  | 0.9624 | -0.0552 | 0.4516 | 0.3563 |
| Sx1b  | _AIEQSIEQEGLNR_2                                                                | #N/A                 | 9.1320  | 9.0305  | 9.8456  | 9.3426  | 8.5534  | 8.9670  | 9.7112  | 9.5905  | 9.3819  | 9.2067  | 0.9654 | -0.0507 | 0.2038 | 0.6900 |
| Sx1b  | _LKAEQSIEQEGLNR_3                                                               | #N/A                 | 5.8018  | 5.7813  | 4.7865  | 4.8462  | 5.7377  | 5.7911  | 5.8446  | 5.5101  | 4.4424  | 3.4277  | 0.9596 | -0.0594 | 0.6008 | 0.2213 |
| Sx1b  | _QHSAILAAPNPDEK_2                                                               | #N/A                 | 6.2254  | 6.0882  | 5.2594  | 5.6985  | 6.1270  | 6.0347  | 5.7319  | 5.9547  | 6.0959  | 5.7409  | 1.0045 | 0.0065  | 0.8978 | 0.0468 |
| Sx1b  | _DS(Phospho (STY))DOEEEVHVDOR_2                                                 | #N/A                 | 7.5065  | 8.2630  | 4.1932  | 8.7100  | 6.9216  | 8.1155  | 9.1215  | 8.3493  | 8.5972  | 8.3502  | 0.8466 | -0.2402 | 0.1584 | 0.8004 |
| Sx1b  | _TOELRS(Phospho (STY))AKDS(Phospho (STY))DOEEEVHVDOR_4                          | #N/A                 | 3.8035  | 3.5936  | 3.9500  | 4.0650  | 3.4573  | 3.8755  | 3.9361  | 3.5877  | 3.5897  | 0.0452  | 0.8837 | -0.1784 | 0.3303 | 0.4811 |
| Sx1b  | _FUEVM(Oxidation (M))TEYNATQSK_2                                                | #N/A                 | 4.0125  | 4.0180  | 3.4206  | 4.1935  | 4.0058  | 4.0958  | 4.1606  | 5.2579  | 4.2711  | 4.0097  | 0.8897 | -0.1686 | 0.1011 | 0.9952 |
| Sx1b  | _KFUEVM(Oxidation (M))TEYNATQSK_3                                               | #N/A                 | 4.0179  | 3.2083  | 3.2039  | 3.7065  | 3.1436  | 3.0851  | 3.4212  | 6.5002  | 4.0605  | 3.6735  | 0.7690 | -0.3790 | 0.1232 | 0.9092 |
| Fg12  | _EPS(Phospho (STY))LHEIGEK_2                                                    | P61329_S212_M1_Fg12  | 14.3055 | 13.9989 | 14.6553 | 14.5998 | 13.8489 | 14.2915 | 14.5711 | 14.0902 | 14.2653 | 14.1993 | 1.0001 | -0.0002 | 0.9920 | 0.0035 |
| Fg12  | _VVAIGQVK_2                                                                     | #N/A                 | 3.7330  | 4.7600  | 4.0038  | 3.6923  | 4.3503  | 4.2197  | 3.8406  | 4.8475  | 4.6327  | 4.1969  | 0.9423 | -0.0858 | 0.3805 | 0.4197 |
| Fg12  | _K(Sphospho (STY))SGTPTMNGGK_2                                                  | P61329_S226_M1_Fg12  | 3.3707  | 3.9012  | 3.7691  | 6.2843  | 4.0040  | 3.8668  | 4.8800  | 4.1259  | 3.1395  | 4.4031  | 1.0212 | 0.0303  | 0.8889 | 0.0511 |
| Fg12  | _SRKS(Phospho (STY))K(Sphospho (STY))GTPTMNGGK_2                                | #N/A                 | 4.2892  | 3.8413  | 3.8939  | 4.0799  | 4.3468  | 3.8355  | 4.4330  | 3.4120  | 3.3990  | 3.9390  | 1.0374 | 0.0530  | 0.4977 | 0.3030 |
| Rp127 | _YSVDPLDK_2                                                                     | #N/A                 | 6.1440  | 5.4255  | 6.2330  | 6.5869  | 6.8131  | 6.4452  | 6.3084  | 5.9074  | 6.3581  | 6.3418  | 1.0146 | 0.0208  | 0.7351 | 0.1336 |
| Rp127 | _NIDOGTSORPSYSHALVAGIDR_3                                                       | #N/A                 | 3.7458  | 3.6575  | 3.9565  | 4.0227  | 3.5218  | 4.2830  | 4.4623  | 4.0043  | 3.8556  | 3.3508  | 0.9892 | -0.0157 | 0.8622 | 0.0644 |
| Smg6  | _NWS(Phospho (STY))GC(Carbamidomethyl (C))GEGEQK_2                              | P61406_S331_M1_Smg6  | 6.2115  | 6.2724  | 4.2510  | 3.7513  | 4.1908  | 5.7257  | 6.1225  | 5.6192  | 6.1977  | 6.4746  | 0.8302 | -0.2685 | 0.1184 | 0.9265 |
| Snn   | _LM(Oxidation (M))JTANS(Phospho (STY))PEVHG_2                                   | #N/A                 | 7.6043  | 7.0184  | 7.9450  | 6.4810  | 7.6820  | 7.0605  | 7.4554  | 7.3457  | 7.2578  | 6.9473  | 0.9720 | -0.0459 | 0.5763 | 0.2394 |
| Abat  | _GNYVDVGNR_2                                                                    | #N/A                 | 12.0318 | 11.9108 | 12.4792 | 12.2621 | 11.4903 | 12.2322 | 12.3422 | 12.0395 | 12.1253 | 12.1066 | 0.9930 | -0.0102 | 0.6527 | 0.1853 |
| Abat  | _GTFC(Carbamidomethyl (C))SFDTPEAIR_2                                           | #N/A                 | 8.4567  | 8.5808  | 8.5754  | 8.4352  | 8.5278  | 8.6293  | 8.7973  | 8.5122  | 8.6422  | 8.1407  | 1.0013 | -0.0199 | 0.9271 | 0.0217 |
| Abat  | _GVVLGG(Carbamidomethyl (C))GDK_2                                               | #N/A                 | 8.2342  | 8.1637  | 8.0073  | 8.1423  | 8.3283  | 8.0916  | 7.9720  | 8.2715  | 8.2766  | 8.0603  | 1.0020 | 0.0029  | 0.8511 | 0.0700 |
| Abat  | _TVAGIVEIPEQSGGDNHASDQFFR_3                                                     | #N/A                 | 7.9082  | 7.9857  | 8.2760  | 8.3762  | 7.5888  | 7.8507  | 7.7709  | 8.1029  | 8.1682  | 8.0075  | 0.9982 | -0.0027 | 0.9299 | 0.0315 |
| Abat  | _LDLUNVAR_2                                                                     | #N/A                 | 8.1017  | 7.8283  | 7.7229  | 8.0060  | 7.7492  | 7.8812  | 7.7356  | 8.0383  | 8.1306  | 7.9006  | 0.9912 | -0.0127 | 0.5121 | 0.2906 |
| Abat  | _INTNLGDPDSK_2                                                                  | #N/A                 | 7.7746  | 7.9101  | 7.4520  | 7.9417  | 7.5722  | 7.6949  | 7.6268  | 7.9183  | 7.7479  | 7.6084  | 0.9992 | -0.0001 | 0.9946 | 0.0024 |
| Abat  | _IDPISDFWPIAPFR_2                                                               | #N/A                 | 7.9673  | 7.9174  | 7.8853  | 7.6764  | 7.4200  | 7.6574  | 7.6219  | 7.6508  | 7.7949  | 7.4462  | 1.0165 | 0.0235  | 0.3273 | 0.4850 |
| Abat  | _LKYPLEFTTNDQGEAR_3                                                             | #N/A                 | 7.7661  | 7.5934  | 6.6500  | 7.2600  | 7.7814  | 8.0931  | 8.2361  | 7.7086  | 7.7817  | 7.4710  | 0.9649 | -0.0515 | 0.3691 | 0.4328 |
| Abat  | _M(Oxidation (M))DLXYSQSSVPIGTNHPALAK_3                                         | #N/A                 | 6.1782  | 5.9671  | 6.2671  | 5.3709  | 5.7182  | 6.5997  | 5.7611  | 5.8337  | 5.7726  | 5.8904  | 1.0348 | 0.0494  | 0.3890 | 0.4100 |
| Abat  | _NLLAEVNIWK_2                                                                   | #N/A                 | 5.7939  | 5.6419  | 3.4435  | 5.9273  | 5.2369  | 5.6994  | 6.0392  | 6.2405  | 5.9572  | 5.5526  | 0.8895 | -0.1689 | 0.2171 | 0.6634 |
| Abat  | _C(Carbamidomethyl (C))LEEVEDUVK_2                                              | #N/A                 | 4.9777  | 5.0506  | 5.0151  | 4.9912  | 5.1090  | 5.3939  | 5.3154  | 5.0619  | 4.6882  | 5.0474  | 0.9963 | -0.0054 | 0.9200 | 0.0362 |
| Abat  | _TLTLGLLDLQAYPQIRSR_2                                                           | #N/A                 | 3.1907  | 5.9027  | 5.4274  | 5.9750  | 5.4221  | 5.4667  | 5.3201  | 5.9970  | 5.6160  | 5.0404  | 0.9522 | -0.0707 | 0.6456 | 0.1900 |
| Abat  | _EFFRSPAPYR_3                                                                   | #N/A                 | 5.9673  | 4.7613  | 4.3910  | 5.5324  | 3.5304  | 5.8347  | 4.0831  | 5.5759  | 6.0260  | 5.9918  | 0.9791 | -0.0304 | 0.8195 | 0.0865 |
| Abat  | _REDLUNVAR_2                                                                    | #N/A                 | 6.0277  | 5.4729  | 4.1812  | 6.3088  | 4.6037  | 5.4358  | 5.6423  | 5.3196  | 5.0316  | 4.3842  | 1.0479 | 0.0675  | 0.6155 | 0.2108 |
| Abat  | _QLNTIQNAEAVHFFC(Carbamidomethyl (C))IYNEER_3                                   | #N/A                 | 5.2642  | 5.3747  | 5.2697  | 5.2034  | 4.4315  | 5.2994  | 4.0378  | 4.8075  | 5.4357  | 1.0289  | 0.0411 | 0.6682  | 0.0171 | 0.7507 |
| Abat  | _TM(Oxidation (M))GC(Carbamidomethyl (C))LATHSK_2                               | #N/A                 | 5.3990  | 5.8840  | 5.3467  | 6.0929  | 6.0857  | 5.4582  | 5.2918  | 5.5136  | 5.5723  | 5.3205  | 1.0528 | 0.0743  | 0.1632 | 0.7874 |
| Abat  | _VDIEFVDGPM(Lysine Oxidation (M))K_2                                            | #N/A                 | 6.0248  | 5.2663  | 5.8451  | 5.7731  | 5.6021  | 5.9096  | 5.7752  | 5.9539  | 5.8005  | 5.5947  | 0.9923 | -0.0111 | 0.7752 | 0.1164 |
| Abat  | _YPLEFTTNDQGEAR_2                                                               | #N/A                 | 4.4241  | 3.2055  | 3.6838  | 3.7092  | 4.2181  | 3.3308  | 5.6702  | 4.4092  | 4.0578  | 4.6171  | 0.8095 | -0.3050 | 0.0371 | 0.4308 |
| Abat  | _GM(Oxidation (M))SQTMATC(Carbamidomethyl (C))GSC(Carbamidomethyl (C))SNENAFK_2 | #N/A                 | 3.9040  | 3.1594  | 3.6377  | 3.7554  | 3.0477  | 3.5769  | 3.4701  | 4.3631  | 4.0117  | 3.7224  | 0.9028 | -0.1475 | 0.1387 | 0.8400 |
| Ufm1  | _VLSPSTPFTAVLK_2                                                                | #N/A                 | 5.3437  | 5.6800  | 5.8496  | 5.1038  | 6.2112  | 5.9769  | 5.9188  | 6.0025  | 5.4784  | 5.5561  | 0.9922 | -0.0113 | 0.8527 | 0.0692 |
| Ufm1  | _TLTSDPR_2                                                                      | #N/A                 | 5.0827  | 5.0142  | 3.9975  | 5.7638  | 5.7528  | 4.9227  | 4.8876  | 4.7320  | 5.0231  | 5.1605  | 1.0279 | 0.0397  | 0.6953 | 0.1578 |
| Dca7  | _LEC(Carbamidomethyl (C))LUNNK_2                                                | #N/A                 | 6.5419  | 5.8018  | 6.3392  | 5.9983  | 5.3646  | 5.6402  | 5.5808  | 5.6692  | 6.0795  | 5.9544  | 1.0218 | 0.0311  | 0.6157 | 0.2106 |
| Dca7  | _LALGSPVEYNIWK_2                                                                | #N/A                 | 5.8513  | 6.1368  | 6.6971  | 7.3648  | 5.7489  | 6.2426  | 6.5024  | 6.2089  | 5.6837  | 5.9686  | 1.0409 | 0.0579  | 0.4805 | 0.3183 |
| Ap1s1 | _AIEQADLQGEDES(Phospho (STY))PR_2                                               | P61967_S147_M1_Ap1s1 | 8.2103  | 8.8993  | 8.1793  | 9.5531  | 8.0996  | 8.6993  | 9.6897  | 9.3144  | 9.3431  | 9.1932  | 0.9171 | -0.1249 | 0.0317 | 1.4986 |
| Hmrpk | _TDYNASVSPGSSQGR_2                                                              | #N/A                 | 8.3756  | 8.8346  | 8.6838  | 9.0641  | 8.8790  | 8.7570  | 8.6373  | 8.6045  | 8.6888  | 8.8688  | 1.0076 | 0.0109  | 0.6169 | 0.2098 |
| Hmrpk | _JILDISEPK_2                                                                    | #N/A                 | 7.4891  | 7.8662  | 7.8393  | 7.7718  | 7.7447  | 7.8617  | 7.6904  | 7.7224  | 7.4980  | 7.4683  | 1.0204 | -0.0051 | 0.1355 | 0.8681 |
| Hmrpk | _GSDPDC(Carbamidomethyl (C))ELR_2                                               | #N/A                 | 6.5748  | 6.0157  | 6.7748  | 6.8866  | 6.5761  | 6.5707  | 6.2020  | 6.1648  | 6.3428  | 6.4788  | 1.0428 | 0.0604  | 0.1374 | 0.8621 |
| Hmrpk | _JITITGTQDDQNAQVLLQNSVK_3                                                       | #N/A                 | 5.9015  | 5.4042  | 5.7969  | 6.7848  | 5.1141  | 6.1882  | 4.2216  | 5.1882  | 5.4603  | 6.7451  | 1.0853 | 0.1181  | 0.3916 | 0.4071 |
| Hmrpk | _DYDDM(Oxidation (M))S(Phospho (STY))PR_2                                       | #N/A                 | 11.7898 | 11.8953 | 12.3156 | 12.2544 | 11.5694 | 11.9685 | 11.8151 | 11.8180 | 11.8358 | 11.9605 | 1.0091 | 0.0131  | 0.4820 | 0.3169 |
| Hmrpk | _LFQEC(Carbamidomethyl (C))C(Carbamidomethyl (C))PHSTRDR_3                      | #N/A                 | 6.1222  | 6.3230  | 6.6172  | 6.8642  | 6.9264  | 6.2697  | 6.2022  | 6.5688  | 6.3345  | 6.4473  | 1.0226 | 0.0233  | 0.6144 | 0.2116 |
| Hmrpk | _DLAGSIGK_2                                                                     | #N/A                 | 6.0331  | 5.8925  | 5.8062  | 4.9330  | 5.5878  | 5.5753  | 4.4016  | 6.1337  | 5.9128  | 6.2442  | 0.9938 | -0.0089 | 0.9311 | 0.0310 |
| Hmrpk | _RDYDDM(Oxidation (M))S(Phospho (STY))PR_2                                      | #N/A                 | 9.6921  | 8.3441  | 8.9291  | 10.6054 | 9.1030  | 8.6384  | 9.2802  | 8.6486  | 8.3587  | 8.6694  | 1.0403 | -0.0569 | 0.4520 | 0.3400 |
| Hmrpk | _RPAEDM(Oxidation (M))IEEQAFKR_3                                                | #N/A                 | 6.0151  | 6.2216  | 5.4164  | 5.6805  | 7.0511  | 6.1340  | 7.6827  | 5.8848  | 5.9148  | 6.1223  | 0.9819 | -0.0263 | 0.7426 | 0.1292 |
| Hmrpk | _GSYGDLGGPIITQVTPK_2                                                            | #N/A                 | 6.0671  | 5.8039  | 5.7920  | 6.1395  | 5.9031  | 5.9925  | 5.9579  | 5.6028  | 5.9993  | 6.2129  | 1.0049 | 0.0070  | 0.8057 | 0.0987 |
| Hmrpk | _LHLQSLAGLIGVK_2                                                                | #N/A                 | 4.7904  | 5.0987  | 4.8055  | 4.5638  | 5.0346  | 4.3023  | 4.8474  | 4.3958  | 5.1993  | 5.2129  | 0.9699 | -0.0441 | 0.5101 | 0.2923 |
| Hmrpk | _IIFTLLEGQLP(Sphospho (STY))PTASQPLESDAVEC(Carbamidomethyl (C))LNYQHYK_4        | P61979_S116_M1_Hmrpk | 8.5182  | 9.5817  | 9.7381  | 9.7381  | 9.2153  | 9.1556  | 9.0194  | 9.1841  | 9.5081  | 9.0874  | 0.9332 | 0.0409  | 0.4862 | 0.3132 |
|       |                                                                                 |                      |         |         |         |         |         |         |         |         |         |         |        |         |        |        |



|         |                                                                     |                       |         |         |         |         |         |         |         |         |         |         |        |         |        |        |
|---------|---------------------------------------------------------------------|-----------------------|---------|---------|---------|---------|---------|---------|---------|---------|---------|---------|--------|---------|--------|--------|
| Ywhag   | _TAFDDAIAELDTNEDSYK_2                                               | #N/A                  | 8.0283  | 7.6777  | 7.5185  | 8.0730  | 7.4323  | 7.7667  | 7.7887  | 7.4974  | 7.6698  | 7.7830  | 1.0084 | 0.0121  | 0.6649 | 0.1772 |
| Ywhag   | _YLAETATGEKR_2                                                      | #N/A                  | 8.0670  | 8.5720  | 8.6675  | 8.6304  | 8.5793  | 8.5904  | 8.1822  | 8.3679  | 8.4544  | 8.2371  | 1.0249 | 0.0356  | 0.1336 | 0.8742 |
| Ywhag   | _ELEAV[C]Carbamidomethyl (C)[Q]DVLSLDNYUK_2                         | #N/A                  | 4.3615  | 3.0121  | 3.5474  | 5.2352  | 3.0294  | 3.6665  | 3.3763  | 4.3846  | 3.4440  | 4.0171  | 1.0008 | 0.0012  | 0.9948 | 0.0022 |
| Ywhag   | _VVSSEQKTS[Phospho (STY)]ADGNEKK_2                                  | #N/A                  | 3.2170  | 2.9941  | 4.3766  | 3.6257  | 2.8155  | 3.4132  | 3.7740  | 3.3754  | 3.6745  | 3.3030  | 0.9647 | -0.0519 | 0.6862 | 0.1636 |
| Ywhag   | _VVSSEQKTS[Phospho (STY)]ADGNEKK_2                                  | #N/A                  | 7.2634  | 7.6284  | 7.7646  | 7.9546  | 7.6206  | 7.9606  | 7.8901  | 7.7766  | 7.2267  | 7.5211  | 1.0125 | 0.0179  | 0.6601 | 0.2181 |
| Rsa2    | _FQEQEC[Carbamidomethyl (C)]PPS[Phospho (STY)]PEPTR_2               | #N/A                  | 10.6290 | 10.4616 | 10.8615 | 10.9141 | 10.1446 | 10.4423 | 11.0326 | 10.5141 | 10.6675 | 10.6094 | 0.9878 | -0.0177 | 0.4709 | 0.3270 |
| Rsa2    | _KTFQEQC[Carbamidomethyl (C)]PPS[Phospho (STY)]PEPTRK_3             | #N/A                  | 8.5848  | 8.3631  | 9.2368  | 8.9734  | 8.2988  | 8.5133  | 8.8660  | 8.9430  | 8.7470  | 8.6074  | 0.9853 | -0.0213 | 0.5294 | 0.2762 |
| Rsa2    | _FQEQEC[Carbamidomethyl (C)]PPS[Phospho (STY)]PEPTRK_2              | #N/A                  | 8.2496  | 8.1547  | 7.5503  | 8.7989  | 6.9407  | 7.1868  | 8.0062  | 8.6088  | 8.3724  | 8.2795  | 0.9395 | -0.0900 | 0.2155 | 0.6665 |
| Rsa2    | _KTFQEQEC[Carbamidomethyl (C)]PPS[Phospho (STY)]PEPTR_2             | #N/A                  | 7.1466  | 4.7890  | 5.9819  | 7.2470  | 6.9370  | 7.1120  | 4.3671  | 7.1502  | 7.1860  | 6.9797  | 1.0184 | 0.0263  | 0.8765 | 0.0573 |
| Rsa2    | _J[Acetyl (Protein N-term)]AAGWROGGS[Phospho (STY)]GGEK_2           | P62071_S10_M1_Rras2   | 2.9941  | 4.6950  | 4.4369  | 5.9439  | 3.6207  | 4.8030  | 4.2138  | 4.1816  | 5.5835  | 5.2972  | 1.0224 | 0.0319  | 0.8746 | 0.0582 |
| Timm10  | _YLDIHER_2                                                          | #N/A                  | 6.2846  | 7.0565  | 6.7728  | 6.7298  | 7.2280  | 6.8962  | 6.6635  | 6.7444  | 6.4161  | 7.1289  | 1.0133 | 0.0191  | 0.6693 | 0.1744 |
| Timm10  | _GESVC[Carbamidomethyl (C)]LDR_2                                    | #N/A                  | 6.4085  | 5.2239  | 3.3975  | 6.5531  | 7.1321  | 6.2233  | 5.8604  | 5.8926  | 6.4348  | 6.3515  | 0.9492 | -0.0752 | 0.6654 | 0.1769 |
| Timm10  | _EAEISKGESVC[Carbamidomethyl (C)]LDR_2                              | #N/A                  | 2.9957  | 3.7663  | 3.1996  | 4.5727  | 4.2557  | 3.3804  | 3.6440  | 3.7786  | 3.3311  | 3.7950  | 1.0159 | 0.0228  | 0.8641 | 0.0634 |
| Timm13  | _VQIAVANAQELLQR_2                                                   | #N/A                  | 5.2891  | 5.3079  | 5.9447  | 5.1296  | 5.9524  | 6.2043  | 6.0957  | 5.3539  | 5.4329  | 5.6056  | 1.0028 | 0.0041  | 0.9531 | 0.0208 |
| Timm13  | _YM[Oxidation (M)]DAWNTVSR_2                                        | #N/A                  | 6.6616  | 6.4718  | 6.7945  | 4.9164  | 6.9328  | 7.1537  | 6.6486  | 6.4135  | 6.7663  | 6.6069  | 0.9818 | -0.0265 | 0.7789 | 0.1085 |
| Timm13  | _LDPGAMEZVK_2                                                       | #N/A                  | 3.9801  | 3.2844  | 3.1660  | 4.7837  | 5.3920  | 3.1229  | 3.4837  | 3.6658  | 3.9648  | 3.0127  | 1.1198 | 0.1632  | 0.4308 | 0.3657 |
| Timm8b  | _FIDTLTAITGR_2                                                      | #N/A                  | 2.8892  | 3.2705  | 3.7487  | 3.2925  | 5.1028  | 4.4089  | 3.4407  | 4.0781  | 4.0077  | 2.9698  | 1.0445 | 0.0628  | 0.7405 | 0.1305 |
| Rps7    | _HWFVIAQR_2                                                         | #N/A                  | 5.8245  | 6.7024  | 6.4639  | 6.7866  | 6.2771  | 6.6309  | 5.9150  | 6.4499  | 6.4073  | 6.4073  | 1.0181 | 0.0259  | 0.6064 | 0.2173 |
| Rps7    | _AIIFVVPVQLK_2                                                      | #N/A                  | 6.0719  | 5.4158  | 6.1581  | 5.5154  | 5.9780  | 5.8838  | 6.1613  | 5.7882  | 5.4398  | 5.5543  | 1.0177 | 0.0252  | 0.6257 | 0.2036 |
| Ppp1c1a | _LLEVGSGS[Phospho (STY)]RPGK_2                                      | P62137_S22_M1_Ppp1c1a | 5.1349  | 4.5914  | 5.0753  | 5.1916  | 4.7977  | 5.3851  | 4.9434  | 4.7451  | 5.1230  | 5.5285  | 0.9891 | -0.0159 | 0.7848 | 0.1052 |
| Ppp1c1a | _J[Acetyl (Protein N-term)]JOSEKLNDSIGR_2                           | #N/A                  | 4.2451  | 3.5162  | 3.4664  | 3.7471  | 5.3536  | 4.1195  | 3.4185  | 4.3256  | 4.2036  | 4.0804  | 1.0169 | 0.0242  | 0.8672 | 0.0619 |
| Ppp1c1b | _J[Acetyl (Protein N-term)]ADGELNVDSLIR_2                           | #N/A                  | 5.6113  | 5.7723  | 5.5234  | 5.3595  | 6.0827  | 6.1252  | 5.5541  | 5.3138  | 5.5836  | 4.7944  | 1.0818 | 0.0134  | 0.0764 | 0.1170 |
| Punc1   | _VAEHAPSIVFIDEAIGTR_3                                               | #N/A                  | 3.0372  | 4.0318  | 3.7240  | 4.4947  | 3.8510  | 4.0657  | 3.9414  | 3.5197  | 3.5037  | 3.3678  | 1.0793 | 0.1101  | 0.3158 | 0.5006 |
| Punc1   | _AVANGTSATLR_2                                                      | #N/A                  | 3.1023  | 4.1239  | 5.0997  | 4.1943  | 5.1642  | 4.1133  | 4.0064  | 4.8890  | 4.4878  | 5.1446  | 0.9282 | -0.1074 | 0.4671 | 0.3306 |
| Punc1   | _APQETAYADIGGLDNQIQEK_2                                             | #N/A                  | 5.1316  | 6.5157  | 3.2473  | 4.2919  | 4.1582  | 3.9673  | 4.4402  | 4.2101  | 3.0083  | 3.9692  | 1.0961 | 0.1324  | 0.2758 | 0.2397 |
| Punc5   | _NDSTYLUK_2                                                         | #N/A                  | 4.2773  | 3.3511  | 4.5619  | 3.5637  | 4.0574  | 3.3852  | 3.2784  | 4.9139  | 3.9228  | 3.5307  | 0.9884 | -0.0168 | 0.9089 | 0.0415 |
| Rps8    | _LTPTEEEILNK_2                                                      | #N/A                  | 8.1922  | 8.3440  | 8.4081  | 8.2633  | 8.3285  | 8.1133  | 8.4122  | 8.4455  | 8.0396  | 8.4154  | 0.9936 | -0.0093 | 0.5868 | 0.2315 |
| Rps8    | _LIDVYVNASNNELVR_2                                                  | #N/A                  | 6.3152  | 5.5301  | 7.0950  | 5.9993  | 5.3740  | 6.0509  | 6.5652  | 5.4678  | 5.0900  | 6.1510  | 1.0411 | 0.0581  | 0.5765 | 0.2392 |
| Rps8    | _N[C]Carbamidomethyl (C)[I]VIDSTPRR_2                               | #N/A                  | 5.6628  | 5.6765  | 5.9771  | 6.0349  | 4.8947  | 5.2713  | 6.0296  | 5.0415  | 4.9239  | 4.9667  | 1.0660 | 0.0922  | 0.2893 | 0.5386 |
| Rps8    | _ISLLEQFQGGK_2                                                      | #N/A                  | 4.7787  | 5.0760  | 5.4530  | 5.4811  | 4.7348  | 5.0499  | 5.2769  | 5.7081  | 4.8631  | 5.5436  | 0.9528 | -0.0697 | 0.2817 | 0.5502 |
| Rps8    | _LDVGNFSWGSC[Carbamidomethyl (C)]C[Carbamidomethyl (C)]TR_2         | #N/A                  | 3.0863  | 4.6695  | 3.7731  | 4.2292  | 4.3060  | 4.1336  | 4.3775  | 4.4278  | 4.8183  | 4.6404  | 0.8908 | -0.1668 | 0.1330 | 0.8763 |
| Rps15a  | _IVNLTGR_2                                                          | #N/A                  | 5.7292  | 5.9005  | 4.3499  | 5.9460  | 5.1073  | 5.6612  | 4.4048  | 6.3702  | 6.2736  | 5.9559  | 0.9475 | -0.0779 | 0.5460 | 0.2628 |
| Rps15a  | _M[Oxidation (M)]NWLADALK_2                                         | #N/A                  | 5.6828  | 5.8652  | 5.4202  | 3.8666  | 5.6746  | 4.9058  | 4.9495  | 5.5697  | 5.0046  | 5.4196  | 0.9841 | -0.0231 | 0.8700 | 0.0605 |
| Rps15a  | _HGYGFEIHDHR_3                                                      | #N/A                  | 5.4325  | 4.6919  | 4.3649  | 3.3157  | 2.8038  | 3.1883  | 5.2926  | 3.5299  | 3.9190  | 5.5551  | 0.8671 | -0.2058 | 0.3798 | 0.4205 |
| Ywhae   | _EALQGEVDENQ_2                                                      | #N/A                  | 11.7530 | 11.4763 | 11.9316 | 11.9567 | 11.2047 | 11.4122 | 11.3688 | 11.6001 | 11.6730 | 11.6730 | 0.9985 | -0.0021 | 0.9264 | 0.0332 |
| Ywhae   | _YLAETATGNDR_2                                                      | #N/A                  | 9.8926  | 9.6518  | 10.0243 | 10.2635 | 9.5723  | 9.9322  | 10.1131 | 9.7774  | 9.9432  | 9.9911  | 0.9933 | -0.0097 | 0.6458 | 0.1899 |
| Ywhae   | _UC[Carbamidomethyl (C)]C[Carbamidomethyl (C)]DLEVIDK_2             | #N/A                  | 9.7015  | 9.5464  | 9.1385  | 9.8653  | 10.1302 | 9.4298  | 9.8131  | 9.4742  | 9.6725  | 9.6065  | 0.9993 | -0.0009 | 0.9736 | 0.0116 |
| Ywhae   | _VAGM[Oxidation (M)]DELVEER_2                                       | #N/A                  | 9.1595  | 8.0686  | 10.0457 | 9.6844  | 9.5157  | 9.7286  | 9.5718  | 9.8407  | 9.8659  | 9.8784  | 0.9569 | -0.0636 | 0.2764 | 0.5585 |
| Ywhae   | _EAAENSLVAYK_2                                                      | #N/A                  | 9.5688  | 9.4670  | 9.9324  | 9.6522  | 9.7981  | 9.7940  | 9.4600  | 9.5360  | 9.5621  | 9.6052  | 1.0169 | 0.0242  | 0.1127 | 0.9479 |
| Ywhae   | _ISSIEQK_2                                                          | #N/A                  | 8.1420  | 7.9047  | 7.8502  | 7.8931  | 8.6162  | 7.8867  | 7.0752  | 8.0805  | 8.2813  | 7.9630  | 1.0253 | 0.0361  | 0.4657 | 0.3319 |
| Ywhae   | _UC[Carbamidomethyl (C)]C[Carbamidomethyl (C)]DLEVDLKHUPAAANTGESK_4 | #N/A                  | 5.4395  | 5.6481  | 5.3057  | 5.9226  | 5.3501  | 5.6157  | 5.1327  | 5.5307  | 5.8317  | 5.4029  | 1.0132 | 0.0190  | 0.6705 | 0.1736 |
| Ywhae   | _HUPAANTGESK_2                                                      | #N/A                  | 9.2439  | 9.2122  | 8.8510  | 9.6020  | 9.5783  | 9.2674  | 9.0013  | 9.2344  | 9.3112  | 9.1802  | 1.0121 | 0.0173  | 0.4825 | 0.1365 |
| Ywhae   | _QM[Oxidation (M)]VETELK_2                                          | #N/A                  | 7.0355  | 6.7846  | 6.2370  | 7.3764  | 7.3652  | 7.0653  | 6.3958  | 6.7866  | 6.7801  | 7.0858  | 1.0318 | 0.0452  | 0.4040 | 0.3936 |
| Ywhae   | _YLAETATGNDRK_2                                                     | #N/A                  | 7.9693  | 8.3398  | 8.5738  | 8.6232  | 8.2702  | 8.2399  | 8.1905  | 8.1375  | 8.1707  | 8.0545  | 1.0243 | 0.0346  | 0.1511 | 0.8209 |
| Ywhae   | _AAFDDAIAELDTLSEESYK_2                                              | #N/A                  | 8.9213  | 8.8429  | 9.0135  | 9.8531  | 8.4872  | 9.1686  | 9.1161  | 8.8951  | 8.7441  | 9.2792  | 1.0043 | 0.0063  | 0.8797 | 0.0556 |
| Ywhae   | _J[Acetyl (Protein N-term)]M[Oxidation (M)]DREEDLVYQAK_2            | #N/A                  | 7.4050  | 7.5286  | 7.8473  | 7.9035  | 7.6737  | 7.8867  | 7.3438  | 7.5092  | 7.7555  | 7.7555  | 1.0280 | 0.0399  | 0.1414 | 0.8494 |
| Ywhae   | _M[Oxidation (M)]KGDVHR_2                                           | #N/A                  | 3.9504  | 3.2547  | 3.1363  | 3.3651  | 3.0761  | 3.1526  | 6.8188  | 5.2287  | 5.5314  | 5.6729  | 0.5716 | -0.8070 | 0.0001 | 0.4265 |
| Ywhae   | _KEAAENSLVAYK_2                                                     | #N/A                  | 4.7744  | 2.8273  | 5.2756  | 4.9532  | 3.1050  | 4.8860  | 3.4127  | 4.6326  | 4.0690  | 5.0792  | 0.9792 | -0.0303 | 0.8899 | 0.0507 |
| Ywhae   | _AASDIAM[Oxidation (M)]TELPPTPIR_2                                  | #N/A                  | 7.9475  | 7.2444  | 6.6652  | 7.4808  | 8.3077  | 7.0975  | 7.6982  | 7.2403  | 8.5225  | 7.4247  | 0.9658 | -0.0502 | 0.5032 | 0.2983 |
| Ywhae   | _YDEM[Oxidation (M)]VESM[Oxidation (M)]KK_2                         | #N/A                  | 5.4932  | 5.0048  | 4.8674  | 5.9191  | 5.8633  | 4.8798  | 5.1609  | 5.2210  | 4.8124  | 5.2798  | 1.0429 | 0.0606  | 0.4257 | 0.3709 |
| Ywhae   | _ENKGGEDLK_2                                                        | #N/A                  | 4.7680  | 4.8588  | 4.2754  | 4.3815  | 5.3599  | 4.6258  | 4.6022  | 4.4731  | 4.4387  | 4.8659  | 1.0252 | 0.0358  | 0.6011 | 0.2211 |
| Ywhae   | _ISSIEQKEENK_2                                                      | #N/A                  | 5.8382  | 5.8332  | 5.6853  | 6.4661  | 5.9062  | 6.0767  | 6.0252  | 5.6221  | 6.0772  | 5.7659  | 1.0162 | 0.0232  | 0.5788 | 0.2375 |
| Ywhae   | _KVAGM[Oxidation (M)]DELVEER_3                                      | #N/A                  | 5.1782  | 5.2408  | 6.0262  | 5.0130  | 5.3879  | 5.7392  | 4.7264  | 5.4258  | 5.4067  | 5.4199  | 1.0355 | 0.0503  | 0.4559 | 0.3411 |
| Ywhae   | _YDEM[Oxidation (M)]VESMK_2                                         | #N/A                  | 3.1180  | 3.8743  | 4.3525  | 4.5414  | 3.7626  | 4.3629  | 4.2560  | 3.5771  | 3.2257  | 3.0075  | 1.1380 | 0.1865  | 0.1978 | 0.7037 |
| Ywhae   | _LAEQAERYDEM[Oxidation (M)]VSM[Oxidation (M)]KK_3                   | #N/A                  | 6.1158  | 7.0359  | 7.7702  | 6.7290  | 6.8937  | 7.2887  | 6.1870  | 6.6347  | 6.7422  | 6.5513  | 1.0679 | 0.0948  | 0.1761 | 0.7543 |
| Ywhae   | _ISSIEQKEENKGGEDK_3                                                 | #N/A                  | 6.2500  | 6.1775  | 6.5613  | 6.5856  | 6.7704  | 6.3462  | 6.1338  | 6.0364  | 6.5175  | 6.1441  | 1.0387 | 0.0548  | 0.1313 | 0.8816 |
| Ywhae   | _DNLTLYWTSOMGGGEEQNK_2                                              | #N/A                  | 3.7783  | 12.3316 | 3.8736  | 12.2042 | 11.1901 | 3.7247  | 4.0855  | 11.6557 | 11.4825 | 11.8343 | 0.8040 | -0.3148 | 0.5025 | 0.2989 |
| Ywhae   | _AAFDDAIAELDTLSEESYKDSLUMGLLR_3                                     | #N/A                  | 3.5004  | 3.8055  | 4.1508  | 2.7831  | 3.4739  | 3.8601  | 3.5084  | 3.9706  | 3.9332  | 3.9332  | 0.9529 | -0.0696 | 0.5059 | 0.2959 |
| Ywhae   | _LAEQAERYDEMVESMK_3                                                 | #N/A                  | 4.0931  | 3.2788  | 3.8268  | 3.3706  | 2.9487  | 3.1581  | 3.5888  | 3.6601  | 3.9592  | 3.8836  | 0.9176 | -0.1241 | 0.2225 | 0.6527 |
| Rps14   | _IEDVTPPSDSTR_2                                                     | #N/A                  | 6.8328  | 7.3466  | 7.2165  | 6.9511  | 7.0973  | 6.9095  | 6.8058  | 7.2281  | 6.5182  | 6.9118  | 1.0228 | 0.0325  | 0.3852 | 0.4143 |
| Rps14   | _TPGPGAGSALR_2                                                      | #N/A                  | 4.2486  | 6.0970  | 5.4023  | 5.6831  | 6.3156  | 5.5529  | 5.6888  | 6.0285  | 3.7742  | 6.4157  | 1.0133 | 0.0191  | 0.9049 | 0.0434 |
| Rps23   | _ANFFGGASHAK_2                                                      | #N/A                  | 6.1439  | 6.5739  | 5.3411  | 6.3450  | 6.7568  | 6.4069  | 5.2577  | 6.5339  | 5.8412  | 6.0114  | 1.0592 | 0.0830  | 0.3164 | 0.4998 |
| Rps18   | _VLNTNIDGR_2                                                        | #N/A                  | 7.9986  | 7.8423  | 7.7645  | 7.7927  | 7.9588  | 8.0238  | 7.7587  | 7.6158  | 8.0660  | 8.1836  | 0.9988 | -0.0017 | 0.9399 | 0.0269 |
| Rps18   | _IPDWFVLR_2                                                         | #N/A                  | 6.9096  | 6.9141  | 6.7983  | 6.7285  | 6.8161  | 6.6889  | 6.8379  | 7.0431  | 7.185   |         |        |         |        |        |



|             |                                                                                  |                      |         |         |         |         |         |         |         |         |         |         |        |         |        |        |
|-------------|----------------------------------------------------------------------------------|----------------------|---------|---------|---------|---------|---------|---------|---------|---------|---------|---------|--------|---------|--------|--------|
| Pumc6       | _ADHDFVQEDFM[Oxidation (M)]K_3                                                   | #N/A                 | 3.2191  | 3.9754  | 4.4536  | 3.9974  | 5.1843  | 4.2618  | 4.1457  | 5.5130  | 3.3028  | 3.6747  | 1.0055 | 0.0079  | 0.9649 | 0.0155 |
| Kcnab2      | _RSS[Phospho (STY)]VITTK_2                                                       | #N/A                 | 8.5553  | 3.9439  | 8.8372  | 3.9559  | 7.3715  | 4.2932  | 4.1142  | 3.0352  | 8.6043  | 3.6432  | 1.2705 | 0.3454  | 0.4259 | 0.3707 |
| Kcnab2      | _QTGS[Phospho (STY)]JGM[Oxidation (M)]YSTR_2                                     | #N/A                 | 8.1562  | 8.1687  | 8.1573  | 8.6695  | 3.1053  | 8.1209  | 8.5536  | 7.5436  | 7.3802  | 8.2131  | 0.9336 | -0.0992 | 0.6451 | 0.1904 |
| Kcnab2      | _AEVLGNLK_2                                                                      | #N/A                 | 4.4772  | 4.9095  | 3.6034  | 5.3810  | 3.3439  | 2.9346  | 3.7873  | 5.0302  | 4.2220  | 4.6677  | 0.9280 | -0.1077 | 0.5677 | 0.2459 |
| Kcnab2      | _SS[Phospho (STY)]VITTK_2                                                        | #N/A                 | 3.7686  | 3.7686  | 6.0830  | 3.8196  | 3.6090  | 4.5581  | 3.8061  | 5.0529  | 4.7534  | 5.2057  | 0.9069 | -0.1410 | 0.4448 | 0.3518 |
| Kcnab2      | _VESTGS[Phospho (STY)]PAR_2                                                      | #N/A                 | 3.3076  | 4.0639  | 4.5422  | 4.0859  | 3.9522  | 4.1732  | 5.6293  | 4.4161  | 3.2143  | 3.7632  | 0.9448 | -0.0819 | 0.6230 | 0.2055 |
| Kcnab2      | _J[Acetyl (Protein N-term)]M[Oxidation (M)]PESTGS[Phospho (STY)]PAR_2            | #N/A                 | 11.2618 | 10.4805 | 11.1126 | 10.5752 | 9.4758  | 10.3659 | 10.7112 | 10.5819 | 10.5037 | 10.8130 | 0.9899 | -0.0146 | 0.7528 | 0.1233 |
| Kcnab2      | _J[Acetyl (Protein N-term)]MPESTGS[Phospho (STY)]PARLS[Phospho (STY)]JLR_2       | P62484_S14_M2_Kcnab2 | 4.0394  | 3.2095  | 4.0739  | 6.4882  | 3.1651  | 3.9669  | 3.4427  | 3.7608  | 4.0617  | 3.6951  | 1.1115 | 0.5125  | 0.5251 | 0.7797 |
| Kcnab2      | _NEGVSSVLGASNAELQM[Oxidation (M)]ENGAQVLVK_3                                     | #N/A                 | 3.6706  | 3.6718  | 3.4042  | 4.4489  | 2.8143  | 3.8103  | 3.0963  | 4.0532  | 4.3522  | 4.1261  | 0.9308 | -0.1034 | 0.4618 | 0.3356 |
| Kcnab2      | _LQLEVDVVFANRPDPKTPM[Oxidation (M)]EETVR_3                                       | #N/A                 | 3.8486  | 3.3776  | 4.5354  | 3.5372  | 2.9743  | 3.2544  | 3.2519  | 3.0804  | 4.2298  | 3.5042  | 1.2023 | 0.0290  | 0.8409 | 0.0753 |
| Abi2        | _EIGLTTNK_2                                                                      | #N/A                 | 6.3306  | 5.9360  | 5.8085  | 6.1016  | 5.9863  | 5.7303  | 5.8077  | 6.1157  | 6.3131  | 6.0405  | 0.9857 | -0.0208 | 0.5439 | 0.2645 |
| Abi2        | _ALFDSYTLNR_2                                                                    | #N/A                 | 6.0977  | 5.9611  | 6.4337  | 6.0123  | 6.0887  | 5.5455  | 5.6680  | 5.7941  | 5.8843  | 3.6380  | 1.1481 | 0.1993  | 0.1222 | 0.9128 |
| Abi2        | _VADYC[Carbamidomethyl (C)]ENNYQSPOK_2                                           | #N/A                 | 6.7141  | 6.5172  | 4.2305  | 7.2220  | 6.6752  | 6.7637  | 6.8415  | 3.2269  | 6.9792  | 6.7167  | 1.0695 | 0.0969  | 0.6587 | 0.1813 |
| Abi2        | _VADYC[Carbamidomethyl (C)]ENNYQS[Phospho (STY)]PDKQR_3                          | P62484_S40_M1_Abi2   | 4.9028  | 4.4052  | 4.1718  | 3.4916  | 4.2265  | 3.5030  | 3.8638  | 3.2856  | 3.5847  | 3.3928  | 1.1657 | 0.2211  | 0.0831 | 1.0806 |
| Abi2        | _NMAPSQCS[Phospho (STY)]PVR_2                                                    | #N/A                 | 8.7479  | 7.7826  | 3.3133  | 9.7990  | 7.1320  | 5.3765  | 8.0234  | 6.7283  | 6.9400  | 8.0110  | 0.9461 | -0.0800 | 0.7535 | 0.1229 |
| Abi2        | _HTPTTIGGS[Phospho (STY)]L_PVR_2                                                 | P62484_S301_M1_Abi2  | 3.7817  | 10.2098 | 10.7809 | 10.4306 | 3.7808  | 10.1089 | 8.7172  | 10.3932 | 7.5483  | 9.1506  | 0.9140 | -0.1298 | 0.6807 | 0.1670 |
| Abi2        | _J[Acetyl (Protein N-term)]AELQM[Oxidation (M)]LLEEEPPGR_2                       | #N/A                 | 4.0979  | 3.3534  | 3.8316  | 3.5614  | 4.1328  | 3.3829  | 3.2761  | 3.0562  | 4.0729  | 5.0267  | 0.9660 | -0.0500 | 0.7480 | 0.1261 |
| Abi2        | _TTPPTQKPPS[Phospho (STY)]PPM[Oxidation (M)]SGK_2                                | #N/A                 | 10.9351 | 11.3274 | 9.6742  | 12.5969 | 10.7192 | 10.7785 | 11.4188 | 11.1382 | 10.7105 | 10.9010 | 0.9953 | -0.0068 | 0.9202 | 0.0361 |
| Rab11a      | _ENDM[Oxidation (M)]S[Phospho (STY)]PSNNVPHVPTTENKPK_3                           | #N/A                 | 3.6285  | 6.3308  | 9.7099  | 7.1652  | 5.6450  | 6.7175  | 3.8168  | 7.9178  | 4.0204  | 3.8452  | 1.3332 | 0.1419  | 0.2413 | 0.6175 |
| Tac2d1      | _NSQLQDENLLK_2                                                                   | #N/A                 | 7.0811  | 7.3416  | 7.2180  | 7.7284  | 7.5452  | 7.1631  | 7.6775  | 7.0189  | 6.9581  | 7.0765  | 1.0228 | 0.0325  | 0.3965 | 0.4018 |
| Tac2d1      | _EVEVLK_2                                                                        | #N/A                 | 3.1588  | 0.4168  | 3.8456  | 4.3482  | 3.9557  | 4.1697  | 4.0629  | 3.7703  | 3.4188  | 4.3152  | 0.8520 | -0.3111 | 0.4754 | 0.3229 |
| Dynrlb1     | _J[Acetyl (Protein N-term)]AEVEULKR_2                                            | #N/A                 | 7.4563  | 7.8815  | 7.8471  | 8.2325  | 8.4961  | 7.9088  | 7.5722  | 7.8311  | 7.9451  | 7.8036  | 1.0234 | 0.0333  | 0.3718 | 0.4296 |
| Dynrlb1     | _EDPONDLTFLR_2                                                                   | #N/A                 | 7.5534  | 7.6461  | 7.9198  | 7.9615  | 8.4800  | 7.9442  | 7.3484  | 7.6553  | 7.8124  | 7.3198  | 1.0509 | 0.0716  | 0.0791 | 1.1019 |
| Dynrlb1     | _GVGGIVNTEGPIK_2                                                                 | #N/A                 | 4.5213  | 3.4875  | 4.1610  | 4.3468  | 4.8371  | 4.1692  | 4.4952  | 4.5805  | 3.8970  | 4.5470  | 0.9712 | -0.0421 | 0.6456 | 0.1900 |
| Eef1a2      | _RYDEVK_2                                                                        | #N/A                 | 9.3626  | 9.2090  | 9.4532  | 9.2731  | 9.4156  | 9.2639  | 9.0213  | 9.3199  | 9.2892  | 9.2055  | 1.0131 | 0.0188  | 0.1329 | 0.8764 |
| Eef1a2      | _KLNDPK_2                                                                        | #N/A                 | 5.1354  | 5.1688  | 4.0598  | 4.6669  | 5.4974  | 3.1698  | 5.3310  | 4.4345  | 5.2527  | 4.6864  | 0.9371 | -0.0937 | 0.5323 | 0.2739 |
| Eef1a2      | _VETGLRPGM[Oxidation (M)]VVTFAPWNITTEVK_3                                        | #N/A                 | 6.5979  | 6.4343  | 6.8802  | 6.8880  | 6.7178  | 6.5021  | 6.8254  | 7.6096  | 6.6911  | 6.9545  | 0.9483 | -0.0766 | 0.0846 | 1.0726 |
| Eef1a2      | _VYITDAPGHR_2                                                                    | #N/A                 | 7.9133  | 7.8538  | 8.3179  | 7.9973  | 7.6629  | 8.1031  | 8.2851  | 8.0828  | 8.1862  | 7.9132  | 0.9825 | -0.0255 | 0.3074 | 0.5123 |
| Eef1a2      | _EVSAYIKK_2                                                                      | #N/A                 | 4.4926  | 4.2081  | 4.0897  | 3.5252  | 4.3164  | 5.3213  | 4.3391  | 4.4535  | 3.1747  | 4.7844  | 1.0329 | 0.0467  | 0.7449 | 0.1279 |
| Eef1a2      | _SGDAIVEM[Oxidation (M)]VPGKPF[Oxidation (M)]C[Carbamidomethyl (C)]VFSFSQPPGLR_3 | #N/A                 | 4.3845  | 3.6400  | 4.1182  | 3.2748  | 3.5283  | 3.0963  | 4.4903  | 3.3392  | 2.9914  | 3.3393  | 1.0378 | 0.0535  | 0.7208 | 0.1422 |
| Rps4x       | _LSMIFVIGK_2                                                                     | #N/A                 | 4.2894  | 4.8003  | 4.4354  | 4.5328  | 3.9096  | 4.3106  | 4.1274  | 5.1197  | 5.0298  | 4.3521  | 0.9404 | -0.0887 | 0.2922 | 0.5343 |
| Rps4x       | _EC[Carbamidomethyl (C)]PLUFLR_2                                                 | #N/A                 | 4.3622  | 4.7860  | 4.0958  | 3.6101  | 4.6026  | 3.1187  | 3.7879  | 4.2771  | 3.6606  | 3.5091  | 1.0754 | 0.1049  | 0.4332 | 0.2633 |
| Rps4x       | _TDITPYAGFM[Oxidation (M)]DVISDK_2                                               | #N/A                 | 4.5004  | 4.8632  | 5.7966  | 4.8802  | 4.5369  | 4.5287  | 3.7288  | 4.4685  | 4.9125  | 3.7288  | 1.0507 | 0.0713  | 0.5476 | 0.3615 |
| Rps4x       | _FDTGNLC[Carbamidomethyl (C)]M[Oxidation (M)]VTGGANLGR_2                         | #N/A                 | 4.6012  | 3.9655  | 3.8471  | 3.5642  | 4.3098  | 4.4807  | 3.9853  | 3.9034  | 3.6488  | 3.5312  | 1.0958 | 0.1320  | 0.1416 | 0.8490 |
| Pp2cb       | _YSFLQFDPAPR_2                                                                   | #N/A                 | 8.7677  | 8.6904  | 8.6178  | 8.8186  | 8.2972  | 8.6531  | 8.7093  | 8.8691  | 8.5649  | 8.6035  | 0.9947 | -0.0076 | 0.6824 | 0.1660 |
| Pp2cb       | _NVVTFISAPNYC[Carbamidomethyl (C)]VR_2                                           | #N/A                 | 6.3900  | 6.9744  | 7.3266  | 6.6149  | 6.4274  | 6.6863  | 6.9386  | 6.7547  | 7.1129  | 6.7965  | 0.9762 | -0.0347 | 0.4203 | 0.3764 |
| Pp2cb       | _LGDQWVQLNLC[Carbamidomethyl (C)]K_2                                             | #N/A                 | 6.2057  | 5.7564  | 6.9578  | 6.3120  | 5.9294  | 6.0417  | 5.9263  | 5.8868  | 6.2671  | 1.0249  | 0.9355 | 0.5325  | 0.2737 | 0.7767 |
| Pp2cb       | _LAGDYGQDSETFNHANGTLVSR_3                                                        | #N/A                 | 5.2783  | 4.9896  | 5.7293  | 5.2691  | 3.8991  | 4.8465  | 5.0352  | 4.6883  | 4.9680  | 5.5759  | 0.9872 | -0.0186 | 0.8569 | 0.0671 |
| Pp2cb       | _QTCVYGVFGDC[Carbamidomethyl (C)]JLR_2                                           | #N/A                 | 4.9343  | 4.3600  | 5.4450  | 5.2884  | 5.1701  | 5.0590  | 5.4249  | 4.7729  | 4.8964  | 4.7906  | 1.0144 | 0.0206  | 0.7617 | 0.1182 |
| Pp2cb       | _SPDTNLFM[Oxidation (M)]GDVDR_2                                                  | #N/A                 | 5.9642  | 5.7980  | 5.9287  | 6.2414  | 5.1243  | 5.8742  | 5.4712  | 5.6677  | 5.5683  | 6.1347  | 1.0195 | 0.0279  | 0.6313 | 0.1997 |
| Pp2cb       | _LQEVPHGFM[Oxidation (M)]C[Carbamidomethyl (C)]DLLWSDDPR_3                       | #N/A                 | 4.0575  | 3.1903  | 3.5334  | 5.9734  | 5.5629  | 3.5495  | 3.4426  | 5.9368  | 5.5136  | 5.9025  | 0.8539 | -0.2279 | 0.3474 | 0.4592 |
| Pp2cb       | _AHLQVM[Oxidation (M)]EGVWVC[Carbamidomethyl (C)]HDR_3                           | #N/A                 | 4.9732  | 5.1021  | 4.1873  | 4.5138  | 4.7193  | 3.0107  | 5.7726  | 5.5610  | 6.2310  | 5.7016  | 0.7936 | -0.3335 | 0.0385 | 1.4145 |
| Rpl18a      | _SSGEVYC[Carbamidomethyl (C)]GQVFKS[Phospho (STY)]PLR_3                          | P62717_S71_M1_Rpl18a | 3.3808  | 3.8713  | 3.8404  | 3.8226  | 3.7110  | 3.6285  | 4.9036  | 3.8090  | 3.7205  | 3.6634  | 0.9217 | -0.1176 | 0.2454 | 0.6101 |
| Rpl18a      | _DLTTAGATQC[Carbamidomethyl (C)]VR_2                                             | #N/A                 | 3.6728  | 3.6696  | 3.4065  | 4.4511  | 3.4809  | 4.2386  | 3.0985  | 4.0509  | 4.3499  | 4.1284  | 0.9782 | -0.0319 | 0.7884 | 0.1032 |
| Acta2,Actg2 | _YPIEHGNTWDDM[Oxidation (M)]EK_3                                                 | #N/A                 | 11.0749 | 10.9509 | 11.0843 | 11.1401 | 11.1010 | 11.1420 | 11.1669 | 11.0245 | 11.2226 | 11.1323 | 0.9951 | -0.0071 | 0.2964 | 0.5282 |
| Acta2,Actg2 | _VAPEHPTLTLEAPLNPK_2                                                             | #N/A                 | 8.6061  | 8.8871  | 8.8425  | 9.0857  | 6.0453  | 8.6094  | 8.9338  | 8.7465  | 8.4940  | 8.9538  | 1.0040 | -0.0682 | 0.5102 | 0.2823 |
| Acta2,Actg2 | _DLYANNVSGGTTM[Oxidation (M)]VPGADR_2                                            | #N/A                 | 3.2161  | 4.0100  | 3.9029  | 4.4056  | 6.0245  | 6.0547  | 4.1203  | 6.4162  | 5.8160  | 5.7370  | 0.8334 | -0.2629 | 0.2344 | 0.6300 |
| Ap2s1       | _FLIQNR_2                                                                        | #N/A                 | 9.2679  | 9.1216  | 9.4976  | 8.9446  | 8.4120  | 8.8450  | 9.4105  | 9.3877  | 9.2546  | 8.9823  | 0.9736 | -0.0385 | 0.2721 | 0.5652 |
| Ap2s1       | _HTNVFVR_2                                                                       | #N/A                 | 5.9460  | 6.3183  | 5.6081  | 5.6243  | 5.7871  | 5.5030  | 5.9552  | 6.2328  | 5.8371  | 6.0485  | 0.9633 | -0.0539 | 0.2207 | 0.6561 |
| Ap2s1       | _VYTVVDEM[Oxidation (M)]FLAGEIR_2                                                | #N/A                 | 4.6961  | 5.0318  | 6.0991  | 3.2125  | 4.3076  | 5.0113  | 5.9835  | 5.2628  | 5.5736  | 4.5447  | 0.8849 | -0.1764 | 0.2893 | 0.5387 |
| Rhob        | _LVVVGDGAC[Carbamidomethyl (C)]GK_2                                              | #N/A                 | 7.6355  | 7.2666  | 7.6275  | 7.3904  | 7.6357  | 7.1348  | 7.6657  | 7.2164  | 7.6158  | 7.3437  | 1.0053 | 0.0076  | 0.7985 | 0.0977 |
| Rhob        | _EVFETATR_2                                                                      | #N/A                 | 7.5391  | 7.0653  | 6.9940  | 7.2179  | 7.6104  | 7.0334  | 6.8172  | 7.4589  | 7.2154  | 7.2164  | 1.0092 | 0.0133  | 0.7107 | 0.1483 |
| Rhob        | _IQAYDYLEC[Carbamidomethyl (C)]SAK_2                                             | #N/A                 | 4.3205  | 5.0575  | 5.4692  | 5.0708  | 5.1685  | 3.9644  | 4.4431  | 5.3245  | 4.6493  | 4.8433  | 1.0056 | 0.0800  | 0.9369 | 0.0283 |
| Rhob        | _LDRS[Phospho (STY)]DEHVR_2                                                      | P62746_S123_M1_Rhob  | 5.5151  | 4.4860  | 4.8713  | 6.3666  | 4.3014  | 4.1758  | 5.6862  | 5.1221  | 4.8495  | 4.8802  | 0.9646 | -0.0520 | 0.7014 | 0.1540 |
| Hpcal1      | _EHTEFTDHLQEWYK_3                                                                | #N/A                 | 5.1318  | 4.0965  | 4.4010  | 3.4028  | 3.9618  | 4.5424  | 3.7495  | 3.2148  | 4.3642  | 3.3698  | 1.1582 | 0.1219  | 0.1454 | 0.8373 |
| Rpl23a      | _LAPDYDALDVANK_3                                                                 | #N/A                 | 8.6874  | 8.6620  | 8.9657  | 8.9006  | 8.6285  | 8.8145  | 8.7839  | 8.6066  | 8.3979  | 8.6868  | 1.0183 | 0.0261  | 0.1388 | 0.8777 |
| Rpl23a      | _IRTS[Phospho (STY)]PTFR_2                                                       | P62751_S43_M1_Rpl23a | 8.7983  | 4.1237  | 3.7893  | 9.3955  | 8.6713  | 4.0005  | 9.2933  | 8.8883  | 8.7595  | 4.2589  | 0.8286 | -0.2712 | 0.4503 | 0.3465 |
| Rpl23a      | _KLYDIDVAK_2                                                                     | #N/A                 | 5.3058  | 5.0515  | 5.7116  | 5.3108  | 5.7015  | 5.6198  | 5.6644  | 5.3543  | 4.9844  | 5.9511  | 0.9930 | -0.0101 | 0.8619 | 0.0645 |
| Rp6         | _DIPGLTOTTPVR_2                                                                  | #N/A                 | 8.0074  | 7.7925  | 8.0974  | 7.9716  | 7.7353  | 7.7099  | 7.7012  | 7.9568  | 7.5669  | 7.5378  | 1.0257 | 0.0366  | 0.1162 | 0.9350 |
| Rp6         | _LIEVDDEI_2                                                                      | #N/A                 | 6.7407  | 6.2569  | 6.4672  | 6.6620  | 6.0116  | 6.4899  | 5.9361  | 6.5607  | 6.1215  | 6.7117  | 1.0167 | 0.0238  | 0.6097 | 0.2149 |
| Vsn1        | _FFPYGDASK_2                                                                     | #N/A                 | 9.2999  | 10.0007 | 9.4856  | 8.7911  | 8.2764  | 9.1716  | 8.8810  | 9.0673  | 8.5616  | 8.7488  | 1.0404 | 0.0572  | 0.2885 | 0.5398 |
| Vsn1        | _FAQHAFR_2                                                                       | #N/A                 | 8.3017  | 8.9841  | 8.5524  | 8.7362  | 9.1344  | 8.5119  | 8.5397  | 8.6723  | 8.7333  | 8.4174  | 1.0131 | 0.0188  | 0.5226 | 0.2818 |
| Vsn1        | _STFENEHLK_2                                                                     | #N/A                 | 8.0456  | 7.7947  | 7.7289  | 7.9877  | 8.3214  | 7.8669  | 8.0588  | 7.9316  | 8.1362  | 8.05    |        |         |        |        |



|          |  |                                                                 |                       |         |         |         |         |         |         |         |         |         |         |        |         |        |        |
|----------|--|-----------------------------------------------------------------|-----------------------|---------|---------|---------|---------|---------|---------|---------|---------|---------|---------|--------|---------|--------|--------|
|          |  | _DAVITYEHAH_2                                                   | #N/A                  | 10.2956 | 10.2951 | 10.6932 | 10.5419 | 10.4598 | 10.3201 | 10.2602 | 10.4784 | 10.4841 | 10.2024 | 1.0075 | 0.0108  | 0.4611 | 0.3362 |
| H4c1     |  | _JSGUYETR_2                                                     | #N/A                  | 9.5035  | 9.6483  | 10.0437 | 10.3831 | 9.5544  | 9.9300  | 9.8994  | 10.1630 | 10.0451 | 9.8189  | 0.9862 | -0.0201 | 0.4742 | 0.3241 |
| H4c1     |  | _TVTAM[Oxidation (M)]DVVYALK_2                                  | #N/A                  | 6.2528  | 6.5448  | 6.4180  | 6.5193  | 6.5743  | 6.5074  | 6.4292  | 6.6901  | 6.5652  | 6.3314  | 1.0042 | 0.0061  | 0.7095 | 0.1490 |
| H4c1     |  | _DNQDGMTPAIR_2                                                  | #N/A                  | 10.1047 | 10.4026 | 10.8957 | 10.5318 | 10.4611 | 10.1771 | 10.6208 | 10.6445 | 10.3430 | 10.0726 | 1.0008 | 0.0012  | 0.9630 | 0.0164 |
| H4c1     |  | _TVTAM[Oxidation (M)]DVVVYALR_2                                 | #N/A                  | 5.5094  | 5.6300  | 6.6814  | 5.4691  | 5.4194  | 5.9332  | 6.0457  | 6.1582  | 6.0948  | 6.0927  | 0.9469 | -0.0788 | 0.2247 | 0.6485 |
| H4c1     |  | _RIS[Phospho (STY)]GLUYETR_2                                    | P62806_S48_M1_H4c1    | 3.1848  | 3.9900  | 4.5869  | 5.3203  | 4.4347  | 3.9181  | 4.2789  | 4.3714  | 3.1696  | 3.8079  | 1.0850 | 0.1177  | 0.4597 | 0.3375 |
| H4c1     |  | _DAVITYEHAKR_3                                                  | #N/A                  | 2.9970  | 4.2291  | 3.6838  | 4.1865  | 3.6236  | 4.0063  | 3.9012  | 3.9320  | 4.5179  | 3.9482  | 0.8740 | -0.1943 | 0.1183 | 0.9271 |
| H4c1     |  | _DNQGITK_2                                                      | #N/A                  | 4.0303  | 3.3346  | 3.2163  | 3.2852  | 3.1560  | 3.0727  | 3.4335  | 4.2048  | 4.3174  | 3.6859  | 0.8565 | -0.2235 | 0.0494 | 1.3061 |
| Gabra1   |  | _NNITYAPTATY(Phospho (TY))TPNLAR_2                              | P62812_Y374_M1_Gabra1 | 3.3919  | 6.5136  | 7.3684  | 7.1262  | 4.7073  | 6.8793  | 6.8829  | 6.7379  | 6.7379  | 6.3829  | 0.8881 | -0.1711 | 0.3863 | 0.7171 |
| Atp6v1b2 |  | _NMITGPGPYER_2                                                  | #N/A                  | 10.6376 | 10.7008 | 10.9644 | 10.7385 | 10.2378 | 10.5525 | 10.7904 | 10.5877 | 10.6265 | 10.6431 | 0.9978 | -0.0032 | 0.8593 | 0.0659 |
| Atp6v1b2 |  | _NVNSQPR_2                                                      | #N/A                  | 7.1527  | 7.1126  | 7.2018  | 7.3709  | 8.6042  | 8.9087  | 8.5161  | 8.5008  | 7.6133  | 7.7584  | 0.9255 | -0.1133 | 0.2119 | 0.6738 |
| Atp6v1b2 |  | _QIVPPRVLPSSLR_2                                                | #N/A                  | 8.7821  | 8.7759  | 9.0168  | 8.8812  | 9.0252  | 8.9791  | 8.7712  | 8.6633  | 9.0113  | 8.8879  | 1.0087 | 0.0125  | 0.3823 | 0.4176 |
| Atp6v1b2 |  | _EQALAVSR_2                                                     | #N/A                  | 9.0935  | 9.0099  | 9.1922  | 9.0620  | 9.3848  | 9.1570  | 8.2354  | 9.0687  | 9.1992  | 9.2354  | 1.0282 | 0.0402  | 0.2198 | 0.6580 |
| Atp6v1b2 |  | _PQSISEFYPR_2                                                   | #N/A                  | 8.8498  | 9.0316  | 8.8861  | 8.9607  | 9.0833  | 8.8683  | 8.7759  | 8.9103  | 8.8858  | 8.6612  | 1.0157 | 0.0225  | 0.0704 | 1.1522 |
| Atp6v1b2 |  | _AVWQVEFGTSIDAK_2                                               | #N/A                  | 8.7232  | 8.6319  | 8.8705  | 9.1499  | 8.6571  | 8.5908  | 8.9767  | 8.7196  | 8.7328  | 8.7645  | 0.9968 | -0.0046 | 0.8183 | 0.0871 |
| Atp6v1b2 |  | _GFPGYM[Oxidation (M)]YTDLATYR_2                                | #N/A                  | 8.5489  | 8.9580  | 9.1420  | 8.0349  | 8.2954  | 8.8841  | 9.1509  | 8.6194  | 8.8861  | 8.3385  | 0.9852 | -0.0215 | 0.6320 | 0.1993 |
| Atp6v1b2 |  | _SGQVLVSSGS_2                                                   | #N/A                  | 8.3932  | 8.3710  | 8.7286  | 8.5612  | 8.1967  | 8.3094  | 8.1702  | 8.3525  | 8.4347  | 8.4672  | 1.0084 | 0.0121  | 0.5400 | 0.2676 |
| Atp6v1b2 |  | _AVNGEEISDOLLYLEFLQG_2                                          | #N/A                  | 5.7788  | 6.0624  | 6.7396  | 7.1515  | 5.8157  | 6.2658  | 6.4695  | 5.9044  | 6.0175  | 6.3374  | 1.0194 | 0.0278  | 0.6965 | 0.1571 |
| Atp6v1b2 |  | _FEVPGRR_2                                                      | #N/A                  | 6.7013  | 6.5353  | 7.1836  | 6.1782  | 6.1782  | 7.1022  | 6.2778  | 6.4201  | 6.6077  | 6.5562  | 1.0534 | 0.0750  | 0.1499 | 0.8241 |
| Atp6v1b2 |  | _PIFSAAGPHNEIAAQ(C)[Carbamidomethyl (C)]R_3                     | #N/A                  | 6.2071  | 6.1472  | 6.3443  | 6.7740  | 6.1437  | 6.0712  | 6.4225  | 6.2850  | 6.5814  | 6.4798  | 0.9750 | -0.0365 | 0.2851 | 0.5450 |
| Atp6v1b2 |  | _GPVVLAEDFLDM[Oxidation (M)]GGPINPQC[Carbamidomethyl (C)]R_3    | #N/A                  | 6.4879  | 5.6042  | 5.9296  | 6.0493  | 5.9545  | 6.3094  | 6.1380  | 6.2718  | 6.5079  | 5.9314  | 0.9748 | -0.0368 | 0.4221 | 0.3746 |
| Atp6v1b2 |  | _TSC[Carbamidomethyl (C)]EFTGDILR_2                             | #N/A                  | 5.7209  | 6.0728  | 3.8162  | 6.1283  | 6.1219  | 5.6476  | 6.1883  | 6.1671  | 6.0302  | 6.0593  | 0.9144 | -0.1292 | 0.2839 | 0.5468 |
| Atp6v1b2 |  | _TPVSEEDMLGR_2                                                  | #N/A                  | 7.9612  | 6.8974  | 4.5813  | 8.8392  | 7.6563  | 3.2085  | 6.6903  | 6.3449  | 6.3867  | 6.5018  | 1.0066 | 0.0095  | 0.9700 | 0.0132 |
| Atp6v1b2 |  | _KTS[Carbamidomethyl (C)]EFTGDILR_3                             | #N/A                  | 6.5724  | 6.6873  | 7.0918  | 7.0465  | 6.6942  | 6.5209  | 6.9191  | 6.9341  | 1.0289  | 0.9341  | 1.0041 | 0.0112  | 0.2610 | 0.5834 |
| Atp6v1b2 |  | _IYPEEM[Oxidation (M)]QTGSAIDGM[Oxidation (M)]NSIAR_3           | #N/A                  | 5.3479  | 6.4483  | 5.8646  | 5.2279  | 5.5474  | 6.5232  | 6.0426  | 5.4842  | 5.6699  | 5.6735  | 0.9805 | -0.0284 | 0.7421 | 0.1295 |
| Atp6v1b2 |  | _SAIGEGMTR_2                                                    | #N/A                  | 7.6290  | 6.4390  | 3.5640  | 8.5951  | 7.4778  | 3.8881  | 5.9789  | 4.0519  | 5.7757  | 5.9963  | 1.1495 | 0.0210  | 0.4902 | 0.3096 |
| Atp6v1b2 |  | _YAEIVHLPDGTGR_3                                                | #N/A                  | 7.1641  | 7.3993  | 7.9182  | 7.4088  | 7.4037  | 7.4473  | 7.2535  | 7.3609  | 7.5554  | 7.3913  | 1.0090 | 0.0130  | 0.6367 | 0.1961 |
| Atp6v1b2 |  | _LALITAEFLAYQC[Carbamidomethyl (C)]EK_2                         | #N/A                  | 6.4849  | 6.3074  | 6.9593  | 6.2191  | 5.9959  | 6.2950  | 6.4202  | 5.6860  | 6.1608  | 6.3045  | 1.0381 | 0.0539  | 0.2968 | 0.1961 |
| Atp6v1b2 |  | _YAEIVHLPDGTGR_2                                                | #N/A                  | 5.1004  | 4.8449  | 5.1194  | 5.5796  | 4.6831  | 5.0741  | 4.8741  | 5.1343  | 4.7316  | 5.1385  | 1.0196 | 0.0280  | 0.5924 | 0.2274 |
| Atp6v1b2 |  | _TVSGNGNPLVLDLHWK_3                                             | #N/A                  | 3.0280  | 3.6838  | 4.2291  | 3.2310  | 3.7095  | 3.5606  | 4.4465  | 3.3262  | 3.0353  | 3.5543  | 0.9953 | -0.0688 | 0.9594 | 0.0180 |
| Atp6v1b2 |  | _TVYETIDGWLQR_2                                                 | #N/A                  | 3.1470  | 3.9032  | 4.3815  | 4.6462  | 3.7915  | 4.3339  | 4.2271  | 4.8974  | 3.3750  | 3.6025  | 1.0021 | 0.0030  | 0.9831 | 0.0074 |
| Atp6v1b2 |  | _HVLVILTDM[Oxidation (M)]SSYAEALR_3                             | #N/A                  | 5.1951  | 3.8414  | 5.7753  | 5.1269  | 4.3475  | 5.4998  | 4.6622  | 4.8716  | 4.9000  | 4.9753  | 1.0231 | 0.0329  | 0.7735 | 0.1115 |
| Atp6v1b2 |  | _SDFEENGSM[Oxidation (M)]DNVC[Carbamidomethyl (C)]LFLNLANDPIR_3 | #N/A                  | 3.9262  | 3.3000  | 3.1121  | 3.6148  | 3.1883  | 3.4363  | 3.3295  | 3.0028  | 4.1523  | 3.5818  | 0.9753 | -0.0361 | 0.7330 | 0.1349 |
| Rab1A    |  | _QWLQEIDR_2                                                     | #N/A                  | 8.5791  | 8.3693  | 8.7199  | 7.9510  | 7.4646  | 7.7933  | 8.6727  | 8.5077  | 8.0139  | 8.1539  | 0.9771 | -0.0334 | 0.5104 | 0.1291 |
| Rab1A    |  | _EFADSGIPPLETSK_2                                               | #N/A                  | 8.2695  | 8.0001  | 8.1285  | 7.2876  | 7.3880  | 7.8547  | 8.0370  | 7.7472  | 7.8923  | 7.8486  | 0.9924 | -0.0110 | 0.7826 | 0.1065 |
| Rab1A    |  | _IGST[Phospho (STY)]PMK_2                                       | P62821_T195_M1_Rab1A  | 3.1875  | 7.4471  | 8.5694  | 7.1330  | 3.8320  | 7.4408  | 4.1140  | 3.0354  | 7.9810  | 7.4471  | 1.1105 | 0.1513  | 0.6846 | 0.1646 |
| Rab1A    |  | _IKVVDYTK_2                                                     | #N/A                  | 6.2446  | 6.5261  | 5.6028  | 5.9086  | 5.9813  | 6.0477  | 6.3826  | 6.6100  | 6.0202  | 6.0073  | 0.9675 | -0.0476 | 0.3334 | 0.4770 |
| Rab1A    |  | _TITS[Phospho (STY)]SYVR_2                                      | P62821_S78_M1_Rab1A   | 3.7005  | 4.6678  | 5.0791  | 4.2790  | 4.4604  | 4.4175  | 3.7203  | 6.2607  | 5.0017  | 4.2631  | 0.9216 | -0.1178 | 0.4658 | 0.3318 |
| Rab1A    |  | _GAIHGIVPVVDGSEFNNVK_3                                          | #N/A                  | 5.9942  | 6.0208  | 6.6095  | 6.8826  | 3.4173  | 4.7278  | 6.2686  | 6.0513  | 5.3355  | 5.2774  | 0.9613 | -0.0317 | 0.8622 | 0.3348 |
| Rab1A    |  | _YASENNVK_2                                                     | #N/A                  | 7.3422  | 7.0898  | 7.2517  | 7.2884  | 6.9525  | 6.9478  | 7.4994  | 7.5775  | 7.3330  | 7.2371  | 0.9641 | -0.0528 | 0.3082 | 1.4184 |
| Rab1A    |  | _FADDTYESTYSGIVDFK_2                                            | #N/A                  | 5.2631  | 5.7703  | 6.6163  | 6.1613  | 3.9674  | 5.4553  | 6.0760  | 5.5329  | 5.2523  | 5.2523  | 0.9931 | -0.0100 | 0.9393 | 0.1472 |
| Rab1A    |  | _QWLQEIDRYA[Phospho (STY)]ENNVNK_3                              | P62821_S114_M1_Rab1A  | 3.8511  | 3.1065  | 3.5848  | 4.6294  | 2.9948  | 3.6298  | 3.5229  | 4.8373  | 4.1717  | 4.3067  | 0.8630 | -0.1216 | 0.1558 | 0.8073 |
| Rab1A    |  | _MGPGATAGGAEK_2                                                 | #N/A                  | 4.2114  | 3.1310  | 3.9450  | 3.4888  | 2.9524  | 3.2763  | 3.6371  | 3.5124  | 3.8114  | 3.1617  | 0.9912 | -0.0127 | 0.9121 | 0.0400 |
| Rab1C    |  | _TITATYR_2                                                      | #N/A                  | 8.3268  | 8.1903  | 8.5301  | 7.8701  | 7.6780  | 7.9895  | 7.2633  | 8.3949  | 8.0808  | 8.1018  | 1.0172 | 0.0247  | 0.5975 | 0.2237 |
| Rab1C    |  | _TYSVDNAQVILAGNK_2                                              | #N/A                  | 6.5847  | 6.0405  | 6.8348  | 4.4334  | 5.4723  | 6.1793  | 6.6245  | 6.5457  | 6.1014  | 5.8303  | 0.9971 | -0.0041 | 0.9513 | 0.0217 |
| Rab1C    |  | _LVDDIC[Carbamidomethyl (C)]DK_2                                | #N/A                  | 6.8193  | 6.4999  | 4.5105  | 4.3834  | 6.3772  | 6.6275  | 7.3588  | 6.7923  | 6.8165  | 8.0580  | 0.8089 | -0.3060 | 0.0540 | 1.2678 |
| Rab1C    |  | _MSESLDTPAITAAK_2                                               | #N/A                  | 5.2706  | 6.4459  | 6.5333  | 6.3264  | 6.5514  | 6.3412  | 6.6161  | 6.1682  | 6.1862  | 9.9266  | 0.9647 | -0.0518 | 0.4660 | 0.3316 |
| Rab1C    |  | _LGEQLGFEFFETSAK_2                                              | #N/A                  | 5.4260  | 4.8903  | 4.5546  | 4.2430  | 4.1092  | 4.8090  | 4.9303  | 5.2210  | 4.6012  | 5.2120  | 0.9361 | -0.0953 | 0.2723 | 0.5650 |
| Rab1C    |  | _DNINVKQITER_3                                                  | #N/A                  | 3.4352  | 4.1915  | 3.1689  | 4.2135  | 4.0798  | 4.0457  | 4.3617  | 4.2885  | 3.0868  | 3.8908  | 0.9869 | -0.0190 | 0.8779 | 0.0566 |
| Ran      |  | _VC[Carbamidomethyl (C)]ENPMVLC[Carbamidomethyl (C)]GNK_2       | #N/A                  | 8.6973  | 8.2455  | 8.0808  | 8.5781  | 8.7586  | 8.3854  | 8.7808  | 8.2679  | 8.4474  | 8.1498  | 1.0055 | 0.0079  | 0.7976 | 0.0982 |
| Ran      |  | _LVLVDGGTGK_2                                                   | #N/A                  | 5.8545  | 8.0628  | 8.8679  | 8.3921  | 8.4749  | 8.4536  | 7.9173  | 8.3222  | 5.5421  | 8.2562  | 1.0258 | 0.0367  | 0.2415 | 0.0875 |
| Ran      |  | _LAcetyl (Protein N-term)[AAQGEPPQVQK_2                         | #N/A                  | 8.3693  | 8.4473  | 8.6788  | 8.3377  | 8.3215  | 8.3868  | 8.2797  | 8.4027  | 8.2030  | 8.5075  | 1.0088 | 0.0127  | 0.4169 | 0.3799 |
| Ran      |  | _NLKPYDSAK_2                                                    | #N/A                  | 8.0441  | 7.7997  | 7.7449  | 7.8492  | 8.1833  | 8.2278  | 7.5814  | 7.9143  | 7.8228  | 8.2630  | 1.0101 | 0.0144  | 0.6181 | 0.2089 |
| Ran      |  | _FMKWDATAGGEK_2                                                 | #N/A                  | 8.1651  | 8.1565  | 8.3646  | 8.2736  | 8.2421  | 8.0056  | 8.3654  | 8.2244  | 8.1210  | 8.1091  | 0.9995 | -0.0007 | 0.9631 | 0.0163 |
| Ran      |  | _HLTGEFEK_2                                                     | #N/A                  | 5.9772  | 5.6983  | 5.6422  | 5.4210  | 6.4954  | 5.3826  | 5.9677  | 5.0173  | 6.0859  | 6.0921  | 0.9963 | -0.0053 | 0.9441 | 0.0250 |
| Ran      |  | _YVATIGVEVHPVHHTNR_3                                            | #N/A                  | 4.7848  | 3.3597  | 4.5532  | 5.4296  | 2.9921  | 4.8109  | 5.7729  | 5.4259  | 4.8216  | 5.0252  | 0.8031 | -0.3164 | 0.0695 | 1.1582 |
| Rpl23    |  | _LSLGLPVGAVNC[Carbamidomethyl (C)]ADNTGAK_2                     | #N/A                  | 6.8287  | 6.3972  | 6.7079  | 5.7045  | 6.1217  | 6.4112  | 6.6428  | 6.5247  | 5.9629  | 6.3357  | 0.9850 | -0.0218 | 0.6586 | 0.1813 |
| Rpl23    |  | _GSGATGPKVAK_2                                                  | #N/A                  | 5.8757  | 5.2837  | 5.7830  | 6.2208  | 6.3415  | 5.6152  | 5.8921  | 6.3172  | 5.7953  | 6.0288  | 0.9742 | 0.0377  | 0.4977 | 0.3017 |
| Rap1a    |  | _YDPTIEDSYR_2                                                   | #N/A                  | 8.2526  | 8.1545  | 8.6133  | 8.2273  | 7.9159  | 8.3073  | 8.3557  | 8.1723  | 8.1562  | 8.2439  | 1.0016 | 0.0023  | 0.9161 | 0.0381 |
| Rap1a    |  | _YDPTIEDSYRK_2                                                  | #N/A                  | 7.6806  | 7.5359  | 7.8093  | 7.9283  | 7.8844  | 7.8059  | 7.9244  | 7.5961  | 7.9107  | 7.9107  | 1.0029 | 0.0042  | 0.8586 | 0.0662 |
| Rap1a    |  | _LVLVSGGGVGK_2                                                  | #N/A                  | 6.9153  | 7.5584  | 7.1628  | 7.3147  | 6.8203  | 6.7462  | 6.5687  | 7.7133  | 7.0217  | 6.6713  | 1.0132 | 0.0190  | 0.7313 | 0.1359 |
| Rap1a    |  | _EQQGNLAR_2                                                     | #N/A                  | 6.9441  | 6.9195  | 7.0086  | 6.8281  | 7.3578  | 6.7583  | 6.9857  | 7.0533  | 7.1940  | 6.7868  | 0.9949 | -0.0073 | 0.7853 | 0.1049 |
| Rap1a    |  | _IWNVEIFDVR_2                                                   | #N/A                  | 4.5857  | 4.6058  | 5.1493  | 4.5383  | 5.1763  | 5.2069  | 5.3265  | 5.1905  | 5.0765  | 4.2593  | 0.9590 | -0.0604 | 0.3151 | 0.5016 |
| Rap1a    |  |                                                                 |                       |         |         |         |         |         |         |         |         |         |         |        |         |        |        |



|        |                                                                                                    |                       |         |         |         |         |        |         |         |         |         |         |         |         |        |        |
|--------|----------------------------------------------------------------------------------------------------|-----------------------|---------|---------|---------|---------|--------|---------|---------|---------|---------|---------|---------|---------|--------|--------|
| Gnb1   | _ELAGHTGYLSC[Carbamidomethyl (C)]C[Carbamidomethyl (C)]R_3                                         | #N/A                  | 7.7712  | 8.0461  | 7.8947  | 7.9770  | 8.4361 | 7.9055  | 7.8874  | 7.7961  | 8.1933  | 7.8781  | 1.0084  | 0.0120  | 0.6391 | 0.1944 |
| Gnb1   | _LTVSGAC[Carbamidomethyl (C)]DASAK_2                                                               | #N/A                  | 8.2913  | 8.6747  | 8.5274  | 8.9844  | 8.8307 | 8.5561  | 8.5587  | 9.0723  | 8.8577  | 8.4912  | 0.9885  | -0.0167 | 0.5555 | 0.2553 |
| Gnb1   | _KAC[Carbamidomethyl (C)]ADATLSQITNNIDPVG_3                                                        | #N/A                  | 8.5061  | 8.2646  | 8.6532  | 8.3870  | 8.3875 | 8.4969  | 8.2957  | 8.4192  | 8.3372  | 8.2957  | 0.9975  | -0.0037 | 0.8606 | 0.0652 |
| Gnb1   | _VSC[Carbamidomethyl (C)]LQVTDGDM[Oxidation (M)]AVATGSWDSFLK_3                                     | #N/A                  | 6.9479  | 7.1714  | 8.1006  | 7.0927  | 6.6802 | 7.5142  | 7.9126  | 6.7929  | 7.1711  | 7.3156  | 0.9936  | -0.0093 | 0.8850 | 0.0531 |
| Gnb1   | _LLAAGYDFNC[Carbamidomethyl (C)]NWDALK_2                                                           | #N/A                  | 6.4332  | 6.5840  | 7.0593  | 7.2854  | 6.2720 | 6.7795  | 6.9571  | 6.7949  | 6.7426  | 6.2168  | 1.0086  | 0.0124  | 0.8110 | 0.0910 |
| Gnb1   | _ADQELM[Oxidation (M)]YSHONIC[Carbamidomethyl (C)]GITSVSFK_3                                       | #N/A                  | 7.5435  | 7.9916  | 8.7919  | 9.4364  | 6.9347 | 8.2031  | 8.4544  | 9.4565  | 7.9637  | 9.4128  | 0.9239  | -0.1142 | 0.2474 | 0.6066 |
| Gnb1   | _Acetyl (Protein N-term)[SELDQURGEAEGLK_2                                                          | #N/A                  | 6.5515  | 6.8939  | 6.9065  | 6.9777  | 6.6943 | 6.6907  | 6.9309  | 6.7858  | 6.7876  | 6.6139  | 1.0009  | 0.0013  | 0.9511 | 0.0218 |
| Gnb1   | _Acetyl (Protein N-term)[SELDQURGEAEGLKNQIR_3                                                      | #N/A                  | 4.3126  | 5.1221  | 5.6814  | 5.6333  | 4.6462 | 4.7263  | 4.6788  | 3.9673  | 5.1653  | 1.0644  | 0.9900  | 0.0000  | 0.4182 | 0.3786 |
| Gnb1   | _YAM[Oxidation (M)]HWGDSR_2                                                                        | #N/A                  | 7.7480  | 8.2491  | 8.4041  | 8.4272  | 8.3674 | 8.4181  | 8.4189  | 8.3713  | 8.3417  | 8.2184  | 0.9918  | -0.0119 | 0.6341 | 0.1979 |
| Gnb1   | _AC[Carbamidomethyl (C)]ADATLSQITNNIDPVG_2                                                         | #N/A                  | 8.3053  | 8.0059  | 7.8553  | 8.5890  | 8.4456 | 8.1932  | 8.4822  | 8.0154  | 8.2074  | 8.2182  | 1.0002  | 0.0003  | 0.9923 | 0.0034 |
| Gnb1   | _Acetyl (Protein N-term)[SELDQLR_2                                                                 | #N/A                  | 4.6008  | 3.5656  | 4.0438  | 3.5876  | 3.4539 | 3.1707  | 3.7359  | 3.4136  | 3.2589  | 4.0099  | 1.0368  | 0.0521  | 0.6614 | 0.1795 |
| Gnb1   | lation (M)[TTC[Carbamidomethyl (C)]AYAPSGNYVAC[Carbamidomethyl (C)]GGLDNIC[Carbamidomethyl (C)]R_3 | #N/A                  | 4.0253  | 3.2807  | 3.7590  | 3.6340  | 3.1690 | 3.4556  | 3.3487  | 2.9836  | 4.1330  | 3.6010  | 1.0106  | 0.0152  | 0.8850 | 0.0530 |
| Gnb1   | _QTFTHGESDINAC[Carbamidomethyl (C)]FPNGNAFATGSDOATC[Carbamidomethyl (C)]R_3                        | #N/A                  | 4.2643  | 3.0781  | 3.9980  | 3.5418  | 3.4081 | 3.2165  | 3.6900  | 3.4594  | 3.7584  | 3.2191  | 1.0149  | 0.0214  | 0.8406 | 0.0754 |
| Rbx1   | _QVC[Carbamidomethyl (C)]PLDNR_2                                                                   | #N/A                  | 3.7036  | 6.7803  | 6.4549  | 6.6230  | 7.0542 | 3.7772  | 3.1294  | 6.4458  | 4.3191  | 4.1592  | 1.2700  | 0.3449  | 0.2425 | 0.6152 |
| Rbx1   | _Acetyl (Protein N-term)[AAAMDOVTPSGTNSGAGK_2                                                      | #N/A                  | 5.4929  | 3.1469  | 3.6252  | 3.7678  | 4.9917 | 3.5894  | 3.4825  | 4.3506  | 3.9992  | 3.7348  | 1.0541  | 0.0760  | 0.6802 | 0.1673 |
| Gnb2   | _TVSGAC[Carbamidomethyl (C)]DASIK_2                                                                | #N/A                  | 7.8742  | 8.0991  | 8.2889  | 8.4871  | 8.6788 | 8.2731  | 8.1155  | 8.5571  | 8.3942  | 8.2159  | 0.9955  | -0.0064 | 0.8262 | 0.0829 |
| Gnb2   | _KAC[Carbamidomethyl (C)]GDSLTQITAGLDPVGR_3                                                        | #N/A                  | 8.0533  | 8.4461  | 8.6873  | 8.7948  | 8.3032 | 8.4523  | 8.4148  | 8.3939  | 8.2196  | 8.2705  | 1.0158  | 0.0226  | 0.3779 | 0.4227 |
| Gnb2   | _AC[Carbamidomethyl (C)]GDSLTQITAGLDPVGR_2                                                         | #N/A                  | 7.2341  | 6.0332  | 6.1134  | 6.8815  | 6.4865 | 6.4567  | 6.6223  | 6.2468  | 6.4334  | 5.6864  | 1.0096  | 0.0138  | 0.8051 | 0.0941 |
| Gnb2   | _Acetyl (Protein N-term)[S[Phospho (STY)]ELEQLRGEAEQLR_2                                           | #N/A                  | 5.4278  | 5.6813  | 6.1929  | 5.9034  | 5.5535 | 5.5714  | 6.0438  | 5.9164  | 5.9271  | 5.5605  | 0.9761  | -0.0349 | 0.4212 | 0.3755 |
| Gnb2   | _LLAAGYDFNC[Carbamidomethyl (C)]NWDAM[Oxidation (M)]K_2                                            | #N/A                  | 6.7876  | 6.8559  | 7.1447  | 6.9932  | 6.7557 | 6.3747  | 7.1076  | 6.5899  | 6.9951  | 6.9020  | 0.9884  | -0.0168 | 0.6294 | 0.2011 |
| Gnb2   | _LPGHTGYLSC[Carbamidomethyl (C)]C[Carbamidomethyl (C)]R_3                                          | #N/A                  | 8.3417  | 8.1726  | 7.4080  | 8.4687  | 8.7815 | 8.1476  | 8.2269  | 8.3065  | 8.4235  | 8.1262  | 0.9939  | -0.0089 | 0.8377 | 0.0769 |
| Gnb2   | _Acetyl (Protein N-term)[SELEQLR_2                                                                 | #N/A                  | 5.2610  | 3.5624  | 3.8072  | 4.2420  | 4.8627 | 4.1721  | 3.9853  | 4.7590  | 4.6777  | 4.5416  | 0.9615  | -0.0567 | 0.6184 | 0.1949 |
| Gnb2   | _ADQELLM[Oxidation (M)]YSHONIC[Carbamidomethyl (C)]GITSVAFSR_3                                     | #N/A                  | 3.0455  | 3.8018  | 4.2800  | 4.4138  | 4.1613 | 6.4571  | 4.4988  | 3.1821  | 3.1532  | 3.5011  | 1.2166  | 0.2828  | 0.2546 | 0.5942 |
| Gnb2   | _QTFTHGESDINAVAFPPGVAFITGSDOATC[Carbamidomethyl (C)]R_3                                            | #N/A                  | 3.8762  | 3.3499  | 4.5630  | 3.5649  | 3.2382 | 3.3864  | 3.2795  | 3.0528  | 4.2022  | 3.5319  | 1.0417  | 0.0589  | 0.6589 | 0.1812 |
| Gnb5   | _SEAES[Phospho (STY)]LXGK_2                                                                        | #N/A                  | 8.0930  | 7.9074  | 3.4208  | 8.5595  | 7.7357 | 7.7507  | 8.0258  | 7.9662  | 8.0205  | 0.9079  | -0.1394 | 0.4698  | 0.3281 | 0.6232 |
| Gnb5   | _VWVDSFTTNK_2                                                                                      | #N/A                  | 6.1129  | 5.7733  | 5.7630  | 6.1240  | 5.2648 | 5.6399  | 6.0995  | 5.8149  | 6.1251  | 5.9623  | 0.9632  | -0.0541 | 0.2381 | 0.6232 |
| Gnb5   | _SEAES[Phospho (STY)]LXGKLEER_2                                                                    | #N/A                  | 3.0330  | 4.3561  | 3.7198  | 4.2976  | 4.7817 | 4.0714  | 4.2499  | 4.0219  | 3.2604  | 4.4468  | 1.0121  | 0.0174  | 0.8992 | 0.0461 |
| Gnb5   | _SQGC[Carbamidomethyl (C)]VQAFETHSDVNSVR_3                                                         | #N/A                  | 4.2698  | 4.0176  | 5.0025  | 5.2772  | 3.5870 | 4.4225  | 3.8749  | 4.7387  | 4.5436  | 4.7575  | 0.9890  | -0.0160 | 0.8941 | 0.0486 |
| Gnb5   | _LVDLHVQVAER_3                                                                                     | #N/A                  | 3.3372  | 4.1424  | 4.0240  | 4.1400  | 3.9637 | 4.8869  | 4.2413  | 3.5918  | 3.2404  | 4.6397  | 1.0392  | 0.0555  | 0.6757 | 0.1703 |
| Gnb5   | _VSPDGTAF[Carbamidomethyl (C)]SGSWDHLTR_2                                                          | #N/A                  | 3.3188  | 4.0750  | 4.5533  | 4.3406  | 3.9633 | 4.1621  | 4.0553  | 4.4050  | 4.4703  | 3.7743  | 0.9743  | -0.0376 | 0.6797 | 0.1677 |
| Rpl30  | _V[Carbamidomethyl (C)]TLAIIDPGSDIR_2                                                              | #N/A                  | 6.7960  | 6.7671  | 7.3593  | 7.3580  | 6.7925 | 7.0123  | 6.9328  | 6.8862  | 6.8531  | 6.6300  | 1.0276  | 0.0393  | 0.2524 | 0.5800 |
| Rpl30  | _LVLIANN[Carbamidomethyl (C)]PALR_2                                                                | #N/A                  | 6.2695  | 6.3127  | 5.6580  | 6.1057  | 5.7883 | 6.1985  | 6.0368  | 5.9405  | 6.2041  | 5.9999  | 1.0017  | 0.0024  | 0.9459 | 0.0242 |
| Cyc5   | _TGNPLHGLGR_2                                                                                      | #N/A                  | 9.0918  | 5.9941  | 9.9071  | 9.9460  | 9.5459 | 9.2829  | 9.6558  | 9.4748  | 9.3645  | 9.4170  | 1.0088  | 0.0126  | 0.6542 | 0.1843 |
| Cyc5   | _TGGAAAGSYTDANK_2                                                                                  | #N/A                  | 6.3754  | 6.3025  | 6.5575  | 7.4592  | 6.2446 | 6.4209  | 6.9521  | 6.5946  | 6.6922  | 6.8055  | 0.9703  | -0.0436 | 0.4250 | 0.3716 |
| Cyc5   | _GITWGEDTLM[Oxidation (M)]DYLENPKK_3                                                               | #N/A                  | 6.2081  | 6.7655  | 7.2530  | 6.8358  | 6.5219 | 6.5203  | 6.9381  | 6.9783  | 6.8992  | 6.7699  | 0.9692  | -0.0451 | 0.2845 | 0.5459 |
| Cyc5   | _ADUAIK_2                                                                                          | #N/A                  | 4.8633  | 6.2573  | 3.9941  | 5.0681  | 5.9307 | 5.1693  | 3.2676  | 5.4689  | 5.8839  | 4.4254  | 1.0950  | 0.1309  | 0.4853 | 0.3140 |
| Cyc5   | _KTGAAAGSYTDANK_3                                                                                  | #N/A                  | 5.7243  | 5.2185  | 4.9897  | 5.5381  | 5.0715 | 5.9674  | 4.8546  | 5.1537  | 5.4653  | 5.4426  | 1.0362  | 0.0513  | 0.4312 | 0.3653 |
| Rpl31  | _SAINENVTR_2                                                                                       | #N/A                  | 6.9464  | 6.7681  | 7.4443  | 6.6977  | 7.5687 | 7.2675  | 7.1712  | 7.2775  | 6.6273  | 6.8040  | 1.0209  | 0.0298  | 0.5295 | 0.2761 |
| Rpl31  | _EYTNHKK_2                                                                                         | #N/A                  | 5.3709  | 4.6658  | 5.1920  | 5.8838  | 5.7866 | 5.7692  | 5.4820  | 5.7184  | 5.6585  | 0.9800  | -0.0292 | 0.6643  | 0.1776 |        |
| Rpl31  | _LITLVTVYVPTTK_2                                                                                   | #N/A                  | 3.5413  | 4.4151  | 5.1011  | 4.6988  | 4.3196 | 4.1183  | 4.6073  | 3.3028  | 3.8628  | 4.7039  | 1.0598  | 0.0838  | 0.5302 | 0.2756 |
| Rpl31  | _NLQZVWVDEN_2                                                                                      | #N/A                  | 4.0687  | 3.2767  | 5.7810  | 3.3432  | 4.2784 | 4.5054  | 4.8734  | 3.6580  | 4.1499  | 5.7102  | 0.9154  | -0.1275 | 0.5257 | 0.2793 |
| Rpl31  | _DELPTT[Phospho (STY)]PSEQK_2                                                                      | P62908_T221_M1_Rp3    | 3.6377  | 10.1239 | 10.6952 | 10.7363 | 9.6644 | 11.0513 | 3.7309  | 11.0513 | 10.6196 | 10.5563 | 0.8905  | -0.1673 | 0.6613 | 0.1796 |
| Rpl31  | _AELNEFLTR_2                                                                                       | #N/A                  | 6.7524  | 7.0297  | 7.2668  | 6.4705  | 6.5129 | 6.4537  | 6.6484  | 6.8391  | 6.7271  | 6.4709  | 1.0114  | 0.0164  | 0.6870 | 0.1631 |
| Rpl31  | _GLC[Carbamidomethyl (C)]IAQAESR_2                                                                 | #N/A                  | 6.1786  | 6.3390  | 4.3497  | 6.1207  | 5.7142 | 6.0825  | 6.6731  | 6.0749  | 6.4132  | 6.0177  | 0.9210  | -0.1187 | 0.2445 | 0.6116 |
| Rpl32  | _SYC[Carbamidomethyl (C)]AEIAHNVSK_2                                                               | #N/A                  | 4.7492  | 5.2944  | 3.2700  | 6.0241  | 5.8689 | 4.7578  | 5.6756  | 5.3716  | 4.9764  | 5.0869  | 0.9463  | -0.0797 | 0.6041 | 0.2189 |
| Rpl8   | _DIHDPGR_2                                                                                         | #N/A                  | 6.6352  | 5.6518  | 6.5687  | 6.2408  | 6.4364 | 6.1945  | 6.1511  | 6.5729  | 6.0162  | 6.5530  | 0.9944  | -0.0011 | 0.8724 | 0.0593 |
| Rpl8   | _AVGVGAVGGGR_2                                                                                     | #N/A                  | 5.1332  | 5.4199  | 4.5823  | 4.9748  | 5.2976 | 4.5785  | 5.2501  | 4.8460  | 5.1965  | 5.4370  | 0.9644  | -0.0523 | 0.3971 | 0.4011 |
| Cacng7 | _YPDHLHST[Phospho (STY)]PC[Carbamidomethyl (C)]_2                                                  | P62956_S273_M1_Cacng7 | 7.9895  | 8.3161  | 4.4188  | 8.5472  | 7.3800 | 8.5512  | 9.2367  | 8.7394  | 8.3410  | 8.2638  | 0.9638  | -0.1113 | 0.1870 | 0.7283 |
| Cacng7 | _LS[Phospho (STY)]DC[Carbamidomethyl (C)]SDYSGQLFPEAWR_2                                           | P62956_S222_M1_Cacng7 | 3.6782  | 3.6642  | 3.4119  | 4.4565  | 3.4855 | 4.2440  | 3.1039  | 4.0455  | 4.3445  | 4.1338  | 0.9786  | -0.0312 | 0.7927 | 0.1009 |
| Ybx1   | _AADPPAENS[Phospho (STY)]APEAEGGAE_2                                                               | P62960_S312_M1_Ybx1   | 6.4007  | 6.6748  | 4.0315  | 4.3055  | 3.6397 | 4.3082  | 3.7495  | 3.5480  | 3.8470  | 6.8294  | 1.0890  | 0.1230  | 0.6707 | 0.1735 |
| Pln1   | _DPSVWAVPGK_2                                                                                      | #N/A                  | 9.2764  | 9.3607  | 9.4976  | 9.5482  | 9.4953 | 9.4577  | 9.5275  | 9.2369  | 9.2761  | 9.3195  | 1.0106  | 0.0153  | 0.2096 | 0.6785 |
| Pln1   | _TFVSTPAEVGVGVK_2                                                                                  | #N/A                  | 8.2030  | 8.1099  | 8.2071  | 7.8022  | 8.1137 | 8.0225  | 7.8934  | 8.2431  | 8.0766  | 8.0766  | 1.0014  | 0.0020  | 0.9100 | 0.0409 |
| Pln1   | _STGGAPTFNVVTM[Oxidation (M)]TAK_2                                                                 | #N/A                  | 5.9014  | 6.0920  | 6.6020  | 5.1439  | 5.8724 | 6.6455  | 6.3119  | 5.9689  | 5.9415  | 6.6243  | 0.9728  | -0.0397 | 0.6012 | 0.2210 |
| Pln1   | _DSLQDQGFMTM[Oxidation (M)]DLR_2                                                                   | #N/A                  | 7.4585  | 7.5479  | 8.2238  | 7.4653  | 7.5211 | 7.6452  | 7.8630  | 7.2650  | 7.7341  | 7.4943  | 1.0072  | 0.0103  | 0.7721 | 0.1123 |
| Pln1   | _Acetyl (Protein N-term)[AGWNAVDSL[Oxidation (M)]ADGTC[Carbamidomethyl (C)]QDAAHVGVK_2             | #N/A                  | 4.6619  | 3.8973  | 4.8859  | 3.7264  | 4.7275 | 4.4780  | 4.6023  | 4.5357  | 4.3370  | 5.2925  | 0.9512  | -0.0722 | 0.4808 | 0.3181 |
| Pln1   | _C[Carbamidomethyl (C)]YEM[Oxidation (M)]ASHR_2                                                    | #N/A                  | 3.6526  | 4.5173  | 4.2872  | 3.9267  | 5.8826 | 3.9219  | 4.5187  | 4.5350  | 3.9128  | 4.0683  | 1.0249  | 0.0355  | 0.8109 | 0.0911 |
| Tra2b  | _Acetyl (Protein N-term)[S[Phospho (STY)]DSGEQNTGER_2                                              | P62996_S2_M1_Tra2b    | 10.4215 | 10.5976 | 10.9292 | 10.9134 | 9.9048 | 10.4932 | 10.9596 | 10.8395 | 10.6621 | 10.3659 | 0.9847  | -0.0222 | 0.4750 | 0.3233 |
| Tra2b  | _Acetyl (Protein N-term)[DSGEQNVGERIS[Phospho (STY)]R_2                                            | P62996_S14_M1_Tra2b   | 6.5705  | 5.6492  | 3.8948  | 6.2200  | 3.3048 | 4.9897  | 6.6913  | 6.4678  | 5.9532  | 7.7975  | 0.7975  | -0.3264 | 0.0904 | 1.0438 |
| Tra2b  | _S[Phospho (STY)]HS[Phospho (STY)]HS[Phospho (STY)]RDR_2                                           | P62996_S87_M3_Tra2b   | 3.9788  | 6.5078  | 6.9864  | 6.8932  | 2.9512 | 6.7070  | 3.5668  | 7.9860  | 6.5957  | 4.0405  | 1.0223  | 0.0318  | 0.9218 | 0.0354 |
| Tra2b  | _RPH[Phospho (STY)]PTPGVMGR_3                                                                      | P62996_T201_M1_Tra2b  | 3.9905  | 4.0095  | 4.5674  | 5.9140  | 3.8309 | 3.8986  | 4.2594  | 4.3909  | 3.1891  | 3.7884  | 1.1181  | 0.1611  | 0.3470 | 0.4597 |
| Tra2b  | _RHS[Phospho (STY)]HS[Phospho (STY)]HS[Phospho (STY)]PMSTR_3                                       | #N/A                  | 5.7280  | 3.7450  | 3.9587  | 5.3754  | 3.8961 | 3.9816  | 3.6485  | 4.1883  | 4.8088  | 4.1592  | 1.0586  | 0.0822  | 0.6220 | 0.2062 |
| Tra2b  | _RRHS[Phospho (STY)]HS[Phospho (STY)]HS[Phospho (STY)]PMSTR_2                                      | #N/A                  | 3.5500  | 3.8888  | 4.1618  | 3.9227  | 3.6779 | 5.5800  | 4.3077  | 4.0877  | 3.7515  | 3.6895  | 1.0432  | 0.0611  | 0.676  |        |







|         |                     |                                                             |                                                         |                       |                   |         |         |         |         |         |         |         |         |         |         |         |        |        |        |        |  |
|---------|---------------------|-------------------------------------------------------------|---------------------------------------------------------|-----------------------|-------------------|---------|---------|---------|---------|---------|---------|---------|---------|---------|---------|---------|--------|--------|--------|--------|--|
| Hspd1   | VVTEPKKEEKDPGM      | [Oxidation (M)]GAM                                          | [Oxidation (M)]GGM                                      | [Oxidation (M)]GGG    | [Oxidation (M)]GG | #N/A    | 3.1056  | 4.2368  | 4.3401  | 3.0802  | 3.7502  | 4.3753  | 4.0322  | 3.1173  | 3.4163  | 3.5612  | 1.0801 | 0.1112 | 0.4326 | 0.3639 |  |
| Hspd1   | _ILQSSSEVGVDAM      | [Oxidation (M)]GDVNM                                        | [Oxidation (M)]VEK_3                                    | #N/A                  | 3.6910            | 3.5352  | 4.3778  | 3.3796  | 4.2413  | 3.2011  | 3.0943  | 3.2381  | 4.3875  | 3.3466  | 1.0629  | 0.0880  | 0.5289 | 0.2766 |        |        |  |
| Hspd1   | _DM                 | [Oxidation (M)]AIAITGGAVGEEGLNLENDVOQHDLGK_3                | #N/A                                                    | 4.3674                | 4.3597            | 3.5533  | 4.0560  | 3.4930  | 4.2365  | 3.7707  | 2.2205  | 3.7111  | 4.0230  | 1.1689  | 0.2252  | 0.1668  | 0.7779 | 0.1913 |        |        |  |
| Cpb1    | _KAIPPGC            | [Carbamidomethyl (C)]GDEPEEDESILDTVK_3                      | #N/A                                                    | 6.7692                | 7.3712            | 6.7542  | 7.6288  | 7.7087  | 7.6215  | 7.2616  | 7.4025  | 7.5995  | 7.4153  | 0.9851  | -0.0217 | 0.6437  | 0.2237 |        |        |        |  |
| Cpb1    | _EAEDAAM            | [Oxidation (M)]EANSSEGS[Phospho (STY)]LTPRK_2               | #N/A                                                    | 5.4041                | 6.9687            | 6.4041  | 3.7084  | 6.9931  | 7.0996  | 7.0512  | 6.7346  | 6.1252  | 6.0821  | 0.9405  | -0.0886 | 0.5989  | 0.1913 |        |        |        |  |
| Slm4    | _RRPSP              | [Phospho (STY)]LEEQK_3                                      | #N/A                                                    | 7.9054                | 7.8909            | 8.3380  | 8.0381  | 7.6022  | 7.9592  | 8.0652  | 8.0083  | 8.2304  | 8.0148  | 0.9846  | -0.0223 | 0.3625  | 0.4407 |        |        |        |  |
| Vamp2   | _DQKLS              | [Phospho (STY)]ELDDR_2                                      | P63046_S61_M1_Vamp2                                     | 7.7009                | 7.3651            | 7.7720  | 7.8538  | 5.3456  | 7.6395  | 7.9153  | 7.7337  | 7.4451  | 6.9057  | 0.9706  | -0.0430 | 0.6833  | 0.1654 |        |        |        |  |
| Vamp2   | _SLELDR_2           | #N/A                                                        | 5.6245                                                  | 5.3234                | 5.3494            | 4.2051  | 4.2584  | 4.8594  | 4.1716  | 5.6371  | 5.2104  | 4.4158  | 1.0160  | 0.0230  | 0.8531  | 0.0690  |        |        |        |        |  |
| Vamp2   | _ADALAGASQFETSAAK_2 | #N/A                                                        | 8.8879                                                  | 8.6501                | 9.1683            | 8.7428  | 8.1147  | 8.6791  | 9.2775  | 8.7913  | 8.8527  | 8.7361  | 0.9767  | -0.0339 | 0.3351  | 0.4748  |        |        |        |        |  |
| Vamp2   | _J                  | [Acetyl (Protein N-term)]SATAAATVPPAAPAGEGGPAPPPLNSNR_3     | #N/A                                                    | 3.7213                | 3.9581            | 4.4081  | 3.4100  | 10.4896 | 9.5383  | 3.1246  | 8.7792  | 8.4864  | 3.3769  | 1.1480  | 0.1991  | 0.6842  | 0.1648 |        |        |        |  |
| Vamp2   | _L                  | [_LQQTQAQVDEVVDIM]Oxidation (M)]R_2                         | #N/A                                                    | 6.7276                | 6.4441            | 7.0626  | 6.5729  | 5.4426  | 6.3122  | 6.6472  | 6.4572  | 6.6269  | 6.5849  | 0.9769  | -0.0337 | 0.6037  | 0.2192 |        |        |        |  |
| Vamp2   | _S                  | [_SLELDRADALAGASQFETSAAK_3                                  | #N/A                                                    | 6.3072                | 7.3299            | 7.4324  | 6.9681  | 6.4165  | 6.7367  | 7.3850  | 7.0048  | 7.0033  | 6.8303  | 0.9730  | -0.0395 | 0.4749  | 0.3234 |        |        |        |  |
| Sult4a1 | _J                  | [Acetyl (Protein N-term)]AESEAIETGT[Phospho (STY)]PGEFESK_2 | P63046_T11_M1_Sult4a1                                   | 9.1312                | 9.6081            | 9.4188  | 9.7610  | 7.9104  | 9.5261  | 9.5541  | 9.5022  | 9.3795  | 9.5667  | 0.9711  | -0.0423 | 0.4523  | 0.3446 |        |        |        |  |
| Pcp4    | _                   | _AAVAISQGR_2                                                | #N/A                                                    | 9.4538                | 9.8883            | 10.1057 | 10.3115 | 10.9749 | 10.3796 | 9.7712  | 10.2252 | 10.3512 | 10.2250 | 1.0042  | 0.0060  | 0.8830  | 0.0540 |        |        |        |  |
| Pcp4    | _                   | _VQEEFDIDM                                                  | [Oxidation (M)]DAPETER_2                                | #N/A                  | 8.0891            | 8.5380  | 8.9204  | 9.0199  | 9.2152  | 9.0629  | 8.4751  | 8.4750  | 8.6194  | 1.0268  | 0.0382  | 0.3262  | 0.4865 |        |        |        |  |
| Pcp4    | _                   | _KVQEEFDIDM                                                 | [Oxidation (M)]DAPETER_3                                | #N/A                  | 7.4461            | 7.1319  | 7.9258  | 8.4680  | 7.8145  | 7.0691  | 7.9039  | 7.3428  | 7.5294  | 1.0495  | 0.0697  | 0.2305  | 0.6374 |        |        |        |  |
| Thra    | _VEC                | [Carbamidomethyl (C)]G[Phospho (STY)]DPENSAR_2              | P63058_S12_M1_Thra                                      | 6.1963                | 3.0956            | 4.4780  | 6.6715  | 2.9169  | 3.3118  | 6.3668  | 5.7941  | 5.7628  | 3.4468  | 0.8320  | -0.2654 | 0.3871  | 0.4122 |        |        |        |  |
| Elf4e   | _                   | _DAYTHGR_2                                                  | #N/A                                                    | 5.9295                | 5.4304            | 5.2204  | 5.6852  | 6.1215  | 5.4749  | 6.0375  | 5.5607  | 5.5453  | 5.5671  | 0.9940  | -0.0087 | 0.8666  | 0.0622 |        |        |        |  |
| Elf4e   | _                   | _IAIWTEC                                                    | [Carbamidomethyl (C)]ENR_2                              | #N/A                  | 3.2565            | 3.9697  | 3.9433  | 4.4459  | 4.1402  | 4.1792  | 4.1606  | 3.6725  | 3.3211  | 5.1465  | 0.9789  | -0.3008 | 0.8240 | 0.0841 |        |        |  |
| Gabrb3  | _                   | _NSAIS[Phospho (STY)]FONSQIYR_2                             | P63080_S394_M1_Gabrb3                                   | 3.8956                | 3.1511            | 3.2611  | 6.0174  | 3.0394  | 5.1742  | 4.0987  | 6.1348  | 5.7973  | 4.6613  | 0.7906  | -0.3390 | 0.1780  | 0.7496 |        |        |        |  |
| Gabrb3  | _                   | _KQS                                                        | [Phospho (STY)]MPEKHGR_3                                | P63080_S406_M1_Gabrb3 | 3.7077            | 3.5184  | 4.3945  | 3.3963  | 3.4067  | 3.2179  | 3.1110  | 3.2213  | 4.3707  | 3.3633  | 1.0257  | 0.0366  | 0.7801 | 0.1079 |        |        |  |
| Mapk1   | _J                  | [Acetyl (Protein N-term)]AAAAAGPEM                          | [Oxidation (M)]VR_2                                     | #N/A                  | 8.2397            | 8.9348  | 9.1368  | 7.7776  | 8.5834  | 8.6633  | 8.6784  | 8.0080  | 8.6208  | 0.9778  | -0.0324 | 0.4872  | 0.3123 |        |        |        |  |
| Mapk1   | _                   | _GQVFOVGR_2                                                 | #N/A                                                    | 8.4223                | 8.3253            | 8.5971  | 8.0828  | 8.2781  | 8.1714  | 8.5294  | 8.5031  | 8.5002  | 7.9972  | 0.9917  | -0.0120 | 0.6273  | 0.2025 |        |        |        |  |
| Mapk1   | _                   | _NYLISPHK_2                                                 | #N/A                                                    | 7.6869                | 8.1165            | 7.9531  | 7.8152  | 7.8317  | 7.6219  | 8.0039  | 8.1476  | 8.2708  | 8.1139  | 0.9635  | -0.0536 | 0.0191  | 1.7188 |        |        |        |  |
| Mapk1   | _                   | _ELUFEETAR_2                                                | #N/A                                                    | 5.7141                | 5.2714            | 5.7414  | 5.3189  | 5.1214  | 5.6625  | 6.3204  | 6.0987  | 5.6798  | 5.6230  | 1.0411  | 0.0582  | 0.6506  | 0.1867 |        |        |        |  |
| Mapk1   | _                   | _LKLIFEETAR_3                                               | #N/A                                                    | 4.6583                | 3.2623            | 3.1439  | 3.3576  | 4.1938  | 3.7546  | 3.5058  | 3.8785  | 5.1072  | 4.9540  | 0.8549  | -0.2262 | 0.1847  | 0.7336 |        |        |        |  |
| Mapk1   | _                   | _DYYVQDLM                                                   | [Oxidation (M)]ETDLYK_2                                 | #N/A                  | 5.7149            | 5.8737  | 6.9113  | 6.5059  | 6.0187  | 6.0746  | 6.2749  | 5.8736  | 6.0682  | 6.2315  | 1.0116  | 0.0167  | 0.7726 | 0.1121 |        |        |  |
| Mapk1   | _                   | _VADPDHDTGLTEYVATR_3                                        | #N/A                                                    | 6.1501                | 7.2324            | 7.3255  | 8.3620  | 5.8292  | 7.1797  | 7.1531  | 7.8959  | 7.5232  | 7.6294  | 0.9288  | -0.1065 | 0.2955  | 0.5295 |        |        |        |  |
| Mapk1   | _                   | _SPFEHQIYTC                                                 | [Carbamidomethyl (C)]QR_3                               | #N/A                  | 5.5736            | 4.9418  | 5.2496  | 5.0214  | 5.0560  | 4.6017  | 4.9043  | 5.1813  | 4.7907  | 5.2624  | 1.0078  | 0.0112  | 0.8389 | 0.0763 |        |        |  |
| Mapk1   | _                   | _YTNLSYSGEGAYGM                                             | [Oxidation (M)]VC[Carbamidomethyl (C)]SAYDNLK_3         | #N/A                  | 4.1172            | 4.5713  | 3.3032  | 3.8058  | 3.2429  | 2.9857  | 3.3678  | 3.7407  | 3.9612  | 3.7685  | 0.9896  | -0.0151 | 0.9079 | 0.0420 |        |        |  |
| Mapk1   | _                   | _APEMLNSK_2                                                 | #N/A                                                    | 3.5850                | 4.3902            | 4.2718  | 5.2879  | 4.5341  | 3.5180  | 3.8788  | 3.5697  | 3.6256  | 3.4078  | 1.1779  | 0.2362  | 0.0979  | 1.0091 |        |        |        |  |
| Mapk1   | _                   | _YHSANVLHR_3                                                | #N/A                                                    | 3.2511                | 4.1037            | 4.5819  | 4.1257  | 3.9920  | 4.1335  | 3.7566  | 4.3763  | 3.9853  | 3.8030  | 1.1583  | 0.2120  | 0.3149  | 0.5018 |        |        |        |  |
| Ppp1cc  | _                   | _GNHEC                                                      | [Carbamidomethyl (C)]AS[Phospho (STY)]INR_2             | P63087_S129_M1_Ppp1cc | 6.9840            | 6.9407  | 7.1904  | 7.2681  | 7.2829  | 7.0031  | 7.2108  | 6.8563  | 6.7077  | 0.8023  | 0.1297  | 0.0423  | 0.1127 | 0.9480 |        |        |  |
| Ppp1cc  | _                   | _HDLRLC                                                     | [Carbamidomethyl (C)]R_2                                | #N/A                  | 7.6957            | 7.4170  | 7.2503  | 7.5155  | 7.7220  | 7.2809  | 7.2531  | 6.5347  | 7.4099  | 7.2623  | 1.0513  | 0.0722  | 0.0858 | 1.0667 |        |        |  |
| Ppp1cc  | _                   | _NVQLQENR_2                                                 | #N/A                                                    | 7.2881                | 7.1838            | 7.4851  | 7.2001  | 7.5452  | 7.8973  | 7.5625  | 6.9669  | 7.6193  | 7.6854  | 0.9966  | -0.0049 | 0.8978  | 0.0468 |        |        |        |  |
| Ppp1cc  | _                   | _YGFYDEC                                                    | [Carbamidomethyl (C)]K_2                                | #N/A                  | 7.3614            | 7.1010  | 7.4201  | 7.5192  | 7.3783  | 7.1899  | 7.5225  | 6.9886  | 6.7052  | 6.7383  | 1.0486  | 0.0685  | 0.0790 | 1.1022 |        |        |  |
| Ppp1cc  | _                   | _TFTDC                                                      | [Carbamidomethyl (C)]FNC[Carbamidomethyl (C)]PIAAVDEK_2 | #N/A                  | 7.0109            | 7.1516  | 7.1392  | 7.6966  | 7.3616  | 7.0048  | 7.1431  | 6.9964  | 6.9328  | 6.9020  | 1.0334  | 0.0475  | 0.1361 | 0.8662 |        |        |  |
| Ppp1cc  | _                   | _EIFSQPILLEAPLK_2                                           | #N/A                                                    | 5.4946                | 5.7327            | 6.2285  | 5.5677  | 5.7164  | 5.5080  | 5.6131  | 5.9766  | 5.5969  | 5.7457  | 0.9954  | -0.0067 | 0.8690  | 0.0610 |        |        |        |  |
| Ppp1cc  | _                   | _YPENFILR_2                                                 | #N/A                                                    | 5.5300                | 5.2086            | 4.0431  | 5.4464  | 3.7750  | 3.7467  | 4.6031  | 4.1697  | 4.3806  | 5.2500  | 1.0085  | 0.0122  | 0.9371  | 0.0282 |        |        |        |  |
| Ppp1cc  | _                   | _J                                                          | [Acetyl (Protein N-term)]ADIDKLNDSIQR_2                 | #N/A                  | 5.3827            | 4.9896  | 5.8110  | 5.3469  | 5.7015  | 5.6170  | 5.7624  | 5.4875  | 5.4890  | 5.3924  | 0.9895  | -0.0152 | 0.7338 | 0.1344 |        |        |  |
| Ppp1cc  | _                   | _IFC                                                        | [Carbamidomethyl (C)]C[Carbamidomethyl (C)]HGLSPDLQSM   | [Oxidation (M)]EQIR_3 | #N/A              | 4.9707  | 5.1902  | 5.3059  | 5.3529  | 5.4496  | 5.0682  | 5.0543  | 4.8309  | 5.2914  | 5.4098  | 1.0148  | 0.0212 | 0.5939 | 0.2263 |        |  |
| Ppp1cc  | _                   | _AHQVVEDGEYFAK_2                                            | #N/A                                                    | 6.4217                | 5.8049            | 6.2273  | 5.8709  | 5.7413  | 6.0801  | 6.2809  | 5.9491  | 6.1284  | 1.0224  | 0.2099  | 0.5836  | 0.2339  |        |        |        |        |  |
| Ppp1cc  | _                   | _QSLTEIC                                                    | [Carbamidomethyl (C)]LLAYK_2                            | #N/A                  | 3.0723            | 3.0114  | 3.7591  | 4.2432  | 3.6989  | 4.0306  | 4.3914  | 3.8567  | 3.5053  | 3.6325  | 0.9453  | -0.0812 | 0.5006 | 0.3005 |        |        |  |
| Ppp1cc  | _                   | _C                                                          | [Carbamidomethyl (C)]GDHGGYDLRL_3                       | #N/A                  | 3.4494            | 4.0727  | 3.6093  | 4.3120  | 3.6419  | 4.1698  | 4.2407  | 4.0387  | 3.2312  | 3.4377  | 1.0371  | 0.0526  | 0.6100 | 0.2147 |        |        |  |
| Ywhaz   | _                   | _EKIETELR_2                                                 | #N/A                                                    | 11.1018               | 10.7407           | 10.8378 | 11.0418 | 11.2191 | 11.0294 | 10.8354 | 10.8060 | 11.0086 | 11.0466 | 1.0065  | 0.0093  | 0.5049  | 0.2968 |        |        |        |  |
| Ywhaz   | _                   | _GVDGSGQAYGEAFESK_3                                         | #N/A                                                    | 9.3580                | 9.8653            | 10.3760 | 10.1721 | 9.2875  | 9.5993  | 9.7457  | 9.4191  | 9.6099  | 9.7210  | 1.0158  | 0.0227  | 0.5300  | 0.2757 |        |        |        |  |
| Ywhaz   | _                   | _VSSIEQK_2                                                  | #N/A                                                    | 8.4056                | 8.4159            | 8.5894  | 8.4202  | 8.7549  | 8.5281  | 7.9329  | 7.8188  | 8.0404  | 8.6527  | 1.0496  | 0.0699  | 0.0369  | 1.4332 |        |        |        |  |
| Ywhaz   | _                   | _YLAEVAAGDDK_2                                              | #N/A                                                    | 7.5799                | 6.8866            | 6.9951  | 7.0966  | 7.0366  | 7.3388  | 6.8721  | 7.2407  | 7.3686  | 7.3105  | 0.9941  | -0.0085 | 0.7954  | 0.0994 |        |        |        |  |
| Ywhaz   | _                   | _FUPNASEPESK_2                                              | #N/A                                                    | 11.2674               | 11.5145           | 11.6738 | 11.5527 | 11.7299 | 11.4314 | 11.4806 | 11.3905 | 11.4481 | 11.3819 | 1.0090  | 0.0129  | 0.2726  | 0.5645 |        |        |        |  |
| Ywhaz   | _J                  | [Acetyl (Protein N-term)]M                                  | [Oxidation (M)]DKNELVQK_2                               | #N/A                  | 8.7508            | 9.3729  | 9.0806  | 9.4078  | 9.2506  | 9.2357  | 9.0869  | 9.2224  | 9.3049  | 1.0132  | 0.0189  | 0.5023  | 0.2960 |        |        |        |  |
| Ywhaz   | _                   | _SVTEGGAELSNEER_2                                           | #N/A                                                    | 10.3018               | 10.4991           | 10.6741 | 10.7970 | 10.7449 | 10.6387 | 10.4509 | 10.4306 | 10.3957 | 10.5885 | 1.0136  | 0.0196  | 0.1856  | 0.7314 |        |        |        |  |
| Ywhaz   | _                   | _KGVDGSGQAYGEAFESK_3                                        | #N/A                                                    | 5.7431                | 4.9050            | 5.7703  | 6.0146  | 4.6539  | 4.2892  | 5.7181  | 3.9125  | 4.7911  | 5.1223  | 1.0703  | 0.0980  | 0.4838  | 0.3154 |        |        |        |  |
| Ywhaz   | _                   | _YDOM                                                       | [Oxidation (M)]AAC[Carbamidomethyl (C)]M                | [Oxidation (M)]K_2    | #N/A              | 5.7754  | 5.4424  | 5.4786  | 6.4200  | 6.3145  | 5.4406  | 4.6743  | 5.7034  | 5.3454  | 5.4945  | 1.0957  | 0.1318 | 0.1171 | 0.9314 |        |  |
| Ywhaz   | _                   | _DIC                                                        | [Carbamidomethyl (C)]NDVLSLEK_2                         | #N/A                  | 9.4832            | 9.4416  | 8.9788  | 9.5170  | 9.6494  | 9.5046  | 9.6004  | 9.2208  | 9.5472  | 9.4036  | 0.9985  | -0.0021 | 0.9311 | 0.0357 |        |        |  |
| Ywhaz   | _                   | _TAFDEAAELDTSEESYK_2                                        | #N/A                                                    | 9.3378                | 9.3145            | 9.7847  | 10.3463 | 9.6027  | 9.5060  | 9.8555  | 9.5014  | 9.5000  | 9.9479  | 0.9946  | -0.0078 | 0.8145  | 0.0891 |        |        |        |  |
| Ywhaz   | _                   | _YLAEVAAGDDK_2                                              | #N/A                                                    | 10.0122               | 10.2067           | 10.2159 | 10.4516 | 10.5794 | 10.4387 | 10.0265 | 10.2154 | 10.2615 | 10.3748 | 1.0088  | 0.0126  | 0.4607  | 0.3366 |        |        |        |  |
| Ywhaz   | _                   | _VSS[Phospho (STY)]IEKTEGAEEK_3                             | #N/A                                                    | 3.9922                | 3.2339            | 3.1782  | 3.6809  | 6.5318  | 3.1107  | 3.3955  | 4.4376  | 4.0862  | 3.6478  | 1.0161  | 0.0231  | 0.9299  | 0.0316 |        |        |        |  |
| Ywhaz   | _                   | _GVDGSGQAYGEAFESK_2                                         | #N/A                                                    | 3.0054                | 3.8106            | 3.6922  | 10.8006 | 3.6319  | 4       |         |         |         |         |         |         |         |        |        |        |        |  |



|        |                                                                                          |                      |         |         |         |         |         |         |         |         |         |         |         |         |        |        |
|--------|------------------------------------------------------------------------------------------|----------------------|---------|---------|---------|---------|---------|---------|---------|---------|---------|---------|---------|---------|--------|--------|
| Ef5a   | _EDLRLPEGDLGKEIEQK_3                                                                     | #N/A                 | 5.6211  | 5.9724  | 6.0699  | 5.6783  | 5.7969  | 6.4011  | 6.4361  | 5.4996  | 5.5235  | 6.5840  | 0.9854  | -0.0212 | 0.7564 | 0.1212 |
| Ef5a   | _RNDQLQGIQDGIVSLSQSGEVR_3                                                                | #N/A                 | 2.3261  | 3.5283  | 4.3847  | 3.7975  | 3.4166  | 3.2080  | 3.1012  | 3.2312  | 4.3806  | 2.3767  | 1.0523  | 0.0735  | 0.7295 | 0.1370 |
| Ef5a   | _IIVEMSTSK_2                                                                             | #N/A                 | 4.0832  | 3.1430  | 3.2691  | 3.7718  | 3.0313  | 3.5933  | 3.4865  | 4.3467  | 3.9953  | 3.7388  | 0.8947  | -0.1605 | 0.1435 | 0.8430 |
| PKia   | _I[Acetyl (Protein N-term)]TQVETTVYADFIASGR_2                                            | #N/A                 | 4.4249  | 4.6794  | 4.9328  | 4.5083  | 5.6581  | 5.0132  | 5.2525  | 4.0587  | 4.0651  | 4.7682  | 1.0735  | 0.1023  | 0.3350 | 0.4749 |
| PKia   | _SSTQSGEAGGEAAK_2                                                                        | #N/A                 | 4.1448  | 2.7132  | 3.9498  | 3.0313  | 4.6955  | 3.8744  | 4.3261  | 3.6031  | 3.9430  | 3.6382  | 1.0062  | 0.0089  | 0.9401 | 0.0268 |
| PKia   | _SSTQSGEAGGEAAK5[Phospho (STY)]E5_2                                                      | P63248_ST4_M1_Pkia   | 3.4946  | 4.1800  | 3.7506  | 3.9899  | 3.8479  | 3.6502  | 4.1382  | 3.8657  | 3.3595  | 3.6672  | 1.0163  | 0.0233  | 0.7426 | 0.1293 |
| KcnJ3  | _ERIN5[Phospho (STY)]VE[C[Carbamidomethyl (C)]DLGDDISTK_3                                | #N/A                 | 4.1961  | 5.7862  | 3.9298  | 5.6327  | 3.7879  | 5.2988  | 5.7759  | 5.7389  | 6.4422  | 5.9217  | 0.7994  | -0.3231 | 0.0364 | 1.4391 |
| KcnJ3  | _HNS[Phospho (STY)]VE[C[Carbamidomethyl (C)]DLGDDISTK_2                                  | #N/A                 | 3.9322  | 4.2194  | 4.0898  | 3.7052  | 3.8028  | 3.4297  | 3.8514  | 4.5470  | 3.6109  | 3.1836  | 1.0170  | 0.0243  | 0.8154 | 0.0886 |
| ActG1  | _I[Acetyl (Protein N-term)]EEEEIAAVIDNGSGM[Oxidation (M)]C[Carbamidomethyl (C)]K_2       | #N/A                 | 11.7492 | 11.9004 | 12.5158 | 12.0530 | 11.5173 | 11.5506 | 11.9746 | 11.6206 | 12.2148 | 11.5658 | 1.0031  | 0.0045  | 0.8733 | 0.0589 |
| ActG1  | [Acetyl (Protein N-term)]EEEEIAAVIDNGSGM[Oxidation (M)]C[Carbamidomethyl (C)]KAGAGDOAPR_ | #N/A                 | 8.5415  | 9.1764  | 8.8418  | 9.2416  | 8.4534  | 8.1317  | 9.1769  | 8.7913  | 8.6069  | 8.4265  | 0.9978  | -0.0032 | 0.9415 | 0.0262 |
| Prkg   | _AAPALT[Phospho (STY)]PPDR_2                                                             | P63318_T655_M1_Prkg  | 16.7896 | 16.6543 | 17.3737 | 16.9527 | 16.0607 | 16.6525 | 17.0796 | 16.7850 | 16.7606 | 16.6768 | 0.9954  | -0.0067 | 0.7428 | 0.1291 |
| Prkg   | _ENVPVGSTR_2                                                                             | #N/A                 | 8.0781  | 8.4624  | 8.6175  | 8.2997  | 8.4582  | 7.8822  | 7.9760  | 8.4182  | 8.1760  | 8.1153  | 1.0157  | 0.0225  | 0.4397 | 0.3568 |
| Prkg   | _DIVQDDDDVDC[Carbamidomethyl (C)]TLVEK_2                                                 | #N/A                 | 7.7100  | 7.9583  | 8.6718  | 9.1743  | 6.9339  | 7.8561  | 8.4384  | 7.8733  | 7.5435  | 8.0072  | 1.0107  | 0.0153  | 0.8463 | 0.0725 |
| Prkg   | _RGS[Phospho (STY)]DELVAIK_2                                                             | P63318_S373_M1_Prkg  | 7.9296  | 8.1672  | 4.4437  | 8.2898  | 7.3609  | 7.7879  | 8.8677  | 8.3972  | 8.1636  | 7.9165  | 0.8793  | -0.1856 | 0.2206 | 0.6564 |
| Prkg   | _FEAC[Carbamidomethyl (C)]NVPLELYR_2                                                     | #N/A                 | 7.4706  | 7.4895  | 7.4064  | 7.5485  | 6.9501  | 7.6291  | 7.4265  | 7.3466  | 7.5793  | 7.0967  | 1.0073  | 0.0104  | 0.7243 | 0.1401 |
| Prkg   | _C[Carbamidomethyl (C)]FFGAS[Phospho (STY)]PGR_2                                         | P63318_S342_M1_Prkg  | 7.1239  | 6.9269  | 6.4801  | 7.0021  | 6.2939  | 6.5150  | 7.0802  | 6.7725  | 6.7887  | 6.7807  | 0.9808  | -0.0280 | 0.4886 | 0.3110 |
| Prkg   | _APVDGWYK_2                                                                              | #N/A                 | 6.3744  | 5.9297  | 6.3828  | 5.7797  | 6.0807  | 6.1725  | 5.5495  | 6.4835  | 6.1341  | 6.5208  | 1.0291  | 0.0414  | 0.4418 | 0.3548 |
| Prkg   | _LSVEVWDWR_2                                                                             | #N/A                 | 5.8412  | 5.2636  | 3.8679  | 5.4904  | 5.0784  | 5.2112  | 6.0708  | 5.5155  | 5.8562  | 6.0068  | 0.8743  | -0.1938 | 0.0726 | 1.1392 |
| Prkg   | _S[Phospho (STY)]GENDKFFTR_2                                                             | P63318_S639_M1_Prkg  | 2.9651  | 7.0359  | 7.2211  | 7.5740  | 6.1398  | 7.1794  | 7.4133  | 7.4513  | 6.8413  | 6.6012  | 0.8977  | -0.1558 | 0.4428 | 0.3538 |
| Prkg   | _DIVQDDDDVDC[Carbamidomethyl (C)]TLVEKR_3                                                | #N/A                 | 4.9875  | 5.7021  | 7.0081  | 6.5450  | 4.4056  | 5.6706  | 5.2767  | 6.2215  | 5.2724  | 5.8213  | 1.0127  | 0.0182  | 0.8941 | 0.0486 |
| Prkg   | _DIVQDDDDVDC[Carbamidomethyl (C)]TLVEK_3                                                 | #N/A                 | 4.6755  | 4.1905  | 3.7728  | 4.8875  | 3.1828  | 3.5992  | 4.1994  | 3.8859  | 3.8760  | 4.6404  | 0.9761  | -0.0349 | 0.7919 | 0.1013 |
| Prkg   | _S[Phospho (STY)]TPSPVPVPVM_2                                                            | P63318_S687_M1_Prkg  | 8.8692  | 7.1282  | 4.8304  | 6.6815  | 4.8926  | 4.9792  | 7.8322  | 5.1122  | 6.9436  | 5.4277  | 1.0634  | 0.0887  | 0.7500 | 0.1249 |
| Prkg   | _SVPSLC[Carbamidomethyl (C)]GVHTR_2                                                      | #N/A                 | 6.1576  | 6.6166  | 5.9317  | 6.3396  | 6.7296  | 6.3068  | 7.0718  | 6.7472  | 6.7266  | 6.7648  | 0.9296  | -0.1053 | 0.0184 | 1.7351 |
| Prkg   | _M[Oxidation (M)]GPSSPPSPS[Phospho (STY)]PS[Phospho (STY)]PTDSKR_3                       | #N/A                 | 5.8130  | 7.9780  | 3.9378  | 6.7233  | 7.2182  | 7.9022  | 8.2412  | 8.1868  | 8.1624  | 7.9680  | 0.8103  | -0.3035 | 0.0837 | 1.0771 |
| Prkg   | _NDFM[Oxidation (M)]GAM[Oxidation (M)]SGFVSELLK_2                                        | #N/A                 | 5.1775  | 4.8037  | 4.3235  | 4.3616  | 4.2950  | 5.4985  | 3.8025  | 4.7315  | 5.1605  | 3.3315  | 1.1144  | 0.1562  | 0.2801 | 0.5527 |
| Prkg   | _APTS[Phospho (STY)]DEHITVGAR_2                                                          | #N/A                 | 3.2919  | 4.1782  | 4.1693  | 5.1383  | 3.9175  | 4.2071  | 4.1543  | 4.5359  | 4.6171  | 3.5952  | 0.9822  | -0.0259 | 0.8376 | 0.0770 |
| Prkg   | _DLKLDNVLDAEGHIK_3                                                                       | #N/A                 | 5.6102  | 3.2673  | 3.1489  | 6.1398  | 3.0886  | 3.1400  | 3.5008  | 3.6486  | 3.9477  | 3.2131  | 1.1365  | 0.1846  | 0.5229 | 0.2816 |
| Prkg   | _S[Phospho (STY)]VPSLC[Carbamidomethyl (C)]GVHTR_3                                       | P63318_S145_M1_Prkg  | 3.0447  | 3.8009  | 4.2792  | 4.6147  | 3.6892  | 3.4164  | 4.3294  | 3.5038  | 3.1524  | 3.0808  | 1.0827  | 0.1147  | 0.4525 | 0.3444 |
| Prkg   | _LLNQEGEYNNVPVADADNC[Carbamidomethyl (C)]SLIQK_3                                         | #N/A                 | 4.3293  | 3.6350  | 3.5193  | 4.7366  | 3.6120  | 3.1523  | 3.7542  | 4.8762  | 4.1423  | 3.7762  | 0.9259  | -0.1110 | 0.4235 | 0.3731 |
| Prkg   | _GSDLEVAIK_2                                                                             | #N/A                 | 3.8021  | 3.0576  | 3.1848  | 3.8572  | 2.9459  | 2.9562  | 3.5719  | 4.2613  | 3.9099  | 4.2577  | 0.8251  | -0.2773 | 0.0234 | 1.6300 |
| Prkg   | _LGSQGGPEPTR_2                                                                           | #N/A                 | 5.2823  | 5.9419  | 3.6354  | 3.1792  | 3.0454  | 3.5792  | 3.3274  | 3.8220  | 4.1211  | 4.3573  | 1.0521  | 0.0733  | 0.7580 | 0.1203 |
| Prkg   | _MGFSSSPSPSPS[Phospho (STY)]PTDSK_2                                                      | #N/A                 | 3.1657  | 4.0854  | 4.0442  | 4.9470  | 3.7978  | 4.1040  | 4.1128  | 3.5415  | 3.3770  | 3.6833  | 1.0939  | 0.1295  | 0.3099 | 0.5088 |
| Rala   | _VIM[Oxidation (M)]VGGSGVGK_2                                                            | #N/A                 | 7.4713  | 7.6879  | 7.7346  | 6.8505  | 7.5552  | 7.6062  | 7.1312  | 7.7479  | 7.6629  | 7.5257  | 0.9957  | -0.0063 | 0.8728 | 0.0591 |
| Rala   | _ADGWNNVYETSAK_2                                                                         | #N/A                 | 5.6054  | 6.1848  | 6.4390  | 6.7485  | 5.9820  | 6.1982  | 6.2386  | 5.7932  | 5.7824  | 6.7533  | 1.0083  | 0.0120  | 0.8542 | 0.0684 |
| Rala   | _SLEDKR_2                                                                                | #N/A                 | 5.7582  | 5.8469  | 5.6642  | 5.7750  | 6.7588  | 6.3470  | 5.4338  | 6.4022  | 5.7279  | 4.9219  | 1.0718  | 0.1000  | 0.2553 | 0.5929 |
| Rala   | _VKEDENVFLLVGNK_3                                                                        | #N/A                 | 5.8113  | 5.8872  | 4.7741  | 5.3869  | 5.6038  | 5.8443  | 4.8872  | 5.2424  | 5.5989  | 6.0758  | 1.0184  | 0.0263  | 0.7430 | 0.1290 |
| Rala   | _GQNSLAIHK_2                                                                             | #N/A                 | 3.9730  | 4.7414  | 4.7317  | 4.6767  | 5.0149  | 4.6095  | 4.9557  | 5.3051  | 4.5632  | 5.0869  | 0.9290  | -0.1062 | 0.1408 | 0.8515 |
| Rala   | _VLVDGEEVDILDTAGGEDVAAIR_3                                                               | #N/A                 | 4.2393  | 4.9735  | 5.0415  | 5.0715  | 3.3831  | 3.2415  | 3.6650  | 3.4844  | 3.7834  | 3.1941  | 1.2246  | 0.2923  | 0.1107 | 0.9560 |
| Rps12  | _TALHGLAR_2                                                                              | #N/A                 | 7.2607  | 7.4092  | 6.7620  | 7.5915  | 7.8383  | 7.5310  | 7.0896  | 7.7199  | 7.5666  | 7.3053  | 0.9971  | -0.0042 | 0.9346 | 0.0346 |
| Rps12  | _I[Acetyl (Protein N-term)]AEEGAAGGV[Oxidation (M)]DWTALQEVLK_2                          | #N/A                 | 5.7566  | 4.7774  | 4.9176  | 6.2537  | 5.2848  | 5.7695  | 4.8614  | 4.4401  | 3.6144  | 6.2159  | 1.1415  | 0.1910  | 0.2274 | 0.6433 |
| Rps12  | _DVVEYK_2                                                                                | #N/A                 | 3.1800  | 3.1223  | 4.4145  | 3.9583  | 2.5978  | 3.8312  | 4.1066  | 3.2809  | 3.3419  | 3.8216  | 0.9669  | -0.0486 | 0.7556 | 0.1217 |
| Rps10  | _AEAGAGS[Phospho (STY)]ATEFQFR_2                                                         | P63325_S146_M1_Rps10 | 4.2094  | 3.1330  | 3.9430  | 3.4868  | 6.0748  | 6.9829  | 3.6351  | 6.3669  | 3.8134  | 6.9082  | 0.8953  | -0.1596 | 0.6135 | 0.2122 |
| Rps10  | _IAIYELFK_2                                                                              | #N/A                 | 4.5801  | 4.9324  | 3.8344  | 4.3356  | 4.2291  | 4.3324  | 4.0847  | 5.0296  | 4.4595  | 5.2035  | 0.9318  | -0.1020 | 0.2801 | 0.5526 |
| Ppp3ca | _ITEGASLR_2                                                                              | #N/A                 | 9.6598  | 9.8234  | 9.9212  | 9.7050  | 9.6004  | 9.7092  | 9.8806  | 9.8344  | 9.6502  | 9.9863  | 10.1205 | -0.0199 | 0.2012 | 0.6965 |
| Ppp3ca | _TQVNDQKPR_2                                                                             | #N/A                 | 8.6515  | 8.3316  | 8.4619  | 8.5254  | 8.9287  | 8.8085  | 8.2448  | 8.6105  | 8.6491  | 8.6981  | 1.0054  | 0.0077  | 0.7394 | 0.1311 |
| Ppp3ca | _QTLOGATVEAEADAEAK_2                                                                     | #N/A                 | 7.1413  | 6.6125  | 6.9385  | 6.6681  | 6.3832  | 6.9722  | 6.9473  | 6.4773  | 7.4096  | 6.9866  | 0.9866  | -0.0195 | 0.6771 | 0.1694 |
| Ppp3ca | _GRS[Phospho (STY)]PQHK_2                                                                | #N/A                 | 8.8208  | 6.8905  | 8.6038  | 8.7095  | 8.0011  | 8.6764  | 8.3831  | 8.3954  | 8.4998  | 8.3575  | 1.0208  | 0.0297  | 0.2835 | 0.5474 |
| Ppp3ca | _ITSFEAK_2                                                                               | #N/A                 | 7.5875  | 6.8240  | 7.5276  | 6.7602  | 7.0751  | 7.5339  | 7.3873  | 7.7659  | 6.9116  | 7.0535  | 1.0356  | 0.0505  | 0.5382 | 0.2691 |
| Ppp3ca | _TQEHFHTNVR_2                                                                            | #N/A                 | 7.0278  | 7.1593  | 7.0563  | 7.1334  | 7.4352  | 7.2702  | 7.2654  | 7.2336  | 6.9193  | 6.8701  | 1.0153  | 0.0219  | 0.3630 | 0.4400 |
| Ppp3ca | _GLTPGMLPSGVLSGK_2                                                                       | #N/A                 | 7.8276  | 6.8124  | 5.3560  | 8.9810  | 7.2010  | 3.5706  | 6.9611  | 6.2214  | 6.2709  | 6.5712  | 1.0182  | 0.0261  | 0.9072 | 0.0423 |
| Ppp3ca | _DAM[Oxidation (M)]PSDANLNSNK_2                                                          | #N/A                 | 9.2694  | 8.8726  | 3.3487  | 9.3501  | 7.1271  | 8.1612  | 9.2747  | 8.7324  | 8.7958  | 9.0271  | 0.8668  | -0.2063 | 0.3421 | 0.4658 |
| Ppp3ca | _ALASETNGTDSNGSNNSNQ_2                                                                   | #N/A                 | 4.6359  | 4.7705  | 7.0676  | 5.6851  | 4.4398  | 5.6324  | 8.0160  | 5.3229  | 4.9998  | 5.6886  | 0.8943  | -0.1612 | 0.4141 | 0.3829 |
| Ppp3ca | _LEESVALR_2                                                                              | #N/A                 | 5.8374  | 5.7714  | 5.3828  | 5.8810  | 5.9566  | 6.0814  | 3.7679  | 6.0869  | 6.2039  | 6.0847  | 1.0510  | 0.0718  | 0.5739 | 0.2412 |
| Ppp3ca | _ITS[Phospho (STY)]FEEAKGLDR_2                                                           | #N/A                 | 4.2547  | 9.7362  | 10.7223 | 9.4852  | 2.8598  | 9.6139  | 8.8981  | 9.6091  | 9.5982  | 9.1640  | 0.8349  | -0.2604 | 0.3929 | 0.4057 |
| Ppp3ca | _VTMLVMVNLNC[Carbamidomethyl (C)]SDQELGSEEDGGGATAAAR_3                                   | #N/A                 | 3.2912  | 4.0512  | 4.5258  | 4.0695  | 3.9358  | 4.1896  | 4.2178  | 4.4325  | 3.2307  | 3.7468  | 1.0265  | 0.0377  | 0.7354 | 0.1335 |
| Ppp3ca | _QTLOGATVEAEADAEAKGRFS[Phospho (STY)]PQHK_3                                              | #N/A                 | 3.6568  | 3.6235  | 3.9028  | 4.1421  | 3.5118  | 3.9636  | 3.8567  | 7.3847  | 3.7645  | 2.9934  | 0.8445  | -0.2438 | 0.3990 | 0.3990 |
| Ppp2ca | _LDQGWIEQLNCC[Carbamidomethyl (C)]K_2                                                    | #N/A                 | 6.9794  | 6.9332  | 7.0933  | 7.3476  | 6.7919  | 6.8282  | 6.9764  | 7.1255  | 6.9554  | 6.9033  | 1.0008  | 0.0011  | 0.9617 | 0.0170 |
| Phb    | _VLPSITELK_2                                                                             | #N/A                 | 8.0581  | 8.2168  | 8.2153  | 7.9394  | 7.9689  | 8.0428  | 8.0170  | 8.3114  | 8.4222  | 8.0497  | 0.9846  | -0.0224 | 0.2375 | 0.6243 |
| Phb    | _DLQNVNITUR_2                                                                            | #N/A                 | 6.6919  | 7.3752  | 7.3751  | 7.6345  | 7.7949  | 7.3514  | 7.2253  | 7.4016  | 7.5006  | 7.4581  | 0.9965  | -0.0051 | 0.8993 | 0.0461 |
| Phb    | _TDAGELTQR_2                                                                             | #N/A                 | 6.8930  | 7.3286  | 7.4839  | 7.4868  | 7.5241  | 7.5636  | 7.3348  | 7.2693  | 7.3924  | 6.7717  | 1.0261  | 0.0372  | 0.3031 | 0.5185 |
| Phb    | _YTSKGEIDYDR_2                                                                           | #N/A                 | 5.6002  | 5.9137  | 5.5719  | 6.4961  | 6.2985  | 6.5041  | 6.2033  | 6.0437  | 5.8258  | 6.0889  | 1.0039  | 0.0056  | 0.9196 | 0.0364 |
| Phb    | _NVPVITGSK_2                                                                             | #N/A                 | 6.3537  | 6.5617  | 5.8937  | 6.0635  | 6.7955  | 6.3576  | 4.9774  | 6.1610  | 6.8644  | 6.7404  | 1.0245  | 0.0350  | 0.6994 | 0.1553 |
| Phb    | _NITYLPAGDSVLQLQL_2                                                                      | #N/A                 | 6.1892  | 5.6233  | 6.9426  | 5.7135  | 6.0587  | 6.1726  | 6.3053  | 6.0234  | 6.0045  | 6.9883  | 0.9662  | -0.0496 | 0.4971 | 0.3035 |
| Phb    | _QVSDDLTR_2                                                                              | #N/A                 | 4.1377  | 7.4276  |         |         |         |         |         |         |         |         |         |         |        |        |



|        |                                                                                        |                      |         |         |         |         |         |         |         |         |         |         |         |         |        |        |
|--------|----------------------------------------------------------------------------------------|----------------------|---------|---------|---------|---------|---------|---------|---------|---------|---------|---------|---------|---------|--------|--------|
| Rack1  | _AEPQC[Carbamidomethyl (C)]TSLAWSQDTFAGYTDNLVR_3                                       | #N/A                 | 3.3185  | 2.2194  | 4.0053  | 4.5079  | 3.7960  | 2.1328  | 4.2226  | 3.6105  | 3.2591  | 2.9741  | 0.9469  | -0.0787 | 0.7385 | 0.1316 |
| Rack1  | _YTVQDSEHSEWYC[Carbamidomethyl (C)]VR_3                                                | #N/A                 | 3.5649  | 3.2389  | 3.1205  | 3.6232  | 3.0602  | 3.1684  | 3.3378  | 2.9945  | 4.1439  | 3.5901  | 0.9373  | -0.0935 | 0.3595 | 0.4443 |
| Prkcb  | _AKEDFLR_2                                                                             | #N/A                 | 7.2015  | 6.7500  | 7.4652  | 6.7473  | 7.0335  | 6.5527  | 6.9100  | 7.3018  | 7.1403  | 6.6351  | 0.9945  | -0.0080 | 0.8575 | 0.0668 |
| Prkcb  | _TIGTSYSGR_2                                                                           | #N/A                 | 6.1962  | 6.2035  | 5.9531  | 5.2287  | 5.8092  | 5.4498  | 4.7671  | 6.4828  | 6.4344  | 5.3453  | 1.0086  | 0.0123  | 0.9025 | 0.0446 |
| Prkcb  | _IQAEFFFLVR_2                                                                          | #N/A                 | 4.8737  | 4.7183  | 4.2272  | 3.8017  | 4.1570  | 4.8546  | 5.5668  | 5.6782  | 5.3924  | 4.5084  | 0.8396  | -0.2522 | 0.0249 | 1.6038 |
| Prkcb  | _TWLTC[Carbamidomethyl (C)]GTPYLAPEILSK_2                                              | #N/A                 | 5.0119  | 5.2784  | 5.3479  | 5.5945  | 4.6434  | 4.8984  | 4.8840  | 5.3362  | 4.9772  | 4.9113  | 1.0203  | 0.0290  | 0.6133 | 0.2123 |
| Prkcb  | _FRGS[Phospho (STY)]GDTSNFDDYEEIIR_3                                                   | #N/A                 | 3.3619  | 4.1182  | 4.5964  | 6.8093  | 4.0065  | 4.1190  | 5.7303  | 6.3873  | 3.1600  | 6.2154  | 0.8378  | -0.2553 | 0.3363 | 0.4732 |
| Prkcb  | _GS[Phospho (STY)]GDTSNFYDYYEIR_2                                                      | #N/A                 | 4.1954  | 3.4509  | 3.9291  | 3.4639  | 3.3392  | 3.2854  | 3.1786  | 3.5283  | 4.3032  | 3.1092  | 1.0199  | 0.0285  | 0.8091 | 0.0920 |
| Prkcb  | _ATEQYAMK_2                                                                            | #N/A                 | 3.8641  | 3.3621  | 4.5509  | 6.9977  | 2.9897  | 3.2389  | 3.2674  | 3.0650  | 4.2144  | 3.5197  | 1.1850  | 0.2449  | 0.4325 | 0.3640 |
| Ywhaq  | _AVTEGGAELSNEER_2                                                                      | #N/A                 | 9.7597  | 9.8715  | 9.9741  | 9.8770  | 9.9411  | 9.9051  | 9.7693  | 9.7835  | 9.9270  | 9.9941  | 1.0020  | 0.0029  | 0.7422 | 0.1295 |
| Ywhaq  | _EKVESEL_2                                                                             | #N/A                 | 9.3581  | 9.4302  | 9.0481  | 9.4742  | 9.6171  | 9.5097  | 9.4070  | 9.4022  | 9.4360  | 9.5280  | 0.9961  | -0.0057 | 0.7267 | 0.1387 |
| Ywhaq  | _YLAEVAC[Carbamidomethyl (C)]GDOR_2                                                    | #N/A                 | 9.3465  | 9.2680  | 9.4353  | 9.4079  | 9.1637  | 9.3502  | 9.4045  | 8.9767  | 9.4173  | 9.3791  | 1.0037  | 0.0053  | 0.7365 | 0.1328 |
| Ywhaq  | _YUANATNPESK_2                                                                         | #N/A                 | 8.8445  | 8.5724  | 8.5234  | 8.5798  | 8.7524  | 8.3320  | 8.5785  | 8.6332  | 8.5937  | 8.3790  | 1.0064  | 0.0092  | 0.6075 | 0.2165 |
| Ywhaq  | _SIC[Carbamidomethyl (C)]ITVLELDK_2                                                    | #N/A                 | 7.3228  | 7.1971  | 6.4554  | 7.2976  | 7.0442  | 6.9144  | 7.3391  | 7.0931  | 7.3892  | 7.1836  | 0.9707  | -0.0429 | 0.2578 | 0.5887 |
| Ywhaq  | _YLAEVAC[Carbamidomethyl (C)]GDORR_2                                                   | #N/A                 | 6.6319  | 6.5539  | 5.9401  | 7.0537  | 7.3640  | 6.7057  | 6.3774  | 6.8385  | 6.4886  | 6.8657  | 1.0099  | 0.0142  | 0.8107 | 0.0912 |
| Ywhaq  | _KQTIENSQAYQEAFDISK_3                                                                  | #N/A                 | 5.6428  | 4.8921  | 5.1744  | 5.2835  | 3.7287  | 4.8285  | 5.6454  | 4.4179  | 4.8646  | 4.8990  | 0.9936  | -0.0093 | 0.9372 | 0.0282 |
| Ywhaq  | _TAFDEIAELDLNEDSYK_2                                                                   | #N/A                 | 6.6687  | 5.8550  | 6.2149  | 6.8701  | 6.0946  | 6.2706  | 6.6214  | 6.3343  | 6.1114  | 6.4034  | 0.9939  | -0.0088 | 0.8577 | 0.0667 |
| Ywhaq  | _KQTIENSQAYQEAFFDSK_3                                                                  | #N/A                 | 4.2494  | 4.5897  | 5.5469  | 4.0438  | 4.3860  | 4.2968  | 4.4043  | 5.3420  | 4.7093  | 0.9924  | -0.0111 | 0.9288  | 0.0321 | 0.0321 |
| Ywhaq  | _YDDMATC[Carbamidomethyl (C)]MK_2                                                      | #N/A                 | 3.1603  | 0.7649  | 4.3948  | 4.9165  | 3.8048  | 4.3206  | 4.0868  | 3.0626  | 3.3617  | 1.1514  | 1.2211  | 0.2882  | 0.4982 | 0.3026 |
| Ywhaq  | _QTIENSQAYQEAFDISK_2                                                                   | #N/A                 | 2.5262  | 4.2922  | 3.6208  | 4.1234  | 4.1805  | 3.9450  | 3.8381  | 3.9951  | 3.6436  | 4.0904  | 0.9716  | -0.0415 | 0.7567 | 0.1211 |
| Tuba4a | _DYNAAMAK_2                                                                            | #N/A                 | 9.8570  | 9.9124  | 9.6765  | 9.7843  | 9.8536  | 9.9724  | 9.7227  | 9.8778  | 9.9393  | 9.8703  | 1.0105  | 0.0151  | 0.4671 | 0.3306 |
| Tuba4a | _EIDPKDR_2                                                                             | #N/A                 | 13.3168 | 13.3417 | 13.3024 | 13.0258 | 13.2256 | 13.2324 | 13.2961 | 13.1871 | 13.1479 | 13.3342 | 1.0000  | -0.0001 | 0.9938 | 0.0027 |
| Tuba4a | _AVVVDLEPTVIDER_2                                                                      | #N/A                 | 10.7816 | 10.8127 | 11.0247 | 10.9791 | 10.8403 | 10.8568 | 10.9370 | 10.6128 | 10.8016 | 10.7422 | 1.0101  | 0.0145  | 0.1715 | 0.7657 |
| Tuba4a | _TIGGGDSFTTFC[Carbamidomethyl (C)]ETGAGK_2                                             | #N/A                 | 3.9953  | 7.5976  | 7.8773  | 7.9140  | 7.2967  | 7.3894  | 7.5479  | 7.0296  | 7.3741  | 7.5569  | 0.9505  | -0.0733 | 0.6482 | 0.1883 |
| Tubb4b | _FPGQLNADR_2                                                                           | #N/A                 | 13.7754 | 13.9702 | 13.8036 | 13.9095 | 14.0604 | 13.7479 | 13.9380 | 13.9018 | 13.8255 | 0.9975  | -0.0037 | 0.6204  | 0.2073 | 0.1253 |
| Tubb4b | _EVDDEG[Oxidation (M)]NVQNK_2                                                          | #N/A                 | 11.7876 | 11.9646 | 11.2834 | 12.8051 | 11.9783 | 12.0063 | 12.0646 | 12.7195 | 11.9677 | 12.0212 | 1.0091  | 0.0131  | 0.7493 | 0.1253 |
| Tubb4b | _AVLVDLPEPTM[Oxidation (M)]DSDVR_2                                                     | #N/A                 | 12.1250 | 12.2718 | 12.6606 | 12.3764 | 12.2062 | 12.4738 | 12.1658 | 12.2862 | 12.3213 | 1.0040  | 0.0058  | 0.6613  | 0.1796 | 0.1796 |
| Tubb4b | _LAVNM[Oxidation (M)]VPPFR_2                                                           | #N/A                 | 12.1193 | 12.2742 | 12.3330 | 12.3854 | 11.9825 | 11.8462 | 12.0763 | 12.1914 | 12.0727 | 12.1648 | 1.0025  | 0.0036  | 0.7907 | 0.1020 |
| Tubb4b | _LHFFM[Oxidation (M)]PGFAPLTSR_3                                                       | #N/A                 | 11.4821 | 11.6544 | 11.6634 | 11.3732 | 11.2465 | 11.5639 | 11.4452 | 11.6753 | 11.5689 | 11.4885 | 0.9959  | -0.0059 | 0.6253 | 0.2039 |
| Tubb4b | _TAVC[Carbamidomethyl (C)]DIPPR_2                                                      | #N/A                 | 12.2207 | 12.6864 | 11.1601 | 12.8916 | 13.6221 | 12.9618 | 12.4852 | 11.7534 | 13.2163 | 12.2432 | 1.0134  | 0.0191  | 0.7433 | 0.1288 |
| Tubb4b | _FPGQLNADRK_2                                                                          | #N/A                 | 10.8692 | 11.4532 | 11.1949 | 11.3762 | 11.6512 | 11.2643 | 10.8943 | 11.4751 | 11.2718 | 11.2601 | 1.0068  | 0.0098  | 0.6575 | 0.1821 |
| Tubb4b | _IREEYDPR_2                                                                            | #N/A                 | 12.1021 | 12.1881 | 12.3770 | 12.3424 | 12.4200 | 12.2493 | 12.1615 | 12.0880 | 12.1075 | 12.1265 | 1.0131  | 0.0188  | 0.0363 | 1.4405 |
| Tubb4b | _YLTVAAVFR_2                                                                           | #N/A                 | 11.4278 | 11.4198 | 11.4607 | 11.4283 | 11.3405 | 11.4686 | 11.5675 | 11.6172 | 11.5795 | 0.9913  | -0.0127 | 0.1080  | 0.9668 | 0.1080 |
| Tubb4b | _GHYTEGALVDSDVVR_2                                                                     | #N/A                 | 9.5473  | 9.8872  | 10.1860 | 10.7695 | 9.4162  | 9.9783  | 9.7972  | 10.0285 | 9.6771  | 10.2013 | 1.0038  | 0.0055  | 0.8890 | 0.0511 |
| Tubb4b | _INVVNEATGGK_2                                                                         | #N/A                 | 9.7497  | 9.9573  | 10.1858 | 10.5438 | 10.2646 | 10.1892 | 9.8733  | 10.1535 | 10.0302 | 10.2231 | 1.0078  | 0.0112  | 0.6183 | 0.2088 |
| Tubb4b | _JM[Oxidation (M)]NTFSPVSPK_2                                                          | #N/A                 | 11.4818 | 11.8640 | 12.0215 | 11.7665 | 11.7890 | 11.8248 | 11.6766 | 11.8003 | 11.7712 | 11.7408 | 1.0038  | 0.0054  | 0.6466 | 0.1894 |
| Tubb4b | _ALTYPELTQOM[Oxidation (M)]FOAK_2                                                      | #N/A                 | 11.5448 | 11.8091 | 11.9576 | 11.6522 | 11.5261 | 11.6618 | 11.7503 | 11.6047 | 11.7672 | 0.9982  | -0.0026 | 0.8308  | 0.0808 | 0.1894 |
| Tubb4b | _M[Oxidation (M)]SATFENSTAEQLFR_3                                                      | #N/A                 | 6.1611  | 7.3531  | 8.4427  | 7.1601  | 6.7705  | 7.2324  | 6.5424  | 6.9136  | 7.1184  | 0.9741  | 1.0283  | 0.0403  | 0.6410 | 0.1931 |
| Tubb4b | _KLAVNM[Oxidation (M)]VPPFR_2                                                          | #N/A                 | 10.4544 | 10.0199 | 11.3250 | 10.4662 | 10.4132 | 10.7515 | 10.6770 | 10.8064 | 10.6460 | 10.8325 | 0.9983  | -0.0025 | 0.9220 | 0.0353 |
| Tubb4b | _NM[Oxidation (M)]M[Oxidation (M)]AAC[Carbamidomethyl (C)]DPR_2                        | #N/A                 | 8.7071  | 7.9513  | 7.8921  | 9.2203  | 9.3212  | 8.0083  | 7.3656  | 8.0533  | 8.3449  | 8.5866  | 1.0531  | 0.0746  | 0.3081 | 0.5113 |
| Tubb4b | _SGPGQIFRRPNFVFGSGAGNWNK_3                                                             | #N/A                 | 7.3719  | 7.8903  | 8.7712  | 9.2780  | 7.1553  | 6.9244  | 8.0332  | 7.9503  | 7.5814  | 7.9322  | 1.0031  | 0.0044  | 0.9615 | 0.0170 |
| Tubb4b | _NSSYFEWIPNNVK_2                                                                       | #N/A                 | 11.4965 | 11.6429 | 12.0483 | 12.0269 | 11.4514 | 11.6454 | 11.8214 | 11.6168 | 11.6903 | 11.6903 | 1.0053  | 0.0075  | 0.6759 | 0.1701 |
| Tubb4b | _GHYTEGALVDSDVVRK_3                                                                    | #N/A                 | 9.1662  | 9.7390  | 10.7023 | 10.3817 | 9.6242  | 9.9791  | 9.6022  | 9.8781  | 9.8925  | 10.1238 | 1.0059  | 0.0084  | 0.8484 | 0.0714 |
| Tubb4b | _LTPPTYGDLNLHVSATMSGVTTC[Carbamidomethyl (C)]LR_3                                      | #N/A                 | 6.1170  | 5.1548  | 4.8890  | 7.8625  | 5.9318  | 5.0041  | 5.9508  | 4.4948  | 5.4880  | 6.0559  | 1.0599  | 0.0839  | 0.6189 | 0.2084 |
| Tubb4b | _AESQ[Carbamidomethyl (C)]DC[Carbamidomethyl (C)]LQGFQLHSLGGGTSGM[Oxidation (M)]GTLISQ | #N/A                 | 5.6728  | 5.6011  | 5.6465  | 6.1512  | 4.6260  | 4.7661  | 4.8273  | 4.7577  | 5.2710  | 5.3797  | 1.0695  | 0.0970  | 0.3112 | 0.5070 |
| Tubb4b | _AESQ[Carbamidomethyl (C)]DC[Carbamidomethyl (C)]LQGFQLHSLGGGTSGM[Oxidation (M)]GTLISK | #N/A                 | 4.2791  | 3.3386  | 3.5018  | 3.4715  | 3.3277  | 3.7886  | 3.2169  | 3.7174  | 4.6121  | 0.9527  | -0.0700 | 0.5620  | 0.2502 | 0.1590 |
| Tubb4b | _FWESVDEHGDPTGYHGSDDLQLER_4                                                            | #N/A                 | 5.4043  | 5.6830  | 6.5826  | 6.5698  | 5.9549  | 5.6148  | 5.5322  | 5.6576  | 6.2329  | 6.1686  | 1.0119  | 0.0171  | 0.8157 | 0.0885 |
| Tubb4b | _ISEQFATM[Oxidation (M)]FR_2                                                           | #N/A                 | 10.1722 | 10.5174 | 10.7767 | 10.0711 | 10.2420 | 10.4764 | 10.4430 | 10.5532 | 10.4719 | 10.4711 | 0.9896  | -0.0151 | 0.4434 | 0.3352 |
| Tubb4b | _TUKLTPPTYGDLNLHVSATM[Oxidation (M)]SGVTTC[Carbamidomethyl (C)]LR_3                    | #N/A                 | 3.3476  | 4.1528  | 3.7734  | 4.0321  | 4.2104  | 4.1340  | 4.1804  | 4.6711  | 5.0953  | 3.5122  | 0.9031  | -0.1471 | 0.2190 | 0.6595 |
| Tubb4b | _MSATFIGNSTAEQLFK_2                                                                    | #N/A                 | 3.2889  | 4.0535  | 4.5235  | 3.5846  | 2.1460  | 3.8547  | 4.2155  | 2.0529  | 3.2330  | 3.7445  | 1.0796  | 0.1106  | 0.6477 | 0.1886 |
| Prkcb  | _Acetyl (Protein N-term)ADPAGPPSP[Phospho (STY)]EGEESTVR_2                             | P68404_S11_M1_Prkcb  | 9.9614  | 10.4840 | 10.1448 | 10.9969 | 10.1219 | 7.8876  | 11.5678 | 10.1973 | 10.4793 | 10.6428 | 0.9111  | -0.1343 | 0.1315 | 0.8810 |
| Prkcb  | _LIPOKSP[Phospho (STY)]ESK_2                                                           | P68404_S206_M1_Prkcb | 9.1699  | 9.0808  | 9.4870  | 9.3926  | 8.5615  | 8.7576  | 9.3137  | 8.9990  | 9.0311  | 0.9872  | -0.0186 | 0.5737  | 0.2413 | 0.2413 |
| Prkcb  | _ENWDGDTTK_2                                                                           | #N/A                 | 8.4159  | 8.1242  | 8.1600  | 8.0684  | 8.1719  | 8.0411  | 8.5141  | 8.1872  | 8.0993  | 8.2003  | 0.9895  | -0.0152 | 0.4070 | 0.3904 |
| Prkcb  | _QPVELT[Phospho (STY)]PTDK_2                                                           | P68404_T642_M1_Prkcb | 3.6313  | 3.7111  | 3.3649  | 4.4095  | 7.8127  | 8.4858  | 4.5578  | 4.0925  | 4.3915  | 8.5027  | 0.9721  | -0.0408 | 0.9190 | 0.0367 |
| Prkcb  | _KGTDELYAVK_2                                                                          | #N/A                 | 4.9368  | 5.4269  | 4.3674  | 5.5418  | 5.0369  | 3.8320  | 5.5330  | 5.3219  | 5.5384  | 5.1398  | 0.9946  | -0.0078 | 0.9585 | 0.0184 |
| Prkcb  | _C[Carbamidomethyl (C)]SNPFENWETFR_2                                                   | #N/A                 | 6.2144  | 5.5544  | 3.2831  | 5.8438  | 5.6939  | 3.9438  | 5.6687  | 4.3468  | 5.4473  | 5.4025  | 0.9803  | -0.0287 | 0.8776 | 0.0567 |
| Prkcb  | _LSVIEWDWOLTSR_2                                                                       | #N/A                 | 5.6751  | 4.0705  | 6.2295  | 5.4757  | 5.0851  | 5.8922  | 6.1147  | 5.1565  | 6.0453  | 5.8550  | 0.9330  | -0.1001 | 0.3869 | 0.4124 |
| Prkcb  | _DLKLDNMV[Oxidation (M)]LDSGHIK_3                                                      | #N/A                 | 6.4212  | 5.7675  | 6.1547  | 6.3875  | 5.7399  | 5.7629  | 5.8034  | 6.2634  | 6.2484  | 6.1331  | 0.9880  | -0.0174 | 0.7031 | 0.1530 |
| Prkcb  | _AGVDGWFK_2                                                                            | #N/A                 | 4.7397  | 3.8515  | 4.1579  | 4.1511  | 3.8346  | 2.9022  | 2.9110  | 5.0000  | 4.4406  | 4.6290  | 0.9280  | -0.1078 | 0.5394 | 0.2681 |
| Prkcb  | _NLVPM[Oxidation (M)]DPNGLSPPY[Phospho (STY)]VK_2                                      | #N/A                 | 7.0944  | 7.3352  | 7.6376  | 7.2913  | 6.8286  | 7.3789  | 7.8050  | 7.7623  | 7.4226  | 7.3658  | 0.9568  | -0.0637 | 0.0841 | 1.0750 |
| Prkcb  | _C[Carbamidomethyl (C)]VM[Oxidation (M)]NVPSLC[Carbamidomethyl (C)]GTDHTER_3           | #N/A                 | 6.1150  | 4.2098  | 3.7031  | 4.2058  | 4.0981  | 4.0273  | 3.9205  | 4.7892  | 4.1728  | 1.0463  | 0.0653  | 0.6899  | 0.1652 | 0.1652 |
| Prkcb  | _FQLKES[Phospho (STY)]DKDR_3                                                           | P68404_S234_M1_Prkcb | 4.1079  | 3.2345  | 3.8416  | 3.3854  | 3.0558  | 3.1728  | 3.5336  | 3.4728  | 3.9149  | 3.0626  | 0.9915  | -0.0123 | 0.9098 | 0.0411 |
| Ywhah  | _AVTELNEPSEEDR_2                                                                       | #N/A                 | 10.7202 | 10.4487 | 10.8365 | 10.8099 | 10.5814 | 10.5634 | 10.6551 | 10.5409 | 10.715  |         |         |         |        |        |



|               |                                                                                |                               |         |         |         |         |         |         |         |         |         |         |         |         |        |        |
|---------------|--------------------------------------------------------------------------------|-------------------------------|---------|---------|---------|---------|---------|---------|---------|---------|---------|---------|---------|---------|--------|--------|
| Kpnb1         | _SNEILTAIQGM[Oxidation (M)]R_2                                                 | #N/A                          | 5.2374  | 4.4430  | 3.3370  | 3.8397  | 3.9276  | 2.9519  | 4.7188  | 5.0013  | 4.1803  | 4.7205  | 0.8498  | -0.2348 | 0.1469 | 0.8329 |
| Kpnb1         | _JAcetyl (Protein N-term)[M]Oxidation (M)]EUTILEK_2                            | #N/A                          | 4.3773  | 2.9651  | 4.1110  | 3.6547  | 3.5210  | 3.1036  | 3.8030  | 2.4442  | 3.0627  | 3.3320  | 1.1461  | 0.1967  | 0.2354 | 0.6282 |
| Doc2b         | _WHTLTNLEPGAVLS[Phospho (STY)]ID_2                                             | P70169_S411_M1_Doc2b          | 4.3382  | 3.0042  | 4.0718  | 8.8269  | 6.7856  | 3.1427  | 3.7639  | 8.0515  | 6.3632  | 3.2929  | 0.9367  | -0.0943 | 0.8234 | 0.0844 |
| Hnh1          | _SRSP[Phospho (STY)]NSP[Phospho (STY)]GLDVIK_2                                 | P70174_S381_M2_Hnh1           | 3.7305  | 3.0348  | 4.4173  | 3.4191  | 2.8562  | 3.1725  | 3.1338  | 3.1985  | 4.3480  | 3.3861  | 0.9872  | -0.0185 | 0.9041 | 0.0438 |
| Hnh1          | _SNSP[Phospho (STY)]GLOYK_2                                                    | P70174_S383_M1_Hnh1           | 3.5152  | 3.8272  | 3.2489  | 4.2935  | 3.6485  | 4.0810  | 4.4418  | 3.0067  | 3.9708  | 0.9647  | 0.9647  | -0.0518 | 0.6740 | 0.1713 |
| Hnh1          | _RIS[Phospho (STY)]ETSDQTLVDR_2                                                | P70174_S344_M1_Hnh1           | 4.3264  | 4.6116  | 3.5123  | 4.0150  | 3.4521  | 4.2774  | 3.8520  | 4.1035  | 3.6787  | 3.9820  | 1.0329  | 0.0467  | 0.6197 | 0.2078 |
| Dlg3          | _GVTSATS[Phospho (STY)]DSESSK_2                                                | P70175_S632_M1_Dlg3           | 7.1702  | 7.2950  | 7.5689  | 7.7691  | 7.0726  | 3.3361  | 7.5527  | 4.0014  | 7.4530  | 7.1902  | 1.0233  | 0.0332  | 0.8917 | 0.0498 |
| Dlg3          | _LAVNNNTIGDVR_2                                                                | #N/A                          | 3.6837  | 4.6758  | 4.5528  | 4.0965  | 4.3542  | 4.8891  | 4.2448  | 5.2118  | 4.4125  | 3.6440  | 0.9993  | -0.0010 | 0.9932 | 0.0029 |
| Dlg3          | _EQMNMNSMS[Phospho (STY)]SGS[Phospho (STY)]GSLR_2                              | P70175_S508_M2_Dlg3           | 6.7046  | 3.8580  | 5.0227  | 4.0454  | 3.8063  | 3.7604  | 4.3378  | 3.8498  | 3.1483  | 3.9176  | 1.1887  | 0.2494  | 0.2830 | 0.5482 |
| Dlg3          | _FIAGQFNOLYGTSGSVR_2                                                           | #N/A                          | 3.9521  | 4.1536  | 4.3473  | 4.1778  | 3.6607  | 3.8297  | 4.0393  | 3.1102  | 2.5446  | 3.5683  | 1.2125  | 0.2546  | 0.0178 | 1.4221 |
| Dlg3          | _VNDLSEFPHK_3                                                                  | #N/A                          | 3.9338  | 3.0136  | 3.6675  | 3.2113  | 3.0775  | 2.2924  | 3.3595  | 1.6236  | 4.0890  | 1.7473  | 1.1828  | 0.2422  | 0.4045 | 0.3931 |
| Dlg3          | _ALFDYDR_2                                                                     | #N/A                          | 3.9665  | 3.2597  | 3.1524  | 3.6551  | 3.0922  | 3.1365  | 3.3698  | 4.4634  | 4.1120  | 3.6221  | 0.8677  | -0.2047 | 0.0880 | 1.0554 |
| Dlg3          | _NATHEQAAAAKKR_3                                                               | #N/A                          | 3.1826  | 3.9878  | 3.8694  | 4.1329  | 3.8091  | 3.9204  | 4.2812  | 3.7464  | 3.3950  | 4.3390  | 0.9687  | -0.0459 | 0.6284 | 0.2017 |
| Dlg3          | _VNEVDVSEVH5R_3                                                                | #N/A                          | 2.9267  | 3.6830  | 4.1612  | 3.7050  | 3.5713  | 3.0533  | 3.8533  | 3.2962  | 3.5952  | 3.3823  | 0.9958  | -0.0061 | 0.9543 | 0.0203 |
| Pip5k1b       | _IQALKASPS[Phospho (STY)]K_2                                                   | P70181_S407_M1_Pip5k1b        | 6.3636  | 4.2472  | 3.6658  | 4.1685  | 4.1355  | 3.9900  | 3.8832  | 3.9500  | 3.5986  | 4.1355  | 1.1379  | 0.1863  | 0.3170 | 0.0486 |
| Pip5k1a       | _IPLKPS[Phospho (STY)]PTK_2                                                    | P70182_S443_M1_Pip5k1a        | 3.6567  | 3.5695  | 6.0806  | 3.3453  | 4.9667  | 5.6458  | 6.7705  | 3.2723  | 3.3123  | 1.0225  | 0.0321  | 0.9128  | 0.0399 | 0.9989 |
| Pip5k1a       | _S[Phospho (STY)]GPSGNSC[Carbamidomethyl (C)]ITSQLMASGEHR_3                    | P70182_S458_M1_Pip5k1a        | 2.5188  | 4.1377  | 3.1151  | 4.2780  | 4.0260  | 4.0995  | 3.9926  | 3.8405  | 3.4891  | 4.2450  | 0.9496  | -0.0745 | 0.6234 | 0.2052 |
| Klfap3        | _RDS[Phospho (STY)]LPK_2                                                       | #N/A                          | 8.8453  | 8.4122  | 8.7702  | 8.8316  | 7.4289  | 8.2433  | 8.7872  | 8.9153  | 8.8788  | 8.3584  | 0.9642  | -0.0526 | 0.3215 | 0.4929 |
| Klfap3        | _RDS[Phospho (STY)]LPKKE_2                                                     | #N/A                          | 6.0500  | 6.8814  | 6.9447  | 6.9169  | 5.5872  | 6.2812  | 6.6727  | 6.6805  | 6.7390  | 6.2859  | 0.9771  | -0.0334 | 0.6267 | 0.2030 |
| Pumb7         | _DGIVGADTR_2                                                                   | #N/A                          | 6.6364  | 5.7879  | 4.4324  | 5.9911  | 5.7379  | 5.9161  | 5.7267  | 4.9774  | 5.5389  | 5.6089  | 1.0526  | 0.0739  | 0.4839 | 0.3152 |
| Pumb7         | _VTPLEIEVETQTM[Oxidation (M)]DTS_2                                             | #N/A                          | 4.8033  | 5.3076  | 6.0052  | 5.5737  | 5.9101  | 5.6302  | 5.3211  | 5.2529  | 5.6162  | 5.2153  | 1.0349  | 0.0496  | 0.4488 | 0.3479 |
| Pumb7         | _ATEGMVADKNC[Carbamidomethyl (C)]SK_2                                          | #N/A                          | 3.0882  | 4.2542  | 4.3227  | 3.8665  | 2.6789  | 3.6540  | 4.0148  | 3.1347  | 4.4317  | 3.5438  | 1.0318  | 0.0452  | 0.7646 | 0.1166 |
| Lxn           | _FLVGVVQQA5K_2                                                                 | #N/A                          | 5.5692  | 5.5558  | 5.3777  | 6.1436  | 5.9198  | 6.3225  | 5.7997  | 5.9709  | 6.0243  | 5.6527  | 0.9920  | -0.0117 | 0.8211 | 0.0856 |
| Lxn           | _FSWEIKK_2                                                                     | #N/A                          | 3.9197  | 4.0609  | 3.6906  | 4.7166  | 3.4985  | 3.5023  | 3.5440  | 3.8801  | 2.6540  | 3.6756  | 1.1337  | 0.0810  | 0.1856 | 0.7315 |
| Lxn           | _AASVAENC[Carbamidomethyl (C)]JNYQQGTPHK_2                                     | #N/A                          | 3.5893  | 3.5954  | 3.9503  | 3.5736  | 3.0936  | 4.3876  | 3.7218  | 3.5300  | 3.8394  | 0.9915  | -0.0123 | 0.8930  | 0.0491 | 0.3344 |
| Ptkna1        | _TASS[Phospho (STY)]PDSLR_2                                                    | P70206_S1630_M1_Ptkna1        | 7.5652  | 7.5017  | 4.3779  | 6.9222  | 2.8167  | 3.4119  | 7.5000  | 3.2380  | 7.7027  | 7.5905  | 0.8348  | -0.1605 | 0.4630 | 0.3863 |
| Ptkna1        | _QTSAYNSGNS[Phospho (STY)]STFTK_2                                              | P70206_S1631_M1_Ptkna1        | 3.3930  | 4.1982  | 4.0798  | 3.9225  | 4.0195  | 3.7100  | 4.0708  | 3.0787  | 3.3777  | 3.5998  | 1.1006  | 0.1383  | 0.1492 | 0.8263 |
| Ptkna1        | _LGKGS[Phospho (STY)]PSNK_2                                                    | P70206_S1793_M1_Ptkna1        | 3.0386  | 3.7948  | 4.2731  | 4.6208  | 3.6821  | 2.9415  | 4.3355  | 3.1843  | 3.4834  | 3.4941  | 1.0279  | 0.0397  | 0.8025 | 0.0955 |
| Ptkna2;Ptkna4 | _YTGS[Phospho (STY)]IPDSLR_2                                                   | P70207_S1630_M1_Ptkna2;Ptkna4 | 8.4185  | 8.0793  | 8.6250  | 7.8441  | 3.7721  | 3.9574  | 4.3182  | 8.4614  | 8.3458  | 3.8472  | 1.0864  | 0.1196  | 0.7328 | 0.1350 |
| Ptkna2;Ptkna4 | _YTGS[Phospho (STY)]PDS[Phospho (STY)]LRSR_2                                   | P70207_S1630_M2_Ptkna2;Ptkna4 | 5.1543  | 5.6858  | 4.0368  | 4.5394  | 3.9765  | 3.7530  | 5.4903  | 3.5790  | 3.2276  | 4.8009  | 1.0585  | 0.0820  | 0.6721 | 0.1725 |
| Fv1           | _S[Phospho (STY)]ISLTSCK_2                                                     | P70213_S244_M1_Fv1            | 6.8283  | 6.9585  | 3.2708  | 7.1707  | 3.2105  | 5.8436  | 3.3789  | 6.6019  | 6.0104  | 3.7405  | 1.1245  | 0.1693  | 0.6035 | 0.2193 |
| Chn1          | _DETTFGEY[Phospho (STY)]DSEKPKGS[Phospho (STY)]LR_3                            | P70232_S1148_M2_Chn1          | 3.5486  | 3.4855  | 3.8089  | 4.3116  | 3.3415  | 4.1331  | 4.0262  | 4.1949  | 3.5201  | 3.5631  | 0.9857  | -0.0207 | 0.8238 | 0.0842 |
| Nfic          | _SPFNPS[Phospho (STY)]PDQSPR_2                                                 | P70255_S339_M1_Nfic           | 3.8934  | 3.4490  | 3.6271  | 3.1708  | 3.0371  | 6.9256  | 3.8303  | 4.1294  | 4.3490  | 0.7197  | 0.7197  | -0.4745 | 0.0507 | 1.2954 |
| Nfic          | _NWTDEGGSS[Phospho (STY)]PVKK_2                                                | #N/A                          | 4.6050  | 3.2773  | 4.3994  | 3.2139  | 3.5514  | 3.3240  | 5.3285  | 4.4662  | 4.4411  | 4.2959  | 0.8048  | -0.3133 | 0.0378 | 1.4222 |
| Nfix          | _S[Phospho (STY)]IDSESPVQDVFPGTGR_2                                            | P70257_S280_M1_Nfix           | 3.7008  | 3.8566  | 3.8064  | 3.9053  | 3.4896  | 3.7268  | 3.6200  | 3.5595  | 3.9500  | 3.7471  | 1.0077  | 0.0110  | 0.7868 | 0.1041 |
| Nfix          | _S[Phospho (STY)]PAAGSSQSGWPNVDVAGPASLK_3                                      | #N/A                          | 4.2401  | 3.7012  | 3.4261  | 4.4818  | 3.3658  | 3.8785  | 4.4692  | 4.1898  | 3.8384  | 3.8957  | 0.9392  | -0.0906 | 0.3558 | 0.4488 |
| Nfix          | _S[Phospho (STY)]PAAGSSQSGWPNVDVAGPASLK_2                                      | #N/A                          | 3.3079  | 4.0345  | 4.5424  | 4.0862  | 3.9525  | 3.8737  | 4.2345  | 4.4158  | 3.2140  | 3.7635  | 1.0152  | 0.0217  | 0.8453 | 0.0780 |
| Ptkb2         | _NS[Phospho (STY)]FTPLSSNTR_2                                                  | #N/A                          | 3.9946  | 6.3265  | 6.5539  | 6.9101  | 3.1383  | 3.4863  | 3.4203  | 5.9491  | 4.0282  | 6.0000  | 1.0451  | 0.0637  | 0.8348 | 0.0784 |
| Ptkb2         | _RNS[Phospho (STY)]FTPLSSNTR_3                                                 | #N/A                          | 3.5398  | 3.8026  | 3.2735  | 4.3181  | 4.1056  | 4.4664  | 4.1839  | 2.9821  | 3.9954  | 0.9668  | -0.0487 | 0.6974  | 0.1565 | 0.3857 |
| Pkn1          | _TDVSNFDEFTGEAPTL[Phospho (STY)]PPR_2                                          | P70268_S920_M1_Pkn1           | 3.0809  | 3.8861  | 3.7677  | 4.2703  | 3.7074  | 4.0221  | 3.9850  | 3.8481  | 3.4967  | 4.2373  | 0.9736  | -0.0386 | 0.6778 | 0.1689 |
| Pdlm4         | _RSS[Phospho (STY)]VSGSLEDNR_2                                                 | #N/A                          | 6.5972  | 6.5058  | 7.2335  | 7.4456  | 4.0214  | 6.9785  | 7.4735  | 6.7804  | 6.0294  | 7.0373  | 0.9463  | -0.0796 | 0.6052 | 0.2181 |
| Pdlm4         | _S[Phospho (STY)]VSGSLEDNR_2                                                   | P70271_S118_M1_Pdlm4          | 5.9727  | 4.2117  | 4.3977  | 3.9415  | 3.8078  | 3.8396  | 4.0898  | 5.6159  | 5.7722  | 3.6188  | 0.9136  | -0.1303 | 0.5105 | 0.2920 |
| Pdlm4         | _IHDPESQDC[Carbamidomethyl (C)]S[Phospho (STY)]PATSR_2                         | #N/A                          | 4.1194  | 4.7274  | 5.2186  | 4.4102  | 4.4211  | 4.1690  | 4.0622  | 3.7404  | 3.1329  | 5.1767  | 1.1199  | 0.1633  | 0.2596 | 0.5857 |
| Hdac2         | _JAC[Carbamidomethyl (C)]DEEPS[Phospho (STY)]DS[Phospho (STY)]EDEGGRR_2        | #N/A                          | 5.6795  | 6.2488  | 3.7991  | 6.9542  | 5.5859  | 6.5615  | 6.4936  | 6.1290  | 6.2795  | 6.0869  | 0.9292  | -0.1060 | 0.4614 | 0.3585 |
| Hdac2         | _M[Oxidation (M)]LPHAPGVQM[Oxidation (M)]QAPEDAVHEDS[Phospho (STY)]GDGEDGPKR_4 | #N/A                          | 2.9635  | 8.5633  | 7.2080  | 10.2241 | 9.2038  | 9.9190  | 7.4513  | 10.2215 | 10.1628 | 9.7849  | 0.8391  | -0.2530 | 0.3210 | 0.4936 |
| Pebp1         | _LYTLVTPDAPSR_2                                                                | #N/A                          | 10.8205 | 10.8957 | 11.1029 | 11.4299 | 11.1924 | 11.0432 | 11.0492 | 10.9495 | 10.9892 | 1.0133  | 0.1689  | 0.0289  | 0.5704 | 0.5704 |
| Pebp1         | _VDYAGVTVDLKG_2                                                                | #N/A                          | 10.6323 | 10.8463 | 11.1888 | 11.1875 | 11.1189 | 11.1371 | 10.7946 | 10.7048 | 10.6637 | 11.0440 | 1.0201  | 0.0287  | 0.1460 | 0.8356 |
| Pebp1         | _FKVETFR_2                                                                     | #N/A                          | 10.2664 | 10.5310 | 10.8320 | 10.7320 | 10.9154 | 10.4764 | 10.4606 | 10.3321 | 10.4262 | 1.0209  | 0.0298  | 0.1242  | 0.9057 | 0.1242 |
| Pebp1         | _VLTPTQVM[Oxidation (M)]NRPS5WGLDGP_3                                          | #N/A                          | 9.6322  | 10.1328 | 10.2286 | 10.0491 | 10.3155 | 10.1662 | 10.1469 | 10.1086 | 10.1045 | 10.0126 | 0.9994  | -0.0008 | 0.9643 | 0.0158 |
| Pebp1         | _LYEQLSGK_2                                                                    | #N/A                          | 7.4383  | 7.1353  | 6.8527  | 7.7523  | 8.1088  | 7.6899  | 6.7163  | 7.5505  | 6.9135  | 7.9037  | 1.0310  | 0.0440  | 0.4987 | 0.3021 |
| Pebp1         | _JAcetyl (Protein N-term)AADISQWAGPLC[Carbamidomethyl (C)]QEVDPEPQHALLR_3      | #N/A                          | 7.6841  | 7.9148  | 8.0679  | 8.5506  | 8.5362  | 8.1972  | 7.9969  | 8.0028  | 8.1847  | 7.7697  | 1.0213  | 0.0304  | 0.3920 | 0.4068 |
| Pebp1         | _GNDISGQTLSDYVGGPPSGTGLHRR_3                                                   | #N/A                          | 8.2733  | 8.0612  | 7.8591  | 7.6538  | 8.0741  | 8.1642  | 8.1006  | 7.1017  | 7.1781  | 7.8656  | 1.0599  | 0.0839  | 0.0814 | 1.0895 |
| Pebp1         | _VVMVLYDEQPLSC[Carbamidomethyl (C)]DEPLSK_3                                    | #N/A                          | 5.1612  | 5.1786  | 4.9590  | 6.3047  | 6.2196  | 5.4331  | 5.2769  | 5.0731  | 5.3940  | 5.5841  | 1.0395  | 0.0559  | 0.5117 | 0.2910 |
| Pebp1         | _NVLGAPVAGTC[Carbamidomethyl (C)]QAEVDDVPK_3                                   | #N/A                          | 3.1625  | 4.0636  | 3.8493  | 4.3520  | 3.7890  | 4.1735  | 4.0667  | 3.7665  | 3.4151  | 4.3190  | 1.0017  | 0.0024  | 0.9807 | 0.0084 |
| Pebp1         | _FWHHFVLVNM[Oxidation (M)]K_2                                                  | #N/A                          | 4.6663  | 3.5293  | 5.5663  | 3.3855  | 3.4176  | 3.2070  | 3.1002  | 3.2322  | 4.3816  | 3.3525  | 1.1267  | 0.1720  | 0.4289 | 0.3677 |
| Slam          | _AS[Phospho (STY)]PALVAK_2                                                     | P70297_S156_M1_Slam           | 6.8940  | 5.8346  | 6.6497  | 6.7699  | 3.2952  | 6.5266  | 3.2942  | 4.2603  | 6.6892  | 6.7776  | 1.1407  | 0.1900  | 0.4744 | 0.3239 |
| Stim1         | _NTGASSGATS[Phospho (STY)]EESTAEFC[Carbamidomethyl (C)]R_2                     | P70302_S40_M1_Stim1           | 3.5624  | 3.6014  | 4.2492  | 3.9131  | 3.3203  | 3.6535  | 4.0143  | 3.7183  | 3.7026  | 3.7849  | 0.9768  | -0.0339 | 0.6257 | 0.2036 |
| Stim1         | _DLTHS[Phospho (STY)]DSESSUHSRR_3                                              | P70302_S519_M1_Stim1          | 3.9124  | 3.9230  | 3.6461  | 3.9450  | 3.8113  | 3.6603  | 4.0933  | 3.9031  | 3.4565  | 3.6223  | 1.0126  | 0.0181  | 0.7274 | 0.1382 |
| Hmrph2        | _JQNGTSGWR_2                                                                   | #N/A                          | 5.0707  | 4.1803  | 3.3018  | 4.7603  | 5.5115  | 4.1339  | 4.4947  | 4.1556  | 2.9538  | 4.3367  | 1.1274  | 0.1771  | 0.3280 | 0.4841 |
| Rock2         | _NQDQWWDNIR_2                                                                  | #N/A                          | 6.7815  | 6.3043  | 7.0090  | 7.0479  | 6.0398  | 6.5214  | 7.2756  | 6.8022  | 6.7005  | 6.9334  | 0.9552  | -0.0662 | 0.2096 | 0.6787 |
| Rock2         | _TLTSDVANLANKEELNNK_3                                                          | #N/A                          | 8.0117  | 8.1780  | 9.0980  | 9.1320  | 6.8577  | 7.8891  | 8.1659  | 8.2808  | 8.0828  | 7.8939  | 1.0109  | 0.0517  | 0.8449 | 0.0732 |
| Rock2         | _QIQQLSENNR_2                                                                  | #N/A                          | 4.3523  | 5.8010  | 7.7281  |         |         |         |         |         |         |         |         |         |        |        |



|          |                                                                                               |                         |         |         |         |         |         |         |         |          |         |         |         |         |        |        |
|----------|-----------------------------------------------------------------------------------------------|-------------------------|---------|---------|---------|---------|---------|---------|---------|----------|---------|---------|---------|---------|--------|--------|
| Elav1    | _FAANPNQNK_2                                                                                  | #N/A                    | 3.8558  | 5.2472  | 3.5895  | 6.0414  | 5.4526  | 4.4215  | 5.2639  | 5.1396   | 6.1770  | 4.3113  | 0.9129  | -0.1315 | 0.4538 | 0.3432 |
| Elav1    | _TNLVWYLPQNM[Oxidation (M)] TQEEU_2                                                           | #N/A                    | 3.4600  | 4.9404  | 4.3612  | 3.3096  | 4.6377  | 5.0476  | 5.3986  | 4.3770   | 4.3598  | 4.2366  | 0.9346  | -0.0975 | 0.5105 | 0.2920 |
| Rasgrf2  | _LGS[Phospho (STY)] SLKK_2                                                                    | P70392_5484_M1_Rasgrf2  | 7.3040  | 6.3101  | 7.1907  | 6.4705  | 2.7951  | 5.6695  | 6.4460  | 7.2471   | 5.8615  | 5.7446  | 0.9418  | -0.0865 | 0.6901 | 0.1611 |
| Rasgrf2  | _KFS[Phospho (STY)] S[Phospho (STY)] PPQLVSR_2                                                | P70392_5725_M2_Rasgrf2  | 4.0235  | 6.3836  | 3.7483  | 3.2920  | 3.1452  | 3.0795  | 3.4403  | 8.8929   | 8.2923  | 2.9693  | 0.6690  | -0.5900 | 0.1578 | 0.7037 |
| Rasgrf2  | _TLNS[Phospho (STY)] C[Carbamidomethyl (C)] KVPQIR_2                                          | P70392_5681_M1_Rasgrf2  | 3.0677  | 4.2747  | 4.3022  | 3.8460  | 3.7123  | 4.4131  | 3.9943  | 3.1552   | 6.9813  | 3.5233  | 0.8918  | -0.1652 | 0.5353 | 0.2714 |
| Rasgrf2  | _EHVGG[S[Phospho (STY)] PR_2                                                                  | #N/A                    | 5.5322  | 5.5234  | 4.0258  | 3.6028  | 3.0399  | 3.1892  | 3.3175  | 5.5782   | 5.1397  | 3.5698  | 0.9434  | -0.0840 | 0.7397 | 0.1310 |
| Rasgrf2  | _XLS[Phospho (STY)] TSSLNRSR_2                                                                | P70392_5745_M1_Rasgrf2  | 3.9128  | 5.3745  | 4.5996  | 3.6014  | 3.0384  | 3.1902  | 3.3161  | 5.7994   | 4.1657  | 3.5684  | 0.9384  | -0.0918 | 0.6930 | 0.1593 |
| Dlx5     | _VPS[Phospho (STY)] AT[Phospho (STY)] S[Phospho (STY)] QPEK_2                                 | P70396_5113_M3_Dlx5     | 9.2530  | 8.4807  | 8.5452  | 9.0781  | 7.4475  | 9.3891  | 9.1616  | 8.8769   | 8.6438  | 9.0456  | 0.9456  | -0.0807 | 0.1978 | 0.7086 |
| Usp9x    | _AQENYEGGEVS[Phospho (STY)] PPQTK_2                                                           | P70398_52547_M1_Usp9x   | 8.5902  | 8.3834  | 3.8403  | 8.4000  | 7.3417  | 4.1645  | 8.6360  | 8.6835   | 8.4041  | 8.2697  | 0.7986  | -0.1245 | 0.1673 | 0.7765 |
| Tp53bp1  | _STFFIVS[Phospho (STY)] SPTEGGGR_2                                                            | P70399_5381_M1_Tp53bp1  | 3.3738  | 10.2460 | 10.3962 | 3.6183  | 9.6719  | 4.0021  | 10.7619 | 10.3402  | 3.2122  | 3.4176  | 0.9930  | -0.0101 | 0.9848 | 0.0607 |
| Tp53bp1  | _SEDRPSS[Phospho (STY)] PQVSAVAETK_3                                                          | #N/A                    | 7.9268  | 7.1236  | 8.5038  | 8.6639  | 7.5043  | 8.3498  | 7.7279  | 8.2788   | 8.3642  | 6.0364  | 1.0540  | 0.0758  | 0.4591 | 0.3381 |
| Tp53bp1  | _MESLGS[Phospho (STY)] PR_2                                                                   | #N/A                    | 9.3203  | 8.5980  | 8.7250  | 9.8610  | 8.4936  | 8.5749  | 8.9661  | 8.7274   | 8.8943  | 9.0079  | 1.0034  | 0.0048  | 0.9184 | 0.0369 |
| Tp53bp1  | _AETTEKDAVTEDS[Phospho (STY)] PQPLPSVR_3                                                      | #N/A                    | 6.9379  | 7.1850  | 7.6673  | 9.5819  | 3.3773  | 7.6222  | 7.2402  | 3.9373   | 4.2363  | 7.6530  | 1.2246  | 0.2923  | 0.3455 | 0.4615 |
| Tp53bp1  | _DAVTEDS[Phospho (STY)] PQPLPSVR_2                                                            | #N/A                    | 8.0117  | 8.1723  | 7.5142  | 9.1032  | 7.7650  | 8.2724  | 8.9119  | 8.5131   | 8.5957  | 8.4040  | 0.9458  | -0.0804 | 0.1490 | 0.8268 |
| Tp53bp1  | _GGPGKS[Phospho (STY)] PR_2                                                                   | P70399_51359_M1_Tp53bp1 | 7.0886  | 7.2763  | 7.3029  | 7.6328  | 6.9167  | 6.6321  | 7.3666  | 7.1550   | 7.0856  | 7.4687  | 0.9825  | -0.0255 | 0.5218 | 0.2825 |
| Tp53bp1  | _ENTQIDOTPELS[Phospho (STY)] PVSNSK_2                                                         | #N/A                    | 5.3300  | 5.1846  | 3.1375  | 3.6401  | 4.0528  | 5.4189  | 4.9734  | 4.9090   | 5.5284  | 5.3914  | 0.8577  | -0.2214 | 0.1879 | 0.7262 |
| Tp53bp1  | _KLPTSEERS[Phospho (STY)] PAK_3                                                               | P70399_51675_M1_Tp53bp1 | 5.1573  | 3.0473  | 4.4297  | 3.5726  | 5.2711  | 3.3600  | 3.7208  | 3.1861   | 3.7277  | 5.2299  | 1.0438  | 0.0618  | 0.7787 | 0.1086 |
| Tp53bp1  | _ASQEPFS[Phospho (STY)] PAEDVM[Oxidation (M)] ETDLLEGIAANQRPSK_3                              | #N/A                    | 3.3715  | 5.7206  | 3.5400  | 6.0670  | 3.6411  | 3.8826  | 3.5382  | 6.0009   | 5.2302  | 4.8533  | 0.8909  | -0.1666 | 0.4866 | 0.3129 |
| Tp53bp1  | _EAPKEEC[Carbamidomethyl (C)] PEAM[Oxidation (M)] EVTSVSDS[Phospho (STY)] POK_3               | P70399_5719_M1_Tp53bp1  | 6.6110  | 8.5089  | 8.3212  | 8.3822  | 7.2250  | 7.3719  | 8.8801  | 7.6604   | 7.1897  | 7.5073  | 0.9907  | -0.0135 | 0.8864 | 0.0524 |
| Tp53bp1  | _EHPPEEGFS[Phospho (STY)] GSEVVEPTFC[Carbamidomethyl (C)] GSHR_4                              | P70399_5652_M1_Tp53bp1  | 3.6089  | 3.8663  | 3.7518  | 6.5263  | 5.2693  | 3.7118  | 3.6794  | 5.9098   | 4.9181  | 0.8896  | -0.1687 | 0.4650  | 0.3325 |        |
| Tp53bp1  | _S[Phospho (STY)] NSSPVPTTAASSSTPTTR_2                                                        | P70399_51628_M1_Tp53bp1 | 3.7548  | 5.0527  | 1.4885  | 4.5331  | 2.8986  | 4.3206  | 3.1806  | 3.9689   | 4.2679  | 4.2104  | 1.0259  | 0.0369  | 0.8355 | 0.0833 |
| Tp53bp1  | _GSGEKPSAPVDOTES[Phospho (STY)] V[S[Phospho (STY)] QGEFEEM[Oxidation (M)] PQPPHGHVLR_2        | #N/A                    | 3.5999  | 3.8285  | 3.1672  | 7.4835  | 5.1157  | 3.4885  | 4.0400  | 7.9854   | 4.0414  | 3.7571  | 0.9212  | -0.1184 | 0.7199 | 0.1308 |
| Tp53bp1  | _TEEDRENTQIDOTPELS[Phospho (STY)] PVSNSK_3                                                    | #N/A                    | 3.9669  | 3.2593  | 3.1528  | 4.3272  | 0.5428  | 3.4770  | 3.3702  | 4.4630   | 4.1116  | 3.6225  | 0.8019  | -0.3184 | 0.3094 | 0.5095 |
| Tp53bp1  | _SEALS[Phospho (STY)] S[Phospho (STY)] VLDQEEAM[Oxidation (M)] DTK_2                          | #N/A                    | 4.1762  | 3.4970  | 3.6305  | 3.6971  | 3.3099  | 3.9292  | 3.5895  | 4.8011   | 3.8906  | 3.5624  | 0.9358  | -0.0957 | 0.3873 | 0.4119 |
| Idh3g    | _ENTGEGYSSLEHSAVGGVESLK_2                                                                     | #N/A                    | 9.2198  | 6.6885  | 10.2864 | 10.5666 | 8.3468  | 9.9886  | 9.8109  | 9.6273   | 9.2354  | 9.6174  | 1.0012  | 0.0018  | 0.9783 | 0.0095 |
| Idh3g    | _LHSYATSR_2                                                                                   | #N/A                    | 7.0230  | 7.4702  | 7.0834  | 7.3978  | 7.3251  | 7.5965  | 3.7102  | 7.0703   | 7.4737  | 7.1413  | 1.1523  | 0.0246  | 0.2091 | 0.6796 |
| Idh3g    | _LGDGLFLQC[Carbamidomethyl (C)] C[Carbamidomethyl (C)] R_2                                    | #N/A                    | 6.8315  | 6.9924  | 6.5387  | 7.0826  | 6.1138  | 6.4354  | 6.7599  | 6.9647   | 6.6766  | 6.7408  | 0.9824  | -0.0257 | 0.5557 | 0.2551 |
| Idh3g    | _HKDIDILVR_3                                                                                  | #N/A                    | 6.3563  | 5.0290  | 7.0975  | 6.3140  | 6.2365  | 6.8559  | 6.2850  | 5.9035   | 2.9512  | 6.2527  | 1.1808  | 0.2397  | 0.2237 | 0.6503 |
| Idh3g    | _HAC[Carbamidomethyl (C)] VPVDFEEVHVSNADEEDIR_4                                               | #N/A                    | 6.1948  | 5.3241  | 6.2585  | 6.4295  | 4.9228  | 6.3038  | 5.9120  | 5.4113   | 6.2312  | 6.2753  | 0.9913  | -0.0126 | 0.8875 | 0.1058 |
| Idh3g    | _TSLDLYANVHC[Carbamidomethyl (C)] K_2                                                         | #N/A                    | 5.2237  | 5.4439  | 5.3490  | 4.9369  | 5.8147  | 5.9043  | 4.6351  | 5.4448   | 6.1397  | 5.9653  | 0.9818  | -0.0265 | 0.7466 | 0.1166 |
| Idh3g    | _DIDILVR_2                                                                                    | #N/A                    | 4.3745  | 3.6299  | 4.1082  | 3.2849  | 4.3949  | 3.1064  | 4.5004  | 3.3328   | 3.1212  | 3.2519  | 1.0334  | 0.0475  | 0.7456 | 0.0610 |
| Idh3g    | _AVLASM[Oxidation (M)] DENM[Oxidation (M)] HTPGDGGQTSQAIDIR_3                                 | #N/A                    | 2.0634  | 3.9862  | 3.7623  | 3.4500  | 3.1206  | 2.9573  | 2.8867  | 3.4864   | 3.2699  | 3.5007  | 0.9809  | -0.0278 | 0.8690 | 0.0610 |
| Cdh10    | _LAEMYGGGS[Phospho (STY)] DKDA_2                                                              | #N/A                    | 8.4708  | 7.4828  | 3.6514  | 9.3678  | 6.8801  | 9.3232  | 8.1384  | 6.8457   | 6.9441  | 7.5310  | 0.9001  | -0.1518 | 0.5657 | 0.2474 |
| Evl      | _TPSVAKS[Phospho (STY)] PEAK_2                                                                | P70429_5347_M1_Evl      | 4.6933  | 5.0209  | 5.0098  | 4.7497  | 5.0303  | 5.2426  | 3.0950  | 5.4768   | 5.0667  | 4.6106  | 1.0867  | 0.1199  | 0.3783 | 0.4222 |
| Evl      | _SNS[Phospho (STY)] VEKPVSSLSLR_2                                                             | #N/A                    | 7.6595  | 8.4597  | 8.7794  | 9.5311  | 7.0116  | 8.4136  | 8.3559  | 8.6310   | 8.3544  | 8.0726  | 0.9947  | -0.0077 | 0.9251 | 0.0338 |
| Evl      | _QVQNGNS[Phospho (STY)] PEEM[Oxidation (M)] DIQR_2                                            | #N/A                    | 4.7538  | 5.7717  | 5.9348  | 5.8622  | 5.2605  | 5.9677  | 5.8250  | 5.5783   | 5.2448  | 3.8977  | 1.0886  | 0.1225  | 0.3103 | 0.5083 |
| Evl      | _KDEKQTEDEPSTS[Phospho (STY)] PPGTR_2                                                         | P70429_5302_M1_Evl      | 3.9132  | 3.3130  | 4.6000  | 3.6018  | 3.0389  | 3.4234  | 3.3165  | 3.0158   | 4.2995  | 3.5688  | 1.0277  | 0.0394  | 0.7888 | 0.1030 |
| Evl      | _VQRPEDAS[Phospho (STY)] GGSVSGTSK_2                                                          | P70429_5240_M1_Evl      | 3.4112  | 4.2164  | 4.0980  | 4.6007  | 4.0377  | 3.6917  | 4.3154  | 3.5178   | 3.1664  | 3.0668  | 1.1401  | 0.1892  | 0.1485 | 0.8284 |
| Evl      | _VWPAGE[Phospho (STY)] NVGGLDGLDILDR_2                                                        | #N/A                    | 3.9137  | 3.4077  | 3.3636  | 3.2642  | 3.1693  | 3.2973  | 3.4768  | 3.1798   | 3.5693  | 0.9679  | -0.0470 | 0.6274  | 0.2025 |        |
| Slc9a3r1 | _SAS[Phospho (STY)] SOTSSEUNSGDSPK_2                                                          | #N/A                    | 9.8759  | 10.0938 | 10.3437 | 10.8236 | 10.0375 | 10.3305 | 10.4935 | 9.9446   | 10.0453 | 10.3585 | 1.0040  | 0.0057  | 0.8437 | 0.0738 |
| Slc9a3r1 | _JAcetyl (Protein N-term) S[Phospho (STY)] ADAAAGEPLPR_2                                      | P70441_52_M1_Slc9a3r1   | 10.1117 | 10.0339 | 10.8107 | 10.6255 | 10.0995 | 10.1665 | 10.4994 | 9.9695   | 10.0627 | 10.2972 | 1.0114  | 0.0163  | 0.5526 | 0.2576 |
| Slc9a3r1 | _LLVDPETDER_2                                                                                 | #N/A                    | 8.3594  | 8.1668  | 8.2645  | 8.6675  | 8.2846  | 8.3668  | 8.3497  | 8.1164   | 8.1680  | 8.4787  | 1.0089  | 0.0127  | 0.5216 | 0.2872 |
| Slc9a3r1 | _AVDPDSPAEGSLR_2                                                                              | #N/A                    | 7.5195  | 7.7289  | 8.1827  | 7.6198  | 8.1272  | 8.0883  | 8.1670  | 7.9250   | 7.6259  | 7.6525  | 1.0045  | 0.0064  | 0.8489 | 0.0711 |
| Slc9a3r1 | _EALVEPASES[Phospho (STY)] PRPALAR_3                                                          | #N/A                    | 12.0482 | 12.0475 | 13.0200 | 12.4626 | 11.7192 | 12.1329 | 12.0622 | 11.9907  | 12.1641 | 12.1641 | 1.0097  | 0.0140  | 0.4027 | 0.2012 |
| Slc9a3r1 | _SEQAEPFAADTHEAGDQNEAEK_3                                                                     | #N/A                    | 5.9449  | 5.8893  | 6.2030  | 6.4860  | 6.3153  | 6.0737  | 5.6234  | 5.5430   | 6.0360  | 6.4108  | 1.0421  | 0.0595  | 0.2415 | 0.6172 |
| Slc9a3r1 | _LVEVNGENVKEITHQGVSR_3                                                                        | #N/A                    | 5.7765  | 5.9802  | 5.1711  | 3.3885  | 5.5056  | 5.1760  | 5.5829  | 5.5777   | 5.1465  | 5.9026  | 0.9026  | -0.1478 | 0.4351 | 0.1614 |
| Slc9a3r1 | _SASSDTSSEUNSGDS[Phospho (STY)] PKR_2                                                         | #N/A                    | 7.6167  | 8.3474  | 8.5421  | 8.5902  | 8.3999  | 8.0971  | 8.4277  | 7.7601   | 8.0311  | 8.3187  | 1.0167  | 0.0239  | 0.5549 | 0.2558 |
| Stx4     | _QGDNS[Phospho (STY)] DDEDEVIR_2                                                              | P70452_515_M1_Stx4      | 9.0196  | 8.9927  | 9.5958  | 9.1438  | 7.6167  | 9.6554  | 9.1383  | 8.8967   | 8.9251  | 0.9622  | -0.0556 | 0.3837  | 0.1460 | 0.4650 |
| Pde7a    | _RGS[Phospho (STY)] HPYIDR_3                                                                  | #N/A                    | 3.8986  | 3.1119  | 6.0605  | 3.5872  | 3.0243  | 3.4647  | 4.6609  | 5.7764   | 4.1965  | 3.5542  | 0.8484  | -0.2371 | 0.3427 | 0.4650 |
| Vasp     | _KVS[Phospho (STY)] KQEEASGGPLAK_3                                                            | P70460_5235_M1_Vasp     | 4.9302  | 2.9774  | 5.3994  | 5.6853  | 2.7987  | 3.2560  | 4.4054  | 3.3286   | 1.1376  | 0.1859  | 0.4807  | 0.3181  | 0.7376 | 0.1381 |
| Sparrc1  | _AESSPNAEPDSDEGNS[Phospho (STY)] REHSAGSC[Carbamidomethyl (C)] TNFQC[Carbamidomethyl (C)] K_2 | #N/A                    | 3.6711  | 3.8464  | 4.3854  | 4.0527  | 4.5089  | 3.9248  | 3.9125  | 4.3409   | 4.8725  | 3.7350  | 0.9643  | -0.0524 | 0.5782 | 0.2379 |
| Sparrc1  | _HGAAGDV[Phospho (STY)] FPS[Phospho (STY)] QEFLEAER_2                                         | P70663_5353_M2_Sparrc1  | 3.8787  | 3.5136  | 4.2488  | 6.0101  | 3.4733  | 3.4461  | 3.4104  | 5.4340   | 3.8268  | 3.1364  | 1.0362  | 0.0514  | 0.8305 | 0.0806 |
| Sparrc1  | _AAGS[Phospho (STY)] KEHPHTEQQDQEGK_3                                                         | #N/A                    | 5.9539  | 5.6344  | 5.8243  | 6.8176  | 6.3947  | 5.9977  | 6.5062  | 5.7551   | 5.7409  | 6.2232  | 1.0089  | 0.0128  | 0.8427 | 0.0743 |
| Sparrc1  | _KAESSPNAEPDSDEGNS[Phospho (STY)] R_2                                                         | #N/A                    | 3.8076  | 3.6805  | 3.6563  | 4.6927  | 4.1220  | 4.3620  | 4.1777  | 4.2432   | 4.1285  | 4.4180  | 0.9556  | -0.0655 | 0.4132 | 0.3839 |
| Sparrc1  | _HQSGQNGQGGQSDSEAFQEDKAAGSKKEHPHT[Phospho (STY)] EQQDQEGK_5                                   | P70663_7290_M1_Sparrc1  | 7.3202  | 3.8636  | 4.3418  | 3.8856  | 3.7519  | 4.3736  | 4.0338  | 3.1156   | 3.4147  | 3.5629  | 1.2995  | 0.3779  | 0.1796 | 0.7554 |
| Sparrc1  | _AEKPSALNS[Phospho (STY)] EETHHQSTEQDK_3                                                      | P70663_570_M1_Sparrc1   | 4.8668  | 3.7864  | 3.6965  | 6.4758  | 5.0476  | 3.2903  | 3.3932  | 3.8322   | 3.1453  | 1.2180  | 0.2845  | 0.2395  | 0.6206 | 0.1308 |
| Naca     | _SPASDTYVFGAK_2                                                                               | #N/A                    | 5.5569  | 6.1620  | 6.2596  | 6.6529  | 5.7163  | 5.8961  | 5.8399  | 5.2075   | 4.8677  | 4.8117  | 1.1658  | 0.2213  | 0.0145 | 1.8385 |
| Naca     | _NNSNDIVNAIM[Oxidation (M)] ELTM[Oxidation (M)] _2                                            | #N/A                    | 3.3730  | 4.1293  | 3.1067  | 4.2864  | 5.8252  | 5.6405  | 4.0010  | 4.6594   | 5.9253  | 3.8286  | 0.9544  | -0.0674 | 0.7680 | 0.1146 |
| Naca     | _DIELVMSQANVR_2                                                                               | #N/A                    | 3.6929  | 2.9483  | 3.4266  | 8.2389  | 2.8366  | 3.7880  | 3.6812  | 4.0309   | 3.8006  | 4.1484  | 1.0613  | 0.0858  | 0.8238 | 0.0842 |
| Irf3     | _SSLPHS[Phospho (STY)] QENLPK_2                                                               | P70671_5135_M1_Irf3     | 7.9013  | 8.5121  | 8.8932  | 8.8428  | 8.0264  | 8.3719  | 8.8076  | 8.3716</ |         |         |         |         |        |        |



|       |                                                                     |                      |        |        |         |         |         |         |         |        |        |         |         |         |        |        |
|-------|---------------------------------------------------------------------|----------------------|--------|--------|---------|---------|---------|---------|---------|--------|--------|---------|---------|---------|--------|--------|
| Cct7  | _INALTAASEAAC[Carbamidomethyl (C)]LIVSVDETIKNPR_3                   | #N/A                 | 2.9683 | 3.7735 | 3.6551  | 4.1578  | 3.5949  | 4.1346  | 3.8725  | 3.9607 | 3.6093 | 4.1248  | 0.9543  | -0.0674 | 0.4771 | 0.3214 |
| Cct7  | _INALTAASEAA[Carbamidomethyl (C)]LIVSVDETIK_3                       | #N/A                 | 3.7472 | 3.0026 | 3.4808  | 3.9122  | 2.8909  | 3.7337  | 3.2629  | 4.2063 | 3.8549 | 3.8792  | 0.8894  | -0.1692 | 0.1051 | 0.9785 |
| Cct2  | _GATQQLDEAER_2                                                      | #N/A                 | 8.3864 | 8.5423 | 8.5423  | 8.3208  | 8.1302  | 8.7331  | 8.3664  | 8.3091 | 8.2435 | 8.4634  | 1.0071  | 0.0102  | 0.6130 | 0.2125 |
| Cct2  | _I[Acetyl (Protein N-term)]ASLSPVAFNIK_2                            | #N/A                 | 6.2708 | 6.9775 | 6.6779  | 6.2861  | 6.7494  | 6.6836  | 6.6854  | 6.2670 | 6.0529 | 6.8678  | 1.0215  | 0.0307  | 0.5158 | 0.2875 |
| Cct2  | _LSSFGIAINGDLVK_2                                                   | #N/A                 | 5.1296 | 4.4632 | 5.3077  | 4.7501  | 4.8714  | 4.4557  | 5.2186  | 5.1871 | 4.7364 | 5.4785  | 0.9369  | -0.0941 | 0.1680 | 0.7746 |
| Cct2  | _LALLSSAVDNGSDAER_2                                                 | #N/A                 | 6.3298 | 5.9194 | 6.0535  | 5.8434  | 6.0615  | 5.5905  | 5.4530  | 5.4085 | 5.5652 | 5.9538  | 1.0621  | 0.0869  | 0.0552 | 1.2579 |
| Cct2  | _VDDDEVGGDTTSVVLAAELLR_2                                            | #N/A                 | 4.8943 | 4.9330 | 6.2707  | 6.3104  | 4.3596  | 5.1307  | 5.4896  | 5.3267 | 4.9996 | 5.2444  | 1.0098  | 0.0140  | 0.9044 | 0.0436 |
| Cct2  | _LAVEAVLVR_2                                                        | #N/A                 | 6.6760 | 4.7806 | 5.1089  | 5.2188  | 4.5484  | 4.2504  | 3.7567  | 5.7254 | 5.2303 | 1.0445  | 0.0628  | 0.7013  | 0.1541 |        |
| Cct2  | _FWQDLM[Oxidation (M)]NIAGTLLSK_2                                   | #N/A                 | 4.9488 | 3.7100 | 5.8209  | 5.4225  | 4.8621  | 4.9012  | 5.0810  | 5.1862 | 3.0614 | 3.1718  | 1.1986  | 0.2613  | 0.2002 | 0.6986 |
| Cct2  | _NIGVONPAAK_2                                                       | #N/A                 | 2.9768 | 4.7501 | 4.2113  | 3.7551  | 5.1447  | 3.0033  | 4.0330  | 5.3439 | 3.5452 | 4.7296  | 0.9004  | -0.1513 | 0.4501 | 0.3467 |
| Cct2  | _M[Oxidation (M)]PTBADNAGYSDADLVAQLR_2                              | #N/A                 | 3.6265 | 4.1051 | 4.5680  | 4.2382  | 3.7686  | 3.9246  | 4.2436  | 4.4263 | 3.8395 | 4.0656  | 0.9746  | -0.0371 | 0.6131 | 0.2124 |
| Cct2  | _LALVTGGIEASTFDHPELVK_3                                             | #N/A                 | 3.1363 | 3.8926 | 4.0204  | 4.5230  | 3.7809  | 4.3446  | 4.2377  | 3.5954 | 3.2440 | 2.9892  | 1.1231  | 0.1675  | 0.2229 | 0.6519 |
| Cct2  | _VAIEHAEEKK_3                                                       | #N/A                 | 3.1927 | 4.0335 | 3.8795  | 4.3822  | 3.9218  | 4.2037  | 4.0969  | 3.7363 | 3.3849 | 4.3492  | 1.0112  | 0.0161  | 0.8739 | 0.0585 |
| Cct4  | _IDOVVNTR_2                                                         | #N/A                 | 6.2568 | 6.0186 | 5.6973  | 5.3544  | 6.7237  | 6.5559  | 5.7028  | 6.3568 | 6.3264 | 6.3337  | 0.9872  | -0.0185 | 0.7948 | 0.0997 |
| Cct4  | _VIDPATATSVOLR_2                                                    | #N/A                 | 6.3063 | 6.3801 | 5.9669  | 5.9177  | 5.8713  | 5.8605  | 5.8357  | 5.4687 | 5.9213 | 5.5648  | 1.0619  | 0.0867  | 0.0415 | 1.3824 |
| Cct4  | _LVIEAER_2                                                          | #N/A                 | 5.9602 | 5.9383 | 6.3474  | 5.1549  | 5.5370  | 5.4711  | 5.0470  | 6.3912 | 6.3533 | 5.8643  | 0.9697  | -0.0444 | 0.6017 | 0.2206 |
| Cct4  | _DALSDLAHFLNKK_2                                                    | #N/A                 | 4.2032 | 4.7733 | 3.1752  | 3.8038  | 3.8186  | 3.8042  | 4.2713  | 4.5687 | 4.0892 | 4.1222  | 0.9219  | -0.1174 | 0.2738 | 0.5626 |
| Cct4  | _ALIAGGGAPFIEIALR_2                                                 | #N/A                 | 2.1659 | 3.7197 | 3.6202  | 3.9050  | 4.2464  | 3.6977  | 3.3122  | 4.3242 | 4.4830 | 4.3421  | 0.8648  | -0.2095 | 0.2263 | 0.6453 |
| Cct4  | _AQDIEAGDGTTSVVIAGSLDSC[Carbamidomethyl (C)]TK_3                    | #N/A                 | 3.7388 | 2.7304 | 3.8607  | 4.0272  | 2.8462  | 3.7410  | 3.2532  | 4.0412 | 1.7353 | 4.1381  | 1.0604  | 0.0846  | 0.7136 | 0.1465 |
| Cct4  | _ITGC[Carbamidomethyl (C)]TSPGK_2                                   | #N/A                 | 4.8057 | 3.9745 | 4.6024  | 4.1462  | 4.9343  | 3.0258  | 4.2945  | 4.1136 | 4.6686 | 3.8235  | 1.0055  | 0.0079  | 0.9537 | 0.0206 |
| Cct4  | _VANSGITR_2                                                         | #N/A                 | 3.6194 | 3.0044 | 3.3531  | 4.3977  | 5.1042  | 3.8615  | 4.5460  | 4.1043 | 4.0221 | 4.3136  | 0.9161  | -0.1265 | 0.3967 | 0.4015 |
| Cct4  | _AFADAM[Oxidation (M)]EVPSTIAENAGLNPSITVELR_3                       | #N/A                 | 3.9854 | 3.2898 | 3.1714  | 3.6740  | 3.1111  | 3.1176  | 3.4784  | 4.4444 | 4.0930 | 3.6410  | 0.8665  | -0.2068 | 0.0721 | 1.1421 |
| Cct4  | _DVEREDIEFIC[Carbamidomethyl (C)]K_3                                | #N/A                 | 3.0168 | 4.3256 | 4.2513  | 3.7951  | 4.1469  | 3.5826  | 3.9434  | 1.2534 | 3.5051 | 3.4724  | 1.2660  | 0.3402  | 0.1742 | 0.7590 |
| Cct5  | _LVLDDNPFPGITAK_2                                                   | #N/A                 | 6.8510 | 6.6880 | 6.6671  | 7.0389  | 6.5816  | 6.8518  | 6.4328  | 6.6259 | 6.4340 | 6.7840  | 1.0321  | 0.0455  | 0.0871 | 1.0600 |
| Cct5  | _LFGAGVQESFGITTK_2                                                  | #N/A                 | 5.4757 | 4.8155 | 5.8376  | 5.1991  | 4.0181  | 3.8457  | 4.5490  | 4.9983 | 5.4702 | 5.5769  | 0.9450  | -0.0817 | 0.5450 | 0.2636 |
| Cct5  | _I[Acetyl (Protein N-term)]ASVGTIAFDEVGRPLIK_2                      | #N/A                 | 2.9445 | 2.0264 | 2.5624  | 2.9734  | 4.0876  | 3.6397  | 1.5144  | 3.8115 | 2.7524 | 2.9336  | 1.1039  | 0.1426  | 0.6047 | 0.2184 |
| Cct5  | _TSLSPNGLDK_2                                                       | #N/A                 | 5.8123 | 6.1464 | 3.2629  | 6.3227  | 6.2467  | 5.7076  | 3.8448  | 5.7612 | 6.4905 | 5.7031  | 1.0244  | 0.0348  | 0.8620 | 0.0645 |
| Cct5  | _VVVGGPEELIAATGGR_2                                                 | #N/A                 | 3.3151 | 3.6211 | 4.2919  | 4.5334  | 4.9352  | 4.7800  | 4.5092  | 4.4640 | 4.9857 | 4.9198  | 0.8997  | -0.1525 | 0.2104 | 0.6769 |
| Cct5  | _ESNPALGIDC[Carbamidomethyl (C)]LHK_2                               | #N/A                 | 5.7708 | 5.7815 | 3.6625  | 5.6743  | 5.6148  | 4.9503  | 5.6246  | 4.7678 | 5.1699 | 0.9839  | -0.0235 | 0.8567  | 0.0672 |        |
| Cct5  | _DVDFELIK_2                                                         | #N/A                 | 0.9759 | 3.2002 | 3.8759  | 3.4197  | 3.2860  | 3.3387  | 3.5679  | 3.5815 | 3.8806 | 0.7316  | 1.0257  | 0.0366  | 0.9256 | 0.0336 |
| Cct5  | _DVFDFELIKVGGK_3                                                    | #N/A                 | 4.2273 | 3.1151 | 3.9610  | 3.5047  | 3.3710  | 3.2536  | 3.6530  | 3.7955 | 3.9610 | 3.1820  | 1.0114  | 0.0164  | 0.8727 | 0.0591 |
| Cct6a | _GLVLDHGAR_2                                                        | #N/A                 | 6.2102 | 6.6146 | 6.2353  | 6.7792  | 6.7924  | 6.4931  | 6.0524  | 6.7983 | 6.5112 | 6.4324  | 1.0112  | 0.0161  | 0.6963 | 0.1572 |
| Cct6a | _GIDPSSLDALAK_2                                                     | #N/A                 | 5.5796 | 6.3612 | 6.3769  | 5.8419  | 5.7997  | 5.4994  | 5.5264  | 6.1511 | 5.8139 | 5.4065  | 1.0324  | 0.0460  | 0.4503 | 0.3465 |
| Cct6a | _LITEGEAAK_2                                                        | #N/A                 | 6.1865 | 6.3194 | 5.9986  | 6.4036  | 5.9587  | 5.9595  | 6.2845  | 6.1857 | 5.4967 | 5.8848  | 1.0293  | 0.0417  | 0.3383 | 0.4707 |
| Cct6a | _VLANSFGDGLQETLVK_2                                                 | #N/A                 | 3.8883 | 3.7823 | 4.1680  | 4.0294  | 3.7964  | 4.1085  | 4.2416  | 3.7162 | 3.9781 | 4.4869  | 0.9650  | -0.0513 | 0.3835 | 0.4163 |
| Cct6a | _GLDDVLR_2                                                          | #N/A                 | 3.8832 | 3.2879 | 6.1605  | 4.0358  | 4.4643  | 4.1889  | 3.5913  | 4.3998 | 3.6148 | 4.6657  | 1.0735  | 0.1024  | 0.5990 | 0.2226 |
| Cct6a | _VATAGDQDITGGTTSVVLJGELLK_3                                         | #N/A                 | 3.7629 | 4.3266 | 4.8044  | 4.6999  | 3.0569  | 3.1995  | 3.4852  | 3.9241 | 3.6506 | 1.1469  | 0.9177  | 0.3051  | 0.5155 |        |
| Cct6a | _EFORMETLDOVR_3                                                     | #N/A                 | 3.3262 | 4.0163 | 4.5607  | 3.9241  | 3.9707  | 4.1547  | 4.2527  | 4.3976 | 3.1958 | 3.7817  | 1.0218  | 0.0311  | 0.7808 | 0.1075 |
| Cct6a | _QALVSEGLHPR_2                                                      | #N/A                 | 3.4415 | 3.4184 | 3.8217  | 3.5660  | 3.0788  | 3.2649  | 4.0601  | 3.9007 | 4.0339 | 3.5330  | 0.8841  | -0.1777 | 0.0237 | 1.6255 |
| Cct3  | _ISTPVOVNRK_2                                                       | #N/A                 | 8.0550 | 8.4803 | 9.0688  | 8.7001  | 7.6955  | 7.6835  | 8.3791  | 8.0363 | 7.9929 | 8.2269  | 1.0149  | 0.0214  | 0.6917 | 0.1601 |
| Cct3  | _LAVQAQLEVIPR_2                                                     | #N/A                 | 6.9209 | 7.5283 | 7.6446  | 7.3241  | 6.9706  | 7.3195  | 7.0110  | 7.5055 | 7.2100 | 7.1021  | 1.0108  | 0.0154  | 0.6623 | 0.1790 |
| Cct3  | _IPGGIEDSC[Carbamidomethyl (C)]VLR_2                                | #N/A                 | 6.5003 | 6.3694 | 5.9030  | 6.8130  | 6.5667  | 6.4727  | 6.6641  | 6.7162 | 6.9283 | 6.3321  | 0.9666  | -0.0491 | 0.2559 | 0.5919 |
| Cct3  | _ELIGVEPLAVK_2                                                      | #N/A                 | 6.3819 | 6.8613 | 6.6324  | 6.1539  | 6.3153  | 6.2293  | 6.6071  | 6.8222 | 6.3272 | 6.2893  | 0.9873  | -0.0184 | 0.6387 | 0.1947 |
| Cct3  | _ELIQVHPAAK_2                                                       | #N/A                 | 5.9830 | 5.9460 | 5.6760  | 5.5215  | 6.0483  | 5.8672  | 5.6673  | 5.9725 | 5.7664 | 5.6835  | 1.0118  | 0.0169  | 0.5778 | 0.2382 |
| Cct3  | _ELISEVER_2                                                         | #N/A                 | 6.9365 | 6.6048 | 7.4026  | 6.4847  | 6.7520  | 7.1759  | 5.9409  | 6.8215 | 6.8824 | 7.0262  | 1.0337  | 0.0479  | 0.4188 | 0.3780 |
| Cct3  | _TAVETAVLLR_2                                                       | #N/A                 | 4.5545 | 3.4698 | 4.0647  | 3.4230  | 5.2732  | 4.0863  | 4.5209  | 3.9896 | 5.6032 | 5.9762  | 0.8253  | -0.2769 | 0.1237 | 0.9076 |
| Cct3  | _LVLLDSSLEYK_2                                                      | #N/A                 | 5.4663 | 5.3793 | 5.0150  | 5.0242  | 4.7367  | 5.1066  | 5.5749  | 5.3400 | 5.5148 | 4.9747  | 0.9571  | -0.0633 | 0.2203 | 0.6569 |
| Cct3  | _NVLLDPQLVPGGASEM[Oxidation (M)]AVAHALTEK_3                         | #N/A                 | 4.9188 | 5.3090 | 5.1927  | 5.8458  | 5.1505  | 5.1573  | 5.5739  | 5.4492 | 5.9153 | 4.9543  | 0.9843  | -0.0228 | 0.6852 | 0.1642 |
| Cct3  | _TUQNC[Carbamidomethyl (C)]GASTIR_2                                 | #N/A                 | 5.6760 | 4.7767 | 5.4885  | 5.8523  | 5.5805  | 3.7001  | 5.5273  | 5.5275 | 5.1172 | 3.8456  | 1.0349  | 0.0495  | 0.7461 | 0.1272 |
| Cct3  | _WSSLAC[Carbamidomethyl (C)]NALDAWK_2                               | #N/A                 | 3.5678 | 4.0547 | 4.2546  | 3.2564  | 4.1943  | 3.0288  | 3.8928  | 3.0098 | 2.6998 | 1.1930  | 0.2546  | 0.0840  | 1.0755 |        |
| Cct3  | _NLQDAM[Oxidation (M)]QVC[Carbamidomethyl (C)]IR_2                  | #N/A                 | 3.3382 | 5.5857 | 5.5674  | 4.7251  | 5.8933  | 4.9820  | 4.0359  | 5.1818 | 3.4459 | 5.6627  | 1.0947  | 0.1305  | 0.5050 | 0.2967 |
| Cct3  | _GTGAPDAGQE_1                                                       | #N/A                 | 3.7625 | 3.5799 | 3.4962  | 4.5408  | 2.9052  | 4.3283  | 3.1882  | 3.9612 | 4.2603 | 4.2181  | 0.9647  | -0.0519 | 0.7124 | 0.1473 |
| Cct3  | _KGESQTGIEITREDFTR_4                                                | #N/A                 | 3.9203 | 3.3652 | 3.4054  | 3.4184  | 3.2190  | 3.2255  | 3.3349  | 3.4610 | 4.1305 | 3.9540  | 0.9209  | -0.1190 | 0.1798 | 0.7453 |
| Ptpm2 | _ADSVAGAIQSDPAEGS[Phospho (STY)]QESHGR_3                            | #N/A                 | 9.9445 | 9.8387 | 10.4535 | 10.2557 | 10.0903 | 10.2424 | 10.0302 | 9.6943 | 9.9366 | 10.0498 | 1.0211  | 0.0302  | 0.1501 | 0.8237 |
| Ptpm2 | _SEQPEVLSS[Phospho (STY)]EEETAGVEHVR_3                              | #N/A                 | 4.0053 | 8.6269 | 9.2702  | 9.0103  | 8.5749  | 9.0234  | 8.8019  | 8.7556 | 9.0398 | 8.9138  | 0.9107  | -0.1350 | 0.4636 | 0.3339 |
| Ptpm2 | _INVSSQFS[Phospho (STY)]DGPML[Oxidation (M)]PS[Phospho (STY)]PSAR_2 | #N/A                 | 3.9500 | 5.5397 | 3.8661  | 3.9193  | 3.8058  | 5.9398  | 3.8554  | 3.7214 | 3.6248 | 5.8107  | 1.0589  | 0.0825  | 0.7071 | 0.1505 |
| Ptpm2 | _SLQQNADNEKWS[Phospho (STY)]ELR_3                                   | P80560_S139_M1_Ptpm2 | 4.2496 | 3.0928 | 3.9833  | 3.5271  | 3.3933  | 3.2313  | 3.6753  | 3.4741 | 3.7732 | 3.2043  | 1.0135  | 0.0194  | 0.8529 | 0.0691 |
| Ptpm2 | _KSEQPEEVLSS[Phospho (STY)]S[Phospho (STY)]EEETAGVEHVR_3            | #N/A                 | 3.7630 | 3.5707 | 3.9546  | 4.1128  | 3.6861  | 4.8735  | 3.9652  | 4.3061 | 3.6296 | 3.0392  | 1.0692  | 0.0965  | 0.4455 | 0.3512 |
| Nucb2 | _SGRLS[Phospho (STY)]QLDLVSHK_3                                     | P81117_S89_M1_Nucb2  | 4.1401 | 3.3955 | 3.8737  | 3.4175  | 3.2838  | 3.3408  | 3.5658  | 4.9173 | 3.8827 | 3.0948  | 0.9250  | -0.1125 | 0.4356 | 0.3610 |
| Isr2  | _VAS[Phospho (STY)]PTSLGR_2                                         | P81122_S1089_M1_Isr2 | 4.2319 | 8.7934 | 3.4179  | 3.9205  | 7.8172  | 8.7726  | 8.7611  | 8.7693 | 8.8013 | 3.8875  | 0.8152  | -0.2947 | 0.4153 | 0.3817 |
| Isr2  | _RVS[Phospho (STY)]GGAGQDLDR_2                                      | P81122_S556_M1_Isr2  | 7.1350 | 7.4617 | 7.7576  | 8.0249  | 6.4514  | 7.3068  | 7.4591  | 7.3356 | 7.3374 | 0.9913  | -0.0127 | 0.8238  | 0.0842 |        |
| Isr2  | _HNSAS[Phospho (STY)]VENVSLRK_3                                     | P81122_S1165_M1_Isr2 | 3.3998 | 4.1561 | 3.1335  | 4.1781  | 4.0444  | 5.8911  | 4.3264  | 4.3239 | 3.1221 | 3.8554  | 1.0581  | 0.0814  | 0.6856 | 0.1639 |
| Isr2  | _TVS[Phospho (STY)]LTPPAR_2                                         | P81122_S573_M1_Isr2  | 4.3579 | 7.4191 | 4.2996  | 3.3014  | 6.7638  | 7.6901  | 7.8137  | 8.0598 | 2.9648 | 7.7354  | 0.8488  | -0.2366 | 0.4819 | 0.3170 |
| Isr2  | _SNT[Phospho (STY)]PESAEITPPAR_2                                    | P81122_T517_M1_Isr2  | 6.3808 | 6.5514 | 6.8159  | 7.4320  | 5.5647  | 6.4437  | 6.8274  | 6.4033 | 6.9148 | 7.3726  | 0.9494  | -0.0749 | 0.3470 | 0.4596 |
| Isr2  |                                                                     |                      |        |        |         |         |         |         |         |        |        |         |         |         |        |        |



|        |                                                                                             |                      |         |         |         |         |         |         |         |         |         |         |        |         |        |        |
|--------|---------------------------------------------------------------------------------------------|----------------------|---------|---------|---------|---------|---------|---------|---------|---------|---------|---------|--------|---------|--------|--------|
| Tnik   | _KNS[Phospho (STY)]PGNGSALGR_2                                                              | #N/A                 | 7.0729  | 7.2285  | 7.5730  | 7.5062  | 5.7535  | 7.1495  | 7.6000  | 7.3093  | 7.0946  | 7.1257  | 0.9677 | -0.0473 | 0.5219 | 0.2824 |
| Tnik   | _SEGS[Phospho (STY)]VLPHFESK_2                                                              | P83510_S740_M1_Tnik  | 12.9432 | 12.9559 | 13.7559 | 13.2201 | 12.0491 | 12.7837 | 13.6639 | 13.2442 | 13.0028 | 12.7930 | 0.9830 | -0.0248 | 0.5042 | 0.2974 |
| Tnik   | _VQQTST[Phospho (STY)]DEEEDDESSAALFTSELLR_3                                                 | P83510_T950_M1_Tnik  | 3.5247  | 4.2810  | 3.2584  | 4.3030  | 4.1693  | 3.9561  | 4.4513  | 4.1990  | 2.9972  | 3.9803  | 1.0022 | 0.0031  | 0.9804 | 0.0086 |
| Tnik   | _AS[Phospho (STY)]NPDLR_2                                                                   | #N/A                 | 3.5641  | 3.7783  | 3.2977  | 4.3424  | 4.2086  | 5.4712  | 3.2641  | 4.1597  | 2.9579  | 4.0196  | 1.1417 | 0.1912  | 0.2961 | 0.5285 |
| Tnik   | _LGSQPHRAS[Phospho (STY)]NPDLR_3                                                            | #N/A                 | 4.2732  | 3.5776  | 3.4985  | 4.5431  | 3.2989  | 4.3306  | 3.1905  | 4.3589  | 4.2204  | 3.9819  | 1.0077 | 0.0110  | 0.9378 | 0.0325 |
| Wnk1   | _GTEGSGSGPS[Phospho (STY)]PPHLC[Carbamidomethyl (C)]SK_3                                    | P83741_S2027_M1_Wnk1 | 5.2449  | 4.9010  | 3.9862  | 6.1177  | 5.5728  | 4.2585  | 5.4634  | 5.7079  | 6.0174  | 5.5198  | 0.8831 | -0.1793 | 0.1540 | 0.8124 |
| Rpl36a | _LEC[Carbamidomethyl (C)]VEPKC[Carbamidomethyl (C)]R_2                                      | #N/A                 | 6.8809  | 6.8350  | 7.1102  | 6.9681  | 7.3124  | 6.3488  | 7.3645  | 7.0944  | 6.7697  | 7.2193  | 0.9715 | -0.0417 | 0.3255 | 0.4874 |
| Cbk1   | _KKVEELVEEEEEVVEVK_3                                                                        | #N/A                 | 4.8237  | 5.5225  | 6.5164  | 6.3457  | 4.7183  | 5.2497  | 5.9656  | 3.8428  | 4.4351  | 5.8590  | 1.1002 | 0.1378  | 0.4012 | 0.3549 |
| Cbk1   | _VEEVLVEEEEEVVEVK_2                                                                         | #N/A                 | 3.0549  | 4.1745  | 6.1544  | 4.6585  | 3.6814  | 5.0611  | 3.9590  | 3.8741  | 3.5227  | 4.2114  | 1.1728 | 0.2299  | 0.3040 | 0.5172 |
| Cbk1   | _ADS[Phospho (STY)]DSEDKGEESKPK_2                                                           | P83917_S89_M1_Cbk1   | 3.9107  | 3.1661  | 3.6444  | 1.9641  | 3.0544  | 3.5702  | 3.4633  | 4.3698  | 4.0184  | 4.3663  | 0.7938 | -0.3332 | 0.0649 | 1.1877 |
| Eloc   | _EIPSHVLSK_2                                                                                | #N/A                 | 6.4095  | 6.6583  | 6.5242  | 6.4516  | 7.1974  | 6.4044  | 6.2214  | 6.4980  | 6.9160  | 6.5032  | 1.0019 | 0.0027  | 0.9579 | 0.0187 |
| Eloc   | _USSDGEHFIVK_2                                                                              | #N/A                 | 4.1777  | 4.6086  | 4.0805  | 4.8069  | 5.0626  | 3.8384  | 4.7051  | 4.4473  | 4.6622  | 4.6957  | 0.9571 | -0.0632 | 0.4416 | 0.3549 |
| Eloc   | _EHALTSGTJK_2                                                                               | #N/A                 | 5.6629  | 6.0483  | 5.7259  | 6.1460  | 6.3046  | 6.2668  | 5.7563  | 6.0028  | 5.8473  | 5.9874  | 1.0216 | 0.0308  | 0.4112 | 0.3859 |
| Hpca   | _GAKS[Phospho (STY)]DPSVVR_2                                                                | P84075_S175_M1_Hpca  | 9.9714  | 10.2499 | 10.7078 | 10.5556 | 9.9565  | 10.2211 | 10.5124 | 10.2717 | 10.3078 | 10.1618 | 0.9965 | -0.0051 | 0.8318 | 0.0800 |
| Hpca   | _LSLEFR_2                                                                                   | #N/A                 | 8.7457  | 8.9836  | 8.5000  | 8.7268  | 8.5961  | 8.6735  | 8.5271  | 9.0749  | 8.5974  | 8.5048  | 1.0033 | 0.0047  | 0.8400 | 0.0757 |
| Hpca   | _FAEHVFR_2                                                                                  | #N/A                 | 8.5793  | 8.9092  | 8.8182  | 8.6007  | 8.9894  | 8.4703  | 8.9058  | 8.8148  | 8.6764  | 8.6760  | 0.9954 | -0.0067 | 0.7335 | 0.1346 |
| Hpca   | _IVANFFPYGDASK_2                                                                            | #N/A                 | 8.4124  | 8.3462  | 8.6748  | 8.5437  | 8.3460  | 8.5184  | 8.5440  | 8.3380  | 8.4712  | 8.4285  | 1.0033 | 0.0048  | 0.7147 | 0.1458 |
| Hpca   | _ENTESEFELQEWYK_2                                                                           | #N/A                 | 7.3230  | 6.4959  | 7.5176  | 7.6479  | 7.1468  | 7.2904  | 7.3884  | 6.4675  | 6.3303  | 7.1658  | 1.0583 | 0.0818  | 0.2069 | 0.6841 |
| Hpca   | _LQJC[Carbamidomethyl (C)]DPSASQF_2                                                         | #N/A                 | 6.6715  | 6.3849  | 6.6732  | 6.4302  | 6.5211  | 6.3111  | 6.6877  | 6.3177  | 6.5515  | 6.1618  | 1.0107 | 0.0154  | 0.5830 | 0.2344 |
| Hpca   | _TDTNDSQDTQFR_2                                                                             | #N/A                 | 6.0767  | 6.2216  | 4.5455  | 6.2263  | 6.3170  | 3.3688  | 5.7185  | 6.9008  | 5.6880  | 5.6514  | 0.9115 | -0.1338 | 0.4510 | 0.3459 |
| Hpca   | _EEM[Oxidation (M)]LEWQAIYK_2                                                               | #N/A                 | 5.1628  | 3.2468  | 4.5972  | 5.0202  | 4.6945  | 4.5847  | 5.2708  | 4.4250  | 4.4184  | 4.8622  | 0.9593 | -0.0599 | 0.6279 | 0.2021 |
| Hpca   | _LRPEMLQDLR_2                                                                               | #N/A                 | 5.3490  | 5.0739  | 3.6937  | 6.1024  | 4.7833  | 3.4458  | 4.7544  | 3.9140  | 5.4002  | 3.6245  | 1.0719 | 0.1002  | 0.6144 | 0.2116 |
| Hpca   | _DC[Carbamidomethyl (C)]PTGLUNVDEFKK_3                                                      | #N/A                 | 4.1347  | 3.4391  | 3.3207  | 3.8234  | 0.1816  | 2.9682  | 3.3290  | 4.2951  | 3.9437  | 2.8415  | 0.8267 | -0.2746 | 0.4422 | 0.3544 |
| Hpca   | _MPEDSTPEKR_2                                                                               | #N/A                 | 4.9429  | 4.3689  | 4.2860  | 5.3052  | 5.0885  | 3.7403  | 5.0155  | 3.8684  | 3.1650  | 3.9608  | 1.1998 | 0.2627  | 0.1223 | 0.9126 |
| Arf5   | _VQESADELQK_2                                                                               | #N/A                 | 5.5588  | 6.1543  | 6.3110  | 6.2854  | 5.3320  | 5.3735  | 6.1903  | 5.7678  | 5.2660  | 5.4628  | 1.0289 | 0.0412  | 0.5806 | 0.2361 |
| Cpk2   | _AALQPC[Carbamidomethyl (C)]EGS[Phospho (STY)]LTRPK_2                                       | #N/A                 | 9.3011  | 9.5841  | 9.7925  | 9.9111  | 9.4773  | 9.5369  | 9.6471  | 9.2002  | 7.3058  | 9.4041  | 1.0800 | 0.1110  | 0.1432 | 0.8440 |
| Cpk2   | _KAIPAGC[Carbamidomethyl (C)]GDSEEEESLDTLVK_3                                               | #N/A                 | 8.3603  | 8.7845  | 9.5555  | 9.6982  | 9.1962  | 9.1149  | 8.9441  | 8.8247  | 8.4762  | 8.9584  | 1.0361 | 0.0511  | 0.2690 | 0.5703 |
| Cpk2   | _AIPAGC[Carbamidomethyl (C)]GDSEEEESLDTLVK_3                                                | #N/A                 | 6.5575  | 6.5388  | 7.1750  | 7.3151  | 7.1279  | 7.0149  | 6.5045  | 6.4271  | 6.0445  | 7.0335  | 1.0696 | 0.0971  | 0.0878 | 1.0565 |
| Cpk2   | _VLPGLQDMFK_2                                                                               | #N/A                 | 7.9700  | 6.7620  | 3.4646  | 8.7055  | 6.7943  | 4.3252  | 6.7531  | 6.0109  | 6.0355  | 6.8734  | 1.0107 | 0.0154  | 0.9516 | 0.0215 |
| Erh    | _Acetyl (Protein N-term)ISHTLVLQPTK_2                                                       | #N/A                 | 6.4609  | 6.7663  | 6.9932  | 7.2107  | 7.1849  | 7.1280  | 6.5925  | 6.4126  | 6.8223  | 6.5692  | 1.0538 | 0.0756  | 0.0619 | 1.2084 |
| Erh    | _TYADYSEVNEC[Carbamidomethyl (C)]M[Oxidation (M)]EGVC[Carbamidomethyl (C)]K_2               | #N/A                 | 4.8280  | 5.0165  | 6.0939  | 6.0474  | 4.7015  | 5.4104  | 5.6121  | 4.8544  | 5.2479  | 5.5186  | 1.0078 | 0.0112  | 0.9057 | 0.1266 |
| Erh    | _MYEHLK_2                                                                                   | #N/A                 | 4.1316  | 3.2108  | 3.8653  | 2.0425  | 3.0114  | 3.3493  | 3.5573  | 1.6224  | 3.8912  | 1.9985  | 1.1811 | 0.2401  | 0.4131 | 0.3839 |
| Erh    | _ADTQTYQPYNK_2                                                                              | #N/A                 | 2.9504  | 4.2758  | 4.1398  | 3.5769  | 4.1526  | 3.9786  | 3.8545  | 3.6272  | 4.1068  | 3.9735  | 0.9735 | -0.0387 | 0.7116 | 0.1477 |
| Ap2m1  | _TFTQDQIK_2                                                                                 | #N/A                 | 8.3957  | 8.4699  | 8.5220  | 7.7689  | 8.3483  | 8.0730  | 8.4923  | 8.6689  | 8.6898  | 8.1261  | 0.9728 | -0.0398 | 0.2338 | 0.6311 |
| Ap2m1  | _ESGISAELELPTNDK_2                                                                          | #N/A                 | 7.7178  | 7.4537  | 7.4065  | 7.1528  | 6.6008  | 7.3259  | 7.5074  | 7.3214  | 7.6022  | 7.8565  | 0.9610 | -0.0575 | 0.2015 | 0.6958 |
| Ap2m1  | _VNVHAR_2                                                                                   | #N/A                 | 7.1071  | 7.5914  | 7.3323  | 6.7240  | 7.3875  | 6.9341  | 7.4890  | 7.4923  | 7.5030  | 7.1320  | 0.9697 | -0.0445 | 0.2424 | 0.6155 |
| Ap2m1  | _DILPFR_2                                                                                   | #N/A                 | 6.5005  | 6.7344  | 6.2128  | 5.9004  | 6.1416  | 6.5475  | 5.4111  | 7.0718  | 6.8024  | 6.8375  | 0.9707 | -0.0429 | 0.5866 | 0.2316 |
| Ap2m1  | _VYRQDGR_2                                                                                  | #N/A                 | 5.6183  | 6.3812  | 6.3459  | 5.4532  | 5.7783  | 5.3488  | 5.4338  | 5.9408  | 5.8208  | 6.0037  | 1.0036 | 0.0053  | 0.9343 | 0.0295 |
| Ap2m1  | _TSFFHWK_2                                                                                  | #N/A                 | 5.6224  | 5.9091  | 6.1572  | 5.5644  | 5.5746  | 5.1047  | 5.8405  | 5.2493  | 5.9202  | 5.3393  | 0.9688 | -0.0457 | 0.4610 | 0.3363 |
| Ap2m1  | _M[Oxidation (M)]IGGLFYHWK_2                                                                | #N/A                 | 5.6185  | 5.9645  | 6.5914  | 5.3240  | 5.1332  | 5.5145  | 5.4923  | 6.6554  | 5.8657  | 3.4376  | 1.0612 | 0.0857  | 0.6019 | 0.2205 |
| Ap2m1  | _ASENAVWVK_2                                                                                | #N/A                 | 6.2875  | 5.4010  | 6.0287  | 5.6853  | 4.6190  | 5.8773  | 4.9458  | 5.9702  | 6.0785  | 5.2546  | 1.0157 | 0.0225  | 0.8192 | 0.0866 |
| Ap2m1  | _SNWLAALVTK_2                                                                               | #N/A                 | 3.0177  | 5.7448  | 5.7346  | 5.7495  | 4.4207  | 4.8873  | 5.4904  | 6.3404  | 5.7748  | 5.7965  | 0.8419 | -0.2482 | 0.1445 | 0.8401 |
| Ap2m1  | _S[Phospho (STY)]PVNTAR_2                                                                   | P84091_S45_M1_Ap2m1  | 7.4240  | 6.9340  | 5.1986  | 6.9981  | 5.6812  | 6.8861  | 7.2890  | 7.3278  | 7.3097  | 7.2044  | 0.8953 | -0.1595 | 0.1253 | 0.9019 |
| Ap2m1  | _SGIVETR_2                                                                                  | #N/A                 | 5.2114  | 4.2784  | 3.5669  | 6.6115  | 4.8004  | 3.6477  | 3.2589  | 5.5140  | 4.3538  | 4.7501  | 0.9739 | -0.0381 | 0.8211 | 0.0856 |
| Ap2m1  | _QSAIDDC[Carbamidomethyl (C)]TTHQC[Carbamidomethyl (C)]VR_3                                 | #N/A                 | 5.5293  | 5.0378  | 5.7178  | 5.3734  | 5.2398  | 4.9191  | 5.5106  | 5.4140  | 5.0896  | 4.9947  | 1.0096 | 0.0138  | 0.7878 | 0.1036 |
| Ap2m1  | _LNYSDHGVK_2                                                                                | #N/A                 | 6.4330  | 6.0905  | 6.3572  | 6.4001  | 6.0641  | 5.9062  | 6.7421  | 6.3498  | 6.2511  | 6.2328  | 0.9724 | -0.0404 | 0.2421 | 0.6159 |
| Ap2m1  | _LS[Phospho (STY)]KFDSER_2                                                                  | P84091_S255_M1_Ap2m1 | 3.7938  | 3.0492  | 3.5275  | 3.8656  | 2.9375  | 3.6871  | 3.5802  | 3.9299  | 4.2290  | 4.2494  | 0.8698 | -0.2012 | 0.0584 | 1.2336 |
| Ap2m1  | _EEQSQTQSGVIGIGWR_2                                                                         | #N/A                 | 3.1119  | 3.9171  | 3.7987  | 4.2036  | 3.7384  | 3.9911  | 4.3519  | 3.8172  | 3.4657  | 4.2683  | 0.9541 | -0.0677 | 0.4870 | 0.3164 |
| Rhog   | _EVIPTVDFMYSQAQSAVDGR_2                                                                     | #N/A                 | 4.9575  | 4.1735  | 3.9170  | 3.4608  | 3.3271  | 3.2975  | 3.6091  | 5.3063  | 5.2333  | 4.7352  | 0.8167 | -0.2921 | 0.0913 | 1.0393 |
| Rhog   | _YLEC[Carbamidomethyl (C)]SALQQDGVK_2                                                       | #N/A                 | 4.0475  | 4.6589  | 3.2335  | 3.7361  | 3.1732  | 3.0555  | 3.4508  | 4.4239  | 4.0309  | 3.7031  | 0.9356 | -0.0961 | 0.5031 | 0.2983 |
| Rpl19  | _VWLDPNETNEANANSR_2                                                                         | #N/A                 | 8.3392  | 8.4149  | 9.0553  | 8.9169  | 7.8401  | 8.2685  | 8.7383  | 8.3946  | 8.3049  | 8.1892  | 1.0078 | 0.0112  | 0.7966 | 0.0988 |
| Rpl19  | _LDAQEAR_2                                                                                  | #N/A                 | 6.7388  | 6.7088  | 6.9042  | 6.6363  | 7.1688  | 6.7047  | 6.8136  | 7.3431  | 7.1431  | 6.8875  | 0.9664 | -0.0493 | 0.1272 | 0.8954 |
| Rpl19  | _TLS[Phospho (STY)]KEETTK_2                                                                 | P84099_S189_M1_Rpl19 | 4.5862  | 5.2723  | 4.8916  | 5.9064  | 3.4923  | 4.4765  | 5.0120  | 5.8815  | 3.6742  | 3.3033  | 1.0678 | 0.0947  | 0.6427 | 0.1920 |
| Srf3   | _S[Phospho (STY)]RS[Phospho (STY)]LS[Phospho (STY)]RDR_2                                    | P84104_S126_M3_Srf3  | 6.6095  | 6.4426  | 6.2585  | 6.8681  | 6.4553  | 6.4511  | 6.8447  | 6.5000  | 7.2367  | 5.7566  | 0.9893 | -0.0155 | 0.8010 | 0.0964 |
| Srf3   | _RRS[Phospho (STY)]PPPR_2                                                                   | P84104_S108_M1_Srf3  | 8.4872  | 4.3034  | 8.2216  | 7.9564  | 8.9688  | 5.2343  | 8.5541  | 8.2836  | 6.4240  | 6.5731  | 0.8976 | -0.1558 | 0.4677 | 0.3300 |
| Srf3   | _NPPGFAPVEFEDPDADAIVR_3                                                                     | #N/A                 | 4.8448  | 5.3047  | 3.7387  | 3.6809  | 4.3254  | 3.4684  | 3.8292  | 5.3257  | 4.7624  | 3.3981  | 0.9765 | -0.0343 | 0.8464 | 0.0724 |
| Srf3   | _NPPGFAPVEFEDPR_2                                                                           | #N/A                 | 5.4558  | 4.1181  | 4.5963  | 4.1401  | 3.6520  | 4.1191  | 5.8538  | 4.6027  | 6.0424  | 3.8174  | 0.8558 | -0.2246 | 0.1997 | 0.6995 |
| Srf3   | _ERS[Phospho (STY)]LS[Phospho (STY)]RRR_2                                                   | #N/A                 | 8.6393  | 8.5292  | 9.0176  | 8.6267  | 8.8406  | 8.6730  | 8.9069  | 8.6433  | 8.8904  | 8.2540  | 1.0055 | 0.0079  | 0.7609 | 0.1187 |
| Srf3   | _VYVNGLGNGNWK_2                                                                             | #N/A                 | 6.6399  | 6.9559  | 3.7018  | 7.5844  | 6.7096  | 3.5127  | 5.1517  | 7.5668  | 6.8850  | 4.4237  | 0.9740 | -0.0380 | 0.8879 | 0.0516 |
| Srf3   | _NHRPS[Phospho (STY)]RS[Phospho (STY)]FSR_3                                                 | P84104_S148_M2_Srf3  | 3.2882  | 4.0445  | 4.5227  | 4.0665  | 3.9328  | 4.1927  | 4.2147  | 2.5614  | 3.2338  | 3.7437  | 1.1656 | 0.2211  | 0.1411 | 0.8505 |
| Srf3   | Acetyl (Protein N-term)MHRDS[Phospho (STY)]C[Carbamidomethyl (C)]PLDC[Carbamidomethyl (C)]K | P84104_S5_M1_Srf3    | 3.5471  | 4.3034  | 3.2808  | 4.1122  | 4.1917  | 3.9337  | 3.8269  | 4.0063  | 3.6548  | 4.0792  | 1.0008 | 0.0011  | 0.9892 | 0.0047 |
| Adcy5  | _SVS[Phospho (STY)]PGVAAQTAASPAPR_2                                                         | P84309_S8_M1_Adcy5   | 10.3167 | 3.4352  | 11.1911 | 10.6721 | 8.9865  | 10.0591 | 11.0561 | 11.0475 | 10.4680 | 10.0916 | 0.8541 | -0.2274 | 0.3237 | 0.4899 |
| Adcy5  | _SGGAVT[Phospho (STY)]PQQQQR_2                                                              | P84309_T62_M1_Adcy5  | 5.9291  | 6.3853  | 4.3901  | 5.9118  | 3.8002  | 3.7214  | 6.5707  | 6.5263  | 5.9019  | 5       |        |         |        |        |



|         |                                                                        |                       |         |         |         |         |         |         |         |         |         |         |        |         |        |        |
|---------|------------------------------------------------------------------------|-----------------------|---------|---------|---------|---------|---------|---------|---------|---------|---------|---------|--------|---------|--------|--------|
| Nptn    | _AEDSGEYHC[Carbamidomethyl (C)]VYHVSAPK_3                              | #N/A                  | 5.9644  | 5.4345  | 6.0454  | 6.0513  | 5.0301  | 5.6688  | 5.8621  | 5.1214  | 4.9355  | 5.6842  | 1.0552 | 0.0776  | 0.3047 | 0.5161 |
| Nptn    | _SENKNEGQDAMMY[Carbamidomethyl (C)]K_3                                 | #N/A                  | 3.6567  | 3.7218  | 4.1473  | 3.6911  | 3.5842  | 3.7552  | 3.8393  | 3.4132  | 3.7123  | 4.1123  | 0.9974 | -0.0038 | 0.9501 | 0.0222 |
| Corp1   | _C[Carbamidomethyl (C)]SQAVYAEK_2                                      | #N/A                  | 5.3390  | 5.7785  | 6.2446  | 5.7467  | 6.3787  | 6.1567  | 5.3999  | 5.4657  | 6.3882  | 5.7649  | 1.0328 | 0.0466  | 0.4979 | 0.3029 |
| Corp1   | _GFGGSGAGALVHSE_2                                                      | #N/A                  | 5.6531  | 7.6343  | 8.3799  | 8.9900  | 8.1916  | 7.8389  | 8.0093  | 8.2256  | 7.9519  | 7.6454  | 0.9789 | -0.3008 | 0.7839 | 0.1058 |
| Corp1   | _GYVGSGAGTLSTDKGESGLK_3                                                | #N/A                  | 6.2955  | 5.7805  | 4.3742  | 6.6688  | 6.7377  | 5.7939  | 5.4191  | 5.4024  | 5.3531  | 5.9255  | 1.0711 | 0.0990  | 0.4124 | 0.3846 |
| Corp1   | _TVYFAEEVQC[Carbamidomethyl (C)]GNSFHK_2                               | #N/A                  | 4.5844  | 5.0899  | 6.1948  | 6.0023  | 4.4915  | 5.5529  | 4.4546  | 3.3794  | 4.8128  | 5.0179  | 1.2045 | 0.2684  | 0.0883 | 1.0538 |
| Corp1   | _HEEAPGHRPTTNPNASK_4                                                   | #N/A                  | 3.5713  | 4.1249  | 3.8651  | 4.0588  | 9.4329  | 3.7358  | 3.9525  | 3.8147  | 3.7728  | 3.6763  | 1.2613 | 0.3349  | 0.4180 | 0.3788 |
| Cdh6    | _LADMYGGM[Oxidation (M)]DS[Phospho (STY)]DKDS_2                        | #N/A                  | 3.6434  | 3.9002  | 3.9225  | 7.4131  | 3.3325  | 3.8893  | 4.7431  | 3.6660  | 3.9651  | 4.3980  | 1.0375 | 0.0531  | 0.8486 | 0.0713 |
| Rps3a   | _LITEDVGK_2                                                            | #N/A                  | 6.8254  | 6.5966  | 7.2708  | 6.5292  | 7.0940  | 6.8560  | 6.3066  | 6.8414  | 6.8056  | 6.9517  | 1.0202 | 0.0288  | 0.4819 | 0.3170 |
| Rps3a   | _TTDGYLLR_2                                                            | #N/A                  | 6.8193  | 6.6185  | 6.5966  | 6.4348  | 6.8753  | 6.3128  | 6.1297  | 6.9562  | 6.6270  | 6.2218  | 1.0194 | 0.0277  | 0.5197 | 0.2843 |
| Rps3a   | _ADGVPEPPVQS[Phospho (STY)]V_2                                         | P97351_S263_M1_Rps3a  | 8.8876  | 8.9429  | 9.3235  | 9.2188  | 8.4831  | 9.0681  | 9.3791  | 9.0281  | 9.0557  | 9.0162  | 0.9855 | -0.0211 | 0.4483 | 0.3485 |
| Rps3a   | _VEFVSLADLQNDVAFR_2                                                    | #N/A                  | 4.9033  | 4.2748  | 5.7075  | 3.5474  | 4.0055  | 5.4586  | 5.6467  | 4.3409  | 4.3298  | 4.5990  | 0.9832 | -0.0245 | 0.8772 | 0.0569 |
| Rps3a   | _KDWYDVK_2                                                             | #N/A                  | 4.0606  | 3.4643  | 3.3459  | 3.1556  | 4.1550  | 4.6459  | 2.3100  | 4.2699  | 4.1447  | 4.1983  | 1.0198 | 0.0283  | 0.8805 | 0.0553 |
| Rps3a   | _EVQTNDLKEVNVK_3                                                       | #N/A                  | 3.6453  | 3.6971  | 3.3790  | 4.4236  | 3.5184  | 4.2111  | 3.0710  | 4.0784  | 4.3775  | 4.1009  | 0.9758 | -0.0353 | 0.7676 | 0.1149 |
| Rps3a   | _LIPDSGKDEK_3                                                          | #N/A                  | 4.1371  | 3.4414  | 3.6346  | 3.1784  | 3.2628  | 2.9659  | 3.3267  | 3.8228  | 4.1218  | 4.3565  | 0.8796 | -0.1850 | 0.1243 | 0.9054 |
| S100a13 | _KGS[Phospho (STY)]LNNEFK_2                                            | P97352_S32_M1_S100a13 | 4.9357  | 4.5363  | 4.3864  | 4.8352  | 4.5552  | 4.2928  | 5.1479  | 5.4125  | 5.1614  | 5.2923  | 0.8737 | -0.1947 | 0.0013 | 2.8925 |
| Evi5    | _SDS[Phospho (STY)]NQYIR_2                                             | P97366_S689_M1_Evi5   | 3.9598  | 3.2641  | 3.1457  | 5.1558  | 3.0855  | 3.1432  | 3.5040  | 2.9692  | 4.1187  | 3.6154  | 1.0208 | 0.0297  | 0.8755 | 0.0577 |
| Atp1b3  | _LFYNPSSGFLGR_2                                                        | #N/A                  | 6.4226  | 6.1588  | 6.2511  | 5.9860  | 6.4983  | 5.6751  | 6.7331  | 6.1479  | 6.0010  | 5.9058  | 0.9949 | -0.0074 | 0.8854 | 0.0528 |
| Atp1b3  | _FDSGLNKK_2                                                            | #N/A                  | 5.3913  | 4.6363  | 5.2652  | 3.8965  | 4.9268  | 4.3627  | 4.0447  | 3.1047  | 3.4038  | 5.1097  | 1.2122 | 0.2776  | 0.1048 | 0.8795 |
| G3bp2   | _SAT[Phospho (STY)]PPAEPASLQPEPPK_2                                    | P97379_T227_M1_G3bp2  | 14.8380 | 14.8317 | 15.4274 | 15.3906 | 14.5841 | 14.8766 | 15.3707 | 14.6729 | 14.8250 | 15.0148 | 1.0014 | 0.0020  | 0.9246 | 0.0340 |
| G3bp2   | _LPNFGVVFDQSPVQR_2                                                     | #N/A                  | 3.0562  | 3.6431  | 4.4085  | 4.2551  | 5.0201  | 4.3201  | 4.4056  | 3.5883  | 3.4484  | 3.9453  | 1.0703 | 0.0980  | 0.5034 | 0.2980 |
| G3bp2   | _VDAPKEVQSPQR_3                                                        | #N/A                  | 4.7601  | 4.1426  | 3.9245  | 3.7827  | 3.5156  | 3.8652  | 4.1419  | 3.6913  | 3.9325  | 5.3604  | 1.0054 | 0.0077  | 0.9990 | 0.0182 |
| G3bp2   | _HLEELEKS[Phospho (STY)]AT[Phospho (STY)]PPPAEPASLQPEPPK_3             | P97379_S225_M2_G3bp2  | 3.9345  | 3.1899  | 3.6682  | 6.8077  | 3.0782  | 3.5464  | 3.3602  | 4.7874  | 4.0883  | 4.3900  | 0.9714 | -0.0419 | 0.8778 | 0.0566 |
| G3bp2   | _GDMEQNDSDNR_2                                                         | #N/A                  | 3.1933  | 3.9496  | 4.4278  | 4.4660  | 3.8379  | 4.2876  | 4.1807  | 3.0296  | 3.3010  | 3.6489  | 1.1376 | 0.1859  | 0.1600 | 0.7958 |
| Anxa11  | _DVGVEYAAGENR_2                                                        | #N/A                  | 7.5435  | 7.4900  | 8.3730  | 7.7436  | 7.2092  | 7.2014  | 8.2198  | 7.7658  | 7.3206  | 7.8304  | 0.9755 | -0.0358 | 0.4927 | 0.3074 |
| Anxa11  | _SDTSGHFQR_2                                                           | #N/A                  | 5.1052  | 4.3769  | 4.2585  | 3.2603  | 4.1982  | 3.5313  | 4.4758  | 4.5835  | 3.2273  | 1.0539  | 0.0757 | 0.6437  | 0.1913 | 0.2362 |
| Arhgap5 | _GSEEDPLS[Phospho (STY)]PVETWK_2                                       | #N/A                  | 4.2078  | 3.1346  | 3.9415  | 7.0316  | 3.3515  | 6.1910  | 7.3110  | 7.1896  | 6.6769  | 3.1625  | 0.7830 | -0.3902 | 0.2362 | 0.1868 |
| Arhgap5 | _HGDNDPAITS[Phospho (STY)]DGEVDOKK_2                                   | #N/A                  | 3.8343  | 3.9181  | 3.7997  | 3.5230  | 4.9239  | 3.3382  | 3.9575  | 3.9437  | 3.5923  | 3.4900  | 1.0384 | 0.0543  | 0.6414 | 0.1928 |
| Arhgap5 | _HRGSEEDPLS[Phospho (STY)]PVETWK_3                                     | #N/A                  | 3.9653  | 4.0904  | 3.5705  | 6.3653  | 4.4724  | 4.4180  | 4.5646  | 6.6674  | 4.3105  | 4.5604  | 0.8939 | -0.1619 | 0.4469 | 0.3498 |
| Lys1    | _QPEFFS[Phospho (STY)]PR_2                                             | P97412_S375_M1_Lys1   | 7.2544  | 7.0248  | 6.9011  | 6.1864  | 4.7317  | 6.5257  | 7.8254  | 7.8448  | 7.2057  | 6.8299  | 0.8668 | -0.2062 | 0.0872 | 1.0597 |
| Lys1    | _RM[Oxidation (M)]S[Phospho (STY)]QEHPSQAEALQIR_3                      | P97412_S2614_M1_Lys1  | 3.9309  | 3.2952  | 4.6709  | 3.6196  | 3.1835  | 3.4411  | 4.3173  | 4.2625  | 4.6356  | 3.0485  | 0.9076 | -0.1399 | 0.3666 | 0.4358 |
| Lys1    | _STANHDSFS[Phospho (STY)]PVHS[Phospho (STY)]PSAHR_3                    | P97412_S2560_M2_Lys1  | 5.0107  | 4.4077  | 5.6413  | 4.5011  | 3.9382  | 4.5698  | 5.1304  | 5.5657  | 3.2660  | 4.6776  | 1.0039 | 0.0056  | 0.9715 | 0.1725 |
| Lys1    | _MFLAYQDQ2S[Phospho (STY)]FDIPDR_2                                     | P97412_S3251_M1_Lys1  | 2.9531  | 3.7583  | 3.6399  | 4.3624  | 3.5796  | 4.1499  | 4.5107  | 4.1396  | 4.4386  | 4.1095  | 0.8700 | -0.2010 | 0.0669 | 0.1145 |
| Cmp1    | _KS[Phospho (STY)]PHITSOR_2                                            | #N/A                  | 8.6119  | 8.8417  | 9.3180  | 9.4027  | 8.5119  | 8.9697  | 9.0498  | 8.7448  | 8.6242  | 9.0249  | 1.0092 | 0.0132  | 0.6977 | 0.1563 |
| Cmp1    | _DNFTLPEGVNGIEER_2                                                     | #N/A                  | 10.0419 | 9.9002  | 10.1663 | 10.3808 | 10.0443 | 9.9851  | 10.1105 | 9.7609  | 9.8883  | 9.8815  | 1.0178 | 0.0254  | 0.1270 | 0.8961 |
| Cmp1    | _VFLGHSVSR_2                                                           | #N/A                  | 7.8248  | 8.3976  | 8.2212  | 8.9511  | 7.7667  | 7.7258  | 8.4327  | 8.2196  | 7.9487  | 7.8657  | 1.0038 | 0.0055  | 0.9091 | 0.0414 |
| Cmp1    | _SAADIALAR_2                                                           | #N/A                  | 8.9830  | 9.3385  | 9.3868  | 9.0428  | 8.9738  | 9.1572  | 9.1324  | 9.1599  | 9.0680  | 9.2636  | 0.9990 | -0.0014 | 0.9288 | 0.0321 |
| Cmp1    | _IFNLVPR_2                                                             | #N/A                  | 8.9095  | 8.5427  | 8.9871  | 8.6553  | 8.9967  | 8.9311  | 8.7333  | 8.6026  | 8.7038  | 8.9358  | 1.0107 | 0.0153  | 0.4291 | 0.3674 |
| Cmp1    | _INC[Carbamidomethyl (C)]PVITK_2                                       | #N/A                  | 8.2983  | 8.2963  | 8.2704  | 8.5713  | 8.8304  | 8.1394  | 8.4496  | 8.2884  | 8.3890  | 8.3330  | 1.0043 | 0.0062  | 0.7920 | 0.1013 |
| Cmp1    | _VFEDGNSVSK_2                                                          | #N/A                  | 7.4210  | 7.3470  | 7.6143  | 7.9310  | 7.7468  | 7.5616  | 7.5495  | 7.4022  | 7.6793  | 7.7790  | 1.0001 | 0.0002  | 0.9934 | 0.0029 |
| Cmp1    | _KPPHELYQR_3                                                           | #N/A                  | 7.5081  | 7.7294  | 7.4081  | 7.6836  | 8.0915  | 7.5148  | 6.5489  | 7.3398  | 6.9225  | 7.5119  | 1.0812 | 0.1127  | 0.0263 | 1.5793 |
| Cmp1    | _AALAGGTTM[Oxidation (M)]IHVVPEPGSSLLTSFEK_3                           | #N/A                  | 6.6830  | 6.1168  | 6.6548  | 6.5302  | 6.3306  | 6.2829  | 7.0555  | 6.0698  | 6.1295  | 6.7197  | 0.9907 | -0.0135 | 0.7905 | 0.1021 |
| Cmp1    | _WHEEAADTK_2                                                           | #N/A                  | 5.8814  | 6.0330  | 5.9332  | 6.1030  | 6.6748  | 5.7928  | 6.1668  | 6.1883  | 5.0385  | 5.6245  | 1.0548 | 0.0769  | 0.2747 | 0.5611 |
| Cmp1    | _OLYQM[Oxidation (M)]SDSLYEAFTRLK_2                                    | #N/A                  | 5.1643  | 5.5835  | 7.0603  | 7.4175  | 6.5258  | 6.4438  | 6.3787  | 5.4434  | 5.7549  | 6.0614  | 1.0772 | 0.1073  | 0.3557 | 0.4489 |
| Cmp1    | _IINDQSFYADVLEGLK_2                                                    | #N/A                  | 5.3262  | 5.5569  | 6.6141  | 6.3273  | 5.4317  | 5.8325  | 5.9894  | 5.7590  | 5.2264  | 5.9808  | 1.0190 | 0.0272  | 0.7255 | 0.1394 |
| Cmp1    | _STVEYNIFEGM[Oxidation (M)]EC[Carbamidomethyl (C)]HGSPLVVISQK_3        | #N/A                  | 5.3831  | 5.4664  | 6.3984  | 5.8020  | 5.4519  | 5.9022  | 4.9585  | 5.3064  | 4.9213  | 1.0596  | 0.0835 | 0.3254  | 0.1394 | 0.1394 |
| Cmp1    | _HAAPAS[Phospho (STY)]AK_2                                             | #N/A                  | 10.0159 | 9.7346  | 10.0818 | 10.4110 | 8.2766  | 9.4259  | 9.9768  | 9.8784  | 9.5853  | 10.0219 | 0.9789 | -0.3007 | 0.6106 | 0.2142 |
| Cmp1    | _S[Phospho (STY)]PHITSOR_2                                             | #N/A                  | 14.2992 | 14.3009 | 15.0906 | 14.8861 | 14.0473 | 14.3946 | 14.7031 | 14.1203 | 14.3331 | 14.5331 | 1.0056 | 0.0081  | 0.7307 | 0.1367 |
| Cmp1    | _GM[Oxidation (M)]YDGPVVEVPAT[Phospho (STY)]PK_2                       | #N/A                  | 12.7114 | 12.6104 | 13.3981 | 12.9585 | 12.2048 | 12.7247 | 13.0658 | 12.4666 | 12.7455 | 12.8066 | 0.9998 | -0.0004 | 0.9891 | 0.0047 |
| Cmp1    | _HAAPAPS[Phospho (STY)]AKSS[Phospho (STY)]PSK_2                        | #N/A                  | 6.7999  | 9.0051  | 9.2933  | 9.4507  | 8.1788  | 8.7376  | 9.2542  | 8.9372  | 9.0651  | 8.8554  | 0.9501 | -0.0738 | 0.3983 | 0.3998 |
| Cmp1    | _HAAPAPS[Phospho (STY)]S[Phospho (STY)]PSKHQPPRIR_4                    | #N/A                  | 11.5768 | 11.8135 | 12.6491 | 12.2871 | 11.9154 | 12.0077 | 11.7981 | 11.9232 | 12.0297 | 11.9117 | 1.0106 | 0.0152  | 0.5395 | 0.2680 |
| Cmp1    | _MI[Oxidation (M)]TVVWDK_2                                             | #N/A                  | 4.3034  | 5.2446  | 4.5332  | 4.7928  | 6.2301  | 4.1106  | 4.9244  | 4.2098  | 5.3015  | 6.2221  | 0.9428 | -0.0850 | 0.5828 | 0.2345 |
| Cmp1    | _IVAPPGGRS[Phospho (STY)]NITS[Phospho (STY)]LG_2                       | P97427_S570_M2_Cmp1   | 3.7689  | 3.6857  | 3.8614  | 8.7685  | 3.5370  | 3.7058  | 3.5913  | 3.5888  | 4.0057  | 8.1265  | 0.9433 | -0.0841 | 0.8466 | 0.0723 |
| Cmp1    | _SS[Phospho (STY)]PSKHQPPRIR_2                                         | #N/A                  | 9.6916  | 12.4700 | 13.1203 | 4.2333  | 12.0779 | 12.4437 | 12.8469 | 12.3251 | 3.9098  | 12.2596 | 1.0196 | 0.0280  | 0.9382 | 0.0277 |
| Cmp1    | _LEELVVDK_2                                                            | #N/A                  | 3.2452  | 3.9809  | 3.9320  | 4.4347  | 4.8784  | 4.3850  | 4.4194  | 3.6838  | 5.0467  | 5.5175  | 0.9007 | -0.1508 | 0.3253 | 0.4878 |
| Cmp1    | _GLGAVLVHVENGLUAQEQK_3                                                 | #N/A                  | 4.2261  | 4.3242  | 4.2527  | 3.7965  | 3.7126  | 4.5617  | 3.9448  | 4.4404  | 4.1834  | 4.7355  | 0.9583 | -0.0614 | 0.4236 | 0.3730 |
| Cmp1    | _NHHGSNFSL[Phospho (STY)]GAQIDONNPR_3                                  | #N/A                  | 7.8955  | 7.4499  | 8.0016  | 8.9044  | 6.7004  | 7.3928  | 7.4868  | 7.8614  | 7.3966  | 7.6027  | 1.0181 | 0.0259  | 0.7311 | 0.1360 |
| Cmp1    | _NHHGSNFSLGAGIDONNPRR_4                                                | #N/A                  | 5.2969  | 5.1494  | 6.2132  | 5.7342  | 5.7286  | 5.3832  | 4.6841  | 4.9164  | 4.9713  | 5.2460  | 1.1271 | 0.1726  | 0.0201 | 1.6958 |
| Cmp1    | _HQPPIRR_2                                                             | #N/A                  | 4.1033  | 6.7338  | 3.2892  | 6.4093  | 3.2290  | 3.8359  | 3.5066  | 6.0422  | 3.5469  | 3.7589  | 1.0917 | 0.1266  | 0.6899 | 0.1612 |
| Cmp1    | _IAVGSDADVVWDPKM[Oxidation (M)]K_2                                     | #N/A                  | 4.8236  | 4.7917  | 4.3819  | 4.7862  | 4.5268  | 4.2653  | 4.7379  | 4.9943  | 5.0102  | 5.0734  | 0.9277 | -0.1082 | 0.0295 | 1.5301 |
| Cmp1    | _ILEM[Oxidation (M)]GITGEGHLSRPEELAEAVR_4                              | #N/A                  | 3.8950  | 4.0766  | 3.9659  | 3.6925  | 4.6036  | 4.7018  | 4.1033  | 3.9538  | 4.4719  | 4.8149  | 0.9585 | -0.0612 | 0.5040 | 0.2976 |
| Cmp1    | _Acetyl (Protein N-term)[S]Phospho (STY)HQGXKS[Phospho (STY)]PHITSOR_3 | P97427_S2_M2_Cmp1     | 3.4622  | 4.6786  | 5.2336  | 3.7836  | 4.0976  | 3.8126  | 4.3773  | 4.0752  | 3.0880  | 4.0522  | 1.0718 | 0.1000  | 0.5068 | 0.2951 |
| Mrip    | _SKS[Phospho (STY)]NPDFLK_2                                            | #N/A                  | 4.0339  | 3.2894  | 3.7678  | 5.8282  | 3.1777  | 3.6898  | 5.9672  | 2.9887  |         |         |        |         |        |        |



|         |                                                                                            |                         |        |        |        |        |        |        |         |         |        |        |         |         |        |        |
|---------|--------------------------------------------------------------------------------------------|-------------------------|--------|--------|--------|--------|--------|--------|---------|---------|--------|--------|---------|---------|--------|--------|
| Cacna1a | _KQNLIAS[Phospho (STY)]REALYGDAER_3                                                        | #N/A                    | 3.7753 | 3.3583 | 5.4904 | 3.4639 | 2.9010 | 3.3276 | 3.6884  | 3.8674  | 4.3105 | 3.4309 | 0.9726  | -0.0401 | 0.8352 | 0.0782 |
| Cacna1a | _GADYTEPDS[Phospho (STY)]PREPPGGADHPAPR_3                                                  | P97445_S2303_M1_Cacna1a | 3.5553 | 3.7871 | 6.2297 | 4.3336 | 4.1999 | 3.9256 | 4.4819  | 4.1684  | 2.9666 | 4.0109 | 1.1105  | 0.1512  | 0.4615 | 0.3358 |
| Cacna1a | _GADYTEPDSPREPPGGADHPAPRS[Phospho (STY)]PR_4                                               | P97445_S2318_M1_Cacna1a | 5.7259 | 6.0129 | 6.7287 | 4.2499 | 3.6870 | 4.0425 | 5.7887  | 5.5171  | 4.2169 | 1.0324 | 0.0460  | 0.8480  | 0.0716 |        |
| Cacna1a | _EQQMR[Phospho (STY)]P[M]Oxidation (M)]FOR_3                                               | #N/A                    | 4.5846 | 3.5668 | 4.1870 | 3.9007 | 3.8887 | 3.8625 | 4.0828  | 4.4862  | 3.7242 | 3.7287 | 1.0149  | 0.0213  | 0.8416 | 0.0749 |
| Cacna1a | _GNLSITSDTS[Phospho (STY)]P[M]Oxidation (M)]KR_2                                           | #N/A                    | 3.1500 | 4.1390 | 4.1562 | 6.1362 | 3.7943 | 5.6168 | 4.0662  | 3.5017  | 3.4099 | 5.7664 | 1.0747  | 0.1039  | 0.6774 | 0.1692 |
| Cacna1a | _QSSSVSGS[Phospho (STY)]PAPSTGSGTSPR_3                                                     | P97445_S2220_M1_Cacna1a | 3.6902 | 3.5436 | 4.3770 | 3.5781 | 3.8321 | 3.4159 | 3.9775  | 3.2464  | 3.7813 | 3.3458 | 1.0423  | 0.0598  | 0.5147 | 0.2885 |
| Cacna1a | _AS[Phospho (STY)]IKS[Phospho (STY)]AKLENTFFHK_3                                           | P97445_S459_M2_Cacna1a  | 3.3063 | 3.9199 | 3.9931 | 3.8381 | 3.8082 | 4.3172 | 4.2104  | 2.5221  | 3.2713 | 2.9619 | 1.1920  | 0.2534  | 0.0950 | 1.0223 |
| Cacna1a | _EVAEVS[Phospho (STY)]PLS[Phospho (STY)]AANM[Oxidation (M)]SIAVK_3                         | #N/A                    | 3.2675 | 4.2497 | 3.7561 | 4.4007 | 3.9334 | 6.1792 | 4.1000  | 7.0506  | 3.2221 | 3.8666 | 0.9498  | -0.0742 | 0.7991 | 0.0974 |
| Cacna1a | _RMAGAAPPGGS[Phospho (STY)]PR_2                                                            | #N/A                    | 3.8519 | 3.1563 | 4.5387 | 3.4636 | 2.9776 | 4.9634 | 3.5971  | 3.5376  | 3.8366 | 3.1409 | 1.0842  | 0.1167  | 0.4871 | 0.3035 |
| Cacna1a | _AKEVAEVS[Phospho (STY)]PLS[Phospho (STY)]AANM[Oxidation (M)]SIAVK_3                       | #N/A                    | 3.6259 | 3.6647 | 3.9330 | 3.9374 | 3.8698 | 3.6019 | 3.9530  | 3.4668  | 3.8467 | 3.7194 | 0.9498  | -0.0743 | 0.1837 | 0.7360 |
| Cacna1a | _WSRS[Phospho (STY)]PS[Phospho (STY)]EGREHTHR_4                                            | P97445_S2200_M2_Cacna1a | 2.9968 | 4.2294 | 3.6836 | 4.1863 | 4.1177 | 4.0078 | 3.9010  | 3.9322  | 3.5808 | 4.1533 | 0.9945  | -0.0080 | 0.9354 | 0.0290 |
| Cacna1a | _EM[Oxidation (M)]GTGDSQSEHY[Phospho (STY)]LPMEGQTR_3                                      | P97445_Y2033_M1_Cacna1a | 3.7055 | 3.5207 | 4.3923 | 3.3941 | 2.8312 | 3.2157 | 3.1088  | 3.2235  | 4.3729 | 3.3611 | 0.9981  | -0.0027 | 0.9853 | 0.0064 |
| Atp5pf  | _FEVDKPS_2                                                                                 | #N/A                    | 6.1936 | 6.0072 | 6.6729 | 6.7163 | 7.7624 | 6.1921 | 6.3930  | 6.1423  | 6.4912 | 6.2403 | 1.0434  | 0.0613  | 0.4339 | 0.3626 |
| Atp5pf  | _QASGGPVDIGPEYQQDLRLKY_3                                                                   | #N/A                    | 6.0705 | 6.8553 | 7.2927 | 7.4237 | 7.9512 | 6.8592 | 6.5075  | 6.3926  | 6.9844 | 6.5748 | 1.0696  | 0.0971  | 0.2144 | 0.6688 |
| Atp5pf  | _QASGGPVDIGPEYQQDLDR_2                                                                     | #N/A                    | 5.0203 | 4.9888 | 4.5141 | 5.7958 | 6.0435 | 4.6408 | 4.8999  | 5.0015  | 4.6560 | 5.3224 | 1.0397  | 0.0562  | 0.5717 | 0.2428 |
| Atp5pf  | _GEM[Oxidation (M)]DTPPTFK_2                                                               | #N/A                    | 7.4315 | 7.9780 | 8.1582 | 8.2560 | 8.7849 | 8.1845 | 7.9675  | 8.0191  | 8.1709 | 7.9371 | 1.0135  | 0.0194  | 0.6458 | 0.1899 |
| Atp5pf  | _FDDPKFEVDKPKQS_2                                                                          | #N/A                    | 7.9029 | 7.9254 | 8.4286 | 8.0642 | 8.6228 | 8.7470 | 8.2561  | 7.7654  | 8.2228 | 8.0866 | 1.0190  | 0.0272  | 0.4215 | 0.3752 |
| Rps5    | _VNQAIIWL[C]Carbamidomethyl (C)]TGAR_2                                                     | #N/A                    | 5.3864 | 4.7983 | 4.9606 | 5.4712 | 4.5706 | 4.7963 | 5.5903  | 5.1994  | 5.4712 | 4.7201 | 0.9366  | -0.0944 | 0.2511 | 0.6002 |
| Rps5    | _GSSNSYAIK_2                                                                               | #N/A                    | 4.8613 | 4.2097 | 3.9882 | 4.0117 | 5.0618 | 3.6467 | 4.2477  | 4.3784  | 4.4943 | 4.2234 | 0.9909  | -0.0132 | 0.8935 | 0.0489 |
| Rps5    | _WSTDQVNDQSLQDYIAVK_2                                                                      | #N/A                    | 0.1554 | 2.5670 | 3.0085 | 3.0074 | 3.2917 | 3.8322 | 3.1128  | 2.2188  | 3.3841 | 2.4721 | 0.9452  | -0.0813 | 0.8302 | 0.0808 |
| Rgs14   | _PLRPGSHLGS[Phospho (STY)]POTAR_3                                                          | #N/A                    | 8.8084 | 8.8254 | 8.8120 | 9.4253 | 8.0331 | 8.7291 | 8.8924  | 8.8669  | 8.7772 | 8.7301 | 0.9950  | -0.0073 | 0.8505 | 0.0703 |
| Rgs14   | _EPGSHLGS[Phospho (STY)]POTAR_2                                                            | #N/A                    | 9.0755 | 8.4235 | 4.0491 | 9.3059 | 7.9754 | 8.8346 | 8.9990  | 8.8783  | 8.6755 | 8.8985 | -0.1545 | 0.3977  | 0.4204 |        |
| Rgs14   | _S[Phospho (STY)]LGSSESESRPK_2                                                             | #N/A                    | 8.5244 | 8.8587 | 8.8862 | 9.2925 | 8.4331 | 8.9270 | 8.9733  | 8.8250  | 8.7418 | 8.9705 | 0.9935  | -0.0094 | 0.7356 | 0.1334 |
| Rgs14   | _S[Phospho (STY)]LPLVEELGQLAEGPC[Carbamidomethyl (C)]GR_2                                  | #N/A                    | 3.9897 | 5.8513 | 5.3905 | 7.2271 | 3.7852 | 3.9197 | 4.6194  | 5.6942  | 5.3317 | 4.4768 | 0.9993  | -0.0009 | 0.9966 | 0.0005 |
| Rgs14   | _SPLYGEC[Carbamidomethyl (C)]LAELAEGLRPLEPGSSHLGS[Phospho (STY)]POTAR_4                    | #N/A                    | 3.7574 | 3.0618 | 4.4442 | 3.5581 | 2.8831 | 3.3455 | 3.7063  | 3.1716  | 3.7422 | 3.4131 | 1.0000  | 0.0000  | 0.9998 | 0.0011 |
| Rgs14   | _GLS[Phospho (STY)]LDDIK_4                                                                 | P97492_S339_M1_Rgs14    | 3.5717 | 3.0149 | 4.1224 | 3.2707 | 2.3612 | 1.8027 | 4.4862  | 3.3470  | 3.2678 | 3.7109 | 0.8166  | -0.2923 | 0.1951 | 0.7098 |
| Rgs14   | _S[Phospho (STY)]LGSSESESR_2                                                               | #N/A                    | 5.9181 | 5.4897 | 5.5576 | 6.8144 | 5.7326 | 5.8235 | 5.7888  | 5.3794  | 5.9152 | 5.7664 | 1.0310  | 0.0440  | 0.5184 | 0.2583 |
| Gdc     | _LLSGSGS[Phospho (STY)]PLSWEETQR_2                                                         | P97494_S8_M1_Gdc        | 6.0143 | 6.0788 | 6.4694 | 6.4479 | 5.0487 | 4.3155 | 3.1754  | 6.1569  | 6.0392 | 3.9439 | 1.1864  | 0.2466  | 0.2576 | 0.5890 |
| Smarcc1 | _RKPS[Phospho (STY)]PS[Phospho (STY)]PPPTTATESR_3                                          | #N/A                    | 7.4468 | 7.2225 | 7.4477 | 7.8685 | 7.3010 | 7.3467 | 7.5328  | 7.4219  | 7.7388 | 0.9940 | -0.0087 | 0.7600  | 0.1192 |        |
| Smarcc1 | _NEEPVRS[Phospho (STY)]PERR_2                                                              | #N/A                    | 4.1469 | 3.5952 | 4.1745 | 3.4771 | 3.3231 | 3.7138 | 3.9347  | 3.7726  | 4.2718 | 4.0232 | 0.9345  | -0.0978 | 0.2212 | 0.6553 |
| Myt1l   | _LEQLS[Phospho (STY)]PR_2                                                                  | P97500_S391_M1_Myt1l    | 8.1676 | 8.2189 | 8.4195 | 8.5354 | 7.7626 | 8.0218 | 8.6754  | 8.1994  | 8.4718 | 8.1315 | 0.9783  | -0.0317 | 0.3235 | 0.2064 |
| Myt1l   | _KLS[Phospho (STY)]ETNPQDR_2                                                               | P97500_S343_M1_Myt1l    | 3.5063 | 3.8361 | 3.2400 | 4.2846 | 4.1508 | 4.0720 | 4.9809  | 4.2175  | 3.0157 | 3.9618 | 0.9516  | -0.0715 | 0.6217 | 0.2064 |
| Myt1l   | M[Oxidation (M)]VEES[Phospho (STY)]DEVC[Carbamidomethyl (C)]LSLCC[Carbamidomethyl (C)]LR_4 | P97500_S319_M1_Myt1l    | 3.3875 | 4.1926 | 4.0743 | 4.5769 | 4.0140 | 3.7155 | 4.2916  | 3.1902  | 3.0431 | 1.9356 | 1.1835  | 0.1835  | 0.1543 | 0.7167 |
| Grm1    | _SAFTS[Phospho (STY)]DVMR_2                                                                | P97772_S853_M1_Grm1     | 7.0892 | 7.4162 | 7.4082 | 3.4277 | 5.9818 | 7.0120 | 7.1058  | 6.9809  | 7.5574 | 7.0912 | 0.8894  | -0.1691 | 0.3462 | 0.4607 |
| Mill11  | _APIASHS[Phospho (STY)]VOLDLI_2                                                            | P97783_S84_M1_Mill11    | 3.7107 | 3.7389 | 5.9601 | 3.9199 | 3.6471 | 3.5852 | 3.7907  | 3.7335  | 3.7861 | 3.7988 | 1.0994  | 0.1368  | 0.4376 | 0.3589 |
| Cxdr    | _APQS[Phospho (STY)]PTLAPAK_2                                                              | #N/A                    | 7.1780 | 9.7065 | 9.9951 | 9.9510 | 8.8089 | 9.5039 | 10.1260 | 10.0116 | 7.9240 | 9.7069 | 0.9734  | -0.0390 | 0.7221 | 0.1414 |
| Cxdr    | _TQYNQVPSDEFERAPQS[Phospho (STY)]PTLAPAK_3                                                 | #N/A                    | 5.5837 | 3.8796 | 7.5412 | 7.0155 | 3.3325 | 5.8935 | 6.2758  | 6.4245  | 6.0885 | 5.0612 | 0.9293  | -0.1058 | 0.6470 | 0.1891 |
| Sirpa   | _LHDOQPAIR_2                                                                               | #N/A                    | 8.1015 | 7.4811 | 7.2810 | 7.4365 | 7.9494 | 7.7932 | 7.4261  | 7.8926  | 7.6302 | 7.8059 | 0.9981  | -0.0028 | 0.9373 | 0.0281 |
| Sirpa   | _LHPSAGEVPR_2                                                                              | #N/A                    | 6.0071 | 5.5216 | 5.8974 | 5.6295 | 5.2460 | 5.6036 | 5.5388  | 4.9704  | 5.3420 | 6.0228 | 1.0338  | 0.0480  | 0.4291 | 0.3675 |
| Sirpa   | _SPPEVSGPADR_2                                                                             | #N/A                    | 9.2522 | 8.9691 | 8.5954 | 9.1867 | 8.9974 | 8.9692 | 9.2208  | 9.0630  | 8.9284 | 9.2284 | 0.9874  | -0.0184 | 0.4022 | 0.3956 |
| Sirpa   | _NNM[Oxidation (M)]DPSR_3                                                                  | #N/A                    | 6.8115 | 6.8394 | 7.0675 | 6.8074 | 6.8961 | 6.7928 | 7.0848  | 7.1949  | 6.7954 | 6.9644 | 0.9799  | -0.0293 | 0.1402 | 0.8533 |
| Sirpa   | _GSTS[Phospho (STY)]TRLHEPEK_3                                                             | P97797_S409_M1_Sirpa    | 3.4189 | 5.6500 | 3.5652 | 4.3564 | 6.8473 | 3.5511 | 3.9743  | 5.9004  | 1.0727 | 0.1013 | 0.7015  | 0.1540  |        |        |
| Sirpa   | _DGGELHPLETVNPSGK_3                                                                        | #N/A                    | 4.7331 | 3.9020 | 3.8234 | 3.7523 | 3.2749 | 4.3789 | 3.8897  | 4.0748  | 3.7022 | 3.8178 | 1.0275  | 0.0391  | 0.7020 | 0.1537 |
| Sirpa   | _VIC[Carbamidomethyl (C)]EVAHITLDR_2                                                       | #N/A                    | 5.0645 | 4.2052 | 4.9213 | 3.8428 | 3.2122 | 4.0493 | 4.7226  | 3.1851  | 4.0283 | 4.4571 | 1.0694  | 0.0968  | 0.4600 | 0.3573 |
| Sirpa   | _VPRDETLTYADLMVHLSR_4                                                                      | #N/A                    | 4.0741 | 3.6037 | 4.0819 | 3.3111 | 3.4920 | 3.1326 | 4.5266  | 3.3755  | 3.6745 | 3.3030 | 0.9720  | -0.0409 | 0.3126 | 0.1326 |
| Neo1    | _NS[Phospho (STY)]QDITPVONSAM[Oxidation (M)]DSNHQR_3                                       | #N/A                    | 6.0072 | 5.4902 | 5.8131 | 6.4263 | 4.7617 | 5.8751 | 6.1155  | 5.9197  | 6.0773 | 0.9380 | -0.0923 | 0.2345  | 0.6179 |        |
| Snm1    | _GTGSGDS[Phospho (STY)]DIWDOTALK_2                                                         | P97801_S28_M1_Snm1      | 3.5834 | 3.9046 | 3.9647 | 4.2627 | 4.8894 | 3.9473 | 4.4497  | 4.8359  | 4.7884 | 3.6091 | 0.9256  | -0.1115 | 0.3340 | 0.4763 |
| Snm1    | _Acetyl (Protein N-term)AM[Oxidation (M)]GSGGAGS[Phospho (STY)]EQEDTVLFR_2                 | #N/A                    | 8.6201 | 8.4599 | 8.8152 | 9.2013 | 8.2569 | 9.0246 | 9.0799  | 8.6392  | 8.7939 | 8.7907 | 0.9891  | -0.0158 | 0.6340 | 0.1979 |
| Snm1    | _Acetyl (Protein N-term)M[Oxidation (M)]AM[Oxidation (M)]GSGGAGSEQEDTVLFR_2                | #N/A                    | 3.3530 | 4.3402 | 4.6135 | 6.4252 | 4.1615 | 3.5680 | 3.9288  | 3.2207  | 3.5197 | 3.7686 | 1.2303  | 0.2990  | 0.1730 | 0.7620 |
| Snm1    | _RGT[Phospho (STY)]GSGDSOSDIWDTALK_3                                                       | P97801_T22_M1_Snm1      | 3.6132 | 3.5653 | 3.3469 | 4.3915 | 3.3744 | 3.8796 | 3.6563  | 4.1225  | 4.0177 | 0.0688 | 0.9316  | -0.1022 | 0.2458 | 0.6093 |
| Fh      | _SGLELPLENPGSSM[Oxidation (M)]PGK_2                                                        | #N/A                    | 7.5246 | 7.8377 | 7.5359 | 7.6439 | 7.3229 | 7.6008 | 7.6184  | 7.6870  | 7.4948 | 7.5593 | 0.9984  | -0.0023 | 0.8973 | 0.0471 |
| Fh      | _LYELAGGTAVTGLNTR_2                                                                        | #N/A                    | 7.4954 | 6.9945 | 7.5807 | 6.9216 | 7.5524 | 7.5294 | 7.0835  | 7.2831  | 7.5165 | 0.9969 | -0.0045 | 0.9011  | 0.0452 |        |
| Fh      | _LHDLMSAK_2                                                                                | #N/A                    | 7.0449 | 7.2802 | 7.2866 | 7.5215 | 7.7973 | 6.3853 | 6.9547  | 7.1098  | 7.2054 | 7.6254 | 0.9994  | -0.0009 | 0.9871 | 0.0056 |
| Fh      | _AAAEVNOEGLDPK_2                                                                           | #N/A                    | 6.3550 | 6.3052 | 5.5325 | 7.1387 | 6.6331 | 6.0624 | 6.4208  | 6.0829  | 6.0468 | 6.2273 | 0.9693  | -0.0449 | 0.7773 | 0.1094 |
| Fh      | _LYGAQTVR_2                                                                                | #N/A                    | 7.4167 | 7.3382 | 7.1114 | 7.4121 | 7.9841 | 7.1631 | 7.1929  | 7.4278  | 7.3185 | 7.7751 | 0.9967  | -0.0047 | 0.8999 | 0.0458 |
| Fh      | _VEFDTGELK_2                                                                               | #N/A                    | 5.3052 | 4.8659 | 3.4506 | 5.0037 | 5.4862 | 4.5907 | 3.1426  | 4.5907  | 4.7538 | 4.5987 | 1.1112  | 0.1521  | 0.3544 | 0.4506 |
| Fh      | _AIEM[Oxidation (M)]LGGELGSK_2                                                             | #N/A                    | 6.4659 | 6.9106 | 3.8423 | 7.1905 | 7.1539 | 6.8757 | 6.5707  | 6.8493  | 4.3793 | 6.8483 | 1.0397  | 0.0562  | 0.7697 | 0.1137 |
| Fh      | _MPPVQAFGLK_2                                                                              | #N/A                    | 4.8573 | 4.4309 | 4.5750 | 5.0138 | 4.4817 | 5.9573 | 3.2915  | 3.6950  | 4.3960 | 5.5424 | 1.1540  | 0.2066  | 0.2184 | 0.6607 |
| Fh      | _ETAEIOLYTAEGDVEWPK_3                                                                      | #N/A                    | 3.0312 | 2.4186 | 3.7180 | 3.6087 | 3.2698 | 4.0717 | 3.9354  | 3.8978  | 3.2822 | 2.1511 | 1.0110  | 0.0157  | 0.9366 | 0.0284 |
| Fh      | _LNDHFLPVWGQTGGTQTM[Oxidation (M)]NVNEVISNR_3                                              | #N/A                    | 3.4252 | 3.6916 | 3.6053 | 4.1021 | 3.3306 | 3.9236 | 3.8168  | 4.0325  | 3.6811 | 4.1938 | 0.9361  | -0.0953 | 0.1879 | 0.7260 |
| Fh      | _QSSNDTPTTAMI[Oxidation (M)]HAAAEVHK_3                                                     | #N/A                    | 3.6656 | 4.4218 | 3.3992 | 4.4438 | 5.9757 | 5.8743 | 3.0913  | 4.0582  | 4.3572 | 6.7144 | 1.0164  | 0.0235  | 0.9217 | 0.3167 |
| Fh      | _THTDAAVPLTGGFSGOVQVQYAMVR_3                                                               | #N/A                    | 3.8708 | 3.7664 | 3.8071 | 3.5594 | 3.7468 | 4.0791 | 4.0244  | 3.9051  | 3.5537 | 3.5264 | 1.0140  | 0.0200  |        |        |



|         |                                                                                           |                       |         |         |         |         |         |         |         |         |         |         |         |         |        |        |
|---------|-------------------------------------------------------------------------------------------|-----------------------|---------|---------|---------|---------|---------|---------|---------|---------|---------|---------|---------|---------|--------|--------|
| Rab33a  | _S[Phospho (STY)]MVEHYR_2                                                                 | P97950_S101_M1_Rab33a | 3.6533  | 4.4095  | 3.3869  | 4.0061  | 2.7970  | 3.8276  | 3.7208  | 4.1124  | 3.7610  | 3.9731  | 0.9456  | -0.0807 | 0.4879 | 0.3117 |
| Alpha2  | _SAS[Phospho (STY)]QDC[Carbamidomethyl (C)]IETPGAQEGK_2                                   | #N/A                  | 9.5167  | 9.5472  | 9.4885  | 9.8774  | 8.1166  | 9.3707  | 9.5862  | 9.2349  | 9.2704  | 9.3821  | 0.9948  | -0.0076 | 0.8820 | 0.0545 |
| Alpha2  | _SAS[Phospho (STY)]QDC[Carbamidomethyl (C)]IETPGAQEGKK_2                                  | #N/A                  | 3.5106  | 6.3973  | 6.2577  | 6.6923  | 3.3625  | 6.1924  | 6.2652  | 5.7453  | 3.7917  | 6.1663  | 0.9836  | -0.0238 | 0.9233 | 0.0347 |
| Clqa    | _DLSFSNTNNK_2                                                                             | #N/A                  | 8.6357  | 8.4892  | 9.0069  | 9.2683  | 8.4830  | 8.9588  | 9.0021  | 8.5977  | 8.9382  | 8.8198  | 0.9963  | -0.0053 | 0.8595 | 0.0657 |
| Cd1     | _GDS[Phospho (STY)]DVNPEVPSSDR_2                                                          | P98191_S56_M1_Cd1     | 8.6781  | 9.5186  | 8.3466  | 4.1479  | 3.5850  | 8.8797  | 10.4525 | 9.6137  | 8.7186  | 7.8140  | 0.7861  | -0.3472 | 0.2015 | 0.6958 |
| Atg8a2  | _ATS[Phospho (STY)]VGQOLEAPR_2                                                            | P98200_S6_M1_Atp8a2   | 10.5174 | 10.4309 | 10.9711 | 10.4853 | 9.1287  | 10.1901 | 11.1434 | 10.8128 | 10.5175 | 10.3054 | 0.9619  | -0.0560 | 0.2758 | 0.5594 |
| Atg8a2  | _EOS[Phospho (STY)]SDOFC[Carbamidomethyl (C)]R_2                                          | P98200_S421_M1_Atp8a2 | 6.4698  | 6.7852  | 7.1006  | 4.1144  | 3.8294  | 3.9019  | 4.2627  | 7.2753  | 3.7917  | 0.9647  | -0.0518 | 0.8588  | 0.0661 |        |
| Atg8a2  | _I[Acetyl (Protein N-term)]S[Phospho (STY)]RATS[Phospho (STY)]VGQOLEAPR_2                 | P98200_S2_M2_Atp8a2   | 4.0231  | 3.3193  | 3.7567  | 3.3005  | 3.1668  | 3.4578  | 3.4488  | 3.7007  | 3.9997  | 2.9778  | 0.9922  | -0.1114 | 0.9102 | 0.0461 |
| Atg8a2  | _M[Oxidation (M)]TSC[Carbamidomethyl (C)]TNS[Phospho (STY)]C[Carbamidomethyl (C)]DFNDPR_1 | #N/A                  | 4.1543  | 4.8288  | 4.9990  | 4.2025  | 4.2487  | 4.5258  | 5.2468  | 4.3683  | 4.2225  | 3.8443  | 1.0164  | 0.0235  | 0.8123 | 0.0903 |
| Arvf    | _DIPSYG[Phospho (STY)]LSR_2                                                               | P98201_S205_M1_Arvf   | 7.6061  | 4.0166  | 3.8982  | 8.2541  | 3.8379  | 3.8916  | 4.2524  | 4.3979  | 3.7940  | 3.7814  | 1.0293  | 0.0416  | 0.9121 | 0.0400 |
| Arvf    | _GSLGS[Phospho (STY)]LDR_2                                                                | P98201_S337_M1_Arvf   | 3.6485  | 2.9529  | 4.1232  | 7.0425  | 4.2750  | 3.4545  | 3.8153  | 3.3342  | 3.6332  | 3.3443  | 1.2032  | 0.2669  | 0.3636 | 0.4394 |
| Arvf    | _S[Phospho (STY)]LAADDEGGDLEFPDYSTATR_2                                                   | P98201_S269_M1_Arvf   | 5.4248  | 6.6556  | 6.1137  | 7.9445  | 6.1949  | 7.2185  | 5.8252  | 7.3540  | 7.8710  | 7.4516  | 0.9251  | -0.1123 | 0.3818 | 0.4181 |
| Arvf    | _RSPS[Phospho (STY)]VDSR_2                                                                | P98201_S347_M1_Arvf   | 5.1150  | 4.5577  | 5.4176  | 5.0992  | 3.2254  | 3.2423  | 3.7583  | 3.8242  | 3.6911  | 4.9539  | 1.0952  | 0.1311  | 0.5042 | 0.2974 |
| Arvf    | _S[Phospho (STY)]LPHFQAEPYGLEDDTR_3                                                       | P98201_S251_M1_Arvf   | 3.5155  | 3.8269  | 3.2492  | 5.7060  | 3.6482  | 4.0813  | 4.4421  | 5.8457  | 5.5109  | 5.0569  | 0.7680  | -0.3807 | 0.0449 | 0.1340 |
| Arvf    | _S[Phospho (STY)]PSVDSR_2                                                                 | #N/A                  | 6.6869  | 3.1587  | 3.6369  | 6.5412  | 3.0470  | 3.5776  | 3.4708  | 6.3818  | 4.1195  | 4.3588  | 0.9692  | -0.0452 | 0.8910 | 0.0501 |
| Arvf    | _NFDI[Phospho (STY)]LDLPK_2                                                               | P98201_T643_M1_Arvf   | 3.6829  | 3.6595  | 3.4166  | 4.4612  | 2.8266  | 4.2486  | 4.1086  | 4.3399  | 4.1384  | 0.9511  | -0.0723 | 0.6190  | 0.2083 |        |
| Tubb5   | _ISVYNEATGGK_2                                                                            | #N/A                  | 9.5551  | 9.3770  | 8.8107  | 10.1733 | 9.9002  | 9.5235  | 9.4391  | 9.7369  | 9.6906  | 9.5921  | 1.0113  | 0.0162  | 0.5122 | 0.2906 |
| Tubb5   | _M[Oxidation (M)]AVTFIGNSTAQLFKR_3                                                        | #N/A                  | 5.4867  | 5.3839  | 6.9177  | 4.4447  | 5.3898  | 5.8879  | 5.3080  | 5.8324  | 6.2020  | 0.9850  | -0.0219 | 0.8528  | 0.0692 |        |
| Tubb5   | _MAYTFIGNSTAQLFK_2                                                                        | #N/A                  | 5.7559  | 4.4177  | 5.4829  | 7.2169  | 4.9561  | 4.5029  | 5.9369  | 4.6553  | 4.9312  | 5.2128  | 1.0395  | 0.0559  | 0.7303 | 0.1365 |
| Tubb5   | _ALTVELTQZQVDM_2                                                                          | #N/A                  | 10.4185 | 10.3929 | 10.5895 | 10.2355 | 10.5165 | 10.3429 | 10.1868 | 10.4192 | 10.4912 | 1.0068  | 0.0098  | 0.4056  | 0.3919 |        |
| Tubb5   | _FWEVSDDEHGDPTGSGDLSQLDR_4                                                                | #N/A                  | 6.7946  | 6.3186  | 7.2634  | 6.8342  | 7.1272  | 7.2562  | 6.6904  | 6.8041  | 6.9955  | 7.3272  | 0.9968  | -0.0046 | 0.9314 | 0.0355 |
| Pmb4    | _GPIVSGTQTEAR_2                                                                           | #N/A                  | 6.5068  | 6.6585  | 6.8826  | 6.9002  | 7.0777  | 6.7465  | 6.2374  | 6.5063  | 6.3296  | 7.0167  | 1.0418  | 0.0991  | 0.5106 | 0.8223 |
| Pmb4    | _FQIATVTEK_2                                                                              | #N/A                  | 6.2629  | 6.2088  | 6.6535  | 6.6262  | 6.6920  | 6.3060  | 6.0155  | 6.2671  | 6.5275  | 6.2890  | 1.0292  | 0.0416  | 0.2262 | 0.6456 |
| Pmb4    | _AHSWLTR_2                                                                                | #N/A                  | 6.3168  | 6.9148  | 6.2337  | 6.6605  | 6.6575  | 6.0568  | 5.0999  | 6.4519  | 6.4707  | 6.2863  | 1.0652  | 0.0911  | 0.2334 | 0.6318 |
| Pmb4    | _TQNPM[Oxidation (M)]VTGTSVLGW_2                                                          | #N/A                  | 4.0446  | 5.6686  | 3.2306  | 5.2332  | 3.1703  | 3.5548  | 3.4479  | 5.2316  | 5.2064  | 3.7003  | 0.9440  | -0.0831 | 0.7192 | 0.1432 |
| Pmb4    | _FDGGVVAADM[Oxidation (M)]LGYGSLAR_2                                                      | #N/A                  | 3.9217  | 4.1421  | 4.2470  | 4.1355  | 4.2412  | 4.5884  | 4.4985  | 3.8251  | 4.1572  | 4.2312  | 1.0083  | 0.0119  | 0.8302 | 0.0808 |
| Pmb4    | _VNDSM[Oxidation (M)]LGASGDYADFQVLEK_2                                                    | #N/A                  | 4.0190  | 4.0611  | 4.4835  | 3.9100  | 4.1589  | 3.9537  | 3.8351  | 3.7146  | 3.4963  | 3.7544  | 1.1075  | 0.1473  | 0.0109 | 1.9631 |
| Rplp2   | _LASVPAGGAAVAASAPGSAAPGASAPAAAEK_3                                                        | #N/A                  | 5.1228  | 6.3443  | 5.9197  | 6.1934  | 7.0270  | 6.0929  | 5.6767  | 6.1422  | 5.0415  | 5.9578  | 1.0722  | 0.1006  | 0.2961 | 0.5286 |
| Rplp2   | _NDEINQGVGK_2                                                                             | #N/A                  | 9.9863  | 10.3459 | 10.7043 | 10.6090 | 10.4095 | 10.2129 | 10.3763 | 9.9878  | 10.0860 | 10.2879 | 1.0190  | 0.0272  | 0.2362 | 0.6566 |
| Rplp2   | _YVASVLAALGNSSPSAK_2                                                                      | #N/A                  | 5.8909  | 5.8822  | 6.4032  | 6.2933  | 6.4846  | 6.1563  | 5.9385  | 5.5185  | 6.0828  | 6.2869  | 1.0383  | 0.0543  | 0.2481 | 0.6053 |
| Rplp2   | _LDSVGIEDDRLNK_2                                                                          | #N/A                  | 4.1581  | 4.5299  | 4.4844  | 4.7140  | 4.9449  | 4.8374  | 4.7743  | 4.3542  | 4.1819  | 4.8336  | 1.0166  | 0.0238  | 0.7040 | 0.1524 |
| Rplp2   | _KEESES[Phospho (STY)]DDM[Oxidation (M)]GFLDF_2                                           | #N/A                  | 3.9573  | 3.3499  | 4.0619  | 10.2997 | 10.4059 | 5.8717  | 4.7264  | 12.8251 | 8.2840  | 5.8698  | 0.7979  | -0.3257 | 0.4825 | 0.3165 |
| Rplp2   | _LASVPAGGAVAASAPGSAAPGSAAPAAAEKKDK_4                                                      | #N/A                  | 4.1382  | 5.0929  | 3.8718  | 5.4406  | 5.0599  | 3.2031  | 3.5639  | 3.5856  | 3.8846  | 4.4682  | 1.1528  | 0.2051  | 0.2453 | 0.6102 |
| Uqcrh   | _ELC[Carbamidomethyl (C)]DNR_2                                                            | #N/A                  | 8.7003  | 9.0680  | 9.0760  | 9.0827  | 9.3545  | 9.0836  | 8.8361  | 8.7907  | 9.0083  | 9.0092  | 1.0168  | 0.0240  | 0.2314 | 0.6356 |
| Uqcrh   | _EHC[Carbamidomethyl (C)]ELEK_2                                                           | #N/A                  | 7.2624  | 7.7999  | 7.7381  | 7.7556  | 7.7556  | 7.7196  | 7.2659  | 7.6478  | 7.8508  | 7.6488  | 1.0317  | 0.0450  | 0.4060 | 0.3915 |
| Uqcrh   | _ERLEC[Carbamidomethyl (C)]DNR_2                                                          | #N/A                  | 7.5113  | 7.3718  | 7.9646  | 7.7848  | 7.9998  | 7.6947  | 7.5752  | 7.4918  | 7.8459  | 7.5486  | 1.0139  | 0.0199  | 0.4749 | 0.3234 |
| Uqcrh   | _SQTEDEC[Carbamidomethyl (C)]TELEDFLHAR_3                                                 | #N/A                  | 6.8680  | 6.7539  | 7.3584  | 7.1556  | 7.5418  | 7.2995  | 6.9988  | 6.4801  | 6.9456  | 7.4931  | 1.0263  | 0.0374  | 0.4378 | 0.3587 |
| Pdx5    | _LADPTGAFQK_2                                                                             | #N/A                  | 10.2801 | 10.6605 | 10.6516 | 10.4399 | 10.6142 | 10.4715 | 10.3240 | 10.5290 | 10.4899 | 10.5048 | 1.0055  | 0.0079  | 0.5159 | 0.2874 |
| Pdx5    | _THPGPVEGAGLK_2                                                                           | #N/A                  | 8.5370  | 8.9945  | 8.8644  | 8.8772  | 9.1546  | 8.8675  | 8.7360  | 8.6955  | 8.8489  | 8.8489  | 1.0167  | 0.0240  | 0.2144 | 0.6687 |
| Pdx5    | _VGDAIPSEVVEGPGK_2                                                                        | #N/A                  | 9.0406  | 8.8618  | 9.3021  | 9.2127  | 8.8166  | 8.9964  | 9.1001  | 8.7749  | 8.6502  | 9.1008  | 1.0148  | 0.0212  | 0.3509 | 0.4548 |
| Pdx5    | _VGDAIPSEVVEGPGKK_2                                                                       | #N/A                  | 7.1080  | 7.2319  | 7.2014  | 7.8717  | 7.3297  | 7.4177  | 7.6120  | 7.2552  | 6.8556  | 7.4056  | 1.0107  | 0.0154  | 0.6890 | 0.1618 |
| Pdx5    | _KVNLAELFK_2                                                                              | #N/A                  | 6.9209  | 6.9388  | 7.0329  | 7.4981  | 7.4055  | 7.0227  | 6.9912  | 6.8459  | 7.0926  | 7.1973  | 1.0149  | 0.0213  | 0.4777 | 0.3208 |
| Pdx5    | _ALNVEPGTGLTC[Carbamidomethyl (C)]SLAPNLSQL_2                                             | #N/A                  | 5.6476  | 6.4102  | 6.2498  | 7.0308  | 6.6998  | 5.9261  | 6.4371  | 6.5049  | 6.5805  | 5.9932  | 0.9919  | -0.0117 | 0.8572 | 0.0669 |
| Pdx5    | _VNLAELFK_2                                                                               | #N/A                  | 5.8512  | 6.9354  | 5.7583  | 6.1349  | 6.6388  | 6.5312  | 4.9084  | 6.4646  | 6.8501  | 6.6574  | 1.0142  | 0.0203  | 0.8407 | 0.0754 |
| Pdx5    | _ATDLLDLSVFGNRR_2                                                                         | #N/A                  | 6.8936  | 6.6367  | 5.9116  | 5.6399  | 6.6880  | 6.3393  | 6.8629  | 5.8745  | 6.2539  | 6.5130  | 0.9961  | -0.0056 | 0.9364 | 0.0286 |
| Pdx5    | _ATDLLDLSVFGNRR_3                                                                         | #N/A                  | 5.5163  | 6.3098  | 6.2182  | 6.4802  | 6.1068  | 6.1209  | 5.9405  | 5.8622  | 6.2987  | 6.0405  | 1.0149  | 0.0213  | 0.6178 | 0.0193 |
| Pdx5    | _FSM[Oxidation (M)]WONGVK_2                                                               | #N/A                  | 7.3828  | 7.3657  | 7.3616  | 7.5439  | 7.3940  | 7.2954  | 7.2357  | 7.1928  | 7.2508  | 7.0296  | 1.0297  | 0.0423  | 0.0063 | 2.1984 |
| Cpe     | _SNAIGDILNR_2                                                                             | #N/A                  | 6.9672  | 6.9097  | 6.8785  | 7.6078  | 7.1286  | 7.1505  | 6.8077  | 7.1522  | 7.0494  | 0.9885  | 0.0085  | 0.7966  | 0.2988 |        |
| Cpe     | _LTASPGYLAITK_2                                                                           | #N/A                  | 5.3285  | 5.8672  | 5.5908  | 5.7147  | 5.4143  | 5.2952  | 5.6016  | 4.7066  | 5.0851  | 5.4725  | 1.0611  | 0.0855  | 0.1459 | 0.8358 |
| Cpe     | _IVVNEK_2                                                                                 | #N/A                  | 3.9346  | 3.1425  | 4.1044  | 4.0250  | 4.4894  | 3.5938  | 3.3128  | 4.4787  | 4.1357  | 4.6535  | 0.9364  | -0.0948 | 0.4520 | 0.3448 |
| Cpe     | _YIGNM[Oxidation (M)]HGNEAVGR_3                                                           | #N/A                  | 3.9466  | 4.5479  | 4.1131  | 4.6158  | 5.1617  | 3.6767  | 4.3305  | 4.6550  | 5.1577  | 3.0819  | 1.0087  | 0.0125  | 0.9351 | 0.0292 |
| Cpe     | _EALVSVMQLC[Carbamidomethyl (C)]TAIR_2                                                    | #N/A                  | 3.2378  | 4.0430  | 3.9246  | 4.2272  | 3.8643  | 3.8652  | 4.1419  | 2.9765  | 3.3398  | 4.3942  | 1.0486  | 0.0685  | 0.5974 | 0.2237 |
| Il6st   | _SHIAQWS[Phospho (STY)]PHT[Phospho (STY)]PPR_3                                            | Q00506_S665_M2_Il6st  | 2.9076  | 4.3185  | 3.5944  | 5.5432  | 3.5341  | 5.1002  | 4.1314  | 5.7688  | 5.3397  | 5.4801  | 0.8043  | -0.3142 | 0.1236 | 0.9079 |
| G6pdx   | _DVAGDFHQQC[Carbamidomethyl (C)]K_2                                                       | #N/A                  | 4.2874  | 4.1646  | 5.9164  | 8.7039  | 4.1623  | 3.5672  | 3.9280  | 3.2215  | 4.5432  | 3.7159  | 1.3327  | 0.0143  | 0.2372 | 0.6250 |
| Hnrrnp2 | _S[Phospho (STY)]GDETSGSEAPGDK_2                                                          | #N/A                  | 12.0838 | 11.9423 | 11.6011 | 12.7379 | 11.2570 | 11.9741 | 12.4759 | 11.8978 | 11.9103 | 12.2417 | 0.9836  | -0.0238 | 0.4936 | 0.3067 |
| Hnrrnp2 | _DLVVQASQC[Carbamidomethyl (C)]SK_2                                                       | #N/A                  | 5.3126  | 5.2907  | 4.7213  | 5.1930  | 5.6594  | 5.3076  | 5.4832  | 5.0964  | 5.2535  | 5.3858  | 0.9892  | -0.0157 | 0.7423 | 0.1294 |
| Hnrrnp2 | _YNVLGAETLTOM[Oxidation (M)]R_2                                                           | #N/A                  | 5.1853  | 6.0190  | 6.7128  | 5.1480  | 6.0570  | 5.8799  | 6.2191  | 5.9203  | 6.0907  | 6.1489  | 0.9572  | -0.0632 | 0.4184 | 0.3784 |
| Hnrrnp2 | _NFLDQC[Carbamidomethyl (C)]NVNNGQR_2                                                     | #N/A                  | 3.4378  | 5.3945  | 3.1714  | 5.3865  | 5.1345  | 6.0398  | 4.3643  | 4.4958  | 5.4321  | 5.4488  | 0.9646  | -0.0519 | 0.7921 | 0.1012 |
| Hnrrnp2 | _AVEEGGGDDGS[Phospho (STY)]EK_2                                                           | Q00P9_S183_M1_Hnrrnp2 | 5.5117  | 4.6666  | 5.5753  | 6.9363  | 5.1861  | 4.4124  | 5.8510  | 6.0677  | 4.8363  | 6.0485  | 0.9440  | -0.0832 | 0.5482 | 0.1621 |
| Hnrrnp2 | _S[Phospho (STY)]KSPFFEEADEEDDQTVLNLDITYSDHFAQSK_5                                        | Q00P9_S224_M1_Hnrrnp2 | 6.2030  | 3.0933  | 3.3188  | 3.8215  | 3.2586  | 2.9701  | 3.3562  | 4.2970  | 3.9456  | 3.7885  | 0.9706  | -0.0430 | 0.8621 | 0.0645 |
| Hnrrnp2 | _S[Phospho (STY)]GDETSGSEAPGDKAVEEGGGDDQSEK_3                                             | #N/A                  | 2.9839  | 4.3585  | 4.2185  | 3.7622  | 1.6685  | 3.5497  | 3.9105  | 3.5669  | 3.3585  | 3.9674  | 0.9674  | -0.0478 | 0.8292 | 0.0813 |
| Hnrrnp2 | _AVEEGGGDDGS[Phospho (STY)]EKS[Phospho (STY)]KPAGS[Phospho (STY)]DGER_3                   | Q00P9_S183_M1_Hnrrnp2 | 3.3078  | 4.1130  | 3.9946  | 4.0077  | 3.9343  | 3.7952  | 4.1560  | 3.6213  | 3.2698  | 2.9634  | 1.1017  | 0.1397  | 0.1929 | 0.7147 |
| Pde     |                                                                                           |                       |         |         |         |         |         |         |         |         |         |         |         |         |        |        |



|         |                                                                |                         |        |        |        |         |        |        |         |         |         |        |        |         |        |        |
|---------|----------------------------------------------------------------|-------------------------|--------|--------|--------|---------|--------|--------|---------|---------|---------|--------|--------|---------|--------|--------|
| Grin2b  | _RQHS[Phospho (STY)]YDTFVLQKEEAALPR_4                          | #N/A                    | 3.8276 | 3.3985 | 7.9154 | 7.9770  | 3.2868 | 3.3378 | 3.2309  | 8.2144  | 4.2508  | 6.9920 | 0.8740 | -0.1943 | 0.6463 | 0.1895 |
| Grin2b  | _ENS[Phospho (STY)]PWHVHVLDTIYK_3                              | Q01097_S1143_M1_Grin2b  | 4.0969 | 3.4013 | 3.2829 | 5.4667  | 3.2226 | 3.0061 | 3.3669  | 5.5785  | 4.9901  | 4.4774 | 0.8138 | -0.2973 | 0.1902 | 0.7208 |
| Grin2b  | _RES[Phospho (STY)]S[Phospho (STY)]VOISEHRR_3                  | Q01097_S929_M2_Grin2b   | 3.9523 | 3.3902 | 5.6373 | 3.2297  | 3.2115 | 3.0172 | 4.9866  | 5.5324  | 4.0705  | 4.8190 | 0.7707 | -0.3757 | 0.0801 | 1.0961 |
| Grin2b  | _QHSY[Phospho (STY)]DTFVLQKEEAALPR_3                           | #N/A                    | 2.9343 | 3.1153 | 3.5935 | 3.1373  | 3.0036 | 3.6210 | 3.2856  | 3.8639  | 4.1629  | 4.3154 | 0.8278 | -0.2726 | 0.0213 | 1.6717 |
| Grin2b  | _RQHS[Phospho (STY)]YDTFVLQK_3                                 | #N/A                    | 3.3087 | 4.0650 | 4.5432 | 6.4406  | 4.1520 | 6.0309 | 6.0276  | 6.5072  | 5.8847  | 6.1702 | 0.7738 | -0.3700 | 0.0588 | 1.2304 |
| Grin2b  | _QHSY[Phospho (STY)]DTFVLQK_2                                  | #N/A                    | 3.4038 | 4.1601 | 3.9665 | 4.2890  | 4.0484 | 4.1106 | 4.0037  | 3.8630  | 3.5115  | 3.5841 | 1.0684 | 0.0954  | 0.1992 | 0.7008 |
| Grin2b  | _S[Phospho (STY)]DVSDDSTHTVYVNEGNAAK_3                         | Q01097_S1058_M1_Grin2b  | 3.2775 | 3.8336 | 3.7304 | 4.4460  | 3.6881 | 3.5929 | 4.3669  | 3.9225  | 3.0997  | 3.5688 | 1.0059 | 0.0084  | 0.9414 | 0.2925 |
| Grin2b  | _NM[Oxidation (M)]ANISGVVNGS[Phospho (STY)]PGSALDFIR_2         | Q01097_S917_M1_Grin2b   | 3.3554 | 3.9870 | 4.5899 | 5.8185  | 3.8083 | 3.9212 | 4.2820  | 5.8383  | 3.1665  | 3.8120 | 0.1070 | 0.1203  | 0.5099 | 0.0262 |
| Grin2b  | _AGNLVDS[Phospho (STY)]ENSLQELDQPAAPVAVSNASTK_3                | Q01097_S1255_M1_Grin2b  | 3.7906 | 3.0949 | 3.9811 | 3.5249  | 2.9163 | 3.3124 | 3.6732  | 3.7976  | 5.0224  | 3.2022 | 0.8759 | -0.1912 | 0.2253 | 0.6473 |
| Grin2b  | _ESSVY[Phospho (STY)]DSEHHR_3                                  | Q01097_Y932_M2_Grin2b   | 4.0747 | 3.3790 | 3.6970 | 3.2408  | 3.2004 | 3.0283 | 3.3891  | 3.7604  | 2.9968  | 4.4189 | 0.9438 | -0.0834 | 0.5269 | 0.2783 |
| Creb1   | _DLVC[Carbamidomethyl (C)]HKS[Phospho (STY)]D_2                | Q01147_S326_M1_Creb1    | 4.1564 | 4.6886 | 3.5114 | 5.9201  | 4.7452 | 4.2784 | 3.1383  | 4.0111  | 4.3102  | 4.5167 | 1.1392 | 0.1880  | 0.2763 | 0.5586 |
| Creb1   | _LNDLS[Phospho (STY)]SDAPGVR_2                                 | Q01147_S128_M1_Creb1    | 6.9198 | 6.7717 | 6.9073 | 7.4068  | 4.0832 | 6.8382 | 7.0193  | 7.2311  | 7.0961  | 7.4921 | 0.8999 | -0.1522 | 0.2761 | 0.5589 |
| Adra2c  | _TEVEPDES[Phospho (STY)]SAAER_3                                | Q01337_S286_M1_Adra2c   | 3.8251 | 3.0805 | 3.5587 | 3.8343  | 2.9688 | 3.6558 | 3.5490  | 4.2842  | 3.9328  | 3.8013 | 0.8960 | -0.1584 | 0.1117 | 0.9521 |
| Adra2a  | _RGGAGAGPGAGSG[Phospho (STY)]GHGEER_3                          | Q01338_S362_M1_Adra2a   | 3.7624 | 3.0178 | 6.6890 | 3.8970  | 2.9061 | 3.7185 | 6.7786  | 7.1644  | 3.8701  | 3.8640 | 0.7378 | -0.4387 | 0.1937 | 0.7129 |
| Adra2a  | _TRAS[Phospho (STY)]QVKPGDS[Phospho (STY)]LPR_3                | Q01338_S339_M2_Adra2a   | 4.5636 | 4.1091 | 3.9907 | 4.4933  | 3.9304 | 3.7991 | 4.2080  | 3.6251  | 3.2737  | 2.9595 | 1.1795 | 0.2381  | 0.0443 | 1.3533 |
| Adra2a  | _ASQVKPGD[Phospho (STY)]LPR_2                                  | #N/A                    | 7.9478 | 7.6794 | 8.1103 | 7.6683  | 6.4701 | 7.4164 | 8.0494  | 8.1543  | 7.6276  | 7.4804 | 0.9643 | -0.0524 | 0.4126 | 0.3845 |
| Adcy6   | _NAEPS[Phospho (STY)]PTPAHTR_2                                 | #N/A                    | 6.6994 | 8.5551 | 9.1689 | 3.5413  | 3.2221 | 3.1784 | 9.2523  | 8.8622  | 8.6648  | 8.4467 | 0.6882 | -0.5390 | 0.1137 | 0.9442 |
| Nme2    | _GLVEIKR_2                                                     | #N/A                    | 9.6460 | 9.9576 | 9.8347 | 9.9205  | 9.9932 | 9.8107 | 9.8305  | 9.6974  | 9.6724  | 9.8717 | 1.0095 | 0.0136  | 0.2539 | 0.5954 |
| Nme2    | _GDFC[Carbamidomethyl (C)]QGVQR_2                              | #N/A                    | 8.5405 | 8.6341 | 8.9856 | 9.0259  | 9.2062 | 8.8238 | 8.5064  | 8.9063  | 9.0990  | 8.8078 | 1.0045 | 0.0064  | 0.8130 | 0.0899 |
| Nme2    | _DRPFFFLGLV_2                                                  | #N/A                    | 7.9820 | 7.9459 | 8.1735 | 8.0016  | 8.2527 | 7.8423 | 7.9704  | 7.9156  | 7.8994  | 7.9567 | 1.0209 | 0.0298  | 0.1107 | 0.9559 |
| Nme2    | _SC[Carbamidomethyl (C)]AHOWWYE_2                              | #N/A                    | 7.5413 | 7.0844 | 7.8674 | 7.6476  | 7.7507 | 7.0294 | 6.8491  | 7.2224  | 7.2387  | 7.0567 | 1.0520 | 0.0731  | 0.0833 | 1.0791 |
| Nme2    | _GLVGEIK_2                                                     | #N/A                    | 7.3919 | 6.8567 | 7.1792 | 6.1409  | 7.5890 | 7.7433 | 6.8469  | 6.9515  | 7.7327  | 7.6374 | 0.9805 | -0.0284 | 0.6947 | 0.1582 |
| Nme2    | _TFIAKPDDVQR_2                                                 | #N/A                    | 9.3151 | 9.5373 | 9.6809 | 9.5942  | 9.5307 | 9.6015 | 9.5981  | 9.2162  | 9.4251  | 9.4788 | 1.0121 | 0.0173  | 0.2391 | 0.6214 |
| Nme2    | _NIHGSDVESAER_2                                                | #N/A                    | 5.3204 | 5.3142 | 3.6334 | 5.4618  | 5.7839 | 5.7288 | 5.0271  | 5.7937  | 5.2375  | 4.6688 | 1.0049 | 0.0070  | 0.9562 | 0.0194 |
| Nme2    | _VM[Oxidation (M)]GETNPADSKPTGR_3                              | #N/A                    | 8.0410 | 8.1698 | 8.6278 | 7.8730  | 8.5471 | 8.2857 | 7.6652  | 8.3469  | 8.4424  | 8.1510 | 1.0130 | 0.0186  | 0.6140 | 0.2118 |
| Cacna1c | _SITADGES[Phospho (STY)]PPTTK_2                                | Q01815_S815_M1_Cacna1c  | 4.3397 | 3.6440 | 3.5256 | 10.2038 | 9.4141 | 9.7203 | 10.8324 | 10.6672 | 10.6561 | 9.7153 | 0.6504 | -0.2607 | 0.0615 | 1.2110 |
| Cacna1c | _EAVSAS[Phospho (STY)]EDDIFR_2                                 | #N/A                    | 3.1624 | 4.0638 | 3.8492 | 4.3518  | 3.9521 | 4.1734 | 4.0665  | 3.7666  | 3.4152  | 4.3188 | 1.0086 | 0.0124  | 0.9006 | 0.0455 |
| Cacna1c | _TGNGNADTES[Phospho (STY)]PSHKR_2                              | Q01815_S1742_M1_Cacna1c | 4.7016 | 4.0761 | 5.3779 | 4.2421  | 3.9270 | 4.4217 | 5.0826  | 5.1035  | 4.8288  | 3.3013 | 0.9735 | -0.0387 | 0.7866 | 0.1043 |
| Cacna1c | _EAVSAS[Phospho (STY)]EDDIFR_2                                 | #N/A                    | 3.5092 | 3.7757 | 3.7910 | 3.8497  | 3.8969 | 3.6480 | 4.4248  | 3.6671  | 3.0414  | 3.6245 | 1.0151 | 0.0216  | 0.8193 | 0.0866 |
| Vcp     | _VDVIGPIDATR_2                                                 | #N/A                    | 9.1115 | 9.3257 | 9.0562 | 9.4402  | 8.9660 | 9.2058 | 9.2178  | 8.7745  | 9.0541  | 9.3412 | 1.0096 | 0.0138  | 0.5273 | 0.7870 |
| Vcp     | _SVS[Phospho (STY)]DNDIR_2                                     | #N/A                    | 8.9767 | 9.1806 | 9.4835 | 9.6804  | 8.8651 | 9.0576 | 9.2746  | 9.0931  | 8.8581  | 9.2556 | 1.0095 | 0.0137  | 0.6372 | 0.1957 |
| Vcp     | _LDQLVPLPDEK_2                                                 | #N/A                    | 8.3967 | 8.7031 | 8.9787 | 8.8854  | 8.9872 | 8.7040 | 8.7354  | 8.3534  | 8.4990  | 8.8101 | 1.0205 | 0.0293  | 0.2485 | 0.6047 |
| Vcp     | _GVLYFGPGC[Carbamidomethyl (C)]GK_2                            | #N/A                    | 8.6260 | 8.5840 | 8.5288 | 8.7750  | 8.6354 | 8.5312 | 8.5690  | 8.3458  | 8.7097  | 8.7319 | 1.0028 | 0.0041  | 0.7800 | 0.1079 |
| Vcp     | _RSVS[Phospho (STY)]DNDIR_2                                    | #N/A                    | 7.4241 | 7.5421 | 7.9205 | 8.2800  | 7.4199 | 7.5494 | 7.7205  | 7.6887  | 7.2852  | 7.6706 | 1.0131 | 0.0187  | 0.6215 | 0.2065 |
| Vcp     | _GGNIGGGGAADR_2                                                | #N/A                    | 8.1983 | 8.2473 | 8.0352 | 8.5466  | 8.3912 | 8.1273 | 8.2162  | 7.9244  | 8.0876  | 8.1320 | 1.0207 | 0.0296  | 0.1532 | 0.8147 |
| Vcp     | _WALSGNSPALR_2                                                 | #N/A                    | 7.3956 | 7.6099 | 7.7160 | 8.1675  | 8.0059 | 7.8034 | 7.7750  | 7.7693  | 7.7798  | 7.8947 | 0.9972 | -0.0040 | 0.8836 | 0.0538 |
| Vcp     | _M[Oxidation (M)]DELQLFR_2                                     | #N/A                    | 7.1634 | 7.1775 | 7.2890 | 7.1822  | 7.4354 | 7.6053 | 7.3589  | 7.4719  | 7.6292  | 7.5029 | 0.9824 | -0.0256 | 0.2235 | 0.6507 |
| Vcp     | _STVEVQPVQVWEDGGLEDVLR_3                                       | #N/A                    | 6.8735 | 7.0249 | 7.7371 | 7.4751  | 7.5425 | 7.0562 | 7.4231  | 7.0897  | 7.2438  | 7.1795 | 1.0070 | 0.0101  | 0.7903 | 0.1022 |
| Vcp     | _LGDVSIQPC[Carbamidomethyl (C)]POWK_2                          | #N/A                    | 6.6412 | 6.7798 | 6.5914 | 7.5428  | 6.5752 | 6.3055 | 6.9594  | 7.1187  | 6.5148  | 6.5454 | 0.9767 | -0.0340 | 0.6147 | 0.2113 |
| Vcp     | _LELQIMTK_2                                                    | #N/A                    | 6.2449 | 6.6156 | 6.3150 | 6.8473  | 6.8612 | 6.8649 | 7.1162  | 6.4197  | 7.0720  | 6.9117 | 0.9629 | -0.0545 | 0.2210 | 0.6557 |
| Vcp     | _ESIESEIR_2                                                    | #N/A                    | 6.2735 | 6.4160 | 6.0953 | 6.2356  | 6.4036 | 6.4060 | 5.8956  | 5.9128  | 6.3768  | 5.5863 | 1.0699 | 0.0975  | 0.0442 | 1.3545 |
| Vcp     | _AIANEC[Carbamidomethyl (C)]QANFISK_2                          | #N/A                    | 5.3335 | 5.3419 | 4.9530 | 5.6177  | 5.3958 | 4.4238 | 4.9053  | 5.2471  | 5.2205  | 5.4525 | 0.9945 | -0.0080 | 0.9059 | 0.0429 |
| Vcp     | _SVS[Phospho (STY)]DNDIR_2                                     | #N/A                    | 4.2244 | 5.5547 | 6.1337 | 3.9131  | 3.3501 | 5.7857 | 3.2393  | 5.6738  | 3.8540  | 5.9590 | 1.0311 | 0.0441  | 0.8582 | 0.0664 |
| Vcp     | _LAGESSNLR_3                                                   | #N/A                    | 7.5122 | 7.6781 | 8.7758 | 8.0779  | 8.0483 | 7.5787 | 7.7553  | 7.5736  | 7.5978  | 7.8799 | 1.0121 | 0.0174  | 0.5099 | 0.2925 |
| Vcp     | _QAAPC[Carbamidomethyl (C)]VFFDELDSIAK_2                       | #N/A                    | 3.3062 | 5.6598 | 4.7711 | 4.8419  | 4.9291 | 4.3596 | 4.3629  | 5.0927  | 4.0317  | 4.7913 | 1.0164 | 0.0235  | 0.8685 | 0.0612 |
| Vcp     | _LVDEANEDNSVLSQPK_2                                            | #N/A                    | 7.1720 | 7.5488 | 8.0565 | 8.3653  | 7.2672 | 7.8137 | 7.9538  | 7.2384  | 7.2010  | 7.8418 | 1.0192 | 0.0274  | 0.6220 | 0.2062 |
| Vcp     | _ELQELVQVVEHPDK_2                                              | #N/A                    | 6.6744 | 6.1537 | 6.4438 | 6.5494  | 6.3698 | 6.5198 | 6.2577  | 6.0602  | 6.1142  | 6.6620 | 1.0284 | 0.0404  | 0.2415 | 0.6170 |
| Vcp     | _NAPAFIDELDAIAPK_2                                             | #N/A                    | 6.1565 | 5.9124 | 3.2558 | 5.5564  | 6.4257 | 5.3372 | 4.4487  | 5.3964  | 5.7377  | 6.5472 | 0.9834 | -0.0241 | 0.8953 | 0.0480 |
| Vcp     | _EM[Oxidation (M)]VELPLR_2                                     | #N/A                    | 7.5189 | 7.4446 | 6.8041 | 7.5643  | 7.6076 | 7.3773 | 7.4063  | 7.3360  | 7.4446  | 7.5439 | 0.9937 | -0.0091 | 0.7720 | 0.1124 |
| Vcp     | _DHFEAM[Oxidation (M)]IR_2                                     | #N/A                    | 5.9971 | 5.2427 | 4.0239 | 6.6709  | 5.8329 | 5.2190 | 4.8548  | 4.9952  | 5.1920  | 5.0917 | 1.0923 | 0.1273  | 0.3452 | 0.4619 |
| Vcp     | _VSQLTLTM[Oxidation (M)]DGUK_2                                 | #N/A                    | 4.9749 | 4.6107 | 4.3722 | 4.1766  | 4.6750 | 4.9059 | 4.6519  | 4.9510  | 4.6766  | 5.0958 | 0.9536 | -0.0685 | 0.2427 | 0.6149 |
| Vcp     | _ESIESEIR_2                                                    | #N/A                    | 6.0636 | 5.6452 | 3.2923 | 5.8537  | 6.5001 | 5.2921 | 4.7489  | 4.1651  | 5.8997  | 6.0065 | 1.0454 | 0.0640  | 0.7359 | 0.1332 |
| Vcp     | _EAVC[Carbamidomethyl (C)]VLSDDTC[Carbamidomethyl (C)]SDEK_2   | #N/A                    | 5.4176 | 3.4721 | 4.8314 | 6.7519  | 3.3604 | 5.8133 | 5.9610  | 2.7590  | 3.6168  | 5.4474 | 1.1114 | 0.1523  | 0.5998 | 0.2220 |
| Vcp     | _Acetyl (Protein N-term)JASGADSKGDLSTALK_2                     | #N/A                    | 4.6105 | 4.8739 | 4.3889 | 5.2489  | 4.9109 | 4.7193 | 5.2237  | 4.8660  | 4.6860  | 4.8226 | 0.9781 | -0.0320 | 0.5561 | 0.2548 |
| Vcp     | _M[Oxidation (M)]TNGFSGADLTBC[Carbamidomethyl (C)]QR_2         | #N/A                    | 3.1663 | 4.0567 | 4.1567 | 6.0881  | 5.8302 | 5.1747 | 4.7865  | 3.4577  | 5.0962  | 5.1211 | 1.0282 | 0.0401  | 0.8484 | 0.0714 |
| Vcp     | _VYNQLITEM[Oxidation (M)]DGM[Oxidation (M)]STK_2               | #N/A                    | 6.8444 | 7.5213 | 7.6540 | 6.9094  | 7.2653 | 7.8063 | 7.6490  | 7.4109  | 7.3174  | 7.4169 | 0.9845 | -0.0225 | 0.5981 | 0.2232 |
| Vcp     | _EDCEES[Phospho (STY)]LNEVGYDDGGC[Carbamidomethyl (C)]IR_2     | Q01853_S197_M1_Vcp      | 4.0464 | 3.6979 | 3.8546 | 4.7462  | 3.3481 | 3.7275 | 3.8118  | 3.7002  | 3.6663  | 4.1922 | 1.0158 | 0.0227  | 0.8203 | 0.0860 |
| Vcp     | _LADNVLEICVAREHGHGADLAALC[Carbamidomethyl (C)]SEALQAIR_4       | #N/A                    | 4.3600 | 3.3316 | 3.5460 | 3.7226  | 3.1331 | 3.8702 | 3.7633  | 4.0698  | 3.1538  | 3.3246 | 1.0231 | 0.0330  | 0.7717 | 0.1125 |
| Vcp     | _DVDFELAK_2                                                    | #N/A                    | 3.9646 | 4.6498 | 3.1506 | 2.3159  | 3.5406 | 4.3222 | 3.4991  | 4.1138  | 6.6550  | 4.1138 | 3.7761 | -0.1332 | 0.4778 | 0.3207 |
| Vcp     | _EAVC[Carbamidomethyl (C)]VLSDDTC[Carbamidomethyl (C)]SDEKIR_3 | #N/A                    | 3.8332 | 3.0886 | 3.5669 | 3.8262  | 2.9769 | 3.6477 | 3.5408  | 4.2923  | 3.9409  | 4.2582 | 0.8707 | -0.1997 | 0.0578 | 1.2383 |
| Vcp     | _LAGESSNLRK_3                                                  | #N/A                    | 3.3920 | 3.9504 | 3.1257 | 4.1703  | 3.7171 | 3.9578 | 4.3186  | 4.3317  | 3.1299  | 3.8476 | 0.9542 | -0.0676 | 0.5678 | 0.2458 |
| Uba1    | _AENYDIS[Phospho (STY)]PADR_2                                  | Q02053_S876_M1_Uba1     | 8.9664 | 8.9787 | 9.2771 | 9.3059  | 8.5789 | 9.9814 | 9.2539  | 8.9191  | 8.8480  | 9.0453 | 0.9998 | -0.0003 | 0.9906 | 0.0041 |
| Uba1    | _DNPGVTC[Carbamidomethyl (C)]LEADR_2                           | #N/A                    | 8.5409 | 8.7182 | 8.8277 | 8.6491  | 8.6    |        |         |         |         |        |        |         |        |        |



|         |                                                                              |                      |          |         |         |         |         |         |         |         |         |         |         |         |        |        |
|---------|------------------------------------------------------------------------------|----------------------|----------|---------|---------|---------|---------|---------|---------|---------|---------|---------|---------|---------|--------|--------|
| Uba1    | _QFLDYFK_2                                                                   | #N/A                 | 3.4627   | 4.3387  | 3.1963  | 3.5618  | 3.4180  | 4.2857  | 4.3922  | 4.5314  | 3.9717  | 4.0889  | 0.8739  | -0.1945 | 0.0792 | 1.1015 |
| Uba1    | _LDQPM[Oxidation (M)]TEVSR_2                                                 | #N/A                 | 7.2134   | 7.1926  | 7.3148  | 7.1859  | 7.4443  | 7.2903  | 7.0855  | 7.3320  | 7.0917  | 7.1800  | 1.0141  | 0.0002  | 0.1746 | 0.7580 |
| Uba1    | _M[Oxidation (M)]IQTSVSVGR_2                                                 | #N/A                 | 5.2968   | 5.3059  | 5.7188  | 4.8996  | 5.0336  | 5.9602  | 4.9976  | 5.9710  | 5.3324  | 5.3353  | 0.9926  | -0.1007 | 0.8822 | 0.0544 |
| Uba1    | _NFPMAETHLQWAR_2                                                             | #N/A                 | 5.6238   | 5.4138  | 4.5350  | 5.3404  | 3.4224  | 5.2803  | 5.4895  | 5.7011  | 5.3393  | 5.4697  | 0.8975  | -0.1561 | 0.2232 | 0.6513 |
| Uba1    | _LAYVAAGDLAPNFAFGGSLAAQEVIM[Oxidation (M)]K_3                                | #N/A                 | 3.9705   | 3.2359  | 2.9658  | 2.7908  | 3.1142  | 2.2088  | 2.8989  | 1.8077  | 2.7559  | 2.5143  | 1.2212  | 0.2883  | 0.1548 | 0.8103 |
| Uba1    | _NFAM[Oxidation (M)]JGSG[Carbamidomethyl (C)]GEGEVVVTDM[Oxidation (M)]DTEK_3 | #N/A                 | 3.9293   | 5.2163  | 5.3868  | 3.7301  | 3.0730  | 6.4352  | 3.4448  | 3.7944  | 4.9387  | 5.3017  | 1.0592  | 0.0829  | 0.7330 | 0.1349 |
| Uba1    | _DEFFGFK_2                                                                   | #N/A                 | 4.0079   | 5.0989  | 4.1128  | 4.6155  | 4.3562  | 4.7863  | 3.5448  | 3.9395  | 4.5045  | 5.2104  | 1.0457  | 0.0645  | 0.5964 | 0.2245 |
| Uba1    | _QM[Oxidation (M)]NPKYQVTHQNR_3                                              | #N/A                 | 3.4411   | 4.2621  | 4.1387  | 4.1093  | 4.7737  | 4.8919  | 4.0010  | 4.8311  | 4.0931  | 4.9376  | 0.9561  | -0.0648 | 0.5677 | 0.2459 |
| Uba1    | _HVS[Phospho (STY)]QELQSANASVDDSELEEK_3                                      | Q02053_S810_M1_Uba1  | 4.1740   | 4.4490  | 3.9848  | 3.3757  | 3.3763  | 3.2644  | 4.0620  | 3.3911  | 3.7888  | 3.1108  | 1.0509  | 0.0716  | 0.5641 | 0.2486 |
| Uba1    | _YDDOFFQNLGDVANAIDNADR_3                                                     | #N/A                 | 3.5598   | 4.3650  | 4.2466  | 3.7557  | 4.1864  | 3.5431  | 3.9039  | 3.2455  | 3.5446  | 3.4329  | 1.1164  | 0.1588  | 0.0944 | 1.0248 |
| Uba1    | _VLGPVTFSC[Carbamidomethyl (C)]DTSNFSOYR_2                                   | #N/A                 | 3.7316   | 3.6108  | 3.4653  | 4.5099  | 3.4322  | 4.2973  | 3.1573  | 3.9921  | 4.2912  | 4.1871  | 0.9832  | -0.0245 | 0.8364 | 0.0776 |
| Uba1    | _QNSLDEDLURK_3                                                               | #N/A                 | 0.6489   | 3.2248  | 3.1064  | 3.6090  | 3.0461  | 3.1825  | 3.5433  | 3.0086  | 4.1580  | 3.5760  | 0.7848  | -0.3496 | 0.2206 | 0.6563 |
| Ctnnb1  | _TS[Phospho (STY)]M[Oxidation (M)]GGTQQQFVEGR_2                              | #N/A                 | 6.7459   | 8.5494  | 9.5750  | 7.9746  | 4.9003  | 8.7201  | 9.2745  | 9.0505  | 9.0062  | 8.5999  | 0.8621  | -0.2140 | 0.1895 | 0.7223 |
| Ctnnb1  | _HAVVNLUNYDDOAEIATR_3                                                        | #N/A                 | 5.4638   | 5.0850  | 4.2022  | 4.6734  | 3.4451  | 3.7653  | 4.3971  | 3.0492  | 4.8173  | 4.9626  | 1.0308  | 0.0437  | 0.8071 | 0.0930 |
| Ctnnb1  | _RTS[Phospho (STY)]M[Oxidation (M)]GGTQQQFVEGR_3                             | #N/A                 | 3.9274   | 3.2415  | 3.8871  | 5.3559  | 4.9306  | 3.3916  | 5.0608  | 5.7534  | 4.1496  | 3.3580  | 0.9000  | -0.1520 | 0.4656 | 0.3320 |
| Ctnnb1  | _TMQNNDIVETAR_2                                                              | #N/A                 | 5.2022   | 4.0106  | 4.5664  | 4.2422  | 3.9764  | 3.8976  | 4.2584  | 4.3919  | 3.1901  | 3.7874  | 1.1047  | 0.1436  | 0.2538 | 0.5955 |
| Ank1    | _GPPETGS[Phospho (STY)]PK_2                                                  | Q02357_S1759_M1_Ank1 | 8.6057   | 8.3846  | 4.1215  | 8.4529  | 3.2748  | 3.8040  | 4.0269  | 3.6300  | 4.3378  | 3.8048  | 1.5462  | 0.6287  | 0.1461 | 0.8354 |
| Ank1    | _LDQVES[Phospho (STY)]PAIPR_2                                                | Q02357_S852_M1_Ank1  | 6.5965   | 6.7898  | 7.1906  | 7.0328  | 4.2719  | 6.9370  | 7.0051  | 6.5699  | 6.1564  | 6.7243  | 0.9782  | -0.0318 | 0.8088 | 0.0921 |
| Ank1    | _AEDS[Phospho (STY)]DAIPEWK_2                                                | Q02357_S1589_M1_Ank1 | 3.5599   | 3.6662  | 4.2467  | 8.7298  | 6.9910  | 3.5430  | 5.8122  | 7.9034  | 7.9791  | 8.2451  | 0.6844  | -0.5471 | 0.0868 | 1.0617 |
| Nfia    | _SVEDEM[Oxidation (M)]DS[Phospho (STY)]GEEPHYTGQGR_2                         | #N/A                 | 3.5491   | 6.1239  | 5.5767  | 7.1037  | 6.0295  | 4.0263  | 6.4118  | 6.7863  | 6.9339  | 6.5302  | 0.7604  | -0.3952 | 0.0777 | 1.1097 |
| Nfia    | _UKS[Phospho (STY)]VEDEM[Oxidation (M)]DS[Phospho (STY)]GEEPHYTGQGR_3        | Q02780_S303_M2_Nfia  | 3.3098   | 4.1150  | 3.9966  | 4.0057  | 3.9364  | 3.7931  | 4.1539  | 3.6192  | 3.2678  | 2.9654  | 1.1022  | 0.1404  | 0.1901 | 0.7210 |
| Nfia    | _S[Phospho (STY)]PSSGSGSGVHVEPEGLPSPSTLK_3                                   | Q02780_S323_M1_Nfia  | 3.7831   | 3.0875  | 4.4609  | 6.2797  | 2.9088  | 3.3199  | 3.6807  | 3.1459  | 4.2953  | 3.4387  | 1.0919  | 0.1269  | 0.6318 | 0.1995 |
| Nucb1   | _KVPETQPELPQLDS[Phospho (STY)]QHIL_3                                         | Q02819_S456_M1_Nucb1 | 6.0885   | 6.7847  | 5.5866  | 7.4687  | 6.1246  | 6.3461  | 5.7620  | 6.9386  | 6.7315  | 6.3451  | 0.9931  | -0.0100 | 0.9122 | 0.0399 |
| Nucb1   | _SGRLS[Phospho (STY)]QELDFVSHNVR_3                                           | Q02819_S85_M1_Nucb1  | 3.9878   | 5.9196  | 3.6091  | 6.9006  | 3.2883  | 4.5048  | 5.0055  | 4.8734  | 5.4057  | 4.3310  | 0.9588  | -0.0607 | 0.7929 | 0.1008 |
| Nucb1   | _AQRLS[Phospho (STY)]QETELGR_2                                               | #N/A                 | 3.8296   | 4.9820  | 4.0316  | 4.2320  | 3.9046  | 4.2912  | 3.7238  | 3.4571  | 3.7562  | 4.3794  | 1.1000  | 0.1374  | 0.1841 | 0.3570 |
| Nucb1   | _LSQELDFVSHNVR_3                                                             | #N/A                 | 4.0292   | 3.3132  | 3.7629  | 3.3067  | 3.1729  | 3.4517  | 3.4549  | 3.6945  | 3.9936  | 2.9839  | 0.9927  | -0.1005 | 0.9164 | 0.0640 |
| Eph4    | _NPKS[Phospho (STY)]JLR_2                                                    | Q03137_S887_M1_Eph4  | 7.7005   | 7.4896  | 7.4194  | 7.8799  | 6.1935  | 6.8888  | 7.3910  | 7.7942  | 7.2036  | 7.3893  | 0.9755  | -0.0358 | 0.5975 | 0.2379 |
| Eph4    | _IDTIADESFTQVDIGDR_2                                                         | #N/A                 | 5.1667   | 4.8160  | 5.2330  | 6.1061  | 3.0771  | 5.5390  | 5.4348  | 4.5964  | 5.4602  | 5.0279  | 0.9727  | -0.0400 | 0.8055 | 0.0939 |
| Eph4    | _TYVPTFYEDPNQAVR_2                                                           | #N/A                 | 4.6438   | 4.7568  | 4.0141  | 4.5167  | 3.3968  | 4.5912  | 5.7879  | 4.7230  | 4.6455  | 0.8702  | -0.2006 | 0.0973  | 0.1020 | 0.1000 |
| Mark3   | _RYS[Phospho (STY)]DHAGPAIPSWAYPK_3                                          | Q03141_S419_M1_Mark3 | 3.7795   | 8.5118  | 8.6329  | 4.5578  | 7.1192  | 8.0552  | 3.5946  | 8.5706  | 8.4450  | 7.9629  | 0.9486  | -0.0761 | 0.8035 | 0.0950 |
| Mark3   | _SROS[Phospho (STY)]TNLFSK_2                                                 | Q03141_S601_M1_Mark3 | 3.4878   | 4.2441  | 3.3215  | 4.1716  | 4.1324  | 3.9931  | 3.8863  | 3.9469  | 5.9588  | 4.1386  | 0.8645  | -0.1201 | 0.2103 | 0.0751 |
| Mark3   | _SLELDASOSS[Phospho (STY)]SSNLISLAK_2                                        | Q03141_S378_M1_Mark3 | 3.3174   | 3.5831  | 4.0042  | 5.2176  | 3.9003  | 4.1227  | 4.7942  | 5.0613  | 4.2197  | 3.5215  | 0.9148  | -0.1285 | 0.4080 | 0.3893 |
| Mark3   | _IDIMVGM[Oxidation (M)]JDS[Phospho (STY)]QEIQESLSK_2                         | Q03141_S341_M1_Mark3 | 2.9862   | 3.7914  | 3.2847  | 4.3293  | 3.6127  | 4.1168  | 4.4776  | 4.1727  | 2.9709  | 4.0066  | 0.9437  | -0.0837 | 0.5625 | 0.2499 |
| Mark3   | _VRPNLSLNSITGGS[Phospho (STY)]PHHK_3                                         | #N/A                 | 5.0502   | 5.1656  | 5.4305  | 5.5513  | 4.4907  | 5.2363  | 5.3137  | 5.5528  | 5.1924  | 5.1372  | 0.9727  | -0.0400 | 0.4963 | 0.3042 |
| Mark3   | _TPVAS[Phospho (STY)]THS[Phospho (STY)]SSATTDR_2                             | Q03141_S540_M2_Mark3 | 3.4367   | 4.2419  | 4.1235  | 3.8788  | 4.0632  | 3.6663  | 4.0271  | 3.1224  | 3.4214  | 3.5561  | 1.1048  | 0.1437  | 0.1238 | 0.8072 |
| Cdk7    | _SFGS[Phospho (STY)]JPNR_2                                                   | Q03147_S164_M1_Cdk7  | 4.1864   | 3.0398  | 3.3724  | 3.8750  | 3.3121  | 4.4174  | 3.5897  | 4.2435  | 7.9543  | 7.5921  | 0.6331  | -0.5955 | 0.0501 | 1.2998 |
| Enah    | _PSS[Phospho (STY)]PNTPPSQPPAAK_2                                            | #N/A                 | 3.7179   | 2.9733  | 3.4388  | 3.9415  | 2.8616  | 7.5239  | 3.6562  | 4.1770  | 7.5515  | 3.9085  | 0.8451  | -0.2428 | 0.5325 | 0.2737 |
| Enah    | _S[Phospho (STY)]VSRPK_2                                                     | Q03172_S740_M1_Enah  | 7.3249   | 4.2437  | 3.6693  | 4.1720  | 5.7009  | 3.9935  | 3.8866  | 3.9465  | 7.2541  | 4.1390  | 1.0092  | 0.0132  | 0.9646 | 0.0157 |
| Enah    | _NSRPSS[Phospho (STY)]PNTPPSQPPAAK_3                                         | #N/A                 | 8.5630   | 8.3268  | 8.7777  | 9.5808  | 8.3267  | 8.8605  | 8.7616  | 8.1985  | 8.5157  | 8.4586  | 1.0301  | 0.0428  | 0.3468 | 0.4599 |
| Atp5f1a | _AVDSLVPIGR_2                                                                | #N/A                 | 12.2132  | 12.4356 | 12.5501 | 12.2423 | 12.1868 | 12.1060 | 12.1276 | 12.2752 | 12.0167 | 12.0453 | 1.0143  | 0.0204  | 0.1137 | 0.9442 |
| Atp5f1a | _VVDALGNADIK_2                                                               | #N/A                 | 11.9426  | 11.8715 | 12.0462 | 12.1298 | 12.1483 | 11.9032 | 12.0000 | 11.8507 | 11.9087 | 11.8819 | 1.0081  | 0.0117  | 0.1782 | 0.7490 |
| Atp5f1a | _VLSIGDGIAR_2                                                                | #N/A                 | 11.8300  | 11.9892 | 11.9680 | 11.8968 | 11.9254 | 11.9104 | 11.8274 | 11.9233 | 11.8124 | 11.8124 | 1.0057  | 0.0082  | 0.0861 | 1.0648 |
| Atp5f1a | _TGAVDVPVGEELLGR_2                                                           | #N/A                 | 11.4067  | 11.2124 | 11.6040 | 11.3943 | 10.9705 | 11.2597 | 11.3264 | 11.1543 | 11.1576 | 11.2472 | 1.0077  | 0.0111  | 0.4703 | 0.3276 |
| Atp5f1a | _ELUGDR_2                                                                    | #N/A                 | 11.4260  | 11.3846 | 11.6489 | 11.3416 | 11.3410 | 11.3793 | 11.2624 | 11.3340 | 11.3740 | 11.3740 | 1.0178  | 0.0254  | 0.0869 | 1.0610 |
| Atp5f1a | _LELAQYR_2                                                                   | #N/A                 | 10.9552  | 11.1023 | 11.1957 | 10.9355 | 10.9915 | 10.8474 | 10.6250 | 10.1234 | 10.8551 | 11.0109 | 1.0116  | 0.0166  | 0.2311 | 0.6362 |
| Atp5f1a | _TSAIDTINQK_2                                                                | #N/A                 | 9.6111   | 9.4416  | 9.9003  | 9.9588  | 9.6888  | 9.9091  | 9.8446  | 9.6587  | 9.8714  | 9.5907  | 1.0011  | 0.0015  | 0.9327 | 0.0303 |
| Atp5f1a | _GYLDKLEPSK_2                                                                | #N/A                 | 9.8907   | 9.8348  | 10.4225 | 10.1214 | 9.7672  | 9.8702  | 10.0058 | 9.9416  | 9.5748  | 9.7142  | 1.0179  | 0.0256  | 0.2709 | 0.5671 |
| Atp5f1a | _HALYDOLSK_2                                                                 | #N/A                 | 9.3064   | 9.4738  | 9.9594  | 9.9713  | 9.5122  | 9.5719  | 9.4551  | 9.5526  | 9.5277  | 9.5012  | 1.0130  | 0.0186  | 0.4041 | 0.3936 |
| Atp5f1a | _LGDATSVDELIGR_2                                                             | #N/A                 | 9.2664   | 8.8508  | 9.3581  | 9.1805  | 9.0576  | 9.1383  | 9.2830  | 9.3626  | 9.0568  | 9.1487  | 0.9923  | -0.0111 | 0.5189 | 0.2849 |
| Atp5f1a | _VDALGNADIKGGPIGSK_2                                                         | #N/A                 | 6.8478   | 7.4811  | 7.7221  | 7.0543  | 7.1393  | 7.4776  | 6.5620  | 7.0839  | 7.2458  | 1.0487  | 0.0866  | 0.1338  | 0.8735 | 0.7835 |
| Atp5f1a | _STVAQVLK_2                                                                  | #N/A                 | 8.1359   | 8.4599  | 7.6541  | 8.1557  | 8.2814  | 7.5285  | 6.7325  | 8.1902  | 8.1606  | 8.0018  | 1.0341  | 0.0483  | 0.4495 | 0.3473 |
| Atp5f1a | _RTGAVDVPVGEELLGR_3                                                          | #N/A                 | 7.6446   | 7.6841  | 7.7685  | 7.7556  | 7.8440  | 8.0195  | 7.8612  | 7.7039  | 7.9003  | 8.0163  | 0.9893  | -0.0156 | 0.3512 | 0.4545 |
| Atp5f1a | _EGDVKR_2                                                                    | #N/A                 | 7.9022   | 7.3884  | 7.6539  | 7.5302  | 7.9938  | 7.3335  | 7.2374  | 7.5553  | 6.8360  | 7.6309  | 1.0436  | 0.0615  | 0.1469 | 0.8331 |
| Atp5f1a | _LKEVNTNFLAGEP_2                                                             | #N/A                 | 6.6250   | 6.8547  | 7.4887  | 7.0489  | 6.6967  | 7.0128  | 6.4712  | 6.9071  | 6.8559  | 1.0324  | 0.0460  | 0.2510  | 0.6006 | 0.6003 |
| Atp5f1a | _RNDGTDK_2                                                                   | #N/A                 | 6.8900   | 6.9589  | 6.9359  | 7.1606  | 6.6730  | 7.1258  | 6.9743  | 6.5289  | 7.1064  | 6.4497  | 1.0531  | 0.0746  | 0.1038 | 0.9836 |
| Atp5f1a | _EVTNFLAGEP_2                                                                | #N/A                 | 7.0797   | 6.8273  | 6.9101  | 6.8494  | 6.6114  | 6.6483  | 6.4956  | 6.3334  | 5.5876  | 6.8896  | 1.0372  | 0.0527  | 0.0919 | 1.0365 |
| Atp5f1a | _EATPGDVPYLHR_2                                                              | #N/A                 | 10.6677  | 10.8258 | 11.1264 | 10.9876 | 10.5026 | 10.7908 | 10.9083 | 10.7716 | 10.6942 | 10.7557 | 1.0032  | 0.0046  | 0.7800 | 0.1079 |
| Atp5f1a | _FNDGTDK_2                                                                   | #N/A                 | 7.8408   | 6.6348  | 7.0987  | 6.3813  | 7.6591  | 6.9406  | 5.5739  | 7.3089  | 7.4547  | 7.4452  | 1.0211  | 0.0302  | 0.7599 | 0.1192 |
| Atp5f1a | _SEQSDAK_2                                                                   | #N/A                 | 7.2138   | 6.8689  | 7.4090  | 7.0762  | 8.2836  | 4.5010  | 6.6228  | 6.6081  | 6.7782  | 6.8906  | 1.0249  | 0.0354  | 0.8035 | 0.0950 |
| Atp5f1a | _QM[Oxidation (M)]SLLR_2                                                     | #N/A                 | 9.3033   | 9.7044  | 9.8705  | 9.3776  | 9.5143  | 9.6191  | 9.3946  | 9.6748  | 9.6713  | 9.6794  | 0.9958  | -0.0060 | 0.7484 | 0.1258 |
| Atp5f1a | _RLTDDAM[Oxidation (M)]K_2                                                   | #N/A                 | 8.1385   | 8.1254  | 7.8822  | 8.4432  | 8.4226  | 7.8029  | 7.7306  | 7.8101  | 7.8004  | 8.0439  | 1.0369  | 0.0523  | 0.0822 | 1.0524 |
| Atp5f1a | _FNDGTDK_2                                                                   | #N/A                 | 5.7315   | 5.4129  | 4.9874  | 4.5156  | 5.9191  | 5.7286  | 5.4694  | 4.3813  | 5.7391  | 5.3292  | 1.0292  | 0.0415  | 0.6823 | 0.1660 |
| Atp5f1a | _LYC[Carbamidomethyl (C)]YVVAQK_2                                            | #N/A                 | 4.9357</ |         |         |         |         |         |         |         |         |         |         |         |        |        |



|       |                                                                         |                      |         |         |         |         |         |         |         |         |         |         |         |         |        |        |
|-------|-------------------------------------------------------------------------|----------------------|---------|---------|---------|---------|---------|---------|---------|---------|---------|---------|---------|---------|--------|--------|
| Seq2  | _EHLGGSS[Phospho (STY)]QEM[Oxidation (M)]ER_2                           | #N/A                 | 3.8685  | 4.1435  | 4.0421  | 10.6828 | 7.9215  | 9.9556  | 9.7305  | 3.6171  | 9.8810  | 9.9093  | 0.8171  | -0.2915 | 0.4753 | 0.3230 |
| Seq2  | _VPSVPS[Phospho (STY)]SEDDQLQEELQAIK_3                                  | Q03517_S532_M1_Seq2  | 3.9358  | 3.4066  | 3.6695  | 3.2133  | 3.2279  | 3.0008  | 3.3616  | 3.7879  | 4.0869  | 4.3914  | 0.8725  | -0.1967 | 0.0775 | 1.1104 |
| Seq2  | _SPYFNVQSDQK_2                                                          | #N/A                 | 6.4723  | 6.4789  | 4.2039  | 6.3182  | 6.6587  | 6.6098  | 6.2057  | 5.9858  | 6.1525  | 6.1931  | 1.0869  | 0.1202  | 0.4485 | 0.3483 |
| Seq2  | _S[Phospho (STY)]GGLGPDENRR_2                                           | #N/A                 | 5.8167  | 6.5895  | 6.6747  | 6.4807  | 5.9868  | 6.2130  | 6.1176  | 5.7503  | 6.1721  | 6.0629  | 1.0445  | 0.0628  | 0.1591 | 0.7009 |
| Seq2  | _ESKQQLSEDAK_2                                                          | #N/A                 | 3.7363  | 3.2019  | 3.9842  | 3.5280  | 4.9881  | 3.2303  | 3.6763  | 3.4732  | 4.5310  | 3.2053  | 1.0103  | 0.0148  | 0.9388 | 0.0321 |
| Seq2  | _VPSVSEDDQLQEELQAIKDEHLPGS[Phospho (STY)]QDEM[Oxidation (M)]ER_4        | #N/A                 | 2.9203  | 3.7255  | 3.6071  | 4.3952  | 3.5460  | 4.1826  | 4.5434  | 4.1068  | 4.4059  | 4.0768  | 0.8707  | -0.1997 | 0.0836 | 1.0776 |
| Seq2  | _FLPMYEKS[Phospho (STY)]RENPFKR_3                                       | Q03517_S176_M1_Seq2  | 4.2291  | 3.4846  | 3.9628  | 5.2067  | 3.3729  | 3.2518  | 3.6548  | 3.4946  | 3.7937  | 3.1839  | 1.1094  | 0.1497  | 0.4572 | 0.4572 |
| Kcnb1 | _NHFESSLPTS[Phospho (STY)]PK_2                                          | #N/A                 | 5.5381  | 8.5657  | 3.1905  | 8.4670  | 6.6946  | 8.5004  | 8.7090  | 8.6064  | 8.4023  | 3.6602  | 0.9975  | -0.0036 | 0.9903 | 0.0042 |
| Kcnb1 | _SLHGSTS[Phospho (STY)]PK_2                                             | Q03717_S782_M1_Kcnb1 | 6.7389  | 6.4648  | 3.8473  | 4.1550  | 3.7870  | 3.9425  | 4.3033  | 6.8911  | 3.1452  | 3.8323  | 1.0615  | 0.0862  | 0.7780 | 0.1090 |
| Kcnb1 | _VDNHL[Phospho (STY)]PNK_2                                              | #N/A                 | 5.5011  | 5.1786  | 3.9809  | 5.8681  | 3.6885  | 5.3126  | 5.9305  | 5.5835  | 5.3478  | 5.3677  | 0.8862  | -0.1743 | 0.2079 | 0.6821 |
| Kcnb1 | _T[Phospho (STY)]PPRSPK_2                                               | Q03717_T732_M1_Kcnb1 | 8.0268  | 7.4827  | 5.8092  | 6.8264  | 3.2335  | 5.9050  | 7.2628  | 8.0885  | 6.4356  | 6.9287  | 0.8656  | -0.2083 | 0.3194 | 0.4957 |
| Kcnb1 | _TQS[Phospho (STY)]QPLINTK_2                                            | 8.2174               | 8.0401  | 7.6427  | 7.9628  | 5.1536  | 7.4600  | 7.7386  | 7.7603  | 7.6939  | 7.4059  | 0.9690  | -0.0454 | 0.6964  | 0.1572 |        |
| Kcnb1 | _TEKNHFESSLPTS[Phospho (STY)]PK_3                                       | #N/A                 | 6.7455  | 6.1766  | 8.2306  | 6.6678  | 5.0882  | 5.5877  | 4.3196  | 6.3508  | 3.1289  | 3.8487  | 1.4542  | 0.5403  | 0.0333 | 1.4778 |
| Kcnb1 | _VQDNHLS[Phospho (STY)]PNKWK_3                                          | #N/A                 | 6.2728  | 5.7734  | 6.2181  | 6.0080  | 4.8356  | 5.9645  | 6.0666  | 6.5089  | 6.2723  | 6.0297  | 0.9399  | -0.0895 | 0.2222 | 0.6532 |
| Kcnb1 | _DKVQDNHLS[Phospho (STY)]PNKWK_3                                        | #N/A                 | 5.6575  | 4.7803  | 4.9619  | 5.1865  | 4.4519  | 5.0438  | 5.5524  | 5.4286  | 5.3274  | 4.7063  | 0.9543  | -0.0675 | 0.3731 | 0.4282 |
| Kcnb1 | _SSSS[Phospho (STY)]PQHUNVQQLQDMYSK_3                                   | Q03717_S520_M1_Kcnb1 | 3.2887  | 4.2152  | 4.1104  | 4.0254  | 4.0799  | 3.9362  | 4.0293  | 3.9399  | 3.8158  | 1.0353  | 0.0501  | 0.5161  | 0.2873 | 0.4282 |
| Kcnb1 | _S[Phospho (STY)]IEM[Oxidation (M)]M[Oxidation (M)]DIVVEK_2             | #N/A                 | 6.2766  | 6.6867  | 6.9398  | 5.7943  | 5.1549  | 6.7077  | 7.2288  | 7.1404  | 6.8733  | 6.6464  | 0.8978  | -0.1555 | 0.0835 | 1.0783 |
| Kcnb1 | _STSS[Phospho (STY)]LPPEPMEWR_2                                         | Q03717_S15_M1_Kcnb1  | 3.8959  | 3.6371  | 3.8942  | 4.0550  | 3.4949  | 3.8518  | 4.9243  | 3.6928  | 3.8167  | 0.9403  | -0.0889 | 0.3695  | 0.4324 | 0.1016 |
| Kcnb1 | _NGSS[Phospho (STY)]VSMNMK_2                                            | Q03717_S444_M1_Kcnb1 | 4.1307  | 3.3861  | 3.8644  | 3.5287  | 3.2744  | 3.3502  | 3.2434  | 3.0890  | 4.2384  | 3.4957  | 1.0206  | 0.0294  | 0.7914 | 0.1016 |
| Kcnb1 | _EQGS[Phospho (STY)]PEKAR_2                                             | Q03717_S511_M1_Kcnb1 | 3.1652  | 3.9215  | 4.4942  | 3.8098  | 4.3157  | 4.2088  | 3.6243  | 3.2729  | 2.9603  | 1.1425  | 0.1922  | 0.1683  | 0.7740 | 0.1016 |
| Knd1  | _QNGQLEDGSG[Phospho (STY)]GGDM[Oxidation (M)]C[Carbamidomethyl (C)]VR_2 | #N/A                 | 3.7904  | 4.0400  | 4.1889  | 4.9189  | 3.4774  | 3.7637  | 6.3411  | 4.2237  | 3.8933  | 3.7220  | 0.8867  | -0.1735 | 0.3713 | 0.4302 |
| Plfn6 | _ETLAQLQGEFQR_2                                                         | #N/A                 | 4.6562  | 5.8813  | 5.3835  | 6.0264  | 6.0011  | 5.6827  | 5.4704  | 3.2150  | 5.4013  | 1.1616  | 0.2162  | 0.1596  | 0.7969 | 0.3230 |
| Ckb   | _VLTPELYAELR_2                                                          | #N/A                 | 11.4805 | 11.8402 | 11.8972 | 11.9634 | 11.9004 | 11.7278 | 11.8682 | 11.8364 | 11.8437 | 11.8972 | 0.9950  | -0.0073 | 0.5275 | 0.2778 |
| Ckb   | _FSEVILKR_2                                                             | #N/A                 | 10.5668 | 11.0721 | 11.0046 | 11.1090 | 11.4880 | 10.8506 | 10.8112 | 10.8626 | 10.9214 | 10.9064 | 1.0129  | 0.0184  | 0.3983 | 0.3998 |
| Ckb   | _DLDPDIEER_2                                                            | #N/A                 | 11.9541 | 11.4902 | 11.1824 | 11.9567 | 11.6264 | 11.5539 | 11.6878 | 11.3571 | 11.3899 | 11.7500 | 1.0070  | 0.1001  | 0.6474 | 0.1888 |
| Ckb   | _GIWNNDNK_2                                                             | #N/A                 | 10.8977 | 11.1667 | 11.0568 | 11.3761 | 11.3423 | 11.0743 | 11.0906 | 10.9541 | 11.0102 | 11.1697 | 1.0087  | 0.0125  | 0.3654 | 0.4372 |
| Ckb   | _LIEMEQR_2                                                              | #N/A                 | 9.9368  | 9.6867  | 9.6060  | 10.8469 | 9.7429  | 9.1482  | 9.7065  | 9.4419  | 9.3415  | 9.6861  | 1.0297  | 0.0423  | 0.3662 | 0.4363 |
| Ckb   | _HGGQVPSDEKTDLPNQLGGDGLPNYVLSR_5                                        | #N/A                 | 9.3445  | 9.5790  | 9.7266  | 9.8154  | 8.6933  | 9.3942  | 9.2326  | 8.9356  | 9.1113  | 9.4291  | 1.0271  | 0.0385  | 0.2940 | 0.5316 |
| Ckb   | _FC[Carbamidomethyl (C)]TLGTQIEFLFK_2                                   | #N/A                 | 9.8089  | 10.0619 | 10.1628 | 10.0858 | 10.2365 | 9.9397  | 9.9826  | 9.9264  | 9.7395  | 10.1791 | 1.0093  | 0.0133  | 0.4106 | 0.3866 |
| Ckb   | _TRLVWINEEDHLR_2                                                        | #N/A                 | 6.6997  | 7.1050  | 7.0863  | 7.9578  | 6.5784  | 6.8612  | 7.2148  | 6.8143  | 7.7136  | 7.4730  | 0.9650  | -0.0514 | 0.4087 | 0.3886 |
| Ckb   | _HEKFS[Phospho (STY)]EVLKR_3                                            | #N/A                 | 7.5654  | 6.9128  | 7.5594  | 7.8817  | 7.4501  | 7.6282  | 7.3762  | 7.3660  | 7.1988  | 7.7431  | 1.0106  | 0.0152  | 0.6862 | 0.1365 |
| Ckb   | _NYEFM[Oxidation (M)]WNPHGLVLTCT[Carbamidomethyl (C)]PNLSGTGLR_3        | #N/A                 | 5.0313  | 5.0236  | 5.0441  | 6.0724  | 5.5223  | 5.0615  | 5.3960  | 5.5607  | 4.7069  | 4.2449  | 1.0634  | 0.0886  | 0.3618 | 0.4415 |
| Ckb   | _LEQGQAIDDL[Oxidation (M)]PAQIK_2                                       | #N/A                 | 11.0802 | 11.1629 | 12.2098 | 11.7237 | 12.1703 | 12.0291 | 11.6385 | 10.9009 | 11.0340 | 11.0340 | 0.9366  | 0.3907  | 0.4081 | 0.4081 |
| Ckb   | _LAVALLSLDGLSGR_2                                                       | #N/A                 | 9.6183  | 9.6573  | 10.1303 | 9.9567  | 9.8711  | 9.9158  | 9.8288  | 9.3473  | 9.7472  | 9.8612  | 1.0167  | 0.0239  | 0.2669 | 0.5737 |
| Ckb   | _HEKFS[Phospho (STY)]EVLK_2                                             | #N/A                 | 6.0189  | 5.7420  | 5.6438  | 5.3863  | 4.9277  | 5.1027  | 5.8353  | 5.6905  | 5.7710  | 6.0695  | 0.9364  | -0.0948 | 0.1285 | 0.8911 |
| Ckb   | _TDLPNPDMLGGDGLPNYVLSR_3                                                | #N/A                 | 4.8361  | 4.5748  | 4.2716  | 5.4698  | 5.2078  | 4.8368  | 4.9268  | 4.6200  | 5.3553  | 4.6754  | 1.0097  | 0.0139  | 0.8708 | 0.0601 |
| Ckb   | _FPADEFPOLSSNNHNM[Oxidation (M)]AK_3                                    | #N/A                 | 8.4342  | 7.8941  | 7.8587  | 8.5944  | 8.5300  | 8.1333  | 7.7545  | 7.3819  | 7.9701  | 8.1218  | 1.0455  | 0.0642  | 0.0861 | 1.0648 |
| Ckb   | _LGRFSEVLQOM[Oxidation (M)]VQGVK_2                                      | #N/A                 | 7.7760  | 7.9893  | 8.1750  | 8.0439  | 7.1596  | 7.7800  | 7.2883  | 7.6498  | 7.6732  | 8.0794  | 0.9985  | -0.0022 | 0.9537 | 0.0206 |
| Ckb   | _PFSNSHTQK_2                                                            | #N/A                 | 7.2311  | 7.6366  | 7.5014  | 7.8234  | 8.6937  | 7.5977  | 7.1977  | 7.6713  | 7.5753  | 1.0320  | 0.0454  | 0.3925  | 0.4062 | 0.4062 |
| Ckb   | _LRPADEFPOLSSNNHNM[Oxidation (M)]AK_4                                   | #N/A                 | 10.0960 | 10.4997 | 11.4321 | 10.7827 | 10.6741 | 10.5104 | 10.4763 | 10.0607 | 10.2791 | 10.5136 | 1.0323  | 0.0458  | 0.2025 | 0.6936 |
| Ckb   | _SMTEAEQQLQDDHFLDKPSPSLASGM[Oxidation (M)]AR_4                          | #N/A                 | 5.2798  | 4.7723  | 3.2942  | 5.8770  | 4.8346  | 4.2554  | 4.0581  | 4.7022  | 4.3213  | 4.6454  | 1.0648  | 0.0906  | 0.5557 | 0.2551 |
| Ckb   | _GTGGVDTAAVGGVDFVSNADR_2                                                | #N/A                 | 8.5785  | 8.6700  | 9.0188  | 9.2068  | 8.8879  | 8.6877  | 8.8393  | 8.4602  | 8.7259  | 8.5639  | 1.0225  | 0.0321  | 0.2015 | 0.6957 |
| Ckb   | _HGGVQPSDEHK_3                                                          | #N/A                 | 5.0524  | 3.1653  | 3.9108  | 3.4545  | 3.2320  | 3.2420  | 3.6028  | 4.1565  | 4.3282  | 3.1318  | 0.9662  | -0.0496 | 0.7719 | 0.1124 |
| Ckb   | _RGTGGVDTAAVGGVDFVSNADR_3                                               | #N/A                 | 4.7372  | 4.7433  | 3.1110  | 3.6136  | 4.1810  | 3.1779  | 3.3283  | 3.0040  | 4.9526  | 3.5806  | 1.0568  | 0.0797  | 0.6878 | 0.1626 |
| Npy1r | _QAS[Phospho (STY)]PVAFKK_2                                             | #N/A                 | 7.1028  | 7.4295  | 8.3507  | 7.6828  | 6.2575  | 7.2571  | 7.7036  | 7.8769  | 7.5337  | 7.4993  | 0.9599  | -0.0590 | 0.4177 | 0.3792 |
| Npy1r | _QAS[Phospho (STY)]PVAFK_2                                              | #N/A                 | 6.8587  | 5.6705  | 6.8482  | 6.1050  | 4.1869  | 6.0114  | 6.0232  | 6.5937  | 6.3204  | 6.4874  | 0.9356  | -0.0960 | 0.4470 | 0.3497 |
| Npy1r | _TS[Phospho (STY)]LKQAS[Phospho (STY)]PVAFK_2                           | #N/A                 | 4.3816  | 4.3454  | 3.5676  | 4.0702  | 4.2337  | 3.8917  | 3.7849  | 5.0168  | 5.2878  | 4.0372  | 0.9007  | -0.1509 | 0.2100 | 0.6778 |
| Npy1r | _TS[Phospho (STY)]LKQAS[Phospho (STY)]PVAFKK_3                          | #N/A                 | 4.0382  | 3.2937  | 3.7719  | 3.3157  | 3.1820  | 3.4427  | 3.4639  | 3.6855  | 3.9846  | 2.9930  | 0.9931  | -0.0100 | 0.9202 | 0.0361 |
| Nf1   | _S[Phospho (STY)]FQHLSDTK_2                                             | #N/A                 | 10.8070 | 10.6461 | 11.0387 | 10.7769 | 9.1806  | 10.4884 | 11.2204 | 10.9203 | 10.6994 | 10.4343 | 0.9696  | -0.0446 | 0.3936 | 0.4049 |
| Nf1   | _KVS[Phospho (STY)]VSENVLDEEVLTPDK_3                                    | Q04690_S2599_M1_Nf1  | 6.2325  | 5.5627  | 3.3861  | 4.4307  | 3.5113  | 6.4361  | 6.0190  | 6.0484  | 5.3450  | 0.7643  | -0.3878 | 0.0488  | 1.3120 | 0.0372 |
| Nf1   | _SFS[Phospho (STY)]PGSVR_2                                              | Q04690_S2190_M1_Nf1  | 7.6122  | 7.1065  | 4.5124  | 6.4973  | 3.8858  | 6.5531  | 7.1144  | 7.4838  | 3.2440  | 6.7302  | 0.9812  | -0.0273 | 0.9179 | 0.0372 |
| Nf1   | _SSSGLATYS[Phospho (STY)]PPM[Oxidation (M)]GAVSER_2                     | #N/A                 | 7.2185  | 7.6554  | 8.7156  | 7.7788  | 3.8791  | 7.5979  | 7.5622  | 3.3944  | 8.0530  | 7.8087  | 1.0651  | 0.0910  | 0.7306 | 0.1363 |
| Nf1   | _KS[Phospho (STY)]FQHLSDTK_2                                            | #N/A                 | 6.9414  | 6.7616  | 7.1266  | 6.6580  | 4.9079  | 6.6168  | 7.1613  | 7.2579  | 7.0224  | 6.4406  | 0.9328  | -0.1004 | 0.3128 | 0.5047 |
| Nf1   | _SM[Oxidation (M)]S[Phospho (STY)]LDM[Oxidation (M)]GQPSQANTK_2         | #N/A                 | 6.8706  | 7.4451  | 8.1585  | 3.8265  | 6.0539  | 7.8482  | 5.8526  | 8.4031  | 7.8809  | 7.7816  | 0.8958  | -0.1587 | 0.4245 | 0.3721 |
| Nf1   | _SAGS[Phospho (STY)]FVR_2                                               | Q04690_S2831_M1_Nf1  | 6.9539  | 6.9512  | 7.3733  | 6.9170  | 6.0008  | 4.0137  | 7.3331  | 7.3842  | 6.9894  | 7.0716  | 0.8852  | -0.1760 | 0.2306 | 0.6371 |
| Nf1   | _GSEGLAATYPAVGQTS[Phospho (STY)]PR_2                                    | Q04690_S2517_M1_Nf1  | 2.9296  | 9.0755  | 3.6164  | 9.1674  | 7.2934  | 9.0955  | 3.8338  | 3.9994  | 9.0430  | 9.0672  | 1.0581  | 0.0815  | 0.8459 | 0.0727 |
| Nf1   | _KS[Phospho (STY)]M[Oxidation (M)]SLDMGQPSQANTK_2                       | #N/A                 | 3.9901  | 3.6437  | 3.9289  | 3.8249  | 3.5152  | 3.8217  | 3.7956  | 3.9134  | 3.7690  | 3.6387  | 1.0022  | 0.0032  | 0.9369 | 0.0283 |
| Nf1   | _SMS[Phospho (STY)]LDMGQPSQANTK_2                                       | #N/A                 | 3.4137  | 4.1099  | 3.1473  | 4.3070  | 4.0582  | 4.0672  | 4.3402  | 4.3101  | 3.1083  | 3.8692  | 0.9881  | -0.0172 | 0.8913 | 0.0500 |
| Cdk16 | _KIS[Phospho (STY)]TEDINK_2                                             | #N/A                 | 5.5170  | 5.6740  | 6.1480  | 4.0133  | 2.7898  | 5.5418  | 3.7280  | 5.6149  | 5.5986  | 3.9803  | 1.0458  | 0.0647  | 0.7844 | 0.1055 |
| Cdk16 | _KIS[Phospho (STY)]TEDINKR_2                                            | #N/A                 | 3.7160  | 4.3876  | 3.8499  | 4.0602  | 3.7793  | 3.7865  | 4.2983  | 4.5280  | 3.8553  | 4.4623  | 0.9169  | -0.1251 | 0.0782 | 1.1088 |
| Cdk16 | _QLS[Phospho (STY)]MTLR_2                                               | Q04735_S12_M1_Cdk16  | 3.0353  | 4.3071  | 4.2698  | 6.3240  | 3.6799  | 2.9447  | 3.1876  | 3.4866  | 3.4909  | 1.1591  | 0.9171  | 0.2129  | 0.4087 | 0.3867 |
| Sox10 | _AS[Phospho (STY)]PGGELGK_2                                             | Q04888_S45_M1_Sox10  | 7.2811  | 7.0091  | 6.6943  | 7.9680  | 6.9625  | 7.0291  | 7.4213  |         |         |         |         |         |        |        |



|        |                                                                                            |                       |         |         |         |         |         |         |         |         |         |         |        |         |        |        |
|--------|--------------------------------------------------------------------------------------------|-----------------------|---------|---------|---------|---------|---------|---------|---------|---------|---------|---------|--------|---------|--------|--------|
| Fabp5  | [Acetyl (Protein N-term)]ASUKLEGK_2                                                        | #N/A                  | 5.8774  | 6.7821  | 6.4875  | 6.9498  | 6.7938  | 6.8070  | 6.5179  | 6.7395  | 6.5658  | 6.7511  | 0.9959 | -0.0059 | 0.8977 | 0.0469 |
| Fabp5  | [Oxidation (M)]AAM[Oxidation (M)]AKPC[Carbamidomethyl (C)]IITC[Carbamidomethyl (C)]DGNNTV  | #N/A                  | 5.3056  | 5.0582  | 5.9062  | 3.6716  | 5.3869  | 5.6002  | 3.0692  | 4.0218  | 4.9059  | 5.2173  | 1.1978 | 0.2604  | 0.1616 | 0.7916 |
| Fabp5  | [M[Oxidation (M)]I]EC[Carbamidomethyl (C)]VM[Oxidation (M)]NNATC[Carbamidomethyl (C)]ITR_2 | #N/A                  | 5.2693  | 5.3582  | 5.5075  | 6.1684  | 5.6849  | 5.4451  | 5.3149  | 5.7783  | 5.4824  | 5.1426  | 1.0263 | 0.0374  | 0.4897 | 0.3100 |
| Fabp5  | [TVFC[Carbamidomethyl (C)]NLGEXFDITADGR_3                                                  | #N/A                  | 5.0355  | 4.2429  | 5.1238  | 3.8778  | 4.0642  | 3.6653  | 4.0261  | 3.1234  | 3.4224  | 3.5551  | 1.2274 | 0.2956  | 0.0479 | 1.3192 |
| Fabp5  | [ETVC[Carbamidomethyl (C)]ITFQDQALVQHQWQDGK_3                                              | #N/A                  | 3.2659  | 4.0765  | 4.5004  | 4.0442  | 3.8978  | 3.8317  | 4.1925  | 4.4578  | 3.2560  | 3.7215  | 1.0075 | 0.0107  | 0.0324 | 0.0346 |
| Fabp5  | [KTEVC[Carbamidomethyl (C)]ITFQDQALVQHQQWQDGK_3                                            | #N/A                  | 3.9427  | 3.2835  | 3.1286  | 3.6313  | 3.1718  | 3.4528  | 3.3460  | 2.9864  | 4.1358  | 5.3498  | 0.8687 | -0.2031 | 0.2749 | 0.5608 |
| Fabp5  | [LMESHGFEYMK_2                                                                             | #N/A                  | 3.9398  | 3.2442  | 3.1258  | 3.3757  | 3.0655  | 3.1632  | 3.5240  | 2.9892  | 3.9245  | 3.5954  | 0.9461 | -0.0800 | 0.4243 | 0.3723 |
| Gch1   | [HRS[Phospho (STY)]EEENQVFNPK_3                                                            | #N/A                  | 4.3048  | 4.1631  | 4.4820  | 5.8719  | 4.2448  | 5.2474  | 3.9670  | 5.3378  | 5.1540  | 4.7943  | 0.9804 | -0.0285 | 0.8303 | 0.0728 |
| Pc     | [ALAVSDLNK_2                                                                               | #N/A                  | 7.0499  | 7.0773  | 6.9938  | 6.9846  | 7.0414  | 7.0580  | 6.6747  | 6.7394  | 6.8410  | 7.0040  | 1.0322 | 0.0457  | 0.0063 | 2.1999 |
| Pc     | [DFTATGPLDSLNTK_2                                                                          | #N/A                  | 6.6266  | 6.2208  | 6.0687  | 6.5863  | 6.0869  | 6.5860  | 6.1982  | 6.4482  | 6.3784  | 6.1944  | 1.0092 | 0.0132  | 0.7001 | 1.1549 |
| Pc     | [GANAVGVNTYPPNVFK_2                                                                        | #N/A                  | 5.8670  | 5.6025  | 3.2320  | 5.1777  | 5.8175  | 5.3229  | 5.6555  | 5.3242  | 5.0340  | 5.6697  | 0.9537 | -0.0684 | 0.6410 | 0.1932 |
| Pc     | [FIGSPFVVR_2                                                                               | #N/A                  | 7.2618  | 6.5425  | 3.4303  | 7.0318  | 7.0829  | 6.6338  | 6.5842  | 6.9852  | 6.6353  | 6.9030  | 0.9341 | -0.0983 | 0.5644 | 0.2484 |
| Pc     | [AC[Carbamidomethyl (C)]TELGR_2                                                            | #N/A                  | 5.3882  | 5.2250  | 5.1945  | 4.2753  | 5.2711  | 4.6520  | 4.3269  | 5.0454  | 5.1277  | 5.2331  | 1.0137 | 0.0197  | 0.8125 | 0.0900 |
| Pc     | [DM[Oxidation (M)]ITLEGDULIEE_2                                                            | #N/A                  | 4.4821  | 4.8457  | 5.9903  | 5.2625  | 4.8401  | 5.6909  | 5.2800  | 3.6122  | 5.2787  | 4.8901  | 1.0881 | 0.1219  | 0.3548 | 0.4502 |
| Pc     | [VVEIAPATHLDPQLR_2                                                                         | #N/A                  | 5.6870  | 5.7994  | 4.9683  | 5.8006  | 5.8065  | 4.3840  | 4.9782  | 5.7798  | 5.7820  | 5.6606  | 0.9743 | -0.0375 | 0.6870 | 0.1631 |
| Pc     | [DAHQSLATR_2                                                                               | #N/A                  | 5.4089  | 5.4165  | 6.1319  | 6.2281  | 5.9633  | 6.5212  | 6.0341  | 6.3282  | 6.0646  | 5.7660  | 0.9829 | -0.0248 | 0.6871 | 0.1630 |
| Pc     | [VFDSYEWEGAR_2                                                                             | #N/A                  | 5.3043  | 5.0074  | 3.9413  | 5.7910  | 4.8288  | 4.7954  | 5.7342  | 4.6392  | 5.2482  | 4.6670  | 0.9749 | -0.0367 | 0.7433 | 0.1289 |
| Pc     | [AEAEQAQELSPFR_2                                                                           | #N/A                  | 4.5622  | 3.5652  | 5.4866  | 4.7214  | 4.3957  | 4.4268  | 5.2544  | 4.4826  | 3.2272  | 5.0789  | 1.0034 | 0.0050  | 0.9750 | 0.0110 |
| Pc     | [EGPFGAR_2                                                                                 | #N/A                  | 5.5888  | 5.3660  | 3.8325  | 3.3763  | 5.9192  | 5.5789  | 3.5246  | 5.4494  | 4.9844  | 5.6426  | 1.0088 | 0.0127  | 0.9493 | 0.0226 |
| Pc     | [VMSYEELEENYTR_3                                                                           | #N/A                  | 4.5301  | 4.6091  | 5.7247  | 5.3957  | 4.8135  | 5.2530  | 4.1149  | 4.9805  | 5.3651  | 5.5881  | 1.0081 | 0.0117  | 0.9111 | 0.0404 |
| Pc     | [ADFAQAC[Carbamidomethyl (C)]QDQAVR_2                                                      | #N/A                  | 5.7160  | 3.2340  | 3.8421  | 3.3859  | 5.1565  | 3.3724  | 5.2366  | 3.6153  | 5.2899  | 4.9601  | 0.8623 | -0.1138 | 0.3216 | 0.4927 |
| Dna1   | [LSL[Phospho (STY)]ITNC[Carbamidomethyl (C)]IEK_2                                          | Q05A62_556_M1_Dna1    | 9.9125  | 8.8390  | 10.4716 | 10.2072 | 9.7251  | 9.9823  | 10.2523 | 9.8359  | 10.0985 | 9.9540  | 0.9968 | -0.0018 | 0.9394 | 0.0271 |
| Drp2   | [GQTT[Phospho (STY)]POTEVADGVGSK_2                                                         | #N/A                  | 5.9408  | 5.7686  | 3.5944  | 6.0706  | 5.2637  | 5.4158  | 6.3744  | 5.8865  | 4.1620  | 5.8590  | 0.9590 | -0.0603 | 0.7144 | 0.1461 |
| Drp2   | [LKGQTT[Phospho (STY)]POTEVADGVGSK_2                                                       | #N/A                  | 3.0038  | 4.2224  | 3.6906  | 4.1932  | 3.6303  | 4.0992  | 3.9079  | 3.9253  | 3.5739  | 6.0207  | 0.8737 | -0.1948 | 0.3061 | 0.5141 |
| Emi1   | [TSSS[Phospho (STY)]ERVSP[Phospho (STY)]PGGR_2                                             | Q05BC3_S135_M2_Emi1   | 4.2966  | 4.6584  | 4.9485  | 4.3999  | 5.1336  | 5.7864  | 5.8181  | 5.8300  | 3.2235  | 4.1035  | 1.0195 | 0.0279  | 0.8757 | 0.0577 |
| Larp7  | [TAS[Phospho (STY)]EGS[Phospho (STY)]EAETPEAPK_2                                           | #N/A                  | 8.6320  | 8.3263  | 8.4548  | 9.1448  | 8.2361  | 8.4669  | 8.9059  | 8.3638  | 8.2824  | 8.5703  | 1.0015 | 0.0022  | 0.9498 | 0.0224 |
| Larp7  | [TAS[Phospho (STY)]EGS[Phospho (STY)]EAETPEAPKQPAK_2                                       | #N/A                  | 6.2059  | 6.7221  | 7.2912  | 7.2254  | 6.2757  | 6.7866  | 7.0645  | 6.8997  | 6.7080  | 6.5834  | 0.9908 | -0.0134 | 0.8062 | 0.0936 |
| Larp7  | [DLEFC[Carbamidomethyl (C)]JES[Phospho (STY)]TI[Phospho (STY)]EEKETDR_2                    | Q05C18_S334_M2_Larp7  | 3.1745  | 3.9308  | 4.4090  | 3.9528  | 3.8191  | 2.9097  | 4.1995  | 3.0484  | 3.3474  | 3.6301  | 1.0402 | 0.0569  | 0.6876 | 0.1627 |
| Eif5b  | [EPHGES[Phospho (STY)]PK_2                                                                 | Q05D44_S1164_M1_Eif5b | 7.9922  | 7.8696  | 8.0567  | 8.2388  | 7.2840  | 7.8979  | 8.6830  | 8.2692  | 8.1482  | 8.2188  | 0.9472 | -0.0783 | 0.0503 | 1.2982 |
| Eif5b  | [SVPVDS[Phospho (STY)]GNEDDDSFK_2                                                          | Q05D44_S215_M1_Eif5b  | 12.4144 | 13.0963 | 13.1769 | 13.3900 | 12.3704 | 12.9807 | 13.6457 | 13.1686 | 13.0299 | 12.8720 | 0.9792 | -0.0303 | 0.3069 | 0.5130 |
| Eif5b  | [TARNSEAPLS[Phospho (STY)]GSEDADDSNK_3                                                     | #N/A                  | 6.1800  | 4.0924  | 4.3049  | 6.3398  | 5.6131  | 4.3026  | 5.7040  | 6.2999  | 3.4456  | 1.1092  | 0.9393 | 0.1496  | 0.4861 | 0.1333 |
| Eif5b  | [KTARNSEAPLS[Phospho (STY)]GSEDADDSNK_3                                                    | #N/A                  | 3.7608  | 3.8524  | 4.4832  | 3.9652  | 3.9768  | 3.7527  | 4.8071  | 3.0360  | 3.3350  | 4.4333  | 1.0160 | 0.0229  | 0.8682 | 0.0516 |
| Eif5b  | [NISEAPLS[Phospho (STY)]GSEDADDSNK_2                                                       | #N/A                  | 4.1923  | 3.1217  | 3.9544  | 4.9995  | 3.3644  | 4.3369  | 3.6464  | 3.1435  | 4.3719  | 3.1754  | 1.1146 | 0.1565  | 0.3519 | 0.4634 |
| Eif5b  | [TSFDENOS[Phospho (STY)]EELEDKDSK_2                                                        | #N/A                  | 4.2534  | 4.0125  | 4.2606  | 4.3383  | 3.2068  | 3.9645  | 3.4764  | 3.6475  | 3.6234  | 3.3428  | 1.1373 | 0.1856  | 0.0601 | 1.2214 |
| Eif5b  | [KTS[Phospho (STY)]FDENOS[Phospho (STY)]EELEDKDSK_3                                        | #N/A                  | 3.9048  | 3.7042  | 4.0786  | 3.7515  | 3.5793  | 3.5589  | 3.6953  | 4.0681  | 3.5834  | 1.0044  | 1.0044 | 0.0063  | 0.9054 | 0.0432 |
| Cab39  | [DVAGJNNILR_2                                                                              | #N/A                  | 5.1310  | 4.7539  | 5.7639  | 4.6472  | 4.9769  | 3.3106  | 5.0914  | 4.9760  | 5.5779  | 3.3406  | 0.9080 | -0.1392 | 0.2926 | 0.5338 |
| Atp5me | [VPPVQVSPUK_2                                                                              | #N/A                  | 9.7018  | 10.2336 | 9.9693  | 9.7999  | 10.3992 | 10.1337 | 9.9087  | 10.2169 | 10.4068 | 9.9688  | 0.9915 | -0.0123 | 0.6136 | 0.2121 |
| Atp5me | [ELAEAQDOSLK_2                                                                             | #N/A                  | 9.4811  | 9.2476  | 9.6833  | 9.5452  | 9.8495  | 9.5818  | 9.6206  | 9.4769  | 9.6677  | 9.5838  | 0.9977 | -0.0034 | 0.8399 | 0.0758 |
| Atp5me | [YSLKPR_2                                                                                  | #N/A                  | 8.6752  | 9.1281  | 8.9754  | 9.1715  | 9.5320  | 8.8990  | 8.7882  | 9.1505  | 9.0927  | 8.8736  | 1.0097 | 0.0140  | 0.6068 | 0.2169 |
| Atp5me | [YSALIGM[Oxidation (M)]AYGAK_2                                                             | #N/A                  | 6.7319  | 6.7984  | 7.1301  | 6.3772  | 7.0743  | 6.8826  | 6.7250  | 6.9936  | 6.9480  | 6.5722  | 1.0033 | 0.0048  | 0.8899 | 0.0507 |
| Sh3bp2 | [S[Phospho (STY)]PPDQGSFR_2                                                                | Q06649_S414_M1_Sh3bp2 | 6.5085  | 6.7192  | 6.5568  | 6.8397  | 3.4227  | 4.3088  | 3.1668  | 6.5191  | 6.9253  | 6.6318  | 0.9854 | -0.0213 | 0.9360 | 0.0287 |
| Clu    | [AGLIDTLQDR_2                                                                              | #N/A                  | 5.7151  | 5.7031  | 5.1059  | 5.8265  | 6.1003  | 5.7044  | 3.4759  | 5.8549  | 5.8179  | 5.5723  | 1.0989 | 0.1361  | 0.3183 | 0.4972 |
| Clu    | [VSTVTTHSSDSEVPSR_3                                                                        | #N/A                  | 4.1616  | 3.1808  | 3.8953  | 3.4390  | 5.7924  | 3.3193  | 3.5873  | 3.5621  | 3.8612  | 3.1163  | 1.1226 | 0.1668  | 0.4198 | 0.3770 |
| Clu    | [QGSQVLDMQDSFAR_2                                                                          | #N/A                  | 3.7527  | 3.0081  | 3.4863  | 6.3368  | 2.8964  | 3.7282  | 3.1784  | 4.5533  | 4.2701  | 7.7413  | 0.7495 | -0.4160 | 0.2347 | 0.6295 |
| Anxa7  | [SDTSGHFER_2                                                                               | #N/A                  | 5.5092  | 5.3078  | 4.6990  | 5.1838  | 5.5285  | 5.4413  | 4.8278  | 3.8440  | 5.2527  | 4.8728  | 1.1232 | 0.1676  | 0.0777 | 1.1097 |
| Anxa7  | [GFGDEQAVDVSNR_2                                                                           | #N/A                  | 5.8867  | 5.7718  | 6.4193  | 6.3590  | 5.4868  | 6.0883  | 6.4551  | 5.6864  | 6.1576  | 5.7592  | 0.9979 | -0.0030 | 0.9779 | 0.0979 |
| Anxa7  | [LVQAGEGR_2                                                                                | #N/A                  | 3.2339  | 3.7592  | 4.4684  | 4.0121  | 3.7993  | 3.1527  | 4.1604  | 3.6827  | 3.2881  | 3.6894  | 1.0088 | 0.0126  | 0.9131 | 0.0395 |
| Igf2r  | [AEALSHGDDQDS[Phospho (STY)]IEVLTVPVEVK_3                                                  | Q07113_S2401_M1_Igf2r | 3.5117  | 4.3169  | 4.1985  | 3.2003  | 5.8707  | 3.5913  | 4.4158  | 7.8821  | 3.0659  | 3.1673  | 0.8882 | -0.1710 | 0.6239 | 0.2049 |
| Igf2r  | [LVSHDSD[Phospho (STY)]IEDLJH_2                                                            | #N/A                  | 3.7757  | 3.3948  | 4.1017  | 3.6455  | 3.4259  | 3.2216  | 4.1342  | 3.3582  | 3.6572  | 3.3228  | 0.9934 | -0.0096 | 0.9159 | 0.0381 |
| Mtf1   | [Acetyl (Protein N-term)]GEHS[Phospho (STY)]PDNNIFFR_2                                     | Q07243_S5_M1_Mtf1     | 3.4650  | 4.2212  | 3.1987  | 4.9481  | 4.1846  | 4.0159  | 4.3915  | 4.6720  | 4.4208  | 3.9205  | 0.9206 | -0.1194 | 0.3376 | 0.0782 |
| Tle3   | [ESTNNSV[Phospho (STY)]PSESLR_2                                                            | Q08122_S203_M1_Tle3   | 9.1069  | 9.3890  | 9.8453  | 10.0930 | 8.9924  | 8.7556  | 9.6005  | 9.0933  | 9.9327  | 9.4617  | 1.1672 | 0.2231  | 0.2624 | 0.5811 |
| Tle3   | [DAPTS[Phospho (STY)]PASVASSTSPSK_2                                                        | Q08122_S286_M1_Tle3   | 3.3500  | 4.1063  | 4.5845  | 10.0412 | 3.9946  | 4.1309  | 9.6485  | 4.3737  | 9.4848  | 9.3422  | 0.6131 | -0.7059 | 0.0859 | 1.0661 |
| Tle3   | [VS[Phospho (STY)]PAHS[Phospho (STY)]PPENGLDK_2                                            | Q08122_S263_M2_Tle3   | 8.0241  | 4.1408  | 3.1182  | 8.9794  | 4.0291  | 4.0964  | 3.9895  | 3.8436  | 3.4922  | 4.2419  | 1.3870 | 0.4720  | 0.2653 | 0.5762 |
| Dmdmd  | [SVEGSSGQSS[Phospho (STY)]PSGVTV_2                                                         | Q08274_S659_M1_Dmdmd  | 3.4891  | 9.7387  | 10.2878 | 10.0535 | 9.0696  | 10.0137 | 10.3262 | 3.9482  | 9.9466  | 4.1372  | 1.2378 | 0.3078  | 0.4082 | 0.3891 |
| Dmdmd  | [YHS[Phospho (STY)]LGNISR_2                                                                | #N/A                  | 9.1518  | 9.2014  | 9.7016  | 9.6173  | 8.1439  | 9.3072  | 9.1647  | 9.1368  | 9.1604  | 9.1245  | 1.0044 | 0.0064  | 0.8900 | 0.0506 |
| Dmdmd  | [TLPGT[Phospho (STY)]IGAT[Phospho (STY)]PPASGSR_2                                          | Q08274_T457_M2_Dmdmd  | 8.5604  | 8.7160  | 9.6861  | 4.5707  | 8.8252  | 9.6334  | 3.2181  | 9.0507  | 8.3311  | 1.1946  | 0.2566 | 0.3929  | 0.4058 | 0.4058 |
| Dmdmd  | [RHS[Phospho (STY)]LGNISR_3                                                                | #N/A                  | 5.2089  | 4.1902  | 5.4524  | 5.4364  | 3.9190  | 4.6904  | 4.0993  | 4.8056  | 4.8668  | 4.5521  | 1.0514 | 0.0723  | 0.5344 | 0.2722 |
| Dmdmd  | [AFTDEETAAGQASWPRS[Phospho (STY)]PSK_3                                                     | Q08274_S643_M1_Dmdmd  | 3.6849  | 2.9893  | 4.3717  | 3.6306  | 3.7731  | 3.4180  | 3.7788  | 3.3706  | 3.6697  | 3.3078  | 1.0320 | 0.0454  | 0.6615 | 0.1795 |
| Dmdmd  | [LGDGDPGAPPST[Phospho (STY)]PSLGAGGGR_2                                                    | Q08274_T112_M1_Dmdmd  | 3.4767  | 3.7495  | 4.1635  | 3.1653  | 3.6378  | 2.9868  | 4.3808  | 3.4523  | 3.1009  | 3.1323  | 1.0038 | 0.0055  | 0.9678 | 0.0142 |
| Dmdmd  | [GGSGGSS[Phospho (STY)]NDKLSGPAPR_2                                                        | #N/A                  | 4.3248  | 3.9833  | 4.2223  | 4.2591  | 3.8418  | 4.0965  | 3.9738  | 3.7664  | 3.5090  | 4.0134  | 1.0801 | 0.1112  | 0.0478 | 1.3206 |
| Dmdmd  | [LNS[Phospho (STY)]LPHPAGGK_2                                                              | Q08274_S487_M1_Dmdmd  | 11.5841 | 11.1895 | 11.6740 | 11.7550 | 10.7107 | 11.4364 | 11.4951 | 11.3446 | 11.3197 | 11.2932 | 0.9966 | -0.0049 | 0.8525 | 0.0693 |
| Dmdmd  | [S[Phospho (STY)]DLNKPIDKR_3                                                               | Q08274_S145_M1_Dmdmd  | 5.3338  | 4.3431  | 3.4077  | 4.0655  | 3.8982  | 3.7319  | 3.6251  | 4.5588  | 4.6983  | 4.9322  | 0.9274 | -0.1088 |        |        |



|         |                                                                                       |                        |         |         |         |         |         |         |         |         |         |         |         |         |        |        |
|---------|---------------------------------------------------------------------------------------|------------------------|---------|---------|---------|---------|---------|---------|---------|---------|---------|---------|---------|---------|--------|--------|
| Inf2    | _SFSEDAVTDSS[Phospho (STY)]GGTLPR_2                                                   | QDGNCL_S1226_M1_Inf2   | 3.6320  | 5.6362  | 4.1826  | 6.2894  | 4.5278  | 4.5485  | 4.0991  | 4.5782  | 5.8789  | 4.7759  | 0.9937  | -0.0091 | 0.9598 | 0.0178 |
| Inf2    | _AVLIASDAQAC[Carbamidomethyl (C)]TLEEVVER_2                                           | #N/A                   | 3.9322  | 2.6858  | 3.6659  | 3.8250  | 3.0759  | 3.5487  | 3.1400  | 4.3913  | 2.3328  | 3.6941  | 1.0195  | 0.0278  | 0.8797 | 0.0557 |
| Unc79   | _ALS[Phospho (STY)]LPEITSK_2                                                          | QOKX59_S1242_M1_Unc79  | 7.5396  | 7.2634  | 7.6368  | 7.4515  | 3.0327  | 7.4868  | 7.9663  | 7.6294  | 7.1415  | 7.1624  | 0.9010  | -0.1503 | 0.4544 | 0.3425 |
| Unc79   | _VDS[Phospho (STY)]PGKAPR_2                                                           | QOKX59_S1596_M1_Unc79  | 3.1872  | 5.0498  | 5.0794  | 5.3122  | 3.5573  | 4.3609  | 5.8474  | 5.8956  | 4.9249  | 5.3489  | 0.8038  | -0.1150 | 0.0568 | 1.2454 |
| Ubin2b  | _FKAIS[Phospho (STY)]GEGQK_2                                                          | #N/A                   | 8.4805  | 9.0432  | 9.5375  | 9.1823  | 7.4300  | 8.9676  | 8.6036  | 8.6822  | 8.7630  | 8.9575  | 1.0025  | 0.0036  | 0.9557 | 0.0197 |
| Ubin2b  | _STPATC[Carbamidomethyl (C)]RS[Phospho (STY)]PR[Phospho (STY)]PPHR_3                  | QOKL01_S56_M2_Ubin2b   | 6.6467  | 7.0823  | 7.3651  | 7.3146  | 5.7817  | 7.1396  | 3.9526  | 7.2018  | 6.6799  | 7.2217  | 1.0997  | 0.1371  | 0.3911 | 0.4077 |
| Ubin2b  | _AFS[Phospho (STY)]GEGQK_2                                                            | #N/A                   | 3.2620  | 4.0804  | 4.4966  | 4.0403  | 3.9066  | 4.2188  | 4.1886  | 4.4617  | 3.2599  | 3.7176  | 1.0240  | 0.0342  | 0.7604 | 0.1190 |
| Trio    | _DSDSAAT[Phospho (STY)]PCDETEER_2                                                     | QOKL02_T1824_M1_Trio   | 6.6716  | 6.2621  | 4.2921  | 3.8359  | 5.0825  | 3.6234  | 3.9842  | 6.9285  | 6.4631  | 6.5446  | 0.8398  | -0.2519 | 0.3043 | 0.5167 |
| Trio    | _NFLNALT[Phospho (STY)]PIEYGR_2                                                       | QOKL02_S2282_M1_Trio   | 3.0350  | 4.3074  | 4.2695  | 6.1528  | 3.6795  | 3.6007  | 3.9615  | 3.1879  | 3.4870  | 3.4905  | 1.1819  | 0.2411  | 0.2881 | 0.5405 |
| Trio    | _SADAGSQKDS[Phospho (STY)]DOSAATPQDETEER_3                                            | QOKL02_S1818_M1_Trio   | 3.0266  | 4.1996  | 3.7134  | 4.2160  | 3.6531  | 4.0375  | 3.9307  | 3.9025  | 5.5511  | 4.1830  | 0.9784  | -0.0315 | 0.7471 | 0.1266 |
| Spta18  | _SARS[Phospho (STY)]PS[Phospho (STY)]PSTGTR_2                                         | QDP557_S244_M2_Spta18  | 3.2559  | 4.0611  | 3.9427  | 4.0596  | 3.8824  | 3.8471  | 4.2079  | 3.6731  | 3.2406  | 4.4123  | 0.9892  | -0.0157 | 0.8753 | 0.0578 |
| Spta18  | _SNS[Phospho (STY)]PC[Carbamidomethyl (C)]TTVAK_2                                     | QDP557_S273_M1_Spta18  | 4.3705  | 3.6259  | 4.1042  | 3.6480  | 3.5142  | 3.1104  | 4.5044  | 3.3532  | 3.6523  | 3.3252  | 1.0054  | 0.0078  | 0.9507 | 0.0219 |
| Sobp    | _SADS[Phospho (STY)]PGSSGQALSAPAE_2                                                   | QDP5V2_S597_M1_Sobp    | 7.5813  | 3.3417  | 3.8200  | 3.3638  | 3.2300  | 3.3946  | 8.6597  | 7.8918  | 3.9365  | 3.0410  | 0.7007  | -0.5131 | 0.2472 | 0.6070 |
| Sic45a4 | _GS[Phospho (STY)]PPNLSLR_2                                                           | QDP5V9_S408_M1_Sic45a4 | 4.3664  | 3.6218  | 4.1001  | 7.1388  | 3.5101  | 3.1145  | 4.5085  | 7.2935  | 6.5961  | 7.3602  | 0.6691  | -0.5797 | 0.0474 | 1.3241 |
| Sic45a4 | _S[Phospho (STY)]MOxidation (M)]SOLVLIQQR_2                                           | #N/A                   | 3.9594  | 6.4554  | 6.8971  | 5.5827  | 3.0851  | 6.7796  | 7.1306  | 6.7578  | 6.8656  | 6.9233  | 0.7891  | -0.3418 | 0.1114 | 0.9530 |
| Zc3h18  | _LGVSV[Phospho (STY)]PSR_2                                                            | QDP678_S530_M1_Zc3h18  | 3.3976  | 8.8046  | 9.4466  | 3.9179  | 4.0241  | 3.7054  | 9.0225  | 3.0833  | 3.3823  | 3.5952  | 1.1632  | 0.2181  | 0.6788 | 0.1683 |
| Zc3h18  | _KRPLS[Phospho (STY)]POS_K_2                                                          | QDP678_S888_M1_Zc3h18  | 3.6395  | 7.8219  | 8.1136  | 4.4178  | 7.1819  | 3.8413  | 8.2724  | 4.0842  | 4.3832  | 4.0951  | 1.1204  | 0.1641  | 0.6515 | 0.1861 |
| Zc3h18  | _KANLS[Phospho (STY)]POR_2                                                            | #N/A                   | 6.3585  | 6.6656  | 6.7699  | 3.7122  | 6.1888  | 5.8745  | 6.5526  | 6.9082  | 6.5621  | 6.7156  | 0.8868  | -0.1732 | 0.2299 | 0.6385 |
| Zc3h18  | _ANLS[Phospho (STY)]PORIGSR_2                                                         | #N/A                   | 4.5920  | 3.6030  | 6.3154  | 5.4733  | 5.2848  | 4.3051  | 3.7020  | 5.6077  | 3.7798  | 5.0254  | 1.0884  | 0.1222  | 0.5334 | 0.2730 |
| Zc3h18  | _M[Oxidation (M)]MGASPS[Phospho (STY)]PKPER_2                                         | #N/A                   | 6.2444  | 6.2916  | 6.0815  | 7.1713  | 5.9318  | 5.8344  | 6.4862  | 6.6178  | 5.9596  | 6.2724  | 0.9882  | -0.0172 | 0.7886 | 0.1031 |
| Zc3h18  | _ANLS[Phospho (STY)]POR_2                                                             | #N/A                   | 5.9369  | 5.5221  | 5.8017  | 5.3818  | 4.9182  | 5.8256  | 5.6705  | 3.7749  | 5.4272  | 6.0264  | 1.0650  | 0.0909  | 0.4614 | 0.3359 |
| Zc3h18  | _S[Phospho (STY)]QPPSR_2                                                              | QDP678_S483_M1_Zc3h18  | 5.6879  | 3.3981  | 3.6780  | 3.2218  | 3.2194  | 3.3644  | 3.3700  | 5.6116  | 5.3712  | 4.6538  | 0.7917  | -0.1370 | 0.1551 | 0.8093 |
| Zc3h18  | _SQGQDS[Phospho (STY)]EAMLSR_2                                                        | QDP678_S80_M1_Zc3h18   | 3.0517  | 4.1745  | 3.7385  | 4.2411  | 3.6782  | 4.0513  | 3.9558  | 3.8773  | 3.5259  | 4.2081  | 0.9822  | -0.0259 | 0.7898 | 0.1025 |
| Zc3h18  | _VQSQEETRS[Phospho (STY)]DEEDRASEP_K_2                                                | QDP678_S64_M1_Zc3h18   | 3.8768  | 4.2238  | 4.0732  | 4.0142  | 3.6836  | 4.2619  | 3.9638  | 3.6559  | 3.5403  | 3.8424  | 1.0724  | 0.1009  | 0.0768 | 1.1149 |
| Dact3   | _SNS[Phospho (STY)]GDASPSAPSEVGAR_2                                                   | QDPHV7_S165_M1_Dact3   | 10.3894 | 10.3238 | 10.2822 | 10.6068 | 9.3575  | 10.3495 | 10.9306 | 10.5384 | 10.5081 | 10.3940 | 0.9653  | -0.0510 | 0.1629 | 0.7881 |
| Dact3   | _GRS[Phospho (STY)]VEQS[Phospho (STY)]PPR_2                                           | #N/A                   | 8.7079  | 7.7284  | 8.1784  | 8.5426  | 8.0723  | 8.4693  | 8.5077  | 8.6538  | 8.1122  | 0.9573  | -0.0630 | 0.2519  | 0.5987 | 0.5887 |
| Dact3   | _SQS[Phospho (STY)]ETSLGR_2                                                           | QDPHV7_S409_M1_Dact3   | 8.1147  | 7.5765  | 8.6949  | 7.8205  | 3.4818  | 8.0998  | 8.1787  | 8.3452  | 7.9261  | 8.1150  | 0.8964  | -0.1577 | 0.4125 | 0.3846 |
| Dact3   | _AFSPVPS[Phospho (STY)]PER_2                                                          | QDPHV7_S10_M1_Dact3    | 4.2136  | 7.9382  | 8.1820  | 8.6090  | 7.7062  | 7.5707  | 8.2975  | 8.6372  | 8.5360  | 8.3734  | 0.8710  | -0.1992 | 0.2167 | 0.6642 |
| Dact3   | _PRPPEAS[Phospho (STY)]PPPGGAR_2                                                      | #N/A                   | 7.0277  | 3.9371  | 6.9432  | 5.4306  | 3.7768  | 5.3152  | 7.4599  | 5.5362  | 6.7815  | 6.7815  | 0.7967  | -0.3279 | 0.1213 | 0.9163 |
| Dact3   | _SFS[Phospho (STY)]APPYTAAAGATC[Carbamidomethyl (C)]SSAER_2                           | QDPHV7_S188_M1_Dact3   | 3.5558  | 3.5681  | 3.8116  | 3.7251  | 3.4564  | 3.6840  | 3.6875  | 3.0907  | 3.8501  | 3.5445  | 1.0255  | 0.0363  | 0.5510 | 0.2588 |
| Dact3   | _GRS[Phospho (STY)]VEQS[Phospho (STY)]PPR_K_2                                         | #N/A                   | 3.6773  | 3.5489  | 4.3641  | 3.3659  | 3.4372  | 3.1874  | 3.0806  | 3.2517  | 4.4012  | 3.3329  | 1.0278  | 0.0325  | 0.8062 | 0.0935 |
| Stum    | _GASSS[Phospho (STY)]GVVVQVR_2                                                        | QDVBFB_S29_M1_Stum     | 8.9744  | 8.6400  | 9.1030  | 8.5915  | 7.4820  | 8.6615  | 9.4244  | 8.8322  | 8.4233  | 8.0790  | 0.9660  | -0.0499 | 0.3939 | 0.4046 |
| Stum    | _DAETAAAAAATAAADR_2                                                                   | #N/A                   | 4.1202  | 3.2222  | 3.8539  | 3.3977  | 3.0435  | 3.1851  | 3.5459  | 3.9026  | 3.8250  | 3.8250  | 0.9826  | -0.0253 | 0.8163 | 0.0882 |
| Rbm15   | _SLS[Phospho (STY)]PGGAALGYR_2                                                        | QDVBLL_S293_M1_Rbm15   | 12.1165 | 12.0289 | 12.6669 | 12.4752 | 11.4549 | 12.1223 | 12.5506 | 11.9493 | 12.0420 | 12.1915 | 0.9968  | -0.0047 | 0.8728 | 0.0591 |
| Rbm15   | _LHYSY[Phospho (STY)]PSTK_2                                                           | QDVBLL_S127_M1_Rbm15   | 3.0156  | 3.8208  | 3.7024  | 4.2998  | 3.6422  | 4.0873  | 4.4481  | 7.0119  | 3.9771  | 3.9771  | 0.6650  | -0.5887 | 0.0270 | 1.5693 |
| Rbm15   | _HLDRS[Phospho (STY)]PESERRP_K_2                                                      | QDVBLL_S655_M1_Rbm15   | 3.9870  | 3.3554  | 3.7207  | 3.2644  | 3.1307  | 3.0519  | 3.4127  | 3.7367  | 4.0358  | 4.4426  | 0.8749  | -0.1927 | 0.0903 | 1.0441 |
| Rbm15   | _S[Phospho (STY)]RS[Phospho (STY)]PEIDKDAYPSSSVGTSGVSHR_3                             | #N/A                   | 3.8925  | 4.1879  | 3.7203  | 8.8697  | 7.6623  | 7.6428  | 4.0462  | 8.9282  | 7.2456  | 8.4858  | 0.8587  | -0.2197 | 0.5384 | 0.2689 |
| Rbm15   | _HC[Carbamidomethyl (C)]T[Phospho (STY)]PS[Phospho (STY)]PORS[Phospho (STY)]PELSSNR_3 | QDVBLL_S670_M1_Rbm15   | 4.6659  | 3.8285  | 4.0844  | 3.9523  | 3.7168  | 3.7772  | 3.9988  | 3.4812  | 3.8760  | 3.4824  | 1.0794  | 0.1102  | 0.1935 | 0.7132 |
| Rbm15   | _DRT[Phospho (STY)]PPLLR_2                                                            | #N/A                   | 9.2233  | 9.2023  | 8.9055  | 9.9774  | 8.8598  | 9.4162  | 9.8608  | 9.1410  | 9.2742  | 9.4819  | 1.0005  | 0.0007  | 0.9857 | 0.0063 |
| Fam83b  | _KSEPKVSS[Phospho (STY)]PR_2                                                          | QDVBIM_S827_M1_fam83b  | 3.5862  | 4.8070  | 3.7598  | 4.8442  | 3.6964  | 3.5766  | 3.9771  | 3.9657  | 3.6143  | 3.7220  | 1.0590  | 0.0826  | 0.4998 | 0.3012 |
| Ppp4r2  | _TS[Phospho (STY)]APEPR_2                                                             | QDVG87_S63_M1_Ppp4r2   | 3.8021  | 3.4241  | 4.4889  | 3.4907  | 3.3124  | 3.3122  | 3.2054  | 3.1269  | 4.2764  | 3.4577  | 1.0346  | 0.0491  | 0.7058 | 0.1513 |
| Vgf     | _LQGGLAQVEAGR_2                                                                       | #N/A                   | 4.5624  | 2.8357  | 4.1658  | 3.7096  | 4.8212  | 3.3000  | 4.1769  | 4.0184  | 3.5906  | 3.3869  | 1.0161  | 0.0230  | 0.8927 | 0.0493 |
| Vgf     | _S[Phospho (STY)]QEEAPGHR_2                                                           | #N/A                   | 11.6846 | 11.9743 | 12.2667 | 12.0386 | 11.8061 | 11.8561 | 11.9268 | 11.8050 | 11.6998 | 11.9648 | 1.0075  | 0.1018  | 0.4607 | 0.3366 |
| Vgf     | _QNALFEEEDGAGAEIDKRS[Phospho (STY)]QEEAPGHR_4                                         | #N/A                   | 5.2177  | 5.1714  | 4.2164  | 6.0928  | 5.6672  | 4.9353  | 5.3880  | 4.8786  | 4.6254  | 5.1099  | 1.0097  | 0.1505  | 0.2406 | 0.6188 |
| Tanc1   | _SPC[Carbamidomethyl (C)]ETIS[Phospho (STY)]PSTLESK_2                                 | QDVGVE_S211_M1_Tanc1   | 3.9142  | 3.4282  | 6.2512  | 3.1917  | 3.0580  | 3.5666  | 3.3400  | 5.9255  | 5.8278  | 4.3698  | 0.8019  | -0.1186 | 0.2518 | 0.5990 |
| Tanc1   | _QGQPPAPANDS[Phospho (STY)]DNEEDAPASSLK_2                                             | QDVGVE_S1436_M1_Tanc1  | 3.3964  | 3.8298  | 4.0832  | 4.5859  | 3.7181  | 4.4074  | 4.3005  | 3.5326  | 3.1812  | 3.0520  | 1.1384  | 0.1871  | 0.1634 | 0.7861 |
| Npepps  | _VIGATSPELIQQ_K_2                                                                     | #N/A                   | 5.9444  | 5.9857  | 5.2458  | 5.4028  | 6.1412  | 6.0884  | 6.9481  | 6.4475  | 6.3808  | 5.7938  | 0.9075  | -0.1400 | 0.0593 | 1.2272 |
| Npepps  | _DNWVEELHNR_2                                                                         | #N/A                   | 5.9524  | 5.9824  | 6.2839  | 5.9530  | 5.8093  | 5.4257  | 6.5226  | 5.9645  | 5.8797  | 5.9926  | 0.9690  | -0.0454 | 0.3349 | 0.4751 |
| Npepps  | _LVSVEGFAVDK_2                                                                        | #N/A                   | 6.0706  | 6.3926  | 5.6034  | 6.0204  | 5.4048  | 5.7380  | 6.5837  | 6.2687  | 5.8722  | 5.9044  | 0.9536  | -0.0685 | 0.2418 | 0.6166 |
| Npepps  | _LGLQNDLPSLAR_2                                                                       | #N/A                   | 5.0528  | 5.0613  | 4.7374  | 4.7953  | 4.3258  | 4.1272  | 5.3309  | 5.1785  | 4.1889  | 5.9600  | 0.9600  | -0.0589 | 0.6861 | 0.1636 |
| Npepps  | _AGISTVEVLK_2                                                                         | #N/A                   | 5.0187  | 7.5562  | 7.8237  | 7.9810  | 7.8220  | 8.0974  | 7.4640  | 5.5680  | 7.8273  | 7.6375  | 1.0363  | 0.0515  | 0.7312 | 0.1360 |
| Npepps  | _OIASADLR_2                                                                           | #N/A                   | 6.2542  | 5.9840  | 6.5862  | 5.8097  | 5.7761  | 6.2676  | 4.4195  | 5.8554  | 5.8058  | 5.8475  | 1.1151  | 0.1572  | 0.0861 | 1.0649 |
| Npepps  | _IDFVGEINDK_2                                                                         | #N/A                   | 5.6695  | 5.6700  | 4.3035  | 6.0501  | 5.7186  | 5.0014  | 5.8385  | 6.1476  | 5.8702  | 5.6075  | 0.9209  | -0.1188 | 0.2058 | 0.6866 |
| Npepps  | _YOGGFUSR_2                                                                           | #N/A                   | 5.4985  | 6.0952  | 6.0751  | 3.6166  | 3.4829  | 5.8794  | 5.5885  | 5.9105  | 8.8250  | 5.9381  | 0.8783  | -0.1872 | 0.2933 | 0.5326 |
| Npepps  | _YAVTQFATDAR_2                                                                        | #N/A                   | 3.7358  | 4.1383  | 3.1302  | 4.6512  | 4.2148  | 4.7398  | 4.6160  | 5.3106  | 4.1342  | 4.5246  | 0.8828  | -0.1799 | 0.1711 | 0.7667 |
| Npepps  | _DVSFPIGR_2                                                                           | #N/A                   | 6.0336  | 5.4463  | 5.6190  | 6.3111  | 5.1537  | 5.6776  | 5.8566  | 5.8010  | 5.4667  | 5.6155  | 1.0037  | 0.0053  | 0.9268 | 0.0330 |
| Npepps  | _ETALLDPK_2                                                                           | #N/A                   | 3.4694  | 3.5556  | 3.3116  | 4.3563  | 3.3022  | 4.3788  | 4.5045  | 4.0123  | 3.5651  | 3.9090  | 0.9328  | -0.1004 | 0.3957 | 0.4027 |
| Npepps  | _DADSHQZYLQGR_2                                                                       | #N/A                   | 5.3673  | 4.9646  | 4.2444  | 4.0775  | 4.7422  | 4.7016  | 4.8685  | 5.1940  | 4.2436  | 4.6557  | 0.9879  | -0.0176 | 0.8463 | 0.0725 |
| Npepps  | _AFFESHAPSAER_2                                                                       | #N/A                   | 5.7050  | 6.0879  | 5.9918  | 3.6834  | 3.8566  | 6.1742  | 3.4427  | 5.9284  | 5.6793  | 5.6417  | 1.0793  | 0.1011  | 0.5550 | 0.2557 |
| Npepps  | _S[Phospho (STY)]PVILTVLK_2                                                           | Q11011_S746_M1_Npepps  | 3.5976  | 3.7448  | 3.3313  | 4.3759  | 4.2422  | 4.1633  | 4.5241  | 4.0075  | 4.4252  | 4.0532  | 0.9193  | -0.1214 | 0.1811 | 0.7420 |
| Npepps  | _VALSMNMVIDR_2                                                                        | #N/A                   | 3.8303  | 3.1081  | 4.0740  | 3.5419  | 3.5724  | 3.4690  | 5.4183  | 3.5261  | 6.7198  | 3.9768  | 0.8688  |         |        |        |



|              |                                                                                              |                                                                                     |  |                         |         |         |         |         |         |         |         |         |         |         |         |         |        |        |
|--------------|----------------------------------------------------------------------------------------------|-------------------------------------------------------------------------------------|--|-------------------------|---------|---------|---------|---------|---------|---------|---------|---------|---------|---------|---------|---------|--------|--------|
| Kmc2         |                                                                                              | _SVLSGDDTSGSEPPLS[Phospho (STY)]PPER_2                                              |  | Q14880_5557_M1_Kmc2     | 8.5645  | 7.5706  | 4.3648  | 8.9680  | 7.0660  | 7.5307  | 8.8657  | 3.2511  | 7.8935  | 8.1224  | 1.0442  | 0.0624  | 0.8178 | 0.0873 |
| Kmc2         | TELNM[Oxidation (M)]AC[Carbamidomethyl (C)]INSTGS[Phospho (STY)]DT[C[Carbamidomethyl (C)]LGK | #N/A                                                                                |  |                         | 3.7277  | 3.8587  | 3.8738  | 3.6175  | 3.2299  | 3.3555  | 3.9023  | 3.4099  | 3.8298  | 3.1127  | 1.0131  | 0.0188  | 0.8207 | 0.0858 |
| Map6d1       |                                                                                              | _AGS[Phospho (STY)]RDAAQERPSGGGR_3                                                  |  | Q14889_582_M1_Map6d1    | 6.5734  | 6.3563  | 7.5087  | 6.8021  | 6.5713  | 6.7059  | 6.6673  | 7.0240  | 6.6885  | 6.9113  | 0.9869  | -0.0191 | 0.6845 | 0.1646 |
| Map6d1       |                                                                                              | _TVVLPVGSDADAAVVAATSR_2                                                             |  | #N/A                    | 5.1746  | 5.5621  | 5.6177  | 5.8394  | 4.8353  | 5.0900  | 3.8201  | 4.9414  | 3.6284  | 5.0966  | 1.2266  | 0.2946  | 0.0243 | 1.6136 |
| Map6d1       |                                                                                              | _VVTHTS[Phospho (STY)]SGWSS[Phospho (STY)]PGASQVPEVR_3                              |  | Q14889_5154_M2_Map6d1   | 4.3391  | 5.0646  | 3.9229  | 6.9036  | 4.2607  | 4.7746  | 4.2729  | 5.2085  | 4.1206  | 4.5879  | 1.0726  | 0.1011  | 0.5840 | 0.2336 |
| Map6d1       |                                                                                              | _SDVAIVPLTHGYS[Phospho (STY)]DRGSEEGAC[Carbamidomethyl (C)]SVSR_3                   |  | Q14889_534_M1_Map6d1    | 3.2783  | 4.0633  | 3.6407  | 6.3153  | 3.9124  | 3.9864  | 4.2178  | 4.9334  | 4.9949  | 4.8484  | 0.8843  | -0.1773 | 0.3610 | 0.4425 |
| Fam171b      |                                                                                              | _STVEDFEANTS[Phospho (STY)]PTK_2                                                    |  | #N/A                    | 10.4626 | 10.1156 | 11.0932 | 10.2044 | 3.3616  | 10.3013 | 11.1084 | 10.2504 | 3.1726  | 1.0573  | 0.0803  | 0.8169  | 0.0879 |        |
| Fam171b      |                                                                                              | _RDS[Phospho (STY)]KTNIWK_2                                                         |  | #N/A                    | 5.4042  | 5.7200  | 4.8306  | 5.7238  | 3.6519  | 5.9572  | 6.1392  | 5.9752  | 6.0909  | 5.6760  | 0.8752  | -0.1924 | 0.1341 | 0.8726 |
| Fam171b      |                                                                                              | _DQTTS[Phospho (STY)]TTHNHSSVK_3                                                    |  | Q14C80_5405_M1_Fam171b  | 5.0236  | 3.3943  | 3.6818  | 4.9911  | 3.2156  | 3.0130  | 3.3738  | 3.7756  | 4.0747  | 4.4037  | 0.9948  | -0.0075 | 0.9678 | 0.0142 |
| Fam171b      |                                                                                              | _HILEGGGVVIEHPGEIS[Phospho (STY)]PGRK_3                                             |  | #N/A                    | 3.8996  | 3.6687  | 3.3024  | 4.5848  | 3.5570  | 3.9465  | 3.8397  | 5.8543  | 3.8889  | 0.8957  | -0.1590 | 0.3786  | 0.4219 |        |
| Fam171b      |                                                                                              | _KSTVEDFEANTS[Phospho (STY)]PTK_2                                                   |  | #N/A                    | 3.7615  | 6.8760  | 3.4952  | 4.5398  | 6.1772  | 6.4636  | 7.5097  | 7.1808  | 7.0225  | 6.5428  | 0.7388  | -0.4367 | 0.0425 | 1.3714 |
| Fam171b      |                                                                                              | _STVEDFEANTSP[Phospho (STY)]KK_2                                                    |  | Q14C80_T794_M1_Fam171b  | 3.3521  | 3.9662  | 3.9824  | 5.3450  | 3.8227  | 4.1116  | 5.7970  | 5.4433  | 3.1747  | 3.8077  | 0.8992  | -0.1532 | 0.4693 | 0.3285 |
| Nsun2        |                                                                                              | _FQGPQPQGEEDAS[Phospho (STY)]DGGR_2                                                 |  | Q1HFZ0_523_M1_Nsun2     | 8.1631  | 8.4948  | 8.2625  | 9.1640  | 7.7304  | 8.4657  | 9.0392  | 8.5412  | 7.9044  | 7.8399  | 1.0059  | 0.0084  | 0.8858 | 0.0527 |
| Nsun2        |                                                                                              | _EGVLTNENAS[Phospho (STY)]PEQPGDEDAK_2                                              |  | #N/A                    | 4.2659  | 3.5702  | 3.4518  | 4.5505  | 3.3916  | 4.3379  | 3.1979  | 7.4408  | 7.2954  | 3.9215  | 0.7189  | -0.4761 | 0.1319 | 0.8798 |
| Nsun2        |                                                                                              | _KKEGVLTNENAS[Phospho (STY)]PEQPGDEDAK_3                                            |  | #N/A                    | 3.6616  | 3.6808  | 3.3953  | 4.4399  | 4.3766  | 4.2274  | 3.0873  | 4.0621  | 4.3612  | 4.1172  | 1.0145  | 0.0208  | 0.8619 | 0.0646 |
| Spec1l       |                                                                                              | _RSS[Phospho (STY)]TSSEPTPTVK_2                                                     |  | Q2KN98_5833_M1_Spec1l   | 7.1403  | 3.4231  | 7.5527  | 7.6025  | 2.9288  | 7.4138  | 3.2064  | 7.2384  | 7.3756  | 3.4587  | 1.1298  | 0.1761  | 0.6460 | 0.1898 |
| Spec1l       |                                                                                              | _SKS[Phospho (STY)]DNQSGDK_2                                                        |  | Q2KN98_5171_M1_Spec1l   | 6.1769  | 3.4018  | 6.7796  | 6.7704  | 5.7886  | 5.4132  | 6.8243  | 6.6550  | 5.0472  | 4.1873  | 1.0076  | 0.0110  | 0.9590 | 0.0182 |
| Spec1l       |                                                                                              | _KGS[Phospho (STY)]SGNAISEVAC[Carbamidomethyl (C)]LTER_3                            |  | Q2KN98_5385_M1_Spec1l   | 3.3024  | 4.0712  | 3.3417  | 4.2489  | 3.9425  | 4.0088  | 3.8371  | 4.3241  | 4.8945  | 4.0215  | 0.8974  | -0.1562 | 0.1518 | 0.8187 |
| Phactr1      |                                                                                              | _S[Phospho (STY)]KFLANGR_2                                                          |  | Q2M3X8_5111_M1_Phactr1  | 8.2380  | 7.5074  | 8.6688  | 8.7021  | 8.1124  | 8.1791  | 8.3009  | 8.4942  | 8.6043  | 8.2518  | 0.9788  | -0.3009 | 0.4651 | 0.3324 |
| Phactr1      |                                                                                              | _KLS[Phospho (STY)]QRPTELELR_3                                                      |  | Q2M3X8_5505_M1_Phactr1  | 7.0742  | 7.1035  | 7.7316  | 8.0380  | 7.3050  | 3.2604  | 7.2975  | 7.1476  | 7.6740  | 7.1652  | 0.9223  | -0.1167 | 0.5445 | 0.2640 |
| Phactr1      |                                                                                              | _SDSLVGTHT[Phospho (STY)]PPR_3                                                      |  | Q2M3X8_T104_M1_Phactr1  | 3.8665  | 4.8308  | 4.5533  | 3.5551  | 2.9922  | 3.2365  | 3.2698  | 4.6838  | 4.2120  | 3.5221  | 0.9789  | -0.3908 | 0.8588 | 0.0661 |
| Phactr1      |                                                                                              | _ILS[Phospho (STY)]QRPTELELR_3                                                      |  | Q2M3X8_5467_M1_Phactr1  | 4.2451  | 3.5495  | 3.4111  | 4.5712  | 2.1034  | 4.1587  | 3.7940  | 4.1847  | 2.2380  | 3.4177  | 1.0892  | 0.1323  | 0.6097 | 0.2422 |
| Phactr1      |                                                                                              | _SKS[Phospho (STY)]DTPLAAR_2                                                        |  | Q2M3X8_567_M1_Phactr1   | 10.0403 | 9.9271  | 10.4319 | 10.5723 | 9.2255  | 10.1379 | 10.1699 | 10.0663 | 9.9421  | 10.0786 | 0.9992  | -0.0012 | 0.9734 | 0.0117 |
| Phactr1      |                                                                                              | _SDT[Phospho (STY)]PTLAAR_2                                                         |  | Q2M3X8_T69_M1_Phactr1   | 4.0047  | 3.2601  | 3.7383  | 3.2821  | 3.1484  | 3.4762  | 3.4304  | 3.7191  | 4.0181  | 2.9594  | 0.9868  | -0.0192 | 0.8531 | 0.0690 |
| Phactr1      |                                                                                              | _NEQEEQEEKR_2                                                                       |  | #N/A                    | 3.9404  | 3.2448  | 3.1264  | 3.6290  | 3.0661  | 3.1625  | 3.5233  | 2.9886  | 4.8813  | 3.5960  | 0.8971  | -0.1567 | 0.3196 | 0.4954 |
| Gak3a        |                                                                                              | _GEPNVSY[Phospho (STY)]C[Carbamidomethyl (C)]SR_2                                   |  | Q2NL51_Y279_M1_Gak3a    | 16.0182 | 15.7447 | 16.5782 | 15.9302 | 14.9507 | 15.6144 | 16.3860 | 15.8097 | 15.9043 | 15.6517 | 0.9917  | -0.0120 | 0.6720 | 0.2726 |
| Gak3a        |                                                                                              | _Acetyl (Protein N-term)[S[Phospho (STY)]GGSPGGGGGGGR_2                             |  | Q2NL51_S2_M1_Gak3a      | 10.3761 | 10.4359 | 10.8638 | 10.5993 | 9.9998  | 10.4516 | 10.7437 | 10.5531 | 10.4896 | 10.3384 | 0.9832  | -0.0244 | 0.5210 | 0.1832 |
| Gak3a        |                                                                                              | _T[Phospho (STY)]SSFAEFGGGGGGGGGGSGGSGGGTGGGK_3                                     |  | Q2NL51_T19_M1_Gak3a     | 3.4717  | 5.9668  | 4.1585  | 3.1603  | 4.0982  | 3.6313  | 3.9921  | 3.4573  | 3.1059  | 3.7073  | 1.1931  | 0.2547  | 0.2521 | 0.5875 |
| Psd3         |                                                                                              | _SHS[Phospho (STY)]SPSLNPASPTAK_3                                                   |  | #N/A                    | 10.7962 | 11.0879 | 11.3879 | 11.4221 | 10.9311 | 11.3582 | 10.9269 | 11.1094 | 11.3842 | 10.7002 | 1.0121  | 0.0174  | 0.4709 | 0.3980 |
| Psd3         |                                                                                              | _VLFGTQSPPEM[Oxidation (M)]GQGWNK_2                                                 |  | #N/A                    | 5.3792  | 5.5705  | 6.0092  | 5.2951  | 4.8530  | 5.6237  | 5.5915  | 5.7407  | 5.5208  | 5.4834  | 0.9769  | -0.0337 | 0.5404 | 0.2673 |
| Psd3         |                                                                                              | _IGS[Phospho (STY)]TNPFLDIPDNAAVVK_3                                                |  | #N/A                    | 7.1882  | 8.3631  | 8.0091  | 9.0687  | 6.0478  | 7.7282  | 6.9551  | 7.6994  | 7.5874  | 0.9185  | 0.0265  | 0.8175  | 0.0735 | 0.6731 |
| Psd3         |                                                                                              | _DHYLEFEK_2                                                                         |  | #N/A                    | 5.2895  | 5.1083  | 5.3908  | 5.3597  | 5.2395  | 5.9620  | 4.3196  | 5.8112  | 5.2323  | 5.5491  | 1.1033  | 0.0444  | 0.5984 | 0.2230 |
| Psd3         |                                                                                              | _SHS[Phospho (STY)]SPSLNPASPTAK_2                                                   |  | #N/A                    | 12.2211 | 12.4634 | 13.1157 | 12.8452 | 11.5778 | 12.4323 | 12.6777 | 12.3318 | 11.8346 | 12.4586 | 1.0058  | 0.0084  | 0.8521 | 0.0695 |
| Psd3         |                                                                                              | _ALYS[Phospho (STY)]IKNEK_2                                                         |  | Q2PFD7_5719_M1_Psd3     | 4.1298  | 3.3853  | 4.5277  | 6.0372  | 3.2736  | 3.3510  | 3.2442  | 3.0881  | 4.7422  | 5.3801  | 1.0009  | 0.0013  | 0.9959 | 0.0018 |
| Psd3         |                                                                                              | _INC[Carbamidomethyl (C)]VAWVSAPFFPAAGSQK_2                                         |  | #N/A                    | 4.0100  | 5.1443  | 3.9243  | 4.8266  | 3.6284  | 4.6091  | 3.9399  | 4.0812  | 4.6516  | 4.1784  | 1.0343  | 0.0486  | 0.6687 | 0.1748 |
| Psd3         |                                                                                              | _KDHREPT[Phospho (STY)]PGIK_3                                                       |  | #N/A                    | 6.7462  | 6.8973  | 3.5346  | 7.1721  | 5.6109  | 6.3262  | 6.6699  | 6.6367  | 5.9447  | 5.6171  | 0.9728  | -0.0398 | 0.8194 | 0.0865 |
| Psd3         |                                                                                              | _LEWAVDDEKKK_3                                                                      |  | #N/A                    | 3.0388  | 4.3036  | 4.2734  | 3.8171  | 2.6604  | 2.9376  | 3.9654  | 3.1840  | 3.4831  | 3.4944  | 0.9925  | -0.0109 | 0.9471 | 0.0236 |
| Psd3         |                                                                                              | _DEYKPKS[Phospho (STY)]LSDDELK_2                                                    |  | #N/A                    | 3.5973  | 3.8453  | 3.4651  | 3.9677  | 3.7107  | 3.6196  | 3.6917  | 4.1905  | 3.8391  | 3.9347  | 0.9456  | -0.0807 | 0.1251 | 0.9038 |
| Pk4k2a       |                                                                                              | _VAAAAGSGPS[Phospho (STY)]PPC[Carbamidomethyl (C)]S[Phospho (STY)]PGHORER_3         |  | #N/A                    | 9.6445  | 10.1301 | 4.1726  | 3.7164  | 9.3430  | 3.0419  | 10.3405 | 9.9107  | 9.7040  | 9.8858  | 0.6707  | -0.5762 | 0.0920 | 1.0362 |
| Pk4k2a       |                                                                                              | _SAS[Phospho (STY)]ESTYSGFSQR_2                                                     |  | Q2TB66_5462_M1_Pk4k2a   | 8.3405  | 8.6574  | 8.6183  | 9.2077  | 4.0361  | 8.6102  | 8.9967  | 8.7957  | 8.7730  | 8.4824  | 0.9030  | -0.1473 | 0.4124 | 0.3847 |
| Pk4k2a       |                                                                                              | _Acetyl (Protein N-term)[M[Oxidation (M)]DET[Phospho (STY)]PLVS[Phospho (STY)]PER_2 |  | Q2TB66_55_M2_Pk4k2a     | 6.7372  | 9.7629  | 3.9970  | 9.7077  | 8.9171  | 9.9873  | 10.4841 | 9.8070  | 9.8218  | 9.8119  | 0.8200  | -0.2863 | 0.1790 | 0.7470 |
| Pk4k2a       |                                                                                              | _VAAAAGSGPS[Phospho (STY)]PPC[Carbamidomethyl (C)]S[Phospho (STY)]PGHOR_2           |  | #N/A                    | 6.8304  | 6.7258  | 7.2228  | 7.8204  | 6.3846  | 6.5897  | 7.0619  | 7.1310  | 7.3449  | 3.8409  | 1.0921  | 0.1271  | 0.4359 | 0.1605 |
| Mstol1       |                                                                                              | _M[Oxidation (M)]AEDEES[Phospho (STY)]GELC[Carbamidomethyl (C)]PDVLYR_2             |  | Q2YDWW_541_M1_Mstol1    | 4.3149  | 3.6193  | 3.4568  | 6.9698  | 3.4406  | 4.2889  | 3.1488  | 6.7784  | 4.2997  | 4.1787  | 0.9450  | -0.0816 | 0.7896 | 0.1026 |
| Acot10/Acot9 |                                                                                              | _DSYIEVLPLGTDFELR_2                                                                 |  | #N/A                    | 4.5577  | 4.2804  | 3.3550  | 4.8476  | 4.4245  | 5.2891  | 4.0715  | 4.7885  | 4.5181  | 4.4105  | 1.0027  | 0.0039  | 0.9738 | 0.0115 |
| Cnmn3        |                                                                                              | _IPVVEER_2                                                                          |  | #N/A                    | 3.3624  | 3.7363  | 5.6065  | 3.6272  | 3.6672  | 4.4028  | 3.5043  | 5.0214  | 4.7019  | 3.8928  | 0.9502  | -0.0737 | 0.6850 | 0.1643 |
| Osbp         |                                                                                              | _SLS[Phospho (STY)]ELESKLPAESNEK_2                                                  |  | #N/A                    | 6.6557  | 6.5899  | 7.3185  | 7.3517  | 6.1749  | 5.3508  | 7.2468  | 7.4802  | 6.9247  | 6.6796  | 0.8862  | -0.1743 | 0.3007 | 0.5219 |
| Osbp         |                                                                                              | _M[Oxidation (M)]LAES[Phospho (STY)]DSS[Phospho (STY)]GDEESSVQDK_2                  |  | #N/A                    | 5.5806  | 6.4336  | 6.6953  | 6.9380  | 5.7016  | 6.1969  | 7.0750  | 6.6494  | 6.3525  | 5.8697  | 0.9647  | -0.0518 | 0.5204 | 0.2836 |
| Osbp         |                                                                                              | _TGS[Phospho (STY)]JNGS[Phospho (STY)]GASSDVLDQYK_2                                 |  | Q3B7Z2_5377_M2_Osbp     | 4.3143  | 3.5945  | 3.7989  | 3.8128  | 3.4490  | 3.8325  | 4.0223  | 3.8039  | 3.7365  | 3.6630  | 0.9984  | -0.0023 | 0.9710 | 0.0126 |
| Osbp         |                                                                                              | _SLS[Phospho (STY)]ELESKL_2                                                         |  | #N/A                    | 4.1620  | 3.1804  | 3.8957  | 3.4395  | 3.3057  | 3.3189  | 3.5877  | 3.5617  | 3.8608  | 3.1167  | 1.0053  | 0.0076  | 0.9382 | 0.0277 |
| Osbp         | /LPANPPGS[Phospho (STY)]AGS[Phospho (STY)]GXQDC[Carbamidomethyl (C)]C[Carbamidomethyl (C)]   |                                                                                     |  | Q3B7Z2_5333_M2_Osbp     | 3.3671  | 4.1234  | 4.6017  | 4.1454  | 4.0117  | 4.1137  | 4.2937  | 4.3566  | 4.7664  | 3.8227  | 0.9422  | -0.0860 | 0.3550 | 0.4498 |
| Nhej1        |                                                                                              | _DSGETQASSST[Phospho (STY)]PR_2                                                     |  | Q3KNJ2_5245_M1_Nhej1    | 3.8913  | 5.8610  | 3.8786  | 3.7781  | 3.8183  | 3.2638  | 3.7180  | 3.8700  | 6.0944  | 6.1006  | 0.8253  | -0.2770 | 0.2518 | 0.5989 |
| Hddc2        |                                                                                              | _ELVELWEVETQSEAEAK_2                                                                |  | #N/A                    | 4.9860  | 6.0492  | 7.1732  | 7.2077  | 6.0734  | 6.6434  | 6.1236  | 5.6382  | 5.0877  | 5.1570  | 1.1552  | 0.2081  | 0.1061 | 0.9742 |
| Arhgap45     |                                                                                              | _YDFEPYVSNWS[Phospho (STY)]PM[Oxidation (M)]R_2                                     |  | Q3TBD2_5568_M1_Arhgap45 | 3.8427  | 3.1471  | 3.9290  | 5.6557  | 2.9684  | 3.2603  | 3.6211  | 3.5284  | 5.1429  | 3.1501  | 0.9844  | -0.0226 | 0.9242 | 0.0342 |
| Pyp1r121     |                                                                                              | _T[Phospho (STY)]PQSEAPQVSESR_2                                                     |  | #N/A                    | 7.6072  | 7.2670  | 7.5007  | 8.0003  | 6.2033  | 7.6328  | 7.4937  | 7.0429  | 7.3300  | 7.9061  | 0.9900  | -0.0145 | 0.8347 | 0.0785 |
| Pyp1r121     |                                                                                              | _SGESSQL[Phospho (STY)]DEQK_2                                                       |  | Q3TDO9_S101_M1_Pyp1r121 | 6.2891  | 5.9177  | 5.7889  | 6.2135  | 4.2173  | 6.0777  | 5.5548  | 6.2139  | 5.8308  | 5.6903  | 0.9877  | -0.0179 | 0.8655 | 0.0627 |
| Pyp1r121     |                                                                                              | _T[Phospho (STY)]PQSEAPQVSEBDLK_2                                                   |  | #N/A                    | 3.3841  | 4.1893  | 4.0709  | 5.2808  | 4.0106  | 3.7189  | 4.2882  | 3.5449  | 3.1935  | 3.0397  | 1.1685  | 0.2346  | 0.1721 | 0.7643 |
| Rogdi        |                                                                                              | _LTTPATLTLPEIAAGLTR_2                                                               |  | #N/A                    | 4.2369  | 3.9144  | 4.7010  | 4.0460  | 4.1249  | 3.6590  | 3.4154  | 5.0906  | 5.0889  | 4.0049  | 0.9349  | -0.0970 | 0.4663 | 0.3314 |
| Slr3         |                                                                                              |                                                                                     |  |                         |         |         |         |         |         |         |         |         |         |         |         |         |        |        |



|          |                                                                                   |                         |         |         |         |         |         |         |         |         |         |         |         |         |        |        |
|----------|-----------------------------------------------------------------------------------|-------------------------|---------|---------|---------|---------|---------|---------|---------|---------|---------|---------|---------|---------|--------|--------|
| Gmps     | _TLNM[Oxidation (M)]TTS[Phospho (STY)]PEEK_2                                      | #N/A                    | 10.4966 | 10.2560 | 10.8088 | 10.9924 | 9.9565  | 10.2358 | 10.6247 | 10.2484 | 10.4293 | 10.4780 | 1.0012  | 0.0017  | 0.9530 | 0.0209 |
| Gmps     | _TLNMTTS[Phospho (STY)]PEEK_2                                                     | #N/A                    | 3.2478  | 4.0041  | 3.9089  | 6.0788  | 3.8924  | 4.2331  | 4.1262  | 3.7069  | 3.8864  | 4.3785  | 1.0504  | 0.0710  | 0.6986 | 0.1558 |
| Gmps     | _NFLVDIAGC[Carbamidomethyl (C)]SGNFTVQNR_2                                        | #N/A                    | 4.2285  | 0.8756  | 3.9622  | 3.7930  | 3.3723  | 3.2523  | 4.2960  | 3.6385  | 3.7942  | 3.1833  | 0.8711  | -0.1992 | 0.4790 | 0.3197 |
| Gmps     | _VIC[Carbamidomethyl (C)]AEPPYIC[Carbamidomethyl (C)]K_2                          | #N/A                    | 3.0365  | 4.1896  | 3.7233  | 4.2260  | 4.1019  | 4.0475  | 3.9407  | 3.8925  | 4.7239  | 5.1295  | 0.8792  | -0.1857 | 0.1476 | 0.8308 |
| Gmps     | _QDAEFAHNLIR_3                                                                    | #N/A                    | 3.6914  | 2.5348  | 4.3782  | 3.8800  | 2.8171  | 3.2015  | 3.0947  | 3.2376  | 4.3871  | 3.3470  | 0.9954  | -0.0666 | 0.9650 | 0.0155 |
| Mat2a    | _FVIGSGPGDAGLTGR_2                                                                | #N/A                    | 4.7889  | 5.7315  | 5.6791  | 5.3465  | 5.0477  | 4.7755  | 3.5755  | 5.6654  | 5.2102  | 4.8536  | 1.0833  | 0.1154  | 0.3618 | 0.4415 |
| Mat2a    | _TQVTVQYVNGQIR_2                                                                  | #N/A                    | 4.1393  | 3.4437  | 3.3253  | 3.8280  | 3.2650  | 2.9636  | 3.3244  | 4.2905  | 3.9391  | 3.7950  | 0.9106  | -0.1351 | 0.2355 | 0.6281 |
| Usp39    | _EADEDS[Phospho (STY)]EPEREVR_2                                                   | #N/A                    | 5.1579  | 5.1261  | 6.4588  | 6.0135  | 5.3048  | 5.3088  | 4.5197  | 5.5548  | 5.5629  | 5.3672  | 1.0591  | 0.0828  | 0.3894 | 0.4096 |
| Usp39    | _EREADDS[Phospho (STY)]EPEREVR_3                                                  | #N/A                    | 4.0462  | 4.2492  | 4.6793  | 4.7770  | 4.0738  | 4.3842  | 4.0577  | 4.7459  | 4.4105  | 4.1011  | 1.0091  | 0.0131  | 0.8491 | 0.0711 |
| Usp39    | _EADEDS[Phospho (STY)]EPER_2                                                      | #N/A                    | 3.9941  | 3.2985  | 3.1801  | 4.9555  | 3.1198  | 3.5413  | 3.4696  | 5.6249  | 6.4794  | 2.9986  | 0.7929  | -0.3348 | 0.2371 | 0.6251 |
| Usp39    | _EREADDS[Phospho (STY)]PTSTR_2                                                    | #N/A                    | 3.4364  | 3.8499  | 3.7316  | 4.2342  | 3.6713  | 4.0582  | 4.5672  | 3.8843  | 3.5329  | 4.2012  | 0.9466  | -0.0792 | 0.3693 | 0.4326 |
| Smarca4  | _DSEAGSST[Phospho (STY)]PTSTR_2                                                   | Q3TKT4_T1390_M1_Smarca4 | 3.7000  | 3.5261  | 4.3868  | 3.3886  | 2.8257  | 3.2102  | 3.1033  | 3.2290  | 4.3784  | 3.3556  | 0.9971  | -0.0042 | 0.9774 | 0.0099 |
| Cwc27    | _NFSLSFGEEAEVEEVR_2                                                               | #N/A                    | 3.8751  | 2.7118  | 3.6087  | 3.1525  | 3.1605  | 5.1093  | 3.3008  | 3.8487  | 3.9136  | 4.3306  | 0.9362  | -0.0951 | 0.6086 | 0.2157 |
| Prrc2c   | _S[Phospho (STY)]LEDWPR_2                                                         | Q3TLH4_S853_M1_Prrc2c   | 8.8325  | 9.0343  | 9.5221  | 9.7234  | 8.3572  | 8.8528  | 8.9691  | 9.0664  | 8.8880  | 8.9790  | 1.0087  | 0.0125  | 0.7682 | 0.1145 |
| Prrc2c   | _SF[Phospho (STY)]SORPGVD_2                                                       | Q3TLH4_S1516_M1_Prrc2c  | 3.5892  | 4.3455  | 6.8832  | 4.3675  | 5.7139  | 3.8916  | 3.7848  | 4.1345  | 4.4335  | 4.0448  | 1.1705  | 0.2272  | 0.3124 | 0.5052 |
| Prrc2c   | _SESS[Phospho (STY)]DFEVVPK_2                                                     | Q3TLH4_S1222_M1_Prrc2c  | 4.2942  | 3.5496  | 4.0279  | 5.3315  | 3.4379  | 3.1867  | 3.0799  | 3.2525  | 4.4019  | 3.2489  | 1.1360  | 0.1840  | 0.3363 | 0.4733 |
| Prrc2c   | _S[Phospho (STY)]VSHGSHHAQNAEEQR_3                                                | #N/A                    | 3.8786  | 3.1106  | 3.6123  | 3.9769  | 3.4976  | 3.6837  | 3.7758  | 4.0446  | 4.0533  | 3.6811  | 0.9326  | -0.1007 | 0.1700 | 0.7695 |
| Trappc10 | _SPS[Phospho (STY)]DNSLNTGIC[Carbamidomethyl (C)]R_2                              | Q3TLU0_S684_M1_Trappc10 | 4.3461  | 8.4688  | 8.8980  | 8.9828  | 6.9542  | 8.2002  | 9.1946  | 9.0006  | 8.3298  | 3.3094  | 1.0248  | 0.0354  | 0.9000 | 0.0458 |
| Tmem38a  | _AKELEGGS[Phospho (STY)]R_2                                                       | #N/A                    | 5.9854  | 6.2870  | 6.9707  | 5.8120  | 6.4844  | 6.1348  | 6.9838  | 6.4858  | 6.3338  | 6.6918  | 0.9480  | -0.0771 | 0.1847 | 0.7336 |
| Tmem38a  | _AKELEGGS[Phospho (STY)]RK_3                                                      | #N/A                    | 4.2419  | 2.9843  | 3.1478  | 3.9305  | 3.3676  | 4.3619  | 3.6452  | 4.1880  | 1.6048  | 3.8975  | 1.1155  | 0.1577  | 0.4965 | 0.3040 |
| Exoc5    | _VC[Carbamidomethyl (C)]HGGDQLEGVNT[Phospho (STY)]PR_3                            | Q3TPK4_T122_M1_Exoc5    | 5.1555  | 4.1159  | 3.1402  | 4.1848  | 4.0511  | 4.0743  | 4.1833  | 5.0387  | 4.6659  | 3.8621  | 0.9285  | -0.1070 | 0.4344 | 0.3621 |
|          | _ADS[Phospho (STY)]ES[Phospho (STY)]EEDEQSESEVR_2                                 | #N/A                    | 5.8618  | 6.6432  | 8.6768  | 6.9083  | 6.2108  | 5.6644  | 6.6967  | 6.5315  | 6.0110  | 0.9974  | 0.0037  | 0.9573  | 0.0190 |        |
|          | _VGDEKPEPERS[Phospho (STY)]PPNR_3                                                 | #N/A                    | 8.2541  | 8.1327  | 8.8392  | 8.9045  | 7.9755  | 7.9798  | 8.3974  | 8.0504  | 8.0906  | 8.1190  | 1.0224  | 0.0320  | 0.4351 | 0.3614 |
|          | _RRADS[Phospho (STY)]ES[Phospho (STY)]EEDEQSESEVR_2                               | #N/A                    | 3.8452  | 3.5268  | 4.0270  | 3.9557  | 4.0890  | 3.7982  | 4.4614  | 4.2669  | 4.2952  | 3.4065  | 0.9431  | -0.0846 | 0.3067 | 0.5132 |
|          | _RADSS[Phospho (STY)]ES[Phospho (STY)]EEDEQSESEVR_2                               | #N/A                    | 3.8693  | 3.8693  | 3.8693  | 3.8693  | 4.2150  | 3.0076  | 3.4656  | 3.9580  | 3.8752  | 3.6333  | 1.2902  | 0.0002  | 0.8425 | 0.0744 |
| Fndc4    | _GKPEQGS[Phospho (STY)]PQGRPVGTRR_3                                               | Q3TR08_S209_M1_Fndc4    | 3.3676  | 5.0695  | 5.2128  | 5.2923  | 5.4685  | 5.1348  | 4.1204  | 5.4631  | 5.1210  | 3.8231  | 1.0631  | 0.0883  | 0.5768 | 0.2390 |
| Pnp1a6   | _DEGGS[Phospho (STY)]PEGASPSSTASEVEEK_2                                           | Q3TRM4_S1319_M1_Pnp1a6  | 3.3779  | 4.1831  | 4.0647  | 4.5673  | 4.0044  | 3.7251  | 4.2820  | 3.5511  | 3.1997  | 3.0335  | 1.1338  | 0.1812  | 0.1569 | 0.8043 |
| Map9     | _ESPGC[Carbamidomethyl (C)]TS[Phospho (STY)]PGSQEK_2                              | Q3TRR0_S257_M1_Map9     | 9.3640  | 9.4421  | 9.5542  | 10.2377 | 9.4084  | 9.4307  | 9.5652  | 9.4690  | 9.5084  | 9.5709  | 1.0044  | 0.0064  | 0.8102 | 0.0914 |
| Map9     | _S[Phospho (STY)]PSAATSHYLSLK_2                                                   | Q3TRR0_S389_M1_Map9     | 6.1992  | 4.1818  | 6.7205  | 4.2339  | 5.6432  | 6.4508  | 5.7363  | 3.8846  | 3.5332  | 4.2095  | 1.2841  | 0.3608  | 0.1101 | 0.9581 |
| Map9     | _KGS[Phospho (STY)]LEPKADHIR_3                                                    | #N/A                    | 8.1362  | 7.9024  | 8.1647  | 8.1781  | 7.1998  | 8.0733  | 7.3917  | 7.7884  | 8.1869  | 8.2366  | 1.0053  | 0.0076  | 0.8711 | 0.0599 |
| Map9     | _TS[Phospho (STY)]GETSSGLDADGHKPKPQPR_3                                           | Q3TRR0_S160_M1_Map9     | 4.0963  | 3.3517  | 4.5612  | 3.5630  | 5.7744  | 3.3846  | 3.2777  | 4.2040  | 3.5300  | 1.1721  | 0.2911  | 0.2747  | 0.0511 |        |
| Map9     | _RTS[Phospho (STY)]FQDELIR_2                                                      | Q3TRR0_S23_M1_Map9      | 3.9479  | 3.2522  | 3.1338  | 6.3470  | 4.6446  | 5.4831  | 3.5159  | 5.2039  | 4.1306  | 5.0314  | 0.9995  | -0.0008 | 0.9975 | 0.0011 |
| Map9     | _M[Oxidation (M)]NDHIS[Phospho (STY)]DDEKNSPR_3                                   | #N/A                    | 5.4837  | 3.8681  | 4.0592  | 7.0921  | 4.6045  | 6.3960  | 6.0120  | 6.4136  | 6.1681  | 6.3399  | 0.8423  | -0.2475 | 0.1802 | 0.7442 |
| Cblb     | _QNSPVTS[Phospho (STY)]PGSS[Phospho (STY)]PLAQR_2                                 | Q3TTA7_S480_M2_Cblb     | 3.9053  | 3.5416  | 3.9935  | 4.0485  | 4.0462  | 3.7240  | 3.9460  | 3.5673  | 3.5277  | 3.9106  | 1.0371  | 0.0525  | 0.3376 | 0.4716 |
| Cdc136   | _GLS[Phospho (STY)]LTETELEELR_2                                                   | Q3TVA9_S50_M1_Cdc136    | 11.0863 | 10.7665 | 11.2686 | 10.8705 | 10.1396 | 10.9367 | 11.0574 | 10.6499 | 10.9337 | 10.9211 | 0.9956  | -0.0063 | 0.8262 | 0.0829 |
| Hexim2   | _TGS[Phospho (STY)]PGGC[Carbamidomethyl (C)]SVEAVLR_2                             | Q3TV44_S75_M1_Hexim2    | 3.1491  | 4.1933  | 4.3837  | 7.4366  | 5.8417  | 3.7149  | 6.2341  | 3.0738  | 6.0626  | 6.1176  | 0.8910  | -0.1665 | 0.5776 | 0.2383 |
| Pbp1p    | _GREPS[Phospho (STY)]SSQVAPVDFVQDAK_3                                             | Q3TVB8_S164_M1_Pbp1p    | 3.6220  | 3.8724  | 4.1161  | 3.7738  | 5.1910  | 3.6496  | 3.6395  | 3.5578  | 3.8710  | 3.6558  | 1.0887  | 0.1226  | 0.3387 | 0.4702 |
| Tmem63b  | _TSSVS[Phospho (STY)]S[Phospho (STY)]VDFDQR_2                                     | Q3TW9_S115_M2_Tmem63b   | 3.5503  | 2.5358  | 3.2840  | 5.7344  | 3.3798  | 3.8742  | 4.0336  | 4.1893  | 5.4697  | 4.0059  | 0.8799  | -0.1846 | 0.3597 | 0.4441 |
| Srsf6    | _SHS[Phospho (STY)]PLPAPPSK_2                                                     | Q3TW9B_S303_M1_Srsf6    | 9.3068  | 9.1173  | 9.7378  | 9.5531  | 8.1344  | 9.0443  | 9.5832  | 9.5966  | 9.2083  | 9.2430  | 0.9725  | -0.0402 | 0.4110 | 0.3861 |
| Srsf6    | _LIVENLSR_2                                                                       | #N/A                    | 6.1113  | 5.7885  | 6.1700  | 5.7596  | 5.9472  | 6.6598  | 5.9507  | 6.0987  | 6.9666  | 6.3354  | 0.9555  | -0.0656 | 0.2897 | 0.5381 |
| Srsf6    | _ARS[Phospho (STY)]MS[Phospho (STY)]PPPK_2                                        | #N/A                    | 7.5132  | 4.1402  | 3.1176  | 8.3365  | 4.0285  | 4.0970  | 3.9901  | 5.4822  | 3.4916  | 3.8395  | 1.2391  | 0.3093  | 0.4093 | 0.3880 |
| Srsf6    | _S[Phospho (STY)]M[Oxidation (M)]S[Phospho (STY)]PPPK_2                           | #N/A                    | 5.6726  | 3.0335  | 5.8876  | 5.9686  | 2.8548  | 7.4264  | 5.5318  | 7.5782  | 6.8238  | 0.7178  | 0.4784  | -0.783  | 0.0942 | 1.0257 |
| Srsf6    | _SRSS[Phospho (STY)]QS[Phospho (STY)]RS[Phospho (STY)]HS[Phospho (STY)]PLPAPPSK_3 | Q3TWW8_S297_M3_Srsf6    | 4.0519  | 3.2905  | 3.7856  | 3.3294  | 3.1956  | 3.1168  | 3.4776  | 3.6718  | 3.9709  | 3.0066  | 0.9802  | -0.0289 | 0.7846 | 0.1053 |
| Srsf6    | _ARS[Phospho (STY)]MS[Phospho (STY)]PPPK_3                                        | #N/A                    | 3.6486  | 2.9530  | 4.3354  | 3.3373  | 4.2752  | 3.4543  | 4.5528  | 3.2804  | 4.4298  | 3.3043  | 0.9423  | -0.0857 | 0.5810 | 0.2558 |
| Pumd1    | _TVGT[Phospho (STY)]PASVPGSTNTGTVPGESEK_2                                         | Q3TKS7_T273_M1_Pumd1    | 6.1164  | 5.8065  | 3.7318  | 6.6549  | 4.0328  | 3.4828  | 6.9206  | 6.2257  | 5.6822  | 5.9003  | 0.8041  | -0.3146 | 0.1376 | 0.8613 |
| Pumd1    | _TPDAS[Phospho (STY)]PEPK_2                                                       | Q3TKS7_S315_M1_Pumd1    | 6.8380  | 4.0906  | 5.7994  | 4.1126  | 6.5456  | 4.1465  | 7.2709  | 7.3010  | 6.8911  | 6.7980  | 0.7863  | -0.3468 | 0.1063 | 0.9735 |
| Pumd1    | _TASAVAGKT[Phospho (STY)]PDAS[Phospho (STY)]PEPKDQTLK_3                           | #N/A                    | 6.3760  | 7.2222  | 8.1282  | 6.6679  | 6.1079  | 6.8730  | 7.2748  | 6.9665  | 7.0692  | 6.7865  | 0.9817  | -0.0266 | 0.7406 | 0.1304 |
| Pumd1    | _IEEEEQEPEPPEFYED_2                                                               | #N/A                    | 3.9907  | 5.0311  | 3.7810  | 5.1777  | 4.4651  | 4.7454  | 5.1980  | 5.3294  | 5.4722  | 0.8686  | -0.2033 | 0.0539  | 1.2682 |        |
| Pumd1    | _TASAVAGKT[Phospho (STY)]PDAS[Phospho (STY)]PEPK_2                                | #N/A                    | 8.8227  | 9.8627  | 10.3172 | 10.1944 | 9.0345  | 9.7014  | 10.3842 | 10.0777 | 9.9415  | 9.8483  | 0.9761  | -0.0349 | 0.3608 | 0.4427 |
| Pumd1    | _NAVESLGRIFLR_2                                                                   | #N/A                    | 4.0660  | 3.3717  | 4.2492  | 3.2510  | 3.5521  | 3.3874  | 3.3667  | 3.8916  | 3.2180  | 1.0601  | 0.0841  | 0.4194  | 0.3774 |        |
| Pumd1    | _TPEQC[Carbamidomethyl (C)]PSVSLSESNPHVR_3                                        | #N/A                    | 3.9574  | 3.2618  | 3.1434  | 3.6461  | 2.1823  | 3.1455  | 3.5063  | 2.9716  | 4.1210  | 3.6131  | 0.9071  | -0.1407 | 0.3852 | 0.4143 |
| Slc17a7  | _WAPPLER_2                                                                        | #N/A                    | 8.5447  | 8.5856  | 8.9426  | 7.7886  | 8.3627  | 7.9131  | 8.6564  | 9.0681  | 8.7474  | 8.0184  | 0.9691  | -0.0453 | 0.3731 | 0.4281 |
| Slc17a7  | _DPPVDC[Carbamidomethyl (C)]TC[Carbamidomethyl (C)]GLPR_2                         | #N/A                    | 6.9434  | 6.4615  | 6.4313  | 5.8747  | 6.3155  | 6.3804  | 7.0258  | 6.1693  | 6.5252  | 6.2605  | 0.9855  | -0.0211 | 0.6948 | 0.1581 |
| Slc17a7  | _VEDAIGESAK_2                                                                     | #N/A                    | 7.2458  | 6.6231  | 7.4244  | 6.7003  | 6.9397  | 6.7426  | 7.0157  | 7.3360  | 6.7626  | 6.8393  | 0.9939  | -0.0088 | 0.8321 | 0.0798 |
| Slc17a7  | _GGHVVQK_2                                                                        | #N/A                    | 5.3014  | 4.5934  | 4.5857  | 4.7349  | 5.3600  | 5.1900  | 4.4232  | 5.4485  | 4.9266  | 5.2222  | 0.9885  | -0.0167 | 0.8241 | 0.0840 |
| Slc17a7  | _VEDAIGESAK_2                                                                     | #N/A                    | 5.0020  | 5.0366  | 4.3157  | 5.1877  | 4.5168  | 4.7675  | 4.5004  | 5.0044  | 4.1391  | 5.0834  | 1.0264  | 0.0376  | 0.6379 | 0.2021 |
| Slc17a7  | _HIM[Oxidation (M)]STTNVR_2                                                       | #N/A                    | 5.8572  | 5.5208  | 5.4925  | 5.6475  | 5.4817  | 4.5026  | 5.6196  | 5.5076  | 5.6886  | 4.8857  | 0.9986  | -0.0021 | 0.9784 | 0.0095 |
| Slc17a7  | _QPWAEPEEM[Oxidation (M)]S[Phospho (STY)]EEK_2                                    | #N/A                    | 6.7586  | 6.8641  | 6.8482  | 7.1688  | 5.9603  | 6.6602  | 7.4544  | 7.3284  | 6.6565  | 6.4280  | 0.9631  | -0.0542 | 0.3962 | 0.4021 |
| Slc17a7  | omethyl (C)]GVGHQDGLAGS[Phospho (STY)]DES[Phospho (STY)]EMEDEAPGPAPPPSPGATHSTVQPI | Q3TX04_S519_M2_Slc17a7  | 3.0592  | 4.2832  | 4.2937  | 3.8375  | 3.7038  | 3.6250  | 3.9858  | 3.1637  | 3.4627  | 3.5148  | 1.0761  | 0.1058  | 0.3511 | 0.4545 |
| Slc17a7  | _RQGEATLEIS[Phospho (STY)]ADGPRVTTTR_4                                            | Q3TX04_S36_M1_Slc17a7   | 4.0931  | 3.3974  | 3.2790  | 3.7817  | 3.2187  | 3.0099  | 3.4964  | 4.3368  | 3.9854  | 3.7487  | 0.8899  | -0.1683 | 0.1229 | 0.9105 |
| Fam131b  | _DTADSDLS[Phospho (STY)]DGEK_2                                                    | #N/A                    | 9.5286  | 9.2145  | 9.4014  | 10.0802 | 9.2353  | 9.1531  | 9.8422  | 9.2321  | 9.4076  | 9.5818  |         |         |        |        |



|          |  |                                                                           |                          |         |         |         |         |         |         |         |         |         |         |        |         |        |        |
|----------|--|---------------------------------------------------------------------------|--------------------------|---------|---------|---------|---------|---------|---------|---------|---------|---------|---------|--------|---------|--------|--------|
|          |  | _HSGTSPQASQALLTEGG[Phospho] (STY)PTAPDTPRKPRETK_4                         | Q3UYD6_S797_M1_Lmtk2     | 3.1550  | 3.9602  | 3.8418  | 4.1605  | 4.4367  | 3.9479  | 5.6348  | 6.1167  | 4.9408  | 5.3082  | 0.7122 | -0.4897 | 0.0007 | 3.1761 |
| Lmtk2    |  | _NAGFSALES[Phospho] (STY)IPOR_2                                           | Q3UYD6_S742_M1_Lmtk2     | 6.9502  | 6.3406  | 6.6488  | 7.8663  | 5.4184  | 6.5242  | 6.7167  | 7.3558  | 7.0132  | 6.9812  | 0.9713 | -0.0420 | 0.6766 | 1.1675 |
| Eyr2     |  | _SSS[Phospho] (STY)SLASPSPNAHK_2                                          | Q3ZT27_S662_M1_Eyr2      | 4.2262  | 2.1162  | 3.9599  | 6.8973  | 2.9276  | 3.2911  | 3.6519  | 6.7654  | 3.7966  | 3.1809  | 0.9362 | -0.0951 | 0.7865 | 1.0143 |
| Tbct1d2b |  | _DTSPOKGEV[Phospho] (STY)DEEET_2                                          | Q3U0I8_S993_M1_Tbct1d2b  | 4.3665  | 6.1698  | 4.1001  | 3.6439  | 4.1634  | 5.3522  | 6.0474  | 5.5979  | 4.7851  | 3.3212  | 0.9339 | -0.0896 | 0.6397 | 0.1940 |
| Trapp9   |  | _FNFESVPES[Phospho] (STY)PGEK_2                                           | Q3UOM1_S953_M1_Trapp9    | 2.9135  | 9.1468  | 7.9127  | 9.9749  | 8.2457  | 3.0665  | 10.2295 | 10.1558 | 9.8196  | 9.7774  | 0.6880 | -0.5396 | 0.0842 | 1.0745 |
| Trapp9   |  | _VESRPTNP[S]Phospho] (STY)GGALASPGSGSGPTFGSGK_3                           | Q3UOM1_S840_M1_Trapp9    | 6.8924  | 4.2336  | 4.3371  | 4.0398  | 4.0915  | 4.1115  | 6.7708  | 6.5711  | 6.8656  | 6.5329  | 0.6907 | -0.5338 | 0.0070 | 2.1540 |
| Rasip1   |  | _AAS[Phospho] (STY)JGGAALASPGSGSGPTFGSGK_2                                | Q3U056_S286_M1_Rasip1    | 4.3709  | 3.6753  | 3.4966  | 5.6225  | 3.4966  | 3.8367  | 3.0928  | 4.0842  | 4.1640  | 4.2008  | 1.0414 | 0.5685  | 0.7439 | 1.2185 |
| Rasip1   |  | _SVS[Phospho] (STY)IELSLQGR_2                                             | Q3U056_S322_M1_Rasip1    | 7.2151  | 7.8948  | 7.5783  | 7.9739  | 6.8088  | 7.8641  | 8.7476  | 8.0589  | 8.0323  | 7.8186  | 0.9333 | -0.0996 | 0.7072 | 1.1535 |
| Khrp     |  | _GS[Phospho] (STY)PQQIDHAK_2                                              | Q3U0VL_S481_M1_Khrp      | 6.4909  | 6.4508  | 6.9153  | 6.8895  | 7.1029  | 7.2503  | 6.6090  | 7.1081  | 6.7926  | 6.6901  | 0.9851 | -0.0216 | 0.6081 | 1.2636 |
| Khrp     |  | _JINLQLSLR_2                                                              | #N/A                     | 5.4964  | 5.7531  | 5.6987  | 5.5227  | 6.0414  | 5.4373  | 6.1226  | 5.7985  | 5.6085  | 5.6138  | 0.9779 | -0.0322 | 0.4162 | 0.3807 |
| Khrp     |  | _SVSLTGAPESVQK_2                                                          | #N/A                     | 5.9571  | 5.9899  | 6.5566  | 6.2879  | 6.3784  | 6.0295  | 6.3131  | 6.0025  | 6.1055  | 6.0004  | 1.0239 | 0.0340  | 0.3655 | 0.1093 |
| Khrp     |  | _VCIS[Phospho] (STY)PDGGLGP_2                                             | Q3U0VL_S182_M1_Khrp      | 10.0876 | 10.3813 | 10.9241 | 10.9413 | 10.2907 | 10.5189 | 10.8383 | 10.3105 | 10.3684 | 10.6468 | 0.9984 | -0.0023 | 0.9348 | 0.0293 |
| Khrp     |  | _IGGDAATTNNNTPOFGGGQK_2                                                   | #N/A                     | 3.2223  | 3.5230  | 3.5011  | 4.5977  | 3.2347  | 3.4912  | 4.2034  | 3.9043  | 3.9047  | 4.0377  | 1.0307 | 0.0437  | 0.7950 | 0.0996 |
| Pag1     |  | _SSSS[Phospho] (STY)C[Carbamidomethyl] (C)NDLYATVK_2                      | Q3UIF9_S351_M1_Pag1      | 8.9687  | 9.0028  | 9.5223  | 9.3040  | 8.3707  | 3.5686  | 9.5127  | 8.7062  | 8.9079  | 9.1170  | 0.8965 | -0.1577 | 0.4435 | 0.3531 |
| Pag1     |  | _RPS[Phospho] (STY)IEEPFOVEAIQTNR_2                                       | Q3UIF9_S379_M1_Pag1      | 4.7503  | 3.9384  | 3.6259  | 5.5813  | 3.8267  | 3.6551  | 4.0316  | 4.8675  | 5.2931  | 6.0299  | 0.9827 | -0.2130 | 0.2059 | 0.6863 |
| Pag1     |  | _HSANAESLG[Phospho] (STY)C[Carbamidomethyl] (C)SDLEEESPVPVK_3             | Q3UIF9_T245_M1_Pag1      | 4.0617  | 3.2569  | 3.5511  | 6.4834  | 4.8707  | 4.1256  | 3.4748  | 6.0714  | 5.1751  | 4.1195  | 0.9309 | -0.1032 | 0.6758 | 0.1702 |
| Tlpt     |  | _TTATLDPTS[Phospho] (STY)PAPEGGSPVR_2                                     | Q3UI11_S180_M1_Tlpt      | 7.0891  | 7.1267  | 7.5899  | 7.9274  | 6.7712  | 7.4316  | 7.5017  | 7.2430  | 7.1930  | 7.5943  | 1.1471 | 0.1880  | 0.2552 | 0.5932 |
| Tlpt     |  | _EGS[Phospho] (STY)IPSC_2                                                 | Q3UI11_S167_M1_Tlpt      | 3.6987  | 3.0030  | 4.3855  | 3.6168  | 2.8244  | 3.4043  | 5.7886  | 3.2304  | 3.6834  | 4.5673  | 0.7601 | -0.3957 | 0.1017 | 0.9942 |
| Tlpt     |  | _LPVPLTAS[Phospho] (STY)PPFD_2                                            | Q3UI11_S255_M1_Tlpt      | 3.9049  | 3.1604  | 3.6386  | 3.7544  | 3.0487  | 3.5760  | 3.4691  | 3.8188  | 4.0126  | 4.6505  | 0.8975 | -0.1561 | 0.1143 | 0.9405 |
| Denn1d1b |  | _ASKIS[Phospho] (STY)S[Phospho] (STY)EDGEETR_2                            | Q3UI19_S516_M2_Denn1d1b  | 3.0049  | 4.8829  | 5.8494  | 4.9664  | 4.9707  | 5.4639  | 6.0244  | 5.4588  | 5.5930  | 4.7876  | 0.8885 | -0.1706 | 0.2916 | 0.5352 |
| Uevld    |  | _DGVIS[Phospho] (STY)SSQACQLSR_2                                          | Q3UI18_S365_M1_Uevld     | 8.7571  | 8.6508  | 9.2849  | 9.1770  | 7.5092  | 8.6655  | 9.2114  | 8.7001  | 8.6644  | 8.8987  | 0.9895 | -0.0153 | 0.7956 | 0.0993 |
| Map3k9   |  | _SS[Phospho] (STY)PPASPTIIPR_2                                            | Q3UI18_S541_M1_Map3k9    | 3.4729  | 7.1526  | 7.5995  | 4.2512  | 3.4344  | 7.1082  | 3.7483  | 3.9208  | 3.9208  | 4.2895  | 1.3870 | 0.4720  | 0.1690 | 0.7720 |
| Denn4d4  |  | _S[Phospho] (STY)APSS[Phospho] (STY)IAPR_2                                | Q3UI1Y4_S732_M2_Denn4d4  | 7.7983  | 7.8212  | 7.4036  | 5.9236  | 3.8537  | 3.3854  | 7.4525  | 8.0877  | 3.1769  | 7.8900  | 0.9112 | -0.1342 | 0.6814 | 0.1666 |
| Denn4d4  |  | _SGS[Phospho] (STY)LSGAR_2                                                | Q3UI1Y4_S961_M1_Denn4d4  | 3.7821  | 3.0375  | 3.5157  | 3.8773  | 2.9258  | 3.6988  | 3.5920  | 4.2412  | 3.1898  | 3.4443  | 0.8924 | -0.0493 | 0.1059 | 0.9750 |
| Gpm3     |  | _SAPPS[Phospho] (STY)PPPPGTR_2                                            | Q3UI25_S38_M1_Gpm3       | 9.0157  | 9.9798  | 3.9759  | 10.4644 | 6.6300  | 9.4522  | 9.7189  | 8.9293  | 7.9442  | 3.1969  | 1.0751 | 0.1045  | 0.7523 | 0.1236 |
| Mast3    |  | _RLS[Phospho] (STY)ADLR_2                                                 | Q3UI214_S769_M1_Mast3    | 8.6466  | 8.7899  | 8.8196  | 8.0918  | 7.0772  | 8.5161  | 8.3822  | 8.9517  | 8.6354  | 8.4421  | 0.9503 | -0.0736 | 0.2483 | 0.6505 |
| Mast3    |  | _RGOIS[Phospho] (STY)ADKLGLTSESR_3                                        | #N/A                     | 8.3314  | 8.0111  | 8.3934  | 7.9864  | 6.8521  | 7.8052  | 8.1728  | 7.1728  | 7.8509  | 7.9937  | 0.9812 | -0.0273 | 0.6183 | 0.3888 |
| Mast3    |  | _DPLEECPQLNDGSGPAPGS[Phospho] (STY)IPESR_3                                | Q3UI214_S370_M1_Mast3    | 6.3486  | 6.6385  | 7.1280  | 7.5232  | 6.0765  | 6.6071  | 4.3269  | 7.4107  | 6.9444  | 3.9559  | 1.0736 | 0.1025  | 0.4648 | 0.2027 |
| Mast3    |  | _KQEAQVQS[Phospho] (STY)FDEEPPPR_2                                        | #N/A                     | 4.5035  | 6.2066  | 6.4933  | 6.9821  | 5.5561  | 6.5660  | 5.7922  | 7.1099  | 6.6157  | 6.9282  | 0.9153 | -0.1277 | 0.3747 | 0.5161 |
| Mast3    |  | _GQS[Phospho] (STY)ADKLGLTSESR_2                                          | #N/A                     | 8.7607  | 8.5757  | 9.1027  | 8.9674  | 7.1368  | 8.5948  | 8.9145  | 8.9221  | 8.8739  | 8.6508  | 0.9751 | -0.0736 | 0.5756 | 0.2369 |
| Mast3    |  | _QEAQVQS[Phospho] (STY)FDEEPPPR_2                                         | #N/A                     | 5.6620  | 6.3009  | 6.8732  | 7.8010  | 6.2544  | 6.2784  | 7.3313  | 7.6044  | 7.1589  | 6.9681  | 0.8985 | -0.1544 | 0.0942 | 1.0258 |
| Mast3    |  | _SFS[Phospho] (STY)EDREDGWGSGDGR_3                                        | #N/A                     | 3.2412  | 3.6939  | 4.1023  | 3.7925  | 3.7926  | 3.5272  | 3.9363  | 4.9153  | 5.0498  | 6.9714  | 0.8403 | -0.2510 | 0.0538 | 1.2691 |
| Mast3    |  | _S[Phospho] (STY)SEVDEDDGR_2                                              | Q3UI214_S156_M1_Mast3    | 3.0976  | 3.9028  | 3.7844  | 4.2871  | 3.7242  | 4.8432  | 4.0018  | 3.8314  | 8.6775  | 3.2541  | 0.8758 | -0.1913 | 0.6487 | 0.1879 |
| Mast3    |  | _HLGS[Phospho] (STY)EDDTNDDEESTEPFSSC[Carbamidomethyl] (C)SHR_4           | Q3UI214_S702_M1_Mast3    | 4.0051  | 3.3095  | 3.1911  | 3.8083  | 3.1308  | 3.0978  | 3.4084  | 4.4247  | 4.0733  | 4.6607  | 0.8797 | -0.1849 | 0.1154 | 0.9376 |
| Mast3    |  | _V[Phospho] (STY)SSSEFLAVQPTPTFAER_2                                      | Q3UI214_Y730_M1_Mast3    | 3.4618  | 3.7644  | 4.1486  | 3.1504  | 4.0883  | 2.9719  | 4.3659  | 6.4083  | 3.1159  | 3.1174  | 0.8461 | -0.2411 | 0.3521 | 0.4533 |
| Fam160a2 |  | _GQS[Phospho] (STY)LGGSSEPPGPR_2                                          | Q3UI219_S510_M1_Fam160a2 | 7.2231  | 4.3337  | 4.2153  | 3.2171  | 4.1550  | 5.0474  | 4.4236  | 3.4005  | 6.5970  | 7.9649  | 1.1273 | 0.6179  | 0.5967 | 0.2242 |
| Gae1     |  | _ERS[Phospho] (STY)PS[Phospho] (STY)PPAVQSC[Carbamidomethyl] (C)JK_2      | Q3UI3C9_S826_M2_Gae1     | 8.1993  | 8.3247  | 9.3116  | 9.0993  | 8.3645  | 8.7890  | 9.0552  | 7.9673  | 8.4117  | 8.6737  | 1.0181 | 0.0259  | 0.6147 | 0.2114 |
| Gae1     |  | _YSPDEM[Oxidation] (M)NNS[Phospho] (STY)PNFEK_2                           | Q3UI3C9_S857_M1_Gae1     | 4.2189  | 3.0073  | 6.1495  | 3.9075  | 2.8956  | 5.8652  | 3.6222  | 4.2110  | 6.3107  | 3.8745  | 0.9636 | -0.0535 | 0.8535 | 0.0688 |
| Gae1     |  | _RQT[Phospho] (STY)PS[Phospho] (STY)IPR_2                                 | Q3UI3C9_S840_M2_Gae1     | 4.1749  | 3.4303  | 3.8570  | 3.4523  | 3.3186  | 3.3060  | 3.1992  | 3.5489  | 3.8479  | 3.1296  | 1.0462 | 0.0652  | 0.4950 | 0.3054 |
| Fam117b  |  | _SSS[Phospho] (STY)WGSTEQLK_2                                             | #N/A                     | 8.8917  | 8.4226  | 3.5388  | 8.8523  | 8.2082  | 8.6163  | 9.0773  | 4.0770  | 8.5596  | 8.6334  | 1.0222 | 0.0316  | 0.9081 | 0.0419 |
| Fam117b  |  | _TS[Phospho] (STY)IPVTATQVAGTSVTR_2                                       | Q3UI3E2_S102_M1_Fam117b  | 3.4442  | 6.7809  | 3.1779  | 4.2225  | 4.0888  | 4.0367  | 6.2020  | 4.2795  | 6.0027  | 6.8400  | 0.8608 | -0.2162 | 0.4667 | 0.3049 |
| Fam117b  |  | _SPS[Phospho] (STY)APVC[Carbamidomethyl] (C)JK_2                          | #N/A                     | 3.4623  | 3.7639  | 4.1491  | 3.1509  | 7.3420  | 2.9724  | 4.3664  | 6.5021  | 7.6413  | 3.1179  | 0.7657 | -0.3851 | 0.3055 | 0.5150 |
| Fam117b  |  | _SSS[Phospho] (STY)WGSTEQLKEAK_2                                          | #N/A                     | 3.6702  | 3.5833  | 4.0616  | 3.2816  | 3.4716  | 3.1785  | 4.0155  | 5.1739  | 3.7204  | 3.2826  | 0.8748 | -0.1930 | 0.1940 | 0.7122 |
| Fam117b  |  | _RSPS[Phospho] (STY)APVC[Carbamidomethyl] (C)JK_2                         | #N/A                     | 3.4574  | 4.2626  | 4.1442  | 3.1461  | 4.0840  | 3.4655  | 4.3616  | 3.4716  | 3.1202  | 3.1130  | 1.0777 | 0.1080  | 0.4235 | 0.3731 |
| Fam117b  |  | _S[Phospho] (STY)PEQGRPSAEKR_3                                            | Q3UI3E2_S176_M1_Fam117b  | 3.8458  | 3.1012  | 3.5795  | 3.8135  | 2.9895  | 3.3651  | 3.5282  | 4.3049  | 3.9535  | 3.7805  | 0.8978 | -0.1555 | 0.1165 | 0.9335 |
| Fam117b  |  | _SDTQTGSGADGSG[Phospho] (STY)NNSSR_3                                      | Q3UI3E2_S399_M1_Fam117b  | 3.0571  | 4.2853  | 4.2916  | 3.8354  | 3.7017  | 4.4238  | 3.9836  | 3.1658  | 3.4649  | 3.5126  | 1.1135 | 0.1551  | 0.2109 | 0.6759 |
| Tepin1   |  | _QQLQELGAS[Phospho] (STY)PGPVYTK_2                                        | Q3UI3N6_S400_M1_Tepin1   | 6.3894  | 4.0451  | 7.1872  | 5.9539  | 3.9334  | 4.1920  | 6.8192  | 7.7480  | 6.0800  | 6.9494  | 0.9172 | -0.1247 | 0.6102 | 0.2145 |
| Prick1e1 |  | _S[Phospho] (STY)AESLQSLNSGLC[Carbamidomethyl] (C)PEK_2                   | Q3UI3C7_S592_M1_Prick1e1 | 6.0224  | 6.4341  | 6.5097  | 6.9691  | 4.0102  | 4.0002  | 6.9139  | 6.8090  | 4.3323  | 6.2609  | 0.9307 | -0.1036 | 0.6218 | 0.2063 |
| Prick1e1 |  | _NIFQOQS[Phospho] (STY)SEVQPR_2                                           | Q3UI3C7_S433_M1_Prick1e1 | 3.0824  | 4.2600  | 4.1475  | 3.8607  | 3.7270  | 3.6482  | 4.0090  | 3.1405  | 3.4395  | 3.1689  | 1.0804 | 0.1116  | 0.3257 | 0.4672 |
| Prick1e1 |  | _KS[Phospho] (STY)RSNALNLVTR_3                                            | #N/A                     | 3.7338  | 2.9892  | 3.4675  | 3.9256  | 2.8775  | 3.7471  | 3.6403  | 4.5186  | 3.8415  | 3.8926  | 0.8700 | -0.2009 | 0.0890 | 1.0507 |
| Prick1e1 |  | _SKS[Phospho] (STY)OSRPOQVK_2                                             | #N/A                     | 4.1077  | 2.5051  | 4.2929  | 3.2286  | 2.0949  | 3.5297  | 3.3768  | 2.8501  | 4.0717  | 4.0702  | 0.9663 | -0.0494 | 0.7242 | 0.1401 |
| Prick1e1 |  | _S[Phospho] (STY)OSRPOQVK_2                                               | #N/A                     | 3.0824  | 3.8387  | 4.3169  | 3.8607  | 3.7270  | 4.3985  | 4.2916  | 3.1405  | 3.4395  | 3.5380  | 1.0745 | 0.1036  | 0.4114 | 0.3858 |
| Prick1e1 |  | _S[Phospho] (STY)RSNALNLVTR_2                                             | #N/A                     | 3.7766  | 3.6829  | 4.0101  | 3.9338  | 3.6580  | 4.1420  | 3.8914  | 3.7591  | 3.6324  | 3.7565  | 1.0286 | 0.0406  | 0.3451 | 0.4621 |
| Foxk2    |  | _EGS[Phospho] (STY)PAPELEPGASQPK_2                                        | Q3UCQ1_S389_M1_Foxk2     | 9.7138  | 9.7613  | 9.9802  | 10.3929 | 9.0209  | 9.6078  | 10.1781 | 9.6633  | 9.8537  | 9.7135  | 0.9892 | -0.0156 | 0.6801 | 0.1674 |
| Tlil2    |  | _Acetyl (Protein N-term)[M]Oxidation (M)IEQSGPQPGS[Phospho] (STY)IGR_2    | #N/A                     | 12.2710 | 12.1933 | 12.5056 | 12.5856 | 11.6790 | 12.1017 | 12.7168 | 12.0373 | 12.1824 | 12.3305 | 0.9924 | -0.0111 | 0.6536 | 0.1847 |
| Tlil2    |  | _Acetyl (Protein N-term)[M]Oxidation (M)IEQSGPQPGS[Phospho] (STY)IGRAER_2 | #N/A                     | 5.6737  | 6.3383  | 7.0287  | 6.5859  | 5.5061  | 5.9143  | 6.2923  | 6.1246  | 5.9576  | 7.0856  | 1.0223 | 0.0318  | 0.6749 | 0.1708 |
| Wdr41    |  | _LEENGLVPS[Phospho] (STY)IPSR_2                                           | Q3UDP0_S459_M1_Wdr41     | 3.4360  | 7.9114  | 8.8923  | 10.3815 | 5.9475  | 4.0449  | 8.9207  | 10.4006 | 10.4116 | 10.4916 | 0.7311 | -0.4518 | 0.1138 | 0.9438 |
| Hgnat    |  | _LSELGS[Phospho] (STY)IPSR_2                                              | Q3UDW8_S238_M1_Hgnat     | 7.6983  | 7.2579  | 7.6066  | 7.3205  | 4.1929  | 3.7566  | 8.0748  | 7.4743  | 7.3319  | 7.2745  | 0.8308 | -0.2674 | 0.2076 | 0.6823 |
| Hgnat    |  | _VTSFS[Phospho] (STY)TPPT[Phospho                                         |                          |         |         |         |         |         |         |         |         |         |         |        |         |        |        |



|         |                                                         |                        |         |         |         |         |         |         |         |         |         |         |         |         |        |        |
|---------|---------------------------------------------------------|------------------------|---------|---------|---------|---------|---------|---------|---------|---------|---------|---------|---------|---------|--------|--------|
| Wnk2    | _QSS[Phospho (STY)]LPGTGGVADSVK_2                       | Q3UH66_S1770_M1_Wnk2   | 9.6696  | 9.2599  | 9.8590  | 9.7751  | 8.1352  | 9.5355  | 9.6488  | 9.1063  | 9.3921  | 9.5404  | 0.9947  | -0.0076 | 0.8879 | 0.0516 |
| Wnk2    | _YS[Phospho (STY)]APPOVLDPEPSPVEK_2                     | Q3UH66_S1713_M1_Wnk2   | 3.4019  | 3.8252  | 4.0887  | 4.5913  | 3.7135  | 3.8318  | 4.3060  | 3.5281  | 3.1767  | 3.0575  | 1.1114  | 0.1523  | 0.2314 | 0.6357 |
| Limch1  | _ZSPESIASAGTGS[Phospho (STY)]PSK_2                      | Q3UH68_S523_M1_Limch1  | 9.2403  | 3.8086  | 4.2868  | 9.5402  | 3.6969  | 4.4286  | 8.9237  | 3.4696  | 8.9237  | 3.5079  | 0.9221  | -0.1170 | 0.8038 | 0.0949 |
| Limch1  | _S[Phospho (STY)]PEPEATLTPPELK_2                        | Q3UH68_S719_M1_Limch1  | 7.7371  | 7.4519  | 3.3611  | 8.7798  | 7.4704  | 7.8608  | 8.0674  | 7.6162  | 8.0245  | 7.3964  | 0.9144  | -0.1292 | 0.5151 | 0.2881 |
| Limch1  | _QTPS[Phospho (STY)]POVAVR_2                            | Q3UH68_S217_M1_Limch1  | 3.4076  | 3.8185  | 4.0944  | 4.5971  | 8.9640  | 10.0632 | 4.3118  | 3.5214  | 3.1700  | 3.0632  | 1.6562  | 0.7279  | 0.1623 | 0.7897 |
| Limch1  | _S[Phospho (STY)]ASQDUK_2                               | #N/A                   | 5.9374  | 3.4743  | 4.4387  | 3.4405  | 2.8776  | 5.9765  | 3.1552  | 5.5457  | 4.3266  | 3.4075  | 1.0605  | 0.0848  | 0.7653 | 0.1162 |
| Limch1  | _SRQT[Phospho (STY)]PS[Phospho (STY)]POVAVR_2           | Q3UH68_S217_M2_Limch1  | 4.0134  | 3.3178  | 3.7583  | 8.8218  | 7.4439  | 3.0896  | 3.4504  | 8.0711  | 8.2152  | 8.5876  | 0.7166  | -0.4808 | 0.2367 | 0.6259 |
| Limch1  | _DOS[Phospho (STY)]FDSLSFGR_2                           | #N/A                   | 3.3512  | 4.1074  | 4.5857  | 7.2614  | 5.5378  | 4.1297  | 4.0229  | 6.6058  | 6.1279  | 7.3589  | 0.8010  | -0.1202 | 0.2226 | 0.6526 |
| Limch1  | _SAS[Phospho (STY)]QDLUKEER_3                           | Q3UH68_S379_M1_Limch1  | 3.6451  | 3.7824  | 3.9778  | 3.9494  | 3.6504  | 3.6922  | 4.0976  | 3.8988  | 3.4444  | 4.3248  | 0.9598  | -0.0592 | 0.3683 | 0.4338 |
| Limch1  | _SDSL[Phospho (STY)]PPR_2                               | Q3UH68_S192_M1_Limch1  | 4.2826  | 3.5381  | 4.0163  | 8.0559  | 3.4264  | 7.4674  | 6.9298  | 3.4411  | 3.7401  | 7.2922  | 0.9589  | -0.0605 | 0.8728 | 0.0591 |
| Limch1  | _KETDIDIS[Phospho (STY)]PKR_2                           | Q3UH68_S169_M1_Limch1  | 4.0809  | 3.3852  | 3.6199  | 4.8143  | 4.7710  | 3.0221  | 3.3829  | 4.3490  | 4.6947  | 3.7365  | 0.9773  | -0.0332 | 0.8410 | 0.0752 |
| Limch1  | _GSSDGRGS[Phospho (STY)]DSESDUPHR_3                     | #N/A                   | 8.4457  | 8.4439  | 9.1099  | 8.9241  | 8.4797  | 8.6454  | 8.5552  | 8.5094  | 8.9321  | 8.8092  | 0.9969  | -0.0044 | 0.8752 | 0.0579 |
| Limch1  | _TINHQM[Oxidation (M)]ES[Phospho (STY)]PGER_2           | #N/A                   | 7.3380  | 7.4226  | 7.8819  | 8.5285  | 7.4154  | 7.1187  | 7.7447  | 7.0361  | 7.1878  | 7.6318  | 1.0294  | 0.0418  | 0.4802 | 0.3186 |
| Limch1  | _HGRDOS[Phospho (STY)]FDSLSFGR_3                        | #N/A                   | 4.2819  | 4.7741  | 3.4678  | 5.9180  | 4.2365  | 4.9065  | 3.1819  | 5.7840  | 4.2666  | 6.0843  | 0.9520  | -0.0709 | 0.7423 | 0.1294 |
| Shisae6 | _LHSDQPLLS[Phospho (STY)]PER_2                          | #N/A                   | 6.9643  | 4.9344  | 6.7282  | 6.7427  | 5.0104  | 6.0655  | 7.0665  | 6.6840  | 6.5799  | 6.6766  | 0.8997  | -0.1526 | 0.1872 | 0.7277 |
| Shisae6 | _ETISADTS[Phospho (STY)]PKENTPVR_2                      | Q3UH99_S247_M1_Shisae6 | 4.4379  | 5.7437  | 3.5602  | 6.5729  | 4.8110  | 5.9271  | 5.8178  | 5.6757  | 4.7218  | 6.1220  | 0.9268  | -0.1097 | 0.5238 | 0.2809 |
| Shisae6 | _ILSDQELLS[Phospho (STY)]TER_2                          | Q3UH99_S422_M1_Shisae6 | 5.4171  | 3.2752  | 5.8300  | 6.7739  | 2.8659  | 5.2606  | 5.4733  | 5.7380  | 5.5304  | 5.5400  | 0.8803  | -0.1839 | 0.4159 | 0.3810 |
| Cdc177  | _YVLT[Phospho (STY)]PR_2                                | Q3UH8B_S90_M1_Cdc177   | 11.0815 | 2.9568  | 11.4894 | 10.5771 | 9.7018  | 10.8673 | 9.9050  | 10.9341 | 10.8198 | 10.8920 | 0.8879  | -0.1715 | 0.4937 | 0.3066 |
| Cdc177  | _SHS[Phospho (STY)]DLSLSR_2                             | #N/A                   | 8.0070  | 7.1172  | 8.6838  | 8.1402  | 6.7458  | 7.8464  | 8.0543  | 7.9913  | 7.7753  | 7.8159  | 0.9807  | -0.0281 | 0.6874 | 0.1623 |
| Cdc177  | _RTS[Phospho (STY)]PS[Phospho (STY)]PPAR_2              | Q3UH8B_S209_M2_Cdc177  | 10.2426 | 9.9557  | 10.5677 | 8.8801  | 3.5796  | 5.0893  | 10.3982 | 10.0609 | 10.0984 | 0.7067  | -0.5008 | 0.1199  | 0.9281 | 0.6188 |
| Cdc177  | _NSC[Carbamidomethyl (C)]PAGSAS[Phospho (STY)]APNPLGR_2 | Q3UH8B_S281_M1_Cdc177  | 4.6691  | 3.0517  | 4.0809  | 3.9969  | 3.1490  | 3.1847  | 3.2497  | 4.5967  | 4.0813  | 3.7457  | 0.9391  | -0.0906 | 0.5408 | 0.2670 |
| Cdc177  | _KSP[Phospho (STY)]LDS[Phospho (STY)]LSR_2              | #N/A                   | 8.0046  | 8.0970  | 8.6422  | 8.0097  | 6.9003  | 8.0197  | 8.0698  | 8.0646  | 8.0171  | 7.8539  | 0.9930  | -0.0101 | 0.8536 | 0.0687 |
| Cdc177  | _SFSGLSLHS[Phospho (STY)]PQTAQHVER_3                    | Q3UH8B_S310_M1_Cdc177  | 6.1781  | 7.1449  | 4.2198  | 7.9530  | 6.0022  | 6.2799  | 6.6472  | 7.7588  | 6.6570  | 6.7716  | 0.9048  | -0.1443 | 0.3550 | 0.4497 |
| Cdc177  | _DGLASSEGASSSY[Phospho (STY)]SGESLR_2                   | Q3UH8B_Y254_M1_Cdc177  | 3.3893  | 3.9531  | 3.1230  | 4.1676  | 4.0339  | 4.0915  | 3.7683  | 4.3344  | 3.1326  | 3.8449  | 1.0001  | 0.0088  | 0.9394 | 0.0271 |
| Tnrc6c  | _DSSSEATGWEPS[Phospho (STY)]PPSIR_3                     | #N/A                   | 7.7875  | 8.2882  | 7.0782  | 3.8965  | 7.8776  | 8.4926  | 8.6710  | 3.1046  | 8.2243  | 8.6131  | 1.0117  | 0.0167  | 0.9532 | 0.0728 |
| Tnrc6c  | _AET[Phospho (STY)]PPHQAGTGQNR_3                        | Q3UHCO_T776_M1_Tnrc6c  | 2.9140  | 3.7192  | 3.6008  | 4.1034  | 3.1079  | 4.1890  | 3.1881  | 4.0150  | 4.5845  | 4.0704  | 0.8747  | -0.1931 | 0.1160 | 0.9356 |
| Tnrc6c  | _QKDSSEATGWEEPS[Phospho (STY)]PPSIR_3                   | #N/A                   | 4.1369  | 3.3923  | 3.8706  | 3.5224  | 3.5391  | 3.3440  | 3.2371  | 3.0952  | 4.2446  | 3.4894  | 1.0335  | 0.0475  | 0.6582 | 0.1816 |
| Dab2ip  | _GDS[Phospho (STY)]PELKP_2                              | #N/A                   | 9.2913  | 8.8571  | 9.1043  | 9.3665  | 8.4516  | 8.8027  | 9.4607  | 9.2411  | 9.1876  | 9.0331  | 0.9727  | -0.0399 | 0.2182 | 0.6611 |
| Dab2ip  | _LPS[Phospho (STY)]PTPENK_2                             | Q3UHCT_S702_M1_Dab2ip  | 8.4252  | 7.6550  | 7.4328  | 4.4185  | 2.7840  | 8.0156  | 3.7338  | 7.7165  | 7.5912  | 4.0958  | 1.1160  | 0.1583  | 0.6560 | 0.1831 |
| Dab2ip  | _RQMS[Phospho (STY)]LTEK_2                              | Q3UHCT_S895_M1_Dab2ip  | 2.9687  | 4.3737  | 4.2032  | 3.7470  | 4.1950  | 3.5345  | 3.8953  | 3.2542  | 3.5532  | 3.4243  | 1.0864  | 0.1196  | 0.3247 | 0.4886 |
| Dab2ip  | _QQSSSSGDS[Phospho (STY)]PELKP_3                        | #N/A                   | 5.7322  | 5.5695  | 6.7711  | 5.9421  | 5.5738  | 5.9129  | 5.8980  | 6.0888  | 6.3602  | 5.7884  | 0.9842  | -0.0230 | 0.7183 | 0.1437 |
| Adgrb1  | _LHUGHS[Phospho (STY)]PR_2                              | Q3UH01_S1289_M1_Adgrb1 | 6.4637  | 7.1062  | 7.2124  | 6.2308  | 4.6178  | 6.2360  | 7.0265  | 6.7754  | 6.1624  | 6.1285  | 0.9675  | -0.0477 | 0.6872 | 0.1629 |
| Adgrb1  | _NENVALTSVSS[Phospho (STY)]LER_2                        | #N/A                   | 3.1917  | 4.6290  | 4.4262  | 5.3635  | 3.8363  | 4.0161  | 4.1183  | 5.2888  | 4.4981  | 4.7405  | 0.9104  | -0.1354 | 0.3555 | 0.4492 |
| Adgrb1  | _NENVALTSVSS[Phospho (STY)]LER_2                        | #N/A                   | 0.9095  | 8.7179  | 9.1597  | 4.0029  | 7.4204  | 9.2157  | 9.4439  | 9.5310  | 9.2334  | 9.2951  | 0.8463  | -0.2408 | 0.2042 | 0.6899 |
| Adgrb1  | _RPS[Phospho (STY)]PEEEKMK_3                            | Q3UH01_S1257_M1_Adgrb1 | 3.4638  | 3.8786  | 3.1975  | 4.2421  | 4.1084  | 4.0295  | 4.3903  | 4.2599  | 3.0582  | 3.9194  | 0.9777  | -0.0325 | 0.7893 | 0.1028 |
| Mtus2   | _QLS[Phospho (STY)]ENANLDEYVEK_2                        | Q3UH03_S1286_M1_Mtus2  | 4.1712  | 3.4267  | 3.9049  | 6.0727  | 3.3150  | 5.3962  | 3.2028  | 5.6778  | 3.8515  | 3.1260  | 1.1051  | 0.1442  | 0.5876 | 0.2309 |
| Mtus2   | _QLS[Phospho (STY)]EEHAVR_3                             | Q3UH03_S109_M1_Mtus2   | 4.5373  | 3.2348  | 3.8625  | 3.6800  | 3.1231  | 3.5015  | 3.3947  | 3.9722  | 3.7022  | 5.2441  | 0.8966  | -0.1575 | 0.3177 | 0.4715 |
| Mtus2   | _SM[Oxidation (M)]S[Phospho (STY)]PVER_2                | #N/A                   | 7.1463  | 7.3878  | 7.7535  | 7.2703  | 7.4892  | 3.2837  | 7.5524  | 7.1588  | 7.3714  | 3.4547  | 1.0529  | 0.0743  | 0.7789 | 0.1085 |
| Snu27   | _SES[Phospho (STY)]GYGNVR_2                             | #N/A                   | 11.4897 | 11.3388 | 11.9810 | 11.6342 | 10.7263 | 11.5151 | 11.6829 | 11.5846 | 11.4839 | 0.9915  | -0.0123 | 0.6611  | 0.1797 | 0.1797 |
| Snu27   | _VKSES[Phospho (STY)]GYGNVR_2                           | #N/A                   | 2.9033  | 2.9383  | 4.1378  | 3.6816  | 3.5479  | 6.0285  | 3.8298  | 3.3196  | 3.6187  | 3.3589  | 1.0966  | 0.1330  | 0.5834 | 0.2340 |
| Agap2   | _ALS[Phospho (STY)]TDC[Carbamidomethyl (C)]TPGSLPSLR_2  | Q3UH09_S802_M1_Agap2   | 11.7929 | 11.2992 | 12.1821 | 12.1591 | 3.7249  | 11.6004 | 11.9241 | 11.6988 | 11.5382 | 11.4184 | 0.8982  | -0.1548 | 0.5042 | 0.2974 |
| Agap2   | _GSEPRDPS[Phospho (STY)]PR_2                            | Q3UH09_S54_M1_Agap2    | 8.5108  | 9.4707  | 10.1635 | 8.9272  | 8.0311  | 9.1122  | 9.2159  | 8.0535  | 8.5820  | 8.8333  | 1.0134  | 0.0192  | 0.7700 | 0.1355 |
| Agap2   | _GAGSRLS[Phospho (STY)]WPESGKPR_3                       | #N/A                   | 7.1607  | 7.4809  | 4.1019  | 7.8529  | 3.4878  | 3.8557  | 8.2191  | 7.8309  | 7.7279  | 7.4536  | 0.7245  | -0.4650 | 0.0741 | 1.1299 |
| Agap2   | _RSS[Phospho (STY)]AASLGR_2                             | #N/A                   | 6.4943  | 6.3966  | 5.9719  | 6.3723  | 5.9368  | 6.6315  | 6.8626  | 6.6666  | 6.3697  | 6.6865  | 0.9409  | -0.0879 | 0.0499 | 0.1397 |
| Agap2   | _ELLGALLRTS[Phospho (STY)]PK_2                          | Q3UH09_S382_M1_Agap2   | 6.0137  | 6.8731  | 3.6698  | 3.2136  | 3.2276  | 7.0044  | 6.6591  | 3.7876  | 7.0784  | 6.8851  | 0.8194  | -0.2874 | 0.3521 | 0.4234 |
| Agap2   | _LRTDS[Phospho (STY)]QSEAVAIQAR_3                       | #N/A                   | 5.9295  | 7.3476  | 3.5081  | 7.8768  | 3.8991  | 4.1009  | 3.4943  | 7.3824  | 7.0829  | 6.4287  | 0.8928  | -0.1635 | 0.5982 | 0.5532 |
| Agap2   | _FLTGS[Phospho (STY)]QVLEK_2                            | Q3UH09_S424_M1_Agap2   | 5.7742  | 3.7802  | 4.1327  | 3.1346  | 4.0725  | 5.8523  | 4.3501  | 6.4392  | 5.7488  | 3.1015  | 0.9079  | -0.1394 | 0.5944 | 0.2259 |
| Agap2   | _LKS[Phospho (STY)]GG[Phospho (STY)]LR_2                | Q3UH09_S856_M2_Agap2   | 10.5612 | 11.8293 | 9.6117  | 12.4284 | 11.1293 | 12.2319 | 12.3180 | 12.5276 | 12.4001 | 0.9080  | 0.1393  | 0.0723  | 1.1407 | 0.1407 |
| Agap2   | _SGNS[Phospho (STY)]LNKEWK_2                            | Q3UH09_S684_M1_Agap2   | 5.9351  | 5.5716  | 3.3158  | 3.8184  | 3.2555  | 5.6923  | 5.6879  | 5.7889  | 5.9338  | 5.8791  | 0.7897  | -0.3406 | 0.0948 | 0.1021 |
| Agap2   | _TDS[Phospho (STY)]QSEAVAIQAR_2                         | #N/A                   | 8.5631  | 3.4265  | 8.5590  | 9.4512  | 7.6099  | 8.7499  | 8.6873  | 9.2904  | 9.1277  | 9.0256  | 0.8554  | -0.2253 | 0.2774 | 0.5569 |
| Agap2   | _RTS[Phospho (STY)]LFANR_2                              | Q3UH09_S642_M1_Agap2   | 3.1149  | 4.8366  | 3.8017  | 6.2630  | 3.7414  | 3.9881  | 4.3489  | 4.3014  | 3.0996  | 3.8779  | 1.0983  | 0.1353  | 0.5483 | 0.2610 |
| Agap2   | _RRS[Phospho (STY)]S[Phospho (STY)]AASLGR_2             | Q3UH09_S1171_M2_Agap2  | 8.4877  | 7.8944  | 8.5991  | 8.2143  | 7.5318  | 8.4009  | 8.2954  | 8.3771  | 8.4648  | 8.4504  | 0.9751  | -0.0363 | 0.3471 | 0.4595 |
| Agap2   | _ELITLTAIGNOTAMR_2                                      | #N/A                   | 3.4635  | 3.8789  | 3.1972  | 4.2418  | 5.2009  | 4.0293  | 4.3901  | 4.2602  | 3.0584  | 5.3119  | 0.9405  | -0.0885 | 0.6336 | 0.1982 |
| Agap2   | _LS[Phospho (STY)]WPESGKPR_2                            | #N/A                   | 4.1695  | 3.4738  | 3.3554  | 7.5940  | 3.2951  | 2.9335  | 3.2943  | 3.8551  | 4.1542  | 4.3242  | 1.0589  | 0.0825  | 0.8061 | 0.0936 |
| Agap2   | _SS[Phospho (STY)]AASLGR_2                              | #N/A                   | 3.5306  | 4.3358  | 4.2174  | 3.2193  | 4.1572  | 3.5723  | 3.9331  | 3.3984  | 3.0470  | 3.1863  | 1.1320  | 0.1789  | 0.1475 | 0.8313 |
| Agap2   | _AEAAAVAGLTPGS[Phospho (STY)]LHR_2                      | Q3UH09_S632_M1_Agap2   | 3.9306  | 3.3443  | 3.9225  | 3.6193  | 3.7514  | 3.3918  | 4.1198  | 3.8530  | 4.1966  | 3.5863  | 0.9280  | -0.1078 | 0.1356 | 0.8677 |
| Agap2   | _AVVNSGEWTLR_2                                          | #N/A                   | 4.2642  | 3.0782  | 3.9979  | 3.5416  | 2.6929  | 3.3291  | 3.6899  | 3.4595  | 3.7586  | 3.2189  | 0.9865  | -0.0196 | 0.8822 | 0.0545 |
| Pitpm3  | _AQ[Phospho (STY)]QPSDKCHEPLPALSWAR_4                   | Q3UHE1_S946_M1_Pitpm3  | 7.2261  | 7.9281  | 3.3842  | 9.1465  | 2.9162  | 7.6453  | 3.6015  | 8.8515  | 8.1884  | 7.9525  | 0.8917  | -0.1653 | 0.6461 | 0.1897 |
| Pitpm3  | _NLVSD[Phospho (STY)]YVSSDDEFFDAR_2                     | Q3UHE1_S27_M1_Pitpm3   | 3.2444  | 4.0496  | 3.9312  | 4.0711  | 3.8709  | 3.8586  | 4.2194  | 4.4309  | 3.2291  | 3.7484  | 0.9823  | -0.0258 | 0.7980 | 0.0980 |
| Pitpm3  | _GS[Phospho (STY)]PPLDAPAS[Phospho (STY)]PPQAR_2        | #N/A                   | 8.9917  | 10.4878 | 9.6019  | 10.9515 | 9.6077  | 10.1916 | 11.1040 | 10.7884 | 10.6748 | 0.4766  | 0.9267  | -0.1098 | 0.0690 | 1.1612 |
| Pitpm3  | _KGS[Phospho (STY)]SSTQDTPVVEEDC[carbamid               |                        |         |         |         |         |         |         |         |         |         |         |         |         |        |        |



|          |                                                                                |                        |         |         |         |         |         |         |         |         |         |         |        |         |        |        |
|----------|--------------------------------------------------------------------------------|------------------------|---------|---------|---------|---------|---------|---------|---------|---------|---------|---------|--------|---------|--------|--------|
| Aak1     | _VGLT[Phospho (STY)]PPSS[Phospho (STY)]PK_2                                    | #N/A                   | 13.5096 | 13.4706 | 13.5492 | 13.8520 | 12.2085 | 13.3263 | 13.7702 | 13.2786 | 13.2444 | 13.2904 | 0.9943 | -0.0083 | 0.8098 | 0.0916 |
| Aak1     | _VQTT[Phospho (STY)]PPPTGGQK_2                                                 | Q3UHU6_T604_M1_Aak1    | 13.2894 | 13.4158 | 14.1121 | 13.7642 | 13.0356 | 13.3964 | 13.7612 | 13.3301 | 13.3745 | 13.4233 | 1.0022 | 0.0032  | 0.8895 | 0.0508 |
| Aak1     | _EQGSSSLGSGSS[Phospho (STY)]GGGGSSSLGSGSYGR_3                                  | #N/A                   | 2.8978  | 2.9438  | 4.1323  | 7.7815  | 6.4723  | 3.4636  | 3.8243  | 3.3251  | 3.6241  | 7.9693  | 0.9850 | -0.0219 | 0.9598 | 0.0178 |
| Aak1     | _LTDPTTETSMAR_2                                                                | #N/A                   | 0.8078  | 7.8751  | 8.0854  | 7.8316  | 0.0381  | 7.9119  | 7.8480  | 7.9449  | 7.8795  | 7.4646  | 1.0243 | 0.0346  | 0.1060 | 0.9746 |
| Aak1     | _VAEDEFPPPLUTK_2                                                               | #N/A                   | 6.8462  | 6.9445  | 6.7442  | 7.0377  | 6.8995  | 7.1434  | 6.9194  | 6.6496  | 7.1447  | 6.5593  | 1.0195 | 0.0278  | 0.3285 | 0.4845 |
| Aak1     | _AAEDSNLSFGVAVGESK_2                                                           | #N/A                   | 6.2300  | 6.0102  | 6.5812  | 7.0400  | 5.6445  | 5.7526  | 6.3071  | 6.4021  | 6.0629  | 6.6509  | 0.9770 | -0.0335 | 0.6238 | 0.2049 |
| Aak1     | _DUKVENILHDR_3                                                                 | #N/A                   | 5.8160  | 5.9404  | 5.5576  | 6.5535  | 6.0910  | 5.9346  | 6.6610  | 5.1081  | 6.0894  | 6.0782  | 0.9997 | -0.0005 | 0.9950 | 0.0022 |
| Aak1     | _FQNPQAEQVNAVEDEIK_3                                                           | #N/A                   | 6.1323  | 5.0028  | 5.8014  | 6.3442  | 6.0287  | 6.0540  | 6.1110  | 6.3406  | 5.8196  | 6.3160  | 0.9589 | -0.0606 | 0.3562 | 0.4483 |
| Aak1     | _SKS[Phospho (STY)]ATTT[Phospho (STY)]PSGS[Phospho (STY)]PR_2                  | Q3UHU6_S676_M3_Aak1    | 4.9167  | 5.2431  | 7.6126  | 6.7594  | 4.5987  | 5.2044  | 6.5294  | 4.9615  | 3.8514  | 4.9096  | 1.1303 | 0.1767  | 0.4030 | 0.3947 |
| Aak1     | _LPSQTESVTSNR_2                                                                | #N/A                   | 6.5040  | 6.5247  | 6.5042  | 6.6208  | 6.5418  | 6.6540  | 6.4922  | 6.4197  | 6.7421  | 6.0833  | 1.0193 | 0.0275  | 0.3017 | 0.5204 |
| Aak1     | _NSS[Phospho (STY)]GSSSESLPNLAR_2                                              | Q3UHU6_S936_M1_Aak1    | 9.7147  | 9.6981  | 10.1128 | 10.1130 | 9.0125  | 9.7381  | 9.9276  | 9.5145  | 6.3911  | 9.7758  | 1.0932 | 1.1285  | 0.2677 | 0.5724 |
| Aak1     | _AQATPSQLQSQPK_2                                                               | #N/A                   | 5.1695  | 4.4921  | 4.0127  | 4.5154  | 4.6516  | 4.1745  | 4.6006  | 4.9363  | 4.6361  | 4.1754  | 0.9816 | -0.0268 | 0.7343 | 0.1341 |
| Aak1     | _SATTPPSG[Phospho (STY)]PR_2                                                   | #N/A                   | 11.5263 | 11.7036 | 12.0797 | 11.7516 | 10.8987 | 11.6362 | 11.5675 | 11.5841 | 11.5576 | 11.5076 | 1.0039 | 0.0056  | 0.8269 | 0.0826 |
| Aak1     | _VGLST[Phospho (STY)]PPSS[Phospho (STY)]PKTOR_2                                | #N/A                   | 10.3491 | 11.6956 | 12.5980 | 11.4757 | 10.4946 | 3.5858  | 11.3791 | 4.1313  | 10.4781 | 9.2733  | 1.1381 | 0.1867  | 0.5782 | 0.2379 |
| Aak1     | _REQSSSLGSGSS[Phospho (STY)]GGGSSSLGSGSYGR_3                                   | #N/A                   | 3.8534  | 3.1088  | 3.5870  | 3.1308  | 2.9971  | 3.6275  | 3.2791  | 3.6338  | 4.1694  | 4.3089  | 0.8795 | -0.1853 | 0.1121 | 0.9504 |
| Aak1     | _LSDVTHSAVFGVPASK_2                                                            | #N/A                   | 4.2124  | 4.0409  | 4.7618  | 6.0819  | 3.8016  | 3.2990  | 4.3832  | 4.1270  | 3.3946  |         | 1.1198 | 0.1632  | 0.3988 | 0.3992 |
| Aak1     | _STQLLQAAAAEASLNK_2                                                            | #N/A                   | 5.8790  | 3.0328  | 5.9453  | 3.9435  | 5.7289  | 3.7035  | 5.5873  | 4.8894  | 5.4677  | 5.3178  | 0.8852 | -0.1759 | 0.3893 | 0.4098 |
| Aak1     | _YTTLSYR_2                                                                     | #N/A                   | 3.3588  | 4.1640  | 4.0456  | 4.5483  | 3.9853  | 3.7442  | 4.2629  | 4.0677  | 3.0144  |         | 1.0658 | 0.0920  | 0.4381 | 0.3584 |
| Aak1     | _GHYVLC[Carbamidomethyl (C)]DFGSATNK_3                                         | #N/A                   | 3.7729  | 3.0284  | 3.5066  | 4.5512  | 2.9167  | 3.7079  | 3.6011  | 3.9508  | 4.2498  | 4.2285  | 0.8935 | -0.1625 | 0.2248 | 0.6482 |
| Aak1     | _LQTGFTENVLQIFC[Carbamidomethyl (C)]QDTC[Carbamidomethyl (C)]EAVAR_3           | #N/A                   | 3.8679  | 3.1233  | 3.6016  | 3.7915  | 3.9377  | 3.6130  | 3.5061  | 3.9756  | 4.3235  |         | 0.9337 | -0.0989 | 0.2319 | 0.6347 |
| Slc2a13  | _GSNYHSDNDAS[Phospho (STY)]DVE_2                                               | #N/A                   | 9.0544  | 10.5901 | 8.5149  | 10.4398 | 9.3040  | 10.3456 | 11.2127 | 10.7444 | 10.4996 | 10.3374 | 0.9074 | -0.1401 | 0.0663 | 1.1785 |
| Slc2a13  | _KAS[Phospho (STY)]EDVEYTLK_2                                                  | Q3UHK1_S6_M1_Slc2a13   | 6.5670  | 3.7017  | 4.2113  | 3.2131  | 4.1510  | 6.7814  | 4.4287  | 6.9474  | 6.7290  |         | 0.7673 | -0.3822 | 0.1497 | 0.8248 |
| Slc2a13  | _VKGSHVHLS[Phospho (STY)]DNDASDVE_2                                            | #N/A                   | 4.6431  | 5.4043  | 4.5271  | 5.6639  | 3.7793  | 6.1804  | 6.0040  | 6.9248  | 5.1867  | 3.5032  | 0.9312 | -0.1028 | 0.6233 | 0.2053 |
| Slc2a13  | _SLSS[Phospho (STY)]LMGER_2                                                    | Q3UHK1_S18_M1_Slc2a13  | 4.0542  | 3.2882  | 3.7879  | 6.1773  | 3.1096  | 3.1191  | 3.4799  | 3.6696  | 3.9686  | 3.0089  | 1.1107 | 0.1515  | 0.5441 | 0.2643 |
| Slc2a13  | _SLIAESAAS[Phospho (STY)]LQGAELR_2                                             | Q3UHK1_S47_M1_Slc2a13  | 3.2895  | 4.0589  | 3.8573  | 4.0678  | 4.1143  | 3.8249  | 3.9411  | 3.7980  | 3.7656  | 3.7451  | 1.0148 | 0.0212  | 0.7352 | 0.1636 |
| Camkv    | _AAAT[Phospho (STY)]PEPAVAQPDSTALEGATGQAPSSK_3                                 | Q3UHL1_T470_M1_Camkv   | 8.5095  | 8.3383  | 8.2933  | 8.4892  | 7.0446  | 8.2474  | 8.2042  | 8.2079  | 8.3135  | 8.1994  | 0.9906 | -0.0137 | 0.7911 | 0.1017 |
| Camkv    | _TEEFC[Carbamidomethyl (C)]EPR_2                                               | #N/A                   | 7.1498  | 6.6540  | 6.5676  | 7.0078  | 6.6185  | 6.4533  | 7.0629  | 7.0706  | 6.7335  |         | 0.9664 | -0.0492 | 0.1659 | 0.8700 |
| Camkv    | _EPC[Carbamidomethyl (C)]GTEVLAPEVGR_2                                         | #N/A                   | 6.7649  | 6.1189  | 5.9228  | 7.1263  | 6.6673  | 6.4998  | 7.0176  | 6.5100  | 6.4851  | 6.6953  | 0.9760 | -0.0351 | 0.5305 | 0.2753 |
| Camkv    | _LENLVYNYR_2                                                                   | #N/A                   | 7.0536  | 6.6973  | 6.4716  | 6.8711  | 5.7617  | 6.0188  | 6.6388  | 7.0043  | 6.6265  | 5.9784  | 0.9874 |         | 0.7935 | 0.1004 |
| Camkv    | _LVISDFHLAK_2                                                                  | #N/A                   | 6.0927  | 6.2022  | 6.3429  | 6.6252  | 5.6491  | 6.0449  | 6.7172  | 6.8838  | 5.1731  | 5.9552  | 0.9963 | -0.0053 | 0.9499 | 0.0223 |
| Camkv    | _AT[Phospho (STY)]PATESTVPATQSSALPAK_2                                         | #N/A                   | 7.5847  | 7.5847  | 7.7648  | 8.0905  | 4.7948  | 7.6460  | 8.3091  | 7.7601  | 7.7783  | 7.7516  | 0.9251 | -0.1124 | 0.3855 | 0.4139 |
| Camkv    | _LVDWDLDGGYSEK_2                                                               | #N/A                   | 4.8044  | 5.4728  | 6.3738  | 5.3967  | 4.9747  | 5.7470  | 5.8225  | 5.0001  | 4.6352  | 5.1779  | 1.0587 | 0.0822  | 0.4100 | 0.3872 |
| Camkv    | _SDDIAS[Phospho (STY)]ADR_1                                                    | #N/A                   | 6.7385  | 6.2269  | 5.9630  | 5.9498  | 4.9772  | 6.3232  | 6.6669  | 7.0141  | 6.3450  |         | 0.9308 | -0.1034 | 0.2346 | 0.6296 |
| Camkv    | _ITAEASHWISGNAASDK_3                                                           | #N/A                   | 5.6416  | 6.0633  | 6.5292  | 5.5597  | 5.2865  | 5.5363  | 5.9624  | 5.1853  | 5.2581  | 5.9363  | 1.0329 | 0.0467  | 0.5348 | 0.2718 |
| Camkv    | _LMEVGEQDK_2                                                                   | #N/A                   | 5.4416  | 4.4082  | 4.2487  | 6.2846  | 4.8374  | 3.5411  | 4.4660  | 3.0583  | 4.2433  | 3.2175  | 1.2796 | 0.3557  | 0.1020 | 0.9913 |
| Camkv    | _GGEATGC[Carbamidomethyl (C)]AQESQR_2                                          | #N/A                   | 6.9981  | 3.2672  | 3.1449  | 3.6476  | 3.1555  | 7.2950  | 3.3622  | 2.9701  | 6.9211  | 3.6146  | 1.0872 | 0.1026  | 0.7756 | 0.1104 |
| Camkv    | _SAT[Phospho (STY)]PATDGR_2                                                    | Q3UHL1_T438_M1_Camkv   | 3.4316  | 3.6452  | 4.3514  | 4.1483  | 3.5335  | 3.1075  | 3.8630  | 3.1874  | 3.8590  | 3.4448  | 1.0319 | 0.0453  | 0.6840 | 0.6601 |
| Camkv    | _NYNQSPSEYDR_2                                                                 | #N/A                   | 6.0285  | 2.9615  | 3.9515  | 4.4541  | 3.8498  | 4.2756  | 4.1688  | 3.6644  | 3.3129  | 4.4211  | 1.1358 | 0.1837  | 0.2864 | 0.5431 |
| Dop1b    | _S[Phospho (STY)]DLSEDDPYVDPOLR_2                                              | Q3UHU6_S1080_M1_Dop1b  | 3.5981  | 4.4033  | 4.2849  | 3.7174  | 4.2246  | 3.5049  | 3.8657  | 3.3309  | 2.9795  | 3.2537  | 1.1781 | 0.2365  | 0.0424 | 1.3721 |
| Dop1b    | _AALLAAGFES[Phospho (STY)]PR_2                                                 | Q3UHU6_S1167_M1_Dop1b  | 3.2868  | 3.8406  | 4.5213  | 0.8480  | 1.9197  | 3.8525  | 4.0942  | 5.0024  | 3.2352  | 3.7423  | 0.7577 | -0.4003 | 0.2396 | 0.6204 |
| Dop1b    | _SDSGSGISGAS[Phospho (STY)]PELSEHLR_3                                          | Q3UHU6_S597_M1_Dop1b   | 4.2715  | 3.0709  | 4.0052  | 3.5490  | 2.8922  | 3.3364  | 3.6972  | 3.4522  | 3.7513  | 3.2262  | 0.9969 | -0.0044 | 0.9709 | 0.0128 |
| Mtd1     | _QELGPQGTGTSS[Phospho (STY)]R_2                                                | Q3UHU5_S1795_M1_Mtd1   | 7.7155  | 7.5079  | 4.1757  | 7.7193  | 3.5858  | 3.5070  | 3.8678  | 3.2817  | 5.5807  | 7.5307  | 1.2490 | 0.3208  | 0.2798 | 0.3729 |
| Mtd1     | _EDVTPPLS[Phospho (STY)]PDOLK_2                                                | Q3UHU5_S1407_M1_Mtd1   | 3.6272  | 3.5401  | 3.2695  | 6.7123  | 3.6207  | 3.8758  | 4.0242  | 6.7774  | 6.0244  | 3.8625  | 0.7942 | -0.3325 | 0.2579 | 0.5885 |
| Mtd1     | _GLPSAGSKEDVT[Phospho (STY)]PLPS[Phospho (STY)]PDOLK_3                         | #N/A                   | 3.7099  | 3.8619  | 4.0600  | 7.2201  | 3.6862  | 3.9202  | 3.8716  |         |         |         | 0.9705 | -0.0432 | 0.8872 | 0.0520 |
| Mtd1     | _GRS[Phospho (STY)]PS[Phospho (STY)]PLVGSETR_3                                 | Q3UHU5_S1799_M2_Mtd1   | 3.8787  | 3.1342  | 3.6124  | 3.7806  | 3.0225  | 3.6022  | 3.4953  | 4.0069  | 3.9864  | 4.3343  | 0.8861 | -0.1745 | 0.0794 | 1.1003 |
| Pdp1     | _SLDS[Phospho (STY)]DES[Phospho (STY)]EEDDDYQQR_2                              | #N/A                   | 7.4890  | 8.2646  | 8.5892  | 9.1983  | 8.6420  | 8.4050  | 8.5390  | 8.4324  | 8.0732  | 7.8147  | 1.0264 | 0.0375  | 0.5114 | 2.1901 |
| Pdp1     | _GVGLDIENPAR_2                                                                 | #N/A                   | 6.3965  | 6.7101  | 6.5719  | 6.6844  | 6.8901  | 6.5269  | 6.7031  | 6.4578  | 6.7218  | 5.6786  | 1.0375 | 0.0531  | 0.2914 | 0.5355 |
| Pdp1     | _M[Oxidation (M)]QSL[Phospho (STY)]LNK_2                                       | #N/A                   | 5.8547  | 6.1743  | 6.6329  | 6.0598  | 5.3860  | 6.4052  | 5.6725  | 6.0142  | 6.2605  | 6.1678  | 1.0177 | 0.0253  | 0.7175 | 0.1442 |
| Pdp1     | _QYTS[Phospho (STY)]PEEDAQLQAEK_2                                              | Q3UHX2_S19_M1_Pdp1     | 3.5009  | 4.6522  | 4.1247  | 4.8883  | 4.5566  | 4.2671  | 3.9914  | 4.0769  | 4.4850  | 4.0607  | 1.0429 | 0.0606  | 0.5209 | 0.2833 |
| Pdp1     | _SLDS[Phospho (STY)]DESEDDDDYQQR_2                                             | #N/A                   | 3.7358  | 4.6451  | 4.9609  | 5.7627  | 4.9014  | 4.6562  | 5.0876  | 5.0171  | 4.7545  | 4.3441  | 0.9950 | -0.0072 | 0.9487 | 0.0228 |
| Pdp1     | _KSLDS[Phospho (STY)]DES[Phospho (STY)]EEDDDYQQR_2                             | #N/A                   | 5.9276  | 6.9292  | 7.3263  | 7.6474  | 7.2215  | 6.8563  | 7.2780  | 6.9184  | 4.7612  | 6.7034  | 1.0888 | 0.1227  | 0.3211 | 0.4934 |
| Pdp1     | _KSLDS[Phospho (STY)]DESEDDDDYQQR_2                                            | #N/A                   | 3.5813  | 3.8787  | 3.8191  | 3.8401  | 3.5533  | 3.6362  | 3.9884  | 3.7871  | 3.5665  | 4.1755  | 0.9584 | -0.0612 | 0.2398 | 0.6202 |
| Arhgap17 | _LGEQGPFGPPTPQPT[Phospho (STY)]PSTT[Phospho (STY)]PLAK_3                       | #N/A                   | 3.5759  | 3.6297  | 3.9907  | 3.5119  | 3.7291  | 3.6556  | 6.6601  | 3.4072  | 3.5213  | 3.4677  | 0.8635 | -0.2117 | 0.3880 | 0.4112 |
| Plekha7  | _SDVISLGS[Phospho (STY)]PR_2                                                   | Q3UHL6_S608_M1_Plekha7 | 5.9921  | 7.1006  | 6.8684  | 7.4108  | 6.4234  | 7.0098  | 7.2606  | 6.8802  | 6.9853  | 7.3235  | 0.9562 | -0.0646 | 0.2887 | 0.5395 |
| Plekha7  | _KVM[Phospho (STY)]PLDS[Phospho (STY)]PTK_2                                    | Q3UHL6_S900_M2_Plekha7 | 3.5433  | 5.1046  | 4.2301  | 6.0383  | 3.4719  | 3.5106  | 3.9714  | 3.4366  | 3.8547  | 4.7165  | 1.0847 | 0.1173  | 0.5697 | 0.2444 |
| Plekha7  | _HLSGSS[Phospho (STY)]PPPR_2                                                   | Q3UHL6_S482_M1_Plekha7 | 10.8422 | 3.4917  | 5.5844  | 6.6290  | 2.9944  | 3.3602  | 3.2764  | 9.7572  | 4.1721  | 4.3063  | 0.9041 | -0.1455 | 0.7946 | 0.0999 |
| Plekha7  | _EDVM[Oxidation (M)]AGLS[Phospho (STY)]ANKENV[Phospho (STY)]R_3                | Q3UHL6_S820_M2_Plekha7 | 3.5872  | 3.6389  | 4.2740  | 3.2759  | 4.2138  | 3.0974  | 4.4914  | 3.3418  | 2.9904  | 3.2429  | 1.0468 | 0.0660  | 0.6593 | 0.1809 |
| Edc4     | _DSQDTSAGS[Phospho (STY)]DHDDVEASASGGGSK_3                                     | Q3UHB9_S884_M1_Edc4    | 3.4905  | 4.2957  | 4.1773  | 8.2499  | 4.1170  | 3.6125  | 4.3946  | 7.8051  | 3.0871  | 3.1461  | 1.0106 | 0.0152  | 0.9701 | 0.0132 |
| Edc4     | _Acetyl (Protein N-term)ASC[Carbamidomethyl (C)]AS[Phospho (STY)]DIEDATQHRLR_2 | Q3UHB9_S6_M1_Edc4      | 3.5689  | 3.7700  | 3.3026  | 4.3472  | 3.5948  | 4.1347  | 4.4955  | 4.1548  | 2.9530  | 4.0245  | 0.9691 | -0.0452 | 0.7240 | 0.1403 |
| Usp19    | _RNS[Phospho (STY)]PVER_2                                                      | Q3UJD6_S1258_M1_Usp19  | 4.3765  | 2.9659  | 4.1102  | 3.6540  | 2.7872  | 3.4415  | 3.8023  | 8.8899  | 3.6462  | 3.9004  | 0.7028 | -0.5088 | 0.1934 | 0.7135 |
| Rmdn3    | _SHS[Phospho (STY)]LPNSLDYQAQSER_2                                             | #N/A                   | 7.4598  | 7.5762  | 8.9615  | 8.0883  | 6.6664  | 7.7526  | 8.3798  | 7.7296  | 7.6490  | 8.1937  | 0.9703 | -0.0435 | 0.5799 | 0.2366 |
| Rmdn3    | _SLGLAGEIVEVR_2                                                                | #N/A                   | 3.9617  | 3.8301  | 3.1477  | 3.2755  | 4.4228  | 4.3718  | 4.3475  |         |         |         |        |         |        |        |



|          |                                                                     |                         |         |         |         |         |         |         |         |        |         |         |         |          |        |        |
|----------|---------------------------------------------------------------------|-------------------------|---------|---------|---------|---------|---------|---------|---------|--------|---------|---------|---------|----------|--------|--------|
| Gpd1     | _TIEELKELLNGQK_3                                                    | #N/A                    | 3.5718  | 4.3281  | 3.3055  | 4.3501  | 4.2164  | 3.9091  | 4.4984  | 4.1519 | 2.9501  | 4.0274  | 1.0102  | 0.0146   | 0.9106 | 0.0407 |
| Pgp17    | _ELVSLNNGVEIEGNNK_2                                                 | #N/A                    | 8.8836  | 9.7589  | 9.9841  | 10.8481 | 8.9333  | 9.0134  | 9.3708  | 9.7547 | 9.1165  | 9.0596  | 1.0263  | 0.0374   | 0.5727 | 0.2421 |
| Pgp17    | _ELDLYDNQIK_2                                                       | #N/A                    | 7.3719  | 7.2786  | 7.4488  | 7.7111  | 7.3639  | 7.2908  | 7.2523  | 7.1806 | 7.2363  | 7.4351  | 1.0185  | 0.0265   | 0.1826 | 0.7385 |
| Pgp17    | _JEGQSVNLR_2                                                        | #N/A                    | 6.8771  | 7.4769  | 6.9031  | 7.4860  | 7.0681  | 7.2839  | 7.0286  | 7.2763 | 7.0083  | 7.2339  | 1.0064  | 0.0092   | 0.7677 | 0.1148 |
| Pgp17    | _QIDATVVR_2                                                         | #N/A                    | 6.1373  | 6.3963  | 5.7602  | 6.2167  | 6.7433  | 6.6123  | 6.0089  | 6.1838 | 6.4219  | 6.3815  | 1.0099  | 0.0142   | 0.7597 | 0.1193 |
| Pgp17    | _SLETVYER_2                                                         | #N/A                    | 7.8546  | 8.0851  | 8.4823  | 8.4949  | 7.4911  | 8.2428  | 8.3154  | 8.1398 | 7.9630  | 8.3568  | 0.9893  | -0.0155  | 0.6880 | 0.1624 |
| Pgp17    | _C[Carbamidomethyl (C)]ENLEELQSLR_2                                 | #N/A                    | 5.1121  | 5.5058  | 4.9616  | 5.5855  | 5.7865  | 5.3861  | 3.7682  | 5.1952 | 5.1404  | 5.2680  | 1.1129  | 0.1543   | 0.1303 | 0.8852 |
| Pgp17    | _HGGGGIVANLS[Phospho (STY)]ECSLKDGVDR_3                             | #N/A                    | 4.0816  | 3.7756  | 3.4603  | 7.7346  | 6.0440  | 4.9828  | 4.5224  | 4.9828 | 5.9003  | 6.2172  | 0.8450  | -0.2431  | 0.3528 | 0.2575 |
| Pgp17    | _LQNLDAITLTVLSVQSNR_2                                               | #N/A                    | 5.4517  | 5.9366  | 6.1248  | 6.4244  | 5.7764  | 5.3260  | 6.4064  | 5.6572 | 5.8725  | 6.2350  | 0.9664  | -0.0492  | 0.4404 | 0.3561 |
| Pgp17    | _RVES[Phospho (STY)]EES[Phospho (STY)]GDEEGK_2                      | #N/A                    | 7.6075  | 7.5832  | 7.8754  | 8.1538  | 8.8195  | 8.3142  | 7.7485  | 7.5616 | 8.1892  | 7.7690  | 1.0309  | 0.0040   | 0.3845 | 0.4151 |
| Pgp17    | _LTMIDIASNR_2                                                       | #N/A                    | 5.7483  | 5.0967  | 3.5953  | 6.4731  | 4.1822  | 4.4274  | 3.2873  | 3.8621 | 4.1612  | 4.3818  | 1.2542  | 0.3268   | 0.1210 | 0.9172 |
| Pgp17    | _IENISNLHLQLQM[Oxidation (M)]LELGSNR_3                              | #N/A                    | 4.7980  | 4.9277  | 5.0736  | 5.4450  | 4.5514  | 5.2054  | 4.8867  | 4.6764 | 4.6609  | 5.1735  | 1.0311  | 0.0442   | 0.4412 | 0.3554 |
| Pgp17    | _KHGGGGIVANLS[Phospho (STY)]EQS[Phospho (STY)]LKDGVDR_3             | #N/A                    | 3.3140  | 3.8914  | 4.0008  | 5.4221  | 3.5445  | 3.9405  | 4.3118  | 4.6816 | 4.5718  | 4.1923  | 0.9053  | -0.1436  | 0.3082 | 0.5111 |
| Pgp17    | _VES[Phospho (STY)]EES[Phospho (STY)]GDEEGK_2                       | #N/A                    | 6.2810  | 7.5626  | 7.1624  | 7.8273  | 7.5253  | 6.6279  | 7.5373  | 6.3409 | 6.9872  | 7.7621  | 1.0011  | 0.0015   | 0.9853 | 0.0064 |
| Pgp17    | _VSEES[Phospho (STY)]GDEEGKHGGGGIVANLSEQSLK_4                       | #N/A                    | 3.8327  | 5.5872  | 3.5664  | 7.4250  | 5.7107  | 3.6482  | 3.2584  | 7.1916 | 5.3472  | 4.2883  | 0.9881  | -0.0173  | 0.9553 | 0.0199 |
| Pgp17    | _HGGGGIVANLS[Phospho (STY)]EQSLK_2                                  | #N/A                    | 4.0877  | 3.1384  | 3.2737  | 3.7763  | 3.0267  | 3.5979  | 3.4910  | 4.3421 | 3.9907  | 3.7433  | 0.8951  | -0.1599  | 0.1455 | 0.8372 |
| Pgp17    | _RVES[Phospho (STY)]EES[Phospho (STY)]GDEEGK_2                      | #N/A                    | 5.2817  | 5.2117  | 5.0384  | 5.7819  | 5.2457  | 3.9060  | 5.4217  | 4.9705 | 4.9119  | 5.3241  | 0.9846  | -0.0224  | 0.8182 | 0.0871 |
| Pgp17    | _GAGGQGS[Phospho (STY)]QIEMM[Oxidation (M)]EVDR_2                   | #N/A                    | 6.1384  | 4.7520  | 4.1376  | 7.3913  | 5.8406  | 3.5757  | 3.4688  | 3.6714 | 3.8612  | 4.2687  | 1.2912  | 0.3687   | 0.2003 | 0.6983 |
| Pgp17    | _GAGGQGS[Phospho (STY)]QIEM[Oxidation (M)]M[Oxidation (M)]EVDRR_3   | #N/A                    | 3.6707  | 3.7659  | 3.9716  | 4.0692  | 3.6743  | 4.0210  | 3.9536  | 3.7347 | 3.2994  | 4.1626  | 1.0197  | 0.0281   | 0.6768 | 0.1695 |
| Pgp17    | _DAEDVGLTYHR_3                                                      | #N/A                    | 2.9467  | 4.2794  | 3.6336  | 5.8523  | 3.5733  | 3.9577  | 3.8509  | 6.3309 | 4.1032  | 0.9888  | -0.0162 | 0.9149   | 0.0292 | 0.9827 |
| Pgp17    | _ELDLYDNQIK_2                                                       | #N/A                    | 3.3720  | 4.1283  | 3.7847  | 4.2873  | 4.0166  | 4.1089  | 4.0020  | 0.8120 | 3.4797  | 4.2543  | 1.2590  | 0.3323   | 0.2451 | 0.6107 |
| Pgp17    | _GAEDPEEHELAVDMETNLDL_3                                             | #N/A                    | 4.1168  | 3.2256  | 3.8505  | 3.4075  | 3.2606  | 3.1818  | 3.5426  | 3.6069 | 3.9059  | 3.0716  | 0.9930  | -0.0101  | 0.9307 | 0.0359 |
| Smc8     | _VAS[Phospho (STY)]PANVTGLTULSLR_2                                  | #N/A                    | 4.7185  | 7.0275  | 6.5263  | 8.1913  | 4.4623  | 4.2837  | 6.2374  | 6.9778 | 5.8277  | 3.8113  | 1.0271  | 0.0385   | 0.8786 | 0.0562 |
| Smc8     | _SS[Phospho (STY)]VESVLK_2                                          | QJUMBS_5420_M1_Smc8     | 3.1249  | 3.9301  | 3.1460  | 4.1906  | 3.7514  | 3.9781  | 4.3389  | 4.3114 | 3.1096  | 4.5493  | 0.9042  | -0.1452  | 0.2912 | 0.5358 |
| Smc8     | _SDS[Phospho (STY)]QASLTVPLSPHVR_2                                  | QJUMBS_5488_M1_Smc8     | 4.1160  | 6.1885  | 3.5921  | 7.3867  | 3.2504  | 3.1967  | 3.3038  | 6.1321 | 5.7838  | 5.1768  | 0.9064  | -0.1418  | 0.6532 | 0.1850 |
| Wash4    | _Acetyl (Protein N-term)[AVDTLS[Phospho (STY)]PDWDFRDVDSGSK_3       | #N/A                    | 3.7960  | 3.6416  | 4.0497  | 3.8812  | 3.4827  | 3.4794  | 3.8320  | 5.2184 | 3.8991  | 3.3610  | 0.9127  | -0.1317  | 0.3205 | 0.4941 |
| Cobl1    | _RQSS[Phospho (STY)]LTFQSSDPEHVR_3                                  | #N/A                    | 4.0022  | 3.3402  | 3.7358  | 3.2796  | 3.7568  | 3.0671  | 3.4279  | 3.7216 | 4.0206  | 3.9259  | 1.1695  | 0.0259   | 0.4984 | 0.3025 |
| Cobl1    | _TIS[Phospho (STY)]SPTGTEINPK_2                                     | QJUMF0_5896_M1_Cobl1    | 7.4962  | 4.1186  | 4.0002  | 8.1085  | 3.9399  | 3.7896  | 7.2517  | 3.6157 | 7.1848  | 2.9690  | 0.9975  | -0.0036  | 0.9925 | 0.0033 |
| Cobl1    | _QDS[Phospho (STY)]NPKPKPSNEIR_3                                    | QJUMF0_5794_M1_Cobl1    | 3.0692  | 3.8744  | 3.2017  | 4.2463  | 3.6957  | 2.7543  | 2.7856  | 3.0539 | 3.9236  | 1.1782  | 0.2365  | 0.1208   | 0.9178 | 0.0033 |
| Cobl1    | _ITVEKDPSALGS[Phospho (STY)]DGETSPSSK_3                             | QJUMF0_5546_M1_Cobl1    | 3.6067  | 3.7357  | 3.3403  | 4.3849  | 3.5571  | 4.1724  | 4.5332  | 4.1171 | 4.4161  | 4.0622  | 0.8873  | -0.1725  | 0.0618 | 1.2093 |
| Cobl1    | _QSS[Phospho (STY)]LTFQSSDPEHVR_2                                   | #N/A                    | 3.5675  | 4.3727  | 4.2543  | 3.2561  | 4.1940  | 3.5355  | 3.8963  | 3.3616 | 3.1011  | 6.6570  | 0.9130  | -0.1312  | 0.6119 | 0.2133 |
| Faxc     | _TETTEDGEANCS[Phospho (STY)]FSR_2                                   | QJUMF9_5378_M1_Faxc     | 4.2091  | 4.9263  | 3.4261  | 3.9288  | 2.8743  | 3.7503  | 3.6435  | 4.1897 | 4.6893  | 4.6089  | 0.8995  | -0.1528  | 0.3172 | 0.4987 |
| Ankrd27  | _PSEVPAGS[Phospho (STY)]PTR_2                                       | QJUMR0_5634_M1_Ankrd27  | 6.8643  | 6.2864  | 7.4041  | 7.1377  | 5.9692  | 3.8819  | 6.8202  | 6.7127 | 6.8660  | 0.9106  | -0.1352 | 0.4418   | 0.3548 | 0.0498 |
| Mcu      | _VAIISPDGVR_2                                                       | #N/A                    | 6.3790  | 6.0846  | 5.9854  | 5.3385  | 5.9384  | 6.0929  | 6.5435  | 6.3794 | 6.4595  | 5.7231  | 0.9512  | -0.0722  | 0.2196 | 0.6584 |
| Mcu      | _DLISHEDAAIYNQK_3                                                   | #N/A                    | 4.1613  | 3.1811  | 3.8950  | 2.7697  | 3.4647  | 3.3195  | 3.5871  | 4.2316 | 3.1938  | 3.1161  | 0.9811  | -0.0276  | 0.8423 | 0.0745 |
| Pgp1r12c | _TGS[Phospho (STY)]TGALGPSER_2                                      | QJUMT1_5431_M1_Pgp1r12c | 4.9802  | 9.8510  | 10.0910 | 10.2086 | 8.9019  | 9.6035  | 9.9764  | 9.7917 | 9.3807  | 9.7603  | 0.9961  | -0.0056  | 0.8885 | 0.0513 |
| Pgp1r12c | _AINGVGS[Phospho (STY)]PVSNPK_2                                     | QJUMT1_5403_M1_Pgp1r12c | 3.5935  | 7.2066  | 7.5031  | 7.5304  | 4.2200  | 7.1310  | 6.7733  | 3.2792 | 6.6900  | 6.8288  | 1.0553  | 0.0777   | 0.7833 | 0.0161 |
| Hdgf12   | _GGSEELHDS[Phospho (STY)]PR_2                                       | QJUMU5_5635_M1_Hdgf12   | 6.4517  | 5.6873  | 5.8433  | 6.0749  | 5.1308  | 5.6717  | 6.6674  | 6.3981 | 5.9903  | 5.5288  | 0.9453  | -0.0812  | 0.2938 | 0.5319 |
| Hdgf12   | _GGS[Phospho (STY)]S[Phospho (STY)]GEELEDEPVKK_2                    | #N/A                    | 9.3204  | 9.7805  | 4.4407  | 10.3644 | 8.4620  | 9.3866  | 10.3909 | 9.9096 | 8.9560  | 9.2891  | 0.8747  | -0.1931  | 0.2971 | 0.5270 |
| Hdgf12   | _TRLAS[Phospho (STY)]ESANDONEDS_2                                   | #N/A                    | 5.2062  | 5.5521  | 6.8013  | 6.0746  | 5.5528  | 5.7145  | 6.2122  | 6.1259 | 5.2537  | 5.1693  | 1.0222  | 0.0317   | 0.7339 | 0.1344 |
| Hdgf12   | _AERGGGS[Phospho (STY)]S[Phospho (STY)]GEELEDEPVK_2                 | #N/A                    | 3.1119  | 5.7660  | 4.3464  | 5.6107  | 4.7945  | 5.9350  | 5.7636  | 5.6142 | 5.4017  | 5.4702  | 0.8858  | -0.1749  | 0.2856 | 0.5544 |
| Hdgf12   | _AQEGDGDGS[Phospho (STY)]EDGPR_2                                    | QJUMU5_5620_M1_Hdgf12   | 4.0803  | 5.9191  | 6.0121  | 4.4160  | 4.4029  | 3.4006  | 3.2937  | 5.0824 | 5.3862  | 5.8039  | 0.9619  | -0.0561  | 0.7936 | 0.1002 |
| Hdgf12   | _LAS[Phospho (STY)]ESANDONEDS_2                                     | #N/A                    | 6.9354  | 6.8755  | 7.0697  | 7.1450  | 6.3067  | 6.1167  | 7.1016  | 7.0609 | 7.0889  | 6.5713  | 0.9692  | -0.0451  | 0.3977 | 0.4004 |
| Hdgf12   | _GGS[Phospho (STY)]S[Phospho (STY)]GEELEDEPVKKR_3                   | #N/A                    | 4.8084  | 5.4082  | 4.9458  | 5.7810  | 5.1214  | 5.7486  | 5.4402  | 6.0439 | 5.8933  | 4.9717  | 0.9490  | -0.0755  | 0.3440 | 0.4627 |
| Hdgf12   | _GGS[Phospho (STY)]S[Phospho (STY)]GEELEDEPVK_2                     | QJUMU5_5366_M1_Hdgf12   | 3.8338  | 9.5277  | 3.7833  | 9.8983  | 8.8926  | 9.5303  | 10.2318 | 9.4851 | 9.6686  | 9.6875  | 0.7757  | -0.3664  | 0.1835 | 0.7365 |
| Hdgf12   | _KRS[Phospho (STY)]EGLSLR_2                                         | QJUMU5_5450_M1_Hdgf12   | 3.6204  | 3.6058  | 4.3072  | 3.3090  | 3.4941  | 3.1305  | 4.5245  | 3.3087 | 2.9573  | 3.2760  | 1.0174  | 0.0249   | 0.8623 | 0.0623 |
| Hdgf12   | _AERGGGS[Phospho (STY)]S[Phospho (STY)]GEELEDEPVK_3                 | #N/A                    | 4.2561  | 4.3753  | 4.2440  | 3.3010  | 5.4450  | 4.2266  | 3.5370  | 4.1789 | 4.4330  | 3.0640  | 1.0484  | 0.0682   | 0.6604 | 0.2215 |
| Gpr162   | _RLS[Phospho (STY)]HOETNFSPTPR_3                                    | QJUN16_5413_M1_Gpr162   | 4.1679  | 7.2286  | 7.1505  | 7.1613  | 5.4525  | 6.6779  | 7.6632  | 7.8140 | 7.4550  | 7.0605  | 0.8409  | -0.2500  | 0.1030 | 0.9872 |
| Gpr162   | _RSS[Phospho (STY)]LQGESAK_2                                        | QJUN16_5256_M1_Gpr162   | 6.4403  | 3.5952  | 4.3178  | 3.3196  | 3.4835  | 3.1412  | 4.5351  | 7.0059 | 7.0134  | 6.3919  | 0.6547  | -0.6112  | 0.0297 | 1.5271 |
| Gpr162   | _C[Carbamidomethyl (C)]SLTGS[Phospho (STY)]EGSSR_2                  | QJUN16_5565_M1_Gpr162   | 3.4842  | 3.7420  | 4.1710  | 3.1728  | 4.1107  | 3.6188  | 4.3883  | 3.4449 | 3.0934  | 3.1398  | 1.0569  | 0.0798   | 0.5329 | 0.2734 |
| Gpr162   | _RLS[Phospho (STY)]LGGPSGR_2                                        | QJUN16_5539_M1_Gpr162   | 7.3064  | 7.3296  | 6.1720  | 6.5322  | 4.4190  | 7.3057  | 7.7428  | 7.3066 | 6.6454  | 7.7008  | 0.8860  | -0.1747  | 0.2084 | 0.6812 |
| Gpr162   | _RC[Carbamidomethyl (C)]S[Phospho (STY)]LTP[Phospho (STY)]GSEGSSR_2 | QJUN16_5763_M2_Gpr162   | 4.3178  | 4.2300  | 13.5004 | 3.7778  | 3.7778  | 3.8107  | 3.9427  | 4.2181 | 3.7311  | 1.0366  | 0.0518  | 0.4397   | 0.3568 | 0.0000 |
| Gprn1    | _DLAAAAQKS[Phospho (STY)]PSAAEAAAPPGR_3                             | #N/A                    | 12.1018 | 12.4526 | 13.3002 | 3.8923  | 11.2382 | 12.0911 | 12.6402 | 3.7339 | 12.2481 | 12.2487 | 1.0615  | 0.0861   | 0.8050 | 0.0942 |
| Gprn1    | _KAS[Phospho (STY)]PASEK_2                                          | #N/A                    | 7.0992  | 7.0796  | 6.9203  | 7.7632  | 6.1430  | 7.2883  | 3.6324  | 6.8800 | 7.1055  | 7.0829  | 1.1415  | 0.1909   | 0.2619 | 0.5819 |
| Gprn1    | _SLGTWGS[Phospho (STY)]LSAAK_2                                      | QJUNH4_5446_M1_Gprn1    | 3.7406  | 6.7792  | 3.1473  | 7.3145  | 3.4232  | 6.9953  | 3.1663  | 6.6992 | 4.2822  | 4.1961  | 1.1530  | 0.2955   | 0.5566 | 0.2545 |
| Gprn1    | _REPPGS[Phospho (STY)]TGGDVLGR_2                                    | #N/A                    | 7.2781  | 6.8905  | 7.1777  | 7.7030  | 3.6574  | 6.9735  | 3.9350  | 3.8982 | 6.7015  | 7.0276  | 1.1198  | 0.1632   | 0.5922 | 0.2275 |
| Gprn1    | _VTIQPGATSPGKVTPTSP[Phospho (STY)]LQK_3                             | QJUNH4_5584_M1_Gprn1    | 4.2390  | 2.9872  | 3.4249  | 3.9276  | 2.8755  | 3.7491  | 3.6423  | 4.1909 | 3.8395  | 3.8946  | 0.9080  | -0.1392  | 0.2498 | 0.6024 |
| Gprn1    | _VDIVS[Phospho (STY)]PGGDNAGSLR_2                                   | #N/A                    | 9.2331  | 9.5302  | 9.6821  | 9.9976  | 8.3973  | 9.6576  | 9.2392  | 9.1443 | 9.2497  | 9.5146  | 1.0139  | 0.0200   | 0.6685 | 0.1749 |
| Gprn1    | _ERKGS[Phospho (STY)]TGGDVLGR_2                                     | #N/A                    | 8.4217  | 8.1756  | 7.4304  | 7.9534  | 8.0772  | 8.6970  | 7.7866  | 8.2544 | 7.2198  | 7.5720  | 1.0542  | 0.0761   | 0.1726 | 0.7630 |
| Gprn1    | _AETVS[Phospho (STY)]PGEVDAM[Oxidation (M)]TLGK_2                   | #N/A                    | 8.9478  | 9.3879  | 10.1862 | 9.9411  | 9.1565  | 9.5457  | 9.8471  | 9.3651 | 9.4753  | 9.6226  | 0.9948  | -0.0076  | 0.8482 | 0.0715 |
| Gprn1    | _KAS[Phospho (STY)]LPASEKTDPLASK_3                                  | #N/A                    | 5.3092  | 5.3954  | 6.3222  | 5.9705  | 3.6382  | 5.2236  | 4.8233  | 4.3034 | 5.2960  | 3.0092  | 1.2184  | 0.2850</ |        |        |



|          |                                                                                    |                         |         |         |         |         |         |         |         |         |         |         |        |         |         |        |
|----------|------------------------------------------------------------------------------------|-------------------------|---------|---------|---------|---------|---------|---------|---------|---------|---------|---------|--------|---------|---------|--------|
| Rbm20    | _SGS[Phospho (STY)] GPLHSVSGYK_2                                                   | Q3UQS8_5728_M1_Rbm20    | 4.0712  | 3.3755  | 3.2571  | 5.9196  | 3.1969  | 3.0318  | 3.4745  | 4.3587  | 4.0073  | 3.7268  | 0.9786 | -0.0311 | 0.8893  | 0.0509 |
| Brd9     | _EKEHC[Carbamidomethyl (C)] DS[Phospho (STY)] EGEADAFDGGK_3                        | #N/A                    | 4.8149  | 5.2583  | 3.3740  | 6.4459  | 2.7841  | 5.3855  | 5.8149  | 6.0787  | 5.6900  | 5.3728  | 0.8150 | -0.2952 | 0.1701  | 0.7694 |
| Brd9     | _EKEHC[Carbamidomethyl (C)] DS[Phospho (STY)] EGEADAFDGGK_3                        | #N/A                    | 3.1909  | 3.7114  | 3.9129  | 4.5725  | 3.4407  | 3.7108  | 4.4891  | 4.4494  | 3.5488  | 3.6126  | 0.9447 | -0.0821 | 0.5266  | 0.2785 |
| Tgfbra1  | _HTAPS[Phospho (STY)] SPSPGRT_2                                                    | #N/A                    | 3.5048  | 5.4474  | 4.4248  | 3.7081  | 3.6029  | 5.6330  | 6.0548  | 5.6596  | 3.9000  | 3.5183  | 0.9171 | -0.1248 | 0.5846  | 0.2331 |
| Tgfbra1  | _HTAPS[Phospho (STY)] SPSPGRT_2                                                    | #N/A                    | 4.3072  | 5.8498  | 3.4932  | 3.9958  | 3.2373  | 3.9921  | 3.7105  | 5.7486  | 5.5279  | 5.4526  | 0.8114 | -0.3016 | 0.1462  | 0.8351 |
| Slmap    | _ESDLS[Phospho (STY)] PSEK_2                                                       | Q3URD3_5469_M1_Slmap    | 3.3645  | 3.6847  | 3.5501  | 4.1037  | 4.3384  | 3.9012  | 4.1380  | 4.0792  | 4.7540  | 4.1714  | 0.8922 | -0.1645 | 0.0716  | 1.1449 |
| Slmap    | _SDVHAFLPS[Phospho (STY)] PVOK_2                                                   | #N/A                    | 6.6397  | 5.9933  | 4.0958  | 6.6924  | 5.0139  | 6.3338  | 6.7527  | 6.3830  | 6.0282  | 6.3982  | 0.9073 | -0.1404 | 0.3036  | 0.5177 |
| Slmap    | _AKESDSDSLSPS[Phospho (STY)] KEK_2                                                 | Q3URD1_5471_M1_Slmap    | 4.2617  | 3.5172  | 3.9954  | 3.5392  | 3.4055  | 3.7191  | 3.6875  | 3.4620  | 3.7610  | 3.2165  | 1.0353 | 0.0500  | 0.5906  | 0.2280 |
| Lingo2   | _HKNS[Phospho (STY)] DLEYVR_3                                                      | Q3JURE_5576_M1_Lingo2   | 5.6188  | 5.4816  | 5.5740  | 6.8594  | 3.6174  | 5.6721  | 4.4729  | 6.3595  | 2.9756  | 4.0019  | 1.2287 | 0.2971  | 0.2240  | 0.6497 |
| Pkc1     | _RSS[Phospho (STY)] IKDPSNQK_2                                                     | #N/A                    | 7.8738  | 7.3797  | 3.6291  | 8.1127  | 6.9581  | 7.9851  | 7.8934  | 7.8137  | 3.6005  | 7.5879  | 1.0395 | 0.0559  | 0.8299  | 0.0810 |
| Pkc1     | _TVS[Phospho (STY)] FSSM Oxidation (M) PSEK_2                                      | #N/A                    | 8.5578  | 3.8066  | 8.3646  | 7.3902  | 7.4276  | 7.7063  | 8.5680  | 7.8081  | 7.8287  | 7.7635  | 0.9020 | -0.1488 | 0.4088  | 0.3885 |
| Pkc1     | _S[Phospho (STY)] GVALPGAAGVPADSEAGLLEAAR_2                                        | Q3USB7_548_M1_Pkc1      | 3.2687  | 4.0250  | 6.0068  | 4.3906  | 3.9133  | 4.2122  | 4.1053  | 5.3080  | 3.3764  | 4.3576  | 1.0037 | 0.0054  | 0.9782  | 0.0096 |
| Pkc1     | _RM Oxidation (M) S[Phospho (STY)] GVNGVEQK_2                                      | #N/A                    | 3.7093  | 5.2699  | 5.4933  | 5.3109  | 3.2198  | 4.2247  | 4.1510  | 3.8345  | 5.2712  | 3.6033  | 1.0766 | 0.1065  | 0.5856  | 0.2324 |
| Pkc1     | _KKT[Phospho (STY)] VS[Phospho (STY)] FSSMPSEK_2                                   | #N/A                    | 3.8751  | 3.1542  | 3.6087  | 5.7799  | 3.0176  | 3.4948  | 4.8023  | 3.6059  | 3.7443  | 3.7281  | 0.9626 | -0.0550 | 0.7976  | 0.0982 |
| Pkc1     | _KLPSDLSLEGEVT[Phospho (STY)] DEDEEAEM Oxidation (M) SR_3                          | Q3USB7_7557_M1_Pkc1     | 2.9739  | 4.2523  | 3.6607  | 4.2127  | 4.1406  | 3.9849  | 3.8780  | 3.9551  | 3.6037  | 4.1303  | 0.9946 | -0.0078 | 0.9387  | 0.0275 |
| Insyn2a  | _STGVQTS[Phospho (STY)] POLRK_2                                                    | #N/A                    | 2.9442  | 8.1199  | 8.6022  | 3.7224  | 7.6724  | 8.0122  | 8.3468  | 7.9028  | 3.5778  | 8.2687  | 0.9271 | -0.1091 | 0.7520  | 0.1238 |
| Insyn2a  | _STGVQTS[Phospho (STY)] POLR_2                                                     | #N/A                    | 7.1054  | 7.1042  | 4.3893  | 3.9331  | 6.8231  | 7.4808  | 7.5391  | 6.5876  | 3.3672  | 7.4952  | 0.9827 | -0.0252 | 0.9250  | 0.0339 |
| Sfwap    | _GV[S[Phospho (STY)] QEDGGQISSAIVSVDGSK_3                                          | Q3USH5_5903_M1_Sfwap    | 3.6395  | 2.9439  | 4.3263  | 6.3428  | 4.2660  | 3.4635  | 4.5437  | 5.5386  | 4.4389  | 3.2951  | 0.9348 | -0.0973 | 0.6916  | 0.1602 |
| Sfwap    | _VKLDD[S[Phospho (STY)] EEDDESRL_2                                                 | Q3USH5_5601_M1_Sfwap    | 3.1344  | 4.0918  | 3.8212  | 4.3238  | 3.9801  | 4.1454  | 4.0385  | 3.7946  | 3.4432  | 4.2908  | 1.0062 | 0.0900  | 0.9269  | 0.0330 |
| Sorbs2   | _RKS[Phospho (STY)] EPAVGLRL_3                                                     | #N/A                    | 10.7775 | 10.3249 | 10.9576 | 10.9658 | 10.1643 | 10.3512 | 10.3978 | 10.5822 | 10.7339 | 10.7462 | 0.9983 | -0.0025 | -0.9382 | 0.0324 |
| Sorbs2   | _RGS[Phospho (STY)] LPONSLHR_2                                                     | #N/A                    | 9.2493  | 9.1998  | 9.8366  | 10.2424 | 7.6944  | 8.8536  | 8.7545  | 9.7097  | 9.1144  | 9.0423  | 1.0026 | 0.0038  | 0.9609  | 0.0173 |
| Sorbs2   | _ESQS[Phospho (STY)] POSIAWR_2                                                     | Q3UTJ2_540_M1_Sorbs2    | 9.6674  | 9.6957  | 10.2672 | 10.0009 | 9.2990  | 9.0951  | 10.0862 | 9.5394  | 9.7793  | 9.8634  | 0.9953 | -0.0068 | 0.8154  | 0.0886 |
| Sorbs2   | _S[Phospho (STY)] EPAVGLRL_2                                                       | #N/A                    | 10.0477 | 8.9181  | 9.3811  | 10.0971 | 8.9328  | 9.2468  | 9.6945  | 9.2088  | 9.4343  | 9.7142  | 0.9920 | -0.0115 | 0.7963  | 0.0989 |
| Sorbs2   | _GAEDYPPPPHYS[Phospho (STY)] SDR_2                                                 | #N/A                    | 3.5768  | 7.9416  | 3.6467  | 9.5260  | 3.7138  | 3.7561  | 8.2645  | 3.7602  | 7.8318  | 4.1164  | 0.8944 | -0.1611 | 0.7117  | 0.1477 |
| Sorbs2   | _VQS[Phospho (STY)] SPNLLAAGR_2                                                    | Q3UTJ2_527_M1_Sorbs2    | 3.7474  | 3.5950  | 3.4811  | 4.5257  | 2.8912  | 3.7334  | 3.1732  | 3.9763  | 4.2753  | 4.2030  | 0.9374 | -0.0933 | 0.4862  | 0.0340 |
| Sorbs2   | _SFSSSPS[Phospho (STY)] PSR_2                                                      | Q3UTJ2_5382_M1_Sorbs2   | 10.0050 | 9.6742  | 10.1211 | 10.3969 | 9.7658  | 9.4422  | 10.2729 | 3.5499  | 9.9340  | 9.9337  | 1.1755 | 0.2333  | 0.2875  | 0.5413 |
| Sorbs2   | _TS[Phospho (STY)] IGRADLPGSSITTK_3                                                | #N/A                    | 3.3307  | 3.6375  | 6.9649  | 6.4890  | 5.8040  | 3.2457  | 5.6454  | 3.4885  | 5.1014  | 5.2735  | 1.0071 | 0.1002  | 0.9716  | 0.0125 |
| Sorbs2   | _AHPHGPGVDESIGPTAR_3                                                               | #N/A                    | 5.8394  | 6.1398  | 4.5052  | 5.8112  | 5.7749  | 5.7093  | 5.8119  | 5.6960  | 5.5615  | 5.8748  | 0.9815 | -0.0269 | 0.7296  | 0.1369 |
| Sorbs2   | _SC[Carbamidomethyl (C)] DOLLNDC[Carbamidomethyl (C)] DS[Phospho (STY)] FPDK_2     | Q3UTJ2_5474_M1_Sorbs2   | 3.7367  | 3.8626  | 3.7416  | 8.7196  | 6.4837  | 4.4907  | 3.9589  | 7.4949  | 6.3387  | 5.4847  | 0.9872 | -0.1857 | 0.5735  | 0.2415 |
| Sorbs2   | _GLLHGWSQS[Phospho (STY)] TEEVR_2                                                  | #N/A                    | 3.7608  | 6.6971  | 6.8497  | 7.6001  | 6.1036  | 3.8024  | 8.1407  | 3.8377  | 6.7962  | 3.9054  | 1.0233 | 0.0333  | 0.9143  | 0.0380 |
| Sorbs2   | _QNAEIVSTTEYS[Phospho (STY)] PK_2                                                  | Q3UTJ2_5456_M1_Sorbs2   | 3.8653  | 3.4199  | 4.1372  | 6.7397  | 3.0003  | 3.4343  | 3.2802  | 6.3683  | 4.1882  | 3.9887  | 0.9199 | -0.1204 | 0.6918  | 0.1069 |
| Sorbs2   | _SR[S[Phospho (STY)] C[Carbamidomethyl (C)] DOLLNDC[Carbamidomethyl (C)] DSFPDPK_3 | #N/A                    | 2.9737  | 4.1240  | 4.2082  | 5.9472  | 4.3764  | 3.2578  | 3.9003  | 3.2502  | 3.5493  | 4.6635  | 1.0799 | 0.1110  | 0.6141  | 0.2117 |
| Sorbs2   | _GS[Phospho (STY)] LPONSLHR_2                                                      | #N/A                    | 7.6656  | 6.9916  | 7.5977  | 7.8576  | 6.5721  | 3.1775  | 7.5665  | 3.2244  | 7.4881  | 7.6275  | 1.0258 | 0.0367  | 0.8964  | 0.0475 |
| Sorbs2   | _RFS[Phospho (STY)] ESLLEETQVR_3                                                   | Q3UTJ2_5630_M1_Sorbs2   | 4.7152  | 4.1104  | 4.4665  | 4.0102  | 3.8765  | 3.7977  | 4.1585  | 2.9909  | 3.2900  | 3.6875  | 1.1787 | 0.2372  | 0.0481  | 1.3182 |
| Sorbs2   | _RGS[Phospho (STY)] LPONSLHR_4                                                     | #N/A                    | 3.2861  | 4.0913  | 3.9729  | 4.0294  | 3.9126  | 3.8169  | 4.1777  | 4.5107  | 4.4426  | 0.9393  | 0.9393 | -0.0903 | 0.3849  | 0.4186 |
| Cdk5     | _LUDRS[Phospho (STY)] PSR_2                                                        | Q3UTQ8_5306_M1_Cdk5     | 8.8786  | 8.9763  | 4.2043  | 9.0050  | 4.1440  | 9.0439  | 8.9072  | 9.0721  | 3.0601  | 8.9438  | 0.9839 | -0.0234 | 0.9460  | 0.0241 |
| Cdk5     | _SNS[Phospho (STY)] KDQNLNLSVGLPR_3                                                | #N/A                    | 4.4627  | 5.6252  | 3.8035  | 7.0704  | 3.7921  | 3.2933  | 3.6541  | 6.3639  | 3.8383  | 3.9959  | 1.0474 | 0.0668  | 0.8170  | 0.0788 |
| Cdk5     | _LSEGNMANYTEY[Phospho (STY)] VATR_2                                                | Q3UTQ8_5171_M1_Cdk5     | 3.9019  | 3.6547  | 4.0422  | 5.4809  | 3.6323  | 3.7815  | 4.1644  | 3.5683  | 3.6404  | 4.3405  | 1.0392 | 0.0554  | 0.7027  | 0.1532 |
| Cdk5     | _VYS[Phospho (STY)] PSDSSSGTWNK_3                                                  | Q3UTQ8_5738_M1_Cdk5     | 3.7537  | 3.5887  | 3.4874  | 4.5320  | 2.8974  | 4.3194  | 3.1794  | 4.2437  | 4.2691  | 4.2093  | 0.9466 | -0.0792 | 0.5802  | 0.2364 |
| Cdk5     | _DLTNNNPHLLS[Phospho (STY)] PK_2                                                   | Q3UTQ8_5407_M1_Cdk5     | 3.0825  | 3.8388  | 4.3170  | 8.8595  | 3.7271  | 4.3984  | 4.2915  | 7.3995  | 3.1902  | 3.0430  | 1.0497 | 0.0700  | 0.8714  | 0.0598 |
| Trappc14 | _KSS[Phospho (STY)] PSPAVR_2                                                       | Q3UTZ3_5495_M1_Trappc14 | 7.9192  | 6.7758  | 4.0363  | 6.5397  | 3.7284  | 3.6140  | 8.0489  | 8.0933  | 7.3803  | 7.7938  | 0.6943 | -0.5264 | 0.0373  | 1.4279 |
| Trappc14 | _SGS[Phospho (STY)] SHQIQPSR_2                                                     | Q3UTZ3_5517_M1_Trappc14 | 5.9882  | 4.0128  | 5.9086  | 6.4913  | 4.3316  | 6.0945  | 5.5295  | 6.1121  | 5.7967  | 5.9351  | 0.8953 | -0.1595 | 0.3659  | 0.4769 |
| Ankr34b  | _VAS[Phospho (STY)] LEELQDITPEEIIAYK_2                                             | Q3UUF8_5260_M1_Ankr34b  | 5.6305  | 5.6921  | 5.9038  | 6.4743  | 5.1194  | 5.8050  | 5.9009  | 5.7288  | 5.7550  | 5.7784  | 0.9966 | -0.0050 | 0.9320  | 0.0306 |
| Ankr34b  | _NSGANHY[Phospho (STY)] SSSQSLAEGVTPPYEDGK_3                                       | Q3UUF8_7965_M1_Ankr34b  | 4.3721  | 4.3549  | 3.5580  | 4.0607  | 4.2432  | 3.7754  | 3.7542  | 3.7064  | 3.7883  | 4.0676  | 1.0480 | 0.0676  | 0.3192  | 0.4959 |
| Ankr34b  | _HDS[Phospho (STY)] DVK_2                                                          | Q3UUF8_5293_M1_Ankr34b  | 5.1398  | 3.2764  | 3.7997  | 3.3435  | 4.8393  | 3.1310  | 3.4818  | 3.6577  | 3.9337  | 3.0208  | 1.1122 | 0.1534  | 0.4199  | 0.3769 |
| Ankr34b  | _RGS[Phospho (STY)] GAFPLDLSLAGSR_3                                                | Q3UUF8_5426_M1_Ankr34b  | 3.9118  | 3.2162  | 4.5986  | 3.4037  | 3.0375  | 3.1911  | 3.5519  | 0.7807  | 3.8966  | 3.2715  | 1.2071 | 0.0715  | 0.3746  | 0.4624 |
| Tbc1d24  | _SVS[Phospho (STY)] SKR_2                                                          | Q3UUG6_5324_M1_Tbc1d24  | 8.5322  | 8.8680  | 9.0266  | 8.6304  | 3.5020  | 3.1226  | 8.8656  | 8.9600  | 8.4997  | 8.4017  | 0.8702 | -0.3216 | 0.2642  | 0.5781 |
| Tbc1d24  | _QKS[Phospho (STY)] VLSK_2                                                         | Q3UUG6_5322_M1_Tbc1d24  | 4.1286  | 3.0976  | 5.9124  | 6.1832  | 3.2543  | 3.1676  | 5.5708  | 5.6839  | 6.0949  | 5.5807  | 1.0057 | -0.3664 | 0.1110  | 0.9547 |
| Kur2     | _S[Phospho (STY)] KSHFEQLGNR_3                                                     | Q3UVCQ_5312_M1_Kur2     | 3.3137  | 4.0699  | 4.5482  | 4.0919  | 3.9582  | 4.1672  | 4.6064  | 4.4101  | 3.2083  | 3.7692  | 1.0422 | 0.0596  | 0.5865  | 0.2317 |
| Kur2     | _TES[Phospho (STY)] VPC[Carbamidomethyl (C)] DINNPRV_2                             | Q3UVCQ_5484_M1_Kur2     | 4.0134  | 3.2688  | 3.7471  | 3.2908  | 3.1571  | 7.8420  | 3.4391  | 3.7103  | 7.4975  | 2.9681  | 0.9582 | -0.0615 | 0.8854  | 0.5259 |
| Kur2     | _TPNVITVT[Phospho (STY)] PGT[Phospho (STY)] PPMR_2                                 | Q3UVCQ_7273_M2_Kur2     | 3.9722  | 3.2276  | 3.7059  | 3.2496  | 3.1159  | 3.5087  | 3.4019  | 3.7515  | 4.0506  | 4.4277  | 0.8862 | -0.1743 | 0.1020  | 0.9915 |
| Fam91a1  | _KLS[Phospho (STY)] EASDER_2                                                       | Q3UVCQ_5671_M1_Fam91a1  | 6.8032  | 5.8236  | 6.0287  | 6.6946  | 6.1018  | 6.1950  | 5.9689  | 6.2792  | 5.8702  | 6.0688  | 1.0377 | 0.0533  | 0.3100  | 0.5086 |
| Vps51    | _Acetyl (Protein N-term) AAAAAAGPGISGGPGDS[Phospho (STY)] PEGPEADAPER_3            | #N/A                    | 3.6876  | 10.4333 | 9.3988  | 11.7072 | 10.1852 | 10.2266 | 7.6293  | 11.8482 | 11.3608 | 10.7872 | 0.8911 | -0.1663 | 0.5068  | 0.2951 |
| Vps51    | _Acetyl (Protein N-term) AAAAAAGPGISGGPGDS[Phospho (STY)] PEGPEADAPER_3            | #N/A                    | 3.0573  | 10.8637 | 10.4908 | 11.5648 | 3.6924  | 10.4887 | 11.0374 | 11.7043 | 11.3392 | 10.9004 | 0.7434 | -0.4278 | 0.1847  | 0.7335 |
| Vps51    | _DVS[Phospho (STY)] PVEFNK_2                                                       | Q3UVA4_5690_M1_Vps51    | 4.0415  | 3.3009  | 3.7752  | 3.3190  | 3.7874  | 3.1064  | 3.4672  | 5.4439  | 4.7512  | 2.9963  | 0.8536 | -0.2383 | 0.2431  | 0.6142 |
| Ttbk2    | _SHS[Phospho (STY)] EELDR_3                                                        | Q3UVR3_5448_M1_Ttbk2    | 4.1326  | 3.8996  | 4.3428  | 3.8865  | 3.7528  | 3.7479  | 4.0348  | 3.9907  | 3.4320  | 4.6228  | 0.9851 | -0.0216 | 0.7986  | 0.0977 |
| Gm5      | _RGS[Phospho (STY)] SETLR_2                                                        | #N/A                    | 5.7885  | 3.9411  | 6.1024  | 5.3744  | 3.7625  | 3.9670  | 4.3278  | 5.8882  | 5.3096  | 3.8568  | 0.9953 | -0.0068 | 0.9726  | 0.0121 |
| Gm5      | _TDDAPS[Phospho (STY)] HS[Phospho (STY)] ETAAR_2                                   | Q3UUV5_51037_M2_Gm5     | 5.7784  | 2.9632  | 3.4415  | 6.3624  | 2.8515  | 3.7731  | 3.6663  | 6.0372  | 5.7499  | 3.8291  | 0.8702 | -0.2005 | 0.5116  | 0.2910 |
| Gm5      | _SVTWAKNEKT[Phospho (STY)] R_2                                                     | Q3UUV5_7923_M1_Gm5      | 3.3009  | 4.1061  | 3.9877  | 4.4903  | 3.9274  | 3.8021  | 4.1629  | 3.6281  | 3.2767  | 2.9565  | 1.1226 | 0.1668  | 0.1703  | 0.7689 |
| Gm5      | _DSVDSGTSPPNS[Phospho (STY)] PQESALC[Carbamidomethyl (C)] PSSPK_3                  | Q3UUV5_51173_M1_Gm5     | 4.0     |         |         |         |         |         |         |         |         |         |        |         |         |        |



|          |                                                           |                         |         |         |         |         |         |         |         |         |         |         |        |         |        |        |
|----------|-----------------------------------------------------------|-------------------------|---------|---------|---------|---------|---------|---------|---------|---------|---------|---------|--------|---------|--------|--------|
| Garni3   | _SFSDVLES[Phospho (STY)]PK_2                              | Q3V0G7_5455_M1_Garni3   | 7.5755  | 8.0628  | 7.7559  | 8.8206  | 7.6908  | 8.1543  | 8.7278  | 8.4897  | 8.3357  | 8.1703  | 9.9501 | -0.0739 | 0.1314 | 0.8814 |
| Garni3   | _JC[Carbamidomethyl (C)]LPTS[Phospho (STY)]IPTX_2         | Q3V0G7_5179_M1_Garni3   | 3.3660  | 2.9403  | 4.3228  | 3.6795  | 4.2625  | 3.4670  | 3.8278  | 5.4934  | 5.5453  | 3.2916  | 0.8190 | -0.2880 | 0.1574 | 0.8031 |
| Garni3   | _GASANTS[Phospho (STY)]PGT[Phospho (STY)]PPAR_2           | Q3V0G7_5848_M2_Garni3   | 3.2969  | 7.2894  | 4.5314  | 8.0319  | 3.9414  | 4.1840  | 7.9038  | 7.5773  | 3.2251  | 3.7524  | 0.9284 | -0.1072 | 0.7804 | 0.1077 |
| Pr7      | _ALELELEGLSAGS[Phospho (STY)]PPGLAPPPPHH_3                | Q3V0U2_568_M1_Pr7       | 3.5356  | 4.5978  | 3.8119  | 5.8092  | 4.4424  | 4.0295  | 3.8288  | 3.4748  | 3.7883  | 3.7862  | 1.1100 | 0.1505  | 0.3850 | 0.4146 |
| Nt5c2    | _NRTS[Phospho (STY)]VDFK_2                                | Q3V1U4_5511_M1_Nt5c2    | 5.1052  | 3.4191  | 3.8974  | 3.5162  | 3.2074  | 3.3377  | 4.0839  | 3.9750  | 4.2714  | 3.9715  | 0.9235 | -0.1148 | 0.4081 | 0.3892 |
| Pac2     | _STS[Phospho (STY)]LKER_2                                 | Q3V9Q7_5408_M1_Pac2     | 3.4799  | 9.1506  | 9.6263  | 9.2895  | 4.1244  | 8.9732  | 9.1801  | 9.2846  | 9.1665  | 3.9354  | 0.9428 | -0.0849 | 0.8067 | 0.0933 |
| Pac2     | _TES[Phospho (STY)]LVSPTR_2                               | Q3V9Q7_5387_M1_Pac2     | 6.3206  | 3.9544  | 3.1217  | 4.1663  | 4.9192  | 6.2931  | 6.1756  | 4.3357  | 3.1339  | 6.1871  | 0.9673 | -0.0480 | 0.8599 | 0.0656 |
| Pac2     | _ANS[Phospho (STY)]LDNER_2                                | #N/A                    | 6.4901  | 6.1805  | 3.3073  | 7.4827  | 6.2033  | 5.9191  | 7.1987  | 6.8114  | 7.0206  | 7.0636  | 0.8444 | -0.2441 | 0.1649 | 0.7828 |
| Pac2     | _ANS[Phospho (STY)]LDNER[Carbamidomethyl (C)]POTR_2       | #N/A                    | 4.4839  | 4.7177  | 4.9790  | 5.4377  | 4.1857  | 3.8012  | 5.8679  | 5.0637  | 4.9836  | 3.8333  | 0.9319 | -0.1018 | 0.4706 | 0.3274 |
| Pac2     | _EPSGQPEDS[Phospho (STY)]PEAETSTLDVFTK_3                  | Q3V9Q7_5361_M1_Pac2     | 2.9279  | 4.4145  | 4.1624  | 3.7062  | 4.2359  | 3.4936  | 3.8544  | 6.3644  | 3.5941  | 3.3834  | 0.8894 | -0.1692 | 0.4643 | 0.3332 |
| Carmi2   | _LQRS[Phospho (STY)]PLXK_2                                | Q3V3V9_51242_M1_Carmi2  | 5.2760  | 6.1945  | 4.9570  | 6.0607  | 4.9603  | 5.4657  | 5.3411  | 5.2804  | 5.2302  | 5.3702  | 1.0340 | 0.0482  | 0.5296 | 0.2760 |
| Carmi2   | _GPRDLET[Phospho (STY)]PGAAAR_2                           | #N/A                    | 3.0992  | 3.5799  | 7.2951  | 3.8775  | 4.0946  | 4.6751  | 3.9764  | 3.9952  | 6.3160  | 3.5548  | 0.9947 | -0.0077 | 0.9799 | 0.0088 |
| Carmi2   | _AGS[Phospho (STY)]DGDIM[Oxidation (M)]DSSTETPPSIK_2      | #N/A                    | 6.4029  | 8.9258  | 8.4574  | 9.8231  | 8.7244  | 9.1031  | 9.1635  | 9.1715  | 8.8995  | 9.2217  | 0.9406 | -0.0883 | 0.3889 | 0.4102 |
| Carmi2   | _KAGS[Phospho (STY)]DGDIM[Oxidation (M)]DSSTETPPSIK_2     | #N/A                    | 6.1932  | 6.8538  | 6.4720  | 7.5554  | 6.5374  | 7.3158  | 5.9379  | 6.8508  | 6.9573  | 7.1222  | 1.0155 | 0.0222  | 0.7675 | 0.1149 |
| Carmi2   | _PLPPYPTEPSPERSPPS[Phospho (STY)]PATI[Phospho (STY)]DQR_2 | Q3V3V9_51284_M2_Carmi2  | 3.5723  | 3.7701  | 3.3060  | 4.3506  | 4.2169  | 4.1381  | 4.4989  | 4.1514  | 2.9496  | 4.0279  | 0.9963 | -0.0054 | 0.9664 | 0.0148 |
| Vest     | _TEYVC[Carbamidomethyl (C)]DPS[Phospho (STY)]PTGEGPSK_2   | Q3ZK22_5667_M1_Vest     | 5.7812  | 5.3881  | 3.5996  | 3.6233  | 3.8095  | 4.8923  | 6.1737  | 3.9912  | 3.9304  | 3.4764  | 1.0279 | 0.0398  | 0.8624 | 0.0643 |
| Bahd1    | _DLS[Phospho (STY)]PELADEGAR_2                            | Q497V6_5182_M1_Bahd1    | 3.6760  | 6.3319  | 4.3628  | 7.4732  | 6.3652  | 6.4062  | 3.7877  | 7.1260  | 6.7531  | 3.3316  | 1.0990 | 0.1362  | 0.6399 | 0.1939 |
| Shank3   | _AHS[Phospho (STY)]PGEGEPLHR_3                            | #N/A                    | 10.5556 | 10.3958 | 11.1095 | 11.0313 | 10.0593 | 10.5172 | 10.8499 | 10.4824 | 10.4761 | 10.5845 | 1.0015 | 0.0021  | 0.9440 | 0.0250 |
| Shank3   | _S[Phospho (STY)]GEEPVGGLSLDPAK_2                         | #N/A                    | 10.0030 | 9.9509  | 10.5444 | 10.4347 | 9.0975  | 9.8738  | 9.6595  | 10.0443 | 9.8699  | 9.7120  | 1.0166 | 0.0237  | 0.5647 | 0.2482 |
| Shank3   | _S[Phospho (STY)]KLWGGPVER_2                              | Q4ACU6_51471_M1_Shank3  | 10.0562 | 9.2367  | 10.8000 | 10.3405 | 9.5090  | 10.1738 | 10.0778 | 10.1193 | 10.3136 | 10.0741 | 0.9875 | -0.0181 | 0.6766 | 0.1196 |
| Shank3   | _STS[Phospho (STY)]M[Oxidation (M)]QDTR_2                 | #N/A                    | 7.7749  | 7.2808  | 8.3514  | 7.8592  | 3.0817  | 3.4453  | 8.7633  | 3.8475  | 3.9096  | 9.2886  | 0.9762 | -0.0347 | 0.9300 | 0.0315 |
| Shank3   | _S[Phospho (STY)]M[Oxidation (M)]TAELEELASIR_2            | #N/A                    | 5.7539  | 5.1774  | 5.6524  | 5.6318  | 5.1782  | 5.6776  | 4.2814  | 3.6085  | 5.9287  | 5.9033  | 1.1179 | 0.1608  | 0.2619 | 0.5818 |
| Shank3   | _SAS[Phospho (STY)]DINIKGGQPAASPGITLR_3                   | #N/A                    | 3.2060  | 8.2898  | 8.5433  | 9.5587  | 7.8234  | 8.4175  | 8.0956  | 9.0141  | 8.8333  | 8.6655  | 0.8830 | -0.1795 | 0.4070 | 0.3904 |
| Shank3   | _RAPSPKVAS[Phospho (STY)]LER_3                            | Q4ACU6_51583_M1_Shank3  | 3.5989  | 4.4041  | 4.2857  | 3.2875  | 4.2255  | 3.5040  | 3.8648  | 6.5928  | 2.9787  | 3.2545  | 0.9309 | -0.1033 | 0.6903 | 0.1610 |
| Shank3   | _S[Phospho (STY)]KSM[Oxidation (M)]TAELEELASIR_3          | #N/A                    | 3.8421  | 5.6510  | 4.0439  | 5.7185  | 4.7634  | 5.8280  | 4.0830  | 6.0488  | 3.6898  | 3.7725  | 1.1309 | 0.1775  | 0.3882 | 0.4130 |
| Shank3   | _TKS[Phospho (STY)]WGEDKLASLEGR_3                         | #N/A                    | 3.2281  | 9.5667  | 9.8983  | 10.4129 | 8.8689  | 9.7114  | 9.6341  | 9.7305  | 9.7397  | 9.8519  | 0.8845 | -0.1770 | 0.4358 | 0.3607 |
| Shank3   | _FM[Oxidation (M)]DIY[Phospho (STY)]VQLHSTOK_2            | #N/A                    | 6.0520  | 5.9455  | 6.6283  | 7.1096  | 5.4873  | 6.3527  | 6.7058  | 6.5246  | 6.2264  | 6.5312  | 0.9639 | -0.0530 | 0.4565 | 0.3405 |
| Shank3   | _LFSSGELTISQAOR_2                                         | #N/A                    | 5.0026  | 4.9442  | 3.5285  | 4.9818  | 5.2753  | 5.5154  | 3.7459  | 3.8816  | 5.4199  | 4.4767  | 1.1127 | 0.1540  | 0.3197 | 0.4952 |
| Shank3   | _S[Phospho (STY)]GEEPVGGLSLDPAKK_2                        | #N/A                    | 4.0792  | 3.3835  | 3.2651  | 3.7678  | 3.2049  | 3.0238  | 3.3846  | 4.3507  | 8.8224  | 3.7348  | 0.7990 | -0.0238 | 0.1020 | 0.9914 |
| Shank3   | _APS[Phospho (STY)]ITTLTLR_2                              | Q4ACU6_5685_M1_Shank3   | 3.3135  | 4.0289  | 4.5480  | 4.0918  | 3.9581  | 4.1674  | 4.2401  | 4.4102  | 3.2084  | 3.7691  | 1.0284 | 0.0404  | 0.7172 | 0.1444 |
| Shank3   | _HYTVGYS[Phospho (STY)]DSLTSKSYDVIDOK_3                   | Q4ACU6_5555_M1_Shank3   | 3.6487  | 3.5775  | 2.0186  | 4.2752  | 3.4543  | 4.5528  | 4.4297  | 3.5535  | 4.4297  | 3.0443  | 1.0265 | 0.0377  | 0.8986 | 0.0464 |
| Shank3   | _SAS[Phospho (STY)]DINLK_2                                | #N/A                    | 4.1211  | 3.0140  | 3.3981  | 3.9007  | 3.3378  | 3.7223  | 3.6154  | 4.2177  | 3.8663  | 3.8677  | 0.9244 | -0.1134 | 0.2571 | 0.5899 |
| Shank3   | _LDELAVAEPLRPDIADADR_3                                    | #N/A                    | 3.2740  | 4.0303  | 4.5085  | 4.3853  | 4.2934  | 4.2069  | 4.1000  | 3.8117  | 3.3817  | 4.3523  | 1.0524 | 0.0737  | 0.4848 | 0.3145 |
| Shank3   | _GPRPGSLDY[Phospho (STY)]SSGEGGLTGFGSPGPVK_3              | Q4ACU6_5998_M1_Shank3   | 4.3792  | 6.3347  | 4.2783  | 5.4524  | 3.5230  | 3.1017  | 4.4957  | 3.3375  | 2.9861  | 3.2471  | 1.1550 | 0.2078  | 0.3085 | 0.5108 |
| Shank3   | _SPTPIVGS[Phospho (STY)]PDADRPGPLVDVQTR_3                 | Q4ACU6_51134_M1_Shank3  | 3.6980  | 4.6055  | 4.3848  | 5.3615  | 3.4164  | 3.2310  | 3.1013  | 4.1804  | 3.3537  | 3.2582  | 1.1694 | 0.2258  | 0.2474 | 0.6066 |
| Prpf38a  | _VPS[Phospho (STY)]PDHR_2                                 | Q4F6K6_5209_M1_Prpf38a  | 8.6500  | 8.3218  | 8.8631  | 8.2993  | 7.0321  | 8.2445  | 8.9060  | 8.6168  | 8.5580  | 8.3187  | 0.9576 | -0.0625 | 0.3127 | 0.5049 |
| Fam189a2 | _SKS[Phospho (STY)]DPVLHSEER_3                            | Q4FZK1_5114_M1_Fam189a2 | 5.2277  | 5.2259  | 4.2422  | 3.7601  | 4.1819  | 4.5967  | 5.5974  | 5.5967  | 5.5401  | 3.2110  | 0.9728 | -0.0398 | 0.8506 | 0.0703 |
| Abi2     | _DKS[Phospho (STY)]PSLEDAR_2                              | Q4IIMS_5632_M1_Abi2     | 3.4776  | 4.2828  | 4.1644  | 3.1662  | 4.1041  | 3.6254  | 4.3817  | 7.6211  | 7.1118  | 7.4001  | 0.5738 | -0.8014 | 0.0022 | 2.6504 |
| Abi2     | _STQASSGS[Phospho (STY)]PALPR_2                           | Q4IIMS_5621_M1_Abi2     | 8.0352  | 8.0425  | 4.0160  | 7.7277  | 3.9557  | 8.9052  | 8.3244  | 8.0015  | 7.9774  | 8.2283  | 0.8132 | -0.2983 | 0.1832 | 0.7371 |
| Abi2     | _S[Phospho (STY)]NSTSSM[Oxidation (M)]SSGLPEQDR_2         | Q4IIMS_5783_M1_Abi2     | 6.1709  | 4.0579  | 4.2070  | 4.3146  | 3.9195  | 4.1284  | 4.1414  | 3.3213  | 3.3422  | 3.3652  | 1.2608 | 0.3343  | 0.0792 | 1.1010 |
| Abi2     | _TVS[Phospho (STY)]TSSQPEENVOR_2                          | Q4IIMS_5819_M1_Abi2     | 3.6251  | 4.3813  | 3.3587  | 7.2977  | 4.2696  | 3.8558  | 3.7490  | 7.0056  | 3.7328  | 6.9183  | 0.8343 | -0.2614 | 0.4185 | 0.3783 |
| Abra1    | _Acetyl (Protein N-term)[M]Oxidation (M)]NVEHVNLLVEIHR_3  | #N/A                    | 5.5603  | 5.8121  | 5.4480  | 4.9608  | 5.1858  | 5.7517  | 5.5625  | 5.2909  | 5.7318  | 5.4372  | 0.9905 | -0.0138 | 0.7823 | 0.1066 |
| Oxr1     | _SDS[Phospho (STY)]VDITAPGPNLGGAGK_2                      | Q4KMM3_515_M1_Oxr1      | 6.6849  | 7.2509  | 7.9524  | 9.0732  | 6.1889  | 6.8813  | 6.7808  | 7.8657  | 7.4311  | 6.2377  | 1.0367 | 0.0520  | 0.6760 | 0.1700 |
| Oxr1     | _ESLPELDQLS[Phospho (STY)]GR_2                            | #N/A                    | 7.3938  | 7.4994  | 7.8522  | 8.3053  | 7.4954  | 7.6873  | 8.2323  | 8.1777  | 7.7969  | 6.9685  | 0.9685 | -0.0461 | 0.1846 | 0.7337 |
| Oxr1     | _DTIQQVQSR_2                                              | #N/A                    | 7.2174  | 7.4314  | 7.5132  | 7.7898  | 7.5399  | 6.7930  | 7.0709  | 7.0598  | 6.9757  | 7.2660  | 1.0406 | 0.0574  | 0.1510 | 0.8211 |
| Oxr1     | _GTEYVES[Phospho (STY)]JR_2                               | Q4KMM3_5104_M1_Oxr1     | 8.2756  | 7.9500  | 8.2047  | 8.1800  | 7.5134  | 8.0181  | 8.6743  | 8.3307  | 8.1830  | 0.9645  | 0.0522 | -0.1289 | 0.8897 | 0.8897 |
| Oxr1     | _TSSNGALSHETGLSGLETATK_3                                  | #N/A                    | 5.5740  | 5.4807  | 6.0315  | 5.6363  | 5.5070  | 5.3751  | 5.7714  | 5.1505  | 5.0034  | 4.9190  | 1.0748 | 0.1040  | 0.0769 | 1.1142 |
| Oxr1     | _DSETEVEELRK_2                                            | #N/A                    | 5.3811  | 5.5702  | 5.4216  | 6.2332  | 5.6783  | 5.8721  | 5.4821  | 5.6801  | 5.8757  | 0.9758  | 0.0353 | -0.5273 | 0.2780 | 0.8271 |
| Oxr1     | _DQGNDS[Phospho (STY)]JASTAPR_2                           | #N/A                    | 5.3476  | 5.5680  | 5.5286  | 4.6764  | 3.7851  | 4.1944  | 4.8523  | 4.0221  | 5.4314  | 4.2578  | 1.0451 | 0.0636  | 0.6597 | 0.1807 |
| Oxr1     | _DQOGELRK_2                                               | #N/A                    | 5.1319  | 4.5815  | 4.8908  | 4.6099  | 5.4647  | 4.5420  | 4.4464  | 4.0213  | 5.2444  | 5.1165  | 1.0346 | 0.0491  | 0.5963 | 0.2246 |
| Oxr1     | _DQOGELKRD[Phospho (STY)]TEVEELR_3                        | #N/A                    | 4.3237  | 5.7827  | 5.9098  | 4.0123  | 2.7908  | 3.8338  | 5.7508  | 4.1062  | 3.7548  | 3.9793  | 1.0101 | 0.0145  | 0.9519 | 0.0234 |
| Oxr1     | _RM[Oxidation (M)]S[Phospho (STY)]FOKPK_2                 | #N/A                    | 7.0293  | 6.0433  | 6.1498  | 7.6260  | 5.9085  | 5.6151  | 6.6628  | 6.2027  | 6.2306  | 6.3305  | 1.0061 | 0.0088  | 0.9254 | 0.0337 |
| Oxr1     | _VVSST[Phospho (STY)]EEFAETK_2                            | Q4KMM3_5204_M1_Oxr1     | 10.7136 | 12.0031 | 12.1623 | 12.3612 | 11.6456 | 12.0267 | 12.3487 | 11.8945 | 12.1303 | 12.1091 | 0.9751 | -0.0364 | 0.3585 | 0.4455 |
| Oxr1     | _DSDGQVFGALASEPPK_2                                       | #N/A                    | 6.7101  | 6.2709  | 7.1124  | 6.6148  | 5.7738  | 4.2647  | 6.7195  | 6.5433  | 6.0523  | 6.2555  | 0.9580 | -0.0618 | 0.6276 | 0.2023 |
| Oxr1     | _TPIEEONNSANTQK_2                                         | #N/A                    | 6.1284  | 5.8809  | 6.1689  | 6.8627  | 6.2759  | 6.8666  | 6.5817  | 6.3059  | 5.9344  | 5.9830  | 1.0106 | 0.0153  | 0.7559 | 0.1215 |
| Oxr1     | _FOTTPNELVQLK_2                                           | #N/A                    | 6.1966  | 6.3305  | 6.2055  | 6.6653  | 5.8906  | 6.2403  | 6.4547  | 5.8739  | 6.1185  | 6.3148  | 1.0104 | 0.0149  | 0.7015 | 0.1539 |
| Oxr1     | _KATGV[Phospho (STY)]JEDADR_2                             | Q4KMM3_5308_M1_Oxr1     | 6.1316  | 4.0301  | 3.9117  | 4.4144  | 3.8515  | 3.8780  | 4.1291  | 3.7041  | 3.3527  | 4.3814  | 1.1228 | 0.1670  | 0.3558 | 0.4488 |
| Oxr1     | _RDS[Phospho (STY)]TEVEELRK_3                             | #N/A                    | 6.5781  | 3.8417  | 3.8332  | 6.6388  | 3.9218  | 3.5498  | 6.4142  | 3.7683  | 3.7015  | 3.6987  | 1.0754 | 0.1049  | 0.7269 | 0.1185 |
| Oxr1     | _ADLEPESRPRLSDPSSELLPQOEK_3                               | #N/A                    | 4.5091  | 4.9503  | 3.1673  | 4.3802  | 4.8262  | 4.4478  | 4.7874  | 4.5878  | 4.3683  | 3.6370  | 1.0081 | 0.0116  | 0.9288 | 0.0321 |
| Oxr1     | _M[Oxidation (M)]S[Phospho (STY)]FOKPK_2                  | #N/A                    | 3.3586  | 3.3492  | 3.5098  | 3.8511  | 3.4719  | 4.0709  | 3.3425  | 3.9346  | 3.7402  | 3.7346  | 0.9767 | -0.0341 | 0.6437 | 0.1913 |
| Oxr1     | _IKESFIELDQLSGR_3                                         | #N/A                    | 5.3346  | 5.2290  | 5.2849  | 5.8391  | 5.1712  | 5.4981  | 5.0849  | 5.6741  | 5       |         |        |         |        |        |



|       |                                                                   |                      |         |         |         |         |         |         |         |         |         |         |        |         |        |        |
|-------|-------------------------------------------------------------------|----------------------|---------|---------|---------|---------|---------|---------|---------|---------|---------|---------|--------|---------|--------|--------|
| Lrc47 | _RQ[S(Phospho (STY))VSGUHR_2                                      | #N/A                 | 3.4310  | 4.1873  | 3.1647  | 4.2093  | 3.6429  | 4.0499  | 4.3576  | 4.2347  | 3.7626  | 3.8866  | 0.9312 | -0.1029 | 0.2922 | 0.5343 |
| Lrc47 | _KQHRES(Phospho (STY))GEGEEEADVASR_3                              | #N/A                 | 3.8320  | 4.0564  | 3.8005  | 3.3443  | 3.5175  | 3.8302  | 3.3321  | 3.6604  | 4.2712  | 3.9248  | 0.9824 | -0.0257 | 0.7515 | 0.1240 |
| Kctd8 | _V[S(Phospho (STY))PKQHEEDR_2                                     | #N/A                 | 5.1231  | 5.8660  | 6.1942  | 5.7096  | 5.4952  | 5.8103  | 5.5255  | 5.7578  | 5.2468  | 5.7750  | 1.0223 | 0.0318  | 0.5694 | 0.2446 |
| Kctd8 | _RNS(Phospho (STY))ELFQSLJK_2                                     | Q50H33_S413_M1_Kctd8 | 3.5439  | 3.6823  | 4.2307  | 6.0850  | 4.1704  | 3.0541  | 4.4481  | 4.8585  | 3.0337  | 3.1995  | 1.0625 | 0.0874  | 0.7165 | 0.1448 |
| Ctcf3 | _SDVGTSLEP[S(Phospho (STY))EEDGVPSR_2                             | Q52K86_S453_M1_Ctcf3 | 4.0457  | 3.3501  | 3.2317  | 3.7344  | 4.4186  | 3.0572  | 3.4490  | 5.5486  | 4.6928  | 5.4186  | 0.7619 | -0.2924 | 0.0401 | 1.3970 |
| Con1  | _EVKAEEKS(Phospho (STY))VSGNVK_3                                  | Q52KE7_S358_M1_Con1  | 4.0543  | 4.3749  | 5.8780  | 3.3318  | 2.9536  | 3.1192  | 5.5694  | 3.6694  | 4.0680  | 4.1343  | 0.9064 | -0.1419 | 0.5459 | 0.2629 |
| Con1  | _GQAS(Phospho (STY))KSPVNGVR_3                                    | Q52KE7_S378_M1_Con1  | 4.3230  | 3.5784  | 4.3346  | 3.3364  | 3.4667  | 3.1579  | 4.5519  | 3.2812  | 4.4307  | 3.3034  | 0.9506 | -0.0731 | 0.6239 | 0.2049 |
| Spir1 | _LRPV[S(Phospho (STY))PEERR_2                                     | Q52Kf3_S229_M1_Spir1 | 7.4014  | 7.6752  | 7.4346  | 7.8533  | 5.3721  | 7.3060  | 7.4920  | 7.4432  | 7.4146  | 6.9114  | 0.9861 | -0.0202 | 0.8386 | 0.0765 |
| Spir1 | _S[Phospho (STY))VKSDDELQPK_2                                     | #N/A                 | 6.4050  | 6.2584  | 3.9976  | 7.0972  | 5.4915  | 6.4499  | 6.6211  | 6.6091  | 6.7164  | 6.8707  | 0.8875 | -0.1722 | 0.2118 | 0.6740 |
| Spir1 | _RHS(Phospho (STY))EKETPTNVR_3                                    | #N/A                 | 4.6385  | 5.9833  | 6.8341  | 6.3730  | 5.3158  | 3.3315  | 5.8240  | 6.1389  | 6.0732  | 6.2156  | 0.8928 | -0.1637 | 0.3515 | 0.4540 |
| Spir1 | _SR[S(Phospho (STY))VKSDDELQPK_3                                  | #N/A                 | 5.4943  | 5.7867  | 5.9028  | 4.0390  | 4.2664  | 5.6548  | 4.1872  | 6.2973  | 5.6703  | 5.8706  | 0.9427 | -0.0852 | 0.5839 | 0.2337 |
| Spir1 | _APTLLAEDS[Phospho (STY)]DS[Phospho (STY)]EEKSLHK_3               | Q52Kf3_S306_M2_Spir1 | 3.9152  | 3.5703  | 3.7628  | 6.9615  | 3.4818  | 3.5741  | 3.6632  | 3.8869  | 3.9454  | 3.8700  | 1.0962 | 0.1325  | 0.6088 | 0.2155 |
| Spir1 | _HS[Phospho (STY)]EKETPTNVR_3                                     | #N/A                 | 3.5432  | 3.7992  | 3.2769  | 4.3215  | 3.6205  | 4.1090  | 4.4698  | 4.1805  | 2.9787  | 3.9988  | 0.9671 | -0.0483 | 0.7007 | 0.1545 |
| Srm1  | _RLS[Phospho (STY)]PS[Phospho (STY)]AS[Phospho (STY)]PPR_2        | Q52KIB_S387_M3_Srm1  | 11.5479 | 11.7288 | 12.1060 | 11.9636 | 11.0720 | 11.5976 | 12.2089 | 11.8911 | 11.8214 | 11.7003 | 0.9802 | -0.0289 | 0.2805 | 0.5520 |
| Srm1  | _TAS[Phospho (STY)]PPPPK_2                                        | #N/A                 | 11.1228 | 11.2746 | 11.7292 | 11.3754 | 10.6880 | 11.0708 | 11.6065 | 11.4242 | 11.2898 | 11.0807 | 0.9876 | -0.0179 | 0.4977 | 0.3030 |
| Srm1  | _RRT[Phospho (STY)]PS[Phospho (STY)]PPPR_2                        | #N/A                 | 11.5099 | 11.6193 | 11.9279 | 11.8216 | 11.1270 | 11.5000 | 11.9027 | 11.6645 | 11.5784 | 11.4097 | 0.9953 | -0.0068 | 0.7497 | 0.1251 |
| Srm1  | _APQTS[Phospho (STY)]PPPR_2                                       | #N/A                 | 11.5510 | 11.6499 | 12.2535 | 11.9964 | 10.9974 | 11.5804 | 12.0426 | 11.8448 | 11.5129 | 11.6253 | 0.9928 | -0.0105 | 0.7303 | 0.1365 |
| Srm1  | _SRV[S(Phospho (STY))VS[Phospho (STY)]PGR_2                       | #N/A                 | 11.1763 | 11.1682 | 11.5559 | 11.3475 | 10.5991 | 11.1070 | 11.5607 | 11.2858 | 11.2589 | 11.2309 | 0.9846 | -0.0225 | 0.3432 | 0.4664 |
| Srm1  | _AAS[Phospho (STY)]PSQSVR_2                                       | Q52KIB_S779_M1_Srm1  | 10.9804 | 11.0529 | 11.5786 | 11.3015 | 10.5373 | 10.9501 | 11.5331 | 11.3405 | 11.0601 | 11.1054 | 0.9829 | -0.0249 | 0.3616 | 0.4418 |
| Srm1  | _RVS[Phospho (STY)]HS[Phospho (STY)]PPPK_2                        | #N/A                 | 11.5227 | 11.5254 | 11.1718 | 11.6487 | 10.3444 | 11.1659 | 11.8167 | 11.5498 | 11.3414 | 11.4609 | 0.9690 | -0.0454 | 0.1840 | 0.7531 |
| Srm1  | _RS[Phospho (STY)]PT[Phospho (STY)]PPPR_2                         | #N/A                 | 10.1800 | 10.3727 | 10.6356 | 10.6713 | 10.5847 | 10.3062 | 10.7028 | 10.1435 | 10.2953 | 11.0872 | 0.9906 | -0.0136 | 0.6390 | 0.2013 |
| Srm1  | _S[Phospho (STY)]PS[Phospho (STY)]PPPAR_2                         | #N/A                 | 11.1430 | 10.5641 | 10.7587 | 8.7962  | 9.5400  | 10.6420 | 11.0148 | 10.8844 | 11.0212 | 10.8838 | 0.9351 | -0.0968 | 0.1556 | 0.8079 |
| Srm1  | _RRS[Phospho (STY)]PS[Phospho (STY)]PPPAR_2                       | #N/A                 | 9.6687  | 9.7074  | 10.2225 | 9.9385  | 9.1388  | 9.6144  | 10.1801 | 9.8619  | 9.7511  | 9.6383  | 0.9855 | -0.0210 | 0.5080 | 0.2942 |
| Srm1  | _RVS[Phospho (STY)]PPQR_2                                         | Q52KIB_S616_M1_Srm1  | 10.8878 | 10.7303 | 11.3664 | 11.2660 | 3.1045  | 10.5307 | 11.1282 | 11.1652 | 10.8327 | 10.6826 | 0.8809 | -0.1830 | 0.4510 | 0.3459 |
| Srm1  | _WQS[Phospho (STY)]PVTK_2                                         | #N/A                 | 10.0516 | 10.0019 | 10.4497 | 10.2874 | 9.4753  | 10.1738 | 10.3876 | 10.2161 | 10.3287 | 10.0371 | 0.9835 | -0.0240 | 0.3787 | 0.4217 |
| Srm1  | _S[Phospho (STY)]PT[Phospho (STY)]PPPR_2                          | #N/A                 | 10.5500 | 10.4005 | 8.6993  | 10.3662 | 7.2418  | 10.1887 | 8.7138  | 9.1918  | 7.8455  | 8.7784  | 1.1022 | 0.1404  | 0.2411 | 0.6178 |
| Srm1  | _RAS[Phospho (STY)]SSK_2                                          | Q52KIB_S674_M2_Srm1  | 7.2179  | 7.3116  | 7.8020  | 7.6581  | 7.2160  | 5.1778  | 8.0065  | 7.6425  | 7.6563  | 7.4670  | 0.9182 | -0.1231 | 0.2400 | 0.6199 |
| Srm1  | _RAS[Phospho (STY)]PS[Phospho (STY)]PPPK_2                        | #N/A                 | 8.9301  | 8.9171  | 8.6028  | 8.1515  | 6.5675  | 8.7828  | 9.2497  | 8.9937  | 8.6050  | 8.6389  | 0.9384 | -0.0917 | 0.2869 | 0.5423 |
| Srm1  | _S[Phospho (STY)]FELPEPSVR_2                                      | #N/A                 | 9.2831  | 8.6569  | 8.4700  | 8.0661  | 3.7570  | 8.8910  | 9.2816  | 8.7042  | 8.8737  | 8.4438  | 0.8120 | -0.3004 | 0.2241 | 0.4696 |
| Srm1  | _S[Phospho (STY)]RS[Phospho (STY)]VS[Phospho (STY)]PR_2           | Q52KIB_S304_M3_Srm1  | 8.2710  | 3.4884  | 6.5039  | 6.9234  | 6.0144  | 3.9766  | 6.8999  | 7.3808  | 7.6752  | 3.1696  | 0.9334 | -0.0995 | 0.7455 | 0.1276 |
| Srm1  | _AAS[Phospho (STY)]PS[Phospho (STY)]PGSVR_2                       | #N/A                 | 4.0584  | 8.2692  | 8.9995  | 8.7619  | 3.0560  | 8.5973  | 9.0482  | 8.7960  | 8.7167  | 8.3450  | 0.7960 | -0.3292 | 0.2275 | 0.6460 |
| Srm1  | _KACVS[Phospho (STY)]PGS_2                                        | Q52KIB_S943_M1_Srm1  | 7.5633  | 7.8277  | 7.9604  | 7.7504  | 6.1479  | 3.5364  | 8.0792  | 7.8990  | 7.4991  | 7.6820  | 0.8726 | -0.1965 | 0.2966 | 0.5279 |
| Srm1  | _AKS[Phospho (STY)]PT[Phospho (STY)]PLS[Phospho (STY)]PAR_2       | Q52KIB_S832_M3_Srm1  | 7.0801  | 6.8784  | 3.8852  | 7.6368  | 6.3847  | 7.0933  | 7.4969  | 6.7420  | 7.3999  | 6.3648  | 0.8986 | -0.1543 | 0.3394 | 0.4692 |
| Srm1  | _RWQS[Phospho (STY)]PVTK_2                                        | #N/A                 | 6.3429  | 3.1503  | 3.2618  | 3.7645  | 3.0386  | 3.5860  | 3.4792  | 4.3540  | 4.0026  | 3.7315  | 0.9911 | -0.0128 | 0.9593 | 0.0181 |
| Srm1  | _QRS[Phospho (STY)]PVTK_2                                         | Q52KIB_S664_M1_Srm1  | 5.7601  | 3.8427  | 6.0393  | 5.8799  | 5.2959  | 5.4788  | 6.1371  | 6.0456  | 3.0222  | 3.9553  | 1.1237 | 0.1683  | 0.4444 | 0.3523 |
| Srm1  | _S[Phospho (STY)]PS[Phospho (STY)]PPARR_2                         | #N/A                 | 8.0246  | 7.4428  | 7.8115  | 8.7597  | 6.6206  | 8.0010  | 8.9137  | 8.2755  | 8.5008  | 7.7433  | 0.9304 | -0.1041 | 0.1946 | 0.7108 |
| Srm1  | _GAS[Phospho (STY)]AS[Phospho (STY)]PGGRQS[Phospho (STY)]PSPRPR_3 | #N/A                 | 6.0037  | 5.6533  | 5.6572  | 5.5087  | 4.9808  | 5.9262  | 6.4731  | 5.8142  | 5.2120  | 5.8537  | 0.9629 | -0.0545 | 0.4549 | 0.3421 |
| Srm1  | _RS[Phospho (STY)]PT[Phospho (STY)]PPPR_2                         | #N/A                 | 8.5925  | 8.6750  | 3.1302  | 8.6116  | 9.2261  | 9.0995  | 8.2805  | 9.3914  | 7.5849  | 8.5823  | 0.9128 | -0.1316 | 0.5541 | 0.2564 |
| Srm1  | _RS[Phospho (STY)]PS[Phospho (STY)]PPARR_2                        | #N/A                 | 7.1301  | 7.0823  | 7.6714  | 7.1150  | 6.5068  | 7.4231  | 7.6585  | 6.6774  | 7.3366  | 6.3731  | 1.0204 | 0.0292  | 0.6530 | 0.1851 |
| Srm1  | _APKEPVPPEKPS[Phospho (STY)]PEX_3                                 | #N/A                 | 7.6754  | 7.5376  | 8.0785  | 7.5947  | 7.0758  | 7.4756  | 8.4454  | 7.5713  | 7.4968  | 7.3212  | 0.9824 | -0.0256 | 0.6136 | 0.2121 |
| Srm1  | _RVS[Phospho (STY)]HS[Phospho (STY)]PPPRQ_3                       | #N/A                 | 6.2656  | 7.3533  | 7.1987  | 7.6672  | 4.2720  | 7.0516  | 5.6005  | 6.6741  | 7.7386  | 7.1811  | 0.9759 | -0.0352 | 0.8284 | 0.0818 |
| Srm1  | _VVS[Phospho (STY)]GS[Phospho (STY)]PEPAAK_2                      | Q52KIB_S795_M2_Srm1  | 3.6503  | 3.9722  | 3.8205  | 3.5015  | 4.1712  | 5.1453  | 3.6498  | 5.0742  | 3.7749  | 3.6062  | 0.9043 | 0.0062  | 0.9673 | 0.0145 |
| Srm1  | _TAS[Phospho (STY)]PPPPK_2                                        | #N/A                 | 9.7550  | 9.7652  | 10.2960 | 10.0111 | 9.0240  | 9.7765  | 10.2400 | 9.9715  | 9.6434  | 9.8206  | 0.9851 | -0.0216 | 0.5517 | 0.2581 |
| Srm1  | _AS[Phospho (STY)]PS[Phospho (STY)]PPPKR_2                        | #N/A                 | 7.3162  | 8.0193  | 4.4113  | 6.5753  | 2.8502  | 6.8939  | 8.9894  | 8.3829  | 7.7067  | 8.1685  | 0.7232 | -0.4676 | 0.0553 | 1.2573 |
| Srm1  | _RRS[Phospho (STY)]PS[Phospho (STY)]PAPPPPPPPPR_3                 | #N/A                 | 9.5320  | 10.7255 | 8.5926  | 11.5983 | 8.1131  | 9.7122  | 11.1158 | 11.0482 | 9.5679  | 8.7250  | 0.9604 | -0.0583 | 0.6335 | 0.1983 |
| Srm1  | _VVS[Phospho (STY)]PPPK_2                                         | Q52KIB_S657_M1_Srm1  | 6.5454  | 3.5575  | 3.4391  | 6.5244  | 3.3789  | 6.3986  | 4.1767  | 6.1769  | 6.4971  | 6.4687  | 0.8427 | -0.2468 | 0.3652 | 0.5432 |
| Srm1  | _KETES[Phospho (STY)]AEIDNLDOLER_2                                | #N/A                 | 3.9117  | 7.0347  | 3.6734  | 7.7667  | 6.3198  | 6.8284  | 6.3406  | 7.5390  | 7.3115  | 7.3667  | 0.8295 | -0.6096 | 0.2139 | 0.6698 |
| Srm1  | _S[Phospho (STY)]PSAPPPPPPPPPPR_2                                 | Q52KIB_S572_M1_Srm1  | 4.0671  | 9.7942  | 3.8008  | 10.6982 | 8.3022  | 10.3972 | 10.6111 | 10.8437 | 10.4895 | 10.2984 | 0.7427 | -0.4222 | 0.1289 | 0.8899 |
| Srm1  | _RES[Phospho (STY)]PS[Phospho (STY)]PAPKPR_2                      | #N/A                 | 8.4983  | 8.4929  | 8.7192  | 7.8715  | 7.8237  | 8.2259  | 8.8741  | 8.7735  | 8.6067  | 8.3192  | 0.9570 | -0.0634 | 0.1137 | 0.9444 |
| Srm1  | _EKS[Phospho (STY)]FELPEPSVR_2                                    | #N/A                 | 10.5625 | 10.8615 | 11.4347 | 11.0854 | 10.0632 | 10.7037 | 11.4758 | 10.8973 | 10.7825 | 10.6777 | 0.9842 | -0.0230 | 0.5497 | 0.2599 |
| Srm1  | _RHS[Phospho (STY)]PS[Phospho (STY)]PPRR_2                        | #N/A                 | 7.0328  | 6.7662  | 7.1572  | 6.8239  | 5.1843  | 6.0337  | 7.3652  | 7.2656  | 6.5191  | 6.6132  | 0.9364 | -0.0947 | 0.3259 | 0.4869 |
| Srm1  | _QS[Phospho (STY)]PSPSTRPR_2                                      | Q52KIB_S731_M1_Srm1  | 3.6183  | 6.4949  | 6.7512  | 7.2955  | 5.9337  | 3.6431  | 6.8052  | 6.9782  | 7.0559  | 6.8788  | 0.8114 | -0.3015 | 0.1496 | 0.8251 |
| Srm1  | _RVS[Phospho (STY)]PS[Phospho (STY)]PPPK_2                        | #N/A                 | 12.7636 | 12.8433 | 13.1373 | 13.1192 | 12.2190 | 12.7988 | 13.3578 | 12.9629 | 12.7889 | 12.7569 | 0.9882 | -0.0171 | 0.4704 | 0.3275 |
| Srm1  | _Y[Phospho (STY)]SPPIQR_2                                         | Q52KIB_Y615_M1_Srm1  | 4.2429  | 3.5472  | 3.5288  | 4.5735  | 3.3686  | 4.3609  | 3.2209  | 3.9286  | 4.2276  | 4.2507  | 1.0077 | 0.0110  | 0.9284 | 0.0323 |
| Srm1  | _S[Phospho (STY)]RS[Phospho (STY)]PS[Phospho (STY)]PAPEKK_2       | Q52KIB_S207_M3_Srm1  | 5.6822  | 3.3506  | 4.9034  | 5.6439  | 3.0013  | 3.1857  | 5.1245  | 5.5150  | 4.2028  | 5.5403  | 0.8493 | -0.2356 | 0.2863 | 0.5432 |
| Srm1  | _RVS[Phospho (STY)]RT[Phospho (STY)]PEPK_2                        | #N/A                 | 9.0382  | 9.0662  | 9.5513  | 9.3695  | 8.2355  | 9.1807  | 9.4429  | 9.2302  | 9.2615  | 9.0620  | 0.9810 | -0.0276 | 0.4850 | 0.3143 |
| Srm1  | _TRHS[Phospho (STY)]PTQCQGNR_3                                    | #N/A                 | 6.4567  | 6.8163  | 6.5789  | 7.2695  | 3.3374  | 5.7545  | 7.0795  | 7.1236  | 3.8417  | 6.3453  | 0.9898 | -0.0147 | 0.9493 | 0.0226 |
| Srm1  | _RES[Phospho (STY)]PSAPK_2                                        | #N/A                 | 3.3980  | 3.8282  | 4.0848  | 4.5874  | 4.0245  | 3.7050  | 4.3021  | 3.5310  | 3.1796  | 3.0536  | 1.1198 | 0.1633  | 0.2008 | 0.6973 |
| Srm1  | _RAS[Phospho (STY)]PS[Phospho (STY)]PPPKR_2                       | #N/A                 | 11.3125 | 11.7348 | 11.7675 | 11.8512 | 10.2390 | 11.6207 | 12.0054 | 11.7618 | 11.6368 | 11.0846 | 0.9827 | -0.0252 | 0.5777 | 0.2383 |
| Srm1  | _KSRVS[Phospho (STY)]VS[Phospho (STY)]PGR_2                       | #N/A                 | 8.3462  | 8.4621  | 4.1114  | 8.3889  | 7.8261  | 8.3193  | 8.7106  | 8.4476  | 3.7259  | 8.1971  | 1.0362 | 0.0513  | 0.8414 | 0.0750 |
| Srm1  | _RRT[Phospho (STY)]AS[Phospho (STY)]PPPPK_2                       | #N/A                 | 7.7376  | 7.      |         |         |         |         |         |         |         |         |        |         |        |        |



|         |                                                              |                         |         |         |         |         |         |         |         |         |         |         |         |         |        |        |
|---------|--------------------------------------------------------------|-------------------------|---------|---------|---------|---------|---------|---------|---------|---------|---------|---------|---------|---------|--------|--------|
| Prune2  | _NLSLTC[Carbamidomethyl (C)]FAGEEPS[Phospho (STY)]PER_2      | Q52XR3_5594_M1_Prune2   | 4.0714  | 3.3757  | 3.2573  | 3.7600  | 3.1971  | 3.0316  | 3.4747  | 4.3585  | 4.0071  | 3.7270  | 0.8862  | -0.1743 | 0.1139 | 0.9436 |
| Prune2  | _DTSLS[Phospho (STY)]GSFTSGQGTWNKSK_2                        | Q52XR3_5876_M1_Prune2   | 3.3024  | 4.1043  | 3.8114  | 4.3141  | 3.9926  | 4.1356  | 4.0288  | 3.8072  | 3.4558  | 4.2811  | 1.0129  | 0.0185  | 0.8312 | 0.0803 |
| Thrap3  | _ASVSDS[Phospho (STY)]PR_2                                   | Q569Z6_5243_M1_Thrap3   | 12.0729 | 12.1199 | 12.7805 | 12.2545 | 11.4287 | 11.9147 | 12.4661 | 12.2878 | 12.1136 | 11.9965 | 0.9898  | -0.0147 | 0.6137 | 0.2120 |
| Thrap3  | _ERS[Phospho (STY)]PAUK_2                                    | Q569Z6_5248_M1_Thrap3   | 10.1884 | 10.1604 | 10.6043 | 10.3451 | 9.1750  | 9.7866  | 10.5869 | 10.4223 | 10.3518 | 10.0395 | 0.9704  | -0.0434 | 0.2516 | 0.5351 |
| Thrap3  | _S[Phospho (STY)]REEWDEYTPK_2                                | Q569Z6_5860_M1_Thrap3   | 9.0006  | 9.2613  | 9.6000  | 9.8604  | 8.0200  | 9.2085  | 9.5813  | 9.5316  | 9.3635  | 9.0018  | 0.9775  | -0.0329 | 0.5527 | 0.2575 |
| Thrap3  | _NKCS[Phospho (STY)]PEHR_2                                   | Q569Z6_5669_M1_Thrap3   | 8.9326  | 9.1329  | 9.8024  | 9.3894  | 7.0828  | 8.6577  | 9.6540  | 9.4189  | 8.8556  | 8.9790  | 0.9573  | -0.0629 | 0.4563 | 0.3407 |
| Thrap3  | _IDS[Phospho (STY)]PSTR_2                                    | #N/A                    | 11.1902 | 10.8797 | 11.4517 | 11.3036 | 10.1150 | 3.0004  | 11.6336 | 11.1950 | 11.0612 | 11.0302 | 0.8599  | -0.2177 | 0.3779 | 0.4227 |
| Thrap3  | _ERS[Phospho (STY)]PALKS[Phospho (STY)]PLGSVVVR_3            | Q569Z6_5248_M2_Thrap3   | 5.6680  | 7.9816  | 6.4077  | 9.3912  | 7.3076  | 7.3350  | 7.5734  | 8.4973  | 8.4018  | 7.2797  | 0.9204  | -0.1197 | 0.3871 | 0.4121 |
| Thrap3  | _S[Phospho (STY)]YS[Phospho (STY)]PAHNR_2                    | Q569Z6_555_M2_Thrap3    | 3.1565  | 3.8654  | 4.1188  | 7.1725  | 3.7912  | 6.1353  | 7.5609  | 7.1156  | 6.2925  | 4.0348  | 0.7583  | -0.3992 | 0.1808 | 0.7428 |
| Thrap3  | _M[Oxidation (M)]DS[Phospho (STY)]FDEDLAR_2                  | #N/A                    | 5.4259  | 7.4003  | 6.8230  | 7.9484  | 6.3356  | 7.2915  | 8.0136  | 7.6919  | 7.5387  | 7.4647  | 0.8950  | -0.1601 | 0.1219 | 0.9139 |
| Thrap3  | _FSGEGEEDDESGT[Phospho (STY)]ENREEK_3                        | Q569Z6_1937_M1_Thrap3   | 3.2269  | 4.0207  | 3.8010  | 4.5489  | 3.7074  | 3.5575  | 4.3478  | 3.8634  | 3.5805  | 3.6825  | 0.9850  | -0.0219 | 0.8320 | 0.0799 |
| Thrap3  | _IDS[Phospho (STY)]PSTRK_2                                   | #N/A                    | 4.3588  | 3.6142  | 4.0925  | 3.3006  | 3.5025  | 6.5184  | 4.5161  | 7.2281  | 6.4136  | 3.1135  | 0.7882  | -0.3433 | 0.2556 | 0.5924 |
| Thrap3  | _S[Phospho (STY)]PRPSPVPK_2                                  | Q569Z6_5264_M1_Thrap3   | 4.0356  | 3.2991  | 3.5258  | 3.5298  | 3.1204  | 4.0136  | 3.4503  | 4.0902  | 4.0162  | 3.3771  | 0.9609  | -0.0576 | 0.5595 | 0.2522 |
| Thrap3  | _M[Oxidation (M)]DS[Phospho (STY)]FEDLARPSGLAQER_3           | #N/A                    | 3.6849  | 4.9376  | 5.3798  | 5.3094  | 4.2933  | 5.1823  | 3.7851  | 6.7107  | 5.5571  | 4.7497  | 0.9226  | -0.1163 | 0.5199 | 0.2841 |
| Thrap3  | _S[Phospho (STY)]RS[Phospho (STY)]YS[Phospho (STY)]PAHNR_2   | Q569Z6_551_M3_Thrap3    | 3.8651  | 5.2649  | 4.1317  | 3.3534  | 3.0002  | 3.4336  | 4.7038  | 3.5007  | 5.6954  | 5.4802  | 0.7929  | -0.3348 | 0.1148 | 0.9400 |
| Thrap3  | _WAHDKS[Phospho (STY)]GEEGEEDESGTENR_3                       | #N/A                    | 3.1024  | 4.1238  | 3.7892  | 4.2918  | 3.7289  | 4.1133  | 4.0065  | 3.8267  | 3.4752  | 4.2588  | 0.9914  | -0.0125 | 0.8892 | 0.0466 |
| Thrap3  | _S[Phospho (STY)]FSITR_2                                     | Q569Z6_5557_M1_Thrap3   | 3.4960  | 4.2522  | 3.2296  | 4.2742  | 4.1405  | 4.1642  | 3.8781  | 3.5007  | 3.0260  | 3.9515  | 1.0412  | 0.0582  | 0.6265 | 0.2031 |
| Thrap3  | _WAHDKS[Phospho (STY)]GTEENR_4                               | #N/A                    | 3.1244  | 4.0584  | 4.2151  | 3.9553  | 3.9467  | 4.0998  | 3.7612  | 3.4098  | 3.8283  | 3.8283  | 1.0189  | 0.0270  | 0.7591 | 0.9179 |
| Thrap3  | _FSGEGEEDDES[Phospho (STY)]GTENR_3                           | #N/A                    | 3.9554  | 3.2707  | 3.1414  | 3.6441  | 3.0811  | 3.1475  | 3.3587  | 2.9736  | 4.1230  | 3.6111  | 0.9593  | -0.0600 | 0.5984 | 0.2230 |
| Scn2b   | _EQKLS[Phospho (STY)]TDOLKTEEGK_3                            | #N/A                    | 5.4725  | 5.4581  | 4.5651  | 5.6836  | 4.4546  | 5.6444  | 4.9406  | 5.6870  | 5.5828  | 5.5858  | 0.9228  | -0.1160 | 0.4021 | 0.3957 |
| Scn2b   | _EQKLS[Phospho (STY)]TDOLK_2                                 | #N/A                    | 6.9846  | 6.8493  | 6.8571  | 6.9133  | 2.9764  | 6.7340  | 7.4380  | 7.1673  | 4.2277  | 6.3643  | 0.9873  | -0.0185 | 0.9377 | 0.0279 |
| Scn2b   | _LS[Phospho (STY)]TDOLKTEEGK_2                               | #N/A                    | 4.4346  | 4.2304  | 3.9180  | 4.1193  | 3.9856  | 4.1803  | 4.2676  | 3.1968  | 3.7966  | 3.7966  | 1.0567  | 0.0795  | 0.3784 | 0.4221 |
| Scn2b   | _YDVSVTLK_2                                                  | #N/A                    | 3.5441  | 3.6821  | 4.2309  | 3.2327  | 3.5704  | 3.0542  | 4.4482  | 3.3849  | 3.0335  | 1.8892  | 1.1140  | 0.1557  | 0.4577 | 0.3394 |
| Gpikow  | _KHS[Phospho (STY)]PDRQDGPVPK_3                              | #N/A                    | 5.9352  | 6.3395  | 6.7356  | 6.6624  | 5.9524  | 6.1397  | 6.1945  | 6.4281  | 6.1681  | 5.9752  | 1.0214  | 0.0306  | 0.4999 | 0.3011 |
| Znf608  | _DRHS[Phospho (STY)]PFSQR_3                                  | Q56A10_51452_M1_Znf608  | 3.8575  | 3.1619  | 4.5443  | 3.4580  | 2.9832  | 3.6062  | 3.5432  | 3.5131  | 0.9610  | -0.0573 | 0.9610  | -0.0573 | 0.6575 | 0.1821 |
| Znf608  | _APGS[Phospho (STY)]PGAGNPPGTPK_2                            | Q56A10_5626_M1_Znf608   | 3.1841  | 3.9893  | 3.8709  | 4.3736  | 3.8107  | 3.9168  | 4.2796  | 3.7449  | 3.3935  | 4.4066  | 0.9793  | -0.3002 | 0.7663 | 0.1156 |
| Deptor  | _STFSMSVS[Phospho (STY)]PSK_2                                | Q570Y9_5265_M1_Deptor   | 4.1314  | 3.2110  | 3.8651  | 3.4089  | 3.0323  | 3.1984  | 3.5571  | 3.5923  | 3.8913  | 3.0842  | 0.9837  | -0.0237 | 0.8280 | 0.0819 |
| Prag1   | _ANS[Phospho (STY)]LPAGTR_2                                  | Q571I4_540_M1_Prag1     | 8.0993  | 7.9154  | 8.4144  | 8.5805  | 6.5658  | 8.0820  | 7.9744  | 7.9419  | 8.0165  | 8.1899  | 0.9891  | -0.0159 | 0.8177 | 0.0874 |
| Tab3    | _TLVHSS[Phospho (STY)]DGHDPQHTAGK_3                          | #N/A                    | 4.3393  | 3.5549  | 3.8349  | 3.6598  | 5.5146  | 3.8697  | 3.7455  | 3.8547  | 4.2710  | 4.7738  | 0.9850  | -0.0218 | 0.8865 | 0.0523 |
| Tab3    | _VLVM[Oxidation (M)]EHS[Phospho (STY)]PEDNR_2                | #N/A                    | 5.0378  | 3.9985  | 3.5288  | 4.3000  | 3.5676  | 5.9342  | 5.7816  | 4.0171  | 4.0425  | 4.1171  | 0.9788  | -0.3009 | 0.8753 | 0.0579 |
| Tab3    | _SSSGSSDXY[Phospho (STY)]JAYTQALLHOR_2                       | Q571K4_Y516_M1_Tab3     | 3.3467  | 3.9057  | 3.1704  | 4.2150  | 4.0813  | 4.0442  | 4.3633  | 4.2870  | 3.0852  | 3.8923  | 0.9749  | -0.0370 | 0.7619 | 0.1181 |
| Spag9   | _ETDYPAGEELSE[Phospho (STY)]GQVQK_2                          | Q58A65_5815_M1_Spag9    | 3.1488  | 4.9698  | 4.0986  | 4.1744  | 3.7832  | 4.6142  | 5.2327  | 4.8335  | 4.6396  | 5.0374  | 0.8370  | -0.2566 | 0.0457 | 1.3404 |
| Spag9   | _SASQSS[Phospho (STY)]DKLDQELKQK_3                           | #N/A                    | 6.9773  | 7.0405  | 4.3576  | 8.1201  | 6.6631  | 7.4924  | 7.6720  | 6.3855  | 7.8448  | 7.5130  | 0.9213  | -0.1182 | 0.4368 | 0.1597 |
| Spag9   | _SASQSS[Phospho (STY)]DKLDQELK_2                             | #N/A                    | 3.3351  | 5.2793  | 3.7124  | 7.4736  | 3.9689  | 5.6914  | 6.0983  | 5.6576  | 3.8259  | 6.8167  | 0.8769  | -0.1896 | 0.4846 | 0.2846 |
| Pex1    | _SQS[Phospho (STY)]REDESUNQGPVK_2                            | Q58L07_51212_M1_Pex1    | 8.3281  | 8.3156  | 8.4822  | 8.8089  | 7.4709  | 8.5837  | 8.3251  | 8.3594  | 8.5464  | 0.9815  | -0.0269 | 0.5329  | 0.3132 | 0.1316 |
| Pex1    | _TPS[Phospho (STY)]QEGC[Carbamidomethyl (C)]QDLTQEQR_2       | Q58L07_51182_M1_Pex1    | 5.6350  | 5.6149  | 6.4042  | 4.1999  | 3.7421  | 6.0889  | 6.3143  | 4.3021  | 5.7751  | 3.8772  | 1.0422  | 0.0596  | 0.7719 | 0.1124 |
| Tut7    | _NTTEVGSG[Phospho (STY)]PAKEK_2                              | Q58UK4_5705_M1_Tut7     | 5.7917  | 6.0235  | 6.6792  | 5.6661  | 3.8049  | 5.3355  | 6.0292  | 6.4099  | 5.3337  | 5.8038  | 0.9423  | -0.0857 | 0.5342 | 0.2723 |
| Stxbp5f | _SSS[Phospho (STY)]SS[Phospho (STY)]DKDSK_2                  | Q5DQ04_5819_M2_Stxbp5f  | 10.3510 | 10.3017 | 10.7233 | 10.3848 | 9.2631  | 10.0662 | 10.5692 | 10.5140 | 10.2645 | 10.1879 | 0.9805  | -0.0284 | 0.4653 | 0.3323 |
| Stxbp5f | _RLS[Phospho (STY)]SADVSK_2                                  | Q5DQ04_5770_M1_Stxbp5f  | 7.5525  | 7.3755  | 8.1461  | 7.1115  | 4.1372  | 7.4237  | 8.2057  | 8.0061  | 7.9444  | 3.1663  | 0.9292  | -0.1060 | 0.7336 | 0.1345 |
| Stxbp5f | _SLSGSTNTSS[Phospho (STY)]EGVTK_2                            | Q5DQ04_5598_M1_Stxbp5f  | 7.9334  | 7.3801  | 7.6599  | 7.7954  | 6.5125  | 7.7665  | 8.0884  | 7.3990  | 7.9165  | 7.1558  | 0.9827  | -0.0251 | 0.6882 | 0.1623 |
| Stxbp5f | _TSYQS[Phospho (STY)]TELNDSPVPLELER_2                        | Q5DQ04_5727_M1_Stxbp5f  | 4.1344  | 3.3898  | 4.5232  | 3.5250  | 3.2781  | 3.3465  | 3.2397  | 3.0927  | 4.2421  | 3.4920  | 1.0520  | 0.0731  | 0.5936 | 0.2265 |
| Stxbp5f | _EIEQELSTSDYFC[Carbamidomethyl (C)]K_2                       | #N/A                    | 3.3238  | 4.2913  | 4.3991  | 4.9407  | 3.9503  | 3.0031  | 4.4692  | 3.6052  | 3.2538  | 0.9871  | 1.0486  | 0.0685  | 0.6711 | 0.1732 |
| Stxbp5f | _SRSS[Phospho (STY)]S[Phospho (STY)]SS[Phospho (STY)]DKDSK_2 | #N/A                    | 3.4375  | 6.2169  | 6.2876  | 4.3893  | 3.3432  | 3.8987  | 6.5053  | 6.4976  | 6.0794  | 4.2063  | 0.7893  | -0.3413 | 0.1674 | 0.7763 |
| Slc4a10 | _FPSKSPS[Phospho (STY)]_2                                    | Q5D7L9_51118_M1_Slc4a10 | 3.1028  | 10.2068 | 10.7233 | 4.1188  | 9.1975  | 10.7804 | 4.0172  | 10.6388 | 11.5192 | 3.9804  | 1.0640  | 0.0895  | 0.8459 | 0.0727 |
| Slc4a10 | _S[Phospho (STY)]FADIGK_2                                    | #N/A                    | 6.6739  | 6.3766  | 7.5392  | 6.2770  | 5.1360  | 5.9955  | 6.6757  | 6.5669  | 6.7436  | 6.3306  | 0.9626  | -0.0550 | 0.5645 | 0.2483 |
| Slc4a10 | _ENS[Phospho (STY)]TVDFSK_2                                  | Q5D7L9_5280_M1_Slc4a10  | 3.5806  | 6.0803  | 3.9027  | 3.8411  | 3.8096  | 3.6626  | 3.5558  | 3.6242  | 6.7935  | 6.5528  | 0.8080  | -0.2636 | 0.2834 | 0.5471 |
| Slc4a10 | _NAGQVSS[Phospho (STY)]PQSPAC[Carbamidomethyl (C)]AENK_2     | Q5D7L9_5261_M1_Slc4a10  | 6.6781  | 4.1592  | 4.0408  | 6.0066  | 3.9806  | 3.7489  | 4.1097  | 3.5750  | 3.2236  | 3.0097  | 1.3758  | 0.4603  | 0.0904 | 0.1439 |
| Slc4a10 | _GHTS[Phospho (STY)]PC[Carbamidomethyl (C)]GIMK_2            | Q5D7L9_5297_M1_Slc4a10  | 3.4216  | 5.8148  | 4.1084  | 3.8939  | 4.0482  | 3.6813  | 4.0421  | 3.1073  | 3.4064  | 3.5711  | 1.1783  | 0.3267  | 0.2080 | 0.6820 |
| Slc4a10 | _EROSGLEDGRES[Phospho (STY)]PSFDTPSOR_4                      | #N/A                    | 5.7158  | 5.3374  | 6.6183  | 4.7594  | 5.0521  | 5.5658  | 5.9885  | 6.2183  | 5.7959  | 5.5030  | 0.9373  | -0.0934 | 0.3234 | 0.4902 |
| Slc4a10 | _OSGLEDGRES[Phospho (STY)]PSFDTPSOR_3                        | #N/A                    | 11.4462 | 10.9416 | 12.0516 | 11.2888 | 10.0259 | 11.0450 | 11.3791 | 11.2232 | 11.4708 | 11.2168 | 0.9833  | -0.0243 | 0.5980 | 0.2233 |
| Slc4a10 | _DDPSVINS[Phospho (STY)]DEM[Oxidation (M)]SK_2               | #N/A                    | 3.7829  | 7.0222  | 4.0911  | 7.8429  | 5.8087  | 7.0473  | 7.5752  | 7.4126  | 7.6268  | 7.1736  | 0.7966  | -0.3280 | 0.1166 | 0.9333 |
| Slc4a10 | _FSRFPSPS[Phospho (STY)]SPS_2                                | Q5D7L9_51115_M1_Slc4a10 | 3.8086  | 3.0640  | 3.3481  | 3.8508  | 2.9523  | 3.6723  | 3.5655  | 4.2677  | 3.9163  | 3.8178  | 0.8863  | -0.1741 | 0.0885 | 1.0533 |
| Slc4a10 | _KQS[Phospho (STY)]EPNSMDK_2                                 | Q5D7L9_5247_M1_Slc4a10  | 5.5994  | 3.2139  | 3.1982  | 3.7009  | 3.1022  | 3.5224  | 4.9894  | 4.4176  | 4.4189  | 3.6679  | 0.8512  | -0.2324 | 0.2533 | 0.5964 |
| Slc4a10 | _NDVS[Phospho (STY)]RENSTVDFSK_2                             | Q5D7L9_5276_M1_Slc4a10  | 3.0290  | 3.7852  | 4.1321  | 4.0328  | 3.6735  | 3.8543  | 4.6006  | 3.4881  | 3.1367  | 3.1009  | 1.0473  | 0.0667  | 0.6329 | 0.1987 |
| Slc4a10 | _S[Phospho (STY)]FADIGK_2                                    | #N/A                    | 3.7447  | 3.4814  | 4.4315  | 3.4333  | 3.3697  | 3.2549  | 3.1480  | 3.1843  | 4.3337  | 2.5778  | 1.0932  | 0.1286  | 0.4219 | 0.3748 |
| Rnf20   | _ALVVPPEPFDSS[Phospho (STY)]NGER_2                           | #N/A                    | 4.1216  | 3.5264  | 3.5694  | 0.9583  | 3.1477  | 8.9617  | 3.2472  | 9.1044  | 4.2068  | 4.1771  | 1.0766  | 0.1065  | 0.8371 | 0.0787 |
| Rnf20   | _KALVVPPEPFDSS[Phospho (STY)]NGER_2                          | #N/A                    | 4.1222  | 3.4079  | 3.8559  | 3.3997  | 3.2660  | 3.1686  | 3.5480  | 3.6094  | 3.9085  | 3.0770  | 1.0003  | 0.0004  | 0.9966 | 0.0015 |
| Jakmip3 | _S[Phospho (STY)]PAINFHTFPVQK_3                              | Q5D7N8_5622_M1_Jakmip3  | 3.6624  | 4.4187  | 3.3961  | 5.9599  | 2.8061  | 3.8185  | 3.0881  | 4.4999  | 4.3604  | 4.1180  | 0.9984  | -0.0023 | 0.9920 | 0.0035 |
| Jakmip3 | _RPS[Phospho (STY)]SLNDLQDSQDER_2                            | #N/A                    | 3.7962  | 4.2090  | 3.8119  | 3.9199  | 3.4204  | 4.4249  | 3.7440  | 3.9436  | 3.8592  | 4.2606  | 0.9946  | -0.0079 | 0.9169 | 0.0377 |



|         |                                                                           |                        |         |         |         |         |         |         |         |         |         |         |         |         |        |        |
|---------|---------------------------------------------------------------------------|------------------------|---------|---------|---------|---------|---------|---------|---------|---------|---------|---------|---------|---------|--------|--------|
| Kctd16  | _QSPDEF[C]Carbamidomethyl (C)[I]HsPhospho (STY)[DFEDASQGSQDTR_3           | Q50TY9_S137_M1_Kctd16  | 3.2341  | 4.8822  | 3.9209  | 5.7971  | 3.9693  | 4.9655  | 4.6333  | 5.3212  | 5.7413  | 4.1574  | 0.8989  | -0.1538 | 0.3859 | 0.4135 |
| Kctd16  | _EKIS[Phospho (STY)]EEEELE_2                                              | Q50TY9_S389_M1_Kctd16  | 3.8873  | 4.5425  | 4.5741  | 3.5759  | 3.9978  | 3.2157  | 3.2906  | 4.1052  | 3.6303  | 4.8495  | 0.9991  | -0.0012 | 0.9931 | 0.0030 |
| Kctd16  | _QSNQI[Phospho (STY)]LDRPIK_3                                             | #N/A                   | 3.3721  | 4.1773  | 4.0589  | 4.5616  | 3.9986  | 3.7309  | 4.2762  | 3.5569  | 3.2055  | 3.0277  | 1.1327  | 0.1798  | 0.1586 | 0.7996 |
| Kctd16  | _QSNQI[Phospho (STY)]LDRPIK_3                                             | #N/A                   | 3.5135  | 4.3187  | 4.2003  | 3.8020  | 4.1400  | 2.6707  | 3.9502  | 3.4155  | 3.4982  | 3.1691  | 1.0758  | 0.1054  | 0.4564 | 0.3406 |
| Kctd16  | _L1APEDVKRS[Phospho (STY)]PDRFC[Carbamidomethyl (C)]HSDFASQGSQDTR_4       | Q50TY9_S130_M1_Kctd16  | 4.0658  | 3.3689  | 3.7995  | 4.0979  | 3.2096  | 3.5074  | 3.4916  | 3.7503  | 4.0493  | 3.7752  | 0.9757  | -0.0356 | 0.6729 | 0.1721 |
| Usp22   | _S[Phospho (STY)]PHMPK_2                                                  | Q50U02_S237_M1_Usp22   | 6.6110  | 3.6130  | 6.6601  | 7.0949  | 5.3280  | 6.5266  | 7.1844  | 6.4622  | 6.6591  | 6.6002  | 0.8879  | -0.1716 | 0.2958 | 0.5290 |
| Iqsec2  | _DPLGARDS[Phospho (STY)]PGR_2                                             | #N/A                   | 9.0814  | 8.3293  | 8.3833  | 9.0279  | 7.8276  | 8.2261  | 9.2213  | 8.8604  | 8.7059  | 8.5642  | 0.9594  | -0.0598 | 0.2243 | 0.6492 |
| Iqsec2  | _HSWDS[Phospho (STY)]PAFNNDVQVR_2                                         | #N/A                   | 5.8635  | 5.3358  | 7.2736  | 6.4028  | 3.3916  | 6.0676  | 5.5373  | 7.4862  | 7.2626  | 6.3545  | 0.9291  | -0.1062 | 0.6679 | 0.1753 |
| Iqsec2  | _SSS[Phospho (STY)]PGAGGGHSTSTSPATTLQR_3                                  | #N/A                   | 4.0325  | 3.6313  | 3.8602  | 6.1020  | 7.3860  | 7.7211  | 7.8627  | 8.1939  | 8.1794  | 7.5422  | 0.6867  | -0.5423 | 0.0311 | 1.5068 |
| Iqsec2  | _SS[Phospho (STY)]LEDYVGAGDGK_2                                           | #N/A                   | 4.3231  | 7.2681  | 3.5091  | 4.0117  | 3.4488  | 4.2807  | 3.7264  | 4.1067  | 3.7553  | 3.9787  | 1.1495  | 0.2010  | 0.4470 | 0.1497 |
| Iqsec2  | _LIEAFSQR_2                                                               | #N/A                   | 5.8729  | 6.5789  | 4.0862  | 6.4028  | 5.5569  | 5.0873  | 6.4208  | 6.5353  | 6.3270  | 5.8256  | 0.8917  | -0.1653 | 0.1991 | 0.7008 |
| Iqsec2  | _M[Oxidation (M)]QIS[Phospho (STY)]FEVEYK_2                               | #N/A                   | 8.2398  | 8.3508  | 8.6912  | 8.2337  | 7.2457  | 8.6701  | 8.4818  | 9.0669  | 8.6881  | 8.7480  | 0.9420  | -0.0863 | 0.1134 | 0.9456 |
| Iqsec2  | _GALSSS[Phospho (STY)]LR_2                                                | #N/A                   | 6.4069  | 3.3245  | 3.8027  | 3.5903  | 3.2128  | 3.4118  | 3.3050  | 4.6099  | 4.1767  | 3.0238  | 1.0475  | 0.0669  | 0.8006 | 0.0966 |
| Iqsec2  | _QLVYEADGC[Carbamidomethyl (C)]S[Phospho (STY)]PHGTLK_2                   | #N/A                   | 5.3235  | 5.6548  | 4.5447  | 5.5845  | 3.0780  | 5.3992  | 5.8986  | 3.6809  | 5.2777  | 3.8134  | 1.0564  | 0.0791  | 0.7028 | 0.1532 |
| Iqsec2  | _ESQV[Phospho (STY)]QNLR_2                                                | Q50U25_Y89_M1_Iqsec2   | 7.4362  | 7.6286  | 7.6349  | 7.5645  | 6.4815  | 7.0809  | 7.6191  | 7.6509  | 7.5986  | 7.5055  | 0.9619  | -0.0560 | 0.2490 | 0.6038 |
| Iqsec2  | _DPLGARDS[Phospho (STY)]PGRESQVQNLR_3                                     | #N/A                   | 3.3522  | 4.1085  | 4.5867  | 4.1305  | 3.9968  | 4.1287  | 4.0218  | 6.7773  | 3.1697  | 3.8078  | 0.9114  | -0.1338 | 0.5693 | 0.2447 |
| Iqsec2  | _ETRHS[Phospho (STY)]WDSFAPFNNQVQR_3                                      | #N/A                   | 3.8598  | 3.5122  | 3.6951  | 7.2141  | 3.4786  | 5.1005  | 6.8944  | 5.5404  | 4.2539  | 0.8749  | -0.1928 | 0.5116  | 0.2911 | 0.9211 |
| Iqsec2  | _Acetyl (Protein N-term)[M][Oxidation (M)]EAGSGPGGSGS[Phospho (STY)]PNR_2 | #N/A                   | 9.4602  | 8.9586  | 8.5010  | 10.0551 | 8.5150  | 8.7472  | 9.1420  | 9.0512  | 8.8764  | 9.1021  | 0.9996  | -0.0005 | 0.9917 | 0.0036 |
| Iqsec2  | _GELHRDPLGARDS[Phospho (STY)]PGR_3                                        | #N/A                   | 7.4851  | 7.1577  | 7.8372  | 7.4519  | 6.7209  | 6.9742  | 7.9544  | 7.6171  | 7.4788  | 7.4074  | 0.9549  | -0.0666 | 0.1671 | 0.7771 |
| Iqsec2  | _SS[Phospho (STY)]EDYVGAGDGK_2                                            | #N/A                   | 3.3940  | 7.0134  | 7.3438  | 7.5685  | 5.8351  | 7.0455  | 7.4832  | 7.3092  | 3.8496  | 0.9783  | -0.0317 | 0.8978  | 0.0468 | 0.4661 |
| Iqsec2  | _AAHLULTIEPPSS[Phospho (STY)]VQLSDR_3                                     | Q50U25_S593_M1_Iqsec2  | 3.5457  | 4.3509  | 4.2325  | 3.7698  | 4.1723  | 3.5572  | 3.9180  | 3.2314  | 3.5305  | 3.4470  | 1.1151  | 0.1571  | 0.0952 | 1.0215 |
| Iqsec2  | _DS[Phospho (STY)]PGRESQVQNLR_2                                           | #N/A                   | 3.6584  | 3.5685  | 4.3452  | 3.3471  | 5.7789  | 6.5900  | 3.9830  | 3.2714  | 6.7061  | 3.3141  | 1.0531  | 0.0747  | 0.8127 | 0.0901 |
| Iqsec2  | _LRSS[Phospho (STY)]ASESR_2                                               | Q50U25_S363_M1_Iqsec2  | 4.4131  | 3.4391  | 3.8288  | 3.9418  | 3.0682  | 3.6710  | 4.4037  | 3.4502  | 4.2357  | 3.7773  | 0.9396  | -0.0899 | 0.4322 | 0.3643 |
| Iqsec2  | _ALSDSYELS[Phospho (STY)]TDLQDK_2                                         | Q50U25_S316_M1_Iqsec2  | 4.0788  | 5.8398  | 3.2648  | 3.7674  | 3.2045  | 3.0242  | 3.3850  | 4.3511  | 3.9997  | 3.7344  | 0.9989  | -0.0016 | 0.9940 | 0.0026 |
| Iqsec2  | _EAS[Phospho (STY)]YQLQDITGYIAR_2                                         | Q50U25_S138_M1_Iqsec2  | 3.0314  | 3.8365  | 7.1182  | 4.2208  | 3.6579  | 5.0874  | 5.5444  | 3.8977  | 4.8747  | 4.1878  | 0.8485  | -0.2370 | 0.1627 | 0.7087 |
| Iqsec2  | _AQNPAYFEGKPA[Phospho (STY)]LDEGAM[Oxidation (M)]AGAR_3                   | #N/A                   | 7.1128  | 7.4128  | 7.9635  | 7.7679  | 6.2316  | 7.6399  | 7.4776  | 8.4268  | 7.7583  | 7.5970  | 0.9411  | -0.0876 | 0.2367 | 0.6258 |
| Iqsec2  | _GALSSS[Phospho (STY)]LRDLSQAGK_2                                         | #N/A                   | 3.2749  | 3.9512  | 3.9325  | 4.4644  | 3.8395  | 4.2859  | 4.1791  | 3.6541  | 3.3027  | 4.4314  | 1.0170  | 0.0244  | 0.8254 | 0.0833 |
| Iqsec2  | _RNS[Phospho (STY)]GVS[Phospho (STY)]LDSTIEGVSSPRPHQR_4                   | Q50U25_S1148_M2_Iqsec2 | 2.9693  | 4.2569  | 3.6561  | 4.1588  | 3.5958  | 3.9803  | 3.8735  | 7.5829  | 3.6083  | 4.1258  | 0.7857  | -0.3479 | 0.2224 | 0.6528 |
| Zlyve26 | _GPLGLRS[Phospho (STY)]PCRS[Phospho (STY)]PQHIAATER_3                     | Q50U37_S605_M2_Zlyve26 | 3.7311  | 3.0355  | 4.4179  | 3.5844  | 2.8568  | 3.7319  | 3.7327  | 3.4168  | 3.7158  | 3.7327  | 0.9909  | -0.0132 | 0.9168 | 0.0377 |
| Lrrc8b  | _S[Phospho (STY)]KTLTSSGGSDADQSK_2                                        | Q50U41_S186_M1_Lrrc8b  | 3.0123  | 3.7686  | 5.7037  | 3.1462  | 3.6569  | 2.9677  | 4.3617  | 3.2106  | 3.1200  | 3.4679  | 1.0478  | 0.0673  | 0.7753 | 0.1105 |
| Rassf5  | _S[Phospho (STY)]PESTLPTFLNNQVC[Carbamidomethyl (C)]K_2                   | Q5EBH1_S177_M1_Rassf5  | 3.6677  | 6.4454  | 3.9450  | 1.5758  | 6.0003  | 3.9211  | 3.5195  | 6.3016  | 6.1637  | 3.7868  | 1.0499  | 0.0702  | 0.8068 | 0.0932 |
| Ernm    | _HREGS[Phospho (STY)]PLKEESLR_3                                           | #N/A                   | 8.9676  | 9.3050  | 9.5921  | 9.8305  | 9.2577  | 9.1855  | 9.5024  | 9.0099  | 9.1335  | 9.2586  | 1.0141  | 0.2002  | 0.4842 | 0.3150 |
| Ernm    | _JNENPEENLVVHQAIK_3                                                       | #N/A                   | 3.7861  | 5.0986  | 4.5666  | 4.1104  | 4.9552  | 4.9310  | 4.3518  | 1.0652  | 0.4063  | 0.9607  | 0.3549  | 0.0864  | 0.4417 | 0.4518 |
| Ernm    | _YKTSYR_2                                                                 | #N/A                   | 3.9503  | 3.6889  | 3.1362  | 4.5248  | 4.8150  | 3.1527  | 3.5135  | 3.8562  | 4.2718  | 3.6059  | 1.0174  | 0.0248  | 0.8658 | 0.0626 |
| Ernm    | _EDSLGSS[Phospho (STY)]PGSQGPDPQPVGKK_3                                   | #N/A                   | 3.4483  | 4.0333  | 4.1352  | 3.5497  | 4.2499  | 3.6546  | 4.1957  | 3.8609  | 3.2872  | 3.3429  | 1.0472  | 0.0666  | 0.4950 | 0.5054 |
| Ernm    | _EGS[Phospho (STY)]PLKEESLR_2                                             | #N/A                   | 10.2853 | 10.3277 | 10.7367 | 10.9803 | 10.0428 | 10.2172 | 10.7302 | 10.0647 | 10.2240 | 10.4278 | 1.0068  | 0.0097  | 0.7510 | 0.1244 |
| Ernm    | _EDSLGSS[Phospho (STY)]PGSQGPDPQPVFGK_3                                   | #N/A                   | 2.9594  | 4.0998  | 4.1939  | 3.7377  | 3.6040  | 3.0207  | 3.8860  | 3.2636  | 3.5626  | 3.4150  | 1.0201  | 0.0286  | 0.8112 | 0.0909 |
| Phka1   | _SRPVLHS[Phospho (STY)]K_3                                                | Q5EBIA_S166_M1_Ermn    | 3.8358  | 3.1401  | 4.5226  | 3.5244  | 2.9614  | 3.2672  | 3.2391  | 3.0933  | 4.2427  | 3.4914  | 1.0072  | 0.0103  | 0.9448 | 0.0247 |
| Phka1   | _SGS[Phospho (STY)]SNVR_2                                                 | Q5EG47_S496_M1_Phka1   | 8.2495  | 8.3108  | 8.7694  | 8.5223  | 3.1358  | 8.0497  | 7.5571  | 8.2137  | 8.3633  | 8.4132  | 0.9225  | -0.1164 | 0.5958 | 0.2322 |
| Phka1   | _SIDOITEAKS[Phospho (STY)]GTATPQR_2                                       | #N/A                   | 3.8584  | 3.6973  | 5.1219  | 4.6838  | 4.3928  | 3.8547  | 4.4907  | 5.6903  | 3.7844  | 5.2440  | 0.8888  | -0.1701 | 0.2582 | 0.5880 |
| Nufip2  | _GADNDGS[Phospho (STY)]GSESGYTPK_2                                        | Q5FZET_S213_M1_Nufip2  | 7.4446  | 7.7644  | 8.0070  | 8.3473  | 7.6837  | 7.5576  | 7.9823  | 7.6842  | 7.6714  | 7.8319  | 1.0028  | 0.0040  | 0.9065 | 0.0426 |
| Nufip2  | _SLS[Phospho (STY)]SDOATNPGR_2                                            | Q5FZET_S113_M1_Nufip2  | 6.8954  | 6.9513  | 3.8499  | 7.2273  | 6.4988  | 7.3637  | 7.5925  | 7.0006  | 7.0543  | 7.3865  | 0.8906  | -0.1672 | 0.2767 | 0.5779 |
| Nufip2  | _KSS[Phospho (STY)]DKPGLSK_2                                              | Q5FZET_S304_M1_Nufip2  | 3.9578  | 3.3846  | 3.6915  | 3.2352  | 3.9809  | 3.0227  | 3.3835  | 3.7659  | 4.0650  | 4.4134  | 0.9075  | -0.1401 | 0.2102 | 0.7774 |
| Nufip2  | _DYIENQNPLAS[Phospho (STY)]PTNLGSGAK_3                                    | Q5FZET_S626_M1_Nufip2  | 3.1183  | 4.2241  | 4.3528  | 3.8966  | 3.7629  | 3.6236  | 4.0449  | 3.1046  | 3.4036  | 3.5739  | 1.1192  | 0.1625  | 0.1828 | 0.6379 |
| Nufip2  | _NDS[Phospho (STY)]WGSFDLR_2                                              | Q5FZET_S649_M1_Nufip2  | 3.5060  | 4.3112  | 4.1928  | 3.1946  | 4.1325  | 3.5970  | 4.4101  | 3.4231  | 3.0716  | 3.1616  | 1.0869  | 0.1203  | 0.3875 | 0.4518 |
| Taok1   | _NS[Phospho (STY)]PQALR_2                                                 | #N/A                   | 9.0948  | 8.9067  | 8.8563  | 9.3229  | 8.1029  | 8.9761  | 8.7482  | 8.9103  | 8.9216  | 9.0498  | 0.9965  | -0.0050 | 0.8904 | 0.0104 |
| Taok1   | _NS[Phospho (STY)]PQALRR_2                                                | #N/A                   | 7.4500  | 7.6380  | 7.6796  | 7.6111  | 6.8637  | 7.6010  | 7.6232  | 7.4763  | 7.1220  | 7.6654  | 1.0003  | 0.0004  | 0.9908 | 0.0040 |
| Taok1   | _ASDPR[Phospho (STY)]PPQVSR_2                                             | Q5F2ER_S421_M1_Taok1   | 11.9068 | 12.1471 | 12.4646 | 12.2708 | 11.7583 | 12.2188 | 12.3924 | 12.0410 | 11.9890 | 12.1449 | 0.9988  | -0.0017 | 0.9270 | 0.0329 |
| Taok1   | _AGS[Phospho (STY)]JKDPIAELEFFKDPED_3                                     | Q5F2ER_S9_M1_Taok1     | 4.3933  | 4.3356  | 3.5793  | 5.7783  | 3.2142  | 3.7147  | 3.7966  | 4.3074  | 3.4195  | 3.5463  | 1.0828  | 0.1147  | 0.5704 | 0.2438 |
| Mlip    | _AEVYFVDS[Phospho (STY)]DGEDEATC[Carbamidomethyl (C)]R_2                  | Q5FW52_S85_M1_Mlip     | 3.4835  | 3.5759  | 4.4253  | 7.9981  | 3.4420  | 3.8896  | 3.9674  | 3.7658  | 3.5033  | 3.5290  | 0.9572  | -0.0631 | 0.8723 | 0.0593 |
| Arhgap1 | _SSS[Phospho (STY)]PEPVTHLK_2                                             | #N/A                   | 12.6177 | 12.6074 | 3.1662  | 13.0378 | 12.4272 | 12.5741 | 12.9796 | 12.7858 | 12.7272 | 12.6380 | 0.8662  | -0.2073 | 0.4127 | 0.3844 |
| Arhgap1 | _STOKS[Phospho (STY)]PATAPIK_3                                            | Q5FWK3_S223_M1_Arhgap1 | 7.3500  | 7.4280  | 7.6739  | 7.5075  | 6.5022  | 6.7883  | 7.6950  | 7.4309  | 7.0107  | 7.1054  | 0.9860  | -0.2003 | 0.7093 | 0.1492 |
| Arhgap1 | _FLIDHQGELFPTSDAQGV_2                                                     | #N/A                   | 6.0787  | 6.2584  | 6.1151  | 5.9173  | 6.0799  | 6.6427  | 6.2390  | 6.1983  | 6.3915  | 5.9793  | 0.9968  | -0.0047 | 0.8932 | 0.0490 |
| Arhgap1 | _SDOSKSS[Phospho (STY)]S[Phospho (STY)]PEPVTHLK_2                         | #N/A                   | 6.7104  | 5.6033  | 7.3399  | 8.2844  | 3.4229  | 4.1498  | 7.8705  | 3.6235  | 7.4487  | 7.0048  | 0.9124  | -0.1323 | 0.6561 | 0.1831 |
| Arhgap1 | _LAS[Phospho (STY)]IDEK_2                                                 | Q5FWK3_S27_M1_Arhgap1  | 4.8638  | 3.1968  | 3.6751  | 3.7180  | 3.0851  | 3.5395  | 3.4327  | 4.6254  | 5.1458  | 4.1888  | 0.8463  | -0.2408 | 0.1606 | 0.7944 |
| Xkr7    | _TRGGS[Phospho (STY)]AELVPR_2                                             | #N/A                   | 4.3175  | 3.6219  | 3.4542  | 4.4988  | 3.4432  | 4.2863  | 3.1463  | 4.0032  | 4.3022  | 4.1761  | 1.0077  | 0.0110  | 0.9277 | 0.0377 |
| Xkr7    | _EGS[Phospho (STY)]AELVPR_2                                               | #N/A                   | 7.0687  | 7.0539  | 4.2024  | 6.7788  | 4.1421  | 3.5873  | 6.9692  | 6.9545  | 6.5354  | 6.9434  | 0.7988  | -0.3241 | 0.1429 | 0.8449 |
| Xkr4    | _GS[Phospho (STY)]GAGSAA[Carbamidomethyl (C)]LR_2                         | Q5GH87_S87_M1_Xkr4     | 4.2283  | 6.4594  | 3.4142  | 4.5881  | 3.3539  | 4.3755  | 6.7790  | 3.9139  | 6.6019  | 3.8839  | 0.8316  | -0.2660 | 0.3300 | 0.4815 |
| Xkr4    | _TVVSSGSAAGEVVRPST[Phospho (STY)]PQR_3                                    | Q5GH67_T208_M1_Xkr4    | 3.7029  | 3.6395  | 3.4366  | 4.4812  | 2.8466  | 3.7780  | 3.1286  | 6.4027  | 5.6152  | 4.1585  | 0.7558  | -0.4040 | 0.1022 | 0.4907 |
| Vps13a  | _ETYEAS[Phospho (STY)]PLEDKVLDNIPVR_3                                     | Q5HBC4_S2581_M1_Vps13a | 3.3473  | 4.1036  | 4.5818  | 4.1256  | 3.9919  | 4.1136  | 4.2739  | 4.3764  | 3.1746  | 3.8029  | 1.0359  | 0.0509  | 0      |        |



|         |                                                                              |                         |        |         |         |         |        |         |         |         |         |        |         |         |         |        |        |
|---------|------------------------------------------------------------------------------|-------------------------|--------|---------|---------|---------|--------|---------|---------|---------|---------|--------|---------|---------|---------|--------|--------|
| Neur4   | _ALS[Phospho (STY)]PEGALR_2                                                  | #N/A                    | 2.9594 | 4.8724  | 4.1939  | 4.8711  | 4.7283 | 4.5297  | 4.4147  | 4.8773  | 3.5626  | 4.7791 | 0.9888  | -0.0162 | 0.9140  | 0.0391 |        |
| Neur4   | _S[Phospho (STY)]PLH[SPhospho (STY)]PVAGVAHR_3                               | Q5NCK5_S904_M2_Neur4    | 4.1680 | 3.1744  | 3.9017  | 3.4454  | 3.3117 | 3.3129  | 3.5937  | 3.5557  | 3.8548  | 3.1227 | 1.0058  | 0.0084  | 0.9318  | 0.0307 |        |
| Crad    | _ESSONOPPS[Phospho (STY)]PSLPEELK_2                                          | #N/A                    | 8.6821 | 8.1555  | 4.0074  | 9.1658  | 3.4174 | 8.4520  | 9.0435  | 8.1219  | 8.2785  | 8.5990 | 0.8201  | -0.2861 | 0.2783  | 0.5555 |        |
| Crad    | _ETAQTD[SPhospho (STY)]PQOPQR_2                                              | Q5PR69_S487_M1_Crad     | 4.2285 | 7.6037  | 3.4144  | 8.4132  | 7.1552 | 7.7609  | 8.1386  | 7.6453  | 7.7456  | 7.7794 | 0.8214  | -0.2838 | 0.2249  | 0.6481 |        |
| Crad    | _VNI[SPhospho (STY)]PVTPAK_2                                                 | Q5PR69_S552_M1_Crad     | 3.8201 | 3.2144  | 4.5069  | 5.5390  | 2.9458 | 3.2829  | 3.2234  | 3.1089  | 4.2584  | 3.4757 | 1.1005  | 0.1381  | 0.5368  | 0.2702 |        |
| Crad    | _ESSONOPPS[Phospho (STY)]PSLPEELKGQK_3                                       | #N/A                    | 3.6221 | 8.1385  | 8.3559  | 4.4414  | 3.4637 | 8.1689  | 5.1187  | 3.4546  | 7.8583  | 8.2075 | 0.9792  | -0.3003 | 0.9353  | 0.0291 |        |
| Crad    | _DLPFSVLVPGLS[Phospho (STY)]PQK_2                                            | Q5PR69_S783_M1_Crad     | 3.5885 | 7.1148  | 6.6188  | 8.2075  | 4.2330 | 3.8924  | 3.7856  | 6.6725  | 5.9333  | 4.0379 | 1.0983  | 0.1352  | 0.6716  | 0.1729 |        |
| Crad    | _PASQTP[Phospho (STY)]PPSS[Phospho (STY)]PLSK_2                              | Q5PR69_S953_M2_Crad     | 3.1237 | 4.1024  | 3.8105  | 4.3132  | 3.7502 | 3.7972  | 4.0279  | 3.8053  | 3.4539  | 4.2802 | 0.9884  | -0.0169 | 0.8610  | 0.0650 |        |
| Diras2  | _C[Carbamidomethyl (C)]DES[Phospho (STY)]PNREVQSSSEALAR_3                    | Q5PR73_S126_M1_Diras2   | 3.9571 | 6.3227  | 6.7925  | 7.1105  | 6.1235 | 6.9050  | 6.7215  | 6.6835  | 7.1267  | 6.6097 | 0.9140  | -0.1297 | 0.3586  | 0.4454 |        |
| Diras2  | _VAIVGAGGVGK_2                                                               | #N/A                    | 5.6790 | 5.8928  | 5.5445  | 5.4591  | 5.9814 | 5.2482  | 4.5912  | 6.2874  | 5.2472  | 5.5819 | 0.9768  | -0.0339 | 0.7845  | 0.1054 |        |
| Diras2  | _ELFQELNLEK_2                                                                | #N/A                    | 5.7853 | 5.7267  | 6.2412  | 5.8362  | 5.5464 | 5.4607  | 5.4839  | 5.9111  | 5.0604  | 5.5227 | 1.0494  | 0.0696  | 0.2031  | 0.6922 |        |
| Diras2  | _PEQSNQVR_2                                                                  | #N/A                    | 4.1648 | 3.2095  | 4.7311  | 4.4573  | 4.9338 | 3.1978  | 3.6092  | 5.1333  | 4.1702  | 2.8022 | 1.0476  | 0.0671  | 0.7405  | 0.1305 |        |
| Diras2  | _GTFRES[Phospho (STY)]HPTVEDTYR_3                                            | Q5PR73_S35_M1_Diras2    | 3.9513 | 3.3911  | 3.6850  | 3.2287  | 3.0950 | 3.5296  | 3.3770  | 3.7725  | 4.0715  | 4.4068 | 0.8908  | -0.1669 | 0.1071  | 0.9704 |        |
| Mdc1    | _VLLAAD[SPhospho (STY)]EEEGDFPSGR_2                                          | Q5PSV9_S168_M1_Mdc1     | 4.3120 | 3.5675  | 4.0457  | 9.7866  | 8.3407 | 3.1688  | 3.0620  | 9.0841  | 8.4494  | 7.8613 | 0.7783  | -0.3616 | 0.4048  | 0.3927 |        |
| Osbp2   | _IVHSS[Phospho (STY)]PSSDGR_2                                                | Q5QNG6_S760_M1_Osbp2    | 3.4471 | 8.4011  | 8.8202  | 8.8683  | 4.0917 | 8.5138  | 8.8037  | 8.8453  | 3.0748  | 8.2571 | 0.9694  | -0.0448 | 0.8996  | 0.0460 |        |
| Brsk1   | _STLPKPGPGS[Phospho (STY)]PR_2                                               | Q5RIJ5_S508_M1_Brsk1    | 9.9647 | 10.4525 | 10.9116 | 10.3668 | 8.7943 | 9.9311  | 10.3338 | 9.7358  | 10.3380 | 0.9927 | -0.0106 | 0.8512  | 0.0699  | 0.0699 |        |
| Brsk1   | _SRLNS[Phospho (STY)]IR_2                                                    | Q5RIJ5_S555_M1_Brsk1    | 5.4573 | 6.2392  | 6.4951  | 5.7658  | 5.9079 | 6.8275  | 5.8932  | 5.8551  | 6.4552  | 5.8018 | 1.0190  | 0.0272  | 0.6977  | 0.1563 |        |
| Brsk1   | _NSFLGS[Phospho (STY)]PR_2                                                   | Q5RIJ5_S563_M1_Brsk1    | 3.7569 | 12.1974 | 13.0899 | 12.8229 | 2.8826 | 12.6537 | 12.4607 | 12.5594 | 3.7416  | 3.4125 | 1.1894  | 0.5203  | 0.6476  | 0.1887 |        |
| Brsk1   | _FQVDISSEGEPS[Phospho (STY)]PR_2                                             | Q5RIJ5_S676_M1_Brsk1    | 2.9528 | 3.7091  | 4.1873  | 3.2057  | 3.5974 | 3.0272  | 4.2121  | 3.4119  | 3.0605  | 3.4084 | 0.9639  | -0.0530 | 0.7103  | 0.1486 |        |
| Brsk1   | _SSGTP[Phospho (STY)]PLH[SPhospho (STY)]PLHTR_2                              | #N/A                    | 4.7969 | 5.0128  | 3.9236  | 5.6131  | 3.4645 | 4.5578  | 4.2923  | 4.7318  | 4.9914  | 4.5727 | 0.9823  | -0.0258 | 0.8465  | 0.0724 |        |
| Brsk1   | _S[Phospho (STY)]PVTSFSPREGAGDEAR_2                                          | Q5RIJ5_S450_M1_Brsk1    | 4.0698 | 3.3252  | 3.8035  | 3.3473  | 3.2135 | 3.4111  | 3.4955  | 3.6539  | 3.9530  | 3.1045 | 0.9991  | -0.0014 | 0.9887  | 0.0049 |        |
| Brsk1   | _SVSGASTGLSE[Phospho (STY)]PLSE[Phospho (STY)]PR_2                           | Q5RIJ5_S443_M2_Brsk1    | 3.7830 | 4.1986  | 3.4840  | 5.1194  | 3.8988 | 4.8506  | 4.6242  | 3.9083  | 3.0203  | 2.0196 | 0.9890  | 0.0280  | 0.8239  | 0.0841 |        |
| Brsk1   | _S[Phospho (STY)]M[Oxidation (M)]EVLSTDAAGSGSPVPTR_2                         | Q5RIJ5_S399_M1_Brsk1    | 3.5508 | 6.3779  | 3.2845  | 4.3291  | 4.9817 | 5.9772  | 5.7897  | 4.1729  | 6.7054  | 5.6132 | 0.8528  | -0.2298 | 0.3156  | 0.5009 |        |
| Brsk1   | _VDS[Phospho (STY)]PMLISR_2                                                  | Q5RIJ5_S384_M1_Brsk1    | 4.3504 | 3.6547  | 3.5363  | 4.1262  | 3.4760 | 4.5355  | 3.7537  | 4.0795  | 3.7281  | 4.0060 | 1.0020  | 0.0029  | 0.9716  | 0.0125 |        |
| Brsk1   | _SLPS[Phospho (STY)]NGELDPDVLSE[Oxidation (M)]ASLGC[Carbamidomethyl (C)]PR_3 | Q5RIJ5_S311_M1_Brsk1    | 3.3608 | 4.1660  | 4.0476  | 4.0558  | 3.9874 | 3.7630  | 4.0320  | 3.5891  | 3.4559  | 3.8688 | 1.0599  | 0.0840  | 0.3163  | 0.0928 |        |
| Islr2   | _EESLAGC[Carbamidomethyl (C)]S[Phospho (STY)]LVESQSK_2                       | Q5RKR3_S700_M1_Islr2    | 4.9895 | 4.9257  | 3.8830  | 5.7772  | 3.3554 | 3.7273  | 6.7770  | 5.5763  | 5.2537  | 4.8107 | 0.7928  | -0.3350 | 0.0800  | 1.0968 |        |
| Islr2   | _ASYLS[Phospho (STY)]EKS[Phospho (STY)]PAR_2                                 | Q5RKR3_S654_M2_Islr2    | 3.5215 | 4.3267  | 4.2502  | 3.7940  | 4.1480 | 3.5815  | 5.8550  | 5.1166  | 3.5062  | 3.4713 | 0.8774  | -0.1887 | 0.3066  | 0.5134 |        |
| Lmk2    | _SNS[Phospho (STY)]SVGEVVR_2                                                 | Q5S006_S910_M1_Lmk2     | 5.8813 | 6.1783  | 3.2049  | 5.7021  | 3.1446 | 3.0840  | 3.4448  | 4.4109  | 4.0595  | 6.4867 | 0.9852  | -0.0215 | 0.9441  | 0.0250 |        |
| Ccdc88a | _AGS[Phospho (STY)]PGSEVTLQQLFEESNK_2                                        | Q5SNZ0_S1627_M1_Ccdc88a | 3.5535 | 4.0377  | 4.2403  | 3.6358  | 3.2951 | 3.5578  | 3.6219  | 4.3142  | 4.0060  | 4.1277 | 0.9260  | -0.1110 | 0.1999  | 0.6990 |        |
| Ccdc88a | _FYDPS[Phospho (STY)]PPR_2                                                   | Q5SNZ0_S1387_M1_Ccdc88a | 4.1360 | 3.0902  | 3.3220  | 3.8246  | 3.2617 | 2.9670  | 3.5393  | 8.5242  | 3.9424  | 3.7916 | 0.6937  | -0.5275 | 0.1576  | 0.8025 |        |
| Ccdc88a | _RT[Phospho (STY)]SHDLRK_3                                                   | Q5SNZ0_S1821_M1_Ccdc88a | 4.0679 | 3.3722  | 6.6598  | 3.7565  | 3.1935 | 3.3051  | 3.4712  | 3.4620  | 4.0106  | 3.7235 | 1.0314  | 0.0447  | 0.8666  | 0.0622 |        |
| Ccdc88a | _QKS[Phospho (STY)]TLTPTTR_2                                                 | Q5SNZ0_S1417_M1_Ccdc88a | 6.1917 | 3.6103  | 6.6029  | 6.8840  | 3.4986 | 6.1325  | 3.7805  | 6.5524  | 6.3899  | 5.8052 | 0.9742  | -0.0077 | 0.8791  | 0.0559 |        |
| Ccdc88a | _DT[Phospho (STY)]TSFDSPPQGISDOSTGSR_2                                       | Q5SNZ0_S1560_M1_Ccdc88a | 4.1496 | 5.6815  | 3.8832  | 6.5881  | 3.3883 | 3.2145  | 3.5753  | 3.9096  | 4.1245  | 3.1724 | 0.9225  | -0.2295 | 0.7174  | 0.6129 |        |
| Ccdc88a | _VS[Phospho (STY)]GKTGDFYDRR_3                                               | Q5SNZ0_S1738_M1_Ccdc88a | 3.8144 | 3.4117  | 4.5012  | 3.5031  | 3.1063 | 3.3246  | 3.2177  | 3.1146  | 4.2640  | 3.4701 | 1.0266  | 0.0379  | 0.7809  | 0.1974 |        |
| Ccdc88a | _VHASRPAS[Phospho (STY)]LDQGR_3                                              | #N/A                    | 3.5874 | 3.8929  | 5.1944  | 3.7435  | 3.7142 | 4.1686  | 3.1744  | 3.9480  | 4.7386  | 3.5665 | 1.0501  | 0.0705  | 0.6436  | 0.1034 |        |
| Ccdc88a | _SSS[Phospho (STY)]QENLLDEVMK_2                                              | Q5SNZ0_S1704_M1_Ccdc88a | 3.0445 | 3.8496  | 3.7313  | 4.2339  | 3.6710 | 4.0585  | 4.4193  | 3.8846  | 3.5332  | 4.2009 | 0.9390  | -0.0908 | 0.3727  | 0.4286 |        |
| Ccdc88a | _S[Phospho (STY)]SPMLQHK_2                                                   | Q5SNZ0_S1653_M1_Ccdc88a | 3.4410 | 4.1973  | 3.1747  | 4.2193  | 4.0856 | 4.0398  | 4.3676  | 3.8809  | 3.8966  | 4.0819 | 0.9879  | -0.0176 | 0.8873  | 0.0875 |        |
| Ccdc85a | _TSS[Phospho (STY)]PEHLHKPR_2                                                | #N/A                    | 9.2471 | 9.2505  | 9.7297  | 9.7991  | 3.4150 | 8.9184  | 9.1772  | 9.3501  | 9.1824  | 8.7799 | 9.1583  | 0.9101  | -0.1359 | 0.5247 | 0.2801 |
| Ccdc85a | _GTS[Phospho (STY)]PEHLK_2                                                   | #N/A                    | 6.7559 | 7.0463  | 4.1259  | 7.2013  | 6.8914 | 6.8736  | 4.3432  | 3.4900  | 7.2387  | 6.6205 | 1.1953  | 0.2573  | 0.2852  | 0.5448 |        |
| Ccdc85a | _HALGGS[Phospho (STY)]LEHLPR_3                                               | #N/A                    | 6.1664 | 5.6828  | 6.3499  | 5.9913  | 3.6878 | 5.7350  | 5.4432  | 5.8364  | 5.3577  | 6.0627 | 0.9872  | -0.0186 | 0.8906  | 0.0503 |        |
| Ccdc85a | _ARGTS[Phospho (STY)]PEHLK_2                                                 | #N/A                    | 2.9430 | 3.6993  | 4.1775  | 3.7213  | 3.5876 | 4.3443  | 4.4310  | 3.2799  | 3.5789  | 3.9986 | 1.0200  | 0.0286  | 0.8271  | 0.0824 |        |
| Ccdc85a | _HRPQGS[Phospho (STY)]PEHTR_3                                                | Q5SPB5_S320_M1_Ccdc85a  | 4.2708 | 3.0716  | 4.0045  | 3.5483  | 2.8929 | 3.3358  | 3.6866  | 3.4529  | 3.7519  | 5.7896 | 0.8437  | -0.2452 | 0.2356  | 0.1076 |        |
| Ccdc85a | _AAGGSAPAECS[Carbamidomethyl (C)]PSAPAGAST[Phospho (STY)]PTGVDDLSK_3         | Q5SPB5_S724_M1_Ccdc85a  | 3.1884 | 3.9936  | 3.8752  | 4.3779  | 3.8150 | 3.9145  | 4.2753  | 3.7406  | 3.3892  | 4.3449 | 0.9805  | -0.0284 | 0.7806  | 0.1076 |        |
| Ccdc85a | _GS[Phospho (STY)]PEQDRHPHPGSS[Phospho (STY)]PEVLPK_3                        | Q5SPB5_S284_M2_Ccdc85a  | 3.7022 | 3.6929  | 5.5485  | 3.8116  | 3.5410 | 3.6887  | 4.7061  | 4.7605  | 4.5912  | 4.9329 | 0.8420  | -0.2481 | 0.0936  | 1.0289 |        |
| Ccdc85a | _HASGSGSGGGS[Phospho (STY)]REGTLR_3                                          | Q5SPB5_S380_M1_Ccdc85a  | 3.9989 | 3.2543  | 3.7326  | 3.6605  | 3.1426 | 3.4820  | 3.3751  | 4.4580  | 4.1066  | 3.6275 | 0.9109  | -0.1346 | 0.2044  | 0.6895 |        |
| Ccdc85a | _HVLSS[Phospho (STY)]PEHFQK_2                                                | #N/A                    | 5.9228 | 3.4431  | 4.4060  | 6.4852  | 2.9205 | 6.3725  | 5.9210  | 6.1110  | 5.8933  | 0.9671 | -0.0483 | 0.8528  | 0.0692  | 0.4861 |        |
| Ccdc85a | _HHASGGS[Phospho (STY)]PEHLQKPR_3                                            | #N/A                    | 3.4085 | 3.9500  | 4.0953  | 3.9963  | 3.8006 | 3.4376  | 4.2685  | 4.4136  | 4.7425  | 3.0641 | 0.9173  | -0.1245 | 0.3265  | 0.4861 |        |
| Ccdc85a | _HSGGS[Phospho (STY)]PEHLQK_2                                                | Q5SPB5_S330_M1_Ccdc85a  | 7.8031 | 8.0369  | 8.5718  | 8.2450  | 8.1513 | 8.0331  | 8.0498  | 7.9771  | 7.9749  | 7.8666 | 1.0217  | 0.0310  | 0.2359  | 0.0872 |        |
| Ccdc85a | _HPHPGS[Phospho (STY)]SPEVLPK_3                                              | Q5SPB5_S295_M1_Ccdc85a  | 3.5055 | 3.8369  | 3.2391  | 4.2837  | 4.1500 | 3.9754  | 4.4320  | 4.2183  | 3.0165  | 3.9610 | 0.9808  | -0.0280 | 0.8196  | 0.0864 |        |
| Ccdc85a | _GPS[Phospho (STY)]PEHKKPLC[Carbamidomethyl (C)]K_3                          | Q5SPB5_S273_M1_Ccdc85a  | 4.0062 | 3.2200  | 3.1922  | 3.6948  | 3.3139 | 3.9068  | 3.4095  | 4.4236  | 4.0722  | 3.6618 | 0.8711  | -0.1990 | 0.0895  | 1.0482 |        |
| Cyfp2   | _SYLQDPWR_2                                                                  | #N/A                    | 6.3989 | 6.3896  | 6.1993  | 5.2630  | 5.3569 | 5.9291  | 6.2503  | 6.2582  | 5.9193  | 6.3506 | 0.9561  | -0.0647 | 0.3410  | 0.4673 |        |
| Cyfp2   | _YAPULHVPLER_2                                                               | #N/A                    | 5.9310 | 4.5618  | 5.9470  | 5.2382  | 3.4283 | 4.8397  | 6.1342  | 6.1412  | 5.7414  | 5.3723 | 0.8536  | -0.2284 | 0.1290  | 0.8895 |        |
| Cyfp2   | _FISELAR_2                                                                   | #N/A                    | 5.7658 | 5.9182  | 3.5077  | 4.9568  | 4.8883 | 3.8608  | 5.5979  | 5.8781  | 5.6434  | 4.9274 | 0.8738  | -0.1946 | 0.2209  | 0.6559 |        |
| Cyfp2   | _QLQVVPFGDM[Oxidation (M)]QIELAR_2                                           | #N/A                    | 5.2591 | 5.6109  | 5.1011  | 3.2390  | 3.9829 | 3.8108  | 5.2877  | 5.4620  | 5.2603  | 4.5515 | 0.8755  | -0.1917 | 0.2449  | 0.6109 |        |
| Cyfp2   | _SLDOASR_2                                                                   | #N/A                    | 5.3316 | 4.4584  | 5.8590  | 6.8785  | 4.5701 | 3.8067  | 4.6705  | 5.0486  | 4.6240  | 3.4383 | 1.1587  | 0.1215  | 0.2948  | 0.5304 |        |
| Cyfp2   | _SVETOSTVEHVR_2                                                              | #N/A                    | 5.0695 | 4.8616  | 4.7328  | 3.1952  | 4.5489 | 4.0014  | 4.7053  | 4.6220  | 4.6844  | 4.1032 | 0.9719  | -0.0411 | 0.7410  | 0.1302 |        |
| Cyfp2   | _LGT[Phospho (STY)]PQQAAR_2                                                  | Q5SQX6_S1067_M1_Cyfp2   | 5.2462 | 3.7059  | 4.4617  | 4.9152  | 3.5942 | 5.1854  | 5.0689  | 5.4344  | 5.0109  | 3.9572 | 0.9282  | -0.1076 | 0.4579  | 0.3393 |        |
| Cyfp2   | _NAPVTGAR_2                                                                  | #N/A                    | 3.9143 | 3.7290  | 3.5270  | 4.5716  | 3.6968 | 4.3591  | 3.2191  | 4.6624  | 4.7074  | 4.1329 | 0.9488  | -0.0759 | 0.5518  | 0.2582 |        |
| Cyfp2   | _YNSSEVYTGSLDSQK_2                                                           | #N/A                    | 4.0264 | 3.3160  | 3.7601  | 3.3038  | 5.6415 | 4.8639  | 5.8771  | 5.9010  | 5.4075  | 2.9811 | 0.8235  | -0.2801 | 0.2554  | 0.5927 |        |
| Cyfp2   | _M[Oxidation (M)]ESVFNQAIR_2                                                 | #N/A                    | 6.0258 | 5.5409  | 3.1453  | 5.5359  | 3.0850 | 5.5932  | 6.4927  | 6.3236  | 4.1191  | 5.6204 | 0.8550  | -0.2261 | 0.3387  | 0.7402 |        |
| Cyfp2   | _EANHNVSAPIGR_2                                                              | #N/A                    | 4.158  |         |         |         |        |         |         |         |         |        |         |         |         |        |        |



|           |                                                                        |                          |         |         |         |         |         |         |         |         |         |         |         |         |        |        |
|-----------|------------------------------------------------------------------------|--------------------------|---------|---------|---------|---------|---------|---------|---------|---------|---------|---------|---------|---------|--------|--------|
| Abr       | _ISONFLSSINEDIDPR_2                                                    | #N/A                     | 4.0719  | 3.3273  | 3.8055  | 3.3493  | 3.2156  | 3.4090  | 3.3022  | 3.5048  | 3.9509  | 3.0266  | 1.0243  | 0.0346  | 0.7250 | 0.1396 |
| Abr       | _GPPEGETMPIDE[S](Phospho (STY))PTMSPOLSR_3                             | QSS5U_553_M1_Abr         | 3.6185  | 3.7239  | 3.3522  | 7.1671  | 4.2630  | 4.1842  | 4.5450  | 4.1052  | 4.4043  | 4.0740  | 1.0240  | 0.0342  | 0.8906 | 0.0503 |
| Abr       | _C[Carbamidomethyl (C)]SQSNNQFOK_2                                     | #N/A                     | 3.0858  | 4.2566  | 4.3203  | 3.8640  | 3.7303  | 4.3951  | 4.0123  | 3.4362  | 3.5413  | 3.5413  | 1.1162  | 0.1586  | 0.1964 | 0.7068 |
| Arhgap44  | _HSATDKRDS(Phospho (STY))EEESESTAL_3                                   | #N/A                     | 6.9840  | 6.6902  | 7.0872  | 5.6037  | 5.9209  | 7.0384  | 5.5239  | 7.0625  | 7.2917  | 5.1383  | 1.0480  | 0.0676  | 0.5917 | 0.2279 |
| Arhgap44  | _SKEL[S](Phospho (STY))PGSGQK_2                                        | QSS5M4_S598_M1_Arhgap44  | 7.2125  | 7.1766  | 7.7743  | 7.5495  | 6.7638  | 7.2872  | 4.3431  | 6.7662  | 1.1401  | 6.7662  | 1.1401  | 0.1891  | 0.1621 | 0.7902 |
| Tms3      | _RES(Phospho (STY))PPSAER_2                                            | QSS5Z5_S934_M1_Tms3      | 9.1914  | 4.0054  | 3.9076  | 4.4103  | 3.8473  | 3.8823  | 4.1149  | 3.7082  | 3.3568  | 9.2652  | 0.9531  | -0.0693 | 0.8805 | 0.0552 |
| Coil      | _VTGS(Phospho (STY))PAEDEEETK_2                                        | #N/A                     | 7.8580  | 7.9757  | 7.2410  | 8.4866  | 7.1805  | 8.0030  | 3.4623  | 4.3708  | 7.3196  | 7.9359  | 1.3497  | 0.4327  | 0.0556 | 1.2551 |
| Coil      | _VTGS(Phospho (STY))PAEDEEETKK_3                                       | #N/A                     | 4.2533  | 3.9854  | 6.3824  | 4.7895  | 4.1219  | 3.9546  | 5.5277  | 4.7895  | 2.1225  | 0.0462  | 1.0325  | 0.0462  | 0.8585 | 0.0501 |
| Coil      | _RQEDSGQNEAS(Phospho (STY))QLETK_3                                     | #N/A                     | 4.4092  | 2.4653  | 4.2956  | 3.6329  | 2.3775  | 3.6623  | 3.8506  | 4.4196  | 4.2766  | 3.8078  | 0.8349  | -0.1603 | 0.1549 | 0.8059 |
| Coil      | _QEDSGQNEAS(Phospho (STY))QLETK_2                                      | #N/A                     | 3.9859  | 3.2902  | 3.3589  | 3.3296  | 2.9546  | 3.1171  | 3.4779  | 3.6715  | 3.9706  | 3.0069  | 0.9455  | -0.0808 | 0.4466 | 0.3591 |
| Luc7i3    | _NEVNGTSDIKSEGQDTS(Phospho (STY))N_2                                   | QSS5U72_S431_M1_Luc7i3   | 3.7600  | 3.4857  | 4.0453  | 3.8839  | 3.3117  | 4.2532  | 4.0770  | 3.9397  | 3.6001  | 3.9688  | 0.9727  | -0.0400 | 0.6021 | 0.2203 |
| Synrg     | _SIS(Phospho (STY))GDKESR_2                                            | QSS5V85_S1067_M1_Synrg   | 9.0548  | 9.2101  | 9.5404  | 9.6665  | 3.2299  | 9.2285  | 9.2156  | 9.0988  | 9.1719  | 9.3272  | 0.9042  | -0.1453 | 0.5100 | 0.2924 |
| Synrg     | _S(Phospho (STY))GSDSFTDFQEM(Oxidation (M))PASSK_2                     | #N/A                     | 3.6612  | 6.1136  | 5.7402  | 7.0466  | 3.8804  | 3.7158  | 3.7641  | 3.9217  | 3.7319  | 6.9069  | 1.0972  | 0.1338  | 0.6571 | 0.1824 |
| Synrg     | _TADSVS(Phospho (STY))PLEPPTK_2                                        | QSS5V85_S576_M1_Synrg    | 3.8152  | 3.1196  | 4.5020  | 7.1013  | 2.9409  | 8.5037  | 8.7135  | 3.1138  | 7.9559  | 3.4708  | 0.8596  | -0.2183 | 0.6329 | 0.1987 |
| Synrg     | _QLS(Phospho (STY))LEGAGLAMEEFKENTSTK_3                                | #N/A                     | 3.7884  | 3.4378  | 4.4752  | 5.1919  | 2.9141  | 3.2985  | 3.1917  | 3.1406  | 4.2900  | 3.4440  | 1.0951  | 0.1310  | 0.5045 | 0.2972 |
| Synrg     | _QLS(Phospho (STY))LEGAGLAMEEFK_2                                      | #N/A                     | 4.2785  | 3.0639  | 3.4022  | 3.5559  | 3.4222  | 3.2024  | 3.7042  | 3.4452  | 3.7443  | 3.2332  | 1.0163  | 0.0233  | 0.8295 | 0.0812 |
| Rap1gap2  | _SETSS(Phospho (STY))NPSS(Phospho (STY))PEIC[Carbamidomethyl (C)]PNK_2 | QSSV16_S590_M2_Rap1gap2  | 11.2431 | 10.9582 | 11.2073 | 11.9068 | 10.1499 | 11.2380 | 10.9041 | 10.4312 | 11.2844 | 11.3172 | 1.0121  | 0.0174  | 0.7006 | 0.1546 |
| Rap1gap2  | _NQRS(Phospho (STY))PK_2                                               | #N/A                     | 6.6567  | 7.1384  | 6.6170  | 6.7171  | 4.7828  | 6.3542  | 6.6851  | 5.9947  | 6.7424  | 0.9778  | 0.0784  | -0.0324 | 0.7514 | 0.1241 |
| Rap1gap2  | _TTFS(Phospho (STY))PPVAAATK_2                                         | QSSV16_S525_M1_Rap1gap2  | 3.3066  | 6.4051  | 3.9934  | 4.961   | 3.9332  | 3.7963  | 4.1571  | 7.6043  | 3.2710  | 7.1441  | 0.7794  | -0.1595 | 0.2631 | 0.5796 |
| Rap1gap2  | _NQRS(Phospho (STY))PKR_2                                              | #N/A                     | 4.1520  | 3.4564  | 3.3380  | 3.8407  | 3.2777  | 2.9509  | 3.5554  | 5.8997  | 9.9264  | 5.7830  | 0.7311  | -0.4519 | 0.0413 | 0.1389 |
| Rap1gap2  | _TDGHS(Phospho (STY))QER_2                                             | QSSV16_S581_M1_Rap1gap2  | 3.1733  | 4.1296  | 6.1269  | 4.2860  | 4.6268  | 5.3952  | 4.0007  | 5.8364  | 1.4810  | 4.2530  | 1.0600  | 0.0840  | 0.6913 | 0.1604 |
| Rap1gap2  | _SHS(Phospho (STY))M(Oxidation (M))ITM(Oxidation (M))VGSQR_2           | #N/A                     | 3.9411  | 4.3823  | 4.3970  | 5.2158  | 4.7011  | 3.9153  | 4.0271  | 4.6339  | 4.0609  | 4.5101  | 0.9921  | -0.0114 | 0.9110 | 0.0405 |
| Rap1gap2  | _LHS(Phospho (STY))GSGGQGSOR_2                                         | QSSV16_S553_M1_Rap1gap2  | 3.0108  | 4.3633  | 3.6976  | 4.3054  | 3.6373  | 4.1094  | 4.2610  | 4.0125  | 3.2575  | 4.1295  | 0.9844  | -0.0227 | 0.8514 | 0.0699 |
| Kat7      | _SQSSQDSS(Phospho (STY))PVR_2                                          | QSSVQ0_S59_M1_Kat7       | 7.5433  | 7.6477  | 8.3152  | 7.8842  | 7.2640  | 7.7350  | 7.8273  | 7.8122  | 7.6663  | 7.5132  | 1.0035  | 0.0050  | 0.8910 | 0.0501 |
| Kat7      | _S(Phospho (STY))SGSETQVDFSDR_2                                        | QSSVQ0_S101_M1_Kat7      | 4.2275  | 3.5318  | 3.4134  | 4.5889  | 3.3532  | 4.1763  | 3.2363  | 3.9131  | 4.2122  | 4.2661  | 1.0021  | 0.0030  | 0.9810 | 0.0803 |
| Tbc1d9b   | _GTS(Phospho (STY))PPDVR_2                                             | QSSVR0_S997_M1_Tbc1d9b   | 9.4976  | 9.2882  | 9.3221  | 4.3694  | 8.4307  | 9.3393  | 9.7512  | 9.7249  | 9.3058  | 9.3887  | 0.8776  | -0.1884 | 0.2869 | 0.5423 |
| Tbc1d9b   | _VFQKNS(Phospho (STY))PM(Oxidation (M))EDLGAK_2                        | #N/A                     | 3.0743  | 5.7085  | 3.7611  | 4.2638  | 4.0401  | 4.6747  | 5.6327  | 5.7237  | 5.8543  | 4.7654  | 0.7743  | -0.3691 | 0.0366 | 0.1460 |
| Tbc1d9b   | _NS(Phospho (STY))PMEDLGAK_2                                           | #N/A                     | 4.6121  | 3.7291  | 3.6107  | 4.1134  | 3.5504  | 4.1791  | 4.5399  | 4.0051  | 3.6537  | 4.0804  | 0.9745  | -0.0373 | 0.6930 | 0.1593 |
| Cluh      | _AVEDM(Oxidation (M))GS(Phospho (STY))PQATK_2                          | #N/A                     | 7.0691  | 3.9979  | 4.0763  | 3.8532  | 4.0837  | 4.2246  | 4.0588  | 3.4087  | 6.7202  | 4.0588  | 0.9881  | -0.0173 | 0.9505 | 0.0021 |
| Suh2      | _IPHSS(Phospho (STY))SENIR_2                                           | QSSW75_S1217_M1_Suh2     | 7.9536  | 7.9341  | 4.0791  | 8.1790  | 2.9283  | 7.6706  | 3.4685  | 7.6578  | 4.0150  | 3.8239  | 1.3620  | 0.4457  | 0.2599 | 0.5852 |
| Suh2      | _EM(Oxidation (M))TTS(Phospho (STY))AQIAEIVK_2                         | QSSW75_S487_M1_Suh2      | 8.6014  | 8.7781  | 9.4961  | 8.4872  | 7.9915  | 9.2056  | 8.8920  | 8.8940  | 9.0362  | 9.0751  | 0.9751  | -0.0363 | 0.4328 | 0.1379 |
| Nacad     | _DEDS(Phospho (STY))LEEDAQR_2                                          | #N/A                     | 6.9901  | 6.0594  | 6.4540  | 6.9503  | 6.1342  | 6.9506  | 6.3692  | 6.1378  | 6.8121  | 0.9772  | -0.0333 | 0.6259  | 0.2035 |        |
| Nacad     | _VLSL(Phospho (STY))PHSTLNPK_2                                         | QSSWP3_S1216_M1_Nacad    | 5.5920  | 6.3319  | 3.2219  | 4.2665  | 4.1328  | 5.6304  | 6.7031  | 5.9079  | 5.9658  | 3.9438  | 0.8637  | -0.2114 | 0.3412 | 0.0637 |
| Nacad     | _ETPALEQDEDS(Phospho (STY))LEEDAQR_3                                   | #N/A                     | 3.6026  | 3.5361  | 4.2894  | 8.3980  | 6.6851  | 5.9023  | 3.9935  | 7.8053  | 7.2925  | 6.9097  | 0.8311  | -0.2669 | 0.3867 | 0.4127 |
| Acaca     | _SSM(Oxidation (M))S(Phospho (STY))GLHLVK_2                            | #N/A                     | 4.5959  | 4.4150  | 5.7305  | 3.7027  | 3.0790  | 3.0957  | 5.3962  | 3.8109  | 4.9420  | 5.5310  | 0.8340  | -0.2619 | 0.2144 | 0.6688 |
| Acaca     | _HIGSVSEDSN(Phospho (STY))EDESILNVK_2                                  | QSSWU9_S29_M1_Acaca      | 3.1301  | 5.3418  | 6.3969  | 3.9734  | 5.2992  | 3.8877  | 3.8770  | 6.2423  | 5.7164  | 3.9562  | 0.9502  | -0.0737 | 0.7549 | 0.1221 |
| Wwc1      | _LNRS(Phospho (STY))DSSLK_2                                            | QSSXAR_S939_M1_Wwc1      | 3.3602  | 4.1164  | 4.5947  | 4.1384  | 4.0047  | 2.9422  | 4.2867  | 4.3636  | 3.1618  | 3.8157  | 0.9878  | -0.0177 | 0.9025 | 0.0445 |
| Specc1    | _LGGSS(Phospho (STY))PTSS[Carbamidomethyl (C)]NPPTK_2                  | #N/A                     | 6.2843  | 5.6055  | 3.6380  | 3.7550  | 3.0481  | 5.3652  | 6.3600  | 6.0645  | 5.3178  | 5.5527  | 0.7926  | -0.3353 | 0.1184 | 0.9266 |
| Specc1    | _ASS(Phospho (STY))EOTLWPGSSASGVAR_2                                   | #N/A                     | 6.4019  | 6.2760  | 6.1719  | 6.9005  | 5.8235  | 6.2348  | 3.8471  | 7.0122  | 6.5684  | 6.4048  | 1.0182  | 0.0260  | 0.8796 | 0.0572 |
| Specc1    | _SSKGS(Phospho (STY))PTGSSPNNASLSASLTK_3                               | QSSXY1_S359_M1_Specc1    | 5.6910  | 3.6340  | 7.1061  | 7.6615  | 3.4165  | 6.1971  | 3.6985  | 6.4268  | 3.8558  | 3.7643  | 1.2663  | 0.3406  | 0.2893 | 0.5386 |
| Specc1    | _S(Phospho (STY))TSLAFESR_2                                            | QSSXY1_S37_M1_Specc1     | 3.7645  | 5.3938  | 4.0072  | 3.5510  | 2.8902  | 3.3384  | 3.6992  | 3.4502  | 6.1888  | 3.2283  | 0.9234  | -0.1150 | 0.6618 | 0.1793 |
| Specc1    | _T(Phospho (STY))SPAPOSATTVK_2                                         | QSSXY1_T809_M1_Specc1    | 3.3988  | 3.9437  | 3.1434  | 4.1770  | 3.7650  | 3.9545  | 4.3253  | 4.3250  | 3.1232  | 3.9548  | 0.9548  | -0.0668 | 0.5729 | 0.2419 |
| Specc1    | _KLGSS(Phospho (STY))PTSS[Carbamidomethyl (C)]NPPTK_2                  | #N/A                     | 4.5849  | 3.7812  | 4.1434  | 3.6872  | 5.4623  | 5.0683  | 5.5252  | 4.9126  | 5.1376  | 4.8649  | 0.8717  | -0.1981 | 0.1256 | 0.9011 |
| Specc1    | _S(Phospho (STY))PLSGPVR_2                                             | QSSXY1_S847_M1_Specc1    | 3.1190  | 3.8752  | 4.3535  | 4.9769  | 3.7635  | 4.3619  | 4.2551  | 4.0787  | 3.2267  | 3.0065  | 1.1190  | 0.1622  | 0.3172 | 0.4987 |
| Specc1    | _GSP(Phospho (STY))GSS(Phospho (STY))PNNASLSASLTK_2                    | QSSXY1_T357_M2_Specc1    | 3.3842  | 4.1894  | 4.0710  | 4.9826  | 4.0108  | 3.7187  | 4.0795  | 3.5448  | 3.1934  | 3.0398  | 1.1718  | 0.0287  | 0.1084 | 0.9650 |
| Nkap1Nkap | _IGELGPEVWGLS(Phospho (STY))PK_2                                       | QSSZT7_S141_M1_Nkap1Nkap | 4.1404  | 6.3053  | 3.3264  | 7.0102  | 3.2661  | 5.9852  | 3.3234  | 6.8459  | 6.1043  | 3.7960  | 0.8459  | -0.0034 | 0.9915 | 0.0540 |
| Rab6      | _ESS(Phospho (STY))DEDRDSKPSK_2                                        | #N/A                     | 7.0418  | 6.7347  | 4.0372  | 7.3332  | 7.5452  | 6.5305  | 7.0345  | 7.4942  | 6.5306  | 3.5764  | 1.0614  | 0.0860  | 0.7028 | 0.1532 |
| Rab6      | _VARQQC[Carbamidomethyl (C)]S(Phospho (STY))EPETK_2                    | QSU3K3_S502_M1_Rab6      | 9.3058  | 3.2342  | 3.8419  | 8.9538  | 3.0555  | 3.1731  | 3.5339  | 9.3224  | 3.0629  | 1.1079  | 0.1479  | 0.8017  | 0.0807 | 0.1960 |
| Rab6      | _EDS(Phospho (STY))DVTDEDTGAQPPPPSK_2                                  | #N/A                     | 3.6236  | 3.4893  | 4.2003  | 3.7705  | 3.2825  | 3.8350  | 7.1677  | 7.4693  | 4.0024  | 3.8214  | 0.6590  | -0.6017 | 0.0428 | 1.3687 |
| Rab6      | _NISLS(Phospho (STY))EEEAAGLAGHPR_3                                    | #N/A                     | 7.5067  | 7.5538  | 8.1520  | 8.0930  | 7.8057  | 7.6089  | 7.9639  | 9.1108  | 7.7040  | 0.9596  | -0.0596 | 0.3105  | 0.5080 | 0.0808 |
| Rab6      | _FPVRDLS(Phospho (STY))DVTDEDTGAQPPPPSK_3                              | #N/A                     | 3.7709  | 3.2933  | 4.4577  | 8.6118  | 4.8504  | 3.3534  | 3.4270  | 7.6884  | 5.5121  | 3.4265  | 0.9420  | -0.0861 | 0.8288 | 0.0816 |
| Tmprs13   | _NKPGVYTK_2                                                            | #N/A                     | 6.7617  | 6.7391  | 6.9677  | 6.6102  | 7.6288  | 6.8689  | 7.0722  | 6.8620  | 6.6558  | 6.7697  | 1.0131  | 0.0188  | 0.6635 | 0.1782 |
| Dnajc11   | _Acetyl (Protein N-term)ATALS(Phospho (STY))EELDNDYSSLNVR_3            | QSU458_S6_M1_Dnajc11     | 4.2607  | 3.0817  | 3.9944  | 5.5580  | 2.9030  | 3.3256  | 3.6864  | 3.4630  | 3.7621  | 4.4884  | 1.0010  | 0.0015  | 0.9943 | 0.0025 |
| Dnajc11   | _RTPAER_2                                                              | #N/A                     | 3.4446  | 4.2009  | 3.1783  | 4.2229  | 4.0892  | 4.0362  | 4.3712  | 1.4941  | 3.0773  | 1.2361  | 1.5177  | 0.0619  | 0.0667 | 1.1760 |
| Gprap1    | _VESTS(Phospho (STY))GSC[Carbamidomethyl (C)]ENPTK_2                   | QSU4C1_S295_M1_Gprap1    | 3.8356  | 3.9299  | 3.4930  | 5.4263  | 4.9077  | 3.9117  | 3.9350  | 4.0331  | 4.9699  | 4.5584  | 0.9718  | -0.0413 | 0.7792 | 0.1083 |
| Scf1      | _APS(Phospho (STY))PAPAS(Phospho (STY))PK_2                            | #N/A                     | 10.4458 | 10.5317 | 10.5351 | 10.9320 | 9.8994  | 10.4846 | 11.0837 | 10.6537 | 10.7076 | 10.4728 | 0.9760  | -0.0351 | 0.2267 | 0.6445 |
| Scf1      | _S(Phospho (STY))AS(Phospho (STY))PPPAASSSSSR_2                        | #N/A                     | 9.9420  | 10.1799 | 10.2727 | 10.5046 | 9.1063  | 9.8718  | 10.6060 | 10.3107 | 10.0097 | 9.6340  | 0.9842  | -0.0230 | 0.6039 | 0.2191 |
| Scf1      | _S(Phospho (STY))AS(Phospho (STY))PPPAASSSSSR_2                        | #N/A                     | 9.3967  | 9.0101  | 8.9648  | 7.8854  | 7.0947  | 9.0249  | 9.4738  | 9.4810  | 8.8593  | 9.4586  | 0.9189  | -0.1220 | 0.1435 | 0.8431 |
| Scf1      | _S(Phospho (STY))FFUKPDER_2                                            | QSU4C3_S821_M1_Scf1      | 8.7208  | 8.0823  | 8.5706  | 8.6217  | 7.1892  | 7.8256  | 8.9973  | 8.4519  | 8.4745  | 8.1761  | 0.9582  | -0.0616 | 0.3133 | 0.5040 |
| Scf1      | _FDYDPHPTDEAYS(Phospho (STY))PPPAEQCK_3                                | QSU4C3_S240_M1_Scf1      | 3.8710  | 3.3552  | 4.5578  | 7.1941  | 5.5356  | 6.4773  | 6.8452  | 7.0369  | 6.8486  | 5.1758  | 0.7975  | -0.3264 | 0.1575 | 0.7502 |
| Scf1      | _GTEETWS(Phospho (STY))GEER_2                                          | QSU4C3_S912_M1_Scf1      | 6.9387  | 7.3423  | 7.5331  | 7.5     |         |         |         |         |         |         |         |         |        |        |



|       |                                                                          |                       |        |        |        |        |        |        |        |        |        |        |         |         |        |        |
|-------|--------------------------------------------------------------------------|-----------------------|--------|--------|--------|--------|--------|--------|--------|--------|--------|--------|---------|---------|--------|--------|
| Leo1  | _KLS[Phospho (STY)]DIEEGSSGR_K_3                                         | #N/A                  | 3.8016 | 3.0972 | 4.0317 | 3.6800 | 3.8963 | 3.6692 | 3.6026 | 3.6743 | 3.6746 | 3.5260 | 1.0212  | 0.0302  | 0.6594 | 0.1809 |
| Leo1  | _Acetyl (Protein N-term)ADM[Oxidation (M)]EDLFGS[Phospho (STY)]EAESEAR_2 | #N/A                  | 3.7330 | 3.3282 | 3.4667 | 4.5113 | 2.8767 | 3.7479 | 3.1587 | 3.9907 | 4.2898 | 4.1886 | 0.9242  | -0.1138 | 0.4146 | 0.3824 |
| Leo1  | _KLS[Phospho (STY)]DIEEGSSG_K_2                                          | #N/A                  | 3.4481 | 3.8943 | 3.1818 | 4.3993 | 3.7847 | 4.0139 | 4.3747 | 3.8720 | 4.1088 | 3.9037 | 0.9317  | -0.1021 | 0.2752 | 0.5603 |
| Leo1  | _MQNT[Phospho (STY)]DDEDR_2                                              | Q5XIES_T189_M1_Leot1  | 4.1272 | 3.4316 | 3.3132 | 3.1883 | 3.2529 | 2.9758 | 3.3365 | 3.8129 | 4.1119 | 4.3664 | 0.8655  | -0.2084 | 0.0846 | 1.0725 |
| Lmtk3 | _S[Phospho (STY)]PSISEYYIR_2                                             | Q5XIV6_S531_M1_Lmtk3  | 7.4358 | 3.4334 | 3.9117 | 7.8478 | 6.6555 | 3.6037 | 8.0468 | 7.7035 | 7.9086 | 0.8716 | -0.1983 | 0.5090  | 0.2933 |        |
| Lmtk3 | _ALVNGFPM[Oxidation (M)]S[Phospho (STY)]PEAGEK_2                         | #N/A                  | 8.6652 | 8.5965 | 8.9207 | 8.8083 | 7.6266 | 8.5277 | 8.9980 | 8.9626 | 8.2661 | 8.4840 | 0.9823  | -0.0258 | 0.5929 | 0.2270 |
| Lmtk3 | _AQRPEGM[Oxidation (M)]S[Phospho (STY)]PELPFR_3                          | #N/A                  | 7.2027 | 6.6939 | 7.5077 | 6.3764 | 5.3374 | 5.8513 | 7.4684 | 7.7784 | 5.6323 | 5.3363 | 0.9910  | -0.0130 | 0.9295 | 0.0317 |
| Lmtk3 | _VAENGLES[Phospho (STY)]PEKEER_2                                         | Q5XIV6_S947_M1_Lmtk3  | 6.4959 | 6.5200 | 6.8477 | 6.7759 | 5.8670 | 3.1169 | 6.8819 | 7.1226 | 6.4318 | 6.6475 | 0.8769  | -0.1896 | 0.2903 | 0.5037 |
| Zdhc8 | _QGLPS[Phospho (STY)]PPGTFR_2                                            | Q5YST5_S672_M1_Zdhc8  | 4.0920 | 3.2504 | 3.8257 | 3.3695 | 3.0717 | 3.1569 | 8.4356 | 3.6317 | 3.9308 | 3.0467 | 0.7269  | -0.4601 | 0.2301 | 0.6380 |
| Zdhc8 | _TPRPGS[Phospho (STY)]AESALSVCIR_2                                       | #N/A                  | 3.8719 | 3.4902 | 3.9492 | 3.9812 | 4.0192 | 3.7686 | 4.1294 | 3.8715 | 3.3774 | 3.6585 | 1.0233  | 0.0332  | 0.6616 | 0.2207 |
| Zdhc8 | _TS[Phospho (STY)]PPTPAMYK_2                                             | Q5YST5_S346_M1_Zdhc8  | 3.2430 | 3.9993 | 4.4775 | 4.4164 | 3.8876 | 4.2379 | 4.1311 | 3.7021 | 3.3507 | 3.6986 | 1.0868  | 0.1201  | 0.2560 | 0.5917 |
| Kif1b | _MADTGS[Phospho (STY)]PGM[Oxidation (M)]QR_2                             | #N/A                  | 3.9175 | 3.6813 | 3.3211 | 4.0894 | 7.8051 | 3.9397 | 3.8328 | 4.2273 | 3.4880 | 3.9081 | 1.1540  | 0.2066  | 0.5068 | 0.2952 |
| Kif1b | _VEGGGSGSEVS[Phospho (STY)]PEEVNR_2                                      | Q60575_S1075_M1_Kif1b | 4.3584 | 4.3686 | 3.5443 | 4.0470 | 4.2569 | 3.8685 | 3.7617 | 4.0715 | 3.7201 | 4.0140 | 1.0468  | 0.0660  | 0.3398 | 0.4688 |
| Kif1b | _SGLS[Phospho (STY)]LEELR_2                                              | Q60575_S1057_M1_Kif1b | 3.8545 | 7.7407 | 4.5413 | 7.6850 | 5.6017 | 7.5652 | 7.7435 | 7.9797 | 7.6726 | 7.6717 | 0.7937  | -0.3333 | 0.1086 | 0.9644 |
| Kif1b | _EFSQVHGS[Phospho (STY)]DC[Carbamidomethyl (C)]K_2                       | Q60575_S1605_M1_Kif1b | 3.8767 | 3.1322 | 3.6104 | 3.7826 | 3.0205 | 3.6041 | 3.4973 | 4.3359 | 3.7038 | 3.7496 | 0.9170  | -0.1250 | 0.2017 | 0.6952 |
| Kif1b | _GDS[Phospho (STY)]LELHQWELEK_2                                          | Q60575_S1487_M1_Kif1b | 4.1082 | 3.4126 | 3.6635 | 3.2073 | 3.2339 | 2.9947 | 3.3555 | 4.0930 | 4.3854 | 0.8796 | -0.1850 | 0.1166  | 0.9331 |        |
| Mast2 | _KLS[Phospho (STY)]NPDIAPTQK_2                                           | Q60592_S14_M1_Mast2   | 3.9449 | 3.2493 | 3.8268 | 5.9971 | 3.0706 | 3.1580 | 5.3271 | 3.9297 | 4.7556 | 0.8840 | -0.1779 | 0.4549  | 0.3421 |        |
| Mast2 | _KLS[Phospho (STY)]EKEKDHSGLAGLK_3                                       | Q60592_S817_M1_Mast2  | 4.3163 | 4.5597 | 5.3023 | 5.1587 | 3.4420 | 4.2875 | 3.1474 | 4.9604 | 3.8695 | 3.9719 | 1.0561  | 0.0788  | 0.6284 | 0.2018 |
| Xrcc1 | _TQAAGS[Phospho (STY)]SPRPPT[Phospho (STY)]PK_2                          | Q60596_S445_M2_Xrcc1  | 7.0328 | 7.0089 | 4.3142 | 6.5286 | 6.3547 | 4.1021 | 6.2908 | 6.9689 | 7.0411 | 6.9240 | 0.8654  | -0.2085 | 0.2228 | 0.6520 |
| Ogdh  | _SSPPTDVAR_2                                                             | #N/A                  | 8.0887 | 8.2431 | 8.3112 | 8.3535 | 8.6140 | 8.2160 | 8.1226 | 8.4364 | 8.2097 | 8.3060 | 1.0043  | 0.0062  | 0.7418 | 0.1297 |
| Ogdh  | _LNVLAMVR_2                                                              | #N/A                  | 8.1998 | 8.2540 | 8.1369 | 8.0892 | 7.7912 | 7.9932 | 7.9532 | 8.2668 | 7.9351 | 8.2085 | 0.9983  | -0.0024 | 0.9042 | 0.0437 |
| Ogdh  | _FEFQIR_2                                                                | #N/A                  | 7.6374 | 7.6037 | 7.2099 | 7.5514 | 7.6338 | 7.4660 | 7.4933 | 7.6574 | 7.7099 | 7.3667 | 0.9947  | -0.0076 | 0.7118 | 0.1477 |
| Ogdh  | _DVVVDLVC[Carbamidomethyl (C)]IR_2                                       | #N/A                  | 6.6867 | 6.9673 | 6.3726 | 7.3336 | 6.4344 | 6.9194 | 7.2164 | 6.6947 | 7.4040 | 7.1290 | 0.9542  | -0.0676 | 0.1766 | 0.7530 |
| Ogdh  | _QLLPFR_2                                                                | #N/A                  | 6.5438 | 7.2858 | 6.9611 | 6.3109 | 6.7912 | 6.8476 | 6.7606 | 7.4820 | 6.8736 | 6.6414 | 0.9785  | -0.0314 | 0.5289 | 0.2766 |
| Ogdh  | _IC[Carbamidomethyl (C)]EEAFTR_2                                         | #N/A                  | 6.6059 | 6.4369 | 6.6960 | 6.7729 | 6.6886 | 5.9241 | 7.0722 | 6.9232 | 6.0842 | 6.4855 | 0.9813  | -0.0272 | 0.6165 | 0.2101 |
| Ogdh  | _THTELR_2                                                                | #N/A                  | 6.0360 | 5.7610 | 6.5596 | 5.7035 | 6.1250 | 4.1141 | 5.4271 | 6.1929 | 6.0512 | 5.6905 | 0.9788  | -0.3009 | 0.7907 | 0.1020 |
| Ogdh  | _ELEQIFC[Carbamidomethyl (C)]QFDSK_2                                     | #N/A                  | 4.9027 | 4.4622 | 3.4706 | 5.4560 | 4.1650 | 5.0702 | 5.5679 | 4.5364 | 4.2859 | 4.8943 | 0.9516  | -0.0716 | 0.5975 | 0.2237 |
| Ogdh  | _TSFDEH[Oxidation (M)]LPGTFQR_3                                          | #N/A                  | 6.3993 | 6.6522 | 6.6545 | 5.1927 | 6.0075 | 5.7416 | 6.3302 | 6.5466 | 6.4945 | 6.6090 | 0.9404  | -0.0887 | 0.2301 | 0.6381 |
| Ogdh  | _VASSVPVFENTHGGSLR_3                                                     | #N/A                  | 5.6653 | 3.7482 | 4.0213 | 5.5606 | 5.4132 | 5.8562 | 6.1197 | 6.6590 | 5.5290 | 6.3066 | 0.8796  | -0.1868 | 0.0582 | 1.2351 |
| Ogdh  | _SWDFFR_2                                                                | #N/A                  | 4.7177 | 3.0856 | 4.7407 | 3.5280 | 4.7602 | 4.9889 | 3.6825 | 4.5563 | 5.6800 | 5.5222 | 0.8854  | -0.1755 | 0.3374 | 0.4719 |
| Ogdh  | _VEDHIAVQSLR_3                                                           | #N/A                  | 4.2150 | 3.9625 | 4.8124 | 3.5251 | 4.6373 | 3.9988 | 3.5123 | 4.2060 | 4.6624 | 4.5650 | 0.9895  | -0.0153 | 0.0918 | 0.4098 |
| Ogdh  | _VVNAPFHVNSDPEAVMVVC[Carbamidomethyl (C)]K_3                             | #N/A                  | 3.7770 | 3.5654 | 3.5107 | 4.0533 | 2.9207 | 3.7039 | 3.2027 | 3.9467 | 4.2458 | 4.2325 | 0.9185  | -0.1227 | 0.2778 | 0.5563 |
| Ogdh  | _TKAEQFYCYC[Carbamidomethyl (C)]GDTEGKK_3                                | #N/A                  | 5.1153 | 4.5433 | 4.0223 | 4.8468 | 5.5245 | 3.1922 | 3.7144 | 4.4729 | 3.2434 | 1.2218 | 0.2890  | 0.9147  | 0.1917 |        |
| Ogdh  | _VHLPTTTTTGGQEPALPR_3                                                    | #N/A                  | 4.1555 | 3.4599 | 3.3415 | 3.8441 | 3.2812 | 2.9475 | 3.5588 | 4.2744 | 3.9229 | 3.8111 | 0.9006  | -0.1511 | 0.1592 | 0.7981 |
| Ogdh  | _HHVLQDNVDKIR_3                                                          | #N/A                  | 2.9442 | 4.2820 | 3.6310 | 4.1337 | 4.1703 | 3.9552 | 3.8483 | 3.9848 | 3.6334 | 4.1007 | 0.9900  | -0.0146 | 0.8873 | 0.0519 |
| Cttn  | _TVPEAVTSK_2                                                             | #N/A                  | 6.5764 | 7.0676 | 7.0463 | 6.9137 | 7.6870 | 6.9768 | 6.3879 | 6.6445 | 6.8354 | 6.7320 | 1.0594  | 0.0832  | 0.0832 | 1.0797 |
| Cttn  | _NAST[Phospho (STY)]FEFVQVPSAYQK_2                                       | Q60598_T323_M1_Cttn   | 4.2462 | 6.3546 | 3.9799 | 5.5236 | 3.8899 | 3.2347 | 3.6719 | 6.9585 | 3.7766 | 3.2009 | 0.9363  | -0.0950 | 0.7636 | 0.1171 |
| Cttn  | _SAVGDFYQK_2                                                             | #N/A                  | 5.7250 | 5.2453 | 4.1338 | 6.7248 | 6.4254 | 6.0648 | 3.8258 | 5.6862 | 5.6591 | 6.3640 | 1.0624  | 0.0874  | 0.6151 | 0.2111 |
| Cttn  | _HC[Carbamidomethyl (C)]S[Phospho (STY)]QVDSVR_2                         | Q60598_S113_M1_Cttn   | 4.9354 | 4.6055 | 6.3628 | 4.3598 | 5.0432 | 4.4185 | 4.4905 | 4.7161 | 4.7219 | 4.7097 | 0.9652  | -0.0511 | 0.6552 | 0.2555 |
| Cttn  | _VGVAQDRVQK_2                                                            | #N/A                  | 4.9980 | 5.0780 | 4.7321 | 5.4174 | 4.4618 | 4.8339 | 4.5964 | 4.5814 | 4.2713 | 4.6612 | 1.0867  | 0.1200  | 0.0608 | 1.2162 |
| Cttn  | _SAVGFEYQK_2                                                             | #N/A                  | 5.7956 | 5.5403 | 4.7840 | 4.1981 | 5.8639 | 5.6737 | 5.2918 | 5.3788 | 5.2681 | 3.8754 | 1.0718  | 0.1001  | 0.4469 | 0.3498 |
| Cttn  | _VGSGSGHQEHNIHK_3                                                        | #N/A                  | 5.3453 | 5.6328 | 5.8957 | 5.4342 | 7.0579 | 5.8325 | 4.0537 | 5.3383 | 5.5917 | 5.7696 | 1.1307  | 0.1772  | 0.1632 | 0.7871 |
| Cttn  | _KQT[Phospho (STY)]PPASPSQPIEDRPSPSYEDAAPK_4                             | Q60598_T401_M1_Cttn   | 7.1716 | 7.9006 | 7.8711 | 9.1246 | 7.8917 | 8.3608 | 7.6336 | 8.3757 | 7.8594 | 7.6199 | 1.0230  | 0.0328  | 0.6274 | 0.2025 |
| Cttn  | _VDQSAVGFEYQK_2                                                          | #N/A                  | 3.6229 | 2.9273 | 4.3097 | 7.0479 | 5.9699 | 3.4801 | 3.8408 | 3.3061 | 5.7731 | 3.2785 | 1.1259  | 0.1711  | 0.6038 | 0.2191 |
| Cttn  | _SAVGHEYQK_2                                                             | #N/A                  | 3.2810 | 4.0862 | 4.1558 | 4.4704 | 5.6485 | 3.8220 | 4.1828 | 4.9752 | 4.0392 | 5.3247 | 0.9165  | -0.1258 | 0.4384 | 0.3582 |
| Cttn  | _VGDKDKVDK_2                                                             | #N/A                  | 3.0566 | 4.3884 | 4.7590 | 4.1428 | 3.5799 | 5.5650 | 4.6940 | 4.9322 | 3.8894 | 5.0593 | 0.9149  | -0.1283 | 0.4445 | 0.3482 |
| Cttn  | _DYSSFGGK_2                                                              | #N/A                  | 3.0318 | 3.7881 | 4.4075 | 4.7189 | 3.6764 | 2.9482 | 4.3422 | 3.4909 | 2.9700 | 3.5278 | 1.0500  | 0.0704  | 0.6859 | 0.1637 |
| Kcnh1 | _S[Phospho (STY)]PQDRS[Phospho (STY)]PIAEV_2                             | Q60603_S899_M2_Kcnh1  | 2.9681 | 4.3743 | 4.2026 | 3.7464 | 3.6126 | 3.0120 | 3.8946 | 3.2548 | 3.5539 | 3.4236 | 1.0342  | 0.0486  | 0.7131 | 0.1469 |
| Myf6  | _ALGNPTNAEVUK_2                                                          | #N/A                  | 7.3967 | 7.7071 | 8.0644 | 7.3451 | 8.3347 | 7.7745 | 7.6953 | 7.4324 | 7.5556 | 7.5381 | 1.0285  | 0.0405  | 0.3126 | 0.5050 |
| Myf6  | _NKDGYEYDVEGLR_3                                                         | #N/A                  | 7.4583 | 7.6355 | 7.4255 | 7.5054 | 7.9735 | 7.8866 | 7.7663 | 7.2328 | 7.6514 | 7.6850 | 1.0084  | 0.0120  | 0.6856 | 0.1639 |
| Myf6  | _EAFQLFDR_2                                                              | #N/A                  | 7.6500 | 7.5357 | 7.4728 | 7.3302 | 7.6342 | 7.7525 | 7.1410 | 7.2987 | 7.5037 | 7.5191 | 1.0267  | 0.0381  | 0.0959 | 0.1080 |
| Myf6  | _HVLVLGEK_2                                                              | #N/A                  | 4.7683 | 4.9836 | 4.5322 | 5.6318 | 5.0478 | 4.9884 | 5.4942 | 4.7926 | 4.8785 | 5.2148 | 0.9798  | -0.0295 | 0.6615 | 0.1794 |
| Myf6  | _ILYSQC[Carbamidomethyl (C)]GDMVR_2                                      | #N/A                  | 4.1450 | 3.4005 | 3.8787 | 5.0714 | 4.5728 | 3.3358 | 3.2290 | 3.5787 | 3.8777 | 3.0998 | 1.1802  | 0.2390  | 0.1335 | 0.8745 |
| Tiam1 | _ANS[Phospho (STY)]GDLVAK_2                                              | Q60610_S231_M1_Tiam1  | 9.1370 | 4.9593 | 9.7962 | 9.6787 | 8.3679 | 9.4892 | 9.6117 | 9.6980 | 9.4989 | 9.5557 | 0.9719  | -0.0411 | 0.3415 | 0.4666 |
| Tiam1 | _TES[Phospho (STY)]LPSAQVYVFGGK_2                                        | Q60610_S1407_M1_Tiam1 | 6.7244 | 6.1276 | 4.3059 | 3.6946 | 3.5950 | 6.7734 | 3.6724 | 6.9013 | 6.9475 | 6.3455 | 0.8721  | -0.1975 | 0.4597 | 0.3375 |
| Tiam1 | _SNATNSYS[Phospho (STY)]PPTGR_2                                          | #N/A                  | 8.8208 | 3.7376 | 9.1154 | 3.9347 | 3.5993 | 8.8951 | 9.3198 | 9.3554 | 8.5300 | 8.7358 | 0.8210  | -0.2846 | 0.4639 | 0.3336 |
| Tiam1 | _SKS[Phospho (STY)]AOWR_2                                                | Q60610_S172_M1_Tiam1  | 2.8995 | 2.9421 | 4.1340 | 3.6778 | 4.2642 | 5.7575 | 3.8260 | 3.3234 | 3.6225 | 6.5924 | 0.9090  | -0.1377 | 0.6371 | 0.1958 |
| Tiam1 | _RSNATNSYS[Phospho (STY)]PPTGR_2                                         | #N/A                  | 4.3281 | 3.0143 | 4.0618 | 3.6055 | 2.8356 | 3.3930 | 8.4973 | 3.3956 | 3.6947 | 3.2828 | 0.7503  | -0.4144 | 0.2909 | 0.5363 |
| Tiam1 | _S[Phospho (STY)]LEGFDOTVPGK_2                                           | #N/A                  | 3.2090 | 4.0142 | 3.8958 | 4.1065 | 3.8355 | 3.8940 | 4.2548 | 4.3955 | 3.1937 | 3.7838 | 0.9792  | -0.0303 | 0.7705 | 0.1132 |
| Tiam1 | _FTIDSDAISAS[Phospho (STY)]PEKEPQAGGGDTR_3                               | Q60610_S1466_M1_Tiam1 | 3.3197 | 3.9064 | 4.0065 | 4.5092 | 3.7947 | 4.3307 | 4.2239 | 3.6093 | 3.2579 | 2.9754 | 1.1312  | 0.1778  | 0.1648 | 0.7829 |
| Tiam1 | _S[Phospho (STY)]LEGFDOTVPGKR_2                                          | #N/A                  | 4.1662 | 3.3293 | 3.8999 | 6.6111 | 3.3099 | 3.3151 | 3.3874 | 3.5580 | 3.8570 | 3.1209 | 1.1794  | 0.2380  | 0.3747 | 0.4264 |
| Satb1 | _LEQNGS[Phospho (STY)]PLGR_2                                             | Q60611_S38_M1_Satb1   | 6.1601 | 6.3276 | 3.1106 | 7.0752 | 6.1110 | 6.1122 | 6.6950 | 5.8429 | 5.7820 | 6.0457 | 0.9548  | -0.0667 | 0.7126 | 0.1472 |
| Icam5 | _LDDLDC[Carbamidomethyl (C)]PR_2                                         | #N/A                  | 5.8724 | 5.9357 | 5.9323 | 6.1191 | 6.2632 | 5.5859 |        |        |        |        |         |         |        |        |



|          |                                                             |                        |         |         |          |         |         |         |         |         |         |         |         |         |        |        |
|----------|-------------------------------------------------------------|------------------------|---------|---------|----------|---------|---------|---------|---------|---------|---------|---------|---------|---------|--------|--------|
| Hnrrpd   | _IDASKNEEDGHSNS[Phospho (STY)]S[Phospho (STY)]PRHTEAAAAQR_4 | #N/A                   | 3.2363  | 4.0415  | 3.9231   | 4.4257  | 3.8628  | 3.8667  | 4.1404  | 3.6928  | 3.3413  | 4.3927  | 1.0002  | 0.0003  | 0.9975 | 0.0011 |
| Ptprm    | _AEDS[Phospho (STY)]SEGHEEVLGGR_3                           | #N/A                   | 4.0481  | 3.3524  | 8.9884   | 3.7367  | 3.1737  | 8.4245  | 3.4514  | 4.3818  | 4.0304  | 3.7037  | 1.3586  | 0.4421  | 0.3391 | 0.4697 |
| Ptprm    | _AEDS[Phospho (STY)]SEGHEEVLGGR_3                           | #N/A                   | 7.5815  | 6.9285  | 7.0094   | 7.0229  | 5.8949  | 3.8238  | 6.2741  | 4.3877  | 3.9104  | 3.8777  | 1.1631  | 0.2180  | 0.3715 | 0.4300 |
| Pp5c     | _SVWSDIEMSOxidation (M)]TIDEVSPK_2                          | #N/A                   | 5.8678  | 6.8193  | 6.9077   | 7.7125  | 6.4438  | 7.4483  | 6.4701  | 6.8066  | 6.5930  | 5.7661  | 1.0714  | 0.0995  | 0.2685 | 0.5711 |
| Pp5c     | _AEGYVANGGR_2                                               | #N/A                   | 5.3322  | 4.7751  | 4.4735   | 4.8714  | 5.5217  | 5.1394  | 4.8142  | 5.1095  | 5.3548  | 5.2141  | 0.9796  | -0.2997 | 0.6833 | 0.1916 |
| Pp5c     | _ALEENQLDYRR_2                                              | #N/A                   | 4.5148  | 5.0440  | 5.7576   | 4.6829  | 3.3560  | 4.7128  | 4.9798  | 3.8624  | 4.8267  | 4.3486  | 1.0385  | 0.0546  | 0.7080 | 0.1500 |
| Pp5c     | _FYSQAEINPQNAIYYGR_2                                        | #N/A                   | 5.5839  | 5.4714  | 5.0171   | 5.2960  | 5.1456  | 5.4166  | 5.9153  | 5.7769  | 5.3915  | 4.6347  | 0.9801  | -0.0290 | 0.6793 | 0.1679 |
| Pp5c     | _TQANDYFK_2                                                 | #N/A                   | 4.2422  | 3.3562  | 4.5567   | 4.6791  | 4.6738  | 4.1561  | 3.2732  | 4.3547  | 4.2085  | 3.5749  | 1.1102  | 0.1508  | 0.2303 | 0.6377 |
| Pp5c     | _TTC[Carbamidomethyl (C)]YGVGLDATR_2                        | #N/A                   | 6.0796  | 3.1216  | 3.9545   | 5.6843  | 5.0392  | 6.0901  | 3.6465  | 3.5029  | 6.0567  | 3.1755  | 1.2196  | 0.2864  | 0.3007 | 0.5218 |
| Pp5c     | _GNHETDNMNGYGFEGEVK_3                                       | #N/A                   | 4.3528  | 3.6571  | 3.5387   | 4.0414  | 3.4784  | 4.2511  | 3.7561  | 4.0771  | 3.7257  | 4.0084  | 0.9987  | -0.0019 | 0.9803 | 0.0086 |
| Pumb6    | _LAADSGQVRR_2                                               | #N/A                   | 6.0465  | 6.4824  | 6.6894   | 7.0830  | 7.0469  | 6.8272  | 6.7963  | 6.9405  | 7.0408  | 6.9126  | 0.9673  | -0.0480 | 0.2957 | 0.5291 |
| Pumb6    | _QVLQGDQPK_2                                                | #N/A                   | 6.4742  | 6.7046  | 6.3975   | 5.6554  | 6.8447  | 5.9022  | 5.3855  | 6.4371  | 6.1109  | 6.2551  | 1.0467  | 0.0659  | 0.3709 | 0.4308 |
| Pumb6    | _TTTSGYANR_2                                                | #N/A                   | 5.3977  | 6.2661  | 5.5299   | 5.7852  | 5.9921  | 5.7476  | 5.7142  | 5.8554  | 5.7078  | 5.1937  | 1.0300  | 0.0427  | 0.4166 | 0.3803 |
| Tcf4     | _SSSGSWGTGGHPS[Phospho (STY)]PSR_2                          | Q60722_S66_M1_Tcf4     | 3.0659  | 4.9301  | 4.3004   | 5.4897  | 3.7105  | 4.4150  | 5.8180  | 3.1570  | 5.1190  | 3.5215  | 0.9806  | -0.0282 | 0.9014 | 0.0451 |
| Tcf4     | _NGGQASSS[Phospho (STY)]PNYEGPLHSLQSR_3                     | Q60722_S371_M1_Tcf4    | 3.9382  | 3.8639  | 4.1142   | 3.3874  | 3.6853  | 3.4320  | 4.1165  | 3.4296  | 3.4518  | 3.2030  | 1.0526  | 0.0739  | 0.4094 | 0.3879 |
| Tcf4     | _DLGSHDNLS[Phospho (STY)]PPFVNGR_3                          | Q60722_S92_M1_Tcf4     | 4.1154  | 3.4198  | 3.3014   | 3.8040  | 3.2411  | 2.9875  | 3.5187  | 4.3144  | 3.9630  | 3.7710  | 0.8937  | -0.1621 | 0.1340 | 0.8799 |
| Conk2a1  | _QLVQLTLDYDR_2                                              | #N/A                   | 3.0909  | 5.0215  | 4.6161   | 5.2901  | 4.4291  | 4.5974  | 4.4791  | 4.8785  | 4.7869  | 4.5961  | 0.9621  | -0.0557 | 0.6655 | 0.1768 |
| Conk2a1  | _FNQILGR_2                                                  | #N/A                   | 5.0512  | 4.3238  | 4.7165   | 4.9025  | 5.0869  | 5.0346  | 4.0104  | 5.1921  | 4.4821  | 4.4290  | 1.0716  | 0.0997  | 0.2217 | 0.6542 |
| Conk2a1  | _FVISENQHLVSPALDFDK_4                                       | #N/A                   | 4.0154  | 4.0845  | 3.2013   | 4.1948  | 4.8869  | 3.9327  | 3.4187  | 4.6750  | 4.0632  | 5.0684  | 0.9411  | -0.0876 | 0.5403 | 0.2673 |
| Conk2a1  | _YSEFVAINTNNEK_2                                            | #N/A                   | 12.6436 | 5.0414  | 3.7007   | 12.8938 | 4.1006  | 7.3929  | 12.4878 | 3.5637  | 12.5390 | 0.7422  | 0.7422  | -0.4301 | 0.3672 | 0.4351 |
| Conk2a1  | _VLGTEDLYDYDKYNLEDPK_3                                      | #N/A                   | 3.4530  | 4.2582  | 3.7417   | 3.7447  | 3.4202  | 3.7321  | 4.0108  | 1.1825  | 3.1246  | 3.1086  | 1.3040  | 0.3829  | 0.1181 | 0.9279 |
| Conk2a1  | _TPALFVEHVNNTDFK_2                                          | #N/A                   | 3.8580  | 4.1790  | 4.1226   | 4.0320  | 3.9192  | 4.2540  | 3.8336  | 4.2848  | 3.7040  | 3.4387  | 1.0641  | 0.0896  | 0.1647 | 0.7834 |
| Conk2a1  | _ETWDEYSHVVEWGQDQYQLVR_3                                    | #N/A                   | 3.8896  | 3.3366  | 4.5764   | 3.5102  | 1.5307  | 3.3997  | 3.2929  | 3.0395  | 4.1889  | 3.5452  | 0.9594  | -0.0598 | 0.8026 | 0.0955 |
| Khdrb1   | _KDDENYLDLFSHK_3                                            | #N/A                   | 7.2104  | 7.0501  | 7.4491   | 7.3198  | 7.3791  | 6.8745  | 7.2934  | 6.6000  | 6.9678  | 6.9850  | 1.0362  | 0.0514  | 0.1482 | 0.8291 |
| Khdrb1   | _DPSGGAHPSVR_2                                              | #N/A                   | 5.3680  | 6.4052  | 5.2787   | 6.3308  | 6.5116  | 6.0613  | 6.0334  | 6.0287  | 5.5636  | 5.9683  | 1.0160  | 0.0228  | 0.7535 | 0.1229 |
| Khdrb1   | _S[Phospho (STY)]C[Carbamidomethyl (C)]SKDPSGAHPSVR_2       | #N/A                   | 3.5200  | 4.0318  | 3.9186   | 3.7827  | 4.0252  | 4.8076  | 4.2408  | 3.7223  | 3.2602  | 3.5285  | 1.0885  | 0.1223  | 0.2694 | 0.5696 |
| Cldn11   | _MGHEPGVAK_2                                                | #N/A                   | 5.5923  | 5.5085  | 4.2140   | 6.1185  | 5.1383  | 3.0006  | 5.6575  | 5.1932  | 3.9529  | 4.9482  | 0.9981  | -0.0027 | 0.9889 | 0.0048 |
| Cldn11   | _KM[Oxidation (M)]DELGSK_2                                  | #N/A                   | 6.6263  | 5.9580  | 6.0246   | 6.3385  | 6.6200  | 6.2327  | 6.2149  | 6.1507  | 6.2899  | 6.0309  | 1.0208  | 0.0297  | 0.4228 | 0.7379 |
| Cldn11   | _FYSSGSSS[Phospho (STY)]PTIAK_2                             | #N/A                   | 12.8530 | 13.1154 | 13.7596  | 13.3250 | 12.1826 | 12.8083 | 13.6202 | 13.0708 | 12.9757 | 0.9900  | -0.0146 | 0.6734  | 0.1717 | 0.1717 |
| Cldn11   | _FYSSGSSS[Phospho (STY)]PTIAKSAHV_3                         | #N/A                   | 7.6243  | 3.5980  | 5.5142   | 3.8077  | 5.0932  | 6.3948  | 5.3141  | 6.1662  | 6.0566  | 5.5991  | 0.9230  | -0.1156 | 0.5929 | 0.2270 |
| Gas7     | _ITSGDGNLSSSS[Phospho (STY)]PGRK_2                          | #N/A                   | 5.5908  | 5.0005  | 6.2271   | 6.1363  | 6.4850  | 6.4487  | 6.3654  | 5.5068  | 5.7649  | 1.1543  | 0.6070  | 0.1528  | 0.8159 | 0.3556 |
| Gas7     | _HTEDM[Oxidation (M)]FNQSTVEPVQLLR_3                        | #N/A                   | 4.0354  | 5.4793  | 5.3038   | 4.0470  | 5.2836  | 5.5436  | 5.1963  | 5.1899  | 4.9983  | 5.6355  | 0.9417  | -0.0866 | 0.4410 | 0.3556 |
| Gas7     | _STGDSGNLSSSS[Phospho (STY)]PGR_2                           | #N/A                   | 7.9570  | 8.5363  | 8.6963   | 9.2830  | 8.3829  | 8.2343  | 8.0730  | 8.6078  | 8.3999  | 7.9929  | 1.0298  | 0.0424  | 0.3671 | 0.4352 |
| Gas7     | _STGDSGNLSSSS[Phospho (STY)]PGRK_2                          | #N/A                   | 7.8753  | 8.1228  | 8.7887   | 8.6561  | 7.9797  | 8.2118  | 8.3835  | 4.3435  | 8.1843  | 8.1174  | 1.1399  | 0.1889  | 0.2357 | 0.6276 |
| Gas7     | _ITSGDGNLSSSS[Phospho (STY)]SSPGR_2                         | Q60780_S106_M1_Gas7    | 3.2870  | 3.9391  | 3.9738   | 4.4765  | 3.9136  | 4.2980  | 4.1912  | 3.6420  | 3.2906  | 4.4435  | 1.0230  | 0.0328  | 0.7679 | 0.1147 |
| Gas7     | _C[Carbamidomethyl (C)]VOLYNQAQSK_2                         | #N/A                   | 3.1930  | 3.9982  | 3.8798   | 4.3825  | 3.8195  | 3.9100  | 4.0971  | 3.7360  | 3.3846  | 4.9211  | 0.9576  | -0.0624 | 0.6145 | 0.2114 |
| Rasa3    | _YSG[Phospho (STY)]QEHPIGDK_2                               | #N/A                   | 9.3518  | 9.1124  | 9.9195   | 9.6643  | 8.4720  | 9.0731  | 9.6065  | 9.6937  | 9.5244  | 9.3622  | 0.9705  | -0.0431 | 0.3190 | 0.4962 |
| Rasa3    | _TI[Phospho (STY)]RNGSGPIGDK_3                              | Q60790_TB05_M1_Rasa3   | 3.9422  | 4.1351  | 4.0168   | 4.3845  | 3.8415  | 3.8013  | 4.8966  | 4.7096  | 4.6240  | 4.9892  | 0.8367  | -0.2572 | 0.0003 | 0.3561 |
| Ppp1r1b  | _DGNSEDQVEGR_2                                              | #N/A                   | 7.6875  | 7.4702  | 7.5170   | 8.0395  | 7.8730  | 7.1467  | 7.3327  | 7.6666  | 7.4825  | 7.6782  | 1.0171  | 0.0244  | 0.3898 | 0.4091 |
| Ppp1r1b  | _ATLSEPGEEPHQS[Phospho (STY)]PP_2                           | Q60829_S192_M1_Ppp1r1b | 15.1542 | 15.2688 | 16.0313  | 15.6211 | 15.3712 | 15.3473 | 15.5584 | 15.1207 | 15.0955 | 15.5092 | 1.0094  | 0.0136  | 0.4658 | 0.3318 |
| Ppp1r1b  | _GLEGPWRRPPLDEPQR_2                                         | #N/A                   | 7.8558  | 7.7440  | 7.6441   | 7.8667  | 8.4262  | 8.2291  | 7.5616  | 6.4375  | 7.6334  | 8.2345  | 1.0662  | 0.0925  | 0.1772 | 0.7517 |
| Ppp1r1b  | _GTVGQKPTC[Carbamidomethyl (C)]GR_2                         | #N/A                   | 6.8445  | 7.0899  | 6.6280   | 6.8522  | 8.1215  | 6.9729  | 6.3639  | 6.6212  | 6.8306  | 7.2354  | 1.0476  | 0.0671  | 0.3255 | 0.0757 |
| Ppp1r1b  | _VSEHSHS[Phospho (STY)]PEEASPHQR_3                          | #N/A                   | 11.2630 | 11.0158 | 11.9411  | 11.6028 | 11.8027 | 11.4781 | 11.2150 | 11.3611 | 11.4298 | 11.6765 | 1.0085  | 0.0122  | 0.6257 | 0.2036 |
| Ppp1r1b  | _IQISVAPPSQLDPR_2                                           | #N/A                   | 5.5500  | 6.3051  | 7.1942   | 4.0227  | 6.7085  | 6.7390  | 5.7181  | 6.2181  | 5.6628  | 6.4588  | 0.9993  | -0.0011 | 0.9941 | 0.0026 |
| Ppp1r1b  | _GLEGPWRRPPLDEPQRDGNSEDQVEGR_4                              | #N/A                   | 6.4035  | 6.6212  | 6.7681   | 7.1792  | 6.6943  | 6.6689  | 6.3656  | 6.4006  | 5.7342  | 5.4644  | 1.1221  | 0.1662  | 0.0119 | 1.9259 |
| Ppp1r1b  | _ELGYPQDEDEDEDEDEDEDSGAELVK_3                               | #N/A                   | 4.3391  | 3.0033  | 3.0428   | 3.6166  | 3.4829  | 3.1418  | 3.7648  | 3.3846  | 3.6837  | 3.2938  | 1.0220  | 0.0314  | 0.7885 | 0.1042 |
| Serpinb6 | _FYAELEELDFQGAATESR_2                                       | #N/A                   | 6.7463  | 7.1019  | 7.9328   | 7.7241  | 6.8201  | 7.6966  | 6.9511  | 6.7750  | 6.8179  | 6.8093  | 1.0729  | 0.1015  | 0.0941 | 1.0265 |
| Stip1    | _LAYINPOLALEEK_2                                            | #N/A                   | 6.7602  | 8.1119  | 8.2359   | 8.3042  | 8.0204  | 7.9864  | 8.2220  | 7.6295  | 8.2064  | 0.9998  | -0.0003 | 0.9920  | 0.0035 | 0.0035 |
| Stip1    | _LDQNHVLYNRR_3                                              | #N/A                   | 7.1387  | 6.8088  | 6.5372   | 6.9941  | 7.4445  | 7.0086  | 6.5974  | 6.2633  | 6.9682  | 7.2030  | 1.0341  | 0.0484  | 0.3370 | 0.4724 |
| Stip1    | _HDS[Phospho (STY)]PEDVKKR_2                                | #N/A                   | 7.0737  | 7.2374  | 7.4857   | 7.8199  | 7.4025  | 7.5056  | 7.3438  | 7.1616  | 7.0694  | 7.3955  | 1.0246  | 0.0351  | 0.2493 | 0.6032 |
| Stip1    | _ALDLDSSC[Carbamidomethyl (C)]K_2                           | #N/A                   | 6.7327  | 6.5006  | 6.3724   | 6.9672  | 7.1479  | 6.7201  | 5.8964  | 6.2486  | 6.3690  | 6.2843  | 1.0879  | 0.1216  | 0.0130 | 1.8868 |
| Stip1    | _DPQALSEHLK_2                                               | #N/A                   | 5.9872  | 5.9377  | 4.7128   | 6.0543  | 6.5299  | 5.4639  | 5.9998  | 5.9675  | 5.9241  | 6.1014  | 0.9638  | -0.0532 | 0.5159 | 0.2875 |
| Stip1    | _ALSAGNDDALQC[Carbamidomethyl (C)]YSEAIK_2                  | #N/A                   | 5.7949  | 5.9728  | 6.2515   | 6.8998  | 6.0128  | 5.9446  | 6.4986  | 6.0314  | 5.0856  | 6.1211  | 1.0357  | 0.0506  | 0.5167 | 0.2867 |
| Stip1    | _DPQALSEHLKNPVIAQK_3                                        | #N/A                   | 5.4594  | 6.0788  | 6.5657   | 6.1070  | 6.9748  | 5.1596  | 6.1151  | 6.2146  | 6.0746  | 6.0093  | 0.9925  | -0.1099 | 0.8976 | 0.0469 |
| Stip1    | _TPDVLUK_2                                                  | #N/A                   | 5.6153  | 5.9656  | 5.6184   | 6.0695  | 5.8898  | 5.0878  | 5.1743  | 5.7631  | 5.5500  | 5.5816  | 1.0345  | 0.0490  | 0.3821 | 0.4178 |
| Stip1    | _HDS[Phospho (STY)]PEDVK_2                                  | #N/A                   | 7.7099  | 7.7168  | 8.0944   | 8.3852  | 7.7821  | 7.6564  | 7.9736  | 7.7090  | 7.7951  | 8.1389  | 0.9983  | -0.0024 | 0.9376 | 0.0280 |
| Stip1    | _ELUGQNKVPSOLGT_3                                           | #N/A                   | 6.2566  | 6.1316  | 5.9340   | 6.6161  | 6.2102  | 6.4550  | 5.9850  | 5.9426  | 6.1542  | 6.2949  | 1.0284  | 0.0404  | 0.2469 | 0.6074 |
| Stip1    | _LM[Oxidation (M)]DVGLIAR_2                                 | #N/A                   | 7.0026  | 6.9447  | 6.4151   | 6.8644  | 6.8536  | 6.8453  | 6.8374  | 6.7712  | 6.6304  | 6.9581  | 1.0032  | 0.0046  | 0.8603 | 0.0654 |
| Stip1    | _HYTEAKR_2                                                  | #N/A                   | 6.9518  | 6.3570  | 3.1879   | 6.3046  | 6.0995  | 6.7401  | 6.7524  | 6.2451  | 6.5598  | 6.5643  | 0.9096  | -0.1367 | 0.4304 | 0.3661 |
| Stip1    | _HDS[Phospho (STY)]PEDVKKR_3                                | #N/A                   | 4.5127  | 5.4008  | 7.2359   | 5.7020  | 5.8939  | 5.9443  | 5.5934  | 5.6857  | 5.8288  | 5.4074  | 1.0271  | 0.0386  | 0.7467 | 0.1268 |
| Stip1    | _HYTEAK_2                                                   | #N/A                   | 2.8334  | 3.2999  | 3.4029   | 3.9056  | 3.1111  | 3.2980  | 3.3751  | 3.2522  | 3.3751  | 3.7327  | 0.9988  | -0.0018 | 0.9888 | 0.0049 |
| Stip1    | _S[Phospho (STY)]LLSDPTVR_2                                 | Q60864_S145_M1_Stip1   | 5.0859  | 3.4901  | 4.4228   | 3.4246  | 2.8617  | 6.0529  | 5.8499  | 5.7127  | 4.3424  | 5.8634  | 0.7760  | -0.3659 | 0.1092 | 0.9617 |
| Stip1    | _LILEQMOK_2                                                 | #N/A                   | 4.3709  | 4.0151  | 4.1431   | 5.5475  | 4.3186  | 3.6467  | 4.3604  | 3.4727  | 3.1213  | 3.1119  | 1.2342  | 0.0306  | 0.0752 | 1.1237 |
| Stip1    | _DAHFVYK_2                                                  | #N/A                   | 4.5328  | 3.3923  | 4.3310</ |         |         |         |         |         |         |         |         |         |        |        |



|         |                                                                                                 |                        |        |        |         |         |         |        |         |         |         |        |         |         |        |        |
|---------|-------------------------------------------------------------------------------------------------|------------------------|--------|--------|---------|---------|---------|--------|---------|---------|---------|--------|---------|---------|--------|--------|
| Arhgef2 | _S[Phospho (STY)]LPAGDAILYSPNPQPISR_2                                                           | Q60875_S885_M1_Arhgef2 | 3.7012 | 7.9159 | 8.2499  | 3.3898  | 5.9384  | 3.4018 | 3.1045  | 3.2278  | 7.5616  | 3.3568 | 1.2597  | 0.3331  | 0.4587 | 0.3384 |
| Arhgef2 | _LES[Phospho (STY)]FESURJGER_2                                                                  | #N/A                   | 3.3200 | 4.0762 | 4.5545  | 4.0982  | 3.9645  | 7.7577 | 7.8583  | 4.4038  | 7.5057  | 3.7755 | 0.7864  | -0.3467 | 0.3088 | 0.5103 |
| Arhgef2 | _SVSTTNAGHFNDES[Phospho (STY)]PLGUR_3                                                           | Q60875_S163_M1_Arhgef2 | 3.9733 | 3.2776 | 3.1592  | 3.1652  | 3.0990  | 3.1297 | 3.3766  | 5.7240  | 4.1052  | 3.6289 | 0.9031  | -0.1471 | 0.5976 | 0.2236 |
| Elavl2  | _LQDSSPDTGSEEEVSSRLS[Phospho (STY)]PPHSPR_3                                                     | #N/A                   | 5.2182 | 5.7143 | 3.9991  | 6.2567  | 4.1603  | 5.8279 | 3.3765  | 3.5446  | 4.1091  | 5.6255 | 1.2479  | 0.3195  | 0.1359 | 0.8667 |
| Elavl2  | _VSYARPPS[Phospho (STY)]ASIR_2                                                                  | Q60899_S119_M1_Elav2   | 6.6328 | 7.0013 | 3.3446  | 4.0484  | 4.2555  | 6.6417 | 3.7631  | 6.9104  | 3.7186  | 4.0154 | 1.1562  | 0.2094  | 0.5023 | 0.2990 |
| Elavl2  | _ELEQFSQYGR_2                                                                                   | #N/A                   | 3.7327 | 6.0778 | 5.4668  | 6.3204  | 5.7338  | 5.8323 | 6.1004  | 5.9453  | 5.8594  | 5.7473 | 0.9348  | -0.0973 | 0.4415 | 0.3551 |
| Elavl2  | _IEAEEAIK_2                                                                                     | #N/A                   | 4.2411 | 3.5455 | 3.4271  | 6.0944  | 3.3668  | 4.8007 | 3.2226  | 4.1887  | 4.8869  | 3.8968 | 1.0487  | 0.0686  | 0.7538 | 0.1227 |
| Elavl2  | _TNQALISQLYQIS[Phospho (STY)]PNIR_2                                                             | Q60899_S211_M1_Elav2   | 3.1254 | 6.8641 | 6.8552  | 7.9693  | 3.7614  | 4.1731 | 0.5654  | 3.7679  | 3.4165  | 5.3574 | 1.1426  | 0.1924  | 0.5787 | 0.2376 |
| Elavl2  | _FANNPSQK_2                                                                                     | #N/A                   | 3.7403 | 3.5494 | 3.4310  | 3.9337  | 3.3707  | 4.3588 | 3.6483  | 4.1848  | 3.8334  | 3.1580 | 1.0066  | 0.0095  | 0.9254 | 0.0337 |
| Eps15l1 | _LQGEETQLGCGQIAGR_2                                                                             | #N/A                   | 4.8645 | 5.5710 | 6.6976  | 3.1563  | 5.3150  | 5.1729 | 4.7855  | 5.6322  | 5.2325  | 4.5385 | 0.9846  | -0.0223 | 0.9016 | 0.0450 |
| Eps15l1 | _STPSHGVSYSLSNGTS[Phospho (STY)]LS[Phospho (STY)]PK_2                                           | #N/A                   | 3.8506 | 4.2575 | 4.1131  | 4.8957  | 4.8208  | 4.4268 | 5.1051  | 4.2997  | 5.2224  | 4.7896 | 0.9052  | -0.1437 | 0.1195 | 0.9227 |
| Eps15l1 | _SDOPHS[Phospho (STY)]SSSODFFKK_3                                                               | Q60902_S669_M1_Eps15l1 | 3.6860 | 3.4406 | 3.4196  | 4.4642  | 3.2876  | 3.9438 | 4.1250  | 4.0443  | 4.3433  | 4.1415 | 0.8903  | -0.1676 | 0.0814 | 1.0893 |
| Eps15l1 | _GIDPPQVLS[Phospho (STY)]PDM[Oxidation (M)]VPPSER_2                                             | Q60902_S353_M1_Eps15l1 | 7.8652 | 9.5640 | 8.7797  | 10.0000 | 8.5524  | 9.2394 | 8.3496  | 10.2919 | 10.1134 | 7.0663 | 1.0050  | 0.0072  | 0.9520 | 0.0214 |
| Eps15l1 | _TVFAGAVPVPAS[Phospho (STY)]PPPK_2                                                              | #N/A                   | 3.2132 | 4.0184 | 3.9000  | 8.0991  | 3.8398  | 3.8897 | 4.2505  | 4.3998  | 3.1980  | 3.7795 | 1.1501  | 0.2018  | 0.5492 | 0.2603 |
| Eps15l1 | _TVFAGAVPVPAS[Phospho (STY)]PPPKSLR_3                                                           | #N/A                   | 4.1503 | 3.4547 | 4.1444  | 7.9775  | 3.2760  | 3.8079 | 3.1751  | 5.9379  | 4.2955  | 3.8423 | 1.0361  | 0.0512  | 0.8812 | 0.0549 |
| Mezf2a  | _SEPS[Phospho (STY)]PPRDR_2                                                                     | Q60929_S406_M1_Mef2a   | 3.7192 | 7.0796 | 3.4529  | 9.1450  | 2.8630  | 3.7616 | 8.7229  | 8.7542  | 4.3036  | 4.1748 | 0.7711  | -0.3750 | 0.3927 | 0.4060 |
| Vdac2   | _YQLOPTASISAK_2                                                                                 | #N/A                   | 9.2116 | 9.2762 | 9.4141  | 9.6534  | 9.6328  | 9.4722 | 9.1766  | 9.3116  | 9.5245  | 9.2292 | 1.0143  | 0.0205  | 0.2627 | 0.5806 |
| Vdac2   | etyl (Protein N-term)[AEC]Carbamidomethyl (C)[C]VPVC[Carbamidomethyl (C)]F                      | #N/A                   | 8.9381 | 8.9636 | 8.4680  | 9.1515  | 9.1610  | 8.5226 | 8.8214  | 8.8456  | 9.1192  | 8.6905 | 0.9998  | -0.0003 | 0.9922 | 0.0034 |
| Vdac2   | _SNFAVGGR_2                                                                                     | #N/A                   | 8.2774 | 8.3879 | 8.5617  | 8.2979  | 8.4292  | 8.3642 | 6.2996  | 8.4118  | 8.5754  | 8.3985 | 1.0587  | 0.0823  | 0.3129 | 0.5047 |
| Vdac2   | _LTLISALVDGK_2                                                                                  | #N/A                   | 7.2845 | 8.1905 | 7.6198  | 7.5611  | 7.7651  | 7.8398 | 6.3376  | 8.0041  | 7.7769  | 7.6298 | 1.0367  | 0.0520  | 0.4377 | 0.3588 |
| Vdac2   | _WC[Carbamidomethyl (C)]EYGLTTEK_2                                                              | #N/A                   | 6.7572 | 6.7990 | 6.7193  | 7.2320  | 6.9266  | 6.9807 | 6.9679  | 6.8806  | 7.2861  | 6.7404 | 0.9905  | -0.0138 | 0.6324 | 0.1990 |
| Vdac2   | _GFGGGLVK_2                                                                                     | #N/A                   | 6.0705 | 6.8523 | 6.3271  | 6.2545  | 6.4739  | 6.3229 | 5.4875  | 6.2384  | 6.7477  | 6.6843 | 1.0150  | 0.0214  | 0.7390 | 0.1349 |
| Vdac2   | _LTFDTTSPNTGK_2                                                                                 | #N/A                   | 6.9239 | 6.4451 | 6.2913  | 6.7222  | 7.0369  | 6.7354 | 6.7430  | 6.8153  | 6.8384  | 6.4244 | 0.9981  | -0.0028 | 0.9390 | 0.0273 |
| Vdac2   | _SFNAGGKH_2                                                                                     | #N/A                   | 7.8151 | 3.9780 | 7.3683  | 7.5528  | 8.3709  | 7.1711 | 7.0794  | 7.5867  | 7.6599  | 7.2502 | 0.9525  | -0.0702 | 0.6731 | 0.1719 |
| Vdac2   | _VMNSSLVGVTQLRPGVK_2                                                                            | #N/A                   | 6.0490 | 5.3700 | 5.3727  | 5.8340  | 5.7127  | 5.5540 | 5.0138  | 5.5400  | 6.1822  | 5.8534 | 1.0002  | 0.0004  | 0.9955 | 0.0020 |
| Vdac2   | _LTFDTTSPNTGK_2                                                                                 | #N/A                   | 4.3493 | 6.6272 | 6.6285  | 7.1494  | 6.7814  | 6.7225 | 6.6981  | 6.5935  | 6.5882  | 6.4154 | 0.9700  | -0.0440 | 0.7132 | 0.1468 |
| Vdac2   | _TGDQQLTNWNGTEFGGSIQK_3                                                                         | #N/A                   | 5.8012 | 4.3997 | 3.3772  | 4.4218  | 2.7872  | 4.9817 | 5.5421  | 4.0803  | 4.3793  | 4.7363 | 0.9168  | -0.1253 | 0.5390 | 0.2684 |
| Vdac2   | _WNTDNTLGTAEIADQC[Carbamidomethyl (C)]GGLK_3                                                    | #N/A                   | 3.7259 | 2.9814 | 4.7008  | 4.5042  | 2.8697  | 3.7549 | 3.1516  | 3.9978  | 3.6378  | 4.1815 | 1.0037  | 0.0054  | 0.9745 | 0.0112 |
| Vdac2   | _SC[Carbamidomethyl (C)]GVEFFSTGSSNTDTGK_2                                                      | #N/A                   | 3.4725 | 4.2288 | 3.2062  | 4.2508  | 4.1171  | 4.0083 | 4.3991  | 4.2512  | 3.0494  | 3.9281 | 0.9933  | -0.0097 | 0.9378 | 0.0279 |
| Vdac3   | /Acetyl (Protein N-term)[C]Carbamidomethyl (C)[NT][Phospho (STY)]PTVC[Carbamidomethyl (C)]DLGK_ | Q60931_T4_M1_Vdac3     | 8.7291 | 8.4486 | 8.7894  | 8.8843  | 8.2383  | 8.5238 | 8.9984  | 8.5034  | 8.5582  | 8.5824 | 0.9933  | -0.0097 | 0.7127 | 0.1471 |
| Vdac3   | _LTDITFVPNTGK_2                                                                                 | #N/A                   | 8.6357 | 8.2708 | 8.6869  | 8.6409  | 8.4551  | 8.8790 | 8.8790  | 8.7719  | 8.4738  | 0.9847 | -0.0222 | 0.2551  | 0.5932 | 0.0251 |
| Vdac3   | _LSQNNFALGVK_2                                                                                  | #N/A                   | 7.7529 | 7.6757 | 7.4900  | 8.2839  | 7.7517  | 7.7115 | 7.6085  | 7.9078  | 7.8998  | 8.0324 | 0.9893  | -0.0156 | 0.5968 | 0.2242 |
| Vdac3   | _LTDITFVPNTGK_2                                                                                 | #N/A                   | 7.8621 | 7.7494 | 8.5724  | 7.9690  | 7.4144  | 7.9639 | 7.8271  | 8.0167  | 7.9006  | 1.0038 | 0.0055  | 0.8813  | 0.0549 | 0.0275 |
| Vdac3   | _VC[Carbamidomethyl (C)]NYGLTFTQK_2                                                             | #N/A                   | 7.4887 | 6.7715 | 7.0120  | 7.5776  | 7.0437  | 6.8240 | 7.0832  | 6.9033  | 6.8875  | 6.9405 | 1.0239  | 0.0340  | 0.3737 | 0.4275 |
| Vdac3   | _NFNAGGKH_2                                                                                     | #N/A                   | 7.6386 | 7.2028 | 7.0433  | 7.2970  | 8.3005  | 6.9968 | 7.0551  | 7.2850  | 7.4158  | 7.1572 | 1.0256  | 0.0364  | 0.4942 | 0.3061 |
| Vdac3   | _VMNASSLGYGTQLRPGVK_2                                                                           | #N/A                   | 5.6510 | 5.5933 | 6.2887  | 6.0884  | 5.2599  | 5.6276 | 5.8129  | 5.7617  | 5.9143  | 5.4450 | 1.0031  | 0.0405  | 0.9326 | 0.0303 |
| Vdac3   | _IETSINLAWTAGSNTR_2                                                                             | #N/A                   | 6.5272 | 4.0058 | 6.7812  | 6.1154  | 5.3486  | 4.9579 | 6.9866  | 5.0951  | 6.2179  | 6.4789 | 0.9077  | -0.1398 | 0.3854 | 0.4140 |
| Vdac3   | _WNTDNTLGTESWENK_2                                                                              | #N/A                   | 5.5766 | 5.4044 | 7.7391  | 4.2418  | 3.6789  | 4.0506 | 6.4064  | 5.4509  | 5.3122  | 5.9016 | 0.7739  | -0.3698 | 0.0260 | 1.5848 |
| Vdac1   | _YQVDPDQAC[Carbamidomethyl (C)]FSM_2                                                            | #N/A                   | 9.5666 | 9.8272 | 9.8456  | 10.1466 | 10.1394 | 9.8216 | 9.6449  | 9.9129  | 9.7122  | 9.8735 | 1.0108  | 0.0154  | 0.4183 | 0.1785 |
| Vdac1   | _LTFDSSFS[Phospho (STY)]PNTGK_2                                                                 | #N/A                   | 8.8883 | 8.6988 | 8.6388  | 9.4261  | 8.6812  | 8.9757 | 9.0300  | 8.8985  | 8.9828  | 8.9962 | 0.9897  | -0.0149 | 0.5630 | 0.2495 |
| Vdac1   | _VTQSNFAVGK_2                                                                                   | #N/A                   | 9.3590 | 9.3955 | 9.5179  | 9.7515  | 9.7142  | 9.5224 | 9.2466  | 9.3417  | 9.4779  | 9.5863 | 1.0138  | 0.0198  | 0.2337 | 0.6314 |
| Vdac1   | _WTEYGLTTEK_2                                                                                   | #N/A                   | 9.3803 | 9.2282 | 9.4017  | 9.4947  | 9.4377  | 9.4763 | 9.2758  | 9.2121  | 9.4958  | 9.3817 | 1.0066  | 0.0095  | 0.3992 | 0.3962 |
| Vdac1   | _TDEQLHTNVNDGTEFGGSIQK_3                                                                        | #N/A                   | 8.9739 | 9.1015 | 9.1514  | 9.5435  | 8.5706  | 8.7088 | 9.2950  | 8.5819  | 8.9993  | 8.8594 | 1.0083  | 0.0120  | 0.7347 | 0.1339 |
| Vdac1   | _GYGFGGLVK_2                                                                                    | #N/A                   | 8.3536 | 8.4579 | 8.4890  | 8.2468  | 8.1460  | 8.4714 | 8.0939  | 8.3601  | 8.7156  | 8.8457 | 0.9832  | -0.0245 | 0.3763 | 0.4244 |
| Vdac1   | _SNGLEFTSSGSANTETTK_2                                                                           | #N/A                   | 5.9116 | 6.1043 | 6.2453  | 8.3190  | 5.6391  | 6.2007 | 3.9053  | 6.6950  | 5.9915  | 2.7708 | 1.3228  | 0.4036  | 0.1106 | 0.9561 |
| Vdac1   | _TKSENGLEFTSSGSANTETTK_3                                                                        | #N/A                   | 5.1596 | 5.2951 | 3.1180  | 5.9444  | 5.7488  | 5.7941 | 4.5723  | 5.4006  | 5.1297  | 5.1705 | 1.0214  | 0.0305  | 0.8501 | 0.0701 |
| Vdac1   | _LTFDSSFS[Phospho (STY)]PNTGK_2                                                                 | #N/A                   | 9.4088 | 9.7284 | 10.1787 | 10.5591 | 9.5432  | 9.7752 | 10.0143 | 9.8550  | 9.8426  | 9.7956 | 0.9989  | -0.0017 | 0.9605 | 0.0175 |
| Vdac1   | _LETAVNLAWTAGSNTR_2                                                                             | #N/A                   | 6.0155 | 6.0027 | 6.0312  | 3.2682  | 5.4530  | 5.7422 | 7.0625  | 3.7330  | 6.3930  | 0.9507 | -0.0730 | 0.7315  | 0.1358 | 0.0275 |
| Vdac1   | _VMNSSLGTYGTQLXPQK_2                                                                            | #N/A                   | 8.0422 | 8.2286 | 8.4899  | 8.3743  | 8.1562  | 8.2153 | 8.2475  | 7.9683  | 8.0827  | 8.3671 | 1.0106  | 0.0151  | 0.4481 | 0.3487 |
| Vdac1   | _EHINLGC[Carbamidomethyl (C)]DVFQIAGPSIR_3                                                      | #N/A                   | 8.0778 | 7.4897 | 6.9542  | 8.0475  | 7.8155  | 8.0813 | 7.9843  | 7.5080  | 7.6498  | 8.3842 | 0.9826  | -0.0253 | 0.6329 | 0.1986 |
| Vdac1   | _WNTDNTLGTETVEDQAR_2                                                                            | #N/A                   | 6.3734 | 5.8232 | 6.5745  | 6.8508  | 6.2032  | 6.1878 | 6.3541  | 6.1347  | 6.4977  | 6.3554 | 1.0000  | 0.0000  | 1.0000 | 0.0000 |
| Vdac1   | _KLETAVNLAWTAGSNTR_3                                                                            | #N/A                   | 5.5373 | 5.4222 | 6.2765  | 3.4826  | 4.1110  | 5.9676 | 3.4458  | 5.4328  | 5.8397  | 1.0030 | 0.0044  | 0.9832  | 0.0074 | 0.0275 |
| Tbc1d1  | _KSPS[Phospho (STY)]QPGLR_2                                                                     | #N/A                   | 3.7175 | 2.9729 | 3.4511  | 4.4957  | 2.8612  | 3.7634 | 3.1432  | 4.0063  | 4.3053  | 4.1730 | 0.9070  | -0.1408 | 0.3531 | 0.4521 |
| Tbc1d1  | _QSARPST[Phospho (STY)]PERDC[Carbamidomethyl (C)]TQLEPTGD_2                                     | Q60949_T1242_M1_Tbc1d1 | 5.5666 | 4.2894 | 4.1710  | 3.8313  | 4.7993  | 3.6188 | 7.1087  | 3.1699  | 5.3978  | 5.7670 | 0.8169  | -0.2917 | 0.2218 | 0.6540 |
| Tbc1d1  | _LNPSSAS[Phospho (STY)]SPNFFK_2                                                                 | Q60949_S660_M1_Tbc1d1  | 4.1797 | 3.4840 | 3.3656  | 3.8683  | 3.3054  | 4.4241 | 7.1140  | 4.2502  | 3.8988  | 3.8353 | 0.7898  | -0.3404 | 0.1692 | 0.7717 |
| Tbc1d1  | _SFS[Phospho (STY)]QPGLR_2                                                                      | #N/A                   | 6.0209 | 3.2782 | 7.0487  | 3.6366  | 3.1665  | 3.4581 | 3.3513  | 3.7010  | 6.6843  | 6.5107 | 0.8761  | -0.1908 | 0.5856 | 0.2324 |
| Pml     | _VPAAPGS[Phospho (STY)]PC[Carbamidomethyl (C)]R_2                                               | Q60953_S17_M1_Pml      | 9.5918 | 9.1560 | 9.6216  | 10.0256 | 9.0354  | 9.2554 | 9.8019  | 9.5533  | 9.5656  | 9.4400 | 0.9851  | -0.0216 | 0.4902 | 0.3096 |
| Pml     | _LATSS[Phospho (STY)]PECSWPSSTK_2                                                               | Q60953_S515_M1_Pml     | 6.1142 | 3.4160 | 3.4157  | 3.4575  | 3.2373  | 5.8844 | 3.3609  | 4.1563  | 5.8772  | 4.0327 | 0.9764  | -0.0344 | 0.9025 | 0.0446 |
| Rbbp4   | _Acetyl (Protein N-term)[ADKEAAAFDAVEER_2                                                       | #N/A                   | 5.8848 | 5.3277 | 5.3994  | 5.9955  | 5.8426  | 5.1667 | 5.3400  | 5.4884  | 5.4164  | 5.5689 | 1.0274  | 0.0390  | 0.4325 | 0.0640 |
| Ncor1   | _AQLS[Phospho (STY)]POLYDSSAR_2                                                                 | Q60974_S1481_M1_Ncor1  | 6.2071 | 6.5674 | 6.9707  | 7.1257  | 6.1205  | 6.6526 | 7.1839  | 6.6851  | 6.6640  | 7.0094 | 0.9644  | -0.0523 | 0.3248 | 0.4884 |
| Ncor1   | _VSI[Phospho (STY)]PENLVOK_2                                                                    | Q60974_S2134_M1_Ncor1  | 6.5270 | 5.9179 | 6.1557  | 6.4565  | 6.0775  | 6.0816 | 6.5068  | 6.5158  | 6.1251  | 6.6188 | 0.9613  | -0.0569 | 0.1393 | 0.8559 |
| Ncor1   | _SHIPEPEPERS[Phospho (STY)]PPQGPAWKE_3                                                          | Q60974_S2165_M1_Ncor1  | 3.6936 | 2.9491 | 3.4273  | 6.2077  | 2.8374  | 3.7872 | 3.6804  | 5.9633  | 4.3292  | 5.8506 | 0.7702  | -0.3767 | 0.1782 | 0.7491 |
| Ncor1   | _EPAPLSAQYETLS[Phospho (STY)]DSDQ_2                                                             |                        |        |        |         |         |         |        |         |         |         |        |         |         |        |        |



|           |                                                              |                          |         |         |         |         |        |         |         |         |         |         |         |         |        |        |
|-----------|--------------------------------------------------------------|--------------------------|---------|---------|---------|---------|--------|---------|---------|---------|---------|---------|---------|---------|--------|--------|
| Hars1     | _ASAEQIEEEVTK_2                                              | #N/A                     | 3.7852  | 6.0033  | 4.4720  | 6.2245  | 6.1998 | 6.2184  | 6.4937  | 6.3260  | 5.9795  | 6.7825  | 0.8575  | -0.2218 | 0.1450 | 0.8387 |
| Hars1     | _TIC[Carbamidomethyl (C)]SSVQKLDK_3                          | #N/A                     | 4.2396  | 1.1777  | 3.9733  | 3.4197  | 2.5293 | 3.1416  | 3.1344  | 3.4841  | 4.3473  | 3.1943  | 0.8701  | -0.2007 | 0.4719 | 0.3261 |
| Pak3      | _I[Acetyl (Protein N-term)]SDS[Phospho (STY)]LONEKPPAPPLR_2  | Q61036_S4_M1_Pak3        | 5.1211  | 8.8836  | 9.0677  | 10.0174 | 7.8319 | 9.0154  | 5.2636  | 8.8293  | 8.9637  | 1.0433  | 0.0612  | 0.7677  | 0.1148 |        |
| Tsc2      | _STS[Phospho (STY)]LINEPK_2                                  | Q61037_S939_M1_Tsc2      | 8.6770  | 8.5373  | 9.0412  | 4.9924  | 7.3422 | 8.3717  | 8.7244  | 8.7402  | 8.6582  | 8.4572  | 0.8957  | -0.1589 | 0.3278 | 0.4844 |
| Tsc2      | _DIDRLS[Phospho (STY)]PEAK_2                                 | Q61037_S1412_M1_Tsc2     | 7.5981  | 6.5011  | 6.9914  | 6.5187  | 5.5184 | 6.3002  | 7.8927  | 7.6273  | 8.6532  | 7.1065  | 0.8923  | -0.1644 | 0.0378 | 1.0814 |
| Tsc2      | _S[Phospho (STY)]PSGLRPR_2                                   | Q61037_S1455_M1_Tsc2     | 7.7093  | 7.6459  | 7.7006  | 3.6537  | 3.0908 | 7.3753  | 7.5476  | 7.7012  | 7.4654  | 7.4034  | 0.8229  | -0.2812 | 0.2690 | 0.5702 |
| Tsc2      | _SSS[Phospho (STY)]SPELTQLQDLGGDGLK_2                        | Q61037_S1388_M1_Tsc2     | 3.3940  | 4.6592  | 4.0808  | 4.5835  | 4.0206 | 3.7089  | 4.2982  | 3.5350  | 3.1836  | 3.0497  | 1.1587  | 0.2124  | 0.1333 | 0.8752 |
| Tsc2      | _SOS[Phospho (STY)]GLDGEAATWSAQTGEER_2                       | Q61037_S1421_M1_Tsc2     | 3.5304  | 4.3356  | 4.2172  | 5.3475  | 4.1569 | 3.5726  | 3.9334  | 4.5913  | 3.8593  | 3.1478  | 1.0799  | 0.1110  | 0.4705 | 0.3275 |
| Tsc2      | _S[Phospho (STY)]VSEHVVR_2                                   | Q61037_S981_M1_Tsc2      | 3.2501  | 3.9761  | 3.9369  | 4.4396  | 3.8766 | 3.8529  | 4.1542  | 3.6789  | 3.3275  | 5.7911  | 0.9176  | -0.1241 | 0.4808 | 0.3181 |
| Tsc2      | _SM[Oxidation (M)]S[Phospho (STY)]GGHGLR_2                   | #N/A                     | 4.7260  | 4.7288  | 4.8604  | 3.7296  | 3.3606 | 3.9705  | 3.8778  | 4.8405  | 5.5847  | 4.3156  | 1.0180  | 0.0257  | 0.8515 | 0.6098 |
| Tsc2      | _LSS[Phospho (STY)]VDDTFEV_2                                 | Q61037_S1806_M1_Tsc2     | 3.4569  | 3.8856  | 3.1905  | 4.2351  | 4.1014 | 4.0226  | 4.3834  | 4.2669  | 3.0651  | 3.9124  | 0.9766  | -0.0342 | 0.7778 | 0.1092 |
| Wbp4      | _S[Phospho (STY)]LDKAKEEEK_2                                 | Q61048_S51_M1_Wbp4       | 3.6200  | 3.2441  | 3.0057  | 2.8616  | 2.9363 | 2.7048  | 2.3100  | 1.8586  | 1.2587  | 4.0064  | 1.2984  | 0.3767  | 0.1931 | 0.7142 |
| Usf1,Usf2 | _THPVS[Phospho (STY)]PK_2                                    | Q61069_S186_M1_Usf1,Usf2 | 7.0000  | 7.3385  | 7.2421  | 7.1241  | 3.9438 | 4.1816  | 4.0748  | 6.9970  | 7.0225  | 4.3271  | 1.0951  | 0.1311  | 0.6235 | 0.2051 |
| Ei24      | _RPS[Phospho (STY)]VER_2                                     | Q61070_S56_M1_Ei24       | 5.5252  | 5.9563  | 6.6831  | 5.1857  | 4.2137 | 4.9486  | 5.4986  | 6.0404  | 5.4858  | 5.5476  | 0.9602  | -0.0585 | 0.6294 | 0.2011 |
| Ei24      | _FPS[Phospho (STY)]PHPS[Phospho (STY)]PAK_2                  | Q61070_S326_M2_Ei24      | 8.3986  | 7.9933  | 3.8526  | 7.7460  | 3.2626 | 3.3620  | 7.6184  | 8.4778  | 6.3986  | 7.3460  | 0.7733  | -0.3708 | 0.2377 | 0.6239 |
| Ppm1g     | _KLEALST[Phospho (STY)]EGADTGNSDK_2                          | Q61074_T525_M1_Ppm1g     | 3.9376  | 4.0044  | 4.3341  | 4.0752  | 4.0259 | 3.8263  | 4.3849  | 4.0545  | 3.1248  | 3.9076  | 1.0429  | 0.0606  | 0.4880 | 0.3115 |
| Map3k2    | _AQ[Phospho (STY)]YPONHQFTDYDNPFEK_3                         | Q61083_S239_M1_Map3k2    | 3.8235  | 4.4946  | 3.5572  | 6.0890  | 2.9672 | 3.6574  | 3.2492  | 3.9002  | 4.7036  | 4.4088  | 1.0080  | 0.0115  | 0.9587 | 0.0183 |
| Map3k3    | _AIDILDRS[Phospho (STY)]S[Phospho (STY)]SM[Oxidation (M)]K_2 | Q61084_S111_M2_Map3k3    | 3.4616  | 4.2396  | 3.6927  | 4.2329  | 4.0983 | 3.8409  | 4.3812  | 4.2921  | 3.9382  | 4.2678  | 0.9308  | -0.1035 | 0.1405 | 0.8523 |
| Kur1      | _TES[Phospho (STY)]YPSDINNVPDR_2                             | Q61097_S392_M1_Kur1      | 7.6976  | 3.0860  | 3.5642  | 4.6088  | 2.9743 | 3.6503  | 3.5435  | 7.2928  | 4.1922  | 7.7059  | 0.7502  | -0.4147 | 0.2836 | 0.5473 |
| Kur1      | _SKS[Phospho (STY)]HESQGNR_2                                 | Q61097_S297_M1_Kur1      | 7.6517  | 7.5633  | 4.4707  | 8.2764  | 7.4555 | 7.9048  | 3.7428  | 7.7538  | 8.0358  | 7.6765  | 1.0599  | 0.0840  | 0.7157 | 0.1453 |
| Dpf2      | _VDD[Phospho (STY)]GEFPPVNSR_2                               | Q61103_S142_M1_Dpf2      | 4.2920  | 7.7589  | 4.0256  | 9.2569  | 8.3500 | 3.1889  | 3.0821  | 9.2141  | 8.9441  | 8.4457  | 0.8281  | -0.2722 | 0.4882 | 0.3114 |
| Shc3      | _G[Phospho (STY)]DNSTAEKG_2                                  | Q61120_S282_M1_Shc3      | 3.3389  | 4.0035  | 7.7144  | 4.1172  | 3.8835 | 4.3848  | 4.2655  | 7.7393  | 7.5102  | 8.8554  | -0.2253 | 0.5097  | 0.2927 |        |
| Shc3      | _AAS[Phospho (STY)]VECC[Carbamidomethyl (C)]SPVTPR_2         | Q61120_S354_M1_Shc3      | 9.1946  | 8.8548  | 8.9308  | 9.1438  | 7.5079 | 8.8857  | 9.1124  | 8.9025  | 8.9720  | 9.0397  | 0.9718  | -0.0412 | 0.4525 | 0.3444 |
| Nab2      | _SF[Phospho (STY)]PKS[Phospho (STY)]PLELGEK_2                | Q61127_S159_M2_Nab2      | 3.9542  | 3.2096  | 3.6878  | 8.0824  | 7.1118 | 3.5267  | 3.4199  | 7.9427  | 6.0772  | 4.4097  | 0.9023  | -0.1483 | 0.6986 | 0.1558 |
| Prgf4b    | _KS[Phospho (STY)]KS[Phospho (STY)]PPLR_2                    | #N/A                     | 10.6666 | 10.4827 | 10.7976 | 10.4867 | 9.4930 | 10.3857 | 10.9343 | 10.6963 | 10.4513 | 0.9709  | -0.0427 | 0.2443  | 0.2431 |        |
| Prgf4b    | _KKS[Phospho (STY)]PVNER_2                                   | Q61136_S278_M1_Prgf4b    | 9.0123  | 8.9064  | 9.5949  | 9.3248  | 8.2782 | 8.9918  | 9.5005  | 9.3585  | 9.0565  | 8.9404  | 0.9787  | -0.0310 | 0.4541 | 0.3429 |
| Prgf4b    | _SKDAS[Phospho (STY)]PNRWS[Phospho (STY)]PTR_2               | #N/A                     | 8.1686  | 8.0137  | 8.8933  | 8.2670  | 7.0872 | 8.1682  | 8.1248  | 8.3649  | 8.1723  | 6.9304  | 1.0255  | 0.0364  | 0.6227 | 0.2057 |
| Prgf4b    | _S[Phospho (STY)]RS[Phospho (STY)]PLNDR_2                    | #N/A                     | 8.8713  | 8.6479  | 9.2689  | 9.0596  | 8.1549 | 8.7342  | 9.2911  | 8.8802  | 8.8406  | 8.6526  | 0.9858  | -0.2006 | 0.5851 | 0.2327 |
| Prgf4b    | _KLEALST[Phospho (STY)]LS[Phospho (STY)]PK_2                 | Q61136_S354_M2_Prgf4b    | 8.2017  | 7.9996  | 8.9621  | 8.1659  | 7.4204 | 8.4315  | 8.5913  | 8.4908  | 7.9154  | 0.9786  | -0.0312 | 0.5416  | 0.1661 |        |
| Prgf4b    | _S[Phospho (STY)]RS[Phospho (STY)]PLRR_2                     | Q61136_S451_M2_Prgf4b    | 7.5403  | 7.8403  | 7.6543  | 7.8950  | 7.1464 | 7.9085  | 8.4135  | 8.0061  | 8.1875  | 7.7163  | 0.9484  | -0.0764 | 0.0589 | 1.2301 |
| Prgf4b    | _AS[Phospho (STY)]RS[Phospho (STY)]LER_2                     | Q61136_S394_M2_Prgf4b    | 6.6350  | 6.6427  | 6.6738  | 7.4019  | 5.8888 | 7.2356  | 7.3081  | 7.4484  | 6.6940  | 0.9414  | -0.0871 | 0.2064  | 0.6854 |        |
| Prgf4b    | _T[Phospho (STY)]GRR_2                                       | Q61136_S387_M1_Prgf4b    | 7.3490  | 7.0386  | 7.7770  | 4.0798  | 5.9472 | 6.6491  | 7.1749  | 4.0386  | 6.9966  | 6.8152  | 1.0400  | 0.0566  | 0.7878 | 0.1036 |
| Prgf4b    | _SKDAS[Phospho (STY)]PNR_2                                   | Q61136_S431_M1_Prgf4b    | 7.2530  | 6.6311  | 6.9497  | 7.2473  | 3.5413 | 6.4479  | 7.1370  | 7.2601  | 3.0044  | 7.0970  | 1.0360  | 0.0510  | 0.8452 | 0.0730 |
| Prgf4b    | _S[Phospho (STY)]KS[Phospho (STY)]PVDLR_2                    | #N/A                     | 10.2244 | 9.6411  | 9.3528  | 10.2060 | 8.6764 | 9.7126  | 10.4044 | 9.7777  | 10.0399 | 9.9838  | 0.9586  | -0.0610 | 0.2207 | 0.6562 |
| Prgf4b    | _S[Phospho (STY)]KS[Phospho (STY)]PLNDRR_2                   | #N/A                     | 7.5720  | 7.3158  | 7.8904  | 5.5096  | 6.7196 | 7.5629  | 7.8839  | 7.7682  | 7.4415  | 0.9658  | -0.0502 | 0.2540  | 0.5952 |        |
| Prgf4b    | _DAS[Phospho (STY)]PNRWS[Phospho (STY)]PTR_2                 | #N/A                     | 6.4624  | 3.8716  | 3.7532  | 8.3316  | 3.6929 | 8.0372  | 8.7722  | 8.0084  | 7.9524  | 4.2228  | 0.7862  | -0.3470 | 0.2954 | 0.5296 |
| Prgf4b    | _EVIEASKEGLS[Phospho (STY)]AKR_3                             | #N/A                     | 6.8406  | 6.8349  | 7.2861  | 7.6188  | 6.5149 | 7.1637  | 7.3057  | 7.4690  | 7.6247  | 7.4451  | 0.9440  | -0.0832 | 0.0777 | 1.1096 |
| Prgf4b    | _LC[Carbamidomethyl (C)]DGGASHADNNTTP[Phospho (STY)]VSR_3    | Q61136_Y849_M1_Prgf4b    | 4.3512  | 8.4123  | 8.1179  | 9.7993  | 3.6460 | 6.1786  | 7.1161  | 8.6591  | 7.2832  | 5.7443  | 0.9971  | -0.0042 | 0.9854 | 0.0064 |
| Prgf4b    | _S[Phospho (STY)]PVLDKR_2                                    | #N/A                     | 8.0296  | 7.6441  | 8.1491  | 8.0365  | 7.3476 | 7.6104  | 8.3900  | 7.9522  | 8.0674  | 8.0751  | 0.9608  | -0.0577 | 0.1098 | 0.9594 |
| Prgf4b    | _RS[Phospho (STY)]RS[Phospho (STY)]PLNDR_3                   | #N/A                     | 3.9570  | 4.2918  | 3.6212  | 4.1239  | 1.1101 | 3.9454  | 3.8386  | 2.5143  | 3.6432  | 4.0909  | 0.9962  | -0.0055 | 0.9844 | 0.0068 |
| Prgf4b    | _S[Phospho (STY)]KS[Phospho (STY)]PLLR_2                     | #N/A                     | 2.9403  | 3.7455  | 3.6271  | 3.2198  | 3.5669 | 4.1626  | 4.5234  | 3.9887  | 4.4259  | 4.0968  | 0.8321  | -0.2652 | 0.0173 | 1.7615 |
| Astn1     | _VGS[Phospho (STY)]PKS[Phospho (STY)]PVNK_2                  | Q61137_S376_M2_Astn1     | 6.7547  | 6.7752  | 7.2185  | 7.1028  | 6.1500 | 6.5132  | 7.2037  | 7.0253  | 6.6977  | 6.6414  | 0.9797  | -0.0295 | 0.5529 | 0.7977 |
| Astn1     | _SAS[Phospho (STY)]AAEANEHYPVLGVGGR_3                        | Q61137_S194_M1_Astn1     | 6.4795  | 7.1134  | 7.3352  | 7.8941  | 3.0717 | 5.7317  | 6.6668  | 6.9673  | 6.8186  | 5.6283  | 0.9618  | -0.0562 | 0.7927 | 0.1009 |
| Astn1     | _GNSPDS[Phospho (STY)]EEREDPK_3                              | #N/A                     | 5.3424  | 3.6335  | 5.7207  | 4.1878  | 3.4819 | 3.9898  | 5.3193  | 3.7816  | 5.3848  | 5.4703  | 0.9786  | -0.0313 | 0.8798 | 0.0556 |
| Astn1     | _VQGHNS[Phospho (STY)]SGTSLR_2                               | Q61137_S227_M1_Astn1     | 6.3735  | 6.2700  | 3.4482  | 6.6442  | 3.1547 | 4.0755  | 7.0163  | 4.0895  | 4.0912  | 6.6113  | 0.9160  | -0.1265 | 0.6685 | 0.1736 |
| Astn1     | _GNSPDS[Phospho (STY)]EERER_2                                | #N/A                     | 3.9498  | 3.2052  | 3.6834  | 3.7096  | 3.0935 | 3.5311  | 3.4243  | 4.4089  | 4.0575  | 4.4053  | 0.8662  | -0.2073 | 0.0584 | 1.2349 |
| Bcar1     | _GS[Phospho (STY)]GTFPEDLR_2                                 | Q61140_S572_M1_Bcar1     | 2.9912  | 4.3512  | 4.2257  | 3.7695  | 4.1725 | 7.2545  | 7.6104  | 7.0393  | 5.5307  | 3.4468  | 0.8250  | -0.2775 | 0.4353 | 0.3612 |
| Psen2     | _TQES[Phospho (STY)]EEDC[Carbamidomethyl (C)]EEDPOR_2        | Q61144_S52_M1_Psen2      | 3.7346  | 5.0766  | 3.4683  | 4.5129  | 2.8783 | 3.7463  | 5.3985  | 3.9891  | 4.2882  | 4.1902  | 0.8738  | -0.1946 | 0.2650 | 0.5786 |
| Psen2     | _TSLMSAE[Phospho (STY)]PTSR_2                                | Q61144_S25_M1_Psen2      | 3.5337  | 4.3389  | 4.2206  | 3.2224  | 4.1603 | 3.5692  | 4.4379  | 3.3953  | 3.0439  | 3.1894  | 1.0922  | 0.1272  | 0.3701 | 0.4316 |
| Ocln      | _YSS[Phospho (STY)]NGNLETPSKR_2                              | #N/A                     | 3.0647  | 3.8210  | 6.0498  | 3.8430  | 3.7093 | 4.4161  | 3.9913  | 6.2683  | 3.4572  | 3.5203  | 0.9632  | -0.0543 | 0.8359 | 0.0779 |
| Ocln      | _YSS[Phospho (STY)]NGNLETPSKR_2                              | #N/A                     | 3.8963  | 3.2007  | 4.5831  | 3.4192  | 3.0220 | 3.2066  | 3.5674  | 7.3317  | 4.1821  | 3.5520  | 0.7631  | -0.3901 | 0.1919 | 0.7170 |
| Ocln      | _NVVS[Phospho (STY)]AGTQDM[Oxidation (M)]PPPSDYAER_2         | #N/A                     | 3.9035  | 5.1983  | 5.9903  | 5.2738  | 4.2852 | 5.1325  | 6.1798  | 5.4580  | 5.7365  | 5.2711  | 0.8768  | -0.1897 | 0.1303 | 0.8850 |
| Ppy2/Se   | _SOS[Phospho (STY)]SSQFR_2                                   | Q61151_S32_M1_Ppy2/Se    | 4.0891  | 6.4017  | 7.0335  | 3.4382  | 3.2125 | 6.4717  | 9.4839  | 4.1754  | 4.1217  | 4.5031  | 0.9370  | -0.0938 | 0.8093 | 0.0919 |
| Map4k2    | _TPS[Phospho (STY)]EIQGHQVL_2                                | Q61161_S328_M1_Map4k2    | 3.9395  | 8.4996  | 8.3322  | 8.8869  | 3.0652 | 8.3332  | 8.7409  | 8.5784  | 8.4792  | 8.5003  | 0.7106  | -0.4930 | 0.1140 | 0.9432 |
| Map4k2    | _ASDPHGLTSL[Phospho (STY)]PEDSLETHMFPDTHWSR_4                | Q61161_S298_M1_Map4k2    | 4.3016  | 3.5570  | 4.0352  | 3.3578  | 3.4453 | 3.1793  | 3.0725  | 3.2598  | 4.4093  | 3.2563  | 1.0419  | 0.0592  | 0.6662 | 0.1764 |
| Clef      | _I[Acetyl (Protein N-term)]M[Oxidation (M)]EGEAIVEAESEETIK_2 | #N/A                     | 4.3998  | 5.4364  | 7.0969  | 6.6367  | 5.6665 | 6.3300  | 6.1862  | 5.3108  | 4.4528  | 5.0038  | 1.1316  | 0.1784  | 0.2615 | 0.5825 |
| Sic9a1    | _LDS[Phospho (STY)]PTLSR_2                                   | #N/A                     | 11.1806 | 10.5555 | 11.0499 | 10.7271 | 9.6133 | 10.4577 | 11.0956 | 11.1424 | 10.8114 | 10.7640 | 0.9675  | -0.0477 | 0.2610 | 0.5834 |
| Sic9a1    | _JGS[Phospho (STY)]DPLAYPEK_2                                | Q61165_S707_M1_Sic9a1    | 9.6808  | 9.4822  | 10.0092 | 9.5035  | 7.6739 | 9.4188  | 10.3293 | 9.8716  | 9.4547  | 0.9465  | -0.0794 | 0.2720  | 0.5654 |        |
| Sic9a1    | _ADLPVITDPA[Phospho (STY)]PGSPESDVLVNEELK_3                  | Q61165_S727_M1_Sic9a1    | 3.6833  | 2.9387  | 3.4170  | 5.4138  | 2.8270 | 3.7976  | 3.1090  | 4.0405  | 4.3395  | 4.1388  | 0.9418  | -0.0865 | 0.6755 | 1.1704 |
| Sic9a1    | _TNYLTVPAAKLDS[Phospho (STY)]PTLSR_2                         | #N/A                     |         |         |         |         |        |         |         |         |         |         |         |         |        |        |



|          |  |                                                                                         |                         |         |         |         |         |         |         |         |         |         |          |        |         |        |        |
|----------|--|-----------------------------------------------------------------------------------------|-------------------------|---------|---------|---------|---------|---------|---------|---------|---------|---------|----------|--------|---------|--------|--------|
| Pafah1b2 |  | _ELFSPHALNFIGGIDTR_3                                                                    | #N/A                    | 5.6606  | 5.5850  | 5.4293  | 6.3234  | 6.2075  | 5.9130  | 5.7002  | 5.7176  | 5.5845  | 6.0422   | 1.0160 | 0.0229  | 0.6549 | 0.1838 |
| Pafah1b2 |  | _Acetyl (Protein N-term)SGQSNPAAPHAEDIQGDWRM(Oxidation (M))SQHNR_4                      | #N/A                    | 5.9252  | 6.5981  | 7.6157  | 9.5983  | 6.5476  | 6.3638  | 6.3901  | 6.3172  | 6.1065  | 6.2454   | 1.0378 | 0.0535  | 0.4782 | 0.3204 |
| Pasp     |  | _G[C]Carbamidomethyl (C)[S]FDPPQK_2                                                     | #N/A                    | 9.6001  | 10.0329 | 10.1293 | 10.0810 | 10.4847 | 10.1073 | 10.0147 | 9.8131  | 9.9792  | 9.8605   | 1.0157 | 0.0225  | 0.3269 | 0.4855 |
| Pasp     |  | _SLP[C]Carbamidomethyl (C)[QK]Carbamidomethyl (C)[K]_2                                  | #N/A                    | 7.8054  | 8.2714  | 8.5531  | 8.1939  | 8.8647  | 7.8352  | 7.8145  | 8.0352  | 8.2437  | 8.2483   | 1.0208 | 0.0298  | 0.4750 | 0.3233 |
| Pasp     |  | _TVTVEAGNLLK_2                                                                          | #N/A                    | 6.5672  | 7.0318  | 6.3363  | 6.8557  | 7.3210  | 6.2133  | 6.4094  | 6.5318  | 6.7249  | 6.3032   | 1.0352 | 0.0499  | 0.3465 | 0.4603 |
| Pasp     |  | _LVSDVQTAWK_2                                                                           | #N/A                    | 5.7504  | 5.9868  | 5.5705  | 5.2401  | 6.5194  | 5.7760  | 5.5949  | 5.9021  | 5.4207  | 5.7644   | 1.0241 | 0.0344  | 0.5753 | 0.2401 |
| Pasp     |  | _LVLYLEHRLK_2                                                                           | #N/A                    | 5.0812  | 3.9156  | 5.1287  | 5.7821  | 5.4773  | 5.1660  | 5.4505  | 4.9828  | 5.2530  | 4.6406   | 1.0020 | 0.0029  | 0.9779 | 0.0097 |
| Pasp     |  | _LGPQVSDK[Carbamidomethyl (C)]K_2                                                       | #N/A                    | 4.8662  | 4.8662  | 5.3882  | 5.8895  | 5.2705  | 4.7714  | 4.7735  | 5.3447  | 5.1271  | 5.6427   | 0.9906 | -0.0137 | 0.8732 | 0.0589 |
| Pasp     |  | _EVDVSYLVLDLM(Oxidation (M))K_2                                                         | #N/A                    | 5.7889  | 6.1905  | 5.8427  | 5.8766  | 6.4557  | 6.3858  | 6.0943  | 5.9207  | 6.0070  | 5.9130   | 1.0178 | 0.0254  | 0.5073 | 0.2948 |
| Pasp     |  | _TC[Carbamidomethyl (C)]EWHSSLSASC[Carbamidomethyl (C)]K_3                              | #N/A                    | 3.8078  | 3.5169  | 4.2203  | 4.1900  | 4.9913  | 4.7861  | 3.9390  | 4.8717  | 3.9152  | 4.0222   | 1.0155 | 0.0222  | 0.8528 | 0.0692 |
| Dyrk1a   |  | _IYQY[Phospho (STY)]IQSR_2                                                              | Q61214_Y321_M1_Dyrk1a   | 12.0795 | 11.9337 | 12.5613 | 12.0456 | 11.1462 | 11.7923 | 12.3213 | 12.0309 | 12.0545 | 11.8292  | 0.9890 | -0.0159 | 0.6089 | 0.2154 |
| Lcp1     |  | _FSLVGIAGGDINEGR_2                                                                      | #N/A                    | 5.5084  | 4.8540  | 5.0603  | 5.2384  | 4.2771  | 5.1923  | 5.6129  | 5.2723  | 4.7649  | 5.2224   | 0.9624 | -0.0553 | 0.4655 | 0.3320 |
| Lcp1     |  | _GS[Phospho (STY)]VSDSEMMELR_2                                                          | Q61233_S5_M1_Lcp1       | 4.2782  | 2.9480  | 3.4641  | 3.9668  | 3.4039  | 4.3256  | 3.6815  | 4.1517  | 3.8003  | 3.9338   | 0.9587 | -0.0608 | 0.5954 | 0.2252 |
| Lcp1     |  | _EGES[Phospho (STY)]LEDLMK_2                                                            | Q61233_S257_M1_Lcp1     | 3.7974  | 3.1018  | 4.4842  | 3.5180  | 2.9231  | 3.3055  | 3.6663  | 3.1316  | 4.2810  | 3.4531   | 0.9694 | -0.0449 | 0.7555 | 0.1218 |
| Snta1    |  | _QPS[Phospho (STY)]PGQPQR_2                                                             | Q61234_S195_M1_Snta1    | 3.9298  | 3.2529  | 8.8339  | 8.7966  | 5.0227  | 3.4360  | 5.8268  | 6.0404  | 8.5030  | 8.7433   | 0.7619 | -0.3923 | 0.2711 | 0.5670 |
| Snta1    |  | _NSAGGTSVGWDS[Phospho (STY)]PPASPLQR_2                                                  | Q61234_S183_M1_Snta1    | 3.9738  | 4.8658  | 6.5095  | 9.1230  | 6.0092  | 6.1030  | 6.0311  | 8.0506  | 6.5859  | 7.0147   | 0.8811 | -0.1827 | 0.4143 | 0.3827 |
| Snta1    |  | _YLEIC[Carbamidomethyl (C)]AADGQDAVFLR_2                                                | #N/A                    | 2.9097  | 3.6660  | 4.1442  | 3.6880  | 3.5543  | 3.0703  | 3.8363  | 3.3132  | 3.6122  | 3.3653   | 0.9925 | -0.0108 | 0.9183 | 0.0370 |
| Sntb2    |  | _GPAGEASAS[Phospho (STY)]PPVR_2                                                         | #N/A                    | 3.7592  | 3.7592  | 3.4608  | 3.9634  | 3.4005  | 4.3290  | 3.3889  | 4.1550  | 3.7488  | 3.9304   | 0.9751 | -0.0363 | 0.9303 | 0.0314 |
| Sntb2    |  | _GLGPPS[Phospho (STY)]PPAPPR_2                                                          | Q61235_S75_M1_Sntb2     | 4.9542  | 9.3607  | 3.6855  | 9.7418  | 7.3927  | 8.5945  | 9.4965  | 9.1910  | 9.2332  | 9.2372   | 0.8653 | -0.2087 | 0.3170 | 0.4990 |
| Sntb2    |  | _GPAGEASAS[Phospho (STY)]PPVR_3                                                         | #N/A                    | 4.0382  | 3.2936  | 3.7719  | 3.3156  | 3.1819  | 3.4427  | 3.4639  | 3.6855  | 3.9846  | 2.9929   | 0.9931 | -0.0100 | 0.9201 | 0.0362 |
| Igfbp1   |  | _Acetyl (Protein N-term)AAS[Phospho (STY)]DELLPR_2                                      | Q61249_S4_M1_Igfbp1     | 5.5581  | 6.5970  | 6.8573  | 7.1047  | 6.2481  | 7.2744  | 6.8299  | 6.2975  | 7.1574  | 6.5536   | 0.9810 | -0.0277 | 0.7281 | 0.1378 |
| Abcd2    |  | _AEAFS[Phospho (STY)]PAENR_2                                                            | Q61285_S58_M1_Abcd2     | 6.9097  | 3.2237  | 3.7314  | 7.1061  | 3.0451  | 3.1836  | 3.5444  | 3.0996  | 4.1591  | 3.5750   | 1.4383 | 0.0244  | 0.2029 | 0.6928 |
| Tcf12    |  | _TSS[Phospho (STY)]TNEDEQNFQK_2                                                         | Q61286_S583_M1_Tcf12    | 3.9839  | 3.2422  | 3.1699  | 3.6725  | 3.1305  | 3.4941  | 3.3872  | 4.4459  | 4.0945  | 3.6395   | 0.8862 | -0.1743 | 0.1178 | 0.9289 |
| Cacna1e  |  | _GTQADWES[Phospho (STY)]PER_2                                                           | #N/A                    | 8.4652  | 8.1154  | 8.8105  | 8.5065  | 6.4225  | 7.9318  | 8.4155  | 8.3973  | 8.1519  | 8.0368   | 0.9747 | -0.0369 | 0.6490 | 0.1878 |
| Cacna1e  |  | _QG[Phospho (STY)]PVFASGPAAYK_2                                                         | Q61290_T29_M1_Cacna1e   | 8.1405  | 7.5500  | 3.6066  | 7.6331  | 3.5463  | 7.2443  | 8.2524  | 8.1363  | 7.9489  | 7.7890   | 0.7828 | -0.3534 | 0.1463 | 0.8348 |
| Cacna1e  |  | _GTQADWES[Phospho (STY)]PERR_2                                                          | #N/A                    | 7.4538  | 7.2938  | 7.8795  | 7.4830  | 6.1130  | 6.9673  | 7.5499  | 7.6481  | 7.0504  | 7.0317   | 0.9834 | -0.0242 | 0.7267 | 0.1463 |
| Cacna1e  |  | _S[Phospho (STY)]YHSSLR_2                                                               | Q61290_S2013_M1_Cacna1e | 7.6708  | 6.6483  | 4.1640  | 7.0752  | 4.8337  | 7.1273  | 7.4979  | 6.9535  | 6.9714  | 0.8757   | 0.9834 | -0.1915 | 0.2571 | 0.5899 |
| Cacna1e  |  | _HLLS[Phospho (STY)]PDVSR_2                                                             | #N/A                    | 3.5970  | 7.1684  | 7.5151  | 6.9681  | 4.2415  | 7.0751  | 7.5954  | 7.5038  | 7.2963  | 6.8269   | 0.8342 | -0.2616 | 0.2066 | 0.6848 |
| Cacna1e  |  | _KHLIS[Phospho (STY)]PDVSR_2                                                            | #N/A                    | 6.9276  | 3.9009  | 4.602   | 4.0250  | 4.0999  | 6.0219  | 4.0104  | 7.1212  | 6.2654  | 6.4115   | 0.8158 | -0.2937 | 0.2314 | 0.6546 |
| Cacna1e  |  | _AS[Phospho (STY)]KIS[Phospho (STY)]TKDVGASYR_3                                         | Q61290_S447_M2_Cacna1e  | 3.1517  | 4.8396  | 4.1295  | 5.0511  | 3.7870  | 4.5194  | 4.0667  | 3.4574  | 5.0002  | 4.8744   | 0.9916 | -0.0122 | 0.9410 | 0.0264 |
| Cacna1e  |  | _FGEAVVGRGPS[Phospho (STY)]GGDGDQSR_3                                                   | #N/A                    | 3.7908  | 6.8812  | 4.0226  | 7.9260  | 5.8601  | 7.1044  | 7.3661  | 8.4009  | 7.0700  | 7.4744   | 0.7774 | -0.3363 | 0.1155 | 0.9736 |
| Cacna1e  |  | _DSSDHCC[Carbamidomethyl (C)]VDISVGT[Phospho (STY)]PLAR_3                               | Q61290_T441_M1_Cacna1e  | 4.9460  | 4.8151  | 4.7004  | 4.2895  | 4.2358  | 4.8383  | 5.4074  | 5.4869  | 4.9121  | 4.9478   | 0.8938 | -0.1620 | 0.0219 | 1.6588 |
| Cacna1e  |  | _GISQ[S]Phospho (STY)EPDLSC[Carbamidomethyl (C)]M(Oxidation (M))TANM(Oxidation (M))DK_2 | #N/A                    | 6.6495  | 6.5871  | 7.0661  | 7.1798  | 3.8470  | 6.0651  | 7.0182  | 6.3260  | 3.9733  | 0.7013   | 1.0165 | 0.0236  | 0.9093 | 0.0413 |
| Cacna1e  |  | _SAS[Phospho (STY)]QERS[Phospho (STY)]LDGVSVEGEKEPHSSHRR_4                              | Q61290_S948_M2_Cacna1e  | 4.7338  | 5.0663  | 3.4779  | 6.0073  | 3.4176  | 4.8627  | 5.0309  | 6.0620  | 5.7666  | 5.2962   | 0.8294 | -0.2698 | 0.1179 | 0.9283 |
| Cacna1e  |  | _TDEGAS[Phospho (STY)]PKKEAEKEEEVEK_4                                                   | Q61290_S1099_M1_Cacna1e | 3.9248  | 3.8986  | 4.3768  | 3.9206  | 3.7868  | 3.4367  | 3.0806  | 2.2059  | 3.5978  | 1.1615   | 0.2160 | 0.4090  | 0.3882 | 0.1494 |
| Cacna1e  |  | _S[Phospho (STY)]LDGVSVEGEKEHEPHSSHRR_4                                                 | #N/A                    | 5.0752  | 3.6074  | 3.9022  | 4.8427  | 4.1598  | 3.8526  | 3.9756  | 5.5775  | 4.5402  | 4.7559   | 0.8998 | -0.1524 | 0.2703 | 0.5681 |
| Cacna1e  |  | _EVS[Phospho (STY)]PMI(Oxidation (M))SAPNM(Oxidation (M))PSIER_2                        | #N/A                    | 7.5416  | 7.0704  | 7.8448  | 7.2912  | 5.6245  | 6.8177  | 7.6015  | 7.5553  | 6.9980  | 6.9880   | 0.9581 | -0.0617 | 0.4778 | 0.3207 |
| Cacna1e  |  | _GGS[Phospho (STY)]LKGGIGGLTSALDNOR_3                                                   | #N/A                    | 3.8996  | 4.7191  | 3.9084  | 4.8867  | 3.7515  | 3.7246  | 3.6177  | 4.7092  | 4.0073  | 3.8366   | 1.0261 | 0.0372  | 0.7517 | 0.1239 |
| Cacna1e  |  | _HIMOMES[Phospho (STY)]IQEALNK_2                                                        | Q61290_S794_M1_Cacna1e  | 3.6809  | 3.5452  | 4.3677  | 3.3695  | 2.8066  | 3.1911  | 3.0842  | 3.2481  | 4.3975  | 3.3365   | 0.9934 | -0.0095 | 0.9501 | 0.0222 |
| Cacna1e  |  | _AKEVS[Phospho (STY)]PMSAPNMPSIER_3                                                     | #N/A                    | 3.3579  | 3.9845  | 4.5924  | 4.1361  | 4.0024  | 4.1230  | 4.2844  | 4.3659  | 3.1641  | 3.8134   | 1.0322 | 0.0457  | 0.6840 | 0.1649 |
| Ctnna2   |  | _VYGTAAVNS[Phospho (STY)]PVVSWK_2                                                       | Q61301_S901_M1_Ctnna2   | 6.8745  | 7.7520  | 8.2618  | 4.6881  | 6.0144  | 7.2172  | 3.1155  | 7.9270  | 7.3879  | 7.0174   | 1.0633 | 0.0886  | 0.7266 | 0.1387 |
| Ctnna2   |  | _NATNEQDLNRR_2                                                                          | #N/A                    | 5.9762  | 5.5182  | 5.9511  | 5.7012  | 5.4585  | 5.6934  | 6.4276  | 5.5882  | 5.9165  | 0.9590   | 0.9590 | -0.0605 | 0.2003 | 0.4883 |
| Ctnna2   |  | _GHTGGLAALNEFDNK_3                                                                      | #N/A                    | 5.9149  | 6.0547  | 6.5305  | 6.5729  | 5.2569  | 4.8658  | 5.9585  | 6.3297  | 6.2129  | 5.1784   | 0.9909 | -0.0132 | 0.8975 | 0.0470 |
| Ctnna2   |  | _QVQEAIGISSAAQATS[Phospho (STY)]PTDEAK_2                                                | #N/A                    | 8.8411  | 9.6148  | 10.3198 | 10.6828 | 8.6966  | 9.0694  | 9.5169  | 10.2901 | 8.9787  | 9.9923   | 0.9923 | -0.0112 | 0.8783 | 0.0564 |
| Ctnna2   |  | _Acetyl (Protein N-term)TSATS[Phospho (STY)]PILK_2                                      | Q61301_S6_M1_Ctnna2     | 2.9594  | 9.6799  | 10.2527 | 9.8712  | 8.9524  | 9.9279  | 10.2945 | 9.7225  | 9.9350  | 9.5991   | 0.8705 | -0.2001 | 0.3980 | 0.4001 |
| Ctnna2   |  | _LVYDQVR_2                                                                              | #N/A                    | 4.6792  | 4.9346  | 5.4153  | 4.8025  | 3.6614  | 5.1052  | 4.4414  | 5.3360  | 5.2371  | 3.5030   | 1.0296 | 0.0421  | 0.7708 | 0.1131 |
| Ctnna2   |  | _VEEALAEVK_2                                                                            | #N/A                    | 4.4750  | 4.5118  | 3.4938  | 4.1626  | 3.9068  | 4.7347  | 4.1130  | 3.8140  | 5.1146  | 4.2243   | 0.9763 | -0.0346 | 0.7583 | 0.1202 |
| Ctnna2   |  | _LLEPLVTQVTLVNTSNK_2                                                                    | #N/A                    | 6.6807  | 4.7862  | 3.6384  | 4.5321  | 3.7293  | 4.1514  | 4.8262  | 4.4004  | 4.3154  | 4.0084   | 0.9639 | -0.0531 | 0.5815 | 0.2354 |
| Ctnna2   |  | _TPREELDSDFEEDYDVR_2                                                                    | #N/A                    | 3.5991  | 4.0448  | 3.8519  | 7.6038  | 5.2235  | 4.1004  | 4.3820  | 4.0094  | 4.3154  | 4.0832   | 1.1286 | 0.1745  | 0.5056 | 0.2962 |
| Ctnna2   |  | _SKLDAEVAK_2                                                                            | #N/A                    | 5.0960  | 4.7619  | 4.1240  | 4.4362  | 4.2820  | 3.0905  | 4.8003  | 3.3334  | 3.1663  | 5.0827   | 1.0495 | 0.0697  | 0.7089 | 0.1494 |
| Ctnna2   |  | _NATM(Oxidation (M))LYTASQAFLR_2                                                        | #N/A                    | 4.4508  | 4.1095  | 4.1482  | 3.6920  | 3.5583  | 4.0569  | 3.8402  | 4.0294  | 3.6082  | 4.1228   | 1.0263 | 0.0374  | 0.6025 | 0.2201 |
| Ctnna2   |  | _LVEVANLAC[Carbamidomethyl (C)]SSNMNEEGVK_2                                             | #N/A                    | 2.7448  | 3.0981  | 2.4030  | 3.8167  | 2.9864  | 3.1301  | 1.6962  | 4.3018  | 3.4492  | 3.7837   | 0.9160 | -0.1266 | 0.5988 | 0.2227 |
| Ctnna2   |  | _VLTEAVDDITSVDRLSVENHLEEDVWK_3                                                          | #N/A                    | 3.3740  | 4.1792  | 4.0608  | 3.8749  | 4.0005  | 3.7290  | 4.2781  | 3.5550  | 3.2036  | 3.0296   | 1.1004 | 0.1381  | 0.2168 | 0.6640 |
| Ctnna2   |  | _HIS[Phospho (STY)]PQVQALSEK_2                                                          | Q61301_S939_M1_Ctnna2   | 4.2007  | 3.4562  | 4.4568  | 6.3775  | 3.3445  | 3.2802  | 3.1733  | 3.1590  | 4.3084  | 3.4256   | 1.1903 | 0.2514  | 0.3249 | 0.4883 |
| Apc      |  | _DSVSGS[Phospho (STY)]PQVGLQTR_2                                                        | Q61315_S2713_M1_Apc     | 9.9144  | 9.8417  | 10.3707 | 9.9757  | 9.1281  | 9.8464  | 10.4313 | 9.9390  | 9.7706  | 9.7007   | 0.9885 | -0.0166 | 0.6513 | 0.1862 |
| Apc      |  | _SEL[Phospho (STY)]PITR_2                                                               | Q61315_S2383_M1_Apc     | 6.9586  | 6.5270  | 7.2265  | 6.7646  | 6.0753  | 7.0790  | 7.6049  | 6.7177  | 6.8684  | 4.2458   | 1.0649 | 0.0907  | 0.5219 | 0.2824 |
| Apc      |  | _SGRS[Phospho (STY)]PTGNTTPPVDSSEK_3                                                    | #N/A                    | 3.4394  | 5.7014  | 3.8994  | 4.2176  | 3.7103  | 3.6030  | 3.5914  | 3.6319  | 6.2148  | 3.8949   | 0.9451 | -0.0815 | 0.7255 | 0.1394 |
| Apc      |  | _AVEFSSGAKS[Phospho (STY)]PSR_2                                                         | Q61315_S1359_M1_Apc     | 4.9888  | 3.1689  | 4.5514  | 5.4494  | 4.0885  | 4.9465  | 5.4807  | 5.8814  | 5.3792  | 0.9060   | 0.9060 | -0.1424 | 0.4715 | 0.3265 |
| Apc      |  | _HSS[Phospho (STY)]PSGTVAAR_2                                                           | Q61315_S2774_M1_Apc     | 3.6476  | 3.5785  | 4.3344  | 5.4287  | 4.2742  | 3.4553  | 4.5518  | 3.2814  | 4.4308  | 3.3032   | 1.0586 | 0.0821  | 0.6384 | 0.1949 |
| Apc      |  | _SPT[Phospho (STY)]GNTTPPVDSSEK_2                                                       | Q61315_T2676_M1_Apc     | 6.2360  | 5.2166  | 3.6028  | 6.1766  | 4.5938  | 5.9065  | 3.8201  | 6.3689  | 3.6783  | 5.7553</ |        |         |        |        |



|         |                                                                                             |                        |         |         |         |         |         |         |         |         |         |         |         |         |        |          |
|---------|---------------------------------------------------------------------------------------------|------------------------|---------|---------|---------|---------|---------|---------|---------|---------|---------|---------|---------|---------|--------|----------|
| Hspa4   | _SNLAYDIVQLPTGLTGK_2                                                                        | #N/A                   | 6.1277  | 5.8510  | 6.2263  | 6.3407  | 5.6829  | 6.4216  | 6.8229  | 6.4372  | 6.2139  | 6.4684  | 0.9418  | -0.0865 | 0.0661 | 1.1798   |
| Hspa4   | _LEDTENWYEDGEDQPK_2                                                                         | #N/A                   | 6.4100  | 6.2725  | 6.3513  | 6.4663  | 5.3608  | 6.5146  | 6.0740  | 5.9937  | 5.9093  | 5.5151  | 1.0607  | 0.0850  | 0.1795 | 0.7460   |
| Hspa4   | _KPWVC[Carbamidomethyl (C)]VSPVSYTDAER_3                                                    | #N/A                   | 5.6363  | 5.2330  | 4.8223  | 6.0936  | 5.8652  | 5.4742  | 5.6880  | 4.7793  | 5.6962  | 5.7214  | 1.0091  | 0.0311  | 0.8704 | 0.0603   |
| Hspa4   | _LFEELCK_2                                                                                  | #N/A                   | 5.4239  | 5.4814  | 5.3287  | 5.6907  | 5.2263  | 5.3999  | 4.2560  | 5.1840  | 5.7629  | 4.9921  | 1.0746  | 0.1037  | 0.1835 | 0.7364   |
| Hspa4   | _DNLSGEYK_2                                                                                 | #N/A                   | 5.5985  | 6.3934  | 6.7683  | 5.7717  | 7.1963  | 6.4644  | 3.0962  | 5.6530  | 6.8101  | 1.1472  | 0.1981  | 0.2858  | 0.5440 |          |
| Hspa4   | _FOSEERPK_2                                                                                 | #N/A                   | 5.4888  | 5.9604  | 5.9745  | 5.5054  | 6.2434  | 5.3760  | 4.6126  | 5.7386  | 5.7094  | 6.0213  | 1.0548  | 0.0770  | 0.3238 | 0.4897   |
| Hspa4   | _LM[Oxidation (M)]NETTAVAIAYGIK_2                                                           | #N/A                   | 4.6283  | 5.0886  | 6.0819  | 4.3736  | 4.9595  | 4.9167  | 5.3010  | 5.3302  | 5.7129  | 5.6490  | 0.9108  | -0.1347 | 0.1533 | 0.8146   |
| Hspa4   | _LKETAESVLK_2                                                                               | #N/A                   | 4.8644  | 3.8142  | 5.5004  | 4.1984  | 6.0042  | 4.0940  | 5.4045  | 5.2153  | 5.7649  | 4.6868  | 0.9009  | -0.1505 | 0.3055 | 0.5149   |
| Hspa4   | _QDLPALEKPR_3                                                                               | #N/A                   | 8.3847  | 7.1967  | 7.5599  | 8.0492  | 8.8227  | 7.9583  | 7.5458  | 8.2564  | 8.5352  | 8.5632  | 0.9721  | -0.0409 | 0.5288 | 0.2767   |
| Hspa4   | _SVM[Oxidation (M)]DATQIAGLNC[Carbamidomethyl (C)]LR_2                                      | #N/A                   | 5.6733  | 5.6139  | 6.0646  | 6.0058  | 5.8705  | 5.7261  | 5.9434  | 5.9009  | 5.8768  | 5.6563  | 0.9974  | -0.0038 | 0.8872 | 0.0520   |
| Hspa4   | _AFSDPPFVEAK_2                                                                              | #N/A                   | 7.0492  | 6.7491  | 6.9860  | 7.8609  | 6.5953  | 6.6471  | 6.9259  | 6.2524  | 6.3427  | 6.9963  | 1.0531  | 0.0746  | 0.2491 | 0.6036   |
| Hspa4   | _NKEDQYHLDAAADVTK_3                                                                         | #N/A                   | 4.8109  | 4.6753  | 4.8461  | 4.6946  | 4.9755  | 4.5740  | 4.4084  | 4.9376  | 5.2647  | 5.0315  | 0.9699  | -0.0441 | 0.3844 | 0.4153   |
| Hspa4   | _FLEM[Oxidation (M)]C[Carbamidomethyl (C)]DLLAR_2                                           | #N/A                   | 3.8297  | 4.1676  | 4.7002  | 4.5844  | 4.5360  | 3.9230  | 4.0332  | 4.5306  | 4.3934  | 4.1039  | 1.0058  | 0.0084  | 0.9083 | 0.0418   |
| Hspa4   | _NAVEYVYEMR_2                                                                               | #N/A                   | 4.9025  | 3.8597  | 3.2163  | 6.2338  | 3.8012  | 4.0484  | 4.4092  | 4.2411  | 3.0393  | 3.9382  | 1.1118  | 0.1529  | 0.4868 | 0.3127   |
| Hspa4   | _WNSPAEGLS[Phospho (STY)]DC[Carbamidomethyl (C)]EVPK_2                                      | Q61316_S415_M1_Hspa4   | 3.9654  | 3.2697  | 3.1514  | 3.3501  | 3.0911  | 3.1376  | 3.4984  | 3.6511  | 3.9501  | 3.0274  | 0.9422  | -0.0859 | 0.3921 | 0.4066   |
| Hspa4   | _SQSVISNAK_2                                                                                | #N/A                   | 4.0833  | 3.2591  | 3.8170  | 3.3608  | 3.2271  | 3.3975  | 3.5091  | 3.7238  | 4.9879  | 3.0381  | 0.9238  | -0.1143 | 0.4592 | 0.3386   |
| Hspa4   | _ELSTLNADAEIVTR_2                                                                           | #N/A                   | 3.5621  | 3.7803  | 3.2958  | 4.3404  | 3.6016  | 4.1278  | 4.4886  | 5.6663  | 2.9599  | 4.0177  | 0.8836  | -0.1785 | 0.3346 | 0.4754   |
| Cntn2   | _TTGTGGGGQPAEVHVR_3                                                                         | #N/A                   | 5.0250  | 4.8792  | 3.1819  | 5.1162  | 4.6643  | 4.9776  | 3.3992  | 3.1793  | 4.0825  | 2.9711  | 1.3617  | 0.0454  | 0.0187 | 1.7291   |
| Cntn2   | _FAQLNALADPR_2                                                                              | #N/A                   | 4.2646  | 3.5200  | 3.9983  | 3.5420  | 8.2421  | 3.2163  | 3.6903  | 3.4591  | 3.7582  | 3.2193  | 1.2639  | 0.3379  | 0.3640 | 0.4389   |
| Bad     | _S[Phospho (STY)]APPNLWAAQR_2                                                               | Q61337_S136_M1_Bad     | 10.2728 | 10.2787 | 10.5044 | 11.0185 | 10.6113 | 10.3088 | 9.5824  | 9.4981  | 10.8879 | 10.7329 | 1.0319  | 0.0452  | 0.3500 | 0.4559   |
| Bad     | _S[Phospho (STY)]AGTATQMR_2                                                                 | Q61337_S170_M1_Bad     | 8.8933  | 7.4743  | 3.3355  | 9.9257  | 8.0823  | 3.8791  | 7.7244  | 4.1219  | 6.9450  | 7.7636  | 1.0441  | 0.0623  | 0.8539 | 0.0686   |
| Bad     | _RM[Oxidation (M)]S[Phospho (STY)]DEFGSK_2                                                  | #N/A                   | 6.1981  | 6.9031  | 6.9800  | 6.4474  | 6.5826  | 7.0638  | 6.2997  | 6.6140  | 6.8020  | 1.0094  | 0.0134  | 0.7622  | 0.1179 |          |
| Bcan    | _ELETSP[Phospho (STY)]EEK_2                                                                 | #N/A                   | 10.3106 | 10.0262 | 10.2216 | 10.8468 | 9.9614  | 10.1665 | 10.4673 | 10.1754 | 10.1685 | 10.5283 | 0.9923  | -0.0111 | 0.6677 | 0.1754   |
| Bcan    | _EYQWIGINDR_2                                                                               | #N/A                   | 9.6256  | 9.5834  | 9.6886  | 9.8522  | 9.4347  | 9.7839  | 9.8264  | 9.4226  | 9.5920  | 9.7144  | 1.0023  | 0.0034  | 0.8313 | 0.0850   |
| Bcan    | _EVGGETGS[Phospho (STY)]PELSGVPK_2                                                          | Q61361_S546_M1_Bcan    | 8.7251  | 8.9537  | 9.2971  | 9.4618  | 8.3260  | 8.9778  | 9.4149  | 8.9861  | 9.9611  | 0.9835  | -0.0241 | 0.5181  | 0.2852 |          |
| Bcan    | _SWEEAESQC[Carbamidomethyl (C)]R_2                                                          | #N/A                   | 7.5646  | 7.7725  | 8.0496  | 8.2377  | 8.1572  | 8.0926  | 8.1312  | 7.7681  | 8.1352  | 8.0289  | 0.9954  | -0.0066 | 0.8095 | 0.0918   |
| Bcan    | _YPIPTPSQR_2                                                                                | #N/A                   | 7.5036  | 7.9517  | 7.6078  | 7.9933  | 8.1728  | 7.8371  | 7.6610  | 7.8941  | 8.0954  | 7.7793  | 0.9983  | -0.0024 | 0.9315 | 0.3008   |
| Bcan    | _FNVVC[Carbamidomethyl (C)]R_2                                                              | #N/A                   | 6.5541  | 6.2743  | 6.2779  | 6.7269  | 5.9433  | 6.0502  | 4.9181  | 6.6209  | 6.4595  | 6.6311  | 1.0239  | 0.0340  | 0.6946 | 0.1583   |
| Bcan    | _C[Carbamidomethyl (C)]IENGLVEAPQISC[Carbamidomethyl (C)]VPR_2                              | #N/A                   | 4.5265  | 6.1303  | 3.6239  | 7.0777  | 5.8898  | 5.6766  | 5.6048  | 5.9836  | 5.7171  | 5.1809  | 0.9761  | -0.0348 | 0.8393 | 0.0761   |
| Bcan    | _LTWEEAR_2                                                                                  | #N/A                   | 5.3387  | 5.3674  | 5.5802  | 5.1154  | 5.8223  | 5.3246  | 3.3525  | 5.5418  | 5.4887  | 5.8198  | 1.0741  | 0.1031  | 0.4473 | 0.3494   |
| Bcan    | _GAIYSIPS[Phospho (STY)]EDGGSGSPTDEPAER_3                                                   | Q61361_S406_M1_Bcan    | 3.7527  | 3.4735  | 4.4395  | 6.1037  | 3.3618  | 5.1157  | 3.1763  | 4.3258  | 3.4083  | 1.0148  | 0.0211  | 0.9304  | 0.0313 |          |
| Bcan    | _ALGAHLTSK[Carbamidomethyl (C)]TPEQDFVNR_3                                                  | #N/A                   | 8.1041  | 8.1549  | 8.3416  | 9.0316  | 7.7962  | 7.5532  | 8.1242  | 7.8137  | 7.7165  | 7.9267  | 1.0340  | 0.0482  | 0.3476 | 0.4590   |
| Bcan    | _C[Carbamidomethyl (C)]SPGWLADGSVR_2                                                        | #N/A                   | 6.0047  | 5.5454  | 3.3244  | 6.0739  | 6.5811  | 6.1520  | 4.5173  | 6.1370  | 6.0644  | 5.9765  | 0.9765  | -0.0342 | 0.8478 | 0.0717   |
| Bcan    | _ELETSP[Phospho (STY)]EEKSGR_2                                                              | #N/A                   | 10.5534 | 10.9261 | 11.5819 | 11.5654 | 10.8216 | 10.9801 | 11.1505 | 10.9975 | 10.8185 | 11.0075 | 1.0071  | 0.0102  | 0.7311 | 0.1360   |
| Bcan    | _DSAHPSAS[Phospho (STY)]SSASSPASQGEIAVITEK_3                                                | Q61361_S361_M1_Bcan    | 3.6435  | 2.9479  | 4.3303  | 3.6720  | 4.2700  | 3.4595  | 3.8203  | 3.3292  | 3.6282  | 3.3493  | 1.0535  | 0.0751  | 0.5204 | 0.2837   |
| Bcan    | _ALGAHLTSK[Carbamidomethyl (C)]TPEQDFVNDYR_4                                                | #N/A                   | 5.4867  | 6.3316  | 5.5001  | 5.5438  | 5.5605  | 5.6021  | 3.4236  | 5.4223  | 5.2959  | 5.2656  | 1.1688  | 0.0250  | 0.0823 | 1.0844   |
| Bcan    | _EVELVVAR_2                                                                                 | #N/A                   | 3.3489  | 4.1541  | 4.0357  | 4.2122  | 3.3702  | 5.2506  | 4.1148  | 2.1360  | 4.5419  | 5.1634  | 1.0183  | 0.0061  | 0.9104 | 0.0408   |
| Bcan    | _C[Carbamidomethyl (C)]EVHQDGOSSDAVEIK_2                                                    | #N/A                   | 3.8299  | 2.0381  | 3.6299  | 3.3661  | 4.2448  | 4.0582  | 3.5944  | 3.9172  | 3.8925  | 3.9600  | 0.8395  | -0.2524 | 0.1797 | 0.7455   |
| Bcan    | _EAC[Carbamidomethyl (C)]S[Phospho (STY)]SGM[Oxidation (M)]DGYGVR_2                         | #N/A                   | 3.8524  | 3.5552  | 3.7169  | 6.6166  | 3.6566  | 4.1105  | 3.9342  | 3.9366  | 3.5852  | 4.1965  | 1.0871  | 0.1205  | 0.5901 | 0.2291   |
| Cox7a2l | _NKVPELCK_2                                                                                 | #N/A                   | 6.3114  | 5.2587  | 6.5252  | 5.9158  | 6.2878  | 5.7322  | 5.7644  | 6.0573  | 6.1327  | 6.3858  | 0.9869  | -0.0191 | 0.7650 | 0.1163   |
| Cox7a2l | _LTSSVTAIVSGK_2                                                                             | #N/A                   | 4.2295  | 6.3497  | 3.4154  | 4.5868  | 5.6030  | 4.3743  | 3.2343  | 3.9152  | 4.2142  | 4.2641  | 1.2183  | 0.2849  | 0.1712 | 0.7665   |
| Prkg2   | _LQDVHVHVGGS[Phospho (STY)]PLQAS[Phospho (STY)]PKVPLDVHR_4                                  | Q61410_S92_M2_Prkg2    | 4.2243  | 3.4797  | 3.9579  | 3.5017  | 1.8496  | 3.2566  | 3.6500  | 4.1288  | 3.7985  | 3.1790  | 0.9158  | -0.1270 | 0.5098 | 0.2958   |
| Prkg2   | _ALS[Phospho (STY)]LEMQLK_2                                                                 | Q61410_S431_M1_Prkg2   | 3.9728  | 3.2533  | 3.1588  | 4.7020  | 3.1416  | 3.4830  | 3.3761  | 4.4570  | 4.1056  | 3.6285  | 0.9298  | -0.1050 | 0.4783 | 0.3203   |
| Hras    | _SFEIHHQVR_2                                                                                | #N/A                   | 6.8009  | 6.7518  | 7.0484  | 6.8916  | 7.0725  | 6.9019  | 7.0286  | 6.6304  | 6.1775  | 6.8784  | 1.0348  | 0.0494  | 0.1872 | 0.7277   |
| Hras    | _QGVEDAFYTLVR_2                                                                             | #N/A                   | 4.3415  | 4.1954  | 5.0123  | 4.8650  | 4.2939  | 5.1529  | 4.6331  | 4.6249  | 5.0593  | 4.7360  | 0.9748  | -0.0368 | 0.6108 | 0.2141   |
| Kcna4   | _GAYSHDPOGS[Phospho (STY)]RGR_3                                                             | Q61423_S79_M1_Kcna4    | 3.7443  | 3.6737  | 3.5553  | 4.5880  | 3.4951  | 4.2455  | 3.9812  | 3.7291  | 4.1353  | 0.9715  | 0.0517  | -0.0417 | 0.6100 | 0.2147   |
| Kcna4   | _QSSPFC[Carbamidomethyl (C)]SOLMPS[Phospho (STY)]SSEK_2                                     | Q61423_S111_M1_Kcna4   | 3.8556  | 3.1111  | 3.3010  | 3.8037  | 2.9994  | 3.4252  | 3.5184  | 1.5732  | 3.9634  | 3.7707  | 1.0758  | 0.1054  | 0.6222 | 0.2060   |
| Hadh    | _DTPGFVNR_2                                                                                 | #N/A                   | 6.0522  | 5.7966  | 6.4688  | 6.6433  | 6.5762  | 5.8796  | 6.3427  | 6.1725  | 6.0532  | 5.9772  | 1.0162  | 0.0232  | 0.6311 | 0.1999   |
| Hadh    | _TFESLVDFC[Carbamidomethyl (C)]K_2                                                          | #N/A                   | 4.1472  | 3.8591  | 4.2739  | 3.8177  | 4.1603  | 4.6852  | 3.9659  | 4.1994  | 3.4510  | 4.5654  | 1.0276  | 0.0393  | 0.6600 | 0.1805   |
| Hadh    | _AGDFVEK_2                                                                                  | #N/A                   | 3.5305  | 3.6857  | 4.2173  | 3.2191  | 2.6523  | 3.0407  | 4.4347  | 2.8063  | 3.0471  | 3.1861  | 1.0071  | 0.0103  | 0.9536 | 0.0206   |
| Hadh    | _FAAETIFASNTSSQITNANATR_3                                                                   | #N/A                   | 3.2465  | 3.5232  | 3.5408  | 4.5854  | 3.3566  | 4.3729  | 3.2328  | 3.9166  | 2.9881  | 4.2627  | 1.0475  | 0.0669  | 0.6570 | 0.1824   |
| Znf638  | _SVRS[Phospho (STY)]AS[Phospho (STY)]PER_2                                                  | Q61464_S560_M2_Znf638  | 8.1231  | 8.6960  | 9.5428  | 8.7717  | 8.0320  | 8.6108  | 8.7202  | 8.6449  | 8.4489  | 8.3250  | 1.0111  | 0.0159  | 0.7493 | 0.1254   |
| Znf638  | _GLS[Phospho (STY)]PAQPKK_2                                                                 | #N/A                   | 8.2295  | 7.8075  | 7.6901  | 8.6407  | 7.5386  | 8.1583  | 8.3340  | 8.0056  | 8.1758  | 7.9791  | 0.9861  | -0.2002 | 0.6193 | 0.2081   |
| Znf638  | _QSSVQVTEQGS[Phospho (STY)]PK_2                                                             | Q61464_S128_M1_Znf638  | 7.3295  | 7.1589  | 7.5920  | 7.5608  | 6.7636  | 7.2005  | 7.6482  | 7.1284  | 7.0123  | 6.9822  | 1.0104  | 0.0149  | 0.7157 | 0.1452   |
| Znf638  | _HTEVDKGLS[Phospho (STY)]PAQPKK_3                                                           | #N/A                   | 4.0441  | 5.0161  | 3.5069  | 3.7327  | 3.1698  | 3.0589  | 4.1341  | 4.3858  | 4.2927  | 3.6997  | 0.9096  | -0.1368 | 0.3601 | 0.4435   |
| Znf638  | _GSTSP[Phospho (STY)]PKL_2                                                                  | Q61464_S1099_M1_Znf638 | 3.7939  | 3.5485  | 3.5275  | 4.5722  | 2.9376  | 3.6870  | 3.2196  | 3.9299  | 4.2289  | 4.2494  | 0.9413  | -0.0872 | 0.5074 | 0.2946   |
| Mxi1    | tyl (Protein N-term)[M][Oxidation (M)]ETDAPQGLAS[Phospho (STY)]PDSPHDC[Carbamidomethyl (C)] | #N/A                   | 3.9497  | 3.9569  | 4.0181  | 3.7467  | 3.4432  | 4.1543  | 4.1890  | 3.8665  | 3.7650  | 3.9295  | 0.9849  | -0.0219 | 0.6959 | 0.1575   |
| Pde1a   | _NLNVDIHQNK_2                                                                               | #N/A                   | 5.8339  | 5.5459  | 6.5696  | 5.8728  | 4.7493  | 4.2819  | 5.9525  | 5.3749  | 4.8724  | 5.5766  | 1.0058  | 0.0083  | 0.9471 | 0.0236   |
| Pde1a   | _NSLQCEPIDR_2                                                                               | #N/A                   | 7.4316  | 7.2598  | 7.8862  | 7.6126  | 6.8375  | 7.4116  | 7.8002  | 7.3155  | 7.4390  | 7.2934  | 0.9926  | -0.0108 | 0.7905 | 0.1021   |
| Pde1a   | _Acetyl (Protein N-term)[GS[Phospho (STY)]TDTIELEENATYK_2                                   | Q61481_S3_M1_Pde1a     | 3.4888  | 7.3168  | 8.0924  | 8.0978  | 3.8722  | 7.7393  | 8.1943  | 8.1487  | 3.6537  | 3.9544  | 1.0749  | 0.1042  | 0.7702 | 0.1134   |
| Alcam   | _APFLETQLK_2                                                                                | #N/A                   | 6.5553  | 6.0598  | 6.5842  | 6.2771  | 5.8279  | 5.9584  | 6.0916  | 6.2509  | 6.3594  | 6.3038  | 0.9934  | -0.0095 | 0.8124 | 0.0902   |
| Alcam   | _SNTYTLTDVR_2                                                                               | #N/A                   | 5.6728  | 5.6997  | 6.1104  | 5.5302  | 5.5710  | 5.4154  | 5.8267  | 5.1753  | 5.9313  | 5.2129  | 1.0235  | 0.0335  | 0.5328 | 0.2735   |
| Alcam   | _EIDPGTQVTVTSSLEK_2                                                                         | #N/A                   | 5.4368  | 5.4592  | 6.0505  | 6.2857  | 5.0980  | 6.0828  | 5.6052  | 5.4646  | 5.6334  | 5.7320  | 1.0226  | 0.0322  | 0.6158 | 0.2106</ |



|         |                                                                |                       |         |         |         |         |         |         |         |         |         |         |        |         |        |        |
|---------|----------------------------------------------------------------|-----------------------|---------|---------|---------|---------|---------|---------|---------|---------|---------|---------|--------|---------|--------|--------|
| Snag91  | _TIDTS[Phospho (STY)]PPVDFATASAAAPVSSAK_2                      | #N/A                  | 3.9243  | 7.3902  | 3.2854  | 8.7120  | 3.5639  | 5.7526  | 3.5740  | 7.5992  | 6.8357  | 3.9334  | 0.9913 | -0.0125 | 0.9737 | 0.0116 |
| Snag91  | _PDAAPSIDLFGDAPSS[Phospho (STY)]PPR_2                          | Q61548_S594_M1_Snap91 | 3.4849  | 4.2412  | 3.2186  | 7.2128  | 5.0595  | 3.9960  | 3.8891  | 4.2388  | 3.0371  | 3.9405  | 1.2010 | 0.2643  | 0.3546 | 0.4503 |
| Snag91  | _SGSHGYDM[Oxidation (M)]JSTFR_3                                | #N/A                  | 4.6133  | 5.2276  | 4.9256  | 4.8332  | 5.0217  | 4.8860  | 3.8379  | 5.5636  | 5.2611  | 4.8915  | 1.0060 | 0.0086  | 0.9280 | 0.0324 |
| Snag91  | _DALEYK_2                                                      | #N/A                  | 3.0136  | 3.7699  | 4.2482  | 3.7919  | 3.6582  | 2.9664  | 3.9402  | 3.2092  | 1.8147  | 3.4692  | 1.1500 | 0.2017  | 0.3213 | 0.4931 |
| Fnc1    | _VNASASS[Phospho (STY)]LKK_2                                   | #N/A                  | 8.9452  | 8.9588  | 9.2716  | 9.2664  | 8.8429  | 8.9860  | 9.2014  | 9.0878  | 8.9223  | 9.0733  | 0.9971 | -0.0042 | 0.8056 | 0.0939 |
| Fnc1    | _RLVIAHDDGR_2                                                  | #N/A                  | 8.5111  | 8.6274  | 8.4531  | 8.6988  | 8.4320  | 8.4385  | 8.6064  | 8.2906  | 8.5509  | 8.5323  | 1.0037 | 0.0054  | 0.6995 | 0.1552 |
| Fnc1    | _VLAPSGPSGTLK_2                                                | #N/A                  | 8.3565  | 8.5155  | 8.9244  | 8.4750  | 8.7971  | 8.2430  | 8.2928  | 8.5884  | 8.2640  | 8.4604  | 1.0179 | 0.0256  | 0.3325 | 0.4782 |
| Fnc1    | _GEGHFGIC[Carbamidomethyl (C)]R_2                              | #N/A                  | 7.8050  | 7.4895  | 7.2618  | 7.9343  | 8.1920  | 7.5228  | 7.4400  | 7.8492  | 7.5358  | 7.7365  | 1.0079 | 0.0114  | 0.7560 | 0.1215 |
| Fnc1    | _LSC[Carbamidomethyl (C)]AQSVSPAEX_2                           | #N/A                  | 7.3705  | 7.7310  | 7.7686  | 7.8205  | 8.1051  | 7.3212  | 7.3824  | 7.4608  | 7.6650  | 7.4384  | 1.0266 | 0.0379  | 0.2429 | 0.6145 |
| Fnc1    | _KVTGLTDANR_2                                                  | #N/A                  | 6.5261  | 6.4629  | 5.9459  | 6.6183  | 7.2338  | 6.7895  | 6.9385  | 6.9654  | 6.6208  | 6.7493  | 0.9674 | -0.0478 | 0.3513 | 0.4543 |
| Fnc1    | _VNASASS[Phospho (STY)]LKKK_2                                  | #N/A                  | 6.4178  | 6.6714  | 7.2847  | 6.5388  | 6.5872  | 6.6981  | 6.9575  | 4.3725  | 6.6986  | 3.7130  | 1.2326 | 0.3017  | 0.0935 | 1.0293 |
| Fnc1    | _YSVQTSOHR_2                                                   | #N/A                  | 7.2920  | 6.9345  | 6.9822  | 7.0475  | 7.7046  | 7.0572  | 7.2271  | 7.0878  | 7.1507  | 7.4025  | 0.9934 | -0.0095 | 0.7709 | 0.1130 |
| Fnc1    | _LVARPEPATGTLLEFR_3                                            | #N/A                  | 7.3446  | 7.1241  | 7.2174  | 7.4241  | 7.0968  | 6.9898  | 7.2121  | 7.3818  | 7.5709  | 7.1701  | 0.9817 | -0.0267 | 0.2568 | 0.5903 |
| Fnc1    | _WSLQSEAH_2                                                    | #N/A                  | 6.5721  | 6.9203  | 7.1071  | 7.0141  | 7.2255  | 7.0144  | 7.2532  | 7.3535  | 7.2929  | 7.0560  | 0.9636 | -0.0535 | 0.0676 | 1.1700 |
| Fnc1    | _YFGGEDR_2                                                     | #N/A                  | 6.6538  | 6.7606  | 6.6761  | 6.4203  | 6.8945  | 6.8484  | 6.3823  | 6.7107  | 6.9737  | 6.9747  | 0.9924 | -0.0110 | 0.7246 | 0.1399 |
| Fnc1    | _YLTAFAFGFK_2                                                  | #N/A                  | 6.4757  | 6.6576  | 6.7909  | 6.2110  | 6.2830  | 6.1631  | 6.3956  | 6.6744  | 6.7179  | 5.6935  | 1.0094 | 0.0135  | 0.7995 | 0.0772 |
| Fnc1    | _AC[Carbamidomethyl (C)]AETIDPASLWEY_2                         | #N/A                  | 5.7827  | 6.5159  | 6.5112  | 5.8163  | 6.4833  | 6.1008  | 5.9912  | 5.7242  | 6.0471  | 5.9246  | 1.0473 | 0.0666  | 0.1717 | 0.7652 |
| Fnc1    | _SSYDVFQLEFNDGAYNIK_2                                          | #N/A                  | 6.0504  | 6.5168  | 6.5095  | 6.7246  | 6.0743  | 6.1951  | 6.1129  | 5.6800  | 6.2601  | 1.0426  | 1.0426 | 0.0601  | 0.1879 | 0.7262 |
| Fnc1    | _VGKIDALEQSC[Carbamidomethyl (C)]AQVLIQAANER_3                 | #N/A                  | 6.1924  | 6.0543  | 6.5324  | 6.4279  | 4.6970  | 5.6528  | 6.6162  | 5.6228  | 6.2110  | 6.0508  | 0.9675 | -0.0477 | 0.6162 | 0.2103 |
| Fnc1    | _VTGTLNDR_2                                                    | #N/A                  | 4.9524  | 5.1936  | 4.9156  | 4.9956  | 5.6100  | 5.7703  | 5.7145  | 5.7594  | 5.6704  | 5.0419  | 0.9447 | -0.0821 | 0.2178 | 0.6619 |
| Fnc1    | _YLAADKDNVTC[Carbamidomethyl (C)]ER_2                          | #N/A                  | 6.4609  | 5.8688  | 5.8292  | 6.4989  | 6.5342  | 6.2713  | 6.0623  | 6.0411  | 6.2192  | 6.1385  | 1.0210 | 0.0300  | 0.4610 | 0.3363 |
| Fnc1    | _YVHLSAR_2                                                     | #N/A                  | 6.1693  | 5.7451  | 5.2450  | 5.1625  | 6.5079  | 5.8274  | 5.2211  | 6.0558  | 6.3589  | 5.3582  | 1.0048 | 0.0069  | 0.9175 | 0.0280 |
| Fnc1    | _QIWTLQPPDEAGSAVVC[Carbamidomethyl (C)]LR_2                    | #N/A                  | 3.6157  | 4.6902  | 4.3025  | 3.3043  | 5.0830  | 4.5845  | 5.8488  | 3.3133  | 2.9619  | 4.9006  | 1.0017 | 0.0024  | 0.9913 | 0.0038 |
| Fnc1    | _DVPVGVGSUTLAFQDQR_2                                           | #N/A                  | 4.0798  | 3.2626  | 3.8135  | 4.7070  | 3.4182  | 3.8776  | 3.5055  | 3.9043  | 4.1720  | 3.5986  | 1.0170 | 0.0244  | 0.8282 | 0.0819 |
| Fnc1    | _VNASASS[Phospho (STY)]LK_2                                    | #N/A                  | 6.7817  | 6.3774  | 6.1946  | 6.7005  | 6.1688  | 6.7047  | 6.7528  | 6.5221  | 6.4974  | 6.7086  | 0.9800 | -0.0291 | 0.4018 | 0.3959 |
| Fnc1    | _QGM[Oxidation (M)]DSANQDEETDQETQLEIDR_3                       | #N/A                  | 3.7917  | 3.1612  | 3.5253  | 4.5699  | 3.3721  | 3.4644  | 3.4853  | 2.7770  | 4.2311  | 4.2472  | 0.9888 | -0.0148 | 0.9525 | 0.0350 |
| Ktn1    | _IQNGTGLRES[Phospho (STY)]DSEHVPK_3                            | Q61595_S75_M1_Ktn1    | 5.4985  | 5.8417  | 4.0951  | 5.4364  | 5.8973  | 3.9926  | 6.1851  | 3.9573  | 3.4813  | 0.9315  | 1.2442 | 0.3153  | 0.1130 | 0.9469 |
| Ktn1    | _DLTL[Phospho (STY)]ELOK_2                                     | Q61595_T1211_M1_Ktn1  | 6.0220  | 5.3465  | 6.6958  | 6.6836  | 6.8240  | 6.4198  | 5.3453  | 5.6803  | 5.8978  | 5.8932  | 1.1101 | 0.1506  | 0.0729 | 1.1375 |
| Gd2     | _NTNDANSC[Carbamidomethyl (C)]QIIPQNCVNR_2                     | #N/A                  | 9.9247  | 10.0197 | 10.2258 | 10.6958 | 9.5932  | 9.6723  | 10.1975 | 9.7156  | 9.9222  | 9.9855  | 1.0067 | 0.0096  | 0.7695 | 0.1138 |
| Gd2     | _LVSELSAR_2                                                    | #N/A                  | 8.8535  | 8.9115  | 9.0244  | 8.7489  | 9.1576  | 8.7458  | 7.9570  | 9.2462  | 8.9174  | 9.0536  | 1.0129 | 0.0185  | 0.6509 | 0.1865 |
| Gd2     | _TDDYLDOPC[Carbamidomethyl (C)]C[Carbamidomethyl (C)]ETINR_2   | #N/A                  | 7.5589  | 7.6741  | 7.7318  | 7.7266  | 7.1323  | 6.9814  | 7.8340  | 7.1363  | 7.5614  | 7.4917  | 0.9949 | -0.0074 | 0.8543 | 0.0684 |
| Gd2     | _VIC[Carbamidomethyl (C)]LSHPK_2                               | #N/A                  | 6.2963  | 6.8746  | 6.9478  | 6.7217  | 6.5518  | 6.3480  | 6.9314  | 6.7630  | 7.1009  | 6.5739  | 0.9680 | -0.0469 | 0.2197 | 0.6581 |
| Gd2     | _FVSDILFVPK_2                                                  | #N/A                  | 6.2869  | 6.4161  | 6.8502  | 6.4435  | 6.2050  | 5.8754  | 6.5922  | 6.5067  | 6.1515  | 0.9793  | 0.9793 | -0.0302 | 0.4938 | 0.3065 |
| Gd2     | _DLGTDSQFSR_2                                                  | #N/A                  | 5.1663  | 5.7104  | 5.6649  | 6.2449  | 6.1333  | 6.2651  | 5.2326  | 6.2910  | 6.1674  | 5.7627  | 1.0001 | 0.0002  | 0.9980 | 0.0009 |
| Gd2     | _M[Oxidation (M)]LUFETVR_2                                     | #N/A                  | 6.4823  | 7.0478  | 6.1557  | 7.0071  | 5.4406  | 6.8189  | 6.3184  | 6.8284  | 5.7637  | 6.8628  | 1.0076 | 0.0109  | 0.8998 | 0.0459 |
| Gd2     | _FLM[Oxidation (M)]ANGGLVK_2                                   | #N/A                  | 6.7069  | 6.2852  | 6.3921  | 6.2858  | 6.3736  | 6.2460  | 6.2160  | 6.5434  | 6.3329  | 6.3344  | 1.0039 | 0.0056  | 0.8124 | 0.0902 |
| Gd2     | _SPLYPLVGLGELQGFAR_2                                           | #N/A                  | 6.5987  | 6.9720  | 7.2532  | 7.5707  | 6.5572  | 6.8588  | 6.9909  | 7.2022  | 6.6394  | 6.4475  | 1.0106 | 0.0153  | 0.7634 | 0.1172 |
| Gd2     | _AYDATHFETTC[Carbamidomethyl (C)]DOIKDYR_4                     | #N/A                  | 4.7270  | 5.4645  | 5.3445  | 4.7458  | 2.8797  | 5.0429  | 4.1457  | 2.9710  | 4.1204  | 4.6157  | 1.1861 | 0.2462  | 0.2201 | 0.6574 |
| Gd2     | _VLHM[Oxidation (M)]DQPPYGGESASTPLEDYK_3                       | #N/A                  | 3.6762  | 3.4089  | 3.2349  | 3.5655  | 2.9217  | 3.3751  | 3.1882  | 3.8807  | 3.6342  | 0.9216  | 0.9216 | -0.1178 | 0.1787 | 0.7478 |
| Gd2     | _FLVYVANTOKDPR_2                                               | #N/A                  | 4.2945  | 4.4371  | 4.1841  | 4.4482  | 3.8410  | 4.1668  | 4.5997  | 3.9632  | 3.9952  | 4.0474  | 1.0186 | 0.0266  | 0.6525 | 0.1854 |
| Gd2     | _VIEGSPYK_2                                                    | #N/A                  | 6.1325  | 3.7186  | 3.6002  | 4.4021  | 4.0327  | 2.8127  | 4.5504  | 4.4991  | 4.3658  | 3.9905  | 0.9798 | -0.0295 | 0.8929 | 0.0492 |
| Gd2     | _FDLGGDWDFTGHSLALYR_3                                          | #N/A                  | 3.8850  | 4.0314  | 3.8903  | 3.8229  | 3.5961  | 3.6231  | 3.8245  | 3.7866  | 3.4969  | 3.6969  | 1.0289 | 0.0411  | 0.3325 | 0.4782 |
| Gd2     | _MTGSEDFEEMKR_3                                                | #N/A                  | 3.6991  | 4.1743  | 4.4027  | 3.9464  | 3.9956  | 3.7339  | 4.0947  | 3.0547  | 3.3538  | 3.6237  | 1.1147 | 0.1567  | 0.1473 | 0.8318 |
| Slc20a1 | _EVKSS[Phospho (STY)]PSES[Phospho (STY)]PLMEKK_2               | #N/A                  | 3.5933  | 3.6433  | 4.0467  | 4.1805  | 3.6222  | 3.9577  | 4.1546  | 3.3680  | 4.0179  | 1.0013  | 0.0019 | 0.9787  | 0.0093 | 0.0939 |
| Slc20a1 | _EVKSS[Phospho (STY)]PSES[Phospho (STY)]PLM[Oxidation (M)]EK_2 | #N/A                  | 4.7254  | 7.1950  | 5.2428  | 3.6123  | 6.0524  | 6.4120  | 7.5553  | 3.1549  | 5.9253  | 3.4664  | 1.1024 | 0.1406  | 0.6389 | 0.1946 |
| Slc20a1 | _SS[Phospho (STY)]PSES[Phospho (STY)]PLMEKK_2                  | #N/A                  | 3.4615  | 4.2667  | 4.1483  | 3.1501  | 4.0880  | 3.6415  | 4.3656  | 3.4675  | 3.1161  | 3.1171  | 1.0785 | 0.1090  | 0.4202 | 0.3765 |
| Slc20a1 | _SS[Phospho (STY)]PSESPLMEK_2                                  | #N/A                  | 3.2401  | 4.1672  | 4.1085  | 3.8104  | 3.8719  | 3.5942  | 5.5885  | 3.5191  | 3.3696  | 3.6865  | 0.9401 | -0.0892 | 0.6026 | 0.2200 |
| Drd1    | _IQPVHSGHQ[Phospho (STY)]T_2                                   | Q61616_S445_M1_Drd1   | 11.4874 | 11.4734 | 11.9073 | 11.4289 | 10.5176 | 11.3453 | 11.7705 | 11.7111 | 9.2740  | 3.2592  | 1.5292 | 0.6128  | 0.0827 | 1.0287 |
| Znf148  | _GGLLTSEED[Phospho (STY)]GSPSPKNSLPK_3                         | Q61624_S301_M1_Znf148 | 4.3670  | 4.3600  | 3.5530  | 4.0556  | 4.2483  | 3.8772  | 3.7703  | 4.0628  | 3.7114  | 4.0226  | 1.0475 | 0.0670  | 0.3266 | 0.4860 |
| Znf148  | _GGLLTSEEDSGFSTS[Phospho (STY)]PK_2                            | Q61624_S306_M1_Znf148 | 3.8481  | 3.4943  | 3.5817  | 4.2623  | 3.1037  | 3.6328  | 3.2738  | 3.8757  | 4.1747  | 4.3036  | 0.9507 | -0.0729 | 0.5603 | 0.2516 |
| Znf148  | _AGMTSS[Phospho (STY)]PDATTGGITFG_2                            | Q61624_S784_M1_Znf148 | 3.8501  | 3.7601  | 3.6576  | 4.3872  | 3.5814  | 4.1746  | 3.6197  | 4.1414  | 3.8132  | 4.0644  | 0.9980 | -0.0029 | 0.9674 | 0.0144 |
| Grb2    | _VPS[Phospho (STY)]KDDOKEIDLEHUR_4                             | Q61625_S865_M1_Grb2   | 6.2719  | 6.2637  | 3.3088  | 6.5912  | 4.2196  | 3.9058  | 5.0168  | 6.4256  | 5.6310  | 5.6773  | 0.8955 | -0.1592 | 0.4620 | 0.3353 |
| Pacsin1 | _TEQSVT[Phospho (STY)]PEQOK_2                                  | #N/A                  | 10.7862 | 11.0244 | 11.3080 | 11.4890 | 10.9834 | 11.0587 | 11.1481 | 10.9322 | 10.9985 | 11.1269 | 1.0051 | 0.0074  | 0.6828 | 0.1657 |
| Pacsin1 | _GPDVGSER_2                                                    | #N/A                  | 9.7944  | 9.6888  | 10.2163 | 9.9531  | 10.0165 | 9.8099  | 9.7643  | 9.4118  | 9.5615  | 9.8050  | 1.0288 | 0.0410  | 0.0507 | 1.2952 |
| Pacsin1 | _GRLDS[Phospho (STY)]GQLGLYPANVVEAL_2                          | #N/A                  | 8.6645  | 8.7675  | 9.3026  | 9.3683  | 8.9908  | 8.8477  | 8.9312  | 8.7721  | 9.0343  | 8.8952  | 1.0073 | 0.0106  | 0.6838 | 0.1651 |
| Pacsin1 | _EVLDDKR_2                                                     | #N/A                  | 9.1597  | 9.7489  | 10.0075 | 9.8683  | 9.7902  | 9.6879  | 9.5667  | 9.4270  | 9.5121  | 9.7189  | 1.0161 | 0.0231  | 0.3531 | 0.4521 |
| Pacsin1 | _NSLINEDLEK_2                                                  | #N/A                  | 9.7376  | 9.4854  | 9.6309  | 9.8168  | 9.8252  | 9.6919  | 9.8596  | 9.4722  | 9.5739  | 9.8821  | 1.0001 | 0.0001  | 0.9925 | 0.0032 |
| Pacsin1 | _AYAQGLTOWAK_2                                                 | #N/A                  | 8.4482  | 8.8935  | 8.6540  | 9.1020  | 9.1200  | 8.5563  | 8.7091  | 8.5465  | 8.6645  | 8.7558  | 1.0146 | 0.0209  | 0.4222 | 0.3745 |
| Pacsin1 | _LGEEDGEGWC[Carbamidomethyl (C)]R_2                            | #N/A                  | 8.4370  | 8.2794  | 8.3579  | 8.3202  | 8.2828  | 8.1038  | 8.4014  | 7.9110  | 8.1034  | 8.3244  | 1.0137 | 0.0196  | 0.3161 | 0.5002 |
| Pacsin1 | _GADAQEDUR_2                                                   | #N/A                  | 8.0703  | 8.3330  | 8.4633  | 7.9974  | 8.8516  | 8.2785  | 7.8324  | 8.1146  | 8.0914  | 8.2322  | 1.0328 | 0.0466  | 0.1584 | 0.8004 |
| Pacsin1 | _ALYVDQGEQDELSFK_2                                             | #N/A                  | 8.0722  | 7.9493  | 8.6843  | 8.3690  | 8.0939  | 8.2862  | 8.1419  | 7.6564  | 7.5318  | 8.1756  | 1.0465 | 0.0655  | 0.0871 | 1.0598 |
| Pacsin1 | _EAEDGFRK_2                                                    | #N/A                  | 7.8184  | 7.6758  | 7.4149  | 7.6801  | 7.9360  | 7.6350  | 7.3492  | 7.5201  | 7.5329  | 7.9659  | 1.0133 | 0.0191  | 0.4824 | 0.3166 |
| Pacsin1 | _LDS[Phospho (STY)]GQLGLYPANVVEAL_2                            | #N/A                  | 7.0006  | 6.3867  | 5.4353  | 5.7123  | 6.8521  | 7.2504  | 6.7781  | 5.7012  | 6.4759  | 6.6722  | 1.0051 | 0.0073  | 0.9399 | 0.0269 |
| Pacsin1 | _NSLINEDLEKVK_2                                                | #N/A                  | 5.6329  |         |         |         |         |         |         |         |         |         |        |         |        |        |



|       |                                                                      |                      |         |         |         |         |         |         |         |         |         |        |         |         |        |        |
|-------|----------------------------------------------------------------------|----------------------|---------|---------|---------|---------|---------|---------|---------|---------|---------|--------|---------|---------|--------|--------|
| Ddx5  | _UDFLEC[Carbamidomethyl (C)]CK_2                                     | #N/A                 | 4.1617  | 4.5891  | 4.8563  | 4.8089  | 3.9980  | 4.0243  | 3.8553  | 3.9743  | 4.2728  | 5.1487 | 1.0217  | 0.0310  | 0.7673 | 0.1150 |
| Ddx5  | _GVEIC[Carbamidomethyl (C)]ATPGR_2                                   | #N/A                 | 5.0261  | 5.6768  | 5.6375  | 5.4041  | 5.2020  | 4.3718  | 6.2904  | 5.4206  | 5.2983  | 3.8876 | 0.9991  | -0.0012 | 0.9925 | 0.0033 |
| Ddx5  | _ELAQVQVQAAYEC[Carbamidomethyl (C)]R_2                               | #N/A                 | 6.2402  | 3.8959  | 6.5771  | 6.3006  | 5.8961  | 6.3446  | 6.5172  | 5.7166  | 6.5456  | 6.0610 | 0.9462  | -0.0798 | 0.5466 | 0.2623 |
| Ddx5  | _LUVLEDR_2                                                           | #N/A                 | 5.5169  | 4.8710  | 5.7143  | 5.7677  | 5.6026  | 5.4182  | 3.5262  | 5.2459  | 6.1381  | 5.3527 | 1.0821  | 0.1139  | 0.3977 | 0.4004 |
| Ddx5  | _STC[Carbamidomethyl (C)]VGGAPK_2                                    | #N/A                 | 6.6882  | 5.4918  | 3.3508  | 5.9318  | 5.3121  | 5.2385  | 3.7569  | 5.4831  | 5.4887  | 5.5082 | 0.9887  | -0.0164 | 0.9344 | 0.0346 |
| Ddx5  | _NIFYQHPDLAR_2                                                       | #N/A                 | 5.6640  | 5.4820  | 5.4900  | 6.0255  | 5.6480  | 5.4635  | 5.4425  | 5.4745  | 5.0248  | 5.2824 | 1.0608  | 0.0852  | 0.0447 | 1.3499 |
| Ddx5  | _FVINYDPKSEDIYHR_3                                                   | #N/A                 | 3.9935  | 3.3489  | 4.9619  | 3.2709  | 4.7793  | 5.1729  | 4.9173  | 3.7302  | 6.2574  | 4.9741 | 0.8561  | -0.2242 | 0.2596 | 0.5856 |
| Ddx5  | _DWVNLFEK_2                                                          | #N/A                 | 3.3012  | 4.4904  | 4.5358  | 4.3581  | 4.6192  | 4.1796  | 4.0728  | 4.0211  | 3.4090  | 4.3251 | 1.0734  | 0.1022  | 0.3503 | 0.3503 |
| Cbx5  | _KSS[Phospho (STY)]FSNSADDK_2                                        | #N/A                 | 8.1579  | 8.3793  | 8.8830  | 8.7952  | 8.2655  | 3.5422  | 8.9535  | 8.3635  | 8.2738  | 8.3904 | 0.9029  | -0.1473 | 0.4547 | 0.3423 |
| Cbx5  | _SS[Phospho (STY)]FSNSADDK_2                                         | #N/A                 | 6.5984  | 6.4956  | 3.5881  | 7.2968  | 6.3373  | 6.6637  | 7.3718  | 4.0374  | 6.6389  | 4.0577 | 1.1152  | 0.1573  | 0.5237 | 0.2809 |
| Cbx5  | _TADSSSS[Phospho (STY)]DEEEYVEK_2                                    | Q61686_S14_M1_Cbx5   | 3.9322  | 3.9319  | 3.6659  | 3.2096  | 4.0134  | 5.1995  | 4.5725  | 3.7957  | 4.0948  | 4.4592 | 0.9436  | -0.0837 | 0.5321 | 0.2740 |
| Atrx  | _EENVNS[Phospho (STY)]PEEDKR_2                                       | Q61687_S912_M1_Atrx  | 4.8992  | 5.5143  | 5.8803  | 5.9171  | 4.9015  | 5.0594  | 6.0516  | 5.6827  | 4.9303  | 4.9212 | 0.9936  | -0.0093 | 0.9189 | 0.0367 |
| Atrx  | _LTL[Phospho (STY)]DGES[Phospho (STY)]GEEKFKPK_2                     | #N/A                 | 5.9671  | 5.8085  | 5.5582  | 5.9531  | 3.7500  | 5.4218  | 6.5105  | 5.6729  | 5.4026  | 4.2362 | 0.9916  | -0.0121 | 0.9378 | 0.0279 |
| Atrx  | _VC[Carbamidomethyl (C)]DQTSKFS[Phospho (STY)]PK_2                   | Q61687_S315_M1_Atrx  | 6.8295  | 6.9842  | 6.9372  | 7.3383  | 6.4396  | 7.0521  | 7.7587  | 3.6429  | 7.1826  | 6.7942 | 1.0923  | 0.1274  | 0.4541 | 0.3428 |
| Atrx  | _QNYSESSNYGS[Phospho (STY)]EELR_2                                    | Q61687_S801_M1_Atrx  | 3.4749  | 4.2311  | 3.2085  | 4.2531  | 4.1194  | 4.0060  | 3.8992  | 4.2489  | 3.0471  | 4.6110 | 0.9825  | -0.0255 | 0.8460 | 0.0726 |
| Atrx  | _YVES[Phospho (STY)]DDEKPTDENVNEK_2                                  | #N/A                 | 5.0145  | 5.2804  | 6.2255  | 6.0209  | 5.0962  | 5.7346  | 6.0232  | 6.1166  | 5.2173  | 5.2027 | 0.9862  | -0.0201 | 0.8162 | 0.0882 |
| Atrx  | _TTSTNPS[Phospho (STY)]S[Phospho (STY)]PAPOWK_2                      | Q61687_S1978_M2_Atrx | 3.8543  | 3.1097  | 3.5879  | 3.1317  | 2.9980  | 3.6266  | 3.2800  | 3.8695  | 4.1685  | 4.3098 | 0.8663  | -0.2070 | 0.0734 | 1.1341 |
| Atrx  | _EIS[Phospho (STY)]DHNENVTLLDESQR_3                                  | Q61687_S626_M1_Atrx  | 3.9244  | 3.2287  | 3.1103  | 3.3911  | 3.0501  | 3.1786  | 3.5394  | 3.6101  | 3.0684  | 0.9383 | -0.0919 | 0.3382  | 0.4708 | 0.4708 |
| Atrx  | _TTQEGS[Phospho (STY)]S[Phospho (STY)]AODGTGGR_2                     | Q61687_S854_M2_Atrx  | 3.7380  | 3.6331  | 3.4717  | 3.8064  | 3.4806  | 3.7494  | 3.9547  | 4.0458  | 3.6349  | 3.4837 | 0.9648  | -0.0518 | 0.3271 | 0.4853 |
| Atrx  | _AKQPGVGDQNS[Phospho (STY)]S[Phospho (STY)]DEM[Oxidation (M)]LAVLK_3 | #N/A                 | 3.9238  | 3.4222  | 4.1532  | 7.4691  | 3.0596  | 3.1177  | 3.3397  | 7.8011  | 4.1528  | 3.2279 | 0.9123  | -0.1324 | 0.7425 | 0.1293 |
| Atrx  | _JGKDS[Phospho (STY)]EES[Phospho (STY)]ADOGELRR_3                    | Q61687_S1287_M2_Atrx | 3.0815  | 4.2609  | 4.3161  | 3.8598  | 4.0822  | 3.6473  | 4.0081  | 3.1413  | 3.4080  | 3.5371 | 1.0996  | 0.1370  | 0.2392 | 0.6213 |
| Hsp1  | _JES[Phospho (STY)]PKLR_2                                            | #N/A                 | 13.2827 | 13.5992 | 14.0838 | 13.9112 | 13.0778 | 13.4159 | 13.8047 | 13.4057 | 13.4612 | 0.9989 | -0.0016 | 0.9426  | 0.0257 | 0.0257 |
| Hsp1  | _PKIES[Phospho (STY)]PKLR_2                                          | #N/A                 | 6.7419  | 6.5979  | 6.9244  | 6.9847  | 5.4452  | 6.8098  | 7.1211  | 6.6826  | 7.0104  | 6.4798 | 0.9649  | -0.0515 | 0.4695 | 0.3283 |
| Hsp1  | _SVLDAQVGLNC[Carbamidomethyl (C)]LR_2                                | #N/A                 | 6.7878  | 6.9761  | 6.4503  | 6.4997  | 6.8537  | 6.6092  | 7.2419  | 6.7815  | 6.7915  | 6.8386 | 0.9686  | -0.0461 | 0.1533 | 0.8146 |
| Hsp1  | _FVVQNVSAQK_2                                                        | #N/A                 | 6.9231  | 6.5164  | 6.1840  | 6.6092  | 6.7555  | 6.1198  | 6.5317  | 7.0189  | 6.5428  | 6.1401 | 0.9938  | -0.0089 | 0.8558 | 0.0676 |
| Hsp1  | _AGGIEIANEFSQR_2                                                     | #N/A                 | 6.7098  | 6.8277  | 6.8713  | 6.8748  | 5.8113  | 6.4925  | 6.9796  | 6.5533  | 6.5533  | 6.4436 | 0.9948  | -0.0075 | 0.8843 | 0.0534 |
| Hsp1  | _Acetyl (Protein N-term)SVGLDVGSGQSC[Carbamidomethyl (C)]VIAYAR_2    | #N/A                 | 6.7937  | 6.0086  | 7.1243  | 7.0157  | 5.2054  | 6.2593  | 6.5708  | 5.9833  | 6.2336  | 6.8940 | 0.9970  | -0.0043 | 0.9632 | 0.0163 |
| Hsp1  | _FIC[Carbamidomethyl (C)]EGEHEK_2                                    | #N/A                 | 6.0231  | 5.9257  | 3.7269  | 5.6703  | 5.7728  | 5.9945  | 5.4407  | 6.0011  | 5.9635  | 6.1731 | 0.9363  | -0.0950 | 0.4473 | 0.3494 |
| Hsp1  | _LITETEDWVEEGEDQAK_2                                                 | #N/A                 | 6.4112  | 6.1887  | 6.8853  | 7.3824  | 5.4344  | 6.3804  | 6.6063  | 6.4203  | 5.7123  | 6.3125 | 1.0294  | 0.0418  | 0.6309 | 0.2000 |
| Hsp1  | _NAVEEC[Carbamidomethyl (C)]VYFEK_2                                  | #N/A                 | 5.7257  | 5.7475  | 6.2118  | 6.4623  | 5.1644  | 5.9387  | 5.4844  | 6.0563  | 5.4813  | 5.2098 | 1.0571  | 0.0801  | 0.2719 | 0.5656 |
| Hsp1  | _SQFEELC[Carbamidomethyl (C)]AELLQK_2                                | #N/A                 | 4.5761  | 4.7461  | 5.2817  | 5.2585  | 3.6516  | 4.3346  | 4.6668  | 3.9943  | 4.2539  | 4.1039 | 1.0909  | 0.1325  | 0.2802 | 0.5526 |
| Hsp1  | _S[Phospho (STY)]LDQDPVVR_2                                          | Q61699_S774_M1_Hsp1  | 3.0623  | 6.2688  | 4.2969  | 6.8262  | 5.9435  | 6.6378  | 6.4206  | 6.3397  | 5.8037  | 6.3043 | 0.8861  | -0.1745 | 0.3868 | 0.4125 |
| Hsp1  | _VVNVLPVEANLVQLGR_2                                                  | #N/A                 | 4.0633  | 3.6249  | 3.8576  | 4.8108  | 4.6460  | 4.8557  | 5.0959  | 4.3245  | 4.4433  | 3.9627 | 1.0344  | -0.0487 | 0.7907 | 0.1207 |
| Hsp1  | _VLELQGR_2                                                           | #N/A                 | 6.3110  | 3.4319  | 4.4811  | 6.4463  | 6.9383  | 5.8327  | 3.1976  | 6.5598  | 6.2088  | 6.4885 | 0.9929  | -0.0103 | 0.9669 | 0.0146 |
| Hsp1  | _QDLPNAEKKR_3                                                        | #N/A                 | 4.0433  | 3.6264  | 3.2749  | 3.7776  | 3.7292  | 3.1928  | 3.4923  | 3.0448  | 3.8795  | 3.7446 | 1.0190  | 0.0271  | 0.7672 | 0.1151 |
| Hsp1  | _NQDTHANNVSSFK_2                                                     | #N/A                 | 4.2152  | 4.0216  | 3.9489  | 3.4927  | 4.7086  | 4.6105  | 3.6409  | 3.8214  | 3.8076  | 3.1699 | 1.1435  | 0.1934  | 0.0613 | 0.2123 |
| Hsp1  | _T[Phospho (STY)]PNPGNKDKELEGK_3                                     | Q61699_T816_M1_Hsp1  | 4.8475  | 3.8884  | 3.1877  | 4.2323  | 3.7097  | 4.0198  | 5.3958  | 7.3582  | 3.0679  | 3.9096 | 0.8070  | -0.3093 | 0.2656 | 0.5757 |
| Elav4 | _SSQALSQLVSK[Phospho (STY)]PNR_2                                     | Q61701_S233_M1_Elav4 | 3.4195  | 7.1037  | 4.1063  | 8.7188  | 4.0460  | 3.6834  | 6.8451  | 6.8124  | 3.1581  | 3.0751 | 1.0416  | 0.0588  | 0.8864 | 0.0524 |
| Elav4 | _LUDQVTEVSR_2                                                        | #N/A                 | 3.9532  | 5.2067  | 3.6869  | 5.1002  | 5.1031  | 3.5277  | 4.8752  | 5.3708  | 4.7998  | 4.4088 | 0.9108  | -0.1348 | 0.3435 | 0.4641 |
| Elav4 | _NC[Carbamidomethyl (C)]PS[Phospho (STY)]PMQTGAATDQK_2               | #N/A                 | 9.9453  | 8.4144  | 3.3698  | 11.2130 | 8.2291  | 3.8495  | 8.9762  | 4.0093  | 7.6682  | 8.4358 | 1.0318  | 0.0451  | 0.9043 | 0.0437 |
| Cd47  | _ISVDUNIGASK_2                                                       | #N/A                 | 5.6788  | 5.4401  | 5.3488  | 5.6374  | 5.4630  | 5.4419  | 5.8581  | 6.0066  | 5.4193  | 5.9575 | 0.9469  | -0.0788 | 0.0381 | 1.4194 |
| Cd47  | _FVANSQR_2                                                           | #N/A                 | 4.1038  | 4.9491  | 3.8375  | 3.5555  | 5.2922  | 4.7442  | 3.2702  | 5.4185  | 4.7250  | 3.0586 | 1.0710  | 0.0889  | 0.6214 | 0.2066 |
| Cd47  | _NVEAGSTEEMFVK_2                                                     | #N/A                 | 4.1850  | 3.0390  | 3.9187  | 8.8850  | 6.7725  | 3.2959  | 8.1065  | 8.0056  | 7.5491  | 3.1397 | 0.7486  | -0.4177 | 0.2977 | 0.5262 |
| Phgdh | _GTQVYTGTSLSK_2                                                      | #N/A                 | 5.7190  | 6.8021  | 7.2838  | 6.7168  | 6.6320  | 6.8547  | 6.7592  | 6.9812  | 6.6235  | 6.8473 | 0.9802  | -0.0289 | 0.6317 | 0.1995 |
| Phgdh | _GVNGDEGALLR_2                                                       | #N/A                 | 7.0492  | 6.8394  | 6.6846  | 6.6411  | 6.9938  | 6.5170  | 6.9616  | 6.8487  | 6.8573  | 6.9252 | 0.9840  | -0.0233 | 0.3394 | 0.4693 |
| Phgdh | _VTADVINAEEK_2                                                       | #N/A                 | 6.6920  | 6.6545  | 6.7713  | 6.5300  | 6.7409  | 6.8362  | 6.3619  | 6.6351  | 6.4274  | 6.5457 | 1.0326  | 0.0463  | 0.0192 | 0.1760 |
| Phgdh | _QADVNLVNAK_2                                                        | #N/A                 | 4.9421  | 4.6150  | 4.9532  | 5.8776  | 5.2875  | 5.8585  | 5.2688  | 5.5234  | 5.0061  | 5.6564 | 0.9799  | -0.0294 | 0.7179 | 0.1439 |
| Phgdh | _NAGTC[Carbamidomethyl (C)]SPAWVGLLR_2                               | #N/A                 | 4.9811  | 5.4079  | 3.8936  | 5.2920  | 5.5274  | 3.9511  | 4.8883  | 4.9960  | 5.2491  | 1.0435 | 0.0615  | 0.5993  | 0.2224 | 0.1224 |
| Phgdh | _VLSDGLDPC[Carbamidomethyl (C)]C[Carbamidomethyl (C)]R_2             | #N/A                 | 2.9137  | 5.8618  | 5.9666  | 6.4318  | 6.3752  | 5.3189  | 5.6476  | 5.5764  | 6.0558  | 5.4130 | 0.9656  | -0.0505 | 0.7819 | 0.1069 |
| Phgdh | _ILDQGLQVVEK_2                                                       | #N/A                 | 3.6838  | 3.6705  | 4.3706  | 3.8885  | 4.2379  | 4.1910  | 3.9753  | 4.3820  | 3.3994  | 3.3394 | 1.0859  | 0.1190  | 0.2935 | 0.5325 |
| Phgdh | _AGTGVNDVLEAATR_2                                                    | #N/A                 | 4.3452  | 4.9519  | 3.6541  | 4.9801  | 4.5468  | 5.2932  | 5.0342  | 5.3505  | 3.6303  | 5.3492 | 0.9571  | -0.0633 | 0.6523 | 0.1856 |
| Phgdh | _ALVDHENVVSC[Carbamidomethyl (C)]PHLGASTK_3                          | #N/A                 | 3.6532  | 4.4622  | 4.1704  | 4.9422  | 4.0681  | 4.0817  | 4.2385  | 3.7301  | 4.0321  | 3.4732 | 1.0594  | 0.1288  | 0.2002 | 0.6986 |
| Kcna5 | _RES[Phospho (STY)]GLDTGGQR_2                                        | Q61762_S535_M1_Kcna5 | 6.0257  | 3.4169  | 6.6453  | 3.4390  | 3.3052  | 3.3194  | 3.5872  | 6.1902  | 6.4700  | 5.8983 | 0.7873  | -0.3451 | 0.2481 | 0.6055 |
| Kif3b | _DYEGPNS[Phospho (STY)]PK_2                                          | Q61771_S681_M1_Kif3b | 9.8322  | 9.9455  | 10.1193 | 10.3046 | 9.3131  | 9.9175  | 10.1981 | 9.8205  | 9.8186  | 9.8727 | 0.9976  | -0.0034 | 0.9021 | 0.0448 |
| Kif3b | _SQNQYVLR_2                                                          | #N/A                 | 3.6667  | 3.6248  | 4.3535  | 3.6488  | 3.8176  | 3.4362  | 3.7970  | 3.2623  | 3.6514  | 3.8510 | 1.0323  | 0.0458  | 0.5586 | 0.2529 |
| Las1  | _GRFSAVDTPQLR_2                                                      | #N/A                 | 7.5750  | 7.6133  | 8.0325  | 8.1257  | 8.2475  | 7.9603  | 7.7068  | 7.5547  | 7.6129  | 7.9710 | 1.0278  | 0.0396  | 0.2115 | 0.6746 |
| Las1  | _YHEEFK_2                                                            | #N/A                 | 7.1339  | 7.2752  | 7.2989  | 7.5924  | 7.9026  | 7.3944  | 6.9189  | 7.4206  | 7.5029  | 7.3034 | 1.0201  | 0.0287  | 0.4239 | 0.3728 |
| Las1  | _YKEEFK_2                                                            | #N/A                 | 7.1549  | 7.2549  | 7.3533  | 7.2445  | 7.7168  | 7.2828  | 6.8207  | 7.2457  | 7.3890  | 7.4117 | 1.0163  | 0.0234  | 0.4495 | 0.3473 |
| Las1  | _QSFTM[Oxidation (M)]VADTPENLR_2                                     | #N/A                 | 6.6347  | 6.9054  | 7.5777  | 6.7318  | 7.0353  | 7.4378  | 6.8818  | 6.4766  | 6.9469  | 7.4013 | 1.0184  | 0.0262  | 0.6181 | 0.2089 |
| Las1  | _TQDQSNIK_2                                                          | #N/A                 | 5.8442  | 6.4774  | 5.7553  | 6.9727  | 6.8343  | 6.3061  | 5.9937  | 6.2594  | 6.0911  | 6.7369 | 1.0151  | 0.0216  | 0.7493 | 0.1253 |
| Las1  | _IVPTEK_2                                                            | #N/A                 | 5.1634  | 5.3348  | 3.4340  | 4.5683  | 5.8744  | 5.3112  | 3.2157  | 5.6989  | 5.0655  | 5.3058 | 1.0262  | 0.0373  | 0.8426 | 0.0744 |
| Las1  | _EAGDSSSYR_2                                                         | #N/A                 | 4.3113  | 4.4152  | 3.6215  | 3.8308  | 7.0645  | 3.2779  | 3.6287  | 4.5803  | 4.4792  | 4.4096 | 1.0341  | 0.0484  | 0.8440 | 0.0737 |
| Las1  | _TGDGMPLPANVVEAL_2                                                   | #N/A                 | 4.5037  | 3.9908  | 3.8724  | 4.6175  | 2.9037  | 3.9173  | 4.0898  | 3.7434  | 3.3920  | 4.3421 | 1.0195  | 0.0278  | 0.8345 | 0.0785 |
| Las1  | _MGPSGEGVEPERR_3                                                     | #N/A                 |         |         |         |         |         |         |         |         |         |        |         |         |        |        |



|         |                                                                                     |                        |         |         |         |         |         |         |         |         |         |         |         |         |        |        |
|---------|-------------------------------------------------------------------------------------|------------------------|---------|---------|---------|---------|---------|---------|---------|---------|---------|---------|---------|---------|--------|--------|
| Myh10   | _DLEAQIEAANK_2                                                                      | #N/A                   | 4.7801  | 3.4789  | 3.3605  | 3.1409  | 5.0175  | 4.4293  | 5.0091  | 4.9531  | 5.8001  | 5.4690  | 0.7601  | -0.3957 | 0.0201 | 1.6958 |
| Myh10   | _QLHIEGAS(Phospho (STY))LELSODTESK_3                                                | #N/A                   | 3.4557  | 3.9090  | 4.1018  | 7.1681  | 5.9386  | 3.7492  | 4.0928  | 7.3194  | 6.5715  | 4.5676  | 0.8373  | -0.2562 | 0.3748 | 0.4262 |
| Myh10   | _ELQAOIAQLQEDFESEK_2                                                                | #N/A                   | 5.4742  | 5.5973  | 5.6608  | 6.1596  | 4.6430  | 4.8521  | 5.7356  | 5.6981  | 5.2016  | 5.2760  | 0.9854  | -0.2212 | 0.8002 | 0.0968 |
| Myh10   | _JAQLEELFEQONM(Oxidation (M))ELJNRD_3                                               | #N/A                   | 5.9635  | 5.9928  | 7.3207  | 6.0266  | 5.2071  | 6.1887  | 6.9419  | 6.4559  | 5.8699  | 6.2863  | 0.9574  | -0.0628 | 0.5053 | 0.2964 |
| Myh10   | _SLEAEILQLEELASSER_2                                                                | #N/A                   | 3.8140  | 3.1183  | 4.5008  | 4.4991  | 2.9997  | 3.5506  | 3.6498  | 2.1139  | 3.7987  | 3.1788  | 1.1732  | 0.2305  | 0.2592 | 0.5864 |
| Myh10   | _RLQLHIEGASLEIS(Phospho (STY))DDOTESK_3                                             | #N/A                   | 4.1208  | 3.5784  | 4.0509  | 6.3805  | 3.2645  | 3.4154  | 3.3936  | 6.2545  | 5.4410  | 3.6816  | 0.8812  | -0.1825 | 0.5065 | 0.2954 |
| Myh10   | _VIQYLAAHWASSHK_3                                                                   | #N/A                   | 5.1379  | 3.9620  | 4.4403  | 3.5174  | 3.8503  | 4.2751  | 4.3849  | 4.6896  | 3.3135  | 3.6613  | 1.0461  | 0.0650  | 0.6411 | 0.1931 |
| Myh10   | _IAEC(Carbamidomethyl (C))SQSLAAEEKAK_2                                             | #N/A                   | 3.2436  | 4.0988  | 4.4781  | 4.0219  | 3.8882  | 4.2373  | 3.1123  | 2.9793  | 3.2784  | 3.6992  | 1.2226  | 0.7900  | 0.0186 | 1.7296 |
| Myh10   | _AVINYPATQADWTAK_2                                                                  | #N/A                   | 3.8768  | 3.3494  | 4.5636  | 3.5654  | 3.0025  | 3.3869  | 3.2801  | 3.0522  | 4.2016  | 3.5324  | 1.0306  | 0.0434  | 0.7594 | 0.1195 |
| Myh10   | _NKQEVMISDLEIR_2                                                                    | #N/A                   | 3.8002  | 3.5422  | 3.5338  | 4.5785  | 3.3636  | 4.3659  | 3.2259  | 3.9236  | 4.2226  | 4.2557  | 0.9980  | -0.0159 | 0.8953 | 0.0480 |
| Myh10   | _LQQLFNHMT(Oxidation (M))FILEEYQIR_3                                                | #N/A                   | 3.8516  | 1.9136  | 3.5853  | 3.1290  | 2.9953  | 3.6293  | 3.2773  | 3.8721  | 4.1712  | 4.3072  | 0.8150  | -0.2952 | 0.1090 | 0.9627 |
| Mog     | _VIGPGVPR_2                                                                         | #N/A                   | 9.0913  | 9.3137  | 9.2574  | 8.5548  | 8.8566  | 8.5824  | 9.3321  | 9.4755  | 9.0451  | 8.7594  | 0.9770  | -0.0335 | 0.3466 | 0.4602 |
| Mog     | _ALVGDIEALPC(Carbamidomethyl (C))IR_2                                               | #N/A                   | 8.6991  | 8.7341  | 8.8427  | 8.3232  | 8.3868  | 8.5865  | 8.9910  | 8.7109  | 8.5698  | 8.3899  | 0.9919  | -0.0117 | 0.6414 | 0.1929 |
| Mog     | _AEVENLHR_2                                                                         | #N/A                   | 7.9496  | 8.0545  | 7.6859  | 7.8697  | 7.8266  | 7.7586  | 8.0572  | 7.8282  | 7.7908  | 7.7397  | 1.0004  | 0.0006  | 0.9692 | 0.0136 |
| Mog     | _TFDPHFLR_2                                                                         | #N/A                   | 7.4906  | 7.6198  | 7.5605  | 7.0716  | 6.9156  | 6.5186  | 7.9991  | 7.6441  | 7.3333  | 7.1653  | 0.9550  | -0.0665 | 0.2376 | 0.6241 |
| Mog     | _FSDEGGTYC(Carbamidomethyl (C))JFR_2                                                | #N/A                   | 6.7488  | 6.1792  | 6.2918  | 6.2285  | 5.7511  | 5.6778  | 6.6901  | 6.4788  | 5.2664  | 6.1904  | 0.9983  | -0.0024 | 0.9752 | 0.0109 |
| Mog     | _LAGQLEELR_2                                                                        | #N/A                   | 6.2469  | 6.4759  | 6.1620  | 5.9797  | 5.7258  | 5.7782  | 6.6492  | 6.5143  | 6.3676  | 5.9288  | 0.9523  | -0.0705 | 0.1529 | 0.8156 |
| Mog     | _LAGQLEELRNPF_2                                                                     | #N/A                   | 5.2954  | 4.5769  | 3.5684  | 4.7276  | 4.6330  | 4.6822  | 5.5571  | 5.9376  | 4.9383  | 4.3565  | 0.8813  | -0.1823 | 0.1586 | 0.7997 |
| Mog     | _DDQDAQAPEVR_2                                                                      | #N/A                   | 7.4064  | 6.7920  | 6.2226  | 7.2634  | 6.7298  | 6.5731  | 7.2627  | 7.0533  | 6.8000  | 6.8246  | 0.9780  | -0.0322 | 0.5396 | 0.2680 |
| Mog     | _LRAEVENLHR_3                                                                       | #N/A                   | 4.8123  | 5.2261  | 5.0787  | 4.6769  | 4.8011  | 3.8294  | 4.5929  | 5.1068  | 5.4922  | 4.4850  | 0.9630  | -0.0543 | 0.5744 | 0.2408 |
| Mog     | _DHSYQEEAAM(Oxidation (M))ELK_2                                                     | #N/A                   | 4.7930  | 4.0300  | 4.4387  | 3.6647  | 3.7949  | 3.6764  | 4.9454  | 4.3601  | 4.6507  | 4.1387  | 0.8967  | -0.1574 | 0.1284 | 0.8914 |
| Mog     | _NGKQDQAEQAPEVR_2                                                                   | #N/A                   | 4.0666  | 3.2758  | 3.8003  | 3.3440  | 3.0971  | 3.1115  | 3.4923  | 5.4184  | 3.9562  | 3.0213  | 0.8692  | -0.2022 | 0.2878 | 0.5409 |
| Runx111 | _STT(Phospho (STY))GTPPTTETPR_2                                                     | Q61909_T565_M1_Runx111 | 3.3876  | 7.5350  | 7.9318  | 4.1659  | 7.3081  | 7.1409  | 7.6439  | 7.4467  | 7.5674  | 7.4165  | 0.8306  | -0.2678 | 0.2358 | 0.6274 |
| Runx111 | _QDCS(Phospho (STY))PVNPDPVALDAHR_3                                                 | #N/A                   | 0.6882  | 5.5534  | 6.1210  | 6.0917  | 5.4062  | 5.9451  | 4.7701  | 5.7168  | 5.5408  | 5.7281  | 1.0810  | 0.1123  | 0.1088 | 0.9632 |
| Kna6    | _S(Phospho (STY))LTLAAPGEVR_2                                                       | #N/A                   | 8.1138  | 4.2036  | 6.1820  | 4.2256  | 6.0973  | 4.0336  | 4.8345  | 4.2764  | 3.0746  | 7.3492  | 0.8603  | -0.2171 | 0.5686 | 0.2452 |
| Kna6    | _SEKS(Phospho (STY))LTLAAPGEVR_2                                                    | #N/A                   | 6.3596  | 4.4101  | 7.0390  | 6.1963  | 2.7975  | 3.8271  | 6.5843  | 4.0699  | 4.3690  | 4.1094  | 1.0673  | 0.0939  | 0.7503 | 0.1248 |
| Kna6    | _MRS(Phospho (STY))EKS(Phospho (STY))LTLAAPGEVR_3                                   | Q61923_S3_M2_Kna6      | 3.9623  | 3.2666  | 3.1482  | 3.3532  | 4.1251  | 3.1407  | 3.5015  | 3.6480  | 3.9470  | 3.0305  | 0.9908  | -0.0133 | 0.9065 | 0.0166 |
| Npm1    | _M(Oxidation (M))TQQAQQLWQWR_2                                                      | #N/A                   | 6.3709  | 6.2909  | 6.3958  | 5.9874  | 6.2740  | 6.5390  | 5.6258  | 6.3009  | 6.5166  | 6.4874  | 1.0124  | 0.0177  | 0.6948 | 0.1582 |
| Npm1    | _GPSVEDIK_2                                                                         | #N/A                   | 5.9308  | 5.4282  | 6.3935  | 5.4737  | 6.3093  | 5.8428  | 5.3697  | 5.4197  | 5.5625  | 6.2022  | 1.0457  | 0.0645  | 0.3447 | 0.4631 |
| Npm1    | _VONDENEHQLSR_2                                                                     | #N/A                   | 4.2930  | 4.7596  | 4.2454  | 5.1888  | 5.5016  | 4.7908  | 5.1032  | 5.2017  | 4.3670  | 4.4386  | 1.0040  | 0.0057  | 0.9520 | 0.0212 |
| Npm1    | _DELHVVEAEM(Oxidation (M))NVEGSPK_3                                                 | #N/A                   | 3.4986  | 3.6190  | 3.3233  | 3.8319  | 5.3319  | 4.6549  | 5.3175  | 4.0960  | 4.1337  | 3.9541  | 0.9206  | -0.1193 | 0.4896 | 0.3103 |
| Npm1    | _MSQVPTVSGGFEITPPVLR_2                                                              | #N/A                   | 3.7473  | 3.0517  | 4.4341  | 5.6891  | 4.1062  | 3.3556  | 3.7164  | 3.4330  | 7.7321  | 3.4030  | 1.1380  | 0.1865  | 0.3385 | 0.4705 |
| Npm1    | Carbamidomethyl (C))GSGPVHSGQHLVAEEDAE(Phospho (STY))DEDEEDVKLLGM(Oxidation (M))SGI | Q61937_S125_M1_Npm1    | 4.2404  | 2.9857  | 3.4264  | 3.9291  | 3.3661  | 4.3634  | 3.6437  | 4.1894  | 3.8380  | 3.8961  | 0.9555  | -0.0007 | 0.5687 | 0.2451 |
| Pcbp2   | _LVVPASQC(Carbamidomethyl (C))GSUGK_2                                               | #N/A                   | 7.8150  | 8.2289  | 8.0973  | 8.2224  | 8.1780  | 7.9546  | 8.0660  | 8.2518  | 8.0971  | 7.9324  | 0.9995  | -0.0007 | 0.9681 | 0.0141 |
| Pcbp2   | _INISEGNC(Carbamidomethyl (C))PER_2                                                 | #N/A                   | 7.9238  | 8.0680  | 7.8765  | 7.9351  | 7.8745  | 7.8247  | 7.7188  | 7.8690  | 7.5712  | 7.7259  | 1.0275  | 0.0392  | 0.0108 | 1.9685 |
| Pcbp2   | _ATIAIGPQSIIE(Carbamidomethyl (C))WK_2                                              | #N/A                   | 7.0762  | 6.8244  | 7.4406  | 7.2926  | 7.5298  | 7.6027  | 7.1486  | 6.8406  | 7.0011  | 7.3966  | 1.0279  | 0.0396  | 0.2988 | 0.5246 |
| Pcbp2   | _LTLAAGTNMFK_2                                                                      | #N/A                   | 6.8520  | 6.8915  | 6.8351  | 7.0835  | 7.0297  | 6.9335  | 7.2088  | 7.5821  | 7.0215  | 0.9732  | -0.0392 | 0.2135  | 0.6706 | 0.0606 |
| Pcbp2   | _PSSS(Phospho (STY))PVFAGGGOR_2                                                     | Q61990_S185_M1_Pcbp2   | 3.5754  | 3.6957  | 3.7385  | 3.8696  | 3.5840  | 3.8922  | 3.7337  | 3.8013  | 3.8147  | 4.3316  | 0.9504  | -0.0734 | 0.1714 | 0.7660 |
| Pcbp2   | _ESTGAQVQVAGDM(Oxidation (M))PNSTER_2                                               | #N/A                   | 4.2778  | 5.1878  | 3.8525  | 4.8052  | 5.0407  | 4.8658  | 4.6650  | 5.4330  | 4.7688  | 4.9356  | 0.9440  | -0.0832 | 0.3700 | 0.4318 |
| Pcbp2   | _QVITITGSAASSIAQYUNVR_2                                                             | #N/A                   | 3.0351  | 4.3074  | 4.2696  | 3.8133  | 3.6796  | 3.6008  | 3.9616  | 3.1878  | 3.4869  | 3.4906  | 1.0715  | 0.0996  | 0.3807 | 0.4195 |
| Ctr9    | _KGGEFDEFVNDOT(Phospho (STY))DDDLPSK_3                                              | #N/A                   | 3.4026  | 4.2078  | 4.0894  | 3.9129  | 4.0291  | 3.7004  | 4.0612  | 7.2378  | 3.3873  | 3.5902  | 0.8514  | -0.2320 | 0.3783 | 0.4222 |
| Ctr9    | _GGEFDEFVNDOT(Phospho (STY))DDDLPSK_2                                               | #N/A                   | 3.3172  | 3.9089  | 4.0040  | 4.5067  | 3.7972  | 4.3282  | 4.2214  | 3.6118  | 3.2604  | 2.9728  | 1.1309  | 0.1775  | 0.1651 | 0.7823 |
| Ctr9    | _NNS(Phospho (STY))DS(Phospho (STY))DDDERPVR_2                                      | Q62018_S1039_M2_Ctr9   | 3.4894  | 4.2946  | 4.1762  | 3.8261  | 4.1159  | 3.6136  | 3.9744  | 3.1751  | 3.4741  | 3.1450  | 1.1386  | 0.1873  | 0.0673 | 1.1723 |
| Ctr9    | _KGS(Phospho (STY))GS(Phospho (STY))EQEGEEGGER_2                                    | #N/A                   | 3.2803  | 3.9459  | 3.9671  | 4.4697  | 3.9088  | 3.8227  | 4.1844  | 3.6487  | 3.2973  | 4.0026  | 1.0018  | 0.0026  | 0.9809 | 0.0084 |
| Ctr9    | _RKGS(Phospho (STY))GS(Phospho (STY))EQEGEEGGER_2                                   | #N/A                   | 4.0895  | 3.1366  | 3.2755  | 3.7781  | 3.2152  | 3.5997  | 1.4723  | 4.3403  | 3.9889  | 3.7451  | 1.0381  | 0.0540  | 0.8196 | 0.0864 |
| Cep131  | _SNS(Phospho (STY))TTQVNGDWTGSPR_2                                                  | Q62036_S78_M1_Cep131   | 3.4988  | 4.0129  | 3.7610  | 4.1437  | 4.1349  | 3.7995  | 4.2919  | 3.8646  | 3.1925  | 4.6685  | 0.9719  | -0.0411 | 0.6995 | 0.1552 |
| Pea15   | _QPS(Phospho (STY))EEEEK_2                                                          | #N/A                   | 14.1747 | 13.9692 | 14.5227 | 14.4419 | 14.0192 | 14.2173 | 13.8661 | 13.7808 | 14.1842 | 14.2517 | 1.0145  | 0.0208  | 0.2001 | 0.6988 |
| Pea15   | _SAC(Carbamidomethyl (C))KEDIPSEK_2                                                 | #N/A                   | 6.3086  | 6.6406  | 6.5305  | 6.6404  | 7.0919  | 6.3156  | 6.2556  | 6.3885  | 6.6555  | 6.1012  | 1.0161  | 0.0616  | 0.6845 | 0.1946 |
| Pea15   | _YKDHRQPS(Phospho (STY))EEEEK_3                                                     | #N/A                   | 10.7542 | 11.6445 | 12.6696 | 11.8826 | 11.4818 | 11.8847 | 11.3931 | 11.5746 | 11.6001 | 11.6474 | 1.0143  | 0.0206  | 0.6204 | 0.2074 |
| Pea15   | _LTRIPQPS(Phospho (STY))AK_2                                                        | Q62048_S104_M1_Pea15   | 4.9543  | 6.8857  | 8.4950  | 6.2055  | 6.6779  | 6.9612  | 3.1744  | 6.2277  | 6.1427  | 5.8284  | 1.2533  | 0.3257  | 0.1384 | 0.8590 |
| Pea15   | _DIIRQPS(Phospho (STY))EEEEK_2                                                      | #N/A                   | 10.8686 | 11.5295 | 12.4484 | 11.8238 | 11.1628 | 11.7935 | 11.6646 | 11.3767 | 11.5176 | 11.5756 | 1.0061  | 0.0088  | 0.8114 | 0.0908 |
| Pea15   | _RPDLTM(Oxidation (M))VDYR_2                                                        | #N/A                   | 4.7044  | 5.2255  | 5.0402  | 4.7631  | 5.3575  | 5.2916  | 4.9391  | 5.0577  | 5.5783  | 5.4571  | 0.9630  | -0.0543 | 0.3281 | 0.4841 |
| Pea15   | _Acetyl (Protein N-term)IAEVTGLQDTNNTLDELEQLK_3                                     | #N/A                   | 3.3764  | 4.6085  | 3.1100  | 4.6986  | 4.4878  | 4.1751  | 4.3029  | 3.8587  | 4.2273  | 4.3860  | 0.9719  | -0.0411 | 0.7496 | 0.1252 |
| Pea15   | _QPS(Phospho (STY))EEDIKLAPPPK_2                                                    | #N/A                   | 7.6523  | 6.4834  | 7.0364  | 7.8656  | 6.9613  | 8.0757  | 7.8972  | 7.5179  | 7.2723  | 7.7766  | 0.9645  | -0.0521 | 0.4393 | 0.3572 |
| Pea15   | _SEITTGSAWFSFESHNK_2                                                                | #N/A                   | 3.1479  | 4.0422  | 4.3468  | 4.7508  | 3.1228  | 4.4940  | 4.6291  | 3.7613  | 3.7037  | 4.3245  | 0.9706  | -0.0430 | 0.7691 | 0.1140 |
| Pea15   | _DNLSEVHFESR_2                                                                      | #N/A                   | 3.4704  | 3.4368  | 4.1496  | 3.5711  | 3.5828  | 3.3100  | 4.3381  | 3.3405  | 2.7119  | 2.7437  | 1.0924  | 0.1274  | 0.3927 | 0.4060 |
| Vcan    | _YEKSLR_2                                                                           | #N/A                   | 6.5756  | 6.7570  | 6.7938  | 6.8968  | 6.8265  | 6.8418  | 6.5189  | 6.6972  | 6.7397  | 6.6750  | 1.0187  | 0.0267  | 0.1072 | 0.9700 |
| Vcan    | _AQCC(Carbamidomethyl (C))GGGLGVLR_2                                                | #N/A                   | 6.1535  | 6.7330  | 6.0099  | 6.7933  | 6.9494  | 6.7756  | 6.0815  | 6.2291  | 6.8967  | 6.2296  | 1.0199  | 0.0284  | 0.6193 | 0.2081 |
| Vcan    | _GTVACC(Carbamidomethyl (C))GGPPVENAK_2                                             | #N/A                   | 5.8597  | 5.7276  | 6.5387  | 5.7885  | 6.2785  | 5.8356  | 6.2759  | 5.6179  | 6.0122  | 6.3391  | 0.9907  | -0.0135 | 0.7958 | 0.0992 |
| Vcan    | _LATVGLQAAWR_2                                                                      | #N/A                   | 5.5855  | 5.5174  | 5.8825  | 5.2989  | 5.9165  | 5.9620  | 5.6606  | 4.9740  | 5.4935  | 5.9616  | 1.0310  | 0.0441  | 0.4441 | 0.3526 |
| Vcan    | _FTFEEAEAC(Carbamidomethyl (C))TSR_2                                                | #N/A                   | 3.2502  | 4.5398  | 4.4847  | 6.0944  | 5.2137  | 4.2306  | 4.1238  | 2.9727  | 3.3579  | 2.5832  | 1.2033  | 0.2632  | 0.5796 | 0.0796 |
| Vcan    | _NGFDQC(Carbamidomethyl (C))YGVGLSDASVR_2                                           | #N/A                   | 3.0709  | 3.8761  | 3.7577  | 4.2446  | 6.2260  | 4.0321  | 6.6344  | 3.8581  | 3.0556  | 6.5477  | 0.8362  | -0.2580 | 0.3918 | 0.4070 |
| Vcan    | _VGHDYQWGLNDK_3                                                                     | #N/A                   | 3.2172  | 4.0090  | 3.9040  | 4.4067  | 4.5765  | 4.2282  | 4.1213  | 3.7118  | 4.7250  | 4.3737  | 0.9584  | -0.0613 | 0.5703 | 0.2439 |



|        |                                                                              |                       |         |         |         |         |         |         |         |         |         |         |         |         |        |        |
|--------|------------------------------------------------------------------------------|-----------------------|---------|---------|---------|---------|---------|---------|---------|---------|---------|---------|---------|---------|--------|--------|
| Dlg4   | _RYS[Phospho (STY)]PVAK_2                                                    | Q62108_S295_M1_Dlg4   | 12.5815 | 12.6108 | 13.0954 | 12.5583 | 11.8629 | 12.3780 | 12.8331 | 12.7883 | 12.5946 | 12.4733 | 0.9875  | -0.0181 | 0.4824 | 0.3166 |
| Dlg4   | _IIPGAAADQGR_2                                                               | #N/A                  | 8.1690  | 8.3275  | 8.0628  | 8.2062  | 8.5818  | 7.9097  | 8.2800  | 8.3959  | 8.3041  | 8.0662  | 0.9937  | -0.0091 | 0.6990 | 0.1555 |
| Dlg4   | _DIYHFVSR_2                                                                  | #N/A                  | 6.7404  | 6.3829  | 6.4862  | 6.6874  | 6.4564  | 6.6812  | 6.7122  | 6.8029  | 6.5886  | 6.1886  | 0.9999  | -0.0001 | 0.9962 | 0.0017 |
| Dlg4   | _VIEDLSPIYVVPAR_2                                                            | #N/A                  | 7.5488  | 7.5357  | 7.3752  | 7.0906  | 7.5387  | 7.4550  | 7.6932  | 7.5344  | 7.4207  | 7.4065  | 0.9881  | -0.0173 | 0.4144 | 0.3826 |
| Dlg4   | _PILGPTK_2                                                                   | #N/A                  | 7.2483  | 6.8659  | 7.1928  | 7.1890  | 7.0297  | 7.2576  | 7.3994  | 7.4634  | 7.2005  | 7.2516  | 0.9730  | -0.0395 | 0.0637 | 1.1958 |
| Dlg4   | _EVTHSAANVAK_2                                                               | #N/A                  | 4.4663  | 4.5644  | 5.0177  | 4.6923  | 5.3764  | 4.8637  | 4.7284  | 5.3316  | 5.0232  | 5.2508  | 0.9502  | -0.0738 | 0.2430 | 0.6143 |
| Dlg4   | _VHSDS[Phospho (STY)]ETDQIGFIPSKR_3                                          | #N/A                  | 4.2706  | 8.8997  | 3.4566  | 3.9592  | 8.1121  | 4.3332  | 3.6739  | 4.1592  | 3.8078  | 3.9262  | 1.4146  | 0.5004  | 0.2178 | 0.6620 |
| Dlg4   | _REYEDGR_2                                                                   | #N/A                  | 5.6880  | 4.9710  | 4.2395  | 5.2577  | 5.7137  | 4.9798  | 4.3690  | 5.0066  | 5.5098  | 5.0957  | 1.0293  | 0.0417  | 0.6753 | 0.1705 |
| Dlg4   | _VNSLIUVNEVDVR_2                                                             | #N/A                  | 6.6796  | 6.1142  | 3.1753  | 5.7947  | 5.4174  | 5.5754  | 6.5008  | 6.0053  | 6.4126  | 5.8098  | 0.8880  | -0.1714 | 0.3048 | 0.5159 |
| Dlg4   | _NTYDDVY[Phospho (STY)]LK_2                                                  | Q62108_Y240_M1_Dlg4   | 8.6224  | 8.2587  | 8.8284  | 8.7111  | 7.5560  | 8.5249  | 8.7678  | 8.6999  | 8.6125  | 8.5615  | 0.9719  | -0.0411 | 0.3390 | 0.4698 |
| Dlg4   | _AKDWGS[Phospho (STY)]SSGQGR_2                                               | Q62108_S509_M1_Dlg4   | 3.2299  | 3.3874  | 4.1593  | 3.4520  | 4.1997  | 3.5332  | 4.1430  | 3.3785  | 3.3775  | 3.2572  | 1.0343  | 0.0486  | 0.6603 | 0.1802 |
| Dlg4   | _EQLM[Oxidation (M)]NSLGS[Phospho (STY)]GTASLR_2                             | #N/A                  | 8.4980  | 8.7056  | 9.3999  | 8.5218  | 4.3857  | 5.3990  | 7.8360  | 5.6074  | 8.7856  | 6.9045  | 1.0277  | 0.0394  | 0.8685 | 0.0612 |
| Dlg4   | _RVHSDS[Phospho (STY)]ETDQIGFIPSK_3                                          | #N/A                  | 3.3534  | 4.3193  | 4.2605  | 4.9780  | 4.1406  | 3.5917  | 3.9525  | 5.0867  | 6.6223  | 6.3831  | 0.7453  | -0.2422 | 0.0395 | 1.4037 |
| Dlg4   | _VHSDSETDQIGFIPSK_3                                                          | #N/A                  | 5.0982  | 4.5489  | 4.3407  | 7.1955  | 5.5807  | 6.7087  | 5.0463  | 6.7087  | 6.2600  | 0.8553  | -0.2255 | 0.1976  | 0.7042 | 0.1042 |
| Dlg4   | _HC[Carbamidomethyl (C)]LDVSAHAVR_2                                          | #N/A                  | 4.1997  | 4.0442  | 3.3856  | 3.8883  | 3.7056  | 4.4041  | 4.0795  | 3.8064  | 4.1869  | 3.8553  | 0.9889  | -0.0161 | 0.8298 | 0.0810 |
| Dlg4   | _RVHS[Phospho (STY)]DS[Phospho (STY)]ETDQIGFIPSKR_3                          | #N/A                  | 3.3059  | 3.6699  | 3.9927  | 3.7594  | 5.4847  | 4.9607  | 4.2100  | 6.2115  | 6.2842  | 6.3447  | 0.7281  | -0.4579 | 0.0298 | 0.5816 |
| Dlg4   | _EVTHSAVAALKEAGS[Phospho (STY)]IVR_3                                         | Q62108_S142_M1_Dlg4   | 3.5190  | 5.5048  | 5.8318  | 7.1965  | 4.1635  | 5.4698  | 3.8551  | 6.4970  | 5.3291  | 4.3397  | 1.0551  | 0.0773  | 0.7415 | 0.1299 |
| Dlg4   | _DWGSSSGS[Phospho (STY)]QGR_2                                                | #N/A                  | 4.6910  | 4.0820  | 3.9101  | 3.9812  | 5.1287  | 3.6663  | 4.7174  | 4.7771  | 4.9416  | 0.7997  | -0.3224 | 0.0589  | 0.1297 | 0.2716 |
| Dlg4   | _GNS[Phospho (STY)]GLGFSAGGDNPHIGDPSFITK_3                                   | Q62108_S73_M1_Dlg4    | 3.7414  | 2.8512  | 3.4750  | 5.0497  | 2.8851  | 3.7395  | 3.1671  | 4.0345  | 4.2814  | 4.1969  | 0.9244  | -0.1134 | 0.5350 | 0.2716 |
| Dlg4   | _FIEAGGYNSHVGTSQSVR_3                                                        | #N/A                  | 5.5927  | 5.7773  | 5.9888  | 8.8108  | 3.2479  | 2.9808  | 3.5255  | 4.3077  | 5.1902  | 5.6894  | 0.9761  | -0.0349 | 0.8915 | 0.0499 |
| Dlg4   | _DLGEDIDPREPR_3                                                              | #N/A                  | 2.8302  | 3.3871  | 3.8653  | 3.4091  | 0.9142  | 3.2034  | 3.5573  | 3.5921  | 3.8911  | 3.0864  | 0.8310  | -0.2671 | 0.3089 | 0.5102 |
| Dlg4   | _EQLMNSLGS[Phospho (STY)]ASLRS[Phospho (STY)]NPKR_3                          | Q62108_S425_M2_Dlg4   | 4.0080  | 4.3857  | 4.1267  | 4.4781  | 3.8053  | 4.0924  | 3.7450  | 4.0885  | 3.7371  | 3.9973  | 1.0404  | 0.0572  | 0.4640 | 0.1505 |
| Dlg4   | _S[Phospho (STY)]ENVLEINR_2                                                  | Q62108_S654_M1_Dlg4   | 3.8971  | 3.2014  | 3.8747  | 3.2029  | 3.0227  | 3.2059  | 3.5667  | 3.5827  | 3.8818  | 3.0957  | 0.9629  | -0.0545 | 0.5903 | 0.2289 |
| Dlg4   | _EAVNSVGLSDVMHEDAAVALK_3                                                     | #N/A                  | 3.3398  | 4.0961  | 4.5743  | 4.1181  | 3.9844  | 4.1411  | 4.0342  | 4.3839  | 3.1821  | 3.7954  | 1.0502  | 0.0707  | 0.5174 | 0.2861 |
| Dlg4   | _IEGGAHDKGR_3                                                                | #N/A                  | 3.0715  | 3.8767  | 3.7583  | 4.2610  | 3.6981  | 4.0314  | 3.9757  | 3.8575  | 3.5061  | 4.2280  | 0.9720  | -0.0410 | 0.6586 | 0.1814 |
| Jak2   | _TNGISQVQGS[Phospho (STY)]PTLQR_2                                            | Q62120_S523_M1_Jak2   | 7.3474  | 3.1451  | 3.2670  | 3.7697  | 5.8166  | 7.1291  | 3.4843  | 7.6709  | 7.1133  | 6.8914  | 0.8075  | -0.3085 | 0.3568 | 0.0716 |
| Ptpr   | _NQEHLS[Phospho (STY)]PIAR_2                                                 | #N/A                  | 6.6293  | 6.2459  | 7.1637  | 6.3074  | 4.9452  | 6.1652  | 7.2895  | 6.6854  | 6.2636  | 5.8537  | 0.9570  | -0.0634 | 0.5473 | 0.2618 |
| Ralbp1 | _TPSPHSDS[Phospho (STY)]SEISPTK_2                                            | Q62172_S29_M1_Ralbp1  | 3.7122  | 6.8201  | 3.9892  | 7.2001  | 6.0067  | 3.5885  | 7.2987  | 3.6601  | 4.0033  | 3.8314  | 1.1109  | 0.1517  | 0.6440 | 0.1911 |
| Ralbp1 | _Acetyl (Protein N-term)TEC[Carbamidomethyl (C)]FLPPS[Phospho (STY)]SPSEHR_2 | Q62172_S10_M1_Ralbp1  | 7.4197  | 3.7894  | 3.6623  | 7.5328  | 3.7373  | 6.9356  | 4.2009  | 6.9146  | 3.5492  | 6.4700  | 1.0434  | 0.0613  | 0.8530 | 0.0691 |
| Ralbp1 | _Acetyl (Protein N-term)TEC[Carbamidomethyl (C)]FLPPS[Phospho (STY)]SPSEHR_3 | #N/A                  | 3.6842  | 3.6261  | 4.1261  | 3.6699  | 3.4886  | 7.1763  | 3.8181  | 3.3900  | 3.6891  | 3.3472  | 1.2061  | 0.2704  | 0.3466 | 0.4601 |
| Ralbp1 | _TEGVAAFQDS[Phospho (STY)]S[Phospho (STY)]GDEAESP_2                          | #N/A                  | 4.2171  | 3.4726  | 4.4404  | 3.1118  | 3.3609  | 7.0178  | 3.1569  | 7.3424  | 7.6936  | 0.7811  | -0.3565 | 0.3205  | 0.4942 | 0.1462 |
| Ralbp1 | _TPS[Phospho (STY)]SEIS[Phospho (STY)]PTKFLVLR_2                             | #N/A                  | 4.0118  | 3.7099  | 3.5818  | 7.5176  | 3.7038  | 3.4126  | 3.9812  | 4.7925  | 6.4881  | 3.7141  | 0.9112  | -0.1341 | 0.6676 | 0.1755 |
| Ralbp1 | _TGEPS[Phospho (STY)]PHDVLHPDPT[Phospho (STY)]VSDDKDHGK_4                    | Q62172_T60_M2_Ralbp1  | 3.4774  | 3.8758  | 3.6966  | 4.4460  | 8.1425  | 3.8300  | 3.7606  | 9.7225  | 9.2720  | 4.2748  | 0.8445  | -0.2439 | 0.5778 | 0.2845 |
| Ralbp1 | _RTGVAAFQDS[Phospho (STY)]S[Phospho (STY)]GDEAESP_3                          | #N/A                  | 3.3230  | 4.0194  | 4.5576  | 4.9512  | 3.9676  | 3.8888  | 4.2496  | 4.4007  | 3.1989  | 3.7786  | 1.0540  | 0.0759  | 0.5736 | 0.2414 |
| Sema4a | _TAS[Phospho (STY)]DVDAONHGLGAEVA_2                                          | Q62178_S746_M1_Sema4a | 3.4536  | 3.6231  | 4.4048  | 3.7189  | 4.0881  | 3.6576  | 4.0184  | 3.1439  | 3.1170  | 3.5128  | 1.1091  | 0.1494  | 0.1635 | 0.7866 |
| Dpyl3  | _DNFTAPETGNGVEER_2                                                           | #N/A                  | 8.2543  | 8.2079  | 8.0352  | 8.7366  | 8.1284  | 8.1261  | 8.5836  | 7.9455  | 8.1433  | 8.2922  | 1.0008  | 0.0012  | 0.9679 | 0.0142 |
| Dpyl3  | _GAPLVLC[Carbamidomethyl (C)]QGR_2                                           | #N/A                  | 6.6204  | 7.4467  | 6.9167  | 6.8352  | 6.7744  | 7.0361  | 7.5249  | 6.4909  | 6.7013  | 6.9403  | 1.0035  | 0.0050  | 0.9194 | 0.0365 |
| Dpyl3  | _QIGDNLVPGVK_2                                                               | #N/A                  | 7.1330  | 6.9004  | 7.1965  | 7.0056  | 7.4214  | 6.9689  | 7.3034  | 7.2859  | 7.0155  | 6.9405  | 0.9955  | -0.0065 | 0.7986 | 0.0977 |
| Dpyl3  | _JAVGSDSLVWDPDAIK_2                                                          | #N/A                  | 6.8860  | 6.9905  | 7.1850  | 7.1808  | 7.4274  | 7.3022  | 6.9967  | 7.0214  | 6.8900  | 7.2085  | 1.0189  | 0.0270  | 0.2772 | 0.5571 |
| Dpyl3  | _AIVASQTNLC[Carbamidomethyl (C)]PLVTK_2                                      | #N/A                  | 6.2553  | 6.6427  | 7.0827  | 6.9623  | 7.0500  | 6.8473  | 7.0368  | 6.4038  | 6.4635  | 6.2815  | 1.0398  | 0.0563  | 0.2459 | 0.6092 |
| Dpyl3  | _GM[Oxidation (M)]YDGPVDFLTIT[Phospho (STY)]PK_2                             | #N/A                  | 11.6396 | 11.4363 | 11.8095 | 11.9699 | 11.3646 | 11.6248 | 11.9940 | 11.4129 | 11.6111 | 11.7008 | 0.9967  | -0.0048 | 0.8015 | 0.0961 |
| Dpyl3  | _SAADLSQAR_2                                                                 | #N/A                  | 7.4214  | 7.6235  | 7.7645  | 7.9763  | 8.3066  | 7.5783  | 7.9733  | 7.6634  | 7.6478  | 7.4915  | 1.0110  | 0.0517  | 0.6540 | 0.1844 |
| Dpyl3  | _GS[Phospho (STY)]PTRPNPPVR_2                                                | #N/A                  | 12.8340 | 12.8016 | 13.3659 | 13.4075 | 12.8555 | 12.9033 | 13.1070 | 12.8008 | 12.9100 | 13.0261 | 1.0052  | 0.0074  | 0.6720 | 0.1726 |
| Dpyl3  | _GGT[Phospho (STY)]PAGSTAGS[Phospho (STY)]PTRPNPPVR_3                        | #N/A                  | 10.9459 | 11.4690 | 11.8659 | 12.1303 | 10.7776 | 11.6245 | 11.5084 | 11.7924 | 11.7947 | 0.9864  | -0.0198 | 0.5844  | 0.2333 | 0.1233 |
| Dpyl3  | _VAPPGRGRS[Phospho (STY)]NITS[Phospho (STY)]S_2                              | Q62188_S64_M2_Dpyl3   | 3.3009  | 4.1061  | 3.9877  | 11.8891 | 10.4173 | 10.0304 | 4.1629  | 11.1791 | 11.1899 | 3.6919  | 0.9646  | -0.0520 | 0.9201 | 0.0362 |
| Dpyl3  | _NLHQSGFS[Phospho (STY)]SGTQVDEGVR_3                                         | #N/A                  | 7.5110  | 6.7680  | 7.8036  | 7.9799  | 5.2770  | 7.0710  | 7.2637  | 7.3364  | 7.3710  | 0.9615  | -0.0567 | 0.5898  | 0.0293 | 0.2362 |
| Dpyl3  | _GM[Oxidation (M)]TTVDHFGQTK_2                                               | #N/A                  | 5.6841  | 6.0354  | 6.8774  | 6.1051  | 6.4244  | 6.4907  | 6.0688  | 6.1044  | 6.1383  | 5.9567  | 1.0334  | 0.0474  | 0.3734 | 0.4278 |
| Dpyl3  | _NHQSAVENFEGM[Oxidation (M)]ELR_3                                            | #N/A                  | 5.4733  | 5.2136  | 6.1802  | 5.7035  | 5.5513  | 5.8973  | 5.8716  | 6.0370  | 6.3340  | 0.9628  | -0.0548 | 0.3914  | 0.4074 | 0.1755 |
| Dpyl3  | _GM[Oxidation (M)]YDGPVDFLTIT[Phospho (STY)]PKGGT[Phospho (STY)]PAGSTR_3     | #N/A                  | 5.1857  | 8.3189  | 8.7428  | 9.2375  | 8.2260  | 3.6901  | 5.2053  | 8.6976  | 9.4271  | 8.2133  | 0.9173  | -0.1246 | 0.6444 | 0.1908 |
| Dpyl3  | _AALAGGTM[Oxidation (M)]IHVVPEPESSTAEYK_3                                    | #N/A                  | 4.7341  | 4.1923  | 5.4873  | 5.7636  | 5.1325  | 5.3972  | 4.9694  | 5.5551  | 5.3454  | 0.9537  | -0.0683 | 0.4506  | 0.3462 | 0.1908 |
| Dpyl3  | _MADHAVPR_2                                                                  | #N/A                  | 5.2160  | 3.6692  | 3.5508  | 6.7709  | 5.8559  | 4.2389  | 5.3850  | 4.0650  | 4.4619  | 4.0205  | 1.0893  | 0.1235  | 0.5845 | 0.2332 |
| Dpyl3  | _IM[Oxidation (M)]LEDNLHVTQAGAR_3                                            | #N/A                  | 4.2968  | 5.5892  | 5.3033  | 5.1802  | 6.1646  | 5.9073  | 4.8278  | 4.7716  | 5.1509  | 4.8850  | 1.1015  | 0.1394  | 0.1826 | 0.7385 |
| Dpyl3  | _SC[Carbamidomethyl (C)]C[Carbamidomethyl (C)]DALVHVDTHWNDSVK_3              | #N/A                  | 3.6947  | 3.9324  | 4.7871  | 4.9000  | 3.3569  | 3.1711  | 4.0774  | 3.8718  | 4.2018  | 3.9166  | 0.9892  | -0.0156 | 0.9110 | 0.0405 |
| Dpyl3  | _NLHQSGFS[Phospho (STY)]LSGTQVDEGVR[Phospho (STY)]ASKR_4                     | Q62188_S551_M2_Dpyl3  | 3.5361  | 3.8063  | 3.2698  | 4.3144  | 4.1807  | 3.9448  | 4.4627  | 4.1876  | 2.9858  | 3.9917  | 0.9834  | -0.0242 | 0.8461 | 0.0726 |
| Scn9a  | _S[Phospho (STY)]ES[Phospho (STY)]EES[Phospho (STY)]IRK_2                    | Q62205_S502_M3_Scn9a  | 4.4557  | 4.3899  | 4.0325  | 4.2875  | 4.0682  | 4.3812  | 4.3724  | 5.0483  | 4.6455  | 4.4092  | 0.9243  | -0.1136 | 0.0514 | 1.2888 |
| Tgfb11 | _EGC[Carbamidomethyl (C)]PS[Phospho (STY)]PGQTSK_2                           | Q62219_S194_M1_Tgfb11 | 9.6197  | 9.3191  | 9.8427  | 10.2912 | 9.2073  | 8.7628  | 9.9508  | 9.4730  | 9.2575  | 9.7884  | 0.9885  | -0.0166 | 0.7212 | 0.1419 |
| Sos1   | _IPSETESTASAPKS[Phospho (STY)]PR_2                                           | Q62245_S1082_M1_Sos1  | 6.8843  | 3.7079  | 6.5674  | 6.8140  | 3.5292  | 5.8841  | 7.2094  | 6.8992  | 4.3882  | 6.3665  | 0.8952  | -0.1597 | 0.5062 | 0.2957 |
| Sos1   | _RLS[Phospho (STY)]ESAC[Carbamidomethyl (C)]R_2                              | Q62245_S401_M1_Sos1   | 4.0677  | 3.2747  | 3.8014  | 3.3451  | 3.2114  | 3.1326  | 3.5002  | 3.6560  | 3.9551  | 3.0224  | 0.9827  | -0.0252 | 0.8091 | 0.0920 |
| Sos1   | _SAS[Phospho (STY)]VSSGLSK_2                                                 | Q62245_S1120_M1_Sos1  | 3.9885  | 3.2376  | 5.8353  | 3.6771  | 3.1142  | 3.1144  | 3.3918  | 3.6441  | 4.0899  | 3.9616  | 0.9836  | -0.0239 | 0.9125 | 0.0398 |
| Sptbn1 | _ETWLSENQR_2                                                                 | #N/A                  | 9.3729  | 9.2655  | 9.6875  | 9.2812  | 8.7944  | 9.1605  | 9.4208  | 9.4011  | 9.1993  | 9.1726  | 0.9959  | -0.0059 | 0.8145 | 0.0891 |
| Sptbn1 | _DVEIDELVWGER_2                                                              | #N/A                  | 9.0876  | 8.5999  | 8.9730  | 8.7609  | 8.1880  | 8.7669  | 9.1831  | 8.7525  | 8.8615  | 8.8312  | 0.9787  | -0.0310 | 0.3464 | 0.4604 |
| Sptbn1 | _DQNTVETLQR_2                                                                |                       |         |         |         |         |         |         |         |         |         |         |         |         |        |        |



|        |                                                                                |                        |         |         |         |         |         |         |         |         |         |         |        |         |        |        |
|--------|--------------------------------------------------------------------------------|------------------------|---------|---------|---------|---------|---------|---------|---------|---------|---------|---------|--------|---------|--------|--------|
| Sptbn1 | _SLDDAC[Carbamidomethyl (C)]EGR_2                                              | #N/A                   | 7.4558  | 6.5642  | 6.7230  | 7.1126  | 6.8816  | 6.6336  | 6.5692  | 6.9137  | 7.0086  | 6.7477  | 1.0125 | 0.0180  | 0.6627 | 0.1787 |
| Sptbn1 | _VQAVAVAR_2                                                                    | #N/A                   | 6.8290  | 7.1773  | 7.3028  | 6.5565  | 6.6760  | 6.3660  | 6.4621  | 7.0965  | 6.8459  | 6.1278  | 1.0279 | 0.0397  | 0.4810 | 0.3179 |
| Sptbn1 | _JDOIFER_2                                                                     | #N/A                   | 7.0738  | 7.0992  | 6.6567  | 6.4349  | 6.5199  | 6.6558  | 5.5540  | 7.4376  | 7.6123  | 7.5344  | 0.9581 | -0.0617 | 0.4998 | 0.3012 |
| Sptbn1 | _LVSQDNFGDPAVEATK_2                                                            | #N/A                   | 6.9548  | 7.1815  | 7.0811  | 7.0872  | 6.4466  | 6.8724  | 6.9432  | 7.0825  | 7.0875  | 6.5913  | 1.0026 | 0.0037  | 0.9161 | 0.0381 |
| Sptbn1 | _LOALDTGWNELHK_2                                                               | #N/A                   | 6.4382  | 6.0570  | 6.1088  | 5.8652  | 6.0752  | 6.0325  | 5.9771  | 6.2272  | 5.7193  | 5.7193  | 1.0313 | 0.0444  | 0.2101 | 0.6776 |
| Sptbn1 | _TQTAAISED[M]PNTLLEAK_2                                                        | #N/A                   | 6.9157  | 6.9610  | 7.3832  | 5.9893  | 6.7279  | 6.9049  | 7.1866  | 6.9631  | 6.9410  | 6.9477  | 0.9720 | -0.0409 | 0.4355 | 0.3610 |
| Sptbn1 | _LQAAAYAGDKADDQKR_3                                                            | #N/A                   | 6.3079  | 6.9140  | 6.9904  | 6.1405  | 6.6565  | 6.9892  | 6.6149  | 7.0393  | 6.7351  | 6.7962  | 0.9809 | -0.0279 | 0.5348 | 0.2718 |
| Sptbn1 | _TAGVPNVNHNFTTSWR_3                                                            | #N/A                   | 6.8305  | 6.5947  | 6.2011  | 6.7486  | 6.2285  | 6.4661  | 6.0958  | 6.9941  | 6.7541  | 6.5004  | 0.9887 | -0.0164 | 0.7222 | 0.1413 |
| Sptbn1 | _LHLLGVEDLLQK_2                                                                | #N/A                   | 7.0803  | 6.6710  | 6.8626  | 6.9258  | 6.1518  | 6.3299  | 6.8645  | 7.2716  | 6.7823  | 6.5819  | 0.9702 | -0.0436 | 0.3736 | 0.4276 |
| Sptbn1 | _LSDGNEYLQAK_2                                                                 | #N/A                   | 6.5483  | 6.3827  | 6.4791  | 6.5322  | 6.3661  | 6.4373  | 6.8131  | 6.7761  | 6.1704  | 6.4391  | 0.9859 | -0.0204 | 0.4860 | 0.3133 |
| Sptbn1 | _EQWANLEQLSAIR_2                                                               | #N/A                   | 6.6958  | 6.4613  | 6.5006  | 6.1059  | 6.2929  | 6.5668  | 7.1704  | 6.3391  | 6.5485  | 6.3773  | 0.9740 | -0.0380 | 0.3832 | 0.4165 |
| Sptbn1 | _VSSNDGVGDEYSTQSLVK_3                                                          | #N/A                   | 5.6743  | 4.9520  | 6.4077  | 5.5146  | 5.7228  | 6.1950  | 6.5115  | 6.0110  | 5.9190  | 6.4109  | 0.9246 | -0.1132 | 0.1414 | 0.8495 |
| Sptbn1 | _EAEKLESHPDQAQALSR_3                                                           | #N/A                   | 5.4436  | 5.4374  | 6.1119  | 5.9078  | 5.4935  | 5.6326  | 5.9709  | 5.8405  | 5.1265  | 5.3952  | 1.0157 | 0.0225  | 0.6872 | 0.1629 |
| Sptbn1 | _LQAAAYAGDK_2                                                                  | #N/A                   | 5.3659  | 5.1765  | 4.9761  | 4.6929  | 5.4811  | 5.4331  | 5.6579  | 5.1976  | 5.6710  | 5.6227  | 0.9098 | -0.1364 | 0.0455 | 1.3421 |
| Sptbn1 | _LQWGLLIETEKR_2                                                                | #N/A                   | 4.9931  | 4.0955  | 4.7271  | 4.6222  | 3.9376  | 4.3325  | 5.2074  | 4.6370  | 4.3055  | 4.0110  | 0.9804 | -0.0285 | 0.7655 | 0.1160 |
| Sptbn1 | _RPPSP[Phospho (STY)]PPNTK_2                                                   | #N/A                   | 14.4084 | 14.4992 | 14.9359 | 14.7733 | 13.6966 | 14.2947 | 14.7729 | 14.7172 | 14.5026 | 14.3601 | 0.9895 | -0.0153 | 0.5291 | 0.2764 |
| Sptbn1 | _TSS[Phospho (STY)]KESP[Phospho (STY)]PVPS[Phospho (STY)]PTLDRK_3              | #N/A                   | 11.2599 | 10.5649 | 10.0185 | 10.4196 | 9.1991  | 10.6373 | 11.4468 | 11.6735 | 11.7505 | 9.8402  | 0.9259 | -0.1110 | 0.1375 | 0.8618 |
| Sptbn1 | _Acetyl (Protein N-term)[TTTTATDYNDEIQQVSDVNNR_3                               | #N/A                   | 11.8186 | 11.1059 | 12.1593 | 11.9128 | 10.6244 | 11.7251 | 12.1779 | 11.7705 | 11.5273 | 0.9784  | 0.9784 | -0.0316 | 0.4373 | 0.3592 |
| Sptbn1 | _ESS[Phospho (STY)]PVPSPTLDR_2                                                 | #N/A                   | 9.1755  | 10.9619 | 4.1015  | 11.3778 | 10.7673 | 8.6721  | 12.0006 | 10.7636 | 9.1255  | 10.5634 | 0.8646 | -0.2099 | 0.3527 | 0.4526 |
| Sptbn1 | _FQDDQSVETEDNK_2                                                               | #N/A                   | 7.9472  | 7.6560  | 8.2774  | 7.8512  | 6.4940  | 7.1731  | 8.3478  | 7.9684  | 7.7077  | 7.5128  | 0.9597 | -0.0593 | 0.3985 | 0.3996 |
| Sptbn1 | _LEQGHOPR_2                                                                    | #N/A                   | 6.1938  | 6.2260  | 5.7143  | 5.7065  | 6.4599  | 6.1598  | 5.9670  | 5.8088  | 6.1252  | 6.0294  | 1.0157 | 0.0225  | 0.5798 | 0.2367 |
| Sptbn1 | _QIEAQEKPR_2                                                                   | #N/A                   | 5.2254  | 4.0232  | 4.3821  | 3.9545  | 5.4814  | 5.0837  | 4.6502  | 5.2869  | 5.2273  | 4.7968  | 0.9406 | -0.0883 | 0.4312 | 0.3653 |
| Sptbn1 | _QALQDTLALYK_2                                                                 | #N/A                   | 4.4844  | 4.6995  | 4.0487  | 4.6806  | 3.7048  | 5.3704  | 5.4715  | 5.2905  | 3.4640  | 4.3382  | 0.9692 | -0.0452 | 0.7690 | 0.1141 |
| Sptbn1 | _LDLDFCSWLSP_2                                                                 | #N/A                   | 3.0286  | 6.1485  | 5.9906  | 6.6596  | 6.6120  | 6.2476  | 6.9062  | 6.8093  | 6.8690  | 6.4912  | 0.8541 | -0.2276 | 0.1988 | 0.7017 |
| Sptbn1 | _HQLLEQAVEDYAEVHQLSK_3                                                         | #N/A                   | 6.3564  | 5.5255  | 4.3442  | 5.0623  | 6.1374  | 5.2562  | 6.6476  | 6.1537  | 6.0303  | 6.5900  | 0.8571 | -0.2225 | 0.0505 | 1.2964 |
| Sptbn1 | _SAATWDER_2                                                                    | #N/A                   | 5.7650  | 5.8132  | 5.8455  | 5.0552  | 6.0395  | 5.8447  | 4.4090  | 5.8747  | 5.5694  | 5.6153  | 1.0671 | 0.0937  | 0.2812 | 0.5510 |
| Sptbn1 | _LPEELGR_2                                                                     | #N/A                   | 5.0894  | 5.5240  | 3.3409  | 4.3855  | 5.5867  | 5.4141  | 5.5551  | 6.0197  | 5.6360  | 5.4281  | 0.8640 | -0.2109 | 0.1324 | 0.8783 |
| Sptbn1 | _AQTLPITSVTTSESS[Phospho (STY)]PGKR_3                                          | #N/A                   | 6.7847  | 8.2394  | 8.4631  | 9.8375  | 5.6952  | 6.2996  | 7.7013  | 9.1010  | 7.7562  | 5.7700  | 1.0100 | 0.0144  | 0.9366 | 0.0284 |
| Sptbn1 | _FATDGGGYKPC[Carbamidomethyl (C)]DPQVIR_3                                      | #N/A                   | 7.0903  | 5.8649  | 3.2364  | 6.7587  | 6.1160  | 5.8510  | 5.9480  | 6.8333  | 6.2260  | 5.3972  | 0.9538 | -0.0682 | 0.7111 | 0.1481 |
| Sptbn1 | _EAIC[Carbamidomethyl (C)]EVALDW_2                                             | #N/A                   | 6.6688  | 5.9633  | 3.6891  | 6.0100  | 5.3338  | 5.3639  | 5.7740  | 5.9849  | 5.3278  | 6.2923  | 0.9418 | -0.0864 | 0.5487 | 0.2607 |
| Sptbn1 | _LISSDDYDK_2                                                                   | #N/A                   | 3.7658  | 3.3082  | 3.3412  | 3.4387  | 4.4297  | 3.7734  | 3.3086  | 4.3663  | 3.9755  | 0.9469  | 0.9469 | -0.0787 | 0.4766 | 0.3218 |
| Sptbn1 | _HRPDLDFDK_3                                                                   | #N/A                   | 7.2424  | 5.9657  | 6.8934  | 6.1219  | 6.0299  | 6.1279  | 6.0199  | 6.5805  | 6.6141  | 6.2125  | 1.0063 | 0.0091  | 0.8955 | 0.0479 |
| Sptbn1 | _SAASGPIPHSEVPVSLK_3                                                           | #N/A                   | 6.9378  | 6.5455  | 5.9765  | 6.2560  | 5.7904  | 6.8528  | 6.3043  | 3.6357  | 6.1717  | 6.1091  | 1.1508 | 0.2027  | 0.1729 | 0.7623 |
| Sptbn1 | _FANSLVGVGQQLQAFNTYR_2                                                         | #N/A                   | 4.5540  | 4.2708  | 5.3447  | 5.2293  | 3.9004  | 4.5345  | 4.6832  | 5.3023  | 4.6088  | 4.6948  | 0.9620 | -0.0559 | 0.5718 | 0.2427 |
| Sptbn1 | _VIESTQDGLNDIAGVM[Oxidation (M)]ALQR_3                                         | #N/A                   | 5.9022  | 5.7088  | 6.5314  | 5.9992  | 5.7978  | 6.0367  | 6.2534  | 6.3565  | 6.2440  | 6.0978  | 0.9612 | -0.0571 | 0.1539 | 0.8128 |
| Sptbn1 | _LQAAAYAGDKADDQIK_2                                                            | #N/A                   | 4.4451  | 4.3408  | 3.5722  | 4.2254  | 4.0768  | 3.9093  | 4.3941  | 3.1823  | 3.7337  | 2.5517  | 1.1816 | 0.2408  | 0.1101 | 0.9580 |
| Sptbn1 | _ESS[Phospho (STY)]PVPS[Phospho (STY)]PTLDRK_2                                 | #N/A                   | 9.8312  | 9.9767  | 8.8782  | 10.2907 | 9.4249  | 9.6540  | 10.5970 | 9.9706  | 10.0266 | 9.7754  | 0.9753 | -0.3362 | 0.2572 | 0.5898 |
| Sptbn1 | _FESLEREM[Oxidation (M)]NNQASR_2                                               | #N/A                   | 7.7726  | 7.5198  | 7.9227  | 7.8537  | 7.2873  | 7.3551  | 7.9722  | 7.7671  | 7.4717  | 7.3861  | 0.9960 | -0.0058 | 0.8639 | 0.0636 |
| Sptbn1 | _DOEMNTWQIASSAISOCHTASTOS[Phospho (STY)]PASSR_4                                | #N/A                   | 5.3265  | 3.8159  | 3.2602  | 7.1579  | 4.1711  | 3.9543  | 6.7184  | 4.1972  | 2.9954  | 3.9821  | 0.9645 | -0.0532 | 0.8728 | 0.0591 |
| Sptbn1 | _INAAVETGR_2                                                                   | #N/A                   | 5.6580  | 5.0575  | 3.3462  | 4.3908  | 5.4412  | 5.2270  | 5.2422  | 4.9388  | 4.7567  | 4.0681  | 1.0215 | 0.0306  | 0.8366 | 0.0775 |
| Sptbn1 | _AQTLPITSVTTSESSPGK_2                                                          | #N/A                   | 4.0887  | 5.5371  | 4.3078  | 3.5851  | 4.0445  | 3.2817  | 4.6047  | 4.3698  | 3.9210  | 3.9376  | 0.9048 | -0.1444 | 0.1361 | 0.8660 |
| Sptbn1 | _STDDEVDSKR_2                                                                  | #N/A                   | 3.4197  | 4.3000  | 4.5379  | 4.0789  | 2.9768  | 3.3612  | 4.2484  | 3.9987  | 2.9791  | 4.1287  | 0.9845 | -0.0226 | 0.8818 | 0.0546 |
| Sptbn1 | _TSS[Phospho (STY)]KESP[Phospho (STY)]PVPSPTLDR_2                              | #N/A                   | 3.8833  | 8.0161  | 8.1616  | 8.9074  | 3.7083  | 8.4523  | 8.8177  | 8.1275  | 8.3018  | 3.9330  | 0.9397 | -0.0898 | 0.7783 | 0.1088 |
| Sptbn1 | _GDQVSGNGLPAEQGS[Phospho (STY)]PR_2                                            | #N/A                   | 11.4437 | 8.3785  | 10.7183 | 11.4467 | 10.0880 | 11.1547 | 11.4804 | 10.7239 | 11.3368 | 11.3035 | 0.9400 | -0.0893 | 0.3057 | 0.5147 |
| Sptbn1 | _EGM[Oxidation (M)]QLSEKPFETAIVVK_3                                            | #N/A                   | 6.1397  | 5.7387  | 6.5892  | 6.0401  | 5.0842  | 6.2933  | 5.9650  | 5.9875  | 6.0244  | 6.1772  | 0.9905 | -0.0138 | 0.8355 | 0.0781 |
| Sptbn1 | _DLVAIEAK_2                                                                    | #N/A                   | 4.3384  | 3.5466  | 3.8960  | 4.0603  | 3.4289  | 4.8365  | 3.5880  | 4.2641  | 4.3318  | 4.5593  | 0.9599 | -0.0591 | 0.6061 | 0.2174 |
| Sptbn1 | _ELEAENHDKR_3                                                                  | #N/A                   | 5.5808  | 5.2620  | 5.0270  | 5.2346  | 5.2748  | 5.6136  | 5.2381  | 5.5323  | 5.5769  | 5.5792  | 0.9727 | -0.0399 | 0.2888 | 0.5395 |
| Sptbn1 | _LILVHQFSR_2                                                                   | #N/A                   | 5.3335  | 5.1784  | 5.5256  | 4.3013  | 4.7841  | 4.6754  | 5.4808  | 5.5206  | 5.1074  | 5.0631  | 0.9383 | -0.0919 | 0.2325 | 0.6337 |
| Sptbn1 | _LSDINK_2                                                                      | #N/A                   | 4.6096  | 3.4658  | 3.5665  | 3.4809  | 4.5751  | 3.2503  | 2.5214  | 5.1390  | 5.0815  | 4.0976  | 0.9085 | -0.1384 | 0.5205 | 0.2835 |
| Sptbn1 | _HDTASTOS[Phospho (STY)]T[Phospho (STY)]PASSR_2                                | Q62261_T2319_M2_Sptbn1 | 5.8687  | 5.3675  | 5.0789  | 5.7718  | 3.8525  | 5.5076  | 5.7148  | 5.0140  | 5.2486  | 5.4057  | 0.9885 | -0.0172 | 0.8751 | 0.0579 |
| Sptbn1 | _GNLSQSHAYQFLR_3                                                               | #N/A                   | 5.0432  | 5.0013  | 5.3888  | 3.2626  | 4.5961  | 4.0587  | 4.7520  | 4.8516  | 4.8535  | 5.2314  | 0.9261 | -0.1107 | 0.3980 | 0.4001 |
| Sptbn1 | _DVSSVELLM[Oxidation (M)]NNHQGK_2                                              | #N/A                   | 4.3611  | 3.8731  | 4.1530  | 4.2887  | 3.4174  | 4.5342  | 4.3349  | 4.8090  | 4.5987  | 4.2436  | 0.9128 | -0.1316 | 0.1259 | 0.8998 |
| Sptbn1 | _VDVTWNM[Oxidation (M)]ADELJNSGHSQAATIAEWK_3                                   | #N/A                   | 4.0284  | 4.7050  | 4.7478  | 5.7093  | 3.8562  | 4.4126  | 5.1142  | 4.9148  | 4.5245  | 4.3427  | 0.9688 | -0.0458 | 0.6962 | 0.1572 |
| Sptbn1 | _EAKSELIMR_2                                                                   | #N/A                   | 5.2220  | 3.8885  | 3.1876  | 5.4419  | 3.6434  | 4.0196  | 4.3804  | 4.2698  | 3.0681  | 2.2279  | 1.2143 | 0.2802  | 0.2576 | 0.5891 |
| Sptbn1 | _DASVAEANLGGEPVLSR_2                                                           | #N/A                   | 5.6966  | 5.5986  | 3.3474  | 5.5664  | 5.1368  | 5.3585  | 6.0974  | 5.6903  | 5.1516  | 5.3343  | 0.9190 | -0.1219 | 0.3780 | 0.4226 |
| Sptbn1 | _MWNVLESTTOTK_2                                                                | #N/A                   | 5.2522  | 2.9683  | 4.1078  | 5.6721  | 4.9969  | 3.3490  | 3.3496  | 3.6487  | 3.3288  | 1.1549  | 0.2078 | 0.3716  | 0.4299 | 0.2998 |
| Sptbn1 | _DALLSALSGNTHLEC[Carbamidomethyl (C)]NETK_3                                    | #N/A                   | 3.7579  | 2.7132  | 3.4916  | 2.8384  | 3.6705  | 3.7685  | 3.6617  | 3.6989  | 4.0405  | 3.9843  | 0.8770 | -0.1893 | 0.0998 | 1.0007 |
| Sptbn1 | _LAISGVWEEMK_2                                                                 | #N/A                   | 4.4972  | 3.5769  | 3.4585  | 5.2890  | 3.3982  | 4.3313  | 4.4606  | 4.1573  | 3.8059  | 3.9281  | 1.0009 | 0.0014  | 0.9926 | 0.0032 |
| Sptbn1 | _WDVDDVDNENSS[Phospho (STY)]SAR_2                                              | Q62261_S35_M1_Sptbn1   | 3.7080  | 2.9635  | 3.4417  | 4.4863  | 2.8518  | 3.7728  | 3.1338  | 4.0157  | 4.3147  | 4.1636  | 0.9054 | -0.1434 | 0.3477 | 0.4588 |
| Sptbn1 | _GNLEVLFTQSK_2                                                                 | #N/A                   | 3.4465  | 4.2436  | 3.6694  | 4.1721  | 3.6091  | 4.3006  | 3.8668  | 2.9962  | 3.7594  | 4.0342  | 1.0648 | 0.0906  | 0.3940 | 0.4045 |
| Sptbn1 | _RRPSP[Phospho (STY)]PPNTK_2                                                   | #N/A                   | 3.9561  | 3.2115  | 9.1050  | 8.8642  | 3.0998  | 3.5248  | 3.3818  | 3.7676  | 3.3960  | 4.4117  | 1.0610 | 0.0854  | 0.8646 | 0.0632 |
| Sptbn1 | _VAHMM[Oxidation (M)]EFC[Carbamidomethyl (C)]QELC[Carbamidomethyl (C)]QLAAER_3 | #N/A                   | 5.8594  | 5.7519  | 6.1121  | 5.7511  | 5.0020  | 5.5416  | 5.9356  | 5.4947  | 5.4717  | 6.2685  | 0.9788 | -0.0309 | 0.6284 | 0.2018 |
| Sptbn1 | _TQLAASVELHK_2                                                                 | #N/A                   | 6.2443  | 5.0381  | 6.7136  | 6.0223  | 5.7450  | 5.7246  | 6.0184  | 6.7895  | 6.5350  | 5.5745  | 0.9495 | -0.0802 | 0.4060 | 0.3914 |
| Sptbn1 | _FQIQDSIVETEDNEK_3                                                             | #N/A                   | 4.8225  | 3.7486  | 3.8475  | 4.5890  | 3.5915  | 4.1376  | 3.8285  | 4.6960  | 4.6630  | 4.2709  | 0.9446 | -0.08   |        |        |



|             |                                                                                   |                           |         |         |         |         |         |         |         |         |         |         |        |         |        |        |
|-------------|-----------------------------------------------------------------------------------|---------------------------|---------|---------|---------|---------|---------|---------|---------|---------|---------|---------|--------|---------|--------|--------|
| Sptbn1      | _FFWEM[Oxidation (M)]AEEGEWIR_2                                                   | #N/A                      | 3.2746  | 4.0678  | 4.5091  | 4.0529  | 3.9192  | 3.8404  | 4.2012  | 4.4491  | 3.2473  | 3.7302  | 1.0095 | 0.0136  | 0.9026 | 0.0445 |
| Sptbn1      | _EAIC[Carbamidomethyl (C)]EVALDYK_3                                               | #N/A                      | 4.3660  | 4.3611  | 3.5519  | 4.0546  | 3.4916  | 4.2379  | 3.7693  | 4.0639  | 3.7125  | 4.0216  | 1.0305 | 0.0433  | 0.5936 | 0.2265 |
| Sptbn1      | _AQQIYFDAAEEAWM[Oxidation (M)]SEQLVM[Oxidation (M)]M[Oxidation (M)]SEEK_3         | #N/A                      | 3.9187  | 3.2321  | 4.6055  | 3.6073  | 3.0444  | 3.1843  | 3.3220  | 3.0103  | 4.1597  | 3.5743  | 1.0229 | 0.0327  | 0.8270 | 0.0825 |
| Syp         | _M[Oxidation (M)]ATDPENIK_2                                                       | #N/A                      | 9.1621  | 8.7704  | 8.5019  | 8.7845  | 8.5618  | 8.1096  | 8.5263  | 8.9846  | 8.6051  | 8.6526  | 0.9836 | -0.0238 | 0.4808 | 0.3181 |
| Syp         | _LHQYV[Phospho (STY)]FDAPSC[Carbamidomethyl (C)]VK_2                              | #N/A                      | 8.5709  | 9.1958  | 9.5647  | 9.3080  | 8.2766  | 8.6581  | 9.4006  | 9.3469  | 9.0029  | 8.7362  | 0.9862 | -0.0201 | 0.6515 | 0.1861 |
| Syp         | _ETGHAAPFM[Oxidation (M)]R_2                                                      | #N/A                      | 8.0035  | 8.1861  | 8.2608  | 7.7387  | 7.5094  | 7.7103  | 8.2173  | 8.2800  | 7.8159  | 7.7394  | 0.9861 | -0.0202 | 0.5648 | 0.2481 |
| Syp         | _M[Oxidation (M)]LLADM[Oxidation (M)]DVVNQLVAGGQR_2                               | #N/A                      | 4.2975  | 4.2499  | 4.1315  | 3.1333  | 4.0712  | 3.6583  | 3.4888  | 4.0790  | 3.1329  | 3.1003  | 1.0705 | 0.0983  | 0.4718 | 0.3262 |
| Tspan7      | _AVDHVQR_2                                                                        | #N/A                      | 6.8380  | 6.2115  | 6.2099  | 5.1182  | 4.4758  | 5.6257  | 6.1435  | 6.1463  | 6.1810  | 5.6686  | 1.0075 | 0.0107  | 0.8944 | 0.3484 |
| Tspan7      | _TYTDAM[Oxidation (M)]QNYNGR_2                                                    | #N/A                      | 6.5698  | 5.7563  | 5.9851  | 6.7535  | 5.0858  | 5.7265  | 7.3439  | 6.1456  | 6.1692  | 5.9975  | 0.9323 | -0.1012 | 0.3059 | 0.5145 |
| Tgdn1,Tgdn2 | _DADS[Phospho (STY)]SQSQNPFPK_2                                                   | Q62313_S28_M1_Tgdn1,Tgdn2 | 4.6968  | 5.9089  | 4.4091  | 6.6532  | 5.8856  | 4.3063  | 4.1011  | 3.0483  | 3.474   | 3.6302  | 1.5884 | 0.6676  | 0.0053 | 2.2727 |
| Tgdn1,Tgdn2 | _TES[Phospho (STY)]GETLAGDSDFSUKPEGD_3                                            | #N/A                      | 2.9882  | 4.2380  | 3.6750  | 4.1776  | 3.6147  | 4.3275  | 3.8923  | 3.9408  | 3.5894  | 4.1446  | 0.9859 | -0.0205 | 0.8475 | 0.0718 |
| Tgdn1,Tgdn2 | _TES[Phospho (STY)]GETLAGDSDFSUKPEK_2                                             | #N/A                      | 3.5541  | 3.8168  | 3.4412  | 3.8392  | 3.6827  | 3.6485  | 3.7253  | 3.7867  | 3.7648  | 3.7085  | 0.9780 | -0.0322 | 0.3272 | 0.4852 |
| Trim28      | _S[Phospho (STY)]GEGEVSGLLR_2                                                     | #N/A                      | 10.0464 | 9.8151  | 9.9809  | 10.2262 | 9.4596  | 9.8422  | 10.2364 | 9.6859  | 10.2295 | 10.1625 | 0.9818 | -0.0265 | 0.3089 | 0.5102 |
| Trim28      | _SR[S[Phospho (STY)]GEGEVSGLLR_2                                                  | #N/A                      | 7.7513  | 7.6032  | 7.4118  | 7.3628  | 6.5316  | 7.5651  | 7.9627  | 8.2880  | 6.9208  | 6.8389  | 0.9825 | -0.0255 | 0.7273 | 0.1383 |
| Trim28      | _Acetyl (Protein N-term)]AASAAATAASATAASAGS[Phospho (STY)]PGSGEGSAGGEK_3          | Q62318_S23_M1_Trim28      | 4.1234  | 3.9304  | 3.8448  | 10.8346 | 7.7137  | 7.9379  | 8.8784  | 9.5210  | 8.9959  | 7.6002  | 0.8352 | -0.2597 | 0.3554 | 0.4493 |
| Trim28      | _LSPYSPQEFQDVGR_2                                                                 | #N/A                      | 7.7806  | 4.0209  | 7.4336  | 8.1343  | 8.0585  | 4.2163  | 4.1094  | 6.8885  | 7.5373  | 5.8613  | 1.0833 | 0.1155  | 0.6716 | 0.1729 |
| Trim28      | _VS[Phospho (STY)]LERLDLDTSDSQPPVK_3                                              | Q62318_S489_M1_Trim28     | 3.0220  | 4.9572  | 4.1347  | 3.1366  | 3.6665  | 2.9581  | 4.3521  | 3.4811  | 3.1297  | 3.4046  | 1.0150 | 0.0215  | 0.9078 | 0.2040 |
| Trim28      | ASSAAASAASS[Phospho (STY)]PAGGGEAQLEH[Carbamidomethyl (C)]GVC[Carbamidomethyl (C] | Q62318_S51_M1_Trim28      | 3.7191  | 3.5071  | 4.4059  | 8.8069  | 3.8954  | 3.2292  | 3.1224  | 3.2099  | 4.3593  | 3.3747  | 1.2827 | 0.0391  | 0.3996 | 0.9484 |
| Trim28      | _Acetyl (Protein N-term)]AASAAATAASATAASAGSGSGG[Phospho (STY)]AGGKR_3             | Q62318_S30_M1_Trim28      | 3.3649  | 3.9775  | 4.5994  | 4.1432  | 4.0095  | 3.9307  | 4.2915  | 5.1443  | 3.1570  | 3.8205  | 0.9758 | -0.0353 | 0.8046 | 0.0944 |
| Srrnp70     | _YDERPGK[Phospho (STY)]PLHR_3                                                     | #N/A                      | 8.7868  | 8.5930  | 8.9023  | 9.0652  | 7.6487  | 8.0467  | 8.6069  | 8.6430  | 8.1214  | 8.2938  | 1.0126 | 0.0180  | 0.7163 | 0.1329 |
| Srrnp70     | _GGGS[Phospho (STY)]GDQNGLESGDGR_2                                                | Q62376_S408_M1_Srrnp70    | 7.1004  | 6.9411  | 6.8526  | 7.8609  | 6.2718  | 6.9011  | 7.4871  | 7.0660  | 6.7071  | 7.0403  | 0.9877 | -0.0179 | 0.7720 | 0.1124 |
| Tpd52       | _NSPTFKS[Phospho (STY)]FEK_2                                                      | #N/A                      | 10.6938 | 10.3909 | 10.8455 | 11.2339 | 9.9226  | 10.5996 | 10.7113 | 10.3405 | 10.5315 | 10.8095 | 1.0638 | 0.0055  | 0.8668 | 0.0621 |
| Tpd52       | _S[Phospho (STY)]FEKVENLK_2                                                       | #N/A                      | 10.4681 | 10.2933 | 10.0901 | 11.1408 | 9.8169  | 10.4240 | 10.6565 | 10.0952 | 10.5109 | 10.5691 | 0.9918 | -0.0119 | 0.7387 | 0.1316 |
| Tpd52       | _NSPTFKS[Phospho (STY)]FEKVENLK_3                                                 | #N/A                      | 7.9451  | 6.8808  | 9.3434  | 10.0157 | 7.8728  | 8.4338  | 8.5656  | 8.8058  | 8.5436  | 8.2811  | 1.0194 | 0.0278  | 0.7114 | 0.1479 |
| Tpd52       | _ASAAFSVSGVITK_2                                                                  | #N/A                      | 3.9161  | 3.1715  | 3.6498  | 3.7432  | 3.6803  | 3.1253  | 3.4579  | 3.3958  | 4.1067  | 4.3717  | 0.9256 | -0.1116 | 0.2903 | 0.5372 |
| Tpd52       | _PAGGDFGEVLNSTATNTSM[Oxidation (M)]TTEPPEQMTES[Phospho (STY)]P_4                  | Q62393_S223_M1_Tpd52      | 3.1335  | 4.2089  | 4.3680  | 6.6330  | 3.7780  | 4.3474  | 4.0600  | 3.0894  | 3.3885  | 3.5890  | 1.2491 | 0.3209  | 0.1973 | 0.7048 |
| Speg        | _SSS[Phospho (STY)]FSQGEAEP_2                                                     | Q62407_S2135_M1_Speg      | 9.4708  | 3.2201  | 10.0222 | 8.9595  | 8.4909  | 9.4438  | 9.6003  | 9.5686  | 9.4695  | 9.5127  | 0.8826 | -0.1802 | 0.4235 | 0.3732 |
| Speg        | _AAS[Phospho (STY)]VELPQR_2                                                       | #N/A                      | 9.3002  | 8.7638  | 9.0089  | 8.9345  | 7.6042  | 8.8002  | 9.1289  | 9.0800  | 8.8727  | 9.1338  | 0.9648 | -0.0517 | 0.3240 | 0.4895 |
| Speg        | _ARS[Phospho (STY)]LEQPK_2                                                        | Q62407_S439_M1_Speg       | 8.6063  | 8.6943  | 9.2653  | 8.9673  | 8.3590  | 8.5935  | 8.9102  | 8.8396  | 8.5238  | 8.5470  | 1.0049 | 0.0070  | 0.8208 | 0.0858 |
| Speg        | _AAS[Phospho (STY)]VELPQRR_2                                                      | #N/A                      | 7.2490  | 6.9202  | 7.3235  | 7.1904  | 5.6102  | 6.9180  | 7.2882  | 6.9482  | 6.9625  | 6.7276  | 0.9838 | -0.0236 | 0.7472 | 0.1266 |
| Speg        | _AS[Phospho (STY)]PVLAVR_2                                                        | Q62407_S2451_M1_Speg      | 5.3263  | 5.7744  | 4.2993  | 5.0461  | 4.4699  | 5.2664  | 5.3786  | 4.8103  | 4.4551  | 4.7189  | 1.0355 | 0.0555  | 0.5729 | 0.2592 |
| Speg        | _SR[S[Phospho (STY)]VDLR_2                                                        | Q62407_S2396_M1_Speg      | 3.6948  | 6.5525  | 3.4284  | 3.9646  | 5.3799  | 6.3792  | 3.6793  | 7.1075  | 6.7544  | 6.7862  | 0.8057 | -0.3118 | 0.2498 | 0.6025 |
| Speg        | _SAT[S[Phospho (STY)]DLELR_2                                                      | Q62407_S493_M1_Speg       | 2.9938  | 3.7990  | 7.2538  | 4.3217  | 3.6203  | 4.1091  | 4.4699  | 7.7573  | 7.5725  | 7.0738  | 0.9837 | -0.3887 | 0.2963 | 0.5282 |
| Speg        | _LSPS[Phospho (STY)]QDHSDSSSSK_2                                                  | Q62407_S860_M1_Speg       | 4.0716  | 5.2079  | 3.2576  | 5.0686  | 4.3257  | 5.5338  | 5.2051  | 5.6704  | 5.7870  | 3.7272  | 0.8980 | -0.1552 | 0.3909 | 0.4080 |
| Speg        | _ATS[Phospho (STY)]EGESLRR_2                                                      | Q62407_S2499_M1_Speg      | 3.4938  | 4.2990  | 6.1134  | 3.8216  | 4.1204  | 3.6091  | 5.1946  | 5.7212  | 3.4786  | 3.1495  | 0.9674 | -0.0478 | 0.8435 | 0.0739 |
| Speg        | _SGGGAAWGT[Phospho (STY)]PEASQELR_2                                               | Q62407_T453_M1_Speg       | 5.8539  | 5.3029  | 5.9184  | 6.6174  | 5.7789  | 5.9345  | 6.2749  | 6.3849  | 6.5330  | 6.6543  | 0.9132 | -0.1310 | 0.0374 | 1.4269 |
| Speg        | _SEGGAAWGT[Phospho (STY)]PEAS[Phospho (STY)]QEELRSPR_3                            | #N/A                      | 3.0872  | 3.8435  | 4.3218  | 4.5721  | 3.7318  | 4.3936  | 4.2868  | 3.5464  | 3.1950  | 3.0383  | 1.1351 | 0.1828  | 0.2195 | 0.6587 |
| Speg        | _S[Phospho (STY)]TS[Phospho (STY)]REELVR_2                                        | Q62407_S509_M2_Speg       | 4.1668  | 5.4786  | 5.8452  | 3.4064  | 4.5419  | 3.3976  | 3.3222  | 3.4747  | 4.1431  | 4.0160  | 1.1962 | 0.2585  | 0.2176 | 0.6624 |
| Speg        | _AAS[Phospho (STY)]SSAAHHQPPPEAR_3                                                | Q62407_S2114_M1_Speg      | 3.7421  | 3.4019  | 4.1230  | 3.3847  | 3.2622  | 3.1884  | 4.1359  | 3.4313  | 3.4668  | 5.0732  | 0.8734 | -0.1953 | 0.1871 | 0.7280 |
| Speg        | _RGSS[Phospho (STY)]AESALPR_2                                                     | Q62407_S2020_M1_Speg      | 4.3373  | 3.5928  | 4.3202  | 3.3220  | 3.4811  | 3.1435  | 4.5375  | 7.1458  | 2.9442  | 3.2890  | 0.8259 | -0.2759 | 0.3565 | 0.4479 |
| Speg        | _RLS[Phospho (STY)]STLER_2                                                        | Q62407_S2461_M1_Speg      | 3.9422  | 3.2840  | 3.1281  | 3.6308  | 3.0678  | 3.1608  | 3.3455  | 2.9869  | 4.1363  | 3.5978  | 0.9580 | -0.0619 | 0.5856 | 0.2324 |
| Speg        | _MPS[Phospho (STY)]PEPEHGDLELR_3                                                  | #N/A                      | 3.7805  | 3.7060  | 3.8782  | 6.1765  | 3.9692  | 3.6829  | 4.0765  | 3.8017  | 3.6428  | 3.8084  | 1.0956 | 0.1318  | 0.4865 | 0.2224 |
| Speg        | _QRS[Phospho (STY)]ATS[Phospho (STY)]DLELR_2                                      | Q62407_S490_M2_Speg       | 4.3074  | 3.5628  | 4.0410  | 3.5848  | 3.4511  | 3.1735  | 3.7331  | 3.4164  | 3.7154  | 3.2621  | 1.0439 | 0.0620  | 0.5193 | 0.2846 |
| Pppr13b     | _S[Phospho (STY)]TTEPGGPGPNCK_2                                                   | Q62415_S708_M1_Pppr13b    | 3.1672  | 4.1752  | 4.4017  | 3.9455  | 3.8117  | 3.7329  | 4.0937  | 3.0557  | 3.3548  | 3.6237  | 1.0964 | 0.1328  | 0.2547 | 0.5940 |
| Pppr13b     | _VNGTSQSQ[Phospho (STY)]PLSTSGR_2                                                 | Q62415_S335_M1_Pppr13b    | 3.8416  | 3.0971  | 3.3151  | 3.8177  | 2.9854  | 3.1692  | 3.5324  | 4.3008  | 3.9493  | 3.7847  | 0.8863 | -0.1741 | 0.0878 | 1.0567 |
| Sorbs1      | _AGEQDPVTPAELT[Phospho (STY)]JGR_2                                                | #N/A                      | 9.2256  | 3.3357  | 3.2173  | 3.7200  | 3.1571  | 3.0716  | 9.5694  | 4.3985  | 9.0515  | 9.3618  | 0.5297 | -0.0168 | 0.0424 | 0.1424 |
| Sorbs1      | _SATN[Phospho (STY)]PQGPQAQGR_2                                                   | Q62417_S1209_M1_Sorbs1    | 8.6448  | 3.9511  | 9.5676  | 9.3798  | 8.5406  | 8.9783  | 9.1003  | 3.7831  | 8.7065  | 8.9504  | 1.0710 | 0.0989  | 0.7238 | 0.1404 |
| Sorbs1      | _NNPNQSELAAGHSGES[Phospho (STY)]PR_3                                              | #N/A                      | 7.0495  | 7.1758  | 6.8014  | 7.7777  | 6.9119  | 6.9750  | 7.4544  | 3.8636  | 7.0954  | 7.2159  | 1.1105 | 0.1512  | 0.3389 | 0.4699 |
| Sorbs1      | _S[Phospho (STY)]AESLESTK_2                                                       | Q62417_S722_M1_Sorbs1     | 7.8805  | 7.4948  | 8.2039  | 8.3973  | 7.1299  | 7.9900  | 7.7095  | 7.8850  | 7.9924  | 8.3442  | 0.9833 | -0.0243 | 0.6228 | 0.2057 |
| Sorbs1      | _EGS[Phospho (STY)]GGVHGDFPK_2                                                    | Q62417_S791_M1_Sorbs1     | 7.6629  | 5.6500  | 5.8656  | 8.3116  | 2.8195  | 7.7345  | 6.4165  | 4.9778  | 5.5341  | 5.7792  | 1.0265 | 0.0378  | 0.8875 | 0.0518 |
| Sorbs1      | _RAGEQDPVTPAELT[Phospho (STY)]JGR_3                                               | #N/A                      | 9.1020  | 9.0170  | 3.9386  | 3.4824  | 3.3487  | 3.2759  | 3.6307  | 9.1045  | 3.8178  | 3.1597  | 1.0878 | 0.1214  | 0.8197 | 0.0863 |
| Sorbs1      | _SAT[Phospho (STY)]PLPAR_2                                                        | Q62417_T286_M1_Sorbs1     | 7.6610  | 3.5053  | 4.4077  | 3.4095  | 2.8466  | 7.5767  | 3.1242  | 7.1128  | 7.6667  | 7.7032  | 0.7656 | -0.3853 | 0.3170 | 0.4990 |
| Sorbs1      | _S[Phospho (STY)]M[Oxidation (M)]PSDFSGR_2                                        | #N/A                      | 8.2526  | 7.4041  | 8.1588  | 8.5703  | 6.7766  | 7.7491  | 8.1521  | 7.7961  | 7.8530  | 7.9152  | 0.9861 | -0.0203 | 0.7526 | 0.1234 |
| Sorbs1      | _GTPSSPSVQES[Phospho (STY)]PQHESK_3                                               | #N/A                      | 10.3026 | 10.4630 | 11.0736 | 10.8922 | 10.3257 | 10.6240 | 10.6139 | 10.3845 | 10.4279 | 10.5568 | 1.0112 | 0.0161  | 0.4972 | 0.3035 |
| Sorbs1      | _SKS[Phospho (STY)]EM[Oxidation (M)]NVEGEK_2                                      | #N/A                      | 6.1661  | 3.1706  | 3.6488  | 4.0621  | 6.8963  | 6.9429  | 6.8939  | 3.8220  | 4.1211  | 4.6962  | 1.0542 | 0.0761  | 0.8041 | 0.0947 |
| Sorbs1      | _GTPSSPSV[Phospho (STY)]PQESPK_2                                                  | Q62417_S58_M1_Sorbs1      | 8.2950  | 7.5842  | 4.2594  | 8.3869  | 3.9484  | 7.7323  | 7.8352  | 7.7614  | 7.7560  | 8.0500  | 0.8536 | -0.2384 | 0.3017 | 0.5204 |
| Sorbs1      | _DIS[Phospho (STY)]PEEDLK_2                                                       | #N/A                      | 4.2294  | 6.9751  | 4.4282  | 9.0645  | 3.3731  | 7.3458  | 7.7927  | 8.0755  | 7.8533  | 8.0539  | 0.7431 | -0.4285 | 0.1094 | 0.9610 |
| Sorbs1      | _SVLEGGDPLQGLSGLK_2                                                               | #N/A                      | 4.1680  | 4.0886  | 3.3540  | 3.8567  | 3.2937  | 4.0840  | 3.2957  | 4.2618  | 3.9104  | 4.6318  | 0.9460 | -0.0801 | 0.4891 | 0.3106 |
| Sorbs1      | _S[Phospho (STY)]JTPVLSR_2                                                        | Q62417_S707_M1_Sorbs1     | 4.8925  | 3.6404  | 4.2833  | 4.0156  | 3.6933  | 3.8249  | 3.9016  | 5.0182  | 3.5886  | 3.8849  | 0.9902 | -0.0142 | 0.9109 | 0.0405 |
| Sorbs1      | _SSS[Phospho (STY)]UKSPER_2                                                       | Q62417_S295_M1_Sorbs1     | 3.1246  | 4.1016  | 3.8114  | 4.9268  | 3.9899  | 4.1355  | 4.0287  | 4.7820  | 3.4530  | 3.2288  | 1.0366 | 0.0519  | 0.7345 | 0.1340 |
| Sorbs1      | _RES[Phospho (STY)]DGTGGGLASLENER_2                                               | Q62417_S432_M1_Sorbs1     | 3.2080  |         |         |         |         |         |         |         |         |         |        |         |        |        |



|        |                                                                                     |                       |         |         |         |         |         |         |         |         |         |         |        |         |        |        |
|--------|-------------------------------------------------------------------------------------|-----------------------|---------|---------|---------|---------|---------|---------|---------|---------|---------|---------|--------|---------|--------|--------|
| Dbn1   | _FVLINWTEGGEVDNR_2                                                                  | ##N/A                 | 4.7613  | 4.9069  | 3.1205  | 5.0004  | 4.5608  | 4.6914  | 3.3378  | 4.6440  | 4.6952  | 4.5675  | 1.0454 | 0.0641  | 0.6674 | 0.1756 |
| Dbn1   | _AMS[Phospho (STY)]ITTSVTSQPGK_2                                                    | Q62418_S277_M1_Dbn1   | 5.1539  | 3.7261  | 3.7724  | 5.9232  | 4.2515  | 3.7755  | 4.3942  | 3.9960  | 3.8175  | 3.7868  | 1.1088 | 0.1490  | 0.3887 | 0.4104 |
| Dbn1   | _QLT[Phospho (STY)]QETSITGR_2                                                       | Q62418_T299_M1_Dbn1   | 4.3324  | 4.3846  | 3.5184  | 4.0210  | 3.4581  | 4.2714  | 3.7357  | 4.0975  | 5.4622  | 3.9880  | 0.9256 | -0.1116 | 0.4138 | 0.3832 |
| Dbn1   | _AEEDVEPC[Carbamidomethyl (C)]IMEX_2                                                | ##N/A                 | 4.2567  | 3.0857  | 3.9904  | 5.5533  | 2.9070  | 3.3217  | 3.6825  | 3.4670  | 3.7660  | 3.2115  | 1.0908 | 0.1254  | 0.5481 | 0.2611 |
| Dbn1   | _ASGANYSFHK_2                                                                       | ##N/A                 | 3.2848  | 2.9414  | 3.9716  | 4.8069  | 3.8297  | 5.0619  | 4.1889  | 3.6442  | 3.2928  | 4.4413  | 1.0662 | 0.0925  | 0.5329 | 0.2733 |
| Sh3g1  | _ITAS[Phospho (STY)]SSFR_2                                                          | Q62419_S286_M1_Sh3g1  | 3.9343  | 4.3274  | 4.2090  | 3.7933  | 4.1488  | 3.5807  | 3.9415  | 3.2079  | 3.5070  | 3.1779  | 1.1562 | 0.2094  | 0.0274 | 1.5626 |
| Sh3g2  | _THEYLQHPASR_2                                                                      | ##N/A                 | 10.4737 | 10.6679 | 10.9584 | 10.9532 | 11.0029 | 10.7295 | 10.7498 | 10.4722 | 10.7483 | 10.6239 | 1.0140 | 0.0200  | 0.2448 | 0.6112 |
| Sh3g2  | _IPDEELR_2                                                                          | ##N/A                 | 9.9162  | 9.9709  | 9.9522  | 9.7854  | 10.3668 | 10.0616 | 9.3841  | 10.0474 | 10.0057 | 10.0833 | 1.0130 | 0.0187  | 0.4587 | 0.3384 |
| Sh3g2  | _ALYDFEPENEGELGFK_2                                                                 | ##N/A                 | 9.7759  | 9.6178  | 10.0118 | 10.0786 | 9.8643  | 9.8757  | 9.8081  | 9.4708  | 9.6368  | 9.6665  | 1.0217 | 0.0310  | 0.0829 | 1.0817 |
| Sh3g2  | _RLDIFYK_2                                                                          | ##N/A                 | 9.1232  | 9.0166  | 8.9927  | 9.2799  | 9.0359  | 9.0969  | 9.0133  | 8.8848  | 9.0321  | 9.2138  | 1.0061 | 0.0087  | 0.4893 | 0.3105 |
| Sh3g2  | _KVDVTSR_2                                                                          | ##N/A                 | 8.7330  | 8.6793  | 8.6591  | 8.6116  | 9.2099  | 8.6827  | 8.4303  | 8.5962  | 8.7052  | 8.6082  | 1.0207 | 0.0295  | 0.1842 | 0.7346 |
| Sh3g2  | _I[Acetyl (Protein N-term)]S[Phospho (STY)]VAGLKK_2                                 | Q62420_S2_M1_Sh3g2    | 8.2883  | 7.6527  | 8.2697  | 7.9403  | 6.6855  | 8.0437  | 7.5404  | 7.9361  | 8.3012  | 8.1962  | 0.9775 | -0.0329 | 0.6047 | 0.2185 |
| Sh3g2  | _RLDIFYK_2                                                                          | ##N/A                 | 8.7798  | 7.8533  | 7.6276  | 8.2742  | 8.0544  | 7.9697  | 8.3054  | 7.7163  | 7.8685  | 7.6710  | 1.0067 | 0.0096  | 0.7482 | 0.1260 |
| Sh3g2  | _QAVQLQQVTVR_2                                                                      | ##N/A                 | 7.3300  | 7.0772  | 7.6050  | 7.0625  | 7.8222  | 7.0992  | 7.3926  | 6.9770  | 7.5462  | 7.4196  | 0.9998 | -0.0002 | 0.9953 | 0.0020 |
| Sh3g2  | _EIQHLLK_2                                                                          | ##N/A                 | 8.0790  | 6.7249  | 6.2002  | 7.1274  | 6.9660  | 7.4135  | 7.1624  | 6.5218  | 7.6276  | 7.2537  | 0.9921 | -0.0114 | 0.8837 | 0.0537 |
| Sh3g2  | _EYQPKR_2                                                                           | ##N/A                 | 6.4097  | 6.3805  | 6.6399  | 6.7992  | 7.0996  | 6.8060  | 6.1525  | 6.6956  | 6.3476  | 6.6156  | 1.0366 | 0.0519  | 0.2026 | 0.6934 |
| Sh3g2  | _QNFIDPLQNUHDKDLR_3                                                                 | ##N/A                 | 7.9651  | 8.1748  | 7.9347  | 8.5319  | 8.2539  | 8.4430  | 8.2881  | 7.9400  | 8.0419  | 7.7664  | 1.0260 | 0.0370  | 0.2061 | 0.6860 |
| Sh3g2  | _ELGDDC[Carbamidomethyl (C)]NFGPALGEVGA[Oxidation (M)]R_2                           | ##N/A                 | 6.2382  | 6.5080  | 6.8190  | 7.3445  | 6.7871  | 6.8947  | 6.5486  | 6.3287  | 6.5318  | 6.2907  | 1.0478 | 0.0673  | 0.1627 | 0.7885 |
| Sh3g2  | _GPGYQQAELAEAM[Oxidation (M)]IK_2                                                   | ##N/A                 | 5.0266  | 5.4556  | 5.7227  | 5.9993  | 5.7254  | 5.7115  | 5.6124  | 5.3767  | 5.6078  | 5.6442  | 1.0084 | 0.0120  | 0.7984 | 0.0978 |
| Sh3g2  | _VGGAETGLDDFKEM[Oxidation (M)]ER_3                                                  | ##N/A                 | 7.3252  | 6.7489  | 6.6927  | 7.6245  | 6.9764  | 6.6596  | 6.8781  | 6.5538  | 6.4795  | 6.8803  | 1.0458 | 0.0646  | 0.1953 | 0.7093 |
| Sh3g2  | _ELSEVKS[DM]Oxidation (M)]EVK_2                                                     | ##N/A                 | 6.0599  | 6.5278  | 7.6873  | 7.4691  | 7.3199  | 6.9811  | 6.9513  | 7.3545  | 6.8549  | 6.2324  | 1.0233 | 0.0332  | 0.6735 | 0.1717 |
| Sh3g2  | _AVMEIMTK_2                                                                         | ##N/A                 | 3.8705  | 3.1209  | 4.4340  | 5.7272  | 3.9643  | 3.7652  | 4.1260  | 3.0234  | 3.6610  | 3.6550  | 1.3307 | 0.4122  | 0.1337 | 0.8738 |
| Sh3g2  | _LDDDFKEMER_3                                                                       | ##N/A                 | 2.6101  | 4.2134  | 4.3635  | 3.9073  | 4.0347  | 3.6947  | 4.0555  | 3.0939  | 3.3930  | 3.5846  | 1.0771 | 0.1071  | 0.4697 | 0.3282 |
| Outf1  | _TLSNAEDYLDEDS[Phospho (STY)]D_2                                                    | Q62420_S2_M1_Outf1    | 4.3797  | 3.6841  | 3.5657  | 11.7429 | 9.4166  | 4.7241  | 4.0175  | 10.9489 | 8.0850  | 4.0353  | 0.9110 | -0.1345 | 0.7941 | 0.1001 |
| Ndufa4 | _LALNPDVSWOR_2                                                                      | ##N/A                 | 9.8466  | 9.7742  | 9.9576  | 10.0753 | 9.9817  | 9.8182  | 9.8158  | 9.7513  | 10.0375 | 9.6866  | 1.0088 | 0.0126  | 0.3351 | 0.4749 |
| Ndufa4 | _PYSVNVOYSK_2                                                                       | ##N/A                 | 9.4274  | 9.1497  | 9.4010  | 9.5446  | 9.3308  | 9.6022  | 9.4089  | 9.3338  | 9.3593  | 9.4210  | 1.0030 | 0.0044  | 0.7417 | 0.1298 |
| Ndufa4 | _KXNPQWNNK_2                                                                        | ##N/A                 | 8.4474  | 8.1156  | 8.0923  | 8.0360  | 8.4840  | 8.4120  | 8.1543  | 8.3113  | 8.4570  | 8.0501  | 1.0026 | 0.0037  | 0.8692 | 0.0609 |
| Ndufa4 | _LGFNEQYK_2                                                                         | ##N/A                 | 7.0540  | 6.7407  | 6.6022  | 6.8007  | 7.0677  | 6.7648  | 6.8198  | 6.8611  | 6.3807  | 6.9129  | 1.0140 | 0.0201  | 0.5037 | 0.2979 |
| Ndufa4 | _LALNPDVSWDRK_3                                                                     | ##N/A                 | 4.5673  | 5.2603  | 5.8009  | 5.8329  | 5.2290  | 5.6887  | 4.9173  | 5.3418  | 5.4325  | 5.4793  | 1.0196 | 0.0280  | 0.7078 | 0.1501 |
| Ndufa4 | _NNPQWNNK_2                                                                         | ##N/A                 | 7.2794  | 6.8538  | 3.3203  | 7.5243  | 7.5000  | 7.2133  | 3.5376  | 7.0151  | 7.4834  | 7.7275  | 1.0271 | 0.0385  | 0.8820 | 0.0545 |
| Ndrg1  | _TAS[Phospho (STY)]GSSVTSLEGTR_2                                                    | Q62433_S330_M1_Ndrg1  | 9.2796  | 9.1991  | 9.6303  | 9.4707  | 9.7445  | 9.2416  | 9.6899  | 8.8387  | 9.4703  | 9.6939  | 1.0005 | 0.0077  | 0.9826 | 0.0076 |
| Ndrg1  | _LUNITPNSGATGNAGPK_2                                                                | ##N/A                 | 7.0294  | 7.1441  | 6.8466  | 7.4925  | 7.1688  | 6.9322  | 7.2559  | 7.0693  | 6.7434  | 7.2224  | 1.0042 | 0.0060  | 0.8471 | 0.0021 |
| Ndrg1  | _I[Acetyl (Protein N-term)]S[Phospho (STY)]REHDOVDLAIEKPLVEK_3                      | Q62433_S2_M1_Ndrg1    | 8.8626  | 9.3868  | 10.1264 | 10.2563 | 9.1200  | 9.3285  | 9.7611  | 9.6738  | 9.3650  | 9.2643  | 0.9997 | -0.0004 | 0.9932 | 0.0730 |
| Ndrg1  | _SRT[Phospho (STY)]AS[Phospho (STY)]GSSVTSLEGTR_2                                   | ##N/A                 | 3.4448  | 3.9994  | 3.1785  | 4.2766  | 4.0893  | 4.5367  | 4.6648  | 4.0459  | 3.2763  | 4.9888  | 0.9239 | -0.1142 | 0.4393 | 0.3572 |
| Tle1   | _DASGS[Phospho (STY)]PASTASGSSSLK_2                                                 | Q62440_S284_M1_Tle1   | 3.3327  | 4.0890  | 5.8362  | 4.3266  | 3.9773  | 4.1482  | 5.1644  | 3.7918  | 5.1644  | 5.2727  | 0.9700 | -0.0439 | 0.8203 | 0.0860 |
| Tle4   | _DAPKS[Phospho (STY)]PASVASSTSPSK_2                                                 | Q62441_S292_M1_Tle4   | 9.3798  | 9.6001  | 10.1585 | 10.0835 | 8.6106  | 9.4587  | 9.9824  | 9.5579  | 9.2625  | 9.2818  | 1.0029 | 0.0041  | 0.9130 | 0.0301 |
| Tle4   | _SSVPS[Phospho (STY)]PSASFR_2                                                       | Q62441_S208_M1_Tle4   | 9.0887  | 9.2980  | 9.0183  | 9.6505  | 8.6714  | 9.1710  | 9.7015  | 8.2625  | 9.2748  | 9.2537  | 1.0066 | 0.0094  | 0.8446 | 0.0733 |
| Nup1   | _FK[Carbamidomethyl (C)]TSPVDADM[Oxidation (M)]C[Carbamidomethyl (C)]AASVAGGAEELR_3 | ##N/A                 | 4.4270  | 4.4980  | 4.3880  | 4.9795  | 4.5539  | 4.5140  | 4.3009  | 4.9073  | 4.6716  | 5.0633  | 1.0166 | 0.0237  | 0.8310 | 0.0804 |
| Flbp3  | _FLDHNGSDS[Phospho (STY)]LAEMK_3                                                    | Q62446_S36_M1_Flbp3   | 4.9927  | 3.2495  | 5.0614  | 5.7596  | 5.1082  | 5.2271  | 4.3498  | 5.3381  | 5.1417  | 3.6167  | 1.0625 | 0.0874  | 0.6054 | 0.2179 |
| Eif4g2 | _TQT[Phospho (STY)]PPLGGTQLGLK_2                                                    | Q62448_T507_M1_Eif4g2 | 7.3706  | 2.9503  | 8.0057  | 9.4231  | 3.5359  | 3.4571  | 8.2584  | 8.4409  | 3.6306  | 6.4941  | 0.8635 | -0.2118 | 0.6004 | 0.2216 |
| Eif4g2 | _LTEAVTVDYLSGNANDAVSGVR_2                                                           | ##N/A                 | 2.4410  | 4.1525  | 3.4247  | 4.7897  | 3.3180  | 3.3384  | 4.3754  | 4.5909  | 3.5922  | 3.1034  | 0.9137 | -0.1303 | 0.5124 | 0.2904 |
| Eif4g2 | _FS[Phospho (STY)]PTMGR_2                                                           | Q62448_S394_M1_Eif4g2 | 3.1055  | 4.1206  | 3.7923  | 4.2950  | 3.7320  | 3.9974  | 4.0097  | 3.8235  | 3.4721  | 4.2620  | 0.9868 | -0.0191 | 0.8422 | 0.0746 |
| Vat1   | _VLLVGPKEKT_2                                                                       | ##N/A                 | 6.8509  | 6.8510  | 6.7208  | 6.5626  | 6.4321  | 6.5593  | 8.8019  | 8.4742  | 8.4330  | 8.4828  | 0.8152 | -0.2947 | 0.0071 | 2.1460 |
| Spn1   | _SSS[Phospho (STY)]PVHLR_2                                                          | Q62504_S749_M1_Spn1   | 6.3346  | 7.6850  | 8.0851  | 7.7982  | 6.8222  | 7.3463  | 8.0858  | 7.7554  | 7.4605  | 7.5607  | 0.9491 | -0.0754 | 0.2908 | 0.5364 |
| Spn1   | _DLEPGVPS[Phospho (STY)]DS[Phospho (STY)]DEDAEHR_2                                  | Q62504_S1395_M2_Spn1  | 4.3161  | 5.7337  | 4.0497  | 6.2856  | 3.4598  | 5.4667  | 6.5359  | 6.7599  | 6.2696  | 5.2572  | 0.7872 | -0.3451 | 0.0660 | 1.1804 |
| Spn1   | _S[Phospho (STY)]SPNRFDAHDR_4                                                       | Q62504_S188_M1_Spn1   | 4.3579  | 3.7491  | 4.2435  | 4.0134  | 3.4504  | 3.6259  | 3.7280  | 3.4520  | 4.0146  | 3.9804  | 1.0298 | 0.0423  | 0.6049 | 0.2183 |
| Spn1   | _EAGPAAAS[Phospho (STY)]PQESFSPQK_2                                                 | Q62504_S1228_M1_Spn1  | 4.0492  | 3.3535  | 3.7225  | 3.2663  | 3.1749  | 3.0538  | 3.4146  | 1.5080  | 4.0339  | 4.4444  | 1.0258 | 0.0368  | 0.8786 | 0.0562 |
| Spn1   | _RPGS[Phospho (STY)]PGVS[Phospho (STY)]PAHSER_3                                     | Q62504_S758_M2_Spn1   | 3.7955  | 3.0509  | 3.5292  | 4.5738  | 2.9392  | 3.4854  | 3.2212  | 3.9282  | 4.2273  | 4.0150  | 0.9203 | -0.1198 | 0.4069 | 0.3905 |
| Zyx    | _S[Phospho (STY)]PGGPGPLTK_2                                                        | Q62523_S336_M1_Zyx    | 10.1984 | 10.622  | 10.4204 | 10.6358 | 9.5657  | 10.2131 | 10.2406 | 9.6870  | 9.7983  | 10.2042 | 1.0200 | 0.0286  | 0.3812 | 0.4189 |
| Ppp3r1 | _DTQLQDVOK_2                                                                        | ##N/A                 | 7.6802  | 7.0655  | 7.0012  | 7.2821  | 8.2856  | 7.5063  | 7.6580  | 7.0660  | 7.3484  | 7.5218  | 1.0097 | 0.0139  | 0.7922 | 0.1012 |
| Ppp3r1 | _VIDIFDTGGEVOK_2                                                                    | ##N/A                 | 6.8441  | 5.4641  | 5.5000  | 6.4405  | 6.6619  | 6.4328  | 5.9347  | 5.7368  | 5.7665  | 6.7429  | 1.0296 | 0.0420  | 0.6297 | 0.2009 |
| Ppp3r1 | _IYDM[Oxidation (M)]DKDGYSGELFQVLK_3                                                | ##N/A                 | 5.6190  | 4.6747  | 4.8561  | 5.6743  | 6.2900  | 5.6771  | 5.4377  | 4.7241  | 5.4087  | 5.7071  | 1.0274 | 0.0390  | 0.6856 | 0.1639 |
| Ppp3r1 | _EFREGVSQFSWK_2                                                                     | ##N/A                 | 6.3350  | 5.7275  | 6.0907  | 6.2806  | 6.7562  | 6.1079  | 5.9697  | 5.6053  | 6.5162  | 6.3508  | 1.0173 | 0.0248  | 0.6665 | 0.1762 |
| Ppp3r1 | _ISFEFC[Carbamidomethyl (C)]AVVGGLDMK_3                                             | ##N/A                 | 3.3850  | 3.4420  | 4.0718  | 4.3136  | 4.0116  | 3.7179  | 4.0787  | 3.5440  | 3.1926  | 4.4670  | 0.9995 | -0.0007 | 0.9953 | 0.0021 |
| Ppp3r1 | _KLDLNGSSLSVEEFM[Oxidation (M)]SLPELQGNPLVOR_3                                      | ##N/A                 | 3.1713  | 3.0216  | 4.4041  | 3.5982  | 2.8430  | 3.3857  | 3.7465  | 3.4030  | 3.7020  | 3.3729  | 0.9828 | -0.0250 | 0.8407 | 0.0754 |
| Ppp3r1 | _LDLNGSSLSVEEFM[Oxidation (M)]SLPELQGNPLVOR_3                                       | ##N/A                 | 3.0379  | 4.3045  | 4.2724  | 3.8162  | 3.6825  | 3.6037  | 3.9645  | 3.1850  | 3.4840  | 3.4935  | 1.0271 | 0.1004  | 0.3770 | 0.4237 |
| Ppp3r1 | _TINAKDKDGGOR_3                                                                     | ##N/A                 | 4.0483  | 3.1778  | 3.2343  | 3.7369  | 3.1740  | 3.0546  | 3.4516  | 4.3815  | 4.0301  | 3.7039  | 0.8747 | -0.1931 | 0.0945 | 1.0245 |
| Mapk3  | _I[Acetyl (Protein N-term)]AAAAAGGGGGGEPFR_2                                        | ##N/A                 | 7.6240  | 7.8302  | 7.9691  | 7.6210  | 7.8490  | 7.6609  | 8.1251  | 8.2543  | 7.8627  | 7.7811  | 0.9692 | -0.0452 | 0.0630 | 1.2003 |
| Mapk3  | _ADPEHDHDTGLEY[Phospho (STY)]VATR_3                                                 | Q63844_Y205_M1_Mapk3  | 5.5799  | 6.0934  | 6.7456  | 7.4543  | 4.7897  | 6.3120  | 6.3278  | 6.8345  | 7.0536  | 6.4254  | 0.9258 | -0.1113 | 0.3428 | 0.4650 |
| Nup62  | _ELEDL[Phospho (STY)]PLEESWK_2                                                      | Q63850_S412_M1_Nup62  | 2.9267  | 3.6830  | 4.1612  | 3.7050  | 3.5713  | 3.0533  | 3.8533  | 3.2962  | 3.5952  | 3.3823  | 0.9958 | -0.0061 | 0.9542 | 0.0203 |
| Omg    | _TLDGNNR_2                                                                          | ##N/A                 | 10.0746 | 9.9419  | 9.9947  | 10.4042 | 9.6756  | 9.8951  | 10.1595 | 9.9224  | 10.1670 | 10.0926 | 1.0040 | 0.0235  | 0.5842 | 0.2335 |
| Omg    | _LESAPQLPR_2                                                                        | ##N/A                 | 8.6766  | 8.8246  | 8.6157  | 8.7124  | 8.8226  | 8.7176  | 8.9621  | 8.7471  | 8.6144  | 8.7460  | 0.9973 | -0.0040 |        |        |



|         |                                                                                           |                         |         |         |         |         |         |         |         |         |         |         |        |         |        |          |
|---------|-------------------------------------------------------------------------------------------|-------------------------|---------|---------|---------|---------|---------|---------|---------|---------|---------|---------|--------|---------|--------|----------|
| Raly    | _LS[Phospho (STY)]PVPVR_2                                                                 | #N/A                    | 4.3530  | 3.6084  | 4.3046  | 4.8960  | 4.0875  | 3.1279  | 4.5219  | 3.3113  | 4.0113  | 3.2734  | 1.0750 | 0.1043  | 0.4936 | 0.3066   |
| ThE3    | _RS[Phospho (STY)]SFSMEES_2                                                               | Q64092_S564_M1_ThE3     | 4.3453  | 3.6496  | 3.5312  | 6.1251  | 3.4710  | 4.2589  | 3.1188  | 4.0309  | 4.3300  | 4.0980  | 1.0862 | 0.1193  | 0.5602 | 0.2517   |
| McD2l   | _TSS[Phospho (STY)]TGEESSEIALR_2                                                          | Q64096_S621_M1_McD2l    | 4.3015  | 3.6069  | 3.4875  | 7.8946  | 3.4272  | 4.3023  | 3.1622  | 3.7769  | 3.9571  | 1.0051  | 0.0073 | 0.9841  | 0.0070 | 0.7956   |
| McD2l   | _QLC[Carbamidomethyl (C)]PEPAEIS[Phospho (STY)]PEPV_2                                     | Q64096_S1145_M1_McD2l   | 3.6157  | 4.4209  | 4.3025  | 5.5634  | 4.6588  | 3.4873  | 3.8481  | 5.4824  | 2.9619  | 3.2713  | 1.1158 | 0.1581  | 0.4656 | 0.3320   |
| McD2l   | _SSS[Phospho (STY)]AQC[Carbamidomethyl (C)]LSSSGK_2                                       | Q64096_S1120_M1_McD2l   | 3.1296  | 4.0965  | 3.8164  | 7.7026  | 3.9848  | 4.1406  | 4.0338  | 3.7994  | 7.0300  | 4.2861  | 0.9355 | -0.0962 | 0.7698 | 0.1136   |
| At13b   | _EALSQQLDS[Phospho (STY)]EGEQDQR_2                                                        | Q640N2_S328_M1_At13b    | 3.3862  | 7.2326  | 3.1199  | 7.6131  | 6.4580  | 7.5707  | 7.8171  | 7.4448  | 7.5864  | 3.8418  | 0.8838 | -0.1783 | 0.5682 | 0.2455   |
| Hepacam | _THTS[Phospho (STY)]PPR_2                                                                 | #N/A                    | 9.6779  | 3.5542  | 9.4864  | 9.3627  | 7.8457  | 3.1821  | 9.6651  | 9.5909  | 3.7240  | 9.3613  | 0.8886 | -0.1703 | 0.6528 | 0.1852   |
| Hepacam | _QNS[Phospho (STY)]LEYM[Oxidation (M)]DQNDORL_2                                           | #N/A                    | 9.3281  | 9.0881  | 9.4370  | 8.6300  | 8.1921  | 8.8252  | 9.7135  | 9.2426  | 9.1961  | 9.1258  | 0.9568 | -0.0637 | 0.1601 | 0.7956   |
| Hepacam | _STEPGPGYYSV[Phospho (STY)]PPVGR_2                                                        | Q640R3_S345_M1_Hepacam  | 6.0735  | 7.4841  | 7.7532  | 9.0599  | 3.6637  | 7.5202  | 6.8958  | 8.0675  | 7.5589  | 3.3052  | 1.0726 | 0.1011  | 0.7225 | 0.1411   |
| Hepacam | _SPARS[Phospho (STY)]PATGR_2                                                              | Q640R3_S370_M1_Hepacam  | 6.3508  | 3.4106  | 6.3506  | 4.0867  | 3.3134  | 3.9447  | 6.5866  | 3.7919  | 4.0909  | 6.2255  | 0.8845 | -0.1771 | 0.5320 | 0.2741   |
| Hepacam | _THTS[Phospho (STY)]PPRAPS[Phospho (STY)]PGR_2                                            | #N/A                    | 11.6233 | 11.8106 | 4.1643  | 11.9622 | 11.2433 | 11.8541 | 12.3517 | 12.1825 | 11.9815 | 11.9307 | 0.8622 | -0.2139 | 0.3209 | 0.4937   |
| Hepacam | _QNS[Phospho (STY)]LEYM[Oxidation (M)]DQNDORL_3                                           | #N/A                    | 8.8299  | 9.2727  | 10.0302 | 7.6163  | 8.0586  | 7.5004  | 9.6505  | 9.4152  | 9.3390  | 7.4571  | 0.9538 | -0.0682 | 0.5414 | 0.2665   |
| Hepacam | _DKDS[Phospho (STY)]EPOENPATEPR_2                                                         | Q640R3_S321_M1_Hepacam  | 3.4987  | 6.6957  | 7.2215  | 6.8033  | 6.1294  | 6.5160  | 4.0382  | 7.1015  | 3.4797  | 6.3689  | 1.1709 | 0.2277  | 0.3853 | 0.4142   |
| Hepacam | _SEADTLPRS[Phospho (STY)]GEQER_2                                                          | #N/A                    | 3.3772  | 4.2267  | 5.7494  | 4.5779  | 4.1600  | 4.4870  | 5.1432  | 3.7082  | 3.3568  | 3.9180  | 1.0988 | 0.1359  | 0.4487 | 0.3481   |
| Hepacam | _S[Phospho (STY)]PGLPR_2                                                                  | Q640R3_S352_M1_Hepacam  | 3.5685  | 3.7739  | 11.4545 | 4.3468  | 4.2131  | 3.9124  | 4.4951  | 4.1552  | 2.9534  | 4.0241  | 1.3339 | 0.4157  | 0.4355 | 0.3610   |
| Spr     | _ETSXPFLR_2                                                                               | #N/A                    | 5.9631  | 5.5013  | 3.1247  | 5.9989  | 5.9884  | 6.4067  | 5.5898  | 5.6169  | 5.3810  | 5.6729  | 0.9878 | -0.0177 | 0.9144 | 0.0888   |
| Spr     | _ALAPQIAR_2                                                                               | #N/A                    | 5.4261  | 5.1198  | 5.2969  | 4.0712  | 6.5136  | 3.8936  | 4.6262  | 5.4531  | 5.8886  | 5.4554  | 0.9436 | -0.0838 | 0.5870 | 0.2313   |
| Spr     | _MEADGLGC[Carbamidomethyl (C)]AVC[Carbamidomethyl (C)]VLTSGR_2                            | #N/A                    | 5.0665  | 3.9626  | 5.6621  | 5.5031  | 4.9539  | 5.7399  | 5.5934  | 5.4325  | 6.1333  | 0.9364  | 0.9364 | -0.0948 | 0.4058 | 0.3916   |
| Spr     | _LUNNATI.GDYSK_2                                                                          | #N/A                    | 3.6045  | 4.3534  | 4.7944  | 4.7711  | 4.9152  | 4.8885  | 3.5918  | 3.2482  | 4.6402  | 4.3211  | 1.1529 | 0.2053  | 0.1342 | 0.8723   |
| Spr     | _DM[Oxidation (M)]YQVLAEEPSVR_2                                                           | #N/A                    | 6.2432  | 6.5265  | 6.6195  | 6.2241  | 6.3020  | 5.9998  | 6.9438  | 6.4782  | 6.2882  | 6.5339  | 0.9631 | -0.0542 | 0.1642 | 0.7846   |
| Spr     | _LKS[Phospho (STY)]DGLVDC[Carbamidomethyl (C)]GTSAGK_2                                    | Q64105_S328_M1_Spr      | 5.3309  | 5.6308  | 4.5954  | 3.5972  | 4.9274  | 5.3023  | 5.8103  | 5.0277  | 5.1341  | 3.5642  | 1.0027 | 0.0039  | 0.9806 | 0.0085   |
| Trim24  | _SEWSDASGS[Phospho (STY)]PNHGETR_3                                                        | Q64127_S312_M1_Trim24   | 4.1644  | 4.2303  | 3.3504  | 3.8530  | 4.2901  | 2.9385  | 3.5677  | 5.1350  | 3.9140  | 4.7513  | 0.8378 | -0.1553 | 0.1099 | 0.9589   |
| Trim24  | _HEADDC[Carbamidomethyl (C)]KFS[Phospho (STY)]DOS[Phospho (STY)]DDIVQPR_3                 | Q64127_S1026_M2_Trim24  | 2.9841  | 4.3583  | 4.2186  | 3.7624  | 3.6286  | 2.9960  | 3.9106  | 3.2388  | 3.5379  | 3.4396  | 1.0357 | 0.0507  | 0.7021 | 0.1536   |
| Maoa    | _EPVDAWPQAR_2                                                                             | #N/A                    | 6.6101  | 6.4977  | 5.8664  | 6.4966  | 6.1553  | 6.3048  | 6.5609  | 6.7425  | 5.6684  | 6.5547  | 0.9906 | -0.0136 | 0.8074 | 0.0929   |
| Maoa    | _DVAPEIHTFLR_2                                                                            | #N/A                    | 5.8303  | 4.9201  | 5.5166  | 5.5648  | 4.2004  | 3.6129  | 5.6487  | 5.8493  | 5.5326  | 4.8627  | 0.9027 | -0.1477 | 0.2969 | 0.5274   |
| Maoa    | _VLGSQEALS[Phospho (STY)]PNHYEEK_2                                                        | #N/A                    | 4.4340  | 3.8467  | 4.0638  | 3.9603  | 3.2426  | 4.1433  | 4.2811  | 3.8551  | 3.2060  | 4.0359  | 1.0270 | 0.0385  | 0.7134 | 0.1467   |
| Maoa    | _YFAGTETATQWGSYM[Oxidation (M)]EAGVEAGER_3                                                | #N/A                    | 3.2986  | 3.9275  | 3.9854  | 4.4881  | 3.9252  | 3.8043  | 4.2028  | 3.6304  | 3.2790  | 2.9543  | 1.1104 | 0.1511  | 0.2131 | 0.6714   |
| Agtpbp1 | _VTS[Phospho (STY)]PTTYVLDEDEPR_2                                                         | Q641K1_S1160_M1_Agtpbp1 | 4.0259  | 3.3165  | 3.7596  | 6.7945  | 3.1696  | 3.4550  | 3.4516  | 3.6979  | 6.7870  | 2.9806  | 0.9663 | -0.0494 | 0.8875 | 0.0518   |
| Nuak1   | _ENDFPQSGDGSVPES[Phospho (STY)]PSK_2                                                      | Q641K5_S389_M1_Nuak1    | 7.3476  | 7.0057  | 3.2433  | 7.9705  | 4.1542  | 3.9712  | 7.7662  | 7.4903  | 7.5635  | 7.7511  | 0.7347 | -0.4447 | 0.0886 | 1.4028   |
| Nuak1   | _SSVC[Carbamidomethyl (C)]DC[Carbamidomethyl (C)]DALPSES[Phospho (STY)]PLAR_2             | Q641K5_S326_M1_Nuak1    | 4.0373  | 4.1612  | 3.2233  | 5.5372  | 4.9396  | 3.0657  | 5.4235  | 5.1005  | 5.8901  | 5.6000  | 0.7560 | -0.4035 | 0.0292 | 1.5352   |
| Nuak1   | _TAIRLPSS[Phospho (STY)]PEADM[Oxidation (M)]SGK_2                                         | #N/A                    | 3.7919  | 3.4128  | 4.1243  | 5.9734  | 3.5343  | 3.2113  | 4.1161  | 3.3368  | 3.4228  | 3.3453  | 1.1273 | 0.1729  | 0.4246 | 0.1467   |
| Actr3b  | _LSQELSGGR_2                                                                              | #N/A                    | 3.6330  | 4.0364  | 3.9181  | 4.0842  | 3.8372  | 3.8717  | 4.2325  | 4.9130  | 3.2160  | 3.5875  | 0.9773 | -0.0331 | 0.7752 | 0.1106   |
| Actr3b  | _TLTGIVSDSGDVTHNIPVAGVYVSC[Carbamidomethyl (C)]JK_3                                       | #N/A                    | 2.9019  | 3.6582  | 4.1365  | 3.6802  | 3.5465  | 3.0781  | 4.4721  | 3.3209  | 3.6200  | 1.9083  | 1.0510 | 0.0718  | 0.7321 | 0.1354   |
| Sf1     | _TGDGIPPNPEDRSPPEPIV[Phospho (STY)]NS[Phospho (STY)]EGKR_4                                | #N/A                    | 3.3654  | 3.8623  | 4.0899  | 7.9435  | 6.3555  | 3.6239  | 4.1533  | 8.8843  | 7.0416  | 5.5613  | 0.7673 | -0.3822 | 0.2570 | 0.5901   |
| Sf1     | _TGDGIPPNPEDRSPPEPIV[Phospho (STY)]NS[Phospho (STY)]EGK_3                                 | #N/A                    | 3.3190  | 4.0234  | 4.5535  | 4.0973  | 3.9636  | 4.1619  | 4.2456  | 5.9608  | 3.2029  | 3.7746  | 0.9357 | -0.0959 | 0.6047 | 0.2184   |
| Zeb1    | _S[Phospho (STY)]C[Carbamidomethyl (C)]TSS[Phospho (STY)]PSNL[C[Carbamidomethyl (C)]SAR_2 | Q64318_S682_M2_Zeb1     | 3.1550  | 3.8758  | 4.1789  | 4.1245  | 3.7918  | 4.1513  | 4.0719  | 4.1987  | 4.9333  | 4.6638  | 0.8685 | -0.2034 | 0.4046 | 1.3043   |
| Npdc1   | _NPDC[Phospho (STY)]PSTPR_2                                                               | Q64322_S236_M1_Npdc1    | 9.9832  | 10.0073 | 10.3528 | 9.8826  | 3.8897  | 9.8595  | 10.3525 | 9.9799  | 9.9928  | 0.8766  | 0.7666 | -0.1901 | 0.3917 | 0.4071   |
| Npdc1   | _IS[Phospho (STY)]PGDOR_2                                                                 | Q64322_S243_M1_Npdc1    | 8.3397  | 8.3017  | 7.9204  | 8.2482  | 7.1744  | 7.9751  | 8.0316  | 8.1143  | 8.2071  | 8.0295  | 0.9874 | -0.0184 | 0.6621 | 0.1791   |
| Npdc1   | _GPTS[Phospho (STY)]PSTPPIS[Phospho (STY)]PGDOR_2                                         | Q64322_S236_M3_Npdc1    | 8.5648  | 3.1788  | 3.6904  | 3.6904  | 3.2002  | 6.7221  | 3.6308  | 3.9585  | 3.5247  | 1.1740  | 0.2315 | 0.4313  | 0.3653 | 0.3653   |
| Syn2    | _VLVVDEPHTDWAK_2                                                                          | #N/A                    | 8.1415  | 7.8928  | 8.4620  | 8.1143  | 8.0803  | 8.3326  | 8.2920  | 8.0276  | 8.0697  | 8.2470  | 1.0014 | 0.0020  | 0.9224 | 0.0351   |
| Syn2    | _FLUECTIYPPNHR_2                                                                          | #N/A                    | 8.3970  | 7.7362  | 7.5120  | 8.0648  | 7.8876  | 8.1298  | 7.5829  | 7.6724  | 8.0924  | 8.4481  | 1.0007 | 0.0010  | 0.9805 | 0.0085   |
| Syn2    | _TLGGEKFLUECTIYPPNHR_3                                                                    | #N/A                    | 8.6688  | 8.9161  | 8.9986  | 9.0699  | 8.8004  | 9.0924  | 8.9473  | 8.8714  | 8.8257  | 8.9463  | 1.0030 | 0.0043  | 0.7676 | 0.1149   |
| Syn2    | _QLTDLVSK_2                                                                               | #N/A                    | 7.9680  | 7.8877  | 8.0304  | 8.2904  | 8.0543  | 8.4668  | 7.7178  | 8.1873  | 8.2254  | 7.9978  | 1.0101 | 0.0145  | 0.5843 | 0.2334   |
| Syn2    | _ILGDYDK_2                                                                                | #N/A                    | 8.1743  | 7.7191  | 7.8364  | 7.6644  | 7.8866  | 7.3843  | 7.4559  | 8.1267  | 7.8129  | 8.1832  | 0.9852 | -0.0216 | 0.5508 | 0.2590   |
| Syn2    | _SFRPDVLIR_2                                                                              | #N/A                    | 7.3528  | 7.6116  | 7.3303  | 7.6834  | 7.2147  | 7.6333  | 7.3006  | 7.5427  | 7.5821  | 7.3385  | 1.0040 | 0.0058  | 0.7995 | 0.0972   |
| Syn2    | _FM[Oxidation (M)]LTITPTPPVVK_2                                                           | #N/A                    | 9.0817  | 9.2283  | 9.4185  | 8.9818  | 9.1717  | 9.2518  | 9.1952  | 9.1960  | 9.1314  | 9.1916  | 1.0011 | 0.0016  | 0.8968 | 0.0473   |
| Syn2    | _MI[Oxidation (M)]NQLLSR_2                                                                | #N/A                    | 6.9533  | 7.6676  | 7.3897  | 7.5903  | 8.1320  | 7.5706  | 7.0474  | 7.8059  | 7.7007  | 7.4024  | 1.0082 | 0.0118  | 0.8023 | 0.0957   |
| Syn2    | _QTAAAGLVDAAPASAA_2                                                                       | #N/A                    | 7.4950  | 7.8026  | 7.9231  | 7.7571  | 7.7462  | 8.0518  | 7.8846  | 7.9202  | 7.6192  | 0.9577  | 1.0071 | 0.0102  | 0.6631 | 0.1884   |
| Syn2    | _KFSASLFSO_2                                                                              | #N/A                    | 5.1464  | 4.9367  | 5.2934  | 6.4133  | 5.3920  | 5.5749  | 4.9967  | 6.3813  | 6.2488  | 6.3512  | 0.9107 | -0.1349 | 0.1888 | 0.7240   |
| Syn2    | _TNTGSAM[Oxidation (M)]LEQAM[Oxidation (M)]SDR_2                                          | #N/A                    | 7.6798  | 8.8251  | 8.2379  | 8.4595  | 7.8170  | 7.9355  | 7.9841  | 7.8883  | 8.1100  | 7.8352  | 1.0257 | 0.0367  | 0.3914 | 0.4704   |
| Syn2    | _T[Phospho (STY)]PALS[Phospho (STY)]PQRPITQQPSGTLK_3                                      | #N/A                    | 5.3196  | 6.3320  | 3.3724  | 7.2655  | 4.6786  | 5.5310  | 5.5772  | 5.8690  | 6.0824  | 5.2174  | 0.9584 | -0.0613 | 0.7407 | 0.1303   |
| Syn2    | _VEQAESELNLVHADGTAYAVDM[Oxidation (M)]QVLR_3                                              | #N/A                    | 4.3203  | 5.0638  | 5.3676  | 6.0446  | 4.4633  | 4.4567  | 3.2358  | 5.1948  | 4.9227  | 5.4620  | 1.0529 | 0.0744  | 0.6477 | 0.1886   |
| Syn2    | _TPALS[Phospho (STY)]PQRPITQQPSGTLKEPSSK_4                                                | #N/A                    | 6.5798  | 7.1911  | 5.6803  | 8.3824  | 6.2154  | 6.4149  | 6.4878  | 7.1850  | 6.7501  | 6.5189  | 1.0013 | 0.0018  | 0.9868 | 0.0058   |
| Syn2    | _SS[Phospho (STY)]ANEDEAKAETR_2                                                           | #N/A                    | 6.1296  | 6.1299  | 6.0575  | 6.5843  | 5.6008  | 6.3682  | 5.9525  | 6.0955  | 5.1771  | 6.2361  | 1.0477 | 0.0672  | 0.2991 | 0.5242   |
| Syn2    | _LVWDAC[Carbamidomethyl (C)]SEM[Oxidation (M)]FGGLDC[Carbamidomethyl (C)]AVK_2            | #N/A                    | 4.8575  | 4.0439  | 3.1863  | 6.0114  | 4.3735  | 4.4302  | 4.5146  | 4.5237  | 4.4145  | 3.9082  | 1.0331 | 0.0469  | 0.9806 | 0.1094   |
| Syn2    | _QNAFGM[Oxidation (M)]AENEDFR_3                                                           | #N/A                    | 5.6121  | 5.2965  | 5.3533  | 5.8052  | 5.6346  | 5.8946  | 5.2655  | 5.5105  | 5.7136  | 1.0281  | 0.0400 | 0.3280  | 0.4842 | 0.3666   |
| Syn2    | _TSSGNWK_2                                                                                | #N/A                    | 7.2979  | 7.6253  | 7.4564  | 7.2663  | 8.0339  | 7.7354  | 6.9909  | 7.5246  | 7.6898  | 7.4124  | 1.0223 | 0.0318  | 0.4106 | 0.3866   |
| Syn2    | _DGKGYPFVEM[Oxidation (M)]DC[Carbamidomethyl (C)]SM[Oxidation (M)]PUGEHQVEDR_4            | #N/A                    | 5.8924  | 6.5610  | 4.0478  | 6.5311  | 5.2272  | 6.1940  | 6.1141  | 6.3269  | 6.5241  | 6.3489  | 0.9074 | -0.1402 | 0.2720 | 0.5655   |
| Syn2    | _SQS[Phospho (STY)]LTNAFSSESSFR_2                                                         | Q64332_S546_M1_Syn2     | 4.3569  | 4.1984  | 4.3551  | 6.5677  | 3.7651  | 3.9259  | 4.6441  | 3.1155  | 3.4146  | 4.2573  | 1.1737 | 0.2311  | 0.2926 | 0.5337   |
| Syn2    | _VENHYDQDASVALTQYATAEFIDAK_3                                                              | #N/A                    | 3.2474  | 0.5506  | 3.9342  | 4.4368  | 3.8671  | 4.2584  | 4.1515  | 3.6816  | 3.3302  | 4.4038  | 0.8691 | -0.2024 | 0.5226 | 0.2819   |
| Tbr1    | _S[Phospho (STY)]PYCV[Carbamidomethyl (C)]GAK_2                                           | Q64336_S549_M1_Tbr1     | 8.4329  | 7.7083  | 7.8684  | 8.9659  | 8.1898  | 8.3275  | 8.6698  | 7.9684  | 8.3111  | 8.3758  | 0.9901 | -0.0144 | 0.7541 | 0.1225</ |



|                 |                                                                                  |                                |         |         |         |         |         |         |         |         |         |         |         |         |        |        |
|-----------------|----------------------------------------------------------------------------------|--------------------------------|---------|---------|---------|---------|---------|---------|---------|---------|---------|---------|---------|---------|--------|--------|
| Ptpd1           | _YANVAYDHSR_2                                                                    | #N/A                           | 5.2464  | 4.9091  | 4.6959  | 4.9744  | 4.4951  | 4.7079  | 5.3598  | 5.1701  | 5.1661  | 4.4068  | 0.9627  | -0.0549 | 0.4066 | 0.3908 |
| Ptpd1           | _GALQIEQSESDGKEYE[Carbamidomethyl] (C)[VATNSAGTR_3                               | #N/A                           | 4.3612  | 3.2172  | 3.4240  | 2.5088  | 3.4734  | 4.2561  | 4.1006  | 4.0334  | 4.3324  | 4.1459  | 0.8524  | -0.2304 | 0.1227 | 0.9113 |
| Top2b           | _ASGS[Phospho (STY)]ENEGDYNGR_2                                                  | Q64511_S1539_M1_Top2b          | 6.2054  | 3.4614  | 4.0735  | 3.3554  | 6.5393  | 7.5539  | 7.3558  | 3.4657  | 3.4775  | 6.5874  | 0.9955  | -0.0065 | 0.9851 | 0.0605 |
| Top2b           | _KAS[Phospho (STY)]SG[Phospho (STY)]ENEGDYNGR_2                                  | Q64511_S1537_M2_Top2b          | 6.2319  | 6.5863  | 6.7047  | 6.3026  | 5.3992  | 4.9062  | 6.6241  | 6.5445  | 6.3907  | 6.2773  | 0.9323  | -0.1011 | 0.2698 | 0.5690 |
| Top2b           | _YFAES[Phospho (STY)]DEEDVDFA[M]PN_2                                             | Q64511_S1600_M1_Top2b          | 4.3069  | 3.6113  | 3.4029  | 4.5094  | 7.2890  | 4.2969  | 3.1568  | 3.9926  | 6.8002  | 3.9625  | 1.0237  | 0.0339  | 0.9135 | 0.0393 |
| Top2b           | _IVETINS[Phospho (STY)]DS[Phospho (STY)]DSEFGPK_2                                | #N/A                           | 3.7039  | 3.6884  | 3.6744  | 4.1079  | 3.5306  | 3.9021  | 3.7033  | 6.0655  | 4.0616  | 3.8366  | 0.8531  | -0.2292 | 0.1879 | 0.7261 |
| Top2b           | _IVETINS[Phospho (STY)]DSEFGPK_2                                                 | #N/A                           | 4.0100  | 3.5461  | 3.5548  | 6.5255  | 3.6533  | 3.9552  | 3.8360  | 7.2134  | 3.7708  | 3.6973  | 0.9089  | -0.1379 | 0.6518 | 0.1859 |
| Top2b           | _KIVETINS[Phospho (STY)]DS[Phospho (STY)]DSEFGPK_3                               | #N/A                           | 2.9505  | 4.2757  | 3.6373  | 4.1399  | 4.1640  | 3.9615  | 3.8546  | 3.9785  | 3.6271  | 4.1069  | 0.9905  | -0.0138 | 0.8927 | 0.0493 |
| Top2b           | _KTSFDQDS[Phospho (STY)]DVDFPSDFTSEPPALP_3                                       | Q64511_S1568_M1_Top2b          | 3.0441  | 3.8003  | 4.2786  | 3.8223  | 3.6886  | 2.9360  | 4.3300  | 3.1788  | 3.4779  | 3.4996  | 0.9927  | -0.0106 | 0.9370 | 0.0283 |
| Top2b           | _KIVETINS[Phospho (STY)]DS[Phospho (STY)]DSEFGPK_2                               | #N/A                           | 3.5205  | 3.9787  | 4.0418  | 3.8394  | 3.6841  | 3.9321  | 3.8575  | 3.6380  | 3.6345  | 3.6196  | 1.0394  | 0.0558  | 0.2238 | 0.6502 |
| Top2b           | _AS[Phospho (STY)]PTNDGDEDFVPSGLDKDEYAFSSGK_3                                    | #N/A                           | 4.1988  | 4.6419  | 5.8140  | 5.7531  | 4.3076  | 4.4114  | 5.6412  | 5.1119  | 4.7157  | 3.8545  | 1.0049  | 0.0070  | 0.9618 | 0.0169 |
| Top2b           | _VKAS[Phospho (STY)]PTNDGDEDFVPS[Phospho (STY)]DGLDKDEYAFSSGK_4                  | Q64511_S1387_M2_Top2b          | 3.5349  | 3.5960  | 4.0743  | 4.3132  | 3.4843  | 3.9949  | 3.7663  | 3.5426  | 3.8417  | 3.9904  | 1.0126  | 0.0181  | 0.8073 | 0.0930 |
| Sdc3            | _KKDEGS[Phospho (STY)]YTLLEPK_3                                                  | Q64519_S418_M1_Sdc3            | 4.0495  | 3.1767  | 3.2355  | 3.7381  | 3.0650  | 3.5596  | 3.4528  | 4.3804  | 4.0289  | 3.7051  | 0.8918  | -0.1652 | 0.1314 | 0.8813 |
| Sdc3            | _QAS[Phospho (STY)]VTYQKPKQEEFYA_3                                               | Q64519_S428_M1_Sdc3            | 2.9238  | 4.3024  | 3.6106  | 4.1132  | 4.1907  | 3.9347  | 3.8279  | 4.0053  | 4.0802  | 0.9882  | -0.0171 | 0.8702  | 0.1064 | 0.0930 |
| Guk1            | _K[Carbamidomethyl] (C)[VLVDLQGV_2                                               | #N/A                           | 4.3118  | 3.9039  | 4.3316  | 4.9916  | 4.7859  | 4.3451  | 5.2665  | 4.3522  | 4.5128  | 4.4054  | 0.9592  | -0.0602 | 0.4869 | 0.3125 |
| Gpd2            | _NLYSSDVEVR_2                                                                    | #N/A                           | 6.0447  | 6.1747  | 6.3587  | 6.5601  | 6.1773  | 5.9816  | 5.9894  | 6.4785  | 6.0783  | 0.9951  | -0.0071 | 0.8402  | 0.0756 | 0.0325 |
| Gpd2            | _ELNWSERL_2                                                                      | #N/A                           | 6.4818  | 6.6007  | 6.6573  | 6.2382  | 5.9953  | 6.3250  | 6.6847  | 6.4454  | 6.3125  | 6.9086  | 0.9689  | -0.0456 | 0.2467 | 0.6078 |
| Gpd2            | _TVGFLDGGK_2                                                                     | #N/A                           | 6.0014  | 6.2317  | 4.4571  | 6.0219  | 5.7918  | 5.7426  | 6.2057  | 6.3107  | 6.2941  | 0.9447  | -0.0821 | 0.3955  | 0.4029 | 0.0429 |
| Gpd2            | _LAFUNVQAAEALPR_2                                                                | #N/A                           | 5.8327  | 5.7485  | 5.4207  | 5.1818  | 5.6888  | 5.9077  | 5.0439  | 5.7612  | 5.8510  | 5.8842  | 0.9991  | -0.0013 | 0.9815 | 0.0081 |
| Gpd2            | _KQIELETATR_2                                                                    | #N/A                           | 5.3373  | 4.3467  | 5.1704  | 5.5322  | 5.7890  | 5.5709  | 5.4802  | 5.7928  | 5.1563  | 5.0888  | 0.9836  | -0.0239 | 0.7678 | 0.1148 |
| Gpd2            | _PHUNAGPSR_2                                                                     | #N/A                           | 6.3795  | 6.9878  | 6.6777  | 6.8093  | 7.3225  | 7.0145  | 6.6932  | 6.8549  | 7.0977  | 6.8993  | 0.9969  | -0.0044 | 0.9083 | 0.0418 |
| Gpd2            | _DWSPTVIR_2                                                                      | #N/A                           | 5.7757  | 5.5715  | 5.9317  | 5.8558  | 5.2043  | 5.5578  | 6.5330  | 4.9497  | 5.8674  | 0.9954  | -0.0066 | 0.9336  | 0.0298 | 0.0318 |
| Gpd2            | _TEQLTOSTEGLLSDIHR_2                                                             | #N/A                           | 6.4589  | 6.7451  | 6.1794  | 7.5364  | 6.4099  | 6.5107  | 6.5350  | 6.7949  | 6.9317  | 6.4861  | 0.9930  | -0.0101 | 0.8596 | 0.0657 |
| Gpd2            | _LVQDYGLESEYVAHLAK_2                                                             | #N/A                           | 4.4284  | 4.8021  | 5.2430  | 5.3174  | 4.9405  | 5.0851  | 4.7155  | 5.2461  | 4.3002  | 5.0027  | 1.0318  | 0.0452  | 0.5260 | 0.2790 |
| Gpd2            | _YGAATANYM[Oxidation (M)]JEVSLK_2                                                | #N/A                           | 2.5811  | 3.4217  | 3.5462  | 3.7071  | 4.2550  | 3.6173  | 3.7636  | 4.1096  | 3.7182  | 3.6702  | 0.9230  | -0.1157 | 0.3378 | 0.1073 |
| Gpd2            | _C[Carbamidomethyl] (C)[VINAGSPDTSVR_2                                           | #N/A                           | 3.4149  | 3.9275  | 3.1486  | 4.0066  | 4.9104  | 5.1638  | 5.9493  | 5.2096  | 5.0498  | 4.7754  | 0.7806  | -0.3573 | 0.0350 | 0.1648 |
| Gpd2            | _M[Oxidation (M)]NLAIALTAAR_2                                                    | #N/A                           | 4.2162  | 4.7082  | 4.4022  | 3.9048  | 4.5212  | 4.9594  | 4.4796  | 6.0222  | 5.4415  | 4.2454  | 0.7977  | -0.2361 | 0.0172 | 1.7468 |
| Gpd2            | _NTPFDLVGGGATG[Carbamidomethyl] (C)[C[Carbamidomethyl] (C)]ALDAVTR_3             | #N/A                           | 4.2466  | 3.3292  | 3.2108  | 4.5220  | 3.1505  | 3.0781  | 4.7402  | 4.2576  | 4.3616  | 4.7179  | 0.7943  | -0.3323 | 0.0239 | 1.6210 |
| Gpd2            | _AIM[Oxidation (M)]NLDOEQVR_2                                                    | #N/A                           | 4.0168  | 6.7676  | 6.7977  | 6.6573  | 6.8777  | 3.7836  | 6.6979  | 6.9525  | 6.4969  | 0.9785  | -0.0313 | 0.8941  | 0.0486 | 0.0616 |
| Gpd2            | _TALVERDDFSSTSR_3                                                                | #N/A                           | 3.7822  | 3.0865  | 4.4690  | 3.5333  | 3.6604  | 3.3208  | 3.6816  | 3.4679  | 3.7669  | 3.2106  | 1.0312  | 0.0444  | 0.6842 | 0.1648 |
| Gpd2            | _LVGAVYVGGQHNDA_2                                                                | #N/A                           | 3.7425  | 3.6646  | 3.8833  | 2.5096  | 3.4991  | 3.5771  | 3.8662  | 3.6546  | 3.6526  | 3.8697  | 0.9252  | -0.1122 | 0.3045 | 0.5164 |
| Gpd2            | _EYAC[Carbamidomethyl] (C)[TAVDMISR_2                                            | #N/A                           | 4.3893  | 3.6448  | 4.1230  | 3.6668  | 3.5331  | 4.7806  | 3.8151  | 3.3344  | 3.6334  | 3.3441  | 1.1391  | 0.0879  | 0.1057 | 0.9761 |
| Gpd2            | _M[Oxidation (M)]TIAGTTDPTDVTTHHPSPSEDNFLNEVR_4                                  | #N/A                           | 3.3320  | 4.0883  | 4.5666  | 4.3273  | 3.9766  | 4.1488  | 4.0420  | 4.3917  | 3.1899  | 3.7876  | 1.0572  | 0.1803  | 0.4725 | 0.3256 |
| H2ac20;H3t2haa1 | _AGLQFPVGR_2                                                                     | #N/A                           | 11.1373 | 11.3524 | 11.4263 | 11.0541 | 10.9542 | 10.8909 | 11.2323 | 11.3304 | 11.0286 | 11.1674 | 0.9952  | -0.0070 | 0.6671 | 0.1758 |
| H2ac20;H3t2haa1 | _HQLQAIR_2                                                                       | #N/A                           | 10.3306 | 10.8746 | 10.8654 | 11.1579 | 11.0416 | 10.8968 | 10.8620 | 10.9636 | 0.9916  | -0.0121 | 0.5745  | 0.0745  | 0.1578 | 0.1758 |
| H2ac20;H3t2haa1 | _VTIAGQVLPNQAVALPK_2                                                             | #N/A                           | 8.7202  | 8.9513  | 8.9441  | 9.1517  | 9.0645  | 8.8255  | 8.9280  | 9.0231  | 8.8153  | 9.1526  | 1.0033  | 0.0048  | 0.8325 | 0.0848 |
| H2ac20;H3t2haa1 | _NDEENILGLK_2                                                                    | #N/A                           | 7.2454  | 7.7295  | 8.3004  | 7.5485  | 7.6057  | 7.7203  | 7.6305  | 7.5986  | 7.6014  | 7.5228  | 1.0156  | 0.0223  | 0.5590 | 0.2526 |
| H2ac20;H3t2haa1 | _NDEENILK_2                                                                      | #N/A                           | 3.1246  | 4.2924  | 3.2698  | 4.1232  | 4.1807  | 3.9447  | 3.8379  | 3.9953  | 3.6438  | 4.0902  | 0.9822  | -0.0259 | 0.8015 | 0.0961 |
| H2ac20;H3t2haa1 | _KGNAYER_2                                                                       | #N/A                           | 3.0818  | 3.8870  | 3.1891  | 4.2337  | 3.7083  | 4.0212  | 4.3820  | 2.9016  | 3.0665  | 3.9110  | 1.0341  | 0.0484  | 0.7468 | 0.1268 |
| Srm             | _YQDILVFR_2                                                                      | #N/A                           | 4.6393  | 5.4496  | 4.4015  | 6.1382  | 5.0384  | 5.1980  | 5.6932  | 5.1665  | 5.2194  | 5.1110  | 0.9711  | -0.0424 | 0.6565 | 0.1828 |
| Srm             | _AAPVLPEFTR_2                                                                    | #N/A                           | 6.7922  | 7.2235  | 6.8847  | 7.2493  | 6.5972  | 7.1622  | 7.1189  | 7.2735  | 6.6834  | 6.7484  | 1.0041  | 0.0060  | 0.8747 | 0.0581 |
| Srm             | _VLUGGGGGVLR_2                                                                   | #N/A                           | 5.5577  | 3.3134  | 4.5996  | 6.0098  | 5.2717  | 3.7502  | 5.6448  | 5.0810  | 5.1607  | 5.3058  | 0.8966  | -0.1574 | 0.3476 | 0.4590 |
| Rb2             | _AQAPGS[Phospho (STY)]PSHQIQQR_2                                                 | Q64700_S37_M1_Rb2              | 3.0375  | 4.3049  | 4.2720  | 3.8158  | 4.1263  | 3.6032  | 3.9640  | 3.1854  | 3.4845  | 3.4930  | 1.0929  | 0.1282  | 0.2731 | 0.5636 |
| Zrsr1           | _GREEDSS[Phospho (STY)]PGQCSQSR_2                                                | #N/A                           | 3.6300  | 3.6036  | 6.6556  | 4.1583  | 4.1427  | 3.9798  | 4.8730  | 4.6263  | 4.4106  | 0.9108  | -0.1348 | 0.0816  | 0.1086 | 0.0816 |
| Zrsr1           | _ALAPREEDSDVS[Phospho (STY)]ANIELAER_2                                           | Q64707_S50_M2_Zrsr1            | 3.1185  | 3.9237  | 3.8053  | 7.2821  | 7.2152  | 3.9844  | 4.3452  | 6.7473  | 7.3146  | 6.2393  | 0.7933  | -0.3340 | 0.2701 | 0.5685 |
| Zrsr1           | _ALPREEDSS[Phospho (STY)]PGQCSQSHRT_3                                            | #N/A                           | 3.7646  | 3.5778  | 3.4983  | 4.5429  | 3.3991  | 4.3303  | 3.1903  | 4.2582  | 4.2202  | 0.9860  | -0.0204 | 0.8646  | 0.0632 | 0.1686 |
| Vcl             | _DPNASS[Phospho (STY)]PGDAGEQAR_2                                                | #N/A                           | 8.9898  | 8.6028  | 8.6837  | 9.4344  | 8.3327  | 8.6141  | 9.2306  | 8.7535  | 8.7927  | 8.9511  | 0.9826  | -0.0254 | 0.4880 | 0.3115 |
| Vcl             | _GWLKDPNASS[Phospho (STY)]PGDAGEQAR_3                                            | #N/A                           | 3.9388  | 6.0902  | 3.1247  | 8.0010  | 6.3524  | 5.8329  | 6.0491  | 7.4794  | 6.6392  | 6.7765  | 0.8249  | -0.2777 | 0.6205 | 0.6207 |
| Vcl             | _GQGS[Phospho (STY)]PVAMQK_2                                                     | Q64727_S346_M1_Vcl             | 5.6887  | 3.4803  | 4.4327  | 7.2534  | 4.8829  | 3.3571  | 3.1492  | 3.1831  | 4.3325  | 3.4015  | 1.3789  | 0.4636  | 0.1260 | 0.8997 |
| Sp9             | _KGS[Phospho (STY)]DS[Phospho (STY)]DTDSNLETPR_2                                 | Q64HY3_S424_M2_Sp9             | 4.2788  | 3.8468  | 3.8640  | 5.9763  | 4.6047  | 3.3505  | 3.5561  | 4.6886  | 4.9273  | 4.9414  | 0.9540  | -0.0679 | 0.7075 | 0.1503 |
| Sp9             | _SES[Phospho (STY)]POLUHDGVSAAAR_2                                               | Q64HY3_S440_M1_Sp9             | 4.0944  | 3.3988  | 3.2804  | 3.7831  | 4.7874  | 3.0085  | 3.3693  | 4.3354  | 3.9840  | 4.4902  | 0.9211  | -0.1186 | 0.4296 | 0.3669 |
| Ctma3           | _TPELEDVS[Phospho (STY)]DLEDDHAEVR_2                                             | #N/A                           | 4.1524  | 3.2027  | 3.6291  | 4.3043  | 3.2869  | 3.9803  | 3.5666  | 3.9572  | 3.8991  | 3.5110  | 1.0069  | 0.0099  | 0.9206 | 0.0359 |
| Wapl            | _TES[Phospho (STY)]PESCC[Carbamidomethyl] (C)[PVK_2                              | #N/A                           | 7.3313  | 7.2435  | 7.9570  | 7.5176  | 3.1566  | 6.7810  | 7.7910  | 7.5011  | 7.4470  | 7.2400  | 0.8892  | -0.1694 | 0.3847 | 0.4149 |
| Wapl            | _RTES[Phospho (STY)]PESCC[Carbamidomethyl] (C)[PVK_2                             | #N/A                           | 3.6433  | 2.9477  | 4.3301  | 3.3319  | 4.2698  | 3.4597  | 3.8205  | 4.4351  | 3.2989  | 0.9875  | -0.0181 | 0.8983  | 0.0466 | 0.0466 |
| Efj32           | /Acetyl (Protein N-term)AAAAAAGDS[Phospho (STY)]DSWDADTFSM[Oxidation (M)]EDPVRK_ | Q66J56_S16_M1_Efj32            | 3.5923  | 3.7429  | 6.5058  | 7.0799  | 3.6114  | 3.7365  | 3.8921  | 3.8285  | 3.8593  | 4.1105  | 1.2011  | 0.2644  | 0.3698 | 0.4321 |
| Rbm12b2;Rbm12b1 | _RVS[Phospho (STY)]VEDLR_2                                                       | Q66N14_S681_M1_Rbm12b2;Rbm12b1 | 6.6828  | 7.7683  | 7.5402  | 5.9505  | 6.9751  | 7.5101  | 7.1802  | 7.0144  | 6.8595  | 0.9731  | -0.0394 | 0.5977  | 0.2235 | 0.2235 |
| Rbm12b2;Rbm12b1 | _S[Phospho (STY)]RS[Phospho (STY)]PLGFYVHLK_3                                    | Q66N14_S277_M2_Rbm12b2;Rbm12b1 | 3.0951  | 3.9003  | 3.7819  | 4.9856  | 3.7217  | 4.0078  | 3.9993  | 4.7972  | 3.4825  | 4.2516  | 0.9474  | -0.0779 | 0.5837 | 0.2338 |
| Rbm12b2;Rbm12b1 | _MRS[Phospho (STY)]EHS[Phospho (STY)]PSR_2                                       | Q66N14_S250_M2_Rbm12b2;Rbm12b1 | 4.1267  | 3.3821  | 3.8603  | 3.4041  | 3.2704  | 3.3542  | 3.2474  | 3.5971  | 3.8961  | 3.0814  | 1.0321  | 0.0455  | 0.6387 | 0.1947 |
| Map3k10         | _GSDGAS[Phospho (STY)]PPASPSIRP_2                                                | #N/A                           | 3.8777  | 7.7940  | 8.7497  | 8.4331  | 6.9852  | 8.1496  | 8.6284  | 8.2843  | 8.1033  | 7.9122  | 0.8906  | -0.1671 | 0.3589 | 0.4450 |
| Map3k10         | _QWSSS[Phospho (STY)]APNLGK_2                                                    | Q66L42_S583_M1_Map3k10         | 3.3768  | 4.1820  | 6.6200  | 4.5663  | 4.0034  | 3.7261  | 4.2810  | 3.5522  | 3.2008  | 3.0325  | 1.2547  | 0.3274  | 0.1918 | 0.7172 |
| Map3k10         | _KGSDGAS[Phospho (STY)]PPASPSIRP_2                                               | #N/A                           | 3.9703  | 7.1767  | 6.2829  | 3.4970  | 3.2829  | 3.3482  | 6.0813  | 6.7215  | 5.9659  | 6.3282  | 0.7433  | -0.4279 | 0.1187 | 0.9254 |
| Chap            | _HAS[Phospho (STY)]LDGASPFVK_2                                                   | #N/A                           | 9.0882  | 9.0376  | 9.4908  | 9.5829  | 7.7289  | 9.1641  | 9.3785  | 9.      |         |         |         |         |        |        |



|        |                                                                                 |                       |         |         |         |         |         |         |         |         |         |         |         |         |        |        |
|--------|---------------------------------------------------------------------------------|-----------------------|---------|---------|---------|---------|---------|---------|---------|---------|---------|---------|---------|---------|--------|--------|
| Rab3ip | _TLVSSSP[Phospho (STY)]PTQELAAAK_2                                              | Q8BEFO_5218_M1_Rab3ip | 6.0143  | 6.5854  | 7.2230  | 7.4931  | 5.3145  | 4.0741  | 6.6737  | 6.2422  | 7.2003  | 6.0274  | 0.9360  | -0.0955 | 0.5574 | 0.2539 |
| Begin  | _AS[Phospho (STY)]PLVATYK_2                                                     | Q8BEFE_5473_M1_Begin  | 8.9186  | 8.5418  | 9.0046  | 8.9552  | 8.1282  | 8.6569  | 8.9836  | 8.8812  | 8.6331  | 8.6094  | 0.9915  | -0.0123 | 0.7007 | 0.1544 |
| Begin  | _AGGDLSS[Phospho (STY)]PSR_2                                                    | Q8BEFE_5510_M1_Begin  | 6.6976  | 6.5843  | 4.4001  | 3.4019  | 7.6625  | 8.2549  | 3.1166  | 8.6507  | 4.3651  | 8.5725  | 1.1064  | 0.1459  | 0.6985 | 0.1558 |
| Begin  | _VLEKPPGGS[Phospho (STY)]LSSR_2                                                 | Q8BEFE_5194_M1_Begin  | 3.3582  | 4.1634  | 4.0450  | 4.5477  | 7.0889  | 3.7447  | 4.2624  | 3.5708  | 3.2194  | 3.0139  | 1.2772  | 0.3530  | 0.2096 | 0.6787 |
| Begin  | _GOY[C[Carbamidomethyl (C)]S][Phospho (STY)]DPALV[C[Carbamidomethyl (C)]PDER_2  | Q8BEFE_5229_M1_Begin  | 8.7842  | 9.6423  | 8.5420  | 10.6116 | 9.2764  | 9.4606  | 9.9484  | 10.0032 | 9.9572  | 10.0622 | 0.9393  | -0.0903 | 0.1423 | 0.8467 |
| Begin  | _YVGGGGGGAAGGGS[Phospho (STY)]GDKAEGR_3                                         | #N/A                  | 5.4158  | 4.0709  | 3.9496  | 4.4523  | 4.1047  | 4.4163  | 4.8214  | 4.9538  | 5.2015  | 5.6854  | 0.8521  | -0.2309 | 0.0400 | 1.3980 |
| Begin  | _RPSATYS[Phospho (STY)]GPR_2                                                    | Q8BEFE_5344_M1_Begin  | 5.4158  | 3.0162  | 4.3987  | 5.3298  | 2.8375  | 3.3911  | 3.7519  | 6.3034  | 3.6966  | 3.3675  | 0.9498  | -0.0744 | 0.7937 | 0.1003 |
| Begin  | _AQNST[Phospho (STY)]DSAAEEEEAAAPAYR_3                                          | Q8BEFE_7263_M1_Begin  | 4.0122  | 5.6842  | 5.3888  | 6.5146  | 5.5237  | 6.0053  | 5.7889  | 6.3294  | 5.3937  | 5.8460  | 0.9633  | -0.0540 | 0.6614 | 0.1795 |
| Begin  | _SADLAGVYAS[Phospho (STY)]DGGDRLR_2                                             | #N/A                  | 3.4591  | 3.4227  | 3.9009  | 4.2374  | 3.8669  | 3.0834  | 3.9745  | 5.1365  | 4.7007  | 5.2659  | 0.7678  | -0.3813 | 0.0076 | 2.1172 |
| Begin  | _LS[Phospho (STY)]PQQAFFR_2                                                     | Q8BEFE_5570_M1_Begin  | 8.5759  | 2.7088  | 4.4124  | 6.2637  | 3.8224  | 6.0145  | 4.1962  | 3.0450  | 5.2927  | 5.9228  | 1.1486  | 0.1998  | 0.5768 | 0.2390 |
| Begin  | _VQL[C[Carbamidomethyl (C)]GAQS[Phospho (STY)]S[Phospho (STY)]PEPHGSR_2         | #N/A                  | 4.5939  | 5.7253  | 5.7506  | 5.7752  | 5.4607  | 5.4422  | 5.8268  | 5.5263  | 5.3761  | 5.3401  | 0.9892  | -0.0156 | 0.8147 | 0.0890 |
| Begin  | _ADS[Phospho (STY)]SEGDQSGHLAEP[C[Carbamidomethyl (C)]FLR_3                     | Q8BEFE_5483_M1_Begin  | 3.0966  | 4.1296  | 3.7834  | 4.2860  | 4.0179  | 4.1075  | 4.0007  | 7.0691  | 3.4810  | 6.2085  | 0.7521  | -0.4109 | 0.1098 | 0.9594 |
| Begin  | _YVGGGGGGAAGGGS[Phospho (STY)]PGDK_2                                            | #N/A                  | 3.9705  | 3.2259  | 3.1862  | 3.6889  | 3.1142  | 5.3815  | 3.4036  | 4.4296  | 4.0782  | 3.6559  | 0.9664  | -0.0492 | 0.7902 | 0.1022 |
| Begin  | _GOY[Phospho (STY)]C[Carbamidomethyl (C)]SDPALV[C[Carbamidomethyl (C)]PDERHAR_4 | #N/A                  | 3.9276  | 3.4148  | 3.6613  | 3.2051  | 3.0714  | 2.9926  | 3.3533  | 3.7961  | 4.0951  | 4.7937  | 0.8427  | -0.2469 | 0.0704 | 1.1525 |
| Begin  | _AASTLGS[Phospho (STY)]PLEAQVAPGAR_2                                            | Q8BEFE_5357_M1_Begin  | 3.3772  | 3.9652  | 3.1109  | 4.1555  | 4.0218  | 3.9430  | 4.3038  | 4.3465  | 3.1447  | 3.8328  | 0.9630  | -0.0544 | 0.6497 | 0.1873 |
| Begin  | _RPS[Phospho (STY)]VDT[Phospho (STY)]PVTDVGLR_2                                 | Q8BEFE_5246_M2_Begin  | 3.2497  | 4.0060  | 4.4842  | 4.0280  | 3.8942  | 4.2312  | 4.1762  | 8.1813  | 3.2723  | 3.7052  | 0.8238  | -0.2796 | 0.3812 | 0.4189 |
| Begin  | _ESLEPS[Phospho (STY)]SMEAS[Phospho (STY)]PEMHPPTR_2                            | Q8BEFE_5555_M2_Begin  | 3.8009  | 3.5415  | 5.3346  | 4.5792  | 2.9447  | 4.3667  | 3.2267  | 3.9228  | 4.2218  | 4.2565  | 0.9712  | -0.0421 | 0.7627 | 0.1177 |
| Citc   | _VIDSNINPER_2                                                                   | #N/A                  | 12.9315 | 12.8998 | 13.3825 | 13.1201 | 11.8375 | 12.7022 | 13.1499 | 13.1016 | 12.7659 |         | 0.9802  | -0.0288 | 0.3934 | 0.4051 |
| Citc   | _LLPWLEAR_2                                                                     | #N/A                  | 9.9946  | 10.1043 | 10.0008 | 9.2684  | 9.0837  | 9.6215  | 10.0507 | 10.1595 | 9.7942  | 9.5528  | 0.9787  | -0.0310 | 0.4114 | 0.3858 |
| Citc   | _NMLAGAEFLAR_2                                                                  | #N/A                  | 9.5829  | 9.3987  | 9.6941  | 9.2215  | 8.8878  | 9.1374  | 9.5726  | 9.6005  | 9.3084  | 9.3511  | 0.9854  | -0.0212 | 0.4237 | 0.3729 |
| Citc   | _DPHLAC[Carbamidomethyl (C)]VAYER_2                                             | #N/A                  | 8.3778  | 7.9336  | 8.1324  | 7.8081  | 7.4860  | 8.2130  | 8.2135  | 8.1793  | 8.0400  | 8.1262  | 0.9818  | -0.0265 | 0.3983 | 0.3997 |
| Citc   | _LYNNVSIFGR_2                                                                   | #N/A                  | 8.9727  | 9.0636  | 9.1514  | 8.4479  | 8.5280  | 8.6941  | 9.3604  | 9.2120  | 9.9676  | 8.6412  | 0.9734  | -0.0389 | 0.2535 | 0.5960 |
| Citc   | _ESNC[Carbamidomethyl (C)]YDER_2                                                | #N/A                  | 8.8112  | 8.6648  | 8.5482  | 8.3488  | 8.5430  | 8.2394  | 8.7173  | 8.9179  | 8.5931  | 8.6598  | 0.9775  | -0.0328 | 0.1391 | 0.8565 |
| Citc   | _CHIEVTGPTTGGNPPFK_3                                                            | #N/A                  | 7.8337  | 7.5715  | 7.9812  | 7.4579  | 7.7146  | 7.4957  | 7.7365  | 7.7614  | 7.4355  | 7.5195  | 0.9863  | -0.0199 | 0.6669 | 0.1759 |
| Citc   | _EVC[Carbamidomethyl (C)]FAC[Carbamidomethyl (C)]VDGK_2                         | #N/A                  | 8.8902  | 8.6994  | 8.6083  | 8.4971  | 7.9767  | 8.2878  | 8.5808  | 8.3751  | 8.5695  | 0.9961  | -0.0056 | 0.8508  | 0.0702 | 0.4693 |
| Citc   | _LALEEFINGPNNAHQVQGR_3                                                          | #N/A                  | 8.8470  | 8.6118  | 8.7823  | 8.8071  | 7.8033  | 8.0072  | 9.0735  | 9.0656  | 8.5729  | 8.3136  | 0.9680  | -0.0469 | 0.3394 | 0.7693 |
| Citc   | _AHIAQC[Carbamidomethyl (C)]EK_2                                                | #N/A                  | 8.3525  | 8.3915  | 8.2718  | 8.2068  | 8.2850  | 7.9092  | 8.5094  | 8.5438  | 8.2693  | 8.2688  | 0.9807  | -0.0280 | 0.1659 | 0.4601 |
| Citc   | _GQFSTDELVAEVRK_2                                                               | #N/A                  | 7.0770  | 7.1332  | 7.3729  | 7.2251  | 5.9545  | 6.5637  | 7.1189  | 7.1123  | 7.0498  | 6.6536  | 0.9863  | -0.0200 | 0.7458 | 0.1274 |
| Citc   | _ENPYDSR_2                                                                      | #N/A                  | 7.6521  | 7.5261  | 7.9288  | 7.1857  | 7.3877  | 7.6211  | 7.2756  | 8.1289  | 7.7951  | 7.8548  | 0.9725  | -0.0402 | 0.2961 | 0.5286 |
| Citc   | _LTDQLPLVIC[Carbamidomethyl (C)]DR_2                                            | #N/A                  | 7.8847  | 7.5461  | 7.3474  | 7.3412  | 6.9076  | 7.1161  | 8.0658  | 7.7046  | 7.3360  | 7.4555  | 0.9629  | -0.0545 | 0.2238 | 0.6501 |
| Citc   | _C[Carbamidomethyl (C)]NEPAVWSQLAK_2                                            | #N/A                  | 7.4691  | 7.8752  | 7.7094  | 7.3155  | 7.5972  | 7.3269  | 7.8739  | 7.9782  | 7.5797  | 7.0205  | 0.9916  | -0.0122 | 0.7609 | 0.1601 |
| Citc   | _SVDPFLALSVLR_2                                                                 | #N/A                  | 7.5979  | 7.6871  | 7.5109  | 7.1337  | 7.0694  | 7.0854  | 7.7366  | 7.9904  | 7.8533  | 7.5721  | 0.9434  | -0.0840 | 0.0248 | 1.6050 |
| Citc   | _NLQKLLITAIK_2                                                                  | #N/A                  | 7.8547  | 7.8641  | 8.0416  | 6.8742  | 6.9559  | 6.8318  | 7.9972  | 8.0151  | 7.8644  | 7.3834  | 0.9474  | -0.0780 | 0.2265 | 0.6450 |
| Citc   | _EHLELFWSR_2                                                                    | #N/A                  | 7.9849  | 7.3950  | 7.8030  | 7.2497  | 6.6889  | 7.2745  | 7.7642  | 7.8588  | 7.5305  | 7.3079  | 0.9716  | -0.0415 | 0.9185 | 0.3783 |
| Citc   | _HELIEFR_2                                                                      | #N/A                  | 7.9841  | 7.7946  | 7.6912  | 7.3703  | 6.7033  | 7.1343  | 7.7863  | 7.5160  | 7.1127  | 7.4269  | 0.9981  | -0.0027 | 0.4587 | 0.1881 |
| Citc   | _WLLTGSQAQNR_2                                                                  | #N/A                  | 7.5295  | 6.9221  | 8.0395  | 7.1309  | 5.6997  | 6.8794  | 7.6526  | 7.3983  | 7.2340  | 7.5631  | 0.9426  | -0.0853 | 0.3236 | 0.4900 |
| Citc   | _HDVFLUTK_2                                                                     | #N/A                  | 7.3890  | 6.9517  | 7.2249  | 7.2187  | 5.2328  | 6.6510  | 7.3787  | 7.7508  | 6.5188  | 6.9185  | 0.9491  | -0.0754 | 0.4522 | 0.3447 |
| Citc   | _LASTVHLGEYQAVDGR_3                                                             | #N/A                  | 6.4219  | 6.2639  | 6.0819  | 6.1435  | 5.1320  | 5.9042  | 6.3659  | 6.1653  | 5.9751  | 6.2737  | 0.9671  | -0.0482 | 0.4237 | 0.3729 |
| Citc   | _AFM[Oxidation (M)]TADLPNLEULEK_2                                               | #N/A                  | 6.8494  | 7.0396  | 6.7064  | 6.7683  | 6.3048  | 6.4529  | 7.0677  | 6.9861  | 6.6996  | 0.9594  | -0.0598 | 0.1112  | 0.9539 |        |
| Citc   | _VIQC[Carbamidomethyl (C)]FAETGQVQK_2                                           | #N/A                  | 6.1256  | 6.0191  | 6.0981  | 6.4546  | 6.4053  | 5.3467  | 6.8897  | 6.8146  | 6.3872  | 6.2235  | 0.9234  | -0.1150 | 0.0689 | 1.1617 |
| Citc   | _LEKLEUEFR_3                                                                    | #N/A                  | 6.7217  | 7.1978  | 7.2922  | 6.7982  | 5.6417  | 6.7038  | 6.8311  | 7.5745  | 7.1034  | 6.5450  | 0.9590  | -0.0604 | 0.4301 | 0.3664 |
| Citc   | _LAUYLFK_2                                                                      | #N/A                  | 7.1453  | 7.0127  | 7.6248  | 5.7947  | 5.6580  | 5.8988  | 6.9741  | 7.1344  | 6.8945  | 6.9291  | 0.9340  | -0.0985 | 0.3148 | 0.5019 |
| Citc   | _YIEYVQK_2                                                                      | #N/A                  | 6.4343  | 6.4492  | 6.9627  | 6.0133  | 5.5654  | 6.3228  | 5.6833  | 7.2215  | 6.8480  | 6.8171  | 0.9471  | -0.0784 | 0.3524 | 0.4529 |
| Citc   | _SVNESLNNLITTEEDYQALR_2                                                         | #N/A                  | 5.5369  | 5.6600  | 6.4980  | 6.1109  | 4.4897  | 5.2562  | 6.1040  | 6.0156  | 5.8937  | 5.8110  | 0.9389  | -0.0910 | 0.3403 | 0.4681 |
| Citc   | _SGETIPYATPEATAGIVNR_3                                                          | #N/A                  | 6.4790  | 6.8407  | 7.2874  | 6.5331  | 5.4069  | 5.7368  | 6.3672  | 6.9953  | 5.6057  | 5.5097  | 1.0427  | 0.0603  | 0.5780 | 0.2381 |
| Citc   | _YESLELC[Carbamidomethyl (C)]RPVLQGR_3                                          | #N/A                  | 6.1448  | 5.0688  | 6.1378  | 6.1078  | 4.7565  | 5.5992  | 6.3611  | 6.1944  | 6.3487  | 5.6840  | 0.9223  | -0.1168 | 0.2108 | 0.6746 |
| Citc   | _QSVELC[Carbamidomethyl (C)]KK_2                                                | #N/A                  | 5.2636  | 6.2672  | 4.5774  | 6.5121  | 5.0702  | 6.7658  | 6.5688  | 6.3990  | 5.4263  | 5.9929  | 0.9419  | -0.0863 | 0.4959 | 0.3046 |
| Citc   | _RPLDQVQVATASETQPEEVSVTVK_3                                                     | #N/A                  | 5.5282  | 5.2795  | 6.2585  | 5.9358  | 4.6384  | 5.5154  | 6.8782  | 6.5570  | 6.1719  | 5.8591  | 0.8680  | -0.2043 | 0.0361 | 1.4419 |
| Citc   | _EADSYK_2                                                                       | #N/A                  | 6.1330  | 4.8435  | 5.5939  | 4.6139  | 5.1312  | 6.0905  | 4.5190  | 5.9641  | 5.8291  | 6.1741  | 0.9608  | -0.0577 | 0.6304 | 0.2004 |
| Citc   | _GQFSTDELVAEVRK_2                                                               | #N/A                  | 5.7118  | 5.3066  | 5.8921  | 5.5161  | 4.2174  | 5.1257  | 5.9968  | 4.9275  | 4.8683  | 5.4087  | 0.9990  | -0.0015 | 0.9887 | 0.0049 |
| Citc   | _VNDNSVSEHR_2                                                                   | #N/A                  | 7.5487  | 7.3737  | 7.8984  | 7.4930  | 6.8763  | 7.4263  | 8.1014  | 7.8823  | 7.5230  | 7.3729  | 0.9632  | -0.0540 | 0.2211 | 0.6555 |
| Citc   | _KFNALFAQGNVSEAAK_3                                                             | #N/A                  | 6.5014  | 6.1521  | 6.4736  | 5.7166  | 5.9275  | 6.5670  | 6.2085  | 6.4810  | 6.4324  | 5.9556  | 0.9910  | -0.0130 | 0.7837 | 0.1058 |
| Citc   | _AVEFAER_2                                                                      | #N/A                  | 6.4495  | 6.8098  | 6.7957  | 5.3475  | 6.4084  | 6.0134  | 3.0132  | 6.9285  | 6.9249  | 5.9971  | 1.1029  | 0.1413  | 0.4753 | 0.3230 |
| Citc   | _RDPHLAC[Carbamidomethyl (C)]VAYER_3                                            | #N/A                  | 7.0710  | 6.8887  | 7.1274  | 3.6259  | 6.7509  | 6.4103  | 7.0887  | 6.8218  | 6.8379  | 0.9212  | -0.1185 | 0.4559  | 0.3412 |        |
| Citc   | _VGYYPWIFLLR_2                                                                  | #N/A                  | 4.7044  | 4.9655  | 4.1965  | 4.5230  | 3.5780  | 3.5651  | 5.5096  | 5.9868  | 4.9180  | 4.8963  | 0.7987  | -0.2442 | 0.0184 | 1.7341 |
| Citc   | _QSVELC[Carbamidomethyl (C)]K_2                                                 | #N/A                  | 4.7611  | 5.1555  | 4.2675  | 3.8112  | 5.5141  | 2.9471  | 4.5436  | 5.0114  | 5.1403  | 4.6205  | 0.9131  | -0.1311 | 0.4198 | 0.3770 |
| Citc   | _VM[Oxidation (M)]EYNR_2                                                        | #N/A                  | 7.1013  | 5.7497  | 6.0330  | 6.4127  | 5.5058  | 5.3926  | 5.9636  | 6.2660  | 5.6956  | 5.6683  | 1.0227  | 0.0324  | 0.7077 | 0.1502 |
| Citc   | _VANVELYIK_2                                                                    | #N/A                  | 3.9441  | 3.8838  | 2.9339  | 4.6236  | 3.7113  | 4.4111  | 3.9017  | 4.9250  | 4.5611  | 4.3009  | 0.8860  | -0.1747 | 0.1843 | 0.7346 |
| Citc   | _VVGAM[Oxidation (M)]QLVSDR_2                                                   | #N/A                  | 5.9579  | 5.5911  | 5.6968  | 5.7432  | 4.4533  | 4.9768  | 5.8734  | 5.7173  | 5.2878  | 5.0578  | 0.9852  | -0.0214 | 0.8109 | 0.0911 |
| Citc   | _M[Oxidation (M)]EGNAESTLC[Carbamidomethyl (C)]FAVR_2                           | #N/A                  | 6.0476  | 6.9150  | 3.7706  | 6.6425  | 3.3414  | 6.2756  | 6.8327  | 6.4894  | 6.4796  | 5.8465  | 0.9511  | -0.0723 | 0.6861 | 0.1636 |
| Citc   | _LLEM[Oxidation (M)]NLM[Oxidation (M)]HAPQVADALGNQM[Oxidation (M)]FHYDR_4       | #N/A                  | 5.2269  | 5.5930  | 3.8479  | 3.3916  | 4.6553  | 5.0616  | 5.5944  | 5.8695  | 5.3921  | 5.6509  | 0.8227  | -0.2815 | 0.0535 | 1.2714 |
| Citc   | _FNALFAGNVSEAAK_2                                                               | #N/A                  | 4.5978  | 5.4821  | 3.2376  | 5.1178  | 4.0128  | 4.1485  | 5.1056  | 4.4803  | 5.4083  | 3.7073  | 0.9481  | -0.0769 | 0.6466 | 0.1894 |
| Citc   | _TLQFINIEMK_2                                                                   | #N/A                  | 5.1315  | 3.8555  | 4.3337  | 5.8003  | 2.4290  | 4.3817  | 4.6741  | 2.4817  | 3.2069  | 4.0391  | 1.2004  | -0.2635 | 0.3326 | 0.4781 |
| Citc   | _VOKLDASESLR_2                                                                  | #N/A                  | 6.5160  | 6.3228  | 6.4585  | 6.2     |         |         |         |         |         |         |         |         |        |        |



|          |                                                                 |                          |         |         |         |         |         |         |         |         |         |         |         |         |        |        |
|----------|-----------------------------------------------------------------|--------------------------|---------|---------|---------|---------|---------|---------|---------|---------|---------|---------|---------|---------|--------|--------|
| Ctc      | _AVNYFSK_2                                                      | #N/A                     | 3.1291  | 2.3264  | 3.0859  | 3.0473  | 3.2719  | 3.5512  | 3.3868  | 2.9314  | 3.0486  | 3.1606  | 0.9798  | -0.0294 | 0.7827 | 0.1064 |
| Ctc      | _YQAC[Carbamidomethyl] (C)K_2                                   | #N/A                     | 4.9495  | 3.7907  | 5.0394  | 3.8127  | 4.8451  | 3.3759  | 4.3396  | 5.0657  | 4.8698  | 4.0877  | 0.9372  | -0.0936 | 0.5022 | 0.2991 |
| Ctc      | _NRPSEGLQTR_2                                                   | #N/A                     | 5.9134  | 4.6738  | 5.5148  | 5.2790  | 5.0929  | 4.6555  | 5.5548  | 5.6073  | 5.5548  | 5.4162  | 0.9450  | -0.0816 | 0.2676 | 0.5724 |
| Ctc      | _VGQAVQIWM[Oxidation] (M)NDPNSPR_2                              | #N/A                     | 4.2009  | 3.9699  | 4.4831  | 4.0705  | 3.0974  | 3.4922  | 4.1588  | 4.2540  | 4.1896  | 4.5271  | 0.9074  | -0.1402 | 0.1742 | 0.7590 |
| Ctc      | _AHM[Oxidation] (M)IGM[Oxidation] (M)JTELALYSUK_2               | #N/A                     | 4.0775  | 2.5496  | 4.7599  | 4.5711  | 3.3709  | 4.3586  | 4.2630  | 4.3017  | 4.2484  | 4.2484  | 0.9718  | -0.0413 | 0.6879 | 0.1625 |
| Ctc      | _AHTM[Oxidation] (M)TDGVTFWK_2                                  | #N/A                     | 3.5733  | 4.8154  | 4.2601  | 3.2619  | 3.5412  | 3.0834  | 5.1114  | 5.7326  | 3.4352  | 4.7451  | 0.7897  | -0.3406 | 0.0851 | 1.0702 |
| Ctc      | _RPS[Phospho] (STY)AGSAMNPAK_2                                  | Q68FD5_S67_M1_Ctc        | 3.4287  | 4.1849  | 3.1623  | 4.2307  | 4.0732  | 4.0522  | 3.9454  | 4.2951  | 3.5364  | 3.8842  | 0.9847  | -0.0222 | 0.8229 | 0.0847 |
| Ctc      | _FDVNTSAVCVUEHGNLDR_3                                           | #N/A                     | 4.1681  | 3.4725  | 3.3541  | 3.8568  | 3.2938  | 2.9348  | 3.5714  | 4.2617  | 3.9103  | 3.8238  | 0.9028  | -0.1476 | 0.1687 | 0.7729 |
| Ctc      | _YGYHLYDLGTG[Carbamidomethyl] (C)JYM[Oxidation] (M)NRR_3        | #N/A                     | 3.1967  | 4.0295  | 3.8835  | 4.3862  | 3.9178  | 4.2077  | 4.1008  | 3.7323  | 3.3809  | 4.3531  | 1.0116  | 0.0166  | 0.8706 | 0.0602 |
| Ctc      | _DKLK[Carbamidomethyl] (C)SELEDGLVK_3                           | #N/A                     | 4.0120  | 3.3163  | 3.1979  | 3.7006  | 3.1376  | 3.0910  | 3.4153  | 4.4179  | 4.0665  | 3.6676  | 0.8760  | -0.1910 | 0.0965 | 1.0156 |
| Frip1    | _NESSDSALGDS[Phospho] (STY)JSEDTGPDIR_2                         | #N/A                     | 2.9615  | 4.2646  | 3.6483  | 6.0411  | 4.4276  | 5.0126  | 6.2310  | 5.6389  | 5.2316  | 5.3552  | 0.7824  | -0.3540 | 0.0658 | 1.1817 |
| Frip1    | _NESSDSALGDS[Phospho] (STY)JSEDTGPDIR_3                         | #N/A                     | 4.0188  | 3.3232  | 3.7529  | 3.2967  | 3.1445  | 3.0842  | 3.4450  | 3.7045  | 4.0035  | 2.9740  | 0.9731  | -0.0394 | 0.7195 | 0.1430 |
| Kiaa1549 | _DHTTPSENGVPS[Phospho] (STY)PK_2                                | Q68FD9_S1384_M1_Kiaa1549 | 7.6894  | 6.7650  | 7.9167  | 8.1094  | 7.0185  | 7.2430  | 8.3595  | 7.9028  | 7.7138  | 7.1547  | 0.9582  | -0.0617 | 0.3594 | 0.4445 |
| Kiaa1549 | _LITTS[Phospho] (STY)DGTY_2                                     | Q68FD9_S1613_M1_Kiaa1549 | 6.7148  | 7.8607  | 4.4931  | 8.3917  | 7.3895  | 8.2359  | 9.4045  | 8.4371  | 8.4026  | 8.6256  | 0.8237  | -0.2797 | 0.0789 | 1.1030 |
| Kiaa1549 | _GHYEFVVDLS[Phospho] (STY)SGOTKR_3                              | #N/A                     | 3.8996  | 4.9514  | 3.9910  | 8.4221  | 5.3516  | 5.5043  | 4.5544  | 8.2429  | 6.0607  | 3.6248  | 0.9524  | -0.0703 | 0.8233 | 0.0845 |
| Kiaa1549 | _GLQPGGLGYPTSS[Phospho] (STY)JEDLQPGHSSASLK_3                   | Q68FD9_S1904_M1_Kiaa1549 | 3.5743  | 3.7552  | 4.5098  | 4.0089  | 3.6435  | 3.8304  | 3.7236  | 3.4580  | 3.8881  | 3.6106  | 1.0591  | 0.0829  | 0.2821 | 0.5497 |
| Kiaa1549 | _GHYEFVVDLS[Phospho] (STY)SGDIT_2                               | #N/A                     | 3.5756  | 3.8753  | 3.4913  | 6.5170  | 3.7435  | 3.8512  | 3.9554  | 3.9919  | 5.6674  | 3.7828  | 0.9670  | -0.0484 | 0.8380 | 0.0768 |
| Kiaa1549 | _RGHYEFVVDLS[Phospho] (STY)S[Phospho] (STY)GDKTKR_4             | #N/A                     | 3.9575  | 3.2619  | 3.1435  | 3.3580  | 3.0832  | 3.1454  | 3.5062  | 3.9423  | 3.6131  | 3.9044  | 1.0044  | -0.1449 | 0.0892 | 1.0497 |
| Aig9a    | _LEASDS[Phospho] (STY)PKGEEDULVHAEVSK_3                         | Q68FE2_S18_M1_Aig9a      | 7.0576  | 7.2661  | 7.6905  | 7.4828  | 6.7701  | 5.6817  | 7.2492  | 7.9224  | 7.1204  | 6.7785  | 0.9620  | -0.0559 | 0.5219 | 0.2824 |
| Ripor1   | _FSTYSQ[Phospho] (STY)PPOTPSR_2                                 | Q68FE6_S347_M1_Ripor1    | 10.3837 | 10.5126 | 11.1264 | 11.0628 | 9.0886  | 10.4562 | 10.9272 | 10.6617 | 10.3930 | 10.2702 | 0.9882  | -0.0171 | 0.7587 | 0.1189 |
| Ripor1   | _PLTSPAPDS[Phospho] (STY)PEQIR_2                                | Q68FE6_S748_M1_Ripor1    | 7.7804  | 7.7255  | 3.9167  | 8.5287  | 7.5235  | 7.8900  | 8.7644  | 7.9764  | 8.0997  | 7.9152  | 0.8826  | -0.1802 | 0.2959 | 0.5288 |
| Ripor1   | _JTSS[Phospho] (STY)PEVIAEDR_2                                  | Q68FE6_S875_M1_Ripor1    | 6.8044  | 6.4212  | 3.9096  | 3.7587  | 6.1148  | 6.5486  | 4.1899  | 3.6881  | 3.6234  | 3.7789  | 1.4641  | 0.5500  | 0.0375 | 1.4257 |
| Tmem151b | _SGS[Phospho] (STY)NNEASC[Carbamidomethyl] (C)PTEQTR_2          | Q68FE7_S48B_M1_Tmem151b  | 4.1143  | 3.9057  | 3.8480  | 3.5840  | 3.2580  | 3.3755  | 3.5196  | 4.6579  | 3.9599  | 3.9249  | 0.9167  | -0.1255 | 0.2205 | 0.6566 |
| Znf280d  | _SVNS[Phospho] (STY)DAS[Phospho] (STY)DPSGVR_2                  | Q68FE8_S904_M2_Znf280d   | 3.3731  | 5.0829  | 5.6362  | 3.4257  | 2.8628  | 3.3659  | 6.6283  | 3.1920  | 4.3414  | 3.3927  | 0.9157  | -0.1271 | 0.6693 | 0.1744 |
| Glt1     | _LQENLQIR_2                                                     | #N/A                     | 5.5359  | 5.4910  | 5.5601  | 0.0670  | 5.7143  | 5.6276  | 5.7396  | 5.9351  | 5.7090  | 0.9728  | -0.0398 | 0.3376  | 0.4716 |        |
| Glt1     | _SAVPLPVPNPEYSATR_2                                             | #N/A                     | 5.7513  | 5.7218  | 5.9983  | 5.6116  | 5.6042  | 5.3888  | 3.5397  | 5.5333  | 5.2134  | 5.4099  | 1.1534  | 0.2059  | 0.0838 | 1.0766 |
| Glt1     | _S[Phospho] (STY)M[Oxidation] (M)DSSDLSGAVTLQVELEKK_3           | #N/A                     | 3.5266  | 4.3318  | 4.2134  | 5.4491  | 5.2495  | 5.3609  | 3.9372  | 3.2122  | 6.4517  | 5.5233  | 0.9806  | -0.0282 | 0.0899 | 0.0463 |
| Glt1     | _SLSS[Phospho] (STY)PTDNLLELAR_2                                | Q68FFE_S371_M1_Glt1      | 11.2398 | 11.5678 | 11.9037 | 12.2228 | 11.0943 | 11.8161 | 12.0058 | 11.6084 | 11.6214 | 11.7121 | 0.9918  | -0.0119 | 0.6855 | 0.1640 |
| Glt1     | _ARS[Phospho] (STY)M[Oxidation] (M)DSSDLSGAVTLQVELEKK_3         | #N/A                     | 4.0856  | 3.3411  | 3.8193  | 3.7430  | 3.2294  | 3.4450  | 3.6712  | 3.6879  | 5.0778  | 3.8449  | 0.8870  | -0.1730 | 0.2821 | 0.3693 |
| Glt1     | _S[Phospho] (STY)M[Oxidation] (M)DSSDLSGAVTLQVELEKK_2           | #N/A                     | 4.3960  | 3.7004  | 3.5820  | 4.4203  | 3.5217  | 4.2078  | 3.0678  | 4.0339  | 4.3807  | 4.0516  | 1.0226  | 0.0323  | 0.7831 | 0.1062 |
| Glt1     | _HGS[Phospho] (STY)GASSDYENTQSGDPLGLEKK_3                       | #N/A                     | 3.8018  | 6.4015  | 3.9962  | 7.2048  | 3.4442  | 6.5287  | 3.0278  | 7.2339  | 3.8130  | 6.7770  | 0.9772  | -0.0333 | 0.9170 | 0.0376 |
| Glt1     | _HGS[Phospho] (STY)GASSDYENTQSGDPLGLEKKR_4                      | #N/A                     | 3.5349  | 4.3160  | 3.8250  | 3.8659  | 4.1704  | 3.7705  | 3.8845  | 3.8477  | 3.0150  | 3.6430  | 1.0879  | 0.1215  | 0.1797 | 0.7454 |
| Glt1     | _AEVC[Carbamidomethyl] (C)ACJ[Carbamidomethyl] (C)SAPDQGWASIR_2 | #N/A                     | 2.5278  | 1.9968  | 3.3751  | 4.4198  | 2.7852  | 3.7517  | 3.0672  | 4.0823  | 4.3813  | 4.0970  | 0.8044  | -0.3140 | 0.1677 | 0.7554 |
| Glt1     | _SQSELDQDQHYDSVASEDT[Phospho] (STY)DQELPSAGATR_4                | Q68FFE_T401_M1_Glt1      | 3.3660  | 3.9201  | 4.3381  | 3.6721  | 4.0011  | 3.7022  | 4.2808  | 6.8899  | 6.0318  | 3.4555  | 0.7422  | -0.4301 | 0.0728 | 1.1376 |
| Glt1     | _ENDAWLWATQNHSLVTR_3                                            | #N/A                     | 3.8164  | 4.2240  | 4.5032  | 3.5051  | 1.7923  | 3.3266  | 3.2197  | 3.1126  | 2.8203  | 3.4721  | 1.1178  | 0.1607  | 0.4780 | 0.3206 |
| Stain1   | _S[Phospho] (STY)MPNLAR_2                                       | Q68FF7_S401_M1_Stain1    | 6.1696  | 4.6155  | 3.8804  | 7.1971  | 3.2904  | 3.3342  | 4.7330  | 3.9361  | 3.8761  | 4.4061  | 1.1204  | 0.1640  | 0.5586 | 0.2529 |
| Stain1   | _SQSN[Phospho] (STY)FDSSHGAGSGVSR_2                             | #N/A                     | 3.9233  | 3.4351  | 3.3886  | 4.2178  | 3.2101  | 3.4030  | 3.3399  | 4.1782  | 4.1336  | 4.0042  | 0.9188  | -0.1221 | 0.2404 | 0.6191 |
| Pkp4     | _VGS[Phospho] (STY)PLTLTDAQTR_2                                 | Q68FHQ_S133_M1_Pkp4      | 12.4915 | 12.3010 | 13.0477 | 12.6133 | 11.2275 | 12.2182 | 12.8504 | 12.3703 | 12.2686 | 12.2714 | 0.9901  | -0.0144 | 0.7170 | 0.1445 |
| Pkp4     | _AQSS[Phospho] (STY)PSYVSTGVSFSR_2                              | Q68FHQ_S320_M1_Pkp4      | 9.8204  | 9.7507  | 10.7138 | 10.1530 | 9.7693  | 10.3034 | 10.7467 | 10.2315 | 9.7099  | 9.9951  | -0.0071 | 0.8571  | 0.0670 |        |
| Pkp4     | _VLGS[Phospho] (STY)PR_2                                        | Q68FHQ_S133_M1_Pkp4      | 10.9707 | 10.8434 | 11.3163 | 4.2878  | 9.7507  | 10.7581 | 11.0574 | 10.7913 | 10.7786 | 10.6860 | 0.8916  | -0.1655 | 0.4163 | 0.3806 |
| Pkp4     | _TGS[Phospho] (STY)VGMLQIR_2                                    | Q68FHQ_S446_M1_Pkp4      | 9.6826  | 9.6635  | 9.9337  | 9.6862  | 8.1100  | 9.1910  | 9.8239  | 9.4712  | 9.4037  | 9.4022  | 0.9845  | -0.0225 | 0.6841 | 0.1649 |
| Pkp4     | _VAS[Phospho] (STY)PSQGGVGSSSPK_2                               | Q68FHQ_S326_M1_Pkp4      | 8.9391  | 7.7863  | 8.5642  | 9.2176  | 7.9076  | 3.8057  | 8.5877  | 8.9250  | 3.7603  | 1.2188  | 0.2854  | 0.3858  | 0.1437 |        |
| Pkp4     | _PSPIYSSYS[Phospho] (STY)PAR_2                                  | #N/A                     | 8.8253  | 4.2244  | 3.6886  | 4.1912  | 4.1127  | 8.5099  | 8.6788  | 8.2200  | 8.6461  | 8.3761  | 0.6594  | -0.6007 | 0.0460 | 1.3376 |
| Pkp4     | _TVYS[Phospho] (STY)PVVR_2                                      | Q68FHQ_S421_M1_Pkp4      | 3.3871  | 7.3776  | 7.9140  | 7.5183  | 4.0137  | 7.3158  | 7.7120  | 3.1905  | 7.4813  | 1.0507  | 0.0714  | 0.8537  | 0.0687 |        |
| Pkp4     | _S[Phospho] (STY)YEDPYC[Carbamidomethyl] (C)DOR_2               | Q68FHQ_S1136_M1_Pkp4     | 6.0746  | 5.4375  | 6.1986  | 3.9444  | 5.3157  | 3.7660  | 6.4432  | 4.1740  | 6.3038  | 5.6370  | 0.9084  | -0.1386 | 0.4639 | 0.3336 |
| Pkp4     | _PAS[Phospho] (STY)PTAVR_2                                      | #N/A                     | 3.5196  | 4.2759  | 3.2533  | 4.1397  | 4.1642  | 6.6033  | 3.8544  | 4.2041  | 3.0023  | 7.1227  | 0.9537  | -0.0684 | 0.8284 | 0.0816 |
| Pkp4     | _AAS[Phospho] (STY)PQRSAPAS[Phospho] (STY)PTAVRR_3              | #N/A                     | 6.5778  | 6.3089  | 3.8384  | 3.3822  | 3.2485  | 3.3761  | 3.2693  | 3.6190  | 3.9181  | 3.0595  | 1.2853  | 0.3621  | 0.2557 | 0.5923 |
| Pkp4     | _TSS[Phospho] (STY)JQSHS[Phospho] (STY)TLTQIR_2                 | Q68FHQ_S457_M2_Pkp4      | 3.0651  | 3.8213  | 4.2996  | 4.5943  | 3.7096  | 4.4158  | 4.3090  | 3.1578  | 4.8667  | 3.5206  | 1.0052  | 0.0075  | 0.9618 | 0.0210 |
| Pkp4     | _AASPYSORPAS[Phospho] (STY)PTAVR_3                              | #N/A                     | 8.0014  | 3.5096  | 8.2909  | 7.1869  | 7.0070  | 7.5885  | 8.5291  | 7.7610  | 7.8070  | 7.5255  | 0.8767  | -0.1899 | 0.3134 | 0.5040 |
| Pkp4     | _GLYPGSSKSPY[Phospho] (STY)SSYS[Phospho] (STY)SPAR_3            | Q68FHQ_S1098_M2_Pkp4     | 4.1943  | 3.4498  | 3.9280  | 3.4771  | 3.3381  | 3.2987  | 3.1918  | 6.1670  | 4.3020  | 3.3775  | 0.8485  | -0.2370 | 0.2896 | 0.5382 |
| Pkp4     | _VASPSQGGVGSSS[Phospho] (STY)PKR_2                              | #N/A                     | 8.3562  | 9.2451  | 9.6340  | 9.6293  | 8.6966  | 8.0169  | 9.5512  | 9.4411  | 9.2853  | 4.8812  | 1.0772  | 0.1073  | 0.5252 | 0.2796 |
| Pkp4     | _LQHTGPADDGATRS[Phospho] (STY)PS[Phospho] (STY)DSIQKDRP_4       | #N/A                     | 4.0875  | 7.3194  | 3.6637  | 6.5738  | 7.0552  | 7.3508  | 6.9577  | 3.8331  | 7.5029  | 7.5750  | 0.9291  | -0.1062 | 0.6899 | 0.1612 |
| Pkp4     | _SAVS[Phospho] (STY)POLHTPYEGR_2                                | #N/A                     | 3.8436  | 7.5327  | 7.8869  | 8.1941  | 6.7896  | 7.6495  | 7.7589  | 8.2740  | 7.5430  | 7.4308  | 0.9008  | -0.1507 | 0.3833 | 0.4165 |
| Pkp4     | _LQHTGPADDGATRS[Phospho] (STY)PS[Phospho] (STY)DSIQK_3          | #N/A                     | 3.7580  | 5.2512  | 3.7114  | 5.7814  | 5.3301  | 5.0830  | 6.3227  | 5.5870  | 5.0810  | 5.6004  | 0.8533  | -0.2289 | 0.1282 | 0.8921 |
| Pkp4     | _S[Phospho] (STY)PHNGTVELQSGQTALYR_2                            | Q68FHQ_S426_M1_Pkp4      | 3.3800  | 3.7015  | 3.8776  | 4.9207  | 3.2877  | 3.4474  | 3.8843  | 3.7726  | 3.8457  | 3.7252  | 0.9901  | -0.0144 | 0.9060 | 0.2409 |
| Pkp4     | _ACQVGS[Phospho] (STY)PDQVY_2                                   | Q68FHQ_S1185_M1_Pkp4     | 3.5634  | 4.3197  | 3.2971  | 4.3417  | 4.2080  | 3.9175  | 3.8106  | 4.1603  | 2.9585  | 4.0190  | 1.0546  | 0.0767  | 0.5341 | 0.4826 |
| Pkp4     | _SSYAS[Phospho] (STY)QHS[Phospho] (STY)QLGGELR_2                | Q68FHQ_S391_M2_Pkp4      | 2.9275  | 3.7327  | 3.6143  | 4.1169  | 3.5540  | 4.1755  | 4.5363  | 4.0016  | 3.6501  | 4.0839  | 0.9063  | -0.1419 | 0.1992 | 0.7008 |
| Ahy12    | _DGGELVS[Phospho] (STY)PDGVTPEAR_2                              | #N/A                     | 9.5646  | 9.6312  | 9.8411  | 10.2578 | 8.4875  | 9.6320  | 10.4310 | 9.7192  | 9.9679  | 9.8650  | 0.9573  | -0.0629 | 0.2237 | 0.6504 |
| Ahy12    | _VLAEGR_2                                                       | #N/A                     | 8.1949  | 8.0441  | 7.4771  | 7.6857  | 8.3309  | 7.9274  | 6.9674  | 8.1142  | 8.2656  | 8.0716  | 1.0113  | 0.0162  | 0.7651 | 0.1604 |
| Ahy12    | _GESEDDPVWVC[Carbamidomethyl] (C)DOR_2                          | #N/A                     | 7.1810  | 6.8514  | 7.6186  | 7.1337  | 6.1846  | 6.8256  | 6.8225  | 6.7647  | 7.2104  | 7.0029  | 1.0023  | 0.0032  | 0.9528 | 0.0210 |
| Ahy12    | _AQGEKPLAGAK_2                                                  | #N/A                     | 6.3802  |         |         |         |         |         |         |         |         |         |         |         |        |        |



|          |                                                                         |                         |         |         |         |         |         |         |         |         |         |         |         |         |        |        |
|----------|-------------------------------------------------------------------------|-------------------------|---------|---------|---------|---------|---------|---------|---------|---------|---------|---------|---------|---------|--------|--------|
| Radl1    | _GTPALITSEAAQSS[Phospho (STY)]PPTR_2                                    | Q692B9_S235_M1_Radl1    | 8.4418  | 8.4982  | 9.1448  | 3.6314  | 7.5168  | 8.3702  | 8.9934  | 8.6992  | 3.5455  | 8.1620  | 1.0341  | 0.0484  | 0.8664 | 0.0623 |
| Radl1    | _S[Phospho (STY)]LLLEFEPOVEDTLQR_2                                      | Q692B9_S432_M1_Radl1    | 3.5215  | 3.8209  | 3.2552  | 4.2998  | 4.1661  | 3.9594  | 4.4481  | 4.2570  | 1.2103  | 3.9771  | 1.0369  | 0.0523  | 0.7782 | 0.1089 |
| Brsk2    | _TRLNS[Phospho (STY)]K_2                                                | Q692B9_S482_M1_Brsk2    | 7.5005  | 6.8646  | 7.4104  | 3.1944  | 6.9139  | 6.9200  | 7.5626  | 7.7486  | 3.0718  | 7.1250  | 1.0142  | 0.0003  | 0.9422 | 0.0258 |
| Brsk2    | _VTPHPS[Phospho (STY)]PR_2                                              | Q692B9_S436_M1_Brsk2    | 7.1615  | 3.7322  | 7.6757  | 3.1826  | 6.0837  | 7.1103  | 7.1683  | 7.4818  | 7.1885  | 7.2496  | 0.8009  | -0.1203 | 0.1770 | 0.7521 |
| Brsk2    | _S[Phospho (STY)]M(Oxidation (M))EVLSTDDGGSPVPAR_2                      | #N/A                    | 7.3397  | 8.1079  | 7.7474  | 6.6843  | 6.5800  | 8.2751  | 7.8910  | 8.7906  | 8.5088  | 8.4693  | 0.9256  | -0.1115 | 0.1657 | 0.7808 |
| Brsk2    | _VDS[Phospho (STY)]PMLNR_2                                              | #N/A                    | 5.7644  | 4.6849  | 4.3651  | 7.4988  | 4.0331  | 3.6964  | 4.5736  | 3.0923  | 3.6559  | 4.5827  | 1.2593  | 0.3326  | 0.2208 | 0.6559 |
| Brsk2    | _S[Phospho (STY)]IGASSGLST5[Phospho (STY)]PLSSPR_2                      | Q692B9_S413_M2_Brsk2    | 3.6534  | 3.9914  | 3.7318  | 6.8943  | 3.8534  | 3.7274  | 3.7863  | 6.5414  | 6.7054  | 4.0500  | 0.8175  | -0.2908 | 0.3149 | 0.5018 |
| Brsk2    | _VTPHPS[Phospho (STY)]PRGS[Phospho (STY)]PLTPK_3                        | Q692B9_S436_M2_Brsk2    | 3.2644  | 4.0207  | 4.4990  | 4.3949  | 3.9090  | 4.2164  | 4.1096  | 4.2570  | 3.3721  | 4.1048  | 1.0408  | 0.0577  | 0.5915 | 0.1734 |
| Brsk2    | _GS[Phospho (STY)]PLTPK_2                                               | Q692B9_S440_M1_Brsk2    | 3.0229  | 4.3195  | 4.2574  | 3.5769  | 4.1408  | 3.5887  | 3.9495  | 3.2000  | 3.4990  | 3.4785  | 1.0810  | 0.1123  | 0.3480 | 0.4584 |
| Brsk2    | _KLQVPTPEEM(Oxidation (M))SNLT[Phospho (STY)]PESS[Phospho (STY)]PELAK_3 | #N/A                    | 3.4462  | 5.3084  | 3.6121  | 7.4569  | 3.6195  | 3.8811  | 3.7742  | 4.0774  | 7.3608  | 6.3884  | 0.8433  | -0.2459 | 0.4485 | 0.3482 |
| Brsk2    | _LQVPTPEEM(Oxidation (M))SNLT[Phospho (STY)]PESS[Phospho (STY)]PELAK_3  | #N/A                    | 3.8142  | 3.8544  | 3.8020  | 3.5029  | 3.6968  | 3.5806  | 3.7277  | 3.9683  | 4.9805  | 3.4699  | 0.9187  | -0.1223 | 0.2609 | 0.5836 |
| Brsk2    | _LQVPTPEEMSNLT[Phospho (STY)]PESS[Phospho (STY)]PELAK_3                 | #N/A                    | 3.0823  | 4.1439  | 3.7691  | 4.2717  | 4.0322  | 4.0933  | 3.9864  | 3.8467  | 3.4953  | 4.2387  | 1.0018  | 0.0026  | 0.9788 | 0.0093 |
| Brsk2    | _RVDS[Phospho (STY)]PMLNR_2                                             | #N/A                    | 3.1395  | 3.8958  | 4.3740  | 4.5199  | 3.7841  | 4.3414  | 4.2345  | 3.0796  | 3.2472  | 3.5951  | 1.1328  | 0.1799  | 0.1938 | 0.7128 |
| Cdk13    | _GGDVSS[Phospho (STY)]PSYSSSSWR_2                                       | Q692A1_S384_M1_Cdk13    | 7.2864  | 3.4748  | 8.0184  | 7.8225  | 6.4582  | 7.2236  | 7.9859  | 7.2232  | 7.4955  | 7.2913  | 0.8953  | -0.1595 | 0.3917 | 0.4071 |
| Cdk13    | _QTDPST[Phospho (STY)]PQGESCK_2                                         | Q692A1_T1147_M1_Cdk13   | 5.1802  | 5.5301  | 6.5804  | 6.0798  | 3.7993  | 5.7982  | 6.2121  | 3.4420  | 3.3875  | 4.0275  | 1.2876  | 0.3647  | 0.1255 | 0.9014 |
| Cdk13    | _TEHAPS[Phospho (STY)]PSSGGTVK_2                                        | Q692A1_S526_M1_Cdk13    | 6.7906  | 2.9801  | 7.8591  | 4.5029  | 6.3796  | 3.7562  | 3.1504  | 4.2981  | 4.1802  | 4.0705  | 1.3765  | 0.0461  | 0.1785 | 0.7485 |
| Cdk13    | _HSS[Phospho (STY)]S[Phospho (STY)]PSTLTUK_2                            | Q692A1_S438_M2_Cdk13    | 2.9918  | 3.7970  | 3.6786  | 4.1813  | 3.6183  | 4.1112  | 3.8960  | 7.5824  | 3.5858  | 7.1834  | 0.6706  | -0.5765 | 0.0666 | 1.1768 |
| Cdk13    | _S[Phospho (STY)]LS[Phospho (STY)]PGGGRDES[Phospho (STY)]PVSHR_3        | #N/A                    | 3.5869  | 4.4423  | 3.2397  | 5.4858  | 4.5203  | 4.9427  | 3.9175  | 5.4328  | 5.1650  | 4.8764  | 0.8764  | -0.1903 | 0.2644 | 0.5778 |
| Cdk13    | _S[Phospho (STY)]RS[Phospho (STY)]P[Phospho (STY)]SPVLR_2               | Q692A1_Y400_M3_Cdk13    | 3.7707  | 3.7026  | 3.6735  | 6.8435  | 4.6280  | 3.7634  | 3.8425  | 6.2803  | 3.6437  | 7.2514  | 0.8433  | -0.2459 | 0.4097 | 0.3875 |
| Cdk13    | _S[Phospho (STY)]RS[Phospho (STY)]PYS[Phospho (STY)]PVLR_3              | #N/A                    | 3.9195  | 3.4229  | 3.8532  | 3.1970  | 3.0633  | 3.5613  | 3.3452  | 3.8042  | 4.1032  | 4.3751  | 0.8880  | -0.1713 | 0.1010 | 0.9956 |
| Typy5    | _AAEDANWHDEKPCPS[Phospho (STY)]EETI_2                                   | Q692B3_S41_M1_Typy5     | 5.5585  | 6.0651  | 5.4784  | 3.9260  | 4.0160  | 5.1427  | 5.3758  | 3.9448  | 5.3670  | 5.4006  | 1.0018  | 0.0026  | 0.9867 | 0.0058 |
| Cnm4     | _HSLHHRAS[Phospho (STY)]EETI_2                                          | 5.8804                  | 5.6631  | 3.9531  | 6.0866  | 3.3631  | 5.8323  | 3.1546  | 6.7670  | 5.9760  | 5.7342  | 0.9486  | -0.0762 | 0.7539  | 0.1227 | 0.1277 |
| Arhgap23 | _SYS[Phospho (STY)]PSGR_2                                               | Q692H9_S421_M1_Arhgap23 | 3.1074  | 3.8636  | 8.9261  | 4.5520  | 8.1172  | 8.4265  | 8.4162  | 8.4255  | 8.3912  | 8.3326  | 0.7347  | -0.4447 | 0.1319 | 0.8796 |
| Arhgap23 | _RHS[Phospho (STY)]SDLSOATFSDIR_3                                       | #N/A                    | 3.5590  | 7.3712  | 3.3780  | 7.7356  | 6.5126  | 3.9258  | 7.3872  | 4.0181  | 7.4661  | 7.7872  | 0.8123  | -0.2999 | 0.3436 | 0.4639 |
| Arhgap23 | _S[Phospho (STY)]AALGPGALVSPR_2                                         | Q692H9_S361_M1_Arhgap23 | 11.0978 | 11.1243 | 11.5066 | 12.2204 | 10.5985 | 11.2429 | 11.4044 | 11.6182 | 11.5462 | 11.4538 | 0.9820  | -0.0262 | 0.4773 | 0.3212 |
| Arhgap23 | _SKS[Phospho (STY)]C[Carbamidomethyl (C)]DGLNTRDREGR_3                  | #N/A                    | 8.4103  | 8.1774  | 8.9364  | 8.9513  | 7.6033  | 8.2984  | 8.2073  | 8.5410  | 3.4163  | 8.2930  | 1.1802  | 0.2390  | 0.2400 | 0.6197 |
| Arhgap23 | _HVS[Phospho (STY)]DQC[Carbamidomethyl (C)]SSIK_2                       | Q692H9_S594_M1_Arhgap23 | 5.8751  | 6.4853  | 6.1037  | 6.5574  | 5.6314  | 6.2177  | 6.1436  | 6.2418  | 6.4003  | 6.3960  | 0.9761  | -0.0349 | 0.4463 | 0.3504 |
| Arhgap23 | _HS[Phospho (STY)]SDLSOATFSDIR_3                                        | #N/A                    | 3.7158  | 6.3603  | 4.4026  | 6.8570  | 5.4127  | 6.6336  | 3.7480  | 6.5638  | 6.2775  | 6.6923  | 0.9570  | -0.0635 | 0.7771 | 0.1095 |
| Arhgap23 | _QMNLGEGDES[Phospho (STY)]PEPEAR_2                                      | Q692H9_S515_M1_Arhgap23 | 3.2706  | 4.0758  | 3.9574  | 5.8992  | 3.8971  | 3.8324  | 4.1932  | 3.6660  | 3.3070  | 4.4270  | 1.0659  | 0.0921  | 0.6214 | 0.2066 |
| Arhgap23 | _ARS[Phospho (STY)]DDVLSR_2                                             | Q692H9_S351_M1_Arhgap23 | 8.4264  | 8.6025  | 9.0865  | 8.9797  | 7.9194  | 8.4779  | 8.4928  | 8.3828  | 8.3442  | 8.5182  | 1.0175  | 0.0250  | 0.5167 | 0.2868 |
| Arhgap23 | _SKS[Phospho (STY)]C[Carbamidomethyl (C)]DDGLNTR_2                      | #N/A                    | 8.1981  | 7.4190  | 7.4315  | 8.1084  | 6.8954  | 7.6179  | 7.5065  | 7.8217  | 0.9931  | 7.8217  | 0.9931  | -0.0099 | 0.8527 | 0.0692 |
| Arhgap23 | _HS[Phospho (STY)]SDLSOATFSDIR_3                                        | #N/A                    | 3.0854  | 3.8906  | 3.1854  | 6.1010  | 3.7120  | 3.5172  | 4.3783  | 4.2720  | 3.0702  | 5.4778  | 0.9804  | -0.0286 | 0.9115 | 0.4042 |
| Arhgap23 | _RS[Phospho (STY)]S[Phospho (STY)]YLALITR_2                             | Q692H9_S606_M2_Arhgap23 | 3.0814  | 4.2610  | 4.3159  | 3.8597  | 4.0823  | 3.6472  | 4.0079  | 3.1415  | 3.4405  | 3.5370  | 1.0971  | 0.1337  | 0.2483 | 0.6050 |
| Sh3rf1   | _TS[Phospho (STY)]DSAVPIAPPFR_2                                         | Q692I1_S805_M1_Sh3rf1   | 3.1282  | 4.2142  | 4.3627  | 3.9065  | 3.7728  | 3.6940  | 4.0548  | 8.9290  | 8.6198  | 3.5838  | 0.6108  | -0.7111 | 0.0669 | 1.1748 |
| Prex1    | _DSVLS[Phospho (STY)]YTSVR_2                                            | Q692X0_S1173_M1_Prex1   | 3.2600  | 3.9662  | 3.9468  | 4.4494  | 3.8865  | 4.2710  | 5.1790  | 3.6691  | 3.3176  | 4.4164  | 0.9560  | -0.0649 | 0.6509 | 0.1846 |
| Jmjd1c   | _LVSRIT[Phospho (STY)]PT[Phospho (STY)]PK_2                             | Q692X6_T322_M2_jmjd1c   | 5.1464  | 3.6748  | 3.4013  | 5.2943  | 5.2004  | 4.2334  | 3.0933  | 5.5804  | 4.3552  | 5.7433  | 0.9571  | -0.0632 | 0.7640 | 0.1169 |
| Nlg2     | _RLS[Phospho (STY)]PPGGSGSGVGGGLPTLAGR_3                                | Q692X9_S714_M1_Nlg2     | 3.8234  | 8.9131  | 8.7999  | 10.3924 | 6.7564  | 3.2796  | 3.6404  | 8.6358  | 8.8081  | 3.5840  | 1.4530  | 0.3591  | 0.2599 | 0.5852 |
| Fg6      | _AAS[Phospho (STY)]EELVEK_2                                             | Q692L1_S494_M1_Fg6      | 5.6415  | 2.0143  | 5.6189  | 4.7295  | 3.3819  | 4.3926  | 5.5016  | 4.1608  | 4.2226  | 3.6453  | 1.0184  | 0.0263  | 0.9034 | 0.0441 |
| Fg6      | _S[Phospho (STY)]DEDSFKKEVSPGAK_3                                       | Q692L1_S1167_M1_Fg6     | 3.8313  | 3.1356  | 4.5181  | 3.4842  | 2.9570  | 3.2717  | 3.6325  | 3.0977  | 3.4476  | 3.4869  | 1.0342  | 0.0485  | 0.7108 | 0.1483 |
| Hectd1   | _SSS[Phospho (STY)]DWNNTLGR_2                                           | Q692R2_S1576_M1_Hectd1  | 7.8809  | 8.0953  | 8.3180  | 7.7025  | 4.2017  | 7.7457  | 3.8885  | 7.9257  | 3.5599  | 7.8074  | 1.2638  | 0.3377  | 0.2501 | 0.6018 |
| Hectd1   | _RLDS[Phospho (STY)]SGER_2                                              | Q692R2_S357_M1_Hectd1   | 3.7041  | 4.9734  | 6.1811  | 5.7709  | 2.8298  | 6.3795  | 6.1065  | 3.2249  | 4.3744  | 3.5597  | 1.1657  | 0.2211  | 0.4553 | 0.3417 |
| Hectd1   | _AS[Phospho (STY)]LAUR_2                                                | Q692R2_S545_M1_Hectd1   | 3.2798  | 4.0626  | 4.5143  | 4.0581  | 3.8840  | 3.8455  | 4.2063  | 3.7353  | 3.2422  | 3.7353  | 1.0086  | 0.0124  | 0.9113 | 0.4043 |
| Tasor    | _NNS[Phospho (STY)]RDETTEPQCK_2                                         | Q692R9_S653_M1_Tasor    | 4.1636  | 3.4190  | 3.8973  | 3.4410  | 3.3073  | 3.3173  | 3.2104  | 3.5601  | 3.8592  | 3.5559  | 1.0125  | 0.0180  | 0.8369 | 0.0705 |
| Hbs1     | _SSQS[Phospho (STY)]ESEVPK_2                                            | Q692S7_S150_M1_Hbs1     | 6.3166  | 3.9944  | 6.4098  | 4.3787  | 3.8157  | 6.5288  | 4.2745  | 3.7398  | 3.3884  | 4.3457  | 1.3311  | 0.4126  | 0.0954 | 1.0274 |
| Kazn     | _STSPDINS[Phospho (STY)]PR_2                                            | Q692S8_S343_M1_Kazn     | 9.3978  | 9.6433  | 9.6395  | 9.8142  | 8.9127  | 9.4770  | 9.3655  | 9.2383  | 9.1062  | 9.8287  | 1.0102  | 0.0147  | 0.6482 | 0.1883 |
| Kazn     | _VS[Phospho (STY)]PC[Carbamidomethyl (C)]HSR_2                          | #N/A                    | 5.7723  | 5.8585  | 5.3285  | 5.8144  | 3.2068  | 3.4178  | 5.5609  | 5.0110  | 4.6205  | 5.2570  | 0.9584  | -0.0613 | 0.7538 | 0.1227 |
| Kazn     | _THSLC[Carbamidomethyl (C)]NGDS[Phospho (STY)]PGPVOK_2                  | Q692S8_S356_M1_Kazn     | 6.2813  | 6.6354  | 5.4702  | 7.0850  | 6.2072  | 6.6839  | 3.2006  | 6.5420  | 6.0957  | 6.2257  | 1.1646  | 0.2198  | 0.2193 | 0.6590 |
| Kazn     | _QVRVS[Phospho (STY)]PC[Carbamidomethyl (C)]HSR_3                       | #N/A                    | 3.2066  | 3.9629  | 4.4411  | 4.1238  | 3.8512  | 4.2743  | 4.1332  | 3.0163  | 4.4200  | 3.6622  | 1.0443  | 0.0625  | 0.6207 | 0.0701 |
| Kazn     | _S[Phospho (STY)]DPGLFDDSDQSC[Carbamidomethyl (C)]SPTR_2                | Q692S8_S404_M1_Kazn     | 3.0914  | 3.8477  | 4.3260  | 4.5679  | 3.7360  | 4.3894  | 4.2826  | 3.5506  | 3.1992  | 3.0341  | 1.1355  | 0.1833  | 0.2164 | 0.6648 |
| Ehbp1    | _S[Phospho (STY)]IQEOTKR_2                                              | #N/A                    | 9.5121  | 9.5186  | 9.7639  | 9.7557  | 9.2236  | 9.7204  | 9.3761  | 9.4194  | 9.5061  | 9.7247  | 1.0080  | 0.0115  | 0.5558 | 0.2551 |
| Ehbp1    | _QRS[Phospho (STY)]IQEOTKR_3                                            | #N/A                    | 4.3867  | 5.0811  | 4.9513  | 4.4712  | 5.0838  | 4.4398  | 3.8997  | 4.3915  | 5.1626  | 4.8978  | 1.0322  | 0.0457  | 0.6120 | 0.2133 |
| Ehbp1    | _SRS[Phospho (STY)]LEC[Carbamidomethyl (C)]R_2                          | Q692W3_S747_M1_Ehbp1    | 3.6974  | 4.7085  | 3.8703  | 8.8129  | 3.5191  | 4.6322  | 4.4938  | 4.9836  | 5.0351  | 4.9075  | 0.8665  | -0.2068 | 0.0688 | 1.1623 |
| Ehbp1    | _T[Phospho (STY)]SGSDPPGLSSDTSQAQALASLGR_2                              | Q692W3_T673_M1_Ehbp1    | 3.7240  | 3.6336  | 3.4577  | 3.8664  | 3.7327  | 3.7721  | 4.0147  | 4.0149  | 3.6781  | 4.1796  | 0.9310  | -0.1032 | 0.0369 | 1.4324 |
| Ehbp1    | _QRS[Phospho (STY)]IQEOTK_2                                             | #N/A                    | 3.8752  | 4.2094  | 4.5620  | 3.4403  | 3.0009  | 3.4960  | 4.3203  | 3.5608  | 3.8599  | 3.1176  | 1.0133  | 0.0190  | 0.8920 | 0.0496 |
| Ehbp1    | _LDGLATKPNVSS[Phospho (STY)]PSK_2                                       | Q692W3_S765_M1_Ehbp1    | 3.2568  | 3.9693  | 3.9436  | 4.4463  | 4.3615  | 4.2678  | 4.1610  | 3.6722  | 5.7589  | 4.2133  | 0.8977  | -0.1557 | 0.3017 | 0.5204 |
| Ehbp1    | _VGVVETDNTSS[Phospho (STY)]VQGEK_2                                      | Q692W3_S588_M1_Ehbp1    | 3.0570  | 4.1692  | 3.7438  | 4.2464  | 3.6835  | 4.0460  | 3.8611  | 3.8721  | 5.3206  | 4.4134  | 0.9827  | -0.0252 | 0.7947 | 0.0998 |
| Ehbp1    | _TTEVNLNALSS[Phospho (STY)]LDEGDQDC[Carbamidomethyl (C)]IK_3            | Q692W3_S222_M1_Ehbp1    | 4.0419  | 3.1842  | 3.2279  | 3.7305  | 3.0725  | 3.5521  | 3.4452  | 4.3879  | 4.0365  | 3.6975  | 0.8912  | -0.1663 | 0.1292 | 0.8887 |
| Morcz2a  | _S[Phospho (STY)]PPLPAVIR_2                                             | Q692X6_S614_M1_Morcz2a  | 3.6276  | 8.0014  | 8.5448  | 8.5789  | 7.5874  | 8.2223  | 8.4017  | 8.2092  | 8.5501  | 8.4476  | 0.8840  | -0.1780 | 0.3442 | 0.4632 |
| Abim3    | _ASS[Phospho (STY)]PGVDSPTYSR_2                                         | Q692X8_S373_M1_Abim3    | 3.4419  | 6.9108  | 6.6246  | 3.1305  | 4.0684  | 3.6611  |         |         |         |         |         |         |        |        |



|          |                                                                              |                          |         |         |         |         |         |         |         |         |         |         |        |         |        |        |
|----------|------------------------------------------------------------------------------|--------------------------|---------|---------|---------|---------|---------|---------|---------|---------|---------|---------|--------|---------|--------|--------|
| Cep170   | _S1KS(Phospho (STY))DVPVYLK_2                                                | #N/A                     | 6.1310  | 6.7594  | 6.5306  | 8.4387  | 6.8824  | 6.9979  | 7.2666  | 6.8989  | 6.4966  | 6.7408  | 1.0155 | 0.0221  | 0.8081 | 0.0925 |
| Cep170   | _TEEDSK(Phospho (STY))KIS(Phospho (STY))DVPVYLK_2                            | #N/A                     | 3.6522  | 6.4458  | 3.9872  | 8.2885  | 7.3672  | 3.7311  | 3.9345  | 7.5069  | 7.9056  | 7.1495  | 0.8422 | -0.2478 | 0.4336 | 0.3629 |
| Cep170   | _QGS(Phospho (STY))FITKPSNIPIELPHINK_3                                       | Q6A065_5829_M1_Cep170    | 3.2051  | 4.0103  | 3.8919  | 4.1104  | 3.8316  | 3.8979  | 4.2587  | 4.3916  | 3.1898  | 3.7877  | 0.9789 | -0.0308 | 0.7678 | 0.1148 |
| Cep170   | _C[Carbamidomethyl (C)]JSTSS(Phospho (STY))PSKOVTK_2                         | Q6A065_5963_M1_Cep170    | 4.2719  | 3.0741  | 4.0056  | 3.5493  | 3.1049  | 3.3368  | 3.6976  | 3.4555  | 3.7545  | 3.2266  | 1.0067 | 0.0096  | 0.9320 | 0.0306 |
| Cep170   | _ALHSGS(Phospho (STY))JSSKEK_2                                               | #N/A                     | 2.7154  | 3.5811  | 3.4627  | 4.5396  | 3.4025  | 4.3270  | 3.1870  | 3.4737  | 4.2615  | 4.2168  | 0.9700 | -0.0439 | 0.7846 | 0.1053 |
| Cep170   | _SDS(Phospho (STY))EATSER_2                                                  | Q6A065_51157_M1_Cep170   | 3.3864  | 4.1426  | 6.4010  | 4.3101  | 4.0309  | 4.1316  | 4.0248  | 3.8455  | 3.4941  | 3.5994  | 1.1763 | 0.2342  | 0.2523 | 0.5981 |
| Cep170   | _SDS(Phospho (STY))LDTOSSM(Oxidation (M))DTTLUK_2                            | #N/A                     | 6.2208  | 5.4746  | 3.8523  | 4.3033  | 3.5171  | 6.1657  | 6.3542  | 6.1502  | 3.6323  | 6.0410  | 0.8878 | -0.1717 | 0.4533 | 0.3436 |
| Cep170   | _GNKHDDGTGS(Phospho (STY))JDSNAGAHRR_3                                       | #N/A                     | 3.5783  | 3.7787  | 3.3309  | 4.7041  | 3.3398  | 4.4710  | 4.1364  | 4.2135  | 3.4817  | 0.9820  | 0.9820 | -0.2262 | 0.8337 | 0.0790 |
| Cep170   | _HDDGTGS(Phospho (STY))JDSNAGAHRR_3                                          | #N/A                     | 3.1541  | 4.1308  | 4.1477  | 4.1472  | 3.8616  | 3.8770  | 4.0098  | 3.4747  | 3.3977  | 3.9932  | 1.0409 | 0.0578  | 0.5404 | 0.2672 |
| Cep170   | _RPTDYAS(Phospho (STY))TS(Phospho (STY))JDEFGSNR_2                           | Q6A065_51229_M2_Cep170   | 3.1085  | 4.0533  | 4.1056  | 6.5311  | 3.7445  | 4.1906  | 4.0883  | 3.7461  | 3.4047  | 3.7151  | 1.1465 | 0.3192  | 0.3923 | 0.4063 |
| Cep170   | _NQATSASSEKDDQDQSGKTY(Phospho (STY))TELEPNPSEVEAR_4                          | Q6A065_5499_M1_Cep170    | 1.9302  | 4.2675  | 3.2449  | 4.1482  | 4.1558  | 3.9697  | 3.8629  | 4.2125  | 3.6189  | 3.9668  | 0.9244 | -0.1134 | 0.5485 | 0.2608 |
| Cep170   | _GNKHDDGTGS(Phospho (STY))JDSNAGAHRR_4                                       | #N/A                     | 3.2106  | 4.0158  | 3.8974  | 4.1049  | 3.8372  | 3.8923  | 4.2531  | 4.3971  | 3.1954  | 3.7821  | 0.9794 | -0.0301 | 0.7718 | 0.1125 |
| Larp4b   | _SPS(Phospho (STY))PVHLPEDPKVAEK_3                                           | #N/A                     | 8.3194  | 3.0934  | 9.4864  | 8.7284  | 8.3298  | 8.7970  | 3.6747  | 8.3746  | 3.7738  | 3.2037  | 1.6382 | 0.7121  | 0.0828 | 1.0820 |
| Larp4b   | _EQNTTPKS(Phospho (STY))PQ_2                                                 | Q6A042_5739_M1_Larp4b    | 8.0117  | 8.4900  | 7.5751  | 9.1504  | 7.3308  | 7.2717  | 7.2269  | 8.5065  | 7.4536  | 7.7077  | 1.0321 | 0.0456  | 0.5852 | 0.2327 |
| Larp4b   | _RAS(Phospho (STY))PPAAGKR_2                                                 | #N/A                     | 7.4066  | 8.1136  | 8.1851  | 8.5314  | 7.2534  | 8.4534  | 8.1217  | 6.5181  | 7.8046  | 7.9050  | 1.0531 | 0.0747  | 0.3391 | 0.4697 |
| Larp4b   | _KNS(Phospho (STY))FGVR_2                                                    | Q6A042_5500_M1_Larp4b    | 7.7204  | 8.0271  | 3.3111  | 8.1826  | 7.2753  | 7.6321  | 7.8565  | 4.3047  | 7.7928  | 8.0695  | 1.0027 | 0.0039  | 0.9877 | 0.0054 |
| Larp4b   | _RAS(Phospho (STY))PPAAGK_2                                                  | #N/A                     | 6.7186  | 4.3057  | 7.0036  | 7.2017  | 3.3759  | 7.5325  | 6.1120  | 6.6598  | 6.7619  | 7.0410  | 0.8614 | -0.2152 | 0.2920 | 0.5346 |
| Larp4b   | _SPS(Phospho (STY))PVHLPEDPK_2                                               | #N/A                     | 9.9357  | 9.6438  | 4.3343  | 10.4221 | 8.8440  | 3.4555  | 3.8163  | 3.3331  | 9.4638  | 10.0168 | 1.1675 | 0.2334  | 0.6107 | 0.2142 |
| Rftn1    | _DSVALRH(Phospho (STY))NPR_2                                                 | #N/A                     | 4.3961  | 4.2563  | 4.2880  | 4.0740  | 3.9639  | 4.5530  | 4.5753  | 4.0780  | 4.6124  | 4.6733  | 0.9488 | -0.0758 | 0.1733 | 0.7612 |
| Cgw1     | _SYGSPQRS(Phospho (STY))PTSEDLAK_2                                           | Q6AW69_5203_M1_Cgw1      | 5.1407  | 3.8186  | 3.7002  | 4.4088  | 4.6628  | 4.1062  | 3.6658  | 3.9088  | 3.9482  | 6.4759  | 0.9570 | -0.0634 | 0.7523 | 0.1231 |
| Cgw1     | _RQDS(Phospho (STY))AGPLDGA_2                                                | Q6AW69_5284_M1_Cgw1      | 5.8960  | 4.2318  | 4.3451  | 6.3131  | 5.2257  | 5.3999  | 5.5955  | 5.3396  | 5.9021  | 5.7993  | 0.9187 | -0.1234 | 0.3161 | 0.5002 |
| Nrip14   | _KVM(Oxidation (M))LPSVLIUATR_2                                              | #N/A                     | 12.1281 | 11.1308 | 12.3829 | 11.2980 | 11.8779 | 12.2051 | 12.0210 | 10.8877 | 11.6867 | 12.0445 | 1.0129 | 0.0186  | 0.6547 | 0.1840 |
| Arhgap21 | _DQGEPPVS(Phospho (STY))PSEDEPPSWFGPK_2                                      | Q6DFV3_541_M1_Arhgap21   | 10.5554 | 10.3617 | 10.5822 | 11.3319 | 9.7243  | 10.5016 | 11.0523 | 10.9951 | 3.6766  | 10.4197 | 1.1631 | 0.2180  | 0.3364 | 0.4732 |
| Arhgap21 | _NRS(Phospho (STY))PTLSC[Carbamidomethyl (C)]R_2                             | Q6DFV3_51501_M1_Arhgap21 | 7.2076  | 7.5803  | 7.7768  | 7.8513  | 7.4579  | 7.1081  | 7.7886  | 7.5485  | 7.4883  | 7.2951  | 0.9956 | -0.0064 | 0.8526 | 0.0679 |
| Arhgap21 | _QLS(Phospho (STY))HQDSVGPPSLDGHSSK_3                                        | #N/A                     | 8.4188  | 8.0115  | 8.7203  | 8.6478  | 6.8301  | 8.9390  | 4.3617  | 4.2886  | 3.0868  | 8.4609  | 1.6180 | 0.6942  | 0.0139 | 1.0583 |
| Arhgap21 | _VGGS(Phospho (STY))RPWK_2                                                   | Q6DFV3_5947_M1_Arhgap21  | 7.5759  | 7.6512  | 7.5653  | 8.0459  | 4.0747  | 7.7078  | 7.1795  | 7.5874  | 7.2362  | 7.4299  | 0.9509 | -0.0726 | 0.6437 | 0.1913 |
| Arhgap21 | _LSKDDTS(Phospho (STY))PPDK_3                                                | Q6DFV3_51108_M1_Arhgap21 | 3.7387  | 3.4875  | 4.4255  | 3.4273  | 2.8644  | 3.3488  | 3.1420  | 6.4058  | 4.3397  | 3.3943  | 0.8175 | -0.2907 | 0.2560 | 0.5917 |
| Arhgap21 | _KGS(Phospho (STY))SSEFSDAAR_2                                               | Q6DFV3_5917_M1_Arhgap21  | 3.5379  | 6.0619  | 6.0762  | 7.0841  | 5.9801  | 6.5055  | 7.1338  | 6.7193  | 6.9137  | 6.0451  | 0.8764 | -0.1904 | 0.2370 | 0.6252 |
| Arhgap21 | _SKS(Phospho (STY))VDEGLDYREDAK_3                                            | #N/A                     | 7.5429  | 7.9801  | 7.8507  | 6.6383  | 7.9642  | 7.7327  | 7.7327  | 8.2172  | 7.9224  | 7.9263  | 0.9750 | -0.0365 | 0.5657 | 0.2474 |
| Arhgap21 | _VRTS(Phospho (STY))ASDLSR_2                                                 | Q6DFV3_51847_M1_Arhgap21 | 4.3497  | 3.6541  | 3.5357  | 4.4666  | 3.4754  | 4.2541  | 3.3140  | 4.0354  | 4.1214  | 4.1439  | 1.0265 | 0.0378  | 0.7428 | 0.1291 |
| Arhgap21 | _EKPGS(Phospho (STY))GRQTPQRLR_3                                             | Q6DFV3_5736_M1_Arhgap21  | 2.9161  | 4.4263  | 6.2160  | 3.6944  | 4.2476  | 3.4819  | 3.8427  | 6.1881  | 6.6058  | 5.6437  | 0.8638 | -0.2112 | 0.4212 | 0.3751 |
| Arhgap21 | _T(Phospho (STY))SGQGFTR_2                                                   | Q6DFV3_761_M1_Arhgap21   | 3.6572  | 3.6852  | 3.3909  | 4.4355  | 3.5065  | 4.2229  | 3.0829  | 6.0252  | 4.3656  | 4.1128  | 0.8680 | -0.2042 | 0.3027 | 0.5190 |
| Arhgap21 | _S(Phospho (STY))TS(Phospho (STY))HDRVPSQVQR_2                               | #N/A                     | 3.5665  | 3.7935  | 4.1940  | 4.1149  | 3.5096  | 3.9712  | 3.4759  | 3.8582  | 4.1313  | 3.7812  | 1.0122 | 0.0175  | 0.8018 | 0.0959 |
| Arhgap21 | _RLS(Phospho (STY))HQDSVGPPSLDGHSSK_4                                        | #N/A                     | 7.5039  | 7.6510  | 7.8677  | 7.6324  | 6.0690  | 5.1228  | 7.3274  | 7.5555  | 7.2128  | 7.5407  | 0.9413 | -0.0872 | 0.4698 | 0.3281 |
| Arhgap21 | _TQSPS(Phospho (STY))PKESER_3                                                | Q6DFV3_51092_M1_Arhgap21 | 4.1790  | 4.2134  | 5.0216  | 3.9157  | 3.9378  | 4.5481  | 4.0640  | 4.4626  | 3.3847  | 3.5930  | 1.1101 | 0.0506  | 0.1758 | 0.1758 |
| Arhgap21 | _GIPS(Phospho (STY))JVR_2                                                    | Q6DFV3_51122_M1_Arhgap21 | 5.5471  | 4.5624  | 3.8776  | 5.0135  | 3.2877  | 5.2178  | 3.2301  | 5.7364  | 3.8788  | 5.6991  | 0.9888 | -0.0162 | 0.9402 | 0.0268 |
| Arhgap21 | _SVS(Phospho (STY))QERLEDSVMK_2                                              | Q6DFV3_5453_M1_Arhgap21  | 3.8205  | 3.5219  | 3.5542  | 4.5988  | 3.3432  | 3.9032  | 4.2023  | 3.9032  | 4.2023  | 3.4262  | 0.9908 | -0.0134 | 0.9127 | 0.0397 |
| Ncoa7    | _EVLDSLGS(Phospho (STY))DLK_2                                                | Q6DFV7_5610_M1_Ncoa7     | 3.2922  | 3.4132  | 3.6629  | 3.2067  | 2.3245  | 5.9540  | 3.3549  | 3.7945  | 4.0936  | 4.3848  | 0.9982 | -0.0025 | 0.9905 | 0.0041 |
| Ncoa7    | _HSGS(Phospho (STY))PENLGESTNIHEDLDKK_4                                      | Q6DFV7_5502_M1_Ncoa7     | 3.5073  | 4.2636  | 3.2410  | 4.2856  | 4.1519  | 3.9735  | 3.8667  | 5.5866  | 3.0146  | 3.9629  | 0.9504 | -0.0734 | 0.6814 | 0.1666 |
| Ncoa7    | _VLS(Phospho (STY))JSTSEDEPGVVK_2                                            | Q6DFV7_5211_M1_Ncoa7     | 3.5740  | 3.9561  | 5.0466  | 6.8582  | 3.7774  | 6.3753  | 5.3688  | 3.8098  | 5.5939  | 3.8844  | 1.0573 | 0.0803  | 0.7505 | 0.1247 |
| Ncoa7    | _YYS(Phospho (STY))VDNDQNK_2                                                 | Q6DFV7_592_M1_Ncoa7      | 6.5623  | 4.1661  | 6.3720  | 7.0091  | 6.1996  | 6.4794  | 6.7318  | 4.0075  | 4.1110  | 3.2076  | 1.3604 | 0.4440  | 0.0751 | 1.1243 |
| Ncoa7    | _SVRS(Phospho (STY))PEESTER_2                                                | Q6DFV7_5353_M1_Ncoa7     | 7.0504  | 3.9051  | 7.5852  | 3.9271  | 6.4082  | 6.8626  | 4.0754  | 3.0741  | 6.5296  | 3.6044  | 1.3785 | 0.4631  | 0.1495 | 0.8252 |
|          | _Acetyl (Protein N-term)STIC[Carbamidomethyl (C)]PPPS(Phospho (STY))PAVAK_2  | Q6DFW9_50_M1_            | 7.2764  | 4.3212  | 4.2557  | 3.7995  | 3.6658  | 2.9589  | 7.9059  | 3.2017  | 3.5008  | 7.4177  | 0.7953 | -0.3304 | 0.3938 | 0.4048 |
| Nop58    | _EERLPS(Phospho (STY))EEPEC[Carbamidomethyl (C)]TSTAVPS(Phospho (STY))PEK_2  | #N/A                     | 3.7179  | 3.2948  | 3.4516  | 5.7837  | 3.1425  | 5.8421  | 5.0237  | 6.8691  | 4.3060  | 4.1735  | 0.8257 | -0.2763 | 0.3043 | 0.5166 |
| Nop58    | _HKEEPLS(Phospho (STY))EEPEC[Carbamidomethyl (C)]TSTAVPS(Phospho (STY))PEK_3 | #N/A                     | 3.4327  | 4.7837  | 3.7378  | 3.7466  | 3.8375  | 3.6547  | 4.3477  | 3.9646  | 3.1184  | 3.5280  | 1.0336 | 0.0477  | 0.7038 | 0.1525 |
| Nol4l    | _NTPE(Phospho (STY))PPYSSGYSYDK_2                                            | Q6D0B4_5189_M1_Nol4l     | 3.9680  | 7.3205  | 3.1539  | 3.3475  | 7.0521  | 3.1350  | 3.4958  | 3.6536  | 3.9527  | 7.7320  | 0.9903 | -0.0141 | 0.9726 | 0.0121 |
| Nol4l    | _LEIQSS(Phospho (STY))QEEPALDK_2                                             | Q6D0B4_5354_M1_Nol4l     | 3.8216  | 3.4045  | 4.5085  | 8.4236  | 3.2928  | 3.3138  | 3.2250  | 7.6061  | 4.2568  | 7.7305  | 0.7825 | -0.3539 | 0.3903 | 0.4086 |
| Scal8    | _ASEPVKEPKQTAGS(Phospho (STY))PAVPEK_3                                       | #N/A                     | 7.6104  | 7.5627  | 7.7882  | 7.9052  | 7.0306  | 7.6848  | 8.0270  | 7.5188  | 7.4902  | 7.4505  | 0.9916 | -0.0122 | 0.7366 | 0.1286 |
| Lemd2    | _WTKPSFS(Phospho (STY))DSER_2                                                | Q6D0AD_5507_M1_Lemd2     | 3.9548  | 3.6209  | 3.9212  | 6.9857  | 3.4772  | 6.9865  | 7.5451  | 3.6911  | 7.1487  | 3.8073  | 0.8696 | -0.2016 | 0.5601 | 0.2517 |
| Lemd2    | _AS(Phospho (STY))VRGS(Phospho (STY))SEODEDTRTPDR_3                          | Q6D0AD_5145_M2_Lemd2     | 5.9576  | 3.5481  | 3.9572  | 4.0980  | 3.4037  | 3.1532  | 3.6264  | 4.3179  | 3.8679  | 1.1075  | 0.1473 | 0.4534  | 0.3435 | 0.1435 |
| Utp14b   | _S(Phospho (STY))KAIMAKY(Phospho (STY))DPEAR_2                               | Q6IB86_5307_M2_Utp14b    | 8.2784  | 7.1486  | 7.2752  | 7.0796  | 6.8944  | 8.3068  | 8.8271  | 8.7137  | 7.9900  | 7.5733  | 0.9059 | -0.1426 | 0.0862 | 1.0643 |
| Tmem151a | _SLS(Phospho (STY))GGVUGR_2                                                  | Q6GGT5_5423_M1_Tmem151a  | 7.2019  | 4.4872  | 3.8886  | 3.9058  | 3.5709  | 4.5722  | 4.0540  | 4.7601  | 5.0757  | 5.0991  | 0.9699 | -0.0441 | 0.8445 | 0.0734 |
| Ralgap1  | _SQT(Phospho (STY))PS(Phospho (STY))PTSLSR_2                                 | Q6GYPT_51003_M2_Ralgap1  | 8.9419  | 8.3975  | 8.9535  | 8.2148  | 6.6832  | 8.3853  | 8.8842  | 8.5492  | 8.6924  | 8.7787  | 0.9469 | -0.0787 | 0.3113 | 0.5069 |
| Ralgap1  | _SSS(Phospho (STY))TSDILEPFTVER_2                                            | Q6GYPT_5796_M1_Ralgap1   | 7.6329  | 3.7447  | 3.9946  | 4.2641  | 3.4047  | 3.6967  | 3.6867  | 3.5855  | 7.1271  | 3.9414  | 0.9719 | -0.0411 | 0.9054 | 0.0431 |
| Ralgap1  | _SATTTGS(Phospho (STY))PGETEK_2                                              | Q6GYPT_5730_M1_Ralgap1   | 9.0241  | 9.2865  | 9.6061  | 9.0056  | 8.8212  | 3.9083  | 9.4862  | 9.5740  | 9.8688  | 8.9306  | 0.8054 | -0.1322 | 0.2425 | 0.6153 |
| Ralgap1  | _RGS(Phospho (STY))SPGLSEPK_2                                                | Q6GYPT_5859_M1_Ralgap1   | 7.3240  | 7.0105  | 3.8686  | 3.3939  | 3.2347  | 3.1992  | 8.4761  | 8.0081  | 6.9531  | 6.9204  | 0.6156 | -0.7000 | 0.0232 | 1.6353 |
| Ralgap1  | _GVGHFEQKVS(Phospho (STY))VDK_3                                              | Q6GYPT_5710_M1_Ralgap1   | 3.3693  | 2.7293  | 3.2739  | 3.7765  | 3.2136  | 3.5167  | 3.4912  | 2.7007  | 3.9905  | 3.6492  | 0.9582 | -0.0617 | 0.6194 | 0.2080 |
| Ralgap1  | _GWS(Phospho (STY))RDGPGQAMPR_2                                              | #N/A                     | 4.0918  | 4.0171  | 3.9104  | 3.8886  | 3.5410  | 3.9836  | 3.8210  | 3.7458  | 3.1502  | 3.7282  | 1.0815 | 0.1130  | 0.0983 | 1.0074 |
| Hecw2    | _ANS(Phospho (STY))DTDLVTSESR_2                                              | Q6I6G8_548_M1_Hecw2      | 11.2731 | 11.2694 | 11.7684 | 11.3061 | 10.2137 | 11.0661 | 11.6424 | 11.2232 | 11.1645 | 11.2526 | 0.9849 | -0.0220 | 0.5522 | 0.2579 |
| Hec      |                                                                              |                          |         |         |         |         |         |         |         |         |         |         |        |         |        |        |



|         |                                                                              |                        |         |         |         |         |        |         |         |         |         |         |         |         |        |        |
|---------|------------------------------------------------------------------------------|------------------------|---------|---------|---------|---------|--------|---------|---------|---------|---------|---------|---------|---------|--------|--------|
| Cltb    | _LQELDAASK_2                                                                 | #N/A                   | 8.0679  | 8.1340  | 8.5373  | 8.8395  | 8.7484 | 8.4057  | 8.0757  | 7.8533  | 8.1832  | 8.4778  | 1.0286  | 0.0407  | 0.1950 | 0.7099 |
| Cltb    | _LTYDEQWR_2                                                                  | #N/A                   | 7.7708  | 7.1318  | 7.3392  | 7.7590  | 7.4195 | 7.5721  | 7.3194  | 6.8456  | 7.4711  | 7.3496  | 1.0348  | 0.0494  | 0.1711 | 0.7668 |
| Cltb    | _LXLEEWNR_2                                                                  | #N/A                   | 4.0667  | 3.3711  | 3.2527  | 3.7553  | 5.5882 | 4.5393  | 3.4700  | 4.0000  | 4.1367  | 4.5648  | 1.0130  | 0.0187  | 0.9150 | 0.0386 |
| Cltb    | _LFSKEETPGTEWEK_2                                                            | #N/A                   | 5.3394  | 5.5058  | 5.8681  | 5.7328  | 6.6591 | 6.0683  | 5.6095  | 5.4809  | 5.8622  | 5.9380  | 1.0244  | 0.0348  | 0.5965 | 0.2244 |
| Cltb    | _LAFYQQRADTGTGVIASEAFVK_2                                                    | #N/A                   | 4.0326  | 4.1836  | 3.7663  | 3.3100  | 4.4848 | 5.5689  | 3.4583  | 3.6911  | 3.9902  | 4.2028  | 1.0927  | 0.1279  | 0.3774 | 0.4232 |
| Nipbl   | _LATSLLGGGS(Phospho (STY))PK_2                                               | Q6KCD5_S2652_M1_Nipbl  | 4.0798  | 7.2575  | 7.5302  | 7.8869  | 5.4885 | 6.5250  | 7.6048  | 7.7726  | 3.9886  | 3.7354  | 1.1183  | 0.1613  | 0.5664 | 0.2469 |
| Dgkb    | _LFPHSS(Phospho (STY))PMVK_2                                                 | Q6N5S2_S95_M1_Dgkb     | 4.2642  | 8.7015  | 8.9554  | 8.9993  | 7.7302 | 3.2166  | 8.9443  | 3.4595  | 4.3720  | 3.2190  | 1.3959  | 0.4812  | 0.2740 | 0.5622 |
| Dgkb    | _LVLAC[Carbamidomethyl (C)]GGDGTGVWLDC[Carbamidomethyl (C)]IEK_2             | #N/A                   | 3.3264  | 4.0827  | 4.8973  | 4.1047  | 3.9710 | 4.1544  | 4.2530  | 4.3973  | 3.0656  | 3.0656  | 1.0569  | 0.0798  | 0.5458 | 0.2629 |
| Dgkb    | _LQDLNQTDFEGK_2                                                              | #N/A                   | 3.3176  | 4.0739  | 4.5521  | 4.0959  | 3.1476 | 3.5546  | 4.2441  | 4.4061  | 3.2043  | 3.7732  | 0.9701  | -0.0437 | 0.7458 | 0.1274 |
| Fbxo41  | _LGGGGS(Phospho (STY))ASGPGVR_2                                              | Q6N560_S363_M1_Fbxo41  | 6.7766  | 3.2240  | 3.7023  | 3.2461  | 4.8853 | 6.7334  | 7.0685  | 3.7551  | 4.0542  | 4.4242  | 0.9867  | -0.0193 | 0.9522 | 0.0213 |
| Fbxo41  | _LEHHAGSAVPTSYAVS(Phospho (STY))JR_3                                         | Q6N560_S391_M1_Fbxo41  | 4.4623  | 4.0004  | 4.2758  | 3.5837  | 3.8470 | 4.5237  | 4.6661  | 3.2437  | 4.0395  | 4.6505  | 0.9917  | -0.0120 | 0.9182 | 0.0370 |
| Fbxo41  | _LRHS(Phospho (STY))TEEGGVDSVGSR_3                                           | #N/A                   | 8.4912  | 8.1952  | 9.2624  | 5.6912  | 7.7734 | 8.1153  | 8.5844  | 8.6780  | 8.6273  | 8.3031  | 0.9267  | -0.1099 | 0.3397 | 0.4690 |
| Fbxo41  | _LSARPEGGS(Phospho (STY))GR_2                                                | Q6N560_S526_M1_Fbxo41  | 3.1146  | 4.1116  | 3.8014  | 4.3041  | 8.9363 | 4.1256  | 4.0187  | 3.8144  | 8.8755  | 4.2711  | 0.9023  | -0.1484 | 0.7309 | 0.1361 |
| Fbxo41  | _L[Acetyl (Protein N-term)]AS(Phospho (STY))LDLPIR_2                         | Q6N560_S3_M1_Fbxo41    | 2.8986  | 6.3505  | 3.5854  | 4.0881  | 3.5252 | 4.2043  | 3.8028  | 6.8504  | 3.6790  | 5.9642  | 0.8097  | -0.3045 | 0.3008 | 0.5217 |
| Fbxo41  | _LHGSS(Phospho (STY))PSTGASSR_2                                              | Q6N560_S396_M1_Fbxo41  | 3.8672  | 3.3590  | 4.5540  | 3.5558  | 3.2473 | 3.3773  | 3.2705  | 3.0618  | 4.2113  | 3.5228  | 1.0408  | 0.0577  | 0.6640 | 0.1779 |
| Amer3   | _LSQSTS(Phospho (STY))PC[Carbamidomethyl (C)]SQGYGR_2                        | Q6N569_S52_M1_Amer3    | 3.2795  | 4.0358  | 4.5140  | 4.0578  | 3.9241 | 4.2014  | 4.2061  | 4.4442  | 3.2424  | 3.7351  | 1.0244  | 0.0347  | 0.7562 | 0.1214 |
| Amer3   | _LDGPES(Phospho (STY))PAHS(Phospho (STY))PQALDC[Carbamidomethyl (C)]K_2      | Q6N569_S263_M2_Amer3   | 3.8823  | 3.4691  | 3.6160  | 5.2128  | 3.1039 | 3.6076  | 3.3081  | 3.8504  | 5.0425  | 4.3379  | 0.9227  | -0.1160 | 0.5185 | 0.2852 |
| Retreg2 | _LSAPPAGDEPLAETES(Phospho (STY))ESEAELAGSPVDVK_3                             | Q6N582_S276_M1_Retreg2 | 3.9611  | 4.1605  | 3.3661  | 4.1357  | 3.3120 | 3.9390  | 4.1003  | 4.1811  | 3.4439  | 3.9537  | 0.9726  | -0.0401 | 0.6572 | 0.1872 |
| Sphkap  | _LASSC[Carbamidomethyl (C)]SES(Phospho (STY))PEEDEAR_2                       | Q6N5W3_S1070_M1_Sphkap | 6.9654  | 7.8334  | 7.4239  | 7.2086  | 5.8360 | 3.5913  | 8.1556  | 7.9945  | 7.0173  | 6.8943  | 0.8617  | -0.2147 | 0.2508 | 0.6007 |
| Sphkap  | _LSNS(Phospho (STY))LESTDYWLQNR_2                                            | Q6N5W1_S50_M1_Sphkap   | 5.5393  | 3.4042  | 6.0797  | 6.9958  | 5.3135 | 6.1186  | 3.2253  | 6.7962  | 4.2564  | 3.4776  | 1.2560  | 0.0328  | 0.2393 | 0.6210 |
| Sphkap  | _LANS(Phospho (STY))LDGAGNC[Carbamidomethyl (C)]PQDSVNVQPSR_3                | Q6N5W3_S1244_M1_Sphkap | 3.1138  | 5.6964  | 5.5038  | 7.4562  | 3.7784 | 4.3471  | 4.2183  | 6.2300  | 4.9013  | 4.3578  | 1.0120  | 0.0172  | 0.9478 | 0.0233 |
| Sphkap  | _LQSS(Phospho (STY))C[Carbamidomethyl (C)]STDSTFSR_2                         | Q6N5W3_S1106_M1_Sphkap | 3.6201  | 6.1054  | 3.7880  | 6.0291  | 4.9229 | 6.2087  | 6.6630  | 3.7530  | 7.3128  | 7.0393  | 0.8256  | -0.2764 | 0.2594 | 0.5863 |
| Sphkap  | _L[AS(Phospho (STY))TDLGR_2                                                  | Q6N5W3_S841_M1_Sphkap  | 2.9993  | 3.7556  | 4.2338  | 3.7776  | 3.6439 | 2.9807  | 3.9259  | 3.2236  | 5.8223  | 0.8641  | -0.2108 | 0.3180  | 0.4976 | 0.1875 |
| Sphkap  | _L[AKAS(Phospho (STY))S(Phospho (STY))C[Carbamidomethyl (C)]ESPEEDEAR_2      | Q6N5W3_S1066_M2_Sphkap | 3.2362  | 4.7579  | 3.4313  | 3.4789  | 4.1919 | 4.0888  | 5.2820  | 4.8674  | 4.8215  | 4.0158  | 0.8140  | -0.2969 | 0.0410 | 1.3875 |
| Sphkap  | _LQSS(Phospho (STY))TESITEFYR_2                                              | Q6N5W3_S1171_M1_Sphkap | 3.7949  | 3.0992  | 4.4817  | 3.5206  | 5.6991 | 3.3081  | 3.6689  | 6.9567  | 3.7796  | 3.4505  | 0.8925  | -0.1641 | 0.5761 | 0.2395 |
| Sphkap  | _LELUKEGS(Phospho (STY))ES(Phospho (STY))KEHASGLPGR_3                        | Q6N5W3_S1574_M2_Sphkap | 3.2098  | 4.0150  | 4.5620  | 4.1057  | 3.8363 | 3.8932  | 4.2540  | 4.3963  | 3.1945  | 3.7830  | 1.0077  | 0.0110  | 0.9253 | 0.0337 |
| Sphkap  | _LASSGLC[Carbamidomethyl (C)]KSS(Phospho (STY))DSC[Carbamidomethyl (C)]LYR_3 | Q6N5W3_S1273_M1_Sphkap | 4.1586  | 3.4630  | 3.3446  | 3.8473  | 3.2843 | 3.5619  | 3.9198  | 4.2712  | 3.9198  | 0.9011  | -0.1502 | 0.1615  | 0.9519 | 0.0717 |
| U2surp  | _LRVKS(Phospho (STY))PS(Phospho (STY))PK_2                                   | #N/A                   | 3.9678  | 3.2722  | 3.1538  | 3.3477  | 3.0935 | 3.3151  | 5.1154  | 5.6270  | 4.1106  | 3.6234  | 0.7206  | -0.4728 | 0.0119 | 1.9252 |
| U2surp  | _LRHS(Phospho (STY))TS(Phospho (STY))PS(Phospho (STY))PSR_2                  | Q6N5V3_S390_M3_U2surp  | 4.1016  | 3.1245  | 3.2876  | 3.7903  | 3.2273 | 3.6118  | 3.5049  | 4.3282  | 3.9768  | 3.7573  | 0.9055  | -0.1433 | 0.1596 | 0.9659 |
| U2surp  | _L[VS(Phospho (STY))PS(Phospho (STY))PK_2                                    | #N/A                   | 3.2008  | 3.9571  | 4.4353  | 3.9791  | 3.8454 | 4.2801  | 2.8123  | 3.1811  | 3.3211  | 3.6564  | 1.2180  | 0.2845  | 0.0257 | 1.5900 |
| Wdr44   | _LEANTANAGAGNES(Phospho (STY))PVQLR_2                                        | #N/A                   | 10.2374 | 10.3212 | 11.0434 | 10.7375 | 9.8036 | 10.5305 | 10.7309 | 10.1270 | 10.3075 | 10.3146 | 1.0073  | 0.0105  | 0.7620 | 0.1881 |
| Wdr44   | _L[Phospho (STY)]NSGRELTDEELASVMK_3                                          | Q6N5V8_S344_M1_Wdr44   | 3.8513  | 3.1557  | 4.5381  | 3.5399  | 2.9770 | 3.2516  | 3.6124  | 3.0777  | 4.2271  | 3.5069  | 0.9851  | -0.0217 | 0.8808 | 0.0551 |
| Wdr44   | _LEVNSDATGS(Phospho (STY))DOEEK_2                                            | #N/A                   | 4.3103  | 3.0321  | 4.0440  | 5.1559  | 2.8534 | 3.7360  | 3.8140  | 3.5740  | 3.2650  | 3.1106  | 1.1106  | 0.1513  | 0.4194 | 0.3774 |
| Wdr44   | _L[KEYVSKDATGS(Phospho (STY))DOEEK_2                                         | #N/A                   | 3.8880  | 3.1924  | 4.5748  | 3.5766  | 3.0137 | 3.2149  | 3.2913  | 3.0410  | 4.1904  | 3.5436  | 1.0171  | 0.0245  | 0.8697 | 0.0607 |
| Wdr44   | _L[KEYVSKDATGS(Phospho (STY))DOEEKLSQQTDTDGGR_4                              | #N/A                   | 3.3996  | 4.1559  | 3.1333  | 4.2597  | 4.0442 | 4.0813  | 3.9744  | 4.3241  | 3.5073  | 3.8552  | 0.9822  | -0.0259 | 0.8038 | 0.0949 |
| Cpf6f   | _L[Phospho (STY)]RDRHDDYR_3                                                  | Q6N5V9_S513_M1_Cpf6f   | 5.4673  | 4.1161  | 4.5944  | 4.9930  | 5.2007 | 4.1210  | 5.2095  | 5.2867  | 6.2523  | 4.7711  | 0.8827  | -0.1800 | 0.1350 | 0.8696 |
| Rpr2    | _L[VS(Phospho (STY))SSC[Carbamidomethyl (C)]LDLPSTEEK_2                      | Q6N5X6_S1086_M1_Rpr2   | 6.8181  | 4.0574  | 3.9390  | 4.4417  | 3.8787 | 3.6768  | 6.6417  | 3.3254  | 4.4087  | 3.6768  | 0.9966  | -0.0050 | 0.9856 | 0.0686 |
| Rpr2    | _L[SNYS(Phospho (STY))PSSSTSEVSTASK_2                                        | Q6N5X6_S612_M1_Rpr2    | 3.7707  | 3.3560  | 4.0618  | 6.5372  | 3.1773 | 6.2883  | 3.5457  | 5.6286  | 4.2801  | 3.8779  | 1.0514  | 0.0723  | 0.8003 | 0.0967 |
| Rpr2    | _L[DVEDM(Oxidation (M))ELS(Phospho (STY))DVEDGSK_2                           | #N/A                   | 3.8103  | 7.6228  | 3.8972  | 8.8543  | 7.2298 | 7.8187  | 7.0402  | 8.1193  | 8.0273  | 8.8391  | -0.2531 | 0.2941  | 0.5315 | 0.5151 |
| Rpr2    | _L[ASVGGS(Phospho (STY))PVLPSTTK_2                                           | Q6N5X6_S633_M1_Rpr2    | 4.3932  | 5.1536  | 4.2643  | 6.7653  | 3.5369 | 3.0877  | 5.3936  | 3.3515  | 4.8089  | 3.2331  | 1.0802  | 0.1113  | 0.6813 | 0.1667 |
| Rpr2    | _L[GPSTSVSDGT(Phospho (STY))PVWRD_3                                          | Q6N5X6_S742_M1_Rpr2    | 3.3704  | 4.1528  | 4.3413  | 3.2706  | 4.0055 | 3.9494  | 4.1155  | 3.4132  | 3.4807  | 3.5425  | 1.0578  | 0.0811  | 0.4327 | 0.3638 |
| Wwc2    | _LSDS(Phospho (STY))DSSTLAK_2                                                | #N/A                   | 5.1010  | 5.8629  | 3.4798  | 5.3414  | 3.4176 | 4.3118  | 3.1718  | 3.9776  | 4.2767  | 4.2017  | 1.1737  | 0.2556  | 0.5925 | 0.1514 |
| Wwc2    | _L[UNRSOS(Phospho (STY))DSSTLAK_2                                            | #N/A                   | 3.5138  | 2.5054  | 3.2475  | 4.2921  | 4.1584 | 3.0522  | 4.4404  | 4.2099  | 3.0081  | 3.9694  | 0.8860  | -0.1746 | 0.3270 | 0.4855 |
| Znf532  | _LAADKS[Carbamidomethyl (C)]KEPVANES(Phospho (STY))JR_3                      | Q6N5X2_S313_M1_Znf532  | 3.5053  | 4.2616  | 3.2390  | 4.2836  | 4.1499 | 6.3599  | 4.4318  | 5.5486  | 5.6184  | 6.2413  | 0.7875  | -0.3446 | 0.1048 | 0.9796 |
| Znf532  | _LKAASOS[Carbamidomethyl (C)]KEPVANES(Phospho (STY))JR_3                     | Q6N5X2_S293_M1_Znf532  | 3.0971  | 4.1290  | 3.7839  | 4.2866  | 4.0173 | 4.1081  | 4.0013  | 3.8319  | 3.4805  | 4.2536  | 1.0031  | 0.0044  | 0.9637 | 0.0160 |
| Dpp10   | _LYASAFSER_2                                                                 | #N/A                   | 6.6918  | 6.3693  | 6.8118  | 6.7277  | 5.9734 | 6.4793  | 6.4793  | 7.0104  | 6.6248  | 6.5049  | 0.9645  | -0.0522 | 0.2288 | 0.6405 |
| Dpp10   | _L[ATQSQPADQLGS(Phospho (STY))NSPQR_2                                        | #N/A                   | 8.9889  | 9.0464  | 8.9703  | 9.1788  | 3.5461 | 8.8138  | 9.7806  | 9.4393  | 9.2338  | 8.9199  | 0.8663  | -0.2071 | 0.3079 | 0.5116 |
| Dpp10   | _LQNEPVSFR_2                                                                 | #N/A                   | 5.7336  | 3.0700  | 4.4524  | 5.4699  | 5.4805 | 5.1373  | 5.9379  | 5.1982  | 5.7521  | 5.6739  | 0.8671  | -0.2058 | 0.1898 | 0.7217 |
| Srd1    | _L[LGSA(Phospho (STY))PEEEQEPRLDPR_3                                         | #N/A                   | 5.7917  | 6.6657  | 7.1543  | 7.2025  | 6.3342 | 6.7140  | 6.7853  | 6.3313  | 6.2016  | 6.4716  | 1.0304  | 0.0433  | 0.5142 | 0.2888 |
| Sec23ip | _L[KL(Phospho (STY))VGAIVSSVR_2                                              | Q6N2C7_S748_M1_Sec23ip | 3.0915  | 5.5490  | 5.6051  | 7.6701  | 4.4046 | 4.0114  | 5.1643  | 6.4248  | 3.0763  | 4.2480  | 1.0692  | 0.0965  | 0.7494 | 0.1253 |
| Sec23ip | _L[EM(Oxidation (M))AS(Phospho (STY))PSSSENEKR_2                             | Q6N2C7_S735_M1_Sec23ip | 3.0128  | 4.3296  | 4.2473  | 3.7911  | 4.1510 | 3.5785  | 2.5083  | 2.3709  | 3.5092  | 3.4683  | 1.2994  | 0.3779  | 0.0354 | 1.4511 |
| Zc3h11a | _L[KL(Phospho (STY))VGGDSQPLKR_3                                             | Q6N2F1_S289_M1_Zc3h11a | 3.6509  | 6.2602  | 6.7454  | 7.0177  | 2.7947 | 6.2883  | 3.7231  | 6.3654  | 6.7655  | 6.6565  | 0.9438  | -0.0835 | 0.7698 | 0.1136 |
| Eif4g1  | _LKAAS(Phospho (STY))LTEDR_2                                                 | #N/A                   | 8.9611  | 8.8498  | 9.1588  | 8.9779  | 7.4697 | 8.8987  | 3.2665  | 9.0867  | 8.7129  | 8.7022  | 1.1716  | 0.2285  | 0.2979 | 0.5259 |
| Eif4g1  | _L[SF(Phospho (STY))KEVEER_2                                                 | Q6N2J6_S1189_M1_Eif4g1 | 8.3900  | 6.6846  | 9.1355  | 6.6842  | 5.4525 | 8.3124  | 8.2118  | 8.8138  | 8.4764  | 8.5197  | 0.9535  | -0.0687 | 0.5809 | 0.2359 |
| Eif4g1  | _L[ATLPPVS(Phospho (STY))PK_2                                                | Q6N2J6_S1231_M1_Eif4g1 | 8.9385  | 3.7774  | 4.2557  | 8.4197  | 3.6657 | 2.9589  | 9.6705  | 10.0618 | 7.2594  | 10.1056 | 0.5754  | -0.7975 | 0.0260 | 1.5855 |
| Eif4g1  | _LKAAS(Phospho (STY))LTEDR_2                                                 | #N/A                   | 6.7039  | 4.3947  | 3.3721  | 4.4167  | 2.7822 | 3.8424  | 4.3368  | 5.9461  | 6.0256  | 4.0940  | 0.8102  | -0.3037 | 0.2375 | 0.6243 |
| Eif4g1  | _L[SS(Phospho (STY))LS(Phospho (STY))RER_2                                   | Q6N2J6_S1147_M2_Eif4g1 | 2.9546  | 4.3878  | 4.1891  | 3.7329  | 3.5991 | 3.0255  | 3.8811  | 3.2683  | 3.5674  | 3.4101  | 1.0330  | 0.0468  | 0.7227 | 0.1411 |
| Ptpdc1  | _L[QSYS(Phospho (STY))OSOLR_2                                                | Q6N2X8_S394_M1_Ptpdc1  | 3.1700  | 6.8829  | 8.0436  | 7.3327  | 5.9749 | 6.9670  | 4.0742  | 6.9860  | 3.4076  | 4.3265  | 1.3611  | 0.4448  | 0.1530 | 0.8154 |
| Soga3   | _LEQSE(Phospho (STY))LSLR_2                                                  | Q6N2L0_S639_M1_Soga3   | 8.8530  | 9.4466  | 9.0837  | 9.6803  | 8.5243 | 8.4874  | 10.0944 | 9.4854  | 8.0508  | 9.4555  | 0.9721  | -0.0409 | 0.5569 | 0.2543 |
| Soga3   | _L[RG(Phospho (STY))KULPK_2                                                  | Q6N2L0_S501_M1_Soga3   | 8.9105  | 8.8496  | 9.2     |         |        |         |         |         |         |         |         |         |        |        |



|          |                                                                                           |                        |         |         |         |         |         |         |         |         |         |         |        |         |        |        |
|----------|-------------------------------------------------------------------------------------------|------------------------|---------|---------|---------|---------|---------|---------|---------|---------|---------|---------|--------|---------|--------|--------|
| Pgp2r2a  | _INLWHLEIDR_3                                                                             | #N/A                   | 5.0685  | 4.7444  | 3.4239  | 4.9421  | 4.5411  | 4.3978  | 5.2936  | 4.8634  | 4.6882  | 5.1235  | 0.9053 | -0.1435 | 0.1777 | 0.7503 |
| Pgp2r2a  | _JAcetyl (Protein N-term)JAGAGGGNDIQWC[Carbamidomethyl (C)]FSQVK_2                        | #N/A                   | 4.3900  | 4.4069  | 4.1053  | 3.8970  | 4.6749  | 4.2436  | 5.1738  | 4.1642  | 4.4203  | 3.8692  | 0.9726 | -0.0400 | 0.6553 | 0.1836 |
| Pgp2r2a  | _GEYNVYSTGSEHEFEFDYUK_3                                                                   | #N/A                   | 4.3898  | 3.9835  | 4.5934  | 6.0800  | 4.9079  | 3.9246  | 4.2854  | 5.4600  | 3.1631  | 4.6465  | 1.0587 | 0.0823  | 0.6537 | 0.1846 |
| Pgp2r2a  | _ENMIAVATNNIVKFDGVK_2                                                                     | #N/A                   | 3.7801  | 3.8560  | 4.3239  | 5.3595  | 3.0252  | 4.5740  | 3.1834  | 4.7855  | 4.7288  | 4.1429  | 0.9865 | -0.0197 | 0.9122 | 0.1099 |
| Pgp2r2a  | _GAVDDDAEADISIVFNHSGELLATGVK_3                                                            | #N/A                   | 3.1900  | 3.9952  | 3.8768  | 4.1254  | 3.8166  | 3.9129  | 4.2737  | 4.3766  | 3.1748  | 3.8027  | 0.9776 | -0.0227 | 0.7573 | 0.1307 |
| Psd2     | _KTHS[Phospho (STY)]SG[Phospho (STY)]PALSLHGVPVTSK_3                                      | Q6P1H6_5745_M2_Psd2    | 3.8278  | 3.1322  | 4.5146  | 3.4877  | 2.9535  | 3.8060  | 3.6360  | 4.2604  | 3.8125  | 3.1650  | 0.9736 | -0.0386 | 0.7789 | 0.1085 |
| Inpp4b   | _KPSP[Phospho (STY)]PNVSTEEK_2                                                            | Q6P1YB_5470_M1_inpp4b  | 6.2552  | 3.7847  | 6.3108  | 3.1301  | 3.6730  | 2.9516  | 4.3456  | 3.4875  | 3.1361  | 3.0971  | 1.2372 | 0.3071  | 0.3351 | 0.4749 |
| Pgp4r3a  | _TNLSGRGS[Phospho (STY)]PSFK_2                                                            | Q6P2X6_5728_M1_Pgp4r3a | 5.5995  | 4.1596  | 4.5934  | 3.9611  | 3.9809  | 3.7486  | 6.0232  | 3.0401  | 3.1391  | 3.6384  | 1.1556 | 0.2086  | 0.4409 | 0.3557 |
| Nud3     | _SEKPAQSASS[Phospho (STY)]PEATSGSAGPVVK_3                                                 | Q6P2L6_5561_M1_Nud3    | 3.3675  | 4.0875  | 4.6020  | 4.1458  | 3.7963  | 4.4139  | 4.2940  | 4.5515  | 3.1545  | 3.8230  | 1.0286 | 0.0407  | 0.7416 | 0.1299 |
| Gdm2     | _FDENES[Phospho (STY)]PVDQPHGSK_2                                                         | #N/A                   | 6.4221  | 7.0540  | 5.3010  | 7.2847  | 6.6010  | 5.5948  | 7.3657  | 6.9038  | 6.9679  | 7.0152  | 0.9028 | -0.1476 | 0.1327 | 0.8773 |
| Sik3     | _TWC[Carbamidomethyl (C)]GS[Phospho (STY)]PPYAAPELFEGK_2                                  | Q6P456_5167_M1_Sik3    | 6.7581  | 3.4515  | 3.3332  | 3.8358  | 3.2729  | 2.9558  | 7.0296  | 4.2827  | 7.0237  | 6.8124  | 0.6258 | -0.6762 | 0.0302 | 1.5204 |
| Sik3     | _QLS[Phospho (STY)]ADSAEAHSLNMNR_2                                                        | #N/A                   | 3.9478  | 3.7631  | 3.7564  | 5.3536  | 3.5845  | 3.7942  | 3.7207  | 3.9885  | 4.0062  | 3.7312  | 1.0444 | 0.0627  | 0.6284 | 0.2018 |
| Sik3     | _RAS[Phospho (STY)]DGGANILQHAGQLLK_3                                                      | Q6P456_5493_M1_Sik3    | 3.0203  | 4.3221  | 4.2548  | 3.7985  | 4.1435  | 3.5860  | 3.9468  | 3.2026  | 3.5017  | 3.4758  | 1.0913 | 0.1261  | 0.2846 | 0.5457 |
| Snrnp200 | _EAS[Phospho (STY)]DDDM[Oxidation (M)]EGDEAVVR_2                                          | #N/A                   | 8.9529  | 8.9873  | 8.9776  | 6.6941  | 7.7154  | 8.4942  | 9.4994  | 9.3562  | 8.9908  | 8.7691  | 0.9617 | -0.0563 | 0.3596 | 0.4442 |
| Abd1     | _EAEQGS[Phospho (STY)]GEEKEEGDLK_2                                                        | #N/A                   | 7.4184  | 7.4995  | 7.7324  | 7.8039  | 7.2050  | 7.4617  | 7.5100  | 7.4543  | 7.3398  | 7.4476  | 1.0111 | 0.0159  | 0.4951 | 0.3053 |
| Abd1     | _SKPAADS[Phospho (STY)]EGEEEEETAKEK_3                                                     | #N/A                   | 3.6772  | 5.4924  | 3.4109  | 3.9822  | 5.7410  | 3.8037  | 5.8926  | 6.1398  | 5.8427  | 3.9492  | 0.7975 | -0.3264 | 0.1271 | 0.8959 |
| Abd1     | _QLSVPAS[Phospho (STY)]DEEDVAPAPR_2                                                       | #N/A                   | 4.6947  | 4.0866  | 4.1306  | 11.1502 | 4.3567  | 4.7108  | 4.9711  | 10.5004 | 4.5530  | 4.5231  | 0.8997 | -0.1524 | 0.7446 | 0.1281 |
| Abd1     | _UKQLSVPAS[Phospho (STY)]DEEDVAPAPR_3                                                     | #N/A                   | 4.0981  | 3.2867  | 3.8317  | 8.3635  | 3.1080  | 3.9781  | 3.5238  | 6.8954  | 3.9671  | 3.8679  | 0.9739 | -0.0382 | 0.9218 | 0.0354 |
| Abd1     | _SKPAAADS[Phospho (STY)]GEEEEEOTAKE_2                                                     | #N/A                   | 5.5261  | 2.9636  | 4.3461  | 4.6199  | 4.4557  | 4.8936  | 5.3824  | 4.9486  | 4.9122  | 4.5182  | 0.9043 | -0.1451 | 0.3292 | 0.4826 |
| Abd1     | _GGVFPEALQDDSD[Phospho (STY)]EEEEEEENR_3                                                  | #N/A                   | 3.8558  | 3.1113  | 3.3008  | 3.8035  | 2.9996  | 3.6250  | 3.5182  | 4.3150  | 3.9636  | 3.7705  | 0.8863 | -0.1741 | 0.0883 | 1.0538 |
| Abd1     | _AGGNVFALQDDSD[Phospho (STY)]EEEEEEENR_3                                                  | #N/A                   | 4.2983  | 3.0441  | 4.0319  | 3.5757  | 3.4420  | 3.3632  | 3.7240  | 3.4255  | 3.7245  | 3.2530  | 1.0267 | 0.0380  | 0.7189 | 0.1433 |
| Rrp12    | _GDSIEELAD[Phospho (STY)]EDDEEEER_3                                                       | #N/A                   | 4.1842  | 3.0420  | 3.3701  | 3.8728  | 3.3099  | 4.4196  | 3.5875  | 3.8943  | 3.8398  | 3.8191  | 0.8191 | -0.3880 | 0.2453 | 0.6103 |
| Rrp12    | _GDSIEELAD[Phospho (STY)]EDDEEEER_2                                                       | #N/A                   | 4.0484  | 3.3038  | 3.7820  | 3.6110  | 3.1921  | 3.4325  | 3.3257  | 3.0066  | 4.1561  | 3.5780  | 1.0128 | 0.0184  | 0.8625 | 0.0643 |
| Dqkq     | _TWPSSGS[Phospho (STY)]PR_2                                                               | Q6P5E8_517_M1_Dqkq     | 7.7018  | 3.0990  | 8.9246  | 3.5209  | 6.6767  | 8.9220  | 7.1206  | 3.4803  | 9.0405  | 8.7707  | 0.9115 | -0.1337 | 0.7157 | 0.1453 |
| Dqkq     | _LGS[Phospho (STY)]PAGS[Phospho (STY)]PVLVGGR_2                                           | Q6P5E8_522_M2_Dqkq     | 2.9935  | 8.2084  | 4.2280  | 9.0696  | 7.3009  | 7.1851  | 7.6561  | 8.7832  | 9.0655  | 9.1443  | 0.7501 | -0.4148 | 0.1190 | 0.9246 |
| Tyh3     | _YLATSORPDS[Phospho (STY)]SGS[Phospho (STY)]GH_2                                          | Q6P5F7_5519_M2_Tyh3    | 3.8222  | 3.7731  | 3.6547  | 4.0866  | 3.5944  | 4.1550  | 4.0499  | 4.8161  | 3.4902  | 3.9055  | 0.9464 | -0.0794 | 0.4052 | 0.3923 |
| Tyh3     | _C[Carbamidomethyl (C)]ENTLPGRES[Phospho (STY)]PPPSYSSMR_3                                | #N/A                   | 4.0752  | 3.8760  | 3.9866  | 4.4513  | 3.2114  | 3.2362  | 3.6786  | 4.0414  | 3.7708  | 3.2077  | 1.1265 | 0.1718  | 0.4778 | 0.3208 |
| Mapk4    | _GYS[Phospho (STY)]EGLVTK_2                                                               | Q6P5G0_5186_M1_Mapk4   | 5.9764  | 3.2100  | 6.6814  | 3.7048  | 3.0983  | 6.4994  | 6.4591  | 5.8149  | 5.8780  | 3.6718  | 0.8911 | -0.1664 | 0.5659 | 0.2473 |
| Mapk4    | _VGS[Phospho (STY)]PSYLDK_2                                                               | Q6P5G0_5430_M1_Mapk4   | 6.7852  | 6.4276  | 3.1766  | 6.8143  | 3.7208  | 6.2694  | 6.5505  | 6.3547  | 5.7997  | 3.8985  | 0.9790 | -0.0306 | 0.9050 | 0.0433 |
| Mapk4    | _AGST[Phospho (STY)]PLAEDVQVDR_2                                                          | Q6P5G0_7383_M1_Mapk4   | 3.3803  | 5.5264  | 3.9856  | 4.5571  | 4.1367  | 3.4257  | 5.2218  | 4.0880  | 5.5551  | 3.5796  | 0.9040 | -0.1455 | 0.4442 | 0.3524 |
| Ubnw7    | _LESUDASEDS[Phospho (STY)]QLEAIR_2                                                        | Q6P5G6_5266_M1_Ubnw7   | 3.9773  | 3.3923  | 3.7110  | 3.9648  | 3.2562  | 3.8121  | 3.2889  | 3.7572  | 4.0934  | 3.5555  | 1.0032 | 0.0047  | 0.9549 | 0.0240 |
| Frmf5    | _S[Phospho (STY)]C[Carbamidomethyl (C)]PSITHGR_2                                          | Q6P5H6_5351_M1_Frmf5   | 7.3215  | 3.1896  | 3.2225  | 6.7051  | 3.0779  | 3.5467  | 3.4399  | 4.3933  | 4.0419  | 7.1571  | 0.9480 | -0.0771 | 0.8406 | 0.0794 |
| Frmf5    | _SSS[Phospho (STY)]HGDTLPHVR_3                                                            | Q6P5H6_5396_M1_Frmf5   | 3.7765  | 3.5115  | 4.0965  | 4.0964  | 3.1053  | 3.5496  | 3.1908  | 3.6153  | 4.2746  | 7.4588  | 0.7953 | -0.3305 | 0.2633 | 0.5755 |
| Nwd2     | _V[Phospho (STY)]VDC[Carbamidomethyl (C)]LWR_2                                            | Q6P5U7_51685_M1_Nwd2   | 4.2507  | 3.5061  | 3.9844  | 3.5281  | 3.3944  | 3.2302  | 3.1233  | 3.4730  | 3.7721  | 3.2054  | 1.0753 | 0.1047  | 0.2971 | 0.5271 |
| Adat2    | _VESTTT[Phospho (STY)]PDGFC[Carbamidomethyl (C)]VSVQETEK_2                                | Q6P6I0_710_M1_Adat2    | 3.3939  | 4.1991  | 4.3778  | 5.8543  | 4.0204  | 5.1715  | 5.4994  | 3.7877  | 3.5889  | 1.1578  | 0.2114 | 0.3530  | 0.4523 | 0.6117 |
| Septcs   | _LLEQDK_2                                                                                 | #N/A                   | 6.9763  | 6.6559  | 6.4650  | 6.6061  | 6.3825  | 6.7793  | 6.3401  | 6.9462  | 6.9295  | 6.6263  | 0.9901 | -0.0143 | 0.6853 | 0.1641 |
| Pncp     | _TI[Phospho (STY)]LSVAANFEDESEPEEM[Oxidation (M)]PEAK_3                                   | Q6P8I4_7106_M1_Pncp    | 3.2295  | 3.8726  | 3.5787  | 4.2557  | 6.2485  | 4.1591  | 3.9822  | 4.0006  | 3.9201  | 4.1240  | 1.0542 | 0.0762  | 0.6993 | 0.1553 |
| Snw6     | _SLVOYENANK_2                                                                             | #N/A                   | 6.6277  | 6.9693  | 6.8327  | 6.4403  | 6.4068  | 5.6962  | 6.7287  | 5.9297  | 6.5690  | 4.0960  | 1.1140 | 0.1557  | 0.2445 | 0.6117 |
| Snw6     | _JAcetyl (Protein N-term)M[Oxidation (M)]EGLDDGGPRLS[Phospho (STY)]EEDR_2                 | Q6P8X1_513_M1_Snw6     | 3.7667  | 3.0710  | 4.4535  | 3.5488  | 2.8924  | 3.3363  | 3.6971  | 3.1623  | 3.3118  | 3.4223  | 0.9625 | -0.0552 | 0.7022 | 0.1535 |
| Caskin1  | _ADQPS[Phospho (STY)]PQALGGPMPATAK_2                                                      | #N/A                   | 11.0543 | 11.1853 | 11.6937 | 11.5845 | 10.3528 | 11.1070 | 11.2285 | 11.0451 | 10.9817 | 11.0204 | 1.0085 | 0.0122  | 0.7129 | 0.1470 |
| Caskin1  | _KVLPFGGS[Phospho (STY)]PEVK_3                                                            | #N/A                   | 8.2223  | 9.8476  | 10.2978 | 10.7805 | 8.2035  | 8.7607  | 9.1178  | 9.7664  | 9.1026  | 8.3822  | 1.0286 | 0.0406  | 0.6802 | 0.1674 |
| Caskin1  | _VLPFGGS[Phospho (STY)]PEVK_2                                                             | #N/A                   | 9.9400  | 9.4221  | 9.3113  | 9.8493  | 8.3386  | 9.5170  | 9.8761  | 9.2670  | 9.3352  | 9.5308  | 0.9889 | -0.0162 | 0.7429 | 0.1291 |
| Caskin1  | _SGS[Phospho (STY)]LSNVAGGR_2                                                             | Q6P9K8_5390_M1_Caskin1 | 8.0877  | 7.9038  | 8.2557  | 8.5480  | 7.0721  | 7.9351  | 8.0310  | 8.2298  | 8.1511  | 8.0715  | 0.9811 | -0.0276 | 0.5656 | 0.2475 |
| Caskin1  | _SLPQS[Phospho (STY)]PTHR_2                                                               | Q6P9K8_5828_M1_Caskin1 | 3.7574  | 3.5850  | 3.4911  | 10.0283 | 3.4063  | 9.7437  | 3.1831  | 3.9663  | 4.9968  | 4.2130  | 1.0870 | 0.1204  | 0.8280 | 0.0870 |
| Caskin1  | _PAS[Phospho (STY)]PEFGR_2                                                                | #N/A                   | 7.9562  | 7.6517  | 7.5541  | 8.1393  | 5.5925  | 7.3719  | 7.4116  | 7.5592  | 7.2285  | 7.9781  | 0.9779 | -0.0322 | 0.7398 | 0.1309 |
| Caskin1  | _VLPFGGS[Phospho (STY)]PEVKR_2                                                            | #N/A                   | 7.2827  | 7.2300  | 7.2298  | 7.6254  | 6.3220  | 7.2255  | 7.3970  | 7.3516  | 6.9159  | 7.0426  | 0.9966 | -0.0049 | 0.9225 | 0.0350 |
| Caskin1  | _IQGS[Phospho (STY)]PTPASK_2                                                              | #N/A                   | 8.3928  | 8.5582  | 8.6276  | 8.5294  | 7.4901  | 8.5744  | 8.4407  | 8.4319  | 8.1719  | 8.3797  | 1.0007 | 0.0010  | 0.9794 | 0.0090 |
| Caskin1  | _RAS[Phospho (STY)]DLAGSVDTGSAGVK_3                                                       | #N/A                   | 4.7305  | 5.9361  | 4.9692  | 6.4966  | 4.7040  | 5.3328  | 3.7344  | 3.4150  | 3.7141  | 3.2635  | 1.5181 | 0.6023  | 0.0013 | 2.1850 |
| Caskin1  | _KVLPFGGS[Phospho (STY)]PEVK_2                                                            | #N/A                   | 10.5658 | 10.5106 | 10.9178 | 10.9923 | 9.6526  | 10.3273 | 10.9013 | 10.4583 | 10.3310 | 10.4119 | 0.9970 | -0.0043 | 0.9097 | 0.0411 |
| Caskin1  | _AAASVSGPPVASDC[Carbamidomethyl (C)]AS[Phospho (STY)]PGDSAR_2                             | #N/A                   | 3.9191  | 8.5333  | 8.1736  | 9.1223  | 7.1435  | 8.3065  | 8.5087  | 8.1203  | 8.1614  | 8.0973  | 0.9162 | -0.1262 | 0.4954 | 0.3051 |
| Caskin1  | _TPLDLAC[Carbamidomethyl (C)]EFGR_2                                                       | #N/A                   | 4.4836  | 4.4310  | 3.8823  | 5.2305  | 5.2759  | 4.4739  | 4.6025  | 4.5078  | 3.2510  | 4.3960  | 1.1051 | 0.1441  | 0.2674 | 0.5729 |
| Caskin1  | _TGSEPS[Phospho (STY)]PPQGGGSLGSAPEEEMVLR_3                                               | Q6P9K8_5358_M1_Caskin1 | 4.1604  | 7.3947  | 3.3464  | 8.5681  | 3.2861  | 2.9425  | 3.5637  | 7.3822  | 3.9180  | 3.8161  | 1.0599 | 0.0839  | 0.8492 | 0.0710 |
| Caskin1  | _IQGS[Phospho (STY)]PTPASIK_2                                                             | #N/A                   | 3.3862  | 3.8399  | 4.0730  | 4.5757  | 4.0128  | 4.3972  | 5.2905  | 3.5428  | 3.1914  | 3.0419  | 1.0746 | 0.1038  | 0.5607 | 0.2512 |
| Caskin1  | _RPPEGHPTRPAS[Phospho (STY)]PEGR_4                                                        | #N/A                   | 3.3083  | 4.0341  | 4.5429  | 4.0866  | 3.8554  | 7.4538  | 4.2349  | 4.4154  | 3.2136  | 3.7639  | 1.1638 | 0.2188  | 0.4381 | 0.3585 |
| Caskin1  | _S[Phospho (STY)]QEVLLDEGM[Oxidation (M)]AGPTGR_2                                         | #N/A                   | 7.5602  | 7.7386  | 7.7275  | 7.1720  | 6.3336  | 7.9666  | 7.9732  | 7.6526  | 7.5825  | 7.8252  | 0.9559 | -0.0650 | 0.3025 | 0.5193 |
| Caskin1  | _RAS[Phospho (STY)]DLAGSVDTGSAGVK_2                                                       | #N/A                   | 5.2113  | 3.0325  | 5.5617  | 5.5438  | 3.7487  | 5.0637  | 5.5205  | 6.0958  | 5.1275  | 5.1043  | 0.8627 | -0.2130 | 0.2209 | 0.6558 |
| Caskin1  | _SVSESS[Phospho (STY)]PGDSPVPFPGSSGAAR_3                                                  | Q6P9K8_5428_M1_Caskin1 | 3.6043  | 3.6614  | 4.2911  | 3.7705  | 3.2447  | 3.5779  | 3.6129  | 3.5582  | 3.9458  | 3.7746  | 0.9916 | -0.0122 | 0.8721 | 0.0594 |
| Caskin1  | _RGS[Phospho (STY)]GEPAEGSHPMEDGTAR_3                                                     | #N/A                   | 4.4103  | 3.0997  | 4.1986  | 6.0169  | 3.2634  | 4.4641  | 4.0452  | 4.6414  | 4.7454  | 4.5075  | 0.9459 | -0.0803 | 0.6699 | 0.1740 |
| Caskin1  | DSLEM[Oxidation (M)]M[Oxidation (M)]AEISPPPEPAAAC[Carbamidomethyl (C)]QGS[Phospho (STY)]P | #N/A                   | 6.5442  | 7.9115  | 4.0985  | 8.7819  | 7.7529  | 7.3859  | 8.1342  | 8.1839  | 7.6803  | 7.2248  | 0.8014 | -0.1193 | 0.1495 | 0.8255 |
| Caskin1  | _V[Phospho (STY)]AASDSEPERDELLVPAAGPYATQR_3                                               | Q6P9K8_7888_M1_Caskin1 | 3.1302  | 3.8865  | 4.3647  | 6.5392  | 3.7748  | 4.3507  | 4.2438  | 5.8194  | 3.3917  | 3.5858  | 1.0190 | 0.02    |        |        |



|          |                                                             |                         |         |         |         |         |         |         |         |         |          |         |         |         |        |        |
|----------|-------------------------------------------------------------|-------------------------|---------|---------|---------|---------|---------|---------|---------|---------|----------|---------|---------|---------|--------|--------|
| Ahdc1    | _ASTV[S](Phospho (STY))PGGYM(Oxidation (M))VPK_2            | Q6PAL7_S1060_M1_Ahdc1   | 3.3680  | 4.1732  | 7.9109  | 4.5575  | 3.9946  | 3.7349  | 4.0957  | 7.1395  | 3.2096   | 3.0237  | 1.0586  | 0.0822  | 0.8270 | 0.0825 |
| DennD5a  | _FNS(Phospho (STY))YDGR_2                                   | Q6PAL8_S193_M1_DennD5a  | 7.2153  | 6.9787  | 7.3878  | 6.7529  | 5.6389  | 6.6307  | 4.3070  | 7.5518  | 6.9660   | 6.9541  | 1.0501  | 0.0705  | 0.6357 | 0.1967 |
| Pkfab2   | _S[Phospho (STY)]INDFAVAILDPEGEHQW_3                        | Q6PAM0_S107_M1_Pkfab2   | 7.4728  | 7.4002  | 7.7111  | 8.2991  | 7.0271  | 7.3566  | 7.5465  | 7.1658  | 7.8170   | 7.4488  | 1.0067  | 0.0096  | 0.8429 | 0.0742 |
| Pkfab2   | _JM(Oxidation (M))VGS(Phospho (STY))TDPSVSPDOK_2            | #N/A                    | 3.7897  | 7.7206  | 4.0181  | 8.3367  | 5.2187  | 7.3973  | 7.4682  | 8.0850  | 7.7127   | 6.1862  | 0.7443  | -0.4261 | 0.1245 | 0.9048 |
| Pkfab2   | _DLSSS(Phospho (STY))PPQPGDEM(Oxidation (M))VFR_2           | #N/A                    | 8.7098  | 10.4047 | 10.7702 | 11.2171 | 10.1123 | 10.5384 | 3.7952  | 10.5416 | 10.4292  | 10.2418 | 1.1760  | 0.0239  | 0.2964 | 0.5281 |
| Tnlra    | _EQGVESGAPASS(Phospho (STY))PR_2                            | Q6PAM1_S523_M1_Tnlra    | 5.7016  | 3.5687  | 7.7590  | 6.4544  | 7.0397  | 7.5394  | 6.2912  | 7.4113  | 7.1948   | 3.5207  | 1.0392  | 0.0555  | 0.8273 | 0.0823 |
| Gapvd1   | _SRS(Phospho (STY))SDVSVSR_2                                | #N/A                    | 8.1230  | 7.9426  | 8.5091  | 8.0853  | 6.6940  | 7.6912  | 8.2848  | 8.1035  | 8.0383   | 8.0479  | 0.9658  | -0.0502 | 0.4115 | 0.3856 |
| Gapvd1   | _S[Phospho (STY))SDVSVSR_2                                  | #N/A                    | 7.5986  | 6.8651  | 7.3351  | 6.9654  | 6.7208  | 6.7990  | 7.3617  | 8.6917  | 3.9908   | 7.3240  | 1.1966  | 0.5589  | 0.3372 | 0.4721 |
| Gapvd1   | _LQELSEC[Carbamidomethyl (C)]SGLGS(Phospho (STY))TSDDTDVR_2 | Q6PAR5_S746_M1_Gapvd1   | 3.4298  | 4.2350  | 4.1166  | 3.8856  | 4.0564  | 3.6731  | 4.0339  | 3.1155  | 3.4146   | 3.0855  | 1.1427  | 0.1925  | 0.0695 | 0.1583 |
| Gapvd1   | _FSLC[Carbamidomethyl (C)]S[Phospho (STY)]DNLEGGSGPSNR_2    | Q6PAR5_S569_M1_Gapvd1   | 3.8615  | 3.4809  | 3.5952  | 3.1389  | 3.0052  | 3.6194  | 3.2872  | 4.1613  | 4.3171   | 0.8831  | -0.1794 | 0.0969  | 1.1138 | 0.0969 |
| Ptgn23   | _REEGEAVEAGDT(Phospho (STY))PEELR_3                         | #N/A                    | 4.8854  | 4.9471  | 4.2666  | 5.6762  | 4.2933  | 5.5882  | 5.1402  | 5.4024  | 5.6648   | 5.5718  | 0.9078  | -0.1395 | 0.1581 | 0.8010 |
| Ptgn23   | _ELQAEQHDAR_2                                               | #N/A                    | 3.9099  | 0.1464  | 3.6436  | 3.1873  | 3.0536  | 3.5710  | 1.0164  | 3.8138  | 4.1129   | 4.3655  | 0.8772  | -0.1890 | 0.6755 | 0.1704 |
| Ano8     | _GPS(Phospho (STY))PPRP GK_2                                | Q6PB70_S1009_M1_Ano8    | 7.6695  | 7.2623  | 6.8107  | 6.5355  | 3.9529  | 7.2158  | 7.5737  | 8.0390  | 7.1201   | 7.6672  | 0.8651  | -0.2091 | 0.1818 | 0.7405 |
| Ano8     | _VESIGQWQK_2                                                | #N/A                    | 4.0273  | 7.7247  | 8.0478  | 8.6617  | 7.8966  | 3.0757  | 7.4033  | 7.1497  | 7.6524   | 7.6285  | 0.8812  | -0.1825 | 0.4877 | 0.3119 |
| Ttbk1    | _S[Phospho (STY)]GPLPASTAR_2                                | Q6PCN3_S1222_M1_Ttbk1   | 8.7208  | 8.8057  | 8.6112  | 8.9951  | 7.2922  | 8.6846  | 8.5085  | 8.5125  | 8.5997   | 8.5869  | 0.9961  | -0.0057 | 0.9174 | 0.0375 |
| Ttbk1    | _APPOS(Phospho (STY))PTTPVR_2                               | Q6PCN3_S441_M1_Ttbk1    | 3.3498  | 4.1550  | 4.0366  | 4.5393  | 3.9764  | 3.7576  | 4.2657  | 3.5836  | 3.2322   | 3.9040  | 1.0594  | 0.0833  | 0.4299 | 0.3667 |
| Ttbk1    | _RVNS(Phospho (STY))PESER_2                                 | #N/A                    | 7.5551  | 7.8172  | 8.3221  | 7.8986  | 3.9085  | 7.8752  | 7.9062  | 7.7332  | 3.2667   | 3.7108  | 1.2786  | 0.3545  | 0.2599 | 0.5851 |
| Ttbk1    | _GVGVPS(Phospho (STY))PVR_2                                 | Q6PCN3_S433_M1_Ttbk1    | 2.9564  | 4.3860  | 4.1909  | 3.7347  | 4.2073  | 7.9920  | 8.1098  | 3.2665  | 3.5656   | 3.4120  | 0.9977  | -0.0033 | 0.9937 | 0.0028 |
| Ttbk1    | _KGTISPS(Phospho (STY))R_2                                  | Q6PCN3_S1036_M1_Ttbk1   | 4.1030  | 3.4074  | 3.2890  | 3.7916  | 3.2287  | 2.9999  | 3.3607  | 4.3268  | 3.9754   | 3.7586  | 0.9000  | -0.1520 | 0.1784 | 0.7487 |
| Ttbk1    | _S[Phospho (STY)]QEGAPSTLADQCK_2                            | Q6PCN3_S794_M1_Ttbk1    | 7.4262  | 7.3843  | 7.4215  | 8.2421  | 3.7369  | 7.4624  | 4.0189  | 7.7156  | 7.3982   | 7.5233  | 1.0423  | 0.0597  | 0.8004 | 0.0967 |
| Ttbk1    | _ATGDALLSTST(Phospho (STY))PQOQTR_2                         | Q6PCN3_T325_M1_Ttbk1    | 4.9334  | 3.6552  | 4.2578  | 3.2596  | 3.5435  | 3.0812  | 7.0256  | 6.3739  | 3.0066   | 5.8939  | 0.6795  | -0.5574 | 0.0524 | 1.2807 |
| Ttbk1    | _SETSQPTPTGS(Phospho (STY))PSGPGHSGPR_3                     | Q6PCN3_S638_M1_Ttbk1    | 3.0649  | 3.8212  | 4.0918  | 7.3036  | 3.7095  | 6.1202  | 4.3091  | 3.5241  | 3.1716   | 3.0606  | 1.3323  | 0.4139  | 0.2162 | 0.6651 |
| Ttbk1    | _VNS(Phospho (STY))PESER_2                                  | #N/A                    | 6.1910  | 3.5491  | 4.3638  | 3.3656  | 5.6006  | 5.6721  | 3.0803  | 6.1534  | 6.1683   | 6.2547  | 0.8848  | -0.1766 | 0.4921 | 0.3079 |
| Ttbk1    | _MDLPGS(Phospho (STY))PSR_2                                 | #N/A                    | 8.0466  | 5.9603  | 3.4281  | 8.2103  | 3.3678  | 4.3617  | 7.6202  | 4.1877  | 3.8363   | 3.8978  | 1.1386  | 0.1872  | 0.6257 | 0.2037 |
| Ttbk1    | _RVNS(Phospho (STY))PES(Phospho (STY))ERLSTAADGR_3          | Q6PCN3_S456_M2_Ttbk1    | 6.3421  | 3.4375  | 3.9157  | 6.8050  | 5.2640  | 3.2988  | 3.1920  | 5.8269  | 3.8407   | 6.3807  | 1.0070  | 0.0101  | 0.9734 | 0.0117 |
| Ttbk1    | _SETSQPTPTGSPHS(Phospho (STY))PLHS(Phospho (STY))GPRPR_3    | Q6PCN3_S646_M2_Ttbk1    | 3.2025  | 5.8649  | 4.4371  | 3.9808  | 3.9045  | 5.5805  | 5.0862  | 3.0204  | 3.3194   | 3.6581  | 1.1912  | 0.2524  | 0.2926 | 0.5367 |
| Ttbk1    | _GVGVPS(Phospho (STY))PVRAPPOS(Phospho (STY))PTTPVR_3       | Q6PCN3_S433_M2_Ttbk1    | 3.1551  | 3.8291  | 4.3896  | 3.7652  | 3.7997  | 3.5647  | 4.3816  | 7.4342  | 3.0878   | 3.5506  | 0.8129  | -0.2988 | 0.3119 | 0.5030 |
| Ttbk1    | _SRMDLPGS(Phospho (STY))PSR_2                               | #N/A                    | 3.2208  | 4.0054  | 3.9076  | 4.4103  | 3.8473  | 3.8822  | 4.1249  | 3.7082  | 3.3568   | 4.3772  | 0.9967  | -0.0048 | 0.9623 | 0.0167 |
| Ttbk1    | _NRES(Phospho (STY))DPTGPQR_2                               | Q6PCN3_S655_M1_Ttbk1    | 3.2707  | 3.9555  | 3.9575  | 4.4602  | 3.8972  | 3.3833  | 3.3069  | 4.4722  | 4.1748   | 3.6583  | 1.0010  | 0.0014  | 0.9896 | 0.0046 |
| Ttbk1    | _GRAS(Phospho (STY))MADGDLPEEGSK_2                          | Q6PCN3_S815_M1_Ttbk1    | 3.0042  | 3.8094  | 3.6910  | 4.1937  | 3.6308  | 4.0987  | 4.4595  | 3.9248  | 3.5734   | 4.1607  | 0.9276  | -0.1084 | 0.2977 | 0.5262 |
| Mff      | _NDSPVPS(Phospho (STY))PPQAR_2                              | Q6PCP5_S151_M1_Mff      | 12.2349 | 12.7429 | 12.9291 | 13.0180 | 12.0573 | 12.7444 | 13.3322 | 12.8406 | 12.7821  | 12.7332 | 0.9767  | -0.0340 | 0.2194 | 0.6587 |
| Mff      | _ERS(Phospho (STY))M(Oxidation (M))JENAVR_2                 | #N/A                    | 3.4008  | 3.5410  | 4.7126  | 4.0098  | 4.7387  | 4.2984  | 4.6113  | 4.3038  | 4.1697   | 4.2379  | 0.9506  | -0.0730 | 0.4983 | 0.3025 |
| Mff      | _SM(Oxidation (M))JENAVR_2                                  | Q6PCP5_S131_M1_Mff      | 3.8071  | 3.5384  | 6.1453  | 4.9568  | 8.7498  | 5.5197  | 8.1955  | 6.6462  | 6.9883   | 3.6605  | 0.9688  | -0.0442 | 0.9019 | 0.4048 |
| Ankrd13d | _GRS(Phospho (STY))PKTK(Phospho (STY))PPSPAPSFEEQLR_3       | Q6PD24_S552_M2_Ankrd13d | 9.0302  | 9.6321  | 9.8233  | 10.6511 | 8.7148  | 9.6475  | 9.7527  | 9.5441  | 9.7662   | 9.3150  | 0.9988  | -0.0017 | 0.9752 | 0.0109 |
| Ppp2r5b  | _SHS(Phospho (STY))SSQFR_2                                  | Q6PD28_S46_M1_Ppp2r5b   | 3.0372  | 5.5701  | 4.2717  | 5.4484  | 4.1265  | 3.6029  | 3.9637  | 3.1857  | 3.4848   | 4.9028  | 1.1181  | 0.1610  | 0.4607 | 0.3364 |
| Rundc3b  | _SNDXC[Carbamidomethyl (C)]LASPTELTS(Phospho (STY))PLGTPS_2 | Q6PDC0_S402_M1_Rundc3b  | 3.2583  | 3.9690  | 5.4472  | 6.0127  | 3.9105  | 5.1713  | 4.1625  | 5.5037  | 3.3204   | 3.8321  | 1.1007  | 0.1385  | 0.5380 | 0.2692 |
| Rundc3b  | _FEQSSSGS(Phospho (STY))DEEELR_2                            | Q6PDC0_S217_M1_Rundc3b  | 3.3862  | 4.5921  | 4.0730  | 4.5757  | 3.7283  | 4.3932  | 4.2904  | 3.5428  | 3.1914   | 3.0418  | 1.1731  | 0.2304  | 0.1051 | 0.9784 |
| Smarc2   | _S[Phospho (STY))PS(Phospho (STY))PSPTPEAK_2                | #N/A                    | 9.7529  | 8.9863  | 8.8589  | 9.9192  | 8.0625  | 9.7601  | 9.9299  | 9.5144  | 9.6672   | 9.6383  | 0.9521  | -0.0708 | 0.2494 | 0.6031 |
| Smarc2   | _TLTDEVNS(Phospho (STY))PDSVR_2                             | #N/A                    | 6.8235  | 7.2109  | 6.9692  | 7.9270  | 6.8125  | 6.7074  | 7.1904  | 7.4186  | 7.1305   | 0.9805  | -0.0283 | 0.5704  | 0.2438 | 0.3602 |
| Smarc2   | _RS(Phospho (STY))PS(Phospho (STY))PSPTPEAK_2               | #N/A                    | 7.1887  | 7.4880  | 7.6351  | 7.6390  | 6.7999  | 7.6292  | 7.5832  | 3.3985  | 7.3962   | 6.6081  | 1.1841  | 0.2438  | 0.1826 | 0.7385 |
| Smarc2   | _KRS(Phospho (STY))PS(Phospho (STY))PSPTPEAK_2              | #N/A                    | 9.7954  | 10.1019 | 10.4849 | 10.4326 | 9.8704  | 10.1090 | 10.2199 | 9.9644  | 10.0313  | 10.0796 | 1.0058  | 0.0084  | 0.7068 | 0.1507 |
| Smarc2   | _DM(Oxidation (M))DEPS(Phospho (STY))PVNVEEVLTK_2           | #N/A                    | 9.5798  | 9.6045  | 9.9402  | 10.4248 | 9.3182  | 9.8285  | 10.2469 | 9.9976  | 9.9290   | 0.9692  | -0.0451 | 0.1663  | 0.7791 | 0.5791 |
| Smarc2   | _TLTDEVNS(Phospho (STY))PDS(Phospho (STY))DRDK_3            | #N/A                    | 3.5517  | 3.7851  | 4.3562  | 4.7143  | 4.4166  | 4.1593  | 4.3737  | 4.0395  | 3.8757   | 4.2896  | 1.0046  | 0.0067  | 0.9373 | 0.0281 |
| Smarc2   | _YYEADTVQFQDNVR_2                                           | #N/A                    | 3.2244  | 5.4325  | 3.9112  | 4.0911  | 4.6196  | 4.6843  | 4.2394  | 3.2091  | 3.7684   | 3.1874  | 1.1076  | 0.1474  | 0.3695 | 0.4323 |
| Mon1a    | _S[Phospho (STY)]YEDLTELEDR_2                               | #N/A                    | 8.8193  | 9.9781  | 4.2077  | 10.5553 | 9.0542  | 9.9110  | 10.5976 | 10.3312 | 10.1027  | 10.1027 | 0.8459  | -0.2415 | 0.2152 | 0.6601 |
| Mon1a    | _S[Phospho (STY)]YEDLTELEDRASGSPK_3                         | #N/A                    | 3.5365  | 3.8059  | 3.2701  | 4.3148  | 4.7810  | 5.2263  | 4.4630  | 6.3984  | 6.0939   | 3.9920  | 0.7745  | -0.0467 | 0.0794 | 1.1073 |
| Phidb1   | _TLTPPES(Phospho (STY))PR_2                                 | Q6PDH0_S445_M1_Phdb1    | 9.7946  | 10.1486 | 10.2594 | 10.3998 | 9.6335  | 10.1108 | 10.1064 | 9.7007  | 9.7895   | 10.1158 | 1.0131  | 0.0187  | 0.4680 | 0.3298 |
| Phidb1   | _KLS(Phospho (STY))SGDLR_2                                  | Q6PDH0_S565_M1_Phdb1    | 7.9782  | 7.8964  | 8.5798  | 8.5424  | 7.2734  | 8.1698  | 8.3532  | 8.4690  | 8.0757   | 8.2636  | 0.9758  | -0.0353 | 0.4594 | 0.3378 |
| Phidb1   | _SS[Phospho (STY)]PPPLPAK_2                                 | Q6PDH0_S951_M1_Phdb1    | 3.8563  | 3.7465  | 3.9848  | 4.0818  | 7.2975  | 3.8542  | 3.9608  | 8.2835  | 3.5443   | 3.9556  | 0.9056  | -0.1430 | 0.6921 | 0.1598 |
| Phidb1   | _SQPASG(Phospho (STY))PK_2                                  | Q6PDH0_S382_M1_Phdb1    | 6.4584  | 6.8341  | 3.6775  | 6.4782  | 5.7919  | 4.1123  | 6.0479  | 4.1772  | 6.1695   | 6.3216  | 0.9788  | -0.0309 | 0.8829 | 0.0541 |
| Phidb1   | _SPS(Phospho (STY))PTLGESLAPR_2                             | Q6PDH0_S522_M1_Phdb1    | 7.8823  | 7.3719  | 7.5777  | 7.3062  | 3.3286  | 3.1106  | 8.3740  | 8.2640  | 6.8777   | 7.5544  | 0.7848  | -0.3495 | 0.1927 | 0.7152 |
| Phidb1   | _TJ(Phospho (STY))RSPS(Phospho (STY))PTLGESLAPR_2           | #N/A                    | 3.7256  | 5.8972  | 3.4795  | 4.2548  | 5.8129  | 6.0347  | 5.7032  | 4.1108  | 6.1388   | 6.4365  | 0.8696  | -0.2016 | 0.3446 | 0.4627 |
| Phidb1   | _KNS(Phospho (STY))ITESDNEDELLEYHR_4                        | Q6PDH0_S580_M1_Phdb1    | 3.7104  | 3.6692  | 4.1474  | 3.7641  | 3.4533  | 3.9196  | 3.8128  | 3.3650  | 3.8455   | 3.3685  | 1.0499  | 0.0702  | 0.2953 | 0.5297 |
| Phidb1   | _KNS(Phospho (STY))ITES(Phospho (STY))DNEDELLEYHR_3         | Q6PDH0_S580_M2_Phdb1    | 3.2093  | 4.1331  | 4.4439  | 3.9876  | 3.8539  | 4.2715  | 4.1359  | 3.0135  | 3.3126   | 3.6649  | 1.1278  | 0.1736  | 0.1602 | 0.7955 |
| Phidb1   | _NSTES(Phospho (STY))DNEDELLEYHR_3                          | #N/A                    | 3.2878  | 3.9383  | 3.9746  | 4.4773  | 3.8266  | 4.2988  | 4.1920  | 3.6412  | 3.2898   | 4.4443  | 1.0194  | 0.0277  | 0.8047 | 0.0944 |
| Mindy2   | _VTAS(Phospho (STY))PELAEAAGR_2                             | Q6PDH6_S99_M1_Mindy2    | 4.1017  | 3.2407  | 4.5580  | 3.3791  | 3.2454  | 3.3792  | 9.3698  | 8.5708  | 9.9211   | 8.8000  | 0.5828  | -0.7789 | 0.0814 | 1.0894 |
| Mindy2   | _VS(Phospho (STY))PPEGR_2                                   | Q6PDH6_S21_M1_Mindy2    | 8.1512  | 6.8100  | 7.7123  | 7.8666  | 5.6394  | 6.5316  | 4.1988  | 7.4179  | 7.4345   | 7.2224  | 1.0838  | 0.1160  | 0.5083 | 0.2939 |
| Fbox42   | _RGS(Phospho (STY))LPDCK_2                                  | Q6PDH6_S488_M1_Fbox42   | 8.4038  | 8.4841  | 8.3705  | 8.5817  | 7.1190  | 7.8540  | 8.5517  | 8.3504  | 8.2537   | 8.3549  | 0.9711  | -0.0423 | 0.4269 | 0.3697 |
| Kmt2d    | _ASQVEPC(Phospho (STY))PGLGLR_2                             | Q6PDK2_S2299_M1_Kmt2d   | 3.7565  | 4.3499  | 3.5631  | 8.2254  | 6.8084  | 7.6471  | 7.9950  | 7.5238  | 7.6850   | 7.6240  | 0.8255  | -0.2767 | 0.2111 | 0.6754 |
| Kmt2d    | _C[Carbamidomethyl (C)]POPEPPLS(Phospho (STY))PQPEPR_2      | Q6PDK2_S727_M1_Kmt2d    | 4.0619  | 6.4514  | 7.1876  | 7.0832  | 3.2057  | 6.3437  | 7.1249  | 6.0988  | 4.1697</ |         |         |         |        |        |



|          |                                                                                     |                        |         |         |         |         |         |         |         |         |         |         |         |         |        |        |
|----------|-------------------------------------------------------------------------------------|------------------------|---------|---------|---------|---------|---------|---------|---------|---------|---------|---------|---------|---------|--------|--------|
| Prrt3    | _S[Phospho (STY)]LTV[C[Carbamidomethyl (C)]LR_2                                     | #N/A                   | 8.9580  | 8.0178  | 3.9975  | 8.3697  | 6.2593  | 8.2688  | 8.3280  | 8.4492  | 8.7933  | 8.4631  | 8.5594  | -0.2187 | 0.2449 | 0.6110 |
| Prrt3    | _SSEHSA[Phospho (STY)]SOTIE_L_2                                                     | Q6PE11_S965_M1_Prrt3   | 3.8884  | 3.9140  | 3.7956  | 4.2761  | 3.7353  | 4.0636  | 3.7032  | 3.7266  | 6.9244  | 3.7653  | 0.8710  | -0.1993 | 0.3872 | 0.4120 |
| Prrt3    | _RGS[Phospho (STY)]QDAELDGA[TSLLR_3                                                 | #N/A                   | 3.6899  | 3.6363  | 4.0442  | 6.8213  | 3.4852  | 6.7529  | 6.7732  | 9.6836  | 8.4156  | 3.7411  | 0.6624  | -0.5943 | 0.1007 | 0.9969 |
| Prrt3    | _C[Carbamidomethyl (C)]RS[Phospho (STY)]LTV[C[Carbamidomethyl (C)]LR_2              | #N/A                   | 3.6265  | 4.3827  | 3.5302  | 4.0329  | 4.2710  | 3.8544  | 3.7476  | 4.0856  | 3.7342  | 3.9999  | 1.0149  | 0.0213  | 0.7668 | 0.1153 |
| Prrt3    | _GS[Phospho (STY)]QDAELDGA[TSLLR_2                                                  | #N/A                   | 3.7441  | 3.4821  | 4.4309  | 3.4327  | 2.8697  | 3.3589  | 3.1474  | 3.1850  | 4.3344  | 3.3997  | 1.0104  | 0.0149  | 0.9180 | 0.0372 |
| Prrt3    | _GLAS[Phospho (STY)]PTGGALRPR_2                                                     | Q6PE11_S833_M1_Prrt3   | 3.8071  | 8.0842  | 3.5408  | 4.5854  | 2.9509  | 3.6738  | 3.2328  | 8.2004  | 4.2157  | 4.2627  | 0.8920  | -0.1649 | 0.6873 | 0.1628 |
| Prrt3    | _TSLPQHVM[Oxidation (M)]EPPVGAAAGSGS[Phospho (STY)]SLDSFSK_3                        | Q6PE11_S894_M1_Prrt3   | 3.4600  | 4.2162  | 3.1936  | 4.2382  | 4.1045  | 4.0209  | 3.9141  | 4.2638  | 3.0620  | 3.9155  | 1.0220  | 0.0314  | 0.7890 | 0.1029 |
| Prrt3    | _GSGPAPSLSELDURPS[Phospho (STY)]PINLSR_3                                            | Q6PE11_S799_M1_Prrt3   | 3.7721  | 3.5703  | 3.5058  | 7.0009  | 3.3917  | 4.1378  | 3.1978  | 5.0321  | 4.2507  | 4.2276  | 1.0206  | 0.0294  | 0.9133 | 0.0394 |
| Prrt3    | _S[Phospho (STY)]DAALFR_2                                                           | Q6PE11_S806_M1_Prrt3   | 3.0132  | 3.7694  | 4.2477  | 7.6488  | 3.6577  | 2.9669  | 3.9397  | 3.2097  | 3.5088  | 3.4687  | 1.1941  | 0.2559  | 0.4684 | 0.3293 |
| Gpatch2l | _VAVPLTNFS[Phospho (STY)]DOTVAVK_2                                                  | Q6PE65_S88_M1_Gpatch2l | 3.9678  | 3.2722  | 4.0013  | 3.6564  | 3.0935  | 3.1584  | 3.2522  | 4.1339  | 3.6234  | 0.9500  | -0.0740 | 0.4858  | 0.3136 |        |
| Mob4     | _DNILVPLEEQVNSVSGESA_2                                                              | #N/A                   | 7.8355  | 8.0599  | 8.6316  | 8.8152  | 7.0749  | 7.6453  | 7.9776  | 7.9948  | 7.2963  | 7.7862  | 1.0318  | 0.0451  | 0.5045 | 0.2971 |
| Mob4     | _HTLDGAAAC[Carbamidomethyl (C)]LINSNK_3                                             | #N/A                   | 3.2585  | 4.0637  | 3.9453  | 4.4479  | 3.8850  | 3.8445  | 4.1626  | 3.6705  | 3.3191  | 4.4149  | 1.0040  | 0.0058  | 0.9562 | 0.0295 |
| Cif      | _S[Phospho (STY)]QIEELE_R_2                                                         | Q6PEE2_S18_M1_Cif      | 9.7802  | 9.3889  | 9.3271  | 9.6519  | 9.1154  | 9.4493  | 9.9995  | 9.1039  | 9.6063  | 9.6345  | 0.9860  | -0.0203 | 0.4990 | 0.3019 |
| Slc46a1  | _VNPHPEFQQPQS[Phospho (STY)]P_2                                                     | Q6PEM8_S458_M1_Slc46a1 | 8.2913  | 8.4742  | 8.7758  | 8.7637  | 6.9349  | 8.2640  | 9.1563  | 8.9869  | 8.5912  | 8.0999  | 0.9474  | -0.0779 | 0.2789 | 0.5545 |
| Mapre3   | _LSNVAPP[C[Carbamidomethyl (C)]LR_2                                                 | #N/A                   | 8.0959  | 8.2293  | 8.0284  | 8.3657  | 8.4392  | 7.9515  | 8.0115  | 8.2000  | 8.0907  | 8.1360  | 1.0093  | 0.0134  | 0.4860 | 0.3134 |
| Mapre3   | _LEHEYHNFK_2                                                                        | #N/A                   | 6.0004  | 5.9546  | 5.7559  | 6.3405  | 5.6314  | 5.6174  | 5.7366  | 5.5921  | 5.9432  | 5.2298  | 1.0459  | 0.0647  | 0.1983 | 0.7028 |
| Mapre3   | _FDANVYGDKNPLLAR_3                                                                  | #N/A                   | 6.3812  | 6.8558  | 6.7206  | 6.9151  | 6.7480  | 6.8359  | 6.6567  | 6.6002  | 6.7175  | 6.2326  | 1.0292  | 0.0415  | 0.1803 | 0.7440 |
| Mapre3   | _QGQDVAPPNPGDQFNK_2                                                                 | #N/A                   | 5.9373  | 6.4871  | 6.4427  | 6.1990  | 5.8632  | 5.9592  | 6.9058  | 6.8873  | 6.2612  | 6.3392  | 0.9318  | -0.1020 | 0.0491 | 1.3092 |
| Mapre3   | _FFDANYDGK_2                                                                        | #N/A                   | 5.9239  | 5.9021  | 5.9416  | 6.3746  | 6.4153  | 6.1845  | 6.2446  | 6.2739  | 6.3958  | 5.9443  | 0.9854  | -0.0213 | 0.5380 | 0.2692 |
| Mapre3   | _KLIGTAVPQRT[Phospho (STY)]SPTGPK_3                                                 | #N/A                   | 5.5442  | 3.4001  | 3.2817  | 3.2198  | 3.0072  | 3.3680  | 3.7814  | 4.0805  | 3.7513  | 0.9645  | -0.0521 | 0.7974  | 0.0983 | 0.6983 |
| Mapre3   | _LTVDGLEK_2                                                                         | #N/A                   | 6.5566  | 6.1089  | 4.0260  | 6.1299  | 6.2182  | 6.7569  | 4.8424  | 6.2645  | 6.6062  | 6.3359  | 0.9923  | -0.0111 | 0.9398 | 0.0270 |
| Mapre3   | _DYNPLAR_2                                                                          | #N/A                   | 5.5322  | 5.2587  | 5.4982  | 5.4083  | 6.1539  | 5.6918  | 4.3052  | 6.3216  | 6.1792  | 0.9694  | -0.0448 | 0.6844  | 0.1653 |        |
| Mapre3   | _Acetyl (Protein N-term)AVNVYSTSVTSENLSR_2                                          | #N/A                   | 7.2657  | 6.6416  | 7.4594  | 7.2914  | 6.7615  | 7.0491  | 7.2088  | 6.6161  | 6.6596  | 7.0978  | 1.0265  | 0.0377  | 0.3946 | 0.4038 |
| Mapre3   | _LIGTAVPQRTS[Phospho (STY)]PTGPK_2                                                  | Q6PER3_S162_M1_Mapre3  | 3.7820  | 3.7610  | 3.9672  | 3.7873  | 3.4319  | 3.9242  | 3.6865  | 6.2230  | 5.3349  | 3.6483  | 0.7994  | -0.3231 | 0.1013 | 0.9944 |
| Wipf2    | _HSS[Phospho (STY)]ARPPPPGR_2                                                       | Q6PEV3_S175_M1_Wipf2   | 8.2014  | 3.1693  | 9.4342  | 9.6038  | 3.3464  | 9.7022  | 9.4905  | 3.8914  | 4.0216  | 3.5805  | 1.3669  | 0.4509  | 0.3470 | 0.4596 |
| Pik3c3   | _DGDSS[Phospho (STY)]PLTSTFELVK_2                                                   | Q6PF93_S244_M1_Pik3c3  | 3.1906  | 6.1962  | 6.1244  | 4.3801  | 5.2285  | 3.9123  | 4.0948  | 3.7384  | 5.9606  | 6.2531  | 0.9655  | -0.0507 | 0.8345 | 0.0786 |
| Digap3   | _SHS[Phospho (STY)]LEAPGR_2                                                         | #N/A                   | 10.2182 | 10.3986 | 10.8452 | 10.5365 | 9.3879  | 10.2765 | 10.0770 | 10.3803 | 10.1421 | 10.4277 | 1.0020  | 0.0029  | 0.9393 | 0.0272 |
| Digap3   | _S[Phospho (STY)]DSVDR_2                                                            | #N/A                   | 9.2205  | 8.7529  | 9.0537  | 9.0989  | 7.9422  | 8.9209  | 8.7542  | 8.8443  | 8.8060  | 9.1825  | 0.9927  | -0.0106 | 0.8000 | 0.0969 |
| Digap3   | _SHS[Phospho (STY)]LEAPGK_2                                                         | #N/A                   | 6.8302  | 3.1505  | 7.2433  | 7.4442  | 3.0388  | 6.7536  | 3.4789  | 6.5167  | 6.7741  | 7.2447  | 0.9567  | -0.0639 | 0.8407 | 0.5173 |
| Digap3   | _S[Phospho (STY)]PDS[Phospho (STY)]GRTSP[C[Carbamidomethyl (C)]PR_2                 | Q6PFD5_S783_M2_Digap3  | 6.7972  | 6.9992  | 6.8972  | 7.2392  | 6.3559  | 6.6584  | 6.8279  | 6.4684  | 6.4863  | 7.1546  | 1.0183  | 0.0262  | 0.5469 | 0.2621 |
| Digap3   | _LFAKS[Phospho (STY)]HS[Phospho (STY)]LEAPGKR_3                                     | Q6PFD5_S183_M2_Digap3  | 5.2971  | 5.5564  | 6.2822  | 5.9065  | 5.5679  | 5.9698  | 5.2262  | 5.5665  | 6.2207  | 5.2798  | 0.8868  | -0.1734 | 0.3005 | 0.5221 |
| Digap3   | _RDS[Phospho (STY)]WMER_2                                                           | Q6PFD5_S771_M1_Digap3  | 6.0930  | 4.2723  | 4.1341  | 6.6599  | 4.4169  | 3.6557  | 4.5737  | 4.7807  | 4.3236  | 4.3460  | 1.0812  | 0.1127  | 0.5722 | 0.2424 |
| Digap3   | _ERS[Phospho (STY)]DSVDR_2                                                          | #N/A                   | 8.4819  | 8.4834  | 8.9900  | 8.9207  | 7.9383  | 8.6900  | 8.2224  | 8.6051  | 8.5850  | 8.4826  | 1.0130  | 0.0187  | 0.6080 | 0.2161 |
| Digap3   | _HAS[Phospho (STY)]EPQGR_2                                                          | Q6PFD5_S712_M1_Digap3  | 6.2043  | 5.8435  | 6.4608  | 7.5502  | 8.1794  | 6.4378  | 6.2310  | 6.4712  | 6.4559  | 6.4453  | 1.0591  | 0.0829  | 0.4320 | 0.3645 |
| Digap3   | _WRPSGVQVETIS[Phospho (STY)]DSOTENR_3                                               | Q6PFD5_S641_M1_Digap3  | 3.5871  | 4.3923  | 4.2739  | 5.5278  | 4.1281  | 3.5158  | 3.8766  | 5.3939  | 3.5719  | 3.2428  | 1.0538  | 0.0756  | 0.6931 | 0.1592 |
| Digap3   | _S[Phospho (STY)]NSVTAGVQADLEGLAGLAVATEDK_3                                         | Q6PFD5_S672_M1_Digap3  | 3.2174  | 3.9737  | 4.6419  | 3.9957  | 3.8620  | 4.2635  | 4.1440  | 3.0055  | 3.3045  | 3.6730  | 1.1215  | 0.1654  | 0.1780 | 0.7496 |
| Digap3   | _HSSATES[Phospho (STY)]ADSEINPEAQTR_3                                               | #N/A                   | 6.1595  | 5.9121  | 6.6515  | 7.8691  | 6.3909  | 5.5569  | 6.0015  | 6.7693  | 6.7671  | 6.5856  | 0.9833  | -0.0243 | 0.8077 | 0.0927 |
| Digap3   | _AMGDSESGDS[Phospho (STY)]DGS[Phospho (STY)]PKTS[Phospho (STY)]PK_2                 | Q6PFD5_S407_M3_Digap3  | 3.9720  | 3.3378  | 4.0570  | 4.7693  | 3.6650  | 3.6141  | 3.2417  | 4.0920  | 4.2006  | 3.8840  | 1.0124  | 0.0178  | 0.8791 | 0.0560 |
| Digap3   | _AQAGC[Carbamidomethyl (C)]S[Phospho (STY)]QDQ[C[Carbamidomethyl (C)]LPLAAPASVSGR_3 | Q6PFD5_S510_M1_Digap3  | 3.4430  | 3.7832  | 4.1298  | 3.1316  | 3.6714  | 2.9532  | 3.4372  | 3.4860  | 3.3612  | 3.0986  | 0.8139  | -0.2972 | 0.2281 | 0.6418 |
| Digap3   | _RSSS[Phospho (STY)]VOTAR_2                                                         | Q6PFD5_S429_M1_Digap3  | 4.0800  | 3.2450  | 3.2660  | 3.7686  | 3.2057  | 3.0234  | 3.4833  | 4.3503  | 3.9989  | 3.7356  | 0.8817  | -0.1817 | 0.1059 | 0.9750 |
| Digap3   | _S[Phospho (STY)]PDGSR_2                                                            | Q6PFD5_S779_M1_Digap3  | 2.9735  | 5.2579  | 3.6603  | 4.3420  | 3.6000  | 4.1294  | 4.1714  | 4.1600  | 6.0443  | 4.0193  | 0.8685  | -0.2035 | 0.3048 | 0.5159 |
| Digap3   | _AMGDESGDS[Phospho (STY)]PK_2                                                       | Q6PFD5_S410_M1_Digap3  | 4.8241  | 4.1237  | 3.8737  | 5.6812  | 4.1002  | 3.6991  | 4.0911  | 3.8266  | 3.4752  | 3.8445  | 1.1508  | 0.0206  | 0.1808 | 0.7426 |
| Digap3   | _EADVELPEELEK_2                                                                     | #N/A                   | 3.0594  | 3.8646  | 3.7462  | 4.2488  | 3.6859  | 4.0436  | 3.9635  | 6.7838  | 3.5182  | 4.2158  | 0.8170  | -0.2916 | 0.2079 | 0.6821 |
| Digap3   | _EGYVPEYPATDGS[Phospho (STY)]GPTTPVAPGPGSGR_3                                       | Q6PFD5_S753_M1_Digap3  | 3.6084  | 3.7340  | 3.3421  | 5.6304  | 4.2530  | 4.5350  | 4.8991  | 4.4144  | 4.0640  | 0.9096  | 0.9746  | -0.0371 | 0.3847 | 0.1816 |
| Digap3   | _C[Carbamidomethyl (C)]S[Phospho (STY)]SADGLDGTMGAR_2                               | Q6PFD5_S578_M1_Digap3  | 3.9139  | 3.6011  | 3.3483  | 3.9044  | 3.8545  | 3.6918  | 4.0526  | 4.1906  | 4.2814  | 3.9497  | 0.9030  | -0.1472 | 0.0134 | 1.8721 |
| Digap3   | _DSWMERGS[Phospho (STY)]RS[Phospho (STY)]LDGSR_3                                    | Q6PFD5_S777_M2_Digap3  | 2.9912  | 3.7964  | 3.6780  | 4.3243  | 3.6178  | 4.4177  | 4.4725  | 3.9378  | 2.9760  | 4.1177  | 0.9665  | -0.0492 | 0.7167 | 0.1767 |
| Nup98    | _YGLQDS[Phospho (STY)]DEEEHPKK_2                                                    | #N/A                   | 4.0585  | 4.9426  | 3.5356  | 3.5625  | 3.0830  | 3.3700  | 5.7220  | 4.0516  | 3.9929  | 3.4166  | 0.8750  | -0.1927 | 0.3299 | 0.9876 |
| Nup98    | _GETVQ[C[Carbamidomethyl (C)]S[Phospho (STY)]PR_2                                   | Q6PFD9_S1027_M1_Nup98  | 3.0866  | 3.8918  | 3.7734  | 4.2761  | 3.7132  | 4.0163  | 3.9908  | 3.8424  | 3.4910  | 4.2431  | 0.9746  | -0.0371 | 0.6897 | 0.1613 |
| Tra2a    | _Acetyl (Protein N-term)S[Phospho (STY)]DVEENFEGR_2                                 | Q6PFR5_S2_M1_Tra2a     | 8.7694  | 9.3547  | 9.0792  | 9.7698  | 8.7545  | 9.2905  | 10.0415 | 9.5257  | 9.6420  | 9.5775  | 0.9457  | -0.0806 | 0.0423 | 1.3741 |
| Tra2a    | _S[Phospho (STY)]RS[Phospho (STY)]YT[Phospho (STY)]PEYR_2                           | Q6PFR5_S82_M3_Tra2a    | 8.8185  | 4.1734  | 3.1508  | 4.1954  | 4.0617  | 4.0637  | 4.3066  | 3.1048  | 3.8727  | 1.2450  | 0.9162  | 0.4030  | 0.3947 | 0.3941 |
| Tra2a    | _RRS[Phospho (STY)]PS[Phospho (STY)]PYYSR_2                                         | #N/A                   | 10.7591 | 10.4959 | 11.0211 | 10.6836 | 10.2385 | 10.5957 | 10.8778 | 10.9403 | 10.5902 | 0.9880  | -0.0174 | 0.4156  | 0.3814 | 0.2793 |
| Tra2a    | _S[Phospho (STY)]SPYYSR_2                                                           | #N/A                   | 8.7851  | 8.7120  | 8.9328  | 8.8328  | 8.1231  | 8.4766  | 8.6243  | 8.7723  | 8.6623  | 8.9468  | 0.9877  | -0.0179 | 0.5256 | 0.7514 |
| Tra2a    | _RS[Phospho (STY)]PS[Phospho (STY)]PYYSR_2                                          | #N/A                   | 9.0308  | 9.2186  | 9.7943  | 9.5421  | 8.8203  | 9.2376  | 9.6570  | 9.5053  | 9.4742  | 9.1675  | 0.9861  | -0.0202 | 0.5006 | 0.3005 |
| Tra2a    | _Acetyl (Protein N-term)S[Phospho (STY)]DVEENFEGR[S[Phospho (STY)]R_2               | Q6PFR5_S14_M2_Tra2a    | 3.4777  | 5.1758  | 3.7443  | 9.2011  | 4.0556  | 5.5066  | 5.9606  | 5.3379  | 5.2416  | 5.2252  | 0.8540  | -0.2277 | 0.1773 | 0.7514 |
| Tra2a    | _S[Phospho (STY)]RS[Phospho (STY)]HS[Phospho (STY)]PMSNR_2                          | Q6PFR5_S94_M3_Tra2a    | 3.1602  | 5.1596  | 3.8470  | 7.6381  | 5.4865  | 3.9428  | 5.7432  | 3.7688  | 3.4174  | 5.4875  | 1.0582  | 0.0817  | 0.7838 | 0.1058 |
| Tra2a    | _S[Phospho (STY)]HS[Phospho (STY)]PMSNR_2                                           | Q6PFR5_S96_M2_Tra2a    | 3.0739  | 4.2685  | 4.3084  | 3.8521  | 4.0899  | 3.6396  | 4.0004  | 3.4481  | 3.5294  | 1.0964  | 0.1327  | 0.2521  | 0.5984 | 0.1821 |
| Tra2a    | _AHT[Phospho (STY)]PTPGNMGR_2                                                       | #N/A                   | 3.9071  | 3.2180  | 3.6408  | 5.8560  | 3.0509  | 3.5791  | 3.4892  | 3.8219  | 4.1210  | 4.3627  | 0.9814  | -0.0271 | 0.8954 | 0.0480 |
| Nypa1    | _RPPAKPR_2                                                                          | #N/A                   | 4.3924  | 3.6152  | 3.3749  | 4.3643  | 4.1692  | 3.9889  | 3.7385  | 4.2410  | 3.8895  | 4.3206  | 0.9844  | -0.0227 | 0.7969 | 0.0986 |
| Slc6a7   | _KYGGITSFENT[Phospho (STY)]AIEVDR_3                                                 | Q6PGE7_T620_M1_Slc6a7  | 3.7606  | 3.8921  | 4.0367  | 5.2050  | 3.8398  | 3.3679  | 3.7287  | 3.4752  | 3.7742  | 4.0559  | 1.0688  | 0.0960  | 0.4585 | 0.3885 |
| Morn4    | _NEGLFENNK_2                                                                        | #N/A                   | 5.4470  | 5.6548  | 3.1800  | 6.2591  | 6.1197  | 4.0121  | 4.3729  | 5.6538  | 5.9055  | 5.2880  | 0.9636  | -0.0534 | 0.7856 | 0.1048 |
| Gmp      | _DLS[Phospho (STY)]EGGPAPLITEELDLR_3                                                |                        |         |         |         |         |         |         |         |         |         |         |         |         |        |        |



|        |                                                                                         |                       |         |         |         |         |         |         |         |         |         |         |         |         |        |        |
|--------|-----------------------------------------------------------------------------------------|-----------------------|---------|---------|---------|---------|---------|---------|---------|---------|---------|---------|---------|---------|--------|--------|
| Erc2   | _S[Phospho (STY)]QLQPEPAK_2                                                             | Q6PH08_S364_M1_Erc2   | 6.4556  | 6.4763  | 6.5350  | 6.9951  | 6.3297  | 6.7769  | 6.9811  | 6.8132  | 6.5395  | 7.0292  | 0.9640  | -0.0528 | 0.1457 | 0.8364 |
| Erc2   | _AILUILTEVDLR_2                                                                         | #N/A                  | 4.8522  | 4.9035  | 6.0873  | 5.8514  | 5.9779  | 4.7155  | 5.8338  | 5.6294  | 5.6530  | 5.6940  | 0.9466  | -0.0792 | 0.3785 | 0.4219 |
| Erc2   | _DINHILQDEGNNR_3                                                                        | #N/A                  | 7.3371  | 7.1914  | 7.5740  | 7.9148  | 6.6864  | 7.1519  | 7.3838  | 7.0491  | 6.9823  | 7.1339  | 1.0241  | 0.0944  | 0.4631 | 0.3343 |
| Erc2   | _ESFLIALQTK_2                                                                           | #N/A                  | 5.9642  | 5.6558  | 5.6940  | 6.0105  | 5.2812  | 5.4712  | 5.4654  | 5.8995  | 5.3936  | 5.5935  | 1.1163  | 0.1587  | 0.2046 | 0.6892 |
| Erc2   | _SQSHNHRPS[Phospho (STY)]POQDDEEGWA_3                                                   | #N/A                  | 3.7757  | 10.2627 | 3.9090  | 11.2752 | 9.8666  | 10.2674 | 10.4811 | 10.3737 | 10.1008 | 9.9910  | 0.8030  | -0.3165 | 0.2823 | 0.5493 |
| Erc2   | _JAELESLTR_2                                                                            | #N/A                  | 4.5671  | 4.2499  | 3.7174  | 3.2612  | 4.5346  | 3.4972  | 3.5047  | 3.2588  | 3.9332  | 3.9742  | 1.0827  | 0.1147  | 0.3631 | 0.4400 |
| Erc2   | _TISNLEGS[Phospho (STY)]PSKS[Phospho (STY)]PR_2                                         | Q6PH08_S14_M2_Erc2    | 3.3764  | 3.9679  | 3.9656  | 4.3111  | 4.3273  | 3.3283  | 4.2952  | 3.5380  | 4.1795  | 3.7847  | 0.9823  | -0.0258 | 0.7970 | 0.0985 |
| Rab35  | _DYDHFK_2                                                                               | #N/A                  | 4.5239  | 4.1558  | 4.4111  | 3.8533  | 3.4114  | 4.0002  | 4.5673  | 4.8050  | 3.5477  | 4.4052  | 0.9372  | -0.0936 | 0.3892 | 0.4098 |
| Rab35  | _QQQQQQNDVVK_2                                                                          | #N/A                  | 3.4069  | 4.1416  | 1.8623  | 2.4205  | 3.3487  | 2.9523  | 4.6112  | 3.3720  | 1.9342  | 3.0305  | 0.9336  | -0.0991 | 0.7286 | 0.1375 |
| Rab35  | _FAGQM[Oxidation (M)]GQLFETSAK_2                                                        | #N/A                  | 4.7379  | 3.8617  | 4.4621  | 4.4147  | 4.1824  | 4.0465  | 5.4301  | 4.1240  | 4.2512  | 4.4466  | 0.9389  | -0.0909 | 0.3561 | 0.4485 |
| Rab35  | _WLHNEINQC[Carbamidomethyl (C)]DDVC[Carbamidomethyl (C)]R_3                             | #N/A                  | 4.2942  | 3.3993  | 3.5524  | 4.8831  | 3.2454  | 3.9901  | 3.7698  | 4.0768  | 3.7162  | 4.0221  | 0.9995  | -0.0008 | 0.9949 | 0.0022 |
| Sort1  | _SGVHDS[Phospho (STY)]QEDDL_2                                                           | Q6PH58_S819_M1_Sort1  | 4.2079  | 9.9085  | 5.3699  | 3.8965  | 8.7668  | 9.9060  | 9.9943  | 10.4133 | 10.1820 | 10.2964 | 0.6857  | -0.5443 | 0.0572 | 0.1246 |
| Camk2d | _FTDEVQLFEELGK_2                                                                        | #N/A                  | 7.4285  | 6.9346  | 7.0634  | 8.9254  | 6.7583  | 7.2718  | 7.3736  | 6.7632  | 9.2360  | 7.1211  | 0.9703  | -0.0435 | 0.7123 | 0.1473 |
| Camk2d | _FYFENALSK_2                                                                            | #N/A                  | 5.5805  | 6.1627  | 5.7847  | 5.1182  | 5.9606  | 5.7828  | 5.3273  | 6.2532  | 6.2561  | 5.8642  | 0.9673  | -0.0479 | 0.4647 | 0.3328 |
| Camk2d | _IPTGGEYAAK_2                                                                           | #N/A                  | 6.2071  | 6.5688  | 6.9458  | 6.7226  | 6.9809  | 6.7850  | 3.1212  | 7.0966  | 6.5565  | 6.3266  | 1.1604  | 0.2147  | 0.2375 | 0.6243 |
| Camk2d | _ESTESSNTT[Phospho (STY)]EDEDVK_2                                                       | Q6PHZ2_T337_M1_Camk2d | 3.2477  | 4.0040  | 4.4822  | 4.4116  | 3.8923  | 4.2332  | 4.1263  | 3.7068  | 3.3554  | 4.3786  | 1.0394  | 0.0558  | 0.6135 | 0.2122 |
| Camk2d | _HPWIC[Carbamidomethyl (C)]QR_2                                                         | #N/A                  | 4.4483  | 3.5358  | 3.4174  | 4.5849  | 4.9421  | 4.3724  | 4.4842  | 5.2562  | 4.9880  | 5.1422  | 0.8489  | -0.2364 | 0.0569 | 1.2448 |
| Camk2d | _JC[Carbamidomethyl (C)]DGLTAPEFALGALVEGM[Oxidation (M)]DFHR_3                          | #N/A                  | 6.1359  | 4.4210  | 5.9497  | 6.8388  | 5.7394  | 4.3439  | 3.2039  | 4.7779  | 4.2446  | 4.2338  | 1.3539  | 0.4371  | 0.0338 | 1.4713 |
| Camk2d | _VTEQLEANNNGDEAFATK_2                                                                   | #N/A                  | 5.2830  | 5.5187  | 5.2396  | 5.6863  | 4.8034  | 5.1475  | 5.6613  | 5.1901  | 4.5831  | 5.5267  | 1.0075  | 0.0108  | 0.8766 | 0.0572 |
| Camk2d | _ITASEAK_2                                                                              | #N/A                  | 2.9547  | 2.9518  | 3.5896  | 3.3361  | 3.4441  | 3.4555  | 1.7905  | 3.2816  | 3.4111  | 3.3031  | 1.1161  | 0.1585  | 0.3178 | 0.4714 |
| Rbm15b | _ASGDGAGGAG[Phospho (STY)]PR_2                                                          | Q6PHZ5_S107_M1_Rbm15b | 8.2358  | 8.2704  | 8.6013  | 8.8347  | 7.8091  | 8.1882  | 8.3303  | 8.4902  | 8.3095  | 7.9266  | 1.0072  | 0.1010  | 0.7800 | 0.0779 |
| Rbm15b | _TTHS[Phospho (STY)]PYEVR_2                                                             | Q6PHZ5_S606_M1_Rbm15b | 5.8294  | 6.0471  | 6.2281  | 3.5450  | 3.4113  | 3.2133  | 3.6933  | 3.4562  | 5.5797  | 3.2223  | 1.1817  | 0.3408  | 0.4227 | 0.1399 |
| Rbm15b | _QRS[Phospho (STY)]LS[Phospho (STY)]PVAAPUREPR_3                                        | Q6PHZ5_S261_M2_Rbm15b | 3.3863  | 4.1119  | 3.1200  | 5.5215  | 3.4664  | 5.4174  | 4.3128  | 4.7928  | 5.1417  | 4.4805  | 0.8908  | -0.1669 | 0.3870 | 0.4123 |
| Rbm15b | _RNS[Phospho (STY)]LEGVSR_2                                                             | Q6PHZ5_S559_M1_Rbm15b | 4.0248  | 3.2014  | 3.2107  | 3.7134  | 3.0897  | 3.3549  | 3.4281  | 4.8559  | 4.2289  | 4.7062  | 0.8043  | -0.3141 | 0.0279 | 1.5551 |
| Kcnip4 | _TSS[Phospho (STY)]PAIGNS[Phospho (STY)]VEDELEM[Oxidation (M)]ATVR_2                    | Q6PHZ8_S50_M2_Kcnip4  | 4.0386  | 4.0486  | 4.0757  | 4.0065  | 4.9216  | 4.8531  | 10.4487 | 4.9299  | 4.4540  | 3.2193  | 0.7417  | -0.0241 | 0.2824 | 0.5492 |
| Atp1a3 | _YQSIHETEDPNDR_3                                                                        | #N/A                  | 10.7506 | 10.5463 | 10.8012 | 11.0104 | 10.1456 | 10.7723 | 11.2712 | 11.2023 | 11.1533 | 10.9748 | 0.9570  | -0.0634 | 0.0169 | 1.7712 |
| Atp1a3 | _C[Carbamidomethyl (C)]IELSSGS[Phospho (STY)]VK_2                                       | Q6PIC6_S456_M1_Atp1a3 | 8.7294  | 8.3100  | 9.0044  | 8.2621  | 8.2120  | 8.2621  | 8.7962  | 8.8588  | 8.6921  | 8.4588  | 0.9807  | -0.0282 | 0.3711 | 0.4305 |
| Atp1a3 | _TDKLVNR_2                                                                              | #N/A                  | 10.1443 | 10.1157 | 10.2794 | 9.4425  | 9.8563  | 9.8523  | 10.0910 | 10.4318 | 9.8955  | 9.7471  | 0.9907  | -0.0134 | 0.6424 | 0.1922 |
| Atp1a3 | _GGDONIPVK_2                                                                            | #N/A                  | 10.1563 | 9.8578  | 9.9187  | 9.6139  | 9.5498  | 9.9315  | 10.1572 | 9.7581  | 9.6498  | 9.7981  | 0.9798  | -0.0295 | 0.3032 | 0.5182 |
| Atp1a3 | _IATLAGLEVKK_2                                                                          | #N/A                  | 9.2181  | 9.3596  | 9.3051  | 9.3912  | 9.1058  | 9.0077  | 9.3946  | 9.9213  | 9.3221  | 9.0338  | 0.9802  | -0.0289 | 0.2911 | 0.5359 |
| Atp1a3 | _GGDONIPVKR_2                                                                           | #N/A                  | 8.7217  | 9.1485  | 9.6314  | 8.8366  | 9.0069  | 9.0473  | 9.4951  | 9.4366  | 9.2295  | 8.9607  | 0.9768  | -0.0338 | 0.2851 | 0.5450 |
| Atp1a3 | _ISAHC[Carbamidomethyl (C)]K_2                                                          | #N/A                  | 7.6449  | 8.0254  | 8.0505  | 7.5551  | 8.0548  | 7.3890  | 7.9813  | 8.3162  | 7.9752  | 7.7862  | 0.9715  | -0.0417 | 0.2243 | 0.6491 |
| Atp1a3 | _VLGFC[Carbamidomethyl (C)]HYLPFQFPK_3                                                  | #N/A                  | 7.9300  | 8.3266  | 8.3725  | 8.3725  | 7.0314  | 7.4356  | 8.6985  | 7.4334  | 7.4507  | 0.9906  | -0.0136 | 0.8489  | 0.0712 | 0.0596 |
| Atp1a3 | _GVVATGDR_2                                                                             | #N/A                  | 9.0720  | 8.9021  | 9.3890  | 8.3449  | 8.6419  | 8.8166  | 8.1097  | 9.1841  | 8.8766  | 9.0966  | 1.0050  | 0.0072  | 0.8717 | 0.0596 |
| Atp1a3 | _AC[Carbamidomethyl (C)]VHGTDLK_2                                                       | #N/A                  | 8.8111  | 8.2857  | 8.0379  | 8.2455  | 8.7419  | 8.1836  | 8.6431  | 8.7190  | 8.5853  | 8.1589  | 0.9833  | -0.0243 | 0.4740 | 0.3242 |
| Atp1a3 | _C[Carbamidomethyl (C)]ATRLQDK_2                                                        | #N/A                  | 7.8941  | 7.9567  | 7.7918  | 7.5083  | 7.4727  | 7.8468  | 8.2096  | 8.1136  | 8.1763  | 7.9515  | 0.9547  | -0.0669 | 0.0121 | 1.9172 |
| Atp1a3 | _RDLDDLKK_2                                                                             | #N/A                  | 8.4826  | 8.1596  | 8.0592  | 7.8462  | 7.2393  | 8.1720  | 8.7571  | 8.3183  | 8.0766  | 7.9447  | 0.9660  | -0.0498 | 0.3075 | 0.5122 |
| Atp1a3 | _BNPGGWVEK_2                                                                            | #N/A                  | 7.9477  | 7.7793  | 7.9806  | 7.8150  | 8.2705  | 7.7548  | 8.2705  | 8.3722  | 8.0274  | 8.0317  | 0.9669  | -0.0486 | 0.0304 | 1.5172 |
| Atp1a3 | _EAFQNAYLEGLGLGR_2                                                                      | #N/A                  | 7.1630  | 6.4267  | 6.8461  | 6.6810  | 6.5533  | 6.6485  | 7.5466  | 6.8360  | 6.6913  | 6.7194  | 0.9666  | -0.0490 | 0.2970 | 0.5273 |
| Atp1a3 | _AGELAR_2                                                                               | #N/A                  | 7.2065  | 6.7381  | 7.4210  | 6.3157  | 6.8341  | 6.6526  | 4.4643  | 7.3225  | 7.4561  | 7.5299  | 1.0251  | 0.0358  | 0.7939 | 0.1002 |
| Atp1a3 | _NITFFSTNC[Carbamidomethyl (C)]VEGTAR_2                                                 | #N/A                  | 6.7509  | 6.0014  | 7.3202  | 6.1446  | 6.0105  | 5.4441  | 6.3552  | 6.2060  | 6.8462  | 6.4228  | 0.9723  | -0.0405 | 0.6263 | 0.2032 |
| Atp1a3 | _NPGGWVEKETTY_2                                                                         | #N/A                  | 6.1300  | 6.1883  | 7.5524  | 5.4939  | 5.3125  | 6.1130  | 6.6622  | 6.5363  | 6.2986  | 5.9662  | 0.9658  | -0.0501 | 0.6185 | 0.2086 |
| Atp1a3 | _EQLPEDEM[Oxidation (M)]KEAFQNAYLEGLGLGR_3                                              | #N/A                  | 5.9635  | 6.9913  | 7.0346  | 6.9403  | 5.4952  | 5.8362  | 7.0595  | 7.6112  | 6.7982  | 6.0283  | 0.9276  | -0.1084 | 0.2879 | 0.5407 |
| Atp1a3 | _NPGGWVEK_2                                                                             | #N/A                  | 5.8263  | 5.6284  | 6.1000  | 4.7703  | 5.4422  | 5.5528  | 5.1412  | 6.2279  | 6.2917  | 6.0826  | 0.9356  | -0.0279 | 0.2551 | 0.5937 |
| Atp1a3 | _M[Oxidation (M)]QVNAEEVVGDDVKK_2                                                       | #N/A                  | 9.3678  | 9.5713  | 10.5123 | 9.7583  | 8.6695  | 9.8458  | 9.9021  | 9.7685  | 9.3527  | 9.5326  | 0.9981  | -0.0027 | 0.9567 | 0.0192 |
| Atp1a3 | _KNTDC[Carbamidomethyl (C)]VGGTHSK_3                                                    | #N/A                  | 8.3748  | 8.3953  | 8.6165  | 7.8690  | 8.3415  | 8.0218  | 8.1602  | 8.2435  | 8.1848  | 7.8914  | 1.0185  | 0.0264  | 0.3552 | 0.4496 |
| Atp1a3 | _DFTSEIDELQNHTEVFAR_3                                                                   | #N/A                  | 3.0963  | 5.6220  | 5.5329  | 6.0165  | 3.9967  | 4.6588  | 6.1530  | 5.6762  | 5.5800  | 4.1357  | 0.8950  | -0.1601 | 0.4207 | 0.3760 |
| Atp1a3 | _S[Phospho (STY)]PDC[Carbamidomethyl (C)]THONPLETR_2                                    | #N/A                  | 9.9490  | 9.7696  | 10.0848 | 10.0211 | 9.2195  | 9.5479  | 10.1998 | 10.0481 | 9.8105  | 9.6293  | 0.9842  | -0.0230 | 0.4474 | 0.1493 |
| Atp1a3 | _MSVEEC[Carbamidomethyl (C)]R_2                                                         | #N/A                  | 8.3424  | 7.9273  | 7.8759  | 8.2150  | 7.7735  | 7.2433  | 7.9078  | 7.9291  | 7.8192  | 7.8278  | 1.0032  | 0.0046  | 0.9016 | 0.0450 |
| Atp1a3 | _EVAMTEHK_2                                                                             | #N/A                  | 7.1882  | 4.3525  | 3.1998  | 6.8212  | 6.0508  | 4.0148  | 5.7880  | 4.7361  | 5.5160  | 0.9992  | -0.0011 | 0.9964  | 0.0510 | 0.4506 |
| Atp1a3 | [Carbamidomethyl (C)]DDVFTDNL[Carbamidomethyl (C)]FVGLM[Oxidation (M)]SM[Oxidation (M)] | #N/A                  | 4.9364  | 5.5915  | 4.6220  | 6.5014  | 3.6961  | 5.1308  | 6.5018  | 5.6055  | 5.3326  | 4.9828  | 0.9062  | -0.1421 | 0.3625 | 0.4407 |
| Atp1a3 | _SSHFWWALS HAGL[Carbamidomethyl (C)]NR_3                                                | #N/A                  | 8.2125  | 8.1207  | 8.7178  | 8.2382  | 7.4001  | 7.7149  | 8.2240  | 7.8662  | 8.3069  | 0.9860  | -0.0204 | 0.6557  | 0.1833 | 0.4303 |
| Atp1a3 | _DIVAGDASESALK_2                                                                        | #N/A                  | 7.7677  | 7.5780  | 7.3231  | 7.9228  | 7.6736  | 7.7059  | 7.7069  | 8.8353  | 7.8923  | 7.8529  | 0.9492  | -0.0752 | 0.1101 | 0.9584 |
| Atp1a3 | _ADIGVAM[Oxidation (M)]GIAGSDVSK_2                                                      | #N/A                  | 6.8026  | 7.2910  | 6.8693  | 6.8763  | 6.6535  | 7.1526  | 7.2831  | 7.8291  | 7.1765  | 7.2156  | 0.9410  | -0.0877 | 0.0340 | 1.4683 |
| Atp1a3 | _KADGVAM[Oxidation (M)]GIAGSDVSK_2                                                      | #N/A                  | 5.3299  | 5.6182  | 5.5174  | 5.3106  | 5.6118  | 5.7939  | 4.2938  | 6.3254  | 6.2388  | 6.0896  | 0.9640  | -0.0529 | 0.6141 | 0.2118 |
| Atp1a3 | _MSVEEC[Carbamidomethyl (C)]RK_2                                                        | #N/A                  | 3.3973  | 4.2609  | 3.6521  | 6.2655  | 5.7411  | 3.9763  | 3.8694  | 3.9637  | 4.6713  | 4.1218  | 1.0944  | 0.1301  | 0.5423 | 0.2658 |
| Atp1a3 | _TVNDLSDYGGQWTEYGR_2                                                                    | #N/A                  | 8.8455  | 8.7158  | 9.6365  | 8.8273  | 7.3120  | 8.4891  | 9.3634  | 8.5429  | 8.1946  | 8.4472  | 1.0001  | 0.0001  | 0.9988 | 0.0005 |
| Atp1a3 | _VNTDC[Carbamidomethyl (C)]VGGTHSK_2                                                    | #N/A                  | 6.8173  | 6.7611  | 6.9296  | 6.8814  | 6.6091  | 6.7532  | 7.2973  | 7.0246  | 6.5585  | 6.6398  | 0.9751  | -0.0364 | 0.3844 | 0.4152 |
| Atp1a3 | _M[Oxidation (M)]VAHMH[Oxidation (M)]WFDNQHEADTDCSGTSFDK_4                              | #N/A                  | 7.1059  | 7.3829  | 8.0592  | 6.5857  | 5.9850  | 7.4517  | 8.0297  | 7.5589  | 7.3557  | 7.8738  | 0.9209  | -0.1189 | 0.1560 | 0.8068 |
| Atp1a3 | _VDNSSLTGESEPQTS[Phospho (STY)]PDC[Carbamidomethyl (C)]THONPLETR_4                      | #N/A                  | 2.9559  | 3.7611  | 3.6427  | 4.3595  | 3.5825  | 4.1470  | 4.5078  | 3.9731  | 3.6217  | 4.1124  | 0.9230  | -0.1156 | 0.3112 | 0.5070 |
| Atp1a3 | _AC[Carbamidomethyl (C)]VHGTDLDFTSSEQDELQNHTEVFAR_4                                     | #N/A                  | 3.8452  | 3.1007  | 4.6473  | 6.2335  | 2.9890  | 3.6356  | 4.0282  | 3.8785  | 4.1775  | 4.3008  | 0.9306  | -0.1038 | 0.4719 | 0.3262 |
| Atp1a2 | _VDNSSL[Phospho (STY)]LTGESEPQTR_2                                                      | Q6PIE5_S215_M1_Atp1a2 | 11.9973 | 11.9928 | 12.4327 | 12.1112 | 11.1717 | 11.7378 | 12.4403 | 12.2973 | 11.9927 | 11.8021 | 0.9814  | -0.0271 | 0.3838 | 0.4159 |
| Atp1a2 | _NM[Oxidation (M)]VPOQALVR_2                                                            | #N/A                  | 10.9961 | 11.0807 | 11.3123 | 10.5    |         |         |         |         |         |         |         |         |        |        |



|         |                                                                         |                        |         |         |         |         |          |         |         |         |         |         |         |         |        |        |
|---------|-------------------------------------------------------------------------|------------------------|---------|---------|---------|---------|----------|---------|---------|---------|---------|---------|---------|---------|--------|--------|
| Atp1a2  | _ELDEKK_2                                                               | #N/A                   | 6.2639  | 6.0190  | 5.8876  | 5.5284  | 6.0793   | 5.4908  | 5.9942  | 6.4055  | 5.9724  | 5.0809  | 1.0025  | 0.0037  | 0.9576 | 0.0188 |
| Atp1a2  | _C[Carbamidomethyl (C)]STLVQGK_2                                        | #N/A                   | 6.0847  | 5.5301  | 5.4301  | 5.0340  | 5.7542   | 5.8380  | 5.7097  | 6.1075  | 5.5690  | 5.7636  | 0.9691  | -0.0453 | 0.4143 | 0.3827 |
| Atp1a2  | _VIM[Oxidation (M)]VTGDDPITAK_2                                         | #N/A                   | 8.6768  | 8.7631  | 9.1502  | 8.2903  | 8.3430   | 8.6152  | 9.0862  | 8.5937  | 8.7011  | 8.3170  | 0.9960  | -0.0058 | 0.8684 | 0.0613 |
| Atp1a2  | _NLEAVETLGGSTIC[Carbamidomethyl (C)]SDK_2                               | #N/A                   | 8.6876  | 8.4585  | 8.9651  | 8.6585  | 7.7629   | 8.3189  | 8.8543  | 8.3506  | 8.3540  | 8.0474  | 1.0088  | 0.0126  | 0.7744 | 0.1110 |
| Atp1a2  | _AC[Carbamidomethyl (C)]VWHSOLK_2                                       | #N/A                   | 7.3725  | 7.1233  | 7.1922  | 6.9802  | 7.4125   | 6.8556  | 7.3217  | 7.5612  | 7.4735  | 7.0251  | 0.9742  | -0.0377 | 0.2373 | 0.6443 |
| Atp1a2  | _DTAGDASESALK_2                                                         | #N/A                   | 7.3402  | 7.4004  | 7.7991  | 6.7520  | 6.6349   | 7.2570  | 7.3791  | 7.1253  | 7.5024  | 7.0984  | 0.9891  | -0.0158 | 0.7450 | 0.1278 |
| Atp1a2  | _LC[Carbamidomethyl (C)]FVGM[Oxidation (M)]SM[Oxidation (M)]DPPR_2      | #N/A                   | 7.7438  | 8.0544  | 7.5703  | 4.0427  | 7.1154   | 8.0825  | 8.0075  | 8.7296  | 8.2814  | 7.7190  | 0.8677  | -0.2047 | 0.2150 | 0.6676 |
| Atp1a2  | _AGGENISVK_2                                                            | #N/A                   | 6.5387  | 6.3673  | 6.4123  | 6.1499  | 6.3414   | 6.7937  | 6.9510  | 6.5588  | 6.2599  | 6.0494  | 0.9322  | -0.1013 | 0.3437 | 0.4639 |
| Atp1a2  | _NSVFGQGM[Oxidation (M)]K_2                                             | #N/A                   | 7.9239  | 7.9501  | 7.4184  | 7.6689  | 7.7333   | 7.1745  | 7.7991  | 8.1959  | 7.6887  | 7.3905  | 0.9841  | -0.0232 | 0.5577 | 0.2536 |
| Atp1a2  | _GKFOTDELNPFTEK_3                                                       | #N/A                   | 5.7174  | 6.1115  | 5.6811  | 5.4233  | 5.7090   | 5.9785  | 4.8179  | 6.3998  | 6.1198  | 6.0742  | 0.9859  | -0.0206 | 0.7929 | 0.1008 |
| Atp1a2  | _QGAAVAVTGDGVNDSPALK_2                                                  | #N/A                   | 7.7118  | 8.0117  | 7.8426  | 8.0125  | 6.8675   | 7.8519  | 8.4321  | 8.3749  | 8.0024  | 7.9755  | 0.9414  | -0.0870 | 0.0803 | 1.0952 |
| Atp1a2  | _DM[Oxidation (M)]TSEQLDELR_3                                           | #N/A                   | 6.9995  | 6.4309  | 6.3151  | 6.4450  | 6.2840   | 6.3194  | 7.0579  | 6.7619  | 6.5730  | 6.6089  | 0.9578  | -0.0622 | 0.1187 | 0.9257 |
| Atp1a2  | _QAAAM[Oxidation (M)]LLDGNFASIVTGVEEGR_3                                | #N/A                   | 6.9112  | 6.0609  | 7.1456  | 6.5169  | 6.1497   | 7.0506  | 6.6608  | 6.3613  | 6.4775  | 6.7895  | 1.0102  | 0.0146  | 0.7957 | 0.0992 |
| Atp1a2  | _DGNALTPPTPEWVK_2                                                       | #N/A                   | 10.0832 | 9.6794  | 10.0046 | 9.7658  | 9.4615   | 9.5464  | 10.2598 | 8.965   | 9.7116  | 9.5950  | 0.9890  | -0.0160 | 0.5410 | 0.2668 |
| Atp1a2  | _AIAKGVGISGNETVEDIAAR_3                                                 | #N/A                   | 4.9489  | 4.7389  | 4.5691  | 5.7931  | 3.6170   | 4.1439  | 5.6884  | 5.0861  | 4.5497  | 5.3611  | 0.8963  | -0.1579 | 0.2402 | 0.6194 |
| Atp1a2  | _QGAANVITGDGVNDSPALKK_2                                                 | #N/A                   | 5.1739  | 4.7452  | 3.7794  | 5.7862  | 4.3139   | 4.8480  | 5.2716  | 5.6452  | 5.2653  | 4.9448  | 0.9040  | -0.1457 | 0.2083 | 0.6813 |
| Atp1a2  | _NSQTDKLVNER_2                                                          | #N/A                   | 4.9839  | 3.9467  | 5.1296  | 5.2113  | 5.2418   | 4.4524  | 5.2988  | 5.4228  | 5.1875  | 4.6488  | 0.9393  | -0.0903 | 0.3252 | 0.4878 |
| Atp1a2  | _IISHG[Carbamidomethyl (C)]K_2                                          | #N/A                   | 4.7738  | 5.5550  | 5.5089  | 4.9689  | 5.9952   | 4.6983  | 5.6000  | 5.9489  | 5.5138  | 4.7449  | 0.9630  | -0.0544 | 0.5583 | 0.2532 |
| Atp1a2  | _ELPDKEM[Oxidation (M)]QDAFQNAVY[Oxidation (M)]ELGGLGER_3               | #N/A                   | 4.3196  | 6.3690  | 6.4619  | 6.6447  | 5.1462   | 3.9819  | 6.3488  | 7.0375  | 6.6875  | 3.9348  | 0.9142  | -0.1294 | 0.5451 | 0.2636 |
| Atp1a2  | _YQVDLSK_2                                                              | #N/A                   | 3.5648  | 4.4771  | 3.8953  | 4.3980  | 4.5900   | 4.0636  | 3.1493  | 4.2489  | 4.8326  | 4.2972  | 1.0079  | 0.0114  | 0.9264 | 0.0332 |
| Atp1a2  | _M[Oxidation (M)]QNAEVVVGDSVEVK_2                                       | #N/A                   | 6.8907  | 7.0871  | 8.1535  | 7.2300  | 6.0082   | 7.3912  | 7.4428  | 7.4237  | 6.9495  | 7.0347  | 0.9881  | -0.0173 | 0.8327 | 0.0848 |
| Atp1a2  | _LWIPVSQVNP_2                                                           | #N/A                   | 11.1508 | 11.2090 | 11.4628 | 10.8952 | 10.7820  | 10.8300 | 11.3503 | 11.3609 | 11.1445 | 10.8304 | 0.9898  | -0.0148 | 0.5163 | 0.2871 |
| Atp1a2  | _ADIGIAM[Oxidation (M)]GSGDSVK_2                                        | #N/A                   | 5.6360  | 5.2040  | 6.0532  | 5.1417  | 3.9369   | 3.7926  | 6.0897  | 6.0347  | 5.8237  | 3.6824  | 0.9174  | -0.1244 | 0.5125 | 0.2903 |
| Atp1a2  | _VAEIPFNSTNK_2                                                          | #N/A                   | 10.8092 | 10.7899 | 11.2237 | 10.5520 | 10.5400  | 10.4416 | 11.0564 | 10.9302 | 10.6823 | 10.7273 | 0.9887  | -0.0164 | 0.4664 | 0.3312 |
| Atp1a2  | _SPEFTHEPLETR_2                                                         | #N/A                   | 6.8579  | 6.2698  | 6.5648  | 5.8549  | 6.0312   | 6.2625  | 6.5931  | 6.8643  | 6.2774  | 6.0844  | 0.9762  | -0.0348 | 0.5217 | 0.2888 |
| Atp1a2  | _AGGENIS[Phospho (STY)]YSKR_2                                           | Q6PES_5439_M1_Atp1a2   | 5.4479  | 6.5551  | 7.4254  | 7.0228  | 4.9381   | 4.9762  | 5.1608  | 7.4388  | 7.2768  | 4.9037  | 0.9784  | -0.0316 | 0.8656 | 0.0627 |
| Atp1a2  | _GVGISEGNETVEDIAAR_2                                                    | #N/A                   | 9.4061  | 9.4861  | 10.1440 | 9.7309  | 8.2887   | 9.3221  | 9.9707  | 9.4972  | 9.3170  | 9.2811  | 0.9874  | -0.0183 | 0.7325 | 0.1352 |
| Atp1a2  | _SPTWTALS_2                                                             | #N/A                   | 7.5529  | 7.5820  | 8.1062  | 7.2193  | 7.0740   | 7.2060  | 7.3356  | 7.9081  | 7.4594  | 7.1711  | 0.9984  | -0.0023 | 0.9601 | 0.0177 |
| Atp1a2  | _C[Carbamidomethyl (C)]IELSC[Carbamidomethyl (C)]GS[Phospho (STY)]VRK_2 | #N/A                   | 7.5042  | 7.4027  | 8.2218  | 7.8318  | 6.6351   | 7.5227  | 8.5177  | 7.8437  | 7.5488  | 7.4728  | 0.9584  | -0.0612 | 0.3494 | 0.4567 |
| Atp1a2  | _EDSPSHVLVM[Oxidation (M)]K_2                                           | #N/A                   | 6.5265  | 6.2789  | 5.3478  | 6.0097  | 5.7698   | 5.9544  | 6.6733  | 6.4166  | 5.9754  | 5.8949  | 0.9585  | -0.0611 | 0.3384 | 0.4705 |
| Atp1a2  | _NIC[Carbamidomethyl (C)]FFSTNC[Carbamidomethyl (C)]VEGTAR_2            | #N/A                   | 5.5087  | 5.5302  | 3.8436  | 3.3874  | 6.0626   | 4.5038  | 3.5357  | 3.7729  | 3.9128  | 6.0382  | 1.1138  | 0.1555  | 0.5083 | 0.2939 |
| Atp1a2  | _YQVDLS[Phospho (STY)]KGLTNGR_3                                         | #N/A                   | 4.2495  | 3.0929  | 3.9832  | 3.5270  | 3.3933   | 3.2314  | 3.6752  | 3.4742  | 3.1302  | 3.2043  | 1.0619  | 0.0866  | 0.4277 | 0.1689 |
| Atp1a2  | _M[Oxidation (M)]VVAHM[Oxidation (M)]WFGQIHADTTEDQSATGDKR_4             | #N/A                   | 4.2970  | 3.5524  | 4.0307  | 3.5744  | 3.4407   | 3.1839  | 3.7227  | 3.4267  | 3.7258  | 3.2517  | 1.0419  | 0.0593  | 0.5341 | 0.2724 |
| Nfrkb   | _SPS[Phospho (STY)]PAVPLR_2                                             | Q6PI4_5228_M1_Nfrkb    | 3.5915  | 4.3967  | 4.2783  | 3.7240  | 4.2180   | 3.5115  | 3.8722  | 3.2772  | 3.5762  | 3.4013  | 1.1194  | 0.1627  | 0.0948 | 1.0234 |
| Rhbf1   | _QT[Phospho (STY)]TQTIR_2                                               | Q6PK5_576_M1_Rhbf1     | 7.3760  | 3.5946  | 3.4815  | 4.5261  | 5.6804   | 6.8299  | 3.1735  | 3.9759  | 4.2750  | 6.7359  | 1.1559  | 0.2091  | 0.5143 | 0.2888 |
| Dmx1    | _DS[Phospho (STY)]KLDVLR_2                                              | Q6PNC0_51904_M1_Dmx1   | 6.3901  | 7.0593  | 7.3302  | 7.4236  | 6.0373   | 6.8269  | 7.5603  | 7.8029  | 4.1747  | 7.2516  | 1.0220  | 0.0314  | 0.8444 | 0.0735 |
| Dmx1    | _TGS[Phospho (STY)]ESS[Phospho (STY)]LKK_2                              | 3.8765                 | 3.4430  | 3.6481  | 4.0575  | 3.2643  | 3.8450   | 3.3401  | 4.7886  | 4.1233  | 3.7348  | 0.9230  | -0.1156 | 0.3149  | 0.5019 |        |
| Dmx1    | _WDS[Phospho (STY)]DNDENEDPPSMK_2                                       | Q6PNC0_51965_M1_Dmx1   | 4.1541  | 3.4585  | 3.3401  | 8.5392  | 4.9584   | 2.9489  | 3.3097  | 5.1933  | 2.0177  | 3.8097  | 1.2746  | 0.3501  | 0.4377 | 0.3689 |
| Dmx1    | _SEASWPEEH[Phospho (STY)]SSSPEK_2                                       | #N/A                   | 3.8593  | 6.2570  | 6.7295  | 3.9890  | 3.5098   | 4.0760  | 3.7630  | 4.2641  | 4.0297  | 3.8553  | 1.1904  | 0.2514  | 0.3182 | 0.4974 |
| Dmx1    | _GSSFLTskDS[Phospho (STY)]S[Phospho (STY)]KLDVLR_3                      | #N/A                   | 3.6702  | 3.4840  | 4.2665  | 4.2667  | 3.3917   | 3.7662  | 3.7294  | 4.8193  | 4.3782  | 3.6944  | 0.9163  | -0.1261 | 0.2633 | 0.5796 |
| Atp2b4  | _TQDGVALEIQPLNS[Phospho (STY)]QGLDSEDEK_3                               | #N/A                   | 7.2262  | 6.5101  | 7.4118  | 8.2699  | 6.9593   | 7.0227  | 7.6971  | 8.4984  | 7.4949  | 7.1245  | 0.9389  | -0.0909 | 0.2498 | 0.6023 |
| Atp2b4  | _GLIDSTAGEQR_2                                                          | #N/A                   | 5.9680  | 5.7510  | 5.0629  | 5.4145  | 5.7272   | 6.7886  | 5.8453  | 6.4392  | 5.7331  | 5.8563  | 0.9551  | -0.0563 | 0.3154 | 0.5011 |
| Atp2b4  | _EAGHS[Phospho (STY)]DKEDISR_3                                          | Q6Q477_51065_M1_Atp2b4 | 5.6939  | 4.4217  | 3.7890  | 4.2917  | 4.0122   | 4.1132  | 4.0064  | 5.7289  | 3.4754  | 4.2587  | 1.0045  | 0.0065  | 0.9705 | 0.0130 |
| Atp2b4  | _TDGDVALEIQPLNS[Phospho (STY)]QGLDSEDEK_3                               | #N/A                   | 5.5899  | 5.3700  | 6.2836  | 6.4566  | 5.3640   | 5.4809  | 5.9183  | 6.5995  | 6.6253  | 5.7799  | 0.9240  | -0.1140 | 0.1574 | 0.1020 |
| Atp2b4  | _DOFLC[Carbamidomethyl (C)]LEG_2                                        | #N/A                   | 3.7037  | 3.5225  | 4.3905  | 3.3923  | 2.8294   | 3.3993  | 3.1070  | 1.2950  | 4.3748  | 3.3593  | 1.1666  | 0.2224  | 0.4007 | 0.3972 |
| Atp2b4  | _NEKGEVEKLDK_3                                                          | #N/A                   | 3.0091  | 4.3333  | 4.2436  | 3.7874  | 3.6537   | 2.9709  | 3.9357  | 3.2138  | 3.3836  | 3.4647  | 1.0477  | 0.0672  | 0.6186 | 0.2086 |
| Rictor  | _NDS[Phospho (STY)]GEENVPLDLTR_2                                        | #N/A                   | 3.1840  | 8.0712  | 3.8708  | 8.7353  | 7.0653   | 8.0340  | 8.9300  | 8.9239  | 8.7801  | 8.3968  | 0.7415  | -0.4316 | 0.0988 | 1.0051 |
| Rictor  | _GRNDS[Phospho (STY)]GEENVPLDLTR_2                                      | #N/A                   | 4.2000  | 3.0262  | 3.3860  | 3.8886  | 3.3257   | 5.0006  | 3.6033  | 4.2299  | 3.8784  | 3.8556  | 0.9776  | -0.0327 | 0.8250 | 0.0835 |
| Camk2n1 | _Acetyl (Protein N-term)[S[Phospho (STY)]EVLPGDEK_2                     | Q6QW9F_52_M1_Camk2n1   | 3.9120  | 3.3142  | 4.5988  | 7.8435  | 3.2025   | 7.0409  | 3.3153  | 7.3526  | 7.5634  | 7.9595  | 0.7614  | -0.3933 | 0.2727 | 0.5643 |
| Camk2n1 | _SPYGDGGGVGGQFSC[Carbamidomethyl (C)]R_2                                | 4.5902                 | 3.8694  | 3.4050  | 4.5972  | 3.9037  | 4.3847   | 3.2447  | 4.2108  | 4.2165  | 4.2044  | 1.0393  | 0.0556  | 0.6280  | 0.2021 |        |
| Camk2n1 | _LQDTNNFAGGQSK_2                                                        | 5.8760                 | 5.8235  | 4.2566  | 3.2584  | 5.7112  | 3.0799   | 4.4739  | 3.3592  | 5.8653  | 3.2254  | 1.1032  | 0.1417  | 0.6109  | 0.2140 |        |
| Gnas    | _ISTAS[Phospho (STY)]GDGR_2                                             | Q6R0H7_51091_M1_Gnas   | 4.1048  | 3.3602  | 3.8385  | 3.3822  | 3.2485   | 3.4077  | 3.3009  | 3.6506  | 3.9496  | 3.8917  | 0.9618  | -0.0562 | 0.5155 | 0.2878 |
| Gnas    | _ALWDEGVR_2                                                             | #N/A                   | 6.3240  | 6.4468  | 6.5018  | 3.9737  | 5.9768   | 6.3875  | 6.0892  | 6.1028  | 6.3837  | 6.1206  | 0.9613  | -0.0570 | 0.6470 | 0.1891 |
| Gnas    | _VLTSGFETK_2                                                            | #N/A                   | 4.9255  | 5.3837  | 4.2717  | 5.2584  | 3.6817   | 4.8586  | 5.1883  | 4.4870  | 4.7778  | 0.9633  | -0.0540 | 0.6251  | 0.2040 |        |
| Gnas    | _EAAEM[Oxidation (M)]EGS[Phospho (STY)]PTTATAVEGK_2                     | Q6R0H7_5367_M1_Gnas    | 3.2784  | 3.9478  | 3.9652  | 4.4679  | 3.9049   | 3.8246  | 4.1825  | 3.6506  | 3.2992  | 4.4349  | 1.0016  | 0.0023  | 0.9826 | 0.0076 |
| Ppp1r9b | _AQLEGDSVENKER_2                                                        | #N/A                   | 3.7624  | 4.0369  | 3.2776  | 3.8915  | 4.7488   | 3.3029  | 3.8967  | 3.6891  | 4.1544  | 0.9568  | -0.0637 | 0.5766  | 0.2391 |        |
| Ppp1r9b | _ERPGESEVAQUQTLTEGR_3                                                   | #N/A                   | 3.5773  | 4.3336  | 5.6218  | 5.7085  | 3.8133   | 5.1020  | 5.4450  | 5.1671  | 4.9771  | 4.9137  | 0.9155  | -0.1273 | 0.3911 | 0.4077 |
| Ppp1r9b | _ASS[Phospho (STY)]LNEHVHVSALLK_2                                       | #N/A                   | 8.7814  | 8.8479  | 9.0956  | 9.5940  | 7.3687   | 9.1133  | 8.5000  | 8.7498  | 8.9569  | 9.1407  | 0.9958  | -0.0061 | 0.9287 | 0.0321 |
| Ppp1r9b | _TVTEGGAHR_2                                                            | #N/A                   | 3.9469  | 3.3963  | 3.3518  | 3.2315  | 4.5391   | 3.2731  | 3.2332  | 2.7596  | 2.0497  | 1.1791  | 0.9377  | -0.2697 | 0.2567 | 0.9906 |
| Ppp1r9b | _ETQAQYQALER_2                                                          | #N/A                   | 3.7949  | 3.0503  | 6.6842  | 6.8134  | 6.7868   | 3.6860  | 6.4337  | 4.2540  | 3.9026  | 6.4050  | 0.9785  | -0.0314 | 0.9181 | 0.0371 |
| Mag1    | _KDS[Phospho (STY)]QNSQHSVSHR_3                                         | Q6RHR9_5733_M1_Mag1    | 6.0036  | 3.8095  | 6.0361  | 6.3959  | 3.6308   | 5.3116  | 5.5534  | 5.8144  | 5.1149  | 5.7476  | 0.9353  | -0.0965 | 0.5804 | 0.2663 |
| Mag1    | _SLHTASPHGQVLPE[Phospho (STY)]LADAPAPQDTSSGQK_4                         | Q6RHR9_5762_M1_Mag1    | 4.0576  | 3.1686  | 3.2435  | 3.7462  | 3.1833   | 3.4054  | 3.4609  | 4.3723  | 4.0209  | 3.7132  | 0.8755  | -0.1918 | 0.0962 | 1.0170 |
| Sdk2    | _S[Phospho (STY)]PRPSPGSLHS[Phospho (STY)]DEDVTK_3                      | 3.7581                 | 3.3375  | 3.3950  | 3.7893  | 3.3554  | 3.4404</ |         |         |         |         |         |         |         |        |        |



|         |                                                                               |                        |        |        |         |         |        |        |        |         |        |        |         |         |        |        |
|---------|-------------------------------------------------------------------------------|------------------------|--------|--------|---------|---------|--------|--------|--------|---------|--------|--------|---------|---------|--------|--------|
| Kctd12  | _S[Phospho (STY)]PSGGAAGRLTTPSQSLDGR_2                                        | #N/A                   | 3.8088 | 8.1512 | 9.0219  | 9.0124  | 6.7985 | 7.7522 | 7.6855 | 3.5473  | 7.9292 | 7.2573 | 1.1241  | 0.1687  | 0.5424 | 0.2657 |
| Kctd12  | _SPSGGAAGRLT[Phospho (STY)]PS[Phospho (STY)]QSLDGR_3                          | #N/A                   | 3.2496 | 4.0548 | 3.9364  | 6.6356  | 5.0888 | 6.7516 | 5.7083 | 6.1287  | 6.7568 | 6.2710 | 0.7968  | -0.3278 | 0.1395 | 0.8554 |
| Kctd12  | _MTQDQQLER_2                                                                  | #N/A                   | 3.6151 | 4.2003 | 4.3019  | 3.7004  | 4.2416 | 3.4878 | 3.8486 | 3.3008  | 3.5999 | 3.3777 | 1.1216  | 0.1656  | 0.0966 | 1.0152 |
| Tacc1   | _EADEQLVAIEK[Carbamidomethyl (C)]S[Phospho (STY)]POT[Carbamidomethyl (C)]SR_3 | Q6V685_S111_M1_Tacc1   | 5.4558 | 4.4177 | 6.7040  | 7.0799  | 6.1029 | 3.4905 | 3.8513 | 6.2538  | 3.5872 | 5.5057 | 1.1541  | 0.2067  | 0.4189 | 0.3779 |
| Tacc1   | _KYEAQLDLDA[Carbamidomethyl (C)]S[Phospho (STY)]QDEGAVSK_3                    | Q6V685_S480_M1_Tacc1   | 3.7142 | 3.6282 | 3.4479  | 6.1193  | 4.1290 | 4.8244 | 3.1399 | 5.0427  | 4.3850 | 4.1698 | 1.0301  | 0.0429  | 0.8398 | 0.0758 |
| Tacc1   | _ESC[Carbamidomethyl (C)]DSS[Phospho (STY)]GLAEPEAKPQESR_3                    | Q6V685_S82_M1_Tacc1    | 3.0191 | 3.7754 | 4.2536  | 3.7974  | 3.6637 | 2.9609 | 3.9457 | 3.2038  | 3.5028 | 3.4747 | 1.0132  | 0.0189  | 0.8728 | 0.0591 |
| Glyf2   | _SCS[Phospho (STY)]WEER_2                                                     | #N/A                   | 8.7042 | 8.7391 | 3.7855  | 9.3388  | 3.7252 | 4.0043 | 8.9119 | 8.7209  | 8.6421 | 4.2551 | 0.8363  | -0.2580 | 0.4790 | 0.3196 |
| Glyf2   | _WRHS[Phospho (STY)]PDGPR_3                                                   | #N/A                   | 8.2965 | 8.2280 | 7.6749  | 7.7267  | 6.9891 | 8.1240 | 8.1356 | 8.2434  | 7.5007 | 8.7978 | -0.0294 | 0.9798  | 0.6050 | 0.2183 |
| Glyf2   | _S[Phospho (STY)]DVEGVFGR_2                                                   | Q6Y7W8_S140_M1_Glyf2   | 3.4867 | 4.2430 | 3.6700  | 6.5486  | 4.6795 | 3.9942 | 3.8873 | 5.8681  | 5.0786 | 4.1397 | 0.9354  | -0.0964 | 0.6613 | 0.1796 |
| Glyf2   | _SCS[Phospho (STY)]WEERGR_2                                                   | #N/A                   | 6.9585 | 3.9212 | 3.1549  | 4.1995  | 3.7425 | 3.9870 | 4.3478 | 6.1026  | 3.1007 | 6.9525 | 0.8442  | -0.2444 | 0.4126 | 0.3640 |
| Glyf2   | _ALSSGGSIT[Phospho (STY)]PLSPALPK_2                                           | Q6Y7W8_S26_M1_Glyf2    | 2.9472 | 4.3952 | 4.1817  | 8.8410  | 3.5918 | 3.0328 | 3.8738 | 6.6488  | 3.5747 | 3.4028 | 1.0282  | 0.0401  | 0.9255 | 0.0336 |
| Glyf2   | _QQQQQQQQQQHQGQSNR_3                                                          | #N/A                   | 3.8726 | 3.4698 | 3.6063  | 3.1500  | 3.0163 | 3.6083 | 3.2983 | 3.8512  | 4.1502 | 4.3281 | 0.8840  | -0.1778 | 0.0971 | 1.0128 |
| Sbf1    | _GS[Phospho (STY)]GEGGQILQR_2                                                 | Q6ZPE2_S20_M1_Sbf1     | 8.2806 | 8.4399 | 9.0630  | 8.3373  | 7.3613 | 7.9801 | 8.8742 | 8.5121  | 8.3562 | 8.2357 | 0.9705  | -0.0432 | 0.4361 | 0.3604 |
| Sbf1    | _DKGPS[Phospho (STY)]JFR_2                                                    | Q6ZPE2_S1047_M1_Sbf1   | 7.7917 | 7.7162 | 8.3170  | 7.7015  | 5.4627 | 7.2059 | 7.6409 | 8.1575  | 7.4810 | 7.3215 | 0.9628  | -0.0547 | 0.6051 | 0.2182 |
| Sbf1    | _ALYEPSDGV[Phospho (STY)]PTQETGEAQSDDER_3                                     | Q6ZPE2_S706_M1_Sbf1    | 4.0796 | 3.2628 | 3.8133  | 6.5826  | 3.2233 | 3.1445 | 3.5053 | 3.6441  | 3.9432 | 3.0343 | 1.1376  | 0.1860  | 0.4984 | 0.3024 |
| Sbf1    | _NC[Carbamidomethyl (C)]SGPHNS[Phospho (STY)]JAR_2                            | Q6ZPE2_S559_M1_Sbf1    | 4.0939 | 3.8267 | 3.2799  | 3.7825  | 3.1529 | 3.9302 | 3.4972 | 5.1483  | 3.9845 | 4.6232 | 0.8526  | -0.2300 | 0.1018 | 0.2924 |
| Tiam2   | _TSSS[Phospho (STY)]SEWSPSEPK_2                                               | Q6ZPF3_S1524_M1_Tiam2  | 3.8239 | 4.0256 | 3.8750  | 3.8891  | 3.5252 | 3.5582 | 3.8050 | 3.7275  | 3.6603 | 3.7394 | 1.0133  | 0.0191  | 0.6450 | 0.1904 |
| Tiam2   | _QGS[Phospho (STY)]PIEIKQFQR_2                                                | #N/A                   | 3.5801 | 3.7060 | 8.2161  | 8.5633  | 7.1806 | 3.7371 | 3.8929 | 8.0866  | 8.0305 | 8.6837 | 0.8128  | -0.2990 | 0.3986 | 0.3995 |
| Tiam2   | _HIS[Phospho (STY)]DADR_2                                                     | Q6ZPF3_S1116_M1_Tiam2  | 4.5725 | 4.5467 | 4.6547  | 4.8202  | 3.4164 | 4.2807 | 4.4614 | 4.9467  | 4.1450 | 4.7951 | 0.9553  | -0.0660 | 0.5047 | 0.2970 |
| Tiam2   | _SDSLEDSEDFHPLK_3                                                             | #N/A                   | 5.3016 | 4.5996 | 4.1740  | 10.4834 | 8.4710 | 4.9645 | 4.9905 | 10.0266 | 9.7026 | 5.1708 | 0.8474  | -0.2389 | 0.5208 | 0.2833 |
| Tiam2   | _HQS[Phospho (STY)]DSHPETASDLNLVLR_3                                          | Q6ZPF3_S1672_M1_Tiam2  | 4.1116 | 3.2309 | 3.8452  | 3.3890  | 3.2553 | 3.3693 | 3.5373 | 3.6122  | 3.9112 | 3.0663 | 1.0005  | 0.0007  | 0.9939 | 0.0036 |
| Tex2    | _TAPSS[Phospho (STY)]PLT[Phospho (STY)]SPDTR_2                                | Q6ZP02_T268_M2_Tex2    | 7.8369 | 3.7983 | 7.4702  | 6.4080  | 5.9256 | 6.4822 | 7.2393 | 7.5866  | 8.8244 | 1.1091 | 0.6493  | 0.5772  | 0.2386 | 0.1513 |
| Tex2    | _SL[Phospho (STY)]TEVEPK_2                                                    | Q6ZP02_S195_M1_Tex2    | 4.2035 | 3.4590 | 3.9372  | 3.4810  | 3.3472 | 3.5786 | 3.1705 | 3.5202  | 4.9747 | 3.1582 | 0.9897  | -0.0149 | 0.9226 | 0.0350 |
| Ube2o   | _KEEKPEVDS[Phospho (STY)]PVK_2                                                | Q6ZP13_S893_M1_Ube2o   | 6.4361 | 6.1005 | 5.3025  | 6.7873  | 4.9042 | 5.8706 | 7.0502 | 6.7737  | 6.2552 | 6.3935 | 0.8915  | -0.1657 | 0.0998 | 1.0009 |
| Ube2o   | _LHGEDS[Phospho (STY)]D[Phospho (STY)]EGDDGR_2                                | #N/A                   | 6.4438 | 5.6410 | 3.6873  | 5.8529  | 4.8162 | 5.7061 | 6.5825 | 5.8083  | 5.6933 | 5.7067 | 0.9089  | -0.1378 | 0.3243 | 0.4891 |
| Ube2o   | _DSSSLEPMAAE[Phospho (STY)]DSGA_2                                             | Q6ZP13_S1175_M1_Ube2o  | 4.3711 | 2.9713 | 4.1047  | 6.1502  | 2.7927 | 3.3460 | 3.7968 | 3.3527  | 3.6517 | 3.3258 | 1.1244  | 0.1691  | 0.5091 | 0.2932 |
| Ube2o   | _DHS[Phospho (STY)]M[Oxidation (M)]EOPKKGAR_2                                 | Q6ZP13_S406_M1_Ube2o   | 4.4078 | 2.9373 | 3.4749  | 5.1086  | 2.8256 | 3.7990 | 3.6922 | 4.1410  | 3.7896 | 3.6612 | 0.9837  | -0.0236 | 0.8953 | 0.2820 |
| Ube2o   | _S[Phospho (STY)]PLSK_2                                                       | Q6ZP13_S510_M1_Ube2o   | 3.7322 | 3.0366 | 4.0395  | 3.5833  | 2.8579 | 3.3707 | 3.7315 | 3.4179  | 3.7170 | 3.2605 | 0.9731  | -0.0394 | 0.7058 | 0.1513 |
| Ube2o   | _NM[Oxidation (M)]TVEQLTGST[Phospho (STY)]PTEPEKPTR_3                         | Q6ZP13_S836_M1_Ube2o   | 3.3061 | 4.8625 | 4.9071  | 5.4859  | 3.8274 | 4.0523 | 4.2439 | 3.7325  | 3.2211 | 3.5631 | 1.1942  | 0.2561  | 0.4077 | 0.8103 |
| Ube2o   | _NC[Carbamidomethyl (C)]AQEGGS[Phospho (STY)]M[Oxidation (M)]AKK_2            | Q6ZP13_S376_M1_Ube2o   | 4.3339 | 3.6383 | 3.4378  | 4.4824  | 3.4596 | 4.2699 | 3.1298 | 4.0196  | 4.3187 | 4.1597 | 1.0077  | 0.0110  | 0.9278 | 0.0325 |
| Zlyve28 | _LKSGS[Phospho (STY)]DEEER_2                                                  | Q6ZPK7_S394_M1_Zlyve28 | 3.9943 | 3.6833 | 3.1803  | 3.6251  | 3.0734 | 3.4807 | 3.807  | 3.8511  | 4.0856 | 3.6499 | 0.9258  | -0.1113 | 0.2076 | 0.6828 |
| Ddx55   | _TVQLTDLGV[Phospho (STY)]DLEES_2                                              | Q6ZP19_S594_M1_Ddx55   | 3.8107 | 3.5317 | 3.5444  | 4.5890  | 2.9544 | 4.3765 | 3.2364 | 3.9130  | 4.2121 | 4.2663 | 0.9729  | -0.0396 | 0.7758 | 0.1102 |
| Pitpmn2 | _KQWS[Phospho (STY)]TSSK_2                                                    | Q6ZPQ6_S302_M1_Pitpmn2 | 7.9696 | 7.8114 | 8.1346  | 4.5592  | 3.3828 | 7.8316 | 3.9428 | 7.4205  | 7.4205 | 7.4205 | 1.1170  | 0.1597  | 0.6234 | 0.2057 |
| Pitpmn2 | _GAS[Phospho (STY)]PSHS[Phospho (STY)]SEWR_3                                  | #N/A                   | 7.6548 | 6.5764 | 8.1065  | 7.8975  | 5.9640 | 7.3694 | 7.6388 | 7.4268  | 7.5413 | 7.2671 | 0.9723  | -0.0406 | 0.6414 | 0.1929 |
| Pitpmn2 | _HS[Phospho (STY)]SEWR_2                                                      | Q6ZPQ6_S321_M1_Pitpmn2 | 3.6346 | 3.9304 | 4.3214  | 4.2311  | 4.2611 | 3.4684 | 4.5387 | 3.2944  | 4.4265 | 3.9349 | 0.9866  | -0.0151 | 0.8920 | 0.0496 |
| Pitpmn2 | _TDTGNNVFNLS[Phospho (STY)]PVEK_2                                             | Q6ZPQ6_S129_M1_Pitpmn2 | 6.7236 | 6.3886 | 3.5079  | 7.4443  | 6.2446 | 6.7830 | 7.4276 | 6.7768  | 6.6870 | 6.7985 | 0.8930  | -0.1632 | 0.3301 | 0.4813 |
| Pitpmn2 | _VNS[Phospho (STY)]NDLMQK_2                                                   | Q6ZPQ6_S365_M1_Pitpmn2 | 6.4324 | 3.4129 | 3.8911  | 6.3548  | 3.3012 | 3.3234 | 3.2166 | 3.7183  | 3.1122 | 3.1083 | 0.3877  | 0.2172  | 0.6632 | 0.1722 |
| Pitpmn2 | _RIGAS[Phospho (STY)]PSHS[Phospho (STY)]SEWR_3                                | #N/A                   | 4.0599 | 3.1663 | 3.2459  | 7.2618  | 3.1856 | 7.3662 | 3.4632 | 7.6130  | 7.3852 | 7.3550 | 0.7330  | -0.4481 | 0.2272 | 0.6435 |
| Pitpmn2 | _S[Phospho (STY)]NDPR_2                                                       | Q6ZPQ6_S630_M1_Pitpmn2 | 2.9133 | 3.2339 | 3.6001  | 4.1028  | 3.5399 | 4.1896 | 3.8175 | 4.2762  | 4.6689 | 4.5621 | 0.8304  | -0.2981 | 0.0363 | 1.4395 |
| Pitpmn2 | _QWSTSSKSS[Phospho (STY)]R_2                                                  | Q6ZPQ6_S308_M1_Pitpmn2 | 3.6324 | 2.9368 | 4.3192  | 3.3210  | 4.2590 | 3.4705 | 3.8313 | 3.2966  | 2.9452 | 3.2880 | 1.0947  | 0.1305  | 0.3406 | 0.4678 |
| Kcnt1   | _GGSGVGS[Phospho (STY)]DVGR_2                                                 | Q6ZPR4_S47_M1_Kcnt1    | 6.9804 | 4.1729 | 4.0545  | 6.5892  | 5.3507 | 3.7357 | 6.9930 | 3.5618  | 3.3082 | 6.6017 | 1.0063  | 0.0090  | 0.9763 | 0.0104 |
| Ank1b1  | _GVAPADS[Phospho (STY)]PDAPR_2                                                | #N/A                   | 9.6948 | 9.7106 | 10.2954 | 10.1617 | 9.4462 | 9.9352 | 9.9066 | 9.7427  | 9.7524 | 9.9633 | 1.0033  | 0.0048  | 0.8505 | 0.0743 |
| Ank1b1  | _GVAPADS[Phospho (STY)]PDAPR_2                                                | #N/A                   | 8.5955 | 8.6453 | 9.1432  | 8.9996  | 8.1706 | 8.7523 | 8.8193 | 8.7625  | 8.7100 | 8.7993 | 0.9937  | -0.0091 | 0.7613 | 0.1184 |
| KIH9    | _AC[Carbamidomethyl (C)]TLTVFPPEENPGS[Phospho (STY)]PSR_2                     | Q6ZP11_S603_M1_KIH9    | 8.3455 | 8.0826 | 4.5703  | 8.4781  | 6.9030 | 7.9033 | 8.1610 | 3.0455  | 7.6185 | 7.6083 | 1.0455  | 0.1594  | 0.5415 | 0.2864 |
| Zc3h4   | _TGTGS[Phospho (STY)]FAGNS[Phospho (STY)]JAR_2                                | Q6ZP23_S1270_M2_Zc3h4  | 7.8657 | 7.7417 | 7.3989  | 8.2898  | 4.9465 | 7.2274 | 8.1763 | 7.5946  | 7.5334 | 7.7940 | 0.9319  | -0.1018 | 0.4149 | 0.3821 |
| Efr3b   | _S[Phospho (STY)]PSPLQAPEK_2                                                  | Q6ZQ18_S214_M1_Efr3b   | 8.3972 | 3.4452 | 3.6707  | 4.0334  | 3.2665 | 3.8209 | 3.3627 | 3.8265  | 4.1255 | 3.7107 | 1.1817  | 0.2409  | 0.5169 | 0.2862 |
| Cand1   | _SVLEAFSPSEVK_2                                                               | #N/A                   | 6.1517 | 6.1742 | 6.5000  | 6.3690  | 5.4834 | 5.7165 | 5.8968 | 6.4548  | 5.8453 | 5.9825 | 1.0135  | 0.0193  | 0.7493 | 0.1254 |
| Cand1   | _LTUDPETLPR_2                                                                 | #N/A                   | 6.3047 | 5.8139 | 6.5043  | 5.4881  | 4.7475 | 5.0782 | 6.2829 | 6.3554  | 5.7404 | 5.8817 | 0.9326  | -0.1007 | 0.3007 | 0.5219 |
| Cand1   | _AVALTPEAEK_2                                                                 | #N/A                   | 5.6156 | 5.6907 | 5.3734  | 5.0796  | 5.2646 | 5.7557 | 6.4189 | 6.0986  | 5.7859 | 5.7358 | 0.9091  | -0.1375 | 0.0182 | 1.7393 |
| Cand1   | _EGPAVVGFIQDVK_2                                                              | 6.1971                 | 5.6048 | 6.2556 | 5.7911  | 4.5222  | 4.9083 | 6.3438 | 5.9200 | 5.6085  | 5.8829 | 0.9163 | -0.1262 | 0.1765  | 0.7534 |        |
| Cand1   | _ITSEALLVTQLVK_2                                                              | #N/A                   | 4.9666 | 5.4534 | 5.7501  | 3.3372  | 3.3514 | 5.1199 | 5.3167 | 5.4061  | 4.2520 | 4.7561 | 0.9453  | -0.0811 | 0.6542 | 0.1843 |
| Cand1   | _Acetyl (Protein N-term)[ASASVHSMILLEK_2                                      | #N/A                   | 3.9719 | 3.9444 | 5.3790  | 4.0533  | 3.8895 | 2.9311 | 5.1575 | 4.6563  | 4.3145 | 3.9213 | 0.8927  | -0.1638 | 0.3130 | 0.5044 |
| Cand1   | _JSGSINELIGVR_2                                                               | #N/A                   | 3.6324 | 2.9926 | 4.1884  | 1.3991  | 4.1281 | 1.7796 | 4.0716 | 4.6375  | 3.8984 | 3.2155 | 0.7634  | -0.3894 | 0.1892 | 0.7231 |
| Cand1   | _DS[Phospho (STY)]SSTNLESMQTS_2                                               | Q6ZQ38_S1219_M1_Cand1  | 2.9951 | 3.7514 | 4.2297  | 3.1634  | 3.6397 | 2.9849 | 4.3789 | 3.4543  | 3.1028 | 3.1304 | 0.9841  | -0.0231 | 0.8759 | 0.0575 |
| Cand1   | _NVVAEC[Carbamidomethyl (C)]LQK_2                                             | #N/A                   | 4.3718 | 4.3552 | 3.5578  | 4.0604  | 4.3064 | 3.7744 | 3.7751 | 4.8111  | 5.5702 | 4.8350 | 0.8574  | -0.2219 | 0.0813 | 1.9091 |
| Cand1   | _OFFEKQDELKR_3                                                                | #N/A                   | 3.5740 | 3.3759 | 3.7002  | 3.2440  | 4.1048 | 4.4672 | 3.3922 | 3.9000  | 4.2204 | 2.8789 | 1.0401  | 0.0567  | 0.6757 | 0.1702 |
| Cand1   | _HIVVDGLDIRK_3                                                                | #N/A                   | 3.7397 | 3.6027 | 3.4734  | 4.5180  | 3.4240 | 4.3055 | 3.1655 | 3.9840  | 3.3856 | 2.5019 | 1.1794  | 0.2380  | 0.1205 | 0.9191 |
| Cand1   | _DLSDSLVPLHNETK_3                                                             | #N/A                   | 3.9178 | 3.2222 | 3.8539  | 1.8525  | 3.0435 | 3.1851 | 3.5459 | 3.6035  | 2.2313 | 3.0749 | 1.0210  | 0.0299  | 0.8897 | 0.0508 |
| Cand1   | _QSYSIK_2                                                                     | #N/A                   | 3.0838 | 3.8890 | 3.7706  | 4.2733  | 3.7104 | 4.0191 | 3.9880 | 3.8616  | 3.4938 | 4.2403 | 0.9731  | -0.0394 | 0.6717 | 0.1728 |
| Cand1   | _HC[Carbamidomethyl (C)]EC[Carbamidomethyl (C)]AEGETR_2                       | #N/A                   | 3.2062 | 4.1362 | 4.4407  | 3.9845  | 3.9576 | 3.7719 | 4.1327 | 3.0167  | 3.3158 | 3.6617 | 1.1089  | 0.1491  | 0.2123 | 0.6730 |
| Larp1   | _GLAS[Phospho (STY)]LPOLDESWEVK_2                                             | Q6ZQ58_S525_M1_Larp1   | 6.3319 | 3.8285 | 3.7971  | 3.7971  | 3.6712 | 6.8641 |        |         |        |        |         |         |        |        |



|         |                                                                       |                        |         |         |         |         |        |         |         |         |         |        |         |         |        |        |
|---------|-----------------------------------------------------------------------|------------------------|---------|---------|---------|---------|--------|---------|---------|---------|---------|--------|---------|---------|--------|--------|
| Acap2   | _ESLPSTVS[Phospho (STY)]ANSIYEEGER_2                                  | Q6ZQKS_5573_M1_Acap2   | 5.3205  | 3.5110  | 3.7724  | 4.4477  | 3.5200 | 3.7559  | 3.9689  | 3.8524  | 3.5752  | 3.7135 | 1.0734  | 0.1021  | 0.4726 | 0.3255 |
| Acap2   | _YSALLS[Phospho (STY)]PSEQEKR_2                                       | #N/A                   | 7.6249  | 7.2723  | 7.8303  | 7.7293  | 3.9998 | 7.0618  | 7.9864  | 7.5162  | 7.5038  | 3.4654 | 1.0456  | 0.0643  | 0.7943 | 0.1000 |
| Rps9    | _LCEYGLR_2                                                            | #N/A                   | 6.3449  | 6.3981  | 5.0945  | 6.2663  | 5.4976 | 6.3824  | 6.9143  | 6.6734  | 6.4899  | 5.9234 | 0.9226  | -0.1162 | 0.1669 | 0.7775 |
| Rps9    | _LFEGNALLR_2                                                          | #N/A                   | 6.3980  | 5.4910  | 6.4816  | 5.6360  | 5.4399 | 5.5866  | 6.0664  | 6.2850  | 5.7701  | 5.7198 | 0.9735  | -0.0387 | 0.5843 | 0.2334 |
| Rps9    | _LKDRLR_2                                                             | #N/A                   | 5.3192  | 4.2933  | 4.2028  | 3.9232  | 4.7510 | 3.9612  | 4.4058  | 4.9764  | 4.0975  | 4.6339 | 0.9735  | -0.0387 | 0.7093 | 0.1492 |
| Rps9    | _ELLTLDEKDPK_3                                                        | #N/A                   | 4.1877  | 3.1547  | 3.9214  | 3.4651  | 1.4653 | 3.2526  | 3.6134  | 3.5360  | 2.4750  | 3.1424 | 1.0155  | 0.0222  | 0.9279 | 0.0325 |
| Syne2   | _SSEGHPPWHVPS[Phospho (STY)]PSHSK_3                                   | Q6ZWQ0_56448_M1_Syne2  | 3.3573  | 3.9851  | 6.9567  | 6.0423  | 4.8434 | 6.0565  | 6.4593  | 4.3664  | 6.1373  | 5.3875 | 0.9319  | -0.1018 | 0.6446 | 0.1907 |
| Syne2   | _LTSHPTGLDDEKEAS[Phospho (STY)]EJNETDIEDPK_3                          | Q6ZWQ0_56348_M1_Syne2  | 3.6693  | 2.9737  | 4.3561  | 3.6462  | 2.7950 | 5.6328  | 3.7945  | 3.3550  | 3.6540  | 3.1228 | 1.0888  | 0.1228  | 0.5755 | 0.2399 |
| Syne1   | _NPET[Phospho (STY)]PTFLQHEADLR_2                                     | Q6ZW86_T2368_M1_Syne1  | 4.0503  | 3.2921  | 3.7839  | 3.3277  | 4.7666 | 3.4306  | 3.4760  | 3.6735  | 3.9725  | 3.0050 | 1.0689  | 0.0962  | 0.4832 | 0.3158 |
| Syne1   | _YLFQTGS[Phospho (STY)]HER_2                                          | Q6ZW86_S1360_M1_Syne1  | 7.5705  | 7.3532  | 7.3646  | 6.9841  | 5.3661 | 6.9974  | 7.4711  | 7.3194  | 7.0763  | 6.9336 | 0.9638  | -0.0532 | 0.5530 | 0.2573 |
| Syne1   | _TLPS[Phospho (STY)]EDEEGEEDKPYLR_3                                   | Q6ZW86_S8308_M1_Syne1  | 3.7837  | 3.0881  | 4.4705  | 7.2430  | 2.9094 | 3.3192  | 3.1870  | 3.1453  | 4.2947  | 3.4393 | 1.1760  | 0.2339  | 0.4894 | 0.3104 |
| Rps27   | _LTGEC[Carbamidomethyl (C)]SFR_2                                      | #N/A                   | 6.0737  | 5.7903  | 4.0482  | 5.6332  | 6.0095 | 5.9401  | 5.3764  | 6.4352  | 5.9938  | 5.8741 | 0.9430  | -0.0847 | 0.4534 | 0.3435 |
| Rps27   | _DLHPS[Phospho (STY)]PEEEKK_3                                         | Q6ZWU9_S11_M1_Rps27    | 6.5758  | 6.2600  | 6.4999  | 6.8359  | 6.1409 | 6.3572  | 6.8957  | 6.5687  | 6.4554  | 6.3221 | 0.9824  | -0.0256 | 0.4892 | 0.3105 |
| Rpl35   | _LTVNQTKQ_2                                                           | #N/A                   | 5.5850  | 4.7916  | 4.8375  | 6.0080  | 5.9618 | 5.9592  | 6.0703  | 6.2623  | 6.0593  | 5.3682 | 0.9299  | -0.1048 | 0.2426 | 0.6151 |
| Rpl35   | _QLDDKVELSQLR_2                                                       | #N/A                   | 4.1155  | 3.0109  | 4.3933  | 4.0828  | 2.8322 | 3.3965  | 3.1098  | 4.0325  | 3.4529  | 4.4036 | 0.9704  | -0.0434 | 0.7891 | 0.1029 |
| Elf2s1  | _ADEIAC[Carbamidomethyl (C)]VGYEGIDAVK_2                              | #N/A                   | 3.5263  | 3.8161  | 5.6271  | 4.3045  | 3.6375 | 4.9347  | 4.4528  | 4.1975  | 2.9957  | 4.2050 | 1.0871  | 0.1204  | 0.5065 | 0.2954 |
| Tmsb10  | _ETIEQKR_2                                                            | #N/A                   | 7.9915  | 7.8298  | 7.9615  | 7.7749  | 9.4378 | 8.3248  | 7.6570  | 7.6083  | 8.2910  | 7.8079 | 1.0483  | 0.0681  | 0.3009 | 0.5276 |
| Tmsb10  | _TET[Phospho (STY)]QKNTLPTK_2                                         | Q6ZWY8_T23_M1_Tmsb10   | 6.5719  | 6.1823  | 6.3966  | 4.3233  | 3.7603 | 3.9691  | 6.2627  | 3.7952  | 5.6530  | 5.8971 | 0.9238  | -0.1143 | 0.6208 | 0.2010 |
| Tmsb10  | _NTLPTKETIEQKR_3                                                      | #N/A                   | 4.7637  | 5.5954  | 7.2240  | 5.3263  | 6.8113 | 5.9706  | 4.1218  | 5.5045  | 6.0209  | 5.7601 | 1.1115  | 0.1525  | 0.3329 | 0.4777 |
| Tmsb10  | _JAcetyl (Protein N-term)ADKPM[Oxidation (M)]GEASFQK_2                | #N/A                   | 6.3333  | 6.4193  | 6.1478  | 7.0011  | 7.2317 | 6.8243  | 5.8028  | 6.4286  | 6.1883  | 1.0954 | 0.1315  | 0.0345  | 0.3514 | 0.3514 |
| Tmsb10  | _JAcetyl (Protein N-term)ADKPMGEASF[Phospho (STY)]FOKAK_3             | Q6ZWY8_S12_M1_Tmsb10   | 3.2413  | 3.9849  | 3.9281  | 4.4307  | 3.8678 | 3.8617  | 4.1454  | 3.6878  | 3.3363  | 4.3977 | 0.9984  | -0.0023 | 0.9826 | 0.0076 |
| Sym     | _LOSTPFQVEVDGSP[Phospho (STY)]PK_2                                    | Q70V5_5780_M1_Sym      | 4.1153  | 3.9851  | 3.5706  | 3.6354  | 4.6664 | 3.9832  | 4.7899  | 3.9832  | 4.1817  | 0.9471 | -0.0784 | 0.5022  | 0.2954 | 0.2954 |
| Sym     | _QFTGS[Phospho (STY)]PGAEESATSPOTK_2                                  | Q70V5_5655_M1_Sym      | 3.9257  | 3.3005  | 3.1116  | 3.6143  | 3.0514 | 3.1773  | 3.3290  | 3.0033  | 4.1528  | 3.5813 | 0.9565  | -0.0642 | 0.5704 | 0.2438 |
| Znr2f   | _S[Phospho (STY)]LGGVSGASGGK_2                                        | Q71F05_S75_M1_Znr2f    | 4.8055  | 8.2033  | 8.6368  | 8.9963  | 8.1573 | 8.6095  | 8.5585  | 7.8050  | 8.3893  | 8.5519 | 1.0226  | 0.0323  | 0.3994 | 0.3986 |
| Znr2f   | _AYS[Phospho (STY)]GSLPSTGSGGGGADGAR_2                                | Q71F05_S18_M1_Znr2f    | 4.1006  | 8.6373  | 9.3021  | 3.3780  | 8.5993 | 8.8026  | 3.2735  | 3.6231  | 3.9222  | 3.0553 | 1.0409  | 0.0274  | 1.5623 | 0.3986 |
| Tln2    | _TS[Phospho (STY)]PEESIR_2                                            | Q71LX4_S2083_M1_Tln2   | 3.1617  | 5.3335  | 4.3962  | 3.9400  | 3.8063 | 4.3191  | 4.0883  | 5.5972  | 3.3602  | 6.2658 | 0.8816  | -0.2150 | 0.3304 | 0.4809 |
| Tln2    | _DRFGLEGDESTM[Oxidation (M)]LEESVS[Phospho (STY)]PK_3                 | Q71LX4_S428_M1_Tln2    | 4.9702  | 3.5207  | 3.3085  | 3.8111  | 3.2482 | 5.8799  | 3.3412  | 5.6507  | 6.0411  | 4.8787 | 0.8283  | -0.2718 | 0.2694 | 0.5696 |
| Cspg5   | _VSS[Phospho (STY)]PHAR_2                                             | Q71M36_S498_M1_Cspg5   | 6.7825  | 3.0901  | 6.9446  | 3.8246  | 2.9784 | 3.4662  | 3.5393  | 4.2938  | 3.9424  | 6.3039 | 1.0054  | 0.0078  | 0.9819 | 0.0079 |
| Cspg5   | _GDDDDLVGNC[Carbamidomethyl (C)]LQNNLT_2                              | #N/A                   | 5.9657  | 5.2982  | 3.9802  | 5.3860  | 4.8122 | 4.7838  | 6.0851  | 5.1148  | 5.9199  | 5.3343 | 0.8974  | -0.1561 | 0.1785 | 0.4078 |
| Cspg5   | _LEGKGDDQDLGVNC[Carbamidomethyl (C)]LQNNLT_2                          | #N/A                   | 5.3442  | 5.7987  | 6.2386  | 6.5587  | 4.4821 | 5.2303  | 5.4042  | 5.7131  | 5.2619  | 5.1872 | 1.0403  | 0.0570  | 0.5965 | 0.2244 |
| Cspg5   | _KF[C[Carbamidomethyl (C)]DTPRVS[Phospho (STY)]S[Phospho (STY)]PHAR_3 | Q71M36_S497_M2_Cspg5   | 3.7678  | 3.5746  | 6.0012  | 4.5461  | 3.3960 | 5.9500  | 5.1935  | 3.9559  | 5.7766  | 4.2233 | 1.0588  | 0.0824  | 0.7420 | 0.1286 |
| Cspg5   | _LKEEFNQNSMS[Phospho (STY)]PK_2                                       | #N/A                   | 3.5846  | 4.1319  | 3.8797  | 4.0573  | 4.2200 | 3.7232  | 4.2056  | 3.8026  | 2.9654  | 3.6885 | 1.0729  | 0.1015  | 0.2980 | 0.5259 |
| Ssh1    | _SSS[Phospho (STY)]SSSHSVLR_2                                         | Q76I79_S929_M1_Ssh1    | 7.6357  | 7.9563  | 8.3569  | 8.0424  | 7.3269 | 7.9236  | 8.2658  | 8.1298  | 8.0801  | 7.7547 | 0.9772  | -0.0333 | 0.3845 | 0.4151 |
| Ssh1    | _SDS[Phospho (STY)]LQVIELEK_2                                         | Q76I79_S585_M1_Ssh1    | 3.7987  | 3.5437  | 3.5324  | 4.5770  | 2.9424 | 6.7890  | 6.7917  | 3.9250  | 4.2241  | 4.2543 | 0.8746  | -0.1932 | 0.5130 | 0.2899 |
| Mindy1  | _TRAS[Phospho (STY)]PQGR_2                                            | Q76LS9_S440_M1_Mindy1  | 9.6845  | 9.9551  | 10.3267 | 10.3665 | 9.7248 | 10.1205 | 10.0966 | 9.8630  | 10.0821 | 9.9676 | 1.0027  | 0.0039  | 0.8646 | 0.0632 |
| Mindy1  | _VETAEVC[Carbamidomethyl (C)]SRQELPQDS[Phospho (STY)]PR_3             | #N/A                   | 7.0267  | 7.1688  | 7.3468  | 7.9797  | 6.6504 | 6.9055  | 7.3332  | 7.4525  | 7.1398  | 6.9416 | 0.9949  | -0.0074 | 0.8855 | 0.0528 |
| Mindy1  | _PQELPQDS[Phospho (STY)]PR_2                                          | #N/A                   | 5.9826  | 5.7375  | 5.4457  | 6.0701  | 5.1236 | 5.7173  | 6.5860  | 6.0231  | 5.7302  | 5.8046 | 0.9409  | -0.0878 | 0.1681 | 0.7744 |
| Pgp2r1a | _LAGGDWITSR_2                                                         | #N/A                   | 8.2365  | 7.9551  | 8.2465  | 7.8831  | 7.9090 | 7.9779  | 8.1868  | 7.9925  | 7.8907  | 7.8024 | 1.0084  | 0.0120  | 0.5475 | 0.2616 |
| Pgp2r1a | _DKAVESLR_2                                                           | #N/A                   | 7.8396  | 8.0018  | 7.6754  | 7.8959  | 7.9021 | 7.9284  | 7.7685  | 7.8925  | 7.9720  | 1.0075 | 0.1008  | 0.4955  | 0.1055 | 0.2616 |
| Pgp2r1a | _IGPILNLTQSEVPILEK_3                                                  | #N/A                   | 7.7051  | 7.2371  | 7.8994  | 7.4720  | 7.3237 | 7.4967  | 7.6696  | 7.8377  | 7.2511  | 7.9011 | 0.9814  | -0.0271 | 0.4268 | 0.3698 |
| Pgp2r1a | _VLELDNVK_2                                                           | #N/A                   | 7.9302  | 7.8009  | 8.0498  | 7.6070  | 7.5364 | 7.6817  | 7.3845  | 8.0648  | 7.6109  | 8.0086 | 1.0001  | 0.0001  | 0.9978 | 0.0010 |
| Pgp2r1a | _NEDVQLR_2                                                            | #N/A                   | 7.4980  | 7.0978  | 6.5076  | 6.8637  | 7.2478 | 6.8846  | 6.5496  | 7.0391  | 7.2177  | 7.2619 | 0.9999  | -0.0001 | 0.9983 | 0.0007 |
| Pgp2r1a | _AVGPEITK_2                                                           | #N/A                   | 7.0618  | 6.6431  | 6.8015  | 5.5054  | 7.1015 | 6.7079  | 6.7208  | 7.3136  | 6.5825  | 6.9576 | 0.9628  | -0.0548 | 0.4510 | 0.3458 |
| Pgp2r1a | _LSTIALALQVER_2                                                       | #N/A                   | 6.6832  | 6.6489  | 6.7582  | 6.3370  | 6.8392 | 6.2550  | 6.6978  | 6.7751  | 6.9940  | 6.7412 | 0.9684  | -0.0464 | 0.1399 | 0.8542 |
| Pgp2r1a | _EWAHATIPK_2                                                          | #N/A                   | 6.3821  | 6.4491  | 7.2940  | 6.6785  | 6.0872 | 6.6574  | 6.3115  | 6.5997  | 6.8159  | 6.3179 | 1.0123  | 0.0176  | 0.7348 | 0.1338 |
| Pgp2r1a | _SALASVM[Oxidation (M)]GLSPILGK_2                                     | #N/A                   | 6.0636  | 6.4881  | 5.6584  | 5.6386  | 6.4838 | 6.3772  | 6.1745  | 6.1888  | 5.5425  | 1.0096 | 0.0138  | 0.8185  | 0.1078 | 0.1338 |
| Pgp2r1a | _LTQDQDVQVK_2                                                         | #N/A                   | 7.3104  | 7.2468  | 7.0804  | 7.8844  | 7.4523 | 7.4062  | 7.2764  | 7.3200  | 7.2682  | 7.2978 | 1.0146  | 0.0209  | 0.4679 | 0.3298 |
| Pgp2r1a | _TSAC[Carbamidomethyl (C)]GLFSVC[Carbamidomethyl (C)]YPR_2            | #N/A                   | 6.7549  | 6.6602  | 6.6102  | 6.1638  | 6.7042 | 6.0732  | 6.5069  | 6.1285  | 6.2026  | 6.4671 | 1.0266  | 0.0378  | 0.3480 | 0.4584 |
| Pgp2r1a | _AISHEPSDLEAHVPLVK_3                                                  | #N/A                   | 5.3139  | 4.9732  | 3.7669  | 3.6261  | 5.2913 | 6.7277  | 6.6253  | 5.8427  | 5.5200  | 6.6257 | 0.8044  | -0.3140 | 0.0904 | 1.0437 |
| Pgp2r1a | _QLSQSLPAIVELAEADK_2                                                  | #N/A                   | 5.3375  | 5.2117  | 4.7936  | 5.2003  | 4.5570 | 5.0819  | 5.0458  | 4.6645  | 4.8178  | 5.0608 | 0.0098  | 0.0098  | 0.8709 | 0.0600 |
| Pgp2r1a | _SEIIPM[Oxidation (M)]FSNLASDEQDSVR_2                                 | #N/A                   | 6.8268  | 7.9210  | 6.7920  | 7.2288  | 7.4386 | 6.7577  | 7.8535  | 6.7505  | 6.5419  | 6.2930 | 1.0395  | 0.0559  | 0.4882 | 0.3114 |
| Pgp2r1a | _NL[C[Carbamidomethyl (C)]SDOTPM[Oxidation (M)]VR_2                   | #N/A                   | 7.0543  | 6.5419  | 6.5725  | 6.0488  | 6.6400 | 6.4134  | 6.5837  | 6.5980  | 6.5478  | 6.6105 | 0.9599  | -0.0088 | 0.8173 | 0.0876 |
| Pgp2r1a | _MAGDPVANNR_2                                                         | #N/A                   | 7.3469  | 6.9184  | 3.2651  | 8.0742  | 7.0520 | 7.7467  | 7.1059  | 6.6035  | 6.4383  | 6.2223 | 1.0214  | 0.0306  | 0.8800 | 0.0555 |
| Pgp2r1a | _YFAQEALTVSLA_2                                                       | #N/A                   | 4.5157  | 4.9603  | 4.0181  | 5.1624  | 4.3280 | 4.6995  | 4.8365  | 4.0668  | 4.2253  | 3.3419 | 1.1205  | 0.1642  | 0.1633 | 0.7871 |
| Pgp2r1a | _LNHSNLD[C[Carbamidomethyl (C)]VNEVGR_2                               | #N/A                   | 5.2919  | 4.9431  | 5.8604  | 5.9007  | 5.1290 | 5.5219  | 5.4960  | 5.3550  | 5.3826  | 5.2183 | 1.0146  | 0.0209  | 0.7117 | 0.1477 |
| Pgp2r1a | _HM[Oxidation (M)]PTVLR_2                                             | #N/A                   | 6.9048  | 7.2460  | 7.4826  | 6.4240  | 6.9307 | 6.9291  | 6.8665  | 7.3950  | 6.9414  | 7.2638 | 0.9817  | -0.0267 | 0.5490 | 0.2604 |
| Pgp2r1a | _ENVIM[Oxidation (M)]TGILP[C[Carbamidomethyl (C)]IK_2                 | #N/A                   | 6.2460  | 6.2583  | 6.4827  | 5.9309  | 6.0305 | 6.1706  | 6.2873  | 5.7837  | 6.7358  | 6.2813 | 0.9864  | -0.0198 | 0.6519 | 0.1858 |
| Pgp2r1a | _VLAM[Oxidation (M)]SGDPRYLHR_2                                       | #N/A                   | 4.9543  | 6.2448  | 6.0350  | 5.9431  | 6.2073 | 6.1808  | 6.2146  | 6.1303  | 6.1054  | 6.0320 | 0.9685  | -0.0462 | 0.4657 | 0.3319 |
| Pgp2r1a | _ELVSDANQHWK_2                                                        | #N/A                   | 7.0321  | 7.5387  | 7.4270  | 7.7841  | 7.7326 | 7.8787  | 7.4206  | 7.7614  | 7.0578  | 7.4784 | 1.0183  | 0.0262  | 0.5050 | 0.2967 |
| Pgp2r1a | _LNSLC[Carbamidomethyl (C)]M[Oxidation (M)]AWLVDHYAIR_3               | #N/A                   | 3.2761  | 4.0663  | 4.5106  | 4.0543  | 3.8877 | 3.8418  | 4.2026  | 3.7027  | 3.2459  | 3.7316 | 1.0588  | 0.0824  | 0.4190 | 0.3778 |
| Pgp2r1a | _VKFC[Carbamidomethyl (C)]ENLSADC[Carbamidomethyl (C)]JR_2            | #N/A                   | 4.2722  | 3.0702  | 4.0059  | 3.5497  | 3.4159 | 3.2087  | 3.6979  | 3.4515  | 3.7506  | 3.2269 | 1.0157  | 0.0224  | 0.8344 | 0.0786 |
| Stambp1 | _SDGSNNFVS[Phospho (STY)]PPVNR_2                                      | Q76N33_S242_M1_Stambp1 | 10.4695 | 10.4617 | 10.9097 | 11.0399 | 9.3566 | 10.6688 | 10.7113 | 10.3935 | 10.3658 | 10     |         |         |        |        |



|         |                                                                                       |                       |         |         |         |         |         |         |         |         |         |         |         |         |        |        |
|---------|---------------------------------------------------------------------------------------|-----------------------|---------|---------|---------|---------|---------|---------|---------|---------|---------|---------|---------|---------|--------|--------|
| Mtch2   | _EYSSFOR_2                                                                            | IN/A                  | 4.0255  | 3.3169  | 3.7592  | 3.3030  | 5.1138  | 3.4554  | 3.4512  | 5.7761  | 3.9973  | 5.7561  | 0.8069  | -0.3095 | 0.1593 | 0.7979 |
| Picalm  | _ATLSNAVSLASTGLSTK_2                                                                  | IN/A                  | 3.6738  | 3.5725  | 3.5085  | 5.1268  | 3.6643  | 2.4972  | 4.7400  | 3.9052  | 2.5179  | 4.0861  | 0.9637  | -0.0534 | 0.8130 | 0.0899 |
| Scn4b   | _EC[Carbamidomethyl (C)]LIVSSGNDNTENGIPGSK_2                                          | IN/A                  | 4.0227  | 4.7035  | 5.1841  | 3.8944  | 3.3924  | 3.5312  | 5.5880  | 5.3883  | 4.8573  | 3.9724  | 0.8324  | -0.2647 | 0.1054 | 0.9770 |
| Opalin  | _IS[Phospho (STY)]ENPRRSPTHM[Oxidation (M)]NPR_4                                      | IN/A                  | 7.7246  | 8.4277  | 9.3891  | 8.1258  | 8.7293  | 8.4436  | 8.3069  | 8.3500  | 8.4827  | 8.2794  | 1.0142  | 0.0003  | 0.6931 | 0.1592 |
| Opalin  | _RS[Phospho (STY)]PHEM[Oxidation (M)]NPR_3                                            | IN/A                  | 6.8176  | 8.4869  | 5.0621  | 8.0006  | 6.6878  | 4.9688  | 4.3189  | 5.0365  | 5.4543  | 4.6503  | 1.2464  | 0.3178  | 0.1200 | 0.9208 |
| Opalin  | _GS[Phospho (STY)]QEGHVPK_2                                                           | Q7M750_S100_M1_Opalin | 8.1974  | 8.4063  | 8.3849  | 8.8042  | 8.4924  | 8.6112  | 8.6622  | 8.1313  | 8.2431  | 8.4983  | 1.0136  | 0.0195  | 0.4435 | 0.3531 |
| Opalin  | _TVSGSEEPLOTVRPPELER_3                                                                | IN/A                  | 5.7958  | 5.9911  | 5.8550  | 6.2775  | 6.0017  | 6.4426  | 6.2878  | 5.4431  | 6.1014  | 5.2199  | 1.0516  | 0.0726  | 0.2491 | 0.6035 |
| Opalin  | _S[Phospho (STY)]PHEMNPR_2                                                            | IN/A                  | 7.3709  | 5.6383  | 3.7422  | 8.1668  | 6.5120  | 3.7672  | 5.8956  | 5.1384  | 3.8745  | 6.5369  | 1.0942  | 0.1298  | 0.6412 | 0.1930 |
| Asap2   | _LHLEDDES[Phospho (STY)]DOOVDEK_2                                                     | IN/A                  | 3.5812  | 8.6850  | 3.8513  | 9.2910  | 7.9462  | 8.7806  | 9.0457  | 8.7876  | 8.9124  | 8.9228  | 0.7875  | -0.1446 | 0.1911 | 0.7188 |
| Asap2   | _LHLEDDES[Phospho (STY)]DOOVDEKLQSPNRR_4                                              | IN/A                  | 4.1266  | 3.4310  | 3.1226  | 8.8635  | 6.9161  | 2.9764  | 3.3371  | 8.3632  | 4.1113  | 4.3670  | 0.9788  | -0.0309 | 0.9454 | 0.0244 |
| Asap2   | _LHLEDDES[Phospho (STY)]DOOVDEKLQSPNRR_4                                              | IN/A                  | 3.2504  | 3.9758  | 3.9372  | 7.4587  | 3.8641  | 4.2613  | 4.1545  | 6.8927  | 3.3272  | 4.4068  | 0.9494  | -0.0749 | 0.8147 | 0.0890 |
| Cyfp1   | _SGDGEST[Phospho (STY)]PVEHVR_2                                                       | Q7TM88_T1234_M1_Cyfp1 | 6.8098  | 6.8753  | 3.4368  | 6.4025  | 5.5512  | 6.6610  | 3.1289  | 6.5857  | 6.6803  | 1.1670  | 0.2228  | 0.4110  | 0.3862 | 0.0890 |
| Pippr4  | _PGSSQLVHPTEQENISTS[Phospho (STY)]PK_3                                                | Q7TME0_S549_M1_Pippr4 | 9.8447  | 10.0900 | 10.5275 | 10.8188 | 8.2333  | 4.2981  | 3.1580  | 10.6810 | 4.2904  | 3.9613  | 1.6240  | 0.6995  | 0.1010 | 0.9958 |
| Pippr4  | _DASS[Phospho (STY)]LTNLKR_2                                                          | Q7TME0_S386_M1_Pippr4 | 8.4179  | 8.2952  | 8.8447  | 8.5965  | 6.4279  | 8.2357  | 8.3875  | 8.7444  | 8.2234  | 7.8292  | 0.9807  | -0.0281 | 0.7408 | 0.1303 |
| Pippr4  | _QGGLQSS[Phospho (STY)]PK_2                                                           | Q7TME0_S594_M1_Pippr4 | 9.2092  | 9.4917  | 9.6156  | 9.4147  | 8.6491  | 9.1517  | 3.5074  | 9.4638  | 9.4496  | 9.1363  | 1.1732  | 0.2304  | 0.2764 | 0.5585 |
| Pippr4  | _DAURS[Phospho (STY)]LTDLNQDPSR_2                                                     | IN/A                  | 5.5616  | 5.7363  | 6.4991  | 7.0323  | 5.6171  | 5.9980  | 4.5829  | 7.0155  | 5.7222  | 1.0225  | 0.0321  | 0.7995  | 0.0972 | 0.1490 |
| Pippr4  | _M[Oxidation (M)]SLQVM[Oxidation (M)]DTEPEGGS[Phospho (STY)]PPR_2                     | IN/A                  | 6.5720  | 6.5974  | 7.3972  | 6.9447  | 4.9253  | 7.3577  | 7.3674  | 7.1012  | 6.9906  | 7.0597  | 0.9302  | -0.1043 | 0.3191 | 0.4960 |
| Pippr4  | _TVHTS[Phospho (STY)]PGGGGLAR_2                                                       | IN/A                  | 3.7326  | 3.5620  | 4.0724  | 3.7676  | 3.3355  | 3.4901  | 3.7088  | 3.4208  | 4.1016  | 4.1215  | 0.9498  | -0.0744 | 0.3262 | 0.4866 |
| Pippr4  | _S[Phospho (STY)]LTDLNQDPSR_2                                                         | IN/A                  | 7.5890  | 6.7823  | 7.2167  | 8.1667  | 6.0974  | 7.4844  | 7.7236  | 7.4365  | 7.2903  | 3.2770  | 1.1230  | 0.1673  | 0.4104 | 0.3868 |
| Pippr4  | _NASHAS[Phospho (STY)]M[Oxidation (M)]DSAR_2                                          | Q7TME0_S439_M1_Pippr4 | 3.0249  | 5.0816  | 3.7117  | 4.2144  | 3.6514  | 4.0780  | 4.4388  | 3.9041  | 3.5527  | 4.1814  | 0.9853  | -0.0213 | 0.8813 | 0.0549 |
| Pippr4  | _KM[Oxidation (M)]SLQVM[Oxidation (M)]DTEPEGGS[Phospho (STY)]PPR_3                    | IN/A                  | 3.7906  | 3.0950  | 4.4774  | 3.5037  | 2.9163  | 3.3124  | 3.4548  | 3.3158  | 4.0528  | 3.3308  | 0.9936  | -0.0093 | 0.9450 | 0.0246 |
| Pippr4  | _DSEC[Carbamidomethyl (C)]ESUKDSGS[Phospho (STY)]GDR_2                                | IN/A                  | 4.0115  | 4.0788  | 3.9604  | 3.7001  | 3.9001  | 3.8899  | 4.1777  | 3.7649  | 3.4115  | 3.6671  | 1.0446  | 0.0630  | 0.2721 | 0.5653 |
| Pippr4  | _SNS[Phospho (STY)]PENTR_2                                                            | Q7TME0_S746_M1_Pippr4 | 4.2278  | 3.1146  | 3.9615  | 3.5053  | 3.3715  | 3.2531  | 3.6535  | 3.4959  | 3.7950  | 3.1825  | 1.0115  | 0.0165  | 0.8722 | 0.0594 |
| Ndufa12 | _FNVSATPEQVVPYSTR_2                                                                   | IN/A                  | 8.1751  | 8.1353  | 7.9745  | 8.3746  | 8.0366  | 8.2553  | 8.3341  | 7.9521  | 8.2974  | 7.7046  | 1.0107  | 0.0154  | 0.5528 | 0.2574 |
| Ndufa12 | _GTLVGEDK_2                                                                           | IN/A                  | 5.2504  | 5.9265  | 4.2365  | 6.1965  | 5.7015  | 5.6936  | 5.4276  | 6.2111  | 5.2047  | 6.1751  | 0.9559  | -0.0651 | 0.5514 | 0.5875 |
| Ndufa12 | _Acetyl (Protein N-term)[M]ELVEVKR_2                                                  | IN/A                  | 7.6460  | 7.8793  | 7.5414  | 7.8327  | 7.5148  | 7.6007  | 7.5618  | 7.7462  | 7.5847  | 7.7418  | 1.0014  | 0.0020  | 0.9069 | 0.0424 |
| Ndufa12 | _GVQQTGHGGLR_2                                                                        | IN/A                  | 7.0567  | 7.3709  | 7.3642  | 7.4891  | 8.0294  | 7.1818  | 6.7375  | 7.0840  | 7.7444  | 7.4850  | 1.0210  | 0.0300  | 0.5518 | 0.2582 |
| Ndufa12 | _WLHC[Carbamidomethyl (C)]M[Oxidation (M)]TDDPPTNPPTAR_3                              | IN/A                  | 3.3275  | 3.8987  | 4.0143  | 4.5169  | 5.6468  | 4.3385  | 4.2316  | 6.4068  | 6.5196  | 5.8268  | 0.7467  | -0.4215 | 0.0356 | 0.1490 |
| Ndufa12 | _Acetyl (Protein N-term)[M]ELVEVKR_2                                                  | IN/A                  | 3.9443  | 3.3981  | 3.6779  | 3.2217  | 2.7670  | 3.0092  | 3.3700  | 3.5813  | 3.4799  | 3.3998  | 0.8820  | -0.1811 | 0.1521 | 0.8780 |
| Uhrf2   | _RPAS[Phospho (STY)]DOEC[Carbamidomethyl (C)]PGDSK_2                                  | Q7TM13_S668_M1_Uhrf2  | 4.2933  | 3.5977  | 3.4793  | 3.9820  | 3.4190  | 3.8757  | 3.1704  | 4.1365  | 3.7851  | 3.9490  | 1.0038  | 0.0055  | 0.9538 | 0.0205 |
| Syncrip | _NIANTYTEILEK_2                                                                       | IN/A                  | 4.3470  | 3.7477  | 4.4581  | 5.2507  | 4.6387  | 5.3941  | 5.0067  | 5.0152  | 4.7666  | 4.5657  | 0.9588  | -0.0606 | 0.5540 | 0.2565 |
| Syncrip | _DIEDELVPFEK_2                                                                        | IN/A                  | 4.7604  | 5.5612  | 3.5416  | 5.0503  | 5.2037  | 5.7726  | 5.0726  | 5.0520  | 5.0163  | 5.9367  | 0.9454  | -0.0810 | 0.5323 | 0.2738 |
| Syncrip | _DSDSHVQNK_2                                                                          | IN/A                  | 4.3066  | 4.1708  | 4.8076  | 5.3090  | 4.6495  | 4.9547  | 3.7529  | 4.0188  | 3.9700  | 5.1872  | 1.1105  | 0.1512  | 0.1991 | 0.7010 |
| Syncrip | _LYNNHEIR_2                                                                           | IN/A                  | 3.7740  | 5.1758  | 3.5076  | 4.5522  | 4.3761  | 5.2896  | 3.1997  | 3.9498  | 4.2488  | 5.2924  | 1.0655  | 0.0915  | 0.6015 | 0.2208 |
| Syncrip | _TGYLTDVITGGR_2                                                                       | IN/A                  | 5.2168  | 3.1214  | 4.5038  | 6.0246  | 5.0158  | 5.7868  | 3.2203  | 5.8832  | 4.2614  | 3.4727  | 1.1747  | 0.3223  | 0.3333 | 0.4771 |
| Syncrip | _GFC[Carbamidomethyl (C)]FUEYDHK_3                                                    | IN/A                  | 3.8521  | 3.3741  | 4.5389  | 3.5407  | 3.2624  | 3.3622  | 3.2554  | 3.0770  | 4.2264  | 3.5077  | 1.0394  | 0.0557  | 0.6729 | 0.1721 |
| Syncrip | _YTEGLTDVLYHPQDK_2                                                                    | IN/A                  | 4.2729  | 3.5772  | 3.4588  | 4.5434  | 3.3986  | 4.3309  | 3.1909  | 4.1570  | 3.8056  | 3.9285  | 1.0424  | 0.0599  | 0.6153 | 0.2109 |
| Tabb2a  | _AIVDLPGTM[Oxidation (M)]DSVR_2                                                       | IN/A                  | 12.8603 | 12.8848 | 13.2180 | 12.9376 | 12.9932 | 13.1711 | 13.0129 | 12.7440 | 13.0274 | 13.0271 | 1.0037  | 0.0054  | 0.6367 | 0.1960 |
| Tabb2a  | _ALTVPELTQGM[Oxidation (M)]FSK_2                                                      | IN/A                  | 11.5334 | 11.7243 | 11.8047 | 11.6333 | 11.5706 | 11.5277 | 11.6731 | 11.6109 | 11.5197 | 11.6646 | 1.0013  | 0.0019  | 0.8162 | 0.0882 |
| Tabb2a  | _YLTVAAFR_2                                                                           | IN/A                  | 11.3253 | 11.3809 | 11.3973 | 11.3958 | 11.2455 | 11.3753 | 11.1873 | 11.4581 | 11.5686 | 11.4396 | 0.9947  | -0.0076 | 0.4190 | 0.3778 |
| Tabb2a  | _INVYNEAAGNK_2                                                                        | IN/A                  | 11.4335 | 11.5329 | 12.1236 | 12.2234 | 11.6793 | 11.8998 | 11.7464 | 12.0333 | 11.8159 | 12.0386 | 0.9922  | -0.0113 | 0.6067 | 0.2170 |
| Tabb2a  | :SESC[Carbamidomethyl (C)]DC[Carbamidomethyl (C)]LGGQLTHSLGGTGSGM[Oxidation (M)]GTLIS | IN/A                  | 6.2317  | 5.6659  | 5.5815  | 6.4858  | 4.9746  | 5.7729  | 5.5211  | 5.1334  | 4.8602  | 5.9987  | 1.0602  | 0.0843  | 0.3826 | 0.4844 |
| Tabb2a  | _M[Oxidation (M)]NTFSVM[Oxidation (M)]PSK_2                                           | IN/A                  | 8.9408  | 9.2310  | 9.2102  | 9.5541  | 9.4818  | 9.2127  | 9.0979  | 9.3558  | 9.2675  | 9.2999  | 1.0018  | 0.0026  | 0.8946 | 0.0484 |
| Tabb2a  | _FWEVSEHGDPGTSHGSDQLQER_4                                                             | IN/A                  | 6.6771  | 6.4782  | 6.9223  | 6.6945  | 7.0422  | 6.9681  | 5.9817  | 6.5929  | 6.6775  | 7.2613  | 1.0255  | 0.0363  | 0.4920 | 0.3080 |
| Tabb2a  | _INVNYNEAAGNKVPR_3                                                                    | IN/A                  | 4.5337  | 4.7772  | 5.2499  | 4.1676  | 4.7330  | 4.5926  | 3.7755  | 4.1518  | 4.2351  | 4.4497  | 1.1258  | 0.1710  | 0.0392 | 1.4062 |
| Tabb2a  | SESC[Carbamidomethyl (C)]DC[Carbamidomethyl (C)]LGGQLTHSLGGTGSGM[Oxidation (M)]GTLIS  | IN/A                  | 3.0180  | 3.7742  | 3.9590  | 4.6668  | 3.6625  | 2.9621  | 3.9445  | 2.8305  | 3.5040  | 3.4735  | 1.0685  | 0.0956  | 0.5433 | 0.2650 |
| Huwe1   | _AES[Phospho (STY)]PEEVAC[Carbamidomethyl (C)]R_2                                     | IN/A                  | 10.7333 | 10.4261 | 10.5895 | 10.5997 | 9.3468  | 10.0663 | 11.0495 | 10.0674 | 10.5124 | 10.4971 | 0.9635  | -0.0537 | 0.2053 | 0.6876 |
| Huwe1   | _RAQK[Carbamidomethyl (C)]ETLS[Phospho (STY)]PGLPPEQPQTTR_3                           | IN/A                  | 6.6635  | 7.0141  | 7.7750  | 7.0222  | 3.0036  | 6.4781  | 7.5878  | 7.4717  | 4.1629  | 6.3836  | 0.9882  | -0.0171 | 0.9453 | 0.0244 |
| Huwe1   | _ESQKPPEDS[Phospho (STY)]PPASSSSTR_2                                                  | Q7TM98_S2918_M1_Huwe1 | 7.9882  | 4.2759  | 8.5706  | 4.1397  | 3.5767  | 4.1527  | 8.7889  | 3.9788  | 3.6274  | 4.1067  | 1.0634  | 0.0888  | 0.8324 | 0.0797 |
| Huwe1   | _GSGTAS[Phospho (STY)]DDEFENLR_2                                                      | Q7TM98_S1907_M1_Huwe1 | 3.4056  | 9.4641  | 8.6999  | 9.7146  | 8.2557  | 9.0959  | 9.9352  | 9.6821  | 9.5168  | 0.8463  | -0.2407 | 0.2667  | 0.5739 | 0.0876 |
| Huwe1   | _AQK[Carbamidomethyl (C)]ETLS[Phospho (STY)]PGLPPEQPQTTR_2                            | IN/A                  | 7.3117  | 6.8441  | 7.0545  | 7.4063  | 5.9779  | 5.2766  | 7.9043  | 7.5528  | 6.9412  | 7.2332  | 0.8970  | -0.1568 | 0.1360 | 0.8665 |
| Huwe1   | _DGGGS[Phospho (STY)]GNSTIVSR_2                                                       | Q7TM98_S2362_M1_Huwe1 | 2.8988  | 4.3273  | 3.5856  | 4.0883  | 3.5253  | 4.2041  | 4.0302  | 3.6788  | 6.6478  | 0.8308  | -0.2675 | 0.2521  | 0.5984 | 0.0876 |
| Huwe1   | _AES[Phospho (STY)]PEEVAC[Carbamidomethyl (C)]RK_2                                    | IN/A                  | 7.7378  | 6.8457  | 7.3604  | 7.3237  | 5.8359  | 6.3177  | 7.8640  | 7.5040  | 7.1996  | 7.2936  | 0.9248  | -0.1129 | 0.1814 | 0.7413 |
| Huwe1   | _DIS[Phospho (STY)]MSEEDQMMR_2                                                        | Q7TM98_S1368_M1_Huwe1 | 3.9084  | 3.4340  | 3.6421  | 3.1859  | 3.2553  | 2.9733  | 3.3341  | 3.8153  | 4.1144  | 3.3640  | 0.8702  | -0.2006 | 0.0726 | 1.1394 |
| Smag2   | _DLDLASVPS[Phospho (STY)]PSVSR_2                                                      | Q7TN29_S219_M1_Smag2  | 3.8788  | 7.9832  | 8.1493  | 9.2452  | 6.9262  | 6.9581  | 3.9961  | 8.0191  | 7.4315  | 3.5252  | 1.2520  | 0.3242  | 0.3008 | 0.5217 |
| Smag2   | _S[Phospho (STY)]DNVLR_2                                                              | Q7TN29_S127_M1_Smag2  | 3.1256  | 1.6383  | 3.8124  | 4.3150  | 3.9889  | 4.1366  | 4.0297  | 3.8034  | 3.4520  | 4.2820  | 0.9000  | -0.1519 | 0.4836 | 0.3155 |
| Smag2   | _KAVGSMPTAGSAGS[Phospho (STY)]VPENULFPEPGSK_3                                         | Q7TN29_S239_M1_Smag2  | 3.1219  | 4.1042  | 3.8087  | 9.4540  | 3.9925  | 4.1329  | 4.0261  | 3.8071  | 3.4557  | 4.2784  | 1.2254  | 0.2933  | 0.4837 | 0.3154 |
| Cpeb4   | _QLQLSPS[Phospho (STY)]PGQAGILPETEK_2                                                 | Q7TN98_S99_M1_Cpeb4   | 6.9640  | 7.1499  | 6.1796  | 6.7679  | 6.2916  | 7.2676  | 6.1956  | 3.8589  | 3.6982  | 3.9212  | 1.5665  | 0.6476  | 0.0020 | 2.7011 |
| Cpeb4   | _S[Phospho (STY)]PASHPPPPFTHR_3                                                       | Q7TN98_S252_M1_Cpeb4  | 3.9089  | 3.4335  | 3.6425  | 3.1863  | 3.2549  | 2.9738  | 3.3346  | 3.8149  | 4.1139  | 3.7545  | 0.9056  | -0.1431 | 0.1157 | 0.8675 |
| Cpeb3   | _SPAS[Phospho (STY)]PSQAQYAGR_2                                                       | Q7TN99_S197_M1_Cpeb3  | 8.3549  | 8.4903  | 8.6539  | 9.0432  | 8.0691  | 8.5052  | 8.7120  | 8.3039  | 8.2911  | 7.9896  | 1.0235  | 0.0335  | 0.3631 | 0.4400 |
| Cpeb3   | _RS[Phospho (STY)]PAS[Phospho (STY)]PSQAQYAGR_2                                       | IN/A                  | 3.8525  | 4.3444  | 4.2325  | 3.7762  | 3.6425  | 2.9821  | 3.9245  | 3.2249  | 3.5240  | 4.4535  | 1.0774  | 0.1075  | 0.3467 | 0.4600 |
| Spag7   | _EFAPS[Phospho (STY)]DEELDSVR_2                                                       | Q7TNE                 |         |         |         |         |         |         |         |         |         |         |         |         |        |        |



|         |                                                         |                         |         |         |         |         |         |         |         |         |         |         |         |         |        |        |
|---------|---------------------------------------------------------|-------------------------|---------|---------|---------|---------|---------|---------|---------|---------|---------|---------|---------|---------|--------|--------|
| Prrc2b  | _ESGS[Phospho (STY)]PQAQFSK_2                           | Q7TPM1_5621_M1_Prrc2b   | 8.1560  | 7.5002  | 7.2002  | 8.0163  | 6.8734  | 7.5078  | 8.1546  | 7.5615  | 7.5985  | 7.8585  | 0.9678  | -0.0472 | 0.3792 | 0.4212 |
| Prrc2b  | _ALS[Phospho (STY)]SSAADSDAKR_2                         | Q7TPM1_5415_M1_Prrc2b   | 3.2537  | 4.0100  | 4.4883  | 6.1324  | 3.8983  | 4.2721  | 4.1203  | 5.2543  | 3.3615  | 6.3510  | 0.9085  | -0.1385 | 0.5593 | 0.2523 |
| Prrc2b  | _LKFS[Phospho (STY)]DDEDEEDVKKDQ_3                      | #N/A                    | 3.4246  | 5.5501  | 4.1115  | 7.2371  | 5.8715  | 6.1157  | 6.1540  | 6.6051  | 5.8477  | 5.7949  | 0.8827  | -0.1799 | 0.3530 | 0.4522 |
| Prrc2b  | _LKFS[Phospho (STY)]DDEDEEDVKK_2                        | #N/A                    | 3.4531  | 4.2583  | 4.1399  | 4.6037  | 4.0796  | 3.6499  | 4.2351  | 3.8354  | 4.1116  | 4.1773  | 0.9855  | -0.0210 | 0.7989 | 0.0975 |
| Prrc2b  | _S[Phospho (STY)]PDFAFGGSGHSPVALER_3                    | Q7TPM1_5789_M1_Prrc2b   | 4.1196  | 3.2228  | 3.8533  | 3.3970  | 3.2633  | 3.3613  | 3.5453  | 3.6041  | 3.9022  | 3.0743  | 1.0013  | 0.0018  | 0.9849 | 0.0066 |
| Prrc2b  | _QQQQQQQQQQQQQQGQLVK_3                                  | #N/A                    | 4.1028  | 3.2396  | 3.8365  | 3.3803  | 3.0609  | 3.1677  | 3.5385  | 3.6209  | 3.9200  | 3.0575  | 0.9810  | -0.0277 | 0.7983 | 0.0979 |
| Fzd1    | _TAS[Phospho (STY)]PVNSPAR_2                            | Q7TPM6_5313_M1_Fzd1     | 9.2061  | 9.2525  | 7.6701  | 9.3646  | 7.4693  | 9.2607  | 9.0332  | 8.9603  | 8.9099  | 9.1144  | 0.9666  | -0.0490 | 0.5245 | 0.2803 |
| Fzd1    | _RGS[Phospho (STY)]ATSSSNTSLT_2                         | Q7TPM9_5486_M1_Fzd1     | 8.9467  | 8.7783  | 3.9913  | 9.1838  | 3.2523  | 8.9564  | 8.7713  | 8.6661  | 8.7721  | 8.7442  | 0.8153  | -0.2945 | 0.2803 | 0.5524 |
| Fzd1    | _LDGSSDNLNR_2                                           | #N/A                    | 4.3107  | 3.5669  | 4.0444  | 3.5882  | 4.3447  | 3.1701  | 3.7365  | 3.4130  | 3.7120  | 3.2655  | 1.0866  | 0.1198  | 0.2676 | 0.5726 |
| Fzd1    | _ALESSEELLETTANGLQAASDESDFSQAAK_3                       | #N/A                    | 3.2731  | 4.0294  | 3.8836  | 4.3863  | 3.9177  | 4.2078  | 4.1010  | 3.7322  | 3.3808  | 4.3533  | 1.0149  | 0.0213  | 0.8278 | 0.0821 |
| Mtmr10  | _NWLIS[Phospho (STY)]TETLANED_2                         | Q7TPM9_5763_M1_Mtmr10   | 3.8890  | 3.3372  | 4.5758  | 3.5776  | 3.2255  | 3.3991  | 3.2923  | 3.0401  | 4.1895  | 3.5446  | 1.0429  | 0.0606  | 0.6520 | 0.1857 |
| Mtmr10  | _RNS[Phospho (STY)]LVLK_2                               | Q7TPM9_5603_M1_Mtmr10   | 3.5353  | 3.6908  | 4.2221  | 3.2239  | 3.5791  | 3.0455  | 4.4395  | 3.3937  | 3.0423  | 3.1909  | 1.0093  | 0.0134  | 0.9220 | 0.0353 |
| Actn1   | _ATLPDADKER_2                                           | #N/A                    | 8.2451  | 8.2048  | 8.3562  | 8.2720  | 8.0501  | 8.2341  | 8.1789  | 8.4366  | 8.0921  | 7.9174  | 1.0087  | 0.0125  | 0.4982 | 0.3026 |
| Actn1   | _TINEVENQLTR_2                                          | #N/A                    | 8.0678  | 7.6343  | 8.1333  | 7.6574  | 7.8851  | 7.7404  | 8.0459  | 8.0057  | 7.8992  | 7.2063  | 1.0082  | 0.0118  | 0.7450 | 0.1279 |
| Actn1   | _LASDLEWIR_2                                            | #N/A                    | 7.6801  | 7.2008  | 7.3905  | 7.6732  | 6.9043  | 7.5382  | 7.9801  | 7.6788  | 7.6065  | 7.5670  | 0.9597  | -0.0593 | 0.1075 | 0.9686 |
| Actn1   | _ILAGDNVYTEDEL_3                                        | #N/A                    | 7.4744  | 7.0885  | 7.4742  | 7.7982  | 6.9540  | 7.3798  | 7.5327  | 7.6492  | 7.2400  | 7.5707  | 0.9818  | -0.0265 | 0.4441 | 0.3525 |
| Actn1   | _EGLLLWC[Carbamidomethyl (C)]QR_2                       | #N/A                    | 7.6067  | 7.2357  | 7.3493  | 7.3178  | 6.7302  | 6.9088  | 7.4543  | 7.6546  | 6.7586  | 6.9655  | 0.9976  | -0.0034 | 0.9428 | 0.0256 |
| Actn1   | _EYEEWLNEIR_2                                           | #N/A                    | 7.2695  | 6.9367  | 7.0325  | 7.0421  | 6.7032  | 6.7380  | 7.1808  | 6.9648  | 7.0334  | 7.0316  | 0.9860  | -0.0204 | 0.4094 | 0.3879 |
| Actn1   | _VQWQLLTUAR_2                                           | #N/A                    | 7.2101  | 7.4409  | 7.0591  | 7.3134  | 6.3694  | 7.1725  | 7.3998  | 7.3124  | 7.3016  | 7.0251  | 0.9772  | -0.0333 | 0.4392 | 0.3574 |
| Actn1   | _TIPWLENR_2                                             | #N/A                    | 7.1028  | 7.4164  | 6.9054  | 6.6252  | 7.2290  | 7.0616  | 6.9948  | 6.7753  | 7.1295  | 6.9985  | 0.9985  | -0.0022 | 0.9505 | 0.0221 |
| Actn1   | _IC[Carbamidomethyl (C)]DQWDLGALTQK_2                   | #N/A                    | 6.4728  | 6.8392  | 7.0886  | 7.1135  | 6.5878  | 6.7661  | 7.1743  | 6.5638  | 6.7526  | 6.4463  | 1.0114  | 0.0164  | 0.6844 | 0.1647 |
| Actn1   | _FACQDSVEETSAK_2                                        | #N/A                    | 6.5537  | 6.4386  | 7.0205  | 6.9039  | 5.6972  | 6.4118  | 6.6944  | 6.7627  | 6.3866  | 6.7483  | 0.9784  | -0.0315 | 0.5791 | 0.2372 |
| Actn1   | _LAILGHNNEYSK_2                                         | #N/A                    | 5.8002  | 6.4279  | 6.2719  | 6.5181  | 5.5435  | 6.1407  | 6.6898  | 6.5791  | 6.3167  | 6.3292  | 0.9442  | -0.0829 | 0.1172 | 0.9310 |
| Actn1   | _ASPNFDR_2                                              | #N/A                    | 6.0005  | 6.2087  | 6.1077  | 6.0892  | 6.2406  | 5.9932  | 5.8662  | 6.3016  | 6.0383  | 5.6833  | 1.0227  | 0.0323  | 0.2777 | 0.5563 |
| Actn1   | _DLLDPAAWEK_2                                           | #N/A                    | 6.5570  | 6.0883  | 5.0800  | 5.9049  | 5.8202  | 5.8156  | 6.0131  | 6.0735  | 5.9810  | 5.9230  | 0.9800  | -0.0291 | 0.6389 | 0.1946 |
| Actn1   | _DDPLTNTAFAOVAER_3                                      | #N/A                    | 5.6661  | 5.7622  | 6.1732  | 5.3798  | 6.0875  | 5.3729  | 5.5334  | 5.6536  | 5.8947  | 5.6534  | 1.0099  | 0.0143  | 0.7661 | 0.1157 |
| Actn1   | _LLETIDQLVEYAK_2                                        | #N/A                    | 5.2459  | 4.8616  | 6.1646  | 4.9836  | 5.2392  | 5.3069  | 5.1484  | 5.4041  | 5.0191  | 5.2147  | 1.0200  | 0.0285  | 0.6794 | 0.1679 |
| Actn1   | _RDQALTEHAR_3                                           | #N/A                    | 7.0102  | 6.0654  | 6.3818  | 6.1881  | 6.5580  | 6.6329  | 6.6148  | 6.0493  | 6.7581  | 6.3510  | 1.0046  | 0.0066  | 0.8934 | 0.0490 |
| Actn1   | _DDPLTNTAFAOVAER_2                                      | #N/A                    | 6.1835  | 5.9016  | 3.1949  | 5.9654  | 6.0304  | 5.7010  | 6.0930  | 5.6634  | 6.1508  | 6.0900  | 1.0080  | -0.1392 | 0.3738 | 0.4273 |
| Actn1   | _DGLGFC[Carbamidomethyl (C)]ALUHR_2                     | #N/A                    | 5.1506  | 3.8031  | 4.2819  | 4.4752  | 3.4534  | 3.5407  | 5.1955  | 5.3314  | 5.1759  | 4.9428  | 0.7977  | -0.3260 | 0.0146 | 1.8358 |
| Actn1   | _IDQLLC[Carbamidomethyl (C)]DHQLQCALFDONK_3             | #N/A                    | 4.2668  | 5.5759  | 4.5875  | 5.5906  | 2.8445  | 4.6672  | 5.3582  | 5.0420  | 4.7950  | 4.4676  | 0.9335  | -0.0993 | 0.5602 | 0.1560 |
| Actn1   | _QFGAELVNGPQWQTK_2                                      | #N/A                    | 5.1622  | 4.9140  | 5.5537  | 5.1948  | 4.1172  | 5.1355  | 5.4306  | 5.3294  | 5.5238  | 5.1276  | 0.9365  | -0.0947 | 0.2214 | 0.6549 |
| Actn1   | _HRPELDYQK_2                                            | #N/A                    | 4.8304  | 4.6979  | 5.9571  | 5.5285  | 5.3317  | 5.7503  | 5.2822  | 6.2192  | 5.8620  | 5.9064  | 0.9908  | -0.0134 | 0.8797 | 0.0557 |
| Actn1   | _VLAVNQNEQLM[Oxidation (M)]EYEK_2                       | #N/A                    | 4.4936  | 4.5642  | 5.7501  | 5.8046  | 3.9926  | 4.8225  | 5.3120  | 4.6076  | 4.3497  | 5.4238  | 0.9928  | -0.0104 | 0.9367 | 0.0284 |
| Actn1   | _GISQCM[Oxidation (M)]NEFR_2                            | #N/A                    | 5.9448  | 6.4797  | 7.1940  | 5.6717  | 6.3711  | 6.0563  | 5.8791  | 6.8820  | 6.1719  | 6.2462  | 0.9986  | -0.0020 | 0.9793 | 0.0091 |
| Actn1   | _ALDFIAK_2                                              | #N/A                    | 5.2220  | 3.6898  | 3.7031  | 5.7751  | 5.5852  | 5.0531  | 3.3952  | 4.9525  | 4.6004  | 5.1118  | 1.0716  | 0.0997  | 0.5806 | 0.2362 |
| Actn1   | _C[Carbamidomethyl (C)]QLEINFNTLQTK_2                   | #N/A                    | 5.7718  | 4.4744  | 3.6872  | 4.1898  | 5.6499  | 5.6410  | 3.9045  | 4.8337  | 5.4813  | 5.6223  | 0.9883  | -0.0170 | 0.9189 | 0.0367 |
| Actn1   | _JMSVQPNR_2                                             | #N/A                    | 5.6595  | 4.3916  | 3.5213  | 6.4303  | 5.2885  | 4.2684  | 3.7387  | 3.8472  | 2.6878  | 3.9910  | 1.3815  | 0.4662  | 0.0500 | 1.3008 |
| Actn1   | _NIVICQNFVSHWK_2                                        | #N/A                    | 5.1661  | 4.5064  | 3.4768  | 4.6091  | 2.8868  | 4.7610  | 3.6310  | 4.2022  | 3.5168  | 3.8833  | 1.1119  | 0.1530  | 0.3794 | 0.4209 |
| Actn1   | _HTNYNM[Oxidation (M)]EHR_3                             | #N/A                    | 6.0064  | 3.2794  | 3.4249  | 3.9666  | 4.3880  | 7.6129  | 6.3143  | 4.5246  | 3.8007  | 4.0245  | 1.0244  | 0.0347  | 0.9102 | 0.0408 |
| Actn1   | _MVSDDINAWGC[Carbamidomethyl (C)]LEQAEK_2               | #N/A                    | 5.7326  | 4.0161  | 4.5608  | 6.0307  | 4.9820  | 4.1546  | 4.2528  | 4.3975  | 3.1957  | 3.7818  | 1.2575  | 0.1305  | 0.0665 | 1.1769 |
| Actn1   | _AIM[Oxidation (M)]TYSSPHYAFSGAQK_2                     | #N/A                    | 3.3980  | 3.5253  | 4.6051  | 4.3182  | 3.2958  | 3.5862  | 4.2822  | 4.4349  | 3.2607  | 4.3852  | 0.9260  | -0.1109 | 0.4153 | 0.3816 |
| Actn1   | _ASIEHAWTGGK_2                                          | #N/A                    | 5.2778  | 5.1317  | 4.3681  | 5.8152  | 4.8767  | 5.1881  | 5.7408  | 5.0429  | 5.1945  | 5.3010  | 0.9605  | -0.0582 | 0.4598 | 0.3375 |
| Actn1   | _KHEAFESDLAAHQDR_3                                      | #N/A                    | 5.2626  | 3.4556  | 3.6526  | 3.7281  | 4.6033  | 3.9598  | 3.2447  | 5.0037  | 3.8765  | 3.5321  | 1.0501  | 0.0075  | 0.6847 | 0.1645 |
| Actn1   | _VEQIAAAGLELQDYDPSVNAER_3                               | #N/A                    | 3.9986  | 3.2276  | 3.1846  | 3.6872  | 3.9115  | 3.5088  | 3.3586  | 4.4312  | 4.0798  | 4.1887  | 0.8933  | -0.1627 | 0.1279 | 0.8933 |
| Actn1   | _QXDYETATLSER_2                                         | #N/A                    | 3.8153  | 3.6460  | 3.9127  | 4.0030  | 3.4935  | 3.8904  | 3.9218  | 4.1652  | 3.1380  | 3.1380  | 1.0161  | 0.0231  | 0.7693 | 0.1139 |
| Actn1   | _SIEIM[Oxidation (M)]HGTLEDQLSHLR_3                     | #N/A                    | 5.7224  | 5.2594  | 6.0809  | 4.3169  | 4.9297  | 5.5695  | 6.1070  | 3.8016  | 3.4502  | 5.3366  | 1.1368  | 0.1850  | 0.3113 | 0.5069 |
| Actn1   | _MLDAEDVGTARPQEK_2                                      | #N/A                    | 3.0624  | 4.2800  | 4.2969  | 3.8407  | 3.7070  | 3.6281  | 3.9889  | 3.1605  | 3.4596  | 3.5180  | 1.0767  | 0.1066  | 0.3475 | 0.0560 |
| C2cd5   | _NQTSYS[Phospho (STY)]PSK_2                             | Q7TPS5_5295_M1_C2cd5    | 2.9799  | 4.3625  | 4.2144  | 3.7582  | 3.6245  | 3.5456  | 7.1625  | 3.2430  | 3.5421  | 6.7838  | 0.7231  | -0.4678 | 0.1334 | 0.8748 |
| C2cd5   | _SQS[Phospho (STY)]ESSEDEVTELDLSHGKK_3                  | #N/A                    | 5.3065  | 6.4341  | 5.4580  | 6.1397  | 5.2124  | 5.4299  | 6.1510  | 6.6793  | 6.5713  | 0.8702  | -0.2005 | 0.0146  | 1.8343 | 0.0885 |
| C2cd5   | _SQSES[Phospho (STY)]DEVTELDLSHGK_2                     | #N/A                    | 3.8313  | 3.3916  | 3.5463  | 3.9054  | 3.2315  | 3.7036  | 3.9316  | 4.7523  | 4.2367  | 3.6796  | 0.8678  | -0.2045 | 0.0413 | 1.3844 |
| C2cd5   | _LSSPAAFLPAC[Carbamidomethyl (C)]S[Phospho (STY)]SPSR_2 | Q7TPS5_5259_M1_C2cd5    | 3.9391  | 6.9275  | 4.1677  | 8.4615  | 2.9655  | 3.2690  | 3.3550  | 7.1519  | 4.1382  | 3.2426  | 1.1056  | 0.1448  | 0.7348 | 0.1339 |
| Mybbp1a | _SPASNPRTL[Phospho (STY)]PSTRAK_2                       | Q7TPV4_51253_M1_Mybbp1a | 2.9065  | 3.7830  | 3.8910  | 3.9064  | 4.2331  | 5.8747  | 3.8218  | 3.7099  | 3.6435  | 3.7570  | 1.0981  | 0.1350  | 0.4846 | 0.3147 |
| Nxn     | _TVS[Phospho (STY)]QESLTPGK_2                           | Q7TPW1_5296_M1_Nxn      | 8.9741  | 8.6117  | 8.6411  | 9.5898  | 8.5263  | 8.7516  | 9.2300  | 8.6803  | 8.3826  | 8.8942  | 1.0059  | 0.0086  | 0.8368 | 0.0774 |
| Nxn     | _EM[Oxidation (M)]LAS[Phospho (STY)]DDEESSPK_2          | #N/A                    | 9.2687  | 9.3941  | 9.5535  | 10.2839 | 9.1882  | 9.2977  | 9.2560  | 9.2299  | 8.7154  | 9.4276  | 1.0296  | 0.0421  | 0.3088 | 0.5103 |
| Nxn     | _EMLAS[Phospho (STY)]DDEESSPK_2                         | #N/A                    | 3.3499  | 4.1061  | 3.8068  | 4.3095  | 3.9944  | 4.1310  | 4.0242  | 3.8090  | 3.4576  | 4.2765  | 1.0149  | 0.0213  | 0.7974 | 0.0972 |
| Lnpk    | _ADS[Phospho (STY)]VPLNLESPESLVTK_2                     | Q7TQ95_5411_M1_Lnpk     | 12.0341 | 11.8667 | 12.4546 | 12.2777 | 10.8961 | 11.9866 | 12.5077 | 12.3345 | 12.1921 | 12.0414 | 0.9715  | -0.0417 | 0.2605 | 0.5841 |
| Lnpk    | _IVELYGDGFQNR_2                                         | #N/A                    | 5.9565  | 5.9824  | 3.2967  | 3.7994  | 4.7518  | 5.9930  | 6.1142  | 5.6035  | 5.9414  | 4.6700  | 0.8891  | -0.1695 | 0.3796 | 0.4206 |
| Tppp    | _AANKT[Phospho (STY)]PPKS[Phospho (STY)]PGDPAK_2        | #N/A                    | 12.5651 | 12.8802 | 13.1412 | 13.2234 | 12.4772 | 12.9235 | 12.6083 | 12.5778 | 12.6624 | 12.8200 | 1.0159  | 0.0227  | 0.2403 | 0.6193 |
| Tppp    | _AVSS[Phospho (STY)]PTVSR_2                             | Q7TQD2_5159_M1_Tppp     | 10.2580 | 10.4380 | 10.6071 | 10.4622 | 10.7046 | 10.4527 | 10.1427 | 10.0021 | 10.2355 | 10.4919 | 1.0263  | 0.0375  | 0.0448 | 1.3491 |
| Tppp    | _VDLVDESQVPPGYK_2                                       | #N/A                    | 10.7696 | 10.5808 | 10.9170 | 10.8628 | 10.9370 | 10.8406 | 10.7080 | 10.4320 | 10.5674 | 10.8134 | 1.0192  | 0.0320  | 0.0682 | 1.0682 |
| Tppp    | _APVSGVTK_2                                             | #N/A                    | 8.8663  | 9.1820  | 9.3042  | 9.1025  | 9.5645  | 9.1160  | 8.3452  | 9.1765  | 9.1034  | 9.1098  | 1.0286  | 0.0407  | 0.2282 | 0.6416 |
| Tppp    | _FAWGDTR_2                                              | #N/A                    | 8.8133  | 8.9987  | 8.7476  | 9.0565  | 9.4332  | 8.9691  | 8.7507  | 8.7012  | 8.7638  | 8.8977  | 1.0256  | 0.0365  | 0.1157 | 0.9365 |
| T       |                                                         |                         |         |         |         |         |         |         |         |         |         |         |         |         |        |        |



|         |                                                                                 |                        |         |         |         |         |        |         |         |         |         |         |        |         |        |        |
|---------|---------------------------------------------------------------------------------|------------------------|---------|---------|---------|---------|--------|---------|---------|---------|---------|---------|--------|---------|--------|--------|
| Amph    | _EIAVL[C[Carbamidomethyl (C)]HK_2                                               | #N/A                   | 7.2513  | 7.6119  | 7.0767  | 7.8193  | 7.8629 | 7.2867  | 7.6058  | 6.9377  | 7.6535  | 7.3960  | 1.0117 | 0.0168  | 0.6919 | 0.1600 |
| Amph    | _VGFWNTK_2                                                                      | #N/A                   | 6.4162  | 6.8861  | 6.6782  | 6.3450  | 5.4754 | 6.2510  | 6.5633  | 6.4665  | 6.1389  | 6.6302  | 0.9833 | -0.0243 | 0.6914 | 0.1603 |
| Amph    | _LVVDYSAR_2                                                                     | #N/A                   | 6.4050  | 6.5506  | 6.6225  | 6.5775  | 7.0249 | 6.6757  | 4.9065  | 6.4234  | 5.5065  | 7.0662  | 1.0670 | 0.0935  | 0.3051 | 0.1516 |
| Amph    | _ADETQEQFEFYQNFKR_3                                                             | #N/A                   | 5.4142  | 6.1149  | 6.3083  | 6.4084  | 5.7229 | 6.2802  | 5.4966  | 5.5688  | 5.6013  | 6.0740  | 1.0627 | 0.0877  | 0.1516 | 0.8192 |
| Amph    | _EAEDEVAAQSGAGEK_2                                                              | #N/A                   | 6.3565  | 5.3633  | 4.1149  | 6.0739  | 6.1118 | 6.2463  | 6.0551  | 5.6269  | 5.6533  | 6.1069  | 0.9745 | -0.0373 | 0.2746 | 0.1264 |
| Amph    | _GDVVLVPPSDSEADQAGWLVGVK_3                                                      | #N/A                   | 5.0244  | 3.0448  | 5.4406  | 6.0233  | 5.6308 | 5.5722  | 3.2151  | 5.4104  | 5.1461  | 5.0883  | 1.0865 | 0.1197  | 0.5625 | 0.2499 |
| Amph    | _ADETQEQFEFYQNFKR_3                                                             | #N/A                   | 6.2247  | 6.3766  | 6.4637  | 7.4431  | 6.1906 | 6.4726  | 6.5270  | 6.3428  | 6.0962  | 7.0843  | 1.0025 | 0.0035  | 0.9572 | 0.0190 |
| Amph    | _VDGSLTLDTYLGQFPOR_2                                                            | #N/A                   | 5.5104  | 5.7357  | 6.0361  | 6.0803  | 5.5901 | 5.3874  | 5.7269  | 6.0355  | 5.0395  | 5.7754  | 1.0140 | 0.0201  | 0.7308 | 0.1362 |
| Amph    | _AFSQQGAPSDS[Phospho (STY)]IGLR_2                                               | Q7TQF7_S252_M1_Amph    | 9.0457  | 9.8295  | 7.3561  | 11.0647 | 9.3757 | 9.9094  | 10.0120 | 7.2216  | 9.9237  | 9.9486  | 1.0166 | 0.0237  | 0.8572 | 0.0669 |
| Amph    | _TPS[Phospho (STY)]IPEEPSPSPSTASPNHILAPASPAVRPR_4                               | Q7TQF7_S262_M1_Amph    | 3.6996  | 3.6681  | 10.3433 |         | 3.8005 | 3.7721  | 4.0810  | 9.3402  | 4.0021  | 3.8926  | 0.9046 | -0.1446 | 0.7776 | 0.1093 |
| Amph    | _VETIHDFEANSDELNLQR_3                                                           | #N/A                   | 5.8900  | 5.4750  | 6.5007  | 6.7519  | 6.5113 | 6.3901  | 5.7631  | 6.2150  | 5.9768  | 6.0992  | 1.0398 | 0.0564  | 0.3742 | 0.4269 |
| Amph    | _LITESHVEYEPDWYGREDV_3                                                          | #N/A                   | 3.3010  | 4.4719  | 3.9831  | 4.4006  | 4.5653 | 4.2656  | 4.1153  | 3.7601  | 4.1591  | 4.5764  | 1.0029 | 0.0041  | 0.9665 | 0.0148 |
| Amph    | _LYEVM[Oxidation (M)]TK_2                                                       | #N/A                   | 3.9272  | 0.9743  | 3.3437  | 3.7470  | 3.6170 | 4.0597  | 4.0988  | 4.1939  | 3.4770  | 3.9368  | 0.8349 | -0.2604 | 0.3136 | 0.5037 |
| Amph    | _C[Carbamidomethyl (C)]DVLWEDPHQK_3                                             | #N/A                   | 4.1436  | 3.3991  | 3.8773  | 3.4211  | 3.2874 | 3.3372  | 3.5694  | 3.5801  | 3.8791  | 3.0984  | 1.0130 | 0.0186  | 0.8393 | 0.0761 |
| Plekha6 | _TKS[Phospho (STY)]PAEEELTPSAVVR_2                                              | #N/A                   | 7.1217  | 8.3188  | 8.9306  | 8.7971  | 7.8026 | 8.2381  | 7.8660  | 8.2885  | 8.3136  | 7.1264  | 1.0383 | 0.0543  | 0.4759 | 0.3225 |
| Plekha6 | _DPSQTS[Phospho (STY)]PLGTPR_2                                                  | #N/A                   | 8.1169  | 7.9612  | 8.2310  | 8.6469  | 7.4916 | 8.1360  | 8.6292  | 7.8750  | 7.9856  | 8.4062  | 0.9846 | -0.0224 | 0.6082 | 0.2160 |
| Plekha6 | _SHSVPRS[Phospho (STY)]PSQGSYSR_3                                               | #N/A                   | 3.2436  | 4.0248  | 6.3963  | 4.2445  | 4.9245 | 4.0631  | 4.1566  | 4.1911  | 4.9111  | 4.4786  | 1.0599 | 0.0840  | 0.6879 | 0.1625 |
| Plekha6 | _S[Phospho (STY)]PSQGSYSR_2                                                     | #N/A                   | 3.7552  | 3.8557  | 3.9605  | 3.7566  | 3.6992 | 3.5603  | 5.2563  | 3.9431  | 3.8134  | 3.5779  | 0.9076 | -0.1398 | 0.2463 | 0.0806 |
| Plekha6 | _ANGLSPSGETAS[Phospho (STY)]EPGSPYQGR_2                                         | Q7TQG1_S247_M1_Plekha6 | 3.9904  | 5.9378  | 3.1763  | 3.6790  | 3.1161 | 3.1126  | 3.4734  | 5.5109  | 4.0881  | 3.6460  | 0.9176 | -0.1240 | 0.6190 | 0.2083 |
| Plekha6 | _QPVFYDILDAAQSG[Phospho (STY)]ILRR_3                                            | Q7TQG1_S443_M1_Plekha6 | 3.4784  | 6.8480  | 4.1652  | 6.9314  | 4.1049 | 3.6246  | 4.3825  | 3.4506  | 6.1239  | 3.1340  | 1.1371 | 0.1854  | 0.5633 | 0.2492 |
| Plekha6 | _MVENS[Phospho (STY)]PR_2                                                       | Q7TQG1_S574_M1_Plekha6 | 5.7640  | 4.1042  | 4.5824  | 6.3483  | 4.3292 | 4.1330  | 4.2744  | 3.8978  | 3.1740  | 3.8035  | 1.2876 | 0.3647  | 0.0678 | 1.1687 |
| Plekha6 | _KOPSGTS[Phospho (STY)]LGTPR_2                                                  | #N/A                   | 8.0956  | 8.3049  | 8.6268  | 8.8979  | 7.9816 | 3.6772  | 8.5447  | 8.1703  | 8.1022  | 8.1782  | 0.9185 | -0.1226 | 0.5184 | 0.2853 |
| Plekha6 | _SSS[Phospho (STY)]PKYDVLGDR_2                                                  | Q7TQG1_S506_M1_Plekha6 | 3.7848  | 3.0892  | 4.4716  | 3.4735  | 2.9105 | 3.3181  | 6.5074  | 3.1442  | 4.2936  | 6.0707  | 0.7010 | -0.5124 | 0.0597 | 1.2243 |
| Plekha6 | _QDGTWVPS[Phospho (STY)]PSR_2                                                   | Q7TQG1_S426_M1_Plekha6 | 7.2194  | 3.7622  | 3.6438  | 4.1464  | 3.5835 | 8.5908  | 3.8119  | 4.0941  | 8.4548  | 8.4277  | 0.8323 | -0.2649 | 0.5115 | 0.2911 |
| Plekha6 | _YS[Phospho (STY)]PVWS[Phospho (STY)]PSAR_2                                     | Q7TQG1_S472_M2_Plekha6 | 9.2685  | 9.3023  | 3.1757  | 9.6660  | 8.5563 | 9.4149  | 9.4761  | 8.9484  | 8.9397  | 9.2040  | 0.9003 | -0.1515 | 0.4972 | 0.3035 |
| Plekha6 | _AVRPLES[Phospho (STY)]PPTVPLPNEAR_2                                            | #N/A                   | 3.8759  | 3.8164  | 8.8294  | 9.6709  | 3.6378 | 7.7529  | 3.6591  | 8.9335  | 7.4273  | 3.2261  | 1.0334 | 0.0474  | 0.9104 | 0.0408 |
| Plekha6 | _GVPPEDLRS[Phospho (STY)]PSR_2                                                  | Q7TQG1_S336_M1_Plekha6 | 3.7977  | 3.1021  | 3.9740  | 3.5177  | 2.9234 | 3.3052  | 3.6660  | 3.4834  | 3.7825  | 3.1950  | 0.9731 | -0.0394 | 0.6902 | 0.1610 |
| Plekha6 | _S[Phospho (STY)]LQLPASAPESTRPAYK_2                                             | Q7TQG1_S967_M1_Plekha6 | 3.9508  | 3.4286  | 3.6844  | 6.5938  | 3.0945 | 3.5412  | 3.3765  | 3.7840  | 4.0831  | 3.7813  | 1.0779 | 0.1082  | 0.6703 | 0.1737 |
| Atxn2l  | _LQSSSPET[Phospho (STY)]GLDFPR_2                                                | Q7TQH0_S265_M1_Atxn2l  | 3.6259  | 4.0727  | 3.9041  | 8.3754  | 3.6798 | 7.5605  | 7.7075  | 3.7472  | 8.3351  | 3.7442  | 1.0934 | 0.1289  | 0.7504 | 0.1340 |
| Atxn2l  | _EVDGLLSDPM[Oxidation (M)]GS[Phospho (STY)]PVSSK_2                              | #N/A                   | 9.0221  | 8.8391  | 9.4142  | 9.3295  | 8.3463 | 8.9919  | 9.3174  | 8.7714  | 8.8752  | 8.9143  | 1.0023 | 0.0034  | 0.9255 | 0.0336 |
| Atxn2l  | _EKEVDGLTSDPM[Oxidation (M)]GS[Phospho (STY)]PVSSK_3                            | #N/A                   | 3.4980  | 4.5377  | 5.4553  | 5.9589  | 4.3540 | 4.4625  | 5.0972  | 5.0221  | 4.4625  | 5.0221  | 0.9902 | -0.0141 | 0.9206 | 0.0359 |
| Atxn2l  | _GPPQS[Phospho (STY)]PVFEGVNNR_2                                                | #N/A                   | 9.3574  | 9.7983  | 9.9484  | 10.6947 | 8.9706 | 9.8187  | 9.9102  | 9.7297  | 9.6197  | 9.5960  | 1.0052 | 0.0075  | 0.8709 | 0.0600 |
| Atxn2l  | _QSGGRES[Phospho (STY)]PSLVS_2                                                  | #N/A                   | 3.9962  | 3.2875  | 3.3674  | 6.0817  | 3.2461 | 5.4260  | 3.4538  | 3.9518  | 5.2422  | 4.7574  | 0.9731 | -0.0394 | 0.8714 | 0.0598 |
| Atxn2l  | _ES[Phospho (STY)]PSLVS_2                                                       | #N/A                   | 3.0221  | 4.2040  | 3.7089  | 4.2116  | 4.0923 | 4.0331  | 3.9263  | 3.9069  | 3.5555  | 4.1786  | 0.9966 | -0.0049 | 0.9602 | 0.0176 |
| Otub1   | _IQQEAIVQNPVLSER_2                                                              | #N/A                   | 7.9084  | 7.9532  | 8.0000  | 8.3725  | 8.1971 | 8.0918  | 7.8074  | 7.8808  | 8.2101  | 7.8959  | 1.0174 | 0.0249  | 0.2562 | 0.5914 |
| Otub1   | _LITSGVQR_2                                                                     | #N/A                   | 7.6999  | 8.2321  | 8.0342  | 7.8826  | 7.8307 | 7.4345  | 7.7605  | 7.8979  | 7.8907  | 7.4422  | 1.0135 | 0.0193  | 0.5405 | 0.2672 |
| Otub1   | _EYAEEDNIQOK_2                                                                  | #N/A                   | 7.6329  | 7.7391  | 7.7112  | 7.7000  | 7.3770 | 7.5990  | 7.3511  | 7.3302  | 7.5428  | 7.2632  | 1.0346 | 0.0490  | 0.0152 | 1.8193 |
| Otub1   | _FEFHIEGGR_3                                                                    | #N/A                   | 6.8552  | 7.0158  | 7.4108  | 6.6945  | 6.5383 | 6.9462  | 7.0918  | 6.9496  | 6.8201  | 6.8516  | 0.9974 | -0.0038 | 0.9128 | 0.0396 |
| Otub1   | _LELSVYK_2                                                                      | #N/A                   | 5.1455  | 5.5401  | 4.7370  | 5.2986  | 5.1926 | 5.0931  | 3.9247  | 5.1758  | 5.3766  | 5.4801  | 1.0358 | 0.0507  | 0.5867 | 0.2316 |
| Otub1   | _QEPLGSDS[Phospho (STY)]EGVNC[Carbamidomethyl (C)]IAYDEAM[Oxidation (M)]AQQDR_3 | #N/A                   | 3.8997  | 5.4346  | 3.4233  | 4.2505  | 3.5950 | 4.0142  | 3.6059  | 5.7834  | 3.9073  | 5.2727  | 0.8838 | -0.1782 | 0.3582 | 0.4459 |
| Otub1   | _EFC[Carbamidomethyl (C)]IQGEVPM[C[Carbamidomethyl (C)]K_2                      | #N/A                   | 5.8826  | 4.3711  | 3.3485  | 8.8658  | 4.2594 | 3.8660  | 3.7592  | 4.0740  | 3.7226  | 4.7969  | 1.1657 | 0.2212  | 0.3669 | 0.4355 |
| Otub1   | _AFGSHLEALLDOSKELQR_3                                                           | #N/A                   | 3.8714  | 3.1289  | 3.6051  | 3.7880  | 3.0151 | 3.6095  | 3.5026  | 3.9279  | 3.4204  | 3.9718  | 0.9453 | -0.0811 | 0.3661 | 0.4364 |
| Otub1   | _GEGGTINPHVPPGSGPK_2                                                            | #N/A                   | 2.9282  | 7.3782  | 3.6150  | 8.6753  | 3.5547 | 4.1748  | 8.1719  | 7.8514  | 7.9891  | 4.0846  | 0.7196 | -0.4748 | 0.2079 | 0.6821 |
| Abtb2   | _SPTVDS[Phospho (STY)]GDR_2                                                     | Q7TQI7_S444_M1_Abtb2   | 2.9473  | 4.3951  | 4.1818  | 3.7256  | 4.2165 | 3.5130  | 3.8738  | 6.0688  | 3.5747  | 3.4028  | 0.9054 | -0.1434 | 0.4981 | 0.3027 |
| Ccd93   | _QSLSAEES[Phospho (STY)]PEKLGTSLHQR_3                                           | #N/A                   | 7.2679  | 7.1857  | 7.3056  | 8.1195  | 6.8553 | 7.8263  | 7.7679  | 7.7889  | 7.6084  | 7.4233  | 0.9712 | -0.0422 | 0.3941 | 0.4044 |
| Ccd93   | _QSLSAEES[Phospho (STY)]PEK_2                                                   | #N/A                   | 6.0702  | 3.0726  | 3.4550  | 6.0957  | 2.8939 | 5.8815  | 3.6956  | 3.4539  | 5.3530  | 5.6191  | 1.0473 | 0.0667  | 0.8118 | 0.0895 |
| Prrc2a  | _KGTSS[Phospho (STY)]PGSELPPPK_2                                                | #N/A                   | 4.1184  | 3.2761  | 3.6095  | 3.6509  | 3.1644 | 3.4724  | 3.3656  | 8.3959  | 3.9337  | 3.4587  | 0.7411 | -0.4323 | 0.2375 | 0.6244 |
| Prrc2a  | _SDS[Phospho (STY)]GSGSSSEPPER_2                                                | #N/A                   | 3.8467  | 9.0752  | 9.4620  | 9.8279  | 8.3040 | 9.1877  | 9.2958  | 8.8835  | 8.7190  | 9.2355  | 0.9170 | -0.1250 | 0.5308 | 0.2756 |
| Prrc2a  | _SS[Phospho (STY)]PGSELPPPK_2                                                   | #N/A                   | 3.4559  | 9.4251  | 3.1896  | 4.2342  | 4.1005 | 4.0249  | 4.3825  | 4.2678  | 3.0660  | 3.9115  | 1.2128 | 0.2784  | 0.5124 | 0.2904 |
| Prrc2a  | _EGPEPPEEVPPTT[Phospho (STY)]PPAPK_2                                            | Q7TSC1_T609_M1_Prrc2a  | 3.8702  | 3.1257  | 3.6039  | 3.1477  | 3.0140 | 3.6106  | 3.5038  | 9.3075  | 4.1525  | 4.3258  | 0.6379 | -0.6485 | 0.1105 | 0.9566 |
| Prrc2a  | _S[Phospho (STY)]EGSEYEIPKR_2                                                   | #N/A                   | 3.5612  | 3.7812  | 3.2949  | 4.3395  | 4.2057 | 3.9197  | 4.4877  | 6.9019  | 2.9608  | 4.0167  | 0.8385 | -0.2541 | 0.3130 | 0.5044 |
| Prrc2a  | _ETPPGGNS[Phospho (STY)]PAPR_2                                                  | Q7TSC1_S1002_M1_Prrc2a | 11.2496 | 11.5404 | 11.7724 | 11.8111 | 9.9302 | 11.3936 | 10.9184 | 10.8339 | 10.7529 | 11.4718 | 1.0263 | 0.0374  | 0.4672 | 0.3305 |
| Prrc2a  | _KQSS[Phospho (STY)]SSESLAVER_2                                                 | Q7TSC1_S454_M1_Prrc2a  | 3.2160  | 3.9722  | 4.4505  | 4.4434  | 3.8605 | 4.2649  | 4.1581  | 3.6751  | 3.3237  | 6.1809  | 0.9308 | -0.1034 | 0.6061 | 0.2174 |
| Prrc2a  | _TASSTRS[Phospho (STY)]EGSEYEIPKR_3                                             | #N/A                   | 5.9386  | 3.5404  | 3.8358  | 3.8477  | 6.5365 | 5.1488  | 3.7790  | 4.0401  | 6.1369  | 3.6881  | 1.0900 | 0.1243  | 0.6276 | 0.2023 |
| Prrc2a  | _ERS[Phospho (STY)]DS[Phospho (STY)]GSGSSSEPPER_2                               | Q7TSC1_S759_M2_Prrc2a  | 4.6214  | 7.8260  | 5.3816  | 5.0613  | 6.5381 | 4.8679  | 5.0163  | 7.3247  | 4.4760  | 3.6809  | 1.1155 | 0.1576  | 0.5213 | 0.2829 |
| Prrc2a  | _TAS[Phospho (STY)]ETRS[Phospho (STY)]GSGSEYEIPK_2                              | #N/A                   | 3.8486  | 3.4906  | 4.1872  | 3.8934  | 3.4551 | 4.2010  | 3.7342  | 3.4361  | 3.8126  | 3.1081  | 1.0918 | 0.1267  | 0.1590 | 0.7985 |
| Prrc2a  | _FS[Phospho (STY)]IEEFFTLQAAGQDK_3                                              | Q7TSC1_S166_M1_Prrc2a  | 3.0645  | 3.8697  | 3.7513  | 4.2540  | 3.6911 | 4.0384  | 3.9687  | 4.7357  | 3.5131  | 4.2210  | 0.9194 | -0.1213 | 0.2841 | 0.5465 |
| Prrc2a  | _S[Phospho (STY)]EGSEYEIPK_2                                                    | #N/A                   | 3.4567  | 4.2130  | 3.1904  | 4.2026  | 4.1013 | 4.0241  | 3.9173  | 4.2670  | 3.5645  | 5.0469  | 0.9204 | -0.1197 | 0.3465 | 0.4603 |
| Prrc2a  | _SGETSGSETHS[Phospho (STY)]DLAPSK_2                                             | Q7TSC1_S1113_M1_Prrc2a | 4.0321  | 3.1941  | 3.2180  | 3.7207  | 3.6201 | 3.5422  | 3.4354  | 4.3978  | 4.0464  | 3.6877  | 0.9133 | -0.1308 | 0.1841 | 0.7351 |
| Prrc2a  | _LKFS[Phospho (STY)]DEEDGRDS[Phospho (STY)]DEEGAEGHK_4                          | #N/A                   | 3.1872  | 4.1729  | 3.8740  | 4.1002  | 3.8137 | 3.9328  | 4.0306  | 3.7588  | 3.4428  | 3.7035  | 1.0302 | 0.0430  | 0.5930 | 0.2269 |
| Lrrc75a | _AS[Phospho (STY)]PGAAAGPR_2                                                    | #N/A                   | 9.3989  | 8.9517  | 9.3058  | 9.6444  | 8.6067 | 9.3641  | 9.4874  | 9.2656  | 9.4447  | 9.4766  | 0.9781 | -0.0320 | 0.3171 | 0.4788 |
| Lrrc75a | _ETGDDQDQGS[Phospho (STY)]PVTPAR_2                                              | Q7TSF4_S322_M1_Lrrc75a | 8.1080  | 8.0652  | 8.0542  | 8.6608  | 7.0247 | 8.0669  | 8.5523  |         |         |         |        |         |        |        |



|          |  |                                                                                          |                          |         |         |         |         |         |         |         |         |         |         |         |         |        |        |
|----------|--|------------------------------------------------------------------------------------------|--------------------------|---------|---------|---------|---------|---------|---------|---------|---------|---------|---------|---------|---------|--------|--------|
| Map6     |  | _NGSPVPEPVK_2                                                                            | #N/A                     | 7.8135  | 7.9248  | 7.4157  | 7.8180  | 8.1573  | 7.5436  | 8.0198  | 7.5687  | 7.4244  | 7.9028  | 1.0065  | 0.0093  | 0.7825 | 0.1065 |
| Map6     |  | _DQGPATDPVK_2                                                                            | #N/A                     | 7.6792  | 7.4458  | 7.4039  | 8.0501  | 7.7798  | 7.5715  | 7.5560  | 7.2357  | 7.3033  | 7.7535  | 1.0259  | 0.0368  | 0.2460 | 0.6090 |
| Map6     |  | _NQLAGPELVK_2                                                                            | #N/A                     | 7.5822  | 7.7160  | 6.9927  | 7.5798  | 7.9031  | 7.3899  | 7.4956  | 7.3460  | 7.3585  | 7.5501  | 1.0121  | 0.0173  | 0.5997 | 0.2221 |
| Map6     |  | _NKDSVPLAPAK_2                                                                           | #N/A                     | 6.5892  | 7.1419  | 7.0270  | 7.1091  | 7.4855  | 7.1127  | 6.7324  | 6.9238  | 6.8598  | 6.7766  | 1.0373  | 0.0528  | 0.1297 | 0.8870 |
| Map6     |  | _DQGVLLGPVK_2                                                                            | #N/A                     | 6.9950  | 6.5387  | 6.4543  | 7.1783  | 7.2107  | 6.9257  | 6.7090  | 6.5235  | 6.6578  | 6.5859  | 1.0400  | 0.0566  | 0.1501 | 0.8237 |
| Map6     |  | _NOSPVPASTK_2                                                                            | #N/A                     | 6.9971  | 6.5021  | 6.2906  | 6.9055  | 6.7896  | 6.6609  | 6.6834  | 6.3025  | 6.3032  | 6.6871  | 1.0303  | 0.0431  | 0.2539 | 0.5953 |
| Map6     |  | _GHDSVVPAPVK_2                                                                           | #N/A                     | 6.4538  | 6.5879  | 5.9874  | 6.8613  | 6.7977  | 6.2857  | 6.4413  | 6.2499  | 6.1099  | 6.5398  | 1.0253  | 0.0361  | 0.4082 | 0.3891 |
| Map6     |  | _DTGTDITAPK_2                                                                            | #N/A                     | 6.4583  | 6.1004  | 6.1112  | 6.6967  | 6.7890  | 6.3756  | 6.0853  | 6.2932  | 6.2370  | 6.3058  | 1.0323  | 0.0459  | 0.2046 | 0.6891 |
| Map6     |  | _DKQVSGQAAK_2                                                                            | #N/A                     | 7.0590  | 5.9413  | 6.8051  | 6.3399  | 6.3035  | 6.7550  | 7.1153  | 6.3558  | 6.2800  | 7.0786  | 0.9741  | -0.0378 | 0.5455 | 0.2632 |
| Map6     |  | _FWNLDK_2                                                                                | #N/A                     | 5.8965  | 5.9817  | 5.5584  | 5.5781  | 5.8403  | 6.0845  | 5.4052  | 6.1580  | 6.3241  | 0.9821  | 0.1580  | -0.2621 | 0.5990 | 0.2226 |
| Map6     |  | _DPEGAGGAVLAAGK_2                                                                        | #N/A                     | 3.3218  | 3.7667  | 4.4118  | 4.2441  | 3.6117  | 3.6165  | 3.2156  | 2.8341  | 3.7707  | 4.9631  | 1.0360  | 0.0510  | 0.7619 | 0.1181 |
| Map6     |  | _AVAIETQPAQGESDAVAR_2                                                                    | #N/A                     | 8.1969  | 8.4308  | 8.8193  | 8.6151  | 8.4171  | 8.5380  | 8.6208  | 8.2284  | 8.3026  | 8.5789  | 1.0083  | 0.0120  | 0.6100 | 0.2147 |
| Map6     |  | _ATGPAPGPS[Phospho (STY)]VDK_2                                                           | #N/A                     | 7.8183  | 7.5103  | 7.5553  | 8.3540  | 7.8224  | 7.7534  | 7.6341  | 7.4321  | 7.6628  | 7.8213  | 1.0216  | 0.0308  | 0.3507 | 0.4551 |
| Map6     |  | _GQS[Phospho (STY)]PTAPGPTKDGAVLLGPVK_3                                                  | #N/A                     | 2.9076  | 9.5169  | 3.5944  | 10.3673 | 3.5341  | 4.1954  | 3.8117  | 7.0493  | 3.6700  | 7.0851  | 1.0522  | 0.0734  | 0.8834 | 0.0538 |
| Map6     |  | _NGS[Phospho (STY)]PVVLGPVK_2                                                            | Q7TSJ2_S832_M1_Map6      | 7.4620  | 6.9036  | 6.4039  | 7.7930  | 5.3254  | 7.0197  | 6.9213  | 6.7613  | 6.5859  | 7.2355  | 0.9916  | -0.0122 | 0.9024 | 0.4446 |
| Map6     |  | _VDQHASELLK_2                                                                            | #N/A                     | 5.3603  | 5.5175  | 5.8573  | 5.6604  | 5.6660  | 5.0659  | 5.1955  | 5.0087  | 5.4981  | 5.6392  | 1.0348  | 0.0494  | 0.3354 | 0.4744 |
| Map6     |  | _AGPAWM[Oxidation (M)]VTR_2                                                              | #N/A                     | 8.0314  | 8.2886  | 8.3181  | 8.3580  | 8.0664  | 7.6627  | 7.7683  | 8.0443  | 7.8075  | 8.0024  | 1.0272  | 0.0388  | 0.1748 | 0.7574 |
| Map6     |  | _AQS[Phospho (STY)]PLLPELVNDSVPVPASTK_3                                                  | #N/A                     | 4.6977  | 8.0236  | 7.2094  | 9.3418  | 5.6562  | 6.5517  | 6.5435  | 5.6552  | 5.6851  | 1.0557  | 0.0782  | 0.6933  | 0.1591 | 0.7574 |
| Map6     |  | _RPQS[Phospho (STY)]QERGM[Oxidation (M)]QLSADAR_3                                        | #N/A                     | 5.8560  | 3.9259  | 3.6843  | 3.8029  | 4.9045  | 5.5589  | 5.3460  | 5.6734  | 5.3067  | 4.2809  | 0.8972  | -0.1565 | 0.3557 | 0.4489 |
| Map6     |  | _GPM[Oxidation (M)]QLS[Phospho (STY)]ADAR_2                                              | #N/A                     | 6.7032  | 6.6678  | 6.3649  | 6.7874  | 6.6214  | 6.8061  | 6.7305  | 6.6047  | 6.6570  | 6.8419  | 0.9925  | -0.1008 | 0.5982 | 0.2232 |
| Map6     |  | _S[Phospho (STY)]LYSEFFE[C]Carbamidomethyl (C)]PK_2                                      | Q7TSJ2_S491_M1_Map6      | 4.6190  | 3.9018  | 4.3801  | 3.9239  | 3.7901  | 4.3353  | 4.0721  | 3.0773  | 3.3764  | 3.6011  | 1.1774  | 0.2356  | 0.0394 | 1.5314 |
| Map6     |  | _DQVPVPVPSGLKGS[Phospho (STY)]PTAPGPTK_3                                                 | #N/A                     | 3.7056  | 9.7465  | 10.2279 | 10.3690 | 7.9383  | 8.4924  | 8.4885  | 9.1941  | 8.6411  | 8.4419  | 1.1305  | 0.1770  | 0.5745 | 0.2407 |
| Map6     |  | _EPHKGDSVAPGLPK_2                                                                        | #N/A                     | 5.7301  | 3.7614  | 3.6430  | 5.4604  | 5.5304  | 5.7175  | 4.5076  | 4.4565  | 5.7549  | 5.2852  | 0.9946  | -0.0079 | 0.9627 | 0.0165 |
| Map6     |  | _RSEGHET[Phospho (STY)]PAHAAGTGTPGGK_3                                                   | Q7TSJ2_T392_M1_Map6      | 4.5445  | 4.1982  | 4.8630  | 5.1725  | 4.0726  | 4.3350  | 4.0075  | 4.5981  | 4.9607  | 4.0635  | 1.0280  | 0.0399  | 0.6704 | 0.1737 |
| Map6     |  | _AKPOYKPODK_3                                                                            | #N/A                     | 3.5167  | 3.8257  | 4.8489  | 3.9807  | 5.9862  | 5.4848  | 4.7986  | 4.4465  | 5.1747  | 4.9642  | 0.9507  | -0.0729 | 0.6587 | 0.1813 |
| Map6     |  | _EVAIVSSVSR_2                                                                            | #N/A                     | 3.6271  | 5.8121  | 4.1542  | 3.4309  | 6.2587  | 6.2647  | 5.8313  | 5.5982  | 5.6069  | 6.2904  | 0.9216  | -0.1178 | 0.5055 | 0.2963 |
| Map6     |  | _GQS[Phospho (STY)]PTAPGPTK_2                                                            | #N/A                     | 13.8412 | 14.0523 | 14.2605 | 14.4114 | 13.6436 | 14.0573 | 14.0636 | 13.8193 | 13.7839 | 14.0530 | 1.0082  | 0.0118  | 0.4763 | 0.3221 |
| Map6     |  | _TEGHEETPPAQSGQTQEGGPAAGK_3                                                              | #N/A                     | 5.5752  | 6.3700  | 3.6893  | 6.2680  | 6.3252  | 3.2026  | 3.3814  | 6.0945  | 4.0671  | 5.8332  | 1.0814  | 0.1129  | 0.6808 | 0.1670 |
| Map6     |  | _TTEGPSPAKPKDKEQSK_2                                                                     | #N/A                     | 3.8753  | 3.8313  | 3.6939  | 2.9597  | 4.0653  | 4.4961  | 4.0479  | 3.7611  | 4.6892  | 4.2747  | 0.9111  | -0.1344 | 0.2501 | 0.6019 |
| Map6     |  | _YSEATEHPGAPPQAPLQALAPPSR_3                                                              | #N/A                     | 3.1813  | 3.9865  | 3.8681  | 5.8913  | 5.4307  | 5.4348  | 5.1361  | 4.6424  | 4.0915  | 4.3377  | 1.0176  | 0.0252  | 0.8945 | 0.2484 |
| Map6     |  | _S[Phospho (STY)]EGHETTPAHAAGTGTPGGK_3                                                   | #N/A                     | 3.7749  | 2.8823  | 3.6708  | 3.1390  | 2.9455  | 3.3130  | 3.6530  | 3.2060  | 3.3518  | 3.4059  | 0.9629  | -0.0545 | 0.5508 | 0.0590 |
| Map6     |  | _GTLQPTVSPVM[Oxidation (M)]PTVPHYEYEGS[Phospho (STY)]P_3                                 | #N/A                     | 3.2639  | 8.3787  | 7.4040  | 10.2442 | 5.4198  | 3.3342  | 5.9984  | 8.5136  | 6.4932  | 3.5028  | 1.0349  | 0.0495  | 0.9004 | 0.0456 |
| Map6     |  | _GPM[Oxidation (M)]QLS[Phospho (STY)]ADARPEGAGGAVLAAGK_3                                 | #N/A                     | 3.3767  | 4.1819  | 4.0635  | 4.8158  | 3.0694  | 3.3287  | 3.3457  | 3.4064  | 7.7151  | 1.1323  | 1.1793  | 0.1793  | 0.2917 | 0.5351 |
| Map6     |  | _M[Oxidation (M)]VHETSYSAQIK_2                                                           | #N/A                     | 3.2283  | 3.4701  | 3.3409  | 3.2405  | 3.9050  | 3.7833  | 3.3124  | 4.4950  | 4.2802  | 4.4739  | 0.8440  | -0.2446 | 0.0411 | 1.3865 |
| Map6     |  | _GEANPSAANDK_2                                                                           | #N/A                     | 5.1331  | 4.1014  | 5.4693  | 5.3905  | 4.0100  | 4.3944  | 5.4709  | 5.0744  | 3.1942  | 3.0391  | 1.1323  | 0.1942  | 0.3820 | 0.4179 |
| Map6     |  | _SEGHEKPPAQSGQTQEGGPAAGK_4                                                               | #N/A                     | 4.1029  | 3.4072  | 3.6688  | 3.2126  | 4.4365  | 3.0001  | 3.3609  | 5.0081  | 4.0876  | 4.3907  | 0.8638  | -0.2113 | 0.1782 | 0.7492 |
| Map6     |  | _SGLGLGASASTSGSPADSM[Oxidation (M)]R_2                                                   | #N/A                     | 3.6846  | 4.2369  | 4.9202  | 4.3031  | 3.5746  | 4.2106  | 3.6213  | 3.8603  | 3.7299  | 3.8084  | 1.0625  | 0.0875  | 0.1874 | 0.7027 |
| Map6     |  | _RRPOS[Phospho (STY)]QER_2                                                               | #N/A                     | 4.2216  | 2.0046  | 3.4075  | 3.9102  | 3.3473  | 4.3822  | 3.6249  | 4.2083  | 3.8569  | 3.8772  | 0.9539  | -0.0682 | 0.5568 | 0.2543 |
| Map6     |  | _ACS[Phospho (STY)]PLPELVK_2                                                             | #N/A                     | 3.3060  | 4.0364  | 5.4405  | 12.5943 | 3.8577  | 3.8718  | 4.2326  | 4.4177  | 3.2159  | 4.7714  | 1.2905  | 0.3680  | 0.5391 | 0.2765 |
| Map6     |  | _NEGHEKPLPPAGSQTQEGGPAAGK_4                                                              | #N/A                     | 3.7169  | 2.9724  | 3.4506  | 4.4952  | 2.8607  | 3.7639  | 3.1427  | 4.0068  | 4.3058  | 4.1725  | 0.9069  | -0.1409 | 0.3528 | 0.4525 |
| Se6      |  | _S[Phospho (STY)]QLQPR_2                                                                 | Q7TSK2_S952_M1_Se6       | 7.9411  | 6.8378  | 6.9596  | 7.5195  | 6.9303  | 7.7193  | 8.0087  | 7.6554  | 7.4310  | 7.7117  | 0.9502  | -0.0737 | 0.1739 | 0.7597 |
| Pcdh8    |  | _EERPGAAGGAS[Phospho (STY)]APGS[Phospho (STY)]PDATAR_2                                   | Q7TSK3_S798_M2_Pcdh8     | 3.6773  | 3.7089  | 4.0525  | 4.2954  | 3.5302  | 4.1796  | 3.9075  | 3.6620  | 3.4365  | 1.0353  | 0.0501  | 0.5121  | 0.2907 | 0.7997 |
| Pcdh8    |  | _DSGKGDSDFNDS[Phospho (STY)]DSDSGDALK_3                                                  | Q7TSK3_S926_M1_Pcdh8     | 3.3427  | 4.1479  | 4.0295  | 4.5322  | 3.9693  | 3.7602  | 4.1210  | 3.5863  | 3.2349  | 2.9984  | 1.1373  | 0.1856  | 0.1255 | 0.9012 |
| Pgm2     |  | _Acetyl (Protein N-term)[AAAT[Phospho (STY)]PTETPAPEGSLGMDAR_2                           | Q7TSV4_T5_M1_Pgm2        | 3.7343  | 3.0387  | 4.4211  | 3.5812  | 2.8600  | 3.3886  | 3.7294  | 3.1947  | 4.3441  | 3.3900  | 0.9553  | -0.0660 | 0.6493 | 0.8755 |
| Ait7ip   |  | _NKQIEDLNSEALS[Phospho (STY)]PSITC[Carbamidomethyl (C)]DLSSR_3                           | Q7TT18_S112_M1_Ait7ip    | 3.9767  | 3.2811  | 6.3413  | 6.9144  | 3.1024  | 3.1263  | 3.3800  | 5.3494  | 5.8832  | 3.6323  | 0.9772  | -0.0333 | 0.9201 | 0.0362 |
| Ait7ip   |  | _SKS[Phospho (STY)]EDMDSVESK_2                                                           | #N/A                     | 4.3728  | 2.9697  | 4.1064  | 3.6502  | 3.5165  | 3.4377  | 3.7985  | 3.3510  | 3.6500  | 3.3275  | 1.0407  | 0.0576  | 0.6104 | 0.2144 |
| Ait7ip   |  | _SKS[Phospho (STY)]EDMDSVESK_2                                                           | #N/A                     | 3.9757  | 3.2311  | 3.1810  | 3.6836  | 3.1194  | 3.5052  | 3.3983  | 4.4348  | 4.0834  | 3.6506  | 0.8863  | -0.1741 | 0.1143 | 0.9419 |
| Ait7ip   |  | _EAFVLVS[Phospho (STY)]DEEDSC[Carbamidomethyl (C)]GKDESEAVQSK_3                          | Q7TT18_S533_M1_Ait7ip    | 4.0672  | 3.2752  | 3.8008  | 3.3446  | 3.0966  | 3.1321  | 3.4929  | 3.6566  | 3.9556  | 3.0219  | 0.9776  | -0.0326 | 0.7628 | 0.1916 |
| Rexo1    |  | _S[Phospho (STY)]LEGAQDTPK_2                                                             | Q7TT28_S487_M1_Rexo1     | 7.7128  | 3.5708  | 7.9536  | 7.6171  | 6.8942  | 7.4578  | 8.0299  | 8.0294  | 7.8723  | 7.4707  | 0.8748  | -0.1930 | 0.2811 | 0.5511 |
| Rexo1    |  | _ALS[Phospho (STY)]HAELFGDES[Phospho (STY)]EEEESSGAGAPR_3                                | Q7TT28_S505_M2_Rexo1     | 4.0314  | 3.2868  | 3.7651  | 3.6280  | 3.1751  | 3.4495  | 3.3427  | 2.9897  | 4.1391  | 3.5950  | 1.0112  | 0.0161  | 0.8790 | 0.0560 |
| Elp1     |  | _SSGNSANDLANVAIDGNR_2                                                                    | #N/A                     | 4.8548  | 5.9661  | 5.9962  | 5.5182  | 3.6329  | 5.6999  | 5.9199  | 5.6789  | 5.1721  | 5.5729  | 0.9410  | -0.0877 | 0.5062 | 0.2957 |
| Cdk42bpb |  | _ALGNS[Phospho (STY)]NRDKER_3                                                            | #N/A                     | 5.3222  | 5.0472  | 5.3852  | 5.2335  | 4.0813  | 5.2034  | 4.9641  | 5.2774  | 4.8447  | 0.9815  | -0.0270 | 0.7360  | 0.1331 | 0.8464 |
| Cdk42bpb |  | _HSTPSNNSNPGPSS[Phospho (STY)]PNSS[Phospho (STY)]PIHR_3                                  | Q7TT50_S1692_M2_Cdk42bpb | 6.8548  | 6.5669  | 6.7144  | 7.0350  | 6.1203  | 6.6457  | 7.3257  | 6.9959  | 6.9355  | 6.6316  | 0.9547  | -0.0669 | 0.1424 | 0.8464 |
| Cdk42bpb |  | _SM[Oxidation (M)]S[Phospho (STY)]DPOQDFDKEPDSDTK_2                                      | Q7TT50_S1661_M1_Cdk42bpb | 3.9880  | 3.3544  | 3.7217  | 3.2655  | 3.1757  | 3.0529  | 4.4678  | 3.7357  | 4.0348  | 4.4436  | 0.8216  | -0.2835 | 0.0117 | 1.9317 |
| Ahcyl1   |  | _LVLLAER_2                                                                               | #N/A                     | 6.3232  | 7.5366  | 6.5479  | 6.2097  | 5.9647  | 6.1883  | 5.2101  | 7.0008  | 6.5177  | 6.2037  | 1.0367  | 0.0520  | 0.5955 | 0.2251 |
| Ahcyl1   |  | _Acetyl (Protein N-term)[S[Phospho (STY)]M[Oxidation (M)]POAM[Oxidation (M)]PLPGVGEELK_2 | #N/A                     | 7.2602  | 7.6037  | 7.8725  | 7.5534  | 6.5238  | 7.3388  | 7.8960  | 7.5518  | 7.2595  | 0.9738  | -0.0382 | 0.4650  | 0.3325 | 0.3235 |
| Ahcyl1   |  | _EIIAEQDM[Oxidation (M)]SALISLR_2                                                        | #N/A                     | 5.4123  | 5.6024  | 6.7721  | 6.1434  | 5.4036  | 6.5738  | 6.4820  | 6.1316  | 6.0666  | 6.2436  | 0.9605  | -0.0582 | 0.4565 | 0.3406 |
| Ahcyl1   |  | _QVDVVITC[Carbamidomethyl (C)]TGANK_2                                                    | #N/A                     | 3.4178  | 3.8083  | 4.1046  | 4.6073  | 3.6966  | 4.4288  | 4.3220  | 3.5112  | 3.1598  | 5.7823  | 0.9563  | -0.0644 | 0.7315 | 0.1358 |
| Ahcyl1   |  | _GSSNFC[Carbamidomethyl (C)]VK_2                                                         | #N/A                     | 3.9857  | 3.2900  | 3.7477  | 3.3298  | 2.4403  | 3.1173  | 3.4781  | 3.6713  | 3.9704  | 2.7541  | 0.9567  | -0.0638 | 0.6725 | 0.1723 |
| Ahcyl1   |  | _TIDWMFGGK_2                                                                             | #N/A                     | 4.7183  | 3.0254  | 3.5036  | 3.8104  | 2.9137  | 3.7109  | 3.1957  | 3.9538  | 4.2528  | 4.2255  | 0.9249  | -0.1126 | 0.4681 | 0.3296 |
| Ahcyl1   |  | _NSC[Carbamidomethyl (C)]JVC[Carbamidomethyl (C)]NM[Oxidation (M)]GHSNTEIDVTSR_3         | #N/A                     | 3.9104  | 3.0662  | 4.1125  | 3.5658  | 3.7603  | 3.3533  | 3.7141  | 3.4475  | 3.7466  | 3.2431  | 1.0255  | 0.0363  | 0.6871 | 0      |



|          |                                                                          |                          |         |         |         |         |         |         |         |         |         |         |         |         |        |        |
|----------|--------------------------------------------------------------------------|--------------------------|---------|---------|---------|---------|---------|---------|---------|---------|---------|---------|---------|---------|--------|--------|
| Vat1l    | _ETSKEPAEGGDSHR_3                                                        | ##N/A                    | 2.9798  | 3.7850  | 3.6666  | 4.1693  | 3.6064  | 4.1231  | 4.4839  | 3.9492  | 3.5978  | 4.1363  | 0.9208  | -0.1190 | 0.2606 | 0.5840 |
| Sipa1l2  | _EYGS(Phospho (STY))TSSDR_2                                              | QB0TE4_S195_M1_Sipa1l2   | 3.8401  | 8.1982  | 8.4302  | 4.6184  | 3.3236  | 8.0711  | 3.2658  | 3.8836  | 4.1827  | 7.5903  | 1.2853  | 0.3621  | 0.3775 | 0.4231 |
| Sipa1l2  | _TLS(Phospho (STY))DESW(C[Carbamidomethyl] (C))SNR_2                     | QB0TE4_S1488_M1_Sipa1l2  | 8.0064  | 7.4873  | 4.0652  | 7.9758  | 6.8773  | 7.8251  | 8.1103  | 7.8056  | 7.7026  | 7.8807  | 0.8599  | -0.1618 | 0.3137 | 0.5035 |
| Sipa1l2  | _YTGDFVHS(Phospho (STY))PQR_2                                            | QB0TE4_S149_M1_Sipa1l2   | 5.6514  | 5.5260  | 3.7721  | 5.0327  | 3.7118  | 4.0177  | 5.6778  | 5.6238  | 4.6745  | 4.8272  | 0.8880  | -0.1713 | 0.2771 | 0.5574 |
| Sipa1l2  | _SEG(Phospho (STY))PPPEEVEIC[Carbamidomethyl] (C))PR_2                   | QB0TE4_S1406_M1_Sipa1l2  | 5.7262  | 3.6668  | 6.9178  | 6.5833  | 3.5328  | 6.8440  | 5.7487  | 7.2053  | 7.1798  | 4.0628  | 0.9167  | -0.1255 | 0.6353 | 0.2039 |
| Sipa1l2  | _NEFWHS(Phospho (STY))DGLSLK_2                                           | QB0TE4_S1549_M1_Sipa1l2  | 3.1353  | 4.2071  | 4.3698  | 3.9136  | 6.2894  | 3.7010  | 4.0618  | 3.0876  | 3.3867  | 3.5909  | 1.2089  | 0.7376  | 0.2350 | 0.6290 |
| Lnc7     | _TPS(Phospho (STY))PFDR_2                                                | QB0TE7_S850_M1_Lnc7      | 9.1825  | 8.5670  | 9.6347  | 4.5247  | 3.7793  | 9.2011  | 9.3903  | 9.1076  | 3.3872  | 9.1428  | 0.9645  | -0.0522 | 0.8797 | 0.0557 |
| Lnc7     | _GVAIKS(Phospho (STY))TER_2                                              | QB0TE7_S928_M1_Lnc7      | 2.9695  | 8.3674  | 4.2040  | 3.1891  | 7.4495  | 3.0106  | 8.5903  | 8.9321  | 8.7179  | 8.5264  | 0.5597  | -0.8372 | 0.0147 | 1.8315 |
| Lnc7     | _S(Phospho (STY))M(Oxidation (M))DGPECF(C[Carbamidomethyl] (C))VR_2      | ##N/A                    | 13.1192 | 12.8609 | 13.2264 | 13.4588 | 12.4199 | 13.0914 | 13.3961 | 12.9430 | 13.1804 | 13.2621 | 0.9874  | -0.0183 | 0.4235 | 0.3732 |
| Lnc7     | _LETTPTTS(Phospho (STY))PLPR_2                                           | ##N/A                    | 6.7760  | 6.0281  | 3.8186  | 4.0025  | 3.0757  | 4.9071  | 6.7650  | 3.8721  | 4.2005  | 3.8402  | 1.0211  | 0.0001  | 0.9165 | 0.0379 |
| Lnc7     | _VYNPLENYAGSGHLGS(Phospho (STY))HERPD_3                                  | ##N/A                    | 4.1460  | 3.1607  | 3.8797  | 3.6107  | 3.0181  | 3.4159  | 3.5507  | 3.5915  | 3.9353  | 3.1008  | 0.9983  | -0.0025 | 0.9819 | 0.0079 |
| Lnc7     | _TAPPSKLETT(Phospho (STY))PTTS(Phospho (STY))PLPERK_3                    | ##N/A                    | 3.3023  | 4.0401  | 4.5368  | 4.0806  | 3.8615  | 3.8680  | 4.2288  | 7.2832  | 3.2197  | 3.7578  | 0.8542  | -0.2274 | 0.3940 | 0.4045 |
| Lnc7     | _SQS(Phospho (STY))DEIDVGTYK_2                                           | ##N/A                    | 10.1253 | 9.8675  | 10.3704 | 11.0556 | 9.8205  | 10.2087 | 10.3272 | 10.3581 | 10.2190 | 10.3019 | 0.9942  | -0.0085 | 0.8007 | 0.0965 |
| Lnc7     | _KQS(Phospho (STY))DEIDVGTYK_2                                           | ##N/A                    | 5.7615  | 6.4628  | 3.7245  | 7.6497  | 6.1502  | 6.3730  | 6.6492  | 6.9329  | 6.6220  | 5.3346  | 0.9429  | -0.0848 | 0.6248 | 0.2042 |
| Lnc7     | _S(Phospho (STY))VPAHGR_2                                                | QB0TE7_S801_M1_Lnc7      | 6.8191  | 3.1716  | 5.6902  | 6.0356  | 2.9929  | 5.5253  | 6.0273  | 6.7410  | 5.9663  | 6.2818  | 0.8057  | -0.3116 | 0.1761 | 0.7543 |
| Lnc7     | _FKKS(Phospho (STY))QS(Phospho (STY))DEIDVGTYK_3                         | ##N/A                    | 3.8983  | 7.5747  | 3.9739  | 8.8177  | 8.1837  | 7.7466  | 5.7068  | 8.7215  | 8.7096  | 8.9609  | 0.8348  | -0.2605 | 0.3276 | 0.4847 |
| Lnc7     | _SYS(Phospho (STY))TESYGASQTR_2                                          | ##N/A                    | 7.9381  | 3.3172  | 7.8557  | 8.5819  | 7.2282  | 7.6898  | 7.9993  | 7.6372  | 7.4775  | 7.8484  | 0.9175  | -0.1243 | 0.5313 | 0.2747 |
| Lnc7     | _STERLS(Phospho (STY))PLM(Oxidation (M))K_2                              | QB0TE7_S933_M1_Lnc7      | 6.6333  | 6.8820  | 7.4137  | 3.7888  | 3.4213  | 6.7690  | 3.7011  | 3.8260  | 6.7711  | 6.8017  | 1.1030  | 0.1414  | 0.6419 | 0.1925 |
| Lnc7     | _LETT(Phospho (STY))PTTS(Phospho (STY))PLPERK_2                          | ##N/A                    | 4.0188  | 3.4933  | 4.2288  | 6.6597  | 3.3570  | 3.7095  | 6.1642  | 3.4870  | 4.2840  | 4.6066  | 0.9157  | -0.1271 | 0.6242 | 0.2047 |
| Lnc7     | _SYS(Phospho (STY))TESYGASQTRPVSAR_2                                     | ##N/A                    | 5.7220  | 4.7521  | 4.4687  | 5.6071  | 3.4998  | 3.8359  | 3.6979  | 3.5276  | 5.0393  | 3.9110  | 0.9849  | -0.0220 | 0.9199 | 0.0362 |
| Lnc7     | _TIAVDENFLPULR_2                                                         | ##N/A                    | 4.0003  | 5.0936  | 5.8357  | 5.5501  | 5.7179  | 3.0652  | 3.2460  | 5.5384  | 4.0225  | 5.3464  | 1.0641  | 0.0896  | 0.6844 | 0.1647 |
| Lnc7     | _S(Phospho (STY))REQQPTGWNK_2                                            | ##N/A                    | 6.6323  | 6.7163  | 6.8014  | 7.0526  | 5.4073  | 6.4719  | 5.8380  | 6.5275  | 6.5516  | 6.5561  | 1.0196  | 0.0280  | 0.7027 | 0.1532 |
| Lnc7     | _IPS(Phospho (STY))DYNLGNVGDK_2                                          | QB0TE7_S1233_M1_Lnc7     | 4.3067  | 3.5622  | 4.0404  | 8.8522  | 6.6867  | 8.1350  | 3.7324  | 8.5151  | 3.7161  | 8.4199  | 0.9729  | -0.0397 | 0.9195 | 0.0364 |
| Lnc7     | _S(Phospho (STY))QVPMLODEMLO(Oxidation (M))VGSXK_2                       | QB0TE7_S997_M1_Lnc7      | 3.7770  | 3.9810  | 4.2336  | 3.7646  | 3.6838  | 3.8517  | 3.9129  | 3.2839  | 3.5416  | 3.3745  | 1.1003  | 0.1378  | 0.0457 | 1.3404 |
| Lnc7     | _RVS(Phospho (STY))EPHELPPGDR_3                                          | QB0TE7_S1132_M1_Lnc7     | 4.1327  | 3.4371  | 3.3187  | 3.8213  | 3.2584  | 2.9702  | 3.5360  | 4.2971  | 3.9457  | 3.7883  | 0.8967  | -0.1573 | 0.1440 | 0.8417 |
| Pcdh19   | _DKES(Phospho (STY))PSWIR_2                                              | QB0TF3_S1134_M1_Pcdh19   | 3.2953  | 4.1005  | 3.9821  | 4.0201  | 3.9219  | 3.8076  | 4.1684  | 3.6337  | 3.2801  | 4.4518  | 0.9926  | -0.0108 | 0.9128 | 0.0396 |
| Pcdh19   | _SKS(Phospho (STY))PEHVR_2                                               | QB0TF3_S983_M1_Pcdh19    | 3.1500  | 4.1924  | 3.4845  | 3.9283  | 4.0137  | 3.7158  | 4.0766  | 5.9338  | 3.3719  | 3.6056  | 0.9177  | -0.1239 | 0.5120 | 0.2907 |
| Pcdh19   | _EAGNGC[Carbamidomethyl] (C))EAS(Phospho (STY))PVTS(Phospho (STY))PUHK_2 | QB0TF3_S1063_M2_Pcdh19   | 4.1462  | 3.4017  | 3.8799  | 3.4237  | 3.2900  | 3.3347  | 3.5719  | 3.5775  | 3.8766  | 3.1009  | 1.0135  | 0.0193  | 0.8332 | 0.0792 |
| Erbin    | _SES(Phospho (STY))AENHSYAK_2                                            | QB0TH2_S1013_M1_Erbin    | 5.0572  | 4.7120  | 5.8189  | 5.3401  | 3.9467  | 3.7827  | 4.2244  | 5.7325  | 5.2193  | 5.4985  | 0.9241  | -0.1139 | 0.4403 | 0.3563 |
| Erbin    | _VRQDENFSLQNGVNLNKS(Phospho (STY))PEEK_3                                 | QB0TH2_S712_M1_Erbin     | 3.7294  | 3.0338  | 4.4162  | 3.4180  | 2.8551  | 3.3735  | 3.7343  | 3.1996  | 4.3490  | 4.2532  | 0.8937  | -0.1622 | 0.2751 | 0.5605 |
| Erbin    | _STEDLS(Phospho (STY))PQR_2                                              | QB0TH2_S854_M1_Erbin     | 7.0525  | 7.3486  | 7.7837  | 6.9723  | 7.3011  | 7.6177  | 7.0489  | 7.6557  | 0.9918  | -0.0119 | 0.7926  | 0.1069  | 0.1926 | 0.1069 |
| Gramd1b  | _STPAC[Carbamidomethyl] (C))S(Phospho (STY))PLR_2                        | QB0T02_S21_M1_Gramd1b    | 3.2113  | 8.5266  | 8.9636  | 8.4005  | 7.1473  | 4.2223  | 8.8884  | 8.6732  | 8.7174  | 8.3829  | 0.7784  | -0.3614 | 0.1629 | 0.7880 |
| Gramd1b  | _TESTYAEIHRQ(Phospho (STY))PK_3                                          | ##N/A                    | 7.3566  | 7.0823  | 7.4279  | 6.8730  | 5.8938  | 6.8130  | 6.7384  | 7.7024  | 7.4283  | 7.0965  | 0.9539  | -0.0680 | 0.3385 | 0.4705 |
| Gramd1b  | _SSIETKPDAS(Phospho (STY))PQLPKK_3                                       | ##N/A                    | 5.6379  | 5.3213  | 4.1948  | 3.1982  | 3.7188  | 3.0197  | 4.2741  | 5.9132  | 3.0680  | 5.5464  | 0.8897  | -0.1687 | 0.5123 | 0.2905 |
| Gramd1b  | _S(Phospho (STY))RSPTPNQDQGTMVKEK_3                                      | QB0T02_S28_M1_Gramd1b    | 5.0477  | 3.5993  | 3.5411  | 5.2495  | 3.7209  | 3.8821  | 4.1122  | 3.9889  | 4.1243  | 4.1675  | 1.0184  | 0.0262  | 0.8528 | 0.0691 |
| Gramd1b  | _SSIETKPDAS(Phospho (STY))PQLPK_2                                        | ##N/A                    | 8.7768  | 8.7469  | 9.5722  | 8.9737  | 7.3584  | 8.5122  | 9.2524  | 8.9468  | 8.6317  | 8.5659  | 0.9782  | -0.0317 | 0.6375 | 0.1955 |
| Gramd1b  | _S(Phospho (STY))PTPNQDQDQD(Oxidation (M))VEK_2                          | ##N/A                    | 5.5744  | 3.8648  | 3.2113  | 4.2559  | 4.1222  | 5.5051  | 4.4042  | 5.2666  | 4.9753  | 0.9363  | -0.0949 | 0.5750  | 0.2404 | 0.2404 |
| Plekhh1  | _SC[Carbamidomethyl] (C))QS(Phospho (STY))DEVEAGTGR_2                    | QB0T1L_S739_M1_Plekhh1   | 4.3283  | 2.5837  | 4.0620  | 4.6482  | 3.4720  | 3.1526  | 4.5466  | 4.1003  | 4.4360  | 3.2981  | 0.9461  | -0.0799 | 0.5624 | 0.2500 |
| Cadps    | _VILHPTPNS(Phospho (STY))PK_2                                            | QB0T1L_S486_M1_Cadps     | 8.5114  | 3.2273  | 8.7839  | 8.7051  | 3.0486  | 8.0754  | 9.1447  | 8.7721  | 8.4865  | 8.1239  | 0.7791  | -0.3601 | 0.2204 | 0.6568 |
| Cadps    | _DIVTPVPQEEVW_2                                                          | ##N/A                    | 8.0941  | 7.5314  | 8.0464  | 7.2147  | 7.2906  | 7.5524  | 7.9666  | 7.8025  | 7.9085  | 7.6913  | 0.9719  | -0.0412 | 0.2925 | 0.5339 |
| Cadps    | _LDALQIFIR_2                                                             | ##N/A                    | 6.2498  | 6.1700  | 6.0991  | 4.6085  | 5.5131  | 5.7206  | 6.1134  | 6.5117  | 6.3445  | 6.0835  | 0.9144  | -0.1292 | 0.1375 | 0.8618 |
| Cadps    | _EGDTVFASDQEDGR_2                                                        | ##N/A                    | 6.0541  | 6.0830  | 5.9310  | 6.4492  | 4.6040  | 5.5705  | 6.6528  | 6.0776  | 6.1395  | 5.8498  | 0.9356  | -0.0960 | 0.2938 | 0.5320 |
| Cadps    | _S(Phospho (STY))LPEIGLSK_2                                              | QB0T1L_S219_M1_Cadps     | 9.1023  | 8.3980  | 8.5439  | 8.7564  | 7.3865  | 8.5894  | 9.4375  | 8.9525  | 8.9123  | 8.5460  | 0.9443  | -0.0827 | 0.1679 | 0.7749 |
| Cadps    | _SLSNLPNNVLPNNVLPK_2                                                     | ##N/A                    | 5.0841  | 5.5387  | 4.2891  | 5.4646  | 4.6917  | 5.1720  | 5.4440  | 6.0105  | 5.5234  | 4.9507  | 0.9194  | -0.1213 | 0.1754 | 0.7559 |
| Cadps    | _LGVGLDSTLNSK_2                                                          | ##N/A                    | 5.0166  | 5.2623  | 4.4954  | 4.8219  | 4.6142  | 4.7641  | 4.8234  | 5.2078  | 4.9918  | 3.4642  | 1.0448  | 0.0633  | 0.5612 | 0.2508 |
| Cadps    | _HSGDVLR_2                                                               | ##N/A                    | 5.7936  | 5.6681  | 5.7540  | 7.8824  | 5.8785  | 5.3960  | 6.4410  | 5.7214  | 5.6650  | 5.0934  | 1.0579  | 0.0812  | 0.5348 | 0.2718 |
| Cadps    | _ATLSLLER_2                                                              | ##N/A                    | 5.2911  | 4.1766  | 4.5222  | 4.9502  | 3.5396  | 4.2410  | 3.1021  | 5.0934  | 5.2244  | 4.5687  | 0.9903  | -0.0141 | 0.9321 | 0.0305 |
| Cadps    | _LQKEEER_2                                                               | ##N/A                    | 4.7653  | 4.8685  | 5.0747  | 4.7356  | 4.9529  | 4.7076  | 4.5882  | 4.4492  | 3.8769  | 1.2009  | 0.9601  | -0.0261 | 0.0126 | 1.9012 |
| Cadps    | _EQLYEM(Oxidation (M))FQNLGK_2                                           | ##N/A                    | 3.6001  | 3.9429  | 3.1565  | 3.3450  | 3.0962  | 3.3623  | 3.5092  | 3.6562  | 3.5496  | 3.2936  | 0.9757  | -0.0354 | 0.6316 | 0.1995 |
| Cadps    | _VLENIQIFHR_2                                                            | ##N/A                    | 4.6816  | 5.6262  | 5.5878  | 4.6216  | 4.1125  | 4.4801  | 5.2695  | 5.3803  | 4.6113  | 4.2829  | 0.9930  | -0.0102 | 0.9297 | 0.0316 |
| Cadps    | _LFTFSTGLALDKELGR_2                                                      | ##N/A                    | 3.6187  | 4.3750  | 3.3524  | 4.7088  | 4.2633  | 3.8622  | 5.8177  | 4.8783  | 3.7264  | 4.0076  | 0.8747  | -0.1932 | 0.2395 | 0.6206 |
| Cadps    | _VYDLM(Oxidation (M))ESSIAQSHR_3                                         | ##N/A                    | 4.0039  | 3.0682  | 4.0745  | 3.4045  | 3.1295  | 3.2124  | 3.3254  | 3.4291  | 4.0827  | 3.2850  | 0.9863  | -0.0199 | 0.8630 | 0.0640 |
| Cadps    | _M(Oxidation (M))VQSGG[Carbamidomethyl] (C))SANDSR_2                     | ##N/A                    | 2.7742  | 4.1857  | 4.3677  | 3.6964  | 4.0071  | 3.7339  | 4.3158  | 4.1444  | 3.1546  | 3.4826  | 1.0053  | 0.0076  | 0.9574 | 0.0189 |
| PH8      | _DAEYVPSLES(Phospho (STY))DODDPAUK_2                                     | QB0T17_S820_M1_PH8       | 3.1103  | 4.1159  | 3.7971  | 4.2997  | 3.7368  | 4.1213  | 4.0144  | 3.8187  | 3.4673  | 4.2667  | 0.9927  | -0.1005 | 0.9144 | 0.0389 |
| PH8      | _SGSSSSGLGTVSSS(Phospho (STY))PASQR_2                                    | QB0T17_S768_M1_PH8       | 3.0157  | 4.3267  | 4.2503  | 3.7940  | 4.1480  | 3.5815  | 3.9423  | 3.2072  | 3.5062  | 3.4713  | 1.0909  | 0.1255  | 0.2878 | 0.5409 |
| Kiaa1107 | _S(Phospho (STY))LDSIC[Carbamidomethyl] (C))PSGLPQEGQWK_2                | QB0TK0_S1051_M1_Kiaa1107 | 3.2309  | 7.7574  | 3.9177  | 4.4204  | 3.8575  | 4.2419  | 8.0390  | 3.6981  | 3.3467  | 4.3874  | 0.9390  | -0.0908 | 0.8086 | 0.0923 |
| Kiaa1107 | _SSS(Phospho (STY))DTSTPELK_2                                            | ##N/A                    | 7.1004  | 4.0776  | 4.2099  | 3.5044  | 5.8568  | 6.8160  | 7.0327  | 6.6304  | 3.3250  | 7.0075  | 0.8770  | -0.1894 | 0.5042 | 0.2974 |
| Kiaa1107 | _SAPPTLAQAGSGSGSPHS(Phospho (STY))VK_2                                   | QB0TK0_S343_M1_Kiaa1107  | 3.6028  | 5.0580  | 3.6372  | 4.1398  | 3.5769  | 4.9062  | 4.0263  | 4.8719  | 3.6323  | 4.7523  | 0.9613  | -0.0569 | 0.6989 | 0.1556 |
| Kiaa1107 | _TGGGGGHQHS(Phospho (STY))AS(Phospho (STY))DOEIPR_3                      | ##N/A                    | 5.3871  | 5.6026  | 3.9571  | 5.9977  | 4.7564  | 5.8927  | 6.1904  | 6.0758  | 5.1448  | 5.6345  | 0.9140  | -0.1298 | 0.2920 | 0.5346 |
| Kiaa1107 | _SEYDAGGS(Phospho (STY))QDDEGSHDR_2                                      | ##N/A                    | 4.4245  | 4.1506  | 3.9226  | 4.7950  | 4.0930  | 4.2988  | 4.4153  | 4.0671  | 4.5580  | 3.7652  | 1.0117  | 0.0167  | 0.8187 | 0.0869 |
| Kiaa1107 | _TGGGGGHQHS(Phospho (STY))AS(Phospho (STY))DOEIPR_2                      | ##N/A                    | 7.5907  | 7.3411  | 4.2916  | 5.0002  | 4.2145  | 4.8348  | 8.1705  | 7.5     |         |         |         |         |        |        |



|        |                                                                                                    |                        |         |         |         |         |         |         |         |         |         |         |         |         |        |        |
|--------|----------------------------------------------------------------------------------------------------|------------------------|---------|---------|---------|---------|---------|---------|---------|---------|---------|---------|---------|---------|--------|--------|
| Phf24  | _EAEASAPVQEESS[Phospho (STY)]INR_2                                                                 | Q80TL4_573_M1_Ph24     | 6.6100  | 4.7534  | 3.7486  | 7.4984  | 5.3644  | 6.2332  | 6.9859  | 5.8858  | 5.9694  | 6.9441  | 0.8844  | -0.1772 | 0.3376 | 0.4716 |
| Phf24  | _LTEAPSC[Carbamidomethyl (C)]SVISHVGPAAOSS[Phospho (STY)]PAASSSK_3                                 | Q80TL4_5348_M1_Ph24    | 3.7927  | 3.3752  | 6.9042  | 9.0726  | 3.0147  | 5.7692  | 3.3334  | 3.7305  | 6.4670  | 4.0125  | 1.2133  | 0.2790  | 0.5034 | 0.2981 |
| Phf24  | _RGT[Phospho (STY)]VEGSVGVQEEKEAEASAPVQEESSNR_4                                                    | #N/A                   | 4.1829  | 3.1595  | 3.9156  | 3.4603  | 2.9808  | 3.2478  | 3.6086  | 5.5408  | 6.1690  | 6.1093  | 0.7188  | -0.4763 | 0.0627 | 1.2025 |
| Phf24  | _RGT[Phospho (STY)]VEGSVGVQEEKE_2                                                                  | #N/A                   | 3.7504  | 3.5920  | 3.4841  | 4.5287  | 2.8941  | 3.7305  | 3.1761  | 3.4672  | 4.2724  | 4.2060  | 0.9690  | -0.0454 | 0.7425 | 0.1293 |
| Mon2   | _DEOAAAS[Phospho (STY)]DPM[Oxidation (M)]QDETYSR_2                                                 | #N/A                   | 3.7597  | 4.0057  | 4.5089  | 4.2052  | 3.4312  | 4.1177  | 4.1627  | 4.2803  | 3.5553  | 3.4548  | 1.0366  | 0.0519  | 0.5902 | 0.2290 |
| R3hdm2 | _PWSS[Phospho (STY)]TDSOGSVR_2                                                                     | #N/A                   | 6.0807  | 2.9750  | 4.1010  | 3.6448  | 2.7964  | 6.1015  | 3.7931  | 3.3564  | 6.6363  | 3.3221  | 1.0015  | 0.0021  | 0.9950 | 0.0022 |
| R3hdm2 | _DSS[Phospho (STY)]QETYSTDGIDHFLVNLTK_3                                                            | Q80TM6_5143_M1_R3hdm2  | 3.2791  | 4.0354  | 4.5136  | 4.0574  | 3.9237  | 6.6377  | 4.2057  | 4.4446  | 3.2428  | 3.7347  | 1.1282  | 0.1740  | 0.4490 | 0.3477 |
| R3hdm2 | _SKS[Phospho (STY)]IEEREEYQQR_3                                                                    | #N/A                   | 6.7349  | 4.1929  | 7.2237  | 5.4405  | 6.0564  | 7.4465  | 6.5934  | 4.8742  | 6.8254  | 6.9015  | 0.9974  | -0.0037 | 0.9831 | 0.0074 |
| R3hdm2 | _ASS[Phospho (STY)]JSGSILTR_2                                                                      | Q80TM6_5381_M1_R3hdm2  | 3.9289  | 8.5993  | 3.8428  | 10.4778 | 3.0546  | 6.2094  | 7.6409  | 8.4028  | 7.3760  | 3.0638  | 0.9091  | -0.1375 | 0.7460 | 0.1272 |
| R3hdm2 | _SLEPRPWSS[Phospho (STY)]TDSOGSVR_2                                                                | #N/A                   | 3.9778  | 6.5355  | 3.6397  | 7.0788  | 5.7707  | 6.7826  | 7.1399  | 7.3949  | 3.6841  | 7.7809  | 0.8663  | -0.2071 | 0.4177 | 0.3588 |
| R3hdm2 | _S[Phospho (STY)]IEEREEYQQR_2                                                                      | #N/A                   | 3.3491  | 7.0353  | 4.5836  | 8.1256  | 3.9937  | 7.5009  | 7.4148  | 7.1842  | 7.4334  | 3.8047  | 0.8925  | -0.1641 | 0.5937 | 0.2265 |
| R3hdm2 | _SAS[Phospho (STY)]TDLGTADVVLGR_2                                                                  | Q80TM6_5923_M1_R3hdm2  | 3.7736  | 3.4526  | 4.4604  | 11.3457 | 3.3409  | 3.2837  | 3.1769  | 3.1554  | 4.3049  | 3.4292  | 1.4056  | 0.4912  | 0.4071 | 0.3903 |
| R3hdm2 | _TPS[Phospho (STY)]KEOVKEGEEENGLR_3                                                                | Q80TM6_537_M1_R3hdm2   | 3.7662  | 3.5762  | 3.4999  | 4.5445  | 2.9099  | 3.7147  | 3.1919  | 3.9575  | 4.2566  | 4.2217  | 0.9390  | -0.0908 | 0.4942 | 0.3061 |
| R3hdm2 | _SKS[Phospho (STY)]IEER_2                                                                          | #N/A                   | 4.2022  | 3.0240  | 3.3882  | 4.9497  | 2.9123  | 3.7123  | 3.6055  | 4.8740  | 3.8762  | 5.6602  | 0.8211  | -0.2844 | 0.1762 | 0.7541 |
| R3hdm2 | _LEQELDFINNNNQFK_2                                                                                 | #N/A                   | 4.3032  | 4.5635  | 3.6036  | 6.0407  | 4.1977  | 3.9278  | 5.0075  | 4.0122  | 4.5299  | 4.0732  | 1.0076  | 0.0110  | 0.9448 | 0.0247 |
| Nisch  | _TPS[Phospho (STY)]PEPVKDXFYSEFGDK_3                                                               | #N/A                   | 5.3639  | 3.6946  | 3.6384  | 3.9826  | 4.4397  | 3.4900  | 4.5960  | 5.0813  | 4.6985  | 4.6802  | 0.8609  | -0.2160 | 0.1105 | 0.9568 |
| Nisch  | _AC[Carbamidomethyl (C)]SDS[Phospho (STY)]LESIPAGQVASDOLR_2                                        | Q80TM9_5545_M1_Nisch   | 3.7186  | 5.0984  | 3.5356  | 6.4778  | 3.8806  | 4.1636  | 5.4043  | 6.2245  | 3.8093  | 5.5695  | 0.8529  | -0.2296 | 0.3028 | 0.5188 |
| Nav3   | _SQS[Phospho (STY)]JFNSDK_2                                                                        | Q80TN7_5275_M1_Nav3    | 4.2042  | 3.4597  | 3.9379  | 5.8282  | 3.3480  | 3.5977  | 3.6299  | 3.5195  | 3.8186  | 3.1589  | 1.2353  | 0.3048  | 0.1592 | 0.7981 |
| Nav3   | _S[Phospho (STY)]LPPRSK_2                                                                          | Q80TN7_51140_M1_Nav3   | 4.0194  | 8.2659  | 9.2099  | 8.4896  | 8.4442  | 8.2718  | 8.0308  | 8.1619  | 9.5866  | 2.9742  | 1.0828  | 0.1148  | 0.7005 | 0.1546 |
| Nav3   | _KTS[Phospho (STY)]LDSGNSQDDVLUHVHSK_3                                                             | Q80TN7_51116_M1_Nav3   | 3.7856  | 3.0411  | 3.5193  | 3.8737  | 2.9294  | 3.6952  | 3.5884  | 3.9381  | 4.2371  | 4.2412  | 0.8683  | -0.2038 | 0.0569 | 1.2448 |
| Ubr5   | _VLDGAS[Phospho (STY)]FONER_2                                                                      | Q80TP9_5121_M1_Ubr5    | 4.4425  | 6.2654  | 3.7840  | 6.3851  | 4.5306  | 6.0286  | 6.8640  | 6.9028  | 6.8100  | 6.8483  | 0.7642  | -0.3880 | 0.0320 | 1.6575 |
| Cyld   | _SELFYLUGSS[Phospho (STY)]HVSQDQK_2                                                                | Q80TQ2_5359_M1_Cyld    | 4.0929  | 5.0730  | 3.5886  | 6.4095  | 3.2280  | 5.8033  | 3.5079  | 6.2962  | 5.4864  | 6.8654  | 0.8654  | -0.2086 | 0.4086 | 0.3887 |
| Cyld   | _VTGST[Phospho (STY)]PDGSR_2                                                                       | Q80TQ2_5341_M1_Cyld    | 5.3020  | 3.5752  | 4.2144  | 5.8675  | 3.4044  | 5.8640  | 3.7353  | 3.2751  | 3.1789  | 5.8085  | 1.1763  | 0.2343  | 0.3746 | 0.4264 |
| Adgr1  | _YYTGQS[Phospho (STY)]R_2                                                                          | Q80TR1_51141_M1_Adgr1  | 7.5157  | 7.0815  | 7.7135  | 7.2710  | 5.8319  | 7.7288  | 7.6847  | 8.0242  | 7.4808  | 7.3851  | 0.9309  | -0.1033 | 0.1780 | 0.7497 |
| Adgr1  | _SPGGTGS[Phospho (STY)]LJK_2                                                                       | Q80TR1_51123_M1_Adgr1  | 8.0816  | 7.6463  | 7.4127  | 7.5240  | 6.2979  | 7.5240  | 7.6927  | 8.5446  | 7.9118  | 7.6225  | 0.9198  | -0.1207 | 0.0991 | 1.0738 |
| Adgr1  | _PLSS[Phospho (STY)]PPGR_2                                                                         | Q80TR1_51369_M1_Adgr1  | 4.1985  | 3.5028  | 3.3844  | 4.6179  | 3.3242  | 4.4053  | 3.2653  | 3.8842  | 4.1832  | 4.2951  | 0.9996  | -0.0005 | 0.9968 | 0.1005 |
| Adgr1  | _QTESSFM[Oxidation (M)]AGDINST[Phospho (STY)]PTLNR_2                                               | #N/A                   | 3.7066  | 3.7983  | 3.4403  | 3.7588  | 3.6866  | 3.8035  | 3.6330  | 4.0464  | 4.8838  | 4.1621  | 0.9409  | -0.0879 | 0.0758 | 1.2214 |
| Adgr1  | _RPS[Phospho (STY)]HEGYAARLEGPGDGGODGM[Oxidation (M)]QLVTSL_3                                      | Q80TR1_51439_M1_Adgr1  | 3.0725  | 3.8777  | 3.7593  | 4.2619  | 3.6990  | 4.0305  | 4.3913  | 3.8565  | 3.5051  | 4.2289  | 0.9469  | -0.0076 | 0.4359 | 0.3606 |
| Adgr1  | _TDLTEYASWEDYVAAIR_2                                                                               | #N/A                   | 3.7628  | 3.0672  | 4.4496  | 3.4515  | 2.8885  | 3.3401  | 3.1661  | 3.1662  | 4.3156  | 3.4185  | 0.9934  | -0.0987 | 0.9496 | 0.0224 |
| Adgr1  | _SVYVDDSEAGNRVDYAFNTNAR_3                                                                          | #N/A                   | 3.7381  | 3.6043  | 3.4718  | 4.5164  | 2.8818  | 4.3038  | 3.1638  | 3.9856  | 4.2847  | 4.1936  | 0.9605  | -0.0581 | 0.6821 | 0.1662 |
| Adgr13 | _GPAHLVTS[Phospho (STY)]L_2                                                                        | Q80TS3_51536_M1_Adgr13 | 3.3462  | 4.2429  | 3.9226  | 4.1245  | 4.0991  | 4.5438  | 4.2728  | 3.7451  | 3.2015  | 3.8018  | 1.7179  | 0.5408  | 0.2929 | 0.3293 |
| Adgr13 | _MPLNGDSR_2                                                                                        | Q80TS3_51485_M1_Adgr13 | 5.6371  | 3.2037  | 3.8724  | 6.1620  | 3.2824  | 3.2036  | 4.1275  | 3.5850  | 3.8841  | 3.0934  | 1.1918  | 0.2531  | 0.4109 | 0.3863 |
| Adgr13 | _GSSDGFVPKNKGAS[Phospho (STY)]PEGTSK_3                                                             | Q80TS3_51222_M1_Adgr13 | 5.6635  | 3.4783  | 3.7211  | 3.9817  | 5.4132  | 4.4013  | 6.1702  | 6.3369  | 5.8248  | 6.2776  | 0.7135  | -0.4870 | 0.0058 | 0.2364 |
| Adgr13 | _STESSGS[Phospho (STY)]GK_2                                                                        | Q80TS3_51222_M1_Adgr13 | 3.3344  | 4.1396  | 4.0212  | 4.5239  | 3.9610  | 3.7685  | 4.1293  | 3.5946  | 3.2432  | 2.9900  | 1.1344  | 0.1819  | 0.1334 | 0.8749 |
| Ddn    | _S[Phospho (STY)]PLGQRPPEPR_2                                                                      | #N/A                   | 8.0869  | 7.6348  | 8.3577  | 8.0980  | 7.2176  | 7.9097  | 8.4328  | 8.1864  | 8.1959  | 7.7108  | 0.9696  | -0.0446 | 0.3302 | 0.4812 |
| Ddn    | _LRPGS[Phospho (STY)]PEPPRR_2                                                                      | Q80TS7_577_M1_Ddn      | 8.9992  | 9.0995  | 9.7290  | 9.0195  | 8.4424  | 9.1177  | 9.4404  | 9.4070  | 9.0739  | 9.0441  | 0.9812  | -0.0273 | 0.4631 | 0.3343 |
| Ddn    | _RS[Phospho (STY)]PLGQRPPEPR_3                                                                     | #N/A                   | 3.0202  | 4.2060  | 3.7070  | 4.2096  | 4.0943  | 4.0312  | 3.0950  | 3.8990  | 3.2899  | 4.1766  | 1.0727  | 0.1013  | 0.4186 | 0.3782 |
| Baiap3 | _SGS[Phospho (STY)]PAPAEVPQNR_2                                                                    | Q80TT2_578_M1_Baiap3   | 11.9519 | 12.1811 | 12.4037 | 11.9665 | 10.1151 | 11.7077 | 12.4319 | 12.0936 | 11.4902 | 11.5234 | 0.9862  | -0.2000 | 0.7390 | 0.1373 |
| Cu9    | _VGLGS[Phospho (STY)]PSVETR_2                                                                      | Q80TT8_51775_M1_Cu9    | 8.7653  | 8.2501  | 8.7412  | 5.7505  | 6.7212  | 7.8575  | 8.0101  | 8.5124  | 8.1668  | 8.3375  | 0.8627  | -0.2131 | 0.2867 | 0.5426 |
| Cu9    | _AVLETPSTGGQDGS[Phospho (STY)]PESLR_2                                                              | Q80TT8_5284_M1_Cu9     | 4.2768  | 3.5323  | 4.3807  | 3.3825  | 3.4205  | 3.2041  | 3.0972  | 3.2351  | 4.3845  | 5.4306  | 0.9164  | -0.1259 | 0.5205 | 0.2836 |
| Clasp1 | _NSSNTQVGS[Phospho (STY)]PSNTGR_2                                                                  | Q80TV8_51088_M1_Clasp1 | 10.5553 | 10.6244 | 10.9136 | 10.6848 | 4.1015  | 10.3897 | 11.0536 | 10.9594 | 10.5415 | 10.2620 | 0.8917  | -0.1654 | 0.4225 | 0.3741 |
| Clasp1 | _S[Phospho (STY)]QEDLNEPIKR_2                                                                      | #N/A                   | 1.8106  | 7.5424  | 7.7449  | 7.6274  | 5.6370  | 7.5159  | 7.9108  | 7.5494  | 7.4234  | 7.7356  | 0.9634  | -0.0538 | 0.5590 | 0.2526 |
| Clasp1 | _FSRFS[Phospho (STY)]QEDLNEPIKR_3                                                                  | #N/A                   | 3.5074  | 4.3126  | 7.9221  | 7.3179  | 4.1339  | 3.5955  | 3.9563  | 7.5167  | 3.4921  | 6.7545  | 0.9451  | -0.0815 | 0.8210 | 0.0856 |
| Clasp1 | _DGGAS[Phospho (STY)]PATEGR_2                                                                      | Q80TV8_51220_M1_Clasp1 | 8.4368  | 8.1901  | 8.6257  | 7.7537  | 3.2063  | 7.7960  | 8.4716  | 8.4007  | 8.1157  | 8.8960  | -0.1585 | -0.0890 | 0.4428 | 0.3538 |
| Clasp1 | _SR[Phospho (STY)]JANPAGASR_2                                                                      | Q80TV8_5676_M1_Clasp1  | 4.3767  | 3.7313  | 5.4707  | 4.1371  | 2.8976  | 4.5785  | 3.4745  | 3.7202  | 4.0192  | 3.8144  | 1.1175  | 0.1603  | 0.3537 | 0.4514 |
| Clasp1 | _TS[Phospho (STY)]JP[TS[Phospho (STY)]PTNC[Carbamidomethyl (C)]JSHGLSPSR_2                         | Q80TV8_51106_M2_Clasp1 | 3.9161  | 3.8109  | 4.2892  | 5.6418  | 4.6555  | 3.8035  | 4.3166  | 5.5800  | 3.1683  | 3.4614  | 1.0536  | 0.0753  | 0.7038 | 0.1525 |
| Clasp1 | _SR[Phospho (STY)]DIDVNAASAK_2                                                                     | Q80TV8_5600_M1_Clasp1  | 5.7907  | 5.9415  | 5.5066  | 5.4943  | 4.7387  | 6.1005  | 6.0182  | 6.1278  | 3.6191  | 3.1763  | 1.0201  | 0.0286  | 0.8466 | 0.0723 |
| Clasp1 | _RS[Phospho (STY)]PTGTASR_2                                                                        | Q80TV8_5572_M1_Clasp1  | 3.4867  | 4.2919  | 4.1735  | 3.8288  | 4.1132  | 3.6163  | 3.9771  | 3.4423  | 3.4714  | 3.1424  | 1.1169  | 0.1595  | 0.0929 | 0.1020 |
| Clasp1 | _NFDDDES[Phospho (STY)]VQGNRPSSASSSSK_3                                                            | Q80TV8_5246_M1_Clasp1  | 4.1754  | 3.4308  | 3.9091  | 3.4528  | 3.3191  | 3.3055  | 3.1987  | 3.5483  | 3.8474  | 3.1301  | 1.0489  | 0.0688  | 0.4780 | 0.3206 |
| Frbp1  | _TVS[Phospho (STY)]DNLSSSK_2                                                                       | Q80TY0_5296_M1_Frbp1   | 10.6899 | 10.9956 | 11.3854 | 11.4846 | 10.5745 | 10.9350 | 11.1500 | 10.8613 | 10.7163 | 10.9797 | 1.0077  | 0.0111  | 0.6849 | 0.1644 |
| Frbp1  | _TVS[Phospho (STY)]DNL[Phospho (STY)]LSSKEGKPELR_3                                                 | #N/A                   | 3.1788  | 4.4590  | 3.8657  | 4.3683  | 3.8054  | 3.9241  | 4.2849  | 3.7502  | 3.3988  | 4.3353  | 0.9978  | -0.0032 | 0.9770 | 0.1021 |
| Vps13b | [Phospho (STY)]EM[Oxidation (M)]PVFES[Phns[Phospho (STY)]APOM[Oxidation (M)]JPS[Phospho (STY)]PVKE | Q80TV8_51001_M2_Vps13b | 3.7114  | 3.8387  | 3.8624  | 3.9162  | 4.8278  | 3.3876  | 3.7645  | 5.2339  | 4.5581  | 4.3965  | 1.0704  | 0.0981  | 0.7906 | 0.1020 |
| Vps13b | _RKEDELS[Phospho (STY)]JGS[Phospho (STY)]JAPLQK_3                                                  | Q80TV5_51001_M2_Vps13b | 3.1855  | 4.0407  | 3.8723  | 4.3749  | 3.8120  | 3.9175  | 4.0896  | 3.7436  | 3.3921  | 4.3419  | 0.9937  | -0.0092 | 0.9260 | 0.0334 |
| Dnajc6 | _RTATASAS[Phospho (STY)]PTLR_2                                                                     | #N/A                   | 7.0705  | 3.9104  | 7.1240  | 6.8797  | 5.9084  | 3.8689  | 6.6866  | 7.2076  | 6.7157  | 6.7809  | 0.8461  | -0.2411 | 0.2195 | 0.6585 |
| Dnajc6 | _SAATS[Phospho (STY)]PTGSSHGTFPHQSR_3                                                              | Q80T23_5683_M1_Dnajc6  | 5.6097  | 5.1770  | 4.5254  | 5.6595  | 2.9643  | 5.5017  | 3.2522  | 5.5663  | 5.6490  | 5.0092  | 0.9887  | -0.0164 | 0.9330 | 0.3031 |
| Dnajc6 | _VSEC[Carbamidomethyl (C)]JWPRR_2                                                                  | #N/A                   | 5.9076  | 6.2099  | 6.2293  | 5.1816  | 5.7626  | 5.7851  | 6.2092  | 6.0177  | 9.9309  | 6.0243  | 0.9670  | -0.0484 | 0.3502 | 0.4556 |
| Dnajc6 | _YSTC[Carbamidomethyl (C)]JTFER_2                                                                  | #N/A                   | 5.6356  | 5.1650  | 3.3107  | 5.0743  | 5.3672  | 5.3757  | 5.0397  | 5.3338  | 5.0350  | 5.3170  | 0.9627  | -0.0549 | 0.6692 | 0.1744 |
| Dnajc6 | _HLDHYTVYNLS[Phospho (STY)]PR_3                                                                    | Q80T23_5137_M1_Dnajc6  | 6.6052  | 6.4450  | 3.8238  | 6.2058  | 3.7636  | 4.1480  | 4.0412  | 7.1216  | 6.8178  | 6.5053  | 0.8438  | -0.2450 | 0.3191 | 0.4961 |
| Dnajc6 | _TATSASAS[Phospho (STY)]PTLR_2                                                                     | #N/A                   | 9.6003  | 5.9515  | 5.7980  | 9.8559  | 8.7795  | 3.2528  | 9.7787  | 9.6364  | 9.4904  | 9.5087  | 0.8760  | -0.1909 | 0.3936 | 0.4049 |
| Dnajc6 | _GASS[Phospho (STY)]PDM[Oxidation (M)]EJPSYGGGLFDMVK_2                                             | #N/A                   | 5.2678  | 3.6501  | 3.9673  | 7       |         |         |         |         |         |         |         |         |        |        |



|          |                                                                        |                          |         |         |         |         |         |         |         |         |         |         |         |         |        |        |
|----------|------------------------------------------------------------------------|--------------------------|---------|---------|---------|---------|---------|---------|---------|---------|---------|---------|---------|---------|--------|--------|
| Rusc2    | _ASVGDSSQEFIS(Phospho (STY))PIQEAQQDR_2                                | Q8BU22_5572_M1_Rusc2     | 4.0925  | 6.0096  | 3.2784  | 6.8100  | 5.0475  | 6.3289  | 3.4958  | 4.3374  | 6.4755  | 5.7908  | 1.0470  | 0.0663  | 0.7956 | 0.0993 |
| Rusc2    | _AAGSGS(Phospho (STY))PPLR_2                                           | Q8BU22_5557_M1_Rusc2     | 4.0955  | 3.2469  | 3.8291  | 3.3729  | 3.2392  | 7.2478  | 3.5212  | 3.6283  | 7.3458  | 7.1336  | 0.7715  | -0.3742 | 0.3142 | 0.5028 |
| SnpH     | _RTS(Phospho (STY))PPVSVR_2                                            | #N/A                     | 3.6244  | 10.8511 | 11.3776 | 4.1991  | 10.4255 | 10.7744 | 11.1835 | 4.0104  | 10.7625 | 10.8628 | 0.9280  | -0.1078 | 0.7800 | 0.1079 |
| SnpH     | _EEGTGESAGGS(Phospho (STY))PAR_2                                       | Q8BU23_S204_M1_SnpH      | 9.0034  | 8.7564  | 8.9633  | 9.3512  | 8.5723  | 8.8446  | 9.0988  | 8.8594  | 9.0645  | 8.9213  | 0.9921  | -0.0114 | 0.6327 | 0.1988 |
| SnpH     | _TS(Phospho (STY))PPVSVR_2                                             | #N/A                     | 3.8052  | 3.8803  | 3.3995  | 3.9022  | 3.7686  | 3.7237  | 3.6169  | 7.1969  | 3.8914  | 7.5814  | 0.6724  | -0.5725 | 0.0611 | 1.2137 |
| SnpH     | _AQTFVQVQVQNTLEAK_2                                                    | #N/A                     | 4.7421  | 4.8983  | 3.5523  | 5.0915  | 4.2207  | 4.1009  | 3.5147  | 4.3146  | 3.5277  | 3.8451  | 1.1668  | 0.2225  | 0.0916 | 1.0382 |
| SnpH     | _QPQDPNTS(Phospho (STY))AEDGADSGYVAAODTLR_3                            | Q8BU23_S236_M1_SnpH      | 4.3043  | 3.6086  | 3.4902  | 3.9929  | 3.4300  | 4.2995  | 3.7076  | 6.4052  | 3.7742  | 3.9599  | 0.8639  | -0.2111 | 0.3036 | 0.5786 |
| SnpH     | _SSYTKLS(Phospho (STY))DPAVC(Carbamidomethyl) (C)IGDR_2                | #N/A                     | 4.8100  | 3.8511  | 5.3454  | 5.0800  | 3.8682  | 4.6802  | 6.1807  | 3.4123  | 3.4851  | 3.8306  | 1.0896  | 0.1238  | 0.5514 | 0.2175 |
| SnpH     | _EEGTGESAGGS(Phospho (STY))PARS(Phospho (STY))ILTR_2                   | Q8BU23_S208_M2_SnpH      | 5.7707  | 2.9853  | 3.4635  | 3.9295  | 2.8736  | 5.7446  | 6.3731  | 5.8024  | 5.5098  | 5.3784  | 0.7159  | -0.4822 | 0.0460 | 1.3369 |
| Madd     | _EKPAGS(Phospho (STY))PR_2                                             | #N/A                     | 11.3577 | 11.4395 | 11.9340 | 11.3819 | 10.6186 | 11.2053 | 11.6537 | 11.5677 | 11.3107 | 11.1928 | 0.9905  | -0.0137 | 0.6539 | 0.1845 |
| Madd     | _S(Phospho (STY))PTENVNTPVGK_2                                         | #N/A                     | 10.0347 | 9.5689  | 10.0774 | 10.2618 | 9.6498  | 9.8616  | 10.3426 | 9.8119  | 10.0569 | 9.8692  | 0.9889  | -0.0161 | 0.5206 | 0.2835 |
| Madd     | _KRS(Phospho (STY))PTENVNTPVGK_3                                       | #N/A                     | 9.0332  | 8.8661  | 9.5072  | 9.2723  | 8.5123  | 8.7341  | 9.4528  | 9.3197  | 9.2122  | 8.9740  | 0.9727  | -0.0399 | 0.2467 | 0.6079 |
| Madd     | _REFPS(Phospho (STY))PQGR_2                                            | Q8BU28_S929_M1_Madd      | 3.4701  | 3.9009  | 3.6330  | 4.4146  | 3.7635  | 8.9364  | 9.6367  | 3.9067  | 3.9200  | 4.2262  | 0.8643  | -0.1204 | 0.6469 | 0.1891 |
| Madd     | _LAS(Phospho (STY))DSDAESDSR_2                                         | Q8BU40_S817_M1_Madd      | 7.8404  | 7.6166  | 8.1301  | 7.7163  | 7.0731  | 7.6184  | 8.2800  | 7.7575  | 7.6600  | 7.5661  | 0.9808  | -0.0280 | 0.5101 | 0.2923 |
| Madd     | _S(Phospho (STY))LKEENVASVELWNK_3                                      | #N/A                     | 6.5263  | 6.3674  | 7.2551  | 6.1622  | 6.5516  | 6.4286  | 6.3354  | 6.7685  | 6.8590  | 6.4471  | 0.9691  | -0.0453 | 0.4939 | 0.3063 |
| Madd     | _LRRNP(Phospho (STY))LK_2                                              | Q8BU28_S812_M1_Madd      | 7.1677  | 7.1444  | 7.2729  | 7.4679  | 5.4540  | 6.3091  | 7.1132  | 7.4531  | 6.8468  | 6.5218  | 0.9741  | -0.0379 | 0.6804 | 0.1672 |
| Madd     | _S(Phospho (STY))PTENVNTPVGKDQGLAGR_2                                  | #N/A                     | 3.4989  | 3.5901  | 4.0684  | 4.2772  | 3.4784  | 5.5950  | 3.6882  | 6.5898  | 3.8883  | 3.9545  | 0.9017  | -0.1494 | 0.5328 | 0.2735 |
| Madd     | _SSVKHS(Phospho (STY))PTVK_2                                           | #N/A                     | 6.4225  | 6.9456  | 7.1519  | 6.9406  | 5.8330  | 6.7043  | 6.9298  | 3.8218  | 6.4014  | 6.7298  | 1.1165  | 0.1590  | 0.2963 | 0.5282 |
| Madd     | _EKPAGS(Phospho (STY))PRSSDDVQSR_3                                     | #N/A                     | 3.6478  | 6.2122  | 3.7924  | 3.7580  | 5.4835  | 5.4694  | 3.6961  | 3.8865  | 5.6192  | 3.5937  | 1.1258  | 0.1710  | 0.4635 | 0.3340 |
| Madd     | _RNGS(Phospho (STY))ETQLNK_2                                           | Q8BU28_S1499_M1_Madd     | 2.9329  | 3.7381  | 3.3380  | 4.3826  | 3.5595  | 4.1700  | 4.5308  | 3.4003  | 4.4185  | 4.0598  | 0.8987  | -0.1541 | 0.2550 | 0.5935 |
| Madd     | _AT(Phospho (STY))LS(Phospho (STY))DSIETNSATSAIFGK_2                   | Q8BU28_S1237_M2_Madd     | 3.1037  | 3.9089  | 3.7905  | 4.4299  | 3.7302  | 4.0210  | 4.3732  | 3.9645  | 3.9557  | 4.2623  | 0.9255  | -0.1116 | 0.2291 | 0.6399 |
| Clec16a  | _RGS(Phospho (STY))SCPT16a                                             | Q8BU30_S848_M1_Clec16a   | 4.1509  | 3.4063  | 3.8845  | 3.5085  | 3.2946  | 3.3300  | 5.8168  | 3.5729  | 3.8719  | 3.1056  | 0.8788  | -0.1864 | 0.3532 | 0.4530 |
| Arhgef17 | _LPSLDHRDS(Phospho (STY))PR_3                                          | Q8BU35_S2005_M1_Arhgef17 | 5.0828  | 4.8922  | 5.7270  | 4.6972  | 3.6059  | 3.6908  | 4.1306  | 3.7510  | 5.4503  | 5.4624  | 0.9824  | -0.0256 | 0.8841 | 0.0535 |
| Arhgef17 | _SLS(Phospho (STY))DHPQR_2                                             | Q8BU35_S728_M1_Arhgef17  | 4.1013  | 3.1249  | 3.2872  | 3.7899  | 3.0132  | 3.6114  | 3.5046  | 4.3286  | 6.4141  | 3.7569  | 0.7749  | -0.3679 | 0.1104 | 0.9570 |
| Rimbp2   | _RGTG(Phospho (STY))VDQFLK_2                                           | Q8BU40_S737_M1_Rimbp2    | 3.3726  | 4.1288  | 3.1062  | 4.1509  | 4.0171  | 4.1083  | 4.0015  | 4.3512  | 3.1494  | 3.8281  | 0.9952  | -0.0070 | 0.9532 | 0.0208 |
| Rimbp2   | _DHLS(Phospho (STY))PDYDESETDPAEELPAR_3                                | Q8BU40_S852_M1_Rimbp2    | 3.2150  | 4.9186  | 5.7906  | 7.5990  | 3.8596  | 4.2717  | 4.1649  | 3.6741  | 3.3227  | 3.8093  | 1.3205  | 0.4011  | 0.1792 | 0.7468 |
| Cep170b  | _GS(Phospho (STY))LDWPEER_2                                            | #N/A                     | 8.7730  | 9.2971  | 9.0527  | 10.1609 | 8.5349  | 9.6938  | 9.6882  | 10.1186 | 9.5873  | 0.9545  | -0.0671 | 0.2193  | 0.6589 |        |
| Cep170b  | _SQS(Phospho (STY))FTHTPADPK_2                                         | Q8BU49_S421_M1_Cep170b   | 3.7200  | 8.0146  | 8.0143  | 3.9393  | 2.8638  | 3.7608  | 3.6540  | 7.9018  | 3.8278  | 8.1221  | 0.8597  | -0.0180 | 0.6061 | 0.2174 |
| Cep170b  | _HEDGTGS(Phospho (STY))DSDQPLAK_2                                      | #N/A                     | 8.4609  | 3.0685  | 3.5468  | 9.3320  | 2.9568  | 8.3390  | 3.2388  | 3.9107  | 8.2280  | 8.4474  | 0.9963  | -0.0054 | 0.9909 | 0.0040 |
| Cep170b  | _VVQTS(Phospho (STY))PSAR_2                                            | Q8BU49_S819_M1_Cep170b   | 9.2592  | 9.7522  | 3.9929  | 4.4955  | 3.9326  | 9.5465  | 4.1577  | 3.6229  | 3.2715  | 2.9617  | 1.9409  | 0.9567  | 0.0599 | 1.2228 |
| Cep170b  | _AGS(Phospho (STY))JTFGSDSETAPAR_2                                     | Q8BU49_S1166_M1_Cep170b  | 7.8323  | 7.7550  | 7.8170  | 8.4404  | 7.0116  | 7.8856  | 8.1930  | 8.0106  | 7.9373  | 7.9086  | 0.9723  | -0.0405 | 0.3788 | 0.4216 |
| Cep170b  | _ESRIS(Phospho (STY))PTVPDGGATGSGAR_2                                  | Q8BU49_S981_M1_Cep170b   | 4.3071  | 8.5495  | 8.6762  | 9.5991  | 3.4509  | 7.8931  | 8.5128  | 3.4166  | 7.7156  | 7.5489  | 1.2209  | 0.9879  | 0.4630 | 0.3344 |
| Cep170b  | _LDAS(Phospho (STY))DTEAVQZR_2                                         | Q8BU49_S1122_M1_Cep170b  | 7.7392  | 7.8100  | 4.1361  | 3.6799  | 3.5462  | 7.4253  | 3.8282  | 7.6911  | 7.5050  | 7.5803  | 0.8604  | -0.2169 | 0.5014 | 0.2998 |
| Cep170b  | _GASVTPSTT(Phospho (STY))PPPTDQQLTK_2                                  | Q8BU49_S541_M1_Cep170b   | 6.9709  | 4.3287  | 7.2817  | 7.5806  | 3.2799  | 7.5291  | 3.9687  | 7.0963  | 6.8432  | 7.5704  | 0.9674  | -0.0479 | 0.8612 | 0.0649 |
| Cep170b  | _DGPQDDHS(Phospho (STY))TKS(Phospho (STY))DLPVHTR_3                    | #N/A                     | 5.9393  | 7.2246  | 3.8750  | 3.9337  | 5.5234  | 6.7866  | 4.0923  | 5.9383  | 7.1437  | 7.3024  | 0.9065  | -0.1416 | 0.5542 | 0.2563 |
| Cep170b  | _QES(Phospho (STY))FTKEPTSGPPAPGK_2                                    | #N/A                     | 4.2191  | 5.2768  | 3.6708  | 3.8708  | 4.6002  | 3.8843  | 3.5855  | 3.6089  | 3.9305  | 3.6084  | 1.1549  | 0.2077  | 0.1052 | 0.9779 |
| Cep170b  | _EHDVAGDGLGSG(Phospho (STY))PGPTR_2                                    | #N/A                     | 7.5296  | 7.8121  | 7.8007  | 8.1158  | 7.2628  | 8.0003  | 7.6198  | 7.2770  | 7.5312  | 7.9578  | 1.0207  | 0.0295  | 0.4425 | 0.3540 |
| Cep170b  | _GHSGRGS(Phospho (STY))LDWPEER_3                                       | #N/A                     | 5.5717  | 6.0957  | 3.9357  | 6.6404  | 4.2676  | 6.3405  | 5.9107  | 6.0067  | 6.6147  | 6.6637  | 0.8692  | -0.2022 | 0.2037 | 0.6911 |
| Cep170b  | _GHHVEDGTGS(Phospho (STY))DSDQPLAK_3                                   | #N/A                     | 7.3627  | 7.2487  | 7.9270  | 7.8198  | 7.1772  | 7.5243  | 7.5094  | 7.3487  | 7.4258  | 7.4607  | 1.0099  | 0.0142  | 0.6546 | 0.1840 |
| Cep170b  | _NGPS(Phospho (STY))PTTPQTPGPK_2                                       | Q8BU49_S965_M1_Cep170b   | 9.5955  | 9.7205  | 9.8832  | 10.3603 | 9.0970  | 9.5235  | 10.0828 | 9.6610  | 9.5932  | 3.0324  | 1.1582  | 0.2609  | 0.2698 | 0.5690 |
| Cep170b  | _SNS(Phospho (STY))LSTPFR_2                                            | #N/A                     | 7.7175  | 4.3565  | 7.7051  | 8.1562  | 4.1778  | 7.7470  | 3.9124  | 7.3218  | 6.8445  | 7.9179  | 1.0152  | 0.0218  | 0.9344 | 0.0295 |
| Cep170b  | _RGHS(Phospho (STY))RGS(Phospho (STY))LDWPEER_3                        | #N/A                     | 3.8695  | 5.7722  | 4.0502  | 5.9937  | 4.3825  | 5.5837  | 5.6115  | 5.5790  | 5.5028  | 5.4007  | 0.8927  | -0.1638 | 0.2543 | 0.5947 |
| Cep170b  | _S(Phospho (STY))PSLGNVPNTPASTISAR_2                                   | Q8BU49_S1347_M1_Cep170b  | 3.6329  | 3.8082  | 4.3681  | 3.6954  | 3.6295  | 3.4829  | 3.8437  | 3.1709  | 3.6177  | 3.4612  | 1.0699  | 0.0974  | 0.2410 | 0.6179 |
| Cep170b  | _SNS(Phospho (STY))LSTR_2                                              | #N/A                     | 4.1940  | 3.4984  | 3.3800  | 3.8826  | 3.3197  | 4.4098  | 3.2697  | 4.2358  | 3.8844  | 3.8496  | 0.9923  | -0.0111 | 0.9198 | 0.0363 |
| Av19     | _DLSPSDS(Phospho (STY))PRVQVQDANNR_2                                   | Q8BU56_S368_M1_Av19      | 8.5706  | 9.0562  | 9.2349  | 9.3896  | 7.9939  | 9.0691  | 9.6927  | 9.5069  | 9.1539  | 8.8517  | 0.9553  | -0.0659 | 0.2062 | 0.6856 |
| Av19     | _TEKPYQVEGNUNK_2                                                       | #N/A                     | 4.2256  | 4.2025  | 3.9906  | 5.2708  | 3.6924  | 4.4735  | 4.8915  | 4.9628  | 3.9514  | 0.9435  | -0.0839 | 0.4578  | 0.3394 |        |
| Rims3    | _RLS(Phospho (STY))QSS(Phospho (STY))LESATSPC(Carbamidomethyl) (C)JS_2 | #N/A                     | 10.2765 | 9.1597  | 9.6742  | 11.5405 | 10.5827 | 11.0404 | 11.6257 | 10.8882 | 11.1141 | 10.9933 | 0.9304  | -0.1041 | 0.1332 | 0.8756 |
| Rims3    | _LQSGS(Phospho (STY))LESATSPC(Carbamidomethyl) (C)JS_2                 | #N/A                     | 3.6054  | 4.3617  | 3.5513  | 8.6159  | 4.5200  | 3.8755  | 3.7686  | 7.8785  | 7.7131  | 4.0209  | 0.9721  | -0.0409 | 0.9180 | 0.0372 |
| Rims3    | _SSS(Phospho (STY))SGEC(Carbamidomethyl) (C)GQAGGAGGATTAK_2            | Q8BU57_S22_M1_Rims3      | 3.4544  | 4.2596  | 4.1412  | 3.1430  | 4.0810  | 3.6485  | 4.3586  | 3.4746  | 3.1232  | 3.1100  | 1.0772  | 0.1072  | 0.4260 | 0.3706 |
| Rims3    | _QGSRESTDGSNS(Phospho (STY))NSSEGTFRPTR_3                              | Q8BU57_S114_M1_Rims3     | 3.8514  | 3.1558  | 4.5382  | 3.4641  | 2.9771  | 3.2515  | 3.6123  | 3.0776  | 4.2270  | 3.5070  | 1.0816  | -0.0268 | 0.8535 | 0.0688 |
| Pum2     | _QAS(Phospho (STY))PTEVER_2                                            | Q8BU58_S181_M1_Pum2      | 9.4572  | 9.6475  | 10.0738 | 9.9860  | 2.8345  | 9.5471  | 9.8081  | 4.1499  | 3.7985  | 9.6026  | 1.2560  | 0.3289  | 0.3953 | 0.4030 |
| Pum2     | _GKAS(Phospho (STY))PFEEDQNR_2                                         | Q8BU58_S136_M1_Pum2      | 7.4216  | 7.8569  | 8.2160  | 8.7615  | 7.6666  | 7.8062  | 8.1944  | 7.9628  | 7.6293  | 7.8880  | 1.0046  | 0.0066  | 0.8921 | 0.0496 |
| Kiaa0232 | _SAQTS(Phospho (STY))LDS(Phospho (STY))DEATGILPK_2                     | Q8BU59_S1194_M2_Kiaa0232 | 3.8200  | 3.8171  | 3.7892  | 5.8104  | 3.6595  | 3.6173  | 4.0065  | 3.9586  | 3.6072  | 3.4756  | 1.0860  | 0.1190  | 0.4883 | 0.3113 |
| Rubcn    | _KQES(Phospho (STY))PLLVTK_2                                           | Q8BU62_S198_M1_Rubcn     | 4.3118  | 3.5672  | 4.0454  | 3.5892  | 3.4555  | 3.1691  | 3.7375  | 3.4120  | 7.7110  | 3.5882  | 1.0215  | 0.0906  | 0.7338 | 0.1344 |
| Suz12    | _ASM(Oxidation (M))SERLES(Phospho (STY))EDGEVQQR_2                     | Q8BU70_S548_M1_Suz12     | 3.0778  | 3.4849  | 4.3124  | 3.8561  | 3.7224  | 4.5524  | 4.0044  | 3.1450  | 4.6988  | 3.5334  | 0.9971  | -0.0042 | 0.9775 | 0.0099 |
| Scrib    | _NS(Phospho (STY))KESSDR_2                                             | Q8BU72_S1206_M1_Scrib    | 8.6031  | 3.0341  | 7.7133  | 8.6121  | 7.0759  | 8.0048  | 8.7870  | 7.8752  | 8.1036  | 8.4053  | 0.8651  | -0.2091 | 0.3336 | 0.4767 |
| Scrib    | _M(Oxidation (M))GS(Phospho (STY))PELPAPER_2                           | #N/A                     | 8.9009  | 8.5815  | 9.1170  | 9.0767  | 7.4574  | 8.7956  | 9.0053  | 8.6033  | 8.6132  | 8.8083  | 0.9883  | -0.0170 | 0.7597 | 0.1194 |
| Scrib    | _VS(Phospho (STY))PTGAAGR_2                                            | Q8BU72_S1126_M1_Scrib    | 3.6920  | 2.9964  | 4.3788  | 3.3806  | 2.8177  | 3.4110  | 3.0953  | 3.2370  | 5.5692  | 3.3476  | 0.9039  | -0.1457 | 0.5198 | 0.2842 |
| Scrib    | _M(Oxidation (M))KS(Phospho (STY))LEQDALR_2                            | #N/A                     | 5.8820  | 5.4898  | 6.2861  | 6.1366  | 4.7911  | 5.8307  | 5.9690  | 6.8020  | 5.9740  | 0.8692  | -0.2023 | 0.0738  | 1.1318 |        |
| Scrib    | _EDGES(Phospho (STY))EGGQPEAAWPLPSGR_2                                 | Q8BU72_S583_M1_Scrib     | 3.9281  | 3.1835  | 3.6618  | 7.3657  | 6.1838  | 3.5528  | 3.4459  | 6.4971  | 4.0358  | 4.3837  | 1.0120  | 0.0173  | 0.9580 | 0.01   |



|         |                                                                                                 |                         |         |         |         |         |         |         |         |         |         |         |         |         |        |        |
|---------|-------------------------------------------------------------------------------------------------|-------------------------|---------|---------|---------|---------|---------|---------|---------|---------|---------|---------|---------|---------|--------|--------|
| Slc20a2 | _AS[Phospho (STY)]DESLRK_2                                                                      | #N/A                    | 5.3470  | 5.6018  | 5.8217  | 3.5245  | 4.6180  | 5.4024  | 3.2392  | 3.0931  | 4.2426  | 3.4915  | 1.4368  | 0.5228  | 0.0125 | 1.9024 |
| Slc20a2 | _ALS[Phospho (STY)]MTHGSAK_2                                                                    | QB0U8P_5316_M1_Slc20a2  | 2.9882  | 4.2380  | 3.6750  | 4.1777  | 3.6147  | 4.1148  | 3.8923  | 3.9408  | 3.5894  | 4.1447  | 0.9768  | -0.0339 | 0.7372 | 0.1324 |
| Slc20a2 | _AS[Phospho (STY)]DES[Phospho (STY)]LRKVOEASPGFK_3                                              | #N/A                    | 3.8724  | 3.1278  | 3.6061  | 3.1498  | 3.0161  | 3.6085  | 3.2981  | 3.8513  | 4.1504  | 4.3280  | 0.8694  | -0.2019 | 0.0759 | 1.1196 |
| Pgrmc2  | _GLC[Carbamidomethyl (C)]QISGPGAGESS[Phospho (STY)]PAATLPR_2                                    | QB0UUS_584_M1_Pgrmc2    | 7.3717  | 7.3684  | 7.6978  | 7.7085  | 6.6717  | 7.1666  | 8.2715  | 7.6347  | 7.2947  | 7.3886  | 0.9586  | -0.0610 | 0.2622 | 0.5813 |
| Pgrmc2  | _DFS[Phospho (STY)]LEQLR_2                                                                      | QB0UUS_598_M1_Pgrmc2    | 3.4460  | 5.0978  | 4.1328  | 3.1346  | 4.3444  | 3.6570  | 4.0178  | 5.6475  | 5.2980  | 3.1016  | 0.8788  | -0.1864 | 0.3794 | 0.4208 |
| Pgrmc2  | _LLKPGEEPSEVT[Phospho (STY)]DEEDTKQSK_4                                                         | #N/A                    | 3.1899  | 3.9951  | 3.8767  | 4.1256  | 3.8164  | 3.9130  | 4.2738  | 4.3764  | 3.1747  | 3.8029  | 0.9776  | -0.0327 | 0.7572 | 0.1208 |
| Pgrmc2  | _LLKPGEEPSEVT[Phospho (STY)]DEEDTK_3                                                            | #N/A                    | 4.2131  | 3.0130  | 3.3991  | 3.9018  | 2.9013  | 3.7233  | 3.6164  | 3.9883  | 3.8653  | 3.8687  | 0.9193  | -0.1214 | 0.2841 | 0.5465 |
| Fbxo2   | _VLAEIPELTVLQAC[Carbamidomethyl (C)]IR_2                                                        | #N/A                    | 7.5971  | 7.4851  | 7.9638  | 7.9535  | 7.8190  | 7.7152  | 8.0435  | 7.5411  | 7.7695  | 8.0653  | 0.9953  | -0.0609 | 0.7798 | 0.1348 |
| Fbxo2   | _TDAGSLYELTVR_2                                                                                 | #N/A                    | 5.9604  | 6.4991  | 3.2378  | 6.9413  | 6.3559  | 6.4842  | 6.4418  | 6.3914  | 6.3569  | 6.0714  | 0.9301  | -0.1046 | 0.5357 | 0.2711 |
| Fbxo2   | _NPC[Carbamidomethyl (C)]GEEDLEGWSS[Phospho (STY)]DVEHGDDGWR_3                                  | QB0UW2_5141_M1_Fbxo2    | 3.3487  | 4.1050  | 4.5832  | 5.3098  | 3.8382  | 4.1322  | 4.0253  | 4.4504  | 4.5010  | 3.8043  | 1.0058  | 0.0803  | 0.9489 | 0.0228 |
| Fbxo2   | _C[Carbamidomethyl (C)]QQEGLLVPEGS[Phospho (STY)]ADEERDHWQGYFLSK_4                              | QB0UW2_5106_M1_Fbxo2    | 4.2058  | 3.4612  | 3.9395  | 3.4535  | 3.3495  | 3.2751  | 3.1682  | 3.1641  | 4.3135  | 3.4205  | 1.0277  | 0.0395  | 0.7427 | 0.1292 |
| Fbxo2   | _EAEELGEAEVLAELPEFLLR_3                                                                         | #N/A                    | 3.8470  | 3.4955  | 3.5806  | 3.9796  | 2.9907  | 4.4127  | 3.8768  | 2.4286  | 2.4717  | 1.2341  | 0.3035  | 0.0923  | 1.0348 |        |
| Fbxo2   | _FEHGQDGSVYWK_3                                                                                 | #N/A                    | 2.4585  | 3.8120  | 4.2903  | 3.8340  | 3.7003  | 4.4251  | 3.9823  | 3.1671  | 3.4662  | 3.5113  | 1.0628  | 0.0878  | 0.5756 | 0.2399 |
| Kcmf1   | ucetyl (Protein N-term))[S[Phospho (STY)]RHEGVSC[Carbamidomethyl (C)]DAC[Carbamidomethyl (C)]LK | QB0UY2_52_M1_Kcmf1      | 4.2358  | 4.9930  | 4.3314  | 5.5252  | 3.7415  | 4.3840  | 5.3470  | 4.8276  | 3.4250  | 5.5525  | 1.0576  | 0.0808  | 0.6299 | 0.2007 |
| Ap4e1   | _IEQPEC[Carbamidomethyl (C)]SS[Phospho (STY)]PVIETER_2                                          | QB0V94_5962_M1_Ap4e1    | 7.1978  | 7.1808  | 3.5610  | 7.8486  | 6.0122  | 7.3713  | 3.2531  | 7.9014  | 7.3772  | 7.1110  | 1.0184  | 0.0263  | 0.9218 | 0.0354 |
| Camsap3 | _DLPDGHAVS[Phospho (STY)]PR_2                                                                   | QB0VC9_5334_M1_Camsap3  | 8.9166  | 8.7480  | 9.6367  | 9.0294  | 7.6564  | 8.9521  | 9.3060  | 8.9881  | 8.7636  | 9.0358  | 0.9778  | -0.0324 | 0.5744 | 0.2408 |
| Camsap3 | _AVASS[Phospho (STY)]PAANNSEVK_2                                                                | QB0VC9_5555_M1_Camsap3  | 7.2942  | 7.7082  | 8.0861  | 7.5076  | 6.0926  | 7.5767  | 7.8725  | 7.3497  | 7.4127  | 7.0880  | 0.9928  | -0.1014 | 0.8897 | 0.0508 |
| Camsap3 | _RAS[Phospho (STY)]LLER_2                                                                       | QB0VC9_5903_M1_Camsap3  | 5.6736  | 5.2762  | 5.2710  | 5.3161  | 4.4233  | 5.4693  | 5.6368  | 5.4453  | 5.6973  | 6.4449  | 0.9780  | -0.0321 | 0.6960 | 0.1574 |
| Camsap3 | _NTTVPS[Phospho (STY)]QNNSSGSPVFNFR_2                                                           | QB0VC9_5343_M1_Camsap3  | 4.0457  | 4.0791  | 3.6403  | 4.1429  | 3.5800  | 4.0209  | 3.6796  | 5.5132  | 3.6384  | 4.1099  | 0.9251  | -0.1123 | 0.4146 | 0.3823 |
| Camsap3 | _KFS[Phospho (STY)]PSQCPVQTR_2                                                                  | QB0VC9_5343_M1_Camsap3  | 4.2704  | 5.8773  | 6.1227  | 6.5145  | 3.8418  | 4.1226  | 5.5333  | 5.6913  | 4.8133  | 4.0266  | 1.0217  | 0.0309  | 0.8751 | 0.0579 |
| Camsap3 | _APSPSGLM[Oxidation (M)]S[Phospho (STY)]PSR_2                                                   | QB0VC9_51082_M1_Camsap3 | 3.8861  | 3.1905  | 4.5729  | 3.4294  | 3.0118  | 3.2168  | 7.6881  | 3.5718  | 3.8709  | 3.5418  | 0.7607  | -0.3945 | 0.2262 | 0.6456 |
| Camsap3 | _RS[Phospho (STY)]PGPGSPPTPR_2                                                                  | QB0VC9_5767_M1_Camsap3  | 3.7701  | 3.0255  | 3.5038  | 4.5484  | 2.9138  | 3.7108  | 5.2821  | 3.9536  | 4.2527  | 0.7007  | 0.8081  | -0.3074 | 0.0558 | 1.2533 |
| Camsap3 | _SVS[Phospho (STY)]SSGSGPPPVTSOR_3                                                              | QB0VC9_5431_M1_Camsap3  | 3.2032  | 3.9595  | 4.4377  | 5.0962  | 3.8478  | 4.2777  | 4.1708  | 3.6623  | 3.3109  | 3.6588  | 1.1179  | 0.1608  | 0.2516 | 0.5992 |
| Znf579  | _Acetyl (Protein N-term)[M[Oxidation (M)]DPCPPPPACGS[Phospho (STY)]PPHR_2                       | QB0VM4_512_M1_Znf579    | 3.5597  | 8.1340  | 5.1891  | 4.3380  | 6.6589  | 8.0443  | 8.3314  | 8.3092  | 2.9622  | 7.3287  | 0.9883  | -0.0170 | 0.9602 | 0.0176 |
| Tecpr1  | _GSGTESAFSDTAS[Phospho (STY)]LEVER_2                                                            | QB0VP0_5418_M1_Tecpr1   | 3.7181  | 5.3519  | 3.9979  | 4.9027  | 3.6319  | 5.1774  | 5.2151  | 4.6773  | 5.0307  | 4.5543  | 0.9166  | -0.1256 | 0.3517 | 0.1429 |
| Epn1    | _TALPTSGS[Phospho (STY)]STGELELGAEPVAR_2                                                        | #N/A                    | 7.3851  | 6.0609  | 9.9026  | 5.2432  | 5.4052  | 8.1238  | 8.4172  | 4.8341  | 8.6380  | 7.9140  | 0.9422  | -0.0859 | 0.7196 | 0.1429 |
| Epn1    | _Acetyl (Protein N-term)[STSS[Phospho (STY)]LRR_2                                               | QB0VP1_55_M1_Epn1       | 9.2532  | 9.5717  | 9.4241  | 9.7250  | 8.9755  | 9.5802  | 9.0653  | 9.2796  | 9.4518  | 9.5215  | 1.0099  | 0.0099  | 0.5809 | 0.2359 |
| Epn1    | _NWHVSEAEK_2                                                                                    | #N/A                    | 4.1070  | 4.3013  | 3.9174  | 5.0854  | 4.5912  | 4.9241  | 3.2650  | 4.4425  | 4.2301  | 4.7134  | 1.0781  | 0.1084  | 0.3708 | 0.4309 |
| Epn1    | _T[Phospho (STY)]PESFLGNALVOLDSLSVR_2                                                           | QB0VP1_1469_M1_Epn1     | 3.2247  | 3.9810  | 4.4592  | 4.0030  | 3.8693  | 4.2562  | 4.1493  | 2.9982  | 3.2972  | 3.6803  | 1.1230  | 0.1673  | 0.1745 | 0.5781 |
| Epn1    | _ENMVAVQTLK_2                                                                                   | #N/A                    | 3.5443  | 4.3495  | 4.2311  | 4.7554  | 4.1708  | 3.5587  | 4.4484  | 3.3848  | 3.0333  | 3.1999  | 1.1664  | 0.2220  | 0.1320 | 0.8795 |
| Inka2   | _HIETPTSS[Phospho (STY)]PK_2                                                                    | QB0VY2_5281_M1_Inka2    | 3.3469  | 3.8793  | 4.0337  | 5.4096  | 3.9734  | 3.7561  | 4.2510  | 4.5116  | 4.9238  | 0.9615  | -0.0566 | 0.7313  | 0.1359 |        |
| Tmcc2   | _GS[Phospho (STY)]PHLR_2                                                                        | QB0W04_5189_M1_Tmcc2    | 5.8958  | 5.6158  | 5.3252  | 3.8319  | 4.1404  | 5.4973  | 5.6908  | 5.4989  | 5.6947  | 5.9024  | 0.8867  | -0.1735 | 0.1798 | 0.7453 |
| Tmcc2   | _NKGFS[Phospho (STY)]ADNIAHLK_3                                                                 | #N/A                    | 4.9237  | 4.5077  | 6.1149  | 5.4671  | 3.8794  | 4.0309  | 4.9568  | 5.6941  | 3.6435  | 4.6174  | 1.0196  | 0.0280  | 0.8713 | 0.0598 |
| Tmcc2   | _ALSGSATLVSS[Phospho (STY)]PK_2                                                                 | QB0W04_5467_M1_Tmcc2    | 3.5953  | 4.9350  | 4.2821  | 3.7202  | 4.2219  | 3.5076  | 3.8684  | 3.2810  | 5.7254  | 3.2510  | 1.0030  | 0.0044  | 0.9824 | 0.0077 |
| Tmcc2   | _NKGFS[Phospho (STY)]ADNIAHLKCPIMEDGPEEAA_4                                                     | #N/A                    | 3.8953  | 3.4336  | 4.0913  | 3.8363  | 3.4158  | 3.2184  | 4.1042  | 3.4630  | 3.4985  | 3.1748  | 1.0248  | 0.0354  | 0.7136 | 0.1466 |
| Tmcc2   | Carbamidomethyl (C)[KS[Phospho (STY)]DELQQQGGDEGGAGMEDAAC[Carbamidomethyl (C)]LPGADU            | QB0W06_56_M1_Tmcc2      | 3.6867  | 2.9911  | 4.3735  | 3.6288  | 2.8124  | 3.4163  | 3.7771  | 3.3724  | 3.6714  | 3.3423  | 0.9842  | -0.0230 | 0.8551 | 0.0680 |
| Gstm7   | _IRVQIENQIM[Oxidation (M)]QNR_3                                                                 | #N/A                    | 4.0843  | 5.2570  | 6.0038  | 5.3978  | 4.5411  | 5.2901  | 3.2897  | 4.6149  | 4.1920  | 5.6208  | 1.1504  | 0.2022  | 0.2329 | 0.6328 |
| Wip2    | _GAYVPS[Phospho (STY)]PTR_2                                                                     | QB0W47_5395_M1_Wip2     | 12.4377 | 12.5630 | 13.0854 | 12.6998 | 11.8435 | 12.5406 | 7.0341  | 6.2351  | 12.6457 | 12.5156 | 1.3040  | 0.3829  | 0.0670 | 1.1739 |
| Agf2    | _ELGGC[Carbamidomethyl (C)]SQAGNR_2                                                             | #N/A                    | 4.1273  | 3.9874  | 3.8790  | 4.1233  | 3.9204  | 3.4184  | 4.2201  | 4.3787  | 4.2709  | 4.3316  | 0.9095  | -0.1369 | 0.0214 | 1.6702 |
| Mtdh    | _SETNWES[Phospho (STY)]PK_2                                                                     | #N/A                    | 9.6479  | 9.2687  | 9.8798  | 9.6965  | 8.8593  | 9.2143  | 10.0246 | 9.6801  | 9.5369  | 9.4905  | 0.9736  | -0.0386 | 0.2707 | 0.5675 |
| Mtdh    | _SEPSNDQKVS[Phospho (STY)]DDQKEK_3                                                              | QB0W17_5423_M1_Mtdh     | 6.3693  | 5.9283  | 6.1262  | 6.0872  | 5.4686  | 5.5644  | 5.9986  | 5.9527  | 5.9843  | 5.9903  | 1.0159  | 0.0227  | 0.6742 | 0.1712 |
| Mtdh    | _SETNWES[Phospho (STY)]PKQIK_2                                                                  | #N/A                    | 7.0688  | 7.8713  | 7.6205  | 7.7276  | 7.7290  | 7.7290  | 7.7276  | 7.7483  | 7.7157  | 7.4195  | 0.9361  | -0.0953 | 0.6328 | 0.1987 |
| Mtdh    | _SETNWES[Phospho (STY)]PKQIK_2                                                                  | #N/A                    | 3.1944  | 4.0318  | 3.8812  | 4.3838  | 3.9201  | 4.2053  | 5.7327  | 3.7347  | 3.3832  | 4.3508  | 0.9153  | -0.1277 | 0.4506 | 0.3462 |
| Tmt9b   | _S[Phospho (STY)]DESTLRK_2                                                                      | #N/A                    | 6.4836  | 4.2227  | 7.3068  | 7.8136  | 6.8109  | 7.3756  | 7.4338  | 7.4101  | 3.0555  | 7.1826  | 1.0635  | 0.0889  | 0.7199 | 0.1427 |
| Tmt9b   | _S[Phospho (STY)]DESTLR_2                                                                       | #N/A                    | 4.1199  | 5.3724  | 3.3059  | 3.8086  | 3.2456  | 2.9830  | 3.5232  | 5.7944  | 3.9585  | 6.4945  | 0.7700  | -0.3770 | 0.1523 | 0.8174 |
| Tmt9b   | _S[Phospho (STY)]HSM[Oxidation (M)]DYGSAVAR_2                                                   | QB0WQ4_5210_M1_Tmt9b    | 3.1868  | 3.9920  | 3.8736  | 4.1287  | 3.8133  | 3.7422  | 3.1715  | 4.3433  | 3.7422  | 3.9832  | -0.0244 | 0.8176  | 0.0716 |        |
| Aftph   | _SFS[Phospho (STY)]PGFR_2                                                                       | QB0W15_5151_M1_Aftph    | 2.9932  | 6.4582  | 4.2277  | 3.7715  | 5.1624  | 2.9868  | 4.3808  | 3.2297  | 3.5287  | 3.4488  | 1.2156  | 0.2817  | 0.3584 | 0.4456 |
| Aftph   | _HLETHSS[Phospho (STY)]PAK_2                                                                    | #N/A                    | 5.3605  | 5.5572  | 6.1287  | 5.8366  | 5.4652  | 3.8482  | 5.5095  | 5.4147  | 5.6221  | 5.8583  | 1.2156  | -0.0353 | 0.7522 | 0.1236 |
| Aftph   | _S[Phospho (STY)]PPDPPTQGNALDGSASMK_2                                                           | QB0W15_5395_M1_Aftph    | 4.3063  | 3.5617  | 4.0399  | 3.5837  | 3.4500  | 3.1746  | 3.0678  | 3.4175  | 3.7165  | 3.2610  | 1.0952  | 0.1312  | 0.2135 | 0.6706 |
| Srm3    | _ARPAS[Phospho (STY)]TSPGTR[Phospho (STY)]PSGTR_2                                               | QB0WV2_5464_M2_Srm3     | 3.6995  | 3.6894  | 3.8543  | 3.9775  | 3.5657  | 3.6661  | 3.7877  | 5.4568  | 3.6917  | 3.8583  | 0.8913  | -0.1661 | 0.2176 | 0.6568 |
| Srm3    | _RRDS[Phospho (STY)]PSFMEPR_3                                                                   | #N/A                    | 3.5495  | 3.8533  | 3.6692  | 3.7572  | 3.7416  | 3.6869  | 3.6401  | 4.3722  | 4.7097  | 4.2741  | 0.8730  | -0.1959 | 0.0190 | 1.7216 |
| Ubpap2l | _RYPSSSSS[Phospho (STY)]PQKDLTQAK_3                                                             | #N/A                    | 8.0790  | 8.4557  | 9.2880  | 9.3109  | 7.9455  | 3.6424  | 8.2964  | 8.3613  | 8.1005  | 8.1353  | 0.9469  | -0.0787 | 0.6965 | 0.1571 |
| Ubpap2l | _RYPSSSSS[Phospho (STY)]PQK_2                                                                   | #N/A                    | 8.3957  | 8.1971  | 8.4987  | 9.1427  | 4.1450  | 8.4211  | 8.6315  | 8.1669  | 8.4232  | 8.4537  | 0.9265  | -0.1101 | 0.5252 | 0.2797 |
| Ubpap2l | _YPPSSSSS[Phospho (STY)]PQK_2                                                                   | #N/A                    | 4.3187  | 4.4083  | 3.5046  | 7.4993  | 3.4444  | 7.2073  | 3.7220  | 4.1112  | 6.6367  | 7.2247  | 0.9336  | -0.0991 | 0.7646 | 0.1166 |
| Ubpap2l | _TATEEWGTEDWNEDELTK_2                                                                           | #N/A                    | 4.6292  | 5.1979  | 6.5599  | 6.7807  | 4.3956  | 5.7784  | 6.0868  | 5.4621  | 4.4141  | 5.6922  | 1.0264  | 0.0376  | 0.8108 | 0.0911 |
| Ubpap2l | _YPPSSSSS[Phospho (STY)]PQKDLTQAK_2                                                             | #N/A                    | 5.3052  | 3.8461  | 4.2827  | 3.4389  | 4.5338  | 3.2962  | 6.0072  | 4.9640  | 5.3133  | 5.1025  | 0.7700  | -0.3770 | 0.0200 | 1.6981 |
| Ubpap2l | _NQDEEC[Carbamidomethyl (C)]VALHDC[Carbamidomethyl (C)]NGDVNR_3                                 | #N/A                    | 5.1774  | 4.9889  | 4.0998  | 5.8811  | 3.7979  | 5.1661  | 5.3072  | 4.6416  | 4.4608  | 5.4081  | 0.9793  | -0.0302 | 0.8195 | 0.0865 |
| Ubpap2l | _STAPQMS[Phospho (STY)]PGSSNCGSSSPQPAQK_3                                                       | #N/A                    | 6.8260  | 6.1083  | 4.1147  | 9.1031  | 3.4391  | 3.4970  | 6.3562  | 5.2070  | 5.3653  | 4.1648  | 1.0458  | 0.0646  | 0.8457 | 0.0728 |
| Btdb10  | _Acetyl (Protein N-term)JAGRHPYDGNSS[Phospho (STY)]DPFNWDR_3                                    | QB0X66_513_M1_Btdb10    | 3.1028  | 4.2396  | 4.2936  | 4.3373  | 3.8811  | 3.7474  | 4.3781  | 4.0294  | 3.1201  | 3.5584  | 1.1178  | 0.1606  | 0.1889 | 0.7237 |
| C2cd2l  | _NLGT[Phospho (STY)]PTSTPR_2                                                                    | #N/A                    | 10.2341 | 9.8160  | 10.0310 | 10.3400 | 9.0334  | 9.8396  | 10.3888 | 10.1738 | 9.7692  | 10.0721 | 0.9784  | -0.0316 | 0.4220 | 0.3747 |
| C2cd2l  | _VDGKLS[Phospho (STY)]PSR_2                                                                     | #N/A                    |         |         |         |         |         |         |         |         |         |         |         |         |        |        |



|          |                                                                               |                         |         |         |         |         |         |         |         |         |         |         |         |         |        |        |
|----------|-------------------------------------------------------------------------------|-------------------------|---------|---------|---------|---------|---------|---------|---------|---------|---------|---------|---------|---------|--------|--------|
| Reps2    | _VS[Phospho (STY)]SHGYSK_2                                                    | Q80KA6_567_M1_Reps2     | 3.5622  | 3.7802  | 3.2958  | 4.3404  | 4.7730  | 3.9187  | 4.4887  | 4.1616  | 4.3732  | 4.0177  | 0.9260  | -0.1109 | 0.3025 | 0.5192 |
| Reps2    | _VS[Phospho (STY)]STSEEAAM_2                                                  | Q80KA6_5324_M1_Reps2    | 4.1485  | 3.1939  | 3.8822  | 3.4260  | 3.0152  | 3.2134  | 3.5742  | 3.5752  | 3.8743  | 3.1032  | 0.9853  | -0.0213 | 0.8461 | 0.0726 |
| Reps2    | _SFS[Phospho (STY)]NEREPQENNSVNPDEPWR_3                                       | Q80KA6_5119_M1_Reps2    | 4.0434  | 3.3477  | 3.2294  | 3.7320  | 3.1691  | 3.0596  | 3.4467  | 4.3865  | 4.0351  | 3.6990  | 0.8814  | -0.1821 | 0.1045 | 0.9810 |
| Reps2    | _APSQAMESSPT[Phospho (STY)]KMDAPHAGPPSKPR_4                                   | Q80KA6_7413_M1_Reps2    | 3.3354  | 4.1406  | 4.0222  | 4.5249  | 3.9620  | 3.7675  | 4.1283  | 3.5936  | 3.2422  | 2.9911  | 1.1347  | 0.1823  | 0.1324 | 0.8781 |
| Reps2    | _RGEDEPT[Phospho (STY)]PPRRPKK_3                                              | Q80KA6_7340_M1_Reps2    | 3.7961  | 2.5463  | 3.5297  | 4.5744  | 3.2677  | 4.3618  | 3.2218  | 3.9277  | 4.2516  | 0.9687  | -0.0164 | 0.8917  | 0.0498 |        |
| Usp6fnl  | _SVGRPS[Phospho (STY)]PK_2                                                    | Q80KC3_5394_M1_Usp6fnl  | 6.3670  | 6.2897  | 6.4218  | 3.2366  | 5.3763  | 3.0241  | 6.7694  | 6.6979  | 6.7454  | 6.0877  | 0.7786  | -0.3611 | 0.1141 | 0.9426 |
| Ric8b    | _GONWYS[Phospho (STY)]EDEDOTEYK_2                                             | Q80KE1_5468_M1_Ric8b    | 3.9583  | 4.1384  | 3.5153  | 4.8461  | 3.9849  | 4.3284  | 5.0857  | 4.0244  | 4.5914  | 4.1703  | 0.9240  | -0.1140 | 0.2821 | 0.5497 |
| Lrrtm4   | _AYEAVSIEQDS[Phospho (STY)]SLILGR_2                                           | Q80XG9_5560_M1_Lrrtm4   | 4.1831  | 3.4632  | 3.6692  | 3.3143  | 3.3179  | 3.9666  | 3.2667  | 3.9370  | 6.1090  | 5.9395  | 0.7909  | -0.3384 | 0.1106 | 0.9562 |
| Eif4g3   | _TSS[Phospho (STY)]PISLPLAR_2                                                 | Q80KX3_5267_M1_Eif4g3   | 14.1174 | 18.8247 | 14.4837 | 14.4326 | 12.7302 | 13.7664 | 14.4430 | 13.9334 | 13.8167 | 13.7166 | 0.9939  | -0.0088 | 0.8153 | 0.0887 |
| Eif4g3   | _NPT[Phospho (STY)]PPKGR_2                                                    | Q80KX3_7168_M1_Eif4g3   | 10.0991 | 8.7268  | 8.3774  | 10.6764 | 9.0362  | 8.9952  | 10.2659 | 10.0259 | 9.6492  | 9.7900  | 0.9382  | -0.0921 | 0.2201 | 0.6574 |
| Eif4g3   | _GSS[Phospho (STY)]KDLLONGSQEQR_3                                             | #N/A                    | 7.2252  | 6.7841  | 7.2490  | 7.6792  | 3.2115  | 6.6861  | 3.3779  | 7.0656  | 3.9926  | 6.5625  | 1.2329  | 0.3021  | 0.3012 | 0.5211 |
| Eif4g3   | _GSS[Phospho (STY)]KDLLONGSQEQR_2                                             | #N/A                    | 3.3816  | 4.1379  | 3.1153  | 4.4412  | 4.0262  | 4.0993  | 3.9925  | 2.9424  | 3.1404  | 3.8372  | 1.1118  | 0.1529  | 0.2712 | 0.5668 |
| Eif4g3   | _T[Phospho (STY)]PDEVLEAEAPK_2                                                | Q80KX3_7513_M1_Eif4g3   | 3.9681  | 3.2236  | 3.7018  | 6.6485  | 3.1119  | 3.5127  | 6.3923  | 6.0658  | 5.9378  | 4.4237  | 0.7060  | -0.5022 | 0.0578 | 1.2380 |
| Eif4g3   | _AESES[Phospho (STY)]DQGAETADPQSHSGR_3                                        | Q80KX3_5472_M1_Eif4g3   | 4.1462  | 3.1599  | 3.8798  | 3.4236  | 3.0173  | 3.4167  | 3.5719  | 3.5916  | 3.8906  | 3.1009  | 0.9911  | -0.0129 | 0.9046 | 0.0436 |
| Pip4k2b  | _FGIDQDQYQNSVTR_2                                                             | #N/A                    | 5.2735  | 5.5518  | 3.4243  | 6.0666  | 4.7789  | 5.2706  | 3.2254  | 5.6144  | 5.3787  | 4.9843  | 1.0542  | 0.0762  | 0.6902 | 0.1610 |
| Atg2b    | _DFATAPPTS[Phospho (STY)]PAK_2                                                | Q80XK6_51571_M1_Atg2b   | 9.2577  | 8.9107  | 9.5259  | 9.0685  | 3.3961  | 8.9328  | 9.3213  | 9.0165  | 8.8615  | 3.8507  | 1.0540  | 0.0759  | 0.7980 | 0.0980 |
| Atg2b    | _S[Phospho (STY)]PSWNP_2                                                      | Q80XK6_5255_M1_Atg2b    | 3.6154  | 6.2245  | 5.9600  | 6.7026  | 4.2419  | 3.4876  | 4.5195  | 3.3136  | 6.0704  | 6.2698  | 0.9925  | -0.0109 | 0.9674 | 0.0144 |
| Atg2b    | _S[Phospho (STY)]SPVC[Carbamidomethyl (C)]STAPVETPK_2                         | Q80XK6_5239_M1_Atg2b    | 4.3440  | 4.3830  | 5.7944  | 4.0326  | 4.2713  | 3.8541  | 3.7473  | 4.0859  | 3.7344  | 3.9996  | 1.2196  | 0.2864  | 0.2709 | 0.5671 |
| Atg2b    | _S[Phospho (STY)]PGADVC[Carbamidomethyl (C)]SLPR_2                            | Q80XK6_51741_M1_Atg2b   | 6.5849  | 5.7238  | 4.3005  | 6.5317  | 4.0977  | 6.0555  | 6.7360  | 5.2750  | 5.8671  | 6.1037  | 0.9255  | -0.1116 | 0.4834 | 0.3157 |
| Atg2b    | _SAS[Phospho (STY)]VDSRPFEC[Carbamidomethyl (C)]R_2                           | #N/A                    | 4.6295  | 4.6592  | 4.8310  | 4.2038  | 3.8112  | 4.2975  | 3.9185  | 5.1160  | 4.5754  | 6.6226  | 0.9665  | -0.0492 | 0.5904 | 0.2289 |
| Atg2b    | _AFTEVLDDSHS[Phospho (STY)]PANR_3                                             | Q80XK6_5734_M1_Atg2b    | 3.0440  | 4.2984  | 4.2785  | 3.8223  | 4.1197  | 3.6098  | 3.9706  | 3.1789  | 3.4779  | 3.4996  | 1.0935  | 0.1290  | 0.2690 | 0.5702 |
| Bdh1     | _VSVVPGNFIATSLYSER_2                                                          | #N/A                    | 6.6214  | 6.5741  | 6.5761  | 6.4163  | 6.4163  | 6.5472  | 6.1986  | 6.3270  | 6.4998  | 6.3573  | 1.0316  | 0.0449  | 0.0106 | 1.9750 |
| Bdh1     | _FGIEAFSDC[Carbamidomethyl (C)]IR_2                                           | #N/A                    | 5.5345  | 6.3636  | 6.1921  | 5.7163  | 5.2452  | 5.7947  | 5.3844  | 5.9568  | 5.9128  | 6.2067  | 0.9902  | -0.0142 | 0.8251 | 0.0835 |
| Bdh1     | _AIIITGC[Carbamidomethyl (C)]DSGFGSLAK_2                                      | #N/A                    | 3.9613  | 3.3328  | 4.8851  | 3.5129  | 2.6823  | 4.3354  | 4.8926  | 3.0774  | 4.6974  | 3.6010  | 0.9306  | -0.1037 | 0.6063 | 0.2173 |
| Bdh1     | _VYVNSMLGR_2                                                                  | #N/A                    | 6.1797  | 4.3938  | 3.7099  | 6.6487  | 5.4986  | 3.5047  | 5.3264  | 4.6759  | 4.1329  | 4.4317  | 1.0749  | 0.4302  | 0.6328 | 1.1988 |
| Bdh1     | _SPYC[Carbamidomethyl (C)]ITK_2                                               | #N/A                    | 4.3734  | 4.1349  | 4.1071  | 3.2860  | 5.2112  | 3.1075  | 4.5015  | 4.3764  | 2.9803  | 3.2530  | 1.0685  | 0.0956  | 0.6160 | 0.2104 |
| Fam76b   | _VSSLS[Phospho (STY)]PEQEGLGWK_2                                              | Q80XP8_5193_M1_Fam76b   | 8.0015  | 7.9993  | 3.1267  | 8.5595  | 7.8034  | 3.1622  | 8.4398  | 7.8061  | 7.9490  | 8.1820  | 0.7959  | -0.3294 | 0.2443 | 0.7599 |
| Wnk3     | _EGETTNTTETS[Phospho (STY)]PK_2                                               | Q80XP9_51039_M1_Wnk3    | 3.6720  | 3.1668  | 8.1722  | 8.5865  | 2.8157  | 8.0796  | 3.0977  | 4.0517  | 8.0011  | 8.0575  | 1.1345  | 0.1820  | 0.6549 | 0.1838 |
| Wnk3     | _S[Phospho (STY)]IVEM[Oxidation (M)]TEDDKVAESSR_2                             | Q80XP9_562_M1_Wnk3      | 4.1408  | 3.0854  | 3.3267  | 3.8294  | 2.9737  | 3.6509  | 3.5441  | 4.2891  | 3.9377  | 3.7964  | 0.8996  | -0.1526 | 0.1732 | 0.7181 |
| Tbcd15   | _TISSPS[Phospho (STY)]ESLPGGR_2                                               | Q80XQ2_5565_M1_Tbcd15   | 4.8880  | 8.0955  | 3.8329  | 8.5855  | 5.3261  | 7.9476  | 8.7557  | 8.4504  | 8.2882  | 8.4852  | 0.8294  | -0.2698 | 0.1911 | 0.7188 |
| Tbcd15   | _FTFGQ[Phospho (STY)]PPPSATKK_2                                               | Q80XQ2_5578_M1_Tbcd15   | 8.2748  | 4.2160  | 4.0976  | 4.6003  | 7.8097  | 3.6921  | 4.3150  | 3.5182  | 8.7202  | 0.9316  | 1.1108  | 0.1516  | 0.7194 | 0.1831 |
| Tbcd15   | _SES[Phospho (STY)]MPVQLNK_2                                                  | Q80XQ2_5546_M1_Tbcd15   | 5.6762  | 4.3144  | 3.5986  | 4.1012  | 3.5383  | 3.9228  | 3.8159  | 4.0172  | 3.6658  | 4.0682  | 1.0771  | 0.1072  | 0.4820 | 0.3169 |
| Fam168b  | _J[Acetyl (Protein N-term)]M[Oxidation (M)]NPVYS[Phospho (STY)]PGSSGVPYANAK_2 | #N/A                    | 3.1915  | 4.1659  | 7.7487  | 6.9556  | 3.9821  | 4.0515  | 4.1180  | 3.6575  | 3.3454  | 7.1021  | 1.1010  | 0.1388  | 0.7041 | 0.1324 |
| Nucks1   | _ATVTPS[Phospho (STY)]PVKK_2                                                  | #N/A                    | 10.3752 | 10.1287 | 10.9640 | 10.5823 | 9.4584  | 9.9517  | 10.7983 | 10.7114 | 10.3585 | 10.0784 | 0.9768  | -0.0339 | 0.4369 | 0.3597 |
| Nucks1   | _ATVTPS[Phospho (STY)]PVK_2                                                   | #N/A                    | 7.6462  | 6.1852  | 3.8446  | 6.4558  | 3.3700  | 6.2066  | 6.9640  | 3.9119  | 6.8810  | 0.8556  | -0.2249 | 0.4576  | 0.3395 | 0.3957 |
| Nucks1   | _LKATVTPS[Phospho (STY)]PVK_2                                                 | #N/A                    | 7.2412  | 6.3091  | 7.5718  | 3.5745  | 5.0536  | 3.3620  | 3.7228  | 3.4266  | 3.7257  | 3.2518  | 1.5626  | 0.6440  | 0.0652 | 1.1857 |
| Nucks1   | _TPSPKEEDEAES[Phospho (STY)]PPEKK_3                                           | #N/A                    | 7.6646  | 6.6036  | 7.2314  | 7.0844  | 3.5373  | 6.7998  | 7.7417  | 7.1733  | 7.5936  | 7.1492  | 0.8100  | -0.3040 | 0.1799 | 0.7449 |
| Nucks1   | _EEDDEAES[Phospho (STY)]PPEKK_3                                               | #N/A                    | 7.1127  | 3.8535  | 4.2135  | 6.2437  | 3.5878  | 3.0369  | 6.0570  | 4.9471  | 5.5314  | 4.2985  | 0.8975  | -0.1560 | 0.5610 | 0.2510 |
| Nucks1   | _KVVDYSQFQES[Phospho (STY)]DOADEDYGR_3                                        | #N/A                    | 3.7070  | 3.0114  | 4.3938  | 3.3956  | 2.8327  | 3.3960  | 3.1103  | 3.2220  | 4.3714  | 3.3636  | 0.9828  | -0.0250 | 0.8720 | 0.0595 |
| Nucks1   | _KVVDYSQFQES[Phospho (STY)]DOADEDYGR_3                                        | #N/A                    | 3.4513  | 6.5982  | 3.7374  | 8.8641  | 7.1554  | 6.8427  | 3.9684  | 8.7073  | 8.0465  | 7.4900  | 0.8660  | -0.2075 | 0.5073 | 0.2948 |
| Nucks1   | _VVVDYSQFQESDADED[Phospho (STY)]GRDGGPAK_3                                    | Q80XU3_726_M1_Nucks1    | 3.8657  | 3.2396  | 4.5525  | 3.5318  | 2.9913  | 3.2379  | 3.4717  | 3.2990  | 4.4650  | 5.0213  | 0.9676  | -0.0475 | 0.7460 | 0.1272 |
| Nucks1   | _LKATVTPS[Phospho (STY)]PVKK_2                                                | Q80XU3_5181_M2_Nucks1   | 3.5170  | 4.2733  | 3.2507  | 4.1423  | 4.1616  | 3.9639  | 6.7440  | 3.9761  | 3.6247  | 4.1093  | 0.8420  | -0.2480 | 0.2624 | 0.5811 |
| Nucks1   | _NSQDES[Phospho (STY)]EES[Phospho (STY)]EEKDVK_2                              | #N/A                    | 8.0959  | 7.8869  | 8.4013  | 8.0598  | 7.1641  | 7.1583  | 8.4679  | 8.3671  | 8.1638  | 7.5805  | 0.9570  | -0.0635 | 0.2871 | 0.5420 |
| Nucks1   | _VVVDYSQFQES[Phospho (STY)]DOADEDYGR_3                                        | #N/A                    | 3.8958  | 6.6036  | 3.8331  | 9.4238  | 7.8979  | 6.5999  | 3.3068  | 8.1664  | 8.5528  | 8.4081  | 0.8664  | -0.2068 | 0.5455 | 0.2632 |
| Nucks1   | _VVVDYSQFQES[Phospho (STY)]DOADEDYGRDGGPAK_4                                  | #N/A                    | 3.8724  | 3.7976  | 3.8229  | 4.9534  | 3.6392  | 3.6545  | 3.7948  | 3.9040  | 3.7001  | 3.5281  | 1.0603  | 0.0844  | 0.4145 | 0.3824 |
| Nucks1   | _SGKNS[Phospho (STY)]QEES[Phospho (STY)]EEKDVK_2                              | Q80XU3_554_M3_Nucks1    | 3.0966  | 3.2359  | 3.7383  | 4.0561  | 3.4932  | 3.7096  | 3.9703  | 3.4130  | 3.8022  | 3.2416  | 0.9856  | -0.0209 | 0.8320 | 0.0846 |
| Nucks1   | _ODSHS[Phospho (STY)]AESD[Phospho (STY)]EEKDEKHNVK_4                          | Q80XU3_575_M2_Nucks1    | 3.9811  | 3.5353  | 3.7216  | 4.2242  | 3.5122  | 3.9864  | 3.9389  | 3.9600  | 3.6086  | 3.7114  | 1.0058  | 0.0084  | 0.8936 | 0.0809 |
| Nucks1   | _EM[Oxidation (M)]LIEDVGHAEQEK_3                                              | Q80XU3_5113_M1_Nucks1   | 3.2608  | 4.0660  | 3.9476  | 6.1791  | 3.8873  | 3.8422  | 4.4030  | 6.4792  | 3.3168  | 1.9880  | 1.0501  | 0.0706  | 0.8308 | 0.0485 |
| Nucks1   | _XKDS[Phospho (STY)]HS[Phospho (STY)]AESD[Phospho (STY)]EEKDDHK_4             | #N/A                    | 3.1612  | 4.3725  | 3.3499  | 4.3945  | 4.2608  | 3.8466  | 3.3758  | 4.1075  | 4.4065  | 4.0718  | 0.9732  | -0.0392 | 0.6677 | 0.1754 |
| Lrfn4    | _SC[Carbamidomethyl (C)]S[Phospho (STY)]DLGGTGGC[Carbamidomethyl (C)]YGYAR_2  | Q80XU8_5585_M1_Lrfn4    | 3.4615  | 4.2667  | 8.9178  | 9.2738  | 7.1457  | 8.1672  | 8.8316  | 8.7994  | 8.7126  | 8.6450  | 0.9786  | -0.3481 | 0.1729 | 0.7622 |
| Lrfn4    | _GVGGS[Phospho (STY)]AERLESV_2                                                | Q80XU8_5627_M1_Lrfn4    | 3.6709  | 9.7798  | 4.1008  | 10.0244 | 8.8941  | 10.0009 | 10.5382 | 9.9209  | 9.9337  | 9.9726  | 0.7675  | -0.3818 | 0.1676 | 0.7757 |
| GlrX5    | _SALVDEKDDDS[Phospho (STY)]K_2                                                | Q80Y14_5151_M1_GlrX5    | 5.5119  | 5.4320  | 5.9045  | 6.2735  | 5.9604  | 5.8362  | 5.4428  | 5.7157  | 5.7783  | 5.7924  | 1.0242  | 0.0345  | 0.4435 | 0.3531 |
| Lgl1     | _S[Phospho (STY)]RQS[Phospho (STY)]FR_2                                       | #N/A                    | 7.1245  | 6.7711  | 7.1045  | 7.3185  | 6.3132  | 7.1138  | 6.8931  | 6.4637  | 6.8898  | 7.0186  | 1.0207  | 0.0296  | 0.5161 | 0.2873 |
| Lgl1     | _S[Phospho (STY)]RQS[Phospho (STY)]FR_2                                       | #N/A                    | 6.1106  | 5.7482  | 5.6417  | 5.6928  | 4.5652  | 5.5728  | 5.2151  | 5.4374  | 5.8015  | 5.1460  | 1.0287  | 0.0409  | 0.6069 | 0.2169 |
| Lgl1     | _DIIAPES[Phospho (STY)]C[Carbamidomethyl (C)]EGS[Phospho (STY)]PSSAHSK_3      | #N/A                    | 3.4431  | 6.2766  | 4.1299  | 3.8723  | 4.0697  | 3.6598  | 7.0986  | 3.1288  | 3.4279  | 6.2990  | 0.8503  | -0.2339 | 0.4549 | 0.3420 |
| Lgl1     | _DIIAPESC[Carbamidomethyl (C)]EGS[Phospho (STY)]PSSAHSK_2                     | #N/A                    | 3.3713  | 7.7138  | 7.6212  | 7.3855  | 7.1836  | 3.8566  | 8.0218  | 7.0998  | 6.8790  | 6.4322  | 0.8710  | -0.1993 | 0.4117 | 0.3854 |
| Prickle2 | _S[Phospho (STY)]QESLGGGR_2                                                   | #N/A                    | 9.9879  | 9.3908  | 9.8880  | 9.8719  | 8.7407  | 9.6728  | 9.9009  | 9.3835  | 9.5698  | 9.8109  | 0.9923  | -0.0111 | 0.7792 | 0.1083 |
| Prickle2 | _VYTS[Phospho (STY)]DELUK_2                                                   | Q80Y24_5807_M1_Prickle2 | 9.1438  | 9.0245  | 3.5712  | 9.4518  | 8.1347  | 9.3501  | 9.6796  | 9.2999  | 9.2126  | 9.1821  | 0.8683  | -0.2038 | 0.3211 | 0.4934 |
| Prickle2 | _AC[Carbamidomethyl (C)]SAGEDPNSG[Phospho (STY)]DSSDSAFQNR_2                  | Q80Y24_5319_M1_Prickle2 | 3.8583  | 3.0953  | 3.3154  | 7.8809  | 2.9921  | 7.0598  | 8.0052  | 4.2404  | 6.8353  | 6.8048  | 0.7263  | -0.4613 | 0.2033 | 0.6918 |
| Prickle2 | _S[Phospho (STY)]DNALHLASER_2                                                 | #N/A                    | 8.5037  | 8.0937  | 8.4706  | 8.6566  | 7.3620  | 8.5307  | 8.950   |         |         |         |         |         |        |        |



|          |                                                                               |                         |         |          |         |         |         |         |         |         |         |         |         |         |        |        |
|----------|-------------------------------------------------------------------------------|-------------------------|---------|----------|---------|---------|---------|---------|---------|---------|---------|---------|---------|---------|--------|--------|
| Cnkr2    | _RENS[Phospho (STY)]LR_2                                                      | Q80YA9_S467_M1_Cnkr2    | 5.6243  | 5.5484   | 5.9392  | 6.1837  | 4.8636  | 5.2178  | 6.0198  | 5.9808  | 5.9132  | 5.8419  | 0.9367  | -0.0944 | 0.1641 | 0.7848 |
| Cnkr2    | _LGD[Phospho (STY)]LDLVR_2                                                    | #N/A                    | 4.1907  | 10.8993  | 3.9244  | 11.8425 | 10.0476 | 10.6660 | 10.5101 | 11.4755 | 11.0130 | 11.1569 | 0.7786  | -0.3610 | 0.2174 | 0.6628 |
| Cnkr2    | _GSES[Phospho (STY)]PNGLDQYRK_2                                               | #N/A                    | 6.0512  | 6.1523   | 3.7209  | 4.3101  | 3.6607  | 6.0634  | 6.7338  | 6.4387  | 6.1762  | 5.9918  | 0.7882  | -0.3434 | 0.0681 | 1.1669 |
| Cnkr2    | _STYDGLHVTGTENS[Phospho (STY)]PADR_3                                          | Q80YA9_S248_M1_Cnkr2    | 3.7795  | 3.4467   | 4.4663  | 5.3146  | 5.5658  | 3.2896  | 3.1828  | 5.1496  | 4.2990  | 3.4351  | 1.0731  | 0.1018  | 0.6414 | 0.1929 |
| Cnkr2    | _QEVTVGSSAS[Phospho (STY)]IRK_2                                               | #N/A                    | 5.8599  | 5.1240   | 3.7446  | 6.2061  | 4.5340  | 5.5759  | 5.9318  | 5.4862  | 5.7392  | 5.5867  | 0.9100  | -0.1361 | 0.3091 | 0.5099 |
| Cnkr2    | _QEVTVGSSAS[Phospho (STY)]IR_2                                                | #N/A                    | 5.6953  | 3.1087   | 4.4911  | 5.5320  | 2.9300  | 3.2987  | 5.7615  | 4.6126  | 4.6607  | 3.4599  | 0.9032  | -0.1469 | 0.5590 | 0.2526 |
| Cnkr2    | _IKGEQDW[Phospho (STY)]ES[Phospho (STY)]KDEADTPSPK_3                          | Q80YA9_S685_M2_Cnkr2    | 4.2496  | 3.5288   | 3.7455  | 3.7314  | 3.3847  | 3.9215  | 3.1737  | 4.1067  | 4.5120  | 4.4107  | 0.9283  | -0.1074 | 0.3402 | 0.4683 |
| Cnkr2    | _EKLGD[Phospho (STY)]LDLVR_2                                                  | #N/A                    | 3.7797  | 3.9010   | 3.8034  | 3.7240  | 3.7437  | 3.5281  | 3.6778  | 3.9577  | 3.8363  | 3.4446  | 1.0047  | 0.0068  | 0.8749 | 0.0580 |
| Cnkr2    | _SPITSSVAPST[Phospho (STY)]T[Phospho (STY)]PKR_2                              | Q80YA9_S338_M2_Cnkr2    | 3.3108  | 4.1160   | 3.9976  | 4.5003  | 3.9374  | 3.7921  | 7.8058  | 3.6182  | 3.2668  | 5.3006  | 0.7888  | -0.3422 | 0.2459 | 0.6093 |
| Aatk     | _EQDLRS[Phospho (STY)]PPS[Phospho (STY)]PGHGSVQAFPR_3                         | Q80YE4_S1032_M2_Aatk    | 3.5610  | 4.3173   | 3.2947  | 4.3393  | 4.2056  | 3.9199  | 7.0039  | 4.1627  | 2.9609  | 4.0166  | 0.8685  | -0.2034 | 0.4306 | 0.3659 |
| Aatk     | _AVDSGYDENTYES[Phospho (STY)]PEFLVK_2                                         | Q80YE4_S950_M1_Aatk     | 3.0392  | 4.1869   | 3.7260  | 4.2287  | 4.4264  | 4.0502  | 3.9434  | 5.0053  | 3.5384  | 4.1957  | 0.9454  | -0.0810 | 0.5374 | 0.2697 |
| Aatk     | _SPPS[Phospho (STY)]PGHGSVQAFPR_3                                             | Q80YE4_S1035_M1_Aatk    | 3.5347  | 3.8077   | 3.2684  | 4.3130  | 3.6290  | 4.1005  | 4.4613  | 5.8285  | 2.9872  | 3.9903  | 0.8746  | -0.1933 | 0.3158 | 0.5006 |
| Aatk     | _AS[Phospho (STY)]PEVGHLSQEDPR_2                                              | #N/A                    | 5.9781  | 5.0693   | 5.5181  | 5.7202  | 3.1267  | 4.9416  | 5.8047  | 5.8508  | 5.7819  | 5.5004  | 0.8822  | -0.1808 | 0.2352 | 0.6286 |
| Arhgap33 | _QQ[Phospho (STY)]DGSGLVR_2                                                   | Q80YF9_S995_M1_Arhgap33 | 6.1943  | 3.2128   | 6.3476  | 3.2348  | 3.1011  | 3.5235  | 3.3831  | 3.7664  | 4.0654  | 4.4129  | 1.0927  | 0.1279  | 0.6681 | 0.1752 |
| Arhgap33 | _TPAS[Phospho (STY)]PVER_2                                                    | Q80YF9_S594_M1_Arhgap33 | 8.7390  | 9.0548   | 9.3806  | 8.7210  | 7.9877  | 8.7578  | 9.3177  | 9.2484  | 8.4584  | 8.7706  | 0.9804  | -0.0285 | 0.5566 | 0.2545 |
| Arhgap33 | _TSAWLDDGDLD[Phospho (STY)]PPR_2                                              | Q80YF9_S749_M1_Arhgap33 | 3.3168  | 7.0937   | 7.8368  | 7.7967  | 7.6701  | 7.5147  | 7.9300  | 8.6196  | 8.8125  | 0.9062  | -0.1421 | 0.5056  | 0.2962 | 0.1430 |
| Arhgap33 | _S[Phospho (STY)]AKSESLSQASGAGLQR_3                                           | Q80YF9_S657_M1_Arhgap33 | 3.6115  | 3.5339   | 3.6217  | 3.6698  | 3.1354  | 3.6536  | 3.8081  | 3.9866  | 3.6505  | 3.2998  | 0.9597  | -0.0594 | 0.3656 | 0.4370 |
| Arhgap33 | _AQOVKEQCSQDEGGTFPPAPH[Phospho (STY)]PFR_3                                    | Q80YF9_S949_M1_Arhgap33 | 3.5465  | 3.7720   | 3.7530  | 3.8290  | 3.4923  | 4.0251  | 3.7714  | 3.8089  | 3.8513  | 4.3345  | 0.9479  | -0.0771 | 0.1920 | 0.7167 |
| Bcas1    | _RQS[Phospho (STY)]GGFLK_2                                                    | #N/A                    | 9.2444  | 9.6788   | 10.5442 | 11.1433 | 8.9068  | 9.3512  | 10.1035 | 9.8136  | 9.6139  | 9.4002  | 1.0081  | 0.0116  | 0.8666 | 0.0622 |
| Bcas1    | _LGLS[Phospho (STY)]IRK_2                                                     | Q80YN3_S347_M1_Bcas1    | 8.5634  | 9.2289   | 8.4083  | 8.9996  | 8.3039  | 8.2129  | 9.4297  | 8.8632  | 8.4358  | 8.6028  | 1.0136  | 0.0194  | 0.7675 | 0.1149 |
| Bcas1    | _ANITQETR_2                                                                   | #N/A                    | 7.3409  | 7.0619   | 7.7880  | 7.6580  | 8.3491  | 7.2055  | 7.1445  | 7.5935  | 7.0964  | 7.8429  | 1.0199  | 0.0285  | 0.6105 | 0.2143 |
| Bcas1    | _AGPTS[Phospho (STY)]PLGK_2                                                   | Q80YN3_S414_M1_Bcas1    | 4.1225  | 3.2199   | 8.3506  | 8.3971  | 7.6054  | 7.5833  | 8.4369  | 3.6012  | 3.9002  | 7.9630  | 1.0956  | 0.1317  | 0.7210 | 0.1420 |
| Bcas1    | _TVSPNKTETK_2                                                                 | #N/A                    | 5.5043  | 5.0859   | 5.5389  | 5.2970  | 5.7746  | 5.0727  | 5.7439  | 4.9087  | 5.1832  | 5.0763  | 1.0289  | 0.0410  | 0.4749 | 0.3234 |
| Bcas1    | _ADS[Phospho (STY)]VC[Carbamidomethyl (C)]DGHAAQGK_2                          | Q80YN3_S316_M1_Bcas1    | 5.1013  | 5.1859   | 4.5123  | 5.7377  | 5.9800  | 5.1875  | 5.3524  | 4.8389  | 4.8088  | 5.3902  | 1.0368  | 0.0522  | 0.5388 | 0.2886 |
| Bcas1    | _M[Oxidation (M)]DQAQVCTDPVSGPGVK_2                                           | #N/A                    | 4.7031  | 5.6530   | 6.1971  | 5.8330  | 6.2524  | 6.1245  | 6.1294  | 5.5884  | 6.0651  | 5.8186  | 0.9820  | -0.2662 | 0.7432 | 0.1699 |
| Bcas1    | _TPS[Phospho (STY)]PPEPEPAGTAK_2                                              | Q80YN3_S525_M1_Bcas1    | 11.8037 | 11.9332  | 12.0084 | 12.6630 | 12.1091 | 11.8196 | 12.2820 | 11.7096 | 11.7823 | 12.0377 | 1.0086  | 0.0124  | 0.6064 | 0.2172 |
| Bcas1    | _EPAPC[Carbamidomethyl (C)]VQPTVEANAM[Oxidation (M)]TGDKTC[Phospho (STY)]PK_3 | #N/A                    | 5.1456  | 5.9602   | 5.8032  | 7.2592  | 5.9595  | 6.3274  | 3.3892  | 3.8948  | 5.9079  | 3.5750  | 1.4495  | 0.3535  | 0.0119 | 0.2172 |
| Bcas1    | _SC[Carbamidomethyl (C)]S[Phospho (STY)]PPPPPTSEGR_2                          | Q80YN3_S390_M1_Bcas1    | 8.2364  | 6.7935   | 4.3257  | 4.3645  | 9.0809  | 8.6550  | 8.1396  | 8.4053  | 8.4251  | 9.0099  | 0.8526  | -0.2301 | 0.3129 | 0.5046 |
| Bcas1    | _RM[Oxidation (M)]S[Phospho (STY)]DAQVCTDPVSGPGVK_3                           | #N/A                    | 4.7684  | 5.6496   | 5.7437  | 6.5717  | 5.2652  | 5.5811  | 4.9669  | 5.5759  | 5.8848  | 5.4873  | 1.0215  | 0.0307  | 0.7371 | 0.1325 |
| Bcas1    | _S[Phospho (STY)]KEDTLSTGAEEANVC[Carbamidomethyl (C)]ESPETVR_3                | #N/A                    | 3.9664  | 3.2707   | 4.0170  | 3.3603  | 3.0921  | 3.1519  | 3.2863  | 3.9357  | 4.1833  | 3.6220  | 0.9254  | -0.1119 | 0.3117 | 0.5063 |
| Bcas1    | _KS[Phospho (STY)]KEDTLSTGAEEANVC[Carbamidomethyl (C)]ESPETVR_3               | #N/A                    | 3.1654  | 4.3716   | 3.5414  | 4.0440  | 4.2599  | 3.8655  | 3.7587  | 3.7231  | 3.7311  | 3.6110  | 1.0149  | 0.0213  | 0.7635 | 0.1172 |
| Bcas1    | _EDTLSTGAEEANVC[Carbamidomethyl (C)]ES[Phospho (STY)]PVTVR_3                  | Q80YN3_S443_M1_Bcas1    | 3.1354  | 3.9406   | 3.8222  | 4.3248  | 3.7619  | 3.9676  | 4.0395  | 3.7936  | 3.4422  | 4.2918  | 0.9829  | -0.0248 | 0.7936 | 0.1004 |
| Bcas1    | _QS[Phospho (STY)]LGGFLK_2                                                    | #N/A                    | 2.9050  | 4.3212   | 3.5918  | 6.0856  | 4.2095  | 3.9160  | 3.8091  | 4.0240  | 4.0615  | 0.6726  | 1.0719  | 0.1001  | 0.6244 | 0.2045 |
| Safb2    | _MEEEGS[Phospho (STY)]EDNGLEDSR_2                                             | Q80YR5_S95_M1_Safb2     | 3.7497  | 3.4764   | 4.4365  | 3.4383  | 2.8754  | 3.2599  | 3.1530  | 3.1793  | 4.3287  | 3.4053  | 1.0065  | 0.0093  | 0.9491 | 0.0227 |
| Afap1    | _SGTSSQS[Phospho (STY)]PVR_2                                                  | Q80YR5_S669_M1_Afap1    | 8.4357  | 8.5961   | 9.1055  | 8.8732  | 7.0213  | 7.9526  | 8.8062  | 8.4125  | 8.0511  | 8.1283  | 0.9972  | -0.0040 | 0.9559 | 0.0196 |
| Z3hc1    | _LC[Carbamidomethyl (C)]SSSS[Phospho (STY)]SDTSPR_2                           | Q80YV2_S409_M1_Z3hc1    | 4.9108  | 6.1732   | 5.6088  | 6.6775  | 4.7067  | 5.6518  | 4.6848  | 6.5745  | 4.7446  | 4.6419  | 1.0154  | 0.0220  | 0.8784 | 0.0563 |
| Z3hc1    | _SQDATVSPGSEDS[Phospho (STY)]KSGPGVGR_3                                       | Q80YV2_S340_M1_Z3hc1    | 4.4344  | 3.4552   | 3.4500  | 6.9413  | 4.9309  | 3.9563  | 4.6927  | 5.9966  | 5.4607  | 4.0077  | 0.9567  | -0.0639 | 0.7949 | 0.0967 |
| Z3hc1    | _SQDATVS[Phospho (STY)]PGSGSEK_2                                              | Q80YV2_S334_M1_Z3hc1    | 5.8201  | 5.9628   | 5.9781  | 3.3721  | 5.0396  | 5.6489  | 6.0530  | 3.2456  | 4.3950  | 3.3391  | 1.2455  | 0.1367  | 0.1891 | 0.7233 |
| Z3hc1    | _DTAATFVSVDGS[Phospho (STY)]PQAEQSLESTK_3                                     | Q80YV2_S62_M1_Z3hc1     | 5.7407  | 5.8208   | 5.4190  | 6.8465  | 5.4814  | 6.4318  | 6.3876  | 5.9029  | 5.9837  | 5.8981  | 0.9857  | -0.0208 | 0.7827 | 0.1064 |
| Z3hc1    | _SWESSVPORPELEAS[Phospho (STY)]PTTR_3                                         | Q80YV2_S369_M1_Z3hc1    | 3.4713  | 3.7548   | 4.1581  | 3.1600  | 3.6431  | 5.9717  | 4.3755  | 6.2666  | 3.1063  | 3.1270  | 0.9544  | -0.0673 | 0.8118 | 0.0905 |
| Pank4    | _VRS[Phospho (STY)]PDHPGK_2                                                   | Q80YV4_S63_M1_Pank4     | 7.2412  | 6.7010   | 7.2360  | 7.3404  | 6.5209  | 7.1895  | 7.4783  | 7.3295  | 7.1827  | 7.5261  | 0.9538  | -0.0683 | 0.1006 | 0.9974 |
| Negr1    | _VVNFAPTIQEK_2                                                                | #N/A                    | 7.1711  | 7.1356   | 7.5526  | 7.3183  | 7.2057  | 7.0293  | 6.9568  | 7.1962  | 7.0196  | 7.2403  | 1.0186  | 0.0266  | 0.2526 | 0.0746 |
| Negr1    | _DQAGEYC[Carbamidomethyl (C)]SAENDVSPDVK_2                                    | #N/A                    | 6.9299  | 6.6103   | 6.6634  | 7.3041  | 5.4233  | 6.1132  | 7.2105  | 6.4769  | 6.1487  | 6.8435  | 0.9756  | -0.0356 | 0.6822 | 0.1661 |
| Negr1    | _LFGQGQIGQINFSTR_2                                                            | #N/A                    | 5.0656  | 4.8062   | 3.1667  | 4.2113  | 4.0776  | 3.9993  | 5.4220  | 4.2059  | 6.8750  | 5.0636  | 0.7829  | -0.3531 | 0.0687 | 1.1631 |
| Topors   | _LQGTVPADAS[Phospho (STY)]PDOK_2                                              | Q80Z37_S99_M1_Topors    | 7.1411  | 4.0838   | 4.4932  | 4.0369  | 3.9051  | 3.8244  | 4.1852  | 4.4651  | 3.2613  | 6.8540  | 0.9763  | -0.0346 | 0.9035 | 0.0441 |
| Shank2   | _APSPVVS[Phospho (STY)]PTELSK_2                                               | #N/A                    | 7.7704  | 4.1263   | 7.5139  | 4.2894  | 5.9327  | 7.1255  | 7.7408  | 3.8291  | 7.1454  | 7.7304  | 0.9266  | -0.1099 | 0.6733 | 0.0718 |
| Shank2   | _NSPFLS[Phospho (STY)]TDLGDEDVGLGPPAPR_3                                      | #N/A                    | 4.0757  | 3.2667   | 3.8094  | 8.7518  | 3.2195  | 3.1407  | 3.5014  | 3.6480  | 3.9470  | 7.2599  | 0.9538  | -0.0682 | 0.8761 | 0.0574 |
| Shank2   | _RNSPFLS[Phospho (STY)]TDLGDEDVGLGPPAPR_3                                     | #N/A                    | 3.2080  | 4.1344   | 4.4425  | 9.3381  | 3.9558  | 3.7737  | 4.1345  | 3.0149  | 3.3140  | 3.6635  | 1.0146  | 0.4453  | 0.3058 | 0.5476 |
| Shank2   | _QSNVEDS[Phospho (STY)]PEK_2                                                  | #N/A                    | 4.2081  | 3.4635   | 6.8135  | 7.6856  | 5.6492  | 3.1660  | 3.1664  | 7.4170  | 3.4183  | 1.2105  | 0.2756  | 0.7566  | 0.4866 | 0.3128 |
| Shank2   | _TIVAAGS[Phospho (STY)]VEEAVILPR_2                                            | Q80Z38_S1005_M1_Shank2  | 3.7554  | 7.7548   | 3.4890  | 4.5336  | 3.4084  | 4.3211  | 3.8111  | 3.9684  | 4.2674  | 4.2109  | 1.1630  | 0.2178  | 0.4792 | 0.3194 |
| Shank2   | _S[Phospho (STY)]KSM[Oxidation (M)]TAEELGLSLVDK_3                             | Q80Z38_S370_M1_Shank2   | 4.8101  | 3.4267   | 3.9049  | 3.4487  | 3.3150  | 3.3096  | 3.2028  | 3.5525  | 3.8515  | 3.1260  | 1.0784  | 0.1090  | 0.4336 | 0.3629 |
| Shank2   | _ELDRFS[Phospho (STY)]DSEDVYSR_2                                              | #N/A                    | 4.1372  | 3.9560   | 3.3232  | 6.7367  | 5.2098  | 6.5125  | 3.5406  | 6.4823  | 5.6242  | 3.7929  | 1.0245  | 0.0350  | 0.8995 | 0.0460 |
| Shank2   | _S[Phospho (STY)]NSDNNINAGAPEWAVC[Carbamidomethyl (C)]SAATSHR_3               | Q80Z38_S41_M1_Shank2    | 3.7874  | 3.5443   | 3.9805  | 3.2374  | 4.2194  | 3.0414  | 3.9979  | 5.4201  | 4.9369  | 3.0617  | 0.8348  | -0.2604 | 0.1661 | 0.7797 |
| Shank2   | _ANVISELNSIQQM[Oxidation (M)]NR_2                                             | #N/A                    | 5.0778  | 3.7824   | 4.2606  | 3.8044  | 3.6707  | 2.9539  | 5.5281  | 3.1968  | 4.8620  | 4.1888  | 0.8832  | -0.1792 | 0.3588 | 0.4452 |
| Shank2   | _QSNVEDSPETKC[Carbamidomethyl (C)]S[Phospho (STY)]IRPTIVK_3                   | Q80Z38_S654_M1_Shank2   | 3.2317  | 4.1170   | 4.1662  | 3.4640  | 4.4600  | 3.0211  | 4.1450  | 5.5963  | 4.8652  | 3.2665  | 0.8378  | -0.2554 | 0.1799 | 0.7450 |
| Shank2   | _DNEGFGVLR_2                                                                  | #N/A                    | 4.6722  | 3.4447   | 4.4597  | 5.2824  | 4.3004  | 4.4149  | 3.3234  | 4.4007  | 4.6016  | 5.2443  | 1.0083  | 0.0120  | 0.9356 | 0.0289 |
| Shank2   | _RAPSPVVS[Phospho (STY)]PTELSK_2                                              | #N/A                    | 7.1283  | 7.7269   | 8.4434  | 9.2526  | 6.6631  | 8.3837  | 8.4196  | 8.2391  | 8.3777  | 7.9899  | 0.9608  | -0.0577 | 0.5281 | 0.2773 |
| Shank2   | _RELDRF[Phospho (STY)]LDSDEVYSR_3                                             | #N/A                    | 3.2145  | 3.9708   | 4.4490  | 3.9928  | 3.8591  | 4.2664  | 4.4141  | 3.0084  | 3.3074  | 3.6701  | 1.1209  | 0.1647  | 0.1791 | 0.7469 |
| Shank2   | _IFLSGITEER_2                                                                 | #N/A                    | 4.9010  | 3.9244   | 4.4437  | 4.8688  | 3.7932  | 4.2828  | 3.7069  | 3.1721  | 4.2080  | 5.2186  | 1.0718  | 0.1000  | 0.5036 | 0.2979 |
| Shank2   | _SM[Oxidation (M)]T[Phospho (STY)]AEELGLSLVDK_2                               | Q80Z38_S374_M1_Shank2   | 3.0852  | 3.8677   | 4.0547  | 3.9686  | 3.7202  | 3.5347  | 4.1169  | 3.9026  | 3.3556  | 4.2667  | 0.9475  | -0.0778 | 0.4180 | 0.3788 |
| Amigo1   | _RM[Oxidation (M)]S[Phospho (STY)]DPESVSVSDTPVIV_2                            | #N/A                    | 3.7102  | 3.8199</ |         |         |         |         |         |         |         |         |         |         |        |        |



|          |                                                                     |                          |        |        |         |        |        |        |        |        |        |        |        |         |        |        |
|----------|---------------------------------------------------------------------|--------------------------|--------|--------|---------|--------|--------|--------|--------|--------|--------|--------|--------|---------|--------|--------|
| Nfasc    | _GTTVQLEC[Carbamidomethyl (C)]R_2                                   | #N/A                     | 6.0262 | 4.5009 | 5.9419  | 5.8448 | 5.1838 | 4.1312 | 5.2643 | 4.3740 | 3.1722 | 5.3158 | 1.1633 | 0.2182  | 0.2317 | 0.6351 |
| Nfasc    | _SGTVLIDFR_2                                                        | #N/A                     | 3.8316 | 3.3945 | 4.5948  | 4.4269 | 3.2635 | 7.4358 | 4.3168 | 3.7555 | 5.0999 | 3.4873 | 1.0784 | 0.1088  | 0.7058 | 0.1513 |
| Nfasc    | _DQGSYTC[Carbamidomethyl (C)]MASTELDDOLAK_2                         | #N/A                     | 2.2488 | 4.4234 | 4.1536  | 4.6877 | 4.2447 | 3.4848 | 3.8456 | 3.3038 | 3.6029 | 3.3746 | 1.0969 | 0.1334  | 0.4830 | 0.3161 |
| Nfasc    | _DKETEENESSEAS[Phospho (STY)]PVNVAISLA_3                            | Q810L3_S1231_M1_Nfasc    | 4.0668 | 3.3222 | 4.5807  | 3.5926 | 3.2105 | 3.4141 | 3.3072 | 3.0251 | 2.1292 | 3.5596 | 1.2310 | 0.2998  | 0.0943 | 1.0254 |
| Nrcam    | _SVQLTWITGPDNNSRTK_2                                                | #N/A                     | 7.5764 | 7.5547 | 7.9571  | 8.3085 | 7.6958 | 7.8566 | 8.0940 | 7.3779 | 7.6907 | 7.8287 | 1.0084 | 0.0121  | 0.7361 | 0.1331 |
| Nrcam    | _GFHTPEGVPSPAPSLK_3                                                 | #N/A                     | 6.7881 | 7.2171 | 7.4205  | 7.3548 | 7.6183 | 7.1879 | 7.0436 | 7.3924 | 7.4631 | 6.8187 | 1.0118 | 0.0170  | 0.6606 | 0.1801 |
| Nrcam    | _ONGELPINDER_2                                                      | #N/A                     | 8.7110 | 8.9226 | 8.9247  | 9.5354 | 8.7673 | 8.9063 | 9.1498 | 8.6846 | 8.9022 | 9.2653 | 0.9956 | -0.0063 | 0.8348 | 0.0784 |
| Nrcam    | _ENIVQIC[Carbamidomethyl (C)]EAK_2                                  | #N/A                     | 6.6061 | 6.1354 | 5.8324  | 6.6016 | 6.8336 | 6.7796 | 7.0782 | 5.9678 | 6.8095 | 6.8283 | 0.9691 | -0.0453 | 0.4798 | 0.3189 |
| Nrcam    | _DSTGYTC[Carbamidomethyl (C)]VAR_2                                  | #N/A                     | 2.9860 | 5.6975 | 3.6728  | 5.5840 | 6.4587 | 5.9443 | 5.6477 | 5.7502 | 5.9818 | 6.0007 | 0.8652 | -0.2089 | 0.3007 | 0.5219 |
| Nrcam    | _EDDGTGGEYS[Phospho (STY)]DAEDHKFK_3                                | Q810U4_S1178_M1_Nrcam    | 3.4191 | 3.9233 | 3.1527  | 4.1974 | 4.0636 | 4.0618 | 4.3456 | 4.3047 | 5.7315 | 3.8746 | 0.8332 | -0.1632 | 0.0827 | 0.1527 |
| Nrcam    | _NEVHLEKDPTTR_3                                                     | #N/A                     | 5.2485 | 4.8545 | 5.2106  | 5.5447 | 5.3486 | 5.7652 | 5.1951 | 5.4280 | 4.7817 | 5.4090 | 1.0241 | 0.0343  | 0.5449 | 0.2637 |
| Nrcam    | _ISWLTVGPEIALDOPSR_2                                                | #N/A                     | 2.9999 | 4.0896 | 4.2344  | 3.7094 | 2.9436 | 2.9802 | 4.4158 | 3.6990 | 3.5221 | 3.5919 | 0.9174 | -0.1243 | 0.3873 | 0.4120 |
| Nrcam    | _TLQITHVSEADSGNYQC[Carbamidomethyl (C)]IAK_3                        | #N/A                     | 4.1110 | 3.1316 | 3.2970  | 4.5546 | 3.2367 | 2.9919 | 3.3527 | 4.3188 | 3.9674 | 3.7667 | 0.9227 | -0.1160 | 0.4299 | 0.3666 |
| Nrcam    | _HQAEVSGTQTIAQLK_3                                                  | #N/A                     | 3.6708 | 3.0863 | 4.0655  | 3.9663 | 3.3957 | 4.2854 | 4.1579 | 3.7571 | 3.7120 | 4.8600 | 0.9086 | -0.1383 | 0.2597 | 0.5855 |
| Nrcam    | _EPAEENESSEAPS[Phospho (STY)]PVNAMNSFV_2                            | #N/A                     | 3.4323 | 3.7939 | 4.1191  | 4.1100 | 3.6822 | 2.9424 | 4.3364 | 3.4967 | 3.1453 | 3.0879 | 1.0465 | 0.0655  | 0.6255 | 0.2038 |
| Nrcam    | _EKPEAEENESSEAPS[Phospho (STY)]PVNAM[Oxidation (M)]NSFV_3           | #N/A                     | 5.1910 | 5.3173 | 4.2332  | 3.7770 | 3.6432 | 2.9814 | 4.3754 | 5.9913 | 3.5233 | 3.4542 | 0.9664 | -0.0493 | 0.8312 | 0.0803 |
| Nrcam    | _AETYGVGVC[Carbamidomethyl (C)]ITAR_2                               | #N/A                     | 4.0265 | 3.3159 | 3.7602  | 3.3040 | 3.1703 | 3.4543 | 3.4523 | 3.6972 | 3.9962 | 2.9813 | 0.9925 | -0.0109 | 0.9137 | 0.0392 |
| Atg4c    | _RFST[Phospho (STY)]EEFVL_2                                         | Q811C2_T452_M1_At4c      | 3.6133 | 4.3696 | 3.3470  | 4.0460 | 4.2579 | 4.9465 | 3.7607 | 4.5294 | 3.7211 | 4.0130 | 1.0226 | 0.0323  | 0.7877 | 0.1037 |
| Atg4c    | _DFDSTTAS[Phospho (STY)]ELDLFSDERK_3                                | Q811C2_S434_M1_At4c      | 2.8972 | 3.7024 | 3.5840  | 4.0867 | 3.5237 | 4.2057 | 3.8014 | 4.0318 | 3.6804 | 4.0537 | 0.9421 | -0.0860 | 0.3915 | 0.4073 |
| Dlg1     | _DYHFVTSR_2                                                         | #N/A                     | 6.7661 | 6.4719 | 7.3031  | 7.0799 | 6.9600 | 6.6168 | 6.8727 | 6.3713 | 6.8761 | 6.8966 | 1.0166 | 0.0237  | 0.5647 | 0.2482 |
| Dlg1     | _AVEAKEAGS[Phospho (STY)]NR_2                                       | #N/A                     | 4.5895 | 6.6408 | 7.3173  | 7.4100 | 6.2450 | 6.7012 | 6.7114 | 7.2363 | 6.4579 | 5.9360 | 0.9947 | -0.0076 | 0.9460 | 0.0241 |
| Dlg1     | _QVTPDGESEIVGVPSKR_3                                                | #N/A                     | 6.3094 | 5.9397 | 6.1751  | 6.5667 | 6.4286 | 6.3914 | 6.0341 | 6.1269 | 6.2334 | 6.7107 | 1.0041 | 0.0059  | 0.8798 | 0.0556 |
| Dlg1     | _QIEEGSGPIVVPAM_2                                                   | #N/A                     | 5.6081 | 5.3881 | 5.8088  | 5.9534 | 5.3324 | 5.4232 | 5.7688 | 5.4840 | 5.2788 | 5.3332 | 1.0219 | 0.0312  | 0.4623 | 0.3351 |
| Dlg1     | _VNDQC[Carbamidomethyl (C)]LR_2                                     | #N/A                     | 5.9626 | 5.4136 | 4.5174  | 5.2811 | 5.5545 | 5.7022 | 4.9335 | 5.7214 | 5.2686 | 5.4577 | 0.9977 | -0.0033 | 0.9661 | 0.0150 |
| Dlg1     | _IISVNSDLR_2                                                        | #N/A                     | 6.0329 | 6.4489 | 5.9342  | 6.7078 | 5.4835 | 5.9384 | 6.9115 | 6.4747 | 6.0298 | 6.4622 | 0.9415 | -0.0870 | 0.1864 | 0.7295 |
| Dlg1     | _IEEGAAAHK_2                                                        | #N/A                     | 5.0274 | 4.9606 | 3.3030  | 5.0007 | 4.2875 | 4.0895 | 3.2501 | 5.3117 | 4.4859 | 5.2485 | 0.9717 | -0.0414 | 0.8088 | 0.0922 |
| Dlg1     | _IITGGAAQDGR_2                                                      | #N/A                     | 6.5545 | 5.7953 | 3.3941  | 4.4387 | 3.5033 | 6.1824 | 5.5735 | 5.5007 | 4.3624 | 5.1460 | 1.0184 | 0.0263  | 0.9096 | 0.0412 |
| Dlg1     | _EQOM[Oxidation (M)]M[Oxidation (M)]NSVSSGGSG[Phospho (STY)]LR_2    | #N/A                     | 9.0787 | 9.2593 | 10.0690 | 9.1010 | 8.5393 | 9.9841 | 9.6280 | 9.5509 | 9.4659 | 9.6577 | 0.9752 | -0.0362 | 0.4538 | 0.3431 |
| Dlg1     | _ALFDYDK_2                                                          | #N/A                     | 2.5476 | 4.2382 | 3.6748  | 4.1775 | 2.6265 | 2.4424 | 3.8921 | 3.4935 | 3.5896 | 4.1444 | 0.8689 | -0.2027 | 0.2982 | 0.5254 |
| Dlg1     | _NLSEINNVGVSHSHS[Phospho (STY)]PK_3                                 | Q811D0_S158_M1_Dlg1      | 3.0852 | 3.8414 | 4.0715  | 4.5742 | 3.7297 | 4.3957 | 4.2889 | 5.5105 | 3.1929 | 3.0403 | 0.9854 | -0.0212 | 0.9144 | 0.0388 |
| Dlg1     | _T[Phospho (STY)]KDSGLPSGLNFR_3                                     | Q811D0_T595_M1_Dlg1      | 3.3846 | 4.1409 | 3.7721  | 4.2747 | 4.0292 | 4.0963 | 3.9894 | 3.8437 | 3.4923 | 3.2417 | 1.0149 | 0.0213  | 0.7861 | 0.1045 |
| Dlg1     | _HC[Carbamidomethyl (C)]ILDVSGNAIK_2                                | #N/A                     | 3.6194 | 4.3757 | 3.3531  | 4.3977 | 2.9372 | 3.5662 | 4.5882 | 4.1043 | 4.4034 | 4.0750 | 0.8638 | -0.2112 | 0.0966 | 0.1515 |
| Dlg1     | _HVTSMAS[Phospho (STY)]DSESSVR_2                                    | Q811D0_S688_M1_Dlg1      | 4.0250 | 3.2804 | 4.9733  | 3.6344 | 3.1687 | 3.4559 | 3.3490 | 2.9833 | 4.1327 | 3.6014 | 1.0682 | 0.0951  | 0.5565 | 0.2051 |
| Dlg1     | _ASHHQAAALK_2                                                       | #N/A                     | 3.3315 | 3.0774 | 3.3348  | 3.8374 | 2.9657 | 3.6590 | 3.5521 | 4.2810 | 3.1409 | 3.8044 | 0.9115 | -0.1337 | 0.2336 | 0.6316 |
| Dlg1     | _TRGDKGEIPDDM[Oxidation (M)]GS[Phospho (STY)]K_3                    | #N/A                     | 3.3823 | 4.1055 | 4.3637  | 4.4046 | 4.0177 | 3.9260 | 4.1724 | 3.6076 | 4.0566 | 3.7014 | 1.0383 | 0.0542  | 0.5137 | 0.2893 |
| Dlg1     | _FIEAGQVNNHLVGTSSQSVR_3                                             | #N/A                     | 5.8312 | 4.0850 | 4.5632  | 4.1070 | 3.9733 | 4.1521 | 4.2553 | 4.3950 | 4.1052 | 3.7843 | 1.0767 | 0.1066  | 0.4219 | 0.3748 |
| Dlg1     | _NAGQAVTNVAGVPEEYSR_3                                               | #N/A                     | 3.1759 | 4.1665 | 4.4105  | 3.9542 | 3.9878 | 3.7417 | 4.1025 | 3.1049 | 4.7684 | 6.3315 | 1.0048 | 0.0069  | 0.9597 | 0.0179 |
| Dlg1     | _EAGS[Phospho (STY)]NR_2                                            | #N/A                     | 3.2798 | 4.0626 | 4.5143  | 4.0581 | 3.9244 | 4.2011 | 4.2064 | 4.4439 | 3.2421 | 3.7354 | 1.0255 | 0.0664  | 0.7450 | 0.1278 |
| Alpaf1   | _RGS[Phospho (STY)]GLPPEGADGSGVSELEANNPYDR_3                        | Q811D0_S52_M1_Alpaf1     | 7.3307 | 2.9563 | 7.3717  | 8.4197 | 6.2618 | 6.9328 | 3.6732 | 8.0049 | 6.8942 | 7.9255 | 1.1638 | 0.2188  | 0.4951 | 0.3053 |
| Mast4    | _TPSPPTPQTS[Phospho (STY)]PQR_2                                     | Q811L6_S1389_M1_Mast4    | 3.8835 | 6.9159 | 7.4154  | 3.1609 | 3.0272 | 6.8984 | 7.2907 | 6.9786 | 6.9841 | 4.3390 | 0.8154 | -0.2945 | 0.3489 | 0.4573 |
| Mast4    | _SDS[Phospho (STY)]LPSR_2                                           | Q811L6_S2517_M1_Mast4    | 3.0377 | 6.4287 | 3.7245  | 4.2272 | 3.6643 | 4.0652 | 3.9419 | 3.8913 | 6.7874 | 4.1942 | 0.8911 | -0.1664 | 0.5461 | 0.2627 |
| Mast4    | _KHS[Phospho (STY)]LEVTEQEVOR_3                                     | Q811L6_S1465_M1_Mast4    | 4.1745 | 2.4349 | 3.9082  | 4.6969 | 3.3182 | 3.8596 | 3.6002 | 3.5492 | 3.8483 | 3.1292 | 1.0567 | 0.8796  | 0.6417 | 0.7927 |
| Mast4    | _SLSYSAS[Phospho (STY)]PPEAQGVOR_2                                  | Q811L6_S2461_M1_Mast4    | 4.1213 | 3.2211 | 3.8550  | 3.3987 | 3.2650 | 5.8474 | 3.5470 | 3.6024 | 3.9015 | 3.0760 | 1.1188 | 0.1620  | 0.4472 | 0.3495 |
| Arhgap32 | _AVS[Phospho (STY)]PEGDER_2                                         | Q811P8_S1823_M1_Arhgap32 | 8.3223 | 8.0920 | 8.7886  | 8.5940 | 7.8719 | 8.3772 | 8.2667 | 8.3405 | 8.4065 | 8.3301 | 1.0006 | 0.0009  | 0.9772 | 0.0100 |
| Arhgap32 | _DVNRS[Phospho (STY)]PTQLQLQK_2                                     | #N/A                     | 6.4943 | 7.4146 | 7.7284  | 7.9193 | 6.3953 | 6.0506 | 4.7705 | 3.6941 | 7.6165 | 7.5962 | 1.1954 | 0.2575  | 0.2175 | 0.6625 |
| Arhgap32 | _S[Phospho (STY)]PTQLQLQK_2                                         | #N/A                     | 6.5089 | 5.1913 | 3.8333  | 3.7205 | 3.4826 | 5.9579 | 3.9881 | 3.7713 | 5.9065 | 3.6955 | 1.1018 | 0.1399  | 0.5846 | 0.2621 |
| Arhgap32 | _TQAAQS[Phospho (STY)]PIVITENK_2                                    | Q811P8_S613_M1_Arhgap32  | 6.6086 | 6.4414 | 3.4724  | 6.0727 | 2.8825 | 3.7421 | 6.1781 | 4.1979 | 5.7993 | 3.8876 | 0.9709 | -0.0425 | 0.8841 | 0.0535 |
| Arhgap32 | _NES[Phospho (STY)]EPSEM[Oxidation (M)]K_2                          | #N/A                     | 7.2349 | 6.1061 | 5.4012  | 7.6396 | 6.2612 | 5.4440 | 5.2912 | 5.5866 | 6.5358 | 6.5786 | 1.0803 | 0.0818  | 0.5328 | 0.2734 |
| Arhgap32 | _KLHDM[Oxidation (M)]GC[Carbamidomethyl (C)]S[Phospho (STY)]LPEHR_3 | Q811P8_S613_M1_Arhgap32  | 5.6379 | 5.5579 | 6.8267  | 6.5441 | 5.2667 | 5.8356 | 6.2318 | 6.0270 | 6.6122 | 5.6860 | 0.9683 | -0.0464 | 0.5900 | 0.2292 |
| Arhgap32 | _SPFFTLDSL[Phospho (STY)]PTDOK_2                                    | Q811P8_S871_M1_Arhgap32  | 3.2571 | 4.0134 | 4.4917  | 6.7630 | 3.9017 | 4.2237 | 4.1169 | 4.4666 | 3.2648 | 3.7127 | 1.1418 | 0.1913  | 0.4211 | 0.3756 |
| Arhgap32 | _DAEAGGSQSTPGSTASPEVS[Phospho (STY)]PVQEK_3                         | Q811P8_S856_M1_Arhgap32  | 8.7613 | 8.8808 | 9.4606  | 9.4985 | 8.0551 | 8.7687 | 9.2431 | 9.0780 | 8.9475 | 8.7075 | 0.9900 | -0.0145 | 0.7619 | 0.1181 |
| Arhgap32 | _S[Phospho (STY)]SDASLASFGNVDLGNR_2                                 | Q811P8_S730_M1_Arhgap32  | 3.5897 | 3.7195 | 4.4569  | 3.7495 | 3.5408 | 3.5489 | 3.7325 | 3.0808 | 3.8810 | 3.5548 | 1.0576 | 0.0808  | 0.3881 | 0.4111 |
| Arhgap32 | _SAKS[Phospho (STY)]EESLSHAVDGSOK_3                                 | #N/A                     | 7.1998 | 7.4943 | 8.0925  | 7.5891 | 6.6436 | 7.2074 | 7.8848 | 7.5603 | 7.5548 | 7.1428 | 0.9782 | -0.0319 | 0.5654 | 0.2477 |
| Arhgap32 | _SLIVSS[Phospho (STY)]PSTK_2                                        | Q811P8_S592_M1_Arhgap32  | 3.1842 | 4.2479 | 4.4187  | 4.4752 | 3.8287 | 4.2967 | 4.1899 | 3.6433 | 3.2919 | 3.7382 | 1.0967 | 0.1332  | 0.2513 | 0.5998 |
| Arhgap32 | _S[Phospho (STY)]EESLSHAVDGSOK_2                                    | #N/A                     | 4.1244 | 3.1017 | 3.3104  | 7.2219 | 2.9900 | 3.6346 | 3.5277 | 4.3054 | 3.9540 | 3.7801 | 1.0442 | 0.0624  | 0.8404 | 0.0755 |
| Arhgap32 | _LSS[Phospho (STY)]RDAFAPNPR_2                                      | Q811P8_S1689_M1_Arhgap32 | 4.1701 | 3.4744 | 3.3560  | 3.1454 | 3.2957 | 4.4337 | 3.2937 | 3.8557 | 4.1548 | 4.3236 | 0.9332 | -0.0998 | 0.4415 | 0.3550 |
| Arhgap32 | _S[Phospho (STY)]PFNLGK_2                                           | Q811P8_S662_M1_Arhgap32  | 3.8869 | 3.1912 | 3.8849  | 3.4286 | 3.0126 | 3.2161 | 3.5769 | 3.5726 | 3.8716 | 3.1059 | 0.9731 | -0.0394 | 0.6870 | 0.1630 |
| Arhgap32 | _AES[Phospho (STY)]FPGHSC[Carbamidomethyl (C)]GFAAPVPPTTR_3         | Q811P8_S1405_M1_Arhgap32 | 3.6264 | 2.9308 | 4.3132  | 3.6891 | 4.2529 | 3.4766 | 3.8374 | 3.3026 | 2.9512 | 3.2820 | 1.1111 | 0.1520  | 0.2510 | 0.6003 |
| Pcy11b   | _QS[Phospho (STY)]PVSSPTR_2                                         | Q811Q9_S319_M1_Pcy11b    | 3.3240 | 4.1292 | 4.0108  | 3.9915 | 3.9505 | 3.7790 | 4.1398 | 6.9994 | 6.8403 | 3.6688 | 0.7207 | -0.4726 | 0.0604 | 1.2187 |
| Pcy11b   | _M[Oxidation (M)]LQALS[Phospho (STY)]PK_2                           | #N/A                     | 4.9250 | 5.3212 | 4.9799  | 5.1959 | 3.7665 | 5.1771 | 4.7006 | 6.2926 | 5.0391 | 5.9384 | 0.8911 | -0.1664 | 0.1872 | 0.7277 |
| Pcy11b   | _AASASS[Phospho (STY)]MKS[Phospho (STY)]EGDEDEK_2                   | Q811Q9_S360_M2_Pcy11b    | 3.5612 | 3.6052 | 4.0035  | 5.6539 | 3.4649 | 2.9803 | 3.9372 | 3.5130 | 3.8121 | 4.0368 | 1.0153 | 0.0219  | 0.9066 | 0.0426 |
| Pcy11b   | _MLQALS[Phospho (STY)]PKQS[Phospho (STY)]PVSSPTR_2                  | Q811Q9_S315_M2_Pcy11b    | 3      |        |         |        |        |        |        |        |        |        |        |         |        |        |



|         |                                                                                             |                        |         |         |         |         |         |         |         |         |         |         |         |         |        |        |
|---------|---------------------------------------------------------------------------------------------|------------------------|---------|---------|---------|---------|---------|---------|---------|---------|---------|---------|---------|---------|--------|--------|
| Tufm    | _AEAGDNLGALVR_2                                                                             | #N/A                   | 7.8151  | 7.9736  | 8.0733  | 8.1248  | 7.7757  | 7.8173  | 7.4640  | 7.4875  | 7.7815  | 7.7592  | 1.0403  | 0.0569  | 0.0164 | 1.7857 |
| Tufm    | _TVTVGEM[Oxidation (M)]FHK_2                                                                | #N/A                   | 4.4202  | 5.8890  | 5.9565  | 6.1090  | 6.1249  | 6.8376  | 6.4193  | 6.4063  | 6.3534  | 6.1665  | 0.9176  | -0.1240 | 0.1879 | 0.7261 |
| Tufm    | _TITGSLVTPVPM[Oxidation (M)]TEEDKMR_3                                                       | #N/A                   | 4.5610  | 5.1384  | 5.5408  | 4.9378  | 5.3105  | 5.2904  | 4.8846  | 4.5742  | 5.0967  | 1.0259  | 0.0369  | 0.5844  | 0.2333 | 0.2333 |
| Tufm    | _KYEEDNAPEER_3                                                                              | #N/A                   | 6.5995  | 5.7055  | 3.9246  | 6.3375  | 6.8936  | 6.4728  | 6.4656  | 6.2297  | 6.1905  | 6.5772  | 0.9408  | -0.0880 | 0.5190 | 0.2848 |
| Tufm    | _KGDEC[Carbamidomethyl (C)]ELGHNK_3                                                         | #N/A                   | 5.9847  | 4.9431  | 5.7174  | 5.3864  | 6.1696  | 6.3825  | 6.3012  | 5.0113  | 5.6995  | 6.4464  | 0.9828  | -0.2505 | 0.7952 | 0.0945 |
| Tufm    | _TLTAATK_2                                                                                  | #N/A                   | 5.5609  | 5.4060  | 5.5065  | 5.6017  | 5.6897  | 5.8481  | 4.5326  | 5.5702  | 5.3174  | 6.2009  | 1.0364  | 0.0516  | 0.5076 | 0.2945 |
| Tufm    | _VEEDINAPEER_2                                                                              | #N/A                   | 7.1115  | 7.1245  | 7.0873  | 3.1866  | 7.8141  | 7.3398  | 7.2800  | 7.2164  | 7.4999  | 7.4033  | 0.8994  | -0.1529 | 0.4196 | 0.3772 |
| Tufm    | _ILAEGGAK_2                                                                                 | #N/A                   | 5.0823  | 5.1117  | 4.4709  | 5.0585  | 5.9728  | 5.2143  | 4.3591  | 5.6858  | 5.1522  | 5.1571  | 1.0124  | 0.0178  | 0.8517 | 0.0697 |
| Tufm    | _ELIAM[Oxidation (M)]PGIDLK_2                                                               | #N/A                   | 6.3162  | 7.1218  | 7.3705  | 7.3955  | 7.5834  | 7.1001  | 7.2549  | 7.2184  | 7.1587  | 7.4876  | 0.9819  | -0.0264 | 0.5893 | 0.2297 |
| Tufm    | _ELLTEFGVKEETPVVGSLC[Carbamidomethyl (C)]ALEQR_3                                            | #N/A                   | 4.0787  | 0.7906  | 3.2647  | 3.9537  | 3.2044  | 1.7668  | 2.1459  | 3.4352  | 1.5694  | 1.1193  | 1.0097  | 0.1626  | 0.6935 | 0.1590 |
| Tufm    | _GEETPVVGSLC[Carbamidomethyl (C)]ALEQR_2                                                    | #N/A                   | 3.7334  | 4.2760  | 4.1577  | 4.5059  | 3.3113  | 4.5065  | 3.8016  | 3.4582  | 4.3633  | 3.8857  | 1.0528  | 0.0742  | 0.4901 | 0.3097 |
| Tufm    | _GDEC[Carbamidomethyl (C)]ELGHNK_2                                                          | #N/A                   | 6.6486  | 2.9545  | 4.3369  | 7.1417  | 4.8667  | 3.4528  | 6.4185  | 5.2390  | 4.4283  | 3.4417  | 1.0037  | 0.0054  | 0.9858 | 0.0062 |
| Tufm    | _NM[Oxidation (M)]ITGAPLDGC[Carbamidomethyl (C)]LVAANDGPM[Oxidation (M)]PQTR_3              | #N/A                   | 3.9145  | 3.7615  | 4.2397  | 3.1533  | 3.3594  | 5.2753  | 4.3688  | 4.3577  | 2.6605  | 4.8230  | 0.9749  | -0.0367 | 0.8549 | 0.0681 |
| Tufm    | _GITINAAHVEYTAAR_2                                                                          | #N/A                   | 4.5923  | 4.3928  | 3.5467  | 3.2142  | 3.7091  | 4.1358  | 4.1026  | 4.3515  | 4.6324  | 4.7423  | 0.8821  | -0.1809 | 0.1111 | 0.9544 |
| Tufm    | _ADAVQDSEM[Oxidation (M)]VELVEIR_2                                                          | #N/A                   | 5.7809  | 6.1959  | 7.6468  | 7.1123  | 6.5357  | 6.5770  | 6.3946  | 5.8471  | 5.9197  | 6.0564  | 1.0970  | 0.1335  | 0.1329 | 0.8760 |
| Tufm    | _DKPHVNVGTIGHVDHGK_4                                                                        | #N/A                   | 3.5532  | 4.3584  | 4.2400  | 4.1832  | 4.1797  | 3.9106  | 4.0982  | 3.6487  | 3.4396  | 1.0904  | 1.0904  | 0.1248  | 0.1019 | 0.9926 |
| Tufm    | _HYAHTDC[Carbamidomethyl (C)]PGHADVVK_3                                                     | #N/A                   | 3.2530  | 4.0894  | 4.4875  | 4.0313  | 4.6685  | 3.8187  | 4.1795  | 2.9699  | 3.2690  | 3.7085  | 1.1490  | 0.2004  | 0.1502 | 0.8235 |
| Tufm    | _QIGVEHVVVVVK_2                                                                             | #N/A                   | 3.3227  | 3.9034  | 4.0095  | 4.5122  | 3.7917  | 4.4337  | 4.2269  | 3.8063  | 3.2549  | 2.9784  | 1.1315  | 0.1782  | 0.1646 | 0.7836 |
| Swap    | _SEDDAAS[Phospho (STY)]GEHDQIEGVR_3                                                         | #N/A                   | 3.8284  | 3.4642  | 4.0909  | 6.7264  | 5.5099  | 6.0571  | 4.3287  | 6.9127  | 6.5873  | 6.6453  | 0.8084  | -0.3069 | 0.1955 | 0.7087 |
| Swap    | _RTGESARS[Phospho (STY)]EDDAAS[Phospho (STY)]GEHDQIEGVR_4                                   | #N/A                   | 3.1969  | 3.9769  | 4.2963  | 3.8329  | 4.1023  | 4.2264  | 4.0825  | 3.2468  | 4.3372  | 0.9762  | -0.3437 | 0.7189  | 0.1314 | 1.0134 |
| Rhf214  | _SDESPGLS[Phospho (STY)]PK_2                                                                | QB8FUJ_536_M1_Rhf214   | 8.9807  | 9.5214  | 9.3253  | 9.8535  | 9.1725  | 9.7884  | 9.9950  | 9.4131  | 9.5981  | 9.8093  | 0.9728  | -0.3997 | 0.2290 | 0.4602 |
| Rhf214  | _VOODQDQDS[Phospho (STY)]SKL_2                                                              | QB8FUJ_519_M1_Rhf214   | 3.6845  | 2.9889  | 4.3713  | 6.0492  | 2.8102  | 3.4184  | 3.0878  | 3.2445  | 4.3919  | 3.3401  | 1.1054  | 0.0445  | 0.5862 | 0.2320 |
| Rhf214  | / (Protein N-term)]AASEVAGLGAGT[Phospho (STY)]PS[Phospho (STY)]PSSSALC[Carbamidomethyl (C)] | QB8FUJ_515_M2_Rhf214   | 3.2760  | 3.9502  | 3.9628  | 4.4654  | 3.4800  | 3.8270  | 4.1801  | 5.6902  | 3.3017  | 4.4324  | 0.8695  | -0.2017 | 0.2321 | 0.6344 |
| Rhf214  | _NIS[Phospho (STY)]PPSVSSGMITK_2                                                            | QB8FUJ_548_M1_Rhf214   | 3.4252  | 4.1814  | 3.1588  | 4.2035  | 4.0697  | 4.0557  | 3.9489  | 4.2986  | 3.0968  | 3.8807  | 1.0113  | 0.0161  | 0.8909 | 0.0590 |
| Pe1     | _VC[Carbamidomethyl (C)]TQLQVLEAFR_2                                                        | #N/A                   | 3.2458  | 4.0021  | 4.7769  | 4.4135  | 3.7042  | 4.2351  | 4.1306  | 4.3975  | 4.5751  | 4.2126  | 0.9623  | -0.0555 | 0.6028 | 0.2192 |
| Actb2   | _VAPDEHPILLTEAPLNPK_3                                                                       | #N/A                   | 13.8258 | 13.7291 | 14.2603 | 14.0375 | 13.8851 | 13.9751 | 13.8623 | 13.8629 | 13.8638 | 13.7403 | 1.0123  | 0.0177  | 0.1364 | 0.8652 |
| Hnrnpa3 | _IFVGKEDTEEYNLR_3                                                                           | #N/A                   | 7.2980  | 7.2461  | 7.9207  | 7.9584  | 7.3751  | 7.3364  | 7.2857  | 6.5795  | 7.3767  | 7.6659  | 1.0409  | 0.0578  | 0.2654 | 0.5761 |
| Hnrnpa3 | _GFAVFTDQHTVDKVMQK_3                                                                        | #N/A                   | 7.1983  | 8.1817  | 9.2118  | 8.8999  | 7.6941  | 7.8567  | 8.1418  | 8.1294  | 7.8988  | 8.1875  | 1.0104  | 0.0150  | 0.8345 | 0.0786 |
| Hnrnpa3 | _GFAVFTDQHTVDK_2                                                                            | #N/A                   | 5.7438  | 5.5697  | 6.1830  | 5.9688  | 5.7314  | 6.5158  | 6.0401  | 5.8271  | 5.9799  | 5.8267  | 1.0057  | 0.0082  | 0.8590 | 0.0229 |
| Hnrnpa3 | _EDTEEYNLR_2                                                                                | #N/A                   | 7.0286  | 6.3544  | 4.0107  | 6.7477  | 7.2788  | 6.6659  | 6.6844  | 6.7205  | 6.4460  | 6.6399  | 0.9585  | -0.0612 | 0.6631 | 0.1784 |
| Hnrnpa3 | _ETIEVM[Oxidation (M)]EDR_2                                                                 | #N/A                   | 7.9283  | 7.8524  | 7.6656  | 8.6470  | 8.0167  | 8.1021  | 7.9947  | 7.6870  | 7.8533  | 8.2412  | 1.0115  | 0.0165  | 0.6511 | 0.1863 |
| Hnrnpa3 | _EDSVKPGAHLTVK_2                                                                            | #N/A                   | 5.6384  | 6.1633  | 6.2831  | 6.6141  | 6.8070  | 6.3766  | 6.2355  | 5.7809  | 6.2645  | 6.1584  | 1.0334  | 0.0474  | 0.3902 | 0.4087 |
| Hnrnpa3 | _SSGS[Phospho (STY)]PYGGVSGSGSGSGGYGR_2                                                     | QB8G59_5359_M1_hnrnpa3 | 7.7165  | 7.7389  | 7.7215  | 8.1849  | 6.8619  | 7.7976  | 7.7571  | 7.3581  | 10.4640 | 0.9247  | -0.1130 | 0.3556  | 0.4491 | 0.1863 |
| Hnrnpa3 | _LFIGLSFETTDQSRHFEK_3                                                                       | #N/A                   | 5.5466  | 6.3553  | 3.8266  | 7.0062  | 5.8116  | 3.3880  | 6.1419  | 5.8136  | 6.3421  | 6.4572  | 0.8600  | -0.2176 | 0.2732 | 0.5635 |
| Hnrnpa3 | _LFIGLSFETTDQSR_2                                                                           | #N/A                   | 4.4825  | 3.7814  | 3.6030  | 3.9356  | 3.9162  | 3.4747  | 3.9014  | 5.1114  | 5.3191  | 3.7479  | 0.8574  | -0.2219 | 0.1153 | 0.9381 |
| Hnrnpa3 | _GEEGHDPKEPELRK_4                                                                           | #N/A                   | 3.4208  | 4.2260  | 4.1076  | 3.8947  | 4.0473  | 3.6822  | 4.0430  | 3.1065  | 3.1606  | 3.5720  | 1.1227  | 0.1670  | 0.1010 | 0.9955 |
| Hnrnpa3 | _GFGFVTYS[Carbamidomethyl (C)]VEVDVDAAM[Oxidation (M)]C[Carbamidomethyl (C)]AR_2            | #N/A                   | 3.6513  | 3.6214  | 3.9648  | 3.4171  | 2.7420  | 2.9587  | 3.6569  | 3.5605  | 3.8596  | 3.5629  | 0.9269  | -0.1095 | 0.3000 | 0.5229 |
| Hnrnpa3 | _WGTLTDC[Carbamidomethyl (C)]VMR_2                                                          | #N/A                   | 3.0264  | 4.1998  | 3.7132  | 4.2158  | 4.0881  | 4.0373  | 4.3042  | 3.9027  | 3.5512  | 4.1828  | 0.9736  | -0.0386 | 0.7048 | 0.1519 |
| Hnrnpa3 | _YNTNGN[Carbamidomethyl (C)]EVK_3                                                           | #N/A                   | 3.0028  | 3.2553  | 3.8208  | 3.3646  | 3.0766  | 3.1521  | 3.5129  | 3.6366  | 3.9356  | 3.0419  | 0.9284  | -0.1073 | 0.2633 | 0.5795 |
| Hnrnpa3 | _YQKIEFVMEOR_3                                                                              | #N/A                   | 3.3975  | 3.9449  | 3.1312  | 4.1758  | 3.7663  | 3.9632  | 4.3240  | 4.3263  | 3.1245  | 3.8530  | 0.9547  | -0.0669 | 0.5719 | 0.2427 |
| Sic6a15 | _QSGS[Phospho (STY)]PTLDAPNGR_2                                                             | #N/A                   | 3.0162  | 7.6417  | 7.5990  | 4.2993  | 7.0422  | 7.2601  | 7.8623  | 4.2027  | 7.6535  | 7.2189  | 0.9122  | -0.1326 | 0.6396 | 0.1941 |
| Sic6a15 | _JPSENMS[Phospho (STY)]PNFGK_2                                                              | QB8G16_5687_M1_Sic6a15 | 2.9933  | 3.7496  | 4.2279  | 3.7716  | 3.6379  | 4.3807  | 3.2295  | 3.5286  | 6.7403  | 0.7967  | 0.3278  | 0.2157  | 0.6662 | 0.0529 |
| Sic6a15 | _KDS[Phospho (STY)]SGS[Phospho (STY)]PTLDAPNGR_2                                            | QB8G16_5699_M2_Sic6a15 | 6.9498  | 6.3048  | 6.6907  | 6.5781  | 3.7454  | 6.3479  | 6.6121  | 7.0068  | 6.4318  | 6.2639  | 0.9161  | -0.1264 | 0.3761 | 0.4247 |
| Sic6a15 | _DTDAEDGS[Phospho (STY)]EADDERPAWNK_2                                                       | QB8G16_555_M1_Sic6a15  | 3.2683  | 3.9579  | 3.9551  | 4.4578  | 3.8462  | 4.7293  | 4.1724  | 3.6607  | 3.3093  | 1.6065  | 1.2427  | 0.3135  | 0.1607 | 0.8218 |
| Necab1  | _ETSPSSNNS[Phospho (STY)]SELSSTQLSK_2                                                       | QB8G18_514_M1_Necab1   | 3.9017  | 3.4533  | 3.8665  | 4.2241  | 3.2955  | 3.6398  | 3.6862  | 5.2124  | 3.8370  | 4.0097  | 0.8910  | -0.1665 | 0.1974 | 0.7046 |
| Pumd11  | _AQGS[Phospho (STY)]LISTDR_2                                                                | QB8G32_514_M1_Pumd11   | 7.6164  | 6.8652  | 6.9951  | 7.5811  | 5.1268  | 7.1231  | 6.8943  | 7.4060  | 7.3971  | 0.9510  | -0.0725 | 0.4825  | 0.3165 | 0.7065 |
| Pumd11  | _LYONLEQNLR_2                                                                               | #N/A                   | 4.5474  | 5.3204  | 4.4353  | 4.8981  | 4.8090  | 3.2586  | 5.7511  | 5.4724  | 5.3415  | 4.5661  | 0.8603  | -0.2171 | 0.1099 | 0.9590 |
| Pumd11  | _YQEAHLGSLR_2                                                                               | #N/A                   | 3.3311  | 4.0113  | 3.8620  | 4.1094  | 2.7416  | 4.1498  | 4.2576  | 4.3927  | 3.1909  | 3.7866  | 0.9472  | -0.0782 | 0.5786 | 0.2376 |
| Pumd11  | _TAYSFYFAEFGYSDSPK_2                                                                        | #N/A                   | 5.3515  | 3.8109  | 3.2652  | 3.8229  | 4.1761  | 3.9493  | 4.4581  | 4.1922  | 2.9904  | 3.9871  | 0.9622  | -0.0556 | 0.6374 | 0.1956 |
| Sv2b    | _DNYEGYAPSDGYR_2                                                                            | #N/A                   | 8.0385  | 7.7108  | 7.5794  | 7.4508  | 7.2290  | 7.4978  | 8.1266  | 7.9043  | 7.7271  | 7.5018  | 0.9705  | -0.0432 | 0.2230 | 0.6517 |
| Sv2b    | _YQDEEYS[Phospho (STY)]K_2                                                                  | QB8G39_5425_M1_Sv2b    | 6.3104  | 6.1447  | 6.6820  | 6.3316  | 5.1486  | 6.2357  | 6.5720  | 6.9469  | 6.3183  | 6.6612  | 0.9272  | -0.1091 | 0.1283 | 0.8918 |
| Sv2b    | _YQDEEYK_2                                                                                  | #N/A                   | 6.7836  | 6.2827  | 6.0307  | 5.8875  | 5.9857  | 5.7857  | 6.1786  | 6.6459  | 6.2064  | 6.0561  | 0.9768  | -0.0339 | 0.5100 | 0.2925 |
| Sv2b    | _HVLFEITTFDK_2                                                                              | #N/A                   | 4.9977  | 5.2680  | 5.0131  | 4.5129  | 4.4992  | 5.0228  | 4.5035  | 5.3191  | 5.3396  | 4.8786  | 0.9751  | -0.0363 | 0.5927 | 0.2272 |
| Sv2b    | _QVHDITMMR_2                                                                                | #N/A                   | 4.8416  | 3.5205  | 3.9987  | 4.5782  | 4.9463  | 3.2158  | 3.1090  | 3.0535  | 3.7577  | 0.9390  | 1.5410  | 0.6239  | 0.0421 | 1.3760 |
| Sv2b    | _DMC[Carbamidomethyl (C)]LSS[Phospho (STY)]SKL_2                                            | QB8G39_5144_M1_Sv2b    | 2.9565  | 3.7128  | 4.1910  | 3.7348  | 3.6011  | 3.0235  | 4.4175  | 3.2664  | 3.5654  | 3.4121  | 0.9649  | -0.0516 | 0.6932 | 0.1591 |
| Sv2b    | _ADGLGGQADLMAER_2                                                                           | #N/A                   | 5.1132  | 3.8292  | 3.2469  | 4.2915  | 3.6505  | 4.0790  | 4.4398  | 4.2105  | 3.0087  | 3.9688  | 0.9645  | -0.0521 | 0.6722 | 0.1725 |
| Sv2b    | _SNECNGEEDAQS[Phospho (STY)]DVT[Phospho (STY)]EGHDEDEYEGYGGPHPDQVK_5                        | QB8G39_533_M2_Sv2b     | 3.2344  | 4.1080  | 4.4689  | 4.0127  | 3.8790  | 4.2465  | 4.1609  | 9.0191  | 3.2875  | 3.6900  | 0.7921  | -0.3363 | 0.3803 | 0.4433 |
| Tmem169 | lactyl (Protein N-term)]M[Oxidation (M)]EESAPVEGQGLPS[Phospho (STY)]PHHGS[Phospho (STY)]LRR | #N/A                   | 5.9077  | 6.3469  | 6.2115  | 7.0898  | 4.4286  | 5.8992  | 6.2220  | 6.6286  | 5.8534  | 5.5160  | 0.9877  | -0.0178 | 0.8820 | 0.0545 |
| Tmem169 | _KDS[Phospho (STY)]RPESIRYR_3                                                               | QB8G50_547_M1_Tmem169  | 3.1903  | 4.8134  | 3.8771  | 4.3797  | 3.8168  | 5.1521  | 4.0944  | 5.7088  | 5.5729  | 4.3467  | 0.8528  | -0.2297 | 0.1782 | 0.7490 |
| Tmem169 | _Acetyl (Protein N-term)]MESAPVESGQGLPS[Phospho (STY)]PHHGS[Phospho (STY)]LR_3              | #N/A                   | 2.9991  | 3.7554  | 4.1576  | 3.1594  | 3.6437  | 2.9810  | 4.3749  | 3.4582  | 3.1068  | 3.1264  | 0.9809  | -0.0279 | 0.8475 | 0.0719 |
| Efr3a   | _NIVFLY[Phospho (STY)]NK_2                                                                  | QB8G67_7660_M1_Efr3a   | 7.4350  | 6.7605  | 7.6971  | 13.8158 | 6.7258  | 17.3556 | 12.7533 | 7.3142  | 7.7169  | 0.8106  | -0.3030 | 0.3298  | 0.4817 | 0.1819 |
| Efr3a   | _LGPPSS[Phospho (STY)]PSAADKENPAVLAES[Carbamidomethyl (C)]FR_3                              | QB8G67_5220_M1_Efr3a   | 3.6626  | 3.1940  | 4.0203  | 3.8173  | 3.4304  | 3.2049  | 3.5567  | 3.4478  | 3.7469  | 3.2414  | 1.0162  |         |        |        |



|         |                                                                              |                         |         |         |         |         |         |         |         |         |         |         |        |         |        |        |
|---------|------------------------------------------------------------------------------|-------------------------|---------|---------|---------|---------|---------|---------|---------|---------|---------|---------|--------|---------|--------|--------|
| Creg2   | _RES[Phospho (STY)]GS[Phospho (STY)]SEASPGRR_2                               | QBBGC9_S109_M2_Creg2    | 3.6885  | 2.9439  | 3.4682  | 3.9709  | 2.8322  | 3.7924  | 3.6855  | 3.2814  | 3.5274  | 3.9379  | 0.9560 | -0.0649 | 0.5605 | 0.2514 |
| Coa6    | _FEAGGFQSSQSTENS_2                                                           | #N/A                    | 6.7217  | 6.5770  | 7.0892  | 7.5222  | 7.0953  | 6.9799  | 7.2700  | 7.0898  | 7.0078  | 6.9710  | 0.9877 | -0.0178 | 0.6353 | 0.1970 |
| Coa6    | _EKFEAGGFQSSQSTENS_2                                                         | #N/A                    | 7.0230  | 6.4141  | 4.2168  | 5.8853  | 5.4349  | 2.9977  | 5.9816  | 3.4414  | 3.0900  | 3.1432  | 1.2647 | 0.0388  | 0.2917 | 0.5350 |
| Eif4b   | _SQSS[Phospho (STY)]DTEPSP[Phospho (STY)]PTSGGK_2                            | #N/A                    | 12.0517 | 12.3982 | 12.6545 | 12.8502 | 12.3877 | 12.4698 | 12.4593 | 12.1410 | 12.1588 | 12.4519 | 1.0135 | 0.0193  | 0.3145 | 0.5023 |
| Eif4b   | _AFGSP[Phospho (STY)]GVRR_2                                                  | #N/A                    | 3.8254  | 2.5370  | 7.5649  | 7.4589  | 2.9691  | 7.0907  | 7.0906  | 6.8234  | 6.7426  | 4.2809  | 0.8669 | -0.2061 | 0.5176 | 0.2860 |
| Eif4b   | _SWSS[Phospho (STY)]RDQYSR_2                                                 | QBBGD9_S312_M1_Eif4b    | 4.2401  | 3.4955  | 3.9738  | 3.4193  | 3.3838  | 3.2408  | 3.1139  | 3.1984  | 4.3478  | 6.1863  | 0.8598 | -0.2179 | 0.3521 | 0.4534 |
| Eif4b   | _TGS[Phospho (STY)]ESSQTGASATSGR_2                                           | #N/A                    | 7.6999  | 7.4099  | 7.6092  | 8.2739  | 6.9605  | 7.5257  | 7.5375  | 7.4857  | 7.3789  | 7.7030  | 1.0071 | 0.0102  | 0.8174 | 0.0876 |
| Eif4b   | _ERHPS[Phospho (STY)]WR_2                                                    | #N/A                    | 6.5289  | 6.0365  | 6.7184  | 7.0036  | 3.9115  | 6.9329  | 6.6740  | 6.3718  | 6.2082  | 3.7078  | 1.0781 | 0.1084  | 0.5930 | 0.2270 |
| Eif4b   | _RAFGS[Phospho (STY)]GYR_2                                                   | #N/A                    | 4.2931  | 3.5485  | 4.0267  | 3.5705  | 3.4368  | 3.1878  | 3.7188  | 3.4307  | 3.7297  | 3.2478  | 1.0412 | 0.0582  | 0.5399 | 0.2677 |
| Eif4b   | _YAALS[Phospho (STY)]VGDEDEGGDC[Carbamidomethyl (C)]TE_2                     | QBBGD9_S597_M1_Eif4b    | 3.5372  | 4.2076  | 3.9534  | 10.0324 | 8.4061  | 8.8845  | 5.9941  | 8.8916  | 8.4949  | 8.9727  | 0.8041 | -0.3146 | 0.3469 | 0.4598 |
| Eif4b   | _ARPTT[Phospho (STY)]DSFDDYPR_2                                              | QBBGD9_T205_M1_Eif4b    | 7.6790  | 6.9658  | 3.7814  | 4.2271  | 3.9173  | 8.6275  | 4.1959  | 7.9291  | 8.0414  | 7.4984  | 0.8482 | -0.2375 | 0.4462 | 0.3504 |
| Eif4b   | _SRTGS[Phospho (STY)]ESSQTGASATSGR_2                                         | #N/A                    | 3.8406  | 3.1449  | 4.5274  | 3.5292  | 2.9663  | 1.8426  | 3.2439  | 3.0884  | 4.2379  | 3.4962  | 0.9408 | -0.0880 | 0.6909 | 0.1606 |
| Eif4b   | _RGDOSFGDKYR_3                                                               | #N/A                    | 4.6130  | 4.6694  | 4.0259  | 4.9001  | 5.0547  | 3.9149  | 3.0818  | 3.4315  | 3.7306  | 4.6374  | 1.2175 | 0.2840  | 0.0515 | 1.2885 |
| Eif4b   | _ERHPS[Phospho (STY)]WRS[Phospho (STY)]EETQER_3                              | QBBGD9_S406_M2_Eif4b    | 4.2821  | 3.5533  | 3.9992  | 4.0712  | 3.5949  | 4.3103  | 3.6912  | 4.0637  | 3.9202  | 4.1495  | 1.0031 | 0.0045  | 0.9485 | 0.0230 |
| Eif4b   | _SAPKEDDASASTQSSR_2                                                          | #N/A                    | 2.4725  | 4.8191  | 4.7778  | 4.3273  | 3.2630  | 2.9657  | 3.3265  | 3.8230  | 4.1220  | 4.3563  | 0.9652 | -0.0511 | 0.8075 | 0.0928 |
| Atg4b   | _FDS[Phospho (STY)]DEDEFEILS_2                                               | QBBGE6_S383_M1_Atg4b    | 4.1538  | 3.4582  | 6.1271  | 4.9494  | 6.9025  | 6.6315  | 4.9733  | 6.5163  | 6.8491  | 6.1950  | 0.8756 | -0.1917 | 0.3596 | 0.4442 |
| Pan2    | _VPEPESQTS[Phospho (STY)]PK_2                                                | QBBGF7_S1188_M1_Pan2    | 6.8410  | 3.9490  | 7.3061  | 6.9629  | 3.8115  | 4.1668  | 7.3325  | 7.0944  | 3.6894  | 4.0518  | 0.9935 | -0.0094 | 0.9760 | 0.0106 |
| Sic35d3 | _DYLY[Oxidation (M)]ENALPSS[Phospho (STY)]P_2                                | #N/A                    | 8.2955  | 8.8739  | 9.3995  | 8.5398  | 8.3871  | 9.3257  | 9.1133  | 9.9716  | 9.4872  | 9.4978  | 0.9250 | -0.1125 | 0.0342 | 1.4664 |
| Sic35d3 | _KDYLMENALPSS[Phospho (STY)]P_2                                              | #N/A                    | 3.7387  | 3.6037  | 3.4724  | 8.9618  | 6.4949  | 3.7422  | 3.1644  | 6.1021  | 4.2841  | 6.2608  | 1.0100 | 0.0143  | 0.9704 | 0.0130 |
| Samm50  | _LYLGGTYSVR_2                                                                | #N/A                    | 7.0508  | 6.9798  | 6.9714  | 6.7584  | 6.7519  | 6.6365  | 6.9432  | 7.1401  | 6.4378  | 6.8763  | 1.0013 | 0.0018  | 0.9529 | 0.0209 |
| Samm50  | _LELYNC[Carbamidomethyl (C)]PM[Oxidation (M)]GVGGDR_2                        | #N/A                    | 5.3484  | 5.2050  | 3.4443  | 4.5579  | 4.8931  | 4.3454  | 3.2054  | 3.9441  | 5.7122  | 5.2386  | 1.0237 | 0.0338  | 0.8572 | 0.0669 |
| Samm50  | _THFLNAGNLC[Carbamidomethyl (C)]NLYNVEGPK_3                                  | #N/A                    | 3.2929  | 4.0495  | 4.5275  | 4.0712  | 3.8708  | 3.8587  | 4.2195  | 4.6945  | 5.9886  | 3.8370  | 0.8895 | -0.1689 | 0.3163 | 0.9886 |
| Samm50  | _DVVVQVHVFDGLGR_3                                                            | #N/A                    | 4.2732  | 3.5775  | 3.4591  | 4.5432  | 3.3988  | 4.3306  | 3.1906  | 3.9588  | 4.2579  | 4.2205  | 1.0060 | 0.0086  | 0.9441 | 0.0250 |
| Samm50  | _SSLSHAM[Oxidation (M)]WDSR_2                                                | #N/A                    | 5.2592  | 3.5629  | 3.4445  | 3.9472  | 3.3842  | 4.4343  | 3.6619  | 4.1713  | 5.2192  | 3.9142  | 0.9408 | -0.0880 | 0.5968 | 0.2242 |
| Reep1   | _SFSP[Phospho (STY)]MQDLTTR_2                                                | QBBGH4_S152_M1_Reep1    | 4.3750  | 3.6804  | 4.1087  | 5.2415  | 3.5187  | 3.1059  | 4.4999  | 3.3487  | 2.9819  | 3.3297  | 1.1290 | 0.1750  | 0.3561 | 0.6473 |
| Sic7a6  | _Acetyl (Protein N-term)[M][Oxidation (M)]EAGELGSP[Phospho (STY)]PTPYHLLPK_2 | #N/A                    | 3.6579  | 3.5931  | 4.0714  | 4.1134  | 3.4814  | 4.0026  | 3.9708  | 3.5784  | 3.6027  | 3.0547  | 1.0756 | 0.1051  | 0.2253 | 0.6473 |
| Sic7a6  | _EDAGS[Phospho (STY)]PSQSGSPETMLQL_2                                         | QBBGK6_S30_M1_Sic7a6    | 4.2892  | 3.5446  | 4.0229  | 3.5667  | 3.4329  | 3.1917  | 3.0848  | 3.4345  | 3.7336  | 3.0547  | 1.0890 | 0.1231  | 0.2354 | 0.6280 |
| Enpp6   | _VDYLTDPDFSLSP[Phospho (STY)]PNYYTLM[Oxidation (M)]TGR_3                     | QBBGN3_S17_M1_Enpp6     | 4.1582  | 3.1842  | 3.8918  | 3.4356  | 3.0056  | 3.2231  | 3.5839  | 3.5656  | 3.8646  | 3.1129  | 0.9862 | -0.0200 | 0.8563 | 0.0617 |
| Vipas39 | _AFT[Phospho (STY)]FDEDEDELSQLK_2                                            | QBBGQL_T21_M1_Vipas39   | 3.6486  | 3.5776  | 4.3354  | 3.3372  | 4.2751  | 3.5827  | 4.4299  | 3.2805  | 4.4299  | 4.5527  | 0.9564 | -0.0643 | 0.6581 | 0.1874 |
| Vipas39 | _ETAGG[Phospho (STY)]SGSTPEGR_2                                              | QBBGQL_577_M1_Vipas39   | 3.6258  | 4.3821  | 3.3595  | 4.0336  | 4.2704  | 3.8551  | 3.7482  | 4.0849  | 3.7335  | 4.0006  | 1.0075 | 0.0108  | 0.8928 | 0.0493 |
| Vipas39 | _TRPGS[Phospho (STY)]GSSLSDALSTPAK_3                                         | QBBGQL_S1119_M1_Vipas39 | 3.7230  | 3.7198  | 3.8670  | 3.9796  | 3.5724  | 3.6576  | 3.7580  | 3.6707  | 3.6710  | 3.8576  | 1.0037 | 0.0054  | 0.8707 | 0.0601 |
| Aars1   | _NAVVGAEAQK_2                                                                | #N/A                    | 3.4101  | 5.0106  | 5.3577  | 4.3618  | 5.3220  | 4.3562  | 4.3142  | 5.7279  | 5.3351  | 5.1406  | 0.9039 | -0.1458 | 0.3031 | 0.5184 |
| Aars1   | _ITC[Carbamidomethyl (C)]LC[Carbamidomethyl (C)]QVPQNAANR_2                  | #N/A                    | 6.4138  | 3.4228  | 4.4801  | 3.4919  | 6.9432  | 6.3113  | 6.7520  | 6.5205  | 4.2751  | 6.8199  | 0.8501 | -0.2343 | 0.3573 | 0.4470 |
| Aars1   | _QIWQNGLDEAR_2                                                               | #N/A                    | 5.9978  | 5.8824  | 5.9123  | 6.2591  | 5.1952  | 5.6980  | 4.4796  | 5.7613  | 5.4895  | 6.2831  | 1.0583 | 0.0817  | 0.3875 | 0.4118 |
| Aars1   | _M[Oxidation (M)]AIELLTQEGFIPVER_2                                           | #N/A                    | 4.2875  | 4.5052  | 4.0212  | 3.3718  | 4.3312  | 6.0791  | 3.0865  | 5.9788  | 6.1043  | 3.2422  | 0.9304 | -0.1041 | 0.7093 | 0.1492 |
| Aars1   | _LVVYTGDEAAGLEPDEK[Carbamidomethyl (C)]R_2                                   | #N/A                    | 3.6079  | 2.7236  | 4.2947  | 3.2965  | 3.4730  | 4.3471  | 3.8559  | 3.3212  | 2.9697  | 3.3110  | 1.0771 | 0.1071  | 0.3766 | 0.3219 |
| Aars1   | _MFVDEVTGDEK[Carbamidomethyl (C)]GVWLK_2                                     | #N/A                    | 3.9783  | 3.2479  | 3.1642  | 4.3414  | 3.1040  | 3.4884  | 3.8161  | 4.4516  | 4.1002  | 3.6339  | 0.9132 | -0.1310 | 0.4165 | 0.4969 |
| Fam53b  | _SSS[Phospho (STY)]SLPAR_2                                                   | QBBGR5_S168_M1_Fam53b   | 8.2077  | 3.4971  | 3.9753  | 8.6106  | 7.8026  | 8.4128  | 3.6674  | 7.8082  | 3.7811  | 3.1964  | 1.4634 | 0.5493  | 0.1842 | 0.7347 |
| Fam53b  | _S[Phospho (STY)]RSQPC[Carbamidomethyl (C)]VLNOKK_3                          | QBBGR5_S267_M1_Fam53b   | 5.4761  | 6.2778  | 3.8866  | 6.3830  | 3.2966  | 3.3280  | 3.2112  | 5.4139  | 2.8606  | 3.4735  | 1.1668 | 0.2125  | 0.4364 | 0.3602 |
| Zkscan1 | _ETTGLS[Phospho (STY)]PQAAGEK_2                                              | QBBGS3_S13_M1_Zkscan1   | 3.4553  | 4.2116  | 3.1890  | 4.2336  | 4.0999  | 4.0256  | 3.9187  | 4.2684  | 3.0666  | 3.9109  | 1.0206 | 0.0294  | 0.8024 | 0.0956 |
| Mical1  | _KPS[Phospho (STY)]PSASPTVR_2                                                | QBBGT6_S647_M1_Mical1   | 6.1450  | 7.6868  | 3.4489  | 3.9515  | 6.8795  | 7.8852  | 5.5878  | 6.3821  | 6.7133  | 7.7602  | 0.9075 | -0.1400 | 0.5688 | 0.2450 |
| Mical1  | _SLHPWGWPTP[Phospho (STY)]SSPK_2                                             | QBBGT6_T479_M1_Mical1   | 3.8763  | 3.3929  | 4.1415  | 3.3784  | 3.0019  | 3.2375  | 5.0567  | 3.4536  | 4.1671  | 3.2135  | 0.8822 | -0.1808 | 0.2671 | 0.5734 |
| Mical1  | _APS[Phospho (STY)]AS[Phospho (STY)]PLAHASR_2                                | QBBGT6_S494_M2_Mical1   | 4.2044  | 3.4598  | 3.9381  | 3.4818  | 3.3481  | 3.2765  | 3.6301  | 3.5193  | 3.8184  | 3.1591  | 1.0245 | 0.0349  | 0.7019 | 0.1537 |
| Mical1  | _QSL[Phospho (STY)]SS[Phospho (STY)]JFR_2                                    | QBBGT6_S28_M2_Mical1    | 3.3621  | 4.1184  | 4.5966  | 4.2973  | 4.0067  | 4.1188  | 4.0120  | 3.8212  | 3.4698  | 4.2643  | 1.0492 | 0.0693  | 0.4610 | 0.3363 |
| Phyhl1  | _VHLTQLEK_2                                                                  | #N/A                    | 5.9929  | 6.9255  | 5.4198  | 6.5214  | 5.3179  | 6.6331  | 5.8390  | 7.0969  | 6.3566  | 6.7853  | 0.9410 | -0.0877 | 0.3679 | 0.4342 |
| Phyhl1  | _TCT[Carbamidomethyl (C)]NIS[Phospho (STY)]VGR_2                             | QBBGT8_S372_M1_Phyhl1   | 6.8928  | 6.8975  | 6.9866  | 5.9677  | 7.1442  | 6.7309  | 6.1263  | 7.0187  | 6.9997  | 1.0275  | 0.0392 | 0.5444  | 0.2641 |        |
| Phyhl1  | _SQDSGIAEM[Oxidation (M)]EELPVPHNKK_3                                        | #N/A                    | 5.8795  | 6.2958  | 6.0982  | 4.9383  | 6.1935  | 6.4065  | 6.5169  | 5.9280  | 6.0154  | 6.0427  | 0.9758 | -0.0353 | 0.6317 | 0.1995 |
| Phyhl1  | _NLSLEAIQLC[Carbamidomethyl (C)]DR_2                                         | #N/A                    | 4.3031  | 4.3422  | 5.9984  | 7.7301  | 6.3819  | 4.1864  | 7.2787  | 7.1954  | 7.2509  | 6.9801  | 0.7651 | -0.9863 | 0.0526 | 1.2794 |
| Phyhl1  | _LDHALSPSS[Phospho (STY)]PC[Carbamidomethyl (C)]EEK_2                        | #N/A                    | 7.3540  | 7.2894  | 4.3104  | 7.8062  | 4.5256  | 7.1224  | 7.6835  | 7.1927  | 3.7210  | 7.4436  | 0.9833 | -0.0243 | 0.9225 | 0.0350 |
| Phyhl1  | _GHWFLSPR_2                                                                  | #N/A                    | 6.7117  | 6.9893  | 7.0405  | 8.2978  | 6.5914  | 6.6623  | 7.1208  | 6.9862  | 7.1390  | 7.0085  | 0.9979 | -0.0030 | 0.9650 | 0.0155 |
| Phyhl1  | _TEYTVAVGTASK_2                                                              | #N/A                    | 3.0988  | 4.1274  | 3.7856  | 4.2883  | 4.0157  | 5.5316  | 4.0029  | 5.0598  | 3.6327  | 4.2552  | 0.9772 | -0.0332 | 0.8432 | 0.0740 |
| Phyhl1  | _ISWDMDSK_2                                                                  | #N/A                    | 3.6706  | 3.6718  | 3.4042  | 2.9777  | 2.1214  | 3.8103  | 3.0963  | 4.0532  | 4.3522  | 4.1261  | 0.8385 | -0.2541 | 0.1468 | 0.8332 |
| Phyhl1  | _DNGSGHSGSPISK_2                                                             | #N/A                    | 3.7078  | 3.5183  | 4.3946  | 3.3964  | 3.8964  | 3.2180  | 3.1111  | 3.2212  | 4.3706  | 3.3634  | 1.0489 | 0.0689  | 0.5978 | 0.2235 |
| Phyhl1  | _FEIAEK_2                                                                    | #N/A                    | 3.2298  | 3.9861  | 3.9269  | 4.4295  | 3.8744  | 4.2511  | 4.1442  | 3.6889  | 4.0563  | 4.1859  | 0.9828 | -0.0251 | 0.7695 | 0.1138 |
| Phyhl1  | _NLS[Phospho (STY)]LEAIQLC[Carbamidomethyl (C)]DRDGNK_3                      | #N/A                    | 3.8605  | 3.1159  | 3.5941  | 3.7989  | 3.0042  | 3.6204  | 3.5136  | 4.3196  | 3.9682  | 3.7659  | 0.8991 | -0.1535 | 0.1209 | 0.9176 |
| Cnry    | _SAS[Phospho (STY)]ADNLUPR_2                                                 | #N/A                    | 14.8977 | 14.6204 | 15.4578 | 14.8661 | 13.5612 | 14.5353 | 15.3134 | 14.9370 | 14.7735 | 14.6165 | 0.9830 | -0.0248 | 0.4777 | 0.3208 |
| Cnry    | _ASTIFLSKSQT[Phospho (STY)]DVR_2                                             | QBBGU5_T75_M1_Cnry      | 3.0494  | 4.2930  | 4.2839  | 3.8277  | 3.6940  | 3.6152  | 3.9760  | 3.1735  | 3.4725  | 3.5050  | 1.0742 | 0.1033  | 0.3628 | 0.4404 |
| Cnry    | _LESYRPDTLS[Phospho (STY)]R_2                                                | #N/A                    | 5.8902  | 3.9965  | 3.7604  | 3.9332  | 3.8848  | 4.9805  | 6.0059  | 5.0475  | 5.4500  | 5.3166  | 0.8080 | -0.3076 | 0.0532 | 1.2741 |
| Cnry    | _RSAS[Phospho (STY)]ADNLUPR_2                                                | #N/A                    | 7.6103  | 3.2629  | 8.6533  | 3.6471  | 3.0842  | 3.1445  | 8.4244  | 8.0938  | 7.6688  | 7.3468  | 0.6216 | -0.6859 | 0.0517 | 1.2866 |
| Cnry    | _LESYRPDTLS[Phospho (STY)]REDTGG[Carbamidomethyl (C)]NLQHSRD_4               | #N/A                    | 3.5459  | 4.3022  | 3.2796  | 4.3242  | 4.1905  | 3.9350  | 4.4724  | 4.1778  | 2.9761  | 4.0014  | 1.0058 | 0.0083  | 0.9484 | 0.0230 |
| Mief1   | _AISAPTS[Phospho (STY)]PTR_2                                                 | QBBGV8_S59_M1_Mief1     | 10.9654 | 11.0333 | 11.4885 | 3.9511  | 10.2596 | 8.3232  | 8.5924  | 8.2891  | 11.0929 | 10.9660 | 0.9591 | -0.0603 | 0.8071 | 0.0931 |
| Wbp11   | _GVS[Phospho (STY)]POSEDKTGR_2                                               | QBBGW2_S238_M1_Wbp11    | 3.0588  |         |         |         |         |         |         |         |         |         |        |         |        |        |



|          |  |                                           |                         |        |        |        |         |        |        |        |        |        |        |         |         |        |        |
|----------|--|-------------------------------------------|-------------------------|--------|--------|--------|---------|--------|--------|--------|--------|--------|--------|---------|---------|--------|--------|
|          |  | _S[Phospho (STY)]RSEISETMAAK_2            | QBBH50_S143_M1_         | 4.0076 | 3.2445 | 3.3343 | 4.2349  | 3.1384 | 3.8370 | 3.4514 | 4.9508 | 4.0311 | 3.9797 | 0.8853  | -0.1757 | 0.2013 | 0.6961 |
| Wdr48    |  | DTNNVAYVWDVK_2                            | #N/A                    | 6.0109 | 6.0770 | 6.2164 | 6.5897  | 5.6356 | 6.1307 | 6.1808 | 5.8679 | 6.2407 | 5.7464 | 1.0168  | 0.0241  | 0.5977 | 0.2235 |
| Tipr1    |  | _IDPNVDSQST[Phospho (STY)]PSE_2           | QBBH58_T268_M1_Tipr1    | 7.9955 | 7.6086 | 3.8070 | 7.8328  | 3.5293 | 8.0084 | 8.2596 | 7.3824 | 7.8016 | 8.0187 | 0.8218  | -0.2832 | 0.2453 | 0.6103 |
| Sc25a12  |  | _LTDNDFVR_2                               | #N/A                    | 8.3470 | 8.4431 | 8.3813 | 8.1096  | 7.8756 | 7.9687 | 8.2013 | 8.4871 | 8.3703 | 8.4207 | 0.9782  | -0.0318 | 0.1984 | 0.7026 |
| Sc25a12  |  | _LLADENGR_2                               | #N/A                    | 8.4113 | 8.0469 | 8.3195 | 7.7360  | 7.7740 | 7.9045 | 7.8086 | 8.2628 | 8.2682 | 8.0726 | 0.9912  | -0.0127 | 0.6824 | 0.1659 |
| Sc25a12  |  | _YLGLYNDFNSNP_2                           | #N/A                    | 7.9080 | 7.5991 | 7.8543 | 7.2641  | 7.3543 | 7.7013 | 7.6584 | 7.9100 | 7.8099 | 7.5160 | 0.9858  | -0.0207 | 0.4838 | 0.3153 |
| Sc25a12  |  | _LTIADIER_2                               | #N/A                    | 8.1025 | 7.8658 | 7.6803 | 7.1300  | 6.9849 | 7.8626 | 7.4672 | 7.9314 | 8.1366 | 7.7301 | 0.9729  | -0.0397 | 0.4290 | 0.3676 |
| Sc25a12  |  | _IAPLAEGALPYNIAELQR_2                     | #N/A                    | 6.5528 | 6.4525 | 6.3630 | 6.3105  | 6.0750 | 6.1808 | 6.5836 | 6.7955 | 6.7121 | 6.3808 | 0.9553  | -0.0659 | 0.0323 | 1.4904 |
| Sc25a12  |  | _IVQLLAGVADQTK_2                          | #N/A                    | 7.2406 | 6.9888 | 7.1230 | 7.1103  | 6.4357 | 7.1959 | 7.2943 | 7.5014 | 7.0596 | 7.2727 | 0.9634  | -0.0538 | 0.1504 | 0.8227 |
| Sc25a12  |  | _LATATAGIENIK_2                           | #N/A                    | 6.9193 | 6.8372 | 6.6598 | 7.4072  | 6.6983 | 6.7971 | 7.0524 | 6.7351 | 6.6570 | 0.9990 | -0.0014 | 0.9689  | 0.0137 | 0.0137 |
| Sc25a12  |  | _YEGFFGLYR_2                              | #N/A                    | 7.1195 | 7.2340 | 6.6008 | 6.8660  | 6.1547 | 6.7788 | 7.0614 | 7.0229 | 6.9848 | 7.0222 | 0.9672  | -0.0482 | 0.2782 | 0.5557 |
| Sc25a12  |  | _SGNGEVTENVK_2                            | #N/A                    | 7.2451 | 6.5879 | 7.4753 | 7.1730  | 6.4624 | 6.5615 | 6.5933 | 7.0771 | 6.4368 | 6.4329 | 1.0426  | 0.0602  | 0.2919 | 0.5348 |
| Sc25a12  |  | _IYSTLAGTR_2                              | #N/A                    | 5.7926 | 5.4272 | 5.5767 | 5.6698  | 6.0732 | 5.0349 | 5.3201 | 5.9502 | 5.9287 | 5.3963 | 0.9906  | -0.0136 | 0.8180 | 0.0872 |
| Sc25a12  |  | _VGGINLLTAGLAGVPAASLVTPADVK_3             | #N/A                    | 4.7002 | 4.4447 | 3.8125 | 3.5682  | 3.7044 | 3.3595 | 3.0124 | 4.2739 | 5.0378 | 4.2618 | 0.9482  | -0.0768 | 0.6277 | 0.2022 |
| Sc25a12  |  | _DIEVKEEFQAQSAR_3                         | #N/A                    | 5.2725 | 5.0572 | 6.0425 | 5.5745  | 5.2969 | 5.2518 | 4.8898 | 5.1357 | 5.5634 | 5.9845 | 1.0042  | 0.0060  | 0.9333 | 0.0300 |
| Sc25a12  |  | _LQVAGEITTPR_2                            | #N/A                    | 6.5805 | 5.3744 | 4.5992 | 5.8182  | 5.4491 | 4.2358 | 6.1740 | 5.9906 | 5.9378 | 5.6394 | 0.9002  | -0.1517 | 0.2138 | 0.6700 |
| Sc25a12  |  | _EEGSPAFWK_2                              | #N/A                    | 5.2892 | 5.6677 | 5.8662 | 6.1382  | 5.8444 | 5.2551 | 5.4480 | 3.9389 | 5.8258 | 5.9529 | 1.0728  | 0.1014  | 0.3715 | 0.4300 |
| Sc25a12  |  | _AGQTTYSGVDD[Carbamidomethyl (C)]FR_2     | #N/A                    | 6.0728 | 5.5674 | 3.4747 | 6.0670  | 5.3540 | 5.3404 | 5.8140 | 5.4344 | 5.3733 | 5.5209 | 0.9597  | -0.0593 | 0.6645 | 0.1775 |
| Sc25a12  |  | _FTLGSVAGAVGATVYPIDLVK_2                  | #N/A                    | 3.8502 | 4.4805 | 4.4955 | 4.3140  | 3.6065 | 4.1064 | 3.7949 | 4.0681 | 3.7156 | 3.6136 | 1.0906  | 0.1251  | 0.1211 | 0.9168 |
| Sc25a12  |  | _SSPOGTVLTVYELLQR_2                       | #N/A                    | 4.0781 | 3.3336 | 3.8968 | 3.5812  | 2.9094 | 3.4028 | 3.2959 | 3.9793 | 4.4320 | 3.0329 | 0.9589  | -0.0605 | 0.6593 | 0.1809 |
| Sc25a12  |  | _NSDF[Carbamidomethyl (C)]FK_2            | #N/A                    | 3.5288 | 3.7297 | 3.6113 | 4.3910  | 3.5510 | 2.4692 | 4.5393 | 4.1110 | 4.4100 | 3.4230 | 0.8607  | -0.2164 | 0.1615 | 0.7930 |
| Sc25a12  |  | _NIFLQYASTEVEGHHM[Oxidation (M)]TPEDVQR_3 | #N/A                    | 3.9071 | 3.1625 | 3.6408 | 3.1846  | 3.0508 | 3.5738 | 3.3328 | 3.8166 | 4.1157 | 4.3637 | 0.8753  | -0.1921 | 0.0825 | 1.0835 |
| At11     |  | _LIPWLLSPFR_2                             | #N/A                    | 5.2139 | 5.5450 | 3.4645 | 4.9276  | 4.8062 | 5.3384 | 5.2223 | 5.3604 | 5.0792 | 5.0248 | 0.9441  | -0.0830 | 0.4741 | 0.3241 |
| At11     |  | _SSDWSS[Phospho (STY)]EEEEPVR_2           | #N/A                    | 6.6326 | 8.6673 | 7.7367 | 8.7311  | 7.4267 | 8.7905 | 9.1304 | 8.7556 | 8.5477 | 0.8250 | -0.2775 | 0.1618  | 0.7910 | 0.7910 |
| At11     |  | _SSDWSS[Phospho (STY)]EEEEPVK_2           | #N/A                    | 7.4617 | 7.5059 | 8.2757 | 7.7126  | 7.6737 | 7.3081 | 7.4194 | 7.9956 | 7.6544 | 7.2741 | 0.9893  | -0.0155 | 0.7804 | 0.1077 |
| At11     |  | _DDHSFELDEAALNR_3                         | #N/A                    | 3.9254 | 3.2298 | 3.1114 | 3.3901  | 3.0511 | 3.1776 | 3.5383 | 2.7248 | 1.8144 | 3.5810 | 1.1371  | 0.1853  | 0.3088 | 0.5104 |
| At11     |  | _DRNS[Phospho (STY)]WGGFSEK_2             | #N/A                    | 3.6271 | 3.7791 | 8.0940 | 3.8205  | 3.5064 | 6.9361 | 3.7875 | 3.9040 | 6.9152 | 3.6368 | 1.0876  | 0.1212  | 0.7476 | 0.1261 |
| At11     |  | _VAVLM[Oxidation (M)]DTQGTDFGOSTUR_2      | #N/A                    | 2.4747 | 4.4174 | 3.4955 | 3.9982  | 2.8049 | 3.8197 | 2.3009 | 4.1203 | 3.7689 | 3.9652 | 0.9895  | -0.0152 | 0.9429 | 0.2055 |
| Fbx4     |  | _TS[Phospho (STY)]PLNAEVQYAK_2            | QBBH70_S45_M1_Fbx4      | 3.6875 | 3.8152 | 3.5578 | 4.0604  | 3.6785 | 3.6557 | 3.7140 | 4.0995 | 4.9256 | 4.0274 | 0.8929  | -0.1635 | 0.0791 | 1.0116 |
| Nup107   |  | _HPDISVLGTERG[Phospho (STY)]PR_3          | QBBH74_S87_M1_Nup107    | 3.7349 | 3.0393 | 4.4218 | 6.0248  | 3.6718 | 3.3680 | 5.1010 | 6.3390 | 5.0107 | 3.3906 | 0.8152  | -0.2949 | 0.2429 | 0.6146 |
| Napepld  |  | _S[Phospho (STY)]KLDYR_2                  | QBBH82_S43_M1_Napepld   | 5.0971 | 5.3229 | 4.4098 | 5.6367  | 5.7697 | 5.6319 | 5.6319 | 5.8379 | 5.0455 | 0.8998 | -0.1523 | 0.1555  | 0.8083 | 0.0808 |
| Napepld  |  | _QNS[Phospho (STY)]QNSGGSGVSR_2           | QBBH82_S27_M1_Napepld   | 3.5085 | 4.2648 | 3.2422 | 4.1508  | 4.1531 | 3.4745 | 3.8655 | 4.2152 | 3.6163 | 3.9641 | 0.9703  | -0.0435 | 0.6475 | 0.1888 |
| Ech1     |  | _AQFGPEILGTPAGGATOR_2                     | #N/A                    | 6.6549 | 6.5491 | 6.0748 | 6.8536  | 6.0047 | 6.8205 | 6.2605 | 6.4118 | 6.6203 | 6.6647 | 1.0006  | 0.0008  | 0.9862 | 0.0060 |
| Ech1     |  | _LVEAIDC[Carbamidomethyl (C)]AEK_2        | #N/A                    | 6.7955 | 3.6327 | 3.4433 | 4.4879  | 6.5232 | 6.1759 | 6.6787 | 6.2003 | 4.3131 | 6.6424 | 0.8687  | -0.2030 | 0.4027 | 0.3950 |
| Ech1     |  | _FLSHWDHTR_3                              | #N/A                    | 2.9807 | 3.7369 | 5.6796 | 5.8763  | 4.9390 | 5.9933 | 5.3812 | 6.0516 | 3.0884 | 4.9974 | 0.9975  | -0.0036 | 0.9885 | 0.0050 |
| Ech1     |  | _AFAGADIK_2                               | #N/A                    | 2.9836 | 3.9141 | 4.2181 | 3.7619  | 4.2236 | 3.5494 | 3.9102 | 4.2762 | 4.0210 | 4.4608 | 0.9059  | -0.1425 | 0.1675 | 0.7760 |
| Ech1     |  | _LPYSTATDORR_2                            | #N/A                    | 3.4365 | 4.0857 | 3.4421 | 3.4312  | 4.0811 | 4.1623 | 4.2677 | 3.6408 | 3.3622 | 4.0194 | 0.9871  | -0.0188 | 0.8461 | 0.0726 |
| Ech1     |  | _LGMTARVEK_2                              | #N/A                    | 4.4366 | 3.6190 | 4.0973 | 3.6410  | 3.5073 | 3.1173 | 4.8638 | 3.3601 | 3.6592 | 3.3183 | 0.9800  | -0.0292 | 0.8401 | 0.0757 |
| Rab30b   |  | _SGVPVNVVSS[Phospho (STY)]EIVK_2          | #N/A                    | 6.6192 | 6.3322 | 7.0787 | 7.1584  | 3.4267 | 3.6723 | 7.1735 | 6.9983 | 6.9718 | 3.8955 | 0.9129  | -0.3315 | 0.6243 | 0.2045 |
| Gemin8   |  | _S[Phospho (STY)]LEPPSEKPIWER_2           | QBBHE1_S181_M1_Gemin8   | 3.9504 | 3.3920 | 3.6841 | 3.2279  | 3.0941 | 3.5305 | 3.3761 | 3.7733 | 4.0724 | 4.4060 | 0.8907  | -0.1670 | 0.1068 | 0.9712 |
| Atcay    |  | _LGGAVEDSSS[Phospho (STY)]PSTLNSGAHR_3    | QBBHE3_S46_M1_Atca      | 9.4537 | 9.7064 | 3.2858 | 11.0655 | 7.8888 | 9.1033 | 9.7537 | 4.3300 | 9.6194 | 9.4170 | 1.0125  | 0.0179  | 0.9539 | 0.0205 |
| Atcay    |  | _IQVHSEELER_3                             | #N/A                    | 3.6312 | 3.5143 | 4.3436 | 3.8873  | 3.3759 | 4.3718 | 4.2650 | 3.1138 | 3.4129 | 3.7694 | 0.8823  | -0.0823 | 0.4852 | 0.3141 |
| Atcay    |  | _AAEATEDQETS[Phospho (STY)]MS_2           | QBBHE3_S370_M1_Atca     | 4.3189 | 3.0235 | 4.0525 | 3.5963  | 2.8449 | 3.3838 | 3.7446 | 3.4049 | 3.7039 | 3.2736 | 1.0014  | 0.0020  | 0.9876 | 0.0054 |
| Tmem108  |  | _EQISLESTEDQLS[Phospho (STY)]EPR_2        | QBBHE4_S538_M1_Tmem108  | 4.0338 | 6.9414 | 3.7674 | 7.7574  | 6.2692 | 7.0044 | 7.702  | 7.7456 | 7.1924 | 7.2389 | 0.7977  | -0.3261 | 0.1164 | 0.9340 |
| Nrdc     |  | _LGADES[Phospho (STY)]EEEGR_2             | QBBHG1_S85_M1_Nrdc      | 7.6493 | 7.7174 | 7.6866 | 7.8576  | 6.1260 | 7.3275 | 7.8503 | 7.7329 | 7.5843 | 7.2305 | 0.9730  | -0.0395 | 0.5692 | 0.2448 |
| Serinc5  |  | _SSG[Phospho (STY)]DALQSR_2               | QBBH6_S339_M1_Serinc5   | 3.0131 | 7.1836 | 7.3983 | 7.5573  | 6.3529 | 4.0899 | 6.3529 | 7.4794 | 6.9733 | 1.0648 | 0.0906  | -0.0784 | 0.7784 | 0.0886 |
| Slu7     |  | _LVEQANS[Phospho (STY)]PK_2               | QBBH49_S215_M1_Slu7     | 8.5279 | 8.5825 | 8.6607 | 9.1497  | 8.6262 | 8.5675 | 8.8319 | 8.4830 | 8.6236 | 8.6430 | 1.0047  | 0.0067  | 0.7662 | 0.1156 |
| Scn3b    |  | _ATEAAQENASD[Phospho (STY)]LAIPSENK_2     | QBBH2_S198_M1_Scn3b     | 3.0662 | 3.8225 | 5.2325 | 3.8445  | 3.7108 | 4.4147 | 3.9927 | 6.2413 | 6.1599 | 5.3823 | 0.6549  | -0.6107 | 0.0078 | 0.2078 |
| Tbc1d10b |  | _ASVPVPGGT[Phospho (STY)]PTR_2            | QBBH43_T136_M1_Tbc1d10b | 0.9728 | 9.3057 | 4.1677 | 3.7115  | 3.5778 | 8.8296 | 9.3065 | 9.1670 | 3.5888 | 3.3888 | 1.0128  | 0.0183  | 0.9681 | 0.0141 |
| Tbc1d10b |  | _HGAPAAP[Phospho (STY)]PPPR_2             | #N/A                    | 7.5501 | 7.7245 | 7.7413 | 6.5223  | 5.2957 | 8.2655 | 8.5839 | 8.3897 | 6.2493 | 6.9092 | 0.9314  | -0.1025 | 0.4588 | 0.3384 |
| Tbc1d10b |  | _RHGAPAAP[Phospho (STY)]PPPR_3            | #N/A                    | 6.4117 | 6.8504 | 7.4090 | 7.8436  | 3.3024 | 4.4271 | 7.6878 | 7.6852 | 6.7605 | 5.5137 | 0.8740  | -0.1943 | 0.4090 | 0.3883 |
| Tbc1d10b |  | _ELLQNPQGFEEELR_3                         | #N/A                    | 4.2074 | 3.3247 | 3.3933 | 2.4314  | 2.7910 | 4.2513 | 3.8116 | 3.4900 | 3.8711 | 3.8630 | 0.9045  | -0.1448 | 0.3738 | 0.4274 |
| Txlng    |  | _KHS[Phospho (STY)]EGDEGSOFITK_3          | QBBHN1_S79_M1_Txlng     | 3.0694 | 3.5830 | 3.7562 | 4.9135  | 3.7573 | 4.0336 | 3.9736 | 4.3607 | 4.1944 | 4.2259 | 0.9197  | -0.1208 | 0.3207 | 0.4939 |
| Ganab    |  | _NPEPELLVR_2                              | #N/A                    | 6.0059 | 6.0877 | 5.7523 | 5.6664  | 6.2171 | 5.7463 | 6.0731 | 5.5218 | 5.5933 | 1.0433 | 0.0612  | 0.1562  | 0.8064 | 0.064  |
| Ganab    |  | _LDLEDR_2                                 | #N/A                    | 6.2077 | 5.7760 | 3.2373 | 5.8512  | 5.9018 | 5.9212 | 5.2190 | 5.7459 | 6.1295 | 6.1003 | 0.9455  | -0.0809 | 0.6070 | 0.2168 |
| Ganab    |  | _ILTAQDFR_2                               | #N/A                    | 5.7101 | 5.9241 | 8.1140 | 5.6847  | 5.9191 | 5.6664 | 5.8802 | 5.7817 | 6.0931 | 5.7479 | 1.0500  | 0.0704  | 0.5678 | 0.2458 |
| Ganab    |  | _M[Oxidation (M)]LDYLQSGSETPQDIR_2        | #N/A                    | 4.2464 | 4.5281 | 2.9475 | 3.3297  | 4.4449 | 5.0226 | 4.3518 | 4.4993 | 3.2666 | 5.0287 | 0.9533  | -0.0690 | 0.6976 | 0.1564 |
| Ganab    |  | _DAVHYGGWEHR_3                            | #N/A                    | 3.6998 | 2.9553 | 3.4569 | 3.9595  | 1.8440 | 2.5290 | 3.6742 | 4.1590 | 3.8075 | 3.9265 | 0.7899  | -0.3403 | 0.0830 | 0.0709 |
| Armcx3   |  | _KLDAES[Phospho (STY)]DGSSTEDESET_2       | QBBHRR_S319_M1_         | 4.0123 | 4.8172 | 4.7058 | 5.7923  | 2.6714 | 4.4883 | 5.4599 | 4.7454 | 3.6379 | 4.3134 | 0.9725  | -0.0402 | 0.8428 | 0.1843 |
| Armcx3   |  | _YNDVSS[Phospho (STY)]DDDDONSSEK_2        | QBBH56_S61_M1_Armcx3    | 8.9219 | 9.1582 | 9.5270 | 9.3744  | 8.3577 | 9.0113 | 9.5266 | 9.3647 | 8.8301 | 9.0167 | 0.9863  | -0.0199 | 0.6195 | 0.2880 |
| Armcx3   |  | _ASPSNDTVLS[Phospho (STY)]PQELQK_2        | QBBH56_S119_M1_Armcx3   | 6.6196 | 4.4120 | 6.6868 | 6.9724  | 5.7448 | 6.9602 | 6.8205 | 6.7717 | 7.1640 | 6.4134 | 0.9816  | -0.1241 | 0.3164 | 0.4097 |
| Armcx3   |  | _RAS[Phospho (STY)]PKSDTVLSQELQK_2        | QBBH56_S110_M1_Armcx3</ |        |        |        |         |        |        |        |        |        |        |         |         |        |        |



|                                                                            |                                                            |                        |         |         |         |         |         |         |         |         |         |         |         |         |        |        |
|----------------------------------------------------------------------------|------------------------------------------------------------|------------------------|---------|---------|---------|---------|---------|---------|---------|---------|---------|---------|---------|---------|--------|--------|
| Frm4a                                                                      | _SVD[S]Phospho (STY) PTR_2                                 | Q8BI66_5679_M1_Frm4a   | 3.8161  | 3.1205  | 4.5029  | 3.5047  | 2.9418  | 3.2869  | 3.2194  | 7.2262  | 7.3931  | 3.4717  | 0.6624  | -0.5943 | 0.0952 | 1.0214 |
| Frm4a                                                                      | _ISGSSGSL[Phospho (STY)]SGSQSDSSQSAK_2                     | Q8BI66_5356_M1_Frm4a   | 3.2329  | 4.1095  | 4.4674  | 4.0112  | 3.8775  | 4.2480  | 4.1594  | 2.9900  | 3.2890  | 3.6885  | 1.1301  | 0.1764  | 0.1575 | 0.8026 |
| Cd99i2                                                                     | _QETQS[Phospho (STY)]AEPPPPPPRI_2                          | Q8BI05_5226_M1_Cd99i2  | 3.5470  | 7.5806  | 4.2338  | 3.2356  | 4.1735  | 3.5560  | 3.9168  | 3.3820  | 3.0306  | 3.0752  | 1.2970  | 0.3025  | 0.2640 | 0.5784 |
| Cd99i2                                                                     | _GENLEAVIC[Carbamidomethyl (C)]IEPQVITYSK_2                | #N/A                   | 4.4021  | 4.1690  | 4.0506  | 4.5533  | 3.9903  | 4.7881  | 4.2680  | 3.5652  | 5.6300  | 3.0194  | 1.0497  | 0.0700  | 0.6766 | 0.1697 |
| Rfmx3-Rfmx2-Rfmx                                                           | _KIEVNNITAR_2                                              | #N/A                   | 4.9472  | 4.7973  | 4.2230  | 5.3876  | 5.3419  | 5.0064  | 5.2314  | 5.1525  | 4.4437  | 5.3452  | 0.9816  | -0.2627 | 0.7402 | 0.1306 |
| Iars2                                                                      | _VLSLGVDAGLSAM[Oxidation (M)]EIR_2                         | #N/A                   | 4.3565  | 5.2701  | 5.1670  | 4.4557  | 3.5159  | 5.0350  | 5.1135  | 4.1269  | 4.6660  | 4.6531  | 0.9987  | -0.0019 | 0.9871 | 0.0056 |
| Rufy1                                                                      | _SQLPS[Phospho (STY)]PGEUR_2                               | Q8BI07_552_M1_Rufy1    | 3.6966  | 8.0810  | 3.4303  | 8.2345  | 3.4671  | 7.1594  | 3.1223  | 4.0271  | 4.3262  | 4.1522  | 1.4533  | 0.5394  | 0.1891 | 0.7233 |
| Dock9                                                                      | _GSLUSTDS[Phospho (STY)]GSLPDRNPKR_3                       | Q8BIK4_51270_M1_Dock9  | 3.7497  | 3.3555  | 3.4834  | 4.0225  | 3.2143  | 3.8300  | 3.9340  | 4.2484  | 4.6192  | 4.0935  | 0.8545  | -0.7269 | 0.0137 | 1.8629 |
| Dock9                                                                      | _LDKLPLVHYVEDEADKDDAAS[Phospho (STY)]LGSKQ_4               | Q8BIK4_5178_M1_Dock9   | 3.6324  | 3.5938  | 4.3192  | 3.3210  | 4.2589  | 3.4706  | 4.5365  | 3.5831  | 2.9452  | 3.2880  | 1.0495  | 0.0608  | 0.6203 | 0.2074 |
| Cat2                                                                       | _SLGTGAPVIESPYGESIS[Phospho (STY)]PEADPESSK_3              | Q8BIQ5_5120_M1_Cat2    | 3.6719  | 2.9273  | 3.4056  | 3.9874  | 2.8156  | 3.8090  | 3.7021  | 4.1310  | 3.7796  | 3.9544  | 0.8829  | -0.1796 | 0.1123 | 0.9495 |
| Anks1b                                                                     | _NVSKS[Phospho (STY)]DSLIUAYPKDK_3                         | #N/A                   | 3.3274  | 8.3213  | 3.8293  | 8.7295  | 7.2625  | 8.4745  | 8.8849  | 8.7100  | 3.4351  | 4.2989  | 1.0514  | 0.0723  | 0.8518 | 0.0697 |
| Anks1b                                                                     | _TLANLPWVEPGEQAK_2                                         | #N/A                   | 7.4265  | 6.6992  | 6.9911  | 6.7056  | 6.9873  | 6.7871  | 7.2431  | 6.8320  | 7.0228  | 6.6345  | 1.0000  | -0.0001 | 0.9986 | 0.0006 |
| Anks1b                                                                     | _NLIAEHIR_2                                                | #N/A                   | 6.6770  | 6.7028  | 6.4073  | 6.8808  | 5.9612  | 6.5421  | 6.6283  | 6.8250  | 6.6169  | 6.2468  | 0.9923  | -0.0112 | 0.7954 | 0.0994 |
| Anks1b                                                                     | _LIFQSC[Carbamidomethyl (C)]DYK_2                          | #N/A                   | 5.7800  | 5.9802  | 4.5336  | 5.5131  | 5.2905  | 5.7292  | 5.5775  | 6.0046  | 5.9210  | 4.6051  | 0.9899  | -0.0147 | 0.8823 | 0.0544 |
| Anks1b                                                                     | _NVSKS[Phospho (STY)]DSLIUAYPSK_2                          | #N/A                   | 4.0688  | 3.3087  | 3.2548  | 7.5749  | 3.1945  | 3.0352  | 7.4904  | 7.0844  | 4.0107  | 3.7244  | 0.7302  | -0.4536 | 0.2416 | 0.6169 |
| _NLSSTGPTDC[Carbamidomethyl (C)]S[Phospho (STY)]PPS[Phospho (STY)]POTALK_2 |                                                            | Q8BI21_5507_M2_Ans1b   | 3.6539  | 4.4136  | 3.9943  | 4.0402  | 6.0739  | 3.7613  | 4.7817  | 7.2076  | 7.1760  | 6.6272  | 0.6704  | -0.5769 | 0.0108 | 1.9673 |
|                                                                            |                                                            | #N/A                   | 7.2316  | 7.1504  | 7.4616  | 7.8143  | 7.0744  | 7.3284  | 7.6302  | 7.0652  | 7.1132  | 7.3704  | 1.0067  | 0.0096  | 0.7831 | 0.1062 |
| Snip1                                                                      | _LS[Phospho (STY)]PEPVAHR_2                                | #N/A                   | 6.5548  | 7.0019  | 7.0730  | 7.0730  | 6.8590  | 7.1134  | 7.3226  | 6.9299  | 6.9722  | 6.8002  | 0.9897  | -0.0149 | 0.6137 | 0.2120 |
| Snip1                                                                      | _S[Phospho (STY)]GDALTYVVK_2                               | #N/A                   | 3.2645  | 7.0100  | 8.6668  | 4.0428  | 5.8067  | 3.8302  | 4.1910  | 7.0240  | 6.6441  | 6.5940  | 0.8403  | -0.2511 | 0.3477 | 0.4588 |
| Snip1                                                                      | _RDPAPAS[Phospho (STY)]LS[Phospho (STY)]PPAAEPHGSHR_3      | Q8BI26_548_M2_Snip1    | 3.7224  | 3.6200  | 3.4561  | 4.5007  | 8.2761  | 8.1723  | 3.1481  | 8.0942  | 8.0223  | 4.1780  | 0.9028  | -0.1474 | 0.7234 | 0.1486 |
| Snip1                                                                      | _HRS[Phospho (STY)]GDALTYVVK_3                             | #N/A                   | 3.3446  | 3.9978  | 4.5792  | 4.1229  | 3.4469  | 3.9104  | 4.2712  | 4.3791  | 3.1773  | 5.0425  | 0.9248  | -0.1128 | 0.4323 | 0.3642 |
| Zc3h14                                                                     | _DLVGDPKPAS[Phospho (STY)]PK_2                             | Q8BI05_5515_M1_Zc3h14  | 8.9865  | 9.2614  | 9.6985  | 9.8082  | 8.9975  | 9.1934  | 9.3454  | 9.2173  | 9.2485  | 1.0099  | 0.0143  | 0.6304  | 0.2073 |        |
| Zc3h14                                                                     | _WIRPQCS[Phospho (STY)]SE_2                                | Q8BI05_5733_M1_Zc3h14  | 6.3778  | 6.4606  | 6.9364  | 4.0633  | 3.9296  | 4.1959  | 4.0890  | 6.2736  | 3.2369  | 3.7406  | 1.2289  | 0.2974  | 0.2970 | 0.5273 |
| Zc3h14                                                                     | _S[Phospho (STY)]PPWKEEAKGSDTGK_3                          | Q8BI05_5409_M1_Zc3h14  | 3.1697  | 4.0564  | 5.7158  | 6.3418  | 3.7963  | 3.9332  | 4.0739  | 4.3333  | 4.4153  | 5.3027  | 0.9936  | -0.0093 | 0.9662 | 0.0149 |
| Zc3h14                                                                     | _RFS[Phospho (STY)]HOGEEEEDEEDVGR_3                        | Q8BI05_5309_M1_Zc3h14  | 2.6607  | 2.9885  | 3.1477  | 3.6504  | 3.1390  | 3.4719  | 3.3651  | 4.4681  | 3.6248  | 2.5863  | 0.9047  | -0.1445 | 0.3735 | 0.4277 |
| Dlgap2                                                                     | _EKS[Phospho (STY)]DLDPDR_2                                | #N/A                   | 13.3018 | 13.3957 | 13.6670 | 13.9915 | 12.7315 | 13.5671 | 13.6185 | 13.4270 | 13.4594 | 13.5467 | 0.9948  | -0.0075 | 0.7554 | 0.1218 |
| Dlgap2                                                                     | _SDVETATDS[Phospho (STY)]DTER_2                            | Q8BI42_5745_M1_Dlgap2  | 11.5359 | 11.5721 | 12.0838 | 11.9247 | 11.2271 | 11.7338 | 11.8672 | 11.5360 | 11.5572 | 11.7038 | 1.0012  | 0.0017  | 0.9374 | 0.0281 |
| Dlgap2                                                                     | _LIES[Phospho (STY)]PERKEER_3                              | #N/A                   | 9.2802  | 9.5170  | 10.2200 | 9.6317  | 9.5077  | 9.5231  | 9.4461  | 9.5524  | 9.6814  | 9.4325  | 1.0089  | 0.0128  | 0.6277 | 0.2023 |
| Dlgap2                                                                     | _LIES[Phospho (STY)]PERK_2                                 | #N/A                   | 10.4428 | 10.2706 | 10.4571 | 10.6585 | 9.9019  | 10.2013 | 10.6279 | 10.3559 | 10.4760 |         | 0.9865  | -0.0196 | 0.3467 | 0.4600 |
| Dlgap2                                                                     | _S[Phospho (STY)]DKAVLASK_2                                | Q8BI42_5700_M1_Dlgap2  | 8.9642  | 8.7945  | 9.4082  | 9.2014  | 7.4761  | 8.8864  | 8.2367  | 9.1342  | 9.1300  | 8.7713  | 0.9966  | -0.0048 | 0.9407 | 0.0265 |
| Dlgap2                                                                     | _EKS[Phospho (STY)]DLDPDRQK_3                              | #N/A                   | 5.8616  | 7.2991  | 8.8745  | 6.9349  | 6.9996  | 7.7555  | 6.1280  | 7.1997  | 6.8649  | 7.1473  | 1.0662  | 0.0925  | 0.4307 | 0.3659 |
| Dlgap2                                                                     | _GLQFGSS[Phospho (STY)]FQR_2                               | Q8BI42_5806_M1_Dlgap2  | 2.8989  | 3.6551  | 6.0020  | 3.2597  | 3.5434  | 3.0812  | 4.4752  | 3.3240  | 3.0066  | 3.3544  | 1.0565  | 0.0793  | 0.7614 | 0.1184 |
| Dlgap2                                                                     | _SHS[Phospho (STY)]LEGSSK_2                                | Q8BI42_5248_M1_Dlgap2  | 6.6963  | 7.0005  | 7.2738  | 6.9580  | 2.9034  | 3.7212  | 3.1854  | 6.8768  | 4.2631  | 6.8513  | 1.0878  | 0.1214  | 0.7147 | 0.1459 |
| Dlgap2                                                                     | _C[Carbamidomethyl (C)]SS[Phospho (STY)]GVGDSEFPDHPQPYPR_3 | Q8BI42_5720_M1_Dlgap2  | 3.3813  | 4.1375  | 3.1149  | 4.1595  | 4.0258  | 4.0996  | 3.9928  | 5.5872  | 5.7398  | 5.5780  | 0.7311  | -0.4518 | 0.0079 | 2.1024 |
| Dlgap2                                                                     | _GLYNS[Phospho (STY)]M[Oxidation (M)]DSLSNKK_2             | #N/A                   | 7.6925  | 7.8610  | 7.9521  | 7.9675  | 6.3316  | 8.4266  | 8.0994  | 7.6687  | 8.4156  | 8.4401  | 0.9447  | -0.0820 | 0.2834 | 0.5475 |
| Dlgap2                                                                     | _T[Phospho (STY)]PPPPVPR_2                                 | Q8BI42_7616_M1_Dlgap2  | 9.2910  | 8.5509  | 4.5968  | 9.0773  | 9.3120  | 9.3337  | 8.6844  | 8.1985  | 8.6704  | 9.5369  | 0.9530  | -0.0694 | 0.6845 | 0.1646 |
| Dlgap2                                                                     | _ADS[Phospho (STY)]EIVPEAQTR_2                             | #N/A                   | 3.8028  | 3.1071  | 4.4896  | 3.4914  | 2.9285  | 3.3002  | 3.1262  | 5.6201  | 3.4584  | 0.9136  | -0.1303 | 0.5621  | 0.2502 |        |
| Dlgap2                                                                     | _EAENLLEDLDLK_2                                            | #N/A                   | 4.7939  | 4.3375  | 4.5995  | 5.4434  | 4.1513  | 5.4269  | 3.3160  | 3.0163  | 4.1537  | 3.7607  | 1.3455  | 0.0281  | 0.0069 | 2.1629 |
| Dlgap2                                                                     | _TTSKPLSVTAQ[S]Phospho (STY)]STESDQAYQDSR_3                | Q8BI42_5636_M1_Dlgap2  | 3.9031  | 3.8694  | 3.9391  | 6.7774  | 3.7085  | 3.8128  | 3.4568  | 4.0662  | 4.0752  | 3.7631  | 1.1731  | 0.2303  | 0.3342 | 0.6293 |
| Dlgap2                                                                     | _RES[Phospho (STY)]PER_2                                   | #N/A                   | 6.5897  | 6.1814  | 6.3315  | 6.7732  | 6.1907  | 5.8350  | 6.3358  | 6.6018  | 6.0752  | 6.6292  | 0.9854  | -0.0212 | 0.6489 | 0.1878 |
| Dlgap2                                                                     | _QNSATERADS[Phospho (STY)]EIVPEAQTR_3                      | #N/A                   | 3.4773  | 3.9954  | 3.7821  | 7.4551  | 4.2047  | 3.7451  | 3.7942  | 7.5161  | 3.7006  | 6.0700  | 0.8431  | -0.2462 | 0.4572 | 0.3399 |
| Dlgap2                                                                     | _HS[Phospho (STY)]EPSTPTQYGAIR_2                           | Q8BI42_5811_M1_Dlgap2  | 2.8973  | 3.6536  | 7.1019  | 8.0695  | 3.5419  | 7.3484  | 7.4143  | 3.3564  | 7.4491  | 6.9152  | 0.8650  | -0.2092 | 0.5641 | 0.2486 |
| Dlgap2                                                                     | _SGM[Oxidation (M)]SSWWS[Phospho (STY)]SDNLLSDSYR_2        | #N/A                   | 3.9215  | 3.5757  | 3.8904  | 3.5257  | 3.8764  | 3.6893  | 3.7385  | 3.6897  | 4.2242  | 3.5406  | 0.9864  | -0.0198 | 0.7332 | 0.1348 |
| Dlgap2                                                                     | _MRS[Phospho (STY)]GSYK_2                                  | Q8BI42_5438_M1_Dlgap2  | 3.1828  | 3.9880  | 3.8696  | 4.3722  | 3.8093  | 3.9498  | 4.3392  | 3.7463  | 3.3948  | 4.3392  | 0.9789  | -0.0308 | 0.7617 | 0.1182 |
| Dlgap2                                                                     | _AMGDEIGESDSS[Phospho (STY)]PK_2                           | Q8BI42_5456_M1_Dlgap2  | 4.5787  | 3.8443  | 4.1007  | 4.4146  | 3.6485  | 3.2538  | 4.0215  | 3.4600  | 3.9917  | 3.7955  | 1.0409  | 0.0579  | 0.5811 | 0.2358 |
| Dlgap2                                                                     | _ADSEIVPEAQTR_2                                            | #N/A                   | 6.1076  | 3.6440  | 9.7198  | 3.6573  | 9.5545  | 6.5693  | 6.4123  | 5.3445  | 6.0534  | 9.4699  | 0.9592  | -0.0600 | 0.8620 | 0.0645 |
| Dlgap2                                                                     | _S[Phospho (STY)]DLDPDR_2                                  | #N/A                   | 3.5160  | 4.2723  | 3.2497  | 4.2943  | 4.1606  | 3.9649  | 3.8580  | 4.2077  | 4.9843  | 4.7134  | 0.8804  | -0.1838 | 0.1120 | 0.9508 |
| Dlgap2                                                                     | _DGS[Phospho (STY)]WFLK_2                                  | Q8BI42_5873_M1_Dlgap2  | 4.3450  | 6.0005  | 4.0787  | 3.6225  | 3.4888  | 3.3158  | 3.7708  | 3.6777  | 3.2998  | 1.0510  | 0.0718  | 0.4719  | 0.3262 |        |
| Chmp2b                                                                     | _ATS[Phospho (STY)]DEEIR_2                                 | Q8BIJ9_5199_M1_Chmp2b  | 9.3886  | 9.6417  | 10.1669 | 9.9768  | 9.3296  | 9.8503  | 9.8796  | 9.7558  | 9.7788  | 9.6860  | 0.9949  | -0.0073 | 0.7816 | 0.1070 |
| Zc2hc1a                                                                    | _NTT[Phospho (STY)]PPSLAR_2                                | Q8BIH1_1743_M1_Zc2hc1a | 11.9759 | 11.8193 | 12.4821 | 12.4913 | 11.6889 | 12.1227 | 11.7842 | 12.9334 | 11.9064 | 1.2113  | 0.2766  | 0.1999  | 0.6992 |        |
| Skc6a17                                                                    | _YSGVGLAST[Phospho (STY)]PESEL_2                           | Q8BIJ1_1722_M1_Skc6a17 | 8.6656  | 7.9808  | 8.7956  | 8.1252  | 6.4982  | 8.0725  | 8.5914  | 8.2500  | 7.9335  | 8.0573  | 0.9774  | -0.0329 | 0.6802 | 0.1674 |
| Skc6a17                                                                    | _S[Phospho (STY)]NLEENDETR_2                               | Q8BIJ1_5665_M1_Skc6a17 | 10.1968 | 9.3955  | 9.9270  | 10.0220 | 7.9335  | 9.9345  | 9.9346  | 9.7863  | 9.7766  | 9.6580  | 0.9760  | -0.0350 | 0.5998 | 0.2220 |
| Skc6a17                                                                    | _HHS[Phospho (STY)]NEHVTESVADLLALEEPDYK_3                  | #N/A                   | 8.9182  | 9.2718  | 9.8126  | 9.7547  | 8.2568  | 8.9862  | 9.4886  | 10.0079 | 9.6782  | 8.9828  | 0.9609  | -0.0575 | 0.3078 | 0.5118 |
| Skc6a17                                                                    | _SLPGSGTS[Phospho (STY)]PLMSNNPNPKR_2                      | #N/A                   | 8.2845  | 8.4493  | 8.7286  | 8.5863  | 3.2923  | 3.2265  | 8.8834  | 8.6336  | 8.3247  | 8.1666  | 0.7952  | -0.1305 | 0.2464 | 0.6083 |
| Skc6a17                                                                    | _LGLVSNMVLNR_2                                             | #N/A                   | 3.7501  | 4.5039  | 4.4199  | 3.9065  | 3.8300  | 3.7062  | 3.9783  | 4.4740  | 0.9771  | 3.0796  | 1.2853  | 0.3621  | 0.1986 | 0.7021 |
| Skc6a17                                                                    | _VPS[Phospho (STY)]EAPSPM[Oxidation (M)]PTHR_2             | Q8BIJ1_5682_M1_Skc6a17 | 5.8194  | 6.2994  | 5.7980  | 6.4090  | 3.4803  | 5.4239  | 5.8964  | 5.9703  | 5.5017  | 5.0339  | 0.9094  | -0.1370 | 0.4588 | 0.3384 |
| Sgt4                                                                       | _ALELDPDNDTYK_2                                            | #N/A                   | 6.1666  | 6.8792  | 3.3525  | 6.9618  | 6.9173  | 6.9404  | 6.6464  | 6.2210  | 6.4097  | 6.6029  | 0.9587  | -0.0608 | 0.7252 | 0.1395 |
| Sgt4                                                                       | _TPS[Phospho (STY)]ASHEEQQE_2                              | #N/A                   | 6.3160  | 5.7894  | 6.0914  | 6.7913  | 5.7984  | 6.3848  | 5.7888  | 5.9031  | 6.3558  | 3.1820  | 1.1673  | 0.2231  | 0.1781 | 0.7495 |
| Sgt4                                                                       | _AIELNPANAVYFC[Carbamidomethyl (C)]NIR_2                   | #N/A                   | 4.4583  | 4.2985  | 4.3201  | 5.5143  | 4.6983  | 4.7358  | 4.3976  | 4.6055  | 4.7128  | 4.7337  | 1.0127  | 0.0082  | 0.8127 | 0.0901 |
| Sgt4                                                                       | _SRTPS[Phospho (STY)]ASHEEQQE_2                            | #N/A                   | 4.8556  | 5.9745  | 5.4417  | 6.3209  | 6.1733  | 6.2005  | 6.2604  | 5.7022  | 4.1120  | 5.5838  | 1.0763  | 0.1061  | 0.3996 | 0.3984 |
| Sgt4                                                                       | _APORT[Phospho (STY)]PPSEDSAEAR_3                          | #N/A                   | 6.6854  | 8.0252  | 7.6873  | 6.8967  | 8.8189  | 8.0263  | 8.1190  |         |         |         |         |         |        |        |



|          |                                                           |                        |         |         |         |         |         |         |         |         |         |         |         |         |        |        |
|----------|-----------------------------------------------------------|------------------------|---------|---------|---------|---------|---------|---------|---------|---------|---------|---------|---------|---------|--------|--------|
| Ipo5     | _NUDEGNNQWPEGLK_2                                         | #N/A                   | 8.7116  | 7.8874  | 8.8597  | 8.5410  | 7.2760  | 8.4024  | 8.9278  | 8.4273  | 8.3045  | 8.2034  | 0.9780  | -0.0321 | 0.5872 | 0.2312 |
| Ipo5     | _LVEQVTVTSASVADTAEK_3                                     | #N/A                   | 4.7346  | 4.4744  | 4.1246  | 5.4667  | 3.4518  | 4.4248  | 4.7315  | 4.8974  | 4.8172  | 4.3493  | 0.9462  | -0.0797 | 0.4947 | 0.3057 |
| Ipo5     | _HIVENAVIK_2                                              | #N/A                   | 3.6871  | 2.9425  | 3.4208  | 3.9723  | 2.8308  | 4.0325  | 3.6869  | 4.1462  | 3.7948  | 4.1427  | 0.8829  | -0.1797 | 0.1341 | 0.8725 |
| P4kb     | _S[Phospho (STY)]VENLPE[Carbamidomethyl (C)]GITHEQR_2     | #N/A                   | 7.0975  | 6.8935  | 7.1024  | 7.0683  | 3.6055  | 7.1073  | 7.2903  | 7.2385  | 7.0979  | 6.9264  | 0.9100  | -0.1361 | 0.4018 | 0.3960 |
| Mapkap1  | _RTS[Phospho (STY)]FSFOK_2                                | #N/A                   | 6.4629  | 6.0047  | 6.8431  | 6.3206  | 3.5215  | 3.1183  | 6.2701  | 3.1926  | 3.9750  | 3.4394  | 1.2747  | 0.3502  | 0.2785 | 0.5552 |
| Mapkap1  | _YS[Phospho (STY)]PGLTSK_2                                | Q8BKH7_S270_M1_Mapkap1 | 5.0988  | 4.3396  | 4.2212  | 3.7811  | 4.3928  | 3.5685  | 3.8293  | 3.2201  | 3.5192  | 3.1900  | 1.2220  | 0.2892  | 0.0357 | 1.4467 |
| Mapkap1  | _TS[Phospho (STY)]FSFOK_2                                 | #N/A                   | 4.1660  | 3.1764  | 3.8997  | 3.4435  | 2.9977  | 3.2309  | 3.5917  | 3.5577  | 3.8568  | 3.1207  | 0.9870  | -0.0189 | 0.8647 | 0.0632 |
| Ttrc6b   | _DDEPSGWEER[Phospho (STY)]PQDSGR_2                        | Q8BKX2_S913_M1_Ttrc6b  | 6.4583  | 3.1329  | 6.4160  | 7.3781  | 3.1918  | 6.0759  | 6.3034  | 6.0541  | 6.7421  | 6.7454  | 0.7454  | -0.4239 | 0.1334 | 0.8749 |
| Ttrc6b   | _M[Oxidation (M)]GSG[Phospho (STY)]PAPLLPGDLLGGGSDSI_2    | Q8BKX2_S1793_M1_Ttrc6b | 3.4320  | 5.4869  | 5.2631  | 5.6340  | 4.0585  | 4.3453  | 4.9913  | 4.6658  | 3.8539  | 4.4518  | 1.0473  | 0.0667  | 0.6769 | 0.1695 |
| Ttrc6b   | _SSSS[Phospho (STY)]AGSEVGGSQSGSNHK_2                     | Q8BKX2_S601_M1_Ttrc6b  | 3.7318  | 3.0362  | 4.4186  | 3.4204  | 2.8575  | 3.3712  | 3.7320  | 3.3466  | 3.3874  | 0.9473  | 0.0781  | 0.5927  | 0.3315 | 0.5527 |
| Baiap2   | _EGDLTLVPEAR_2                                            | #N/A                   | 5.9695  | 6.1159  | 5.7196  | 5.2309  | 5.7508  | 6.4122  | 5.6753  | 5.5950  | 5.8201  | 5.9676  | 1.0177  | 0.0253  | 0.6484 | 0.1881 |
| Baiap2   | _QIQNQLLETK_2                                             | #N/A                   | 5.7156  | 4.9944  | 5.3675  | 5.6468  | 5.5941  | 5.1949  | 5.3861  | 5.3448  | 5.8852  | 4.6514  | 1.0192  | 0.0274  | 0.6909 | 0.1606 |
| Baiap2   | _YSQELQYDAISNK_2                                          | #N/A                   | 6.0925  | 6.1307  | 5.8447  | 6.4669  | 5.9622  | 6.3663  | 5.7284  | 5.7323  | 6.2773  | 6.2446  | 1.0247  | 0.0352  | 0.4112 | 0.3859 |
| Baiap2   | _LSDSYNTLPVR_2                                            | #N/A                   | 5.5325  | 5.0156  | 4.8201  | 5.6364  | 5.8665  | 5.2835  | 5.3634  | 5.7426  | 5.2626  | 5.7574  | 0.9688  | -0.0457 | 0.4661 | 0.3315 |
| Baiap2   | _SIS[Phospho (STY)]PQSGSK_2                               | Q8BKX1_S326_M1_Baiap2  | 14.5249 | 14.7686 | 15.2324 | 15.2850 | 14.5829 | 14.8396 | 14.9759 | 14.6794 | 14.8595 | 1.0059  | 0.0085  | 0.6343  | 0.1977 | 0.1977 |
| Baiap2   | _LPLWQQAC[Carbamidomethyl (C)]ADPNKIPDR_3                 | #N/A                   | 5.6366  | 5.5326  | 5.9806  | 6.2640  | 5.6226  | 5.4694  | 5.6790  | 5.2595  | 5.7380  | 5.7847  | 1.0242  | 0.0344  | 0.4810 | 0.3179 |
| Baiap2   | _SFNHLLTQLEQK_3                                           | #N/A                   | 4.8614  | 4.0863  | 4.8542  | 5.1103  | 5.1828  | 5.5839  | 4.5151  | 5.2919  | 5.6845  | 5.8320  | 0.9279  | -0.1080 | 0.2977 | 0.5262 |
| Baiap2   | _SSS[Phospho (STY)]M[Oxidation (M)]AAGLER_2               | #N/A                   | 3.8625  | 4.9923  | 5.7169  | 4.2561  | 3.7637  | 5.9425  | 3.8472  | 5.4665  | 6.0694  | 3.7650  | 0.9935  | -0.0095 | 0.9635 | 0.1606 |
| Baiap2   | _SNLVSDIPGAKLPVPPELAPFVGR_3                               | #N/A                   | 4.4083  | 4.1362  | 3.4698  | 3.9724  | 3.3960  | 4.3200  | 3.6871  | 3.2035  | 3.7946  | 3.9314  | 1.0811  | 0.1125  | 0.2737 | 0.5627 |
| Baiap2   | _TIM[Oxidation (M)]EQNPSPSR_2                             | #N/A                   | 4.4214  | 5.8690  | 6.0654  | 5.8325  | 5.8993  | 5.8582  | 5.9516  | 5.4035  | 5.6814  | 6.5659  | 0.9588  | -0.0607 | 0.5283 | 0.2771 |
| Baiap2   | _AIFSHAAGNSTLISFK_2                                       | #N/A                   | 4.4430  | 3.7480  | 3.9937  | 4.0086  | 3.8119  | 4.4572  | 4.9125  | 2.9926  | 4.2640  | 4.2791  | 0.9915  | -0.0123 | 0.9328 | 0.0344 |
| Baiap2   | _LTENVYK_2                                                | #N/A                   | 3.3086  | 4.0648  | 4.5431  | 4.0869  | 3.9531  | 4.1723  | 4.0655  | 4.4152  | 3.2134  | 3.7641  | 1.0406  | 0.0574  | 0.6006 | 0.2214 |
| Baiap2   | _ELGDVLFQM[Oxidation (M)]AEVHR_3                          | #N/A                   | 3.5118  | 3.6123  | 3.9605  | 3.5042  | 3.3705  | 3.3183  | 3.6525  | 3.5612  | 3.8602  | 3.9674  | 0.9431  | -0.0845 | 0.1596 | 0.7969 |
| Pdhx     | _VVDEDLATR_2                                              | #N/A                   | 7.2759  | 7.5528  | 7.6715  | 7.5559  | 7.9716  | 7.1240  | 6.8832  | 7.3742  | 7.2288  | 7.3061  | 1.0455  | 0.0641  | 0.0985 | 1.0067 |
| Pdhx     | _VSVNDFIR_2                                               | #N/A                   | 6.6626  | 7.0116  | 7.4076  | 6.9708  | 6.7660  | 6.5135  | 6.7861  | 6.8227  | 6.6075  | 6.9009  | 1.0161  | 0.0231  | 0.5342 | 0.2723 |
| Pdhx     | _DLVKDDIK_2                                               | #N/A                   | 4.8681  | 5.2695  | 4.8636  | 5.1018  | 5.6273  | 5.4820  | 4.7986  | 5.0604  | 5.2041  | 5.2550  | 1.0241  | 0.0344  | 0.5164 | 0.2870 |
| Pdhx     | _GIEADIADSVK_2                                            | #N/A                   | 5.9419  | 5.3532  | 4.1391  | 5.4107  | 6.0042  | 5.6420  | 4.3564  | 5.3387  | 5.6153  | 4.8754  | 1.0731  | 0.1017  | 0.3944 | 0.4401 |
| Pdhx     | _HSDASGATGPR_2                                            | #N/A                   | 2.9577  | 3.7629  | 3.6445  | 4.1471  | 3.5842  | 4.1453  | 4.5061  | 3.9713  | 3.6199  | 3.0420  | 0.9794  | -0.0300 | 0.8199 | 0.0863 |
| Pdhx     | _LTDEEGNPQLQHQILVTM[Oxidation (M)]SSDSR_3                 | #N/A                   | 3.0364  | 3.7927  | 4.2709  | 3.8147  | 3.6810  | 2.9437  | 3.9629  | 3.1865  | 3.4856  | 3.4920  | 1.0165  | 0.0236  | 0.8453 | 0.0730 |
| Usp54    | _NSSS[Phospho (STY)]PDLDAAPPDSVNVVR_2                     | Q8BL06_S613_M1_Usp54   | 2.9558  | 3.7121  | 4.1904  | 8.2478  | 3.6004  | 3.0242  | 4.8922  | 8.1579  | 3.5661  | 7.8524  | 0.6111  | -0.1704 | 0.0813 | 1.0902 |
| Ablin2   | _S[Phospho (STY)]PQHYSR_2                                 | #N/A                   | 10.3798 | 9.9148  | 9.7184  | 10.4352 | 9.1914  | 10.1837 | 10.1469 | 9.9836  | 10.3924 | 0.9864  | -0.0198 | 0.9860  | 0.6025 | 0.1201 |
| Ablin2   | _NPYDSLVNTR_2                                             | #N/A                   | 5.5456  | 6.4193  | 5.9019  | 7.0186  | 6.5761  | 6.1231  | 5.4433  | 6.2134  | 6.1177  | 6.3428  | 1.0389  | 0.0551  | 0.4841 | 0.3151 |
| Ablin2   | _TSSESISVSPASSTS[Phospho (STY)]PSR_2                      | #N/A                   | 12.5509 | 12.5976 | 13.1100 | 13.1014 | 12.5345 | 12.6849 | 13.1282 | 12.5670 | 12.7314 | 1.0065  | 0.0094  | 0.6965  | 0.1575 | 0.1575 |
| Ablin2   | _TSS[Phospho (STY)]PSSAGSVSLGHTPTPSR_3                    | #N/A                   | 3.3897  | 4.9349  | 7.2114  | 8.4099  | 7.2791  | 3.7291  | 4.0748  | 6.6784  | 7.5626  | 6.6524  | 0.9400  | -0.0893 | 0.7621 | 0.1180 |
| Ablin2   | _S[Phospho (STY)]PQHSRSGSESGR_3                           | #N/A                   | 6.3129  | 6.3823  | 3.7882  | 3.3320  | 5.9824  | 5.6703  | 6.2583  | 5.4608  | 6.2042  | 6.3453  | 0.8644  | -0.2102 | 0.2746 | 0.5614 |
| Ablin2   | _RLDVESS[Phospho (STY)]FDQDSR_2                           | Q8BL65_S453_M1_Ablin2  | 4.0880  | 3.5258  | 3.6192  | 4.4083  | 4.3450  | 4.1374  | 3.9944  | 4.1336  | 3.9553  | 4.6008  | 0.9639  | -0.0530 | 0.5166 | 0.2868 |
| Ablin2   | _TI[Phospho (STY)]NSPDLDSGLSSGTDQELQR_3                   | Q8BL65_S475_M1_Ablin2  | 3.6702  | 3.9089  | 3.8756  | 3.1523  | 5.2388  | 3.3481  | 3.7639  | 7.1534  | 3.7446  | 3.6392  | 1.0270  | 0.0385  | 0.9168 | 0.0377 |
| Ees1     | _SLGS[Phospho (STY)]ADELFK_2                              | Q8BL66_S52_M1_Ees1     | 3.4371  | 4.2423  | 4.1239  | 5.4007  | 4.0636  | 3.6659  | 4.0267  | 5.2349  | 4.8468  | 3.0927  | 0.9663  | -0.0494 | 0.7845 | 0.1054 |
| Ees1     | _LQDSSQAAGELAEAK_2                                        | #N/A                   | 2.0685  | 3.0836  | 3.9261  | 4.4288  | 3.7069  | 3.0858  | 3.3790  | 2.6441  | 3.3383  | 2.9000  | 1.1043  | 0.1431  | 0.4914 | 0.3086 |
| Gtf3c2   | _VSS[Phospho (STY)]PTXPK_2                                | Q8BL74_S219_M1_Gtf3c2  | 4.6538  | 3.9967  | 5.9579  | 5.8441  | 3.8850  | 4.2405  | 4.1336  | 6.3844  | 3.3481  | 4.3860  | 1.0438  | 0.0619  | 0.7806 | 0.1076 |
| Afhgap22 | _LEELDQER_2                                               | #N/A                   | 11.6381 | 11.8383 | 11.8598 | 12.0373 | 12.2965 | 12.0412 | 11.5818 | 11.5582 | 11.5998 | 11.9147 | 1.0247  | 0.0352  | 0.0618 | 1.2088 |
| Srf7     | _S[Phospho (STY)]RS[Phospho (STY)]AS[Phospho (STY)]LRR_2  | Q8BL97_S200_M3_Srf7    | 6.9125  | 6.9709  | 5.1482  | 6.8623  | 6.9484  | 6.7978  | 7.0810  | 6.8938  | 7.1812  | 6.6990  | 0.9487  | -0.0759 | 0.3696 | 0.4323 |
| Srf7     | _S[Phospho (STY)]RS[Phospho (STY)]VSLR_2                  | Q8BL97_S192_M2_Srf7    | 3.1033  | 3.5643  | 5.1733  | 4.2122  | 3.7298  | 3.9997  | 5.6411  | 3.8649  | 3.4743  | 4.2597  | 0.9197  | -0.1208 | 0.5227 | 0.2818 |
| Srf7     | _S[Phospho (STY)]RS[Phospho (STY)]ASLR_2                  | #N/A                   | 4.5844  | 4.1958  | 5.3980  | 5.9654  | 4.0841  | 4.0414  | 5.8917  | 3.8986  | 3.5472  | 5.2809  | 1.0434  | 0.0613  | 0.7517 | 0.1219 |
| Srf7     | _S[Phospho (STY)]RS[Phospho (STY)]GS[Phospho (STY)]IGSR_2 | Q8BL97_S208_M3_Srf7    | 8.9042  | 8.9908  | 9.3930  | 9.4189  | 8.3414  | 8.8881  | 9.4505  | 9.1139  | 9.1375  | 8.8931  | 0.9826  | -0.0253 | 0.4925 | 0.3076 |
| Srf7     | _SGS[Phospho (STY)]IGSR_2                                 | Q8BL97_S212_M1_Srf7    | 9.0161  | 4.3409  | 9.4468  | 3.5561  | 3.7561  | 4.0269  | 8.3510  | 3.3892  | 5.3103  | 4.4097  | 1.0663  | 0.0926  | 0.8332 | 0.0793 |
| Ankr34c  | _VLNIEPG[Phospho (STY)]PTR_2                              | Q8BL88_S231_M1_Ankr34c | 3.6848  | 3.6576  | 3.4185  | 4.4631  | 6.8822  | 3.7961  | 3.1105  | 4.0389  | 4.3380  | 4.1403  | 1.1050  | 0.1440  | 0.5741 | 0.4410 |
| Ankr34c  | _T[Phospho (STY)]NDSKDPFLPTFVQELVK_3                      | Q8BL88_T299_M1_Ankr34c | 4.5960  | 3.3819  | 3.9326  | 3.5375  | 2.9746  | 3.2527  | 5.4258  | 4.2342  | 3.5045  | 0.8805  | -0.1837 | 0.3410  | 0.2672 | 0.1670 |
| Ankr34c  | _RGS[Phospho (STY)]GTLDDR_2                               | Q8BL88_S446_M1_Ankr34c | 3.2024  | 4.5196  | 3.8893  | 4.3919  | 3.8217  | 3.9005  | 4.1066  | 3.7266  | 3.3752  | 4.3858  | 1.0143  | 0.0205  | 0.8555 | 0.0678 |
| Hirip3   | _AVES[Phospho (STY)]TDEDHOTLDAK_2                         | Q8BLH7_S134_M1_Hirip3  | 5.8689  | 4.3132  | 5.8521  | 4.5098  | 3.6212  | 4.3148  | 3.7988  | 4.5275  | 3.8768  | 3.5843  | 1.2026  | 0.2672  | 0.1437 | 0.8426 |
| Plox3    | _LNVYNEGEANT_2                                            | #N/A                   | 3.4371  | 6.5701  | 7.4068  | 7.1112  | 6.2584  | 7.0904  | 7.1899  | 6.4552  | 6.2872  | 7.2213  | 0.9299  | -0.1049 | 0.5554 | 0.2554 |
| Lsmp     | _AANEVSSADWK_2                                            | #N/A                   | 7.6399  | 7.7317  | 7.5930  | 7.9398  | 7.5917  | 7.4673  | 7.2180  | 7.9468  | 7.5726  | 7.8338  | 1.0023  | 0.0034  | 0.9098 | 0.0410 |
| Lsmp     | _HALEYSR_2                                                | #N/A                   | 7.3714  | 7.2416  | 7.3034  | 7.6403  | 7.0212  | 7.1414  | 6.8377  | 7.3282  | 6.7433  | 7.3123  | 1.0328  | 0.0465  | 0.1943 | 0.7114 |
| Lsmp     | _QGDAILR_2                                                | #N/A                   | 6.1129  | 5.2559  | 6.2780  | 5.5476  | 5.7186  | 5.4524  | 4.7701  | 6.0703  | 5.2776  | 5.5122  | 1.0592  | 0.0829  | 0.3075 | 0.5121 |
| Lsmp     | _C[Carbamidomethyl (C)]EASVAPAFOWYR_2                     | #N/A                   | 5.2880  | 4.8737  | 5.5786  | 4.4303  | 5.2890  | 3.6360  | 4.5294  | 4.5083  | 4.6054  | 4.3809  | 1.0022  | 0.0032  | 0.9806 | 0.0085 |
| Lsmp     | _EFFEELYELGTR_2                                           | #N/A                   | 6.0498  | 6.9306  | 7.4062  | 7.7460  | 6.3689  | 6.7662  | 6.7337  | 6.5344  | 6.3664  | 6.5686  | 1.0499  | 0.0703  | 0.3473 | 0.4593 |
| Lsmp     | _C[Carbamidomethyl (C)]EASVAPAFOWYRDDR_3                  | #N/A                   | 4.2888  | 3.5931  | 3.4747  | 5.6730  | 5.3586  | 5.4304  | 3.1750  | 5.4163  | 5.2003  | 5.6179  | 0.9555  | -0.0657 | 0.7556 | 0.1217 |
| Lsmp     | _SGIFAGHDK_2                                              | #N/A                   | 4.2771  | 3.0653  | 6.2807  | 3.5545  | 3.4208  | 3.7038  | 6.1082  | 5.8088  | 5.9197  | 0.7367  | 0.7367  | -0.4408 | 0.0996 | 1.0017 |
| Lsmp     | _VDVYDEGSYTC[Carbamidomethyl (C)]SVQTOHEPK_3              | #N/A                   | 4.2812  | 1.1371  | 3.8850  | 4.8843  | 3.2699  | 2.9588  | 3.3196  | 3.8298  | 4.1289  | 4.3494  | 0.8709  | -0.1994 | 0.4858 | 0.1335 |
| Lsmp     | _IQKVVDYDEGSYTC[Carbamidomethyl (C)]SVQTOHEPK_3           | #N/A                   | 3.4165  | 5.0843  | 4.1034  | 4.4520  | 4.0431  | 3.6864  | 4.3207  | 3.5125  | 3.7206  | 3.0722  | 1.1298  | 0.1760  | 0.2280 | 0.6421 |
| Rps6k1   | _VC[Carbamidomethyl (C)]LQPSAS[Phospho (STY)]PGGGSFESR_2  | Q8BLK9_S448_M1_Rps6k1  | 6.9931  | 7.0328  | 4.3616  | 7.5699  | 5.7118  | 6.6580  | 3.9857  | 6.6515  | 6.5397  | 4.8177  | 1.1617  | 0.2162  | 0.2930 | 0.5332 |
| Rps6k1   | _SS[Phospho (STY)]PDQFLFSSLR_2                            | Q8BLK9_S779_M1_Rps6k1  | 5.2623  | 3.7191  | 3.6007  | 4.0280  | 5.4071  | 5.4821  | 3.8977  | 6.4830  | 3.6361  | 3.9081  | 1.0228  | 0.0325  | 0.8875 | 0.0518 |
| Rps6k1   | _S[Phospho (STY)]SQESLD                                   |                        |         |         |         |         |         |         |         |         |         |         |         |         |        |        |



|          |                                                            |                         |         |         |         |         |         |         |         |         |         |         |         |         |        |        |
|----------|------------------------------------------------------------|-------------------------|---------|---------|---------|---------|---------|---------|---------|---------|---------|---------|---------|---------|--------|--------|
| Cadm2    | _YKEDANR_K_2                                               | #N/A                    | 3.3729  | 2.6419  | 3.9589  | 3.5026  | 4.1712  | 2.3399  | 2.6280  | 3.4985  | 4.1550  | 3.1799  | 0.9898  | -0.0147 | 0.9407 | 0.0265 |
| Cadm2    | _GAEDAPADADAINAEGS[Phospho (STY)]QVNAECK_3                 | #N/A                    | 3.3473  | 3.9951  | 4.5818  | 4.1256  | 3.8164  | 3.9131  | 4.2739  | 4.3764  | 3.1746  | 4.3665  | 0.9791  | -0.3005 | 0.7913 | 0.1017 |
| Cadm2    | _GAEDAPADADAINAEGS[Phospho (STY)]QVNAECKYF1_3              | #N/A                    | 3.3750  | 3.4236  | 4.3626  | 4.6791  | 3.5279  | 4.1760  | 3.8064  | 4.1154  | 4.2666  | 0.9814  | -0.0270 | 0.8090  | 0.0921 | 0.6245 |
| Sowaha   | _QRS[Phospho (STY)]EEPSPR_2                                | QB8LS7_S242_M1_Sowaha   | 3.5572  | 3.5798  | 3.4614  | 3.7565  | 3.4011  | 4.3284  | 3.1698  | 1.8550  | 3.6946  | 3.9310  | 1.1638  | 0.2189  | 0.2374 | 0.6245 |
| Slc9a7   | _TKS[Phospho (STY)]SSEVELER_2                              | QB8LV3_S694_M1_Slc9a7   | 4.8164  | 4.3360  | 4.2409  | 3.7847  | 4.1573  | 3.5722  | 4.9802  | 3.2165  | 3.5155  | 3.4620  | 1.0943  | 0.1300  | 0.3829 | 0.4169 |
| Slc9a7   | _VGVEELS[Phospho (STY)]EEDQENR_2                           | QB8LV3_S546_M1_Slc9a7   | 3.9616  | 3.2660  | 3.1476  | 3.6502  | 3.0873  | 3.1414  | 3.3649  | 5.0184  | 4.1168  | 3.6172  | 0.8378  | -0.2554 | 0.0907 | 1.0426 |
| Plekha3  | _S[Phospho (STY)]RSOYTHDWR_3                               | QB8MA7_S150_M1_Plekha3  | 3.3961  | 3.9463  | 3.1298  | 4.1744  | 3.7677  | 3.9618  | 4.3226  | 4.3276  | 3.1259  | 3.8516  | 0.9545  | -0.0671 | 0.5708 | 0.2435 |
| Nypa2    | _LSTS[Phospho (STY)]SETVNSTAASK_2                          | QB8M65_S154_M1_Nypa2    | 7.7711  | 7.6411  | 7.7222  | 8.1604  | 6.2865  | 7.8430  | 7.7678  | 7.3387  | 7.7966  | 0.9963  | -0.0053 | 0.9379  | 0.0279 | 0.0062 |
| Nypa2    | _RNPNTQSTLS[Phospho (STY)]FDETYYK_3                        | QB8M65_S238_M1_Nypa2    | 3.7059  | 3.5203  | 4.3927  | 3.3945  | 2.8316  | 3.2160  | 3.1092  | 3.2231  | 4.3726  | 3.3615  | 0.9982  | -0.0026 | 0.9859 | 0.0062 |
| Nypa2    | _FTVPASHS[Phospho (STY)]JPRR_2                             | QB8M65_S184_M1_Nypa2    | 8.5672  | 8.4692  | 9.0789  | 9.4078  | 3.4504  | 3.8348  | 9.3246  | 4.1052  | 6.2526  | 3.9803  | 1.1121  | 0.1533  | 0.6957 | 0.1573 |
| Nypa2    | _KEEDDOSEAVY[Phospho (STY)]EEM[Oxidation (M)]KYPFDLGHOSK_4 | #N/A                    | 3.8253  | 3.9751  | 3.9175  | 3.9376  | 3.5928  | 3.3725  | 4.0859  | 4.1566  | 4.1386  | 3.6149  | 0.9428  | -0.0850 | 0.1873 | 0.7274 |
| Nypa2    | _DQTGALGAPAGASILSSS[Phospho (STY)]PPPSLTVR_3               | QB8M65_S442_M1_Nypa2    | 3.9264  | 3.2998  | 6.4069  | 3.6150  | 3.0521  | 3.1766  | 3.3297  | 3.0026  | 4.1520  | 3.5820  | 1.1127  | 0.1540  | 0.2427 | 0.2427 |
| Emy3     | _TNS[Phospho (STY)]SSSPVVLK_2                              | QB8MB0_S173_M1_Emy3     | 2.9320  | 3.7372  | 3.6188  | 6.9534  | 6.3940  | 6.9236  | 6.9460  | 6.5557  | 3.6456  | 6.9673  | 0.8448  | -0.2433 | 0.4349 | 0.3616 |
| Me3      | _VRGEEYDLDDEFM[Oxidation (M)]QAVTDK_3                      | #N/A                    | 3.7768  | 4.4010  | 4.4742  | 4.5425  | 4.6918  | 5.6485  | 4.6929  | 5.1246  | 6.6170  | 4.5950  | 0.9165  | -0.1258 | 0.2797 | 0.5533 |
| Me3      | _TFTPGQGNNAVVPGLVGIAGGIR_3                                 | #N/A                    | 3.7084  | 2.1025  | 3.4182  | 3.9266  | 3.4577  | 4.3775  | 3.2315  | 4.3391  | 4.2377  | 4.6229  | 0.8517  | -0.2316 | 0.2218 | 0.6541 |
| Me3      | _EMFAGQHPENVSLSEVR_3                                       | #N/A                    | 3.6153  | 4.0270  | 3.9086  | 4.0937  | 3.8483  | 3.8812  | 4.2420  | 4.4083  | 3.2065  | 4.3783  | 0.9598  | -0.0592 | 0.5189 | 0.2849 |
| Dlat     | _ILVPEGTR_2                                                | #N/A                    | 9.9112  | 10.1968 | 10.1866 | 10.1804 | 10.5591 | 10.0302 | 9.8564  | 10.2096 | 9.9361  | 10.0552 | 1.0163  | 0.0233  | 0.2351 | 0.6287 |
| Dlat     | _DVPLGAR[C[Carbamidomethyl (C)]I]VEK_2                     | #N/A                    | 7.8826  | 7.8288  | 7.6386  | 8.1364  | 8.0695  | 8.1255  | 8.1792  | 7.2099  | 7.6197  | 8.0568  | 1.0232  | 0.0331  | 0.3972 | 0.4010 |
| Dlat     | _GLTIAADVSLASK_2                                           | #N/A                    | 7.5633  | 7.6955  | 7.7645  | 8.0821  | 7.5971  | 7.7426  | 7.3094  | 7.5402  | 7.6873  | 8.1370  | 1.0094  | 0.0136  | 0.6764 | 0.1698 |
| Dlat     | _VPLPSLPTM[Oxidation (M)]QAGTIAR_2                         | #N/A                    | 7.3505  | 7.7830  | 8.4546  | 7.6868  | 7.7719  | 7.8958  | 7.9369  | 8.0610  | 7.8565  | 7.8646  | 0.9866  | -0.0194 | 0.5879 | 0.2307 |
| Dlat     | _DIDSVPVK_2                                                | #N/A                    | 7.4514  | 7.5156  | 7.7765  | 7.2445  | 8.0595  | 7.7782  | 6.5721  | 7.5703  | 7.6227  | 7.9062  | 1.0296  | 0.0421  | 0.4454 | 0.3513 |
| Dlat     | _VPSPLAK_2                                                 | #N/A                    | 7.4724  | 7.2403  | 7.5725  | 7.2336  | 7.6947  | 6.9423  | 5.7034  | 7.5142  | 7.8127  | 7.2112  | 1.0310  | 0.0441  | 0.6009 | 0.2212 |
| Dlat     | _YLEKPTM[Oxidation (M)]IL_2                                | #N/A                    | 5.1523  | 6.2078  | 5.7512  | 5.4858  | 5.2517  | 5.2878  | 5.5951  | 5.7442  | 5.3013  | 5.9149  | 0.9794  | -0.0300 | 0.6232 | 0.2054 |
| Dlat     | _SVNDRK_2                                                  | #N/A                    | 4.7717  | 4.9929  | 5.9171  | 6.0811  | 4.7582  | 5.5313  | 4.8725  | 5.6634  | 4.6139  | 4.4585  | 1.0898  | 0.1240  | 0.2628 | 0.5804 |
| Dlat     | _VAPAPAGVTDIPSNIR_2                                        | #N/A                    | 8.1703  | 8.3389  | 8.4805  | 8.5741  | 8.4992  | 8.2670  | 7.9601  | 8.4009  | 8.2162  | 8.3568  | 1.0188  | 0.0269  | 0.2021 | 0.6945 |
| Dlat     | _DVPVGSIC[Carbamidomethyl (C)]ITVEKPDIEAFK_3               | #N/A                    | 6.5357  | 6.8174  | 3.4241  | 7.3455  | 6.9181  | 6.5503  | 6.7590  | 6.6127  | 7.1073  | 6.9185  | -0.1227 | 0.4686  | 0.3292 | 0.5581 |
| Dlat     | _LQPHFQGGFTFNSLGM[Oxidation (M)]FGIK_3                     | #N/A                    | 5.1364  | 4.8399  | 5.3627  | 5.5675  | 4.4042  | 5.4497  | 5.7128  | 4.7333  | 5.4962  | 6.0182  | 0.9338  | -0.0988 | 0.2766 | 0.2766 |
| Dlat     | _VPEANSWAM[Oxidation (M)]DTVIR_2                           | #N/A                    | 6.7240  | 6.5762  | 7.1269  | 7.0470  | 6.8871  | 6.6260  | 6.3459  | 6.2903  | 6.4488  | 6.4275  | 1.0710  | 0.0990  | 0.0052 | 2.2855 |
| Dlat     | _AAPAAAAAM[Oxidation (M)]APPGPR_2                          | #N/A                    | 5.6031  | 6.2468  | 5.9233  | 5.7806  | 5.6002  | 5.9899  | 5.7226  | 6.2240  | 5.6789  | 6.3465  | 0.9748  | -0.0368 | 0.4337 | 0.2628 |
| Dlat     | _ASALAC[Carbamidomethyl (C)]LK_2                           | #N/A                    | 2.9518  | 3.8732  | 4.1863  | 3.7301  | 4.5648  | 3.5175  | 3.8783  | 4.1138  | 3.4321  | 3.4074  | 1.0245  | 0.0350  | 0.7807 | 0.1075 |
| Dlat     | _VVDGAVGACWLAEFK_2                                         | #N/A                    | 4.0643  | 3.1618  | 3.2503  | 3.7530  | 3.1900  | 3.0386  | 3.4676  | 4.3655  | 4.0141  | 3.7200  | 0.8761  | -0.1908 | 0.0975 | 0.1010 |
| Rab3gap2 | _GGFS[Phospho (STY)]PFGNTQSPR_2                            | QB8MG7_S448_M1_Rab3gap2 | 9.9258  | 9.8537  | 10.2790 | 10.2852 | 7.2600  | 9.7082  | 9.9650  | 9.9439  | 9.5551  | 9.6021  | 0.9780  | -0.0320 | 0.7262 | 0.1389 |
| Rab3gap2 | _AKS[Phospho (STY)]PRPDSFETEK_3                            | QB8MG7_S566_M1_Rab3gap2 | 4.3972  | 2.9390  | 3.1733  | 3.9757  | 2.8273  | 3.7973  | 3.6904  | 4.1427  | 4.1393  | 4.9031  | 0.9031  | -0.1471 | 0.2748 | 0.5360 |
| Rab3gap2 | _TSS[Phospho (STY)]WEEDOSWGAWETEPR_2                       | QB8MG7_S42_M1_Rab3gap2  | 3.2719  | 4.0705  | 4.5064  | 4.0502  | 3.8918  | 3.8377  | 4.1985  | 4.4518  | 3.2500  | 3.7275  | 1.0080  | 0.0115  | 0.9181 | 0.0371 |
| Gga3     | _LAS[Phospho (STY)]ETEDNONSGLDLQASDNLRL_3                  | QB8MI3_S267_M1_Gga3     | 4.0531  | 3.1731  | 3.2390  | 3.7417  | 3.1788  | 3.0499  | 3.4564  | 4.3768  | 4.0254  | 3.7087  | 0.8752  | -0.1924 | 0.0953 | 0.1070 |
| Clap4    | _VGAHGS[Phospho (STY)]EEGAVFK_2                            | QB8MK4_S367_M1_Clap4    | 5.6669  | 5.5640  | 4.5070  | 6.7034  | 4.4274  | 5.3515  | 5.8148  | 6.3020  | 5.5140  | 5.9051  | 0.9127  | -0.1319 | 0.2845 | 0.5459 |
| Hadha    | _FVULVGAQK_2                                               | #N/A                    | 6.3157  | 5.9656  | 5.3339  | 6.2464  | 5.6326  | 6.1039  | 5.6556  | 5.5697  | 5.5011  | 1.0303  | 0.0431  | 0.4499  | 0.3469 | 0.3469 |
| Hadha    | _DGPYFTTR_2                                                | #N/A                    | 6.3774  | 6.1084  | 4.1262  | 5.9409  | 5.6862  | 6.1388  | 5.9327  | 6.5778  | 6.0120  | 6.0596  | 0.9323  | -0.1011 | 0.3653 | 0.4373 |
| Hadha    | _GLEQGSDACTLAESQK_2                                        | #N/A                    | 3.1975  | 3.0292  | 3.6818  | 3.6487  | 3.2156  | 4.4568  | 4.5275  | 3.8092  | 4.1707  | 4.8144  | 0.8171  | -0.2915 | 0.0369 | 1.4333 |
| Hadha    | _SUNSEM[Oxidation (M)]DNILANLR_2                           | #N/A                    | 5.1380  | 5.1364  | 3.5257  | 4.5703  | 5.4037  | 5.7295  | 5.8388  | 5.6909  | 4.2308  | 5.8255  | 0.9112  | -0.1342 | 0.3694 | 0.4325 |
| Hadha    | _DTTASAVAVGR_2                                             | #N/A                    | 3.5215  | 4.1457  | 4.2083  | 4.7894  | 4.5673  | 3.5815  | 5.0743  | 3.8335  | 4.3396  | 4.2385  | 0.9460  | -0.0800 | 0.4965 | 0.3041 |
| Hadha    | _TVLGVPEVLGLPGAGGTQR_2                                     | #N/A                    | 3.6576  | 3.5910  | 4.0490  | 3.5436  | 3.2486  | 3.4495  | 3.8184  | 3.7981  | 3.2734  | 3.1500  | 1.0228  | 0.0325  | 0.6902 | 0.1610 |
| Hadha    | _LPAKEVSSDDVCYR_3                                          | #N/A                    | 3.6666  | 3.4547  | 3.6214  | 4.2036  | 4.4330  | 3.5932  | 3.3134  | 3.8446  | 4.1351  | 4.3433  | 0.9794  | -0.0300 | 0.7712 | 0.1128 |
| Larp6    | _SPGAS[Phospho (STY)]PLLSR_2                               | QB8N59_S451_M1_Larp6    | 3.5942  | 4.3505  | 3.3279  | 6.7005  | 4.2388  | 6.9870  | 5.6880  | 6.3878  | 4.0498  | 6.7528  | 0.9758  | -0.4097 | 0.1108 | 0.9554 |
| Larp6    | _YLSPGWGSAS[Phospho (STY)]EEEPSPR_2                        | QB8N59_S58_M1_Larp6     | 3.9149  | 3.2147  | 4.0135  | 3.5569  | 3.0406  | 7.0159  | 3.4895  | 5.9116  | 3.9864  | 3.5705  | 0.9732  | -0.0391 | 0.8997 | 0.0459 |
| Spata2l  | _SGDLAPPSPSPS[Phospho (STY)]PGQASPR_2                      | QB8N59_S329_M1_Spata2l  | 3.6378  | 8.4198  | 4.0387  | 8.0960  | 7.7853  | 7.8248  | 9.1656  | 7.7390  | 7.8527  | 0.9320  | 1.0166  | 0.7475  | 0.1264 | 0.1264 |
| Kbtbd11  | _ASAAEGSEAS[Phospho (STY)]PPSLR_2                          | QB8NWS_570_M1_Kbtbd11   | 12.0569 | 11.9958 | 12.6454 | 12.4283 | 11.9645 | 12.3556 | 12.5928 | 12.2492 | 12.3980 | 12.5149 | 0.9841  | -0.0231 | 0.2324 | 0.6337 |
| Kbtbd11  | _LLADAYSGR_2                                               | #N/A                    | 4.8744  | 5.6180  | 4.7237  | 4.1964  | 5.0548  | 5.6968  | 4.6772  | 5.6248  | 4.5750  | 5.4397  | 0.9888  | -0.0418 | 0.8888 | 0.0515 |
| Kbtbd11  | _A[C[Carbamidomethyl (C)]LLAAALGTGTR_2                     | #N/A                    | 4.8179  | 3.7833  | 4.1297  | 5.5259  | 4.9032  | 5.5824  | 5.2229  | 4.8815  | 5.1017  | 5.2042  | 0.9388  | -0.0911 | 0.4298 | 0.3667 |
| Kbtbd11  | _SGS[Phospho (STY)]RPOS[Phospho (STY)]PSGDAESR_2           | QB8NWS_5316_M1_Kbtbd11  | 8.5576  | 8.4276  | 8.3539  | 7.7295  | 7.8700  | 7.7681  | 8.3967  | 8.1207  | 8.7415  | 8.1207  | 0.9773  | -0.0332 | 0.5756 | 0.2399 |
| Kbtbd11  | _GDAAVVC[Carbamidomethyl (C)]VQAEAGEWR_2                   | #N/A                    | 4.3315  | 4.6657  | 5.2765  | 5.6262  | 3.4752  | 3.1494  | 4.8585  | 3.3922  | 3.5953  | 3.2862  | 1.1686  | 0.2247  | 0.2999 | 0.5230 |
| Kbtbd11  | _POS[Phospho (STY)]PSGDAESR_2                              | #N/A                    | 3.5865  | 3.7559  | 3.3202  | 4.2985  | 3.5772  | 4.1523  | 4.7083  | 4.1372  | 4.4363  | 4.0421  | 0.8732  | -0.1956 | 0.0405 | 1.3921 |
| Fam92a   | _ANSKS[Phospho (STY)]IPLDR_2                               | QB8P22_S312_M1_Fam92a   | 4.1298  | 3.3853  | 3.8635  | 3.4073  | 3.2736  | 4.5319  | 3.5555  | 3.5939  | 4.9628  | 3.0845  | 0.9911  | -0.0130 | 0.9358 | 0.0288 |
| Sfr1     | _S[Phospho (STY)]SSHSG[C[Carbamidomethyl (C)]I]SVWK_2      | QB8P27_S139_M1_Sfr1     | 4.0667  | 3.5229  | 6.4159  | 6.5778  | 3.3686  | 6.8614  | 6.3563  | 3.9992  | 3.5587  | 0.9719  | -0.0411 | 0.8904  | 0.0504 | 0.0504 |
| Sfr1     | _ENPPS[Phospho (STY)]PHNSGSGKPSGTPK_3                      | #N/A                    | 3.5858  | 3.6404  | 4.2726  | 3.2744  | 3.5287  | 3.0960  | 9.1866  | 3.3432  | 2.9918  | 0.9091  | 0.5794  | -0.7874 | 0.0976 | 1.0107 |
| Sfr1     | _ENPPS[Phospho (STY)]PPTS[Phospho (STY)]PAAPQPR_2          | #N/A                    | 14.1096 | 14.4073 | 14.9534 | 12.7420 | 14.3735 | 14.5017 | 14.7469 | 14.1102 | 14.4050 | 14.3854 | 0.9840  | -0.0233 | 0.5798 | 0.2367 |
| Sfr1     | _ENPPS[Phospho (STY)]PHGNSGK_2                             | #N/A                    | 10.3959 | 10.4798 | 10.8983 | 11.3429 | 10.6391 | 10.7208 | 10.5992 | 10.6588 | 10.6671 | 10.6474 | 1.0097  | 0.0139  | 0.5722 | 0.2424 |
| NARS1    | _ISALEGYR_2                                                | #N/A                    | 5.5462  | 5.7625  | 5.6640  | 5.7854  | 4.5445  | 3.7705  | 5.8968  | 6.0301  | 5.2550  | 5.1555  | 0.9274  | -0.1088 | 0.4032 | 0.3944 |
| NARS1    | _DVC[Carbamidomethyl (C)]LYPR_2                            | #N/A                    | 4.8206  | 5.2427  | 5.6133  | 5.1382  | 5.6213  | 4.4860  | 5.0052  | 5.5781  | 3.7623  | 5.2087  | 1.0542  | 0.0762  | 0.5112 | 0.2914 |
| NARS1    | _SWDSEELGYR_3                                              | #N/A                    | 3.3564  | 3.8060  | 3.2701  | 4.3147  | 4.1810  | 3.9445  | 4.4630  | 4.1873  | 2.9855  | 3.9920  | 0.9834  | -0.0241 | 0.8463 | 0.0725 |
| Fra10ac1 | _TTPEC[Carbamidomethyl (C)]DES[Phospho (STY)]PRKK_2        | QB8P78_S243_M1_Fra10ac1 | 4.3227  | 6.2835  | 6.2910  | 3.6001  | 6.1727  | 5.3590  | 5.6966  | 5.5826  | 5.5066  | 3.2774  | 1.0437  | 0.0617  | 0.7762 | 0.1100 |
| Fra10ac1 | _S[Phospho (STY)]RSPSPSEASK_2                              | QB8P78_S248_M1_Fra10ac1 | 4.4237  | 3.6451  | 4.0501  | 3.9564  | 3.6419  |         |         |         |         |         |         |         |        |        |



|          |                                                                           |                        |         |         |         |         |         |         |         |         |         |         |         |         |        |        |
|----------|---------------------------------------------------------------------------|------------------------|---------|---------|---------|---------|---------|---------|---------|---------|---------|---------|---------|---------|--------|--------|
| Dmx12    | _VDPIGLSYTGGVSELAR_2                                                      | #N/A                   | 6.1399  | 6.4799  | 5.5542  | 4.5239  | 5.4513  | 6.1736  | 6.4812  | 5.8235  | 5.9823  | 6.0192  | 0.9414  | -0.0871 | 0.3726 | 0.4287 |
| Dmx12    | _RQ[S](Phospho (STY))ESAAPVASEM[Oxidation (M)]DKHR_4                      | #N/A                   | 7.1342  | 6.6595  | 8.1488  | 4.0581  | 5.9229  | 7.0229  | 7.3501  | 7.1630  | 7.1379  | 6.8934  | 0.9096  | -0.1367 | 0.3934 | 0.4051 |
| Dmx12    | _QLDHES[Phospho (STY)]DOADREDEER_3                                        | #N/A                   | 5.1761  | 4.2892  | 5.4905  | 4.7846  | 4.2058  | 4.3291  | 4.6949  | 5.2492  | 4.8659  | 3.9736  | 1.0035  | 0.0051  | 0.9625 | 0.0166 |
| Dmx12    | _LVQAVWDAR_2                                                              | #N/A                   | 4.2629  | 5.2341  | 4.5750  | 4.9211  | 2.9397  | 3.6849  | 3.2217  | 5.3337  | 4.2268  | 4.2516  | 1.0027  | 0.0038  | 0.9840 | 0.0070 |
| Dmx12    | _VS[Phospho (STY)]VOSNLVYSK_2                                             | QB8PN8_S1141_M1_Dmx12  | 3.9677  | 5.5647  | 7.2304  | 6.7844  | 6.3633  | 6.6744  | 7.7980  | 7.6559  | 7.3930  | 6.8685  | 0.8455  | -0.2422 | 0.1026 | 0.9889 |
| Dmx12    | _RKOS[Phospho (STY)]EVAADLVPGGK_3                                         | #N/A                   | 3.7923  | 3.7185  | 4.2703  | 4.2414  | 3.2800  | 3.2495  | 3.6382  | 3.2706  | 3.8678  | 3.3933  | 1.0610  | 0.0855  | 0.4118 | 0.3853 |
| Dmx12    | _RKOS[Phospho (STY)]EVAADLVPGGK_3                                         | #N/A                   | 5.7856  | 4.7639  | 3.9796  | 3.5234  | 2.9178  | 3.3108  | 3.6716  | 5.5281  | 3.7769  | 3.2006  | 1.0006  | 0.0009  | 0.9971 | 0.0013 |
| Dmx12    | _SS[Phospho (STY)]DDIDYR_2                                                | #N/A                   | 3.4180  | 4.2024  | 4.3662  | 3.8502  | 4.0523  | 3.9408  | 4.0238  | 5.3925  | 5.5445  | 3.4728  | 0.8618  | -0.2145 | 0.1829 | 0.7379 |
| Dmx12    | _LDHLSLDRES[Phospho (STY)]EAGTGSSEHDEGEREGS[Phospho (STY)]PR_4            | QB8PN8_S456_M2_Dmx12   | 3.6399  | 3.7025  | 3.3735  | 4.4181  | 3.5239  | 4.2056  | 3.0656  | 4.1161  | 4.3829  | 4.0954  | 0.9733  | -0.0390 | 0.7454 | 0.1276 |
| Dmx12    | _ESAGTGSSEHDEGEREGS[Phospho (STY)]PR_3                                    | QB8PN8_S473_M1_Dmx12   | 4.1577  | 4.1900  | 4.6203  | 4.4542  | 4.5438  | 4.1302  | 4.4574  | 4.3986  | 4.5782  | 3.8565  | 1.0062  | 0.0089  | 0.8773 | 0.0569 |
| Dmx12    | _NIGAGVMQIASQDNR_2                                                        | #N/A                   | 5.3240  | 4.1645  | 4.4124  | 3.9562  | 3.9858  | 7.3437  | 4.1044  | 3.0450  | 3.3440  | 3.6335  | 1.2075  | 0.2720  | 0.0628 | 1.2022 |
| Dmx12    | _VGSVLDSRSV[Phospho (STY)]VDS[Phospho (STY)]NLVYSK_3                      | #N/A                   | 3.1488  | 4.0774  | 3.8356  | 4.3382  | 3.7753  | 4.1598  | 4.0529  | 3.7802  | 3.4288  | 4.3052  | 0.9993  | -0.0010 | 0.9922 | 0.0034 |
| Dmx12    | _QLDHES[Phospho (STY)]DOADREDEERSQDER_4                                   | #N/A                   | 3.5008  | 4.0223  | 3.5093  | 4.3820  | 3.6881  | 3.8279  | 3.9688  | 4.0079  | 4.3987  | 4.1457  | 0.9253  | -0.1120 | 0.1413 | 0.8500 |
| Sgsm1    | _C[Carbamidomethyl (C)]SSGAS[Phospho (STY)]LDSHLHR_3                      | #N/A                   | 3.5791  | 3.9055  | 4.0815  | 3.4520  | 3.5877  | 3.7401  | 4.2559  | 4.4169  | 5.1268  | 3.9902  | 0.8374  | -0.2560 | 0.0127 | 1.1898 |
| Sgsm1    | _QDS[Phospho (STY)]PTKRPALC[Carbamidomethyl (C)]IQK_3                     | QB8PQ7_S215_M1_Sgsm1   | 4.3545  | 4.3725  | 3.5405  | 4.0431  | 3.4802  | 4.2493  | 3.7578  | 4.0753  | 3.7239  | 2.5142  | 1.1390  | 0.1877  | 0.1891 | 0.7232 |
| Sgsm1    | _RHS[Phospho (STY)]S[Phospho (STY)]GSM[Oxidation (M)]DDRPSISAR_3          | #N/A                   | 5.5974  | 5.2490  | 3.8584  | 4.6655  | 3.5544  | 5.5161  | 3.5635  | 5.4638  | 5.2838  | 0.9415  | -0.0869 | 0.6347  | 0.1974 | 0.3712 |
| Sgsm1    | _HSGGS[Phospho (STY)]M[Oxidation (M)]DDRPSISAR_2                          | #N/A                   | 3.4871  | 3.7688  | 3.9085  | 4.1662  | 3.6204  | 3.8557  | 3.9758  | 3.6584  | 3.5511  | 4.0813  | 0.9959  | -0.0059 | 0.9235 | 0.0346 |
| Sgsm1    | _SPQSGSSESTSS[Phospho (STY)]DKEDDEADTVVFR_3                               | QB8PQ7_S407_M1_Sgsm1   | 4.1526  | 3.1898  | 3.8863  | 3.4300  | 3.2963  | 2.7357  | 3.5783  | 3.5711  | 3.8702  | 3.1073  | 0.9764  | -0.0344 | 0.7793 | 0.1083 |
| Elmo1    | _AFDAEFPNNSGS[Phospho (STY)]M[Oxidation (M)]EK_2                          | #N/A                   | 5.3888  | 3.6740  | 4.0408  | 6.8225  | 3.5149  | 3.8377  | 3.6206  | 3.6638  | 7.2194  | 7.2172  | 0.8372  | -0.2563 | 0.4254 | 0.3712 |
| Pyp118   | _SC[Carbamidomethyl (C)]LVKGS[Phospho (STY)]PER_2                         | QB8Q30_S510_M1_Pyp118  | 6.9619  | 7.0372  | 7.0174  | 7.8131  | 6.847   | 7.2752  | 7.3361  | 6.7204  | 7.0694  | 6.8939  | 1.0413  | 0.0585  | 0.2627 | 0.5806 |
| Fam102b  | _SSS[Phospho (STY)]SEFC[Carbamidomethyl (C)]HR_2                          | QB8Q54_S197_M1_Fam102b | 3.0373  | 7.6112  | 7.4598  | 8.5597  | 7.1686  | 8.2263  | 8.3540  | 7.7989  | 8.2058  | 7.9940  | 0.8668  | -0.3063 | 0.3267 | 0.4859 |
| Fam102b  | _C[Carbamidomethyl (C)]PVKQGS[Phospho (STY)]VESQLK_3                      | QB8Q54_S267_M1_Fam102b | 5.4354  | 5.6774  | 6.1932  | 4.4181  | 5.4318  | 3.8411  | 3.0655  | 5.8687  | 5.9480  | 7.0940  | 1.0899  | 0.1229  | 0.5699 | 0.2442 |
| Fam102b  | _SAS[Phospho (STY)]VPDGLGAWGH5R_2                                         | QB8Q54_S162_M1_Fam102b | 4.1048  | 3.3602  | 3.8385  | 3.5546  | 3.2485  | 3.3761  | 3.2693  | 3.0631  | 4.2125  | 3.5216  | 1.0182  | 0.0260  | 0.8119 | 0.0905 |
| Ralgabp  | _SDS[Phospho (STY)]APPTPVNR_2                                             | QB8Q24_S359_M1_Ralgabp | 11.0912 | 8.8404  | 11.6293 | 10.8789 | 10.0103 | 10.9531 | 11.8527 | 11.3862 | 11.1300 | 10.9643 | 0.9365  | -0.0946 | 0.2066 | 0.6848 |
| Bicd1    | _SGS[Phospho (STY)]LKGPDOPR_2                                             | QB8R07_S548_M1_Bicd1   | 3.8874  | 7.6577  | 8.2546  | 3.7720  | 7.0997  | 5.9395  | 3.4867  | 4.3465  | 3.9951  | 7.7708  | 1.1655  | 0.2210  | 0.5653 | 0.2447 |
| Fam177a1 | _RVHVFVSGET[Phospho (STY)]M[Oxidation (M)]EY[Phospho (STY)]STDEDEVGLDKK_4 | QB8R63_T60_M2_Fam177a1 | 4.1021  | 3.8322  | 3.1023  | 3.6406  | 3.7063  | 3.6600  | 3.9852  | 3.6870  | 3.0763  | 3.5175  | 1.0693  | 0.0967  | 0.1987 | 0.7019 |
| Paln2    | _EES[Phospho (STY)]LATDPAPGTQK_2                                          | QB8R92_S355_M1_Paln2   | 8.4692  | 7.8006  | 8.5867  | 7.4749  | 8.1226  | 8.3182  | 7.8172  | 7.8050  | 8.2385  | 0.9992  | -0.0012 | 0.9804  | 0.0086 | 0.3712 |
| Paln2    | _LEQBIQAESESQSAK_2                                                        | #N/A                   | 6.6866  | 6.0814  | 6.8255  | 6.9885  | 5.0574  | 5.8944  | 6.7764  | 5.8664  | 5.8416  | 6.1593  | 1.0154  | 0.0220  | 0.8226 | 0.0848 |
| Paln2    | _AELVLDEDEKES[Phospho (STY)]LREK_3                                        | #N/A                   | 8.2654  | 8.8293  | 8.6592  | 9.9200  | 8.8148  | 9.2288  | 9.0177  | 9.2848  | 9.3234  | 9.1790  | 0.9730  | -0.0395 | 0.4231 | 0.3746 |
| Paln2    | _AELVLDEDEKES[Phospho (STY)]LR_2                                          | #N/A                   | 7.0557  | 7.7722  | 7.1456  | 9.8950  | 8.1530  | 8.3392  | 8.1276  | 9.0559  | 8.6530  | 8.6600  | 0.9346  | -0.0976 | 0.3355 | 0.4743 |
| Scd1     | _VNLEESTGVENS[Phospho (STY)]PAGARP_2                                      | #N/A                   | 3.3190  | 4.5599  | 4.0058  | 5.5648  | 3.9455  | 3.7921  | 4.0760  | 5.0587  | 3.3897  | 4.6510  | 0.9339  | -0.0987 | 0.6187 | 0.2085 |
| Rel2     | _SWG[S](Phospho (STY))GGGQEPGGSQAAGGQPR_2                                 | QB8RJ2_S195_M1_Rel2    | 3.9377  | 3.2885  | 3.1236  | 3.6263  | 3.1768  | 3.4478  | 3.3410  | 5.8767  | 4.1408  | 3.5933  | 0.8102  | -0.3037 | 0.1310 | 0.8828 |
| Rel2     | _YGLHERHDS[Phospho (STY)]PTDR_3                                           | QB8RJ2_S187_M1_Rel2    | 3.6546  | 6.1362  | 4.3414  | 3.3432  | 4.2811  | 3.1647  | 4.5587  | 6.2158  | 4.4239  | 4.7917  | 0.8311  | -0.2669 | 0.2251 | 0.6477 |
| Rel2     | _GS[Phospho (STY)]EPDQALQPPEDDVDNEVTR_3                                   | QB8RJ2_S52_M1_Rel2     | 4.3410  | 3.0014  | 4.0747  | 6.1440  | 2.8227  | 3.4059  | 3.7667  | 3.3827  | 3.6818  | 3.2958  | 1.1227  | 0.1669  | 0.5106 | 0.2919 |
| Prkaa2   | _SC[Carbamidomethyl (C)]S[Phospho (STY)]AAGLHR_2                          | QB8RK8_S491_M1_Prkaa2  | 4.2059  | 3.1365  | 3.9395  | 3.4833  | 3.3496  | 5.9919  | 6.4632  | 6.2164  | 6.4422  | 0.7212  | -0.4714 | 0.0983  | 0.1075 | 0.3712 |
| Prkaa2   | _TSC[Carbamidomethyl (C)]GS[Phospho (STY)]PNYAAPEVSSGR_2                  | QB8RK8_S176_M1_Prkaa2  | 4.2397  | 3.1027  | 3.9734  | 3.5172  | 3.3835  | 3.3046  | 3.6654  | 3.4840  | 3.7831  | 3.1945  | 1.0156  | 0.0223  | 0.8262 | 0.0829 |
| Prkaa2   | _MPLUAS[Phospho (STY)]PK_2                                                | QB8RK8_S377_M1_Prkaa2  | 3.8599  | 3.1153  | 3.0956  | 3.1373  | 3.0036  | 3.6210  | 3.2856  | 3.8638  | 4.1629  | 4.3155  | 0.8673  | -0.2054 | 0.0741 | 1.1299 |
| Clasp2   | _ESSRDS[Phospho (STY)]PVR_2                                               | QB8RT1_S547_M1_Clasp2  | 8.2842  | 8.5901  | 9.4874  | 8.6479  | 7.4317  | 8.4228  | 8.9546  | 9.2841  | 8.8320  | 8.3856  | 0.9564  | -0.0644 | 0.3248 | 0.4883 |
| Clasp2   | _AQT[Phospho (STY)]SAGASOPTADVSGS_2                                       | #N/A                   | 3.7465  | 3.5959  | 3.4802  | 4.5248  | 2.8903  | 3.7343  | 3.1722  | 3.9772  | 4.2763  | 0.9373  | -0.0934 | 0.4859  | 0.3135 | 0.3712 |
| Clasp2   | _RAQTGS[Phospho (STY)]AGADPTADVSGS_2                                      | QB8RT1_S1273_M1_Clasp2 | 5.9379  | 6.0036  | 4.2233  | 6.2998  | 4.9779  | 5.7612  | 6.7116  | 6.5206  | 6.1096  | 6.0597  | 0.8714  | -0.1985 | 0.0864 | 1.0634 |
| Clasp2   | _VLTTALTVSSGAQR_2                                                         | #N/A                   | 4.1969  | 4.5426  | 4.5831  | 3.5849  | 2.8965  | 4.1090  | 3.9616  | 4.2636  | 4.6757  | 4.4141  | 0.9207  | -0.1192 | 0.3543 | 0.4506 |
| Clasp2   | _MVSGSQSPS[Phospho (STY)]R_2                                              | QB8RT1_S465_M1_Clasp2  | 7.9320  | 6.8269  | 6.2545  | 8.3877  | 6.3529  | 3.0344  | 7.5167  | 6.6059  | 6.5104  | 6.9381  | 0.8654  | -0.2086 | 0.4579 | 0.3992 |
| Clasp2   | _SSSS[Phospho (STY)]QESLNRPSSK_2                                          | #N/A                   | 4.2047  | 3.4869  | 3.6350  | 6.5437  | 3.3386  | 5.7243  | 3.3271  | 6.3155  | 5.9620  | 5.7951  | 0.8391  | -0.2532 | 0.3505 | 0.5553 |
| Clasp2   | _SR[S](Phospho (STY))DIDVNAAGAK_2                                         | QB8RT1_S376_M1_Clasp2  | 8.5006  | 8.3990  | 3.9213  | 8.4496  | 7.4884  | 8.5564  | 8.7903  | 8.6024  | 8.4984  | 8.3556  | 0.8821  | -0.1809 | 0.3110 | 0.4073 |
| Clasp2   | _IPRPVS[Phospho (STY)]GGC[Carbamidomethyl (C)]S[Phospho (STY)]R_2         | QB8RT1_S531_M2_Clasp2  | 3.9867  | 6.1077  | 3.8943  | 3.6753  | 3.8341  | 3.9653  | 4.1117  | 6.3961  | 6.2100  | 3.6423  | 0.8338  | -0.2623 | 0.2801 | 0.5527 |
| Clasp2   | _S[Phospho (STY)]QIDMSEFVR_2                                              | QB8RT1_S947_M1_Clasp2  | 6.4384  | 3.5171  | 4.3959  | 6.8454  | 2.8348  | 3.1299  | 3.1124  | 4.3693  | 3.3647  | 1.2998  | 0.3783  | -0.2701 | 0.5685 | 0.1748 |
| Clasp2   | _EILSDOHWDQCR_3                                                           | #N/A                   | 4.4428  | 3.5974  | 4.3156  | 3.3174  | 4.7657  | 3.1389  | 4.5329  | 4.9814  | 2.9488  | 3.6627  | 0.9747  | -0.0369 | 0.8418 | 0.1748 |
| Clasp2   | _IC[Carbamidomethyl (C)]DYKXS[Phospho (STY)]FDDEESVGNRPSSAASAFK_3         | QB8RT1_S14_M1_Clasp2   | 3.6759  | 2.9803  | 4.0958  | 3.6396  | 2.8016  | 3.4270  | 3.7878  | 3.3616  | 3.6607  | 3.3168  | 0.9731  | -0.0394 | 0.7246 | 0.0399 |
| Klaa1671 | _RDES[Phospho (STY)]DEEPPRVR_2                                            | #N/A                   | 9.2274  | 9.2548  | 9.8587  | 9.3740  | 9.0305  | 8.7532  | 9.0074  | 9.6233  | 9.4418  | 9.2310  | 0.9918  | -0.0118 | 0.7333 | 0.1347 |
| She      | _KNS[Phospho (STY)]AELGASK_2                                              | QB8SD5_S80_M1_She      | 3.4141  | 4.5059  | 4.1009  | 4.6036  | 4.0406  | 4.3734  | 4.3183  | 3.1635  | 3.9707  | 1.0729  | 0.1015  | 0.3685  | 0.4336 | 0.1748 |
| Ppf1a2   | _C[Carbamidomethyl (C)]ETS[Phospho (STY)]PPPTPR_2                         | QB8SS9_S774_M1_Ppf1a2  | 10.2874 | 11.0583 | 11.5864 | 11.2690 | 10.6751 | 11.1274 | 11.3096 | 11.0047 | 11.0026 | 3.3516  | 1.2005  | 0.2630  | 0.2712 | 0.5667 |
| Ppf1a2   | _QAOS[Phospho (STY)]PSGVSEVEVLK_2                                         | #N/A                   | 8.4093  | 6.6489  | 9.4671  | 9.0562  | 8.0319  | 8.8996  | 8.8912  | 8.5889  | 8.5400  | 8.7182  | 1.0077  | 0.0111  | 0.8064 | 0.0934 |
| Ppf1a2   | _S[Phospho (STY)]GDHEWNR_2                                                | #N/A                   | 5.1883  | 5.3895  | 4.2299  | 5.9821  | 4.2196  | 5.3686  | 5.5254  | 5.9485  | 5.4517  | 5.7980  | 0.8912  | -0.1661 | 0.1334 | 0.8747 |
| Ppf1a2   | _VKS[Phospho (STY)]LGDHEWNR_2                                             | #N/A                   | 4.1156  | 4.8046  | 3.5636  | 5.2940  | 4.0370  | 4.5421  | 5.0077  | 4.4235  | 4.8271  | 4.1123  | 0.9565  | -0.0642 | 0.5860 | 0.2321 |
| Ppf1a2   | _RQAOS[Phospho (STY)]PSGVSEVEVLK_3                                        | #N/A                   | 3.0573  | 4.1689  | 3.7441  | 4.2468  | 3.6838  | 4.0683  | 3.9614  | 3.8717  | 3.5203  | 4.2138  | 0.9837  | -0.0238 | 0.8070 | 0.0931 |
| Ppf1a2   | _VAS[Phospho (STY)]VS[Phospho (STY)]LEGLNLR_2                             | QB8SS9_S687_M2_Ppf1a2  | 3.9062  | 3.7781  | 3.3267  | 7.8149  | 3.6664  | 3.8471  | 4.0888  | 6.8527  | 3.4988  | 3.9216  | 0.9563  | -0.0645 | 0.8537 | 0.0687 |
| Ppf1a2   | _KMVSSEGS[Phospho (STY)]TES[Phospho (STY)]EHLEGEAGQK_3                    | QB8SS9_S236_M2_Ppf1a2  | 3.4979  | 4.3031  | 4.2738  | 3.8176  | 4.1244  | 3.6051  | 3.9659  | 3.1836  | 3.4826  | 3.4949  | 1.1147  | 0.1567  | 0.1002 | 0.9990 |
| Top1111  | _VGRPHS[Phospho (STY)]SPAR_2                                              | QB8TG3_S55_M1_Top1111  | 5.0044  | 3.6274  | 5.0993  | 4.4933  | 2.8587  | 5.3391  | 3.1407  | 4.0087  | 4.9394  | 4.1705  | 1.0834  | 0.1155  | 0.5720 | 0.2426 |
| Ndr4g    | _LDPTTTTLK_2                                                              | #N/A                   | 5.7238  | 6.1240  | 5.7607  | 5.6457  | 5.5709  | 5.2240  | 5.8397  | 6.2641  | 5.5694  | 5.0313  | 0.9998  | -0.0003 | 0.9961 | 0.0017 |
| Ndr4g    | _TAS[Phospho (STY)]TSASSVDGSR_2                                           | QB8TG7_S317_M1_Ndr4g   | 6.8738  | 4.2619  | 6.5573  | 4.2840  | 6.3066  | 3.9752  | 6.5488  | 4.2181  | 5.9546  | 3.9612  | 1.0398  | 0.0563  |        |        |



|      |                                                                                  |                      |         |         |         |         |         |         |         |         |         |         |         |         |          |        |
|------|----------------------------------------------------------------------------------|----------------------|---------|---------|---------|---------|---------|---------|---------|---------|---------|---------|---------|---------|----------|--------|
| Srm2 | _ERAPS[Phospho (STY)]PASR_2                                                      | Q8BT18_S2381_M1_Srm2 | 9.3632  | 9.5758  | 10.1528 | 9.7615  | 9.0749  | 9.5078  | 9.9215  | 9.8652  | 9.5051  | 9.4783  | 0.9876  | -0.0180 | 0.5805   | 0.2362 |
| Srm2 | _ALPQT[Phospho (STY)]PJR_2                                                       | Q8BT18_T1448_M1_Srm2 | 9.3458  | 9.6609  | 10.2272 | 9.7606  | 8.7607  | 9.2283  | 9.9612  | 9.6511  | 9.3605  | 9.4026  | 0.9899  | -0.0146 | 0.7383   | 0.1318 |
| Srm2 | _DKFS[Phospho (STY)]PTQDORPESVLK_3                                               | Q8BT18_S1151_M1_Srm2 | 9.2387  | 9.0302  | 9.8891  | 9.5826  | 8.3779  | 9.1145  | 9.3745  | 9.0806  | 9.0140  | 0.8167  | 1.0071  | 0.0102  | 0.8679   | 0.0879 |
| Srm2 | _S[Phospho (STY)]RT[Phospho (STY)]PUSR_2                                         | Q8BT18_T1836_M2_Srm2 | 9.1547  | 9.0741  | 9.2835  | 9.5745  | 8.5854  | 8.9222  | 9.5532  | 9.1526  | 9.1343  | 8.9571  | 0.9891  | -0.0158 | 0.6256   | 0.2037 |
| Srm2 | _RVP[S[Phospho (STY)]PTFPVK_2                                                    | #N/A                 | 8.7917  | 8.5421  | 9.4090  | 9.4991  | 3.9293  | 3.3004  | 4.1761  | 3.3400  | 3.3305  | 3.3005  | 1.7658  | 0.8203  | 0.1110   | 0.9546 |
| Srm2 | _RES[Phospho (STY)]S[Phospho (STY)]SPTSK_2                                       | Q8BT18_S453_M2_Srm2  | 3.1958  | 7.9370  | 8.4666  | 7.9808  | 7.0674  | 3.2032  | 8.5921  | 8.4748  | 7.8289  | 3.3773  | 0.8972  | -0.1565 | 0.6558   | 0.1832 |
| Srm2 | _SGAGS[Phospho (STY)]PPGR_2                                                      | Q8BT18_S1179_M1_Srm2 | 8.8207  | 3.6668  | 4.2461  | 3.2479  | 3.5551  | 7.6351  | 8.9881  | 8.8010  | 3.0183  | 8.7927  | 0.7021  | -0.5103 | 0.2268   | 0.6444 |
| Srm2 | _T[Phospho (STY)]PPVALSSSR_2                                                     | Q8BT18_T2056_M1_Srm2 | 8.5145  | 3.6743  | 3.4017  | 8.6051  | 7.4488  | 8.1112  | 8.7763  | 8.1491  | 8.0026  | 8.1040  | 0.8024  | -0.1177 | 0.2269   | 0.6444 |
| Srm2 | _S[Phospho (STY)]RSR[Phospho (STY)]S[Phospho (STY)]PAPWK_2                       | Q8BT18_S1808_M3_Srm2 | 7.0071  | 3.8380  | 3.8974  | 7.3857  | 7.2477  | 6.8828  | 3.6420  | 3.6518  | 3.6243  | 3.8369  | 1.6383  | 0.7122  | 0.0262   | 1.5810 |
| Srm2 | _VPS[Phospho (STY)]PTFPVK_2                                                      | #N/A                 | 9.1321  | 7.7796  | 8.1290  | 8.0511  | 3.4997  | 8.4293  | 3.0898  | 7.7314  | 8.2997  | 4.0296  | 1.2965  | 0.3746  | 0.2728   | 0.5641 |
| Srm2 | _GHS[Phospho (STY)]RS[Phospho (STY)]RS[Phospho (STY)]PQWR_3                      | Q8BT18_S503_M3_Srm2  | 7.8045  | 7.3997  | 8.1020  | 7.4337  | 6.6395  | 7.5646  | 7.6583  | 7.1860  | 7.9452  | 7.6622  | 0.9839  | -0.0234 | 0.6745   | 0.1710 |
| Srm2 | _S[Phospho (STY)]RS[Phospho (STY)]RTS[Phospho (STY)]PVSR_2                       | Q8BT18_S1844_M3_Srm2 | 6.9912  | 6.3083  | 3.5734  | 7.1857  | 4.2279  | 3.8976  | 6.8834  | 7.1520  | 3.6910  | 4.0430  | 0.9856  | -0.0209 | 0.9453   | 0.0244 |
| Srm2 | _S[Phospho (STY)]RS[Phospho (STY)]RS[Phospho (STY)]LVR_2                         | Q8BT18_S700_M3_Srm2  | 7.3624  | 7.1391  | 7.5503  | 7.3581  | 6.5799  | 7.0633  | 7.5931  | 7.3232  | 6.9691  | 7.1883  | 0.9872  | -0.0186 | 0.6575   | 0.1821 |
| Srm2 | _SSS[Phospho (STY)]PVTETARS[Phospho (STY)]PVK_2                                  | #N/A                 | 3.6519  | 6.8136  | 3.8638  | 7.1904  | 6.0230  | 3.7505  | 6.9579  | 6.9262  | 3.6234  | 1.0701  | 0.0977  | 0.7397  | 0.1309   | 0.1309 |
| Srm2 | _SRS[Phospho (STY)]T[Phospho (STY)]T[Phospho (STY)]PAPK_2                        | Q8BT18_S250_M3_Srm2  | 6.5083  | 3.7615  | 6.8868  | 6.6212  | 3.5496  | 3.9223  | 6.1795  | 5.8350  | 6.0750  | 3.3606  | 0.9712  | -0.0421 | 0.8788   | 0.0561 |
| Srm2 | _TS[Phospho (STY)]PAPWKR_2                                                       | #N/A                 | 6.2160  | 6.6884  | 3.8405  | 6.8483  | 4.1193  | 3.8150  | 6.9637  | 3.8166  | 6.3791  | 6.3940  | 0.8924  | -0.1643 | 0.5175   | 0.2861 |
| Srm2 | _ARS[Phospho (STY)]RT[Phospho (STY)]PPSPASQSR_3                                  | #N/A                 | 8.2346  | 8.1380  | 8.8445  | 8.3319  | 7.4430  | 8.2838  | 8.6398  | 8.3232  | 8.4139  | 8.0321  | 0.9833  | -0.0243 | 0.5928   | 0.2271 |
| Srm2 | _RKET[Phospho (STY)]PS[Phospho (STY)]PJR_2                                       | #N/A                 | 8.3735  | 8.1319  | 8.6152  | 7.7065  | 3.7393  | 6.7002  | 8.8193  | 8.4610  | 7.6107  | 7.8851  | 0.8800  | -0.1844 | 0.3350   | 0.4750 |
| Srm2 | _HSGST[Phospho (STY)]SPYK_2                                                      | Q8BT18_T983_M1_Srm2  | 3.9307  | 3.2351  | 7.9264  | 3.3847  | 3.0564  | 3.1722  | 5.3330  | 3.6164  | 3.9155  | 3.0620  | 1.1659  | 0.0214  | 0.5645   | 0.2483 |
| Srm2 | _GRS[Phospho (STY)]PS[Phospho (STY)]PKPR_2                                       | Q8BT18_S1718_M2_Srm2 | 7.4316  | 7.3296  | 7.8219  | 7.2573  | 3.0355  | 5.6098  | 8.0821  | 6.3360  | 7.2834  | 0.8696  | 0.8696  | -0.2016 | 0.3546   | 0.4503 |
| Srm2 | _NNKS[Phospho (STY)]VT[Phospho (STY)]PQR_2                                       | #N/A                 | 7.2657  | 6.9734  | 6.4532  | 7.6035  | 4.1460  | 5.7700  | 7.3932  | 7.4788  | 6.4889  | 6.3666  | 0.9187  | -0.1223 | 0.4352   | 0.3613 |
| Srm2 | _VSS[Phospho (STY)]PVLTVQORT[Phospho (STY)]PSR_3                                 | Q8BT18_S1360_M2_Srm2 | 4.2617  | 2.9644  | 3.4477  | 3.9503  | 2.8527  | 3.7719  | 3.6650  | 4.1641  | 3.8167  | 0.9100  | -0.1361 | 0.2715  | 0.5663   | 0.1663 |
| Srm2 | _TS[Phospho (STY)]PLM[Oxidation (M)]LDR_2                                        | #N/A                 | 8.8372  | 7.2829  | 4.0503  | 10.2890 | 6.9341  | 8.5148  | 10.4181 | 8.3509  | 4.1106  | 7.2418  | 1.1945  | 0.2564  | 0.4679   | 0.3299 |
| Srm2 | _SLYS[Phospho (STY)]PVER_2                                                       | Q8BT18_S2648_M1_Srm2 | 7.8069  | 9.2233  | 8.3649  | 9.5295  | 6.9605  | 9.2180  | 9.8529  | 9.3947  | 9.3776  | 9.4114  | 0.8957  | -0.1589 | 0.0911   | 1.0405 |
| Srm2 | _S[Phospho (STY)]RTS[Phospho (STY)]PAPWKR_2                                      | #N/A                 | 7.6887  | 7.8931  | 3.9660  | 8.2910  | 7.5031  | 8.0286  | 8.0836  | 7.9147  | 0.8836  | 7.9391  | 0.8962  | -0.1582 | 0.3429   | 0.4649 |
| Srm2 | _GRS[Phospho (STY)]RT[Phospho (STY)]PLTSR_2                                      | #N/A                 | 9.0653  | 8.9895  | 9.4853  | 9.2205  | 8.5553  | 9.0260  | 9.3236  | 8.9980  | 9.2436  | 9.0655  | 0.9890  | -0.0160 | 0.5635   | 0.2491 |
| Srm2 | _RSS[Phospho (STY)]SELSPEVVK_2                                                   | Q8BT18_S1339_M1_Srm2 | 6.4203  | 6.5554  | 6.7953  | 6.6846  | 5.9927  | 6.4292  | 7.1358  | 6.5400  | 6.2763  | 6.5012  | 0.9798  | -0.0295 | 0.5295   | 0.2762 |
| Srm2 | _HAS[Phospho (STY)]S[Phospho (STY)]SPESUKPTAPGSR_3                               | Q8BT18_S434_M2_Srm2  | 5.9243  | 6.2489  | 3.9677  | 6.6294  | 5.4637  | 6.0663  | 6.5923  | 6.3024  | 6.2047  | 6.2143  | 0.9033  | -0.1467 | 0.2421   | 0.6122 |
| Srm2 | _LKSGM[Oxidation (M)]S[Phospho (STY)]PEQSK_2                                     | #N/A                 | 3.9840  | 3.2815  | 3.4773  | 7.2111  | 6.9540  | 3.4548  | 7.3473  | 6.9122  | 6.1533  | 6.3495  | 0.6811  | -0.5541 | 0.0491   | 1.3089 |
| Srm2 | _GRS[Phospho (STY)]C[Carbamidomethyl (C)]DS[Phospho (STY)]S[Phospho (STY)]PEPK_2 | Q8BT18_S1434_M3_Srm2 | 4.9263  | 4.6746  | 6.1169  | 5.1492  | 5.3555  | 5.0487  | 5.6116  | 5.9963  | 4.6050  | 5.5188  | 0.9593  | -0.0599 | 0.5394   | 0.2681 |
| Srm2 | _SSSE[Phospho (STY)]PEVEK_2                                                      | Q8BT18_S1343_M1_Srm2 | 3.9686  | 3.9648  | 6.3852  | 6.6158  | 3.9660  | 3.4171  | 5.9055  | 5.2335  | 3.1911  | 0.9810  | -0.0277 | 0.9303  | 0.0314   | 0.0314 |
| Srm2 | _SM[Oxidation (M)]LQT[Phospho (STY)]PPDQNLGSK_2                                  | #N/A                 | 8.8779  | 8.2096  | 8.7177  | 8.4401  | 7.5840  | 6.7368  | 6.8229  | 8.1428  | 8.2474  | 8.6111  | 1.0174  | 0.0249  | 0.7947   | 0.0998 |
| Srm2 | _PSM[Oxidation (M)]S[Phospho (STY)]PTPLR_2                                       | #N/A                 | 3.7977  | 7.0824  | 6.9381  | 6.4887  | 7.1833  | 7.5899  | 7.3313  | 7.5827  | 7.3387  | 0.9035  | -0.1465 | 0.6035  | 0.2193   | 0.2193 |
| Srm2 | _S[Phospho (STY)]PVKQDKSESTDPK_2                                                 | #N/A                 | 3.8359  | 5.3442  | 5.7134  | 5.2967  | 5.1963  | 5.5690  | 5.8142  | 5.6597  | 5.7584  | 5.4112  | 0.9114  | -0.1339 | 0.1917   | 0.7174 |
| Srm2 | _VSSPVLTVQORT[Phospho (STY)]PS[Phospho (STY)]RER_3                               | Q8BT18_S1372_M2_Srm2 | 2.9466  | 6.7006  | 4.1811  | 6.8631  | 4.2172  | 3.5123  | 6.8238  | 7.2359  | 6.1012  | 6.1930  | 0.7190  | -0.4760 | 0.0659   | 1.1808 |
| Srm2 | _S[Phospho (STY)]RT[Phospho (STY)]PLPR_2                                         | Q8BT18_S1984_M2_Srm2 | 8.2256  | 5.7709  | 10.5726 | 3.9098  | 11.0950 | 11.6787 | 12.2104 | 11.5652 | 3.8573  | 4.9663  | 1.0481  | 0.0678  | 0.8718   | 0.0596 |
| Srm2 | _S[Phospho (STY)]RAS[Phospho (STY)]PVSR_2                                        | #N/A                 | 7.7421  | 7.5508  | 7.8979  | 7.9233  | 5.9507  | 6.6277  | 8.0152  | 7.6637  | 6.5479  | 7.5237  | 0.9791  | -0.0305 | 0.7551   | 0.1220 |
| Srm2 | _QSHSES[Phospho (STY)]POGEVK_2                                                   | Q8BT18_S851_M1_Srm2  | 3.6580  | 3.9492  | 7.0178  | 6.7641  | 3.7987  | 3.6402  | 3.8249  | 6.9343  | 3.5047  | 6.4218  | 0.9291  | -0.1061 | 0.7430   | 0.1290 |
| Srm2 | _AQS[Phospho (STY)]GTS[Phospho (STY)]S[Phospho (STY)]PEHKIPAPR_2                 | #N/A                 | 7.3666  | 8.0181  | 3.7635  | 3.9765  | 6.7161  | 7.1529  | 8.9372  | 7.2577  | 7.8768  | 3.2888  | 0.9014  | -0.1498 | 0.6307   | 0.2002 |
| Srm2 | _NHGGS[Phospho (STY)]RT[Phospho (STY)]PPVALSSSR_3                                | Q8BT18_S2054_M2_Srm2 | 7.5911  | 6.3950  | 3.8204  | 7.9306  | 6.5960  | 7.7120  | 5.4694  | 7.8110  | 6.1714  | 3.9107  | 1.1427  | 0.1925  | 0.4330   | 0.3635 |
| Srm2 | _SLS[Phospho (STY)]GSS[Phospho (STY)]P[C[Carbamidomethyl (C)]PK_2                | #N/A                 | 3.5794  | 3.7182  | 6.3644  | 5.7642  | 6.1827  | 6.3642  | 6.3348  | 4.0766  | 3.4425  | 7.0540  | 1.0195  | 0.0279  | 0.9183   | 0.0370 |
| Srm2 | _SQTS[Phospho (STY)]PKGS[Phospho (STY)]LSR_2                                     | Q8BT18_S1058_M2_Srm2 | 4.3737  | 6.4842  | 3.5596  | 6.4339  | 5.7994  | 4.4721  | 6.3947  | 6.4548  | 3.7048  | 4.0293  | 1.0080  | 0.0115  | 0.9627   | 0.0165 |
| Srm2 | _EISS[Phospho (STY)]PTSK_2                                                       | Q8BT18_S454_M1_Srm2  | 4.0551  | 3.3105  | 3.7888  | 3.6042  | 3.1988  | 3.4258  | 3.3189  | 3.0134  | 4.1628  | 3.5712  | 1.0134  | 0.0193  | 0.8560   | 0.0675 |
| Srm2 | _SRSGS[Phospho (STY)]S[Phospho (STY)]PQGR_2                                      | Q8BT18_S1399_M2_Srm2 | 3.0959  | 5.2968  | 4.1125  | 3.7063  | 5.8037  | 3.5063  | 4.3412  | 6.1842  | 6.2109  | 3.9451  | 0.8227  | -0.2816 | 0.2398   | 0.6201 |
| Srm2 | _S[Phospho (STY)]VT[Phospho (STY)]PQBR_2                                         | #N/A                 | 5.3632  | 4.2982  | 3.3772  | 6.0109  | 2.9233  | 3.7013  | 5.3223  | 5.2378  | 5.2581  | 7.7210  | 0.7946  | -0.3316 | 0.1110   | 0.9547 |
| Srm2 | _SAVRPS[Phospho (STY)]PS[Phospho (STY)]PER_2                                     | Q8BT18_S349_M2_Srm2  | 10.6730 | 10.7897 | 11.1915 | 11.0778 | 10.2878 | 10.7900 | 10.7783 | 10.7556 | 0.9917  | -0.0120 | 0.6239  | 0.0297  | 0.5576   | 0.0297 |
| Srm2 | _RQPS[Phospho (STY)]PQPS[Phospho (STY)]PJR_2                                     | Q8BT18_S2656_M2_Srm2 | 9.6175  | 9.1638  | 9.2495  | 9.4783  | 8.2996  | 9.8044  | 9.5159  | 9.1573  | 9.8876  | 9.0879  | 0.9848  | -0.0221 | 0.6530   | 0.1851 |
| Srm2 | _S[Phospho (STY)]PQRPQWSR_2                                                      | Q8BT18_S533_M1_Srm2  | 4.0349  | 5.8118  | 3.2208  | 5.9244  | 3.0796  | 3.5450  | 4.3482  | 4.3950  | 4.0436  | 5.8849  | 0.9615  | -0.0567 | 0.8304   | 0.0807 |
| Srm2 | _GGS[Phospho (STY)]GHS[Phospho (STY)]RS[Phospho (STY)]PTRQESSR_3                 | #N/A                 | 3.0750  | 4.2278  | 4.4132  | 3.9570  | 4.0801  | 3.8790  | 4.1053  | 3.9175  | 3.0311  | 3.4899  | 1.0833  | 0.1154  | 0.3473   | 0.4593 |
| Srm2 | _S[Phospho (STY)]RS[Phospho (STY)]RT[Phospho (STY)]PLPR_2                        | #N/A                 | 4.3604  | 9.2279  | 3.8476  | 9.4760  | 8.7002  | 9.3466  | 9.9206  | 9.3888  | 9.3237  | 0.7780  | 0.7880  | -0.3437 | 0.1748   | 0.5778 |
| Srm2 | _SS[Phospho (STY)]SRSS[Phospho (STY)]PELTR_2                                     | #N/A                 | 8.1333  | 8.2596  | 4.1437  | 8.5027  | 3.7636  | 8.1368  | 8.7276  | 8.2313  | 8.2648  | 8.2410  | 0.8156  | -0.2941 | 0.2136   | 0.6703 |
| Srm2 | _S[Phospho (STY)]LTRS[Phospho (STY)]PPAIR_2                                      | Q8BT18_S2019_M2_Srm2 | 7.5247  | 10.8962 | 3.5246  | 11.6591 | 10.7929 | 11.3127 | 11.5346 | 11.3143 | 11.1210 | 11.4263 | 0.8181  | -0.2896 | 0.2410   | 0.6181 |
| Srm2 | _S[Phospho (STY)]RS[Phospho (STY)]RT[Phospho (STY)]PLSR_2                        | #N/A                 | 5.9734  | 9.6040  | 10.0836 | 10.0023 | 9.1055  | 9.6303  | 10.1276 | 9.7316  | 9.6841  | 9.6240  | 0.9872  | -0.0186 | 0.5493   | 0.2602 |
| Srm2 | _S[Phospho (STY)]RS[Phospho (STY)]RS[Phospho (STY)]PLAIR_2                       | #N/A                 | 7.3207  | 7.7856  | 3.3883  | 7.8028  | 7.1986  | 7.7974  | 8.1072  | 7.6475  | 7.9379  | 7.9446  | 0.8701  | -0.2007 | 0.2804   | 0.5523 |
| Srm2 | _KET[Phospho (STY)]PS[Phospho (STY)]PJR_2                                        | #N/A                 | 4.0312  | 3.3112  | 3.7649  | 6.6399  | 3.1325  | 5.6479  | 6.8880  | 3.6925  | 5.6408  | 2.9860  | 0.9203  | -0.1198 | 0.7140   | 0.1463 |
| Srm2 | _SRT[Phospho (STY)]PPSPASQSR_2                                                   | Q8BT18_T2362_M1_Srm2 | 9.0771  | 9.1618  | 7.6558  | 9.6256  | 8.7033  | 9.0606  | 9.1775  | 9.3234  | 9.2272  | 9.0519  | 0.9658  | -0.0502 | 0.3879   | 0.4113 |
| Srm2 | _RGS[Phospho (STY)]RS[Phospho (STY)]IEPK_2                                       | Q8BT18_S1631_M2_Srm2 | 8.6285  | 8.6576  | 4.3343  | 3.6339  | 7.8535  | 3.5722  | 9.0112  | 3.2049  | 8.6336  | 8.7602  | 0.8258  | -0.2761 | 0.4687   | 0.3291 |
| Srm2 | _SRRS[Phospho (STY)]S[Phospho (STY)]SEL[S[Phospho (STY)]PEVVEK_2                 | #N/A                 | 3.7622  | 5.3402  | 3.7606  | 6.0830  | 3.4799  | 3.7604  | 3.6571  | 4.4016  | 3.8875  | 3.9636  | 1.0973  | 0.1339  | 0.5109   | 0.2917 |
| Srm2 | _S[Phospho (STY)]RS[Phospho (STY)]RAS[Phospho (STY)]PVSR_2                       | Q8BT18_S1864_M3_Srm2 | 6.5153  | 6.6607  | 6.8293  | 6.9905  | 6.5116  | 7.0716  | 7.0129  | 6.7470  | 6.9364  | 6.8035  | 0.9837  | -0.0236 | 0.4191</ |        |



|         |                                                                                             |                        |         |         |         |         |         |         |         |         |         |        |         |         |        |        |
|---------|---------------------------------------------------------------------------------------------|------------------------|---------|---------|---------|---------|---------|---------|---------|---------|---------|--------|---------|---------|--------|--------|
| Srm2    | _SGMS[Phospho (STY)]PEGK_2                                                                  | #N/A                   | 3.6855  | 3.6569  | 3.4191  | 4.4637  | 3.4783  | 4.2512  | 3.1112  | 4.0383  | 4.3373  | 4.1410 | 0.9792  | -0.0303 | 0.7984 | 0.0978 |
| Srm2    | _SGT[Phospho (STY)]PPRPGSVTNMQADCE[Carbamidomethyl (C)]TAT[Phospho (STY)]PQR_3              | Q8BT18_T823_M2_Srm2    | 3.2144  | 3.9706  | 4.4489  | 3.9927  | 3.8589  | 4.2665  | 4.1409  | 3.0085  | 3.3076  | 3.6699 | 1.1209  | 0.1646  | 0.1792 | 0.7467 |
| Srm2    | _SGSQELGDKGPSAS[Phospho (STY)]POER_2                                                        | Q8BT18_S1508_M1_Srm2   | 3.7206  | 3.0250  | 4.0511  | 3.5949  | 2.8463  | 3.3823  | 3.7431  | 9.6778  | 3.7054  | 3.2722 | 0.6739  | -0.5694 | 0.2136 | 0.6703 |
| Srm2    | _MELGT[Phospho (STY)]PLR_2                                                                  | Q8BT18_T955_M1_Srm2    | 2.9542  | 3.7594  | 3.6410  | 4.1437  | 3.5807  | 4.1488  | 3.8583  | 3.9748  | 3.6234  | 4.1107 | 0.9519  | -0.0711 | 0.4574 | 0.3397 |
| Srm2    | _S[Phospho (STY)]RS[Phospho (STY)]RAS[Phospho (STY)]PATHR_2                                 | Q8BT18_S1820_M3_Srm2   | 4.9212  | 4.0731  | 4.0958  | 4.1046  | 3.7431  | 4.1956  | 4.0229  | 5.1869  | 3.4428  | 4.9027 | 0.9544  | -0.0673 | 0.6080 | 0.2161 |
| Srm2    | _SS[Phospho (STY)]PELTR_2                                                                   | #N/A                   | 2.9165  | 3.6727  | 4.1510  | 3.6947  | 3.5610  | 3.0636  | 3.8430  | 3.3064  | 3.6055  | 3.3720 | 0.9938  | -0.0089 | 0.9327 | 0.3033 |
| Srm2    | _RGGSGVHS[Phospho (STY)]RS[Phospho (STY)]PTR_3                                              | #N/A                   | 3.2295  | 3.9857  | 4.4640  | 4.0077  | 3.8740  | 4.2514  | 4.1446  | 2.9934  | 3.2925  | 3.6850 | 1.1246  | 0.1695  | 0.1694 | 0.7710 |
| Srm2    | _C[Carbamidomethyl (C)]RS[Phospho (STY)]PGMLEPGSAR_3                                        | Q8BT18_S2084_M1_Srm2   | 3.6566  | 3.5695  | 4.3434  | 3.8812  | 2.7823  | 3.4463  | 4.5608  | 3.2724  | 4.4218  | 3.3123 | 1.0569  | 0.0798  | 0.7855 | 0.1040 |
| Srm2    | _SGS[Phospho (STY)]SGLR_2                                                                   | Q8BT18_S1399_M1_Srm2   | 3.6482  | 3.6942  | 3.3819  | 4.4265  | 2.7919  | 4.2140  | 3.0739  | 4.0755  | 4.3746  | 4.1038 | 0.9452  | -0.0813 | 0.5836 | 0.2339 |
| Srm2    | _MS[Phospho (STY)]C[Carbamidomethyl (C)]PS[Phospho (STY)]RPS[Moxidation (M)]SPTPLDR_2       | Q8BT18_S2067_M2_Srm2   | 3.4854  | 4.2906  | 3.1722  | 3.8301  | 4.1120  | 3.6175  | 3.9783  | 3.1711  | 3.7837  | 3.5073 | 1.0853  | 0.1181  | 0.1918 | 0.7172 |
| Srm2    | _TPAAAAANLAS[Phospho (STY)]PR_2                                                             | Q8BT18_S2224_M1_Srm2   | 3.7692  | 3.5732  | 3.5029  | 3.8859  | 3.3945  | 4.3350  | 3.1949  | 3.9545  | 4.2536  | 4.2248 | 0.9582  | -0.0617 | 0.5488 | 0.2606 |
| Srm2    | _S[Phospho (STY)]RT[Phospho (STY)]PAR_2                                                     | Q8BT18_S570_M3_Srm2    | 3.6139  | 3.4154  | 4.3007  | 3.3025  | 3.5006  | 3.1240  | 4.5180  | 3.3152  | 2.9637  | 3.2695 | 1.0075  | 0.0107  | 0.9407 | 0.0266 |
| Cpsf7   | _SSS[Phospho (STY)]TEPPPPVR_2                                                               | Q8BTV2_S48_M1_Cpsf7    | 10.8165 | 10.5288 | 3.9706  | 4.4733  | 10.0717 | 3.8191  | 10.9815 | 3.6452  | 10.8867 | 4.4403 | 0.9722  | -0.0407 | 0.9326 | 0.3033 |
| Cpsf7   | _DSSDSADGRAT[Phospho (STY)]PSENVPSAR_3                                                      | Q8BTU2_T203_M1_Cpsf7   | 7.2760  | 6.4571  | 7.5389  | 7.3947  | 6.7064  | 6.3733  | 3.8154  | 7.0573  | 7.2799  | 7.2120 | 1.0263  | 0.0374  | 0.8713 | 0.0598 |
| Pak4    | _RES[Phospho (STY)]PPPPAR_2                                                                 | Q8BTW9_S104_M1_Pak4    | 7.9137  | 6.7678  | 7.3377  | 8.1406  | 3.4645  | 8.1348  | 7.8656  | 5.9976  | 6.7685  | 8.0208 | 0.9716  | -0.0415 | 0.8425 | 0.0744 |
| Gmpb    | _LYSGPGVGNVLVDPSAR_2                                                                        | #N/A                   | 3.7636  | 3.9675  | 3.2027  | 3.5450  | 4.0390  | 3.3394  | 4.5626  | 4.4642  | 4.3148  | 3.7773 | 0.8512  | -0.2324 | 0.0206 | 1.6868 |
| Tox4    | _LSTPS[Phospho (STY)]PT[Phospho (STY)]NSLHEDGVDFRR_3                                        | Q8BU11_S178_M2_To4     | 3.7906  | 3.4356  | 4.4774  | 3.4792  | 2.9163  | 3.3124  | 3.1939  | 3.1384  | 4.2878  | 3.4462 | 1.0148  | 0.0212  | 0.8828 | 0.0541 |
| Sec62   | _EDSKKEETPGT[Phospho (STY)]PK_2                                                             | #N/A                   | 3.6473  | 4.3116  | 4.0308  | 3.5411  | 3.5756  | 3.8988  | 3.8946  | 4.6294  | 3.7332  | 3.7332 | 0.9623  | -0.0554 | 0.5369 | 0.2701 |
| Sec62   | _SQHS[Phospho (STY)]SGNNGDFEM[Oxidation (M)]ITK_2                                           | Q8BU14_S356_M1_Sec62   | 3.8749  | 3.1792  | 4.5617  | 3.4406  | 3.0005  | 3.2281  | 5.3482  | 3.5605  | 5.5944  | 3.1179 | 0.8053  | -0.1124 | 0.1744 | 0.7584 |
| Sec62   | _EELQEQIT[Phospho (STY)]DGDG[Carbamidomethyl (C)]DEEDKDDGVPK_3                              | Q8BU14_T375_M1_Sec62   | 4.3289  | 3.0135  | 4.0626  | 3.6064  | 3.4726  | 3.1520  | 3.7546  | 3.3948  | 3.6939  | 3.2836 | 1.0210  | 0.0300  | 0.7947 | 0.0998 |
| Hook3   | _LNGOSDEDPS[Phospho (STY)]PAGR_2                                                            | #N/A                   | 9.1222  | 8.9290  | 9.3935  | 9.6676  | 8.5985  | 8.7503  | 9.2672  | 8.7019  | 8.9455  | 9.0015 | 1.0109  | 0.0156  | 0.6750 | 0.1707 |
| Hook3   | _LNGOSDEDPS[Phospho (STY)]PAGR_2                                                            | #N/A                   | 6.9048  | 6.9661  | 7.6604  | 7.4457  | 6.5940  | 7.1583  | 7.1289  | 7.1627  | 7.1371  | 7.1420 | 0.9973  | -0.0040 | 0.9337 | 0.0345 |
| Plekha1 | _RLS[Phospho (STY)]NPC[Carbamidomethyl (C)]QIR_2                                            | Q8BU6_S308_M1_Plekha1  | 6.4420  | 7.3298  | 7.1522  | 7.6514  | 6.0819  | 6.8462  | 7.2236  | 7.2907  | 6.9173  | 7.1533 | 0.9680  | -0.0470 | 0.4727 | 0.3254 |
| Ptpn7   | _AQG[Phospho (STY)]QEDSDYINANTIR_2                                                          | Q8BUM3_S143_M1_Ptpn7   | 3.0763  | 3.8815  | 3.7631  | 5.5268  | 3.7028  | 4.0267  | 4.3875  | 4.9829  | 3.0610  | 3.9165 | 0.9778  | -0.0324 | 0.8673 | 0.0618 |
| Foxj3   | _VLYNAGDQGSOS[Phospho (STY)]PR_2                                                            | Q8BUR3_S223_M1_Foxj3   | 6.4631  | 7.2961  | 7.2638  | 7.4957  | 7.3311  | 7.6826  | 8.1139  | 7.0027  | 7.3149  | 7.5170 | 0.9690  | -0.0454 | 0.4359 | 0.0690 |
| Gphn    | _ASHS[Phospho (STY)]JAVDITK_2                                                               | Q8BUV3_S338_M1_Gphn    | 7.4011  | 7.7684  | 8.0867  | 8.0462  | 6.8713  | 7.6903  | 7.6126  | 7.7935  | 7.8347  | 8.2182 | 0.9719  | -0.0411 | 0.4078 | 0.3896 |
| Gphn    | _IPDSIR_2                                                                                   | #N/A                   | 5.9372  | 5.9876  | 5.5183  | 6.2451  | 6.8897  | 5.5805  | 6.2481  | 5.7489  | 6.1062  | 1.0087 | 1.0087  | 0.0124  | 0.7960 | 0.0991 |
| Gphn    | _VLADQVYAK_2                                                                                | #N/A                   | 5.5495  | 5.8735  | 4.4574  | 4.9155  | 6.2607  | 5.5392  | 5.4888  | 4.9144  | 5.8319  | 5.6214 | 0.9942  | -0.0083 | 0.9337 | 0.0298 |
| Gphn    | _DTASASTSPSES[Phospho (STY)]PR_2                                                            | #N/A                   | 11.3523 | 11.3889 | 11.8052 | 12.3778 | 11.1247 | 11.7493 | 11.6496 | 11.3243 | 12.0117 | 0.9989 | -0.0016 | 0.9624  | 0.0166 | 0.1686 |
| Gphn    | _DLVQPSLLGGTISAYK_2                                                                         | #N/A                   | 4.7278  | 5.1799  | 5.8096  | 5.7308  | 5.5846  | 5.6939  | 5.1188  | 4.9560  | 5.1060  | 6.0151 | 1.0293  | 0.0417  | 0.6027 | 0.2199 |
| Gphn    | _VGVLTVSDSC[Carbamidomethyl (C)]FR_2                                                        | #N/A                   | 3.7612  | 5.1001  | 3.4949  | 5.5035  | 4.9489  | 5.5119  | 5.6613  | 5.2890  | 4.9238  | 5.1493 | 0.8981  | -0.1551 | 0.2822 | 0.5145 |
| Gphn    | _DTASLSTT[Phospho (STY)]PSES[Phospho (STY)]PRAQATSR_3                                       | #N/A                   | 4.1124  | 3.2016  | 4.0278  | 3.6420  | 3.2447  | 3.4621  | 3.5115  | 3.5786  | 4.1628  | 3.6090 | 0.9730  | -0.0395 | 0.6750 | 0.1707 |
| Gphn    | _LSTAS[Phospho (STY)]T[Carbamidomethyl (C)]PT[Phospho (STY)]PK_2                            | Q8BUV3_T286_M2_Gphn    | 7.9669  | 8.0400  | 8.2687  | 8.1144  | 6.4908  | 8.1324  | 7.7517  | 8.0260  | 7.2666  | 7.8326 | 1.0151  | 0.0216  | 0.7570 | 0.1209 |
| Gphn    | _C[Carbamidomethyl (C)]SS[Phospho (STY)]KENIUR_2                                            | Q8BUV3_S328_M1_Gphn    | 3.3619  | 4.8895  | 8.8103  | 8.7494  | 8.0860  | 8.7551  | 4.1828  | 5.8861  | 8.4907  | 8.6453 | 1.1334  | 0.1807  | 0.5316 | 0.2744 |
| Gphn    | _AQATSRLS[Phospho (STY)]TAS[Phospho (STY)]C[Carbamidomethyl (C)]PT[Phospho (STY)]PK_2       | Q8BUV3_S286_M3_Gphn    | 6.7148  | 5.9174  | 6.2434  | 7.5522  | 6.7689  | 6.4940  | 5.6033  | 6.0384  | 6.9400  | 6.3261 | 1.0623  | 0.0872  | 0.3129 | 0.5046 |
| Gphn    | _EVHDELEDLPS[Phospho (STY)]PPPLPS[Phospho (STY)]PPPTSPHK_4                                  | #N/A                   | 3.8820  | 6.2075  | 3.8878  | 8.7835  | 7.1214  | 5.4815  | 5.8705  | 8.1157  | 7.0519  | 5.4824 | 0.8890  | -0.1698 | 0.5154 | 0.2878 |
| Gphn    | _VKEVHDELEDLPS[Phospho (STY)]PPPLPS[Phospho (STY)]PPPTSPHK_QDTEK_5                          | Q8BUV3_T198_M3_Gphn    | 3.5713  | 3.6769  | 4.0974  | 3.9299  | 3.5209  | 3.7333  | 3.8926  | 3.5029  | 3.6458  | 4.0269 | 0.9968  | -0.0046 | 0.9361 | 0.0287 |
| Gphn    | _VKEVHDELEDLPS[Phospho (STY)]PPPLPS[Phospho (STY)]PPPTSPHK_4                                | #N/A                   | 3.6663  | 2.9706  | 4.3531  | 6.4798  | 2.7919  | 3.4367  | 3.7975  | 3.2628  | 3.6510  | 3.3219 | 1.1258  | 0.1710  | 0.5458 | 0.2630 |
| Lsm11   | _DSE[Phospho (STY)]TLTR_2                                                                   | Q8BUVE_S220_M1_Lsm11   | 3.6127  | 4.4179  | 4.2995  | 3.7028  | 4.2392  | 3.4903  | 3.8511  | 3.3163  | 2.9649  | 3.2683 | 1.1822  | 0.2414  | 0.0416 | 1.3806 |
| Lsm11   | _S[Phospho (STY)]NPSSLQASAR_2                                                               | Q8BUVE_S281_M1_Lsm11   | 4.3739  | 3.6782  | 3.3978  | 4.4424  | 3.4996  | 4.2299  | 3.0899  | 5.2346  | 4.3586  | 4.1197 | 0.9372  | -0.0935 | 0.5492 | 0.2603 |
| Gpr107  | _KVS[Phospho (STY)]NGAVPEQGSWEGTA_2                                                         | Q8BUVE_S537_M1_Gpr107  | 7.1679  | 7.4430  | 7.9714  | 7.6142  | 6.2186  | 6.8326  | 7.8152  | 7.6952  | 7.5696  | 6.9707 | 0.9594  | -0.0597 | 0.4088 | 0.3885 |
| Gprasp2 | _QLQIQIDNQNDPEEG_2                                                                          | #N/A                   | 3.6976  | 4.5364  | 3.5851  | 5.4451  | 4.2467  | 5.6734  | 4.9360  | 4.8458  | 4.5965  | 3.9926 | 0.9854  | -0.0196 | 0.8996 | 0.0575 |
| Atp6v1h | _QLQSEQPQTAAARS[Phospho (STY)]_2                                                            | Q8BVE3_S483_M1_Atp6v1h | 8.7480  | 8.8987  | 9.4099  | 8.6701  | 7.9230  | 8.6969  | 9.0647  | 9.1200  | 9.0660  | 8.7093 | 0.9705  | -0.0433 | 0.3291 | 0.4827 |
| Atp6v1h | _GAVDAAPVTNIAAK_2                                                                           | #N/A                   | 8.4569  | 8.3721  | 9.1918  | 8.3557  | 8.2717  | 8.3389  | 8.8561  | 8.5375  | 8.4839  | 7.9613 | 1.0025  | 0.0037  | 0.9289 | 0.0320 |
| Atp6v1h | _LEWSPVHK_2                                                                                 | #N/A                   | 5.8335  | 6.1255  | 6.7576  | 6.3727  | 5.3782  | 5.7481  | 6.1367  | 6.8694  | 6.1999  | 6.0547 | 0.9558  | -0.0652 | 0.3644 | 0.4384 |
| Atp6v1h | _LLEVSDDQVLAVAAHODVGEYVR_3                                                                  | #N/A                   | 6.1997  | 5.6823  | 5.7700  | 5.7166  | 4.6836  | 5.5501  | 5.4762  | 6.2044  | 5.6203  | 4.9932 | 1.0048  | 0.0069  | 0.9356 | 0.0289 |
| Atp6v1h | _LGESVDQLSFDYSESLK_2                                                                        | #N/A                   | 5.7954  | 5.3472  | 6.0625  | 6.2122  | 4.1653  | 5.6081  | 6.5997  | 5.7234  | 5.3522  | 5.8017 | 0.9425  | -0.0854 | 0.4550 | 0.3420 |
| Atp6v1h | _QLQSEQPQTAAAR_2                                                                            | #N/A                   | 6.7653  | 6.5139  | 3.4289  | 6.7769  | 6.7372  | 6.9382  | 6.7789  | 6.9211  | 7.1091  | 6.8789 | 0.9847  | -0.1605 | 0.3263 | 0.4864 |
| Atp6v1h | _NBNPSVLQLESVK_2                                                                            | #N/A                   | 5.5284  | 5.1949  | 4.1009  | 5.9063  | 4.2928  | 3.1136  | 4.9565  | 6.1789  | 5.2365  | 5.0992 | 0.8736  | -0.1949 | 0.2719 | 0.5656 |
| Atp6v1h | _QLENLEQKQYDDEIDSEDK_3                                                                      | #N/A                   | 3.4518  | 4.9105  | 4.3546  | 5.2941  | 4.1708  | 3.3852  | 5.1929  | 5.1129  | 4.4555  | 2.7283 | 0.9745  | -0.0372 | 0.8569 | 0.0671 |
| Atp6v1h | _RSS[Phospho (STY)]EKDEM[Oxidation (M)]LQTEGSGQC[Carbamidomethyl (C)]AK_3                   | #N/A                   | 3.2562  | 3.7566  | 3.9684  | 4.2907  | 3.3961  | 4.0966  | 4.5348  | 4.9354  | 3.2524  | 3.6817 | 0.9252  | -0.1122 | 0.4283 | 0.3683 |
| Atp6v1h | _VIEQLGSK_2                                                                                 | #N/A                   | 4.1235  | 4.2035  | 3.1132  | 4.1578  | 4.4117  | 4.4405  | 3.3172  | 3.7428  | 3.9375  | 4.7248 | 1.0367  | 0.0521  | 0.6835 | 0.1652 |
| Nsd2    | _SSS[Phospho (STY)]AENQEGGPGTK_2                                                            | Q8BVE8_S408_M1_Nsd2    | 7.5618  | 3.6347  | 7.6557  | 4.4859  | 3.4561  | 8.0604  | 7.8972  | 7.8149  | 4.3151  | 7.6629 | 0.8392  | -0.2530 | 0.4181 | 0.3787 |
| Dpp9    | tyl (Protein N-term)[C]Carbamidomethyl (C)]SGVS[Phospho (STY)]PVEQVAAGDM[Oxidation (M)]DDTA | #N/A                   | 3.4873  | 3.6081  | 3.9724  | 6.6959  | 5.0403  | 5.9743  | 6.0685  | 6.3016  | 6.0090  | 6.1097 | 0.7834  | -0.3521 | 0.0875 | 1.0582 |
| Qdpr    | _EGGLTLGAK_2                                                                                | #N/A                   | 7.2478  | 7.7399  | 7.2035  | 6.8828  | 6.9173  | 7.0579  | 6.9869  | 7.2191  | 7.4526  | 7.3393 | 0.9897  | -0.0149 | 0.6865 | 0.1634 |
| Qdpr    | _VOALC[Carbamidomethyl (C)]AGGWAGGNAK_2                                                     | #N/A                   | 4.0970  | 3.3524  | 3.8307  | 6.3913  | 3.2407  | 5.6901  | 6.6589  | 3.0553  | 6.2852  | 6.1567 | 0.8604  | -0.3211 | 0.2718 | 0.5657 |
| Qdpr    | _AALDGTGPMGVM[Oxidation (M)]AK_2                                                            | #N/A                   | 4.3019  | 3.5574  | 4.0356  | 5.8793  | 3.4457  | 3.1789  | 3.7276  | 3.4218  | 3.7208  | 3.2567 | 1.1514  | 0.2034  | 0.3224 | 0.4915 |
| Qdpr    | _MTDSFTEGAQDQTADVGR_2                                                                       | #N/A                   | 5.7142  | 4.5570  | 4.3532  | 7.2762  | 5.0165  | 4.3622  | 5.2496  | 3.1042  | 4.7671  | 4.8453 | 1.1607  | 0.2150  | 0.3262 | 0.4866 |
| Qdpr    | _GAVHQLC[Carbamidomethyl (C)]QSLAGK_3                                                       | #N/A                   | 3.2376  | 4.9203  | 3.2646  | 3.2369  | 3.7089  | 3.0243  | 3.3851  | 3.7643  | 4.6088  | 4.4717 | 0.8787  | -0.1865 | 0.2804 | 0.5522 |
| Qdpr    | _QSM[Oxidation (M)]WTSTSHLTK_2                                                              | #N/A                   | 3.8605  | 3.4208  | 3.7425  | 3.7715  | 2.6756  | 3.8878  | 3.4141  | 3.8424  | 3.7852  | 3.6261 | 0.9708  | -0.0428 | 0.6779 | 0.1688 |
| Six16   | _S[Phospho (STY)]PKWVGVDGDIQYDVG_3                                                          | #N/A                   | 6.1655  | 6       |         |         |         |         |         |         |         |        |         |         |        |        |



|         |                                                                                            |                        |         |         |         |         |         |         |         |         |         |         |        |         |        |        |
|---------|--------------------------------------------------------------------------------------------|------------------------|---------|---------|---------|---------|---------|---------|---------|---------|---------|---------|--------|---------|--------|--------|
| Aldh5a1 | _ISFGSTATGK_2                                                                              | #N/A                   | 6.2878  | 6.5225  | 6.1741  | 6.5743  | 6.5925  | 6.3432  | 5.8467  | 6.6524  | 6.1197  | 6.6661  | 1.0150 | 0.0214  | 0.6192 | 0.2081 |
| Aldh5a1 | _LGTVADIC[Carbamidomethyl (C)]GVPEAR_2                                                     | #N/A                   | 6.2880  | 6.6869  | 6.2178  | 6.7279  | 6.2721  | 5.7785  | 6.3427  | 6.5241  | 6.1661  | 6.0306  | 1.0100 | 0.0444  | 0.7586 | 0.1200 |
| Aldh5a1 | _WLPAATPVPYDPASGAK_2                                                                       | #N/A                   | 7.8539  | 8.1890  | 8.1411  | 7.9450  | 8.0837  | 8.2058  | 7.8831  | 7.9903  | 7.9604  | 8.0340  | 1.0126 | 0.0181  | 0.2248 | 0.6482 |
| Aldh5a1 | _DM[Oxidation (M)]C[Carbamidomethyl (C)]TEETGGLAPVVK_2                                     | #N/A                   | 5.7169  | 5.4173  | 4.7880  | 5.1344  | 5.3410  | 5.4331  | 6.0606  | 5.8152  | 4.7239  | 5.4456  | 0.9626 | -0.0550 | 0.4838 | 0.3153 |
| Aldh5a1 | _VAEQLEVM[Oxidation (M)]GVNNEGUSSEVC[Carbamidomethyl (C)]PFGGVK_3                          | #N/A                   | 4.5044  | 4.9389  | 5.3778  | 5.5843  | 3.2980  | 5.2186  | 5.1087  | 4.9214  | 4.8263  | 4.3792  | 1.0020 | 0.0029  | 0.9830 | 0.0075 |
| Aldh5a1 | _YIGDEYEVK_2                                                                               | #N/A                   | 4.5457  | 4.5657  | 4.8391  | 4.0608  | 4.6966  | 4.7880  | 3.7754  | 5.0896  | 4.4804  | 4.3185  | 1.0372 | 0.0527  | 0.5411 | 0.2667 |
| Aldh5a1 | _QPVGVAIITPWNPFSAM[Oxidation (M)]ITR_2                                                     | #N/A                   | 3.6576  | 4.2848  | 4.2957  | 3.8395  | 3.4492  | 4.0181  | 2.0238  | 3.6067  | 3.4305  | 3.6448  | 1.2354 | 0.3050  | 0.0664 | 1.1780 |
| Aldh5a1 | _HCSGNGFFETLLSNVTR_2                                                                       | #N/A                   | 2.8982  | 2.8386  | 4.2585  | 3.0189  | 3.5427  | 1.9437  | 3.4335  | 1.9437  | 1.9024  | 3.2274  | 1.0347 | 0.0492  | 0.8375 | 0.0770 |
| Airb1   | _DDKDEEDGTGS[Phospho (STY)]PHLNNR_2                                                        | #N/A                   | 4.2166  | 4.6337  | 4.5917  | 5.2901  | 3.6275  | 4.2385  | 4.7842  | 4.4338  | 4.4419  | 3.5491  | 1.0304 | 0.0432  | 0.7194 | 0.1430 |
| Airb1   | _GM[Oxidation (M)]KDDKDEEDGTGS[Phospho (STY)]PHLNNR_4                                      | #N/A                   | 5.6580  | 5.4680  | 6.6562  | 5.4362  | 6.0964  | 5.7543  | 4.2110  | 5.9121  | 6.7073  | 5.8427  | 1.0312 | 0.0443  | 0.7208 | 0.1422 |
| Phka2   | _S[Phospho (STY)]LNLVDSQPQLK_2                                                             | QB8WJ3_5729_M1_Pha2    | 4.3035  | 4.8878  | 5.2221  | 4.6193  | 2.8602  | 3.3684  | 3.7292  | 5.8718  | 5.5010  | 3.2582  | 0.9172 | -0.1246 | 0.5977 | 0.2235 |
| Gprn3   | _S[Phospho (STY)]VSTSL[Phospho (STY)]PSLPAYLK_2                                            | QB8W55_5327_M2_Gprn3   | 10.7613 | 10.6034 | 11.7628 | 11.4855 | 10.7300 | 10.7849 | 10.9904 | 10.7578 | 10.6768 | 10.5416 | 1.0260 | 0.0371  | 0.3057 | 0.5147 |
| Acaa2   | _LEDTLWAGLTQDHWK_2                                                                         | #N/A                   | 4.0601  | 4.2846  | 5.2199  | 5.4796  | 4.7021  | 5.3537  | 5.0878  | 4.4978  | 3.8474  | 4.6885  | 1.0706 | 0.0984  | 0.4065 | 0.3909 |
| Acaa2   | _VGVPTEGALTUR_2                                                                            | #N/A                   | 5.6164  | 5.6474  | 6.1703  | 5.0479  | 6.1178  | 5.8827  | 5.4702  | 6.2621  | 5.9136  | 5.8761  | 0.9773 | -0.0331 | 0.6030 | 0.2197 |
| Acaa2   | _TNVSGGAIALHPLGGSGSR_2                                                                     | #N/A                   | 3.3764  | 3.8324  | 4.4964  | 4.2666  | 4.1990  | 4.0324  | 4.0484  | 3.8599  | 4.2357  | 4.1235  | 0.9919 | -0.0118 | 0.8787 | 0.0562 |
| Acaa2   | _DPSATDLTEFAAR_2                                                                           | #N/A                   | 5.2426  | 5.1759  | 4.0837  | 4.8627  | 5.4418  | 5.3458  | 5.0963  | 5.0208  | 5.3050  | 5.4885  | 0.9613 | -0.0569 | 0.4743 | 0.3239 |
| Acaa2   | _YALQSQQR_2                                                                                | #N/A                   | 3.1639  | 3.9691  | 3.1070  | 4.1516  | 5.9659  | 3.9391  | 4.2999  | 5.6789  | 3.1486  | 5.5987  | 0.8650 | -0.2093 | 0.3999 | 0.3980 |
| Acaa2   | _VPPETISVVGNNM[Oxidation (M)]QSSSDAAYLR_3                                                  | #N/A                   | 3.6259  | 2.7990  | 3.7314  | 4.7281  | 3.4220  | 3.5239  | 3.9879  | 3.6257  | 3.5839  | 3.4476  | 0.9937 | -0.0091 | 0.9467 | 0.0238 |
| Gemin5  | _APSQPPS[Phospho (STY)]PTFER_2                                                             | QB8X17_51414_M1_Gemin5 | 3.1799  | 3.6225  | 3.4536  | 4.4982  | 7.6853  | 4.2857  | 9.0404  | 6.7583  | 8.6266  | 4.1755  | 0.5940 | -0.7515 | 0.0350 | 1.4556 |
| Vps13c  | _EVST[Phospho (STY)]PQDWHITQGVPAAR_3                                                       | QB8X70_71397_M1_Vps13c | 3.7787  | 5.6037  | 4.0220  | 3.2568  | 3.7803  | 3.2421  | 5.9814  | 3.5776  | 3.6437  | 3.9255  | 0.9218 | -0.1174 | 0.6114 | 0.2137 |
| Vps13c  | _LS[Phospho (STY)]HNDGSR_2                                                                 | QB8X70_51956_M1_Vps13c | 6.8779  | 3.5095  | 4.4035  | 3.4053  | 2.8424  | 3.2268  | 3.1200  | 6.4226  | 6.0858  | 3.3723  | 0.8514 | -0.3231 | 0.5908 | 0.2926 |
| Vps13c  | _LLENLGGAASQPS[Phospho (STY)]PQVQAQEAR_3                                                   | QB8X70_51891_M1_Vps13c | 6.4409  | 6.9196  | 7.4914  | 3.6444  | 5.5528  | 6.3424  | 6.7113  | 7.2982  | 7.0896  | 3.4684  | 0.9875 | -0.0281 | 0.9402 | 0.0268 |
| Vps13c  | _SST[Phospho (STY)]PS[Phospho (STY)]PERQVAGSPVLSGGTK_3                                     | QB8X70_5841_M2_Vps13c  | 3.2518  | 4.0080  | 4.4863  | 6.7824  | 3.8963  | 4.2291  | 4.1223  | 2.9711  | 3.2702  | 3.7073  | 1.2628 | 0.3367  | 0.1946 | 0.7109 |
| Vps13c  | _TANAS[Phospho (STY)]LEEDIK_2                                                              | QB8X70_5736_M1_Vps13c  | 3.5088  | 4.3140  | 4.1956  | 7.0031  | 4.1153  | 3.5942  | 3.9550  | 3.4202  | 3.0688  | 3.1644  | 1.3105 | 0.3901  | 0.1571 | 0.8038 |
| Scio2b1 | _KVS[Phospho (STY)]VEPDGSHQDAQPR_3                                                         | #N/A                   | 4.4430  | 3.9429  | 4.8958  | 4.5339  | 2.9669  | 4.0054  | 5.2145  | 4.4771  | 4.8181  | 3.5026  | 0.9174 | -0.1243 | 0.4310 | 0.3656 |
| Agap1   | _VFDQVADK_2                                                                                | #N/A                   | 4.2900  | 4.5586  | 5.4106  | 4.8299  | 4.1453  | 4.3631  | 3.6031  | 4.4578  | 4.6419  | 4.0312  | 1.0995 | 0.1368  | 0.2015 | 0.6958 |
| Agap1   | _ATSA[C[Carbamidomethyl (C)]APSS[Phospho (STY)]PK_2                                        | QB8XK8_5422_M1_Agap1   | 7.3035  | 7.1508  | 7.3021  | 7.8035  | 3.7751  | 7.2847  | 7.4760  | 7.2437  | 7.3238  | 7.1458  | 0.9277 | -0.1082 | 0.5071 | 0.2949 |
| Agap1   | _LDPPPS[Phospho (STY)]PHANR_2                                                              | QB8XK8_5521_M1_Agap1   | 10.4944 | 10.9928 | 11.0771 | 11.3417 | 9.9769  | 10.8334 | 11.1018 | 10.8485 | 10.5667 | 10.5857 | 1.0009 | 0.0013  | 0.9728 | 0.0521 |
| Agap1   | _YLTGYVEES[Phospho (STY)]JEGGR_2                                                           | QB8XK8_5101_M1_Agap1   | 3.2754  | 4.0630  | 4.2640  | 4.0578  | 3.9111  | 3.9833  | 4.2060  | 5.4225  | 3.2425  | 4.1210  | 0.9241 | -0.1138 | 0.4375 | 0.3190 |
| Fam53c  | _GNAGGGQVPPQGS[Phospho (STY)]PPKR_2                                                        | #N/A                   | 7.1358  | 6.9455  | 7.6512  | 8.1053  | 6.9277  | 7.0535  | 6.9264  | 7.0994  | 7.0272  | 7.1254  | 1.0367 | 0.0520  | 0.3212 | 0.4933 |
| Fam53c  | _SRSP[Phospho (STY)]QPC[Carbamidomethyl (C)]DLDAR_2                                        | QB8XK8_5273_M1_Fam53c  | 6.6668  | 4.2289  | 3.2063  | 4.2509  | 4.1172  | 6.0083  | 6.9986  | 6.5001  | 3.0493  | 6.9862  | 0.8556 | -0.2250 | 0.4562 | 0.3408 |
| Fam53c  | _S[Phospho (STY)]LVPVDSR_2                                                                 | QB8XK8_5120_M1_Fam53c  | 4.0716  | 3.3760  | 3.2576  | 3.2438  | 3.1973  | 3.3013  | 3.3921  | 3.7573  | 4.0564  | 3.7273  | 0.9008 | -0.1907 | 0.1231 | 0.9097 |
| Skc7a14 | _QNSEALIANDELDC[Carbamidomethyl (C)]S[Phospho (STY)]PE_2                                   | #N/A                   | 7.5726  | 9.5612  | 7.3446  | 10.6956 | 9.2188  | 8.4331  | 9.4594  | 10.6012 | 10.4320 | 9.9168  | 0.8715 | -0.1584 | 0.0932 | 0.3035 |
| Skc7a14 | _HKQSEALIANDELDC[Carbamidomethyl (C)]S[Phospho (STY)]PE_2                                  | #N/A                   | 4.0935  | 7.5526  | 5.7650  | 8.6766  | 7.3858  | 7.9577  | 7.2803  | 8.8640  | 8.4421  | 8.2969  | 0.8400 | -0.2516 | 0.1807 | 0.7430 |
| Skc7a14 | Phospho (STY)[C[Carbamidomethyl (C)]SPSP[Phospho (STY)]EGEESPATNT[C[Carbamidomethyl (C)]Gd | QB8XK1_5468_M2_Skc7a14 | 3.6579  | 2.9622  | 4.1139  | 3.6576  | 2.7835  | 3.3435  | 3.8059  | 3.3435  | 3.6426  | 3.3349  | 0.9731 | -0.0394 | 0.7312 | 0.1360 |
| Skc7a14 | _NLPS[Phospho (STY)]LGNENM[Oxidation (M)]LJGK_2                                            | #N/A                   | 3.5681  | 6.6413  | 7.6003  | 7.2708  | 5.2790  | 6.6000  | 6.7005  | 7.1282  | 6.4838  | 6.6247  | 0.9147 | -0.1286 | 0.4784 | 0.3202 |
| Naln    | _GKS[Phospho (STY)]LETLTQDHSNTRV_3                                                         | QB8XK5_5781_M1_Naln    | 4.1598  | 5.5626  | 3.3458  | 5.9670  | 3.2855  | 2.9431  | 3.5631  | 6.9223  | 5.7623  | 3.8154  | 0.8395 | -0.1524 | 0.4017 | 0.3962 |
| Ocbp6   | _TAS[Phospho (STY)]JSTPEVSR_2                                                              | QB8XK9_544_M1_Ocbp6    | 10.2558 | 10.1174 | 10.5964 | 4.4985  | 9.2801  | 10.2564 | 3.1459  | 10.3006 | 10.2863 | 4.1757  | 1.3125 | 0.3923  | 0.2919 | 0.5348 |
| Ocbp6   | _Acetyl (Protein N-term)]S[Phospho (STY)]SDENKGS[Phospho (STY)]PAHK_2                      | QB8XK9_59_M2_Ocbp6     | 4.5621  | 4.7785  | 3.9941  | 4.3002  | 4.0087  | 4.1217  | 4.0149  | 5.3043  | 4.7304  | 4.7082  | 0.9162 | -0.1263 | 0.1757 | 0.7552 |
| Rgs8    | _RLS[Phospho (STY)]TEEATR_2                                                                | QB8XT1_546_M1_Rgs8     | 4.0732  | 5.0662  | 5.7255  | 5.4541  | 3.4709  | 4.8326  | 4.3378  | 5.3363  | 4.5322  | 4.3605  | 1.0277 | 0.0395  | 0.7928 | 0.1008 |
| Rgs8    | _SDS[Phospho (STY)]C[Carbamidomethyl (C)]SDTALPDKPKR_2                                     | QB8XT1_526_M1_Rgs8     | 3.0382  | 3.8434  | 3.7250  | 4.2277  | 3.6647  | 4.0648  | 4.4255  | 6.1146  | 3.5394  | 4.1947  | 0.8232 | -0.2808 | 0.1322 | 0.8788 |
| Fgd2    | _TPEGPEEDVS[Phospho (STY)]D_2                                                              | QB8Y35_5654_M1_Fgd2    | 7.0120  | 7.7868  | 7.7376  | 7.7376  | 7.3455  | 7.3413  | 7.7603  | 7.4909  | 7.6902  | 7.5059  | 0.9810 | -0.0276 | 0.4149 | 0.3820 |
| Usp47   | _STETSDENIS[Phospho (STY)]PLNR_2                                                           | QB8Y87_5911_M1_Usp47   | 3.5303  | 6.6722  | 6.6369  | 8.2407  | 7.0860  | 7.1314  | 7.2412  | 7.8462  | 7.5482  | 7.5042  | 0.8692 | -0.2022 | 0.2621 | 0.5815 |
| Usp47   | _LFLVLPES[Phospho (STY)]PGSYK_2                                                            | QB8Y87_5832_M1_Usp47   | 3.2818  | 4.0381  | 6.2492  | 6.9078  | 3.9264  | 4.1990  | 4.4761  | 6.4933  | 5.3168  | 4.3445  | 0.9243 | -0.1136 | 0.6535 | 0.1847 |
| Usp47   | _LELQHIQIS[Phospho (STY)]DPENFGSEER_3                                                      | QB8Y87_5934_M1_Usp47   | 3.2758  | 4.0666  | 4.5103  | 4.0541  | 3.8879  | 3.8416  | 4.2024  | 4.9482  | 3.2461  | 3.7314  | 0.9770 | -0.0335 | 0.7993 | 0.0973 |
| Sowahd  | _PC[Carbamidomethyl (C)]JHY[Phospho (STY)]RPPDAS[Phospho (STY)]LNLR_2                      | QB8Y98_5236_M2_Sowahd  | 3.2293  | 7.9880  | 3.8957  | 4.1363  | 8.2064  | 7.8525  | 9.1244  | 8.0847  | 8.8440  | 8.2784  | 0.6856 | -0.5445 | 0.0575 | 1.2403 |
| Sowahd  | _PDAIS[Phospho (STY)]LNLR_2                                                                | QB8Y98_5236_M1_Sowahd  | 4.2788  | 3.2199  | 3.8562  | 4.6146  | 3.0412  | 3.1875  | 3.5483  | 3.6012  | 3.9002  | 3.0773  | 1.0476 | 0.0670  | 0.6521 | 0.1857 |
| Tbc1d17 | _YLLASIS[Phospho (STY)]PQDSR_2                                                             | QB8YH7_5176_M1_Tbc1d17 | 3.8819  | 3.8307  | 3.7123  | 4.2900  | 3.6520  | 4.0775  | 4.4383  | 3.9035  | 3.0102  | 4.1819  | 1.0062 | 0.0089  | 0.9327 | 0.0302 |
| Tnr     | _LILNYSR_2                                                                                 | #N/A                   | 4.8880  | 8.6022  | 8.6312  | 8.1618  | 8.1365  | 7.8845  | 8.7602  | 8.4728  | 8.2928  | 8.5743  | 0.9756 | -0.3556 | 0.2616 | 0.5824 |
| Tnr     | _LYPATEYELNSVR_2                                                                           | #N/A                   | 8.0595  | 8.2835  | 8.7056  | 8.4577  | 8.2988  | 8.3616  | 8.4925  | 8.0288  | 8.4458  | 8.4225  | 1.0016 | 0.0024  | 0.9233 | 0.0347 |
| Tnr     | _ASGPIDHYR_2                                                                               | #N/A                   | 7.8942  | 7.9760  | 8.0359  | 8.3074  | 8.4143  | 7.9407  | 7.8044  | 7.8353  | 7.7565  | 7.8647  | 1.0358 | 0.0507  | 0.0355 | 1.4494 |
| Tnr     | _YEYISAVR_2                                                                                | #N/A                   | 7.6626  | 7.3749  | 7.7673  | 7.5170  | 7.7952  | 7.7849  | 7.3620  | 7.7138  | 7.7768  | 1.0244  | 0.0348 | 0.2977  | 0.5262 | 0.0605 |
| Tnr     | _YGLVGGGGK_2                                                                               | #N/A                   | 7.4480  | 7.8244  | 7.7326  | 7.6446  | 7.5861  | 7.0829  | 7.1738  | 7.9071  | 7.2620  | 7.8539  | 1.0005 | 0.0007  | 0.9852 | 0.0065 |
| Tnr     | _SLTSTVTITGGR_2                                                                            | #N/A                   | 7.0762  | 7.4358  | 7.0960  | 7.4628  | 7.1901  | 7.3026  | 6.5636  | 6.9932  | 7.3661  | 7.2770  | 1.0299 | 0.0425  | 0.2409 | 0.6181 |
| Tnr     | _AIENNVLYTK_2                                                                              | #N/A                   | 7.1039  | 7.1043  | 7.3290  | 7.2821  | 7.0056  | 7.3872  | 7.3251  | 7.0616  | 7.1189  | 6.9291  | 1.0131 | 0.0188  | 0.3827 | 0.4172 |
| Tnr     | _QSALISWQPPR_2                                                                             | #N/A                   | 6.9782  | 6.8487  | 5.3895  | 6.9857  | 6.9395  | 7.5297  | 6.5362  | 7.0999  | 7.0452  | 7.0788  | 0.9767 | -0.0340 | 0.6850 | 0.1643 |
| Tnr     | _LILVDMEDTWR_2                                                                             | #N/A                   | 6.9812  | 6.8737  | 7.2650  | 7.3040  | 6.8985  | 7.0892  | 7.2793  | 6.4751  | 6.8496  | 7.2546  | 1.0149 | 0.0214  | 0.5743 | 0.2409 |
| Tnr     | _LDSVVPNTVTEFAIR_2                                                                         | #N/A                   | 6.1712  | 6.4401  | 6.5977  | 6.9451  | 6.6070  | 6.9154  | 6.1743  | 6.6128  | 6.4027  | 6.4853  | 1.0302 | 0.0430  | 0.2763 | 0.5587 |
| Tnr     | _TATSLDEWNSAEAEAEYK_2                                                                      | #N/A                   | 6.3837  | 6.6665  | 7.5361  | 7.7164  | 6.1943  | 6.6469  | 7.0471  | 6.4430  | 6.1387  | 6.5553  | 1.0476 | 0.0670  | 0.4015 | 0.3963 |
| Tnr     | _DGGAEFAFYDK_2                                                                             | #N/A                   | 6.3930  | 6.3145  | 6.6529  | 6.7015  | 5.3832  | 5.8207  | 6.8506  | 6.4050  | 6.4030  | 6.7998  | 1.0390 | -0.0908 | 0.1862 | 0.7300 |
| Tnr     | _YATHLSTPGGLQFK_3                                                                          | #N/A                   | 6.2236  | 6.4365  | 6.2824  | 6.5736  | 6.6256  | 6.3288  | 6.1762  | 6.4512  | 6.2117  | 6.7141  | 0.9937 | 0.0053  |        |        |



|          |                                                                                               |                          |         |         |         |         |         |         |         |         |         |         |         |         |        |        |
|----------|-----------------------------------------------------------------------------------------------|--------------------------|---------|---------|---------|---------|---------|---------|---------|---------|---------|---------|---------|---------|--------|--------|
| Cadps2   | _PVSPSPSVLS[Phospho (STY)]EGR_2                                                               | QBBYR5_568_M1_Cadps2     | 7.4602  | 7.0428  | 7.1219  | 6.9603  | 5.0122  | 7.1950  | 7.4619  | 7.2203  | 6.9396  | 7.0574  | 0.9482  | -0.0767 | 0.4468 | 0.3499 |
| Arhgap25 | _SKDAPIS[Phospho (STY)]PPAQK_2                                                                | #N/A                     | 9.4456  | 9.2651  | 9.2573  | 9.4972  | 8.8590  | 9.3276  | 9.5802  | 9.2065  | 8.8707  | 9.3837  | 1.0016  | 0.0023  | 0.9298 | 0.0316 |
| Arhgap25 | _S[Phospho (STY)]S(V)GWDATEDPPLSR_2                                                           | QBBYW1_5378_M1_Arhgap25  | 4.0685  | 3.2739  | 3.8022  | 3.3460  | 3.2123  | 3.1334  | 3.4942  | 3.6552  | 3.9542  | 3.0833  | 0.9833  | -0.0243 | 0.8160 | 0.0883 |
| Arhgap25 | _DAPIS[Phospho (STY)]PPAQK_2                                                                  | #N/A                     | 7.8399  | 7.0446  | 3.8445  | 8.7298  | 7.5683  | 8.8835  | 7.8840  | 8.5497  | 8.3082  | 8.1612  | 0.8897  | -0.1686 | 0.3652 | 0.4375 |
| Znf609   | _TNS[Phospho (STY)]M(Oxidation (M))GSATGFLPGTK_2                                              | QBBZ47_5467_M1_Znf609    | 3.8830  | 6.9328  | 7.3728  | 7.2231  | 3.0267  | 7.2622  | 7.7100  | 3.8407  | 4.1398  | 4.3386  | 1.1880  | 0.2485  | 0.4657 | 0.3319 |
| Znf609   | _LVEPIS[Phospho (STY)]PSPSK_2                                                                 | QBBZ47_5575_M1_Znf609    | 4.1604  | 3.4158  | 4.4972  | 3.4990  | 6.2284  | 3.3205  | 3.2137  | 3.1187  | 4.2681  | 6.5589  | 0.9760  | -0.0350 | 0.9062 | 0.0428 |
| Znf609   | _AEADKYSFTDNAPS[Phospho (STY)]PSGGSSR_3                                                       | QBBZ47_5803_M1_Znf609    | 4.2507  | 2.9755  | 3.4366  | 3.9393  | 3.3764  | 3.7608  | 3.6540  | 4.1792  | 3.8278  | 3.9063  | 0.9310  | -0.1032 | 0.3085 | 0.5107 |
| Znf609   | _AP[S[Phospho (STY)]LTDLVK_2                                                                  | QBBZ47_51057_M1_Znf609   | 3.2271  | 3.9834  | 4.4616  | 4.0054  | 3.8717  | 4.2538  | 4.1536  | 5.5790  | 3.2949  | 4.9496  | 0.9496  | -0.0746 | 0.6520 | 0.1858 |
| Znf609   | _f[C[Carbamidomethyl (C)]DS[Phospho (STY)]PISDLEMR_2                                          | QBBZ47_5358_M1_Znf609    | 4.1140  | 3.4184  | 3.3000  | 3.8026  | 3.2397  | 2.9890  | 3.3498  | 4.3158  | 3.9644  | 3.7696  | 0.9032  | -0.1469 | 0.1942 | 0.7117 |
| Dnm3     | _S[Phospho (STY)]PPPSPTTQR_2                                                                  | #N/A                     | 12.9033 | 12.6768 | 13.0177 | 13.1369 | 12.2668 | 12.8017 | 13.1835 | 13.0030 | 12.9738 | 13.0517 | 0.9807  | -0.0282 | 0.1552 | 0.8791 |
| Dnm3     | _ENC[Carbamidomethyl (C)]ULAVTPANTOLANSALK_2                                                  | #N/A                     | 4.1005  | 4.2249  | 4.8961  | 4.8179  | 4.4725  | 8.0857  | 4.2415  | 8.0447  | 4.7262  | 3.9337  | 0.9739  | -0.0382 | 0.9014 | 0.0451 |
| Dnm3     | _STIGNQVIR_2                                                                                  | #N/A                     | 6.1057  | 6.2255  | 5.1448  | 5.9259  | 5.9829  | 5.7420  | 5.1612  | 5.8131  | 5.6940  | 5.6832  | 1.0477  | 0.0672  | 0.2745 | 0.5614 |
| Dnm3     | _LVPVGQPPDIEQIR_2                                                                             | #N/A                     | 6.8299  | 6.7109  | 7.1984  | 7.3457  | 6.4460  | 6.8607  | 7.0769  | 6.7248  | 6.7571  | 4.2859  | 1.1107  | 0.1514  | 0.2370 | 0.6252 |
| Dnm3     | _FLELAC[Carbamidomethyl (C)]DSQEDVDSWK_2                                                      | #N/A                     | 5.0402  | 5.0063  | 6.0991  | 3.8659  | 4.8427  | 3.6875  | 6.2561  | 5.4028  | 4.8359  | 5.1334  | 0.8798  | -0.1848 | 0.2389 | 0.0884 |
| Dnm3     | _RS[Phospho (STY)]PPPSPTTQR_2                                                                 | #N/A                     | 11.4610 | 11.4729 | 11.8651 | 11.7192 | 10.5944 | 11.1282 | 11.5144 | 11.5418 | 11.5701 | 11.1072 | 0.9948  | -0.0076 | 0.8158 | 0.0884 |
| Dnm3     | _APPSVPSR_2                                                                                   | #N/A                     | 4.3120  | 3.6164  | 3.4597  | 5.0051  | 5.9664  | 4.6225  | 3.1517  | 3.9977  | 5.3440  | 4.1816  | 1.0787  | 0.1094  | 0.5953 | 0.2253 |
| Dnm3     | _LQGLLSIEHEVAFK_3                                                                             | #N/A                     | 2.4215  | 3.6532  | 3.5348  | 4.0374  | 3.4745  | 4.2550  | 3.7521  | 3.0977  | 2.9302  | 4.0044  | 1.0338  | 0.0480  | 0.7686 | 0.1143 |
| Dnm3     | _RS[Phospho (STY)]PPPS[Phospho (STY)]PTTQRR_3                                                 | #N/A                     | 3.0363  | 3.8415  | 3.7231  | 4.2792  | 3.6628  | 4.0666  | 4.4274  | 3.9565  | 3.0211  | 3.9565  | 0.9645  | -0.0521 | 0.6833 | 0.1654 |
| Tigar    | _HOGGQGVQDAPSETGR_2                                                                           | #N/A                     | 3.6032  | 4.3595  | 3.3369  | 4.0561  | 4.8477  | 5.0257  | 3.7708  | 4.7339  | 4.1693  | 4.0588  | 1.0052  | 0.0074  | 0.9557 | 0.0195 |
| Pogz     | _SLDAEPSPVSAAKPS[Phospho (STY)]SPEK_2                                                         | QBBZH4_5421_M1_Pogz      | 6.1762  | 5.9500  | 6.5853  | 7.0570  | 3.4666  | 4.0983  | 6.9727  | 3.9073  | 6.5452  | 6.7145  | 0.9206  | -0.1194 | 0.6188 | 0.2087 |
| Pogz     | _SDLAISNISPSPS[Phospho (STY)]PJOSK_2                                                          | QBBZB_5111_M1_           | 7.0080  | 7.3816  | 3.6259  | 8.0090  | 8.0776  | 3.9342  | 3.5847  | 6.2169  | 7.6517  | 7.7195  | 1.0073  | 0.0105  | 0.9722 | 0.0122 |
| Dock10   | _DM[Oxidation (M)]SGS[Phospho (STY)]PTSPFVR_2                                                 | #N/A                     | 5.7240  | 3.8619  | 4.3496  | 3.3514  | 3.6832  | 3.4456  | 5.5004  | 3.2716  | 2.7513  | 3.3184  | 0.8416  | -0.2489 | 0.4104 | 0.3868 |
| Dock10   | _ASLASDS[Phospho (STY)]NPSTTEK_2                                                              | QBBZM6_51295_M1_Dock10   | 6.1825  | 3.9501  | 5.5156  | 6.8232  | 3.7714  | 6.5312  | 3.6719  | 7.1163  | 6.9475  | 5.7875  | 0.9288  | -0.1065 | 0.6610 | 0.1798 |
| Dock10   | _HATS[Phospho (STY)]VDTSPK_2                                                                  | QBBZM6_51257_M1_Dock10   | 4.2715  | 4.0438  | 4.5331  | 4.0769  | 3.8651  | 3.8844  | 4.2252  | 4.2693  | 3.2233  | 3.7542  | 1.0623  | 0.0873  | 0.3322 | 0.4786 |
| Dock10   | _EKDM[Oxidation (M)]SGS[Phospho (STY)]PTSSFVR_2                                               | #N/A                     | 3.2496  | 4.0279  | 3.4878  | 4.2263  | 3.8861  | 4.0509  | 4.3482  | 4.1055  | 3.3196  | 4.0610  | 0.9654  | -0.0509 | 0.6116 | 0.2135 |
| Ncbp3    | _AEAPAGGALGPS[Phospho (STY)]PEVESGLER_2                                                       | QBBZNR_525_M1_Ncbp3      | 3.8253  | 3.1296  | 4.5121  | 3.5139  | 2.9509  | 3.2777  | 3.2286  | 3.1038  | 4.2532  | 3.4809  | 1.0052  | 0.0075  | 0.9600 | 0.0177 |
| Sowahb   | _VAGPDPS[Phospho (STY)]PEDSPNQIR_2                                                            | QBBZM6_5132_M1_Sowahb    | 7.6099  | 7.6158  | 4.0276  | 3.4646  | 3.4646  | 7.9972  | 7.7902  | 3.7395  | 3.9945  | 1.0850  | 1.0177  | 0.7293  | 0.1371 |        |
| Dzank1   | _FTQGLEQLS[Phospho (STY)]PPGNR_2                                                              | QBCDOB_5768_M1_Dzank1    | 10.2465 | 10.9162 | 11.0858 | 11.8081 | 10.2309 | 10.8763 | 11.0978 | 11.0545 | 10.8767 | 10.8977 | 0.9890  | -0.0160 | 0.7000 | 0.1549 |
| Pak5     | _S[Phospho (STY)]LVGTPTVM(Oxidation (M))APEVSR_2                                              | #N/A                     | 5.4731  | 7.7964  | 8.1298  | 9.0812  | 5.9042  | 7.0979  | 7.9324  | 5.9214  | 3.8676  | 1.0787  | 0.9096  | 0.1096  | 0.6336 | 0.1982 |
| Pak5     | _ESPPTDQGAAS[Phospho (STY)]R_2                                                                | QBCD15_5114_M1_Pak5      | 4.0468  | 8.9998  | 3.2327  | 3.7354  | 3.0677  | 3.5569  | 3.4501  | 8.6701  | 5.5747  | 3.7024  | 0.8300  | -0.2688 | 0.5601 | 0.0518 |
| Pak5     | _ASSSS[Phospho (STY)]PLDVSFQLTPSR_2                                                           | QBCD15_5226_M1_Pak5      | 3.3357  | 3.9087  | 4.0225  | 3.9073  | 3.7611  | 3.4923  | 3.9979  | 3.6020  | 2.5066  | 3.8743  | 0.9990  | -0.0014 | 0.9866 | 0.2559 |
| Pak5     | _SNS[Phospho (STY)]LRKES[Phospho (STY)]PPT[Phospho (STY)]PDQGAASR_3                           | QBCD15_599_M1_Pak5       | 4.1336  | 4.6093  | 3.9857  | 4.4229  | 3.6064  | 3.4885  | 5.9235  | 3.6437  | 4.5814  | 4.6231  | 0.8611  | -0.2158 | 0.1710 | 0.7670 |
| Pak5     | _KES[Phospho (STY)]PPT[Phospho (STY)]PDQGAASR_2                                               | QBCD15_5107_M2_Pak5      | 9.4256  | 9.6191  | 8.9350  | 10.0385 | 9.1273  | 9.6210  | 9.8469  | 9.6132  | 9.7297  | 9.4412  | 0.9952  | -0.0070 | 0.7970 | 0.0785 |
| Pak5     | _SSYLHQS[Phospho (STY)]PQPMAR_2                                                               | #N/A                     | 5.2086  | 3.8048  | 3.9713  | 6.2296  | 3.4255  | 3.9222  | 3.4595  | 3.7427  | 4.0741  | 3.9639  | 1.1619  | 0.2165  | 0.2993 | 0.5239 |
| Pak5     | _AQMVFIS[Phospho (STY)]PPLSGSDTYPR_2                                                          | QBCD15_5341_M1_Pak5      | 3.8584  | 3.4840  | 3.5921  | 3.1359  | 3.3053  | 4.4242  | 3.2841  | 3.8653  | 4.1644  | 4.3140  | 0.9300  | -0.1048 | 0.3816 | 0.4184 |
| Lrrc4c   | _M[Oxidation (M)]NS[Phospho (STY)]KDNVQETOJ_2                                                 | #N/A                     | 9.9388  | 9.8087  | 10.5188 | 10.1335 | 8.9954  | 9.8918  | 10.2310 | 9.9860  | 9.9720  | 9.8746  | 0.9866  | -0.0195 | 0.6229 | 0.2056 |
| Arhgef10 | _NDLSSS[Phospho (STY)]SGS[Phospho (STY)]NLHSGSSLEHR_3                                         | QBCD33_51259_M2_Arhgef10 | 3.8030  | 5.3394  | 3.5367  | 4.5813  | 2.9468  | 3.6778  | 3.2288  | 4.2197  | 4.9876  | 0.9421  | -0.0860 | 0.5122  | 0.2562 |        |
| Arhgef10 | _T[Phospho (STY)]RSLVSGDHR_3                                                                  | QBCD33_7353_M1_Arhgef10  | 4.8496  | 3.3299  | 4.5831  | 3.5849  | 3.0230  | 3.2067  | 3.2996  | 3.0328  | 4.1822  | 3.5519  | 1.0700  | 0.0976  | 0.5883 | 0.2304 |
| Rps3a5   | _TLQSPNPTGGNPOTLQFS[Phospho (STY)]D_2                                                         | QBCD50_5862_M1_Rps3a5    | 3.8744  | 3.1788  | 4.5612  | 5.7995  | 3.0001  | 3.2286  | 3.5894  | 7.4821  | 6.9809  | 3.5300  | 0.7303  | -0.4534 | 0.1860 | 0.7305 |
| Map1s    | _RPVVTTHOLEAPS[Phospho (STY)]RANS[Phospho (STY)]QDSLASR_4                                     | QBCD52_5458_M2_Map1s     | 3.8358  | 5.5900  | 4.5226  | 3.5244  | 4.4925  | 5.4978  | 5.5454  | 5.8786  | 5.6558  | 3.4914  | 0.8900  | -0.1681 | 0.3838 | 0.4159 |
| Map1s    | _ANS[Phospho (STY)]QDSLASR_2                                                                  | QBCD52_5462_M1_Map1s     | 11.2486 | 11.2829 | 11.3112 | 11.2767 | 10.9782 | 11.2027 | 11.6174 | 11.3893 | 11.3132 | 11.2408 | 0.9848  | -0.0221 | 0.0895 | 1.0480 |
| Camk2    | _GGPC[Carbamidomethyl (C)]VSEWGAPAPGS[Phospho (STY)]PPR_2                                     | QBCD78_5572_M1_Camk2     | 11.0841 | 10.8867 | 11.2010 | 11.7626 | 9.9477  | 10.6352 | 11.6022 | 10.8867 | 10.8914 | 10.7559 | 0.9892  | -0.0156 | 0.7402 | 0.1306 |
| Camk2    | _S[Phospho (STY)]GNPFEGGR_2                                                                   | #N/A                     | 11.7766 | 11.3368 | 11.6126 | 12.0202 | 10.9302 | 11.5422 | 11.8734 | 11.3874 | 11.7736 | 11.7175 | 0.9870  | -0.0188 | 0.4888 | 0.3109 |
| Camk2    | _SLS[Phospho (STY)]APGNLLTK_2                                                                 | QBCD78_5511_M1_Camk2     | 9.0695  | 2.9696  | 9.8124  | 7.7523  | 8.9484  | 9.1434  | 9.1023  | 8.9658  | 8.8247  | 0.9813  | 0.9813  | -0.1660 | 0.4790 | 0.3190 |
| Camk2    | _DQPPFADQGELEAPS[Phospho (STY)]DPESR_2                                                        | #N/A                     | 3.5671  | 7.8814  | 3.8156  | 6.6645  | 5.1675  | 6.0265  | 5.0646  | 3.7574  | 8.4044  | 8.2445  | 0.8669  | -0.2060 | 0.5181 | 0.2853 |
| Camk2    | C[Carbamidomethyl (C)]C[Carbamidomethyl (C)]PSLVS[Phospho (STY)]SPASS[Phospho (STY)]PQSSPFR_2 | QBCD78_5133_M2_Camk2     | 2.9691  | 3.7743  | 3.6559  | 6.1253  | 3.9556  | 4.1339  | 4.4947  | 4.1556  | 2.9538  | 4.0237  | 1.0347  | 0.0491  | 0.8311 | 0.0806 |
| Camk2    | _KRS[Phospho (STY)]GNPFEGSR_3                                                                 | #N/A                     | 4.7012  | 6.5006  | 6.6003  | 7.4436  | 2.9227  | 3.3059  | 5.5480  | 6.0591  | 5.6647  | 4.7410  | 0.9307  | -0.1036 | 0.7079 | 0.1500 |
| Camk2    | _KMS[Phospho (STY)]QEPSSGGPSSSSNLMNGR_3                                                       | QBCD78_599_M1_Camk2      | 3.9139  | 3.2183  | 4.6007  | 3.6025  | 3.0396  | 3.1891  | 3.3172  | 3.0151  | 4.1645  | 3.5695  | 1.0220  | 0.0314  | 0.8336 | 0.0790 |
| Strip1   | _AAS[Phospho (STY)]PPASASDUEQQQR_3                                                            | #N/A                     | 4.1873  | 3.1551  | 3.9210  | 3.4647  | 2.9765  | 7.2958  | 3.6130  | 3.5364  | 3.8355  | 3.1420  | 1.1798  | 0.2385  | 0.4631 | 0.3344 |
| Strip1   | _AAS[Phospho (STY)]PPASASDUEQQQK_2                                                            | #N/A                     | 11.9281 | 11.5780 | 12.3578 | 11.7613 | 10.3858 | 11.4549 | 12.4675 | 11.9116 | 11.7148 | 11.5427 | 0.9722  | -0.4047 | 0.4012 | 0.3967 |
| Srx16    | _SSS[Phospho (STY)]GVSSTSSTSK_2                                                               | QBCD80_529_M1_Srx16      | 10.0082 | 8.9836  | 10.3660 | 10.6500 | 9.1473  | 9.9790  | 9.9473  | 8.9153  | 9.7950  | 10.1058 | 1.0092  | 0.0133  | 0.7395 | 0.1311 |
| Srx16    | _FLFC[Carbamidomethyl (C)]LDDPPGPFDS[Phospho (STY)]LEESR_2                                    | QBCD80_5222_M1_Srx16     | 3.9039  | 3.1594  | 3.6376  | 3.1814  | 3.0477  | 3.5769  | 3.4701  | 3.8198  | 4.1188  | 4.3595  | 0.8670  | -0.2059 | 0.0519 | 1.2851 |
| Csner1   | _GES[Phospho (STY)]PLAHGEFALR_2                                                               | #N/A                     | 5.1126  | 4.7363  | 5.7185  | 5.5051  | 4.4225  | 4.8811  | 5.5536  | 5.0503  | 4.0314  | 4.6153  | 1.0520  | 0.0731  | 0.5023 | 0.2991 |
| Farsa    | _SLQALGEVIEAELR_2                                                                             | #N/A                     | 3.7430  | 4.0790  | 4.4979  | 4.0417  | 3.5380  | 4.0517  | 4.1899  | 3.5955  | 4.0970  | 3.8088  | 1.0176  | 0.0252  | 0.7373 | 0.1323 |
| Farsa    | _LQLVQAGQAEK_2                                                                                | #N/A                     | 3.2284  | 3.1206  | 4.4629  | 4.7172  | 3.9824  | 4.2525  | 4.6838  | 2.9945  | 4.7010  | 3.6840  | 0.9863  | -0.0200 | 0.9092 | 0.0413 |
| Arhgap12 | _ATT[Phospho (STY)]PPHGGRPDS[Phospho (STY)]PYVAMLELK_3                                        | QBCD04_5238_M2_Arhgap12  | 7.7659  | 4.0174  | 4.4956  | 10.0165 | 3.9057  | 8.1611  | 4.1877  | 9.2109  | 3.2608  | 3.7167  | 1.2539  | 0.3264  | 0.4730 | 0.3251 |
| Arhgap12 | _TSPSQEQSC[Carbamidomethyl (C)]DS[Phospho (STY)]AGEGSR_2                                      | QBCD04_5199_M1_Arhgap12  | 3.8823  | 4.1438  | 4.6475  | 5.1121  | 3.9677  | 4.5718  | 4.0608  | 4.5022  | 4.2608  | 4.7961  | 0.9936  | -0.0093 | 0.9195 | 0.0365 |
| Arhgap12 | _LQQDSES[Phospho (STY)]GDELSSSTEQM(Oxidation (M))R_2                                          | #N/A                     | 3.9138  | 4.1168  | 4.2000  | 4.5589  | 3.9271  | 4.2447  | 3.3179  | 4.3731  | 4.4283  | 4.1900  | 1.0203  | 0.0290  | 0.7363 | 0.1329 |
| Vps26b   | _TPGGLSDNNRSR_2                                                                               | #N/A                     | 6.9330  | 6.9258  | 6.5162  | 6.7922  | 5.8381  | 6.3408  | 6.9501  | 7.1298  | 6.7244  | 6.7860  | 0.9507  | -0.0729 | 0.1741 | 0.7591 |
| Vps26b   | _SM(Oxidation (M))S[Phospho (STY)]HQAAIASQR_2                                                 | #N                       |         |         |         |         |         |         |         |         |         |         |         |         |        |        |



|          |                                                                        |                         |         |         |         |         |        |         |         |         |         |         |        |         |        |        |
|----------|------------------------------------------------------------------------|-------------------------|---------|---------|---------|---------|--------|---------|---------|---------|---------|---------|--------|---------|--------|--------|
| Sipa11   | _LIDLES(Phospho (STY))PTPESQK_2                                        | #N/A                    | 10.5744 | 10.6705 | 11.2693 | 11.1995 | 9.2500 | 10.8608 | 11.1176 | 10.7483 | 10.7487 | 10.7540 | 0.9811 | -0.0275 | 0.6062 | 0.2174 |
| Sipa11   | _QDPVHLS(Phospho (STY))PNK_2                                           | QBC0T5_S1249_M1_Sipa11  | 8.6702  | 8.6856  | 8.7836  | 8.8718  | 7.6660 | 8.6829  | 8.7503  | 8.6632  | 8.5852  | 8.4007  | 0.9954 | -0.0067 | 0.8693 | 0.0608 |
| Sipa11   | _DLQAS(Phospho (STY))PKPTSK_2                                          | QBC0T5_S1507_M1_Sipa11  | 4.0816  | 4.3541  | 5.3539  | 3.3590  | 5.1113 | 3.1465  | 3.5073  | 3.6422  | 3.9412  | 3.0363  | 1.2933 | 0.3711  | 0.1526 | 0.8164 |
| Sipa11   | _SIS(Phospho (STY))SDGRPLER_2                                          | QBC0T5_S1116_M1_Sipa11  | 3.5410  | 4.2973  | 3.2747  | 4.1183  | 4.1856 | 3.9398  | 3.8330  | 4.1827  | 7.3886  | 3.9966  | 0.8026 | -0.1172 | 0.2097 | 0.6784 |
| Sipa11   | _KLIDLES(Phospho (STY))PTRESQK_2                                       | #N/A                    | 3.5233  | 6.1047  | 7.1054  | 3.2119  | 4.1498 | 6.2482  | 4.4274  | 5.9911  | 5.8662  | 6.7935  | 0.8765 | -0.1902 | 0.4601 | 0.3372 |
| Sipa11   | _GSGFS(Phospho (STY))DIVDGSQIR_2                                       | QBC0T5_S259_M1_Sipa11   | 5.9773  | 5.8385  | 3.9197  | 5.9167  | 4.6603 | 3.0659  | 5.1179  | 6.0143  | 6.1536  | 5.6548  | 0.8534 | -0.2388 | 0.2310 | 0.6364 |
| Sipa11   | _EYGS(Phospho (STY))TSSDIK_2                                           | QBC0T5_S208_M1_Sipa11   | 3.0250  | 4.3174  | 4.2595  | 3.8033  | 3.6696 | 2.9550  | 3.9516  | 3.1979  | 3.4969  | 3.4806  | 1.0396 | 0.0560  | 0.6764 | 0.1698 |
| Sipa11   | _RSPAS(Phospho (STY))IDR_2                                             | QBC0T5_S1184_M1_Sipa11  | 3.9616  | 3.2646  | 3.1475  | 3.6502  | 3.1529 | 3.4717  | 3.3649  | 4.4683  | 4.1169  | 3.6493  | 0.8843 | -0.1774 | 0.1158 | 0.9363 |
| Sipa11   | _HS(Phospho (STY))AS(Phospho (STY))PVFSSAR_2                           | QBC0T5_S1410_M2_Sipa11  | 3.3606  | 6.2556  | 4.5951  | 6.8740  | 4.0051 | 6.7410  | 5.9527  | 6.0818  | 6.1645  | 6.5213  | 0.8584 | -0.2202 | 0.2926 | 0.5337 |
| Sipa11   | _SKS(Phospho (STY))ETGGSSIFRK_2                                        | #N/A                    | 4.0699  | 7.3119  | 5.8727  | 7.7870  | 3.0939 | 3.1348  | 3.4956  | 3.6539  | 3.9529  | 3.0246  | 1.4757 | 0.5614  | 0.1555 | 0.8084 |
| Sipa11   | _SKS(Phospho (STY))ETGGSSIFRK_2                                        | #N/A                    | 3.8890  | 3.3771  | 5.1182  | 4.2837  | 3.1612 | 3.4693  | 3.9838  | 3.3570  | 4.5353  | 3.9952  | 0.9787 | -0.0311 | 0.8439 | 0.0737 |
| Sipa11   | _SYSKSDPS(Phospho (STY))PTLASK_2                                       | QBC0T5_S1712_M1_Sipa11  | 3.6679  | 3.4492  | 7.5387  | 7.7221  | 3.4382 | 6.9258  | 7.3553  | 3.4736  | 4.8402  | 3.2492  | 1.1538 | 0.2064  | 0.5974 | 0.2237 |
| Sipa11   | _QKS(Phospho (STY))M(Oxidation (M))PEGGVSFR_2                          | #N/A                    | 4.3546  | 3.6590  | 3.4171  | 4.4617  | 3.4803 | 6.3050  | 3.1091  | 6.4716  | 6.6660  | 4.1390  | 0.8397 | -0.2520 | 0.3844 | 0.4152 |
| Sipa11   | _SLHGFSAS(Phospho (STY))DSSLTDIQETR_3                                  | QBC0T5_S1626_M1_Sipa11  | 3.4251  | 4.2061  | 3.8646  | 4.0483  | 4.0606 | 3.8801  | 3.9943  | 3.8307  | 3.2689  | 3.7256  | 1.0565 | 0.0793  | 0.2909 | 0.5362 |
| Sipa11   | _S(Phospho (STY))MPEGGVSFR_2                                           | #N/A                    | 2.9025  | 2.9391  | 4.1370  | 3.6807  | 3.5470 | 3.0776  | 3.8290  | 3.3204  | 3.6195  | 3.3580  | 0.9572 | -0.0631 | 0.5880 | 0.2306 |
| Ttk1     | _SDYFEYQGNGSS(Phospho (STY))PVR_2                                      | QBC0V0_S1559_M1_Ttk1    | 3.7405  | 3.0449  | 4.4273  | 6.0133  | 2.8662 | 3.3624  | 3.1438  | 5.7567  | 4.3379  | 3.3862  | 0.9400 | -0.0893 | 0.7507 | 0.1245 |
| Ttk1     | _LSTS(Phospho (STY))PTPGSAAAAAR_2                                      | QBC0V0_S222_M1_Ttk1     | 3.9134  | 3.2177  | 4.6002  | 3.4021  | 3.0390 | 3.1896  | 7.1612  | 3.5990  | 3.8981  | 3.0794  | 0.7828 | -0.3533 | 0.2909 | 0.5363 |
| Frmf6    | _HSLS(Phospho (STY))LDQIR_2                                            | QBC0V9_S544_M1_Frmf6    | 3.9804  | 3.2847  | 3.1663  | 3.6690  | 3.1061 | 3.1226  | 3.4834  | 4.0981  | 6.7779  | 6.6298  | 0.6298 | -0.6669 | 0.0301 | 0.5211 |
| Frmf6    | _LRGQS(Phospho (STY))TDS(Phospho (STY))LPQTIC(Carbamidomethyl (C))IR_2 | QBC0V9_S522_M2_Frmf6    | 3.6505  | 3.5757  | 4.3373  | 3.3391  | 4.2770 | 3.1606  | 4.5546  | 3.2785  | 4.4280  | 3.3061  | 0.9567 | -0.0638 | 0.6606 | 0.1801 |
| Ppp4a    | _SQS(Phospho (STY))FNNQAFNAK_2                                         | QBC0V0_S777_M1_Ppp4a    | 7.8393  | 7.1739  | 7.7968  | 7.9879  | 7.3837 | 8.1751  | 7.7184  | 7.4751  | 7.6688  | 9.9416  | 0.9416 | -0.0868 | 0.2639 | 0.5786 |
| Ldrap1   | _RDS(Phospho (STY))TPSK_2                                              | QBC142_S198_M1_Ldrap1   | 3.8776  | 3.3063  | 3.8538  | 3.4647  | 4.6955 | 3.3560  | 5.9169  | 3.3702  | 4.0798  | 4.2584  | 0.8531 | -0.2292 | 0.2332 | 0.6322 |
| Sk39a6   | _YDSQLS(Phospho (STY))SNEEK_2                                          | QBC145_S488_M1_Sk39a6   | 4.0120  | 3.3164  | 3.1980  | 3.3035  | 3.1377 | 3.9099  | 3.4517  | 4.4178  | 4.6661  | 4.6273  | 0.7791 | -0.1600 | 0.0103 | 0.1965 |
| Cpe1     | _NC(Carbamidomethyl (C))SS(Phospho (STY))PEFSK_2                       | QBC166_S54_M1_Cpe1      | 7.2143  | 7.0604  | 7.8824  | 7.7015  | 6.8975 | 6.9234  | 7.6886  | 7.2824  | 3.0726  | 3.9049  | 1.3267 | 0.4079  | 0.0954 | 1.0206 |
| Cpe1     | _APPT(Phospho (STY))PGKGPAQAPQA_2                                      | QBC166_TS25_M1_Cpe1     | 6.8286  | 6.4463  | 3.4573  | 7.2944  | 5.8505 | 6.8727  | 3.1493  | 6.3422  | 6.6046  | 6.2698  | 1.0954 | 0.1315  | 0.5940 | 0.2262 |
| Cpe1     | _FAAQAAQQR_2                                                           | #N/A                    | 3.6594  | 4.4157  | 3.3931  | 3.9999  | 6.5442 | 3.8215  | 3.7146  | 4.1185  | 6.2708  | 5.8077  | 0.8649 | -0.2093 | 0.4063 | 0.3911 |
| Myo9a    | _DWNES(Phospho (STY))PVR_2                                             | QBC170_S1950_M1_Myo9a   | 7.9876  | 7.3946  | 7.7268  | 7.4558  | 5.8067 | 7.4057  | 7.8209  | 7.7420  | 7.6532  | 7.3095  | 0.9561 | -0.0648 | 0.4270 | 0.3695 |
| Myo9a    | _GNYPSPSS(Phospho (STY))PVVR_2                                         | QBC170_S2296_M1_Myo9a   | 7.5013  | 3.1536  | 7.7235  | 3.7612  | 3.1983 | 7.0987  | 8.0266  | 4.3573  | 7.7600  | 6.9160  | 0.8809 | -0.3203 | 0.3385 | 0.4074 |
| Myo9a    | _S(Phospho (STY))LEDLHQK_2                                             | QBC170_S1259_M1_Myo9a   | 5.7645  | 5.4078  | 4.1771  | 5.6104  | 4.2212 | 5.4894  | 5.3108  | 5.6252  | 5.2861  | 4.8333  | 0.9711 | -0.0423 | 0.7053 | 0.1517 |
| Myo9a    | _S(Phospho (STY))LELDQK_2                                              | QBC170_S755_M1_Myo9a    | 4.1992  | 3.5035  | 3.3851  | 4.6172  | 3.3248 | 4.4046  | 4.7591  | 3.8848  | 6.1097  | 4.2945  | 0.8202 | -0.2860 | 0.1120 | 0.9508 |
| Myo9a    | _RDS(Phospho (STY))GTDLGDDVVR_2                                        | QBC170_S1243_M1_Myo9a   | 4.2243  | 3.5287  | 3.4103  | 3.9130  | 3.3500 | 4.3795  | 3.2394  | 4.2055  | 3.8541  | 3.8800  | 1.0016 | 0.0024  | 0.9825 | 0.0077 |
| Myo9a    | _AAS(Phospho (STY))AC(Carbamidomethyl (C))EAQGTGGLGQAK_2               | QBC170_S2458_M1_Myo9a   | 3.2303  | 4.0355  | 3.9172  | 4.3081  | 3.8569 | 3.8726  | 4.1345  | 3.6987  | 3.3473  | 3.3868  | 0.9944 | -0.0081 | 0.4368 | 0.0293 |
| Thop1    | _VDLSAQIR_2                                                            | #N/A                    | 4.1334  | 5.3117  | 3.3194  | 4.2075  | 5.2103 | 5.6259  | 4.3696  | 5.2077  | 5.4168  | 3.9737  | 0.9774 | -0.0330 | 0.8439 | 0.0737 |
| Thop1    | _LEELGPEDFLSSLEK_2                                                     | #N/A                    | 4.8162  | 4.6736  | 4.4428  | 5.0728  | 4.1212 | 4.4556  | 3.1593  | 3.9667  | 4.8875  | 4.7518  | 1.0968 | 0.1333  | 0.2903 | 0.5372 |
| Thop1    | _TSQTAVTLDELAQK_2                                                      | #N/A                    | 3.0542  | 4.9656  | 5.6551  | 4.9079  | 3.6988 | 5.0404  | 5.5380  | 4.8498  | 4.7569  | 5.3530  | 0.8886 | -0.1704 | 0.3028 | 0.5188 |
| Thop1    | _VDQVLHTGDAQDAPEAYAR_3                                                 | #N/A                    | 5.1239  | 3.2400  | 3.8361  | 3.3798  | 5.6672 | 3.3785  | 3.5281  | 5.5565  | 3.9204  | 3.0571  | 1.0221 | 0.0315  | 0.8995 | 0.0460 |
| Thop1    | _NINEDTFLPFTTR_2                                                       | #N/A                    | 4.1023  | 3.1239  | 3.2883  | 3.7909  | 3.0122 | 4.6883  | 4.9952  | 4.3275  | 5.0757  | 3.7579  | 0.8080 | -0.3076 | 0.0676 | 0.1703 |
| Thop1    | _LLEAFNC(Carbamidomethyl (C))IR_2                                      | #N/A                    | 3.1999  | 4.0051  | 3.8867  | 4.3894  | 4.2272 | 3.9031  | 4.1040  | 4.8478  | 3.3777  | 4.3564  | 0.9434 | -0.0841 | 0.4815 | 0.1374 |
| Camsap2  | _SYS(Phospho (STY))NEGTLUNSR_2                                         | QBC181_S439_M1_Camsap2  | 11.4967 | 11.4706 | 11.8347 | 11.5382 | 9.8593 | 11.4588 | 11.7756 | 11.5016 | 11.4896 | 11.3759 | 0.9775 | -0.0328 | 0.5006 | 0.3005 |
| Camsap2  | _LNGSS(Phospho (STY))PONLTOTK_2                                        | QBC181_S573_M1_Camsap2  | 10.0380 | 9.9404  | 10.6349 | 10.1811 | 8.9072 | 9.9096  | 10.5001 | 9.9208  | 10.0013 | 10.0391 | 0.9822 | -0.0259 | 0.5749 | 0.2404 |
| Camsap2  | _WUKS(Phospho (STY))PTTPVOPFR_2                                        | QBC181_S836_M1_Camsap2  | 3.1509  | 6.7847  | 3.8377  | 4.3404  | 3.7775 | 3.9520  | 4.0551  | 6.6284  | 3.4267  | 4.3074  | 0.9355 | -0.0963 | 0.7366 | 0.1328 |
| Camsap2  | _EQQAWWS(Phospho (STY))PPQPSQK_2                                       | QBC181_S905_M1_Camsap2  | 3.8778  | 3.1332  | 7.7083  | 4.2575  | 3.0215 | 5.6187  | 8.0713  | 8.0312  | 7.2180  | 6.0575  | 0.6267 | -0.6741 | 0.0239 | 1.6222 |
| Camsap2  | _ADVSEKLDGESS(Phospho (STY))DKEQFDODQK_3                               | #N/A                    | 3.3186  | 4.0238  | 4.5531  | 4.0969  | 3.9632 | 3.8843  | 4.2451  | 2.5078  | 3.2033  | 3.7742  | 1.1575 | 0.2110  | 0.1705 | 0.1622 |
| Camsap2  | _SES(Phospho (STY))VEGLSPSR_2                                          | QBC181_S1285_M1_Camsap2 | 7.8154  | 8.8994  | 7.9871  | 9.2457  | 6.0576 | 8.0263  | 3.6656  | 7.9981  | 7.8668  | 9.1354  | 1.1170 | 0.1597  | 0.4699 | 0.3280 |
| Camsap2  | _SKS(Phospho (STY))LADIK_2                                             | QBC181_S818_M1_Camsap2  | 3.7492  | 3.2198  | 4.2916  | 4.1826  | 3.5097 | 3.3149  | 4.5089  | 3.3242  | 2.9728  | 2.6047  | 1.0459 | 0.0647  | 0.6711 | 0.1732 |
| Camsap2  | _SSSI(Phospho (STY))MSYVGFGTGWPK_2                                     | QBC181_S391_M1_Camsap2  | 3.2517  | 3.7581  | 3.4363  | 4.2054  | 3.8892 | 4.1519  | 3.9245  | 4.1114  | 3.3733  | 4.0236  | 0.9803 | -0.0287 | 0.7543 | 0.1224 |
| Camsap2  | _DHIES(Phospho (STY))PK_2                                              | QBC181_S1248_M1_Camsap2 | 4.4156  | 3.7339  | 4.1364  | 4.4280  | 3.5140 | 3.8095  | 4.6400  | 4.0740  | 4.5501  | 3.1679  | 0.9460 | -0.0801 | 0.5772 | 0.1372 |
| Camsap2  | _LDGESS(Phospho (STY))DKEQFDODQK_2                                     | #N/A                    | 5.5704  | 4.1064  | 3.2179  | 3.2835  | 3.4353 | 2.8178  | 3.4318  | 4.5627  | 3.9533  | 4.1594  | 0.9284 | -0.1071 | 0.6072 | 0.2167 |
| Septin11 | _SYELQESNVR_2                                                          | #N/A                    | 7.8678  | 7.8103  | 8.0238  | 8.1084  | 8.0271 | 8.0387  | 7.4968  | 7.6661  | 7.9570  | 7.9570  | 1.0245 | 0.1045  | 0.1364 | 0.8653 |
| Septin11 | _ELLEEVSNFK_2                                                          | #N/A                    | 7.7668  | 7.6747  | 7.4908  | 7.7730  | 7.6100 | 7.5090  | 7.6656  | 6.9478  | 7.1163  | 7.4380  | 1.0474 | 0.0668  | 0.0407 | 1.3905 |
| Septin11 | _STSQGF(Carbamidomethyl (C))PNIL(Carbamidomethyl (C))VGETGIGK_2        | #N/A                    | 5.2491  | 5.6512  | 6.1101  | 6.6920  | 5.6609 | 6.0282  | 5.8963  | 4.9687  | 5.4269  | 5.8186  | 1.0671 | 0.0937  | 0.2570 | 0.5901 |
| Septin11 | _Acetyl (Protein N-term)IAVAVGRPS(Phospho (STY))NEELR_2                | QBC187_S9_M1_Septin11   | 6.4582  | 6.4916  | 6.4127  | 6.9678  | 6.2585 | 6.2715  | 6.6409  | 6.2463  | 6.4873  | 6.8823  | 0.9867 | -0.0194 | 0.6191 | 0.2082 |
| Septin11 | _FSDPATHNEFGR_3                                                        | #N/A                    | 6.3661  | 6.3906  | 3.2900  | 6.4619  | 6.7654 | 6.6866  | 6.4912  | 6.5661  | 6.2418  | 1.0406  | 0.0574 | 0.7941  | 0.1001 | 0.5744 |
| Septin11 | _SLFNHYOTR_2                                                           | #N/A                    | 7.3185  | 7.5874  | 4.3039  | 3.8477  | 6.9098 | 3.6352  | 7.3297  | 7.4363  | 3.4525  | 3.5250  | 1.0303 | 0.0430  | 0.9023 | 0.0446 |
| Septin11 | _AAQQLSQSQAQSGAQQT_2                                                   | #N/A                    | 6.5254  | 6.6419  | 6.9877  | 7.1696  | 6.4383 | 6.5041  | 6.1421  | 6.1421  | 6.3455  | 5.8020  | 1.0828 | 0.1148  | 0.0290 | 1.5376 |
| Septin11 | _KKELEEVANFK_3                                                         | #N/A                    | 6.2822  | 4.1215  | 4.0839  | 4.3280  | 5.1262 | 6.4250  | 5.5578  | 5.0147  | 5.6437  | 5.2786  | 0.9418 | -0.0865 | 0.5906 | 0.2287 |
| Septin11 | _NLSLGHVGFQSLPDQLVAK_3                                                 | #N/A                    | 5.8765  | 5.4136  | 5.2484  | 5.8557  | 5.4917 | 5.5629  | 5.7877  | 5.2969  | 6.1359  | 5.8768  | 0.9654 | -0.0507 | 0.3196 | 0.4954 |
| Septin11 | _LTHOTVFGDGQINK_2                                                      | #N/A                    | 3.3326  | 4.0889  | 4.5671  | 4.3267  | 3.9772 | 4.1482  | 4.0414  | 4.3911  | 4.8178  | 3.7882  | 0.9563 | -0.0645 | 0.5201 | 0.2839 |
| Iws1     | _EAEDS(Phospho (STY))DS(Phospho (STY))DONIKR_2                         | QBC1D8_S458_M2_Iws1     | 6.6130  | 5.8808  | 6.2160  | 6.2712  | 4.1034 | 5.1422  | 6.1103  | 6.3471  | 6.2703  | 6.2239  | 0.9145 | -0.1290 | 0.2948 | 0.5304 |
| Iws1     | _VVC(Carbamidomethyl (C))DADDS(Phospho (STY))DSDDVSK_2                 | QBC1D8_S366_M1_Iws1     | 3.4202  | 5.3932  | 4.3788  | 3.7000  | 5.2589 | 5.7227  | 6.3069  | 5.5739  | 3.1421  | 6.0980  | 0.9080 | -0.1393 | 0.5362 | 0.2707 |
| Iws1     | _IS(Phospho (STY))DS(Phospho (STY))EELPKPR_2                           | QBC1D8_S183_M2_Iws1     | 2.9409  | 5.5747  | 4.0756  | 5.7285  | 4.6002 | 5.0553  | 4.5017  | 5.8675  | 5.4034  | 6.6382  | 0.8857 | -0.1750 | 0.4804 | 0.3184 |
| Iws1     | _KAVALS(Phospho (STY))DS(Phospho (STY))EDDAGNASAK_2                    | #N/A                    | 4.8517  | 5.4121  | 3.2551  | 3.2463  | 3.1948 | 5.      |         |         |         |         |        |         |        |        |



|         |                                                                                  |                        |         |         |         |         |         |         |         |         |         |         |        |         |        |        |
|---------|----------------------------------------------------------------------------------|------------------------|---------|---------|---------|---------|---------|---------|---------|---------|---------|---------|--------|---------|--------|--------|
| Suco    | _SKS(Phospho (STY))LQFTGK_2                                                      | QBC341_S1077_M1_Suco   | 6.5738  | 6.4702  | 7.0196  | 6.2918  | 5.7835  | 3.9040  | 6.9170  | 6.9148  | 6.3838  | 6.3068  | 0.9060 | -0.1425 | 0.3132 | 0.5041 |
| Layn    | _KDS(Phospho (STY))EADLAEPRPDLK_3                                                | QBC351_S299_M1_Layn    | 5.7368  | 5.4736  | 5.7753  | 5.7503  | 4.9720  | 5.6600  | 5.6369  | 5.6920  | 5.1653  | 5.3294  | 1.0193 | 0.0276  | 0.5869 | 0.2314 |
| Layn    | _QENS(Phospho (STY))PDLVYNNVR_2                                                  | QBC351_S286_M1_Layn    | 3.5509  | 3.6753  | 4.2377  | 3.2395  | 4.1774  | 3.0610  | 4.4550  | 4.8033  | 5.5259  | 3.2065  | 0.8131 | -0.2985 | 0.1016 | 0.9931 |
| Mett13  | _S(Phospho (STY))DSPVPTATSSGPKSTTSVAPELATDPELEKX_4                               | QBC3P7_S48_M1_Mett13   | 3.9159  | 3.6756  | 3.3366  | 4.1223  | 3.8189  | 4.1835  | 3.9740  | 5.9302  | 3.4893  | 3.9317  | 0.8871 | -0.1729 | 0.3172 | 0.4986 |
| Shia7   | _EHLIS(Phospho (STY))PPR_2                                                       | QBC3Q5_S451_M1_Shia7   | 11.1730 | 10.4181 | 10.6550 | 11.1517 | 9.8135  | 10.7562 | 11.2045 | 10.7049 | 10.5267 | 10.0949 | 1.0027 | 0.0039  | 0.9304 | 0.0313 |
| Shia7   | _SSSS(Phospho (STY))TGPLGGPDSM(Oxidation (M))APR_2                               | #N/A                   | 10.7844 | 5.9248  | 11.2648 | 11.0273 | 9.2558  | 10.7055 | 6.6424  | 10.6621 | 3.0930  | 10.3831 | 1.2771 | 0.3528  | 0.2588 | 0.5870 |
| Shia7   | _RVMS(Phospho (STY))QEHLLGGDSR_3                                                 | QBC3Q5_S405_M1_Shia7   | 5.8663  | 4.1988  | 4.0804  | 6.7806  | 4.0201  | 3.7094  | 4.0702  | 4.6583  | 4.5923  | 3.0492  | 1.1670 | 0.2228  | 0.3571 | 0.4472 |
| Shia7   | _EHLIS(Phospho (STY))PPPS(Phospho (STY))PALPPDPPTTR_3                            | QBC3Q5_S451_M2_Shia7   | 4.3221  | 3.6265  | 3.5081  | 5.9168  | 3.4478  | 5.7945  | 3.7254  | 5.7003  | 6.8013  | 6.6998  | 0.7739 | -0.3697 | 0.1491 | 0.8725 |
| Shia7   | _LVSQEHLLSS(Phospho (STY))PEARL_2                                                | #N/A                   | 4.3302  | 3.6110  | 4.9902  | 6.3040  | 4.2609  | 3.8050  | 3.4381  | 6.0636  | 3.7210  | 3.6870  | 1.0764 | 0.1062  | 0.6566 | 0.1827 |
| Tango6  | _EAS(Phospho (STY))DOEALYQK_2                                                    | QBC3S2_S561_M1_Tango6  | 4.0129  | 3.2683  | 3.7466  | 7.2415  | 6.2999  | 3.4680  | 3.4386  | 7.1519  | 6.9339  | 6.8878  | 0.7657 | -0.3852 | 0.2319 | 0.6347 |
|         | _SSS(Phospho (STY))DALGPAPR_2                                                    | QBC3W1_S176_M1_        | 10.6507 | 4.1067  | 11.0323 | 10.8682 | 10.2912 | 10.8324 | 11.0346 | 10.2325 | 10.5679 | 10.9174 | 0.9010 | -0.1504 | 0.4698 | 0.3281 |
| Gpr158  | _SAS(Phospho (STY))AHNLSSEK_2                                                    | QBC419_S881_M1_Gpr158  | 9.5360  | 9.4716  | 9.5859  | 9.4371  | 7.1463  | 9.1739  | 9.1848  | 9.4337  | 9.1023  | 9.3123  | 0.9784 | -0.0315 | 0.6924 | 0.1597 |
| Gpr158  | _SLS(Phospho (STY))VASAK_2                                                       | QBC419_S904_M1_Gpr158  | 7.8208  | 3.5805  | 7.8660  | 6.8809  | 3.4688  | 7.6110  | 3.7508  | 7.8580  | 7.2726  | 7.4958  | 0.9409 | -0.0879 | 0.7743 | 0.1111 |
| Gpr158  | _LKEDS(Phospho (STY))EAESTESPLVC(Carbamidomethyl (C))K_2                         | #N/A                   | 3.5689  | 3.3866  | 3.8265  | 6.5612  | 3.2534  | 3.3049  | 3.6456  | 6.6439  | 6.5595  | 4.0827  | 0.8186 | -0.2888 | 0.3424 | 0.4654 |
| Gpr158  | _EQTVQDQLQWYQALVR_2                                                              | #N/A                   | 3.7061  | 3.4000  | 3.7995  | 3.5935  | 3.8788  | 4.4199  | 4.5729  | 2.7932  | 4.1736  | 4.6049  | 0.9414 | -0.0871 | 0.5513 | 0.2586 |
| Gpr158  | _EES(Phospho (STY))LKNR_2                                                        | QBC419_S806_M1_Gpr158  | 6.6022  | 6.2874  | 3.1558  | 6.1093  | 4.0666  | 4.0588  | 4.3486  | 4.3016  | 3.0999  | 3.8776  | 1.2917 | 0.3693  | 0.1808 | 0.7428 |
| Gpr158  | _VS(Phospho (STY))LPTANPOVSSGITQIK_2                                             | QBC419_S976_M1_Gpr158  | 3.9286  | 3.1841  | 3.6623  | 5.6012  | 3.0724  | 3.5522  | 3.4454  | 3.7951  | 4.0941  | 4.3842  | 0.9755 | -0.0358 | 0.8511 | 0.7000 |
| Gpr158  | _S(Phospho (STY))DKTEVC(Carbamidomethyl (C))PWEHSQSLLEDNR_3                      | QBC419_S1059_M1_Gpr158 | 3.9084  | 3.8290  | 3.7868  | 3.8366  | 3.8241  | 3.6486  | 3.7364  | 3.7781  | 3.7350  | 3.6972  | 1.0184 | 0.0264  | 0.1731 | 0.0717 |
| Gpr158  | _QC(Carbamidomethyl (C))S(Phospho (STY))KEKEGTHSAAK_3                            | QBC419_S770_M1_Gpr158  | 3.3761  | 4.1323  | 3.1097  | 4.1543  | 4.0206  | 4.1048  | 3.9980  | 4.3477  | 3.1459  | 3.8316  | 0.9962 | -0.0055 | 0.9634 | 0.1662 |
| Pex5I   | _KGS(Phospho (STY))PGLTR_2                                                       | #N/A                   | 10.8019 | 10.9763 | 11.1408 | 11.2968 | 10.2146 | 10.6895 | 11.0814 | 10.9318 | 10.8444 | 11.0628 | 0.9884 | -0.0168 | 0.5441 | 0.0243 |
| Pex5I   | _S(Phospho (STY))PVOSVLEGVK_2                                                    | #N/A                   | 9.0082  | 8.4416  | 8.6040  | 3.2628  | 3.1291  | 8.6620  | 9.2478  | 8.3235  | 8.7489  | 8.8226  | 0.7798 | -0.3588 | 0.2206 | 0.6564 |
| Pex5I   | _TGS(Phospho (STY))KELLWSAEHR_2                                                  | #N/A                   | 5.8196  | 5.7362  | 6.7706  | 6.4222  | 4.7362  | 5.3143  | 5.8616  | 6.7140  | 5.8216  | 6.2961  | 0.9412 | -0.0874 | 0.4048 | 0.3928 |
| Pex5I   | _SALNSES(Phospho (STY))ASELEVAAPAQAR_2                                           | QBC437_S172_M1_Pex5I   | 4.2288  | 3.4843  | 7.5889  | 8.5542  | 6.6437  | 3.2520  | 3.6545  | 3.4949  | 7.5853  | 3.1836  | 1.2558 | 0.3286  | 0.4425 | 0.3541 |
| Pex5I   | _NKGGS(Phospho (STY))PGLTR_2                                                     | #N/A                   | 5.6428  | 7.4489  | 8.1731  | 3.2821  | 3.1591  | 6.5449  | 6.5492  | 4.3965  | 6.7544  | 6.1680  | 0.9567 | -0.0639 | 0.8286 | 0.0816 |
| Pex5I   | _S(Phospho (STY))QPELSTGK_2                                                      | QBC437_S157_M1_Pex5I   | 4.8988  | 8.1343  | 4.3907  | 8.2679  | 3.4105  | 7.2068  | 3.1072  | 3.2251  | 4.3745  | 8.6034  | 1.3778 | 0.4624  | 0.2634 | 0.5794 |
| Pex5I   | _GPETS(Phospho (STY))SLDLQITQLEK_2                                               | QBC437_S105_M1_Pex5I   | 3.9339  | 3.1893  | 3.6676  | 3.2113  | 3.0776  | 3.5470  | 3.3596  | 3.7898  | 4.0889  | 4.3895  | 0.8799 | -0.1846 | 0.0895 | 0.1481 |
| Pex5I   | _KGS(Phospho (STY))PGLTR_2                                                       | #N/A                   | 3.3155  | 5.6169  | 6.5358  | 4.3438  | 3.9601  | 4.1654  | 4.0585  | 6.0469  | 3.4232  | 5.1979  | 0.9946 | -0.0078 | 0.9743 | 0.0033 |
| Pex5I   | _NHS(Phospho (STY))LEEFER_2                                                      | #N/A                   | 8.2919  | 6.8469  | 9.7891  | 9.1098  | 7.7850  | 8.6310  | 8.7297  | 8.2994  | 8.4649  | 9.1075  | 1.0068 | 0.0097  | 0.8806 | 0.0552 |
| Pex5I   | _M(Oxidation (M))SKS(Phospho (STY))PVOSVLEGVK_2                                  | #N/A                   | 6.8026  | 6.0002  | 7.0469  | 7.7889  | 4.9830  | 3.6928  | 6.2484  | 6.1865  | 5.8725  | 3.5826  | 1.1060 | 0.1453  | 0.5445 | 0.2640 |
| Pex5I   | _RM(Oxidation (M))SKS(Phospho (STY))PVOSVLEGVK_3                                 | #N/A                   | 3.5681  | 5.4291  | 4.1887  | 5.5732  | 5.2391  | 5.7577  | 5.1972  | 5.4495  | 5.4138  | 5.9883  | 0.8997 | -0.1525 | 0.2701 | 0.5684 |
| Tmem145 | _VVTM(Oxidation (M))AEPGAAS(Phospho (STY))PPPPAR_2                               | #N/A                   | 7.9033  | 7.9716  | 8.7022  | 8.3362  | 6.6699  | 7.6827  | 8.5978  | 8.4328  | 8.0483  | 7.7675  | 0.9593 | -0.0599 | 0.4088 | 0.3885 |
| Fbw13   | _GGRDS(Phospho (STY))DQGS(Phospho (STY))AEGTAEKPK_3                              | QBC4V4_S12_M2_Fbw13    | 3.1816  | 3.9868  | 3.8684  | 4.3711  | 3.8081  | 3.9214  | 4.2822  | 3.7474  | 3.3960  | 4.3380  | 0.9785 | -0.0313 | 0.7578 | 0.1204 |
| Mb21d2  | _GSTSPS(Phospho (STY))PQSGDGDPNQPODR_2                                           | QBC525_S37_M1_Mb21d2   | 3.8181  | 3.8954  | 3.5518  | 3.9175  | 3.8506  | 3.7006  | 5.6378  | 3.9435  | 3.5636  | 5.0270  | 0.8340 | -0.2618 | 0.0860 | 1.0656 |
| Crot2   | _TNSMSSGLGS(Phospho (STY))PNR_2                                                  | QBC3L3_S165_M1_Crot2   | 7.6290  | 6.0323  | 3.3054  | 8.5076  | 5.6578  | 2.9835  | 6.3543  | 5.2956  | 5.2082  | 6.4147  | 0.9773 | -0.0332 | 0.9125 | 0.0398 |
| Cwc22   | _GGGQSS(Phospho (STY))PQEEPTWK_2                                                 | QBC5N3_S106_M1_Cwc22   | 3.5624  | 8.5171  | 8.8564  | 8.8312  | 7.2550  | 9.3858  | 6.3543  | 8.8195  | 8.2940  | 6.7702  | 0.7702 | -0.3767 | 0.1638 | 0.7856 |
| Clmn    | _JKES(Phospho (STY))PSEQGSR_2                                                    | QBC5W0_S317_M1_Clmn    | 7.5053  | 7.6068  | 8.3695  | 8.0288  | 7.2474  | 7.4009  | 7.9057  | 7.8920  | 7.8024  | 7.1505  | 1.0007 | 0.0010  | 0.9837 | 0.0072 |
| Clmn    | _NHS(Phospho (STY))DSSVIR_2                                                      | QBC5W0_S925_M1_Clmn    | 7.9374  | 7.7095  | 7.6487  | 7.6487  | 3.5547  | 3.5547  | 8.2194  | 7.6682  | 7.4562  | 7.8972  | 0.8915 | -0.1657 | 0.3862 | 0.4132 |
| Clmn    | _SKS(Phospho (STY))PLVK_2                                                        | QBC5W0_S419_M1_Clmn    | 7.4529  | 7.1899  | 7.6671  | 3.1556  | 6.4618  | 7.6050  | 7.8443  | 3.4621  | 7.7848  | 7.0840  | 1.0069 | 0.0099  | 0.9713 | 0.0126 |
| Clmn    | _VFVC(Carbamidomethyl (C))DQLESP(Phospho (STY))GFC(Carbamidomethyl (C))LDSAPHK_3 | QBC5W0_T360_M1_Clmn    | 3.9954  | 3.2998  | 3.1814  | 3.3201  | 3.1211  | 3.1076  | 3.4684  | 3.6811  | 3.9801  | 2.9974  | 0.9450 | -0.0816 | 0.4349 | 0.3616 |
| Tbcl    | _VS(Phospho (STY))PENFPYR_2                                                      | QBC5W3_S18_M1_Tbcl     | 7.4101  | 6.8929  | 7.4709  | 7.4467  | 6.7819  | 7.1400  | 7.8361  | 3.6696  | 3.6658  | 7.4541  | 1.2712 | 0.3462  | 0.1349 | 0.8698 |
| Spta33  | _AS(Phospho (STY))NETLISYGPONDEQR_2                                              | QBC624_S87_M1_Spta33   | 3.4949  | 3.7312  | 4.1817  | 3.1836  | 6.0747  | 3.6080  | 4.3991  | 3.4341  | 5.8430  | 3.1505  | 0.9617 | -0.0563 | 0.8282 | 0.0818 |
| Rtkn    | _RPSDS(Phospho (STY))VCPAQHSRC(Carbamidomethyl (C))R_3                           | QBC6B2_S108_M1_Rtkn    | 3.4704  | 3.7175  | 4.7026  | 4.0720  | 3.8916  | 4.2742  | 4.1764  | 3.9921  | 3.7476  | 3.6817  | 1.0313 | 0.0444  | 0.6241 | 0.2048 |
| Rtkn    | _TFS(Phospho (STY))LDAAPADHSGPSR_2                                               | #N/A                   | 4.0873  | 4.2433  | 3.7623  | 3.6690  | 4.1372  | 4.1879  | 4.0810  | 4.9736  | 4.4437  | 4.1442  | 0.9102 | -0.1358 | 0.0855 | 1.0680 |
| Wdr26   | _RLS(Phospho (STY))QSDSDVIR_2                                                    | #N/A                   | 3.1049  | 4.1212  | 7.2341  | 4.2944  | 6.1721  | 6.3899  | 4.0091  | 3.8241  | 3.4727  | 5.7173  | 1.2263 | 0.2943  | 0.3202 | 0.4946 |
| Wdr26   | _LSQS(Phospho (STY))DDEDVIR_2                                                    | QBC6G8_S103_M1_Wdr26   | 4.3235  | 4.4035  | 3.5095  | 4.0121  | 6.1129  | 6.7867  | 3.7268  | 6.3662  | 6.2911  | 3.9791  | 0.9543 | -0.0675 | 0.7955 | 0.0994 |
| Wdr26   | _KRLS(Phospho (STY))QSDSDVIR_3                                                   | #N/A                   | 3.8012  | 3.0566  | 6.9347  | 3.8582  | 6.2068  | 6.1134  | 6.0676  | 6.6289  | 4.2567  | 6.9603  | 0.9603 | -0.0584 | 0.8381 | 0.0761 |
| Usp20   | _EAQPPS(Phospho (STY))PR_2                                                       | QBC6M1_S369_M1_Usp20   | 9.3847  | 9.5252  | 9.7720  | 9.4563  | 8.5098  | 9.3337  | 9.7149  | 9.7853  | 9.6235  | 9.4019  | 0.9687 | -0.0458 | 0.2253 | 0.6471 |
| Usp20   | _LSEQDS(Phospho (STY))PPPSHPKX_2                                                 | QBC6M1_S112_M1_Usp20   | 8.1258  | 8.3668  | 8.6450  | 3.8107  | 7.5599  | 3.6122  | 3.5253  | 8.4801  | 3.9954  | 3.7776  | 1.3557 | 0.6390  | 0.2794 | 0.5357 |
| Usp20   | _KFS(Phospho (STY))WGQQR_2                                                       | QBC6M1_S334_M1_Usp20   | 6.9839  | 6.8359  | 6.7775  | 6.4563  | 2.8528  | 6.5405  | 6.9475  | 4.0146  | 6.5582  | 6.1888  | 1.0248 | 0.0354  | 0.8823 | 0.0544 |
| Usp20   | _AVPIAIVADEGES(Phospho (STY))EODULKPR_3                                          | QBC6M1_S314_M1_Usp20   | 3.8394  | 3.4514  | 3.9654  | 8.0189  | 3.5627  | 3.8437  | 8.1079  | 3.8105  | 3.5659  | 0.9106  | 1.0069 | -0.1351 | 0.7396 | 0.9106 |
| Usp20   | _STS(Phospho (STY))PC(Carbamidomethyl (C))QTPEPDNEAHR_3                          | #N/A                   | 3.8124  | 3.6824  | 3.9626  | 6.2025  | 3.6714  | 4.8159  | 3.8069  | 3.5753  | 3.5798  | 3.0583  | 1.2433 | 0.3142  | 0.1430 | 0.8445 |
| Usp20   | _LSSPPRAS(Phospho (STY))PVR_2                                                    | QBC6M1_S415_M1_Usp20   | 5.5130  | 4.3182  | 4.1998  | 3.2016  | 4.1395  | 3.5900  | 3.9508  | 4.7732  | 3.0646  | 3.1686  | 1.0235 | 0.0334  | 0.8277 | 0.0821 |
| Fam126b | _TAITTA(Phospho (STY))IRR_2                                                      | QBC729_S321_M1_Fam126b | 2.9131  | 2.9284  | 4.1476  | 6.5512  | 4.2506  | 3.4789  | 3.8397  | 3.3098  | 3.6088  | 6.9582  | 0.9133 | -0.1309 | 0.7008 | 0.1544 |
| Fam126b | _VEVT(Phospho (STY))PTVPR_2                                                      | QBC729_S306_M1_Fam126b | 4.0392  | 3.3435  | 6.9863  | 3.2763  | 3.1649  | 3.0638  | 3.4246  | 3.7249  | 4.0239  | 2.9536  | 1.1266 | 0.1720  | 0.5882 | 0.2305 |
| Fam126b | _NSLPDAPDSS(Phospho (STY))QEQGK_2                                                | QBC729_S294_M1_Fam126b | 7.3905  | 8.1082  | 8.4742  | 3.5615  | 7.1461  | 7.4705  | 8.8884  | 8.2478  | 8.3300  | 8.2552  | 0.8333 | -0.2631 | 0.1611 | 0.7928 |
| Fam126b | _TNS(Phospho (STY))LSUR_2                                                        | QBC729_S442_M1_Fam126b | 6.9586  | 3.1912  | 3.2209  | 6.7950  | 3.0796  | 3.5451  | 6.5951  | 6.5260  | 6.5849  | 3.6905  | 0.7634 | -0.0893 | 0.2490 | 0.6038 |
| Fam126b | _YSTS(Phospho (STY))LGEDR_2                                                      | QBC729_S491_M1_Fam126b | 3.1963  | 4.1461  | 4.4308  | 3.9746  | 3.9675  | 3.7620  | 4.1228  | 3.0266  | 3.3257  | 3.6518  | 1.1079 | 0.1479  | 0.2135 | 0.6705 |
| Fam126b | _S(Phospho (STY))AKDKETALAK_3                                                    | QBC729_S383_M1_Fam126b | 3.9093  | 3.1648  | 3.6430  | 3.7500  | 3.0531  | 3.5715  | 3.4647  | 2.6500  | 3.4531  | 3.7170  | 1.0584 | 0.0819  | 0.4619 | 0.3354 |
| Fam110b | _SKS(Phospho (STY))DLSDR_2                                                       | QBC739_S257_M1_Fam110b | 8.9607  | 8.9559  | 9.1577  | 4.1217  | 4.1822  | 9.0109  | 8.9107  | 8.7846  | 9.0549  | 9.1784  | 0.8237 | -0.2799 | 0.2529 | 0.5971 |
| Fam110b | _ANS(Phospho (STY))DISLNR_2                                                      | QBC739_S297_M1_Fam110b | 4.0146  | 3.      |         |         |         |         |         |         |         |         |        |         |        |        |



|      |                                                                                              |                      |         |         |         |         |         |         |         |         |         |         |         |         |        |        |
|------|----------------------------------------------------------------------------------------------|----------------------|---------|---------|---------|---------|---------|---------|---------|---------|---------|---------|---------|---------|--------|--------|
| Ank2 | _ATFSPIVLEPR_2                                                                               | #N/A                 | 6.7558  | 7.0194  | 7.4656  | 6.8153  | 6.6848  | 6.9039  | 6.7753  | 7.1094  | 7.0014  | 6.8051  | 1.0026  | 0.0037  | 0.9117 | 0.0401 |
| Ank2 | _AREETPIHIASR_3                                                                              | #N/A                 | 6.5047  | 6.5750  | 5.5450  | 6.5792  | 6.9443  | 6.5706  | 7.4177  | 6.8952  | 6.8714  | 6.8148  | 0.9219  | -0.1173 | 0.0731 | 1.1358 |
| Ank2 | _FVUUC[Carbamidomethyl] [C]R_2                                                               | #N/A                 | 6.4405  | 6.6324  | 6.6775  | 6.6659  | 5.7729  | 6.2150  | 6.3477  | 6.5418  | 6.3477  | 6.2375  | 1.0084  | 0.0120  | 0.7857 | 0.1048 |
| Ank2 | _Y[Phospho] (STY)IEGGR_2                                                                     | QBCRR3_Y8R9_M1_Ank2  | 3.1325  | 6.3878  | 6.3976  | 3.9543  | 3.5185  | 3.7528  | 4.5362  | 6.7618  | 3.8538  | 3.7302  | 0.9647  | -0.0518 | 0.8610 | 0.0650 |
| Ank2 | _HS[Phospho] (STY)PVSLK_2                                                                    | #N/A                 | 6.0447  | 5.0358  | 4.0486  | 6.2778  | 4.8522  | 3.3799  | 6.0103  | 6.0832  | 5.5762  | 5.9769  | 0.8353  | -0.2596 | 0.1305 | 0.8844 |
| Ank2 | _HTPVS[Phospho] (STY)PSSNEK_2                                                                | #N/A                 | 5.2441  | 6.0482  | 4.0692  | 3.6130  | 5.0434  | 3.1454  | 6.0658  | 5.9217  | 5.9610  | 3.2902  | 0.8526  | -0.2300 | 0.3415 | 0.4666 |
| Ank2 | _ERAEGFES[Phospho] (STY)ESEDGATPK_3                                                          | #N/A                 | 6.1613  | 3.0534  | 4.4358  | 3.4376  | 2.8747  | 6.0152  | 3.1523  | 6.5572  | 4.3294  | 3.4046  | 0.9928  | -0.0104 | 0.9750 | 0.0110 |
| Ank2 | _SVYSGGDQES[Phospho] (STY)PES[Phospho] (STY)PEEQK_2                                          | QBCRR3_S2Z26_M2_Ank2 | 5.6958  | 5.3568  | 5.8545  | 3.8335  | 4.7141  | 5.4962  | 5.8438  | 5.0140  | 5.9627  | 0.9627  | -0.0548 | 0.6403  | 0.1936 | 0.1936 |
| Ank2 | _GS[Phospho] (STY)DEEPEEASEPK_2                                                              | #N/A                 | 7.3802  | 5.7470  | 4.2655  | 7.1892  | 5.4569  | 6.4626  | 7.3212  | 6.6839  | 6.4871  | 6.3400  | 0.9069  | -0.1410 | 0.3445 | 0.4628 |
| Ank2 | QPETC[Carbamidomethyl] [C]DGHGQ[Carbamidomethyl] [C]ETVSPNSATPVSLGVQS[Phospho] (STY)PEI      | QBCRR3_S2755_M1_Ank2 | 6.1125  | 5.6743  | 5.7848  | 6.5264  | 5.2538  | 5.8589  | 6.3200  | 4.1442  | 5.9789  | 5.8309  | 1.0539  | 0.0757  | 0.5163 | 0.2671 |
| Ank2 | _ATS[Phospho] (STY)PUEETPGSR_2                                                               | #N/A                 | 3.4186  | 9.2048  | 9.3508  | 9.5781  | 4.0452  | 9.2346  | 9.2634  | 9.3254  | 9.1673  | 8.8496  | 0.8165  | -0.2925 | 0.2911 | 0.5360 |
| Ank2 | _ATAVPDSLC[Carbamidomethyl] [C]K_2                                                           | #N/A                 | 6.3016  | 6.0537  | 6.3979  | 6.6045  | 6.5959  | 5.6989  | 7.0840  | 6.7338  | 6.3277  | 6.1105  | 0.9560  | -0.0649 | 0.2758 | 0.5594 |
| Ank2 | _HLPVS[Phospho] (STY)PGK_2                                                                   | #N/A                 | 6.9234  | 6.1116  | 5.8134  | 5.6577  | 4.8178  | 6.0400  | 6.3683  | 6.4408  | 6.2118  | 6.4012  | 0.9369  | -0.0940 | 0.3074 | 0.5123 |
| Ank2 | _ELEEWVIVS[Phospho] (STY)DEEQEAK_2                                                           | QBCRR3_S1562_M1_Ank2 | 8.6973  | 8.5944  | 9.8999  | 10.2406 | 8.7948  | 9.3261  | 9.8375  | 9.9698  | 9.5775  | 9.4389  | 0.9539  | -0.0680 | 0.2528 | 0.5973 |
| Ank2 | _GADSGLTFEVR_2                                                                               | #N/A                 | 5.6093  | 4.2413  | 5.3609  | 4.2347  | 4.9067  | 5.2259  | 5.3687  | 4.5674  | 5.0660  | 5.0875  | 0.9816  | -0.0268 | 0.7829 | 0.1063 |
| Ank2 | _TLEQENFSEVAR_2                                                                              | #N/A                 | 4.6722  | 4.2433  | 4.5330  | 4.8606  | 4.6797  | 4.4670  | 5.1673  | 4.5414  | 4.2322  | 4.6324  | 0.9855  | -0.0211 | 0.7295 | 0.1370 |
| Ank2 | _KTS[Phospho] (STY)LVVESTDDQGVFER_3                                                          | #N/A                 | 9.2458  | 3.6694  | 3.7874  | 3.7706  | 8.1720  | 9.2067  | 5.5477  | 3.9632  | 9.2840  | 3.7376  | 1.0723  | 0.1008  | 0.8167 | 0.0880 |
| Ank2 | _TEKHPPVS[Phospho] (STY)PGKTEK_2                                                             | #N/A                 | 6.2811  | 7.1595  | 7.2699  | 5.1027  | 6.2883  | 6.3600  | 5.8270  | 6.8006  | 6.1465  | 6.6041  | 1.0104  | 0.0149  | 0.8836 | 0.0537 |
| Ank2 | _GAADVFTAR_2                                                                                 | #N/A                 | 4.5709  | 4.2207  | 4.9381  | 4.2586  | 4.4043  | 4.4071  | 4.3003  | 4.9332  | 5.1741  | 5.0834  | 0.9167  | -0.1256 | 0.0835 | 1.0781 |
| Ank2 | _TDADADQWSEIRDDAAFEAR_3                                                                      | #N/A                 | 5.3839  | 5.2357  | 6.3481  | 5.8646  | 3.7096  | 5.5723  | 5.2385  | 5.1534  | 4.3099  | 5.1233  | 1.0799  | -0.1109 | 0.0409 | 0.3557 |
| Ank2 | _EGHVGLVQELLGR_3                                                                             | #N/A                 | 3.4962  | 4.6718  | 4.0583  | 3.5931  | 3.1163  | 3.5008  | 4.5500  | 4.2944  | 3.8742  | 4.8642  | 0.8507  | -0.2333 | 0.0778 | 1.1091 |
| Ank2 | _ARS[Phospho] (STY)YETETER_2                                                                 | #N/A                 | 4.9184  | 8.0301  | 8.3888  | 8.4071  | 7.8626  | 8.0436  | 8.5077  | 7.8406  | 7.7550  | 0.9461  | -0.0799 | 0.5499  | 0.2597 | 0.1297 |
| Ank2 | _ESPC[Carbamidomethyl] [C]RDSLES[Phospho] (STY)S[Phospho] (STY)PVEPK_2                       | QBCRR3_S2431_M2_Ank2 | 4.2100  | 4.7456  | 3.5974  | 4.8740  | 3.2318  | 3.9324  | 3.5411  | 4.4206  | 4.5286  | 4.3193  | 0.9753  | -0.0361 | 0.7876 | 0.1037 |
| Ank2 | .C[Carbamidomethyl] [C]KTPEDIS[Phospho] (STY)I[Phospho] (STY)PPEGTKPC[Carbamidomethyl] [C]KQ | QBCRR3_S3744_M2_Ank2 | 3.8873  | 3.1222  | 3.6410  | 3.6892  | 3.0310  | 3.6177  | 3.5898  | 6.8883  | 3.8811  | 3.5494  | 0.7813  | -0.1560 | 0.1771 | 0.7519 |
| Ank2 | _GSPVQGEASEPKEESS[Phospho] (STY)PR_3                                                         | #N/A                 | 12.7126 | 11.7990 | 7.5362  | 11.4639 | 7.2439  | 11.7268 | 8.2316  | 11.3267 | 12.0958 | 11.8269 | 0.9580  | -0.0619 | 0.7537 | 0.1258 |
| Ank2 | _TERHS[Phospho] (STY)PVSGKPK_3                                                               | #N/A                 | 6.7454  | 6.6311  | 7.0007  | 7.1317  | 5.7072  | 6.3433  | 7.1047  | 7.0490  | 6.7679  | 4.1500  | 1.0543  | 0.0763  | 0.5968 | 0.2242 |
| Ank2 | _GSPVQGEASEPKEESS[Phospho] (STY)PRK_3                                                        | #N/A                 | 4.4525  | 3.7215  | 4.0244  | 5.9803  | 3.4345  | 3.7100  | 3.8587  | 3.5634  | 3.8625  | 3.9644  | 1.1071  | 0.1468  | 0.4189 | 0.3779 |
| Ank2 | _TELKKS[Phospho] (STY)I[Phospho] (STY)EESVDEDR_2                                             | #N/A                 | 4.0227  | 1.3122  | 3.2238  | 4.1422  | 2.4161  | 3.9908  | 2.3570  | 4.2336  | 3.0318  | 4.0911  | 0.9289  | -0.1064 | 0.7275 | 0.1381 |
| Ank2 | _NEKS[Phospho] (STY)PVSG[Phospho] (STY)PSAK_2                                                | #N/A                 | 11.4806 | 11.5499 | 11.8397 | 11.9092 | 10.5065 | 11.5310 | 11.9043 | 11.5556 | 11.5144 | 0.9832  | -0.0244 | 0.4830  | 0.3160 | 0.1360 |
| Ank2 | _HLPGS[Phospho] (STY)PSR_2                                                                   | QBCRR3_S1900_M1_Ank2 | 4.3284  | 3.5838  | 4.0620  | 3.6058  | 3.4721  | 3.1525  | 3.7541  | 3.3954  | 3.6944  | 3.2831  | 1.0479  | 0.0674  | 0.4916 | 0.3084 |
| Ank2 | _NERHS[Phospho] (STY)PVSSKTER_4                                                              | #N/A                 | 3.9308  | 3.4116  | 3.6645  | 3.2082  | 3.0745  | 3.5501  | 3.3565  | 3.7929  | 4.0920  | 4.3863  | 0.8890  | -0.1697 | 0.1028 | 0.9879 |
| Ank2 | _MDVHLLEINTEPQER_3                                                                           | #N/A                 | 5.7947  | 3.8295  | 3.4538  | 5.8191  | 2.8466  | 3.7780  | 5.1161  | 3.7412  | 3.8106  | 3.9054  | 1.0266  | 0.0379  | 0.8769 | 0.0571 |
| Ank2 | _KSDSNAS[Phospho] (STY)FLR_2                                                                 | #N/A                 | 6.7787  | 6.7643  | 8.7304  | 8.3726  | 7.2180  | 6.8062  | 7.4332  | 6.9122  | 6.9122  | 0.9608  | -0.0576 | 0.5810  | 0.2358 | 0.1370 |
| Ank2 | _S[Phospho] (STY)PSDPOTPSSEVSEVTPK_2                                                         | QBCRR3_S2493_M1_Ank2 | 3.7232  | 3.5610  | 3.8929  | 5.8516  | 3.7834  | 3.5653  | 4.2367  | 5.5245  | 3.2920  | 3.5179  | 0.9807  | -0.0281 | 0.8977 | 0.0469 |
| Ank2 | _ETTKVGT[Phospho] (STY)PTDHSK_2                                                              | #N/A                 | 3.7181  | 4.8383  | 3.8208  | 3.5518  | 3.5000  | 3.8655  | 4.0201  | 5.3297  | 4.4852  | 4.8502  | 0.8305  | -0.1680 | 0.0446 | 1.3506 |
| Ank2 | _VDVQGGM[Oxidation] (M)IDFQIS[Phospho] (STY)PDRK_2                                           | #N/A                 | 6.5876  | 7.5902  | 8.0705  | 8.4700  | 7.1734  | 8.1595  | 7.6966  | 8.8995  | 8.1662  | 8.0569  | 0.9355  | -0.0963 | 0.2326 | 0.6334 |
| Ank2 | _HPPVS[Phospho] (STY)PGKTEK_2                                                                | #N/A                 | 4.0022  | 8.4710  | 8.6506  | 8.5009  | 3.6218  | 8.3372  | 4.1396  | 8.5056  | 8.1566  | 8.4570  | 0.9475  | -0.0778 | 0.8035 | 0.0950 |
| Ank2 | _THPAVS[Phospho] (STY)PSK_2                                                                  | QBCRR3_S1777_M1_Ank2 | 4.5975  | 8.8777  | 9.0852  | 4.0829  | 4.3965  | 8.7992  | 3.4735  | 4.7974  | 8.7107  | 8.6697  | 1.0354  | 0.0502  | 0.8947 | 0.0483 |
| Ank2 | _VSSSS[Phospho] (STY)IESEPELTQSK_2                                                           | QBCRR3_S2624_M1_Ank2 | 3.3757  | 3.6576  | 3.6978  | 4.3111  | 3.4944  | 3.9228  | 3.8515  | 4.0991  | 7.2320  | 0.9505  | -0.0732 | 0.3240  | 0.4895 | 0.1297 |
| Ank2 | _HLPVS[Phospho] (STY)PGATEK_2                                                                | #N/A                 | 7.7931  | 3.8274  | 8.3923  | 8.1112  | 3.7157  | 3.7955  | 8.1389  | 3.5303  | 3.8908  | 7.5318  | 1.0278  | 0.0395  | 0.9197 | 0.0363 |
| Ank2 | _KGS[Phospho] (STY)S[Phospho] (STY)EESVDEDR_2                                                | #N/A                 | 6.2887  | 5.6425  | 5.4054  | 6.0155  | 5.5293  | 3.8381  | 6.7448  | 6.4656  | 6.3521  | 6.1608  | 0.8480  | -0.2379 | 0.0604 | 1.2187 |
| Ank2 | _ATS[Phospho] (STY)PUEETPGSKDK_2                                                             | #N/A                 | 4.7161  | 5.2394  | 5.8165  | 3.9367  | 3.6333  | 5.5107  | 3.9137  | 4.2712  | 3.7649  | 3.7461  | 1.2326  | 0.3017  | 0.0838 | 1.0765 |
| Ank2 | _AEGFES[Phospho] (STY)ESEDGATPK_2                                                            | #N/A                 | 4.7665  | 3.0797  | 3.6046  | 3.5955  | 3.0830  | 4.4572  | 5.0315  | 5.1736  | 4.6064  | 4.4970  | 0.7798  | -0.3587 | 0.0237 | 1.6261 |
| Ank2 | _SDSNAS[Phospho] (STY)FLR_2                                                                  | #N/A                 | 8.9517  | 7.9592  | 9.4280  | 8.4609  | 8.8315  | 8.6153  | 9.6451  | 8.6450  | 8.5992  | 9.7645  | 0.9503  | -0.0736 | 0.2338 | 0.6312 |
| Ank2 | _VDVQGGM[Oxidation] (M)IDFQIS[Phospho] (STY)PDR_2                                            | #N/A                 | 5.9866  | 6.8979  | 6.7801  | 7.6028  | 6.0619  | 7.7380  | 7.5933  | 8.1023  | 7.2195  | 7.5114  | 0.8919  | -0.1650 | 0.0559 | 1.2526 |
| Ank2 | _SKS[Phospho] (STY)ESDASSLDK_2                                                               | QBCRR3_S3343_M1_Ank2 | 11.0633 | 11.2528 | 11.7873 | 11.4628 | 10.6739 | 11.4486 | 11.5425 | 11.2366 | 11.1323 | 0.9908  | -0.0133 | 0.6268  | 0.1430 | 0.1370 |
| Ank2 | _STSSSGRGT[Phospho] (STY)PTR_2                                                               | QBCRR3_S3411_M1_Ank2 | 9.1929  | 9.2128  | 10.0167 | 9.6252  | 8.7698  | 9.3814  | 9.5916  | 9.6588  | 9.3098  | 9.2565  | 0.9907  | -0.0134 | 0.7136 | 0.1466 |
| Ank2 | _RFT[Phospho] (STY)PEEEMFK_2                                                                 | #N/A                 | 3.0310  | 4.3114  | 4.2655  | 5.9814  | 3.6756  | 2.9490  | 3.9576  | 3.1919  | 3.4909  | 3.4866  | 1.1427  | 0.1924  | 0.4129 | 0.3842 |
| Ank2 | _SHLVNEVPAS[Phospho] (STY)PDLSVSEVM[Oxidation] (M)IK_3                                       | QBCRR3_S1467_M1_Ank2 | 3.5036  | 5.3728  | 5.7349  | 6.0469  | 4.1482  | 4.0694  | 4.4302  | 5.8226  | 3.0183  | 3.9592  | 1.1173  | 0.1600  | 0.4929 | 0.3072 |
| Ank2 | _ELDTFEQHOR_3                                                                                | #N/A                 | 4.3763  | 3.6317  | 4.1099  | 3.6537  | 3.5200  | 3.1046  | 3.8020  | 4.7546  | 3.6465  | 3.1993  | 0.9694  | -0.0449 | 0.7420 | 0.1296 |
| Ank2 | _HS[Phospho] (STY)SSASAPER_2                                                                 | QBCRR3_S1793_M1_Ank2 | 5.0742  | 3.4288  | 4.8527  | 4.9708  | 3.9803  | 5.2819  | 4.1873  | 3.7896  | 3.8743  | 3.7801  | 1.1767  | 0.2347  | 0.1059 | 0.9749 |
| Ank2 | _KGS[Phospho] (STY)S[Phospho] (STY)EESVDEDRGLVPELPCTAK_3                                     | #N/A                 | 3.7783  | 3.5517  | 3.9732  | 9.1288  | 7.6612  | 3.3938  | 3.9856  | 8.6679  | 7.7751  | 3.0570  | 0.8938  | -0.1620 | 0.7195 | 0.1430 |
| Ank2 | _HGLAETPESPESLFS[Phospho] (STY)PK_3                                                          | QBCRR3_S2213_M1_Ank2 | 3.5098  | 4.9143  | 4.1966  | 6.0608  | 4.1363  | 3.5935  | 4.4139  | 3.4195  | 3.0681  | 5.8801  | 1.0492  | 0.0693  | 0.7747 | 0.1109 |
| Ank2 | _VGT[Phospho] (STY)PTDHSKELPITNDYDSSQK_3                                                     | #N/A                 | 3.2863  | 5.2828  | 5.4507  | 6.3467  | 3.9198  | 3.0821  | 4.9390  | 5.7184  | 3.0057  | 3.2276  | 1.0802  | 0.1113  | 0.7014 | 0.1540 |
| Ank2 | _SQDHQVILLER_2                                                                               | #N/A                 | 3.8653  | 3.8626  | 3.7571  | 4.6752  | 3.7086  | 3.9688  | 3.3495  | 3.9425  | 4.4559  | 3.6289  | 1.0335  | 0.0475  | 0.6352 | 0.1971 |
| Ank2 | _ESES[Phospho] (STY)QEPPEEGMTSEK_2                                                           | QBCRR3_S1428_M1_Ank2 | 5.7117  | 6.8270  | 3.8860  | 9.7722  | 3.5114  | 4.4116  | 6.6471  | 6.6779  | 7.1536  | 0.7988  | -0.2342 | 0.2757  | 0.5596 | 0.1297 |
| Ank2 | _TPEDIST[Phospho] (STY)PPEGTKPC[Carbamidomethyl] [C]LQTPVSR_3                                | QBCRR3_T3745_M1_Ank2 | 3.0468  | 4.2956  | 5.3875  | 3.8250  | 4.1170  | 3.6125  | 3.9733  | 3.1761  | 3.9033  | 3.5023  | 1.1123  | 0.1535  | 0.3876 | 0.4346 |
| Ank2 | _ASSDVM[Oxidation] (M)IINGDGDAPTLR_2                                                         | #N/A                 | 3.8985  | 4.2579  | 4.5853  | 3.4170  | 5.0603  | 3.7045  | 3.5653  | 3.5842  | 4.9416  | 3.0943  | 1.0722  | 0.1006  | 0.5820 | 0.2351 |
| Ank2 | _NS[Phospho] (STY)EFFEESDEASK_2                                                              | QBCRR3_S3427_M1_Ank2 | 3.1868  | 3.9431  | 4.4213  | 4.4726  | 3.8313  | 4.2941  | 4.1873  | 3.0361  | 3.2945  | 3.6423  | 1.1369  | 0.1852  | 0.1638 | 0.7857 |
| Ank2 | _IENPNSLQDQSHALLK_3                                                                          | #N/A                 | 2.7718  | 4.2044  | 3.3809  | 3.8835  | 4.7393  | 3.7051  | 3.5982  | 4.6926  | 4.6092  | 4.7826  | 0.8553  | -0.2256 | 0.1562 | 0.8063 |
| Ank2 | _HSPVSGAPKEHS[Phospho] (STY)PGS[Phospho] (STY)PSTK_3                                         | QBCRR3_S1839_M2_Ank2 | 6.6251  | 4.3133  | 5.5997  | 5.3747  | 4.2016  | 5.7968  | 6.6150  | 5.9752  | 5.7940  | 4.0693  | 0.8881  | -0.1712 | 0.4102 | 0.1370 |
| Ank2 | _KRFT[Phospho] (STY)PEEEMFK_3                                                                | #N/A                 | 4.3944  | 3.6498  | 4.1281  | 5.6445  | 3.5381  |         |         |         |         |         |         |         |        |        |



|         |                                                                                          |                        |        |        |         |         |        |        |        |        |        |        |         |         |        |        |
|---------|------------------------------------------------------------------------------------------|------------------------|--------|--------|---------|---------|--------|--------|--------|--------|--------|--------|---------|---------|--------|--------|
| Efn1    | _AS[Phospho (STY)]PSIWER_2                                                               | QBC8T7_5773_M1_Efn1    | 8.9469 | 8.9221 | 9.1263  | 8.6899  | 7.5506 | 8.6763 | 8.9582 | 9.0715 | 8.5590 | 3.5877 | 1.1469  | 0.1977  | 0.3372 | 0.4721 |
| Efn1    | _AVAAAA[Phospho (STY)]LUK_2                                                              | QBC8T7_5460_M1_Efn1    | 8.0007 | 7.6062 | 7.8711  | 7.3763  | 6.4339 | 7.4472 | 7.9125 | 7.9799 | 7.3811 | 7.6679 | 0.9639  | -0.0531 | 0.3835 | 0.4162 |
| Ppflb1p | _SSS[Phospho (STY)]IGNLXK_2                                                              | QBC8U0_5435_M1_Ppflb1p | 7.5686 | 3.6815 | 3.5631  | 8.1784  | 7.0345 | 7.9299 | 7.9431 | 8.2136 | 7.9312 | 0.9106 | -0.1352 | 0.6654  | 0.1769 |        |
| Tmem163 | _ISES[Phospho (STY)]GQSGLEDR_2                                                           | QBC896_556_M1_Tmem163  | 5.6863 | 6.4373 | 3.7900  | 7.2489  | 5.3725 | 6.3821 | 6.8676 | 7.2331 | 6.6338 | 6.6186 | 0.8510  | -0.2327 | 0.1377 | 0.8611 |
| Tmem163 | _GHAPSTAAPASPAPM[Oxidation (M)]SSS[Phospho (STY)]VQSDER_3                                |                        | 4.2835 | 3.3919 | 3.7608  | 5.2365  | 5.6728 | 3.8704 | 5.5504 | 5.5468 | 4.6482 | 3.6414 | 0.9015  | -0.1496 | 0.4361 | 0.3604 |
| Tmem163 | _GHAPSTAAPASPAPM[Oxidation (M)]SSS[Phospho (STY)]DEERQPR_4                               | #N/A                   | 7.0808 | 6.8488 | 3.9948  | 4.2613  | 5.7133 | 3.8012 | 4.2433 | 3.4641 | 6.9601 | 3.6024 | 1.1567  | 0.2101  | 0.4894 | 0.3103 |
| Tmem163 | _S[Phospho (STY)]PGGQVPRPPP_3                                                            | QBC896_511_M1_Tmem163  | 4.2640 | 5.0727 | 3.5078  | 6.2039  | 3.3896 | 4.3398 | 4.7547 | 4.8565 | 4.2487 | 4.2297 | 0.9869  | -0.0191 | 0.9169 | 0.0377 |
| Dido1   | _GLS[Phospho (STY)]PSYLGGR_2                                                             | QBC898_51840_M1_Dido1  | 3.1230 | 4.2194 | 4.3576  | 3.9013  | 4.0407 | 6.3657 | 3.0998 | 3.3989 | 5.5103 | 1.0797 | 0.1106  | 0.6585  | 0.1814 |        |
| Strp2   | _AAS[Phospho (STY)]PPSYLDGESQLAPPSK_2                                                    | #N/A                   | 8.7899 | 3.6497 | 4.2593  | 9.4680  | 3.9661 | 4.0969 | 9.2258 | 9.4665 | 8.9730 | 8.0600 | 0.6388  | -0.4667 | 0.0480 | 1.3190 |
| Strp2   | _QDS[Phospho (STY)]LDYNER_2                                                              | #N/A                   | 9.4222 | 9.1567 | 9.5365  | 9.3741  | 7.8531 | 9.3614 | 9.6795 | 9.4568 | 9.2044 | 9.3579 | 0.9674  | -0.0478 | 0.3814 | 0.4187 |
| Strp2   | _QLLTQKDS[Phospho (STY)]LDYNER_3                                                         | #N/A                   | 4.0349 | 3.3392 | 3.2208  | 3.7235  | 3.1606 | 3.0681 | 3.4382 | 4.3950 | 4.0436 | 3.6905 | 0.8799  | -0.1845 | 0.1021 | 0.9911 |
| Shia4   | _DLTLUTER_2                                                                              | #N/A                   | 4.4173 | 4.7572 | 5.0320  | 5.3937  | 4.1271 | 4.5551 | 4.5596 | 4.9023 | 5.0255 | 4.8860 | 0.9732  | -0.0391 | 0.6095 | 0.2150 |
| Pde10a  | _ST[Phospho (STY)]PEKLNVK_2                                                              | QBCA95_1780_M1_Pde10a  | 6.5860 | 5.4291 | 3.2726  | 5.4925  | 3.2124 | 5.1355 | 5.8576 | 6.4242 | 3.9918 | 5.9617 | 0.8733  | -0.1954 | 0.4077 | 0.3896 |
| Pde10a  | _AYLSLHPQVLDEFVSVAETVEK_3                                                                | #N/A                   | 4.2339 | 3.0320 | 5.3685  | 5.4254  | 3.1224 | 4.6771 | 3.4000 | 4.3589 | 3.9828 | 3.6523 | 1.1199  | 0.1633  | 0.4356 | 0.3609 |
| Pde10a  | _EVDLYGYTTR_2                                                                            | #N/A                   | 3.2892 | 4.0944 | 3.9760  | 4.0263  | 3.9157 | 3.8138 | 5.6161 | 5.9360 | 3.2739 | 3.7036 | 0.8317  | -0.2659 | 0.1938 | 0.7127 |
| Pgm21   | _IVLATPDADRLVAELQENGR_3                                                                  | #N/A                   | 4.9283 | 5.0568 | 5.1649  | 5.6949  | 4.9559 | 4.6308 | 5.4961 | 5.5530 | 4.4627 | 4.1926 | 1.0296  | 0.0421  | 0.6707 | 0.1735 |
| Pgm21   | _LIDALNFLEPK_2                                                                           | #N/A                   | 4.6369 | 4.7862 | 4.2970  | 4.6104  | 4.5973 | 5.3910 | 5.5816 | 4.5948 | 4.4694 | 4.9523 | 0.9523  | -0.0706 | 0.4182 | 0.3786 |
| Pgm21   | _DITGVQSSQPMKK_2                                                                         | #N/A                   | 4.5963 | 5.1984 | 4.0598  | 3.6036  | 4.3111 | 4.3124 | 4.3373 | 4.2252 | 3.5487 | 3.2809 | 1.1301  | 0.1765  | 0.1788 | 0.7477 |
| Pgm21   | _AVAGVMITAS[Phospho (STY)]HNLR_2                                                         | QBCAA7_5175_M1_Pgm21   | 3.7877 | 3.0431 | 3.5214  | 6.6917  | 2.9314 | 3.6932 | 3.5864 | 4.2468 | 3.8954 | 3.8387 | 1.0136  | 0.0195  | 0.9430 | 0.0255 |
| Podx12  | _RDPEDS[Phospho (STY)]DVFEEDTHL_2                                                        | #N/A                   | 3.3789 | 3.7833 | 4.0657  | 3.9135  | 3.6350 | 3.6119 | 4.4262 | 4.6715 | 3.2385 | 3.8535 | 0.9219  | -0.1173 | 0.2940 | 0.5317 |
| Nhd1    | _SIS[Phospho (STY)]SGPR_2                                                                | QBCAF4_51482_M1_Nhd1   | 4.2356 | 3.5400 | 3.4216  | 4.5807  | 3.3613 | 4.3682 | 3.2282 | 4.8402 | 5.4707 | 5.0768 | 0.8418  | -0.2484 | 0.1608 | 0.7936 |
| Nhd1    | _KNS[Phospho (STY)]GAGAVLFSEPSAQEQR_3                                                    | #N/A                   | 5.2635 | 4.5325 | 5.1036  | 4.2994  | 4.1272 | 5.3304 | 4.0140 | 5.4747 | 5.3348 | 4.7970 | 1.0795  | 0.1104  | 0.4495 | 0.3472 |
| Nhd1    | _NHS[Phospho (STY)]PS[Phospho (STY)]PPVPTSAAPNLASP_K_3                                   | QBCAF4_51373_M2_Nhd1   | 3.2768 | 4.0331 | 4.5113  | 4.3826  | 3.9214 | 4.2041 | 4.0972 | 3.6883 | 3.3845 | 4.5285 | 1.0332  | 0.0471  | 0.6735 | 0.1716 |
| Nhd1    | _SEPSADSPDSSSC[Carbamidomethyl (C)]S[Phospho (STY)]PNK_K_2                               | QBCAF4_51459_M1_Nhd1   | 3.9971 | 3.2525 | 3.7307  | 3.2745  | 3.1408 | 3.4838 | 3.4228 | 3.7267 | 4.0257 | 2.9518 | 0.9853  | -0.0213 | 0.8389 | 0.0763 |
| Shf1    | _FHGKVS[Phospho (STY)]PK_2                                                               | #N/A                   | 9.3236 | 9.7953 | 10.0233 | 10.2202 | 9.9921 | 9.7375 | 9.6031 | 9.6373 | 9.8297 | 1.0148 | 0.9212  | 0.4057  | 0.3917 |        |
| Shf1    | _EFKHGVS[Phospho (STY)]PK_K_2                                                            | #N/A                   | 5.5977 | 4.8781 | 4.2107  | 5.9565  | 5.4781 | 5.4876 | 4.4279 | 5.2994 | 5.0528 | 4.9027 | 1.0706  | 0.0984  | 0.3496 | 0.4564 |
| Immt    | _SLEDALNR_2                                                                              | #N/A                   | 8.3571 | 8.1598 | 8.8188  | 8.4646  | 8.1361 | 8.2981 | 7.9951 | 8.6567 | 8.5103 | 8.5973 | 0.9920  | -0.0116 | 0.7104 | 0.1485 |
| Immt    | _SEIAEQDR_2                                                                              | #N/A                   | 7.5347 | 7.6587 | 7.6105  | 7.5357  | 7.8268 | 7.5529 | 7.7433 | 7.6799 | 7.6708 | 7.4525 | 0.9978  | -0.0032 | 0.8317 | 0.0801 |
| Immt    | _ELDSITPDITPGWK_2                                                                        | #N/A                   | 7.2636 | 7.4752 | 7.2793  | 7.5559  | 7.6292 | 7.6730 | 7.8460 | 7.3976 | 7.5256 | 7.0605 | 1.0029  | 0.0042  | 0.8918 | 0.0497 |
| Immt    | _LSEQELEFR_2                                                                             | #N/A                   | 7.4460 | 7.5501 | 7.2373  | 7.4129  | 6.8194 | 7.4287 | 7.1684 | 7.0876 | 7.1887 | 7.2860 | 1.0185  | 0.0265  | 0.3639 | 0.4390 |
| Immt    | _AVDEAADALLK_2                                                                           | #N/A                   | 6.3643 | 6.6662 | 6.5700  | 6.1322  | 6.7993 | 6.4318 | 6.3397 | 6.9320 | 6.5495 | 6.5726 | 0.9842  | -0.0230 | 0.5195 | 0.2844 |
| Immt    | _GVSTETLR_2                                                                              | #N/A                   | 6.3250 | 6.7497 | 6.0202  | 6.6467  | 6.6421 | 6.8181 | 5.0841 | 6.2212 | 6.6244 | 6.8889 | 1.0530  | 0.0745  | 0.3754 | 0.4255 |
| Immt    | _TSSAEM[Oxidation (M)]PTPLGSVAEAIR_2                                                     | #N/A                   | 6.2407 | 6.3859 | 6.5231  | 6.5899  | 6.2495 | 6.4948 | 6.3728 | 6.3955 | 6.3812 | 6.1537 | 1.0139  | 0.0200  | 0.3431 | 0.4646 |
| Immt    | _EIGATPHITAAEGR_3                                                                        | #N/A                   | 6.3436 | 5.7790 | 5.8115  | 6.0465  | 6.4009 | 6.4303 | 5.5903 | 5.8616 | 6.0680 | 6.0514 | 1.0411  | 0.0582  | 0.2036 | 0.6912 |
| Immt    | _TSSVTLQITTAQNAVAQVK_K_2                                                                 | #N/A                   | 5.6809 | 5.3077 | 5.7529  | 4.4157  | 4.4377 | 4.7668 | 5.6757 | 4.8102 | 4.4134 | 4.0930 | 1.0658  | 0.0919  | 0.4677 | 0.3300 |
| Immt    | _QAAHTDHLR_2                                                                             | #N/A                   | 5.7387 | 4.6324 | 3.6050  | 5.2816  | 5.2190 | 4.9862 | 5.2610 | 4.3543 | 5.0976 | 5.3017 | 0.9814  | -0.0271 | 0.8276 | 0.0822 |
| Immt    | _STSETTEAFSSSVR_2                                                                        | #N/A                   | 4.2172 | 6.5183 | 6.4819  | 7.2337  | 5.8849 | 6.1129 | 6.6395 | 6.3938 | 6.0560 | 6.3344 | 0.9558  | -0.0653 | 0.6093 | 0.2152 |
| Immt    | _QHLEALEK_2                                                                              | #N/A                   | 4.1889 | 4.8458 | 4.5826  | 5.5974  | 5.2300 | 5.1929 | 4.9999 | 5.2237 | 4.9523 | 5.4816 | 0.9565  | -0.0642 | 0.4382 | 0.3583 |
| Immt    | _TFSASNM_K_2                                                                             | #N/A                   | 5.0438 | 4.5226 | 3.7333  | 4.9489  | 5.3931 | 4.1061 | 4.0232 | 4.0611 | 5.0872 | 1.1074 | 0.1472  | 0.2353  | 0.6284 |        |
| Immt    | _VVSQYHVLVQAR_2                                                                          | #N/A                   | 4.4001 | 4.4426 | 5.0724  | 5.0609  | 4.6895 | 4.1924 | 4.9513 | 3.9170 | 4.5487 | 3.9375 | 1.0701  | 0.0978  | 0.2958 | 0.5289 |
| Immt    | _QEGAVQSHAAVEEAR_3                                                                       | #N/A                   | 5.9141 | 5.3465 | 6.4166  | 5.0602  | 5.2688 | 5.3888 | 5.2878 | 5.9329 | 5.3312 | 5.1282 | 1.0269  | 0.0383  | 0.6316 | 0.1996 |
| Immt    | _RIDQLNR_2                                                                               | #N/A                   | 5.1656 | 3.2881 | 3.1697  | 3.6724  | 2.7538 | 3.1192 | 3.8982 | 3.6971 | 4.4206 | 4.3458 | 0.8625  | -0.2133 | 0.2541 | 0.5950 |
| Immt    | _LSTDNLNLAHAHR_3                                                                         | #N/A                   | 5.9324 | 6.0373 | 6.1723  | 6.3171  | 5.8736 | 5.6888 | 6.0768 | 6.1213 | 6.0139 | 5.7598 | 1.0018  | 0.0026  | 0.9371 | 0.0282 |
| Immt    | _SSVSEVMK_K_2                                                                            | #N/A                   | 4.8138 | 3.0321 | 3.5104  | 5.4194  | 4.3885 | 3.7042 | 3.2024 | 3.9470 | 4.2461 | 4.2323 | 1.0609  | 0.0852  | 0.6431 | 0.1917 |
| Immt    | _SQEQM[Oxidation (M)]DSFTLDINTAYR_2                                                      | #N/A                   | 3.3902 | 3.8360 | 4.0770  | 4.5796  | 4.0167 | 4.4011 | 4.2943 | 3.6140 | 3.1874 | 3.6579 | 1.0981  | 0.1350  | 0.2334 | 0.6319 |
| Immt    | _YSTSSSGLTAGK_2                                                                          | #N/A                   | 3.2669 | 3.9593 | 3.9537  | 4.4563  | 2.8739 | 4.2779 | 4.1710 | 3.6621 | 3.3982 | 4.4233 | 0.9704  | -0.0433 | 0.7570 | 0.1209 |
| Immt    | _VQDELLEYFEQGLSEK_3                                                                      | #N/A                   | 4.1171 | 3.5755 | 3.3031  | 3.1984  | 3.2428 | 2.9859 | 3.3466 | 4.3127 | 4.1018 | 3.7727 | 0.8765  | -0.1902 | 0.1051 | 0.9783 |
| Acat2   | _VAVSQNR_2                                                                               | #N/A                   | 5.1832 | 5.6903 | 4.3659  | 5.2631  | 6.1756 | 5.2977 | 5.1704 | 5.7661 | 6.1254 | 0.9360 | -0.0953 | 0.3203  | 0.4945 |        |
| Acat2   | : [Carbamidomethyl (C)]LAQSQAM[Oxidation (M)]GDSIVVAGGM[Oxidation (M)]ENM[Oxidation (M)] | #N/A                   | 4.4012 | 3.7260 | 4.7422  | 3.2076  | 3.7479 | 4.1514 | 3.9447 | 4.5050 | 3.1763 | 3.9856 | 1.0239  | 0.0340  | 0.7988 | 0.0975 |
| Acat2   | _VINDGGALGLHPLGASGC[Carbamidomethyl (C)]R_3                                              | #N/A                   | 3.5696 | 4.6875 | 4.2564  | 5.2674  | 4.2347 | 3.5334 | 4.4737 | 4.8617 | 3.0080 | 4.1595 | 1.0321  | 0.0456  | 0.7821 | 0.1067 |
| Eloa    | _SVS[Phospho (STY)]PEHR_2                                                                | QBC8T7_5125_M1_Eloa    | 4.2860 | 7.7534 | 8.3078  | 3.5635  | 8.2866 | 8.0948 | 8.3077 | 3.4377 | 7.9754 | 8.0550 | 0.9671  | -0.0483 | 0.8785 | 0.0563 |
| Eloa    | _S[Phospho (STY)]PEEQDFPISHQKPGK_3                                                       | QBC8T7_5195_M1_Eloa    | 5.7539 | 5.7495 | 5.4711  | 6.7475  | 5.3336 | 5.3920 | 6.0956 | 5.5705 | 5.4563 | 5.7613 | 1.0036  | 0.0051  | 0.9457 | 0.0242 |
| Wdr37   | _SHS[Phospho (STY)]LSR_2                                                                 | #N/A                   | 7.8356 | 7.6416 | 7.8327  | 8.1148  | 6.3666 | 7.6351 | 7.3937 | 7.8904 | 7.5064 | 7.6973 | 0.9933  | -0.0097 | 0.8798 | 0.0556 |
| Wdr37   | _STLLELFGQIER_2                                                                          | #N/A                   | 4.9422 | 3.9947 | 3.9064  | 4.2048  | 4.8279 | 4.7177 | 4.9008 | 4.9792 | 4.6913 | 5.0173 | 0.9051  | -0.1439 | 0.0858 | 1.0665 |
| Wdr37   | _ASHSTQSL[Phospho (STY)]QK_K_2                                                           | QBC8E3_5119_M1_Wdr37   | 7.0234 | 6.6032 | 6.9006  | 7.2445  | 6.0056 | 7.1556 | 6.9437 | 6.7527 | 6.8525 | 6.6271 | 1.0041  | 0.0060  | 0.9095 | 0.0412 |
| Wdr37   | _KSHS[Phospho (STY)]LSR_2                                                                | #N/A                   | 6.6650 | 6.5476 | 3.4664  | 3.9690  | 2.8340 | 6.6467 | 6.1661 | 6.1661 | 6.7074 | 6.7273 | 0.7679  | -0.3810 | 0.1370 | 0.8634 |
| Wdr37   | _DPSHSVWVFGQHTDTSYSAVTVGQNVVSGSDOR_4                                                     | #N/A                   | 4.0542 | 3.1720 | 3.2401  | 3.7428  | 3.1799 | 3.0488 | 3.4575 | 4.3757 | 4.0243 | 3.7098 | 0.8752  | -0.1922 | 0.0955 | 1.0198 |
| Ephb1   | _VLGDDTS[Phospho (STY)]DPTYSLGGK_K_2                                                     | QBC8F3_5774_M1_Ephb1   | 3.7803 | 5.4051 | 4.1824  | 5.6894  | 3.7276 | 4.8700 | 5.5908 | 5.4768 | 3.6055 | 5.2806 | 0.9240  | -0.1141 | 0.5204 | 0.2836 |
| Mfsd6   | _VAILT[Phospho (STY)]DDEEQKR_K_2                                                         | #N/A                   | 7.4870 | 6.8187 | 7.2798  | 7.2807  | 5.5203 | 6.6572 | 7.4768 | 7.5463 | 6.6430 | 6.7001 | 0.9646  | -0.0520 | 0.5613 | 0.2508 |
| Mfsd6   | _ [Acetyl (Protein N-term)]AADQVALT[Phospho (STY)]DDEEQKR_3                              | #N/A                   | 3.5158 | 5.4958 | 4.2026  | 6.7793  | 5.8210 | 6.7145 | 4.4199 | 6.8002 | 6.9929 | 6.5763 | 0.8748  | -0.1930 | 0.3750 | 0.4259 |
| Mfsd6   | _ [Acetyl (Protein N-term)]AADQVALT[Phospho (STY)]DDEEQK_K_2                             | #N/A                   | 3.2860 | 3.9401 | 3.9728  | 6.2144  | 5.4641 | 4.2970 | 4.1902 | 6.6237 | 6.3942 | 5.8645 | 0.7852  | -0.3489 | 0.1177 | 0.9292 |
| Mfsd6   | _IPVPSPVPRIAT[Phospho (STY)]DLVQDQTEDVM[Oxidation (M)]PR_3                               | QBC8H5_1653_M1_Mfsd6   | 4.1582 | 3.4136 | 4.4993  | 3.5011  | 3.3019 | 3.3227 | 3.2158 | 3.1165 | 4.2659 | 3.4681 | 1.0520  | 0.0731  | 0.5941 | 0.2261 |
| Mfsd6   | _VAILT[Phospho (STY)]DDEEQK_K_2                                                          | #N/A                   | 3.0372 | 3.8424 | 3.7240  | 4.2783  | 3.6637 | 4.8623 | 4.4265 | 4.7161 | 3.0219 | 4.1937 | 0       |         |        |        |



|          |                                                                                |                         |         |         |         |         |         |         |         |         |         |         |        |         |        |        |
|----------|--------------------------------------------------------------------------------|-------------------------|---------|---------|---------|---------|---------|---------|---------|---------|---------|---------|--------|---------|--------|--------|
| Cacnb2   | _SGGNSS[Phospho (STY)]SLGDVPSR_2                                               | QBC27_5202_M1_Cacnb2    | 3.7726  | 7.8672  | 3.5063  | 8.4667  | 3.8207  | 7.6932  | 8.2651  | 3.9279  | 3.9089  | 4.2212  | 1.1523 | 0.2045  | 0.6143 | 0.2116 |
| Cacnb2   | _SAS[Phospho (STY)]QAEEP[C[Carbamidomethyl (C)]LEPVKK_2                        | #N/A                    | 6.5503  | 3.3902  | 4.5228  | 3.5246  | 2.9617  | 3.2670  | 3.2393  | 7.3543  | 4.2424  | 3.4916  | 0.8809 | -0.1830 | 0.6053 | 0.2180 |
| Cacnb2   | _SAS[Phospho (STY)]QAEEP[C[Carbamidomethyl (C)]LEPVK_2                         | #N/A                    | 3.3932  | 4.1984  | 4.0800  | 4.5827  | 4.0198  | 3.7097  | 3.5358  | 3.1844  | 3.0488  | 1.1367  | 1.1367 | 0.1849  | 0.1528 | 0.8160 |
| Synpo    | _VAS[Phospho (STY)]PAR_2                                                       | QBC35_5765_M1_Synpo     | 10.9356 | 10.8727 | 11.2789 | 11.2682 | 10.1255 | 11.0258 | 10.6747 | 10.8540 | 3.1162  | 11.2429 | 1.2169 | 0.2832  | 0.2478 | 0.6059 |
| Synpo    | _VSPSPS[Phospho (STY)]STVPSSDPSPSHLK_4                                         | QBC35_5751_M1_Synpo     | 8.2604  | 8.4311  | 8.7953  | 9.8863  | 7.4964  | 8.9120  | 3.6752  | 8.1960  | 8.4092  | 8.3940  | 1.2039 | 0.2677  | 0.1845 | 0.7341 |
| Synpo    | _YTPWQLDLVQTADKK_2                                                             | #N/A                    | 8.0103  | 7.9779  | 8.1740  | 8.1615  | 8.4299  | 8.1408  | 7.8125  | 7.8154  | 7.9957  | 8.0234  | 1.0268 | 0.0381  | 0.0455 | 1.3418 |
| Synpo    | _ASPAAAEEAVPEWASC[Carbamidomethyl (C)]LK_2                                     | #N/A                    | 7.3847  | 6.9213  | 6.9102  | 7.5487  | 7.2488  | 7.1620  | 7.2404  | 6.7077  | 6.8344  | 7.1682  | 1.0298 | 0.0424  | 0.2411 | 0.6179 |
| Synpo    | _YTTNAPGGR_2                                                                   | #N/A                    | 7.0260  | 7.2685  | 7.0113  | 7.5418  | 7.8237  | 7.3366  | 6.8410  | 7.1468  | 7.2828  | 7.3753  | 1.0219 | 0.0312  | 0.4222 | 0.3745 |
| Synpo    | _HPSQ[S[Phospho (STY)]PSR_2                                                    | QBC35_5230_M1_Synpo     | 3.2575  | 4.2433  | 6.1587  | 3.8777  | 3.8920  | 4.0884  | 4.0260  | 3.1237  | 5.6675  | 6.0115  | 0.9035 | -0.1464 | 0.5564 | 0.2546 |
| Synpo    | _VAS[Phospho (STY)]EEEEVLVVILK_2                                               | #N/A                    | 12.2372 | 12.1263 | 12.6079 | 12.7377 | 12.0646 | 12.3858 | 12.5174 | 12.1000 | 12.2748 | 1.0049  | 0.0070 | 0.7062  | 0.1511 |        |
| Synpo    | _SPGLYTPAQDLSQPTAVS[Phospho (STY)]PTYSSSDPSPSR_3                               | QBC35_5882_M1_Synpo     | 4.0223  | 4.6863  | 6.5483  | 8.4293  | 4.0570  | 4.4743  | 4.5958  | 5.5801  | 6.0854  | 4.1362  | 1.0530 | 0.0745  | 0.7869 | 0.1041 |
| Synpo    | _LIGQS[Phospho (STY)]PVLER_2                                                   | #N/A                    | 6.6901  | 7.4507  | 7.7581  | 8.4409  | 6.2162  | 7.0723  | 7.3615  | 7.3532  | 6.7488  | 6.7974  | 1.0292 | 0.0415  | 0.6407 | 0.1933 |
| Synpo    | _PSLYALS[Phospho (STY)]PVKEPAK_2                                               | #N/A                    | 6.0135  | 6.0853  | 4.1398  | 6.6766  | 4.0795  | 6.0542  | 6.0295  | 5.8500  | 5.8477  | 5.7845  | 0.9371 | -0.0937 | 0.5335 | 0.2729 |
| Synpo    | _ASPAAAEEAVPEWASC[Carbamidomethyl (C)]LKS[Phospho (STY)]PR_2                   | QBC35_5689_M1_Synpo     | 2.9083  | 2.9333  | 4.1428  | 6.5519  | 3.5529  | 3.0718  | 3.8348  | 4.6546  | 3.8383  | 3.3639  | 0.9840 | -0.0233 | 0.9350 | 0.0292 |
| Synpo    | _C[Carbamidomethyl (C)]PS[Phospho (STY)]PTM[Oxidation (M)]SLPSWK_2             | #N/A                    | 8.0187  | 9.3172  | 9.6105  | 10.9816 | 7.8752  | 8.3785  | 9.1802  | 9.2278  | 8.6938  | 8.1606  | 1.0244 | 0.0347  | 0.7442 | 0.1283 |
| Synpo    | _AAS[Phospho (STY)]PAKPSLLDLPNLR_3                                             | #N/A                    | 3.7989  | 4.0000  | 3.9233  | 10.4705 | 3.8213  | 3.9946  | 3.6153  | 8.2393  | 3.9402  | 3.8845  | 1.0166 | 0.0237  | 0.9612 | 0.0172 |
| Synpo    | _PKPNQNLSEASGK_3                                                               | #N/A                    | 3.4180  | 3.0119  | 4.0364  | 3.7366  | 3.3400  | 3.7244  | 3.6176  | 4.2156  | 3.9761  | 3.3648  | 0.9344 | -0.0979 | 0.3243 | 0.4890 |
| Synpo    | _ENALLTANGHLQSGSR_2                                                            | #N/A                    | 2.4529  | 4.2596  | 3.6533  | 4.1560  | 1.8373  | 3.9775  | 3.8707  | 3.9625  | 2.9875  | 4.1230  | 0.9073 | -0.1404 | 0.5469 | 0.2621 |
| Synpo    | _DRAS[Phospho (STY)]PAAAEAVPEWASC[Carbamidomethyl (C)]LK_3                     | #N/A                    | 3.2061  | 3.9343  | 3.9793  | 4.4820  | 3.8413  | 4.1078  | 4.1967  | 9.2667  | 3.2857  | 3.8711  | 0.7614 | -0.3932 | 0.3018 | 0.5203 |
| Synpo    | _AWAPPASMAADRS[Phospho (STY)]POPOP_2                                           | QBC35_5512_M1_Synpo     | 4.1246  | 3.4290  | 3.3106  | 7.2361  | 3.2503  | 2.9784  | 3.3392  | 3.8103  | 4.1093  | 4.3690  | 1.0378 | 0.0536  | 0.8642 | 0.0634 |
| Rybp     | _S[Phospho (STY)]STI[Phospho (STY)]PKGDMASVNDSE_2                              | QBC35_7215_M2_Rybp      | 3.2595  | 4.0419  | 4.4157  | 4.9460  | 3.8945  | 4.0614  | 4.1627  | 1.0418  | 3.3408  | 3.6368  | 1.1573 | 0.2107  | 0.1423 | 0.8469 |
| Amer2    | _TVPLVDSGGS[Phospho (STY)]GR_2                                                 | #N/A                    | 10.5270 | 10.3860 | 11.0214 | 3.5937  | 10.1140 | 3.3811  | 10.8483 | 10.1659 | 10.4177 | 10.5214 | 0.7786 | -0.3610 | 0.2472 | 0.8601 |
| Amer2    | _C[Carbamidomethyl (C)]LEAGS[Phospho (STY)]PTGGGQGSR_2                         | QBC4_5280_M1_Amer2      | 7.7249  | 7.7841  | 7.9321  | 8.7392  | 8.0056  | 7.8383  | 8.1917  | 8.0684  | 8.1763  | 8.2849  | 0.9785 | -0.0314 | 0.3902 | 0.4087 |
| Amer2    | _ASAVPDPSPDPSPS[Phospho (STY)]DPSADR_2                                         | QBC4_5356_M1_Amer2      | 5.3116  | 6.8948  | 6.3357  | 7.6482  | 6.7746  | 7.3047  | 7.4545  | 7.0704  | 7.0857  | 7.0523  | 0.9366 | -0.0945 | 0.3172 | 0.4986 |
| Amer2    | _DWSS[Phospho (STY)]WOR_2                                                      | QBC4_5488_M1_Amer2      | 3.9356  | 3.1910  | 3.6693  | 3.7238  | 3.0793  | 3.5453  | 3.4384  | 4.3947  | 4.0433  | 3.6908  | 0.9055 | -0.1432 | 0.1564 | 0.8988 |
| Amer2    | _AAGPGLNLVPGS[Phospho (STY)]LAS[Phospho (STY)]LLE[Carbamidomethyl (C)]VKEPPR_3 | QBC4_5223_M2_Amer2      | 3.2388  | 4.1037  | 4.4733  | 4.0170  | 3.9250  | 3.8045  | 4.1653  | 2.9841  | 3.2832  | 3.6943  | 1.1119 | 0.1531  | 0.2101 | 0.1868 |
| Amer2    | _RPS[Phospho (STY)]PGQDASA_2                                                   | QBC4_5244_M1_Amer2      | 9.8472  | 10.2375 | 10.7440 | 10.7506 | 10.1006 | 10.5388 | 10.2180 | 10.2660 | 10.3453 | 10.2561 | 1.0096 | 0.0138  | 0.6165 | 0.2101 |
| Amer2    | _S[Phospho (STY)]GGTSPSIFGVK_2                                                 | QBC4_571_M1_Amer2       | 3.9896  | 3.2450  | 3.1671  | 7.3887  | 3.1333  | 3.4913  | 3.3845  | 4.4487  | 4.0973  | 3.6368  | 1.0456 | 0.0643  | 0.8429 | 0.5742 |
| Amer2    | _HAAGEPAGGEQAPAS[Phospho (STY)]AESAPER_3                                       | QBC4_5266_M1_Amer2      | 3.3997  | 3.8264  | 4.0865  | 4.5892  | 3.1542  | 4.4107  | 4.3039  | 3.5293  | 3.1779  | 3.0554  | 1.1122 | 0.1534  | 0.3087 | 0.0105 |
| Bcas3    | _VKS[Phospho (STY)]PQSPSPK_2                                                   | QBC35_5565_M1_Bcas3     | 3.3477  | 6.6483  | 4.5822  | 4.1260  | 3.8160  | 3.9135  | 4.2743  | 4.3760  | 3.1742  | 8.0159  | 0.8882 | -0.1710 | 0.6034 | 0.2194 |
| Bcas3    | _G[S[Phospho (STY)]ETLNSSGSGSGSPR_2                                            | QBC35_5886_M1_Bcas3     | 5.9197  | 5.6432  | 4.1771  | 6.4198  | 3.5872  | 5.7973  | 5.4207  | 6.0531  | 5.5582  | 0.9338  | 0.9887 | -0.0988 | 0.5376 | 0.2695 |
| Bcas3    | _DVG[S[Phospho (STY)]GTELQR_2                                                  | QBC35_5877_M1_Bcas3     | 2.9896  | 3.7948  | 3.2813  | 4.3259  | 5.9882  | 4.1134  | 4.4741  | 4.1761  | 6.9985  | 4.0032  | 0.8309 | -0.2673 | 0.3148 | 0.5019 |
| Bcas3    | _LADAM[Oxidation (M)]AES[Phospho (STY)]PSR_2                                   | #N/A                    | 3.5538  | 3.8406  | 3.4300  | 6.1515  | 3.7067  | 3.6250  | 3.7029  | 4.2312  | 3.8798  | 3.8997  | 1.0313 | 0.0444  | 0.8247 | 0.0837 |
| Bcas3    | _LTSQ[S[Phospho (STY)]YNNFTNNNNPGR_2                                           | QBC35_5503_M1_Bcas3     | 5.3349  | 5.7613  | 5.0611  | 5.5176  | 4.0119  | 5.5525  | 3.5247  | 3.7722  | 4.9083  | 5.5848  | 1.1707 | 0.2273  | 0.1676 | 0.7758 |
| Bcas3    | _LADAM[Oxidation (M)]AES[Phospho (STY)]PSRDVSGSGTELR_3                         | #N/A                    | 3.9531  | 3.2731  | 3.1391  | 3.6417  | 3.0788  | 3.1499  | 3.3564  | 2.9759  | 4.1253  | 6.6705  | 0.7876 | -0.3444 | 0.2184 | 0.6607 |
| Bcas3    | _HGS[Phospho (STY)]DLSASGSGGEDEWISQVINTHTGPHR_5                                | QBC35_5707_M1_Bcas3     | 3.9583  | 5.4974  | 3.6919  | 3.2357  | 3.1020  | 5.5119  | 3.4158  | 5.7348  | 4.0645  | 4.4138  | 0.9453 | -0.0811 | 0.7297 | 0.1368 |
| Bcas3    | _C[Carbamidomethyl (C)]SPVGLSG[Phospho (STY)]SSPSGS[Phospho (STY)]PLHGK_2      | QBC35_5486_M2_Bcas3     | 3.3605  | 3.8657  | 4.0473  | 4.5489  | 3.7540  | 4.1715  | 4.2646  | 3.5685  | 3.2171  | 4.0761  | 1.1350 | 0.1827  | 0.1628 | 0.7884 |
| Pabpn1   | _QMNM[S[Phospho (STY)]PPPQMGVMSLEEK_3                                          | QBC36_5146_M1_Pabpn1    | 3.6524  | 2.5738  | 4.3392  | 3.3410  | 4.2789  | 3.4506  | 4.5565  | 3.2767  | 4.4261  | 3.3080  | 0.9694 | -0.0449 | 0.7431 | 0.1290 |
| Tceal5   | _RPADVPLR_2                                                                    | #N/A                    | 7.7950  | 7.1150  | 7.8185  | 7.0134  | 7.5430  | 7.6657  | 7.1137  | 7.7829  | 7.0677  | 1.0098  | 0.0141 | 0.7616  | 0.1182 |        |
| Tceal5   | _DAQDALVPR_2                                                                   | #N/A                    | 6.1790  | 6.4913  | 5.7429  | 5.7313  | 7.2226  | 6.3218  | 5.7937  | 6.2590  | 6.2102  | 5.8526  | 1.0421 | 0.0595  | 0.4195 | 0.3773 |
| Tceal5   | _TDRGTDS[Phospho (STY)]PKNSQEDLQOR_3                                           | #N/A                    | 5.8178  | 6.6729  | 7.4968  | 6.9953  | 6.9808  | 6.6637  | 6.4481  | 6.4658  | 6.3661  | 6.3424  | 1.0571 | 0.0801  | 0.2358 | 0.6274 |
| Tceal5   | _GTD[S[Phospho (STY)]PKNSQEDLQOR_2                                             | #N/A                    | 10.3275 | 10.5408 | 11.4532 | 11.1425 | 10.7469 | 10.6108 | 10.7105 | 10.5611 | 10.6555 | 10.5753 | 1.0168 | 0.0240  | 0.4318 | 0.2648 |
| Tceal5   | _M[Oxidation (M)]GGFWVPR_2                                                     | #N/A                    | 5.3979  | 6.9541  | 7.1118  | 5.5072  | 6.4969  | 5.7107  | 4.2262  | 6.5777  | 3.5155  | 6.1705  | 1.2097 | 0.2746  | 0.1644 | 0.7841 |
| Tceal5   | _ADEK[S[Phospho (STY)]DAEGKPAR_2                                               | QBC4_535_M1_Tceal5      | 3.8941  | 3.3933  | 3.5607  | 4.6053  | 2.9708  | 3.2384  | 4.7281  | 2.9114  | 1.1887  | 0.2493  | 0.3336 | 0.3536  | 0.4515 |        |
| Inpp5f   | _S[Phospho (STY)]PSADSHNR_2                                                    | QBC4_5941_M1_Inpp5f     | 7.1521  | 3.6830  | 3.1948  | 7.5228  | 5.8026  | 7.0684  | 7.4516  | 7.4223  | 7.4605  | 7.2839  | 0.7748 | -0.3681 | 0.1204 | 0.9193 |
| Inpp5f   | _GLS[Phospho (STY)]PLXK_2                                                      | QBC4_5936_M1_Inpp5f     | 7.3093  | 6.6819  | 7.7791  | 7.3679  | 6.4193  | 7.4590  | 6.8167  | 7.0659  | 6.6910  | 6.6137  | 1.0103 | 0.0147  | 0.8008 | 0.0922 |
| Inpp5f   | _IPS[Phospho (STY)]PDOSK_2                                                     | QBC4_5123_M1_Inpp5f     | 7.6682  | 3.3002  | 7.1266  | 3.6146  | 3.1885  | 7.2865  | 3.3293  | 7.3579  | 7.1542  | 3.5816  | 1.0016 | 0.0022  | 0.9954 | 0.0020 |
| Inpp5f   | _VOKS[Phospho (STY)]PAEPAVNEIQNELK_3                                           | QBC4_51103_M1_Inpp5f    | 5.2861  | 5.6471  | 6.1939  | 5.8170  | 4.4102  | 5.2790  | 6.2785  | 5.7486  | 5.3945  | 5.8174  | 0.9362 | -0.0952 | 0.3112 | 0.0725 |
| Inpp5f   | _SDS[Phospho (STY)]ASSDVSTHAPSEAAAGSGELGK_3                                    | QBC4_5908_M1_Inpp5f     | 5.5868  | 3.2400  | 3.1216  | 5.9823  | 3.0613  | 3.1673  | 3.3389  | 2.9934  | 4.1428  | 5.0038  | 1.0405 | 0.0573  | 0.8463 | 0.0725 |
| Inpp5f   | _GLS[Phospho (STY)]PLKKS[Phospho (STY)]PSADSHNR_3                              | #N/A                    | 5.8577  | 5.8017  | 6.0872  | 6.3027  | 5.1025  | 5.9921  | 6.1358  | 5.6279  | 5.2906  | 5.3127  | 1.0475 | 0.0669  | 0.3388 | 0.4700 |
| Inpp5f   | _KSPS[Phospho (STY)]ADSHNR_2                                                   | #N/A                    | 5.9300  | 6.1238  | 7.0619  | 6.1709  | 5.6876  | 5.9014  | 6.4674  | 5.9621  | 5.6088  | 5.3569  | 1.0508 | 0.0715  | 0.3667 | 0.4357 |
| Vcjp1    | _ESS[Phospho (STY)]PSHGLK_2                                                    | #N/A                    | 8.7381  | 4.1854  | 9.3388  | 9.2592  | 8.0673  | 8.8006  | 3.9449  | 3.8882  | 6.8139  | 8.8965  | 1.2729 | 0.3481  | 0.2789 | 0.5545 |
| Vcjp1    | _DGP[S[Phospho (STY)]APATPTK_2                                                 | QBCD3_5756_M1_Vcjp1     | 9.9246  | 9.7675  | 9.9101  | 10.3574 | 8.6102  | 9.8049  | 9.8860  | 9.5411  | 9.6607  | 9.8050  | 1.0006 | 0.0009  | 0.9850 | 0.0066 |
| Vcjp1    | _TVS[Phospho (STY)]PSTR_2                                                      | QBCD3_5746_M1_Vcjp1     | 9.3893  | 3.0839  | 9.4515  | 9.4852  | 8.4490  | 9.1635  | 8.9390  | 9.1481  | 9.9458  | 9.2584  | 0.9007 | -0.1509 | 0.5036 | 0.2879 |
| Vcjp1    | _APYS[Phospho (STY)]PTTSK_2                                                    | QBCD3_5767_M1_Vcjp1     | 3.7652  | 3.5472  | 3.9601  | 3.4100  | 7.1002  | 7.9107  | 7.7810  | 3.2501  | 8.0214  | 3.3710  | 0.8826 | -0.1802 | 0.6650 | 0.1724 |
| Vcjp1    | _S[Phospho (STY)]RESS[Phospho (STY)]PSHGLK_2                                   | QBCD3_5993_M2_Vcjp1     | 3.5576  | 3.8120  | 5.0947  | 4.7311  | 3.3806  | 3.2780  | 4.0330  | 3.7433  | 4.0508  | 3.4933  | 1.0388 | 0.0549  | 0.7105 | 0.1422 |
| Fam160b1 | _TS[Phospho (STY)]PDHPKNGGKTEVHK_3                                             | QBCDM8_5552_M1_Fam160b1 | 4.1657  | 3.4211  | 3.8994  | 3.4936  | 3.3094  | 3.3152  | 3.2083  | 3.1240  | 4.2734  | 3.1204  | 1.0493 | 0.0694  | 0.5702 | 0.2440 |
| Txn1     | _QHLENDPGS[Phospho (STY)]NEDADPK_2                                             | #N/A                    | 5.8977  | 5.6385  | 5.9324  | 6.2271  | 4.6962  | 5.4702  | 5.8826  | 5.4683  | 5.6881  | 5.9522  | 0.9819 | -0.0264 | 0.7242 | 0.1401 |
| Txn1     | _IKHLENDPGS[Phospho (STY)]NEDADPK_3                                            | #N/A                    | 5.4699  | 6.0386  | 6.6233  | 6.7539  | 5.9938  | 6.5399  | 6.1197  | 6.0996  | 6.3088  | 6.4361  | 0.9993 | -0.0101 | 0.9866 | 0.0096 |
| Txn1     | _FQNVNVTLPQNGGEEETTR_3                                                         | #N/A                    | 3.5304  | 4.2867  | 3.6263  | 4.1289  | 4.1750  | 3.6022  | 3.8436  | 3.9895  | 3.6381  | 4.5422  | 0.9721 | -0.0409 | 0.6418 |        |



|         |                                                                                               |                         |         |         |         |         |         |         |         |         |         |         |         |         |        |        |
|---------|-----------------------------------------------------------------------------------------------|-------------------------|---------|---------|---------|---------|---------|---------|---------|---------|---------|---------|---------|---------|--------|--------|
| Tns2    | _SFS[Phospho (STY)] DPLMER_2                                                                  | QBCGB6_S120_M1_Tns2     | 4.2011  | 3.5055  | 3.3871  | 5.3388  | 3.3268  | 4.4027  | 3.2627  | 3.8868  | 4.1858  | 4.2925  | 1.0307  | 0.0437  | 0.7916 | 0.1015 |
| Tns2    | _GYPSGAS[Phospho (STY)] PR_2                                                                  | QBCGB6_S825_M1_Tns2     | 2.9669  | 4.3755  | 4.2015  | 3.7452  | 4.1968  | 3.5327  | 3.8935  | 3.2559  | 6.4807  | 3.4225  | 0.8999  | -0.1522 | 0.5317 | 0.2743 |
| Tns2    | _WDS[Phospho (STY)] YFNHNIHEDSVGALAHTR_4                                                      | QBCGB6_S455_M1_Tns2     | 3.8910  | 3.1954  | 3.8807  | 3.4245  | 3.0167  | 3.1210  | 3.5728  | 3.5767  | 3.1018  | 3.1018  | 0.9731  | -0.0394 | 0.6874 | 0.1628 |
| Rgs12   | _TLPOSQVPS[Phospho (STY)] PAK_2                                                               | QBCGE9_S850_M1_Rgs12    | 11.7648 | 3.3217  | 3.7544  | 12.3756 | 3.1430  | 11.8478 | 12.3214 | 11.9155 | 11.9102 | 11.8655 | 0.6416  | -0.6403 | 0.1117 | 0.9520 |
| Rgs12   | _S[Phospho (STY)] NEDVGEDESEK_2                                                               | #N/A                    | 6.2191  | 6.2413  | 6.3824  | 7.2897  | 5.8978  | 6.4087  | 6.8163  | 6.6749  | 5.5866  | 6.4157  | 0.9673  | -0.0480 | 0.4084 | 0.3890 |
| Rgs12   | _S[Phospho (STY)] NEDVGEDESEK_2                                                               | #N/A                    | 8.7220  | 8.4119  | 8.8249  | 9.0508  | 4.1748  | 8.7854  | 8.9221  | 8.4470  | 8.6316  | 8.6197  | 0.9237  | -0.1145 | 0.5128 | 0.2900 |
| Rgs12   | _QNSAVNSS[Phospho (STY)] PR_2                                                                 | QBCGE9_S1130_M1_Rgs12   | 5.3938  | 4.8584  | 5.3109  | 3.6795  | 4.6086  | 4.3316  | 4.6018  | 5.0759  | 5.2789  | 4.0172  | 0.9902  | -0.0141 | 0.9098 | 0.0410 |
| Rgs12   | _ESQSGVSS[Phospho (STY)] AGSLDSEAC[Carbamidomethyl (C)] R_2                                   | QBCGE9_S940_M1_Rgs12    | 3.9107  | 3.4317  | 3.6444  | 3.1882  | 5.5915  | 3.5702  | 3.3364  | 3.8130  | 4.1121  | 4.3863  | 0.9955  | -0.0065 | 0.9715 | 0.0125 |
| Rgs12   | _LPAGSSSLAIS[Phospho (STY)] PPPWK_2                                                           | QBCGE9_S1233_M1_Rgs12   | 4.3157  | 3.0267  | 4.0494  | 3.5931  | 3.4594  | 3.3806  | 3.7414  | 3.4081  | 3.7071  | 3.2704  | 1.0299  | 0.0426  | 0.6907 | 0.1607 |
| Rgs12   | _SKS[Phospho (STY)] GRS[Phospho (STY)] NEDVGEDESEK_2                                          | QBCGE9_S876_M2_Rgs12    | 3.0385  | 2.6060  | 4.2730  | 3.8168  | 3.6830  | 2.9416  | 3.9650  | 3.1844  | 3.4835  | 3.4940  | 0.9608  | -0.0578 | 0.6992 | 0.1554 |
| Rgs12   | _HSIS[Phospho (STY)] DSNVSTPK_2                                                               | QBCGE9_S859_M1_Rgs12    | 3.4135  | 3.8127  | 4.1003  | 4.6029  | 3.7010  | 4.4244  | 4.3176  | 3.5156  | 3.1642  | 3.0691  | 1.1401  | 0.1891  | 0.1644 | 0.7842 |
| Wdr47   | _RIS[Phospho (STY)] DLGNK_2                                                                   | QBCGF6_S532_M1_Wdr47    | 5.5088  | 3.1973  | 6.6970  | 3.4226  | 5.3892  | 5.9018  | 5.5785  | 6.6720  | 3.8777  | 6.2402  | 0.8976  | -0.1559 | 0.5265 | 0.2786 |
| Wdr47   | _LSPYPSS[Phospho (STY)] PMR_2                                                                 | QBCGF6_S297_M1_Wdr47    | 4.0002  | 3.3045  | 3.1861  | 3.3153  | 3.1258  | 3.1028  | 3.4636  | 4.4297  | 4.0783  | 3.6558  | 0.8547  | -0.2265 | 0.0471 | 1.3272 |
| Wdr47   | _RPQS[Phospho (STY)] ADAYM[Oxidation (M)] TR_2                                                | #N/A                    | 4.6846  | 4.7959  | 5.4603  | 3.3865  | 3.4041  | 4.5502  | 4.0155  | 4.9392  | 3.4674  | 3.2091  | 1.1209  | 0.1647  | 0.3887 | 0.4104 |
| Wdr47   | _YQHLQEK_2                                                                                    | #N/A                    | 3.0125  | 3.6305  | 3.0028  | 4.4902  | 2.8556  | 4.2777  | 3.1376  | 4.0118  | 4.3109  | 4.1675  | 0.9073  | -0.1403 | 0.4096 | 0.3877 |
| Fam193a | _LILAS[Phospho (STY)] POPK_2                                                                  | QBCG11_S1151_M1_Fam193a | 6.4565  | 3.3539  | 7.1158  | 3.5609  | 2.9980  | 3.2307  | 3.2756  | 3.0567  | 4.2061  | 3.5279  | 1.2662  | 0.3405  | 0.3551 | 0.4496 |
| Lomp1   | _VLEFIASQLR_2                                                                                 | #N/A                    | 5.4747  | 3.8082  | 4.2183  | 4.6740  | 4.4314  | 5.2308  | 4.7506  | 4.0906  | 4.9554  | 4.2736  | 1.0270  | 0.0384  | 0.7414 | 0.1299 |
| Lomp1   | _LALDNIHSEFNVTR_3                                                                             | #N/A                    | 3.1850  | 3.9412  | 4.4195  | 3.9633  | 3.8295  | 2.9099  | 4.1115  | 2.2241  | 3.3370  | 3.6405  | 1.1141  | 0.1559  | 0.3985 | 0.3996 |
| Gnal    | _VLTSGFETR_2                                                                                  | #N/A                    | 5.9344  | 5.9330  | 5.5605  | 5.5285  | 4.7687  | 5.5697  | 5.4381  | 6.0519  | 5.7532  | 3.2649  | 1.0823  | 0.1141  | 0.4614 | 0.3359 |
| Gnal    | _ESLDLSEFNNNR_2                                                                               | #N/A                    | 6.1032  | 5.8657  | 6.1246  | 5.6835  | 4.0671  | 2.9507  | 5.0193  | 5.8205  | 5.1066  | 5.7641  | 0.9040  | -0.1456 | 0.4521 | 0.3448 |
| Gnal    | _DSVSLVDTPTDQLLR_2                                                                            | #N/A                    | 4.0038  | 4.5618  | 4.9312  | 4.7560  | 3.3612  | 4.3730  | 5.1289  | 4.5583  | 4.1458  | 3.1955  | 1.0174  | 0.0249  | 0.8691 | 0.0609 |
| Gnal    | _SHQYLDQC[Carbamidomethyl (C)] AQVFLR_2                                                       | #N/A                    | 3.1065  | 2.4630  | 3.7933  | 4.2090  | 3.7330  | 3.9965  | 4.3573  | 3.8225  | 3.4711  | 3.6934  | 0.9255  | -0.1117 | 0.4537 | 0.3432 |
| Adgrb2  | _S[Phospho (STY)] DEDEPK_2                                                                    | QBCGM1_S1269_M1_Adgrb2  | 6.4898  | 5.2580  | 4.5281  | 5.6838  | 5.0722  | 5.8569  | 5.9989  | 6.5719  | 6.4551  | 6.4169  | 0.8618  | -0.2146 | 0.0412 | 1.3855 |
| Bcor    | _TDVLC[Carbamidomethyl (C)] GEDEDC[Carbamidomethyl (C)] QAAS[Phospho (STY)] PLQK_2            | QBCGN4_S1348_M1_Bcor    | 4.3107  | 2.8338  | 4.0444  | 4.6801  | 4.0890  | 3.7281  | 3.7364  | 4.0152  | 3.5520  | 4.0131  | 1.0309  | 0.0440  | 0.7318 | 0.1356 |
| Bcor    | _DGGSS[Phospho (STY)] PPLLEK_2                                                                | QBCGN4_S423_M1_Bcor     | 4.1174  | 3.4218  | 3.3034  | 3.8061  | 3.2431  | 5.5598  | 6.2247  | 5.0898  | 3.9610  | 3.7731  | 0.8243  | -0.2788 | 0.2318 | 0.3847 |
| H2bu1   | _PDPSP[Phospho (STY)] KSAPAPK_2                                                               | QBCGPD_S5_M1_H2bu1      | 4.3867  | 3.6911  | 3.3850  | 4.4296  | 3.5124  | 4.2171  | 3.0770  | 4.0724  | 4.3715  | 4.1069  | 1.0077  | 0.0110  | 0.9289 | 0.0321 |
| H2bu1   | _ESVSVYK_2                                                                                    | #N/A                    | 3.6908  | 2.9463  | 3.4245  | 3.9685  | 4.7501  | 5.6550  | 4.9324  | 4.9435  | 4.0882  | 3.8838  | 0.8848  | -0.1766 | 0.3683 | 0.4338 |
| Calcoo1 | _LPSVGLC[Carbamidomethyl (C)] ESGNTSSS[Phospho (STY)] PPGPR_2                                 | QBCGU1_S563_M1_Calcoo1  | 3.8828  | 6.5538  | 3.7363  | 4.2389  | 3.4306  | 3.8454  | 6.7344  | 6.9254  | 6.4796  | 6.7873  | 0.6360  | -0.6529 | 0.0031 | 2.5037 |
| Tph2    | _RRS[Phospho (STY)] S[Phospho (STY)] EVEPVDC[Carbamidomethyl (C)] C[Carbamidomethyl (C)] GK_3 | QBCGV2_S101_M2_Tph2     | 3.0736  | 3.8298  | 4.3081  | 4.5546  | 4.1982  | 4.4073  | 4.3005  | 5.5691  | 3.4484  | 3.5291  | 1.0000  | 0.0001  | 0.9998 | 0.0001 |
| Tph2    | _GLS[Phospho (STY)] DSAVPEDHQLGLSLGNK_3                                                       | QBCGV2_S19_M1_Tph2      | 3.1464  | 5.0456  | 4.3809  | 6.1895  | 3.7910  | 4.3345  | 4.2276  | 3.0765  | 4.9196  | 3.6020  | 1.1327  | 0.1797  | 0.4232 | 0.3734 |
| Ogt     | _DSGNPEIASYR_2                                                                                | #N/A                    | 6.5613  | 6.7108  | 6.6302  | 6.8228  | 6.7186  | 6.5842  | 6.7432  | 6.5253  | 6.2938  | 6.6895  | 1.0165  | 0.0236  | 0.2834 | 0.5476 |
| Ogt     | _AIDNIPADAHNSLASHK_3                                                                          | #N/A                    | 6.0753  | 5.6054  | 6.0290  | 5.8777  | 5.2517  | 5.5050  | 6.1534  | 5.6540  | 6.0643  | 4.9074  | 1.0051  | 0.0074  | 0.9191 | 0.0366 |
| Ogt     | _SDGNLILK_2                                                                                   | #N/A                    | 4.0019  | 2.8954  | 4.2717  | 3.2087  | 3.4960  | 2.9429  | 2.8877  | 3.1857  | 4.4050  | 4.7694  | 0.9101  | -0.1358 | 0.4806 | 0.3182 |
| Sugp1   | _DIDASPS[Phospho (STY)] PLSVQDLK_2                                                            | QBCHO2_S409_M1_Sugp1    | 4.3589  | 4.3681  | 3.5449  | 4.0476  | 3.4846  | 4.2449  | 3.7622  | 6.6363  | 6.6052  | 6.6940  | 0.6765  | -0.5637 | 0.0133 | 1.8766 |
| Sugp1   | _ALQHQHQHYDS[Phospho (STY)] DEEVDSGLTWEHQLR_4                                                 | QBCHO2_S483_M1_Sugp1    | 3.5025  | 3.9520  | 4.0098  | 3.8175  | 4.1376  | 3.8129  | 4.2272  | 3.6548  | 3.3034  | 3.7845  | 1.0346  | 0.0491  | 0.5094 | 0.2929 |
| Sugp2   | _GRS[Phospho (STY)] NIADQEGTLGK_3                                                             | #N/A                    | 6.6271  | 6.6753  | 7.0797  | 7.4936  | 5.6188  | 6.6604  | 6.8794  | 7.0029  | 6.9996  | 6.8813  | 0.9642  | -0.0526 | 0.4600 | 0.3372 |
| Sitm    | _DVQDAIAQS[Phospho (STY)] PEK_2                                                               | #N/A                    | 10.7985 | 10.4744 | 10.8591 | 11.3264 | 10.4270 | 10.5723 | 11.1675 | 10.4507 | 10.6167 | 10.7569 | 0.9995  | -0.0007 | 0.9817 | 0.0080 |
| Sitm    | _S[Phospho (STY)] PGHM[Oxidation (M)] VLNQTK_2                                                | #N/A                    | 6.7127  | 6.0647  | 6.3797  | 7.8992  | 5.8309  | 6.3758  | 6.8898  | 6.6266  | 6.2362  | 6.5581  | 0.9949  | -0.0074 | 0.9325 | 0.1005 |
| Sitm    | _DVQDAIAQS[Phospho (STY)] PEKAK_2                                                             | #N/A                    | 10.1411 | 10.3247 | 11.0040 | 11.0554 | 9.9179  | 10.2816 | 10.7974 | 10.2928 | 10.1287 | 10.3108 | 1.0069  | 0.0099  | 0.7935 | 0.1304 |
| Sitm    | _SS[Phospho (STY)] KS[Phospho (STY)] PGHM[Oxidation (M)] VLNQTK_3                             | #N/A                    | 3.3629  | 3.5864  | 4.2119  | 5.0914  | 3.4494  | 3.5265  | 3.7914  | 3.6251  | 3.6861  | 3.7468  | 1.0428  | 0.0605  | 0.6551 | 0.1837 |
| Sitm    | _AGAGMITQHSSTAS[Phospho (STY)] PVNR_2                                                         | #N/A                    | 3.9257  | 3.2729  | 4.1961  | 3.8286  | 3.0942  | 3.1406  | 3.3406  | 3.4423  | 4.1282  | 4.0504  | 0.9561  | -0.0647 | 0.5830 | 0.2343 |
| Trim32  | _EM[Oxidation (M)] DMJ[Oxidation (M)] S[Phospho (STY)] PEEVAPSPR_2                            | #N/A                    | 9.1971  | 11.0990 | 11.7625 | 10.9478 | 10.5967 | 11.2107 | 11.5065 | 11.0342 | 11.1154 | 11.0541 | 0.9665  | -0.0492 | 0.4338 | 0.2627 |
| Trim32  | _EMDMSPEVAPS[Phospho (STY)] PRAS[Phospho (STY)] PAK_2                                         | #N/A                    | 3.1180  | 3.9232  | 4.2040  | 4.1658  | 3.7445  | 3.9903  | 4.1057  | 7.7085  | 3.3801  | 4.0005  | 0.8039  | -0.3149 | 0.2752 | 0.5604 |
| Nav1    | _SIGS[Phospho (STY)] PESTPK_2                                                                 | QBCH77_S762_M1_Nav1     | 7.4268  | 7.6616  | 3.9608  | 3.5046  | 6.8426  | 3.2920  | 7.3038  | 7.5907  | 7.7033  | 7.7460  | 0.9782  | -0.4776 | 0.0781 | 0.2895 |
| Nav1    | _S[Phospho (STY)] TNLSFLTDESEK_2                                                              | #N/A                    | 3.1744  | 4.8764  | 3.8612  | 6.4721  | 4.7362  | 3.9285  | 4.2893  | 5.9548  | 5.6326  | 3.8183  | 0.9156  | -0.1272 | 0.5761 | 0.2395 |
| Nav1    | _S[Phospho (STY)] PLSWR_2                                                                     | QBCH77_S315_M1_Nav1     | 5.6681  | 3.0670  | 3.5452  | 3.8478  | 2.9553  | 3.6693  | 3.9122  | 3.9193  | 5.5638  | 0.8945  | -0.1609 | 0.4873  | 0.3873 | 0.2395 |
| Nav1    | _LVHLPSPS[Phospho (STY)] VGFHSTASPEDR_3                                                       | QBCH77_S1816_M1_Nav1    | 3.1522  | 4.0739  | 3.8390  | 4.3417  | 3.7788  | 4.1632  | 4.0564  | 3.7768  | 3.4254  | 4.3087  | 0.9999  | -0.0001 | 0.9990 | 0.0004 |
| Nav1    | _S[Phospho (STY)] TNLSFLTDESEK_2                                                              | #N/A                    | 3.2732  | 3.7294  | 3.9600  | 5.3684  | 4.9964  | 4.4711  | 5.1359  | 4.7961  | 3.7242  | 4.9598  | 0.9592  | -0.0592 | 0.7139 | 0.0464 |
| Nav1    | _RSS[Phospho (STY)] TVLR_2                                                                    | QBCH77_S455_M1_Nav1     | 3.7177  | 3.5084  | 4.4045  | 5.5503  | 2.8434  | 5.4284  | 5.8497  | 3.2113  | 4.3607  | 3.3734  | 1.0103  | 0.0148  | 0.9543 | 0.0203 |
| Nav1    | _VNSNS[Phospho (STY)] LDLPSSSDHASK_3                                                          | #N/A                    | 5.1676  | 4.6762  | 3.7778  | 5.8351  | 3.7017  | 4.8842  | 4.9391  | 3.6823  | 3.4278  | 1.0805  | 0.1117  | 0.5456  | 0.2631 | 0.0805 |
| Nav1    | _LVELVES[Phospho (STY)] LDPSDEVCLK_2                                                          | QBCH77_S380_M1_Nav1     | 3.0944  | 3.8507  | 4.3029  | 4.5649  | 3.7390  | 4.3864  | 4.2796  | 5.9919  | 3.2021  | 3.5500  | 0.9385  | -0.0916 | 0.6549 | 0.1838 |
| Nav1    | _SVQPEVELS[Phospho (STY)] GGSGSGGGEGADESR_2                                                   | QBCH77_S16_M1_Nav1      | 3.3158  | 4.1209  | 4.0026  | 4.0306  | 3.9423  | 3.8181  | 4.1789  | 3.5544  | 4.6607  | 4.7463  | 0.9035  | -0.1463 | 0.1536 | 0.8135 |
| Nav1    | _SLAESGLNWFSP[Phospho (STY)] ESEK_2                                                           | QBCH77_S477_M1_Nav1     | 3.1124  | 4.2300  | 4.3469  | 5.0980  | 3.7570  | 3.7682  | 4.0390  | 3.1105  | 3.4095  | 3.5680  | 1.1431  | 0.1929  | 0.2202 | 0.6572 |
| Nav1    | _APEAIVS[Phospho (STY)] DDGKS[Phospho (STY)] DEELSSK_2                                        | #N/A                    | 3.4634  | 3.8948  | 4.3170  | 3.7909  | 3.7162  | 3.6032  | 3.9806  | 3.2877  | 3.6951  | 3.3781  | 1.0592  | 0.0830  | 0.3098 | 0.5089 |
| Nav1    | _ERPSP[Phospho (STY)] C[Carbamidomethyl (C)] DOASK_2                                          | QBCH77_S510_M1_Nav1     | 3.5648  | 3.7776  | 3.2985  | 4.3431  | 3.5989  | 4.1306  | 4.4914  | 4.1589  | 2.9571  | 4.0204  | 0.9689  | -0.0455 | 0.7313 | 0.1419 |
| Nav1    | _SGVMS[Phospho (STY)] DSDLMGK_2                                                               | QBCH77_S394_M1_Nav1     | 4.2292  | 3.1132  | 3.9629  | 3.5066  | 2.9345  | 3.2941  | 3.6549  | 3.4045  | 3.7936  | 3.1839  | 0.9929  | -0.0102 | 0.9201 | 0.0315 |
| Nav1    | _SLAESGLNWFSP[Phospho (STY)] EES[Phospho (STY)] EERTPK_3                                      | QBCH77_S477_M2_Nav1     | 3.6654  | 3.6770  | 3.3990  | 4.4437  | 3.4984  | 4.2311  | 3.0911  | 4.0584  | 4.3574  | 4.1209  | 0.9775  | -0.0328 | 0.7827 | 0.1064 |
| Synj1   | _EFGGVGAPSP[Phospho (STY)] PGVAR_2                                                            | QBCHC4_S1147_M1_Synj1   | 10.7606 | 10.5021 | 11.0495 | 10.1609 | 8.8541  | 10.2442 | 10.9162 | 10.3763 | 10.2582 | 10.4971 | 0.9762  | -0.0347 | 0.5552 | 0.2556 |
| Synj1   | _TNC[Carbamidomethyl (C)] LDCC[Carbamidomethyl (C)] LDR_2                                     | #N/A                    | 7.3609  | 6.8553  | 7.0584  | 6.6140  | 7.0591  | 6.9781  | 7.2133  | 7.1134  | 7.2145  | 6.8679  | 0.9839  | -0.0235 | 0.4425 | 0.3541 |
| Synj1   | _REIAPKS[Phospho (STY)] PGTAR_3                                                               | #N/A                    | 5.1400  | 3.7965  | 7.3087  | 5.7987  | 3.9369  | 3.8859  | 4.8646  | 6.4111  | 3.6505  | 5.2083  | 0.9889  | -0.0161 | 0.9489 | 0.0228 |
| Synj1   | _YAGTGALEK_2                                                                                  | #N/A                    |         |         |         |         |         |         |         |         |         |         |         |         |        |        |



|         |                                                                           |                        |         |         |         |         |         |         |         |         |         |         |         |         |        |        |
|---------|---------------------------------------------------------------------------|------------------------|---------|---------|---------|---------|---------|---------|---------|---------|---------|---------|---------|---------|--------|--------|
| Synj1   | _HLEEMSP[Phospho (STY)]LEK_2                                              | QBCHC4_5982_M1_Synj1   | 3.8638  | 3.3624  | 4.5506  | 3.5524  | 2.9895  | 3.2392  | 3.2671  | 3.0652  | 4.2147  | 3.5194  | 1.0217  | 0.0310  | 0.8304 | 0.0807 |
| Synj1   | _IDLPMVEKELR_2                                                            | #N/A                   | 4.2561  | 3.0863  | 3.9898  | 3.5335  | 2.9077  | 3.3210  | 3.6818  | 3.4676  | 2.5497  | 3.2108  | 1.0893  | 0.1234  | 0.4077 | 0.3897 |
| Synj1   | _FLOWGYFYDGSEVQR_2                                                        | #N/A                   | 3.2241  | 4.1183  | 4.4586  | 4.0023  | 3.8686  | 3.7898  | 4.1506  | 2.9988  | 3.2979  | 3.6796  | 1.1072  | 0.1469  | 0.2239 | 0.6500 |
| Ragef2  | _RSS[Phospho (STY)]FUNK_2                                                 | QBCHG7_5960_M1_Ragef2  | 10.1166 | 10.0321 | 10.5899 | 10.4950 | 6.3297  | 9.9977  | 10.4790 | 10.3144 | 10.2163 | 10.0566 | 0.8906  | -0.1671 | 0.4412 | 0.3554 |
| Ragef2  | _SETSP[Phospho (STY)]PVAPR_2                                              | QBCHG7_5102_M1_Ragef2  | 8.8598  | 8.6300  | 9.3393  | 8.7684  | 7.3508  | 8.5422  | 8.5527  | 8.5484  | 8.6563  | 8.6010  | 0.9991  | -0.0013 | 0.9821 | 0.0078 |
| Ragef2  | _HIPALPVGSLSS[Phospho (STY)]NPQLQSHHR_4                                   | QBCHG7_5585_M1_Ragef2  | 3.5902  | 8.6364  | 8.4792  | 4.3685  | 4.2348  | 3.8906  | 3.7838  | 4.1325  | 4.4325  | 4.0458  | 1.3499  | 0.4329  | 0.2693 | 0.5698 |
| Ragef2  | _ILS[Phospho (STY)]SEEGSLR_2                                              | QBCHG7_51088_M1_Ragef2 | 3.2533  | 3.9729  | 3.9401  | 4.4427  | 3.8798  | 3.8497  | 4.1574  | 5.4893  | 5.6232  | 6.0397  | 0.7301  | -0.4538 | 0.0051 | 2.2965 |
| Ragef2  | _QAEEDTSNASSQLSS[Phospho (STY)]PP7SP[Phospho (STY)]PCSPSPR_3              | #N/A                   | 3.5016  | 6.8989  | 4.1884  | 7.0580  | 3.6956  | 6.7846  | 3.9980  | 3.5243  | 6.6771  | 3.6666  | 1.1988  | 0.2616  | 0.4259 | 0.3707 |
| Ragef2  | _SSVSNSP[Phospho (STY)]FOSVPVSLHDER_3                                     | #N/A                   | 3.4202  | 3.9222  | 3.1539  | 4.1985  | 4.0648  | 4.0607  | 4.3468  | 4.3035  | 3.1017  | 3.8758  | 0.9735  | -0.0388 | 0.7487 | 0.1257 |
| Ragef2  | _S[Phospho (STY)]LGLSLGGSANATVLDAQTGGHK_3                                 | QBCHG7_5930_M1_Ragef2  | 4.0850  | 7.0801  | 7.2813  | 8.1267  | 3.2107  | 3.0179  | 3.3787  | 6.9614  | 6.3909  | 4.8047  | 1.0154  | 0.0221  | 0.9517 | 0.0215 |
| Ragef2  | _SSVSNSP[Phospho (STY)]FOSVPVSLHDER_3                                     | #N/A                   | 3.4960  | 3.8464  | 3.2297  | 4.2743  | 3.6677  | 4.0618  | 4.4226  | 4.2277  | 3.0259  | 3.9516  | 0.9631  | -0.0543 | 0.6561 | 0.1830 |
| Ragef2  | _NNM[Oxidation (M)]ETETLC[Carbamidomethyl (C)]S[Phospho (STY)]DEDAQELLR_2 | QBCHG7_5698_M1_Ragef2  | 3.9345  | 3.2917  | 3.1204  | 4.3544  | 3.1800  | 3.4446  | 3.3378  | 4.5247  | 4.1440  | 3.5901  | 0.9115  | -0.1336 | 0.3227 | 0.4912 |
| Septin8 | _EFLSELQR_2                                                               | #N/A                   | 7.8132  | 7.6738  | 7.5072  | 7.1507  | 7.3174  | 7.2581  | 7.6176  | 7.7394  | 7.3185  | 7.2725  | 0.9955  | -0.0065 | 0.8378 | 0.0769 |
| Septin8 | _ELEETNAFNC[Carbamidomethyl (C)]R_2                                       | #N/A                   | 6.5738  | 6.1575  | 5.8648  | 6.5764  | 6.5082  | 6.6590  | 6.7700  | 6.1144  | 6.9841  | 7.0305  | 0.9502  | -0.0737 | 0.1844 | 0.7342 |
| Septin8 | _SFDYHDIR_2                                                               | #N/A                   | 4.0653  | 6.3444  | 6.6830  | 6.7015  | 6.3269  | 6.4120  | 6.7820  | 6.5510  | 6.4688  | 6.7461  | 0.9174  | -0.1244 | 0.3194 | 0.4957 |
| Septin8 | _SVTQGSFNLC[Carbamidomethyl (C)]VGETGIGK_2                                | #N/A                   | 4.1554  | 4.2860  | 4.7866  | 5.6678  | 4.4641  | 4.4341  | 5.0998  | 4.6821  | 4.5552  | 4.0383  | 1.0084  | 0.0120  | 0.9099 | 0.0410 |
| Septin8 | _LTIVDAVFGDQINK_2                                                         | #N/A                   | 5.3076  | 4.2451  | 5.3040  | 4.4585  | 4.2958  | 3.7358  | 4.0984  | 3.3551  | 4.9209  | 5.3668  | 1.0276  | 0.0393  | 0.8035 | 0.0950 |
| Septin8 | _Acetyl (Protein N-term)[AATDLERSV[Phospho (STY)]NAEPEPR_2                | #N/A                   | 9.4485  | 9.3499  | 9.7729  | 10.0314 | 9.3714  | 9.6344  | 9.9402  | 9.4080  | 9.5914  | 9.8667  | 0.9874  | -0.0150 | 0.5661 | 0.2471 |
| Septin8 | _SLSLGGHVGFGSLPQLVSK_3                                                    | #N/A                   | 5.7662  | 5.6923  | 5.7487  | 6.1032  | 5.4110  | 5.7135  | 6.0292  | 5.8718  | 5.8454  | 5.8489  | 0.9729  | -0.0396 | 0.2128 | 0.6721 |
| Ep400   | _S[Phospho (STY)]SPVNRPPSATNK_2                                           | QBCH8_5720_M1_Ep400    | 3.2943  | 3.9318  | 3.9811  | 4.4838  | 3.8201  | 4.3053  | 4.1985  | 3.6347  | 3.2833  | 4.4508  | 1.0199  | 0.0285  | 0.8008 | 0.0965 |
| Phc3    | _ISORDPS[Phospho (STY)]PFESK_2                                            | QBCHP6_5261_M1_Ph3     | 8.2411  | 8.8658  | 9.4810  | 9.1773  | 8.8636  | 8.9904  | 8.9639  | 2.9705  | 8.7713  | 8.8639  | 1.2089  | 0.2737  | 0.2286 | 0.6408 |
| Phc3    | _KGGSP[Phospho (STY)]PGLER_2                                              | QBCHP6_5269_M1_Ph3     | 7.5891  | 6.7599  | 7.8183  | 7.7777  | 7.2414  | 3.3197  | 7.7078  | 3.5625  | 7.8616  | 7.6280  | 1.2140  | 0.2798  | 0.3686 | 0.4334 |
| Phc3    | _M[Oxidation (M)]DRT[Phospho (STY)]PPPTLS[Phospho (STY)]PAAVTVGR_3        | #N/A                   | 4.1728  | 6.1410  | 3.5809  | 7.2461  | 5.2092  | 3.2053  | 6.0320  | 6.0769  | 3.7536  | 5.9628  | 0.9032  | -0.1470 | 0.5804 | 0.2363 |
| Pgp     | _FIFPC[Carbamidomethyl (C)]VSGEYGINPR_2                                   | #N/A                   | 6.2038  | 6.2405  | 6.2944  | 6.2424  | 6.3546  | 6.0880  | 6.5086  | 5.8643  | 5.9037  | 5.6034  | 1.0447  | 0.0631  | 0.1303 | 0.8852 |
| Pgp     | _GETAVGAPETLR_2                                                           | #N/A                   | 7.3475  | 7.3557  | 7.3090  | 7.2190  | 7.5105  | 7.2868  | 7.4724  | 7.0982  | 7.2657  | 7.5616  | 0.9985  | -0.0022 | 0.9088 | 0.0415 |
| Pgp     | _FIAGTGC[Carbamidomethyl (C)]LVR_2                                        | #N/A                   | 6.0106  | 2.6486  | 5.1175  | 6.3363  | 5.8097  | 6.1463  | 5.4730  | 5.8261  | 5.6003  | 5.8045  | 0.9417  | -0.0867 | 0.6536 | 0.1847 |
| Pgp     | _TILITGVSSLEDVK_2                                                         | #N/A                   | 4.5925  | 3.7054  | 3.5369  | 3.5805  | 4.6390  | 5.1286  | 4.8868  | 4.1784  | 3.9779  | 4.9421  | 1.0019  | 0.0028  | 0.9838 | 0.0071 |
| Pgp     | _SNGESDC[Carbamidomethyl (C)]MFK_2                                        | #N/A                   | 3.6148  | 4.3710  | 3.3484  | 4.3930  | 4.2593  | 3.8661  | 4.5413  | 4.1090  | 4.4080  | 4.0703  | 0.9284  | -0.1072 | 0.2368 | 0.6256 |
| Fbxo4   | _GAGSP[Phospho (STY)]PPPASDWR_2                                           | QBCHQ0_511_M1_Fbxo4    | 10.8836 | 10.7585 | 11.3294 | 11.0951 | 10.3870 | 11.0877 | 10.7585 | 10.8250 | 9.8975  | 10.8251 | 1.0325  | 0.0321  | 0.3852 | 0.4144 |
| Ngef    | _TKVSP[Phospho (STY)]FTSR_2                                               | #N/A                   | 3.1369  | 9.1400  | 9.7885  | 9.3682  | 7.2385  | 8.7210  | 9.2095  | 9.4112  | 9.0776  | 8.7368  | 0.8672  | -0.2056 | 0.3711 | 0.4306 |
| Ngef    | _FVSP[Phospho (STY)]FTSR_2                                                | #N/A                   | 9.8935  | 9.1389  | 9.7820  | 9.3961  | 7.4978  | 9.3352  | 8.7022  | 9.7953  | 9.7147  | 9.6222  | 0.9699  | -0.0441 | 0.5749 | 0.2404 |
| Ngef    | _MEDPQRS[Phospho (STY)]QNKDR_2                                            | #N/A                   | 6.5000  | 5.2293  | 5.1592  | 7.1118  | 5.1794  | 5.0550  | 4.9330  | 5.2744  | 5.1426  | 5.5941  | 1.0897  | 0.1239  | 0.3372 | 0.4722 |
| Ngef    | _VEELEDQGTLANVILR_2                                                       | #N/A                   | 2.4205  | 4.2300  | 3.9672  | 4.4950  | 3.2597  | 4.0072  | 3.7686  | 4.2500  | 3.0318  | 0.9979  | -0.0030 | 0.9863  | 0.0060 | 0.6546 |
| Ngef    | _MEDPQRS[Phospho (STY)]QNK_2                                              | #N/A                   | 6.9147  | 4.9865  | 4.2915  | 7.0499  | 5.4885  | 4.4239  | 5.5896  | 5.1787  | 5.3510  | 5.6602  | 1.0149  | 0.0213  | 0.8997 | 0.0459 |
| Epn2    | _TTS[Phospho (STY)]POLFESQSLTASASK_2                                      | #N/A                   | 8.7595  | 8.5718  | 8.7719  | 9.3596  | 8.2619  | 4.1133  | 8.9495  | 8.6020  | 8.8482  | 8.8188  | 0.9055  | -0.1431 | 0.4325 | 0.3742 |
| Epn2    | _TTS[Phospho (STY)]POLFESQSLTASASKSPAR_3                                  | #N/A                   | 3.4875  | 8.6692  | 9.1885  | 10.4321 | 7.2924  | 8.3121  | 3.8865  | 8.9949  | 3.5952  | 7.4408  | 1.3207  | 0.4013  | 0.2686 | 0.5708 |
| Epn2    | _AGGSP[Phospho (STY)]PASHYSGSPR_2                                         | QBCHU3_5192_M1_Epn2    | 6.6996  | 7.2123  | 7.3723  | 7.4756  | 6.1951  | 6.8395  | 6.7270  | 6.7462  | 6.8068  | 6.7050  | 1.0121  | 0.0173  | 0.7644 | 0.1167 |
| Epn2    | _GSS[Phospho (STY)]QPNLSSTYGEYQK_2                                        | QBCHU3_5173_M1_Epn2    | 8.5338  | 3.5573  | 8.6666  | 9.1302  | 8.1972  | 8.9905  | 8.7669  | 3.5267  | 8.5351  | 8.8274  | 1.0583  | 0.0817  | 0.7798 | 0.1080 |
| Epn2    | _NSDPWAAQQSPASNAGK_2                                                      | #N/A                   | 5.3576  | 3.0256  | 4.0505  | 3.5943  | 4.6005  | 3.2439  | 3.7426  | 5.1956  | 4.7693  | 3.2716  | 0.9373  | -0.0934 | 0.6539 | 0.1845 |
| Elf2b5  | _AGSP[Phospho (STY)]PQLDIR_2                                              | QBCHW4_5540_M1_Elf2b5  | 11.7225 | 12.0232 | 12.1408 | 12.0270 | 10.8728 | 11.7484 | 12.7037 | 12.1560 | 12.0421 | 11.9472 | 0.9626  | -0.0550 | 0.1316 | 0.8808 |
| Rtn2    | _NSS[Phospho (STY)]PSYANPK_2                                              | QBCHX7_5228_M1_Rtn2    | 2.9695  | 3.7258  | 4.2041  | 3.7478  | 3.6141  | 3.0105  | 3.8961  | 3.2533  | 3.5524  | 3.4251  | 1.0038  | 0.0055  | 0.9605 | 0.0175 |
| Rtn2    | _S[Phospho (STY)]LGLDTNASSQAAGGR_2                                        | QBCHX7_5429_M1_Rtn2    | 3.5160  | 4.2723  | 3.2497  | 4.1433  | 4.1606  | 3.9648  | 3.8580  | 5.4333  | 3.6237  | 3.8605  | 0.8276  | -0.2731 | 0.1364 | 0.8050 |
| Rtn2    | _PVTWNSAAQT[Phospho (STY)]PERK_3                                          | #N/A                   | 6.2779  | 5.2083  | 5.4509  | 6.5205  | 5.3724  | 5.2798  | 5.8465  | 6.3941  | 6.0747  | 5.8935  | 0.9393  | -0.0903 | 0.2621 | 0.5816 |
| Rtn2    | _PVTWNSAAQT[Phospho (STY)]PER_2                                           | #N/A                   | 6.9947  | 6.1787  | 6.9613  | 7.0021  | 5.5849  | 6.3430  | 6.9313  | 6.4723  | 6.4957  | 0.9822  | -0.0259 | 0.7088  | 0.1495 | 0.5774 |
| Rtn2    | _ETRRAGSDSP[Phospho (STY)]SGFSSDSVLR_3                                    | QBCHX7_5469_M1_Rtn2    | 3.7472  | 3.3717  | 3.8536  | 3.6340  | 3.4818  | 3.3537  | 4.1047  | 3.9303  | 3.4792  | 3.6010  | 0.9537  | -0.0683 | 0.2646 | 0.5774 |
| Gatad2a | _RPPSP[Phospho (STY)]PDVNLSP[Phospho (STY)]DSQPSPPR_3                     | QBCHY6_5103_M2_Gatad2a | 4.3880  | 4.3390  | 3.5739  | 4.0766  | 4.2273  | 3.7913  | 4.0419  | 3.6905  | 4.0436  | 1.0493  | 0.0895  | 0.2970  | 0.5272 | 0.0722 |
| Flwch1  | _SHC[Carbamidomethyl (C)]HSP[Phospho (STY)]PDIEGLQAR_3                    | QBCHQ3_5294_M1_Flwch1  | 4.0806  | 6.6977  | 7.3910  | 3.3581  | 6.4205  | 3.1455  | 3.5063  | 3.6431  | 7.0998  | 6.7148  | 0.9888  | -0.0163 | 0.9628 | 0.0165 |
| Slain2  | _S[Phospho (STY)]PNLSR_2                                                  | QBCH8_5414_M1_Slain2   | 8.5590  | 8.2853  | 8.8244  | 8.6576  | 7.8479  | 8.4047  | 8.1081  | 8.2385  | 8.1825  | 8.4482  | 1.0259  | 0.0369  | 0.3274 | 0.4849 |
| Slain2  | _RTSP[Phospho (STY)]SEDLR_2                                               | QBCH8_587_M1_Slain2    | 3.0894  | 3.8946  | 3.7762  | 4.2788  | 3.7159  | 4.0136  | 3.9935  | 3.8396  | 5.7684  | 0.8882  | -0.1711 | 0.3210  | 0.4936 | 0.0646 |
| Gnl3    | _ELSP[Phospho (STY)]PEQSTAGKPSDGGSSALDR_3                                 | QBCH11_5505_M1_Gnl3    | 5.9384  | 4.2686  | 3.2461  | 4.1470  | 4.1569  | 3.8617  | 4.2114  | 6.2011  | 5.8799  | 1.0299  | 0.0425  | 0.8425  | 0.0744 | 0.4364 |
| Pdlim5  | _RGS[Phospho (STY)]QGDOK_2                                                | QBCH51_5228_M1_Pdlim5  | 8.1316  | 7.5109  | 7.9557  | 7.7370  | 3.8893  | 4.2721  | 7.8447  | 7.1784  | 6.3615  | 8.4740  | 0.8811  | -0.1827 | 0.4278 | 0.3688 |
| Baq4    | _S[Phospho (STY)]PONGSPTPMSR_2                                            | QBCH61_5175_M1_Baq4    | 5.6255  | 4.2440  | 4.3329  | 7.5226  | 4.0653  | 3.6641  | 4.0249  | 3.1245  | 3.4236  | 3.5540  | 1.3900  | 0.0751  | 0.1036 | 0.9846 |
| Vps50   | _SVSP[Phospho (STY)]RETUK_2                                               | QBCH71_5585_M1_Vps50   | 8.1387  | 7.8395  | 8.4226  | 8.0013  | 6.1187  | 7.8958  | 8.3085  | 8.3151  | 7.8043  | 7.8707  | 0.9581  | -0.0618 | 0.4558 | 0.3412 |
| Vps50   | _KKS[Phospho (STY)]DYSUNK_2                                               | QBCH71_5595_M1_Vps50   | 3.0545  | 4.9141  | 4.2890  | 5.2754  | 3.6991  | 4.4264  | 5.3931  | 5.0944  | 5.3190  | 3.0710  | 0.9061  | -0.1422 | 0.4818 | 0.3171 |
| Vps50   | _SAYQDYSP[Phospho (STY)]DSOVPEELKR_2                                      | #N/A                   | 3.9009  | 6.7130  | 3.9459  | 8.5083  | 6.7297  | 3.6565  | 3.8251  | 6.9263  | 7.9138  | 8.2906  | 0.8274  | -0.2734 | 0.3986 | 0.3994 |
| Vps50   | _FLQCERS[Phospho (STY)]PPSPSPK_2                                          | #N/A                   | 6.9875  | 7.1388  | 8.3397  | 7.4933  | 3.6888  | 3.7227  | 8.8093  | 3.6666  | 6.1314  | 5.6142  | 1.0286  | 0.0407  | 0.8992 | 0.0461 |
| Vps50   | _SAYQDY[Phospho (STY)]DSOSDVPEELK_2                                       | QBCH71_5557_M1_Vps50   | 4.1585  | 3.4629  | 3.3445  | 3.1570  | 3.2842  | 2.9444  | 3.3052  | 3.8442  | 4.1433  | 4.3351  | 0.8682  | -0.2039 | 0.0995 | 1.0024 |
| Vps50   | _S[Phospho (STY)]PPSPSPK_2                                                | #N/A                   | 3.0788  | 3.8840  | 3.7656  | 4.2683  | 3.7053  | 4.0241  | 3.9830  | 3.8502  | 3.4988  | 4.2353  | 0.9733  | -0.0391 | 0.6735 | 0.1717 |
| Dis3l2  | _RPGLEKAS[Phospho (STY)]DEEED_2                                           | QBCH75_5864_M1_Dis3l2  | 10.7993 | 11.0166 | 11.6031 | 11.1871 | 9.6831  | 10.6404 | 11.3207 | 11.2325 | 10.7234 | 10.7962 | 0.9822  | -0.0260 | 0.5923 | 0.2275 |
| Pygb    | _QKQSP[Phospho (STY)]VR_2                                                 | QBCH94_515_M1_Pygb     | 11.3226 | 11.6965 | 12.4489 | 11.6333 | 11.0645 | 11.6072 | 11.5496 | 11.6944 | 12.0391 | 11.2446 | 0.9997  | -0.0004 | 0.9911 | 0.0039 |
| Pygb    | _Acetyl (Protein N-term)[AKPLTDSER_2                                      | #N/A                   | 7.8724  | 8.2759  | 7.9118  | 8.2486  | 8.1393  | 8.0642  | 7.9893  | 8.3391  | 7.9278  | 7.8661  | 1.0068  | 0.0098  | 0.6601 |        |



|         |                                                                                          |                        |         |         |         |         |         |         |         |         |         |         |        |         |        |        |
|---------|------------------------------------------------------------------------------------------|------------------------|---------|---------|---------|---------|---------|---------|---------|---------|---------|---------|--------|---------|--------|--------|
| Pvgb    | _NNTVNTMR_2                                                                              | #N/A                   | 3.7877  | 3.0921  | 4.4745  | 3.4764  | 2.9134  | 3.3152  | 3.1910  | 3.1413  | 4.2907  | 3.4434  | 0.9981 | -0.0028 | 0.9854 | 0.0064 |
| Pvgb    | _WLLC[Carbamidomethyl][C]NPGIAEIVR_2                                                     | #N/A                   | 3.9958  | 3.3002  | 3.7759  | 3.3196  | 3.1215  | 3.1071  | 3.4679  | 3.6815  | 3.9806  | 2.9969  | 0.9731 | -0.0394 | 0.7117 | 0.1477 |
| Obtp11  | _SFLASSGNS[Phospho][STY]IPISQR_2                                                         | QBCP5_S186_M1_Obtp11   | 6.4059  | 6.8828  | 7.2671  | 7.5228  | 5.4298  | 6.7279  | 3.9433  | 6.7267  | 6.7054  | 6.3083  | 1.1198 | 0.1632  | 0.3097 | 0.5091 |
| Clp4    | _SWSC[Phospho][STY]SSTAGLEGTVK_2                                                         | QBC9C_S608_M1_Clp4     | 3.3165  | 4.5388  | 4.5510  | 4.0947  | 3.9610  | 4.1644  | 4.2430  | 4.4073  | 3.2055  | 5.1124  | 0.9676 | -0.0476 | 0.7320 | 0.1355 |
| Tmem230 | _LAS[Phospho][STY]TDGQYDLQFK_2                                                           | QBCB6_S24_M1_Tmem230   | 3.7698  | 3.0741  | 4.4566  | 3.4584  | 2.8955  | 3.3332  | 3.1731  | 6.6632  | 4.3087  | 3.4254  | 0.7963 | -0.2386 | 0.2311 | 0.6362 |
| Copa    | _NLS[Phospho][STY]PGAVEIDVR_2                                                            | QBCIE_S173_M1_Copa     | 3.0375  | 8.7714  | 4.2720  | 3.8158  | 3.6821  | 2.9425  | 9.7768  | 9.0231  | 3.4844  | 8.8949  | 0.5671 | -0.8184 | 0.0680 | 1.1672 |
| Pa2     | _Acetyl[Protein N-term]S[Phospho][STY]DNGEELKKPAPPVR_2                                   | QBCIN4_S2_M1_Pa2       | 3.9286  | 8.6870  | 3.1146  | 9.1147  | 8.4170  | 8.6920  | 8.9398  | 8.4846  | 8.5973  | 8.7057  | 0.8054 | -0.3122 | 0.2573 | 0.5896 |
| Mark4   | _RS[Phospho][STY]PTSGDTELKEK_2                                                           | QBCP4_S438_M1_Mark4    | 8.1781  | 7.9678  | 8.8787  | 7.7298  | 7.3806  | 8.1204  | 7.8375  | 8.1101  | 8.4643  | 7.7517  | 1.0002 | 0.0003  | 0.9955 | 0.0019 |
| Mark4   | _KAS[Phospho][STY]C[Carbamidomethyl][C]SAGVSGSR_2                                        | QBCP4_S458_M1_Mark4    | 4.4686  | 4.6359  | 3.9341  | 3.4779  | 3.3442  | 3.2804  | 3.1736  | 5.0638  | 5.0202  | 4.3678  | 0.8753 | -0.1922 | 0.2661 | 0.5749 |
| Dock3   | _GS[Phospho][STY]PSLPDKYR_2                                                              | QBCQ7_S1763_M1_Dock3   | 8.5575  | 8.3469  | 3.4699  | 4.5145  | 3.4275  | 4.3020  | 3.1619  | 3.9875  | 8.0899  | 8.1696  | 0.9289 | -0.1063 | 0.8019 | 0.0959 |
| Dock3   | _GNVLASHSPMS[Phospho][STY]PENIK_2                                                        | #N/A                   | 5.5744  | 3.9807  | 4.0019  | 6.2861  | 3.9416  | 3.8575  | 4.2192  | 3.6836  | 3.3321  | 3.7501  | 1.2298 | 0.2984  | 0.1596 | 0.7969 |
| Mical3  | _GTSQVSS[Phospho][STY]PSQPFEX_2                                                          | QBCI19_S1154_M1_Mical3 | 6.6197  | 10.6894 | 11.2595 | 11.1722 | 9.8207  | 10.7454 | 11.4076 | 11.1602 | 10.7482 | 10.7556 | 0.9123 | -0.1325 | 0.3169 | 0.4691 |
| Mical3  | _RKT[Phospho][STY]SQSEEEPPR_3                                                            | QBCI19_T684_M1_Mical3  | 3.9957  | 6.0889  | 3.1817  | 3.5269  | 3.1214  | 3.1074  | 3.4474  | 6.7527  | 4.0191  | 3.6513  | 0.8588 | -0.2195 | 0.4782 | 0.3204 |
| Mical3  | _QVGVS[Phospho][STY]IPAR_2                                                               | QBCI19_S1167_M1_Mical3 | 8.0906  | 7.6179  | 8.2969  | 7.8014  | 6.1679  | 7.6199  | 8.1584  | 8.0602  | 7.7759  | 7.7328  | 0.9580 | -0.0618 | 0.4206 | 0.3761 |
| Mical3  | _GRS[Phospho][STY]EEELASK_2                                                              | QBCI19_S977_M1_Mical3  | 7.7128  | 8.0108  | 8.0368  | 7.8005  | 6.5662  | 5.7581  | 7.8954  | 7.7244  | 7.7889  | 7.5318  | 0.9848 | -0.0221 | 0.6899 | 0.1612 |
| Mical3  | _SVFS[Phospho][STY]GVXK_2                                                                | QBCI19_S1736_M1_Mical3 | 3.8439  | 7.1671  | 4.5307  | 7.3109  | 2.9696  | 3.2591  | 3.6198  | 6.8421  | 3.8286  | 6.4432  | 0.9351 | -0.0969 | 0.7846 | 0.1053 |
| Mical3  | _KTS[Phospho][STY]QSEEEPPR_2                                                             | #N/A                   | 2.9284  | 7.3460  | 4.1629  | 3.2301  | 3.5729  | 3.0517  | 4.4457  | 7.7543  | 3.0361  | 3.1971  | 0.8786 | -0.1868 | 0.6578 | 0.1821 |
| Mical3  | _S[Phospho][STY]PTEEAKSPLATK_2                                                           | QBCI19_S1171_M1_Mical3 | 7.4600  | 7.1344  | 6.7362  | 6.7313  | 4.8737  | 6.9389  | 6.0725  | 7.3130  | 7.2271  | 6.1085  | 0.9948 | -0.0075 | 0.9503 | 0.0219 |
| Mical3  | _AVS[Phospho][STY]IPR_2                                                                  | QBCI19_S1216_M1_Mical3 | 8.5155  | 7.6504  | 8.6976  | 7.8459  | 6.1377  | 8.1327  | 7.6936  | 8.3871  | 8.1422  | 8.0728  | 0.9698 | -0.0443 | 0.6263 | 0.2032 |
| Mical3  | _SAGDQPLLTPKS[Phospho][STY]IPSP[Phospho][STY]DKELR_3                                     | QBCI19_S1404_M2_Mical3 | 2.9658  | 4.3766  | 4.2004  | 8.3517  | 6.2908  | 3.5316  | 3.8924  | 8.3113  | 8.9274  | 7.7358  | 0.7374 | -0.4395 | 0.2078 | 0.6824 |
| Mical3  | _QVGVS[Phospho][STY]PGTI[Phospho][STY]IEAKR_3                                            | QBCI19_T1174_M2_Mical3 | 3.6658  | 3.7759  | 3.9702  | 4.0471  | 3.8325  | 3.8485  | 4.8295  | 3.9131  | 4.9265  | 4.2254  | 0.8621 | -0.2141 | 0.0165 | 1.7820 |
| Mical3  | _VKS[Phospho][STY]PEEPFLVTRLRLR_3                                                        | QBCI19_S1187_M1_Mical3 | 4.0158  | 6.0056  | 7.1494  | 7.2304  | 3.1595  | 3.4651  | 3.4415  | 6.1114  | 4.0070  | 2.9705  | 1.1142 | 0.1560  | 0.6487 | 0.1880 |
| Mical3  | _RQLS[Phospho][STY]PSDSSSOILER_3                                                         | QBCI19_S1783_M1_Mical3 | 2.9229  | 3.6792  | 4.1575  | 3.2356  | 3.5675  | 3.0571  | 4.4511  | 3.3821  | 3.0307  | 3.2026  | 0.9773 | -0.0332 | 0.8220 | 0.0852 |
| Croc    | _GSGQRT[Phospho][STY]PTI[Phospho][STY]IPRHS[Phospho][STY]PGR_3                           | QBC40_T494_M1_Croc     | 6.2239  | 7.1947  | 7.1034  | 7.5607  | 7.0605  | 4.1012  | 7.2111  | 7.4304  | 6.8534  | 8.3357  | 0.8771 | -0.1893 | 0.2243 | 0.4491 |
| Croc    | _EAPAGGGDGLS[Phospho][STY]SPSLEYSR_2                                                     | QBC40_S1468_M1_Croc    | 6.8566  | 6.8504  | 4.3435  | 4.3626  | 3.8636  | 4.1698  | 4.2763  | 6.0254  | 6.8457  | 3.4656  | 1.0905 | 0.1250  | 0.6608 | 0.1799 |
| Croc    | _DLQAALS[Phospho][STY]DTESGVLSSESR_2                                                     | QBC40_S464_M1_Croc     | 3.6133  | 3.3188  | 4.2190  | 3.5039  | 4.2398  | 3.3061  | 4.2101  | 4.7427  | 3.3277  | 3.3132  | 0.9491 | -0.0753 | 0.5891 | 0.2298 |
| Croc    | _TPTPRHS[Phospho][STY]IPGR_3                                                             | QBC40_S501_M1_Croc     | 3.7631  | 3.8457  | 3.9928  | 3.9183  | 4.0359  | 3.6768  | 3.8751  | 3.7721  | 3.6465  | 3.7416  | 1.0301 | 0.0428  | 0.1912 | 0.1286 |
| Cmtm4   | _TES[Phospho][STY]RDVDSRPEIQR_3                                                          | QBC61_S194_M1_Cmtm4    | 3.9455  | 3.9117  | 4.0678  | 4.1586  | 3.7608  | 3.4701  | 4.4043  | 3.4735  | 3.4586  | 3.1712  | 1.0989 | 0.1361  | 0.1038 | 0.9840 |
| Syn3    | _SPGS[Phospho][STY]PQLSR_2                                                               | QBI2P2_S483_M1_Syn3    | 11.1909 | 11.5216 | 11.8998 | 11.7040 | 10.6275 | 11.5593 | 11.4206 | 11.2955 | 11.3550 | 11.3550 | 1.0062 | 0.0090  | 0.7680 | 0.1146 |
| Syn3    | _LSPGQQPVS[Phospho][STY]PQSGSPQQQR_3                                                     | #N/A                   | 8.7356  | 9.0895  | 9.0853  | 9.4988  | 7.6818  | 8.8598  | 8.8572  | 8.9798  | 8.7098  | 8.6259  | 1.0036 | 0.0052  | 0.9232 | 0.0347 |
| Syn3    | _S[Phospho][STY]LNSLS30TSHR_2                                                            | #N/A                   | 8.3638  | 8.1436  | 8.4433  | 8.6926  | 7.3075  | 8.4930  | 8.3343  | 8.1922  | 8.5405  | 8.2261  | 0.9901 | -0.0144 | 0.7570 | 0.1209 |
| Syn3    | _STS[Phospho][STY]QQGEPEQK_2                                                             | QBI2P2_S519_M1_Syn3    | 8.9813  | 8.8335  | 8.9405  | 4.0703  | 3.6273  | 9.0948  | 8.3219  | 8.8524  | 8.8957  | 9.0423  | 0.8268 | -0.2743 | 0.2947 | 0.5305 |
| Syn3    | _SAS[Phospho][STY]PHHNLNK_2                                                              | QBI2P2_S530_M1_Syn3    | 3.4735  | 3.8689  | 3.2072  | 4.2518  | 3.6902  | 4.0393  | 4.4001  | 4.2502  | 3.0484  | 3.9291  | 0.9611 | -0.0572 | 0.6355 | 0.1969 |
| Gaz211  | _TGTS[Phospho][STY]IPQR_2                                                                | QBI2P9_S292_M1_Gaz211  | 7.1415  | 4.0340  | 7.7330  | 7.1728  | 3.8553  | 3.8742  | 4.2350  | 7.5959  | 7.0653  | 7.0897  | 0.8674 | -0.2052 | 0.4708 | 0.3271 |
| Gaz211  | _GSPTPSPRPGS[Phospho][STY]PVPSGSR_3                                                      | QBI2P9_S306_M1_Gaz211  | 3.5621  | 5.1643  | 5.9865  | 5.4147  | 5.0649  | 3.8006  | 3.8135  | 3.9051  | 3.8618  | 3.6143  | 1.2721 | 0.3472  | 0.0668 | 1.1751 |
| Alf312  | _NLETLQDELGEGENR_2                                                                       | #N/A                   | 3.4944  | 3.8480  | 3.2281  | 4.2727  | 5.3939  | 4.0602  | 4.4210  | 5.6579  | 3.0275  | 3.9500  | 0.9497 | -0.0745 | 0.7214 | 0.1458 |
| Ef3b    | _GHPSAGAEFGES[Phospho][STY]DGS[Phospho][STY]AAEAER_2                                     | #N/A                   | 6.8432  | 6.9160  | 7.2546  | 7.4001  | 6.8572  | 7.2337  | 7.3864  | 7.1508  | 7.4115  | 6.8077  | 0.9854 | -0.0212 | 0.5430 | 0.2612 |
| Ef3b    | _AKPAQSEETATS[Phospho][STY]PAAS[Phospho][STY]PTQSAER_3                                   | QBI2Q9_S75_M2_Ef3b     | 10.4281 | 10.7216 | 11.1658 | 11.3299 | 10.3347 | 10.7750 | 11.0234 | 10.8493 | 10.8745 | 10.6075 | 0.9957 | -0.0062 | 0.8333 | 0.0792 |
| Ef3b    | _SPS[Phospho][STY]DEPSAPGK_2                                                             | QBI2Q9_S90_M1_Ef3b     | 7.9401  | 7.2836  | 3.7580  | 4.1452  | 6.9281  | 3.4777  | 8.0845  | 7.0864  | 4.0238  | 3.8224  | 0.9712 | -0.0421 | 0.9041 | 0.0438 |
| Slc4a8  | _KLSS[Phospho][STY]IPGR_2                                                                | QBI2R6_S1046_M1_Slc4a8 | 8.3231  | 8.4665  | 9.0458  | 3.5153  | 3.3816  | 3.2430  | 8.9100  | 8.9127  | 3.7849  | 8.3334  | 0.8010 | -0.3201 | 0.4235 | 0.3732 |
| Slc4a8  | _ALS[Phospho][STY]INGNTK_2                                                               | QBI2R6_S1076_M1_Slc4a8 | 5.8954  | 6.0136  | 4.3521  | 3.3539  | 2.7910  | 5.5485  | 5.7559  | 5.7183  | 5.4392  | 5.1435  | 0.8449 | -0.2432 | 0.2627 | 0.5805 |
| Slc4a8  | _DGGTVS[Phospho][STY]PQSATNLEVK_2                                                        | QBI2R6_S259_M1_Slc4a8  | 3.6970  | 3.5292  | 4.3838  | 3.3856  | 3.4175  | 5.8738  | 6.9830  | 3.2320  | 6.0098  | 3.3526  | 0.8270 | -0.2740 | 0.3725 | 0.4288 |
| Slc4a8  | _KGS[Phospho][STY]DPHSMADR_2                                                             | QBI2R6_S246_M1_Slc4a8  | 3.2946  | 3.9315  | 3.9814  | 4.6944  | 3.8198  | 4.3056  | 4.1988  | 3.6344  | 3.2830  | 4.4511  | 1.0290 | 0.0412  | 0.7329 | 0.1550 |
| Lin7a   | _EQNS[Phospho][STY]PYHSR_2                                                               | QBI2S0_S130_M1_Lin7a   | 9.3229  | 9.3484  | 9.8089  | 9.7410  | 9.0229  | 9.4825  | 9.5815  | 9.3023  | 9.3833  | 9.4589  | 1.0055 | 0.0078  | 0.7056 | 0.1314 |
| Lin7a   | _ATVAFAAASEGHSHPR_3                                                                      | #N/A                   | 5.8908  | 5.3647  | 3.4301  | 6.3993  | 6.1986  | 5.3511  | 3.1222  | 5.7391  | 5.3551  | 4.1520  | 1.1845 | 0.2442  | 0.2744 | 0.5612 |
| Lin7a   | _VLQSEFC[Carbamidomethyl][C]ITAR_2                                                       | #N/A                   | 3.5449  | 4.3012  | 3.2786  | 4.9811  | 5.1254  | 4.8705  | 4.4714  | 4.9209  | 2.9771  | 4.0005  | 1.0630 | 0.0881  | 0.6321 | 0.1993 |
| Lin7a   | _VLEMEAR_2                                                                               | #N/A                   | 4.0389  | 3.1873  | 3.2249  | 5.2278  | 3.0756  | 3.5490  | 3.4422  | 4.3910  | 4.0395  | 3.7672  | 0.9507 | -0.0729 | 0.6777 | 0.1690 |
| Lin7a   | _QQQQLLIQQQQQQQQQQQNHM[Oxidation][M]IS_3                                                 | #N/A                   | 3.5714  | 3.6954  | 4.4925  | 4.0252  | 3.3486  | 3.5106  | 3.8714  | 3.0460  | 3.1434  | 3.5865  | 1.1061 | 0.1455  | 0.2053 | 0.6876 |
| Lin7a   | _LQGEVPEVHK_3                                                                            | #N/A                   | 3.4956  | 4.3008  | 4.1824  | 3.1842  | 4.1221  | 3.6073  | 4.3998  | 3.4334  | 3.0820  | 3.1512  | 1.0850 | 0.1177  | 0.3945 | 0.4040 |
| Cpne5   | _DIVQVPRR_2                                                                              | #N/A                   | 7.6582  | 8.0949  | 7.7121  | 7.9705  | 7.6000  | 7.8328  | 7.4140  | 7.7995  | 7.8578  | 7.6597  | 1.0167 | 0.0240  | 0.3344 | 0.4758 |
| Cpne5   | icetyl[Protein N-term]M[Oxidation][M]EQPEDM[Oxidation][M]AS[Phospho][STY]LSEFDSLAGSIPATK | QBI2W4_S9_M1_Cpne5     | 3.0710  | 3.8762  | 3.7578  | 4.2604  | 3.6975  | 4.0320  | 4.3928  | 3.8580  | 3.5066  | 4.2274  | 0.9465 | -0.0793 | 0.4323 | 0.3642 |
| Cpne5   | _FDLVVDVSKS[Phospho][STY]PDLSK_2                                                         | #N/A                   | 3.8283  | 6.5676  | 3.5943  | 7.7802  | 6.7126  | 4.1963  | 7.5504  | 7.0739  | 7.0025  | 7.0759  | 0.7590 | -0.3978 | 0.0958 | 1.0188 |
| Cpne5   | 'RPPPAAPAQSS[Phospho][STY]PPQS[Phospho][STY]PAHS[Phospho][STY]PPGSPVHT[Phospho][STY]HL   | QBI2W4_T581_M1_Cpne5   | 3.2627  | 9.2572  | 3.7950  | 10.9226 | 9.8511  | 8.8162  | 5.9248  | 10.1732 | 9.8448  | 10.5777 | 0.8380 | -0.2550 | 0.4531 | 0.3438 |
| Cpne5   | iRPPPPAAAPAQSS[Phospho][STY]PPQS[Phospho][STY]PAHS[Phospho][STY]PPGSP[Phospho][STY]PVHT  | #N/A                   | 4.2510  | 3.3437  | 3.9847  | 7.3633  | 3.3947  | 3.2305  | 3.3963  | 5.0839  | 4.1248  | 3.2631  | 1.0742 | 0.1033  | 0.7431 | 0.1289 |
| Sh2d5   | _LGMPYC[Carbamidomethyl][C]S[Phospho][STY]PTLVLR_2                                       | QBI2W5_S237_M1_Sh2d5   | 10.0059 | 3.0774  | 4.4598  | 3.4616  | 2.8987  | 8.7663  | 3.1763  | 3.1560  | 4.3054  | 3.4286  | 1.5484 | 0.6307  | 0.2650 | 0.5767 |
| Sh2d5   | _RAS[Phospho][STY]DQ[Carbamidomethyl][C]GPAPVPR_3                                        | QBI2W5_S12_M1_Sh2d5    | 4.8732  | 4.4025  | 5.6326  | 5.3075  | 4.5548  | 3.5057  | 4.9719  | 5.5366  | 2.9803  | 3.2529  | 1.1260 | 0.1712  | 0.4254 | 0.3712 |
| Rbm17   | _RPDPDS[Phospho][STY]DEDEYER_2                                                           | #N/A                   | 3.6820  | 3.5442  | 4.3688  | 3.3706  | 7.0169  | 3.1921  | 3.0853  | 3.2470  | 4.3965  | 7.4332  | 0.9241 | -0.1139 | 0.7585 | 0.1200 |
| Rbm17   | _RPOFDS[Phospho][STY]DEDEYERER_3                                                         | #N/A                   | 6.8035  | 6.7231  | 7.5786  | 6.8082  | 3.7023  | 4.4232  | 6.9587  | 3.5168  | 7.3676  | 6.9051  | 0.9708 | -0.0427 | 0.8694 | 0.0608 |
| Adgr12  | _S[Phospho][STY]ENEDIYK_2                                                                | QBI2Z7_S1428_M1_Adgr12 | 6.3876  | 5.7218  | 3.7854  | 4.2880  | 3.6935  | 5.5257  | 5.7994  | 5.1824  | 5.6180  | 5.7636  | 0.8684 | -0.2036 | 0.2353 | 0.6285 |
| Adgr12  | _GNS[Phospho][STY]DGYIPNK_2                                                              | QBI2Z7_S1458_M1_Adgr12 | 3.1320  | 10.3290 | 4.3665  | 10.7864 | 9.3955  | 10.4    |         |         |         |         |        |         |        |        |



|         |                                                                                     |                        |          |         |         |         |         |         |         |         |         |         |        |         |        |        |
|---------|-------------------------------------------------------------------------------------|------------------------|----------|---------|---------|---------|---------|---------|---------|---------|---------|---------|--------|---------|--------|--------|
| Bclaf1  | _FHDS[Phospho (STY)]EGGOTEETEDYR_2                                                  | #N/A                   | 6.3653   | 5.1472  | 6.0919  | 6.0821  | 5.5785  | 5.8948  | 5.4667  | 6.3794  | 6.5480  | 5.9793  | 0.9617 | -0.0563 | 0.4478 | 0.3489 |
| Bclaf1  | _YS[Phospho (STY)]PSQNS[Phospho (STY)]PHHIPSRR_3                                    | #N/A                   | 8.3077   | 7.4255  | 6.9026  | 7.1704  | 6.1284  | 7.5857  | 6.9763  | 3.7419  | 7.2312  | 3.9600  | 1.3242 | 0.4052  | 0.0653 | 1.1853 |
| Bclaf1  | _NTPSQSHSQSH[Phospho (STY)]PER_3                                                    | QBK019_5267_M1_Bclaf1  | 7.7765   | 7.6554  | 8.2951  | 8.0150  | 7.2283  | 7.4697  | 7.9474  | 8.0476  | 7.8757  | 7.5295  | 0.9860 | -0.0204 | 0.6209 | 0.2070 |
| Bclaf1  | _LKEFDYS[Phospho (STY)]PLHK_3                                                       | #N/A                   | 3.9536   | 7.3464  | 7.8426  | 8.2865  | 5.5987  | 6.3571  | 6.7542  | 7.6916  | 7.1297  | 3.7502  | 1.0368 | 0.0521  | 0.8346 | 0.0785 |
| Bclaf1  | _SIFREES[Phospho (STY)]PLR_2                                                        | #N/A                   | 9.0894   | 9.2567  | 10.0251 | 9.4536  | 8.6070  | 9.2080  | 9.8852  | 9.4907  | 9.3473  | 9.3392  | 0.9745 | -0.0372 | 0.3749 | 0.4260 |
| Bclaf1  | _OKFHDS[Phospho (STY)]EGGOTEETEDYR_3                                                | #N/A                   | 5.7786   | 5.4246  | 6.2138  | 5.8124  | 5.3194  | 5.3680  | 5.2567  | 5.5437  | 5.5452  | 5.1083  | 1.0539 | 0.0758  | 0.1794 | 0.7461 |
| Bclaf1  | _EKSFREES[Phospho (STY)]PLR_3                                                       | #N/A                   | 4.8336   | 5.8896  | 6.3309  | 3.8934  | 4.9838  | 5.8780  | 5.6966  | 5.6504  | 5.3875  | 5.7176  | 0.9445 | -0.0824 | 0.5198 | 0.2842 |
| Bclaf1  | _EVCS[Phospho (STY)]PEQVCKEK_2                                                      | #N/A                   | 8.7382   | 9.3555  | 10.1057 | 9.2846  | 9.0031  | 9.2049  | 9.5536  | 9.6341  | 9.0792  | 9.0397  | 0.9957 | -0.0062 | 0.8832 | 0.0540 |
| Bclaf1  | _YS[Phospho (STY)]PSQNS[Phospho (STY)]PHHIPSRR_3                                    | #N/A                   | 8.2214   | 8.1706  | 4.1605  | 8.4116  | 3.5706  | 7.9891  | 8.3665  | 3.3851  | 3.0337  | 7.8897  | 1.1914 | 0.2527  | 0.5189 | 0.2850 |
| Bclaf1  | _GRAAGGWDDQEVLDYF[Phospho (STY)]DKESAK_4                                            | #N/A                   | 3.2417   | 4.0264  | 4.1857  | 3.1484  | 3.8758  | 3.3562  | 4.2059  | 3.3574  | 3.1179  | 3.2904  | 1.0418 | 0.0591  | 0.6157 | 0.1967 |
| Bclaf1  | _ADGGWDDQEVLDYF[Phospho (STY)]DKESAK_3                                              | #N/A                   | 3.3301   | 4.0123  | 4.5646  | 4.1084  | 3.9747  | 4.1507  | 4.2567  | 4.3936  | 3.1918  | 3.7857  | 1.0298 | 0.0424  | 0.7043 | 0.1522 |
| Bclaf1  | _SQEPEKDTTEHDPS[Phospho (STY)]DEFNK_3                                               | QBK019_5198_M1_Bclaf1  | 4.2523   | 3.5078  | 3.9860  | 3.5298  | 3.3961  | 3.2285  | 3.6780  | 3.4714  | 3.7704  | 3.2071  | 1.0335 | 0.0476  | 0.6073 | 0.2166 |
| Bclaf1  | _LRC[Carbamidomethyl (C)]DS[Phospho (STY)]ADLR_2                                    | QBK019_5688_M1_Bclaf1  | 3.0541   | 3.8104  | 4.2886  | 3.8324  | 3.6987  | 4.4268  | 3.9806  | 3.1688  | 3.4679  | 3.5096  | 1.0906 | 0.1252  | 0.2884 | 0.5400 |
| Scamp1  | _TVQTAAANAATAATSAAQNAFK_3                                                           | #N/A                   | 3.5344   | 5.1302  | 5.1579  | 5.3302  | 4.4706  | 4.5176  | 5.4411  | 5.1939  | 5.2676  | 4.8692  | 0.9032 | -0.1469 | 0.1934 | 0.7135 |
| Scamp1  | _EMQNLS[Phospho (STY)]QHGR_2                                                        | QBK021_5112_M1_Scamp1  | 5.8455   | 3.2127  | 3.6909  | 6.2262  | 3.6465  | 3.5236  | 4.9798  | 2.7230  | 4.0655  | 4.4128  | 1.0772 | 0.1073  | 0.6961 | 0.1573 |
| Stard8  | _SL[Phospho (STY)]ESL[Carbamidomethyl (C)]POEGR_2                                   | QBK031_5234_M1_Stard8  | 7.7443   | 3.6702  | 8.1287  | 4.0925  | 3.5585  | 7.9475  | 3.8072  | 4.1035  | 8.0037  | 7.9143  | 0.9832 | -0.0245 | 0.9478 | 0.0233 |
|         | _IQPQLPDEDGNHS[Phospho (STY)]DKEDQPVVVVKK_4                                         | #N/A                   | 3.1905   | 7.8297  | 4.5812  | 9.1917  | 8.1096  | 7.6125  | 6.9190  | 8.1140  | 7.7119  | 7.6318  | 0.8892 | -0.1695 | 0.5044 | 0.2973 |
|         | _KIQPLPDEDGNHS[Phospho (STY)]DKEDQPVVVVKK_4                                         | #N/A                   | 3.0565   | 4.1697  | 3.7433  | 5.7643  | 5.0662  | 4.7784  | 3.9606  | 5.0348  | 5.0375  | 5.1668  | 0.9229 | -0.1158 | 0.5154 | 0.2878 |
|         | _IQPQLPDEDGNHS[Phospho (STY)]DKEDQPVVVVKK_4                                         | #N/A                   | 3.6740   | 3.6121  | 3.7793  | 6.8641  | 5.7512  | 5.3754  | 3.7419  | 5.5906  | 6.2515  | 5.6251  | 0.9133 | -0.1308 | 0.5879 | 0.2307 |
|         | _NSSLSFDS[Phospho (STY)]EDENE_2                                                     | QBK039_5150_M1_        | 3.7791   | 3.7197  | 4.2539  | 7.7983  | 6.2585  | 3.7456  | 3.9459  | 7.2324  | 3.5899  | 3.4749  | 1.0800 | 0.1111  | 0.7538 | 0.1228 |
| Samd14  | _S[Phospho (STY)]LDEPPPSPLAR_2                                                      | QBK070_5108_M1_Samd14  | 11.5205  | 12.2128 | 11.9123 | 12.6082 | 11.2331 | 12.4245 | 12.4203 | 12.1622 | 12.2425 | 12.4186 | 0.9735 | -0.0387 | 0.2730 | 0.5638 |
| Samd14  | _VTDGC[Carbamidomethyl (C)]SG[Phospho (STY)]PLHR_2                                  | QBK070_577_M1_Samd14   | 6.9128   | 7.2906  | 6.6928  | 6.8886  | 6.2740  | 6.1396  | 6.4047  | 6.7917  | 6.4047  | 6.7917  | 0.9539 | -0.0681 | 0.4125 | 0.3846 |
| Samd14  | _HEGFS[Phospho (STY)]PK_2                                                           | QBK070_5267_M1_Samd14  | 4.8563   | 4.8909  | 5.8154  | 5.6730  | 4.4068  | 4.8503  | 4.3183  | 3.5218  | 5.5727  | 5.0169  | 1.1030 | 0.1415  | 0.3198 | 0.4951 |
| Samd14  | _AEPHSEDOSRDS[Phospho (STY)]PPPEASPTGLDKK_4                                         | #N/A                   | 6.1104   | 5.2216  | 3.7729  | 3.7127  | 6.9224  | 6.7280  | 6.6556  | 6.9262  | 6.7139  | 3.9685  | 0.8921 | -0.1648 | 0.4939 | 0.3064 |
| Samd14  | _GSASSGTSPT[Phospho (STY)]C[Carbamidomethyl (C)]SPK_2                               | QBK070_17258_M1_Samd14 | 3.4221   | 4.0105  | 3.9585  | 3.8971  | 3.5440  | 3.7120  | 4.0390  | 3.5885  | 3.6919  | 4.1445  | 0.9719 | -0.0411 | 0.5194 | 0.2845 |
| Samd14  | _DAS[Phospho (STY)]PPPEASPTGLDKK_2                                                  | #N/A                   | 3.5974   | 4.0407  | 3.9754  | 3.9057  | 3.7973  | 3.6519  | 3.8507  | 3.5990  | 3.7105  | 3.6799  | 1.0318 | 0.0452  | 0.2708 | 0.5673 |
| Samd14  | _DAS[Phospho (STY)]PPPEASPTGLDKK_2                                                  | #N/A                   | 4.3596   | 2.9828  | 4.0933  | 3.6371  | 8.7023  | 3.4245  | 9.5212  | 9.0501  | 3.6632  | 3.3143  | 0.7097 | -0.4946 | 0.3086 | 0.5107 |
| Samd14  | _DASSAEDGE[Phospho (STY)]DGGPGK_2                                                   | QBK070_564_M1_Samd14   | 3.8388   | 3.3707  | 3.7212  | 4.1285  | 3.0028  | 3.4421  | 3.4133  | 3.7520  | 4.2499  | 3.8058  | 0.9419 | -0.0864 | 0.3901 | 0.4089 |
| Znf536  | _GGS[Phospho (STY)]DOESQSVSR_2                                                      | QBK083_5678_M1_Znf536  | 2.8969   | 3.6532  | 4.2598  | 3.2616  | 5.5665  | 3.0832  | 4.4771  | 3.3560  | 5.6167  | 3.2286  | 0.3560 | -0.1389 | 0.5854 | 0.2765 |
| Cdk17   | _RLS[Phospho (STY)]PADIR_2                                                          | QBK000_5146_M1_Cdk17   | 7.2650   | 6.9532  | 7.3040  | 7.8832  | 5.5879  | 7.5281  | 7.7044  | 7.5618  | 7.3285  | 7.3776  | 0.9458 | -0.0804 | 0.3533 | 0.4219 |
| Cdk17   | _RAS[Phospho (STY)]LSEIGFK_2                                                        | QBK000_5180_M1_Cdk17   | 3.1226   | 3.8789  | 4.3571  | 7.5509  | 3.7672  | 7.1511  | 6.9546  | 6.8880  | 7.0560  | 6.9458  | 0.7005 | -0.5136 | 0.0529 | 0.2756 |
| Cdk17   | _RIS[Phospho (STY)]Mediation (M)]JEDLNKR_3                                          | #N/A                   | 5.6939   | 4.9379  | 5.9987  | 5.3777  | 4.5454  | 5.6887  | 5.3232  | 5.3332  | 5.9144  | 5.4550  | 0.9759 | -0.0352 | 0.6674 | 0.1756 |
| Cdk17   | _RIS[Phospho (STY)]MEDUNK_2                                                         | #N/A                   | 5.6440   | 4.8730  | 3.9197  | 6.8489  | 3.3298  | 3.2948  | 3.1880  | 3.1443  | 3.5857  | 3.4403  | 1.3929 | 0.4781  | 0.1083 | 0.9654 |
| Cdk17   | _MGSDGSDQASGTSEVQ[Phospho (STY)]PTGV[Carbamidomethyl (C)]LR_3                       | QBK000_5122_M1_Cdk17   | 3.2388   | 3.9950  | 4.4733  | 4.0171  | 3.8833  | 4.2421  | 4.1353  | 2.9841  | 3.2832  | 3.6943  | 1.1279 | 0.1736  | 0.1598 | 0.7963 |
| Cdk17   | _LQIS[Phospho (STY)]PPFDQPMR_2                                                      | QBK000_5165_M1_Cdk17   | 3.9244   | 3.3017  | 3.1104  | 7.0709  | 3.1900  | 3.4346  | 3.3277  | 3.0046  | 4.1540  | 3.5801  | 1.1390 | 0.1878  | 0.5599 | 0.2961 |
| Phyhip  | _JSWAM[Oxidation (M)]JESDLR_2                                                       | #N/A                   | 6.7427   | 6.6413  | 7.1769  | 6.4775  | 6.3017  | 7.2462  | 6.9963  | 7.0135  | 7.1000  | 6.7220  | 0.9722 | -0.0407 | 0.3692 | 0.4328 |
| Phyhip  | _EYQHAR_2                                                                           | #N/A                   | 6.7093   | 6.2515  | 6.0602  | 6.2530  | 6.4589  | 6.0965  | 6.1069  | 6.6181  | 6.3753  | 6.1651  | 0.9982 | -0.0026 | 0.9427 | 0.0256 |
| Phyhip  | _THC[Carbamidomethyl (C)]GNVLPLYK_2                                                 | #N/A                   | 4.7997   | 4.3498  | 5.4714  | 3.6743  | 4.5758  | 4.5107  | 4.1664  | 4.8770  | 4.8321  | 5.1228  | 0.9608 | -0.0576 | 0.5995 | 0.2222 |
| Phyhip  | _RLTC[Carbamidomethyl (C)]SIVEDGEUFR_2                                              | #N/A                   | 5.8504   | 2.9577  | 3.4360  | 3.9571  | 5.1963  | 5.5511  | 3.6718  | 4.9059  | 5.3932  | 3.9241  | 1.0038 | 0.0054  | 0.9811 | 0.0083 |
| Phyhip  | _Acetyl (Protein N-term)]M[Oxidation (M)]ELLSHPHSEIRNNTC[Carbamidomethyl (C)]DSFR_3 | #N/A                   | 3.5967   | 4.3529  | 3.5600  | 4.0627  | 4.2412  | 4.0847  | 3.7774  | 4.2351  | 4.8750  | 3.9790  | 0.9446 | -0.0822 | 0.3834 | 0.4164 |
| Erich5  | _LSSERDS[Phospho (STY)]PGAPQAGTM[Oxidation (M)]KC_2                                 | #N/A                   | 3.7596   | 4.8803  | 4.8749  | 3.9766  | 4.7812  | 4.6198  | 3.6913  | 4.2237  | 3.7945  | 4.1423  | 1.1310 | 0.1776  | 0.0909 | 1.0415 |
| Rtn1    | _HOAQVQYGLGVIR_2                                                                    | #N/A                   | 6.4478   | 5.8299  | 6.5804  | 5.6984  | 5.6680  | 6.3691  | 6.3688  | 6.3397  | 6.3982  | 6.1486  | 0.9660 | -0.0500 | 0.3457 | 0.4613 |
| Rtn1    | _THINTVAAK_2                                                                        | #N/A                   | 7.0660   | 7.2088  | 7.7404  | 6.7027  | 7.0831  | 7.2612  | 7.5786  | 7.4100  | 7.2705  | 7.0103  | 0.9808 | -0.0279 | 0.4965 | 0.3041 |
| Rtn1    | _TDEGHPFK_2                                                                         | #N/A                   | 7.3093   | 7.2027  | 6.5800  | 6.7248  | 7.0874  | 6.9439  | 7.1960  | 7.3444  | 7.1048  | 7.0776  | 0.9713 | -0.0420 | 0.2102 | 0.6773 |
| Rtn1    | _VSLVTAPVK_2                                                                        | #N/A                   | 4.4071   | 4.8690  | 5.5371  | 3.9358  | 4.9677  | 5.7049  | 4.0173  | 5.8007  | 5.2745  | 5.4883  | 0.9530 | -0.0694 | 0.6139 | 0.2119 |
| Rtn1    | _APNOPAPVEGK_2                                                                      | #N/A                   | 7.1527   | 7.2637  | 7.0215  | 6.5064  | 7.3469  | 6.8361  | 6.9892  | 7.2123  | 6.7878  | 6.9312  | 1.0059 | 0.0085  | 0.8181 | 0.0872 |
| Rtn1    | _ELC[Carbamidomethyl (C)]SGPAR_2                                                    | #N/A                   | 5.2498   | 5.0010  | 4.3177  | 4.8380  | 5.8734  | 4.9273  | 4.0098  | 5.5781  | 5.0918  | 5.4699  | 0.9994 | -0.0008 | 0.9943 | 0.0025 |
| Rtn1    | _EQDS[Phospho (STY)]PPM[Oxidation (M)]KPGALDAIR_2                                   | #N/A                   | 9.7028   | 9.2077  | 9.5474  | 10.1042 | 8.4539  | 9.0779  | 10.1146 | 9.7481  | 9.4663  | 9.3355  | 0.9672 | -0.0481 | 0.3530 | 0.4522 |
| Rtn1    | _Acetyl (Protein N-term)]AAPLOLDEPLSG[Phospho (STY)]PGSQWFGGR_3                     | QBK070_516_M1_Rtn1     | 3.7955   | 6.1313  | 4.4823  | 7.4418  | 3.3190  | 3.3057  | 3.1988  | 6.4213  | 4.2829  | 3.4511  | 1.0939 | 0.1295  | 0.7050 | 0.1518 |
| Rtn1    | _REQDS[Phospho (STY)]PPM[Oxidation (M)]KPGALDAIR_3                                  | #N/A                   | 5.5860   | 5.8939  | 6.0384  | 5.7390  | 5.4924  | 5.5147  | 6.3938  | 6.0537  | 3.4659  | 1.0322  | 0.0457 | 0.7583  | 0.1202 | 0.1903 |
| Rtn1    | _GDGEDATAVMGAR_2                                                                    | #N/A                   | 6.4010   | 3.9998  | 3.9132  | 6.8841  | 3.8529  | 3.8766  | 4.1305  | 3.7026  | 3.3512  | 4.3829  | 1.2388 | 0.0390  | 0.2485 | 0.6047 |
| Rtn1    | _GS[Phospho (STY)]SEDELAIAIK_2                                                      | QBK070_5350_M1_Rtn1    | 3.8765   | 3.6623  | 4.0007  | 4.0934  | 3.4836  | 3.6059  | 3.9667  | 5.6181  | 5.2655  | 3.9660  | 0.8870 | -0.1729 | 0.2455 | 0.6100 |
| Unc13c  | _NAWLSPMDS[Phospho (STY)]DRELESOLR_3                                                | QBK070_5450_M1_Unc13c  | 3.7113   | 3.0156  | 4.3981  | 3.6042  | 2.8369  | 3.3917  | 3.7525  | 3.3969  | 3.6960  | 3.2815  | 0.9890 | -0.0159 | 0.8997 | 0.0459 |
| Hspa12a | _ETAPTSTYS[Phospho (STY)]PAR_2                                                      | QBK014_524_M1_Hspa12a  | 11.5446  | 11.6042 | 12.0069 | 11.8870 | 10.3749 | 11.5725 | 11.6208 | 11.5956 | 11.5956 | 11.5030 | 0.9931 | -0.1011 | 0.7938 | 0.1003 |
| Hspa12a | _LDLTGS[Phospho (STY)]GGTAVPAR_2                                                    | QBK014_5631_M1_Hspa12a | 8.7377   | 8.3942  | 8.5597  | 9.1630  | 7.8754  | 8.6609  | 9.1064  | 8.8538  | 5.9440  | 8.8118  | 1.0472 | 0.0666  | 0.5567 | 0.2544 |
| Hspa12a | _HIPQDGLTLK_2                                                                       | #N/A                   | 7.3800   | 7.1744  | 6.9609  | 7.2703  | 7.2681  | 7.1628  | 7.1951  | 7.4059  | 7.3746  | 7.2539  | 0.9857 | -0.0208 | 0.2406 | 0.6188 |
| Hspa12a | _TPTTLTTPR_2                                                                        | #N/A                   | 7.4329   | 7.3775  | 7.3708  | 7.4829  | 7.3912  | 7.3253  | 7.1996  | 7.5098  | 7.6997  | 6.8443  | 1.0114 | 0.0164  | 0.5949 | 0.2256 |
| Hspa12a | _Acetyl (Protein N-term)]ADKEAGGGDAPR_2                                             | #N/A                   | 6.7908   | 7.1832  | 6.8871  | 7.3214  | 7.1426  | 7.1941  | 6.8750  | 6.9131  | 7.1099  | 7.1251  | 1.0115 | 0.0165  | 0.5050 | 0.2967 |
| Hspa12a | _ELSDQAGGSFENSQVIR_2                                                                | #N/A                   | 6.8157   | 6.2369  | 6.4967  | 6.5065  | 6.1765  | 6.8588  | 6.8565  | 6.4176  | 6.3687  | 6.8664  | 0.9687 | -0.0459 | 0.2348 | 0.6292 |
| Hspa12a | _GAVLFGDPAVIR_2                                                                     | #N/A                   | 6.3922   | 6.8472  | 6.6578  | 5.8669  | 6.6466  | 6.7461  | 6.5496  | 6.9198  | 6.7560  | 7.1518  | 0.9535 | -0.0687 | 0.1646 | 0.7835 |
| Hspa12a | _IFGEDIEQFK_2                                                                       | #N/A                   | 5.8889   | 5.9857  | 5.9045  | 5.3111  | 5.3391  | 5.4772  | 6.0658  | 5.6282  | 5.3503  | 5.9644  | 0.9824 | -0.0256 | 0.6330 | 0.1825 |
| Hspa12a | _WEGGDQPVSNQK_2                                                                     | #N/A                   | 6.7195</ |         |         |         |         |         |         |         |         |         |        |         |        |        |



|         |                                                             |                       |         |         |         |         |         |         |         |         |         |         |         |         |        |        |
|---------|-------------------------------------------------------------|-----------------------|---------|---------|---------|---------|---------|---------|---------|---------|---------|---------|---------|---------|--------|--------|
| Pdkk    | _VNDVNKYDYVLTGYTR_3                                         | #N/A                  | 7.7125  | 7.6311  | 7.3544  | 7.7541  | 7.3858  | 7.8205  | 7.3580  | 7.1025  | 7.2998  | 7.5593  | 1.0382  | 0.0540  | 0.0548 | 1.2613 |
| Pdkk    | _SQELHIEVGLK_2                                              | #N/A                  | 6.1110  | 6.0331  | 5.9829  | 6.1866  | 5.9973  | 5.9182  | 5.9439  | 5.5027  | 5.1454  | 5.9055  | 1.0736  | 0.1024  | 0.0297 | 1.5269 |
| Pdkk    | _DKVVPVADIPNQNQFAELISGR_3                                   | #N/A                  | 4.9605  | 5.2066  | 5.3115  | 4.918   | 5.6851  | 4.0312  | 5.6418  | 5.0625  | 5.2693  | 5.2933  | 0.9212  | -0.1184 | 0.2619 | 0.5819 |
| Pdkk    | _SFLAM[Oxidation (M)]VVOVR_2                                | #N/A                  | 4.2375  | 4.1367  | 3.5095  | 3.4875  | 4.6422  | 4.3209  | 5.0821  | 4.4399  | 4.8028  | 4.2402  | 0.8738  | -0.1946 | 0.0693 | 1.1594 |
| Pdkk    | _XPDSGYTOR_2                                                | #N/A                  | 6.7873  | 6.5976  | 7.3913  | 7.1146  | 7.4916  | 7.6810  | 4.4470  | 6.9667  | 6.4153  | 5.7274  | 1.2187  | 0.2854  | 0.0279 | 1.5543 |
| Pdkk    | _TVSAMQHWLQR_2                                              | #N/A                  | 5.0449  | 3.8092  | 3.9470  | 6.7077  | 4.7914  | 3.2676  | 3.9372  | 3.9062  | 3.7477  | 4.6240  | 1.1334  | 0.1807  | 0.4252 | 0.3714 |
| Pdkk    | _DIEDPEVWQATV_2                                             | #N/A                  | 2.9125  | 3.7177  | 3.5993  | 4.3597  | 3.8985  | 4.1904  | 4.9264  | 4.0165  | 3.6651  | 3.8577  | 0.9182  | -0.1231 | 0.3536 | 0.4515 |
| Cz2d1a  | _LANHDEGS[Phospho (STY)]DDEEEETPK_3                         | #N/A                  | 6.9822  | 6.0285  | 7.0464  | 6.7977  | 6.3051  | 6.1933  | 6.4458  | 6.9554  | 6.9934  | 6.5350  | 0.9742  | -0.0377 | 0.5060 | 0.2959 |
| Cz2d1a  | _LANHDEGS[Phospho (STY)]DDEEEETPKXQNTPAASTQLK_4             | #N/A                  | 3.4440  | 4.2492  | 6.5204  | 3.1326  | 4.0705  | 3.6589  | 4.3482  | 3.4850  | 3.1336  | 3.0996  | 1.1885  | 0.2491  | 0.3461 | 0.4607 |
| Cz2d1a  | _SSPS[Phospho (STY)]KAPPPGPAPAGK_2                          | QBK1A6_S461_M1_Cz2d1a | 3.2619  | 4.0671  | 3.9487  | 4.4513  | 3.8884  | 3.8411  | 4.1660  | 3.6672  | 3.3157  | 4.4183  | 1.0046  | 0.0066  | 0.9502 | 0.6622 |
| Cz2d1a  | _LANHDEGS[Phospho (STY)]DDEEEETPK_2                         | #N/A                  | 3.4522  | 4.9777  | 5.2668  | 4.3497  | 4.4434  | 4.9225  | 3.8595  | 4.7347  | 4.7095  | 4.9750  | 0.9998  | -0.0003 | 0.9981 | 0.0008 |
| Enho    | _SADVDS[Phospho (STY)]LESPPNSPGFC[Carbamidomethyl (C)]PEK_2 | QBK1D8_S43_M1_Enho    | 2.9239  | 3.6802  | 4.1584  | 3.7022  | 3.8264  | 4.7748  | 3.8505  | 4.6933  | 3.3795  | 0.9907  | -0.0134 | 0.9279  | 0.0325 |        |
| Tcp1l12 | _QC[Carbamidomethyl (C)]VSEQQSQS[Phospho (STY)]DSESSR_2     | QBK1H7_S16_M1_Tcp1l12 | 3.4285  | 3.7976  | 4.1153  | 4.6180  | 4.0550  | 3.6744  | 3.3895  | 3.5005  | 2.3910  | 3.0841  | 1.2772  | 0.3530  | 0.0180 | 1.7452 |
| Sde2    | _EDGIDAVEVAADRPQS[Phospho (STY)]PR_2                        | #N/A                  | 5.1522  | 5.0227  | 3.6311  | 6.0478  | 5.1068  | 5.0863  | 5.5813  | 6.0079  | 5.6647  | 5.8491  | 0.8670  | -0.2058 | 0.0934 | 1.0296 |
| Ppp1r11 | _AFGESSTDEDEEEGC[Carbamidomethyl (C)]S[Phospho (STY)]HK_3   | QBK1L5_S91_M1_Ppp1r11 | 4.1053  | 3.2871  | 3.2913  | 3.5168  | 5.4016  | 3.3248  | 3.4209  | 4.0969  | 4.8725  | 4.5999  | 0.8996  | -0.1526 | 0.4141 | 0.3829 |
| Dnm1l   | _ELPSAGS[Phospho (STY)]RDK_2                                | QBK1M6_S535_M1_Dnm1l  | 9.3908  | 9.3252  | 9.2977  | 3.6571  | 3.0941  | 9.2546  | 8.8636  | 9.3048  | 9.1918  | 9.2720  | 0.8011  | -0.3199 | 0.2796 | 0.5535 |
| Dnm1l   | _SQLDINNIX_2                                                | #N/A                  | 6.6041  | 6.5492  | 6.6159  | 7.1581  | 6.5686  | 6.4505  | 6.7432  | 6.9040  | 6.5732  | 6.9113  | 0.9815  | -0.0270 | 0.4063 | 0.3912 |
| Dnm1l   | _LYTDFERQREIETER_3                                          | #N/A                  | 6.3966  | 6.1881  | 6.5368  | 6.5204  | 5.7576  | 5.9978  | 5.2959  | 6.2960  | 6.4925  | 6.5112  | 1.0137  | 0.0196  | 0.7703 | 0.1134 |
| Dnm1l   | _DTQSELVGLYK_2                                              | #N/A                  | 6.3751  | 6.4619  | 6.1408  | 6.0410  | 6.2279  | 5.9279  | 5.8753  | 5.6273  | 6.0666  | 5.8222  | 1.0595  | 0.0834  | 0.0239 | 1.6214 |
| Dnm1l   | _VFSFNVNLTVLDFGM[Oxidation (M)]TK_2                         | #N/A                  | 6.2193  | 4.6728  | 5.0033  | 5.5915  | 5.8063  | 5.6511  | 5.5065  | 5.6170  | 5.4270  | 0.9994  | -0.0009 | 0.9912  | 0.0039 |        |
| Dnm1l   | _ALQSGAQIAER_2                                              | #N/A                  | 5.2869  | 5.4379  | 4.7366  | 4.2470  | 5.1069  | 5.0617  | 5.1066  | 4.7703  | 4.8424  | 5.4667  | 0.9867  | -0.1919 | 0.3793 | 0.0984 |
| Dnm1l   | _SVTDSRDEYAFQK_3                                            | #N/A                  | 6.4632  | 5.7835  | 3.5612  | 6.5762  | 6.3686  | 6.7731  | 6.3476  | 6.0135  | 6.3043  | 6.7291  | 0.9326  | -0.1006 | 0.5130 | 0.2899 |
| Dnm1l   | _SQLDINNIX_2                                                | #N/A                  | 6.8193  | 6.6127  | 7.1260  | 7.2095  | 6.5208  | 6.7335  | 6.8800  | 6.6694  | 6.9240  | 6.8036  | 1.0026  | 0.0037  | 0.9078 | 0.0420 |
| Dnm1l   | _GHAVNLLDVPPVVAR_2                                          | #N/A                  | 4.6225  | 4.8397  | 4.2935  | 5.2023  | 4.3101  | 4.4480  | 4.7679  | 5.1568  | 4.5805  | 4.0009  | 0.9985  | -0.0022 | 0.9788 | 0.0093 |
| Dnm1l   | _RLEEPSLR_2                                                 | #N/A                  | 5.0691  | 4.4197  | 5.0736  | 4.7228  | 4.5461  | 4.6470  | 3.1590  | 4.3236  | 4.3227  | 3.4113  | 1.2477  | 0.3192  | 0.0094 | 2.0263 |
| Dnm1l   | _VPSALAPASQEPPPAASAEADGK_2                                  | #N/A                  | 4.9300  | 4.8706  | 3.9064  | 3.4502  | 4.8354  | 3.2376  | 3.5984  | 4.8684  | 4.7994  | 4.0559  | 0.9710  | -0.0424 | 0.7924 | 0.1011 |
| Dnm1l   | _DC[Carbamidomethyl (C)]EVIER_2                             | #N/A                  | 5.2773  | 3.0402  | 4.4226  | 3.5797  | 5.6025  | 4.6700  | 3.7279  | 4.8317  | 3.3915  | 0.6703  | 1.0666  | 0.0930  | 0.6418 | 0.1926 |
| Dnm1l   | _SKPIPM[Oxidation (M)]PLAS[Phospho (STY)]POK_2              | #N/A                  | 7.3276  | 8.3097  | 7.0882  | 9.4935  | 3.8888  | 7.8362  | 7.2972  | 8.1472  | 7.3478  | 6.6381  | 0.9954  | -0.0066 | 0.9739 | 0.0115 |
| Dnm1l   | _TLESVPLGLGNTDILAIR_2                                       | #N/A                  | 3.3532  | 4.2350  | 4.5452  | 4.6710  | 4.2636  | 4.0886  | 4.4637  | 4.5123  | 4.2773  | 3.5180  | 1.0000  | 0.0000  | 0.9998 | 0.0001 |
| Dnm1l   | _SSLLDLLESEDM[Oxidation (M)]AJQR_2                          | #N/A                  | 5.5230  | 5.6135  | 5.9378  | 5.4506  | 5.4979  | 5.7662  | 5.6561  | 5.4957  | 5.6823  | 5.5444  | 1.0066  | 0.0095  | 0.7261 | 0.1390 |
| Dnm1l   | _LQDFVNTVGADILQPGVVGVTQSSGK_3                               | #N/A                  | 3.1300  | 4.0684  | 3.8168  | 4.3195  | 3.7566  | 4.1410  | 4.0342  | 3.3536  | 4.2865  | 0.9211  | -0.1185 | 0.7335  | 0.0360 |        |
| Dnm1l   | _YIETSELG[Carbamidomethyl (C)]GGAR_2                        | #N/A                  | 3.9837  | 3.2881  | 3.1697  | 3.6724  | 3.1094  | 3.1192  | 3.3870  | 4.4461  | 4.0947  | 3.6394  | 0.8712  | -0.1990 | 0.0912 | 1.0400 |
| Dnm1l   | _IHGHC[Carbamidomethyl (C)]SNYSTQELLR_3                     | #N/A                  | 4.2615  | 3.3499  | 3.7627  | 3.7473  | 3.6221  | 3.9228  | 3.6767  | 3.8827  | 4.0268  | 3.6676  | 0.9906  | -0.0136 | 0.8387 | 0.1661 |
| Dnm1l   | _C[Carbamidomethyl (C)]YFHETGR_2                            | #N/A                  | 4.1751  | 4.0639  | 4.1056  | 4.0133  | 4.3461  | 3.8218  | 3.9119  | 3.5629  | 3.2404  | 3.8750  | 1.1206  | 0.1643  | 0.0203 | 1.6927 |
| Dnm1l   | _FATEYC[Carbamidomethyl (C)]NTEGTAK_2                       | #N/A                  | 4.3901  | 3.4635  | 4.1238  | 3.6675  | 3.5338  | 3.0908  | 3.8158  | 3.1216  | 3.6327  | 3.3448  | 1.0669  | 0.0935  | 0.4126 | 0.3845 |
| Dnm1l   | _SNSNSHILAVTAANTDM[Oxidation (M)]AJSEALK_3                  | #N/A                  | 3.6755  | 2.9799  | 4.3623  | 3.3641  | 2.8012  | 3.4274  | 3.0788  | 3.2535  | 4.4029  | 2.2381  | 1.0591  | 0.0829  | 0.6822 | 0.1261 |
| Phldb2  | _RIS[Phospho (STY)]AGTTVADQK_2                              | QBK1N2_S465_M1_Phldb2 | 3.9264  | 3.4160  | 3.6601  | 3.2038  | 3.2374  | 2.9913  | 3.3521  | 3.7973  | 4.0964  | 4.3819  | 0.8717  | -0.1980 | 0.0756 | 1.1613 |
| Spire2  | _DRS[Phospho (STY)]FSHQALQR_3                               | QBK1S6_S443_M1_Spire2 | 3.8319  | 3.3728  | 5.0547  | 4.2458  | 4.0393  | 4.9254  | 3.3706  | 4.0517  | 4.1918  | 4.7761  | 1.0360  | 0.0510  | 0.7328 | 0.1410 |
| Wdr11   | _YVSSSHSS[Phospho (STY)]PAHUK_2                             | #N/A                  | 5.5882  | 4.9494  | 4.5429  | 6.6184  | 4.5893  | 3.9579  | 4.0341  | 4.7728  | 4.5562  | 3.6035  | 1.1447  | 0.1950  | 0.1364 | 0.8651 |
| Cof9    | _YTQGS[Phospho (STY)]GEEETVESEQLQHR_3                       | QBK1Z0_S81_M1_Cof9    | 4.0412  | 5.9183  | 5.6918  | 6.2970  | 6.1076  | 6.2824  | 6.1082  | 5.3586  | 6.3039  | 6.0191  | 0.9623  | -0.0555 | 0.6428 | 0.1919 |
| Cof9    | _LVLGQAAEK_2                                                | #N/A                  | 4.7773  | 4.6561  | 3.8946  | 4.8385  | 5.1205  | 5.0761  | 5.1213  | 4.0793  | 5.2049  | 4.9276  | 0.9781  | -0.0320 | 0.7371 | 0.1325 |
|         | _GRDYC[Carbamidomethyl (C)]S[Phospho (STY)]EEDIT_2          | QBK207_S115_M1_       | 10.0520 | 10.3856 | 11.0047 | 10.6916 | 10.3065 | 10.3705 | 10.6055 | 10.2052 | 10.4497 | 0.9715  | 0.0164  | 0.5501  | 0.2595 |        |
|         | _ANM[Oxidation (M)]HS[Phospho (STY)]ESQEFFR_3               | QBK207_S93_M1_        | 2.9158  | 2.9257  | 4.1503  | 3.6941  | 4.2479  | 3.4816  | 3.8424  | 3.3071  | 3.6061  | 3.3714  | 1.0106  | 0.0152  | 0.9066 | 0.0426 |
| Adrg1   | _LPISSGS[Phospho (STY)]TSSSR_2                              | QBK209_S681_M1_Adrg1  | 3.1422  | 3.8985  | 4.3767  | 4.5171  | 3.7868  | 4.3866  | 4.2318  | 3.6014  | 3.2499  | 3.8313  | 1.1403  | 0.2005  | 0.8801 | 0.0555 |
| Adrg1   | _NNNSDS[Phospho (STY)]AKLPSSGTSSSR_3                        | #N/A                  | 4.0844  | 3.3614  | 4.4914  | 3.4932  | 3.2202  | 3.1292  | 3.5054  | 3.1297  | 4.2792  | 3.4602  | 1.0143  | -0.0266 | 0.6515 | 0.1861 |
| Pacs1   | _QLS[Phospho (STY)]KPLSER_2                                 | QBK212_S517_M1_Pacs1  | 10.2365 | 10.1294 | 10.2143 | 10.3999 | 8.3671  | 10.1321 | 9.9925  | 10.1914 | 10.2169 | 9.9893  | 0.9817  | -0.0266 | 0.6515 | 0.1861 |
| Pacs1   | _DVSVPAEIK_2                                                | #N/A                  | 6.3107  | 6.1728  | 5.7971  | 5.9699  | 5.5719  | 6.0106  | 6.2693  | 5.8686  | 4.8173  | 5.3959  | 1.0688  | 0.0960  | 0.2092 | 0.6795 |
| Pacs1   | _S[Phospho (STY)]TLKER_2                                    | QBK212_S508_M1_Pacs1  | 3.7937  | 3.0981  | 4.4805  | 3.4823  | 2.9194  | 3.3093  | 5.2942  | 3.1353  | 4.2847  | 3.4493  | 0.8696  | -0.2016 | 0.3020 | 0.5199 |
| Pacs1   | _ALQSGAS[Phospho (STY)]PSKVEGTHPR_3                         | QBK212_S493_M1_Pacs1  | 4.3666  | 5.5871  | 4.1003  | 3.6441  | 3.5103  | 3.1143  | 3.7923  | 5.7355  | 3.6562  | 3.3213  | 0.9824  | -0.0256 | 0.9097 | 0.0411 |
| Pacs1   | _VAAGSGSYLSILR_2                                            | #N/A                  | 4.3662  | 3.6141  | 3.9013  | 4.0404  | 3.8410  | 4.2255  | 3.3672  | 3.9265  | 3.4674  | 0.9999  | 1.3804  | 0.4651  | 0.0744 | 1.1285 |
| Pacs1   | _DTS[Phospho (STY)]PM[Oxidation (M)]ELAAEK_2                | #N/A                  | 7.2343  | 3.9399  | 3.5842  | 4.1838  | 3.9768  | 3.9589  | 7.4945  | 6.9786  | 3.2250  | 7.3837  | 0.7144  | -0.4852 | 0.1314 | 0.8814 |
| Pacs1   | _YSSTLDSAWR_2                                               | #N/A                  | 5.3228  | 5.3549  | 4.7433  | 5.7680  | 4.6576  | 5.0283  | 3.3280  | 3.8215  | 4.1426  | 4.2773  | 1.3220  | 0.4028  | 0.0017 | 2.7694 |
| Pacs1   | _TNS[Phospho (STY)]DSERSPOLGHSTQIPR_3                       | QBK212_S526_M1_Pacs1  | 7.0243  | 5.9866  | 8.0832  | 6.0143  | 5.8561  | 7.2136  | 7.5476  | 7.5919  | 7.3608  | 7.3571  | 0.8971  | -0.1566 | 0.1317 | 0.8803 |
| Pacs1   | _GSGVAQS[Phospho (STY)]QQQPPQQPPQPPQPTPPK_3                 | QBK212_S528_M1_Pacs1  | 3.9315  | 4.5301  | 4.1504  | 5.6658  | 3.5530  | 3.6689  | 3.7100  | 3.4084  | 8.8506  | 3.7664  | 1.1537  | 0.2062  | 0.1984 | 0.7024 |
| Pacs1   | _GS[Phospho (STY)]LGDTTSPM[Oxidation (M)]ELAAEK_3           | QBK212_S421_M1_Pacs1  | 3.4765  | 4.2817  | 4.1633  | 3.8390  | 4.1030  | 3.5024  | 3.9873  | 3.4525  | 3.1011  | 3.6948  | 1.0942  | 0.1299  | 0.1838 | 0.7357 |
| Arfp2   | _HPSHST[Phospho (STY)]PSGQGVAR_3                            | QBK221_S76_M1_Arfp2   | 5.1793  | 4.7959  | 4.1566  | 3.9156  | 4.9855  | 5.0130  | 3.6303  | 5.0141  | 3.9548  | 5.4494  | 1.0359  | 0.0509  | 0.7156 | 0.1453 |
| Fcho1   | _GHS[Phospho (STY)]PSC[Carbamidomethyl (C)]LAR_2            | QBK285_S628_M1_Fcho1  | 3.1386  | 3.8949  | 4.3732  | 4.5207  | 3.7832  | 4.3422  | 4.2354  | 3.5978  | 3.2464  | 3.5942  | 1.0928  | 0.1280  | 0.3032 | 0.5183 |
| Mtmr3   | _RSS[Phospho (STY)]DPSLNEX_2                                | QBK296_S633_M1_Mtmr3  | 8.9484  | 9.1441  | 9.6737  | 9.3483  | 8.5405  | 4.2062  | 9.4820  | 9.4058  | 9.1731  | 8.8555  | 0.9004  | -0.1513 | 0.4071 | 0.3903 |
| Anln    | _DSNLSAAS[Phospho (STY)]PKPGK_2                             | QBK298_S637_M1_Anln   | 10.0992 | 10.3316 | 10.8567 | 10.9002 | 10.0989 | 10.4042 | 10.6761 | 10.2001 | 10.2888 | 10.4201 | 1.0050  | 0.0072  | 0.7996 | 0.0971 |
| Anln    | _AES[Phospho (STY)]ADS[Phospho (STY)]LGSED_2                | #N/A                  | 7.9042  | 7.6673  | 3.8108  | 8.2355  | 7.4718  | 8.0513  | 8.2049  | 8.0260  | 8.4116  | 7.9861  | 0.9815  | -0.1820 | 0.2932 | 0.5329 |
| Anln    | _AESADS[Phospho (STY)]GSEDRDLYSIDAYR_3                      | QBK298_S656_M1_Anln   | 3.1834  | 4.2303  | 4.0855  | 4.3471  | 4.6419  | 4.4928  | 4.0515  | 3.7270  | 3.7330  | 3.6546  | 1.0881  | 0.1350  | 0.2109 | 0.5679 |
| Anln    | _KDS[Phospho (STY)]LGPDKK_2                                 | QBK298_S887_M1_Anln   | 3.6327  | 3.6323  | 4.9797  | 3.9277  | 3.7546  | 3.9749  | 4.6270  | 4.5420  | 3.4049  | 3.8032  | 0.9730  | -0.0395 | 0.7594 |        |



|          |                                                                           |                         |         |         |         |         |         |         |         |         |         |         |         |         |        |        |
|----------|---------------------------------------------------------------------------|-------------------------|---------|---------|---------|---------|---------|---------|---------|---------|---------|---------|---------|---------|--------|--------|
| Sdha     | _TYFSC[Carbamidomethyl (C)]TSAHTSTGDTGAM[Oxidation (M)]VTR_3              | #N/A                    | 3.3588  | 4.1640  | 4.0456  | 5.6696  | 3.9853  | 3.7442  | 4.1050  | 3.5702  | 3.2188  | 3.0144  | 1.1968  | 0.2591  | 0.1637 | 0.7860 |
| Sdha     | _TGHSLHTLUGR_3                                                            | #N/A                    | 5.5175  | 5.4814  | 3.1247  | 5.2843  | 3.0645  | 5.2380  | 3.5250  | 4.3595  | 5.2798  | 5.4674  | 0.9915  | -0.0123 | 0.9564 | 0.0194 |
| Sdha     | _SHTVAQGGINAAIGNMEEDNWR_3                                                 | #N/A                    | 4.9532  | 5.4531  | 3.3166  | 8.1196  | 4.2275  | 3.8979  | 3.7911  | 4.0421  | 3.6907  | 4.0434  | 1.2834  | 0.3599  | 0.2428 | 0.6148 |
| Sdha     | _HVGNGQDQVPGLYAC[Carbamidomethyl (C)]GEAAC[Carbamidomethyl (C)]ASVHGAMR_4 | #N/A                    | 5.2637  | 3.8937  | 4.0308  | 3.9072  | 5.0395  | 4.8865  | 4.2482  | 3.5965  | 5.4784  | 4.8620  | 0.9759  | -0.0351 | 0.8108 | 0.0911 |
| Hacd3    | _EGS[Phospho (STY)]PETLTNUK_2                                             | #N/A                    | 3.0164  | 3.8216  | 7.1879  | 4.2059  | 3.6430  | 6.2623  | 7.1589  | 3.9126  | 6.7173  | 6.2552  | 0.7802  | -0.5882 | 0.2302 | 0.6379 |
| Hacd3    | _EGS[Phospho (STY)]PETLTNUK_2                                             | #N/A                    | 4.2669  | 6.8086  | 3.4529  | 3.9556  | 3.3926  | 4.3369  | 3.6702  | 4.1629  | 3.8115  | 3.9226  | 1.1226  | 0.1668  | 0.4824 | 0.3166 |
| Hacd3    | _WLDES[Phospho (STY)]DAEM[Oxidation (M)]ELR_2                             | #N/A                    | 7.9718  | 8.3547  | 7.4551  | 9.5699  | 7.1625  | 8.6040  | 9.1353  | 9.3248  | 9.6004  | 8.8897  | 0.8862  | -0.1743 | 0.0506 | 1.2958 |
| Edc3     | _SCDVAS[Phospho (STY)]PQGGC[Carbamidomethyl (C)]SK_2                      | QBK2D3_S131_M1_Edc3     | 9.2247  | 9.3118  | 9.9481  | 8.9941  | 8.3973  | 9.1057  | 9.3584  | 9.1126  | 8.9977  | 8.9599  | 1.0065  | 0.0093  | 0.8361 | 0.7774 |
| Edc3     | _HNS[Phospho (STY)]WSSSR_2                                                | QBK2D3_S161_M1_Edc3     | 6.5590  | 5.7205  | 6.3003  | 6.6452  | 3.4585  | 5.0511  | 5.8402  | 3.4089  | 6.2488  | 3.2695  | 1.2197  | 0.2865  | 0.2686 | 0.5730 |
| Brd3     | _SES[Phospho (STY)]PPLSSEPK_2                                             | QBK2F0_S262_M1_Brd3     | 10.6078 | 10.5776 | 11.2232 | 10.7140 | 9.5412  | 10.5705 | 11.1901 | 10.7212 | 10.5411 | 10.5234 | 0.9809  | -0.0278 | 0.5212 | 0.2810 |
| Lum14a   | _S[Phospho (STY)]PQLDPLR_2                                                | #N/A                    | 10.1872 | 10.0609 | 4.4669  | 10.5569 | 9.8652  | 3.9096  | 10.6776 | 9.9086  | 10.2787 | 10.3065 | 0.7942  | -0.3324 | 0.2187 | 0.6601 |
| Lum14a   | _SFFDNIS[Phospho (STY)]C[Carbamidomethyl (C)]DONRER_2                     | #N/A                    | 3.5282  | 3.8887  | 3.3866  | 3.7704  | 3.7556  | 3.5793  | 3.6630  | 4.6774  | 4.6515  | 3.6356  | 0.8784  | -0.1870 | 0.0782 | 1.1070 |
| Lum14a   | _S[Phospho (STY)]PQLDPLR_2                                                | #N/A                    | 10.2417 | 9.9559  | 4.1050  | 10.5593 | 9.6439  | 10.0925 | 10.4773 | 9.8708  | 9.9424  | 10.1658 | 0.8997  | -0.1525 | 0.4450 | 0.3516 |
| Lum14a   | _S[Phospho (STY)]PVPARPLPTTSQK_2                                          | QBK2F8_S216_M1_Lum14a   | 3.2843  | 8.4363  | 4.5188  | 8.2099  | 3.9289  | 4.1966  | 4.2109  | 7.1356  | 7.2577  | 7.2577  | 0.9943  | -0.0083 | 0.9829 | 0.0075 |
| Pphn1    | _DAS[Phospho (STY)]PSSSAVASSK_2                                           | QBK2H1_S219_M1_Pphn1    | 10.7340 | 10.9931 | 11.3248 | 11.4131 | 10.9900 | 11.0423 | 10.9852 | 10.9063 | 10.7978 | 10.9727 | 1.0153  | 0.0220  | 0.2373 | 0.6247 |
| Pphn1    | _DAPFFES[Phospho (STY)]PVGR_2                                             | #N/A                    | 6.5522  | 7.1077  | 7.5402  | 7.7722  | 6.8234  | 7.3032  | 7.5253  | 7.1039  | 6.7958  | 7.2940  | 1.0005  | 0.0007  | 0.9900 | 0.0044 |
| Pphn1    | _DAPFFES[Phospho (STY)]PVGR_3                                             | #N/A                    | 3.2379  | 3.7259  | 4.4724  | 4.0822  | 3.2853  | 4.2430  | 4.1644  | 3.4318  | 3.2841  | 3.6934  | 1.0543  | 0.0762  | 0.5312 | 0.2747 |
| Otd5b    | _Acetyl (Protein N-term)MEEVAEELDDEEQLVR_2                                | #N/A                    | 3.9727  | 3.6339  | 4.2790  | 6.6822  | 3.4758  | 3.1024  | 4.4964  | 3.3368  | 2.9854  | 3.8952  | 1.1393  | 0.1882  | 0.4888 | 0.3109 |
| Frtb     | _PVPGEEC[Carbamidomethyl (C)]DEEVT[Phospho (STY)]DPATO_2                  | QBK2U1_S432_M1_Frtb     | 2.9789  | 3.7351  | 4.2134  | 3.1797  | 3.6234  | 3.0012  | 4.3952  | 6.8267  | 3.0866  | 3.4344  | 0.7790  | -0.3604 | 0.2058 | 0.6866 |
| Afg1     | _GTPSGS[Phospho (STY)]PVGR_2                                              | QBK2M6_S181_M1_Afg1     | 10.3213 | 10.5475 | 10.8752 | 11.0699 | 9.5894  | 10.6607 | 10.3950 | 10.2641 | 10.2333 | 10.5195 | 1.0152  | 0.0218  | 0.5761 | 0.2395 |
| Afg1     | _SSS[Phospho (STY)]ADGFTVSQSHQTASTVSK_3                                   | QBK2M6_S293_M1_Afg1     | 4.1926  | 3.1498  | 3.9362  | 3.4700  | 2.9712  | 3.2575  | 3.6183  | 3.5312  | 3.8302  | 3.1473  | 0.9895  | -0.0153 | 0.8926 | 0.0493 |
| Afg1     | _SISM[Oxidation (M)]TTTTTQDEIFLQK_2                                       | #N/A                    | 3.0149  | 3.1884  | 3.9612  | 3.7932  | 4.1488  | 3.5807  | 3.4005  | 3.5070  | 3.4705  | 1.0234  | 0.0334  | 0.7545  | 0.1223 | 0.0890 |
| Trappc12 | _SSLTAPVGES[Phospho (STY)]POSTSPSYSTR_3                                   | QBK2L8_S309_M1_Trappc12 | 7.1064  | 6.9889  | 7.5841  | 7.7162  | 4.8974  | 6.7862  | 7.0638  | 7.5082  | 7.3893  | 6.7999  | 0.9522  | -0.0707 | 0.5387 | 0.2687 |
| Slc38a1  | _S[Phospho (STY)]LTNSHLEK_2                                               | #N/A                    | 7.8107  | 7.6068  | 8.2071  | 7.8601  | 6.2428  | 7.4352  | 8.0361  | 8.6938  | 7.7307  | 3.3923  | 1.0810  | 0.1123  | 0.5939 | 0.2263 |
| Slc38a1  | _RS[Phospho (STY)]LTNSHLEK_2                                              | #N/A                    | 6.0984  | 6.2769  | 6.9060  | 6.3661  | 5.1702  | 6.3398  | 7.0662  | 6.4855  | 6.2351  | 0.9245  | -0.1133 | 0.1658  | 0.1784 | 0.7803 |
| Slc38a1  | _S[Phospho (STY)]LTNSHLEK_2                                               | #N/A                    | 6.0631  | 6.6426  | 6.7056  | 4.4718  | 4.9353  | 6.3199  | 6.4812  | 6.5413  | 5.5933  | 5.7889  | 0.9603  | -0.0585 | 0.6496 | 0.1873 |
| Slc38a1  | _RS[Phospho (STY)]LTNS[Phospho (STY)]HLEKR_3                              | #N/A                    | 3.6290  | 3.6893  | 3.8357  | 4.0078  | 3.5489  | 4.3962  | 3.8542  | 3.7264  | 3.7689  | 3.8045  | 1.0165  | 0.0237  | 0.7074 | 0.5703 |
| Ipo11    | _NEDESS[Phospho (STY)]PETLEAHK_2                                          | QBK2V6_S343_M1_Ipo11    | 6.0741  | 6.4921  | 4.4848  | 6.0255  | 3.8949  | 4.2306  | 7.0267  | 2.9726  | 6.4526  | 3.7059  | 1.0319  | 0.0453  | 0.8731 | 0.0590 |
| Obi1     | _LKAEVDNR[Phospho (STY)]POK_2                                             | #N/A                    | 3.9331  | 4.0498  | 4.8937  | 4.4802  | 3.6315  | 3.7917  | 3.4817  | 3.8400  | 4.3316  | 4.1086  | 1.0486  | 0.0685  | 0.5145 | 0.2886 |
| Obi1     | _SVEGPGSKS[Phospho (STY)]PQGR_2                                           | QBK2Y0_S566_M1_Obi1     | 5.8202  | 6.0154  | 4.2127  | 6.5579  | 3.4338  | 6.3388  | 6.2363  | 3.9938  | 6.0757  | 6.0753  | 0.9645  | -0.0522 | 0.8037 | 0.0949 |
| Ccm2     | _TAQDPGSI[Phospho (STY)]PQSLC[Carbamidomethyl (C)]JAESSR_2                | QBK2Y9_S164_M1_Ccm2     | 8.3506  | 8.6672  | 8.6157  | 9.0532  | 7.8966  | 8.6831  | 8.7196  | 8.6399  | 8.5178  | 8.6811  | 0.9900  | -0.0146 | 0.6811 | 0.1668 |
| Ccm2     | _GITDS[Phospho (STY)]FGR_2                                                | QBK2Y9_S393_M1_Ccm2     | 4.0960  | 9.2688  | 3.2820  | 3.7846  | 8.4089  | 9.3851  | 3.4993  | 5.9455  | 3.9824  | 9.4399  | 0.9628  | -0.0546 | 0.9048 | 0.0434 |
| Matr3    | _RDS[Phospho (STY)]FQDR_2                                                 | #N/A                    | 8.5994  | 8.3404  | 8.3418  | 8.8857  | 8.5859  | 8.1672  | 8.5925  | 8.4878  | 8.4389  | 8.5436  | 0.9966  | -0.0049 | 0.8330 | 0.0794 |
| Matr3    | _S[Phospho (STY)]ATREPPYR_2                                               | #N/A                    | 8.8091  | 8.5079  | 7.9456  | 9.4399  | 8.1204  | 7.6866  | 8.7969  | 8.5916  | 4.3282  | 4.1501  | 1.3018  | 0.3805  | 0.1053 | 0.9775 |
| Matr3    | _ITFENPQILQLK_2                                                           | #N/A                    | 6.9782  | 7.0327  | 6.9295  | 6.7469  | 6.9480  | 6.6888  | 6.2169  | 6.5188  | 6.8493  | 7.1104  | 1.0320  | 0.0454  | 0.2421 | 0.6161 |
| Matr3    | _GDTDOASNLISFGLSAR_2                                                      | #N/A                    | 6.4496  | 5.8527  | 6.3514  | 5.5697  | 6.2170  | 5.9211  | 6.1631  | 5.2639  | 5.4819  | 6.1900  | 1.0494  | 0.0696  | 0.2927 | 0.5336 |
| Matr3    | _JGYPQNPVPGVGVPK_2                                                        | #N/A                    | 5.9735  | 5.9049  | 6.1758  | 6.6023  | 5.4610  | 5.7659  | 6.1218  | 6.0712  | 5.6268  | 5.9297  | 1.0073  | 0.0105  | 0.8465 | 0.0724 |
| Matr3    | _KRS[Phospho (STY)]SP[Phospho (STY)]POGK_2                                | #N/A                    | 3.1167  | 6.3811  | 3.8035  | 4.1988  | 3.7432  | 3.9863  | 4.3471  | 6.1253  | 6.7542  | 3.8761  | 0.7970  | -0.2373 | 0.2138 | 0.6699 |
| Matr3    | _S[Phospho (STY)]QESGYDR_2                                                | QBK310_S208_M1_Matr3    | 7.8482  | 7.3898  | 7.7762  | 8.0068  | 6.8983  | 4.0136  | 7.8330  | 7.4368  | 7.5791  | 7.5505  | 0.8319  | -0.2656 | 0.2297 | 0.6389 |
| Matr3    | _TES[Phospho (STY)]PAEGKEQEK_2                                            | #N/A                    | 7.0158  | 6.6551  | 7.2551  | 4.5881  | 4.7162  | 7.0401  | 7.3363  | 6.9729  | 7.2560  | 7.2607  | 0.8620  | -0.2143 | 0.1518 | 0.8189 |
| Matr3    | _SQQSSUGR_2                                                               | #N/A                    | 6.1952  | 6.0307  | 6.1656  | 6.8522  | 6.3666  | 6.3414  | 5.5463  | 5.9284  | 6.6310  | 5.8972  | 1.0541  | 0.0760  | 0.1984 | 0.7024 |
| Matr3    | _TEEGPTLSYGR_2                                                            | #N/A                    | 6.5475  | 6.9059  | 3.6778  | 6.4313  | 7.0830  | 6.6879  | 6.4027  | 6.5619  | 6.7536  | 0.9544  | -0.0673 | 0.6677  | 0.1754 | 0.7544 |
| Matr3    | _TDAQKT[Phospho (STY)]ESPAEGK_2                                           | QBK310_T617_M1_Matr3    | 3.5551  | 3.5663  | 5.3531  | 4.9502  | 3.4289  | 3.9097  | 4.2950  | 3.3744  | 3.6735  | 3.7710  | 1.0923  | 0.1274  | 0.4556 | 0.3414 |
| Matr3    | _RDS[Phospho (STY)]DORGPSLNPLVDYHGSR_4                                    | #N/A                    | 4.0609  | 9.3947  | 8.8949  | 11.2809 | 9.8834  | 9.2909  | 9.7102  | 10.3188 | 8.8401  | 0.8836  | -0.1785 | 0.3875  | 0.7455 | 0.1170 |
| Matr3    | _RSYS[Phospho (STY)]POGK_2                                                | #N/A                    | 3.6716  | 2.9759  | 4.3584  | 3.3602  | 2.7973  | 3.4114  | 3.0749  | 3.2574  | 4.4069  | 3.3272  | 0.9761  | -0.0349 | 0.8256 | 0.0832 |
| Matr3    | _SYS[Phospho (STY)]POGKES[Phospho (STY)]PSDKK_2                           | #N/A                    | 10.6540 | 10.8039 | 11.3677 | 11.3438 | 10.9307 | 10.9060 | 10.9297 | 10.9281 | 11.0229 | 10.8998 | 1.0051  | 0.0073  | 0.7196 | 0.0632 |
| Matr3    | _TDAQKTES[Phospho (STY)]PAEGKEQEK_3                                       | #N/A                    | 6.0785  | 6.9214  | 3.3909  | 4.4355  | 6.6763  | 6.3947  | 6.6245  | 6.4256  | 6.6828  | 6.3910  | 0.8650  | -0.2092 | 0.2578 | 0.5887 |
| Matr3    | _DOWEEKR_2                                                                | #N/A                    | 6.9147  | 5.7747  | 6.4026  | 6.5770  | 6.7191  | 6.4360  | 6.1269  | 6.4038  | 6.7445  | 6.5804  | 0.9478  | -0.0774 | 0.5130 | 0.2899 |
| Matr3    | _LC[Carbamidomethyl (C)]SLYTFINEAAK_2                                     | #N/A                    | 4.4562  | 3.0661  | 4.4486  | 3.4504  | 4.7687  | 4.4819  | 3.1651  | 5.0701  | 5.3331  | 5.2570  | 0.8737  | -0.1948 | 0.3005 | 0.5221 |
| Matr3    | _SQQSSLGROSI[Phospho (STY)]QGHGR_3                                        | QBK310_S14_M1_Matr3     | 3.4101  | 5.2465  | 5.4240  | 5.2751  | 4.0547  | 4.7088  | 4.9294  | 4.3136  | 3.8657  | 1.1557  | 0.2088  | 0.2506  | 0.6010 | 0.6201 |
| Matr3    | _S[Phospho (STY)]ATREPPYRVPR_3                                            | #N/A                    | 4.1184  | 3.3739  | 3.8521  | 3.5409  | 3.2622  | 3.3624  | 3.2556  | 3.0767  | 4.2262  | 3.0732  | 1.0520  | 0.0731  | 0.5402 | 0.2675 |
| Matr3    | _RRT[Phospho (STY)]EGGPTLSYGR_3                                           | QBK310_T150_M1_Matr3    | 2.9618  | 4.6267  | 3.6486  | 5.8176  | 5.5770  | 3.9728  | 3.5805  | 5.2958  | 3.6158  | 5.3002  | 0.9017  | -0.1493 | 0.4890 | 0.3107 |
| Matr3    | _SYS[Phospho (STY)]POGKESPSDK_2                                           | #N/A                    | 7.4054  | 7.6307  | 8.0620  | 7.9828  | 7.4944  | 7.6669  | 7.6724  | 7.8032  | 7.6908  | 7.7541  | 0.9970  | -0.0043 | 0.8697 | 0.0606 |
| Matr3    | _DSFDORGPSLNPLVDYHGSR_4                                                   | #N/A                    | 4.2768  | 4.2231  | 3.9011  | 3.9424  | 4.7689  | 5.1065  | 3.3380  | 4.1469  | 4.1993  | 4.8880  | 1.0547  | 0.0769  | 0.5343 | 0.2722 |
| Matr3    | _VYHMDFOR_2                                                               | #N/A                    | 4.8157  | 4.2739  | 4.3030  | 6.0430  | 3.7131  | 4.4124  | 3.9950  | 3.1544  | 3.4534  | 3.5241  | 1.3066  | 0.3792  | 0.0379 | 1.4216 |
| Matr3    | _VHLSNLPVSGSYDSAAVLK_3                                                    | #N/A                    | 6.1119  | 6.5596  | 6.8047  | 6.0356  | 5.8646  | 6.2866  | 5.6131  | 6.6184  | 6.3745  | 6.2995  | 1.0082  | 0.0117  | 0.8423 | 0.0745 |
| Matr3    | _GPSLNPLVDYHGSR_3                                                         | #N/A                    | 3.8490  | 3.4277  | 3.5827  | 4.6273  | 3.2282  | 4.4147  | 3.2747  | 3.6711  | 4.4274  | 3.6094  | 1.0292  | 0.0415  | 0.7588 | 0.1199 |
| Matr3    | _DLSAAGLGLAAATGSLSM[Oxidation (M)]PASLGR_2                                | #N/A                    | 4.0147  | 3.2115  | 3.2007  | 3.7033  | 3.1404  | 3.5249  | 3.4180  | 4.4151  | 4.0637  | 3.6703  | 0.8906  | -0.1672 | 0.1240 | 0.9066 |
| Champ1   | _AVLPAS[Phospho (STY)]PEPR_2                                              | QBK327_S532_M1_Cham1    | 7.7742  | 7.4561  | 8.4638  | 8.3465  | 6.9471  | 7.9085  | 8.1537  | 7.4146  | 7.7883  | 7.7075  | 1.0064  | 0.0093  | 0.8768 | 0.0571 |
| Champ1   | _KPSSSI[Phospho (STY)]POLWK_2                                             | QBK327_S434_M1_Cham1    | 4.2986  | 3.6030  | 6.8260  | 3.9872  | 3.4243  | 4.3052  | 3.7019  | 4.1312  | 3.7798  | 3.9542  | 1.1325  | 0.1795  | 0.4412 | 0.3554 |
| Champ1   | _TAS[Phospho (STY)]PEPR_2                                                 | QBK327_S265_M1_Cham1    | 5.8979  | 5.8105  | 3.7177  | 5.5710  | 3.1797  | 3.0490  | 3.4098  | 3.7397  | 4.0387  | 4.4396  | 1.1614  | 0.2159  | 0.4042 | 0.3934 |
| Champ1   | _DSQENS[Phospho (STY)]DAELSSSEYR_2                                        | QBK327_S617_M1_Cham1    | 3.3424  | 7.1758  | 4.      |         |         |         |         |         |         |         |         |         |        |        |



|         |                                                                              |                        |         |         |         |         |        |         |         |         |         |         |         |         |        |        |
|---------|------------------------------------------------------------------------------|------------------------|---------|---------|---------|---------|--------|---------|---------|---------|---------|---------|---------|---------|--------|--------|
| Dennd1a | _ESDSAEGDETES[Phospho (STY)]PEQLVR_2                                         | QBK382_5546_M1_Dennd1a | 3.0755  | 4.9274  | 4.3155  | 5.3234  | 4.8181 | 3.6836  | 5.4923  | 5.4940  | 4.0651  | 5.3079  | 0.8561  | -0.2242 | 0.1887 | 0.7242 |
| Pkl2    | _RS[Phospho (STY)]LEAIPK_2                                                   | #N/A                   | 9.7689  | 9.1515  | 9.4326  | 9.7440  | 8.0568 | 9.3009  | 9.8333  | 9.5595  | 9.5722  | 9.4117  | 0.9633  | -0.0539 | 0.3158 | 0.5006 |
| Pkl2    | _S[Phospho (STY)]LEAIPKASDENG_2                                              | #N/A                   | 8.3852  | 9.4211  | 9.5651  | 9.9277  | 8.5058 | 9.7088  | 10.2765 | 9.7225  | 9.6637  | 9.5665  | 0.9434  | -0.0840 | 0.1556 | 0.8081 |
| Pkl2    | _SSNC[Carbamidomethyl (C)]SGVGQDV[Phospho (STY)]DEDEGAEM[Oxidation (M)]SOR_3 | #N/A                   | 5.6907  | 6.4102  | 3.5685  | 7.2330  | 5.7014 | 6.5345  | 6.8445  | 6.8810  | 6.6910  | 6.5938  | 0.8673  | -0.2054 | 0.2025 | 0.6936 |
| Pkl2    | _S[Phospho (STY)]LEAIPK_2                                                    | #N/A                   | 3.4470  | 3.7791  | 4.1338  | 5.5556  | 4.0735 | 5.4073  | 6.0764  | 6.1507  | 5.6246  | 6.0749  | 1.3765  | -0.3999 | 0.0178 | 1.7508 |
| Pkl2    | _TSP[Phospho (STY)]PAAGVPVR_2                                                | QBK394_587_M1_Pkl2     | 5.3277  | 4.3488  | 4.2304  | 3.2322  | 4.1701 | 3.5594  | 4.4477  | 3.3855  | 4.1241  | 3.1992  | 1.0939  | 0.1294  | 0.4402 | 0.3564 |
| Pkl2    | _RS[Phospho (STY)]LEAIPKASDENG_2                                             | #N/A                   | 3.1148  | 5.5468  | 6.2435  | 5.8816  | 3.7509 | 5.8348  | 4.3117  | 5.7997  | 5.4946  | 5.4997  | 0.9594  | -0.0598 | 0.7708 | 0.1131 |
| Mepce   | _ALNAET[Phospho (STY)]PKSS[Phospho (STY)]PLPAK_2                             | QBK3A9_5192_M2_Mepce   | 3.4162  | 8.2180  | 8.3656  | 8.3463  | 8.7568 | 8.4488  | 8.5339  | 8.1877  | 7.8933  | 8.1459  | 0.8618  | -0.2146 | 0.3138 | 0.5033 |
| Sw5     | _ELVPOFDLNLND_2                                                              | #N/A                   | 3.9087  | 4.4104  | 4.9634  | 3.7102  | 4.2933 | 3.4977  | 2.4725  | 3.2909  | 3.9873  | 3.3875  | 1.2576  | 0.3307  | 0.0501 | 1.2997 |
| Ahl1    | _ERK[Phospho (STY)]PLPTPK_2                                                  | QBK3E5_5974_M1_Ahl1    | 9.4747  | 9.7942  | 9.9269  | 9.8714  | 3.7184 | 9.6459  | 9.4241  | 3.5329  | 3.9849  | 3.0517  | 1.3765  | 0.4610  | 0.2393 | 0.6211 |
| Ahl1    | _GKTPADDS[Phospho (STY)]DOSR_2                                               | #N/A                   | 2.9687  | 3.7739  | 3.6555  | 4.6241  | 3.5952 | 4.5375  | 4.4951  | 5.1927  | 2.9534  | 4.6795  | 0.8912  | -0.1661 | 0.3711 | 0.4305 |
| Ahl1    | _NLSM[Oxidation (M)]TS[Phospho (STY)]PPPGPAK_2                               | #N/A                   | 10.0790 | 10.0621 | 10.2733 | 9.4729  | 9.0136 | 10.0312 | 9.8359  | 9.7143  | 9.6353  | 9.5774  | 1.0135  | 0.0194  | 0.6114 | 0.2137 |
| Ahl1    | _AVSDNEDNTGDGVHEITSRDS[Phospho (STY)]PVHPK_4                                 | QBK3E5_5181_M1_Ahl1    | 6.6454  | 3.6643  | 3.4118  | 6.6338  | 5.8484 | 7.1390  | 6.6121  | 6.4478  | 6.5784  | 6.7129  | 0.8435  | -0.2455 | 0.2482 | 0.6051 |
| Ahl1    | _GKTPADDS[Phospho (STY)]DOSREK_2                                             | #N/A                   | 5.5348  | 6.2201  | 6.2642  | 6.2160  | 5.3483 | 6.1730  | 5.8840  | 3.8496  | 5.8097  | 5.5771  | 1.1286  | 0.1746  | 0.1556 | 0.8079 |
| Ahl1    | _TPTADD[Phospho (STY)]DOSREK_2                                               | #N/A                   | 5.9981  | 6.8344  | 4.5459  | 6.7048  | 2.9848 | 6.8298  | 6.6966  | 6.6582  | 6.5557  | 6.2533  | 0.8637  | -0.2113 | 0.3009 | 0.5216 |
| Ahl1    | _TPTADD[Phospho (STY)]DOSR_2                                                 | #N/A                   | 3.5030  | 4.3082  | 4.1898  | 3.8124  | 4.1296 | 3.5999  | 3.9607  | 3.1887  | 3.4878  | 3.4897  | 1.1110  | 0.1519  | 0.1012 | 0.9950 |
| Ahl1    | _VKERS[Phospho (STY)]PLPT[Phospho (STY)]PK_3                                 | #N/A                   | 3.5768  | 4.3331  | 3.3105  | 4.0826  | 4.2214 | 3.9041  | 3.7972  | 4.0359  | 3.6845  | 4.0496  | 1.0033  | 0.0048  | 0.9532 | 0.0208 |
| Ahl1    | _ERS[Phospho (STY)]PLPT[Phospho (STY)]PKEK_3                                 | #N/A                   | 4.4342  | 3.6476  | 3.5292  | 4.0318  | 3.4689 | 4.2606  | 3.1205  | 4.0866  | 3.7352  | 3.9988  | 1.0388  | 0.0649  | 0.5927 | 0.2271 |
| Kcnq3   | _GSAFTYPSQGS[Phospho (STY)]PR_2                                              | QBK3F6_5599_M1_Kcnq3   | 9.7306  | 9.3912  | 10.2616 | 9.2911  | 8.1372 | 9.2892  | 10.2933 | 9.8616  | 9.4281  | 9.4692  | 0.9577  | -0.0623 | 0.3325 | 0.4914 |
| Kcnq3   | _T[Phospho (STY)]PGQGLLAK_2                                                  | QBK3F6_T82_M1_Kcnq3    | 3.1004  | 3.9056  | 3.7873  | 4.2150  | 3.7270 | 4.0025  | 4.3633  | 4.2870  | 3.0852  | 4.2569  | 0.9479  | -0.0772 | 0.5192 | 0.2846 |
| Vrk3    | _DINSFET[Phospho (STY)]SPK_2                                                 | QBK3G5_758_M1_Vrk3     | 6.2079  | 5.8043  | 4.5299  | 6.4419  | 5.6538 | 3.6598  | 4.0206  | 6.0237  | 6.2541  | 3.6363  | 1.0801  | 0.1112  | 0.6151 | 0.2110 |
| App2    | _YVLNDAQDATTGGS[Phospho (STY)]PSNR_2                                         | QBK3G9_5651_M1_App2    | 3.3264  | 5.4016  | 5.5514  | 5.9246  | 4.9769 | 4.1565  | 6.0295  | 5.5165  | 5.4400  | 4.0105  | 0.9314  | -0.1026 | 0.5675 | 0.2460 |
| App1    | _SESNLSSVC[Carbamidomethyl (C)]HFSNNNEGEK_2                                  | #N/A                   | 3.0450  | 4.0071  | 4.2991  | 5.3360  | 3.8998 | 3.8485  | 5.6037  | 3.4361  | 5.3743  | 4.2015  | 0.8751  | -0.1925 | 0.3248 | 0.4883 |
| App1    | _VQGSALAVTSP[Phospho (STY)]PSPGQR_2                                          | QBK3H0_5401_M1_App1    | 4.5240  | 5.9867  | 5.6755  | 4.3262  | 4.3834 | 5.0166  | 5.2565  | 6.0666  | 5.4817  | 4.8035  | 0.9229  | -0.1158 | 0.3455 | 0.4616 |
| App1    | _EVFQASNDHDAANR_3                                                            | #N/A                   | 3.2408  | 3.9854  | 3.9276  | 4.4303  | 3.8673 | 4.2518  | 4.1449  | 3.6882  | 3.3368  | 4.3973  | 1.0151  | 0.0216  | 0.8390 | 0.0762 |
| Myr1p   | _GLPS[Phospho (STY)]GAHPR_2                                                  | QBK3I4_5540_M1_Myr1p   | 7.5744  | 7.6160  | 7.9231  | 7.6534  | 6.4727 | 7.6412  | 7.6321  | 6.8769  | 7.0919  | 7.3881  | 1.0321  | 0.0456  | 0.4464 | 0.3503 |
| Myr1p   | _GSLS[Phospho (STY)]SEENNGGVGEELK_2                                          | #N/A                   | 3.5972  | 6.1665  | 4.2840  | 3.2858  | 3.5173 | 6.0214  | 4.5013  | 3.3319  | 2.9804  | 6.1853  | 1.0539  | 0.0757  | 0.7999 | 0.0970 |
| Glc1c1  | _SAS[Phospho (STY)]WGSADQLK_2                                                | #N/A                   | 10.3298 | 9.9884  | 10.0979 | 10.4206 | 9.2514 | 10.0895 | 10.4378 | 9.7174  | 10.1001 | 10.2198 | 0.9912  | -0.0128 | 0.7230 | 0.1409 |
| Glc1c1  | _S[Phospho (STY)]PGS[Phospho (STY)]PVC[Carbamidomethyl (C)]R_2               | QBK3I9_5136_M2_Glc1c1  | 8.0374  | 8.1127  | 7.9125  | 8.4321  | 7.1780 | 8.0899  | 7.7867  | 7.7453  | 8.0292  | 1.0140  | 0.9621  | -0.0201 | 0.6324 | 0.1990 |
| Glc1c1  | _VPC[Carbamidomethyl (C)]NVEGGS[Phospho (STY)]PELEK_2                        | QBK3I9_5293_M1_Glc1c1  | 8.3361  | 8.5155  | 8.6214  | 8.5088  | 7.5900 | 8.1442  | 9.1146  | 8.4160  | 8.5424  | 8.3782  | 0.9621  | -0.0558 | 0.2041 | 0.6901 |
| Glc1c1  | _SAS[Phospho (STY)]WGSADQLKEIAK_2                                            | #N/A                   | 4.2111  | 3.1313  | 7.9743  | 2.9527  | 7.0658 | 7.2950  | 6.9397  | 6.7711  | 7.0710  | 7.2950  | 0.7722  | -0.3730 | 0.2015 | 0.6958 |
| Glc1c1  | _SAS[Phospho (STY)]JDTQTSPVQER_2                                             | QBK3I9_5335_M1_Glc1c1  | 9.5505  | 9.5421  | 9.9239  | 10.2037 | 8.4877 | 9.6718  | 9.8647  | 9.5004  | 9.5204  | 9.7586  | 0.9899  | -0.0147 | 0.7581 | 0.1203 |
| Glc1c1  | _TAGGS[Phospho (STY)]PPAAGSGTGAGGSC[Carbamidomethyl (C)]JAPAAAGAR_2          | #N/A                   | 3.2041  | 4.0524  | 3.8909  | 7.7306  | 3.8306 | 3.8998  | 4.1860  | 4.5113  | 4.3605  | 1.0569  | 0.0799  | 0.7999  | 0.0569 | 0.1049 |
| Glc1c1  | _TS[Phospho (STY)]DITTGPGPLYTGWPR_2                                          | QBK3I9_5163_M1_Glc1c1  | 3.7399  | 3.0442  | 4.4267  | 7.1421  | 2.8656 | 3.3631  | 3.7239  | 3.4256  | 3.7246  | 3.2529  | 1.1600  | 0.2142  | 0.5090 | 0.2933 |
| Nduf8   | _EPATINYPFEK_2                                                               | #N/A                   | 9.0531  | 9.1363  | 9.0648  | 9.2196  | 9.2809 | 9.1923  | 8.9763  | 8.8745  | 8.7949  | 8.9862  | 1.0281  | 0.0399  | 0.0026 | 2.5809 |
| Nduf8   | _LC[Carbamidomethyl (C)]EAKC[Carbamidomethyl (C)]PAQAITAEPR_2                | #N/A                   | 6.3232  | 6.8453  | 6.2248  | 7.0331  | 7.0979 | 7.1171  | 6.4875  | 6.4045  | 6.4547  | 6.9034  | 1.0322  | 0.0457  | 0.3724 | 0.4289 |
| Nduf8   | _GLGM[Oxidation (M)]TSYLR_2                                                  | #N/A                   | 5.8854  | 6.2415  | 6.0792  | 5.8011  | 6.6656 | 6.3346  | 6.4635  | 6.3482  | 6.9138  | 6.3279  | 0.9470  | -0.0786 | 0.1139 | 0.9436 |
| Nduf8   | _RYPGSEER_2                                                                  | #N/A                   | 5.4403  | 4.9225  | 5.3400  | 5.3693  | 6.2016 | 5.6046  | 5.3570  | 4.4380  | 4.9686  | 5.3852  | 1.0879  | 0.1216  | 0.1478 | 0.8304 |
| Nduf8   | _ILM[Oxidation (M)]WTELIR_2                                                  | #N/A                   | 7.1533  | 7.2844  | 6.0443  | 6.9590  | 7.4373 | 6.8049  | 6.1814  | 7.0639  | 7.1304  | 6.3710  | 1.0392  | 0.0555  | 0.4325 | 0.3640 |
| Nduf8   | _YDIDMTK_2                                                                   | #N/A                   | 4.0293  | 3.3131  | 3.7630  | 3.3068  | 3.7615 | 3.4515  | 3.4551  | 3.6944  | 3.9934  | 2.9841  | 1.0205  | 0.0293  | 0.7557 | 0.1216 |
| Optn    | _T[Phospho (STY)]SSDQQTLYLQR_2                                               | QBK3K8_T529_M1_Optn    | 3.3906  | 3.8355  | 4.0774  | 4.5801  | 3.7238 | 4.4016  | 4.2948  | 5.5384  | 3.1870  | 3.0462  | 1.1379  | 0.1864  | 0.1632 | 0.7874 |
| Minar1  | _SWS[Phospho (STY)]UNTEEVPOFER_2                                             | QBK3V7_5370_M1_Minar1  | 4.0431  | 3.2986  | 3.7768  | 3.3206  | 5.4316 | 3.4378  | 6.1494  | 3.6806  | 3.5555  | 2.9979  | 0.8100  | -0.3040 | 0.2830 | 0.7874 |
| Babam2  | _Acetyl (Protein N-term)[M][Oxidation (M)]PS[Phospho (STY)]PEALNR_2          | #N/A                   | 5.9104  | 6.2553  | 6.7779  | 6.4494  | 5.0796 | 6.1224  | 6.3693  | 6.2464  | 6.1935  | 6.0289  | 0.9822  | -0.0259 | 0.7237 | 0.1404 |
| Casc3   | _FGSS[Phospho (STY)]PQRDPNWIGDR_3                                            | QBK3W3_5263_M1_Casc3   | 6.6153  | 2.9696  | 4.1065  | 3.6503  | 3.7986 | 6.2446  | 5.9450  | 5.9805  | 5.9805  | 0.7153  | -0.4834 | 0.1009  | 0.9963 | 0.1963 |
| Casc3   | _GTVTGERQSE[Phospho (STY)]GDGQESTEPVENK_3                                    | QBK3W3_5145_M1_Casc3   | 4.6133  | 3.9300  | 4.9044  | 4.0855  | 4.7839 | 4.7860  | 4.5181  | 3.3828  | 3.0314  | 3.2019  | 1.2784  | 0.3543  | 0.0195 | 1.7106 |
| Irf2bp1 | _NSSS[Phospho (STY)]PVSPASVPGQR_2                                            | QBK3X4_5638_M1_Irf2bp1 | 7.8908  | 9.3013  | 9.8763  | 9.9733  | 9.2411 | 9.5467  | 9.7713  | 9.2678  | 9.5792  | 0.9825  | -0.0255 | 0.6871  | 0.1630 | 0.6801 |
| Irf2bp1 | _S[Phospho (STY)]PGPPPVGVK_2                                                 | QBK3X4_569_M1_Irf2bp1  | 8.5456  | 7.5054  | 7.6133  | 9.1968  | 7.3612 | 7.1159  | 6.5857  | 7.0715  | 8.2785  | 8.0821  | 0.9857  | -0.0208 | 0.8192 | 0.0866 |
| Irf2bp1 | _RKAS[Phospho (STY)]PEPPPSAESALK_3                                           | #N/A                   | 3.1922  | 7.1163  | 7.1407  | 6.9787  | 7.0983 | 6.6660  | 6.2846  | 4.3787  | 6.5155  | 1.2508  | 0.3229  | 0.2449  | 0.6110 | 0.0872 |
| Irf2bp1 | _RNS[Phospho (STY)]SS[Phospho (STY)]PVS[Phospho (STY)]PASVPGQR_2             | QBK3X4_5638_M1_Irf2bp1 | 7.2313  | 7.7811  | 7.3514  | 8.3516  | 7.7500 | 6.5009  | 7.8746  | 7.4215  | 7.3934  | 7.8896  | 0.9803  | -0.0287 | 0.6675 | 0.1755 |
| Irf2bp1 | _KAS[Phospho (STY)]PEPPPSAESALK_2                                            | #N/A                   | 8.1415  | 8.3306  | 8.9480  | 9.1230  | 7.9555 | 8.1932  | 8.7536  | 8.2561  | 8.3433  | 8.2621  | 1.0053  | 0.0077  | 0.8667 | 0.1651 |
| Irf2bp1 | _RPGS[Phospho (STY)]VSTDOER_2                                                | QBK3X4_5313_M1_Irf2bp1 | 4.3587  | 4.1223  | 4.8486  | 3.6361  | 4.5521 | 4.3359  | 3.9215  | 4.6676  | 3.5424  | 5.0183  | 1.0050  | 0.0072  | 0.9511 | 0.0218 |
| Pom121  | _SQPTSS[Phospho (STY)]PPSPASSR_2                                             | QBK3Z9_5403_M1_Pom121  | 6.8269  | 5.3234  | 7.0661  | 6.7809  | 5.6324 | 5.1615  | 7.2975  | 3.7037  | 6.5746  | 6.6441  | 0.9632  | -0.0542 | 0.8181 | 0.0872 |
| Pom121  | _SQTT[Phospho (STY)]PERPAMK_2                                                | QBK3Z9_7421_M1_Pom121  | 3.3203  | 4.0766  | 3.8364  | 4.3390  | 3.9649 | 4.1605  | 5.7516  | 3.7795  | 3.4280  | 4.3060  | 0.9151  | -0.1281 | 0.4313 | 0.3652 |
| Stxbp5  | _SSS[Phospho (STY)]VTS[Phospho (STY)]DKESR_2                                 | QBK400_5783_M2_Stxbp5  | 9.9091  | 9.9363  | 10.5196 | 10.1328 | 8.8172 | 7.8989  | 10.3611 | 10.1252 | 9.9325  | 9.6088  | 0.9529  | -0.0696 | 0.3883 | 0.4108 |
| Stxbp5  | _QPS[Phospho (STY)]GAGLC[Carbamidomethyl (C)]DITGVVPEDR_2                    | QBK400_5693_M1_Stxbp5  | 3.9955  | 2.2307  | 8.0633  | 3.6841  | 3.1212 | 8.6055  | 3.3988  | 4.4344  | 4.0830  | 3.6511  | 1.3147  | 0.3948  | 0.3729 | 0.4285 |
| Stxbp5  | _RPVSVS[Phospho (STY)]PSSSGEISENZAVNC[Carbamidomethyl (C)]SEK_3              | QBK400_5903_M1_Stxbp5  | 4.2259  | 3.9651  | 3.6896  | 3.5666  | 3.3599 | 3.8888  | 3.5239  | 3.9962  | 3.6005  | 1.0231  | 0.0330  | 0.6429  | 0.1919 | 0.0872 |
| Mta1    | _SAPVNNGS[Phospho (STY)]PTLGK_2                                              | QBK4B0_5576_M1_Mta1    | 4.9934  | 3.0341  | 4.3966  | 3.6057  | 4.0958 | 3.3932  | 3.7540  | 3.3955  | 3.6945  | 5.1171  | 0.9815  | -0.0269 | 0.8810 | 0.0550 |
| Mta1    | _NWM[Oxidation (M)]S[Phospho (STY)]PHGIPAR_2                                 | #N/A                   | 8.4345  | 8.3996  | 8.9044  | 9.1345  | 7.9829 | 8.1912  | 8.7086  | 8.4980  | 8.4519  | 8.3597  | 1.0004  | 0.0006  | 0.9890 | 0.3048 |
| Mta1    | _ATVVNGTGTGPGGS[Phospho (STY)]PGAGR_2                                        | QBK4B0_5386_M1_Mta1    | 4.0284  | 3.2838  | 3.7621  | 6.3195  | 3.1721 | 3.4525  | 3.4541  | 3.6954  | 3.9944  | 2.9831  | 1.1335  | 0.1807  | 0.4719 | 0.0261 |
| Abil1c1 | _QSLGES[Phospho (STY)]PR_2                                                   | QBK4G5_5470_M1_Abil1c1 | 9.0877  | 9.2952  | 9.4757  | 9.6700  | 8.9055 | 9.4417  | 9.2924  | 8.9854  | 9.0921  | 9.3186  | 1.0153  | 0.0219  | 0.3928 | 0.4058 |



|         |                                                                            |                        |         |         |         |         |         |         |         |         |         |         |        |         |        |        |
|---------|----------------------------------------------------------------------------|------------------------|---------|---------|---------|---------|---------|---------|---------|---------|---------|---------|--------|---------|--------|--------|
| Ddx54   | _ALSPFTSEC[Carbamidomethyl (C)]V5[Phospho (STY)]VEPOTR_2                   | Q8K4L0_574_M1_Ddx54    | 3.0191  | 3.7753  | 4.1376  | 3.1394  | 3.6636  | 2.9610  | 4.3550  | 3.4782  | 3.1268  | 3.1064  | 0.9809 | -0.0279 | 0.8405 | 0.0724 |
| Ddx54   | _IDORDS[Phospho (STY)]EEGFSNQR_2                                           | Q8K4L0_5774_M1_Ddx54   | 3.7438  | 2.9993  | 3.4775  | 4.5221  | 2.8876  | 3.7370  | 3.6302  | 3.9799  | 4.2789  | 4.1994  | 0.8854 | -0.1756 | 0.1928 | 0.7148 |
| Wdr33   | _Acetyl (Protein N-term)ATGSG[Phospho (STY)]PPR_2                          | Q8K4P0_57_M1_Wdr33     | 5.9768  | 8.7049  | 4.3345  | 8.4874  | 4.2743  | 8.4294  | 4.5519  | 3.2813  | 4.3707  | 3.3034  | 1.7219 | 0.7840  | 0.0352 | 0.1456 |
| Wdr33   | _SSS[Phospho (STY)]DGGHHQVHR_3                                             | Q8K4P0_51273_M1_Wdr33  | 3.1618  | 3.9670  | 3.8486  | 4.3513  | 3.7894  | 3.9411  | 4.3019  | 4.2873  | 3.4158  | 2.5433  | 1.0566 | 0.0795  | 0.6081 | 0.2160 |
| Wdr33   | _DAPRPDPHPPHGGHS[Phospho (STY)]PASR_4                                      | Q8K4P0_51204_M1_Wdr33  | 5.8558  | 3.4821  | 3.5940  | 3.1378  | 3.2034  | 4.4261  | 3.2861  | 3.8634  | 4.1624  | 4.3159  | 1.0153 | 0.0218  | 0.9171 | 0.0376 |
| Hecw1   | _STS[Phospho (STY)]DTDLVTSQSR_4                                            | Q8K4P8_568_M1_Hecw1    | 10.8538 | 10.8197 | 11.2910 | 11.0872 | 9.0675  | 10.4978 | 10.8998 | 10.7838 | 10.5658 | 10.6193 | 0.9893 | -0.0155 | 0.7884 | 0.1033 |
| Hecw1   | _SY_S[Phospho (STY)]AGEASEVSR_2                                            | Q8K4P8_51073_M1_Hecw1  | 8.6964  | 8.5125  | 8.8383  | 8.5829  | 8.6054  | 8.6281  | 8.8035  | 8.6571  | 8.6711  | 8.6457  | 0.9597 | -0.0594 | 0.3950 | 0.4034 |
| Hecw1   | _EGGS[Phospho (STY)]PVNSQK_2                                               | #N/A                   | 8.4000  | 8.6150  | 8.5293  | 7.8077  | 7.0020  | 7.8077  | 8.8286  | 8.4505  | 7.9354  | 8.2585  | 0.9734 | -0.0388 | 0.5482 | 0.2611 |
| Hecw1   | _GST[Phospho (STY)]TEEDGLEESTUK_2                                          | Q8K4P8_1579_M1_Hecw1   | 4.0277  | 3.2314  | 3.5305  | 3.5123  | 3.9660  | 3.1759  | 4.9061  | 3.3337  | 4.0308  | 3.3530  | 0.9150 | -0.1281 | 0.3646 | 0.4381 |
| Hecw1   | _REGSL[Phospho (STY)]PVNSQK_2                                              | #N/A                   | 4.7512  | 3.9073  | 5.2576  | 4.3652  | 3.7286  | 4.6945  | 4.3077  | 5.4687  | 5.1534  | 4.1981  | 0.9307 | -0.1036 | 0.4110 | 0.3861 |
| Hecw1   | _C[Carbamidomethyl (C)]SPC[Carbamidomethyl (C)]S[Phospho (STY)]PQNSPQLQR_2 | Q8K4P8_51203_M1_Hecw1  | 3.6314  | 3.7110  | 3.3650  | 4.4097  | 4.2759  | 3.8495  | 4.5579  | 4.0924  | 4.3914  | 4.0869  | 0.9046 | -0.1446 | 0.1045 | 0.9807 |
| Hecw1   | _APS[Phospho (STY)]PYRR_2                                                  | Q8K4P8_51219_M1_Hecw1  | 3.0525  | 3.8088  | 4.2870  | 3.8308  | 3.6970  | 4.4284  | 3.9790  | 3.1704  | 3.4695  | 3.5080  | 1.0903 | 0.1248  | 0.2900 | 0.5376 |
| Hecw1   | _SGS[Phospho (STY)]VHQMEQLNR_2                                             | Q8K4P8_5871_M1_Hecw1   | 4.2474  | 3.5517  | 3.4333  | 3.9360  | 3.3730  | 4.3564  | 3.6507  | 4.1825  | 3.8311  | 3.9030  | 0.9806 | -0.0283 | 0.7553 | 0.1219 |
| Rptor   | _SVSS[Phospho (STY)]YGNIR_2                                                | Q8K4Q0_5722_M1_Rptor   | 9.0282  | 9.0524  | 9.3378  | 3.8785  | 7.6903  | 8.8550  | 9.5870  | 9.3563  | 3.4217  | 8.8993  | 1.0202 | 0.0288  | 0.9229 | 0.0349 |
| Rptor   | _ILDSSLTQSAPAS[Phospho (STY)]PTNK_2                                        | Q8K4Q0_5863_M1_Rptor   | 7.6749  | 8.9664  | 9.1622  | 9.6890  | 6.1715  | 8.0469  | 8.9951  | 9.3111  | 8.4601  | 7.4368  | 0.9689 | -0.0455 | 0.7240 | 0.1403 |
| Pitpnc1 | _KKS[Phospho (STY)]APETLTUPDEK_3                                           | #N/A                   | 8.2424  | 7.3406  | 7.6787  | 7.7137  | 5.6490  | 7.7330  | 4.1980  | 3.6352  | 7.4527  | 4.4503  | 1.4983 | 0.5834  | 0.0170 | 1.7697 |
| Pitpnc1 | _S[Phospho (STY)]APSSAPSTLSDTAFELISPK_2                                    | Q8K4R4_5270_M1_Pitpnc1 | 3.5806  | 5.0001  | 3.3830  | 4.1465  | 3.6170  | 3.9597  | 4.1927  | 4.2484  | 3.9298  | 3.9059  | 0.9702 | -0.0437 | 0.7025 | 0.1534 |
| Pitpnc1 | _YEDNKG[Phospho (STY)]NSDIFSEAK_2                                          | #N/A                   | 5.0988  | 4.8257  | 3.5985  | 5.3610  | 5.2384  | 5.5768  | 5.7584  | 5.7529  | 5.7898  | 6.2850  | 0.8395 | -0.2525 | 0.0358 | 1.4455 |
| Pitpnc1 | _S[Phospho (STY)]APETLTUPDEK_2                                             | #N/A                   | 2.9226  | 3.6788  | 9.6318  | 3.7009  | 3.5671  | 9.7269  | 4.4515  | 9.5968  | 9.6630  | 3.3781  | 0.8177 | -0.2903 | 0.5738 | 0.2412 |
| Naxe    | _GNPSGQPLQLSLTAPK_2                                                        | #N/A                   | 6.6873  | 7.0600  | 7.6933  | 9.9115  | 7.3396  | 7.3940  | 7.3248  | 7.1264  | 6.8917  | 7.2469  | 1.0047 | 0.0067  | 0.8714 | 0.0598 |
| Naxe    | _YHYLGR_2                                                                  | #N/A                   | 6.7542  | 7.1186  | 6.7094  | 6.8527  | 7.1164  | 6.8994  | 7.1160  | 6.7862  | 6.6407  | 6.9182  | 1.0063 | 0.0900  | 0.7282 | 0.1377 |
| Naxe    | _SPPTVLVC[Carbamidomethyl (C)]QGNNGGDLVC[Carbamidomethyl (C)]AR_2          | #N/A                   | 5.5566  | 5.8413  | 5.8452  | 5.5914  | 5.2733  | 5.1668  | 5.5902  | 5.6056  | 5.5252  | 5.8256  | 1.0134 | 0.0193  | 0.7841 | 0.1056 |
| Naxe    | _RGS[Phospho (STY)]ETMGAIVK_2                                              | Q8K4Z3_543_M1_Naxe     | 8.3520  | 7.7477  | 4.3648  | 9.8292  | 6.7419  | 3.4249  | 7.9704  | 6.3116  | 6.1347  | 7.2249  | 0.9758 | -0.0353 | 0.9002 | 0.0456 |
| Slc8a2  | _GIS[Phospho (STY)]ALLNGQNGDK_2                                            | #N/A                   | 8.1311  | 7.8967  | 8.2859  | 8.3719  | 6.2811  | 7.9151  | 8.4862  | 8.2747  | 8.1504  | 7.4918  | 0.9646 | -0.0521 | 0.5233 | 0.2813 |
| Slc8a2  | _S[Phospho (STY)]GIIAGEGDPK_2                                              | Q8K596_5266_M1_Slc8a2  | 6.4715  | 3.3559  | 7.1698  | 2.9445  | 6.4677  | 7.1882  | 7.1567  | 7.1107  | 7.1508  | 7.7655  | 0.7855 | -0.3856 | 0.1096 | 0.9604 |
| Slc8a2  | _C[Carbamidomethyl (C)]QGVLLPVWPEPDSLGDK_2                                 | #N/A                   | 3.4936  | 4.2444  | 4.1804  | 3.1822  | 4.1454  | 3.1667  | 4.3977  | 4.6420  | 4.6776  | 4.5892  | 0.8162 | -0.2930 | 0.0134 | 1.8736 |
| Slc8a2  | _TNLALVGTGHSWR_2                                                           | #N/A                   | 3.4641  | 3.9755  | 4.6014  | 4.1451  | 3.8004  | 3.9326  | 2.3330  | 4.3569  | 2.0083  | 2.6650  | 1.4033 | 0.4888  | 0.0363 | 1.4406 |
| Slc8a2  | _GIS[Phospho (STY)]ALLNGQNGDK_2                                            | #N/A                   | 3.7648  | 3.5776  | 3.4985  | 4.5431  | 2.9086  | 3.7160  | 3.1906  | 3.9589  | 4.2579  | 4.2204  | 0.9389 | -0.0910 | 0.4936 | 0.3066 |
| Dcaf8   | _GHGHS[Phospho (STY)]DEEDEQPR_2                                            | #N/A                   | 4.8289  | 5.1294  | 5.4137  | 5.1617  | 5.5037  | 5.2354  | 5.2384  | 5.2905  | 5.2970  | 4.9786  | 1.0021 | 0.0031  | 0.9369 | 0.0283 |
| Fln     | _AHSPAEGASSESS[Phospho (STY)]PGPK_2                                        | Q8QZ63_573_M1_Fln      | 2.9385  | 4.4039  | 4.1730  | 3.7167  | 4.2253  | 3.5042  | 3.8650  | 3.2844  | 3.5835  | 3.3940  | 1.0836 | 0.1158  | 0.3517 | 0.4539 |
| Acat1   | _FASETPTITSVK_2                                                            | #N/A                   | 8.4227  | 8.4322  | 8.3514  | 8.6976  | 8.6049  | 8.5940  | 8.6336  | 8.4608  | 8.5317  | 8.6946  | 0.9927 | -0.0106 | 0.4525 | 0.3444 |
| Acat1   | _QEQQDYALSSYTR_2                                                           | #N/A                   | 7.9710  | 7.8037  | 8.7990  | 8.3654  | 8.4262  | 8.4521  | 8.2355  | 7.7861  | 8.0114  | 8.1177  | 1.0139 | 0.0199  | 0.5267 | 0.2784 |
| Acat1   | _QATLGAGLPISTPC[Carbamidomethyl (C)]ITVVK_2                                | #N/A                   | 7.2540  | 7.0645  | 7.2526  | 7.5275  | 7.9368  | 7.7390  | 7.7163  | 7.2918  | 7.2588  | 7.2739  | 1.0243 | 0.0247  | 0.3271 | 0.4853 |
| Acat1   | _LGTAAIQGAIK_2                                                             | #N/A                   | 6.4634  | 6.9888  | 6.7837  | 7.4691  | 7.2551  | 7.0892  | 7.3656  | 7.5592  | 6.9364  | 7.4368  | 0.9609 | -0.0575 | 0.1662 | 0.7792 |
| Acat1   | _TPIGSFLGSLAQSPATK_2                                                       | #N/A                   | 6.8882  | 7.2222  | 7.3972  | 7.0245  | 7.0483  | 6.8652  | 6.3626  | 6.8582  | 6.3626  | 7.1222  | 1.0513 | 0.0722  | 0.0730 | 1.1367 |
| Acat1   | _SKEAWDAGK_2                                                               | #N/A                   | 6.7306  | 6.8665  | 5.8447  | 6.7486  | 7.0178  | 6.8138  | 6.3089  | 6.4055  | 6.3674  | 6.8393  | 1.0293 | 0.0417  | 0.4394 | 0.3572 |
| Acat1   | _M[Oxidation (M)]LIDPQK_2                                                  | #N/A                   | 5.5701  | 6.3478  | 7.0839  | 5.9733  | 6.6341  | 6.6014  | 6.1854  | 6.5117  | 6.2254  | 6.5000  | 1.0020 | 0.0029  | 0.9648 | 0.0156 |
| Acat1   | _LEDUVK_2                                                                  | #N/A                   | 5.9857  | 5.0994  | 3.1935  | 5.8009  | 5.9156  | 5.5725  | 2.0563  | 5.2745  | 5.4557  | 5.9836  | 1.1212 | 0.1650  | 0.5403 | 0.2674 |
| Acat1   | _EVMY[Oxidation (M)]QNVQGGEGQAPTR_2                                        | #N/A                   | 5.8228  | 5.7743  | 6.0425  | 6.2405  | 6.1418  | 6.1646  | 5.9751  | 6.0649  | 6.0577  | 5.9357  | 1.0038 | 0.0054  | 0.8274 | 0.0823 |
| Acat1   | _GATPIPGVK_2                                                               | #N/A                   | 5.0395  | 5.2098  | 4.9742  | 5.3550  | 4.1073  | 5.5313  | 3.9113  | 5.2197  | 3.0592  | 5.1103  | 1.1644 | 0.2196  | 0.1772 | 0.7514 |
| Acat1   | _ENGITTAANASTLNDGAAALVLM[Oxidation (M)]TAAEAQR_3                           | #N/A                   | 3.7081  | 3.8578  | 3.2725  | 4.3171  | 4.6189  | 3.7564  | 4.4656  | 3.5468  | 4.5740  | 4.2208  | 0.9334 | -0.0995 | 0.3845 | 0.4152 |
| Acat1   | _DGLTDVYVK_2                                                               | #N/A                   | 5.7303  | 3.7213  | 3.6029  | 5.2626  | 5.1685  | 4.7541  | 3.8202  | 5.4158  | 3.6615  | 5.9108  | 1.0010 | 0.0144  | 0.9944 | 0.0024 |
| Acat1   | _EEVKEVVMGVQGGEGQAPTR_3                                                    | #N/A                   | 4.4588  | 4.2365  | 4.1181  | 6.1602  | 3.2231  | 3.6716  | 4.0324  | 3.4977  | 3.1463  | 3.0869  | 1.2530 | 0.3254  | 0.1469 | 0.8328 |
| Acat1   | _IAAFADAADVDFPIFLAPAYAVPK_3                                                | #N/A                   | 4.3837  | 3.6881  | 3.3880  | 4.4326  | 3.3414  | 3.6877  | 3.0800  | 4.3685  | 4.1099  | 4.0978  | 0.9778 | -0.0324 | 0.8002 | 0.0786 |
| Csasp   | _AHS[Phospho (STY)]VDVEK_2                                                 | #N/A                   | 10.8889 | 10.7818 | 11.2863 | 11.4957 | 10.7908 | 11.0104 | 11.0488 | 10.9184 | 10.9857 | 11.1859 | 1.0007 | 0.0010  | 0.9620 | 0.0168 |
| Csasp   | _ETDGAPS[Phospho (STY)]GPGR_2                                              | Q8QZT2_5129_M1_Csasp   | 8.1918  | 3.9381  | 8.9576  | 4.3223  | 8.6876  | 3.9701  | 8.5720  | 8.5060  | 4.2893  | 8.8469  | 1.0047 | -0.2398 | 0.4747 | 0.3235 |
| Csasp   | _GALGEP[Phospho (STY)]APS[Phospho (STY)]AREEGPVGJR_3                       | Q8QZT2_576_M2_Csasp    | 3.3542  | 5.9090  | 4.2211  | 6.4509  | 5.9492  | 6.1079  | 5.9234  | 6.1285  | 6.0170  | 6.1410  | 0.8859 | -0.1747 | 0.2878 | 0.5409 |
| Csasp   | _QRAHS[Phospho (STY)]VDVEK_3                                               | #N/A                   | 4.4961  | 4.5115  | 5.4980  | 4.9749  | 4.4710  | 4.9828  | 4.6736  | 3.0423  | 5.0894  | 4.9602  | 1.0858 | 0.1187  | 0.4003 | 0.1967 |
| Csasp   | _QMOMGS[Phospho (STY)]QIK_2                                                | Q8QZT2_5180_M1_Csasp   | 3.0899  | 3.2824  | 3.7767  | 4.2794  | 3.7164  | 4.1009  | 3.9941  | 3.8391  | 3.4877  | 4.2464  | 0.9527 | -0.0699 | 0.5072 | 0.2949 |
| Slk32c  | _GSSAAPPSS[Phospho (STY)]PPPGRR_2                                          | #N/A                   | 14.3627 | 15.1292 | 15.1260 | 14.7553 | 13.9140 | 14.5123 | 14.7967 | 14.6921 | 14.5372 | 14.3886 | 0.9951 | -0.0071 | 0.7491 | 0.1255 |
| Slk32c  | _RGS[Phospho (STY)]SAAAPPSS[Phospho (STY)]PPPGRR_2                         | Q8QZV4_518_M2_Slk32c   | 6.3017  | 4.2583  | 7.8197  | 3.9824  | 7.3110  | 3.7842  | 3.9289  | 3.9769  | 7.4014  | 3.7711  | 1.1691 | 0.2254  | 0.5023 | 0.2990 |
| Slk32c  | _M[Oxidation (M)]S[Phospho (STY)]MSSGSGSAR_2                               | #N/A                   | 5.1938  | 3.3538  | 3.4897  | 4.2291  | 3.2007  | 4.0309  | 3.4204  | 4.0484  | 4.1952  | 4.0853  | 0.9947 | -0.0077 | 0.9598 | 0.0178 |
| Fam161a | _SS[Phospho (STY)]NPKPR_2                                                  | Q8QZV6_5384_M1_Fam161a | 3.2982  | 4.1033  | 3.9850  | 4.0173  | 3.9247  | 3.8048  | 4.1656  | 3.6309  | 3.2829  | 2.9538  | 1.0990 | 0.1362  | 0.2069 | 0.6842 |
| Mapre2  | _SDKDLQEQQLNEQVHSLK_3                                                      | #N/A                   | 5.4141  | 5.2076  | 5.0484  | 5.4534  | 4.9675  | 5.4787  | 5.5251  | 5.1593  | 4.8569  | 5.7291  | 0.9895 | -0.0153 | 0.7756 | 0.1104 |
| Mapre2  | _LALGVEK_2                                                                 | #N/A                   | 6.5792  | 7.0157  | 3.2203  | 6.8514  | 3.5396  | 3.0686  | 3.4846  | 6.8822  | 6.8566  | 6.6712  | 0.8447 | -0.2435 | 0.4588 | 0.3384 |
| Mapre2  | _SPSPKPGTSPRPSS[Phospho (STY)]AK_3                                         | Q8R001_5222_M1_Mapre2  | 4.2382  | 3.2847  | 3.4242  | 4.2959  | 3.1336  | 4.0967  | 3.4555  | 4.1917  | 4.0372  | 3.8938  | 0.9617 | -0.0563 | 0.6361 | 0.2034 |
| Mapre2  | _IELLLC[Carbamidomethyl (C)]QEHSGEINDOLVQR_3                               | #N/A                   | 5.4587  | 4.4512  | 5.3947  | 4.6814  | 4.3918  | 4.7256  | 5.0454  | 3.9745  | 4.6356  | 4.6786  | 1.0583 | 0.0817  | 0.3925 | 0.4062 |
| Mapre2  | _SHHANS[Phospho (STY)]PTAGAAK_2                                            | Q8R001_5199_M1_Mapre2  | 6.6032  | 4.4221  | 4.3037  | 6.1466  | 4.2435  | 3.4880  | 4.5211  | 6.5320  | 6.4363  | 6.1809  | 0.8226 | -0.2818 | 0.1863 | 0.7299 |
| Blimh   | _NLVHSGATK_2                                                               | #N/A                   | 5.2454  | 3.7294  | 3.3466  | 4.3912  | 4.2575  | 3.8679  | 4.5395  | 4.1108  | 4.4098  | 4.0685  | 0.9667 | -0.0488 | 0.6932 | 0.1591 |
| Blimh   | _VENSWGEDGHGK_3                                                            | #N/A                   | 3.5339  | 4.2901  | 3.2676  | 4.1255  | 4.1784  | 2.3266  | 3.8402  | 3.9930  | 3.6416  | 4.0925  | 0.9303 | -0.1043 | 0.5073 | 0.2948 |
| Gsp1    | _ENLSAFAFSR_2                                                              | #N/A                   | 4.2920  | 3.3789  | 3.6972  | 3.2409  | 4.4642  | 3.0284  | 4.9840  | 3.7602  | 4.5077  | 4.1169  | 0.8483 | -0.2373 | 0.1070 | 0.9708 |
| Itpka   | _DTLEIDFFR_2                                                               | #N/A                   | 4.1501  | 4.4408  | 4.9872  | 3.50    |         |         |         |         |         |         |        |         |        |        |



|          |  |                                                                  |                        |         |         |         |         |         |         |         |         |         |         |         |         |        |        |
|----------|--|------------------------------------------------------------------|------------------------|---------|---------|---------|---------|---------|---------|---------|---------|---------|---------|---------|---------|--------|--------|
| Kiaa0513 |  | _QAVIGNLDEEQYK_2                                                 | #N/A                   | 4.3041  | 4.4457  | 5.0202  | 4.0249  | 4.3014  | 3.8123  | 4.1497  | 3.9125  | 3.4284  | 4.5541  | 1.0765  | 0.1064  | 0.3063 | 0.5138 |
| Kiaa0513 |  | _VTVM(Oxidation (M))IS[Phospho (STY)]PEDEQKGEK_2                 | #N/A                   | 10.2340 | 10.4035 | 11.0816 | 10.8059 | 9.5617  | 10.2226 | 10.8153 | 10.5915 | 10.2758 | 10.2495 | 0.9906  | -0.0136 | 0.7432 | 0.1289 |
| Kiaa0513 |  | _S[Phospho (STY)]SNSFSFQSGADSAPODETLALR_3                        | QBROA7_S72_M1_Kiaa0513 | 3.1727  | 3.9290  | 4.4072  | 4.4867  | 3.8173  | 4.3082  | 4.2013  | 3.0502  | 3.2804  | 3.6283  | 1.1356  | 0.1835  | 0.1723 | 0.7636 |
| Kiaa0513 |  | _IFSGGDLIOFEK_2                                                  | #N/A                   | 3.1370  | 3.8933  | 4.3716  | 3.9153  | 3.7816  | 4.3438  | 4.0636  | 3.0858  | 3.3849  | 3.5926  | 1.1063  | 0.1457  | 0.2192 | 0.6591 |
| Fah11    |  | _ITLEEGDLITGPK_2                                                 | #N/A                   | 3.3894  | 3.7777  | 3.9215  | 3.1905  | 3.9942  | 4.0915  | 2.7493  | 4.3343  | 3.9067  | 3.7410  | 1.0094  | 0.0135  | 0.9165 | 0.0379 |
| Tada3    |  | _ESGADGASTS[Phospho (STY)]PR_2                                   | QBRO19_S298_M1_Tada3   | 3.8144  | 3.4118  | 4.5012  | 3.5030  | 2.9401  | 3.2886  | 3.2177  | 6.0675  | 4.2640  | 7.0146  | 0.6957  | -0.5235 | 0.0649 | 1.1880 |
| Aamd     |  | _ETGTEHS[Phospho (STY)]PGVGPAQVW_2                               | #N/A                   | 5.8545  | 5.9883  | 4.1584  | 3.7705  | 5.8774  | 6.0937  | 6.0080  | 3.3560  | 3.6550  | 3.3794  | 1.2905  | 0.3679  | 0.1426 | 0.8459 |
| Aif7     |  | _TDSVIADITPT[Phospho (STY)]PTR_2                                 | QBRO51_T53_M1_Aif7     | 7.0805  | 7.3305  | 7.4237  | 4.0200  | 6.7612  | 7.6372  | 7.6745  | 7.1443  | 7.0443  | 7.3559  | 0.9184  | -0.1228 | 0.4183 | 0.3785 |
| Iqec1    |  | _SLGGQGG[Phospho (STY)]PK_2                                      | QBRO52_S415_M1_Iqec1   | 11.4670 | 11.6486 | 11.8664 | 11.4561 | 10.5966 | 11.2335 | 11.8357 | 11.6541 | 11.5252 | 11.2934 | 0.9828  | -0.0250 | 0.4324 | 0.3641 |
| Iqec1    |  | _LQHST[Phospho (STY)]VLR_2                                       | #N/A                   | 8.9068  | 8.4110  | 9.0847  | 8.9752  | 7.8509  | 8.7418  | 9.2127  | 8.9119  | 8.8968  | 8.8007  | 0.9672  | -0.0481 | 0.2661 | 0.5750 |
| Iqec1    |  | _SALS5S[Phospho (STY)]LRDLSEAGK_3                                | #N/A                   | 4.2386  | 3.8937  | 3.4245  | 7.8949  | 6.0096  | 6.7878  | 7.6546  | 4.1949  | 3.8435  | 6.9610  | 0.9490  | -0.0755 | 0.8144 | 0.0892 |
| Iqec1    |  | _M(Oxidation (M))IQFS[Phospho (STY)]FEGPEK_2                     | #N/A                   | 11.0658 | 10.9261 | 11.4384 | 11.2636 | 9.7936  | 10.8744 | 11.4536 | 10.8944 | 10.9248 | 10.9940 | 0.9844  | -0.0227 | 0.5952 | 0.2253 |
| Iqec1    |  | _SALS5S[Phospho (STY)]LR_2                                       | #N/A                   | 3.2945  | 4.0508  | 4.5290  | 4.0728  | 3.9391  | 4.1864  | 4.2210  | 4.4292  | 7.0418  | 6.4050  | 0.7263  | -0.4614 | 0.0346 | 1.4603 |
| Iqec1    |  | _SLAES[Phospho (STY)]IDALNC[Carbamidomethyl (C)]R_2              | QBRO52_S251_M1_Iqec1   | 3.8312  | 3.0866  | 3.5649  | 7.9706  | 6.5144  | 3.6497  | 3.5428  | 4.2903  | 6.8090  | 6.5118  | 0.9019  | -0.1490 | 0.6764 | 0.1698 |
| Iqec1    |  | _ETIGVYR_2                                                       | #N/A                   | 3.4608  | 3.1346  | 4.3399  | 2.8706  | 4.0584  | 3.3193  | 4.0319  | 5.4187  | 5.2557  | 4.7432  | 0.7261  | -0.4617 | 0.0078 | 2.1074 |
| Iqec1    |  | _VLINFNAPNQDR_2                                                  | #N/A                   | 5.1504  | 4.2562  | 3.2282  | 4.2728  | 4.5868  | 4.9639  | 5.6588  | 5.1140  | 4.8492  | 5.2824  | 0.8438  | -0.2451 | 0.0600 | 1.2218 |
| Iqec1    |  | _ETRNS[Phospho (STY)]WDSFASNDVIR_3                               | #N/A                   | 3.6211  | 5.3839  | 4.8643  | 4.1552  | 4.6899  | 5.5531  | 4.8606  | 4.1468  | 5.7389  | 4.0320  | 1.0036  | 0.0051  | 0.9734 | 0.0117 |
| Iqec1    |  | _LQGSTS[Phospho (STY)]VLRK_2                                     | #N/A                   | 3.4192  | 4.2244  | 4.3525  | 3.8963  | 4.0457  | 3.6838  | 4.0446  | 3.1049  | 3.4039  | 3.5736  | 1.1147  | 0.1567  | 0.1235 | 0.9083 |
| Iqec1    |  | _SALS5S[Phospho (STY)]LRDLSEAGK_2                                | #N/A                   | 3.7296  | 3.7553  | 3.6236  | 5.2071  | 3.8737  | 3.7246  | 5.6573  | 5.4684  | 5.4277  | 5.7228  | 0.7157  | -0.4826 | 0.0010 | 3.0075 |
| Iqec1    |  | _GVODGEDIPR_2                                                    | #N/A                   | 3.9023  | 4.2643  | 5.2427  | 3.5909  | 4.9955  | 5.3505  | 3.2077  | 4.9175  | 4.9492  | 4.7287  | 1.0240  | 0.0343  | 0.8365 | 0.0775 |
| Iqec1    |  | _S[Phospho (STY)]HSEVPASDAR_2                                    | QBRO52_S260_M1_Iqec1   | 6.8373  | 6.7123  | 4.2699  | 4.6240  | 6.5842  | 6.5238  | 7.5788  | 3.4945  | 3.1431  | 7.1999  | 1.1067  | 0.1462  | 0.6187 | 0.2085 |
| Iqec1    |  | _STPS[Phospho (STY)]LERPEPR_2                                    | #N/A                   | 2.9060  | 3.6623  | 4.1406  | 3.6843  | 3.5846  | 3.0740  | 3.8326  | 7.4141  | 6.9407  | 3.3616  | 0.6502  | -0.6210 | 0.0587 | 1.2311 |
| Iqec1    |  | _LKSS[Phospho (STY)]MSGNR_2                                      | QBRO52_S159_M1_Iqec1   | 4.3173  | 3.6216  | 3.5032  | 4.0059  | 3.2989  | 4.2866  | 3.1465  | 4.1126  | 3.7612  | 3.9729  | 1.0242  | 0.0345  | 0.7504 | 0.1247 |
| Iqec1    |  | _SLS[Phospho (STY)]ESVELSSDLQDK_2                                | QBRO52_S106_M1_Iqec1   | 4.1176  | 3.2248  | 3.8513  | 3.3951  | 3.2614  | 3.1826  | 3.5434  | 3.6061  | 7.1198  | 3.0724  | 0.8086  | -0.3066 | 0.3100 | 0.5087 |
| Iqec1    |  | _NSWDS[Phospho (STY)]FAFSNDVIR_2                                 | QBRO52_S513_M1_Iqec1   | 3.6442  | 3.5447  | 3.8738  | 10.7558 | 4.3759  | 4.0398  | 3.9330  | 3.7655  | 3.6226  | 0.9017  | -0.1493 | 0.7931  | 0.1007 | 1.0507 |
| Iqec1    |  | _SR[S[Phospho (STY)]S[Phospho (STY)]ESVELSDLQDK_2                | #N/A                   | 3.8941  | 3.2000  | 3.8010  | 5.6593  | 3.0435  | 3.3365  | 3.4931  | 3.6727  | 3.9718  | 4.1113  | 1.0027  | 0.0039  | 0.9843 | 0.0069 |
| Cacn4    |  | _HSNHS[Phospho (STY)]PIER_2                                      | #N/A                   | 5.9826  | 5.5871  | 6.4589  | 6.2520  | 5.2351  | 5.9812  | 5.4299  | 5.4809  | 5.6763  | 5.7900  | 1.0575  | 0.0807  | 0.2105 | 0.6768 |
| Cacn4    |  | _HSNHS[Phospho (STY)]TENS[Phospho (STY)]PIER_3                   | #N/A                   | 4.2274  | 3.4811  | 3.9573  | 3.8298  | 3.6447  | 3.7939  | 3.8805  | 4.4104  | 4.2214  | 3.5857  | 0.9498  | -0.0743 | 0.3309 | 0.4804 |
| Cacn4    |  | _ATHTSSS[Phospho (STY)]TPMT(Oxidation (M))T[Phospho (STY)]PLGR_2 | #N/A                   | 7.5075  | 3.4591  | 5.0339  | 3.4123  | 7.3173  | 8.3280  | 4.7254  | 7.7341  | 8.8129  | 5.0769  | 1.0947  | 0.1306  | 0.7050 | 0.1518 |
| Cacn4    |  | _SNTRSS[Phospho (STY)]LAEQSEIER_3                                | QBRO54_S287_M1_Cacn4   | 3.9016  | 3.2060  | 4.5884  | 3.5903  | 3.0273  | 3.2013  | 3.3049  | 3.0274  | 4.1768  | 5.2111  | 0.9124  | -0.1322 | 0.5026 | 0.2988 |
| Cacn4    |  | _SDG[S[Phospho (STY)]TSTST[Phospho (STY)]FLR_2                   | QBRO54_S38_M2_Cacn4    | 3.3172  | 3.9095  | 3.1676  | 5.5478  | 3.9538  | 4.3605  | 4.2909  | 5.0971  | 3.8895  | 4.9026  | 0.9026  | -0.1478 | 0.3919 | 0.4069 |
| Cacn4    |  | _NRG[S[Phospho (STY)]GGC[Carbamidomethyl (C)]SHSDR_2             | #N/A                   | 4.7905  | 3.4026  | 3.8808  | 5.6165  | 3.2909  | 3.4074  | 5.2587  | 4.9729  | 3.9493  | 3.8766  | 0.9004  | -0.1514 | 0.4418 | 0.3543 |
| Cacn4    |  | _NRLS[Phospho (STY)]SSSQHSR_2                                    | QBRO54_S474_M1_Cacn4   | 3.3725  | 3.9846  | 2.8845  | 4.7792  | 3.9915  | 3.7713  | 2.4038  | 4.1422  | 3.3497  | 3.4844  | 1.1352  | 0.1829  | 0.3263 | 0.4867 |
| Aldh11   |  | _LIPNVPVEDSTDFK_2                                                | #N/A                   | 5.8859  | 5.5130  | 5.8917  | 5.5615  | 5.2159  | 5.5591  | 6.0828  | 5.8767  | 5.8004  | 6.1041  | 0.9394  | -0.0902 | 0.0354 | 1.4505 |
| Aldh11   |  | _LIAETAPR_2                                                      | #N/A                   | 5.7981  | 6.3772  | 6.2276  | 5.2888  | 6.3527  | 5.5375  | 5.2740  | 6.7707  | 5.8495  | 5.9973  | 0.9929  | -0.0103 | 0.9028 | 0.0444 |
| Aldh11   |  | _KVS[Phospho (STY)]LELGGK_2                                      | QBROV6_S671_M1_Aldh11  | 5.5054  | 5.5720  | 5.4654  | 6.0901  | 4.2318  | 5.4838  | 5.1171  | 5.5218  | 5.4768  | 5.6968  | 0.9887  | -0.0164 | 0.8556 | 0.0677 |
| Aldh11   |  | _KLVEY[Carbamidomethyl (C)]QR_2                                  | #N/A                   | 6.3554  | 5.8741  | 5.8798  | 5.9858  | 5.9067  | 6.3219  | 7.0379  | 6.4885  | 6.6472  | 6.2804  | 0.9154  | -0.1275 | 0.0112 | 1.9498 |
| Aldh11   |  | _EC[Carbamidomethyl (C)]PDIVPSTVLYNR_2                           | #N/A                   | 4.2493  | 3.8593  | 3.9742  | 3.5180  | 4.4918  | 4.2554  | 3.8100  | 4.3636  | 5.0043  | 5.0681  | 0.9035  | -0.1465 | 0.2204 | 0.6567 |
| Aldh11   |  | _AGLIFGNDDR_2                                                    | #N/A                   | 5.6326  | 5.2399  | 3.9202  | 6.1154  | 4.4701  | 5.6130  | 5.6910  | 5.7624  | 5.5373  | 3.1413  | 1.0270  | 0.0384  | 0.8398 | 0.0758 |
| Aldh11   |  | _DLGEAMLEYR_2                                                    | #N/A                   | 4.9450  | 5.2937  | 3.7519  | 5.2906  | 5.0656  | 5.4551  | 4.8434  | 5.1952  | 4.4081  | 4.7913  | 1.0327  | 0.0465  | 0.6577 | 0.1820 |
| Aldh11   |  | _ANATEGLASGVTR_2                                                 | #N/A                   | 4.7003  | 2.6161  | 3.2851  | 3.7878  | 3.7720  | 4.6253  | 3.5024  | 4.3307  | 4.1045  | 3.7548  | 0.9681  | -0.0468 | 0.7785 | 0.1087 |
| Aldh11   |  | _GSASSALETEELATAEAVR_2                                           | #N/A                   | 4.6053  | 4.2862  | 4.8813  | 5.2039  | 3.7933  | 3.4823  | 5.2265  | 4.5930  | 4.5579  | 4.7824  | 0.9135  | -0.1306 | 0.2768 | 0.5578 |
| Aldh11   |  | _LRDEGESE[Carbamidomethyl (C)]VINVEK_3                           | #N/A                   | 4.9343  | 3.6898  | 3.2385  | 4.2831  | 3.5803  | 4.1581  | 4.0839  | 4.2189  | 3.0171  | 4.4092  | 1.0123  | 0.0177  | 0.9055 | 0.0431 |
| Aldh11   |  | _IAVGSQSLFGQEV[Carbamidomethyl (C)]QLR_2                         | #N/A                   | 3.3096  | 4.0658  | 2.6694  | 3.6170  | 3.1601  | 4.1713  | 4.0645  | 4.4142  | 3.2124  | 3.6878  | 0.9100  | -0.1360 | 0.3588 | 0.4451 |
| Aldh11   |  | _TYSTINPTGSGVC[Carbamidomethyl (C)]QVSLAQVSDVK_3                 | #N/A                   | 3.2397  | 3.9960  | 4.4743  | 3.9868  | 3.8843  | 4.2411  | 4.1343  | 3.6989  | 3.3474  | 3.6953  | 1.0676  | 0.0944  | 0.3404 | 0.6880 |
| Aldh11   |  | _DTHNGPQNHAEHLR_4                                                | #N/A                   | 3.7036  | 3.5226  | 4.3904  | 3.3922  | 3.1132  | 3.3994  | 3.1069  | 3.2254  | 4.3749  | 3.3592  | 0.9252  | -0.1122 | 0.6789 | 0.1682 |
| Vps37c   |  | _LALS[Phospho (STY)]FEVQQLER_2                                   | QBRI05_S29_M1_Vps37c   | 3.2228  | 3.9791  | 4.4574  | 7.3122  | 3.8674  | 4.2580  | 4.1512  | 6.3360  | 3.3305  | 3.6784  | 1.0325  | 0.0461  | 0.8792 | 0.0559 |
| Fiad1    |  | _C[Carbamidomethyl (C)]LS[Phospho (STY)]PGGHPVYR_2               | #N/A                   | 3.5830  | 5.0621  | 3.8169  | 4.5579  | 3.3532  | 4.1192  | 3.8494  | 3.7713  | 3.8315  | 3.7374  | 1.0750  | 0.1043  | 0.4087 | 0.0807 |
| Apeh     |  | _ALDVSA[Phospho (STY)]DEEM(Oxidation (M))ARPK_2                  | #N/A                   | 4.6287  | 4.9730  | 4.2702  | 5.7293  | 3.4289  | 5.4311  | 5.1797  | 5.0406  | 5.0412  | 5.1766  | 0.9284  | -0.1072 | 0.4151 | 0.3819 |
| Bud13    |  | _VRHDT[Phospho (STY)]PDLIS[Phospho (STY)]PPRR_3                  | #N/A                   | 6.4757  | 5.8318  | 6.4215  | 6.7471  | 5.4779  | 6.4392  | 5.4357  | 6.8973  | 6.4115  | 6.4566  | 0.9892  | -0.0157 | 0.8481 | 0.0715 |
| Bud13    |  | _HDT[Phospho (STY)]PPPS[Phospho (STY)]PPRR_2                     | #N/A                   | 5.8652  | 5.6337  | 6.7127  | 3.9841  | 5.1698  | 5.3783  | 5.4079  | 6.1979  | 5.9439  | 6.3213  | 0.9145  | -0.1290 | 0.3237 | 0.4898 |
| Bud13    |  | _AHHES[Phospho (STY)]PDLEHLK_3                                   | QBRI49_S297_M1_Bud13   | 4.3493  | 3.6537  | 3.4224  | 4.4670  | 3.4750  | 4.2545  | 3.1144  | 4.0350  | 4.3341  | 4.1443  | 1.0077  | 0.0110  | 0.9280 | 0.0324 |
| Bud13    |  | _HLDAS[Phospho (STY)]PPRK_3                                      | QBRI49_S238_M1_Bud13   | 3.4113  | 4.2165  | 4.0981  | 3.9041  | 4.0379  | 3.6916  | 1.3675  | 3.0970  | 3.3961  | 3.5814  | 1.3610  | 0.4447  | 0.0426 | 1.3701 |
| Bud13    |  | _HDT[Phospho (STY)]PDLIS[Phospho (STY)]PPRR_3                    | #N/A                   | 3.3036  | 3.9225  | 3.9904  | 4.4931  | 3.8108  | 4.3146  | 4.2078  | 3.6254  | 3.2740  | 2.9592  | 1.1296  | 0.1759  | 0.1666 | 0.7784 |
| Bud13    |  | _VRHDT[Phospho (STY)]PDLIS[Phospho (STY)]PPRR_3                  | #N/A                   | 3.6296  | 2.9339  | 4.3164  | 3.3182  | 4.2561  | 3.4734  | 3.8342  | 4.0797  | 2.9480  | 3.2852  | 1.0333  | 0.0473  | 0.7401 | 0.1307 |
| Bph1     |  | _TDFAPQLGSLNK_2                                                  | #N/A                   | 7.0854  | 6.6692  | 7.0059  | 7.1085  | 7.3458  | 7.1060  | 7.3642  | 6.6405  | 6.6533  | 6.7531  | 1.0293  | 0.0416  | 0.2885 | 0.5398 |
| Bph1     |  | _FLVAWQPR_2                                                      | #N/A                   | 5.3951  | 5.7104  | 4.9644  | 6.1163  | 5.6651  | 5.7867  | 3.7615  | 5.4431  | 3.6870  | 5.7145  | 1.2053  | 0.2694  | 0.0767 | 1.1152 |
| Bph1     |  | _T[C[Carbamidomethyl (C)]EDWVGSGQPK_2                            | #N/A                   | 4.8888  | 4.9667  | 4.4263  | 3.9701  | 5.2380  | 4.8084  | 4.1184  | 4.1872  | 3.8906  | 5.4332  | 1.0701  | 0.0978  | 0.4136 | 0.3835 |
| Bph1     |  | _FADEFNR_2                                                       | #N/A                   | 2.6970  | 2.6394  | 3.1059  | 3.7725  | 2.9671  | 3.3515  | 3.2447  | 2.1225  | 2.3493  | 3.4970  | 1.1019  | 0.1399  | 0.4287 | 0.3679 |
| Bph1     |  | _QVSLSGWGGGITALAAAK_2                                            | #N/A                   | 3.0368  | 2.8834  | 3.7236  | 4.2787  | 3.6633  | 4.0662  | 4.4270  | 4.2233  | 3.0215  | 1.4878  | 1.0969  | 0.1334  | 0.6122 | 0.2131 |
| Syng3    |  | _AGAADPVSFAR_2                                                   | #N/A                   | 8.9692  | 8.7445  | 8.5751  | 8.6001  | 8.2217  | 8.3781  | 9.0909  | 8.9356  | 8       |         |         |         |        |        |



|          |                                                              |                         |         |         |         |         |         |         |         |         |         |         |         |         |        |        |
|----------|--------------------------------------------------------------|-------------------------|---------|---------|---------|---------|---------|---------|---------|---------|---------|---------|---------|---------|--------|--------|
| Uqer10   | _AFDQGDADYEHINEGK_2                                          | #N/A                    | 5.5401  | 5.2205  | 5.3561  | 4.3848  | 4.8487  | 4.7494  | 5.0988  | 5.1311  | 5.2957  | 5.4546  | 0.9564  | -0.0642 | 0.3485 | 0.4578 |
| Dync1i1  | _NVLLEDGAGK_2                                                | #N/A                    | 6.6702  | 6.9967  | 6.7851  | 7.1586  | 6.8553  | 6.9492  | 6.7229  | 6.5634  | 6.9714  | 6.7622  | 1.0106  | 0.0152  | 0.6153 | 0.2109 |
| Dync1i1  | _DAYPIAGWONDKK_2                                             | #N/A                    | 6.6596  | 6.6753  | 6.6773  | 7.1554  | 6.5745  | 6.8795  | 6.4553  | 6.2968  | 6.5684  | 6.4116  | 1.0524  | 0.0737  | 0.0211 | 1.6767 |
| Dync1i1  | _FSIDALSUR_2                                                 | #N/A                    | 6.3539  | 6.2400  | 5.6434  | 6.0793  | 6.1103  | 6.0328  | 5.8600  | 6.4982  | 6.3254  | 6.4861  | 0.9657  | -0.0503 | 0.2429 | 0.6146 |
| Dync1i1  | _KPASVSPFTPS(Phospho [STY])PTEGEAS_2                         | QBR1Q8_S516_M1_Dync1i1  | 12.8225 | 13.0644 | 13.6079 | 13.1619 | 12.6410 | 12.7843 | 13.3896 | 12.9400 | 13.0527 | 13.0117 | 0.9935  | -0.0094 | 0.6240 | 0.1713 |
| Dync1i1  | _DFQEVPEGEFPAS(Phospho [STY])PQR_3                           | #N/A                    | 11.8942 | 12.0445 | 12.7251 | 12.9672 | 11.5958 | 12.2473 | 12.1710 | 12.4784 | 12.4144 | 12.2939 | 0.9923  | -0.0112 | 0.7335 | 0.1346 |
| Dync1i1  | _DFQEVPEGEFPAS(Phospho [STY])PQR_2                           | #N/A                    | 12.3239 | 12.2075 | 12.3863 | 13.3124 | 12.1637 | 12.6311 | 12.6609 | 12.5560 | 12.5458 | 12.4907 | 0.9931  | -0.0101 | 0.7001 | 0.1549 |
| Dync1i1  | _IPAVVVEK_2                                                  | #N/A                    | 3.8227  | 4.2365  | 4.1264  | 4.7373  | 4.0063  | 3.4660  | 3.5154  | 4.3189  | 4.8754  | 4.8392  | 0.9267  | -0.1097 | 0.3611 | 0.4424 |
| Dync1i1  | _SVS(Phospho [STY])NVAASVPPAGSK_2                            | QBR1Q8_S415_M1_Dync1i1  | 3.6664  | 2.9708  | 4.3532  | 3.3550  | 2.7921  | 3.4366  | 5.4448  | 3.2626  | 4.4120  | 3.3220  | 0.8342  | -0.2615 | 0.2077 | 0.6826 |
| Dync1i1  | _VPGGS(Phospho [STY])PRT(Phospho [STY])PNR_2                 | QBR1Q8_S405_M2_Dync1i1  | 3.5591  | 3.6671  | 4.2459  | 3.2477  | 3.5554  | 3.0692  | 3.3699  | 3.0185  | 3.2147  | 1.0116  | 0.1666  | 0.3699  | 0.9044 | 0.0437 |
| Dync1i1  | _GLELYLVNHDEDRDQTR_3                                         | #N/A                    | 4.0622  | 3.3666  | 3.2482  | 3.7508  | 3.9266  | 3.4048  | 4.2380  | 4.3676  | 4.0162  | 3.7178  | 0.8729  | -0.1961 | 0.0591 | 1.2284 |
| Dync1i1  | _NIDLVIK_2                                                   | #N/A                    | 3.7395  | 3.0438  | 4.4263  | 3.4281  | 2.8652  | 3.3635  | 3.1428  | 2.0818  | 4.3390  | 1.1081  | 1.3035  | 0.3824  | 0.2267 | 0.6446 |
| Stard7   | _ATAPS(Phospho [STY])PERK_2                                  | QBR1R3_S356_M1_Stard7   | 3.9236  | 6.5819  | 3.1096  | 3.6123  | 5.6617  | 3.4338  | 3.3269  | 5.9691  | 4.1548  | 6.7377  | 0.8692  | -0.2022 | 0.5061 | 0.2958 |
| Chmp7    | _VS(Phospho [STY])PVNDVDVGVLQM(Oxidation [M])QSEQLLR_3       | #N/A                    | 3.7709  | 4.3589  | 4.8282  | 5.3481  | 4.1415  | 3.4088  | 4.0106  | 4.4767  | 4.5574  | 3.8093  | 1.0228  | 0.0325  | 0.8104 | 0.0913 |
| Spart    | _S(Phospho [STY])PEQSVSTAPQR_2                               | #N/A                    | 7.9008  | 7.5960  | 7.3645  | 8.5728  | 7.2026  | 7.8299  | 8.0579  | 7.7521  | 7.6065  | 7.9515  | 0.9876  | -0.0181 | 0.7174 | 0.1442 |
| Spart    | _DAC(Carbamidomethyl [C])KJCS(Phospho [STY])PEQSVSTAPQR_3    | #N/A                    | 6.1071  | 5.6875  | 6.1079  | 6.3960  | 5.2148  | 4.2208  | 3.7863  | 5.5424  | 4.9380  | 5.6003  | 1.1320  | 0.1789  | 0.2487 | 0.6044 |
| Spart    | _KS(Phospho [STY])PEQSVSTAPQR_2                              | #N/A                    | 4.2385  | 4.8194  | 5.6597  | 5.8142  | 4.6479  | 5.1155  | 3.6642  | 5.7823  | 4.8880  | 4.8954  | 1.0503  | 0.0708  | 0.6153 | 0.2109 |
| Aagab    | _VASAESC(Carbamidomethyl [C])HSEQEQSP(Phospho [STY])PTAER_3  | QBR2R3_S211_M1_Aagab    | 6.2590  | 4.3639  | 4.2230  | 6.6673  | 6.1113  | 3.5443  | 6.5914  | 6.9683  | 6.9530  | 6.0785  | 0.7812  | -0.3563 | 0.0669 | 1.1748 |
| Aagab    | _AFWM(Oxidation [M])AGGDRDEIGLSS(Phospho [STY])DDEH_3        | QBR2R3_S312_M1_Aagab    | 3.5770  | 3.7655  | 3.3106  | 4.3552  | 3.5868  | 4.1427  | 4.5035  | 4.1468  | 2.9450  | 4.0325  | 0.9700  | -0.0440 | 0.7329 | 0.1350 |
| Actr8    | _RIPYS(Phospho [STY])PEQTR_2                                 | QBR2S9_S132_M1_Actr8    | 3.1376  | 6.4879  | 4.3721  | 3.9158  | 3.7821  | 4.3433  | 4.0641  | 3.0853  | 3.3844  | 3.5931  | 1.2288  | 0.0739  | 0.2194 | 0.6588 |
| Tmcc3    | _RGS(Phospho [STY])TALTVDK_2                                 | QBR310_S4_M1_Tmcc3      | 5.7329  | 5.9946  | 6.8633  | 3.6422  | 3.5085  | 3.1161  | 3.7904  | 6.2261  | 5.4366  | 5.8678  | 0.9023  | -0.1483 | 0.5826 | 0.2346 |
| Ubqin1   | _AISNLESPGDNIAUR_2                                           | #N/A                    | 6.3961  | 6.7038  | 5.5322  | 6.2597  | 6.8160  | 6.1542  | 6.4916  | 5.6577  | 6.6311  | 6.4446  | 1.0276  | 0.0393  | 0.4469 | 0.3498 |
| Ubqin1   | _EANIQLIATGGDNIAIER_2                                        | #N/A                    | 4.4551  | 2.8263  | 4.1616  | 4.9397  | 2.9844  | 3.6370  | 3.7888  | 3.6955  | 4.3779  | 4.7757  | 0.9218  | -0.1175 | 0.5097 | 0.2927 |
| Ubqin1   | _FQQLEQLSAM(Oxidation [M])IGLRN_2                            | #N/A                    | 3.6928  | 4.5807  | 4.3796  | 3.6227  | 4.0477  | 3.4101  | 3.7680  | 3.2362  | 3.6776  | 3.3484  | 1.1277  | 0.1734  | 0.1174 | 0.9303 |
| Ubqin1   | _JAcetyl (Protein N-term)AIESAESSGPPAQDSAADGPAEPK_2          | #N/A                    | 3.8947  | 3.4477  | 4.1286  | 3.0384  | 3.5862  | 3.3204  | 3.8290  | 4.1281  | 4.3503  | 0.9267  | -0.1098 | 0.3030  | 0.5185 | 0.1805 |
| Papc1    | _LFLVNLPDITEEDFK_2                                           | #N/A                    | 3.5954  | 3.8630  | 4.2822  | 3.8426  | 3.5190  | 4.5741  | 2.9959  | 3.3336  | 3.9249  | 3.6482  | 1.1353  | 0.1831  | 0.1096 | 0.9600 |
| Papc1    | _FAQPGTFEYASR_2                                              | #N/A                    | 3.8435  | 5.5986  | 3.9282  | 3.4720  | 6.1618  | 5.6842  | 5.0455  | 6.0651  | 6.1697  | 5.7342  | 0.8310  | -0.2670 | 0.1580 | 0.8014 |
| Ccdc12   | _GQEDSLAS(Phospho [STY])AVADTQGEAC(Carbamidomethyl [C])DSO_2 | QBR344_S152_M1_Ccdc12   | 4.0108  | 3.8523  | 3.9619  | 4.5651  | 3.9016  | 3.6631  | 4.1793  | 4.2527  | 3.4143  | 3.6664  | 1.0295  | 0.0419  | 0.6224 | 0.2060 |
| Rab11fp5 | _TYS(Phospho [STY])DEASQLR_2                                 | #N/A                    | 9.5503  | 9.5300  | 10.0289 | 10.0093 | 8.4657  | 9.7528  | 9.6698  | 9.3329  | 9.4201  | 9.7308  | 1.0019  | 0.0027  | 0.9547 | 0.0201 |
| Rab11fp5 | _S(Phospho [STY])PSHSWLTSEGK_2                               | #N/A                    | 7.8160  | 7.8669  | 4.2162  | 8.3067  | 3.3018  | 7.5993  | 7.9780  | 7.8398  | 7.6565  | 8.0404  | 0.8349  | -0.2603 | 0.2826 | 0.5488 |
| Rab11fp5 | _RTYS(Phospho [STY])DEASQLR_2                                | #N/A                    | 4.8345  | 5.4432  | 4.5667  | 5.8201  | 4.4787  | 3.7368  | 3.6299  | 5.2248  | 5.6467  | 3.8822  | 1.0473  | 0.0667  | 0.7000 | 0.1549 |
| Rab11fp5 | _GSPSLGAS(Phospho [STY])PHSSTGEEK_3                          | #N/A                    | 5.4527  | 6.8306  | 3.9633  | 4.4478  | 3.6676  | 3.5622  | 5.9351  | 6.7272  | 3.8813  | 4.7739  | 0.8448  | -0.2433 | 0.3265 | 0.4861 |
| Rab11fp5 | _DKPRS(Phospho [STY])PFSK_2                                  | QBR361_S188_M1_Rab11fp5 | 4.0434  | 5.8640  | 3.7770  | 3.3208  | 3.1204  | 3.1083  | 3.4691  | 3.6804  | 3.9794  | 2.9981  | 1.0964  | 0.1328  | 0.5583 | 0.2531 |
| Rab11fp5 | _ATVALDEVR_2                                                 | #N/A                    | 4.4427  | 3.3613  | 3.5622  | 4.0648  | 4.1443  | 4.2276  | 3.0875  | 4.0536  | 3.7022  | 4.0318  | 1.0668  | 0.0933  | 0.3963 | 0.4019 |
| Rab11fp5 | _RGS(Phospho [STY])KEKGS(Phospho [STY])PSGASPHSSTGEEK_4      | QBR361_S474_M2_Rab11fp5 | 3.2907  | 3.9355  | 3.9775  | 4.4802  | 3.9172  | 3.8123  | 4.1948  | 3.6383  | 3.2869  | 4.4472  | 1.0027  | 0.0039  | 0.9717 | 0.0125 |
| Igsf8    | _VLPEQLQSAAPGR_2                                             | #N/A                    | 8.3990  | 8.1126  | 8.3275  | 8.0833  | 7.9804  | 7.8621  | 8.7360  | 8.3567  | 8.2765  | 8.1948  | 0.9686  | -0.0460 | 0.0979 | 1.0093 |
| Igsf8    | _AIEAPVGR_2                                                  | #N/A                    | 7.0359  | 7.3483  | 7.5849  | 6.5484  | 7.2812  | 6.5910  | 7.0675  | 7.2672  | 7.0475  | 6.8328  | 1.0016  | 0.0023  | 0.9618 | 0.0169 |
| Igsf8    | _LVAQLDEIGSLGPGVEDR_2                                        | #N/A                    | 5.4704  | 5.7615  | 5.5371  | 5.6262  | 4.9125  | 5.5978  | 5.8284  | 5.7899  | 5.2662  | 6.0220  | 0.9577  | -0.0624 | 0.2559 | 0.5919 |
| Igsf8    | _DSQFYAVFGR_2                                                | #N/A                    | 5.5304  | 6.4055  | 6.2635  | 6.1493  | 5.4624  | 5.9183  | 6.4258  | 5.8553  | 5.3868  | 5.9773  | 1.0074  | 0.0106  | 0.8714 | 0.0598 |
| Igsf8    | _VASGDLQVGR_2                                                | #N/A                    | 5.8713  | 6.0309  | 6.1269  | 6.0616  | 5.7536  | 6.0923  | 6.4455  | 6.2281  | 6.2704  | 6.0437  | 0.9588  | -0.0807 | 0.0314 | 1.5035 |
| Igsf8    | _ATLQEVVGR_2                                                 | #N/A                    | 4.8801  | 5.6360  | 3.6822  | 4.5808  | 5.0664  | 4.3347  | 3.7343  | 5.2999  | 5.9989  | 5.6180  | 0.9259  | -0.1111 | 0.5305 | 0.2753 |
| Igsf8    | _HAAYSVGWEM(Oxidation [M])APAGAPGPR_3                        | #N/A                    | 5.2241  | 4.2563  | 4.1379  | 3.1397  | 4.8829  | 3.6518  | 6.1295  | 6.0533  | 5.5656  | 5.1952  | 0.7349  | -0.4443 | 0.0075 | 2.1243 |
| Igsf8    | _LEAAPADAGTYR_3                                              | #N/A                    | 4.1106  | 3.7334  | 4.1795  | 3.1813  | 4.8664  | 3.7129  | 4.3969  | 3.4363  | 3.0849  | 4.2487  | 1.0455  | 0.0641  | 0.6644 | 0.1776 |
| Igsf8    | _LTVHEGQELALGC(Carbamidomethyl [C])LAQTK_3                   | #N/A                    | 3.8128  | 3.4133  | 4.4996  | 3.5014  | 3.3016  | 4.6659  | 3.2161  | 4.6333  | 4.2656  | 3.4684  | 0.9923  | -0.0112 | 0.9414 | 0.0262 |
| Igsf8    | _AVLAHYDVQTLSSQLAVTSGPER_3                                   | #N/A                    | 2.8984  | 2.9432  | 4.1160  | 3.6767  | 3.5430  | 3.0816  | 3.8250  | 3.3245  | 3.6235  | 3.3540  | 0.9560  | -0.0649 | 0.5725 | 0.2422 |
| Igsf8    | _EGGVLEAVWLAGVTGYR_2                                         | #N/A                    | 4.0275  | 3.1986  | 3.2135  | 3.7162  | 3.0869  | 3.5377  | 3.4308  | 4.4023  | 4.0509  | 3.6832  | 0.8899  | -0.1682 | 0.1255 | 0.9014 |
| Clmp     | _LVKFSSSSGS(Phospho [STY])R_2                                | QBR373_S293_M1_Clmp     | 3.0857  | 3.8909  | 3.7725  | 4.2298  | 3.7122  | 4.0173  | 4.3781  | 4.2722  | 3.7074  | 4.2421  | 0.9484  | -0.0765 | 0.5307 | 0.2752 |
| Mcm1p    | _VS(Phospho [STY])PSTSTPSR_2                                 | QBR3C0_S154_M1_Mcm1p    | 7.8757  | 7.6328  | 8.1216  | 8.2034  | 7.6214  | 7.9720  | 8.1513  | 8.0772  | 7.5590  | 3.8007  | 1.1461  | 0.0772  | 0.2605 | 0.5843 |
| Tbc1d13  | _SGVTNMSS(Phospho [STY])PHK_2                                | QBR3D1_S184_M1_Tbc1d13  | 4.8920  | 4.3159  | 4.1975  | 3.8048  | 4.1373  | 3.5922  | 3.9530  | 3.4183  | 3.0669  | 3.1663  | 1.0221  | 0.2894  | 0.0263 | 1.5802 |
| Mcat     | _DSS(Phospho [STY])VAEEGAGAVAR_2                             | QBR3F5_S41_M1_Mcat      | 5.9681  | 5.9247  | 4.4373  | 3.4391  | 2.8761  | 3.3525  | 3.1538  | 3.1786  | 3.3280  | 5.7982  | 1.0531  | 0.0746  | 0.8031 | 0.9552 |
| Mboat2   | _RTS(Phospho [STY])TQBNVLSQAK_3                              | QBR3I2_S472_M1_Mboat2   | 3.6890  | 3.5372  | 4.3758  | 3.3776  | 4.7937  | 3.1992  | 3.0923  | 3.2400  | 4.3894  | 3.3446  | 1.0888  | 0.1227  | 0.4512 | 0.3456 |
| Cuap1    | _KPEPLDES(Phospho [STY])DNDF_2                               | #N/A                    | 3.1371  | 3.9423  | 3.8239  | 6.6645  | 5.9069  | 5.0119  | 4.3267  | 6.9818  | 7.2724  | 6.6109  | 0.7539  | -0.4076 | 0.1132 | 0.9462 |
| Cuap1    | _IKPEPLDES(Phospho [STY])DNDF_2                              | #N/A                    | 4.2013  | 5.7867  | 3.3873  | 7.1465  | 5.4211  | 5.4208  | 3.5364  | 6.7028  | 6.3618  | 6.1854  | 0.9176  | -0.1240 | 0.6083 | 0.2159 |
| Pyp6r2   | _NVPGLAAPS(Phospho [STY])PDNF_2                              | QBR3Q2_S670_M1_Pyp6r2   | 12.1669 | 12.0225 | 12.6223 | 12.1271 | 10.5679 | 11.8701 | 12.6046 | 11.8359 | 12.0267 | 11.6334 | 0.9893  | -0.0156 | 0.7509 | 0.1244 |
| Pyp6r2   | _VGTGLVDS(Phospho [STY])FSQGLR_2                             | QBR3Q2_S289_M1_Pyp6r2   | 4.2262  | 3.4817  | 3.9599  | 3.5037  | 3.3700  | 3.2546  | 3.6520  | 3.4975  | 3.7965  | 3.1810  | 1.0286  | 0.0407  | 0.6569 | 0.1825 |
| Exoc1    | _LTGSTS(Phospho [STY])LNK_2                                  | QBR3S6_S473_M1_Exoc1    | 6.5092  | 6.6330  | 6.7162  | 6.5813  | 4.4683  | 3.7666  | 6.5315  | 6.9838  | 5.0791  | 6.1532  | 0.9341  | -0.0984 | 0.5970 | 0.2240 |
| Sh3glb2  | _GKVPVTVLELLS(Phospho [STY])_2                               | #N/A                    | 6.4288  | 7.7002  | 8.0354  | 8.8552  | 7.7846  | 7.1853  | 7.4903  | 7.8577  | 7.7322  | 7.0500  | 1.0176  | 0.0251  | 0.7709 | 0.1130 |
| Sh3glb2  | _QTEVLQPNPSAR_2                                              | #N/A                    | 6.9374  | 7.4138  | 7.5747  | 7.3157  | 7.6968  | 7.1469  | 7.2075  | 7.1186  | 7.4628  | 7.1513  | 1.0155  | 0.0223  | 0.4885 | 0.3111 |
| Sh3glb2  | _NFLGEGWK_2                                                  | #N/A                    | 6.4508  | 6.4058  | 6.5410  | 6.4187  | 6.1597  | 6.7290  | 6.1553  | 6.2074  | 6.2042  | 6.6467  | 1.0234  | 0.0334  | 0.2949 | 0.5304 |
| Sh3glb2  | _VAQTEFDR_2                                                  | #N/A                    | 6.1659  | 5.9429  | 5.9023  | 6.1000  | 6.6654  | 5.9653  | 4.0620  | 5.8271  | 6.2077  | 6.2872  | 1.0943  | 0.1300  | 0.2614 | 0.5827 |
| Sh3glb2  | _VEFLYEK_2                                                   | #N/A                    | 5.5769  | 4.1522  | 4.7604  | 4.9619  | 5.2080  | 4.6474  | 4.2295  | 4.9098  | 5.1152  | 4.7440  | 1.0284  | 0.0404  | 0.6556 | 0.1843 |
| Sh3glb2  | _SQTTYAQCC(Carbamidomethyl [C])YR_2                          | #N/A                    | 6.0478  | 5.8981  | 4.4960  | 3.5063  | 6.0397  | 6.1608  | 6.0320  | 5.1293  | 5.8432  | 5.7861  | 0.9404  | -0.0886 | 0.5760 | 0      |



|          |                                                                       |                         |         |         |         |         |         |         |         |         |         |         |         |         |        |        |
|----------|-----------------------------------------------------------------------|-------------------------|---------|---------|---------|---------|---------|---------|---------|---------|---------|---------|---------|---------|--------|--------|
| Cacnb1   | _S[Phospho (STY)]GDNSSSLGVDTGTR_2                                     | #N/A                    | 8.0604  | 8.1939  | 7.5870  | 8.7465  | 6.7967  | 8.3259  | 8.4189  | 8.2315  | 6.3269  | 8.4755  | 1.0113  | 0.0161  | 0.8726 | 0.0592 |
| Cacnb1   | _QGS[Phospho (STY)]MEDEYVEEM[Oxidation (M)]TMDNR_2                    | #N/A                    | 3.1849  | 6.2334  | 5.3238  | 7.0802  | 5.3577  | 6.4210  | 6.0504  | 6.2976  | 7.0614  | 6.0875  | 0.8786  | -0.1868 | 0.3124 | 0.5052 |
| Cacnb1   | _ATHPPSS[Phospho (STY)]TPPNLNLNR_3                                    | QBR3Z5_5417_M1_Cacnb1   | 3.6558  | 5.6694  | 3.3894  | 4.0039  | 3.7622  | 3.8254  | 3.7186  | 4.1149  | 5.1779  | 3.9709  | 0.9528  | -0.0698 | 0.6931 | 0.1592 |
| Cacnb1   | _ALS[Phospho (STY)]RQDT[Phospho (STY)]FDADTPGSR_2                     | #N/A                    | 3.8305  | 5.2253  | 4.0261  | 5.3619  | 4.4904  | 5.5060  | 5.7136  | 5.3607  | 5.4239  | 5.2485  | 0.8719  | -0.1978 | 0.1017 | 0.9929 |
| Cacnb1   | _GPVPPSQEPM[Oxidation (M)]EVDFPS[Phospho (STY)]POGK_3                 | #N/A                    | 3.7547  | 5.3899  | 3.4013  | 6.7576  | 4.3496  | 5.4322  | 3.6186  | 5.7799  | 5.5960  | 3.8709  | 1.0278  | 0.0396  | 0.8703 | 0.0603 |
| Micos13  | _DSWNSGISVM[Oxidation (M)]SALSAPSK_2                                  | #N/A                    | 3.3549  | 5.3062  | 6.2993  | 5.1089  | 4.2820  | 5.1572  | 5.1628  | 5.0530  | 3.2217  | 5.7523  | 1.0251  | 0.0358  | 0.8616 | 0.0647 |
| Micos13  | _GSVAGGAVLYDQELLGPSK_2                                                | #N/A                    | 4.6902  | 4.3634  | 4.4535  | 4.5254  | 4.0779  | 4.9613  | 4.1455  | 4.1238  | 4.5201  | 3.6000  | 1.1012  | 0.1390  | 0.0884 | 1.0538 |
| Cadm4    | _VWSVASTVR_2                                                          | #N/A                    | 5.1810  | 4.9034  | 4.2834  | 4.8740  | 5.1935  | 5.0702  | 4.3251  | 4.8432  | 5.5414  | 0.8812  | -0.1825 | 0.3992  | 0.3988 |        |
| Cadm4    | _GSYLTHEAS[Phospho (STY)]GLDQEGEAR_3                                  | #N/A                    | 4.7544  | 4.1110  | 4.2219  | 4.6730  | 3.7979  | 4.1361  | 4.4282  | 5.5396  | 5.3023  | 4.5340  | 0.8650  | -0.2093 | 0.0482 | 1.3170 |
| Cadm4    | _FQLEEFSPR_2                                                          | #N/A                    | 4.3527  | 5.9629  | 5.8239  | 5.3174  | 5.0601  | 3.1281  | 6.4351  | 2.9596  | 5.0518  | 0.9746  | -0.0371 | 0.8774  | 0.0568 |        |
| Cadm4    | _LHQYDGSVVQNPAPR_3                                                    | #N/A                    | 4.0794  | 2.9925  | 3.4708  | 4.5154  | 2.8808  | 3.7438  | 3.1628  | 4.1923  | 4.2857  | 4.1927  | 0.9130  | -0.1314 | 0.3964 | 0.4018 |
| Purg     | _BAS[Phospho (STY)]GEEQEC[Carbamidomethyl (C)]LD_2                    | QBR4E6_5342_M1_Purg     | 10.6191 | 10.6233 | 11.0757 | 11.1806 | 10.4616 | 10.7438 | 10.9060 | 10.8681 | 10.8784 | 10.6827 | 0.9954  | -0.0066 | 0.7484 | 0.1259 |
| Purg     | _DALVQLIEDYGGDIEER_2                                                  | #N/A                    | 5.1906  | 5.3483  | 6.7354  | 6.3507  | 5.3807  | 5.5575  | 5.7751  | 5.3691  | 5.2247  | 4.0191  | 1.1302  | 0.1766  | 0.1686 | 0.7731 |
| Purg     | _HSAPS[Phospho (STY)]PPVSVGS[Phospho (STY)]EEHPHSVLK_3                | #N/A                    | 6.6261  | 6.5598  | 6.4805  | 6.6218  | 4.1501  | 7.1112  | 6.5382  | 6.5385  | 8.2608  | 3.9246  | 0.9909  | -0.0131 | 0.9502 | 0.0222 |
| Purg     | _QKHSA[Phospho (STY)]PPVS[Phospho (STY)]VGS[Phospho (STY)]EEHPHSVLK_4 | #N/A                    | 3.8861  | 5.6231  | 3.3166  | 6.0098  | 5.6800  | 5.5978  | 4.0965  | 6.7392  | 6.5234  | 5.9069  | 0.8629  | -0.2128 | 0.3148 | 0.5020 |
| Arhgef12 | _SEGVQDAEPQSLVGS[Phospho (STY)]PSTR_2                                 | QBR4H2_5341_M1_Arhgef12 | 8.7114  | 8.5573  | 8.8588  | 8.8585  | 3.8074  | 8.6679  | 8.9199  | 8.5820  | 2.9626  | 1.0875  | 0.1221  | 0.6888  | 0.1619 |        |
| Arhgef12 | _TGTGDIATC[Carbamidomethyl (C)]DS[Phospho (STY)]PR_2                  | QBR4H2_5157_M1_Arhgef12 | 7.3400  | 6.9098  | 7.4213  | 7.5177  | 5.7482  | 6.6028  | 7.5549  | 7.2418  | 6.6024  | 7.1006  | 0.9717  | -0.0414 | 0.6075 | 0.2165 |
| Arhgef12 | _JTS[Phospho (STY)]PVLVEENNVVNWQK_3                                   | #N/A                    | 3.4878  | 5.6299  | 3.6592  | 6.5914  | 3.3798  | 5.6261  | 3.6590  | 5.8651  | 3.9020  | 5.7228  | 0.9878  | -0.0176 | 0.9467 | 0.0608 |
| Arhgef12 | _HLTSPSS[Phospho (STY)]PEPDPAK_2                                      | QBR4H2_5637_M1_Arhgef12 | 3.6172  | 4.3735  | 3.3509  | 4.3955  | 4.2618  | 3.8636  | 4.5438  | 4.1065  | 4.4055  | 4.0728  | 0.9288  | -0.1066 | 0.2395 | 0.6208 |
| Arhgef12 | _TSSWSDGASRPSSDASD[Phospho (STY)]PK_3                                 | QBR4H2_5309_M1_Arhgef12 | 3.0948  | 3.8511  | 4.3293  | 3.8731  | 3.7394  | 3.1861  | 3.4271  | 3.1281  | 3.4271  | 5.5504  | 1.0786  | 0.1092  | 0.3842 | 0.4154 |
| Arhgef12 | _VEHHQLSVAGLGS[Phospho (STY)]POR_3                                    | QBR4H2_5176_M1_Arhgef12 | 5.3229  | 4.8531  | 3.7951  | 4.2978  | 4.1566  | 3.9946  | 4.3554  | 5.6311  | 5.4173  | 5.4929  | 0.8429  | -0.2466 | 0.0595 | 1.2253 |
| Arhgef12 | _SSS[Phospho (STY)]HGFDPDTSSSK_2                                      | #N/A                    | 3.1342  | 7.2569  | 3.8210  | 4.1813  | 3.7607  | 7.4493  | 4.3296  | 3.1189  | 7.1639  | 0.8942  | -0.1614 | 0.6620  | 0.1792 |        |
| Arhgef12 | _SSS[Phospho (STY)]HGFDPDTSSSK_2                                      | #N/A                    | 4.5298  | 4.0399  | 4.1132  | 5.2409  | 3.7543  | 4.2067  | 4.0999  | 3.5121  | 4.3598  | 3.9561  | 1.0834  | 0.1156  | 0.2999 | 0.5231 |
| Gtf2a1   | _LPGNELR_2                                                            | #N/A                    | 6.8682  | 7.5117  | 7.4149  | 6.1396  | 7.8934  | 7.0771  | 6.9159  | 7.3002  | 7.6608  | 7.1991  | 0.9837  | -0.0236 | 0.7327 | 0.1251 |
| Neto1    | _GTGATADADVAEDFENY[Phospho (STY)]HK_3                                 | QBR4I7_7417_M1_Neto1    | 4.3013  | 3.6056  | 3.4872  | 3.1412  | 3.4270  | 3.3625  | 3.5868  | 3.7772  | 3.9569  | 1.0248  | 0.0354  | 0.7568  | 0.1310 |        |
| Cybl     | _VDC[Carbamidomethyl (C)]AVLDC[Carbamidomethyl (C)]EDGVAENK_2         | #N/A                    | 4.2151  | 3.1273  | 3.9488  | 3.4926  | 3.3588  | 3.2658  | 4.4447  | 3.5086  | 3.8077  | 3.1698  | 0.9559  | -0.0651 | 0.6032 | 0.2195 |
| Nup35    | _TLGT[Phospho (STY)]PTQSGSTPR_2                                       | QBR4R6_7272_M1_Nup35    | 6.4382  | 6.5920  | 7.0089  | 7.1156  | 6.9181  | 6.7817  | 3.2060  | 6.0617  | 6.3976  | 6.6664  | 1.2196  | 0.2864  | 0.0949 | 0.1229 |
| Ppp1r14c | _KLS[Phospho (STY)]PQKK_2                                             | QBR4S0_5157_M1_Ppp1r14c | 7.0337  | 6.5236  | 7.1100  | 7.9571  | 7.2363  | 7.1806  | 6.4809  | 7.4974  | 6.4174  | 7.1519  | 1.0416  | 0.0588  | 0.3879 | 0.4113 |
| Cys1     | _LAPAVS[Phospho (STY)]PEKK_2                                          | QBR4T1_595_M1_Cys1      | 7.0850  | 7.5046  | 8.0837  | 8.0425  | 7.0313  | 7.5478  | 7.6517  | 7.4174  | 7.7264  | 7.9723  | 0.9814  | -0.0270 | 0.5791 |        |
| Cys1     | _GNPEDSC[Carbamidomethyl (C)]ASEAPGNS[Phospho (STY)]PK_2              | QBR4T1_5116_M1_Cys1     | 6.3825  | 5.4950  | 4.5340  | 7.0189  | 5.6818  | 5.9014  | 4.0745  | 6.6105  | 5.8892  | 5.7490  | 1.0457  | 0.0644  | 0.6839 | 0.1050 |
| Luzp1    | _ELS[Phospho (STY)]PQHK_2                                             | #N/A                    | 8.2165  | 8.9151  | 9.1461  | 9.0959  | 7.6822  | 8.7469  | 8.6694  | 8.6227  | 8.5330  | 8.3750  | 1.0098  | 0.0141  | 0.7854 | 0.1649 |
| Luzp1    | _KGS[Phospho (STY)]DYLK_2                                             | #N/A                    | 5.9543  | 5.5445  | 4.2419  | 6.3399  | 4.1816  | 3.5479  | 5.8794  | 5.6455  | 5.7387  | 3.4377  | 0.9600  | -0.0589 | 0.7857 | 0.1047 |
| Luzp1    | _RKGS[Phospho (STY)]DYLK_2                                            | #N/A                    | 3.2784  | 6.7037  | 4.5249  | 6.6073  | 5.2060  | 5.6190  | 4.2049  | 5.8458  | 6.1555  | 6.5549  | 0.9351  | -0.0967 | 0.6488 | 0.1879 |
| Luzp1    | _ELS[Phospho (STY)]PQHK_2                                             | #N/A                    | 6.1655  | 5.5875  | 5.4174  | 2.5607  | 3.2719  | 4.4390  | 4.9525  | 5.6789  | 4.9760  | 3.5397  | 0.9555  | -0.0657 | 0.7980 | 0.0880 |
| Luzp1    | _NQRPF[Phospho (STY)]PR_2                                             | QBR4U7_5746_M1_Luzp1    | 5.9686  | 5.6466  | 6.2737  | 7.5898  | 2.9549  | 6.3989  | 6.5650  | 5.6087  | 6.3520  | 0.9388  | -0.0911 | 0.6535  | 0.1848 |        |
| Luzp1    | _S[Phospho (STY)]QENILQFSUPNK_2                                       | QBR4U7_5612_M1_Luzp1    | 3.1964  | 3.9527  | 4.4309  | 7.5272  | 3.8410  | 4.2845  | 4.1229  | 3.0265  | 5.7738  | 3.6520  | 1.0953  | 0.1313  | 0.6747 | 0.1703 |
| Luzp1    | _EFALS[Phospho (STY)]NEHYSLSK_2                                       | #N/A                    | 4.6469  | 4.1000  | 5.3122  | 5.3819  | 2.6743  | 4.5636  | 4.4386  | 4.7891  | 5.2026  | 4.9731  | 0.8548  | -0.2264 | 0.1980 | 0.7009 |
| Luzp1    | _EKPOS[Phospho (STY)]DOOLDLSEVYATK_2                                  | #N/A                    | 3.8281  | 3.8824  | 3.2545  | 4.0009  | 3.7469  | 3.5838  | 3.7156  | 4.2832  | 3.7914  | 3.8523  | 0.9503  | -0.0736 | 0.2826 | 0.5489 |
| Luzp1    | _TFS[Phospho (STY)]DSHVSVPNIDVQK_2                                    | QBR4U7_5513_M1_Luzp1    | 3.4554  | 4.2117  | 3.1891  | 4.2337  | 4.1000  | 4.0255  | 4.2683  | 3.0665  | 3.9110  | 0.9903  | -0.0140 | 0.9104  | 0.0408 |        |
| Lrrc8c   | _SQS[Phospho (STY)]KLS[Phospho (STY)]PEK_2                            | #N/A                    | 9.9369  | 9.6742  | 10.2433 | 9.7730  | 8.6428  | 9.5815  | 10.3168 | 9.8764  | 9.8736  | 9.8585  | 0.9660  | -0.0499 | 0.2761 | 0.5589 |
| Lrrc8c   | _SGT[Phospho (STY)]QSGPEGNLVR_2                                       | QBR502_7198_M1_Lrrc8c   | 3.7224  | 5.2555  | 4.2651  | 3.8685  | 3.5600  | 3.6969  | 3.8587  | 3.8622  | 3.7890  | 5.8691  | 0.9337  | -0.0989 | 0.5926 | 0.2272 |
| Lrrc8c   | _S[Phospho (STY)]QSLKS[Phospho (STY)]PEKPVQK_2                        | QBR502_5210_M2_Lrrc8c   | 3.8324  | 3.1590  | 3.6648  | 3.2714  | 2.9581  | 3.2793  | 3.5600  | 3.4931  | 3.9358  | 3.4453  | 0.9314  | -0.1026 | 0.2251 | 0.6476 |
| Mib2     | _RVS[Phospho (STY)]ADGGPFQR_2                                         | #N/A                    | 8.2955  | 8.2976  | 8.9863  | 9.0430  | 7.7085  | 8.5338  | 8.6989  | 8.4599  | 8.1947  | 8.4431  | 1.0033  | 0.0048  | 0.9182 | 0.0371 |
| Mib2     | _HGS[Phospho (STY)]PSTPOR_2                                           | QBR516_544_M1_Mib2      | 3.4455  | 6.0684  | 4.1323  | 6.4030  | 4.0720  | 3.6575  | 4.0183  | 6.6487  | 5.8385  | 6.5155  | 0.8044  | -0.3139 | 0.2009 | 0.0790 |
| Mib2     | _VS[Phospho (STY)]ADGGPFQR_2                                          | #N/A                    | 3.8522  | 3.1077  | 3.3045  | 3.8071  | 2.9960  | 3.6286  | 3.5218  | 4.3114  | 3.9599  | 3.7741  | 0.8863  | -0.1741 | 0.0881 | 1.0548 |
| Sh3kbp1  | _S[Phospho (STY)]EVENDFLUPVK_2                                        | QBR550_5274_M1_Sh3kbp1  | 8.6621  | 8.5927  | 8.8367  | 9.6647  | 8.0798  | 9.0112  | 8.3932  | 8.7891  | 9.1816  | 0.9940  | -0.0086 | 0.8652  | 0.0629 |        |
| Sh3kbp1  | _LIS[Phospho (STY)]GESDLGSDQSLSK_2                                    | QBR550_5156_M1_Sh3kbp1  | 5.6176  | 4.1536  | 3.7598  | 7.5813  | 6.5982  | 6.2297  | 4.0856  | 6.9214  | 7.4910  | 4.0918  | 1.0016  | 0.0024  | 0.9931 | 0.0030 |
| Sh3kbp1  | _ASS[Phospho (STY)]PSFSTGKPK_2                                        | QBR550_5631_M1_Sh3kbp1  | 9.8228  | 10.1696 | 10.5495 | 10.3377 | 9.5305  | 9.8746  | 10.2854 | 3.5292  | 9.4766  | 8.8046  | 1.2143  | 0.2802  | 0.2006 | 0.6976 |
| Otud7a   | _AAGGAAS[Phospho (STY)]PGPGGAR_2                                      | QBR554_5749_M1_Otud7a   | 7.4803  | 7.8190  | 8.3962  | 8.3983  | 6.5317  | 7.6751  | 7.6010  | 7.8010  | 7.7954  | 7.9073  | 0.9924  | -0.0111 | 0.8720 | 0.0595 |
| Otud7a   | _AS[Phospho (STY)]PGPTAAQPTQLVLK_2                                    | QBR554_5711_M1_Otud7a   | 4.2230  | 3.0032  | 3.4090  | 3.9116  | 3.3487  | 4.3808  | 3.6263  | 4.2069  | 3.8554  | 3.8786  | 0.9540  | -0.0680 | 0.5577 | 0.0577 |
| Snap47   | _ELLSQGTAAENPSHVTR_3                                                  | #N/A                    | 5.4268  | 5.0165  | 5.4856  | 5.2149  | 4.8982  | 5.0542  | 5.2532  | 4.7776  | 4.8970  | 5.1872  | 1.0306  | 0.0435  | 0.3355 | 0.4743 |
| Snap47   | _ELLSDALVLR_2                                                         | #N/A                    | 4.2981  | 4.3198  | 4.6570  | 4.3798  | 3.8069  | 2.5287  | 4.2911  | 3.5174  | 4.5183  | 0.9665  | -0.0492 | 0.7546  | 0.1223 |        |
| Snap47   | _ELPTGGQEGELQIQK_2                                                    | #N/A                    | 5.7805  | 5.9897  | 6.2240  | 6.6637  | 5.5106  | 6.0354  | 3.6334  | 6.7385  | 6.5574  | 6.4625  | 1.0318  | 0.0452  | 0.7713 | 0.1128 |
| Ppsap2   | _LGIAVHGEAQDAESDLVGRHS[Phospho (STY)]PPM[Oxidation (M)]VR_4           | #N/A                    | 3.8912  | 8.3079  | 3.6249  | 8.9483  | 3.0349  | 6.4298  | 7.4413  | 3.8325  | 7.6603  | 6.6807  | 0.8911  | -0.1664 | 0.6494 | 0.1875 |
| Ppsap2   | _HS[Phospho (STY)]PPMVR_2                                             | #N/A                    | 3.6221  | 3.6041  | 4.3089  | 6.8718  | 4.2486  | 3.4809  | 4.5262  | 3.3069  | 2.9555  | 3.2777  | 1.2387  | 0.3088  | 0.2703 | 0.5681 |
| Apbb1p   | _S[Phospho (STY)]SDTC[Carbamidomethyl (C)]GSPALPK_2                   | QBR5A3_5531_M1_Apbb1p   | 7.9402  | 3.6999  | 3.3762  | 4.4208  | 2.7862  | 3.8384  | 3.0682  | 4.0812  | 4.3803  | 4.0981  | 1.1118  | 0.1529  | 0.6637 |        |
| Apbb1p   | _RSSDT[Phospho (STY)]C[Carbamidomethyl (C)]GSPALPK_2                  | QBR5A3_7534_M1_Apbb1p   | 3.8303  | 3.5121  | 3.5640  | 4.6086  | 3.3334  | 4.3961  | 3.2560  | 3.8934  | 4.1925  | 4.2859  | 0.9916  | -0.0122 | 0.9210 | 0.0357 |
| Apbb1p   | _GGLGNHS[Phospho (STY)]PGATR_2                                        | QBR5A3_5007_M1_Apbb1p   | 5.9658  | 4.0518  | 6.2110  | 6.1323  | 3.8731  | 3.8564  | 4.1507  | 5.7170  | 3.3310  | 4.4030  | 1.1397  | 0.1886  | 0.4213 | 0.3754 |
| Tbc1d22a | _SVS[Phospho (STY)]ESHTPC[Carbamidomethyl (C)]PSESTGDTVPLQR_3         | QBR5A6_5144_M1_Tbc1d22a | 8.5595  | 8.2798  | 9.1593  | 3.5538  | 3.2493  | 3.3753  | 8.6036  | 3.0639  | 4.2133  | 3.5208  | 1.2431  | 0.3139  | 0.5289 | 0.2766 |
| Actr1b   | _AGFAGDQPK_2                                                          | #N/A                    | 7.7291  | 7.8660  | 8.0100  | 7.5598  | 7.0371  | 7.4712  | 7.6101  | 7.6009  | 7.5561  | 7.4354  | 1.0082  | 0.0117  | 0.7384 | 0.1317 |
| Actr1b   | _VCYTLPGDGLDVGPAR_2                                                   | #N/A                    | 6.8596  | 5.9542  | 6.8083  | 6.9351  | 6.1953  | 6.2698  | 6.5894  | 6.4748  | 6.1491  | 6.4954  |         |         |        |        |



|         |                                                                                    |                        |         |         |         |         |         |         |         |         |         |         |         |         |        |        |
|---------|------------------------------------------------------------------------------------|------------------------|---------|---------|---------|---------|---------|---------|---------|---------|---------|---------|---------|---------|--------|--------|
| Cops8   | _SANSEGGWISVGQR_2                                                                  | #N/A                   | 5.1564  | 4.5702  | 6.1513  | 5.2152  | 5.3367  | 5.1603  | 5.4795  | 5.3391  | 5.1626  | 5.7025  | 0.9712  | -0.0421 | 0.5867 | 0.2316 |
| Cops8   | _GVLEQGWADSTTR_2                                                                   | #N/A                   | 4.1561  | 3.4115  | 3.8897  | 4.3261  | 4.6448  | 5.1561  | 3.2180  | 3.5677  | 4.9826  | 3.1108  | 1.1463  | 0.1970  | 0.2707 | 0.5674 |
| Sk6a8   | _GLTLTT[Phospho (STY)]P[PSV]S[Phospho (STY)]JESSK_2                                | QBV8W1_5628_M2_Sk6a8   | 3.4400  | 3.9024  | 3.1736  | 4.2183  | 3.7238  | 5.8134  | 4.3665  | 5.7039  | 5.6947  | 3.8955  | 0.8230  | -0.2810 | 0.1870 | 0.7282 |
| Nae1    | _LIQSQQAQSPSEK_2                                                                   | #N/A                   | 4.2673  | 4.8269  | 4.0605  | 4.5316  | 4.7288  | 4.7906  | 3.1265  | 4.4625  | 4.6963  | 4.5267  | 1.0788  | 0.1095  | 0.3414 | 0.4668 |
| Mpd1    | _DMSQTPAVAPDLEPPST[Phospho (STY)]R_2                                               | QBV8X6_51590_M1_Mpd1   | 3.9962  | 3.2006  | 3.1822  | 3.3193  | 3.2129  | 3.1067  | 3.4675  | 3.6819  | 3.9810  | 2.9965  | 0.9451  | -0.0815 | 0.4361 | 0.3604 |
| Camk1   | _KFS[Phospho (STY)]QER_2                                                           | QBV8Y2_574_M1_Camk1    | 6.3091  | 5.9466  | 6.5103  | 6.0053  | 5.1231  | 5.6857  | 5.9070  | 5.7129  | 6.0804  | 6.0158  | 1.0002  | 0.0002  | 0.9970 | 0.0013 |
| Camk1   | _S[Phospho (STY)]IGNPFEPQAR_2                                                      | #N/A                   | 3.0784  | 12.1813 | 12.1550 | 13.0465 | 11.5980 | 12.5139 | 12.8794 | 12.2847 | 12.6095 | 12.5314 | 0.8558  | -0.2247 | 0.3768 | 0.4739 |
| Camk1   | _EGC[Carbamidomethyl (C)]JEGC[Carbamidomethyl (C)]KQ[Phospho (STY)]PELPGVQEDEAAS_2 | #N/A                   | 3.4732  | 6.9500  | 6.7033  | 7.6795  | 5.4460  | 6.1757  | 7.4027  | 6.9818  | 6.8530  | 6.9002  | 0.8678  | -0.2045 | 0.2576 | 0.5890 |
| Camk1   | _SM[Oxidation (M)]S[Phospho (STY)]APGSLMK_2                                        | #N/A                   | 3.7283  | 3.7396  | 4.1853  | 7.8458  | 3.5953  | 3.8781  | 6.2230  | 3.3433  | 3.6424  | 5.1755  | 0.9781  | -0.0320 | 0.9221 | 0.0352 |
| Camk1   | _KRS[Phospho (STY)]GNPFEPQAR_3                                                     | #N/A                   | 4.2740  | 2.9521  | 3.4600  | 7.2395  | 2.8404  | 3.7842  | 3.6773  | 5.8884  | 3.8044  | 3.9296  | 0.9461  | -0.0800 | 0.8082 | 0.0925 |
| Ccd9    | _S[Phospho (STY)]M[Oxidation (M)]JENKM[Oxidation (M)]AVEEK_2                       | #N/A                   | 4.3871  | 4.5230  | 5.1541  | 5.2367  | 4.1542  | 5.0154  | 4.6053  | 4.1080  | 4.5569  | 8.8389  | 0.8585  | -0.2201 | 0.4134 | 0.3836 |
| Raggef3 | _LENGC[Carbamidomethyl (C)]GNVS[Phospho (STY)]PQTK_2                               | QBVCC8_5531_M1_Raggef3 | 3.1706  | 3.9268  | 4.4051  | 4.4888  | 3.8151  | 4.3103  | 4.2035  | 3.6297  | 3.2783  | 2.9549  | 1.1430  | 0.1928  | 0.1652 | 0.7820 |
| Reep2   | _TETS[Phospho (STY)]EEDLGOKAPK_2                                                   | #N/A                   | 6.0679  | 4.2116  | 4.1265  | 6.4319  | 3.6690  | 6.1758  | 6.6057  | 3.9881  | 3.3970  | 3.2323  | 1.1877  | 0.2481  | 0.3877 | 0.4115 |
| Reep2   | _TETS[Phospho (STY)]EEDLGOKAPK_R_3                                                 | #N/A                   | 3.3732  | 4.7384  | 3.1069  | 4.1515  | 3.7905  | 3.9390  | 5.7973  | 5.3277  | 3.1487  | 3.8288  | 0.8507  | -0.2333 | 0.2725 | 0.5646 |
| Reep2   | _TETS[Phospho (STY)]EEDLGOK_2                                                      | #N/A                   | 3.5493  | 4.3056  | 3.2830  | 4.3276  | 4.1939  | 3.9315  | 4.4759  | 4.1744  | 2.9726  | 4.0049  | 1.0064  | 0.0092  | 0.9433 | 0.0254 |
| Gpn1    | _GTLDEEDEAD[Phospho (STY)]DTDIDH_R_3                                               | #N/A                   | 3.9680  | 5.2874  | 3.5079  | 6.0220  | 4.7307  | 6.2800  | 4.6918  | 6.0531  | 5.8375  | 5.4754  | 0.9005  | -0.1511 | 0.3965 | 0.4018 |
| Gpn1    | _GNAS[Phospho (STY)]PVLDPQDLTR_2                                                   | QBVCE2_5314_M1_Gpn1    | 2.9224  | 5.2383  | 4.2343  | 5.8871  | 3.5670  | 3.0576  | 5.4010  | 5.3723  | 3.0301  | 3.2031  | 0.9764  | -0.0345 | 0.9036 | 0.0440 |
| Rfxap   | _Acetyl (Protein N-term)MEAGAVPEGSGPSTAS[Phospho (STY)]PR_2                        | QBVCG9_516_M1_Rfxap    | 3.9729  | 3.3695  | 3.7066  | 3.2504  | 3.1166  | 3.5080  | 3.3986  | 3.7508  | 4.0499  | 4.4285  | 0.8926  | -0.1639 | 0.1129 | 0.9472 |
| Pex19   | _AKPS[Phospho (STY)]PEHAPTSAPDASGPOK_3                                             | #N/A                   | 9.3228  | 9.3038  | 9.9073  | 10.2084 | 9.2495  | 9.4066  | 9.7705  | 9.0702  | 9.2751  | 9.4180  | 1.0195  | 0.0279  | 0.4552 | 0.3418 |
| Pex19   | _C[Carbamidomethyl (C)]JKEQFAET[Phospho (STY)]PTDSEATOR_2                          | #N/A                   | 3.5647  | 5.0200  | 4.1305  | 9.9332  | 3.3702  | 3.8563  | 3.6479  | 4.2238  | 3.8724  | 4.9753  | 0.9645  | -0.0522 | 0.6803 | 0.1673 |
| Pex19   | _AKPS[Phospho (STY)]PEHAPTSAPDASGPOK_R_4                                           | #N/A                   | 3.3362  | 4.1414  | 4.0230  | 4.5257  | 3.9627  | 3.7668  | 4.2403  | 3.5928  | 3.2414  | 2.9918  | 1.1259  | 0.1711  | 0.1711 | 0.7669 |
| Plpp2   | _LSPWEDLSQAPTM[Oxidation (M)]DS[Phospho (STY)]PLEK_2                               | #N/A                   | 3.6464  | 5.1487  | 3.9589  | 3.8542  | 3.8307  | 3.6566  | 3.8300  | 6.6166  | 5.5330  | 2.9645  | 0.8177  | -0.3903 | 0.1934 | 0.7315 |
| Gripap1 | _KQES[Phospho (STY)]PC[Carbamidomethyl (C)]R_2                                     | #N/A                   | 6.5343  | 6.4689  | 6.5825  | 7.0777  | 6.3722  | 6.3499  | 6.6571  | 6.4213  | 6.6742  | 7.0454  | 0.9798  | -0.0294 | 0.4497 | 0.3470 |
| Gripap1 | _EC[Carbamidomethyl (C)]JVG[Phospho (STY)]POPDPLEGEAN_2                            | #N/A                   | 8.8219  | 12.0789 | 11.2250 | 12.5603 | 11.5439 | 12.1041 | 12.5096 | 11.6307 | 12.0307 | 12.2695 | 0.9405  | -0.0886 | 0.3334 | 0.5771 |
| Gripap1 | _LSKEC[Carbamidomethyl (C)]JVG[Phospho (STY)]POPDPLEGEAN_2                         | #N/A                   | 2.9073  | 7.7652  | 4.1418  | 3.2512  | 3.5519  | 7.4022  | 4.4667  | 6.9279  | 7.1442  | 3.2182  | 0.8892  | -0.1694 | 0.6651 | 0.1771 |
| Gripap1 | _TQTGDSS[Phospho (STY)]VSSFVR_2                                                    | QBV004_5631_M1_Gripap1 | 3.9005  | 3.0981  | 3.9412  | 5.8853  | 2.9550  | 3.4785  | 3.6091  | 4.9521  | 4.1976  | 3.5562  | 0.9504  | -0.0734 | 0.7449 | 0.1279 |
| Gripap1 | _KKQES[Phospho (STY)]C[Carbamidomethyl (C)]R_2                                     | #N/A                   | 4.0353  | 3.3085  | 3.1782  | 5.1208  | 3.9713  | 3.8107  | 4.3728  | 3.9007  | 4.3730  | 0.9268  | 0.9268  | -0.1097 | 0.4213 | 0.3754 |
| Gripap1 | _TGLEELVSEM[Oxidation (M)]NS[Phospho (STY)]PSR_2                                   | #N/A                   | 3.8048  | 7.2862  | 3.9050  | 6.3865  | 4.1245  | 4.4082  | 4.8467  | 3.7192  | 6.5147  | 7.2816  | 0.8918  | -0.1652 | 0.5567 | 0.2544 |
| Znf385a | _CGSG[Phospho (STY)]PSPSPVPESGGVTK_2                                               | QBV012_5160_M1_Znf385a | 4.2562  | 2.9700  | 3.4421  | 3.9448  | 3.3818  | 4.3476  | 3.6595  | 4.1737  | 3.8223  | 3.9118  | 0.9568  | -0.0637 | 0.5794 | 0.3271 |
| Sgtb    | _SFS[Phospho (STY)]SSADEHS_2                                                       | #N/A                   | 7.4891  | 7.5859  | 7.6719  | 7.8147  | 6.1520  | 7.5792  | 7.3079  | 6.9565  | 7.4923  | 7.8650  | 0.9969  | -0.0045 | 0.9481 | 0.0232 |
| Sgtb    | _SR[Phospho (STY)]JSSADEHS_2                                                       | QBV033_5295_M1_Sgtb    | 3.0348  | 6.6456  | 4.2693  | 7.0921  | 6.6580  | 3.9614  | 6.8156  | 6.6327  | 6.7998  | 0.8612  | -0.2155 | 0.4528  | 0.3441 | 0.2767 |
| Sgtb    | _NDIRPLNS[Phospho (STY)]PVEDVK_2                                                   | QBV033_577_M1_Sgtb     | 4.189   | 3.3718  | 4.5412  | 3.5430  | 3.2601  | 3.3465  | 3.2577  | 3.0746  | 4.2241  | 3.5100  | 1.0663  | 0.0927  | 0.5288 | 0.0467 |
| Sgip1   | _TGS[Phospho (STY)]PLIVATGNDQQAATEAK_2                                             | QBV037_5265_M1_Sgip1   | 11.3982 | 11.3203 | 12.0278 | 11.8716 | 10.9993 | 11.2523 | 11.2193 | 11.2389 | 1.0011  | 0.0015  | 0.9670  | 0.0146  | 0.1241 | 0.2767 |
| Sgip1   | _AT[Phospho (STY)]PPPPPPPTTR_2                                                     | #N/A                   | 12.5925 | 12.5338 | 12.4686 | 13.1454 | 11.6888 | 12.2672 | 12.9582 | 12.2537 | 12.4150 | 12.5243 | 0.9929  | -0.0102 | 0.7514 | 0.1241 |
| Sgip1   | _RST[Phospho (STY)]PT[Phospho (STY)]PELTSK_2                                       | #N/A                   | 10.7479 | 10.9653 | 11.2715 | 11.4192 | 10.1156 | 10.8773 | 11.0515 | 10.7238 | 10.8400 | 1.0064  | 0.0092  | 0.7817  | 0.1241 | 0.2767 |
| Sgip1   | _TVPATPRPT[Phospho (STY)]S[Phospho (STY)]PLIVATGNDQQAATEAK_3                       | QBV037_7259_M1_Sgip1   | 11.3871 | 11.4731 | 3.3379  | 4.3825  | 11.5864 | 11.4862 | 11.9308 | 4.1195  | 4.4186  | 11.7649 | 1.1097  | 0.1501  | 0.7480 | 0.1261 |
| Sgip1   | _RVATPRPT[Phospho (STY)]S[Phospho (STY)]PLIVATGNDQQAATEAK_3                        | #N/A                   | 9.0072  | 9.6549  | 8.4690  | 8.3604  | 3.2398  | 3.7683  | 3.5196  | 9.5462  | 4.1085  | 9.1112  | 1.1033  | 0.1418  | 0.7384 | 0.1367 |
| Sgip1   | _RS[Phospho (STY)]PGAIR_2                                                          | #N/A                   | 9.4965  | 10.1294 | 10.4833 | 10.4065 | 9.0612  | 10.1179 | 9.6797  | 9.8703  | 10.0258 | 9.8129  | 1.0104  | 0.0149  | 0.7338 | 0.1367 |
| Sgip1   | _STPT[Phospho (STY)]PELTSK_2                                                       | #N/A                   | 9.2590  | 9.3454  | 9.8100  | 9.8720  | 8.3170  | 9.1732  | 9.1649  | 3.0778  | 9.2863  | 9.3848  | 1.2029  | 0.2665  | 0.2482 | 0.6051 |
| Sgip1   | _NLS[Phospho (STY)]SEEVAR_2                                                        | #N/A                   | 9.3847  | 9.2046  | 3.8434  | 9.7438  | 8.3757  | 9.3133  | 9.1981  | 9.1866  | 9.3962  | 9.4410  | 0.8931  | -0.1631 | 0.4090 | 0.3882 |
| Sgip1   | _VAEQTFKDDYLETSS[Phospho (STY)]PK_3                                                | #N/A                   | 7.7043  | 7.3371  | 7.2295  | 8.0195  | 6.6394  | 4.8749  | 7.6197  | 7.4645  | 3.8130  | 7.7580  | 1.0456  | 0.0643  | 0.7567 | 0.1211 |
| Sgip1   | _S[Phospho (STY)]PGAIR_2                                                           | #N/A                   | 8.8832  | 8.8713  | 8.8454  | 9.5055  | 8.0597  | 9.0621  | 8.9183  | 8.9377  | 9.0650  | 1.0017  | 0.0025  | 0.9541  | 0.0204 | 0.5771 |
| Sgip1   | _HVP[Phospho (STY)]PUNLEEVQK_3                                                     | #N/A                   | 8.3372  | 8.7644  | 9.3351  | 9.0813  | 7.5262  | 8.5212  | 8.3764  | 8.2759  | 8.2456  | 8.3279  | 1.0346  | 0.0491  | 0.4028 | 0.3950 |
| Sgip1   | _RS[Phospho (STY)]PGAIR_2                                                          | #N/A                   | 8.4378  | 8.1721  | 8.3116  | 8.4248  | 6.6748  | 7.9724  | 8.1476  | 8.0692  | 7.9149  | 8.2551  | 0.9879  | -0.0175 | 0.7855 | 0.1261 |
| Sgip1   | _RNLS[Phospho (STY)]SEEVARR_3                                                      | #N/A                   | 3.1843  | 4.1582  | 4.4188  | 6.6816  | 3.8288  | 6.2507  | 4.1108  | 6.4137  | 3.3377  | 3.6398  | 1.0864  | 0.1196  | 0.6857 | 0.1639 |
| Sgip1   | _VAEQTFKDDYLETSS[Phospho (STY)]PKEC[Carbamidomethyl (C)]GLGGR_4                    | #N/A                   | 3.9241  | 3.4183  | 3.6578  | 7.5169  | 3.0678  | 2.9890  | 3.3498  | 6.8921  | 4.0987  | 4.3796  | 0.8751  | -0.1924 | 0.5980 | 0.2233 |
| Sgip1   | _TVVSS[Phospho (STY)]PGGSGSGTGTTSGASPAR_2                                          | QBV037_5424_M1_Sgip1   | 5.5561  | 6.0387  | 6.0733  | 6.9256  | 3.3542  | 5.6049  | 6.5128  | 6.1233  | 3.8499  | 5.7185  | 1.0074  | 0.0106  | 0.9589 | 0.0182 |
| Sgip1   | _ITGEM[Oxidation (M)]VLSFAGTR_2                                                    | #N/A                   | 3.6199  | 5.7694  | 6.5999  | 4.3982  | 6.0043  | 6.0548  | 6.2927  | 6.0170  | 6.0154  | 6.0890  | 0.8860  | -0.1746 | 0.2692 | 0.5700 |
| Sgip1   | _IEKLPS[Phospho (STY)]ISDLSFGPLVS[Phospho (STY)]PK_3                               | QBV037_5287_M2_Sgip1   | 3.2349  | 4.0147  | 8.3217  | 9.2307  | 3.8709  | 4.0638  | 6.2020  | 5.8616  | 7.2266  | 3.7892  | 0.9456  | -0.0807 | 0.8337 | 0.0790 |
| Sgip1   | _VNS[Phospho (STY)]PEDEEGVSRPEPGSTK_3                                              | QBV037_578_M1_Sgip1    | 3.7521  | 3.6090  | 3.8257  | 6.5272  | 3.3379  | 3.6846  | 5.8911  | 7.0154  | 0.8721  | -0.1974 | 0.5013  | 0.2999  | 0.2999 | 0.2999 |
| Sgip1   | _KVAEQTFKDDYLETSS[Phospho (STY)]PK_3                                               | #N/A                   | 3.8285  | 4.0653  | 3.5856  | 4.2456  | 3.5254  | 4.2043  | 4.2175  | 4.0304  | 4.0905  | 4.0553  | 0.9538  | -0.0682 | 0.2762 | 0.5587 |
| Sgip1   | _IPDISOK_2                                                                         | #N/A                   | 4.5517  | 4.2118  | 3.1892  | 4.3677  | 5.4192  | 4.6027  | 4.2532  | 4.2682  | 4.9787  | 5.2238  | 0.9379  | -0.0925 | 0.5058 | 0.2961 |
| Sgip1   | _NLS[Phospho (STY)]SEEVARR_2                                                       | #N/A                   | 10.7346 | 11.0864 | 11.7582 | 11.6617 | 10.5262 | 11.0607 | 11.0896 | 10.9056 | 10.9788 | 10.9537 | 1.0142  | 0.0204  | 0.5536 | 0.2568 |
| Sgip1   | _EC[Carbamidomethyl (C)]GLGQRA[Phospho (STY)]PPPPPPPTTR_3                          | #N/A                   | 4.1011  | 3.1250  | 3.2871  | 3.7898  | 3.0133  | 3.6113  | 5.6661  | 6.3415  | 5.1587  | 3.7568  | 0.6668  | -0.5847 | 0.0069 | 2.1609 |
| Sgip1   | _DDYLETSS[Phospho (STY)]PKEC[Carbamidomethyl (C)]GLGQR_3                           | #N/A                   | 3.7587  | 3.0142  | 3.4024  | 3.9006  | 2.9025  | 3.7221  | 3.6153  | 4.7428  | 3.8665  | 3.8676  | 0.8613  | -0.2154 | 0.0890 | 1.0508 |
| Sgip1   | _VVWFSAS[Phospho (STY)]PEVVT[Phospho (STY)]PELTPR_3                                | #N/A                   | 10.1569 | 10.4778 | 10.5979 | 11.9882 | 10.4854 | 10.5538 | 10.5848 | 11.0737 | 10.8493 | 10.4910 | 0.9963  | -0.0053 | 0.9112 | 0.0404 |
| Sgip1   | _HVP[Phospho (STY)]PUNLEEVQK_2                                                     | #N/A                   | 7.4240  | 7.3617  | 7.8084  | 8.0104  | 6.3014  | 7.3880  | 7.6762  | 7.4081  | 7.0471  | 7.2098  | 1.0064  | 0.0092  | 0.8869 | 0.0521 |
| Sgip1   | _ASIGNALSPSPVR_2                                                                   | #N/A                   | 6.3970  | 6.3026  | 6.5540  | 6.8893  | 6.7574  | 6.6137  | 6.6809  | 6.5686  | 6.3436  | 5.9116  | 1.0329  | 0.0466  | 0.2648 | 0.5771 |
| Sgip1   | _DDYLETSS[Phospho (STY)]PK_2                                                       | #N/A                   | 4.3515  | 3.6558  | 3.5374  | 4.0401  | 3.4772  | 4.2523  | 3.7548  | 4.0784  | 3.7270  | 4.0071  | 0.9984  | -0.0023 | 0.9771 | 0.0101 |
| Sgip1   | _ASIGNALS[Phospho (STY)]S[Phospho (STY)]PVRR_2                                     | QBV037_5149_M2_Sgip1   | 2.9757  | 3.7320  | 4.2102  | 5.3865  | 3.6331  | 3.0043  | 3.9023  | 3.2472  | 3.5462  | 4.0413  | 1.0826  | 0.1146  | 0.5525 | 0.2577 |
| Sgip1   | _ASIGNALS[Phospho (STY)]P[PSV]S[Phospho (STY)]PK_3                                 | QBV037_5149_M3_Sgip1   | 2.9682  | 3.7734  | 3       |         |         |         |         |         |         |         |         |         |        |        |



|         |                                                                                   |                        |         |         |         |         |         |         |         |         |         |         |         |         |        |        |
|---------|-----------------------------------------------------------------------------------|------------------------|---------|---------|---------|---------|---------|---------|---------|---------|---------|---------|---------|---------|--------|--------|
| Phip    | _TAFYNEDDS[Phospho (STY)]EEEEQR_2                                                 | QBVD09_S1783_M1_Phip   | 6.9686  | 7.0430  | 7.6288  | 7.7831  | 6.1329  | 6.9760  | 8.0221  | 7.6710  | 7.3731  | 6.9440  | 0.9448  | -0.0819 | 0.2702 | 0.5683 |
| Phip    | _VLS[Phospho (STY)]DS[Phospho (STY)]EEEEKADVPGTSTR_2                              | #N/A                   | 3.1905  | 5.6772  | 4.0740  | 5.5422  | 4.6326  | 3.4165  | 6.1658  | 6.3346  | 5.1842  | 3.0428  | 0.8534  | -0.2287 | 0.3721 | 0.4293 |
| Phip    | _KVL[Phospho (STY)]DS[Phospho (STY)]EEEEKADVPGTSTR_3                              | #N/A                   | 3.9039  | 3.4385  | 3.6376  | 6.1053  | 5.7764  | 2.9688  | 3.3296  | 4.5541  | 4.1189  | 4.3594  | 1.0525  | 0.0738  | 0.7671 | 0.1151 |
| Parn    | _TILS[Phospho (STY)]PPRR_2                                                        | QBVG03_SS56_M1_Parn    | 6.0667  | 5.5499  | 4.5739  | 3.5757  | 4.4963  | 3.3973  | 3.2904  | 3.0419  | 4.1913  | 5.1945  | 1.1732  | 0.2304  | 0.3344 | 0.4758 |
| Hdlbp   | _ETDGP[Phospho (STY)]PR_2                                                         | #N/A                   | 2.9301  | 9.2353  | 8.3857  | 9.3352  | 3.5746  | 7.5690  | 8.3632  | 9.5488  | 8.1373  | 3.8556  | 0.9291  | -0.1062 | 0.7805 | 0.1076 |
| Hdlbp   | _EAKETDGP[Phospho (STY)]PR_2                                                      | #N/A                   | 4.3497  | 7.7189  | 8.7671  | 7.4240  | 7.7595  | 7.8834  | 7.5078  | 7.6163  | 7.2066  | 7.2238  | 0.9903  | -0.0140 | 0.9293 | 0.0318 |
| Hdlbp   | _ETDGP[Phospho (STY)]PRR_2                                                        | #N/A                   | 4.2898  | 7.0072  | 3.4758  | 7.4434  | 3.4155  | 7.0394  | 3.6931  | 4.1400  | 7.0403  | 7.1878  | 0.9873  | -0.0185 | 0.9556 | 0.0197 |
| Hdlbp   | _VATLNS[Phospho (STY)]EENDPPYTK_2                                                 | QBVDJ3_S31_M1_Hdlbp    | 7.9717  | 7.9767  | 4.0735  | 8.8630  | 7.3715  | 8.7658  | 8.8404  | 8.1208  | 8.3378  | 8.4080  | 0.8911  | -0.1663 | 0.3302 | 0.1782 |
| Zgpai   | _GKS[Phospho (STY)]LQGC[Carbamidomethyl (C)]AELQK_2                               | QBVDM1_S353_M1_Zgpai   | 3.7071  | 4.0773  | 3.8866  | 4.2647  | 3.2137  | 3.6484  | 3.1933  | 3.6133  | 4.3277  | 4.6783  | 0.9612  | -0.0571 | 0.6498 | 0.1872 |
| Zgpai   | _LSTVDQES[Phospho (STY)]PAGEADAEYLAFAQK_3                                         | QBVDM1_S70_M1_Zgpai    | 4.2946  | 2.9315  | 1.4806  | 3.9833  | 4.8765  | 4.6371  | 3.6979  | 4.1352  | 3.7838  | 2.1441  | 1.1726  | 0.2297  | 0.2788 | 0.5547 |
| Pumd2   | _LTPVGQQSPAT[Phospho (STY)]PSGADEK_2                                              | #N/A                   | 7.9466  | 3.9081  | 8.0259  | 8.3394  | 7.3928  | 7.8611  | 8.5638  | 8.2616  | 8.0634  | 8.0560  | 0.8797  | -0.1849 | 0.2796 | 0.5535 |
| Pumd2   | _DKTPVGQQSPSAT[Phospho (STY)]PSGADEK_3                                            | #N/A                   | 3.2150  | 5.3747  | 3.1979  | 5.8533  | 4.6519  | 4.0900  | 5.6757  | 5.7016  | 3.0608  | 5.3327  | 0.8896  | -0.1687 | 0.4892 | 0.3105 |
| Pumd2   | _TITGQTHTPVLAAHGER_3                                                              | #N/A                   | 4.5006  | 3.7513  | 5.7548  | 4.1355  | 3.7765  | 4.5846  | 4.8722  | 3.7442  | 4.6197  | 4.1906  | 1.0139  | 0.0199  | 0.8908 | 0.0502 |
| Pumd2   | _FGGS[Phospho (STY)]GSQVDSAR_2                                                    | QBVDMA_S361_M1_Pumd2   | 5.3170  | 3.9491  | 4.1813  | 6.3316  | 3.9489  | 6.0206  | 6.1892  | 4.2540  | 6.1038  | 4.0329  | 0.9637  | -0.0534 | 0.8005 | 0.0966 |
| Pumd2   | _LVGSQEELASWGHEVVR_3                                                              | #N/A                   | 3.6063  | 4.3626  | 3.3400  | 4.3846  | 4.2509  | 3.8746  | 4.5329  | 4.1174  | 4.4165  | 4.0619  | 0.9271  | -0.1093 | 0.2282 | 0.6417 |
| Hmrnpu1 | _GRS[Phospho (STY)]PQPPAEDEDDFDOTLVAIDYINC[Carbamidomethyl (C)]DUHFK_4            | #N/A                   | 4.2415  | 7.0395  | 3.4274  | 7.4522  | 6.6795  | 7.1057  | 6.6294  | 7.2955  | 7.0789  | 7.1912  | 0.8499  | -0.2346 | 0.2633 | 0.5795 |
| Hmrnpu1 | _NYLQDTNYYGS[Phospho (STY)]IAQR_2                                                 | QBVDM6_S513_M1_Hmrnpu1 | 6.5333  | 6.5819  | 7.2250  | 3.2220  | 5.5767  | 6.6517  | 7.2355  | 6.9301  | 6.9877  | 6.2576  | 0.8705  | -0.2001 | 0.2739 | 0.5624 |
| Hmrnpu1 | _S[Phospho (STY)]PQPPAEDEDDFDOTLVAIDYINC[Carbamidomethyl (C)]DUHFK_3              | #N/A                   | 3.9516  | 4.8499  | 3.6853  | 6.0397  | 3.0954  | 3.5292  | 5.6075  | 5.4298  | 4.0711  | 4.4072  | 0.8592  | -0.2190 | 0.3040 | 0.5171 |
| Atp1a1  | _S[Phospho (STY)]PQFTNENPLETR_2                                                   | QBVDN2_S228_M1_Atp1a1  | 12.3075 | 11.8700 | 12.2529 | 12.1269 | 10.9480 | 11.8867 | 12.8598 | 12.1129 | 12.1681 | 12.0329 | 0.9679  | -0.0471 | 0.2196 | 0.6585 |
| Atp1a1  | _IVEIPFNTKNC_2                                                                    | #N/A                   | 10.4074 | 10.2019 | 10.4846 | 10.0400 | 9.8862  | 10.0456 | 10.5228 | 10.3559 | 10.2174 | 10.0214 | 0.9901  | -0.0144 | 0.5007 | 0.3004 |
| Atp1a1  | _LNIPNQVNPTR_2                                                                    | #N/A                   | 9.7792  | 9.5152  | 10.1790 | 9.4967  | 9.3434  | 9.2039  | 9.9411  | 9.7022  | 9.6675  | 9.2309  | 0.9949  | -0.0074 | 0.8329 | 0.0846 |
| Atp1a1  | _YHTEWFAIR_2                                                                      | #N/A                   | 7.5855  | 7.0549  | 7.4329  | 7.4690  | 6.7225  | 7.2364  | 7.8981  | 7.7576  | 7.6905  | 7.5230  | 0.9395  | -0.0901 | 0.0379 | 1.5540 |
| Atp1a1  | _LSLDELHR_2                                                                       | #N/A                   | 8.7871  | 8.6608  | 8.5822  | 8.3797  | 8.4313  | 8.1485  | 8.9497  | 8.8680  | 8.7486  | 8.3804  | 0.9727  | -0.0399 | 0.1570 | 0.8040 |
| Atp1a1  | _AVFQANQENLPILK_2                                                                 | #N/A                   | 8.2076  | 7.8453  | 8.0901  | 8.1629  | 7.5468  | 8.1587  | 8.2835  | 8.1333  | 8.0391  | 7.9906  | 0.9865  | -0.0196 | 0.4591 | 0.3381 |
| Atp1a1  | _TSATWFAISR_2                                                                     | #N/A                   | 7.5539  | 7.6855  | 7.8845  | 7.7922  | 7.2319  | 7.5382  | 8.1414  | 8.2582  | 7.9105  | 7.5629  | 0.9556  | -0.0655 | 0.0693 | 1.1591 |
| Atp1a1  | _GIVVYTGDR_2                                                                      | #N/A                   | 8.1198  | 7.6072  | 8.2886  | 7.2384  | 7.2959  | 7.9799  | 6.7460  | 8.0456  | 8.2911  | 7.7135  | 1.0073  | 0.0104  | 0.8770 | 0.0570 |
| Atp1a1  | _YDLSHK_2                                                                         | #N/A                   | 7.5451  | 6.8285  | 7.1907  | 7.2212  | 6.9765  | 6.8750  | 7.6002  | 7.2942  | 7.0364  | 7.0668  | 0.9802  | -0.0288 | 0.4276 | 0.3690 |
| Atp1a1  | _KYGTDLCSR_2                                                                      | #N/A                   | 7.4835  | 6.9955  | 7.2154  | 6.3534  | 6.9062  | 6.9828  | 7.6175  | 7.3079  | 7.4622  | 7.0108  | 0.9510  | -0.0725 | 0.1363 | 0.8656 |
| Atp1a1  | _C[Carbamidomethyl (C)]SSLLHOK_2                                                  | #N/A                   | 5.6911  | 6.2771  | 5.1448  | 5.5268  | 6.2787  | 5.5572  | 5.6128  | 6.1399  | 6.5338  | 5.5408  | 0.9646  | -0.0520 | 0.4951 | 0.3053 |
| Atp1a1  | _YGTDLSCR_2                                                                       | #N/A                   | 7.5655  | 5.5671  | 5.4918  | 3.8982  | 4.9117  | 4.8074  | 4.9348  | 5.9483  | 5.9692  | 5.8806  | 0.8927  | -0.1637 | 0.1693 | 0.7712 |
| Atp1a1  | _NIAFFSTNC[Carbamidomethyl (C)]VEGTAR_2                                           | #N/A                   | 6.4619  | 4.3806  | 6.7387  | 4.7541  | 4.4168  | 5.7263  | 6.8626  | 5.3124  | 6.0517  | 6.1769  | 0.8873  | -0.1726 | 0.2764 | 0.5584 |
| Atp1a1  | _ISANGC[Carbamidomethyl (C)]K_2                                                   | #N/A                   | 6.0834  | 5.2782  | 3.8257  | 4.6604  | 6.3160  | 5.1248  | 5.6030  | 5.9305  | 6.0455  | 4.8865  | 0.9285  | -0.1070 | 0.4553 | 0.3145 |
| Atp1a1  | _AVAGASAESALLK_2                                                                  | #N/A                   | 5.8406  | 6.4456  | 6.0608  | 6.3837  | 6.0730  | 6.0305  | 7.2753  | 7.4179  | 5.8888  | 6.3162  | 0.9129  | -0.1314 | 0.1008 | 0.9965 |
| Atp1a1  | _DM[Oxidation (M)]DELLK_2                                                         | #N/A                   | 6.0095  | 5.1940  | 5.1399  | 5.4838  | 5.6860  | 4.7816  | 4.8455  | 5.4617  | 5.0168  | 4.5154  | 1.0852  | 0.1180  | 0.1584 | 0.8003 |
| Atp1a1  | _EVS[Phospho (STY)]MDOHK_2                                                        | #N/A                   | 7.2301  | 4.7425  | 3.9869  | 7.5811  | 5.6727  | 3.8029  | 6.3177  | 5.0693  | 5.4325  | 5.2732  | 0.9963  | -0.0054 | 0.9814 | 0.0081 |
| Atp1a1  | _WYNDEDSYGQWVTEOIR_2                                                              | #N/A                   | 5.0736  | 4.7848  | 6.1264  | 5.3552  | 3.0431  | 3.7679  | 5.1883  | 4.7461  | 4.7154  | 4.2434  | 0.9933  | -0.0096 | 0.9587 | 0.0183 |
| Atp1a1  | _M[Oxidation (M)]SNNAEDVVGDLVEVK_2                                                | #N/A                   | 6.9617  | 7.2230  | 7.7668  | 7.3333  | 5.9544  | 7.4411  | 7.7850  | 7.2933  | 7.1966  | 7.3435  | 0.9607  | -0.0579 | 0.4110 | 0.3861 |
| Atp1a1  | _DM[Oxidation (M)]TSELDOLR_2                                                      | #N/A                   | 6.8124  | 6.1597  | 6.4559  | 6.2618  | 6.1465  | 6.3908  | 7.0334  | 6.5804  | 6.2772  | 6.6575  | 0.9599  | -0.0590 | 0.1708 | 0.7676 |
| Atp1a1  | _ADIGVAM[Oxidation (M)]GVSGSVOLR_2                                                | #N/A                   | 5.3845  | 5.3121  | 5.7602  | 5.2099  | 5.1823  | 5.6975  | 5.0965  | 5.7753  | 5.8579  | 5.3225  | 0.9839  | -0.0234 | 0.6557 | 0.1833 |
| Atp1a1  | _EQPLDEELDAQFQMYATELGGGER_3                                                       | #N/A                   | 3.7509  | 3.5915  | 3.4846  | 4.7480  | 2.8946  | 3.4602  | 4.3523  | 4.7843  | 4.6818  | 4.2065  | 0.8111  | -0.3021 | 0.0321 | 1.4930 |
| Atp1a1  | _DKYEPAAVSEHGDKX_2                                                                | #N/A                   | 5.9531  | 5.2950  | 5.2018  | 5.0094  | 4.9696  | 5.6489  | 5.5569  | 5.7357  | 5.7919  | 5.2350  | 0.9599  | -0.0590 | 0.3294 | 0.4822 |
| Atp1a1  | _EVS[Phospho (STY)]M[Oxidation (M)]DDHKLSDLHR_3                                   | #N/A                   | 4.7934  | 6.0072  | 4.0774  | 6.1899  | 3.5181  | 5.6369  | 6.4213  | 5.6161  | 4.3171  | 5.7040  | 0.8799  | -0.1884 | 0.3351 | 0.4748 |
| Atp1a1  | _AC[Carbamidomethyl (C)]VHGSOLKDM[Oxidation (M)]TSELDOLR_4                        | #N/A                   | 3.8679  | 4.4002  | 4.1608  | 4.6746  | 4.0730  | 4.4755  | 3.2823  | 4.8352  | 4.6737  | 4.7929  | 0.9725  | -0.0402 | 0.7248 | 0.1398 |
| Atp1a1  | _M[Oxidation (M)]TVAHMM[Oxidation (M)]WFQNDQHEADTENGSGVSFK_4                      | #N/A                   | 5.7168  | 6.3639  | 4.7636  | 6.0974  | 2.8032  | 5.9415  | 6.0839  | 6.6486  | 6.2836  | 4.1150  | 0.9916  | -0.0121 | 0.9592 | 0.0181 |
| Atp1a1  | _EVS[Phospho (STY)]M[Oxidation (M)]DDHKL[Phospho (STY)]LDELHRK_3                  | #N/A                   | 4.1293  | 4.2973  | 3.9006  | 4.1398  | 3.3993  | 4.2349  | 4.6287  | 4.5217  | 3.7806  | 4.2008  | 0.9379  | -0.0925 | 0.2737 | 0.5627 |
| Ccd92   | _KSLS[Phospho (STY)]APLHPEFEEVVR_3                                                | #N/A                   | 4.2835  | 3.3087  | 3.6685  | 4.7684  | 2.9757  | 4.3203  | 3.7648  | 4.2682  | 4.2102  | 1.0082  | 0.0118  | 0.9391  | 0.0273 | 0.1073 |
| Ccd92   | _SATGQHS[Phospho (STY)]PAR_2                                                      | QBVDNA_S261_M1_Ccd92   | 3.9616  | 3.2171  | 3.6953  | 3.2391  | 3.1054  | 3.5192  | 3.3874  | 3.7621  | 4.0611  | 4.4172  | 0.8847  | -0.1768 | 0.0989 | 1.0047 |
| Ccd92   | _SL[Phospho (STY)]APLHPEFEEVVR_2                                                  | #N/A                   | 3.5759  | 3.5878  | 3.7004  | 3.7934  | 3.3947  | 3.8439  | 3.6741  | 3.8403  | 3.8269  | 4.3040  | 0.9327  | -0.1006 | 0.0887 | 1.0518 |
| Mical1  | _VS[Phospho (STY)]PVPSPQPAR_2                                                     | QBVDP3_S777_M1_Mical1  | 8.0445  | 7.3752  | 3.5543  | 7.1331  | 6.4917  | 7.4811  | 7.3717  | 4.1350  | 6.7591  | 7.6149  | 1.1992  | 0.2621  | 0.3489 | 0.4573 |
| Ccar2   | _EAPDGTGAEP[Phospho (STY)]FEDSOPTYSSK_2                                           | QBVDP4_S298_M1_Ccar2   | 6.2443  | 6.1951  | 6.6516  | 7.1597  | 5.6252  | 6.2834  | 7.0473  | 6.4212  | 6.4225  | 6.6084  | 0.9600  | -0.0589 | 0.3815 | 0.4185 |
| Ccar2   | _HDL[Phospho (STY)]PYR_2                                                          | QBVDP4_S222_M1_Ccar2   | 7.6267  | 7.6582  | 7.9022  | 7.8843  | 7.1118  | 7.4590  | 7.6737  | 7.4346  | 3.3356  | 7.5607  | 1.1701  | 0.2266  | 0.2287 | 0.6407 |
| Ccar2   | _RPS[Phospho (STY)]GGEEEKAR_2                                                     | #N/A                   | 3.9294  | 3.2208  | 4.0312  | 3.5515  | 3.0768  | 3.3574  | 3.4819  | 4.0800  | 3.9916  | 3.3923  | 0.9442  | -0.0829 | 0.4105 | 0.3867 |
| Ccar2   | _S[Phospho (STY)]VAS[Phospho (STY)]NQSEM[Oxidation (M)]EYSLQDM[Oxidation (M)]PK_2 | #N/A                   | 4.6238  | 6.4690  | 4.2466  | 5.9494  | 5.5999  | 6.4365  | 6.8549  | 6.4043  | 6.6276  | 6.3266  | 0.8475  | -0.2387 | 0.0734 | 1.1342 |
| Pigr2   | _VVGIC[Carbamidomethyl (C)]GTQDEK_2                                               | #N/A                   | 3.3929  | 4.4159  | 3.1266  | 4.1712  | 5.2578  | 3.9587  | 4.3308  | 3.1290  | 4.8664  | 0.9741  | -0.0378 | 0.8300  | 0.0809 | 0.2945 |
| Sir2    | _LDELTEGVTR_2                                                                     | #N/A                   | 7.5635  | 8.0904  | 7.8271  | 8.0489  | 7.8558  | 7.9245  | 8.1749  | 7.7016  | 8.0148  | 7.9527  | 0.9905  | -0.0138 | 0.5565 | 0.2545 |
| Sir2    | _JFSEATPR_2                                                                       | #N/A                   | 7.7149  | 7.9198  | 7.4864  | 7.7387  | 8.3837  | 7.9319  | 7.5808  | 7.9447  | 7.9446  | 8.1629  | 0.9942  | -0.0084 | 0.8076 | 0.0928 |
| Sir2    | _NIFTQTLGLGSKK_2                                                                  | #N/A                   | 7.4926  | 7.8030  | 7.7129  | 7.5390  | 7.6199  | 7.8307  | 7.4291  | 7.8582  | 7.4878  | 7.6267  | 1.0087  | 0.0125  | 0.5419 | 0.2660 |
| Sir2    | _SPSTGLVANLEK_2                                                                   | #N/A                   | 7.2089  | 7.1229  | 6.8193  | 7.2370  | 6.8743  | 7.2035  | 7.0184  | 6.8454  | 6.5838  | 6.9715  | 1.0325  | 0.0462  | 0.1034 | 0.9854 |
| Sir2    | _ELDOLVR_2                                                                        | #N/A                   | 5.6739  | 5.3784  | 5.5846  | 4.5603  | 5.8513  | 5.7983  | 3.5701  | 5.9428  | 6.3021  | 5.7792  | 1.0141  | 0.0201  | 0.8930 | 0.0491 |
| Sir2    | _C[Carbamidomethyl (C)]EQC[Carbamidomethyl (C)]QSVKPVDFVGGNLPKR_3                 | #N/A                   | 5.1600  | 4.8112  | 4.7778  | 5.8967  | 4.9628  | 4.9363  | 5.1980  | 4.5365  | 5.1954  | 4.7186  | 1.0364  | 0.0515  | 0.4970 | 0.3036 |
| Sir2    | _VAGLEPQDLVAHGFTFYTHC[Carbamidomethyl (C)]VNTSC[Carbamidomethyl (C)]R_4           | #N/A                   | 6.3028  | 6.2453  | 6.4229  | 6.5287  | 5.7324  | 6.1234  | 6.0616  | 6.4410  | 6.1653  | 4.7833  | 1.1334  | 1.8086  | 0.2549 | 0.3930 |
| Sir2    | _EHANIDAGSGQAPNPSTTGPCK_3                                                         | #N/A                   | 5.5980  | 5.7394  | 5.7082  | 7.0004  | 5.8087  | 5.6761  | 5.3327  | 5.7337  | 5.8750  | 5.7532  | 1.0437  | 0.0618  | 0.4132 | 0.3839 |
| Sir2    | _EHANIDAGSGQAPNPSTTSPK[Phospho (STY)]PPAK_4                                       | QBVDQ8_S372_M1_Sir2    | 3.4886  | 3.8869  | 4.17    |         |         |         |         |         |         |         |         |         |        |        |



|          |                                                                                                                                 |                         |         |         |         |           |         |         |         |         |         |         |        |         |        |        |
|----------|---------------------------------------------------------------------------------------------------------------------------------|-------------------------|---------|---------|---------|-----------|---------|---------|---------|---------|---------|---------|--------|---------|--------|--------|
| Gdap11   | _LNLGEEVPVHIR_3                                                                                                                 | #N/A                    | 4.6520  | 3.5598  | 3.9121  | 3.5702    | 4.0888  | 5.1078  | 4.5523  | 4.7143  | 5.0649  | 4.2864  | 0.8913 | -0.1660 | 0.1761 | 0.7543 |
| Gdap11   | _TFTGEHVLM(Oxidation (M))PEAGS(Phospho (STY))QPHAR_3                                                                            | #N/A                    | 4.1852  | 4.1858  | 3.9189  | 5.7689    | 3.3290  | 3.2978  | 3.1910  | 4.8580  | 4.5459  | 3.7088  | 1.0094 | 0.0135  | 0.9462 | 0.0240 |
| Uba5     | _KTEDSASEVTDESGELEDLMAR_3                                                                                                       | #N/A                    | 4.2028  | 3.9651  | 3.1110  | 5.7709    | 4.0218  | 4.1036  | 4.3464  | 3.1447  | 3.8328  | 3.1447  | 1.0740 | 0.1029  | 0.5748 | 0.2405 |
| Ogfr11   | _IS(Phospho (STY))PGASHVNSK_2                                                                                                   | #N/A                    | 7.0617  | 6.9859  | 6.6638  | 7.0019    | 6.7728  | 6.8463  | 7.3502  | 7.2352  | 6.9230  | 6.6622  | 0.9781 | -0.0319 | 0.3222 | 0.4919 |
| Ogfr11   | _EPGEEADKPS(Phospho (STY))PERGSGDPIKR_3                                                                                         | QBVE52_5382_M1_Ogfr11   | 5.1386  | 4.8923  | 6.2988  | 5.9960    | 2.8504  | 3.3782  | 5.5308  | 5.5039  | 6.0525  | 3.5502  | 0.9224 | -0.1165 | 0.6429 | 0.1919 |
| Ogfr11   | _AS(Phospho (STY))PPEDHAEAGAEQGEGESTENAKPK_4                                                                                    | #N/A                    | 3.9274  | 3.9993  | 4.4252  | 4.0478    | 3.3319  | 3.5949  | 3.1564  | 3.6632  | 4.3112  | 3.8314  | 1.0394 | 0.0557  | 0.6011 | 0.2211 |
| Ogfr11   | _D5AADQSOS(Phospho (STY))PPEK_2                                                                                                 | QBVE52_5406_M1_Ogfr11   | 2.9698  | 3.7261  | 4.1869  | 4.2435    | 3.6144  | 3.0103  | 4.4043  | 3.4289  | 3.0775  | 3.5844  | 1.0004 | 0.0006  | 0.9970 | 0.0013 |
| Ogfr11   | _D5KS(Phospho (STY))PGASHVNSK_2                                                                                                 | #N/A                    | 3.6278  | 2.9322  | 4.3146  | 3.3164    | 4.2543  | 3.7452  | 4.5320  | 3.3012  | 2.9498  | 3.2834  | 1.0389 | 0.0551  | 0.7347 | 0.1339 |
| Taf12    | _IATPTGT(Phospho (STY))GGRLSPENNQLVLK_3                                                                                         | QBVE65_746_M1_Taf12     | 3.8125  | 3.5780  | 3.6898  | 4.1924    | 3.6357  | 4.0140  | 5.0844  | 3.9722  | 3.6208  | 4.1594  | 0.9076 | -0.1398 | 0.1957 | 0.7083 |
| Pdc10    | _IPOENDR_2                                                                                                                      | #N/A                    | 5.9064  | 5.0139  | 5.1527  | 5.6616    | 5.7520  | 5.1367  | 5.1561  | 5.3860  | 5.2129  | 5.7344  | 1.0121 | 0.0173  | 0.7749 | 0.1108 |
| Fam114a2 | _AETSLGSP(Phospho (STY))PTIEASEVK_2                                                                                             | QBVE88_5119_M1_Fam114a2 | 3.2166  | 9.0238  | 3.9035  | 4.4061    | 8.4382  | 4.2276  | 9.0652  | 9.0895  | 9.1044  | 8.9185  | 0.6121 | -0.7082 | 0.0257 | 1.5896 |
| Cdc115   | _ADAQT(Phospho (STY))PEEVGPSEASLR_2                                                                                             | QBVE99_790_M1_Cdc115    | 6.1346  | 6.1991  | 7.0386  | 7.8426    | 6.8500  | 6.4166  | 7.2848  | 6.5976  | 6.9480  | 6.9535  | 0.9713 | -0.0419 | 0.5824 | 0.2348 |
| Grk5     | _NSNHNSNSTGS(Phospho (STY))IS_2                                                                                                 | QBVEB1_5589_M1_Grk5     | 5.7115  | 6.0309  | 6.0174  | 3.3377    | 5.6499  | 5.7745  | 5.5743  | 3.6635  | 5.8451  | 5.5777  | 1.0494 | 0.0696  | 0.7095 | 0.1491 |
| MACIR    | _S(Phospho (STY))LDYLNLDK_2                                                                                                     | QBVEB3_5167_M1_MACIR    | 3.4196  | 4.1758  | 3.1533  | 4.2398    | 4.0641  | 4.0613  | 3.9545  | 3.8787  | 4.8170  | 3.8751  | 0.9325 | -0.1009 | 0.3691 | 0.4328 |
| Bloc1s4  | _Acetyl (Protein N-term))MEGPAVGLTS(Phospho (STY))R_2                                                                           | QBVED2_511_M1_Bloc1s4   | 4.3759  | 2.9665  | 4.1096  | 3.6534    | 3.5196  | 3.1050  | 3.8016  | 3.3478  | 3.6469  | 3.3306  | 1.0255 | 0.0363  | 0.7686 | 0.1143 |
| Lgal1    | _IQTLSAIDTK_2                                                                                                                   | #N/A                    | 6.4040  | 6.8954  | 6.8800  | 6.7434    | 6.8021  | 6.5382  | 6.3693  | 6.1929  | 6.4654  | 6.4998  | 1.0515 | 0.0725  | 0.0210 | 1.6780 |
| Lgal1    | _Acetyl (Protein N-term))AGS(Phospho (STY))VADSDAVVK_2                                                                          | QBVED9_54_M1_Lgal1      | 12.0494 | 12.2112 | 12.5393 | 12.5981   | 12.1853 | 12.4340 | 12.7462 | 11.9918 | 12.3608 | 12.4211 | 0.9965 | -0.0051 | 0.7984 | 0.0978 |
| Lgal1    | _GEOGSAIPFPDQPPR_2                                                                                                              | #N/A                    | 4.5878  | 4.5481  | 5.2422  | 5.7696    | 5.2722  | 5.2074  | 4.8821  | 5.3444  | 5.1049  | 5.3204  | 0.9887 | -0.0164 | 0.8224 | 0.0849 |
| Lgal1    | _VFDGGLHQLDFYHR_3                                                                                                               | #N/A                    | 4.1516  | 5.3729  | 4.0567  | 4.8419    | 4.5083  | 4.2579  | 4.6851  | 4.7237  | 4.5039  | 5.1194  | 0.9524 | -0.0704 | 0.4340 | 0.3625 |
| Lgal1    | _LDDGHNLS(Phospho (STY))LGS(Phospho (STY))PVQADVYFPR_3                                                                          | QBVED9_522_M2_Lgal1     | 3.1770  | 4.4138  | 4.0690  | 9.4453    | 3.8701  | 4.8806  | 4.5282  | 8.5338  | 5.5880  | 3.6609  | 0.8921 | -0.1647 | 0.6843 | 0.1647 |
| Lgal1    | _Acetyl (Protein N-term))AGSVADSDAVVKDDGHNLSGS(Phospho (STY))PVQADVYFPR_4                                                       | #N/A                    | 2.9995  | 4.2267  | 5.9302  | 4.1890    | 3.9649  | 4.0105  | 3.9037  | 3.9295  | 3.5781  | 4.1560  | 1.0839 | 0.1163  | 0.5359 | 0.2791 |
| Rpe      | _thyl (C))AEAGANN(Oxidation (M))NS(Phospho (STY))GS(Phospho (STY))AIM(Oxidation (M))RS(Phospho (STY))S(Phospho (STY))SPSSPSLR_2 | QBVEO_5196_M3_Rpe       | 4.1401  | 3.0860  | 3.3261  | 3.8288    | 3.2658  | 2.9638  | 3.5434  | 4.2897  | 3.9383  | 3.7958  | 0.8826 | -0.1802 | 0.1206 | 0.9185 |
| Gram1a   | _S(Phospho (STY))SPSSPSLR_2                                                                                                     | QBVEF1_511_M1_Gram1a    | 3.9177  | 3.9358  | 4.0717  | 3.7160    | 3.7827  | 3.4489  | 7.5275  | 7.1688  | 3.6017  | 3.1664  | 0.7104 | -0.4933 | 0.1282 | 0.8920 |
| Ar18a    | _EIC(Carbamidomethyl (C))C(Carbamidomethyl (C))YS(C(Carbamidomethyl (C))C)_2                                                    | #N/A                    | 3.5051  | 4.3887  | 5.7251  | 5.4789    | 4.9640  | 4.9412  | 5.4934  | 5.2587  | 5.0323  | 5.3596  | 0.9712 | -0.0421 | 0.5648 | 0.2481 |
| Ar18a    | _M(Oxidation (M))NLSAQDR_2                                                                                                      | #N/A                    | 5.6826  | 5.6908  | 5.9251  | 5.0496    | 5.6454  | 6.0328  | 5.7672  | 5.9168  | 6.2451  | 5.7687  | 0.9536 | -0.0686 | 0.1997 | 0.6086 |
| Ar18a    | _DIALGALDEK_2                                                                                                                   | #N/A                    | 3.4165  | 4.1728  | 3.1502  | 4.1948    | 4.0611  | 4.0644  | 4.3430  | 4.3072  | 3.1055  | 4.5314  | 0.9439 | -0.0833 | 0.5245 | 0.2802 |
| Vps4a    | _ENGSEKGS(Phospho (STY))DS(Phospho (STY))DSEGNPEK_2                                                                             | QBVEJ_595_M2_Vps4a      | 3.3946  | 4.0838  | 4.0814  | 4.5841    | 3.7199  | 4.4056  | 3.8471  | 3.5344  | 3.1830  | 3.0502  | 1.1884 | 0.2490  | 0.0414 | 1.3834 |
| Tmem30a  | _EIIDYGTPESS(Phospho (STY))PC(Carbamidomethyl (C))NK_2                                                                          | QBVEKO_589_M1_Tmem30a   | 4.0804  | 3.2294  | 3.6585  | 3.7601    | 4.1278  | 3.5712  | 3.6231  | 3.9613  | 3.8637  | 3.7949  | 0.9809 | -0.0278 | 0.6966 | 0.0570 |
| Hnrnpu   | _DLPHAVLK_2                                                                                                                     | #N/A                    | 8.1057  | 8.2127  | 8.2220  | 8.2408    | 8.4900  | 8.5503  | 8.1734  | 8.1424  | 8.4547  | 8.5870  | 0.9957 | -0.0602 | 0.7800 | 0.1079 |
| Hnrnpu   | _SGPSTLSFATVAPPGR_2                                                                                                             | #N/A                    | 7.8704  | 8.0471  | 8.5363  | 8.3296    | 8.2915  | 8.4040  | 8.4989  | 8.2719  | 8.5407  | 8.1024  | 0.9872 | -0.0186 | 0.4924 | 0.3076 |
| Hnrnpu   | _DIDHEVR_2                                                                                                                      | #N/A                    | 7.4499  | 7.4579  | 7.6910  | 7.7899    | 7.4176  | 7.5089  | 7.1250  | 7.3801  | 7.3643  | 7.3743  | 1.0330 | 0.0469  | 0.0299 | 1.5241 |
| Hnrnpu   | _LNTLQOR_2                                                                                                                      | #N/A                    | 7.1962  | 7.0841  | 7.3420  | 7.0173    | 7.5351  | 7.0132  | 7.2656  | 6.7250  | 7.3674  | 6.8710  | 1.0199 | 0.0285  | 0.4082 | 0.3891 |
| Hnrnpu   | _EKYPPIPEDC(Carbamidomethyl (C))TFQNVPLEDR_3                                                                                    | #N/A                    | 6.7658  | 7.0384  | 7.0265  | 7.1577    | 6.9158  | 6.5128  | 7.0383  | 6.5650  | 6.5780  | 6.5780  | 1.0143 | 0.0205  | 0.5577 | 0.2536 |
| Hnrnpu   | _NFLDQTNVSAAGR_2                                                                                                                | #N/A                    | 6.5423  | 5.7128  | 6.7445  | 5.9011    | 6.3403  | 6.4011  | 6.4133  | 5.7105  | 6.0003  | 6.8256  | 1.0058 | 0.0084  | 0.8993 | 0.0461 |
| Hnrnpu   | _LEQYKEESK_3                                                                                                                    | #N/A                    | 5.8546  | 5.8551  | 5.9217  | 5.2344    | 6.6488  | 6.3759  | 5.1744  | 5.7192  | 6.3249  | 5.6881  | 1.0445 | 0.0629  | 0.4361 | 0.3605 |
| Hnrnpu   | _KS(Phospho (STY))POPPVEEEDHFDOTV(C(Carbamidomethyl (C))LDYNC(Carbamidomethyl (C))DLHF_3                                        | #N/A                    | 8.9519  | 9.0360  | 9.7719  | 9.7270    | 8.5286  | 8.8343  | 9.4281  | 9.2904  | 9.2892  | 9.1643  | 0.9837 | -0.0237 | 0.5756 | 0.2399 |
| Hnrnpu   | _i(Phospho (STY))POPPVEEEDHFDOTV(C(Carbamidomethyl (C))LDYNC(Carbamidomethyl (C))DLHF_3                                         | #N/A                    | 3.8448  | 5.4294  | 4.5316  | 3.4707    | 2.9705  | 5.9492  | 3.6189  | 3.0842  | 6.2155  | 5.5005  | 1.0453 | 0.0639  | 0.8165 | 0.0881 |
| Hnrnpu   | _GYEVENKYSR_2                                                                                                                   | #N/A                    | 5.1021  | 4.2511  | 4.2695  | 3.2713    | 4.5157  | 4.9369  | 4.9018  | 4.6623  | 4.3004  | 5.0732  | 0.9275 | -0.1086 | 0.3641 | 0.4388 |
| Hnrnpu   | _Acetyl (Protein N-term))SSS(Phospho (STY))PVNVKK_2                                                                             | #N/A                    | 12.3371 | 12.6979 | 13.3092 | 13.0154   | 12.5107 | 12.7955 | 12.8663 | 12.6163 | 12.6163 | 12.6314 | 1.0076 | 0.0109  | 0.6172 | 0.2096 |
| Hnrnpu   | _FIEAAR_2                                                                                                                       | #N/A                    | 3.9051  | 3.8226  | 3.6388  | 3.7741    | 3.6296  | 5.3692  | 3.3308  | 5.5412  | 4.2972  | 5.2172  | 0.8753 | -0.1922 | 0.3026 | 0.5191 |
| Hnrnpu   | _Acetyl (Protein N-term))SSS(Phospho (STY))PVNVK_2                                                                              | #N/A                    | 3.9963  | 3.7461  | 3.7300  | 3.9899    | 3.8562  | 3.6183  | 4.1381  | 3.8612  | 3.3755  | 3.6672  | 1.0166 | 0.0237  | 0.6865 | 0.1633 |
| Hnrnpu   | _NGDGLGVAFK_2                                                                                                                   | #N/A                    | 3.3862  | 4.1914  | 4.0730  | 2.8217    | 4.1397  | 3.7168  | 4.0776  | 3.3709  | 3.7099  | 3.0418  | 1.0976 | 0.1344  | 0.3503 | 0.4556 |
| Hnrnpu   | _VSEKEELK_3                                                                                                                     | #N/A                    | 3.4309  | 4.2360  | 4.1177  | 4.6203    | 1.8176  | 3.6721  | 4.3350  | 3.4982  | 3.1468  | 2.1340  | 1.1130 | 0.1545  | 0.5671 | 0.2464 |
| Hnrnpu   | _PAMEPGNGS(Phospho (STY))LDLGGDAAGR_2                                                                                           | #N/A                    | 3.4129  | 4.1691  | 3.1465  | 4.4970    | 4.0574  | 4.0680  | 3.9612  | 3.1091  | 3.8684  | 3.1883  | 1.1083 | 0.1483  | 0.5356 | 0.2712 |
| Hnrnpu   | _LQALDNEAGRRPAMEPGNGS(Phospho (STY))LDLGGDAAGR_3                                                                                | #N/A                    | 3.4715  | 4.2278  | 3.6636  | 4.2144    | 3.4563  | 4.0360  | 3.9291  | 3.9307  | 3.5792  | 3.4229  | 0.9807 | -0.0281 | 0.7309 | 0.1361 |
| Hnrnpu   | _LSASLTM(Oxidation (M))ESAFLOWAGR_2                                                                                             | #N/A                    | 3.5616  | 3.6646  | 4.2484  | 3.2502    | 4.1881  | 3.5414  | 4.4657  | 3.3675  | 3.0161  | 3.2172  | 1.0642 | 0.0898  | 0.5081 | 0.2941 |
| Rem2     | _GHAGGQRPEPSS(Phospho (STY))PDGAPPTR_4                                                                                          | #N/A                    | 3.8602  | 3.7051  | 4.1834  | 3.7271    | 3.5934  | 3.0332  | 4.1226  | 3.2760  | 3.5751  | 4.9883  | 0.9231 | -0.1154 | 0.4118 | 0.3853 |
| Rem2     | _QAS(Phospho (STY))PLGTPTPEADTLTK_2                                                                                             | QBVEL9_527_M1_Rem2      | 8.0047  | 7.8043  | 8.3131  | 8.6017    | 6.9092  | 8.1018  | 7.9241  | 7.8283  | 7.3537  | 7.8824  | 1.0269 | 0.0383  | 0.5255 | 0.2794 |
| Rem2     | _GHAGGQRPEPSS(Phospho (STY))PDGAPPTR_3                                                                                          | #N/A                    | 8.0460  | 8.0371  | 8.1823  | 8.4633    | 3.5380  | 7.7635  | 7.9070  | 7.9303  | 7.4747  | 8.0089  | 0.9372 | -0.0936 | 0.6020 | 0.2056 |
| Rem2     | _RGS(Phospho (STY))M(Oxidation (M))PVPK_2                                                                                       | #N/A                    | 5.8983  | 4.2470  | 3.9025  | 4.0952    | 4.7106  | 3.8337  | 6.1061  | 5.9653  | 6.1422  | 6.4265  | 0.7304 | -0.4532 | 0.0239 | 2.5298 |
| Rem2     | _SRSS(Phospho (STY))C(Carbamidomethyl (C))HOLSVL_2                                                                              | QBVEL9_5334_M1_Rem2     | 3.3834  | 3.9355  | 3.9978  | 4.3365    | 3.7927  | 4.1419  | 4.2750  | 3.9972  | 3.2086  | 3.8389  | 1.0265 | 0.0377  | 0.6890 | 0.1618 |
| Rem2     | _RRGS(Phospho (STY))M(Oxidation (M))PVPK_3                                                                                      | #N/A                    | 2.9899  | 3.7461  | 4.2244  | 3.7681    | 3.6344  | 2.9902  | 3.9164  | 3.2330  | 3.5321  | 3.4454  | 1.0077 | 0.0110  | 0.9230 | 0.0348 |
| Rem2     | _GS(Phospho (STY))MPVPK_2                                                                                                       | #N/A                    | 3.7961  | 3.1004  | 4.4829  | 3.5194    | 2.9218  | 3.3069  | 3.6677  | 3.4818  | 3.7808  | 3.1967  | 0.9970 | -0.0043 | 0.9733 | 0.0117 |
| Slc25a3  | _IGTOPGVANTLR_2                                                                                                                 | #N/A                    | 10.2186 | 10.1673 | 10.3658 | 9.6214    | 10.1682 | 9.8332  | 10.4800 | 10.2740 | 10.1061 | 9.9538  | 0.9862 | -0.2001 | 0.4243 | 0.3723 |
| Slc25a3  | _GSTASQVLQR_2                                                                                                                   | #N/A                    | 8.3511  | 8.3714  | 8.5609  | 8.2431    | 8.2173  | 8.2595  | 8.5572  | 8.7038  | 8.5331  | 8.3227  | 0.9771 | -0.0334 | 0.0611 | 1.2139 |
| Slc25a3  | _LEGANAFYK_2                                                                                                                    | #N/A                    | 6.0881  | 5.6761  | 5.2457  | 5.4274    | 5.8863  | 5.1923  | 5.7454  | 6.2503  | 6.3567  | 6.6049  | 0.8953 | -0.1596 | 0.0228 | 1.6414 |
| Slc25a3  | _IGPYEVFK_2                                                                                                                     | #N/A                    | 5.2199  | 5.0501  | 5.2207  | 4.9144    | 3.9305  | 4.6519  | 5.0093  | 5.1355  | 5.0132  | 4.4525  | 0.9854 | -0.0212 | 0.8037 | 0.0949 |
| Slc25a3  | _GIINGISITLK_2                                                                                                                  | #N/A                    | 5.9652  | 4.0641  | 5.6144  | 4.7982    | 4.0736  | 4.9326  | 5.3366  | 3.4071  | 5.3392  | 5.1484  | 1.0208 | 0.0298  | 0.8584 | 0.0663 |
| Slc25a3  | _MYKEELGANAFYK_2                                                                                                                | #N/A                    | 6.4148  | 6.1132  | 3.3256  | 7.1149    | 5.5945  | 2.9633  | 6.1964  | 5.5403  | 5.4900  | 5.6623  | 0.9182 | -0.1231 | 0.6103 | 0.2144 |
| Slc25a3  | _LYALC(Carbamidomethyl (C))GGGVLS(Carbamidomethyl (C))TLHTAVPLDLVK_3                                                            | #N/A                    | 3.7970  | 3.1014  | 4.4838  | 3.5184    | 2.9227  | 3.3059  | 3.6667  | 3.4827  | 3.7818  | 3.4527  | 0.9793 | -0.3002 | 0.8064 | 0.0934 |
| Rbm39    | _YRS(Phospho (STY))PVSQPK_2                                                                                                     | QBWH51_597_M1_Rbm39     | 7.9840  | 8.2193  | 8.7295  | 8.5048    | 7.4131  | 7.8766  | 8.4867  | 8.3020  | 8.1238  | 8.9654  | 0.9654 | -0.0508 | 0.2981 | 0.5257 |
| Rbm39    | _DKS(Phospho (STY))PVREIDNLTPEER_3                                                                                              | #N/A                    | 10.1055 | 9.9213  | 10.7141 | 10.6136</ |         |         |         |         |         |         |        |         |        |        |



|          |                                                                       |                         |        |        |        |        |        |        |        |        |        |        |        |         |          |        |
|----------|-----------------------------------------------------------------------|-------------------------|--------|--------|--------|--------|--------|--------|--------|--------|--------|--------|--------|---------|----------|--------|
| Setd7    | _AFQATQK_Q_2                                                          | #N/A                    | 3.9090 | 4.1784 | 3.7346 | 4.2373 | 4.1952 | 4.0588 | 3.9519 | 3.8812 | 3.5298 | 4.9637 | 0.9928 | -0.0105 | 0.9137   | 0.0392 |
| Setd7    | _AVEAEELLYVAGYDHS[Phospho (STY)]PPGK_3                                | QBWH1L_S340_M1_Setd7    | 3.9698 | 3.3726 | 3.7035 | 3.2472 | 3.1135 | 3.5111 | 3.3955 | 3.7540 | 4.0530 | 3.5084 | 0.9479 | -0.0771 | 0.3598   | 0.4440 |
| Ppp1r16b | _RAS[Phospho (STY)]LSDR_2                                             | QBWHQ3_S350_M1_Ppp1r16b | 3.5025 | 3.7326 | 3.2457 | 3.1911 | 4.1290 | 3.0127 | 4.4067 | 3.4265 | 3.0751 | 3.1581 | 1.0808 | 0.0121  | 0.5694   | 0.2445 |
| Ppp1r16b | _EQS[Phospho (STY)]PQTLELKR_2                                         | QBWHQ3_S477_M1_Ppp1r16b | 4.2663 | 3.3136 | 3.7919 | 4.8458 | 3.2019 | 3.4227 | 3.3158 | 4.4899 | 3.9646 | 3.0129 | 1.0301 | 0.0428  | 0.7971   | 0.0985 |
| Rab40c   | _Acetyl (Protein N-term)[GTGGGS[Phospho (STY)]PKVS DYLLK_2            | QBWHQ4_S6_M1_Rab40c     | 5.0987 | 2.9655 | 3.4466 | 3.9493 | 3.8863 | 3.7708 | 3.6640 | 5.1973 | 3.8178 | 5.2999 | 0.8387 | -0.2538 | 0.1926   | 0.7154 |
| Gata2b   | _LQQQAALS[Phospho (STY)]PTTAPAVSSVK_2                                 | QBVHRS_S487_M1_Gata2b   | 3.0447 | 6.4391 | 4.2792 | 7.7777 | 4.1190 | 3.6105 | 5.8154 | 3.1782 | 5.2249 | 3.5003 | 1.1013 | 0.1392  | 0.6843   | 0.1647 |
| Gata2b   | _S[Phospho (STY)]LDPADERDDVLAK_2                                      | #N/A                    | 3.9959 | 6.7491 | 3.7295 | 7.4154 | 6.6566 | 6.9434 | 7.3099 | 6.6714 | 6.7288 | 7.2441 | 0.8464 | -0.2406 | 0.2339   | 0.6309 |
| Gata2b   | _GRLTL[Phospho (STY)]PSPDVLSS[Phospho (STY)]DNEASSPR_3                | #N/A                    | 3.5929 | 5.3925 | 3.8152 | 3.6388 | 3.3807 | 3.8293 | 4.8751 | 3.8267 | 3.8748 | 4.0484 | 0.9483 | -0.0765 | 0.6225   | 0.2058 |
| Gata2b   | _VSS[Phospho (STY)]PLPS[Phospho (STY)]PSAM[Oxidation (M)]SDAANSQAAK_2 | #N/A                    | 3.8837 | 3.7163 | 3.7852 | 4.2879 | 3.7249 | 4.3637 | 4.9560 | 4.9022 | 3.5438 | 3.5394 | 0.9351 | -0.0969 | 0.4542   | 0.3427 |
| Gata2b   | _LTPSPDILVLS[Phospho (STY)]DNEASS[Phospho (STY)]PRR_2                 | #N/A                    | 3.8753 | 3.9177 | 3.7993 | 4.6033 | 3.7390 | 4.0750 | 3.6977 | 3.7206 | 3.7740 | 3.7957 | 1.0679 | 0.0948  | 0.1556   | 0.8079 |
| Gata2b   | _S[Phospho (STY)]LDPADERDDVLAK_2                                      | #N/A                    | 3.6315 | 4.3878 | 7.9156 | 4.0278 | 4.2761 | 3.8494 | 3.7425 | 8.0502 | 3.7392 | 3.9948 | 0.9590 | -0.0605 | 0.8685   | 0.0612 |
| Cacng8   | _AGGGAGGS[Phospho (STY)]GGSGPSAILR_2                                  | QBVHW2_S251_M1_Cacng8   | 6.8310 | 5.6669 | 7.0593 | 6.8286 | 4.9859 | 6.1835 | 7.3881 | 7.7794 | 7.4804 | 7.2908 | 0.8363 | -0.2580 | 0.0196   | 1.7086 |
| Cacng8   | _DAS[Phospho (STY)]PGGPGGPGFASTDISM[Oxidation (M)]YTLR_3              | #N/A                    | 4.1536 | 4.5120 | 4.9930 | 3.6660 | 3.2555 | 3.8587 | 3.5673 | 4.8055 | 5.0047 | 3.5256 | 0.9639 | -0.0531 | 0.7400   | 0.1308 |
| Cacng8   | _SSS[Phospho (STY)]RGS[Phospho (STY)]SEASPSR_2                        | QBVHW2_S277_M2_Cacng8   | 3.4422 | 4.2168 | 4.1290 | 3.9778 | 4.0669 | 3.9232 | 4.3463 | 3.5103 | 3.1589 | 3.9448 | 1.0586 | 0.0822  | 0.4015   | 0.3963 |
| Setb2    | _SGS[Phospho (STY)]POVKGPPPVK_2                                       | QBVI24_S20_M1_Setb2     | 7.5794 | 3.8354 | 3.2407 | 4.2853 | 7.2729 | 4.0728 | 4.4336 | 7.9595 | 3.0149 | 3.9626 | 1.0424 | 0.0598  | 0.8770   | 0.0570 |
| Setb2    | _ES[Phospho (STY)]SPPREA PPPPTTEOSC[Carbamidomethyl (C)]AK_3          | QBVI24_S593_M1_Setb2    | 4.0916 | 3.2131 | 3.5508 | 3.6090 | 2.9921 | 3.6394 | 5.7471 | 4.0076 | 4.1636 | 0.7862 | 0.3740 | -0.0396 | 1.4023   | 0.0396 |
| Setb2    | _SES[Phospho (STY)]PC[Carbamidomethyl (C)]LRDS[Phospho (STY)]PORR_2   | #N/A                    | 4.1010 | 3.4054 | 4.0876 | 4.4895 | 3.2267 | 3.8552 | 4.8482 | 3.6813 | 4.0300 | 4.4970 | 0.9054 | -0.1433 | 0.2362   | 0.6266 |
| Pxn      | _YAHQQPSP[Phospho (STY)]PLPVSSSAK_3                                   | QBVI36_S83_M1_Pxn       | 6.1589 | 5.7046 | 6.5752 | 6.9048 | 5.9670 | 3.5150 | 6.1727 | 4.4768 | 6.0082 | 5.8309 | 1.0324 | 0.0460  | 0.7972   | 0.0985 |
| Lrp4     | _RGS[Phospho (STY)]POTGWK_2                                           | #N/A                    | 3.2592 | 4.0832 | 6.6303 | 7.1369 | 3.9045 | 6.2644 | 7.5378 | 4.4645 | 6.6902 | 6.5497 | 0.8261 | -0.2756 | 0.2989   | 0.5245 |
| Lrp4     | _GS[Phospho (STY)]POTGWK_2                                            | #N/A                    | 3.3533 | 4.1096 | 3.8034 | 4.3060 | 3.9979 | 4.1275 | 4.0207 | 6.2889 | 3.4611 | 5.4813 | 0.8206 | -0.2852 | 0.1500   | 0.8240 |
| Pcn3     | _S0APLILSLSPVSEAS[Phospho (STY)]PAR_2                                 | QBVS9_S1980_M1_Pcn3     | 3.6147 | 3.7278 | 3.3483 | 4.3939 | 4.2592 | 3.8662 | 4.5412 | 4.1091 | 4.4081 | 4.0702 | 0.9033 | -0.1467 | 0.0983   | 1.0073 |
| Nr3c1    | _SVSVSS[Phospho (STY)]PANUNSR_2                                       | QBVS9_S299_M1_Nr3c1     | 7.1276 | 7.1662 | 7.4210 | 7.6961 | 6.4836 | 6.8519 | 7.3593 | 7.4688 | 4.2376 | 6.7315 | 1.1047 | 0.1436  | 0.3187   | 0.4966 |
| Nr3c2    | _DAEYTDQNGQGS[Phospho (STY)]LSPAK_2                                   | QBVI8_S127_M1_Nr3c2     | 3.9205 | 4.1491 | 5.2566 | 4.1700 | 3.9704 | 3.7592 | 4.8450 | 3.5852 | 3.4961 | 3.5164 | 1.0890 | 0.1230  | 0.3897   | 0.4092 |
| Slpq     | _YGEPEVPINK_2                                                         | #N/A                    | 7.2822 | 7.5623 | 7.6480 | 7.4046 | 7.2230 | 7.3073 | 7.8088 | 7.3497 | 7.3283 | 7.4907 | 0.9880 | -0.0174 | 0.4849   | 0.3143 |
| Slpq     | _LFGNLADITDEFK_3                                                      | #N/A                    | 6.6037 | 6.9493 | 6.8806 | 7.1122 | 6.8561 | 6.9399 | 7.0903 | 6.8088 | 6.9120 | 7.0238 | 0.9902 | -0.0143 | 0.5053   | 0.2964 |
| Slpq     | _FATHAALSVR_2                                                         | #N/A                    | 5.9230 | 5.8156 | 5.8979 | 6.4787 | 6.5220 | 6.0816 | 6.1912 | 5.8475 | 6.0246 | 6.0605 | 1.0147 | 0.0211  | 0.6084   | 0.2158 |
| Slpq     | _FGGAGGAPVGGGGPR_2                                                    | #N/A                    | 6.1636 | 6.7451 | 3.1547 | 6.7339 | 6.8656 | 6.1746 | 6.7059 | 6.7461 | 6.5930 | 6.9653 | 0.8845 | -0.1770 | 0.3129   | 0.5045 |
| Slpq     | _PVVEPLELDDDEGLPEK_2                                                  | #N/A                    | 5.9263 | 5.5752 | 5.1650 | 6.3647 | 5.5211 | 5.3991 | 5.7686 | 5.9466 | 3.9839 | 5.3575 | 1.0749 | 0.1042  | 0.3675   | 0.4347 |
| Slpq     | _LFGNLADITDEFK_2                                                      | #N/A                    | 4.6296 | 4.0679 | 3.8451 | 4.3477 | 5.2420 | 4.1693 | 4.0624 | 3.8910 | 4.6345 | 5.2158 | 0.9849 | -0.0220 | 0.8511   | 0.0700 |
| Clapin1  | _EPVETAENVNDK_2                                                       | #N/A                    | 6.4559 | 5.3206 | 4.7651 | 6.5069 | 5.3758 | 5.5750 | 5.5564 | 5.3602 | 6.0416 | 6.1359 | 0.9867 | -0.0193 | 0.8451   | 0.0731 |
| Clapin1  | _EALS[Phospho (STY)]PEVGSVQELHGVHSDLSR_3                              | QBWTY4_S136_M1_Clapin1  | 3.6591 | 6.0842 | 3.3238 | 6.3499 | 3.5737 | 5.2057 | 5.8650 | 5.8546 | 5.5364 | 5.2635 | 0.8327 | -0.2642 | 0.2181   | 0.6613 |
| Wdr13    | _YGPLS[Phospho (STY)]EPGSAR_2                                         | QB1V09_S70_M1_Wdr13     | 9.2657 | 9.0055 | 9.5288 | 9.2578 | 8.3910 | 9.0570 | 9.3954 | 8.8590 | 8.8092 | 8.9713 | 1.0084 | 0.0121  | 0.7442   | 0.1283 |
| Wdr13    | _LVVHGSPVTSISAR_3                                                     | #N/A                    | 4.3185 | 4.1808 | 4.1288 | 5.6085 | 4.7667 | 4.0201 | 3.9668 | 4.3572 | 4.3221 | 4.6059 | 1.0443 | 0.0625  | 0.5715   | 0.2430 |
| Wdr13    | _LWAGDOR_2                                                            | #N/A                    | 3.4265 | 3.5515 | 3.3793 | 4.5539 | 3.5773 | 3.1717 | 3.2704 | 3.6887 | 4.5873 | 4.3161 | 0.9103 | -0.1355 | 0.3287   | 0.4832 |
| Wdr13    | _VLALSDFAPGR_2                                                        | #N/A                    | 3.8405 | 3.6241 | 3.5742 | 7.4664 | 4.2703 | 4.0861 | 3.2662 | 4.1699 | 4.1823 | 4.2961 | 1.1253 | 0.1703  | 0.5422   | 0.2659 |
| Wdr13    | _Acetyl (Protein N-term)[AWWQGVQVADAR_2                               | #N/A                    | 3.8731 | 3.1286 | 3.6068 | 3.7862 | 3.0169 | 3.6077 | 3.5009 | 4.3323 | 3.9809 | 3.7532 | 0.9002 | -0.1518 | 0.1253   | 0.9020 |
| Aco7     | _Y[Phospho (STY)]EQAQLER_2                                            | Q91V12_Y195_M1_Aco7     | 7.4082 | 7.7306 | 8.1019 | 7.5748 | 7.5768 | 7.5212 | 7.6100 | 7.6800 | 7.5886 | 7.2289 | 1.0167 | 0.0238  | 0.4211   | 0.3757 |
| Aco7     | _LEVPPVILR_2                                                          | #N/A                    | 7.9426 | 7.8095 | 7.9170 | 7.6430 | 7.6528 | 7.7905 | 7.7741 | 8.0932 | 7.9739 | 8.0321 | 0.9779 | -0.0322 | 0.0715   | 1.1456 |
| Aco7     | _LM[Oxidation (M)]DEVAGINAAAR_2                                       | #N/A                    | 7.0366 | 7.2143 | 7.2694 | 7.5418 | 7.2934 | 7.2344 | 7.3246 | 7.6325 | 7.4159 | 7.4783 | 0.9752 | -0.0362 | 0.0944   | 1.0248 |
| Aco7     | _SM[Oxidation (M)]EIEVLVDQAPVVDNSOK_2                                 | #N/A                    | 5.3935 | 5.1642 | 3.1563 | 3.6589 | 4.6081 | 5.7864 | 5.6853 | 6.1568 | 6.0272 | 4.9902 | 0.8098 | -0.3044 | 0.0908   | 1.0419 |
| Aco7     | _AASAFFTVSLNDEGK_2                                                    | #N/A                    | 3.4275 | 4.5597 | 5.6651 | 5.0810 | 4.6299 | 3.6755 | 4.3316 | 4.0220 | 4.9234 | 5.3671 | 0.9668 | -0.0487 | 0.7610   | 0.1186 |
| Aco7     | _M[Oxidation (M)]EEAGAISTR_2                                          | #N/A                    | 5.2941 | 5.4565 | 5.6982 | 5.0489 | 6.6295 | 6.1801 | 5.3298 | 6.0327 | 5.8122 | 6.3731 | 0.9713 | -0.0420 | 0.6394   | 0.0942 |
| Aco7     | _TNVTATSDAINFHDK_2                                                    | #N/A                    | 5.7449 | 5.5849 | 5.9240 | 5.5939 | 5.3063 | 5.4114 | 5.9219 | 5.7353 | 5.9263 | 5.3058 | 0.9776 | -0.0327 | 0.4514   | 0.3454 |
| Aco7     | _M[Oxidation (M)]TFTNSK_2                                             | #N/A                    | 2.9029 | 2.9386 | 4.1374 | 3.6812 | 3.5475 | 3.0771 | 3.8295 | 3.3200 | 3.6190 | 3.3585 | 0.9573 | -0.0630 | 0.5886   | 0.2302 |
| Slc12a5  | _LFIQSDISR_2                                                          | #N/A                    | 7.8655 | 7.6082 | 7.8701 | 7.4529 | 7.4711 | 7.2541 | 7.7911 | 7.9114 | 7.6105 | 7.7336 | 0.9903 | -0.0141 | 0.6526   | 0.1853 |
| Slc12a5  | _ENLWSSYLTK_2                                                         | #N/A                    | 7.1993 | 6.9145 | 7.0921 | 6.9113 | 6.4860 | 6.8411 | 7.5171 | 7.0696 | 7.2045 | 6.7100 | 0.9694 | -0.0448 | 0.2657   | 0.5757 |
| Slc12a5  | _LNEVWNK_2                                                            | #N/A                    | 6.1527 | 5.7270 | 6.6221 | 5.5962 | 5.8187 | 6.0452 | 6.1915 | 6.1445 | 6.1952 | 5.3982 | 1.0019 | 0.0027  | 0.9641   | 0.0159 |
| Slc12a5  | _VDDQDNVHPQLLSLSLQK_3                                                 | #N/A                    | 5.1195 | 4.9304 | 5.1952 | 4.6223 | 4.0621 | 5.0823 | 5.3496 | 5.1656 | 4.6268 | 4.2135 | 0.9993 | -0.0011 | 0.9907   | 0.0540 |
| Slc12a5  | _LVLLNM[Oxidation (M)]PGPR_2                                          | #N/A                    | 6.5037 | 6.0880 | 6.9717 | 4.6924 | 6.1798 | 6.6721 | 6.8399 | 7.0210 | 6.7758 | 6.6153 | 0.9078 | -0.1396 | 0.1669   | 0.7776 |
| Slc12a5  | _GFC[Carbamidomethyl (C)]QVWSSNLR_2                                   | #N/A                    | 5.9628 | 5.8866 | 5.6290 | 5.6971 | 4.8562 | 5.2452 | 6.0274 | 5.4751 | 5.5455 | 5.8701 | 0.9680 | -0.0469 | 0.4643   | 0.3332 |
| Slc12a5  | _NKGPS[Phospho (STY)]PVSSGK_2                                         | QB1V14_S1044_M1_Slc12a5 | 3.9020 | 3.4404 | 3.6356 | 3.1794 | 3.0457 | 3.5789 | 6.2193 | 3.8218 | 4.1208 | 4.3575 | 0.7481 | -0.4187 | 0.0340   | 1.4689 |
| Slc12a5  | _DLTLVLHLR_2                                                          | #N/A                    | 4.4937 | 5.3222 | 5.6710 | 4.9745 | 3.7488 | 4.4260 | 4.8991 | 4.8561 | 5.1099 | 4.4575 | 0.9880 | -0.0174 | 0.8792   | 0.0559 |
| Slc12a5  | _HGFQVC[Carbamidomethyl (C)]AK_2                                      | #N/A                    | 5.0720 | 4.9698 | 3.7802 | 3.9627 | 4.7303 | 3.7606 | 4.9272 | 5.0304 | 3.9733 | 5.0956 | 0.9207 | -0.1192 | 0.3437   | 0.4638 |
| Slc12a5  | _ESS[Phospho (STY)]PFINSIDTEK_2                                       | QB1V14_S49_M1_Slc12a5   | 9.6594 | 9.2456 | 9.7081 | 9.2378 | 8.1213 | 9.3737 | 9.9702 | 9.6939 | 9.2253 | 9.3309 | 0.9654 | -0.0508 | 0.3369   | 0.4724 |
| Slc12a5  | _FIQSDISR[Phospho (STY)]RGSRR_3                                       | #N/A                    | 6.7311 | 3.4400 | 4.3454 | 5.1919 | 3.3022 | 7.0845 | 3.5825 | 5.1937 | 3.9670 | 7.1700 | 1.0075 | 0.0108  | 0.9722   | 0.0123 |
| Slc12a5  | _ERFIQSDISRGS[Phospho (STY)]IR_3                                      | #N/A                    | 3.9792 | 3.2835 | 3.1651 | 6.9383 | 3.1049 | 6.2923 | 3.4846 | 6.5436 | 6.0450 | 5.9883 | 0.8088 | -0.3062 | 0.3351   | 0.4748 |
| Slc12a5  | _EIGSFDISRGS[Phospho (STY)]IR_2                                       | #N/A                    | 5.3306 | 5.7327 | 5.6801 | 5.8807 | 3.8296 | 5.8746 | 5.1055 | 5.9083 | 5.5788 | 5.8588 | 0.9599 | -0.0590 | 0.6139   | 0.2119 |
| Slc12a5  | _ESSPINS[Phospho (STY)]TDTCKR_2                                       | QB1V14_S54_M1_Slc12a5   | 4.3085 | 3.6129 | 3.4945 | 3.9972 | 3.4342 | 4.2953 | 3.7118 | 4.1213 | 3.7699 | 3.9642 | 0.9911 | -0.0129 | 0.8760   | 0.0075 |
| Slc12a5  | _GLTVGSGLVGLFDNHPQAGR_3                                               | #N/A                    | 4.0782 | 3.6093 | 3.4737 | 4.5183 | 3.7578 | 4.3058 | 3.0271 | 2.9971 | 4.6743 | 5.0800 | 1.0032 | 0.0046  | 0.9798   | 0.0589 |
| Slc12a5  | _TLVMEQR_2                                                            | #N/A                    | 3.8733 | 3.3529 | 4.5601 | 5.6548 | 2.9989 | 3.3834 | 3.2766 | 3.0558 | 3.0183 | 3.5289 | 1.2331 | 0.3023  | 0.1807   | 0.7431 |
| Slc12a5  | _ITEAEVEVEM[Oxidation (M)]HESDISATTYK_3                               | #N/A                    | 4.5415 | 5.0116 | 3.8319 | 4.4563 | 3.7717 | 5.1850 | 5.0236 | 3.8788 | 4.4084 | 3.6244 | 1.0549 | 0.0771  | 0.5633   | 0.2493 |
| Slc12a5  | _NVSMFFGNPFR_2                                                        | #N/A                    | 3.9877 | 3.2920 | 3.1736 | 3.3278 | 3.1133 | 3.1153 | 3.4761 | 3.6733 | 3.9724 | 3.0051 | 0.9443 | -0.0827 | 0.4237</ |        |



|         |                                                                             |                        |         |         |         |         |         |         |         |         |         |         |        |         |        |        |
|---------|-----------------------------------------------------------------------------|------------------------|---------|---------|---------|---------|---------|---------|---------|---------|---------|---------|--------|---------|--------|--------|
| Shn3    | _QGIFQVVISR_2                                                               | #N/A                   | 5.0125  | 3.5604  | 4.2974  | 3.6982  | 3.4487  | 4.1541  | 4.5445  | 5.0731  | 4.2836  | 4.0651  | 0.8969 | -0.1570 | 0.2105 | 0.6645 |
| Shn3    | _YVDSAHPTGSEK_2                                                             | #N/A                   | 6.9705  | 6.7996  | 7.2155  | 6.4256  | 6.1619  | 6.6397  | 7.1552  | 6.5459  | 6.6758  | 6.9557  | 0.9808 | -0.0279 | 0.5708 | 0.2435 |
| Shn3    | _AQIOAQNSIDVYWNK_2                                                          | #N/A                   | 5.5338  | 5.4706  | 5.9518  | 5.9884  | 5.0548  | 5.7036  | 5.9100  | 6.0447  | 5.5766  | 5.3294  | 0.9828 | -0.0250 | 0.6655 | 0.1768 |
| Shn3    | _SGDAPITVQDGLQVYSATVAGVATALGLK_3                                            | #N/A                   | 3.8508  | 3.4203  | 4.5376  | 4.3399  | 2.9765  | 3.2522  | 3.6130  | 2.5741  | 3.5023  | 2.3689  | 1.2372 | 0.3070  | 0.1149 | 0.9395 |
| Ady     | _TAS[Phospho (STY)]FSESER_2                                                 | #N/A                   | 11.7076 | 11.5594 | 11.7173 | 11.8985 | 10.1206 | 11.4914 | 11.4373 | 11.5996 | 11.5749 | 11.4736 | 0.9908 | -0.0133 | 0.7595 | 0.1195 |
| Ady     | _TAS[Phospho (STY)]FSERADEVAPMK_3                                           | #N/A                   | 7.5356  | 7.9929  | 8.6331  | 8.2513  | 7.1800  | 8.1814  | 7.9516  | 7.7301  | 7.8716  | 7.8660  | 1.0137 | 0.0196  | 0.7010 | 0.1543 |
| Ady     | _EAGVFPVR_2                                                                 | #N/A                   | 6.6150  | 6.6298  | 6.1840  | 6.4318  | 6.4187  | 6.0277  | 6.1527  | 6.9724  | 6.4081  | 6.5186  | 0.9803 | -0.0287 | 0.5004 | 0.3007 |
| Ady     | _THIAAGFPEALTR_2                                                            | #N/A                   | 5.8728  | 5.9186  | 6.0586  | 6.1965  | 5.4821  | 6.0760  | 5.8962  | 6.0498  | 5.8839  | 5.9984  | 0.9984 | -0.0023 | 0.9449 | 0.0246 |
| Ady     | _LNTEDKR_2                                                                  | #N/A                   | 5.4896  | 5.5881  | 5.6086  | 5.9753  | 6.0619  | 3.7594  | 5.8464  | 5.8181  | 5.5225  | 5.4427  | 0.9569 | -0.0635 | 0.5927 | 0.2271 |
| Ady     | _DLVSLTSGLLTGDR_2                                                           | #N/A                   | 4.1058  | 3.3970  | 4.6226  | 3.2179  | 4.3328  | 4.2219  | 4.0294  | 3.1968  | 3.7957  | 4.1730  | 1.0485 | 0.0683  | 0.5916 | 0.2280 |
| Ady     | _DGVYLDLAAK_2                                                               | #N/A                   | 4.3691  | 4.4406  | 4.2089  | 4.9827  | 4.1486  | 4.9572  | 4.4262  | 4.4585  | 3.0556  | 4.6645  | 1.0883 | 0.1221  | 0.3207 | 0.4940 |
| Ady     | _TAS[Phospho (STY)]FSERADEVAPAK_2                                           | #N/A                   | 3.1191  | 3.8754  | 4.3536  | 4.5402  | 3.7637  | 4.3618  | 4.2549  | 3.5782  | 3.2268  | 3.0064  | 1.1381 | 0.1867  | 0.1971 | 0.7053 |
| Ady     | _LGLVGVNLSLDGVK_2                                                           | #N/A                   | 5.6166  | 4.8360  | 3.2379  | 4.2825  | 5.3061  | 4.0699  | 5.4023  | 5.3091  | 3.0178  | 3.9597  | 1.0307 | 0.0437  | 0.8359 | 0.0778 |
| Ady     | _SINNPOMR_2                                                                 | #N/A                   | 3.5466  | 4.3518  | 4.2334  | 3.2353  | 4.1732  | 3.5563  | 4.4508  | 3.3824  | 3.0310  | 3.2023  | 1.0947 | 0.1305  | 0.3629 | 0.4403 |
| Ady     | _SAYDSTM[Oxidation (M)]ETM[Oxidation (M)]NYAQIR_2                           | #N/A                   | 3.2338  | 3.9924  | 3.9206  | 4.4233  | 3.8603  | 4.2448  | 4.1379  | 3.6952  | 3.3438  | 4.3903  | 1.0139 | 0.0199  | 0.8506 | 0.0703 |
| Pppr14a | _GPGGS[Phospho (STY)]PSGLQK_2                                               | #N/A                   | 10.2344 | 10.6386 | 10.7079 | 10.8842 | 10.9192 | 10.2941 | 10.9076 | 10.1708 | 10.2316 | 10.4590 | 1.0164 | 0.0234  | 0.4146 | 0.3823 |
| Pppr14a | _QPFGPQPSPSDPS[Phospho (STY)]SPRQDR_3                                       | Q91VC7_S134_M1_Pppr14a | 3.9129  | 3.1684  | 3.6466  | 3.1904  | 3.0567  | 3.5679  | 3.3387  | 3.8108  | 4.1098  | 4.3685  | 0.8763 | -0.1904 | 0.0839 | 0.1763 |
| Pppr14a | _QPFGPQPSPSDPS[Phospho (STY)]PR_2                                           | Q91VC7_S136_M1_Pppr14a | 9.2641  | 9.3717  | 8.8796  | 9.8497  | 9.0106  | 9.4610  | 9.8071  | 9.0221  | 9.1461  | 9.4389  | 0.9058 | -0.1427 | 0.4713 | 0.3267 |
| Pppr14a | _ARGPGGS[Phospho (STY)]PSGLQK_2                                             | #N/A                   | 8.8035  | 9.4485  | 9.7610  | 9.5819  | 9.6170  | 9.1529  | 9.6046  | 3.7585  | 8.8074  | 9.1331  | 1.2004 | 0.2635  | 0.1899 | 0.7215 |
| Pppr14a | _GPGGS[Phospho (STY)]PSGLQKR_2                                              | #N/A                   | 4.1146  | 8.2669  | 8.5741  | 7.9695  | 8.4630  | 2.9883  | 3.3491  | 7.7594  | 7.3006  | 7.5992  | 1.0350 | 0.0496  | 0.8850 | 0.0531 |
| Ndufs1  | _NAVTPFGLAR_2                                                               | #N/A                   | 8.8182  | 9.0951  | 9.0322  | 9.0024  | 9.3686  | 8.8351  | 8.8066  | 9.0203  | 8.9080  | 8.9637  | 1.0113 | 0.0162  | 0.3820 | 0.4179 |
| Ndufs1  | _FEAPFNAR_2                                                                 | #N/A                   | 8.8564  | 9.0471  | 8.7362  | 8.9109  | 8.9823  | 8.8248  | 8.8460  | 9.0448  | 8.7744  | 8.8661  | 1.0011 | 0.0016  | 0.8930 | 0.0491 |
| Ndufs1  | _ILQDIASGR_2                                                                | #N/A                   | 8.2790  | 8.5318  | 8.8698  | 8.3287  | 8.6667  | 8.2816  | 8.3099  | 8.6576  | 8.4228  | 8.2116  | 1.0110 | 0.0158  | 0.5406 | 0.2671 |
| Ndufs1  | _FASBAGVDDGLTGR_2                                                           | #N/A                   | 7.9109  | 7.9870  | 8.6336  | 8.5725  | 8.2076  | 7.8342  | 8.3029  | 8.0194  | 7.9972  | 7.8635  | 1.0180 | 0.0258  | 0.4661 | 0.3315 |
| Ndufs1  | _GWNLTNSEX_2                                                                | #N/A                   | 7.8858  | 7.9325  | 7.9962  | 7.9319  | 7.8265  | 8.0768  | 8.2783  | 8.0102  | 8.0177  | 7.8693  | 0.9873 | -0.0185 | 0.2407 | 0.6185 |
| Ndufs1  | _AVTEGAQAVEPSC[Carbamidomethyl (C)]_2                                       | #N/A                   | 7.2926  | 7.4027  | 7.3365  | 7.5448  | 7.3974  | 7.2885  | 7.7881  | 7.3036  | 7.2970  | 7.4597  | 0.9886 | -0.0165 | 0.4339 | 0.3626 |
| Ndufs1  | _VALIGSPVOLTIR_2                                                            | #N/A                   | 7.1499  | 7.8037  | 7.8711  | 7.8275  | 7.3457  | 7.1427  | 7.5653  | 7.8308  | 7.5157  | 7.2096  | 0.9992 | -0.0012 | 0.9764 | 0.0104 |
| Ndufs1  | _SATYVTEGR_2                                                                | #N/A                   | 7.1465  | 7.2712  | 7.2455  | 7.5155  | 7.5829  | 7.3545  | 7.3487  | 7.3431  | 7.2618  | 7.2986  | 1.0054 | 0.0078  | 0.6606 | 0.1801 |
| Ndufs1  | _GNDM[Oxidation (M)]QVGYEK_2                                                | #N/A                   | 7.1928  | 7.2911  | 7.1645  | 6.7851  | 7.1136  | 7.5105  | 7.3364  | 7.0244  | 7.1473  | 7.7050  | 0.9826 | -0.0253 | 0.4733 | 0.3249 |
| Ndufs1  | _YDHLDGSPK_2                                                                | #N/A                   | 7.1431  | 7.1845  | 6.7627  | 7.4324  | 7.6475  | 7.1986  | 7.2177  | 7.3797  | 6.9803  | 7.1069  | 1.0079 | 0.0114  | 0.7406 | 0.1304 |
| Ndufs1  | _ALSEIAGTLPYOTLDQVR_2                                                       | #N/A                   | 7.2375  | 7.2831  | 6.8788  | 7.5758  | 7.2064  | 7.4316  | 7.2407  | 7.3134  | 7.3850  | 7.1781  | 0.9986 | -0.0021 | 0.9359 | 0.0188 |
| Ndufs1  | _LSVAGNC[Carbamidomethyl (C)]IR_2                                           | #N/A                   | 6.7994  | 7.1032  | 7.0244  | 7.2299  | 7.7610  | 6.7480  | 7.2804  | 7.3142  | 7.3856  | 6.9692  | 0.9825 | -0.0254 | 0.5468 | 0.2622 |
| Ndufs1  | _GLTYSWEDALSIR_2                                                            | #N/A                   | 6.4337  | 6.3783  | 6.9666  | 6.7900  | 6.8859  | 6.7942  | 6.9810  | 5.9186  | 7.0718  | 6.6851  | 1.0066 | 0.0095  | 0.8601 | 0.0655 |
| Ndufs1  | _SWHNOLK_2                                                                  | #N/A                   | 6.4259  | 6.7446  | 6.4053  | 6.5083  | 6.9787  | 6.6122  | 5.8367  | 6.9312  | 6.4830  | 6.1827  | 1.0400 | 0.0565  | 0.2710 | 0.5670 |
| Ndufs1  | _HSFC[Carbamidomethyl (C)]EVK_2                                             | #N/A                   | 6.4806  | 6.3045  | 6.0696  | 6.5756  | 6.6164  | 6.2260  | 6.1073  | 6.4892  | 6.1547  | 1.0221  | 1.0035 | 0.0315  | 0.3151 | 0.5016 |
| Ndufs1  | _JASQVAALDGYKPGVEAIR_3                                                      | #N/A                   | 5.7533  | 5.6538  | 5.6505  | 6.0787  | 5.4690  | 5.3151  | 5.2351  | 5.6538  | 5.4793  | 5.6593  | 1.0266 | 0.0379  | 0.3708 | 0.4309 |
| Ndufs1  | _MI[Oxidation (M)]LFLIGADGGC[Carbamidomethyl (C)]ITR_2                      | #N/A                   | 6.2202  | 5.0065  | 5.5955  | 5.9689  | 5.7334  | 5.4817  | 4.7303  | 5.6926  | 5.5655  | 1.0566  | 0.0795 | 0.2991  | 0.5241 | 0.0699 |
| Ndufs1  | _VTTGVAAEWK_2                                                               | #N/A                   | 6.1472  | 5.8002  | 3.3271  | 6.7841  | 6.5023  | 6.0875  | 6.5304  | 6.1436  | 6.2001  | 6.5471  | 0.9086 | -0.1382 | 0.3922 | 0.4065 |
| Ndufs1  | _MC[Carbamidomethyl (C)]LVEIK_2                                             | #N/A                   | 5.8785  | 4.8187  | 6.6885  | 6.6697  | 4.2793  | 4.1013  | 5.2467  | 4.3399  | 4.4861  | 4.9377  | 1.0323 | 0.0459  | 0.8970 | 0.0931 |
| Ndufs1  | _DPFM[Oxidation (M)]TDSGR_2                                                 | #N/A                   | 6.6817  | 6.6264  | 6.5965  | 6.0256  | 6.4562  | 6.6437  | 6.6143  | 6.5289  | 6.3582  | 6.9086  | 0.9852 | -0.0215 | 0.5484 | 0.2609 |
| Ndufs1  | _LTFPMVR_2                                                                  | #N/A                   | 4.6926  | 3.5066  | 4.4064  | 5.0056  | 4.6650  | 3.3834  | 3.1229  | 3.2094  | 2.8514  | 3.5194  | 1.3466 | 0.4293  | 0.0157 | 1.8051 |
| Ndufs1  | _NRLIEVSPNLVR_3                                                             | #N/A                   | 6.8201  | 6.7571  | 6.9132  | 6.3774  | 6.9381  | 6.9978  | 6.3641  | 6.6449  | 6.8961  | 5.9794  | 1.0509 | 0.0716  | 0.1264 | 0.8983 |
| Ndufs1  | _MI[Oxidation (M)]HEDINEWISDK_3                                             | #N/A                   | 3.5899  | 3.4935  | 3.2461  | 3.7488  | 3.1858  | 4.3691  | 3.4635  | 4.3756  | 4.3137  | 4.0962  | 0.8876 | -0.1720 | 0.1343 | 0.8719 |
| Ndufs1  | _VAGM[Oxidation (M)]LQNFEGNAVAAGGLVDAAELVALK_3                              | #N/A                   | 3.7162  | 2.9716  | 3.4499  | 4.4945  | 2.8599  | 3.7647  | 3.1419  | 4.0075  | 4.3066  | 4.1718  | 0.9068 | -0.1718 | 0.3524 | 0.4530 |
| Ndufs1  | _SNWLTNTAGAEADVLLVGTNPR_3                                                   | #N/A                   | 3.4217  | 3.8045  | 4.1085  | 4.6111  | 4.0482  | 3.6813  | 4.3258  | 3.5073  | 3.1559  | 3.0773  | 1.1221 | 0.1662  | 0.2010 | 0.6969 |
| Rnh1    | _Acetyl (Protein N-term)[S]Phospho (STY)LDQIC[Carbamidomethyl (C)]EQLSDAR_2 | Q91V17_S2_M1_Rnh1      | 7.4925  | 8.8187  | 9.2098  | 10.1021 | 9.1536  | 9.2763  | 9.2764  | 9.2947  | 9.7164  | 9.6429  | 0.9546 | -0.0670 | 0.3742 | 0.4269 |
| Rnh1    | _ELSLASLXDEGAR_3                                                            | #N/A                   | 5.4804  | 4.8337  | 3.5864  | 4.0726  | 5.1783  | 4.8287  | 3.5213  | 4.2585  | 5.0867  | 5.4174  | 1.0202 | 0.0289  | 0.8562 | 0.0674 |
| Rnh1    | _LLC[Carbamidomethyl (C)]GLGDPQC[Carbamidomethyl (C)]IR_2                   | #N/A                   | 3.1511  | 4.7590  | 3.1198  | 5.7245  | 6.0175  | 3.9519  | 4.3127  | 5.4862  | 5.0333  | 3.8417  | 0.9541 | -0.0679 | 0.7681 | 0.1146 |
| Itm2c   | _AASGPASASAPAEELLT[Phospho (STY)]PAR_2                                      | Q91VK4_T39_M1_Itm2c    | 4.1186  | 4.2469  | 3.8523  | 5.5109  | 3.2624  | 3.3622  | 3.2554  | 4.0232  | 3.9041  | 3.0734  | 1.1389 | 0.1876  | 0.3083 | 0.5111 |
| Terf2ip | _YLLGNAPV[Phospho (STY)]PSQK_2                                              | Q91VL8_S200_M1_Terf2ip | 8.5407  | 4.2272  | 9.1508  | 9.0353  | 8.1234  | 8.8747  | 3.5071  | 3.1556  | 8.7237  | 1.6217  | 0.6975 | 0.0601  | 1.2214 | 0.1214 |
| Zbtb1   | _LST[Phospho (STY)]PKER_2                                                   | Q91VL9_T203_M1_Zbtb1   | 12.9191 | 13.1249 | 13.5920 | 13.6379 | 12.6964 | 13.3454 | 13.2154 | 13.1809 | 13.2611 | 13.3479 | 0.9976 | -0.0035 | 0.8726 | 0.0592 |
| Rbm1    | _DVLVS[Phospho (STY)]PR_2                                                   | #N/A                   | 3.2566  | 3.9696  | 3.9434  | 4.4460  | 10.4206 | 4.2676  | 7.5287  | 3.6724  | 3.3210  | 10.9602 | 0.7928 | -0.3350 | 0.5214 | 0.2828 |
| Rbm1    | _RDVLVS[Phospho (STY)]PR_2                                                  | #N/A                   | 4.2431  | 6.5125  | 3.9767  | 3.5205  | 7.3765  | 7.5584  | 7.8061  | 7.7139  | 7.8981  | 7.8925  | 0.7279 | -0.4581 | 0.0670 | 1.1736 |
| Rbm1    | _Acetyl (Protein N-term)[VEADRPK_2                                          | #N/A                   | 6.9644  | 6.9705  | 6.5395  | 7.0917  | 7.3953  | 7.0213  | 6.7238  | 6.7129  | 7.1903  | 7.2787  | 1.0030 | 0.0043  | 0.9132 | 0.0394 |
| Rbm1    | _LFGGLNTETNEK_2                                                             | #N/A                   | 5.8761  | 5.8773  | 5.9402  | 6.8486  | 6.1528  | 6.2111  | 5.7854  | 5.7998  | 5.6449  | 5.9406  | 1.0619 | 0.0866  | 0.1032 | 0.9863 |
| Rbm1    | _ST[Phospho (STY)]PSGPIR_2                                                  | #N/A                   | 4.0349  | 3.3201  | 3.4632  | 4.4931  | 3.1677  | 4.0621  | 3.1406  | 4.0090  | 6.3990  | 6.6892  | 0.7425 | -0.4295 | 0.1173 | 0.9308 |
| Rbm1    | _GRAVVFESPADAK_2                                                            | #N/A                   | 5.7981  | 5.0536  | 6.3454  | 6.1613  | 6.2021  | 6.1652  | 5.6202  | 5.5987  | 5.8889  | 5.6507  | 1.0465 | 0.0656  | 0.3190 | 0.4961 |
| Rbm1    | _VEQATKPS[Phospho (STY)]PSGR_2                                              | Q91VM5_S88_M1_Rbm1     | 6.1512  | 5.3678  | 6.7118  | 4.1398  | 6.0567  | 6.1410  | 4.0125  | 4.3622  | 3.1604  | 3.8171  | 1.5011 | 0.5860  | 0.0050 | 2.3010 |
| Rbm1    | _DVLVS[Phospho (STY)]PRODGYSTK_2                                            | #N/A                   | 9.0534  | 9.7392  | 10.5016 | 10.0391 | 9.4541  | 9.7319  | 10.0430 | 9.7270  | 9.4732  | 9.7094  | 1.0015 | 0.0022  | 0.9566 | 0.0192 |
| Rbm1    | _REPLPSR_2                                                                  | #N/A                   | 3.3242  | 4.8966  | 4.5587  | 4.3352  | 4.7527  | 4.6656  | 4.0499  | 5.1021  | 3.6667  | 4.0044  | 1.0514 | 0.0724  | 0.5855 | 0.2325 |
| Rbm1    | _DYSYSGNSR_2                                                                | #N/A                   | 3.6088  | 3.0427  | 6.5579  | 6.6429  | 6.5760  | 6.4704  | 6.2169  | 6.4274  | 6.6331  | 6.0707  | 0.9363 | -0.0950 | 0.5959 | 0.2248 |
| Rbm1    | _RST[Phospho (STY)]PSGPIR_2                                                 | #N/A                   | 9.7767  | 9.9750  | 10.5351 | 10.3656 | 9.9012  | 9.9743  | 10.0627 | 9.9636  | 9.9031  | 10.0328 | 1.0098 | 0.0140  | 0.5423 | 0.2658 |
| Rbm1    | _DYSHS[Phospho (STY)]SSRDGYPSR_3                                            | Q91VM5_S246_M1_Rbm1    | 3.7824  | 3.5892  | 3.5161  | 3.8961  | 3.3798  | 3.6836  | 4.0444  | 3.9706  | 3.6050  | 4.2503  | 0.9177 | -0.1238 | 0.0514 | 1.2886 |
| Rbm1    | _DRDYSHPSGGSIR_3                                                            | #N/A                   | 5.0174  | 3.7776  | 3.7582  | 4.0014  | 5.6599  | 4.5521  | 4.5265  | 4.0430  | 5.1431  | 4.2114  | 0.9956 | -0.0064 |        |        |



|          |                                                                          |                         |        |         |         |         |         |         |         |         |         |         |         |         |        |        |
|----------|--------------------------------------------------------------------------|-------------------------|--------|---------|---------|---------|---------|---------|---------|---------|---------|---------|---------|---------|--------|--------|
| Atp5f1c  | _EVMVGVGK_2                                                              | #N/A                    | 7.0557 | 5.8092  | 3.1684  | 8.6240  | 6.0857  | 3.4925  | 5.9851  | 5.5144  | 5.6068  | 6.1142  | 0.9829  | -0.0249 | 0.9286 | 0.0322 |
| Atp5f1c  | _THSQDQVSK_2                                                             | #N/A                    | 6.7952 | 6.7658  | 6.9193  | 7.2305  | 6.8628  | 7.1705  | 6.8726  | 6.8326  | 6.6684  | 7.2208  | 1.0085  | 0.0122  | 0.6774 | 0.1692 |
| Atp5f1c  | _GLC[Carbamidomethyl (C)]GAHSSVAK_2                                      | #N/A                    | 3.5099 | 6.2953  | 3.2435  | 6.9141  | 6.2897  | 5.3481  | 5.0038  | 3.0121  | 3.9654  | 0.2390  | 1.1801  | 0.0390  | 0.4128 | 0.3842 |
| Atp5f1c  | _MTAMDNASK_2                                                             | #N/A                    | 4.6022 | 3.5174  | 3.9956  | 5.8877  | 3.4057  | 3.2189  | 3.1121  | 3.4618  | 3.7608  | 3.2167  | 1.2116  | 0.2769  | 0.2099 | 0.6780 |
| Atp5f1c  | _NASDMDK_2                                                               | #N/A                    | 3.1991 | 4.1433  | 4.4336  | 3.9774  | 3.8436  | 3.7648  | 4.1256  | 3.0238  | 3.3219  | 3.6546  | 1.1025  | 0.1407  | 0.2360 | 0.6271 |
| Ddx1     | _ALVEPSR_2                                                               | #N/A                    | 5.6627 | 5.5810  | 5.3961  | 6.0705  | 5.6683  | 5.9566  | 5.4027  | 5.6280  | 5.3371  | 5.1774  | 1.0624  | 0.0874  | 0.0512 | 1.2906 |
| Ddx1     | _ELAEQTLNHWK_2                                                           | #N/A                    | 7.0328 | 6.6828  | 7.3978  | 7.1070  | 6.6303  | 6.4926  | 7.0202  | 6.4359  | 6.1106  | 6.7137  | 1.0488  | 0.0687  | 0.2071 | 0.6839 |
| Ddx1     | _DQLSLVNDGVGVVGTGR_2                                                     | #N/A                    | 4.7805 | 3.1215  | 3.9384  | 5.3510  | 4.0881  | 3.7859  | 5.0748  | 4.5286  | 4.3590  | 4.4057  | 0.8916  | -0.1655 | 0.3072 | 0.5125 |
| Ddx1     | _ONTRPGANS[Phospho (STY)]PEM[Oxidation (M)]WSEAIK_3                      | #N/A                    | 4.0136 | 4.0294  | 5.5496  | 5.5829  | 4.5400  | 5.4382  | 5.2803  | 4.8056  | 4.4188  | 4.4127  | 1.0274  | 0.0390  | 0.7642 | 0.1168 |
| Ddx1     | _FLDLEADQGLSQGYFINR_2                                                    | #N/A                    | 0.9569 | 3.3945  | 3.6816  | 2.8339  | 3.2158  | 3.0128  | 3.3736  | 1.8056  | 2.2732  | 4.4035  | 0.9613  | -0.0569 | 0.8696 | 0.0607 |
| Map1c3a  | _IPVIER_2                                                                | #N/A                    | 8.8070 | 8.6894  | 8.9929  | 8.3598  | 8.9362  | 8.8384  | 7.9753  | 8.8425  | 8.7904  | 8.7262  | 1.0218  | 0.0311  | 0.3742 | 0.4269 |
| Map1c3a  | _QLPVLDK_2                                                               | #N/A                    | 6.9515 | 7.3709  | 6.8712  | 6.7837  | 7.6513  | 6.7558  | 7.0324  | 7.3902  | 7.6682  | 7.0787  | 0.9687  | -0.0459 | 0.3290 | 0.4828 |
| Map1c3a  | _PS[Phospho (STY)]DRPFK_2                                                | Q91VR7_S3_M1_Map1c3a    | 5.2120 | 4.6795  | 4.4355  | 4.9856  | 5.1588  | 4.9401  | 5.3680  | 5.2027  | 5.2842  | 5.4057  | 0.9223  | -0.1168 | 0.0287 | 1.5428 |
| Map1c3a  | _FLVDPHNVN[Oxidation (M)]SELVK_3                                         | #N/A                    | 5.3378 | 4.9291  | 5.0881  | 5.3053  | 5.1481  | 5.2523  | 4.4187  | 4.7985  | 4.6628  | 5.1594  | 1.0876  | 0.1221  | 0.0208 | 1.6817 |
| Brk1     | _EIHQDWANR_2                                                             | #N/A                    | 6.9685 | 7.0978  | 6.8595  | 7.3805  | 7.4599  | 7.3146  | 6.8575  | 6.9962  | 7.4454  | 6.9990  | 1.0149  | 0.0214  | 0.5260 | 0.2790 |
| Brk1     | _LVEIITSSIK_2                                                            | #N/A                    | 5.4095 | 5.0190  | 5.7554  | 5.9533  | 6.1187  | 5.6443  | 5.1700  | 5.2634  | 6.1478  | 5.4524  | 1.0257  | 0.0366  | 0.6098 | 0.2148 |
| Brk1     | _RIEYEAR_2                                                               | #N/A                    | 5.3974 | 4.9617  | 4.9876  | 5.4920  | 5.2814  | 5.5961  | 5.5978  | 5.1795  | 5.6742  | 4.6511  | 1.0020  | 0.0028  | 0.9649 | 0.0155 |
| Brk1     | _SDFLNSFDM[Oxidation (M)]SC[Carbamidomethyl (C)]R_2                      | #N/A                    | 4.3546 | 5.2586  | 5.6197  | 4.0432  | 5.0578  | 5.1088  | 5.9954  | 5.5037  | 6.3587  | 4.7524  | 0.8681  | -0.2040 | 0.1050 | 0.9786 |
| Brk1     | _VTKGELT[Phospho (STY)]L_2                                               | Q91VR8_T75_M1_Brk1      | 4.1178 | 3.3732  | 3.8515  | 3.3952  | 3.2615  | 3.3631  | 3.5435  | 3.6059  | 3.9050  | 3.0725  | 1.0081  | 0.0117  | 0.9002 | 0.0456 |
| Ptov1    | _SRS[Phospho (STY)]WPGGPR_2                                              | Q91VJ8_S36_M1_Ptov1     | 7.1320 | 7.0462  | 1.4474  | 3.9501  | 3.3871  | 4.1424  | 7.8895  | 7.6780  | 7.4724  | 3.9171  | 0.7297  | -0.4547 | 0.1619 | 0.7907 |
| Sh3bgr13 | _SQDSVTR_2                                                               | #N/A                    | 6.6890 | 6.8333  | 6.6850  | 7.0137  | 8.1341  | 7.0437  | 6.4212  | 6.6702  | 6.7128  | 7.0925  | 1.0509  | 0.0716  | 0.2853 | 0.5446 |
| Sh3bgr13 | _VYSTVIGSR_2                                                             | #N/A                    | 7.9343 | 8.1227  | 8.4649  | 8.5049  | 9.0828  | 8.5298  | 8.1419  | 8.2945  | 8.4149  | 8.2405  | 1.0191  | 0.0272  | 0.4650 | 0.3336 |
| Sh3bgr13 | _IQYQLVDSQDNALRDEM[Oxidation (M)]R_3                                     | #N/A                    | 6.3140 | 5.4970  | 5.3713  | 6.4812  | 6.0243  | 5.1626  | 6.1020  | 5.7028  | 5.5627  | 5.9094  | 0.9981  | -0.0027 | 0.9712 | 0.0127 |
| Sh3bgr13 | _IQYQLVDSQDNALR_2                                                        | #N/A                    | 4.1992 | 3.1745  | 4.0788  | 4.8621  | 4.1032  | 4.3080  | 4.0718  | 3.5370  | 4.0114  | 4.9972  | 0.9920  | -0.0116 | 0.9301 | 0.0315 |
| Golg4a   | _TSS[Phospho (STY)]FTDQLDVTVPNR_2                                        | Q91WV5_S41_M1_Golg4a    | 4.2105 | 6.4603  | 4.0591  | 7.4075  | 5.4429  | 3.2881  | 4.4005  | 6.7752  | 6.9418  | 0.9875  | 0.8375  | -0.2559 | 0.3370 | 0.4724 |
| Ubp2     | _NS[Phospho (STY)]VEEWTTDWTEDSETK_2                                      | Q91VX2_S254_M1_Ubp2     | 3.6218 | 3.9881  | 3.8088  | 3.6721  | 3.6718  | 3.6916  | 3.4884  | 3.6910  | 4.0846  | 0.9707  | 0.9977  | -0.0034 | 0.9433 | 0.0254 |
| Smap1    | _LVEANLPENFR_2                                                           | #N/A                    | 6.7388 | 7.1642  | 7.4220  | 7.5047  | 7.5312  | 7.4447  | 7.1497  | 7.1843  | 7.2101  | 7.1930  | 1.0162  | 0.0232  | 0.4756 | 0.3224 |
| Ncoa5    | _SS[Phospho (STY)]ADSLPGPSR_2                                            | Q91W39_S378_M1_Ncoa5    | 0.9763 | 3.9056  | 9.0918  | 4.0284  | 3.7717  | 9.0358  | 3.7431  | 8.7071  | 8.9884  | 8.9773  | 0.8528  | -0.2297 | 0.5443 | 0.2642 |
| Ncoa5    | _I[Acetyl (Protein N-term)]M[Oxidation (M)]NTAPSRPS[Phospho (STY)]PTR_2  | #N/A                    | 7.6975 | 3.0454  | 8.5185  | 8.3265  | 7.5381  | 3.3834  | 8.2414  | 8.1517  | 7.9552  | 7.5611  | 0.8046  | -0.3137 | 0.2603 | 0.5845 |
| Ncoa5    | _DRS[Phospho (STY)]PIRGS[Phospho (STY)]PIR_2                             | #N/A                    | 9.6228 | 9.7796  | 9.8023  | 10.0833 | 9.5716  | 9.6932  | 9.7772  | 9.6915  | 9.5013  | 9.9256  | 1.0036  | 0.0052  | 0.7718 | 0.1125 |
| Ncoa5    | _LKRSS[Phospho (STY)]ADS[Phospho (STY)]LPGPSR_3                          | #N/A                    | 3.7274 | 3.9041  | 4.4142  | 3.4161  | 3.6934  | 3.4025  | 3.7175  | 3.3831  | 1.0516  | 0.0726  | 0.4494  | 0.0726  | 0.4494 | 0.3474 |
| Cde1     | _EAFGR_2                                                                 | #N/A                    | 5.9847 | 6.3215  | 5.2139  | 5.3813  | 5.8943  | 5.5636  | 5.5545  | 5.9359  | 5.0025  | 6.3353  | 1.0034  | 0.0049  | 0.9511 | 0.0218 |
| Cde1     | _ATNIEVSLNTQFTNEAR_2                                                     | #N/A                    | 3.9820 | 4.1610  | 3.6594  | 4.7278  | 4.6209  | 4.8872  | 4.7910  | 4.4392  | 4.6424  | 4.4797  | 0.9459  | -0.0803 | 0.3553 | 0.4494 |
| Cde1     | _LGRNS[Phospho (STY)]NSK_2                                               | #N/A                    | 3.2889 | 5.5704  | 3.9757  | 5.3602  | 3.8256  | 5.7947  | 4.1930  | 3.6401  | 3.2887  | 5.5805  | 1.1102  | 0.1509  | 0.5133 | 0.2896 |
| Cde1     | _SPAAPGGS[Phospho (STY)]PTGSVC[Carbamidomethyl (C)]YER_2                 | Q91W50_S123_M1_Cde1     | 7.2980 | 7.7760  | 3.7793  | 8.2632  | 7.3186  | 7.3484  | 7.6407  | 7.5695  | 7.6854  | 3.7093  | 0.9568  | -0.0637 | 0.8306 | 0.0806 |
| Ubi7     | _DM[Oxidation (M)]GGGRFDGLS[Phospho (STY)]DDEDDHPSTR_3                   | #N/A                    | 3.2851 | 3.4040  | 3.7849  | 4.0634  | 6.3549  | 3.7150  | 4.2117  | 6.1444  | 5.6872  | 3.7407  | 0.8292  | -0.2702 | 0.2855 | 0.5444 |
| Ube2e2   | _VODS[Phospho (STY)]PSTSGSSGQDGR_2                                       | Q91W82_S11_M1_Ube2e2    | 3.8127 | 3.7915  | 4.2532  | 3.9319  | 3.6398  | 3.5899  | 4.0218  | 4.0567  | 3.4680  | 1.0199  | 0.0285  | 0.6813  | 0.1637 | 0.5644 |
| Cdc42ep1 | _RSDS[Phospho (STY)]LSFR_2                                               | #N/A                    | 8.3942 | 8.3098  | 8.9245  | 8.8125  | 7.8832  | 8.5951  | 8.8703  | 8.0639  | 8.1535  | 8.5905  | 1.0053  | 0.0076  | 0.8595 | 0.0658 |
| Cdc42ep1 | _AS[Phospho (STY)]WGASR_2                                                | Q91W92_S332_M1_Cdc42ep1 | 3.3879 | 4.1441  | 3.1215  | 4.1662  | 4.0324  | 4.0930  | 3.9862  | 3.1341  | 3.8434  | 0.9998  | -0.0003 | 0.9983  | 0.0008 | 0.9983 |
| Cdc42ep1 | _SSS[Phospho (STY)]LSFR_2                                                | #N/A                    | 3.1669 | 4.0593  | 3.8537  | 4.3563  | 3.7934  | 3.9361  | 4.0710  | 3.7621  | 3.4107  | 4.3233  | 0.9921  | -0.0115 | 0.9065 | 0.0426 |
| Pipb7    | _RQS[Phospho (STY)]QQLPEEDC[Carbamidomethyl (C)]M[Oxidation (M)]QNPSTK_3 | #N/A                    | 4.6798 | 4.9094  | 6.1633  | 6.3795  | 4.0218  | 4.4673  | 5.8516  | 5.6711  | 5.0111  | 3.8328  | 1.0023  | 0.0034  | 0.9848 | 0.0066 |
| Setd3    | _S[Phospho (STY)]GTGATATVSPK_2                                           | Q91W0D_S12_M1_Setd3     | 6.4910 | 3.2514  | 4.1998  | 3.4820  | 3.1104  | 6.0989  | 3.1967  | 6.2819  | 5.6573  | 6.4178  | 0.8238  | -0.2797 | 0.3536 | 0.4516 |
| Acsl6    | _LVILM[Oxidation (M)]EPPFDALR_2                                          | #N/A                    | 4.6819 | 5.4110  | 5.0477  | 4.4204  | 4.8713  | 4.1214  | 5.7267  | 5.3471  | 5.2518  | 4.0112  | 0.9360  | -0.0954 | 0.4118 | 0.3853 |
| Acsl6    | _LPEISLGGQFFR_2                                                          | #N/A                    | 4.9017 | 5.3984  | 3.7426  | 4.6915  | 3.1527  | 3.4720  | 5.5561  | 5.8228  | 4.1166  | 4.7812  | 0.8338  | -0.2623 | 0.1637 | 0.7860 |
| Acsl6    | _VGFQGQDR_2                                                              | #N/A                    | 3.6894 | 4.9788  | 3.4231  | 4.4677  | 3.6906  | 3.8715  | 5.1291  | 5.2287  | 5.0007  | 4.1450  | 0.8245  | -0.2784 | 0.0436 | 1.3602 |
| Acsl6    | _LVDAEELNRYTC[Carbamidomethyl (C)]K_2                                    | #N/A                    | 4.6158 | 4.7983  | 3.1442  | 5.5751  | 4.0551  | 3.6039  | 3.9635  | 3.5182  | 4.6966  | 1.0715  | 0.0996  | 0.5737  | 0.2423 | 0.2613 |
| Acsl6    | _LALDSGDWLHTGDGK_3                                                       | #N/A                    | 2.8966 | 3.6529  | 4.1311  | 3.2619  | 3.5412  | 3.0835  | 4.4775  | 3.3557  | 3.0043  | 3.2289  | 0.9748  | -0.0369 | 0.8033 | 0.0951 |
| Nduf2    | _VLFGTR_2                                                                | #N/A                    | 7.3063 | 7.2450  | 6.9325  | 7.0084  | 7.2333  | 6.9881  | 6.9126  | 7.3155  | 7.0833  | 7.1079  | 1.0020  | 0.0029  | 0.8958 | 0.0478 |
| Nduf2    | _IEQC[Carbamidomethyl (C)]UNK_2                                          | #N/A                    | 6.7532 | 7.1642  | 6.9990  | 6.9742  | 7.2802  | 6.6833  | 6.8474  | 6.9763  | 6.8384  | 6.6445  | 1.0218  | 0.0312  | 0.2816 | 0.5504 |
| Nduf2    | _TOPVDVQCVDFDVPKGR_2                                                     | #N/A                    | 6.9083 | 7.0589  | 6.4706  | 6.8158  | 6.6515  | 7.0887  | 6.6132  | 6.6967  | 7.2599  | 1.0100  | 0.0144  | 0.7196  | 0.1429 | 0.5504 |
| Nduf2    | _TYLALPHYDR_2                                                            | #N/A                    | 6.6072 | 6.5184  | 6.7732  | 6.7764  | 6.3272  | 6.4276  | 6.6899  | 7.0760  | 6.8302  | 6.8528  | 0.9587  | -0.0608 | 0.0367 | 1.4350 |
| Nduf2    | _GSGQWDLR_2                                                              | #N/A                    | 6.5942 | 6.6014  | 6.4201  | 6.6121  | 6.5790  | 6.5300  | 6.7481  | 6.6713  | 6.7682  | 6.0852  | 0.9982  | -0.0027 | 0.9302 | 0.0314 |
| Nduf2    | _APGFAHLAGLDK_2                                                          | #N/A                    | 6.6503 | 6.5598  | 6.0914  | 6.1616  | 6.1172  | 3.6065  | 6.2155  | 6.5336  | 5.9096  | 6.5003  | 0.9324  | -0.1010 | 0.4907 | 0.3092 |
| Nduf2    | _M[Oxidation (M)]FEFYER_2                                                | #N/A                    | 4.7999 | 5.0481  | 5.4117  | 3.2556  | 3.9308  | 5.2028  | 5.3824  | 4.9566  | 5.8916  | 5.4111  | 0.8517  | -0.2316 | 0.1151 | 0.9388 |
| Nduf2    | _TVDGIVTAEDALNYGSGVM[Oxidation (M)]LR_3                                  | #N/A                    | 4.1130 | 4.5241  | 5.9633  | 5.2962  | 3.6760  | 4.2946  | 3.4056  | 4.4276  | 4.8885  | 4.8797  | 1.0555  | 0.0779  | 0.6445 | 0.1908 |
| Nduf2    | _DREYEM[Oxidation (M)]TNNR_2                                             | #N/A                    | 8.9342 | 8.4869  | 9.0148  | 9.3523  | 7.9168  | 8.3490  | 9.0163  | 8.4553  | 8.3677  | 8.7481  | 1.0033  | 0.0048  | 0.9234 | 0.0346 |
| Nduf2    | _AVTNM[Oxidation (M)]TNTFGPQHAAHGVLR_4                                   | #N/A                    | 4.4584 | 4.1192  | 3.8386  | 4.8310  | 4.0516  | 4.8510  | 3.7127  | 5.1730  | 4.9669  | 4.5495  | 0.9473  | -0.0780 | 0.4898 | 0.3100 |
| Nduf2    | _TSM[Oxidation (M)]ESLHHFK_3                                             | #N/A                    | 4.1277 | 3.2424  | 3.4073  | 4.2010  | 3.1114  | 3.7793  | 3.1448  | 3.7372  | 4.1292  | 4.1846  | 0.9594  | -0.0597 | 0.6238 | 0.2049 |
| Nduf2    | _LDYSVM[Oxidation (M)]M[Oxidation (M)]C[Carbamidomethyl (C)]NEQAYSAVEK_2 | #N/A                    | 4.2408 | 3.5452  | 3.5309  | 4.5755  | 3.3665  | 4.3630  | 3.2229  | 3.9205  | 4.2256  | 4.2528  | 1.0077  | 0.0110  | 0.9284 | 0.0323 |
| Prkag2   | _VYASS[Phospho (STY)]PPTQGR_2                                            | Q91WGS_S196_M1_Prkag2   | 4.0988 | 1.11098 | 11.5469 | 11.5761 | 10.5614 | 11.2301 | 11.5698 | 11.2076 | 11.1759 | 11.1844 | 0.8880  | -0.1714 | 0.4222 | 0.3745 |
| Prkag2   | _PSS[Phospho (STY)]PVSP[Phospho (STY)]APVRPK_2                           | Q91WGS_S87_M2_Prkag2    | 6.8437 | 3.1161  | 3.2960  | 6.5636  | 3.2358  | 3.4725  | 3.5134  | 3.3198  | 3.9684  | 3.7657  | 1.2626  | 0.0364  | 0.3189 | 0.4965 |
| Prkag2   | _SSS[Phospho (STY)]KESSPNNSPSTPGGR_2                                     | Q91WGS_S131_M1_Prkag2   | 3.3178 | 4.0246  | 4.5523  | 4.0961  | 3.8459  | 3.8836  | 4.2444  | 4.4059  | 3.2041  | 3.7734  | 1.0119  | 0.0170  | 0.8791 | 0.0560 |
| Dgk      | _I[Acetyl (Protein N-term)]S[Phospho (STY)]EEQVWLSSEFDQLQK_2             | Q91WG7_S2_M1_Dgk        | 3.5377 | 4.2940  | 3.2714  | 4.3160  | 4.1823  | 3.      |         |         |         |         |         |         |        |        |



|         |                                                           |                        |         |         |         |         |         |         |         |         |         |         |         |         |          |        |
|---------|-----------------------------------------------------------|------------------------|---------|---------|---------|---------|---------|---------|---------|---------|---------|---------|---------|---------|----------|--------|
| Stpr5   | _S[Phospho (STY)]PSAAGSGGRLR_2                            | #N/A                   | 3.6937  | 3.8735  | 7.4005  | 6.3417  | 2.8281  | 3.6199  | 3.4259  | 3.7967  | 4.0958  | 3.7302  | 1.2297  | 0.2983  | 0.3792   | 0.4211 |
| Zland2b | _TLTSSSS[Phospho (STY)]PSR_2                              | Q91XS8_S173_M1_Zland2b | 3.0434  | 4.2990  | 4.2779  | 3.8217  | 4.1204  | 3.6091  | 3.9699  | 3.1795  | 3.4786  | 3.4889  | 1.0935  | 0.1289  | 0.2694   | 0.5696 |
| Ncald   | _YGNFPFYDASK_2                                            | #N/A                   | 7.5852  | 7.6908  | 3.8635  | 7.4970  | 7.8379  | 7.2869  | 7.6981  | 7.8245  | 7.4851  | 0.8938  | -0.1620 | 0.3243  | 0.4890   | 0.8900 |
| Ncald   | _AEM[Oxidation (M)]LEVQAIYK_2                             | #N/A                   | 5.7896  | 5.2865  | 5.5011  | 5.7727  | 5.7226  | 5.5681  | 5.4555  | 5.3066  | 6.3217  | 5.6513  | 0.9864  | -0.0197 | 0.7143   | 0.1461 |
| Gdm1    | _LQEEVPS[Phospho (STY)]IEQDM[Oxidation (M)]PQEK_2         | #N/A                   | 6.5061  | 6.3347  | 6.9496  | 6.9964  | 5.7522  | 6.1826  | 6.8992  | 6.5577  | 6.2526  | 6.0050  | 1.0041  | 0.0059  | 0.9285   | 0.0322 |
| Trex1   | _AC[Carbamidomethyl (C)]S[Phospho (STY)]GASGETGLSK_2      | Q91XB0_S78_M1_Trex1    | 8.2544  | 3.6171  | 8.2501  | 8.5579  | 8.1893  | 8.3505  | 8.7772  | 3.3200  | 8.2073  | 8.2979  | 1.0540  | 0.0758  | 0.7915   | 0.1016 |
| Dap     | _LAcetyl (Protein N-term)[SS[Phospho (STY)]PPEGILETK_2    | Q91XC8_S3_M1_Dap       | 3.8412  | 10.3014 | 11.0349 | 10.3770 | 2.9669  | 10.3248 | 10.3556 | 9.8178  | 9.9955  | 10.0113 | 0.8100  | -0.3039 | 0.3408   | 0.4675 |
| Ppno    | _S[Phospho (STY)]SGIGAVVSR_2                              | Q91XF0_S164_M1_Ppno    | 3.2466  | 4.0418  | 11.9234 | 4.4261  | 3.8632  | 4.1408  | 6.3929  | 6.7742  | 6.5394  | 7.4540  | 0.7450  | -0.4246 | 0.1140   | 0.9433 |
| Ppno    | _FTNYESR_2                                                | #N/A                   | 6.4242  | 6.1561  | 5.7490  | 6.3870  | 6.4276  | 5.3812  | 5.5769  | 5.5875  | 5.9115  | 6.0304  | 1.0538  | 0.0756  | 0.2292   | 0.6399 |
| Ppno    | _GLATGDS[Phospho (STY)]PLGPM[Oxidation (M)]THHGEEEDWYER_4 | #N/A                   | 3.9566  | 3.5437  | 3.5252  | 4.1861  | 3.6425  | 3.4729  | 3.8113  | 4.4268  | 3.6387  | 3.6551  | 0.9583  | -0.0614 | 0.4568   | 0.3403 |
| Osblp1a | _ITM[Oxidation (M)]PVFNEPFLQIR_2                          | #N/A                   | 2.9330  | 3.9610  | 3.7358  | 3.6572  | 3.4626  | 3.9449  | 3.7925  | 4.5184  | 3.6625  | 4.0645  | 0.9018  | -0.1491 | 0.1483   | 0.8289 |
| Osblp1a | _M[Oxidation (M)]QC[Carbamidomethyl (C)]VAFAVSAVSAQWER_2  | #N/A                   | 3.8858  | 3.4566  | 3.6195  | 3.1632  | 3.2779  | 3.8817  | 3.3115  | 3.8379  | 4.1370  | 4.3414  | 0.9080  | -0.1393 | 0.1647   | 0.7833 |
| Dlg2    | _AIS[Phospho (STY)]LEGEP_2                                | #N/A                   | 12.1731 | 11.3517 | 12.5146 | 11.9730 | 10.4303 | 11.6190 | 11.8864 | 11.8623 | 11.8649 | 11.8210 | 0.9847  | -0.0223 | 0.6410   | 0.1931 |
| Dlg2    | _LC[Carbamidomethyl (C)]DKPAS[Phospho (STY)]PR_2          | Q91XM9_S360_M1_Dlg2    | 11.1812 | 11.3193 | 11.7466 | 11.3934 | 10.4693 | 10.8205 | 11.5280 | 11.4188 | 11.1666 | 11.0724 | 0.9875  | -0.0182 | 0.5797   | 0.2368 |
| Dlg2    | _QPS[Phospho (STY)]VTLQIR_2                               | Q91XM9_S406_M1_Dlg2    | 9.7168  | 9.3428  | 3.7257  | 9.9271  | 3.6655  | 4.0640  | 9.4165  | 11.3601 | 11.5538 | 11.3160 | 0.6177  | -0.6950 | 0.0384   | 1.4160 |
| Dlg2    | _GPELVHS[Phospho (STY)]EK_2                               | Q91XM9_S45_M1_Dlg2     | 9.6672  | 9.1126  | 9.7712  | 9.6219  | 8.3904  | 9.2436  | 9.8361  | 9.7151  | 9.4185  | 9.3363  | 0.9712  | -0.0421 | 0.3527   | 0.2391 |
| Dlg2    | _GQEDULSYEPVTR_2                                          | #N/A                   | 7.3410  | 7.1700  | 7.6491  | 7.4747  | 7.0034  | 7.1522  | 7.3581  | 7.1207  | 7.2888  | 7.1702  | 1.0088  | 0.0127  | 0.6317   | 0.1995 |
| Dlg2    | _LVIEEGSGPFIWPSK_2                                        | #N/A                   | 5.4975  | 6.0474  | 5.7666  | 5.8610  | 5.9616  | 5.8421  | 5.4906  | 5.4206  | 6.2057  | 5.9546  | 1.0107  | 0.0153  | 0.7377   | 0.1321 |
| Dlg2    | _AIS[Phospho (STY)]LEGEPK_2                               | #N/A                   | 9.2971  | 9.9239  | 10.7849 | 9.9649  | 8.6843  | 9.9588  | 10.1174 | 9.9485  | 9.9499  | 9.9094  | 0.9787  | -0.0310 | 0.5767   | 0.2391 |
| Dlg2    | _DYHFVSR_2                                                | #N/A                   | 6.1007  | 6.2316  | 6.3139  | 6.7133  | 6.0098  | 6.2247  | 6.4421  | 6.2732  | 6.2149  | 6.3076  | 0.9931  | -0.0100 | 0.7458   | 0.1274 |
| Dlg2    | _YQDEGDGHDS[Phospho (STY)]UPR_3                           | #N/A                   | 9.4747  | 9.0244  | 9.9605  | 9.4796  | 8.4796  | 9.0767  | 9.6344  | 9.5214  | 9.4748  | 9.1070  | 0.9804  | -0.0286 | 0.5179   | 0.2857 |
| Dlg2    | _YQDIUVNVASDQWQAR_3                                       | #N/A                   | 4.4093  | 4.7218  | 4.8164  | 6.2018  | 4.5894  | 3.1791  | 5.1843  | 4.2357  | 4.5573  | 4.7937  | 0.9915  | -0.0123 | 0.9406   | 0.0266 |
| Dlg2    | _TSLPIS[Phospho (STY)]PGR_2                               | Q91XM9_S323_M1_Dlg2    | 10.0224 | 3.8380  | 10.4077 | 4.2827  | 3.6593  | 9.9259  | 9.5998  | 10.4975 | 9.2483  | 3.9600  | 0.8434  | -0.2457 | 0.5507   | 0.2591 |
| Dlg2    | _TSLPPS[Phospho (STY)]PGIRS[Phospho (STY)]PIPK_2          | #N/A                   | 3.6532  | 3.6268  | 4.2346  | 8.2920  | 3.8574  | 3.7552  | 4.1598  | 7.4600  | 3.9955  | 6.9619  | 0.8096  | -0.3047 | 0.3899   | 0.4901 |
| Dlg2    | _HYS[Phospho (STY)]PVEC[Carbamidomethyl (C)]DK_2          | Q91XM9_S365_M1_Dlg2    | 9.3492  | 9.3492  | 9.6564  | 9.5964  | 8.6289  | 9.0115  | 9.6205  | 9.3677  | 9.2938  | 0.9810  | -0.0277 | 0.4068  | 0.3060   | 0.4096 |
| Dlg2    | _NISQIENVGVYLGQSHS[Phospho (STY)]PLK_3                    | Q91XM9_S65_M1_Dlg2     | 4.3735  | 7.0107  | 3.5595  | 8.7113  | 5.4226  | 5.6396  | 7.2857  | 7.8215  | 7.3620  | 4.0291  | 0.8734  | -0.1952 | 0.4943   | 0.3080 |
| Dlg2    | _FIEAGGVNOLVGTSGVQSVR_2                                   | #N/A                   | 4.3937  | 4.3441  | 4.5209  | 3.1768  | 3.6950  | 4.2489  | 4.3733  | 3.7895  | 4.4085  | 4.4578  | 0.9544  | -0.0673 | 0.5264   | 0.2787 |
| Dlg2    | _DSGLPSQGLSKF_2                                           | #N/A                   | 6.6883  | 6.4579  | 6.7901  | 6.5593  | 6.7337  | 6.8381  | 6.7945  | 6.6942  | 6.3660  | 6.5976  | 1.0098  | 0.0141  | 0.5478   | 0.2614 |
| Dlg2    | _SKDS[Phospho (STY)]GLSPGSLSKF_2                          | Q91XM9_S553_M1_Dlg2    | 3.8271  | 3.6877  | 7.6840  | 7.2597  | 6.0703  | 7.3000  | 7.6400  | 6.8773  | 6.9654  | 0.7604  | -0.3952 | 0.1162  | 0.9348   | 0.2614 |
| Mtmr4   | _TSS[Phospho (STY)]DPNUNNVQSEVR_2                         | Q91XS1_S629_M1_Mtmr4   | 3.7471  | 3.4791  | 5.5392  | 5.2408  | 3.3674  | 3.2572  | 3.1504  | 3.1819  | 4.3314  | 3.4027  | 1.1674  | 0.2233  | 0.3252   | 0.4879 |
| Wrmip1  | _AKGPS[Phospho (STY)]PPGAK_2                              | Q91XU0_S65_M1_Wrmip1   | 8.7873  | 8.7994  | 9.1602  | 8.9009  | 7.9042  | 8.7159  | 9.0477  | 7.9639  | 8.1704  | 8.8016  | 1.0254  | 0.0361  | 0.4883   | 0.3113 |
| Wrmip1  | _RPAASAAAAGSAS[Phospho (STY)]PR_2                         | #N/A                   | 3.7953  | 7.2523  | 6.4248  | 8.3697  | 5.7860  | 6.7502  | 5.9057  | 6.2755  | 6.5483  | 6.5869  | 1.0106  | 0.0153  | 0.9347   | 0.0293 |
| Wrmip1  | _RLS[Phospho (STY)]ESSALK_2                               | Q91XU0_S75_M1_Wrmip1   | 7.1183  | 6.6912  | 6.7244  | 3.7128  | 3.0902  | 6.7244  | 7.1836  | 6.5509  | 7.4031  | 7.0981  | 0.8100  | -0.3040 | 0.1897   | 0.7220 |
| Pig4k2c | _FADHDHYVLSLTR_3                                          | #N/A                   | 5.4547  | 5.0575  | 4.7264  | 5.3743  | 4.5806  | 5.2191  | 5.1772  | 5.5615  | 5.0368  | 5.2538  | 0.9641  | -0.0527 | 0.3735   | 0.4277 |
| Pig4k2c | _ENLPSHFK_2                                               | #N/A                   | 3.4984  | 5.2185  | 4.2569  | 5.7398  | 6.1592  | 3.9824  | 4.2253  | 5.5434  | 3.9540  | 1.0463  | 0.0653  | 0.7340  | 0.1343   | 0.4277 |
| Basp1   | _AEGAGTEEGT[Phospho (STY)]PK_2                            | #N/A                   | 11.3664 | 11.2661 | 11.4231 | 11.8857 | 11.5975 | 11.3181 | 11.5389 | 11.1860 | 11.3637 | 11.4586 | 1.0078  | 0.0113  | 0.5182   | 0.2855 |
| Basp1   | _ETPAAEAAPSSAAK_2                                         | #N/A                   | 10.9727 | 10.8021 | 11.6162 | 11.1740 | 11.3033 | 11.0327 | 10.6624 | 10.9933 | 11.0403 | 10.9123 | 1.0228  | 0.0325  | 0.1600   | 0.7959 |
| Basp1   | _AGEAS[Phospho (STY)]AES[Phospho (STY)]GAADGAAPEEGEAK_2   | Q91XV3_S131_M2_Basp1   | 10.0980 | 9.6202  | 10.7004 | 11.0927 | 10.5552 | 10.4247 | 10.6652 | 10.2274 | 10.3055 | 10.4336 | 1.0007  | 0.0010  | 0.9793   | 0.0091 |
| Basp1   | _ESPEQAAADATEVK_2                                         | #N/A                   | 11.5077 | 11.4424 | 11.1699 | 11.8436 | 12.2459 | 11.5946 | 11.3457 | 11.2545 | 11.3758 | 11.5458 | 1.0223  | 0.0318  | 0.2304   | 0.6376 |
| Basp1   | _KTEAPAAAAGPEAK_2                                         | #N/A                   | 10.1646 | 10.4590 | 10.5297 | 10.6559 | 11.1394 | 10.7636 | 10.1212 | 10.2236 | 10.1931 | 10.4641 | 1.0359  | 0.0509  | 0.0707   | 1.1504 |
| Basp1   | _APAPAAAPAAEPQAEAPAAAS[Phospho (STY)]EQSVAK_3             | #N/A                   | 6.2397  | 4.7180  | 6.6637  | 7.8955  | 6.3584  | 6.3770  | 4.7518  | 6.9041  | 6.2047  | 7.2377  | 1.0161  | 0.0230  | 0.8854   | 0.0529 |
| Basp1   | _GYNVNDEK_2                                               | #N/A                   | 7.4908  | 7.2793  | 7.6932  | 7.3614  | 8.2874  | 7.1062  | 6.3494  | 7.1693  | 7.5151  | 7.6555  | 1.0508  | 0.0714  | 0.2806   | 0.5520 |
| Basp1   | _TEAPAAAAGPEAK_2                                          | #N/A                   | 7.2565  | 7.3047  | 7.1099  | 7.5347  | 8.0272  | 7.4100  | 7.1629  | 7.3520  | 7.3665  | 7.2446  | 1.0218  | 0.0312  | 0.3723   | 0.4291 |
| Basp1   | _DAADEGAKEAK_2                                            | #N/A                   | 6.5296  | 6.3513  | 5.9840  | 6.3768  | 7.9777  | 6.8086  | 6.1385  | 6.3427  | 6.4042  | 6.5791  | 1.0479  | 0.0676  | 0.4228   | 0.3739 |
| Basp1   | _AAAAKEAPK_2                                              | #N/A                   | 5.0364  | 4.6261  | 4.9172  | 5.3827  | 5.8854  | 5.3338  | 4.7999  | 4.5618  | 4.6013  | 5.8231  | 1.0506  | 0.0712  | 0.4617   | 0.3356 |
| Basp1   | _SDAAPAASDKSPSAEPAPSSK_3                                  | #N/A                   | 9.4986  | 9.8294  | 10.1214 | 10.1057 | 10.9557 | 9.8371  | 9.6210  | 10.1249 | 10.1249 | 10.1266 | 1.0173  | 0.0248  | 0.5516   | 0.2584 |
| Basp1   | _SDAAPAASDKSPSAEPAPSSK[Phospho (STY)]PAASEAPSSAAK_4       | Q91XV3_T183_M1_Basp1   | 4.4644  | 4.6376  | 4.0048  | 5.4058  | 5.0922  | 4.0735  | 4.2052  | 4.3843  | 4.4520  | 4.9755  | 1.0242  | 0.0344  | 0.7364   | 0.1329 |
| Basp1   | _APAPAAAPAAEPQAEAPAAAS[Phospho (STY)]EQSVAK_3             | #N/A                   | 11.1611 | 11.5399 | 11.0558 | 12.3679 | 11.0511 | 11.6277 | 11.6953 | 11.4545 | 11.5047 | 11.6094 | 0.9915  | -0.0124 | 0.7156   | 0.1493 |
| Basp1   | _GYNVNDEK_2                                               | #N/A                   | 5.4177  | 6.2254  | 5.9072  | 5.9129  | 6.6079  | 5.9911  | 5.4035  | 5.6943  | 5.8240  | 6.0892  | 1.0448  | 0.0632  | 0.2958   | 0.5290 |
| Basp1   | _ESTEEKDAADEGEAK_2                                        | #N/A                   | 4.1697  | 4.5287  | 4.6037  | 4.0552  | 5.4628  | 4.7143  | 4.5771  | 3.9682  | 4.5444  | 4.4235  | 1.0481  | 0.0678  | 0.4697   | 0.3282 |
| Basp1   | _KAEGAGTEEGT[Phospho (STY)]PKESEPQAAADATEVK_4             | #N/A                   | 9.7477  | 9.5648  | 10.1472 | 10.3502 | 9.9999  | 8.0623  | 9.6176  | 9.7482  | 9.9020  | 9.9240  | 0.9844  | -0.0226 | 0.7285   | 0.1376 |
| Basp1   | _AEGAGTEEGT[Phospho (STY)]PKESEPQAAADATEVK_3              | #N/A                   | 11.0448 | 11.2788 | 11.9416 | 11.9292 | 11.2662 | 11.2575 | 11.5596 | 11.1935 | 11.3153 | 11.2367 | 1.0112  | 0.0161  | 0.5558   | 0.2551 |
| Basp1   | _AEPEKS[Phospho (STY)]EGAAEEQEPAPAPQAEAAAPGAAGPEAK_4      | #N/A                   | 10.8974 | 10.9004 | 11.4018 | 11.5507 | 11.2993 | 11.1933 | 11.3276 | 10.5899 | 10.9789 | 11.1376 | 1.0180  | 0.0258  | 0.3116   | 0.5064 |
| Basp1   | _DAADEGAKEAKEADK_3                                        | #N/A                   | 5.5663  | 5.2570  | 5.5432  | 5.7455  | 4.9495  | 5.8931  | 6.3526  | 5.7288  | 5.9124  | 5.8156  | 0.9227  | -0.1160 | 0.0559   | 1.2525 |
| Basp1   | _AGEASASTGAADGAAPEEGEAKKTEAPAAAAGPEAK_4                   | #N/A                   | 4.3383  | 4.0680  | 4.2362  | 4.6974  | 4.4817  | 4.7786  | 3.9822  | 3.6967  | 5.0052  | 5.0690  | 1.0019  | 0.0028  | 0.9789   | 0.0093 |
| Basp1   | _EADKAAAAKEAPEK_2                                         | #N/A                   | 5.5141  | 5.7396  | 5.9240  | 6.0034  | 4.2293  | 5.8144  | 5.5550  | 5.4606  | 5.4821  | 5.8759  | 1.0459  | 0.0647  | 0.1091   | 0.9621 |
| Basp1   | _KAEGAGTEEGT[Phospho (STY)]PK_2                           | #N/A                   | 8.1424  | 8.2058  | 7.9081  | 8.6757  | 8.7247  | 8.4225  | 8.2860  | 8.0784  | 8.2383  | 8.3986  | 1.0117  | 0.0167  | 0.5898   | 0.2293 |
| Basp1   | _AEKEADKAAAAK_2                                           | #N/A                   | 4.8509  | 4.6433  | 4.7703  | 4.3777  | 5.8894  | 5.6847  | 4.6949  | 4.4868  | 5.5505  | 4.9923  | 1.0213  | 0.0304  | 0.7779   | 0.1091 |
| Basp1   | _ESEPEQAAADATEVKESTEKPK_3                                 | #N/A                   | 8.8919  | 8.3243  | 8.7595  | 9.5428  | 8.1280  | 8.4646  | 8.5751  | 8.1510  | 8.4181  | 8.2174  | 1.0610  | 0.0854  | 0.0683   | 1.0658 |
| Basp1   | _KKGVNVNDEK_2                                             | #N/A                   | 3.7813  | 4.1508  | 3.7622  | 3.8896  | 5.2304  | 4.0276  | 4.9262  | 3.2266  | 3.5022  | 4.2318  | 1.0425  | 0.0600  | 0.6944   | 0.1584 |
| Basp1   | _DKAEGAGT[Phospho (STY)]EEGETPK_2                         | #N/A                   | 4.0621  | 3.2485  | 4.3145  | 4.2721  | 3.0986  | 3.3915  | 3.4754  | 3.6263  | 4.0042  | 4.1276  | 0.9797  | -0.0295 | 0.8061   | 0.0936 |
| Basp1   | _EEAPKAPEKS[Phospho (STY)]EGAAEEQEPAPAPQAEAAAPGAAGPEAK_4  | #N/A                   | 3.6613  | 3.6982  | 3.5609  | 4.0635  | 3.5648  | 3.7675  | 3.7782  | 4.1462  | 3.7948  | 4.0305  | 0.9446  | -0.0822 | 0.1041</ |        |



|        |                                                                                |                       |        |        |         |         |        |        |        |         |        |        |         |           |        |        |
|--------|--------------------------------------------------------------------------------|-----------------------|--------|--------|---------|---------|--------|--------|--------|---------|--------|--------|---------|-----------|--------|--------|
| Cdc2c  | _JAcetyl (Protein N-term)[T]ESTLPPVPLVHS[Phospho (STY)]PK_2                    | Q91YQ3_S16_M1_Cdc2c   | 3.1826 | 6.9730 | 6.2764  | 7.8137  | 5.8347 | 6.4988 | 5.7943 | 6.6921  | 6.1360 | 5.7401 | 1.0010  | 0.0014    | 0.9945 | 0.0024 |
| Cdc2c  | _DUPS[Phospho (STY)]PLPTK_2                                                    | #N/A                  | 2.9670 | 3.7232 | 4.2015  | 3.1916  | 3.6115 | 3.0131 | 4.4071 | 3.4261  | 3.0747 | 3.1586 | 0.9814  | -0.0270   | 0.8545 | 0.0683 |
| Cdc2c  | _AS[Phospho (STY)]AGPVFK_2                                                     | Q91YQ3_S65_M1_Cdc2c   | 4.1728 | 3.4771 | 3.3587  | 3.8614  | 3.2985 | 4.4310 | 3.5761 | 4.2571  | 3.9057 | 2.8489 | 1.0328  | 0.0466    | 0.7309 | 0.1362 |
| Rpn1   | _VTADVLVHPGGGGSIR_2                                                            | #N/A                  | 3.7059 | 3.2972 | 3.4396  | 4.4842  | 3.2936 | 3.7273 | 3.5363 | 4.1411  | 4.3169 | 4.1614 | 0.9057  | -0.1429   | 0.1896 | 0.7223 |
| Rpn1   | _NIQVDSFVIDSR_2                                                                | #N/A                  | 4.2405 | 4.6658 | 3.4265  | 4.5758  | 4.3626 | 4.3633 | 3.2232 | 4.1893  | 3.8379 | 5.0471 | 1.0486  | 0.0685    | 0.6130 | 0.2125 |
| Twf1   | _SPLEVER_2                                                                     | #N/A                  | 6.0613 | 5.8064 | 5.6841  | 5.7309  | 5.7969 | 6.1437 | 6.2069 | 5.9517  | 6.1835 | 5.7655 | 0.9741  | -0.0379   | 0.2504 | 0.6014 |
| Twf1   | _YLSQSS[Phospho (STY)]PAPLTAAEEELR_2                                           | Q91YR1_S143_M1_Twf1   | 3.1098 | 3.8341 | 5.7208  | 6.2449  | 5.3675 | 2.8592 | 6.0994 | 5.6399  | 5.9922 | 5.6544 | 0.7736  | -0.3704   | 0.1115 | 0.9528 |
| Ndufv1 | _GPDVILGEM[Oxidation (M)]K_2                                                   | #N/A                  | 8.0293 | 8.4249 | 8.4427  | 7.6454  | 7.9527 | 8.1137 | 8.0607 | 7.9773  | 7.7348 | 1.0189 | 0.1089  | 0.0271    | 0.3882 | 0.4110 |
| Ndufv1 | _IFTNLYGR_2                                                                    | #N/A                  | 7.7752 | 8.0285 | 7.8678  | 7.4386  | 7.9816 | 7.8656 | 7.3106 | 8.0082  | 7.9292 | 8.0146 | 1.0014  | 0.0020    | 0.9523 | 0.0212 |
| Ndufv1 | _LVGG[Carbamidomethyl (C)]LVGGR_2                                              | #N/A                  | 7.4430 | 7.2135 | 7.2628  | 7.6226  | 7.8022 | 7.3292 | 7.3465 | 7.4168  | 7.0560 | 7.3476 | 1.0211  | 0.0301    | 0.2789 | 0.5546 |
| Ndufv1 | _EAYEAGLUGK_2                                                                  | #N/A                  | 6.9340 | 7.2157 | 7.6629  | 7.4740  | 7.5499 | 7.4135 | 6.9651 | 7.2577  | 7.3005 | 7.6283 | 1.0120  | 0.0171    | 0.6255 | 0.2038 |
| Ndufv1 | _NAC[Carbamidomethyl (C)]GSDYDFVDFVVR_2                                        | #N/A                  | 6.7701 | 6.9496 | 7.4561  | 7.2870  | 6.6938 | 6.6940 | 7.0465 | 6.6683  | 6.7718 | 7.1166 | 1.0108  | 0.0155    | 0.7007 | 0.1545 |
| Ndufv1 | _YLVNNADEGEPTG[Carbamidomethyl (C)]K_2                                         | #N/A                  | 6.2055 | 6.4022 | 5.6764  | 7.1303  | 6.6296 | 6.7136 | 6.5536 | 6.5588  | 5.9640 | 6.2100 | 1.0218  | 0.0312    | 0.6320 | 0.1993 |
| Ndufv1 | _GAGAY[Carbamidomethyl (C)]GEETALESIEGK_2                                      | #N/A                  | 6.3606 | 6.4358 | 7.3108  | 7.5789  | 6.1320 | 6.4247 | 6.9127 | 6.5882  | 6.2619 | 6.5983 | 1.0177  | 0.0254    | 0.7227 | 0.1410 |
| Ndufv1 | _HFRPELDR_3                                                                    | #N/A                  | 7.5092 | 5.6294 | 6.7821  | 6.6861  | 6.8525 | 6.7778 | 7.0296 | 6.3705  | 6.7672 | 5.7410 | 1.0354  | 0.0502    | 0.5637 | 0.2489 |
| Ndufv1 | _GEFYNASNQLQVAIR_2                                                             | #N/A                  | 6.2901 | 2.7964 | 6.2346  | 5.9678  | 5.6840 | 5.7775 | 6.2892 | 5.4264  | 6.3895 | 6.1948 | 0.8985  | -0.1544   | 0.4033 | 0.3944 |
| Ndufv1 | _GDARPAEIDSLWEISK_3                                                            | #N/A                  | 6.1388 | 5.8594 | 6.0452  | 5.1667  | 5.5664 | 6.2039 | 3.9579 | 5.3984  | 5.6616 | 5.7923 | 1.1206  | 0.1643    | 0.1473 | 0.8317 |
| Ndufv1 | _YLVNNADEGEPTG[Carbamidomethyl (C)]KDR_2                                       | #N/A                  | 5.3840 | 5.6635 | 5.8524  | 6.0448  | 5.7840 | 6.0407 | 5.5784 | 5.9664  | 5.7196 | 6.5506 | 1.0116  | 0.0166    | 0.6579 | 0.1818 |
| Ndufv1 | _KTSFGSKKDEDR_3                                                                | #N/A                  | 6.6922 | 4.1932 | 3.7198  | 5.6554  | 5.9683 | 6.5476 | 5.7305 | 5.5970  | 5.9819 | 5.9961 | 0.9376  | -0.0930   | 0.5827 | 0.2346 |
| Ndufv1 | _EGVDWMNK_2                                                                    | #N/A                  | 4.3099 | 4.1534 | 3.5341  | 4.8754  | 2.9442 | 3.6804 | 1.6971 | 3.9233  | 1.8977 | 4.2560 | 1.3305  | 0.4119    | 0.1609 | 0.7936 |
| Ndufv1 | _HESK[Carbamidomethyl (C)]GG[Carbamidomethyl (C)]TPC[Carbamidomethyl (C)]R_2   | #N/A                  | 3.1495 | 4.0766 | 3.8363  | 4.3390  | 3.7771 | 3.9534 | 4.0537 | 3.7795  | 3.4281 | 4.3060 | 0.9906  | -0.0136   | 0.8887 | 0.0513 |
| Ndufv1 | _HAGGVTVGGWDLNLAVPGGGSPLPK_3                                                   | #N/A                  | 3.1901 | 0.7747 | 3.8769  | 4.1697  | 1.7370 | 4.2011 | 4.0943 | 3.7389  | 3.3875 | 4.3466 | 0.7687  | -0.3795   | 0.2621 | 0.5816 |
| Ndufv1 | _TSFGSKKDEDR_3                                                                 | #N/A                  | 3.6134 | 4.4186 | 4.3002  | 3.7021  | 4.2399 | 3.4896 | 3.8504 | 3.2990  | 3.5981 | 3.3794 | 1.1214  | 0.1653    | 0.0964 | 1.0160 |
| Ndufv1 | _QIEGHTK[Carbamidomethyl (C)]ALGGOGAAWPGVQLR_3                                 | #N/A                  | 3.1957 | 3.6541 | 3.8825  | 4.1198  | 3.8222 | 3.9072 | 4.2680 | 4.3822  | 3.1805 | 3.7971 | 0.9633  | -0.0539   | 0.6094 | 0.2151 |
| Ythdf2 | _DGLNDDDPEFPLS[Phospho (STY)]PDAR_2                                            | Q91Y77_S39_M1_Ythdf2  | 8.2050 | 3.2547 | 3.7642  | 3.2767  | 3.1430 | 7.5034 | 3.2745 | 7.9222  | 2.9540 | 1.2250 | 0.2928  | 0.5381    | 0.1261 | 0.2591 |
| Ptbp2  | _DFGNSPLHR_2                                                                   | #N/A                  | 4.0298 | 4.8385 | 3.2158  | 5.6814  | 5.7455 | 3.0731 | 3.4339 | 3.7155  | 4.0146 | 2.9629 | 1.2545  | 0.3272    | 0.1893 | 0.7228 |
| Ptbp2  | _LALDGGNNYNAC[Carbamidomethyl (C)]C[Carbamidomethyl (C)]TJR_2                  | #N/A                  | 4.3527 | 3.6570 | 3.5386  | 4.4637  | 3.4784 | 3.5366 | 3.1111 | 4.0384  | 4.3374 | 4.0083 | 1.0337  | 0.0479    | 0.7011 | 0.1542 |
| Ttc1   | _AAEAHPQDDHVEEC[Carbamidomethyl (C)]PDC[Carbamidomethyl (C)]SASFEECGHAHVAGSK_5 | #N/A                  | 5.8717 | 4.2057 | 4.3712  | 3.9150  | 4.0271 | 3.7024 | 6.0663 | 3.0862  | 3.3853 | 3.5922 | 1.0785  | 0.1090    | 0.6508 | 0.1865 |
| Ttc1   | _QDSSTGYSINFCVNPNNNR_2                                                         | #N/A                  | 3.4126 | 3.9298 | 3.1463  | 6.1489  | 4.0572 | 3.9784 | 4.3392 | 4.3111  | 3.1093 | 3.8682 | 1.0525  | 0.0739    | 0.7356 | 0.1334 |
| Grhpr  | _LDAAGANLR_2                                                                   | #N/A                  | 6.3215 | 6.4933 | 6.5457  | 6.3814  | 6.8058 | 6.1701 | 5.6592 | 6.4483  | 6.6833 | 5.9077 | 1.0451  | 0.0636    | 0.2364 | 0.6263 |
| Grhpr  | _VPTGCPFAEGR_2                                                                 | #N/A                  | 5.7489 | 6.5704 | 5.4211  | 5.5226  | 5.8331 | 5.8021 | 6.2785 | 5.4789  | 5.9646 | 6.0972 | 0.9767  | -0.0339   | 0.5898 | 0.2293 |
| Grhpr  | _NTM[Oxidation (M)]SLAANLLAGLR_2                                               | #N/A                  | 5.0173 | 5.1286 | 5.3100  | 4.4212  | 5.1056 | 4.8749 | 5.0946 | 4.7228  | 4.4339 | 5.3075 | 1.0177  | 0.0253    | 0.7033 | 0.1528 |
| Grhpr  | _VISTSVGDHLDLEIK_2                                                             | #N/A                  | 4.0979 | 3.1283 | 3.2838  | 3.7865  | 3.0166 | 3.6080 | 3.5012 | 3.9806  | 3.4980 | 1.0907 | 0.5217  | 0.2512    | 0.5879 | 0.2825 |
| Srgap2 | _S[Phospho (STY)]POSTANVR_2                                                    | #N/A                  | 9.3837 | 9.0777 | 9.0981  | 9.4564  | 2.8079 | 9.1372 | 9.3664 | 9.0000  | 9.1745 | 9.0999 | 0.8908  | -0.1668   | 0.4774 | 0.3281 |
| Srgap2 | _ELEGPVYS[Phospho (STY)]R_2                                                    | Q91267_S691_M1_Srgap2 | 8.5065 | 8.0396 | 4.3262  | 8.6763  | 4.0720 | 8.1066 | 8.8106 | 3.1312  | 3.4302 | 8.2642 | 1.1769  | 0.2350    | 0.5388 | 0.2615 |
| Srgap2 | _QTPRS[Phospho (STY)]POSTANVR_3                                                | #N/A                  | 4.0845 | 3.3889 | 3.2705  | 3.2310  | 3.2102 | 3.0185 | 3.3793 | 3.7702  | 4.0692 | 4.4091 | 0.8619  | -0.2145   | 0.0686 | 1.1634 |
| Srgap2 | _KQDS[Phospho (STY)]SQARLVESK[Carbamidomethyl (C)]R_2                          | Q91267_S500_M1_Srgap2 | 3.7775 | 3.0129 | 3.5112  | 6.7151  | 2.9212 | 3.7034 | 3.5965 | 6.2904  | 4.2453 | 4.2331 | 0.8589  | -0.2194   | 0.4691 | 0.3287 |
| Srgap1 | _GLNNDS[Phospho (STY)]PERR_2                                                   | Q91269_S883_M1_Srgap1 | 5.8883 | 5.8592 | 3.9788  | 6.8196  | 3.9185 | 5.3725 | 4.1718 | 5.1023  | 3.2767 | 3.7008 | 1.3060  | 0.3852    | 0.0981 | 1.0083 |
| Srgap1 | _DMNS[Phospho (STY)]PTDR_2                                                     | Q91269_S812_M1_Srgap1 | 3.1919 | 4.0343 | 3.8787  | 5.6353  | 3.9226 | 4.2029 | 4.0960 | 3.7371  | 3.3857 | 4.3483 | 1.0649  | 0.0907    | 0.5857 | 0.2233 |
| Ugp2   | _ITYTNGSR_2                                                                    | #N/A                  | 5.7454 | 5.6320 | 5.0114  | 6.1612  | 6.0243 | 5.6736 | 5.5852 | 6.2439  | 5.8394 | 5.5440 | 0.9836  | -0.0238   | 0.7026 | 0.1533 |
| Ugp2   | _AM[Oxidation (M)]S[Phospho (STY)]QDGASQGEVLEQLSVK_3                           | Q91275_S13_M1_Ugp2    | 3.7256 | 3.0300 | 4.4124  | 3.5899  | 2.8513 | 3.3773 | 3.7381 | 3.2034  | 3.7104 | 3.3812 | 0.9970  | -0.0043   | 0.9731 | 0.0119 |
| Ugp2   | _NENTFLDLTVQIEHLNK_3                                                           | #N/A                  | 3.8573 | 3.1616 | 4.5441  | 3.4582  | 2.9830 | 3.2457 | 3.6065 | 3.5430  | 3.8420 | 3.1355 | 1.0040  | 0.0040    | 0.9757 | 0.0107 |
| Shz2b1 | _ALANDGTS[Phospho (STY)]PGER_2                                                 | Q912M2_S219_M1_Shz2b1 | 3.3662 | 7.4475 | 3.3799  | 7.7313  | 2.7899 | 4.2120 | 3.0719 | 4.0775  | 4.3766 | 4.1018 | 1.2459  | 0.3172    | 0.4178 | 0.3790 |
| Shz2b1 | _S[Phospho (STY)]SEDLAQLPSSVPSSTSKPK_3                                         | Q912M2_S126_M1_Shz2b1 | 3.3129 | 4.0295 | 4.5474  | 4.0912  | 3.8508 | 3.8787 | 4.2395 | 7.8076  | 3.2090 | 3.7685 | 0.8309  | -0.2673   | 0.3697 | 0.4322 |
| Ndfip2 | _DDFS[Phospho (STY)]DVQLR_2                                                    | Q912P6_S195_M1_Ndfip2 | 3.3202 | 6.1528 | 4.5547  | 7.2013  | 5.0744 | 4.1607 | 4.0539 | 6.8947  | 6.7966 | 6.5627 | 0.8355  | -0.2593   | 0.2965 | 0.5279 |
| Necab2 | _TLS[Phospho (STY)]FDLQQR_2                                                    | Q912P9_S271_M1_Necab2 | 7.3606 | 3.3200 | 3.2016  | 8.7129  | 7.5774 | 3.0873 | 8.2623 | 7.7270  | 8.0030 | 6.6903 | 0.6903  | -0.5148   | 0.0990 | 1.0046 |
| Necab2 | _VVEGGSNVDQVTR_2                                                               | #N/A                  | 4.8177 | 4.1104 | 3.8026  | 4.3052  | 4.0397 | 4.1267 | 4.0199 | 3.8133  | 3.4618 | 4.2722 | 1.0793  | 0.1101    | 0.2010 | 0.6967 |
| Dst    | _SES[Phospho (STY)]NSSTATQPTIAK_2                                              | Q912U6_S7186_M1_Dst   | 8.7484 | 8.8627 | 9.1274  | 8.8946  | 7.2713 | 9.4427 | 8.9469 | 8.8912  | 8.7561 | 0.9550 | -0.0664 | 0.2944    | 0.5310 | 0.0677 |
| Dst    | _QKS[Phospho (STY)]FSEDDVSHK_3                                                 | #N/A                  | 6.5287 | 3.7817 | 6.4026  | 3.9911  | 3.4592 | 3.8729 | 4.8300 | 6.2300  | 3.9737 | 3.9581 | 0.9841  | -0.0231   | 0.9300 | 0.0315 |
| Dst    | _LLDPEDVDVSS[Phospho (STY)]PDEK_2                                              | Q912U6_S237_M1_Dst    | 3.7165 | 3.5741 | 3.6886  | 10.3566 | 8.6880 | 4.0128 | 3.9059 | 10.0857 | 9.7311 | 0.6612 | -0.5968 | 0.1808    | 0.7429 | 0.0429 |
| Dst    | _AM[Oxidation (M)]VESQKSS[Phospho (STY)]PVKR_3                                 | #N/A                  | 4.8816 | 5.0920 | 5.7713  | 4.9111  | 4.6483 | 5.0113 | 4.8891 | 5.2101  | 4.9997 | 5.0023 | 1.0054  | 0.0078    | 0.8961 | 0.0477 |
| Dst    | _AMVESQKSS[Phospho (STY)]PVK_2                                                 | #N/A                  | 5.0332 | 3.2297 | 3.7080  | 3.2518  | 3.1180 | 3.5066 | 3.4000 | 3.7494  | 4.0485 | 4.4299 | 0.9320  | -0.1016   | 0.5289 | 0.2766 |
| Dst    | _QIS[Phospho (STY)]LLDSR_2                                                     | Q912U6_S5407_M1_Dst   | 4.2755 | 2.9506 | 3.4615  | 3.9642  | 3.4012 | 4.3283 | 3.6789 | 4.1543  | 3.8029 | 3.9312 | 0.9585  | -0.0612   | 0.5934 | 0.2266 |
| Mia2   | _DNLGNSNVQDS[Phospho (STY)]PPAC[Carbamidomethyl (C)]EAAGR_2                    | Q912V0_S1271_M1_Mia2  | 2.9002 | 4.3259 | 3.5870  | 4.0897  | 4.2142 | 3.9112 | 3.8044 | 4.0288  | 3.6774 | 4.0567 | 0.9862  | -0.0201   | 0.8518 | 0.0696 |
| Mia2   | _SLS[Phospho (STY)]PPWEGDQRR_2                                                 | Q912V0_S1190_M1_Mia2  | 3.9558 | 3.3866 | 10.1685 | 3.2332  | 8.4247 | 3.2027 | 7.9860 | 3.7679  | 9.9351 | 9.3633 | 0.6911  | -0.5331   | 0.2497 | 0.6027 |
| Lrp1   | _QJLTGENR_2                                                                    | #N/A                  | 5.2413 | 3.3996 | 5.4086  | 5.2132  | 4.7727 | 4.9128 | 4.9699 | 5.1290  | 4.9600 | 4.5637 | 0.9830  | -0.0247   | 0.8353 | 0.0781 |
| Lrp1   | _NVTDEEPLFANR_2                                                                | #N/A                  | 5.2367 | 5.4343 | 4.3588  | 3.9025  | 5.4593 | 5.8475 | 4.0508 | 5.4682  | 4.9410 | 3.5798 | 1.1175  | 0.1603    | 0.3276 | 0.4846 |
| Lrp1   | _AEGSEYGVLYADONER_2                                                            | #N/A                  | 4.7943 | 4.0525 | 5.2827  | 4.8828  | 3.9972 | 4.5622 | 5.2717 | 5.0211  | 3.9641 | 4.1403 | 0.9991  | -0.0013   | 0.9913 | 0.0038 |
| Lrp1   | _HS[Phospho (STY)]LAS[Phospho (STY)]TDEKR_2                                    | Q912X7_S4521_M2_Lrp1  | 6.3491 | 4.1319 | 4.8371  | 6.1525  | 4.6657 | 6.0006 | 6.1464 | 6.0490  | 6.1233 | 6.1356 | 0.8761  | -0.1908   | 0.1476 | 0.8310 |
| Lrp1   | _IFFSDHFGNQDQDGGSR_3                                                           | #N/A                  | 3.8374 | 3.1418 | 4.5242  | 3.4781  | 2.9631 | 3.2655 | 3.6263 | 3.0916  | 3.8222 | 3.4821 | 1.0084  | 0.0121    | 0.9279 | 0.0325 |
| Sncb   | _EGVAAAEK_2                                                                    | #N/A                  | 9.0549 | 8.9298 | 9.3932  | 8.9541  | 9.3633 | 8.9333 | 7.7113 | 9.0449  | 9.0409 | 9.1689 | 1.0416  | 0.0587    | 0.2519 | 0.5989 |
| Sncb   | _TKEGASHLGAVFSGAGNIAATGLVK_3                                                   | #N/A                  | 6.8888 | 7.1737 | 7.8975  | 7.7147  | 7.4309 | 7.4331 | 7.2358 | 7.1354  | 7.5255 | 7.8340 | 0.9987  | -0.0019</ |        |        |



|          |                                                                     |                         |        |        |        |        |        |        |        |        |        |        |         |         |        |        |
|----------|---------------------------------------------------------------------|-------------------------|--------|--------|--------|--------|--------|--------|--------|--------|--------|--------|---------|---------|--------|--------|
| Ivns1abp | _N[Phospho (STY)]POSS[Phospho (STY)]PTSTPK_2                        | Q920Q8_S322_M2_Ivns1abp | 6.0974 | 7.6812 | 6.1376 | 6.5117 | 7.5103 | 5.8241 | 7.5034 | 5.7189 | 5.5418 | 8.0446 | 0.9888  | -0.0163 | 0.9092 | 0.0413 |
| Ala2     | _QHKDS[Phospho (STY)]PEILSR_3                                       | #N/A                    | 3.6465 | 5.2324 | 4.3333 | 5.4404 | 4.3051 | 3.4564 | 4.5507 | 3.2825 | 4.4319 | 3.3022 | 1.1312  | 0.1778  | 0.3319 | 0.4790 |
| Ala2     | _QLGCG[Carbamidomethyl (C)]IES[Phospho (STY)]PGGGEVWK_2             | Q920R0_S1302_M1_Ala2    | 5.8843 | 5.7445 | 7.1120 | 6.1767 | 4.4216 | 4.5946 | 6.5348 | 5.7750 | 4.8410 | 4.7003 | 1.0587  | 0.0822  | 0.6135 | 0.2122 |
| Ala2     | _RQHKDS[Phospho (STY)]PEILSR_3                                      | #N/A                    | 3.5144 | 4.2707 | 3.2481 | 4.1449 | 4.1590 | 3.9665 | 3.8596 | 3.9735 | 3.6221 | 4.1119 | 0.9980  | -0.0029 | 0.9729 | 0.0119 |
| Ala2     | _SSS[Phospho (STY)]M[Oxidation (M)]DIREELEGGSR_3                    | #N/A                    | 3.5272 | 3.8958 | 4.0781 | 4.6493 | 3.7841 | 3.9447 | 3.8378 | 3.9939 | 3.7969 | 3.5973 | 1.0455  | 0.0643  | 0.4174 | 0.3795 |
| Ala2     | _RLS[Phospho (STY)]PGLLSQV[Phospho (STY)]PK_2                       | Q920R0_S477_M2_Ala2     | 3.2179 | 4.0231 | 3.9047 | 4.4074 | 3.8444 | 3.8851 | 4.1120 | 3.9192 | 3.3597 | 4.3744 | 0.9839  | -0.0234 | 0.8135 | 0.0897 |
| Gjc3     | _S[Phospho (STY)]KOTTELDVWEAK_2                                     | Q921C1_S253_M1_Gjc3     | 3.5759 | 4.3321 | 3.5808 | 4.0835 | 4.2204 | 3.9050 | 3.7982 | 4.0350 | 3.6836 | 4.0505 | 1.0149  | 0.0213  | 0.7545 | 0.1223 |
| Brdw1    | _KS[Phospho (STY)]SSDKESNLQVTCIK_3                                  | Q921C3_S1888_M1_Brdw1   | 3.9460 | 3.2504 | 3.8257 | 3.3695 | 3.0717 | 3.1570 | 3.5177 | 3.0396 | 3.9307 | 3.0468 | 1.0157  | 0.0224  | 0.8381 | 0.0767 |
| Brdw1    | _RGPEVGS[Phospho (STY)]PVSEALR_3                                    | Q921C3_S1830_M1_Brdw1   | 3.9112 | 3.2156 | 4.5980 | 3.4043 | 3.0369 | 4.2344 | 3.5526 | 3.0178 | 4.1672 | 3.5668 | 1.0440  | 0.0621  | 0.6777 | 0.1690 |
| Bicd2    | _QTS[Phospho (STY)]LQNEKDR_2                                        | Q921C3_S411_M1_Bicd2    | 3.0622 | 3.8185 | 4.2968 | 4.5971 | 3.7068 | 4.4186 | 4.3118 | 3.5214 | 3.1700 | 3.0633 | 1.1327  | 0.1798  | 0.2382 | 0.6230 |
| Bicd2    | _S[Phospho (STY)]PVLFPK_2                                           | Q921C3_S578_M1_Bicd2    | 4.1816 | 3.0446 | 3.3675 | 3.8702 | 2.9329 | 3.6917 | 3.5849 | 4.2483 | 3.8969 | 3.8372 | 0.9031  | -0.1470 | 0.2013 | 0.6962 |
| Tardbp   | _LPNSKGS[Phospho (STY)]PDEPLR_2                                     | #N/A                    | 4.1632 | 3.1227 | 3.6472 | 3.6621 | 3.2979 | 3.5154 | 4.0775 | 3.9542 | 7.8321 | 3.5127 | 0.6105  | -0.7118 | 0.0495 | 1.3058 |
| Tardbp   | _FGGNPGFGNGQGFGNSR_2                                                | #N/A                    | 3.8832 | 3.4592 | 3.6169 | 6.1439 | 3.2805 | 2.9481 | 3.3089 | 3.8405 | 4.1396 | 5.5506 | 0.9237  | -0.1145 | 0.6575 | 0.1821 |
| Tardbp   | _GISVNSNAEPK_3                                                      | #N/A                    | 3.7445 | 2.9999 | 3.4782 | 3.9148 | 2.8882 | 3.7364 | 3.6295 | 3.9792 | 3.8522 | 4.2001 | 0.8838  | -0.1782 | 0.0906 | 1.0427 |
| Hnrrnpl  | _TEEGEVVS[Phospho (STY)]AEESNR_2                                    | #N/A                    | 3.6117 | 4.3680 | 3.3454 | 4.0476 | 4.2563 | 5.6800 | 3.7623 | 4.0708 | 3.7194 | 4.0673 | 1.0802  | 0.1113  | 0.4797 | 0.3190 |
| Hnrrnpl  | _LKTTEGEVVS[Phospho (STY)]AEESNR_3                                  | #N/A                    | 3.3657 | 4.5699 | 3.5785 | 5.2535 | 4.0103 | 4.1180 | 4.2486 | 5.2402 | 2.9271 | 4.5553 | 0.9780  | -0.0321 | 0.8617 | 0.7889 |
| Hnrrnpl  | _ITRPGNTDPSGGNK_2                                                   | #N/A                    | 3.5582 | 3.7273 | 3.8273 | 3.9128 | 3.9728 | 3.5005 | 4.4740 | 3.8090 | 3.8913 | 3.8089 | 0.9384  | -0.0917 | 0.1626 | 0.7889 |
| Sh3bp4   | _SYS[Phospho (STY)]ISELSVLQAK_2                                     | Q921I6_S245_M1_Sh3bp4   | 3.9682 | 3.2725 | 3.1541 | 3.3473 | 3.0939 | 3.1348 | 5.4987 | 3.6539 | 3.9529 | 3.0246 | 0.8254  | -0.2768 | 0.1546 | 0.8108 |
| Rheb     | _IILEAKIDGAAS[Phospho (STY)]GDK_2                                   | Q921I2_S175_M1_Rheb     | 4.1282 | 4.7100 | 3.8619 | 4.4632 | 3.2720 | 4.2119 | 3.5539 | 3.5955 | 3.8945 | 4.5083 | 1.0565  | 0.0793  | 0.4981 | 0.3027 |
| Rheb     | _ALAESWNAFLSSAK_2                                                   | #N/A                    | 3.1001 | 3.8564 | 4.3346 | 4.5593 | 3.7447 | 3.9746 | 4.2739 | 3.5592 | 3.8007 | 3.0254 | 1.0712  | 0.0993  | 0.4527 | 0.3442 |
| Cyrb     | _INNVPAEGEENVNELANR_2                                               | #N/A                    | 8.3302 | 8.1683 | 8.3906 | 8.2383 | 7.2706 | 8.1475 | 8.7666 | 8.1911 | 8.1843 | 8.0218 | 0.9759  | -0.0352 | 0.4413 | 0.3553 |
| Cyrb     | _DAEGLEDQSVR_2                                                      | #N/A                    | 7.3691 | 7.3221 | 7.3497 | 7.0461 | 6.9005 | 7.4003 | 7.7315 | 7.4629 | 7.2609 | 7.1910 | 0.9757  | -0.0355 | 0.2415 | 0.6172 |
| Cyrb     | _IAIHQPADEKLGEK_3                                                   | #N/A                    | 4.0767 | 3.3149 | 5.1163 | 3.3050 | 4.4973 | 3.8892 | 3.4533 | 5.0152 | 4.1154 | 4.4384 | 0.9478  | -0.0774 | 0.6276 | 0.2023 |
| Rin1     | _RLS[Phospho (STY)]ADGSLGR_2                                        | Q921Q7_S446_M1_Rin1     | 6.0177 | 4.3424 | 3.5705 | 4.0732 | 3.5103 | 4.2192 | 3.7879 | 5.8435 | 3.6939 | 4.0402 | 0.9879  | -0.0175 | 0.9340 | 0.0296 |
| Rin1     | _EKPSPTDPL[Phospho (STY)]DTPDTR_2                                   | #N/A                    | 5.9344 | 7.4351 | 3.9083 | 6.9978 | 2.9633 | 7.0533 | 6.8550 | 7.4912 | 7.4584 | 6.4015 | 0.8105  | -0.3031 | 0.2061 | 0.6860 |
| Rin1     | _SM[Oxidation (M)]S[Phospho (STY)]SAFC[Carbamidomethyl (C)]SLAPER_2 | #N/A                    | 3.9665 | 3.3876 | 4.1414 | 7.8258 | 3.2494 | 3.2181 | 4.1431 | 3.4020 | 3.4234 | 3.2305 | 1.2108  | 0.2760  | 0.4383 | 0.3682 |
| Rin1     | _ALPLS[Phospho (STY)]PAQELQR_2                                      | Q921Q7_S590_M1_Rin1     | 3.4299 | 4.1862 | 3.1636 | 4.2082 | 4.0745 | 4.0510 | 4.3565 | 4.2938 | 3.0920 | 3.8855 | 0.9860  | -0.2004 | 0.8694 | 0.0568 |
| Dars1    | _NNAYLAQS[Phospho (STY)]PQLYK_2                                     | Q922B2_S249_M1_Dars1    | 7.6809 | 7.2086 | 7.7912 | 7.9539 | 6.7485 | 7.7423 | 7.9228 | 7.1653 | 3.7226 | 7.5684 | 1.1404  | 0.1896  | 0.2809 | 0.5514 |
| Dars1    | _FLEPTLR_2                                                          | #N/A                    | 4.8505 | 5.6335 | 5.2260 | 5.1661 | 5.2593 | 4.6798 | 3.8091 | 5.1931 | 4.8984 | 4.8851 | 1.0936  | 0.1291  | 0.1747 | 0.7576 |
| Dars1    | _ISAASEGGANVTVSFYK_2                                                | #N/A                    | 2.2473 | 3.6167 | 3.3156 | 4.3602 | 3.5818 | 4.1476 | 4.5084 | 4.1418 | 4.4409 | 2.6730 | 0.8995  | -0.1528 | 0.4595 | 0.3377 |
| Ppp6r3   | _C[Carbamidomethyl (C)]TALPTPSSS[Phospho (STY)]PEQR_2               | Q922D4_S824_M1_Ppp6r3   | 3.2800 | 4.0852 | 3.9668 | 4.4694 | 3.9065 | 5.7814 | 4.1972 | 3.6494 | 6.0949 | 4.0849 | 0.9429  | -0.0849 | 0.6832 | 0.1655 |
| Ppp6r3   | _LQGFDDGGS[Phospho (STY)]DEEDWEEK_2                                 | Q922D4_S588_M1_Ppp6r3   | 3.2944 | 7.0963 | 4.2475 | 9.0376 | 7.1234 | 6.0267 | 4.7050 | 8.7823 | 7.8886 | 7.2389 | 0.8580  | -0.2210 | 0.4482 | 0.3485 |
| Mthfd1   | _TPVPSDIASR_2                                                       | #N/A                    | 5.4954 | 5.3137 | 6.3694 | 5.1472 | 5.8070 | 5.8221 | 5.3046 | 5.1608 | 5.7141 | 4.1056 | 0.9055  | 0.0505  | 0.4562 | 0.3408 |
| Mthfd1   | _LIDDPETTWQR_2                                                      | #N/A                    | 4.1243 | 4.0417 | 4.5352 | 4.4864 | 3.9453 | 4.1802 | 4.2273 | 4.4230 | 3.2212 | 4.1756 | 1.0516  | 0.0726  | 0.4232 | 0.3734 |
| Clp1     | _TASESNLSEAGS[Phospho (STY)]VK_2                                    | Q92213_S203_M1_Clp1     | 8.0672 | 8.4215 | 8.5025 | 8.8867 | 7.2947 | 8.4691 | 8.2988 | 8.1138 | 8.2126 | 8.5150 | 0.9986  | -0.0020 | 0.9692 | 0.0136 |
| Clp1     | _TASESNLS[Phospho (STY)]EAGS[Phospho (STY)]VKKGER_3                 | #N/A                    | 3.9149 | 5.0180 | 3.8016 | 4.8426 | 3.7413 | 4.7319 | 4.3490 | 4.4425 | 3.0995 | 4.1191 | 1.0847  | 0.1174  | 0.4034 | 0.3943 |
| Clp1     | _S[Phospho (STY)]VEELQLK_2                                          | Q92213_S910_M1_Clp1     | 3.4700 | 4.2752 | 4.1568 | 4.7734 | 4.0965 | 3.4991 | 3.9938 | 4.8773 | 4.8165 | 0.8658 | -0.2079 | 0.0786  | 1.1043 | 0.0786 |
| Tspan2   | _HVQSM[Oxidation (M)]VEEAYSQVKDR_3                                  | #N/A                    | 3.6664 | 6.1098 | 6.5292 | 4.4447 | 3.4973 | 4.8833 | 6.4163 | 5.9091 | 5.1991 | 4.1220 | 0.8972  | -0.1565 | 0.4787 | 0.3199 |
| Tspan2   | _KSPSGPVKS[Phospho (STY)]PPPLS[Phospho (STY)]PVGTTPVK_3             | Q922M7_S189_M2_Ivns1abp | 2.9518 | 3.7081 | 4.1863 | 7.0650 | 4.4520 | 3.0282 | 4.4222 | 5.3327 | 6.0431 | 3.4074 | 0.8814  | -0.1821 | 0.5420 | 0.2660 |
| Glyc1    | _KLS[Phospho (STY)]SEGR_2                                           | Q922P9_S130_M1_Glyc1    | 4.5580 | 4.9712 | 4.7249 | 5.0729 | 2.8479 | 3.7767 | 5.1851 | 5.2424 | 4.3186 | 4.1597 | 0.9151  | -0.1280 | 0.4380 | 0.3586 |
| Lrrc59   | _LQQLPADGR_2                                                        | #N/A                    | 4.6477 | 3.7064 | 3.5880 | 4.8288 | 5.0435 | 4.2018 | 5.5112 | 5.4439 | 3.6764 | 4.0576 | 0.9280  | -0.1078 | 0.5062 | 0.2957 |
| Lrrc59   | _LVNLQLDLNLNR_2                                                     | #N/A                    | 3.7871 | 3.4885 | 3.5208 | 3.5235 | 1.5976 | 4.3529 | 4.0354 | 3.9366 | 3.0939 | 3.5262 | 0.9061  | -0.1108 | 0.6079 | 0.2161 |
| Pdia6    | _GSFSEGINFUR_2                                                      | #N/A                    | 5.8066 | 5.9792 | 6.2042 | 6.0927 | 6.1656 | 6.3190 | 5.8738 | 5.9198 | 6.0840 | 5.8138 | 1.0290  | 0.0412  | 0.1343 | 0.8719 |
| Pdia6    | _LAADVATNVQLVLR_2                                                   | #N/A                    | 4.0449 | 4.1205 | 4.7882 | 4.7276 | 4.5586 | 4.9213 | 4.3428 | 4.2356 | 4.4748 | 4.6518 | 1.0227  | 0.0324  | 0.6266 | 0.2030 |
| Pde2a    | _VETVYTYLIDGESR_2                                                   | #N/A                    | 5.7640 | 5.3090 | 5.7001 | 3.6927 | 4.7218 | 5.5976 | 5.8031 | 6.0009 | 5.8247 | 5.9550 | 0.8702  | -0.2005 | 0.0995 | 1.0022 |
| Pde2a    | _DLIATDLAHHLR_3                                                     | #N/A                    | 4.3740 | 4.3213 | 3.5600 | 4.4423 | 3.5168 | 4.2298 | 3.0898 | 3.6444 | 3.7709 | 4.0771 | 1.1175  | 0.1603  | 0.1508 | 0.8216 |
| Pde2a    | _RPEAVQNTS[Phospho (STY)]VDAESEQKDEK_3                              | Q92254_S204_M1_Pde2a    | 4.8051 | 3.2263 | 4.0569 | 3.2850 | 2.9078 | 4.7477 | 4.4649 | 3.5587 | 4.2582 | 3.3655 | 0.9721  | -0.0408 | 0.8145 | 0.0891 |
| Pde2a    | _GLPIS[Phospho (STY)]NNSDLDEEYEPDGLTR_3                             | Q92254_S908_M1_Pde2a    | 3.9227 | 3.9574 | 3.6564 | 3.9686 | 3.8457 | 3.6280 | 3.9795 | 3.7883 | 3.7539 | 3.7428 | 1.0036  | 0.0051  | 0.8820 | 0.0820 |
| Pde2a    | _LHHDGIDPVAADSNFANTYTPR_3                                           | #N/A                    | 3.2985 | 2.9276 | 4.5330 | 4.0768 | 3.8652 | 3.8643 | 4.2251 | 4.4252 | 3.5949 | 1.1670 | 1.1216  | 0.1656  | 0.5540 | 0.2565 |
| Pde2a    | _SVLAALYSSEGSVM[Oxidation (M)]ER_2                                  | #N/A                    | 4.6798 | 4.3069 | 3.6920 | 6.1414 | 4.1093 | 4.0162 | 3.9093 | 3.9238 | 3.5724 | 4.1617 | 1.1539  | 0.2066  | 0.2246 | 0.6486 |
| Pde2a    | _SQQVPAAR_2                                                         | #N/A                    | 3.7177 | 3.6247 | 3.4514 | 4.4960 | 2.8614 | 4.0043 | 3.1434 | 4.0060 | 4.3051 | 4.1733 | 0.9451  | -0.0814 | 0.5545 | 0.2561 |
| Prpf3    | _WDEQTSNTKGDDDEES[Phospho (STY)]DEEAVKK_3                           | #N/A                    | 3.6711 | 3.6713 | 3.4048 | 4.4494 | 2.0988 | 4.2369 | 3.0968 | 4.0526 | 4.3517 | 4.1267 | 0.9185  | -0.1226 | 0.5227 | 0.2818 |
| Prpf3    | _GDDDEES[Phospho (STY)]DEEAVKK_2                                    | #N/A                    | 4.0520 | 3.3914 | 4.2639 | 4.8728 | 3.3674 | 4.7779 | 4.5126 | 4.9088 | 4.0980 | 4.5279 | 0.9134  | -0.1308 | 0.3057 | 0.5146 |
| Ubxn1    | _SS[Phospho (STY)]PPATDPGPVSPSPQEPPTKR_3                            | Q922Y1_S188_M1_Ubxn1    | 3.4559 | 3.7951 | 4.1427 | 3.8688 | 3.6627 | 3.6772 | 3.7670 | 3.7467 | 3.7061 | 3.7305 | 1.0079  | 0.0113  | 0.8098 | 0.0916 |
| Dbr1     | _NQAYAAVDGDAS[Phospho (STY)]AE_2                                    | Q923B1_S548_M1_Dbr1     | 3.1768 | 3.9820 | 3.8636 | 4.3663 | 4.7096 | 3.2662 | 4.0810 | 5.1142 | 5.2349 | 4.5715 | 0.8429  | -0.2466 | 0.0580 | 1.2369 |
| Dbr1     | _C[Carbamidomethyl (C)]GETVES[Phospho (STY)]GDEKDLAK_2              | #N/A                    | 4.3972 | 3.5195 | 4.0187 | 4.1068 | 3.1464 | 3.9387 | 3.1801 | 3.6098 | 4.2862 | 3.8813 | 1.0308  | 0.0438  | 0.7050 | 0.1518 |
| Wbp11    | _RRDEDM[Oxidation (M)]KYS[Phospho (STY)]PELAGR_3                    | #N/A                    | 5.7233 | 3.8702 | 3.8637 | 3.6023 | 3.6915 | 3.3897 | 6.9491 | 3.4535 | 3.7526 | 3.2796 | 0.9231  | -0.1155 | 0.6909 | 0.1606 |
| Ppp1r16a | _SVS[Phospho (STY)]HLSPEENSAPDALVR_3                                | Q923M0_S432_M1_Ppp1r16a | 5.1891 | 3.6825 | 3.6462 | 5.2892 | 3.1595 | 3.9499 | 3.6450 | 4.9259 | 4.5489 | 0.9319 | 0.9319  | -0.1017 | 0.6285 | 0.2017 |
| Ppp1r16a | _RVS[Phospho (STY)]LTHR_2                                           | Q923M0_S353_M1_Ppp1r16a | 4.3485 | 3.2228 | 4.6052 | 3.6070 | 3.0441 | 3.1845 | 3.5453 | 3.0106 | 4.0262 | 3.5740 | 1.0366  | 0.0519  | 0.7377 | 0.1321 |
| Stard13  | _KKGGDS[Phospho (STY)]DEEDLC[Carbamidomethyl (C)]ISNK_3             | Q923Q2_S133_M1_Stard13  | 5.2496 | 5.4990 | 3.6636 | 4.7143 | 4.4708 | 5.2074 | 5.3019 | 5.5656 | 4.0929 | 4.3855 | 0.9926  | -0.0107 | 0.9378 | 0.0779 |
| Camk2g   | _QET[Phospho (STY)]VECC[Carbamidomethyl (C)]LR_2                    | Q923T9_T287_M1_Camk2g   | 7.6722 | 6.3243 | 6.3237 | 7.4198 | 6.2833 | 7.3836 | 7.4152 | 6.9429 | 7.1751 | 7.1337 | 0.96    |         |        |        |



|         |                                                                     |                         |         |         |         |         |         |         |         |         |         |         |        |         |        |        |
|---------|---------------------------------------------------------------------|-------------------------|---------|---------|---------|---------|---------|---------|---------|---------|---------|---------|--------|---------|--------|--------|
| Wac     | _QQSHDPV[S]Phospho (STY)]PR_2                                       | #N/A                    | 8.6208  | 8.3994  | 8.5343  | 8.9288  | 8.2863  | 8.5142  | 8.4965  | 8.4533  | 8.4310  | 8.3937  | 1.0123 | 0.0176  | 0.3880 | 0.4112 |
| Wac     | _DAADPS[Phospho (STY)]PPNK_2                                        | #N/A                    | 8.7424  | 8.8421  | 8.9907  | 9.1716  | 8.5774  | 8.6399  | 8.9905  | 8.0301  | 8.8935  | 8.9823  | 1.0118 | 0.0170  | 0.6459 | 0.1898 |
| Wac     | _QGPV[SATQPVATKQKQSHDPV[S]Phospho (STY)]PR_4                        | #N/A                    | 3.8111  | 3.1154  | 4.4079  | 3.9997  | 4.6724  | 3.2919  | 3.6527  | 3.1179  | 4.2674  | 3.4667  | 1.0520 | 0.0731  | 0.6323 | 0.1991 |
| Wac     | _MRDAADPS[Phospho (STY)]PPNK_2                                      | #N/A                    | 3.8744  | 7.2185  | 3.6080  | 9.2963  | 3.2894  | 2.9393  | 3.3001  | 3.8494  | 4.1484  | 4.3299  | 1.2894 | 0.3667  | 0.4325 | 0.3741 |
| Wac     | _S[Phospho (STY)]NS[Phospho (STY)]PENKYSOSTGHMK_2                   | Q924H7_562_M2_Wac       | 3.7749  | 2.7160  | 3.5842  | 4.0868  | 3.6043  | 3.9083  | 3.8015  | 4.0421  | 6.6907  | 4.0538  | 0.9697 | -0.0443 | 0.3584 | 0.4456 |
| Wac     | _QGPV[S]Phospho (STY)]H[S]Phospho (STY)]ATQGPV[Phospho (STY)]ADK_2  | Q924H7_5491_M3_Wac      | 8.5187  | 4.0941  | 4.5724  | 4.1161  | 3.9824  | 4.1430  | 4.0362  | 4.3859  | 3.1841  | 3.7934  | 1.2739 | 0.3493  | 0.2902 | 0.5372 |
| Mta3    | _HAELSG[S]Phospho (STY)]PKL_2                                       | Q924K8_5516_M1_Mta3     | 7.3578  | 7.1515  | 7.8007  | 7.6601  | 6.3571  | 7.2337  | 7.4369  | 7.4514  | 7.2727  | 7.1912  | 0.9894 | -0.0154 | 0.7754 | 0.1104 |
| Mta3    | _S[Phospho (STY)]PPSLQTPATK_2                                       | Q924K8_5547_M1_Mta3     | 6.9995  | 4.1017  | 3.8113  | 4.3140  | 5.9059  | 6.7006  | 6.9124  | 6.5766  | 3.4531  | 6.2126  | 0.9157 | -0.1270 | 0.6220 | 0.2062 |
| Mta3    | _M[Oxidation (M)]PTQSDIEKS[Phospho (STY)]PS[Phospho (STY)]PTAEDPR_2 | #N/A                    | 4.0690  | 3.9575  | 4.1878  | 5.7615  | 3.8284  | 4.1913  | 3.7943  | 3.9142  | 3.7935  | 4.7561  | 1.0660 | 0.0921  | 0.5295 | 0.2761 |
| Mpi     | _ISQVFDGNMEDIYGK_2                                                  | #N/A                    | 4.3243  | 4.0057  | 3.8873  | 5.6411  | 3.8271  | 3.9024  | 4.2632  | 4.3871  | 3.1853  | 3.7922  | 1.0916 | 0.1264  | 0.4148 | 0.3822 |
| Slc12a6 | _IDDPGLSDT[S]Phospho (STY)]PLSSR_2                                  | Q924N4_532_M1_Slc12a6   | 9.4853  | 8.7638  | 4.3619  | 3.6706  | 3.7591  | 3.4714  | 9.3212  | 3.1822  | 9.3244  | 8.7195  | 0.7314 | -0.4513 | 0.2972 | 0.5270 |
| Slc12a6 | _LTSIG[S]Phospho (STY)]DEDETETVLEK_2                                | Q924N4_51032_M1_Slc12a6 | 3.5628  | 7.8669  | 7.4185  | 8.2129  | 6.9706  | 7.9841  | 8.6594  | 8.4340  | 8.2366  | 8.0309  | 0.8396 | -0.2522 | 0.1736 | 0.7604 |
| Spred2  | _TSS[Phospho (STY)]PTSC[Carbamidomethyl (C)]EHR_2                   | Q92457_5168_M1_Spred2   | 7.9231  | 7.6341  | 4.3679  | 7.8581  | 6.6357  | 7.0634  | 8.1245  | 8.0914  | 7.7575  | 3.3367  | 1.0126 | 0.0181  | 0.9420 | 0.0259 |
| Spred1  | _HVS[Phospho (STY)]FQDEDEIVR_2                                      | Q92458_5239_M1_Spred1   | 3.5670  | 4.2813  | 3.3007  | 4.3089  | 4.1077  | 4.2838  | 4.1406  | 5.0342  | 4.4205  | 5.1264  | 0.8493 | -0.2357 | 0.0414 | 1.3831 |
| Trim66  | _SVS[Phospho (STY)]PGSGPAAESIGTR_2                                  | Q924W6_5767_M1_Trim66   | 7.6220  | 7.9292  | 8.3947  | 8.3540  | 7.2779  | 8.0186  | 4.0750  | 7.8411  | 7.9746  | 7.6534  | 1.1520 | 0.2041  | 0.2134 | 0.6707 |
| Trps1   | _GS[Phospho (STY)]SERGSPIEK_2                                       | Q925H1_51061_M1_Trps1   | 3.7404  | 2.9958  | 3.4741  | 6.3578  | 2.8841  | 3.7405  | 3.6336  | 4.1995  | 3.8481  | 3.8859  | 0.9932 | -0.0098 | 0.9690 | 0.1037 |
| Trps1   | _HPNYS[Phospho (STY)]PPGS[Phospho (STY)]PIEK_2                      | Q925H1_51081_M2_Trps1   | 2.9800  | 3.7852  | 3.6669  | 4.1695  | 3.6066  | 4.1229  | 3.8842  | 3.9490  | 3.5976  | 4.1365  | 0.9563 | -0.0644 | 0.4943 | 0.3060 |
| Ata3    | _TAGTLGGFR_2                                                        | #N/A                    | 5.2084  | 5.3432  | 5.2941  | 5.3591  | 6.1173  | 4.9579  | 3.5996  | 4.9846  | 5.6664  | 5.2054  | 1.1061 | 0.1455  | 0.2374 | 0.6245 |
| Med1    | _SQT[Phospho (STY)]PPGVATPPPK_2                                     | Q925I9_71051_M1_Med1    | 8.8150  | 3.2169  | 9.1531  | 9.5402  | 3.1052  | 8.9266  | 9.4726  | 8.9663  | 4.0691  | 3.6649  | 1.0891 | 0.1231  | 0.7775 | 0.1093 |
| Med1    | _NXXQTGKAPGS[Phospho (STY)]PTK_2                                    | Q925I9_51158_M1_Med1    | 3.7081  | 5.6414  | 3.9513  | 4.8945  | 5.4796  | 3.6660  | 4.0157  | 3.8158  | 4.1636  | 4.1365  | 1.1543 | 0.2070  | 0.2525 | 0.5978 |
| Med1    | _HDGGS[Phospho (STY)]PSK_2                                          | Q925I9_51403_M1_Med1    | 3.7488  | 5.5936  | 3.4825  | 4.5271  | 4.8330  | 4.3145  | 5.7348  | 3.9749  | 4.2740  | 4.2043  | 0.8980 | -0.1552 | 0.3061 | 0.5141 |
| Sln5    | _FAVQLLEDYK_2                                                       | #N/A                    | 6.1612  | 5.7674  | 5.3779  | 5.6674  | 5.4575  | 5.7409  | 5.9210  | 6.0678  | 5.9418  | 6.0065  | 0.9517 | -0.0714 | 0.0790 | 1.1024 |
| Sln5    | _HALLETALTR_2                                                       | #N/A                    | 5.6306  | 5.5631  | 4.3269  | 5.0086  | 4.3809  | 4.7313  | 5.1577  | 5.0534  | 5.3692  | 4.6801  | 0.9753 | -0.0360 | 0.6982 | 0.1560 |
| Sln5    | _YGLEEGGIQVLDADGNLVGSSK_2                                           | #N/A                    | 5.3144  | 4.8902  | 5.3428  | 5.5346  | 4.1111  | 4.3788  | 4.9295  | 5.5918  | 4.7444  | 3.9215  | 1.0275 | 0.0931  | 0.7504 | 0.1247 |
| Sln5    | _HFIDIDPR_2                                                         | #N/A                    | 4.5204  | 5.5673  | 4.3405  | 5.4304  | 3.4808  | 4.5290  | 5.3085  | 5.5124  | 5.1548  | 5.1655  | 0.8788 | -0.1864 | 0.1454 | 0.5788 |
| Sln5    | _FQQTSPYGR_2                                                        | #N/A                    | 6.5243  | 7.0512  | 6.9811  | 7.0840  | 3.9597  | 6.3175  | 4.0589  | 7.0559  | 6.5548  | 4.3511  | 1.1479 | 0.1990  | 0.3697 | 0.4321 |
| Grip1   | _RGS[Phospho (STY)]PEEFK_2                                          | Q925T6_543_M1_Grip1     | 9.1456  | 8.9480  | 9.5459  | 9.5759  | 8.1759  | 9.0433  | 9.5400  | 9.0291  | 9.0228  | 9.0123  | 0.9914 | -0.0124 | 0.7860 | 0.1046 |
| Grip1   | _SLYST[Phospho (STY)]PR_2                                           | Q925T6_5432_M1_Grip1    | 4.1977  | 7.7538  | 3.3837  | 8.0028  | 3.3234  | 4.4061  | 7.6120  | 7.7381  | 3.8807  | 3.8533  | 0.8972 | -0.1565 | 0.6818 | 0.1663 |
| Grip1   | _TSL[Phospho (STY)]PVPKPR_2                                         | Q925T6_5846_M1_Grip1    | 5.9257  | 7.0182  | 4.0548  | 3.5986  | 3.4648  | 3.1598  | 4.5538  | 3.4026  | 3.7017  | 3.2758  | 1.2152 | 0.2812  | 0.3615 | 0.4418 |
| Grip1   | _QAS[Phospho (STY)]FQER_2                                           | Q925T6_5952_M1_Grip1    | 5.3333  | 4.4860  | 5.0647  | 5.4135  | 4.9384  | 5.2822  | 4.6359  | 5.3628  | 5.3282  | 4.6704  | 1.0174 | 0.0249  | 0.7219 | 0.1415 |
| Grip1   | _QTDQAS[Phospho (STY)]PK_2                                          | #N/A                    | 3.2797  | 3.9465  | 3.9665  | 4.4691  | 3.9062  | 4.2906  | 4.1838  | 3.2979  | 4.4361  | 4.3617  | 1.0217 | 0.0310  | 0.7786 | 0.1087 |
| Grip1   | _KQTDQAS[Phospho (STY)]PK_2                                         | #N/A                    | 3.9619  | 3.2643  | 3.1479  | 3.6505  | 3.0876  | 3.4720  | 3.3652  | 4.4680  | 4.1166  | 3.6175  | 0.8815 | -0.1819 | 0.1134 | 0.9452 |
| Taldo1  | _SYEPDEDPGVK_2                                                      | #N/A                    | 4.7774  | 5.5117  | 4.0527  | 5.5631  | 5.4513  | 5.5094  | 4.7078  | 4.9824  | 5.5757  | 1.0847  | 0.1173 | 0.3865  | 0.4129 | 0.5961 |
| Taldo1  | _WUNEDQM[Oxidation (M)]AVEK_3                                       | #N/A                    | 3.5244  | 4.8094  | 4.1997  | 4.1997  | 5.4480  | 4.8533  | 3.2080  | 3.1243  | 4.7852  | 4.5219  | 1.1524 | 0.2046  | 0.2534 | 0.5961 |
| Taldo1  | _LSTWEGIQAGK_2                                                      | #N/A                    | 6.0552  | 6.1565  | 3.7859  | 6.3946  | 6.7776  | 6.8728  | 6.3395  | 5.9792  | 6.6615  | 6.5596  | 0.9408 | -0.0880 | 0.5410 | 0.2668 |
| Taldo1  | _M[Oxidation (M)]ESALDQLK_2                                         | #N/A                    | 5.0246  | 4.8333  | 5.3280  | 3.9294  | 5.1028  | 5.3933  | 4.0322  | 4.6276  | 5.0383  | 3.5521  | 1.0363 | 0.0514  | 0.6382 | 0.1950 |
| Taldo1  | _Acetyl (Protein N-term)[SGS[Phospho (STY)]PVKR_2                   | #N/A                    | 13.0636 | 13.2089 | 13.6700 | 13.3750 | 12.3082 | 13.0801 | 13.3037 | 13.1993 | 13.1349 | 13.1843 | 0.9933 | -0.0906 | 0.7172 | 0.1444 |
| Taldo1  | _TIVM[Oxidation (M)]GAS[Phospho (STY)]FR_2                          | Q93092_5237_M1_Taldo1   | 10.4668 | 10.3714 | 11.1734 | 10.5300 | 10.1182 | 10.7200 | 10.8553 | 10.5964 | 10.6834 | 10.6475 | 0.9876 | -0.0180 | 0.5018 | 0.2994 |
| Hnnpab  | _IFVGLNPEATEEK_2                                                    | #N/A                    | 7.0638  | 7.0499  | 6.7346  | 7.1992  | 7.2786  | 6.2362  | 6.6801  | 6.7914  | 6.3781  | 6.9476  | 1.0407 | 0.0576  | 0.2349 | 0.6292 |
| Hnnpab  | _EVVQQQYVSSGR_2                                                     | #N/A                    | 5.1571  | 4.8200  | 3.1783  | 3.6810  | 5.8140  | 5.4129  | 5.2214  | 4.6467  | 5.4949  | 5.4553  | 0.8987 | -0.1541 | 0.3647 | 0.4381 |
| Hnnpab  | _EYFGQGEAEALPDPK_2                                                  | #N/A                    | 4.2379  | 4.5522  | 5.5143  | 5.2019  | 4.1612  | 3.9642  | 4.0868  | 4.2210  | 4.1104  | 4.1362  | 1.1128 | 0.1542  | 0.1801 | 0.7445 |
| Myo5a   | _AIS[Phospho (STY)]PTSATSSGR_2                                      | #N/A                    | 14.0474 | 13.7083 | 14.1242 | 13.8788 | 12.5988 | 13.4055 | 14.4280 | 14.1461 | 13.8084 | 13.7384 | 0.9713 | -0.0420 | 0.2368 | 0.6257 |
| Myo5a   | _SAPEVTAGAPAYR_2                                                    | #N/A                    | 7.3005  | 7.5177  | 3.9451  | 7.1909  | 7.4305  | 7.2802  | 7.9052  | 7.4647  | 7.4436  | 7.2082  | 0.9030 | -0.1472 | 0.3415 | 0.4667 |
| Myo5a   | _YQNLNFSR_2                                                         | #N/A                    | 6.2512  | 6.0667  | 5.9065  | 5.5884  | 5.1793  | 5.8421  | 5.9830  | 5.9548  | 5.0950  | 5.0956  | 1.0495 | 0.0967  | 0.3532 | 0.4520 |
| Myo5a   | _M[Oxidation (M)]LPELFQDDEKAS[Phospho (STY)]PTSATSSGR_3             | #N/A                    | 7.3462  | 9.1119  | 9.2707  | 9.8413  | 6.6927  | 7.6191  | 7.8739  | 9.4473  | 8.0789  | 7.3023  | 1.0169 | 0.0242  | 0.8560 | 0.0675 |
| Myo5a   | _AC[Carbamidomethyl (C)]QVLETR_2                                    | #N/A                    | 5.5163  | 5.2566  | 4.2743  | 4.3069  | 4.7979  | 4.3189  | 3.1989  | 5.5870  | 4.9234  | 5.0147  | 1.0144 | 0.0207  | 0.8940 | 0.4807 |
| Myo5a   | _QLELDINDER_2                                                       | #N/A                    | 5.4135  | 4.2712  | 4.0369  | 5.4505  | 3.9766  | 4.3610  | 5.1896  | 5.4392  | 4.6403  | 4.4933  | 0.9280 | -0.1078 | 0.3834 | 0.4163 |
| Myo5a   | _ETLEPUQAQLQWK_2                                                    | #N/A                    | 4.6448  | 4.7868  | 3.5571  | 3.7389  | 4.0349  | 3.3269  | 3.2492  | 4.1879  | 4.0486  | 4.2790  | 1.0187 | -0.0782 | 0.8406 | 0.0754 |
| Myo5a   | _TSS[Phospho (STY)]IADGTYLDSLR_2                                    | Q99104_51650_M1_Myo5a   | 7.3944  | 7.5608  | 4.1586  | 7.2067  | 3.3407  | 7.0385  | 4.0649  | 7.5842  | 3.2186  | 7.0341  | 1.1171 | 0.1597  | 0.6289 | 0.2015 |
| Myo5a   | _VLNLYTPVNEFEER_2                                                   | #N/A                    | 6.2382  | 3.9461  | 6.2117  | 5.5469  | 3.7674  | 3.9620  | 6.2698  | 6.4018  | 5.4120  | 5.5808  | 0.8359 | -0.2586 | 0.1643 | 0.7844 |
| Myo5a   | _SHENEAALRGEQSLKENNR_4                                              | #N/A                    | 5.3449  | 6.4999  | 7.1494  | 6.3900  | 3.9533  | 6.5178  | 6.8460  | 5.7706  | 6.4685  | 5.2862  | 0.9808 | -0.0280 | 0.8613 | 0.0648 |
| Myo5a   | _LHIGMENK_2                                                         | #N/A                    | 3.8226  | 3.1299  | 6.1258  | 5.2140  | 2.9512  | 3.2775  | 3.2288  | 3.1035  | 4.2529  | 3.4811  | 1.1621 | 0.2168  | 0.4329 | 0.3636 |
| Myo5a   | _YVVSQLEWLR_2                                                       | #N/A                    | 4.6861  | 3.9646  | 3.1115  | 4.1561  | 3.7859  | 3.9436  | 4.0797  | 4.9598  | 4.9286  | 4.5961  | 0.8492 | -0.2358 | 0.0524 | 1.2804 |
| Myo5a   | _YFATVSGSAEANVEEK_2                                                 | #N/A                    | 3.7798  | 3.0352  | 5.5135  | 4.5581  | 2.8235  | 3.7011  | 3.2055  | 4.6077  | 4.2430  | 4.2354  | 0.8803 | -0.1840 | 0.2402 | 0.6194 |
| Myo5a   | _IGELEVQGMENS[Phospho (STY)]PGQIDPIRPVNR_3                          | Q99104_51450_M1_Myo5a   | 3.5376  | 3.6885  | 4.2244  | 3.2262  | 4.1642  | 3.5653  | 4.4418  | 3.3914  | 3.0400  | 3.1932  | 1.0619 | 0.0867  | 0.5143 | 0.2888 |
| Myo5a   | _VLMELQTSVSEELVR_2                                                  | #N/A                    | 2.9960  | 4.2302  | 3.6828  | 4.1854  | 4.1185  | 4.0070  | 3.9001  | 3.9330  | 3.5816  | 4.1524  | 0.9944 | -0.0081 | 0.9346 | 0.0294 |
| Cacna1d | _SES[Phospho (STY)]GDGQZPTKC[Carbamidomethyl (C)]R_2                | Q99246_51833_M1_Cacna1d | 3.0937  | 6.4702  | 4.0714  | 4.0104  | 5.1792  | 6.2656  | 6.9519  | 6.6345  | 3.4569  | 6.4733  | 0.8247 | -0.2781 | 0.3062 | 0.5140 |
| Cacna1d | _QT[Phospho (STY)]VLSWQAANDAAR_2                                    | Q99246_749_M1_Cacna1d   | 4.2192  | 3.0069  | 3.4052  | 3.9079  | 2.8952  | 3.7294  | 3.6225  | 4.2106  | 3.8592  | 3.8749  | 0.9063 | -0.1419 | 0.2320 | 0.6345 |
| Cacna1d | _RGS[Phospho (STY)]S[Phospho (STY)]QDQVPSPALPHR_3                   | Q99246_51950_M2_Myo5a   | 3.3278  | 4.0840  | 4.5623  | 4.1060  | 3.9723  | 4.1531  | 4.0463  | 5.8167  | 3.1942  | 3.7833  | 0.9582 | -0.0616 | 0.7294 | 0.1370 |
| Cacna1d | _YS[Phospho (STY)]PSHSTR_2                                          | Q99246_51991_M1_Cacna1d | 3.8073  | 3.5351  | 3.5409  | 4.5856  | 3.3565  | 4.3730  | 3.2330  | 3.9165  | 4.2155  | 4.2628  | 0.9896 | -0.0151 | 0.9014 | 0.0451 |
| Cacna1d | _RIS[Phospho (STY)]ELNMK_2                                          | Q99246_5869_M1_Cacna1d  | 2.9605  | 3.7168  | 4.1950  | 4.0558  | 3.6051  | 3.0195  | 3.8870  | 3.2624  | 3.5615  | 3.4161  | 1.0171 | 0.0245  | 0.8362 | 0.0777 |
| Sec142  | _MNOQGADT[Phospho (STY)]PK_2                                        | Q99108_7401_M1_Sec142   | 4.      |         |         |         |         |         |         |         |         |         |        |         |        |        |



|         |                                                             |                        |         |         |         |          |         |         |         |         |         |         |         |         |        |        |
|---------|-------------------------------------------------------------|------------------------|---------|---------|---------|----------|---------|---------|---------|---------|---------|---------|---------|---------|--------|--------|
| Mpst    | _AQPEHISEGR_3                                               | #N/A                   | 3.6595  | 3.9359  | 3.6786  | 3.2224   | 3.7760  | 3.8313  | 3.3706  | 3.7788  | 2.6757  | 4.3389  | 1.0404  | 0.0571  | 0.6511 | 0.1864 |
| Mpst    | _FQGTQPEPR_2                                                | #N/A                   | 4.2572  | 6.3204  | 3.9909  | 6.6893   | 6.6946  | 5.9217  | 3.6830  | 3.4665  | 3.7655  | 3.2120  | 1.5986  | 0.6768  | 0.0098 | 2.0071 |
| Mpst    | _THEDLENIDAR_3                                              | #N/A                   | 3.9800  | 3.2843  | 3.1659  | 3.6686   | 4.2237  | 4.5120  | 3.3833  | 3.4209  | 4.5713  | 3.6356  | 1.0141  | 0.0002  | 0.8829 | 0.0541 |
| Mpst    | _HWNUNONIPSSGK_2                                            | #N/A                   | 4.1467  | 3.0794  | 3.3327  | 3.8354   | 4.7505  | 3.6569  | 3.5501  | 4.2831  | 5.0980  | 3.8024  | 0.9084  | -0.1386 | 0.3738 | 0.4274 |
| Mpst    | _DIGEPGHIGSPNPFERLTNEGLEK_3                                 | #N/A                   | 3.6462  | 4.4025  | 3.3799  | 4.7260   | 2.7899  | 3.8347  | 2.8336  | 4.0775  | 3.7539  | 4.1018  | 1.0284  | 0.0404  | 0.8122 | 0.0903 |
| Mpst    | _AFGHGVSVLDDGFR_3                                           | #N/A                   | 6.1551  | 2.9630  | 3.4413  | 3.9518   | 6.0146  | 3.7733  | 3.6664  | 4.1667  | 3.8153  | 4.1632  | 1.1088  | 0.1491  | 0.5568 | 0.2543 |
| Stom2   | _ILEPLNVLPIKDR_2                                            | #N/A                   | 4.9477  | 5.4976  | 5.6268  | 5.3048   | 5.3165  | 5.2488  | 5.1379  | 4.5779  | 5.3412  | 4.9725  | 1.0632  | 0.0884  | 0.1072 | 0.9698 |
| Stom2   | _NTVILFVQGEAWVVER_2                                         | #N/A                   | 3.5748  | 4.2182  | 3.8791  | 3.4229   | 4.2199  | 2.5284  | 3.5711  | 3.8904  | 3.4615  | 3.1001  | 1.0384  | 0.0544  | 0.7092 | 0.1493 |
| Stom2   | _APVPGAQNSQGR_2                                             | #N/A                   | 3.7532  | 3.0576  | 4.4400  | 6.6489   | 4.8811  | 3.3498  | 3.7106  | 3.1758  | 3.7379  | 3.4088  | 1.2414  | 0.3119  | 0.2467 | 0.6078 |
| Pacin3  | _DLQGSIAAS(Phospho (STY))DEEDR_2                            | Q99JBB_S276_M1_Pacin3  | 3.1847  | 3.9409  | 4.4192  | 4.4747   | 3.8292  | 4.2962  | 4.1894  | 3.6438  | 3.2924  | 4.4417  | 1.0340  | 0.0482  | 0.6921 | 0.1598 |
| Pacin3  | _DGTAPPQSPSPSGQGDQWS(Phospho (STY))DEESPR_3                 | Q99JBB_S354_M1_Pacin3  | 4.1769  | 3.1656  | 3.9105  | 5.4743   | 3.3206  | 3.9857  | 3.6026  | 3.5469  | 3.8459  | 3.1316  | 1.1342  | 0.1816  | 0.3079 | 0.5117 |
| Pacin3  | _GGRS(Phospho (STY))PDEVLTISVPTFR_3                         | Q99JBB_S319_M1_Pacin3  | 3.3448  | 4.1011  | 4.5793  | 5.7641   | 3.9894  | 4.1361  | 4.0292  | 3.8039  | 3.4525  | 2.8151  | 1.1098  | 0.1503  | 0.3568 | 0.4476 |
| Pacin3  | _ALYDVAGQEADLS(Phospho (STY))FR_2                           | Q99JBB_S383_M1_Pacin3  | 3.0111  | 4.2150  | 3.6979  | 4.2006   | 4.1033  | 4.0221  | 3.9153  | 3.9179  | 3.5665  | 4.1676  | 0.9957  | -0.0062 | 0.9493 | 0.0226 |
| Puip1   | _QSNASS(Phospho (STY))DVEVEEK_2                             | #N/A                   | 10.4015 | 10.2991 | 10.6470 | 11.0462  | 9.9832  | 10.4086 | 10.7098 | 10.1835 | 10.1474 | 10.4779 | 1.0082  | 0.0117  | 0.6979 | 0.1562 |
| Puip1   | _NLAKPGVTS(Phospho (STY))EDEDQGEKK_3                        | #N/A                   | 3.7037  | 4.9893  | 4.3905  | 6.1732   | 3.5923  | 3.2138  | 3.1070  | 4.9795  | 4.7309  | 3.3593  | 1.0741  | 0.1031  | 0.6682 | 0.1751 |
| Puip1   | _FSSQASTK_2                                                 | #N/A                   | 3.0801  | 4.0614  | 4.3146  | 4.1804   | 5.5221  | 4.8448  | 4.7720  | 3.4836  | 5.1949  | 4.6203  | 0.9593  | -0.0599 | 0.7266 | 0.1387 |
| Puip1   | _QVOTEEAGM(Oxidation (M))YTAATASNKKAS(Phospho (STY))PK_3    | #N/A                   | 5.7213  | 5.8535  | 6.6094  | 7.3255   | 5.9686  | 6.1458  | 5.7896  | 6.5545  | 6.0310  | 5.6260  | 1.0451  | 0.0636  | 0.4573 | 0.3398 |
| Puip1   | _NLAKPGVTS(Phospho (STY))EDEDQGEKK_3                        | #N/A                   | 3.4868  | 5.5186  | 3.2205  | 4.1726   | 6.0910  | 5.4272  | 3.8873  | 3.9459  | 5.3267  | 5.1497  | 1.0165  | 0.0236  | 0.9142 | 0.0390 |
| Puip1   | _QSNASS(Phospho (STY))DVEVEEKTNVSK_2                        | #N/A                   | 3.2927  | 3.7958  | 2.7781  | 4.0710   | 3.8711  | 3.8584  | 4.2192  | 4.4310  | 3.2293  | 3.7482  | 0.9243  | -0.1136 | 0.3892 | 0.4098 |
| Puip1   | _PGVTS(Phospho (STY))DQGEK(Phospho (STY))EDEDQGEKK_2        | #N/A                   | 3.8386  | 3.3876  | 4.5524  | 5.8930   | 4.4919  | 3.3487  | 3.2419  | 3.0904  | 4.2398  | 3.4942  | 1.2079  | 0.2725  | 0.2031 | 0.6922 |
| Puip1   | _QVOTEEAGM(Oxidation (M))YTAATASNKKAS(Phospho (STY))PKR_3   | #N/A                   | 4.7299  | 5.7677  | 6.5414  | 6.0937   | 4.8803  | 4.3628  | 4.5364  | 5.8961  | 5.2138  | 4.3539  | 1.0792  | 0.1099  | 0.4684 | 0.3294 |
| Puip1   | _ETNVSKEDT(Phospho (STY))DQGEK_2                            | #N/A                   | 5.7050  | 4.8566  | 3.7600  | 4.2626   | 4.0413  | 4.0841  | 4.7502  | 4.2424  | 4.2296  | 1.0645  | 0.0902  | 0.5357  | 0.2711 | 0.1693 |
| Puip1   | _EDTDQEEKAS(Phospho (STY))NEDVTK_2                          | #N/A                   | 3.3470  | 3.7607  | 4.1921  | 4.3133   | 3.6748  | 3.6808  | 4.0079  | 3.7186  | 3.5146  | 3.5126  | 1.0379  | 0.0536  | 0.5165 | 0.2869 |
| Puip1   | _NFQAAHR_2                                                  | #N/A                   | 3.5863  | 4.3426  | 3.3200  | 4.9818   | 5.0699  | 3.8945  | 3.7877  | 4.3808  | 3.6941  | 4.0400  | 1.0562  | 0.0789  | 0.5819 | 0.2351 |
| Puip1   | _ETNVSKEDT(Phospho (STY))DQGEKASNEDVTK_3                    | #N/A                   | 3.7326  | 3.7335  | 3.7826  | 2.7975   | 3.9905  | 3.3283  | 3.8985  | 3.4978  | 3.2160  | 3.7609  | 0.9910  | -0.0131 | 0.9000 | 0.4585 |
| Puip1   | _QSNASS(Phospho (STY))DVEVEEKETNVSKEDTQGEK_4                | #N/A                   | 3.5841  | 4.3403  | 3.3177  | 4.3624   | 4.2286  | 3.8968  | 4.5106  | 4.5850  | 4.4387  | 4.0396  | 1.0002  | -0.1517 | 0.1062 | 0.9739 |
| Gpr371  | _LGDVSC[Carbamidomethyl (C)]R_2                             | #N/A                   | 6.5391  | 6.5687  | 6.6067  | 6.2143   | 6.2365  | 5.5272  | 6.5443  | 6.7019  | 6.1179  | 5.7543  | 0.9004  | 0.0006  | 0.9927 | 0.0032 |
| Gpr371  | _ES(Phospho (STY))PLPLGTGTC[Carbamidomethyl (C)]_2          | #N/A                   | 9.8747  | 9.1773  | 9.1155  | 9.6670   | 8.5281  | 9.1806  | 10.1323 | 9.5966  | 9.5306  | 9.2834  | 0.9607  | -0.0578 | 0.2122 | 0.6733 |
| Gpr371  | _PRES(Phospho (STY))PLPLGTGTC[Carbamidomethyl (C)]_2        | #N/A                   | 4.0069  | 6.7678  | 3.7406  | 7.4081   | 3.1506  | 3.4740  | 7.2260  | 7.1510  | 4.0159  | 2.9616  | 0.8912  | -0.1661 | 0.6606 | 0.1801 |
| KH22    | _LHLEDPKGT(Phospho (STY))PKR_2                              | #N/A                   | 4.5706  | 5.4159  | 5.8738  | 3.9411   | 3.7578  | 3.7286  | 5.0650  | 4.8657  | 4.0714  | 4.7682  | 0.9692  | -0.0451 | 0.7784 | 0.1088 |
| Cdc26   | _EDVEGVGTS(Phospho (STY))DGEAAGLSSDPK_2                     | #N/A                   | 3.8429  | 4.4403  | 3.9066  | 3.9114   | 3.9363  | 3.7181  | 3.8316  | 3.7083  | 3.6348  | 4.7214  | 0.9963  | -0.0054 | 0.9519 | 0.0814 |
| Cdc26   | _QKEDVEGVGTS(Phospho (STY))DGEAAGLSSDPK_3                   | #N/A                   | 3.7621  | 3.8922  | 4.0918  | 3.6356   | 3.5019  | 3.3480  | 3.7839  | 3.3687  | 3.6678  | 3.3129  | 1.0487  | 0.0686  | 0.3257 | 0.4871 |
| Home3   | _SQS(Phospho (STY))ADTGPPTFR_2                              | Q99JP6_S159_M1_Home3   | 7.8816  | 8.1370  | 8.8086  | 8.7871   | 8.3750  | 8.2571  | 7.8854  | 6.8816  | 8.1527  | 7.8854  | 1.0159  | 0.0227  | 0.5820 | 0.2351 |
| Ggt7    | _LPSISSEM(Oxidation (M))SQSDGGS(Phospho (STY))PURETR_3      | #N/A                   | 5.8810  | 6.5071  | 3.5476  | 4.2001   | 3.3261  | 6.4446  | 3.4522  | 3.9172  | 6.2151  | 6.6638  | 0.9847  | -0.0223 | 0.9388 | 0.0274 |
| Ggt7    | _LPSISSEM(Oxidation (M))SQSDGGS(Phospho (STY))PLR_2         | #N/A                   | 5.6606  | 5.7037  | 5.4747  | 6.4880   | 5.3212  | 5.4752  | 5.9338  | 5.5076  | 5.0362  | 5.4258  | 1.0386  | 0.0546  | 0.4355 | 0.1630 |
| Ggt7    | _KDEDAFLGDDPT(Phospho (STY))DPDSFK_3                        | Q99JP7_T56_M1_Ggt7     | 4.3026  | 3.0398  | 4.0363  | 3.5800   | 3.4463  | 3.3675  | 3.7283  | 3.4212  | 3.7202  | 3.2573  | 1.0275  | 0.0391  | 0.7118 | 0.1477 |
| Shn1    | _NLTLNQLLENAR_2                                             | #N/A                   | 5.3438  | 5.7237  | 5.9165  | 4.6685   | 5.1838  | 4.1951  | 5.9339  | 5.1365  | 4.4626  | 0.9908  | -0.0134 | 0.9090  | 0.0414 | 0.1474 |
| Shn1    | _QATQVNSR_2                                                 | #N/A                   | 4.6089  | 4.9425  | 4.0611  | 4.2623   | 3.9767  | 4.1682  | 5.0737  | 4.6810  | 5.0870  | 3.8488  | 0.9281  | -0.1077 | 0.2904 | 0.5369 |
| Shn1    | _ASHFTVTDPR_3                                               | #N/A                   | 2.7729  | 3.4842  | 3.9624  | 3.4306   | 3.3725  | 3.2521  | 3.1453  | 3.4950  | 1.6596  | 3.1835  | 1.1480  | 0.1991  | 0.3540 | 0.4510 |
| Gorasp2 | _ADASSLTVDTVS(Phospho (STY))PASK_2                          | Q99JK3_S418_M1_Gorasp2 | 9.2719  | 9.4554  | 9.5335  | 10.2776  | 8.7424  | 9.5439  | 9.5111  | 9.3453  | 9.3297  | 9.7264  | 0.9992  | -0.0011 | 0.9785 | 0.0094 |
| Gorasp2 | _LVVYNTDTNCC[Carbamidomethyl (C)]R_2                        | #N/A                   | 5.0583  | 5.3602  | 4.1363  | 5.8341   | 4.9404  | 5.4074  | 5.3860  | 4.7288  | 4.6566  | 5.1417  | 1.0350  | 0.0413  | 0.6672 | 0.1758 |
| Eif3m   | _Acetyl (Protein N-term)[SVPAFIDSEDDQAELR_2                 | #N/A                   | 5.3067  | 5.6085  | 6.4278  | 5.0136   | 4.2767  | 5.2335  | 5.3452  | 5.8286  | 5.1255  | 1.0253  | 0.1023  | 0.0764  | 0.7674 | 0.1150 |
| Hadhb   | _LAISGLLHR_2                                                | #N/A                   | 3.6322  | 6.8325  | 6.9761  | 6.8035   | 6.9635  | 6.4298  | 7.0804  | 6.9941  | 6.6274  | 6.9531  | 0.9731  | -0.0393 | 0.2711 | 0.5669 |
| Hadhb   | _DHYVSGDPK_2                                                | #N/A                   | 6.6080  | 5.6646  | 6.0312  | 6.5820   | 5.9621  | 6.3851  | 6.2050  | 5.7300  | 5.5641  | 5.8480  | 1.0632  | 0.0884  | 0.1341 | 0.8726 |
| Hadhb   | _NLNVEGVR_2                                                 | #N/A                   | 6.2370  | 5.1549  | 3.6062  | 6.1918   | 6.0305  | 6.5739  | 5.4700  | 5.7792  | 6.4461  | 6.4197  | 0.9343  | -0.0981 | 0.5229 | 0.2816 |
| Hadhb   | _DVAHYFGTVQEVK_2                                            | #N/A                   | 3.0163  | 4.3261  | 4.2509  | 2.9581   | 2.7252  | 3.5821  | 3.9429  | 3.2066  | 3.5056  | 3.4719  | 0.9843  | -0.0228 | 0.8855 | 0.0528 |
| Pfpp3   | _ELSPVDIQR_2                                                | #N/A                   | 5.4016  | 5.9776  | 5.3876  | 4.5553   | 5.0827  | 5.4449  | 6.2498  | 6.2107  | 5.7632  | 5.4418  | 0.8972  | -0.1565 | 0.0645 | 1.1905 |
| Pfpp3   | _NGGSP(Phospho (STY))PALNNPR_2                              | Q99JY8_S19_M1_Pfpp3    | 9.1018  | 7.0763  | 7.9289  | 7.4669   | 5.9644  | 6.2220  | 8.9945  | 8.9096  | 6.5697  | 7.1828  | 0.9216  | -0.1179 | 0.4392 | 0.1374 |
| Actr3   | _DVEEIGPSC[Carbamidomethyl (C)]R_2                          | #N/A                   | 7.5417  | 7.3830  | 7.8052  | 8.0088   | 7.7863  | 7.6352  | 7.7983  | 7.2809  | 7.6438  | 7.7943  | 1.0084  | 0.0120  | 0.6770 | 0.1694 |
| Actr3   | _AEPEIDHYLTPPLNTPENR_3                                      | #N/A                   | 6.8619  | 7.9196  | 7.8635  | 7.9057   | 6.1153  | 6.6572  | 7.3284  | 7.7909  | 6.4941  | 5.6114  | 1.0609  | 0.0853  | 0.4728 | 0.3253 |
| Actr3   | _GVOLDIFFGDEAEKPYATK_3                                      | #N/A                   | 4.4155  | 5.7147  | 5.8335  | 4.8490   | 5.5271  | 5.8079  | 5.3528  | 5.1123  | 6.1196  | 6.0270  | 0.9478  | -0.0773 | 0.4348 | 0.3618 |
| Actr3   | _YSYVC[Carbamidomethyl (C)]POLVK_2                          | #N/A                   | 6.8232  | 6.9327  | 3.9253  | 6.9645   | 6.9589  | 6.4020  | 6.7959  | 6.5277  | 6.8006  | 6.7124  | 0.9441  | -0.0829 | 0.5586 | 0.2529 |
| Actr3   | _DVTGVNAISK_2                                               | #N/A                   | 5.0015  | 5.4263  | 4.4920  | 6.1477   | 6.3698  | 5.3530  | 5.2362  | 5.1756  | 5.8105  | 5.9789  | 0.9846  | -0.0223 | 0.8333 | 0.0792 |
| Actr3   | _DITYFQQLR_2                                                | #N/A                   | 3.7889  | 5.0335  | 4.4757  | 5.8070   | 4.6154  | 5.3713  | 5.4045  | 5.1893  | 5.2748  | 5.1441  | 0.9230  | -0.1156 | 0.3020 | 0.5200 |
| Actr3   | _LPAC[Carbamidomethyl (C)]VQDC[Carbamidomethyl (C)]GTGYTK_2 | #N/A                   | 6.0077  | 6.7395  | 3.8860  | 6.3944   | 7.0652  | 4.2102  | 4.1033  | 6.7717  | 6.5285  | 5.8252  | 0.9845  | -0.0225 | 0.9168 | 0.0377 |
| Actr3   | _HNPFGVM(Oxidation (M))S(Phospho (STY))_2                   | #N/A                   | 11.3004 | 11.4417 | 12.0706 | 11.4050  | 10.7178 | 11.4531 | 11.8915 | 11.4140 | 11.5578 | 11.3769 | 0.9860  | -0.0204 | 0.5166 | 0.0499 |
| Actr3   | _TLTGTVIDSGDGVTHVPVAGVVGSC[Carbamidomethyl (C)]IK_3         | #N/A                   | 2.9993  | 3.8045  | 4.0220  | 4.2278   | 3.7231  | 4.3247  | 4.4644  | 2.8278  | 2.1732  | 4.1558  | 1.1307  | 0.1772  | 0.3936 | 0.4049 |
| Arfgap2 | _VSNCS(Phospho (STY))FTEDR_2                                | Q99K28_S239_M1_Arfgap2 | 3.9772  | 6.5836  | 7.6343  | 3.2546   | 5.9002  | 6.4887  | 3.3969  | 7.0958  | 6.8652  | 6.3241  | 0.9526  | -0.0701 | 0.8037 | 0.0949 |
| Arfgap2 | _AIS(Phospho (STY))SDM(Oxidation (M))JFGR_2                 | #N/A                   | 4.4245  | 4.7018  | 5.1487  | 5.2704   | 3.8545  | 5.3846  | 5.6932  | 5.1157  | 5.0834  | 5.0501  | 0.9163  | -0.1261 | 0.2127 | 0.0721 |
| Arfgap2 | _HGTDLWIDSM(Oxidation (M))NSAPSHS(Phospho (STY))PEKK_4      | #N/A                   | 5.3126  | 3.7976  | 6.7789  | 6.9991   | 3.4927  | 3.4188  | 4.0023  | 6.8524  | 5.9070  | 3.4270  | 0.9847  | -0.0222 | 0.9431 | 0.0254 |
| Arfgap2 | _Acetyl (Protein N-term)[AAS](Phospho (STY))PSKETQTFK_2     | Q99K28_S4_M1_Arfgap2   | 3.2841  | 4.0893  | 3.9709  | 5.8793   | 3.9107  | 3.8188  | 4.1883  | 4.7985  | 3.2935  | 4.4406  | 0.9949  | -0.0074 | 0.9682 | 0.0140 |
| Eps8I2  | _LAYDELIQR_2                                                | #N/A                   | 3.8487  | 3.1531  | 4.5355  | 3.5373   | 2.9744  | 3.2543  | 3.6151  | 3.0803  | 4.2297  | 3.5043  | 0.9842  | -0.0229 | 0.8740 | 0.0585 |
| Eps8I2  | _YWGSPAS(Phospho (STY))PTHK_2                               | Q99K30_S573_M1_Eps8I2  | 4.0468  | 3.3022  | 3.1099  | 3.6125</ |         |         |         |         |         |         |         |         |        |        |



|        |                                                                      |                       |         |         |         |         |         |         |         |         |         |         |         |         |        |        |
|--------|----------------------------------------------------------------------|-----------------------|---------|---------|---------|---------|---------|---------|---------|---------|---------|---------|---------|---------|--------|--------|
| Pstt1  | _LPHSVLEIQK_2                                                        | #N/A                  | 3.8594  | 5.0216  | 4.5410  | 4.8934  | 4.5429  | 4.3175  | 4.4124  | 4.3368  | 3.6841  | 4.9601  | 1.0416  | 0.0588  | 0.5586 | 0.2529 |
| Pstt1  | _SQM[Oxidation (M)]VEIDNSGFVVC[Carbamidomethyl (C)]PVER_3            | #N/A                  | 3.2268  | 3.9830  | 5.7168  | 5.7183  | 3.8713  | 4.2541  | 3.2815  | 2.9961  | 3.2952  | 5.3036  | 1.1997  | 0.2626  | 0.3021 | 0.5198 |
| Pstt1  | _SADVYTGVAWSAK_2                                                     | #N/A                  | 3.8253  | 3.5171  | 3.5590  | 5.4068  | 3.3384  | 4.3911  | 3.2510  | 3.8984  | 4.1975  | 4.2809  | 1.0254  | 0.0362  | 0.8262 | 0.0829 |
| Hagh   | _ALFLEIGR_2                                                          | #N/A                  | 4.6670  | 6.2393  | 3.5652  | 5.1241  | 5.7921  | 5.3483  | 3.6382  | 5.2504  | 6.1420  | 5.6638  | 0.9902  | -0.0143 | 0.9388 | 0.0274 |
| Hagh   | _HVERGNAAIQEK_2                                                      | #N/A                  | 6.1221  | 5.4506  | 5.8173  | 5.7832  | 6.1901  | 6.3980  | 6.1643  | 4.9377  | 5.5105  | 5.5105  | 1.0776  | 0.1079  | 0.1422 | 0.8471 |
| Hagh   | _TVQQHAGETDPVTM[Oxidation (M)]R_2                                    | #N/A                  | 3.6526  | 3.6291  | 2.3394  | 4.4309  | 4.0292  | 3.9167  | 3.4821  | 4.2759  | 3.6956  | 3.7471  | 0.9648  | -0.0517 | 0.7386 | 0.1316 |
| Hagh   | _VYHLSTLQVGLSVK_3                                                    | #N/A                  | 2.5893  | 3.8927  | 3.4672  | 4.2292  | 3.2954  | 3.3425  | 4.3774  | 4.1154  | 2.6398  | 4.0429  | 0.9145  | -0.1290 | 0.4638 | 0.3337 |
| Rbm10  | _GLVAAVSGES[Phospho (STY)]DS[Phospho (STY)]EEQIER_2                  | Q99KG3_5736_M2_Rbm10  | 3.7175  | 8.4557  | 3.4512  | 9.7313  | 8.8009  | 8.8315  | 6.2380  | 8.7512  | 8.9649  | 9.3631  | 0.8602  | -0.2173 | 0.4706 | 0.3274 |
| Rbm10  | _LASDRPS[Phospho (STY)]PPR_2                                         | Q99KG3_5723_M1_Rbm10  | 9.6941  | 10.0431 | 10.6898 | 10.5308 | 9.5926  | 9.8529  | 9.9963  | 9.7554  | 10.0514 | 10.0538 | 1.0103  | 0.0148  | 0.6746 | 0.1709 |
| Sik24  | _J[Acetyl (Protein N-term)]JAHSG[Phospho (STY)]PVQSGLPQMQLNK_2       | Q99KH8_54_M1_Sik24    | 4.2764  | 3.0660  | 4.0101  | 9.1327  | 3.4202  | 3.3414  | 3.7022  | 3.4473  | 3.7463  | 3.2312  | 1.2858  | 0.3627  | 0.4151 | 0.3819 |
| Ac02   | _SQFTITPGSQIR_2                                                      | #N/A                  | 10.5834 | 10.6134 | 10.8563 | 10.9080 | 10.7978 | 10.7085 | 10.7909 | 10.5813 | 10.5566 | 10.5284 | 1.0123  | 0.0176  | 0.1514 | 0.8198 |
| Ac02   | _NAVYQFGPVPOTAR_2                                                    | #N/A                  | 10.7304 | 10.6356 | 10.9103 | 10.9011 | 10.6210 | 10.5757 | 10.8856 | 10.4947 | 10.6049 | 10.5394 | 1.0092  | 0.0132  | 0.3642 | 0.4386 |
| Ac02   | _VDVSPTSQR_2                                                         | #N/A                  | 9.2592  | 9.5685  | 9.6431  | 9.6797  | 9.6541  | 9.4482  | 9.4533  | 9.4719  | 9.3526  | 9.5185  | 1.0099  | 0.0141  | 0.3168 | 0.4992 |
| Ac02   | _SDFDPGQDTYHPKP_3                                                    | #N/A                  | 9.3477  | 9.3377  | 9.1351  | 9.7163  | 9.4306  | 9.1946  | 9.3656  | 9.3025  | 9.1733  | 9.3486  | 1.0068  | 0.0097  | 0.5841 | 0.0097 |
| Ac02   | _NTIVTSVNR_2                                                         | #N/A                  | 10.0467 | 10.2095 | 10.3702 | 10.4210 | 10.5151 | 10.1746 | 10.1725 | 10.2695 | 10.3826 | 10.1959 | 1.0034  | 0.0048  | 0.7316 | 0.1357 |
| Ac02   | _FNPETDFLTGK_2                                                       | #N/A                  | 10.0855 | 10.2744 | 10.4391 | 10.2787 | 10.1411 | 10.1122 | 10.4019 | 10.2046 | 9.9341  | 10.1781 | 1.0041  | 0.0060  | 0.6910 | 0.1605 |
| Ac02   | _EHAALPEPR_2                                                         | #N/A                  | 9.9489  | 9.8357  | 9.6833  | 9.9155  | 10.0967 | 9.8102  | 9.5549  | 9.7392  | 9.7321  | 9.8344  | 1.0171  | 0.0245  | 0.0861 | 1.0649 |
| Ac02   | _VYGHLDOPANQEIER_3                                                   | #N/A                  | 8.9838  | 8.8475  | 8.9084  | 9.1491  | 8.7470  | 9.0089  | 8.8862  | 8.6901  | 8.5233  | 8.7628  | 1.0258  | 0.0688  | 0.0418 | 1.3788 |
| Ac02   | _DFAPGPKLX_2                                                         | #N/A                  | 9.6704  | 10.0001 | 9.3054  | 9.8197  | 10.1672 | 9.3549  | 9.7691  | 9.7375  | 9.8445  | 9.5892  | 0.9984  | -0.0023 | 0.9343 | 0.0295 |
| Ac02   | _FKELEPDADLPB_2                                                      | #N/A                  | 8.3714  | 8.2554  | 8.2913  | 8.4724  | 8.4203  | 8.3642  | 8.4723  | 8.1601  | 8.2510  | 8.3424  | 1.0067  | 0.0097  | 0.4251 | 0.3715 |
| Ac02   | _LEAPDADELPR_2                                                       | #N/A                  | 9.2532  | 8.5191  | 8.4961  | 8.8132  | 9.0447  | 8.7463  | 9.0287  | 8.7177  | 8.7068  | 9.1283  | 0.9906  | -0.0136 | 0.6441 | 0.1911 |
| Ac02   | _ITGSLSGWTSYK_2                                                      | #N/A                  | 8.5144  | 8.8053  | 9.0684  | 8.9105  | 8.7074  | 8.5880  | 8.7322  | 8.5538  | 8.7579  | 9.0097  | 1.0068  | 0.0097  | 0.7069 | 0.1506 |
| Ac02   | _EGWFLDIR_2                                                          | #N/A                  | 8.4246  | 8.5125  | 7.7178  | 8.8205  | 8.0304  | 8.8011  | 8.5946  | 8.4563  | 8.1033  | 8.6817  | 0.9754  | -0.0359 | 0.3919 | 0.4068 |
| Ac02   | _IHETNLK_2                                                           | #N/A                  | 7.9962  | 7.5489  | 7.3558  | 7.5599  | 7.9536  | 7.6465  | 7.0165  | 7.8604  | 7.5566  | 7.7958  | 1.0158  | 0.0226  | 0.5633 | 0.2493 |
| Ac02   | _DVGGVLANAC[Carbamidomethyl (C)]GPC[Carbamidomethyl (C)]IGQWDR_2     | #N/A                  | 7.4526  | 7.5922  | 6.9482  | 7.6999  | 7.6550  | 7.1755  | 7.5968  | 7.2510  | 7.4217  | 6.6703  | 1.0257  | 0.0365  | 0.4239 | 0.3728 |
| Ac02   | _GGLPLTTFADPSYNNK_2                                                  | #N/A                  | 7.3814  | 7.4279  | 7.5140  | 7.5266  | 6.9230  | 7.1022  | 7.6947  | 7.2550  | 7.4772  | 7.4968  | 0.9775  | -0.0328 | 0.2755 | 0.5598 |
| Ac02   | _DGAYQLR_2                                                           | #N/A                  | 8.0151  | 7.2679  | 7.6508  | 7.0005  | 7.3427  | 7.6627  | 7.5255  | 7.6933  | 7.8524  | 8.0622  | 1.0214  | 0.0305  | 0.7451 | 0.1278 |
| Ac02   | _QAAHGLK_2                                                           | #N/A                  | 6.5144  | 6.2344  | 6.5006  | 6.6647  | 7.1469  | 6.4505  | 5.8744  | 6.7000  | 6.8376  | 6.8462  | 1.0032  | 0.0045  | 0.9339 | 0.0297 |
| Ac02   | _DVGGVLANAC[Carbamidomethyl (C)]GPC[Carbamidomethyl (C)]IGQWDRK_3    | #N/A                  | 5.6377  | 6.0360  | 6.6767  | 6.6617  | 6.6544  | 5.9697  | 5.7935  | 6.2456  | 6.1353  | 6.0839  | 1.0343  | 0.0487  | 0.4145 | 0.3825 |
| Ac02   | _TDIANLEEFK_2                                                        | #N/A                  | 6.4609  | 5.5455  | 4.6814  | 6.3699  | 5.8053  | 6.1270  | 5.6901  | 5.7785  | 5.5242  | 6.1436  | 1.0082  | 0.0118  | 0.8960 | 0.0477 |
| Ac02   | _NDANPETHAFVTSPEVTALAAITLK_3                                         | #N/A                  | 6.3033  | 5.7390  | 5.7891  | 6.5547  | 5.1318  | 5.7157  | 5.6444  | 5.7585  | 5.7165  | 5.8349  | 1.0233  | 0.0332  | 0.0616 | 0.2098 |
| Ac02   | _VVVGGDENVGEGSSR_2                                                   | #N/A                  | 8.4496  | 8.5941  | 9.2285  | 9.5443  | 8.4440  | 8.8446  | 8.9563  | 8.8422  | 8.7589  | 8.7383  | 1.0030  | 0.0044  | 0.9110 | 0.0405 |
| Ac02   | _VAGILTVK_2                                                          | #N/A                  | 5.5717  | 4.7362  | 6.1568  | 5.2735  | 5.6744  | 6.0085  | 6.3518  | 6.0228  | 6.3518  | 6.0533  | 1.0135  | 0.0194  | 0.9008 | 0.0454 |
| Ac02   | _AKDINQEVYNFLATAGK_3                                                 | #N/A                  | 6.9453  | 7.0326  | 7.4227  | 7.2738  | 6.6539  | 7.1106  | 7.0061  | 7.1818  | 7.0198  | 7.3376  | 0.9911  | -0.0128 | 0.6843 | 0.1647 |
| Ac02   | _GHLDNLSNNLIGANNENGK_3                                               | #N/A                  | 6.9463  | 6.4031  | 6.9048  | 7.4659  | 5.9924  | 6.4349  | 6.4349  | 6.5118  | 6.6468  | 6.9942  | 1.0122  | 0.0175  | 0.7879 | 0.1035 |
| Ac02   | _C[Carbamidomethyl (C)]ITDHSAAWPKLX_2                                | #N/A                  | 5.1049  | 5.6179  | 4.3460  | 6.0634  | 6.1470  | 5.9270  | 6.2057  | 5.8267  | 5.6816  | 5.9727  | 0.9346  | -0.0976 | 0.3200 | 0.4948 |
| Ac02   | _VAM[Oxidation (M)]SHFSEYR_3                                         | #N/A                  | 7.5128  | 7.7984  | 7.9327  | 7.7882  | 8.1212  | 7.5943  | 7.3701  | 7.8601  | 7.8381  | 7.6289  | 1.0152  | 0.0218  | 0.4419 | 0.3547 |
| Ac02   | _VGLGSC[Carbamidomethyl (C)]TNSVEDM[Oxidation (M)]GR_2               | #N/A                  | 5.2592  | 5.2596  | 3.4401  | 5.6383  | 5.1149  | 4.9861  | 3.7290  | 5.3677  | 5.1363  | 5.0665  | 1.0259  | 0.0668  | 0.8057 | 0.0938 |
| Ac02   | _VAM[Oxidation (M)]QDATAQM[Oxidation (M)]AM[Oxidation (M)]LQFSSGLK_3 | #N/A                  | 4.8913  | 4.7122  | 6.6597  | 4.4877  | 4.9189  | 4.4847  | 5.5428  | 5.3068  | 5.0105  | 4.8983  | 0.9480  | -0.0770 | 0.2794 | 0.5538 |
| Ac02   | _SDFDPGQDTYHPKXSSGGR_4                                               | #N/A                  | 3.3794  | 6.1245  | 4.0662  | 5.3746  | 5.8567  | 5.4518  | 4.0844  | 5.5803  | 5.6672  | 5.4945  | 0.9684  | -0.0463 | 0.7995 | 0.0972 |
| Ac02   | _DINQDEVYNFLATAGK_2                                                  | #N/A                  | 6.7643  | 6.5776  | 6.8642  | 6.8166  | 6.6716  | 6.9644  | 6.6932  | 6.2924  | 6.6575  | 6.7545  | 1.0268  | 0.0382  | 0.1412 | 0.8501 |
| Ac02   | _VAVPSTIH[Carbamidomethyl (C)]DHLEAQVGGEK_3                          | #N/A                  | 7.0933  | 6.7370  | 6.7089  | 6.4827  | 7.0374  | 6.5647  | 6.8907  | 6.2572  | 6.7486  | 6.7766  | 1.0247  | 0.0352  | 0.3831 | 0.4167 |
| Ac02   | _VAVPSTIH[Carbamidomethyl (C)]DHLEAQVGGEKDR_4                        | #N/A                  | 3.6840  | 2.9884  | 4.3708  | 3.3726  | 2.8097  | 3.4189  | 3.0873  | 3.7342  | 4.3944  | 3.3396  | 0.7564  | -0.4028 | 0.2172 | 0.6632 |
| Ac02   | _HPNPQETLLNHTFNETQIEWFR_4                                            | #N/A                  | 2.9454  | 4.3970  | 4.1799  | 3.7237  | 4.2183  | 3.5112  | 3.8720  | 3.2775  | 3.5765  | 3.4010  | 1.0842  | 0.0167  | 0.3453 | 0.4618 |
| Ubxn2a | _AKS[Phospho (STY)]VEVONK_2                                          | Q99KQ4_S154_M1_Ubxn2a | 5.9381  | 6.8521  | 6.4054  | 6.8698  | 5.4309  | 6.9455  | 6.7556  | 6.7069  | 6.0482  | 6.3064  | 0.9927  | -0.0106 | 0.8927 | 0.0493 |
| Ubxn2a | _C[Carbamidomethyl (C)]S[Phospho (STY)]PTEQK_2                       | Q99KQ4_S54_M1_Ubxn2a  | 3.6043  | 3.7381  | 3.3379  | 4.3826  | 4.2488  | 4.4100  | 4.4385  | 4.4508  | 4.4325  | 4.0598  | 0.9975  | -0.1560 | 0.0839 | 0.1766 |
| Dctn2  | _YADLPGLAR_2                                                         | #N/A                  | 7.4222  | 7.9130  | 7.7741  | 7.0319  | 7.8649  | 7.5405  | 7.3830  | 7.4957  | 7.6596  | 7.7672  | 1.0019  | 0.0028  | 0.9379 | 0.0278 |
| Dctn2  | _WSPVSTLPELVQR_2                                                     | #N/A                  | 6.7218  | 7.1420  | 6.9075  | 7.4278  | 7.4573  | 7.3852  | 7.4819  | 7.0571  | 7.1623  | 7.2216  | 0.9921  | -0.0114 | 0.7475 | 0.1264 |
| Dctn2  | _LLGPDAAINLADPDGALAK_2                                               | #N/A                  | 5.9256  | 6.3150  | 6.5225  | 6.7689  | 6.6271  | 6.5196  | 6.3473  | 6.5361  | 6.3416  | 6.5973  | 0.9986  | -0.0020 | 0.9556 | 0.0197 |
| Dctn2  | _LQIVASHLEK_2                                                        | #N/A                  | 5.8769  | 6.4279  | 6.2250  | 6.1836  | 6.8064  | 6.3787  | 5.9811  | 6.1604  | 6.0329  | 6.0216  | 1.0442  | 0.0624  | 0.1339 | 0.8732 |
| Dctn2  | _ASVEDADTQNK_2                                                       | #N/A                  | 6.1070  | 5.7612  | 5.4032  | 6.1738  | 6.4759  | 5.4761  | 5.9973  | 5.4843  | 6.2450  | 6.2743  | 0.9832  | -0.0244 | 0.7085 | 0.1496 |
| Dctn2  | _YSADLAVLDQVEAR_2                                                    | #N/A                  | 5.0232  | 4.7337  | 5.2965  | 3.7701  | 5.5733  | 5.0241  | 4.7020  | 4.2803  | 5.4883  | 5.2520  | 0.9945  | -0.0800 | 0.9454 | 0.0244 |
| Dctn2  | _LHVEQELITEVK_3                                                      | #N/A                  | 6.1252  | 5.2884  | 3.8069  | 6.1267  | 6.2088  | 6.0005  | 4.5361  | 5.6545  | 5.7583  | 6.6687  | 0.9891  | -0.0158 | 0.9194 | 0.0365 |
| Dctn2  | _ENLATIVEGNFASIDAR_2                                                 | #N/A                  | 6.0390  | 5.9259  | 6.4231  | 6.2905  | 6.0382  | 5.7572  | 6.2801  | 5.4935  | 5.7889  | 6.0203  | 1.0311  | 0.0442  | 0.3412 | 0.4670 |
| Dctn2  | _LTELEATVR_2                                                         | #N/A                  | 4.0694  | 3.3721  | 3.8352  | 4.1714  | 4.4358  | 4.8953  | 3.3960  | 5.3032  | 5.1163  | 5.5195  | 0.8544  | -0.2771 | 0.1700 | 0.7696 |
| Dctn2  | _DNTALTQVQVTM[Oxidation (M)]R_2                                      | #N/A                  | 5.6804  | 6.3540  | 6.3650  | 5.6209  | 5.9324  | 6.1404  | 6.4149  | 5.7069  | 6.0080  | 6.3095  | 0.9846  | -0.0224 | 0.6628 | 0.1786 |
| Dctn2  | _VHGLEYTIQR_2                                                        | #N/A                  | 4.8109  | 4.1487  | 3.4425  | 4.8783  | 5.0335  | 4.6475  | 4.9727  | 4.8332  | 4.2409  | 4.7994  | 0.9537  | -0.0684 | 0.5282 | 0.2772 |
| Dctn2  | _GLDFSDR_2                                                           | #N/A                  | 3.4929  | 3.3370  | 4.4964  | 4.1591  | 4.1574  | 4.2575  | 3.2924  | 3.0399  | 4.7913  | 3.8402  | 1.0648  | 0.0906  | 0.5477 | 0.2615 |
| Dctn2  | _TGYES[Phospho (STY)]GDYEM[Oxidation (M)]LGLGLOVK_2                  | Q99KJ8_S83_M1_Dctn2   | 3.6709  | 2.9264  | 3.4046  | 5.2604  | 2.8147  | 3.8099  | 3.0967  | 4.0528  | 4.3518  | 4.1265  | 0.9337  | -0.0990 | 0.6192 | 0.2082 |
| Hars2  | _DLIS[Phospho (STY)]PQGMVVR_2                                        | Q99KK9_S66_M1_Hars2   | 8.9779  | 7.1216  | 4.2603  | 10.1939 | 7.4630  | 3.1836  | 8.3685  | 6.7604  | 5.6158  | 7.8045  | 0.9644  | -0.0523 | 0.8651 | 0.0629 |
| Clint1 | _TIDLGAHAHYTGKAS[Phospho (STY)]PQGNASTHYTPOSSAK_4                    | Q99KN9_S307_M1_Clint1 | 4.0041  | 3.5995  | 4.4333  | 5.1817  | 3.4557  | 3.8555  | 3.5413  | 4.2256  | 3.9691  | 4.0256  | 0.9859  | 0.0204  | 0.7827 | 0.1064 |
| Cryl1  | _J[Acetyl (Protein N-term)]ASPAAGGVVSGSLGR_2                         | #N/A                  | 3.0226  | 3.6101  | 3.1559  | 3.4564  | 3.2859  | 3.0878  | 3.9205  | 1.5663  | 4.0019  | 4.1790  | 0.9569  | -0.0635 | 0.7773 | 0.1094 |
| Nampt  | _SYSG[Phospho (STY)]FDEVRK_2                                         | Q99KQ4_S472_M1_Nampt  | 7.0200  | 7.5528  | 7.8284  | 7.9184  | 3.5553  | 7.9795  | 7.5624  | 7.7431  | 7.5950  | 0.8920  | -0.1648 | 0.3564  | 0.4481 | 0.0829 |
| Rnf34  | _GLGSGDLDLSS[Phospho (STY)]LNSR_2                                    | Q99KR6_S163_M         |         |         |         |         |         |         |         |         |         |         |         |         |        |        |



|           |                                                                                        |                          |         |         |         |         |         |         |         |         |         |         |         |         |        |        |
|-----------|----------------------------------------------------------------------------------------|--------------------------|---------|---------|---------|---------|---------|---------|---------|---------|---------|---------|---------|---------|--------|--------|
| Cd2       | _EDAPPEKES[Phospho (STY)]ESEA_K_2                                                      | Q99L43_520_M1_Cd2        | 3.9744  | 3.2787  | 3.1603  | 3.6630  | 3.1000  | 3.1286  | 3.4894  | 4.4555  | 4.1041  | 3.6300  | 0.8634  | -0.2120 | 0.0667 | 1.1762 |
| Cd2       | _ALS[Phospho (STY)]NLSR_2                                                              | Q99L43_559_M1_Cd2        | 6.4903  | 5.7751  | 4.1114  | 3.6552  | 3.5215  | 6.1110  | 3.8035  | 6.1953  | 3.6450  | 3.3325  | 1.1649  | 0.2203  | 0.4363 | 0.3602 |
| Cd2       | _EDAPPEKESEAFADGETAS[Phospho (STY)]DSESR_4                                             | #N/A                     | 5.6530  | 3.9441  | 4.2486  | 3.3204  | 3.5700  | 3.5500  | 3.6225  | 5.9538  | 3.9072  | 3.2174  | 0.9667  | -0.0489 | 0.8366 | 0.0775 |
| EF2s2     | _DYTYEILNR_2                                                                           | #N/A                     | 5.2742  | 5.3302  | 5.6622  | 5.2767  | 5.0661  | 5.2788  | 5.3112  | 5.4431  | 5.5009  | 5.6030  | 0.9859  | -0.0205 | 0.5932 | 0.2268 |
| EF2s2     | _Aceyl (Protein N-term)[S]Phospho (STY)]QDEM[Oxidation (M)]FDFPTM[Oxidation (M)]SK_K_2 | #N/A                     | 9.1138  | 9.2760  | 10.2759 | 9.7187  | 9.1487  | 9.5420  | 9.6378  | 9.3616  | 9.4858  | 9.4305  | 1.0035  | 0.0051  | 0.8875 | 0.0518 |
| EF2s2     | _Aceyl (Protein N-term)[S]Phospho (STY)]QDEM[Oxidation (M)]FDFPTM[Oxidation (M)]SK_K_2 | #N/A                     | 13.4816 | 13.7975 | 14.5640 | 13.5273 | 13.4361 | 14.1901 | 14.3015 | 13.7249 | 13.9289 | 13.9174 | 0.9903  | -0.0141 | 0.6046 | 0.2185 |
| EF2s2     | _VKDAS[Phospho (STY)]DOLDDNFNRK_3                                                      | Q99L45_567_M1_EF2s2      | 3.2214  | 4.0266  | 3.9083  | 4.4109  | 3.8480  | 3.8815  | 4.2423  | 3.7076  | 3.3562  | 4.3779  | 0.9903  | -0.0141 | 0.8916 | 0.0498 |
| EF2s2     | _IFIDAEAEAKDVK_3                                                                       | #N/A                     | 3.7259  | 1.1705  | 3.4596  | 3.3320  | 2.8697  | 3.7550  | 3.6481  | 3.9978  | 3.8336  | 4.1815  | 0.7795  | -0.1593 | 0.1266 | 0.8975 |
| EF2s2     | _EYVTC[Carbamidomethyl (C)]HTC[Carbamidomethyl (C)]R_2                                 | #N/A                     | 4.0780  | 3.2644  | 3.8117  | 3.3554  | 3.2217  | 3.1429  | 3.5037  | 3.6457  | 3.9448  | 3.0327  | 0.9851  | -0.0217 | 0.8344 | 0.0786 |
| EF2s2     | _IES[Phospho (STY)]DAQEAPFEDOLDMLGNK_3                                                 | Q99L45_5105_M1_EF2s2     | 3.3327  | 4.0890  | 4.5673  | 4.1110  | 3.9773  | 4.1481  | 4.0413  | 4.3910  | 3.1892  | 3.7883  | 1.0481  | 0.0677  | 0.5356 | 0.2711 |
| Sl13      | _AIEINPSAQPK_K_2                                                                       | #N/A                     | 5.7565  | 7.7741  | 8.1667  | 7.4439  | 7.9307  | 7.4887  | 7.7885  | 7.5236  | 7.5417  | 7.6524  | 1.0136  | 0.0195  | 0.5138 | 0.2892 |
| Sl13      | _GAIEALNDGELQK_K_2                                                                     | #N/A                     | 5.4936  | 6.0334  | 5.6101  | 6.1904  | 5.6379  | 5.1777  | 5.2830  | 5.7896  | 5.0505  | 5.8538  | 1.0357  | 0.0506  | 0.4431 | 0.3535 |
| Sl13      | _AIDLTDAIK_K_2                                                                         | #N/A                     | 4.5844  | 5.9500  | 5.6282  | 6.0141  | 6.5741  | 6.5174  | 5.3842  | 5.9028  | 6.3585  | 6.2052  | 0.9858  | -0.0206 | 0.8411 | 0.0752 |
| Sl13      | _KGAEALNDGELQK_K_3                                                                     | #N/A                     | 4.7333  | 4.0773  | 3.4306  | 5.2604  | 4.7118  | 3.7840  | 3.1226  | 4.5021  | 4.1731  | 4.9450  | 1.0352  | 0.0499  | 0.7598 | 0.1193 |
| Sl13      | _QDPSVLTTEMR_K_3                                                                       | #N/A                     | 4.2807  | 2.9454  | 3.4667  | 4.7698  | 2.8337  | 3.7909  | 3.6840  | 4.1491  | 2.5352  | 3.6764  | 1.0484  | 0.0682  | 0.7281 | 0.1378 |
| Sntb1     | _GSPVSEIGWETPPES[Phospho (STY)]PR_K_2                                                  | #N/A                     | 7.0953  | 6.7066  | 7.5089  | 8.5612  | 6.4603  | 7.2600  | 7.3849  | 7.6194  | 7.3811  | 7.2349  | 1.1169  | 0.1595  | 0.3772 | 0.4235 |
| Sntb1     | _KGSPVSEIGWETPPES[Phospho (STY)]PR_K_3                                                 | #N/A                     | 3.8298  | 3.5361  | 3.2780  | 5.4125  | 3.8077  | 4.6595  | 4.0081  | 5.5142  | 4.9278  | 5.4752  | 0.8168  | -0.2919 | 0.0948 | 1.0232 |
| Mcrs1     | _GDQVLNFS[Phospho (STY)]DAEDLUDOSK_K_2                                                 | #N/A                     | 3.0095  | 4.2167  | 3.6963  | 4.1990  | 3.6360  | 4.0935  | 3.9136  | 3.5681  | 4.1660  | 3.9786  | 0.9786  | -0.0312 | 0.7535 | 0.1229 |
| Mcrs1     | _GDQVLNFS[Phospho (STY)]DAEDLUDOSK_K_3                                                 | #N/A                     | 3.2491  | 4.0053  | 4.4836  | 4.0273  | 3.8936  | 4.2318  | 4.1756  | 2.9738  | 3.2729  | 3.7046  | 1.1274  | 0.1730  | 0.1671 | 0.7770 |
| Dntt1p1   | _QAEESHRS[Phospho (STY)]IPK_K_2                                                        | Q99L80_5160_M1_Dntt1p1   | 3.9182  | 3.2226  | 3.9276  | 4.7862  | 2.6536  | 4.3678  | 1.8205  | 3.9305  | 3.6879  | 3.1431  | 1.2111  | 0.2764  | 0.2553 | 0.5990 |
| Mat2b     | _VUTGATGLLR_K_2                                                                        | #N/A                     | 6.1454  | 5.1862  | 6.0398  | 5.7814  | 5.9276  | 5.9716  | 6.2084  | 6.2151  | 5.8575  | 5.6493  | 0.9765  | -0.0343 | 0.5158 | 0.2875 |
| Mat2b     | _AULENNGAANLR_K_2                                                                      | #N/A                     | 4.0683  | 4.2133  | 5.0261  | 4.2553  | 5.3926  | 4.1853  | 4.3836  | 3.3602  | 4.6224  | 3.1808  | 1.1638  | 0.2189  | 0.1495 | 0.8254 |
| Ndufa10   | _LGSWLYASR_K_2                                                                         | #N/A                     | 6.7248  | 7.1286  | 7.1509  | 7.8981  | 7.2334  | 7.4276  | 7.1383  | 7.4993  | 7.1970  | 7.3674  | 0.9945  | -0.0079 | 0.8527 | 0.0692 |
| Ndufa10   | _QDDWTFHYLR_K_2                                                                        | #N/A                     | 5.5593  | 5.9289  | 6.1408  | 5.8331  | 5.7307  | 6.7503  | 6.4299  | 5.9401  | 6.1617  | 6.0868  | 0.9598  | -0.0592 | 0.1474 | 0.8316 |
| Ndufa10   | _VITVDGNIC[Carbamidomethyl (C)]SGK_K_2                                                 | #N/A                     | 6.0097  | 5.8299  | 5.4842  | 6.1777  | 6.3596  | 6.0094  | 6.2737  | 6.2194  | 5.9592  | 6.0693  | 0.9693  | -0.0449 | 0.2806 | 0.5520 |
| Ndufa10   | _VTSAYLQDIENAYK_K_3                                                                    | #N/A                     | 5.2045  | 5.4539  | 3.7979  | 4.3044  | 5.3503  | 5.1306  | 3.4899  | 5.3634  | 5.0861  | 5.2232  | 1.0173  | 0.0248  | 0.8684 | 0.0613 |
| Ndufa10   | _LIQYADALEHLSTGGGVLER_K_3                                                              | #N/A                     | 4.1290  | 3.4334  | 3.3150  | 3.8177  | 3.3832  | 2.9739  | 3.3347  | 3.3049  | 3.7847  | 0.9132  | -0.1311 | 0.2369  | 0.6254 | 0.0520 |
| Ndufa10   | _VTSAYLQDIENAYK_K_2                                                                    | #N/A                     | 3.9155  | 3.2199  | 4.6023  | 3.6041  | 5.7303  | 3.1874  | 3.3188  | 3.0135  | 4.1629  | 3.5711  | 1.1498  | 0.2013  | 0.3536 | 0.4515 |
| Ndufa10   | _TEVLNVTTPVLPETIGAHQGSR_K_3                                                            | #N/A                     | 3.2299  | 4.0351  | 3.9167  | 4.0856  | 3.8564  | 3.8731  | 4.2339  | 3.6992  | 3.2146  | 4.3863  | 0.9869  | -0.0190 | 0.8523 | 0.0694 |
| Ndufa10   | _VAPGNAEVGDK_K_2                                                                       | #N/A                     | 3.0022  | 3.7584  | 4.2367  | 3.7804  | 3.6467  | 2.9779  | 3.9287  | 3.2207  | 7.6790  | 3.4577  | 0.7803  | -0.3580 | 0.2786 | 0.5551 |
| Etfa      | _LVNAPVSQIEIK_K_2                                                                      | #N/A                     | 6.3753  | 6.6615  | 6.2940  | 6.9081  | 6.8057  | 6.8020  | 5.8562  | 6.4710  | 6.1888  | 6.8559  | 1.0470  | 0.0663  | 0.1957 | 0.7085 |
| Etfa      | _GLPEELTULETK_K_2                                                                      | #N/A                     | 3.3223  | 5.6136  | 5.1959  | 5.8814  | 6.0452  | 5.4882  | 6.0878  | 6.3034  | 5.9906  | 6.1630  | 0.9112  | -0.1342 | 0.0140 | 1.8536 |
| Etfa      | _TIYAGNALC[Carbamidomethyl (C)]TVK_K_2                                                 | #N/A                     | 4.9476  | 5.5346  | 4.7920  | 4.0656  | 5.6078  | 5.4471  | 5.0054  | 5.2890  | 5.4025  | 0.9591  | -0.0603 | 0.5071  | 0.2949 | 0.1836 |
| Etfa      | _VLVAGHDAYK_K_2                                                                        | #N/A                     | 4.8282  | 5.5326  | 4.9914  | 3.1568  | 6.1109  | 5.3447  | 4.8194  | 4.5715  | 4.1435  | 4.8170  | 1.0886  | 0.1224  | 0.4643 | 0.3332 |
| Etfa      | _APSSSSVGSEWLQDK_K_2                                                                   | #N/A                     | 3.2165  | 4.7275  | 4.9420  | 4.6952  | 5.3080  | 5.0397  | 3.8776  | 3.0064  | 4.5380  | 4.9680  | 1.1360  | 0.1840  | 0.3031 | 0.5184 |
| Etfa      | _AAYDAGFVNDM[Oxidation (M)]QVGSGTG_K_2                                                 | #N/A                     | 6.4208  | 6.8710  | 7.1335  | 6.9712  | 6.9121  | 7.0160  | 6.7895  | 6.5246  | 6.5839  | 6.9996  | 1.0242  | 0.0346  | 0.3141 | 0.5029 |
| Etfa      | _SPDTFVR_K_2                                                                           | #N/A                     | 3.5211  | 5.4175  | 3.4494  | 4.6697  | 5.2578  | 4.8173  | 3.1415  | 4.1974  | 4.4689  | 4.1713  | 1.1320  | 0.1789  | 0.3142 | 0.5028 |
| Etfa      | _VVPENTEUK_K_2                                                                         | #N/A                     | 4.5110  | 4.0770  | 3.8653  | 5.8454  | 3.2754  | 3.3492  | 4.7905  | 3.5921  | 3.4260  | 3.0864  | 1.1155  | 0.1577  | 0.4689 | 0.3289 |
| Etfa      | _SONPELTGAK_K_2                                                                        | #N/A                     | 5.0622  | 5.2895  | 4.2609  | 5.1511  | 4.2006  | 3.5289  | 4.3360  | 3.0025  | 5.2970  | 1.0966  | 0.1331  | 0.4550  | 0.3420 | 0.3289 |
| Etfa      | _GTFSEAAATSGGASSEK_K_2                                                                 | #N/A                     | 3.0271  | 3.8323  | 3.7139  | 6.3367  | 3.6536  | 5.1896  | 4.4367  | 4.2136  | 3.0118  | 3.9657  | 1.0986  | 0.1357  | 0.5832 | 0.2342 |
| Etfa      | _LVYDADQLHAAGVQSR_K_2                                                                  | #N/A                     | 4.3476  | 3.6520  | 3.5336  | 4.0362  | 3.4733  | 4.2562  | 3.7509  | 4.0823  | 3.7308  | 3.4333  | 0.9764  | -0.0344 | 0.6891 | 0.1617 |
| Gps1      | _SPPREGS[Phospho (STY)]QGETLPANSQSR_K_3                                                | #N/A                     | 9.6221  | 9.6025  | 10.4519 | 9.6868  | 8.8137  | 9.4377  | 9.8610  | 9.8367  | 9.6769  | 9.6047  | 0.9956  | 0.0647  | 0.8813 | 0.0549 |
| Gps1      | _EGS[Phospho (STY)]QGETLPANSQSR_K_2                                                    | #N/A                     | 11.7168 | 11.2912 | 11.4535 | 11.9418 | 10.6766 | 11.4107 | 11.9113 | 11.5418 | 11.5488 | 11.5611 | 0.9806  | -0.0282 | 0.3581 | 0.4559 |
| Gps1      | _FLFLEPQVR_K_2                                                                         | #N/A                     | 4.9947  | 5.2612  | 4.5909  | 4.6984  | 4.8888  | 5.1471  | 4.9978  | 5.3691  | 5.0538  | 4.7788  | 0.9763  | -0.0346 | 0.4835 | 0.3459 |
| Gps1      | _GERDS[Phospho (STY)]QTQALTK_K_2                                                       | Q99L44_5220_M1_Gps1      | 3.4666  | 4.2228  | 3.2002  | 4.2449  | 4.1111  | 4.0143  | 4.3931  | 4.2572  | 3.0554  | 5.0159  | 0.9273  | -0.1088 | 0.4622 | 0.3352 |
| Rtcb      | _NLDFQVLDK_K_2                                                                         | #N/A                     | 5.2492  | 3.9148  | 4.5059  | 3.9559  | 4.9932  | 4.8009  | 4.4157  | 3.6412  | 4.6534  | 1.0438  | 0.0619  | 0.5947  | 0.1257 | 0.3525 |
| Rtcb      | _MLQADPNKVS[Phospho (STY)]PR_K_2                                                       | Q99L44_5208_M1_Rtcb      | 1.4981  | 3.9338  | 4.4121  | 4.4818  | 3.8221  | 4.3033  | 4.1965  | 3.6367  | 3.2853  | 4.4488  | 0.9615  | -0.0567 | 0.8131 | 0.0899 |
| Tmem51    | _AETETS[Phospho (STY)]PGHAPOR_K_2                                                      | Q99L61_5178_M1_Tmem51    | 4.0003  | 3.3047  | 3.1863  | 3.8602  | 3.1260  | 4.0150  | 3.4634  | 4.4295  | 4.0781  | 3.6559  | 0.9169  | 0.1252  | 0.2703 | 0.5681 |
| Ptds1     | _TYSE[Carbamidomethyl (C)]EDGTYS[Phospho (STY)]PEISWHHGK_K_3                           | Q99LH2_5425_M1_Ptds1     | 3.7410  | 3.6014  | 3.4747  | 4.5193  | 4.3095  | 4.3068  | 3.1668  | 3.9827  | 4.2817  | 4.1966  | 1.0218  | 0.0311  | 0.7843 | 0.1055 |
| Sh3bp5f   | _TVAS[Phospho (STY)]DLQK_K_2                                                           | Q99LH9_5342_M1_Sh3bp5f   | 4.8968  | 4.2443  | 8.7987  | 8.9799  | 4.1326  | 8.2905  | 3.9472  | 8.0857  | 8.5080  | 0.9926  | -0.0107 | 0.9719  | 0.1019 | 0.1054 |
| Sh3bp5f   | _RGS[Phospho (STY)]DIGVR_K_2                                                           | Q99LH9_5377_M1_Sh3bp5f   | 8.0055  | 7.8882  | 8.3727  | 8.3776  | 7.3756  | 8.1357  | 8.3926  | 8.1597  | 8.0771  | 8.1586  | 0.9791  | -0.0304 | 0.4129 | 0.3841 |
| Sh3bp5f   | _GLSDHAS[Phospho (STY)]LDGQELGAQSR_K_2                                                 | #N/A                     | 5.6513  | 4.6102  | 6.3447  | 6.4486  | 5.5813  | 3.6899  | 5.6649  | 5.7780  | 4.4251  | 6.4408  | 0.9660  | -0.0499 | 0.7731 | 0.1117 |
| Sh3bp5f   | _TVAS[Phospho (STY)]DLQK[Carbamidomethyl (C)]QSS[Phospho (STY)]VEHLR_K_3               | #N/A                     | 3.8102  | 3.0907  | 4.1060  | 6.0943  | 2.9447  | 3.4979  | 3.6091  | 5.7488  | 5.3985  | 5.9947  | 0.7564  | -0.4028 | 0.1195 | 0.9227 |
| Ctcl1     | _FHSQNKNS[Phospho (STY)]PEVLR_K_2                                                      | Q99L2_5433_M1_Ctcl1      | 3.2230  | 4.1194  | 4.4575  | 6.5172  | 3.9407  | 6.7825  | 6.6856  | 6.6106  | 6.8440  | 6.6214  | 0.7234  | -0.4671 | 0.0383 | 1.4172 |
| Ctcl1     | _KEVSPDS[Phospho (STY)]SEAEELSDC[Carbamidomethyl (C)]LHR_K_3                           | #N/A                     | 3.2433  | 4.0485  | 4.5284  | 4.0722  | 5.6185  | 3.8596  | 4.2204  | 4.4299  | 3.2281  | 3.7494  | 1.0823  | 0.1141  | 0.5034 | 0.2981 |
| Ctcl1     | _EVSPDS[Phospho (STY)]SEAEELSDC[Carbamidomethyl (C)]LHR_K_3                            | #N/A                     | 3.9111  | 3.7466  | 3.6447  | 3.9165  | 3.7880  | 3.6843  | 3.8140  | 3.6993  | 4.7794  | 4.6057  | 0.8952  | -0.1597 | 0.0833 | 1.0792 |
| Catf3     | _RPNEDS[Phospho (STY)]DDEEKGAUVPPHVDYR_K_4                                             | #N/A                     | 3.6383  | 4.0466  | 3.9022  | 9.5073  | 8.2821  | 8.1563  | 3.5685  | 9.1010  | 9.1319  | 8.9892  | 0.8126  | -0.2993 | 0.4319 | 0.3646 |
| Hgs       | _ALQNAVSTFVNR_K_2                                                                      | #N/A                     | 5.5820  | 5.7689  | 3.1296  | 6.5902  | 6.3004  | 5.9613  | 5.7823  | 6.3648  | 6.1859  | 6.2435  | 0.9042  | -0.1453 | 0.3859 | 0.4135 |
| Hgs       | _ASSTLELPPEVLTSPSGS[Phospho (STY)]QLPPK_K_3                                            | Q99LH8_5246_M1_Hgs       | 3.7475  | 3.0519  | 4.4344  | 3.4362  | 2.8732  | 3.3554  | 3.7162  | 3.1815  | 4.3309  | 3.4032  | 0.9522  | -0.0707 | 0.6270 | 0.2027 |
| Cttnbp2nl | _FQSGADQDQAGSGS[Phospho (STY)]PPSR_K_2                                                 | Q99LH2_5481_M1_Cttnbp2nl | 6.2488  | 6.2682  | 6.1239  | 7.1857  | 6.4334  | 5.0005  | 7.0581  | 4.3507  | 3.1490  | 5.5303  | 1.2366  | 0.3063  | 0.1525 | 0.8167 |
| Cttnbp2nl | _DLS[Phospho (STY)]PTLLDNSAAK_K_2                                                      | Q99LH2_5488_M1_Cttnbp2nl | 3.2894  | 3.8862  | 4.8392  | 5.5013  | 8.1406  | 8.7408  | 8.7406  | 8.8162  | 8.8288  | 8.8864  | 0.8776  | -0.1884 | 0.3706 | 0.4311 |
| Pwp1      | _GLVSGPC[Carbamidomethyl (C)]GSGS[Phospho (STY)]PQQTPMES_K_2                           | Q99LH5_5493_M1_Pwp1      | 6.0773  | 4.3781  | 4.25    |         |         |         |         |         |         |         |         |         |        |        |



|          |                                                                      |                         |         |         |         |         |         |         |         |         |         |         |         |         |        |        |
|----------|----------------------------------------------------------------------|-------------------------|---------|---------|---------|---------|---------|---------|---------|---------|---------|---------|---------|---------|--------|--------|
| Rnps1    | _APS[Phospho (STY)]PTKR_2                                            | #N/A                    | 4.1775  | 3.4329  | 3.9112  | 3.4549  | 3.3212  | 3.3034  | 3.6032  | 3.5462  | 3.8453  | 3.1322  | 1.0194  | 0.0277  | 0.7610 | 0.1186 |
| Rnps1    | _STRASP[Phospho (STY)]PTK_2                                          | #N/A                    | 3.3297  | 4.0860  | 3.8270  | 4.3296  | 3.9743  | 4.1511  | 4.0443  | 3.7889  | 3.4375  | 4.2966  | 1.0149  | 0.0213  | 0.8071 | 0.0931 |
| Epdr1    | _ALVSDGQNR_2                                                         | #N/A                    | 7.1313  | 7.1825  | 6.9418  | 7.2229  | 7.3378  | 7.1710  | 7.0671  | 7.3313  | 6.9246  | 6.8410  | 1.0175  | 0.0251  | 0.2847 | 0.5456 |
| Epdr1    | _DC[Carbamidomethyl (C)]YVQETFR_2                                    | #N/A                    | 7.0627  | 6.6459  | 6.3569  | 7.1061  | 7.0339  | 6.9362  | 6.8138  | 6.6143  | 6.7811  | 6.8804  | 1.0125  | 0.0179  | 0.6055 | 0.2179 |
| Epdr1    | _STETWGYNTAK_2                                                       | #N/A                    | 5.3615  | 5.4670  | 3.2667  | 6.0696  | 5.4645  | 5.3909  | 6.1080  | 5.7181  | 5.4592  | 5.6668  | 0.8487  | -0.2366 | 0.1833 | 0.7368 |
| Epdr1    | _QLVYQSSGHNR_2                                                       | #N/A                    | 3.6657  | 5.0385  | 4.4124  | 5.4052  | 5.5333  | 3.4923  | 3.6607  | 5.2431  | 3.9054  | 3.5031  | 1.1258  | 0.1710  | 0.3754 | 0.4255 |
| Sprt1    | _GGASGPATPAPPQLS[Phospho (STY)]PVQA_2                                | Q99M85_S344_M1_Sprt1    | 7.3553  | 7.5134  | 8.1696  | 8.1353  | 6.5377  | 4.1079  | 8.0937  | 7.6101  | 7.2149  | 7.2394  | 0.9244  | -0.1133 | 0.4939 | 0.3064 |
| Dnaja3   | _VTYPVPAVDGGQTVR_2                                                   | #N/A                    | 6.2228  | 6.1632  | 6.7021  | 6.3278  | 7.1341  | 7.0836  | 6.4551  | 6.2752  | 6.5034  | 6.7754  | 1.0159  | 0.0227  | 0.6725 | 0.1723 |
| Grk2     | _NKRPS[Phospho (STY)]PVVELSK_3                                       | #N/A                    | 5.8326  | 5.5746  | 3.6030  | 5.5590  | 4.7525  | 5.5345  | 5.6741  | 4.0401  | 3.6887  | 6.0737  | 1.0562  | 0.0789  | 0.6770 | 0.1694 |
| Grk2     | _SLLEGLQIR_2                                                         | #N/A                    | 4.4432  | 3.8821  | 3.7250  | 4.4645  | 5.0633  | 3.2256  | 4.7385  | 4.0036  | 4.4849  | 1.0446  | 0.0629  | 0.6234  | 0.2053 |        |
| Grk2     | _GEVNAADAFKIS[Phospho (STY)]DEEDTK_2                                 | Q99MK8_S487_M1_Grk2     | 3.9902  | 3.4882  | 3.7239  | 4.1664  | 3.6029  | 3.6503  | 3.6965  | 3.8696  | 3.8389  | 3.6396  | 1.0024  | 0.0035  | 0.9486 | 0.0229 |
| Grk2     | _EAQQLVGR_2                                                          | #N/A                    | 3.3973  | 4.1536  | 3.7594  | 4.2620  | 4.0419  | 4.1569  | 2.6312  | 3.8565  | 2.5095  | 4.4053  | 1.1824  | 0.2417  | 0.1682 | 0.7742 |
| Grk2     | _S[Phospho (STY)]PVVELSK_2                                           | #N/A                    | 4.3702  | 4.0858  | 3.8272  | 4.3298  | 3.9741  | 4.1513  | 4.0445  | 3.7887  | 3.4372  | 4.2968  | 1.0594  | 0.0833  | 0.2342 | 0.6304 |
| Kars1    | _ETAATTEPTEASP[Phospho (STY)]V_2                                     | Q99MN1_S594_M1_Kars1    | 3.5829  | 3.7596  | 3.3165  | 8.4927  | 4.2274  | 7.9727  | 4.5094  | 4.1409  | 4.4399  | 4.0384  | 1.2202  | 0.2872  | 0.4562 | 0.3408 |
| Pccb     | _DTSYLFITGPEVVK_2                                                    | #N/A                    | 5.2694  | 4.9683  | 3.3252  | 4.8875  | 5.5570  | 5.5166  | 4.3056  | 4.9126  | 5.0536  | 5.1373  | 1.0141  | 0.0202  | 0.8825 | 0.0543 |
| Pccb     | _EFFNFLSSQDPAPIR_2                                                   | #N/A                    | 4.3280  | 4.9876  | 4.4112  | 5.1109  | 4.3088  | 4.3208  | 4.2618  | 4.9589  | 5.1538  | 4.2198  | 0.9848  | -0.0221 | 0.7977 | 0.0982 |
| Pccb     | _IM[Oxidation (M)]DQATVGAAPVIGNDSSGAR_2                              | #N/A                    | 4.0199  | 3.6683  | 4.5944  | 3.2465  | 4.0523  | 3.0680  | 4.0097  | 4.8414  | 3.0198  | 3.2135  | 1.0010  | 0.0015  | 0.9933 | 0.0029 |
| Pccb     | _QEOVESLAGADIFLR_2                                                   | #N/A                    | 3.6825  | 3.6349  | 4.2781  | 3.2799  | 3.3132  | 3.9347  | 4.4955  | 2.9025  | 2.9863  | 4.3164  | 1.0033  | 0.0047  | 0.9759 | 0.1006 |
| Brap     | _EQSESNTAPESP[Phospho (STY)]K_2                                      | Q99MR5_S118_M1_Brap     | 7.9032  | 7.1923  | 7.7424  | 8.0764  | 6.9726  | 7.5859  | 7.8119  | 7.3568  | 7.8034  | 7.6060  | 0.9914  | -0.0125 | 0.7842 | 0.1056 |
| Brap     | _SRIQSESVNTAPESP[Phospho (STY)]PSK_2                                 | #N/A                    | 3.6632  | 3.9076  | 5.4945  | 3.9444  | 4.6171  | 3.6770  | 3.9492  | 3.7697  | 5.1588  | 4.6931  | 0.9601  | -0.0588 | 0.7045 | 0.1521 |
| Col25a1  | _GEQPS[Phospho (STY)]PGAAGSGSGPKK_2                                  | Q99MC5_S265_M1_Col25a1  | 4.2863  | 8.6297  | 4.0200  | 9.4212  | 3.4301  | 8.6051  | 8.8774  | 3.4374  | 8.4395  | 3.2411  | 1.0667  | 0.0931  | 0.8350 | 0.0783 |
| Gigyf1   | _S[Phospho (STY)]EEGDGAGR_2                                          | Q99MR1_S117_M1_Gigyf1   | 9.4912  | 9.3212  | 9.8525  | 9.8685  | 8.7096  | 9.6116  | 9.0952  | 9.5437  | 9.7066  | 1.0101  | 0.0144  | 0.7135  | 0.1466 | 0.4768 |
| Gigyf1   | _SS[Phospho (STY)]PPGPPGOLDEGLK_2                                    | Q99MR1_S413_M1_Gigyf1   | 3.9200  | 3.1755  | 3.2367  | 10.6315 | 3.0638  | 3.5608  | 10.3099 | 9.7984  | 4.0277  | 3.7063  | 0.6606  | -0.5982 | 0.2877 | 0.5410 |
| Gigyf1   | _GDS[Phospho (STY)]WDDRGER_2                                         | Q99MR1_S157_M1_Gigyf1   | 6.4087  | 6.7696  | 7.4261  | 7.2948  | 3.7568  | 4.3886  | 6.5701  | 7.0345  | 6.7082  | 3.5678  | 1.0057  | 0.0082  | 0.9743 | 0.0713 |
| Gigyf1   | _STS[Phospho (STY)]PDGGPIR_2                                         | Q99MR1_S228_M1_Gigyf1   | 3.2344  | 7.8695  | 3.9212  | 7.8276  | 3.8610  | 6.3545  | 4.1386  | 3.6946  | 3.3432  | 4.3909  | 1.4162  | 0.5020  | 0.1749 | 0.5112 |
| Gigyf1   | _GLEEEEEEPSP[Phospho (STY)]EGVDEERPEAGK_3                            | Q99MR1_S343_M1_Gigyf1   | 3.5702  | 4.3754  | 4.2570  | 3.7453  | 4.1967  | 3.5328  | 3.8936  | 3.3588  | 3.0074  | 3.2258  | 1.1705  | 0.2271  | 0.0447 | 1.3492 |
| Slc12a9  | _Acetyl (Protein N-term)GDS[Phospho (STY)]LLAYR_2                    | Q99MR3_S6_M1_Slc12a9    | 9.1030  | 8.6256  | 9.3288  | 8.3942  | 7.6876  | 8.8626  | 4.5369  | 8.8925  | 8.9793  | 9.0119  | 1.1033  | 0.1419  | 0.4052 | 0.3923 |
| Srt      | _Acetyl (Protein N-term)GDS[Phospho (STY)]DDEYDR_2                   | #N/A                    | 8.6357  | 8.8322  | 9.4322  | 9.2019  | 8.6946  | 9.1241  | 9.2769  | 8.6592  | 8.9504  | 8.8475  | 1.0060  | 0.0086  | 0.7868 | 0.1042 |
| Srt      | _ERFS[Phospho (STY)]PPRHLS[Phospho (STY)]PPQK_3                      | #N/A                    | 9.2856  | 6.6457  | 6.3469  | 9.4033  | 7.3959  | 7.3774  | 7.4775  | 9.2552  | 9.1516  | 8.5039  | 1.0624  | 0.0873  | 0.7025 | 0.1533 |
| Srt      | _HELS[Phospho (STY)]PPQKR_2                                          | Q99MR6_S74_M1_Srt       | 8.2055  | 8.0084  | 4.1148  | 8.7317  | 7.8110  | 7.5662  | 8.6254  | 7.9355  | 8.2990  | 7.5622  | 0.9137  | -0.1302 | 0.4430 | 0.3536 |
| Srt      | _FS[Phospho (STY)]PPRHLS[Phospho (STY)]PPQKR_3                       | #N/A                    | 6.7397  | 5.5860  | 5.4673  | 5.6417  | 5.6672  | 5.8673  | 6.4599  | 4.0542  | 3.7772  | 5.7586  | 1.0941  | 0.1298  | 0.5543 | 0.2543 |
| Srt      | _Acetyl (Protein N-term)GDS[Phospho (STY)]DDEYDR_2                   | #N/A                    | 6.6947  | 7.2384  | 3.4519  | 6.8918  | 7.3524  | 3.7027  | 7.6557  | 7.6623  | 4.3046  | 4.1738  | 1.0300  | 0.0427  | 0.8847 | 0.0532 |
| Srt      | _ERFS[Phospho (STY)]PPR_2                                            | Q99MR6_S67_M1_Srt       | 3.0588  | 3.8640  | 3.7456  | 8.8590  | 3.8853  | 8.3636  | 7.6121  | 7.1254  | 3.0435  | 8.0788  | 0.8048  | -0.1314 | 0.4481 | 0.3486 |
| Srt      | _LRE[Carbamidomethyl (C)]EL[Phospho (STY)]PGVNR_3                    | Q99MR6_S492_M1_Srt      | 3.2359  | 3.9903  | 3.9227  | 4.4253  | 3.8624  | 3.8671  | 4.1400  | 3.6931  | 3.3417  | 4.3923  | 0.9980  | -0.0029 | 0.9773 | 0.0100 |
| Tmem121b | _GSWVS[Phospho (STY)]PSR_2                                           | Q99MR7_S521_M1_Tmem121b | 3.4268  | 4.1830  | 8.2266  | 4.2326  | 4.0713  | 4.0541  | 3.9473  | 3.8859  | 7.9106  | 7.5437  | 0.8071  | -0.3091 | 0.3949 | 0.4035 |
| Tmem121b | _GHLENGGGHYNTLAVASQN_3                                               | #N/A                    | 4.0980  | 3.7335  | 3.8317  | 3.5613  | 3.2418  | 3.3828  | 3.2760  | 2.9125  | 4.2057  | 3.5283  | 1.0280  | 0.0399  | 0.7300 | 0.1367 |
| Cadm3    | _GAPVPQYVWK_2                                                        | #N/A                    | 7.7226  | 7.0567  | 7.6647  | 7.3445  | 7.0162  | 7.2480  | 7.1343  | 7.4150  | 7.1991  | 7.3207  | 1.0108  | 0.0154  | 0.6349 | 0.1973 |
| Cadm3    | _LLHK[Carbamidomethyl (C)]EGR_2                                      | #N/A                    | 5.6044  | 6.1754  | 5.3669  | 4.3898  | 5.0913  | 5.3837  | 5.3069  | 6.3890  | 5.7368  | 6.2546  | 0.9009  | -0.1505 | 0.1411 | 0.8506 |
| Cadm3    | _STYLTHEAK_2                                                         | #N/A                    | 4.9321  | 3.5549  | 3.5212  | 5.5306  | 5.4514  | 5.0332  | 5.3174  | 5.6527  | 5.5150  | 5.9900  | 0.8312  | -0.2667 | 0.0817 | 1.0879 |
| Cadm3    | _STYLTHEAKS[Phospho (STY)]DDAPDADTAINAEGGSGGDKK_4                    | #N/A                    | 3.3612  | 4.1174  | 4.5957  | 4.1395  | 4.0057  | 4.1197  | 4.2877  | 4.3626  | 5.1410  | 3.8167  | 0.9215  | -0.1179 | 0.2784 | 0.5553 |
| Cadm3    | _GSDAPDADTAINAEGGS[Phospho (STY)]GGDDKK_3                            | Q99N28_S386_M1_Cadm3    | 3.8657  | 4.1723  | 3.3175  | 4.3560  | 3.6842  | 3.8266  | 3.7198  | 4.6559  | 3.7734  | 3.9143  | 0.9555  | -0.0657 | 0.5068 | 0.2952 |
| Cadm3    | _EDDGANVVC[Carbamidomethyl (C)]SVNHESLK_2                            | #N/A                    | 4.1304  | 4.0199  | 3.3164  | 3.8190  | 4.0825  | 3.8689  | 4.9702  | 4.4530  | 4.5988  | 4.3101  | 0.8450  | -0.2429 | 0.0056 | 2.2543 |
| Cadm3    | _GSDAPDADTAINAEGGSGGDDKKEYI_3                                        | #N/A                    | 3.3296  | 4.0858  | 4.5641  | 4.3298  | 3.9741  | 4.1513  | 4.0445  | 4.3942  | 3.1924  | 3.7851  | 1.0567  | 0.0795  | 0.4771 | 0.3214 |
| Sylt2    | _LALQVPPEP[Phospho (STY)]PGK_2                                       | #N/A                    | 10.6841 | 10.4963 | 11.2867 | 11.0189 | 9.9699  | 10.6443 | 11.2811 | 10.6151 | 10.5704 | 10.4947 | 0.9962  | -0.0506 | 0.8805 | 0.0553 |
| Sylt2    | _LALQVPPEP[Phospho (STY)]PGK_3                                       | #N/A                    | 3.4976  | 3.8448  | 3.2313  | 4.2759  | 3.6661  | 4.0634  | 4.4242  | 4.2261  | 3.0243  | 3.9532  | 0.9632  | -0.0541 | 0.6576 | 0.1825 |
| Raf1     | _SAS[Phospho (STY)]EPSLHR_2                                          | Q99N57_S621_M1_Raf1     | 8.6752  | 8.3651  | 9.4265  | 8.8699  | 3.4941  | 9.0041  | 9.0614  | 9.2686  | 8.9737  | 1.2230  | 0.2904  | 0.4022  | 0.3951 | 0.3951 |
| Raf1     | _AAHTEDINAC[Carbamidomethyl (C)]TLTS[Phospho (STY)]PR_2              | #N/A                    | 4.1342  | 3.5794  | 3.5721  | 3.9387  | 3.2674  | 3.9629  | 3.1947  | 3.9681  | 4.4790  | 4.1752  | 0.9464  | -0.0794 | 0.4590 | 0.3382 |
| Raf1     | _RAS[Phospho (STY)]DGGKLTOSSK_2                                      | #N/A                    | 3.9106  | 3.9140  | 4.0782  | 4.6220  | 4.2592  | 4.1697  | 4.3177  | 4.3924  | 4.6442  | 4.0516  | 0.9558  | -0.0653 | 0.2805 | 0.5521 |
| Sf3b1    | _GGDSGET[Phospho (STY)]PT[Phospho (STY)]PGASK_2                      | Q99NB9_T236_M2_Sf3b1    | 7.5580  | 3.5163  | 7.4665  | 4.6044  | 3.3376  | 4.3919  | 3.2518  | 7.5834  | 7.0196  | 7.0876  | 0.8252  | -0.2771 | 0.4091 | 0.3882 |
| Sf3b1    | _AKGSET[Phospho (STY)]PGAT[Phospho (STY)]PGSK_2                      | #N/A                    | 4.1396  | 3.1185  | 3.2936  | 4.1886  | 3.0068  | 3.6178  | 3.5109  | 4.3222  | 4.0829  | 3.7633  | 0.9084  | -0.1386 | 0.2603 | 0.5845 |
| Sf3b1    | _WDETASQMGSGT[Phospho (STY)]PVLTPGK_2                                | Q99NB9_T350_M1_Sf3b1    | 3.5679  | 2.1688  | 4.2547  | 3.2565  | 3.5466  | 3.0781  | 4.4720  | 3.3611  | 3.0097  | 3.2235  | 0.9418  | -0.0864 | 0.6517 | 0.1859 |
| Sf3b1    | _GSET[Phospho (STY)]PGAT[Phospho (STY)]PGSK_2                        | #N/A                    | 3.2575  | 4.0849  | 4.4620  | 5.0623  | 3.9021  | 3.8233  | 4.1841  | 4.4662  | 3.2644  | 3.7131  | 1.0504  | 0.0709  | 0.6510 | 0.2097 |
| Sf3b1    | _DT[Phospho (STY)]PGHSGSWAETPR_2                                     | Q99NB9_T303_M1_Sf3b1    | 4.6384  | 3.2279  | 3.1843  | 5.3195  | 3.1240  | 3.1047  | 3.4016  | 5.5791  | 4.0801  | 3.6539  | 0.9013  | -0.1499 | 0.5281 | 0.2773 |
| Sf3b1    | _TM[Oxidation (M)]IS[Phospho (STY)]PERLDPFADGGAT[Phospho (STY)]DPK_3 | #N/A                    | 4.2358  | 4.7225  | 5.5466  | 5.5510  | 3.8862  | 4.7421  | 4.3720  | 5.6878  | 4.7017  | 4.5639  | 0.9895  | -0.0152 | 0.9059 | 0.0429 |
| Sf3b1    | _KLSSWDQAE[Phospho (STY)]PGHT[Phospho (STY)]PSLR_3                   | Q99NB9_T223_M2_Sf3b1    | 3.1314  | 4.2110  | 4.3659  | 3.9097  | 1.0658  | 3.6971  | 4.0579  | 4.1483  | 3.3906  | 3.4638  | 0.9022  | -0.1485 | 0.5821 | 0.2350 |
| Sf3b1    | _RWDQTAGDT[Phospho (STY)]PGAT[Phospho (STY)]PK_2                     | Q99NB9_T207_M2_Sf3b1    | 4.1920  | 3.4061  | 3.5799  | 6.6245  | 3.3175  | 4.4120  | 3.7720  | 3.8775  | 4.1765  | 4.3018  | 1.0077  | 0.0111  | 0.9398 | 0.0316 |
| Rims1    | _GQS[Phospho (STY)]PTGSPPADTSFGR_2                                   | Q99N95_S1023_M1_Rims1   | 9.3886  | 10.0780 | 10.3769 | 10.3632 | 8.4265  | 10.0441 | 10.6721 | 10.2040 | 8.7671  | 9.9211  | 0.9887  | -0.0164 | 0.8294 | 0.0813 |
| Rims1    | _GRS[Phospho (STY)]QDVPORLEK_3                                       | #N/A                    | 10.7888 | 10.7951 | 11.3837 | 11.4524 | 10.2377 | 11.0369 | 10.8989 | 10.9155 | 11.0323 | 10.9119 | 1.0009  | 0.0012  | 0.9683 | 0.0140 |
| Rims1    | _S[Phospho (STY)]LDEHPTIR_3                                          | #N/A                    | 11.0617 | 10.9358 | 11.6194 | 11.1881 | 10.1575 | 11.0707 | 10.6476 | 11.1112 | 11.1267 | 11.1240 | 1.0003  | 0.0004  | 0.9906 | 0.0041 |
| Rims1    | _S[Phospho (STY)]LDEHPTIR_2                                          | #N/A                    | 11.9120 | 11.4661 | 11.8311 | 12.1915 | 10.5327 | 11.4977 | 11.7817 | 11.6559 | 11.6781 | 11.7018 | 0.9887  | -0.0164 | 0.6653 | 0.1770 |
| Rims1    | _SGS[Phospho (STY)]IEQASLVVEER_2                                     | Q99N95_S1051_M1_Rims1   | 8.4735  | 8.0650  | 8.8930  | 2.8706  | 8.3087  | 8.4612  | 8.7220  | 8.3890  | 8.3942  | 0.8838  | -0.1783 | 0.4227  | 0.3740 | 0.3469 |
| Rims1    | _ETS[Phospho (STY)]PSSHPTVWQPSK_2                                    | #N/A                    |         |         |         |         |         |         |         |         |         |         |         |         |        |        |



|         |                                                                                  |                         |         |         |         |         |         |         |         |         |         |         |         |         |        |        |
|---------|----------------------------------------------------------------------------------|-------------------------|---------|---------|---------|---------|---------|---------|---------|---------|---------|---------|---------|---------|--------|--------|
| Rims1   | _S[Phospho (STY)]VS[Phospho (STY)]PHRGDDQGRPR_3                                  | Q99NE5_5788_M2_Rims1    | 4.2761  | 2.8816  | 4.0097  | 2.6473  | 1.7253  | 3.2048  | 3.7018  | 3.4477  | 3.2311  | 3.2308  | 0.9181  | -0.1233 | 0.5811 | 0.2357 |
| Rims1   | _S[Phospho (STY)]RS[Phospho (STY)]JPHR_2                                         | Q99NE5_5786_M2_Rims1    | 3.5393  | 3.6869  | 4.2261  | 3.2279  | 3.5752  | 3.0494  | 4.4434  | 5.3704  | 3.0383  | 3.1949  | 0.8851  | -0.1761 | 0.3678 | 0.4344 |
| Rims1   | _LQTHIDESSLPQPS[Phospho (STY)]PFMPR_3                                            | Q99NE5_5716_M1_Rims1    | 4.3349  | 3.0075  | 4.0686  | 6.9196  | 2.8288  | 3.3988  | 3.7606  | 3.3888  | 3.6879  | 3.2896  | 1.1590  | 0.2129  | 0.4881 | 0.3115 |
| Nsmf    | _QGS[Phospho (STY)]KEC[Carbamidomethyl (C)]PGC[Carbamidomethyl (C)]AQLVGPSSR_3   | #N/A                    | 7.3823  | 7.2993  | 7.2229  | 7.8290  | 3.8476  | 6.1707  | 4.2621  | 6.7749  | 7.0539  | 7.1606  | 1.0427  | 0.0603  | 0.7723 | 0.1122 |
| Nsmf    | _M[Oxidation (M)]SP[Phospho (STY)]VDGVSDVPIR_2                                   | #N/A                    | 6.9550  | 7.2246  | 4.1454  | 9.1924  | 5.9545  | 7.4796  | 3.6935  | 8.0436  | 8.0649  | 7.6598  | 0.9941  | -0.0085 | 0.9741 | 0.0114 |
| Nsmf    | _S[Phospho (STY)]DPTPMK_2                                                        | Q99NF2_5394_M1_Nsmf     | 6.1105  | 3.3723  | 3.6994  | 5.6907  | 3.2494  | 3.3603  | 3.9001  | 3.9258  | 3.9483  | 4.6439  | 1.0307  | 0.0436  | 0.8585 | 0.0663 |
| Nsmf    | _ERS[Phospho (STY)]FS[Phospho (STY)]KS[Phospho (STY)]WSQTPMK_2                   | #N/A                    | 3.3777  | 3.4073  | 3.5389  | 4.0386  | 3.2538  | 3.9798  | 3.7533  | 4.0856  | 3.7342  | 4.0056  | 0.9242  | -0.1138 | 0.1448 | 0.8394 |
| Cep41   | _LEDND[Phospho (STY)]AT[Phospho (STY)]SEADAIAAK_2                                | Q99NF3_7398_M2_Cep41    | 3.5063  | 5.3298  | 3.7675  | 5.8663  | 3.7199  | 3.5598  | 4.2134  | 5.6210  | 3.8899  | 3.7301  | 0.9880  | -0.0247 | 0.9086 | 0.0416 |
| Cep41   | _GGGNIP[PS[Carbamidomethyl (C)]PASH[Phospho (STY)]JPR_3                          | Q99NF3_5358_M1_Cep41    | 3.7300  | 2.9854  | 3.4636  | 4.5083  | 2.8737  | 3.7509  | 3.1557  | 3.9938  | 4.2928  | 4.1855  | 0.9091  | -0.1374 | 0.3606 | 0.4430 |
| Ankrd17 | _NS[Phospho (STY)]PLOC[Carbamidomethyl (C)]GASPNK_2                              | Q99NH0_52055_M1_Ankrd17 | 6.3222  | 3.1484  | 3.2637  | 6.9842  | 5.6387  | 5.4039  | 6.1095  | 6.2113  | 4.0007  | 5.7953  | 0.9272  | -0.1090 | 0.6693 | 0.1744 |
| Ankrd17 | _EHYVSPSS[Phospho (STY)]PS[Phospho (STY)]PPAQGGVSR_3                             | Q99NH0_52041_M2_Ankrd17 | 4.2257  | 8.8138  | 3.9594  | 8.9475  | 8.4281  | 8.9924  | 9.5064  | 8.9961  | 8.9099  | 9.0562  | 0.7928  | -0.3350 | 0.1687 | 0.7729 |
| Par3    | _RSSDPALGLS[Phospho (STY)]TSVSDNNFSSEEPSR_3                                      | Q99NH2_5352_M1_Par3     | 3.5694  | 3.6568  | 4.2562  | 3.2580  | 3.5451  | 3.0795  | 4.4735  | 3.3597  | 3.0082  | 3.2250  | 1.0126  | 0.0180  | 0.8969 | 0.0472 |
| Par3    | _NNVSPGRFS[Phospho (STY)]POSH[Carbamidomethyl (C)]VANR_3                         | Q99NH2_5383_M1_Par3     | 3.2334  | 3.9927  | 3.9202  | 4.4229  | 3.8810  | 4.2444  | 4.1376  | 4.6456  | 3.3442  | 4.3899  | 0.9564  | -0.0644 | 0.5706 | 0.2437 |
| Hspbp1  | _LIGTC[Carbamidomethyl (C)]FSS[Phospho (STY)]PTDOSM[Oxidation (M)]DR_2           | #N/A                    | 3.1911  | 3.9963  | 3.8779  | 8.8224  | 7.2556  | 8.2801  | 8.7474  | 8.6789  | 8.3827  | 4.7930  | 0.7717  | -0.3739 | 0.2719 | 0.5657 |
| Rtn4    | _KAOITEKS[Phospho (STY)]PK_2                                                     | #N/A                    | 10.1267 | 10.6000 | 11.1046 | 10.6629 | 9.5945  | 10.2161 | 10.8161 | 10.7563 | 10.3255 | 10.0419 | 0.9904  | -0.0139 | 0.7481 | 0.1260 |
| Rtn4    | _GSGS[Phospho (STY)]VDLTFALPAASEPVPSAEK_3                                        | Q99P72_5167_M1_Rtn4     | 3.7757  | 3.5667  | 3.5094  | 4.5540  | 2.9194  | 3.7052  | 3.2014  | 3.9480  | 4.2471  | 4.2312  | 0.9398  | -0.0896 | 0.4985 | 0.3023 |
| Rtn4    | _LPS[Phospho (STY)]DTEKEDR_2                                                     | #N/A                    | 3.2203  | 8.1381  | 8.7669  | 4.4097  | 3.8468  | 8.2241  | 4.1244  | 8.7559  | 3.3573  | 4.3767  | 1.1838  | 0.2435  | 0.5729 | 0.2420 |
| Rtn4    | _HQAQIHYGLANK_3                                                                  | #N/A                    | 7.2291  | 7.2201  | 7.6663  | 7.0350  | 6.7557  | 7.4892  | 7.5919  | 7.3719  | 6.9918  | 0.9662  | -0.0495 | 0.2551  | 0.5933 | 0.2648 |
| Rtn4    | _Acetyl (Protein N-term)[M][Oxidation (M)]EDIQGSLVSSADS[Phospho (STY)]PPRPAPFK_3 | #N/A                    | 9.1904  | 7.1940  | 10.9590 | 11.3351 | 9.4408  | 9.9419  | 10.1633 | 10.6460 | 10.1812 | 9.3946  | 0.9510  | -0.0724 | 0.5435 | 0.2648 |
| Rtn4    | _TSNPLVHAHDEADYVTDNLSK_3                                                         | #N/A                    | 3.5107  | 4.6132  | 4.7394  | 5.0059  | 4.6093  | 4.3357  | 4.9480  | 3.1106  | 4.8797  | 4.4025  | 1.0316  | 0.0449  | 0.7569 | 0.1210 |
| Rtn4    | _LSTEPS[Phospho (STY)]REFSNYIAK_2                                                | Q99P72_5690_M1_Rtn4     | 8.0115  | 8.5590  | 3.3393  | 9.0540  | 5.0701  | 8.5852  | 8.8507  | 9.0201  | 8.6484  | 8.5977  | 0.8091  | -0.3056 | 0.1979 | 0.7035 |
| Rtn4    | _GUPAAPPT[Phospho (STY)]APIERQPSWR_3                                             | Q99P72_T08_M1_Rtn4      | 2.9086  | 3.7138  | 3.3623  | 8.3035  | 4.9248  | 4.1944  | 7.0183  | 4.0951  | 5.5812  | 5.5413  | 0.7863  | -0.3468 | 0.3013 | 0.5211 |
| Rtn4    | _EAEKLP[Phospho (STY)]DTEKEDR_2                                                  | #N/A                    | 6.6736  | 8.2250  | 8.9570  | 8.0174  | 6.6901  | 7.9395  | 8.5988  | 8.5859  | 8.1097  | 8.0805  | 0.9289  | -0.1064 | 0.2464 | 0.6084 |
| Rtn4    | _VVKEDGVM[Oxidation (M)]S[Phospho (STY)]PEK_2                                    | #N/A                    | 9.8087  | 9.5615  | 9.5796  | 9.9943  | 8.7881  | 9.5091  | 10.1199 | 9.7866  | 9.4878  | 9.7116  | 0.9758  | -0.0353 | 0.3425 | 0.4653 |
| Rtn4    | _DGS[Phospho (STY)]PKYTDLVSNK_2                                                  | #N/A                    | 8.1851  | 8.9827  | 8.2612  | 9.5676  | 8.0201  | 8.9392  | 9.5272  | 9.3125  | 9.9441  | 8.9755  | 0.9423  | -0.0858 | 0.1418 | 0.8482 |
| Rtn4    | _RNGS[Phospho (STY)]GSDVETLALPAASEPVPSAEK_3                                      | #N/A                    | 7.0473  | 9.5529  | 9.6174  | 10.5700 | 7.4235  | 7.4637  | 8.9402  | 9.8161  | 8.8092  | 4.0172  | 1.0908  | 0.1254  | 0.5914 | 0.2281 |
| Rtn4    | _EHGYLGNLSAVASTEGTREETLEASR_3                                                    | #N/A                    | 4.1651  | 4.6153  | 4.3456  | 3.8537  | 3.0504  | 3.3291  | 3.5848  | 3.3808  | 3.6345  | 3.8207  | 1.0109  | 0.0517  | 0.9049 | 0.0434 |
| Rtn4    | _RGS[Phospho (STY)]GSDVETLALPAASEPVPSAEK_3                                       | #N/A                    | 5.1648  | 9.8983  | 4.1876  | 10.4366 | 3.1067  | 8.8933  | 3.6641  | 10.1501 | 9.4265  | 8.5806  | 0.8734  | -0.1954 | 0.6263 | 0.2032 |
| Rtn4    | _AQITEKS[Phospho (STY)]PK_2                                                      | #N/A                    | 4.2939  | 2.9910  | 10.5258 | 10.1600 | 9.1931  | 9.7894  | 10.3847 | 7.5866  | 9.9714  | 10.3314 | 0.9087  | -0.1381 | 0.7197 | 0.1428 |
| Rtn4    | _AYLSEVAISEELVQK_2                                                               | #N/A                    | 5.8495  | 6.1251  | 7.2816  | 6.5446  | 4.7551  | 6.6141  | 6.4576  | 5.6338  | 5.5894  | 6.0130  | 1.0458  | 0.0647  | 0.5759 | 0.2396 |
| Rtn4    | _ESTSEVETQHK_2                                                                   | #N/A                    | 4.6753  | 4.4974  | 4.7427  | 3.8015  | 3.5612  | 4.3963  | 4.3724  | 4.4040  | 3.9569  | 4.2831  | 1.0059  | 0.0085  | 0.9259 | 0.0354 |
| Rtn4    | _SKDKDLVC[Carbamidomethyl (C)]SAAHNPQES[Phospho (STY)]PATLTIK_4                  | Q99P72_5329_M1_Rtn4     | 4.1993  | 3.0269  | 3.3852  | 3.8879  | 3.3249  | 4.4045  | 3.6026  | 4.2306  | 3.8792  | 3.8549  | 0.9519  | -0.0710 | 0.5441 | 0.2643 |
| Rtn4    | _EDGVMS[Phospho (STY)]PEK_2                                                      | #N/A                    | 6.4059  | 3.7077  | 4.2052  | 6.5037  | 3.5960  | 3.0286  | 4.4226  | 3.4106  | 3.0592  | 3.1741  | 1.3008  | 0.3794  | 0.2257 | 0.6465 |
| Rtn4    | _LSAS[Phospho (STY)]QGVGPKYLESQNLHITK_3                                          | Q99P72_5768_M1_Rtn4     | 3.2329  | 3.9892  | 4.4674  | 4.4265  | 3.8775  | 4.2480  | 4.1411  | 2.9900  | 3.3406  | 3.6885  | 1.1413  | 0.1907  | 0.1392 | 0.8564 |
| Rtn4    | _ESAEP[SVLSEYEM[Oxidation (M)]GSSFGNS[Phospho (STY)]PK_3                         | Q99P72_5291_M1_Rtn4     | 3.5589  | 4.3152  | 3.2926  | 4.3372  | 4.2035  | 3.9220  | 4.4855  | 4.1648  | 2.9630  | 4.0145  | 1.0080  | 0.0115  | 0.9292 | 0.0319 |
| Nup155  | _AAPGS[Phospho (STY)]PSVPK_2                                                     | Q99P88_5992_M1_Nup155   | 4.3278  | 4.3992  | 3.5137  | 4.0164  | 2.7867  | 3.8379  | 3.7311  | 4.1021  | 9.3021  | 3.9834  | 0.7223  | -0.4693 | 0.2312 | 0.6553 |
| Ogfr    | _IALNLEG[Carbamidomethyl (C)]ALS[Phospho (STY)]PTSQEPR_2                         | Q99PC2_5453_M1_Ogfr     | 5.0378  | 6.3940  | 6.5508  | 7.4131  | 5.1587  | 7.3492  | 6.6007  | 6.8605  | 3.2238  | 5.9087  | 1.0151  | 0.0217  | 0.9302 | 0.0314 |
| Lpin2   | _S[Phospho (STY)]DELEVPSSESLR_2                                                  | #N/A                    | 3.3234  | 4.1286  | 4.0414  | 7.9554  | 6.3286  | 4.1699  | 7.1096  | 3.3081  | 3.9201  | 1.0672  | 0.0938  | 0.7898  | 0.1025 | 0.5769 |
| Ntm     | _TVNNPPPISEAK_2                                                                  | #N/A                    | 8.3156  | 8.2260  | 8.2770  | 8.3792  | 8.1528  | 7.9937  | 8.0448  | 8.3382  | 8.1738  | 7.7839  | 1.0172  | 0.0246  | 0.2649 | 0.5769 |
| Ntm     | _AVGPVSEDELEQGITR_2                                                              | #N/A                    | 5.8787  | 6.2794  | 7.2596  | 6.9473  | 5.5351  | 6.5105  | 6.2140  | 6.4165  | 5.8455  | 5.9158  | 1.0498  | 0.0701  | 0.4054 | 0.3922 |
| Ntm     | _EQSGEYEC[Carbamidomethyl (C)]SASNDVAAPVVR_2                                     | #N/A                    | 6.2796  | 6.0997  | 6.6287  | 7.5314  | 6.2649  | 6.7819  | 6.3361  | 7.0725  | 6.1910  | 6.7363  | 1.0021  | 0.0030  | 0.9658 | 0.0151 |
| Ntm     | _GTGVPVGGQK_2                                                                    | #N/A                    | 5.9242  | 6.3530  | 6.7665  | 6.4708  | 6.2114  | 6.1536  | 6.7003  | 6.5403  | 6.0231  | 6.1815  | 1.0095  | 0.0136  | 0.7367 | 0.1367 |
| Ntm     | _VHLVQVSPK_2                                                                     | #N/A                    | 6.1302  | 5.1508  | 6.1015  | 4.2109  | 4.2861  | 4.6877  | 6.2530  | 5.0811  | 5.4215  | 5.6908  | 0.9079  | -0.1395 | 0.3129 | 0.5047 |
| Ntm     | _STLJYAGNDK_2                                                                    | #N/A                    | 7.9979  | 6.8563  | 7.6783  | 7.3918  | 7.8476  | 7.0142  | 7.3033  | 7.4878  | 7.3527  | 7.4835  | 1.0078  | 0.0112  | 0.8145 | 0.0891 |
| Ntm     | _AMDNVTVR_2                                                                      | #N/A                    | 5.8607  | 3.4747  | 3.6014  | 5.8571  | 3.2960  | 6.7017  | 3.2934  | 3.8560  | 4.1551  | 4.3233  | 1.2282  | 0.2966  | 0.2907 | 0.5365 |
| Rrbp1   | _LASS[Phospho (STY)]PKDR_2                                                       | Q99PL5_5135_M1_Rrbp1    | 3.2166  | 3.9729  | 7.5877  | 4.4427  | 3.8612  | 4.1574  | 4.2442  | 3.7368  | 3.2444  | 6.5026  | 0.8538  | -0.2281 | 0.4944 | 0.3059 |
| Ubxm6   | _GKS[Phospho (STY)]PLALR_2                                                       | Q99PL6_536_M1_Ubxm6     | 11.1017 | 11.3272 | 11.5523 | 11.6699 | 10.0556 | 11.2109 | 10.9285 | 10.9168 | 10.9955 | 11.0843 | 1.0156  | 0.0224  | 0.5782 | 0.2379 |
| Ubxm6   | _EALQNDWLFPFLR_2                                                                 | #N/A                    | 5.5244  | 5.6282  | 5.4902  | 4.0009  | 6.0042  | 5.7242  | 6.4919  | 5.6799  | 5.7273  | 5.3864  | 0.9268  | -0.1096 | 0.3251 | 0.4879 |
| Ubxm6   | _SVLRPELLAAEQLS_2                                                                | #N/A                    | 3.2085  | 3.9648  | 4.4431  | 4.4508  | 3.8531  | 4.2723  | 4.1655  | 3.6677  | 3.3162  | 4.4178  | 1.0361  | 0.0511  | 0.6633 | 0.1783 |
| Znf318  | _RAS[Phospho (STY)]PS[Phospho (STY)]JPR_2                                        | #N/A                    | 9.5114  | 9.5582  | 9.4394  | 10.0352 | 8.9871  | 9.4970  | 9.8596  | 9.3220  | 9.4948  | 0.9972  | -0.0041 | 0.8920  | 0.0496 | 0.6851 |
| Znf318  | _RGS[Phospho (STY)]PS[Phospho (STY)]JPR_2                                        | Q99P22_579_M2_Znf318    | 9.4759  | 9.6389  | 10.1433 | 10.1937 | 8.8187  | 9.4667  | 9.8435  | 9.6852  | 9.7048  | 9.5971  | 0.9909  | -0.0132 | 0.7462 | 0.1272 |
| Znf318  | _DQVGGNV[Phospho (STY)]JPR_2                                                     | Q99P22_52206_M1_Znf318  | 8.1944  | 7.9483  | 7.8936  | 8.8735  | 7.9750  | 7.9691  | 8.4826  | 8.1520  | 8.1190  | 8.1175  | 0.9908  | -0.0133 | 0.7195 | 0.1430 |
| Znf318  | _WAS[Phospho (STY)]PS[Phospho (STY)]JPR_2                                        | Q99P22_569_M2_Znf318    | 7.7025  | 8.6777  | 6.5276  | 9.1929  | 7.9767  | 8.3203  | 9.0311  | 7.4796  | 8.7935  | 8.6530  | 0.9499  | -0.0742 | 0.4555 | 0.3416 |
| Znf318  | _LGS[Phospho (STY)]PDGLQDM[Oxidation (M)]DRDLTDDSVFTR_3                          | Q99P22_5205_M1_Znf318   | 3.8983  | 3.3279  | 4.5851  | 3.5869  | 3.0240  | 3.2047  | 3.3016  | 2.1477  | 4.1801  | 5.5539  | 1.0936  | 0.1291  | 0.5068 | 0.2951 |
| Znf318  | _S[Phospho (STY)]PGLC[Carbamidomethyl (C)]DSDSLESLR_2                            | Q99P22_5167_M1_Znf318   | 3.9956  | 3.2510  | 3.7292  | 3.6638  | 3.1393  | 3.4853  | 3.3785  | 4.4547  | 4.1033  | 3.6308  | 0.9106  | -0.1350 | 0.2015 | 0.6958 |
| Znf318  | _RAS[Phospho (STY)]PS[Phospho (STY)]PPAGR_3                                      | #N/A                    | 3.4972  | 3.8452  | 3.2309  | 4.2755  | 4.1418  | 3.9836  | 4.4238  | 4.2265  | 3.0247  | 3.9538  | 0.9801  | -0.0291 | 0.8125 | 0.0902 |
| Trim33  | _LKS[Phospho (STY)]DERPWHK_3                                                     | Q99PP7_51134_M1_Trim33  | 4.7632  | 4.2714  | 4.7033  | 4.2054  | 4.4344  | 3.4079  | 4.2054  | 3.0313  | 4.6451  | 4.7825  | 1.0316  | 0.0448  | 0.7519 | 0.1239 |
| Arhgdia | _VAVSADPVNPNVTVTR_2                                                              | #N/A                    | 9.4338  | 9.6279  | 9.9235  | 9.8677  | 9.6989  | 9.8445  | 9.7015  | 9.5693  | 9.6917  | 9.6415  | 1.0085  | 0.0122  | 0.4226 | 0.3741 |
| Arhgdia | _Acetyl (Protein N-term)[AEQEPTEALQIAENEEDEHGVNY[Phospho (STY)]KPPAQK_4          | Q99PT1_Y27_M1_Arhgdia   | 5.4857  | 6.9133  | 6.9850  | 6.4064  | 6.5591  | 6.8481  | 6.4332  | 6.9593  | 6.7738  | 6.9645  | 0.9877  | -0.0178 | 0.8174 | 0.0876 |
| Arhgdia | _TDYM[Oxidation (M)]VSGVGR_2                                                     | #N/A                    | 7.8105  | 7.4537  | 7.5493  | 7.3614  | 8.0747  | 7.8865  | 7.7347  | 7.8142  | 7.7948  | 7.8880  | 0       |         |        |        |



|         |                                                              |                      |         |         |         |         |         |         |         |         |         |         |         |         |        |        |
|---------|--------------------------------------------------------------|----------------------|---------|---------|---------|---------|---------|---------|---------|---------|---------|---------|---------|---------|--------|--------|
| Cow6c   | _AGIFSAAK_2                                                  | #N/A                 | 5.6658  | 4.6114  | 5.9059  | 5.0930  | 5.4519  | 5.7279  | 4.0777  | 5.6713  | 5.6410  | 5.2789  | 1.0469  | 0.0661  | 0.5459 | 0.2629 |
| Cow6c   | _NYDSM[Oxidation (M)]KDFEEMRK_3                              | #N/A                 | 5.9626  | 4.0589  | 4.5474  | 5.2341  | 3.8981  | 4.0211  | 4.2394  | 4.4110  | 3.2092  | 3.7684  | 1.1826  | 0.2420  | 0.1679 | 0.7749 |
| Cow6c   | _ATAEFYR_2                                                   | #N/A                 | 3.6173  | 6.9162  | 3.3510  | 6.1734  | 4.2619  | 3.8636  | 3.2804  | 7.5512  | 7.3277  | 7.4276  | 0.7343  | -0.4455 | 0.1665 | 0.7786 |
| Cow6c   | _NYSMDKDFEEMR_3                                              | #N/A                 | 3.7107  | 3.0151  | 4.0610  | 3.6048  | 2.8364  | 3.9322  | 3.7530  | 3.3964  | 3.6955  | 3.2820  | 0.9731  | -0.0394 | 0.7126 | 0.1472 |
| Tomn22  | _JAcetyl (Protein N-term)AAVAAGAEPLS[Phospho (STY)]PEELLPK_2 | #N/A                 | 10.7653 | 12.2672 | 12.6897 | 13.0191 | 11.3005 | 11.2970 | 11.4892 | 12.4848 | 11.9533 | 11.0702 | 1.0120  | 0.0171  | 0.7928 | 0.1008 |
| Tomn22  | _LWGLTEM[Oxidation (M)]PER_2                                 | #N/A                 | 3.2336  | 5.1491  | 4.4681  | 4.4258  | 5.3196  | 5.2081  | 4.1405  | 5.4157  | 5.6642  | 5.1917  | 0.9081  | -0.1391 | 0.3582 | 0.4458 |
| Tomn22  | _LOM[Oxidation (M)]EQQQQLQGR_2                               | #N/A                 | 3.6889  | 4.4251  | 4.6753  | 4.6342  | 3.9773  | 4.2056  | 4.4596  | 4.5347  | 4.5120  | 4.2922  | 0.9591  | -0.0602 | 0.3945 | 0.4040 |
| Tomn22  | _AAEAFAEELEDDOEDLTSLER_3                                     | #N/A                 | 4.1824  | 3.4378  | 3.9160  | 4.3032  | 3.3261  | 3.7985  | 3.1917  | 3.1406  | 4.2901  | 3.4440  | 1.0647  | 0.0904  | 0.4849 | 0.3143 |
| Atp5mg  | _VELVPPTPAEPTAIGSVK_2                                        | #N/A                 | 9.9745  | 9.9292  | 9.8853  | 10.0667 | 9.8061  | 9.8134  | 10.0734 | 10.1384 | 9.9445  | 9.7225  | 0.9946  | -0.0078 | 0.5556 | 0.2553 |
| Atp5mg  | _LATWHHYAK_2                                                 | #N/A                 | 7.8626  | 7.7985  | 7.9919  | 7.8371  | 6.9070  | 7.7923  | 7.7431  | 7.9200  | 7.7325  | 0.9941  | -0.0086 | 0.8418  | 0.0748 |        |
|         | _TPS[Phospho (STY)]PGEQQQVQVEVK_2                            | #N/A                 | 10.3239 | 10.4550 | 3.8517  | 10.9892 | 11.2248 | 10.5749 | 10.8789 | 10.4545 | 10.5389 | 10.6661 | 0.8999  | -0.1522 | 0.4814 | 0.3175 |
|         | _TPS[Phospho (STY)]PGEQQQVQVEVK_3                            | #N/A                 | 3.1635  | 4.0627  | 3.8503  | 4.3529  | 5.3472  | 4.1745  | 4.0676  | 3.7656  | 3.4141  | 4.3199  | 1.0685  | 0.0956  | 0.5191 | 0.2847 |
| Glo1    | _RFEELGVK_2                                                  | #N/A                 | 6.8239  | 7.7514  | 7.5497  | 7.4552  | 7.9966  | 7.2260  | 7.2746  | 7.2131  | 7.5726  | 7.0637  | 1.0256  | 0.0364  | 0.4332 | 0.3633 |
| Glo1    | _GLAFIQDPDGVWIELNPNK_2                                       | #N/A                 | 5.8318  | 6.1443  | 5.4117  | 6.6766  | 5.6059  | 5.7695  | 6.1012  | 5.8086  | 5.9200  | 5.3269  | 1.0203  | 0.0290  | 0.6681 | 0.1752 |
| Glo1    | _DFLLQNM[Oxidation (M)]LR_2                                  | #N/A                 | 6.5706  | 6.6998  | 5.7765  | 6.2918  | 6.9522  | 7.0673  | 6.5419  | 6.5320  | 6.7969  | 3.7175  | 1.1124  | 0.1536  | 0.3199 | 0.4950 |
| Glo1    | _FEELGVK_2                                                   | #N/A                 | 4.1657  | 4.8085  | 4.7066  | 2.9846  | 4.3485  | 4.5235  | 3.8424  | 4.3326  | 4.5587  | 4.3341  | 0.9975  | -0.0036 | 0.9769 | 0.0101 |
| Glo1    | _SLDFYTR_2                                                   | #N/A                 | 4.8716  | 4.0226  | 5.7640  | 4.2102  | 4.7162  | 5.0463  | 4.2463  | 4.3926  | 5.0015  | 4.8512  | 1.0322  | 0.0457  | 0.6810 | 0.1669 |
| Glo1    | _FGFHGIAVDVPSAC[Carbamidomethyl (C)]K_2                      | #N/A                 | 4.6138  | 3.6109  | 4.4557  | 3.6705  | 3.8426  | 3.7869  | 4.7976  | 2.0172  | 5.0722  | 3.6767  | 1.0315  | 0.0447  | 0.8405 | 0.0754 |
| Mgt13   | _IASGIGLAWIGR_2                                              | #N/A                 | 4.5948  | 4.2511  | 3.6512  | 3.7418  | 3.0613  | 3.9212  | 3.4565  | 3.8284  | 4.0012  | 4.3731  | 0.9886  | -0.0165 | 0.8887 | 0.0513 |
| Mgt13   | _VLIVAYOYTGDPK_2                                             | #N/A                 | 3.2962  | 4.0525  | 3.8605  | 4.3631  | 3.7835  | 4.1846  | 4.0778  | 4.0912  | 3.4040  | 3.9885  | 1.0085  | 0.0122  | 0.8893 | 0.0509 |
| Glo4    | _VTLAVSLOLK_2                                                | #N/A                 | 6.4554  | 6.6653  | 6.7694  | 7.2459  | 6.7200  | 6.8702  | 6.9687  | 6.6859  | 6.6673  | 6.6975  | 1.0049  | 0.0070  | 0.8374 | 0.0823 |
| Glo4    | _VAGIGFETEAPGCVK_2                                           | #N/A                 | 6.7030  | 6.6871  | 6.9201  | 7.3239  | 6.6587  | 7.1651  | 6.4096  | 6.7410  | 6.4306  | 6.8983  | 1.0438  | 0.0618  | 0.1195 | 0.8878 |
| Glo4    | _FQTVHFR_2                                                   | #N/A                 | 6.2282  | 6.5922  | 6.6672  | 6.6075  | 6.2982  | 6.3628  | 6.6113  | 6.5317  | 6.1386  | 6.6337  | 0.9970  | -0.0043 | 0.8858 | 0.0527 |
| Glo4    | _SPSCDPVLK_2                                                 | #N/A                 | 6.1940  | 6.1357  | 6.4415  | 6.5441  | 6.5450  | 6.4282  | 5.6845  | 6.4874  | 6.0207  | 6.0258  | 1.0545  | 0.0766  | 0.0682 | 1.1664 |
| Glo4    | _IYEQDEEKQR_2                                                | #N/A                 | 4.4621  | 5.1900  | 5.3570  | 4.4929  | 4.8485  | 4.8224  | 4.0991  | 5.2663  | 5.0500  | 4.8583  | 1.0091  | 0.0130  | 0.8765 | 0.0752 |
| Glo4    | _ALLGYADNQC[Carbamidomethyl (C)]K_2                          | #N/A                 | 5.0712  | 5.6228  | 5.7994  | 5.9633  | 5.7449  | 5.2666  | 5.4090  | 5.8649  | 5.6118  | 5.6523  | 0.9900  | -0.0145 | 0.7727 | 0.1120 |
| Glo4    | _FYLQDRS[Phospho (STY)]PSCDPPVLK_3                           | #N/A                 | 4.0211  | 3.6967  | 4.0146  | 6.0423  | 4.5515  | 5.5904  | 5.3863  | 5.3387  | 3.7839  | 5.8070  | 0.9161  | -0.1265 | 0.4976 | 0.3032 |
| Glo4    | _EHSHTPLVSLDTPGK_3                                           | #N/A                 | 5.1809  | 5.0968  | 4.8876  | 5.5679  | 5.3987  | 5.5074  | 4.3605  | 4.9380  | 5.4359  | 5.5402  | 1.0404  | 0.0571  | 0.4408 | 0.3558 |
| Glo4    | _DVLGM[Oxidation (M)]QVLR_2                                  | #N/A                 | 4.6367  | 4.2306  | 4.5951  | 5.0995  | 8.1277  | 7.7360  | 4.7450  | 5.2009  | 6.1929  | 4.8080  | 1.0957  | 0.1318  | 0.6009 | 0.2212 |
| Glo4    | _LELQGIQGAHVAAAAGR_3                                         | #N/A                 | 5.3242  | 5.1302  | 5.4100  | 5.5779  | 5.5282  | 5.4254  | 5.2074  | 5.0263  | 4.8756  | 5.5599  | 1.0449  | 0.0634  | 0.1413 | 0.8499 |
| Glo4    | _LLDAMEAKDSDEWFATR_3                                         | #N/A                 | 3.6134  | 3.7290  | 3.3471  | 5.0667  | 4.2580  | 3.8675  | 4.5400  | 4.1103  | 4.4094  | 4.0690  | 0.9295  | -0.1055 | 0.3800 | 0.0672 |
| Arpc5   | _ALAAAGVGSVLR_2                                              | #N/A                 | 6.3218  | 6.7963  | 6.4833  | 7.0643  | 6.9713  | 6.7000  | 6.3803  | 6.7064  | 6.9415  | 6.5037  | 1.0135  | 0.0194  | 0.6203 | 0.2074 |
| Lap3    | _QVIDC[Carbamidomethyl (C)]QLADVNLGK_2                       | #N/A                 | 7.5096  | 7.2361  | 7.9821  | 8.0272  | 7.5473  | 6.7325  | 7.8963  | 7.4401  | 7.3640  | 7.4105  | 0.9971  | -0.0042 | 0.9363 | 0.0286 |
| Lap3    | _ANKPGDQVR_2                                                 | #N/A                 | 6.5349  | 6.3959  | 6.4931  | 6.7589  | 7.1011  | 6.9085  | 6.2647  | 6.5454  | 5.7852  | 6.3161  | 1.0756  | 0.1052  | 0.0364 | 1.4386 |
| Lap3    | _ADM[Oxidation (M)]GGAATIC[Carbamidomethyl (C)]SAVSAAK_2     | #N/A                 | 5.4225  | 5.3882  | 5.8541  | 5.2682  | 5.5068  | 5.4153  | 5.9181  | 4.8295  | 4.8081  | 6.3187  | 1.0013  | 0.0019  | 0.9824 | 0.0072 |
| Lap3    | _SAGAC[Carbamidomethyl (C)]TAAAFLR_2                         | #N/A                 | 5.0018  | 5.3899  | 4.0808  | 5.4928  | 5.8240  | 5.3476  | 5.0316  | 4.6705  | 5.2019  | 5.3421  | 1.0253  | 0.0360  | 0.7074 | 0.1503 |
| Lap3    | _DKDDQLQDFTSAGESFK_3                                         | #N/A                 | 3.1914  | 5.8667  | 3.8782  | 6.7147  | 5.9913  | 6.3461  | 6.1148  | 4.0955  | 5.6126  | 6.3123  | 0.9634  | -0.0538 | 0.8145 | 0.0891 |
| Lap3    | _TUEFLR_2                                                    | #N/A                 | 3.0485  | 5.2159  | 3.4045  | 4.1213  | 3.1338  | 3.6005  | 3.9613  | 4.6492  | 4.5490  | 4.6194  | 0.7764  | -0.3652 | 0.1766 | 0.7531 |
| Lap3    | _FAEIEK_2                                                    | #N/A                 | 3.2591  | 3.9671  | 3.9459  | 4.4485  | 3.3513  | 4.2701  | 4.1632  | 2.9403  | 3.3185  | 2.1234  | 1.2351  | 0.3046  | 0.1134 | 0.9453 |
| Lap3    | _S[Phospho (STY)]WIEEQBMGSLVAK_2                             | Q9CPY7_S238_M1_Lap3  | 3.6436  | 3.6988  | 3.3773  | 4.4219  | 3.5201  | 4.2094  | 3.0693  | 4.0801  | 4.3792  | 4.0992  | 0.9757  | -0.0356 | 0.7663 | 0.1156 |
| Mdi1p1  | _T[Phospho (STY)]TPAPS[Phospho (STY)]PGSANSFAPSR_2           | Q9CQ20_S71_M2_Mdi1p1 | 3.4556  | 4.2608  | 4.3161  | 3.8599  | 4.0821  | 7.2382  | 4.0082  | 3.1413  | 3.4403  | 3.5372  | 1.2842  | 0.3609  | 0.1944 | 0.7112 |
| Lamtor1 | _LLDPSP[Phospho (STY)]PTK_2                                  | #N/A                 | 3.8098  | 3.9926  | 9.3641  | 9.3909  | 3.5679  | 8.9882  | 3.8479  | 8.9826  | 9.0315  | 3.7505  | 1.0157  | 0.0225  | 0.9596 | 0.0779 |
| Lamtor1 | _KLLDPSP[Phospho (STY)]PTK_2                                 | #N/A                 | 10.2622 | 10.0993 | 10.9114 | 10.4382 | 9.7171  | 10.0496 | 10.6258 | 10.2143 | 2.9505  | 10.1250 | 1.2084  | 0.2732  | 0.2648 | 0.5771 |
| Nduf2   | _DHDMMGVK_2                                                  | #N/A                 | 5.3477  | 2.6822  | 4.0872  | 4.3685  | 3.7141  | 4.4114  | 4.3045  | 3.5286  | 3.1772  | 1.4496  | 1.3168  | 0.3970  | 0.1706 | 0.7681 |
| Nduf2   | _TYAELEPHVPR_2                                               | #N/A                 | 6.4497  | 5.7745  | 6.1274  | 6.1605  | 5.7229  | 5.5805  | 6.4231  | 6.3691  | 6.4374  | 5.5720  | 0.9627  | -0.0548 | 0.3564 | 0.4480 |
| Pgls    | _DLPAALAPAGPASFR_2                                           | #N/A                 | 6.8894  | 6.6364  | 6.4802  | 4.0793  | 7.4244  | 6.6647  | 6.8296  | 6.6158  | 6.8152  | 0.9319  | 1.0177  | -0.1017 | 0.4603 | 0.3369 |
| Pgls    | _LPIPDQVLTINPALPVEDAAEDYAR_3                                 | #N/A                 | 4.0669  | 3.7963  | 3.8005  | 3.3443  | 5.3944  | 4.6727  | 3.4926  | 3.6569  | 4.3880  | 3.0216  | 1.1482  | 0.1994  | 0.2531 | 0.5967 |
| Pgls    | _TGALC[Carbamidomethyl (C)]WFLDEAAAR_2                       | #N/A                 | 3.0479  | 4.1782  | 3.7347  | 4.2374  | 3.6744  | 4.0589  | 3.9521  | 3.5297  | 4.2044  | 1.0642  | 0.0898  | 0.5263  | 0.5263 | 0.5263 |
| Decor1  | _VAGHPDVPVNNAAAGNFSPSR_3                                     | #N/A                 | 5.7378  | 5.9722  | 5.5630  | 5.6831  | 4.5792  | 5.0842  | 5.5945  | 5.0593  | 5.6246  | 5.7617  | 0.9867  | -0.0194 | 0.8056 | 0.0939 |
| Uqcqr   | _HVSYSLSPEQR_3                                               | #N/A                 | 4.5933  | 4.8297  | 4.5740  | 5.5831  | 5.2861  | 4.8602  | 4.3592  | 5.1937  | 5.5540  | 5.0720  | 0.9821  | -0.0261 | 0.7592 | 0.1196 |
| Uqcqr   | _EFGNLR_2                                                    | #N/A                 | 6.2953  | 6.2576  | 4.4479  | 5.6621  | 5.6905  | 5.8853  | 4.8036  | 6.4316  | 6.1986  | 6.0674  | 0.9713  | -0.0421 | 0.7166 | 0.1447 |
| Uqcqr   | _AFPSYSK_2                                                   | #N/A                 | 5.9347  | 6.3637  | 6.6058  | 5.7416  | 6.2999  | 6.0514  | 5.6814  | 6.5349  | 5.8465  | 3.4408  | 1.1470  | 0.1979  | 0.1918 | 0.7171 |
| Uqcqr   | _KNPAMYENOK_2                                                | #N/A                 | 5.7706  | 4.6671  | 4.0784  | 6.3242  | 5.0679  | 3.4097  | 5.9706  | 3.3790  | 4.9702  | 3.2995  | 1.1093  | 0.1497  | 0.5390 | 0.2684 |
| Ndufa2  | _AHPNPLUR_2                                                  | #N/A                 | 7.6639  | 8.0272  | 7.9979  | 8.0457  | 7.8567  | 7.3707  | 7.4969  | 7.9309  | 8.0331  | 7.8977  | 0.9984  | -0.0023 | 0.9406 | 0.0266 |
| Ndufa2  | _TVSLNLSADEVTR_2                                             | #N/A                 | 6.9740  | 6.4770  | 7.1397  | 7.0370  | 6.9921  | 7.2266  | 6.9084  | 6.8168  | 6.4773  | 6.7727  | 1.0342  | 0.0485  | 0.1691 | 0.7730 |
| Ndufa2  | _EC[Carbamidomethyl (C)]SEVDPK_2                             | #N/A                 | 5.1055  | 5.1554  | 4.4679  | 4.2671  | 5.7123  | 4.6205  | 3.9818  | 4.7714  | 5.1483  | 4.9505  | 1.0372  | 0.0526  | 0.6201 | 0.2075 |
| Ndufa2  | _YAFGDEK_2                                                   | #N/A                 | 5.2168  | 5.7933  | 5.1680  | 4.4106  | 5.0905  | 5.3065  | 4.1127  | 5.5873  | 5.3322  | 5.6952  | 0.9966  | -0.0049 | 0.9630 | 0.0164 |
| Ndufa2  | _AM[Oxidation (M)]QNVISGK_2                                  | #N/A                 | 5.1807  | 5.1142  | 4.9289  | 3.8498  | 5.8713  | 5.7845  | 5.4244  | 5.6636  | 5.3926  | 5.5074  | 0.9317  | -0.1020 | 0.3464 | 0.4604 |
| Mien1   | _RAS[Phospho (STY)]NGEPEVK_2                                 | Q9CQ86_S97_M1_Mien1  | 3.4704  | 2.1863  | 3.2041  | 3.7432  | 3.9752  | 4.0573  | 3.7730  | 3.5793  | 2.3409  | 3.3320  | 1.0562  | 0.0789  | 0.6837 | 0.1652 |
| Cuta    | _TSSSLVPAITEFVR_2                                            | #N/A                 | 5.8112  | 4.9151  | 5.5863  | 4.9347  | 6.5560  | 6.0592  | 4.5236  | 4.9596  | 5.6463  | 5.7750  | 1.0799  | 0.1109  | 0.3299 | 0.4816 |
| Fis1    | _GLQTEPQNNGAK_2                                              | #N/A                 | 6.4761  | 6.1886  | 7.1333  | 4.0200  | 6.3591  | 3.8074  | 6.7394  | 6.6669  | 6.4567  | 6.3227  | 0.8652  | -0.2089 | 0.2527 | 0.5974 |
| Fis1    | _JAcetyl (Protein N-term)[M]Oxidation (M)]EAVLNELSVEDLK_2    | #N/A                 | 4.4521  | 4.8956  | 4.9223  | 4.8490  | 4.7222  | 5.3748  | 4.7340  | 4.7069  | 4.3419  | 5.1634  | 1.0280  | 0.0399  | 0.5321 | 0.2740 |
| Fis1    | _KFGSEGAQGS[Phospho (STY)]VSK_2                              | Q9CQ92_S29_M1_Fis1   | 3.1031  | 4.1231  | 3.7899  | 4.2925  | 4.0114  | 3.9329  | 4.0072  | 3.8259  | 3.4745  | 4.2595  | 0.9958  | -0.0061 | 0.9493 | 0.0226 |
| Fis1    | _STQFEYAWC[Carbamidomethyl (C)]LVR_2                         | #N/A                 | 3.7135  | 3.3999  | 3.6762  | 3.2200  | 3.2212  | 3.0074  | 3.3682  | 3.7812  | 4.0803  | 4.3981  | 0.8633  | -0.2120 | 0.0445 | 0.3515 |
| Sdhb    | _LQDPFYSVR_2                                                 | #N/A                 | 8.4129  | 8.7792  | 8.      |         |         |         |         |         |         |         |         |         |        |        |



|         |                                                                   |                        |         |         |         |         |         |         |         |         |         |         |         |         |        |        |
|---------|-------------------------------------------------------------------|------------------------|---------|---------|---------|---------|---------|---------|---------|---------|---------|---------|---------|---------|--------|--------|
| Rab5a   | _QASPNVIALSGNK_2                                                  | #N/A                   | 4.9919  | 4.1574  | 5.2384  | 5.2479  | 4.3147  | 4.2973  | 4.9033  | 4.9354  | 4.9461  | 5.1885  | 0.9428  | -0.0849 | 0.3101 | 0.5086 |
| Rab5a   | _GAQAANVVDINEESFAR_2                                              | #N/A                   | 4.2857  | 3.5412  | 4.0194  | 4.5803  | 3.4295  | 3.1951  | 3.0883  | 3.2440  | 4.3934  | 3.2238  | 1.1016  | 0.1397  | 0.3602 | 0.4434 |
| Rgs10   | _WASS[Phospho (STY)]LENLEDPGEQVOR_2                               | Q9CQES_541_M1_Rgs10    | 6.5663  | 4.0181  | 3.8949  | 7.1912  | 7.0082  | 7.0357  | 6.5935  | 6.7468  | 7.0080  | 4.3646  | 0.9635  | -0.0537 | 0.8145 | 0.0891 |
| RTRAF   | _INEAINVQVIAQPK_2                                                 | #N/A                   | 3.4398  | 5.0064  | 3.1734  | 4.2196  | 3.4968  | 4.0411  | 3.9343  | 3.2846  | 3.7907  | 4.1866  | 1.0256  | 0.0964  | 0.8015 | 0.0961 |
| Nudt21  | _LPGGELNPGDEVEGLKR_3                                              | #N/A                   | 5.9191  | 6.7459  | 7.0564  | 6.9121  | 6.2694  | 6.9095  | 6.5967  | 6.3423  | 6.2772  | 6.2369  | 1.0469  | 0.0661  | 0.2457 | 0.6097 |
| Mtres1  | _FADEEDS[Phospho (STY)]DEETSYPER_2                                | Q9CF4_5106_M1_Mtres1   | 11.3921 | 11.5212 | 11.6611 | 12.1987 | 11.4244 | 11.5669 | 11.8047 | 11.4346 | 11.4818 | 11.6926 | 1.0023  | 0.0033  | 0.8779 | 0.0566 |
| Ndufb5  | _NFDVGPEK_2                                                       | #N/A                   | 6.5057  | 6.4554  | 6.4451  | 5.7480  | 5.8345  | 5.7851  | 5.6905  | 6.9497  | 5.9780  | 6.5768  | 0.9730  | -0.0394 | 0.5809 | 0.2359 |
| Ndufb5  | _EFDHSPK_2                                                        | #N/A                   | 5.8201  | 5.5799  | 4.7114  | 3.2336  | 5.6311  | 3.5247  | 5.4960  | 5.1206  | 4.6811  | 4.9315  | 0.9400  | -0.0893 | 0.6239 | 0.2049 |
| Ndufb5  | _TLAILQIESEKAEIR_2                                                | #N/A                   | 3.8378  | 4.2266  | 4.8916  | 3.8700  | 3.3593  | 3.7973  | 4.4548  | 4.1576  | 4.0903  | 4.0149  | 0.9564  | -0.0643 | 0.5261 | 0.2789 |
| Gmfb    | _NTEDLTEEWLR_2                                                    | #N/A                   | 7.2323  | 7.0716  | 7.0669  | 7.4029  | 7.1290  | 7.3860  | 6.9506  | 7.0787  | 7.0446  | 7.2716  | 1.0181  | 0.0259  | 0.2086 | 0.6806 |
| Gmfb    | _LVQTAEITLK_2                                                     | #N/A                   | 5.7747  | 5.5316  | 6.4229  | 6.0662  | 6.8956  | 5.9157  | 5.3887  | 6.0424  | 6.2784  | 6.5023  | 1.0080  | 0.0114  | 0.8819 | 0.0546 |
| Gmfb    | _LVVLDELEGVSPDELKDELPER_3                                         | #N/A                   | 4.4342  | 4.9719  | 5.2421  | 5.2336  | 5.0581  | 4.2752  | 4.2784  | 5.3575  | 4.7189  | 4.6885  | 1.0228  | 0.0325  | 0.7042 | 0.1523 |
| Gmfb    | _ETHNAIIM[Oxidation (M)]K_2                                       | #N/A                   | 4.2032  | 3.7595  | 3.8287  | 3.1553  | 5.1691  | 5.3368  | 4.5495  | 4.0374  | 4.5692  | 3.1223  | 1.0424  | 0.0599  | 0.7446 | 0.1281 |
| Gmfb    | _J[Acetyl (Protein N-term)]SESLVVC[Carbamidomethyl (C)]DVAEDLVK_2 | #N/A                   | 9.5182  | 10.0859 | 11.3560 | 11.0698 | 9.8425  | 10.6789 | 10.0441 | 9.8327  | 9.4893  | 9.9599  | 1.0604  | 0.0846  | 0.1588 | 0.7992 |
| Cot11   | _KAGGANYDAQS[Phospho (STY)]E_2                                    | #N/A                   | 7.8014  | 8.0317  | 8.1896  | 8.3287  | 8.1162  | 7.5739  | 8.4036  | 7.8487  | 8.2439  | 4.1727  | 1.1172  | 0.1598  | 0.3284 | 0.4836 |
| Cot11   | _EFVISDRK_2                                                       | #N/A                   | 6.9083  | 7.3780  | 7.5138  | 7.3389  | 7.4361  | 7.4108  | 7.0562  | 7.1153  | 7.4706  | 7.1754  | 1.0176  | 0.0251  | 0.3649 | 0.4379 |
| Cot11   | _ELEEDFIR_2                                                       | #N/A                   | 7.1235  | 6.6896  | 6.2941  | 6.7737  | 6.9907  | 7.3353  | 5.4415  | 6.9306  | 6.8176  | 7.1842  | 1.0416  | 0.0588  | 0.4697 | 0.3282 |
| Cot11   | _EVOGNFAK_2                                                       | #N/A                   | 4.6480  | 5.7144  | 4.5964  | 5.0315  | 6.0330  | 5.2975  | 5.7565  | 6.2340  | 4.6682  | 1.0319  | 0.0454  | 0.7778  | 0.1092 | 0.3501 |
| Cot11   | _EFVISDR_2                                                        | #N/A                   | 6.5393  | 5.6685  | 5.9140  | 5.6203  | 5.6873  | 6.1588  | 4.2018  | 5.8622  | 6.4665  | 5.9507  | 1.0553  | 0.0777  | 0.4896 | 0.3101 |
| Cot11   | _YDGATVPGDQGDYHQIQ[C[Carbamidomethyl (C)]TDDVR_3                  | #N/A                   | 1.4475  | 3.4949  | 1.9732  | 3.4199  | 3.3832  | 3.2414  | 3.1346  | 3.1978  | 4.3472  | 3.3869  | 0.8986  | -0.1543 | 0.4953 | 0.3051 |
| Cot11   | _AGGANYDAQS[Phospho (STY)]E_2                                     | #N/A                   | 9.8004  | 9.8166  | 9.8936  | 9.8938  | 9.2110  | 8.7629  | 9.9271  | 9.6436  | 9.6504  | 9.7043  | 0.9827  | -0.2552 | 0.5123 | 0.2905 |
| Cot11   | _FAULTIWGEDYSGLQR_2                                               | #N/A                   | 4.9367  | 4.4688  | 7.1704  | 4.2796  | 4.2713  | 3.8884  | 4.4600  | 4.0201  | 5.0812  | 4.4942  | 0.9436  | -0.0838 | 0.3905 | 0.4083 |
| Cot11   | _FTTGDAAMK_2                                                      | #N/A                   | 3.0172  | 4.2089  | 3.7040  | 4.6762  | 4.8441  | 4.0282  | 3.9214  | 3.9118  | 3.5604  | 4.1737  | 1.0483  | 0.0681  | 0.6108 | 0.2141 |
| Denr    | _LTVENS[Phospho (STY)]PK_2                                        | #N/A                   | 7.0542  | 6.4970  | 4.5893  | 7.3101  | 5.9787  | 3.2005  | 6.9457  | 6.9001  | 4.1760  | 7.0312  | 0.9215  | -0.1179 | 0.6291 | 0.2013 |
| Denr    | _WPEVDDSDIEDLGEVKK_3                                              | #N/A                   | 5.1810  | 5.1009  | 4.5531  | 6.1109  | 5.4150  | 5.9476  | 5.5057  | 5.0616  | 5.5879  | 5.4401  | 0.9974  | -0.0038 | 0.9646 | 0.0156 |
| Denr    | _LTVENS[Phospho (STY)]PKQETGIGTGQGPVGPEEEK_3                      | #N/A                   | 4.2128  | 3.4682  | 3.9465  | 3.4466  | 3.3565  | 3.2681  | 3.1612  | 3.1711  | 4.3205  | 5.1719  | 0.9141  | -0.1295 | 0.4531 | 0.3438 |
| Ndufb9  | _HLESWC[Carbamidomethyl (C)]IHR_3                                 | #N/A                   | 5.1175  | 5.2737  | 5.7348  | 6.3438  | 4.3925  | 5.3608  | 3.3763  | 6.1939  | 5.2012  | 5.6892  | 1.0499  | 0.0703  | 0.6755 | 0.1704 |
| Ndufb9  | _VPEWC[Carbamidomethyl (C)]LDWHPSK_3                              | #N/A                   | 3.8723  | 3.0363  | 4.0397  | 5.0724  | 5.2632  | 4.9349  | 3.7318  | 3.4177  | 3.7167  | 5.1894  | 1.0887  | 0.1226  | 0.5302 | 0.2756 |
| Ndufb9  | _ARFEHNKXK_3                                                      | #N/A                   | 3.7919  | 3.0037  | 4.3862  | 3.3880  | 2.8251  | 3.9613  | 3.1027  | 3.2296  | 4.6518  | 3.3550  | 0.9929  | -0.1033 | 0.9528 | 0.0210 |
| Ndufb9  | _EAEFEFVQNQHQPYPFPGSDGSPFSER_3                                    | #N/A                   | 3.8318  | 3.5106  | 3.5655  | 4.6101  | 3.3319  | 4.3976  | 3.2576  | 3.8919  | 4.1909  | 4.2874  | 0.9917  | -0.0120 | 0.9223 | 0.0351 |
| Nicn1   | _S[Phospho (STY)]PSLAFFK_2                                        | Q9CQMO_5142_M1_Nicn1   | 6.0209  | 3.8156  | 3.6972  | 4.1715  | 3.6369  | 4.5737  | 4.4534  | 3.9186  | 4.1669  | 0.9795  | 0.9077  | -0.0299 | 0.8888 | 0.0512 |
| Tandc17 | _SWC[Carbamidomethyl (C)]PDC[Carbamidomethyl (C)]VEAPEVR_2        | #N/A                   | 6.4294  | 6.8774  | 6.7259  | 6.7345  | 7.2169  | 6.7277  | 6.8546  | 6.1507  | 6.4005  | 6.4972  | 1.0362  | 0.0513  | 0.2856 | 0.5442 |
| Tandc17 | _J[Acetyl (Protein N-term)]ATFEELVSLGFEEDK_2                      | #N/A                   | 4.8957  | 5.7305  | 7.0620  | 6.8959  | 5.9054  | 6.4700  | 4.2623  | 5.6923  | 5.3516  | 1.1619  | 0.1265  | 0.1275  | 0.5845 | 0.4945 |
| Tandc17 | _LVSESC[Carbamidomethyl (C)]CQISLVEIM[Oxidation (M)]FSED_2        | #N/A                   | 5.3909  | 5.0820  | 5.9853  | 7.2033  | 5.1209  | 5.1274  | 5.4639  | 5.2366  | 4.6417  | 5.0900  | 1.1064  | 0.1459  | 0.2582 | 0.5881 |
| Glx3    | _J[Acetyl (Protein N-term)]HINQSFDFSDIEVR_3                       | #N/A                   | 4.8656  | 3.4389  | 5.7577  | 5.2107  | 4.0354  | 4.8026  | 4.1192  | 4.2558  | 5.3466  | 1.0858  | 1.1188  | 0.4893  | 0.3052 | 0.1750 |
| Glx3    | _J[Acetyl (Protein N-term)]JAGAAZAGAAVAVVEGSAQGFELLR_3            | #N/A                   | 4.0316  | 3.2870  | 3.7652  | 4.4771  | 3.0926  | 3.4493  | 2.4278  | 2.1876  | 4.1393  | 3.5948  | 1.1932  | 0.2548  | 0.2238 | 0.6502 |
| Trap1   | _AFLEALONQATSSK_2                                                 | #N/A                   | 3.9427  | 3.6745  | 3.6763  | 3.2201  | 3.4168  | 3.0076  | 3.6884  | 4.2328  | 4.0801  | 4.3982  | 0.3684  | -0.2041 | 0.0668 | 0.1623 |
| Trap1   | _GVDSGDRUNLS[Phospho (STY)]RR_2                                   | Q9CQNI_5403_M1_Trap1   | 4.0087  | 2.2175  | 3.1946  | 7.8853  | 3.1058  | 3.5188  | 3.4120  | 7.4911  | 4.0698  | 3.6643  | 0.8918  | -0.1652 | 0.6881 | 0.1623 |
| Tomm6   | _NLSIDGLM[Oxidation (M)]ADPQGV_2                                  | #N/A                   | 4.1822  | 3.9105  | 3.7921  | 4.2948  | 5.2417  | 5.5535  | 4.0095  | 4.5926  | 5.0309  | 5.0998  | 0.9600  | -0.0589 | 0.6683 | 0.1750 |
| Trappc2 | _FAMNPPYEPKS[Phospho (STY)]PIR_2                                  | Q9CQP2_5119_M1_Trappc2 | 3.6635  | 4.1713  | 3.3972  | 7.2592  | 4.1698  | 3.8174  | 3.7105  | 4.1226  | 3.7712  | 3.9628  | 1.1339  | 0.1813  | 0.4963 | 0.3042 |
| Atp5pb  | _HYFDFQIR_2                                                       | #N/A                   | 8.8468  | 8.9786  | 9.2050  | 8.8860  | 8.4613  | 8.8849  | 9.0692  | 9.1936  | 8.9657  | 8.6779  | 0.9889  | -0.0161 | 0.5281 | 0.2773 |
| Atp5pb  | _IAQLEEVK_2                                                       | #N/A                   | 7.5319  | 7.5616  | 7.6502  | 7.0355  | 7.5507  | 7.6416  | 6.7003  | 7.8326  | 7.8161  | 7.6530  | 0.9993  | -0.0010 | 0.9834 | 0.0073 |
| Atp5pb  | _AQQAALVQK_2                                                      | #N/A                   | 6.5824  | 6.9641  | 6.8545  | 6.5288  | 6.7991  | 6.3245  | 6.1066  | 6.6833  | 6.8421  | 6.7930  | 1.0105  | 0.0151  | 0.7120 | 0.1475 |
| Atp5pb  | _QIQDAIDMEK_2                                                     | #N/A                   | 6.3530  | 4.8745  | 3.8738  | 6.6900  | 5.3842  | 3.9160  | 4.9894  | 3.3813  | 3.3906  | 5.2025  | 1.2219  | 0.2891  | 0.2294 | 0.6394 |
| Atp5pb  | _SISVGQEKETIAK_2                                                  | #N/A                   | 5.4786  | 5.8761  | 6.4696  | 5.8371  | 5.0524  | 5.7177  | 5.6715  | 5.6489  | 5.0106  | 4.6194  | 1.0957  | 0.1318  | 0.1493 | 0.8260 |
| Atp5pb  | _RKEEHHM[Oxidation (M)]DWWVEK_4                                   | #N/A                   | 7.2057  | 5.1345  | 3.7746  | 4.1628  | 5.9726  | 5.0726  | 5.1892  | 5.5769  | 5.4322  | 0.8956  | 1.0577  | -0.1591 | 0.3945 | 0.4039 |
| Atp5pb  | _KEEHHMIDWVEK_3                                                   | #N/A                   | 3.9123  | 3.1678  | 3.6460  | 3.1898  | 3.0561  | 3.5686  | 3.3380  | 3.8114  | 4.1105  | 4.3679  | 0.8762  | -0.1906 | 0.0837 | 0.0771 |
| Atp5pb  | _LDHYHSVQNM[Oxidation (M)]M[Oxidation (M)]JR_3                    | #N/A                   | 4.3216  | 4.4054  | 3.5076  | 4.0103  | 2.1859  | 4.2822  | 3.7250  | 4.1082  | 3.7568  | 3.9773  | 0.9727  | -0.0400 | 0.8149 | 0.1889 |
| Rps21   | _TVGIC[Carbamidomethyl (C)]GAR_2                                  | #N/A                   | 5.6917  | 6.2900  | 5.4600  | 6.4489  | 6.7574  | 5.8681  | 5.8470  | 6.0221  | 6.2205  | 5.7370  | 1.0217  | 0.0310  | 0.6391 | 0.1944 |
| Rps21   | _J[Acetyl (Protein N-term)]M[Oxidation (M)]QNQDAGEFVLYVPR_2       | #N/A                   | 3.6008  | 3.7811  | 4.2498  | 4.2687  | 2.5947  | 4.3319  | 4.2526  | 3.6298  | 3.7924  | 3.9558  | 0.9736  | -0.0386 | 0.7784 | 0.1088 |
| Rps21   | _DHASIQM[Oxidation (M)]NVAEVR_2                                   | #N/A                   | 3.6405  | 3.6099  | 3.7683  | 3.8646  | 4.1881  | 4.8181  | 3.7438  | 3.7716  | 5.2036  | 4.5717  | 0.9211  | -0.1186 | 0.3752 | 0.4258 |
| Aco13   | _VTLVSAAPEK_2                                                     | #N/A                   | 7.6612  | 7.9905  | 8.3025  | 7.8757  | 7.9379  | 6.5246  | 6.5149  | 7.7288  | 6.8070  | 6.6354  | 1.1147  | 0.1567  | 0.0724 | 1.1402 |
| Aco13   | _TLAFASVOLTNK_2                                                   | #N/A                   | 5.9856  | 6.1771  | 5.7252  | 7.1932  | 6.6734  | 6.2069  | 6.2555  | 5.9725  | 5.7145  | 6.3342  | 1.0425  | 0.0600  | 0.4016 | 0.3962 |
| Aco13   | _J[Acetyl (Protein N-term)]SMTQNLK_2                              | #N/A                   | 3.2846  | 4.0578  | 4.5191  | 4.0629  | 0.3837  | 4.1963  | 4.2111  | 4.4391  | 3.2374  | 3.7402  | 0.8747  | -0.1931 | 0.5642 | 0.2486 |
| Pyp6c   | _APLDDKYVEAR_3                                                    | #N/A                   | 2.9908  | 3.0126  | 4.2254  | 2.6671  | 3.0196  | 2.9892  | 3.5580  | 3.2634  | 3.5311  | 3.2848  | 0.9242  | -0.1138 | 0.3895 | 0.4095 |
| Sk25a46 | _SFGSGTELGHWYTT[Phospho (STY)]PPDPSGR_3                           | Q9CQ54_745_M1_Sk25a46  | 4.1666  | 5.8873  | 6.1636  | 7.5262  | 3.1103  | 3.1143  | 3.5923  | 3.5572  | 3.8562  | 4.4359  | 1.3111  | 0.3908  | 0.2166 | 0.6644 |
| Sec61b  | _PGPTPSGTNVESSGRS[Phospho (STY)]PSK_2                             | #N/A                   | 6.6428  | 6.0439  | 6.8238  | 6.3348  | 5.2878  | 6.1741  | 6.5034  | 6.6043  | 6.7621  | 5.3965  | 0.9844  | -0.0227 | 0.7961 | 0.0990 |
| Sec61b  | _S[Phospho (STY)]PSKAVAAAR_2                                      | #N/A                   | 3.4032  | 3.8230  | 5.1029  | 3.6627  | 4.0297  | 3.6998  | 4.3073  | 3.5259  | 3.1744  | 3.0588  | 1.1243  | 0.1690  | 0.2814 | 0.5506 |
| Rer1    | _YDPSLM[Oxidation (M)]EIS[Phospho (STY)]DDGPSLPTK_2               | #N/A                   | 3.6895  | 3.7188  | 3.7248  | 7.1983  | 3.5640  | 3.9209  | 4.1919  | 8.1112  | 3.4784  | 7.3977  | 0.7425  | -0.4295 | 0.2357 | 0.6277 |
| Rer1    | _J[Acetyl (Protein N-term)]S[Phospho (STY)]GDSGVSHGKPSVYVR_3      | Q9CQJ3_52_M1_Rer1      | 2.9972  | 3.8024  | 3.6840  | 4.3183  | 3.6237  | 4.1058  | 4.4666  | 4.1837  | 2.9819  | 4.1536  | 0.9515  | -0.0717 | 0.5987 | 0.2228 |
| Zwint   | _NCS[Phospho (STY)]YLQLLC[Carbamidomethyl (C)]SLQNK_2             | Q9CQJ5_5216_M1_Zwint   | 4.2138  | 4.3233  | 3.3998  | 5.8936  | 2.9006  | 3.7240  | 3.6171  | 3.8899  | 3.8646  | 3.8694  | 1.0697  | 0.0972  | 0.6599 | 0.2007 |
| Retreg3 | _AM[Oxidation (M)]S[Phospho (STY)]GSWER_2                         | #N/A                   | 6.8391  | 6.6756  | 7.4307  | 6.5443  | 5.3787  | 6.8065  | 7.4582  | 7.3175  | 7.0968  | 6.9752  | 0.9169  | -0.1252 | 0.1305 | 0.8843 |
| Retreg3 | _GQTLPLT[Phospho (STY)]EGEGLDGHSDHPEES[Phospho (STY)]FAR_3        | Q9CQV4_5325_M2_Retreg3 | 3.5694  | 3.7150  | 3.7649  | 5.4657  | 3.7064  | 4.0535  | 5.0631  | 3.5440  | 3.5401  | 0.9850  | -0.0218 | 0       |        |        |



|          |                                                                    |                      |         |         |         |         |         |         |         |         |         |         |        |         |        |        |
|----------|--------------------------------------------------------------------|----------------------|---------|---------|---------|---------|---------|---------|---------|---------|---------|---------|--------|---------|--------|--------|
| Ywhab    | _TAFDEAIEDLTNEESYK_2                                               | #N/A                 | 7.6299  | 7.3887  | 7.2563  | 8.1996  | 7.0329  | 7.5140  | 7.6944  | 7.1593  | 7.1169  | 7.4035  | 1.0218 | 0.0311  | 0.5048 | 0.2968 |
| Ywhab    | _YDDM[Oxidation (M)](AAAM)[Oxidation (M)]K_2                       | #N/A                 | 4.8417  | 4.8061  | 4.4562  | 5.2841  | 6.0868  | 4.3209  | 4.7787  | 5.1558  | 5.6644  | 4.9442  | 0.9669 | -0.0485 | 0.6517 | 0.1860 |
| Ywhab    | _NLISWAYK_2                                                        | #N/A                 | 10.2738 | 10.1138 | 10.4176 | 9.7717  | 10.4250 | 10.4692 | 8.4008  | 10.5754 | 10.6523 | 10.5957 | 1.0188 | 0.0269  | 0.6899 | 0.1612 |
| Ywhab    | _IEALQDIC[Carbamidomethyl (C)]INDVLELDK_2                          | #N/A                 | 3.2628  | 3.9634  | 3.9496  | 3.2566  | 3.8517  | 4.2738  | 4.1669  | 5.2584  | 0.9827  | 4.4192  | 1.2431 | 0.3140  | 0.3016 | 0.5205 |
| ArfBb    | _DLPNALDEK_2                                                       | #N/A                 | 6.4436  | 6.5107  | 6.6943  | 6.5455  | 5.7299  | 6.4556  | 6.6804  | 6.6070  | 6.5997  | 6.7483  | 0.9606 | -0.0580 | 0.1726 | 0.7631 |
| Cy65b    | _[_Acetyl (Protein N-term)]AT[Phospho (STY)]PEASGSGEVEGSEPSVITYR_3 | #N/A                 | 6.8833  | 7.2454  | 7.8061  | 7.4717  | 6.8364  | 7.4831  | 7.3945  | 7.6307  | 7.2642  | 7.7463  | 0.9705 | -0.0431 | 0.3247 | 0.4885 |
| Cy65b    | _RNS[Phospho (STY)]AEETWM[Oxidation (M)]VHGR_3                     | #N/A                 | 4.8582  | 5.0594  | 6.0004  | 5.8521  | 4.9476  | 5.0125  | 5.6244  | 5.7111  | 5.2258  | 5.5532  | 0.9565 | -0.0641 | 0.3979 | 0.4003 |
| Cy65b    | _FLSEHPGGEVLLVQLGADATESIEDVGHSPOAR_4                               | #N/A                 | 5.4980  | 6.2254  | 6.7234  | 7.9388  | 5.8035  | 6.3886  | 6.4927  | 6.4435  | 6.1042  | 6.6913  | 0.9995 | -0.0007 | 0.9943 | 0.0025 |
| Cy65b    | _[_Acetyl (Protein N-term)]AT[Phospho (STY)]PEASGSGEK_2            | #N/A                 | 8.9336  | 8.7137  | 8.6274  | 9.0030  | 7.9172  | 9.0551  | 8.9925  | 8.6826  | 3.8790  | 9.0217  | 1.1392 | 0.1881  | 0.3259 | 0.4869 |
| Cy65b    | _NSAEETWM[Oxidation (M)]VHGR_2                                     | #N/A                 | 3.3684  | 4.0385  | 3.8856  | 3.8054  | 3.9874  | 4.5212  | 3.7649  | 3.6702  | 3.7630  | 4.0572  | 1.0316 | 0.0449  | 0.5467 | 0.2466 |
| Mrps36   | _LSASEALGSAALPSHSSAOSH_K_3                                         | #N/A                 | 5.3205  | 5.5334  | 3.8581  | 5.9534  | 6.1986  | 5.5143  | 5.6428  | 5.3711  | 5.3390  | 5.4156  | 0.9916 | -0.0122 | 0.9163 | 0.0079 |
| Ramac    | _RPES[Phospho (STY)]PPVVEWNSR_3                                    | #N/A                 | 6.1057  | 8.7095  | 6.8345  | 9.5349  | 8.5416  | 9.1123  | 6.7659  | 8.6948  | 8.2340  | 8.8387  | 1.0008 | 0.0011  | 0.9937 | 0.0327 |
| Ramac    | _[_Acetyl (Protein N-term)]S[Phospho (STY)]DTSEEPNFEEMFASR_2       | Q9CRQ2_S2_M1_Ramac   | 4.1708  | 3.4262  | 3.9045  | 3.4482  | 3.3145  | 3.3460  | 3.5965  | 5.5630  | 3.8879  | 3.9506  | 0.8476 | -0.2386 | 0.1393 | 0.8561 |
| Hsbp1    | _TM[Oxidation (M)]QDITLVETLLQDM[Oxidation (M)]QDK_3                | #N/A                 | 3.1330  | 4.0903  | 4.4866  | 3.7872  | 4.1173  | 3.8178  | 4.1786  | 2.6092  | 4.3179  | 3.7077  | 1.0546 | 0.0766  | 0.6133 | 0.2123 |
| Hsbp1    | _NIADLM[Oxidation (M)]TQAGVELDPENKPTAQKS[Phospho (STY)]_3          | Q9CQZ1_S76_M1_Hsbp1  | 4.3839  | 4.2241  | 4.2809  | 3.8399  | 3.2038  | 4.2199  | 3.9300  | 3.7764  | 4.3687  | 4.1097  | 0.9949 | -0.0074 | 0.9352 | 0.0291 |
| Hsbp1    | _NIADLMTQAGVELDPENKPTAQK_3                                         | #N/A                 | 3.4705  | 4.3390  | 3.5740  | 4.9219  | 3.5377  | 3.8981  | 3.7913  | 4.0419  | 3.6904  | 4.0436  | 1.0167 | 0.0239  | 0.8341 | 0.0788 |
| Ndufa6   | _QAAAAASTSPKPSR_2                                                  | #N/A                 | 4.3788  | 4.0867  | 3.8421  | 5.2183  | 4.5831  | 4.4856  | 3.5519  | 4.0978  | 4.4429  | 4.1772  | 1.0897 | 0.1240  | 0.2326 | 0.6333 |
| Ndufa6   | _NAHVTDPR_2                                                        | #N/A                 | 5.6809  | 6.0338  | 4.3378  | 5.5202  | 6.7850  | 5.2754  | 5.4543  | 5.4575  | 3.4187  | 3.5588  | 1.2534 | 0.3258  | 0.1011 | 0.9954 |
| Ndufa6   | _MLQETIK_2                                                         | #N/A                 | 3.9912  | 3.2538  | 3.1254  | 4.3700  | 3.5995  | 3.1635  | 3.3428  | 2.9681  | 2.0806  | 3.5951  | 1.1960 | 0.2582  | 0.1490 | 0.8267 |
| Ndufa6   | _VDDLVIK_2                                                         | #N/A                 | 2.0724  | 3.0525  | 3.5308  | 2.6611  | 1.9434  | 1.0399  | 3.5769  | 2.4387  | 1.6357  | 1.1262  | 1.0861 | 0.1192  | 0.7680 | 0.1146 |
| Ndufa6   | _EVPNTVHLM[Oxidation (M)]QLDITVK_2                                 | #N/A                 | 3.8492  | 3.1047  | 3.5829  | 4.6275  | 2.9930  | 3.6316  | 3.5248  | 8.2416  | 4.1735  | 4.3048  | 0.7175 | -0.4789 | 0.1509 | 0.8712 |
| NdufB3   | _MLDPVR_2                                                          | #N/A                 | 6.1322  | 4.8778  | 3.2602  | 6.7284  | 5.4551  | 3.9543  | 4.7839  | 4.5259  | 3.9821  | 3.9821  | 1.1345 | 0.1821  | 0.4293 | 0.3672 |
| PsmD9    | _[_Acetyl (Protein N-term)]S[Phospho (STY)]GEDVPIR_2               | Q9CR00_S2_M1_PsmD9   | 8.8117  | 8.4097  | 8.4308  | 8.8832  | 8.6943  | 8.9205  | 8.5550  | 8.3061  | 8.7166  | 9.1032  | 1.0025 | 0.0036  | 0.9052 | 0.0432 |
| PsmD9    | _ADVLDVQR_2                                                        | #N/A                 | 3.1977  | 6.1123  | 6.5557  | 5.5106  | 5.8448  | 5.7399  | 6.1580  | 5.4412  | 5.9584  | 6.0292  | 0.9436 | -0.0838 | 0.5504 | 0.2593 |
| PsmD9    | _LASNS[Phospho (STY)]PVLQAFAR_2                                    | Q9CR00_S128_M1_PsmD9 | 3.7482  | 7.5308  | 3.4819  | 9.5317  | 2.8919  | 3.7327  | 3.1739  | 3.9755  | 4.2746  | 4.2037  | 1.3189 | 0.3993  | 0.3986 | 0.3995 |
| Ppid     | _VFFDVQIGGR_2                                                      | #N/A                 | 5.3303  | 5.3408  | 4.2948  | 6.2775  | 5.7668  | 4.7965  | 5.7399  | 5.7801  | 6.3645  | 5.9446  | 0.8899 | -0.1684 | 0.1174 | 0.9304 |
| Ppid     | _ILLSEDK_2                                                         | #N/A                 | 4.6979  | 5.1423  | 3.8029  | 4.1994  | 3.8929  | 4.6947  | 4.3477  | 4.8177  | 4.6662  | 3.9037  | 0.9935 | -0.0094 | 0.9288 | 0.0321 |
| Ppid     | _AIQAELLK_2                                                        | #N/A                 | 3.3066  | 4.1632  | 5.0019  | 4.6726  | 5.2140  | 5.1408  | 4.2164  | 4.5843  | 4.4782  | 4.2623  | 1.0451 | 0.0637  | 0.6177 | 0.2092 |
| Ppid     | _VLELFADNVK_2                                                      | #N/A                 | 3.6312  | 3.5949  | 4.3180  | 3.3199  | 1.1320  | 3.1414  | 4.2354  | 3.2978  | 2.9464  | 3.2869  | 0.9070 | -0.1408 | 0.6115 | 0.2136 |
| Ppid     | _EVDQALADUK_3                                                      | #N/A                 | 3.2080  | 3.9643  | 4.4425  | 3.9863  | 3.8526  | 4.2728  | 4.1346  | 3.0149  | 3.3139  | 3.6636  | 1.1197 | 0.1631  | 0.1817 | 0.7406 |
| Ppid     | _AQEAPGDK_2                                                        | #N/A                 | 4.1662  | 3.1762  | 3.8999  | 3.4437  | 3.3100  | 3.3146  | 3.8565  | 3.5575  | 3.3919  | 3.1210  | 1.0057 | 0.0082  | 0.9377 | 0.0298 |
| Ppid     | _[_Acetyl (Protein N-term)]SHASPAKPSK_3                            | #N/A                 | 3.6006  | 3.6256  | 4.2874  | 3.2892  | 3.5139  | 3.1107  | 4.5047  | 3.3284  | 2.9770  | 3.2562  | 1.0155 | 0.0222  | 0.8753 | 0.2503 |
| Ndufab1  | _LYKIDPEK_2                                                        | #N/A                 | 8.5604  | 8.8554  | 8.8197  | 9.1991  | 9.3909  | 8.9184  | 8.9171  | 8.9670  | 8.7572  | 8.8124  | 1.0106 | 0.0152  | 0.5620 | 0.5708 |
| Ndufab1  | _LM[Oxidation (M)]C[Carbamidomethyl (C)]PQEVNDYADKK_3              | #N/A                 | 8.1532  | 8.3745  | 8.0979  | 8.3653  | 8.4941  | 8.4088  | 8.1433  | 8.3207  | 8.3417  | 8.2456  | 1.0064 | 0.0092  | 0.5596 | 0.2521 |
| Dph2     | _PALPLPVSS[Phospho (STY)]PSSQPSLER_2                               | Q9CR25_S188_M1_Dph2  | 5.7942  | 6.4906  | 3.1678  | 7.8393  | 4.7882  | 3.9999  | 4.3607  | 6.7175  | 3.0878  | 3.8897  | 1.1845 | 0.2443  | 0.4580 | 0.3392 |
| Vta1     | _YAGSAQYEDVGTAVQNIQK_2                                             | #N/A                 | 4.6826  | 5.0123  | 5.5557  | 4.8440  | 3.7880  | 3.6582  | 2.3030  | 4.3406  | 3.8249  | 2.5832  | 1.4042 | 0.4898  | 0.0410 | 1.3876 |
| Vta1     | _LTPEDFAR_2                                                        | #N/A                 | 3.6603  | 2.9646  | 4.3471  | 3.3489  | 4.4857  | 3.4427  | 3.0636  | 3.2687  | 3.1317  | 3.3159  | 1.1606 | 0.2149  | 0.1330 | 0.8760 |
| Cdc43    | _DSRDES[Phospho (STY)]QR_2                                         | Q9CR29_S186_M1_Cdc43 | 7.2427  | 7.4296  | 4.4853  | 7.8261  | 3.9129  | 3.8166  | 4.1774  | 7.7357  | 3.2711  | 7.0340  | 1.0416 | 0.0588  | 0.8627 | 0.0641 |
| Cdc43    | _AALLAQYADVTT[Phospho (STY)]DEEEDAKDKDAGASTANVSDR_4                | Q9CR29_S127_M1_Cdc43 | 4.3501  | 2.9923  | 4.0838  | 3.6276  | 2.8136  | 3.4151  | 3.7759  | 3.3736  | 3.6726  | 3.3049  | 1.0043 | 0.0063  | 0.9629 | 0.0164 |
| Atp6v1g1 | _[_Acetyl (Protein N-term)]ASQSGQIGQLLAQEK_2                       | #N/A                 | 5.9768  | 6.2295  | 5.6739  | 6.2184  | 6.9313  | 6.4465  | 6.2736  | 5.5048  | 6.0667  | 6.2498  | 1.0369 | 0.0523  | 0.4169 | 0.3800 |
| Atp6v1g1 | _[_Acetyl (Protein N-term)]ASQSGQIGQLLAQEKR_3                      | #N/A                 | 4.9469  | 5.0305  | 5.6061  | 5.3368  | 5.1443  | 5.5990  | 3.7473  | 4.4798  | 4.6193  | 3.3475  | 1.3035 | 0.3824  | 0.0023 | 2.6412 |
| Rpl14    | _AALKAS[Phospho (STY)]PK_2                                         | Q9CR57_S139_M1_Rpl14 | 11.9201 | 12.0223 | 12.9079 | 12.1973 | 11.6790 | 11.8659 | 12.4402 | 12.6203 | 12.0304 | 11.9811 | 0.9862 | -0.0200 | 0.5217 | 0.1981 |
| Rpl14    | _LVAVDVQDNR_2                                                      | #N/A                 | 6.1537  | 5.9384  | 6.8819  | 6.4863  | 5.8161  | 5.9881  | 6.3626  | 6.2642  | 5.7562  | 5.8671  | 1.0244 | 0.0348  | 0.5480 | 0.2613 |
| Rpl14    | _AATAAAAAAAK_2                                                     | #N/A                 | 1.4009  | 3.3489  | 3.8271  | 3.5659  | 3.2372  | 3.3875  | 3.2806  | 3.0517  | 1.6685  | 3.5329  | 1.0848 | 0.0517  | 0.1174 | 0.7138 |
| Ndufb7   | _DYC[Carbamidomethyl (C)]AHYLR_2                                   | #N/A                 | 7.4995  | 7.2349  | 7.7245  | 8.0978  | 7.6793  | 7.7640  | 7.5646  | 7.6776  | 7.1291  | 7.2445  | 1.0355 | 0.0503  | 0.1802 | 0.7442 |
| Ndufb7   | _DSFPNLAC[Carbamidomethyl (C)]K_2                                  | #N/A                 | 6.4330  | 6.0888  | 6.3110  | 6.4397  | 6.2346  | 5.6126  | 5.7563  | 6.2324  | 5.9055  | 6.3066  | 1.0225 | 0.0322  | 0.4916 | 0.3084 |
| Ndufb7   | _VAQGGQGEVEGPEVAL_2                                                | #N/A                 | 3.1651  | 6.4947  | 6.0578  | 6.5765  | 6.2987  | 6.5599  | 4.2089  | 6.5092  | 5.8843  | 6.3955  | 1.0190 | 0.0272  | 0.8947 | 0.2483 |
| Ndufb7   | _HEQHDWDYC[Carbamidomethyl (C)]EHLDYK_4                            | #N/A                 | 4.6455  | 4.0681  | 3.4744  | 3.9771  | 3.4141  | 4.3153  | 3.6918  | 4.1414  | 3.7900  | 5.0801  | 0.9537 | -0.0684 | 0.5948 | 0.0856 |
| Skc25a11 | _[_Acetyl (Protein N-term)]AATASPGAGR_2                            | #N/A                 | 7.5064  | 8.0990  | 7.7999  | 7.6702  | 7.2507  | 7.6168  | 7.8303  | 7.9844  | 7.3259  | 7.6567  | 0.9945 | -0.0079 | 0.8239 | 0.0841 |
| Skc25a11 | _NVFNALVR_2                                                        | #N/A                 | 7.7118  | 7.6676  | 7.0493  | 6.9575  | 7.3824  | 7.6138  | 7.9137  | 7.9396  | 7.9396  | 7.9396  | 0.9483 | -0.0766 | 0.1062 | 0.9738 |
| Skc25a11 | _TFSHALSLK_2                                                       | #N/A                 | 6.3203  | 6.1760  | 6.6832  | 5.6931  | 5.1945  | 5.6312  | 5.8249  | 6.0459  | 5.8529  | 5.9423  | 1.0056 | 0.0081  | 0.9081 | 0.0419 |
| Skc25a11 | _LTGADGTPPGILLK_2                                                  | #N/A                 | 5.6531  | 7.1524  | 3.2412  | 5.6459  | 6.4541  | 6.2855  | 7.1300  | 7.2784  | 6.3552  | 6.2834  | 0.8711 | -0.1990 | 0.2703 | 0.5682 |
| Skc25a11 | _AVVNAQAQASYSQSK_2                                                 | #N/A                 | 5.9363  | 3.1797  | 3.6579  | 3.2017  | 4.5367  | 5.5101  | 5.2741  | 4.4795  | 5.5726  | 5.2399  | 0.8435 | -0.2455 | 0.2401 | 0.6196 |
| Skc25a11 | _M[Oxidation (M)]JGKPEYK_2                                         | #N/A                 | 4.1274  | 4.4033  | 3.3030  | 2.3207  | 4.4729  | 4.5448  | 4.0279  | 4.7243  | 4.3133  | 4.5428  | 0.8773 | -0.1888 | 0.2795 | 0.5536 |
| Skc25a11 | _MQLSGEGAK_2                                                       | #N/A                 | 5.9924  | 4.1026  | 4.5934  | 6.6117  | 5.0605  | 3.1963  | 4.7740  | 5.0463  | 4.7190  | 4.3263  | 1.0445 | 0.0628  | 0.7542 | 0.1225 |
| Skc25a11 | _LGYTVAFER_2                                                       | #N/A                 | 5.4592  | 5.2225  | 4.2057  | 3.7495  | 4.1925  | 3.5370  | 5.3061  | 5.7651  | 3.5507  | 4.5538  | 0.8850 | -0.1762 | 0.2932 | 0.5329 |
| Skc25a11 | _ALKGM[Oxidation (M)]TAGATGAVGTAEVALR_2                            | #N/A                 | 3.6216  | 4.1760  | 4.7041  | 3.1304  | 3.8169  | 3.7866  | 4.4984  | 4.5559  | 3.3532  | 3.5108  | 0.9731 | -0.0393 | 0.7796 | 0.1081 |
| Skc25a11 | _QATYTTTR_2                                                        | #N/A                 | 3.5153  | 3.7108  | 4.2021  | 3.2039  | 3.5991  | 3.0255  | 4.4195  | 4.2628  | 3.0623  | 2.9958  | 0.9614 | -0.0568 | 0.7083 | 0.1498 |
| Skc25a11 | _FLFGGLAGM[Oxidation (M)]GATVFVQPLDLVK_2                           | #N/A                 | 3.5634  | 3.6627  | 4.2502  | 3.2520  | 3.5510  | 3.0736  | 2.2525  | 3.3656  | 3.0142  | 3.2190  | 1.2012 | 0.2644  | 0.0694 | 1.1583 |
| Uqcrlf1  | _SGFPAPVLSATSR_2                                                   | #N/A                 | 9.1546  | 9.3178  | 9.5526  | 9.4538  | 9.7004  | 9.4765  | 9.3388  | 9.3956  | 9.3168  | 9.3495  | 1.0099 | 0.0142  | 0.3699 | 0.4319 |
| Uqcrlf1  | _LSIDPEK_2                                                         | #N/A                 | 7.8992  | 7.9855  | 8.1162  | 7.3818  | 8.3049  | 8.0441  | 6.6683  | 8.1727  | 8.1407  | 7.9739  | 1.0280 | 0.0398  | 0.5255 | 0.2795 |
| Uqcrlf1  | _GVAGALRPLQGVAPASEPVLVDK_3                                         | #N/A                 | 7.1643  | 7.3320  | 7.3708  | 7.3223  | 7.4547  | 7.4619  | 7.6620  | 7.2713  | 7.3418  | 7.2513  | 0.9959 | -0.0060 | 0.7524 | 0.1235 |
| Uqcrlf1  | _RAEVLDSIK_2                                                       | #N/A                 | 7.0164  | 7.3052  | 6.9369  | 7.0138  | 7.2855  | 7.2510  | 6.7501  | 7.2246  | 6.7537  | 7.0217  | 1.0284 | 0.0405  | 0.1480 | 0.8296 |
| Uqcrlf1  | _VPDSDVR_2                                                         | #N                   |         |         |         |         |         |         |         |         |         |         |        |         |        |        |



|         |                                                                                             |                       |        |        |        |         |        |        |        |        |        |        |        |         |        |        |
|---------|---------------------------------------------------------------------------------------------|-----------------------|--------|--------|--------|---------|--------|--------|--------|--------|--------|--------|--------|---------|--------|--------|
| Necap1  | _VSGELFAQAPVEQYPGIAVETVDSRR_3                                                               | #N/A                  | 4.4163 | 4.4686 | 5.8940 | 5.0883  | 5.8253 | 5.0127 | 4.3537 | 4.5690 | 5.4507 | 5.0640 | 1.0531 | 0.0747  | 0.5151 | 0.2881 |
| Necap1  | _SAGIFGRTDR_2                                                                               | #N/A                  | 6.4371 | 4.9722 | 3.5753 | 5.8800  | 5.9816 | 5.9842 | 5.9189 | 5.4561 | 3.9494 | 6.1176 | 1.0208 | 0.0296  | 0.8702 | 0.0604 |
| Necap1  | _ASDWKLDQPDWTR_3                                                                            | #N/A                  | 4.8414 | 5.0002 | 5.8852 | 4.5293  | 5.4696 | 3.0469 | 4.4409 | 4.7607 | 5.4644 | 5.5555 | 0.9484 | -0.0764 | 0.6448 | 0.1906 |
| Necap1  | _ESQEMDNRPK_2                                                                               | #N/A                  | 4.0583 | 4.2257 | 3.6873 | 5.2951  | 4.1140 | 4.0115 | 3.9046 | 3.9285 | 3.5771 | 4.1569 | 1.0874 | 0.1209  | 0.2848 | 0.5455 |
| Fam136a | _C[Carbamidomethyl (C)]HAPLAQAQAVTSELR_3                                                    | #N/A                  | 4.0746 | 4.7928 | 3.8083 | 4.2982  | 5.1934 | 4.4768 | 4.5678 | 3.6491 | 5.1568 | 4.4790 | 0.9950 | -0.0073 | 0.9509 | 0.0219 |
| Gdph3   | _AAGGGGCS[Phospho (STY)]GEDAQS_2                                                            | Q9CRAS_S3S_M1_Gdph3   | 6.1664 | 7.2615 | 7.3028 | 7.2335  | 5.0259 | 4.6169 | 6.8706 | 6.1145 | 5.5661 | 6.9119 | 0.9808 | -0.0280 | 0.8591 | 0.0660 |
| Exos5   | _ADANLLTDTGTSS[Phospho (STY)]PR_2                                                           | Q9CRAB_S20_M1_Exos5   | 3.1554 | 3.9117 | 4.3899 | 3.9337  | 3.8000 | 4.3255 | 4.0819 | 6.1590 | 3.3666 | 6.4644 | 0.7811 | -0.3565 | 0.1268 | 0.8969 |
| Snx24   | _AESCC[Carbamidomethyl (C)]GSP[Phospho (STY)]DTESESSK_2                                     | Q9CRB0_S116_M1_Snx24  | 5.0806 | 3.9051 | 4.6534 | 5.7874  | 4.6590 | 5.2124 | 5.1098 | 5.0813 | 5.2538 | 5.0803 | 0.9516 | -0.0716 | 0.4686 | 0.3292 |
| Tppp3   | _ALELATR_2                                                                                  | #N/A                  | 6.1027 | 6.6818 | 6.1681 | 5.4070  | 6.8533 | 6.4664 | 6.3675 | 5.8768 | 6.0755 | 5.7947 | 1.0467 | 0.0658  | 0.3612 | 0.4422 |
| Tppp3   | _Acetyl (Protein N-term)[AASTDAGLEESFRK_2                                                   | #N/A                  | 5.2743 | 6.0436 | 6.3347 | 6.3792  | 6.5104 | 6.4176 | 5.9821 | 5.9469 | 6.0543 | 6.3850 | 1.0111 | 0.0160  | 0.7916 | 0.1015 |
| Tppp3   | _AVTGTVDVDFSK_2                                                                             | #N/A                  | 4.3804 | 4.3213 | 4.2867 | 5.1021  | 3.9040 | 3.2809 | 4.1862 | 2.9933 | 3.2623 | 3.7766 | 1.1851 | 0.2450  | 0.1144 | 0.9415 |
| Chchd3  | _LSENVDLR_2                                                                                 | #N/A                  | 5.9989 | 6.2065 | 6.7404 | 5.9994  | 6.4599 | 5.8406 | 6.0397 | 6.0952 | 5.8466 | 5.7517 | 1.0462 | 0.0652  | 0.1734 | 0.7609 |
| Chchd3  | _YSSVGVASVDEDLK_2                                                                           | #N/A                  | 4.6943 | 5.8186 | 5.4648 | 7.3754  | 6.5281 | 6.4004 | 4.5485 | 6.8250 | 5.1454 | 5.7780 | 1.0848 | 0.1174  | 0.4619 | 0.3355 |
| Chchd3  | _VEYHPVC[Carbamidomethyl (C)]ADLQTK_3                                                       | #N/A                  | 5.4354 | 5.3620 | 3.2544 | 5.6902  | 5.6077 | 4.2143 | 3.1133 | 5.3497 | 4.3519 | 3.9362 | 1.1766 | 0.2346  | 0.2675 | 0.5726 |
| Ociad1  | _FDNSVSGSSFGT[Phospho (STY)]SPAADNIEK_2                                                     | Q9CRD0_T146_M1_Ociad1 | 3.3810 | 4.0299 | 4.0414 | 4.1593  | 4.0255 | 4.0125 | 4.3075 | 4.3431 | 3.1413 | 3.8365 | 1.0088 | 0.0127  | 0.8992 | 0.0462 |
| Ociad1  | _RSS[Phospho (STY)]PPGHYTKPK_3                                                              | Q9CRD0_S123_M1_Ociad1 | 3.5313 | 3.6520 | 3.6157 | 4.1184  | 3.4373 | 3.8047 | 5.0875 | 4.0464 | 6.6949 | 4.0854 | 0.8734 | -0.1953 | 0.0799 | 1.0974 |
| Dbndd2  | _TSS[Phospho (STY)]LSOSSNLNR_2                                                              | Q9CRD4_S117_M1_Dbndd2 | 7.9288 | 8.3047 | 3.9868 | 8.7691  | 8.6118 | 6.7694 | 8.7686 | 8.5298 | 8.6184 | 8.4687 | 0.8603 | -0.2172 | 0.2317 | 0.6351 |
| Filp1   | _ENGPS[Phospho (STY)]APQEK_2                                                                | #N/A                  | 9.0632 | 8.9798 | 8.6534 | 9.5499  | 8.3867 | 9.0112 | 9.1685 | 8.8254 | 9.0115 | 9.1717 | 0.9685 | -0.0166 | 0.6383 | 0.1950 |
| Par3b   | _ASS[Phospho (STY)]PGEFPASQOQK_2                                                            | Q9CSB4_S338_M1_Par3b  | 3.9534 | 3.2577 | 3.1393 | 3.3621  | 3.0790 | 3.1496 | 3.5104 | 3.6390 | 3.9381 | 3.6090 | 0.9046 | -0.1447 | 0.0886 | 1.0524 |
| Snw1    | _GPPS[Phospho (STY)]PPAPVM[Oxidation (M)]HSP[Phospho (STY)]PSR_2                            | #N/A                  | 9.1139 | 9.2619 | 7.7367 | 10.1118 | 9.2167 | 9.3212 | 9.5779 | 8.9791 | 9.2089 | 9.2975 | 0.9313 | -0.1312 | 0.5207 | 0.2874 |
| Snw1    | _GPPS[Phospho (STY)]PPAPVM[Oxidation (M)]HSP[Phospho (STY)]IRK_3                            | #N/A                  | 6.9754 | 4.8617 | 4.1458 | 8.1310  | 5.7526 | 3.6384 | 3.6800 | 8.1275 | 3.7991 | 3.5507 | 1.1660 | 0.2215  | 0.5407 | 0.2670 |
| Ranbp3  | _TSS[Phospho (STY)]LTHSEK_2                                                                 | #N/A                  | 8.5606 | 8.8608 | 9.2959 | 9.2089  | 8.7158 | 8.9700 | 8.6216 | 8.8247 | 8.7535 | 1.0213 | 0.0304 | 0.2460  | 0.6090 | 0.2591 |
| Ranbp3  | _S[Phospho (STY)]PSESAMETHLEKVPQK_3                                                         | #N/A                  | 3.5744 | 3.8771 | 3.8182 | 3.7371  | 5.6265 | 3.3902 | 3.6970 | 3.9628 | 3.8330 | 6.0221 | 0.9144 | -0.1291 | 0.5507 | 0.2165 |
| Ranbp3  | _LIS[Phospho (STY)]PPKLINEARQTSR_3                                                          | Q9CT10_S257_M1_Ranbp3 | 8.1066 | 7.2572 | 3.9530 | 7.8140  | 7.2090 | 7.4544 | 7.7931 | 6.9579 | 7.9291 | 6.8989 | 0.9420 | -0.0862 | 0.6074 | 0.1465 |
| Ranbp3  | _S[Phospho (STY)]PSEAEETHLEK_2                                                              | #N/A                  | 4.8286 | 5.0362 | 3.9046 | 6.0756  | 5.6809 | 5.2653 | 5.4822 | 5.3086 | 6.2570 | 5.1427 | 0.9251 | -0.1234 | 0.3617 | 0.2167 |
| Ranbp3  | _ERTSS[Phospho (STY)]LTHSEK_2                                                               | #N/A                  | 3.2840 | 4.0892 | 6.6870 | 4.4734  | 5.2714 | 3.8190 | 6.0479 | 5.7948 | 5.9469 | 4.4404 | 0.8284 | -0.2715 | 0.2039 | 0.6905 |
| Ranbp3  | _SAGSSSPAGEGDS[Phospho (STY)]DHEDGNYC[Carbamidomethyl (C)]PPVKR_4                           | Q9CT10_S40_M1_Ranbp3  | 3.2313 | 4.0581 | 4.2302 | 4.2203  | 3.6809 | 4.1791 | 4.0723 | 4.1342 | 3.3232 | 4.0634 | 1.0090 | 0.0129  | 0.8941 | 0.0886 |
| Arcp2   | _ASHATPQVLFShR_3                                                                            | #N/A                  | 7.2002 | 7.3247 | 7.3900 | 6.8137  | 7.4081 | 7.2041 | 7.3088 | 6.8990 | 7.6671 | 7.0889 | 0.9976 | -0.0035 | 0.9215 | 0.3555 |
| Arcp2   | _NC[Carbamidomethyl (C)]FASVFEK_2                                                           | #N/A                  | 6.5240 | 6.5124 | 5.5831 | 6.1128  | 6.3115 | 6.0327 | 5.8484 | 6.2177 | 6.1045 | 6.0806 | 1.0192 | 0.0275  | 0.5585 | 0.2030 |
| Arcp2   | _DYHVIHK_2                                                                                  | #N/A                  | 6.3763 | 6.1036 | 7.0123 | 6.1088  | 5.7238 | 6.6677 | 5.9995 | 6.2791 | 6.4893 | 5.8465 | 1.0290 | 0.0413  | 0.5115 | 0.2912 |
| Arcp2   | _M[Oxidation (M)]LLEVNMR_2                                                                  | #N/A                  | 7.2896 | 7.4824 | 7.7917 | 8.1799  | 7.3732 | 7.6169 | 7.9348 | 7.7916 | 7.6307 | 7.5968 | 0.9850 | -0.0218 | 0.5310 | 0.2749 |
| Arcp2   | _IIEETLALK_2                                                                                | #N/A                  | 3.2391 | 3.7093 | 4.2036 | 5.8036  | 5.0817 | 4.5422 | 4.4210 | 5.3651 | 5.7657 | 4.6223 | 0.8783 | -0.1871 | 0.2849 | 0.5453 |
| Arcp2   | _ELQHADELELKR_3                                                                             | #N/A                  | 4.7921 | 5.0608 | 5.5663 | 5.1484  | 4.5433 | 5.0142 | 4.8083 | 5.2416 | 5.1429 | 5.1805 | 0.9858 | -0.0207 | 0.7159 | 0.1451 |
| Arcp2   | _VFM[Oxidation (M)]QIFK_2                                                                   | #N/A                  | 3.9981 | 5.0240 | 5.1537 | 4.8209  | 4.5028 | 4.5837 | 3.4032 | 4.9656 | 5.1079 | 4.6675 | 1.0318 | 0.0452  | 0.7091 | 0.1493 |
| Arcp2   | _DNTNLKHTFR_2                                                                               | #N/A                  | 6.6662 | 7.0205 | 7.2437 | 7.2381  | 6.7147 | 6.9720 | 6.9829 | 6.8969 | 7.3529 | 7.0569 | 0.9863 | -0.0198 | 0.5343 | 0.2722 |
| Arcp2   | _YFQFIEGEGENR_2                                                                             | #N/A                  | 3.3636 | 3.7749 | 5.5219 | 4.3081  | 3.6632 | 3.8651 | 3.7583 | 4.0131 | 4.0265 | 4.1197 | 1.0260 | 0.0370  | 0.8012 | 0.0963 |
| Smc3    | _SLQSEASHAM[Oxidation (M)]ESTRES[Phospho (STY)]IK_3                                         | Q9CW03_S776_M1_Smc3   | 3.2422 | 8.1061 | 4.4767 | 4.4172  | 6.6661 | 7.5816 | 7.1621 | 8.6553 | 7.9146 | 6.6977 | 0.8383 | -0.2545 | 0.4278 | 0.3687 |
| Smc3    | _GDVEGSS[Phospho (STY)]QDEGEGGSESR_2                                                        | #N/A                  | 3.6952 | 2.9506 | 3.4288 | 4.4735  | 2.8389 | 3.7857 | 3.1209 | 4.0286 | 4.3276 | 4.1507 | 0.9032 | -0.1469 | 0.3407 | 0.4677 |
| Smc3    | _KGVGEGSS[Phospho (STY)]QDEGEGGSESR_3                                                       | #N/A                  | 3.3988 | 3.9436 | 3.1325 | 4.1771  | 4.0434 | 4.0821 | 4.3253 | 4.3249 | 3.1232 | 3.8544 | 0.9717 | -0.0415 | 0.7323 | 0.1353 |
| Ppp1r3g | _SFS[Phospho (STY)]PAOPLQAAIK_2                                                             | Q9CW07_S81_M1_Ppp1r3g | 7.7611 | 9.3060 | 9.6780 | 10.5150 | 8.4040 | 8.8488 | 8.8055 | 4.1871 | 8.8362 | 8.3523 | 1.2041 | 0.2680  | 0.1688 | 0.7727 |
| Raver1  | _LIS[Phospho (STY)]PASNR_2                                                                  | Q9CW46_S576_M1_Raver1 | 2.9105 | 5.7861 | 5.1572 | 7.4734  | 4.5695 | 5.4185 | 6.1653 | 5.9960 | 5.2980 | 5.2585 | 0.9190 | -0.1219 | 0.5743 | 0.2409 |
| Golga1  | _ESVASM[Oxidation (M)]GADGS[Phospho (STY)]GDDFASDGSSSR_2                                    | #N/A                  | 4.0289 | 3.3073 | 4.1130 | 3.4167  | 3.1536 | 3.2171 | 3.4305 | 3.5884 | 4.3387 | 3.2269 | 0.9707 | -0.0428 | 0.7209 | 0.1401 |
| Golga1  | _GSRPS[Phospho (STY)]S[Phospho (STY)]NPR_2                                                  | Q9CW79_S749_M2_Golga1 | 4.2032 | 3.0229 | 3.3892 | 3.8919  | 2.9112 | 3.7134 | 3.6065 | 4.2266 | 3.8752 | 3.8589 | 0.9050 | -0.1441 | 0.2184 | 0.6607 |
| Mtfr1   | _NAS[Phospho (STY)]VPHLR_2                                                                  | Q9CW02_S100_M1_Mtfr1  | 9.4802 | 8.4646 | 9.7438 | 9.5290  | 8.7281 | 9.9436 | 9.2893 | 9.1574 | 9.7471 | 9.3299 | 0.9850 | -0.0219 | 0.6294 | 0.2011 |
| Mtfr1   | _AS[Phospho (STY)]FETPNLSDLC[Carbamidomethyl (C)]LK_2                                       | Q9CW02_S38_M1_Mtfr1   | 3.0270 | 6.8686 | 6.6681 | 7.9265  | 6.1050 | 5.8768 | 6.4577 | 7.0746 | 6.5204 | 5.7975 | 0.9406 | -0.0884 | 0.6710 | 0.1733 |
| Mtfr1   | _TTC[Carbamidomethyl (C)]SSS[Phospho (STY)]S[Phospho (STY)]EEDCC[Carbamidomethyl (C)]SLSK_2 | Q9CW02_S222_M2_Mtfr1  | 3.7138 | 3.5186 | 4.0461 | 6.0073  | 5.4766 | 3.9081 | 5.1304 | 5.2120 | 3.7969 | 5.8096 | 0.8937 | -0.1621 | 0.4191 | 0.3777 |
| Mtfr1   | _ASS[Phospho (STY)]FADML[Oxidation (M)]M[Oxidation (M)]GLK_2                                | #N/A                  | 6.6809 | 9.0786 | 4.1837 | 10.0351 | 7.3607 | 3.7762 | 3.8522 | 8.8889 | 3.7465 | 3.7075 | 1.3573 | 0.0407  | 0.3033 | 0.5181 |
| Mtfr1   | _TELEQDESHLR_3                                                                              | #N/A                  | 3.6415 | 3.5847 | 4.3283 | 3.3301  | 4.2680 | 3.4615 | 4.5456 | 3.2876 | 4.4370 | 3.2971 | 0.9684 | -0.0463 | 0.7342 | 0.1342 |
| Tubb2b  | _INMYNEATGNK_2                                                                              | #N/A                  | 9.2233 | 8.8902 | 9.3199 | 9.5807  | 9.2913 | 9.1547 | 9.1205 | 9.0461 | 9.1330 | 9.3481 | 1.0089 | 0.0128  | 0.5366 | 0.2703 |
| Cd2bp2  | _GTRGNPS[Phospho (STY)]PQRLDR_3                                                             | #N/A                  | 7.9124 | 7.6331 | 3.5105 | 8.3923  | 8.3672 | 8.0403 | 7.8057 | 7.8335 | 7.8461 | 4.2324 | 1.0548 | 0.0770  | 0.7587 | 0.1199 |
| Cd2bp2  | _GTRGNPS[Phospho (STY)]PQR_2                                                                | #N/A                  | 6.7708 | 6.9756 | 5.9706 | 4.4834  | 6.6794 | 4.2708 | 7.1425 | 6.9564 | 6.7821 | 4.1606 | 0.9358 | -0.0957 | 0.6398 | 0.1939 |
| Cd2bp2  | _GKHSLS[Phospho (STY)]DEEDDDEEGSSK_2                                                        | Q9CWK3_S49_M1_Cd2bp2  | 3.0448 | 3.8500 | 3.7316 | 4.2707  | 3.6713 | 4.0582 | 4.4190 | 4.2313 | 3.0295 | 3.9480 | 0.9652 | -0.0511 | 0.6861 | 0.1636 |
| Snx2    | _SKS[Phospho (STY)]APVIFDR_2                                                                | Q9CWK8_S119_M1_Snx2   | 6.7876 | 3.3374 | 7.4450 | 3.7216  | 3.1587 | 6.9103 | 7.1348 | 7.1025 | 4.0454 | 5.5719 | 0.8412 | -0.2495 | 0.4275 | 0.3690 |
| Snx2    | _ELILSESPS[Phospho (STY)]PAVTF[Phospho (STY)]PVPTPTLAPR_3                                   | Q9CWK8_S97_M2_Snx2    | 3.0052 | 4.2210 | 3.6920 | 4.1946  | 3.6317 | 4.0161 | 3.9093 | 3.9239 | 5.7375 | 4.1616 | 0.9747 | -0.0369 | 0.7073 | 0.1504 |
| Ctmbl1  | _EYAEINIGDGRS[Phospho (STY)]PEFR_3                                                          | Q9CWL8_S545_M1_Ctmbl1 | 5.1306 | 3.4861 | 3.5900 | 3.1338  | 3.0001 | 4.4221 | 3.2820 | 5.4923 | 5.0211 | 4.6348 | 0.8234 | -0.2804 | 0.1866 | 0.7290 |
| Plfn1   | _LADIQEQLNR_2                                                                               | #N/A                  | 6.7938 | 6.3751 | 6.4963 | 7.1287  | 7.0019 | 7.1630 | 6.6040 | 6.7308 | 6.5587 | 6.7410 | 1.0252 | 0.0359  | 0.3602 | 0.4434 |
| Ddah1   | _S[Phospho (STY)]GGEVDFAR_2                                                                 | Q9CW50_S33_M1_Ddah1   | 8.6923 | 8.6536 | 9.2845 | 9.1266  | 8.7169 | 9.0123 | 8.7720 | 8.4632 | 8.7945 | 8.8761 | 1.0215 | 0.0307  | 0.2527 | 0.5975 |
| Ddah1   | _Acetyl (Protein N-term)[AGLGHPSAFGR_2                                                      | #N/A                  | 9.0290 | 9.2659 | 9.3210 | 9.1155  | 9.5415 | 8.8436 | 8.9856 | 9.2459 | 9.0449 | 9.0559 | 1.0113 | 0.0163  | 0.4586 | 0.3386 |
| Ddah1   | _GAEILADTFKDYAVSTVPVADSLHK_3                                                                | #N/A                  | 5.8104 | 6.4487 | 7.3235 | 6.9625  | 5.6876 | 6.7743 | 6.2860 | 6.0117 | 6.2550 | 6.7446 | 1.0148 | 0.0212  | 0.7947 | 0.0998 |
| Ddah1   | _TPREYPSAK_2                                                                                | #N/A                  | 5.7731 | 5.3872 | 5.9303 | 5.2940  | 6.8656 | 5.1597 | 5.4076 | 5.6706 | 6.3664 | 5.2103 | 1.0126 | 0.0180  | 0.8548 | 0.0681 |
| Ddah1   | _GAEILADTFK_2                                                                               | #N/A                  | 6.4053 | 6.6394 | 6.1551 | 5.8955  | 5.7859 | 6.1004 | 2.8838 | 6.0831 | 6.3069 | 6.1247 | 1.1210 | 0.1648  | 0.3597 | 0.4441 |
| Ddah1   | _EFFVLGSK_2                                                                                 | #N/A                  | 5.6437 | 6.1025 | 5.3411 | 6.2849  | 5.6938 | 5.5097 | 5.1968 | 6.1200 |        |        |        |         |        |        |



|            |                                                                                 |                           |        |        |         |         |        |        |         |        |        |        |         |         |        |        |
|------------|---------------------------------------------------------------------------------|---------------------------|--------|--------|---------|---------|--------|--------|---------|--------|--------|--------|---------|---------|--------|--------|
| Nagg       | _WKPYDASAAYGK_2                                                                 | #N/A                      | 4.0951 | 5.6744 | 3.5924  | 4.3680  | 5.8317 | 4.7961 | 3.3306  | 4.2712 | 3.9596 | 5.6270 | 1.0999  | 0.1373  | 0.4899 | 0.3099 |
| Nagg       | _YMONDIYAK_2                                                                    | #N/A                      | 3.8815 | 3.3446 | 4.5683  | 4.1946  | 3.2329 | 3.3917 | 3.2848  | 3.0475 | 4.1969 | 3.5371 | 1.0718  | 0.1000  | 0.4753 | 0.3230 |
| Nagg       | _KS[Phospho (STY)]PAT[Phospho (STY)]POAKPGAGMAAEEDEESGGL[Carbamidomethyl (C)]_3 | #N/A                      | 3.2303 | 4.0355 | 3.9171  | 4.4197  | 3.8568 | 3.8727 | 4.1344  | 3.6887 | 3.3473 | 4.3867 | 0.9992  | -0.0012 | 0.9910 | 0.0039 |
| Nagg       | _KKS[Phospho (STY)]PAT[Phospho (STY)]POAK_2                                     | #N/A                      | 3.4302 | 4.1865 | 3.1639  | 4.2085  | 4.0748 | 4.0507 | 4.3568  | 4.2935 | 3.0917 | 3.8858 | 0.9860  | -0.0203 | 0.8699 | 0.0605 |
| Is11       | _IVADQLC[Carbamidomethyl (C)]AK_2                                               | #N/A                      | 4.0075 | 2.3119 | 3.1935  | 3.6961  | 4.5175 | 3.0954 | 3.4108  | 4.4223 | 4.6141 | 3.6631 | 0.9030  | -0.1472 | 0.3128 | 0.5047 |
| Is11       | _ELDSGLAESVLUWAAPR_2                                                            | #N/A                      | 4.1544 | 5.5828 | 5.9961  | 3.1611  | 3.2801 | 2.9486 | 3.3094  | 4.2755 | 5.4870 | 6.0326 | 0.8767  | -0.1899 | 0.4064 | 0.3042 |
| Sug11      | _ALEQNPDQAQY[C[Carbamidomethyl (C)]QR_2                                         | #N/A                      | 5.1600 | 4.9438 | 3.3378  | 5.4980  | 5.3045 | 5.4060 | 4.5307  | 5.0055 | 4.4199 | 5.3153 | 1.0257  | 0.0366  | 0.7878 | 0.1036 |
| Sug11      | _JAcetyl (Protein N-term)AAAAAGPASSQR_2                                         | #N/A                      | 4.6538 | 4.5379 | 3.3008  | 4.3454  | 4.8107 | 5.2643 | 4.2676  | 5.1228 | 5.0941 | 4.9625 | -0.2552 | 0.6688  | 0.1747 |        |
| Sug11      | _LFGQYSGDSSEVKR_3                                                               | #N/A                      | 4.3467 | 3.6022 | 4.0804  | 3.6242  | 3.9953 | 4.8874 | 3.7725  | 3.3770 | 3.6760 | 3.3015 | 1.1579  | 0.2115  | 0.0663 | 1.1788 |
| D10Wsu102e | _LEIDS[Phospho (STY)]PAASK_2                                                    | Q9CK66_S177_M1_D10Wsu102e | 4.1705 | 3.1719 | 3.9042  | 4.9624  | 3.3142 | 3.3104 | 4.7894  | 4.3944 | 3.8523 | 3.7003 | 0.8583  | -0.2205 | 0.1449 | 0.8389 |
| D10Wsu102e | _SDS[Phospho (STY)]KEEDSPEESSR_2                                                | Q9CK66_S125_M1_D10Wsu102e | 4.3535 | 3.6578 | 3.5394  | 3.5139  | 3.4792 | 4.2503 | 3.1103  | 4.0392 | 4.3382 | 4.1401 | 0.9724  | -0.0404 | 0.7242 | 0.1401 |
| Rgs19      | _LQPLPSC[Carbamidomethyl (C)]EVC[Carbamidomethyl (C)]TPPS[Phospho (STY)]PK_2    | Q9CK84_S80_M1_Rgs19       | 8.5050 | 0.9028 | 9.2393  | 3.9478  | 7.2323 | 3.7353 | 9.4675  | 9.3788 | 8.6847 | 3.0233 | 0.9110  | -0.1345 | 0.7116 | 0.1478 |
| Rgs19      | _LMHS[Phospho (STY)]PTGR_2                                                      | Q9CK84_S97_M1_Rgs19       | 3.7349 | 3.4913 | 4.4217  | 3.4235  | 2.8606 | 3.3681 | 3.1382  | 3.1941 | 4.3436 | 3.3905 | 1.0095  | 0.0136  | 0.9250 | 0.0339 |
| Hnrrpa0    | _LFGGLVMQVTSSEGLR_2                                                             | #N/A                      | 4.7155 | 5.5997 | 6.3641  | 5.2887  | 5.8108 | 6.0394 | 5.6412  | 5.2859 | 6.0192 | 5.7570 | 0.9930  | -0.0101 | 0.9050 | 0.0433 |
| Hnrrpa0    | _GDAEAGLUEHPSQFQAVK_3                                                           | #N/A                      | 4.4234 | 3.1226 | 4.1371  | 4.9937  | 2.2373 | 4.6888 | 3.7553  | 3.5449 | 4.6900 | 4.2128 | 0.9711  | -0.0423 | 0.8432 | 0.0741 |
| Hnrrpa0    | _SGGGGGGGGSGWGR_2                                                               | #N/A                      | 3.2951 | 4.0514 | 4.5296  | 4.3643  | 3.9397 | 4.1715 | 4.0790  | 3.7542 | 4.2170 | 4.3313 | 0.9910  | -0.0130 | 0.8824 | 0.0543 |
| Bd7a       | _QENSSNS[Phospho (STY)]PAPETNPPVSDGTEAK_3                                       | Q9CKE2_S114_M1_Bd7a       | 4.0129 | 3.3295 | 3.7466  | 3.2903  | 3.1509 | 3.0778 | 3.4386  | 3.7108 | 4.0099 | 2.9676 | 0.9725  | -0.0402 | 0.7145 | 0.1460 |
| Bd7a       | _MKLEASQNS[Phospho (STY)]EEM[Oxidation (M)]_2                                   | Q9CK82_S207_M1_Bd7a       | 2.9380 | 4.2882 | 3.6248  | 4.1274  | 4.7203 | 3.9489 | 3.8421  | 3.9911 | 3.6397 | 4.1523 | 1.0090  | 0.0129  | 0.9166 | 0.0378 |
| Tbc1d15    | _D[Phospho (STY)]PTQLTASPNAC[Carbamidomethyl (C)]R_2                            | Q9CKF4_S655_M1_Tbc1d15    | 7.0745 | 6.3546 | 3.8107  | 7.0956  | 6.2418 | 3.7377 | 4.0280  | 6.8047 | 6.6763 | 3.5580 | 1.0859  | 0.1189  | 0.6752 | 0.1706 |
| Rbm33      | _SVNTY[Phospho (STY)]PPC[Carbamidomethyl (C)]R_2                                | Q9CKX9_S792_M1_Rbm33      | 8.0406 | 3.8250 | 4.0879  | 4.5906  | 7.4495 | 3.7018 | 3.0567  | 7.4374 | 3.1765 | 3.0567 | 1.1755  | 0.2332  | 0.5542 | 0.2563 |
| Rbm33      | _ANS[Phospho (STY)]GGGGGGPHSSK_2                                                | Q9CKX9_S1032_M1_Rbm33     | 7.7461 | 8.1144 | 8.3040  | 8.8142  | 7.8288 | 8.1262 | 8.4004  | 8.0667 | 8.3486 | 8.0050 | 0.9940  | -0.0087 | 0.9017 | 0.0863 |
| Rbm33      | _DKES[Phospho (STY)]DEEDDDEESSR_2                                               | Q9CK00_S343_M1_Rbm33      | 3.5569 | 4.0015 | 3.2449  | 3.1685  | 3.5350 | 2.3683 | 3.0256  | 3.0972 | 2.6670 | 3.0256 | 1.0153  | 0.0219  | 0.8914 | 0.0451 |
| Gng10      | _JAcetyl (Protein N-term)SSGASV[Phospho (STY)]ALQR_2                            | Q9CKP8_S8_M1_Gng10        | 7.9095 | 7.9543 | 8.5998  | 8.1890  | 8.1109 | 8.1234 | 9.0213  | 7.8373 | 8.7108 | 8.0724 | 0.9688  | -0.0458 | 0.3257 | 0.4872 |
| Cenpv      | _LDDTFEYGLGVK_2                                                                 | #N/A                      | 4.3150 | 3.8144 | 4.4235  | 4.3923  | 4.6747 | 4.7625 | 4.9161  | 3.4239 | 3.3330 | 4.9314 | 1.0593  | 0.0830  | 0.5478 | 0.2614 |
| Cenpv      | _SVTTEFGNS[Phospho (STY)]DWER_2                                                 | Q9CKS4_S234_M1_Cenpv      | 3.3179 | 4.0742 | 4.5524  | 6.1650  | 4.2228 | 4.1630 | 4.0561  | 4.4863 | 3.2040 | 3.7735 | 1.1381  | 0.1867  | 0.3405 | 0.7619 |
| Cenpv      | _NPPGGFGIAPH[C[Carbamidomethyl (C)]DEGTVR_2                                     | #N/A                      | 3.1993 | 3.9794 | 4.1951  | 4.1908  | 3.8352 | 4.1002 | 4.1151  | 3.4329 | 3.3534 | 4.0356 | 1.0488  | 0.0688  | 0.4835 | 0.3156 |
| Cenpv      | _QRLS[Phospho (STY)]FEGAIAK_2                                                   | Q9CKS4_S105_M1_Cenpv      | 3.6737 | 3.5525 | 4.3605  | 3.3623  | 2.7994 | 3.0770 | 3.2553  | 4.4048 | 3.3293 | 3.2553 | 1.0037  | 0.0053  | 0.9714 | 0.0126 |
| Cacybp     | _WDVLTQVEK_2                                                                    | #N/A                      | 4.8009 | 5.1761 | 3.1593  | 5.1593  | 5.1813 | 4.8228 | 4.2892  | 4.4120 | 4.9185 | 5.0051 | 1.0130  | 0.0186  | 0.8902 | 0.0505 |
| Cacybp     | _JAcetyl (Protein N-term)ASVLEELQKLEEVK_2                                       | #N/A                      | 3.9264 | 3.2192 | 3.6601  | 2.3579  | 1.3541 | 2.3888 | 3.5716  | 2.2548 | 4.3820 | 2.8033 | 0.8662  | -0.2072 | 0.4979 | 0.3029 |
| Rpl11      | _VLEQLTGQTPVFSK_2                                                               | #N/A                      | 6.3646 | 5.9336 | 6.5911  | 5.8450  | 6.2642 | 6.6490 | 6.1537  | 5.6636 | 6.3432 | 5.9850 | 1.0395  | 0.0558  | 0.2765 | 0.5582 |
| Rpl11      | _YDGLPGK_2                                                                      | #N/A                      | 5.6028 | 6.5248 | 6.5283  | 5.7855  | 5.7688 | 5.4020 | 6.3182  | 6.1439 | 6.2970 | 5.9010 | 0.9627  | -0.0548 | 0.3963 | 0.4030 |
| Rpl11      | _JAcetyl (Protein N-term)AQDQGEKENPM[Oxidation (M)]R_2                          | #N/A                      | 3.2039 | 3.4885 | 3.9668  | 3.5106  | 4.2843 | 3.2478 | 3.6588  | 3.4906 | 3.7897 | 3.1878 | 1.0241  | 0.0344  | 0.7315 | 0.1358 |
| Ilf2       | _VLGSALAIR_2                                                                    | #N/A                      | 4.2804 | 5.3310 | 4.9330  | 5.2851  | 4.4642 | 4.4115 | 5.3058  | 5.3941 | 4.9629 | 4.9371 | 0.9290  | -0.1063 | 0.1867 | 0.7290 |
| Ilf2       | _NDQLAPNSAEQASLSLVTK_2                                                          | #N/A                      | 4.4407 | 3.6577 | 3.4184  | 4.8917  | 4.4218 | 5.3768 | 5.4547  | 4.0390 | 5.3705 | 4.3880 | 0.9075  | -0.1400 | 0.3695 | 0.4324 |
| Nduf4      | _EDMAIAEK_2                                                                     | #N/A                      | 7.3711 | 6.9362 | 6.7129  | 7.2092  | 7.6889 | 7.6783 | 6.9124  | 6.9783 | 7.0258 | 7.5131 | 1.0223  | 0.0319  | 0.5073 | 0.2947 |
| Nduf4      | _DTQUTVDEK_2                                                                    | #N/A                      | 6.8420 | 6.4768 | 6.7398  | 7.4147  | 7.1098 | 6.9724 | 7.0176  | 6.4094 | 7.2941 | 6.9744 | 1.0003  | 0.0004  | 0.9928 | 0.0031 |
| Nduf4      | _LDTLTLTGVPPEHK_2                                                               | #N/A                      | 5.6172 | 5.8317 | 5.1499  | 5.9377  | 5.6137 | 5.4802 | 5.9049  | 5.7569 | 5.6561 | 5.5992 | 0.9783  | -0.0316 | 0.4351 | 0.3615 |
| Nduf4      | _NMMGSGVNNTK_2                                                                  | #N/A                      | 4.6329 | 5.6929 | 5.2744  | 6.0794  | 4.2953 | 3.6117 | 4.1247  | 5.6637 | 3.8068 | 4.4716 | 1.0895  | 0.0237  | 0.5004 | 0.3007 |
| Nduf4      | _DTQLTVDEKLDITLTGVPFEHK_3                                                       | #N/A                      | 4.8982 | 5.0413 | 3.7018  | 7.2126  | 4.7253 | 4.0880 | 5.5941  | 5.7152 | 5.1241 | 4.1714 | 0.9599  | -0.0591 | 0.7699 | 0.1136 |
| Nduf4      | _NMMGSGVNNTK_2                                                                  | #N/A                      | 2.4598 | 2.9752 | 3.4369  | 4.5545  | 3.5027 | 3.7611 | 3.6543  | 4.1789 | 3.8275 | 3.9066 | 0.8861  | -0.1745 | 0.2684 | 0.5713 |
| Tecr       | _S[Phospho (STY)]LKDEDVLQK_2                                                    | Q9CY27_S58_M1_Tecr        | 5.6106 | 5.5292 | 4.1518  | 5.4781  | 4.5764 | 5.2459 | 5.5816  | 6.0719 | 5.6840 | 4.6403 | 0.9280  | -0.1079 | 0.3374 | 0.4718 |
| Chtop      | _GHLDAELDAYM[Oxidation (M)]AQDTPEIND_2                                          | #N/A                      | 6.0142 | 5.5350 | 6.7758  | 4.3865  | 5.7338 | 5.7574 | 6.5997  | 6.2733 | 5.7603 | 6.0778 | 0.9227  | -0.1160 | 0.2885 | 0.5399 |
| Serbp1     | _SAAQAAAQGTNSNAAGK_2                                                            | #N/A                      | 4.7004 | 5.4120 | 4.8711  | 5.9252  | 5.4239 | 5.4015 | 4.1605  | 4.3137 | 4.8635 | 5.1761 | 1.1427  | 0.1925  | 0.0540 | 1.2677 |
| Serbp1     | _GGSGSHNWGTKDELTES[Phospho (STY)]PK_3                                           | #N/A                      | 5.7161 | 5.1749 | 4.5037  | 6.3592  | 5.2539 | 3.2860 | 3.6468  | 5.4113 | 5.4460 | 3.4726 | 1.1234  | 0.1679  | 0.4444 | 0.3522 |
| Serbp1     | _EFDRHS[Phospho (STY)]GDSR_2                                                    | Q9CYS8_S197_M1_Serbp1     | 4.2882 | 4.0091 | 3.4741  | 4.5282  | 5.0204 | 4.3156 | 3.1756  | 4.1695 | 4.4547 | 3.9438 | 1.0855  | 0.1184  | 0.3527 | 0.4527 |
| Serbp1     | _TDKSSAS[Phospho (STY)]APDQVDQPEAFPALA_2                                        | #N/A                      | 4.4222 | 3.1002 | 6.7601  | 3.5196  | 2.9215 | 3.3071 | 3.6679  | 6.9648 | 3.7806 | 3.1969 | 0.9029  | -0.1473 | 0.6811 | 0.1668 |
| Serbp1     | _SSAS[Phospho (STY)]APDQVDQPEAFPALA_2                                           | #N/A                      | 3.2400 | 3.8616 | 3.9268  | 4.4294  | 3.7163 | 4.2232 | 4.3390  | 7.1273 | 3.3541 | 3.7576 | 0.8396  | -0.2522 | 0.3221 | 0.4921 |
| Serbp1     | _DELTES[Phospho (STY)]PKYQK_2                                                   | #N/A                      | 3.6269 | 4.3831 | 3.5298  | 6.9980  | 4.2714 | 3.8540 | 6.1977  | 6.1046 | 3.7346 | 3.9995 | 0.8872  | -0.1727 | 0.5212 | 0.2826 |
| Serbp1     | _FDQLFDES[Phospho (STY)]DPFEVVK_2                                               | Q9CYS8_S25_M1_Serbp1      | 3.1144 | 4.1118 | 3.8012  | 4.3038  | 5.6841 | 4.1254 | 4.0185  | 4.4974 | 4.9123 | 4.2708 | 0.9470  | -0.0786 | 0.6209 | 0.2070 |
| Serbp1     | _GGSGSHNWGTKDELTES[Phospho (STY)]PKYQK_4                                        | #N/A                      | 3.5399 | 4.2962 | 3.2736  | 4.3182  | 4.1845 | 3.9410 | 3.8341  | 4.1838 | 2.9820 | 3.9955 | 1.0471  | 0.0664  | 0.5775 | 0.2705 |
| Serbp1     | _SKS[Phospho (STY)]EEAHAEDSM[Oxidation (M)]DHHR_4                               | #N/A                      | 9.4532 | 9.0165 | 8.1794  | 10.0191 | 7.9030 | 3.9528 | 8.2276  | 9.2800 | 7.7467 | 8.5795 | 0.9561  | -0.0647 | 0.7526 | 0.1234 |
| Serbp1     | _S[Phospho (STY)]EEAHAEDSM[Oxidation (M)]DHHR_3                                 | #N/A                      | 3.5029 | 3.6116 | 3.7054  | 3.8920  | 3.4548 | 3.8093 | 3.9629  | 3.9530 | 3.6016 | 4.1751 | 0.9336  | -0.0991 | 0.0771 | 1.1130 |
| Blvra      | _SGS[Phospho (STY)]LEVPNVGVNKK_2                                                | Q9CY64_S236_M1_Blvra      | 9.8646 | 9.7788 | 10.3835 | 10.2054 | 9.1569 | 9.7411 | 10.3571 | 9.6685 | 9.8082 | 9.8290 | 0.9939  | -0.0088 | 0.8132 | 0.0898 |
| Blvra      | _SQEVDVAVIC[Carbamidomethyl (C)]TESSSHEDYR_3                                    | #N/A                      | 6.6774 | 6.9158 | 8.0714  | 7.3955  | 5.3804 | 6.5112 | 7.2438  | 6.1848 | 6.4787 | 5.7559 | 1.0638  | 0.0893  | 0.4571 | 0.3400 |
| Blvra      | _QISLEALR_2                                                                     | #N/A                      | 4.7239 | 3.1103 | 4.4027  | 4.1551  | 4.7659 | 3.9850 | 3.6578  | 3.4916 | 3.7907 | 3.7219 | 1.1473  | 0.1983  | 0.1299 | 0.8863 |
| Blvra      | _DQDFQIK_2                                                                      | #N/A                      | 3.7700 | 3.6220 | 3.2119  | 4.5453  | 3.8348 | 4.7640 | 4.7117  | 4.4039 | 4.2934 | 3.6815 | 0.9253  | -0.1120 | 0.3820 | 0.4179 |
| Tomm34     | _VPS[Phospho (STY)]AGDVER_2                                                     | Q9CYG7_S186_M1_Tomm34     | 7.1411 | 6.9785 | 6.3939  | 7.8140  | 6.8351 | 7.3565 | 7.4763  | 6.9036 | 6.6780 | 7.2372 | 1.0018  | 0.0026  | 0.9651 | 0.0154 |
| Tomm34     | _TVLQDINSVASALEGINR_2                                                           | #N/A                      | 5.1617 | 4.4319 | 3.9977  | 4.0854  | 2.8917 | 4.2578 | 4.9228  | 3.1872 | 4.4735 | 4.2107 | 0.9855  | -0.0211 | 0.9014 | 0.0451 |
| Tomm34     | _VSDS[Phospho (STY)]VEQLR_2                                                     | Q9CYG7_S8_M1_Tomm34       | 4.2176 | 3.5220 | 5.3470  | 4.5987  | 3.3433 | 4.3862 | 3.2461  | 5.5235 | 3.8608 | 3.8732 | 1.0266  | 0.0379  | 0.8433 | 0.0740 |
| Tomm34     | _SSISDSSLLQIEPR_2                                                               | #N/A                      | 3.6626 | 4.4189 | 3.3963  | 3.9967  | 2.8064 | 3.8182 | 3.7114  | 4.1218 | 3.5681 | 4.1182 | 0.9493  | -0.0750 | 0.5331 | 0.2732 |
| Tomm34     | _YESLHC[Carbamidomethyl (C)]SSLEATSYSNR_2                                       | #N/A                      | 3.6051 | 4.3614 | 3.3388  | 4.0542  | 4.2497 | 3.8757 | 3.7689  | 4.0643 | 3.7128 | 4.0607 | 1.0032  | 0.0046  | 0.9545 | 0.0202 |
| Pnx12a     | _LDELGVPLVAVVK_2                                                                | #N/A                      | 6.1323 | 5.9241 | 6.4392  | 6.0803  | 6.0494 | 5.5620 | 5.8169  | 6.2746 | 6.2648 | 5.7969 | 0.9988  | -0.0017 | 0.9697 | 0.0134 |
|            |                                                                                 |                           |        |        |         |         |        |        |         |        |        |        |         |         |        |        |



|         |                                                                                          |                        |         |         |         |         |         |         |         |         |         |         |         |         |        |        |
|---------|------------------------------------------------------------------------------------------|------------------------|---------|---------|---------|---------|---------|---------|---------|---------|---------|---------|---------|---------|--------|--------|
| Cap2    | _THTPS[Phospho (STY)]PTS[Phospho (STY)]PKSNSPQK_2                                        | #N/A                   | 5.6696  | 7.4660  | 4.0729  | 6.7368  | 3.7104  | 6.6281  | 6.4786  | 6.9140  | 8.2050  | 7.7602  | 0.7785  | -0.3612 | 0.0886 | 1.0524 |
| Cap2    | _S[Phospho (STY)]PTKTHPTSPPTS[Phospho (STY)]PK_2                                         | #N/A                   | 8.0871  | 8.2998  | 4.0214  | 8.4140  | 7.9317  | 6.2433  | 6.5637  | 6.1633  | 6.0601  | 8.3910  | 1.0547  | 0.0768  | 0.7152 | 0.1456 |
| Cap2    | _VEYQEDNDIVSETEUK_3                                                                      | #N/A                   | 5.3966  | 6.5092  | 8.0210  | 6.7293  | 6.0787  | 4.4289  | 5.8747  | 5.1629  | 5.9378  | 5.6156  | 1.0967  | 0.1332  | 0.4181 | 0.3787 |
| Cap2    | _SSEM[Oxidation (M)]NVLVPQDDVREFPPEQFK_3                                                 | #N/A                   | 5.2149  | 5.4273  | 5.6630  | 5.9504  | 4.7087  | 4.9798  | 5.7504  | 5.3127  | 5.1972  | 4.8084  | 1.0108  | 0.0155  | 0.8428 | 0.0743 |
| Cap2    | _AQQGRS[Phospho (STY)]PTK_2                                                              | #N/A                   | 11.8500 | 11.9746 | 12.3847 | 12.3969 | 11.7672 | 11.9335 | 12.5577 | 12.7507 | 11.9125 | 11.8870 | 1.0052  | 0.0074  | 0.6852 | 0.1642 |
| Cap2    | _SALFAQLNGEATK_2                                                                         | #N/A                   | 5.4344  | 4.3493  | 6.0328  | 4.8626  | 5.3359  | 4.8252  | 5.5176  | 5.3931  | 5.2921  | 4.7481  | 0.9809  | -0.0279 | 0.7683 | 0.1145 |
| Cap2    | _VIAGDVETHAEM[Oxidation (M)]VHGAFQAQR_3                                                  | #N/A                   | 3.6760  | 5.9764  | 3.4096  | 3.7889  | 5.3270  | 5.7376  | 3.9372  | 5.2425  | 3.7112  | 5.8819  | 0.9913  | -0.0125 | 0.9562 | 0.0194 |
| Cap2    | _TWWDGSK_2                                                                               | #N/A                   | 3.4151  | 3.9273  | 3.1487  | 4.1934  | 4.0596  | 3.6033  | 4.3416  | 3.1069  | 4.2920  | 0.9283  | -0.1074 | 0.3883  | 0.4109 |        |
| Hdh3    | _DVLVHTRR_2                                                                              | #N/A                   | 5.6050  | 4.8291  | 5.6098  | 5.3309  | 5.9883  | 5.6251  | 4.3278  | 5.8865  | 5.3848  | 5.4828  | 1.0432  | 0.0610  | 0.5091 | 0.2932 |
| Tpd52l2 | _NSATKS[Phospho (STY)]FEDR_2                                                             | #N/A                   | 9.9425  | 9.9925  | 10.8255 | 10.8084 | 9.4767  | 10.1074 | 10.1390 | 9.9232  | 10.1625 | 10.1552 | 1.0096  | 0.0138  | 0.7320 | 0.1355 |
| Tpd52l2 | _S[Phospho (STY)]WHHDVQVSTAYVK_2                                                         | QB9CY2_S96_M1_Tpd52l2  | 3.7550  | 3.5874  | 3.4887  | 4.5333  | 5.8577  | 4.3208  | 3.1808  | 3.9687  | 5.9391  | 4.2106  | 0.9844  | -0.0227 | 0.9191 | 0.0366 |
| Tpd52l2 | rotein N-term)[M]Oxidation (M)]DSASQDNLNSPNKGVL[S[Phospho (STY)]DFM[Oxidation (M)]TDPVDI | QB9CY2_S19_M1_Tpd52l2  | 4.1032  | 3.8350  | 4.0679  | 5.5210  | 3.2288  | 3.6515  | 3.7536  | 3.7700  | 3.7122  | 3.6984  | 1.0896  | 0.1237  | 0.4257 | 0.3709 |
| Tpd52l2 | _Acetyl (Protein N-term)]MDSASQDNLNS[Phospho (STY)]PNK_2                                 | #N/A                   | 7.3029  | 5.4129  | 3.5559  | 8.5334  | 5.6276  | 4.2784  | 6.7009  | 4.5140  | 5.2326  | 6.0073  | 1.0305  | 0.0434  | 0.8706 | 0.0602 |
| Tpd52l2 | _ENGSDNLPSP[Phospho (STY)]PGSGDQLTPOHAPF_3                                               | QB9CY2_S206_M1_Tpd52l2 | 3.4035  | 9.2104  | 9.5615  | 9.6727  | 8.2668  | 10.0985 | 9.7459  | 3.5345  | 8.8781  | 9.6904  | 1.0511  | 0.0719  | 0.8211 | 0.0856 |
| Tpd52l2 | _S[Phospho (STY)]FEDRVGTIK_2                                                             | #N/A                   | 3.5921  | 4.3484  | 3.3258  | 4.3704  | 4.2367  | 3.8887  | 3.7819  | 4.1316  | 4.4306  | 4.0477  | 0.9664  | -0.0493 | 0.5898 | 0.2293 |
| Tpd52l2 | _H[S[Phospho (STY)]M[Oxidation (M)]PVM[Oxidation (M)]R_2                                 | QB9CY2_S168_M1_Tpd52l2 | 2.9577  | 3.7139  | 4.1922  | 3.2008  | 3.6022  | 3.0224  | 4.4164  | 3.4168  | 4.3273  | 4.9387  | 0.8066  | -0.3100 | 0.0451 | 1.3461 |
| Dbndd1  | _Acetyl (Protein N-term)]M[Oxidation (M)]ES[Phospho (STY)]PEGAGGGEVK_2                   | #N/A                   | 7.9069  | 8.7185  | 8.7596  | 9.4101  | 8.6792  | 8.9470  | 9.1194  | 8.4614  | 8.8848  | 9.0339  | 0.9845  | -0.0226 | 0.6287 | 0.2016 |
| Uqcrcl  | _VEYEDAVALGTFC[Carbamidomethyl (C)]R_2                                                   | #N/A                   | 10.7192 | 10.6056 | 11.0548 | 11.0100 | 10.8317 | 10.6679 | 10.8852 | 10.4598 | 10.5241 | 10.5745 | 1.0192  | 0.0275  | 0.1281 | 0.8923 |
| Uqcrcl  | _TDLTVDLNR_2                                                                             | #N/A                   | 10.7116 | 10.7232 | 10.9780 | 10.8574 | 10.3221 | 10.6792 | 10.8986 | 10.5549 | 10.5838 | 10.6271 | 1.0043  | 0.0062  | 0.7318 | 0.1356 |
| Uqcrcl  | _NALVSHLDGTPVC[Carbamidomethyl (C)]EDIGR_3                                               | #N/A                   | 7.5862  | 8.0315  | 8.4115  | 8.1656  | 8.7395  | 8.2114  | 7.7828  | 8.3032  | 8.4308  | 1.0188  | 0.0269  | 0.5599  | 0.2519 |        |
| Uqcrcl  | _C[Carbamidomethyl (C)]TSATESVTR_2                                                       | #N/A                   | 7.4484  | 8.0739  | 8.2036  | 7.9739  | 8.1422  | 8.0167  | 7.7255  | 7.8818  | 7.8517  | 8.3015  | 1.0046  | 0.0066  | 0.8364 | 0.0776 |
| Uqcrcl  | _EHTAYLK_2                                                                               | #N/A                   | 7.9235  | 7.7475  | 8.3245  | 8.1513  | 8.0295  | 8.0240  | 7.7412  | 7.7985  | 7.7222  | 7.9291  | 1.0230  | 0.0329  | 0.1420 | 0.8476 |
| Uqcrcl  | _IPLAEWESR_2                                                                             | #N/A                   | 7.1767  | 7.1089  | 7.0488  | 7.0063  | 7.5036  | 6.9035  | 6.9693  | 7.3231  | 6.9597  | 7.4264  | 0.9937  | -0.0091 | 0.7600 | 0.1192 |
| Uqcrcl  | _RIPLAEWESR_2                                                                            | #N/A                   | 7.0492  | 7.2641  | 7.1254  | 6.6530  | 6.9440  | 7.1214  | 7.0580  | 6.9915  | 6.8094  | 7.3676  | 0.9957  | -0.0062 | 0.8350 | 0.0783 |
| Uqcrcl  | _VVELLADIVONSSLEDSQIEKR_3                                                                | #N/A                   | 6.3792  | 6.7962  | 7.7351  | 7.8392  | 6.1135  | 7.1396  | 7.1877  | 6.4984  | 6.0947  | 7.3858  | 1.0307  | 0.0437  | 0.6406 | 0.1934 |
| Uqcrcl  | _NRPGNALEK_2                                                                             | #N/A                   | 6.4563  | 6.5312  | 6.2367  | 6.5721  | 7.0719  | 6.1597  | 5.7631  | 6.1403  | 6.3927  | 6.2930  | 1.0581  | 0.0815  | 0.1081 | 0.9664 |
| Uqcrcl  | _NNGAGCYLHLAFK_2                                                                         | #N/A                   | 5.3549  | 5.0739  | 4.7243  | 4.3818  | 4.8216  | 4.0714  | 5.5127  | 5.5408  | 5.4650  | 5.6815  | 0.8537  | -0.2282 | 0.0094 | 2.0260 |
| Uqcrcl  | _IQEVDAGM[Oxidation (M)]R_2                                                              | #N/A                   | 8.1742  | 8.6538  | 8.9058  | 8.3505  | 8.0130  | 8.7522  | 7.8225  | 7.5407  | 7.7353  | 7.7278  | 1.0997  | 0.1371  | 0.0032 | 2.4974 |
| Uqcrcl  | _SULTVGR_2                                                                               | #N/A                   | 6.8500  | 5.6883  | 4.0542  | 5.5702  | 6.5460  | 6.3202  | 3.2794  | 6.9136  | 6.8963  | 6.6380  | 0.9842  | -0.0230 | 0.9167 | 0.0378 |
| Uqcrcl  | _YFYDQC[Carbamidomethyl (C)]PAVAGGVEIQLPDYNR_3                                           | #N/A                   | 5.5313  | 7.0225  | 6.8526  | 7.5214  | 5.9112  | 6.1611  | 6.1686  | 7.0267  | 6.3398  | 5.9440  | 1.0205  | 0.0292  | 0.7679 | 0.1147 |
| Uqcrcl  | _SGM[Oxidation (M)]FWLR_2                                                                | #N/A                   | 5.9975  | 6.2342  | 5.7583  | 5.5201  | 5.6606  | 6.7892  | 3.4633  | 6.8354  | 5.5217  | 6.1047  | 1.0934  | 0.1288  | 0.4327 | 0.3638 |
| Uqcrcl  | _FTGSEIR_2                                                                               | #N/A                   | 6.9115  | 6.9010  | 6.3959  | 5.8511  | 7.6357  | 6.8524  | 3.2045  | 7.1457  | 7.1898  | 7.4722  | 1.0807  | 0.1120  | 0.5737 | 0.2413 |
| Uqcrcl  | _M[Oxidation (M)]VLAAGGVGHQQLDLQAK_3                                                     | #N/A                   | 6.1381  | 6.0109  | 6.7458  | 5.8112  | 5.7851  | 6.0018  | 6.1216  | 5.7150  | 5.7893  | 6.0566  | 1.0273  | 0.0388  | 0.4331 | 0.3634 |
| Uqcrcl  | _VVELLADIVONSSLEDSQIEK_2                                                                 | #N/A                   | 4.3629  | 4.6683  | 5.1660  | 5.9262  | 4.2606  | 3.9188  | 3.5499  | 4.2911  | 4.5351  | 5.2351  | 0.9720  | -0.0409 | 0.7569 | 0.1209 |
| Uqcrcl  | _VASEQSSHATC[Carbamidomethyl (C)]TVGVWIDAGSR_3                                           | #N/A                   | 4.1850  | 4.3515  | 3.5615  | 4.0642  | 4.7049  | 2.8119  | 3.6344  | 4.0543  | 3.7029  | 4.0312  | 1.0235  | 0.0336  | 0.8034 | 0.0951 |
| Uqcrcl  | _EVESGAHLNAYSTR_2                                                                        | #N/A                   | 4.0207  | 4.2409  | 4.2553  | 4.1195  | 4.0954  | 4.5532  | 3.9595  | 3.5813  | 3.5070  | 3.8861  | 1.1287  | 0.1747  | 0.0062 | 2.2092 |
| Ola1    | _GIVGLPMVVK_2                                                                            | #N/A                   | 5.8325  | 6.4391  | 6.2419  | 5.7686  | 5.6357  | 6.0026  | 6.0457  | 6.2619  | 5.3687  | 6.1314  | 1.0058  | 0.0084  | 0.8790 | 0.0560 |
| Ola1    | _IPAFUNVVDIAGLVK_2                                                                       | #N/A                   | 3.4138  | 3.9438  | 4.4220  | 4.4719  | 3.2614  | 4.2258  | 2.8561  | 1.7571  | 2.3613  | 3.2716  | 1.5446  | 0.2722  | 0.0054 | 2.2702 |
| Ola1    | _NVNEDGDHFFK_2                                                                           | #N/A                   | 3.7648  | 5.7002  | 3.4985  | 4.5431  | 3.8319  | 5.4181  | 5.0736  | 3.8764  | 4.5195  | 4.6276  | 0.9857  | -0.0208 | 0.9020 | 0.0448 |
| Naxd    | _DOLLNWR_2                                                                               | #N/A                   | 7.5024  | 7.2932  | 7.4848  | 8.1036  | 6.9795  | 6.9294  | 6.6075  | 7.0514  | 7.4800  | 7.5093  | 1.0307  | 0.0437  | 0.4481 | 0.3486 |
| Naxd    | _SYSPELVHPVLDSNAVEEVEK_3                                                                 | #N/A                   | 5.2833  | 4.1874  | 4.8843  | 5.4968  | 4.4511  | 4.7388  | 5.2990  | 5.0831  | 4.5103  | 5.0826  | 0.9693  | -0.0450 | 0.6049 | 0.2183 |
| Naxd    | _LSQALGNITVVQK_2                                                                         | #N/A                   | 4.6507  | 4.4810  | 3.6105  | 4.6707  | 4.8612  | 5.2456  | 4.1726  | 4.3510  | 4.2241  | 4.2045  | 1.0823  | 0.0437  | 0.2481 | 0.6054 |
| Naxd    | _AILTPNHVEFSR_3                                                                          | #N/A                   | 3.2965  | 3.9297  | 3.9833  | 5.0776  | 4.5831  | 4.3586  | 4.2006  | 4.4122  | 3.6584  | 4.0617  | 1.0298  | 0.0423  | 0.7277 | 0.1380 |
| Naxd    | _STTTMTNTEVGTAFSR_2                                                                      | #N/A                   | 3.6404  | 2.9448  | 4.3272  | 5.9732  | 4.2669  | 3.4626  | 3.8233  | 3.2886  | 4.4380  | 3.2960  | 1.1054  | 0.1445  | 0.5184 | 0.2854 |
| Nfl1c   | _S[Phospho (STY)]PGTSPRPFAGGGVYR_3                                                       | #N/A                   | 8.8690  | 8.6365  | 8.9116  | 9.2761  | 8.2289  | 8.8769  | 8.2795  | 8.6446  | 8.6042  | 8.8645  | 1.0234  | 0.0334  | 0.3457 | 0.4613 |
| Nfl1c   | _EANLNAVIVQR_2                                                                           | #N/A                   | 6.6004  | 6.3753  | 6.1018  | 6.6717  | 6.8855  | 6.2865  | 6.5799  | 6.5148  | 6.4574  | 6.2337  | 1.0063  | 0.0090  | 0.8036 | 0.0950 |
| Nfl1c   | _SVQDSNAQFLISR_2                                                                         | #N/A                   | 6.1342  | 6.2667  | 6.3012  | 6.6165  | 6.7724  | 6.5221  | 5.7713  | 5.6647  | 6.0099  | 5.7008  | 1.1121  | 0.1533  | 0.0015 | 2.8212 |
| Nfl1c   | _DLHQDQEEEEEGQR_3                                                                        | #N/A                   | 5.9241  | 5.5377  | 6.8830  | 6.7339  | 6.2797  | 5.9273  | 5.8155  | 5.4911  | 5.6366  | 1.0423  | 0.0597  | 0.4519  | 0.3450 |        |
| Nfl1c   | _ASSILNIEAEPITNIQR_2                                                                     | #N/A                   | 6.0061  | 4.9754  | 5.9859  | 5.7406  | 6.2096  | 6.0452  | 5.1972  | 5.6006  | 5.9227  | 5.9750  | 1.0270  | 0.0385  | 0.5817 | 0.2353 |
| Nfl1c   | _RHS[Phospho (STY)]GDDVHVVLK_3                                                           | #N/A                   | 9.2727  | 9.3892  | 9.8145  | 9.9570  | 9.6442  | 10.1921 | 9.6285  | 9.4468  | 9.8401  | 10.2984 | 0.9906  | -0.0136 | 0.6899 | 0.1556 |
| Nfl1c   | _S[Phospho (STY)]PNELVDLFK_2                                                             | #N/A                   | 7.2148  | 6.4973  | 6.6707  | 7.4662  | 7.1421  | 6.8354  | 7.2394  | 6.5559  | 6.8866  | 7.3620  | 0.9943  | -0.0082 | 0.8697 | 0.0606 |
| Nfl1c   | _BRHS[Phospho (STY)]GDDVHVVLK_3                                                          | #N/A                   | 7.1573  | 6.8199  | 8.8364  | 10.2410 | 6.5640  | 7.5405  | 7.6997  | 8.5612  | 8.0562  | 7.6706  | 0.9120  | -0.1329 | 0.5385 | 0.2688 |
| Nfl1c   | _VTKS[Phospho (STY)]PGETSKPR_2                                                           | #N/A                   | 5.2673  | 6.0449  | 5.6037  | 6.1336  | 4.4504  | 5.8492  | 5.1984  | 5.4150  | 4.0062  | 5.3734  | 1.1120  | 0.1532  | 0.2141 | 0.6693 |
| Nfl1c   | _TGFSIDNGDLR_2                                                                           | #N/A                   | 5.8182  | 5.8156  | 3.9263  | 6.2400  | 5.6118  | 3.2883  | 5.6485  | 5.2989  | 5.7920  | 5.5953  | 0.9164  | -0.1260 | 0.4728 | 0.3253 |
| Nfl1c   | _FYAGGSEIR_2                                                                             | #N/A                   | 5.8873  | 5.5981  | 5.2735  | 5.2199  | 6.3345  | 5.8337  | 3.0993  | 5.8562  | 5.9595  | 5.9556  | 1.0907  | 0.1253  | 0.4514 | 0.3454 |
| Nfl1c   | _S[Phospho (STY)]PGTSPRPR_2                                                              | #N/A                   | 4.2756  | 4.7615  | 4.0093  | 3.5530  | 2.8881  | 3.3405  | 4.9616  | 3.4441  | 3.7472  | 3.2303  | 0.9890  | -0.0159 | 0.9395 | 0.0317 |
| Nfl1c   | _HS[Phospho (STY)]GDDVHVVLK_2                                                            | #N/A                   | 4.3592  | 4.5475  | 4.0810  | 4.8934  | 3.8494  | 4.8085  | 4.0948  | 3.8317  | 3.8285  | 4.6837  | 1.0763  | 0.1061  | 0.2663 | 0.5746 |
| Nfl1c   | _KKS[Phospho (STY)]PNELVDLFK_2                                                           | #N/A                   | 3.6350  | 3.8025  | 3.8829  | 11.2349 | 3.6435  | 3.6636  | 3.7989  | 3.8706  | 3.5192  | 3.7782  | 1.3302  | 0.4116  | 0.4531 | 0.3438 |
| Antxr1  | _EVPPPPVEES[Phospho (STY)]EEEDDGLPK_2                                                    | QB9CZ2_S360_M1_Antxr1  | 3.1626  | 3.9678  | 3.8494  | 8.9713  | 7.7331  | 7.9414  | 8.7729  | 9.4670  | 8.8945  | 9.1132  | 0.6552  | -0.0099 | 0.0435 | 1.3616 |
| Cep97   | _QLM[Oxidation (M)]S[Phospho (STY)]QDELSPLAAVETR_2                                       | #N/A                   | 3.1437  | 3.9489  | 3.8305  | 4.4187  | 3.7702  | 3.9780  | 4.3558  | 3.9171  | 3.1258  | 4.5526  | 0.9650  | -0.0514 | 0.6813 | 0.1667 |
| Sdhc    | _HLWDGLK_2                                                                               | #N/A                   | 5.4289  | 5.1301  | 3.7715  | 4.5973  | 4.4102  | 4.0956  | 5.1835  | 5.2539  | 4.5423  | 4.5526  | 0.9551  | -0.0663 | 0.5862 | 0.2320 |
| Thumpd2 | _LLOQS[Phospho (STY)]PEQGEAVTR_2                                                         | #N/A                   | 3.8116  | 3.5308  | 4.9538  | 5.7867  | 4.5923  | 3.6692  | 5.6189  | 5.5766  | 5.7927  | 5.2185  | 0.7909  | -0.3185 | 0.0358 | 1.4458 |
| Thumpd2 | _DHGSEQEDKLQGS[Phospho (STY)]PEQGEAVTR_3                                                 | #N/A                   | 3.6670  | 3.5591  | 4.3538  | 3.3557  | 2.7927  | 1.6025  | 3.0703  | 3.2620  | 2.6456  | 3.322   |         |         |        |        |



|         |                                                                                            |                        |         |         |         |         |         |         |         |         |         |         |         |         |        |        |
|---------|--------------------------------------------------------------------------------------------|------------------------|---------|---------|---------|---------|---------|---------|---------|---------|---------|---------|---------|---------|--------|--------|
| Hspa12b | _RS[Phospho (STY)]VNVLK_2                                                                  | Q9CZ12_S434_M1_Hspa12b | 4.2308  | 3.1116  | 7.2934  | 3.5082  | 5.9979  | 6.8046  | 6.9055  | 7.3487  | 7.2686  | 7.0893  | 0.7211  | -0.4718 | 0.0594 | 1.2259 |
| Hspa12b | _TQESQ[Carbamidomethyl (C)]QIAPLTPS[Phospho (STY)]QSPKPEAR_3                               | Q9CZ12_S44_M1_Hspa12b  | 6.8605  | 6.1339  | 4.3363  | 5.9535  | 5.0637  | 6.1634  | 6.6690  | 6.4796  | 6.1270  | 6.6922  | 0.8860  | -0.1746 | 0.1551 | 0.8094 |
| Hspa12b | _RS[Phospho (STY)]DSSS[Phospho (STY)]FR_2                                                  | #N/A                   | 4.7361  | 4.0057  | 4.7263  | 3.8082  | 4.1426  | 3.5807  | 4.4202  | 4.2306  | 3.0628  | 3.1717  | 1.1197  | 0.1631  | 0.2624 | 0.5810 |
| Hspa12b | _S[Phospho (STY)]FR_2                                                                      | #N/A                   | 3.5660  | 3.7124  | 4.2528  | 4.0558  | 3.6007  | 3.8773  | 3.7705  | 5.0034  | 3.8650  | 4.0228  | 0.9229  | -0.1158 | 0.2579 | 0.5885 |
| Rpl15   | _SLOSAEER_2                                                                                | #N/A                   | 5.7994  | 5.9937  | 6.0660  | 4.9050  | 5.7941  | 5.9017  | 4.5460  | 5.8982  | 6.3451  | 5.5253  | 1.0277  | 0.0995  | 0.6884 | 0.1621 |
| Rpl15   | _NTLQHR_2                                                                                  | #N/A                   | 4.8881  | 5.6373  | 4.4548  | 5.0846  | 5.9100  | 5.1615  | 4.5349  | 5.2143  | 5.2864  | 3.4236  | 1.1251  | 0.1701  | 0.2193 | 0.6590 |
| Rpl15   | _VLHSYVWGEDSTYK_2                                                                          | #N/A                   | 4.0238  | 5.1764  | 3.2098  | 3.7124  | 3.0907  | 3.5339  | 3.4271  | 4.4061  | 5.2570  | 3.6794  | 0.9043  | -0.1451 | 0.4501 | 0.3467 |
| Hspa9   | _AVGNSGDGWAVATLKS[Phospho (STY)]FK_3                                                       | Q9CZN4_S296_M1_Hspa9   | 5.2935  | 4.8021  | 4.4600  | 5.8152  | 3.8700  | 5.1680  | 4.1486  | 2.9975  | 3.2965  | 3.6810  | 1.3882  | 0.4732  | 0.0090 | 2.0457 |
| Hspa9   | _AFS[Phospho (STY)]PEHGPAQGNQK_2                                                           | Q9CZN4_S337_M1_Hspa9   | 7.5705  | 7.3508  | 3.8884  | 8.0906  | 6.6533  | 7.2515  | 7.9515  | 7.8811  | 7.3679  | 7.2697  | 0.8928  | -0.1636 | 0.3247 | 0.4886 |
| Aldh1b1 | _TVFEESYR_2                                                                                | #N/A                   | 2.9855  | 2.7357  | 4.2200  | 4.5270  | 3.6300  | 2.9946  | 4.3886  | 3.2374  | 3.5365  | 3.4410  | 0.9629  | -0.0545 | 0.7581 | 0.1203 |
| Rab3b   | _LIAELQGFDFEASAK_2                                                                         | #N/A                   | 4.0392  | 3.0566  | 3.8820  | 4.0091  | 3.2920  | 3.3326  | 3.5740  | 4.5356  | 3.8745  | 4.0365  | 0.8993  | -0.1531 | 0.1719 | 0.7648 |
| Rab3b   | _M[Oxidation (M)]SDS[Phospho (STY)]M[Oxidation (M)]DTDPSVLGASK_2                           | #N/A                   | 6.6795  | 3.0270  | 7.7554  | 4.7852  | 3.1425  | 7.6859  | 8.1434  | 8.0632  | 3.7917  | 6.8392  | 0.8216  | -0.2834 | 0.4067 | 0.3907 |
| Rab3b   | VDAC[Carbamidomethyl (C)]DKM[Oxidation (M)]S[Phospho (STY)]DSM[Oxidation (M)]DTDPSVLGASK_2 | Q9CZT8_S188_M1_Rab3b   | 3.1011  | 4.2161  | 3.6969  | 4.1996  | 3.6366  | 4.0929  | 3.9143  | 6.5082  | 3.5675  | 4.1666  | 0.8391  | -0.2531 | 0.2424 | 0.6154 |
| Cs      | _LVPGYGHVAVLR_2                                                                            | #N/A                   | 10.2946 | 10.6302 | 10.6596 | 10.4680 | 10.7158 | 10.3219 | 10.5691 | 10.8252 | 10.5306 | 10.3099 | 0.9959  | -0.0060 | 0.7343 | 0.1341 |
| Cs      | _GLVYETSLVDPDEGIR_2                                                                        | #N/A                   | 10.3558 | 10.0257 | 10.6064 | 10.4698 | 9.9864  | 10.3859 | 10.4538 | 10.1187 | 10.1936 | 10.3010 | 1.0037  | 0.0054  | 0.7900 | 0.1024 |
| Cs      | _EGSGAGIDSR_2                                                                              | #N/A                   | 8.8601  | 8.7999  | 8.4185  | 8.7641  | 7.9482  | 8.2303  | 8.5485  | 8.4660  | 8.2506  | 8.8207  | 0.9979  | -0.0030 | 0.9337 | 0.0298 |
| Cs      | _ALGPLERPK_2                                                                               | #N/A                   | 9.9570  | 10.4155 | 10.4493 | 9.9821  | 10.1916 | 9.9219  | 10.2533 | 10.2550 | 10.2211 | 10.0817 | 0.9951  | -0.0071 | 0.7002 | 0.1548 |
| Cs      | _VPMILLEQK_2                                                                               | #N/A                   | 5.9585  | 9.8044  | 8.9509  | 9.3773  | 9.5179  | 9.5359  | 9.7618  | 9.8950  | 9.4126  | 9.6006  | 0.9906  | -0.0136 | 0.4812 | 0.3177 |
| Cs      | _GYSPEC[Carbamidomethyl (C)]QK_2                                                           | #N/A                   | 9.1683  | 9.2118  | 9.4526  | 9.2056  | 9.3377  | 9.1254  | 9.1355  | 9.1126  | 9.2311  | 9.2194  | 1.0082  | 0.0118  | 0.2887 | 0.5395 |
| Cs      | _DTYWNLTNGSR_2                                                                             | #N/A                   | 9.3560  | 9.1223  | 9.1525  | 9.4109  | 8.9650  | 9.1150  | 9.1752  | 9.1917  | 9.2139  | 9.1771  | 0.9997  | -0.0004 | 0.9771 | 0.0101 |
| Cs      | _LVLAQYK_2                                                                                 | #N/A                   | 7.3908  | 7.1100  | 6.8496  | 6.6071  | 6.9053  | 7.0277  | 5.0849  | 7.4281  | 7.5000  | 7.2795  | 1.0232  | 0.0332  | 0.7490 | 0.1255 |
| Cs      | _EVGKDVSDKLR_3                                                                             | #N/A                   | 6.5227  | 6.4743  | 6.4007  | 6.0985  | 7.1301  | 6.5674  | 6.5310  | 7.0854  | 6.9033  | 0.9681  | -0.0468 | 0.3233  | 0.4904 | 0.2230 |
| Cs      | _EVGKDVSDK_2                                                                               | #N/A                   | 6.6723  | 6.4679  | 5.7907  | 6.1965  | 6.7785  | 6.4017  | 6.4812  | 6.5161  | 6.4199  | 6.5374  | 0.9840  | -0.0233 | 0.5848 | 0.2330 |
| Cs      | _ALGVLAQIWSR_2                                                                             | #N/A                   | 4.8065  | 5.5873  | 5.2674  | 5.2208  | 5.3922  | 6.3610  | 6.0724  | 6.2339  | 6.1567  | 5.6031  | 0.9040  | -0.1455 | 0.0799 | 0.1972 |
| Cs      | _AYAEGM[Oxidation (M)]NR_2                                                                 | #N/A                   | 6.8870  | 6.9381  | 6.0146  | 7.1635  | 7.9510  | 7.0158  | 6.3643  | 6.6829  | 7.0440  | 6.7850  | 1.0411  | 0.0581  | 0.4341 | 0.3625 |
| Cs      | _LDWSHNFTNM[Oxidation (M)]GVYDPQFTLM[Oxidation (M)]R_3                                     | #N/A                   | 4.4699  | 4.0569  | 4.9448  | 4.6955  | 4.0187  | 4.7886  | 4.7404  | 4.9640  | 5.8088  | 3.5701  | 0.9423  | -0.0857 | 0.5260 | 0.2790 |
| Cs      | _AALPSHWVTM[Oxidation (M)]DNFTNTHPM[Oxidation (M)]SQLSAITAIENSENFAR_4                      | #N/A                   | 5.6415  | 6.2013  | 5.6850  | 6.8177  | 4.7736  | 5.5093  | 6.8189  | 6.5426  | 6.1354  | 6.1349  | 0.9007  | -0.1509 | 0.1283 | 0.8918 |
| Cs      | _TVVGQ[IVDM[Oxidation (M)]M[Oxidation (M)]YGGM[Oxidation (M)]R_2                           | #N/A                   | 6.0078  | 6.1941  | 7.3846  | 5.4352  | 5.6601  | 6.2318  | 6.0025  | 6.4084  | 6.4150  | 6.0876  | 0.9878  | -0.0177 | 0.8363 | 0.0776 |
| Cs      | _DVLNSLRK_2                                                                                | #N/A                   | 3.3420  | 3.8842  | 4.0288  | 4.5314  | 3.9685  | 4.3529  | 4.2461  | 3.5871  | 3.2356  | 2.9976  | 1.1426  | 0.0923  | 0.1343 | 0.8720 |
| Cs      | _YWELIYEDC[Carbamidomethyl (C)]M[Oxidation (M)]DLIAK_2                                     | #N/A                   | 4.1851  | 2.1926  | 3.9187  | 2.7102  | 3.3288  | 3.2958  | 3.1890  | 3.1433  | 4.2928  | 3.4932  | 0.9270  | -0.1094 | 0.5674 | 0.2461 |
| Cs      | _SMSTDGLMK_2                                                                               | #N/A                   | 3.7072  | 3.6352  | 3.4409  | 4.4855  | 2.8509  | 3.7377  | 3.1329  | 4.0166  | 4.3156  | 4.1627  | 0.9339  | -0.0986 | 0.4718 | 0.3262 |
| Tom70   | _NVDLSTFYQNR_2                                                                             | #N/A                   | 7.3643  | 7.4791  | 7.7323  | 7.9114  | 7.4403  | 7.4706  | 7.6471  | 7.6565  | 7.5434  | 7.6236  | 0.9933  | -0.0098 | 0.6503 | 0.1869 |
| Tom70   | _AAAFEGQLK_2                                                                               | #N/A                   | 7.1029  | 7.2610  | 7.4424  | 7.1950  | 7.1799  | 6.8794  | 7.2352  | 6.9986  | 6.5910  | 6.7176  | 1.0423  | 0.0597  | 0.0851 | 1.0699 |
| Tom70   | _SYSSFTDHSQPM[Oxidation (M)]LK_2                                                           | #N/A                   | 6.8333  | 6.6439  | 6.9891  | 6.7642  | 6.8942  | 6.9028  | 6.4730  | 6.7716  | 6.6777  | 6.7773  | 1.0244  | 0.0348  | 0.0868 | 1.0616 |
| Tom70   | _FALAAQAK_2                                                                                | #N/A                   | 6.2535  | 6.2673  | 6.0846  | 6.0808  | 6.3658  | 5.8089  | 5.5253  | 6.3704  | 6.0649  | 5.9007  | 1.0201  | 0.0287  | 0.5059 | 0.2960 |
| Tom70   | _YEQAQIC[Carbamidomethyl (C)]TEASL[C[Carbamidomethyl (C)]IPEK_2                            | #N/A                   | 5.1092  | 4.3288  | 5.4196  | 5.9632  | 4.7124  | 4.4871  | 4.6386  | 4.9603  | 4.4192  | 4.6633  | 1.0713  | 0.0994  | 0.3390 | 0.4698 |
| Tom70   | _ATFYLGSSNAAKPOLDK_2                                                                       | #N/A                   | 4.6026  | 4.3333  | 5.5513  | 5.5074  | 4.8148  | 5.1547  | 5.3503  | 5.6763  | 4.3744  | 5.1988  | 0.9697  | -0.0444 | 0.6532 | 0.1850 |
| Tom70   | _C[Carbamidomethyl (C)]DLEPONTATYVHK_3                                                     | #N/A                   | 5.5896  | 3.5581  | 3.2394  | 4.4343  | 5.6338  | 5.2263  | 3.8683  | 4.9976  | 3.6795  | 5.0239  | 1.0606  | 0.0849  | 0.6821 | 0.1662 |
| Tom70   | _GDASGR_2                                                                                  | #N/A                   | 5.6062  | 2.4514  | 5.2086  | 4.8392  | 5.7145  | 5.4186  | 5.3442  | 5.2432  | 4.9722  | 5.2574  | 0.9684  | -0.0463 | 0.7135 | 0.1466 |
| Tom70   | _YM[Oxidation (M)]AEALLR_2                                                                 | #N/A                   | 5.2917  | 5.5719  | 4.9051  | 5.9224  | 4.7044  | 5.0506  | 5.3216  | 5.4713  | 5.6192  | 4.9645  | 0.9807  | -0.0281 | 0.6966 | 0.1570 |
| Tom70   | _C[Carbamidomethyl (C)]AEGYALYAQALDQQQFGK_2                                                | #N/A                   | 3.6556  | 3.4896  | 3.5011  | 4.0038  | 3.7514  | 4.1932  | 3.7185  | 4.1147  | 4.8191  | 4.6106  | 0.8726  | -0.1966 | 0.0536 | 1.2707 |
| Tom70   | _AS[Phospho (STY)]PALGSGHHGSGGSGLEM[Oxidation (M)]SSLRD_3                                  | #N/A                   | 9.7024  | 9.4879  | 9.5827  | 10.6679 | 9.0217  | 9.2871  | 9.5618  | 9.6438  | 9.6269  | 9.2562  | 1.0108  | 0.0155  | 0.7381 | 0.1309 |
| Tom70   | _SDEKDKKEGALEVK_3                                                                          | #N/A                   | 4.2575  | 3.5129  | 3.9911  | 3.6761  | 3.4012  | 3.2234  | 3.1166  | 3.4663  | 4.5289  | 3.2122  | 1.0268  | 0.0382  | 0.7740 | 0.1112 |
| Tom70   | _WKEVAQDC[Carbamidomethyl (C)]TK_2                                                         | #N/A                   | 3.9475  | 3.2518  | 3.1334  | 3.3680  | 5.2649  | 3.1555  | 3.5163  | 3.6331  | 3.9322  | 3.0453  | 1.0439  | 0.0620  | 0.7378 | 0.1321 |
| Tom70   | _GFEHK_2                                                                                   | #N/A                   | 1.2679  | 3.0472  | 3.3649  | 3.8676  | 3.3047  | 4.2448  | 3.5823  | 4.2509  | 3.8995  | 3.8346  | 0.8255  | -0.2766 | 0.2580 | 0.5884 |
| Tom70   | _QAYTANSSGVQAAMK_2                                                                         | #N/A                   | 3.8149  | 3.4113  | 4.5017  | 3.5035  | 3.2996  | 3.3250  | 3.2182  | 3.1141  | 4.2636  | 3.4705  | 1.0358  | 0.0508  | 0.6968 | 0.1569 |
| Tom70   | _NSEKRTK[Phospho (STY)]PEGR_2                                                              | Q9CZW5_T88_M1_Tom70    | 4.3250  | 3.5804  | 4.0586  | 3.3344  | 3.4687  | 3.1559  | 4.5499  | 3.2832  | 4.4327  | 3.3014  | 0.9389  | -0.0910 | 0.5239 | 0.2807 |
| Tom70   | _EC[Carbamidomethyl (C)]LEDVAV[C[Carbamidomethyl (C)]ILEGFNGQSM[Oxidation (M)]LIADK_3      | #N/A                   | 3.4600  | 4.2652  | 4.1468  | 3.8555  | 4.0866  | 4.0037  | 3.1457  | 3.4448  | 3.1157  | 1.1406  | 1.1898  | 0.0676  | 0.7184 | 0.1704 |
| Rps19   | _DVNQEFVR_2                                                                                | #N/A                   | 7.3711  | 7.6472  | 7.4805  | 7.2345  | 7.5994  | 7.4121  | 6.8078  | 7.3889  | 7.3322  | 7.3100  | 1.0344  | 0.0487  | 0.0974 | 1.0114 |
| Rps19   | _ELAPYDENWYFR_2                                                                            | #N/A                   | 6.7985  | 6.5839  | 6.3347  | 6.3528  | 6.8535  | 6.3554  | 6.6343  | 6.4249  | 6.2669  | 6.3304  | 1.0206  | 0.0295  | 0.3592 | 0.4447 |
| Rps19   | _JAGQVAAANK_2                                                                              | #N/A                   | 4.3235  | 4.3570  | 4.2386  | 3.4703  | 5.2723  | 3.8410  | 4.4613  | 3.3772  | 4.5364  | 2.9340  | 1.1106  | 0.1513  | 0.3658 | 0.4367 |
| Rps19   | _GGAQGVGMTK_2                                                                              | #N/A                   | 3.2788  | 4.0636  | 4.5134  | 4.0571  | 4.4820  | 3.8446  | 4.2054  | 4.4449  | 3.2431  | 3.7344  | 1.0340  | 0.0483  | 0.6826 | 0.1658 |
| Emc4    | _S[Phospho (STY)]DRGSGGDSYVPVGLDK_3                                                        | Q9CZX9_S32_M1_Emc4     | 3.1078  | 3.8641  | 4.3423  | 4.5516  | 3.7524  | 4.3731  | 4.2662  | 3.1151  | 4.6707  | 3.5634  | 1.0243  | 0.0346  | 0.8135 | 0.0897 |
| Ube2v1  | _LPQPPFQC[Carbamidomethyl (C)]YS[Phospho (STY)]N_2                                         | Q9CZY3_S146_M1_Ube2v1  | 3.6946  | 2.9501  | 3.4283  | 4.4729  | 2.8384  | 8.4564  | 3.1204  | 4.0291  | 8.8742  | 4.1502  | 0.8539  | -0.2278 | 0.6342 | 0.1978 |
| Ube2v1  | _YNM[Oxidation (M)]SGVSSNGVDPK_2                                                           | #N/A                   | 3.8267  | 5.3254  | 4.2794  | 4.4218  | 5.4199  | 5.2434  | 3.6777  | 4.9509  | 4.4800  | 4.6891  | 1.0682  | 0.0951  | 0.4727 | 0.3254 |
| Nt5c3a  | _DNSHILLGDS[Phospho (STY)]QDGR_2                                                           | Q9D020_S273_M1_Nt5c3a  | 3.5483  | 4.3535  | 4.2234  | 7.8558  | 6.4591  | 5.6811  | 3.9154  | 6.6516  | 5.3331  | 3.4444  | 1.2206  | 0.2875  | 0.3720 | 0.4294 |
| Sbp3    | _NS[Phospho (STY)]PMNVSIGNPPGTPR_2                                                         | Q9D032_S347_M1_Sbp3    | 2.9918  | 4.3506  | 4.2263  | 7.7712  | 4.1719  | 5.6287  | 3.9184  | 3.2311  | 5.7291  | 3.4474  | 1.1899  | 0.2509  | 0.4410 | 0.3556 |
| Pdhb    | _VLEDSVPQVK_2                                                                              | #N/A                   | 9.8564  | 9.7503  | 10.0507 | 9.9525  | 10.0461 | 9.7302  | 9.8185  | 9.6373  | 9.6367  | 9.8247  | 1.0173  | 0.0248  | 0.0786 | 1.1046 |
| Pdhb    | _VSPWNSEDAK_2                                                                              | #N/A                   | 9.1915  | 9.1730  | 9.3323  | 9.4464  | 9.4468  | 9.2395  | 8.9771  | 9.1228  | 9.1808  | 9.3083  | 1.0172  | 0.0247  | 0.0938 | 1.0278 |
| Pdhb    | _EGEC[Carbamidomethyl (C)]EVNLR_2                                                          | #N/A                   | 6.5057  | 8.6408  | 8.2076  | 8.8542  | 8.1075  | 8.1897  | 8.6898  | 8.3373  | 8.4264  | 8.5504  | 0.9930  | -0.0101 | 0.7362 | 0.1330 |
| Pdhb    | _VFLGEEVAGYQGYAK_2                                                                         | #N/A                   | 8.3093  | 8.2374  | 8.6512  | 8.3946  | 8.2760  | 8.6561  | 8.5347  | 8.0404  | 8.3309  | 8.4494  | 1.0098  | 0.0141  | 0.5409 | 0.2669 |
| Pdhb    | _DLRIQK_2                                                                                  | #N/A                   | 6.5825  | 6.5425  | 5.7703  | 6.6271  | 6.9152  | 7.1446  | 5.6475  | 6.9537  | 7.0058  | 7.0497  | 0.9899  | -0.0146 | 0.8563 | 0.0674 |
| Pdhb    | _TIRPM[Oxidation (M)]DIEAEASVM[Oxidation (M)]K_3                                           | #N/A                   | 7.5186  | 7.8864  | 7.9920  | 7.6377  | 7.4645  | 7.7956  | 7       |         |         |         |         |         |        |        |



|        |                                                                            |                       |         |         |         |         |         |         |         |         |         |         |         |         |        |        |
|--------|----------------------------------------------------------------------------|-----------------------|---------|---------|---------|---------|---------|---------|---------|---------|---------|---------|---------|---------|--------|--------|
| Hnrrpm | _AFITNIPDVK_2                                                              | #N/A                  | 6.7150  | 6.7132  | 6.3960  | 6.6710  | 6.0536  | 6.7082  | 6.4058  | 6.6433  | 6.2313  | 6.3660  | 1.0205  | 0.0292  | 0.4171 | 0.3798 |
| Hnrrpm | _INELSNALK_2                                                               | #N/A                  | 5.2229  | 5.7916  | 5.0145  | 5.3066  | 5.7793  | 5.7784  | 5.3643  | 5.4803  | 5.7404  | 5.3362  | 1.0003  | 0.0005  | 0.9923 | 0.0034 |
| Hnrrpm | _MGLS[Phospho (STY)]MOR_2                                                  | Q900E1_S527_M1_Hnrrpm | 3.9010  | 3.2053  | 3.8708  | 3.4145  | 3.0266  | 3.2020  | 3.5866  | 3.8857  | 3.0918  | 0.9731  | -0.0394 | 0.6886  | 0.1620 | 0.1620 |
| Hnrrpm | _MGLAMGGAGAS[Phospho (STY)]FOR_2                                           | Q900E1_S617_M1_Hnrrpm | 4.2710  | 3.5265  | 4.0047  | 3.3883  | 3.4148  | 3.2098  | 3.1030  | 3.2293  | 4.3788  | 3.2258  | 1.0435  | 0.0615  | 0.6444 | 0.1908 |
| Hnrrpm | _VGS[Phospho (STY)]EIER_2                                                  | Q900E1_S431_M1_Hnrrpm | 3.3693  | 4.1745  | 4.0561  | 4.5587  | 3.9958  | 3.7337  | 4.0945  | 3.5598  | 3.2083  | 3.0249  | 1.1467  | 0.1975  | 0.1036 | 0.9848 |
| Hnrrpm | _MGS[Phospho (STY)]GVER_2                                                  | Q900E1_S512_M1_Hnrrpm | 4.3477  | 3.6520  | 3.5336  | 4.4687  | 3.4734  | 4.2561  | 3.1161  | 4.0334  | 4.3324  | 1.0397  | 1.2635  | 0.3374  | 0.2274 | 0.6433 |
| Lysmd1 | _S[Phospho (STY)]YGSUVGSSC[Carbamidomethyl (C)]SPVR_2                      | Q900E3_S23_M1_Lysmd1  | 3.8959  | 3.3303  | 5.6754  | 3.5845  | 3.0216  | 3.2071  | 3.2992  | 3.0331  | 4.1825  | 3.5515  | 1.0765  | 0.1064  | 0.6278 | 0.2022 |
| Lysmd1 | _DLFNGLS[Phospho (STY)]EENDGEEVPSKDDGGSSGR_4                               | Q900E3_S99_M1_Lysmd1  | 4.1426  | 3.4469  | 3.3285  | 3.8312  | 3.2683  | 2.9604  | 3.5459  | 4.2873  | 3.9359  | 3.7982  | 0.8984  | -0.1546 | 0.1503 | 0.8231 |
| Pgm1   | _YDYEEVAEGANK_2                                                            | #N/A                  | 10.0391 | 9.8301  | 10.5818 | 10.0383 | 9.5837  | 10.0894 | 10.4530 | 9.7907  | 10.0508 | 10.1727 | 0.9911  | -0.0129 | 0.6667 | 0.1761 |
| Pgm1   | _ADNFEYSQPVGGSK_2                                                          | #N/A                  | 7.0701  | 7.1155  | 7.6606  | 7.1911  | 6.7852  | 7.2896  | 7.2196  | 6.9329  | 7.2592  | 7.2094  | 1.0042  | 0.0060  | 0.8543 | 0.0684 |
| Pgm1   | _ELLSGPNR_2                                                                | #N/A                  | 6.5270  | 6.9325  | 6.8767  | 7.0250  | 6.8752  | 6.7584  | 6.5498  | 6.8119  | 6.8821  | 6.6898  | 1.0147  | 0.0211  | 0.3749 | 0.4260 |
| Pgm1   | _TQAPDQKPGTSGLR_3                                                          | #N/A                  | 6.3836  | 5.8398  | 6.0290  | 6.1316  | 6.5587  | 6.0599  | 5.6533  | 6.3339  | 6.5820  | 6.4286  | 0.9868  | -0.0191 | 0.7049 | 0.1519 |
| Pgm1   | _IALVETPTGWK_2                                                             | #N/A                  | 6.6336  | 6.5315  | 6.6039  | 6.4040  | 6.3966  | 6.2913  | 6.4246  | 6.3981  | 5.9964  | 6.7827  | 1.0119  | 0.0171  | 0.6110 | 0.2140 |
| Pgm1   | _LIFADGSR_2                                                                | #N/A                  | 5.5628  | 5.3623  | 4.4182  | 5.5630  | 5.1744  | 5.2674  | 4.8360  | 6.1736  | 5.4024  | 5.6013  | 0.9494  | -0.0750 | 0.3914 | 0.4073 |
| Pgm1   | _QQQDLNKK_2                                                                | #N/A                  | 5.0695  | 5.2759  | 4.5823  | 5.6025  | 4.7872  | 5.4617  | 5.0715  | 4.7237  | 5.3329  | 4.9328  | 1.0229  | 0.0326  | 0.6241 | 0.2047 |
| Pgm1   | _AIGGILITAS[Phospho (STY)]HNPGGPNRGDFIK_3                                  | Q900F9_S117_M1_Pgm1   | 4.0167  | 3.3257  | 7.3056  | 9.2411  | 5.0540  | 3.0816  | 4.9775  | 7.7121  | 4.0061  | 2.9714  | 1.0856  | 0.1184  | 0.7846 | 0.1054 |
| Pgm1   | _VDGLVGK_2                                                                 | #N/A                  | 4.2863  | 4.3038  | 3.3641  | 3.7706  | 3.6684  | 3.9699  | 2.8120  | 4.0577  | 4.0911  | 5.0084  | 0.9753  | -0.0360 | 0.8130 | 0.7809 |
| Pgm1   | _INQDPQVM[Oxidation (M)]LAPUSALK_2                                         | #N/A                  | 3.2432  | 3.9150  | 3.2567  | 4.2430  | 4.0797  | 5.0191  | 4.3135  | 4.6228  | 4.5319  | 4.3877  | 0.8870  | -0.1730 | 0.1817 | 0.0495 |
| Pgm1   | _QIATUVGGDGR_2                                                             | #N/A                  | 2.9509  | 6.3636  | 4.1854  | 3.2076  | 3.5955  | 3.0291  | 4.4231  | 3.4100  | 3.0586  | 6.7451  | 0.8819  | -0.1812 | 0.5916 | 0.2280 |
| Pgm1   | _FFGLNM[Oxidation (M)]DASK_2                                               | #N/A                  | 4.3552  | 3.1466  | 4.4612  | 4.8085  | 4.2486  | 4.1759  | 4.0409  | 4.4813  | 4.3077  | 0.9879  | 0.0879  | -0.0175 | 0.8469 | 0.0772 |
| Pgm1   | _FNISNGPAPEATDK_2                                                          | #N/A                  | 4.8563  | 4.8228  | 4.0850  | 3.9173  | 5.5781  | 3.7047  | 4.0655  | 3.0839  | 3.3830  | 3.9409  | 1.2420  | 0.3127  | 0.0637 | 1.1960 |
| Pgm1   | _DEALMLDR_2                                                                | #N/A                  | 3.8054  | 3.0609  | 5.1391  | 3.8539  | 2.9492  | 3.6754  | 3.5686  | 4.2646  | 3.9132  | 3.8209  | 0.8944  | -0.1611 | 0.1084 | 0.9652 |
| Pgm1   | _YIDSYEKDVAK_3                                                             | #N/A                  | 3.8671  | 3.3591  | 4.5539  | 3.5557  | 3.2474  | 3.3772  | 3.2704  | 3.0620  | 4.2114  | 3.5227  | 1.0408  | 0.0577  | 0.6640 | 0.1778 |
| Sbx17  | _LTSS[Phospho (STY)]C[Carbamidomethyl (C)]PDLPSQSK_2                       | Q900H4_S288_M1_Sbx17  | 8.3684  | 7.9778  | 8.2004  | 8.5197  | 3.5715  | 3.6886  | 3.8444  | 8.0601  | 3.8114  | 8.0676  | 1.1304  | 0.1768  | 0.6328 | 0.1987 |
| Ptms   | _Acetyl (Protein N-term)[S]Phospho (STY)]EKSVEAAELSAK_2                    | Q900I8_S2_M1_Ptms     | 3.6636  | 6.0096  | 6.6078  | 6.4608  | 7.6193  | 6.3259  | 6.6458  | 6.7547  | 7.3328  | 7.4548  | 0.9192  | -0.1215 | 0.5330 | 0.2733 |
| Ptms   | _TAEEDDEAPKR_3                                                             | #N/A                  | 3.8799  | 3.9350  | 3.5899  | 4.3525  | 3.5069  | 4.1562  | 3.6028  | 6.3498  | 3.9999  | 4.1742  | 0.8614  | -0.2153 | 0.2576 | 0.5890 |
| Oxct1  | _PYTPVEAVK_2                                                               | #N/A                  | 8.6454  | 8.3186  | 8.2299  | 8.4729  | 8.7320  | 7.9729  | 8.5400  | 8.4798  | 8.3788  | 8.2924  | 0.9967  | -0.0047 | 0.8588 | 0.0661 |
| Oxct1  | _GVFDVKK_2                                                                 | #N/A                  | 8.2413  | 8.1174  | 8.5080  | 8.7204  | 8.8066  | 8.1781  | 8.2872  | 8.3503  | 8.4304  | 8.5796  | 1.0020  | 0.0029  | 0.9179 | 0.0372 |
| Oxct1  | _DGSVAIAASKR_2                                                             | #N/A                  | 8.0085  | 8.0401  | 8.3895  | 8.4104  | 8.2861  | 8.0976  | 7.9585  | 8.0523  | 7.9788  | 8.1395  | 1.0216  | 0.0308  | 0.1119 | 0.9513 |
| Oxct1  | _YGLDANWM[Oxidation (M)]PGK_2                                              | #N/A                  | 7.7815  | 7.9213  | 7.9357  | 7.2972  | 7.4725  | 7.6369  | 7.6728  | 8.1494  | 7.7310  | 7.8406  | 0.9778  | -0.0324 | 0.2932 | 0.5329 |
| Oxct1  | _AGGAGAPVPTSTGTGLVEGGSPK_3                                                 | #N/A                  | 4.5938  | 3.4361  | 5.5271  | 4.6174  | 4.2871  | 4.7978  | 5.0383  | 4.4333  | 4.2126  | 4.9909  | 0.9731  | -0.0393 | 0.7523 | 0.1236 |
| Oxct1  | _GM[Oxidation (M)]GGAM[Oxidation (M)]DLVSSK_2                              | #N/A                  | 6.5143  | 6.7763  | 7.1043  | 5.4935  | 6.9116  | 6.7852  | 6.6648  | 6.6260  | 6.4337  | 6.7661  | 0.9962  | -0.0055 | 0.9349 | 0.0292 |
| Oxct1  | _C[Carbamidomethyl (C)]TLPLTK_2                                            | #N/A                  | 3.5795  | 5.1304  | 3.3132  | 4.0798  | 6.2680  | 4.2460  | 4.6653  | 5.7032  | 5.2582  | 0.8587  | -0.2198 | 0.2469  | 0.6074 | 0.0528 |
| Oxct1  | _QFLSGELEVLTPQGTIAER_2                                                     | #N/A                  | 2.9877  | 5.3894  | 5.5201  | 6.0688  | 5.2624  | 4.1153  | 3.8918  | 5.3388  | 5.5113  | 5.2055  | 0.9807  | -0.0281 | 0.8855 | 0.0528 |
| Oxct1  | _DLTAVSNNAAGVDFNGLGLLR_2                                                   | #N/A                  | 5.4850  | 5.3727  | 5.7268  | 6.2771  | 5.5053  | 5.4368  | 5.6687  | 5.6114  | 5.2349  | 5.7493  | 1.0122  | 0.0175  | 0.7357 | 0.1333 |
| Oxct1  | _ETVTVLPGFSSDSFAMIR_2                                                      | #N/A                  | 3.7913  | 3.0468  | 3.5250  | 3.6487  | 3.4468  | 3.6895  | 3.2171  | 3.9324  | 4.2314  | 3.1073  | 1.0974  | 0.1340  | 0.5995 | 0.2222 |
| Oxct1  | _STGC[Carbamidomethyl (C)]DFAVSPNLM[Oxidation (M)]PM[Oxidation (M)]QQIST_2 | #N/A                  | 5.0383  | 5.5826  | 5.3174  | 4.6190  | 5.8967  | 5.8237  | 5.7707  | 5.5838  | 5.5527  | 5.6597  | 0.9535  | -0.0686 | 0.3312 | 0.4799 |
| Oxct1  | _YVVTMSAK_2                                                                | #N/A                  | 2.9835  | 4.3589  | 4.2180  | 5.1956  | 3.9224  | 2.9966  | 4.7023  | 3.2394  | 3.5385  | 2.7317  | 1.1106  | 0.1513  | 0.4925 | 0.3076 |
| Oxct1  | _M[Oxidation (M)]ISDVGENAEFER_2                                            | #N/A                  | 5.2202  | 4.7729  | 5.1920  | 4.2468  | 4.3465  | 3.9744  | 5.1995  | 4.0877  | 4.7286  | 4.6423  | 0.9916  | -0.0121 | 0.9058 | 0.0430 |
| Armc10 | _S[Phospho (STY)]AEDLTGSGYDOLNAEQUK_3                                      | #N/A                  | 2.9253  | 3.7305  | 9.7311  | 9.6273  | 3.5518  | 4.1777  | 4.5385  | 9.9221  | 3.6523  | 4.0817  | 1.0136  | 0.0194  | 0.9708 | 0.0129 |
| Armc10 | _S[Phospho (STY)]AEDLTGSGYDOLNAEQUK_2                                      | #N/A                  | 8.8990  | 8.9782  | 9.0858  | 4.2251  | 3.7169  | 4.0126  | 9.5702  | 9.7365  | 9.4238  | 8.8927  | 0.6896  | -0.5362 | 0.0719 | 1.1432 |
| Armc10 | _LVLESTDOPVTEK_2                                                           | #N/A                  | 2.5236  | 1.7964  | 3.9812  | 4.4838  | 3.5772  | 4.3053  | 3.5250  | 2.9917  | 3.4063  | 4.4508  | 0.9586  | -0.0610 | 0.8092 | 0.0920 |
| Rnmt   | _ASVASDPE[Phospho (STY)]PPGNEFAAASGQR_2                                    | #N/A                  | 10.2404 | 10.0878 | 10.8305 | 10.9814 | 9.9918  | 10.4444 | 10.6780 | 10.3541 | 10.4584 | 10.2880 | 0.9985  | -0.0021 | 0.9455 | 0.0243 |
| Rnmt   | _GDVS[Phospho (STY)]EEDPSLGR_2                                             | Q900L8_S100_M1_Rnmt   | 11.2390 | 11.2223 | 11.7970 | 11.5471 | 10.3139 | 11.4177 | 11.1227 | 11.2291 | 11.2078 | 11.2078 | 1.0059  | 0.0085  | 0.8066 | 0.0933 |
| Rnmt   | _EFGEDLVEGNSSVQDS[Phospho (STY)]PSKK_3                                     | #N/A                  | 3.2408  | 3.9971  | 4.4753  | 4.0191  | 3.8854  | 6.1349  | 4.1674  | 6.2402  | 3.2811  | 3.6964  | 0.9875  | -0.0181 | 0.9421 | 0.0259 |
| Rnmt   | _EFGEDLVEGNSSVQDS[Phospho (STY)]PSKKR_3                                    | #N/A                  | 3.3393  | 6.3217  | 6.8091  | 6.3403  | 5.9501  | 3.7810  | 4.1418  | 3.8850  | 3.3240  | 5.8455  | 1.2616  | 0.3352  | 0.2307 | 0.6370 |
| Rnmt   | _EFGEDLVEGNSSVQDS[Phospho (STY)]PSK_2                                      | #N/A                  | 6.5771  | 3.6171  | 8.9081  | 9.2283  | 8.4752  | 9.0210  | 9.2047  | 8.7311  | 8.9829  | 8.6680  | 0.8585  | -0.2201 | 0.2950 | 0.5302 |
| Rnmt   | _LPNT[Phospho (STY)]PPC[Carbamidomethyl (C)]QQVDQPK_2                      | Q900L8_T34_M1_Rnmt    | 3.7125  | 2.9679  | 3.4442  | 3.9469  | 6.1386  | 3.6616  | 4.1716  | 3.8202  | 3.9139  | 1.0269  | 0.0383  | 0.8588  | 0.0361 | 0.0660 |
| Cyc1   | _LILVGVC[Carbamidomethyl (C)]YTEEAK_2                                      | #N/A                  | 4.8727  | 4.9667  | 4.3514  | 5.5834  | 4.7991  | 4.9273  | 4.8463  | 5.1134  | 5.2508  | 5.1131  | 0.9677  | -0.0474 | 0.4624 | 0.3349 |
| Cyc1   | _LSDYFPKPPNPEAR_3                                                          | #N/A                  | 7.7527  | 7.2672  | 8.2134  | 7.7690  | 7.3448  | 7.9125  | 4.2157  | 7.9695  | 7.6371  | 7.4074  | 1.1326  | 0.1796  | 0.2409 | 0.6182 |
| Cyc1   | _HGGEDVFSLLTGYC[Carbamidomethyl (C)]EPPTGVSLR_3                            | #N/A                  | 4.8830  | 5.1683  | 3.1822  | 5.3609  | 4.7044  | 5.2685  | 4.4909  | 5.3094  | 4.8883  | 4.5926  | 0.9877  | -0.0178 | 0.8963 | 0.0476 |
| Cyc1   | _GLLSLDHMSR_2                                                              | #N/A                  | 6.7132  | 6.6857  | 6.5288  | 6.5748  | 6.6574  | 6.5616  | 6.5876  | 6.5117  | 6.2010  | 6.7489  | 1.0166  | 0.0237  | 0.3056 | 0.5148 |
| Cyc1   | _DVATRLR_2                                                                 | #N/A                  | 7.0623  | 5.9939  | 5.8628  | 4.0310  | 6.2449  | 6.5902  | 3.9809  | 6.0573  | 7.3011  | 6.8659  | 0.9856  | -0.0209 | 0.9148 | 0.0387 |
| Cyc1   | _ALAAEEVQDGNDDGEM[Oxidation (M)]JFM[Oxidation (M)]RPGK_3                   | #N/A                  | 4.3329  | 5.0384  | 5.4754  | 4.3974  | 4.6658  | 5.1415  | 5.1970  | 4.6485  | 4.9990  | 4.5783  | 0.9972  | -0.0041 | 0.9585 | 0.0184 |
| Cyc1   | _DAASEPEHDBK_3                                                             | #N/A                  | 3.7976  | 3.0531  | 3.5313  | 4.5759  | 4.0275  | 3.6832  | 3.2233  | 3.9261  | 4.3290  | 4.2532  | 0.9606  | -0.0579 | 0.6489 | 0.1878 |
| Dynll2 | _WIAEYKK_2                                                                 | #N/A                  | 6.3860  | 7.3873  | 7.5512  | 6.8133  | 6.5574  | 7.0898  | 6.7961  | 6.9782  | 6.9447  | 6.9533  | 1.0067  | 0.0096  | 0.8508 | 0.7022 |
| Dynll2 | _NFGSGVYTHETK_2                                                            | #N/A                  | 6.2487  | 6.1685  | 5.7044  | 6.3181  | 6.3439  | 5.6059  | 6.2841  | 6.3459  | 5.9387  | 5.8753  | 0.9925  | -0.0109 | 0.8150 | 0.0888 |
| Dynll2 | _YNPTWHC[Carbamidomethyl (C)]WGR_2                                         | #N/A                  | 8.9600  | 8.9515  | 8.8707  | 8.6954  | 8.6734  | 8.4765  | 9.1203  | 8.9196  | 8.6660  | 8.4950  | 0.9984  | -0.0023 | 0.9277 | 0.0326 |
| Dynll2 | _NADM[Oxidation (M)]SEDMQGDQAVOC[Carbamidomethyl (C)]ATQAMEK_3             | #N/A                  | 4.2160  | 3.4961  | 4.0139  | 3.6928  | 3.3507  | 3.9328  | 3.4075  | 3.7852  | 4.1109  | 3.6598  | 1.0115  | 0.0164  | 0.8387 | 0.0764 |
| Hmt2   | _ISOAEEDDQLLGHLLVAK_3                                                      | #N/A                  | 3.6551  | 3.4544  | 4.3419  | 3.2685  | 3.6307  | 3.1652  | 4.5592  | 3.2740  | 4.4234  | 3.3107  | 0.9214  | -0.1181 | 0.4047 | 0.3929 |
| Snu13  | _QQIQSQDQS[Phospho (STY)]IER_2                                             | Q900T1_S122_M1_Snu13  | 3.2337  | 4.2511  | 3.8001  | 4.0120  | 4.8323  | 4.3613  | 4.3631  | 3.8532  | 4.4435  | 3.5555  | 0.9760  | -0.0350 | 0.7741 | 0.1112 |
| Ebag9  | _KLS[Phospho (STY)]GQI[LUPTTVSSVVPK_2                                      | #N/A                  | 3.1279  | 3.9863  | 4.1128  | 7.2800  | 3.8746  | 4.2588  | 4.1520  | 6.8624  | 3.3377  | 3.7888  | 0.9790  | -0.0306 | 0.9241 | 0.0343 |
| Fayd6  | _APGDEAQVENLITNAEAPKAEK_3                                                  | #N/A                  | 10.1696 | 10.8017 | 11.9110 | 11.1283 | 9.1148  | 10.2686 | 11.1149 | 10.9237 | 10.4205 | 10.3998 | 0.9861  |         |        |        |



|           |                                                                 |                        |         |         |         |         |         |         |         |         |         |         |         |         |        |        |
|-----------|-----------------------------------------------------------------|------------------------|---------|---------|---------|---------|---------|---------|---------|---------|---------|---------|---------|---------|--------|--------|
| Tbcb      | _YEIS[Phospho (STY)]PEAYER_2                                    | Q9D1E6_S110_M1_Tbcb    | 8.9310  | 8.7368  | 8.9141  | 9.2700  | 8.2139  | 8.7726  | 9.0354  | 8.8130  | 8.9368  | 8.7797  | 0.9905  | -0.0138 | 0.6547 | 0.1840 |
| Tbcb      | _AQQEAQAQR_2                                                    | #N/A                   | 3.2655  | 4.3010  | 3.9523  | 4.1376  | 4.9306  | 4.2765  | 4.0437  | 4.6890  | 3.8491  | 4.2205  | 0.9865  | -0.0196 | 0.8600 | 0.0655 |
| Tbcb      | _AQAASVGSR_2                                                    | #N/A                   | 3.1735  | 4.0527  | 3.8603  | 4.3629  | 3.8202  | 4.4547  | 4.0776  | 3.7555  | 4.7337  | 4.3299  | 0.9360  | -0.0954 | 0.3732 | 0.4280 |
| Akt1s1    | _SSDEENGPSS[Phospho (STY)]POLDR_2                               | Q9D1F4_S213_M1_Akt1s1  | 7.3260  | 7.8671  | 7.9554  | 8.3084  | 7.4736  | 7.5974  | 8.1478  | 7.4811  | 8.1721  | 7.8246  | 0.9808  | -0.0279 | 0.5178 | 0.2858 |
| Akt1s1    | _EDEEEDDEPETETIS[Phospho (STY)]GER_2                            | Q9D1F4_S117_M1_Akt1s1  | 7.6884  | 8.0760  | 4.5118  | 8.8441  | 7.8525  | 7.9769  | 8.7057  | 3.5107  | 8.7860  | 7.8783  | 1.0729  | 0.0105  | 0.6846 | 0.1646 |
| Akt1s1    | _LNT[Phospho (STY)]SOFCK_2                                      | Q9D1F4_T247_M1_Akt1s1  | 6.1040  | 5.1761  | 5.6893  | 6.1825  | 3.3106  | 5.6318  | 5.1918  | 5.5320  | 5.4460  | 3.1216  | 1.1091  | 0.1494  | 0.4773 | 0.3212 |
| Akt1s1    | _TEARSS[Phospho (STY)]DEENGPPSS[Phospho (STY)]POLDR_3           | #N/A                   | 6.1113  | 5.5121  | 5.5239  | 5.9237  | 3.6767  | 5.6904  | 5.5755  | 5.4195  | 4.2881  | 4.2288  | 1.0400  | 0.0566  | 0.7740 | 0.1113 |
| Akt1s1    | _AATATRPFGPPAPCPQPS[Phospho (STY)]PAPS[Phospho (STY)]PPRPALAR_4 | Q9D1F4_S88_M2_Akt1s1   | 4.2948  | 2.9313  | 3.4808  | 7.8386  | 3.4205  | 3.8050  | 3.6981  | 4.1350  | 3.7816  | 3.9504  | 1.1036  | 0.1423  | 0.6722 | 0.1725 |
| Rab1b     | _EFADSDVPLETSAX_2                                               | #N/A                   | 7.2351  | 7.1271  | 7.1709  | 7.1852  | 6.5106  | 6.1033  | 7.5802  | 7.0857  | 6.7255  | 7.1845  | 0.9761  | -0.0349 | 0.4512 | 0.3456 |
| Rab1b     | _Acetyl (Protein N-term)[M]Oxidation (M)[N]PEYDYLFK_2           | #N/A                   | 4.5533  | 5.4971  | 5.5982  | 3.8585  | 4.8164  | 5.3668  | 5.8926  | 5.5071  | 4.8663  | 5.4937  | 0.9096  | -0.1366 | 0.2341 | 0.6306 |
| Rab1b     | _GANGHVVVDVTDQESYANVK_3                                         | #N/A                   | 3.3670  | 5.4728  | 4.6015  | 5.3147  | 3.7968  | 3.9327  | 4.2935  | 4.4908  | 4.2541  | 3.9297  | 1.0406  | 0.0574  | 0.7101 | 0.1487 |
| Rab1b     | _MGPGAAS[Phospho (STY)]GGERPXLK_2                               | #N/A                   | 5.1176  | 3.8702  | 3.9044  | 5.3143  | 3.7585  | 3.7147  | 3.8472  | 3.8712  | 3.6351  | 3.7807  | 1.1245  | 0.1693  | 0.2428 | 0.6147 |
| Lrrc57    | _SLSLNNK_2                                                      | #N/A                   | 4.8858  | 6.6839  | 3.2974  | 7.0866  | 4.5644  | 6.7656  | 4.6433  | 4.8645  | 2.9582  | 4.0193  | 1.3460  | 0.4287  | 0.1311 | 0.8825 |
| Atp6v1f   | _OTTINEEDTFR_2                                                  | #N/A                   | 8.3587  | 8.2059  | 8.2994  | 8.5798  | 8.8318  | 8.8661  | 8.6093  | 8.1624  | 8.4817  | 8.6714  | 1.0050  | 0.0072  | 0.8082 | 0.0925 |
| Atp6v1f   | _DDGILUNQYIAEM[Oxidation (M)]VR_2                               | #N/A                   | 3.5497  | 3.9132  | 4.2201  | 4.0965  | 4.9423  | 4.2812  | 5.0374  | 4.0757  | 3.6574  | 3.9635  | 0.9961  | -0.0056 | 0.9622 | 0.0168 |
| Atp6v1f   | _GM[Oxidation (M)]FTAEDLR_2                                     | #N/A                   | 6.7922  | 7.0306  | 7.4972  | 6.7302  | 7.4090  | 6.9546  | 6.2088  | 6.7367  | 6.6016  | 7.0457  | 1.0633  | 0.0885  | 0.0829 | 1.0815 |
| Atp6v1f   | _UAVGGDEDVTGRLGGIGELNK_3                                        | #N/A                   | 3.3829  | 2.9506  | 3.1166  | 3.1029  | 3.7808  | 3.9487  | 3.1938  | 3.7200  | 3.7592  | 3.8385  | 0.9318  | -0.1019 | 0.3259 | 0.4870 |
| Atp6v1f   | _LSVTPPTS[Phospho (STY)]EGYSIK_2                                | Q9D1K7_S99_M1_         | 3.6812  | 3.5449  | 4.3680  | 3.3698  | 3.4332  | 3.1914  | 3.0845  | 3.2478  | 7.1452  | 3.3368  | 0.8560  | -0.2244 | 0.4731 | 0.3251 |
| Chchd2    | _C[Carbamidomethyl (C)]EGFNEVLR_2                               | #N/A                   | 5.6780  | 4.9948  | 4.0308  | 4.9580  | 5.0214  | 3.7590  | 4.1198  | 3.0296  | 5.1508  | 3.6488  | 1.1889  | 0.2496  | 0.1759 | 0.7547 |
| Sec13     | _GGGSVASITGGQNET_2                                              | #N/A                   | 5.9168  | 3.2991  | 3.1407  | 7.3421  | 5.4188  | 5.9536  | 3.5091  | 6.8928  | 7.0981  | 3.0381  | 1.0073  | 0.0105  | 0.9760 | 0.0106 |
| Kat8      | _S[Phospho (STY)]GRV[S[Phospho (STY)]PPTPAR_2                   | Q9D1P2_S37_M2_Kat8     | 9.6580  | 4.3248  | 9.0267  | 10.0158 | 4.2131  | 9.5602  | 10.2406 | 9.3041  | 2.9534  | 9.6051  | 0.9712  | -0.0421 | 0.9085 | 0.0417 |
| Rpl34     | _AFUECK_2                                                       | #N/A                   | 5.2962  | 5.3432  | 6.0583  | 6.2188  | 5.9761  | 5.3418  | 5.0595  | 5.0879  | 5.3587  | 1.0644  | 0.0901  | 0.2349  | 0.6291 | 0.2542 |
| Rpl34     | _SAC[Carbamidomethyl (C)]GVC[Carbamidomethyl (C)]PGR_2          | #N/A                   | 3.8429  | 4.7984  | 4.5297  | 5.3750  | 4.8962  | 4.9320  | 4.9614  | 4.8428  | 4.2356  | 3.8469  | 1.0576  | 0.0807  | 0.4630 | 0.3345 |
| Rpl34     | _LSYNTASK_2                                                     | #N/A                   | 2.9797  | 4.3627  | 4.2142  | 3.7580  | 4.0934  | 3.0003  | 3.9063  | 3.2432  | 3.5422  | 3.4353  | 1.0575  | 0.0806  | 0.5560 | 0.2549 |
| Lingo1    | _S[Phospho (STY)]DAGISSADAPR_2                                  | #N/A                   | 9.1451  | 8.8291  | 9.0601  | 9.2239  | 7.9151  | 8.8524  | 9.3595  | 9.1198  | 9.0106  | 9.1985  | 0.9635  | -0.0536 | 0.2193 | 0.7548 |
| Lingo1    | _HNIEIYPRKS[Phospho (STY)]DAGISSADAPR_4                         | #N/A                   | 3.0882  | 6.4141  | 7.2346  | 4.0783  | 6.5005  | 4.1940  | 6.3273  | 7.9544  | 7.3653  | 6.8499  | 0.7372  | -0.4400 | 0.0705 | 1.1519 |
| Lingo1    | _FVAVPEGPIETR_2                                                 | #N/A                   | 6.2994  | 6.3181  | 6.7604  | 5.5931  | 5.7892  | 5.7672  | 6.1982  | 6.0986  | 5.9438  | 5.8417  | 1.0112  | 0.0160  | 0.7820 | 0.1068 |
| Lingo1    | _LTVPGDTLEVR_2                                                  | #N/A                   | 4.1744  | 4.7809  | 5.7064  | 3.8630  | 3.3001  | 4.6972  | 5.1294  | 4.6098  | 5.1257  | 3.8300  | 0.9458  | -0.0804 | 0.6192 | 0.2081 |
| Lingo1    | _KS[Phospho (STY)]DAGISSADAPR_2                                 | #N/A                   | 9.0692  | 9.0950  | 9.5315  | 9.4460  | 8.0967  | 9.1071  | 9.5585  | 8.9646  | 9.0886  | 9.0886  | 0.9814  | -0.0271 | 0.6529 | 0.2542 |
| Nol3      | _ASEQEEVGGGSS[Phospho (STY)]EALQPR_2                            | Q9D1X0_S142_M1_Nol3    | 5.1702  | 5.6752  | 5.3668  | 6.4563  | 4.9475  | 5.3388  | 3.2785  | 5.0126  | 5.7101  | 5.5397  | 1.1243  | 0.1690  | 0.2730 | 0.5639 |
| Nol3      | _LVETLQADSGLLDALVAR_2                                           | #N/A                   | 3.6868  | 3.5124  | 4.1897  | 3.9102  | 3.7424  | 3.7317  | 3.6248  | 3.5569  | 3.9242  | 3.8772  | 1.0133  | 0.0190  | 0.7281 | 0.1781 |
| Bcl9      | _IPVEGLPS[Phospho (STY)]PSR_2                                   | Q9D219_S686_M1_Bcl9    | 8.2714  | 4.3895  | 7.9123  | 4.0262  | 7.7824  | 3.8477  | 8.5816  | 7.6510  | 8.0663  | 8.5270  | 0.7358  | -0.4426 | 0.0867 | 1.0622 |
| Bcl9      | _SST[Phospho (STY)]PSHGQTPAPEPSAQK_2                            | Q9D219_T155_M1_Bcl9    | 3.9155  | 5.0662  | 4.6023  | 5.6774  | 3.1990  | 3.4256  | 3.3188  | 3.8025  | 3.5711  | 1.2269  | 0.2950  | 0.1714  | 0.7661 | 0.1621 |
| Bcl9      | _FSNQCKPGGSGASQSPS[Phospho (STY)]PC[Carbamidomethyl (C)]DSK_3   | Q9D219_S62_M1_Bcl9     | 3.8210  | 3.5215  | 3.5546  | 4.5992  | 2.9647  | 3.6599  | 3.2467  | 3.9028  | 4.2018  | 4.2765  | 0.9437  | -0.0837 | 0.5222 | 0.2822 |
| Toe1      | _AADS[Phospho (STY)]DDOVPPVPTSPDGGVNNK_2                        | #N/A                   | 3.9312  | 3.1866  | 3.6649  | 3.2086  | 8.3416  | 7.1204  | 3.4428  | 3.7925  | 4.0916  | 4.3868  | 1.2496  | 0.3214  | 0.4199 | 0.3769 |
| Dist      | _VGGTPTFLTR_2                                                   | #N/A                   | 8.2337  | 8.4357  | 7.7094  | 8.5269  | 8.5910  | 8.3741  | 8.5299  | 8.3893  | 8.3904  | 8.5634  | 0.9815  | -0.0269 | 0.3771 | 0.4235 |
| Dist      | _AKPAETRAPAHK_3                                                 | #N/A                   | 5.9864  | 4.8513  | 5.2575  | 5.4075  | 6.6222  | 6.0323  | 5.1368  | 5.1368  | 6.6598  | 6.0360  | 1.0100  | 0.0144  | 0.8788 | 0.0561 |
| Dist      | _NVETM[Oxidation (M)]NYADIER_2                                  | #N/A                   | 4.9061  | 4.9539  | 4.0694  | 5.5989  | 5.3823  | 5.2460  | 4.9840  | 5.2079  | 5.1199  | 5.6552  | 0.9646  | -0.0520 | 0.5609 | 0.2511 |
| Dist      | _ASAFALGEOPVWAVDQDATK_3                                         | #N/A                   | 6.4254  | 6.8302  | 6.6336  | 7.0926  | 6.9335  | 6.7251  | 6.8737  | 6.6043  | 6.6716  | 6.5944  | 1.0131  | 0.0187  | 0.5303 | 0.2838 |
| Dist      | _TIMELEGK_2                                                     | #N/A                   | 5.7581  | 5.6792  | 3.5984  | 4.8700  | 6.6094  | 6.1911  | 4.5521  | 5.9709  | 5.8236  | 5.5996  | 0.9935  | -0.0094 | 0.9547 | 0.0202 |
| Dist      | _NDVITVQTPAFAESVTEGQVR_2                                        | #N/A                   | 4.1978  | 3.0283  | 3.3838  | 5.2305  | 3.3235  | 4.4060  | 3.6011  | 4.2320  | 3.8806  | 3.8535  | 1.0094  | 0.0135  | 0.9355 | 0.0290 |
| Ube2v2    | _LPQPFEGQTYNN_2                                                 | #N/A                   | 11.6495 | 11.4717 | 12.0652 | 11.7636 | 11.3999 | 11.6211 | 11.9930 | 11.2917 | 11.5431 | 11.6905 | 1.0028  | 0.0040  | 0.8518 | 0.0697 |
| Ube2v2    | _LLEELEGQK_2                                                    | #N/A                   | 8.4946  | 8.5474  | 8.2243  | 8.5132  | 8.5764  | 8.6416  | 8.4710  | 8.4032  | 8.4642  | 8.5595  | 1.0030  | 0.0043  | 0.7556 | 0.1217 |
| Ube2v2    | _VLQELR_2                                                       | #N/A                   | 8.2794  | 8.2318  | 7.6710  | 7.9239  | 8.5240  | 8.1693  | 7.0607  | 8.3250  | 8.4275  | 8.2255  | 1.0154  | 0.0221  | 0.6858 | 0.1638 |
| Ube2v2    | _WTGM[Oxidation (M)]IGPPR_2                                     | #N/A                   | 7.2777  | 7.5333  | 7.4952  | 6.8893  | 7.7156  | 7.9329  | 7.3470  | 7.5058  | 7.6680  | 7.5463  | 0.9943  | -0.0082 | 0.8291 | 0.0814 |
| Ube2v2    | _YPEAPPSVR_2                                                    | #N/A                   | 8.4502  | 8.6608  | 4.1122  | 8.3127  | 9.1431  | 8.1187  | 8.5675  | 8.5667  | 8.5011  | 0.9122  | 0.0122  | 0.1326  | 0.4536 | 0.3433 |
| Ube2v2    | _ENM[Oxidation (M)]KLQPPGEGTYNN_2                               | #N/A                   | 9.6655  | 9.9000  | 10.7361 | 10.4046 | 9.6847  | 9.9904  | 10.1505 | 9.8464  | 9.8845  | 9.9016  | 1.0118  | 0.0170  | 0.6127 | 0.2128 |
| Ube2v2    | _VEC[Carbamidomethyl (C)]GSS[Phospho (STY)]KYPEAPPSVR_3         | Q9D2M8_S71_M1_Ube2v2   | 2.8991  | 3.6554  | 4.1337  | 3.6774  | 3.5437  | 3.3089  | 3.8257  | 3.3238  | 3.3547  | 0.9916  | -0.0137 | 0.8956  | 0.0479 | 0.5479 |
| Ube2v2    | _GVGDGTSVGLEDEEDM[Oxidation (M)]TLTR_2                          | #N/A                   | 5.0397  | 5.2087  | 5.5193  | 5.9152  | 5.0599  | 5.3062  | 5.3346  | 4.7820  | 4.4319  | 5.3597  | 1.0732  | 0.1020  | 0.1763 | 0.7537 |
| Dtna      | _SS[Phospho (STY)]PSHTGR_2                                      | Q9D2N4_S568_M1_Dtna    | 4.3179  | 3.5982  | 3.8013  | 3.8173  | 3.4526  | 3.4630  | 3.7987  | 3.7328  | 3.6682  | 1.0373  | 0.0528  | 0.4191  | 0.3777 | 0.1737 |
| Mobp      | _HQPAA[S[Phospho (STY)]PVVVR_2                                  | Q9D2P8_S85_M1_Mobp     | 11.4783 | 11.5532 | 12.0878 | 11.4978 | 10.7044 | 11.2751 | 12.1809 | 11.8248 | 11.4996 | 11.3992 | 0.9750  | -0.0366 | 0.3057 | 0.5147 |
| Mobp      | _ATS[Phospho (STY)]PQRPK_2                                      | #N/A                   | 9.3245  | 9.3820  | 9.5958  | 8.8213  | 2.8257  | 8.4324  | 9.9975  | 5.5966  | 4.3408  | 9.1241  | 0.9756  | -0.0357 | 0.9078 | 0.0420 |
| Mobp      | _GGS[Phospho (STY)]PTRAPR_2                                     | Q9D2P8_S162_M1_Mobp    | 8.3657  | 9.2783  | 9.9208  | 3.6362  | 7.7888  | 8.4646  | 9.3982  | 9.2456  | 8.6658  | 9.1563  | 0.8709  | -0.1994 | 0.3347 | 0.4754 |
| Mobp      | _S[Phospho (STY)]PPRPAPKR_2                                     | Q9D2P8_S107_M1_Mobp    | 8.7286  | 8.7236  | 8.5020  | 8.9947  | 8.1892  | 8.3973  | 9.3521  | 9.0884  | 8.7216  | 8.5843  | 0.9611  | -0.0572 | 0.1215 | 0.9154 |
| Mobp      | _RATS[Phospho (STY)]PQRPK_2                                     | #N/A                   | 3.8683  | 8.1031  | 4.5551  | 3.5569  | 2.9939  | 3.2348  | 3.2716  | 3.0609  | 7.2435  | 3.5239  | 1.0258  | 0.0668  | 0.9317 | 0.3907 |
| Mobp      | _SS[Phospho (STY)]PLKRGPTSR_2                                   | Q9D2P8_S150_M1_Mobp    | 6.0910  | 6.4707  | 6.9311  | 6.6226  | 6.0575  | 4.3499  | 4.2431  | 6.5065  | 6.7407  | 6.2554  | 1.0254  | 0.0262  | 0.8224 | 0.0849 |
| Mobp      | _S[Phospho (STY)]PLM[Oxidation (M)]PAKPR_2                      | #N/A                   | 8.5046  | 7.9749  | 7.1351  | 8.7418  | 6.7595  | 7.3864  | 8.7713  | 7.8771  | 7.6930  | 7.9254  | 0.9608  | -0.0577 | 0.4966 | 0.3040 |
| Hist3h2ba | _PEPSRST[Phospho (STY)]PAKP_2                                   | Q9D2U9_T8_M1_Hist3h2ba | 7.7105  | 8.0416  | 8.5465  | 8.2255  | 7.7459  | 4.1094  | 8.2117  | 7.9609  | 3.1505  | 7.9569  | 1.0845  | 0.1171  | 0.6643 | 0.1776 |
| Coro7     | _IWDLGTGAIR_2                                                   | #N/A                   | 4.4564  | 4.9474  | 4.1953  | 4.7964  | 4.2456  | 5.0501  | 4.6110  | 4.7642  | 3.7656  | 4.7738  | 1.0305  | 0.0433  | 0.6224 | 0.2059 |
| Coro7     | _S[Phospho (STY)]QSLGLGPKK_2                                    | Q9D2V7_S459_M1_Coro7   | 4.0919  | 7.9369  | 3.2779  | 8.9491  | 3.2176  | 8.0392  | 8.2569  | 7.8220  | 7.7256  | 3.7476  | 0.8593  | -0.2188 | 0.5596 | 0.2521 |
| Coro7     | _EDPLPDQDS[Phospho (STY)]FEGVDEWD_2                             | #N/A                   | 3.9257  | 3.3005  | 3.1116  | 3.6143  | 3.0513  | 3.4358  | 3.3290  | 3.0034  | 4.1528  | 3.5813  | 0.9687  | -0.0459 | 0.6770 | 0.1968 |
| Coro7     | _LGNREDLPQDS[Phospho (STY)]FEGVDEWD_3                           | #N/A                   | 3.4304  | 3.7957  | 4.1172  | 6.6199  | 4.0570  | 3.6725  | 4.3346  | 3.4986  | 3.1472  | 3.0861  | 1.1229  | 0.1672  | 0.2013 | 0.6961 |
| Acpl      | _SPIAEAVFR_2                                                    | #N/A                   | 7.1951  |         |         |         |         |         |         |         |         |         |         |         |        |        |



|          |                                                                                      |                         |         |         |         |         |         |         |         |         |         |         |         |         |        |        |
|----------|--------------------------------------------------------------------------------------|-------------------------|---------|---------|---------|---------|---------|---------|---------|---------|---------|---------|---------|---------|--------|--------|
| Digap1   | ..GC[Carbamidomethyl (C)]S[Phospho (STY)]QDDEC[Carbamidomethyl (C)]VSLR_2            | #N/A                    | 11.8835 | 11.7195 | 12.1762 | 12.2536 | 11.3587 | 11.5763 | 12.3462 | 11.6349 | 11.9265 | 11.9306 | 0.9890  | -0.0160 | 0.5508 | 0.2590 |
| Digap1   | ..SHS[Phospho (STY)]LEGP5K_2                                                         | Q90415_S154_M1_Digap1   | 8.8037  | 9.1404  | 9.8200  | 9.5089  | 3.2665  | 9.1216  | 9.2295  | 9.1733  | 8.9568  | 9.4753  | 0.8988  | -0.1539 | 0.4834 | 0.3157 |
| Digap1   | ..ERS[Phospho (STY)]LESSOR_2                                                         | Q90415_S947_M1_Digap1   | 9.6860  | 9.8482  | 10.2330 | 10.2233 | 9.6940  | 9.9649  | 9.8397  | 9.8517  | 9.9034  | 9.9729  | 1.0050  | 0.0072  | 0.7066 | 0.1508 |
| Digap1   | ..SLDSLDPAGLITS[Phospho (STY)]PK_2                                                   | Q90415_S437_M1_Digap1   | 4.1076  | 8.5822  | 8.8909  | 9.2950  | 3.0751  | 8.7219  | 8.3946  | 8.6340  | 8.2851  | 7.9103  | 0.8472  | -0.2392 | 0.3874 | 0.4118 |
| Digap1   | ..AVSEVS[Phospho (STY)]INR_2                                                         | Q90415_S412_M1_Digap1   | 8.7327  | 8.4900  | 8.7495  | 8.9983  | 8.1427  | 8.6804  | 8.6507  | 8.4933  | 7.7689  | 8.7482  | 1.0258  | 0.0067  | 0.3718 | 0.4297 |
| Digap1   | ..AS[Phospho (STY)]PQESQTLR_2                                                        | #N/A                    | 7.7651  | 3.4123  | 3.8906  | 8.0353  | 7.5176  | 7.6787  | 3.2171  | 7.8185  | 7.8917  | 7.4159  | 0.9692  | -0.0451 | 0.8890 | 0.0511 |
| Digap1   | ..SRNES[Phospho (STY)]VM[Oxidation (M)]R_2                                           | #N/A                    | 3.2658  | 4.3074  | 3.4884  | 4.9924  | 3.6948  | 4.0349  | 4.1827  | 4.0879  | 3.3159  | 4.0657  | 1.0130  | 0.0186  | 0.8902 | 0.0505 |
| Digap1   | ..AM[Oxidation (M)]GDEDS[Phospho (STY)]QDS[Phospho (STY)]JOTS[Phospho (STY)]PKP5PK_2 | #N/A                    | 7.1612  | 6.1129  | 8.4687  | 7.5627  | 7.4826  | 7.8655  | 8.0710  | 7.9284  | 7.8055  | 9.9885  | -0.0317 | 0.9883  | 0.8813 | 0.0549 |
| Digap1   | ..GSVNGGAS[Phospho (STY)]PQESQTLR_2                                                  | #N/A                    | 3.7036  | 5.2400  | 3.8742  | 4.0125  | 4.8018  | 3.6428  | 5.3080  | 4.9181  | 4.7546  | 4.4438  | 0.8675  | -0.2051 | 0.1141 | 0.9427 |
| Digap1   | ..AEIKGC[Carbamidomethyl (C)]S[Phospho (STY)]QDDEC[Carbamidomethyl (C)]VSLR_3        | #N/A                    | 3.6862  | 3.5399  | 4.3730  | 3.3748  | 4.4819  | 3.1964  | 3.0895  | 3.2428  | 4.3922  | 3.3418  | 1.0736  | 0.1024  | 0.4911 | 0.3088 |
| Digap1   | ..GDMISQSLSNS[Phospho (STY)]TESLDSAM[Oxidation (M)]K_2                               | Q90415_S605_M1_Digap1   | 3.9289  | 3.8513  | 3.8965  | 5.2790  | 3.7106  | 3.3183  | 4.1720  | 3.8601  | 4.1368  | 3.8991  | 0.9951  | -0.0070 | 0.9563 | 0.0194 |
| Digap1   | ..QNS[Phospho (STY)]JATESAESIEYPEAQTR_3                                              | Q90415_S973_M1_Digap1   | 3.5218  | 4.3270  | 4.2086  | 3.7937  | 4.1483  | 3.5812  | 3.9420  | 7.7268  | 3.0558  | 3.1774  | 0.8781  | -0.1875 | 0.5562 | 0.2548 |
| Digap1   | ..C[Carbamidomethyl (C)]S[Phospho (STY)]GGQVDAEEPEK_2                                | Q90415_S666_M1_Digap1   | 3.3029  | 4.1081  | 3.9897  | 4.0126  | 3.9294  | 3.8001  | 4.1609  | 3.6261  | 3.2747  | 2.9585  | 1.1004  | 0.1381  | 0.1995 | 0.7000 |
| GOLGA78  | ..RSA[Phospho (STY)]IATK_2                                                           | Q90428_S16_M1_GOLGA78   | 3.5473  | 4.3525  | 4.2341  | 3.7682  | 4.1738  | 3.5557  | 3.9165  | 3.2330  | 5.0473  | 3.2029  | 1.0230  | 0.0329  | 0.8246 | 0.0837 |
| GOLGA78  | ..DYS[Phospho (STY)]DGTIC[Carbamidomethyl (C)]QFQTK_2                                | Q90428_S28_M1_GOLGA78   | 3.5067  | 7.7742  | 3.6500  | 4.1526  | 4.1513  | 3.9741  | 3.8673  | 7.4791  | 7.1836  | 7.0730  | 0.7085  | -0.4972 | 0.1165 | 0.9337 |
| Clvs1    | ..SQS[Phospho (STY)]VVEAGTLK_2                                                       | #N/A                    | 7.7436  | 7.3068  | 6.8355  | 7.3606  | 6.0712  | 7.3808  | 3.5061  | 7.1519  | 7.5488  | 7.4826  | 1.1081  | 0.1481  | 0.4262 | 0.3704 |
| Clvs1    | ..HTC[Carbamidomethyl (C)]S[Phospho (STY)]NLER_2                                     | Q90449_S313_M1_Clvs1    | 3.9443  | 3.0459  | 3.7443  | 3.7263  | 2.9019  | 5.1324  | 4.4073  | 3.9055  | 3.8168  | 3.5670  | 0.9554  | -0.0658 | 0.6942 | 0.1585 |
| Clvs1    | ..SQS[Phospho (STY)]VVEAGTLKHEEK_2                                                   | #N/A                    | 4.0655  | 4.4887  | 3.4767  | 4.3302  | 4.2817  | 3.5209  | 3.8523  | 4.0001  | 4.5309  | 4.5309  | 1.0017  | 0.0024  | 0.9829 | 0.0075 |
| Clvs1    | ..FC[Carbamidomethyl (C)]S[Phospho (STY)]PKMK_2                                      | #N/A                    | 4.7631  | 2.5966  | 4.1622  | 5.0241  | 4.1019  | 3.6276  | 3.9884  | 3.1611  | 3.4601  | 3.5174  | 1.1456  | 0.1961  | 0.2990 | 0.5244 |
| Clvs1    | ..FC[Carbamidomethyl (C)]S[Phospho (STY)]PKPMR_2                                     | #N/A                    | 5.8884  | 3.1393  | 3.6176  | 7.0540  | 3.0276  | 3.5970  | 3.3096  | 4.1389  | 4.8968  | 1.0843  | 1.0168  | 0.1168  | 0.7124 | 0.1473 |
| Pfpp6    | ..ASDS[Phospho (STY)]PMR_2                                                           | Q90472_S60_M1_Pfpp6     | 3.1622  | 3.9185  | 4.3967  | 4.4971  | 3.8068  | 4.1387  | 4.2118  | 4.2299  | 3.2699  | 3.6178  | 1.0481  | 0.0678  | 0.5755 | 0.2399 |
| Exoc2    | ..ASMTADTLQEVGLR_2                                                                   | #N/A                    | 2.9071  | 3.7122  | 3.3638  | 5.1191  | 3.5336  | 4.1959  | 4.5567  | 4.0366  | 4.0857  | 8.8915  | -0.1657 | 0.2858  | 0.5440 |        |
| Exoc2    | ..GSS[Phospho (STY)]FGSGRDTWR_2                                                      | Q904H1_S432_M1_Exoc2    | 3.1424  | 3.8987  | 4.3769  | 4.5170  | 3.7870  | 4.3385  | 4.2316  | 3.0805  | 3.2501  | 3.5980  | 1.1328  | 0.1799  | 0.1922 | 0.7162 |
| Phf14    | ..NSADDEELT[Phospho (STY)]NDS[Phospho (STY)]LTSQSK_2                                 | Q904H9_S283_M2_Ph14     | 3.9970  | 3.3014  | 3.1830  | 5.8640  | 3.1227  | 3.1060  | 3.4003  | 4.4329  | 5.6824  | 3.6526  | 0.8766  | -0.1900 | 0.4618 | 0.3356 |
| Wdr20    | ..SNS[Phospho (STY)]LPHSAVNSAAK_2                                                    | #N/A                    | 7.8173  | 8.0551  | 8.1708  | 8.4970  | 6.9992  | 7.7657  | 8.0729  | 7.7774  | 7.8081  | 7.7453  | 1.0042  | 0.0061  | 0.9034 | 0.0441 |
| Atad1    | ..EYNSTSEES[Phospho (STY)]HDEDIRPVQGDUIR_4                                           | Q90570_S322_M1_Atad1    | 3.7345  | 3.4916  | 4.4213  | 3.4232  | 3.3799  | 3.2447  | 3.3178  | 3.1945  | 4.3439  | 3.3902  | 1.0282  | 0.0402  | 0.7577 | 0.1205 |
| Rab11fp1 | ..ESS[Phospho (STY)]PSNPSPPQGR_2                                                     | Q90620_S340_M1_Rab11fp1 | 7.6102  | 7.2467  | 4.3818  | 3.9256  | 4.0164  | 3.7131  | 7.7143  | 3.0756  | 3.3746  | 3.6029  | 1.1273  | 0.1729  | 0.6445 | 0.1908 |
| Lratd1   | ..GPPGC[Carbamidomethyl (C)]SPC[Carbamidomethyl (C)]PES[Phospho (STY)]PSR_2          | Q90650_S67_M1_Lratd1    | 6.4098  | 3.8410  | 4.0720  | 4.5746  | 4.0117  | 5.2783  | 6.3222  | 6.2897  | 3.1924  | 3.0408  | 0.9972  | -0.0041 | 0.9883 | 0.0051 |
| Tic9b    | ..C[Carbamidomethyl (C)]SLQREDS[Phospho (STY)]DGGTGGPAR_2                            | #N/A                    | 3.8709  | 4.8610  | 4.8744  | 5.0938  | 4.5786  | 5.3002  | 4.6516  | 5.0997  | 4.8360  | 0.9941  | -0.0085 | 0.9197  | 0.0364 |        |
| Tic9b    | ..EDS[Phospho (STY)]DGGTGGPAR_2                                                      | #N/A                    | 5.9112  | 8.5444  | 4.5606  | 8.3446  | 3.2407  | 3.3839  | 6.9397  | 7.6497  | 4.2047  | 8.0232  | 0.8449  | -0.2432 | 0.4738 | 0.3244 |
| Tubb4a   | ..IREEFFOR_2                                                                         | #N/A                    | 10.3127 | 10.2970 | 10.2141 | 10.4762 | 10.4909 | 10.3009 | 10.2602 | 10.2648 | 10.2231 | 1.0109  | 0.0156  | 0.0887  | 0.1522 |        |
| Tubb4a   | ..GHYTEGAEVLDAVDVLR_3                                                                | #N/A                    | 8.0899  | 8.0943  | 8.0330  | 8.7346  | 7.8240  | 8.3427  | 8.0965  | 8.1333  | 8.4615  | 8.3208  | 0.9919  | -0.0117 | 0.7125 | 0.1472 |
| Tubb4a   | ..GHYTEGAEVLDAVDVVRK_3                                                               | #N/A                    | 6.8696  | 7.7190  | 6.8573  | 8.3313  | 7.6041  | 7.5632  | 7.6238  | 8.0387  | 7.6730  | 7.6335  | 1.0063  | 0.0090  | 0.8871 | 0.0520 |
| Tubb4a   | ..EVDQIM[Oxidation (M)]SVQSK_2                                                       | #N/A                    | 9.3294  | 9.2745  | 9.2526  | 9.8219  | 9.1964  | 9.5723  | 9.3602  | 9.1532  | 9.4182  | 9.5266  | 1.0046  | 0.0067  | 0.7616 | 0.1183 |
| Tubb4a   | ..M[Oxidation (M)]AATFGNSTAIQELFK_2                                                  | #N/A                    | 8.7802  | 8.9121  | 9.9696  | 10.1986 | 8.9426  | 9.3699  | 9.3602  | 9.0519  | 9.4635  | 1.0217  | 0.0309  | 0.5480  | 0.2682 |        |
| Tubb4a   | ..INVNYEATGNYVPR_2                                                                   | #N/A                    | 7.8482  | 7.8969  | 8.4493  | 8.0805  | 8.0335  | 8.0238  | 8.0628  | 7.7113  | 7.9029  | 7.8558  | 1.0218  | 0.0312  | 0.1977 | 0.7040 |
| Lurap1   | ..RGS[Phospho (STY)]NDSGLPOTSSDTR_2                                                  | Q90609_S126_M1_Lurap1   | 4.0614  | 3.2255  | 3.2474  | 7.1842  | 6.0750  | 3.1739  | 3.4647  | 6.6748  | 4.0183  | 6.8901  | 0.8605  | -0.2168 | 0.5278 | 0.2775 |
| Ndufb8   | ..GDDPTKEPVPVVDL_3                                                                   | #N/A                    | 6.5396  | 6.5958  | 6.7929  | 6.4621  | 5.9548  | 6.4476  | 6.2387  | 6.5516  | 6.1224  | 6.1233  | 1.0330  | 0.0468  | 0.2425 | 0.6152 |
| Ndufb8   | ..QVPNNVLYR_2                                                                        | #N/A                    | 7.4258  | 7.4190  | 7.2947  | 6.9226  | 6.7035  | 7.2084  | 7.2881  | 7.0441  | 6.5830  | 6.7769  | 1.0346  | 0.0490  | 0.2479 | 0.6058 |
| Ndufb8   | ..DPWYQWOWSLR_2                                                                      | #N/A                    | 5.8065  | 5.0148  | 4.0971  | 3.2959  | 5.9949  | 4.3265  | 5.6698  | 5.8537  | 4.0690  | 5.4734  | 0.9031  | -0.1471 | 0.4359 | 0.3606 |
| Ndufv2   | ..QDSQLETLQR_2                                                                       | #N/A                    | 9.6659  | 9.7607  | 10.0163 | 10.0597 | 9.9487  | 9.8234  | 9.8546  | 9.5009  | 9.6139  | 9.7755  | 1.0199  | 0.0284  | 0.0918 | 1.0370 |
| Ndufv2   | ..QDIEDELK_2                                                                         | #N/A                    | 8.4086  | 8.4662  | 8.2695  | 8.4560  | 8.6847  | 8.3943  | 8.4332  | 8.1446  | 8.1486  | 8.7306  | 1.0098  | 0.0141  | 0.5457 | 0.1671 |
| Ndufv2   | ..DTNPENPOTPDFTPENYK_3                                                               | #N/A                    | 7.6769  | 7.6678  | 7.8574  | 8.1265  | 7.8321  | 8.0519  | 7.8437  | 7.5067  | 7.4530  | 7.6081  | 1.0350  | 0.0496  | 0.0546 | 1.2626 |
| Ndufv2   | ..DTNPENPOTPDFTPENYK_2                                                               | #N/A                    | 6.9252  | 6.4526  | 6.1645  | 7.1991  | 6.9862  | 6.4021  | 6.7775  | 6.4576  | 6.4156  | 6.5937  | 1.0194  | -0.0276 | 0.5726 | 0.2421 |
| Ndufv2   | ..NYPEGHQAALVPLDLAQK_3                                                               | #N/A                    | 7.3976  | 7.6042  | 7.7923  | 8.1279  | 7.7862  | 7.7532  | 7.3814  | 7.3820  | 7.2863  | 7.4443  | 1.0502  | 0.0706  | 0.0187 | 1.7289 |
| Ndufv2   | ..FC[Carbamidomethyl (C)]C[Carbamidomethyl (C)]IFPAGLSTLEPKPGFGVQAGL_3               | #N/A                    | 2.5169  | 3.7337  | 4.9695  | 3.9106  | 4.3480  | 4.3486  | 4.0589  | 3.9906  | 3.3896  | 4.7365  | 1.0399  | 0.0564  | 0.7745 | 0.1180 |
| Ndufv2   | ..VVEVATFTM[Oxidation (M)]YNR_2                                                      | #N/A                    | 2.9825  | 6.0790  | 6.7629  | 3.7608  | 6.3957  | 6.9141  | 3.9091  | 3.2404  | 5.5756  | 6.4543  | 1.1434  | 0.1934  | 0.5260 | 0.2790 |
| Ndufv2   | ..YHQVC[Carbamidomethyl (C)]TTTFC[Carbamidomethyl (C)]M[Oxidation (M)]LR_3           | #N/A                    | 3.1401  | 3.8964  | 4.3747  | 4.5192  | 4.6499  | 4.3407  | 4.2339  | 3.0827  | 4.7134  | 5.9444  | 0.9918  | -0.0118 | 0.9613 | 0.0712 |
| Slc25a22 | ..LAANDFFR_2                                                                         | #N/A                    | 8.3501  | 8.4688  | 8.3459  | 7.9105  | 7.9385  | 7.9576  | 8.3589  | 8.6730  | 8.1383  | 7.9748  | 0.9850  | -0.0218 | 0.4990 | 0.3019 |
| Slc25a22 | ..HEGSPARLK_2                                                                        | #N/A                    | 6.5921  | 7.3425  | 6.8577  | 6.6928  | 6.8149  | 6.5247  | 6.4646  | 7.4470  | 7.1415  | 6.7591  | 0.9792  | -0.3003 | 0.5450 | 0.2636 |
| Slc25a22 | ..NHGIAGLYK_2                                                                        | #N/A                    | 6.7377  | 6.5760  | 6.2997  | 6.2109  | 6.6226  | 6.1305  | 6.6065  | 6.8353  | 6.5251  | 6.4035  | 0.9753  | -0.0361 | 0.2954 | 0.5296 |
| Slc25a22 | ..GVNEDTSGFLDC[Carbamidomethyl (C)]AR_2                                              | #N/A                    | 7.7972  | 7.3875  | 7.8917  | 7.6951  | 7.3926  | 7.2301  | 7.8941  | 7.5895  | 7.1718  | 7.1388  | 1.0157  | 0.0225  | 0.5676 | 0.2459 |
| Slc25a22 | ..SEGVGMYR_2                                                                         | #N/A                    | 6.3892  | 5.4325  | 3.8728  | 6.7493  | 5.0084  | 3.3417  | 5.4243  | 4.2746  | 4.6119  | 2.4316  | 1.2262  | 0.2942  | 0.2590 | 0.5257 |
| Slc25a22 | ..LUNGAGUGVTC[Carbamidomethyl (C)]VPDLAK_2                                           | #N/A                    | 3.0716  | 3.8768  | 3.7584  | 4.2611  | 3.6981  | 4.0314  | 3.9758  | 3.8574  | 3.5060  | 4.2281  | 0.9720  | -0.0409 | 0.6588 | 0.1813 |
| Slc25a22 | ..SPFYVSFLAG[Carbamidomethyl (C)]VAGSAAVAIVNPC[Carbamidomethyl (C)]DVVK_3            | #N/A                    | 3.5724  | 3.7700  | 3.3061  | 4.3507  | 3.5913  | 4.1382  | 4.4990  | 1.5902  | 2.9495  | 4.0280  | 1.1596  | 0.2137  | 0.3692 | 0.4320 |
| Idh3a    | ..APQWIER_2                                                                          | #N/A                    | 9.9266  | 10.0669 | 9.5577  | 10.2437 | 10.1646 | 9.9329  | 10.0911 | 9.6899  | 9.7658  | 9.6953  | 1.0196  | 0.0280  | 0.1995 | 0.7007 |
| Idh3a    | ..TPITDVIWTR_2                                                                       | #N/A                    | 8.9478  | 9.1798  | 9.4046  | 9.4742  | 9.2110  | 9.4007  | 9.3128  | 9.0851  | 9.1589  | 9.0044  | 1.0142  | 0.0203  | 0.2842 | 0.5463 |
| Idh3a    | ..NVTAIGQGGK_2                                                                       | #N/A                    | 8.8781  | 9.0757  | 9.3608  | 9.2844  | 9.6029  | 9.0881  | 9.0370  | 9.1712  | 9.2229  | 9.0683  | 1.0099  | 0.0142  | 0.5221 | 0.2822 |
| Idh3a    | ..LITEEASR_2                                                                         | #N/A                    | 9.1649  | 9.1280  | 9.1280  | 9.2134  | 9.9955  | 9.0776  | 8.9244  | 9.0399  | 9.1254  | 8.9952  | 1.0111  | 0.0159  | 0.4118 | 0.3853 |
| Idh3a    | ..IAEFAFYAR_2                                                                        | #N/A                    | 8.7009  | 8.8891  | 8.8997  | 8.9910  | 8.9444  | 9.0548  | 9.1290  | 8.7398  | 9.0088  | 8.8891  | 0.9968  | -0.0046 | 0.7610 | 0.1186 |
| Idh3a    | ..SVNTAVHK_2                                                                         | #N/A                    | 7.9032  | 7.9636  | 7.3180  | 7.5524  | 8.4881  | 7.7609  | 7.5970  | 7.8472  | 7.8743  | 8.0278  | 0.9993  | -0.0010 | 0.9803 | 0.0087 |
| Idh3a    | ..ENTEGEYSIEHVVDGVQSK_3                                                              | #N/A                    | 7.7692  | 7.8927  | 9.1954  | 9.4420  | 7.3956  |         |         |         |         |         |         |         |        |        |



|         |                                                                                         |                        |        |        |        |         |        |        |        |        |        |        |         |         |        |        |
|---------|-----------------------------------------------------------------------------------------|------------------------|--------|--------|--------|---------|--------|--------|--------|--------|--------|--------|---------|---------|--------|--------|
| Nop56   | _KAPKEELAS(Phospho (STY))DLEEMATSSAK_3                                                  | #N/A                   | 3.7163 | 3.8727 | 3.5567 | 4.0594  | 3.7359 | 4.2548 | 3.7741 | 4.0829 | 3.7315 | 4.0264 | 0.9903  | -0.0140 | 0.8043 | 0.0946 |
| Rap3    | _AVDNPPRGS(Phospho (STY))PK_2                                                           | Q9D706_S429_M1_Rap3    | 8.5421 | 8.5724 | 8.5613 | 8.7773  | 8.3352 | 8.4959 | 8.6242 | 8.2189 | 8.4925 | 8.7654 | 1.0026  | 0.0037  | 0.8551 | 0.0680 |
| Fam219a | _NGSM(Oxidation (M))GSP(Phospho (STY))PVNQOPK_2                                         | #N/A                   | 7.7793 | 7.9438 | 7.7829 | 7.6604  | 7.3050 | 7.8578 | 7.7766 | 7.7345 | 8.0953 | 0.9772 | -0.0333 | 0.2146  | 0.6684 | 0.5719 |
| Prps1   | _ENSEWR_2                                                                               | #N/A                   | 6.7204 | 6.3816 | 7.0193 | 6.2443  | 7.0087 | 6.6348 | 5.9021 | 6.7918 | 6.9126 | 6.9305 | 1.0051  | 0.0074  | 0.8966 | 0.0474 |
| Prps1   | _YVALTHGFSGPAISR_3                                                                      | #N/A                   | 3.5279 | 3.4465 | 3.8294 | 3.7114  | 3.0856 | 3.9805 | 3.2125 | 3.4929 | 4.1169 | 3.9392 | 0.9746  | -0.0371 | 0.6944 | 0.1584 |
| Prps1   | _INNA(C[Carbamidomethyl (C)]FEAVIVVTMTPOEDK_2                                           | #N/A                   | 3.6000 | 6.1559 | 4.2868 | 3.2886  | 4.2265 | 5.7658 | 6.4211 | 3.3290 | 5.8484 | 3.2556 | 0.9661  | -0.0497 | 0.8611 | 0.0650 |
| Prps1   | _IQVIDSM(Oxidation (M))LAEAR_2                                                          | #N/A                   | 4.3107 | 3.6151 | 3.4967 | 3.9994  | 3.4364 | 4.2931 | 3.7140 | 2.9231 | 3.7677 | 3.9664 | 1.0740  | 0.1030  | 0.3562 | 0.4483 |
| Prps1   | _VAILEVDMADTC(C[Carbamidomethyl (C)]GTIC(C[Carbamidomethyl (C)]HAAADK_3                 | #N/A                   | 4.1570 | 3.4613 | 3.3429 | 5.1787  | 3.2827 | 2.9460 | 3.3068 | 4.2729 | 3.9215 | 3.8126 | 0.9738  | -0.0383 | 0.8271 | 0.0824 |
| Prps1   | _IFSGSSHQDLSQK_2                                                                        | #N/A                   | 3.0694 | 4.2343 | 4.3040 | 3.8477  | 4.1870 | 4.4114 | 3.9960 | 3.1535 | 3.4525 | 3.5250 | 1.1351  | 0.1829  | 0.1374 | 0.8619 |
| Iscu    | _ELS(Phospho (STY))APAR_2                                                               | Q9D7P6_S30_M1_Iscu     | 9.3418 | 9.0428 | 9.6299 | 9.4716  | 9.5571 | 9.4035 | 8.8353 | 9.2426 | 9.6572 | 9.5585 | 1.0090  | 0.0130  | 0.6525 | 0.1854 |
| Iscu    | _AAS(Phospho (STY))ALLRS(Phospho (STY))PR_2                                             | #N/A                   | 8.8040 | 9.5560 | 9.4274 | 10.3124 | 9.6413 | 9.8268 | 9.8903 | 9.6471 | 9.9408 | 9.8885 | 0.9749  | -0.0367 | 0.3663 | 0.4361 |
| Iscu    | _RAAS(Phospho (STY))ALLRS(Phospho (STY))PR_3                                            | #N/A                   | 3.2136 | 5.5226 | 4.2279 | 6.3694  | 5.4379 | 5.5561 | 5.6675 | 6.1699 | 5.9172 | 5.9853 | 0.8517  | -0.2316 | 0.1701 | 0.7692 |
| Iscu    | _RAAS(Phospho (STY))ALLR_2                                                              | Q9D7P6_S15_M1_Iscu     | 4.1649 | 3.4204 | 3.8986 | 3.4424  | 3.3087 | 3.3159 | 3.5906 | 3.5588 | 3.8578 | 3.1197 | 1.0170  | 0.0243  | 0.7897 | 0.1026 |
| Rpl22i1 | _YFQISQDEGDS(Phospho (STY))ESED_2                                                       | Q9D757_S118_M1_Rpl22i1 | 4.0329 | 7.5084 | 3.4640 | 7.5710  | 6.0870 | 8.6203 | 6.2337 | 8.6704 | 8.3674 | 8.5403 | 0.7813  | -0.3560 | 0.1707 | 0.7678 |
| Chmp5   | _NKDGVDFGLGPQIPAS_2                                                                     | #N/A                   | 2.9888 | 4.0372 | 4.1678 | 3.1697  | 4.3807 | 2.9912 | 4.3852 | 3.4480 | 4.5700 | 3.1367 | 0.9325  | -0.1009 | 0.5570 | 0.2541 |
| Lysmd2  | _I(Acetyl (Protein N-term))ADLS(Phospho (STY))PAPALR_2                                  | Q9D7V2_S5_M1_Lysmd2    | 7.0133 | 7.5189 | 7.2967 | 7.7046  | 6.0615 | 7.4924 | 7.1101 | 6.9194 | 6.4034 | 7.4760 | 1.0292  | 0.0416  | 0.5781 | 0.2380 |
| Lysmd2  | _AHRPSAPS(Phospho (STY))PPRR_3                                                          | #N/A                   | 6.6892 | 6.6669 | 7.5244 | 6.5559  | 3.3530 | 6.7909 | 3.3558 | 6.7835 | 7.2557 | 6.5694 | 1.0454  | 0.0641  | 0.7977 | 0.0981 |
| Lysmd2  | _HRS(Phospho (STY))PEEAELSLSLAR_2                                                       | Q9D7V2_S33_M1_Lysmd2   | 3.0458 | 3.8020 | 4.2803 | 3.8241  | 3.6903 | 2.9343 | 3.9723 | 5.8540 | 3.4762 | 3.5013 | 0.8560  | -0.2243 | 0.2748 | 0.5609 |
| Kctd4   | _HNS(Phospho (STY))VEDAEGQK_2                                                           | #N/A                   | 7.3627 | 7.2266 | 7.4245 | 7.5624  | 6.8511 | 7.1777 | 7.4304 | 7.3069 | 7.2032 | 7.5161 | 0.9869  | -0.0191 | 0.5007 | 0.3004 |
| Kctd4   | _HNS(Phospho (STY))VEDAEGQNC(C[Carbamidomethyl (C)]K_2                                  | #N/A                   | 3.2382 | 3.5108 | 3.4720 | 3.2199  | 3.7169 | 3.3642 | 3.5641 | 3.0889 | 3.6393 | 3.9345 | 0.9617  | -0.0564 | 0.4411 | 0.3555 |
| Dusp3   | _YVGNASVAGDITQLOK_2                                                                     | #N/A                   | 5.3065 | 4.8358 | 4.9884 | 5.3539  | 5.1594 | 5.4848 | 5.3304 | 4.9268 | 4.7286 | 4.9232 | 1.0424  | 0.0599  | 0.2217 | 0.6542 |
| Dusp3   | _ANDTQEFNLSAYFER_2                                                                      | #N/A                   | 5.7675 | 4.0766 | 5.7991 | 5.1281  | 5.3515 | 5.3672 | 5.5020 | 5.2845 | 5.0413 | 5.4111 | 0.9883  | -0.0169 | 0.8563 | 0.0674 |
| Dusp3   | _EIGPNDFGLQLC(C[Carbamidomethyl (C)]QLNDR_2                                             | #N/A                   | 4.9531 | 4.9912 | 5.1524 | 5.6422  | 5.1981 | 4.7427 | 5.1344 | 5.4383 | 5.1904 | 4.6674 | 1.0011  | 0.0016  | 0.9783 | 0.0095 |
| Dusp3   | _LGITHVNAEGR_3                                                                          | #N/A                   | 4.6611 | 4.5815 | 4.3498 | 4.0530  | 4.0484 | 4.0209 | 4.3691 | 3.2170 | 3.9869 | 3.5709 | 1.1320  | 0.1789  | 0.0768 | 1.1146 |
| Gtct    | _GKIS(Phospho (STY))DEM(Oxidation (M))EDIHK_2                                           | #N/A                   | 3.5600 | 3.2482 | 3.9126 | 4.6208  | 3.6677 | 4.3751 | 4.3757 | 4.2305 | 4.1897 | 3.7905 | 0.9399  | -0.0894 | 0.4028 | 0.3949 |
| Ppa1    | _AAPTLEYR_2                                                                             | #N/A                   | 7.4662 | 7.7274 | 7.8523 | 7.4595  | 7.8692 | 7.6966 | 7.4765 | 7.4127 | 7.4168 | 7.4892 | 1.0308  | 0.0438  | 0.0391 | 1.4074 |
| Ppa1    | _VIANVODPDAAANYKDSIDVER_3                                                               | #N/A                   | 6.0308 | 6.0412 | 7.2550 | 6.6695  | 6.9095 | 6.1069 | 6.7047 | 5.7993 | 6.2823 | 6.1700 | 1.0422  | 0.0596  | 0.4113 | 0.8558 |
| Ppa1    | _HTGC(C[Carbamidomethyl (C)]C(C[Carbamidomethyl (C)]GDNPDV(C[Carbamidomethyl (C)]EGSK_3 | #N/A                   | 6.8358 | 5.7839 | 5.8801 | 6.8952  | 6.3192 | 5.7500 | 6.3223 | 5.8620 | 6.1124 | 6.5672 | 1.0045  | 0.0065  | 0.9259 | 0.0334 |
| Ppa1    | _VLGILAM(Oxidation (M))DEGETDWK_2                                                       | #N/A                   | 4.9136 | 4.3473 | 3.6822 | 4.8773  | 4.5498 | 4.7618 | 4.7276 | 4.4051 | 5.0214 | 4.7460 | 0.9876  | -0.0180 | 0.8443 | 0.0735 |
| Ppa1    | _STHDVWK_2                                                                              | #N/A                   | 4.3325 | 4.7001 | 4.3509 | 4.8471  | 5.6897 | 4.8857 | 7.3530 | 4.7395 | 4.1279 | 4.7855 | 1.1033  | 0.1418  | 0.1990 | 0.7012 |
| Fip1i1  | _ERDHS(Phospho (STY))PTPSVFNSEDER_3                                                     | #N/A                   | 6.5541 | 6.1903 | 6.5784 | 7.4221  | 6.2751 | 6.4220 | 6.6242 | 6.7737 | 6.2884 | 6.2220 | 1.0149  | 0.0213  | 0.7082 | 0.1498 |
| Fip1i1  | _ERDHS(Phospho (STY))PTPSVFNSEDERV_4                                                    | #N/A                   | 6.7164 | 7.0472 | 7.7537 | 8.3530  | 6.6632 | 7.1219 | 6.8916 | 7.7060 | 7.1052 | 6.6433 | 1.0267  | 0.0380  | 0.6316 | 0.1996 |
| Fip1i1  | _AES(Phospho (STY))POLR_2                                                               | Q9D824_S280_M1_Fip1i1  | 3.6759 | 2.9803 | 3.6395 | 2.8016  | 3.4270 | 3.7878 | 3.3616 | 3.6607 | 2.2804 | 1.0637 | 0.0891  | 0.6100  | 0.2147 | 0.7012 |
| Ap1f    | _TTGASGLQGS(Phospho (STY))PEITK_2                                                       | Q9D842_S149_M1_Ap1f    | 3.6764 | 3.6660 | 3.4101 | 6.8869  | 6.2100 | 3.8045 | 7.0665 | 6.3616 | 6.1758 | 4.1320 | 0.7767  | -0.3645 | 0.1892 | 0.7231 |
| Ap1f    | _RLS(Phospho (STY))PSGMSK_2                                                             | Q9D842_S238_M1_Ap1f    | 3.9473 | 3.2788 | 3.1333 | 3.6359  | 3.0730 | 3.1556 | 3.3506 | 2.9817 | 4.1311 | 3.6029 | 0.9585  | -0.0611 | 0.5905 | 0.2288 |
| Uqcrb   | _WYVYNAAGFNK_2                                                                          | #N/A                   | 7.7829 | 8.0561 | 7.7216 | 8.1090  | 8.2519 | 8.0425 | 7.9256 | 7.8714 | 8.0887 | 7.9466 | 1.0045  | 0.0065  | 0.7516 | 0.1240 |
| Uqcrb   | _LPEFLYNDR_2                                                                            | #N/A                   | 8.0816 | 8.2625 | 8.2966 | 8.2557  | 8.5972 | 8.3476 | 8.1588 | 7.8346 | 8.0685 | 8.4448 | 1.0222  | 0.0316  | 0.2080 | 0.6820 |
| Uqcrb   | _DOTUHETEDVKEIR_3                                                                       | #N/A                   | 7.2454 | 6.8616 | 7.7942 | 7.3833  | 7.7530 | 7.3727 | 7.7937 | 6.6508 | 7.2904 | 6.7389 | 1.0776  | 0.1079  | 0.0344 | 1.4633 |
| Uqcrb   | _DOTUHETEDVYK_2                                                                         | #N/A                   | 6.7551 | 6.7246 | 6.4561 | 7.0692  | 7.2852 | 6.8788 | 6.5823 | 6.2373 | 6.3567 | 7.0355 | 1.0511  | 0.0719  | 0.1486 | 0.8279 |
| Uqcrb   | _RLPEFLYNDR_2                                                                           | #N/A                   | 7.4787 | 6.9716 | 7.0575 | 6.4534  | 5.9893 | 7.5544 | 7.8158 | 7.5118 | 7.2488 | 8.0292 | 0.9041  | -0.1455 | 0.0606 | 1.2173 |
| Uqcrb   | _YEDKYLEPLHK_2                                                                          | #N/A                   | 6.3823 | 6.2037 | 6.4397 | 6.9089  | 6.3577 | 6.5184 | 6.4885 | 5.9221 | 6.4994 | 6.4159 | 1.0232  | 0.0331  | 0.4187 | 0.3781 |
| Fam241b | _SS(Phospho (STY))SSQCGFFNR_2                                                           | Q9D882_S27_M1_Fam241b  | 3.5791 | 6.9690 | 7.4331 | 4.0106  | 6.4123 | 3.9989 | 3.5406 | 3.4917 | 4.0545 | 3.7631 | 1.4547  | 0.0928  | 0.1024 | 0.3781 |
| U2af1   | _AVIDUNNR_2                                                                             | #N/A                   | 8.0121 | 7.7856 | 8.5280 | 8.1632  | 7.6682 | 7.5751 | 8.4566 | 7.9179 | 7.8258 | 7.9780 | 0.9889  | -0.0161 | 0.6858 | 0.1638 |
| Itpa    | _IDLPEYGEPOEDSQK_2                                                                      | #N/A                   | 7.3657 | 6.4675 | 7.4582 | 6.9979  | 7.0484 | 7.1954 | 6.7191 | 6.9130 | 6.9895 | 7.0295 | 1.0206  | 0.0295  | 0.4885 | 0.3111 |
| Itpa    | _LIFYTGNAK_2                                                                            | #N/A                   | 3.2261 | 2.3877 | 3.6293 | 4.5424  | 2.9079 | 2.8134 | 0.8946 | 3.9596 | 4.2586 | 3.5863 | 1.0240  | 0.0343  | 0.9185 | 0.0369 |
| Itpa    | _LQEYFYSVAGAGDH_2                                                                       | #N/A                   | 4.2589 | 3.5143 | 3.9926 | 3.4004  | 3.4026 | 3.2220 | 5.7832 | 3.2172 | 5.6718 | 3.3674 | 0.8053  | -0.1124 | 0.1771 | 0.5712 |
| Arpc5l  | _ALAVGLGSHR_2                                                                           | #N/A                   | 7.4512 | 7.9243 | 7.7598 | 7.8330  | 7.7830 | 7.8618 | 7.6156 | 7.9175 | 7.5809 | 7.7334 | 1.0074  | 0.0106  | 0.5983 | 0.2231 |
| Arpc5l  | _AFHAALRNS(Phospho (STY))PINTK_3                                                        | #N/A                   | 3.9086 | 6.5686 | 3.6423 | 8.0119  | 5.0202 | 3.6056 | 3.6221 | 7.0064 | 4.1475 | 4.9539 | 1.0393  | 0.0556  | 0.8641 | 0.0503 |
| Arpc5l  | _NS(Phospho (STY))PINTK_2                                                               | #N/A                   | 3.2458 | 7.0017 | 4.4803 | 4.4136  | 3.8903 | 7.0297 | 4.1283 | 7.3656 | 3.3535 | 7.8695 | 0.8822  | -0.1808 | 0.5980 | 0.2233 |
| Arpc5l  | _SSEIEQAVQSLDR_2                                                                        | #N/A                   | 7.0320 | 7.1405 | 7.2101 | 7.3080  | 7.4910 | 7.3916 | 7.4977 | 6.9702 | 7.1930 | 7.3696 | 1.0006  | 0.0009  | 0.9715 | 0.0126 |
| Chmp4b  | _GGPTPQEAQR_2                                                                           | #N/A                   | 6.0681 | 6.5330 | 3.5040 | 6.8065  | 7.1382 | 6.4055 | 6.0149 | 6.0076 | 6.6147 | 6.7485 | 0.9574  | -0.0628 | 0.7039 | 0.1525 |
| Chmp4b  | _KIEQELTAAK_2                                                                           | #N/A                   | 3.3784 | 3.7456 | 4.1852 | 4.5066  | 5.2556 | 4.4011 | 3.6196 | 3.7818 | 4.5555 | 3.5206 | 1.0972  | 0.1338  | 0.3520 | 0.4534 |
| Chmp4b  | _LIAQDGLSTIEFOR_2                                                                       | #N/A                   | 4.1013 | 3.7679 | 5.2911 | 4.3528  | 4.3314 | 3.9838 | 4.5011 | 3.9663 | 4.1845 | 3.6761 | 1.0546  | 0.0766  | 0.4845 | 0.3147 |
| Ndufa11 | _FFSYHEVFPDGTQC(C[Carbamidomethyl (C)]HR_3                                              | #N/A                   | 6.7321 | 6.1957 | 3.3195 | 6.1450  | 6.2123 | 6.5101 | 6.7489 | 6.3048 | 6.4444 | 3.7892 | 1.0053  | 0.0076  | 0.9718 | 0.0124 |
| Ndufa11 | _EKPODPLNYGGC(C[Carbamidomethyl (C)]AGGLTLGAR_3                                         | #N/A                   | 5.5045 | 4.7646 | 4.0671 | 5.7115  | 4.2612 | 4.4976 | 5.3823 | 5.1828 | 4.8936 | 4.9359 | 0.9416  | -0.0868 | 0.4248 | 0.3719 |
| Rpl4    | _ILKS(Phospho (STY))PEIOR_2                                                             | Q9D8E6_S295_M1_Rpl4    | 6.7332 | 6.8785 | 7.3335 | 7.2203  | 6.6475 | 6.3130 | 7.3512 | 6.7220 | 6.5291 | 6.4156 | 1.0148  | 0.0212  | 0.7044 | 0.1522 |
| Rpl4    | _IC(C[Carbamidomethyl (C)]WTFASFR_2                                                     | #N/A                   | 4.6777 | 5.8883 | 4.0140 | 3.5578  | 4.6398 | 4.8483 | 5.3195 | 5.2079 | 3.7425 | 4.9132 | 0.9601  | -0.0588 | 0.7096 | 0.1490 |
| Rpl4    | _QPIAVSELAGHQTSAESWGTR_3                                                                | #N/A                   | 2.9758 | 3.8902 | 4.0227 | 4.5254  | 3.7785 | 4.3469 | 4.2401 | 3.5931 | 3.2417 | 2.9915 | 1.1156  | 0.1579  | 0.2788 | 0.5548 |
| Rpl4    | _SGOGAFGNM(Oxidation (M))C(C[Carbamidomethyl (C)]R_2                                    | #N/A                   | 4.8925 | 3.8774 | 3.7590 | 4.2617  | 3.6988 | 4.0307 | 3.9764 | 3.8568 | 3.5054 | 4.2287 | 1.0501  | 0.0705  | 0.4679 | 0.3298 |
| P2yr13  | _TAGGSEDRHS(Phospho (STY))IS(Phospho (STY))GDTNITLA_2                                   | Q9D812_S328_M2_P2yr13  | 4.2084 | 3.1340 | 3.9420 | 3.4858  | 3.3521 | 3.2725 | 3.6341 | 3.5154 | 3.8144 | 3.1631 | 1.0096  | 0.0139  | 0.8906 | 0.0503 |
| Eef1g   | _STFVDEFKR_2                                                                            | #N/A                   | 7.2838 | 7.5053 | 7.6181 | 7.6548  | 7.1063 | 7.7708 | 7.9369 | 7.7403 | 7.7779 | 7.2329 | 0.9763  | -0.0347 | 0.3296 | 0.4820 |
| Eef1g   | _I(Acetyl (Protein N-term))AAGTLTYPTENWR_2                                              | #N/A                   | 7.1445 | 7.1871 | 7.5518 | 7.1586  | 6.7602 | 7.0498 | 7.2116 | 7.2491 | 7.2123 | 6.7156 | 1.0063  | 0.0091  | 0.7921 | 0.1012 |
| Eef1g   | _TRFVGER_2                                                                              | #N/A                   | 6.8371 | 5.9766 | 6.2000 | 5.4650  | 5.9740 | 5.9223 | 6.1478 | 6.7451 | 6.3818 | 6.4179 | 0       |         |        |        |



|          |                                                              |                        |        |         |         |         |         |         |         |         |         |         |         |         |        |        |
|----------|--------------------------------------------------------------|------------------------|--------|---------|---------|---------|---------|---------|---------|---------|---------|---------|---------|---------|--------|--------|
| Ociad2   | _Acetyl (Protein N-term)[ASVSTHGNDK_2                        | #N/A                   | 3.7428 | 3.8331  | 3.1376  | 4.3369  | 4.7960  | 3.9747  | 3.9372  | 3.0037  | 3.9960  | 4.0937  | 1.0566  | 0.0794  | 0.5604 | 0.2515 |
| Ociad2   | _GAGGEPHN_R_2                                                | #N/A                   | 5.9829 | 5.9571  | 6.5920  | 5.9567  | 6.3159  | 6.4490  | 6.0327  | 6.5942  | 6.8905  | 5.5493  | 0.9908  | -0.0134 | 0.8393 | 0.0761 |
| Ehd2     | _ADLNQGGEPQS[Phospho (STY)]PSR_2                             | #N/A                   | 9.8256 | 9.7485  | 9.9181  | 9.9727  | 9.0097  | 9.9677  | 9.6301  | 9.2770  | 6.8870  | 9.8453  | 1.0592  | 0.1286  | 0.1851 | 0.7326 |
| Ehd2     | _RADLNQGGEPQS[Phospho (STY)]PSR_3                            | #N/A                   | 7.1957 | 5.0700  | 5.1250  | 7.1397  | 6.1799  | 5.4915  | 6.4780  | 4.9428  | 7.1177  | 5.1184  | 1.0202  | 0.0288  | 0.8577 | 0.0667 |
| Ehd2     | _VQAINVSSR_2                                                 | #N/A                   | 8.1415 | 8.5735  | 8.7149  | 8.5629  | 8.9617  | 8.5870  | 8.0637  | 8.2570  | 8.6035  | 8.2707  | 1.0351  | 0.0498  | 0.1104 | 0.9569 |
| Ehd2     | _LSEIDVSTEGVK_2                                              | #N/A                   | 6.5018 | 6.9714  | 6.8262  | 7.0769  | 7.2263  | 7.3817  | 7.1959  | 6.5889  | 6.9682  | 7.0562  | 1.0065  | 0.0093  | 0.8173 | 0.0876 |
| Ehd2     | _RADLNQGGEPQS[Phospho (STY)]PSRR_3                           | #N/A                   | 4.3471 | 7.2825  | 7.7326  | 7.5929  | 3.4908  | 7.1923  | 4.2005  | 6.8991  | 7.0786  | 3.2920  | 1.1687  | 0.2249  | 0.4758 | 0.3225 |
| Ehd2     | _ADLNQGGEPQS[Phospho (STY)]PSRR_3                            | #N/A                   | 6.1227 | 6.5304  | 6.5965  | 6.7318  | 5.5359  | 6.1651  | 5.5010  | 4.0987  | 6.3976  | 1.1870  | 0.0987  | 0.2474  | 0.2634 | 0.5794 |
| Ehd2     | _Acetyl (Protein N-term)[ATDELASLS[Phospho (STY)]R_2         | Q9DBY0_S11_M1_Ehd2     | 3.7798 | 6.6610  | 4.1480  | 7.3713  | 6.8065  | 6.8736  | 6.6186  | 5.3431  | 5.7464  | 6.2847  | 0.9903  | -0.0141 | 0.9454 | 0.0244 |
| Ehd2     | _ELQSTFK_2                                                   | #N/A                   | 4.1875 | 3.5879  | 3.3735  | 3.8761  | 3.6226  | 4.4163  | 3.5908  | 4.2424  | 3.8909  | 3.8431  | 0.9877  | -0.0178 | 0.8391 | 0.0762 |
| Ehd2     | _SMIEQVDEDFDSK_2                                             | #N/A                   | 3.0005 | 4.3419  | 4.2350  | 3.7788  | 3.6451  | 2.9795  | 3.9271  | 3.2224  | 3.5214  | 3.4561  | 1.0373  | 0.0528  | 0.6913 | 0.1603 |
| Borcs5   | _GLLSGGTS[Phospho (STY)]PTNAK_2                              | #N/A                   | 3.5744 | 3.8194  | 10.0075 | 10.1248 | 9.2586  | 9.8572  | 10.0305 | 4.2007  | 9.7051  | 9.8012  | 0.9217  | -0.1177 | 0.7456 | 0.1275 |
| Borcs5   | _GLLSGGTS[Phospho (STY)]PTNAKLEK_2                           | #N/A                   | 3.5574 | 6.4625  | 3.2911  | 6.4370  | 5.7175  | 6.2760  | 6.3592  | 4.1663  | 2.9646  | 6.3672  | 1.0657  | 0.0917  | 0.7540 | 0.1226 |
| Rwd2a    | _KLS[Phospho (STY)]DEPSVQAK_2                                | #N/A                   | 3.1820 | 4.1604  | 4.4165  | 4.7421  | 3.9817  | 3.7477  | 4.1085  | 3.0409  | 3.3400  | 3.6376  | 1.1435  | 0.1934  | 0.1637 | 0.7860 |
| Rwd2a    | _KLS[Phospho (STY)]DEPSVQAKPVK_2                             | #N/A                   | 4.0908 | 5.7328  | 3.2767  | 6.4961  | 5.7354  | 3.6009  | 6.4490  | 4.3391  | 3.9877  | 3.7464  | 1.0414  | 0.0585  | 0.8248 | 0.0837 |
| Fam135b  | _SVSAPO[Phospho (STY)]SPEESAEGADTIK_2                        | Q9DAI6_S75_M1_Fam135b  | 3.9543 | 4.5928  | 5.4992  | 6.3492  | 3.3063  | 3.2981  | 3.9432  | 5.8613  | 4.1519  | 3.3622  | 1.0393  | 0.0557  | 0.8281 | 0.0819 |
| Fam135b  | _NTAGFSEDLPSSKENS[Phospho (STY)]PPR_3                        | Q9DAI6_S805_M1_Fam135b | 2.9653 | 3.7215  | 4.1998  | 5.6437  | 3.6098  | 3.0148  | 3.8918  | 3.2576  | 3.5567  | 3.4208  | 1.0927  | 0.1279  | 0.5434 | 0.2649 |
| Gng12    | _TASTNS[Phospho (STY)]AAQAR_2                                | Q9DAS9_S10_M1_Gng12    | 8.5560 | 8.4510  | 9.0708  | 8.8349  | 8.4578  | 8.5973  | 8.7207  | 8.6084  | 8.6457  | 8.5808  | 1.0026  | 0.0037  | 0.8643 | 0.0633 |
| Gng12    | _SDPLM[Oxidation (M)]GPTSENPKF_2                             | #N/A                   | 7.1211 | 7.2694  | 7.4956  | 7.3558  | 6.9185  | 7.0135  | 7.2550  | 7.2661  | 7.3161  | 6.8880  | 1.0020  | 0.0029  | 0.9182 | 0.0371 |
| Gng12    | _LEASIR_2                                                    | #N/A                   | 5.8496 | 6.1869  | 6.1008  | 5.5896  | 6.0634  | 6.2799  | 4.9731  | 6.3405  | 6.2683  | 5.7791  | 1.0294  | 0.0417  | 0.5575 | 0.2538 |
| Gng12    | _ASADLM[Oxidation (M)]JVC[Carbamidomethyl (C)]EHAR_2         | #N/A                   | 3.8068 | 3.8643  | 3.9852  | 4.1851  | 3.7096  | 3.5313  | 3.8998  | 3.2956  | 3.7747  | 3.3216  | 1.0767  | 0.1066  | 0.1413 | 0.8499 |
| Mrgbp    | _VLTANAPSP[Phospho (STY)]PSAAK_2                             | Q9DA72_S195_M1_Mrgbp   | 5.8914 | 5.6624  | 6.0422  | 6.0897  | 6.6436  | 3.6471  | 3.7608  | 5.7589  | 6.4029  | 6.0677  | 0.9655  | -0.0507 | 0.8110 | 0.0910 |
| Zhyve19  | _WS[Phospho (STY)]PPQNYK_2                                   | Q9DAZ9_S69_M1_Zhyve19  | 8.0657 | 3.8520  | 3.2241  | 4.2687  | 8.0284  | 8.2238  | 8.0962  | 7.8003  | 7.3383  | 3.9460  | 0.8747  | -0.1931 | 0.5703 | 0.2439 |
| Zhyve19  | _VTLDQYHLPPDS[Phospho (STY)]DEDETAQR_3                       | Q9DAZ9_S280_M1_Zhyve19 | 3.0003 | 4.3421  | 4.2349  | 7.8342  | 3.6449  | 2.9797  | 3.9269  | 6.7067  | 3.9301  | 3.4559  | 0.9633  | -0.0540 | 0.8834 | 0.0538 |
| Zhyve19  | _TNS[Phospho (STY)]GGQASQSLEEKYK_2                           | Q9DAZ9_S219_M1_Zhyve19 | 4.3469 | 2.9807  | 3.5328  | 4.1763  | 3.4725  | 4.2569  | 3.1169  | 1.9154  | 3.2943  | 4.0025  | 1.2310  | 0.2999  | 0.1460 | 0.8358 |
| Zhyve19  | _EHQTS[Phospho (STY)]PIVHR_2                                 | Q9DAZ9_S378_M1_Zhyve19 | 4.6204 | 3.4224  | 3.7756  | 3.5415  | 5.0676  | 3.0399  | 4.0616  | 4.1152  | 3.5792  | 3.5704  | 1.0208  | 0.0297  | 0.8515 | 0.0698 |
| Napa     | _VEELPAPFSDSR_2                                              | #N/A                   | 8.5092 | 6.6016  | 8.2125  | 8.9428  | 8.5893  | 8.5547  | 8.4994  | 8.5537  | 8.3992  | 8.2836  | 1.0159  | 0.0228  | 0.3244 | 0.0889 |
| Napa     | _TIQGDIEDLR_2                                                | #N/A                   | 7.1100 | 7.1504  | 7.2669  | 7.5122  | 7.3860  | 7.4204  | 7.2329  | 7.3137  | 7.1323  | 6.6942  | 1.0302  | 0.0430  | 0.1536 | 0.8136 |
| Napa     | _VAGYAAQLEQYQK_2                                             | #N/A                   | 6.3997 | 5.8653  | 5.8226  | 7.5488  | 7.2077  | 6.2115  | 6.3773  | 6.6108  | 6.1248  | 6.3467  | 1.0227  | 0.0324  | 0.7090 | 0.1494 |
| Napa     | _NSQSFSLFGGSSK_2                                             | #N/A                   | 5.0164 | 5.2321  | 5.1238  | 5.6512  | 5.3844  | 4.7288  | 5.0505  | 4.8985  | 5.6349  | 5.3134  | 0.9933  | -0.0097 | 0.8696 | 0.0607 |
| Napa     | _LEAEHEQENVOSTEAWKEYDSSR_4                                   | #N/A                   | 5.0503 | 5.5687  | 6.0117  | 5.9107  | 4.6005  | 4.8385  | 4.9888  | 4.2542  | 5.3108  | 5.2726  | 1.0753  | 0.1048  | 0.3245 | 0.4887 |
| Napa     | _ADIYEQVGTSA[M]Oxidation (M)]DSPLK_2                         | #N/A                   | 4.1285 | 4.2029  | 4.0898  | 5.6933  | 4.6667  | 4.7918  | 4.5515  | 5.1496  | 5.1491  | 4.5322  | 0.9484  | -0.0765 | 0.4855 | 0.3138 |
| Napa     | _LEAEHEQENVOSTEAWK_3                                         | #N/A                   | 5.7138 | 4.8432  | 5.0770  | 5.4489  | 4.1012  | 4.7322  | 5.5418  | 4.2311  | 5.0074  | 4.8801  | 1.0144  | 0.0207  | 0.8488 | 0.0712 |
| Napa     | _AIEIYDMGR_2                                                 | #N/A                   | 4.0285 | 3.1977  | 3.2144  | 4.6624  | 3.1542  | 3.0745  | 3.4318  | 4.4014  | 4.0500  | 3.6841  | 0.9135  | -0.1305 | 0.3894 | 0.4096 |
| Napa     | _HDAATC[Carbamidomethyl (C)]JVDAGNAFK_2                      | #N/A                   | 3.9766 | 3.2320  | 3.7103  | 5.3173  | 3.1203  | 3.5043  | 3.3974  | 3.7471  | 4.0462  | 4.4322  | 0.9755  | -0.0357 | 0.8351 | 0.0783 |
| Mrgp12   | _NVQGINVQAK_2                                                | #N/A                   | 4.6641 | 4.5885  | 5.1014  | 5.8376  | 4.8279  | 4.5679  | 4.6691  | 4.9014  | 5.2004  | 4.5004  | 1.0235  | 0.0336  | 0.6915 | 0.1602 |
| Mrgp12   | _LITEAKPVQK_2                                                | #N/A                   | 4.7652 | 5.3834  | 5.4118  | 5.3840  | 6.2252  | 5.8939  | 5.5203  | 5.1689  | 4.5281  | 5.3879  | 1.0697  | 0.0973  | 0.2788 | 0.5547 |
| Atp5p    | _LVRRPVQVYGEGR_3                                             | #N/A                   | 9.9627 | 10.4282 | 11.1191 | 10.5229 | 10.5260 | 10.4907 | 10.4341 | 10.2739 | 10.7213 | 10.6886 | 0.9980  | -0.0029 | 0.9305 | 0.0360 |
| Atp5p    | _VSLAVLVNPK_2                                                | #N/A                   | 9.0013 | 9.3813  | 9.2419  | 9.4259  | 9.2398  | 9.0044  | 9.4715  | 9.2569  | 9.3454  | 9.3454  | 0.9908  | -0.0133 | 0.4533 | 0.3436 |
| Atp5p    | _SFLSPNQIK_2                                                 | #N/A                   | 8.8267 | 9.1825  | 9.1213  | 9.1391  | 9.0783  | 8.7167  | 8.9783  | 9.3357  | 8.9375  | 9.1138  | 0.9911  | -0.0128 | 0.5232 | 0.2813 |
| Atp5p    | _YATALYSAAKK_2                                               | #N/A                   | 8.0891 | 8.3177  | 8.7384  | 8.2903  | 8.5712  | 8.1215  | 7.7899  | 8.3234  | 7.9995  | 8.1039  | 1.0373  | 0.0529  | 0.0916 | 1.0380 |
| Atp5p    | _SLNDITKR_2                                                  | #N/A                   | 7.4086 | 7.7146  | 7.9631  | 7.8368  | 8.1590  | 7.5413  | 7.4913  | 7.8035  | 7.8938  | 7.2441  | 1.0213  | 0.3005  | 0.4014 | 0.3964 |
| Atp5p    | _EKFSPLTANLM[Oxidation (M)]NLLAENGR_3                        | #N/A                   | 7.6525 | 7.8142  | 8.0594  | 7.6140  | 7.5741  | 7.8971  | 7.6674  | 7.8769  | 7.9475  | 7.8300  | 0.9921  | -0.0115 | 0.5796 | 0.2369 |
| Atp5p    | _EKSPLTANLM[Oxidation (M)]NLLAENGR_3                         | #N/A                   | 6.5610 | 6.0685  | 6.0006  | 6.4587  | 6.3303  | 6.1964  | 6.4993  | 6.2695  | 6.4195  | 0.9820  | -0.0262 | 0.3613  | 0.4421 | 0.2681 |
| Atp5p    | _LGNTQGISAFSTM[Oxidation (M)]SVHR_3                          | #N/A                   | 6.0041 | 5.6462  | 6.2718  | 6.3427  | 5.2105  | 5.5980  | 5.5807  | 5.7671  | 5.5406  | 6.2516  | 1.0105  | 0.0150  | 0.8204 | 0.0860 |
| Atp5p    | _TDSPIGGGMVIR_2                                              | #N/A                   | 3.5548 | 4.3600  | 4.2416  | 7.7201  | 5.4378  | 3.5482  | 3.2361  | 3.2405  | 3.5395  | 3.4380  | 1.4302  | 0.5162  | 0.1122 | 0.9500 |
| Atp5p    | _GEVPC[Carbamidomethyl (C)]TVYTASLDAVSELK_2                  | #N/A                   | 6.8653 | 6.7176  | 6.6176  | 7.1529  | 7.1457  | 6.4549  | 6.7015  | 6.8090  | 6.6361  | 6.6398  | 1.0215  | 0.0307  | 0.3246 | 0.4886 |
| Atp5p    | _VYDMSAK_2                                                   | #N/A                   | 3.6426 | 2.9469  | 4.1292  | 3.6729  | 4.2691  | 3.4604  | 3.8212  | 3.3283  | 3.6273  | 3.3502  | 1.0439  | 0.0620  | 0.5680 | 0.2586 |
| Slc25a18 | _LIQIQDAGR_2                                                 | #N/A                   | 8.3304 | 8.3876  | 8.1330  | 8.2463  | 8.3012  | 8.2789  | 8.3892  | 8.5308  | 8.4154  | 8.1658  | 0.9886  | -0.0166 | 0.2360 | 0.6271 |
| Slc25a18 | _GAAVNLTLVPEK_2                                              | #N/A                   | 7.2611 | 7.0021  | 7.1356  | 7.6709  | 6.8942  | 7.6574  | 7.2262  | 7.5500  | 7.3534  | 7.2159  | 0.9910  | -0.0131 | 0.7211 | 0.1420 |
| Slc25a18 | _LAANDFLR_2                                                  | #N/A                   | 5.2693 | 4.9243  | 5.6393  | 5.5793  | 5.2940  | 5.2006  | 5.6025  | 5.5063  | 5.7342  | 5.6409  | 0.9461  | -0.0800 | 0.0605 | 1.2185 |
| Slc25a18 | _ASFTHSFVAGC[Carbamidomethyl (C)]TAGSVAVAVTFDLWK_3           | #N/A                   | 4.3241 | 3.6284  | 3.5100  | 4.4923  | 3.4498  | 4.2797  | 4.1058  | 3.7544  | 3.9797  | 1.0541  | 0.0760  | 0.5082  | 0.2940 | 0.2498 |
| Pabir1   | _VSTTTDSPVS[Phospho (STY)]PAQAASFPFVDELSSK_3                 | Q9DBS2_S267_M1_Pabir1  | 3.3148 | 5.7231  | 6.3263  | 6.7366  | 3.9594  | 4.1661  | 4.2413  | 5.7728  | 3.2071  | 4.9091  | 1.1114  | 0.1524  | 0.5626 | 0.2498 |
| Pabir1   | _RIDRIPVS[Phospho (STY)]PAPS[Phospho (STY)]PTR_2             | Q9DBS2_S140_M2_Pabir1  | 2.9284 | 4.4140  | 4.1630  | 8.9486  | 6.9334  | 3.4942  | 3.8550  | 7.4610  | 7.1888  | 3.3840  | 0.9406  | -0.0884 | 0.8288 | 0.0816 |
| Pabir1   | _RNS[Phospho (STY)]ITFPSR_2                                  | Q9DBS2_S59_M1_Pabir1   | 4.6226 | 3.5180  | 3.9963  | 3.3968  | 3.4063  | 3.2183  | 3.1114  | 3.2209  | 4.3703  | 3.3638  | 1.0331  | 0.0470  | 0.7154 | 0.1454 |
| Pabir1   | _SNVS[Phospho (STY)]JAPUNGLSGSSQSFVQAEAPSAR_3                | Q9DBS2_S334_M1_Pabir1  | 3.7640 | 3.6179  | 3.5120  | 6.9835  | 3.7067  | 3.6236  | 3.9993  | 3.5964  | 3.5320  | 1.1107  | 0.1514  | 0.5686  | 0.2452 | 0.2452 |
| Pxv2b    | _SILDQHDVR_2                                                 | #N/A                   | 5.5464 | 5.9183  | 5.8216  | 5.6595  | 6.2943  | 5.0645  | 5.2458  | 5.0544  | 5.5021  | 6.0254  | 1.0477  | 0.0673  | 0.3588 | 0.4451 |
| Pxv2b    | _WIAQDLSNLR_2                                                | #N/A                   | 5.4260 | 5.8009  | 5.2016  | 5.4725  | 5.6644  | 5.6854  | 5.4542  | 5.4552  | 5.4549  | 5.3506  | 1.0208  | 0.0297  | 0.3459 | 0.4610 |
| Fundc1   | _NPPPDQYVES[Phospho (STY)]JODESEVLDTLEYAR_3                  | Q9DB70_S13_M1_Fundc1   | 3.3987 | 3.7445  | 4.4434  | 3.8426  | 5.8443  | 4.0060  | 4.3135  | 3.7061  | 4.9691  | 4.9463  | 0.9397  | -0.0898 | 0.6055 | 0.2179 |
| Cdip1    | _Acetyl (Protein N-term)[S[Phospho (STY)]NEPPPPYGGPTALPEEK_2 | Q9DB75_S2_M1_Cdip1     | 3.6141 | 3.6121  | 4.3009  | 3.3027  | 3.5004  | 3.1242  | 4.5182  | 6.7837  | 2.9635  | 3.2697  | 0.8157  | -0.2939 | 0.2919 | 0.5347 |
| Uqcrc2   | _TSAAPGVLPQDQLETK_2                                          | #N/A                   | 9.2038 | 9.0633  | 8.9442  | 9.1674  | 9.1388  | 9.1583  | 9.2671  | 9.0279  | 8.9697  | 8.8297  | 1.0099  | 0.0142  | 0.3353 | 0.4746 |
| Uqcrc2   | _AAVAGNGLSSADVQAAK_2                                         | #N/A                   | 7.2104 | 7.8985  | 7.6270  | 8.2664  | 7.6579  | 8.0663  | 8.1743  | 8.0087  | 8.0069  | 8.1814  | 0.9623  | -0.0554 | 0.1548 | 0.8103 |
| Uqcrc2   | _GNNTTSLSSQVAK_2                                             | #N/A                   | 8.8451 | 8.9339  | 8.8456  | 8.9009  | 8.9998  | 9.1538  | 9.1379  | 8.6628  | 9.0732  | 8       |         |         |        |        |



|          |                                                         |                       |         |         |         |         |         |         |         |         |         |         |         |         |        |        |
|----------|---------------------------------------------------------|-----------------------|---------|---------|---------|---------|---------|---------|---------|---------|---------|---------|---------|---------|--------|--------|
| Cmtr1    | _HLS[Phospho (STY)]STSDPEPLSVNHAAK_3                    | Q90BC3_S27_M1_Cmtr1   | 3.2247  | 6.0873  | 4.1782  | 6.0282  | 4.9358  | 5.9435  | 4.1034  | 6.5236  | 3.3689  | 6.0967  | 1.0086  | 0.0123  | 0.9608 | 0.0173 |
| Pkr1a1a  | _EDES[Phospho (STY)]PPPPNPNVK_2                         | #N/A                  | 7.4044  | 7.2687  | 6.5432  | 7.9112  | 6.1709  | 7.4493  | 8.0919  | 7.1653  | 7.5667  | 7.2914  | 0.9463  | -0.0796 | 0.3020 | 0.5199 |
| Pkr1a1a  | _LTVADALPVGFDGQK_2                                      | #N/A                  | 6.4298  | 6.5693  | 6.4289  | 6.6025  | 6.3417  | 6.6526  | 6.2179  | 6.0620  | 6.2995  | 6.3758  | 1.0425  | 0.0601  | 0.0116 | 0.1942 |
| Pkr1a1a  | _TDSREDS[Phospho (STY)]PPPPNPNVK_3                      | #N/A                  | 10.3752 | 10.9632 | 11.0693 | 11.5721 | 10.4937 | 10.6048 | 11.3039 | 10.4048 | 10.5639 | 10.3666 | 1.0175  | 0.0250  | 0.5324 | 0.2738 |
| Aldh7a1  | _FQDEEFVFNNEVK_2                                        | #N/A                  | 4.2878  | 5.7174  | 5.8879  | 5.5524  | 5.2351  | 5.6115  | 4.5062  | 5.0235  | 5.2290  | 5.2852  | 1.0740  | 0.1030  | 0.2887 | 0.5985 |
| Aldh7a1  | _GEVITYC[Carbamidomethyl (C)]PANNEPAR_2                 | #N/A                  | 5.0171  | 5.0909  | 5.7615  | 5.3965  | 5.1249  | 5.3053  | 4.8834  | 5.1749  | 5.4767  | 4.8296  | 1.0376  | 0.0533  | 0.3256 | 0.4873 |
| Aldh7a1  | _VNLLSTGSGTQVGR_2                                       | #N/A                  | 3.9469  | 2.9953  | 3.4168  | 3.9195  | 4.6521  | 3.7410  | 4.6095  | 4.1990  | 3.3372  | 4.2211  | 0.9235  | -0.1149 | 0.4038 | 0.3939 |
| Ap2b1    | _DIPNELELQVQR_2                                         | #N/A                  | 8.9053  | 8.6211  | 9.0485  | 8.7581  | 8.6858  | 8.9473  | 9.3035  | 9.2339  | 9.0970  | 8.8358  | 0.9682  | -0.0466 | 0.0388 | 1.4116 |
| Ap2b1    | _IQGPNPNYTLTK_2                                         | #N/A                  | 8.4602  | 8.3952  | 8.3307  | 8.4203  | 8.0068  | 8.1900  | 8.3363  | 8.6204  | 8.2763  | 8.1508  | 0.9946  | -0.0079 | 0.7099 | 0.1488 |
| Ap2b1    | _LSTDPVTAK_2                                            | #N/A                  | 7.9855  | 7.9626  | 8.0782  | 7.3345  | 7.8476  | 7.5599  | 7.9771  | 8.1220  | 7.9944  | 7.5509  | 0.9853  | -0.0214 | 0.5288 | 0.2767 |
| Ap2b1    | _LQNNNNVYTIK_2                                          | #N/A                  | 7.3086  | 7.2279  | 7.0766  | 7.3427  | 6.9761  | 6.6235  | 7.2733  | 7.3376  | 7.5559  | 7.1781  | 0.9668  | -0.0487 | 0.1456 | 0.8367 |
| Ap2b1    | _QVFLATWK_2                                             | #N/A                  | 6.0733  | 6.3586  | 6.5104  | 6.1376  | 5.5970  | 6.2625  | 5.5197  | 6.3532  | 5.9024  | 5.8186  | 1.0438  | 0.0618  | 0.2560 | 0.5918 |
| Ap2b1    | _VNNVQEAIVR_2                                           | #N/A                  | 5.1973  | 4.6874  | 5.4272  | 4.9489  | 4.1505  | 4.7389  | 5.4815  | 5.1938  | 5.1729  | 5.1794  | 0.9242  | -0.1137 | 0.1281 | 0.8925 |
| Ap2b1    | _APEVSQYVQYDSILKN_3                                     | #N/A                  | 3.1408  | 3.6098  | 4.7268  | 5.0040  | 2.7015  | 3.8519  | 4.0694  | 3.9902  | 4.1253  | 4.4090  | 0.9254  | -0.1118 | 0.5211 | 0.2831 |
| Ap2b1    | _DSDYYNM[Oxidation (M)]LLK_2                            | #N/A                  | 6.4129  | 6.3548  | 6.4780  | 6.2905  | 6.0940  | 6.0612  | 6.6370  | 6.7020  | 6.3175  | 6.0057  | 0.9792  | -0.0304 | 0.4099 | 0.3873 |
| Ap2b1    | _KPSETQLVQVLSLATQSDSNPDLR_3                             | #N/A                  | 4.8127  | 4.4237  | 4.5143  | 4.7084  | 1.2951  | 4.2011  | 5.1320  | 4.1925  | 3.2422  | 3.8882  | 0.9700  | -0.0440 | 0.8732 | 0.0589 |
| Ap2b1    | _LHDINAQM[Oxidation (M)]VEDQGLDLSLR_3                   | #N/A                  | 6.9169  | 6.4262  | 6.4594  | 6.4895  | 5.9624  | 6.3715  | 6.9606  | 6.8284  | 6.5991  | 6.6371  | 0.9528  | -0.0697 | 0.0963 | 1.0165 |
| Ap2b1    | _LAPLVLTSGEPEVQVVALR_2                                  | #N/A                  | 5.2858  | 4.9954  | 5.1185  | 4.8342  | 4.6646  | 4.4976  | 3.6915  | 5.6202  | 5.0822  | 4.7413  | 1.0242  | 0.0344  | 0.7527 | 0.1234 |
| Ap2b1    | _GLEISGTFTHR_2                                          | #N/A                  | 6.7385  | 5.9644  | 6.0213  | 5.6314  | 6.2880  | 3.7553  | 6.0520  | 5.4754  | 3.1095  | 3.0033  | 1.3000  | 0.3785  | 0.1449 | 0.8390 |
| Ap2b1    | _EC[Carbamidomethyl (C)]HUNAIDVSSK_2                    | #N/A                  | 5.9663  | 5.7700  | 5.1614  | 5.3800  | 5.7045  | 5.8991  | 6.1327  | 5.8302  | 5.8662  | 6.3020  | 0.9360  | -0.0954 | 0.0679 | 1.1683 |
| Ap2b1    | _DUADSNPM[Oxidation (M)]VANAVAAALSESHSPNSLLDLNPQNIK_4   | #N/A                  | 4.0521  | 3.8108  | 3.7196  | 4.7428  | 3.1778  | 3.0508  | 4.2388  | 4.0010  | 4.0369  | 4.4415  | 0.8994  | -0.1530 | 0.2311 | 0.6362 |
| Ap2b1    | _APEVSQMYQYDSILK_2                                      | #N/A                  | 3.5774  | 4.3826  | 4.1943  | 3.7381  | 4.2039  | 3.5256  | 3.8864  | 3.2631  | 3.4154  | 1.1147  | 0.1567  | 0.0960  | 1.0176 | 0.2623 |
| Ap2b1    | _LTINGWILAEIR_2                                         | #N/A                  | 3.7765  | 2.9896  | 4.4633  | 3.4652  | 2.9022  | 3.3264  | 3.1798  | 3.2243  | 2.4319  | 3.4322  | 1.1370  | 0.1852  | 0.2523 | 0.5980 |
| Rpn2     | _YHVPVVVPEGSDSDTQEGAILR_3                               | #N/A                  | 4.3935  | 4.8669  | 4.3191  | 3.8628  | 3.7291  | 3.9408  | 3.7723  | 4.6761  | 4.5156  | 3.5401  | 1.0144  | 0.0206  | 0.8521 | 0.6095 |
| Wwp2     | _TATAASEDS[Phospho (STY)]PGAR_2                         | Q90BHO_S211_M1_Wwp2   | 7.3822  | 7.8026  | 8.0956  | 8.0609  | 6.7974  | 7.3900  | 7.4388  | 7.4069  | 7.4906  | 7.0690  | 1.0137  | 0.0196  | 0.6991 | 0.1555 |
| Pgam1    | _ALPFWNEEPQIK_2                                         | #N/A                  | 10.9051 | 11.1909 | 11.2480 | 11.0939 | 11.2049 | 11.0453 | 10.9893 | 10.9739 | 11.0132 | 11.0734 | 1.0093  | 0.0133  | 0.1666 | 0.7784 |
| Pgam1    | _VLIAHGNLSR_2                                           | #N/A                  | 9.6434  | 10.0203 | 10.0203 | 10.4293 | 10.2090 | 10.1035 | 10.1616 | 10.1797 | 10.0536 | 10.0833 | 1.0003  | 0.0004  | 0.9831 | 0.0074 |
| Pgam1    | _HYGGLTGLNK_2                                           | #N/A                  | 8.4740  | 8.6735  | 8.8886  | 8.9696  | 9.0404  | 8.7889  | 8.6164  | 8.7593  | 8.8223  | 8.7446  | 1.0080  | 0.0116  | 0.5466 | 0.2623 |
| Pgam1    | _YADLTEDQLPSC[Carbamidomethyl (C)]ESKDTIAR_3            | #N/A                  | 8.6174  | 8.9152  | 9.0590  | 9.3270  | 9.3707  | 9.2404  | 9.2240  | 8.9167  | 8.9259  | 8.8597  | 1.0119  | 0.0170  | 0.5243 | 0.2805 |
| Pgam1    | _FSGWYDALSPAGHEAK_2                                     | #N/A                  | 6.5928  | 6.2990  | 6.2682  | 5.9660  | 5.9964  | 6.6104  | 5.8094  | 5.9696  | 5.9765  | 6.4885  | 1.0376  | 0.0532  | 0.2500 | 0.6021 |
| Pgam1    | _AM[Oxidation (M)]EAVAAQGK_2                            | #N/A                  | 7.2369  | 7.4133  | 7.2554  | 7.6111  | 7.3411  | 7.4731  | 7.1738  | 7.6200  | 7.6640  | 7.0029  | 1.0020  | 0.0029  | 0.9486 | 0.0229 |
| Pgam1    | _YADLTEDQLPSC[Carbamidomethyl (C)]ESLK_2                | #N/A                  | 6.5598  | 5.8852  | 6.4339  | 6.6926  | 6.6495  | 6.3491  | 6.0811  | 3.5437  | 6.1853  | 5.9008  | 1.1844  | 0.2441  | 0.0910 | 1.0408 |
| Pgam1    | _HGES[Phospho (STY)]AWNLENP_2                           | Q90BIL_S14_M1_Pgam1   | 8.1166  | 8.1603  | 8.7281  | 8.5188  | 7.7438  | 8.2656  | 8.3723  | 7.9323  | 8.0120  | 8.2203  | 1.0149  | 0.0214  | 0.5439 | 0.2645 |
| Pgam1    | _KAM[Oxidation (M)]EAVAAQGK_2                           | #N/A                  | 5.3128  | 5.2987  | 5.5976  | 5.3859  | 6.1791  | 5.6930  | 5.0801  | 4.6568  | 5.0801  | 5.0650  | 1.1222  | 0.1663  | 0.0126 | 1.8992 |
| Pgam1    | _SYDVP PPPP[Oxidation (M)]EPDHPFYSNK_3                  | #N/A                  | 9.4717  | 9.5660  | 9.9332  | 9.8934  | 9.8590  | 9.7598  | 9.5680  | 9.3546  | 9.4770  | 9.2537  | 1.0355  | 0.0503  | 0.0165 | 1.7828 |
| Pgam1    | _DAGYEFDFC[Carbamidomethyl (C)]FTSVQK_2                 | #N/A                  | 4.7749  | 5.8038  | 3.7728  | 5.2103  | 4.0285  | 4.0970  | 4.6295  | 3.8430  | 4.1934  | 4.2427  | 1.0800  | 0.1111  | 0.4436 | 0.3530 |
| Pgam1    | _FSGWYDALSPAGHEAKR_3                                    | #N/A                  | 7.0974  | 7.0869  | 7.4585  | 7.7677  | 8.0511  | 7.8406  | 7.3823  | 7.3632  | 8.0647  | 7.8124  | 0.9862  | -0.0200 | 0.6801 | 0.1675 |
| Pgam1    | _HLEGSSEAIM[Oxidation (M)]ELNPTGPIVYELDK_3              | #N/A                  | 3.8971  | 3.3290  | 4.5839  | 1.1721  | 3.0228  | 3.2058  | 3.3004  | 3.0319  | 4.1813  | 3.5528  | 0.9105  | -0.1353 | 0.6332 | 0.2054 |
| Pgam1    | _TLTWTVLDAQDQMWLVVR_2                                   | #N/A                  | 3.7161  | 3.5101  | 4.4029  | 3.4047  | 2.8417  | 3.2262  | 3.1194  | 3.2130  | 3.4624  | 3.3717  | 1.0001  | 0.0001  | 0.9992 | 0.0003 |
| Acadb    | _YAGISUNGR_2                                            | #N/A                  | 5.5381  | 5.5063  | 4.2583  | 5.4604  | 5.4655  | 5.6927  | 3.9503  | 5.7142  | 6.0835  | 3.4793  | 1.1068  | 0.1464  | 0.3977 | 0.4005 |
| Acadb    | _FDQGLQHQAQVATQLKATR_3                                  | #N/A                  | 3.3260  | 3.9001  | 4.0128  | 4.5155  | 3.7884  | 4.3370  | 4.2302  | 3.6030  | 3.2516  | 2.9816  | 1.1318  | 0.1786  | 0.1643 | 0.7843 |
| Gdap2    | _ENGPYFASPPSP[Phospho (STY)]PDL_2                       | Q90BIL_S495_M1_Gdap2  | 9.4952  | 8.8661  | 4.0349  | 8.5509  | 8.4820  | 3.1797  | 8.8225  | 9.2595  | 8.7388  | 0.9392  | -0.0904 | 0.8025  | 0.0955 | 0.2053 |
| P33monox | _EEKHPASAGTSPST[Phospho (STY)]PHAS[Phospho (STY)]PK_3   | #N/A                  | 4.7174  | 3.6753  | 6.0662  | 3.8839  | 6.0613  | 6.1860  | 4.0321  | 5.7597  | 5.7192  | 6.3300  | 0.9337  | -0.0989 | 0.6234 | 0.2052 |
| P33monox | _HPASAGTSPSTPHAS[Phospho (STY)]PK_3                     | #N/A                  | 6.1089  | 4.9220  | 4.7027  | 5.0444  | 4.4594  | 5.7427  | 6.1446  | 5.4597  | 5.7645  | 6.0927  | 0.8803  | -0.1839 | 0.0778 | 1.1050 |
| Ddx59    | _EGEGDLRPS[Phospho (STY)]PQR_2                          | Q90BNR_S150_M1_Ddx59  | 3.1872  | 3.9435  | 4.4218  | 3.9655  | 3.8318  | 4.2936  | 4.1868  | 3.0356  | 3.3347  | 3.6428  | 1.1100  | 0.1506  | 0.2208 | 0.6559 |
| Cmpk1    | _NIDGILQGWNK_2                                          | #N/A                  | 8.3580  | 8.5784  | 8.9027  | 9.0104  | 8.7082  | 8.6159  | 8.7742  | 8.3449  | 8.4086  | 8.6610  | 1.0174  | 0.0248  | 0.3343 | 0.4758 |
| Cmpk1    | _FLUDGPPR_2                                             | #N/A                  | 6.7468  | 7.9919  | 6.9876  | 7.7998  | 7.3573  | 6.7999  | 7.2961  | 7.6104  | 6.9882  | 6.9730  | 1.0130  | 0.0186  | 0.7470 | 0.1267 |
| Cmpk1    | _NVPETISLTK_2                                           | #N/A                  | 5.6060  | 5.3488  | 5.0276  | 5.3696  | 5.3355  | 5.4920  | 5.5794  | 5.4131  | 5.8998  | 5.9461  | 0.9393  | -0.0903 | 0.0404 | 1.3934 |
| Cmpk1    | _IKQYLESTKPIHYLEM[Oxidation (M)]GK_3                    | #N/A                  | 4.2201  | 5.0972  | 5.9037  | 5.5061  | 6.3070  | 5.9375  | 3.2436  | 5.4773  | 5.4910  | 5.6092  | 1.0753  | 0.1048  | 0.5207 | 0.2834 |
| Cmpk1    | _SDVEVGEVVK_2                                           | #N/A                  | 6.0697  | 6.2103  | 6.7265  | 6.9173  | 6.4002  | 6.5122  | 6.4465  | 6.1959  | 6.5025  | 6.2112  | 1.0211  | 0.0301  | 0.4621 | 0.3353 |
| Cmpk1    | _YGVTHSAGELLR_3                                         | #N/A                  | 3.7518  | 3.6697  | 4.0470  | 5.1179  | 4.3498  | 4.2524  | 3.9619  | 3.5958  | 3.9085  | 4.0340  | 1.0834  | 0.1155  | 0.2789 | 0.5546 |
| Cmpk1    | _KIDASKS[Phospho (STY)]VDEVGEVVK_3                      | #N/A                  | 4.0252  | 3.3172  | 3.7589  | 3.3303  | 3.1690  | 3.4556  | 3.4510  | 3.6985  | 3.9975  | 2.9800  | 0.9937  | -0.0092 | 0.9269 | 0.0309 |
| Cmpk1    | _SDONRESLEK_2                                           | #N/A                  | 3.9865  | 3.3559  | 3.7201  | 3.2639  | 3.1773  | 1.3343  | 3.4122  | 3.7373  | 4.0363  | 4.4420  | 0.8036  | -0.3154 | 0.1693 | 0.7712 |
| Cmpk1    | _KNPDQYQGLIEK_3                                         | #N/A                  | 4.2716  | 2.9546  | 3.4576  | 3.9602  | 3.3973  | 4.3322  | 4.1583  | 3.8069  | 3.9272  | 0.9581  | -0.0617 | 0.5905  | 0.2288 | 0.1940 |
| Akap8    | _ADS[Phospho (STY)]DGLS[Phospho (STY)]ENDOGAGDLR_2      | Q90BR0_S320_M2_Akap8  | 4.3740  | 6.1360  | 3.5600  | 6.8199  | 6.2280  | 6.8712  | 6.9997  | 6.3033  | 6.2436  | 6.7378  | 0.8621  | -0.2141 | 0.2406 | 0.6186 |
| Akap8    | _S[Phospho (STY)]EDKTR_2                                | Q90BR0_S634_M1_Akap8  | 4.8700  | 3.4046  | 3.2862  | 3.2152  | 3.2260  | 3.0027  | 4.3924  | 3.7860  | 5.1327  | 3.7559  | 0.8205  | -0.2855 | 0.1146 | 0.9409 |
| Akap8    | _SKS[Phospho (STY)]STHR_2                               | Q90BR0_S201_M1_Akap8  | 3.8113  | 3.0668  | 3.5450  | 3.8480  | 2.9551  | 3.6696  | 3.5627  | 4.2704  | 3.9190  | 3.8150  | 0.8949  | -0.1603 | 0.1092 | 0.9617 |
| Xm2      | _AEDS[Phospho (STY)]DS[Phospho (STY)]EPEEDNVR_2         | #N/A                  | 8.0317  | 8.3090  | 7.9558  | 8.2671  | 7.4876  | 8.2271  | 8.6231  | 8.1279  | 8.2887  | 7.8174  | 0.9796  | -0.0298 | 0.4370 | 0.3596 |
| Xm2      | _NS[Phospho (STY)]JGCG[Carbamidomethyl (C)]QVANSNPR_2   | Q90BR1_S448_M1_Xm2    | 7.6558  | 8.1357  | 8.0506  | 8.2668  | 7.6323  | 7.8694  | 7.9399  | 7.8614  | 7.8899  | 8.0651  | 0.9995  | -0.0007 | 0.9775 | 0.0099 |
| Xm2      | _RKAEDS[Phospho (STY)]DS[Phospho (STY)]EPEEDNVR_2       | #N/A                  | 4.3900  | 4.4770  | 4.8963  | 5.2302  | 3.8755  | 4.5511  | 4.8113  | 4.9011  | 4.3738  | 4.5243  | 0.9822  | -0.0258 | 0.7542 | 0.1225 |
| Xm2      | _KAEADS[Phospho (STY)]DS[Phospho (STY)]EPEEDNVR_2       | #N/A                  | 7.6625  | 7.8120  | 8.2732  | 7.2286  | 7.7163  | 8.1302  | 7.9381  | 7.8769  | 7.7760  | 7.9647  | 0.9847  | -0.0222 | 0.5629 | 0.2496 |
| Fam13c   | _AGTPAHES[Phospho (STY)]PQSSFR_2                        | #N/A                  | 5.9698  | 6.2508  | 4.0055  | 7.2365  | 4.1536  | 6.4269  | 6.7799  | 6.1012  | 3.7343  | 5.7799  | 1.0134  | 0.0192  | 0.9314 | 0.0309 |
| Fam13c   | _SEAVGPEPGS[Phospho (STY)]S[Phospho (STY)]GETSDAVPEKR_3 | Q90BR2_S405_M2_Fam13c | 2.9816  | 6.1266  | 4.2147  | 6.7427  | 6.1281  | 6.3540  | 6.2257  | 6.1923  | 6.6207  | 3.8231  |         |         |        |        |



|        |                                                        |                       |        |        |        |         |        |        |        |        |        |        |         |         |        |        |
|--------|--------------------------------------------------------|-----------------------|--------|--------|--------|---------|--------|--------|--------|--------|--------|--------|---------|---------|--------|--------|
| OxpbI3 | _QDS[Phospho (STY)]WEVVEGLR_2                          | Q9DB59_S33_M1_OxpbI3  | 3.5885 | 4.3937 | 4.2753 | 5.8871  | 3.4244 | 3.5144 | 4.4927 | 5.5017 | 5.1664 | 4.9436 | 0.8318  | -0.2657 | 0.1317 | 0.8804 |
| Ampd2  | _S[Phospho (STY)]LPGNAQC[Carbamidomethyl] (C)]LQ_2     | Q9DBT5_S19_M1_Ampd2   | 9.3321 | 8.3218 | 7.3524 | 8.9342  | 3.4332 | 8.7050 | 6.0820 | 8.5774 | 9.2909 | 9.0692 | 0.9303  | -0.1042 | 0.6602 | 0.1804 |
| Ampd2  | _QIS[Phospho (STY)]DWLEPDILR_3                         | #N/A                  | 6.1094 | 6.7837 | 7.0457 | 7.4618  | 5.5571 | 6.2310 | 5.9416 | 6.8755 | 6.9061 | 6.0712 | 1.0128  | 0.0184  | 0.8443 | 0.0735 |
| Ampd2  | _S[Phospho (STY)]AESELR_2                              | Q9DBT5_S53_M1_Ampd2   | 2.9398 | 6.5104 | 3.6266 | 6.7415  | 3.5663 | 6.9144 | 3.8439 | 3.9892 | 7.0111 | 4.0962 | 1.0665  | 0.0928  | 0.7859 | 0.1047 |
| Ampd2  | _TDS[Phospho (STY)]DSOLQVLR_2                          | Q9DBT5_S109_M1_Ampd2  | 4.3428 | 3.6471 | 3.5287 | 4.4736  | 4.7361 | 5.5763 | 6.6732 | 5.5987 | 5.7523 | 6.3517 | 0.7193  | -0.4753 | 0.0042 | 2.3765 |
| Ampd2  | _SAPYEPFESS[Phospho (STY)]REGLEER_2                    | Q9DBT5_S70_M1_Ampd2   | 4.2795 | 3.5839 | 3.4655 | 3.9682  | 3.4052 | 4.3243 | 3.1842 | 4.1503 | 3.7989 | 3.9351 | 1.0187  | 0.0268  | 0.7971 | 0.0985 |
| Ampd2  | _QIS[Phospho (STY)]QDVK_2                              | #N/A                  | 3.7311 | 3.0355 | 4.4179 | 3.4197  | 2.8568 | 3.3718 | 3.1344 | 3.1979 | 4.3473 | 3.3867 | 0.9874  | -0.0183 | 0.9050 | 0.0434 |
| RioK3  | _AASFLKDDGS[Phospho (STY)]PPVLSAD_2                    | Q9DBU3_S512_M1_RioK3  | 6.2873 | 6.2081 | 6.9835 | 6.9507  | 6.0972 | 6.5618 | 6.9542 | 6.2627 | 6.4908 | 6.3309 | 1.0008  | 0.0011  | 0.9829 | 0.0075 |
| Pdcl   | _NSATC[Carbamidomethyl] (C)]HEDS[Phospho (STY)]OLEID_2 | Q9DBX2_S296_M1_Pdcl   | 3.6784 | 9.2134 | 6.2300 | 9.7431  | 8.9190 | 9.2764 | 6.9896 | 9.1778 | 9.3321 | 9.4795 | 0.8327  | -0.2642 | 0.2340 | 0.6308 |
| Nvl    | _ESLPDLS[Phospho (STY)]DOQNSK_2                        | Q9DBV9_S109_M1_Nvl    | 3.8553 | 3.1108 | 3.5890 | 9.9343  | 8.7888 | 3.6255 | 3.5187 | 9.2017 | 9.3671 | 8.7308 | 0.7118  | -0.4905 | 0.2772 | 0.5572 |
| Nebi   | _QSFVTADTPENLR_2                                       | #N/A                  | 5.9749 | 5.9714 | 6.6259 | 6.4561  | 6.8403 | 6.1703 | 6.3632 | 5.9043 | 6.0558 | 6.2486 | 1.0320  | 0.0455  | 0.3537 | 0.4514 |
| Nebi   | _GQVHPVEMOR_3                                          | #N/A                  | 3.0794 | 4.1467 | 3.7662 | 4.2689  | 4.0350 | 4.0904 | 3.9836 | 3.8496 | 4.2359 | 4.0015 | 1.0015  | 0.0022  | 0.9817 | 0.0810 |
| Pkdc2  | _RGS[Phospho (STY)]GHPAYAEVPEVK_3                      | Q9DC11_S507_M1_Pkdc2  | 5.4809 | 4.2297 | 4.1113 | 4.6140  | 4.0510 | 3.6784 | 4.3287 | 3.5045 | 3.1531 | 3.0801 | 1.2401  | 0.3104  | 0.0631 | 1.2000 |
| Dcaf6  | _DGEQS[Phospho (STY)]PNVSLM[Oxidation (M)]QR_2         | #N/A                  | 7.1415 | 7.4435 | 8.0047 | 6.7041  | 6.3899 | 7.2424 | 7.8242 | 7.2551 | 7.4344 | 7.3141 | 0.9594  | -0.0598 | 0.3517 | 0.4538 |
| Dcaf6  | _DSALQDQDSS[Phospho (STY)]ODDPVLPGAR_2                 | Q9DC22_S673_M1_Dcaf6  | 4.0822 | 3.2602 | 3.8159 | 3.3597  | 3.2260 | 3.1471 | 3.5079 | 8.8491 | 3.9406 | 3.0370 | 0.7203  | -0.4733 | 0.2482 | 0.6052 |
| Cank1d | _GAPVNS[Phospho (STY)]SSDLTGR_2                        | Q9DC28_S382_M1_Cank1d | 3.8621 | 3.3641 | 4.5489 | 3.5507  | 3.2524 | 3.3722 | 3.2654 | 3.0669 | 7.9064 | 3.5177 | 0.8241  | -0.2791 | 0.4348 | 0.3617 |
| Abcb6  | _AIQASIAK_2                                            | #N/A                  | 6.1958 | 6.6328 | 6.7005 | 5.3253  | 6.8947 | 5.7196 | 3.8921 | 6.2105 | 6.6516 | 6.6247 | 1.0685  | 0.0955  | 0.5294 | 0.2763 |
| Hmg20a | _S[Phospho (STY)]PLTGVYR_2                             | #N/A                  | 7.5676 | 7.3212 | 6.4454 | 3.8812  | 7.2385 | 7.1053 | 6.9073 | 4.2373 | 3.8859 | 7.3210 | 1.1799  | 0.3387  | 0.3418 | 0.4662 |
| Hmg20a | _DSNAPKS[Phospho (STY)]PLTGVYR_3                       | #N/A                  | 3.1959 | 4.0011 | 3.8827 | 4.3854  | 3.8224 | 3.9070 | 4.2678 | 3.7331 | 4.7320 | 4.7330 | 0.8853  | -0.1757 | 0.1028 | 0.9879 |
| GnaI3  | _ISQTNVPTQGVLR_2                                       | #N/A                  | 5.8892 | 5.4999 | 5.5511 | 5.7249  | 5.1342 | 4.8485 | 6.2911 | 5.3672 | 5.4967 | 6.0521 | 0.9379  | -0.0925 | 0.2074 | 0.6832 |
| GnaI3  | _LYQLNDSASYLNOLDR_2                                    | #N/A                  | 3.8917 | 4.1344 | 3.1118 | 6.2384  | 4.0227 | 4.1028 | 6.5665 | 4.3456 | 6.3708 | 3.8337 | 0.8051  | -0.3127 | 0.2162 | 0.6651 |
| Ndufa9 | _NIFEDFVFNIPR_2                                        | #N/A                  | 6.9701 | 6.8055 | 6.6180 | 6.1438  | 6.3974 | 6.4291 | 6.7179 | 6.3081 | 6.3919 | 6.8305 | 0.9997  | -0.0004 | 0.9918 | 0.0036 |
| Ndufa9 | _QPVYVADVSR_2                                          | #N/A                  | 6.7927 | 6.4640 | 6.8408 | 6.4482  | 6.4959 | 6.4543 | 6.8092 | 6.5150 | 6.3301 | 6.4411 | 1.0090  | 0.0129  | 0.6467 | 0.1893 |
| Ndufa9 | _M[Oxidation (M)]GSQVPIPR_2                            | #N/A                  | 6.9157 | 6.7387 | 7.0097 | 5.3803  | 6.2288 | 6.4248 | 6.9633 | 7.6185 | 6.6695 | 6.5848 | 0.9268  | -0.1097 | 0.1930 | 0.7143 |
| Ndufa9 | _SVFPAIRPSDFGR_3                                       | #N/A                  | 5.9398 | 5.1919 | 5.4608 | 5.3247  | 4.5283 | 5.8912 | 5.2290 | 5.4529 | 6.3100 | 5.5050 | 0.9583  | -0.0615 | 0.4892 | 0.3105 |
| Ndufa9 | _SSVSGVATVFGATGFLGR_2                                  | #N/A                  | 4.3951 | 3.6506 | 4.1288 | 3.6726  | 3.5389 | 2.3689 | 1.8089 | 2.2037 | 2.4863 | 3.0732 | 1.5152  | 0.5995  | 0.0176 | 1.7552 |
| Ndufa9 | _AVQHNNVINLGR_3                                        | #N/A                  | 5.5400 | 5.5380 | 6.0802 | 5.2171  | 5.0480 | 5.3295 | 4.8652 | 5.3183 | 5.5136 | 5.0802 | 1.0509  | 0.0716  | 0.2521 | 0.5984 |
| Ndufa9 | _IHSDVM[Oxidation (M)]PTDLGLEDLGVQPTLELK_3             | #N/A                  | 3.3235 | 3.6482 | 4.6610 | 4.3359  | 2.4633 | 4.1574 | 4.0827 | 4.2817 | 3.2883 | 3.2027 | 1.0137  | 0.0197  | 0.9146 | 0.0387 |
| Ndufa9 | _GVNATKDPDAVGK_2                                       | #N/A                  | 5.2926 | 5.3024 | 4.8399 | 4.8433  | 4.7525 | 4.8628 | 5.4171 | 5.1489 | 5.0060 | 4.8435 | 0.9762  | -0.0348 | 0.4651 | 0.3324 |
| Ndufa9 | _LM[Oxidation (M)]DGLGLTLFEWARD_2                      | #N/A                  | 4.7717 | 2.9674 | 5.8049 | 3.3517  | 2.7887 | 4.8242 | 3.0664 | 4.2856 | 4.4154 | 4.1850 | 1.0242  | 0.0346  | 0.8887 | 0.0512 |
| Ndufa9 | _WSSDEETPKAK_3                                         | #N/A                  | 3.0372 | 3.4379 | 3.9161 | 3.4769  | 3.3262 | 3.2984 | 3.1916 | 1.9042 | 4.2901 | 3.4439 | 1.0648  | 0.0906  | 0.6318 | 0.1994 |
| Ndufa9 | _C[Carbamidomethyl] (C)]DVOIMHLR_3                     | #N/A                  | 3.1315 | 3.8878 | 4.3660 | 3.9098  | 3.7761 | 4.3494 | 4.0580 | 3.0914 | 3.3904 | 3.5871 | 1.1052  | 0.1444  | 0.2229 | 0.6518 |
| Nduf7  | _LDDUNWAR_2                                            | #N/A                  | 7.6642 | 7.8231 | 7.5556 | 7.4537  | 7.4396 | 7.6921 | 7.7822 | 7.5761 | 7.4822 | 0.9884 | -0.0169 | 0.4436  | 0.3530 | 0.3510 |
| Nduf7  | _SRAEYVYTK_2                                           | #N/A                  | 6.1838 | 6.3703 | 6.4230 | 6.0848  | 7.1548 | 5.7915 | 6.4111 | 6.7454 | 6.4438 | 6.0869 | 0.9864  | -0.0197 | 0.7446 | 0.1281 |
| Nduf7  | _KVYQDM[Oxidation (M)]PEPR_2                           | #N/A                  | 5.0762 | 5.0704 | 5.2328 | 4.4478  | 4.5098 | 3.4784 | 5.0742 | 4.0835 | 5.0229 | 4.7285 | 0.9807  | -0.0282 | 0.8154 | 0.0887 |
| Nduf7  | _QADVM[Oxidation (M)]VAGLTNKK_2                        | #N/A                  | 5.3675 | 5.9974 | 7.0525 | 6.0885  | 6.0724 | 6.4169 | 5.5479 | 5.9626 | 5.6828 | 6.5456 | 1.0389  | 0.0551  | 0.5061 | 0.2958 |
| Hmgm3  | _TES[Phospho (STY)]EKEJGE_2                            | #N/A                  | 3.8137 | 3.0958 | 3.3008 | 3.8034  | 2.9477 | 3.5156 | 3.5181 | 3.6867 | 3.9852 | 3.7704 | 0.9125  | -0.1321 | 0.1401 | 0.8537 |
| Arpp21 | _AIWSS[Phospho (STY)]TDSOSNR_2                         | Q9DCB4_S362_M1_Arpp21 | 7.4965 | 7.2705 | 7.8708 | 8.0112  | 6.9481 | 7.6306 | 7.5488 | 7.2423 | 7.4242 | 3.6975 | 1.1636  | 0.2186  | 0.2013 | 0.6962 |
| Arpp21 | _TGS[Phospho (STY)]SSSSAGSGSGSR_2                      | Q9DCB4_S408_M1_Arpp21 | 6.4658 | 6.5316 | 6.6820 | 7.0895  | 6.2535 | 6.5995 | 6.6415 | 6.5820 | 6.6727 | 0.9233 | -0.1152 | 0.5020  | 0.2993 | 0.3324 |
| Arpp21 | _SES[Phospho (STY)]DEEEKLELQR_3                        | #N/A                  | 3.6519 | 2.9563 | 4.3387 | 3.6636  | 4.2784 | 3.4511 | 3.8119 | 7.3976 | 3.6366 | 3.3075 | 0.8204  | -0.2856 | 0.3400 | 0.4686 |
| Arpp21 | _SES[Phospho (STY)]LDEEEKLELQR_2                       | #N/A                  | 3.6783 | 4.0247 | 7.8198 | 9.1961  | 3.4382 | 7.9193 | 7.7324 | 8.5795 | 8.4951 | 7.8920 | 0.7355  | -0.4432 | 0.1409 | 0.8512 |
| Arpp21 | _QSS[Phospho (STY)]SETELRWPOHQIR_3                     | Q9DCB4_S346_M1_Arpp21 | 3.3090 | 4.1142 | 3.9958 | 4.0065  | 3.9355 | 3.7939 | 4.1547 | 2.9947 | 3.2938 | 2.9646 | 1.1513  | 0.2033  | 0.0915 | 1.0386 |
| Arpp21 | _TAS[Phospho (STY)]FGGIVLTKR_2                         | Q9DCB4_S381_M1_Arpp21 | 3.5881 | 3.6381 | 4.2749 | 7.4972  | 4.2146 | 3.0983 | 4.4923 | 3.3409 | 2.9895 | 3.2437 | 1.2470  | 0.3185  | 0.3374 | 0.4719 |
| Arpp21 | _DNS[Phospho (STY)]IJKEDNQNR_2                         | Q9DCB4_S256_M2_Arpp21 | 3.3649 | 4.1701 | 4.0517 | 4.5543  | 3.9914 | 3.7381 | 4.0989 | 3.5642 | 3.2127 | 3.0205 | 1.1452  | 0.1956  | 0.1069 | 0.9711 |
| Tomn20 | _IVS[Phospho (STY)]AQSLAEDDVE_2                        | Q9DCCB_S315_M1_Tomn20 | 5.7151 | 7.0542 | 4.5651 | 7.9354  | 5.0758 | 5.3889 | 7.8816 | 7.5726 | 7.7108 | 7.7665 | 0.7702  | -0.3767 | 0.0267 | 1.5736 |
| Pgd    | _LVPLDTGDIIDGNSKYR_2                                   | #N/A                  | 5.4586 | 5.0242 | 5.4190 | 5.0566  | 4.3631 | 4.5552 | 5.7307 | 5.7031 | 3.2744 | 1.1827 | 1.0327  | 0.2421  | 1.1359 | 0.8669 |
| Pgd    | _VDOFLNAEK_2                                           | #N/A                  | 5.3143 | 3.5400 | 5.3156 | 4.5806  | 5.1433 | 4.3681 | 5.6898 | 5.5915 | 5.3277 | 5.6850 | 0.8451  | -0.2428 | 0.0440 | 1.3565 |
| Pgd    | _NPELQNLDDOFFK_2                                       | #N/A                  | 3.5809 | 3.5717 | 3.3146 | 4.3592  | 2.0600 | 3.9000 | 3.7931 | 3.6423 | 4.4419 | 3.0176 | 0.9303  | -0.1042 | 0.5871 | 0.2363 |
| Pgd    | _GLFVGSVSGGEGEAR_2                                     | #N/A                  | 4.2727 | 3.8426 | 3.6369 | 3.1806  | 3.9277 | 2.9681 | 3.3289 | 3.2105 | 4.1196 | 3.8663 | 1.0019  | 0.0027  | 0.9826 | 0.0076 |
| Tjp11  | _KDS[Phospho (STY)]LTQADEQGTLYS_2                      | Q9DCD5_S527_M1_Tjp11  | 3.9411 | 5.9579 | 3.1270 | 6.0869  | 3.0668 | 5.6766 | 6.5874 | 2.9879 | 3.9258 | 6.0869 | 0.9427  | -0.0851 | 0.7855 | 0.1049 |
| Sr3    | _KLS[Phospho (STY)]EADNR_2                             | #N/A                  | 6.1591 | 6.1268 | 6.8681 | 6.0057  | 6.2282 | 5.7147 | 6.6028 | 6.7024 | 6.4380 | 3.5520 | 1.0618  | 0.0865  | 0.5840 | 0.2336 |
| Sr3    | _KLS[Phospho (STY)]EADNRK_2                            | #N/A                  | 4.2346 | 4.4412 | 4.8695 | 4.7858  | 2.8226 | 1.6652 | 4.9873 | 4.3805 | 4.7487 | 3.2419 | 0.8764  | -0.1904 | 0.4790 | 0.3196 |
| Sr3    | _QQS[Phospho (STY)]EOLLQDFSR_2                         | Q9DCP9_S11_M1_Sr3     | 4.3650 | 7.5209 | 3.5510 | 7.9473  | 7.1654 | 4.2388 | 3.0987 | 4.0507 | 8.3491 | 4.1286 | 1.1816  | 0.2408  | 0.5303 | 0.2755 |
| Eif3f  | _TC[Carbamidomethyl] (C)]PS[Phospho (STY)]PNR_2        | Q9DCI4_S262_M1_Eif3f  | 9.7065 | 9.6909 | 9.7638 | 10.3713 | 9.6402 | 9.6784 | 9.8502 | 9.4556 | 9.5250 | 9.7738 | 1.0163  | 0.0233  | 0.3567 | 0.4477 |
| Eif3f  | _VGLSSDLQVGGASAR_2                                     | #N/A                  | 4.3485 | 3.6039 | 4.0821 | 3.6259  | 3.4922 | 3.1324 | 4.5264 | 3.3753 | 4.7941 | 3.3032 | 0.9286  | -0.1069 | 0.4705 | 0.2775 |
| Ndufa8 | _ARPEPNPPIVEGLKPKAK_3                                  | #N/A                  | 9.3881 | 9.2431 | 9.7461 | 9.5663  | 9.7491 | 9.4501 | 9.5143 | 9.1823 | 9.2004 | 9.2558 | 1.0254  | 0.0361  | 0.0849 | 1.0712 |
| Ndufa8 | _TORLPENPPHYR_3                                        | #N/A                  | 7.5319 | 7.2108 | 6.8168 | 7.4941  | 8.2526 | 7.7407 | 6.9749 | 7.1477 | 7.5703 | 7.3800 | 1.0330  | 0.0468  | 0.3975 | 0.4006 |
| Ndufa8 | _FDQC[Carbamidomethyl] (C)]VLQK_2                      | #N/A                  | 6.5958 | 6.6953 | 6.2532 | 6.7274  | 7.0633 | 6.2242 | 6.2649 | 6.5575 | 5.7908 | 6.6650 | 1.0433  | 0.0612  | 0.2558 | 0.5921 |
| Ndufa8 | _GVGLPTEELKVEEVK_2                                     | #N/A                  | 5.8144 | 5.8830 | 5.3786 | 6.2983  | 6.1384 | 5.9197 | 5.1892 | 5.9697 | 5.5248 | 5.9462 | 1.0438  | 0.0619  | 0.2884 | 0.5400 |
| Ndufa8 | _LVNQG[Carbamidomethyl] (C)]ALNFR_2                    | #N/A                  | 5.2210 | 5.4247 | 4.9312 | 5.6576  | 5.0694 | 5.1270 | 3.1870 | 5.7941 | 4.9702 | 5.5878 | 1.0724  | 0.1009  | 0.4885 | 0.3111 |
| Ndufa8 | _AAAHYGAQC[Carbamidomethyl] (C)]DK_3                   | #N/A                  | 3.3892 | 4.1944 | 4.0760 | 4.5786  | 4.0157 | 3.7138 | 4.2933 | 3.1884 | 3.0448 | 1.1359 | 1.1839  | 0.1538  | 0.3810 | 0.3111 |
| Ppp1r2 | _TSAAS[Phospho (STY)]PPVPSAEQPRPPIVEELSK_4             | #N/A                  | 4.3268 | 3.6312 | 9.2773 | 4.4895  | 7.8315 | 4.2770 | 3.1370 | 8.3261 | 4.3115 | 4.1668 | 1.1311  | 0.1777  | 0.6727 | 0.1722 |
| Ppp1r2 | _TSAAS[Phospho (STY)]PPVPSAEQPRPPIVEELSK_3             | #N/A                  | 7.1969 | 7.5567 |        |         |        |        |        |        |        |        |         |         |        |        |



|         |                                                                                |                        |         |         |         |         |         |         |         |         |         |         |         |         |        |        |
|---------|--------------------------------------------------------------------------------|------------------------|---------|---------|---------|---------|---------|---------|---------|---------|---------|---------|---------|---------|--------|--------|
| Ndufb10 | _VDQEMNIQER_2                                                                  | #N/A                   | 5.4701  | 5.1294  | 3.5387  | 6.9015  | 5.5576  | 4.2510  | 3.1110  | 4.0385  | 4.5310  | 4.8713  | 1.2425  | 0.3133  | 0.1699 | 0.7698 |
| Nduf53  | _SLADITAVDVPTR_2                                                               | #N/A                   | 8.6025  | 8.7503  | 8.8201  | 8.8745  | 8.7039  | 8.8059  | 8.6260  | 8.5671  | 8.5313  | 8.6189  | 1.0202  | 0.0289  | 0.0107 | 1.9702 |
| Nduf53  | _VVAEVELAQEFR_2                                                                | #N/A                   | 8.3186  | 8.3075  | 8.6453  | 8.1221  | 8.5565  | 8.1941  | 8.3393  | 8.5055  | 8.3693  | 0.9900  | -0.0144 | 0.4740  | 0.3242 | 0.3242 |
| Nduf53  | _DPFUTGVVEIR_2                                                                 | #N/A                   | 7.7732  | 8.0553  | 7.8531  | 7.9651  | 8.0865  | 7.8390  | 7.7322  | 7.8372  | 8.1492  | 7.6674  | 1.0105  | 0.0150  | 0.4616 | 0.3358 |
| Nduf53  | _YODEVKR_2                                                                     | #N/A                   | 7.2504  | 6.9732  | 7.4791  | 7.4374  | 7.6648  | 7.2437  | 6.5699  | 6.6138  | 7.4368  | 7.3049  | 1.0516  | 0.0726  | 0.1354 | 0.6865 |
| Nduf53  | _DHYNAQPK_2                                                                    | #N/A                   | 5.6230  | 5.0738  | 5.7407  | 5.0530  | 6.0433  | 5.3095  | 5.6801  | 5.5566  | 5.8887  | 5.3625  | 0.9737  | -0.0385 | 0.5195 | 0.2844 |
| Nduf53  | _FEVYNLSLR_2                                                                   | #N/A                   | 5.6838  | 4.8154  | 5.1243  | 4.8089  | 3.9818  | 4.2487  | 5.2561  | 5.0622  | 4.8483  | 5.4139  | 0.9285  | -0.1071 | 0.2912 | 0.5357 |
| Nduf53  | _LEAGDKKPETK_2                                                                 | #N/A                   | 5.3164  | 5.2072  | 5.6266  | 4.8172  | 5.2369  | 5.1918  | 5.0750  | 5.6085  | 4.9206  | 5.5218  | 0.9908  | -0.0134 | 0.8012 | 0.0963 |
| Nduf53  | _QLSAFGEYVAELPK_2                                                              | #N/A                   | 4.4561  | 4.6928  | 4.4056  | 4.6812  | 5.4577  | 4.7952  | 5.1822  | 4.4279  | 5.1827  | 4.5742  | 0.9807  | -0.0282 | 0.7166 | 0.1447 |
| Nduf53  | _LITDYGFEGHPR_2                                                                | #N/A                   | 5.7025  | 5.4168  | 5.4572  | 6.1257  | 6.1898  | 5.8381  | 5.8811  | 5.7265  | 5.8408  | 5.9129  | 0.9911  | -0.0129 | 0.7671 | 0.1152 |
| Nduf53  | _FDLNSPWEAFPAYR_2                                                              | #N/A                   | 5.1556  | 5.4272  | 3.3492  | 3.1522  | 4.6521  | 4.8651  | 4.6795  | 5.1751  | 5.7170  | 4.5845  | 0.8798  | -0.1847 | 0.2855 | 0.5443 |
| Bap18   | _VVESDGLPAES[Phospho (STY)]PK_2                                                | Q9DCT6_S96_M1_Bap18    | 8.8816  | 8.3352  | 8.8393  | 9.1557  | 8.7020  | 9.0085  | 9.2800  | 8.5846  | 8.7545  | 8.9790  | 0.9911  | -0.0129 | 0.6836 | 0.1652 |
| Crip2   | _GVNTGAVGSYYDKDPGTVQP_2                                                        | #N/A                   | 6.4879  | 6.4494  | 6.6779  | 6.5042  | 6.8940  | 6.9433  | 7.0063  | 5.9846  | 6.2670  | 6.7238  | 1.0252  | 0.0360  | 0.4607 | 0.3366 |
| Crip2   | _KTS[Phospho (STY)]GPKGPK_2                                                    | Q9DCT8_S104_M1_Crip2   | 3.7778  | 6.2365  | 6.0551  | 6.4848  | 6.2326  | 3.3251  | 5.9337  | 6.0194  | 5.9749  | 6.4416  | 0.8785  | -0.1869 | 0.3369 | 0.3784 |
| Crip2   | _TVFAEK_2                                                                      | #N/A                   | 2.8122  | 3.6849  | 3.4265  | 3.2200  | 3.9136  | 4.4519  | 3.6812  | 3.0113  | 3.2660  | 3.6468  | 1.0540  | 0.0758  | 0.5789 | 0.2374 |
| Rmdn1   | _VEILAQADLYESGETEK_2                                                           | #N/A                   | 5.1756  | 5.8569  | 6.0586  | 6.5806  | 4.8646  | 5.3273  | 5.1815  | 4.7510  | 4.8396  | 5.3759  | 1.1205  | 0.1641  | 0.1161 | 0.9352 |
| Etfb    | _EIDGGLETUR_2                                                                  | #N/A                   | 7.0728  | 6.9912  | 7.1796  | 7.0240  | 7.2323  | 6.8023  | 6.8234  | 7.0286  | 7.3440  | 7.2259  | 0.9922  | -0.0112 | 0.6564 | 0.1829 |
| Etfb    | _GIHVEIPGAQESLGPLQVAR_3                                                        | #N/A                   | 6.2650  | 6.8296  | 6.4689  | 6.9819  | 6.1114  | 6.3085  | 6.4961  | 6.9609  | 5.1019  | 5.7431  | 1.0689  | 0.0962  | 0.2884 | 0.5400 |
| Etfb    | _EBAVSC[Carbamidomethyl (C)]GPSQ[Carbamidomethyl (C)]QETR_2                    | #N/A                   | 4.9948  | 5.2540  | 5.4334  | 5.4213  | 5.3228  | 5.7709  | 4.7867  | 5.1594  | 4.8228  | 4.0861  | 1.1384  | 0.1870  | 0.0182 | 1.7405 |
| Etfb    | _AGDGLGVOLTSK_2                                                                | #N/A                   | 5.6126  | 5.5530  | 4.4674  | 6.1837  | 5.8589  | 5.8251  | 4.1412  | 5.7257  | 3.2891  | 5.3671  | 1.2057  | 0.2699  | 0.1136 | 0.9447 |
| Etfb    | _TALAMGADR_2                                                                   | #N/A                   | 4.5948  | 0.9321  | 3.4407  | 4.9721  | 4.0796  | 4.3491  | 3.2091  | 2.6058  | 4.2394  | 3.9103  | 1.0679  | 0.0947  | 0.7749 | 0.1108 |
| Atp5pd  | _SC[Carbamidomethyl (C)]AFVVSQSQR_2                                            | #N/A                   | 7.7806  | 8.0564  | 8.1092  | 8.7206  | 9.0409  | 7.9604  | 7.8140  | 8.0737  | 8.1393  | 7.9050  | 1.0335  | 0.0476  | 0.3237 | 0.4998 |
| Atp5pd  | _LASLSEKPPAIDWAYVR_3                                                           | #N/A                   | 7.3673  | 7.4947  | 7.1249  | 7.8018  | 7.7400  | 7.5848  | 7.2471  | 7.4311  | 7.5653  | 7.5151  | 1.0107  | 0.0153  | 0.5839 | 0.2336 |
| Atp5pd  | _ANVAKPLGVDOFEK_2                                                              | #N/A                   | 7.3207  | 7.2875  | 7.3793  | 7.6825  | 7.8372  | 7.4408  | 7.3998  | 7.2138  | 7.0679  | 7.1983  | 1.0376  | 0.0532  | 0.0610 | 1.2149 |
| Atp5pd  | _ANVAKPLGVDOFEKX_3                                                             | #N/A                   | 8.1919  | 8.3362  | 8.5687  | 8.2992  | 8.6303  | 8.3612  | 8.0863  | 8.2372  | 7.9666  | 8.1724  | 1.0348  | 0.0493  | 0.0198 | 1.7033 |
| Atp5pd  | _SWNETFMAR_2                                                                   | #N/A                   | 7.5587  | 7.9520  | 7.7735  | 8.3577  | 8.4682  | 8.1780  | 7.6811  | 7.9563  | 7.7713  | 8.0684  | 1.0227  | 0.0324  | 0.3784 | 0.4220 |
| Atp5pd  | _IPVPEDKRYALVDQEKEDVK_3                                                        | #N/A                   | 7.7135  | 7.7575  | 7.8614  | 7.3492  | 8.1348  | 8.2037  | 8.3264  | 7.0710  | 7.5287  | 8.1341  | 1.0260  | 0.0370  | 0.5513 | 0.2586 |
| Atp5pd  | _YTALVDQEKEDVK_2                                                               | #N/A                   | 4.7145  | 5.0856  | 4.1837  | 4.6580  | 5.3154  | 3.9457  | 4.4993  | 4.4319  | 4.3825  | 4.7135  | 1.0319  | 0.0453  | 0.6109 | 0.2140 |
| Atp5pd  | _TIDVWSVFEVM[Oxidation (M)]PONQK_2                                             | #N/A                   | 7.4095  | 7.5289  | 8.0901  | 7.7950  | 8.0605  | 8.7464  | 7.8497  | 7.4866  | 7.7723  | 7.9513  | 1.0223  | 0.0319  | 0.5204 | 0.2837 |
| Atp5pd  | _NIIPFDQM[Oxidation (M)]TIDOLNEIFETK_3                                         | #N/A                   | 4.5180  | 5.6339  | 4.3980  | 6.1539  | 5.0636  | 6.1831  | 5.2473  | 5.4626  | 5.0477  | 5.0378  | 1.0243  | 0.0346  | 0.7657 | 0.1159 |
| Atp5pd  | _PLGVDOFEK_2                                                                   | #N/A                   | 4.5137  | 4.0925  | 3.8205  | 3.7542  | 5.0822  | 4.1608  | 4.8954  | 4.0457  | 4.6644  | 4.2901  | 0.9471  | -0.0784 | 0.4437 | 0.3529 |
| Apoa    | _IDELSYSPVEGQSK_2                                                              | #N/A                   | 8.3601  | 8.3325  | 8.6696  | 8.5428  | 8.3521  | 8.6113  | 8.5317  | 8.2574  | 8.4143  | 8.2627  | 1.0133  | 0.0191  | 0.2591 | 0.5865 |
| Apoa    | _LYDWGLR_2                                                                     | #N/A                   | 7.1347  | 7.3382  | 7.3882  | 6.7371  | 7.0292  | 6.8178  | 6.8134  | 7.1535  | 7.3576  | 6.8499  | 1.0043  | 0.0063  | 0.8615 | 0.0647 |
| Apoa    | _TQLEINSQR_2                                                                   | #N/A                   | 6.8034  | 6.9613  | 7.2739  | 6.8237  | 6.9999  | 6.7912  | 6.6166  | 6.8594  | 6.8048  | 6.6566  | 1.0309  | 0.0439  | 0.0823 | 1.0848 |
| Apoa    | _GYNEDLWK_2                                                                    | #N/A                   | 5.3114  | 5.7577  | 3.9850  | 5.8005  | 5.5896  | 5.5500  | 4.6962  | 5.7108  | 5.9860  | 5.9021  | 0.9567  | -0.0639 | 0.5817 | 0.2353 |
| Dtd1    | _SASS[Phospho (STY)]GAEGDVSSER_2                                               | #N/A                   | 7.0199  | 6.4869  | 6.2827  | 7.1867  | 6.4437  | 6.7263  | 6.6608  | 6.7029  | 6.9645  | 3.2595  | 1.1347  | 0.1823  | 0.3021 | 0.5198 |
| Dtd1    | _SASS[Phospho (STY)]GAEGDVSSERP_2                                              | #N/A                   | 10.1635 | 10.1451 | 10.8406 | 10.8490 | 10.0591 | 10.4905 | 10.5967 | 10.3379 | 10.2872 | 10.3276 | 1.0079  | 0.0114  | 0.6558 | 0.1832 |
| Dtd1    | _ASVTVGEGSAGR_2                                                                | #N/A                   | 5.0846  | 4.0160  | 3.8969  | 4.3996  | 4.7980  | 4.8154  | 4.9411  | 3.7189  | 3.3675  | 4.3666  | 1.0984  | 0.1354  | 0.3049 | 0.5158 |
| Dtd1    | _AKGPSESS[Phospho (STY)]KER_2                                                  | Q9D018_S182_M1_Dtd1    | 2.9412  | 3.6975  | 4.1757  | 3.7195  | 3.5857  | 3.0389  | 3.8677  | 3.2817  | 3.5808  | 3.3957  | 0.9985  | -0.0022 | 0.9839 | 0.0070 |
| Txc1    | _GGFDS[Phospho (STY)]PFYR_2                                                    | Q9EP53_S502_M1_Txc1    | 3.8470  | 6.1637  | 4.5338  | 6.7603  | 3.2675  | 3.3572  | 3.2503  | 3.0820  | 6.4929  | 6.6714  | 0.9550  | -0.0664 | 0.8452 | 0.0731 |
| Wdr4    | _SPFPDS[Phospho (STY)]PEQTKR_2                                                 | Q9EP82_S397_M1_Wdr4    | 7.8058  | 3.7180  | 8.2966  | 8.2900  | 3.6063  | 3.0183  | 4.4123  | 3.4208  | 7.7574  | 3.1638  | 1.2347  | 0.3042  | 0.5007 | 0.3004 |
| Senp3   | _NHL5[Phospho (STY)]CEGGATPGVPPC[Carbamidomethyl (C)]C[Carbamidomethyl (C)]R_3 | Q9EP97_S163_M1_Senp3   | 3.4907  | 4.2469  | 3.2244  | 4.2690  | 4.1352  | 3.9902  | 6.7453  | 4.2331  | 3.0313  | 6.0437  | 0.7765  | -0.3650 | 0.1506 | 0.8222 |
| Senp3   | _S[Phospho (STY)]PPVSGPPMEEGLR_2                                               | Q9EP97_S206_M1_Senp3   | 4.3237  | 3.5791  | 4.0573  | 3.3357  | 3.4674  | 3.1572  | 4.5512  | 3.2819  | 4.4314  | 3.3027  | 0.9387  | -0.0912 | 0.5229 | 0.2816 |
| Pycard  | _EIHPLYLM[Oxidation (M)]DLEQSS[Phospho (STY)]_2                                | #N/A                   | 6.9914  | 7.3900  | 7.8691  | 7.9827  | 8.4839  | 7.9817  | 7.5866  | 7.7757  | 7.9265  | 7.6598  | 1.0059  | 0.0805  | 0.8702 | 0.0604 |
| Parva   | _JAcetyl (Protein N-term)[ATP][Phospho (STY)]PQSKPLVK_2                        | Q9EPC1_S4_M1_Parva     | 6.4995  | 6.1898  | 5.4989  | 5.4053  | 3.3821  | 5.3038  | 6.9899  | 4.9785  | 5.0858  | 5.8644  | 0.9390  | -0.0909 | 0.6135 | 0.2122 |
| Parva   | _SPTPKS[Phospho (STY)]PPSR_2                                                   | Q9EPC1_S19_M1_Parva    | 7.9594  | 7.8691  | 8.8899  | 3.3044  | 3.7901  | 7.0886  | 8.0674  | 7.9811  | 7.9287  | 0.9579  | -0.0620 | 0.8528  | 0.0690 | 0.2692 |
| Atp13a1 | _DS[Phospho (STY)]PVLNSGPR_2                                                   | Q9EPE9_S896_M1_Atp13a1 | 7.9169  | 2.9965  | 3.4748  | 3.9183  | 2.8848  | 7.2254  | 8.1639  | 3.9826  | 7.1338  | 7.5026  | 0.7073  | -0.4995 | 0.1869 | 0.7284 |
| Arfgap1 | _S[Phospho (STY)]PSSDSWTC[Carbamidomethyl (C)]ADASTGR_2                        | #N/A                   | 9.8322  | 9.7436  | 9.7639  | 7.5250  | 8.7906  | 9.6265  | 9.6328  | 9.3122  | 9.5659  | 7.2030  | 1.0319  | 0.0454  | 0.1669 | 0.1781 |
| Arfgap1 | _AAPSTADEGWQNW_2                                                               | #N/A                   | 6.3993  | 6.9964  | 7.5480  | 7.7365  | 7.3794  | 7.5176  | 7.8976  | 7.1047  | 7.0908  | 7.6582  | 0.9886  | -0.0166 | 0.7197 | 0.1428 |
| Arfgap1 | _TLQFTAHR_2                                                                    | #N/A                   | 6.1310  | 6.9626  | 6.5811  | 7.0786  | 7.3046  | 6.9775  | 6.8556  | 7.0999  | 6.8817  | 1.0178  | 0.0254  | 0.6827  | 0.1658 | 0.2803 |
| Arfgap1 | _NNSDGSWESWEGASGEGR_2                                                          | #N/A                   | 4.5910  | 7.7934  | 4.5127  | 7.9800  | 6.9221  | 7.1501  | 5.3230  | 7.1520  | 7.1258  | 6.9383  | 0.9784  | -0.0315 | 0.8726 | 0.0592 |
| Arfgap1 | _KAAPSTADEGWQNW_2                                                              | #N/A                   | 6.9967  | 6.7768  | 6.9730  | 7.0332  | 6.1171  | 7.1087  | 7.7954  | 7.0611  | 7.1645  | 7.0653  | 0.9399  | -0.0895 | 0.0985 | 1.0065 |
| Arfgap1 | _AKS[Phospho (STY)]PSSDSWTC[Carbamidomethyl (C)]ADASTGR_3                      | #N/A                   | 6.9541  | 6.6992  | 3.4835  | 6.0396  | 3.7602  | 5.5318  | 6.3680  | 6.3980  | 6.7044  | 7.2680  | 0.8095  | -0.3048 | 0.1373 | 0.8624 |
| Arfgap1 | _SS[Phospho (STY)]DSWDVWWSGGSASNNK_2                                           | #N/A                   | 3.2355  | 3.9917  | 4.0723  | 10.9685 | 10.8923 | 4.2570  | 10.1315 | 10.0975 | 3.3399  | 3.5605  | 0.9195  | -0.1211 | 0.8261 | 0.0830 |
| Arfgap1 | _RS[Phospho (STY)]DSWDVWWSGGSASNNK_3                                           | #N/A                   | 3.5652  | 3.7079  | 3.6950  | 3.9595  | 3.5715  | 3.9907  | 4.0029  | 4.0491  | 3.5854  | 3.7210  | 0.9762  | -0.0347 | 0.5008 | 0.3003 |
| Arfgap1 | _AFEDWNLNOLGQDGAQENR_2                                                         | #N/A                   | 6.2969  | 5.6232  | 6.6396  | 6.8552  | 5.7549  | 5.5581  | 6.1647  | 5.8395  | 6.1049  | 6.5057  | 0.9677  | -0.0474 | 0.5047 | 0.2970 |
| Arfgap1 | _DVTFFSGK_2                                                                    | #N/A                   | 4.3237  | 3.3883  | 4.9675  | 4.6019  | 4.7762  | 3.3483  | 3.7091  | 3.8015  | 4.7615  | 4.7437  | 0.9954  | -0.0667 | 0.9643 | 0.0158 |
| Arfgap1 | _AKS[Phospho (STY)]PSSDS[Phospho (STY)]WTC[Carbamidomethyl (C)]ADASTGR_3       | #N/A                   | 3.7431  | 3.9933  | 3.5263  | 4.0289  | 3.4660  | 4.1419  | 3.5362  | 4.0929  | 3.7415  | 3.9959  | 0.9935  | -0.0094 | 0.8894 | 0.0901 |
| Arfgap1 | _GLGVHLSFVR_2                                                                  | #N/A                   | 5.6242  | 5.1922  | 4.3129  | 4.1600  | 5.7887  | 5.7468  | 4.5929  | 5.1499  | 5.6417  | 4.1396  | 1.0525  | 0.0739  | 0.5875 | 0.2310 |
| Arfgap1 | _S[Phospho (STY)]PSSDSWTC[Carbamidomethyl (C)]ADASTGR_2                        | #N/A                   | 3.3932  | 6.0816  | 4.1415  | 6.6416  | 3.4981  | 5.5139  | 5.9926  | 5.7514  | 6.2828  | 3.6733  | 0.8992  | -0.1532 | 0.5378 | 0.2904 |
| Arfgap1 | _FGGASQK_2                                                                     | #N/A                   | 3.5647  | 3.6615  | 4.2515  | 3.6555  | 4.4114  | 3.5383  | 5.0624  | 4.4714  | 4.3599  | 4.4664  | 0.8381  | -0.2547 | 0.0126 | 1.6693 |
| Arfgap1 | _EWLSSEPAQNWTPPQPK_2                                                           | #N/A                   | 5.4471  | 5.7597  | 5.3052  | 5.8974  | 5.7399  | 5.8485  | 5.8325  | 5.2545  | 5.3539  | 5.3588  | 1.0397  | 0.0562  | 0.2089 | 0.6801 |
| Ipo7    | _ETENDLTNNVQK_2                                                                | #N/A                   | 5.6390  | 5.1843  | 5.1249  | 3.5709  | 3.7444  | 5.2419  | 5.0513  | 5.6442  | 4.9116  | 4.3643  | 0.9515  | -0.0717 | 0.6341 | 0.1979 |
| Nbea    | _ROFS[Phospho (STY)]GPR_2                                                      | #N/A                   | 10.9270 | 10.7799 | 11.3    |         |         |         |         |         |         |         |         |         |        |        |



|         |                                                                   |                        |         |         |         |         |         |         |         |         |         |         |         |         |        |        |
|---------|-------------------------------------------------------------------|------------------------|---------|---------|---------|---------|---------|---------|---------|---------|---------|---------|---------|---------|--------|--------|
| Aldh6a1 | _DMDLYSYR_2                                                       | #N/A                   | 2.9420  | 3.7472  | 3.3289  | 4.3735  | 3.5685  | 4.1610  | 4.5218  | 4.1285  | 4.4276  | 4.0508  | 0.8610  | -0.2160 | 0.0696 | 1.1572 |
| Pold3   | _VDLS[Phospho (STY)]DEEAKETELK_3                                  | Q9EQ28_S306_M1_Pold3   | 4.3380  | 5.5405  | 3.5239  | 5.9265  | 5.5655  | 4.2658  | 3.7413  | 4.0919  | 5.6186  | 3.9936  | 1.1143  | 0.1562  | 0.4225 | 0.3742 |
| Dpyl5   | _PHGSGVQDR_2                                                      | #N/A                   | 7.0064  | 7.3211  | 7.1328  | 7.5086  | 7.6994  | 7.0143  | 7.3725  | 7.1808  | 7.0854  | 7.1151  | 1.0128  | 0.0183  | 0.5633 | 0.2492 |
| Dpyl5   | _ILNLYPR_2                                                        | #N/A                   | 6.6473  | 7.1499  | 7.2338  | 6.5918  | 6.8214  | 6.0002  | 6.9722  | 7.1456  | 6.7664  | 6.8505  | 0.9722  | -0.4007 | 0.4390 | 0.3575 |
| Dpyl5   | _VVNDCC[Carbamidomethyl (C)]HEADVYSGRQVQR_3                       | #N/A                   | 6.2215  | 6.7977  | 7.2725  | 7.2538  | 6.5153  | 6.6579  | 6.9770  | 6.1462  | 6.5642  | 6.6862  | 1.0293  | 0.4016  | 0.4659 | 0.3317 |
| Dpyl5   | _FNVATSSNAAK_2                                                    | #N/A                   | 6.0152  | 6.6263  | 6.2011  | 6.7197  | 6.7975  | 6.5432  | 6.6086  | 6.5171  | 6.4152  | 6.4168  | 0.9991  | -0.0013 | 0.9731 | 0.0118 |
| Dpyl5   | _AEM[Oxidation (M)]ETLVR_2                                        | #N/A                   | 5.7007  | 5.8755  | 5.4015  | 4.9022  | 6.5617  | 6.0822  | 5.2188  | 5.8131  | 6.0622  | 5.9498  | 0.9988  | -0.0018 | 0.9834 | 0.0073 |
| Dpyl5   | _C[Carbamidomethyl (C)]HGVLPLTVSR_2                               | #N/A                   | 5.5993  | 6.1652  | 4.3829  | 6.4719  | 5.8978  | 6.0308  | 5.3374  | 6.0868  | 5.4069  | 5.4209  | 1.0350  | 0.4097  | 0.6382 | 0.1951 |
| Dpyl5   | _EM[Oxidation (M)]GT[Phospho (STY)]PLADT[Phospho (STY)]PTRPVTR_2  | #N/A                   | 11.3656 | 11.8271 | 12.6257 | 12.0117 | 11.3556 | 12.0391 | 12.1443 | 11.8293 | 11.9270 | 11.9415 | 0.9925  | -0.0109 | 0.7282 | 0.1378 |
| Dpyl5   | _KEM[Oxidation (M)]GT[Phospho (STY)]PLADT[Phospho (STY)]PTRPVTR_3 | #N/A                   | 6.5678  | 6.6747  | 3.9457  | 6.7121  | 5.6160  | 6.9198  | 6.8077  | 6.2226  | 6.6955  | 6.5841  | 0.9233  | -0.1152 | 0.4163 | 0.3805 |
| Dpyl5   | _DIHESSFLSGS[Phospho (STY)]QIDHVPKR_4                             | #N/A                   | 3.7068  | 7.1054  | 8.1182  | 8.1720  | 3.7559  | 6.7156  | 4.2949  | 6.8988  | 5.2544  | 6.5058  | 1.0913  | 0.1260  | 0.6589 | 0.1812 |
| Dpyl5   | _ELM[Oxidation (M)]PGGAK_2                                        | #N/A                   | 6.3736  | 6.5663  | 6.5030  | 6.1393  | 6.8052  | 6.1524  | 6.0158  | 6.2632  | 6.4349  | 6.2876  | 1.0277  | 0.0394  | 0.2758 | 0.5594 |
| Dpyl5   | _VVYENGVM[Oxidation (M)]C[Carbamidomethyl (C)]AEGTGK_2            | #N/A                   | 4.2155  | 5.1409  | 3.4015  | 5.1464  | 4.5779  | 5.3243  | 3.6188  | 5.3577  | 5.4060  | 4.9445  | 0.9592  | -0.0602 | 0.7029 | 0.1531 |
| Dpyl5   | _MI[Oxidation (M)]SVVWR_2                                         | #N/A                   | 4.9091  | 5.2231  | 5.9977  | 4.7611  | 5.3014  | 4.2774  | 4.6627  | 5.0739  | 4.8972  | 4.7854  | 1.0460  | 0.0649  | 0.4837 | 0.3154 |
| Dpyl5   | _DIHESSFLSGS[Phospho (STY)]QIDHVPK_3                              | #N/A                   | 6.0931  | 6.2032  | 6.5700  | 7.3945  | 5.9028  | 6.3383  | 6.2464  | 6.6903  | 5.9625  | 6.5746  | 1.0076  | 0.0109  | 0.8755 | 0.0578 |
| Dpyl5   | _EALDGTGPEGIEHPLEEAEATHR_3                                        | #N/A                   | 3.7896  | 3.7110  | 4.7226  | 4.6099  | 3.7328  | 4.2075  | 3.7488  | 4.5315  | 3.8788  | 4.7187  | 0.9785  | -0.0313 | 0.7700 | 0.1135 |
| Dpyl5   | _LDTNSTYLM[Oxidation (M)]SLANDLNIVASDRPFTTK_4                     | #N/A                   | 3.4438  | 4.2001  | 3.1775  | 3.5296  | 4.0884  | 4.0126  | 3.9302  | 4.2799  | 3.1321  | 3.6534  | 0.9981  | -0.0027 | 0.9812 | 0.0083 |
| Dpyl5   | _DSELYQVHC[Carbamidomethyl (C)]IR_2                               | #N/A                   | 4.9112  | 4.9543  | 3.9426  | 5.9670  | 5.2597  | 4.8080  | 5.0202  | 4.7566  | 5.1697  | 4.9891  | 0.9980  | -0.0029 | 0.9772 | 0.0100 |
| Dpyl5   | _TISTASTQVGGDFNYENM[Oxidation (M)]R_2                             | #N/A                   | 4.1631  | 3.4674  | 3.3490  | 3.8517  | 3.2888  | 4.3513  | 3.9872  | 4.2668  | 3.5917  | 4.8066  | 0.8996  | -0.1526 | 0.2069 | 0.6841 |
| Dpyl5   | _AMGKIDFTK_2                                                      | #N/A                   | 2.9518  | 4.3906  | 4.1863  | 3.7301  | 3.5963  | 3.0283  | 3.8783  | 3.2711  | 3.5702  | 3.4073  | 1.0327  | 0.0464  | 0.7347 | 0.1398 |
| Dpyl5   | _THC[Carbamidomethyl (C)]PVLNVVSSGSDVAAAK_3                       | #N/A                   | 3.5711  | 4.3274  | 3.3048  | 3.4101  | 4.2157  | 3.9098  | 3.8029  | 4.1526  | 2.9508  | 4.0267  | 1.0151  | 0.0217  | 0.8577 | 0.0667 |
| Dpyl5   | _TPVLGDVAVHVPK_3                                                  | #N/A                   | 3.5640  | 3.6621  | 4.2508  | 3.2526  | 1.1137  | 3.5390  | 4.4681  | 3.3650  | 3.2196  | 0.9186  | -0.1225 | 0.6523  | 0.1855 |        |
| Cert1   | _FVQKPS[Phospho (STY)]R_2                                         | Q9EQG9_S373_M1_Cert1   | 3.6697  | 4.4259  | 3.4033  | 7.5686  | 2.8134  | 3.8112  | 3.7044  | 4.1288  | 6.7403  | 3.9567  | 0.9243  | -0.1135 | 0.7424 | 0.1294 |
| Cert1   | _SSS[Phospho (STY)]M[Oxidation (M)]SS[Phospho (STY)]DLVSSASDVHR_2 | Q9EQG9_S377_M2_Cert1   | 3.7994  | 3.5205  | 4.3380  | 3.7890  | 3.3759  | 3.3682  | 3.6125  | 3.5387  | 3.9279  | 3.6843  | 1.0128  | 0.0183  | 0.8018 | 0.0959 |
| Vps35   | _RES[Phospho (STY)]PESEGPYEGUL_2                                  | #N/A                   | 5.6994  | 9.2969  | 9.6515  | 8.7783  | 9.1602  | 9.8286  | 9.6931  | 9.5673  | 9.3001  | 9.5757  | 0.9354  | -0.0534 | 0.2772 | 0.5572 |
| Vps35   | _SRRES[Phospho (STY)]PESEGPYEGUL_3                                | #N/A                   | 8.9092  | 3.9725  | 3.8294  | 8.7479  | 8.1419  | 4.1050  | 8.0678  | 9.4815  | 9.3422  | 8.7467  | 0.7053  | -0.5036 | 0.0832 | 1.0801 |
| Vps35   | _IREDLPNLSSEETEQUIN_3                                             | #N/A                   | 6.8585  | 6.3059  | 6.9057  | 6.4698  | 5.4746  | 6.3611  | 6.6433  | 6.0534  | 6.0864  | 6.5921  | 0.9849  | -0.0219 | 0.7403 | 0.1306 |
| Vps35   | _LELAELPLR_2                                                      | #N/A                   | 6.6839  | 6.7042  | 6.2806  | 5.9773  | 5.5996  | 6.5999  | 6.4785  | 6.8972  | 6.2303  | 6.3730  | 0.9480  | -0.0771 | 0.2455 | 0.6100 |
| Vps35   | _SDPOQDQULNLTAR_2                                                 | #N/A                   | 6.1509  | 5.4342  | 6.4017  | 5.6064  | 5.8095  | 6.2472  | 6.3707  | 6.3426  | 5.9879  | 6.2135  | 0.9539  | -0.0681 | 0.2041 | 0.6901 |
| Vps35   | _LSQLEGVWVER_2                                                    | #N/A                   | 5.7927  | 5.2228  | 3.8892  | 5.9188  | 4.8952  | 3.2205  | 5.9974  | 5.5374  | 5.4306  | 4.9305  | 0.8811  | -0.1826 | 0.2896 | 0.5383 |
| Vps35   | _IPDVTNNILTVLK_2                                                  | #N/A                   | 5.1937  | 5.1637  | 4.7666  | 5.1361  | 3.6691  | 5.0448  | 5.5088  | 5.3212  | 4.3846  | 5.4321  | 0.9355  | -0.0961 | 0.3887 | 0.4104 |
| Vps35   | _LFDIFSQVATVQSR_2                                                 | #N/A                   | 3.9467  | 4.1009  | 5.4225  | 4.0198  | 3.0546  | 4.6059  | 4.8013  | 4.7365  | 4.1057  | 4.7216  | 0.9130  | -0.1314 | 0.3698 | 0.4320 |
| Vps35   | _PTTQSQ[Phospho (STY)]PDQIEKLDLDAQAVK_3                           | #N/A                   | 3.4568  | 7.1175  | 7.8361  | 7.4992  | 6.2819  | 3.8916  | 3.6351  | 6.9894  | 6.5808  | 6.0851  | 0.9689  | -0.0455 | 0.8754 | 0.0578 |
| Vps35   | _LDDAQIAVK_2                                                      | #N/A                   | 4.5928  | 3.4422  | 3.1276  | 3.3886  | 4.5373  | 3.1613  | 3.5221  | 3.9561  | 4.1368  | 4.6046  | 0.9145  | -0.1289 | 0.3970 | 0.4012 |
| Vps35   | _PTTQSQ[Phospho (STY)]PDQIEK_2                                    | #N/A                   | 9.1954  | 8.6862  | 8.7668  | 9.0281  | 8.2297  | 8.9466  | 9.3373  | 9.0228  | 9.0160  | 8.8854  | 0.9717  | -0.0414 | 0.2096 | 0.6785 |
| Vps35   | _LNLHATSSAVK_2                                                    | #N/A                   | 3.3081  | 3.7438  | 4.2865  | 3.8302  | 3.6281  | 3.8528  | 3.8633  | 3.9543  | 4.0464  | 3.6508  | 0.9732  | -0.0391 | 0.5725 | 0.2422 |
| Vps35   | _ES[Phospho (STY)]PESEGPYEGUL_2                                   | #N/A                   | 3.7907  | 3.2282  | 4.0439  | 3.7241  | 3.1612  | 3.9822  | 3.4388  | 3.7535  | 3.5608  | 3.6911  | 1.0122  | 0.0175  | 0.8312 | 0.0803 |
| Vps35   | _TQC[Carbamidomethyl (C)]JALAAK_2                                 | #N/A                   | 3.0331  | 4.3093  | 4.2676  | 3.8114  | 3.6777  | 2.9469  | 3.9597  | 5.7657  | 3.4888  | 3.4887  | 0.8799  | -0.1845 | 0.3650 | 0.4047 |
| Mag3    | _SGS[Phospho (STY)]PNLDSEVLK_2                                    | #N/A                   | 3.9164  | 6.6819  | 7.3662  | 7.2641  | 3.4947  | 6.8466  | 7.0509  | 6.8432  | 5.5214  | 6.1076  | 0.9978  | -0.0032 | 0.9907 | 0.0341 |
| Mag3    | _GGPC[Carbamidomethyl (C)]S[Phospho (STY)]PTK_2                   | Q9EQB9_S662_M1_Mag3    | 2.9969  | 4.2292  | 3.6837  | 4.1864  | 4.1175  | 4.0079  | 3.9011  | 3.9321  | 3.5807  | 4.1534  | 0.9945  | -0.0080 | 0.9355 | 0.0290 |
| Mag3    | _QPEDESHAFSQNGS[Phospho (STY)]PR_3                                | #N/A                   | 3.7838  | 4.3521  | 3.5636  | 3.5681  | 3.5034  | 4.2289  | 7.1689  | 4.0549  | 3.7035  | 4.0333  | 0.8087  | -0.3063 | 0.2130 | 0.6717 |
| Slc19a2 | _KQEDPSSSS[Phospho (STY)]PQASTS_2                                 | Q9EQN9_S492_M1_Slc19a2 | 4.1531  | 6.6888  | 7.4177  | 3.4306  | 3.0106  | 3.1810  | 7.5571  | 7.0859  | 7.1833  | 6.7272  | 0.6518  | -0.6174 | 0.0357 | 1.4476 |
| Ehd4    | _DKPYVDLFTLS[Phospho (STY)]PINK_3                                 | Q9EQP2_S459_M1_Ehd4    | 4.8488  | 4.8144  | 4.3441  | 4.5990  | 3.9984  | 4.7468  | 4.2645  | 4.6750  | 5.0931  | 4.3556  | 0.9916  | -0.0121 | 0.8682 | 0.0614 |
| Oga     | _LENEG[Phospho (STY)]DEDITDVLVSPQM[Oxidation (M)]ALK_3            | #N/A                   | 3.4916  | 3.5543  | 3.6733  | 4.3845  | 3.3994  | 3.8432  | 3.8778  | 6.5710  | 3.7857  | 4.0414  | 0.8055  | -0.3121 | 0.1410 | 0.8507 |
| Syl13   | _PAVTAPEVINYADTYLLEETAPAS[Phospho (STY)]PQAGDSQR_4                | Q9EQT6_S113_M1_Syl13   | 6.2076  | 6.1843  | 4.4195  | 6.6014  | 5.9028  | 3.3703  | 3.7311  | 6.8107  | 6.4185  | 6.4826  | 0.9295  | -0.1054 | 0.6435 | 0.1915 |
| Set     | _IDFFENPPYFENK_2                                                  | #N/A                   | 6.6347  | 6.6067  | 6.9955  | 6.3349  | 6.4090  | 6.8992  | 7.0699  | 6.3313  | 6.4464  | 6.5517  | 1.0071  | 0.0102  | 0.8069 | 0.0932 |
| Set     | _VEVFEDIK_2                                                       | #N/A                   | 5.7236  | 4.8106  | 5.9816  | 6.2508  | 5.9262  | 5.8518  | 5.9889  | 5.4810  | 5.1638  | 6.2296  | 1.0073  | 0.0105  | 0.8987 | 0.0464 |
| Set     | _EFHNEGDPSSK_2                                                    | #N/A                   | 4.7039  | 5.2565  | 5.6853  | 5.9887  | 5.9111  | 5.9321  | 5.5768  | 5.3775  | 5.5851  | 5.3775  | 1.0332  | 0.0471  | 0.5344 | 0.0724 |
| Rims2   | _TGSVQTS[Phospho (STY)]PSTGTGR_2                                  | Q9EQZ7_S1095_M1_Rims2  | 9.1122  | 9.1835  | 9.4945  | 9.4190  | 8.1351  | 8.7213  | 9.5576  | 9.1176  | 8.4983  | 8.9397  | 0.9981  | -0.0028 | 0.9569 | 0.0191 |
| Rims2   | _TSNHS[Phospho (STY)]PPTPR_2                                      | Q9EQZ7_S472_M1_Rims2   | 9.8574  | 10.1462 | 10.4604 | 10.3457 | 9.6238  | 9.2740  | 10.2856 | 2.9755  | 10.0175 | 9.8775  | 1.2005  | 0.2637  | 0.2757 | 0.5596 |
| Rims2   | _SWS[Phospho (STY)]SAPPPQR_2                                      | Q9EQZ7_S1039_M1_Rims2  | 9.8921  | 9.8817  | 3.1518  | 3.3496  | 3.0915  | 10.0056 | 3.4979  | 9.9115  | 9.7000  | 9.6482  | 0.8013  | -0.3196 | 0.4904 | 0.3094 |
| Rims2   | _ASQSS[Phospho (STY)]LESSTGPSYSR_2                                | Q9EQZ7_S1518_M1_Rims2  | 8.2498  | 8.2933  | 8.3249  | 8.9068  | 3.8158  | 8.0841  | 8.8772  | 8.3491  | 7.8499  | 8.0505  | 0.9192  | -0.1216 | 0.5123 | 0.2905 |
| Rims2   | _RHS[Phospho (STY)]DVSLANAELEDSR_3                                | Q9EQZ7_S409_M1_Rims2   | 7.2455  | 7.7058  | 7.7089  | 8.1325  | 7.2789  | 7.7891  | 7.8079  | 7.8467  | 7.8488  | 7.6047  | 0.9828  | -0.0250 | 0.4717 | 0.3263 |
| Rims2   | _YRS[Phospho (STY)]DPNLLAR_2                                      | Q9EQZ7_S375_M1_Rims2   | 7.9955  | 3.3774  | 8.9472  | 5.5374  | 7.3298  | 3.3589  | 8.2532  | 3.6017  | 4.2297  | 3.0767  | 1.2019  | 0.2654  | 0.5679 | 0.2457 |
| Rims2   | _SPS[Phospho (STY)]DYADBR_2                                       | Q9EQZ7_S311_M1_Rims2   | 3.2040  | 6.3328  | 6.3469  | 3.9823  | 5.6495  | 5.9040  | 6.4294  | 6.1427  | 6.2696  | 6.6596  | 0.9309  | -0.1033 | 0.6604 | 0.1802 |
| Rims2   | _S[Phospho (STY)]ASQLSQTGGGK_2                                    | Q9EQZ7_S1285_M1_Rims2  | 3.6664  | 4.4227  | 3.4001  | 4.4447  | 2.8101  | 3.8145  | 6.2094  | 4.0573  | 4.3564  | 4.1220  | 0.9259  | -0.1111 | 0.3964 | 0.4019 |
| Rims2   | _NDGQS[Phospho (STY)]DTAVGALGTSGK_2                               | Q9EQZ7_S1251_M1_Rims2  | 6.7609  | 7.0379  | 7.2207  | 4.1033  | 3.8388  | 3.8907  | 7.4442  | 7.3893  | 3.1970  | 7.0083  | 0.8747  | -0.1931 | 0.5257 | 0.2793 |
| Rims2   | _IPSTHAQLESSSSFS[Phospho (STY)]QIK_3                              | Q9EQZ7_S788_M1_Rims2   | 4.3034  | 3.5588  | 4.0371  | 3.5808  | 3.4471  | 3.1775  | 3.7291  | 3.4203  | 3.7194  | 3.2581  | 1.0431  | 0.0609  | 0.5249 | 0.2799 |
| Rims2   | _RAS[Phospho (STY)]GSS[Phospho (STY)]LESSTGPSYSR_2                | Q9EQZ7_S1515_M2_Rims2  | 4.9712  | 4.0744  | 4.0744  | 3.3540  | 3.5120  | 4.5234  | 4.0705  | 3.4658  | 3.4804  | 4.3429  | 1.0495  | 0.0697  | 0.6139 | 0.2119 |
| Rims2   | _RADS[Phospho (STY)]RK_2                                          | Q9EQZ7_S493_M1_Rims2   | 3.8056  | 3.5282  | 3.4099  | 3.9125  | 3.3496  | 3.1605  | 3.3575  | 1.3439  | 3.8546  | 2.7848  | 1.2443  | 0.3153  | 0.1650 | 0.7824 |
| Rims2   | _RQLIHGS[Phospho (STY)]PTR_2                                      | Q9EQZ7_S965_M1_Rims2   | 3.8900  | 3.8003  | 4.0528  | 3.6913  | 3.6216  | 3.4787  | 3.8395  | 3.2555  | 3.6312  | 3.1451  | 1.0830  | 0.1151  | 0.1187 | 0.9256 |
| Rims2   | _NDS[Phospho (STY)]LSSQGSSESRPPPPRHK_3                            | Q9EQZ7_S522_M1_Rims2   | 3.3355  | 4.0069  | 4.5700  | 4.1138  | 3.8282  | 3.9012  | 4.2620  | 4.3882  | 3.1864  | 3.7911  | 1.0134  |         |        |        |



|          |                                                                                       |                         |         |         |         |         |         |         |         |         |         |         |         |         |        |        |
|----------|---------------------------------------------------------------------------------------|-------------------------|---------|---------|---------|---------|---------|---------|---------|---------|---------|---------|---------|---------|--------|--------|
| Osbp5    | _ENAE[Phospho (STY)]DAETQDHSR_2                                                       | Q9ER64_S311_M1_Osbp5    | 3.0168  | 4.2094  | 3.7036  | 3.9888  | 4.0977  | 4.0277  | 3.9209  | 3.9123  | 3.5608  | 4.1732  | 0.9869  | -0.0191 | 0.8395 | 0.0760 |
| Wtap     | _EGS[Phospho (STY)]TREDDFSSSGNGK_2                                                    | Q9ER69_S297_M1_Wtap     | 3.4818  | 4.2870  | 4.1686  | 6.7898  | 4.1084  | 3.6211  | 4.3860  | 3.4472  | 3.0958  | 3.1375  | 1.2539  | 0.3264  | 0.2138 | 0.6699 |
| Cars1    | _VQPOWS[Phospho (STY)]PRAGTEPC[Carbamidomethyl (C)]R_2                                | Q9ER72_S102_M1_Cars1    | 3.7549  | 3.5418  | 9.5008  | 9.8795  | 2.8806  | 8.5932  | 9.5845  | 9.3153  | 9.2885  | 9.1773  | 0.6807  | -0.5550 | 0.1136 | 0.9445 |
| Cars1    | _ALQDEGG[Phospho (STY)]ADR_2                                                          | Q9ER72_S390_M1_Cars1    | 3.6494  | 3.6930  | 3.3831  | 4.4277  | 2.7932  | 3.8314  | 3.0751  | 4.0743  | 4.3734  | 4.1050  | 0.9290  | -0.1062 | 0.4572 | 0.3399 |
| Tlp11    | _TQSQIDFPVADS[Phospho (STY)]EEAEFEQK_3                                                | Q9ERAE_S211_M1_Tlp11    | 2.9942  | 3.7505  | 4.2288  | 3.7725  | 2.6388  | 2.9858  | 3.9208  | 6.1064  | 5.2777  | 3.4498  | 0.8378  | -0.2553 | 0.2489 | 0.6040 |
| Tlp11    | _FEATGYVWABDS[Phospho (STY)]DEERPSFGK_3                                               | Q9ERAE_S60_M1_Tlp11     | 3.7824  | 3.7239  | 3.6868  | 4.1895  | 3.6265  | 3.4516  | 3.9041  | 4.3790  | 3.0403  | 4.1565  | 0.9673  | -0.0480 | 0.6439 | 0.1912 |
| Tlp11    | _GAEEAADS[Phospho (STY)]EDS[Phospho (STY)]DAEKNPVQEDFPK_3                             | Q9ERAE_S96_M2_Tlp11     | 3.7407  | 3.6017  | 3.4744  | 3.6872  | 2.8844  | 2.4059  | 3.1664  | 3.9830  | 4.2821  | 2.3367  | 0.9585  | -0.0612 | 0.7541 | 0.1226 |
| Ralign2  | _EDLAGPDGAS[Phospho (STY)]PGGR_2                                                      | Q9ERD6_S308_M1_Ralign2  | 6.3386  | 6.2222  | 3.1882  | 6.4321  | 3.1279  | 6.1052  | 6.4048  | 4.4277  | 6.3651  | 5.8716  | 0.9078  | -0.1395 | 0.5714 | 0.2430 |
| Tubb3    | _LYTVATVR_2                                                                           | #N/A                    | 10.3435 | 10.6260 | 10.8861 | 10.7290 | 10.3605 | 10.5226 | 10.3034 | 10.6023 | 10.5880 | 10.5707 | 1.0059  | 0.0085  | 0.6260 | 0.2034 |
| Tubb3    | _VREEYPRD_2                                                                           | #N/A                    | 9.0431  | 8.7669  | 8.6761  | 8.6617  | 9.1877  | 8.7364  | 8.6596  | 8.9332  | 8.7715  | 8.6776  | 1.0097  | 0.0139  | 0.5049 | 0.2968 |
| Tubb3    | _M[Oxidation (M)]SSTFGKNSAIQELKR_3                                                    | #N/A                    | 6.3583  | 6.7987  | 8.2216  | 6.7040  | 6.0950  | 7.0813  | 6.0475  | 6.3716  | 6.7202  | 7.3332  | 1.0390  | 0.0553  | 0.5711 | 0.2433 |
| Tubb3    | _EVDEQM[Oxidation (M)]LAICSK_2                                                        | #N/A                    | 9.5651  | 9.7213  | 9.8353  | 9.9031  | 9.4616  | 9.8445  | 9.5268  | 9.5338  | 9.6722  | 9.8469  | 1.0080  | 0.0115  | 0.4938 | 0.3646 |
| Tubb3    | _LHFM[Oxidation (M)]PGFAPLTAIR_3                                                      | #N/A                    | 8.4655  | 8.6269  | 8.3565  | 7.9511  | 8.0850  | 8.3635  | 8.1993  | 8.5459  | 8.3978  | 8.1037  | 0.9996  | -0.0006 | 0.9814 | 0.0081 |
| Tubb3    | _MSSSTGNSTAIQELK_2                                                                    | #N/A                    | 9.9466  | 10.0613 | 11.5864 | 10.7587 | 10.2401 | 10.7178 | 10.5380 | 10.2445 | 10.3600 | 10.9824 | 1.0020  | 0.0028  | 0.9525 | 0.0211 |
| Tubb3    | _ISVYNEASSHK_2                                                                        | #N/A                    | 6.7883  | 6.9800  | 6.6796  | 7.4923  | 6.9374  | 7.1220  | 6.6468  | 7.2431  | 6.9325  | 7.1842  | 0.9998  | -0.0003 | 0.9928 | 0.0031 |
| Tubb3    | _LATPTYGDLNHLVSA[Oxidation (M)]SGVTTSLR_3                                             | #N/A                    | 5.5512  | 5.6654  | 6.0619  | 5.9697  | 5.8079  | 6.2043  | 5.3040  | 5.9611  | 5.8149  | 6.2091  | 1.0093  | 0.0134  | 0.7890 | 0.1029 |
| Tubb3    | _ISVYNEASS[Phospho (STY)]HKYVPR_3                                                     | Q9ERD7_S56_M1_Tubb3     | 3.4005  | 3.8256  | 4.0874  | 4.5900  | 3.7139  | 4.4115  | 4.3047  | 3.5285  | 3.1771  | 3.0562  | 1.1388  | 0.1876  | 0.1636 | 0.7863 |
| Tubb3    | _VAVC[Carbamidomethyl (C)]DIPPR_2                                                     | #N/A                    | 2.9090  | 4.3171  | 3.5958  | 4.0985  | 9.4809  | 3.9200  | 3.8132  | 4.0200  | 9.8626  | 4.0655  | 0.9051  | -0.1439 | 0.7602 | 0.1191 |
| Tubb3    | _FWEVSEDEHGDPSGNNVGGSSQLQER_3                                                         | #N/A                    | 3.9004  | 3.4420  | 3.6341  | 3.1779  | 3.2633  | 2.9654  | 3.3262  | 3.8233  | 4.1223  | 4.3560  | 0.8695  | -0.2017 | 0.0714 | 0.1462 |
| Tubb3    | zmethyl (C)[ENC[Carbamidomethyl (C)]DC[Carbamidomethyl (C)]LQGLTHSGGTGSGM[Oxidation ( | Q9ERD7_S56_M1_Tubb3     | 3.2242  | 4.0850  | 3.9110  | 4.4137  | 3.8508  | 3.8820  | 4.1158  | 3.7081  | 3.3567  | 4.3807  | 1.0011  | 0.0015  | 0.9880 | 0.0053 |
| Tlrd1    | _JAcetyl (Protein N-term)[ASQ[Phospho (STY)]AGATGEAASPAPSAVGASSQPR_3                  | Q9ERER_S5_M1_Tlrd1      | 3.2734  | 4.0786  | 3.9602  | 4.4629  | 3.8999  | 3.8296  | 4.1775  | 3.6556  | 3.3042  | 4.4299  | 1.0066  | 0.0095  | 0.9397 | 0.0317 |
| Mapk8ip2 | _MSEGS[Phospho (STY)]PRR_2                                                            | Q9ERER_S370_M1_Mapk8ip2 | 4.1870  | 5.7635  | 3.9207  | 3.4645  | 2.9767  | 3.2520  | 6.1393  | 3.5367  | 8.3157  | 0.9433  | -0.0842 | 0.7574  | 0.1207 |        |
| Mapk8ip2 | _SSQELSS[Phospho (STY)]PGSSDEDAGGAR_2                                                 | Q9ERER_S230_M1_Mapk8ip2 | 4.1759  | 3.4313  | 3.9096  | 3.4534  | 3.3196  | 3.3050  | 3.1981  | 3.5478  | 3.8469  | 3.1306  | 1.0490  | 0.0691  | 0.4764 | 0.3220 |
| Wdr61    | _ENIETVWTGSDDLVK_2                                                                    | #N/A                    | 4.0424  | 3.3468  | 3.2284  | 4.6029  | 3.7941  | 3.8086  | 3.4457  | 4.3874  | 3.6259  | 4.4710  | 0.9238  | -0.1143 | 0.4261 | 0.3705 |
| Lima1    | _ELSS[Phospho (STY)]VEEQIK_2                                                          | Q9ERGO_S735_M1_Lima1    | 12.1265 | 10.0047 | 3.2537  | 8.7789  | 4.1646  | 8.2091  | 11.1534 | 3.6277  | 3.9756  | 10.1462 | 1.0122  | 0.0271  | 0.8271 | 0.0825 |
| Lima1    | _TSS[Phospho (STY)]PESSPK_2                                                           | Q9ERGO_S367_M1_Lima1    | 6.6812  | 3.4669  | 3.6092  | 7.6004  | 3.0192  | 3.6054  | 3.3012  | 3.8482  | 4.1473  | 4.3311  | 1.1937  | 0.2554  | 0.4761 | 0.3323 |
| Strn3    | _SLGLNSEPPNGS[Phospho (STY)]VEAK_2                                                    | Q9ERGO_S214_M1_Strn3    | 7.8293  | 7.9264  | 8.3192  | 8.4825  | 7.4971  | 8.1882  | 8.4037  | 7.6936  | 8.1171  | 8.1593  | 0.9935  | -0.0095 | 0.8139 | 0.0894 |
| Strn3    | _NLEQLNGGES[Phospho (STY)]PKCK_2                                                      | #N/A                    | 3.5470  | 3.6278  | 4.4913  | 3.7988  | 3.4492  | 3.6348  | 3.9157  | 8.5466  | 8.7677  | 3.5962  | 0.5001  | -0.9999 | 0.0074 | 2.3131 |
| Strn3    | _VSHPTLPVTITAEHR_4                                                                    | #N/A                    | 3.3086  | 3.9176  | 3.9954  | 2.6384  | 3.9351  | 4.3195  | 4.2127  | 3.6205  | 3.2690  | 2.9642  | 1.0481  | 0.6078  | 0.0647 | 0.1774 |
| Strn3    | _NLEQLNGGES[Phospho (STY)]PK_2                                                        | #N/A                    | 4.1258  | 4.1512  | 4.0328  | 8.9436  | 3.9725  | 3.7570  | 4.1178  | 3.5830  | 3.2316  | 3.0016  | 1.3867  | 0.4716  | 0.2349 | 0.6292 |
| Cie1     | _LLQTDEEEAGLELLK_2                                                                    | #N/A                    | 4.3708  | 3.0126  | 3.6875  | 4.1676  | 2.3515  | 3.9550  | 4.3158  | 3.3986  | 3.1327  | 3.2569  | 0.8908  | -0.1669 | 0.6524 | 0.1855 |
| Cie1     | _VVEDEPNKC[Carbamidomethyl (C)]EADR_3                                                 | #N/A                    | 3.3013  | 2.6707  | 3.1534  | 3.6560  | 3.0931  | 3.4776  | 3.3707  | 4.4624  | 4.1110  | 3.6230  | 0.8288  | -0.2710 | 0.0337 | 0.4721 |
| Znf704   | _VGESDC[Carbamidomethyl (C)]S[Phospho (STY)]JGDEDFYITEK_2                             | Q9ERQ3_S381_M1_Znf704   | 2.9372  | 4.4052  | 4.1717  | 3.7155  | 4.2266  | 3.5029  | 3.8637  | 3.2857  | 3.5848  | 3.3927  | 1.0835  | 0.1156  | 0.3529 | 0.1424 |
| Nde1     | _S[Phospho (STY)]APSS[Phospho (STY)]PTLDC[Carbamidomethyl (C)]EK_2                    | #N/A                    | 11.8477 | 12.0399 | 12.0056 | 12.2430 | 12.1060 | 11.9777 | 11.9543 | 11.7889 | 11.8994 | 12.1275 | 1.0079  | 0.0113  | 0.3140 | 0.5030 |
| Nde1     | _GTENSPS[Phospho (STY)]PKR_2                                                          | Q9ERR1_S231_M1_Nde1     | 9.4393  | 9.8536  | 10.2571 | 10.2068 | 9.2728  | 9.4810  | 9.3873  | 9.6278  | 9.6278  | 9.3724  | 1.0215  | 0.0306  | 0.3724 | 0.4289 |
| Nde1     | _KSAPS[Phospho (STY)]SPTLDC[Carbamidomethyl (C)]EK_2                                  | Q9ERR1_S197_M1_Nde1     | 3.4062  | 4.1474  | 6.4327  | 3.9861  | 3.9688  | 3.7735  | 5.6889  | 3.8990  | 3.3270  | 3.6633  | 1.0341  | 0.0483  | 0.8434 | 0.0740 |
| Nde1     | _M[Oxidation (M)]DISAVQSLSS[Phospho (STY)]PAT[Phospho (STY)]PVGK_2                    | #N/A                    | 6.8220  | 5.8210  | 7.9055  | 8.0640  | 8.2691  | 7.2158  | 7.3558  | 8.4450  | 8.5573  | 7.5424  | 0.9216  | -0.1178 | 0.2732 | 0.5635 |
| Nde1     | _SALNNGDQLR_2                                                                         | #N/A                    | 3.3631  | 4.7858  | 3.9170  | 3.4608  | 3.5776  | 3.2482  | 3.6978  | 4.0178  | 4.6217  | 3.1381  | 0.9747  | -0.0370 | 0.7980 | 0.0980 |
| Ndufa13  | _LUIDELAR_2                                                                           | #N/A                    | 8.7840  | 8.7026  | 8.9390  | 8.6554  | 8.2020  | 8.5842  | 8.9971  | 9.0169  | 8.6833  | 8.7306  | 0.9760  | -0.0350 | 0.1795 | 0.7459 |
| Ndufa13  | _VGVSVFITR_2                                                                          | #N/A                    | 6.6836  | 6.8379  | 6.8517  | 7.0011  | 6.9147  | 6.8446  | 6.9035  | 7.0094  | 6.5444  | 6.6719  | 1.0108  | 0.0155  | 0.4818 | 0.3171 |
| Ndufa13  | _IALM[Oxidation (M)]PLTQAEK_2                                                         | #N/A                    | 6.5788  | 6.1724  | 6.0341  | 5.9038  | 5.5924  | 5.4972  | 6.0896  | 6.3988  | 6.0807  | 5.5429  | 0.9892  | -0.0156 | 0.7990 | 0.0975 |
| Ndufa13  | _ENLEEAHIM[Oxidation (M)]K_2                                                          | #N/A                    | 5.4663  | 5.8284  | 3.9584  | 5.0205  | 5.6708  | 6.2998  | 3.6505  | 6.6763  | 4.9651  | 5.7854  | 1.0200  | 0.0285  | 0.8765 | 0.0753 |
| Plekha3  | _SAS[Phospho (STY)]HPGSC[Carbamidomethyl (C)]SSER_2                                   | Q9ERS4_S211_M1_Plekha3  | 3.3569  | 3.6892  | 4.2237  | 4.8142  | 4.1634  | 3.5660  | 4.4411  | 4.5304  | 3.0407  | 3.1925  | 1.0520  | 0.0732  | 0.6374 | 0.1956 |
| Ppp1r1a  | _STLM[Oxidation (M)]S[Phospho (STY)]PRR_2                                             | #N/A                    | 10.5131 | 10.8129 | 11.0385 | 11.1645 | 10.6296 | 10.7597 | 10.5208 | 10.5545 | 10.7444 | 10.4444 | 1.0203  | 0.0289  | 0.1396 | 0.1396 |
| Ppp1r1a  | _JAcetyl (Protein N-term)[MEPDNS[Phospho (STY)]PRK_2                                  | #N/A                    | 6.6682  | 4.6456  | 4.5158  | 8.3338  | 5.2974  | 3.8470  | 4.9417  | 4.4377  | 3.2407  | 5.6553  | 1.2150  | 0.2810  | 0.3263 | 0.4864 |
| Ppp1r1a  | _JAcetyl (Protein N-term)[MEPDNS[Phospho (STY)]PRR_2                                  | #N/A                    | 5.9596  | 3.8243  | 4.1479  | 7.0189  | 5.2932  | 3.7065  | 4.1661  | 4.1531  | 4.4776  | 4.1776  | 1.1970  | 0.2594  | 0.2596 | 0.5875 |
| Ppp1r1a  | _TDESSAHMLPLDSGASLV_2                                                                 | #N/A                    | 3.2467  | 4.0519  | 4.5251  | 4.0688  | 3.1524  | 3.8563  | 4.2171  | 4.4332  | 3.2314  | 3.7461  | 0.9769  | -0.0337 | 0.7988 | 0.0678 |
| Ppp1r1a  | _EPDPS[Phospho (STY)]PRR_2                                                            | #N/A                    | 3.8751  | 3.4673  | 3.6088  | 3.1526  | 3.2886  | 2.9400  | 3.3008  | 3.8486  | 4.1477  | 4.3307  | 0.8674  | -0.2053 | 0.0687 | 1.1931 |
| Ranbp2   | _SHETDGGGS[Phospho (STY)]ANGDEEDGHPFEPVPLPDKIEVK_5                                    | Q9ERU9_S1154_M1_Ranbp2  | 3.4121  | 3.8140  | 4.0989  | 4.6016  | 4.0387  | 3.9608  | 4.3163  | 3.5169  | 5.5853  | 3.0678  | 0.9566  | -0.0640 | 0.7210 | 0.1421 |
| Ranbp2   | _VIASVQSGAPS[Phospho (STY)]PRR_2                                                      | Q9ERU9_S21_M1_Ranbp2    | 5.8942  | 5.9124  | 5.8722  | 6.7033  | 4.2224  | 5.5608  | 5.9446  | 3.3332  | 5.5914  | 6.4761  | 1.0660  | 0.0923  | 0.6207 | 0.2071 |
| Ranbp2   | _HSTPS[Phospho (STY)]PTKSLS[Phospho (STY)]PSK_2                                       | Q9ERU9_S781_M2_Ranbp2   | 3.5801  | 7.0092  | 3.3137  | 4.3583  | 3.5837  | 4.1458  | 4.5066  | 4.1437  | 2.9419  | 4.0356  | 1.1087  | 0.1489  | 0.5854 | 0.2326 |
| Ranbp2   | _SALS[Phospho (STY)]PSKSPAK_2                                                         | Q9ERU9_S2113_M1_Ranbp2  | 3.7089  | 5.2682  | 3.8844  | 3.8353  | 3.7674  | 5.2510  | 4.4831  | 5.8137  | 5.6168  | 3.6665  | 0.8756  | -0.1917 | 0.3040 | 0.5171 |
| Ranbp2   | _LNSNKSAS[Phospho (STY)]PHR_2                                                         | Q9ERU9_S837_M1_Ranbp2   | 3.8293  | 3.3968  | 4.5162  | 4.2094  | 2.9550  | 3.2736  | 3.2327  | 4.7507  | 4.2491  | 3.4850  | 0.9408  | -0.0880 | 0.5862 | 0.2319 |
| Ranbp2   | _HSTPS[Phospho (STY)]PTK_2                                                            | Q9ERU9_S781_M1_Ranbp2   | 4.1489  | 3.4043  | 3.8826  | 3.4263  | 3.2926  | 3.3320  | 3.5748  | 3.8739  | 3.1036  | 1.0140  | 0.0200  | 0.8269  | 0.0825 |        |
| Ranbp2   | _NRPGYVS[Phospho (STY)]EEEDDEYEM[Oxidation (M)]AVK_3                                  | Q9ERU9_S2505_M1_Ranbp2  | 3.8154  | 3.1197  | 3.9564  | 3.5001  | 2.9410  | 3.2876  | 3.6484  | 3.5010  | 3.8001  | 3.1774  | 0.9731  | -0.0394 | 0.6878 | 0.1626 |
| Mkn2     | _KQLS[Phospho (STY)]SEGTVR_2                                                          | Q9ERV1_S365_M1_Mkn2     | 3.3929  | 4.1492  | 3.1266  | 4.1712  | 4.0375  | 4.0880  | 4.2817  | 4.7620  | 4.6558  | 4.7877  | 0.8282  | -0.2720 | 0.0125 | 1.9037 |
| Mkn2     | _VNNPGGC[Carbamidomethyl (C)]SDPCT[Phospho (STY)]PEMKPHSYLDAIR_4                      | Q9ERV1_S139_M1_Mkn2     | 3.3441  | 3.9983  | 4.5786  | 5.9943  | 3.9887  | 4.1368  | 4.2706  | 4.3796  | 3.1779  | 3.7997  | 1.1109  | 0.1517  | 0.4191 | 0.3777 |
| Chrm3    | _SC[Carbamidomethyl (C)]SSY[Phospho (STY)]ELQQGQTKR_2                                 | Q9ERQ3_Y292_M1_Chrm3    | 4.1988  | 3.4543  | 5.2011  | 3.4763  | 3.3426  | 3.2820  | 4.6339  | 3.5249  | 3.8239  | 3.1536  | 1.0110  | 0.0158  | 0.9294 | 0.0318 |
| Chrm3    | _SC[Carbamidomethyl (C)]S[Phospho (STY)]SYELQQGQTKR_2                                 | Q9ERQ3_S290_M1_Chrm3    | 3.6565  | 4.9629  | 3.4927  | 3.9954  | 3.4324  | 3.9015  | 5.4845  | 4.1448  | 3.7934  | 3.9624  | 0.8989  | -0.1538 | 0.3250 | 0.4881 |
| Chrm2    | _KEPVANQDPVS[Phospho (STY)]PSLVGR_3                                                   | #N/A                    | 3.7966  | 6.6153  | 7.8906  | 7.0243  | 3.7475  | 6.6173  | 6.8994  | 7.4665  | 7.2052  | 5.9058  | 0.8660  | -0.2076 | 0.3524 | 0.4529 |
|          |                                                                                       |                         |         |         |         |         |         |         |         |         |         |         |         |         |        |        |



|          |                                                                                       |                                                              |                         |         |         |         |         |         |         |         |         |         |         |         |         |        |        |
|----------|---------------------------------------------------------------------------------------|--------------------------------------------------------------|-------------------------|---------|---------|---------|---------|---------|---------|---------|---------|---------|---------|---------|---------|--------|--------|
| Rtn3     |                                                                                       | _SEEHFFK_2                                                   | #N/A                    | 7.2174  | 7.1886  | 6.8321  | 6.1909  | 7.0802  | 6.9746  | 7.0272  | 7.2319  | 6.7845  | 6.3408  | 1.0099  | 0.0142  | 0.7902 | 0.1023 |
| Rtn3     | [Protein N-term]]AESSAATGSPVSSSSGAEPSALGGGGG[Phospho (STY)]PGAC[Carbamidomethyl (C)]P | _Q9ES97_S31_M1_Rtn3                                          |                         | 9.5341  | 10.5725 | 10.9396 | 11.1559 | 8.9861  | 9.8487  | 10.4944 | 10.6515 | 10.4157 | 9.6864  | 0.9865  | -0.0196 | 0.7733 | 0.1117 |
| Rtn3     |                                                                                       | _SALDGGQSK_2                                                 | #N/A                    | 3.7614  | 5.5303  | 3.4951  | 5.5367  | 5.6033  | 5.4997  | 5.4115  | 5.8942  | 5.3765  | 4.9942  | 0.9050  | -0.1440 | 0.3575 | 0.4468 |
| Rtn3     |                                                                                       | _ETTGAPTM[Oxidation (M)]S[Phospho (STY)]PDLEQQLTIR_2         | #N/A                    | 9.1357  | 9.1816  | 9.7809  | 9.6749  | 8.0829  | 9.2925  | 9.7998  | 9.6024  | 9.2945  | 9.2776  | 0.9682  | -0.0467 | 0.3783 | 0.4222 |
| Rtn3     |                                                                                       | _KLD[Phospho (STY)]PGCTNK_2                                  | #N/A                    | 4.0253  | 3.3297  | 3.2113  | 5.7598  | 4.5482  | 6.4363  | 3.4286  | 4.4045  | 5.8954  | 3.6810  | 1.0458  | 0.0646  | 0.8093 | 0.0919 |
| Rtn3     |                                                                                       | _TQDMYVGAR_2                                                 | #N/A                    | 5.9282  | 6.5555  | 6.3820  | 6.7497  | 6.1725  | 6.2998  | 7.0195  | 6.5599  | 6.3602  | 6.3457  | 0.9660  | -0.0499 | 0.2793 | 0.5539 |
| Rtn3     |                                                                                       | _GVQKEEGGVLEAVLEK_3                                          | #N/A                    | 4.6567  | 3.1308  | 4.8844  | 5.7006  | 3.2211  | 4.1021  | 4.6615  | 5.0186  | 4.4187  | 4.4983  | 0.9211  | -0.1185 | 0.5015 | 0.2997 |
| Rtn3     |                                                                                       | _QTHAPQSGQSSDLEHTDVK_3                                       | #N/A                    | 4.1830  | 3.2113  | 3.2008  | 3.7034  | 3.0996  | 3.5449  | 3.4181  | 4.4150  | 3.7823  | 4.2612  | 0.8794  | -0.1854 | 0.1214 | 0.9158 |
| Rtn3     |                                                                                       | _KLD[Phospho (STY)]PGGTNKDR_2                                | #N/A                    | 3.5526  | 4.3578  | 4.2394  | 4.8941  | 4.1791  | 3.5504  | 4.9658  | 5.4790  | 4.4881  | 3.2082  | 0.9104  | -0.1354 | 0.4080 | 0.3893 |
| Rtn3     |                                                                                       | _DQTKSVEK_2                                                  | #N/A                    | 2.2509  | 3.4862  | 3.3678  | 3.8704  | 3.3075  | 4.4220  | 3.8876  | 2.8024  | 3.8966  | 0.6863  | 1.2245  | 0.2921  | 0.3933 | 0.4052 |
| Rtn3     |                                                                                       | _Y[Phospho (STY)]VEDTGGSPEDLM[Oxidation (M)]AVLTGAEEK_3      | Q9ES97_Y589_M1_Rtn3     | 3.9406  | 3.5673  | 4.1227  | 3.3521  | 3.4556  | 3.1736  | 3.9650  | 5.7901  | 3.8169  | 3.3191  | 0.8530  | -0.2294 | 0.2190 | 0.6596 |
| Rtn3     |                                                                                       | _S[Phospho (STY)]LEGEVASQVNTLNEVPEK_2                        | Q9ES97_S529_M1_Rtn3     | 3.5200  | 4.2763  | 3.6367  | 4.1393  | 4.1646  | 3.9608  | 3.8540  | 5.2816  | 3.6277  | 4.1063  | 0.9365  | -0.0946 | 0.4411 | 0.3554 |
| Rtn3     |                                                                                       | _SEM[C[Carbamidomethyl (C)]ENGEQPPAQPET[Phospho (STY)]PTQK_2 | Q9ES97_T524_M1_Rtn3     | 4.3178  | 3.5732  | 4.0514  | 3.3416  | 3.4615  | 3.1631  | 4.5571  | 3.4060  | 4.4255  | 3.2725  | 0.9326  | -0.1006 | 0.4701 | 0.3278 |
| Rtn3     |                                                                                       | _QFSHTAALEEVSR_3                                             | #N/A                    | 4.2709  | 3.0715  | 4.0046  | 3.5483  | 2.8928  | 3.3358  | 3.6966  | 3.4528  | 3.7519  | 3.3450  | 0.9885  | -0.0167 | 0.8887 | 0.0512 |
| Nckip3d  |                                                                                       | _AAPTT[Phospho (STY)]PPPPVK_2                                | #N/A                    | 3.9779  | 3.2482  | 3.1639  | 3.6665  | 3.1365  | 3.4881  | 3.3812  | 4.4519  | 4.1005  | 3.6335  | 0.8857  | -0.1752 | 0.1171 | 0.9313 |
| Nckip3d  |                                                                                       | _RAAPT[Phospho (STY)]PPPPVK_2                                | #N/A                    | 3.2691  | 4.3197  | 3.8069  | 4.0474  | 3.9137  | 3.5651  | 3.8809  | 3.8079  | 3.3029  | 3.7247  | 1.0384  | 0.0543  | 0.5280 | 0.2723 |
| Rb1cc1   |                                                                                       | _VSTSQAS[Phospho (STY)]PQSAASPR_2                            | Q9ES97_S646_M1_Rb1cc1   | 7.0022  | 7.7420  | 7.9108  | 7.8069  | 3.7821  | 7.0855  | 8.1928  | 7.8376  | 7.2533  | 7.4929  | 0.8953  | -0.1596 | 0.3529 | 0.4573 |
| Rb1cc1   |                                                                                       | _STELVLS[Phospho (STY)]PDM[Oxidation (M)]PR_2                | #N/A                    | 6.0656  | 6.1491  | 3.7829  | 5.8345  | 3.6915  | 6.5093  | 6.6929  | 6.3087  | 6.3479  | 0.8231  | -0.2809 | 0.1141  | 0.9426 | 0.1252 |
| Rb1cc1   |                                                                                       | _S[Phospho (STY)]MCHVAPOPTGTIR_2                             | Q9ES97_S261_M1_Rb1cc1   | 3.9412  | 3.2850  | 3.1271  | 3.6298  | 3.1733  | 3.4513  | 3.3445  | 2.9878  | 4.1373  | 3.5968  | 0.9767  | -0.0340 | 0.7495 | 0.1252 |
| Trim2    |                                                                                       | _I[Acetyl (Protein N-term)]ASEGASPS[Phospho (STY)]PVVR_2     | Q9ES96_S10_M1_Trim2     | 11.4916 | 11.6590 | 11.9590 | 12.0148 | 10.5578 | 11.6601 | 11.9176 | 11.3028 | 11.4788 | 11.6271 | 0.9295  | -0.0031 | 0.9144 | 0.0979 |
| Trim2    |                                                                                       | _VKS[Phospho (STY)]PGSGHWK_2                                 | Q9ES96_S440_M1_Trim2    | 9.9800  | 10.1234 | 10.4304 | 10.3496 | 9.1810  | 9.9492  | 10.2787 | 9.9607  | 9.6277  | 10.0797 | 0.9999  | -0.0002 | 0.9967 | 0.0014 |
| Trim2    |                                                                                       | _VRS[Phospho (STY)]ADVS[Phospho (STY)]PTTEGVKR_3             | #N/A                    | 7.8154  | 8.5314  | 9.3127  | 8.6217  | 8.5833  | 8.4892  | 8.3551  | 7.9103  | 8.0652  | 8.3414  | 1.0479  | 0.0674  | 0.1675 | 0.7761 |
| Trim2    |                                                                                       | _SADVS[Phospho (STY)]PTTEGVK_2                               | #N/A                    | 12.6216 | 12.7967 | 13.0801 | 13.2961 | 12.6136 | 12.8673 | 13.0888 | 12.6671 | 12.7154 | 12.9847 | 1.0012  | 0.0017  | 0.9258 | 0.0335 |
| Trim2    |                                                                                       | _VLQSLQDTLQLQGQSK_2                                          | #N/A                    | 4.4926  | 4.2408  | 3.5247  | 4.0500  | 4.3226  | 4.2562  | 3.2167  | 3.8452  | 4.4876  | 5.3279  | 0.9830  | -0.0247 | 0.8611 | 0.0649 |
| Trim2    |                                                                                       | _EGDFTLSLR_2                                                 | #N/A                    | 4.8862  | 4.0002  | 3.9008  | 3.2872  | 3.7406  | 3.4443  | 4.1181  | 3.7150  | 4.4078  | 4.3304  | 0.9357  | -0.0959 | 0.4191 | 0.3777 |
| Trim2    |                                                                                       | _LYDQHIR_2                                                   | #N/A                    | 4.7149  | 4.2820  | 3.9283  | 4.8666  | 4.7508  | 4.2525  | 4.4156  | 4.4845  | 3.3361  | 5.4657  | 1.0248  | 0.0353  | 0.7920 | 0.1013 |
| Trim2    |                                                                                       | _VRS[Phospho (STY)]ADVS[Phospho (STY)]PTTEGVK_2              | #N/A                    | 8.6294  | 9.6182  | 9.7945  | 9.9514  | 9.4354  | 9.6601  | 9.8435  | 9.3230  | 9.4764  | 9.5810  | 0.9957  | -0.0062 | 0.8751 | 0.0579 |
| Trim2    |                                                                                       | _ASVDDHSTFDELQK_3                                            | #N/A                    | 3.9881  | 3.3543  | 3.7218  | 4.0405  | 3.6243  | 3.0530  | 3.4138  | 4.5768  | 4.1001  | 4.4437  | 0.8783  | -0.1873 | 0.1121 | 0.9505 |
| Trim2    |                                                                                       | _LNELAQDQFFHPR_2                                             | #N/A                    | 4.3803  | 4.8052  | 4.5275  | 5.2703  | 4.4440  | 3.8094  | 5.1042  | 3.7360  | 5.2769  | 4.7263  | 0.9636  | -0.0535 | 0.6536 | 0.1847 |
| Trim2    |                                                                                       | _SADVS[Phospho (STY)]PTTEGVKR_2                              | #N/A                    | 9.8378  | 9.9388  | 10.2143 | 10.4461 | 9.8089  | 10.0708 | 10.2804 | 9.9014  | 9.8890  | 10.1714 | 0.9992  | -0.0011 | 0.9592 | 0.0881 |
| Trim2    |                                                                                       | _TGNAVLTAELS[Phospho (STY)]TPDGSVADGELDNK_3                  | Q9ES96_S370_M1_Trim2    | 3.7125  | 3.6404  | 3.6207  | 4.1233  | 3.5604  | 3.8380  | 4.0654  | 3.7140  | 4.0903  | 0.9510  | -0.0725 | 0.1639  | 0.9185 | 0.1151 |
| Trim2    |                                                                                       | _RVKS[Phospho (STY)]PGS[Phospho (STY)]GHVK_2                 | #N/A                    | 4.4263  | 4.1901  | 4.0818  | 3.6060  | 2.9853  | 4.8813  | 4.9730  | 4.3815  | 4.7972  | 4.2635  | 0.8750  | -0.1926 | 0.1510 | 0.8212 |
| Trim2    |                                                                                       | _RPASMY[Phospho (STY)]TGK_2                                  | Q9ES96_S459_M1_Trim2    | 4.0095  | 3.2167  | 3.1955  | 3.6981  | 3.1050  | 3.5197  | 3.4128  | 4.4204  | 4.0689  | 3.6651  | 0.8884  | -0.1708 | 0.1217 | 0.9148 |
| Trim2    |                                                                                       | _VFNQGEFMLK_2                                                | #N/A                    | 3.4407  | 4.2459  | 4.1275  | 3.8748  | 4.0672  | 3.6623  | 4.0231  | 3.1263  | 3.4254  | 3.5868  | 1.1024  | 0.1407  | 0.1301 | 0.8858 |
| Mapk8ip3 |                                                                                       | _LFSSSS[Phospho (STY)]PPPAK_2                                | #N/A                    | 10.3238 | 4.4138  | 9.8471  | 4.0019  | 2.8012  | 8.7299  | 3.7166  | 4.1166  | 3.7652  | 3.9689  | 1.7180  | 0.7808  | 0.1372 | 0.8626 |
| Mapk8ip3 |                                                                                       | _STHPS[Phospho (STY)]PEK_2                                   | Q9ES97_S755_M1_Mapk8ip3 | 7.9872  | 7.5530  | 7.7683  | 7.6495  | 3.0099  | 6.2070  | 8.0465  | 3.0448  | 3.8600  | 7.8002  | 1.1767  | 0.3248  | 0.4983 | 0.3025 |
| Mapk8ip3 |                                                                                       | _ANKTS[Phospho (STY)]PTSGEGTRPGGHHYGDSSDK_4                  | Q9ES97_S192_M1_Mapk8ip3 | 3.7503  | 3.0057  | 3.4840  | 2.7773  | 2.8940  | 3.7306  | 3.6237  | 3.9734  | 3.8580  | 4.2059  | 1.0277  | 0.0394  | 0.9004 | 0.0455 |
| Mapk8ip3 |                                                                                       | _Q[S[Phospho (STY)]PTAGGQEDTR_2                              | #N/A                    | 8.4779  | 8.2281  | 8.5558  | 8.3662  | 6.8965  | 8.2938  | 8.5044  | 8.3085  | 3.1937  | 8.2109  | 1.1534  | 0.2059  | 0.3400 | 0.4686 |
| Mapk8ip3 |                                                                                       | _S[Phospho (STY)]PTAGGQSR_2                                  | Q9ES97_S603_M1_Mapk8ip3 | 7.3945  | 6.3867  | 4.4427  | 3.4445  | 2.8816  | 3.3470  | 7.1529  | 6.9774  | 4.3215  | 7.2361  | 0.7240  | -0.4660 | 0.1423 | 0.8467 |
| Mapk8ip3 |                                                                                       | _TGSS[Phospho (STY)]PTQGIWNK_2                               | Q9ES97_S366_M1_Mapk8ip3 | 11.2412 | 11.3497 | 11.7937 | 11.5129 | 10.2893 | 11.1112 | 11.6514 | 11.4009 | 11.1745 | 11.2601 | 0.9863  | -0.0198 | 0.5861 | 0.2320 |
| Mapk8ip3 |                                                                                       | _YKLS[Phospho (STY)]PNGGQEDTR_2                              | #N/A                    | 5.6484  | 6.3151  | 6.3120  | 6.1716  | 4.8839  | 5.9932  | 4.2620  | 6.2499  | 5.8758  | 4.1682  | 1.1456  | 0.1961  | 0.1810 | 0.7424 |
| Mapk8ip3 |                                                                                       | _AKET[Phospho (STY)]PEADATSSR_2                              | Q9ES97_S764_M1_Mapk8ip3 | 3.8596  | 3.1151  | 3.5933  | 3.1371  | 3.0034  | 3.6212  | 3.2854  | 3.8304  | 4.1651  | 4.3152  | 0.8691  | -0.2024 | 0.0784 | 0.1056 |
| Mapk8ip3 |                                                                                       | _LFSSSS[Phospho (STY)]PPPAK_2                                | #N/A                    | 4.1740  | 3.4294  | 3.9077  | 3.4514  | 3.3177  | 3.3069  | 3.2000  | 3.5497  | 3.8488  | 3.1287  | 1.0484  | 0.0682  | 0.4821 | 0.3169 |
| Mapk8ip3 |                                                                                       | _LYNALHQR_2                                                  | #N/A                    | 3.4594  | 4.4950  | 4.5944  | 3.5962  | 4.0231  | 3.4177  | 3.3109  | 3.8995  | 3.8591  | 3.5632  | 1.0746  | 0.1038  | 0.3713 | 0.4303 |
| Mapk8ip3 |                                                                                       | _LMELQEAIR_2                                                 | #N/A                    | 3.0793  | 4.2631  | 4.3139  | 3.8576  | 4.4015  | 4.0059  | 3.1435  | 3.4426  | 3.5349  | 1.1156  | 0.1578  | 0.1994  | 0.7002 | 0.1847 |
| Eif4enf1 |                                                                                       | _SS[Phospho (STY)]PVESLKK_2                                  | Q9EST3_S77_M1_Eif4enf1  | 7.9905  | 8.4124  | 8.9106  | 8.7686  | 8.3202  | 8.1600  | 8.4584  | 4.2237  | 8.3419  | 8.1689  | 1.1559  | 0.2091  | 0.2078 | 0.7824 |
| Eif4enf1 |                                                                                       | _SSS[Phospho (STY)]PVGLAK_2                                  | Q9EST3_S949_M1_Eif4enf1 | 3.7264  | 3.6160  | 3.4600  | 7.5171  | 6.9876  | 6.9528  | 5.9706  | 6.8022  | 7.1932  | 4.1819  | 0.8906  | -0.1671 | 0.5752 | 0.2402 |
| Eif4enf1 |                                                                                       | _SSS[Phospho (STY)]GSTPHHEELR_2                              | Q9EST3_S352_M1_Eif4enf1 | 7.1434  | 7.5616  | 8.0297  | 8.2817  | 7.2459  | 7.5508  | 8.0052  | 7.4466  | 6.5995  | 7.7301  | 0.9903  | -0.0141 | 0.7665 | 0.1155 |
| Brd4     |                                                                                       | _HS[Phospho (STY)]PIIR_2                                     | Q9ESU6_S1153_M1_Brd4    | 7.9370  | 7.9680  | 8.2973  | 8.4389  | 7.3315  | 7.9873  | 8.1525  | 8.0814  | 7.9057  | 8.1017  | 0.9917  | -0.0120 | 0.7462 | 0.1271 |
| Brd4     |                                                                                       | _MPDEPEEPVTVTS[Phospho (STY)]PAVPPPTK_2                      | Q9ESU6_S471_M1_Brd4     | 3.3467  | 4.1030  | 4.5812  | 4.1250  | 3.9913  | 4.1342  | 4.0273  | 4.3770  | 3.1752  | 3.8023  | 1.0524  | 0.0737  | 0.5002 | 0.3009 |
| Ddx24    |                                                                                       | _AQAVS[Phospho (STY)]EEEEEGGSSSPK_2                          | Q9ESV0_S80_M1_Ddx24     | 3.8113  | 5.3418  | 5.4224  | 4.7999  | 3.3709  | 4.7560  | 5.7209  | 4.7347  | 4.5510  | 5.0243  | 0.9153  | -0.1276 | 0.3919 | 0.4068 |
| Agk      |                                                                                       | _LASWQAQODASSR_2                                             | #N/A                    | 6.8584  | 6.3375  | 4.2783  | 3.8221  | 6.5325  | 6.7084  | 6.0914  | 6.2865  | 6.8522  | 6.4406  | 0.8969  | -0.1569 | 0.3697 | 0.4321 |
| Agk      |                                                                                       | _PIGFIPLGGTSSLSHTLFAESGNK_3                                  | #N/A                    | 4.1477  | 2.0446  | 3.8814  | 3.5117  | 3.2914  | 3.3332  | 2.8728  | 3.5761  | 2.9783  | 2.9761  | 1.0863  | 0.1194  | 0.5149 | 0.2883 |
| Dkc1     |                                                                                       | _TVLES[Phospho (STY)]GGGTGGGDNDDTK_2                         | #N/A                    | 7.4903  | 7.5383  | 8.1272  | 7.7332  | 6.6341  | 7.6315  | 8.2491  | 7.8837  | 7.6229  | 7.4565  | 0.9645  | -0.0522 | 0.3607 | 0.4429 |
| Dkc1     |                                                                                       | _KROSES[Phospho (STY)]ES[Phospho (STY)]DETPVPLQLK_3          | #N/A                    | 3.8513  | 3.6403  | 4.1249  | 8.0295  | 7.1172  | 6.6973  | 3.6468  | 8.1911  | 8.0031  | 7.0223  | 0.8304  | -0.0681 | 0.4021 | 0.3957 |
| Dkc1     |                                                                                       | _VKVVEIM[Oxidation (M)]S[Phospho (STY)]E_2                   | #N/A                    | 4.5054  | 4.7850  | 5.5664  | 4.6379  | 4.6612  | 5.0501  | 5.2957  | 5.0138  | 4.5016  | 4.7395  | 0.9958  | -0.0061 | 0.9341 | 0.0296 |
| Dkc1     |                                                                                       | _TVLES[Phospho (STY)]GGGTGGGDNDDTK_2                         | #N/A                    | 2.3116  | 3.2961  | 3.9061  | 3.3238  | 3.1901  | 3.4346  | 3.4720  | 3.3969  | 3.9765  | 3.0011  | 0.9370  | -0.0938 | 0.5011 | 0.3000 |
| Gif2i    |                                                                                       | _ESTSKS[Phospho (STY)]PPR_2                                  | Q9ES28_S823_M1_Gif2i    | 3.8603  | 3.1647  | 4.5471  | 7.4290  | 2.9860  | 3.2426  | 3.6034  | 3.0687  | 6.8975  | 7.1447  | 0.8120  | -0.3005 | 0.4424 | 0.3541 |
| Jph3     |                                                                                       | _TS[Phospho (STY)]INSUR_2                                    | Q9ET77_S163_M1_Jph3     | 3.1008  | 4.2416  | 4.3354  | 3.8791  | 4.0629  | 6.0607  | 4.0274  | 6.8331  | 5.5496  | 3.5564  | 0.8339  | -0.2620 | 0.3613 | 0.4421 |
| Jph3     |                                                                                       | _TES[Phospho (STY)]PTTWSHHR_3                                | Q9ET77_S578_M1_Jph3     | 6.2932  | 5.2577  | 4.2372  | 5.9415  | 3.6472  | 2.9774  | 5.8702  | 3.2203  | 5.5264  | 6.2140  | 0.9074  | -0.1401 | 0.5902 | 0.2290 |
| Jph3     |                                                                                       |                                                              |                         |         |         |         |         |         |         |         |         |         |         |         |         |        |        |



|         |                                                         |                         |         |        |         |        |        |        |        |        |        |         |         |         |        |        |
|---------|---------------------------------------------------------|-------------------------|---------|--------|---------|--------|--------|--------|--------|--------|--------|---------|---------|---------|--------|--------|
| Palmd   | _MELS[Phospho (STY)]PSRAS[Phospho (STY)]PGK_2           | Q9IHU2_S370_M2_Palmd    | 6.5005  | 3.1568 | 3.9815  | 7.1456 | 5.4111 | 4.8310 | 5.5097 | 4.7459 | 4.8595 | 5.6349  | 0.9968  | -0.0046 | 0.9839 | 0.0070 |
| Dync1h1 | _LVQT[Phospho (STY)]PLTOR_2                             | Q9IHU4_T1880_M1_Dync1h1 | 10.3163 | 9.8952 | 10.1040 | 5.1737 | 8.1134 | 9.8305 | 5.3047 | 9.9513 | 5.5590 | 9.9904  | 1.1564  | 0.2096  | 0.4308 | 0.3657 |
| Dync1h1 | _VTFDGOKEVDFTFNQIQSGVNR_3                               | #N/A                    | 7.3421  | 7.2953 | 7.8442  | 7.1290 | 6.7431 | 7.6820 | 7.0921 | 6.9107 | 6.9591 | -0.0602 | -0.9591 | -0.0602 | 0.4561 | 0.3409 |
| Dync1h1 | _VAAPOVWPTDVLOR_2                                       | #N/A                    | 6.4624  | 6.4772 | 6.8542  | 6.3646 | 6.3819 | 6.2139 | 7.3220 | 7.1213 | 6.4356 | 6.3601  | 0.9485  | -0.0763 | 0.1503 | 0.8231 |
| Dync1h1 | _EOPWVSQVPR_2                                           | #N/A                    | 6.4479  | 6.6345 | 6.5054  | 5.8695 | 5.9208 | 6.1765 | 7.0415 | 7.0181 | 6.2102 | 6.3406  | 0.9408  | -0.0880 | 0.1369 | 0.8635 |
| Dync1h1 | _EYQTQIQR_2                                             | #N/A                    | 7.0276  | 6.4371 | 6.6446  | 6.1414 | 6.2420 | 6.4021 | 7.0967 | 6.5926 | 6.8559 | 6.0126  | 0.9764  | -0.0345 | 0.5404 | 0.2673 |
| Dync1h1 | _SLQAUENVK_2                                            | #N/A                    | 5.9361  | 6.3973 | 6.7717  | 5.8916 | 5.3446 | 5.5016 | 5.5871 | 6.4192 | 5.9542 | 6.0624  | 0.9947  | -0.0077 | 0.9194 | 0.0365 |
| Dync1h1 | _LNTFLER_2                                              | #N/A                    | 5.6918  | 6.2417 | 6.2210  | 5.3865 | 4.5239 | 5.6923 | 6.3422 | 6.2087 | 6.0236 | 5.4918  | 0.9351  | -0.0968 | 0.3047 | 0.5162 |
| Dync1h1 | _VTVVNTVTR_2                                            | #N/A                    | 5.7177  | 5.9349 | 6.0588  | 5.2745 | 5.5063 | 5.8193 | 5.7632 | 6.0143 | 6.2428 | 6.2255  | 0.9434  | -0.0840 | 0.0809 | 1.0922 |
| Dync1h1 | _ONLNDGLNLQK_2                                          | #N/A                    | 5.2075  | 5.0769 | 3.9529  | 4.2451 | 3.5052 | 4.5032 | 5.2730 | 5.0248 | 4.3547 | 3.8066  | 0.9567  | -0.0638 | 0.6510 | 0.1864 |
| Dync1h1 | _EWDTGFTTHVR_2                                          | #N/A                    | 4.8296  | 4.0871 | 5.0911  | 3.6115 | 3.6811 | 3.7362 | 4.3474 | 4.9016 | 3.6897 | 3.9590  | 0.9878  | -0.0177 | 0.8969 | 0.0473 |
| Dync1h1 | _TFSELNR_2                                              | #N/A                    | 5.1775  | 5.8383 | 5.8598  | 4.5676 | 4.9755 | 4.9743 | 5.6353 | 5.9791 | 5.5002 | 5.4521  | 0.9274  | -0.1087 | 0.1821 | 0.7397 |
| Dync1h1 | _LNTQEFDDWAR_2                                          | #N/A                    | 5.4120  | 4.8540 | 3.8681  | 5.5486 | 4.8585 | 3.3465 | 5.8875 | 4.6854 | 4.8135 | 3.0891  | 1.0063  | 0.0090  | 0.9647 | 0.0156 |
| Dync1h1 | _SLSNASTVAPLTQLR_2                                      | #N/A                    | 4.6274  | 4.3607 | 4.2647  | 3.9418 | 2.5758 | 3.7072 | 4.4895 | 4.5718 | 4.7668 | 4.1717  | 0.8788  | -0.1863 | 0.1937 | 0.7129 |
| Dync1h1 | _FLSDPQVHTVLVER_3                                       | #N/A                    | 5.7053  | 5.4730 | 4.4410  | 3.8366 | 4.4241 | 5.0260 | 5.4267 | 5.7527 | 5.2831 | 4.9468  | 0.9001  | -0.1518 | 0.2030 | 0.6925 |
| Dync1h1 | _IQGLTVEQAEAVVR_2                                       | #N/A                    | 3.8533  | 3.1190 | 5.1872  | 3.5033 | 2.9404 | 3.4771 | 5.2125 | 4.4663 | 3.1475 | 3.6265  | 0.8947  | -0.1605 | 0.4511 | 0.3458 |
| Dync1h1 | _LQGATC[Carbamidomethyl (C)]SNMK_2                      | #N/A                    | 4.4588  | 4.0300 | 3.3390  | 4.6090 | 4.2178 | 3.9967 | 4.5884 | 5.4020 | 4.4670 | 4.2572  | 0.8782  | -0.1875 | 0.0956 | 0.1093 |
| Dync1h1 | _SAC[Carbamidomethyl (C)]DVTDTWDDTAK_2                  | #N/A                    | 4.6527  | 4.2015 | 3.8026  | 4.3052 | 4.3683 | 3.6686 | 4.0199 | 4.3072 | 5.1874 | 4.2722  | 0.9370  | -0.0939 | 0.3391 | 0.4697 |
| Dync1h1 | _EWVNTYLDVNVQNK_2                                       | #N/A                    | 5.3600  | 4.3755 | 5.4380  | 4.7243 | 3.1422 | 3.0865 | 5.3915 | 4.8327 | 5.0776 | 4.4459  | 0.8820  | -0.1811 | 0.3232 | 0.4905 |
| Dync1h1 | _VQVLEELQDK_2                                           | #N/A                    | 3.4126  | 4.3802 | 3.7441  | 4.2468 | 3.9780 | 4.0683 | 3.9615 | 4.9107 | 4.2138 | 4.8952  | -0.1597 | -0.0960 | 0.0176 | 0.1076 |
| Dync1h1 | _FNGFYELGVQDK_2                                         | #N/A                    | 4.4424  | 3.7947 | 3.6763  | 4.3260 | 3.3143 | 4.5557 | 5.0285 | 4.9029 | 4.6492 | 4.4463  | 0.8448  | -0.4344 | 0.0368 | 1.5721 |
| Dync1h1 | _ESEPVLTLDDLK_2                                         | #N/A                    | 4.6263  | 3.4126 | 3.1246  | 3.7926 | 4.0355 | 3.8191 | 4.7170 | 4.2133 | 4.2744 | 4.3619  | 0.8647  | -0.2097 | 0.0667 | 1.1758 |
| Dync1h1 | _LKQDGSFR_2                                             | #N/A                    | 5.9615  | 3.0047 | 5.7507  | 5.0505 | 4.8210 | 5.5230 | 5.9875 | 5.7861 | 3.6851 | 5.3739  | 0.9636  | -0.0535 | 0.7896 | 0.1026 |
| Dync1h1 | _LQGFQQLR_2                                             | #N/A                    | 4.7556  | 4.5950 | 4.9855  | 4.5583 | 3.7456 | 4.7487 | 4.8631 | 5.9914 | 4.9069 | 4.5575  | 0.8986  | -0.1542 | 0.1581 | 0.8012 |
| Dync1h1 | _IFTESAR_2                                              | #N/A                    | 3.2799  | 3.2799 | 3.7581  | 3.3019 | 5.5201 | 3.4502 | 3.6993 | 3.9983 | 4.7664 | 0.9763  | 0.9763  | -0.0346 | 0.8908 | 0.0502 |
| Dync1h1 | _ENRPTVWVSAEISDAIR_2                                    | #N/A                    | 4.0305  | 3.2859 | 3.7642  | 4.8156 | 3.1742 | 3.4504 | 3.3436 | 4.3698 | 4.5327 | 2.9852  | 0.9857  | -0.2007 | 0.9030 | 0.0443 |
| Dync1h1 | _M[Oxidation (M)]LSAVSQVQC[Carbamidomethyl (C)]QEALR_2  | #N/A                    | 4.0080  | 4.0003 | 5.0329  | 3.4150 | 3.6768 | 3.6209 | 4.2740 | 4.5749 | 4.2445 | 4.1928  | 0.9161  | -0.1264 | 0.2624 | 0.5811 |
| Dync1h1 | _TDS[Phospho (STY)]TSDGRPAWNR_2                         | #N/A                    | 8.3375  | 3.7435 | 4.1527  | 8.6415 | 3.3853 | 3.6950 | 3.8421 | 3.8761 | 3.8670 | 3.6326  | 1.3999  | 0.4853  | 0.2612 | 0.5830 |
| Dync1h1 | _SPLVM[Oxidation (M)]DVLNIGQVQR_2                       | #N/A                    | 3.6754  | 4.1719 | 4.4216  | 3.3640 | 2.0979 | 4.1225 | 5.2382 | 4.2530 | 4.0853 | 3.4905  | 0.8536  | -0.2283 | 0.2628 | 0.5803 |
| Dync1h1 | _IAFIM[Oxidation (M)]DESNVDSGFER_2                      | #N/A                    | 3.9691  | 3.6236 | 3.9962  | 3.6902 | 3.1129 | 3.5118 | 4.3801 | 3.4614 | 3.0531 | 4.2447  | 0.9532  | -0.0691 | 0.5872 | 0.2312 |
| Dync1h1 | _DHLVETDPNTR_2                                          | #N/A                    | 5.7468  | 3.6260 | 3.4501  | 4.4947 | 3.4473 | 4.2822 | 5.0433 | 5.3895 | 4.3064 | 5.4084  | 0.8371  | -0.2565 | 0.1362 | 0.8657 |
| Dync1h1 | _DVLVAGQEM[Oxidation (M)]ALEFLK_2                       | #N/A                    | 4.1018  | 3.3572 | 3.8355  | 3.5575 | 3.2455 | 3.3791 | 3.2722 | 3.1026 | 4.2095 | 3.0565  | 1.0496  | 0.0699  | 0.5508 | 0.2590 |
| Dync1h1 | _QLGNSQAAASGGAK_2                                       | #N/A                    | 4.9698  | 3.0462 | 3.3659  | 3.8686 | 4.2966 | 4.8093 | 3.5832 | 4.5634 | 3.8985 | 3.8356  | 1.0225  | 0.0321  | 0.8401 | 0.7571 |
| Dync1h1 | _IQFVGAC[Carbamidomethyl (C)]NPPTDGR_2                  | #N/A                    | 3.8102  | 3.1145 | 4.4970  | 3.5053 | 2.9359 | 3.2928 | 3.6536 | 6.3296 | 3.7949 | 3.1826  | 0.8316  | -0.2661 | 0.2898 | 0.5379 |
| Dync1h1 | _FTQDTQPHMYSR_3                                         | #N/A                    | 3.9905  | 3.3519 | 3.7242  | 3.2679 | 3.1732 | 4.4873 | 3.4162 | 4.0894 | 3.9261 | 4.4461  | 0.9235  | -0.1148 | 0.3545 | 0.4503 |
| Dync1h1 | _LTDKAKNQDK_2                                           | #N/A                    | 3.1916  | 3.9479 | 4.4261  | 3.9699 | 3.6993 | 4.2893 | 4.1824 | 3.0313 | 3.3303 | 3.6472  | 1.1051  | 0.1442  | 0.2457 | 0.6095 |
| Dync1h1 | _VAEYFDADANAAEEVNLAVENVK_3                              | #N/A                    | 4.2169  | 3.4724 | 3.9506  | 3.4944 | 3.3607 | 3.2638 | 3.6426 | 3.5068 | 3.8059 | 3.1717  | 1.0268  | 0.0382  | 0.6757 | 0.1702 |
| Dync1h1 | _TTSPIPSRIC[Carbamidomethyl (C)]IK_2                    | #N/A                    | 3.1740  | 3.7972 | 4.5977  | 4.1415 | 3.8005 | 3.5290 | 4.2898 | 4.3605 | 1.6333 | 1.7584  | 1.3078  | 0.3871  | 0.1892 | 0.7230 |
| Dync1h1 | _EAVINSC[Carbamidomethyl (C)]VFHQTALQANAR_3             | #N/A                    | 4.1800  | 3.9173 | 4.1618  | 4.2034 | 4.0697 | 3.9909 | 4.2986 | 3.9068 | 3.8807 | 3.0968  | 0.9869  | -0.0190 | 0.8861 | 0.0525 |
| Dync1h1 | _LALESC[Carbamidomethyl (C)]LLGESTDQWK_2                | #N/A                    | 2.9845  | 3.7408 | 4.2190  | 3.7628 | 3.6291 | 2.9955 | 3.9111 | 3.2384 | 3.5374 | 3.0267  | 1.0370  | 0.0524  | 0.6724 | 0.1724 |
| Ilyna1  | _SC[Carbamidomethyl (C)]ENIFR_2                         | #N/A                    | 5.2040  | 3.3476 | 4.3172  | 4.5282 | 5.0921 | 4.3497 | 6.5104 | 6.4847 | 4.6077 | 4.7277  | 0.8013  | -0.3197 | 0.0736 | 1.1329 |
| Ilyna1  | _VVLWNTANTR_2                                           | #N/A                    | 4.2850  | 2.9411 | 3.4710  | 3.9737 | 4.5746 | 4.3188 | 3.6883 | 4.2513 | 4.3480 | 3.9407  | 0.9680  | -0.0469 | 0.7087 | 0.1495 |
| Ilyna1  | _HVPVGDOFK_2                                            | #N/A                    | 4.6799  | 4.4609 | 3.2567  | 4.3479 | 4.3081 | 4.8907 | 3.8510 | 4.2007 | 2.9989 | 4.2071  | 1.1336  | 0.1809  | 0.2016 | 0.6955 |
| Nit2    | _AVDNQYVATASPAR_2                                       | #N/A                    | 3.5879  | 3.3871 | 3.8653  | 3.4091 | 4.7128 | 3.8901 | 3.5574 | 3.9807 | 3.8506 | 3.0864  | 1.0525  | 0.0738  | 0.5394 | 0.2681 |
| Nit2    | _T[LS[Phospho (STY)]PDGOSTDTPC[Carbamidomethyl (C)]K_2  | Q9JHW2_S133_M1_Nit2     | 2.9639  | 3.7691 | 3.6507  | 5.3485 | 3.5905 | 4.1390 | 3.8681 | 4.1235 | 3.6137 | 4.1204  | 0.9946  | -0.0078 | 0.9611 | 0.0172 |
| Nit2    | _FAELAQVAKR_2                                           | #N/A                    | 3.6847  | 2.9402 | 3.4184  | 4.4630 | 3.7962 | 3.1104 | 4.0390 | 4.3381 | 4.1043 | 4.1403  | 0.9014  | -0.1497 | 0.3353 | 0.4746 |
| Stk3    | _ELEEEENS[Phospho (STY)]DEDEDSHTM[Oxidation (M)]VK_3    | #N/A                    | 3.4595  | 4.1436 | 3.6355  | 5.2598 | 4.0454 | 4.5230 | 4.3220 | 5.2433 | 4.6234 | 5.3717  | 0.8543  | -0.2271 | 0.1026 | 0.9887 |
| Nudt3   | _LVGFENQER_2                                            | #N/A                    | 7.5418  | 7.6002 | 7.8605  | 7.5100 | 7.2445 | 7.6677 | 7.4797 | 7.4151 | 7.4748 | 7.3868  | 1.0177  | 0.0253  | 0.2450 | 0.6109 |
| Nudt3   | _SESEEVLVSSR_2                                          | #N/A                    | 5.2003  | 7.6231 | 8.1067  | 8.8064 | 7.6147 | 7.6968 | 7.9670 | 5.3790 | 8.0289 | 7.9923  | 1.0226  | 0.0323  | 0.8424 | 0.0745 |
| Nudt3   | _WVPGGGM[Oxidation (M)]JEEPEEPSAAVR_2                   | #N/A                    | 5.2299  | 4.9786 | 5.6673  | 5.5807 | 5.0864 | 5.5289 | 5.3656 | 4.9728 | 5.2423 | 1.0152  | 0.0217  | 0.6496  | 0.1874 | 0.1745 |
| Rnf14   | _LTYHGLS[Phospho (STY)]PC[Carbamidomethyl (C)]K_2       | #N/A                    | 8.7818  | 8.4082 | 8.6227  | 8.6446 | 7.4005 | 8.0316 | 9.0657 | 8.4154 | 8.2260 | 8.1502  | 0.9823  | -0.0257 | 0.6446 | 0.1907 |
| Rnf14   | _LTYHGLS[Phospho (STY)]PC[Carbamidomethyl (C)]KVTAEX_3  | #N/A                    | 4.2502  | 2.9760 | 3.4361  | 3.9388 | 2.8643 | 3.7603 | 4.1797 | 3.6535 | 3.8283 | 3.3438  | 0.9430  | -0.0846 | 0.5120 | 0.2907 |
| Actn2   | _ETADDTAEQVASFR_2                                       | #N/A                    | 3.6090  | 5.0514 | 5.1829  | 4.6773 | 4.7069 | 5.2821 | 5.4797 | 4.8228 | 4.8616 | 5.5393  | 0.9180  | -0.1234 | 0.2568 | 0.5903 |
| Actn2   | _ISSNPSYSTVM[Oxidation (M)]DELK_2                       | #N/A                    | 5.1522  | 6.0042 | 6.0979  | 4.8495 | 5.2807 | 5.8498 | 5.8557 | 5.9040 | 5.8282 | 5.5417  | 0.9579  | -0.0620 | 0.3934 | 0.4052 |
| Actn2   | _ATLPEADGER_2                                           | #N/A                    | 6.3824  | 3.1695 | 3.2426  | 6.8357 | 6.5286 | 6.2433 | 3.4600 | 6.8628 | 6.4053 | 6.1898  | 0.9426  | -0.0854 | 0.7650 | 0.1163 |
| Actn2   | _AC[Carbamidomethyl (C)]ISM[Oxidation (M)]GYDLGAEAFAR_2 | #N/A                    | 6.1463  | 5.6856 | 6.2380  | 4.1694 | 5.1414 | 4.3921 | 6.3307 | 5.5676 | 5.4096 | 5.5026  | 0.9286  | -0.1069 | 0.4203 | 0.3764 |
| Actn2   | _HTNTYMEHR_3                                            | #N/A                    | 3.4715  | 3.4421 | 4.4709  | 4.5084 | 3.8028 | 3.2942 | 3.1874 | 3.1449 | 1.0356 | 3.4397  | 1.4181  | 0.5040  | 0.0615 | 1.2108 |
| Actn2   | _VEQAAIAGELNELDPAHVNVDNR_3                              | #N/A                    | 3.9725  | 3.2279 | 3.7061  | 3.6869 | 3.1162 | 3.5084 | 3.4016 | 4.4316 | 4.0802 | 4.4280  | 0.8656  | -0.2082 | 0.0610 | 1.2149 |
| Sgpp1   | _NS[Phospho (STY)]LTGEEGLVK_2                           | #N/A                    | 3.2643  | 3.9619 | 3.9511  | 4.4537 | 3.8908 | 7.6952 | 4.1684 | 3.6648 | 3.3133 | 4.4207  | 1.1656  | 0.0420  | 0.4633 | 0.3342 |
| Sgpp1   | _RNS[Phospho (STY)]LTGEEGLVK_2                          | #N/A                    | 6.9045  | 7.0430 | 7.4996  | 4.1236 | 3.8184 | 6.9614 | 4.2719 | 4.3784 | 3.1766 | 6.9073  | 1.2936  | 0.3713  | 0.2232 | 0.6513 |
| Lgi1    | _DNALAC[Carbamidomethyl (C)]ENAR_2                      | #N/A                    | 7.4128  | 7.6211 | 7.3425  | 7.9157 | 7.6917 | 7.7080 | 7.6049 | 7.5877 | 7.7317 | 7.7791  | 0.9921  | -0.0114 | 0.6076 | 0.2164 |
| Lgi1    | _FQELNVQAPR_2                                           | #N/A                    | 7.1362  | 6.6707 | 7.2836  | 6.9940 | 6.3859 | 6.5077 | 6.9157 | 6.7286 | 6.9828 | 6.7429  | 0.9981  | -0.0027 | 0.9481 | 0.0232 |
| Lgi1    | _LDSLTNVOLR_2                                           | #N/A                    | 6.5564  | 6.1649 | 6.4654  | 6.1257 | 6.3121 | 6.4852 | 6.8134 | 6.1982 | 6.4099 | 6.4244  | 0.9830  | -0.0247 | 0.4440 | 0.3527 |
| Lgi1    | _DFDC[Carbamidomethyl (C)]ITEFAK_2                      | #N/A                    | 6.2157  | 6.2149 | 6.7111  | 6.2800 | 6.0332 | 6.2557 |        |        |        |         |         |         |        |        |



|         |                                                                           |                       |         |         |         |         |         |         |         |         |         |         |         |         |        |        |
|---------|---------------------------------------------------------------------------|-----------------------|---------|---------|---------|---------|---------|---------|---------|---------|---------|---------|---------|---------|--------|--------|
| Akr1a1  | _DAGHPLVPFNDPY_2                                                          | #N/A                  | 7.2025  | 7.1360  | 7.4136  | 7.7407  | 7.2505  | 7.5860  | 7.5647  | 7.4634  | 7.4422  | 7.9663  | 0.9710  | -0.0425 | 0.1912 | 0.7184 |
| Akr1a1  | _Acetyl (Protein N-term)[TASSVLHTGQK_2                                    | #N/A                  | 6.9127  | 7.5984  | 7.4597  | 7.6367  | 7.5536  | 7.4285  | 7.2320  | 7.2587  | 7.1443  | 7.1910  | 1.0312  | 0.0444  | 0.1399 | 0.8541 |
| Akr1a1  | _ALGSNPNR_2                                                               | #N/A                  | 7.1877  | 7.2559  | 7.4438  | 7.0140  | 7.1311  | 7.2910  | 7.1445  | 7.2061  | 7.0455  | 7.0574  | 1.0151  | 0.0216  | 0.2207 | 0.6561 |
| Akr1a1  | _GLEVTASPLGSSDR_2                                                         | #N/A                  | 6.3090  | 6.5519  | 6.7495  | 7.3350  | 6.8497  | 6.8257  | 6.4861  | 6.4636  | 6.4186  | 6.8934  | 1.0312  | 0.0443  | 0.3260 | 0.4868 |
| Akr1a1  | _LQNIQVDFDTFSREM(Oxidation (M))K_2                                        | #N/A                  | 4.1636  | 3.7080  | 4.5843  | 4.3630  | 4.0711  | 4.1240  | 4.3870  | 4.2345  | 4.5635  | 0.9467  | -0.0790 | 0.2816  | 0.5504 |        |
| Akr1a1  | _HALSAGYR_2                                                               | #N/A                  | 6.1097  | 6.3112  | 6.2168  | 6.6437  | 6.7558  | 6.2152  | 5.8784  | 5.9518  | 6.1931  | 5.9755  | 1.0626  | 0.0876  | 0.0310 | 1.5084 |
| Akr1a1  | _HPDEPLLEEPVVALAEK_3                                                      | #N/A                  | 4.1765  | 3.7945  | 4.3830  | 4.4215  | 3.8424  | 4.3017  | 4.0484  | 3.5815  | 4.0755  | 4.0089  | 1.0572  | 0.0803  | 0.2153 | 0.6669 |
| Akr1a1  | _LELVFTSK_2                                                               | #N/A                  | 1.8187  | 3.6213  | 4.0996  | 3.6433  | 2.3632  | 2.8985  | 4.5090  | 3.3578  | 3.6569  | 3.3206  | 0.8284  | -0.2717 | 0.2341 | 0.6306 |
| Akr1a1  | _YDSTHYK_2                                                                | #N/A                  | 4.3180  | 3.5734  | 4.0517  | 3.5954  | 3.4617  | 3.1629  | 4.5569  | 3.4058  | 3.7048  | 3.2727  | 0.9890  | -0.0160 | 0.8984 | 0.0465 |
| Ddx21   | _EITEEPS(Phospho (STY))EEADM(Oxidation (M))PKPK_3                         | #N/A                  | 3.5945  | 3.5036  | 3.8151  | 4.5636  | 5.1563  | 4.0802  | 3.8408  | 5.6433  | 3.8108  | 3.7592  | 0.9661  | -0.0498 | 0.7742 | 0.1111 |
| Sv2a    | _GGLS(Phospho (STY))DGEPPGGR_2                                            | #N/A                  | 14.1870 | 14.0115 | 14.4018 | 14.3173 | 13.0765 | 13.8440 | 14.5697 | 14.2706 | 14.0778 | 13.9971 | 0.9820  | -0.0262 | 0.3654 | 0.4372 |
| Sv2a    | _HLQAVDYAAR_2                                                             | #N/A                  | 7.4383  | 7.3692  | 7.7324  | 7.7459  | 7.5076  | 7.1565  | 7.5418  | 7.7703  | 7.4180  | 7.3626  | 0.9958  | -0.0061 | 0.8215 | 0.0854 |
| Sv2a    | _GGLS(Phospho (STY))DGEPPGGRGEAQR_2                                       | #N/A                  | 8.2803  | 8.4078  | 9.2801  | 8.4840  | 7.7690  | 8.3339  | 8.5399  | 8.6861  | 8.5371  | 8.3999  | 0.9866  | -0.0195 | 0.6627 | 0.1787 |
| Sv2a    | _M(Oxidation (M))ADGAPLAGVR_2                                             | #N/A                  | 7.7171  | 7.9907  | 7.5640  | 7.4386  | 7.7226  | 7.2138  | 7.7942  | 8.1213  | 7.7123  | 7.4071  | 0.9805  | -0.0283 | 0.4239 | 0.1367 |
| Sv2a    | _FEEDODDDFPADAGYVR_2                                                      | #N/A                  | 7.2031  | 7.0572  | 4.2508  | 7.9284  | 6.9443  | 7.0355  | 7.4915  | 8.0614  | 7.7175  | 7.4353  | 0.8776  | -0.1884 | 0.1906 | 0.7199 |
| Sv2a    | _VFSVTHIK_2                                                               | #N/A                  | 6.8593  | 6.4962  | 6.8111  | 6.1775  | 5.7704  | 6.0829  | 6.8124  | 6.9803  | 6.4269  | 5.8003  | 0.9787  | -0.0311 | 0.6582 | 0.1816 |
| Sv2a    | _DREELAQYETILR_3                                                          | #N/A                  | 6.2051  | 5.8057  | 5.5006  | 5.2452  | 4.7681  | 5.6761  | 5.4984  | 5.4358  | 5.3016  | 6.0234  | 0.9944  | -0.0082 | 0.9139 | 0.0391 |
| Sv2a    | _Acetyl (Protein N-term)[MEEGFRDR_2                                       | #N/A                  | 4.8039  | 3.3079  | 3.9875  | 5.4085  | 3.7652  | 3.8023  | 3.1259  | 3.6283  | 3.2769  | 4.1397  | 1.1797  | 0.2384  | 0.1808 | 0.7428 |
| Sv2a    | _GGGYNDK_2                                                                | #N/A                  | 4.4496  | 3.7037  | 3.1545  | 3.6572  | 3.9515  | 3.6428  | 3.3718  | 4.5946  | 4.4234  | 3.8840  | 0.9242  | -0.1138 | 0.3466 | 0.4602 |
| Sv2a    | _VQDEYSR_2                                                                | #N/A                  | 3.4394  | 3.3861  | 4.0135  | 3.9888  | 3.5204  | 3.7763  | 4.1371  | 2.8830  | 3.3114  | 3.6661  | 1.0537  | 0.0755  | 0.4797 | 0.3190 |
| Sv2a    | _THQDELIHQSDGTGWQR_3                                                      | #N/A                  | 7.0015  | 6.9718  | 8.1050  | 8.0385  | 5.1462  | 7.1761  | 7.6471  | 7.1397  | 6.1904  | 6.4934  | 1.0299  | 0.0425  | 0.7426 | 0.1292 |
| Adin1   | _TAQVPS(Phospho (STY))PPR_2                                               | #N/A                  | 13.3880 | 13.2341 | 13.7056 | 13.7508 | 12.6658 | 13.1832 | 13.3337 | 13.2599 | 13.3042 | 0.9956  | -0.0064 | 0.7906  | 0.1030 |        |
| Adin1   | _TAQVPS(Phospho (STY))PPRG_2                                              | #N/A                  | 10.9096 | 11.9637 | 12.9511 | 12.2037 | 11.2944 | 11.8187 | 11.7917 | 11.9419 | 11.4662 | 11.5130 | 1.0153  | 0.0219  | 0.6464 | 0.1895 |
| Acin1   | _LQPEQGS(Phospho (STY))PK_2                                               | Q9JUX_5729_M1_Acin1   | 11.4489 | 11.5154 | 11.9447 | 11.6828 | 10.9518 | 11.4110 | 11.5903 | 11.6906 | 11.5309 | 11.4047 | 0.9947  | -0.0077 | 0.7329 | 0.1350 |
| Acin1   | _SLS(Phospho (STY))PLSGTDTK_2                                             | #N/A                  | 10.2866 | 10.1113 | 10.5219 | 10.6148 | 9.4113  | 10.2076 | 10.5872 | 10.2248 | 10.0548 | 10.2387 | 0.9918  | -0.0119 | 0.7299 | 0.1367 |
| Acin1   | _GVQAGNS(Phospho (STY))JTEGGQGR_2                                         | #N/A                  | 7.9430  | 3.2017  | 8.4674  | 8.5124  | 7.6196  | 8.2390  | 8.1732  | 8.1443  | 3.8821  | 8.1757  | 1.0334  | 0.0473  | 0.8648 | 0.0631 |
| Acin1   | _SSSFSEKES(Phospho (STY))DEKPR_3                                          | #N/A                  | 5.5630  | 5.3714  | 6.3907  | 6.0367  | 5.9700  | 6.0326  | 5.5791  | 6.3787  | 6.1766  | 5.8414  | 0.9833  | -0.0242 | 0.6808 | 0.1670 |
| Acin1   | _KS(Phospho (STY))LS(Phospho (STY))PGVR_2                                 | Q9JUX_5655_M2_Acin1   | 6.0339  | 6.1958  | 6.4666  | 6.8973  | 5.8442  | 6.1235  | 6.6834  | 6.3820  | 4.2279  | 3.5061  | 1.2039  | 0.2677  | 0.1414 | 0.8497 |
| Acin1   | _S(Phospho (STY))RST(Phospho (STY))PVRDR_2                                | Q9JUX_51326_M2_Acin1  | 5.1613  | 4.6151  | 5.2067  | 5.3460  | 5.6477  | 4.9208  | 3.9993  | 4.4789  | 5.4573  | 5.0615  | 1.0141  | 0.0202  | 0.8738 | 0.0586 |
| Acin1   | _KIS(Phospho (STY))VVSATK_2                                               | Q9JUX_5825_M1_Acin1   | 4.3376  | 4.3826  | 4.5380  | 4.9132  | 3.3869  | 4.8495  | 3.1309  | 4.6078  | 4.3508  | 4.0018  | 1.0941  | 0.1297  | 0.3475 | 0.4591 |
| Acin1   | _SLS(Phospho (STY))PLSGTDTKAEIS(Phospho (STY))PAGR_2                      | #N/A                  | 4.7469  | 6.2968  | 5.5814  | 6.6828  | 6.1090  | 6.9193  | 4.1116  | 3.9245  | 4.0891  | 4.2955  | 1.3154  | 0.3955  | 0.0420 | 1.3767 |
| Acin1   | _SDS(Phospho (STY))SPPLPEDLK_2                                            | Q9JUX_5389_M1_Acin1   | 3.9569  | 3.2205  | 3.8858  | 9.6478  | 8.2955  | 3.2946  | 3.9456  | 9.1289  | 7.8438  | 3.3792  | 0.8863  | -0.1742 | 0.7155 | 0.1454 |
| Acin1   | _HLS(Phospho (STY))HPEPEQQHVR_2                                           | #N/A                  | 5.7693  | 6.1700  | 6.3744  | 5.8988  | 5.0835  | 5.4343  | 5.8793  | 5.8120  | 5.3940  | 5.7456  | 1.0141  | 0.0203  | 0.7612 | 0.1185 |
| Acin1   | _GVQAGNS(Phospho (STY))JTEGGQGRK_3                                        | #N/A                  | 3.8776  | 3.1330  | 3.6113  | 3.1551  | 3.0213  | 3.6033  | 4.7303  | 3.8461  | 4.1452  | 4.3332  | 0.7975  | -0.3265 | 0.0054 | 2.2710 |
| Plekha1 | _AKOPPOS(Phospho (STY))PPQSESEQLLETER_3                                   | Q9JHY_5341_M1_Plekha1 | 3.7359  | 3.4903  | 4.4227  | 3.4245  | 2.8616  | 3.3671  | 3.1392  | 3.1931  | 3.4325  | 3.3915  | 1.0096  | 0.0138  | 0.9242 | 0.0342 |
| Kcnip2  | _DLDGS(Phospho (STY))DQLTGHPPGSKK_3                                       | #N/A                  | 8.4728  | 8.5471  | 9.1257  | 9.4860  | 8.5723  | 9.1570  | 8.8610  | 8.8473  | 2.9667  | 9.1647  | 1.1922  | 0.2536  | 0.2681 | 0.5717 |
| Kcnip2  | _DLDGS(Phospho (STY))DQLTGHPPGFSK_2                                       | #N/A                  | 3.5286  | 7.5473  | 7.4532  | 8.8760  | 7.4344  | 8.3301  | 8.2174  | 7.9868  | 7.9233  | 8.2040  | 0.8901  | -0.1679 | 0.3843 | 0.4153 |
| Rprm    | _RPS(Phospho (STY))KEVAIVVGPY_2                                           | Q9JH2_598_M1_Rprm     | 8.5554  | 8.6656  | 8.7873  | 9.4531  | 8.0946  | 9.1050  | 9.2551  | 9.2693  | 8.9795  | 8.8529  | 0.9656  | -0.5905 | 0.2504 | 0.6014 |
| Tamalin | _NFTOS(Phospho (STY))PEQQR_2                                              | #N/A                  | 9.5354  | 9.5724  | 9.9441  | 10.0558 | 9.3011  | 9.6211  | 9.8504  | 9.7425  | 9.6784  | 9.7003  | 0.9927  | -0.0078 | 0.6381 | 0.1951 |
| Tamalin | _RIPGLNRS(Phospho (STY))LEEEESQL_2                                        | #N/A                  | 8.4624  | 9.0239  | 9.9449  | 9.1353  | 8.7318  | 8.9328  | 9.1848  | 9.3849  | 8.8015  | 8.7209  | 1.0017  | 0.0025  | 0.9581 | 0.0186 |
| Tamalin | _NFTOS(Phospho (STY))PEQQRK_2                                             | #N/A                  | 3.5347  | 4.2910  | 3.2684  | 4.3130  | 4.1793  | 3.9462  | 7.2081  | 4.1890  | 6.8148  | 3.9903  | 0.7066  | -0.5010 | 0.0499 | 1.3017 |
| Tamalin | _S(Phospho (STY))LEEEESQL_2                                               | #N/A                  | 3.8751  | 6.1191  | 4.5619  | 6.8860  | 5.9987  | 7.0736  | 6.8141  | 6.9198  | 6.9971  | 6.9193  | 0.8322  | -0.1651 | 0.1135 | 0.9451 |
| Rilp1   | _T(Phospho (STY))SPQESGKR_2                                               | Q9JUC_1348_M1_Rilp1   | 3.2825  | 4.0599  | 4.5171  | 4.0608  | 3.9271  | 3.4843  | 7.5429  | 4.4412  | 3.2394  | 3.7381  | 0.8331  | -0.1634 | 0.3463 | 0.4605 |
| Rilp1   | _Acetyl (Protein N-term)[M(Oxidation (M))EPLGSS(Phospho (STY))PPAALSALK_2 | #N/A                  | 9.5986  | 9.8426  | 10.3473 | 10.3709 | 9.6253  | 11.1608 | 9.8048  | 9.9854  | 10.0108 | 0.9727  | -0.0400 | 0.3784  | 0.0241 |        |
| Tacc2   | _VQNS(Phospho (STY))PPVGR_2                                               | Q9JUG_5419_M1_Tacc2   | 11.5498 | 11.7336 | 12.0411 | 12.3365 | 11.5569 | 11.8189 | 11.8295 | 11.6038 | 11.6298 | 11.8609 | 1.0092  | 0.0133  | 0.5268 | 0.2783 |
| Tacc2   | _FNS(Phospho (STY))PSELDYR_2                                              | Q9JUG_5714_M1_Tacc2   | 7.6047  | 8.0144  | 7.9836  | 8.6492  | 7.4224  | 8.0779  | 7.8452  | 7.9458  | 8.2393  | 0.9658  | 0.0033  | 0.3095  | 0.5093 |        |
| Tacc2   | _TRRPS(Phospho (STY))LK_2                                                 | #N/A                  | 7.3552  | 7.9926  | 8.0884  | 8.1749  | 7.3088  | 4.3234  | 4.2165  | 7.6545  | 7.5659  | 7.7474  | 1.0605  | 0.0847  | 0.6945 | 0.1583 |
| Tacc2   | _KTRRPS(Phospho (STY))LK_2                                                | #N/A                  | 5.0902  | 3.3141  | 3.7924  | 3.3361  | 3.2024  | 5.4637  | 3.4844  | 3.6650  | 3.9641  | 5.1986  | 0.9890  | -0.0160 | 0.9413 | 0.0263 |
| Tacc2   | _LQNTPASPRPS(Phospho (STY))PT(Phospho (STY))EPSDTPIAK_3                   | Q9JUG_5716_M2_Tacc2   | 3.3525  | 4.7173  | 3.5426  | 6.6499  | 3.9900  | 3.9746  | 3.8418  | 3.9966  | 6.8580  | 6.3367  | 0.8313  | -0.2666 | 0.3397 | 0.4689 |
| Tacc2   | _ETQGEFGEES(Phospho (STY))PVPSHLEPETK_3                                   | Q9JUG_5354_M1_Tacc2   | 4.9148  | 5.4626  | 5.8117  | 7.0872  | 4.8597  | 4.2864  | 3.8990  | 5.5515  | 5.7594  | 3.8154  | 1.1361  | 0.1841  | 0.3466 | 0.4602 |
| Land2   | _SGNYPSSLNETOR_2                                                          | #N/A                  | 6.4512  | 6.2625  | 5.8891  | 6.2415  | 5.0488  | 5.7741  | 5.6643  | 6.5278  | 5.1303  | 5.3344  | 1.0495  | 0.0697  | 0.4525 | 0.3444 |
| Land2   | _SFPNFPDYEAASAGLAAGSAETGR_3                                               | #N/A                  | 4.7680  | 4.1784  | 3.1558  | 4.6719  | 2.3380  | 5.3969  | 2.5669  | 5.3365  | 4.4280  | 3.8777  | 1.0507  | 0.0713  | 0.7575 | 0.1206 |
| Sh3bgr1 | _GQYDAFFEAR_2                                                             | #N/A                  | 5.1425  | 5.7858  | 6.2303  | 6.5519  | 6.1742  | 5.6555  | 4.7345  | 5.9649  | 6.1892  | 5.7892  | 1.0448  | 0.0632  | 0.5015 | 0.2997 |
| Sh3bgr1 | _QQDVL[Carbamidomethyl (C)]LEANK_2                                        | #N/A                  | 4.0054  | 4.6223  | 4.1165  | 5.1984  | 5.0834  | 4.2887  | 5.0155  | 4.7319  | 4.4722  | 4.5130  | 0.9721  | -0.0408 | 0.6470 | 0.1891 |
| Phn2    | _SQGGEPYNAVGR_2                                                           | #N/A                  | 9.3894  | 9.2270  | 9.6868  | 9.7602  | 9.8796  | 9.3607  | 9.4683  | 9.3931  | 9.4206  | 9.4699  | 1.0119  | 0.0171  | 0.4230 | 0.3736 |
| Phn2    | _DSLNVGGDC[Carbamidomethyl (C)]T[M(Oxidation (M))DIR_2                    | #N/A                  | 7.3081  | 7.7852  | 8.3623  | 8.2331  | 8.1181  | 8.3396  | 7.7124  | 8.0803  | 7.9781  | 7.6690  | 1.0209  | 0.0299  | 0.4824 | 0.3166 |
| Phn2    | _EGVHGGGLNKK_2                                                            | #N/A                  | 6.8420  | 6.1611  | 5.1478  | 5.9618  | 5.1641  | 6.3799  | 6.5208  | 6.1050  | 6.0449  | 6.2113  | 0.9554  | -0.0659 | 0.4567 | 0.3404 |
| Phn2    | _LVLVFMGK_2                                                               | #N/A                  | 4.5674  | 2.6019  | 3.3058  | 4.7367  | 3.8905  | 3.9087  | 3.9888  | 4.0313  | 2.6426  | 4.0542  | 1.0708  | 0.0986  | 0.6135 | 0.2122 |
| Phn2    | DNLM(Oxidation (M))[C]Carbamidomethyl (C)[C]Carbamidomethyl (C)[Q]EA      | #N/A                  | 3.6993  | 2.6102  | 4.3861  | 4.4529  | 2.8250  | 3.2094  | 3.1026  | 3.2297  | 4.3791  | 1.3603  | 1.1698  | 0.2263  | 0.4421 | 0.3545 |
| Cacng4  | _ASSSS(Phospho (STY))PIAR_2                                               | Q9JUV_5228_M1_Cacng4  | 6.1294  | 3.9098  | 6.5199  | 4.5058  | 3.7981  | 4.3273  | 4.2205  | 3.6127  | 3.2612  | 2.9720  | 1.3835  | 0.4683  | 0.0655 | 1.1839 |
| Cacng4  | _STEAS(Phospho (STY))SRDAS(Phospho (STY))PVGLK_2                          | #N/A                  | 4.5251  | 4.0334  | 5.1061  | 5.6030  | 4.5894  | 5.6765  | 5.7877  | 5.7465  | 5.0598  | 3.7796  | 0.9657  | -0.0503 | 0.7360 | 0.1331 |
| Cacng4  | _DAS(Phospho (STY))PVGLK_2                                                | Q9JUV_5259_M1_Cacng4  | 6.4154  | 5.4418  | 3.8441  | 4.3468  | 3.7839  | 3.9456  | 4.8239  | 3.7717  | 3.4203  | 4.3138  | 1.1340  | 0.1815  | 0.3869 | 0.6124 |
| Cacng3  | _SRDLS(Phospho (STY))PISK_2                                               | #N/A                  | 10.3259 | 10.3431 | 10.88   |         |         |         |         |         |         |         |         |         |        |        |



|         |                                                                                   |                       |         |         |         |         |         |         |         |         |         |         |         |         |        |        |
|---------|-----------------------------------------------------------------------------------|-----------------------|---------|---------|---------|---------|---------|---------|---------|---------|---------|---------|---------|---------|--------|--------|
| Uch3    | _WLPLEANPEVNTQFLX_2                                                               | #N/A                  | 5.2090  | 5.5016  | 4.5286  | 4.8833  | 5.7765  | 6.0797  | 5.6889  | 5.0802  | 5.4749  | 6.1013  | 0.9541  | -0.0678 | 0.4695 | 0.3284 |
|         | _FLEESVM[Oxidation (M)]S[Phospho (STY)]PEER_2                                     | #N/A                  | 7.0504  | 7.9967  | 8.3283  | 8.0470  | 7.6994  | 8.1947  | 8.1968  | 8.0730  | 7.8894  | 7.9995  | 0.9809  | -0.0278 | 0.5411 | 0.2667 |
| Uch3    | _TSDETLEDIAIEV[C]carbamidomethyl [C]IKK_3                                         | #N/A                  | 3.2987  | 4.0550  | 3.8580  | 4.3606  | 3.9433  | 3.6814  | 4.0753  | 3.7579  | 3.4065  | 4.3276  | 0.9934  | -0.0095 | 0.9181 | 0.0371 |
| Yb3     | _S[Phospho (STY)]RPLNVAISQDGK_2                                                   | Q9IKB3_S328_M1_Yb3    | 7.4410  | 7.1673  | 8.1299  | 8.5244  | 7.2831  | 7.7842  | 7.7752  | 7.4794  | 7.5102  | 7.9702  | 1.0049  | 0.0071  | 0.8973 | 0.0470 |
| Yb3     | _I[Acetyl (Protein N-term)]S[Phospho (STY)]EGEATIGGTLFQAAADAPAAAPDPAPK_3          | Q9IKB3_S32_M1_Yb3     | 3.2981  | 4.0544  | 4.5326  | 4.3612  | 3.9427  | 4.1828  | 4.0759  | 3.7572  | 3.4058  | 4.3282  | 1.0437  | 0.0617  | 0.5464 | 0.2625 |
| Cend1   | _PAPTVPAAPSS[Phospho (STY)]PDATSEPK_2                                             | #N/A                  | 9.3153  | 9.0145  | 3.9617  | 9.5779  | 8.2206  | 3.9205  | 9.7386  | 9.1731  | 8.9775  | 3.8103  | 0.9258  | -0.1113 | 0.7448 | 0.1279 |
| Cend1   | _OTQAEKQGAAPGAATK_3                                                               | #N/A                  | 7.6326  | 8.2360  | 8.4866  | 7.9782  | 8.2046  | 7.7902  | 7.3993  | 8.1767  | 7.8782  | 7.8707  | 1.0111  | 0.0159  | 0.6177 | 0.2092 |
| Cend1   | _QEQAAAPGAATK_2                                                                   | #N/A                  | 7.8993  | 7.6674  | 7.0493  | 7.6575  | 8.2391  | 7.7345  | 7.5500  | 7.4722  | 7.6376  | 7.6840  | 1.0161  | 0.0230  | 0.5631 | 0.2494 |
| Cend1   | _OTQAEKQGAAPGAATK_3                                                               | #N/A                  | 6.6595  | 6.8626  | 7.0947  | 6.4168  | 6.7854  | 7.1925  | 6.9404  | 6.8651  | 6.5675  | 6.6422  | 1.0121  | 0.0173  | 0.6268 | 0.2028 |
| Cend1   | _VPQATAEAK_2                                                                      | #N/A                  | 7.0403  | 6.2867  | 6.0890  | 5.9704  | 6.8850  | 6.6571  | 5.7673  | 6.3532  | 5.5865  | 6.9510  | 1.0115  | 0.0165  | 0.8109 | 0.0911 |
| Cend1   | _S[Phospho (STY)]PKPOTK_2                                                         | #N/A                  | 8.2546  | 7.6164  | 8.1064  | 7.8001  | 7.3059  | 7.5862  | 8.3036  | 8.1821  | 7.5013  | 8.1311  | 0.9687  | -0.0459 | 0.3050 | 0.5158 |
| Cend1   | _S[Phospho (STY)]PKPOTKVPQATAEAK_3                                                | #N/A                  | 11.7069 | 12.4127 | 13.6052 | 12.4232 | 12.1380 | 12.4989 | 12.4082 | 12.3792 | 12.2947 | 8.3089  | 1.0984  | 0.1354  | 0.2320 | 0.6345 |
| Cend1   | _GPDGAAEEDSNTGGR_2                                                                | #N/A                  | 5.0731  | 4.9669  | 4.8425  | 4.9950  | 4.9595  | 4.6400  | 5.0746  | 5.3664  | 5.1808  | 5.2424  | 0.9303  | -0.1043 | 0.0114 | 1.9444 |
| Cend1   | _ADPVLNNHNSLKPAPTVPAAPSS[Phospho (STY)]PDATSEPKGPDGAEEDSNTGGR_5                   | #N/A                  | 6.7702  | 8.3993  | 9.1748  | 9.3652  | 7.0555  | 7.5046  | 4.3015  | 7.9859  | 8.0372  | 7.3836  | 1.1614  | 0.2158  | 0.2486 | 0.6045 |
| Cend1   | _ADPVLNNHNSLKPAPTVPAAPSS[Phospho (STY)]PDATSEPK_4                                 | #N/A                  | 3.9364  | 9.8158  | 9.8820  | 11.0994 | 9.4151  | 7.9536  | 3.3621  | 9.7872  | 8.2698  | 9.9328  | 1.1079  | 0.1478  | 0.6467 | 0.1893 |
| Cend1   | _GKS[Phospho (STY)]ASSPKPOTK_2                                                    | Q9IKC6_57_M1_Cend1    | 3.7214  | 3.0257  | 4.4082  | 3.7260  | 2.8471  | 3.3816  | 3.1247  | 3.2076  | 4.3571  | 3.3770  | 1.0005  | 0.0007  | 0.9963 | 0.0016 |
| Scamp5  | _AQEEWTTGAWK_2                                                                    | #N/A                  | 8.2930  | 7.8541  | 8.5745  | 7.8453  | 7.4413  | 7.8965  | 8.5554  | 8.2070  | 8.1445  | 7.9741  | 0.9713  | -0.0420 | 0.3221 | 0.4920 |
| Scamp5  | ^HVQQAQNAAM[Oxidation (M)]GAADGAM[Oxidation (M)]NQPQTQYSATPNYTSYEM[Oxidation (M)] | #N/A                  | 3.7549  | 3.4712  | 4.4417  | 3.4435  | 2.8806  | 3.2651  | 3.1741  | 4.3235  | 3.4105  | 1.0075  | 0.0007  | 0.9413  | 0.0263 | 0.0623 |
| Nectin1 | _AGPLGGSS[Phospho (STY)]YEEEEEGGGGGER_3                                           | #N/A                  | 3.6023  | 3.5852  | 4.2891  | 4.3441  | 3.4580  | 3.6610  | 3.6931  | 6.5659  | 4.0597  | 3.7973  | 0.8442  | -0.2444 | 0.2549 | 0.5936 |
| Nectin1 | _AGPLGGSS[Phospho (STY)]YEEEEEGGGGGER_3                                           | #N/A                  | 4.0498  | 3.3542  | 4.1895  | 3.2765  | 3.1755  | 3.9403  | 3.4248  | 4.0346  | 3.9973  | 0.9804  | -0.0286 | 0.7852  | 0.1050 | 0.1050 |
| Nectin1 | _AGPQHPPM[Oxidation (M)]AQLNLYPQDS[Phospho (STY)]DDEKK_4                          | #N/A                  | 3.8563  | 3.6021  | 3.9169  | 3.9474  | 8.3924  | 9.1874  | 3.7705  | 9.7306  | 3.7782  | 4.0206  | 1.0298  | 0.0424  | 0.9301 | 0.0315 |
| Shb     | _I[Acetyl (Protein N-term)]S[Phospho (STY)]M[Oxidation (M)]EDFPVVK_2              | #N/A                  | 7.6484  | 7.3031  | 7.4003  | 6.9946  | 5.8362  | 7.5039  | 6.8619  | 7.3639  | 7.5412  | 0.9720  | -0.0410 | 0.5856  | 0.2324 | 0.1722 |
| Tmod2   | _ANDPSLQEVNLNKK_2                                                                 | #N/A                  | 9.1740  | 9.6330  | 10.1754 | 10.3315 | 9.2964  | 9.4593  | 9.6440  | 9.4281  | 9.3321  | 9.3426  | 1.0256  | 0.0365  | 0.3597 | 0.4441 |
| Tmod2   | _SLENTNHWK_2                                                                      | #N/A                  | 6.1801  | 6.2390  | 6.1084  | 6.2784  | 7.0509  | 6.8335  | 5.7797  | 5.6517  | 5.9947  | 6.1031  | 1.0879  | 0.1215  | 0.0324 | 1.4900 |
| Tmod2   | _SDNPVALAFAM[Oxidation (M)]LK_2                                                   | #N/A                  | 4.6820  | 5.2662  | 4.8189  | 4.7348  | 5.2798  | 5.3364  | 5.7327  | 5.1869  | 5.1143  | 5.0959  | 0.9503  | -0.0736 | 0.2173 | 0.6629 |
| Tmod2   | _NIDDELLGK_2                                                                      | #N/A                  | 5.7373  | 5.0587  | 3.4742  | 5.6628  | 5.6604  | 5.7971  | 4.5083  | 4.8699  | 5.4785  | 5.3242  | 1.0370  | 0.0524  | 0.7145 | 0.1460 |
| Tmod2   | _QLENVLDLDPESATLPAGFR_2                                                           | #N/A                  | 4.7872  | 5.3490  | 4.7145  | 5.8867  | 5.8646  | 5.2580  | 5.3812  | 5.3436  | 5.1603  | 5.3402  | 1.0007  | 0.0010  | 0.9889 | 0.0049 |
| Tmod2   | _ENDLTTEK_2                                                                       | #N/A                  | 6.3643  | 6.2061  | 4.3397  | 6.1684  | 6.6802  | 6.1764  | 5.2997  | 5.8367  | 5.9697  | 6.1742  | 1.0291  | 0.0413  | 0.7163 | 0.1449 |
| Tmod2   | _DREDVPFTGEK_2                                                                    | #N/A                  | 5.9852  | 5.8736  | 5.6415  | 6.0995  | 6.1859  | 5.9219  | 5.9913  | 5.8228  | 6.1478  | 0.9855  | -0.0210 | 0.4792  | 0.3195 | 0.1722 |
| Tmod2   | _SLNVSNTFTGTGLALVEALR_2                                                           | #N/A                  | 2.9260  | 3.6823  | 4.1605  | 3.2325  | 3.5706  | 3.0541  | 4.4481  | 1.0231  | 3.0337  | 3.1995  | 1.1748  | 0.2324  | 0.4239 | 0.3769 |
| Ndufa3  | _VTGAALPPPGGTALASLQASE_2                                                          | #N/A                  | 5.1861  | 5.9964  | 4.5967  | 6.1267  | 4.0068  | 4.1187  | 5.7912  | 3.8213  | 5.4878  | 6.0816  | 0.9452  | -0.0813 | 0.6503 | 0.1828 |
| Novo1   | _QTLPSPT[Phospho (STY)]PTTK_2                                                     | Q9IKN6_T156_M1_Novo1  | 7.9419  | 8.0852  | 8.5318  | 8.7374  | 8.1107  | 3.8975  | 8.3882  | 7.9362  | 8.2531  | 8.4103  | 0.9156  | -0.1272 | 0.4756 | 0.3228 |
| Novo1   | _IKQTLPS[Phospho (STY)]PTTK_2                                                     | #N/A                  | 3.6980  | 3.5282  | 8.2455  | 3.8866  | 3.4165  | 7.6336  | 3.1013  | 3.2310  | 7.5391  | 3.3536  | 1.1576  | 0.2111  | 0.6525 | 0.1854 |
| Novo1   | _TLVEVQLTGAR_2                                                                    | #N/A                  | 3.6810  | 3.5452  | 4.3678  | 3.3696  | 4.5153  | 3.4220  | 3.0843  | 4.1184  | 4.3975  | 3.3366  | 1.0221  | 0.0316  | 0.8214 | 0.0855 |
| Chrvc1  | _REEEDNEDDGS[Phospho (STY)]DLGEALA_2                                              | Q9IKB8_S122_M1_Chrvc1 | 3.5188  | 4.3240  | 4.2056  | 6.3294  | 6.9887  | 4.4229  | 6.3458  | 7.1003  | 6.6294  | 0.9837  | -0.1784 | 0.4651  | 0.3324 | 0.1787 |
| Hyou1   | _DAVYPLVFETR_2                                                                    | #N/A                  | 5.0396  | 4.6216  | 3.5734  | 4.5483  | 5.0617  | 4.5150  | 4.6129  | 3.8042  | 4.6216  | 4.6224  | 1.0328  | 0.0465  | 0.6627 | 0.1787 |
| Hyou1   | _VLQINDNTATLSVGVRR_2                                                              | #N/A                  | 3.9328  | 4.6464  | 5.5360  | 5.1024  | 3.5936  | 3.8200  | 3.6214  | 3.3646  | 6.6431  | 4.3930  | 1.1081  | 0.1481  | 0.3792 | 0.4212 |
| Hyou1   | _VESVTELVEESPEESTLK_2                                                             | #N/A                  | 4.0856  | 2.8578  | 3.2716  | 3.6003  | 3.2113  | 3.0173  | 3.4890  | 4.3442  | 3.9928  | 3.7413  | 0.8584  | -0.2203 | 0.0740 | 1.1310 |
| Ldb3    | _ASSEGAQGVGS[Phospho (STY)]PK_2                                                   | Q9IKS4_S179_M1_Ldb3   | 5.1265  | 4.8409  | 5.2339  | 5.8099  | 4.8069  | 4.2782  | 5.5338  | 3.3193  | 4.7920  | 1.0448  | 0.0632  | 0.6726  | 0.1722 | 0.1722 |
| Habp4   | _SLAASGAQPPDS[Phospho (STY)]PGGPPPGSK_2                                           | #N/A                  | 9.1809  | 9.1010  | 9.5059  | 9.9323  | 8.9104  | 9.3720  | 9.6390  | 9.1195  | 9.1302  | 9.4105  | 1.0010  | 0.0014  | 0.9669 | 0.0146 |
| Habp4   | _AFDS[Phospho (STY)]FDOR_2                                                        | Q9IKS5_S206_M1_Habp4  | 5.6804  | 5.7553  | 6.1399  | 7.1932  | 4.7018  | 6.8895  | 5.7444  | 6.3402  | 6.4876  | 6.7955  | 0.9507  | -0.0730 | 0.5299 | 0.2758 |
| Habp4   | _KSLAASGAQPPDS[Phospho (STY)]PGGPPPGQK_3                                          | #N/A                  | 8.5366  | 8.8173  | 9.1755  | 9.6605  | 8.4968  | 8.6737  | 8.6322  | 8.5519  | 8.5640  | 1.0335  | 0.0475  | 0.2459  | 0.0693 | 0.0693 |
| Habp4   | _S[Phospho (STY)]PAVAGHRPGAGGR_3                                                  | Q9IKS5_S74_M1_Habp4   | 3.8016  | 3.5408  | 3.5353  | 4.5799  | 3.3621  | 4.3674  | 3.2274  | 3.9221  | 4.2211  | 4.2572  | 0.9891  | -0.0158 | 0.8965 | 0.0474 |
| Habp4   | _RGEQQGWINDR_3                                                                    | #N/A                  | 2.3204  | 3.0793  | 3.9968  | 3.5406  | 2.4478  | 3.1277  | 3.6888  | 3.4606  | 3.7597  | 3.2179  | 0.8779  | -0.1879 | 0.2409 | 0.6182 |
| Adrm1   | _OKKDEEDM[Oxidation (M)]S[Phospho (STY)]LD_2                                      | #N/A                  | 7.6244  | 7.1937  | 6.5711  | 8.4560  | 7.3736  | 6.9825  | 7.2988  | 6.9335  | 6.3605  | 6.9639  | 1.0693  | 0.0967  | 0.2237 | 0.6504 |
| Adrm1   | _QS[Phospho (STY)]AAVTPSSSTSSAR_2                                                 | Q9IKV1_S213_M1_Adrm1  | 5.8399  | 5.7965  | 5.0369  | 4.1168  | 5.3747  | 5.0975  | 5.1629  | 3.9897  | 5.7893  | 1.0530  | 0.0745  | 0.5840  | 0.2409 | 0.6182 |
| Nudt5   | _ESTES[Phospho (STY)]PGKHLVTESEUSEGK_3                                            | Q9IKJ6_S10_M1_Nudt5   | 5.6371  | 3.1781  | 4.5605  | 3.5623  | 2.9994  | 5.9160  | 3.2770  | 3.0553  | 4.2047  | 3.5293  | 1.2253  | 0.2931  | 0.2731 | 0.5636 |
| Fmn2    | _GATADDGGGGS[Phospho (STY)]PVLAAX_2                                               | Q9IL04_S493_M1_Fmn2   | 8.6163  | 8.5912  | 9.2426  | 8.8145  | 8.0125  | 9.0033  | 8.4971  | 8.7165  | 8.3918  | 1.0009  | 0.0014  | 0.9724  | 0.0316 | 0.0316 |
| Fmn2    | _S[Phospho (STY)]PKK_2                                                            | Q9IL04_S629_M1_Fmn2   | 10.1504 | 9.9971  | 10.5846 | 10.4936 | 9.6574  | 10.0304 | 10.5820 | 10.3081 | 10.2171 | 10.1837 | 0.9835  | -0.0240 | 0.3932 | 0.4053 |
| Fmn2    | _LPEEPES[Phospho (STY)]PKDVOTEPK_2                                                | 3.6421                | 2.9465  | 7.5853  | 7.3827  | 6.3595  | 3.4608  | 6.9682  | 7.3118  | 6.8844  | 7.1000  | 0.7401  | -0.4343 | 0.1277  | 0.8939 | 0.1277 |
| Fmn2    | _GS[Phospho (STY)]PGIEWVPEVEASQR_2                                                | #N/A                  | 10.2024 | 10.0174 | 10.4067 | 11.2444 | 10.1119 | 10.3816 | 10.6615 | 10.7142 | 10.5972 | 10.4502 | 0.9800  | -0.0291 | 0.3853 | 0.4142 |
| Fmn2    | _SIQTS[Phospho (STY)]PTEGR_2                                                      | Q9IL04_S724_M1_Fmn2   | 10.8933 | 11.1398 | 11.6521 | 11.4586 | 10.4904 | 11.0011 | 11.3714 | 11.1309 | 11.0482 | 11.1226 | 0.9944  | -0.0081 | 0.7825 | 0.1065 |
| Fmn2    | _S[Phospho (STY)]ADWTEELGVR_2                                                     | Q9IL04_S459_M1_Fmn2   | 2.9086  | 3.6649  | 4.2481  | 3.2499  | 3.5532  | 3.0714  | 4.4654  | 3.3677  | 3.0163  | 3.2169  | 0.9809  | -0.0279 | 0.8549 | 0.0681 |
| Fmn2    | _QLSSPHSPS[Phospho (STY)]QSPNQSPR_3                                               | Q9IL04_S411_M1_Fmn2   | 4.0123  | 3.5022  | 4.3556  | 4.1157  | 4.0503  | 3.9630  | 3.9507  | 3.1849  | 3.5089  | 3.4581  | 1.1345  | 0.1821  | 0.0372 | 1.4295 |
| Fmn1    | _SKPLDQSVEDS[Phospho (STY)]K_2                                                    | Q9IL26_S189_M1_Fmn1   | 3.6209  | 7.8929  | 4.5598  | 7.9633  | 6.2239  | 7.8152  | 3.8520  | 7.7453  | 7.5810  | 7.6452  | 0.9463  | -0.0796 | 0.7759 | 0.1102 |
| Fmn1    | _EAAADTSGREPPTPKS[Phospho (STY)]PKK_3                                             | Q9IL26_S1021_M1_Fmn1  | 6.8173  | 6.8491  | 7.4717  | 7.1735  | 4.0660  | 6.7058  | 7.4222  | 7.4259  | 7.2581  | 7.2117  | 0.8888  | -0.1701 | 0.2319 | 0.6347 |
| Fmn1    | _GPGDVVSEILPGAAAT[Phospho (STY)]PGGDAQAPR_3                                       | Q9IL26_T509_M1_Fmn1   | 3.3216  | 4.1268  | 4.4501  | 5.7593  | 3.9482  | 3.7813  | 4.1421  | 5.2274  | 4.9312  | 3.6711  | 0.9417  | -0.0866 | 0.6231 | 0.2055 |
| Gltp    | _I[Acetyl (Protein N-term)]ALLAEHLKPLPADR_3                                       | #N/A                  | 4.1797  | 5.4801  | 5.5768  | 5.4492  | 5.3592  | 4.0572  | 5.3118  | 5.9261  | 5.7197  | 5.3415  | 0.9000  | -0.1521 | 0.1768 | 0.7525 |
| Mpp6    | _IDSLVVQTR_2                                                                      | #N/A                  | 6.4474  | 5.5383  | 6.1841  | 6.4648  | 6.3700  | 6.1465  | 6.0216  | 6.0128  | 5.9745  | 5.7780  | 1.0412  | 0.0000  | 0.2162 | 0.6652 |
| Mpp6    | _VENNDLVAR_2                                                                      | #N/A                  | 5.3750  | 5.5835  | 5.3946  | 5.1633  | 5.8660  | 5.7064  | 5.0082  | 5.2307  | 5.4617  | 4.9763  | 1.0669  | 0.0934  | 0.0592 | 1.2275 |
| Mpp6    | _NAEFDRIHQVEEVAK_3                                                                | #N/A                  | 3.1993  | 3.9617  | 4.4338  | 4.5001  | 3.8439  | 4.2816  | 3.5283  | 4.1278  | 3.9465  | 3.4937  | 1.0696  | 0.0971  | 0.3703 | 0.4315 |
| Mpp6    | _YLHGEGYGLGK_3                                                                    | #N/A                  | 2.9421  | 3.6984  | 4.1766  | 3.2164  | 3.5867  | 3.0379  | 4.4319  | 3.4013  | 3.0498  | 3.1834  | 0.9791  | -0.0305 | 0.8360 | 0.0778 |
|         |                                                                                   |                       |         |         |         |         |         |         |         |         |         |         |         |         |        |        |



|          |                                                                                        |                          |         |         |         |         |         |         |         |         |         |         |         |         |        |        |
|----------|----------------------------------------------------------------------------------------|--------------------------|---------|---------|---------|---------|---------|---------|---------|---------|---------|---------|---------|---------|--------|--------|
| Dcl1     | _ISQHGGS[Phospho (STY)]STLSSTK_2                                                       | #N/A                     | 9.5478  | 9.2147  | 10.0867 | 9.9089  | 8.7319  | 9.6213  | 9.4061  | 9.3064  | 9.1584  | 9.2257  | 1.0264  | 0.0375  | 0.3629 | 0.4402 |
| Dcl1     | _VC[Carbamidomethyl (C)]SS[Phospho (STY)]M[Oxidation (M)]DENDGPGEGDELGR_3              | #N/A                     | 3.4844  | 3.5180  | 4.0144  | 5.4786  | 3.7320  | 5.7126  | 5.3979  | 6.2567  | 5.9972  | 5.9721  | 0.7423  | -0.4299 | 0.0172 | 1.7649 |
| Dcl1     | _VC[Carbamidomethyl (C)]SS[Phospho (STY)]M[Oxidation (M)]DENDGPGEGDELGR_2              | #N/A                     | 6.6734  | 7.0204  | 7.3949  | 8.2104  | 3.7951  | 7.2427  | 7.2671  | 7.2519  | 6.4929  | 6.7955  | 1.0840  | 0.1164  | 0.6359 | 0.1966 |
| Dcl1     | _SGKS[Phospho (STY)]PSPSPTS[Phospho (STY)]PGSLRK_3                                     | #N/A                     | 3.8981  | 3.5621  | 3.7848  | 5.1445  | 4.0966  | 5.0115  | 4.2446  | 4.8933  | 5.5353  | 3.6940  | 0.9255  | -0.1117 | 0.4814 | 0.3175 |
| Dcl1     | _TLTSLSEK_2                                                                            | #N/A                     | 4.1794  | 3.0059  | 4.2101  | 4.0350  | 4.3514  | 3.2443  | 3.6051  | 4.8917  | 4.8001  | 4.6467  | 0.8555  | -0.2352 | 0.1202 | 0.9201 |
| Dcl1     | _EES[Phospho (STY)]EEGFQIPATIER_2                                                      | #N/A                     | 4.0248  | 3.3176  | 3.7585  | 9.8530  | 3.1389  | 3.0897  | 3.4505  | 9.5211  | 3.9980  | 2.9795  | 0.9084  | -0.1387 | 0.8065 | 0.0934 |
| Dcl1     | _Acetyl (Protein N-term)[S[Phospho (STY)]FGROMELEHFDERDK_3                             | #N/A                     | 3.3581  | 3.8681  | 4.0449  | 4.0599  | 3.9846  | 3.7449  | 4.2622  | 3.5709  | 3.2195  | 3.0137  | 1.0929  | 0.1282  | 0.2367 | 0.6258 |
| Dcl1     | _Acetyl (Protein N-term)[S[Phospho (STY)]FGROMELEHFDER_3                               | #N/A                     | 3.6339  | 3.5923  | 4.3207  | 3.3225  | 3.4806  | 3.1440  | 4.5380  | 3.2951  | 2.9437  | 3.2895  | 1.0187  | 0.0267  | 0.8538 | 0.0686 |
| Cd2ap    | _S[Phospho (STY)]VDLDAFVAR_2                                                           | Q9ILQ0_S458_M1_Cd2ap     | 4.4349  | 6.0465  | 4.0776  | 7.6514  | 5.8660  | 5.8013  | 3.7696  | 7.0206  | 5.6920  | 6.3984  | 0.9844  | -0.0226 | 0.9205 | 0.0360 |
| Higd1a   | _Acetyl (Protein N-term)[S[Phospho (STY)]NTDLSLSYDEGGQSGK_2                            | #N/A                     | 4.0168  | 4.5470  | 5.0788  | 4.8235  | 3.4747  | 4.4157  | 4.5479  | 4.8770  | 4.3704  | 0.9727  | -0.0400 | 0.7036  | 0.1527 |        |
| Bag3     | _SGS[Phospho (STY)]PAASDC[Carbamidomethyl (C)]SSSSSSASLPSSGR_2                         | Q9JLV1_S179_M1_Bag3      | 5.4528  | 5.8382  | 5.2930  | 4.0342  | 3.6532  | 5.9827  | 6.0922  | 5.3989  | 3.5399  | 5.8150  | 0.9675  | -0.0476 | 0.8075 | 0.0928 |
| Bag3     | _AASPRFS[Phospho (STY)]PVR_2                                                           | Q9JLV1_S274_M1_Bag3      | 4.5131  | 3.2342  | 3.7124  | 3.2562  | 3.1225  | 3.5022  | 3.3953  | 3.7450  | 4.0441  | 4.4343  | 0.9109  | -0.1346 | 0.3020 | 0.5200 |
| Cul3     | _FLQESGNDR_2                                                                           | #N/A                     | 4.2807  | 3.5361  | 4.0143  | 3.3787  | 3.4244  | 2.8903  | 7.3545  | 6.8742  | 4.3884  | 3.3457  | 0.6534  | -0.6140 | 0.0455 | 1.3416 |
| Auh      | _LAIPGGGGTOR_2                                                                         | #N/A                     | 7.9513  | 8.0864  | 8.5220  | 8.5560  | 8.1558  | 8.1291  | 7.9807  | 8.4295  | 7.9321  | 8.0292  | 1.0174  | 0.0248  | 0.3910 | 0.4079 |
| Auh      | _HLEENR_2                                                                              | #N/A                     | 5.3428  | 6.9276  | 4.3172  | 7.0100  | 7.6767  | 6.8782  | 5.1995  | 4.9390  | 5.6125  | 5.2307  | 1.2122  | 0.2777  | 0.1266 | 0.8976 |
| Auh      | _EFLPQGPVAM[Oxidation (M)]R_2                                                          | #N/A                     | 6.8296  | 7.0295  | 6.9662  | 6.8512  | 7.1857  | 7.1459  | 7.3432  | 7.2130  | 6.9916  | 7.3467  | 0.9692  | -0.0451 | 0.0571 | 1.2433 |
| Auh      | _SEVPGGFC[Carbamidomethyl (C)]AGADUK_2                                                 | #N/A                     | 3.2902  | 4.0954  | 3.9770  | 5.3924  | 4.9965  | 5.6284  | 4.1943  | 5.1075  | 5.1866  | 4.7442  | 0.9491  | -0.0754 | 0.6377 | 0.1954 |
| Auh      | _AVGLSHVLQNGQGDAAVRK_3                                                                 | #N/A                     | 4.8006  | 4.8291  | 5.0465  | 3.8020  | 4.9170  | 5.0352  | 4.9835  | 4.5497  | 5.4318  | 5.0901  | 0.9451  | -0.0815 | 0.3535 | 0.4516 |
| Auh      | _AVGLSHVLQNGQGDAAVR_3                                                                  | #N/A                     | 3.6473  | 3.8531  | 7.4523  | 4.7648  | 2.7734  | 4.0843  | 4.4805  | 4.2362  | 4.9441  | 4.1825  | 0.9929  | -0.1003 | 0.9708 | 0.0726 |
| Rahgef1  | _QTS[Phospho (STY)]IETDR_2                                                             | Q9JIM13_S132_M1_Rahgef1  | 10.5538 | 10.6312 | 16.835  | 11.0019 | 9.9674  | 10.7817 | 10.7220 | 10.6403 | 10.5698 | 10.7083 | 0.8852  | -0.1759 | 0.4231 | 0.3139 |
| Rahgef1  | _YM[Oxidation (M)]SGQTS[Phospho (STY)]PR_2                                             | #N/A                     | 8.2200  | 7.9685  | 7.8681  | 8.1473  | 8.1117  | 7.9399  | 7.8914  | 7.7861  | 8.1298  | 7.9181  | 1.0239  | 0.0341  | 0.1779 | 0.7498 |
| Rahgef1  | _LDAGSLHLSQEDFYRM[Oxidation (M)]S[Phospho (STY)]GQTSPR_3                               | #N/A                     | 3.8130  | 3.4365  | 3.7943  | 4.0029  | 3.3075  | 3.6799  | 3.8339  | 3.6684  | 3.9056  | 3.9647  | -0.0518 | 0.3570  | 0.4473 |        |
| Nt5c     | _DTEVFC[Carbamidomethyl (C)]TT[Phospho (STY)]PLK_2                                     | #N/A                     | 3.4341  | 3.7921  | 5.4558  | 4.6236  | 4.0606  | 6.0900  | 6.2720  | 5.3355  | 3.1435  | 3.0897  | 1.0260  | 0.0370  | 0.8912 | 0.0500 |
| Nt5c     | _WVEQNLGPEVER_2                                                                        | #N/A                     | 5.7617  | 5.7218  | 4.5472  | 6.7492  | 6.3331  | 6.1391  | 6.0390  | 5.9720  | 6.4004  | 5.1982  | 0.9954  | -0.0066 | 0.9518 | 0.0214 |
| Nt5c     | _EM[Oxidation (M)]NDM[Oxidation (M)]KDETVFC[Carbamidomethyl (C)]TT[Phospho (STY)]PLK_3 | #N/A                     | 4.1486  | 5.3599  | 5.5166  | 5.6259  | 4.7710  | 3.5376  | 4.7987  | 4.8620  | 4.8910  | 0.9835  | -0.0240 | 0.8557  | 0.0677 |        |
| Nt5c     | _VLVDM[Oxidation (M)]DGLVADFESGLLGFR_2                                                 | #N/A                     | 3.2072  | 3.9635  | 4.4418  | 4.4521  | 3.8518  | 4.2736  | 4.1668  | 2.8614  | 3.3149  | 3.6628  | 1.1514  | 0.0204  | 0.1419 | 0.8480 |
| Mink1    | _SQS[Phospho (STY)]LQDDPTR_2                                                           | Q9JMS2_S603_M1_Mink1     | 11.4659 | 11.4134 | 11.6088 | 11.5689 | 9.7649  | 11.4364 | 11.3278 | 11.5229 | 11.4778 | 11.3816 | 0.9809  | -0.0278 | 0.5672 | 0.2667 |
| Mink1    | _S[Phospho (STY)]PVLSPGNK_2                                                            | Q9JMS2_S746_M1_Mink1     | 11.5055 | 11.7373 | 11.8772 | 11.9131 | 10.1916 | 11.5436 | 11.9226 | 11.7999 | 11.5024 | 11.4841 | 0.9814  | -0.0270 | 0.5411 | 0.2667 |
| Mink1    | _SDSVLPASGHGLQAGS[Phospho (STY)]LER_3                                                  | #N/A                     | 11.3403 | 11.6396 | 11.9093 | 12.0198 | 9.2883  | 11.3115 | 11.4510 | 11.6935 | 11.3914 | 11.1043 | 0.9861  | -0.0202 | 0.7686 | 0.1143 |
| Mink1    | _S[Phospho (STY)]DPGWER_2                                                              | Q9JMS2_S706_M1_Mink1     | 6.1609  | 5.0864  | 5.9582  | 6.2137  | 2.9569  | 3.7177  | 5.3734  | 6.0249  | 6.2333  | 6.3130  | 0.8255  | -0.2767 | 0.0127 | 0.6722 |
| Mink1    | _QQNS[Phospho (STY)]PLAK_2                                                             | Q9JMS2_S537_M1_Mink1     | 4.2227  | 7.3949  | 6.9375  | 4.8352  | 6.9375  | 3.6260  | 4.2071  | 3.8557  | 6.5665  | 1.3804  | 0.8557  | -0.0451 | 0.0879 | 0.1560 |
| Mink1    | _GQS[Phospho (STY)]PPTKDGSGVDSR_2                                                      | Q9JMS2_S903_M1_Mink1     | 7.6711  | 4.4190  | 8.7833  | 7.8880  | 7.5317  | 3.8182  | 8.1192  | 8.5684  | 7.9499  | 7.7390  | 0.8259  | -0.2759 | 0.2175 | 0.6626 |
| Mink1    | _QQQLQQQQQR_2                                                                          | #N/A                     | 2.7038  | 3.6710  | 4.3047  | 3.3065  | 3.5412  | 3.4851  | 3.9834  | 4.3124  | 2.9597  | 3.2735  | 0.9641  | -0.0527 | 0.7284 | 0.1376 |
| Mink1    | _VGASTKLS[Phospho (STY)]PVL[Phospho (STY)]PGNK_2                                       | #N/A                     | 3.2542  | 5.4437  | 3.9410  | 4.4436  | 3.8807  | 3.8488  | 4.1583  | 5.5494  | 3.6683  | 4.6471  | 0.9178  | -0.1238 | 0.4754 | 0.3229 |
| Kcnj10   | _VAS[Phospho (STY)]PSGLR_2                                                             | Q9JME3_S338_M1_Kcnj10    | 2.9472  | 4.2790  | 3.6340  | 7.4973  | 4.1673  | 3.9582  | 3.8513  | 3.9818  | 7.6597  | 0.9232  | -0.1152 | 0.7495  | 0.1252 |        |
| Arp3     | _ATLQQLR_2                                                                             | #N/A                     | 3.7354  | 7.5668  | 7.9140  | 7.1559  | 7.5802  | 7.0911  | 7.0327  | 7.6759  | 7.4525  | 7.5193  | 1.0037  | 0.0053  | 0.8898 | 0.0507 |
| Arp3     | _DTDNDDEAIYRK_2                                                                        | #N/A                     | 6.2152  | 5.3566  | 5.4138  | 6.1455  | 6.1845  | 6.0433  | 6.0908  | 5.8978  | 5.9241  | 5.9464  | 0.9880  | -0.0174 | 0.7370 | 0.1325 |
| Arp3     | _LIGNMALPLR_2                                                                          | #N/A                     | 5.5753  | 4.4098  | 3.5706  | 6.6308  | 4.8771  | 4.2192  | 4.5631  | 3.9936  | 2.9911  | 4.3749  | 1.2337  | 0.3039  | 0.1795 | 0.7460 |
| Arp3     | _ETDSTDVDEAIYRK_3                                                                      | #N/A                     | 3.8129  | 4.1034  | 4.5658  | 3.8088  | 3.8651  | 2.8674  | 3.1913  | 3.3458  | 3.4091  | 1.0742  | 0.1033  | 0.4590  | 0.3382 |        |
| Arp3     | _PAYHSLM[Oxidation (M)]DPTTK_3                                                         | #N/A                     | 4.9465  | 3.6703  | 3.9623  | 4.0914  | 5.6292  | 4.8356  | 3.8061  | 4.1247  | 3.7733  | 5.6839  | 1.0404  | 0.0571  | 0.7442 | 0.1283 |
| Arp3     | _VFDPQSDQPSK_3                                                                         | #N/A                     | 4.2557  | 3.5600  | 3.4417  | 3.9443  | 3.3951  | 4.3481  | 3.2081  | 4.1742  | 3.7683  | 3.9113  | 1.0156  | 0.0223  | 0.8318 | 0.0800 |
| Arfp4    | _S[Phospho (STY)]AGEDNDGVPULDEQK_2                                                     | Q9JIM93_S140_M1_Arfp4    | 7.3196  | 7.6920  | 8.1611  | 7.8286  | 6.9960  | 8.3019  | 7.5510  | 7.6527  | 7.7587  | 7.4708  | 0.9609  | -0.0575 | 0.3964 | 0.0190 |
| Cdc42ep4 | _SLSS[Phospho (STY)]PWK_2                                                              | Q9JIM96_S140_M1_Cdc42ep4 | 9.2496  | 9.4830  | 9.9225  | 9.8838  | 9.5531  | 6.7546  | 9.5874  | 9.3400  | 9.3778  | 9.4456  | 0.9686  | -0.0461 | 0.6409 | 0.1932 |
| Cdc42ep4 | _EADDES[Phospho (STY)]LEEQASAK_2                                                       | #N/A                     | 8.2742  | 7.9224  | 8.4228  | 9.1689  | 7.0552  | 9.0749  | 8.1637  | 7.8128  | 8.5180  | 1.0084  | 0.9592  | 0.0121  | 0.8725 |        |
| Cdc42ep4 | _DQWGS[Phospho (STY)]EEEEAGWR_2                                                        | #N/A                     | 3.5362  | 5.9156  | 3.2699  | 7.7375  | 6.2712  | 6.8483  | 6.9786  | 6.9783  | 7.3079  | 7.5216  | 0.7777  | -0.3628 | 0.1234 | 0.9088 |
| Cdc42ep4 | _AREADD[Phospho (STY)]LEEQASAK_2                                                       | #N/A                     | 7.6632  | 3.9087  | 7.5781  | 8.2453  | 3.3048  | 8.406   | 7.2082  | 3.6115  | 7.2759  | 3.2543  | 1.2159  | 0.2821  | 0.4481 | 0.3486 |
| Cdc42ep4 | _DQWGS[Phospho (STY)]EEEEAGVRDK_3                                                      | #N/A                     | 3.0526  | 4.2337  | 4.0361  | 4.0533  | 3.9272  | 5.7357  | 3.9679  | 6.7526  | 5.8160  | 3.9046  | 0.8166  | -0.2923 | 0.2249 | 0.4980 |
| Cdc42ep4 | _NAMS[Phospho (STY)]LPLQNEK_2                                                          | Q9JIM96_S116_M1_Cdc42ep4 | 4.0133  | 3.2687  | 3.1434  | 3.6460  | 3.1570  | 3.3607  | 2.9716  | 4.1210  | 3.3607  | 0.9809  | -0.0279 | 0.7999  | 0.0669 |        |
| Usp14    | _WQQPNANDKN[Phospho (STY)]PPKEK_3                                                      | Q9JIM41_S393_M1_Usp14    | 9.3076  | 9.1685  | 9.9315  | 10.0282 | 9.2093  | 9.4566  | 9.6312  | 9.6887  | 9.3405  | 9.3551  | 1.0014  | 0.0020  | 0.9504 | 0.0221 |
| Usp14    | _AS[Phospho (STY)]GEM[Oxidation (M)]ASAQYTAALR_2                                       | #N/A                     | 5.4297  | 8.4626  | 8.8564  | 9.4421  | 3.9070  | 7.8704  | 8.3181  | 8.5733  | 8.1936  | 3.9998  | 1.0078  | 0.0112  | 0.9688 | 0.0138 |
| Usp14    | _QSPTLQR_2                                                                             | #N/A                     | 4.4952  | 4.6428  | 2.7339  | 3.7667  | 5.6376  | 3.1219  | 4.7954  | 3.3648  | 3.6638  | 3.3137  | 1.0745  | 0.1037  | 0.6570 | 0.1824 |
| Usp14    | _LEAIEDSGRETDSAPAVT[Phospho (STY)]PSK_3                                                | Q9JIM41_T235_M1_Usp14    | 3.8737  | 3.3524  | 4.5606  | 4.9879  | 2.9994  | 3.2292  | 3.2771  | 4.2680  | 4.2047  | 3.5294  | 1.0037  | 0.0053  | 0.9758 | 0.0106 |
| Qtrt1    | _Acetyl (Protein N-term)[AIVGS[Phospho (STY)]PSLESAPR_2                                | Q9JIM42_S6_M1_Qtrt1      | 7.7421  | 7.7075  | 7.9928  | 7.9300  | 7.2082  | 3.2745  | 8.4569  | 7.2407  | 8.0160  | 3.4200  | 1.0284  | 0.0404  | 0.8863 | 0.0524 |
| Dnaj4    | _LSQAYEVSQPK_2                                                                         | #N/A                     | 3.9268  | 3.4156  | 3.6605  | 4.4679  | 3.2369  | 2.9917  | 3.3525  | 4.7524  | 4.8143  | 4.3824  | 0.8361  | -0.2582 | 0.0989 | 1.0046 |
| Stard10  | _AGGAGGEGS[Phospho (STY)]DODTSL_2                                                      | Q9JIMD3_S284_M1_Stard10  | 11.3867 | 11.5021 | 11.6702 | 11.9826 | 10.8637 | 11.4593 | 11.7960 | 11.7209 | 11.3259 | 11.5686 | 0.9974  | -0.0037 | 0.8935 | 0.0489 |
| Ap3b2    | _AFYGS[Phospho (STY)]EEDAK_2                                                           | #N/A                     | 8.9613  | 8.5790  | 8.8887  | 4.2869  | 7.4899  | 4.0055  | 4.0016  | 3.8316  | 4.4802  | 4.2539  | 1.8077  | 0.8542  | 0.0287 | 1.5415 |
| Ap3b2    | _QLVPSGQGALS_2                                                                         | #N/A                     | 5.3071  | 5.0553  | 5.2450  | 4.9788  | 5.4618  | 3.4236  | 5.2703  | 5.6285  | 4.7412  | 4.3548  | 0.9826  | -0.0253 | 0.8495 | 0.0709 |
| Ap3b2    | _ATGYGELPQWPEAPDPSVR_2                                                                 | #N/A                     | 5.1138  | 5.1287  | 3.3637  | 4.4084  | 4.9323  | 4.9681  | 5.3810  | 5.2248  | 5.2647  | 4.8814  | 0.8968  | -0.1572 | 0.1743 | 0.7587 |
| Ap3b2    | _AFYGS[Phospho (STY)]EEDAKGSGSEEAATAALPAR_3                                            | #N/A                     | 8.9299  | 8.8363  | 9.3784  | 10.2538 | 8.2512  | 8.6914  | 8.8390  | 8.8136  | 8.8418  | 1.0029  | 0.0041  | 0.9571  | 0.0190 |        |
| Ap3b2    | _TQLFS[Phospho (STY)]PTQNESLLENPEK_2                                                   | Q9JIMES_S253_M1_Ap3b2    | 3.2785  | 4.0837  | 3.9653  | 4.4679  | 3.9050  | 3.8245  | 4.1853  | 3.6505  | 3.9123  | 4.4349  | 0.9691  | -0.0453 | 0.6150 | 0.2111 |
| Ap3b2    | _LEVLTNLANEINPTVLK_2                                                                   | #N/A                     | 4.0525  | 3.8258  | 3.3062  | 3.3481  | 3.9012  | 2.9828  | 4.0265  | 4.8679  | 3.9582  | 4.1810  | 0.9382  | -0.2546 | 0.0338 | 1.4715 |
| Ap3b2    | _TLTVAGSVM[Oxidation (M)]AFEEVC[Carbamidomethyl (C)]PER_2                              | #N/A                     | 4.2693  | 3.5737  | 3.4553  | 3.9579  | 3.3950  | 4.3345  | 3.6726  | 4.1605  | 3.8     |         |         |         |        |        |



|        |                                                                         |                        |         |         |         |         |         |         |         |         |         |         |        |         |        |        |
|--------|-------------------------------------------------------------------------|------------------------|---------|---------|---------|---------|---------|---------|---------|---------|---------|---------|--------|---------|--------|--------|
| Myo18a | _NKLEGS[Phospho (STY)]D[VD5][Phospho (STY)]ELED[RDVGK_V_3               | Q9IMH9_S1966_M2_Myo18a | 3.4588  | 4.2650  | 4.1466  | 3.1484  | 4.0863  | 3.6432  | 4.3639  | 4.1419  | 3.1178  | 3.1154  | 1.0290 | 0.0412  | 0.7655 | 0.1161 |
| Myo18a | _APS[Phospho (STY)]D[DGSLK_2                                            | Q9IMH9_S1994_M1_Myo18a | 3.4512  | 3.8912  | 3.1849  | 4.2295  | 3.7125  | 4.0170  | 4.3778  | 4.2725  | 3.0707  | 4.0720  | 0.8240 | -0.2793 | 0.2130 | 0.6716 |
| Csnk1e | _GAPANVS[Phospho (STY)]S[SDLTGR_2                                       | Q9IMK2_S389_M1_Csnk1e  | 3.5481  | 3.7943  | 3.2818  | 4.3264  | 3.6156  | 4.1139  | 4.4747  | 4.1756  | 4.0037  | 4.6730  | 0.9675 | -0.0476 | 0.7054 | 0.1516 |
| Csnk1e | _JQQTGNTS[Phospho (STY)]PR_2                                            | Q9IMK2_S363_M1_Csnk1e  | 8.6299  | 8.7800  | 9.0332  | 8.8304  | 7.7173  | 8.5467  | 8.8070  | 8.7098  | 10.0894 | 8.5635  | 0.9499 | -0.0741 | 0.2489 | 0.6039 |
| Glxr   | _I[Acetyl (Protein N-term)]A[QEFVNC][Carbamidomethyl (C)]K_2            | #N/A                   | 5.5678  | 6.2069  | 6.6599  | 6.2359  | 6.2890  | 5.1840  | 5.8784  | 6.0147  | 5.7515  | 5.4873  | 1.0458 | 0.0646  | 0.3886 | 0.4105 |
| Rhoa   | _L[VVVGDCAC][Carbamidomethyl (C)]GK_2                                   | #N/A                   | 8.0112  | 8.0588  | 8.3384  | 7.8049  | 7.8976  | 7.6438  | 7.8404  | 7.9985  | 7.6442  | 7.5594  | 1.0223 | 0.0318  | 0.2766 | 0.5582 |
| Rhoa   | _TC[Carbamidomethyl (C)]L[VVFSK_2                                       | #N/A                   | 5.4225  | 5.4259  | 4.4979  | 4.3039  | 5.4268  | 4.9288  | 5.7376  | 5.5826  | 5.1867  | 4.7005  | 0.9150 | -0.1282 | 0.1837 | 0.7358 |
| Rhoa   | _M[Oxidation (M)]K[QEPKPEEGR_3                                          | #N/A                   | 5.9270  | 5.9445  | 7.0116  | 4.5461  | 6.4403  | 6.8972  | 5.7753  | 6.3218  | 6.8205  | 6.3386  | 0.9705 | -0.0432 | 0.7133 | 0.1467 |
| Rhoa   | _LEVEMATR_2                                                             | #N/A                   | 6.1152  | 4.5557  | 3.7029  | 6.8801  | 5.1312  | 3.0342  | 4.8730  | 3.8361  | 4.1670  | 4.8355  | 1.1073 | 0.1471  | 0.5522 | 0.2579 |
| Rhoa   | _Q[VELALWDTAGQEDYDR_2                                                   | #N/A                   | 6.6595  | 6.3939  | 6.8588  | 6.6866  | 5.7949  | 6.3807  | 7.1732  | 6.4962  | 6.5883  | 6.5297  | 0.9650 | -0.0514 | 0.3366 | 0.4729 |
| Pma6   | _AINQGGLTSVAVR_2                                                        | #N/A                   | 5.8316  | 6.1629  | 5.6490  | 6.3213  | 6.3963  | 5.7512  | 5.5313  | 6.3237  | 6.0683  | 6.3766  | 0.9907 | -0.0134 | 0.8064 | 0.0935 |
| Pma6   | _L[DDSTVTHFK_2                                                          | #N/A                   | 4.8328  | 5.4284  | 5.1414  | 5.0241  | 5.0180  | 5.5040  | 5.5913  | 4.5729  | 5.0770  | 4.5481  | 1.0426 | 0.0602  | 0.3974 | 0.4008 |
| Pma6   | _HITFSPGGR_2                                                            | #N/A                   | 6.8588  | 6.5554  | 6.3530  | 6.5615  | 6.1649  | 6.1857  | 6.6754  | 6.2366  | 6.1764  | 5.6058  | 1.0442 | 0.0624  | 0.2498 | 0.6025 |
| Pma6   | _YEANWVK_2                                                              | #N/A                   | 4.4318  | 4.5507  | 3.1901  | 4.3705  | 5.2199  | 4.5723  | 3.9020  | 4.7002  | 4.6023  | 4.2914  | 1.0035 | 0.0050  | 0.9679 | 0.0142 |
| Pma6   | _ITESIGC[Carbamidomethyl (C)]VM[Oxidation (M)]TGM[Oxidation (M)]TADSR_2 | #N/A                   | 5.2411  | 3.9783  | 3.8599  | 4.1424  | 3.7996  | 3.9299  | 4.2907  | 4.3596  | 3.1578  | 4.3295  | 1.0308 | 0.0437  | 0.7398 | 0.1309 |
| Pma6   | _L[TEAEIDHVALAERD_3                                                     | #N/A                   | 3.4822  | 4.2874  | 4.1690  | 3.1708  | 4.1087  | 3.6208  | 3.9815  | 3.4468  | 3.0954  | 3.1378  | 1.1145 | 0.1564  | 0.1991 | 0.7009 |
| Dkk3   | _PAPVGS[HDHS][Phospho (STY)]EESQLPR_3                                   | #N/A                   | 7.3064  | 7.6677  | 7.1601  | 8.3373  | 8.2880  | 7.9714  | 7.9690  | 7.1286  | 8.0438  | 8.1830  | 0.9946 | -0.0079 | 0.8958 | 0.0478 |
| Hapln1 | _L[VEAEQAK_2                                                            | #N/A                   | 6.7236  | 6.6847  | 6.8972  | 7.0270  | 6.9847  | 6.7595  | 6.8735  | 6.4074  | 7.4665  | 7.2692  | 1.0032 | 0.0046  | 0.8934 | 0.0489 |
| Hapln1 | _GGSDNASLVTDLTLDYVGR_2                                                  | #N/A                   | 5.4137  | 5.3509  | 5.0660  | 6.6620  | 5.2212  | 5.5898  | 5.7429  | 5.1359  | 5.5815  | 4.8975  | 1.1470 | 0.1978  | 0.1637 | 0.7860 |
| Hapln1 | _E[PC][Carbamidomethyl (C)]GGQNTVPQVR_2                                 | #N/A                   | 7.5323  | 6.9042  | 3.1416  | 8.0463  | 7.8695  | 6.3569  | 7.7025  | 7.7968  | 7.3816  | 7.6011  | 0.8775 | -0.1886 | 0.3207 | 0.4938 |
| Hapln1 | _DPTAFSGSHK_2                                                           | #N/A                   | 6.1423  | 5.7098  | 6.3665  | 6.4526  | 6.8344  | 5.7571  | 6.1396  | 6.1032  | 6.7295  | 6.1693  | 0.9881 | -0.0173 | 0.7718 | 0.1125 |
| Hapln1 | _YLNWFHEAR_2                                                            | #N/A                   | 5.6212  | 5.5216  | 6.6703  | 6.1006  | 6.3158  | 3.3966  | 2.4541  | 5.7989  | 6.3941  | 6.6739  | 1.0514 | 0.0723  | 0.7854 | 0.1049 |
| Hapln1 | _C[Carbamidomethyl (C)]SPTAAVR_2                                        | #N/A                   | 5.6847  | 5.4283  | 4.4466  | 5.2139  | 5.7173  | 5.5586  | 5.5997  | 5.2092  | 5.5230  | 5.5989  | 0.9743 | -0.0376 | 0.5931 | 0.2269 |
| Hapln1 | _C[Carbamidomethyl (C)]DAGWLADGSGVR_2                                   | #N/A                   | 5.3863  | 4.9686  | 3.8264  | 5.0488  | 5.5272  | 5.2753  | 5.1362  | 3.7894  | 4.9149  | 5.5472  | 1.0327 | 0.0464  | 0.7231 | 0.1408 |
| Hapln1 | _L[TSYLR_2                                                              | #N/A                   | 4.8968  | 4.6211  | 5.1598  | 3.2201  | 5.1619  | 4.8619  | 4.4530  | 4.8138  | 4.7843  | 5.0718  | 0.9734 | -0.0389 | 0.7506 | 0.1246 |
| Prep   | _V[LDPNTLSDDGTVALR_2                                                    | #N/A                   | 4.2854  | 2.9408  | 3.4713  | 3.9740  | 5.1476  | 3.7955  | 3.6887  | 5.4493  | 3.7931  | 3.9410  | 0.9331 | -0.0999 | 0.5906 | 0.2287 |
| Pin1   | _SGEEDFESLASQSDC[Carbamidomethyl (C)]SSAK_2                             | #N/A                   | 5.5435  | 6.0117  | 5.6106  | 6.6329  | 4.5775  | 5.4246  | 6.0861  | 5.5015  | 5.0371  | 5.5593  | 1.0158 | 0.0226  | 0.8265 | 0.0828 |
| Pin1   | _T[GEN][Oxidation (M)]SGPV[TDGSHILR_3                                   | #N/A                   | 4.2959  | 2.5499  | 4.1205  | 3.7812  | 3.9409  | 3.6028  | 3.9698  | 3.1045  | 4.5069  | 3.6857  | 0.9734 | -0.0389 | 0.8022 | 0.0957 |
| Pik2b  | _RNS[Phospho (STY)]L[QIPTUNLEAR_3                                       | #N/A                   | 5.4734  | 7.9205  | 7.6508  | 9.5120  | 4.8395  | 3.6072  | 6.7482  | 8.2391  | 7.0508  | 5.0938  | 0.9584 | -0.0614 | 0.8259 | 0.0381 |
| Pik2b  | _L[LLDAVOQAK_2                                                          | #N/A                   | 5.4835  | 5.0634  | 5.3590  | 4.8299  | 5.2647  | 4.7948  | 4.6343  | 5.0460  | 4.2924  | 3.8480  | 1.1520 | 0.2042  | 0.0257 | 1.5902 |
| Pik2b  | _M[SGVSEPLSRVK_2                                                        | #N/A                   | 5.3982  | 5.5731  | 5.9482  | 4.5257  | 4.4516  | 4.7748  | 5.1788  | 4.7468  | 5.1657  | 3.8523  | 1.0794 | 0.1102  | 0.3730 | 0.4283 |
| Pik2b  | _SHLSESC[Carbamidomethyl (C)]SES[Phospho (STY)]DIYAEIDETLR_3            | QBQV99_S399_M1_Pik2b   | 3.0161  | 3.7723  | 4.2506  | 3.1425  | 3.6606  | 2.9640  | 4.3580  | 3.4752  | 3.1238  | 3.1095  | 0.9861 | -0.0202 | 0.8919 | 0.0497 |
| Pik2b  | _NS[Phospho (STY)]L[QIPTUNLEAR_2                                        | #N/A                   | 3.9794  | 3.2348  | 3.7130  | 3.2568  | 3.1231  | 3.5015  | 3.3947  | 3.7444  | 4.0434  | 4.4349  | 0.8883 | -0.1709 | 0.1094 | 0.9608 |
| Srcn1  | _L[PPSS][Phospho (STY)]P[QK_2                                           | QBQW6_S540_M1_Srcn1    | 12.8144 | 3.2364  | 12.9545 | 13.1776 | 12.5736 | 12.8259 | 12.9592 | 12.7436 | 12.8152 | 12.8977 | 0.8763 | -0.1905 | 0.4516 | 0.3452 |
| Srcn1  | _KAES[Phospho (STY)]EELVQKPKQVK_3                                       | #N/A                   | 9.6690  | 9.7858  | 10.4554 | 10.5080 | 9.2312  | 10.1072 | 9.9616  | 9.9809  | 9.9415  | 10.1168 | 1.0027 | 0.0039  | 0.9209 | 0.0358 |
| Srcn1  | _AES[Phospho (STY)]EELVQKPKQVK_2                                        | #N/A                   | 9.6760  | 9.7095  | 9.9196  | 10.1850 | 9.0537  | 10.0128 | 10.1348 | 9.7828  | 9.9106  | 10.1108 | 0.9774 | -0.0329 | 0.3189 | 0.4963 |
| Srcn1  | _RFS[Phospho (STY)]NVGLVHTSER_3                                         | #N/A                   | 6.8765  | 7.4566  | 7.9643  | 9.3275  | 3.2507  | 6.8099  | 7.6479  | 8.3663  | 7.4700  | 7.4581  | 0.8981 | -0.1550 | 0.4748 | 0.3235 |
| Srcn1  | _AVS[Phospho (STY)]VEAERDWEER_3                                         | #N/A                   | 7.2771  | 6.9548  | 7.6522  | 7.4892  | 6.0726  | 6.9929  | 7.3430  | 7.2984  | 7.4060  | 6.8960  | 0.9775 | -0.0328 | 0.6027 | 0.2199 |
| Srcn1  | _AVS[Phospho (STY)]VEAER_2                                              | #N/A                   | 6.8669  | 6.2226  | 5.6080  | 6.6512  | 6.3164  | 6.5454  | 6.5417  | 6.6023  | 6.7462  | 6.9137  | 0.9504 | -0.0734 | 0.1930 | 0.7167 |
| Srcn1  | _GVTDTLAQIR_2                                                           | #N/A                   | 6.5355  | 6.6281  | 5.7729  | 6.9045  | 6.6139  | 6.6985  | 6.6716  | 6.4504  | 6.1067  | 6.6464  | 1.0088 | 0.0126  | 0.8062 | 0.0936 |
| Srcn1  | _TLGGGGGGG[Phospho (STY)]GGRR_2                                         | QBQW6_S73_M1_Srcn1     | 6.1541  | 6.7323  | 5.3572  | 6.5849  | 5.5557  | 7.1894  | 6.3656  | 6.4838  | 5.8429  | 6.0439  | 1.0126 | 0.0181  | 0.8421 | 0.0746 |
| Srcn1  | _YUNDEELITQQLNDEK_2                                                     | #N/A                   | 5.4625  | 5.4447  | 5.4239  | 5.7081  | 5.5129  | 5.5774  | 5.9655  | 5.1078  | 4.3992  | 4.9486  | 1.0815 | 0.1031  | 0.1510 | 0.0430 |
| Srcn1  | _AAQGAGS[Phospho (STY)]P[QK_2                                           | #N/A                   | 8.4539  | 8.7471  | 9.0803  | 9.0592  | 7.4414  | 8.4199  | 8.7496  | 8.7520  | 8.1606  | 8.6149  | 0.9955 | -0.0066 | 0.9079 | 0.0420 |
| Srcn1  | _F[SNVGLVHTS[Phospho (STY)]ERR_3                                        | #N/A                   | 4.1967  | 6.6268  | 3.9304  | 7.4302  | 5.5424  | 3.2616  | 6.3224  | 6.7748  | 6.2334  | 6.1507  | 0.9068 | -0.1411 | 0.6124 | 0.2130 |
| Srcn1  | _FVSGPNETS[Phospho (STY)]PGSEKPSGSR_3                                   | #N/A                   | 6.7227  | 6.4293  | 7.4424  | 8.0176  | 6.5162  | 7.7719  | 7.3065  | 7.6265  | 7.1073  | 3.9059  | 1.2799 | 0.3560  | 0.1166 | 0.9335 |
| Srcn1  | _QLGETLTELK_2                                                           | #N/A                   | 5.6810  | 5.9657  | 3.1226  | 6.0860  | 6.0231  | 5.1299  | 5.5434  | 5.0661  | 5.1274  | 5.3926  | 1.0099 | 0.0142  | 0.9313 | 0.0309 |
| Srcn1  | _GEGLYADPIVGLHEGR_3                                                     | #N/A                   | 5.7324  | 6.0288  | 5.5432  | 5.4771  | 5.4454  | 5.0999  | 5.0366  | 5.6017  | 5.5494  | 5.5598  | 1.0400 | 0.0566  | 0.1934 | 0.7136 |
| Srcn1  | _Q[IALSTGLVQSALLR_2                                                     | #N/A                   | 4.3878  | 3.7738  | 4.1910  | 4.0747  | 4.1641  | 4.0873  | 3.7879  | 3.9440  | 2.4146  | 4.1960  | 1.1471 | 0.1980  | 0.1506 | 0.8221 |
| Srcn1  | _DSGSSVFAES[Phospho (STY)]PGGK_2                                        | #N/A                   | 11.7521 | 11.9224 | 12.5026 | 12.1821 | 11.6536 | 11.9277 | 12.2867 | 11.5757 | 11.6924 | 11.8659 | 1.0114 | 0.0163  | 0.5191 | 0.2847 |
| Srcn1  | _KDS[Phospho (STY)]GSSSVFAES[Phospho (STY)]PGGK_2                       | QBQW6_S588_M2_Srcn1    | 9.9644  | 10.1921 | 10.5922 | 9.7873  | 9.7263  | 10.2098 | 10.6203 | 10.0314 | 10.1216 | 10.1088 | 0.9861 | -0.0202 | 0.4888 | 0.3109 |
| Srcn1  | _LSYAGGRPPSVAGS[Phospho (STY)]PVNHAER_3                                 | #N/A                   | 6.7169  | 7.5512  | 8.3704  | 8.8765  | 6.6927  | 6.4481  | 3.5035  | 7.5193  | 7.2720  | 7.0013  | 1.1769 | 0.2350  | 0.2518 | 0.5889 |
| Srcn1  | _HTGAGQGLADQAAK_2                                                       | #N/A                   | 4.2456  | 4.6411  | 3.1844  | 4.1283  | 4.6079  | 4.0748  | 4.9443  | 3.7995  | 3.7283  | 4.3566  | 0.9857 | -0.0208 | 0.8680 | 0.0615 |
| Srcn1  | _S[Phospho (STY)]SPPM[Oxidation (M)]L[SADDAEYPR_2                       | #N/A                   | 3.8099  | 4.6230  | 3.5435  | 7.4563  | 4.7277  | 3.7122  | 7.6442  | 3.9522  | 6.9730  | 4.2654  | 0.8137 | -0.2974 | 0.3413 | 0.4669 |
| Srcn1  | _AALITQYSAK_2                                                           | #N/A                   | 4.4975  | 2.9964  | 3.4157  | 4.1933  | 5.4127  | 4.3481  | 3.6330  | 4.6441  | 4.0919  | 4.9459  | 0.9573 | -0.0629 | 0.7170 | 0.1445 |
| Srcn1  | _GS[Phospho (STY)]DELTVPR_2                                             | #N/A                   | 3.0250  | 6.9672  | 7.8374  | 7.9038  | 7.6739  | 3.9151  | 4.2759  | 7.2840  | 7.0870  | 7.6444  | 0.9464 | -0.0795 | 0.7880 | 0.1035 |
| Srcn1  | _GLQNSADUR_2                                                            | #N/A                   | 4.3903  | 6.3313  | 3.3814  | 6.4196  | 6.6788  | 6.6138  | 3.0734  | 6.4048  | 6.6019  | 6.3759  | 1.0039 | 0.0056  | 0.9827 | 0.0076 |
| Srcn1  | _RQEDPLQR_2                                                             | #N/A                   | 6.1360  | 4.0568  | 3.8562  | 6.3269  | 6.3454  | 6.3727  | 4.0735  | 6.5215  | 5.8633  | 6.2108  | 0.9732 | -0.0391 | 0.8459 | 0.0727 |
| Srcn1  | _RGS[Phospho (STY)]DELTVPR_2                                            | #N/A                   | 10.8307 | 10.7871 | 11.4706 | 11.2937 | 10.1763 | 10.7922 | 11.2941 | 10.6724 | 10.8570 | 10.9152 | 0.9961 | -0.0057 | 0.8700 | 0.0605 |
| Srcn1  | _S[Phospho (STY)]PQVL[LFQGETR_2                                         | QBQW6_S247_M1_Srcn1    | 4.2225  | 3.4779  | 4.4350  | 3.4368  | 2.5389  | 3.2584  | 3.1515  | 3.2828  | 4.3302  | 4.2447  | 0.9492 | -0.0753 | 0.6677 | 0.1754 |
| Srcn1  | _S[Phospho (STY)]PPSHGLTTTR_2                                           | QBQW6_S1079_M1_Srcn1   | 8.4638  | 3.9917  | 3.9213  | 8.4446  | 3.8800  | 4.2455  | 4.1386  | 3.6945  | 3.3431  | 4.3909  | 1.4110 | 0.4967  | 0.2149 | 0.6677 |
| Srcn1  | _GEQDPER[Phospho (STY)]SPPM[Oxidation (M)]L[SADDAEYPR_3                 | #N/A                   | 4.1086  | 5.2225  | 3.6967  | 3.5238  | 3.0050  | 3.3721  | 3.5421  | 3.9350  | 3.9592  | 8.5091  | 0.7664 | -0.3839 | 0.2831 | 0.5481 |
| Srcn1  | _RFS[Phospho (STY)]NVGLVHT[Phospho (STY)]SERR_3                         | QBQW6_T86_M2_Srcn1     | 3.9562  | 3.0564  | 3.9768  | 5.4274  | 3.0819  | 4.6624  | 3.3595  | 5.2192  | 4.9751  | 5.3254  | 0.8532 | -0.2291 | 0.2758 | 0.5594 |
| Srcn1  | _QVDEGM[Oxidation (M)]WPP                                               |                        |         |         |         |         |         |         |         |         |         |         |        |         |        |        |



|        |                                                                        |                       |         |         |         |         |         |         |         |         |         |         |        |         |        |        |
|--------|------------------------------------------------------------------------|-----------------------|---------|---------|---------|---------|---------|---------|---------|---------|---------|---------|--------|---------|--------|--------|
| Srcin1 | _RQVDEGMWPPNNLLNQ[S](Phospho (STY))PK_3                                | #N/A                  | 3.3464  | 4.1026  | 4.5809  | 9.8177  | 3.9909  | 4.1345  | 4.0277  | 3.8055  | 3.4541  | 4.2800  | 1.2836 | 0.3602  | 0.3959 | 0.4025 |
| Asap1  | _SHTGDR[S](Phospho (STY))PWQSR_2                                       | QBQWYR_S104S_M1_Asap1 | 6.1843  | 4.3866  | 7.1918  | 4.0290  | 3.4661  | 3.8506  | 3.7437  | 6.6317  | 7.3380  | 7.0232  | 0.9181 | -0.1233 | 0.6876 | 0.1627 |
| Asap1  | _TIS[Phospho (STY)]DPFSLPHGPPNK_2                                      | #N/A                  | 9.3202  | 9.7339  | 10.2158 | 10.4059 | 8.8408  | 9.4424  | 9.9981  | 9.8649  | 9.6251  | 9.5310  | 0.9903 | -0.0141 | 0.7671 | 0.1152 |
| Asap1  | _SPRPQSC[Carbamidomethyl (C)]HSS[Phospho (STY)]S[Phospho (STY)]SPQDK_2 | #N/A                  | 3.5010  | 9.0426  | 3.5847  | 9.6567  | 8.8297  | 9.5439  | 3.7717  | 3.8845  | 7.7296  | 3.8975  | 1.3538 | 0.4370  | 0.3689 | 0.4331 |
| Asap1  | _QDEM[Oxidation (M)]DES[Phospho (STY)]DOOLDOKPSPWK_3                   | #N/A                  | 4.3377  | 5.1903  | 4.7927  | 7.2152  | 4.8050  | 6.4847  | 5.4696  | 6.6658  | 6.7437  | 5.5170  | 0.8970 | -0.1568 | 0.3535 | 0.4536 |
| Asap1  | _QDEMDES[Phospho (STY)]DOOLDOKPSPK_2                                   | #N/A                  | 4.2822  | 3.3118  | 3.4681  | 4.8839  | 3.4079  | 4.3217  | 3.6855  | 4.1478  | 3.7963  | 4.8942  | 0.9552 | -0.0661 | 0.6094 | 0.1875 |
| Son    | _ESAQAVAVALS[Phospho (STY)]PK_2                                        | #N/A                  | 8.5972  | 8.8748  | 8.6570  | 9.7925  | 8.1392  | 8.8459  | 9.5715  | 9.0757  | 9.1243  | 9.2439  | 0.9529 | -0.0696 | 0.1739 | 0.7598 |
| Son    | _S[Phospho (STY)]RT[Phospho (STY)]PLRR_2                               | QBQX47_S2038_M2_Son   | 8.1988  | 7.9415  | 8.3443  | 8.2565  | 7.7280  | 8.3113  | 8.5018  | 8.2087  | 8.3704  | 8.2090  | 0.9769 | -0.0337 | 0.1959 | 0.7079 |
| Son    | _SAAS[Phospho (STY)]PVVSPER_2                                          | QBQX47_S1794_M1_Son   | 2.9017  | 7.2950  | 7.8967  | 7.4697  | 6.4583  | 7.2227  | 8.2538  | 7.4542  | 7.3611  | 7.3694  | 0.8595 | -0.2184 | 0.2959 | 0.5288 |
| Son    | _R[S](Phospho (STY))R[S](Phospho (STY))IPR_2                           | #N/A                  | 6.2121  | 5.8204  | 3.5218  | 6.4503  | 4.8194  | 5.8214  | 5.9167  | 4.1548  | 6.1948  | 5.3236  | 1.0080 | 0.0115  | 0.9494 | 0.0226 |
| Son    | _R[S](Phospho (STY))R[S](Phospho (STY))IPR_2                           | #N/A                  | 5.6974  | 6.8471  | 4.1620  | 7.4130  | 4.1017  | 6.5754  | 7.0720  | 6.2314  | 3.1024  | 5.9246  | 1.0388 | 0.0550  | 0.8320 | 0.0799 |
| Son    | _DVEDSLPIKESAQAVAVALS[Phospho (STY)]PK_3                               | #N/A                  | 3.7439  | 5.3119  | 4.6640  | 5.7260  | 4.9486  | 4.1331  | 3.6301  | 5.7826  | 4.6448  | 4.2890  | 1.0366 | 0.0519  | 0.7539 | 0.1227 |
| Son    | _BRS[Phospho (STY)]S[Phospho (STY)]S[Phospho (STY)]IPVR_2              | #N/A                  | 3.2879  | 7.9475  | 4.5224  | 8.5956  | 7.6361  | 7.9492  | 5.7526  | 8.4503  | 8.4872  | 8.5153  | 0.8532 | -0.2290 | 0.3831 | 0.4166 |
| Chm    | _ESTVLGDEEPP[Phospho (STY)]E_2                                         | QBQXG2_S664_M1_Chm    | 9.7107  | 9.9547  | 10.1113 | 10.3260 | 9.5344  | 10.0869 | 10.6701 | 9.8977  | 10.0908 | 10.0070 | 0.9791 | -0.0305 | 0.3207 | 0.4938 |
| Chm    | _VQDNTE[Phospho (STY)]PKR_2                                            | #N/A                  | 3.9667  | 3.4499  | 3.7004  | 4.0183  | 3.8846  | 3.5884  | 4.1665  | 3.8312  | 4.1303  | 3.6956  | 0.9525 | -0.0702 | 0.2355 | 0.6281 |
| Acs2   | _GW[S](Phospho (STY))PPPEVR_2                                          | #N/A                  | 12.8352 | 12.1974 | 12.5757 | 12.4256 | 11.1826 | 12.0819 | 13.1047 | 12.3666 | 12.3467 | 12.3038 | 0.9749 | -0.0366 | 0.3684 | 0.4337 |
| Acs2   | _VRGW[S](Phospho (STY))PPPEVR_2                                        | #N/A                  | 9.1869  | 9.1220  | 9.8424  | 9.3276  | 7.7268  | 8.7166  | 9.7923  | 9.5301  | 9.1675  | 9.1304  | 0.9556 | -0.0656 | 0.3107 | 0.5077 |
| Acs2   | _AELGM[Oxidation (M)]NOS[Phospho (STY)]PSQSPVK_2                       | #N/A                  | 8.6518  | 6.4529  | 9.2037  | 8.2028  | 7.7578  | 6.8448  | 9.5672  | 9.1706  | 8.7824  | 9.0941  | 0.9041 | -0.1455 | 0.2519 | 0.5987 |
| Kf21b  | _GATD[S](Phospho (STY))PLTR_2                                          | QBQXL1_S1217_M1_Kf21b | 6.4271  | 5.7876  | 3.2429  | 4.1501  | 5.0269  | 3.9717  | 3.8648  | 6.7386  | 3.0127  | 3.9648  | 1.0847 | 0.1174  | 0.6852 | 0.1642 |
| Kf21b  | _AV[S](Phospho (STY))A[C](Carbamidomethyl (C))LGPDISSTK_2              | QBQXL1_S1150_M1_Kf21b | 7.8511  | 7.9189  | 8.4043  | 0.0813  | 3.7743  | 7.9201  | 7.9620  | 8.3560  | 7.5836  | 7.6005  | 0.9301 | -0.1045 | 0.5599 | 0.2519 |
| Kf21b  | _TV[S](Phospho (STY))LPTR_2                                            | QBQXL1_S1198_M1_Kf21b | 4.2184  | 3.0077  | 3.4044  | 3.9070  | 2.8960  | 3.7286  | 4.5224  | 4.2114  | 3.8600  | 3.8740  | 0.8567 | -0.2321 | 0.0785 | 1.1049 |
| Kf21a  | _VC[Carbamidomethyl (C)]QTDENATDK_2                                    | #N/A                  | 8.0679  | 7.8420  | 8.2574  | 8.2629  | 7.6300  | 7.7889  | 8.4117  | 8.0209  | 8.1908  | 8.0330  | 0.9768 | -0.0338 | 0.2477 | 0.6060 |
| Kf21a  | _DQVQLQVSEVSEK_2                                                       | #N/A                  | 6.5551  | 6.5713  | 7.4627  | 6.6289  | 5.6572  | 6.4619  | 7.0103  | 6.2620  | 6.2831  | 6.2915  | 1.0146 | 0.0209  | 0.7797 | 0.1081 |
| Kf21a  | _TQLVSEQANQVLAR_2                                                      | #N/A                  | 5.4991  | 5.8358  | 5.4719  | 4.9875  | 5.2577  | 5.1543  | 5.5322  | 5.2486  | 5.0253  | 5.2136  | 1.0215 | 0.0306  | 0.5348 | 0.2718 |
| Kf21a  | _HSDGASETSL[Phospho (STY)]PPSS[Phospho (STY)]PPSRP_3                   | QBQXL2_S1273_M2_Kf21a | 2.9305  | 4.4119  | 4.1650  | 3.7088  | 3.5751  | 3.4963  | 3.8571  | 3.2924  | 3.5914  | 3.3861  | 1.0518 | 0.0728  | 0.5390 | 0.2684 |
| Kf21a  | _TTASTM[Oxidation (M)]NVQSS[Phospho (STY)]R_2                          | QBQXL2_S224_M1_Kf21a  | 4.9999  | 5.9140  | 6.0963  | 5.4395  | 5.5450  | 5.5805  | 5.9655  | 5.8962  | 6.5202  | 5.3491  | 0.9432 | -0.0843 | 0.2509 | 0.6005 |
| Kf21a  | _AHMYGDGQLSDTGDGEDAS[Phospho (STY)]IN_2                                | #N/A                  | 4.3409  | 5.5519  | 4.7816  | 7.6524  | 6.4022  | 4.0861  | 5.1226  | 7.6149  | 6.8988  | 6.2308  | 0.8457 | -0.2417 | 0.2543 | 0.5946 |
| Kf21a  | _LISES[Phospho (STY)]P[Oxidation (M)]NEFETLAK_2                        | #N/A                  | 6.9302  | 5.9338  | 6.4970  | 7.4459  | 4.8750  | 5.7737  | 6.9539  | 6.4460  | 6.3464  | 6.1000  | 0.9661 | -0.0497 | 0.6650 | 0.1772 |
| Kf21a  | _MTSNMEADMMNR_2                                                        | #N/A                  | 3.4276  | 3.7985  | 4.1144  | 4.6171  | 3.6868  | 2.9378  | 4.3318  | 3.5014  | 3.1500  | 3.0833  | 1.0703 | 0.0980  | 0.5239 | 0.2807 |
| Jmy    | _KSAQWAEGGS[Phospho (STY)]PR_2                                         | QBQXM1_S108_M1_Jmy    | 6.5508  | 6.5881  | 7.4852  | 6.6784  | 5.9617  | 6.9469  | 7.0395  | 6.6467  | 6.3814  | 6.4931  | 1.0093 | 0.0133  | 0.8313 | 0.0803 |
| Jmy    | _GPES[Phospho (STY)]PLRS[Phospho (STY)]PAR_2                           | QBQXM1_S130_M2_Jmy    | 5.8973  | 5.8163  | 4.0870  | 3.9488  | 3.7035  | 5.6307  | 5.8809  | 5.5004  | 5.1513  | 5.3474  | 0.8862 | -0.1744 | 0.2836 | 0.5474 |
| Jmy    | _IKEASPE[Phospho (STY)]EIEEALP[Carbamidomethyl (C)]TOWEN_3             | QBQXM1_S969_M1_Jmy    | 4.3770  | 3.6814  | 3.3947  | 4.4393  | 3.5027  | 4.2268  | 3.0867  | 4.0627  | 4.3618  | 4.1166  | 1.0077 | 0.0110  | 0.9286 | 0.0322 |
| Pde7b  | _RGS[Phospho (STY)]GDLAGAPAPETLQTEGATP_3                               | #N/A                  | 6.9923  | 6.6913  | 7.1829  | 7.1663  | 3.7918  | 7.0580  | 7.0213  | 6.8003  | 6.7010  | 7.0650  | 0.9396 | -0.0899 | 0.5582 | 0.2332 |
| Pde7b  | _GSGDLAGAPAPETLQTEGATP[Phospho (STY)]P_2                               | QBQXQ1_T44S_M1_Pde7b  | 2.9082  | 4.5103  | 4.1427  | 6.3576  | 5.5464  | 5.8226  | 3.8348  | 6.7400  | 6.4644  | 6.3343  | 0.8354 | -0.2595 | 0.2852 | 0.5448 |
| Pde7b  | _NRGS[Phospho (STY)]GDLAGAPAPETLQTEGATP_3                              | #N/A                  | 2.9187  | 4.5167  | 3.6055  | 4.3968  | 3.5452  | 4.1842  | 4.5450  | 4.1052  | 4.6469  | 4.0741  | 0.8891 | -0.1696 | 0.1868 | 0.7786 |
| Plec   | _AQLPEVAS[Phospho (STY)]PAK_2                                          | #N/A                  | 12.1805 | 11.9958 | 12.5679 | 12.0616 | 10.7703 | 11.7474 | 12.7979 | 12.2860 | 12.0332 | 11.9029 | 0.9700 | -0.0440 | 0.3217 | 0.4925 |
| Plec   | _NDESQLS[Phospho (STY)]PATR_2                                          | #N/A                  | 9.9006  | 9.5951  | 9.9078  | 4.2281  | 4.0944  | 4.0311  | 10.1249 | 9.8887  | 9.7723  | 9.6065  | 0.7067 | -0.5009 | 0.1072 | 0.9698 |
| Plec   | _RAS[Phospho (STY)]FAEK_2                                              | QBQXS1_S1729_M1_Plec  | 7.6443  | 7.7272  | 8.1897  | 7.5289  | 5.6818  | 7.2904  | 7.7968  | 8.2031  | 7.9568  | 7.4513  | 0.9353 | -0.0965 | 0.3006 | 0.5230 |
| Plec   | _AQLPEVAS[Phospho (STY)]PAKKP_2                                        | #N/A                  | 6.9105  | 7.6053  | 8.8927  | 7.0715  | 6.2261  | 7.6085  | 7.4318  | 7.9277  | 7.4824  | 6.9870  | 0.9904 | -0.0139 | 0.8861 | 0.0525 |
| Plec   | _LPVDEAVGR_2                                                           | #N/A                  | 5.6140  | 5.5247  | 3.7536  | 5.3581  | 5.8020  | 4.9972  | 5.8186  | 6.0228  | 5.0141  | 5.5401  | 0.9243 | -0.1136 | 0.3410 | 0.4673 |
| Plec   | _ARNDESQLS[Phospho (STY)]PATR_2                                        | #N/A                  | 8.2536  | 8.3544  | 8.9521  | 8.4387  | 7.5248  | 8.3838  | 8.9448  | 8.6612  | 4.1175  | 8.3485  | 1.1064 | 0.1459  | 0.4154 | 0.3816 |
| Plec   | _SSS[Phospho (STY)]WGSSSYPSAGRP_2                                      | QBQXS1_S4393_M1_Plec  | 10.4942 | 10.1565 | 10.0165 | 10.3946 | 9.0782  | 10.2355 | 10.9055 | 10.4058 | 10.4085 | 10.2867 | 0.9741 | -0.0379 | 0.4515 | 0.3453 |
| Plec   | _WQAVLAQTVR_2                                                          | #N/A                  | 4.1038  | 4.6124  | 3.5309  | 4.0335  | 3.4749  | 3.8551  | 3.7482  | 4.3972  | 4.1091  | 4.0005  | 0.9683 | -0.0464 | 0.6048 | 0.2184 |
| Plec   | _DAPGPPSVAEPYTFEGLR_2                                                  | #N/A                  | 5.5267  | 3.6664  | 3.4096  | 4.4542  | 4.3840  | 4.2417  | 5.6712  | 5.5964  | 4.0600  | 4.1839  | 0.8775 | -0.0766 | 0.2766 | 0.5581 |
| Plec   | _LTVDEAVR_2                                                            | #N/A                  | 5.7400  | 3.0293  | 5.6276  | 5.4794  | 2.9176  | 3.7070  | 3.6002  | 6.4260  | 2.3220  | 4.9091  | 1.0238 | 0.0339  | 0.9190 | 0.0367 |
| Plec   | _GYSPSPSSSGSTAGS[Phospho (STY)]R_2                                     | QBQXS1_S4633_M1_Plec  | 5.8452  | 4.4028  | 4.1741  | 3.7179  | 3.5841  | 3.5053  | 3.8661  | 3.2833  | 3.5824  | 3.3951  | 1.1906 | 0.2517  | 0.1803 | 0.7440 |
| Plec   | _VLALPESPAAPLTR_2                                                      | #N/A                  | 5.3124  | 4.9428  | 4.4405  | 3.9843  | 3.9578  | 3.7717  | 5.0417  | 3.0169  | 4.8012  | 5.0785  | 0.9815 | -0.0269 | 0.8724 | 0.0593 |
| Plec   | _LDAQLATGGVDPR_2                                                       | #N/A                  | 3.1961  | 4.1463  | 4.4306  | 3.5513  | 1.1345  | 3.7619  | 4.1227  | 4.3102  | 2.5937  | 3.4414  | 0.9317 | -0.1020 | 0.7242 | 0.1402 |
| Plec   | _FLEVQVLTGGLPEPTGPR_2                                                  | #N/A                  | 3.9354  | 4.0337  | 4.4090  | 3.4108  | 4.3905  | 3.3807  | 3.7415  | 3.2068  | 4.3562  | 4.5601  | 0.9901 | -0.0144 | 0.9092 | 0.0413 |
| Plec   | _VVHDPSTQEPVYSQLQQR_3                                                  | #N/A                  | 3.2375  | 4.0427  | 3.9243  | 4.1533  | 4.3058  | 3.8654  | 4.2262  | 3.6915  | 4.3819  | 4.7539  | 0.9198 | -0.1206 | 0.2204 | 0.6567 |
| Plec   | _LDAQLSTGGVDPSK_2                                                      | #N/A                  | 4.2553  | 3.0871  | 3.9889  | 3.5327  | 3.3990  | 3.2256  | 3.6810  | 3.4685  | 3.7675  | 3.2100  | 1.0141 | 0.0022  | 0.8481 | 0.0716 |
| Plec   | _FLEGTSC[Carbamidomethyl (C)]AGVFDVATK_2                               | #N/A                  | 3.0100  | 3.9026  | 3.6968  | 3.9953  | 3.6365  | 4.6013  | 3.9141  | 3.9190  | 3.8563  | 3.2875  | 1.0168 | 0.0240  | 0.8347 | 0.0785 |
| Plec   | _AQAEEVGLK_2                                                           | #N/A                  | 2.9874  | 3.7436  | 4.2219  | 3.7657  | 3.6319  | 4.4174  | 3.9139  | 3.2355  | 3.5346  | 3.4429  | 1.0744 | 0.1036  | 0.3735 | 0.4278 |
| Plec   | _TEVETTVQVTEETRR_3                                                     | #N/A                  | 3.8984  | 3.1539  | 3.6321  | 3.1759  | 3.0422  | 3.5824  | 3.4756  | 4.6539  | 4.1243  | 4.3540  | 0.8223 | -0.2823 | 0.0229 | 1.6408 |
| Plec   | _ELEEQTLQEQNNMLDR_2                                                    | #N/A                  | 2.9099  | 4.3163  | 3.5967  | 4.0994  | 3.5364  | 4.1931  | 3.8140  | 4.0191  | 3.6677  | 4.0664  | 0.9701 | -0.0439 | 0.6890 | 0.1618 |
| Dbn1   | _Acetyl (Protein N-term)AGVSFSGHR_2                                    | #N/A                  | 7.5946  | 7.6886  | 6.9516  | 8.0923  | 7.9863  | 6.7322  | 7.8438  | 6.8681  | 6.7584  | 6.8862  | 1.0590 | 0.0827  | 0.2603 | 0.5846 |
| Dbn1   | _YVLNVWGEDVPDAR_2                                                      | #N/A                  | 7.0755  | 6.3908  | 6.9488  | 6.9960  | 7.1933  | 7.1816  | 6.9686  | 6.7746  | 6.8108  | 6.9605  | 1.0125 | 0.0179  | 0.5997 | 0.2221 |
| Dbn1   | _KQCS[Phospho (STY)]LEAEAK_2                                           | #N/A                  | 6.3488  | 5.8716  | 6.4286  | 7.0778  | 5.8993  | 5.8289  | 6.7100  | 6.4374  | 6.1140  | 6.7027  | 0.9617 | -0.0563 | 0.3856 | 0.4138 |
| Dbn1   | _EESAADWALVTEEDGSDLK_2                                                 | #N/A                  | 4.6390  | 5.6660  | 5.1708  | 6.8816  | 5.1551  | 5.4715  | 5.5490  | 5.0689  | 5.3563  | 4.8435  | 1.0563 | 0.0790  | 0.4932 | 0.3070 |
| Dbn1   | _LSS[Phospho (STY)]PLVLR_2                                             | QBQXS6_S142_M1_Dbn1   | 13.5039 | 13.7226 | 14.2751 | 14.0479 | 13.3138 | 13.6949 | 13.8122 | 13.6696 | 13.6583 | 13.6741 | 1.0041 | 0.0059  | 0.7652 | 0.1162 |
| Dbn1   | _EGTQASGEYSGS[Phospho (STY)]EEEFAGSEEP[Carbamidomethyl (C)]IAK_3       | QBQXS6_S658_M1_Dbn1   | 5.1186  | 5.1957  | 4.9448  | 7.3907  | 4.5960  | 5.9016  | 6.8519  | 4.7465  | 4.8749  | 4.4939  | 1.0539 | 0.0758  | 0.6843 | 0.1643 |
| Dbn1   | _ASDGPSSSSSSSS[Phospho (STY)]PPR_2                                     | #N/A                  | 11.5485 | 11.4536 | 11.6494 | 12.0368 | 11.2954 | 11.5120 | 11.6803 | 11.4147 |         |         |        |         |        |        |



|        |                                                                               |                        |         |         |         |         |         |         |         |         |         |         |         |         |        |        |
|--------|-------------------------------------------------------------------------------|------------------------|---------|---------|---------|---------|---------|---------|---------|---------|---------|---------|---------|---------|--------|--------|
| Pcsk1n | _VLAQLR_2                                                                     | #N/A                   | 7.2454  | 7.5704  | 8.1540  | 6.9170  | 6.3691  | 7.1918  | 6.4726  | 7.1404  | 6.7022  | 7.3425  | 1.0473  | 0.0666  | 0.3710 | 0.4306 |
| Pcsk1n | _LDPAALAAQLVPAPAAAPR_2                                                        | #N/A                   | 6.4596  | 6.4109  | 6.1407  | 5.9748  | 6.3919  | 6.5519  | 6.1514  | 5.9042  | 6.1243  | 6.2565  | 1.0348  | 0.0493  | 0.1296 | 0.8875 |
| Pcsk1n | _AEAQAEADQQAAR_2                                                              | #N/A                   | 5.3099  | 6.2513  | 5.1613  | 6.0708  | 6.8285  | 6.6188  | 5.3124  | 5.8908  | 6.2930  | 1.0538  | 0.0756  | 0.4517  | 0.3452 | 0.8704 |
| Pcsk1n | _ASDPPLAOPDOPDAPAAQALR_2                                                      | #N/A                   | 7.1528  | 7.5636  | 7.4073  | 7.3544  | 7.7905  | 7.7117  | 7.3356  | 6.8237  | 7.2748  | 7.4351  | 1.0396  | 0.0561  | 0.1071 | 0.8704 |
| Pcsk1n | _ARAEAEAEADQQAAR_2                                                            | #N/A                   | 2.7921  | 6.2919  | 3.7226  | 3.2663  | 3.1748  | 3.0538  | 5.8046  | 3.7348  | 4.0039  | 4.4445  | 0.8252  | -0.2772 | 0.3271 | 0.9503 |
| Cwb8   | _VDQPS[Phospho (STY)]GDSK_2                                                   | Q9QXV1_S164_M1_Cwb8    | 3.1064  | 4.1197  | 6.1164  | 4.2959  | 3.7329  | 3.9965  | 5.8179  | 5.9230  | 6.0987  | 4.2629  | 0.7645  | -0.3875 | 0.0679 | 1.1684 |
| Cwb8   | _RQDS[Phospho (STY)]DLVQVGVSPSSAEASK_3                                        | Q9QXV1_S129_M1_Cwb8    | 4.3545  | 5.1053  | 4.0882  | 3.6320  | 5.0921  | 3.1263  | 4.5203  | 3.3692  | 5.7775  | 3.3093  | 0.9974  | -0.0037 | 0.9861 | 0.0061 |
| Slc7a8 | _PTPVKDPDS[Phospho (STY)]EEQP_2                                               | Q9QXW9_S527_M1_Slc7a8  | 8.3316  | 7.9209  | 3.2797  | 7.7824  | 7.3148  | 3.0092  | 9.0380  | 8.4154  | 9.0380  | 7.6336  | 0.7636  | -0.3892 | 0.3080 | 0.5115 |
| Slc7a8 | _NHPGSDTS[Phospho (STY)]PEAEASSGGGGVALK_3                                     | #N/A                   | 9.4197  | 9.7369  | 10.0888 | 10.1188 | 8.7574  | 9.2041  | 8.8099  | 10.1197 | 9.6697  | 9.6352  | 1.0106  | 0.0153  | 0.8076 | 0.0928 |
| Slc7a8 | _NHPGSDTS[Phospho (STY)]PEAEASSGGGGVALK_3                                     | #N/A                   | 6.6334  | 3.7874  | 3.3202  | 5.7170  | 3.5541  | 3.6927  | 3.4793  | 6.3853  | 3.8860  | 3.9741  | 1.0044  | 0.0064  | 0.9827 | 0.0076 |
| Ehd3   | _SKLPNS[Phospho (STY)]VLGK_2                                                  | Q9QXY6_S479_M1_Ehd3    | 8.5526  | 8.8640  | 9.5088  | 9.3233  | 8.0337  | 8.4227  | 8.8520  | 8.6342  | 8.4813  | 8.6806  | 1.0141  | 0.0202  | 0.6869 | 0.1631 |
| Ehd3   | _LLLEEYR_2                                                                    | #N/A                   | 6.0000  | 6.1154  | 5.8056  | 6.2480  | 6.2557  | 5.8852  | 6.2277  | 6.0863  | 6.1857  | 6.4773  | 0.9692  | -0.0452 | 0.1153 | 0.8689 |
| Ehd3   | _ELVNNLAETGR_2                                                                | #N/A                   | 5.4767  | 5.4772  | 5.2583  | 5.8337  | 5.9343  | 3.4154  | 5.9801  | 6.0001  | 5.2975  | 5.8517  | 0.9049  | -0.1441 | 0.2941 | 0.5316 |
| Ehd3   | _IVNTEFVR_2                                                                   | #N/A                   | 6.4338  | 6.3832  | 6.0246  | 5.8119  | 6.7942  | 6.3827  | 5.5467  | 6.2342  | 6.4358  | 5.8617  | 1.0474  | 0.0668  | 0.2586 | 0.5874 |
| Ehd3   | _DKPM[Oxidation (M)]YDEIFYTL[Phospho (STY)]PVGOK_3                            | #N/A                   | 7.3734  | 8.3837  | 8.0478  | 7.6666  | 7.2796  | 7.8117  | 8.4678  | 7.9557  | 7.8800  | 8.3368  | 0.9510  | -0.0724 | 0.1350 | 0.8695 |
| Ehd3   | _EHQS[Phospho (STY)]PGDFPNLR_3                                                | #N/A                   | 3.8817  | 6.8731  | 3.6153  | 8.0930  | 5.8937  | 6.2445  | 6.5066  | 7.1771  | 6.6200  | 0.8517  | -0.2316 | 0.2934  | 0.5325 | 0.1273 |
| Ehd3   | _LNAFGNAFLNR_2                                                                | #N/A                   | 3.6804  | 5.1208  | 3.4141  | 4.7252  | 3.9069  | 4.4611  | 4.5561  | 5.4723  | 4.5714  | 4.6850  | 0.8749  | -0.1928 | 0.1490 | 0.8269 |
| Ehd3   | _DQCS[Phospho (STY)]LR_2                                                      | Q9QXY6_S284_M1_Ehd3    | 3.9475  | 3.2787  | 3.1334  | 3.6361  | 3.1670  | 3.4576  | 3.3508  | 3.9979  | 4.8520  | 4.8127  | 0.8080  | -0.3076 | 0.0367 | 1.4353 |
| Ehd3   | _EHQS[Phospho (STY)]PGDFPNLR_3                                                | #N/A                   | 3.2919  | 3.9342  | 3.9787  | 3.3175  | 3.9185  | 4.3029  | 4.1961  | 3.6371  | 3.2857  | 4.4484  | 0.9740  | -0.0380 | 0.7383 | 0.1318 |
| Ehd3   | _IGPEPTTDSIAFM[Oxidation (M)]OGGVGPIGNALVDPK_3                                | #N/A                   | 3.7805  | 5.8121  | 4.4673  | 3.5350  | 2.9062  | 3.1224  | 3.6832  | 5.0340  | 3.7652  | 3.2123  | 1.0120  | 0.0171  | 0.9410 | 0.0264 |
| Macf1  | _LIDATDVDP[Phospho (STY)]POEK_2                                               | Q9QXZ0_S280_M1_Macf1   | 11.1491 | 12.2403 | 11.9129 | 12.2895 | 11.0749 | 11.9172 | 12.6766 | 12.5104 | 12.2899 | 12.1776 | 0.9477  | -0.0775 | 0.0516 | 1.2873 |
| Macf1  | _S[Phospho (STY)]QDSLDPAER_2                                                  | #N/A                   | 3.6007  | 4.4059  | 4.2875  | 8.7844  | 4.2272  | 8.4838  | 4.5049  | 8.8674  | 8.7425  | 8.7177  | 0.7306  | -0.4528 | 0.1940 | 0.7123 |
| Macf1  | _AFVESQSKS[Phospho (STY)]PGR_3                                                | #N/A                   | 7.1195  | 7.5308  | 7.8841  | 6.8707  | 5.4332  | 6.9187  | 7.0705  | 7.4618  | 6.8560  | 6.7652  | 0.9888  | -0.0163 | 0.8843 | 0.0633 |
| Macf1  | _QTGDVHDL[Phospho (STY)]PGDPSHK_3                                             | #N/A                   | 6.6823  | 5.6660  | 6.4579  | 7.0847  | 4.4777  | 5.2171  | 7.0154  | 7.2154  | 6.4167  | 5.9179  | 0.8930  | -0.1632 | 0.2362 | 0.6267 |
| Macf1  | _RQGS[Phospho (STY)]FSEDVSHK_3                                                | #N/A                   | 7.7060  | 3.5061  | 8.5561  | 7.6068  | 3.3944  | 3.2302  | 7.8088  | 3.7721  | 3.2054  | 0.9938  | -0.0089 | 0.9835  | 0.0072 | 0.8704 |
| Macf1  | _AFVESQSKS[Phospho (STY)]PGK_2                                                | #N/A                   | 6.6761  | 6.4799  | 6.8896  | 6.9954  | 4.9034  | 6.2039  | 6.5923  | 6.9051  | 6.3380  | 6.3067  | 0.9777  | -0.0325 | 0.7364 | 0.1329 |
| Macf1  | _EAEELAAASGGGSP[Phospho (STY)]GEOQFQQR_3                                      | Q9QXZ0_S553_M1_Macf1   | 3.1401  | 3.9453  | 3.8209  | 4.2396  | 3.7667  | 3.9630  | 4.1758  | 4.0976  | 3.3045  | 4.2966  | 0.9609  | -0.0575 | 0.5656 | 0.0076 |
| Macf1  | _AFLAELEQNS[Phospho (STY)]PK_2                                                | Q9QXZ0_S4483_M1_Macf1  | 3.6915  | 8.9504  | 9.7322  | 9.4493  | 8.0804  | 9.3113  | 10.1235 | 9.7342  | 9.5195  | 9.2270  | 0.8499  | -0.2346 | 0.2524 | 0.7180 |
| Macf1  | _RKS[Phospho (STY)]QDSLDPAER_3                                                | #N/A                   | 3.5784  | 4.3347  | 6.8655  | 4.3567  | 4.2230  | 5.9981  | 4.5049  | 4.1453  | 2.9436  | 4.0340  | 1.2523  | 0.3246  | 0.1933 | 0.5399 |
| Macf1  | _QGS[Phospho (STY)]FSEDVSHK_2                                                 | #N/A                   | 7.9670  | 7.8911  | 8.6015  | 8.0495  | 3.8968  | 7.6460  | 8.7059  | 8.2269  | 8.0795  | 8.0552  | 0.8881  | -0.1712 | 0.3262 | 0.4865 |
| Macf1  | _AM[Oxidation (M)]DATLS[Phospho (STY)]PTKETVK_2                               | #N/A                   | 6.6899  | 6.6102  | 3.6250  | 5.5750  | 5.5864  | 6.1176  | 7.4269  | 3.7091  | 6.2851  | 1.0880  | 0.9137  | 0.1217  | 0.6401 | 0.1938 |
| Macf1  | _LNSQES[Phospho (STY)]DEEPQSDVPHSK_3                                          | Q9QXZ0_S3085_M1_Macf1  | 3.6876  | 5.2232  | 4.0671  | 5.2633  | 4.4347  | 5.2265  | 3.9282  | 5.8335  | 5.0316  | 3.7626  | 1.0025  | 0.0035  | 0.9830 | 0.0074 |
| Ulk2   | _TLPHTICS[Phospho (STY)]PTK_2                                                 | Q9QY01_S600_M1_Ulk2    | 5.6347  | 4.1066  | 3.8063  | 4.3090  | 3.7461  | 3.9834  | 5.9870  | 6.3205  | 5.2545  | 1.0760  | 0.7811  | -0.3564 | 0.0460 | 1.3376 |
| Myo9b  | _AQDKPS[Phospho (STY)]PSGSTQQR_2                                              | Q9QY06_S1264_M1_Myo9b  | 3.0510  | 3.8073  | 4.1057  | 4.6083  | 3.6956  | 4.4298  | 4.3230  | 4.2171  | 3.1587  | 3.0745  | 1.0694  | 0.0968  | 0.5296 | 0.2761 |
| Ptknb3 | _TNS[Phospho (STY)]LLR_2                                                      | Q9QY40_S1747_M1_Ptknb3 | 3.4014  | 4.1577  | 3.1351  | 4.2579  | 4.0460  | 4.0795  | 3.9726  | 3.8605  | 3.5091  | 4.2249  | 0.9883  | -0.0170 | 0.8669 | 0.0620 |
| Vapb   | _SITSPLDOTEVK_2                                                               | #N/A                   | 4.5925  | 4.5060  | 4.7238  | 5.6664  | 4.8009  | 4.7843  | 5.8861  | 4.9112  | 4.4925  | 4.9836  | 0.9561  | -0.0648 | 0.4997 | 0.3013 |
| Vapb   | _SLTS[Phospho (STY)]PLDOTEVK_2                                                | #N/A                   | 4.2822  | 2.9440  | 3.4682  | 3.9708  | 3.4079  | 3.7923  | 3.6855  | 4.2497  | 3.7963  | 3.9378  | 0.9303  | -0.1043 | 0.3232 | 0.4105 |
| Nup210 | _ELAS[Phospho (STY)]PLAIT[Phospho (STY)]PR_2                                  | Q9QB18_S1839_M2_Nup210 | 3.7422  | 3.6002  | 3.4759  | 6.9375  | 6.0879  | 4.3080  | 3.1679  | 7.3349  | 6.8893  | 4.1978  | 0.8693  | -0.2021 | 0.5381 | 0.2692 |
| Tomm40 | _FVNWQVQGYR_2                                                                 | #N/A                   | 3.0702  | 4.2722  | 4.3047  | 3.8485  | 3.7148  | 4.3718  | 3.9968  | 5.4043  | 4.9622  | 3.5258  | 0.8744  | -0.1936 | 0.2316 | 0.6353 |
| Tomm40 | _MAIQTQSK_2                                                                   | #N/A                   | 3.7378  | 3.7954  | 3.6770  | 4.7396  | 3.6168  | 4.1127  | 4.4735  | 3.9388  | 3.5874  | 4.1467  | 0.9777  | -0.0325 | 0.7400 | 0.1308 |
| Add3   | _TEEVL[Phospho (STY)]PDGSPSK_2                                                | #N/A                   | 9.4698  | 9.2885  | 9.6370  | 8.5974  | 9.1067  | 8.3967  | 9.0946  | 8.5123  | 8.5658  | 9.4585  | 1.0196  | 0.0280  | 0.5854 | 0.2325 |
| Add3   | _EQDHIIIPR_3                                                                  | #N/A                   | 4.7986  | 4.5371  | 3.1449  | 4.1287  | 3.6374  | 4.2085  | 4.0737  | 4.1500  | 4.0464  | 4.5228  | 0.9709  | -0.0427 | 0.7118 | 0.1477 |
| Add3   | _TLDNLGYR_2                                                                   | #N/A                   | 5.7248  | 5.4382  | 3.4719  | 4.7819  | 6.3398  | 5.5060  | 5.4582  | 6.1262  | 6.8465  | 5.5318  | 0.8698  | -0.2013 | 0.2047 | 0.6889 |
| Add3   | _TEEVLSPDGSPSKS[Phospho (STY)]PSKK_3                                          | #N/A                   | 6.9939  | 8.5343  | 8.9945  | 8.8729  | 7.8716  | 8.6569  | 8.5924  | 8.4372  | 8.6059  | 8.7477  | 1.0278  | 0.0395  | 0.6953 | 0.1578 |
| Add3   | _TEEVLSPDGSPSKS[Phospho (STY)]PSK_2                                           | #N/A                   | 9.1473  | 9.4024  | 9.8951  | 10.2632 | 8.7725  | 9.5198  | 9.6274  | 10.3044 | 10.5357 | 3.8511  | 1.1073  | 0.1470  | 0.4939 | 0.3063 |
| Add3   | _GLSFSEATSLVK_2                                                               | #N/A                   | 3.8743  | 1.6650  | 4.5611  | 4.4563  | 3.0571  | 4.1364  | 3.5894  | 4.1821  | 3.4695  | 3.5300  | 0.9817  | -0.0267 | 0.9094 | 0.0412 |
| Add3   | _SPERTEEVLSPDGSPSKS[Phospho (STY)]PSK_3                                       | #N/A                   | 6.7639  | 7.6476  | 8.5983  | 6.2089  | 3.4615  | 7.4173  | 7.1641  | 7.2010  | 7.4599  | 3.8207  | 1.0423  | 0.0598  | 0.8170 | 0.0878 |
| Add3   | _J[Acetyl (Protein N-term)]SSDTPAVVTT[Phospho (STY)]PPPPS[Oxidation (M)]PHK_2 | #N/A                   | 7.1278  | 4.0240  | 3.6372  | 7.6241  | 6.3484  | 4.0285  | 4.0106  | 7.6288  | 3.5182  | 4.1069  | 1.1347  | 0.1824  | 0.5954 | 0.2252 |
| Add3   | _SDVEIPATVATFSFEDDSAPLS[Phospho (STY)]PLK_3                                   | #N/A                   | 3.0872  | 3.8434  | 4.3217  | 6.3184  | 3.7317  | 4.3937  | 4.2869  | 3.5463  | 4.4629  | 3.0383  | 1.1171  | 0.1598  | 0.4901 | 0.3097 |
| Add3   | _HKSQVEIPATVATFSFEDDSAPLS[Phospho (STY)]PLK_3                                 | #N/A                   | 3.7417  | 4.5210  | 4.6812  | 3.9579  | 3.6362  | 3.5985  | 3.6725  | 5.3112  | 4.9143  | 4.4047  | 0.8792  | -0.1858 | 0.1710 | 0.7671 |
| Add3   | _SPERTEEVL[Phospho (STY)]PDGSPSK_2                                            | #N/A                   | 3.6759  | 3.6818  | 5.9417  | 5.6749  | 3.5446  | 4.9330  | 5.4936  | 5.4157  | 4.2233  | 4.0804  | 0.9525  | -0.0701 | 0.7262 | 0.1389 |
| Add3   | _NMS[Phospho (STY)]PDLR_2                                                     | #N/A                   | 5.3056  | 3.8677  | 3.6520  | 5.8395  | 2.6481  | 4.0559  | 4.3508  | 3.5283  | 3.9701  | 4.2304  | 1.0518  | 0.0729  | 0.7416 | 0.1298 |
| Add2   | _STPAS[Phospho (STY)]PVQS[Phospho (STY)]PSK_2                                 | #N/A                   | 14.4161 | 14.5442 | 14.9116 | 15.0907 | 14.6274 | 14.5721 | 15.0871 | 14.6016 | 14.5592 | 14.7204 | 0.9967  | -0.0047 | 0.7712 | 0.1128 |
| Add2   | _DIATEKPS[Phospho (STY)]PVK_2                                                 | #N/A                   | 9.0636  | 8.5430  | 8.3029  | 9.6305  | 8.8520  | 8.8664  | 9.3678  | 8.8151  | 8.8163  | 9.0953  | 0.9804  | -0.0286 | 0.5127 | 0.2901 |
| Add2   | _VNWADVQR_2                                                                   | #N/A                   | 8.1040  | 8.2861  | 7.6096  | 8.1503  | 8.3204  | 8.3172  | 8.0184  | 8.1281  | 8.0671  | 8.1559  | 1.0048  | 0.0609  | 0.7891 | 0.1029 |
| Add2   | _FSEDDPYLR_2                                                                  | #N/A                   | 8.1482  | 8.1601  | 7.7745  | 8.1035  | 8.1011  | 7.8398  | 7.8579  | 7.6835  | 7.9445  | 8.2033  | 1.0125  | 0.0179  | 0.4387 | 0.3578 |
| Add2   | _WUNLPTNLYR_2                                                                 | #N/A                   | 7.0163  | 7.2047  | 7.1064  | 7.4888  | 7.0856  | 6.9387  | 6.9685  | 7.5107  | 7.2304  | 7.0993  | 0.9914  | -0.0125 | 0.6560 | 0.1831 |
| Add2   | _VNILGEVVEK_2                                                                 | #N/A                   | 6.6072  | 6.5304  | 6.6363  | 7.2710  | 7.3067  | 6.8611  | 6.9656  | 7.0552  | 7.0787  | 6.7843  | 0.9853  | -0.0213 | 0.5922 | 0.2275 |
| Add2   | _GVSC[Carbamidomethyl (C)]SIVTASSLVK_2                                        | #N/A                   | 5.5694  | 5.4000  | 6.6146  | 6.5451  | 6.2475  | 6.1539  | 5.4755  | 5.9030  | 5.9902  | 5.8323  | 1.0497  | 0.0700  | 0.3189 | 0.4964 |
| Add2   | _EQDHFLSPK_2                                                                  | #N/A                   | 6.5216  | 6.1120  | 6.0094  | 6.2494  | 6.2160  | 6.2302  | 6.3682  | 5.8767  | 5.9139  | 6.1807  | 1.0227  | 0.0324  | 0.3083 | 0.5110 |
| Add2   | _SAGPSQLASVIAEK_2                                                             | #N/A                   | 6.0617  | 6.0128  | 6.2638  | 5.6111  | 5.9795  | 6.0140  | 6.0696  | 5.6481  | 5.7297  | 5.7137  | 1.0346  | 0.0490  | 0.1668 | 0.7778 |
| Add2   | _J[Acetyl (Protein N-term)]SEDVPEAAS[Phospho (STY)]PPPSGGQHYDFR_3             | Q9QYB8_S11_M1_Add2     | 15.4301 | 15.3583 | 15.9144 | 15.9186 | 14.8555 | 15.5337 | 15.8619 | 15.3105 | 15.4807 | 15.5170 | 0.9974  | -0.0038 | 0.8592 | 0.0659 |
| Add2   | _TESVTSGLSPGSP[Phospho (STY)]PSKS[Phospho (STY)]PSK_2                         | #N/A                   | 4.5742  | 5.2897  | 3.5163  | 6.32    |         |         |         |         |         |         |         |         |        |        |



|       |                                                                         |                      |         |         |         |         |         |         |         |         |         |         |        |         |        |        |
|-------|-------------------------------------------------------------------------|----------------------|---------|---------|---------|---------|---------|---------|---------|---------|---------|---------|--------|---------|--------|--------|
| Add2  | _GLQGM[Oxidation (M)]TTNADTDGSDYKDKTESVTSGLPS[Phospho (STY)]PEGSPSK_4   | #N/A                 | 3.5575  | 3.9436  | 3.9774  | 5.3480  | 4.6332  | 3.9693  | 4.7613  | 3.6464  | 4.5408  | 4.6779  | 0.9618 | -0.0562 | 0.6748 | 0.1708 |
| Add2  | _C[Carbamidomethyl (C)]LGPTC[Carbamidomethyl (C)]K_2                    | #N/A                 | 3.9159  | 3.8708  | 3.2053  | 4.2499  | 4.4052  | 4.0374  | 4.3882  | 2.9984  | 3.0503  | 4.6600  | 1.0452 | 0.0638  | 0.6853 | 0.1641 |
| Add2  | _NHGM[Oxidation (M)]VALGDTVEAFYK_3                                      | #N/A                 | 3.9659  | 5.0620  | 6.1116  | 4.3410  | 4.7258  | 3.2139  | 3.1070  | 3.2253  | 4.2297  | 4.8196  | 1.1884 | 0.2491  | 0.2621 | 0.5815 |
| Add2  | _SPAVS[Phospho (STY)]PSK_2                                              | #N/A                 | 3.4227  | 3.8723  | 5.3326  | 4.3999  | 4.8229  | 5.5209  | 4.3393  | 3.9325  | 5.6292  | 4.2348  | 1.0062 | 0.0089  | 0.9580 | 0.0186 |
| Add2  | _SSSGMPR_2                                                              | #N/A                 | 3.5909  | 3.6353  | 4.2777  | 3.2795  | 4.2174  | 3.5121  | 4.4950  | 3.3381  | 2.9867  | 3.2465  | 1.0670 | 0.0935  | 0.5001 | 0.2992 |
| Add2  | _LGEHFEALMR_2                                                           | #N/A                 | 3.4136  | 1.9426  | 4.1004  | 4.6031  | 3.7008  | 4.4246  | 4.3178  | 3.5154  | 3.1640  | 3.0693  | 1.0515 | 0.0724  | 0.7470 | 0.1267 |
| Add2  | _SAGPQSLLASVAKS[Phospho (STY)]R_3                                       | #N/A                 | 3.6467  | 4.4030  | 3.3804  | 6.2947  | 2.7904  | 3.8342  | 3.0724  | 4.0770  | 4.3761  | 4.1023  | 1.0387 | 0.0548  | 0.8247 | 0.0837 |
| Add1  | _AAVTS[Phospho (STY)]PPPTTAPHK_2                                        | #N/A                 | 13.8570 | 14.0752 | 14.5332 | 14.4064 | 13.5106 | 13.8893 | 14.3193 | 13.7176 | 13.9530 | 13.8320 | 1.0064 | 0.0093  | 0.6922 | 0.1597 |
| Add1  | _TSP[Phospho (STY)]FLKK_2                                               | Q9QYCO_5724_M1_Add1  | 12.8762 | 12.8345 | 13.2135 | 13.1623 | 11.9201 | 12.7131 | 12.9303 | 12.7496 | 12.8419 | 12.9421 | 0.9938 | -0.0089 | 0.7503 | 0.1248 |
| Add1  | _AAVTS[Phospho (STY)]PPPTTAPHKER_3                                      | #N/A                 | 9.8676  | 10.8501 | 11.9712 | 10.7790 | 10.3156 | 10.7124 | 10.5699 | 10.8603 | 10.6814 | 10.4497 | 1.0102 | 0.0497  | 0.7730 | 0.1148 |
| Add1  | _GS[Phospho (STY)]EENLDETR_2                                            | #N/A                 | 9.1450  | 8.9881  | 9.2630  | 9.3162  | 8.4883  | 8.9154  | 9.0259  | 8.9612  | 8.9466  | 9.2866  | 0.9961 | -0.0057 | 0.8355 | 0.0781 |
| Add1  | _LEEDLPQEPS[Phospho (STY)]R_2                                           | Q9QYCO_5628_M1_Add1  | 9.7857  | 3.0840  | 3.5622  | 3.8308  | 2.9723  | 9.1777  | 3.5455  | 3.8952  | 4.1942  | 9.4556  | 1.0246 | 0.0350  | 0.9491 | 0.0227 |
| Add1  | _VNLQGDVDR_2                                                            | #N/A                 | 8.1251  | 8.2299  | 7.9372  | 8.0460  | 7.9780  | 8.1935  | 8.0960  | 8.0877  | 8.2469  | 8.2187  | 0.9905 | -0.0137 | 0.2899 | 0.5378 |
| Add1  | _TSTSAPNLFVPLTNPK_2                                                     | #N/A                 | 7.9333  | 7.4548  | 7.8954  | 7.3955  | 7.7309  | 7.6316  | 7.5728  | 7.8943  | 7.9586  | 7.7694  | 0.9839 | -0.0233 | 0.3700 | 0.4317 |
| Add1  | _TLASAGDPNLLVDGK_2                                                      | #N/A                 | 5.7577  | 7.1937  | 6.6516  | 7.4282  | 7.4404  | 7.5888  | 7.4224  | 7.1741  | 7.4510  | 7.5250  | 0.9892 | -0.0156 | 0.6865 | 0.1633 |
| Add1  | _YFDRDENNPVLR_3                                                         | #N/A                 | 7.8444  | 7.7305  | 8.1119  | 7.7831  | 7.3768  | 7.8523  | 7.6762  | 7.5183  | 7.7446  | 7.7819  | 1.0134 | 0.0192  | 0.4519 | 0.3450 |
| Add1  | _GSDSYAKGEK_2                                                           | #N/A                 | 6.9771  | 7.1739  | 7.1932  | 7.3940  | 7.2685  | 7.3092  | 7.0959  | 7.0277  | 7.0099  | 7.1116  | 1.0224 | 0.0319  | 0.0702 | 1.1539 |
| Add1  | _SVQGEIVTASK_2                                                          | #N/A                 | 6.6715  | 6.9080  | 6.8237  | 6.8954  | 7.0752  | 6.9105  | 6.8877  | 6.8323  | 7.0480  | 6.8016  | 0.9983 | -0.0024 | 0.8875 | 0.0518 |
| Add1  | _SPGT[Phospho (STY)]PAGEGSGPPK_2                                        | #N/A                 | 12.5658 | 12.4218 | 12.6956 | 12.8874 | 12.1314 | 12.5645 | 12.8234 | 12.5289 | 12.5596 | 12.6348 | 0.9927 | -0.0106 | 0.5300 | 0.2757 |
| Add1  | _EKS[Phospho (STY)]PPQGSAPVNT[Phospho (STY)]PPSTPVK_3                   | #N/A                 | 8.2723  | 7.8603  | 3.8593  | 9.0266  | 9.3070  | 8.3224  | 9.4905  | 9.2170  | 8.0144  | 9.9308  | 0.8485 | -0.2371 | 0.2290 | 0.6402 |
| Add1  | _EYOPHHVSTGTGNPHNTLDR_3                                                 | #N/A                 | 5.1048  | 4.3437  | 4.3769  | 5.3830  | 5.1079  | 4.8826  | 5.0354  | 5.2519  | 4.9989  | 5.1934  | 0.9505 | -0.0732 | 0.2851 | 0.5450 |
| Add1  | _M[Oxidation (M)]DNLGVR_2                                               | #N/A                 | 6.3454  | 6.7595  | 5.7428  | 7.0677  | 6.7954  | 5.9249  | 6.0566  | 6.3024  | 6.7510  | 6.5084  | 1.0054 | 0.0078  | 0.9086 | 0.0416 |
| Add1  | _IKQGS[Phospho (STY)]EENLDETR_3                                         | #N/A                 | 8.7874  | 8.5017  | 9.3644  | 8.8075  | 8.8201  | 8.7807  | 8.5739  | 8.7635  | 9.1687  | 8.8306  | 1.0011 | 0.0015  | 0.9581 | 0.0186 |
| Add1  | _SPDQGSAPVNT[Phospho (STY)]PPSTPVK_2                                    | #N/A                 | 7.5757  | 9.6829  | 9.8323  | 10.5193 | 9.2701  | 3.7223  | 7.6606  | 9.7784  | 10.0388 | 9.6954  | 0.9075 | -0.1400 | 0.5428 | 0.2654 |
| Add1  | _SRS[Phospho (STY)]GGT[Phospho (STY)]PAGEGSGPPK_2                       | #N/A                 | 11.4576 | 11.6716 | 11.9876 | 12.1798 | 11.4249 | 11.5682 | 11.9420 | 11.7132 | 11.5081 | 11.6166 | 1.0017 | 0.0025  | 0.9104 | 0.0408 |
| Add1  | _WQIQGEFEALM[Oxidation (M)]R_2                                          | #N/A                 | 5.5242  | 5.3350  | 4.4492  | 3.4510  | 4.2471  | 3.2725  | 5.1267  | 4.5291  | 5.4871  | 4.6210  | 0.8864 | -0.1739 | 0.3007 | 0.5219 |
| Add1  | _YSDVEVPAS[Phospho (STY)]VTGHFSFASDGSSTG[Carbamidomethyl (C)]SPLRHSFK_4 | Q9QYCO_5415_M1_Add1  | 4.3206  | 4.4064  | 3.5065  | 4.0092  | 2.7939  | 3.8307  | 3.7239  | 4.1093  | 3.7579  | 3.9762  | 0.9793 | -0.0302 | 0.8034 | 0.0951 |
| Add1  | _GDDASEGONGSS[Phospho (STY)]PK_2                                        | #N/A                 | 9.0922  | 8.3534  | 8.0335  | 8.4963  | 7.0401  | 7.8060  | 9.0295  | 8.5299  | 7.4663  | 9.9225  | 0.9313 | -0.1027 | 0.2972 | 0.5270 |
| Add1  | _WLHSGRGDASEGONGSS[Phospho (STY)]PK_3                                   | #N/A                 | 7.3002  | 7.5663  | 8.4745  | 7.7805  | 7.7296  | 8.0504  | 7.4541  | 7.7021  | 7.6193  | 7.1013  | 0.0233 | 0.0537  | 0.5937 | 0.2624 |
| Add1  | _KQGS[Phospho (STY)]EENLDETR_2                                          | #N/A                 | 9.9036  | 10.0688 | 10.6796 | 10.5081 | 9.8266  | 10.2070 | 10.3070 | 10.2309 | 10.1152 | 10.0553 | 1.0021 | 0.0031  | 0.9053 | 0.0432 |
| Add1  | _YSDVEVPASVTGHFSFASDGSSTG[Carbamidomethyl (C)]S[Phospho (STY)]PLR_3     | #N/A                 | 10.2912 | 10.6019 | 11.3238 | 11.6253 | 10.2181 | 10.4090 | 10.7583 | 10.7924 | 10.2867 | 10.7093 | 1.0093 | 0.0134  | 0.7603 | 0.0190 |
| Add1  | _SPDQGSAPVNT[Phospho (STY)]PPST[Phospho (STY)]PVKLEDPQEPSR_4            | #N/A                 | 6.0026  | 7.3204  | 6.5335  | 7.8396  | 6.1237  | 4.3596  | 4.0308  | 7.5514  | 7.1910  | 7.0492  | 0.9857 | -0.0208 | 0.9201 | 0.0362 |
| Add1  | _NMAPDLR_2                                                              | #N/A                 | 3.9251  | 1.3672  | 4.0909  | 2.8073  | 2.8065  | 3.4222  | 3.7830  | 3.3665  | 3.6655  | 3.3120  | 0.8692 | -0.2022 | 0.3960 | 0.4023 |
| Add1  | _KSDVEVPASVTGHFSFASDGSSTG[Carbamidomethyl (C)]S[Phospho (STY)]PLR_4     | #N/A                 | 3.0827  | 4.8227  | 4.3172  | 4.5766  | 3.7273  | 4.1195  | 4.2913  | 3.5419  | 5.1498  | 3.0428  | 1.0253 | 0.0360  | 0.8397 | 0.0799 |
| Add1  | _EKSPDQGS[Phospho (STY)]APVNT[Phospho (STY)]PPSTPVKLEDPQEPSR_4          | Q9QYCO_5605_M2_Add1  | 3.5287  | 3.7022  | 3.6905  | 3.8205  | 3.5235  | 4.2361  | 3.6850  | 4.7095  | 3.8615  | 4.2839  | 0.9070 | -0.1409 | 0.1265 | 0.0850 |
| Add1  | _IREGNLDQIK_3                                                           | #N/A                 | 3.3795  | 3.9629  | 3.1132  | 4.1578  | 3.7842  | 3.9453  | 4.3061  | 4.3442  | 3.1424  | 3.8351  | 0.9531 | -0.0693 | 0.5587 | 0.2528 |
| Pcnw1 | _SSS[Phospho (STY)]LHR_2                                                | Q9QYCL_5551_M1_Pcnw1 | 5.1746  | 3.9954  | 5.4854  | 5.4549  | 3.7476  | 4.6958  | 4.1349  | 3.6982  | 3.3468  | 3.6947  | 1.2390 | 0.3092  | 0.0401 | 1.3974 |
| Bd11a | _GC[Carbamidomethyl (C)]S[Phospho (STY)]PGESASGLSK_2                    | #N/A                 | 9.6477  | 9.6305  | 10.1714 | 10.4402 | 9.6504  | 9.6040  | 10.0125 | 9.7089  | 9.7609  | 9.7685  | 1.0046 | 0.0066  | 0.8305 | 0.0859 |
| Bd11a | _GC[Carbamidomethyl (C)]S[Phospho (STY)]PGESASGLSKK_2                   | #N/A                 | 6.8571  | 4.2650  | 3.6479  | 6.9637  | 3.5877  | 1.7049  | 7.2391  | 3.9679  | 3.6165  | 4.1176  | 1.1359 | 0.1838  | 0.5794 | 0.2370 |
| Bd11a | _VLESEHGS[Phospho (STY)]PLTPR_3                                         | #N/A                 | 5.7250  | 5.6472  | 6.1043  | 4.3728  | 5.6248  | 6.2573  | 5.2995  | 5.9468  | 5.6179  | 5.7619  | 0.9939 | -0.0089 | 0.9249 | 0.0339 |
| Bd11a | _JST[Phospho (STY)]PPGELOGGSGR_2                                        | Q9QYEC_1701_M1_Bd11a | 8.8974  | 3.1700  | 3.2421  | 9.1790  | 3.0583  | 8.7730  | 9.0183  | 8.3030  | 4.0223  | 3.7118  | 0.9664 | -0.0493 | 0.9171 | 0.0376 |
| Bd11a | _ELAGNTSS[Phospho (STY)]PLPS[Phospho (STY)]PPGSRPMQGR_3                 | Q9QYEC_5328_M2_Bd11a | 3.8000  | 3.0555  | 3.5337  | 4.5783  | 2.9438  | 3.6809  | 3.5740  | 3.9237  | 4.2228  | 4.2556  | 0.9010 | -0.1504 | 0.2595 | 0.0810 |
| Bd11a | _GVDPKPS[Phospho (STY)]PSPIEMK_2                                        | Q9QYEC_586_M1_Bd11a  | 6.4272  | 3.4029  | 3.8811  | 3.4249  | 3.2912  | 3.3335  | 3.2266  | 3.5763  | 3.8754  | 3.1021  | 1.1495 | 0.0210  | 0.4452 | 0.3515 |
| Bd11a | _LLGS[Phospho (STY)]PSSL[Phospho (STY)]PFSK_2                           | Q9QYEC_5625_M2_Bd11a | 4.0287  | 3.1975  | 3.2147  | 3.7173  | 3.1544  | 3.0743  | 3.4320  | 4.4012  | 4.0497  | 3.6843  | 0.8731 | -0.1958 | 0.0917 | 0.3716 |
| Ndr3  | _LDPNITLLK_2                                                            | #N/A                 | 6.6777  | 6.6266  | 6.1365  | 6.4283  | 6.9181  | 6.9050  | 6.4280  | 7.2454  | 6.8021  | 6.7160  | 0.9732 | -0.0393 | 0.3939 | 0.4047 |
| Ndr3  | _DLIERPLGQNDNR_3                                                        | #N/A                 | 9.8750  | 6.9383  | 10.3360 | 10.0872 | 9.2088  | 9.7345  | 10.2651 | 9.6418  | 9.7587  | 9.9498  | 0.9909 | -0.0133 | 0.6985 | 0.1558 |
| Ndr3  | _THSTSS[Phospho (STY)]KSGSGSPFSR_2                                      | #N/A                 | 7.6501  | 6.5694  | 6.9821  | 7.2452  | 5.5986  | 3.7223  | 7.6263  | 7.0268  | 7.0726  | 7.0951  | 0.8736 | -0.1949 | 0.2558 | 0.5920 |
| Ndr3  | _S[Phospho (STY)]RT[Phospho (STY)]HSTSSGSGSPFSR_3                       | Q9QYF9_T329_M2_Ndr3  | 4.2226  | 3.4039  | 3.9563  | 3.3642  | 3.3664  | 3.3070  | 3.6483  | 3.5498  | 3.8489  | 3.7259  | 1.0208 | 0.0397  | 0.7618 | 0.1182 |
| Ndr3  | _HGTMEVS[Phospho (STY)]C[Carbamidomethyl (C)]_2                         | Q9QYF9_S374_M1_Ndr3  | 5.9071  | 4.3058  | 3.6072  | 6.5269  | 3.5469  | 4.1826  | 5.2236  | 4.0086  | 3.6572  | 4.2131  | 1.0944 | 0.1302  | 0.5736 | 0.2414 |
| Ndr3  | _LHIADINQENQLFLGYNR_3                                                   | #N/A                 | 4.2911  | 3.8583  | 3.4771  | 3.9797  | 2.6846  | 4.3127  | 3.6944  | 4.1387  | 3.7873  | 4.1354  | 0.9564 | -0.0643 | 0.6129 | 0.2126 |
| Ndr3  | _SVTNSQSDGTQESC[Carbamidomethyl (C)]ES[Phospho (STY)]PVDLDR_3           | Q9QYF9_S361_M1_Ndr3  | 3.0879  | 4.1382  | 3.7748  | 2.1393  | 4.0265  | 4.0989  | 3.9921  | 3.8411  | 3.4897  | 4.2444  | 0.9107 | -0.1350 | 0.4346 | 0.3619 |
| Ndr3  | _C[Carbamidomethyl (C)]STLLVGDGNPAVEAVVE[Carbamidomethyl (C)]NSR_3      | #N/A                 | 3.0746  | 4.2678  | 4.3091  | 3.8529  | 4.0892  | 3.6403  | 4.0011  | 3.1483  | 3.4474  | 3.5301  | 1.0964 | 0.1328  | 0.2517 | 0.5990 |
| Ndr2  | _SC[Carbamidomethyl (C)]FQPLFR_2                                        | #N/A                 | 8.3448  | 8.7140  | 8.4008  | 8.2741  | 8.5750  | 8.2361  | 8.2772  | 8.6321  | 8.3901  | 8.4221  | 0.9993 | -0.0011 | 0.9565 | 0.0193 |
| Ndr2  | _Acetyl (Protein N-term)AEIQLVQITETKPLGLQTPETA_3                        | #N/A                 | 5.8671  | 6.0542  | 6.4792  | 6.2589  | 6.4137  | 6.7216  | 6.0779  | 6.0933  | 6.3367  | 6.3367  | 1.0271 | 0.0386  | 0.3463 | 0.4606 |
| Ndr2  | _GHQAHNLENLEIWNYNR_3                                                    | #N/A                 | 7.2740  | 7.6037  | 7.5235  | 8.4104  | 7.6027  | 7.4618  | 7.5053  | 7.6188  | 7.6430  | 7.6713  | 1.0048 | 0.0069  | 0.8621 | 0.0644 |
| Ndr2  | _LDPTQTFUK_2                                                            | #N/A                 | 7.4287  | 7.5664  | 7.7778  | 7.5101  | 7.9583  | 7.2745  | 7.8359  | 7.4855  | 7.5664  | 7.6257  | 0.9944 | -0.0080 | 0.7680 | 0.1146 |
| Ndr2  | _GWM[Oxidation (M)]DWAHHK_2                                             | #N/A                 | 6.0918  | 7.0123  | 7.0097  | 5.7785  | 6.1192  | 6.3936  | 6.5876  | 6.7802  | 5.9435  | 6.5042  | 0.9918 | -0.0119 | 0.8628 | 0.0641 |
| Ndr2  | _YALNHPDVTGLVLINDPNAK_3                                                 | #N/A                 | 6.2475  | 6.4270  | 5.9503  | 6.1664  | 6.0600  | 6.7771  | 6.0878  | 6.0878  | 6.3985  | 6.4607  | 0.9795 | -0.0299 | 0.2622 | 0.5814 |
| Ndr2  | _M[Oxidation (M)]ADGGQDQLQTPQK_2                                        | #N/A                 | 7.3545  | 7.8366  | 7.3738  | 7.3390  | 7.9396  | 7.6756  | 7.5100  | 7.6470  | 7.6794  | 7.7039  | 0.9936 | -0.0092 | 0.7381 | 0.1319 |
| Ndr2  | _TAS[Phospho (STY)]LTSASIDGSR_2                                         | Q9QYGO_5332_M1_Ndr2  | 12.0632 | 12.7060 | 12.7895 | 13.4332 | 12.6559 | 12.9932 | 13.0121 | 12.9894 | 12.7989 | 12.9702 | 0.9869 | -0.0190 | 0.4869 | 0.3125 |
| Ndr2  | _FGDM[Oxidation (M)]QEIQNFR_2                                           | #N/A                 | 6.0491  | 6.5117  | 6.5428  | 7.0012  | 5.9333  | 5.9077  | 7.4775  | 6.3941  | 6.0303  | 7.1965  | 0.9335 | -0.0902 | 0.2307 | 0.6369 |
| Ndr2  | _TASLTSAS[Phospho (STY)]IDGS[Phospho (STY)]RSR_2                        | #N/A                 | 3.7810  | 3.4481  | 3.8012  | 4.8638  | 5.4269  | 4.911   |         |         |         |         |        |         |        |        |



|        |                                                       |                       |         |         |         |         |         |         |         |         |          |         |         |         |        |        |
|--------|-------------------------------------------------------|-----------------------|---------|---------|---------|---------|---------|---------|---------|---------|----------|---------|---------|---------|--------|--------|
| Dnaj2  | _DGNLHM[Oxidation (M)]TYK_2                           | #N/A                  | 6.7303  | 5.9391  | 5.4099  | 3.6548  | 5.6323  | 6.1645  | 5.8938  | 6.5200  | 4.9297   | 3.3321  | 1.0812  | 0.1126  | 0.5995 | 0.2222 |
| Dnaj2  | _JTFTGEADQAPVEPQGVLLQEK_2                             | #N/A                  | 3.5461  | 3.6800  | 4.2329  | 3.2347  | 3.5683  | 3.0563  | 4.4503  | 3.3829  | 3.4917   | 3.2017  | 0.9784  | -0.0316 | 0.8020 | 0.0958 |
| Dnaj2  | _JGTEVLC[Carbamidomethyl (C)]GFQTFK_2                 | #N/A                  | 4.2333  | 3.4887  | 3.9669  | 3.4261  | 3.3770  | 3.1408  | 3.4905  | 4.3410  | 3.1880   | 4.0335  | 1.0235  | 0.0335  | 0.7854 | 0.1049 |
| Dnajb1 | _GAS[Phospho (S)]DDEKR_2                              | Q9QY13_S16_M1_Dnajb1  | 7.6793  | 7.8484  | 7.8844  | 8.4755  | 7.9665  | 7.9253  | 7.4574  | 7.7657  | 7.9317   | 7.7764  | 1.0298  | 0.0424  | 0.1840 | 0.7351 |
| Pnck   | _HSHRGLTGSGS[Phospho (S)]PWK_3                        | #N/A                  | 2.9615  | 4.3809  | 4.1961  | 3.7398  | 3.0601  | 3.0185  | 3.8881  | 3.2613  | 5.1312   | 3.4171  | 0.9302  | -0.1044 | 0.5586 | 0.2529 |
| Pnck   | _KLGG[Phospho (S)]PEGEASR_2                           | Q9QY09_S316_M1_Pnck   | 3.1414  | 4.2010  | 6.1842  | 6.2118  | 5.6481  | 6.4133  | 4.0679  | 6.1499  | 6.7800   | 3.5970  | 1.0294  | 0.0418  | 0.8728 | 0.0591 |
| Pnck   | _HSHPGLTGSGS[Phospho (S)]PWK_3                        | #N/A                  | 3.4603  | 3.8821  | 3.1939  | 4.2386  | 4.1048  | 4.0260  | 4.3868  | 4.2635  | 3.0617   | 3.9158  | 0.9771  | -0.0334 | 0.7834 | 0.1060 |
| Map1a  | _VPSAPQGES[Phospho (S)]JPVDTKST[Phospho (S)]TPTR_3    | #N/A                  | 4.1347  | 3.6465  | 10.0270 | 11.2490 | 9.1943  | 7.3207  | 9.6283  | 7.8112  | 10.7558  | 3.7903  | 0.9498  | -0.0742 | 0.8467 | 0.0723 |
| Map1a  | _GEPVPAWEGS[Phospho (S)]PEQEVK_2                      | #N/A                  | 10.9583 | 10.1996 | 10.6156 | 11.0398 | 9.8348  | 10.7967 | 10.4796 | 10.4647 | 10.7941  | 10.9836 | 0.9900  | -0.0144 | 0.6928 | 0.1594 |
| Map1a  | _EAEIT[Phospho (S)]PENIAAAR_2                         | Q9QYR6_T633_M1_Map1a  | 9.5609  | 9.6309  | 9.7033  | 10.0393 | 9.3642  | 9.6356  | 10.0221 | 9.5510  | 9.6663   | 9.7434  | 0.9908  | -0.0134 | 0.5324 | 0.2738 |
| Map1a  | _EQDVQGWK_2                                           | #N/A                  | 8.3682  | 8.5298  | 8.7520  | 8.6651  | 8.6901  | 8.0848  | 8.5524  | 8.3234  | 8.3761   | 8.5509  | 1.0076  | 0.0109  | 0.6505 | 0.1868 |
| Map1a  | _VLFQNAPOK_K_2                                        | #N/A                  | 8.5505  | 8.6987  | 8.8587  | 8.6911  | 8.7621  | 8.2617  | 8.5219  | 8.7507  | 8.5282   | 8.0913  | 1.0194  | 0.0277  | 0.3140 | 0.5030 |
| Map1a  | _ASYVVGNDFPANGFSR_2                                   | #N/A                  | 8.0857  | 7.7159  | 8.6410  | 8.4399  | 8.3150  | 7.0387  | 8.2282  | 8.0851  | 8.2274   | 7.4951  | 1.0038  | 0.0055  | 0.9285 | 0.0322 |
| Map1a  | _GVEQDQGAPEK_2                                        | #N/A                  | 7.9350  | 7.9752  | 8.3223  | 7.9527  | 8.2650  | 8.1274  | 7.9701  | 7.6741  | 7.6129   | 7.9836  | 1.0366  | 0.0519  | 0.0379 | 1.4211 |
| Map1a  | _DLAAGVAPANKPSK_2                                     | #N/A                  | 7.8703  | 8.1869  | 7.7135  | 8.1047  | 8.3693  | 8.3308  | 8.0245  | 7.8361  | 8.0325   | 8.1008  | 1.0122  | 0.0175  | 0.5049 | 0.2968 |
| Map1a  | _SSRPDTLSSQKPK_K_3                                    | #N/A                  | 7.6407  | 7.7024  | 7.7788  | 8.1406  | 8.6369  | 8.0115  | 7.6431  | 7.6669  | 7.9405   | 7.6677  | 1.0331  | 0.0469  | 0.2322 | 0.6342 |
| Map1a  | _GAALQTOQAPEPR_2                                      | #N/A                  | 7.1471  | 7.4844  | 7.5269  | 7.8828  | 7.9368  | 7.4775  | 7.5175  | 7.4514  | 7.6180   | 7.7967  | 0.9974  | -0.0038 | 0.9043 | 0.0437 |
| Map1a  | _GAAPPAAAGHR_2                                        | #N/A                  | 6.7009  | 7.7442  | 7.4728  | 7.6471  | 7.9655  | 7.4574  | 7.1549  | 7.4435  | 7.1349   | 7.4652  | 1.0272  | 0.0387  | 0.4178 | 0.3790 |
| Map1a  | _EVVPDFEDI_K_2                                        | #N/A                  | 7.0523  | 7.2765  | 6.9749  | 7.4365  | 7.5550  | 7.4975  | 7.5685  | 7.2885  | 7.0596   | 7.3149  | 0.9988  | -0.0018 | 0.9524 | 0.0212 |
| Map1a  | _DTAVELKGPEPK_2                                       | #N/A                  | 7.2750  | 7.0784  | 7.4756  | 7.6750  | 7.3745  | 7.3095  | 6.9992  | 7.2676  | 7.1347   | 7.1347  | 1.0253  | 0.0360  | 0.1621 | 0.7901 |
| Map1a  | _NRAPO[Phospho (S)]GAEVER_2                           | #N/A                  | 6.5263  | 6.7833  | 7.0156  | 7.2622  | 6.6358  | 7.0441  | 7.3599  | 7.0564  | 6.6087   | 7.0149  | 0.9812  | -0.0274 | 0.4999 | 0.3012 |
| Map1a  | _LEQDEHLELR_3                                         | #N/A                  | 7.0867  | 6.6899  | 7.4128  | 7.0661  | 7.4348  | 7.3158  | 6.2043  | 6.7837  | 6.7577   | 7.3764  | 1.0571  | 0.0801  | 0.1422 | 0.8470 |
| Map1a  | _LGIGAEPLVR_2                                         | #N/A                  | 7.0251  | 7.2586  | 7.1758  | 7.1392  | 6.2747  | 6.6901  | 6.8346  | 7.2730  | 6.8013   | 7.2478  | 0.9841  | -0.0231 | 0.6202 | 0.2075 |
| Map1a  | _LDM[Oxidation (M)]VYLVNPKV_2                         | #N/A                  | 6.7966  | 6.7353  | 6.2223  | 6.0505  | 6.8035  | 6.8047  | 6.9933  | 6.9446  | 6.8436   | 6.9990  | 0.9458  | -0.0804 | 0.0649 | 1.1876 |
| Map1a  | _EGEGGAGAPDSSS[Phospho (S)]PSSK_2                     | Q9QYR6_S1900_M1_Map1a | 5.2815  | 4.9993  | 3.7726  | 5.9684  | 3.7976  | 4.7725  | 5.6563  | 3.5660  | 6.1420   | 0.8895  | -0.1690 | 0.3888  | 0.0344 | 0.5030 |
| Map1a  | _DFOELPK_K_2                                          | #N/A                  | 6.4526  | 6.0365  | 6.0643  | 6.6415  | 6.3366  | 6.6809  | 6.0487  | 6.1758  | 6.6574   | 6.8041  | 0.9918  | -0.0119 | 0.8008 | 0.0965 |
| Map1a  | _NPTPTPSWLAIRPPWVPK_K_2                               | #N/A                  | 5.9822  | 6.7480  | 6.2645  | 6.5586  | 6.5231  | 6.0317  | 6.3633  | 6.2215  | 5.9865   | 6.6351  | 1.0079  | 0.0113  | 0.8006 | 0.0966 |
| Map1a  | _DAEQTEPEQREPTVPDER_3                                 | #N/A                  | 5.8885  | 6.5490  | 6.6382  | 6.6209  | 6.3969  | 6.5997  | 6.0133  | 6.3997  | 6.0554   | 6.5347  | 1.0317  | 0.0450  | 0.2996 | 0.5235 |
| Map1a  | _VRTS[Phospho (S)]SEALK_K_2                           | #N/A                  | 7.0787  | 6.8116  | 6.9431  | 3.7360  | 3.6023  | 3.0223  | 7.0990  | 7.0375  | 3.5642   | 3.4133  | 0.9849  | -0.0219 | 0.9520 | 0.2016 |
| Map1a  | _AQWQGNLVTLPHTOTEVTR_3                                | #N/A                  | 5.2903  | 4.7133  | 6.0293  | 5.5127  | 5.7791  | 5.3958  | 5.6197  | 5.4359  | 4.7581   | 6.3433  | 0.9845  | -0.0225 | 0.8102 | 0.0218 |
| Map1a  | _S[Phospho (S)]PTPGKPVDR_2                            | #N/A                  | 13.1724 | 13.4185 | 13.7695 | 13.7282 | 13.3738 | 13.5366 | 13.5390 | 13.4081 | 13.3594  | 13.4324 | 1.0048  | 0.0070  | 0.6000 | 0.2914 |
| Map1a  | _ELSEPT[Phospho (S)]PPAQK_K_2                         | #N/A                  | 10.8680 | 11.2012 | 11.6091 | 11.5703 | 10.5963 | 11.1480 | 11.4240 | 11.1414 | 11.1062  | 11.1136 | 0.9972  | -0.0040 | 0.8867 | 0.0522 |
| Map1a  | _ALGLESPFEEK_K_2                                      | #N/A                  | 10.7285 | 11.0774 | 11.0041 | 11.5976 | 10.6703 | 10.9897 | 11.5764 | 10.9824 | 11.0921  | 11.2263 | 0.9815  | -0.1072 | 0.3216 | 0.4926 |
| Map1a  | _ADS[Phospho (S)]KESLK_K_2                            | #N/A                  | 10.3444 | 10.3454 | 10.8351 | 10.6623 | 10.0471 | 10.5094 | 10.6490 | 10.3876 | 10.4502  | 10.5903 | 0.9941  | -0.0085 | 0.6880 | 0.1624 |
| Map1a  | _ALGLEES[Phospho (S)]PEEGKAR_2                        | #N/A                  | 9.1796  | 9.9480  | 10.4800 | 10.1567 | 9.5260  | 9.8542  | 10.1082 | 9.7829  | 9.7773   | 9.8470  | 0.9978  | -0.0031 | 0.9317 | 0.0307 |
| Map1a  | _ALALVPGTPTTR_2                                       | #N/A                  | 7.2496  | 9.7996  | 7.5583  | 10.3134 | 8.5691  | 9.3518  | 9.7962  | 9.6384  | 9.4431   | 9.3384  | 0.9218  | -0.1175 | 0.2725 | 0.5646 |
| Map1a  | _GEKELSEPT[Phospho (S)]PPAQK_K_3                      | #N/A                  | 7.0460  | 7.2715  | 8.2275  | 3.9219  | 7.0689  | 8.2246  | 8.2837  | 7.1505  | 7.6181   | 8.0941  | 0.8939  | -0.1619 | 0.3502 | 0.4557 |
| Map1a  | _SHWDDGTNDS[Phospho (S)]DLEKGR_3                      | #N/A                  | 6.2570  | 7.5881  | 8.9436  | 7.8109  | 7.2816  | 8.0179  | 7.2113  | 7.4282  | 6.9007   | 7.2689  | 1.0621  | 0.0870  | 0.3589 | 0.4450 |
| Map1a  | _APEHIPOQTQTR_2                                       | #N/A                  | 6.9168  | 7.1073  | 6.1371  | 7.1403  | 7.4866  | 6.9299  | 7.0395  | 6.9818  | 7.0146   | 6.8107  | 0.9988  | -0.0018 | 0.9714 | 0.0216 |
| Map1a  | _AKPAS[Phospho (S)]IPARR_2                            | #N/A                  | 7.6043  | 3.2918  | 8.0061  | 7.0657  | 7.2102  | 6.9909  | 8.0858  | 7.8270  | 6.9475   | 7.7063  | 0.8761  | -0.1908 | 0.3203 | 0.4944 |
| Map1a  | _QLS[Phospho (S)]PESGLTQGLSGELK_K_2                   | #N/A                  | 5.5124  | 8.5168  | 8.1947  | 9.6151  | 6.7536  | 6.5298  | 7.5372  | 8.0968  | 7.3875   | 5.5857  | 1.0515  | 0.0725  | 0.6875 | 0.1627 |
| Map1a  | _ESTLDEGNEGETPLQHTPR_K_2                              | #N/A                  | 6.4432  | 6.7082  | 6.4222  | 6.7226  | 5.6234  | 5.6108  | 6.7230  | 6.2279  | 6.0156   | 6.1670  | 0.9955  | -0.0065 | 0.9239 | 0.0344 |
| Map1a  | _VLVEDR_2                                             | #N/A                  | 6.7969  | 6.5996  | 6.9309  | 6.8756  | 6.5774  | 6.6322  | 6.3199  | 6.9638  | 6.7238   | 6.9580  | 0.9991  | -0.0013 | 0.9678 | 0.0142 |
| Map1a  | _EKETWEER_2                                           | #N/A                  | 6.0520  | 6.1435  | 6.0448  | 6.1722  | 6.3405  | 6.2530  | 6.4122  | 6.0159  | 5.6996   | 5.8419  | 1.0293  | 0.0416  | 0.2312 | 0.6359 |
| Map1a  | _VVSNTIPLTHK_K_2                                      | #N/A                  | 4.7185  | 4.4093  | 4.7066  | 4.7489  | 4.9654  | 4.8803  | 4.0028  | 4.8391  | 5.0359   | 5.1493  | 0.9961  | -0.0057 | 0.9367 | 0.0284 |
| Map1a  | _APSLDLSLQLPSPSPGAPLSNLPR_3                           | #N/A                  | 5.2696  | 5.3715  | 3.4458  | 5.4430  | 5.6623  | 5.3560  | 5.8693  | 4.8633  | 5.0821   | 5.7113  | 0.9461  | -0.0800 | 0.5448 | 0.2637 |
| Map1a  | _SPQAQDTLSLGGAGGTG[Carbamidomethyl (C)]TQLLEQEK_K_3   | #N/A                  | 5.5883  | 9.8070  | 9.3599  | 11.0272 | 7.9356  | 8.2064  | 8.9991  | 9.6191  | 9.1261   | 7.8560  | 0.9774  | -0.0330 | 0.8392 | 0.0761 |
| Map1a  | _IDSVLLTHGADNPGINGLLQR_K_3                            | #N/A                  | 5.6104  | 5.3277  | 5.6140  | 5.5907  | 5.1390  | 4.9867  | 4.4933  | 5.1685  | 5.9228   | 5.0755  | 1.0413  | 0.0583  | 0.4530 | 0.3439 |
| Map1a  | _C[Carbamidomethyl (C)]LS[Phospho (S)]TPDOSTVK_2      | Q9QYR6_S981_M1_Map1a  | 11.6998 | 12.0054 | 12.7362 | 12.3627 | 11.7351 | 12.0156 | 12.2283 | 11.9629 | 11.9471  | 11.9342 | 1.0062  | 0.0089  | 0.7318 | 0.1356 |
| Map1a  | _SEPQDFQEDS[Phospho (S)]WGDTK_K_2                     | Q9QYR6_S1023_M1_Map1a | 10.1452 | 11.8626 | 11.5670 | 12.5949 | 11.6242 | 11.9464 | 12.3336 | 11.9430 | 11.9299  | 12.1181 | 0.9621  | -0.0557 | 0.3084 | 0.5108 |
| Map1a  | _AKPAS[Phospho (S)]PAR_2                              | #N/A                  | 10.8123 | 3.2539  | 10.8576 | 10.3294 | 3.7170  | 10.2988 | 11.0253 | 10.5746 | 3.1801   | 10.6680 | 0.9266  | -0.1100 | 0.7932 | 0.1006 |
| Map1a  | _YPVATOK_K_2                                          | #N/A                  | 5.6270  | 5.5407  | 4.7364  | 5.7418  | 6.1060  | 5.5125  | 5.5315  | 5.6683  | 5.5824   | 5.6759  | 1.0840  | 0.1163  | 0.3938 | 0.4047 |
| Map1a  | _TQEPAPKQKDELFTDQGS[Phospho (S)]PEDAESVLSVSPOTAK_4    | Q9QYR6_S1133_M1_Map1a | 3.8679  | 4.0514  | 3.9759  | 4.8955  | 3.4594  | 3.1232  | 4.4942  | 3.4961  | 3.7595   | 4.2870  | 0.9717  | -0.0415 | 0.7589 | 0.1198 |
| Map1a  | _NUSPELGVPFVNPVK_K_2                                  | #N/A                  | 4.9061  | 4.9575  | 4.9862  | 5.2314  | 4.6268  | 3.6502  | 5.3645  | 4.5825  | 4.1921   | 4.4366  | 1.0178  | 0.0254  | 0.8195 | 0.0865 |
| Map1a  | _ETS[Phospho (S)]TRGEPVPAWEGK_K_3                     | #N/A                  | 12.9766 | 12.7130 | 13.9813 | 13.4554 | 12.4184 | 12.8443 | 12.8101 | 13.1192 | 12.8704  | 12.9583 | 1.0097  | 0.0139  | 0.6798 | 0.1676 |
| Map1a  | _ELALSS[Phospho (S)]PELTQDFELKR_3                     | #N/A                  | 4.8793  | 7.2991  | 7.7416  | 6.2467  | 7.1743  | 4.1245  | 6.2612  | 7.7813  | 7.6788   | 6.0832  | 0.8983  | -0.1547 | 0.4157 | 0.3812 |
| Map1a  | _EM[Oxidation (M)]TLQKSS[Phospho (S)]PEKAK_K_2        | #N/A                  | 9.5234  | 9.9866  | 10.6155 | 10.3986 | 9.6706  | 9.7859  | 9.9803  | 9.9992  | 9.9211   | 9.8719  | 1.0054  | 0.0078  | 0.8134 | 0.0897 |
| Map1a  | _ETS[Phospho (S)]TRGEPVPAWEGKSPQEVK_4                 | #N/A                  | 6.4097  | 4.0716  | 9.5960  | 8.5236  | 3.9411  | 4.0653  | 4.1313  | 8.4871  | 7.7351   | 7.6218  | 0.8724  | -0.1970 | 0.5650 | 0.2479 |
| Map1a  | _HRA[Phospho (S)]KESLK_K_2                            | #N/A                  | 7.7069  | 5.0933  | 8.2699  | 7.9244  | 6.0096  | 7.3318  | 7.9931  | 7.7756  | 7.1040   | 7.9777  | 0.9149  | -0.1284 | 0.3444 | 0.4630 |
| Map1a  | _TES[Phospho (S)]SEALKAEK_K_2                         | #N/A                  | 6.3017  | 6.2636  | 6.5291  | 6.8891  | 6.1655  | 6.2910  | 6.6478  | 3.9656  | 6.3635   | 6.5212  | 1.0906  | 0.1251  | 0.3386 | 0.4703 |
| Map1a  | _ADS[Phospho (S)]KES[Phospho (S)]UKAAPK_K_2           | #N/A                  | 10.6744 | 10.9411 | 11.5037 | 11.3783 | 10.5911 | 11.0279 | 11.1909 | 10.8152 | 10.9436  | 11.0040 | 0.9058  | 0.0058  | 0.8283 | 0.0818 |
| Map1a  | _S[Phospho (S)]PPC[Carbamidomethyl (C)]EDFSVGESEK_K_2 | #N/A                  | 6.0099  | 5.7886  | 3.7505  | 7.7045  | 6.0297  | 6.3986  | 4.4000  | 6.4726  | 6.1127   | 6.5423  | 1.0111  | 0.0159  | 0.9341 | 0.0296 |
| Map1a  | _STPSQVTSSEKDGHS[Phospho (S)]PM[Oxidation (M)]SK_K_3  | #N/A                  | 10.4417 | 7.4210  | 11.1447 | 11.1772 | 10.3584 | 10.6915 | 10.7635 | 9.9469  | 3.4828</ |         |         |         |        |        |



|       |                                                                                   |                       |        |         |         |         |        |         |         |         |         |         |        |         |        |        |
|-------|-----------------------------------------------------------------------------------|-----------------------|--------|---------|---------|---------|--------|---------|---------|---------|---------|---------|--------|---------|--------|--------|
| Map1a | _S[Phospho (STY)]PELSSPAM[Oxidation (M)]EDIAM[Oxidation (M)]EWGGK_2               | #N/A                  | 5.2211 | 5.9092  | 5.9255  | 5.9198  | 3.7332 | 6.3872  | 6.1375  | 7.0574  | 5.9311  | 6.4166  | 0.8638 | -0.2112 | 0.1342 | 0.8722 |
| Map1a | _EKEGALDQDNR_2                                                                    | #N/A                  | 6.0256 | 6.4436  | 6.1673  | 6.5816  | 5.8059 | 5.9720  | 6.5392  | 6.1506  | 6.3104  | 6.4904  | 0.9676 | -0.0476 | 0.2494 | 0.6030 |
| Map1a | _GKDYLEDOGLAEKD_3                                                                 | #N/A                  | 5.5870 | 5.5648  | 6.8063  | 6.3352  | 5.8956 | 6.0979  | 5.7686  | 5.8131  | 5.8578  | 5.5363  | 1.0529 | 0.0744  | 0.2571 | 0.5899 |
| Map1a | _KVAELEEQS[Phospho (STY)]QGS5SYQDWVK_3                                            | #N/A                  | 6.7604 | 7.2391  | 8.5624  | 7.9319  | 6.8735 | 7.4027  | 6.9841  | 7.2156  | 7.1449  | 7.2577  | 1.0435 | 0.0614  | 0.4014 | 0.3964 |
| Map1a | _VAELEEQS[Phospho (STY)]QGS5SYQDWVK_2                                             | #N/A                  | 8.9339 | 8.8799  | 9.6754  | 9.6309  | 8.7237 | 9.1475  | 9.4754  | 8.6799  | 8.9734  | 9.0407  | 1.0136 | 0.0195  | 0.6368 | 0.2039 |
| Map1a | _M[Oxidation (M)]AS[Phospho (STY)]PPSPGSPSAATHPHQSPVEEK_4                         | #N/A                  | 8.7955 | 9.5213  | 10.4649 | 9.9699  | 9.0745 | 9.3200  | 9.1898  | 10.1562 | 9.9627  | 9.6497  | 0.9779 | -0.0322 | 0.5589 | 0.2527 |
| Map1a | _PASPALSEGS[Phospho (STY)]S[Phospho (STY)]SEATTPVSSVAER_3                         | #N/A                  | 3.6955 | 3.4364  | 3.7551  | 4.2100  | 7.1663 | 3.9577  | 3.8369  | 4.7209  | 6.6309  | 5.2378  | 0.8558 | -0.2247 | 0.4106 | 0.3865 |
| Map1a | _QEPEPGNVEPST[Phospho (STY)]PPAVPPR_2                                             | Q9QYR6_12031_M1_Map1a | 8.6635 | 4.2865  | 8.8223  | 10.2903 | 6.7072 | 3.8198  | 4.4185  | 9.0936  | 7.9254  | 7.0044  | 0.8811 | -0.1826 | 0.6140 | 0.2118 |
| Map1a | _VPEVESHTR_2                                                                      | #N/A                  | 7.1160 | 7.3023  | 7.4393  | 7.4325  | 7.7201 | 7.4752  | 7.2959  | 7.3961  | 7.2168  | 7.4930  | 1.0007 | 0.0125  | 0.5863 | 0.2319 |
| Map1a | _APDS[Phospho (STY)]GAEVER_2                                                      | #N/A                  | 7.1145 | 6.3968  | 6.7297  | 7.1871  | 6.5379 | 6.8916  | 6.8449  | 6.6005  | 7.1345  | 6.9325  | 0.9900 | -0.0144 | 0.7171 | 0.1444 |
| Map1a | _DEALDEENKPGGQDK_2                                                                | #N/A                  | 4.0239 | 4.1386  | 4.3642  | 5.4021  | 3.6820 | 3.6714  | 4.2587  | 4.5951  | 4.3836  | 4.7688  | 0.9361 | -0.0953 | 0.4205 | 0.3762 |
| Map1a | _GKDYLEDOGLAEK_3                                                                  | #N/A                  | 4.3229 | 4.5418  | 3.3197  | 4.9803  | 4.8562 | 4.9740  | 4.5125  | 5.0877  | 3.9117  | 4.2442  | 1.0135 | 0.0194  | 0.8778 | 0.0566 |
| Map1a | _S[Phospho (STY)]IAPC[Carbamidomethyl (C)]GSLAFSGDR_2                             | Q9QYR6_S2162_M1_Map1a | 9.6527 | 9.7548  | 9.7148  | 10.3740 | 9.1252 | 9.6454  | 9.9240  | 9.7308  | 9.9618  | 9.7846  | 0.9859 | -0.0205 | 0.5219 | 0.2824 |
| Map1a | _EES[Phospho (STY)]FEVKEVDIEK_2                                                   | #N/A                  | 6.9915 | 6.7818  | 6.6491  | 8.0042  | 6.5524 | 7.2270  | 7.6093  | 7.2685  | 7.3009  | 7.2461  | 0.9562 | -0.0645 | 0.2844 | 0.5461 |
| Map1a | _QEATPRS[Phospho (STY)]PC[Carbamidomethyl (C)]T[Phospho (STY)]KEQQLHK_3           | #N/A                  | 3.9365 | 6.8236  | 3.1125  | 7.3427  | 6.1309 | 7.1489  | 6.7848  | 6.8372  | 4.1419  | 6.1195  | 0.9632 | -0.0542 | 0.8377 | 0.0769 |
| Map1a | _WLAESPVLGPLEEEDKLTR_3                                                            | #N/A                  | 4.9709 | 6.1514  | 3.9022  | 10.7186 | 5.9168 | 6.3501  | 5.5249  | 10.1256 | 5.7962  | 5.5516  | 0.9386 | -0.0915 | 0.7874 | 0.1038 |
| Map1a | _EKEVVPDPEDK_2                                                                    | #N/A                  | 6.7704 | 6.5518  | 6.8870  | 6.8450  | 6.6533 | 6.9300  | 6.7624  | 6.5469  | 6.5597  | 6.5975  | 1.0236 | 0.0337  | 0.1002 | 0.9991 |
| Map1a | _HMQEALK_2                                                                        | #N/A                  | 4.9338 | 3.0974  | 3.1577  | 3.9203  | 2.9580 | 3.6389  | 3.8479  | 3.8818  | 4.1808  | 4.2975  | 0.9100 | -0.1361 | 0.3551 | 0.4496 |
| Map1a | _TEATQGLDYVPSAGTS[Phospho (STY)]PTSSLEEDK_3                                       | #N/A                  | 6.6419 | 5.9601  | 6.1243  | 7.4313  | 6.5462 | 6.5225  | 6.7488  | 6.5581  | 6.6241  | 6.3776  | 0.9940 | -0.0087 | 0.8870 | 0.0521 |
| Map1a | _APLSQSDSPNNGSTTSC[Carbamidomethyl (C)]GPRORT[Phospho (STY)]PS[Phospho (STY)]PK_4 | #N/A                  | 3.0444 | 4.2980  | 4.2789  | 3.8227  | 6.2670 | 3.6101  | 3.9709  | 10.4242 | 6.8993  | 9.5205  | 0.5478 | -0.8603 | 0.0261 | 1.5837 |
| Map1a | _RS[Phospho (STY)]PT[Phospho (STY)]PGQGPVDK_2                                     | #N/A                  | 5.9364 | 5.1886  | 5.4831  | 6.1316  | 6.2744 | 5.5122  | 5.9967  | 5.0873  | 5.1390  | 5.3499  | 1.0670 | 0.0935  | 0.2212 | 0.6553 |
| Map1a | _EAELEPENIAAAREES[Phospho (STY)]FEVKEVDIEK_4                                      | #N/A                  | 3.8756 | 3.6659  | 4.2751  | 3.8189  | 3.8755 | 3.8788  | 3.9671  | 8.1672  | 3.5113  | 3.4961  | 0.8024 | -0.1176 | 0.3227 | 0.4912 |
| Map1a | _KHS[Phospho (STY)]PGETGGGWHF[M]Oxidation (M)]TSSSGLTK_4                          | #N/A                  | 3.5196 | 5.7069  | 4.2812  | 7.2412  | 5.1406 | 5.0930  | 3.9684  | 6.5599  | 5.9629  | 5.6673  | 0.9321 | -0.1014 | 0.6444 | 0.1908 |
| Map1a | _S[Phospho (STY)]EEAE[Carbamidomethyl (C)]LTQLHUNK_2                              | Q9QYR6_S155_M1_Map1a  | 4.0806 | 3.2182  | 3.3864  | 5.4888  | 4.1105 | 3.3655  | 3.5017  | 4.4104  | 4.7792  | 4.3665  | 0.9251 | -0.1123 | 0.5274 | 0.2778 |
| Map1a | _EALTEPENIAAAREES[Phospho (STY)]FEVK_3                                            | #N/A                  | 3.8138 | 3.0693  | 3.5475  | 4.5921  | 2.9576 | 3.6670  | 3.5602  | 3.9099  | 5.8139  | 4.2893  | 0.8222 | -0.2825 | 0.1531 | 0.8152 |
| Map1a | _GDSALFAVNGNILVOGSDIR_2                                                           | #N/A                  | 3.2318 | 4.0369  | 3.9186  | 5.1591  | 3.8583 | 3.8712  | 4.1359  | 4.3614  | 2.2855  | 3.3362  | 1.1368 | 0.1850  | 0.3538 | 0.4512 |
| Map1a | _QEATPRS[Phospho (STY)]PC[Carbamidomethyl (C)]T[Phospho (STY)]PK_2                | #N/A                  | 7.2505 | 7.9147  | 7.4058  | 7.6785  | 6.2834 | 7.3356  | 7.3939  | 7.3160  | 7.4835  | 7.4813  | 0.9855 | -0.0210 | 0.7188 | 0.1434 |
| Map1a | _DQLSEK_2                                                                         | #N/A                  | 3.1435 | 3.0831  | 4.0666  | 3.6104  | 7.4169 | 3.3978  | 3.7586  | 3.3908  | 3.0619  | 3.2877  | 1.2208 | 0.2878  | 0.4074 | 0.9500 |
| Map1a | _PRYS[Phospho (STY)]EER_2                                                         | Q9QYR6_S1694_M1_Map1a | 3.8275 | 3.0829  | 3.3292  | 3.8319  | 2.9712 | 3.6534  | 3.5466  | 4.2866  | 3.9352  | 3.7989  | 0.8863 | -0.1741 | 0.0877 | 1.3707 |
| Map1a | _ELAS[Phospho (STY)]S[Phospho (STY)]PEDLTQDFEEK_2                                 | #N/A                  | 3.2583 | 4.0635  | 3.9451  | 4.0572  | 3.8848 | 3.8446  | 4.2054  | 3.6707  | 3.3193  | 4.4148  | 0.9846 | -0.0225 | 0.8153 | 0.0887 |
| Map1a | _SPEQVR_2                                                                         | #N/A                  | 3.1686 | 4.1016  | 3.8554  | 4.3580  | 4.4414 | 3.9394  | 4.0727  | 4.0895  | 3.6680  | 4.1803  | 0.9937 | -0.0091 | 0.0322 | 0.0352 |
| Map1a | _APDS[Phospho (STY)]GAEVERKEETWEER_3                                              | #N/A                  | 4.0866 | 3.2558  | 3.8203  | 4.5613  | 3.0771 | 3.1515  | 3.5123  | 3.6371  | 3.9362  | 3.0413  | 1.0360 | 0.0510  | 0.7170 | 0.1445 |
| Map1a | _AELEEM[Oxidation (M)]EEVHPS[Phospho (STY)]DEEEETKAESFYQK_4                       | #N/A                  | 3.5018 | 5.3788  | 6.4691  | 3.9188  | 6.1110 | 3.7210  | 4.0818  | 3.9239  | 3.8858  | 3.5470  | 1.2566 | 0.3296  | 0.1772 | 0.7172 |
| Map1a | _DSVMHQIDEALDEENKPGGQDQK_4                                                        | #N/A                  | 4.3281 | 3.4223  | 3.3695  | 4.9386  | 3.7950 | 3.9630  | 3.3000  | 4.9508  | 3.9086  | 3.8392  | 0.9924 | -0.0110 | 0.9426 | 0.0257 |
| Map1a | _TEATQGLDYVPSAGTS[Phospho (STY)]PTSSLEEDKGFK_4                                    | #N/A                  | 3.4697 | 5.1979  | 5.8626  | 4.4420  | 3.4481 | 3.8340  | 3.7271  | 5.5250  | 3.9405  | 4.2735  | 1.0021 | 0.0030  | 0.9881 | 0.0052 |
| Map1a | _DEAS[Phospho (STY)]EEKEQVLEQK_2                                                  | #N/A                  | 2.9837 | 4.3587  | 4.2182  | 4.9824  | 4.1801 | 3.5494  | 3.9102  | 3.2392  | 6.3541  | 2.5056  | 1.0108 | 0.0155  | 0.9555 | 0.0198 |
| Map1a | _FPTSTYDLSGPGGPGPEFASQSAVASPPSK_3                                                 | #N/A                  | 4.2164 | 2.6400  | 3.9501  | 3.4429  | 3.3602 | 3.2644  | 3.1576  | 1.5439  | 4.3242  | 3.4099  | 1.1191 | 0.1623  | 0.5107 | 0.2919 |
| Map1a | _SLFEQK_2                                                                         | #N/A                  | 2.9704 | 3.7756  | 3.3004  | 4.3450  | 3.5970 | 4.1325  | 4.4933  | 4.1570  | 2.9552  | 4.0223  | 0.9437 | -0.0837 | 0.5689 | 0.2450 |
| Map1a | _DRDITLQQDAYWK_3                                                                  | #N/A                  | 3.2815 | 4.0867  | 3.9683  | 4.4710  | 3.9800 | 3.8214  | 4.1822  | 3.6475  | 3.2961  | 4.4380  | 1.0082 | 0.0118  | 0.9134 | 0.0394 |
| Map1a | _EQKDEAS[Phospho (STY)]EEKEQVLEQK_3                                               | #N/A                  | 3.7749 | 3.0793  | 4.4617  | 3.5405  | 2.9006 | 3.3280  | 3.6888  | 3.4606  | 3.7597  | 3.2178  | 0.9950 | -0.0072 | 0.9551 | 0.0200 |
| Map1a | _DKT[Phospho (STY)]PEEKDK_2                                                       | Q9QYR6_T1472_M1_Map1a | 4.1899 | 3.4943  | 3.3759  | 4.6264  | 3.3156 | 4.4139  | 3.2738  | 3.8756  | 4.1747  | 3.8455  | 1.0291 | 0.0413  | 0.7463 | 0.1271 |
| Pcd   | _EHKENPELVLDLS[Phospho (STY)]PR_3                                                 | #N/A                  | 8.7552 | 5.9485  | 9.7557  | 9.6130  | 8.7679 | 9.5559  | 9.6889  | 9.3037  | 9.3787  | 9.3913  | 0.9886 | -0.0166 | 0.6630 | 0.1781 |
| Pcd   | _ENPELVLDLS[Phospho (STY)]PR_2                                                    | #N/A                  | 9.1957 | 10.1332 | 9.9310  | 10.8495 | 9.3971 | 10.3267 | 10.6085 | 10.1819 | 10.3256 | 10.4826 | 0.9589 | -0.0606 | 0.2177 | 0.6621 |
| Pcd   | _TPQPKV[Phospho (STY)]PEQPDQDQK_2                                                 | #N/A                  | 8.1944 | 8.5742  | 9.4012  | 9.1098  | 8.8124 | 9.3001  | 8.8116  | 9.3001  | 9.0614  | 9.0887  | 0.9775 | -0.0328 | 0.4236 | 0.3726 |
| Pcd   | _SPVPSSQAS[Phospho (STY)]PK_2                                                     | #N/A                  | 9.6110 | 9.3066  | 9.2909  | 9.9015  | 8.9905 | 9.4465  | 9.7250  | 9.1753  | 9.2627  | 9.7012  | 0.9956 | -0.0063 | 0.8367 | 0.0774 |
| Pcd   | _SHSSQNQS[Phospho (STY)]PKPSPVK_3                                                 | #N/A                  | 7.5665 | 7.0188  | 7.9721  | 7.7979  | 6.7590 | 5.4980  | 7.4224  | 7.3178  | 7.3408  | 7.4670  | 0.9614 | -0.0568 | 0.5578 | 0.2535 |
| Pcd   | _AKS[Phospho (STY)]PGVDPK_2                                                       | Q9QYK7_S4544_M1_Pcd   | 7.9512 | 8.3162  | 8.5991  | 8.4043  | 6.4821 | 8.1093  | 8.0761  | 7.9256  | 7.7159  | 8.0144  | 1.0055 | 0.0080  | 0.9143 | 0.0389 |
| Pcd   | _SLVSLPEKPS[Phospho (STY)]EEEK_3                                                  | Q9QYK7_S1149_M1_Pcd   | 7.5336 | 7.7358  | 8.0650  | 8.5603  | 7.0164 | 7.4733  | 8.0614  | 7.9336  | 7.7099  | 7.6672  | 0.9857 | -0.0208 | 0.7003 | 0.1547 |
| Pcd   | _SPVPSSQAS[Phospho (STY)]PKKELPSK_3                                               | #N/A                  | 7.7704 | 7.5989  | 8.2534  | 8.7889  | 7.3752 | 4.2886  | 4.1818  | 7.8287  | 7.3977  | 7.9808  | 1.0728 | 0.1014  | 0.6549 | 0.1838 |
| Pcd   | _S[Phospho (STY)]QEVDFLARLQTSR_2                                                  | Q9QYK7_S4016_M1_Pcd   | 6.6697 | 7.7817  | 3.8781  | 8.9711  | 6.7931 | 6.2177  | 7.4361  | 8.1941  | 8.7863  | 6.8760  | 1.0186 | 0.0265  | 0.9176 | 0.0385 |
| Pcd   | _SS[Phospho (STY)]TS[Phospho (STY)]FOODAGR_2                                      | #N/A                  | 7.2738 | 7.0907  | 7.1830  | 7.5656  | 5.8481 | 6.9480  | 6.9650  | 7.0546  | 7.1842  | 7.3398  | 0.9788 | -0.0309 | 0.6391 | 0.1944 |
| Pcd   | _SEGITKPSLQDS[Phospho (STY)]PK_2                                                  | #N/A                  | 9.0681 | 9.0094  | 9.7032  | 9.5781  | 8.4034 | 9.2057  | 8.9538  | 8.8368  | 8.8777  | 9.0771  | 1.0252 | 0.0359  | 0.3766 | 0.4241 |
| Pcd   | _SQPTT[Phospho (STY)]QEVTVGK_2                                                    | Q9QYK7_T860_M1_Pcd    | 9.3178 | 3.2033  | 3.2101  | 8.9708  | 3.1633 | 10.0072 | 8.9515  | 8.4723  | 8.7357  | 10.1771 | 0.6948 | -0.5252 | 0.1575 | 0.8027 |
| Pcd   | _LTQHFTSEFEEDVVDYTR_3                                                             | #N/A                  | 3.1663 | 7.4286  | 8.0696  | 8.5956  | 6.7507 | 7.4573  | 7.6342  | 7.2256  | 6.8398  | 7.4848  | 0.9473 | -0.0782 | 0.7102 | 0.1486 |
| Pcd   | _ELPSKQDS[Phospho (STY)]PKAPESK_2                                                 | #N/A                  | 3.8187 | 3.7718  | 3.6972  | 6.6664  | 3.6321 | 4.3194  | 3.9146  | 6.0218  | 3.6142  | 4.1669  | 0.9748 | -0.0369 | 0.8833 | 0.0539 |
| Pcd   | _YNS[Phospho (STY)]LDLR_2                                                         | Q9QYK7_S3936_M1_Pcd   | 2.9142 | 2.9274  | 4.1487  | 3.6925  | 6.5016 | 3.0658  | 3.8407  | 3.3087  | 6.6077  | 8.8362  | 0.8810 | -0.1828 | 0.5991 | 0.2225 |
| Pcd   | _SSTS[Phospho (STY)]FOODAGR_2                                                     | #N/A                  | 3.1336 | 3.9388  | 3.1373  | 4.1819  | 3.7601 | 3.9694  | 4.3302  | 4.3201  | 3.1183  | 3.8592  | 0.9437 | -0.0837 | 0.5120 | 0.2907 |
| Pcd   | _ITQPKQV[Phospho (STY)]PEQPDQDQK_2                                                | #N/A                  | 6.9899 | 7.1568  | 7.7881  | 7.7993  | 7.1344 | 7.5179  | 7.7879  | 7.4277  | 7.7477  | 7.2294  | 0.9889 | -0.0161 | 0.6919 | 0.1599 |
| Pcd   | _DSFSQESSPS[Phospho (STY)]PSDLAK_2                                                | #N/A                  | 9.8982 | 10.1680 | 10.6031 | 10.4108 | 9.6599 | 10.1969 | 10.5454 | 9.8429  | 10.0592 | 10.1484 | 1.0007 | 0.0010  | 0.9734 | 0.0117 |
| Pcd   | _KIVDSGVQT[Phospho (STY)]DOEETADR_2                                               | #N/A                  | 5.2119 | 3.7032  | 5.1087  | 6.4405  | 3.6429 | 3.8292  | 5.8156  | 3.6885  | 5.5625  | 3.8280  | 0.9857 | -0.0208 | 0.9280 | 0.0325 |
| Pcd   | _RS[Phospho (STY)]PQESR_2                                                         | #N/A                  | 6.5083 | 5.7331  | 6.4378  | 6.6483  | 6.2320 | 5.9802  | 6.6664  | 6.0671  | 6.1322  | 6.4606  | 0.9882 | -0.0172 | 0.7292 | 0.1371 |
| Pcd   | _VVKLTAVLSLS[Phospho (STY)]PTDEQSGVM[Oxidation (M)]QK_3                           | #N/A                  | 4.1479 | 3.4522  | 7.2492  | 3.8365  | 5.3502 | 2.9551  | 3.3159  | 7.1988  | 6.2834  | 4.6278  | 0.8    |         |        |        |



|         |                                                                             |                       |         |         |         |         |        |        |         |         |         |        |         |         |        |        |
|---------|-----------------------------------------------------------------------------|-----------------------|---------|---------|---------|---------|--------|--------|---------|---------|---------|--------|---------|---------|--------|--------|
| Pcdo    | _ADPTVQLAPS[Phospho (STY)]PPKS[Phospho (STY)]PK_2                           | #N/A                  | 8.6709  | 9.4060  | 9.5248  | 9.7175  | 8.4758 | 9.2887 | 9.8079  | 9.1454  | 9.3288  | 9.4816 | 0.9724  | -0.0403 | 0.3731 | 0.4282 |
| Pcdo    | _LVDGSGVQ[Phospho (STY)]DDEETADR_2                                          | #N/A                  | 9.5870  | 9.4551  | 9.9672  | 10.3241 | 8.8433 | 9.5541 | 9.7994  | 9.6475  | 9.6258  | 9.6334 | 0.9943  | -0.0082 | 0.8370 | 0.0773 |
| Pcdo    | _LPTAVSLV[Phospho (STY)]SPTEDEGSM[Oxidation (M)]IQK_2                       | #N/A                  | 6.5767  | 8.7493  | 4.0815  | 8.5739  | 6.5856 | 7.7192 | 7.2686  | 6.1879  | 7.4991  | 7.5649 | 0.9237  | -0.1146 | 0.5333 | 0.2730 |
| Pcdo    | _ERPKT[Phospho (STY)]PPSP[Phospho (STY)]NLSPIEDAS[Phospho (STY)]PTELR_3     | #N/A                  | 3.7082  | 3.9390  | 3.4917  | 7.6243  | 5.1656 | 3.5766 | 3.4670  | 4.0818  | 4.9563  | 4.0520 | 1.1075  | 0.1473  | 0.6177 | 0.2092 |
| Pcdo    | _KSS[Phospho (STY)]TSP[Phospho (STY)]FODDAGR_2                              | #N/A                  | 6.1349  | 6.1148  | 5.9330  | 3.8254  | 3.4637 | 3.5497 | 6.2354  | 6.1356  | 5.9774  | 6.1011 | 0.7913  | -0.3736 | 0.1014 | 0.9941 |
| Pcdo    | _T[Phospho (STY)]PPAVATDQK_2                                                | Q9QYX7_T1120_M1_Pcdo  | 3.4432  | 4.2484  | 4.1300  | 3.1319  | 4.0698 | 3.6597 | 4.3474  | 3.4658  | 3.1344  | 3.0989 | 1.0750  | 0.1044  | 0.4356 | 0.3609 |
| Pcdo    | _GAHANSGPTASGSSVPS[Phospho (STY)]PGGPGS[Phospho (STY)]PSVSK_3               | Q9QYX7_S4592_M2_Pcdo  | 4.2452  | 6.7419  | 6.4197  | 8.8382  | 5.2859 | 4.8350 | 6.0996  | 7.1299  | 5.7087  | 4.0502 | 1.0546  | 0.0767  | 0.7581 | 0.1203 |
| Pcdo    | _TSGS[Phospho (STY)]PPPTGDTLDSK_2                                           | Q9QYX7_S748_M1_Pcdo   | 3.9914  | 7.3107  | 3.7251  | 3.2688  | 3.1351 | 3.4895 | 9.3168  | 8.0307  | 8.0215  | 8.6640 | 0.4882  | -1.0346 | 0.0008 | 0.3731 |
| Pcdo    | _ETGGGLEVLDAVK_2                                                            | #N/A                  | 4.0758  | 3.3079  | 4.6051  | 2.4570  | 3.1962 | 3.4284 | 3.3216  | 3.8589  | 4.1602  | 3.5739 | 0.9418  | -0.0865 | 0.6078 | 0.2162 |
| Pcdo    | _AYLQGVADREYD[Phospho (STY)]M[Oxidation (M)]SOSEVSSTRPSR_3                  | #N/A                  | 3.9470  | 7.1446  | 3.4939  | 7.1727  | 6.4748 | 7.1948 | 7.3126  | 6.9488  | 3.6788  | 0.9458 | -0.0804 | 0.7680  | 0.1147 | 0.1147 |
| Pcdo    | _S[Phospho (STY)]RSHGFFDPSK_3                                               | Q9QYX7_S4782_M1_Pcdo  | 4.1202  | 3.4246  | 3.3062  | 3.8088  | 3.2459 | 2.9827 | 3.3435  | 4.3096  | 3.9582  | 3.7758 | 0.9050  | -0.1440 | 0.2038 | 0.6909 |
| Pcdo    | _GSVPAAAE[Phospho (STY)]PSMHRK_2                                            | #N/A                  | 2.9646  | 2.9869  | 3.8651  | 5.2917  | 3.2751 | 3.3495 | 3.5571  | 3.5923  | 3.8914  | 3.0861 | 1.0256  | 0.0365  | 0.8517 | 0.0697 |
| Pcdo    | _S[Phospho (STY)]RTDFKEEV_2                                                 | #N/A                  | 3.5050  | 4.2663  | 3.8393  | 4.0457  | 3.6812 | 3.5690 | 3.9265  | 3.7806  | 3.6923  | 3.9345 | 0.9959  | -0.0059 | 0.9227 | 0.0349 |
| Pcdo    | _KTLTYFDEEPELM[Oxidation (M)]ESLTD[Phospho (STY)]PEDR_3                     | #N/A                  | 2.9051  | 2.9365  | 4.1396  | 6.6597  | 5.4754 | 3.4709 | 3.7900  | 7.0947  | 6.2506  | 3.3607 | 0.8323  | -0.2649 | 0.4402 | 0.3563 |
| Pcdo    | _QAELEEEKEIDAK_2                                                            | #N/A                  | 1.2139  | 3.6620  | 3.4141  | 4.4587  | 1.7403 | 4.2462 | 3.1061  | 4.0433  | 0.8625  | 4.1360 | 1.0282  | 0.0401  | 0.9275 | 0.0327 |
| Pcdo    | _RASVDSVEDSSEENS[Phospho (STY)]PVAR_3                                       | #N/A                  | 3.1762  | 3.9814  | 5.1908  | 4.2137  | 4.7413 | 3.9280 | 4.1446  | 4.1328  | 4.2179  | 4.0543 | 1.0164  | 0.0235  | 0.8543 | 0.0684 |
| Pcdo    | _SIS[Phospho (STY)]M[Oxidation (M)]EQLMK_2                                  | Q9QYX7_S4706_M1_Pcdo  | 3.5785  | 4.4436  | 4.2653  | 5.7495  | 4.2050 | 3.0887 | 4.6855  | 3.3505  | 2.9991  | 3.2341 | 1.1835  | 0.2430  | 0.2684 | 0.5712 |
| Pcdo    | _DYMS[Phospho (STY)]DSEVSTRPSR_2                                            | #N/A                  | 4.4119  | 3.3691  | 3.3950  | 5.1718  | 3.2924 | 3.8357 | 3.3501  | 4.1624  | 4.1260  | 4.0074 | 1.0003  | 0.0004  | 0.9977 | 0.0010 |
| Pcdo    | _DIAMIFDDPHAM[Oxidation (M)]S[Phospho (STY)]DSEAYHLR_3                      | Q9QYX7_S4358_M1_Pcdo  | 3.1253  | 3.8816  | 4.3598  | 5.9443  | 3.7699 | 4.3556 | 4.0519  | 3.0976  | 3.3966  | 3.5809 | 1.2004  | 0.2635  | 0.2031 | 0.6923 |
| Pcdo    | _AEDGS[Phospho (STY)]MEDPVELK_2                                             | Q9QYX7_S4042_M1_Pcdo  | 4.0256  | 3.2005  | 3.2116  | 3.7142  | 3.1513 | 3.0773 | 3.4289  | 4.4042  | 4.0528  | 3.6812 | 0.8728  | -0.1963 | 0.0913 | 1.0394 |
| Pcdo    | _RHS[Phospho (STY)]WHDODETDESPELK_4                                         | Q9QYX7_S1563_M1_Pcdo  | 3.5568  | 2.7432  | 4.4802  | 3.7670  | 3.4651 | 3.8666 | 3.8820  | 4.5511  | 3.3375  | 5.3993 | 0.8883  | -0.1708 | 0.2609 | 0.5835 |
| Pcdo    | _SPSTG[Phospho (STY)]LK_2                                                   | Q9QYX7_S131_M1_Pcdo   | 3.8362  | 3.5062  | 3.5699  | 4.6145  | 3.275  | 4.4020 | 3.2620  | 3.8875  | 4.1865  | 4.2918 | 0.9921  | -0.0115 | 0.9601 | 0.0334 |
| Pcdo    | _TSVACIHLIEDAGAAAEEAVQQLR_3                                                 | #N/A                  | 3.0064  | 4.3361  | 4.2409  | 3.7846  | 4.1574 | 3.5721 | 2.6738  | 2.2774  | 3.5156  | 1.2280 | 1.5883  | 0.6675  | 0.0140 | 1.8539 |
| Pcdo    | _TTLTYFDEEPELEM[Oxidation (M)]ESLTD[Phospho (STY)]PEDR_3                    | #N/A                  | 3.7020  | 2.9574  | 3.4356  | 3.9574  | 2.8457 | 3.7789 | 3.6721  | 4.1611  | 3.8097  | 3.9244 | 0.8855  | -0.1754 | 0.1081 | 0.9661 |
| Pcdo    | _SPS[Phospho (STY)]TSG[Phospho (STY)]LKESK_2                                | Q9QYX7_S128_M2_Pcdo   | 3.6582  | 2.9625  | 4.3450  | 3.6573  | 2.7838 | 3.4448 | 3.8056  | 3.3438  | 3.6429  | 3.3346 | 0.9840  | -0.0233 | 0.8553 | 0.0679 |
| Pcdo    | _GSLG[C]Carbamidomethyl (C)]QTETPDQTQS[Phospho (STY)]PPYMGATSPPK_3          | Q9QYX7_S3506_M1_Pcdo  | 4.1440  | 3.4484  | 3.3300  | 4.9191  | 3.2697 | 2.9590 | 3.3198  | 3.8297  | 4.1287  | 3.3496 | 0.9415  | -0.0870 | 0.5915 | 0.2281 |
| Pcdo    | _KSVDTSVQT[Phospho (STY)]DEDDQDEWD[M[Oxidation (M)]PSR_3                    | #N/A                  | 4.0356  | 3.2910  | 3.5109  | 3.4484  | 3.1793 | 3.4459 | 3.3391  | 4.1173  | 3.5920  | 3.3513 | 0.9681  | -0.0467 | 0.5973 | 0.2281 |
| Pcdo    | _LPS[Phospho (STY)]PT[Phospho (STY)]SPSPSHNK_2                              | Q9QYX7_S2489_M2_Pcdo  | 2.9654  | 3.7217  | 4.2000  | 3.7437  | 3.6100 | 3.0146 | 4.4086  | 3.2574  | 3.5565  | 3.4210 | 0.9677  | -0.0474 | 0.7174 | 0.1442 |
| Pcdo    | _LPSPTSPSPSHNS[Phospho (STY)]SS[Phospho (STY)]PR_3                          | Q9QYX7_S2501_M2_Pcdo  | 2.9332  | 3.7384  | 3.3377  | 4.3823  | 3.5597 | 4.1698 | 4.5306  | 4.1197  | 4.4188  | 4.0596 | 0.8610  | -0.2160 | 0.0718 | 1.1440 |
| Pcdo    | _TPPSNLS[Phospho (STY)]PIEDAS[Phospho (STY)]PTELRQAEM[Oxidation (M)]EELHR_4 | #N/A                  | 4.3852  | 3.6896  | 4.5712  | 4.4311  | 3.5109 | 4.2186 | 3.0785  | 4.0709  | 4.3700  | 4.1084 | 1.0156  | 0.0223  | 0.8501 | 0.0705 |
| Pcdo    | _KQHEH[Oxidation (M)]SAEDAS[Phospho (STY)]GSEDEFIR_3                        | Q9QYX7_S1505_M1_Pcdo  | 3.3266  | 3.8995  | 4.0314  | 5.161   | 3.7878 | 4.2308 | 3.6024  | 3.2510  | 3.2823  | 1.1318 | 0.1787  | 0.1643  | 0.7844 | 0.1463 |
| Pcdo    | _SSGEHLRS[Phospho (STY)]HGPS[Phospho (STY)]JR_3                             | Q9QYX7_S4820_M2_Pcdo  | 4.2654  | 3.0770  | 3.9991  | 3.5428  | 2.8983 | 3.3303 | 3.6911  | 3.4583  | 3.7574  | 3.2201 | 0.9963  | -0.0053 | 0.9652 | 0.0154 |
| Gab1    | _SVS[Phospho (STY)]HDVLPK_2                                                 | Q9QYQY_S266_M1_Gab1   | 4.3247  | 4.4023  | 3.5107  | 4.0133  | 2.8904 | 4.2791 | 3.7280  | 6.6969  | 3.7537  | 3.9803 | 0.8804  | -0.1838 | 0.3989 | 0.3991 |
| Gab1    | _SSS[Phospho (STY)]LEGHSQYK_2                                               | Q9QYQY_S420_M1_Gab1   | 6.7691  | 3.6458  | 4.2672  | 3.2690  | 4.2069 | 3.9095 | 4.4845  | 3.3486  | 2.9972  | 3.2360 | 1.1966  | 0.2590  | 0.3733 | 0.4280 |
| Gab1    | _SVLTAGVGSEGLDENVPYM[Oxidation (M)]NPN[Phospho (STY)]PPR_3                  | 3.2589                | 4.1357  | 4.7774  | 5.6254  | 3.8954  | 4.0409 | 3.9948 | 3.8386  | 3.4872  | 5.8376  | 0.9610 | -0.0574 | 0.7813  | 0.1072 | 0.1072 |
| Spast   | _SVS[Phospho (STY)]PQTLFAYR_2                                               | Q9QYR_S595_M1_Spast   | 8.5076  | 8.6551  | 8.8694  | 3.8694  | 8.1335 | 8.5355 | 8.9622  | 8.6386  | 8.5704  | 8.3840 | 0.8985  | -0.1544 | 0.3994 | 0.3986 |
| Spast   | _SSGTAPAPAS[Phospho (STY)]TSP[Phospho (STY)]PEPFGGGEAESVR_3                 | Q9QYR_S101_M2_Spast   | 4.0243  | 3.2019  | 3.2102  | 5.6079  | 3.1500 | 3.5344 | 4.7756  | 4.4056  | 4.0542  | 3.6799 | 0.8958  | -0.1588 | 0.4208 | 0.3759 |
| Tollp   | _GPVYQELPQDLR_2                                                             | #N/A                  | 6.4832  | 6.5599  | 6.4715  | 6.5815  | 6.5692 | 6.4257 | 6.8764  | 6.6530  | 6.6676  | 6.6197 | 0.9718  | -0.0413 | 0.0100 | 1.9984 |
| Tollp   | _LSTVQAK_2                                                                  | #N/A                  | 4.7305  | 4.5538  | 5.3794  | 5.8239  | 5.4727 | 5.0984 | 4.0092  | 5.2585  | 4.3617  | 5.4178 | 1.0871  | 0.1205  | 0.2876 | 0.5412 |
| Tollp   | _GGQVEDEWYSLSGR_2                                                           | #N/A                  | 4.5648  | 5.9098  | 3.4777  | 3.9803  | 3.4174 | 6.0741 | 3.6950  | 6.4128  | 3.7867  | 3.9473 | 1.0247  | 0.0352  | 0.8928 | 0.0493 |
| Nagk    | _Acetyl (Protein N-term)]AALYGVEGGGTR_2                                     | #N/A                  | 2.9034  | 3.6597  | 4.1379  | 4.4042  | 4.4358 | 4.9151 | 3.8300  | 3.3195  | 3.6185  | 4.6838 | 1.0552  | 0.0775  | 0.6323 | 0.1991 |
| Nagk    | _LUELR_2                                                                    | #N/A                  | 3.1021  | 2.4328  | 3.6489  | 4.1515  | 3.4336 | 3.8274 | 3.8662  | 3.9670  | 3.0981  | 4.1185 | 0.9124  | -0.1323 | 0.3829 | 0.4169 |
| Nagk    | _SLGLSL[Phospho (STY)]GGGEQDAVR_2                                           | Q9QZ08_S76_M1_Nagk    | 4.1296  | 3.3851  | 3.8633  | 3.4071  | 3.2734 | 3.3513 | 3.5553  | 3.5941  | 3.8932  | 3.0843 | 1.0103  | 0.0148  | 0.8723 | 0.0593 |
| Nfu1    | _LRPTVQEDGGVYVR_3                                                           | #N/A                  | 2.2936  | 4.0488  | 4.5281  | 4.9229  | 4.7003 | 3.4055 | 4.2201  | 2.7536  | 3.2284  | 3.6348 | 1.1997  | 0.2626  | 0.1445 | 0.8401 |
| Nfu1    | _GFEDGVR_2                                                                  | #N/A                  | 3.1549  | 4.1875  | 4.3895  | 3.9332  | 3.7995 | 4.3259 | 4.0815  | 3.0680  | 3.3670  | 3.6105 | 1.1227  | 0.1670  | 0.1711 | 0.7667 |
| Vps29   | _IQHL[C]Carbamidomethyl (C)]TGNLC[Carbamidomethyl (C)]TK_3                  | 5.4368                | 5.7741  | 5.6639  | 6.1278  | 5.3412  | 5.7895 | 5.0002 | 5.8404  | 6.0832  | 5.7723  | 1.0026 | 0.0038  | 0.9509  | 0.0219 | 0.0219 |
| Vps29   | _VTVVGQFK_2                                                                 | #N/A                  | 5.5873  | 5.9002  | 5.9343  | 6.2209  | 5.9285 | 5.9127 | 4.7651  | 5.9758  | 5.9065  | 5.4577 | 1.0702  | 0.0978  | 0.1490 | 0.8267 |
| Vps29   | _TLADGVHVR_2                                                                | #N/A                  | 5.3931  | 5.7080  | 5.3061  | 6.2797  | 6.3629 | 6.1299 | 5.9729  | 6.2682  | 6.0858  | 6.2719 | 0.9534  | -0.0688 | 0.2685 | 0.5710 |
| Vps29   | _FEAFENIK_2                                                                 | #N/A                  | 5.7289  | 4.5364  | 4.1909  | 5.9386  | 5.7450 | 5.4230 | 4.8072  | 5.1978  | 5.0869  | 3.4119 | 1.1372  | 0.1854  | 0.2335 | 0.6316 |
| Rgs20   | _ARAS[Phospho (STY)]PSASPADRGLEGGSR_3                                       | Q9QZB1_S13_M1_Rgs20   | 6.5160  | 6.1794  | 3.7745  | 3.5897  | 3.3242 | 5.8902 | 6.0016  | 6.4856  | 4.9173  | 5.8130 | 0.8406  | -0.2506 | 0.2752 | 0.5604 |
| Rgs20   | _NQEDQRPORAS[Phospho (STY)]HEIR_3                                           | Q9QZB1_S86_M1_Rgs20   | 2.7340  | 4.3801  | 3.5684  | 2.6877  | 2.9245 | 3.8570 | 4.5504  | 3.5459  | 3.3637  | 2.3553 | 0.9724  | -0.0403 | 0.8536 | 0.0687 |
| Actr10  | _RAFS[Phospho (STY)]TEK_2                                                   | Q9QZB7_S414_M1_Actr10 | 3.3975  | 4.1794  | 4.4484  | 3.9922  | 4.0327 | 3.9171 | 4.1405  | 3.8955  | 7.1481  | 3.6695 | 0.8475  | -0.2387 | 0.3146 | 0.5022 |
| Actr10  | _DSVVEIFEGDNEEK_2                                                           | #N/A                  | 5.4696  | 3.0031  | 6.1933  | 3.3873  | 5.0417 | 5.6084 | 6.0231  | 4.7208  | 5.1809  | 5.1167 | 0.9094  | -0.1370 | 0.5112 | 0.2914 |
| Plnc1   | _KDS[Phospho (STY)]QLELLESIRK_3                                             | Q9QZC2_S984_M1_Plnc1  | 3.4425  | 5.3676  | 6.2739  | 6.3826  | 3.6720 | 4.7950 | 5.3601  | 6.2932  | 5.7846  | 3.0981 | 0.9717  | -0.0413 | 0.8687 | 0.0611 |
| Erc4    | _TSS[Phospho (STY)]PEVGETTK_2                                               | Q9QZD4_S363_M1_Erc4   | 6.9753  | 3.9964  | 6.8543  | 4.4192  | 5.6306 | 6.4814 | 6.9349  | 6.9338  | 6.3850  | 6.6927 | 0.8500  | -0.2344 | 0.1633 | 0.7871 |
| Chml    | _S[Phospho (STY)]SPLEASATPADDSLSLSPK_2                                      | Q9QZD5_S122_M1_Chml   | 4.0489  | 3.1772  | 3.2349  | 5.5097  | 3.0655 | 3.4522 | 4.3809  | 4.0295  | 3.7046  | 0.9676 | 0.9676  | -0.0474 | 0.8069 | 0.0632 |
| Chml    | _LVQDS[Phospho (STY)]EGPKR_2                                                | #N/A                  | 5.6430  | 5.8923  | 5.6784  | 6.4423  | 4.3266 | 6.0181 | 5.9366  | 5.8624  | 6.0936  | 5.9888 | 0.9492  | -0.0753 | 0.4334 | 0.3631 |
| Serinc1 | _LTLTS[Phospho (STY)]DESTDGNGR_2                                            | Q9QZB_S348_M1_Serinc1 | 4.8482  | 3.4841  | 4.0056  | 3.6800  | 3.3460 | 3.7058 | 3.5164  | 6.1341  | 4.0010  | 4.0588 | 0.8684  | -0.2036 | 0.3088 | 0.5103 |
| Serinc1 | _SDGS[Phospho (STY)]DGGDGHK_2                                               | Q9QZB_S364_M1_Serinc1 | 10.2123 | 10.0879 | 10.7307 | 10.1444 | 9.0452 | 9.9807 | 10.6523 | 10.4026 | 10.0616 | 9.9400 | 0.9761  | -0.0349 | 0.4510 | 0.3458 |
| Dkl1    | _GAREDS[Phospho (STY)]LEDGVHPQHAH_4                                         | Q9QZL9_S200_M1_Dkl1   | 3.1163  | 3.1058  | 4.3508  | 3.8946  | 3.7609 | 3.3624 | 4.0428  | 3.1066  | 1.6636  | 2.9579 | 1.2228  | 0.2902  | 0.1929 | 0.7146 |
| Ubqln2  | _GPAAPAGAS[Phospho (STY)]PPAEK_2                                            | Q9QZM0_S25_M1_Ubqln2  | 13.0367 | 13.3    |         |         |        |        |         |         |         |        |         |         |        |        |



|        |                                                                             |                        |         |         |         |         |        |         |         |         |         |         |         |         |        |        |
|--------|-----------------------------------------------------------------------------|------------------------|---------|---------|---------|---------|--------|---------|---------|---------|---------|---------|---------|---------|--------|--------|
| Hipk2  | _AVC[Carbamidomethyl (C)]STY[Phospho (STY)]LQSR_2                           | Q9QZR5_Y361_M1_Hipk2   | 7.5849  | 7.2803  | 7.6016  | 7.3305  | 6.8735 | 7.0022  | 7.8720  | 7.2857  | 3.0693  | 7.6362  | 1.1257  | 0.1709  | 0.3991 | 0.3990 |
| Hipk2  | _NVSTC[Carbamidomethyl (C)]EVTSQSAISS[Phospho (STY)]PQR_2                   | Q9QZR5_S827_M1_Hipk2   | 2.9877  | 3.7929  | 3.6745  | 4.1772  | 3.6143 | 4.1152  | 4.4760  | 3.9413  | 3.5899  | 4.1442  | 0.9230  | -0.1156 | 0.2720 | 0.5654 |
| Rnf4   | _LRQDHADSC[Carbamidomethyl (C)]VYSP[Phospho (STY)]S[Phospho (STY)]DDEELSR_3 | Q9QZS2_S58_M2_Rnf4     | 3.3548  | 3.8714  | 4.0416  | 4.5442  | 3.9568 | 3.7482  | 4.0395  | 3.5743  | 3.2228  | 3.0104  | 1.1322  | 0.1792  | 0.1243 | 0.9055 |
| Numb   | _TNPS[Phospho (STY)]PTNPFSSQCK_2                                            | Q9QZS3_S636_M1_Numb    | 9.3498  | 9.2815  | 9.5524  | 9.5626  | 8.1523 | 9.9376  | 9.1668  | 9.0399  | 9.0099  | 9.1131  | 1.0147  | 0.0211  | 0.6381 | 0.1951 |
| Numb   | _RTSPS[Phospho (STY)]EADR_2                                                 | Q9QZS3_S440_M1_Numb    | 3.5935  | 3.7489  | 3.3272  | 4.3718  | 3.5702 | 4.1593  | 4.5201  | 4.1302  | 4.4293  | 4.0491  | 0.8863  | -0.1742 | 0.0582 | 1.2354 |
| Sh2d3c | _TASPA[Phospho (STY)]PSGSK_2                                                | Q9QZS8_S341_M1_Sh2d3c  | 2.9061  | 3.7113  | 3.5929  | 4.0956  | 3.5327 | 4.1968  | 4.5576  | 4.0229  | 3.6715  | 4.0626  | 0.9004  | -0.1513 | 0.1800 | 0.7446 |
| Sh2d3c | _VHAPSATPSTSAQPAS[Phospho (STY)]PVAR_3                                      | Q9QZS8_S435_M1_Sh2d3c  | 5.2276  | 4.4222  | 3.3996  | 4.4443  | 2.8097 | 3.8149  | 3.0917  | 4.0578  | 4.3568  | 4.1215  | 1.0289  | 0.0411  | 0.8241 | 0.0840 |
| Sh2d3c | _S[Phospho (STY)]TMTDGLTDR_2                                                | Q9QZS8_S354_M1_Sh2d3c  | 3.2098  | 4.1326  | 4.4443  | 3.9881  | 3.8544 | 4.7711  | 4.1363  | 3.0131  | 3.3122  | 3.6654  | 1.1279  | 0.1363  | 0.1601 | 0.7956 |
| Atp11c | _RAS[Phospho (STY)]DLSAR_2                                                  | Q9QZW0_S1105_M1_Atp11c | 3.8772  | 3.4652  | 3.6108  | 3.1546  | 3.0209 | 2.9421  | 3.3029  | 3.8466  | 4.1456  | 4.3327  | 0.8562  | -0.2240 | 0.0612 | 1.2136 |
| Srr    | _GLPST[Phospho (STY)]PEEKPK_2                                               | Q9QZX7_T71_M1_Srr      | 8.8021  | 9.6129  | 9.5975  | 10.0784 | 9.1705 | 9.8362  | 10.2284 | 9.6913  | 9.8429  | 10.0059 | 0.9575  | -0.0627 | 0.1331 | 0.8757 |
| Srr    | _DLVDVFTVTEDEK_2                                                            | #N/A                   | 7.6919  | 6.9293  | 8.1104  | 7.7595  | 7.1325 | 7.9185  | 7.3013  | 6.8408  | 7.0218  | 7.4595  | 1.0607  | 0.0851  | 0.1327 | 0.8771 |
| Srr    | _VYAAEPSNADDC[Carbamidomethyl (C)]YQSK_2                                    | #N/A                   | 6.1756  | 4.0352  | 6.1878  | 7.1208  | 6.3486 | 6.1023  | 6.7979  | 6.6635  | 6.2422  | 6.2242  | 0.9249  | -0.1127 | 0.3925 | 0.4062 |
| Srr    | _LAIQAYGASIVYC[Carbamidomethyl (C)]DPSDES_2                                 | #N/A                   | 2.9496  | 2.4777  | 4.4140  | 3.9577  | 3.9843 | 3.9336  | 4.1060  | 3.3862  | 3.3425  | 3.6350  | 1.0006  | 0.0008  | 0.9961 | 0.0017 |
| Zranb2 | _S[Phospho (STY)]RPSP[Phospho (STY)]PAVR_2                                  | #N/A                   | 10.0636 | 9.9473  | 10.4084 | 10.1522 | 9.2820 | 9.8908  | 10.3177 | 10.8175 | 9.9515  | 9.8881  | 0.9720  | -0.0409 | 0.2961 | 0.5286 |
| Zranb2 | _YNLDAS[Phospho (STY)]EEEDSNK_2                                             | #N/A                   | 6.6574  | 5.8029  | 6.0914  | 6.7131  | 4.7260 | 5.9505  | 4.0037  | 6.1510  | 5.9184  | 5.6134  | 1.1049  | 0.1439  | 0.3166 | 0.4995 |
| Zranb2 | _EES[Phospho (STY)]DGEYDEGR_2                                               | #N/A                   | 3.0860  | 8.5676  | 3.7728  | 9.0081  | 3.7125 | 8.8250  | 9.3677  | 8.7990  | 9.2635  | 9.0135  | 0.6763  | -0.5642 | 0.0823 | 1.0845 |
| Zranb2 | _YNLDAS[Phospho (STY)]EEEDSNKKK_2                                           | #N/A                   | 4.4555  | 4.9921  | 4.7306  | 4.7040  | 4.0221 | 4.7363  | 4.4741  | 4.8592  | 4.9509  | 4.5130  | 0.9803  | -0.0287 | 0.6476 | 0.1887 |
| Zranb2 | _S[Phospho (STY)]RPSP[Phospho (STY)]PAVRK_2                                 | #N/A                   | 3.3339  | 3.9646  | 3.5667  | 6.2672  | 3.9705 | 3.9681  | 4.2506  | 5.4473  | 3.2392  | 6.2327  | 0.8719  | -0.1978 | 0.4366 | 0.3599 |
| Zranb2 | _EVEYERIES[Phospho (STY)]DGEYDEGR_3                                         | #N/A                   | 4.2776  | 2.9486  | 3.4636  | 6.3725  | 3.4033 | 3.7878  | 3.6809  | 4.9039  | 3.2328  | 3.9332  | 1.0265  | 0.0378  | 0.8824 | 0.0543 |
| Zranb2 | _SRS[Phospho (STY)]RPSP[Phospho (STY)]PAVR_2                                | #N/A                   | 3.8922  | 3.4439  | 3.8117  | 3.4459  | 3.6038 | 3.2283  | 3.8790  | 3.8831  | 5.7771  | 3.3326  | 0.8466  | -0.2402 | 0.1815 | 0.7411 |
| Zranb2 | _EVEYERIES[Phospho (STY)]DGEYDEGR_3                                         | #N/A                   | 3.1904  | 6.7929  | 4.5813  | 8.8978  | 2.7930 | 6.9112  | 6.5414  | 8.4653  | 7.9250  | 7.2973  | 0.8307  | -0.2676 | 0.2763 | 0.5585 |
| Zranb2 | _YNLDAS[Phospho (STY)]EEEDSNK_2                                             | #N/A                   | 3.7630  | 6.0381  | 5.7086  | 7.2324  | 2.9048 | 5.8982  | 6.2691  | 6.3312  | 7.8633  | 0.9353  | -0.0964 | 0.7098  | 0.1489 | 0.4189 |
| Zranb2 | _PS[Phospho (STY)]S[Phospho (STY)]PAVRK_2                                   | #N/A                   | 3.4996  | 3.8964  | 3.7780  | 4.2243  | 3.7177 | 4.0118  | 4.3726  | 4.2822  | 3.0759  | 4.2476  | 0.9650  | -0.0515 | 0.6240 | 0.2048 |
| Prkab1 | _S[Phospho (STY)]GNVVAILLDPGEHQVK_2                                         | #N/A                   | 7.2666  | 7.3298  | 7.7494  | 8.1738  | 6.9205 | 7.2828  | 7.2878  | 7.6581  | 7.5380  | 7.2937  | 1.0013  | 0.0018  | 0.9692 | 0.0136 |
| Pex14  | _JAcetyl (Protein N-term)ASSEAEQNPQPS[Phospho (STY)]PPGSENVVPR_3            | Q9R0AD_S15_M1_Pex14    | 4.1686  | 3.1338  | 3.6889  | 8.1504  | 7.0460 | 7.5501  | 7.6474  | 7.7025  | 7.7701  | 7.6475  | 0.7310  | -0.4520 | 0.1025 | 0.9891 |
| Zeb2   | _LYLQSTPQGYSDS[Phospho (STY)]EER_2                                          | Q9R0G7_S1124_M1_Zeb2   | 3.7028  | 3.7956  | 3.9735  | 3.6712  | 3.6169 | 3.4586  | 3.8194  | 3.4254  | 3.7244  | 4.1000  | 0.9830  | -0.0248 | 0.6611 | 0.1797 |
| Zeb2   | _SNT[Phospho (STY)]PS[Phospho (STY)]JNLNLSSTSK_2                            | Q9R0G7_T782_M2_Zeb2    | 3.5639  | 6.0293  | 3.6963  | 6.6042  | 3.3951 | 3.8346  | 4.0190  | 3.9934  | 6.1270  | 6.5407  | 0.8744  | -0.1937 | 0.4897 | 0.3150 |
| Zeb2   | _S[Phospho (STY)]DHEEDNMEDGME_2                                             | #N/A                   | 3.5157  | 4.2940  | 3.7886  | 4.1985  | 3.5068 | 3.7852  | 3.9262  | 3.6801  | 3.5700  | 3.5602  | 1.0445  | 0.0628  | 0.3963 | 0.4019 |
| Zeb2   | _VVQYKNSRS[Phospho (STY)]PSLR_3                                             | Q9R0G7_S705_M1_Zeb2    | 3.9391  | 3.1945  | 3.6728  | 3.7202  | 3.0828 | 3.5418  | 3.4349  | 4.3982  | 3.7938  | 3.6872  | 0.9208  | -0.1191 | 0.2281 | 0.6418 |
| Atp2b2 | _TSPVEGLGTAPOLEK_2                                                          | #N/A                   | 8.8747  | 8.7106  | 9.1054  | 8.8706  | 8.5568 | 8.5008  | 9.1568  | 8.8744  | 8.6720  | 8.4118  | 0.9990  | -0.0015 | 0.9592 | 0.0181 |
| Atp2b2 | _EIPDSSINAK_2                                                               | #N/A                   | 8.4373  | 8.1484  | 8.8688  | 7.6035  | 8.0711 | 7.7336  | 8.4897  | 8.3708  | 8.3684  | 8.1579  | 0.9757  | -0.0355 | 0.4281 | 0.3685 |
| Atp2b2 | _LISGAEAR_2                                                                 | #N/A                   | 6.9819  | 7.3219  | 7.0153  | 6.5364  | 6.9471 | 6.4801  | 7.1546  | 7.6777  | 7.2549  | 6.9979  | 0.9463  | -0.0797 | 0.0851 | 1.0700 |
| Atp2b2 | _GIDSTHTTEQR_2                                                              | #N/A                   | 7.1324  | 6.7232  | 6.5204  | 6.8164  | 6.9439 | 7.3779  | 7.3482  | 7.2476  | 7.0268  | 0.9549  | -0.0666 | 0.0928  | 1.0324 | 0.2890 |
| Atp2b2 | _GASEVKKK_2                                                                 | #N/A                   | 4.8464  | 4.5668  | 4.5500  | 3.3029  | 3.7652 | 5.5640  | 5.2272  | 4.8037  | 5.0268  | 3.7263  | 0.9439  | -0.0833 | 0.6030 | 0.2197 |
| Atp2b2 | _YGDLPAADGLPGGNDUK_2                                                        | #N/A                   | 6.0831  | 6.2736  | 7.0606  | 6.5446  | 5.4932 | 5.7881  | 7.0014  | 7.0967  | 6.5606  | 6.3183  | 0.9204  | -0.1197 | 0.1307 | 0.8837 |
| Atp2b2 | _YNNSAIDS[Phospho (STY)]GINULTDTSK_2                                        | Q9R0K7_S1170_M1_Atp2b2 | 6.1753  | 6.0366  | 5.8668  | 4.5659  | 4.6766 | 5.9000  | 6.3535  | 6.5487  | 5.4170  | 6.0980  | 0.9587  | -0.0609 | 0.5140 | 0.2890 |
| Atp2b2 | _AFRS[Phospho (STY)]VEGLKEXPESR_3                                           | Q9R0K7_S1105_M1_Atp2b2 | 3.1171  | 3.9091  | 4.0039  | 4.5066  | 3.9436 | 3.7859  | 4.2212  | 6.6859  | 3.2605  | 2.9727  | 0.9127  | -0.1318 | 0.6050 | 0.2182 |
| Atp2b2 | _AGQVQVPAEVAEVDMAQIK_2                                                      | #N/A                   | 5.6743  | 4.7990  | 3.7285  | 4.4361  | 4.1819 | 4.2318  | 5.4947  | 5.2376  | 6.7545  | 4.8599  | 0.8070  | -0.3093 | 0.0514 | 1.2889 |
| Atp2b2 | _IDESSLTGESDQVR_2                                                           | #N/A                   | 7.9380  | 7.5129  | 3.7879  | 7.0605  | 7.1318 | 6.8790  | 3.4799  | 3.6695  | 7.2695  | 7.4789  | 1.2272  | 0.2954  | 0.3119 | 0.5060 |
| Atp2b2 | _MPDESFR_2                                                                  | #N/A                   | 5.7066  | 3.1592  | 4.5031  | 5.2295  | 4.6071 | 4.2123  | 3.7269  | 4.9879  | 3.3499  | 4.2734  | 1.1188  | 0.1619  | 0.3858 | 0.4136 |
| Atp2b2 | _EASDILTDNFSNVKK_2                                                          | #N/A                   | 7.0466  | 6.8875  | 7.4084  | 7.3063  | 5.8115 | 6.8610  | 7.4898  | 6.9300  | 6.7711  | 6.9571  | 0.9787  | -0.0311 | 0.6480 | 0.1884 |
| Atp2b2 | _NES[Phospho (STY)]SHGGEFGC[Carbamidomethyl (C)]TM[Oxidation (M)]EELR_3     | #N/A                   | 3.8439  | 3.4781  | 3.9261  | 6.9958  | 5.0193 | 5.5130  | 3.8751  | 5.9947  | 5.9398  | 5.3258  | 0.9077  | -0.1397 | 0.5499 | 0.2597 |
| Atp2b2 | _T[Phospho (STY)]SHNM[Oxidation (M)]AHPEFR_3                                | #N/A                   | 5.1902  | 7.9182  | 5.0728  | 9.0819  | 5.1354 | 4.9302  | 7.8869  | 5.5952  | 7.7871  | 6.9078  | 0.8832  | -0.1792 | 0.4398 | 0.3567 |
| Atp2b2 | _QNS[Phospho (STY)]PPSLNK_2                                                 | #N/A                   | 10.9993 | 10.4453 | 10.8148 | 10.8958 | 9.7126 | 10.5227 | 11.2873 | 10.7515 | 10.7309 | 10.6227 | 0.9739  | -0.0381 | 0.3202 | 0.4945 |
| Atp2b2 | _IDESSLTGESDQVRK_2                                                          | #N/A                   | 4.8777  | 4.9631  | 5.7229  | 4.5569  | 4.3753 | 4.7150  | 5.1322  | 5.0001  | 4.7682  | 5.1532  | 0.9711  | -0.0423 | 0.5775 | 0.2384 |
| Atp2b2 | _TELLNVMAINSAYTK_2                                                          | #N/A                   | 3.8075  | 4.1021  | 3.7485  | 4.3135  | 1.9000 | 4.1350  | 3.3886  | 3.8050  | 4.2001  | 4.2805  | 0.9360  | -0.0504 | 0.6177 | 0.2092 |
| Atp2b2 | _VIEPMAC[Carbamidomethyl (C)]DGLR_2                                         | #N/A                   | 6.2584  | 4.3471  | 3.3245  | 6.0448  | 4.2354 | 3.8901  | 4.5173  | 4.1329  | 4.4320  | 4.0464  | 1.0937  | 0.1292  | 0.5329 | 0.2733 |
| Atp2b2 | _IEDSOPHPLIDOTDEEAALQKNS[Phospho (STY)]PPSLNK_4                             | #N/A                   | 8.8108  | 3.9796  | 4.4578  | 6.6513  | 3.8679 | 8.6452  | 9.2673  | 9.9505  | 9.2289  | 8.5768  | 0.7097  | -0.0697 | 0.0934 | 1.0297 |
| Atp2b2 | _TTC[Carbamidomethyl (C)]GLLGVLDLR_2                                        | #N/A                   | 3.5260  | 4.3312  | 4.2128  | 3.7895  | 4.1526 | 3.5769  | 4.5747  | 3.4643  | 3.0516  | 3.1816  | 1.1019  | 0.1399  | 0.2970 | 0.5272 |
| Atp2b2 | _EIEPEELNEDEVEIDHAER_3                                                      | #N/A                   | 3.8909  | 3.3353  | 4.5777  | 7.0784  | 3.2236 | 3.4010  | 3.2942  | 6.4434  | 4.1875  | 3.5465  | 0.9733  | -0.0391 | 0.9043 | 0.0437 |
| Atp2b2 | _LTOKEIEPEELNEDEVEIDHAER_4                                                  | #N/A                   | 4.1794  | 3.0844  | 3.6867  | 4.5098  | 3.3149 | 3.1190  | 3.2531  | 5.1443  | 4.2319  | 3.9597  | 0.8799  | -0.1846 | 0.2813 | 0.5508 |
| Atp2b2 | _M[Oxidation (M)]TVQVAVGVGVHYK_3                                            | #N/A                   | 3.9723  | 2.0395  | 3.1583  | 3.6609  | 2.2873 | 3.1306  | 4.4914  | 4.4575  | 4.1061  | 2.3462  | 0.8448  | -0.2433 | 0.3236 | 0.4900 |
| Pcm1   | _SNRPVS[Phospho (STY)]ADGVVPRPLAK_3                                         | Q9R0L6_S957_M1_Pcm1    | 7.0477  | 7.1828  | 7.8276  | 7.9990  | 6.7574 | 6.8927  | 7.4634  | 7.2666  | 7.2000  | 7.6289  | 0.9858  | -0.0207 | 0.7087 | 0.1495 |
| Pcm1   | _VTNANS[Phospho (STY)]PESSPGVGR_2                                           | Q9R0L6_S65_M1_Pcm1     | 8.6178  | 8.1651  | 9.0578  | 8.5936  | 8.0421 | 8.6737  | 8.9389  | 8.2802  | 8.5519  | 8.6702  | 0.9901  | -0.0144 | 0.7049 | 0.1519 |
| Pcm1   | _ILEGDHSS[Phospho (STY)]RAGEIDDEKDDEKDETVK_4                                | Q9R0L6_S1729_M1_Pcm1   | 3.7447  | 3.0490  | 4.4315  | 3.5708  | 2.8704 | 3.3583  | 3.7191  | 4.3404  | 3.7294  | 5.0182  | 0.8817  | -0.1816 | 0.2730 | 0.5639 |
| Pcm1   | _RS[Phospho (STY)]S[Phospho (STY)]VDEAPEDEEFQK_2                            | Q9R0L6_S644_M2_Pcm1    | 3.4547  | 3.9534  | 3.6998  | 5.7327  | 4.7862 | 3.9772  | 4.3380  | 4.7438  | 5.0919  | 5.2175  | 0.8802  | -0.1841 | 0.2416 | 0.6169 |
| Pcm1   | _HS[Phospho (STY)]ESDR_2                                                    | Q9R0L6_S1432_M1_Pcm1   | 2.3005  | 4.3942  | 4.1828  | 3.7265  | 3.5928 | 3.5140  | 3.8748  | 3.2746  | 3.5737  | 3.4038  | 1.0246  | 0.0350  | 0.8285 | 0.0817 |
| Pcm1   | _NVRS[Phospho (STY)]DVS[Phospho (STY)]DQDEIEESER_2                          | Q9R0L6_S1766_M2_Pcm1   | 2.8165  | 3.3927  | 4.0107  | 3.1821  | 2.3273 | 3.2039  | 3.2353  | 4.3847  | 3.3494  | 0.8973  | -0.1563 | 0.3577  | 0.4465 |        |
| Pcm1   | _KAS[Phospho (STY)]JADASLAK_2                                               | Q9R0L6_S1280_M1_Pcm1   | 4.3489  | 3.6043  | 4.0826  | 3.6263  | 3.4926 | 3.1320  | 3.7746  | 3.3749  | 3.6739  | 3.3036  | 1.0517  | 0.0728  | 0.4676 | 0.3301 |
| Celr2  | _STLTSYNC[Carbamidomethyl (C)]PS[Phospho (STY)]PYADGR_2                     | Q9R0M0_S2648_M1_Celr2  | 4.3330  | 2.9894  | 4.0867  | 3.6305  | 3.4968 | 3.4179  | 3.7787  | 3.3707  | 3.6698  | 3.3078  | 1.0370  | 0.0524  | 0.6360 | 0.1965 |
| Syt11  | _DYGEELRS[Phospho (STY)]PM[Oxidation (M)]TSLT[Phospho (STY)]PGESK_3         | Q9R0N3_T139_M2_Syt11   | 3.5390  | 4.3270  | 3.9862  | 3.5150  |        |         |         |         |         |         |         |         |        |        |



|        |                                                                   |                       |        |         |        |         |         |         |         |         |         |         |        |         |        |        |
|--------|-------------------------------------------------------------------|-----------------------|--------|---------|--------|---------|---------|---------|---------|---------|---------|---------|--------|---------|--------|--------|
| Dstn   | _ELVGDVGATITDPFK_2                                                | #N/A                  | 5.4860 | 4.8403  | 3.1783 | 5.2115  | 5.0081  | 5.4892  | 5.4399  | 5.0053  | 4.9513  | 5.6702  | 0.9245 | -0.1133 | 0.4156 | 0.3813 |
| Dstn   | _HFVGM[Oxidation (M)]LPEKDC[Carbamidomethyl (C)]R_3               | #N/A                  | 5.7768 | 5.6644  | 3.7626 | 5.9724  | 6.3531  | 5.9961  | 7.0093  | 5.4053  | 6.4427  | 5.5700  | 0.9150 | -0.1282 | 0.3794 | 0.4209 |
| Dstn   | _C[Carbamidomethyl (C)]VVVEEGELVGDVGATITDPFK_3                    | #N/A                  | 3.0498 | 4.2926  | 3.9514 | 3.8281  | 3.6944  | 4.4310  | 4.0962  | 3.1731  | 3.4721  | 3.5054  | 1.0878 | 0.1215  | 0.3174 | 0.4984 |
| Uch1   | _M[Oxidation (M)]PPVNHGASSEDLSQDAAK_3                             | #N/A                  | 9.2274 | 9.2710  | 9.3282 | 9.5767  | 9.3603  | 9.2942  | 9.1155  | 9.0305  | 8.9272  | 9.0053  | 1.0359 | 0.0508  | 0.0017 | 2.7658 |
| Uch1   | _LGVAGQWR_2                                                       | #N/A                  | 9.4209 | 10.0374 | 9.7017 | 9.6704  | 9.4471  | 9.4153  | 9.6889  | 9.8467  | 9.3983  | 9.6736  | 0.9962 | -0.0055 | 0.8069 | 0.0932 |
| Uch1   | _QLSETEK_2                                                        | #N/A                  | 9.0897 | 9.4626  | 9.6195 | 9.3835  | 10.0681 | 9.4505  | 9.1953  | 9.2763  | 9.4701  | 9.5922  | 1.0137 | 0.0197  | 0.4937 | 0.3066 |
| Uch1   | _NEAIAAHDSVAEGGC[Carbamidomethyl (C)]R_3                          | #N/A                  | 7.8654 | 7.8370  | 8.0812 | 8.4587  | 8.5275  | 7.7911  | 7.9295  | 7.6055  | 7.9030  | 8.0838  | 1.0270 | 0.0385  | 0.2807 | 0.5518 |
| Uch1   | _FSAVALC[Carbamidomethyl (C)]R_2                                  | #N/A                  | 7.8111 | 7.6677  | 7.5323 | 7.4694  | 7.8426  | 7.6713  | 7.3383  | 7.3429  | 7.8649  | 7.8906  | 1.0074 | 0.0107  | 0.7045 | 0.1077 |
| Uch1   | _QLSETEKLS[Phospho (STY)]PEDR_2                                   | #N/A                  | 7.0376 | 7.5032  | 8.1532 | 7.9940  | 7.7312  | 7.8638  | 7.4197  | 7.2077  | 7.5128  | 7.7995  | 1.0306 | 0.0435  | 0.3399 | 0.4686 |
| Uch1   | _QTIGNSC[Carbamidomethyl (C)]TGILGHAVANNQDKLLEFGDSVLK_4           | #N/A                  | 5.1001 | 4.5329  | 5.7502 | 5.0466  | 4.2484  | 3.7025  | 4.4084  | 4.6699  | 5.0351  | 4.9286  | 1.0095 | 0.0137  | 0.9146 | 0.0388 |
| Uch1   | _C[Carbamidomethyl (C)]FENNEAIAAHDSVAEGGC[Carbamidomethyl (C)]R_4 | #N/A                  | 6.2205 | 6.6997  | 6.4931 | 6.5993  | 7.1287  | 6.2238  | 6.1673  | 6.2550  | 6.2762  | 6.5004  | 1.0414 | 0.0586  | 0.1898 | 0.7216 |
| Uch1   | _QIEELQGEVSPK_2                                                   | #N/A                  | 7.1227 | 7.4423  | 7.7063 | 7.6595  | 7.8849  | 7.7614  | 7.0467  | 7.1683  | 7.2429  | 7.4952  | 1.0494 | 0.0696  | 0.0539 | 1.2687 |
| Arpc1a | _TLESSIGLR_2                                                      | #N/A                  | 8.1522 | 7.8928  | 8.6315 | 8.4626  | 8.2723  | 8.0406  | 7.7689  | 8.3053  | 8.4229  | 7.7230  | 1.0232 | 0.0331  | 0.3754 | 0.4255 |
| Arpc1a | _WSPLENK_2                                                        | #N/A                  | 5.7649 | 6.3572  | 5.9003 | 5.6831  | 5.5980  | 5.9930  | 6.0400  | 6.7310  | 6.1781  | 5.5309  | 0.9612 | -0.0570 | 0.3511 | 0.4545 |
| Arpc1a | _Acetyl (Protein N-term)[SHQFLLEPTC[Carbamidomethyl (C)]HAWN_R_3  | #N/A                  | 4.3615 | 4.9409  | 4.9220 | 5.8769  | 4.8112  | 4.9578  | 4.1520  | 5.4360  | 4.9674  | 4.7418  | 1.0319 | 0.0454  | 0.6518 | 0.1859 |
| Arpc1a | _FC[Carbamidomethyl (C)]TTGIDGAM[Oxidation (M)]TWDKF_2            | #N/A                  | 5.8998 | 6.0537  | 6.1362 | 5.8091  | 5.5840  | 5.4590  | 6.5367  | 5.9689  | 5.9142  | 5.8325  | 0.9605 | -0.0581 | 0.2312 | 0.6360 |
| Arpc1a | _NAYVWSQK_2                                                       | #N/A                  | 4.7148 | 5.2695  | 5.5688 | 3.1611  | 5.3151  | 5.0666  | 4.3766  | 5.4746  | 5.4042  | 5.4424  | 0.9372 | -0.0936 | 0.5286 | 0.2769 |
| Arpc1a | _IVTC[Carbamidomethyl (C)]GADR_2                                  | #N/A                  | 5.1282 | 3.8363  | 4.0767 | 4.5793  | 5.9862  | 3.7131  | 5.1994  | 5.6356  | 5.8877  | 4.8174  | 0.8455 | -0.2420 | 0.1243 | 0.9057 |
| Arpc1a | _EVEDKPASTPWGSK_2                                                 | #N/A                  | 5.8811 | 5.9347  | 6.0794 | 6.0517  | 5.6973  | 5.9471  | 6.3219  | 5.9466  | 5.8752  | 5.7688  | 0.9923 | -0.0112 | 0.7056 | 0.1515 |
| Arpc1a | _SVQVSTLR_2                                                       | #N/A                  | 4.2365 | 8.7917  | 3.3771 | 3.8797  | 3.7980  | 4.1063  | 3.5944  | 4.2388  | 4.1669  | 3.9904  | 1.1753 | 0.2330  | 0.5198 | 0.2842 |
| Arpc1a | _NM[Oxidation (M)]S[Phospho (STY)]AMER_2                          | #N/A                  | 3.3248 | 4.6208  | 4.1251 | 4.1090  | 3.6345  | 4.1652  | 4.0387  | 3.5214  | 4.0368  | 3.9504  | 1.0282 | 0.0402  | 0.6739 | 0.1714 |
| Arpc1a | _LAWSHDSTVSHADASK_2                                               | #N/A                  | 2.7162 | 3.9694  | 4.3276 | 4.3481  | 3.9814  | 4.2763  | 4.2612  | 3.3685  | 3.4492  | 3.1402  | 1.1046 | 0.1436  | 0.3422 | 0.4657 |
| Arpc1a | _EHNGHTGIDWAPK_3                                                  | #N/A                  | 4.0791 | 3.3834  | 3.2650 | 3.7677  | 3.2048  | 3.0239  | 3.3847  | 4.3508  | 3.9994  | 3.7347  | 0.8931 | -0.1631 | 0.1478 | 0.8302 |
| Arpc1a | _LUSVC[Carbamidomethyl (C)]WFESDWWVWSK_2                          | #N/A                  | 3.1458 | 4.0803  | 3.8326 | 4.3353  | 3.7723  | 3.9571  | 4.0500  | 1.8406  | 3.4318  | 4.3023  | 1.1315 | 0.1782  | 0.3806 | 0.4195 |
| Piges3 | _HLNEIDLHFC[Carbamidomethyl (C)]OPNDSK_3                          | #N/A                  | 7.7046 | 7.7366  | 7.8342 | 8.7044  | 7.7350  | 7.7758  | 8.0350  | 7.7804  | 7.7469  | 7.8995  | 1.0083 | 0.0120  | 0.7532 | 0.1231 |
| Piges3 | _DWEDDSDSD[Oxidation (M)]SNDFR_2                                  | #N/A                  | 7.2207 | 12.2057 | 8.5217 | 12.5189 | 12.0636 | 12.3929 | 12.7491 | 12.2232 | 12.2751 | 12.4052 | 0.8717 | -0.1981 | 0.2179 | 0.6617 |
| Piges3 | _SILC[Carbamidomethyl (C)]C[Carbamidomethyl (C)]LR_2              | #N/A                  | 6.9001 | 3.3718  | 7.1296 | 3.3938  | 7.8345  | 3.3645  | 5.5995  | 7.4682  | 7.4120  | 7.3390  | 0.7569 | -0.4018 | 0.1719 | 0.7648 |
| Piges3 | _LTFSC[Carbamidomethyl (C)]LGGSDNFK_2                             | #N/A                  | 5.5018 | 5.9366  | 5.5293 | 6.7059  | 6.4094  | 5.9130  | 6.0118  | 5.8393  | 5.9604  | 5.7633  | 1.0179 | 0.0256  | 0.6819 | 0.1663 |
| Piges3 | _LGGESGSWPR_2                                                     | #N/A                  | 4.8516 | 4.8483  | 4.0661 | 5.1680  | 4.8677  | 4.7930  | 5.5527  | 5.1918  | 4.1334  | 5.2727  | 0.9460 | -0.0800 | 0.4052 | 0.3923 |
| Srsf10 | _S[Phospho (STY)]RS[Phospho (STY)]FDYNYR_3                        | #N/A                  | 8.0969 | 8.1684  | 7.8793 | 8.2795  | 7.9383  | 8.3308  | 8.3241  | 8.3039  | 8.4945  | 8.1043  | 0.9770 | -0.0336 | 0.1258 | 0.9003 |
| Srsf10 | _S[Phospho (STY)]RS[Phospho (STY)]FDYNYR_2                        | #N/A                  | 8.5441 | 9.5769  | 8.0631 | 9.9902  | 8.7555  | 9.4376  | 10.0415 | 9.6793  | 9.6200  | 9.6625  | 0.9293 | -0.1058 | 0.1055 | 0.9768 |
| Srsf10 | _S[Phospho (STY)]FDYNYR_2                                         | #N/A                  | 3.7048 | 3.6376  | 3.4384 | 6.4423  | 5.1940  | 6.1792  | 3.1305  | 6.6783  | 6.9578  | 6.3489  | 0.8247 | -0.2780 | 0.3347 | 0.4754 |
| Srsf10 | _SRS[Phospho (STY)]WT[Phospho (STY)]SPK_2                         | Q9R0U0_S253_M2_Srsf10 | 3.8606 | 3.1649  | 3.7425 | 3.4815  | 3.8275  | 3.2689  | 4.0864  | 3.9553  | 3.7981  | 3.5311  | 0.9258 | -0.1112 | 0.1493 | 0.8259 |
| Srsf10 | _S[Phospho (STY)]RS[Phospho (STY)]RS[Phospho (STY)]FDYNYR_2       | #N/A                  | 4.0882 | 6.3159  | 4.3064 | 7.0525  | 5.6413  | 6.5461  | 6.5541  | 6.4938  | 6.5467  | 3.3840  | 0.9850 | -0.0218 | 0.9244 | 0.0341 |
| Srsf10 | _S[Phospho (STY)]RS[Phospho (STY)]RS[Phospho (STY)]YER_2          | Q9R0U0_S119_M3_Srsf10 | 4.2062 | 3.1362  | 6.5516 | 3.4837  | 3.3499  | 3.2747  | 3.8166  | 3.5175  | 3.8166  | 3.1609  | 0.9914 | -0.0125 | 0.9663 | 0.0149 |
| Srsf10 | _S[Phospho (STY)]RS[Phospho (STY)]HSDNDRFK_3                      | Q9R0U0_S156_M2_Srsf10 | 4.2309 | 3.1115  | 3.9645 | 3.5083  | 3.3746  | 3.2500  | 3.6566  | 3.4929  | 3.7919  | 3.1856  | 1.0118 | 0.0169  | 0.8694 | 0.0608 |
| Rgr    | _SS[Phospho (STY)]SSEILGGNDPTSK_2                                 | Q9R0X5_S913_M1_Rgr    | 4.0074 | 3.2629  | 3.7411 | 7.8189  | 3.1512  | 3.4734  | 3.4331  | 3.7163  | 4.0153  | 2.9622  | 1.2012 | 0.2645  | 0.4645 | 0.3330 |
| Ak1    | _HFNVGPGSGSK_2                                                    | #N/A                  | 8.8298 | 9.2638  | 9.4723 | 9.4455  | 9.4664  | 9.9370  | 9.2517  | 9.0775  | 9.3056  | 9.3381  | 1.0075 | 0.0108  | 0.6320 | 0.2062 |
| Ak1    | _VDSNSFLUDGYPYR_2                                                 | #N/A                  | 7.2207 | 7.3605  | 6.3312 | 7.6447  | 7.5699  | 7.0199  | 7.2084  | 7.4405  | 6.7294  | 1.0012  | 0.0017 | 0.9758  | 0.0106 | 0.0106 |
| Ak1    | _GELVPILOTVLDM[Oxidation (M)]LR_2                                 | #N/A                  | 6.0657 | 6.6303  | 6.0960 | 6.5578  | 7.2287  | 6.9139  | 6.4615  | 6.9221  | 6.9118  | 6.5556  | 0.9805 | -0.0284 | 0.6161 | 0.2104 |
| Ak1    | _RLETYNYATEPVSYDKR_3                                              | #N/A                  | 6.0497 | 6.5920  | 6.7673 | 7.3570  | 6.9008  | 6.6943  | 6.7653  | 6.4732  | 6.6331  | 6.4581  | 1.0227 | 0.0324  | 0.5244 | 0.2803 |
| Ak1    | _VDNEETIKK_2                                                      | #N/A                  | 5.6864 | 5.6275  | 5.9538 | 5.7574  | 6.2926  | 5.7560  | 5.8879  | 5.0971  | 5.1415  | 5.5830  | 1.0771 | 0.0639  | 0.1946 | 0.1946 |
| Ak1    | _LETYNYATEPVSYDKR_3                                               | #N/A                  | 5.2269 | 4.6153  | 5.1294 | 5.0117  | 5.5283  | 5.5598  | 5.0098  | 5.2588  | 5.4433  | 5.1852  | 0.9912 | -0.0127 | 0.8186 | 0.0869 |
| Ak1    | _YDVTSLTGDLR_3                                                    | #N/A                  | 5.3142 | 5.2160  | 5.1389 | 4.4285  | 5.3048  | 5.2623  | 5.5490  | 5.0654  | 5.0264  | 4.9949  | 0.9907 | -0.0135 | 0.8178 | 0.0874 |
| Ak1    | _AEVSSGSR_2                                                       | #N/A                  | 5.7596 | 4.0809  | 3.8321 | 5.1594  | 3.9692  | 4.6410  | 5.8281  | 5.3608  | 3.4323  | 5.8808  | 0.8923 | -0.1643 | 0.3842 | 0.4154 |
| Dic1   | _SEDS[Phospho (STY)]DEDEPC[Carbamidomethyl (C)]AIGK_2             | #N/A                  | 7.8905 | 7.6109  | 8.3588 | 8.5094  | 7.2614  | 7.7089  | 7.8973  | 7.7823  | 7.8973  | 7.7823  | 0.9907 | -0.0134 | 0.7765 | 0.1099 |
| Dic1   | _QDPIPGS[Phospho (STY)]PONS_R_2                                   | Q9R0Z9_S129_M1_Dic1   | 3.6416 | 3.5846  | 4.3284 | 3.3302  | 7.9579  | 8.5909  | 8.9738  | 3.2874  | 8.6471  | 8.3780  | 0.7168 | -0.4804 | 0.2359 | 0.8273 |
| Dic1   | _FSDGSDGSALDSVSPC[Carbamidomethyl (C)]PSS[Phospho (STY)]PK_2      | Q9R0Z9_S510_M1_Dic1   | 4.0615 | 4.9096  | 4.0580 | 3.6018  | 4.4971  | 3.2671  | 3.3995  | 3.6985  | 3.2791  | 1.1512  | 0.2032 | 0.1287  | 0.6605 | 0.6605 |
| Dic1   | _RSED[Phospho (STY)]DEDEPC[Carbamidomethyl (C)]AIGK_2             | #N/A                  | 4.1735 | 1.2150  | 3.3594 | 3.8621  | 3.2991  | 4.4304  | 3.2903  | 4.2564  | 3.9050  | 3.8291  | 0.8874 | -0.1724 | 0.5004 | 0.3007 |
| Dic1   | _KRSED[Phospho (STY)]DEDEPC[Carbamidomethyl (C)]AIGK_3            | #N/A                  | 3.0019 | 3.9259  | 3.3374 | 4.1207  | 3.7876  | 3.3254  | 3.6051  | 4.0074  | 3.6560  | 3.9240  | 0.9434 | -0.0841 | 0.3805 | 0.4047 |
| Gda    | _YTPTTEQR_2                                                       | #N/A                  | 8.6609 | 8.7222  | 8.6461 | 8.6904  | 8.7328  | 8.8385  | 8.4241  | 8.6785  | 8.6678  | 8.8023  | 1.0083 | 0.0120  | 0.3458 | 0.4612 |
| Gda    | _TPPLALVFR_2                                                      | #N/A                  | 8.4696 | 8.8672  | 8.1762 | 8.3038  | 8.3662  | 8.4515  | 8.3831  | 8.7404  | 8.7614  | 8.5385  | 0.9806 | -0.0282 | 0.2660 | 0.5751 |
| Gda    | _DHLIGVDSQK_2                                                     | #N/A                  | 8.5733 | 8.4229  | 8.6801 | 8.5502  | 8.6782  | 8.5326  | 8.3754  | 8.2757  | 8.6615  | 8.5447  | 1.0128 | 0.0184  | 0.2333 | 0.6321 |
| Gda    | _STDVAEIVYR_2                                                     | #N/A                  | 7.7871 | 7.7002  | 7.8981 | 7.8909  | 8.1101  | 8.0378  | 7.6496  | 7.9410  | 7.9815  | 8.0376  | 1.0002 | 0.0003  | 0.9880 | 0.0052 |
| Gda    | _NLFLESSQDEK_2                                                    | #N/A                  | 6.9514 | 7.2194  | 7.0217 | 8.0143  | 7.4173  | 7.7374  | 7.3223  | 7.4477  | 7.0050  | 7.8489  | 0.9983 | -0.0024 | 0.9622 | 0.0167 |
| Gda    | _NIEEYVGGK_2                                                      | #N/A                  | 7.0838 | 6.8539  | 6.3099 | 7.2827  | 6.8927  | 7.0967  | 7.1187  | 6.1672  | 6.9571  | 7.2594  | 1.0064 | 0.0093  | 0.8680 | 0.0615 |
| Gda    | _EFDALLNPR_2                                                      | #N/A                  | 6.3518 | 6.3556  | 6.0627 | 6.7335  | 6.4861  | 6.3361  | 6.5442  | 6.4885  | 6.6074  | 6.2876  | 0.9855 | -0.0211 | 0.4704 | 0.3275 |
| Gda    | _FLYLGDDR_2                                                       | #N/A                  | 4.6761 | 5.9720  | 5.7767 | 6.2540  | 5.6987  | 6.3449  | 6.4606  | 6.3767  | 6.1804  | 6.6521  | 0.9485 | -0.0762 | 0.1035 | 0.9851 |
| Gda    | _ETTESVRETER_2                                                    | #N/A                  | 3.9394 | 4.2354  | 4.0480 | 4.8440  | 5.1248  | 5.5048  | 4.6177  | 4.0612  | 5.0877  | 4.5878  | 1.0060 | 0.0086  | 0.9417 | 0.0261 |
| Gda    | _GTPVHSTWTC[Carbamidomethyl (C)]PM[Oxidation (M)]EVL_R_3          | #N/A                  | 6.1183 | 5.8583  | 3.1935 | 6.2488  | 6.3170  | 6.2571  | 5.8016  | 6.7213  | 6.2554  | 6.0221  | 0.9138 | -0.1301 | 0.4297 | 0.3668 |
| Gda    | _FVSEMI[Oxidation (M)]LQK_2                                       | #N/A                  | 3.2438 | 4.9677  | 4.0341 | 4.6244  | 5.0887  | 4.2687  | 4.4209  | 4.6891  | 4.4963  | 4.0886  | 0.9881 | -0.0172 | 0.8884 | 0.0514 |
| Gda    | _NYTDVDDNNLLTNK_2                                                 | #N/A                  | 5.2909 | 4.7507  | 4.6977 | 5.3416  | 5.3700  | 5.0386  | 5.2413  | 5.3751  | 5.2691  | 5.3779  | 0.9559 | -0.0650 | 0.1720 | 0.7644 |
| Gda    | _TVM[Oxidation (M)]AIGC[Carbamidomethyl (C)]YLSEELNIFSR_3         | #N/A                  | 5.4393 | 5.8076  | 6.1163 | 6.1179  | 5.3070  | 5.7612  | 5.5690  | 5.3236  | 5.3036  | 5.7075  | 1.0515 | 0.0725  | 0.1723 | 0      |



|         |                                                                |                        |         |         |         |         |         |        |         |         |         |         |        |         |        |        |
|---------|----------------------------------------------------------------|------------------------|---------|---------|---------|---------|---------|--------|---------|---------|---------|---------|--------|---------|--------|--------|
| Mast1   | _FSASEASFLGEAS(Phospho (STY))PPLGAR_2                          | Q9R1L5_S791_M1_Mast1   | 3.1842  | 4.1582  | 4.4187  | 7.1497  | 3.8288  | 4.2967 | 4.1108  | 7.3034  | 3.3377  | 3.6398  | 0.9800 | -0.0291 | 0.9295 | 0.0318 |
| Pma4    | _TTFSFSEGR_2                                                   | #N/A                   | 7.3352  | 7.4522  | 7.7170  | 7.4916  | 7.6065  | 7.5915 | 7.1323  | 7.5430  | 7.3775  | 7.5840  | 1.0166 | 0.0238  | 0.2793 | 0.5539 |
| Pma4    | _LDEVFSEK_2                                                    | #N/A                   | 5.9347  | 5.6164  | 6.5701  | 6.2775  | 5.8225  | 6.3014 | 5.9944  | 6.1315  | 5.8716  | 6.1488  | 1.0084 | 0.0120  | 0.7953 | 0.0995 |
| Pma4    | _QAYTFGGK_2                                                    | #N/A                   | 4.0359  | 3.9065  | 3.7696  | 3.3133  | 2.6695  | 3.1008 | 3.4616  | 3.6878  | 3.0093  | 5.2386  | 0.8744 | -0.1936 | 0.3197 | 0.4953 |
| Pmb3    | _TVGLAGLATQTVQVQR_3                                            | #N/A                   | 4.3448  | 3.6055  | 3.7866  | 4.8055  | 4.0522  | 4.2503 | 4.0039  | 4.2472  | 3.5689  | 4.2998  | 1.0298 | 0.0423  | 0.6434 | 0.1915 |
| Pmb3    | _DAVSGM(Oxidation (M))GVNVHKE_3                                | #N/A                   | 2.9555  | 3.7118  | 4.1901  | 3.2030  | 3.6001  | 1.4482 | 4.4185  | 3.4147  | 3.0633  | 3.1700  | 0.9056 | -0.1430 | 0.5587 | 0.2528 |
| Pmb2    | _FINLPTFSVR_2                                                  | #N/A                   | 6.4103  | 6.4871  | 6.3059  | 6.3590  | 6.6650  | 6.3206 | 6.7476  | 6.8363  | 6.7474  | 6.5569  | 0.9558 | -0.0653 | 0.0072 | 2.1413 |
| Pmb2    | _TYPTISR_2                                                     | #N/A                   | 6.6299  | 6.8907  | 3.7040  | 7.2910  | 6.8433  | 6.6391 | 6.5670  | 6.7786  | 6.7805  | 7.3171  | 0.9231 | -0.1155 | 0.4603 | 0.3370 |
| Pmb2    | _JAcetyl (Protein N-term) M(Oxidation (M))EYUGQGPQYLVASDR_2    | #N/A                   | 3.9619  | 3.3805  | 3.6956  | 3.2394  | 3.1056  | 4.2653 | 3.3876  | 3.8408  | 4.0609  | 4.4175  | 0.9188 | -0.1221 | 0.2963 | 0.5283 |
| Pma1    | _NQYNDQVTVWSPQGR_2                                             | #N/A                   | 7.8867  | 7.7870  | 8.0820  | 8.4097  | 7.8057  | 7.9590 | 8.0434  | 7.8228  | 7.7584  | 7.9524  | 1.0119 | 0.0171  | 0.4872 | 0.3123 |
| Pma1    | _ETLPAEQDLTK_2                                                 | #N/A                   | 7.5615  | 7.3238  | 7.5952  | 7.6954  | 7.8449  | 7.5232 | 7.8163  | 7.2565  | 7.3873  | 7.8323  | 1.0023 | 0.0033  | 0.9078 | 0.0420 |
| Pma1    | _TQIPTQR_2                                                     | #N/A                   | 3.6442  | 6.7285  | 6.4215  | 6.4310  | 6.8366  | 6.2863 | 5.7438  | 6.2009  | 6.5437  | 6.6735  | 0.9630 | -0.0543 | 0.7235 | 0.1406 |
| Pma1    | _AQPS(Phospho (STY))QAAEEPAEK_2                                | #N/A                   | 3.8596  | 3.1150  | 3.2971  | 2.2770  | 3.0033  | 2.8433 | 3.5145  | 4.3187  | 3.3122  | 3.7668  | 0.8224 | -0.2821 | 0.0702 | 1.1536 |
| Pma1    | _AQPS(Phospho (STY))QAAEEPAEKADPEMH_3                          | #N/A                   | 3.6098  | 3.3234  | 4.2966  | 3.5006  | 3.9322  | 3.3028 | 4.2055  | 3.3232  | 3.3308  | 3.3096  | 1.0335 | 0.0475  | 0.6647 | 0.1774 |
| Pma1    | _IHQIEYAMEAVK_2                                                | #N/A                   | 3.2656  | 4.0768  | 4.5001  | 4.0439  | 3.8982  | 3.8313 | 4.1921  | 4.4581  | 3.2564  | 3.7211  | 1.0074 | 0.0107  | 0.9237 | 0.0345 |
| Tagln3  | _GFS(Phospho (STY))EEQLR_2                                     | #N/A                   | 8.7825  | 8.1756  | 8.7840  | 8.6443  | 8.0704  | 8.6967 | 7.9041  | 8.6310  | 8.8384  | 9.0040  | 0.9920 | -0.0116 | 0.7911 | 0.1018 |
| Tagln3  | _LINSLYPPGQEPK_2                                               | #N/A                   | 9.4516  | 9.3059  | 9.7535  | 9.3590  | 9.8625  | 9.2381 | 9.4584  | 9.4479  | 8.1674  | 9.5595  | 1.0368 | 0.0521  | 0.2825 | 0.5489 |
| Tagln3  | _RGFS(Phospho (STY))EEQLR_2                                    | #N/A                   | 8.7997  | 8.5804  | 9.1973  | 9.2049  | 7.3583  | 8.7332 | 9.0307  | 8.7487  | 8.7662  | 8.9806  | 0.9759 | -0.0352 | 0.5628 | 0.2497 |
| Tagln3  | _GFSWFHR_2                                                     | #N/A                   | 7.7133  | 7.6226  | 7.2068  | 8.2740  | 8.0040  | 8.1717 | 7.7669  | 7.8247  | 8.2209  | 8.3499  | 0.9741 | -0.0379 | 0.3962 | 0.4021 |
| Tagln3  | _TTDFQTVDLWIEGK_2                                              | #N/A                   | 7.2949  | 6.9853  | 8.2020  | 7.6133  | 7.3409  | 7.3902 | 7.4715  | 7.2804  | 7.5707  | 7.1445  | 1.0142 | 0.0031  | 0.6523 | 0.1855 |
| Tagln3  | _GPSYGLSR_2                                                    | #N/A                   | 7.1870  | 7.2790  | 6.5097  | 7.4318  | 7.8213  | 7.2865 | 6.3933  | 7.3985  | 7.3318  | 7.2058  | 1.0240 | 0.0343  | 0.5676 | 0.2459 |
| Tagln3  | _TLM(Oxidation (M))ALGSVAVTK_2                                 | #N/A                   | 5.9440  | 6.5279  | 6.0271  | 6.1620  | 6.7933  | 6.1462 | 5.8541  | 6.4548  | 6.7241  | 6.3022  | 0.9965 | -0.0050 | 0.9125 | 0.0350 |
| Tagln3  | _AAEYGVGR_2                                                    | #N/A                   | 6.7366  | 6.5325  | 7.0633  | 6.7631  | 7.5543  | 6.9726 | 5.2362  | 7.1557  | 7.0839  | 7.1327  | 1.0428 | 0.0605  | 0.5118 | 0.2909 |
| Tagln3  | _WLM(Oxidation (M))DGTVLQ(Carbamidomethyl (C))K_2              | #N/A                   | 6.1756  | 6.9419  | 3.6709  | 6.6184  | 6.7350  | 6.7863 | 6.6293  | 7.0373  | 6.9737  | 6.8281  | 0.8963 | -0.1580 | 0.2972 | 0.5269 |
| Tagln3  | _LVDWILQ(Carbamidomethyl (C))AEDIEHPPGR_3                      | #N/A                   | 5.4303  | 5.2563  | 3.5517  | 5.6278  | 5.1340  | 3.9385 | 5.5157  | 5.1388  | 4.9689  | 5.7962  | 0.9007 | -0.1509 | 0.2839 | 0.5468 |
| Tagln3  | _QM(Oxidation (M))EQSGFLK_2                                    | #N/A                   | 6.0916  | 6.5457  | 6.8495  | 6.7087  | 7.1439  | 6.7075 | 6.3996  | 6.7056  | 6.8740  | 6.5630  | 1.0059 | 0.0084  | 0.8470 | 0.0721 |
| Tagln3  | _GGQNWGLMGSGNK_2                                               | #N/A                   | 3.1267  | 4.4693  | 3.8135  | 6.1866  | 3.7533  | 3.9762 | 4.3370  | 3.8023  | 3.1115  | 4.2832  | 1.0869 | 0.1202  | 0.5789 | 0.2374 |
| Atp6ap1 | _FY(Phospho (STY))PVSAR_2                                      | Q9R1Q9_Y326_M1_Atp6ap1 | 7.5853  | 7.1850  | 7.9667  | 7.6034  | 6.4660  | 7.0402 | 7.6546  | 7.6052  | 7.5110  | 7.5221  | 0.9649 | -0.0515 | 0.3556 | 0.4490 |
| Atp6ap1 | _Y(Phospho (STY))WFAMER_2                                      | Q9R1Q9_Y332_M1_Atp6ap1 | 4.1561  | 3.4115  | 4.5014  | 5.0846  | 3.2998  | 3.3248 | 3.2179  | 3.1144  | 4.2638  | 3.4702  | 1.1270 | 0.1724  | 0.3294 | 0.0842 |
| Trim3   | _S(Phospho (STY))PGGSGSHVR_2                                   | #N/A                   | 9.4883  | 9.5754  | 9.7708  | 9.9557  | 9.0084  | 9.5955 | 9.6542  | 9.5388  | 9.5170  | 9.5799  | 0.9993 | -0.0010 | 0.9683 | 0.0140 |
| Trim3   | _TGS(Phospho (STY))AELC(Carbamidomethyl (C))AETPGDQVR_2        | Q9R1R2_S359_M1_Trim3   | 3.7518  | 3.8907  | 6.7284  | 7.1400  | 6.0698  | 6.1074 | 3.7801  | 3.3738  | 3.6729  | 5.9595  | 1.2890 | 0.3663  | 0.2207 | 0.0540 |
| Trim3   | _EDS(Phospho (STY))PGPEVPMOK_2                                 | #N/A                   | 8.1995  | 6.7811  | 4.0188  | 9.3182  | 6.7646  | 3.3500 | 7.6563  | 3.4387  | 6.5381  | 7.1402  | 1.0342 | 0.0486  | 0.8835 | 0.0538 |
| Trim3   | _ALRPGDLPPS(Phospho (STY))PDQVVR_3                             | #N/A                   | 4.0275  | 7.0561  | 3.2134  | 8.6821  | 5.5842  | 6.2103 | 7.6299  | 6.8843  | 6.7150  | 9.0254  | 0.7612 | -0.3936 | 0.1201 | 0.9204 |
| Trim3   | _VKS(Phospho (STY))PGGSGSHVR_2                                 | #N/A                   | 8.5561  | 8.7232  | 8.9643  | 9.0993  | 8.1887  | 8.7069 | 8.7152  | 8.5856  | 8.5340  | 8.6918  | 1.0087 | 0.0124  | 0.6659 | 0.1766 |
| Trim3   | _S(Phospho (STY))PGPEVPMOK_2                                   | #N/A                   | 7.3509  | 6.5796  | 4.5979  | 9.0579  | 6.1013  | 3.3629 | 6.6552  | 5.3146  | 5.5996  | 6.3879  | 1.0310 | 0.0441  | 0.8649 | 0.0630 |
| Trim3   | _ALRPGDLPPS(Phospho (STY))PDQV_2                               | #N/A                   | 3.7667  | 3.0453  | 4.0259  | 3.6028  | 2.8791  | 3.5314 | 5.6865  | 5.4762  | 5.4598  | 3.5698  | 0.6884 | -0.3386 | 0.0082 | 2.0880 |
| Septin6 | _RNEFLGELQK_2                                                  | #N/A                   | 7.2796  | 6.7525  | 7.1370  | 6.8970  | 7.1119  | 7.0133 | 7.1989  | 7.0360  | 7.1018  | 6.9561  | 0.9942 | -0.0085 | 0.7011 | 0.1542 |
| Septin6 | _SDASKS(Phospho (STY))ELAK_2                                   | Q9R1T4_S192_M1_Septin6 | 6.8440  | 3.3324  | 7.5600  | 7.5246  | 6.6493  | 7.3773 | 7.4558  | 7.0761  | 7.1100  | 6.8381  | 0.9194 | -0.1212 | 0.5111 | 0.2915 |
| Septin6 | _EALKEAFELHKE_3                                                | #N/A                   | 6.8101  | 6.0369  | 7.3609  | 6.5564  | 6.5451  | 7.1748 | 7.5111  | 6.2934  | 6.7796  | 5.8997  | 1.0193 | 0.0276  | 0.7372 | 0.1324 |
| Septin6 | _NEFLGELQK_2                                                   | #N/A                   | 6.6392  | 5.9333  | 5.5147  | 6.2605  | 6.2010  | 6.1749 | 6.4142  | 6.2795  | 5.8424  | 6.1891  | 0.9902 | -0.0142 | 0.7840 | 0.1057 |
| Septin6 | _AAAEILQSGSQAGGS(Phospho (STY))ITLK_2                          | Q9R1T4_S416_M1_Septin6 | 4.7832  | 5.3145  | 3.5377  | 5.6702  | 4.3043  | 4.9567 | 4.5197  | 4.3549  | 4.8462  | 4.7843  | 1.0291 | 0.0414  | 0.7433 | 0.1288 |
| Septin6 | _STLM(Oxidation (M))DTLPNTK_2                                  | #N/A                   | 6.7653  | 6.1199  | 6.1507  | 6.9815  | 6.1288  | 6.5625 | 6.4826  | 5.9999  | 5.9912  | 6.5318  | 1.0320 | 0.0455  | 0.3968 | 0.1404 |
| Septin6 | _VNMEDLR_2                                                     | #N/A                   | 6.1911  | 4.7122  | 3.4901  | 6.3605  | 5.8478  | 3.7245 | 3.6176  | 3.4013  | 4.2391  | 4.1514  | 1.3120 | 0.3918  | 0.1077 | 0.9677 |
| Septin6 | _SVSQGF(Carbamidomethyl (C))FNL(Carbamidomethyl (C))VGETGLQK_2 | #N/A                   | 4.7672  | 3.0436  | 4.0325  | 6.2617  | 4.4262  | 6.4939 | 5.9090  | 4.7541  | 4.7956  | 5.7738  | 0.8548 | -0.2263 | 0.6416 | 0.2282 |
| Septin6 | _TVPLAGHVGDSPDQLVVK_3                                          | #N/A                   | 6.9729  | 7.3870  | 7.3714  | 7.4788  | 6.1938  | 5.8417 | 6.5683  | 7.2001  | 6.8201  | 6.6642  | 1.0090 | 0.0129  | 0.8734 | 0.0888 |
| Septin6 | _TDFDQSPKSLQETAYK_3                                            | #N/A                   | 4.5865  | 4.3655  | 3.6489  | 5.0001  | 4.6684  | 4.5482 | 3.5097  | 4.1945  | 4.1902  | 5.0160  | 1.0537 | 0.0755  | 0.5174 | 0.2562 |
| Septin6 | _QVGE(Carbamidomethyl (C))R_2                                  | #N/A                   | 2.9499  | 4.1203  | 3.5674  | 3.2086  | 5.2932  | 3.0302 | 4.4242  | 3.4090  | 3.0576  | 3.4054  | 1.0338 | 0.0480  | 0.8192 | 0.0866 |
| Adam22  | _SNS(Phospho (STY))TETLSPAK_2                                  | Q9R1V6_S855_M1_Adam22  | 10.0385 | 10.1152 | 10.4366 | 10.3049 | 9.7026  | 9.9390 | 10.5766 | 10.3678 | 10.1077 | 10.2822 | 0.9764 | -0.0345 | 0.1520 | 0.0812 |
| Adam22  | _SPSSS(Phospho (STY))TGSIASSR_2                                | Q9R1V6_S868_M1_Adam22  | 8.7755  | 9.0965  | 9.4640  | 9.2437  | 8.7715  | 3.8306 | 9.6605  | 8.5634  | 8.9816  | 7.5613  | 0.9450 | -0.0816 | 0.6902 | 0.1610 |
| Adam22  | _FAISENPULTR_2                                                 | #N/A                   | 5.7374  | 4.9579  | 4.9362  | 5.0090  | 5.1061  | 4.4292 | 6.0773  | 5.8599  | 5.2231  | 5.0308  | 0.9065 | -0.1416 | 0.1132 | 0.9461 |
| Adam22  | _FOPLGTVC(Carbamidomethyl (C))R_2                              | #N/A                   | 6.6246  | 4.2612  | 4.3158  | 6.4980  | 6.4056  | 6.5729 | 6.3424  | 6.4746  | 3.4407  | 6.0411  | 1.0367 | 0.0520  | 0.8088 | 0.0922 |
| Adam22  | _KLAS(Phospho (STY))EC(Carbamidomethyl (C))K_2                 | Q9R1V6_S387_M1_Adam22  | 6.5348  | 6.4845  | 6.1949  | 6.3683  | 6.0245  | 4.4099 | 6.8951  | 6.3205  | 6.2986  | 3.0546  | 1.0049 | 0.0070  | 0.9765 | 0.0103 |
| Adam22  | _S(Phospho (STY))NSTETSPAKS(Phospho (STY))PSSSTGSIASSR_3       | Q9R1V6_S853_M2_Adam22  | 3.6793  | 3.8544  | 3.7579  | 4.0299  | 3.8274  | 3.7060 | 5.5428  | 3.9203  | 3.6658  | 3.3905  | 0.9223 | -0.1166 | 0.4319 | 0.3646 |
| Adam22  | _DVL(Carbamidomethyl (C))GVLL(Carbamidomethyl (C))TNIGNPR_2    | #N/A                   | 3.0744  | 4.2680  | 4.3089  | 3.8526  | 2.8037  | 3.6401 | 3.9837  | 3.3235  | 3.4476  | 3.5299  | 1.0243 | 0.0346  | 0.8021 | 0.0958 |
| Adam22  | _LSVYNTYAK_2                                                   | #N/A                   | 3.7836  | 3.1647  | 3.5173  | 5.2594  | 4.6025  | 4.0550 | 3.5904  | 5.0605  | 3.8913  | 5.2500  | 0.9136 | -0.1304 | 0.4717 | 0.3264 |
| Adam22  | _SNS(Phospho (STY))WQGNMAGNK_2                                 | #N/A                   | 11.8630 | 10.5050 | 8.8241  | 12.5664 | 10.1484 | 7.4446 | 11.3248 | 9.9910  | 10.1528 | 10.6374 | 0.9714 | -0.0419 | 0.7698 | 0.1136 |
| Adam22  | _SNGLSHS(Phospho (STY))WSEKIPDTK_3                             | #N/A                   | 3.0121  | 3.8173  | 5.4997  | 5.8765  | 3.6387  | 4.0908 | 4.4516  | 4.1987  | 2.9969  | 3.9806  | 1.1064 | 0.1458  | 0.5251 | 0.2798 |
| Adam22  | _SNS(Phospho (STY))WQGNM(Oxidation (M))GGNKK_2                 | #N/A                   | 8.4825  | 8.1534  | 8.6152  | 9.1085  | 7.4342  | 8.7416 | 8.4579  | 8.0428  | 8.1368  | 9.0928  | 0.9028 | -0.1475 | 0.4729 | 0.3252 |
| Adam22  | _ADAVHPSGSGFESSR_3                                             | #N/A                   | 3.0150  | 3.6220  | 3.7018  | 4.2045  | 3.6415  | 4.0879 | 3.9192  | 3.9140  | 3.5626  | 4.1183  | 0.9571 | -0.0633 | 0.4956 | 0.3049 |
| Adam22  | _SNGLSHS(Phospho (STY))WSEK_2                                  | #N/A                   | 8.2773  | 7.2910  | 8.1080  | 7.2823  | 5.9120  | 7.7118 | 7.4567  | 7.1664  | 8.0749  | 6.8025  | 1.0075 | 0.0108  | 0.9116 | 0.0402 |
| Adam23  | _DNOC(Carbamidomethyl (C))QVWGTK_2                             | #N/A                   | 6.4756  | 5.8692  | 6.1893  | 6.2551  | 5.6403  | 5.7155 | 6.7377  | 6.0216  | 5.9563  | 6.1111  | 0.9706 | -0.0431 | 0.4331 | 0.3634 |
| Adam23  | _QDGVSC(Carbamidomethyl (C))NQNGQR_2                           | #N/A                   | 3.3447  | 3.9977  | 4.5792  | 4.1229  | 3.9892  | 3.9104 | 4.2712  | 4.3791  | 3.1773  | 3.8002  | 1.0214 | 0.0306  | 0.7847 | 0.1053 |
| Abcc5   | _S(Phospho (STY))EC(Carbamidomethyl (C))QDALETAAR_2            | Q9R1X5_S43_M1_Abcc5    | 6.7788  | 6.7622  | 5.7412  | 6.4487  | 5.3423  | 6.1761 | 7.2889  | 6.483   |         |         |        |         |        |        |



|          |                                                                                |                       |         |         |         |         |         |         |         |         |         |         |         |         |        |        |
|----------|--------------------------------------------------------------------------------|-----------------------|---------|---------|---------|---------|---------|---------|---------|---------|---------|---------|---------|---------|--------|--------|
| Ak3      | _HLSSGDLR_2                                                                    | #N/A                  | 5.2464  | 4.7956  | 3.5641  | 5.3414  | 6.1273  | 5.1031  | 3.5944  | 5.4996  | 4.7931  | 5.3906  | 1.0436  | 0.0616  | 0.7132 | 0.1468 |
| Ak3      | _EDDPEYVKR_3                                                                   | #N/A                  | 4.4744  | 4.0800  | 3.4922  | 4.5368  | 4.9050  | 3.9109  | 2.1536  | 4.1064  | 4.6807  | 4.2141  | 1.1293  | 0.1755  | 0.3750 | 0.4260 |
| Ak3      | _TLTQC[Carbamidomethyl] (C)[S]WLDGFR_2                                         | #N/A                  | 5.6624  | 4.8956  | 3.9455  | 4.0568  | 4.6959  | 3.8442  | 4.2050  | 4.4035  | 3.7532  | 3.7340  | 1.1225  | 0.1667  | 0.2339 | 0.6310 |
| Ak3      | _GLETFSGTEIN_2                                                                 | #N/A                  | 3.5304  | 4.5853  | 3.2641  | 4.3087  | 5.5990  | 5.6412  | 4.4570  | 4.1933  | 2.9915  | 5.6375  | 1.0390  | 0.0551  | 0.8073 | 0.0930 |
| Akap12   | _EGITPWAS[Phospho (STY)]IK_2                                                   | #N/A                  | 7.4094  | 7.0418  | 6.5998  | 7.1709  | 5.2367  | 3.5084  | 7.4263  | 6.4110  | 6.3816  | 4.4280  | 0.9999  | -0.0001 | 0.9995 | 0.0002 |
| Akap12   | _GPSEAPGEAEAEAGAT[Phospho (STY)]SDGEKKR_3                                      | Q9WQT5_T5B3_M1_Akap12 | 4.8930  | 8.8966  | 9.1919  | 8.3398  | 7.7925  | 7.6078  | 3.7483  | 8.1785  | 5.1090  | 7.8724  | 1.2505  | 0.3225  | 0.2155 | 0.6665 |
| Akap12   | _GPSEAPGEAEAEAGAT[Phospho (STY)]DGEK_2                                         | #N/A                  | 7.3043  | 7.3333  | 3.5569  | 7.9405  | 7.2296  | 7.3317  | 7.3997  | 6.9638  | 7.0354  | 7.1970  | 0.9488  | -0.0759 | 0.6673 | 0.1757 |
| Akap12   | _AADAASGNLTKP[Phospho (STY)]PD7NGPK_2                                          | #N/A                  | 5.7533  | 6.1959  | 5.6372  | 5.4818  | 5.0974  | 6.1367  | 5.7749  | 5.0522  | 5.0078  | 5.9827  | 1.0482  | 0.0679  | 0.3888 | 0.4600 |
| Akap12   | _EGITPWAS[Phospho (STY)]IK_2                                                   | #N/A                  | 4.1237  | 8.2312  | 8.5260  | 8.6696  | 3.2674  | 3.3572  | 8.6601  | 8.0745  | 7.5263  | 8.2903  | 0.7409  | -0.4327 | 0.1679 | 0.7750 |
| Akap12   | _EVC[Carbamidomethyl] (C)[V]SGGQHTQLTDL[Phospho (STY)]PEEK_3                   | #N/A                  | 3.5754  | 3.8265  | 3.7001  | 7.5424  | 3.5349  | 5.8144  | 3.7065  | 6.8108  | 6.0871  | 4.7598  | 0.8735  | -0.1951 | 0.5208 | 0.2833 |
| Akap12   | _EKEPTKPLE[Phospho (STY)]PTS[Phospho (STY)]PVSNETTSFK_3                        | #N/A                  | 3.3078  | 4.2487  | 3.9946  | 7.1704  | 3.9344  | 3.8465  | 3.9531  | 6.4099  | 3.5121  | 3.8910  | 0.9945  | -0.0080 | 0.9785 | 0.0094 |
| Akap12   | _VELPLEDCVGQLEALS[Phospho (STY)]EK_2                                           | #N/A                  | 4.3507  | 4.3763  | 3.5367  | 6.1455  | 5.5280  | 4.2531  | 3.7540  | 5.5445  | 5.6957  | 4.0063  | 0.9891  | -0.0158 | 0.9366 | 0.0285 |
| Akap12   | _EPTKPLE[Phospho (STY)]PTS[Phospho (STY)]PVSNETTSFK_3                          | #N/A                  | 3.1074  | 3.8637  | 4.3419  | 3.8857  | 3.7520  | 4.3735  | 4.0340  | 3.1155  | 3.4145  | 3.5630  | 1.1007  | 0.1384  | 0.2405 | 0.6189 |
| Akap12   | _SATLSSTESTAS[Phospho (STY)]GM[Oxidation (M)]QDEV_2                            | #N/A                  | 3.3952  | 3.7626  | 4.0820  | 6.8144  | 6.5701  | 6.6129  | 4.0232  | 6.0314  | 6.0894  | 3.5951  | 1.0550  | 0.0772  | 0.7876 | 0.1037 |
| Akap12   | _EPT[Phospho (STY)]KPLE[Phospho (STY)]PTS[Phospho (STY)]PVSNETTSFK_3           | Q9WQT5_T265_M2_Akap12 | 3.6174  | 3.7098  | 4.1295  | 3.9818  | 3.6558  | 3.7855  | 3.9733  | 3.9746  | 3.5206  | 3.7810  | 1.0002  | 0.0003  | 0.9947 | 0.0023 |
| Akap12   | _LS[Phospho (STY)]ADYKEVLEPLEDQVGQLEALSEK_3                                    | Q9WUT5_S350_M1_Akap12 | 4.0581  | 3.3428  | 3.4926  | 3.6822  | 3.1912  | 4.0386  | 4.2175  | 4.0464  | 4.0383  | 4.4026  | 0.8866  | -0.1736 | 0.0373 | 0.4280 |
| Akap12   | _C[Carbamidomethyl] (C)[Q]ETSENEEQ[Phospho (STY)]PEKR_2                        | #N/A                  | 3.6188  | 3.5886  | 3.7812  | 4.6781  | 3.4060  | 3.4910  | 4.2936  | 4.2424  | 4.6763  | 3.7963  | 0.8844  | -0.1772 | 0.1146 | 0.9407 |
| Akap12   | _TKEVC[Carbamidomethyl] (C)[V]SGGQHTQLTDL[Phospho (STY)]PEEK_3                 | #N/A                  | 4.0145  | 3.3279  | 3.7481  | 3.2919  | 3.1493  | 3.0794  | 3.4402  | 3.7093  | 4.0083  | 2.9692  | 0.9727  | -0.0400 | 0.7158 | 0.1452 |
| Akap12   | _AEDSAGEQLASIEPSRESWVS[Phospho (STY)]IKK_4                                     | #N/A                  | 3.3457  | 3.7837  | 3.9113  | 4.7277  | 3.6913  | 4.2435  | 4.2723  | 3.7408  | 3.2080  | 3.8013  | 1.0519  | 0.0730  | 0.5333 | 0.2731 |
| Akap12   | _HPFGSEVE[M]Oxidation (M)[L]SS[Phospho (STY)]QER_3                             | #N/A                  | 3.7575  | 3.6409  | 3.9234  | 4.0574  | 3.5292  | 3.9488  | 3.8419  | 3.6324  | 3.9249  | 1.0802  | 0.1113  | 0.1434  | 0.8434 | 0.8434 |
| Akap12   | _RPS[Phospho (STY)]ES[Phospho (STY)]DKEEELD_2                                  | Q9WUT5_S613_M2_Akap12 | 4.3506  | 3.6549  | 3.5365  | 4.0392  | 3.4762  | 4.2532  | 3.7539  | 4.0793  | 3.7279  | 4.0062  | 0.9983  | -0.0025 | 0.9748 | 0.0111 |
| Trp2     | _LETS[Phospho (STY)]DGEEGSAFNK_2                                               | Q9WTR1_S15_M1_Trp2    | 8.4352  | 8.4258  | 8.7138  | 8.5339  | 7.1321  | 8.0934  | 9.1178  | 8.8143  | 8.2988  | 8.3576  | 0.9513  | -0.0711 | 0.2388 | 0.6219 |
| Trp2     | _NFS[Phospho (STY)]PQIK_2                                                      | Q9WTR1_S47_M1_Trp2    | 6.1184  | 5.6476  | 3.8870  | 4.9390  | 3.8268  | 5.6473  | 5.7167  | 5.9548  | 5.3608  | 5.4748  | 0.8906  | -0.1672 | 0.2584 | 0.5877 |
| Trp2     | _NSAS[Phospho (STY)]EEDHLPLVLDQSH_3                                            | Q9WTR1_S743_M1_Trp2   | 4.1168  | 3.4212  | 3.3028  | 4.5048  | 3.2425  | 2.9861  | 3.3469  | 3.8800  | 3.9616  | 3.7724  | 0.9614  | -0.0569 | 0.6610 | 0.1798 |
| Cdh13    | _INENTGVSQVTR_2                                                                | #N/A                  | 4.5563  | 3.8409  | 4.7332  | 3.5336  | 7.3811  | 4.6188  | 3.6818  | 3.7334  | 4.6853  | 5.1437  | 1.1082  | 0.1482  | 0.5522 | 0.2579 |
| Cdh13    | _ETIATYQLVETTDASGK_2                                                           | #N/A                  | 3.6302  | 6.2982  | 3.3638  | 4.4085  | 4.2747  | 6.1883  | 7.1406  | 4.0936  | 4.3926  | 4.0857  | 0.9525  | -0.0702 | 0.7948 | 0.0998 |
| Tenn1    | _ANS[Phospho (STY)]I[Phospho (STY)]TDTDHER_2                                   | Q9WTS4_S142_M2_Tenn1  | 3.2471  | 4.0953  | 4.4816  | 4.0254  | 3.9166  | 3.8129  | 4.0178  | 2.9758  | 3.7027  | 1.1251  | 0.1701  | 0.1511  | 0.8207 | 0.1660 |
| Atp6v1g2 | _Acetyl (Protein N-term)[ASQTQGIQQLQAEK_2                                      | #N/A                  | 8.6272  | 8.3086  | 8.4753  | 8.6692  | 8.5935  | 8.2940  | 8.6201  | 8.0969  | 8.2625  | 8.4247  | 1.0172  | 0.0246  | 0.2711 | 0.5669 |
| Atp6v1g2 | _Acetyl (Protein N-term)[ASQTQGIQQLQAEK_3                                      | #N/A                  | 6.8517  | 7.2611  | 7.4109  | 7.3360  | 7.0200  | 7.0721  | 6.9444  | 6.7965  | 6.9068  | 7.0463  | 1.0340  | 0.0482  | 0.0773 | 0.1125 |
| Atp6v1g2 | _EREQFGSK_2                                                                    | #N/A                  | 6.3391  | 6.6596  | 7.1020  | 6.4692  | 6.8478  | 6.4472  | 5.5958  | 6.2913  | 5.7588  | 6.5566  | 1.0981  | 0.1350  | 0.0328 | 1.4835 |
| Atp6v1g2 | _VLAQLGM[Oxidation (M)]VC[Carbamidomethyl] (C)[EVRPQVHPNVR_3                   | #N/A                  | 6.3507  | 5.7427  | 6.7014  | 6.4420  | 5.6334  | 5.8686  | 6.1029  | 6.0748  | 6.1154  | 6.0256  | 1.0071  | 0.0103  | 0.8493 | 0.0709 |
| Atp6v1g2 | _QVQGM[Oxidation (M)]QSSQQR_2                                                  | #N/A                  | 5.4410  | 3.8180  | 4.2888  | 5.5334  | 5.6514  | 5.3639  | 4.0233  | 4.2913  | 5.0000  | 3.8809  | 1.1668  | 0.2226  | 0.1400 | 0.8540 |
| Atp6v1g2 | _EQAQM[Oxidation (M)]IEVQYR_3                                                  | #N/A                  | 6.5840  | 6.7084  | 6.7398  | 6.3556  | 8.0557  | 7.4391  | 6.3174  | 7.4125  | 6.6346  | 7.0749  | 1.0346  | 0.0490  | 0.5527 | 0.2575 |
| Atp6v1g2 | _QQAAM[Oxidation (M)]GS[Phospho (STY)]QGNLSAEVQATR_2                           | #N/A                  | 3.8263  | 4.3935  | 3.6249  | 5.1427  | 3.9323  | 4.6953  | 3.9837  | 4.1614  | 4.5472  | 4.4928  | 0.9937  | -0.0091 | 0.9335 | 0.0299 |
| Atp6v1g2 | _QQAAM[Oxidation (M)]GS[Phospho (STY)]QGNLSAEVQATR_3                           | #N/A                  | 4.2608  | 4.2846  | 5.0558  | 3.9457  | 4.5554  | 4.1682  | 3.2120  | 4.5629  | 4.7734  | 3.8730  | 1.0665  | 0.0929  | 0.4482 | 0.3485 |
| Atp6v1g2 | _EQAQMEVQYR_2                                                                  | #N/A                  | 3.7601  | 3.5823  | 3.4937  | 4.5383  | 3.4037  | 4.3258  | 3.1858  | 3.9637  | 4.2627  | 4.2156  | 0.9856  | -0.0209 | 0.8607 | 0.0652 |
| Ph2      | _RPSASS[Phospho (STY)]PNNTAAK_2                                                | Q9WUTD_S1060_M1_Ph2   | 3.9322  | 3.1877  | 6.6659  | 3.2097  | 3.0760  | 3.5487  | 3.4418  | 3.7915  | 4.0906  | 4.3878  | 0.8749  | -0.1928 | 0.0686 | 1.1639 |
| Ph2      | _DSQVYPSLES[Phospho (STY)]DEDPVTK_2                                            | Q9WUTD_S876_M1_Ph2    | 3.5910  | 3.8061  | 3.7375  | 3.8525  | 3.4442  | 3.6006  | 3.7236  | 3.8002  | 5.1373  | 4.3351  | 0.8642  | -0.2106 | 0.0645 | 1.1905 |
| Ph2      | _RKGS[Phospho (STY)]DQAPSPYTAB_3                                               | 3.2802                | 4.0854  | 3.9670  | 4.0352  | 3.9068  | 3.8227  | 4.1835  | 3.6488  | 4.6041  | 4.4367  | 0.9126  | -0.1320 | 0.1367  | 0.6481 |        |
| Scn8a    | _ELS[Phospho (STY)]EGEGKGDPK_2                                                 | Q9WUTU_S504_M1_Scn8a  | 2.9932  | 6.1028  | 3.6800  | 6.5033  | 3.6197  | 5.2148  | 6.6921  | 6.3547  | 6.4384  | 5.8548  | 0.7396  | -0.4351 | 0.0607 | 1.2168 |
| Scn8a    | _VKFS[Phospho (STY)]ES[Phospho (STY)]IEDGMR_2                                  | #N/A                  | 4.9382  | 3.5453  | 3.4269  | 5.8892  | 3.3667  | 4.3628  | 3.6443  | 4.1889  | 3.8375  | 3.8966  | 1.0933  | 0.1287  | 0.5083 | 0.2938 |
| Scn8a    | _FRDPGSENEFADEHS[Phospho (STY)]IT[Phospho (STY)]VEESGRR_4                      | Q9WUTU_S589_M2_Scn8a  | 4.0682  | 3.1580  | 3.2541  | 3.7568  | 3.0463  | 5.0595  | 3.4715  | 4.3617  | 4.0103  | 3.7238  | 0.9568  | -0.0637 | 0.6978 | 0.1563 |
| Scn8a    | _VKFS[Phospho (STY)]ES[Phospho (STY)]EDGMR_3                                   | #N/A                  | 3.3330  | 3.8732  | 4.0398  | 5.4525  | 3.9795  | 3.7500  | 4.2571  | 3.5760  | 3.2246  | 3.0086  | 1.1156  | 0.1578  | 0.2035 | 0.6915 |
| Mapk9    | _NYENRPK_2                                                                     | #N/A                  | 5.6012  | 3.1623  | 3.2498  | 5.2819  | 5.6068  | 5.2519  | 5.4851  | 5.7345  | 5.2879  | 5.7363  | 0.8438  | -0.2450 | 0.1850 | 0.7329 |
| Mapk9    | :[Carbamidomethyl] (C)[TNFM[Oxidation (M)]I[Phospho (STY)]PY[Phospho (STY)]VVI | #N/A                  | 4.1992  | 3.1776  | 3.7885  | 5.5567  | 3.3375  | 5.1618  | 3.6044  | 5.4680  | 3.8580  | 3.7499  | 1.0080  | 0.0115  | 0.9571 | 0.0190 |
| Mapk9    | _DIYDQWNK_2                                                                    | #N/A                  | 3.8764  | 3.1808  | 3.8953  | 3.4391  | 3.0021  | 3.2266  | 3.5874  | 3.5621  | 3.8611  | 3.1164  | 0.9731  | -0.0394 | 0.6862 | 0.1636 |
| Prkra    | _EDS[Phospho (STY)]GTFSLGK_2                                                   | #N/A                  | 9.8878  | 9.3707  | 10.0117 | 9.9603  | 8.9317  | 9.6973  | 9.5244  | 9.4592  | 9.7138  | 9.8277  | 1.0012  | 0.0018  | 0.9587 | 0.0183 |
| Prkra    | _AEAPPLQRED[Phospho (STY)]GTFSLGK_3                                            | #N/A                  | 5.6654  | 4.0377  | 4.1866  | 4.0148  | 3.9260  | 3.8022  | 4.4171  | 3.9508  | 5.9152  | 3.8057  | 0.9579  | -0.0620 | 0.7303 | 0.1365 |
| Prkra    | _HRAEAPLQRED[Phospho (STY)]GTFSLGK_4                                           | #N/A                  | 3.7588  | 6.5155  | 3.4925  | 8.3783  | 2.9025  | 3.7221  | 3.6152  | 3.9649  | 4.2640  | 4.2144  | 1.1944  | 0.2562  | 0.5012 | 0.3000 |
| Skp1     | _GKT[Phospho (STY)]PEERK_2                                                     | #N/A                  | 11.3845 | 11.6140 | 12.1956 | 12.1156 | 11.7864 | 11.8637 | 11.5820 | 11.5881 | 11.7308 | 11.7308 | 1.0104  | 0.0149  | 0.4791 | 0.3196 |
| Skp1     | _GKT[Phospho (STY)]PEER_2                                                      | #N/A                  | 9.6518  | 9.5391  | 9.9364  | 9.7207  | 9.6554  | 9.7257  | 9.7704  | 9.5510  | 9.6282  | 9.6790  | 1.0046  | 0.0066  | 0.5891 | 0.2298 |
| Skp1     | _TDIDPVWDQFLK_2                                                                | #N/A                  | 8.4739  | 8.0762  | 8.0585  | 8.3251  | 8.6415  | 8.4288  | 8.3680  | 7.6958  | 8.1929  | 8.3318  | 1.0229  | 0.0327  | 0.3035 | 0.5179 |
| Skp1     | _TIDPVWDQFLK_2                                                                 | #N/A                  | 7.2152  | 6.8828  | 7.2182  | 7.5795  | 6.8612  | 6.7297  | 7.1250  | 6.7325  | 6.7524  | 7.1402  | 1.0207  | 0.0296  | 0.4573 | 0.3398 |
| Skp1     | _RTDIDPVWDQFLK_3                                                               | #N/A                  | 4.5363  | 6.8096  | 6.0465  | 7.3919  | 6.5367  | 4.9418  | 5.8073  | 6.1691  | 5.5791  | 5.0353  | 1.0819  | 0.1136  | 0.4219 | 0.3748 |
| Skp1     | _LQSSDGEFEVDEIAK_2                                                             | #N/A                  | 6.8339  | 6.8337  | 8.0386  | 8.0417  | 6.9278  | 7.4803  | 7.4827  | 6.3296  | 6.8980  | 7.4883  | 1.0439  | 0.0620  | 0.4246 | 0.3730 |
| Pipn4    | _S[Phospho (STY)]PSKPLAR_2                                                     | Q9WU12_S358_M1_Pipn4  | 7.9581  | 6.9220  | 4.3992  | 7.5850  | 2.8381  | 7.4023  | 7.1727  | 7.7973  | 7.4337  | 0.9477  | -0.0775 | 0.7995  | 0.0972 | 0.0772 |
| Pipn4    | _NSS[Phospho (STY)]ITGEATR_2                                                   | Q9WU12_S403_M1_Pipn4  | 4.1342  | 6.4794  | 3.8679  | 6.8559  | 5.5200  | 6.9480  | 6.7212  | 6.4968  | 6.4166  | 3.0889  | 0.9918  | -0.0119 | 0.9631 | 0.0163 |
| Pfn5     | _IQPALGEK_2                                                                    | #N/A                  | 5.3135  | 6.0025  | 5.7567  | 5.2260  | 6.6896  | 5.6336  | 5.0125  | 5.4549  | 5.7863  | 3.9445  | 1.1427  | 0.1925  | 0.1228 | 0.9106 |
| Pfn5     | _NGLDQGEVEFLSTSIAGLK_3                                                         | #N/A                  | 3.9808  | 3.9988  | 3.1759  | 3.6785  | 2.8427  | 3.5001  | 3.3932  | 4.4399  | 4.0885  | 3.6455  | 0.9069  | -0.1410 | 0.2570 | 0.5900 |
| LemD3    | _VLLGFSDES[Phospho (STY)]DVEASPR_2                                             | Q9WU40_S140_M1_LemD3  | 3.3706  | 3.4334  | 4.0574  | 3.9170  | 3.2548  | 3.8210  | 3.8254  | 3.6967  | 3.6408  | 3.7723  | 0.9755  | -0.0358 | 0.6093 | 0.2152 |
| Ncor2    | _EGT[Phospho (STY)]PPPPPPR_2                                                   | Q9WU42_T1350_M1_Ncor2 | 9.2287  | 9.5198  | 9.4688  | 10.2037 | 8.8397  | 9.5059  | 9.8425  | 9.7404  | 9.4635  | 9.4649  | 0.9827  | -0.0252 | 0.5075 | 0.2945 |
| Ncor2    | _S[Phospho (STY)]GNTSQPPAFFSK_2                                                | Q9WU42_S2215_M1_Ncor2 | 8.6164  |         |         |         |         |         |         |         |         |         |         |         |        |        |



|          |                                                             |                          |         |         |         |         |         |         |         |         |         |         |        |         |        |        |
|----------|-------------------------------------------------------------|--------------------------|---------|---------|---------|---------|---------|---------|---------|---------|---------|---------|--------|---------|--------|--------|
| Pfkp     | _KVTFEHR_2                                                  | #N/A                     | 6.4562  | 4.4148  | 3.3922  | 5.4230  | 5.1519  | 5.8880  | 6.4886  | 6.0570  | 6.1076  | 5.3970  | 0.8517 | -0.2315 | 0.1659 | 0.7801 |
| Pfkp     | _JIEVDAM(Oxidation (M))ITTAQSHQR_2                          | #N/A                     | 4.4041  | 4.1034  | 4.2185  | 4.4919  | 3.8176  | 3.7877  | 3.3501  | 3.8322  | 3.4762  | 4.1068  | 1.1249 | 0.1698  | 0.0454 | 1.3434 |
| Pfkp     | _LGITNC(Carbamidomethyl (C))VIGDGSGLGANLFR_2                | #N/A                     | 2.4482  | 1.8401  | 4.5614  | 2.3208  | 0.3985  | 1.2830  | 4.2534  | 1.2167  | 3.1951  | 2.4467  | 0.7711 | -0.3751 | 0.4887 | 0.3109 |
| Pfkp     | _WDC(Carbamidomethyl (C))VSLQSGGTIGSAR_2                    | #N/A                     | 3.7699  | 3.9146  | 3.7962  | 3.7450  | 3.7359  | 3.3600  | 3.7964  | 3.2259  | 3.3891  | 3.4256  | 1.0755 | 0.1049  | 0.0896 | 1.0478 |
| Rbck1    | _ALLS(Phospho (STY))PEDYQR_2                                | Q9WUB0_S344_M1_Rbck1     | 8.2114  | 8.5903  | 8.7609  | 9.1701  | 3.5014  | 8.8427  | 8.6875  | 8.5418  | 8.4406  | 8.6515  | 0.9063 | -0.1419 | 0.4789 | 0.3197 |
| Pgym     | _LITAGDVVNHOPAVGDR_3                                        | #N/A                     | 5.1272  | 5.4862  | 4.5781  | 4.5945  | 4.2281  | 5.4050  | 5.3497  | 5.3478  | 4.8565  | 5.1284  | 0.9483 | -0.0766 | 0.3610 | 0.4424 |
| Pgym     | _JGEDYSOLOQLRK_3                                            | #N/A                     | 4.2436  | 3.9473  | 3.9773  | 5.1238  | 3.1934  | 3.2373  | 4.5410  | 4.7477  | 3.8041  | 3.5230  | 0.9518 | -0.0712 | 0.6548 | 0.1839 |
| Pgym     | _I(Acetyl (Protein N-term))SRPLSQDQKR_3                     | #N/A                     | 2.3209  | 3.7205  | 4.1987  | 3.7425  | 3.6088  | 3.0158  | 3.8908  | 3.2587  | 3.5577  | 3.7885  | 1.0187 | 0.0268  | 0.8745 | 0.0582 |
| Lyfh     | _QC(Carbamidomethyl (C))QPTDVC(Carbamidomethyl (C))ASVR_2   | #N/A                     | 6.5889  | 6.8455  | 6.5711  | 6.4272  | 7.0291  | 6.1683  | 6.4942  | 6.2658  | 6.6482  | 6.1128  | 1.0352 | 0.0500  | 0.2501 | 0.6019 |
| Stub1    | _WNS(Phospho (STY))IEER_2                                   | Q9WUD1_S150_M1_Stub1     | 6.5224  | 6.1541  | 6.2576  | 6.4393  | 6.0125  | 6.4490  | 6.0461  | 5.9709  | 6.1461  | 6.4912  | 1.0231 | 0.0329  | 0.3261 | 0.4866 |
| Stub1    | _LGTGGGGS(Phospho (STY))PKKSPSAQLK_2                        | #N/A                     | 7.8831  | 8.0674  | 8.4191  | 8.6360  | 7.1074  | 7.3996  | 8.2904  | 7.9783  | 7.8490  | 8.1235  | 0.9824 | -0.0256 | 0.6583 | 0.1816 |
| CaspRap2 | _KNS(Phospho (STY))PGVSHSQK_2                               | Q9WUF3_S1818_M1_CaspRap2 | 9.3343  | 9.3811  | 9.9373  | 9.6533  | 8.2508  | 9.2518  | 9.7192  | 9.6118  | 9.3272  | 9.2267  | 0.9821 | -0.0261 | 0.5948 | 0.2257 |
| Tmem115  | _TDS(Phospho (STY))PLPLEASTPPGK_2                           | Q9WUH1_S320_M1_Tmem115   | 6.9929  | 5.4538  | 3.4286  | 7.0296  | 3.1268  | 4.1030  | 7.4181  | 4.1105  | 6.7637  | 6.0884  | 0.8240 | -0.2793 | 0.3373 | 0.4719 |
| Eif4h    | _EALTYOGALLGDR_2                                            | #N/A                     | 6.9780  | 6.2935  | 6.2919  | 7.0165  | 7.0863  | 6.2251  | 6.5389  | 6.2405  | 6.1470  | 6.8599  | 1.0313 | 0.0445  | 0.4387 | 0.3578 |
| Eif4h    | _I(Acetyl (Protein N-term))ADFDYDOR_2                       | #N/A                     | 5.9488  | 6.8127  | 6.8701  | 6.6532  | 6.9351  | 6.8671  | 7.0349  | 5.6759  | 6.4648  | 6.6255  | 1.0358 | 0.0508  | 0.4550 | 0.3420 |
| Eif4h    | _TVATPLNQVANPNPSAIFGGAR_2                                   | #N/A                     | 4.5034  | 4.7483  | 4.5460  | 4.8828  | 5.0122  | 4.4149  | 4.0185  | 4.5349  | 4.0185  | 3.5862  | 1.1774 | 0.2356  | 0.0080 | 2.0964 |
| Eif4h    | _GSNM(Oxidation (M))DFRPTTEER_3                             | #N/A                     | 5.0601  | 4.3637  | 5.5876  | 5.2760  | 6.0558  | 5.2878  | 3.6803  | 4.3947  | 4.9779  | 5.2013  | 1.1552 | 0.2081  | 0.1095 | 0.9607 |
| Eif4h    | _DKDQKFK_2                                                  | #N/A                     | 4.8285  | 4.6699  | 3.1588  | 4.0895  | 5.4959  | 5.1139  | 4.9369  | 4.0953  | 4.1056  | 5.0187  | 1.0045 | 0.0064  | 0.9666 | 0.0148 |
| Eif4h    | _AYSSGGGR_2                                                 | #N/A                     | 4.1720  | 3.8682  | 4.0448  | 4.5474  | 3.9696  | 3.7450  | 4.2621  | 3.5710  | 4.5575  | 4.2659  | 0.9745 | -0.0373 | 0.6405 | 0.1935 |
| Zbtb18   | _TVAS(Phospho (STY))PC(Carbamidomethyl (C))SSTESQSR_2       | Q9WUK6_S214_M1_Zbtb18    | 6.9143  | 3.0226  | 4.4050  | 3.4069  | 2.8439  | 3.1847  | 7.3257  | 3.2108  | 7.0324  | 3.3739  | 0.7633 | -0.1897 | 0.3252 | 0.4879 |
| Ar3      | _ILLGLDNAGK_2                                               | #N/A                     | 6.1160  | 6.6995  | 6.1587  | 6.6452  | 5.9942  | 6.1768  | 6.4112  | 6.5037  | 6.2991  | 5.8491  | 1.0052 | 0.0075  | 0.8680 | 0.0615 |
| Ar3      | _LNNWDGGGR_2                                                | #N/A                     | 5.5137  | 6.0074  | 5.7171  | 6.3339  | 6.5228  | 5.4719  | 6.1180  | 5.6282  | 5.5952  | 1.0159  | 0.0228 | 0.7710  | 0.1481 | 0.4815 |
| Ar3      | _QDILLTAAPASEAELGNNHTR_3                                    | #N/A                     | 3.1776  | 3.9339  | 4.4121  | 4.9718  | 3.8222  | 4.5649  | 4.1964  | 3.0453  | 3.8881  | 3.6332  | 1.1236 | 0.1682  | 0.2608 | 0.5837 |
| Coro1b   | _LEQLGR_2                                                   | #N/A                     | 4.7783  | 4.7483  | 3.9773  | 4.7164  | 5.9120  | 5.3754  | 4.9980  | 5.5539  | 4.8889  | 4.8700  | 0.9685 | -0.0461 | 0.6687 | 0.1748 |
| Coro1b   | _VTWOSTFC(Carbamidomethyl (C))AVNPR_2                       | #N/A                     | 3.3531  | 4.1583  | 4.0399  | 4.5425  | 3.9796  | 3.7499  | 4.2572  | 3.5759  | 3.5755  | 3.0087  | 1.1016 | 0.1396  | 0.2376 | 0.6242 |
| Coro1c   | _NDQC(Carbamidomethyl (C))YDOR_2                            | #N/A                     | 5.1370  | 5.1266  | 5.2451  | 4.9163  | 4.5555  | 5.6056  | 4.4803  | 5.0825  | 5.0825  | 4.4127  | 1.0699 | 0.0975  | 0.1855 | 0.7318 |
| Coro1c   | _VTWDSFCC(Carbamidomethyl (C))AVNPR_2                       | #N/A                     | 3.7966  | 3.5458  | 3.5303  | 2.5809  | 3.6743  | 3.6843  | 4.6413  | 3.9745  | 4.2262  | 4.2120  | 0.8136 | -0.2976 | 0.0137 | 1.8648 |
| Suc1g1   | _LUGPNC(Carbamidomethyl (C))GVNPGEC(Carbamidomethyl (C))K_2 | #N/A                     | 9.0606  | 9.3616  | 9.5916  | 9.5669  | 9.1658  | 8.9723  | 9.2314  | 9.0328  | 9.1024  | 8.9219  | 1.0236 | 0.0337  | 0.1720 | 0.7645 |
| Suc1g1   | _HLGLPVFNTWK_2                                              | #N/A                     | 7.7781  | 8.0337  | 8.2349  | 8.1186  | 8.0886  | 8.0720  | 7.5143  | 8.2804  | 7.9154  | 8.1255  | 1.0120 | 0.0172  | 0.5486 | 0.2608 |
| Suc1g1   | _LVGGTTPGK_2                                                | #N/A                     | 6.5046  | 7.2843  | 6.8546  | 6.9331  | 7.6726  | 6.9872  | 6.0679  | 7.1165  | 7.3685  | 7.2399  | 1.0131 | 0.0188  | 0.7770 | 0.1096 |
| Suc1g1   | _IIC(Carbamidomethyl (C))QGTGK_2                            | #N/A                     | 6.5173  | 6.3300  | 6.8096  | 6.8096  | 7.4299  | 6.5903  | 5.7347  | 6.5306  | 7.0000  | 6.9280  | 1.0251 | 0.0358  | 0.5999 | 0.2219 |
| Suc1g1   | _MGHAGAIAGK_2                                               | #N/A                     | 5.6397  | 5.2198  | 4.4611  | 6.1567  | 4.7523  | 3.4249  | 5.4804  | 4.7619  | 6.0264  | 5.6656  | 0.9013 | -0.1499 | 0.3398 | 0.4688 |
| Suc1g1   | _ISAIQSAGVVMVM(Oxidation (M))SPAQLGTTYK_3                   | #N/A                     | 3.1110  | 3.9162  | 3.1599  | 3.6222  | 3.7375  | 3.9920  | 4.3528  | 4.2975  | 3.0957  | 3.7275  | 0.9280 | -0.1078 | 0.3819 | 0.4180 |
| Suc1g1   | _GGTHFSQDALEYGK_3                                           | #N/A                     | 4.7949  | 4.3243  | 4.2059  | 4.2826  | 4.1456  | 3.5839  | 3.9447  | 3.4099  | 3.0585  | 3.9870  | 1.1730 | 0.2302  | 0.0470 | 1.3280 |
| Ecl2     | _ASQDGFENALNQK_2                                            | #N/A                     | 3.7400  | 4.3539  | 4.0458  | 3.1669  | 4.7523  | 2.6712  | 4.1047  | 3.4943  | 3.5907  | 3.6337  | 1.0223 | 0.0318  | 0.8443 | 0.0735 |
| At4      | _IAQNFGLQHSSGHLR_3                                          | #N/A                     | 5.1512  | 3.7513  | 4.2295  | 4.0712  | 4.3902  | 4.6492  | 5.2929  | 5.7177  | 3.5270  | 5.3126  | 0.8814 | -0.1822 | 0.2354 | 0.6282 |
| Trip1    | _YLQQLS(Phospho (STY))PLTR_2                                | Q9WUUR_S416_M1_Trip1     | 6.8057  | 7.1905  | 4.3784  | 3.9222  | 6.7912  | 6.8555  | 7.3930  | 6.9499  | 6.7807  | 6.9218  | 0.8544 | -0.2270 | 0.2064 | 0.6853 |
| Gabb1    | _HPPIT(Phospho (STY))PPDPSSGLPR_2                           | #N/A                     | 8.8914  | 2.2738  | 9.5523  | 4.2831  | 3.1276  | 8.4317  | 3.4263  | 5.6084  | 8.7602  | 4.1520  | 1.1409 | 0.1902  | 0.6780 | 0.1688 |
| Gabb1    | _RHPPIT(Phospho (STY))PPDPSSGLPR_3                          | #N/A                     | 3.3461  | 7.0093  | 4.5806  | 6.8034  | 3.9907  | 4.1348  | 6.6202  | 4.3776  | 3.1758  | 4.0466  | 1.0927 | 0.1129  | 0.6777 | 0.1690 |
| Nfat5    | _RSS(Phospho (STY))PIFQTK_2                                 | Q9WV30_S618_M1_Nfat5     | 6.0814  | 4.3881  | 3.5248  | 4.0275  | 4.8398  | 4.2649  | 6.0919  | 4.0910  | 3.7396  | 3.9945  | 1.0093 | 0.0134  | 0.9478 | 0.0233 |
| Mpp2     | _TIVLUGAGVGGR_2                                             | #N/A                     | 5.8393  | 5.6268  | 5.6013  | 6.1323  | 6.0431  | 5.6883  | 5.0503  | 6.0144  | 5.7881  | 6.0275  | 1.0178 | 0.0254  | 0.6480 | 0.1884 |
| Mpp2     | _VEGELVIAR_2                                                | #N/A                     | 5.8842  | 5.5087  | 4.7268  | 5.8769  | 5.9824  | 5.8612  | 5.5863  | 5.7945  | 6.0348  | 5.9697  | 0.9697 | -0.0444 | 0.5070 | 0.2950 |
| Mpp2     | _DNNEILVQEILR_2                                             | #N/A                     | 5.5230  | 5.3966  | 5.5724  | 6.0212  | 6.4027  | 5.5457  | 5.9733  | 5.4071  | 4.7336  | 5.8081  | 1.0480 | 0.0676  | 0.3974 | 0.4008 |
| Mpp2     | _GIM(Oxidation (M))ES(Phospho (STY))PIVR_2                  | #N/A                     | 9.5971  | 8.7866  | 9.7592  | 10.0903 | 6.4957  | 9.2529  | 8.7757  | 9.1901  | 9.0147  | 9.3220  | 0.9913 | -0.0126 | 0.9097 | 0.0411 |
| Mpp2     | _DLAELAQSS(Phospho (STY))TAAELAR_2                          | Q9WV31_S86_M1_Mpp2       | 3.9117  | 3.1672  | 3.6454  | 3.7476  | 6.0254  | 3.5691  | 6.8132  | 3.8120  | 4.1110  | 4.3673  | 0.8399 | -0.2518 | 0.3391 | 0.2697 |
| Mpp2     | _EGQGYFVSR_2                                                | #N/A                     | 6.7289  | 6.1274  | 3.6485  | 6.3063  | 6.2462  | 6.1047  | 6.5604  | 6.0763  | 5.9007  | 6.3876  | 0.9405 | -0.0885 | 0.5383 | 0.4600 |
| Mpp2     | _DLELT(Phospho (STY))PTSGL(Carbamidomethyl (C))GLSGK_2      | Q9WV34_T303_M1_Mpp2      | 3.0601  | 3.8653  | 3.7469  | 4.2554  | 3.6867  | 4.0428  | 4.4036  | 6.2934  | 3.0449  | 3.9326  | 0.8546 | -0.2267 | 0.3006 | 0.5221 |
| Mpp2     | _ALQEILR_2                                                  | #N/A                     | 4.6881  | 4.1132  | 3.5319  | 6.1440  | 4.2827  | 4.3306  | 3.1178  | 4.8703  | 4.6327  | 4.4677  | 0.9972 | -0.0041 | 0.9753 | 0.0101 |
| Mpp2     | _TYET(Phospho (STY))PPSP(Phospho (STY))PGDPTFSNQPVPDAVR_3   | Q9WV34_T117_M2_Mpp2      | 3.6408  | 3.3937  | 3.4562  | 3.8160  | 3.2328  | 7.6868  | 3.6456  | 9.7963  | 3.8414  | 4.0186  | 0.7895 | -0.3410 | 0.4675 | 0.3302 |
| Mpp2     | _LPSYQEPHLPR_3                                              | #N/A                     | 3.4279  | 5.3879  | 5.7904  | 4.9047  | 5.2754  | 4.9486  | 4.3591  | 5.0173  | 5.3385  | 3.4810  | 1.0894 | 0.1236  | 0.4627 | 0.3347 |
| Mpp2     | _NAEFDRIELLYEEVAR_4                                         | #N/A                     | 3.4627  | 4.2190  | 3.1964  | 4.2410  | 4.1073  | 4.0182  | 3.9113  | 3.5859  | 3.6072  | 3.9183  | 1.0315 | 0.0448  | 0.6277 | 0.2022 |
| Mpp2     | _YLEHGEYGLVIGTR_3                                           | #N/A                     | 4.1644  | 3.4687  | 3.3503  | 3.1511  | 3.2900  | 2.9386  | 3.2994  | 3.8500  | 4.1491  | 4.3293  | 0.8687 | -0.2031 | 0.1025 | 0.9893 |
| Vapa     | _VAHSDXPGS(Phospho (STY))TSVAFSR_3                          | Q9WV55_S214_M1_Vapa      | 3.3404  | 4.0967  | 4.5749  | 5.5624  | 3.9850  | 4.1405  | 4.4673  | 4.6264  | 3.4481  | 3.7960  | 1.0487 | 0.0686  | 0.6619 | 0.1792 |
| Gak3b    | _IQAAAS(Phospho (STY))PANATAASQTNAGDR_2                     | #N/A                     | 8.9528  | 8.9622  | 9.4645  | 9.5681  | 7.7608  | 8.6947  | 9.5177  | 9.4802  | 9.0424  | 8.7929  | 0.9666 | -0.0490 | 0.4168 | 0.3801 |
| Gak3b    | _GQTNNASASASNT_2                                            | #N/A                     | 4.9362  | 5.9035  | 4.3967  | 4.9518  | 3.7690  | 5.0683  | 5.1271  | 5.9653  | 5.1539  | 6.0057  | 0.8696 | -0.2016 | 0.1165 | 0.9305 |
| Gak3b    | _VTTVATGTGGDPDPQOEVSOTTK_3                                  | #N/A                     | 4.2284  | 4.1424  | 4.0241  | 4.5041  | 4.9209  | 4.9762  | 4.5538  | 4.0659  | 4.7405  | 4.9651  | 0.9719 | -0.0411 | 0.6341 | 0.1978 |
| Dmtm     | _GNS(Phospho (STY))LPC(Carbamidomethyl (C))VLEQK_2          | #N/A                     | 14.0214 | 13.6430 | 13.9746 | 14.2792 | 12.9761 | 13.7851 | 14.0740 | 13.4144 | 13.6539 | 13.8576 | 1.0022 | 0.0031  | 0.9095 | 0.0412 |
| Dmtm     | _ESVGGGS(Phospho (STY))PCQK_2                               | #N/A                     | 7.4739  | 11.5273 | 11.8058 | 11.7312 | 11.0155 | 11.5517 | 11.3997 | 11.2582 | 11.0189 | 11.4616 | 0.9616 | -0.0565 | 0.6274 | 0.2024 |
| Dmtm     | _HLS(Phospho (STY))AEDFSR_2                                 | Q9WV69_S372_M1_Dmtm      | 10.9599 | 11.1226 | 11.5495 | 11.7756 | 10.3109 | 11.0749 | 11.2583 | 10.9844 | 11.3954 | 10.9661 | 0.9961 | -0.0057 | 0.8745 | 0.0582 |
| Dmtm     | _GAEEEEEDDD(Phospho (STY))EEEEK_2                           | #N/A                     | 11.0424 | 11.3079 | 11.4506 | 12.0751 | 11.1770 | 11.3468 | 11.6118 | 11.2426 | 11.0448 | 11.4045 | 1.0065 | 0.0094  | 0.7295 | 0.1376 |
| Dmtm     | _OPLTS(Phospho (STY))PGSVSSSR_2                             | Q9WV69_S11_M1_Dmtm       | 9.9868  | 10.1163 | 10.5503 | 10.7087 | 9.8220  | 10.2557 | 10.1932 | 9.7833  | 10.0531 | 10.2150 | 1.0178 | 0.0254  | 0.3728 | 0.4280 |
| Dmtm     | _SREC(Carbamidomethyl (C))SLS(Phospho (STY))PK_2            | #N/A                     | 8.3047  | 8.8186  | 8.9230  | 8.9921  | 8.0240  | 8.5713  | 8.7242  | 8.1131  | 8.5592  | 8.8180  | 1.0061 | 0.0087  | 0.8272 | 0.0824 |
| Dmtm     | _TLGISQASTPR_2                                              | #N/A                     | 6.9761  | 6.9435  | 6.8339  | 7.1887  | 7.0799  | 7.0062  | 6.5474  | 6.8086  | 6.5486  | 7.4099  |        |         |        |        |



|          |                                                                            |                       |         |         |         |         |         |         |         |         |         |         |         |         |        |        |
|----------|----------------------------------------------------------------------------|-----------------------|---------|---------|---------|---------|---------|---------|---------|---------|---------|---------|---------|---------|--------|--------|
| Stxbp4   | _SSS[Phospho (STY)]PLDRDPAFR_2                                             | Q9WV89_S12_M1_Stxbp4  | 3.7113  | 3.0157  | 4.3981  | 3.6042  | 2.8370  | 3.3917  | 3.7525  | 3.3970  | 3.6960  | 3.2815  | 0.9890  | -0.0159 | 0.8997 | 0.0459 |
| Epb413   | _VESTSVGSS[Phospho (STY)]PGGAK_2                                           | Q9WV92_S804_M1_Epb413 | 10.9193 | 10.9245 | 11.3085 | 11.1935 | 9.7673  | 11.0636 | 11.0311 | 10.6459 | 10.7278 | 10.9106 | 1.0031  | 0.0045  | 0.9106 | 0.0407 |
| Epb413   | _ETET[Phospho (STY)]PEDGED_2                                               | #N/A                  | 9.5591  | 9.6981  | 9.9639  | 10.3405 | 9.3583  | 9.7859  | 10.0037 | 9.6459  | 9.6807  | 1.2028  | 0.9866  | 0.2439  | 0.6128 |        |
| Epb413   | _DSVS[Phospho (STY)]AEVGTQGYATIK_2                                         | Q9WV92_S470_M1_Epb413 | 7.0900  | 6.8860  | 6.6356  | 7.6749  | 6.4996  | 7.1483  | 7.4229  | 7.0314  | 7.1530  | 7.3284  | 0.9662  | -0.0497 | 0.3084 | 0.5108 |
| Epb413   | _KKAEEAT[Phospho (STY)]PVTALR_3                                            | #N/A                  | 7.7850  | 7.6488  | 8.5231  | 7.6563  | 3.8382  | 8.1971  | 7.5762  | 7.5388  | 7.6578  | 3.1729  | 1.1215  | 0.1655  | 0.5400 | 0.2660 |
| Epb413   | _RLS[Phospho (STY)]TSPVR_2                                                 | Q9WV92_S599_M1_Epb413 | 7.5295  | 8.4616  | 7.9964  | 3.7319  | 3.5982  | 3.8917  | 8.1935  | 3.2988  | 8.8795  | 7.4975  | 0.8422  | -0.2477 | 0.5002 | 0.3008 |
| Epb413   | _EVPVVHTEK_2                                                               | #N/A                  | 7.4900  | 7.2388  | 7.5398  | 7.3824  | 7.8287  | 7.2196  | 7.2946  | 7.1310  | 7.4813  | 7.4469  | 1.0152  | 0.0217  | 0.4218 | 0.3749 |
| Epb413   | _AEEAAT[Phospho (STY)]PVTALR_2                                             | #N/A                  | 8.0574  | 3.9594  | 3.1167  | 4.1613  | 4.0276  | 7.8086  | 4.3096  | 7.1403  | 7.4906  | 7.8740  | 0.7740  | -0.3696 | 0.2688 | 0.5706 |
| Epb413   | _ASALDRPAPFIFR_3                                                           | #N/A                  | 7.4124  | 7.1647  | 7.1973  | 7.3426  | 7.0826  | 7.1571  | 7.6524  | 7.2780  | 7.7958  | 7.2898  | 0.9630  | -0.0544 | 0.0511 | 1.2912 |
| Epb413   | _SHFESTVR_2                                                                | #N/A                  | 6.8801  | 6.5881  | 6.6292  | 7.2272  | 6.7452  | 6.4019  | 6.4875  | 6.8090  | 6.5192  | 1.0382  | 0.5042  | 0.1050  | 0.9790 |        |
| Epb413   | _LM[Oxidation (M)]DGSSEILLESAR_2                                           | #N/A                  | 6.2338  | 6.0442  | 6.8883  | 5.8301  | 6.3237  | 6.5333  | 6.2948  | 6.1218  | 6.3587  | 6.5883  | 0.9950  | -0.0073 | 0.8795 | 0.0558 |
| Epb413   | _KAAEAT[Phospho (STY)]PVTALR_2                                             | #N/A                  | 3.5360  | 7.7951  | 4.2228  | 3.7795  | 4.1625  | 3.5670  | 3.9278  | 7.6472  | 3.5207  | 3.1916  | 0.9866  | -0.0195 | 0.9594 | 0.0180 |
| Epb413   | _DEVDAEST[Phospho (STY)]PTDR_2                                             | #N/A                  | 6.8057  | 4.0024  | 3.8840  | 4.3867  | 3.8237  | 3.9058  | 4.1013  | 3.7318  | 6.5844  | 4.3536  | 0.9521  | -0.0708 | 0.7810 | 0.1074 |
| Epb413   | _TEPVEAEVESTPHQPLS[Phospho (STY)]TEK_3                                     | Q9WV92_S686_M1_Epb413 | 8.4177  | 4.2967  | 3.6163  | 8.5825  | 4.1850  | 3.9404  | 3.8336  | 3.9996  | 3.6481  | 4.0859  | 1.4149  | 0.5007  | 0.2126 | 0.6724 |
| Epb413   | _QLEYQQFEDDKLS[Phospho (STY)]QDR_3                                         | #N/A                  | 7.2654  | 6.7358  | 6.7947  | 7.8775  | 4.9381  | 7.2121  | 6.4552  | 7.1112  | 6.8832  | 7.2448  | 0.9827  | -0.0252 | 0.8268 | 0.0826 |
| Epb413   | _TLFESTETALTNEWEK_2                                                        | #N/A                  | 5.0567  | 4.5398  | 4.3923  | 4.6983  | 4.1019  | 3.9219  | 4.7977  | 4.9491  | 3.5962  | 4.0345  | 1.0247  | 0.0352  | 0.7518 | 0.1239 |
| Epb413   | _VLQETLVEER_2                                                              | #N/A                  | 6.1812  | 5.9186  | 6.4799  | 5.7846  | 5.1808  | 5.7060  | 5.9264  | 5.7928  | 5.9395  | 5.9193  | 0.9967  | -0.0047 | 0.9345 | 0.0294 |
| Epb413   | _ELEDKVELHK_2                                                              | #N/A                  | 4.8874  | 4.4467  | 5.2041  | 4.8217  | 5.1515  | 5.1613  | 4.8145  | 5.0608  | 5.0339  | 5.2470  | 0.9814  | -0.0271 | 0.5841 | 0.2335 |
| Epb413   | _LSTS[Phospho (STY)]PVR_2                                                  | Q9WV92_S601_M1_Epb413 | 4.2858  | 3.5412  | 4.0195  | 3.5632  | 3.4295  | 3.1951  | 3.0882  | 3.4379  | 3.7370  | 3.2405  | 1.0878  | 0.1214  | 0.2401 | 0.6196 |
| Epb413   | _LIGDKDRDFAAAAAK_3                                                         | #N/A                  | 4.2809  | 5.9135  | 6.1855  | 6.3257  | 5.9871  | 6.2387  | 5.1249  | 6.3608  | 6.0068  | 3.2357  | 1.1235  | 0.1680  | 0.3731 | 0.4282 |
| Epb413   | _VVAHMETIT[Phospho (STY)]PEDGED_2                                          | #N/A                  | 8.2557  | 9.0116  | 10.4008 | 9.2815  | 8.7272  | 9.0248  | 9.0009  | 9.0565  | 8.8878  | 8.6714  | 1.0239  | 0.0341  | 0.5844 | 0.2333 |
| Epb413   | _S[Phospho (STY)]SSS[Phospho (STY)]KLSR_2                                  | #N/A                  | 5.8340  | 3.7931  | 3.7080  | 3.8515  | 3.9435  | 4.0290  | 4.0710  | 4.6885  | 3.9100  | 5.3467  | 0.9310  | -0.1032 | 0.5421 | 0.2659 |
| Epb413   | _FAPNHTK_2                                                                 | #N/A                  | 4.3106  | 5.1564  | 4.2459  | 4.3459  | 4.7181  | 3.5438  | 5.1555  | 4.7035  | 4.5454  | 5.1197  | 0.8987  | -0.1540 | 0.1369 | 0.8635 |
| Epb413   | _KKEGSS[Phospho (STY)]VTEAAK_2                                             | Q9WV92_S740_M1_Epb413 | 4.1990  | 3.4544  | 3.9327  | 3.4765  | 3.3567  | 3.3166  | 3.8776  | 3.5247  | 3.8238  | 3.1537  | 1.0077  | 0.0111  | 0.9052 | 0.0432 |
| Epb413   | _QCPALEGQPEAAHST[Phospho (STY)]PWR_4                                       | Q9WV92_T64_M1_Epb413  | 3.3784  | 4.1347  | 3.7783  | 4.2809  | 4.0230  | 4.1025  | 3.9556  | 4.8984  | 4.5310  | 4.2479  | 0.8939  | -0.1618 | 0.0717 | 1.1446 |
| Epb413   | _TITYESSQVDPADLEGQVL[Oxidation (M)]SAQITTSITSTTTTTHTIK_4                   | #N/A                  | 4.2203  | 4.7403  | 5.8969  | 5.7254  | 4.5771  | 4.5851  | 6.0178  | 3.7488  | 4.1120  | 4.6670  | 1.0791  | 0.1098  | 0.5002 | 0.3008 |
| Epb413   | _GIS[Phospho (STY)]QTNLITVT[Phospho (STY)]PEKK_2                           | #N/A                  | 9.1481  | 9.2084  | 9.6810  | 9.8437  | 7.8061  | 9.2953  | 9.4254  | 9.2728  | 9.1123  | 0.9897  | -0.0149 | 0.8041  | 0.0947 |        |
| Epb413   | _SSSSKLS[Phospho (STY)]RS[Phospho (STY)]PLK_2                              | #N/A                  | 6.2456  | 6.0884  | 6.3206  | 6.7101  | 5.3745  | 6.2573  | 6.2515  | 6.3169  | 6.6796  | 6.1402  | 0.9715  | -0.0417 | 0.4771 | 0.3214 |
| Epb413   | _VTLDGSEYGC[Carbamidomethyl (C)]DVKR_3                                     | #N/A                  | 5.9660  | 5.2434  | 6.0052  | 5.3164  | 5.6158  | 5.8286  | 5.1759  | 5.4124  | 5.7394  | 5.7693  | 1.0250  | 0.0357  | 0.5106 | 0.2919 |
| Epb413   | _LSRS[Phospho (STY)]PLK_2                                                  | Q9WV92_S107_M1_Epb413 | 4.0734  | 7.6863  | 7.9609  | 7.5923  | 6.9188  | 7.5465  | 7.8194  | 7.5292  | 3.8846  | 7.6788  | 1.0349  | 0.0495  | 0.8295 | 0.0812 |
| Epb413   | _GISQTNLITVT[Phospho (STY)]PEK_2                                           | #N/A                  | 6.8436  | 6.4681  | 6.5849  | 10.3223 | 5.9226  | 6.8240  | 7.0772  | 9.0658  | 6.8247  | 6.7200  | 0.9648  | -0.0516 | 0.7837 | 0.0963 |
| Epb413   | _QLEYQQFEDDKLSQR[Phospho (STY)]SSK_3                                       | #N/A                  | 4.3818  | 3.6862  | 3.5678  | 6.2668  | 3.5075  | 4.2220  | 3.7851  | 4.0481  | 3.6966  | 4.0374  | 1.0977  | 0.1345  | 0.4981 | 0.3026 |
| Epb413   | _DEVDAEST[Phospho (STY)]PTDR_2                                             | #N/A                  | 5.5690  | 3.8880  | 3.9056  | 3.7888  | 3.8453  | 3.5944  | 3.7243  | 3.8507  | 3.7551  | 3.6264  | 1.0961  | 0.1324  | 0.3646 | 0.4382 |
| Epb413   | _NWLDPK_2                                                                  | #N/A                  | 4.2643  | 3.5197  | 3.9980  | 3.5417  | 3.4080  | 3.6928  | 3.6900  | 3.7785  | 4.8017  | 3.2190  | 0.9652  | -0.0512 | 0.6773 | 0.1692 |
| Epb413   | _QHPQMSVTK_2                                                               | #N/A                  | 4.7725  | 4.2117  | 4.0933  | 4.5959  | 4.4607  | 3.6965  | 4.3106  | 3.5225  | 3.1711  | 3.0621  | 1.2242  | 0.2919  | 0.0295 | 1.5297 |
| Epb413   | _VITGDADIDQQAQAQAK_3                                                       | #N/A                  | 2.9461  | 3.0287  | 4.2106  | 3.2124  | 4.4468  | 5.0844  | 4.4279  | 3.4052  | 4.5574  | 4.2909  | 0.9163  | -0.1260 | 0.5016 | 0.2996 |
| Epb413   | _S[Phospho (STY)]LDGASSENHEYM[Oxidation (M)]K_2                            | #N/A                  | 8.1031  | 8.6195  | 8.4363  | 9.4437  | 8.2403  | 8.7686  | 9.1595  | 9.1466  | 8.9177  | 8.7687  | 0.9597  | -0.0593 | 0.2096 | 0.6787 |
| Epb413   | _AEEERVEEDRR_3                                                             | #N/A                  | 1.0725  | 3.4524  | 3.9036  | 3.4744  | 2.9742  | 3.2839  | 3.1771  | 3.5268  | 3.8258  | 1.8942  | 0.9760  | -0.0351 | 0.9063 | 0.0427 |
| Epb413   | _TLFESTETALTNEWEK_3                                                        | #N/A                  | 3.4659  | 3.3292  | 5.0671  | 3.2906  | 3.1505  | 3.0781  | 3.4389  | 3.7105  | 4.3414  | 4.8188  | 0.8740  | -0.1943 | 0.2961 | 0.5360 |
| Epb413   | _VC[Carbamidomethyl (C)]VEHITFR_3                                          | #N/A                  | 2.7829  | 3.4849  | 4.4281  | 3.4299  | 2.8670  | 2.9585  | 3.1446  | 3.1877  | 2.9974  | 3.3969  | 1.0451  | 0.0637  | 0.6662 | 0.1764 |
| Timn9    | _LTET[Carbamidomethyl (C)]FLDC[Carbamidomethyl (C)]WK_2                    | #N/A                  | 6.0339  | 6.0887  | 5.3264  | 6.3527  | 6.5246  | 6.0771  | 5.3866  | 6.2542  | 5.8175  | 6.1493  | 1.0280  | 0.0399  | 0.5428 | 0.2654 |
| Timn9    | _FLGTYNK_2                                                                 | #N/A                  | 5.4087  | 5.1780  | 5.7881  | 5.0316  | 5.7844  | 5.9683  | 4.1564  | 5.4387  | 5.9065  | 5.6018  | 1.0475  | 0.0610  | 0.5064 | 0.2955 |
| Timn9    | _EVKPEEVTC[Carbamidomethyl (C)]SEHC[Carbamidomethyl (C)]LQK_3              | #N/A                  | 5.5248  | 5.4670  | 4.3274  | 5.9542  | 6.0197  | 5.3879  | 5.4483  | 5.4628  | 5.1165  | 5.0208  | 1.0351  | 0.0498  | 0.5831 | 0.2343 |
| Timn9    | _FQEHQDQNEALAAK_2                                                          | #N/A                  | 4.1819  | 3.1605  | 3.9156  | 3.4593  | 3.3256  | 3.3990  | 3.6076  | 3.5418  | 3.8409  | 3.1366  | 1.0072  | 0.1013  | 0.9172 | 0.0745 |
| Timn8a1  | _FIDTSQFLNR_2                                                              | #N/A                  | 5.4221  | 5.2579  | 6.1978  | 6.1328  | 6.0373  | 5.5498  | 6.0379  | 4.2211  | 5.3581  | 4.9661  | 1.1206  | 0.1643  | 0.1268 | 0.8969 |
| Timn8a1  | _SKPVSESL[Phospho (STY)]D_2                                                | Q9WVA2_S96_M1_Timn8a1 | 4.2398  | 5.7535  | 3.9735  | 6.8948  | 6.6973  | 3.7410  | 6.7369  | 3.4839  | 3.7829  | 6.7016  | 0.9917  | -0.0120 | 0.9684 | 0.0139 |
| Timn8a1  | _LDS[Phospho (STY)]RAAC[Carbamidomethyl (C)]FVNC[Carbamidomethyl (C)]VER_3 | Q9WVA2_S57_M1_Timn8a1 | 3.9047  | 3.2090  | 4.5915  | 3.5933  | 3.0304  | 3.1983  | 3.3080  | 3.5068  | 2.4281  | 3.5603  | 1.1209  | 0.1647  | 0.3188 | 0.4065 |
| Bub3     | _VAVEYLDPS[Phospho (STY)]PEVK_2                                            | Q9WVA5_S211_M1_Bub3   | 3.2361  | 8.2540  | 4.8706  | 8.6285  | 7.9266  | 8.1823  | 8.6002  | 3.6952  | 3.3438  | 8.2443  | 1.1416  | 0.1911  | 0.6197 | 0.2781 |
| Tagln2   | _NFS[Phospho (STY)]DNQLQGEK_2                                              | Q9WVA4_S163_M1_Tagln2 | 6.4117  | 6.8906  | 7.0236  | 6.3012  | 7.2174  | 7.0155  | 7.2585  | 6.5510  | 6.6616  | 6.8438  | 0.9973  | -0.0040 | 0.9355 | 0.0289 |
| Pascin2  | _LDSQGLVYPANVEAIQ_2                                                        | #N/A                  | 4.7911  | 4.9581  | 4.2848  | 5.2508  | 5.3039  | 5.1725  | 3.9768  | 4.9462  | 5.1209  | 3.5058  | 1.1305  | 0.1770  | 0.1531 | 0.8149 |
| Pascin2  | _AYAQLTEWAR_2                                                              | #N/A                  | 5.5321  | 5.3187  | 6.1127  | 4.4965  | 5.9157  | 5.2184  | 4.2112  | 5.8515  | 3.2705  | 2.9627  | 1.3334  | 0.4515  | 0.0505 | 1.2967 |
| Mu3      | _SSS[Phospho (STY)]PIPLTPSK_2                                              | Q9WVG9_S404_M1_Mu3    | 8.0793  | 7.4280  | 3.1545  | 7.9733  | 4.0654  | 7.5471  | 4.3474  | 7.9023  | 3.1011  | 3.8764  | 1.3262  | 0.4073  | 0.2928 | 0.5335 |
| Foxo3    | _WPGS[Phospho (STY)]PTSR_2                                                 | Q9WVH4_S293_M1_Foxo3  | 3.4723  | 4.2285  | 3.2059  | 7.9136  | 4.1168  | 4.0086  | 3.9018  | 7.4262  | 7.3871  | 3.9278  | 0.7934  | -0.3340 | 0.3531 | 0.4521 |
| Mapk8ip1 | _PHPSSEEDGFDC[Carbamidomethyl (C)]LSS[Phospho (STY)]PER_3                  | #N/A                  | 3.7781  | 3.5574  | 3.2238  | 5.4774  | 3.7494  | 4.3466  | 4.0300  | 4.3211  | 3.6462  | 4.4289  | 0.9792  | -0.3003 | 0.8480 | 0.0716 |
| Pdm13    | _GSDSEDKR_2                                                                | #N/A                  | 3.5000  | 4.3052  | 5.2144  | 3.1886  | 4.2941  | 4.5514  | 4.0441  | 3.4290  | 4.5923  | 5.3801  | 0.9380  | -0.0923 | 0.5890 | 0.2299 |
| Ehd1     | _DKPTYDEIFTLS[Phospho (STY)]PNVGK_3                                        | #N/A                  | 3.1704  | 3.9290  | 5.8001  | 7.3567  | 6.4395  | 5.9732  | 6.9835  | 7.2057  | 6.6407  | 6.5180  | 0.7964  | -0.3285 | 0.1268 | 0.8968 |
| Magi2    | _S[Phospho (STY)]SPGSTFAFGR_2                                              | Q9WVQ1_S725_M1_Magi2  | 9.2157  | 9.9049  | 4.3798  | 3.9236  | 3.7899  | 4.3356  | 4.0719  | 3.0776  | 3.3766  | 3.6009  | 1.6776  | 0.7464  | 0.1387 | 0.8578 |
| Magi2    | _GFFS[Phospho (STY)]PWNK_2                                                 | Q9WVQ1_S685_M1_Magi2  | 7.0127  | 7.1892  | 6.8057  | 7.2372  | 6.0430  | 6.9934  | 4.9481  | 7.1185  | 7.0444  | 6.8615  | 1.0596  | 0.0835  | 0.4307 | 0.3658 |
| Magi2    | _IPIQEEELN[Phospho (STY)]PTSAPSEK_2                                        | Q9WVQ1_S1013_M1_Magi2 | 11.3375 | 11.4983 | 12.0767 | 11.9020 | 11.2600 | 11.4375 | 11.9294 | 11.3803 | 11.4942 | 11.5832 | 0.9990  | -0.0014 | 0.9539 | 0.0205 |
| Magi2    | _M[Oxidation (M)]DSD[Phospho (STY)]SGDPKELDWHLR_3                          | Q9WVQ1_S768_M1_Magi2  | 3.2885  | 4.0448  | 4.5231  | 5.8041  | 4.4486  | 4.1923  | 4.0855  | 3.7477  | 5.2589  | 4.3378  | 1.0060  | 0.0086  | 0.9590 | 0.0182 |
| Magi2    | _GAQGFGFIAD[Phospho (STY)]PTGQR_2                                          | Q9WVQ1_S621_M1_Magi2  | 3.6174  | 6.3661  | 4.3042  | 7.9231  | 4.2439  | 3.8456  | 4.5216  | 6.9406  | 2.9602  | 6.7179  | 0.9440  | -0.0831 | 0.8074 | 0.0929 |
| Magi2    | _SPGVSITHSS[Phospho (STY)]PR_2                                             | #N/A                  | 3.5557  | 5.0914  | 4.9836  | 5.882   |         |         |         |         |         |         |         |         |        |        |



|         |                                                                                               |                        |         |         |         |         |         |         |         |         |         |         |         |         |        |        |
|---------|-----------------------------------------------------------------------------------------------|------------------------|---------|---------|---------|---------|---------|---------|---------|---------|---------|---------|---------|---------|--------|--------|
| Sic22a5 | _DGEES[Phospho (STY)]PTVLK_2                                                                  | Q8Z0E8_5548_M1_Sic22a5 | 3.4471  | 4.2033  | 3.1807  | 4.2254  | 4.0916  | 4.0338  | 3.9270  | 4.2767  | 3.0749  | 3.9026  | 1.0180  | 0.0258  | 0.8263 | 0.0828 |
| Adam17  | _S[Phospho (STY)]FEDLTDHPVTR_2                                                                | Q8Z0F8_5794_M1_Adam17  | 4.1979  | 5.4501  | 3.3839  | 6.7091  | 6.4173  | 6.2070  | 6.5556  | 5.9431  | 6.3164  | 5.9758  | 0.8704  | -0.2003 | 0.2784 | 0.5553 |
| Zbtb22  | _ASENQ[Phospho (STY)]PSSSNVSPR_2                                                              | Q8Z0G7_5203_M1_Zbtb22  | 6.6820  | 6.3297  | 4.5069  | 3.4954  | 6.5726  | 6.9719  | 3.5058  | 6.6786  | 6.7866  | 6.0709  | 0.8575  | -0.1923 | 0.1369 | 0.8635 |
| CelF2   | _ELFEPYGAIVQNVLR_2                                                                            | #N/A                   | 4.2177  | 4.4310  | 3.9682  | 5.7582  | 5.5261  | 5.4061  | 5.7367  | 5.2554  | 5.2615  | 6.0709  | 0.8752  | -0.1923 | 0.1369 | 0.8635 |
| CelF2   | _SWMS[Phospho (STY)]EXELK_2                                                                   | Q8Z0H4_552_M1_CelF2    | 7.2326  | 4.2788  | 7.4540  | 7.8701  | 7.0826  | 7.0690  | 7.3694  | 7.1446  | 6.3002  | 7.3377  | 1.0723  | 0.1007  | 0.6497 | 0.1873 |
| CelF2   | _VM[Oxidation (M)]JSPFGQEE[C]Carbamidomethyl (C)[R_2                                          | #N/A                   | 4.8836  | 5.3798  | 5.7710  | 6.1980  | 5.3695  | 5.3845  | 5.4764  | 5.5284  | 5.4442  | 5.4542  | 1.0040  | 0.0058  | 0.9255 | 0.0336 |
| Clip2   | _JGFPTSS[Phospho (STY)]PAK_2                                                                  | Q8Z0H8_5295_M1_Clip2   | 10.3557 | 10.3235 | 10.6570 | 10.4053 | 8.9218  | 9.9247  | 10.5132 | 10.0864 | 9.9401  | 10.2736 | 0.9897  | -0.0150 | 0.7595 | 0.1195 |
| Clip2   | _QAS[Phospho (STY)]GPGSSGAATYSGKPG_K_3                                                        | #N/A                   | 6.9022  | 3.4738  | 7.7245  | 7.3536  | 6.6273  | 6.7329  | 6.5073  | 7.1214  | 6.6877  | 6.7900  | 0.9546  | -0.0670 | 0.7052 | 0.1517 |
| Clip2   | _YSLIDFAS[Phospho (STY)]PELLK_2                                                               | Q8Z0H8_5980_M1_Clip2   | 6.7233  | 3.7569  | 6.6911  | 3.1579  | 3.6452  | 2.9794  | 4.3734  | 3.4598  | 3.1083  | 3.1249  | 1.2775  | 0.3533  | 0.3191 | 0.4961 |
| Clip2   | _TGNEGSNLS[Phospho (STY)]DSGSK_W_2                                                            | Q8Z0H8_5208_M1_Clip2   | 7.1644  | 6.9926  | 7.6331  | 7.9206  | 6.4716  | 6.9781  | 7.3317  | 7.1528  | 7.1077  | 6.9305  | 1.0088  | 0.0126  | 0.8230 | 0.0846 |
| Clip2   | _EGS[Phospho (STY)]PLHK_2                                                                     | Q8Z0H8_543_M1_Clip2    | 3.3682  | 4.4296  | 4.6787  | 4.2046  | 3.7375  | 3.9920  | 4.2762  | 4.3675  | 3.5783  | 4.2674  | 0.9869  | -0.0190 | 0.8532 | 0.0689 |
| Clip2   | _VLLLEANRHS[Phospho (STY)]JGPER_3                                                             | #N/A                   | 7.5962  | 8.0993  | 8.7128  | 9.0378  | 7.3814  | 7.9073  | 8.0071  | 8.2118  | 8.0379  | 7.7907  | 1.0138  | 0.0188  | 0.7494 | 0.1253 |
| Clip2   | _QDHIEQLLAER_3                                                                                | #N/A                   | 3.1000  | 3.2899  | 4.3345  | 3.7093  | 4.0662  | 4.4591  | 4.2741  | 3.1229  | 3.4220  | 4.0751  | 1.0277  | 0.0394  | 0.7793 | 0.1083 |
| Clip2   | _TGNEGSNLS[Phospho (STY)]DSGS[Phospho (STY)]VNR_2                                             | #N/A                   | 4.1175  | 3.2249  | 3.8512  | 3.3950  | 3.0462  | 3.1825  | 3.5433  | 3.6062  | 3.9052  | 3.0723  | 0.9824  | -0.0256 | 0.8135 | 0.0896 |
| Nos1    | _VTQPLGT[Phospho (STY)]PTK_2                                                                  | Q8Z0I4_T128_M1_Nos1    | 3.9912  | 8.4368  | 3.7249  | 8.7590  | 3.1349  | 3.4897  | 3.4169  | 3.7325  | 4.0316  | 4.4468  | 1.3453  | 0.4279  | 0.3439 | 0.4636 |
| Nos1    | _KSS[Phospho (STY)]GDGPDLR_2                                                                  | Q8Z0I4_5858_M1_Nos1    | 7.3679  | 6.9610  | 4.1225  | 7.3824  | 4.5011  | 7.0524  | 7.4407  | 5.2604  | 4.9291  | 6.9215  | 1.0152  | 0.0218  | 0.9206 | 0.0359 |
| Nos1    | _GNVPVVLNNPYSENEGSPASGK[Phospho (STY)]PTK_3                                                   | Q8Z0I4_5287_M1_Nos1    | 3.8494  | 3.3768  | 4.5362  | 3.5380  | 2.9750  | 3.3595  | 3.2527  | 4.7956  | 4.2291  | 3.5050  | 0.9139  | -0.1299 | 0.4088 | 0.3885 |
| Palm    | _SETLVNAQGT[Phospho (STY)]PLGT[Phospho (STY)]PKENR_2                                          | #N/A                   | 9.2213  | 9.9439  | 10.4139 | 10.4583 | 9.3186  | 10.3203 | 10.0457 | 9.8789  | 9.7646  | 9.9923  | 1.0026  | 0.0037  | 0.9310 | 0.0311 |
| Palm    | _EPAPLNGS[Phospho (STY)]AAELPATK_2                                                            | Q8Z0P4_5345_M1_Palm    | 9.8508  | 4.3553  | 9.4551  | 10.2131 | 3.6316  | 9.7697  | 3.9136  | 3.2358  | 9.7741  | 9.7339  | 1.1823  | 0.2416  | 0.5779 | 0.2381 |
| Palm    | _VLGLQDQTK_2                                                                                  | #N/A                   | 7.1316  | 7.4766  | 7.1149  | 7.4386  | 7.4628  | 7.2938  | 6.9770  | 7.4391  | 7.0251  | 7.2266  | 1.0213  | 0.0304  | 0.2346 | 0.6297 |
| Palm    | _GLAEDVTR_2                                                                                   | #N/A                   | 6.0494  | 6.4468  | 7.1493  | 6.4600  | 6.9121  | 6.0075  | 4.4175  | 6.1877  | 6.4834  | 6.6318  | 1.0968  | 0.1333  | 0.2542 | 0.5947 |
| Palm    | _GLEESTR_2                                                                                    | #N/A                   | 5.7947  | 6.1562  | 6.0058  | 6.3866  | 6.7410  | 6.3320  | 6.3320  | 6.3320  | 6.0445  | 6.4013  | 1.1103  | 0.1509  | 0.3493 | 0.4568 |
| Palm    | _ADEVTL[Phospho (STY)]EAGSTAGPAEPR_2                                                          | Q8Z0P4_5244_M1_Palm    | 5.7855  | 5.9901  | 5.9133  | 7.4760  | 5.5771  | 6.7994  | 4.4198  | 6.4625  | 6.1331  | 6.5286  | 1.0630  | 0.0882  | 0.5120 | 0.2907 |
| Palm    | _SETLVNAQGT[Phospho (STY)]PLGT[Phospho (STY)]PK_2                                             | #N/A                   | 12.5100 | 12.1088 | 12.1618 | 12.8797 | 11.6027 | 12.3963 | 12.4610 | 11.9982 | 12.2668 | 12.5119 | 0.9933  | -0.0097 | 0.7468 | 0.1268 |
| Palm    | _EIDVLEFGESAPAAK_2                                                                            | #N/A                   | 6.8641  | 6.3617  | 7.1386  | 7.4355  | 6.8535  | 6.7955  | 7.1789  | 6.5306  | 6.8268  | 7.0998  | 0.9999  | -0.0002 | 0.9969 | 0.0013 |
| Palm    | _EENQGTGPTTT[Phospho (STY)]PS[Phospho (STY)]DTQDLDM[Oxidation (M)]K_2                         | #N/A                   | 8.5874  | 9.2784  | 7.1165  | 9.9630  | 9.2148  | 9.2948  | 9.8236  | 8.9578  | 9.0803  | 9.4593  | 0.9549  | -0.0666 | 0.4446 | 0.3520 |
| Palm    | _JAcetyl (Protein N-term)[M][Oxidation (M)]EVLATDTAS[Phospho (STY)]QGER_2                     | #N/A                   | 8.3105  | 9.0181  | 9.4428  | 8.8259  | 8.9429  | 9.3640  | 9.0495  | 8.7979  | 8.8079  | 8.9478  | 1.0094  | 0.1374  | 0.7075 | 0.1502 |
| Palm    | _ALVVEDAATPR_2                                                                                | #N/A                   | 6.6339  | 6.4669  | 6.7917  | 6.9555  | 6.9757  | 6.8225  | 6.8365  | 6.8615  | 6.6854  | 6.9261  | 0.9922  | -0.0113 | 0.6346 | 0.1975 |
| Palm    | _EENQGTGPTTTPS[Phospho (STY)]DT[Phospho (STY)]QDLDM[Oxidation (M)]KPR_3                       | Q8Z0P4_T367_M2_Palm    | 3.5475  | 4.3038  | 3.2812  | 4.3258  | 5.4328  | 4.1762  | 3.2944  | 4.0031  | 3.1762  | 4.0031  | 1.1048  | 0.0137  | 0.3986 | 0.3761 |
| Palm    | _ENSAAPSPGRQAS[Phospho (STY)]PAKEEQK_3                                                        | #N/A                   | 10.2803 | 10.1323 | 10.5314 | 10.9530 | 10.4613 | 10.2067 | 10.5473 | 10.3317 | 10.2629 | 10.3738 | 1.0047  | 0.0067  | 0.7688 | 0.1142 |
| Palm    | _TST[Phospho (STY)]PVRSPRQAS[Phospho (STY)]PGSGTMM[Oxidation (M)]K_2                          | #N/A                   | 9.1090  | 9.3789  | 8.0360  | 8.7447  | 6.0746  | 9.1294  | 5.2204  | 6.6600  | 9.2367  | 1.1068  | 0.0463  | 0.6591  | 0.1811 | 0.1841 |
| Palm    | _WLLEGTSSASGDEDMRK_3                                                                          | #N/A                   | 3.3415  | 4.0009  | 4.5761  | 7.0888  | 3.8222  | 3.9073  | 4.2681  | 4.3822  | 3.1804  | 3.7971  | 1.1406  | 0.1897  | 0.4684 | 0.3294 |
| Palm    | _PQAS[Phospho (STY)]PAKEEQK_2                                                                 | #N/A                   | 3.4565  | 4.2640  | 3.7123  | 4.2541  | 3.4619  | 3.8181  | 3.5186  | 3.8674  | 3.5524  | 4.2887  | 1.0055  | 0.0080  | 0.9302 | 0.0314 |
| Palm    | _EEQKSETLVNAQGT[Phospho (STY)]PLGT[Phospho (STY)]PKENR_3                                      | #N/A                   | 3.8180  | 2.2417  | 3.3387  | 3.6027  | 2.9617  | 2.2237  | 3.5561  | 4.2771  | 3.9257  | 2.1514  | 0.8716  | -0.1982 | 0.4038 | 0.3939 |
| Palm    | _ENSAAPSP[Phospho (STY)]PGRQSPAPK_2                                                           | Q8Z0P4_5116_M1_Palm    | 4.2292  | 4.7771  | 4.3640  | 4.3528  | 3.6346  | 4.1099  | 3.6205  | 4.0913  | 3.4568  | 3.1759  | 1.1837  | 0.2433  | 0.0270 | 0.1567 |
| Palm    | _S[Phospho (STY)]PGGSTMNK_2                                                                   | #N/A                   | 4.2291  | 3.1133  | 3.9628  | 3.5066  | 3.3728  | 3.2940  | 3.6548  | 3.4946  | 3.7937  | 3.1838  | 1.0136  | 0.0195  | 0.8475 | 0.0719 |
| Twf2    | _ETIELVHTEPTNVAQLPSR_3                                                                        | #N/A                   | 5.8048  | 5.4643  | 5.8696  | 6.2688  | 5.8516  | 5.6933  | 5.7221  | 5.9937  | 5.9131  | 0.9934  | -0.0096 | 0.7919  | 0.1013 | 0.1013 |
| Twf2    | _VHNEQDVLGASGEQPVGR_2                                                                         | #N/A                   | 3.9537  | 3.7615  | 3.5028  | 4.0055  | 2.7196  | 4.2445  | 5.0835  | 4.3108  | 3.0794  | 4.0143  | 0.8971  | -0.1566 | 0.3508 | 0.4550 |
| Twf2    | _AVPLLDQAQPC[Carbamidomethyl (C)]YLFR_2                                                       | #N/A                   | 3.8023  | 5.0252  | 3.8549  | 4.0488  | 2.9533  | 3.6658  | 4.0266  | 3.6532  | 3.5257  | 3.0928  | 1.0887  | 0.1226  | 0.4219 | 0.3748 |
| Sufu    | _KDS[Phospho (STY)]LGGSGTAIPHLEUR_3                                                           | Q8Z0P7_5346_M1_Sufu    | 3.8063  | 3.4198  | 4.4931  | 3.4950  | 3.3081  | 3.3165  | 3.2096  | 3.1227  | 4.2721  | 3.4619  | 1.0350  | 0.0497  | 0.7028 | 0.1532 |
| Sufu    | _RLS[Phospho (STY)]KQDTEQIR_3                                                                 | Q8Z0P7_5301_M1_Sufu    | 4.3289  | 3.0135  | 4.0626  | 3.6064  | 2.8348  | 3.3938  | 3.7546  | 3.3948  | 3.6939  | 3.2837  | 1.0023  | 0.0034  | 0.9794 | 0.0090 |
| Itsn1   | _LPEEPS[Phospho (STY)]EDEQPEK_2                                                               | #N/A                   | 5.8188  | 9.3881  | 6.6996  | 10.1348 | 8.9748  | 9.5095  | 9.7457  | 6.1010  | 9.3772  | 9.4781  | 1.0283  | 0.0402  | 0.8211 | 0.0856 |
| Itsn1   | _STS[Phospho (STY)]DTGPTSPASLK_2                                                              | #N/A                   | 8.3216  | 3.8594  | 4.8495  | 9.1739  | 6.7081  | 4.8424  | 8.2914  | 8.5428  | 8.5347  | 3.9386  | 1.0244  | 0.0348  | 0.8973 | 0.0471 |
| Itsn1   | _QRS[Phospho (STY)]LEAR_2                                                                     | Q8Z0R4_5623_M1_Itsn1   | 7.6427  | 7.2985  | 8.5309  | 8.0026  | 6.9313  | 7.6020  | 7.5913  | 7.5776  | 7.3981  | 7.7725  | 1.0110  | 0.0157  | 0.7814 | 0.1071 |
| Itsn1   | _QVQGN[Phospho (STY)]LHR_2                                                                    | Q8Z0R4_5558_M1_Itsn1   | 7.5426  | 7.4555  | 7.8426  | 7.8995  | 7.2590  | 7.7541  | 7.4956  | 7.1431  | 7.3713  | 7.0581  | 1.0493  | 0.0695  | 0.0436 | 1.3602 |
| Itsn1   | _STS[Phospho (STY)]DTGPTSPASLKR_2                                                             | #N/A                   | 6.1150  | 6.3052  | 6.7600  | 6.9480  | 4.4435  | 6.7762  | 6.3233  | 6.5240  | 6.4849  | 6.5856  | 0.9607  | -0.0579 | 0.6067 | 0.2170 |
| Itsn1   | _KSTS[Phospho (STY)]DTGPTSPASLKR_2                                                            | #N/A                   | 3.8094  | 3.5330  | 3.5431  | 4.5877  | 3.3543  | 4.3752  | 3.2352  | 3.9143  | 4.2133  | 4.2650  | 0.9898  | -0.0148 | 0.9032 | 0.0442 |
| Itsn1   | _SAFPATATGSSPS[Phospho (STY)]VLGGQEK_2                                                        | Q8Z0R4_5897_M1_Itsn1   | 6.6594  | 6.7541  | 4.4659  | 8.1101  | 3.4050  | 6.6863  | 6.8573  | 6.5495  | 6.4294  | 6.1918  | 0.8985  | -0.1543 | 0.5274 | 0.2779 |
| Itsn1   | _LIS[Phospho (STY)]PGTKIT[Phospho (STY)]PTKLK_2                                               | #N/A                   | 6.7073  | 7.1949  | 7.4165  | 7.7024  | 6.1427  | 7.3198  | 7.2642  | 7.2220  | 7.2379  | 6.9319  | 0.9884  | -0.0169 | 0.7840 | 0.1057 |
| Itsn1   | _LPEEPS[Phospho (STY)]EDEQPEKK_2                                                              | #N/A                   | 7.6836  | 7.9781  | 8.1101  | 3.2624  | 7.1768  | 3.0840  | 7.9356  | 3.3552  | 3.0038  | 3.2294  | 1.4188  | 0.5047  | 0.2661 | 0.5750 |
| Itsn1   | _SGS[Phospho (STY)]GM[Oxidation (M)]SVSSSSVDQR_2                                              | #N/A                   | 8.0030  | 8.5245  | 3.9788  | 8.8612  | 7.3210  | 8.4990  | 8.6524  | 8.2709  | 8.1662  | 8.4405  | 0.8985  | -0.1545 | 0.3883 | 0.4109 |
| Itsn1   | _LIS[Phospho (STY)]PGTSK_2                                                                    | Q8Z0R4_5130_M1_Itsn1   | 6.2136  | 3.2893  | 6.4604  | 3.6254  | 5.2561  | 3.4470  | 3.3401  | 2.9922  | 4.1416  | 3.5924  | 1.3409  | 0.4232  | 0.1538 | 0.8130 |
| Itsn1   | _SNPYC[Carbamidomethyl (C)]EVTM[Oxidation (M)]GS[Phospho (STY)]QC[Carbamidomethyl (C)]HTR_K_2 | #N/A                   | 4.0442  | 4.0330  | 4.4163  | 4.2626  | 3.8856  | 4.0702  | 5.3922  | 3.0414  | 3.2944  | 4.8109  | 0.9961  | -0.0056 | 0.9731 | 0.0118 |
| Itsn1   | _DQFS[Phospho (STY)]PDQFLGR_2                                                                 | Q8Z0R4_51663_M1_Itsn1  | 4.3873  | 3.6427  | 4.1210  | 3.6647  | 3.5310  | 3.6527  | 3.8130  | 3.3364  | 3.6355  | 3.3420  | 1.0854  | 0.1182  | 0.1638 | 0.7858 |
| Itsn1   | _ACS[Phospho (STY)]FDVASAPAAEWAVQSSR_2                                                        | Q8Z0R4_5203_M1_Itsn1   | 3.8783  | 3.1827  | 4.5651  | 3.4371  | 3.0040  | 3.2246  | 3.5854  | 3.5640  | 3.8631  | 3.1144  | 1.0048  | 0.0069  | 0.9592 | 0.0181 |
| Bpnt1   | _NVEYASHPESVK_2                                                                               | #N/A                   | 6.0940  | 8.1558  | 6.0992  | 6.3224  | 6.1019  | 6.3936  | 6.1692  | 6.4372  | 5.8912  | 6.2712  | 0.9912  | -0.0127 | 0.7038 | 0.1525 |
| Bpnt1   | _IQIEGK_2                                                                                     | #N/A                   | 3.7476  | 3.0603  | 3.3519  | 4.2663  | 3.7287  | 4.7150  | 3.5692  | 3.8453  | 5.1899  | 4.1443  | 0.9103  | -0.1356 | 0.3925 | 0.4061 |
| Bpnt1   | _LTDHGNALZYNR_K_2                                                                             | #N/A                   | 4.0295  | 4.5890  | 4.3687  | 3.3070  | 5.2273  | 5.4786  | 3.4552  | 4.1442  | 5.6232  | 2.9843  | 1.1106  | 0.1514  | 0.4829 | 0.3161 |
| Bpnt1   | _SHSNQLVTD[C]Carbamidomethyl (C)]SAMNPOTLVR_3                                                 | #N/A                   | 3.8237  | 3.2856  | 3.9498  | 3.4936  | 4.1764  | 3.2965  | 3.6419  | 3.5079  | 6.4445  | 4.6007  | 0.8956  | -0.1590 | 0.1981 | 0.7031 |
| Bpnt1   | _LVQM[Oxidation (M)]SIC[Carbamidomethyl (C)]SSLAR_2                                           | #N/A                   | 3.9926  | 3.3498  | 3.7263  | 3.2700  | 3.1363  | 3.4883  | 3.4183  | 3.7312  | 4.0302  | 4.4481  | 0.8943  | -0.1612 | 0.1196 | 0.9222 |
| Bpnt1   | _JAcetyl (Protein N-term)]ASHTVLNR_2                                                          | #N/A                   | 3.5347  | 3.8077  | 3.2684  | 2.1585  | 3.6290  | 4.1005  |         |         |         |         |         |         |        |        |



|        |                                                                                                |                       |         |         |         |         |         |         |         |         |         |         |         |         |        |        |
|--------|------------------------------------------------------------------------------------------------|-----------------------|---------|---------|---------|---------|---------|---------|---------|---------|---------|---------|---------|---------|--------|--------|
| Tjp2   | _ERPS[Phospho (STY)]SREETSGR_3                                                                 | Q8Z0U1_S420_M1_Tjp2   | 3.3808  | 3.3898  | 4.2911  | 3.6417  | 3.2523  | 3.2255  | 3.7900  | 3.3616  | 3.6607  | 3.3190  | 0.9993  | -0.0011 | 0.9910 | 0.0039 |
| Tjp2   | _HSHDMLSHS[Phospho (STY)]WEGNRR_4                                                              | #N/A                  | 4.0926  | 3.1336  | 3.2786  | 3.7812  | 3.0219  | 3.6028  | 3.4959  | 4.3372  | 3.5327  | 3.7482  | 0.9223  | -0.1166 | 0.2930 | 0.5332 |
| Tjp2   | _HSHDMLSHS[Phospho (STY)]WEGNR_3                                                               | #N/A                  | 3.3577  | 3.9847  | 4.5922  | 4.1360  | 3.8060  | 3.9235  | 4.2843  | 4.3660  | 3.1642  | 3.8133  | 1.0153  | 0.0219  | 0.8473 | 0.0720 |
| Tjp2   | _RQQYS[Phospho (STY)]QDQVHSFEK_3                                                               | Q8Z0U1_S404_M1_Tjp2   | 3.1548  | 4.0714  | 3.8416  | 4.3442  | 3.9597  | 4.1657  | 4.0589  | 3.7743  | 3.4228  | 4.3112  | 1.0080  | 0.0115  | 0.9076 | 0.0421 |
| Tjp2   | _SRHS[Phospho (STY)]SJHOMLSHSGWGNR_4                                                           | Q8Z0U1_S139_M2_Tjp2   | 3.8876  | 3.3886  | 4.5744  | 3.5762  | 3.0132  | 3.2154  | 3.2909  | 3.0415  | 4.1909  | 3.5432  | 1.0240  | 0.0342  | 0.8147 | 0.0890 |
| Tjp2   | _LAGGNVGVFVAGDGTGSAEQGEGGQDLK_3                                                                | #N/A                  | 3.2630  | 4.0192  | 4.4975  | 4.3964  | 3.9075  | 4.2179  | 4.1111  | 4.4608  | 3.2590  | 3.7195  | 1.0419  | 0.0592  | 0.6082 | 0.2159 |
| Kcnd2  | _GS[Phospho (STY)]VQELSTQIR_2                                                                  | Q8Z0V2_S552_M1_Kcnd2  | 8.6235  | 7.8956  | 8.4088  | 8.5752  | 7.3519  | 8.0847  | 9.1399  | 8.9363  | 8.4833  | 8.1613  | 0.9397  | -0.0898 | 0.1222 | 0.9129 |
| Kcnd2  | _TPLNS[Phospho (STY)]RSJSS[Phospho (STY)]LNAR_2                                                | Q8Z0V2_S575_M2_Kcnd2  | 3.7339  | 8.2324  | 4.1364  | 3.7616  | 3.9999  | 3.5725  | 3.6279  | 7.3166  | 3.7872  | 7.0425  | 0.8400  | -0.2515 | 0.4942 | 0.3061 |
| Kcnd2  | _IPNANVS[Phospho (STY)]GSHR_2                                                                  | Q8Z0V2_S546_M1_Kcnd2  | 3.3619  | 7.0527  | 8.1280  | 3.9536  | 3.9884  | 3.7411  | 4.1019  | 7.7791  | 3.3466  | 3.6309  | 1.0685  | 0.0956  | 0.8121 | 0.0904 |
| Ngfr   | _ADIVELC[Carbamidomethyl (C)]SESTATS[Phospho (STY)]PV_2                                        | Q8Z0W1_S425_M1_Ngfr   | 3.1077  | 4.1185  | 3.7945  | 4.2971  | 3.7342  | 3.9953  | 4.0118  | 4.1268  | 3.4700  | 4.2641  | 0.9680  | -0.0469 | 0.6285 | 0.2017 |
| Aifm1  | _AIASATGGGVQQR_2                                                                               | #N/A                  | 4.2124  | 4.3697  | 3.9460  | 5.3452  | 4.6686  | 3.2773  | 3.6381  | 4.7539  | 3.8104  | 4.8458  | 1.0096  | 0.0139  | 0.9265 | 0.0331 |
| Aifm1  | _SITVGGGFLGSELAC[Carbamidomethyl (C)]ALGR_2                                                    | #N/A                  | 3.1570  | 4.1854  | 4.3915  | 3.9353  | 3.8016  | 4.3239  | 4.0835  | 3.0659  | 2.6539  | 3.6126  | 1.1824  | 0.2417  | 0.1091 | 0.0620 |
| Dctn3  | _I[Acetyl (Protein N-term)]AALTDVQR_2                                                          | #N/A                  | 6.9666  | 6.7746  | 6.4002  | 6.3925  | 6.9536  | 6.7152  | 6.5945  | 6.8697  | 6.6486  | 6.9415  | 0.9907  | -0.0135 | 0.6773 | 0.1692 |
| Dctn3  | _VQVQALGNIAK_2                                                                                 | #N/A                  | 4.7286  | 4.6892  | 5.0289  | 5.6153  | 4.9958  | 5.0460  | 5.7672  | 4.8971  | 4.6811  | 5.1052  | 0.9813  | -0.0272 | 0.7141 | 0.1463 |
| Dctn3  | _LAQHIQQDQDC[Carbamidomethyl (C)]VAITEESK_3                                                    | #N/A                  | 4.1115  | 5.5456  | 3.2974  | 3.8001  | 3.2371  | 4.5954  | 3.5148  | 4.3184  | 3.9670  | 3.7671  | 1.0529  | 0.0744  | 0.6697 | 0.1741 |
| Par16a | _LTGPSSVGPGETDPDS[Phospho (STY)]DDOSSDLVIENR_3                                                 | Q8Z101_S278_M1_Par16a | 4.2504  | 3.0920  | 3.9841  | 9.0492  | 2.9133  | 3.3153  | 3.6761  | 8.3363  | 3.7724  | 3.2051  | 0.9340  | -0.0985 | 0.8416 | 0.0749 |
| Adnp   | _LM[Oxidation (M)]HDAS[Phospho (STY)]DS[Phospho (STY)]EVDQDDVVEWK_3                            | #N/A                  | 3.8604  | 3.6856  | 3.7341  | 5.8147  | 4.2139  | 3.9642  | 3.6587  | 5.3774  | 3.7953  | 3.8305  | 1.0112  | 0.0161  | 0.9310 | 0.0311 |
| Hmnpd1 | _VFVGGLS[Phospho (STY)]PDTSEQIK_2                                                              | Q8Z130_S122_M1_Hmnpd1 | 3.6301  | 4.3863  | 3.3637  | 4.0083  | 4.2746  | 6.0061  | 4.5566  | 4.9327  | 4.0856  | 0.9677  | -0.0473 | 0.7751  | 0.1106 | 0.0620 |
| Hmnpd1 | _DLTEYSR_2                                                                                     | #N/A                  | 4.6556  | 5.3526  | 5.5164  | 4.7041  | 5.3681  | 5.9459  | 3.7776  | 5.0140  | 5.1388  | 4.9982  | 1.0468  | 0.0660  | 0.6715 | 0.1729 |
| Hmnpd1 | _YHQIGSK_2                                                                                     | #N/A                  | 4.3558  | 4.6780  | 3.4188  | 3.9886  | 4.9314  | 5.1706  | 3.6744  | 4.0243  | 4.4239  | 4.4443  | 1.0484  | 0.0682  | 0.6320 | 0.1993 |
| Hmnpd1 | _I[Acetyl (Protein N-term)]MEMD[Oxidation (M)]NEYSNIEFAEGSK_2                                  | #N/A                  | 3.9205  | 3.6669  | 3.9772  | 5.8177  | 3.4607  | 3.5055  | 3.6175  | 3.5879  | 3.7339  | 3.6684  | 1.1112  | 0.1521  | 0.3966 | 0.4016 |
| Cpne6  | _NLNPNPWEPFR_2                                                                                 | #N/A                  | 6.6658  | 6.7340  | 6.4552  | 6.6837  | 6.7553  | 6.9519  | 6.6597  | 6.7891  | 6.9320  | 0.9700  | -0.0440 | 0.0410  | 1.3876 | 0.1086 |
| Cpne6  | _LLOGDDGLR_2                                                                                   | #N/A                  | 6.5393  | 6.9574  | 6.6281  | 6.5181  | 6.9436  | 6.1587  | 7.2763  | 6.1693  | 6.5816  | 6.7449  | 0.9897  | -0.0149 | 0.7788 | 0.1086 |
| Cpne6  | _SC[Carbamidomethyl (C)]SS[Phospho (STY)]PVFSR_2                                               | Q8Z140_S68_M1_Cpne6   | 12.4192 | 12.5397 | 13.0212 | 13.0319 | 12.2037 | 12.4111 | 12.8379 | 12.5133 | 12.4896 | 12.5850 | 0.9998  | -0.0002 | 0.9918 | 0.0036 |
| Cpne6  | _C[Carbamidomethyl (C)]VLAEPFR_2                                                               | #N/A                  | 3.5431  | 5.3524  | 4.0920  | 3.9025  | 4.4470  | 4.7784  | 4.2354  | 5.4380  | 4.6203  | 3.1987  | 0.9953  | -0.0068 | 0.9679 | 0.0142 |
| Cpne6  | _PSTPAM[Oxidation (M)]TPSPS[Phospho (STY)]P_2                                                  | #N/A                  | 11.6505 | 11.6385 | 12.2130 | 11.9998 | 11.6839 | 11.8125 | 12.2757 | 11.7175 | 11.9113 | 11.8323 | 0.9915  | -0.0123 | 0.5231 | 0.2814 |
| Cpne6  | _SSQLSHC[Carbamidomethyl (C)]LS[Phospho (STY)]PR_2                                             | #N/A                  | 10.2439 | 10.3932 | 10.9833 | 10.7393 | 10.2512 | 10.4375 | 10.8032 | 10.5849 | 10.5621 | 10.4096 | 0.9923  | -0.0112 | 0.6295 | 0.2010 |
| Cpne6  | _I[Acetyl (Protein N-term)]S[Phospho (STY)]DPEM[Oxidation (M)]GVVPEPPAM[Oxidation (M)]TLGASR_2 | #N/A                  | 3.2180  | 7.5254  | 7.8018  | 8.8403  | 6.5338  | 6.2115  | 6.5430  | 9.4749  | 7.4385  | 6.3595  | 0.8973  | -0.1563 | 0.5210 | 0.2831 |
| Cpne6  | _LVSEQWVEVER_2                                                                                 | #N/A                  | 5.9442  | 5.3334  | 3.5427  | 4.5873  | 2.9528  | 5.1076  | 6.2347  | 5.6114  | 6.4611  | 5.7683  | 0.8119  | -0.3006 | 0.2515 | 0.5995 |
| Cpne6  | _YSVLLVLTGVVSDM[Oxidation (M)]AETR_2                                                           | #N/A                  | 3.8786  | 3.1829  | 4.5654  | 3.5672  | 3.0043  | 4.7543  | 3.2819  | 3.0504  | 4.1999  | 4.2239  | 1.0370  | 0.0524  | 0.7635 | 0.1172 |
| Cpne6  | _TEVLRSK[Carbamidomethyl (C)]S[Phospho (STY)]S[Phospho (STY)]PVFSR_2                           | Q8Z140_S67_M2_Cpne6   | 4.1664  | 3.4218  | 3.9001  | 3.4929  | 3.3101  | 3.3145  | 3.2076  | 3.1247  | 3.3262  | 3.4599  | 0.9527  | -0.0698 | 0.7011 | 0.1542 |
| Cpne6  | _VLAEYFEK_2                                                                                    | #N/A                  | 3.7010  | 3.0053  | 4.3878  | 3.6145  | 2.8267  | 3.4020  | 3.7628  | 3.3866  | 3.6857  | 3.7537  | 0.9568  | -0.0638 | 0.6045 | 0.2186 |
| Sumo3  | _VAGDGGVQVK_2                                                                                  | #N/A                  | 6.5102  | 6.9497  | 6.9453  | 7.1878  | 7.3949  | 7.0111  | 6.6035  | 6.3353  | 6.9951  | 6.5940  | 1.0555  | 0.0779  | 0.0823 | 1.0844 |
| Sumo3  | _I[Acetyl (Protein N-term)]S[Phospho (STY)]EEKKEGKV_2                                          | Q8Z172_S2_M1_Sumo3    | 4.6040  | 5.4090  | 6.2811  | 5.1671  | 5.3116  | 5.1572  | 5.6883  | 5.2464  | 5.7210  | 5.3389  | 0.9678  | -0.0472 | 0.5649 | 0.2481 |
| Eya4   | _NNPS[Phospho (STY)]PPDSOLR_2                                                                  | Q8Z191_S338_M1_Eya4   | 8.4250  | 3.3803  | 3.6958  | 8.8236  | 3.1059  | 3.5187  | 3.3879  | 3.7616  | 4.0606  | 8.9778  | 1.0551  | 0.0773  | 0.8839 | 0.0386 |
| Pkb1   | _NDSPQDEFTPVWR_2                                                                               | #N/A                  | 8.1950  | 8.2283  | 8.8425  | 8.4972  | 8.1617  | 8.2033  | 8.7450  | 8.1481  | 8.1544  | 8.5199  | 0.9999  | -0.0002 | 0.9954 | 0.0020 |
| Pkb1   | _YNEQNDYLR_2                                                                                   | #N/A                  | 7.0186  | 7.0197  | 7.5968  | 7.2800  | 7.0836  | 7.3232  | 7.4090  | 7.2523  | 7.1409  | 7.0882  | 0.9997  | -0.0005 | 0.9861 | 0.0061 |
| Pkb1   | _WDDOSTVTPILR_2                                                                                | #N/A                  | 6.9386  | 6.3123  | 6.8758  | 6.5284  | 6.7262  | 7.4207  | 6.6756  | 6.2530  | 6.6260  | 6.7503  | 1.0341  | 0.0484  | 0.3243 | 0.4891 |
| Pkb1   | _YHQEVVQYK_2                                                                                   | #N/A                  | 5.2968  | 5.1912  | 4.3372  | 4.6669  | 4.9821  | 5.1458  | 5.0117  | 4.9022  | 5.1157  | 5.7470  | 0.9504  | -0.0734 | 0.3140 | 0.5031 |
| Pkb1   | _SPVEFVENK_2                                                                                   | #N/A                  | 7.2255  | 6.9568  | 5.8467  | 7.3956  | 6.7496  | 6.7575  | 7.5389  | 7.0109  | 7.0325  | 7.3869  | 0.9420  | -0.0863 | 0.1927 | 0.7150 |
| Pkb1   | _EVIEAIEAC[Carbamidomethyl (C)]AFK_2                                                           | #N/A                  | 5.9987  | 6.0420  | 4.0320  | 6.4427  | 5.7152  | 5.4962  | 6.4883  | 5.7303  | 5.6706  | 5.4699  | 0.9625  | -0.0551 | 0.6503 | 0.1869 |
| Pkb1   | _LQVTEPR_2                                                                                     | #N/A                  | 5.1485  | 5.0270  | 5.7931  | 5.6270  | 5.8149  | 5.8362  | 5.7489  | 6.1407  | 5.6029  | 5.4609  | 0.9656  | -0.0505 | 0.3911 | 0.4077 |
| Pkb1   | _LIFGDALLM[Oxidation (M)]EPLEK_2                                                               | #N/A                  | 5.0856  | 4.9459  | 3.7602  | 2.8392  | 4.8310  | 5.3066  | 4.7591  | 4.9858  | 4.5432  | 4.6838  | 0.9406  | -0.0883 | 0.5849 | 0.2329 |
| Pkb1   | _EADPGETS[Phospho (STY)]SEAPSTR_2                                                              | Q8Z183_S848_M1_Pkb1   | 7.7867  | 7.5721  | 7.4984  | 8.4002  | 6.9928  | 7.2542  | 3.7842  | 7.8267  | 7.7242  | 3.8247  | 1.3185  | 0.3989  | 0.0844 | 1.0739 |
| Pkb1   | _VGTVEVMD[Oxidation (M)]JGLPVDTR_2                                                             | #N/A                  | 5.9132  | 5.8413  | 3.1670  | 3.6696  | 5.2377  | 5.0108  | 3.3843  | 4.6787  | 5.6403  | 5.4255  | 1.0051  | 0.0073  | 0.9733 | 0.0117 |
| Pkb1   | _TSPFILLSFNHVDSK_2                                                                             | #N/A                  | 5.3387  | 4.5656  | 4.3684  | 4.4106  | 4.6709  | 4.5007  | 4.2043  | 4.6661  | 4.3807  | 3.3369  | 1.1195  | 0.0162  | 0.1269 | 0.8967 |
| Pkb1   | _SEPSS[Phospho (STY)]PDHSSASQDLAALDAEM[Oxidation (M)]TQK_3                                     | #N/A                  | 11.1182 | 11.1072 | 11.4587 | 8.6186  | 10.5347 | 11.1598 | 11.4004 | 11.2333 | 11.1691 | 11.1443 | 0.9492  | -0.0752 | 0.3183 | 0.4971 |
| Pkb1   | _VNLK[Phospho (STY)]SPSEIEENRGR_3                                                              | #N/A                  | 4.0139  | 5.6256  | 4.0264  | 3.6888  | 3.1396  | 5.8213  | 3.3183  | 3.6328  | 3.9744  | 3.5781  | 1.2096  | 0.2745  | 0.2152 | 0.6871 |
| Pkb1   | _VYNLM[Oxidation (M)]EQR_2                                                                     | #N/A                  | 3.3589  | 6.3440  | 4.5934  | 5.7501  | 6.1287  | 5.8204  | 5.2596  | 6.3216  | 5.5996  | 5.9791  | 0.9210  | -0.1187 | 0.4749 | 0.3234 |
| Pkb1   | _SPS[Phospho (STY)]SEIER_2                                                                     | #N/A                  | 8.8843  | 8.0750  | 3.8713  | 8.9430  | 7.1844  | 8.3168  | 8.2574  | 8.3674  | 3.4035  | 8.7588  | 1.0485  | 0.0683  | 0.8093 | 0.0919 |
| Pkb1   | _ELDVGNIGHLQR_2                                                                                | #N/A                  | 4.0121  | 3.0911  | 3.9974  | 3.2117  | 3.8178  | 3.8731  | 3.7172  | 3.5223  | 4.7152  | 4.3368  | 0.9004  | -0.1514 | 0.2153 | 0.6670 |
| Pkb1   | _KSESPDPHGSS[Phospho (STY)]AEQDLAALDAEM[Oxidation (M)]TQK_4                                    | #N/A                  | 3.6712  | 4.0382  | 7.3014  | 3.9786  | 3.8986  | 3.7019  | 4.0129  | 7.2228  | 6.8430  | 3.6986  | 0.8140  | -0.2969 | 0.3525 | 0.4529 |
| Pkb1   | _FESEISK_2                                                                                     | #N/A                  | 4.5056  | 4.1322  | 4.2190  | 5.3417  | 4.8371  | 2.9956  | 3.9110  | 3.4086  | 4.9595  | 5.3963  | 0.9818  | -0.0265 | 0.8861 | 0.0525 |
| Pkb1   | _C[Carbamidomethyl (C)]VELQC[Carbamidomethyl (C)]WK_2                                          | #N/A                  | 5.0373  | 4.0054  | 3.6826  | 4.1852  | 4.4631  | 2.9853  | 3.5964  | 3.9228  | 4.7533  | 4.1522  | 0.9887  | -0.0164 | 0.9117 | 0.0401 |
| Pkb1   | _VNLKS[Phospho (STY)]PSSEIER_2                                                                 | #N/A                  | 7.9784  | 8.5527  | 8.1742  | 9.4400  | 7.5034  | 9.1890  | 9.2573  | 8.8327  | 9.0656  | 9.1736  | 0.9329  | -0.1002 | 0.1511 | 0.8206 |
| Pkb1   | _LTDVAEC[Carbamidomethyl (C)]QNNQLK_2                                                          | #N/A                  | 3.2492  | 3.6848  | 3.4502  | 3.9003  | 3.4194  | 2.6165  | 3.3260  | 3.3279  | 3.1195  | 3.9367  | 0.9742  | -0.0377 | 0.7429 | 0.1291 |
| Pkb1   | _KXSESPDPHGSS[Phospho (STY)]S[Phospho (STY)]AEQDLAALDAEM[Oxidation (M)]TQK_4                   | #N/A                  | 8.9396  | 7.7877  | 3.3960  | 4.2800  | 7.3870  | 3.8034  | 7.0167  | 4.1236  | 3.7867  | 7.8533  | 1.0417  | 0.0589  | 0.8748 | 0.0581 |
| Pkb1   | _SPS[Phospho (STY)]SEIEENRGR_2                                                                 | #N/A                  | 3.8388  | 3.7945  | 4.3091  | 3.8528  | 3.6440  | 3.5884  | 4.0011  | 4.0017  | 3.4997  | 3.5301  | 1.0212  | 0.0303  | 0.6532 | 0.1850 |
| Pkb1   | _DYVPDITYADVIEALSNPR_2                                                                         | #N/A                  | 4.7858  | 4.7551  | 3.7504  | 4.8023  | 4.5258  | 4.3923  | 3.9677  | 4.6943  | 4.4450  | 4.1284  | 1.0448  | 0.0632  | 0.4487 | 0.3480 |
| Pkb1   | _SPS[Phospho (STY)]SEIEENRGRFQTR_3                                                             | #N/A                  | 3.4496  | 4.2059  | 3.1833  | 4.2098  | 4.0942  | 4.0313  | 3.9245  | 4.2741  | 3.0724  | 3.9051  | 1.0180  | 0.0257  | 0.8259 | 0.0831 |
| Pkb1   | _VFLNLC[Carbamidomethyl (C)]RPREDNFSEGA_3                                                      | #N/A                  | 3.1601  | 4.0661  | 2.5676  | 3.5863  | 3.1804  | 3.6429  | 3.8841  | 3.7623  | 3.4175  | 3.5306  | 0.9122  | -0.1325 | 0.2837 | 0.5471 |
| EF3g   | _GIPLTGDT[Phospho (STY)]PEPLLGGDLPLPPK_3                                                       | Q8Z1D1_S42_M1_EF3g    | 3.8313  | 3.9660  |         |         |         |         |         |         |         |         |         |         |        |        |



|          |                                                               |                        |         |         |         |         |         |         |         |         |         |         |        |         |        |        |
|----------|---------------------------------------------------------------|------------------------|---------|---------|---------|---------|---------|---------|---------|---------|---------|---------|--------|---------|--------|--------|
| Atp6w0a1 | _DLPDQNVNVR_2                                                 | #N/A                   | 8.6112  | 8.5922  | 8.7496  | 8.1517  | 8.1666  | 8.1874  | 8.9666  | 8.6846  | 8.4510  | 8.3103  | 0.9775 | -0.0328 | 0.3104 | 0.5081 |
| Atp6w0a1 | _FLPFSFHR_2                                                   | #N/A                   | 6.5799  | 7.2834  | 6.6231  | 6.3273  | 6.2328  | 6.3564  | 7.4183  | 7.6041  | 6.9790  | 6.5708  | 0.9194 | -0.1213 | 0.0634 | 1.1979 |
| Atp6w0a1 | _HLGTNFGGR_2                                                  | #N/A                   | 7.1522  | 7.2549  | 7.1871  | 6.4849  | 6.2641  | 6.7327  | 7.5271  | 7.2910  | 6.6412  | 6.8033  | 0.9689 | -0.0456 | 0.4350 | 0.3615 |
| Atp6w0a1 | _LGFVAGVNR_2                                                  | #N/A                   | 6.7746  | 6.2557  | 6.3909  | 6.6837  | 5.6147  | 5.9608  | 6.5726  | 7.1259  | 6.3372  | 6.5439  | 0.9451 | -0.0815 | 0.1995 | 0.7001 |
| Atp6w0a1 | _NFILETUK_2                                                   | #N/A                   | 6.2041  | 6.3312  | 6.2903  | 5.8553  | 5.6152  | 5.9026  | 5.8232  | 6.8494  | 6.8373  | 6.6946  | 0.9209 | -0.1188 | 0.0652 | 1.1860 |
| Atp6w0a1 | _FYTGTFK_2                                                    | #N/A                   | 6.4597  | 6.1114  | 6.0767  | 5.3338  | 5.5925  | 5.5443  | 4.7819  | 6.7206  | 6.7188  | 6.0983  | 0.9627 | -0.0549 | 0.6057 | 0.2178 |
| Atp6w0a1 | _GTHSGSTVPSLNR_2                                              | #N/A                   | 5.0526  | 5.3043  | 4.3242  | 4.9117  | 5.1254  | 5.0076  | 5.3271  | 5.5426  | 5.3994  | 4.4515  | 0.9564 | -0.0643 | 0.4098 | 0.3874 |
| Atp6w0a1 | _KANIPMDTGENPEVPPR_3                                          | #N/A                   | 5.6805  | 4.5292  | 3.8879  | 6.3181  | 4.8357  | 3.3267  | 5.2170  | 4.4096  | 3.7070  | 4.0698  | 1.0947 | 0.1306  | 0.5253 | 0.2796 |
| Atp6w0a1 | _ANIPM(Oxidation (M))DTGENPEVPPR_2                            | #N/A                   | 6.8007  | 6.9792  | 6.6165  | 6.1786  | 6.1007  | 6.7221  | 6.7591  | 6.9906  | 6.5553  | 6.1607  | 0.9939 | -0.0088 | 0.8663 | 0.0623 |
| Atp6w0a1 | _LHWVEQNK_2                                                   | #N/A                   | 3.1199  | 5.4964  | 3.8067  | 5.5935  | 4.5087  | 3.9831  | 6.1513  | 4.4176  | 5.0438  | 6.8324  | 0.9339 | -0.2647 | 0.1639 | 0.7854 |
| Atp6w0a1 | _IDDLQM(Oxidation (M))VLNQTEHR_3                              | #N/A                   | 5.0883  | 5.0209  | 4.7288  | 4.2499  | 3.5032  | 4.8723  | 4.8726  | 5.9798  | 5.2226  | 5.2801  | 0.8574 | -0.2220 | 0.0667 | 1.1762 |
| Atp6w0a1 | _QAEINPLEDPVGDVHK_3                                           | #N/A                   | 7.0182  | 6.4227  | 6.7951  | 6.5440  | 6.3286  | 6.9420  | 6.7191  | 6.7536  | 6.5449  | 6.3214  | 1.0137 | 0.0197  | 0.5985 | 0.2229 |
| Atp6w0a1 | _FTHGQNVDAVGIGTYR_3                                           | #N/A                   | 6.1512  | 6.3529  | 6.9131  | 6.2651  | 5.0315  | 6.0695  | 6.6112  | 6.9723  | 6.1890  | 6.2343  | 0.9429 | -0.0848 | 0.3143 | 0.5026 |
| Atp6w0a1 | _AIYHTLNL(Carbamidomethyl (C))INDVTQK_2                       | #N/A                   | 3.5826  | 3.6089  | 5.0077  | 3.4921  | 2.6305  | 2.9821  | 3.1567  | 2.4535  | 3.5658  | 3.7765  | 1.0965 | 0.1329  | 0.5285 | 0.2770 |
| Atp6w0a1 | _ASLYPC(Carbamidomethyl (C))PETPQER_2                         | #N/A                   | 8.1409  | 8.3830  | 8.3650  | 7.7674  | 7.7532  | 7.6856  | 8.1276  | 8.2590  | 8.0218  | 7.9497  | 0.9909 | -0.0132 | 0.6792 | 0.1680 |
| Atp6w0a1 | _EINTNQEALKR_2                                                | #N/A                   | 5.1551  | 5.0394  | 4.6375  | 5.1261  | 4.8595  | 5.0188  | 5.5828  | 5.2951  | 3.9411  | 5.3887  | 0.9843 | -0.0228 | 0.8065 | 0.0934 |
| Atp6w0a1 | _DM(Oxidation (M))IDLEANFEKENLK_3                             | #N/A                   | 3.1212  | 4.0769  | 4.3557  | 3.8995  | 3.1147  | 4.3596  | 4.0478  | 4.2529  | 4.3880  | 4.6177  | 0.8832 | -0.1792 | 0.1382 | 0.8594 |
| Atp6w0a1 | _M(Oxidation (M))QTNQTPPTYNK_2                                | #N/A                   | 6.0734  | 4.9197  | 4.1839  | 6.4630  | 4.5720  | 6.2753  | 6.5002  | 7.3649  | 4.1306  | 3.2522  | 1.0193 | 0.0276  | 0.9133 | 0.0394 |
| Atp6w0a1 | _DMIDLEANFEK_2                                                | #N/A                   | 3.8430  | 3.4994  | 3.5767  | 4.6213  | 3.3207  | 4.4087  | 3.2687  | 3.8807  | 4.1798  | 4.2986  | 0.9927 | -0.1016 | 0.9317 | 0.3037 |
| Atp6w0a1 | _ERPTFR_2                                                     | #N/A                   | 6.4402  | 3.6190  | 1.4571  | 4.5017  | 2.8672  | 6.2387  | 7.2068  | 4.0003  | 4.2993  | 4.1790  | 0.9186 | -0.1225 | 0.6924 | 0.1596 |
| Atp6w0a1 | _SVFIIFGQDLK_2                                                | #N/A                   | 3.8563  | 3.4861  | 3.5899  | 3.1337  | 3.0000  | 4.4230  | 3.2820  | 3.8675  | 1.7642  | 4.3118  | 1.0832 | 0.1153  | 0.6059 | 0.2176 |
| Nek4     | _SPAS(Phospho (STY))LEGT(Phospho (STY))GK_2                   | Q921J2_S434_M2_Nek4    | 9.3694  | 9.7225  | 4.0233  | 10.2262 | 9.7886  | 5.0705  | 6.2150  | 3.7414  | 7.7834  | 5.5659  | 1.6607 | 0.7318  | 0.0629 | 1.2013 |
| Nek4     | _RSSDGGDGE(S(Phospho (STY))ELVPLVPSNK_3                       | Q921J2_S438_M1_Nek4    | 3.9086  | 3.3771  | 4.1981  | 3.4071  | 3.2309  | 3.2142  | 3.3231  | 5.4344  | 4.1422  | 4.5538  | 0.8150 | -0.2952 | 0.0805 | 1.0943 |
| Apc2     | _VSS(Phospho (STY))PEDSPAGTPQR_2                              | Q921K7_S2143_M1_Apc2   | 7.4756  | 7.3403  | 4.1276  | 7.8753  | 3.6736  | 2.9510  | 7.9898  | 7.9802  | 7.4236  | 7.2263  | 0.7281 | -0.4577 | 0.1061 | 0.9744 |
| Apc2     | _RGS(Phospho (STY))DGEARPLR_3                                 | Q921K7_S2099_M1_Apc2   | 5.4296  | 4.8845  | 3.5787  | 4.0814  | 3.5184  | 5.5851  | 5.9502  | 5.5471  | 5.7912  | 5.4878  | 0.7926 | -0.3354 | 0.0374 | 1.4267 |
| Apc2     | _APS(Phospho (STY))PEQQR_2                                    | Q921K7_S1805_M1_Apc2   | 6.8437  | 3.5165  | 4.3965  | 3.3983  | 3.4048  | 3.2198  | 6.4720  | 7.1520  | 4.3688  | 5.9103  | 0.6911 | -0.5330 | 0.0620 | 1.2075 |
| Apc2     | _FHAPALGPPEAART(Phospho (STY))PEG(S(Phospho (STY))PVHSGSPSK_4 | Q921K7_S108_M2_Apc2    | 3.4690  | 6.8524  | 3.2027  | 6.5693  | 5.8290  | 6.3585  | 6.9131  | 7.0640  | 6.9501  | 6.6536  | 0.7803 | -0.3579 | 0.1054 | 0.9773 |
| Ddx39b   | _GLAITVSDENDAK_2                                              | #N/A                   | 4.3720  | 4.8532  | 3.5579  | 5.1460  | 5.2343  | 4.5226  | 5.9583  | 5.2052  | 5.1790  | 5.0330  | 0.8635 | -0.2118 | 0.0743 | 1.1488 |
| Ddx39b   | _DQEIFR_2                                                     | #N/A                   | 3.4200  | 3.9985  | 4.5391  | 3.6486  | 3.4140  | 3.4361  | 4.7358  | 4.4484  | 3.3259  | 3.3557  | 0.9181 | -0.1233 | 0.3557 | 0.4289 |
| Ndufa7   | _NWASGQDLQAK_2                                                | #N/A                   | 8.0078  | 7.9107  | 7.8370  | 7.9302  | 8.2922  | 7.9462  | 7.9500  | 7.7131  | 8.0058  | 8.0716  | 1.0066 | 0.0095  | 0.6227 | 0.2058 |
| Ndufa7   | _LSNNY(C(Phospho (STY))CARBAMIDOMETHYL (C))TR_2               | #N/A                   | 6.4110  | 6.7282  | 5.9343  | 6.6149  | 7.2167  | 6.4963  | 6.3018  | 6.9600  | 6.5090  | 6.6542  | 0.9940 | -0.0086 | 0.8741 | 0.0585 |
| Ndufa7   | _AAESSAM(Oxidation (M))AATEK_2                                | #N/A                   | 5.6388  | 6.4924  | 6.1585  | 6.0917  | 6.7388  | 6.6486  | 6.2057  | 5.9229  | 6.4208  | 5.9436  | 1.0280 | 0.0399  | 0.4779 | 0.3207 |
| Ndufa7   | _VQEAIR_2                                                     | #N/A                   | 5.6348  | 6.4153  | 6.2033  | 5.5761  | 6.5659  | 6.1034  | 5.1477  | 6.1669  | 5.7309  | 5.6166  | 1.0737 | 0.1026  | 0.1530 | 0.8154 |
| Vars1    | _DINDVNR_2                                                    | #N/A                   | 3.8832  | 3.1876  | 3.8885  | 3.4323  | 3.0089  | 3.2197  | 3.5805  | 4.1227  | 4.1166  | 3.1096  | 0.9208 | -0.1191 | 0.3065 | 0.5135 |
| Vars1    | _Acetyl (Protein N-term)SLVSPHPDAPFSR_2                       | #N/A                   | 3.7463  | 4.9206  | 4.4331  | 3.5692  | 2.8720  | 3.3566  | 3.7174  | 5.0350  | 3.7311  | 3.2465  | 0.9705 | -0.0433 | 0.8172 | 0.0877 |
| Vars1    | _LSATVTEAFVR_2                                                | #N/A                   | 3.8081  | 3.1124  | 4.4949  | 3.4967  | 2.9338  | 3.2949  | 3.2114  | 3.1209  | 4.2704  | 3.4637  | 1.0019 | 0.0028  | 0.9850 | 0.0065 |
| Bag6     | _PLTS(Phospho (STY))PESSR_2                                   | #N/A                   | 8.9881  | 8.0964  | 8.4799  | 4.0681  | 3.8739  | 8.4128  | 8.8960  | 4.4339  | 5.5867  | 8.6755  | 0.9135 | -0.1305 | 0.6648 | 0.1773 |
| Bag6     | _LQEDP(S(Phospho (STY))PQR_2                                  | #N/A                   | 4.0763  | 6.1960  | 5.9899  | 6.6199  | 3.2023  | 3.0267  | 7.0038  | 4.3536  | 6.9176  | 6.8117  | 0.7736 | -0.3703 | 0.1786 | 0.7481 |
| Bag6     | _ESFLVQVPGVOIR_2                                              | #N/A                   | 3.3217  | 3.7503  | 4.0085  | 4.3162  | 4.1013  | 3.7813  | 3.5999  | 3.6073  | 3.7611  | 2.9773  | 1.1129 | 0.1543  | 0.1159 | 0.9359 |
| Bag6     | _TSPFPGRENAS(Phospho (STY))PAGTTAAEAM(Oxidation (M))SR_3      | #N/A                   | 6.6018  | 6.9266  | 7.8753  | 7.4552  | 6.4546  | 6.5959  | 7.0490  | 7.1386  | 6.9995  | 4.3195  | 1.0954 | 0.1314  | 0.3512 | 0.4544 |
| Bag6     | _LQEDP(S(Phospho (STY))PQRFPNAHR_3                            | #N/A                   | 9.8335  | 9.5032  | 10.4344 | 4.3903  | 8.9492  | 4.2118  | 9.9196  | 3.7282  | 9.7359  | 4.3573  | 1.1372 | 0.1855  | 0.6395 | 0.1941 |
| Bag6     | _AAGARPLTS(Phospho (STY))PELSR_2                              | #N/A                   | 3.8331  | 3.4357  | 3.5668  | 3.9892  | 3.2859  | 3.9496  | 3.2865  | 3.9007  | 4.1998  | 4.9962  | 0.8977 | -0.1557 | 0.2232 | 0.3562 |
| Bag6     | _ENAS(Phospho (STY))PAGTTAAEAMSR_2                            | #N/A                   | 6.1772  | 4.8454  | 3.1797  | 6.9198  | 4.6545  | 3.6576  | 5.2354  | 4.0470  | 3.6341  | 4.7155  | 1.1129 | 0.1543  | 0.5430 | 0.2652 |
| Rasgrp1  | _SNHVLQMGHD(S(Phospho (STY))JA_2                              | #N/A                   | 5.6690  | 4.0097  | 4.1977  | 3.9186  | 4.6296  | 3.7354  | 6.3279  | 5.4013  | 5.1270  | 5.3797  | 0.8113 | -0.3017 | 0.1064 | 0.9729 |
| Septin3  | _VNNIPVIAK_2                                                  | #N/A                   | 8.4468  | 8.5969  | 8.0297  | 8.2352  | 8.4100  | 8.2178  | 8.1390  | 8.4446  | 8.6397  | 8.4805  | 0.9877 | -0.0178 | 0.4564 | 0.3406 |
| Septin3  | _SLTVNTLFK_2                                                  | #N/A                   | 7.5041  | 7.9105  | 7.8261  | 7.4825  | 7.5449  | 7.5018  | 7.7395  | 7.7879  | 7.5929  | 7.7456  | 1.0016 | 0.0022  | 0.9272 | 0.0328 |
| Septin3  | _KASS(Phospho (STY))WNR_2                                     | Q921S5_S92_M1_Septin3  | 3.9838  | 3.2882  | 3.1698  | 3.6725  | 7.0260  | 3.1191  | 3.3871  | 7.4238  | 7.3773  | 7.1399  | 0.6385 | -0.6472 | 0.0691 | 1.1607 |
| Septin3  | _THLQDLK_2                                                    | #N/A                   | 6.6822  | 6.8279  | 6.2555  | 7.2630  | 6.8514  | 6.1818  | 6.2700  | 6.5675  | 6.7998  | 6.7997  | 1.0102 | 0.0147  | 0.7753 | 0.1105 |
| Septin3  | _YNEQYEK_2                                                    | #N/A                   | 6.1982  | 6.1962  | 5.8974  | 5.8613  | 6.7371  | 8.5205  | 4.9946  | 6.5082  | 5.7216  | 6.2343  | 1.0433 | 0.0611  | 0.4463 | 0.3504 |
| Septin3  | _EVTHNHYETVR_3                                                | #N/A                   | 5.0461  | 5.2084  | 5.1777  | 5.1119  | 6.0807  | 6.5971  | 6.0654  | 5.6621  | 6.3054  | 6.2039  | 0.9138 | -0.1300 | 0.1712 | 0.7665 |
| Septin3  | _LTVDTPGFDQNNEN(Carbamidomethyl (C))WIEPK_3                   | #N/A                   | 3.1670  | 3.9058  | 4.6692  | 4.9947  | 3.6098  | 3.1013  | 2.8114  | 4.3378  | 2.6560  | 4.3235  | 1.1064 | 0.1459  | 0.5067 | 0.2953 |
| Septin3  | _ADTM(Oxidation (M))TLEEK_2                                   | #N/A                   | 5.3986  | 5.7227  | 5.6693  | 5.6925  | 5.6576  | 6.1345  | 5.4885  | 5.8940  | 5.6438  | 5.4527  | 1.0165 | 0.0236  | 0.5399 | 0.2677 |
| Septin3  | _AGHVEEGGVK_2                                                 | #N/A                   | 5.7297  | 6.2019  | 6.2018  | 6.6632  | 6.4778  | 6.4921  | 6.4328  | 6.1544  | 5.9801  | 6.1727  | 1.0177 | 0.0253  | 0.5684 | 0.2453 |
| Septin3  | _ASSWNEEK_2                                                   | #N/A                   | 3.3442  | 3.4574  | 3.9357  | 3.4795  | 3.3457  | 3.2789  | 3.1720  | 2.8963  | 3.8208  | 3.6823  | 1.0238 | 0.0339  | 0.7108 | 0.1483 |
| Gab2     | _ASS(Phospho (STY))C(Carbamidomethyl (C))JETEYPAR_2           | Q921S8_S402_M1_Gab2    | 9.4084  | 9.6501  | 10.1426 | 10.0834 | 8.9986  | 9.4166  | 9.8159  | 9.3965  | 9.5853  | 9.6864  | 0.9995 | -0.0007 | 0.9854 | 0.0064 |
| Gab2     | _SAS(Phospho (STY))FSQGR_2                                    | Q921S8_S211_M1_Gab2    | 5.1236  | 4.9401  | 3.7969  | 4.2996  | 3.7366  | 6.0591  | 4.3537  | 3.8189  | 5.7412  | 6.9495  | 0.9495 | -0.0747 | 0.6885 | 0.1621 |
| Gab2     | _SSLTGS(Phospho (STY))ETDNEDEVTKR_2                           | Q921S8_S282_M1_Gab2    | 4.2052  | 3.1372  | 3.9389  | 5.2845  | 3.3489  | 5.0304  | 3.6309  | 3.5185  | 3.8176  | 3.1599  | 1.1772 | 0.2353  | 0.2079 | 0.6820 |
| Ap3b1    | _EDGLEDNEKNFYES(Phospho (STY))EEEEEEK_4                       | #N/A                   | 3.3730  | 4.1782  | 4.0598  | 3.9425  | 3.9995  | 3.7300  | 4.0908  | 3.0586  | 3.3577  | 3.6198  | 1.0987 | 0.1359  | 0.1638 | 0.7858 |
| Ap3b1    | _NPFES(Phospho (STY))EEEEEEK_2                                | #N/A                   | 3.9908  | 4.6637  | 3.1659  | 4.6604  | 3.1346  | 3.4900  | 3.3832  | 4.8108  | 4.9216  | 3.8006  | 0.9106 | -0.1351 | 0.4403 | 0.3562 |
| Pikfyve  | _SAS(Phospho (STY))TNLSLDR_2                                  | Q921T6_S307_M1_Pikfyve | 8.1106  | 7.5518  | 8.2868  | 4.1459  | 6.1903  | 7.8752  | 8.6777  | 8.0899  | 7.8795  | 8.0683  | 0.8591 | -0.2190 | 0.2008 | 0.6972 |
| Pikfyve  | _Acetyl (Protein N-term)ADTDKSS(Phospho (STY))PTLSDANLDR_3    | Q921T6_S8_M1_Pikfyve   | 5.5811  | 5.9917  | 6.5007  | 6.6941  | 5.7188  | 6.3539  | 4.0837  | 6.3663  | 6.1942  | 6.1670  | 1.0047 | 0.0068  | 0.9705 | 0.0130 |
| Pikfyve  | _SSPMVPSYETSVS(Phospho (STY))QANR_2                           | Q921T6_S329_M1_Pikfyve | 4.0513  | 3.3556  | 3.2372  | 3.2642  | 3.1770  | 3.0517  | 3.4125  | 3.7370  | 4.0360  | 4.4423  | 0.8590 | -0.2192 | 0.0593 | 1.2268 |
| Sik39    | _TJ(Phospho (STY))PDIAQR_2                                    | #N/A                   | 12.2018 | 11.6643 | 11.6508 | 12.0186 | 10.1585 | 11.6473 | 11.3903 | 11.5707 | 11.8539 | 11.9713 | 0.9881 |         |        |        |



|         |                                                                       |                        |         |         |         |         |         |         |         |         |         |         |         |         |        |        |
|---------|-----------------------------------------------------------------------|------------------------|---------|---------|---------|---------|---------|---------|---------|---------|---------|---------|---------|---------|--------|--------|
| Hnrrpc  | _SEEEQSSA[Phospho (STY)]VKMDENVK_3                                    | #N/A                   | 3.7874  | 3.0428  | 3.5211  | 4.5657  | 2.9311  | 3.6935  | 3.5866  | 3.9363  | 4.2354  | 3.7145  | 0.9282  | -0.1076 | 0.4122 | 0.3848 |
| Hnrrpc  | _SDVAFISK_2                                                           | #N/A                   | 4.2703  | 3.5747  | 3.4563  | 2.7307  | 3.3960  | 4.0131  | 3.6736  | 3.6358  | 4.0451  | 4.3255  | 0.9116  | -0.1335 | 0.2850 | 0.5451 |
| Dpp6    | _KHEDSEAWLHR_3                                                        | #N/A                   | 7.8897  | 4.4895  | 6.9660  | 5.7631  | 6.4539  | 7.5938  | 8.2731  | 6.0127  | 6.2218  | 6.7581  | 0.9574  | -0.0628 | 0.7118 | 0.1476 |
| Dpp6    | _IYVLETDLPK_2                                                         | #N/A                   | 5.6836  | 5.2204  | 6.1163  | 4.4025  | 4.1795  | 5.4920  | 5.7451  | 6.0189  | 5.4088  | 5.0965  | 0.9309  | -0.1034 | 0.3815 | 0.4185 |
| Dpp6    | _HLYSANTVOFNR_2                                                       | #N/A                   | 4.3156  | 4.4379  | 4.2759  | 4.3608  | 3.3419  | 3.0993  | 4.9355  | 4.5700  | 4.6111  | 3.9140  | 0.8811  | -0.1825 | 0.1592 | 0.7880 |
| Fxyt1   | _TGPEDEEGTRFS[Phospho (STY)]IR_3                                      | Q92239_S83_M1_Fxyt1    | 3.7677  | 3.5603  | 3.9386  | 4.2381  | 3.3817  | 3.9525  | 3.7110  | 3.6742  | 3.8127  | 4.0343  | 0.9983  | -0.0025 | 0.9698 | 0.0133 |
| Snapii  | _JAcetyl (Protein N-term)IAAGSAKVSAGAT[Phospho (STY)]PVAGPTGR_2       | Q92266_T14_M1_Snapii   | 3.5614  | 7.5671  | 4.7524  | 8.3519  | 6.5795  | 7.7810  | 7.1830  | 7.4345  | 7.1118  | 7.6385  | 0.8761  | -0.1908 | 0.3756 | 0.4253 |
| Snapii  | _AMLDSDGVPPGS[Phospho (STY)]PSK_2                                     | Q92266_S133_M1_Snapii  | 3.8956  | 3.4792  | 3.9574  | 9.3166  | 3.3675  | 3.1571  | 3.1503  | 3.5000  | 4.3315  | 3.1785  | 1.4959  | 0.5810  | 0.2566 | 0.2641 |
| Snapii  | _VVVNNVLNAGEK_2                                                       | #N/A                   | 3.3438  | 4.3396  | 3.9666  | 4.4693  | 4.8088  | 4.2908  | 4.1839  | 3.6492  | 4.0351  | 4.4363  | 1.0312  | 0.0443  | 0.6700 | 0.1739 |
| Rasa1   | _RIS[Phospho (STY)]FKGT[Phospho (STY)]PTEEQVR_3                       | Q92268_S396_M2_Rasa1   | 3.7553  | 4.2255  | 3.4890  | 3.9040  | 2.7182  | 3.5985  | 3.6187  | 3.9684  | 5.0112  | 4.2109  | 0.8603  | -0.2171 | 0.1315 | 0.8811 |
| Rasa1   | _LLEDSS[Phospho (STY)]LOTEVDQGR_2                                     | Q92268_S749_M1_Rasa1   | 4.3784  | 2.9640  | 4.1121  | 3.6559  | 2.7853  | 3.4433  | 3.8041  | 3.3453  | 3.6443  | 3.3332  | 1.0070  | 0.0101  | 0.9423 | 0.0258 |
| Baz1b   | _LADDEGDS[Phospho (STY)]DSESVGQSR_2                                   | Q92277_S1464_M1_Baz1b  | 7.6556  | 7.4265  | 8.2385  | 3.9165  | 6.3150  | 6.1527  | 8.4491  | 8.0243  | 7.4939  | 3.7967  | 0.9534  | -0.0689 | 0.7865 | 0.1043 |
| Baz1b   | _EENVLGKVDK_2                                                         | #N/A                   | 7.5030  | 7.3055  | 7.2764  | 7.3490  | 6.7886  | 7.3279  | 7.6750  | 7.5212  | 7.3993  | 7.2460  | 0.9725  | -0.0403 | 0.1999 | 0.6991 |
| Pdpk1   | _ANS[Phospho (STY)]VGTAGIVSPELLTEK_2                                  | #N/A                   | 9.3443  | 10.1468 | 10.4137 | 10.8545 | 9.1279  | 9.4681  | 9.7841  | 10.2386 | 9.8693  | 9.2296  | 1.0115  | 0.0165  | 0.7783 | 0.1089 |
| Ate1    | _KEGS[Phospho (STY)]KEFHPOSIEEK_3                                     | #N/A                   | 6.2217  | 3.2499  | 7.2160  | 7.0024  | 5.0187  | 6.1260  | 6.6874  | 6.6696  | 6.5024  | 3.0472  | 1.0138  | 0.0198  | 0.9407 | 0.0265 |
| Ate1    | _EFHPOS[Phospho (STY)]IEEK_2                                          | Q922A5_S174_M1_Ate1    | 5.6561  | 6.0420  | 6.0863  | 6.3338  | 4.9861  | 5.5318  | 6.6119  | 6.5143  | 5.2561  | 0.9532  | -0.0691 | 0.4445  | 0.3521 | 0.2621 |
| Ate1    | _EGS[Phospho (STY)]KEFHPOSIEEK_3                                      | #N/A                   | 6.4424  | 5.8528  | 6.5731  | 6.9289  | 8.8710  | 6.2865  | 6.3685  | 6.3584  | 5.8724  | 6.0541  | 0.9993  | -0.0010 | 0.9914 | 0.0094 |
| Rps6k4  | _LEPVSPAGS[Phospho (STY)]PPGQDR_2                                     | Q922B9_S347_M1_Rps6k4  | 4.2632  | 3.5675  | 3.4491  | 3.9518  | 3.3888  | 4.3406  | 3.2006  | 4.1667  | 3.8153  | 3.9188  | 1.0136  | 0.0195  | 0.8523 | 0.0638 |
| Rps6k4  | _RGS[Phospho (STY)]PVASSGR_2                                          | Q922B9_S745_M1_Rps6k4  | 3.3362  | 7.0019  | 4.5707  | 4.2322  | 3.9808  | 4.1447  | 4.0378  | 7.1245  | 3.4439  | 3.7918  | 0.9913  | -0.0126 | 0.9669 | 0.0346 |
| Mtmr1   | _GSS[Phospho (STY)]PHSATPVHTSV_2                                      | Q922CA_S657_M1_Mtmr1   | 11.7191 | 10.9324 | 12.3536 | 11.9452 | 10.9393 | 11.6108 | 11.9711 | 11.8278 | 11.6629 | 0.9836  | -0.0238 | 0.4643  | 0.3132 | 0.1442 |
| Mtmr1   | _HPSIETLDS[Phospho (STY)]PTGSHEVWC[Carbamidomethyl (C)]IK_3           | Q922CA_S51_M1_Mtmr1    | 4.8483  | 3.6981  | 3.9796  | 3.8709  | 4.5721  | 3.3561  | 3.8438  | 4.4801  | 6.9112  | 3.6831  | 0.8636  | -0.2116 | 0.3475 | 0.4590 |
| Mtmr7   | _SPS[Phospho (STY)]QGDDEGALITQDNLK_2                                  | #N/A                   | 4.0574  | 3.5158  | 6.8791  | 7.9852  | 3.5291  | 3.8364  | 3.8170  | 3.5827  | 3.4771  | 1.0660  | 0.0922  | 0.8175  | 0.0875 | 0.0765 |
| Mtmr7   | _S[Phospho (STY)]PSGGEHAPSEDSQGR_3                                    | #N/A                   | 3.6301  | 4.3863  | 3.3637  | 4.0293  | 4.2746  | 3.8508  | 3.7440  | 4.0892  | 3.7378  | 4.0856  | 1.0021  | 0.0031  | 0.9698 | 0.0133 |
| Mtmr7   | _S[Phospho (STY)]PSGGEHAPSEDSQK_2                                     | #N/A                   | 6.0155  | 3.4701  | 3.3517  | 3.8544  | 3.2914  | 5.9653  | 3.5690  | 4.2641  | 3.9127  | 3.8214  | 1.1112  | 0.1522  | 0.5396 | 0.2679 |
| Mtmr2   | _AS[Phospho (STY)]SPAQC[Carbamidomethyl (C)]VTPVQTVV_2                | Q922D1_S630_M1_Mtmr2   | 8.2294  | 3.3135  | 3.7917  | 8.4237  | 7.1541  | 3.4228  | 3.3160  | 8.3558  | 4.1657  | 3.0128  | 1.2143  | 0.2801  | 0.5443 | 0.0694 |
| Mtmr2   | _SSS[Phospho (STY)]C[Carbamidomethyl (C)]ESLGAQPAAR_2                 | Q922D1_S6_M1_Mtmr2     | 10.2219 | 10.0592 | 10.5696 | 10.3426 | 8.9601  | 9.9512  | 10.7073 | 10.1991 | 10.3777 | 10.3231 | 0.9630  | -0.0543 | 0.2347 | 0.6295 |
| Mtmr2   | _SASAISSDSSTADNFS[Phospho (STY)]POLR_2                                | Q922D1_S58_M1_Mtmr2    | 3.3496  | 4.1059  | 4.5841  | 4.1279  | 3.9942  | 4.1313  | 4.0244  | 4.3741  | 3.1723  | 3.8052  | 1.0533  | 0.0749  | 0.4930 | 0.3072 |
| Mecp2   | _AETSESGAPAPPEASA[Phospho (STY)]PK_2                                  | #N/A                   | 12.3171 | 12.1682 | 12.7861 | 12.9492 | 12.0902 | 12.3589 | 12.9040 | 12.3041 | 12.1435 | 12.4008 | 1.0006  | 0.0008  | 0.9758 | 0.0106 |
| Mecp2   | _VLEKS[Phospho (STY)]PGK_2                                            | Q922D6_S216_M1_Mecp2   | 4.1849  | 4.3466  | 3.0576  | 3.7754  | 3.1758  | 4.1604  | 3.6666  | 3.2142  | 2.8273  | 1.0632  | 0.0884  | 0.5488  | 0.2566 | 0.2606 |
| Mecp2   | _GGS[Phospho (STY)]LESDGC[Carbamidomethyl (C)]PKEPAK_2                | Q922D6_S421_M1_Mecp2   | 6.1728  | 6.4626  | 6.1920  | 7.0219  | 6.4854  | 6.2667  | 6.7386  | 4.7826  | 4.4155  | 6.3474  | 1.1548  | 0.2077  | 0.1102 | 0.9580 |
| Mecp2   | _EGKHEPLQPSAHGAEPAGKAETSESGAPAPPEASA[Phospho (STY)]PK_5               | #N/A                   | 4.1487  | 5.0860  | 4.3089  | 3.3107  | 3.4924  | 3.1322  | 4.5262  | 5.0569  | 4.8758  | 3.2777  | 0.8900  | -0.1681 | 0.3577 | 0.4465 |
| Mecp2   | _VGDTSLDNDQDFTVGR_2                                                   | #N/A                   | 4.5713  | 4.5598  | 3.3476  | 4.8882  | 4.8291  | 3.8670  | 3.7602  | 5.1187  | 4.4089  | 4.0694  | 1.0010  | 0.0015  | 0.9909 | 0.0040 |
| Mecp2   | _MPFQAS[Phospho (STY)]PGGK_2                                          | Q922D6_S229_M1_Mecp2   | 5.7436  | 4.3875  | 4.2691  | 6.2806  | 5.1006  | 3.5207  | 3.8815  | 3.2680  | 3.2379  | 1.3999  | 0.8483  | 0.0312  | 1.5058 | 0.0897 |
| Mbd3    | _VRYDS[Phospho (STY)]SNQVK_2                                          | Q922D8_S85_M1_Mbd3     | 4.0878  | 3.2546  | 3.8215  | 3.3653  | 3.0759  | 3.1528  | 3.5136  | 3.6359  | 3.9349  | 4.4967  | 0.8882  | -0.1711 | 0.1446 | 0.8397 |
| Mbd3    | _YLGGAS[Phospho (STY)]JL[Oxidation (M)]DLSTDFR_2                      | #N/A                   | 3.1064  | 4.1223  | 3.7932  | 4.2958  | 3.9372  | 3.9982  | 4.0105  | 3.8251  | 3.4737  | 4.2628  | 0.9955  | -0.0065 | 0.9454 | 0.0244 |
| Mbd2    | _AADTEVIDIM[Oxidation (M)]DS[Phospho (STY)]GDEA_2                     | #N/A                   | 4.2351  | 9.4996  | 3.9688  | 9.6089  | 9.3318  | 9.8069  | 9.7055  | 9.3255  | 9.3677  | 9.5525  | 0.8160  | -0.2934 | 0.2609 | 0.5835 |
| Bnip3l  | _ILLDAQHES[Phospho (STY)]GQSSSR_2                                     | #N/A                   | 5.2241  | 3.7989  | 3.7112  | 5.6211  | 5.8110  | 5.3803  | 5.6843  | 5.5054  | 5.7813  | 5.5144  | 0.8760  | -0.1910 | 0.1818 | 0.7403 |
| Bnip3l  | _DHSSDS[Phospho (STY)]EEVEVEGEKEVALKK_4                               | #N/A                   | 3.6467  | 4.0977  | 3.7658  | 4.1503  | 3.8757  | 6.5156  | 3.9917  | 3.8727  | 6.5932  | 3.8860  | 0.9468  | -0.0789 | 0.7580 | 0.1204 |
| Rgs6    | _SVVGYTDETQSGS[Phospho (STY)]PVHPSQPIR_3                              | #N/A                   | 7.6565  | 7.3582  | 7.8615  | 8.5434  | 5.4577  | 7.1917  | 7.1482  | 7.7270  | 7.4685  | 7.1636  | 1.0113  | 0.0161  | 0.8819 | 0.0546 |
| Rgs6    | _KSVVGYTDETQSGS[Phospho (STY)]PVHPSQPIR_4                             | #N/A                   | 3.1461  | 3.9513  | 3.8329  | 8.1515  | 5.1231  | 3.9569  | 4.0502  | 7.3311  | 3.4315  | 4.5846  | 0.9679  | -0.0471 | 0.8953 | 0.0480 |
| Rgs6    | _SVVGYTDETQSGS[Phospho (STY)]PVHPSQPIR_3                              | #N/A                   | 3.8351  | 7.5371  | 8.4079  | 5.1173  | 3.7449  | 6.9898  | 7.1521  | 3.6975  | 7.5148  | 6.9933  | 0.9368  | -0.0942 | 0.7532 | 0.1231 |
| Rgs6    | _KSVVGYTDETQSGS[Phospho (STY)]PVHPSQPIR_3                             | #N/A                   | 3.2408  | 4.0460  | 3.9276  | 4.4303  | 3.8674  | 3.8621  | 3.6882  | 3.3368  | 4.3973  | 1.0010  | 0.0014  | 0.9888  | 0.0049 | 0.0049 |
| Epb411l | _ETDPS[Phospho (STY)]PEER_2                                           | #N/A                   | 13.0175 | 13.0603 | 13.4968 | 13.2279 | 12.3831 | 13.1164 | 13.0881 | 13.1087 | 13.0879 | 12.9509 | 0.9993  | -0.0009 | 0.9652 | 0.0154 |
| Epb411l | _LVS[Phospho (STY)]PEPPK_2                                            | Q922H5_S378_M1_Epb411l | 11.8412 | 11.4987 | 11.8095 | 11.8715 | 10.9994 | 11.5931 | 11.9658 | 11.6905 | 11.5933 | 11.6354 | 0.9898  | -0.0147 | 0.5301 | 0.0988 |
| Epb411l | _S[Phospho (STY)]PELDR_2                                              | #N/A                   | 11.0361 | 10.3492 | 10.7225 | 10.8537 | 8.8631  | 10.5434 | 9.8727  | 10.6621 | 10.7975 | 10.6931 | 0.9894  | -0.0154 | 0.8042 | 0.0946 |
| Epb411l | _S[Phospho (STY)]LDGAIFSR_2                                           | #N/A                   | 10.0242 | 9.4247  | 9.4669  | 9.7713  | 9.0930  | 9.7653  | 9.5842  | 9.6677  | 9.9832  | 9.9777  | 0.9783  | -0.0316 | 0.2889 | 0.5392 |
| Epb411l | _KELKPEGETT[Phospho (STY)]PR_2                                        | #N/A                   | 8.0779  | 3.8762  | 7.4169  | 7.2826  | 7.0764  | 8.1481  | 8.1127  | 8.2049  | 6.9280  | 6.8834  | 0.9266  | -0.1099 | 0.5367 | 0.2703 |
| Epb411l | _S[Phospho (STY)]PELDRDK_2                                            | #N/A                   | 9.2264  | 9.1993  | 9.1673  | 9.5417  | 7.5135  | 8.9944  | 9.1884  | 8.7077  | 9.9313  | 0.9833  | -0.0243 | 0.7051  | 0.1518 | 0.1508 |
| Epb411l | _ALGURE[Phospho (STY)]IEEK_2                                          | Q922H5_S564_M1_Epb411l | 8.0576  | 7.8581  | 7.7825  | 8.1624  | 6.7811  | 7.6740  | 7.9724  | 7.9534  | 7.9135  | 7.8619  | 0.9740  | -0.0380 | 0.4381 | 0.3585 |
| Epb411l | _VTLDASEYEC[Carbamidomethyl (C)]IEVEK_2                               | #N/A                   | 6.7154  | 6.3199  | 7.3206  | 7.3581  | 6.1410  | 6.7978  | 6.9975  | 6.5337  | 6.9879  | 1.0027  | 0.0039  | 0.9495  | 0.0225 | 0.0225 |
| Epb411l | _ETDPS[Phospho (STY)]PEERDK_2                                         | #N/A                   | 2.9168  | 7.9208  | 3.6036  | 4.3987  | 7.8220  | 8.1859  | 7.8915  | 4.1033  | 4.4024  | 7.7260  | 0.9630  | -0.0543 | 0.8841 | 0.0535 |
| Epb411l | _DNHLAER_2                                                            | #N/A                   | 6.6482  | 6.2538  | 6.4153  | 6.5565  | 6.0782  | 6.6419  | 6.3066  | 6.5627  | 6.4842  | 6.2737  | 1.0040  | 0.0057  | 0.8487 | 0.0713 |
| Epb411l | _FAPNQTR_2                                                            | #N/A                   | 5.8355  | 6.2364  | 6.1803  | 5.9711  | 6.1905  | 5.9501  | 5.5068  | 6.0083  | 6.2975  | 6.1490  | 1.0117  | 0.0168  | 0.6707 | 0.1735 |
| Epb411l | _KAQETPQPEAAAVT[Phospho (STY)]PVT[Phospho (STY)]PAGHSHPETNSNEK_4      | #N/A                   | 4.0672  | 3.3226  | 3.8008  | 3.3446  | 3.2109  | 3.4137  | 3.3069  | 3.6566  | 3.9556  | 3.0219  | 1.0119  | 0.0170  | 0.8640 | 0.0635 |
| Epb411l | _HOAS[Phospho (STY)]INELK_2                                           | #N/A                   | 7.9210  | 7.3253  | 8.3098  | 7.8986  | 6.5333  | 7.7302  | 7.3945  | 8.0041  | 8.0019  | 7.6870  | 0.9804  | -0.0285 | 0.6636 | 0.1781 |
| Epb411l | _S[Phospho (STY)]EAEAGEVR_2                                           | #N/A                   | 8.0962  | 7.4925  | 7.5414  | 7.8056  | 7.4695  | 7.6165  | 8.1013  | 7.6070  | 7.6944  | 7.9140  | 0.9797  | -0.0296 | 0.3246 | 0.4887 |
| Epb411l | _S[Phospho (STY)]EAEAGEVRT[Phospho (STY)]PTK_2                        | Q922H5_T475_M2_Epb411l | 6.2866  | 6.4501  | 6.0701  | 6.8997  | 5.8708  | 6.0600  | 3.1190  | 6.9250  | 6.0613  | 6.8774  | 1.0918  | 0.1267  | 0.4930 | 0.3072 |
| Epb411l | _AQEETPQPEAAAVT[Phospho (STY)]T[Phospho (STY)]VTPAGHSHPETNSNEK_4      | #N/A                   | 4.0001  | 6.3979  | 5.3596  | 6.6325  | 5.3774  | 6.6686  | 4.7530  | 6.4059  | 5.3676  | 1.1272  | 0.1728  | 0.3687  | 0.4333 | 0.4333 |
| Epb411l | _RLSPSPAS[Phospho (STY)]PS[Phospho (STY)]PKGT[Phospho (STY)]PEK_2     | #N/A                   | 7.9752  | 7.5376  | 6.3318  | 8.1943  | 6.0296  | 7.7947  | 7.7245  | 7.7289  | 7.6126  | 7.6918  | 0.9507  | -0.0729 | 0.4368 | 0.3597 |
| Epb411l | _GAC[Carbamidomethyl (C)]ST[Phospho (STY)]PEM[Oxidation (M)]PQFESVK_2 | #N/A                   | 9.0575  | 8.3809  | 8.7251  | 9.0849  | 3.5728  | 8.4989  | 9.1618  | 8.4957  | 8.5530  | 8.4992  | 0.9089  | -0.1379 | 0.4911 | 0.3089 |
| Epb411l | _GAAAM[Oxidation (M)]PGQCVATER_2                                      | #N/A                   | 6.2074  | 6.7118  | 6.7810  | 3.48    |         |         |         |         |         |         |         |         |        |        |



|         |                                                           |                        |        |         |         |         |         |        |        |         |         |         |         |         |        |        |
|---------|-----------------------------------------------------------|------------------------|--------|---------|---------|---------|---------|--------|--------|---------|---------|---------|---------|---------|--------|--------|
| Epb4111 | _VSAADSTQVDGGTPMWK_2                                      | #N/A                   | 3.4569 | 4.2132  | 3.6998  | 4.2024  | 4.1015  | 4.0240 | 3.9171 | 5.6174  | 3.5646  | 4.1694  | 0.9149  | -0.1284 | 0.3725 | 0.4289 |
| Epb4111 | _PASVSENHDAGEGKRDDGASPhospho (STY)JGR_4                   | #N/A                   | 3.1952 | 4.0310  | 3.8820  | 4.3847  | 3.8217  | 4.2062 | 4.0993 | 3.7338  | 3.3824  | 4.3517  | 1.0073  | 0.0105  | 0.9187 | 0.0368 |
| Letm1   | _LLELQSGTNNFLR_2                                          | #N/A                   | 6.0325 | 5.8901  | 6.3765  | 6.0861  | 5.6327  | 6.0239 | 6.0943 | 5.8494  | 5.7636  | 5.7719  | 1.0234  | 0.0333  | 0.3516 | 0.4540 |
| Letm1   | _VAEVEGKVOMK_2                                            | #N/A                   | 6.0740 | 5.7429  | 6.1202  | 5.7801  | 5.6229  | 5.8763 | 6.5041 | 5.6351  | 5.2129  | 5.2517  | 1.0387  | 0.0547  | 0.4202 | 0.3765 |
| Letm1   | _LISLTSALDOKNDQNDQDLVK_3                                  | #N/A                   | 3.9635 | 2.5562  | 3.1932  | 3.9945  | 4.0713  | 4.6483 | 3.2657 | 5.1169  | 3.8934  | 3.6628  | 0.9380  | -0.0923 | 0.6298 | 0.2008 |
| Letm1   | _FLQDTREEMALK_2                                           | #N/A                   | 4.1134 | 3.1128  | 3.2994  | 3.8020  | 3.2391  | 2.8996 | 3.5167 | 4.3165  | 3.9650  | 3.7690  | 0.8803  | -0.1839 | 0.1106 | 0.9561 |
| Sucia2  | _INFDSPhospho (STY)KSAYR_2                                | Q9Z2B9_S279_M1_Sucia2  | 8.9876 | 8.9035  | 9.5845  | 9.1864  | 8.5720  | 9.0797 | 9.3776 | 8.8214  | 9.1027  | 8.9199  | 0.9997  | -0.0005 | 0.9877 | 0.0054 |
| Sucia2  | _LQAVTLIAQK_2                                             | #N/A                   | 7.7866 | 7.6526  | 7.5256  | 7.7679  | 8.1439  | 8.0982 | 7.7467 | 7.7443  | 7.9033  | 1.0034  | 0.9050  | 0.8395  | 0.0760 | 0.0790 |
| Sucia2  | _LVFSPEEAK_2                                              | #N/A                   | 8.0318 | 7.2915  | 7.5425  | 7.2009  | 7.4953  | 7.4341 | 6.9486 | 8.0748  | 7.8433  | 7.9258  | 0.9742  | -0.0377 | 0.4492 | 0.3475 |
| Sucia2  | _ILAC[Carbamidomethyl (C)]DOLDIAAK_2                      | #N/A                   | 7.2477 | 7.3608  | 7.2135  | 7.8190  | 7.1841  | 7.4009 | 7.0506 | 7.2268  | 7.3764  | 1.0144  | 0.5007  | 0.0207  | 0.4640 | 0.3335 |
| Sucia2  | _IC[Carbamidomethyl (C)]NQVLVC[Carbamidomethyl (C)]ER_2   | #N/A                   | 6.6420 | 6.6401  | 5.8779  | 7.3855  | 6.9916  | 6.7144 | 6.5237 | 7.0398  | 6.7843  | 6.9928  | 0.9815  | -0.0270 | 0.6522 | 0.1856 |
| Sucia2  | _LSEVTLAK_2                                               | #N/A                   | 6.0027 | 5.4219  | 5.9751  | 6.2450  | 5.9211  | 6.0536 | 5.4321 | 6.6297  | 5.9670  | 6.4838  | 0.9687  | -0.0458 | 0.4774 | 0.3211 |
| Sucia2  | _LHGGTPANFLDVGCGATVQVTEAFK_3                              | #N/A                   | 5.6622 | 5.5658  | 6.7126  | 6.5078  | 5.8514  | 6.0187 | 6.3361 | 5.9487  | 5.9155  | 6.5331  | 0.9789  | -0.0307 | 0.6359 | 0.1966 |
| Sucia2  | _SSDAEYAAK_2                                              | #N/A                   | 5.4826 | 4.5682  | 3.8223  | 5.7071  | 5.9071  | 5.1611 | 4.1242 | 5.4231  | 5.1455  | 5.3170  | 1.0211  | 0.0301  | 0.8260 | 0.0830 |
| Sucia2  | _IFDLQDWSQEDER_2                                          | #N/A                   | 5.8341 | 5.6060  | 4.2420  | 3.2438  | 5.1661  | 3.5478 | 6.3117 | 5.3986  | 5.5069  | 5.6121  | 0.8071  | -0.3091 | 0.0939 | 1.0274 |
| Sucia2  | _VQAILVNFGGIM[Oxidation (M)]R_2                           | #N/A                   | 4.1301 | 4.0340  | 3.7224  | 3.0164  | 3.1750  | 3.2845 | 3.4144 | 3.7350  | 4.6775  | 4.1223  | 0.8929  | -0.1634 | 0.2206 | 0.6564 |
| Sucia2  | _AVSSQM[Oxidation (M)]GGQK_2                              | #N/A                   | 4.7733 | 4.9291  | 5.4133  | 4.1620  | 5.3337  | 4.8161 | 4.6384 | 5.1566  | 4.7099  | 4.6565  | 1.0238  | 0.0340  | 0.6601 | 0.1804 |
| Sucia2  | _C[Carbamidomethyl (C)]DVIAQGVIM[Oxidation (M)]AVK_2      | #N/A                   | 5.0213 | 5.3650  | 4.1447  | 4.1068  | 5.1548  | 5.3312 | 5.3488 | 5.2510  | 5.0633  | 5.3945  | 0.9220  | -0.1171 | 0.2091 | 0.6797 |
| Sucia2  | _VDATMVNPNM[Oxidation (M)]VEDSDGK_2                       | #N/A                   | 3.7601 | 3.1594  | 3.7649  | 4.0391  | 3.1749  | 3.4632 | 3.5404 | 3.7060  | 3.9272  | 3.8552  | 0.9476  | -0.0777 | 0.3382 | 0.4708 |
| Sucia2  | _VLC[Carbamidomethyl (C)]MDAK_2                           | #N/A                   | 3.6197 | 4.3760  | 5.5370  | 4.0396  | 4.2643  | 3.8612 | 3.7543 | 4.0788  | 3.7274  | 4.0066  | 1.0149  | 0.0213  | 0.3648 | 0.1164 |
| Uni3    | _EFLSPhospho (STY)PNASASNAK_2                             | Q9Z2N6_S27_M1_Uni3     | 3.2507 | 4.0559  | 3.9375  | 4.4402  | 3.8773  | 3.8522 | 4.2130 | 5.8823  | 3.3269  | 4.4072  | 0.8755  | -0.1918 | 0.2647 | 0.5772 |
| Act16a  | _EGSPhospho (STY)PANWVK_2                                 | #N/A                   | 6.8076 | 6.5146  | 6.6003  | 6.6003  | 5.8073  | 4.4011 | 6.8123 | 6.4909  | 6.5943  | 7.4997  | 0.8914  | -0.1659 | 0.1700 | 0.7696 |
| Act16a  | _EGSPhospho (STY)PANWKR_2                                 | #N/A                   | 4.5411 | 4.8790  | 4.1672  | 5.2956  | 5.0812  | 4.3839 | 4.7147 | 5.5626  | 5.5878  | 5.1318  | 0.9001  | -0.1519 | 0.0927 | 1.0330 |
| Knop1   | _ATSPhospho (STY)PSNNVDEVCPEISLSK_2                       | Q9Z2Q2_S57_M1_Knop1    | 2.9507 | 3.7559  | 3.6375  | 4.1401  | 3.5772  | 4.1523 | 4.5131 | 6.2641  | 3.6269  | 4.1071  | 0.8000  | -0.3219 | 0.1057 | 0.9761 |
| Septin5 | _ADC[Carbamidomethyl (C)]LVPSER_2                         | #N/A                   | 9.3890 | 9.2306  | 9.2494  | 9.0818  | 9.4597  | 9.1240 | 9.0855 | 9.2251  | 9.4289  | 0.9974  | 0.9874  | -0.0038 | 0.8075 | 0.0929 |
| Septin5 | _IREEDK_2                                                 | #N/A                   | 8.9494 | 8.4548  | 8.4032  | 8.9173  | 9.1700  | 8.7801 | 8.6564 | 5.8822  | 8.6996  | 8.6285  | 1.0159  | 0.0228  | 0.3978 | 0.4004 |
| Septin5 | _VNVPLUAK_2                                               | #N/A                   | 7.6594 | 8.2070  | 7.7611  | 7.8504  | 8.1155  | 7.8290 | 7.7187 | 8.3346  | 8.2123  | 7.9087  | 0.9825  | -0.0254 | 0.3908 | 0.4080 |
| Septin5 | _KLISAEEK_2                                               | #N/A                   | 7.7813 | 7.7691  | 7.9573  | 7.9909  | 8.2355  | 7.7477 | 7.7746 | 7.9183  | 7.8113  | 7.8445  | 1.0098  | 0.0140  | 0.4623 | 0.3351 |
| Septin5 | _INQTEILK_2                                               | #N/A                   | 7.8183 | 7.8963  | 7.5290  | 7.8228  | 7.6995  | 7.5988 | 7.6132 | 7.6021  | 7.6658  | 1.0134  | 0.9192  | 0.2043  | 0.6898 | 0.3351 |
| Septin5 | _HTVIDEK_2                                                | #N/A                   | 7.4814 | 7.3342  | 7.2815  | 7.3767  | 7.7658  | 7.4876 | 7.3355 | 7.2134  | 7.2278  | 7.7314  | 1.0105  | 0.0151  | 0.5680 | 0.2457 |
| Septin5 | _DVT[Carbamidomethyl (C)]DVHYENR_2                        | #N/A                   | 7.1086 | 6.4542  | 6.5730  | 7.3231  | 7.2978  | 7.1970 | 7.5052 | 6.9452  | 6.8796  | 7.2811  | 0.9776  | -0.0327 | 0.4980 | 0.3028 |
| Septin5 | _M[Oxidation (M)]KDEELK_2                                 | #N/A                   | 6.4594 | 6.4253  | 6.9730  | 6.1875  | 7.3586  | 7.0322 | 6.5166 | 6.8086  | 6.6723  | 6.9302  | 1.0011  | 0.0016  | 0.9761 | 0.1005 |
| Septin5 | _LATPEDKQDIDKQYGFATPNQVHR_4                               | #N/A                   | 6.7791 | 8.2027  | 8.5482  | 7.3921  | 6.9868  | 7.0345 | 7.1212 | 7.1481  | 7.9616  | 6.8827  | 1.0292  | 0.0415  | 0.6209 | 0.2069 |
| Septin5 | _QYVGATUPNQVHR_2                                          | #N/A                   | 6.4576 | 6.3497  | 6.1426  | 6.6846  | 6.6792  | 6.6762 | 6.3663 | 6.0463  | 6.9077  | 6.6500  | 1.0009  | 0.0013  | 0.9762 | 0.0105 |
| Septin5 | _SKLAT[Phospho (STY)]PEDKQDIDK_2                          | #N/A                   | 3.4284 | 5.8274  | 3.1621  | 4.2067  | 4.0730  | 4.0606 | 4.3550 | 3.0945  | 3.8840  | 1.0560  | 0.6078  | 0.6888  | 0.1619 | 0.3970 |
| Septin5 | _STLVHSLTDLVKDR_3                                         | #N/A                   | 5.2613 | 5.8719  | 4.4387  | 5.9749  | 5.3198  | 6.2981 | 4.5010 | 5.2309  | 5.3207  | 5.8500  | 1.0578  | 0.0810  | 0.4766 | 0.3218 |
| Septin5 | _M[Oxidation (M)]ESPhospho (STY)PIPLPTPOAETK_2            | #N/A                   | 9.5252 | 10.0566 | 10.3196 | 10.3872 | 8.9853  | 9.8932 | 9.9015 | 9.9607  | 9.6439  | 9.5277  | 1.0105  | 0.0151  | 0.7258 | 0.1392 |
| Septin5 | _STLVHSLFLTDVK_2                                          | #N/A                   | 4.6451 | 4.4092  | 3.4947  | 4.9832  | 4.4124  | 4.7090 | 4.6722 | 4.8097  | 4.5455  | 4.6449  | 0.9516  | -0.0715 | 0.4177 | 0.3792 |
| Septin5 | _LYPNVGVEVENQAQ[Carbamidomethyl (C)]DPVK_2                | #N/A                   | 5.8586 | 4.2764  | 4.9560  | 5.3215  | 4.7403  | 3.8944 | 5.0948 | 6.3188  | 6.6920  | 8.8404  | -0.2508 | 0.1030  | 0.9970 | 0.3970 |
| Septin5 | _FGHVYQFPFEC[Carbamidomethyl (C)]DSEDDEDFKQDR_4           | #N/A                   | 7.5466 | 6.8959  | 8.9423  | 6.0049  | 10.4102 | 7.3168 | 7.6951 | 11.0651 | 10.7706 | 10.1466 | 0.7917  | -0.3370 | 0.0743 | 1.1291 |
| Septin5 | _ESAPFVAGSNTVVEAK_2                                       | #N/A                   | 7.3498 | 7.1116  | 7.5784  | 7.7486  | 7.2023  | 7.2529 | 7.2903 | 6.9521  | 7.3717  | 7.4529  | 1.0148  | 0.0211  | 0.4994 | 0.3015 |
| Septin5 | _LAT[Phospho (STY)]PEDKQDIDK_2                            | #N/A                   | 8.7167 | 8.7281  | 8.9773  | 9.4299  | 8.1841  | 8.7751 | 9.0040 | 8.6265  | 8.6093  | 8.8146  | 1.0044  | 0.0063  | 0.8659 | 0.0625 |
| Septin5 | _AHC[Carbamidomethyl (C)]IQQM[Oxidation (M)]TSK_2         | #N/A                   | 6.1564 | 5.3926  | 5.5423  | 6.6665  | 6.7784  | 5.7049 | 5.8181 | 5.3842  | 6.1604  | 5.5665  | 1.0537  | 0.0755  | 0.3758 | 0.4251 |
| Septin5 | _ADC[Carbamidomethyl (C)]LVPSERK_3                        | #N/A                   | 3.2563 | 5.9670  | 4.4908  | 4.0346  | 4.0456  | 4.2245 | 4.1829 | 4.8155  | 5.9326  | 5.2061  | 0.8614  | -0.2153 | 0.2342 | 0.6404 |
| Septin5 | _THMHDLK_2                                                | #N/A                   | 4.3479 | 3.4545  | 3.3361  | 3.8910  | 3.4023  | 2.9528 | 3.5535 | 4.2797  | 3.9283  | 5.3600  | 0.8327  | -0.2642 | 0.1077 | 0.9677 |
| Septin5 | _THM[Oxidation (M)]HDLQDVT[Carbamidomethyl (C)]DVHYENR_4  | #N/A                   | 5.4740 | 6.3197  | 7.6284  | 3.4358  | 6.0890  | 6.7692 | 3.5841 | 6.9819  | 6.5707  | 6.4686  | 1.0087  | 0.0125  | 0.9584 | 0.0874 |
| Septin5 | _FGHVYQFPFEC[Carbamidomethyl (C)]DSPhospho (STY)DEDEDFK_3 | #N/A                   | 2.9795 | 4.2466  | 3.6663  | 4.1690  | 3.6061  | 4.1234 | 3.8837 | 3.9495  | 3.5981  | 4.1360  | 0.9760  | -0.0350 | 0.7310 | 0.1361 |
| Septin5 | _MKDEELRR_2                                               | #N/A                   | 3.5063 | 4.2779  | 4.2991  | 3.5210  | 4.0992  | 3.6303 | 4.1273 | 3.1583  | 3.4574  | 3.5201  | 1.0906  | 0.1252  | 0.2335 | 0.6316 |
| Tsc22d3 | _LSPEEAPAPET[Phospho (STY)]PETPEAGGSV_3                   | Q9Z257_T125_M1_Tsc22d3 | 3.3221 | 4.0906  | 3.8344  | 7.3937  | 4.0490  | 3.8878 | 4.2486 | 6.7261  | 4.3437  | 3.7776  | 0.9279  | -0.1080 | 0.7173 | 0.1443 |
| Pma7    | _ALLEVQSGGK_2                                             | #N/A                   | 6.2054 | 6.5820  | 6.6184  | 6.5990  | 6.8687  | 6.9292 | 6.6830 | 6.9037  | 6.7917  | 6.4830  | 0.9953  | -0.0068 | 0.8452 | 0.0731 |
| Pma7    | _ILNPEEK_2                                                | #N/A                   | 7.3091 | 6.8042  | 3.9253  | 7.2721  | 7.2140  | 7.2918 | 7.2831 | 7.3910  | 7.0145  | 7.5358  | 0.9083  | -0.1388 | 0.3600 | 0.4437 |
| Pma7    | _NYTDOAETDOLTK_2                                          | #N/A                   | 2.9421 | 6.4247  | 4.1767  | 6.5532  | 5.9333  | 6.3386 | 6.2470 | 5.7976  | 6.1500  | 6.4030  | 0.8773  | -0.1889 | 0.3537 | 0.4514 |
| Pma7    | _VYAEIEKEEENEK_3                                          | #N/A                   | 6.9573 | 6.9337  | 7.2168  | 6.8087  | 7.1834  | 6.7299 | 7.1213 | 6.3771  | 6.7793  | 7.1884  | 1.0153  | 0.0219  | 0.5708 | 0.2435 |
| Pma7    | _AIVFSPOGHQFVEYAEQAVVK_3                                  | #N/A                   | 4.4571 | 4.9667  | 5.1254  | 4.7841  | 5.1279  | 5.0733 | 5.6183 | 5.0135  | 5.1965  | 4.2580  | 0.9802  | -0.0288 | 0.7144 | 0.1460 |
| Pma5    | _GPQLFHM[Oxidation (M)]DPSGTVCQ[Carbamidomethyl (C)]DAR_3 | #N/A                   | 5.7790 | 5.7325  | 5.6990  | 5.6825  | 5.8999  | 6.5312 | 5.8288 | 5.5463  | 5.7481  | 6.1174  | 1.0131  | 0.0188  | 0.6997 | 0.1551 |
| Pma5    | _GVNTFS[Phospho (STY)]PEGR_2                              | Q9Z2U1_S16_M1_Pma5     | 7.1769 | 6.2689  | 7.3664  | 6.4369  | 6.9315  | 7.2397 | 6.2442 | 6.3391  | 6.4379  | 6.2934  | 1.0908  | 0.1254  | 0.0390 | 1.4088 |
| Pma5    | _ITS[Phospho (STY)]PLM[Oxidation (M)]EPSSEK_2             | #N/A                   | 9.6237 | 9.5544  | 10.1774 | 10.0778 | 9.2122  | 9.6778 | 9.9598 | 9.2269  | 9.3912  | 9.6453  | 1.0172  | 0.0247  | 0.4779 | 0.3207 |
| Pma5    | _LFQVEYAEIAK_2                                            | #N/A                   | 3.6325 | 4.9529  | 3.3661  | 4.4107  | 5.1187  | 5.0625 | 5.5752 | 5.2989  | 5.2141  | 5.8716  | 0.8058  | -0.3115 | 0.0307 | 1.5128 |
| Pma5    | _LELEEWDK_2                                               | #N/A                   | 3.6420 | 2.9463  | 4.9953  | 4.9440  | 5.2755  | 4.5267 | 5.0828 | 4.3917  | 5.2646  | 3.2976  | 0.9732  | -0.0392 | 0.8406 | 0.0754 |
| Pma5    | _AIGSAGEAGSLQGEVYHK_3                                     | #N/A                   | 2.2401 | 3.7900  | 3.9538  | 4.1693  | 5.3613  | 3.7528 | 4.3175 | 6.0862  | 3.3133  | 3.2116  | 0.9163  | -0.1261 | 0.6420 | 0.1925 |
| Pma5    | _PFGVALLGGVDEK_2                                          | #N/A                   | 3.6649 | 3.5613  | 4.3517  | 3.3535  | 2.7906  | 3.1750 | 3.0682 | 3.2641  | 4.4136  | 3.3205  | 0.9904  | -0.0139 | 0.9276 | 0.0326 |
| Hdac6   | _AVLAQGS[Phospho (STY)]SEQAAK_2                           | Q9Z2V5_S909_M1_Hdac6   | 6.5981 | 4.3682  | 3.5447  | 6.0628  | 4.2565  | 3.8689 | 3.7621 | 4.0711  | 3.7197  | 4.0144  | 1.2290  | 0.2975  | 0.2006 | 0.9761 |
| Hdac6   | _HNPGS[Phospho (STY)]PLQESSATLK_2                         | Q9Z2V5_S21_M1_Hdac6    | 6.5500 | 4.2089  | 3.1863  | 4.2309  | 4.0972  | 4.0282 | 4.3792 | 6.1148  | 3.0693  | 3.9082  | 1.0036  | 0.0052  | 0.9842 | 0.0069 |
| Hdac5   | _KTAS[Phospho (STY)]EPNLK_2                               |                        |        |         |         |         |         |        |        |         |         |         |         |         |        |        |



|         |                                                        |                       |        |        |        |        |        |        |        |        |        |        |        |         |        |        |
|---------|--------------------------------------------------------|-----------------------|--------|--------|--------|--------|--------|--------|--------|--------|--------|--------|--------|---------|--------|--------|
| Homer1  | _AIIINSTITPM(Oxidation (M))TFTK_2                      | #N/A                  | 5.5031 | 5.9879 | 6.6014 | 3.2326 | 6.7073 | 5.4948 | 6.0249 | 6.0552 | 6.6708 | 6.6429 | 0.8802 | -0.1841 | 0.2830 | 0.5482 |
| Homer1  | _TOALSHASS(Phospho (STY))AISK_2                        | Q9Z2Y3_S189_M1_Homer1 | 4.8663 | 4.6189 | 4.4653 | 4.3941 | 4.7971 | 4.5338 | 4.6999 | 5.4424 | 4.2246 | 4.3464 | 0.9859 | -0.0204 | 0.7881 | 0.1034 |
| Homer1  | _IISLDGSK_2                                            | #N/A                  | 3.1455 | 3.7405 | 5.8713 | 4.2092 | 4.2903 | 4.2144 | 3.5872 | 4.8853 | 4.2713 | 4.7679 | 0.9697 | -0.0444 | 0.8044 | 0.0945 |
| Homer1  | _NKLEQLSLEQR_3                                         | #N/A                  | 5.7084 | 6.2036 | 5.7626 | 6.8881 | 6.2581 | 6.3044 | 6.2905 | 6.1719 | 6.2907 | 6.2843 | 0.9885 | -0.0166 | 0.7526 | 0.1234 |
| Homer1  | _AEPTONALPFPMSAGDR_3                                   | #N/A                  | 5.9155 | 6.4444 | 5.8375 | 6.5824 | 6.6927 | 5.7966 | 6.0587 | 5.9000 | 5.8189 | 6.4601 | 1.0251 | 0.0358  | 0.5369 | 0.2701 |
| Homer1  | _HWEAEELATLK_2                                         | #N/A                  | 4.1275 | 4.0900 | 4.2522 | 4.7703 | 2.9252 | 3.7950 | 3.2029 | 3.9789 | 4.2789 | 4.3603 | 1.0096 | 0.0138  | 0.9217 | 0.0354 |
| Homer1  | _DLEQLS(Phospho (STY))DLEQR_2                          | #N/A                  | 3.3133 | 3.9129 | 4.0001 | 5.7020 | 3.8012 | 4.3243 | 4.2174 | 3.6157 | 3.2643 | 2.9689 | 1.1874 | 0.2478  | 0.1965 | 0.7067 |
| Homer1  | _NKDLEQLS(Phospho (STY))DLEQRLEK_3                     | #N/A                  | 4.1195 | 3.2229 | 3.8532 | 3.3969 | 3.0442 | 3.1844 | 3.5452 | 3.4062 | 3.9033 | 3.0742 | 0.9965 | -0.0050 | 0.9636 | 0.0161 |
| Homer1  | _ANTYVYGLGFSSEHHLK_3                                   | #N/A                  | 5.0406 | 3.8867 | 4.3650 | 4.5289 | 3.7750 | 4.3504 | 7.3392 | 3.5896 | 3.2381 | 2.9951 | 1.0079 | 0.0114  | 0.9688 | 0.0137 |
| Homer1  | _HAVTVSYFYDSTR_2                                       | #N/A                  | 3.9104 | 3.4320 | 3.6441 | 3.1879 | 3.0541 | 1.3449 | 3.3361 | 3.8133 | 4.1124 | 4.3660 | 0.7923 | -0.3358 | 0.1411 | 0.8504 |
| Pipbp   | _IGS(Phospho (STY))TIFGER_2                            | Q9Z2Y8_S244_M1_Pipbp  | 4.4600 | 5.2517 | 4.2144 | 5.4069 | 5.3452 | 4.4863 | 4.0800 | 5.1225 | 4.4981 | 5.0083 | 1.0392 | 0.0555  | 0.5942 | 0.2261 |
| Pipbp   | _KGPTPEPLK_2                                           | #N/A                  | 3.8579 | 4.2439 | 3.7439 | 3.0222 | 4.1111 | 3.0751 | 3.4359 | 3.4426 | 4.2544 | 2.9649 | 1.0429 | 0.0606  | 0.6668 | 0.1760 |
| Kcnq2   | _GKGS(Phospho (STY))PQAQTVR_2                          | Q9Z351_S429_M1_Kcnq2  | 8.1926 | 8.4584 | 8.6869 | 8.4490 | 7.0248 | 7.9995 | 8.8961 | 8.7435 | 8.2721 | 8.3067 | 0.9510 | -0.0725 | 0.2358 | 0.6274 |
| Kcnq2   | _RSPSADQSLDOS(Phospho (STY))PSKVPK_3                   | #N/A                  | 5.7658 | 6.1205 | 6.6049 | 6.8267 | 5.1810 | 6.4105 | 6.4643 | 6.3053 | 5.8892 | 3.7920 | 1.0960 | 0.1323  | 0.3785 | 0.4219 |
| Kcnq2   | _SPS(Phospho (STY))ADQSLDOSPSK_2                       | Q9Z351_S440_M1_Kcnq2  | 6.2643 | 6.0874 | 3.4612 | 6.1830 | 4.1140 | 5.5811 | 6.8177 | 6.1484 | 5.5523 | 5.7496 | 0.8706 | -0.1999 | 0.2621 | 0.5816 |
| Kcnq2   | _SWS(Phospho (STY))JGDR_2                              | Q9Z351_S457_M1_Kcnq2  | 3.2633 | 7.5405 | 4.4979 | 4.0416 | 5.8470 | 8.1324 | 4.1899 | 4.4604 | 7.8968 | 7.9619 | 0.9064 | -0.1418 | 0.6704 | 0.1737 |
| Kcnq2   | _YPQT(Phospho (STY))WNGR_2                             | Q9Z351_T287_M1_Kcnq2  | 3.5448 | 3.6814 | 4.2316 | 3.2334 | 4.1713 | 3.5582 | 4.4489 | 3.3843 | 3.0328 | 3.2004 | 1.0626 | 0.0876  | 0.5123 | 0.2905 |
| Kcnq2   | _S(Phospho (STY))PSADQSLDOSPSKVPK_2                    | #N/A                  | 6.1610 | 7.1629 | 4.9541 | 3.7634 | 3.4039 | 6.9663 | 7.6653 | 7.4175 | 6.0307 | 3.5543 | 0.8760 | -0.1911 | 0.5102 | 0.2923 |
| Kcnq2   | _QNS(Phospho (STY))EASLPGEVDONK_2                      | Q9Z351_S479_M1_Kcnq2  | 5.9007 | 3.7452 | 6.4956 | 7.4980 | 5.6365 | 3.6391 | 7.3483 | 7.4449 | 7.5586 | 7.2515 | 0.7412 | -0.4320 | 0.0401 | 1.3969 |
| Kcnq2   | _EPEPAPPYHS(Phospho (STY))PEDSR_2                      | #N/A                  | 4.9469 | 5.5990 | 3.8856 | 5.4271 | 3.8511 | 3.9284 | 4.1514 | 3.7982 | 3.9025 | 4.7102 | 1.1125 | 0.1538  | 0.3271 | 0.4853 |
| Kcnq2   | _EPEPAPPYHS(Phospho (STY))PEDSRHADK_3                  | #N/A                  | 3.4143 | 4.1705 | 3.1479 | 6.4207 | 4.0588 | 4.0666 | 4.3408 | 4.3095 | 3.1077 | 3.8698 | 1.0784 | 0.1089  | 0.6413 | 0.1929 |
| Kcnq2   | _RS(Phospho (STY))PSADQSLDOSPSK_2                      | #N/A                  | 5.5738 | 3.4825 | 4.0051 | 6.0385 | 3.3708 | 3.2849 | 6.0367 | 4.0184 | 5.5348 | 3.0838 | 0.9195 | -0.1211 | 0.6582 | 0.1817 |
| Osbpl10 | _SPGSVAAS(Phospho (STY))PSGGGR_2                       | S4R1M9_S66_M1_Osbpl10 | 8.3483 | 7.5725 | 3.7538 | 8.3058 | 3.9709 | 8.3871 | 8.0125 | 8.0545 | 7.4699 | 3.8350 | 0.9825 | -0.0255 | 0.9335 | 0.0299 |
| Osbpl10 | _ATSAGSS(Phospho (STY))PSC[Carbamidomethyl (C)]SLAGR_2 | S4R1M9_S32_M1_Osbpl10 | 5.4915 | 5.2162 | 4.3047 | 3.5335 | 5.0463 | 6.0855 | 6.2198 | 3.3583 | 3.7677 | 5.1516 | 1.0696 | 0.0971  | 0.6551 | 0.1837 |
