# Supplementary material for: The Chronic Effects of a Single Low-Intensity Blast Exposure on Phosphoproteome Networks and Cognitive Function Influenced by Mutant Tau Overexpression
Source: MDPI journal article supplement (doi:10.3390/ijms25063338), 2024-03-15
Supplement: s1 [file s1]

Supplementary Table S8. Black and turquoise module GO

| Module    | GO:ID      | ONTOLOGY | Description                                                          | GeneRatio | BgRatio   | pvalue  | p.adjust | qvalue   | geneID                                                                                         | Count |
|-----------|------------|----------|----------------------------------------------------------------------|-----------|-----------|---------|----------|----------|------------------------------------------------------------------------------------------------|-------|
| black     | GO:0017038 | BP       | protein import                                                       | 02/18'    | 10/28943  | 1.6E-05 | 0.008359 | 0.005521 | 28185/76936                                                                                    | 2     |
| black     | GO:0098686 | CC       | hippocampal mossy fiber to CA3 synapse                               | 02/18'    | 49/28804  | 0.00043 | 0.046037 | 0.025576 | 19085/12388                                                                                    | 2     |
| turquoise | GO:0043209 | CC       | myelin sheath                                                        | 13/121    | 215/28804 | 7.5E-12 | 2.4E-09  | 1.62E-09 | 20910/12799/11966/14688/18673/23980/20867/14086/18377/98660/140559/68585/18810                 | 13    |
| turquoise | GO:0097060 | CC       | synaptic membrane                                                    | 15/121    | 469/28804 | 1.3E-09 | 2.15E-07 | 1.45E-07 | 20910/14811/20511/16490/18673/210274/319504/268566/245537/68585/75406/116838/16443/24050/13821 | 15    |
| turquoise | GO:0099572 | CC       | postsynaptic specialization                                          | 14/121    | 438/28804 | 5E-09   | 5.31E-07 | 3.59E-07 | 12034/14432/14811/18673/18521/210274/319504/244310/268566/245537/217692/68585/20085/13821      | 14    |
| turquoise | GO:0043197 | CC       | dendritic spine                                                      | 10/121    | 200/28804 | 1.3E-08 | 1.08E-06 | 7.31E-07 | 14811/20511/19049/98660/230904/210274/244310/217692/110355/16443                               | 10    |
| turquoise | GO:0044309 | CC       | neuron spine                                                         | 10/121    | 205/28804 | 1.7E-08 | 1.09E-06 | 7.39E-07 | 14811/20511/19049/98660/230904/210274/244310/217692/110355/16443                               | 10    |
| turquoise | GO:0014069 | CC       | postsynaptic density                                                 | 12/121    | 398/28804 | 1.2E-07 | 6.64E-06 | 4.49E-06 | 12034/14432/14811/18673/18521/210274/319504/268566/217692/68585/20085/13821                    | 12    |
| turquoise | GO:0032279 | CC       | asymmetric synapse                                                   | 12/121    | 406/28804 | 1.5E-07 | 7.05E-06 | 4.76E-06 | 12034/14432/14811/18673/18521/210274/319504/268566/217692/68585/20085/13821                    | 12    |
| turquoise | GO:0098984 | CC       | neuron to neuron synapse                                             | 12/121    | 437/28804 | 3.4E-07 | 1.35E-05 | 9.14E-06 | 12034/14432/14811/18673/18521/210274/319504/268566/217692/68585/20085/13821                    | 12    |
| turquoise | GO:0008306 | BP       | associative learning                                                 | 8/122     | 120/28943 | 4.5E-08 | 5.6E-05  | 3.94E-05 | 53328/16653/14811/19049/21375/98660/210274/245537                                              | 8     |
| turquoise | GO:0010563 | BP       | negative regulation of phosphorus metabolic process                  | 13/122    | 453/28943 | 6.7E-08 | 5.6E-05  | 3.94E-05 | 665775/14678/14870/23980/384783/238871/19049/208643/100502698/51810/16971/110355/18810         | 13    |
| turquoise | GO:0045936 | BP       | negative regulation of phosphate metabolic process                   | 13/122    | 453/28943 | 6.7E-08 | 5.6E-05  | 3.94E-05 | 665775/14678/14870/23980/384783/238871/19049/208643/100502698/51810/16971/110355/18810         | 13    |
| turquoise | GO:0042734 | CC       | presynaptic membrane                                                 | 8/121     | 201/28804 | 2.2E-06 | 8E-05    | 5.4E-05  | 20910/14811/20511/16490/18673/116838/16443/24050                                               | 8     |
| turquoise | GO:0010001 | BP       | glial cell differentiation                                           | 10/122    | 261/28943 | 1.7E-07 | 0.000107 | 7.54E-05 | 14432/12799/16653/18377/52615/245537/16971/110355/68585/18810                                  | 10    |
| turquoise | GO:0098982 | CC       | GABA-ergic synapse                                                   | 6/121     | 109/28804 | 6.9E-06 | 0.000222 | 0.00015  | 12034/14432/18673/268566/245537/116838                                                         | 6     |
| turquoise | GO:2000463 | BP       | positive regulation of excitatory postsynaptic potential             | 5/122     | 41/28943  | 8.1E-07 | 0.000367 | 0.000258 | 14811/12297/245537/110355/116838                                                               | 5     |
| turquoise | GO:0007632 | BP       | visual behavior                                                      | 7/122     | 77/28943  | 9.2E-07 | 0.000367 | 0.000258 | 16653/14811/20511/19049/98660/245537                                                           | 6     |
| turquoise | GO:0007409 | BP       | axonogenesis                                                         | 12/122    | 493/28943 | 1.2E-06 | 0.000367 | 0.000258 | 20910/14432/12799/18377/21375/319504/245537/217692/16971/68585/58208/30957                     | 12    |
| turquoise | GO:0050808 | BP       | synapse organization                                                 | 12/122    | 496/28943 | 1.3E-06 | 0.000367 | 0.000258 | 53328/14432/14811/12297/235604/208643/210274/319504/268566/245537/217692/16443                 | 12    |
| turquoise | GO:0007612 | BP       | learning                                                             | 8/122     | 187/28943 | 1.3E-06 | 0.000367 | 0.000258 | 53328/16653/14811/19049/21375/98660/210274/245537                                              | 8     |
| turquoise | GO:0030534 | BP       | adult behavior                                                       | 8/122     | 189/28943 | 1.5E-06 | 0.000367 | 0.000258 | 12799/20511/11669/170719/19049/98660/210274/245537                                             | 8     |
| turquoise | GO:0050821 | BP       | protein stabilization                                                | 8/122     | 193/28943 | 1.7E-06 | 0.00039  | 0.000274 | 20910/12034/18673/12468/12464/68585/30957/23992                                                | 8     |
| turquoise | GO:0016601 | BP       | Rac protein signal transduction                                      | 5/122     | 49/28943  | 2E-06   | 0.000423 | 0.000298 | 2062/16653/12928/140580/68585                                                                  | 5     |
| turquoise | GO:0005741 | CC       | mitochondrial outer membrane                                         | 7/121     | 188/28804 | 1.5E-05 | 0.000444 | 0.0003   | 12034/53328/12799/18673/23980/28185/18810                                                      | 7     |
| turquoise | GO:0097110 | MF       | scaffold protein binding                                             | 6/121     | 84/28404  | 1.6E-06 | 0.000633 | 0.000506 | 14811/238871/11512/12928/245537/110355                                                         | 6     |
| turquoise | GO:0042063 | BP       | gliogenesis                                                          | 10/122    | 363/28943 | 3.4E-06 | 0.000655 | 0.000461 | 14432/12799/16653/18377/52615/245537/16971/110355/68585/18810                                  | 10    |
| turquoise | GO:0019867 | CC       | outer membrane                                                       | 7/121     | 209/28804 | 3E-05   | 0.000742 | 0.000501 | 12034/53328/12799/18673/23980/28185/18810                                                      | 7     |
| turquoise | GO:0031968 | CC       | organelle outer membrane                                             | 7/121     | 209/28804 | 3E-05   | 0.000742 | 0.000501 | 12034/53328/12799/18673/23980/28185/18810                                                      | 7     |
| turquoise | GO:0035020 | BP       | regulation of Rac protein signal transduction                        | 4/122     | 26/28943  | 4.2E-06 | 0.000753 | 0.000529 | 2062/16653/12928/68585                                                                         | 4     |
| turquoise | GO:0098815 | BP       | modulation of excitatory postsynaptic potential                      | 5/122     | 59/28943  | 5.1E-06 | 0.000859 | 0.000604 | 14811/12297/245537/110355/116838                                                               | 5     |
| turquoise | GO:0045121 | CC       | neuron raft                                                          | 9/121     | 394/28804 | 4.5E-05 | 0.00098  | 0.000662 | 14678/12385/16653/20511/11512/12928/98660/110355/271457                                        | 9     |
| turquoise | GO:0098857 | CC       | membrane microdomain                                                 | 9/121     | 395/28804 | 4.6E-05 | 0.00098  | 0.000662 | 14678/12385/16653/20511/11512/12928/98660/110355/271457                                        | 9     |
| turquoise | GO:0031102 | BP       | neuron projection regeneration                                       | 5/122     | 62/28943  | 6.5E-06 | 0.001029 | 0.000724 | 14432/18377/16971/68585/30957                                                                  | 5     |
| turquoise | GO:0042326 | BP       | negative regulation of phosphorylation                               | 10/122    | 394/28943 | 6.9E-06 | 0.001029 | 0.000724 | 14870/23980/384783/238871/208643/100502698/51810/16971/110355/18810                            | 10    |
| turquoise | GO:0031647 | BP       | regulation of protein stability                                      | 9/122     | 312/28943 | 7.4E-06 | 0.00103  | 0.000725 | 20910/12034/16653/18673/12468/12464/68585/30957/23992                                          | 9     |
| turquoise | GO:0002026 | BP       | regulation of the force of heart contraction                         | 4/122     | 31/28943  | 8.7E-06 | 0.001109 | 0.00078  | 12652/23980/98660/110355                                                                       | 4     |
| turquoise | GO:0030900 | BP       | forebrain development                                                | 10/122    | 407/28943 | 9.2E-06 | 0.001109 | 0.00078  | 16653/20511/12928/21375/70762/98660/68585/58208/30957/18536                                    | 10    |
| turquoise | GO:0007611 | BP       | learning or memory                                                   | 9/122     | 321/28943 | 9.2E-06 | 0.001109 | 0.00078  | 53328/16653/14811/238871/19049/21375/98660/210274/245537                                       | 9     |
| turquoise | GO:0048786 | CC       | presynaptic active zone                                              | 5/121     | 99/28804  | 6.3E-05 | 0.00126  | 0.000851 | 20910/12034/18673/210274/116838                                                                | 5     |
| turquoise | GO:0099240 | CC       | intrinsic component of synaptic membrane                             | 7/121     | 247/28804 | 8.6E-05 | 0.001628 | 0.0011   | 14811/20511/16490/319504/268566/245537/68585                                                   | 7     |
| turquoise | GO:0008542 | BP       | visual learning                                                      | 5/122     | 73/28943  | 1.5E-05 | 0.001677 | 0.001179 | 16653/14811/19049/98660/245537                                                                 | 5     |
| turquoise | GO:0050807 | BP       | regulation of synapse organization                                   | 8/122     | 264/28943 | 1.7E-05 | 0.001855 | 0.001305 | 53328/235604/208643/210274/319504/245537/217692/16443                                          | 8     |
| turquoise | GO:0031644 | BP       | regulation of nervous system process                                 | 7/122     | 194/28943 | 1.9E-05 | 0.002002 | 0.001409 | 14811/12297/244310/245537/110355/68585/116838                                                  | 7     |
| turquoise | GO:0002087 | BP       | regulation of respiratory gaseous exchange by nervous system process | 3/122     | 13/28943  | 2E-05   | 0.002033 | 0.00143  | 14660/98660/245537                                                                             | 3     |
| turquoise | GO:0050803 | BP       | regulation of synapse structure or activity                          | 8/122     | 272/28943 | 2.1E-05 | 0.002033 | 0.00143  | 53328/235604/208643/210274/319504/245537/217692/16443                                          | 8     |
| turquoise | GO:0050890 | BP       | cognition                                                            | 9/122     | 358/28943 | 2.2E-05 | 0.002046 | 0.001439 | 53328/16653/14811/238871/19049/21375/98660/210274/245537                                       | 9     |
| turquoise | GO:0035591 | MF       | signaling adaptor activity                                           | 5/121     | 74/28404  | 1.6E-05 | 0.002213 | 0.00177  | 14688/12928/210274/30957/14388                                                                 | 5     |
| turquoise | GO:0060090 | MF       | molecular adaptor activity                                           | 10/121    | 433/28404 | 1.7E-05 | 0.002213 | 0.00177  | 14688/14086/12928/210274/244310/268566/30957/14388/16443/24050                                 | 10    |
| turquoise | GO:0030159 | MF       | signaling receptor complex adaptor activity                          | 4/121     | 39/28404  | 2.3E-05 | 0.002222 | 0.001777 | 14688/12928/210274/30957                                                                       | 4     |
| turquoise | GO:0051968 | BP       | positive regulation of synaptic transmission, glutamatergic          | 4/122     | 41/28943  | 2.7E-05 | 0.002351 | 0.001654 | 20910/14811/210274/245537                                                                      | 4     |
| turquoise | GO:0008277 | BP       | regulation of G protein-coupled receptor signaling pathway           | 6/122     | 138/28943 | 2.7E-05 | 0.002351 | 0.001654 | 14678/12652/18673/238871/230085/110355                                                         | 6     |
| turquoise | GO:0099173 | BP       | postsynapse organization                                             | 7/122     | 208/28943 | 3E-05   | 0.002504 | 0.001761 | 14432/14811/210274/319504/268566/245537/217692                                                 | 7     |
| turquoise | GO:0019897 | CC       | extrinsic component of plasma membrane                               | 6/121     | 190/28804 | 0.00016 | 0.002783 | 0.00188  | 14678/12385/16653/14688/18673/268566                                                           | 6     |
| turquoise | GO:0099084 | BP       | postsynaptic specialization organization                             | 4/122     | 44/28943  | 3.6E-05 | 0.00291  | 0.002047 | 14432/210274/245537/217692                                                                     | 4     |
| turquoise | GO:0044065 | BP       | regulation of respiratory system process                             | 3/122     | 16/28943  | 3.9E-05 | 0.003096 | 0.002178 | 14660/98660/245537                                                                             | 3     |
| turquoise | GO:0060079 | BP       | excitatory postsynaptic potential                                    | 5/122     | 91/28943  | 4.3E-05 | 0.003203 | 0.002253 | 14811/12297/245537/110355/116838                                                               | 5     |
| turquoise | GO:0019233 | BP       | sensory perception of pain                                           | 6/122     | 150/28943 | 4.3E-05 | 0.003203 | 0.002253 | 14811/12297/16490/230085/110355/68585                                                          | 6     |
| turquoise | GO:1903829 | BP       | positive regulation of protein localization                          | 10/122    | 493/28943 | 4.7E-05 | 0.003397 | 0.00239  | 53328/12297/12468/12464/384783/245537/16971/68585/28185/18536                                  | 10    |
| turquoise | GO:0150034 | CC       | distal axon                                                          | 8/121     | 379/28804 | 0.00021 | 0.003453 | 0.002332 | 14811/16490/23980/14086/210274/16971/271457/16443                                              | 8     |
| turquoise | GO:0060077 | CC       | inhibitory synapse                                                   | 3/121     | 28/28804  | 0.00022 | 0.003453 | 0.002332 | 268566/245537/116838                                                                           | 3     |
| turquoise | GO:0045177 | CC       | apical part of cell                                                  | 9/121     | 488/28804 | 0.00023 | 0.003453 | 0.002332 | 12297/11966/23980/210274/16971/110355/58810/18810/18536                                        | 9     |
| turquoise | GO:0046395 | BP       | carboxylic acid catabolic process                                    | 7/122     | 226/28943 | 5E-05   | 0.003534 | 0.002486 | 14660/15356/384783/93747/52538/110842/58810                                                    | 7     |
| turquoise | GO:0016054 | BP       | organic acid catabolic process                                       | 7/122     | 228/28943 | 5.3E-05 | 0.003635 | 0.002557 | 14660/15356/384783/93747/52538/110842/58810                                                    | 7     |
| turquoise | GO:1901077 | BP       | regulation of relaxation of muscle                                   | 3/122     | 18/28943  | 5.7E-05 | 0.003775 | 0.002656 | 12652/238871/110355                                                                            | 3     |
| turquoise | GO:0006979 | BP       | response to oxidative stress                                         | 9/122     | 407/28943 | 5.9E-05 | 0.00383  | 0.002694 | 19173/18584/14870/11669/170719/12928/110355/14388/23992                                        | 9     |
| turquoise | GO:0044306 | CC       | neuron projection terminus                                           | 6/121     | 215/28804 | 0.0003  | 0.004432 | 0.002994 | 14811/20511/16490/23980/271457/16443                                                           | 6     |
| turquoise | GO:0099565 | BP       | chemical synaptic transmission, postsynaptic                         | 5/122     | 102/28943 | 7.4E-05 | 0.00461  | 0.003243 | 14811/12297/245537/110355/116838                                                               | 5     |

|           |            |    |                                                             |       |           |         |          |          |                                                           |   |
|-----------|------------|----|-------------------------------------------------------------|-------|-----------|---------|----------|----------|-----------------------------------------------------------|---|
| turquoise | GO:0031103 | BP | axon regeneration                                           | 4/122 | 53/28943  | 7.5E-05 | 0.00461  | 0.003243 | 14432/18377/16971/30957                                   | 4 |
| turquoise | GO:0031252 | CC | cell leading edge                                           | 8/121 | 409/28804 | 0.00034 | 0.004798 | 0.003241 | 12385/20511/11966/16490/14086/271457/30957/16443          | 8 |
| turquoise | GO:0009150 | BP | purine ribonucleotide metabolic process                     | 9/122 | 425/28943 | 8.2E-05 | 0.004947 | 0.00348  | 18641/15356/11566/11966/11512/98660/27402/52538/75406     | 9 |
| turquoise | GO:0016574 | BP | histone ubiquitination                                      | 4/122 | 55/28943  | 8.7E-05 | 0.005086 | 0.003578 | 14897/59026/107260/52615                                  | 4 |
| turquoise | GO:0101031 | CC | chaperone complex                                           | 3/121 | 34/28804  | 0.00039 | 0.005173 | 0.003495 | 12468/12464/20867                                         | 3 |
| turquoise | GO:0099699 | CC | integral component of synaptic membrane                     | 6/121 | 227/28804 | 0.00041 | 0.005173 | 0.003495 | 14811/20511/16490/319504/245537/68585                     | 6 |
| turquoise | GO:0031253 | CC | cell projection membrane                                    | 7/121 | 320/28804 | 0.00042 | 0.005173 | 0.003495 | 14432/20511/14688/11512/14086/210274/30957                | 7 |
| turquoise | GO:0044304 | CC | main axon                                                   | 4/121 | 84/28804  | 0.00044 | 0.005244 | 0.003542 | 20511/16490/319504/30957                                  | 4 |
| turquoise | GO:0009314 | BP | response to radiation                                       | 9/122 | 432/28943 | 9.3E-05 | 0.005345 | 0.00376  | 16653/14811/20511/66656/14688/19049/98660/98415/245537    | 9 |
| turquoise | GO:0007264 | BP | small GTPase mediated signal transduction                   | 9/122 | 434/28943 | 9.7E-05 | 0.005412 | 0.003807 | 20262/54366/16653/12928/233071/140580/217692/68585/16443  | 9 |
| turquoise | GO:0009259 | BP | ribonucleotide metabolic process                            | 9/122 | 445/28943 | 0.00012 | 0.006259 | 0.004402 | 18641/15356/11566/11966/11512/98660/27402/52538/75406     | 9 |
| turquoise | GO:0034329 | BP | cell junction assembly                                      | 9/122 | 445/28943 | 0.00012 | 0.006259 | 0.004402 | 14432/12385/14086/208643/210274/245537/217692/16971/18810 | 9 |
| turquoise | GO:0044282 | BP | small molecule catabolic process                            | 8/122 | 350/28943 | 0.00012 | 0.006421 | 0.004517 | 14660/18641/15356/384783/93747/52538/110842/58810         | 8 |
| turquoise | GO:0006163 | BP | purine nucleotide metabolic process                         | 9/122 | 449/28943 | 0.00012 | 0.006421 | 0.004517 | 18641/15356/11566/11966/11512/98660/27402/52538/75406     | 9 |
| turquoise | GO:0032515 | BP | negative regulation of phosphoprotein phosphatase activity  | 3/122 | 24/28943  | 0.00014 | 0.006698 | 0.004711 | 665775/14678/19049                                        | 3 |
| turquoise | GO:0019693 | BP | ribose phosphate metabolic process                          | 9/122 | 456/28943 | 0.00014 | 0.006698 | 0.004711 | 18641/15356/11566/11966/11512/98660/27402/52538/75406     | 9 |
| turquoise | GO:0051952 | BP | regulation of amine transport                               | 5/122 | 117/28943 | 0.00014 | 0.006698 | 0.004711 | 20910/12652/16490/110355/68585                            | 5 |
| turquoise | GO:0060078 | BP | regulation of postsynaptic membrane potential               | 5/122 | 117/28943 | 0.00014 | 0.006698 | 0.004711 | 14811/12297/245537/110355/116838                          | 5 |
| turquoise | GO:0021537 | BP | telencephalon development                                   | 7/122 | 268/28943 | 0.00015 | 0.006717 | 0.004725 | 20511/12928/21375/70762/98660/68585/58208                 | 7 |
| turquoise | GO:0019395 | BP | fatty acid oxidation                                        | 5/122 | 118/28943 | 0.00015 | 0.006717 | 0.004725 | 14077/384783/93747/52538/110842                           | 5 |
| turquoise | GO:0048709 | BP | oligodendrocyte differentiation                             | 5/122 | 119/28943 | 0.00015 | 0.006864 | 0.004828 | 12799/18377/52615/245537/110355                           | 5 |
| turquoise | GO:0015837 | BP | amine transport                                             | 5/122 | 122/28943 | 0.00017 | 0.007577 | 0.00533  | 20910/12652/16490/110355/68585                            | 5 |
| turquoise | GO:0043576 | BP | regulation of respiratory gaseous exchange                  | 3/122 | 26/28943  | 0.00018 | 0.007689 | 0.005409 | 14660/98660/245537                                        | 3 |
| turquoise | GO:0050433 | BP | regulation of catecholamine secretion                       | 4/122 | 68/28943  | 0.0002  | 0.008368 | 0.005886 | 12652/16490/110355/68585                                  | 4 |
| turquoise | GO:0034440 | BP | lipid oxidation                                             | 5/122 | 126/28943 | 0.0002  | 0.008368 | 0.005886 | 14077/384783/93747/52538/110842                           | 5 |
| turquoise | GO:1990778 | BP | protein localization to cell periphery                      | 8/122 | 377/28943 | 0.0002  | 0.008424 | 0.005925 | 20910/53328/14811/12297/11512/83997/268566/16971          | 8 |
| turquoise | GO:0048167 | BP | regulation of synaptic plasticity                           | 8/122 | 378/28943 | 0.00021 | 0.008438 | 0.005935 | 20910/16653/14811/210274/245537/217692/271457/116838      | 8 |
| turquoise | GO:0072329 | BP | monocarboxylic acid catabolic process                       | 5/122 | 128/28943 | 0.00021 | 0.008462 | 0.005952 | 384783/93747/52538/110842/58810                           | 5 |
| turquoise | GO:0072521 | BP | purine-containing compound metabolic process                | 9/122 | 483/28943 | 0.00021 | 0.008462 | 0.005952 | 18641/15356/11566/11966/11512/98660/27402/52538/75406     | 9 |
| turquoise | GO:0045822 | BP | negative regulation of heart contraction                    | 3/122 | 28/28943  | 0.00022 | 0.008462 | 0.005952 | 238871/98660/110355                                       | 3 |
| turquoise | GO:0098698 | BP | postsynaptic specialization assembly                        | 3/122 | 28/28943  | 0.00022 | 0.008462 | 0.005952 | 14432/245537/217692                                       | 3 |
| turquoise | GO:0019079 | BP | viral genome replication                                    | 5/122 | 130/28943 | 0.00023 | 0.008666 | 0.006096 | 18673/18521/98415/110355/271457                           | 5 |
| turquoise | GO:0005832 | CC | chaperonin-containing T-complex                             | 2/121 | 10/28804  | 0.00077 | 0.008832 | 0.005966 | 12468/12464                                               | 2 |
| turquoise | GO:0007585 | BP | respiratory gaseous exchange by respiratory system          | 4/122 | 72/28943  | 0.00025 | 0.009048 | 0.006364 | 14660/98660/245537/30957                                  | 4 |
| turquoise | GO:0048678 | BP | response to axon injury                                     | 4/122 | 72/28943  | 0.00025 | 0.009048 | 0.006364 | 14432/18377/16971/30957                                   | 4 |
| turquoise | GO:0032412 | BP | regulation of ion transmembrane transporter activity        | 7/122 | 293/28943 | 0.00025 | 0.009069 | 0.00638  | 12034/14811/12297/238871/83997/98660/245537               | 7 |
| turquoise | GO:1903523 | BP | negative regulation of blood circulation                    | 3/122 | 30/28943  | 0.00027 | 0.009635 | 0.006777 | 238871/98660/110355                                       | 3 |
| turquoise | GO:0050432 | BP | catecholamine secretion                                     | 4/122 | 74/28943  | 0.00028 | 0.009635 | 0.006777 | 12652/16490/110355/68585                                  | 4 |
| turquoise | GO:0099569 | CC | presynaptic cytoskeleton                                    | 2/121 | 11/28804  | 0.00094 | 0.010394 | 0.007021 | 116838/24050                                              | 2 |
| turquoise | GO:0005902 | CC | microvillus                                                 | 4/121 | 105/28804 | 0.00102 | 0.010575 | 0.007143 | 12799/11966/11512/14086                                   | 4 |
| turquoise | GO:0031234 | CC | extrinsic component of cytoplasmic side of plasma membrane  | 4/121 | 105/28804 | 0.00102 | 0.010575 | 0.007143 | 14678/16653/14688/268566                                  | 4 |
| turquoise | GO:0022898 | BP | regulation of transmembrane transporter activity            | 7/122 | 303/28943 | 0.00031 | 0.010652 | 0.007493 | 12034/14811/12297/238871/83997/98660/245537               | 7 |
| turquoise | GO:0039694 | BP | viral RNA genome replication                                | 3/122 | 32/28943  | 0.00033 | 0.011137 | 0.007834 | 18673/18521/271457                                        | 3 |
| turquoise | GO:0071875 | BP | adrenergic receptor signaling pathway                       | 3/122 | 32/28943  | 0.00033 | 0.011137 | 0.007834 | 14678/12652/238871                                        | 3 |
| turquoise | GO:0006635 | BP | fatty acid beta-oxidation                                   | 4/122 | 78/28943  | 0.00034 | 0.01117  | 0.007857 | 384783/93747/52538/110842                                 | 4 |
| turquoise | GO:0099060 | CC | integral component of postsynaptic specialization membrane  | 4/121 | 108/28804 | 0.00113 | 0.011374 | 0.007684 | 14811/319504/245537/68585                                 | 4 |
| turquoise | GO:0099068 | BP | postsynapse assembly                                        | 3/122 | 33/28943  | 0.00036 | 0.011896 | 0.008368 | 14432/245537/217692                                       | 3 |
| turquoise | GO:0060326 | BP | cell chemotaxis                                             | 7/122 | 314/28943 | 0.00038 | 0.01235  | 0.008687 | 14870/12652/238871/12928/20085/18810/14388                | 7 |
| turquoise | GO:0035308 | BP | negative regulation of protein dephosphorylation            | 3/122 | 34/28943  | 0.0004  | 0.012519 | 0.008806 | 665775/14678/19049                                        | 3 |
| turquoise | GO:0099563 | BP | modification of synaptic structure                          | 3/122 | 34/28943  | 0.0004  | 0.012519 | 0.008806 | 53328/235604/16443                                        | 3 |
| turquoise | GO:0032409 | BP | regulation of transporter activity                          | 7/122 | 317/28943 | 0.0004  | 0.012588 | 0.008855 | 12034/14811/12297/238871/83997/98660/245537               | 7 |
| turquoise | GO:0001508 | BP | action potential                                            | 5/122 | 148/28943 | 0.00042 | 0.012745 | 0.008965 | 14811/12297/16490/83997/319504                            | 5 |
| turquoise | GO:0051047 | BP | positive regulation of secretion                            | 8/122 | 420/28943 | 0.00042 | 0.012745 | 0.008965 | 20910/14678/384783/16971/110355/68585/271457/16443        | 8 |
| turquoise | GO:0098948 | CC | intrinsic component of postsynaptic specialization membrane | 4/121 | 114/28804 | 0.00138 | 0.013141 | 0.008877 | 14811/319504/245537/68585                                 | 4 |
| turquoise | GO:0043679 | CC | axon terminus                                               | 5/121 | 194/28804 | 0.00139 | 0.013141 | 0.008877 | 14811/16490/23980/271457/16443                            | 5 |
| turquoise | GO:0009416 | BP | response to light stimulus                                  | 7/122 | 322/28943 | 0.00044 | 0.013169 | 0.009264 | 16653/14811/20511/14688/19049/98660/245537                | 7 |
| turquoise | GO:1901653 | BP | cellular response to peptide                                | 7/122 | 322/28943 | 0.00044 | 0.013169 | 0.009264 | 14678/384783/11512/12928/98415/16971/110355               | 7 |
| turquoise | GO:0098798 | CC | mitochondrial protein-containing complex                    | 6/121 | 291/28804 | 0.00147 | 0.013487 | 0.009111 | 12034/18673/27402/110842/28185/75406                      | 6 |
| turquoise | GO:0051966 | BP | regulation of synaptic transmission, glutamatergic          | 4/122 | 85/28943  | 0.00047 | 0.013652 | 0.009603 | 20910/14811/210274/245537                                 | 4 |
| turquoise | GO:0048169 | BP | regulation of long-term neuronal synaptic plasticity        | 3/122 | 36/28943  | 0.00047 | 0.013652 | 0.009603 | 16653/14811/271457                                        | 3 |
| turquoise | GO:0004112 | MF | cyclic-nucleotide phosphodiesterase activity                | 3/121 | 26/28404  | 0.00018 | 0.01368  | 0.01094  | 18584/12799/238871                                        | 3 |
| turquoise | GO:0019001 | MF | guanyl nucleotide binding                                   | 8/121 | 384/28404 | 0.00025 | 0.01368  | 0.01094  | 14678/16653/11566/217869/226982/235661/271457/24050       | 8 |
| turquoise | GO:0032561 | MF | guanyl ribonucleotide binding                               | 8/121 | 384/28404 | 0.00025 | 0.01368  | 0.01094  | 14678/16653/11566/217869/226982/235661/271457/24050       | 8 |
| turquoise | GO:0003018 | BP | vascular process in circulatory system                      | 6/122 | 235/28943 | 0.0005  | 0.01416  | 0.00996  | 12652/11512/98660/16971/110355/18810                      | 6 |
| turquoise | GO:0006942 | BP | regulation of striated muscle contraction                   | 4/122 | 87/28943  | 0.00051 | 0.01416  | 0.00996  | 12652/238871/98660/110355                                 | 4 |
| turquoise | GO:0010923 | BP | negative regulation of phosphatase activity                 | 3/122 | 37/28943  | 0.00051 | 0.01416  | 0.00996  | 665775/14678/19049                                        | 3 |
| turquoise | GO:0090075 | BP | relaxation of muscle                                        | 3/122 | 37/28943  | 0.00051 | 0.01416  | 0.00996  | 12652/238871/110355                                       | 3 |
| turquoise | GO:0031099 | BP | regeneration                                                | 5/122 | 155/28943 | 0.00052 | 0.014167 | 0.009966 | 14432/18377/16971/68585/30957                             | 5 |
| turquoise | GO:0035418 | BP | protein localization to synapse                             | 4/122 | 89/28943  | 0.00056 | 0.015078 | 0.010606 | 14811/268566/245537/30957                                 | 4 |
| turquoise | GO:0050805 | BP | negative regulation of synaptic transmission                | 4/122 | 90/28943  | 0.00058 | 0.015274 | 0.010744 | 20910/14678/210274/245537                                 | 4 |
| turquoise | GO:1902600 | BP | proton transmembrane transport                              | 4/122 | 90/28943  | 0.00058 | 0.015274 | 0.010744 | 12034/11966/98660/75406                                   | 4 |

|           |            |    |                                                                                                  |       |           |         |          |          |                                                     |   |
|-----------|------------|----|--------------------------------------------------------------------------------------------------|-------|-----------|---------|----------|----------|-----------------------------------------------------|---|
| turquoise | GO:1904951 | BP | positive regulation of establishment of protein localization                                     | 7/122 | 337/28943 | 0.00058 | 0.015274 | 0.010744 | 12297/12468/12464/384783/16971/28185/18536          | 7 |
| turquoise | GO:0007613 | BP | memory                                                                                           | 5/122 | 160/28943 | 0.0006  | 0.01537  | 0.010812 | 53328/14811/238871/19049/210274                     | 5 |
| turquoise | GO:0070570 | BP | regulation of neuron projection regeneration                                                     | 3/122 | 39/28943  | 0.0006  | 0.01537  | 0.010812 | 18377/16971/68585                                   | 3 |
| turquoise | GO:0051937 | BP | catecholamine transport                                                                          | 4/122 | 91/28943  | 0.00061 | 0.015404 | 0.010836 | 12652/16490/110355/68585                            | 4 |
| turquoise | GO:0098562 | CC | cytoplasmic side of membrane                                                                     | 5/121 | 207/28804 | 0.00185 | 0.016496 | 0.011143 | 14678/16653/14688/268566/271457                     | 5 |
| turquoise | GO:0001933 | BP | negative regulation of protein phosphorylation                                                   | 7/122 | 346/28943 | 0.00068 | 0.017062 | 0.012002 | 14870/23980/238871/208643/16971/110355/18810        | 7 |
| turquoise | GO:0032204 | BP | regulation of telomere maintenance                                                               | 4/122 | 94/28943  | 0.00068 | 0.017062 | 0.012002 | 12468/12464/235134/51810                            | 4 |
| turquoise | GO:0030139 | CC | endocytic vesicle                                                                                | 5/121 | 211/28804 | 0.00201 | 0.017446 | 0.011785 | 20910/245537/73094/271457/16443                     | 5 |
| turquoise | GO:0051341 | BP | regulation of oxidoreductase activity                                                            | 4/122 | 95/28943  | 0.00071 | 0.01758  | 0.012366 | 12034/14678/14870/16653                             | 4 |
| turquoise | GO:0003015 | BP | heart process                                                                                    | 6/122 | 254/28943 | 0.00074 | 0.018175 | 0.012785 | 14678/12652/23980/238871/98660/110355               | 6 |
| turquoise | GO:0001558 | BP | regulation of cell growth                                                                        | 8/122 | 459/28943 | 0.00075 | 0.018175 | 0.012785 | 18673/18377/12928/208643/16971/68585/28185/116838   | 8 |
| turquoise | GO:0001505 | BP | regulation of neurotransmitter levels                                                            | 6/122 | 255/28943 | 0.00076 | 0.018249 | 0.012836 | 20910/20511/23980/98660/271457/116838               | 6 |
| turquoise | GO:0110095 | BP | cellular detoxification of aldehyde                                                              | 2/122 | 10/28943  | 0.00078 | 0.018268 | 0.01285  | 11669/58810                                         | 2 |
| turquoise | GO:1904851 | BP | positive regulation of establishment of protein localization to telomere                         | 2/122 | 10/28943  | 0.00078 | 0.018268 | 0.01285  | 12468/12464                                         | 2 |
| turquoise | GO:0032228 | BP | regulation of synaptic transmission, GABAergic                                                   | 3/122 | 43/28943  | 0.0008  | 0.018604 | 0.013086 | 20910/16653/230085                                  | 3 |
| turquoise | GO:0007411 | BP | axon guidance                                                                                    | 6/122 | 259/28943 | 0.00082 | 0.019056 | 0.013405 | 14432/21375/319504/16971/58208/30957                | 6 |
| turquoise | GO:0097485 | BP | neuron projection guidance                                                                       | 6/122 | 260/28943 | 0.00084 | 0.019264 | 0.013551 | 14432/21375/319504/16971/58208/30957                | 6 |
| turquoise | GO:0042391 | BP | regulation of membrane potential                                                                 | 8/122 | 469/28943 | 0.00086 | 0.019404 | 0.013649 | 14811/12297/16490/83997/319504/245537/110355/116838 | 8 |
| turquoise | GO:0014910 | BP | regulation of smooth muscle cell migration                                                       | 4/122 | 100/28943 | 0.00086 | 0.019404 | 0.013649 | 14870/238871/12928/16971                            | 4 |
| turquoise | GO:1903532 | BP | positive regulation of secretion by cell                                                         | 7/122 | 365/28943 | 0.00093 | 0.020551 | 0.014456 | 20910/384783/16971/110355/68585/271457/16443        | 7 |
| turquoise | GO:0070203 | BP | regulation of establishment of protein localization to telomere                                  | 2/122 | 11/28943  | 0.00095 | 0.020551 | 0.014456 | 12468/12464                                         | 2 |
| turquoise | GO:1902915 | BP | negative regulation of protein polyubiquitination                                                | 2/122 | 11/28943  | 0.00095 | 0.020551 | 0.014456 | 14897/107260                                        | 2 |
| turquoise | GO:0007626 | BP | locomotory behavior                                                                              | 6/122 | 266/28943 | 0.00095 | 0.020551 | 0.014456 | 12799/14811/170719/19049/98660/210274               | 6 |
| turquoise | GO:0009062 | BP | fatty acid catabolic process                                                                     | 4/122 | 103/28943 | 0.00096 | 0.020597 | 0.014489 | 384783/93747/52538/110842                           | 4 |
| turquoise | GO:1901215 | BP | negative regulation of neuron death                                                              | 6/122 | 267/28943 | 0.00096 | 0.020597 | 0.014489 | 20910/12652/16653/170719/16971/16443                | 6 |
| turquoise | GO:0055013 | BP | cardiac muscle cell development                                                                  | 4/122 | 104/28943 | 0.001   | 0.02114  | 0.01487  | 11790/51810/28185/18810                             | 4 |
| turquoise | GO:0008022 | MF | protein C-terminus binding                                                                       | 6/121 | 233/28404 | 0.0005  | 0.021232 | 0.016979 | 12034/2062/18673/226562/20867/210274                | 6 |
| turquoise | GO:0008081 | MF | phosphoric diester hydrolase activity                                                            | 4/121 | 86/28404  | 0.00051 | 0.021232 | 0.016979 | 18584/12799/14688/238871                            | 4 |
| turquoise | GO:0031369 | MF | translation initiation factor binding                                                            | 3/121 | 38/28404  | 0.00057 | 0.021232 | 0.016979 | 217869/208643/20085                                 | 3 |
| turquoise | GO:0008135 | MF | translation factor activity, RNA binding                                                         | 4/121 | 90/28404  | 0.0006  | 0.021232 | 0.016979 | 66656/217869/226982/208643                          | 4 |
| turquoise | GO:0003016 | BP | respiratory system process                                                                       | 3/122 | 47/28943  | 0.00103 | 0.021731 | 0.015286 | 14660/98660/245537                                  | 3 |
| turquoise | GO:0045211 | CC | postsynaptic membrane                                                                            | 6/121 | 326/28804 | 0.0026  | 0.021941 | 0.014821 | 14811/210274/319504/268566/245537/68585             | 6 |
| turquoise | GO:0099634 | CC | postsynaptic specialization membrane                                                             | 4/121 | 138/28804 | 0.00278 | 0.022421 | 0.015146 | 14811/319504/245537/68585                           | 4 |
| turquoise | GO:0005839 | CC | proteasome core complex                                                                          | 2/121 | 19/28804  | 0.00286 | 0.022421 | 0.015146 | 19173/26444                                         | 2 |
| turquoise | GO:0098858 | CC | actin-based cell projection                                                                      | 5/121 | 229/28804 | 0.00286 | 0.022421 | 0.015146 | 14432/12799/11966/11512/14086                       | 5 |
| turquoise | GO:0048588 | BP | developmental cell growth                                                                        | 6/122 | 273/28943 | 0.00108 | 0.02245  | 0.015792 | 18377/245537/16971/68585/28185/116838               | 6 |
| turquoise | GO:0043949 | BP | regulation of cAMP-mediated signaling                                                            | 3/122 | 48/28943  | 0.0011  | 0.02245  | 0.015792 | 12652/23980/238871                                  | 3 |
| turquoise | GO:0006898 | BP | receptor-mediated endocytosis                                                                    | 6/122 | 274/28943 | 0.0011  | 0.02245  | 0.015792 | 245537/73094/16971/110355/271457/16443              | 6 |
| turquoise | GO:0021761 | BP | limbic system development                                                                        | 4/122 | 107/28943 | 0.00111 | 0.02245  | 0.015792 | 12928/21375/70762/98660                             | 4 |
| turquoise | GO:0033182 | BP | regulation of histone ubiquitination                                                             | 2/122 | 12/28943  | 0.00113 | 0.02245  | 0.015792 | 14897/107260                                        | 2 |
| turquoise | GO:0070202 | BP | regulation of establishment of protein localization to chromosome                                | 2/122 | 12/28943  | 0.00113 | 0.02245  | 0.015792 | 12468/12464                                         | 2 |
| turquoise | GO:0075522 | BP | IRES-dependent viral translational initiation                                                    | 2/122 | 12/28943  | 0.00113 | 0.02245  | 0.015792 | 18521/229663                                        | 2 |
| turquoise | GO:0048660 | BP | regulation of smooth muscle cell proliferation                                                   | 5/122 | 185/28943 | 0.00115 | 0.022556 | 0.015866 | 14678/14870/18673/238871/110355                     | 5 |
| turquoise | GO:0032210 | BP | regulation of telomere maintenance via telomerase                                                | 3/122 | 49/28943  | 0.00117 | 0.022689 | 0.01596  | 12468/12464/51810                                   | 3 |
| turquoise | GO:0071375 | BP | cellular response to peptide hormone stimulus                                                    | 6/122 | 278/28943 | 0.00119 | 0.022689 | 0.01596  | 14678/384783/11512/12928/98415/110355               | 6 |
| turquoise | GO:0015844 | BP | monoamine transport                                                                              | 4/122 | 109/28943 | 0.00119 | 0.022689 | 0.01596  | 12652/16490/110355/68585                            | 4 |
| turquoise | GO:0048661 | BP | positive regulation of smooth muscle cell proliferation                                          | 4/122 | 109/28943 | 0.00119 | 0.022689 | 0.01596  | 14678/18673/238871/110355                           | 4 |
| turquoise | GO:0055006 | BP | cardiac cell development                                                                         | 4/122 | 110/28943 | 0.00123 | 0.023293 | 0.016385 | 11790/51810/28185/18810                             | 4 |
| turquoise | GO:0035305 | BP | negative regulation of dephosphorylation                                                         | 3/122 | 50/28943  | 0.00124 | 0.023308 | 0.016396 | 665775/14678/19049                                  | 3 |
| turquoise | GO:0019898 | CC | extrinsic component of membrane                                                                  | 6/121 | 337/28804 | 0.00306 | 0.023378 | 0.015792 | 14678/12385/16653/14688/18673/268566                | 6 |
| turquoise | GO:0030673 | CC | axolemma                                                                                         | 2/121 | 20/28804  | 0.00316 | 0.023526 | 0.015892 | 20511/30957                                         | 2 |
| turquoise | GO:0005905 | CC | clathrin-coated pit                                                                              | 3/121 | 70/28804  | 0.00322 | 0.023526 | 0.015892 | 73094/16971/16443                                   | 3 |
| turquoise | GO:0008344 | BP | adult locomotory behavior                                                                        | 4/122 | 111/28943 | 0.00127 | 0.023554 | 0.016569 | 12799/170719/98660/210274                           | 4 |
| turquoise | GO:0014909 | BP | smooth muscle cell migration                                                                     | 4/122 | 111/28943 | 0.00127 | 0.023554 | 0.016569 | 14870/238871/12928/16971                            | 4 |
| turquoise | GO:0008038 | BP | neuron recognition                                                                               | 3/122 | 51/28943  | 0.00131 | 0.023663 | 0.016645 | 14432/319504/68585                                  | 3 |
| turquoise | GO:0021879 | BP | forebrain neuron differentiation                                                                 | 3/122 | 51/28943  | 0.00131 | 0.023663 | 0.016645 | 21375/70762/58208                                   | 3 |
| turquoise | GO:0070934 | BP | CRD-mediated mRNA stabilization                                                                  | 2/122 | 13/28943  | 0.00133 | 0.023663 | 0.016645 | 51810/229663                                        | 2 |
| turquoise | GO:0099159 | BP | regulation of modification of postsynaptic structure                                             | 2/122 | 13/28943  | 0.00133 | 0.023663 | 0.016645 | 235604/16443                                        | 2 |
| turquoise | GO:1904816 | BP | positive regulation of protein localization to chromosome, telomeric region                      | 2/122 | 13/28943  | 0.00133 | 0.023663 | 0.016645 | 12468/12464                                         | 2 |
| turquoise | GO:1905214 | BP | regulation of RNA binding                                                                        | 2/122 | 13/28943  | 0.00133 | 0.023663 | 0.016645 | 208643/98415                                        | 2 |
| turquoise | GO:0048659 | BP | smooth muscle cell proliferation                                                                 | 5/122 | 192/28943 | 0.00135 | 0.023797 | 0.01674  | 14678/14870/18673/238871/110355                     | 5 |
| turquoise | GO:0007416 | BP | synapse assembly                                                                                 | 5/122 | 194/28943 | 0.00141 | 0.024737 | 0.017401 | 14432/208643/210274/245537/217692                   | 5 |
| turquoise | GO:0005697 | CC | telomerase holoenzyme complex                                                                    | 2/121 | 21/28804  | 0.00349 | 0.024882 | 0.016809 | 51810/15381                                         | 2 |
| turquoise | GO:0043524 | BP | negative regulation of neuron apoptotic process                                                  | 5/122 | 195/28943 | 0.00145 | 0.025129 | 0.017677 | 20910/16653/170719/16971/16443                      | 5 |
| turquoise | GO:0051954 | BP | positive regulation of amine transport                                                           | 3/122 | 53/28943  | 0.00147 | 0.025335 | 0.017821 | 20910/110355/68585                                  | 3 |
| turquoise | GO:2001257 | BP | regulation of cation channel activity                                                            | 5/122 | 196/28943 | 0.00148 | 0.025352 | 0.017833 | 14811/12297/238871/83997/245537                     | 5 |
| turquoise | GO:0030072 | BP | peptide hormone secretion                                                                        | 6/122 | 291/28943 | 0.0015  | 0.02549  | 0.01793  | 18641/12652/384783/16971/116838/16443               | 6 |
| turquoise | GO:0035249 | BP | synaptic transmission, glutamatergic                                                             | 4/122 | 117/28943 | 0.00154 | 0.02572  | 0.018092 | 20910/14811/210274/245537                           | 4 |
| turquoise | GO:0106072 | BP | negative regulation of adenylate cyclase-activating G protein-coupled receptor signaling pathway | 2/122 | 14/28943  | 0.00155 | 0.02572  | 0.018092 | 14678/110355                                        | 2 |
| turquoise | GO:1900152 | BP | negative regulation of nuclear-transcribed mRNA catabolic process, deadenylation-dependent decay | 2/122 | 14/28943  | 0.00155 | 0.02572  | 0.018092 | 51810/229663                                        | 2 |
| turquoise | GO:2001241 | BP | positive regulation of extrinsic apoptotic signaling pathway in absence of ligand                | 2/122 | 14/28943  | 0.00155 | 0.02572  | 0.018092 | 12385/51792                                         | 2 |

|           |            |    |                                                                                         |       |           |         |          |          |                                              |   |
|-----------|------------|----|-----------------------------------------------------------------------------------------|-------|-----------|---------|----------|----------|----------------------------------------------|---|
| turquoise | GO:0008016 | BP | regulation of heart contraction                                                         | 5/122 | 199/28943 | 0.00158 | 0.026039 | 0.018316 | 12652/23980/238871/98660/110355              | 5 |
| turquoise | GO:0099061 | CC | integral component of postsynaptic density membrane                                     | 3/121 | 74/28804  | 0.00377 | 0.026326 | 0.017784 | 14811/319504/68585                           | 3 |
| turquoise | GO:0035097 | CC | histone methyltransferase complex                                                       | 3/121 | 76/28804  | 0.00407 | 0.027774 | 0.018762 | 665775/52615/80886                           | 3 |
| turquoise | GO:0002790 | BP | peptide secretion                                                                       | 6/122 | 299/28943 | 0.00172 | 0.028093 | 0.019762 | 18641/12652/384783/16971/116838/16443        | 6 |
| turquoise | GO:0110096 | BP | cellular response to aldehyde                                                           | 2/122 | 15/28943  | 0.00179 | 0.028524 | 0.020064 | 11669/58810                                  | 2 |
| turquoise | GO:1900044 | BP | regulation of protein K63-linked ubiquitination                                         | 2/122 | 15/28943  | 0.00179 | 0.028524 | 0.020064 | 14897/107260                                 | 2 |
| turquoise | GO:1904814 | BP | regulation of protein localization to chromosome, telomeric region                      | 2/122 | 15/28943  | 0.00179 | 0.028524 | 0.020064 | 12468/12464                                  | 2 |
| turquoise | GO:0021782 | BP | glial cell development                                                                  | 4/122 | 122/28943 | 0.0018  | 0.028524 | 0.020064 | 16653/18377/16971/18810                      | 4 |
| turquoise | GO:0031646 | BP | positive regulation of nervous system process                                           | 3/122 | 57/28943  | 0.00181 | 0.028524 | 0.020064 | 245537/110355/116838                         | 3 |
| turquoise | GO:0051489 | BP | regulation of filopodium assembly                                                       | 3/122 | 57/28943  | 0.00181 | 0.028524 | 0.020064 | 14432/14086/271457                           | 3 |
| turquoise | GO:1902414 | BP | protein localization to cell junction                                                   | 4/122 | 123/28943 | 0.00185 | 0.029016 | 0.020411 | 14811/268566/245537/30957                    | 4 |
| turquoise | GO:0043666 | BP | regulation of phosphoprotein phosphatase activity                                       | 3/122 | 58/28943  | 0.0019  | 0.029307 | 0.020616 | 665775/14678/19049                           | 3 |
| turquoise | GO:1904356 | BP | regulation of telomere maintenance via telomere lengthening                             | 3/122 | 58/28943  | 0.0019  | 0.029307 | 0.020616 | 12468/12464/51810                            | 3 |
| turquoise | GO:1904062 | BP | regulation of cation transmembrane transport                                            | 7/122 | 414/28943 | 0.00191 | 0.029307 | 0.020616 | 12034/14811/12297/238871/83997/98660/245537  | 7 |
| turquoise | GO:0048511 | BP | rhythmic process                                                                        | 6/122 | 306/28943 | 0.00193 | 0.029454 | 0.020719 | 14811/16490/59026/245537/51810/110355        | 6 |
| turquoise | GO:0072659 | BP | protein localization to plasma membrane                                                 | 6/122 | 308/28943 | 0.00199 | 0.029808 | 0.020968 | 20910/53328/12297/11512/83997/16971          | 6 |
| turquoise | GO:0014812 | BP | muscle cell migration                                                                   | 4/122 | 126/28943 | 0.00202 | 0.029808 | 0.020968 | 14870/238871/12928/16971                     | 4 |
| turquoise | GO:0023035 | BP | CD40 signaling pathway                                                                  | 2/122 | 16/28943  | 0.00203 | 0.029808 | 0.020968 | 12034/18673                                  | 2 |
| turquoise | GO:0042428 | BP | serotonin metabolic process                                                             | 2/122 | 16/28943  | 0.00203 | 0.029808 | 0.020968 | 14811/11669                                  | 2 |
| turquoise | GO:0046185 | BP | aldehyde catabolic process                                                              | 2/122 | 16/28943  | 0.00203 | 0.029808 | 0.020968 | 11669/58810                                  | 2 |
| turquoise | GO:0055119 | BP | relaxation of cardiac muscle                                                            | 2/122 | 16/28943  | 0.00203 | 0.029808 | 0.020968 | 12652/238871                                 | 2 |
| turquoise | GO:0086103 | BP | G protein-coupled receptor signalling pathway involved in heart process                 | 2/122 | 16/28943  | 0.00203 | 0.029808 | 0.020968 | 14678/12652                                  | 2 |
| turquoise | GO:0005525 | MF | GTP binding                                                                             | 7/121 | 361/28404 | 0.00092 | 0.029819 | 0.023846 | 14678/16653/11566/217869/226982/271457/24050 | 7 |
| turquoise | GO:0006278 | BP | RNA-templated DNA biosynthetic process                                                  | 3/122 | 60/28943  | 0.0021  | 0.030395 | 0.021381 | 12468/12464/51810                            | 3 |
| turquoise | GO:0007004 | BP | telomere maintenance via telomerase                                                     | 3/122 | 60/28943  | 0.0021  | 0.030395 | 0.021381 | 12468/12464/51810                            | 3 |
| turquoise | GO:0006887 | BP | exocytosis                                                                              | 7/122 | 422/28943 | 0.00212 | 0.030581 | 0.021512 | 20910/14678/12652/236643/271457/116838/16443 | 7 |
| turquoise | GO:0006446 | BP | regulation of translational initiation                                                  | 3/122 | 61/28943  | 0.0022  | 0.031329 | 0.022038 | 117869/226982/208643                         | 3 |
| turquoise | GO:0051931 | BP | regulation of sensory perception                                                        | 3/122 | 61/28943  | 0.0022  | 0.031329 | 0.022038 | 12297/110355/68585                           | 3 |
| turquoise | GO:0099146 | CC | intrinsic component of postsynaptic density membrane                                    | 3/121 | 80/28804  | 0.0047  | 0.031399 | 0.021211 | 14811/319504/68585                           | 3 |
| turquoise | GO:0016324 | CC | apical plasma membrane                                                                  | 6/121 | 370/28804 | 0.00481 | 0.031534 | 0.021302 | 12297/11966/210274/110355/58810/18810        | 6 |
| turquoise | GO:0003334 | BP | keratinocyte development                                                                | 2/122 | 17/28943  | 0.0023  | 0.03192  | 0.022453 | 58208/18810                                  | 2 |
| turquoise | GO:0140374 | BP | antiviral innate immune response                                                        | 2/122 | 17/28943  | 0.0023  | 0.03192  | 0.022453 | 12034/18673                                  | 2 |
| turquoise | GO:2000767 | BP | positive regulation of cytoplasmic translation                                          | 2/122 | 17/28943  | 0.0023  | 0.03192  | 0.022453 | 51810/229663                                 | 2 |
| turquoise | GO:0021872 | BP | forebrain generation of neurons                                                         | 3/122 | 62/28943  | 0.00231 | 0.03192  | 0.022453 | 21375/70762/58208                            | 3 |
| turquoise | GO:0035176 | BP | social behavior                                                                         | 3/122 | 62/28943  | 0.00231 | 0.03192  | 0.022453 | 210274/245537/18536                          | 3 |
| turquoise | GO:1902495 | CC | transmembrane transporter complex                                                       | 6/121 | 373/28804 | 0.005   | 0.032123 | 0.021699 | 14811/12297/16490/238871/98660/75406         | 6 |
| turquoise | GO:1901652 | BP | response to peptide                                                                     | 7/122 | 430/28943 | 0.00236 | 0.03248  | 0.022847 | 14678/384783/11512/12928/98415/16971/110355  | 7 |
| turquoise | GO:0060048 | BP | cardiac muscle contraction                                                              | 4/122 | 132/28943 | 0.0024  | 0.032695 | 0.022999 | 12652/238871/98660/110355                    | 4 |
| turquoise | GO:0015833 | BP | peptide transport                                                                       | 6/122 | 320/28943 | 0.00241 | 0.032695 | 0.022999 | 18641/12652/384783/16971/116838/16443        | 6 |
| turquoise | GO:0010517 | BP | regulation of phospholipase activity                                                    | 3/122 | 63/28943  | 0.00241 | 0.032695 | 0.022999 | 12034/18673/16971                            | 3 |
| turquoise | GO:0030258 | BP | lipid modification                                                                      | 5/122 | 221/28943 | 0.00249 | 0.03351  | 0.023572 | 14077/384783/93747/52538/110842              | 5 |
| turquoise | GO:0014911 | BP | positive regulation of smooth muscle cell migration                                     | 3/122 | 64/28943  | 0.00252 | 0.03351  | 0.023572 | 238871/12928/16971                           | 3 |
| turquoise | GO:0009895 | BP | negative regulation of catabolic process                                                | 6/122 | 324/28943 | 0.00256 | 0.03351  | 0.023572 | 14811/18673/208643/100502698/51810/229663    | 6 |
| turquoise | GO:0060382 | BP | regulation of DNA strand elongation                                                     | 2/122 | 18/28943  | 0.00258 | 0.03351  | 0.023572 | 235134/98415                                 | 2 |
| turquoise | GO:0070200 | BP | establishment of protein localization to telomere                                       | 2/122 | 18/28943  | 0.00258 | 0.03351  | 0.023572 | 12468/12464                                  | 2 |
| turquoise | GO:0099150 | BP | regulation of postsynaptic specialization assembly                                      | 2/122 | 18/28943  | 0.00258 | 0.03351  | 0.023572 | 14432/217692                                 | 2 |
| turquoise | GO:1901160 | BP | primary amino compound metabolic process                                                | 2/122 | 18/28943  | 0.00258 | 0.03351  | 0.023572 | 14811/11669                                  | 2 |
| turquoise | GO:1905244 | BP | regulation of modification of synaptic structure                                        | 2/122 | 18/28943  | 0.00258 | 0.03351  | 0.023572 | 235604/16443                                 | 2 |
| turquoise | GO:0051703 | BP | biological process involved in intraspecies interaction between organisms               | 3/122 | 65/28943  | 0.00264 | 0.033653 | 0.023672 | 210274/245537/18536                          | 3 |
| turquoise | GO:0051932 | BP | synaptic transmission, GABAergic                                                        | 3/122 | 65/28943  | 0.00264 | 0.033653 | 0.023672 | 20910/16653/230085                           | 3 |
| turquoise | GO:0070372 | BP | regulation of ERK1 and ERK2 cascade                                                     | 6/122 | 326/28943 | 0.00264 | 0.033653 | 0.023672 | 12034/18584/14678/14870/18673/16971          | 6 |
| turquoise | GO:0035264 | BP | multicellular organism growth                                                           | 5/122 | 224/28943 | 0.00264 | 0.033653 | 0.023672 | 20511/238871/216527/73094/18810              | 5 |
| turquoise | GO:0042383 | CC | sarcolemma                                                                              | 4/121 | 166/28804 | 0.00536 | 0.033735 | 0.022789 | 12297/11512/98660/18810                      | 4 |
| turquoise | GO:0033673 | BP | negative regulation of kinase activity                                                  | 5/122 | 226/28943 | 0.00275 | 0.034788 | 0.024471 | 14870/384783/100502698/51810/18810           | 5 |
| turquoise | GO:0070374 | BP | positive regulation of ERK1 and ERK2 cascade                                            | 5/122 | 227/28943 | 0.0028  | 0.035174 | 0.024742 | 12034/18584/14678/18673/16971                | 5 |
| turquoise | GO:0044242 | BP | cellular lipid catabolic process                                                        | 5/122 | 228/28943 | 0.00285 | 0.035174 | 0.024742 | 384783/93747/52538/16971/110842              | 5 |
| turquoise | GO:0019081 | BP | viral translation                                                                       | 2/122 | 19/28943  | 0.00288 | 0.035174 | 0.024742 | 18521/229663                                 | 2 |
| turquoise | GO:0033605 | BP | positive regulation of catecholamine secretion                                          | 2/122 | 19/28943  | 0.00288 | 0.035174 | 0.024742 | 110355/68585                                 | 2 |
| turquoise | GO:0044539 | BP | long-chain fatty acid import into cell                                                  | 2/122 | 19/28943  | 0.00288 | 0.035174 | 0.024742 | 14077/384783                                 | 2 |
| turquoise | GO:0044827 | BP | modulation by host of viral genome replication                                          | 2/122 | 19/28943  | 0.00288 | 0.035174 | 0.024742 | 18673/98415                                  | 2 |
| turquoise | GO:0106070 | BP | regulation of adenylate cyclase-activating G protein-coupled receptor signaling pathway | 2/122 | 19/28943  | 0.00288 | 0.035174 | 0.024742 | 14678/110355                                 | 2 |
| turquoise | GO:0043194 | CC | axon initial segment                                                                    | 2/121 | 27/28804  | 0.00574 | 0.035283 | 0.023835 | 16490/319504                                 | 2 |
| turquoise | GO:0099055 | CC | integral component of postsynaptic membrane                                             | 4/121 | 170/28804 | 0.00583 | 0.035283 | 0.023835 | 14811/319504/245537/68585                    | 4 |
| turquoise | GO:0090079 | MF | translation regulator activity, nucleic acid binding                                    | 4/121 | 108/28404 | 0.00119 | 0.035529 | 0.028412 | 66656/217869/226982/208643                   | 4 |
| turquoise | GO:0099504 | BP | synaptic vesicle cycle                                                                  | 5/122 | 230/28943 | 0.00296 | 0.036057 | 0.025363 | 20910/245537/271457/116838/16443             | 5 |
| turquoise | GO:0019933 | BP | cAMP-mediated signaling                                                                 | 3/122 | 68/28943  | 0.003   | 0.036339 | 0.025562 | 12652/23980/238871                           | 3 |
| turquoise | GO:0007188 | BP | adenylate cyclase-modulating G protein-coupled receptor signaling pathway               | 5/122 | 231/28943 | 0.00302 | 0.036381 | 0.025591 | 14678/12652/11512/110355/116838              | 5 |
| turquoise | GO:0016661 | MF | oxidoreductase activity, acting on other nitrogenous compounds as donors                | 2/121 | 13/28404  | 0.00136 | 0.037477 | 0.029969 | 11669/268566                                 | 2 |
| turquoise | GO:0042043 | MF | neurexin family protein binding                                                         | 2/121 | 14/28404  | 0.00158 | 0.037477 | 0.029969 | 236643/245537                                | 2 |
| turquoise | GO:0003924 | MF | GTPase activity                                                                         | 6/121 | 296/28404 | 0.00172 | 0.037477 | 0.029969 | 14678/16653/146888/226982/271457/24050       | 6 |
| turquoise | GO:0004115 | MF | 3',5'-cyclic-AMP phosphodiesterase activity                                             | 2/121 | 15/28404  | 0.00182 | 0.037477 | 0.029969 | 18584/238871                                 | 2 |

|           |            |    |                                                                           |       |           |         |          |          |                                             |   |
|-----------|------------|----|---------------------------------------------------------------------------|-------|-----------|---------|----------|----------|---------------------------------------------|---|
| turquoise | GO:0106222 | MF | lncRNA binding                                                            | 2/121 | 15/28404  | 0.00182 | 0.037477 | 0.029969 | 52615/51810                                 | 2 |
| turquoise | GO:0003697 | MF | single-stranded DNA binding                                               | 4/121 | 124/28404 | 0.00198 | 0.037477 | 0.029969 | 18521/56381/98415/51810                     | 4 |
| turquoise | GO:0008432 | MF | JUN kinase binding                                                        | 2/121 | 16/28404  | 0.00208 | 0.037477 | 0.029969 | 14870/30957                                 | 2 |
| turquoise | GO:0050839 | MF | cell adhesion molecule binding                                            | 6/121 | 308/28404 | 0.0021  | 0.037477 | 0.029969 | 54366/12385/14811/319504/245537/68585       | 6 |
| turquoise | GO:0003743 | MF | translation initiation factor activity                                    | 3/121 | 61/28404  | 0.00227 | 0.037477 | 0.029969 | 17869/226982/208643                         | 3 |
| turquoise | GO:0031625 | MF | ubiquitin protein ligase binding                                          | 6/121 | 315/28404 | 0.00235 | 0.037477 | 0.029969 | 18521/12928/107260/217692/110355/68585      | 6 |
| turquoise | GO:0070034 | MF | telomerase RNA binding                                                    | 2/121 | 17/28404  | 0.00235 | 0.037477 | 0.029969 | 51810/15381                                 | 2 |
| turquoise | GO:0017124 | MF | SH3 domain binding                                                        | 4/121 | 131/28404 | 0.00242 | 0.037477 | 0.029969 | 12928/210274/140580/73094                   | 4 |
| turquoise | GO:0046324 | BP | regulation of glucose import                                              | 3/122 | 69/28943  | 0.00313 | 0.037514 | 0.026388 | 20511/384783/110355                         | 3 |
| turquoise | GO:0010801 | BP | negative regulation of peptidyl-threonine phosphorylation                 | 2/122 | 20/28943  | 0.00319 | 0.037641 | 0.026477 | 208643/110355                               | 2 |
| turquoise | GO:0033599 | BP | regulation of mammary gland epithelial cell proliferation                 | 2/122 | 20/28943  | 0.00319 | 0.037641 | 0.026477 | 12034/68585                                 | 2 |
| turquoise | GO:0050966 | BP | detection of mechanical stimulus involved in sensory perception of pain   | 2/122 | 20/28943  | 0.00319 | 0.037641 | 0.026477 | 12297/230085                                | 2 |
| turquoise | GO:0030073 | BP | insulin secretion                                                         | 5/122 | 235/28943 | 0.00325 | 0.037641 | 0.026477 | 18641/12652/384783/16971/116838             | 5 |
| turquoise | GO:0090276 | BP | regulation of peptide hormone secretion                                   | 5/122 | 235/28943 | 0.00325 | 0.037641 | 0.026477 | 18641/12652/384783/16971/16443              | 5 |
| turquoise | GO:0032206 | BP | positive regulation of telomere maintenance                               | 3/122 | 70/28943  | 0.00326 | 0.037641 | 0.026477 | 12468/12464/235134                          | 3 |
| turquoise | GO:0032507 | BP | maintenance of protein location in cell                                   | 3/122 | 70/28943  | 0.00326 | 0.037641 | 0.026477 | 11512/51810/110355                          | 3 |
| turquoise | GO:0099601 | BP | regulation of neurotransmitter receptor activity                          | 3/122 | 70/28943  | 0.00326 | 0.037641 | 0.026477 | 14811/244310/245537                         | 3 |
| turquoise | GO:0000723 | BP | telomere maintenance                                                      | 4/122 | 144/28943 | 0.00328 | 0.037726 | 0.026538 | 12468/12464/235134/51810                    | 4 |
| turquoise | GO:0030027 | CC | lamellipodium                                                             | 4/121 | 175/28804 | 0.00644 | 0.037819 | 0.025548 | 12385/16490/14086/16443                     | 4 |
| turquoise | GO:1990351 | CC | transporter complex                                                       | 6/121 | 395/28804 | 0.00657 | 0.037819 | 0.025548 | 14811/12297/16490/238871/98660/75406        | 6 |
| turquoise | GO:0044305 | CC | calyx of Held                                                             | 2/121 | 29/28804  | 0.0066  | 0.037819 | 0.025548 | 16490/16443                                 | 2 |
| turquoise | GO:0051056 | BP | regulation of small GTPase mediated signal transduction                   | 5/122 | 236/28943 | 0.00331 | 0.03787  | 0.026639 | 20262/16653/12928/217692/68585              | 5 |
| turquoise | GO:0055117 | BP | regulation of cardiac muscle contraction                                  | 3/122 | 71/28943  | 0.00339 | 0.03865  | 0.027187 | 12652/238871/98660                          | 3 |
| turquoise | GO:0007265 | BP | Ras protein signal transduction                                           | 6/122 | 344/28943 | 0.00344 | 0.038923 | 0.027379 | 20262/54366/16653/12928/140580/68585        | 6 |
| turquoise | GO:0002181 | BP | cytoplasmic translation                                                   | 4/122 | 146/28943 | 0.00344 | 0.038923 | 0.027379 | 217869/51810/229663/20085                   | 4 |
| turquoise | GO:1904705 | BP | regulation of vascular associated smooth muscle cell proliferation        | 3/122 | 72/28943  | 0.00353 | 0.039529 | 0.027805 | 14678/14870/110355                          | 3 |
| turquoise | GO:0010469 | BP | regulation of signaling receptor activity                                 | 4/122 | 147/28943 | 0.00353 | 0.039529 | 0.027805 | 14811/238871/244310/245537                  | 4 |
| turquoise | GO:0002791 | BP | regulation of peptide secretion                                           | 5/122 | 240/28943 | 0.00355 | 0.039597 | 0.027853 | 18641/12652/384783/16971/16443              | 5 |
| turquoise | GO:0051015 | MF | actin filament binding                                                    | 5/121 | 222/28404 | 0.00266 | 0.039598 | 0.031666 | 54366/12385/14086/217692/18810              | 5 |
| turquoise | GO:0033044 | BP | regulation of chromosome organization                                     | 5/122 | 241/28943 | 0.00361 | 0.039715 | 0.027936 | 12468/12464/235134/23566/51810              | 5 |
| turquoise | GO:0006091 | BP | generation of precursor metabolites and energy                            | 7/122 | 465/28943 | 0.00363 | 0.039715 | 0.027936 | 12034/18641/15356/384783/110842/75406/18810 | 7 |
| turquoise | GO:0017156 | BP | calcium-ion regulated exocytosis                                          | 3/122 | 73/28943  | 0.00367 | 0.039715 | 0.027936 | 20910/14678/116838                          | 3 |
| turquoise | GO:0019080 | BP | viral gene expression                                                     | 3/122 | 73/28943  | 0.00367 | 0.039715 | 0.027936 | 18521/98415/229663                          | 3 |
| turquoise | GO:0048168 | BP | regulation of neuronal synaptic plasticity                                | 3/122 | 73/28943  | 0.00367 | 0.039715 | 0.027936 | 16653/14811/271457                          | 3 |
| turquoise | GO:0060047 | BP | heart contraction                                                         | 5/122 | 242/28943 | 0.00368 | 0.039715 | 0.027936 | 12652/23980/238871/98660/110355             | 5 |
| turquoise | GO:0090087 | BP | regulation of peptide transport                                           | 5/122 | 242/28943 | 0.00368 | 0.039715 | 0.027936 | 18641/12652/384783/16971/16443              | 5 |
| turquoise | GO:0032200 | BP | telomere organization                                                     | 4/122 | 149/28943 | 0.0037  | 0.039715 | 0.027936 | 12468/12464/235134/51810                    | 4 |
| turquoise | GO:0034763 | BP | negative regulation of transmembrane transport                            | 4/122 | 149/28943 | 0.0037  | 0.039715 | 0.027936 | 12297/384783/98660/110355                   | 4 |
| turquoise | GO:0006836 | BP | neurotransmitter transport                                                | 5/122 | 243/28943 | 0.00374 | 0.039786 | 0.027986 | 20910/20511/98660/271457/116838             | 5 |
| turquoise | GO:0070371 | BP | ERK1 and ERK2 cascade                                                     | 6/122 | 350/28943 | 0.00374 | 0.039786 | 0.027986 | 12034/18584/14678/14870/18673/16971         | 6 |
| turquoise | GO:0055007 | BP | cardiac muscle cell differentiation                                       | 4/122 | 150/28943 | 0.00379 | 0.039786 | 0.027986 | 11790/51810/28185/18810                     | 4 |
| turquoise | GO:0010833 | BP | telomere maintenance via telomere lengthening                             | 3/122 | 74/28943  | 0.00381 | 0.039786 | 0.027986 | 12468/12464/51810                           | 3 |
| turquoise | GO:0098586 | BP | cellular response to virus                                                | 3/122 | 74/28943  | 0.00381 | 0.039786 | 0.027986 | 12034/18673/28185                           | 3 |
| turquoise | GO:0001975 | BP | response to amphetamine                                                   | 2/122 | 22/28943  | 0.00385 | 0.039786 | 0.027986 | 14811/19049                                 | 2 |
| turquoise | GO:0048791 | BP | calcium ion-regulated exocytosis of neurotransmitter                      | 2/122 | 22/28943  | 0.00385 | 0.039786 | 0.027986 | 20910/116838                                | 2 |
| turquoise | GO:0060080 | BP | inhibitory postsynaptic potential                                         | 2/122 | 22/28943  | 0.00385 | 0.039786 | 0.027986 | 245537/116838                               | 2 |
| turquoise | GO:0071625 | BP | vocalization behavior                                                     | 2/122 | 22/28943  | 0.00385 | 0.039786 | 0.027986 | 210274/245537                               | 2 |
| turquoise | GO:0098936 | CC | intrinsic component of postsynaptic membrane                              | 4/121 | 180/28804 | 0.00711 | 0.040019 | 0.027034 | 14811/319504/245537/68585                   | 4 |
| turquoise | GO:0042886 | BP | amide transport                                                           | 6/122 | 353/28943 | 0.0039  | 0.040138 | 0.028234 | 18641/12652/384783/16971/116838/16443       | 6 |
| turquoise | GO:1990874 | BP | vascular associated smooth muscle cell proliferation                      | 3/122 | 75/28943  | 0.00396 | 0.040524 | 0.028506 | 14678/14870/110355                          | 3 |
| turquoise | GO:0009898 | CC | cytoplasmic side of plasma membrane                                       | 4/121 | 182/28804 | 0.00738 | 0.040861 | 0.027602 | 14678/16653/14688/268566                    | 4 |
| turquoise | GO:0016032 | BP | viral process                                                             | 6/122 | 355/28943 | 0.00401 | 0.040918 | 0.028783 | 18673/18521/98415/229663/110355/271457      | 6 |
| turquoise | GO:0007189 | BP | adenylate cyclase-activating G protein-coupled receptor signaling pathway | 4/122 | 153/28943 | 0.00407 | 0.04135  | 0.029087 | 14678/12652/11512/110355                    | 4 |
| turquoise | GO:0046847 | BP | filopodium assembly                                                       | 3/122 | 76/28943  | 0.00411 | 0.041555 | 0.029231 | 14432/14086/271457                          | 3 |
| turquoise | GO:0044389 | MF | ubiquitin-like protein ligase binding                                     | 6/121 | 332/28404 | 0.00304 | 0.041633 | 0.033293 | 18521/12928/107260/217692/110355/68585      | 6 |
| turquoise | GO:0003779 | MF | actin binding                                                             | 7/121 | 447/28404 | 0.0031  | 0.041633 | 0.033293 | 54366/12385/14086/217692/51810/18810/13821  | 7 |
| turquoise | GO:0045296 | MF | cadherin binding                                                          | 3/121 | 69/28404  | 0.00322 | 0.041633 | 0.033293 | 54366/12385/68585                           | 3 |
| turquoise | GO:0030674 | MF | protein-macromolecule adaptor activity                                    | 6/121 | 336/28404 | 0.00323 | 0.041633 | 0.033293 | 14688/14086/12928/210274/30957/14388        | 6 |
| turquoise | GO:0045056 | BP | transcytosis                                                              | 2/122 | 23/28943  | 0.00421 | 0.042076 | 0.029597 | 16971/271457                                | 2 |
| turquoise | GO:0048670 | BP | regulation of collateral sprouting                                        | 2/122 | 23/28943  | 0.00421 | 0.042076 | 0.029597 | 18377/16971                                 | 2 |
| turquoise | GO:0140354 | BP | lipid import into cell                                                    | 2/122 | 23/28943  | 0.00421 | 0.042076 | 0.029597 | 14077/384783                                | 2 |
| turquoise | GO:0005901 | CC | caveola                                                                   | 3/121 | 96/28804  | 0.00778 | 0.042323 | 0.02859  | 12385/98660/110355                          | 3 |
| turquoise | GO:0030125 | CC | clathrin vesicle coat                                                     | 2/121 | 32/28804  | 0.00799 | 0.04277  | 0.028892 | 217030/73094                                | 2 |
| turquoise | GO:0098839 | CC | postsynaptic density membrane                                             | 3/121 | 99/28804  | 0.00846 | 0.044531 | 0.030082 | 14811/319504/68585                          | 3 |
| turquoise | GO:0014075 | BP | response to amine                                                         | 2/122 | 24/28943  | 0.00458 | 0.045236 | 0.03182  | 14811/19049                                 | 2 |
| turquoise | GO:0032930 | BP | positive regulation of superoxide anion generation                        | 2/122 | 24/28943  | 0.00458 | 0.045236 | 0.03182  | 14678/14870                                 | 2 |
| turquoise | GO:0051481 | BP | negative regulation of cytosolic calcium ion concentration                | 2/122 | 24/28943  | 0.00458 | 0.045236 | 0.03182  | 98660/16971                                 | 2 |
| turquoise | GO:0010977 | BP | negative regulation of neuron projection development                      | 4/122 | 160/28943 | 0.00477 | 0.046925 | 0.033008 | 11512/245537/16971/68585                    | 4 |
| turquoise | GO:0090257 | BP | regulation of muscle system process                                       | 5/122 | 258/28943 | 0.00482 | 0.047201 | 0.033202 | 12652/238871/98660/110355/28185             | 5 |
| turquoise | GO:0043434 | BP | response to peptide hormone                                               | 6/122 | 369/28943 | 0.00483 | 0.047201 | 0.033202 | 14678/384783/11512/12928/98415/110355       | 6 |
| turquoise | GO:0007202 | BP | activation of phospholipase C activity                                    | 2/122 | 25/28943  | 0.00496 | 0.047855 | 0.033662 | 12034/18673                                 | 2 |

|           |            |    |                                                                    |       |           |         |          |          |                                       |   |
|-----------|------------|----|--------------------------------------------------------------------|-------|-----------|---------|----------|----------|---------------------------------------|---|
| turquoise | GO:0046628 | BP | positive regulation of insulin receptor signaling pathway          | 2/122 | 25/28943  | 0.00496 | 0.047855 | 0.033662 | 14678/98415                           | 2 |
| turquoise | GO:0051457 | BP | maintenance of protein location in nucleus                         | 2/122 | 25/28943  | 0.00496 | 0.047855 | 0.033662 | 51810/110355                          | 2 |
| turquoise | GO:0099003 | BP | vesicle-mediated transport in synapse                              | 5/122 | 260/28943 | 0.00498 | 0.047855 | 0.033662 | 20910/245537/271457/116838/16443      | 5 |
| turquoise | GO:0019058 | BP | viral life cycle                                                   | 5/122 | 261/28943 | 0.00506 | 0.048443 | 0.034076 | 18673/18521/98415/110355/271457       | 5 |
| turquoise | GO:0035637 | BP | multicellular organismal signaling                                 | 4/122 | 163/28943 | 0.00509 | 0.048577 | 0.03417  | 16490/238871/319504/18810             | 4 |
| turquoise | GO:0051348 | BP | negative regulation of transferase activity                        | 5/122 | 262/28943 | 0.00514 | 0.048851 | 0.034363 | 14870/384783/100502698/51810/18810    | 5 |
| turquoise | GO:0005834 | CC | heterotrimeric G-protein complex                                   | 2/121 | 35/28804  | 0.00951 | 0.049247 | 0.033267 | 14678/14688                           | 2 |
| turquoise | GO:0046879 | BP | hormone secretion                                                  | 6/122 | 375/28943 | 0.00522 | 0.049454 | 0.034787 | 18641/12652/384783/16971/116838/16443 | 6 |
| turquoise | GO:0016082 | BP | synaptic vesicle priming                                           | 2/122 | 26/28943  | 0.00536 | 0.049847 | 0.035064 | 20910/116838                          | 2 |
| turquoise | GO:0039529 | BP | RIG-I signaling pathway                                            | 2/122 | 26/28943  | 0.00536 | 0.049847 | 0.035064 | 12034/18673                           | 2 |
| turquoise | GO:0071880 | BP | adenylate cyclase-activating adrenergic receptor signaling pathway | 2/122 | 26/28943  | 0.00536 | 0.049847 | 0.035064 | 14678/12652                           | 2 |
| turquoise | GO:0097164 | BP | ammonium ion metabolic process                                     | 2/122 | 26/28943  | 0.00536 | 0.049847 | 0.035064 | 14811/11669                           | 2 |
| turquoise | GO:0099010 | BP | modification of postsynaptic structure                             | 2/122 | 26/28943  | 0.00536 | 0.049847 | 0.035064 | 235604/16443                          | 2 |
| turquoise | GO:0008088 | BP | axo-dendritic transport                                            | 3/122 | 84/28943  | 0.00543 | 0.049952 | 0.035137 | 117197/51810/30957                    | 3 |
| turquoise | GO:0060191 | BP | regulation of lipase activity                                      | 3/122 | 84/28943  | 0.00543 | 0.049952 | 0.035137 | 12034/18673/16971                     | 3 |
| turquoise | GO:1900076 | BP | regulation of cellular response to insulin stimulus                | 3/122 | 84/28943  | 0.00543 | 0.049952 | 0.035137 | 14678/98415/110355                    | 3 |
