# Supplementary material for: The Chronic Effects of a Single Low-Intensity Blast Exposure on Phosphoproteome Networks and Cognitive Function Influenced by Mutant Tau Overexpression
Source: MDPI journal article supplement (doi:10.3390/ijms25063338), 2024-03-15
Supplement: s1 [file s1]

**Supplementary Table S2. Cogwall data**

| Group           | 0-24hrs |           |          | 25-48hrs |           |          |
|-----------------|---------|-----------|----------|----------|-----------|----------|
|                 | Left D1 | Middle D1 | Right D1 | Left D2  | Middle D2 | Right D2 |
| Blast NC 1      | 320     | 137       | 85       | 562      | 58        | 15       |
| Blast NC 2      | 627     | 240       | 91       | 1000     | 35        | 14       |
| Blast NC 3      | 385     | 124       | 90       | 576      | 64        | 27       |
| Blast NC 4      | 463     | 82        | 58       | 655      | 22        | 12       |
| Blast NC 5      | 308     | 86        | 91       | 721      | 52        | 22       |
| Blast NC 6      | 384     | 70        | 29       | 666      | 28        | 12       |
| Blast rTg4510 1 | 695     | 189       | 62       | 830      | 103       | 44       |
| Blast rTg4510 2 | 670     | 112       | 116      | 920      | 66        | 41       |
| Blast rTg4510 3 | 242     | 95        | 67       | 450      | 97        | 36       |
| Blast rTg4510 4 | 1095    | 255       | 166      | 1728     | 198       | 374      |
| Blast rTg4510 5 | 375     | 153       | 92       | 740      | 109       | 12       |
| Sham NC 1       | 306     | 159       | 94       | 610      | 43        | 31       |
| Sham NC 2       | 751     | 134       | 176      | 995      | 102       | 87       |
| Sham NC 3       | 509     | 132       | 105      | 761      | 31        | 16       |
| Sham NC 4       | 503     | 102       | 74       | 690      | 69        | 12       |
| Sham rTg4510 1  | 345     | 175       | 109      | 755      | 84        | 21       |
| Sham rTg4510 2  | 585     | 183       | 99       | 879      | 162       | 31       |
| Sham rTg4510 3  | 660     | 174       | 71       | 970      | 44        | 15       |
| Sham rTg4510 4  | 965     | 241       | 127      | 997      | 117       | 68       |
| Sham rTg4510 5  | 581     | 186       | 98       | 855      | 73        | 30       |

| Learning Index (cumulative) | Learning Level |
|-----------------------------|----------------|
| 0.589266932                 | 5              |
| 0.597600658                 | 5              |
| 0.441660639                 | 4              |
| 0.365651183                 | 3              |
| 0.543733385                 | 4              |
| 0.296623441                 | 3              |
| 0.229734204                 | 2              |
| 0.299421196                 | 3              |
| 0.345719478                 | 3              |
| 0.058017667                 | 1              |
| 0.509254056                 | 4              |
| 0.688813566                 | 5              |
| 0.265097626                 | 3              |
| 0.519052106                 | 4              |
| 0.308292694                 | 3              |
| 0.658834621                 | 5              |
| 0.290444404                 | 3              |
| 0.426762023                 | 4              |
| 0.23910927                  | 2              |
| 0.441616084                 | 4              |
