# Supplementary material for: The Chronic Effects of a Single Low-Intensity Blast Exposure on Phosphoproteome Networks and Cognitive Function Influenced by Mutant Tau Overexpression
Source: MDPI journal article supplement (doi:10.3390/ijms25063338), 2024-03-15
Supplement: s1 [file s1]

## Supplementary Table S1b- MS2 significant phosphopeptides (sheet = 'Non-carrier sig LIB vs sham')

| PG.Genes | PG.ProteinGroups | PG.ProteinDescriptions                                        | EG.PrecursorId                                                                     | Expression Ratio | LOG2FC  | pvalue | (-) Log10 p value |
|----------|------------------|---------------------------------------------------------------|------------------------------------------------------------------------------------|------------------|---------|--------|-------------------|
| Bsn      | O88737           | Protein bassoon                                               | _VLGGQLQYGS[Phospho (STY)]FTDLR_2                                                  | 0.5899           | -0.7614 | 0.0004 | 3.4300            |
| Elav1    | P70372           | ELAV-like protein 1                                           | _VLVDQTTGLSR_2                                                                     | 1.3599           | 0.4435  | 0.0004 | 3.4217            |
| Atp6v1g1 | Q9CR51           | V-type proton ATPase subunit G 1                              | _[Acetyl (Protein N-term)]ASQSQGIQQLQAEKR_3                                        | 2.3902           | 1.2571  | 0.0006 | 3.2594            |
| S100a13  | P97352           | Protein S100-A13                                              | _KGS[Phospho (STY)]LNINEFK_2                                                       | 0.6593           | -0.6009 | 0.0008 | 3.1109            |
| Uqcrc1   | Q9CZ13           | Cytochrome b-c1 complex subunit 1, mitochondrial              | _NNGAGVFLEHLAFK_2                                                                  | 0.5814           | -0.7825 | 0.0009 | 3.0228            |
| Rasa3    | Q60790           | Ras GTPase-activating protein 3                               | _T[Phospho (STY)]RYGSQEHPIGDK_3                                                    | 0.6164           | -0.6980 | 0.0010 | 3.0119            |
| Lrrc7    | Q80TE7           | Leucine-rich repeat-containing protein 7                      | _GVIAIKS[Phospho (STY)]TER_2                                                       | 0.2314           | -2.1113 | 0.0013 | 2.8848            |
| Dlg2     | Q91XM9           | Disks large homolog 2                                         | _QPS[Phospho (STY)]VTLQR_2                                                         | 0.1803           | -2.4719 | 0.0016 | 2.7913            |
| Nsf11c   | Q9CZ44           | NSF11 cofactor p47                                            | _SYQDPSNAQFLESIR_2                                                                 | 1.5537           | 0.6357  | 0.0017 | 2.7772            |
| Syngap1  | F6SEU4           | Ras/Rap GTPase-activating protein SynGAP                      | _S[Phospho (STY)]VSM[Oxidation (M)]LDLQGDGPGGR_2                                   | 0.1824           | -2.4550 | 0.0018 | 2.7353            |
| Uba1     | Q02053           | Ubiquitin-like modifier-activating enzyme 1                   | _SLPASLVEPDFVM[Oxidation (M)]TDFAK_2                                               | 0.7045           | -0.5052 | 0.0020 | 2.6997            |
| Iqsec1   | Q8R052           | IQ motif and SEC7 domain-containing protein 1                 | _SALSSS[Phospho (STY)]LRDLSEAGK_2                                                  | 0.4005           | -1.3202 | 0.0022 | 2.6587            |
| Tesk1    | O70146           | Dual specificity testis-specific protein kinase 1             | _S[Phospho (STY)]LPSSPELPR_2                                                       | 0.0803           | -3.6384 | 0.0023 | 2.6396            |
| Actr1b   | Q8R5C5           | Beta-centractin                                               | _TLFSNIVLSGGSTLFK_2                                                                | 0.7544           | -0.4066 | 0.0024 | 2.6242            |
| Actr2    | P61161           | Actin-related protein 2                                       | _HIVLSGGSTM[Oxidation (M)]YPGLPSR_2                                                | 0.6066           | -0.7211 | 0.0024 | 2.6222            |
| Npy      | P57774           | Pro-neuropeptide Y                                            | _SSPETLSOLL[Oxidation (M)]KES[Phospho (STY)]TENAPR_3                               | 0.1513           | -2.7244 | 0.0025 | 2.6032            |
| Ccnk     | O88874           | Cyclin-K                                                      | _AVVVS[Phospho (STY)]PKKEENK_2                                                     | 0.7232           | -0.4676 | 0.0026 | 2.5817            |
| Pacs1    | Q8K212           | Phosphofurin acidic cluster sorting protein 1                 | _YSSFTLDSAWR_2                                                                     | 2.3509           | 1.2332  | 0.0026 | 2.5807            |
| Nefn     | P19246           | Neurofilament heavy polypeptide                               | _AVAS[Phospho (STY)]EETPAK_2                                                       | 4.6469           | 2.2163  | 0.0027 | 2.5645            |
| Iqsec1   | Q8R052           | IQ motif and SEC7 domain-containing protein 1                 | _ETLGIYER_2                                                                        | 0.3862           | -1.3727 | 0.0027 | 2.5618            |
| Anp32a   | Q35381           | Acidic leucine-rich nuclear phosphoprotein 32 family member A | _NRT[Phospho (STY)]PSDVK_2                                                         | 0.1136           | -3.1374 | 0.0030 | 2.5295            |
| Igfb8    | Q8R366           | Immunoglobulin superfamily member 8                           | _HAAYSVGWEM[Oxidation (M)]APAGAPGGR_3                                              | 0.3995           | -1.3237 | 0.0031 | 2.5088            |
| Agf2     | Q80WC7           | Arf-GAP domain and FG repeat-containing protein 2             | _ELGGC[Carbamidomethyl (C)]SQAGNR_2                                                | 0.7590           | -0.3978 | 0.0033 | 2.4856            |
| Uqcrc1   | Q9CZ13           | Cytochrome b-c1 complex subunit 1, mitochondrial              | _JQEVDAQM[Oxidation (M)]LR_2                                                       | 1.7506           | 0.8078  | 0.0034 | 2.4722            |
| Zfr      | O88532           | Zinc finger RNA-binding protein                               | _DS[Phospho (STY)]DGVDFEAEKG_2                                                     | 0.1873           | -2.4164 | 0.0036 | 2.4454            |
| Dcl1     | Q9JLM8           | Serine/threonine-protein kinase DCL1                          | _VC[Carbamidomethyl (C)]SS[Phospho (STY)]M[Oxidation (M)]DENDGPGEDELGRR_3          | 0.4018           | -1.3153 | 0.0037 | 2.4324            |
| Pic12    | Q8K394           | Inactive phospholipase C-like protein 2                       | _S[Phospho (STY)]LEAIPK_2                                                          | 0.4221           | -1.2443 | 0.0038 | 2.4223            |
| Uqcrc1   | Q9CZ13           | Cytochrome b-c1 complex subunit 1, mitochondrial              | _EVESIGAHLNAYSTR_2                                                                 | 1.5011           | 0.5860  | 0.0040 | 2.4032            |
| Fam114a2 | Q8VE88           | Protein FAM114A2                                              | _AETSLGIPS[Phospho (STY)]PTEIAEVK_2                                                | 0.2880           | -1.7958 | 0.0043 | 2.3637            |
| Dync2i2  | Q5U4F6           | Cytoplasmic dynein 2 intermediate chain 2                     | _VGS[Phospho (STY)]AGAAAAAGGAGGAER_2                                               | 0.5210           | -0.9407 | 0.0050 | 2.3009            |
| Etf1     | Q99LC5           | Electron transfer flavoprotein subunit alpha, mitochondrial   | _GLLPEELTPULETK_2                                                                  | 0.7040           | -0.5063 | 0.0050 | 2.3002            |
| Map7d2   | A2AG50           | MAP7 domain-containing protein 2                              | _RLSS[Phospho (STY)]PVK_2                                                          | 0.1281           | -2.9650 | 0.0053 | 2.2790            |
| Ap2a2    | P17427           | AP-2 complex subunit alpha-2                                  | _YGGTFQNVSVK_2                                                                     | 0.4839           | -1.0472 | 0.0053 | 2.2751            |
| Myh10    | Q61879           | Myosin-10                                                     | _DLEAQIEAANK_2                                                                     | 0.4569           | -1.1300 | 0.0054 | 2.2713            |
| Tppp     | Q7TQD2           | Tubulin polymerization-promoting protein                      | _DC[Carbamidomethyl (C)]HVIDGK_2                                                   | 0.2662           | -1.9095 | 0.0054 | 2.2685            |
| Elf4g1   | Q6NZJ6           | Eukaryotic translation initiation factor 4 gamma 1            | _EATLPPVS[Phospho (STY)]PPK_2                                                      | 0.1657           | -2.5933 | 0.0056 | 2.2531            |
| Atp5md   | Q78IK2           | ATP synthase membrane subunit DAPIT, mitochondrial            | _AGAESDGGQFTGK_2                                                                   | 0.7086           | -0.4970 | 0.0056 | 2.2503            |
| Acin1    | Q9JIX8           | Apoptotic chromatin condensation inducer in the nucleus       | _GVQAGNS[Phospho (STY)]DTEGGQPGRK_2                                                | 0.5708           | -0.8089 | 0.0057 | 2.2455            |
| Coro1c   | Q9WUM4           | Coronin-1C                                                    | _VTWDSFFC[Carbamidomethyl (C)]AVNPR_2                                              | 0.5208           | -0.9412 | 0.0058 | 2.2329            |
| Rbm11    | Q91VM5           | RNA binding motif protein, X-linked-like-1                    | _VEQATKPS[Phospho (STY)]FESGR_2                                                    | 4.5335           | 2.1806  | 0.0061 | 2.2165            |
| Cdc42bpb | Q7TT50           | Serine/threonine-protein kinase MRCK beta                     | _SM[Oxidation (M)]S[Phospho (STY)]DPDQDFDKEPDSSTK_2                                | 0.6080           | -0.7180 | 0.0061 | 2.2112            |
| Fasn     | P19096           | Fatty acid synthase                                           | _TLEAVQDLEQGR_2                                                                    | 0.5935           | -0.7526 | 0.0062 | 2.2044            |
| Slc39a6  | Q8C145           | Zinc transporter ZIP6                                         | _YDSQLS[Phospho (STY)]SNEEK_2                                                      | 0.5202           | -0.9429 | 0.0064 | 2.1932            |
| Kcnb2    | A6H8H5           | Potassium voltage-gated channel subfamily B member 2          | _S[Phospho (STY)]M[Oxidation (M)]ELIDVAEK_2                                        | 0.5139           | -0.9604 | 0.0065 | 2.1895            |
| Psma5    | Q922U1           | Proteasome subunit alpha type-5                               | _LFQVEYAEAIK_2                                                                     | 0.5311           | -0.9129 | 0.0065 | 2.1888            |
| Atp1a2   | Q6PIE5           | Sodium/potassium-transporting ATPase subunit alpha-2          | _YQLSIHER_2                                                                        | 0.7152           | -0.4835 | 0.0067 | 2.1750            |
| Ctnnd1   | P30999           | Catenin delta-1                                               | _S[Phospho (STY)]M[Oxidation (M)]GYDDLIDYGM[Oxidation (M)]M[Oxidation (M)]SDYGAR_2 | 0.4032           | -1.3105 | 0.0069 | 2.1629            |
| Ola1     | Q9CZ30           | Obg-like ATPase 1                                             | _JPAFLNVVDIAGLVK_2                                                                 | 2.3226           | 1.2157  | 0.0070 | 2.1552            |
| Apc2     | Q9Z1K7           | Adenomatous polyposis coli protein 2                          | _RGS[Phospho (STY)]DGEARPLR_3                                                      | 0.4891           | -1.0318 | 0.0071 | 2.1510            |
| Psmb4    | P99026           | Proteasome subunit beta type-4                                | _VNDSTM[Oxidation (M)]LGASGDYADFQYLK_2                                             | 1.3758           | 0.4602  | 0.0071 | 2.1485            |
| Cltc     | Q68FD5           | Clathrin heavy chain 1                                        | _VGYTPDWIFLLR_2                                                                    | 0.4690           | -1.0924 | 0.0072 | 2.1429            |
| Aldoa    | P05064           | Fructose-bisphosphate aldolase A                              | _VNPC[Carbamidomethyl (C)]GGVILFHETLYQK_2                                          | 0.7110           | -0.4922 | 0.0074 | 2.1335            |
| Ubqln2   | Q9QZM0           | Ubiquilin-2                                                   | _NPEISHLLNPNIM[Oxidation (M)]R_3                                                   | 0.6059           | -0.7228 | 0.0074 | 2.1308            |
| Gpd1l    | Q3ULJ0           | Glycerol-3-phosphate dehydrogenase 1-like protein             | _FC[Carbamidomethyl (C)]ETTIGSK_2                                                  | 2.2083           | 1.1429  | 0.0075 | 2.1267            |
| Grin2b   | Q01097           | Glutamate receptor ionotropic, NMDA 2B                        | _QHSY[Phospho (STY)]DTFVLDLQKEEAALAPR_3                                            | 0.6034           | -0.7289 | 0.0075 | 2.1230            |
| Dnm1l    | Q8K1M6           | Dynamin-1-like protein                                        | _IC[Carbamidomethyl (C)]YIFHETFGR_2                                                | 1.4426           | 0.5286  | 0.0077 | 2.1163            |
| Cadps    | Q80TJ1           | Calcium-dependent secretion activator 1                       | _LQKEEEER_2                                                                        | 1.5339           | 0.6172  | 0.0078 | 2.1079            |
| Pclo     | Q9QXY7           | Protein piccolo                                               | _TSVAQITLEDAGAAIAAAEAVQLR_3                                                        | 2.3104           | 1.2081  | 0.0078 | 2.1053            |

|          |         |                                                                 |                                                                                                |        |         |        |        |
|----------|---------|-----------------------------------------------------------------|------------------------------------------------------------------------------------------------|--------|---------|--------|--------|
| Trappc9  | Q3U0M1  | Trafficking protein particle complex subunit 9                  | _VESRPTNPS[Phospho (STY)]EGS[Phospho (STY)]KTGDLGHVK_3                                         | 0.3473 | -1.5256 | 0.0079 | 2.1001 |
| Sptan1   | P16546  | Spectrin alpha chain, non-erythrocytic 1                        | _HALLEADVAAHQDR_3                                                                              | 1.5510 | 0.6332  | 0.0081 | 2.0934 |
| Prkcg    | P63318  | Protein kinase C gamma type                                     | _GSDELYAIK_2                                                                                   | 0.6141 | -0.7035 | 0.0082 | 2.0856 |
| Rbm14    | Q8C2Q3  | RNA-binding protein 14                                          | _IFVGNVSAAC[Carbamidomethyl (C)]TJSQELR_2                                                      | 0.5845 | -0.7747 | 0.0086 | 2.0672 |
| Rbmxl1   | Q91VM5  | RNA binding motif protein, X-linked-like-1                      | _RDVYLS[Phospho (STY)]PR_2                                                                     | 0.4101 | -1.2861 | 0.0086 | 2.0667 |
| Cap2     | Q9CYT6  | Adenylyl cyclase-associated protein 2                           | _LINSM[Oxidation (M)]VAFELK_2                                                                  | 0.6677 | -0.5826 | 0.0087 | 2.0590 |
| Hdgf     | P51859  | Hepatoma-derived growth factor                                  | _GFSGELWEIENNPTVK_2                                                                            | 1.7512 | 0.8083  | 0.0087 | 2.0582 |
| Ndrg2    | Q9QYGO  | Protein NDRG2                                                   | _S[Phospho (STY)]RT[Phospho (STY)]LSSSESGTLPSGPPGHTM[Oxidation (M)]EVSC[Carbamidomethyl (C)]_3 | 0.1261 | -2.9874 | 0.0089 | 2.0521 |
| Ldha     | P06151  | L-lactate dehydrogenase A chain                                 | _DLADELALVDVM[Oxidation (M)]EDKLK_2                                                            | 0.7282 | -0.4577 | 0.0089 | 2.0503 |
| Bud13    | Q8R149  | BUD13 homolog                                                   | _HDLDS[Phospho (STY)]PPRK_3                                                                    | 1.7534 | 0.8101  | 0.0092 | 2.0381 |
| Etfb     | Q9DCW4  | Electron transfer flavoprotein subunit beta                     | _ELIAVSC[Carbamidomethyl (C)]GPSQC[Carbamidomethyl (C)]QETIR_2                                 | 1.5218 | 0.6058  | 0.0092 | 2.0363 |
| Scg2     | Q03517  | Secretogranin-2                                                 | _VAWIPDVESR_2                                                                                  | 1.3358 | 0.4178  | 0.0094 | 2.0273 |
| Prkcg    | P63318  | Protein kinase C gamma type                                     | _SVPSLC[Carbamidomethyl (C)]GVDHTER_2                                                          | 0.7357 | -0.4428 | 0.0094 | 2.0266 |
| Ywhag    | P61982  | 14-3-3 protein gamma                                            | _NC[Carbamidomethyl (C)]SETQYESK_2                                                             | 1.3070 | 0.3862  | 0.0094 | 2.0257 |
| Sptbn1   | Q62261  | Spectrin beta chain, non-erythrocytic 1                         | _QAEAFLNQQLVLAHTEM[Oxidation (M)]PTTGEGAAAIK_3                                                 | 0.6973 | -0.5201 | 0.0097 | 2.0129 |
| Cct6a    | P80317  | T-complex protein 1 subunit zeta                                | _QADLYISEGLHPR_2                                                                               | 0.7361 | -0.4421 | 0.0099 | 2.0040 |
| Slc20a2  | Q80UP8  | Sodium-dependent phosphate transporter 2                        | _AS[Phospho (STY)]DESLRK_2                                                                     | 2.9919 | 1.5811  | 0.0099 | 2.0039 |
| Map6d1   | Q14B89  | MAP6 domain-containing protein 1                                | _TVVLPVPGDADAADVATTSR_2                                                                        | 2.1293 | 1.0903  | 0.0100 | 2.0019 |
| Myh10    | Q61879  | Myosin-10                                                       | _LVQEQGSHSK_2                                                                                  | 1.9379 | 0.9545  | 0.0100 | 1.9992 |
| Eef1a1   | P10126  | Elongation factor 1-alpha 1                                     | _M[Oxidation (M)]DSTEPPYSQK_2                                                                  | 1.3028 | 0.3816  | 0.0101 | 1.9960 |
| Cntn2    | Q61330  | Contactin-2                                                     | _TTGPGDGIAPAEVHIVR_3                                                                           | 2.2086 | 1.1431  | 0.0103 | 1.9876 |
| Gstm5    | P48774  | Glutathione S-transferase Mu 5                                  | _SM[Oxidation (M)]VLGYWDIR_2                                                                   | 0.7055 | -0.5033 | 0.0103 | 1.9855 |
| Gng3     | P63216  | Guanine nucleotide-binding protein G(i)(G)/G(o) subunit gamma-3 | _IEASLC[Carbamidomethyl (C)]R_2                                                                | 0.6626 | -0.5937 | 0.0104 | 1.9819 |
| Dnajc21  | E9QBD0  | DnaJ homolog subfamily C member 21                              | _YEKEFGDGS[Phospho (STY)]DENEVEDQEPR_3                                                         | 2.1021 | 1.0719  | 0.0106 | 1.9745 |
| Gpd1l    | Q3ULJ0  | Glycerol-3-phosphate dehydrogenase 1-like protein               | _KLTDIINNDHENVK_3                                                                              | 1.7205 | 0.7828  | 0.0107 | 1.9724 |
| Fam171b  | Q14CH0  | Protein FAM171B                                                 | _KSTVEDFEANTS[Phospho (STY)]PTK_2                                                              | 0.4105 | -1.2845 | 0.0107 | 1.9687 |
| Tuba3a   | P05214  | Tubulin alpha-3 chain                                           | _LGQIVSSITASLR_2                                                                               | 0.5948 | -0.7494 | 0.0108 | 1.9677 |
| Map11c3a | Q91VR7  | Microtubule-associated proteins 1A/1B light chain 3A            | _FLVPDHHNM[Oxidation (M)]SELVK_3                                                               | 1.3130 | 0.3929  | 0.0110 | 1.9575 |
| Frrs1l   | B1AXV0  | DOMON domain-containing protein FRRS1L                          | _NPARDEEGVFENR_3                                                                               | 0.7125 | -0.4890 | 0.0113 | 1.9480 |
| Srrm3    | Q80WV7  | Serine/arginine repetitive matrix protein 3                     | _BRDS[Phospho (STY)]PSFMEPR_3                                                                  | 0.6721 | -0.5733 | 0.0114 | 1.9430 |
| Map2     | P20357  | Microtubule-associated protein 2                                | _IDLSHVTSK_2                                                                                   | 1.5723 | 0.6529  | 0.0116 | 1.9370 |
| Myh10    | Q61879  | Myosin-10                                                       | _IAEC[Carbamidomethyl (C)]SSQLAEEEEKAK_2                                                       | 1.6637 | 0.7344  | 0.0118 | 1.9267 |
| Dnm1     | P39053  | Dynamin-1                                                       | _LREEM[Oxidation (M)]ER_2                                                                      | 1.8929 | 0.9206  | 0.0119 | 1.9255 |
| Dmtn     | Q9WV69  | Dematin                                                         | _VFAM[Oxidation (M)]S[Phospho (STY)]PEEFGK_2                                                   | 0.5778 | -0.7914 | 0.0122 | 1.9149 |
| Rab3c    | P62823  | Ras-related protein Rab-3C                                      | _LVDIIC[Carbamidomethyl (C)]DK_2                                                               | 0.3929 | -1.3476 | 0.0122 | 1.9134 |
| Slc25a3  | Q8VEM8  | Phosphate carrier protein, mitochondrial                        | _EEGLNAFYK_2                                                                                   | 0.6488 | -0.6241 | 0.0124 | 1.9083 |
| Shisa9   | Q9CZN4  | Protein shisa-9                                                 | _AVGNSDGDWAVATLKS[Phospho (STY)]PK_3                                                           | 2.8232 | 1.4973  | 0.0127 | 1.8977 |
| Dock9    | Q8BIK4  | Dedicator of cytokinesis protein 9                              | _GSLISTDS[Phospho (STY)]GNSLPDRNPEK_3                                                          | 0.6760 | -0.5648 | 0.0127 | 1.8961 |
| Rps26    | P62855  | 40S ribosomal protein S26                                       | _DISEASVFDVAVLPK_2                                                                             | 1.7415 | 0.8003  | 0.0128 | 1.8937 |
| Clip3    | B9EHT4  | CAP-Gly domain-containing linker protein 3                      | _SPSS[Phospho (STY)]PSLSGLQQR_2                                                                | 0.3997 | -1.3231 | 0.0128 | 1.8930 |
| Prkacb   | P68181  | cAMP-dependent protein kinase catalytic subunit beta            | _ILQAVEFPFLVR_2                                                                                | 0.5713 | -0.8076 | 0.0128 | 1.8912 |
| Pygbl    | Q8CI94  | Glycogen phosphorylase, brain form                              | _QAVDQISSGFFSPK_2                                                                              | 1.5682 | 0.6491  | 0.0129 | 1.8894 |
| Sorbs1   | Q62417  | Sorbin and SH3 domain-containing protein 1                      | _YS[Phospho (STY)]FSDDTK_2                                                                     | 1.5923 | 0.6711  | 0.0129 | 1.8881 |
| Aldh1l1  | Q8ROY6  | Cytosolic 10-formyltetrahydrofolate dehydrogenase               | _ILPNVPEVEDSTDFFK_2                                                                            | 0.7425 | -0.4295 | 0.0131 | 1.8825 |
| Sh3gl1   | Q62419  | Endophilin-A2                                                   | _ITAS[Phospho (STY)]JSFR_2                                                                     | 1.5095 | 0.5941  | 0.0131 | 1.8820 |
| Ank2     | Q8C8R3  | Ankyrin-2                                                       | _AEGFES[Phospho (STY)]ESEDGATKPK_2                                                             | 0.5358 | -0.9001 | 0.0131 | 1.8819 |
| Dnm1l    | Q8K1M6  | Dynamin-1-like protein                                          | _RLEEPSLR_2                                                                                    | 1.6464 | 0.7193  | 0.0132 | 1.8801 |
| Rpsa     | P14206  | 40S ribosomal protein SA                                        | _LLVVTDPK_2                                                                                    | 1.3554 | 0.4387  | 0.0132 | 1.8785 |
| Cltc     | Q68FD5  | Clathrin heavy chain 1                                          | _LLEM[Oxidation (M)]NLM[Oxidation (M)]HAPQVADAILGNQM[Oxidation (M)]FTHYDR_4                    | 0.5706 | -0.8095 | 0.0132 | 1.8782 |
| Ppig     | A2AR02  | Peptidyl-prolyl cis-trans isomerase G                           | _HMI[Oxidation (M)]S[Phospho (STY)]ES[Phospho (STY)]PNRKVEK_3                                  | 1.5762 | 0.6565  | 0.0138 | 1.8614 |
| Plec     | Q9QXS1  | Plectin                                                         | _TEVVETQVYTEETR_3                                                                              | 0.5994 | -0.7385 | 0.0138 | 1.8608 |
| Actn1    | Q177PR4 | Alpha-actinin-1                                                 | _DGLGFC[Carbamidomethyl (C)]ALIHHR_2                                                           | 0.5628 | -0.8292 | 0.0141 | 1.8518 |
| Rack1    | P68040  | Receptor of activated protein C kinase 1                        | _FSPNSSNPVSC[Carbamidomethyl (C)]GWDK_2                                                        | 1.3289 | 0.4102  | 0.0142 | 1.8470 |
| Pgam1    | Q9DBJ1  | Phosphoglycerate mutase 1                                       | _KAM[Oxidation (M)]EAVAAQGGK_2                                                                 | 1.5714 | 0.6521  | 0.0143 | 1.8458 |
| Pitpnc1  | Q8K4R4  | Cytoplasmic phosphatidylinositol transfer protein 1             | _KKS[Phospho (STY)]JAPETLTPDPEK_3                                                              | 4.0070 | 2.0025  | 0.0143 | 1.8453 |
| Atp6v1e1 | P50518  | V-type proton ATPase subunit E 1                                | _IMEYYEK_2                                                                                     | 1.8198 | 0.8638  | 0.0144 | 1.8412 |
| Mia3     | Q8BI84  | Transport and Golgi organization protein 1 homolog              | _DETAQTPGS[Phospho (STY)]GEAVLSK_2                                                             | 0.3974 | -1.3312 | 0.0146 | 1.8362 |
| Kcnj3    | P63250  | G protein-activated inward rectifier potassium channel 1        | _ERHNS[Phospho (STY)]VEC[Carbamidomethyl (C)]LDGLDDISTK_3                                      | 0.5129 | -0.9632 | 0.0148 | 1.8306 |
| U2surp   | Q6NV83  | U2 snRNP-associated SURP motif-containing protein               | _VKS[Phospho (STY)]PS[Phospho (STY)]PK_2                                                       | 1.6537 | 0.7257  | 0.0149 | 1.8261 |
| Myh10    | Q61879  | Myosin-10                                                       | _LDPHLVDQLR_2                                                                                  | 0.6038 | -0.7279 | 0.0152 | 1.8194 |
| Caap1    | Q8VDY9  | Caspase activity and apoptosis inhibitor 1                      | _SVNEILGLAESS[Phospho (STY)]PKEPK_2                                                            | 2.4994 | 1.3216  | 0.0154 | 1.8132 |
| Ywhae    | P62259  | 14-3-3 protein epsilon                                          | _M[Oxidation (M)]KGDYHR_2                                                                      | 0.1924 | -2.3780 | 0.0155 | 1.8109 |

|                   |                      |                                                                                                        |                                                                      |        |         |        |        |
|-------------------|----------------------|--------------------------------------------------------------------------------------------------------|----------------------------------------------------------------------|--------|---------|--------|--------|
| Pde1b             | Q01065               | Calcium/calmodulin-dependent 3',5'-cyclic nucleotide phosphodiesterase 1B                              | _TIVFELLTR_2                                                         | 0.7203 | -0.4734 | 0.0155 | 1.8090 |
| Rps20             | P60867               | 40S ribosomal protein S20                                                                              | _DTGKTPVEVEIAHR_3                                                    | 1.3186 | 0.3990  | 0.0156 | 1.8065 |
| Map6              | Q77SJ2               | Microtubule-associated protein 6                                                                       | _M[Oxidation (M)]VHETYSQAQFK_3                                       | 0.6237 | -0.6811 | 0.0157 | 1.8055 |
| Fmn2              | Q9JL04               | Formin-2                                                                                               | _QLSSPNHSPS[Phospho (STY)]QSPNQSPR_3                                 | 1.4508 | 0.5369  | 0.0158 | 1.8005 |
| Atp1a3            | Q6PIC6               | Sodium/potassium-transporting ATPase subunit alpha-3                                                   | _YQLSIHETEDPNDR_3                                                    | 0.7582 | -0.3994 | 0.0159 | 1.8000 |
| Glul              | P15105               | Glutamine synthetase                                                                                   | _AMREENGLK_2                                                         | 1.7857 | 0.8365  | 0.0162 | 1.7894 |
| Calm1;Calm2;Calm3 | P0DP26;P0DP27;P0DP28 | Calmodulin-1;Calmodulin-2;Calmodulin-3                                                                 | _DGNGVISAAELR_2                                                      | 0.4398 | -1.1850 | 0.0164 | 1.7861 |
| Pclo              | Q9QYX7               | Protein piccolo                                                                                        | _TSQS[Phospho (STY)]FPPTGDITITLDSK_2                                 | 0.1146 | -3.1254 | 0.0169 | 1.7730 |
| Eif2s2            | Q99L45               | Eukaryotic translation initiation factor 2 subunit 2                                                   | _IFDIDEAEEAKDVK_3                                                    | 0.5984 | -0.7408 | 0.0170 | 1.7708 |
| Cadm3             | Q99N28               | Cell adhesion molecule 3                                                                               | _EDDGANIVC[Carbamidomethyl (C)]SVNHESLK_2                            | 0.6585 | -0.6028 | 0.0170 | 1.7697 |
| Ubr5              | Q80TP3               | E3 ubiquitin-protein ligase UBR5                                                                       | _WLDGAS[Phospho (STY)]FDNER_2                                        | 0.4638 | -1.1086 | 0.0170 | 1.7688 |
| Mpst              | Q99J99               | 3-mercaptopyruvate sulfurtransferase                                                                   | _FQGTQPEPR_2                                                         | 5.3201 | 2.4115  | 0.0170 | 1.7687 |
| Ywhab             | Q9CQV8               | 14-3-3 protein beta/alpha                                                                              | _AVTEQGHLSNEER_3                                                     | 1.3344 | 0.4162  | 0.0171 | 1.7679 |
| Cbx1              | P83917               | Chromobox protein homolog 1                                                                            | _ADS[Phospho (STY)]DSEDKGEEKPK_2                                     | 0.5926 | -0.7548 | 0.0172 | 1.7654 |
| Nav3              | Q80TN7               | Neuron navigator 3                                                                                     | _KTS[Phospho (STY)]LDGSQNDQDVLHVSSK_3                                | 0.6872 | -0.5411 | 0.0172 | 1.7639 |
| Nr4a1;Nr4a2;Nr4a3 | P12813;Q06219;Q9QZB6 | ubfamily 4 group A member 1;Nuclear receptor subfamily 4 group A member 2;Nuclear receptor subfamily 4 | _TDS[Phospho (STY)]LKGR_2                                            | 0.2866 | -1.8031 | 0.0176 | 1.7537 |
| Hk1               | P17710               | Hexokinase-1                                                                                           | _IDEAVLITWTK_2                                                       | 0.7440 | -0.4267 | 0.0176 | 1.7537 |
| Map6              | Q77SJ2               | Microtubule-associated protein 6                                                                       | _S[Phospho (STY)]LYSEPFKEC[Carbamidomethyl (C)]PK_2                  | 1.5792 | 0.6592  | 0.0179 | 1.7483 |
| Dlgap2            | Q88J42               | Disks large-associated protein 2                                                                       | _EAEENDLLEDILGK_2                                                    | 2.1439 | 1.1003  | 0.0180 | 1.7445 |
| Ap2m1             | P84091               | AP-2 complex subunit mu                                                                                | _LS[Phospho (STY)]KFDSEK_2                                           | 0.6901 | -0.5351 | 0.0180 | 1.7437 |
| Hspa5             | P20029               | Endoplasmic reticulum chaperone BiP                                                                    | _SQIFSTASDNQPTVTIK_2                                                 | 1.3218 | 0.4025  | 0.0183 | 1.7377 |
| Septin3           | Q9Z155               | Neuronal-specific septin-3                                                                             | _KASS[Phospho (STY)]WNR_2                                            | 0.2266 | -2.1418 | 0.0184 | 1.7355 |
| Dmwd              | Q08274               | Dystrophia myotonia WD repeat-containing protein                                                       | _GGSGGNS[Phospho (STY)]NDKLSGAPR_2                                   | 1.3009 | 0.3796  | 0.0186 | 1.7312 |
| Strap             | Q9Z122               | Serine-threonine kinase receptor-associated protein                                                    | _TVDFQTDSNVLTTGGQDK_2                                                | 1.6549 | 0.7268  | 0.0186 | 1.7301 |
| Cse1l             | Q9ERK4               | Exportin-2                                                                                             | _IVEDEPNKIC[Carbamidomethyl (C)]EADR_3                               | 0.6161 | -0.6988 | 0.0186 | 1.7299 |
| Dlg3              | P70175               | Disks large homolog 3                                                                                  | _FIEAGQFNDNLVGTSIQSVR_2                                              | 1.5494 | 0.6317  | 0.0191 | 1.7195 |
| Syngap1           | F6SEU4               | Ras/Rap GTPase-activating protein SyngAP                                                               | _S[Phospho (STY)]QPMVLR_2                                            | 0.6891 | -0.5373 | 0.0192 | 1.7176 |
| Tjp2              | Q9Z0J1               | Tight junction protein ZO-2                                                                            | _S[Phospho (STY)]RGRS[Phospho (STY)]LER_2                            | 1.6506 | 0.7230  | 0.0192 | 1.7165 |
| Gja1              | P23242               | Gap junction alpha-1 protein                                                                           | _PRPDDLEI_2                                                          | 0.5015 | -0.9956 | 0.0193 | 1.7151 |
| Akap5             | D3YVF0               | A-kinase anchor protein 5                                                                              | _KATVGQAEATIDHTEK_3                                                  | 2.3946 | 1.2598  | 0.0194 | 1.7122 |
| Arhgef12          | Q8R4H2               | Rho guanine nucleotide exchange factor 12                                                              | _VEHHDLSVAGLQS[Phospho (STY)]PDR_3                                   | 0.5442 | -0.8778 | 0.0195 | 1.7099 |
| Irf2bp1           | Q8R3Y8               | Interferon regulatory factor 2-binding protein 1                                                       | _S[Phospho (STY)]JPGPPALK_2                                          | 0.6904 | -0.5346 | 0.0195 | 1.7093 |
| Hspa12b           | Q9CZJ2               | Heat shock 70 kDa protein 12B                                                                          | _RSS[Phospho (STY)]JNVLVK_2                                          | 0.4342 | -1.2035 | 0.0196 | 1.7078 |
| Srrm2             | Q8BT18               | Serine/arginine repetitive matrix protein 2                                                            | _S[Phospho (STY)]RSRT[Phospho (STY)]S[Phospho (STY)]PAPWK_2          | 7.9197 | 2.9855  | 0.0196 | 1.7076 |
| Vcp               | Q01853               | Transitional endoplasmic reticulum ATPase                                                              | _EAVC[Carbamidomethyl (C)]JVLSDTTC[Carbamidomethyl (C)]SDEKIR_3      | 0.6920 | -0.5312 | 0.0196 | 1.7069 |
| Ube2m             | P61082               | NEDD8-conjugating enzyme Ubc12                                                                         | _DINELNPK_2                                                          | 1.9388 | 0.9552  | 0.0197 | 1.7065 |
| Crmp1             | P97427               | Dihydropyrimidinase-related protein 1                                                                  | _NLHQSNFSLSGAQIDNNPRR_4                                              | 1.6112 | 0.6881  | 0.0197 | 1.7055 |
| Epb41l3           | Q9WV92               | Band 4.1-like protein 3                                                                                | _EQHPDMSVTK_2                                                        | 1.7157 | 0.7788  | 0.0197 | 1.7054 |
| Srrm1             | Q5ZK18               | Serine/arginine repetitive matrix protein 1                                                            | _AS[Phospho (STY)]PS[Phospho (STY)]PPPKR_2                           | 0.3650 | -1.4542 | 0.0197 | 1.7047 |
| Trap1             | Q9CQN1               | Heat shock protein 75 kDa, mitochondrial                                                               | _AFLEALQNAETSSK_2                                                    | 0.6587 | -0.6023 | 0.0198 | 1.7033 |
| Vim               | P20152               | Vimentin                                                                                               | _DNLAEDIMR_2                                                         | 1.5628 | 0.6441  | 0.0198 | 1.7025 |
| Rnf208            | Q8KOW3               | RING finger protein 208                                                                                | _KGS[Phospho (STY)]SELGFPR_2                                         | 6.7879 | 2.7630  | 0.0200 | 1.7000 |
| Scg5              | P12961               | Neuroendocrine protein 7B2                                                                             | _DFSEDDQGYDPNPNPC[Carbamidomethyl (C)]PLGK_2                         | 1.8763 | 0.9079  | 0.0201 | 1.6979 |
| Hnrnpa2b1         | Q88569               | Heterogeneous nuclear ribonucleoproteins A2/B1                                                         | _EES[Phospho (STY)]GKGAHVTVK_2                                       | 3.6517 | 1.8686  | 0.0202 | 1.6952 |
| Sgsm1             | Q8BPQ7               | Small G protein signaling modulator 1                                                                  | _C[Carbamidomethyl (C)]SSGAS[Phospho (STY)]LDSHLHR_3                 | 0.6016 | -0.7331 | 0.0203 | 1.6919 |
| Larp1             | Q6ZQ58               | La-related protein 1                                                                                   | _TASISS[Phospho (STY)]PSEGTAVGSYGCC[Carbamidomethyl (C)]TPQSLPK_3    | 0.6515 | -0.6182 | 0.0204 | 1.6909 |
| Fis1              | Q9CQ92               | Mitochondrial fission 1 protein                                                                        | _STQFEYAWC[Carbamidomethyl (C)]LVR_2                                 | 0.6683 | -0.5815 | 0.0204 | 1.6893 |
| Ywhaz             | P63101               | 14-3-3 protein zeta/delta                                                                              | _VVSIEQK_2                                                           | 1.3849 | 0.4698  | 0.0206 | 1.6855 |
| Fkbp15            | Q6P9Q6               | FK506-binding protein 15                                                                               | _Acetyl (Protein N-term)]MFGAGDEDDTDFLS[Phospho (STY)]PSGGAK_2       | 0.6791 | -0.5582 | 0.0207 | 1.6843 |
| Tcp1l12           | Q8K1H7               | T-complex protein 11-like protein 2                                                                    | _QC[Carbamidomethyl (C)]VSEDQSS[Phospho (STY)]DSESSR_2               | 1.7271 | 0.7884  | 0.0208 | 1.6809 |
| Adgrl2            | Q8JZ27               | Adhesion G protein-coupled receptor L2                                                                 | _S[Phospho (STY)]JPNLKGAGR_2                                         | 1.6795 | 0.7480  | 0.0210 | 1.6781 |
| Abilim3           | Q69ZX8               | Actin-binding LIM protein 3                                                                            | _SS[Phospho (STY)]PYHSQLDVLR_2                                       | 4.2392 | 2.0838  | 0.0210 | 1.6769 |
| Synj1             | Q8CHC4               | Synaptojanin-1                                                                                         | _TPAWTDR_2                                                           | 0.6145 | -0.7026 | 0.0211 | 1.6764 |
| Sec23ip           | Q6NZC7               | SEC23-interacting protein                                                                              | _EM[Oxidation (M)]AS[Phospho (STY)]PSSSENEKR_2                       | 1.7974 | 0.8459  | 0.0211 | 1.6748 |
| Gpd1l             | Q3ULJ0               | Glycerol-3-phosphate dehydrogenase 1-like protein                                                      | _VC[Carbamidomethyl (C)]JVGSGNWGSAAVAK_2                             | 0.6917 | -0.5319 | 0.0214 | 1.6687 |
| Gpr162            | Q3UN16               | Probable G-protein coupled receptor 162                                                                | _RLS[Phospho (STY)]HDETNIFSTPR_3                                     | 0.5519 | -0.8576 | 0.0215 | 1.6681 |
| Ndufs1            | Q91VD9               | NADH-ubiquinone oxidoreductase 75 kDa subunit, mitochondrial                                           | _LTEPMVR_2                                                           | 2.1133 | 1.0795  | 0.0217 | 1.6639 |
| L1cam             | P11627               | Neural cell adhesion molecule L1                                                                       | _PM[Oxidation (M)]KDETGEYF[Phospho (STY)]RSLES[Phospho (STY)]DNEEK_3 | 0.6180 | -0.6943 | 0.0217 | 1.6628 |
| Map1a             | Q9QYR6               | Microtubule-associated protein 1A                                                                      | _LDM[Oxidation (M)]YVLNVPVK_2                                        | 0.7293 | -0.4554 | 0.0219 | 1.6598 |
| Rims4             | P60191               | Regulating synaptic membrane exocytosis protein 4                                                      | _QASQLS[Phospho (STY)]LESTVGPC[Carbamidomethyl (C)]GERS_2            | 2.2060 | 1.1415  | 0.0224 | 1.6501 |
| Ganab             | Q8BHN3               | Neutral alpha-glucosidase AB                                                                           | _DAVHYGGWEHR_3                                                       | 0.5964 | -0.7456 | 0.0224 | 1.6492 |
| Cct4              | P80315               | T-complex protein 1 subunit delta                                                                      | _VIDPATATSVDLR_2                                                     | 1.3203 | 0.4009  | 0.0224 | 1.6491 |

|          |        |                                                                                |                                                                       |        |         |        |        |
|----------|--------|--------------------------------------------------------------------------------|-----------------------------------------------------------------------|--------|---------|--------|--------|
| Zranb2   | Q9R020 | Zinc finger Ran-binding domain-containing protein 2                            | _EES[Phospho (STY)]DGEYDEFGR_2                                        | 0.4209 | -1.2483 | 0.0226 | 1.6458 |
| Lmtk2    | Q3TYD6 | Serine/threonine-protein kinase LMTK2                                          | _HSGTSPQASPALITEEGS[Phospho (STY)]PTAPTDPILKPEETK_4                   | 0.3894 | -1.3608 | 0.0226 | 1.6453 |
| Suc1g    | Q9WUM5 | Succinate-CoA ligase [ADP/GDP-forming] subunit alpha, mitochondrial            | _QGTFHSQLALEYGTK_3                                                    | 1.6301 | 0.7050  | 0.0229 | 1.6411 |
| Atp5f1a  | Q03265 | ATP synthase subunit alpha, mitochondrial                                      | _LTDADAMK_2                                                           | 1.5864 | 0.6658  | 0.0230 | 1.6390 |
| Ehbp1    | Q69ZW3 | EH domain-binding protein 1                                                    | _SRS[Phospho (STY)]LEC[Carbamidomethyl (C)]R_2                        | 0.6128 | -0.7065 | 0.0230 | 1.6387 |
| Cltc     | Q68FD5 | Clathrin heavy chain 1                                                         | _SVDPTLALSVLR_2                                                       | 0.7672 | -0.3823 | 0.0232 | 1.6340 |
| ApoE     | P08226 | Apolipoprotein E                                                               | _NEVHTM[Oxidation (M)]LGQS[Phospho (STY)]TEEIR_2                      | 1.7311 | 0.7917  | 0.0232 | 1.6338 |
| Bcr      | Q6PA11 | Breakpoint cluster region protein                                              | _ASAPRPPAPADGADAPAVEESEARPDGEGS[Phospho (STY)]PSK_4                   | 0.4263 | -1.2302 | 0.0235 | 1.6284 |
| Trim3    | Q9R1R2 | Tripartite motif-containing protein 3                                          | _ALRPGDLPPS[Phospho (STY)]PDDVK_2                                     | 0.3506 | -1.5120 | 0.0235 | 1.6282 |
| MAPT     | P10636 | Microtubule-associated protein tau                                             | _IPAKT[Phospho (STY)]PPAKT[Phospho (STY)]PPSSGEPPK_3                  | 0.6127 | -0.7068 | 0.0236 | 1.6273 |
| Sowahd   | Q8BY98 | Ankyrin repeat domain-containing protein SOWAHD                                | _PC[Carbamidomethyl (C)]HY[Phospho (STY)]LRPDAS[Phospho (STY)]LNLRL_2 | 0.3761 | -1.4107 | 0.0236 | 1.6268 |
| Sugp1    | Q8CHO2 | SURP and G-patch domain-containing protein 1                                   | _DIDASPS[Phospho (STY)]PLSVQDLK_2                                     | 0.2480 | -2.0117 | 0.0237 | 1.6246 |
| Prdx6    | O08709 | Peroxiredoxin-6                                                                | _VVFIFGPK_2                                                           | 1.5233 | 0.6072  | 0.0238 | 1.6242 |
| Prkg     | P63318 | Protein kinase C gamma type                                                    | _M[Oxidation (M)]GPSSSPIPSPS[Phospho (STY)]PS[Phospho (STY)]PTDSKR_3  | 0.5156 | -0.9557 | 0.0238 | 1.6240 |
| Ripor1   | Q68FE6 | Rho family-interacting cell polarization regulator 1                           | _HTSS[Phospho (STY)]PEVVAEDR_2                                        | 4.6545 | 2.2186  | 0.0238 | 1.6237 |
| Actn4    | P57780 | Alpha-actinin-4                                                                | _VLAVNQENEHLMEDYER_3                                                  | 2.0139 | 1.0100  | 0.0239 | 1.6223 |
| Pdxk     | Q8K183 | Pyridoxal kinase                                                               | _KPDGSTVTQR_2                                                         | 1.8698 | 0.9029  | 0.0239 | 1.6209 |
| Cacna1a  | P97445 | Voltage-dependent P/Q-type calcium channel subunit alpha-1A                    | _AWPGS[Phospho (STY)]PER_2                                            | 0.4468 | -1.1624 | 0.0239 | 1.6207 |
| Ap2a1    | P17426 | AP-2 complex subunit alpha-1                                                   | _DFLTPLLSVR_2                                                         | 0.7295 | -0.4550 | 0.0240 | 1.6197 |
| Srx16    | Q8C080 | Sorting nexin-16                                                               | _EFLC[Carbamidomethyl (C)]LDDPPGPDFS[Phospho (STY)]LEESR_2            | 0.6847 | -0.5465 | 0.0240 | 1.6195 |
| Rbm15b   | Q6PHZ5 | Putative RNA-binding protein 15B                                               | _RNS[Phospho (STY)]LEGYSR_2                                           | 0.5614 | -0.8328 | 0.0242 | 1.6163 |
| Arid1a   | A2B4H0 | AT-rich interactive domain-containing protein 1A                               | _SNS[Phospho (STY)]VGIQDAFPDGSOPTFQK_2                                | 0.2060 | -2.2792 | 0.0243 | 1.6139 |
| Tbc1d9b  | Q5SVR0 | TBC1 domain family member 9B                                                   | _VFQKNS[Phospho (STY)]PM[Oxidation (M)]EDLGAK_2                       | 0.4939 | -1.0176 | 0.0243 | 1.6137 |
| Lrrc7    | Q80TE7 | Leucine-rich repeat-containing protein 7                                       | _S[Phospho (STY)]QSVPMLDDEMMLM[Oxidation (M)]YGSSK_2                  | 1.3415 | 0.4238  | 0.0245 | 1.6105 |
| Lsm11    | Q8BUV6 | U7 snRNA-associated 5m-like protein Lsm11                                      | _DSS[Phospho (STY)]LTLR_2                                             | 1.6054 | 0.6829  | 0.0246 | 1.6084 |
| Calcoc1  | Q8CGU1 | Calcium-binding and coiled-coil domain-containing protein 1                    | _LPSVGLC[Carbamidomethyl (C)]ESGNTSSS[Phospho (STY)]PPGPR_2           | 0.3124 | -1.6787 | 0.0246 | 1.6083 |
| Tbc1d13  | Q8R3D1 | TBC1 domain family member 13                                                   | _SGVTNMSS[Phospho (STY)]PHK_2                                         | 1.7758 | 0.8285  | 0.0249 | 1.6032 |
| Vat1l    | Q80TB8 | Synaptic vesicle membrane protein VAT-1 homolog-like                           | _TPLVPGFEC[Carbamidomethyl (C)]SGIVEALGDSVK_2                         | 1.3759 | 0.4604  | 0.0250 | 1.6017 |
| Dop1b    | Q3UHQ6 | Protein dopey-2                                                                | _S[Phospho (STY)]DLSEEDLPYVDLPDR_2                                    | 1.5874 | 0.6667  | 0.0251 | 1.6011 |
| Palm     | Q9Z0P4 | Paralemin-1                                                                    | _ENSAAPS[Phospho (STY)]PGRPOSASPAK_2                                  | 1.5362 | 0.6193  | 0.0251 | 1.6002 |
| Cox5a    | P12787 | Cytochrome c oxidase subunit 5A, mitochondrial                                 | _GM[Oxidation (M)]NTLVGYDLVPEPK_2                                     | 1.6131 | 0.6899  | 0.0252 | 1.5992 |
| Tardbp   | Q921F2 | TAR DNA-binding protein 43                                                     | _LPNSKQS[Phospho (STY)]PDEPLR_2                                       | 0.0841 | -3.5726 | 0.0252 | 1.5990 |
| Map1a    | Q9QYR6 | Microtubule-associated protein 1A                                              | _WLAE[Phospho (STY)]PVGLPPEEDK_2                                      | 0.3364 | -1.5717 | 0.0252 | 1.5978 |
| Wdr59    | Q8COM0 | GATOR complex protein WDR59                                                    | _AVS[Phospho (STY)]PTEPTPR_2                                          | 0.3572 | -1.4851 | 0.0253 | 1.5972 |
| Bcl9     | Q9D219 | B-cell CLL/lymphoma 9 protein                                                  | _IPVEGLS[Phospho (STY)]PSR_2                                          | 0.4230 | -1.2411 | 0.0254 | 1.5959 |
| Uqcrb    | Q9D855 | Cytochrome b-c1 complex subunit 7                                              | _RLPEDLYNDR_2                                                         | 0.6354 | -0.6542 | 0.0254 | 1.5958 |
| Rpl6     | P47911 | 60S ribosomal protein L6                                                       | _AGS[Phospho (STY)]DAAASRPR_2                                         | 0.6600 | -0.5995 | 0.0255 | 1.5933 |
| Gpr162   | Q3UN16 | Probable G-protein coupled receptor 162                                        | _RSS[Phospho (STY)]LDGSESAK_2                                         | 0.2976 | -1.7487 | 0.0257 | 1.5908 |
| Uqcrb    | Q9D855 | Cytochrome b-c1 complex subunit 7                                              | _DOTLHETEDVKEAIR_3                                                    | 1.4494 | 0.5355  | 0.0258 | 1.5875 |
| Septin11 | Q8C1B7 | Septin-11                                                                      | _AAQLLQSQAQSGAQQT_2                                                   | 1.4152 | 0.5010  | 0.0259 | 1.5859 |
| Bsn      | O88737 | Protein bassoon                                                                | _SPSVS[Phospho (STY)]PDR_2                                            | 1.7066 | 0.7711  | 0.0260 | 1.5845 |
| Atp1a3   | Q6PIC6 | Sodium/potassium-transporting ATPase subunit alpha-3                           | _ADIGVAM[Oxidation (M)]GIAGSDSVSK_2                                   | 0.7375 | -0.4392 | 0.0261 | 1.5838 |
| Gigyl1   | Q99MR1 | GRB10-interacting GYF protein 1                                                | _GLEEEEEEEEPS[Phospho (STY)]EGVDEERPEAGGK_3                           | 1.5538 | 0.6358  | 0.0263 | 1.5808 |
| Cul3     | Q9ILV5 | Cullin-3                                                                       | _FLQESFNDR_2                                                          | 0.1517 | -2.7212 | 0.0263 | 1.5799 |
| Zdhc5    | Q8VDZ4 | Palmitoyltransferase ZDHHC5                                                    | _SFHFDPLSSGS[Phospho (STY)]JR_2                                       | 7.0602 | 2.8197  | 0.0264 | 1.5786 |
| Slc12a2  | P55012 | Solute carrier family 12 member 2                                              | _PLGPTPS[Phospho (STY)]QSR_2                                          | 0.1222 | -3.0332 | 0.0265 | 1.5771 |
| H4c1     | P62806 | Histone H4                                                                     | _DNIQGITK_2                                                           | 0.6584 | -0.6030 | 0.0267 | 1.5742 |
| Abl2     | Q4IIM5 | Tyrosine-protein kinase ABL2                                                   | _DKS[Phospho (STY)]PSSLLEDAK_2                                        | 0.1359 | -2.8799 | 0.0269 | 1.5699 |
| Hcn1     | O88704 | Potassium/sodium hyperpolarization-activated cyclic nucleotide-gated channel 1 | _KNS[Phospho (STY)]ILLQK_2                                            | 0.5842 | -0.7754 | 0.0270 | 1.5689 |
| Begain   | Q68EF6 | Brain-enriched guanylate kinase-associated protein                             | _SADALAGYAA[Phospho (STY)]DGGDRILR_2                                  | 0.5077 | -0.9779 | 0.0270 | 1.5685 |
| Wdr47    | Q8CGF6 | WD repeat-containing protein 47                                                | _LSPYPSS[Phospho (STY)]PMR_2                                          | 0.6495 | -0.6226 | 0.0270 | 1.5680 |
| Hsp90ab1 | P11499 | Heat shock protein HSP 90-beta                                                 | _APFDLFENK_2                                                          | 0.6494 | -0.6228 | 0.0273 | 1.5644 |
| Nefm     | P08553 | Neurofilament medium polypeptide                                               | _EEIAEYRR_2                                                           | 1.7510 | 0.8082  | 0.0273 | 1.5639 |
| Atrx     | Q61687 | Transcriptional regulator ATRX                                                 | _TTSTSNPS[Phospho (STY)]S[Phospho (STY)]PAPDWYK_2                     | 0.6732 | -0.5709 | 0.0274 | 1.5624 |
| Map1b    | P14873 | Microtubule-associated protein 1B                                              | _SSM[Oxidation (M)]LFDTM[Oxidation (M)]QHHLALNR_3                     | 0.3658 | -1.4510 | 0.0274 | 1.5623 |
| Prpf4b   | Q61136 | Serine/threonine-protein kinase PRP4 homolog                                   | _S[Phospho (STY)]KS[Phospho (STY)]PPLR_2                              | 0.6671 | -0.5840 | 0.0274 | 1.5618 |
| Gls      | D3Z7P3 | Glutaminase kidney isoform, mitochondrial                                      | _ILOEQYQVQYTPQGDSDDGK_2                                               | 1.5310 | 0.6145  | 0.0275 | 1.5613 |
| Adgrl3   | Q80TS3 | Adhesion G protein-coupled receptor L3                                         | _GSSDGFIVPNKDGAS[Phospho (STY)]PEGTSK_3                               | 0.4025 | -1.3128 | 0.0275 | 1.5605 |
| Atp6v1g2 | Q9WTT4 | V-type proton ATPase subunit G 2                                               | _EREQEFSK_2                                                           | 1.4593 | 0.5453  | 0.0275 | 1.5605 |
| Phb2     | Q35129 | Prohibitin-2                                                                   | _AQFLVEK_2                                                            | 0.6449 | -0.6329 | 0.0275 | 1.5602 |
| Eif4h    | Q9WUK2 | Eukaryotic translation initiation factor 4H                                    | _TVATPLNQVANPNSAIFGGAR_2                                              | 1.4422 | 0.5282  | 0.0276 | 1.5594 |
| Pds5b    | Q4VA53 | Sister chromatid cohesion protein PDS5 homolog B                               | _M[Oxidation (M)]ETVSNASSSSNPSS[Phospho (STY)]PGR_2                   | 0.5640 | -0.8263 | 0.0276 | 1.5591 |

|          |        |                                                                         |                                                                      |         |         |        |        |
|----------|--------|-------------------------------------------------------------------------|----------------------------------------------------------------------|---------|---------|--------|--------|
| Trappc9  | Q3U0M1 | Trafficking protein particle complex subunit 9                          | _FNFESVPES[Phospho (STY)]JGKEK_2                                     | 0.3908  | -1.3556 | 0.0277 | 1.5568 |
| Rnf34    | Q99KR6 | E3 ubiquitin-protein ligase RNF34                                       | _GLGSGDDLDSSS[Phospho (STY)]LNSSR_2                                  | 0.5386  | -0.8926 | 0.0278 | 1.5564 |
| Dclk1    | Q9JLM8 | Serine/threonine-protein kinase DCLK1                                   | _SKS[Phospho (STY)]PASTSSVNGTPGSQLSTPR_3                             | 0.0810  | -3.6266 | 0.0279 | 1.5550 |
| Nek4     | Q9Z1J2 | Serine/threonine-protein kinase Nek4                                    | _SPAS[Phospho (STY)]LEGHT[Phospho (STY)]GK_2                         | 16.9901 | 4.0866  | 0.0281 | 1.5513 |
| Grim5    | Q3UVX5 | Metabotropic glutamate receptor 5                                       | _DSVDSGSTTPNS[Phospho (STY)]PVSESALC[Carbamidomethyl (C)]IPSSPK_3    | 0.2703  | -1.8876 | 0.0282 | 1.5499 |
| Prkaa2   | Q8BRK8 | 5'-AMP-activated protein kinase catalytic subunit alpha-2               | _MPPLADS[Phospho (STY)]PK_2                                          | 0.6755  | -0.5660 | 0.0282 | 1.5496 |
| Gap43    | P06837 | Neuromodulin                                                            | _AGDAPSEK_2                                                          | 0.7455  | -0.4238 | 0.0282 | 1.5491 |
| Acap2    | Q6ZQK5 | Arf-GAP with coiled-coil, ANK repeat and PH domain-containing protein 2 | _YSALLS[Phospho (STY)]PSEQEK_2                                       | 0.4540  | -1.1392 | 0.0282 | 1.5491 |
| Ank2     | Q8C8R3 | Ankyrin-2                                                               | _GAADVDFAR_2                                                         | 0.7054  | -0.5035 | 0.0284 | 1.5471 |
| Strn3    | Q9ERG2 | Striatin-3                                                              | _NLEQLUNGGES[Phospho (STY)]PKQK_2                                    | 0.0496  | -4.3321 | 0.0284 | 1.5467 |
| Vps4a    | Q8VEJ9 | Vacuolar protein sorting-associated protein 4A                          | _ENQSEKGKS[Phospho (STY)]DS[Phospho (STY)]DSEGDNPEK_2                | 1.5897  | 0.6688  | 0.0284 | 1.5462 |
| Thop1    | Q8C1A5 | Thimet oligopeptidase                                                   | _NLNEDTTLFPTR_2                                                      | 0.5298  | -0.9164 | 0.0284 | 1.5460 |
| Idh2     | P54071 | Isocitrate dehydrogenase [NADP], mitochondrial                          | _FAQTLEK_2                                                           | 0.6689  | -0.5800 | 0.0284 | 1.5460 |
| Scrn1    | Q9CZC8 | Secernin-1                                                              | _DEVQEVVYFPAVDHDAESK_3                                               | 0.6938  | -0.5274 | 0.0285 | 1.5450 |
| Atpt11c  | Q9QZW0 | Phospholipid-transporting ATPase 11C                                    | _RAS[Phospho (STY)]DSLAR_2                                           | 0.6692  | -0.5794 | 0.0286 | 1.5439 |
| Ank2     | Q8C8R3 | Ankyrin-2                                                               | _HTPVS[Phospho (STY)]PSSK_2                                          | 0.0622  | -4.0062 | 0.0286 | 1.5430 |
| Arhgdia  | Q99PT1 | Rho GDP-dissociation inhibitor 1                                        | _LTLVC[Carbamidomethyl (C)]STAPGPLEDLTGDLESFKK_3                     | 0.6591  | -0.6014 | 0.0287 | 1.5428 |
| Prdx6    | O08709 | Peroxisiredoxin-6                                                       | _PGGLLLGDAPNFEANTTIGR_2                                              | 1.3069  | 0.3861  | 0.0288 | 1.5403 |
| Pacsin1  | Q61644 | Protein kinase C and casein kinase substrate in neurons protein 1       | _GPQYGSLEK_2                                                         | 1.3254  | 0.4064  | 0.0288 | 1.5402 |
| Sec16a   | E9AQ14 | Protein transport protein Sec16A                                        | _RSS[Phospho (STY)]LS[Phospho (STY)]SHSQSIYQR_3                      | 0.6939  | -0.5272 | 0.0291 | 1.5367 |
| Dclk1    | Q9JLM8 | Serine/threonine-protein kinase DCLK1                                   | _TLQTLSEK_2                                                          | 0.6062  | -0.7221 | 0.0292 | 1.5349 |
| Dync1li1 | Q8R1Q8 | Cytoplasmic dynein 1 light intermediate chain 1                         | _GLELYLNVHDEDRDDQTR_3                                                | 0.7122  | -0.4896 | 0.0293 | 1.5332 |
| Adra2a   | Q01338 | Alpha-2A adrenergic receptor                                            | _TRAS[Phospho (STY)]QVKPGDS[Phospho (STY)]LPR_3                      | 1.5464  | 0.6289  | 0.0293 | 1.5325 |
| Fam171a2 | A2A699 | Protein FAM171A2                                                        | _S[Phospho (STY)]VEGGGLEPSLDEYRR_3                                   | 0.4941  | -1.0173 | 0.0295 | 1.5302 |
| Ap2a1    | P17426 | AP-2 complex subunit alpha-1                                            | _AADLLYAM[Oxidation (M)]C[Carbamidomethyl (C)]DR_2                   | 0.7464  | -0.4220 | 0.0296 | 1.5292 |
| Rpl18    | P35980 | 60S ribosomal protein L18                                               | _ILTFDQLALESPEK_2                                                    | 0.5194  | -0.9450 | 0.0296 | 1.5281 |
| Ddx3y    | Q62095 | ATP-dependent RNA helicase DDX3Y                                        | _DLLDLLVEAK_2                                                        | 0.7335  | -0.4472 | 0.0297 | 1.5277 |
| Astn1    | Q61137 | Astroactin-1                                                            | _GNSPSDES[Phospho (STY)]EERER_2                                      | 0.6846  | -0.5467 | 0.0297 | 1.5270 |
| Kiaa1549 | Q68FD9 | UPF0606 protein KIAA1549                                                | _LITIDS[Phospho (STY)]DGTYSK_2                                       | 0.4760  | -1.0709 | 0.0298 | 1.5263 |
| Ubxn2a   | Q99KJ0 | UBX domain-containing protein 2A                                        | _C[Carbamidomethyl (C)]LS[Phospho (STY)]PTEQKK_2                     | 0.7272  | -0.4596 | 0.0298 | 1.5262 |
| Ptpcd    | Q64487 | Receptor-type tyrosine-protein phosphatase delta                        | _KSS[Phospho (STY)]LPNSK_2                                           | 0.4469  | -1.1620 | 0.0298 | 1.5256 |
| Snph     | Q80U23 | Syntaxin                                                                | _EEGTGESAGGS[Phospho (STY)]PARS[Phospho (STY)]LTR_2                  | 0.4436  | -1.1726 | 0.0300 | 1.5230 |
| Cbr1     | P48758 | Carbonyl reductase [NADPH] 1                                            | _GVHAEWGWPNSAYGVTK_2                                                 | 2.3901  | 1.2571  | 0.0302 | 1.5205 |
| Slc20a2  | Q80UP8 | Sodium-dependent phosphate transporter 2                                | _AS[Phospho (STY)]DES[Phospho (STY)]LRKVQEAESPGFK_3                  | 0.6806  | -0.5551 | 0.0302 | 1.5193 |
| Cap2     | Q9CYT6 | Adenylyl cyclase-associated protein 2                                   | _THTPS[Phospho (STY)]PTS[Phospho (STY)]PKNSPQK_2                     | 0.4038  | -1.3084 | 0.0303 | 1.5181 |
| Cacna1e  | Q61290 | Voltage-dependent R-type calcium channel subunit alpha-1E               | _QGT[Phospho (STY)]PVPASGPAAYK_2                                     | 0.5170  | -0.9518 | 0.0304 | 1.5175 |
| Ap3b2    | Q9JMES | AP-3 complex subunit beta-2                                             | _LEVLTNLANETNIPTVLR_2                                                | 0.6359  | -0.6532 | 0.0305 | 1.5162 |
| Iqsec1   | Q8R0S2 | IQ motif and SEC7 domain-containing protein 1                           | _VLINFNPNQDDR_2                                                      | 0.6241  | -0.6801 | 0.0305 | 1.5159 |
| Myh10    | Q61879 | Myosin-10                                                               | _LQQLFNHTM[Oxidation (M)]FILEQEEYQR_3                                | 0.6213  | -0.6866 | 0.0306 | 1.5144 |
| Mycbp2   | Q7TPH6 | E3 ubiquitin-protein ligase MYCBP2                                      | _STS[Phospho (STY)]PKPKPVPK_2                                        | 1.6601  | 0.7313  | 0.0307 | 1.5132 |
| Sptbn1   | Q62261 | Spectrin beta chain, non-erythrocytic 1                                 | _FM[Oxidation (M)]ELLEPLSER_2                                        | 0.7667  | -0.3832 | 0.0308 | 1.5120 |
| Sptan1   | P16546 | Spectrin alpha chain, non-erythrocytic 1                                | _M[Oxidation (M)]M[Oxidation (M)]LDHC[Carbamidomethyl (C)]LELQLFHR_3 | 0.6789  | -0.5588 | 0.0308 | 1.5118 |
| Tardbp   | Q921F2 | TAR DNA-binding protein 43                                              | _GISVHISNAEPK_3                                                      | 0.7148  | -0.4844 | 0.0308 | 1.5108 |
| Skt      | A2AQ25 | Sickle tail protein                                                     | _HQEETAHAPGQPLHC[Carbamidomethyl (C)]STGS[Phospho (STY)]PGDVK_4      | 6.3718  | 2.6717  | 0.0309 | 1.5099 |
| Kcnb1    | Q03717 | Potassium voltage-gated channel subfamily B member 1                    | _S[Phospho (STY)]IEM[Oxidation (M)]M[Oxidation (M)]DIVVEK_2          | 0.6580  | -0.6039 | 0.0310 | 1.5093 |
| PsmA5    | Q9Z2U1 | Proteasome subunit alpha type-5                                         | _GVNFTFS[Phospho (STY)]JEGR_2                                        | 1.5070  | 0.5917  | 0.0310 | 1.5086 |
| Unc80    | Q8BLN6 | Protein unc-80 homolog                                                  | _VAS[Phospho (STY)]QS[Phospho (STY)]JEPGQNVLLQQLGR_3                 | 0.7132  | -0.4877 | 0.0311 | 1.5075 |
| Acsbg1   | Q99PUS | Long-chain-fatty-acid-CoA ligase ACSBG1                                 | _ES[Phospho (STY)]PSHGLESAPK_2                                       | 0.6578  | -0.6043 | 0.0311 | 1.5073 |
| M6pr     | P24668 | Cation-dependent mannose-6-phosphate receptor                           | _GVGDDQLGEES[Phospho (STY)]JEERDHLHLM[Oxidation (M)]_3               | 0.4788  | -1.0626 | 0.0311 | 1.5068 |
| Uqcrc2   | Q9DB77 | Cytochrome b-c1 complex subunit 2, mitochondrial                        | _LASSLTK_2                                                           | 0.4901  | -1.0288 | 0.0312 | 1.5061 |
|          | Q99M08 | Uncharacterized protein C4orf3 homolog                                  | _RGS[Phospho (STY)]FEAGR_2                                           | 0.6825  | -0.5510 | 0.0312 | 1.5054 |
| Map1a    | Q9QYR6 | Microtubule-associated protein 1A                                       | _TRHDEYLEVTK_3                                                       | 1.7016  | 0.7669  | 0.0312 | 1.5054 |
| Git1     | Q68FF6 | ARF GTPase-activating protein GIT1                                      | _SAVPFLPVNPEYSATR_2                                                  | 1.4652  | 0.5511  | 0.0313 | 1.5045 |
| Eef1b    | O70251 | Elongation factor 1-beta                                                | _SIQADGLVWGSSK_2                                                     | 2.4936  | 1.3182  | 0.0314 | 1.5024 |
| U2surp   | Q6NV83 | U2 snRNP-associated SURP motif-containing protein                       | _RVKS[Phospho (STY)]PS[Phospho (STY)]PK_2                            | 0.3899  | -1.3588 | 0.0316 | 1.5008 |
| Mtcl1    | Q3UHU5 | Microtubule cross-linking factor 1                                      | _GRS[Phospho (STY)]PS[Phospho (STY)]PLGVGSETFR_3                     | 0.7224  | -0.4691 | 0.0317 | 1.4995 |
| Ppp1r1a  | Q9ERT9 | Protein phosphatase 1 regulatory subunit 1A                             | _EPDNS[Phospho (STY)]PR_2                                            | 0.6866  | -0.5425 | 0.0317 | 1.4992 |
| Frmf4a   | Q8BIE6 | FERM domain-containing protein 4A                                       | _SVDIS[Phospho (STY)]PTR_2                                           | 0.1370  | -2.8674 | 0.0317 | 1.4991 |
| Syt7     | Q9RON7 | Synaptotagmin-7                                                         | _NSLETGT[Phospho (STY)]PDS[Phospho (STY)]GRGR_2                      | 0.7440  | -0.4266 | 0.0318 | 1.4980 |
| Ktn1     | Q61595 | Kinectin                                                                | _DLTLT[Phospho (STY)]ELQK_2                                          | 1.6223  | 0.6981  | 0.0319 | 1.4965 |
| Dclk1    | Q9JLM8 | Serine/threonine-protein kinase DCLK1                                   | _SFEALLDLTR_2                                                        | 0.7693  | -0.3784 | 0.0319 | 1.4957 |
| Tftpt    | Q3U1J1 | TCF3 fusion partner homolog                                             | _EGLS[Phospho (STY)]PSQR_2                                           | 0.3332  | -1.5855 | 0.0320 | 1.4948 |

|           |         |                                                                                |                                                                                |        |         |        |        |
|-----------|---------|--------------------------------------------------------------------------------|--------------------------------------------------------------------------------|--------|---------|--------|--------|
| Hnrnpa2b1 | O88569  | Heterogeneous nuclear ribonucleoproteins A2/B1                                 | _LTD[Carbamidomethyl (C)]VVMR_2                                                | 2.0078 | 1.0056  | 0.0323 | 1.4913 |
| Pank4     | Q80YV4  | 4'-phosphopantetheine phosphatase                                              | _VRS[Phospho (STY)]FDHPGK_2                                                    | 0.7630 | -0.3903 | 0.0324 | 1.4895 |
| Cdk16     | Q04735  | Cyclin-dependent kinase 16                                                     | _KIS[Phospho (STY)]TEDINKR_2                                                   | 0.7259 | -0.4622 | 0.0324 | 1.4889 |
| Pdha1     | P35486  | Pyruvate dehydrogenase E1 component subunit alpha, somatic form, mitochondrial | _M[Oxidation (M)]VNSNLASVEELKEIDVEVRK_4                                        | 0.7448 | -0.4251 | 0.0325 | 1.4887 |
| Rb1cc1    | Q9ESK9  | RB1-inducible coiled-coil protein 1                                            | _STELVLS[Phospho (STY)]PDM[Oxidation (M)]PR_2                                  | 0.5798 | -0.7865 | 0.0331 | 1.4807 |
| Tomm70    | Q9CZW5  | Mitochondrial import receptor subunit TOM70                                    | _C[Carbamidomethyl (C)]AEGYALYAQALTDQQFGK_2                                    | 0.6708 | -0.5761 | 0.0331 | 1.4803 |
| Pcnx1     | Q9QYC1  | Pecanin-like protein 1                                                         | _SSS[Phospho (STY)]LIHR_2                                                      | 2.1086 | 1.0763  | 0.0332 | 1.4786 |
| Actn2     | Q9J9I1  | Alpha-actinin-2                                                                | _VEQIAAQLNELDYHDAVNVNDR_3                                                      | 0.6838 | -0.5483 | 0.0335 | 1.4744 |
| Gpsm1     | Q6IR34  | G-protein-signaling modulator 1                                                | _AAQSSVTAS[Phospho (STY)]PQTEEFFDLIASSQSR_3                                    | 0.6877 | -0.5401 | 0.0336 | 1.4733 |
| Akap12    | Q9WTTQ5 | A-kinase anchor protein 12                                                     | _LS[Phospho (STY)]ADYEKVELPLEDQVGDEALSEK_3                                     | 0.7659 | -0.3847 | 0.0336 | 1.4731 |
| Cltc      | Q68FD5  | Clathrin heavy chain 1                                                         | _AM[Oxidation (M)]LSANIR_2                                                     | 0.6695 | -0.5788 | 0.0337 | 1.4724 |
| Kif1a     | P33173  | Kinesin-like protein KIF1A                                                     | _AASVSS[Phospho (STY)]LHER_2                                                   | 0.1930 | -2.3736 | 0.0338 | 1.4708 |
| Atp6v0a1  | Q9Z1G4  | V-type proton ATPase 116 kDa subunit a1                                        | _NFLELTCLK_2                                                                   | 0.6990 | -0.5167 | 0.0338 | 1.4707 |
| Syngap1   | F6SEU4  | Ras/Rap GTPase-activating protein SynGAP                                       | _LLNDISTALR_2                                                                  | 0.7257 | -0.4626 | 0.0340 | 1.4687 |
| Nfic      | P70255  | Nuclear factor 1 C-type                                                        | _NWTEDEGGISS[Phospho (STY)]PVKK_2                                              | 0.5614 | -0.8329 | 0.0341 | 1.4676 |
| Atp2b1    | G5E829  | Plasma membrane calcium-transporting ATPase 1                                  | _ADVGFAM[Oxidation (M)]GIAGTDVAK_2                                             | 0.6927 | -0.5298 | 0.0341 | 1.4672 |
| Tubb3     | Q9ERD7  | Tubulin beta-3 chain                                                           | _FWEVISEDHIDPSGMVGYDSDQLER_3                                                   | 0.6887 | -0.5381 | 0.0342 | 1.4662 |
| Prkar1b   | P12849  | cAMP-dependent protein kinase type I-beta regulatory subunit                   | _Acetyl (Protein N-term)]ASPS[Phospho (STY)]C[Carbamidomethyl (C)]FHSEDEDSLK_2 | 0.7238 | -0.4664 | 0.0342 | 1.4662 |
| Tpm3      | P21107  | Tropomyosin alpha-3 chain                                                      | _AADAAEAEVASLNR_2                                                              | 0.7637 | -0.3890 | 0.0342 | 1.4659 |
| Vta1      | Q9CR26  | Vacuolar protein sorting-associated protein VTA1 homolog                       | _YAGSALQYEDVGTAVQNLQK_2                                                        | 2.4693 | 1.3041  | 0.0342 | 1.4658 |
| Ran       | P62827  | GTP-binding nuclear protein Ran                                                | _YVATLGVGVHPLVFHTNR_3                                                          | 0.5681 | -0.8158 | 0.0343 | 1.4652 |
| Sgip1     | Q8VD37  | SH3-containing GRB2-like protein 3-interacting protein 1                       | _EC[Carbamidomethyl (C)]GLQQRAT[Phospho (STY)]PPPPPPPTTYR_3                    | 0.2932 | -1.7698 | 0.0343 | 1.4645 |
| Gabbr2    | Q80T41  | Gamma-aminobutyric acid type B receptor subunit 2                              | _FTQFQDSR_2                                                                    | 0.5370 | -0.8971 | 0.0343 | 1.4644 |
| Sorbs2    | Q3UTJ2  | Sorbin and SH3 domain-containing protein 2                                     | _RFS[Phospho (STY)]ESLLEETQVR_3                                                | 1.5679 | 0.6488  | 0.0343 | 1.4642 |
| Dync1h1   | Q9JHU4  | Cytoplasmic dynein 1 heavy chain 1                                             | _FNYGFEYLGVDK_2                                                                | 0.6653 | -0.5879 | 0.0344 | 1.4637 |
| Ilysn1    | Q9JHU9  | Inositol-3-phosphate synthase 1                                                | _SC[Carbamidomethyl (C)]JENIFR_2                                               | 0.3260 | -1.6169 | 0.0345 | 1.4628 |
| Dock4     | P59764  | Dedicator of cytokinesis protein 4                                             | _NSAPASM[Oxidation (M)]S[Phospho (STY)]PDGTR_2                                 | 2.5127 | 1.3293  | 0.0346 | 1.4615 |
| Cap1      | P40124  | Adenylyl cyclase-associated protein 1                                          | _C[Carbamidomethyl (C)]VNTTLQIK_2                                              | 1.6152 | 0.6917  | 0.0347 | 1.4603 |
| Grin2a    | P35436  | Glutamate receptor ionotropic, NMDA 2A                                         | _YLPEEVAHS[Phospho (STY)]DIS[Phospho (STY)]ETSSR_2                             | 0.2941 | -1.7654 | 0.0347 | 1.4601 |
| Paln3     | A2TJV2  | Paralemin-3                                                                    | _QGTSS[Phospho (STY)]PELPTWVK_2                                                | 0.6893 | -0.5368 | 0.0348 | 1.4585 |
| Dync1h1   | Q9JHU4  | Cytoplasmic dynein 1 heavy chain 1                                             | _ESPEVLLTDLK_2                                                                 | 0.6729 | -0.5714 | 0.0349 | 1.4576 |
| Dmx1      | Q8BP88  | Dmx-like protein 2                                                             | _VS[Phospho (STY)]VDSNLFVSK_2                                                  | 0.5697 | -0.8117 | 0.0349 | 1.4575 |
| Sipa1l3   | G3X9J0  | Signal-induced proliferation-associated 1-like protein 3                       | _QDAAGKDS[Phospho (STY)]PNR_2                                                  | 0.7189 | -0.4762 | 0.0349 | 1.4571 |
| Cds2      | Q99L43  | Phosphatidate cytidylyltransferase 2                                           | _EDAPPEDKES[Phospho (STY)]ESEAK_2                                              | 0.6631 | -0.5927 | 0.0349 | 1.4569 |
| Slc4a10   | Q5DTL9  | Sodium-driven chloride bicarbonate exchanger                                   | _ESRFPKSS[Phospho (STY)]SPS_2                                                  | 0.7189 | -0.4761 | 0.0350 | 1.4560 |
| Cltc      | Q68FD5  | Clathrin heavy chain 1                                                         | _AHTM[Oxidation (M)]TDDVTFWK_2                                                 | 0.3848 | -1.3779 | 0.0350 | 1.4558 |
| Stim2     | P83093  | Stromal interaction molecule 2                                                 | _DELS[Phospho (STY)]LEDSSR_2                                                   | 0.4187 | -1.2561 | 0.0351 | 1.4553 |
| Dctn1     | O08788  | Dynactin subunit 1                                                             | _AFLQGGEATDIALLLR_2                                                            | 1.4052 | 0.4908  | 0.0351 | 1.4543 |
| Huwe1     | Q7TMY8  | E3 ubiquitin-protein ligase HUWE1                                              | _DLS[Phospho (STY)]MSEEDQMMR_2                                                 | 0.6894 | -0.5367 | 0.0352 | 1.4539 |
| Usp6nl    | Q80XC3  | USP6 N-terminal-like protein                                                   | _SVGRPS[Phospho (STY)]PK_2                                                     | 0.5355 | -0.9010 | 0.0352 | 1.4534 |
| Tufm      | Q8BFR5  | Elongation factor Tu, mitochondrial                                            | _DKPHVNVGTIGHVDHGK_4                                                           | 1.3713 | 0.4556  | 0.0352 | 1.4533 |
| Tuba8     | Q9JIJ2  | Tubulin alpha-8 chain                                                          | _ES[Phospho (STY)]DLVLDR_2                                                     | 0.6741 | -0.5689 | 0.0352 | 1.4532 |
| Nsf       | P46460  | Vesicle-fusing ATPase                                                          | _VEVDMCK_2                                                                     | 0.7033 | -0.5079 | 0.0354 | 1.4514 |
| Srrm2     | Q8BT18  | Serine/arginine repetitive matrix protein 2                                    | _QSSS[Phospho (STY)]PYEDKDKK_2                                                 | 0.3288 | -1.6046 | 0.0355 | 1.4502 |
| Fth1      | P09528  | Ferritin heavy chain                                                           | _QNYHQDAEAANR_3                                                                | 0.6915 | -0.5321 | 0.0357 | 1.4470 |
| Stmn2     | P55821  | Stathmin-2                                                                     | _NKEQLVELS[Phospho (STY)]G_2                                                   | 0.7340 | -0.4462 | 0.0358 | 1.4466 |
| Ampd2     | Q9DBT5  | AMP deaminase 2                                                                | _TDS[Phospho (STY)]DSDLQLYK_2                                                  | 0.3911 | -1.3543 | 0.0358 | 1.4460 |
| Dlg4      | Q62108  | Disks large homolog 4                                                          | _RVHS[Phospho (STY)]DS[Phospho (STY)]ETDDIGFIPSKR_3                            | 0.3844 | -1.3793 | 0.0359 | 1.4455 |
| Phf2      | Q9WTU0  | Lysine-specific demethylase PHF2                                               | _RPSASS[Phospho (STY)]PNNTAAK_2                                                | 0.6999 | -0.5148 | 0.0359 | 1.4448 |
| Map1a     | Q9QYR6  | Microtubule-associated protein 1A                                              | _PRYS[Phospho (STY)]EER_2                                                      | 0.7190 | -0.4759 | 0.0361 | 1.4422 |
| Bnip3     | O55003  | BCL2/adenovirus E1B 19 kDa protein-interacting protein 3                       | _SSHCH[Carbamidomethyl (C)]DS[Phospho (STY)]PPR_2                              | 0.5824 | -0.7798 | 0.0361 | 1.4419 |
| Actr2     | P61161  | Actin-related protein 2                                                        | _GYAFNHSADFETR_3                                                               | 1.5380 | 0.6210  | 0.0362 | 1.4413 |
| Pip5k1c   | Q70161  | Phosphatidylinositol 4-phosphate 5-kinase type-1 gamma                         | _RTQS[Phospho (STY)]SGQGRPQEEPHAEIDLQK_4                                       | 3.9051 | 1.9653  | 0.0365 | 1.4380 |
| Pacs1     | Q8K212  | Phosphofurin acidic cluster sorting protein 1                                  | _VAAVGSSQSYLSSILR_2                                                            | 1.6216 | 0.6974  | 0.0366 | 1.4367 |
| Tomm20    | Q9DCC8  | Mitochondrial import receptor subunit TOM20 homolog                            | _IVS[Phospho (STY)]AQSLAEDDVE_2                                                | 0.4549 | -1.1364 | 0.0366 | 1.4366 |
| Dnaj1     | P63037  | DnaJ homolog subfamily A member 1                                              | _TIVITSHPGQVQK_2                                                               | 1.3999 | 0.4853  | 0.0366 | 1.4361 |
| Macf1     | Q9QXZ0  | Microtubule-actin cross-linking factor 1                                       | _LLDAEDVDVPS[Phospho (STY)]PDEK_2                                              | 0.6940 | -0.5269 | 0.0367 | 1.4356 |
| Nme2      | Q01768  | Nucleoside diphosphate kinase B                                                | _SC[Carbamidomethyl (C)]AHDWVVE_2                                              | 1.3653 | 0.4493  | 0.0367 | 1.4355 |
| Vsnl1     | P62761  | Visinin-like protein 1                                                         | _VEM[Oxidation (M)]LEIEAINYK_2                                                 | 0.5879 | -0.7663 | 0.0367 | 1.4352 |
| Pikfyve   | Q9Z1T6  | 1-phosphatidylinositol 3-phosphate 5-kinase                                    | _SGSPMVPSYETSVS[Phospho (STY)]PQANR_2                                          | 0.6640 | -0.5908 | 0.0367 | 1.4349 |
| Cct8      | P42932  | T-complex protein 1 subunit theta                                              | _HFSGLEEAAYR_2                                                                 | 0.6086 | -0.7163 | 0.0369 | 1.4324 |
| Mapk8ip3  | Q9ESN9  | C-Jun-amino-terminal kinase-interacting protein 3                              | _AKET[Phospho (STY)]PEADTSSR_2                                                 | 0.6919 | -0.5314 | 0.0373 | 1.4287 |

|          |        |                                                                        |                                                                                                    |        |         |        |        |
|----------|--------|------------------------------------------------------------------------|----------------------------------------------------------------------------------------------------|--------|---------|--------|--------|
| Ehd3     | Q9QXY6 | EH domain-containing protein 3                                         | _DIQS[Phospho (STY)]LPR_2                                                                          | 0.5604 | -0.8354 | 0.0373 | 1.4284 |
| Rab10    | P61027 | Ras-related protein Rab-10                                             | _EPNSENVDISS[Phospho (STY)]GGVGTGWK_2                                                              | 0.3150 | -1.6667 | 0.0373 | 1.4284 |
| Camk2d   | Q6P42Z | Calcium/calmodulin-dependent protein kinase type II subunit delta      | _IC[Carbamidomethyl (C)]DPGLTAFEPEALGNLVEGM[Oxidation (M)]DFHR_3                                   | 3.1896 | 1.6734  | 0.0374 | 1.4272 |
| Ppp1r13b | Q62415 | Apoptosis-stimulating of p53 protein 1                                 | _VNGTSSPOS[Phospho (STY)]PLSTSGR_2                                                                 | 0.7191 | -0.4757 | 0.0374 | 1.4270 |
| Pitpnc1  | Q8K4R4 | Cytoplasmic phosphatidylinositol transfer protein 1                    | _YEDNKG[S[Phospho (STY)]NDISFDSEAK_3                                                               | 0.6143 | -0.7030 | 0.0375 | 1.4258 |
| Kiaa1522 | A2A758 | Uncharacterized protein KIAA1522                                       | _M[Oxidation (M)]GS[Phospho (STY)]PGSDPQK_2                                                        | 0.6907 | -0.5338 | 0.0375 | 1.4257 |
| Phldb2   | Q8K1N2 | Pleckstrin homology-like domain family B member 2                      | _RLS[Phospho (STY)]AGTTVADVQK_2                                                                    | 0.6908 | -0.5336 | 0.0377 | 1.4232 |
| Ppp2cb   | P62715 | Serine/threonine-protein phosphatase 2A catalytic subunit beta isoform | _AHQLVM[Oxidation (M)]EGYNWC[Carbamidomethyl (C)]HDR_3                                             | 0.5102 | -0.9707 | 0.0378 | 1.4229 |
| C2cd5    | Q77P55 | C2 domain-containing protein 5                                         | _SQSESS[Phospho (STY)]DEVTELDLSHGK_3                                                               | 0.6789 | -0.5587 | 0.0378 | 1.4229 |
| Slc25a12 | Q8BH59 | Calcium-binding mitochondrial carrier protein Aralar1                  | _NIFLQYASTEVDGEHYM[Oxidation (M)]TPEDFVQR_3                                                        | 0.6949 | -0.5251 | 0.0378 | 1.4226 |
| Ctr9     | Q62018 | RNA polymerase-associated protein CTR9 homolog                         | _NSNS[Phospho (STY)]DS[Phospho (STY)]DDDERPNR_2                                                    | 1.4393 | 0.5253  | 0.0378 | 1.4225 |
| Cacna1e  | Q61290 | Voltage-dependent R-type calcium channel subunit alpha-1E              | _DSSDEHC[Carbamidomethyl (C)]VDISSVGT[Phospho (STY)]PLAR_3                                         | 0.7240 | -0.4660 | 0.0379 | 1.4216 |
| Hsp90ab1 | P11499 | Heat shock protein HSP 90-beta                                         | _YHTSQSGDEM[Oxidation (M)]TSLSEYVSR_3                                                              | 1.9387 | 0.9551  | 0.0379 | 1.4214 |
| Champ1   | Q8K327 | Chromosome alignment-maintaining phosphoprotein 1                      | _LKKDS[Phospho (STY)]QENS[Phospho (STY)]DAELSSSEYIR_3                                              | 1.4589 | 0.5448  | 0.0379 | 1.4212 |
| Gap43    | P06837 | Neuromodulin                                                           | _AEDGPAKEPK_2                                                                                      | 1.3892 | 0.4742  | 0.0379 | 1.4211 |
| Phrf1    | A6H619 | PHD and RING finger domain-containing protein 1                        | _S[Phospho (STY)]RS[Phospho (STY)]PS[Phospho (STY)]LEHRPR_3                                        | 0.6910 | -0.5333 | 0.0380 | 1.4204 |
| Mdh1     | P14152 | Malate dehydrogenase, cytoplasmic                                      | _VLVTGAAGQIAYSLYSIGNGSVFGK_3                                                                       | 0.6703 | -0.5772 | 0.0380 | 1.4202 |
| Cct4     | P80315 | T-complex protein 1 subunit delta                                      | _AFADAM[Oxidation (M)]EVIPSTLAENAGLNPISTVELR_3                                                     | 0.6704 | -0.5770 | 0.0380 | 1.4197 |
| Cltb     | Q6IRU5 | Clathrin light chain B                                                 | _DLEEWNR_2                                                                                         | 1.3138 | 0.3938  | 0.0381 | 1.4188 |
| Pippr3   | Q77PB0 | Phospholipid phosphatase-related protein type 3                        | _GLGLPDEAS[Phospho (STY)]PVHLR_2                                                                   | 0.6940 | -0.5270 | 0.0382 | 1.4182 |
| Sv2b     | Q8BG39 | Synaptic vesicle glycoprotein 2B                                       | _QVHDTNMR_2                                                                                        | 2.2039 | 1.1401  | 0.0382 | 1.4179 |
| Scn3b    | Q8BHK2 | Sodium channel subunit beta-3                                          | _AEAAQENASDV[Phospho (STY)]LAIPSENK_2                                                              | 0.2983 | -1.7452 | 0.0382 | 1.4176 |
| Mast1    | Q9R1L5 | Microtubule-associated serine/threonine-protein kinase 1               | _AALS[Phospho (STY)]PVQEHETGRR_3                                                                   | 0.5896 | -0.7622 | 0.0383 | 1.4170 |
| Ina      | P46660 | Alpha-internexin                                                       | _HSAEVAGQDSIGLESDLR_3                                                                              | 1.3430 | 0.4254  | 0.0383 | 1.4164 |
| Cct7     | P80313 | T-complex protein 1 subunit eta                                        | _INALTAASEAAC[Carbamidomethyl (C)]LIVSVDETIK_3                                                     | 0.7242 | -0.4656 | 0.0384 | 1.4160 |
| Cdk18    | Q04899 | Cyclin-dependent kinase 18                                             | _FS[Phospho (STY)]MEDLNK_2                                                                         | 0.7227 | -0.4685 | 0.0384 | 1.4156 |
| Wdttc1   | Q802K9 | WD and tetratricopeptide repeats protein 1                             | _GC[Carbamidomethyl (C)]IS[Phospho (STY)]PQVELPPYLR_2                                              | 0.7223 | -0.4694 | 0.0384 | 1.4152 |
| Pacs1    | Q8K212 | Phosphofurin acidic cluster sorting protein 1                          | _DTTS[Phospho (STY)]PM[Oxidation (M)]ELAALEK_2                                                     | 0.2937 | -1.7676 | 0.0385 | 1.4143 |
| Mlb2     | Q8R516 | E3 ubiquitin-protein ligase MIB2                                       | _VS[Phospho (STY)]ADGQPFQR_2                                                                       | 0.7192 | -0.4755 | 0.0386 | 1.4131 |
| Ctnnd2   | Q35927 | Catenin delta-2                                                        | _NS[Phospho (STY)]YGAPAEIDK_2                                                                      | 0.7028 | -0.5087 | 0.0388 | 1.4115 |
| Dbn1     | Q9QX56 | Drebrin                                                                | _ASDSGPGSSSSSSS[Phospho (STY)]PPRTFFPYITC[Carbamidomethyl (C)]HR_4                                 | 0.7282 | -0.4576 | 0.0390 | 1.4089 |
| Shank1   | D3YZU1 | SH3 and multiple ankyrin repeat domains protein 1                      | _THS[Phospho (STY)]PATS[Phospho (STY)]EDEER_2                                                      | 0.7192 | -0.4755 | 0.0390 | 1.4087 |
| Eif5b    | Q05D44 | Eukaryotic translation initiation factor 5B                            | _IEPIGES[Phospho (STY)]PK_2                                                                        | 0.7641 | -0.3881 | 0.0391 | 1.4083 |
| Abcf1    | Q6P542 | ATP-binding cassette sub-family F member 1                             | _GGNVFEALIQDQS[Phospho (STY)]EEEEEEENR_3                                                           | 0.7192 | -0.4755 | 0.0391 | 1.4078 |
| Nsf      | P46460 | Vesicle-fusing ATPase                                                  | _FLALM[Oxidation (M)]REEGAS[Phospho (STY)]PLDFD_2                                                  | 0.6907 | -0.5338 | 0.0392 | 1.4073 |
| Atp5pb   | Q9CQ7  | ATP synthase F(0) complex subunit B1, mitochondrial                    | _KEEHEMIDWVEK_3                                                                                    | 0.6971 | -0.5206 | 0.0392 | 1.4066 |
| Psmb5    | O55234 | Proteasome subunit beta type-5                                         | _AIYQATYR_2                                                                                        | 0.6547 | -0.6111 | 0.0393 | 1.4057 |
| Rbbp6    | P97868 | E3 ubiquitin-protein ligase RBBP6                                      | _YHS[Phospho (STY)]RS[Phospho (STY)]RS[Phospho (STY)]PQAFR_3                                       | 0.5381 | -0.8941 | 0.0393 | 1.4056 |
| Scg2     | Q03517 | Secretogranin-2                                                        | _VSPVS[Phospho (STY)]SEDDLQEEQLQQAIK_3                                                             | 0.6916 | -0.5320 | 0.0393 | 1.4055 |
| Ppp1r14a | Q91VC7 | Protein phosphatase 1 regulatory subunit 14A                           | _QPGFPQPSDDPS[Phospho (STY)]LSRQDR_3                                                               | 0.6973 | -0.5201 | 0.0394 | 1.4046 |
| Calr     | P14211 | Calreticulin                                                           | _VHVIFNYK_2                                                                                        | 0.5893 | -0.7629 | 0.0395 | 1.4034 |
| Tomm70   | Q9CZW5 | Mitochondrial import receptor subunit TOM70                            | _EC[Carbamidomethyl (C)]LEDVTAVC[Carbamidomethyl (C)]LEGFQNEQSM[Oxidation (M)]LLADK_3              | 1.4290 | 0.5150  | 0.0395 | 1.4033 |
| P33monox | Q9DBN4 | Putative monooxygenase p33MONOX                                        | _HPASAQSTPSSTPHAS[Phospho (STY)]PK_3                                                               | 0.6231 | -0.6824 | 0.0395 | 1.4030 |
| Dennd4b  | Q3U1Y4 | DENN domain-containing protein 4B                                      | _SGS[Phospho (STY)]LGSAR_2                                                                         | 0.7300 | -0.4539 | 0.0397 | 1.4014 |
| Prkar2b  | P31324 | cAMP-dependent protein kinase type II-beta regulatory subunit          | _NLDPEQM[Oxidation (M)]SQVLDAMFEK_2                                                                | 0.6978 | -0.5191 | 0.0397 | 1.4010 |
| Gnao1    | P18872 | Guanine nucleotide-binding protein G(o) subunit alpha                  | _PVVYSNTIQSLAAVIR_2                                                                                | 0.7169 | -0.4801 | 0.0398 | 1.3997 |
| Lsm14a   | Q8K2F8 | Protein LSM14 homolog A                                                | _SFFDNIS[Phospho (STY)]C[Carbamidomethyl (C)]DDNRER_2                                              | 0.6621 | -0.5950 | 0.0399 | 1.3992 |
| Grin2b   | Q01097 | Glutamate receptor ionotropic, NMDA 2B                                 | _ROHS[Phospho (STY)]YDFVDLQK_3                                                                     | 0.5031 | -0.9911 | 0.0399 | 1.3992 |
| Pclo     | Q9QYX7 | Protein piccolo                                                        | _TTLVFDEEPELEM[Oxidation (M)]ESLTD[S[Phospho (STY)]PEDR_3                                          | 0.7167 | -0.4807 | 0.0400 | 1.3985 |
| Dock7    | Q8R1A4 | Dedicator of cytokinesis protein 7                                     | _KGS[Phospho (STY)]WSER_2                                                                          | 0.7164 | -0.4811 | 0.0401 | 1.3974 |
| Thumpd2  | Q9CZB3 | THUMP domain-containing protein 2                                      | _LLOGS[Phospho (STY)]PEQGEAVTR_2                                                                   | 0.5534 | -0.8537 | 0.0401 | 1.3970 |
| Myh9     | Q8VDD5 | Myosin-9                                                               | _LQQLDLDLVLVDLHQR_3                                                                                | 0.6577 | -0.6044 | 0.0401 | 1.3966 |
| Scn2a    | B1AWN6 | Sodium channel protein type 2 subunit alpha                            | _AM[Oxidation (M)]SM[Oxidation (M)]ASILT[Phospho (STY)]INT[Phospho (STY)]M[Oxidation (M)]EELEESR_2 | 0.2022 | -2.3064 | 0.0403 | 1.3947 |
| Rbmxl1   | Q91VM5 | RNA binding motif protein, X-linked-like-1                             | _ST[Phospho (STY)]PSGPVR_2                                                                         | 0.2610 | -1.9381 | 0.0404 | 1.3939 |
| Homer1   | Q922Y3 | Homer protein homolog 1                                                | _HAVTVSYFYDSTR_2                                                                                   | 0.6198 | -0.6901 | 0.0404 | 1.3937 |
| Prickle1 | Q3USC7 | Prickle-like protein 1                                                 | _KS[Phospho (STY)]RSDNALNLVTER_3                                                                   | 0.6819 | -0.5524 | 0.0404 | 1.3932 |
| Stip1    | Q60864 | Stress-induced-phosphoprotein 1                                        | _ALDLSSC[Carbamidomethyl (C)]K_2                                                                   | 1.3616 | 0.4453  | 0.0406 | 1.3914 |
| Rufy3    | Q9D394 | Protein RUFY3                                                          | _DGNS[Phospho (STY)]SGSEGDGQITAILDQK_3                                                             | 0.7322 | -0.4497 | 0.0408 | 1.3893 |
| Copa     | Q8CIE6 | Coatamer subunit alpha                                                 | _NLS[Phospho (STY)]PGAIVESDVR_2                                                                    | 0.1891 | -2.4029 | 0.0408 | 1.3891 |
| Slc3a2   | P10852 | 4F2 cell-surface antigen heavy chain                                   | _NQKDEINETDLK_3                                                                                    | 0.7325 | -0.4492 | 0.0410 | 1.3876 |
| Cpeb4    | Q77N98 | Cytoplasmic polyadenylation element-binding protein 4                  | _QQLSPS[Phospho (STY)]PGQEGALPETEK_2                                                               | 2.4761 | 1.3081  | 0.0411 | 1.3859 |
| Ank2     | Q8C8R3 | Ankyrin-2                                                              | _ETTKVGT[Phospho (STY)]PTDIHSEK_2                                                                  | 0.5848 | -0.7741 | 0.0414 | 1.3834 |

|                 |               |                                                                                                 |                                                                                     |        |         |        |        |
|-----------------|---------------|-------------------------------------------------------------------------------------------------|-------------------------------------------------------------------------------------|--------|---------|--------|--------|
| Swi5            | Q8K3D3        | DNA repair protein SWI5 homolog                                                                 | _ELYPDFDLNLD_2                                                                      | 1.8604 | 0.8956  | 0.0414 | 1.3825 |
| Rem2            | Q8VEL9        | GTP-binding protein REM 2                                                                       | _RGS[Phospho (STY)]M[Oxidation (M)]PVPYK_2                                          | 0.4351 | -1.2007 | 0.0415 | 1.3816 |
| Nefh            | P19246        | Neurofilament heavy polypeptide                                                                 | _SPAEPKS[Phospho (STY)]PAEPKS[Phospho (STY)]PAEAK_2                                 | 1.4335 | 0.5195  | 0.0416 | 1.3810 |
| Camk4           | P08414        | Calcium/calmodulin-dependent protein kinase type IV                                             | _ASS[Phospho (STY)]DPPSTQDAK_2                                                      | 0.7005 | -0.5134 | 0.0417 | 1.3802 |
| Actr2           | P61161        | Actin-related protein 2                                                                         | _LALETTVLVESYTLPGDR_2                                                               | 0.6841 | -0.5477 | 0.0417 | 1.3798 |
| Dnajc5          | P60904        | Dnaj homolog subfamily C member 5                                                               | _EINNAHAILDATK_2                                                                    | 0.6505 | -0.6204 | 0.0418 | 1.3790 |
| Pgm1            | Q9D0F9        | Phosphoglucosylase-1                                                                            | _DLEALMLDR_2                                                                        | 0.7340 | -0.4461 | 0.0420 | 1.3765 |
| Hspa8           | P63017        | Heat shock cognate 71 kDa protein                                                               | _YKAEDKQR_2                                                                         | 1.5124 | 0.5968  | 0.0422 | 1.3743 |
| H3-5;H3-3a      | P02301;P84244 | Histone H3.3C;Histone H3.3                                                                      | _FQSAAGALQEASEAYLVGFEDTNLC[Carbamidomethyl (C)]AIHAK_3                              | 1.4200 | 0.5059  | 0.0423 | 1.3739 |
| Wdfy3           | Q6VNB8        | WD repeat and FYVE domain-containing protein 3                                                  | _SQS[Phospho (STY)]EYC[Carbamidomethyl (C)]NVGTK_2                                  | 0.5520 | -0.8572 | 0.0424 | 1.3729 |
| Ndufa9          | Q9DC69        | NADH dehydrogenase [ubiquinone] 1 alpha subcomplex subunit 9, mitochondrial                     | _SSVSGVVATVFGATGFLGR_2                                                              | 1.9729 | 0.9803  | 0.0425 | 1.3718 |
| Srgap2          | Q91267        | SLIT-ROBO Rho GTPase-activating protein 2                                                       | _QTPRS[Phospho (STY)]PDSTANVR_3                                                     | 0.6745 | -0.5682 | 0.0427 | 1.3699 |
| Ank2            | Q8C8R3        | Ankyrin-2                                                                                       | _VGT[Phospho (STY)]PTDIHSEK_2                                                       | 0.7352 | -0.4438 | 0.0428 | 1.3688 |
| Akap8           | Q9DBR0        | A-kinase anchor protein 8                                                                       | _SNS[Phospho (STY)]STFIR_2                                                          | 0.7350 | -0.4442 | 0.0428 | 1.3684 |
| Gapvd1          | Q6PAR5        | GTPase-activating protein and VP59 domain-containing protein 1                                  | _LQELSEC[Carbamidomethyl (C)]SGLGS[Phospho (STY)]TSDDTDVR_2                         | 1.4184 | 0.5043  | 0.0428 | 1.3682 |
| Dctn2           | Q99KJ8        | Dynactin subunit 2                                                                              | _LLEATVR_2                                                                          | 0.5584 | -0.8405 | 0.0428 | 1.3681 |
| Uba1            | Q02053        | Ubiquitin-like modifier-activating enzyme 1                                                     | _QLLDYFK_2                                                                          | 0.6972 | -0.5203 | 0.0429 | 1.3678 |
| Rab10           | P61027        | Ras-related protein Rab-10                                                                      | _ANINIEK_2                                                                          | 0.6738 | -0.5697 | 0.0429 | 1.3671 |
| Lap3            | Q9CPY7        | Cytosol aminopeptidase                                                                          | _ANKPGDVVR_2                                                                        | 1.3294 | 0.4108  | 0.0430 | 1.3663 |
| Map1b           | P14873        | Microtubule-associated protein 1B                                                               | _EEC[Carbamidomethyl (C)]PRPMSIS[Phospho (STY)]PPDFSPK_3                            | 1.4835 | 0.5690  | 0.0430 | 1.3662 |
| Nefh            | P19246        | Neurofilament heavy polypeptide                                                                 | _VKS[Phospho (STY)]EEMIKVVEK_3                                                      | 1.4332 | 0.5193  | 0.0430 | 1.3660 |
| Clec2l          | P0C7M9        | C-type lectin domain family 2 member L                                                          | _PRS[Phospho (STY)]PAEAEAR_2                                                        | 0.7594 | -0.3970 | 0.0431 | 1.3658 |
| Hid1            | Q8R1F6        | Protein HID1                                                                                    | _TGS[Phospho (STY)]QEGTSMEGSR_2                                                     | 1.4764 | 0.5621  | 0.0431 | 1.3657 |
| Pfkf            | Q9WUA3        | ATP-dependent 6-phosphofructokinase, platelet type                                              | _IIEVVDAIM[Oxidation (M)]TTAQSHQR_2                                                 | 1.3332 | 0.4149  | 0.0432 | 1.3650 |
| Sgip1           | Q8VD37        | SH3-containing GRB2-like protein 3-interacting protein 1                                        | _LPS[Phospho (STY)]ISOLDISIFGPVLSPK_2                                               | 0.6346 | -0.6562 | 0.0432 | 1.3648 |
| Ank2            | Q8C8R3        | Ankyrin-2                                                                                       | _AREEQTLHIASR_3                                                                     | 0.7202 | -0.4735 | 0.0432 | 1.3648 |
| Atp2b1          | G5E829        | Plasma membrane calcium-transporting ATPase 1                                                   | _SSLYGLGKPE[Phospho (STY)]JR_2                                                      | 0.6601 | -0.5993 | 0.0434 | 1.3626 |
| Kif1b           | Q60575        | Kinesin-like protein KIF1B                                                                      | _SGLS[Phospho (STY)]LEELR_2                                                         | 0.5271 | -0.9238 | 0.0434 | 1.3626 |
| Hyou1           | Q9JKR6        | Hypoxia up-regulated protein 1                                                                  | _VESVFETLVEDSPPEESTLTK_2                                                            | 0.6786 | -0.5593 | 0.0435 | 1.3614 |
| Ak1             | Q9R0Y5        | Adenylate kinase isoenzyme 1                                                                    | _VDNNEETIKK_2                                                                       | 1.3501 | 0.4330  | 0.0436 | 1.3605 |
| Znf365          | Q8BG89        | Protein ZNF365                                                                                  | _MVEAVDRT[Phospho (STY)]JEK_2                                                       | 0.7091 | -0.4960 | 0.0436 | 1.3605 |
| Pcsk1n          | Q9QXV0        | ProSAS                                                                                          | _ASDPPLAPDDDDPDAPAAQLAR_2                                                           | 1.3029 | 0.3817  | 0.0440 | 1.3561 |
| Map1a           | Q9QYR6        | Microtubule-associated protein 1A                                                               | _APISLSQDPSPLNGSTTSC[Carbamidomethyl (C)]GPDRTT[Phospho (STY)]PS[Phospho (STY)]PK_4 | 0.0464 | -4.4291 | 0.0441 | 1.3555 |
| Pgk1            | P09411        | Phosphoglycerate kinase 1                                                                       | _IQLINNM[Oxidation (M)]LDK_2                                                        | 0.7018 | -0.5109 | 0.0443 | 1.3538 |
| Gapvd1          | Q6PAR5        | GTPase-activating protein and VP59 domain-containing protein 1                                  | _FSLC[Carbamidomethyl (C)]S[Phospho (STY)]DNLEGISEGPSNR_2                           | 0.7160 | -0.4820 | 0.0444 | 1.3530 |
| Tubb2a          | Q7TMM9        | Tubulin beta-2A chain                                                                           | _INVYNEAAGNKYVPR_3                                                                  | 1.4116 | 0.4974  | 0.0444 | 1.3528 |
| Slc8a2          | Q8K596        | Sodium/calcium exchanger 2                                                                      | _S[Phospho (STY)]GIIGAEGDPPK_2                                                      | 0.5409 | -0.8867 | 0.0444 | 1.3527 |
| Iqsec2          | Q5DU25        | IQ motif and SEC7 domain-containing protein 2                                                   | _M[Oxidation (M)]QFS[Phospho (STY)]FEEYEK_2                                         | 0.7298 | -0.4545 | 0.0445 | 1.3518 |
| Snap25          | P60879        | Synaptosomal-associated protein 25                                                              | _ADQLADESLESTRR_2                                                                   | 1.3135 | 0.3934  | 0.0445 | 1.3517 |
| Dlgap2          | Q8BJ42        | Disks large-associated protein 2                                                                | _C[Carbamidomethyl (C)]SS[Phospho (STY)]IGVQDSEFPDHOQPYPR_3                         | 0.4221 | -1.2444 | 0.0447 | 1.3500 |
| Elf4b           | Q8BGD9        | Eukaryotic translation initiation factor 4B                                                     | _RGDDSFQKVR_3                                                                       | 1.6692 | 0.7391  | 0.0447 | 1.3498 |
| Gigyl2          | Q6Y7W8        | GRB10-interacting GYF protein 2                                                                 | _QQQQQQQQQQQQQQQSNR_3                                                               | 0.7167 | -0.4806 | 0.0448 | 1.3488 |
| Aldoa           | P05064        | Fructose-bisphosphate aldolase A                                                                | _VDKGVVPLAGNTGETTQGLDGLSR_3                                                         | 1.3015 | 0.3802  | 0.0448 | 1.3483 |
| Rapgef2         | Q8CHG7        | Rap guanine nucleotide exchange factor 2                                                        | _ILS[Phospho (STY)]LSEEGSLER_2                                                      | 0.4068 | -1.2976 | 0.0449 | 1.3478 |
| Marcks          | P26645        | Myristoylated alanine-rich C-kinase substrate                                                   | _GEATAERPGEAAVASS[Phospho (STY)]PSK_2                                               | 1.3243 | 0.4052  | 0.0449 | 1.3478 |
| Adra2c          | Q01337        | Alpha-2C adrenergic receptor                                                                    | _TEVEPDES[Phospho (STY)]SAAER_2                                                     | 0.7373 | -0.4396 | 0.0450 | 1.3466 |
| Ahsa1           | Q8BK64        | Activator of 90 kDa heat shock protein ATPase homolog 1                                         | _QTFGGYAR_2                                                                         | 0.6676 | -0.5828 | 0.0450 | 1.3464 |
| Cdk17           | Q8K0D0        | Cyclin-dependent kinase 17                                                                      | _RAS[Phospho (STY)]LSEIFGK_2                                                        | 0.4209 | -1.2486 | 0.0451 | 1.3458 |
| Tmsb10          | Q6ZWY8        | Thymosin beta-10                                                                                | _Acetyl (Protein N-term)]ADKPDM[Oxidation (M)]GEIASFDK_2                            | 1.4911 | 0.5764  | 0.0451 | 1.3454 |
| Spen            | Q62504        | Msx2-interacting protein                                                                        | _DLEPGEVPS[Phospho (STY)]DS[Phospho (STY)]DEDAEHR_2                                 | 0.4963 | -1.0107 | 0.0452 | 1.3446 |
| Stip1           | Q60864        | Stress-induced-phosphoprotein 1                                                                 | _IGNSYFKEEK_2                                                                       | 1.5385 | 0.6215  | 0.0453 | 1.3437 |
| Tgolin1,Tgolin2 | Q62313;Q62314 | Trans-Golgi network integral membrane protein 1;Trans-Golgi network integral membrane protein 2 | _DADS[Phospho (STY)]GDSQPNPNQPSK_2                                                  | 2.9766 | 1.5737  | 0.0456 | 1.3411 |
| Hnrrpa2b1       | O88569        | Heterogeneous nuclear ribonucleoproteins A2/B1                                                  | _GGSDGYGSGR_2                                                                       | 0.6942 | -0.5265 | 0.0458 | 1.3395 |
| Plppr3          | Q77PB0        | Phospholipid phosphatase-related protein type 3                                                 | _RAS[Phospho (STY)]VDVDLLAPR_2                                                      | 0.6513 | -0.6186 | 0.0459 | 1.3378 |
| Wdr1            | O88342        | WD repeat-containing protein 1                                                                  | _DYSGGGVVK_2                                                                        | 1.3124 | 0.3923  | 0.0460 | 1.3371 |
| Pex5l           | Q8C437        | PEX5-related protein                                                                            | _GPETS[Phospho (STY)]SLDLDIQTQLEK_2                                                 | 0.7060 | -0.5022 | 0.0460 | 1.3369 |
| Cntn1           | P12960        | Contactin-1                                                                                     | _IFNIQLEDEGLYEC[Carbamidomethyl (C)]EAEINR_3                                        | 0.5458 | -0.8736 | 0.0460 | 1.3369 |
| Pkp4            | Q68FH0        | Plakophilin-4                                                                                   | _PSPIYSSYSS[Phospho (STY)]PAR_2                                                     | 0.4036 | -1.3090 | 0.0462 | 1.3357 |
| Nfrkb           | Q6PIJ4        | Nuclear factor related to kappa-B-binding protein                                               | _SPS[Phospho (STY)]PAVPLR_2                                                         | 1.4460 | 0.5321  | 0.0463 | 1.3343 |
| Gpi             | P06745        | Glucose-6-phosphate isomerase                                                                   | _ILLANFLAQTEALM[Oxidation (M)]K_2                                                   | 0.7456 | -0.4235 | 0.0463 | 1.3341 |
| Stt3b           | Q3TDQ1        | Dolichyl-diphosphooligosaccharide-protein glycosyltransferase subunit STT3B                     | _ENPPVEDS[Phospho (STY)]S[Phospho (STY)]DEDDKRNPGNLYDK_3                            | 0.4276 | -1.2257 | 0.0465 | 1.3326 |
| Adgrb1          | Q3UHD1        | Adhesion G protein-coupled receptor B1                                                          | _NENVATLSVSS[Phospho (STY)]LER_2                                                    | 0.5993 | -0.7386 | 0.0466 | 1.3316 |



|           |               |                                                                    |                                                                                    |        |         |        |        |
|-----------|---------------|--------------------------------------------------------------------|------------------------------------------------------------------------------------|--------|---------|--------|--------|
| Uba1      | Q02053        | Ubiquitin-like modifier-activating enzyme 1                        | _IYDDFFQNLDGVANALDNIDAR_3                                                          | 1.4238 | 0.5098  | 0.0466 | 1.3315 |
| Ndufv1    | Q91Y70        | NADH dehydrogenase [ubiquinone] flavoprotein 1, mitochondrial      | _TSFGSLKDEDR_3                                                                     | 1.4614 | 0.5474  | 0.0467 | 1.3306 |
| Dnmt1     | P13864        | DNA (cytosine-5)-methyltransferase 1                               | _S[Phospho (STY)]KSDSTLSVETSPSSVATR_3                                              | 1.5378 | 0.6209  | 0.0467 | 1.3306 |
| Znf106    | O88466        | Zinc finger protein 106                                            | _ATHVPENS[Phospho (STY)]DTEQDVFTAKPAR_3                                            | 0.6749 | -0.5673 | 0.0467 | 1.3305 |
| Kctd12    | Q6WVG3        | BTB/POZ domain-containing protein KCTD12                           | _MFTQQQPQELAR_2                                                                    | 1.4627 | 0.5486  | 0.0468 | 1.3301 |
| Dnm1l     | Q8K1M6        | Dynamin-1-like protein                                             | _YIETSEL[Carbamidomethyl (C)]GGAR_2                                                | 0.6751 | -0.5668 | 0.0468 | 1.3300 |
| Slc8a2    | Q8K596        | Sodium/calcium exchanger 2                                         | _C[Carbamidomethyl (C)]QPGVLVPVWEPEPSLGDK_2                                        | 0.6551 | -0.6102 | 0.0469 | 1.3288 |
| Pip5k1c   | O70161        | Phosphatidylinositol 4-phosphate 5-kinase type-1 gamma             | _ITVQVEPVC[Carbamidomethyl (C)]GVGVVPK_2                                           | 1.3059 | 0.3851  | 0.0469 | 1.3285 |
| Ube4b     | Q9E500        | Ubiquitin conjugation factor E4 B                                  | _NNEQWKDS[Phospho (STY)]PLATR_2                                                    | 0.4390 | -1.1877 | 0.0470 | 1.3279 |
| Tuba1b    | P05213        | Tubulin alpha-1B chain                                             | _EDM[Oxidation (M)]AALEKDYEEVGVDVSEGEEGEEY_3                                       | 0.7186 | -0.4768 | 0.0470 | 1.3278 |
| Gja1      | P23242        | Gap junction alpha-1 protein                                       | _C[Carbamidomethyl (C)]NTQQPGC[Carbamidomethyl (C)]JENV[Carbamidomethyl (C)]YDK_2  | 1.3962 | 0.4815  | 0.0470 | 1.3276 |
| Srrm2     | Q8BT18        | Serine/arginine repetitive matrix protein 2                        | _RRS[Phospho (STY)]PS[Phospho (STY)]VS[Phospho (STY)]S[Phospho (STY)]PEPTEK_2      | 0.2162 | -2.2094 | 0.0470 | 1.3275 |
| Iqsec2    | Q5DU25        | IQ motif and SEC7 domain-containing protein 2                      | _AAHLPLLTIEPPSDSS[Phospho (STY)]VDLSDR_3                                           | 1.4140 | 0.4998  | 0.0471 | 1.3266 |
| Mark2     | Q05512        | Serine/threonine-protein kinase MARK2                              | _GRNS[Phospho (STY)]JATSADQPHIGNYR_3                                               | 0.7073 | -0.4995 | 0.0471 | 1.3265 |
| Dync1h1   | Q9JHU4        | Cytoplasmic dynein 1 heavy chain 1                                 | _LQGATC[Carbamidomethyl (C)]SNNK_2                                                 | 0.6371 | -0.6505 | 0.0471 | 1.3265 |
| Dmx1      | Q8BPN8        | Dmx-like protein 2                                                 | _SS[Phospho (STY)]DDIDYR_2                                                         | 0.4838 | -1.0475 | 0.0472 | 1.3264 |
| Aak1      | Q3UHU0        | AP2-associated protein kinase 1                                    | _REQSSGLSGSS[Phospho (STY)]GGGSSSGLSGGYIGR_3                                       | 0.6921 | -0.5309 | 0.0473 | 1.3254 |
| Dctn1     | O08788        | Dynactin subunit 1                                                 | _LNQLSTHTHVVDITR_3                                                                 | 1.4217 | 0.5076  | 0.0473 | 1.3249 |
| Pde2a     | Q92254        | cGMP-dependent 3',5'-cyclic phosphodiesterase                      | _VETVYTYLLDGESR_2                                                                  | 0.6833 | -0.5495 | 0.0474 | 1.3246 |
| Ap2b1     | Q9DBG3        | AP-2 complex subunit beta                                          | _APEVSQIYQVYDSLK_2                                                                 | 1.4224 | 0.5083  | 0.0474 | 1.3243 |
| Hivep3    | AZ4884        | Transcription factor HIVEP3                                        | _RSS[Phospho (STY)]VESPK_2                                                         | 1.4228 | 0.5087  | 0.0474 | 1.3239 |
| Pip5k1c   | O70161        | Phosphatidylinositol 4-phosphate 5-kinase type-1 gamma             | _IM[Oxidation (M)]DYSLLLGVHNIDQER_3                                                | 1.4084 | 0.4940  | 0.0476 | 1.3225 |
| Ahcyl2    | Q68FL4        | Putative adenosylhomocysteinase 3                                  | _TPELTWER_2                                                                        | 1.5697 | 0.6505  | 0.0476 | 1.3222 |
| Aldoc     | P05063        | Fructose-bisphosphate aldolase C                                   | _ISDRTPSALAIENANVLAR_3                                                             | 1.3455 | 0.4281  | 0.0477 | 1.3216 |
| Ctu1      | Q99J10        | Cytoplasmic tRNA 2-thiolation protein 1                            | _AGATC[Carbamidomethyl (C)]VSOQC[Carbamidomethyl (C)]DLS[Phospho (STY)]PGNGEDR_2   | 1.4355 | 0.5215  | 0.0477 | 1.3211 |
| Sv2b      | Q8BG39        | Synaptic vesicle glycoprotein 2B                                   | _YFQDEEYKS[Phospho (STY)]K_2                                                       | 0.7334 | -0.4473 | 0.0479 | 1.3200 |
| Ttc3      | O88196        | E3 ubiquitin-protein ligase TTC3                                   | _KQDS[Phospho (STY)]DEM[Oxidation (M)]PFGC[Carbamidomethyl (C)]IK_2                | 0.6180 | -0.6943 | 0.0479 | 1.3195 |
| Cyflp2    | Q5SQX6        | Cytoplasmic FMRI1-interacting protein 2                            | _YAPLHLVPLIER_2                                                                    | 0.5972 | -0.7437 | 0.0479 | 1.3194 |
| Tpt1      | P63028        | Translationally-controlled tumor protein                           | _LEEQKPER_2                                                                        | 1.8302 | 0.8720  | 0.0480 | 1.3189 |
| Clasp1    | Q80TV8        | CLIP-associating protein 1                                         | _RS[Phospho (STY)]PTGSTASR_2                                                       | 1.3902 | 0.4753  | 0.0482 | 1.3172 |
| Prps1     | Q9D7G0        | Ribose-phosphate pyrophosphokinase 1                               | _IFSGSSHQDLSQK_2                                                                   | 1.4900 | 0.5753  | 0.0482 | 1.3167 |
| Atp1a2    | Q6PIE5        | Sodium/potassium-transporting ATPase subunit alpha-2               | _LC[Carbamidomethyl (C)]FVGLM[Oxidation (M)]SM[Oxidation (M)]DPPR_2                | 0.5977 | -0.7426 | 0.0483 | 1.3163 |
| Pja1      | O55176        | E3 ubiquitin-protein ligase Praja-1                                | _EQPOSSS[Phospho (STY)]GESWELLPGKEELR_3                                            | 0.6919 | -0.5314 | 0.0483 | 1.3156 |
| Acot7     | Q91V12        | Cytosolic acyl coenzyme A thioester hydrolase                      | _SM[Oxidation (M)]EIEVLVDADPVVDNSQK_2                                              | 0.5607 | -0.8348 | 0.0484 | 1.3156 |
| Acin1     | Q9JIX8        | Apoptotic chromatin condensation inducer in the nucleus            | _SLS[Phospho (STY)]PLSGTTDTKAES[Phospho (STY)]PAGR_2                               | 2.3991 | 1.2625  | 0.0485 | 1.3141 |
| Srrm2     | Q8BT18        | Serine/arginine repetitive matrix protein 2                        | _LXSGM[Oxidation (M)]S[Phospho (STY)]PEQSK_2                                       | 0.4251 | -1.2342 | 0.0486 | 1.3138 |
| Sumo3     | Q92172        | Small ubiquitin-related modifier 3                                 | _VAGQDGSVVQFK_2                                                                    | 1.3103 | 0.3899  | 0.0486 | 1.3133 |
| Pasma3    | O70435        | Proteasome subunit alpha-type-3                                    | _AVENSSTAIGIR_2                                                                    | 1.6558 | 0.7275  | 0.0486 | 1.3133 |
| Eps8l2    | Q99K30        | Epidermal growth factor receptor kinase substrate 8-like protein 2 | _RRES[Phospho (STY)]QDEEPR_2                                                       | 1.3964 | 0.4817  | 0.0488 | 1.3115 |
| Arf3;Arf1 | P61205;P84078 | ADP-ribosylation factor 3;ADP-ribosylation factor 1                | _HYFQNTQGLUFVDSNDR_3                                                               | 0.5056 | -0.9838 | 0.0488 | 1.3112 |
| Chgb      | P16014        | Secretogranin-1                                                    | _WASS[Phospho (STY)]REDAGAPVEDSQGQTK_3                                             | 1.9595 | 0.9705  | 0.0489 | 1.3105 |
| Slc25a12  | Q8BH59        | Calcium-binding mitochondrial carrier protein Aralar1              | _FTLGSVAGAVGATAVPIDLVK_2                                                           | 1.3795 | 0.4641  | 0.0489 | 1.3104 |
| C2cd3     | Q52KB6        | C2 domain-containing protein 3                                     | _SDVGTSELP[Phospho (STY)]EDDGVEPSR_2                                               | 0.4615 | -1.1155 | 0.0490 | 1.3101 |
| Ccar2     | Q8VDP4        | Cell cycle and apoptosis regulator protein 2                       | _S[Phospho (STY)]VAS[Phospho (STY)]NQSEM[Oxidation (M)]EYSSLQDM[Oxidation (M)]PK_2 | 0.6118 | -0.7089 | 0.0490 | 1.3095 |
| Sucla2    | Q9Z2I9        | Succinate-CoA ligase [ADP-forming] subunit beta, mitochondrial     | _IFDLQDWSQEDER_2                                                                   | 0.5508 | -0.8605 | 0.0491 | 1.3088 |
| Cdk13     | Q69ZA1        | Cyclin-dependent kinase 13                                         | _S[Phospho (STY)]RS[Phospho (STY)]PYS[Phospho (STY)]PVLRR_3                        | 0.7197 | -0.4745 | 0.0492 | 1.3083 |
| Atp6v1c1  | Q921G3        | V-type proton ATPase subunit C 1                                   | _IDC[Carbamidomethyl (C)]NLEFK_2                                                   | 0.6929 | -0.5292 | 0.0492 | 1.3082 |
| Apc       | Q61315        | Adenomatous polyposis coli protein                                 | _SFHVEDTPVC[Carbamidomethyl (C)]FS[Phospho (STY)]R_3                               | 1.3940 | 0.4792  | 0.0492 | 1.3077 |
| Hivep2    | Q3UHF7        | Transcription factor HIVEP2                                        | _LADLEHSSGESS[Phospho (STY)]FESTGTGLSR_3                                           | 1.3933 | 0.4786  | 0.0493 | 1.3069 |
| Htt       | P42859        | Huntingtin                                                         | _DEVAEAS[Phospho (STY)]DPESKPC[Carbamidomethyl (C)]R_2                             | 0.7198 | -0.4743 | 0.0493 | 1.3068 |
| Fam117b   | Q3U3E2        | Protein FAM117B                                                    | _S[Phospho (STY)]PEQGRPSAEKR_3                                                     | 0.7409 | -0.4327 | 0.0494 | 1.3067 |
| Mapre3    | Q6PER3        | Microtubule-associated protein RP/EB family member 3               | _LIGTAVPQRTS[Phospho (STY)]PTGPK_2                                                 | 0.3012 | -1.7314 | 0.0496 | 1.3046 |
| Synj1     | Q8CHC4        | Synaptojanin-1                                                     | _JYAGTGALEGK_2                                                                     | 0.7643 | -0.3878 | 0.0496 | 1.3045 |
| Ap1b1     | O35643        | AP-1 complex subunit beta-1                                        | _VIASMTVGK_2                                                                       | 0.6692 | -0.5795 | 0.0496 | 1.3041 |
| Runx1t1   | Q61909        | Protein CBFA2T1                                                    | _QQS[Phospho (STY)]PVNPDVVALDAHR_3                                                 | 1.3697 | 0.4539  | 0.0498 | 1.3032 |
| Septin5   | Q9Z2Q6        | Septin-5                                                           | _LYPWGIVEVENQAH[C[Carbamidomethyl (C)]DFVK_2                                       | 0.4923 | -1.0223 | 0.0498 | 1.3030 |
| Armt1     | A6H630        | Damage-control phosphatase ARMT1                                   | _JAcetyl (Protein N-term)]AES[Phospho (STY)]PAFLSAK_2                              | 0.6206 | -0.6884 | 0.0499 | 1.3019 |
| Lyst      | P97412        | Lysosomal-trafficking regulator                                    | _QPEPFS[Phospho (STY)]PR_2                                                         | 0.5886 | -0.7646 | 0.0499 | 1.3016 |
