# Supplementary material for: The Chronic Effects of a Single Low-Intensity Blast Exposure on Phosphoproteome Networks and Cognitive Function Influenced by Mutant Tau Overexpression
Source: MDPI journal article supplement (doi:10.3390/ijms25063338), 2024-03-15
Supplement: s1 [file s1]

# Supplementary File S3. Weight peptide coexpression-network analysis of 20 mice cortical phosphopeptides

Marcus Jackson

2023-10-18

## Step 1.

- Import or install all required packages:

```
library(readxl)
library(WGCNA)
```

```
## Loading required package: dynamicTreeCut
```

```
## Loading required package: fastcluster
```

```
##
```

```
## Attaching package: 'fastcluster'
```

```
## The following object is masked from 'package:stats':
```

```
##
```

```
##      hclust
```

```
##
```

```
##
```

```
## Attaching package: 'WGCNA'
```

```
## The following object is masked from 'package:stats':
```

```
##
```

```
##      cor
```

```
library(textshape)
```

```
library(AnnotationDbi)
```

```
## Loading required package: stats4
```

```
## Loading required package: BiocGenerics
```

```
##
```

```
## Attaching package: 'BiocGenerics'
```

```

## The following object is masked from 'package:textshape':
##
##      combine

## The following objects are masked from 'package:stats':
##
##      IQR, mad, sd, var, xtabs

## The following objects are masked from 'package:base':
##
##      anyDuplicated, aperm, append, as.data.frame, basename, cbind,
##      colnames, dirname, do.call, duplicated, eval, evalq, Filter, Find,
##      get, grep, grepl, intersect, is.unsorted, lapply, Map, mapply,
##      match, mget, order, paste, pmax, pmax.int, pmin, pmin.int,
##      Position, rank, rbind, Reduce, rownames, sapply, setdiff, sort,
##      table, tapply, union, unique, unsplit, which.max, which.min

## Loading required package: Biobase

## Welcome to Bioconductor
##
##      Vignettes contain introductory material; view with
##      'browseVignettes()'. To cite Bioconductor, see
##      'citation("Biobase)", and for packages 'citation("pkgname)".

## Loading required package: IRanges

## Loading required package: S4Vectors

##
## Attaching package: 'S4Vectors'

## The following objects are masked from 'package:base':
##
##      expand.grid, I, unname

##
## Attaching package: 'IRanges'

## The following object is masked from 'package:grDevices':
##
##      windows

library(org.Mm.eg.db)

##

library(GO.db)
library(graphics)
library(cluster)

```

## Step 2.

- Read in the proteomics expression data (Log2FC Intensities only!!!)
- Convert first column “PhosName” to rownames
- Check for genes and samples with too many missing values, if true move on.
- Note: In this dataset we will not remove outliers, they are biologically relevant

```
# The following setting is important, do not omit.
options(stringsAsFactors = FALSE);

df1_expr <- read_excel(path = "C:/Users/Marcu/OneDrive/Documents/Proteomic dataset and metadataset_Marcu/
                        sheet = "p-40DPI expression data");
df1_expr <- as.data.frame(df1_expr)

df1_expr <- column_to_rownames(df1_expr, "PhosName")

df1_test = goodSamplesGenes(df1_expr, verbose = 3);

## Flagging genes and samples with too many missing values...
## ..step 1

df1_test$allOK

## [1] TRUE

head(df1_expr)

##                               Blast rTg4510 3
## _QAS[Phospho (STY)]LDGLQQLR_.2             9.526490
## _GQSQLS[Phospho (STY)]NPTDDSWK_.2           9.851300
## _ERGS[Phospho (STY)]PVSGR_.2                4.013213
## _PQSPVIQATAGS[Phospho (STY)]PK_.2           6.751435
## _QSLs[Phospho (STY)]SADNLEPDVQGHQVAAR_.3    3.822566
## _ELEKPM[Oxidation (M)]QSKPQS[Phospho (STY)]PVIQAT[Phospho (STY)]AGSPK_.3 5.324073
##                               Blast rTg4510 4
## _QAS[Phospho (STY)]LDGLQQLR_.2             9.530376
## _GQSQLS[Phospho (STY)]NPTDDSWK_.2           9.539574
## _ERGS[Phospho (STY)]PVSGR_.2                9.209353
## _PQSPVIQATAGS[Phospho (STY)]PK_.2           5.927391
## _QSLs[Phospho (STY)]SADNLEPDVQGHQVAAR_.3    3.574952
## _ELEKPM[Oxidation (M)]QSKPQS[Phospho (STY)]PVIQAT[Phospho (STY)]AGSPK_.3 5.323749
##                               Blast rTg4510 1
## _QAS[Phospho (STY)]LDGLQQLR_.2             9.561561
## _GQSQLS[Phospho (STY)]NPTDDSWK_.2           9.405308
## _ERGS[Phospho (STY)]PVSGR_.2                8.782871
## _PQSPVIQATAGS[Phospho (STY)]PK_.2           6.760365
## _QSLs[Phospho (STY)]SADNLEPDVQGHQVAAR_.3    6.333914
## _ELEKPM[Oxidation (M)]QSKPQS[Phospho (STY)]PVIQAT[Phospho (STY)]AGSPK_.3 4.105218
##                               Blast rTg4510 2
## _QAS[Phospho (STY)]LDGLQQLR_.2             9.310794
## _GQSQLS[Phospho (STY)]NPTDDSWK_.2           9.712202
```

|                                                                             |                 |
|-----------------------------------------------------------------------------|-----------------|
| ## _ERGS[Phospho (STY)]PVSGR_.2                                             | 8.880438        |
| ## _PQSPVIQATAGS[Phospho (STY)]PK_.2                                        | 6.777097        |
| ## _QSLS[Phospho (STY)]SADNLEPDVQGHQVAAR_.3                                 | 3.817567        |
| ## _ELEKPM[Oxidation (M)]QSKPQS[Phospho (STY)]PVIQAT[Phospho (STY)]AGSPK_.3 | 6.646825        |
| ##                                                                          | Blast rTg4510 5 |
| ## _QAS[Phospho (STY)]LDGLQQLR_.2                                           | 3.115400        |
| ## _GQSLS[Phospho (STY)]NPTDDSWK_.2                                         | 8.281087        |
| ## _ERGS[Phospho (STY)]PVSGR_.2                                             | 8.729670        |
| ## _PQSPVIQATAGS[Phospho (STY)]PK_.2                                        | 5.821003        |
| ## _QSLS[Phospho (STY)]SADNLEPDVQGHQVAAR_.3                                 | 4.029503        |
| ## _ELEKPM[Oxidation (M)]QSKPQS[Phospho (STY)]PVIQAT[Phospho (STY)]AGSPK_.3 | 3.541612        |
| ##                                                                          | Sham rTg4510 3  |
| ## _QAS[Phospho (STY)]LDGLQQLR_.2                                           | 9.128237        |
| ## _GQSLS[Phospho (STY)]NPTDDSWK_.2                                         | 8.488968        |
| ## _ERGS[Phospho (STY)]PVSGR_.2                                             | 8.712071        |
| ## _PQSPVIQATAGS[Phospho (STY)]PK_.2                                        | 6.335705        |
| ## _QSLS[Phospho (STY)]SADNLEPDVQGHQVAAR_.3                                 | 4.409535        |
| ## _ELEKPM[Oxidation (M)]QSKPQS[Phospho (STY)]PVIQAT[Phospho (STY)]AGSPK_.3 | 3.130726        |
| ##                                                                          | Sham rTg4510 4  |
| ## _QAS[Phospho (STY)]LDGLQQLR_.2                                           | 8.832007        |
| ## _GQSLS[Phospho (STY)]NPTDDSWK_.2                                         | 9.166122        |
| ## _ERGS[Phospho (STY)]PVSGR_.2                                             | 9.143115        |
| ## _PQSPVIQATAGS[Phospho (STY)]PK_.2                                        | 5.972878        |
| ## _QSLS[Phospho (STY)]SADNLEPDVQGHQVAAR_.3                                 | 6.631398        |
| ## _ELEKPM[Oxidation (M)]QSKPQS[Phospho (STY)]PVIQAT[Phospho (STY)]AGSPK_.3 | 4.770406        |
| ##                                                                          | Sham rTg4510 5  |
| ## _QAS[Phospho (STY)]LDGLQQLR_.2                                           | 8.754462        |
| ## _GQSLS[Phospho (STY)]NPTDDSWK_.2                                         | 8.739547        |
| ## _ERGS[Phospho (STY)]PVSGR_.2                                             | 9.223609        |
| ## _PQSPVIQATAGS[Phospho (STY)]PK_.2                                        | 6.107640        |
| ## _QSLS[Phospho (STY)]SADNLEPDVQGHQVAAR_.3                                 | 3.837163        |
| ## _ELEKPM[Oxidation (M)]QSKPQS[Phospho (STY)]PVIQAT[Phospho (STY)]AGSPK_.3 | 3.258363        |
| ##                                                                          | Sham rTg4510 1  |
| ## _QAS[Phospho (STY)]LDGLQQLR_.2                                           | 8.803521        |
| ## _GQSLS[Phospho (STY)]NPTDDSWK_.2                                         | 8.562182        |
| ## _ERGS[Phospho (STY)]PVSGR_.2                                             | 9.012200        |
| ## _PQSPVIQATAGS[Phospho (STY)]PK_.2                                        | 6.324103        |
| ## _QSLS[Phospho (STY)]SADNLEPDVQGHQVAAR_.3                                 | 3.805728        |
| ## _ELEKPM[Oxidation (M)]QSKPQS[Phospho (STY)]PVIQAT[Phospho (STY)]AGSPK_.3 | 3.201110        |
| ##                                                                          | Sham rTg4510 2  |
| ## _QAS[Phospho (STY)]LDGLQQLR_.2                                           | 9.436497        |
| ## _GQSLS[Phospho (STY)]NPTDDSWK_.2                                         | 9.636452        |
| ## _ERGS[Phospho (STY)]PVSGR_.2                                             | 8.581217        |
| ## _PQSPVIQATAGS[Phospho (STY)]PK_.2                                        | 6.498198        |
| ## _QSLS[Phospho (STY)]SADNLEPDVQGHQVAAR_.3                                 | 3.775299        |
| ## _ELEKPM[Oxidation (M)]QSKPQS[Phospho (STY)]PVIQAT[Phospho (STY)]AGSPK_.3 | 4.757065        |
| ##                                                                          | Blast NC 3      |
| ## _QAS[Phospho (STY)]LDGLQQLR_.2                                           | 8.958440        |
| ## _GQSLS[Phospho (STY)]NPTDDSWK_.2                                         | 8.567541        |
| ## _ERGS[Phospho (STY)]PVSGR_.2                                             | 8.638906        |
| ## _PQSPVIQATAGS[Phospho (STY)]PK_.2                                        | 6.061009        |
| ## _QSLS[Phospho (STY)]SADNLEPDVQGHQVAAR_.3                                 | 6.410237        |
| ## _ELEKPM[Oxidation (M)]QSKPQS[Phospho (STY)]PVIQAT[Phospho (STY)]AGSPK_.3 | 5.728836        |
| ##                                                                          | Blast NC 4      |

|                                                                             |            |
|-----------------------------------------------------------------------------|------------|
| ## _QAS[Phospho (STY)]LDGLQQLR_.2                                           | 8.959951   |
| ## _GQSLS[Phospho (STY)]NPTDDSWK_.2                                         | 8.494754   |
| ## _ERGS[Phospho (STY)]PVSGR_.2                                             | 8.497609   |
| ## _PQSPVIQATAGS[Phospho (STY)]PK_.2                                        | 5.481435   |
| ## _QSLS[Phospho (STY)]SADNLEPDVQGHQVAAR_.3                                 | 4.070464   |
| ## _ELEKPM[Oxidation (M)]QSKPQS[Phospho (STY)]PVIQAT[Phospho (STY)]AGSPK_.3 | 4.865707   |
| ##                                                                          | Blast NC 5 |
| ## _QAS[Phospho (STY)]LDGLQQLR_.2                                           | 9.478251   |
| ## _GQSLS[Phospho (STY)]NPTDDSWK_.2                                         | 8.846596   |
| ## _ERGS[Phospho (STY)]PVSGR_.2                                             | 9.106709   |
| ## _PQSPVIQATAGS[Phospho (STY)]PK_.2                                        | 5.688370   |
| ## _QSLS[Phospho (STY)]SADNLEPDVQGHQVAAR_.3                                 | 3.950248   |
| ## _ELEKPM[Oxidation (M)]QSKPQS[Phospho (STY)]PVIQAT[Phospho (STY)]AGSPK_.3 | 5.152731   |
| ##                                                                          | Blast NC 6 |
| ## _QAS[Phospho (STY)]LDGLQQLR_.2                                           | 9.231628   |
| ## _GQSLS[Phospho (STY)]NPTDDSWK_.2                                         | 8.337931   |
| ## _ERGS[Phospho (STY)]PVSGR_.2                                             | 8.130642   |
| ## _PQSPVIQATAGS[Phospho (STY)]PK_.2                                        | 5.878283   |
| ## _QSLS[Phospho (STY)]SADNLEPDVQGHQVAAR_.3                                 | 4.038407   |
| ## _ELEKPM[Oxidation (M)]QSKPQS[Phospho (STY)]PVIQAT[Phospho (STY)]AGSPK_.3 | 6.243723   |
| ##                                                                          | Blast NC 1 |
| ## _QAS[Phospho (STY)]LDGLQQLR_.2                                           | 8.347308   |
| ## _GQSLS[Phospho (STY)]NPTDDSWK_.2                                         | 5.893559   |
| ## _ERGS[Phospho (STY)]PVSGR_.2                                             | 2.853323   |
| ## _PQSPVIQATAGS[Phospho (STY)]PK_.2                                        | 4.868358   |
| ## _QSLS[Phospho (STY)]SADNLEPDVQGHQVAAR_.3                                 | 3.891793   |
| ## _ELEKPM[Oxidation (M)]QSKPQS[Phospho (STY)]PVIQAT[Phospho (STY)]AGSPK_.3 | 3.830884   |
| ##                                                                          | Blast NC 2 |
| ## _QAS[Phospho (STY)]LDGLQQLR_.2                                           | 9.066606   |
| ## _GQSLS[Phospho (STY)]NPTDDSWK_.2                                         | 8.568276   |
| ## _ERGS[Phospho (STY)]PVSGR_.2                                             | 7.917190   |
| ## _PQSPVIQATAGS[Phospho (STY)]PK_.2                                        | 5.660179   |
| ## _QSLS[Phospho (STY)]SADNLEPDVQGHQVAAR_.3                                 | 6.281934   |
| ## _ELEKPM[Oxidation (M)]QSKPQS[Phospho (STY)]PVIQAT[Phospho (STY)]AGSPK_.3 | 4.714183   |
| ##                                                                          | Sham NC 3  |
| ## _QAS[Phospho (STY)]LDGLQQLR_.2                                           | 9.238355   |
| ## _GQSLS[Phospho (STY)]NPTDDSWK_.2                                         | 9.093485   |
| ## _ERGS[Phospho (STY)]PVSGR_.2                                             | 9.019227   |
| ## _PQSPVIQATAGS[Phospho (STY)]PK_.2                                        | 6.536391   |
| ## _QSLS[Phospho (STY)]SADNLEPDVQGHQVAAR_.3                                 | 3.999680   |
| ## _ELEKPM[Oxidation (M)]QSKPQS[Phospho (STY)]PVIQAT[Phospho (STY)]AGSPK_.3 | 6.865086   |
| ##                                                                          | Sham NC 4  |
| ## _QAS[Phospho (STY)]LDGLQQLR_.2                                           | 8.851384   |
| ## _GQSLS[Phospho (STY)]NPTDDSWK_.2                                         | 8.686150   |
| ## _ERGS[Phospho (STY)]PVSGR_.2                                             | 9.052475   |
| ## _PQSPVIQATAGS[Phospho (STY)]PK_.2                                        | 5.935714   |
| ## _QSLS[Phospho (STY)]SADNLEPDVQGHQVAAR_.3                                 | 3.683997   |
| ## _ELEKPM[Oxidation (M)]QSKPQS[Phospho (STY)]PVIQAT[Phospho (STY)]AGSPK_.3 | 5.175933   |
| ##                                                                          | Sham NC 1  |
| ## _QAS[Phospho (STY)]LDGLQQLR_.2                                           | 9.026282   |
| ## _GQSLS[Phospho (STY)]NPTDDSWK_.2                                         | 8.437126   |
| ## _ERGS[Phospho (STY)]PVSGR_.2                                             | 8.218046   |
| ## _PQSPVIQATAGS[Phospho (STY)]PK_.2                                        | 5.841424   |
| ## _QSLS[Phospho (STY)]SADNLEPDVQGHQVAAR_.3                                 | 3.765512   |

```
## _ELEKPM[Oxidation (M)]QSKPQS[Phospho (STY)]PVIQAT[Phospho (STY)]AGSPK_.3 4.804185
## Sham NC 2
## _QAS[Phospho (STY)]LDGLQQLR_.2 8.979440
## _GQSLS[Phospho (STY)]NPTDDSWK_.2 8.454514
## _ERGS[Phospho (STY)]PVSGR_.2 8.299261
## _PQSPVIQATAGS[Phospho (STY)]PK_.2 6.011762
## _QSLS[Phospho (STY)]SADNLEPDVQGHQVAAR_.3 3.809294
## _ELEKPM[Oxidation (M)]QSKPQS[Phospho (STY)]PVIQAT[Phospho (STY)]AGSPK_.3 4.582183
```

### Step 3.

- Import trait/clinical/phenotype dataset
- In df2\_trait convert first column to rownames
- visualize how the clinical traits relate to the sample dendrogram.
- Convert traits to a color representation (i.e., white means low, red means high, grey means missing entry)
- Plot the sample dendrogram and the colors underneath:

```
df2_trait <- as.data.frame(read_excel("C:/Users/Marcu/OneDrive/Documents/cogwall_df for WGCNA.xlsx", sheet = "Sheet1"))
df2_trait <- column_to_rownames(df2_trait, "Animal_ID");
sampleTree2 = hclust(dist(df2_trait), method = "average");
traitColors = numbers2colors(df2_trait$`Learning Index`, signed = FALSE);
dend_trait <- plotDendroAndColors(sampleTree2, traitColors,
                                groupLabels = names(df2_trait),
                                main = "Sample Dendrogram and Learning Index Heatmap", cex.dendroLabels = 0.8)
```

## Sample Dendrogram and Learning Index Heatmap

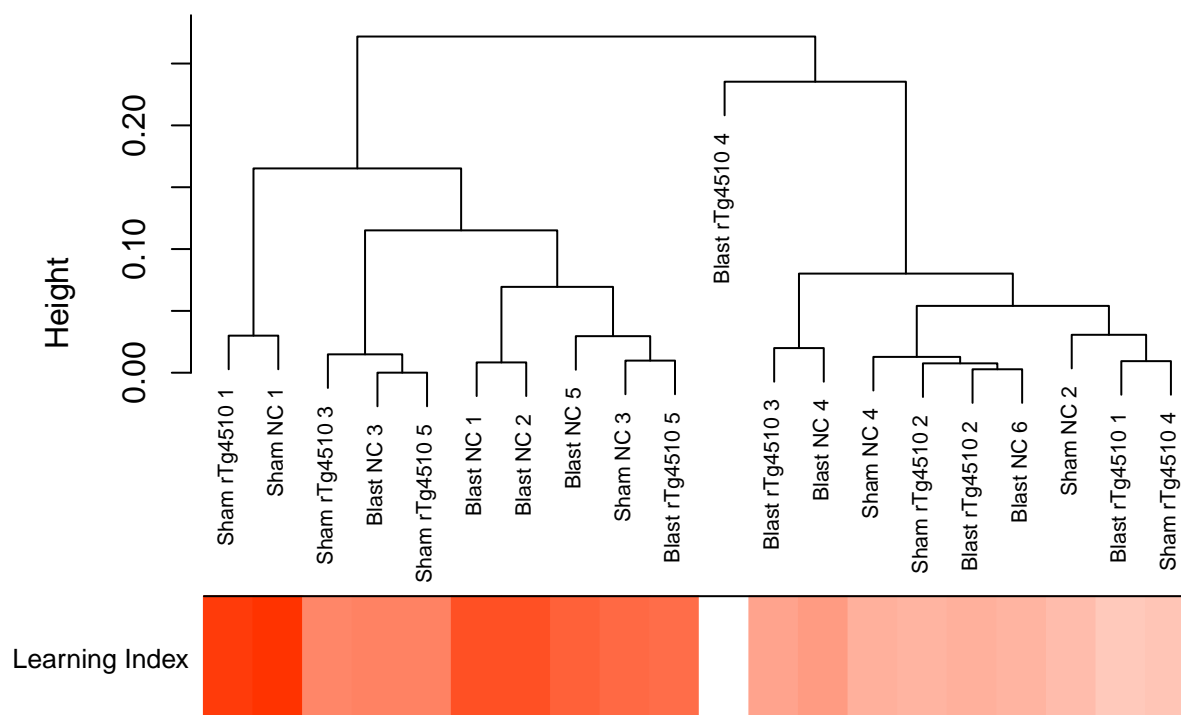

### Step 4.

- Standard peptide screening based on marginal correlation (i.e., Network terminology: GS1 will be referred to as signed peptide significance measure)

```
## Transpose proteomic/expression data to have genes in columns and samples as rows
df1_expr_transposed <- data.frame(t(df1_expr))

GS1= as.numeric(cor(df2_trait, df1_expr_transposed, use="p"));
p.Standard=corPvalueFisher(GS1, nSamples =length(df2_trait));

## Since the q-value function has problems with missing data, we use the following trick
p.Standard2=p.Standard
p.Standard2[is.na(p.Standard)]=1
q.Standard=qvalue(p.Standard2)$qvalues;

# Form a data frame to hold the results
PhosPepNames <- row.names(df1_expr)
StandardPeptideScreeningResults=data.frame(PhosPepNames,PearsonCorrelation=GS1,
                                           p.Standard, q.Standard)

head(StandardPeptideScreeningResults)
```

##

PhosPepNames

```
## 1 _QAS[Phospho (STY)]LDGLQQLR_.2
## 2 _GSQLS[Phospho (STY)]NPTDDSWK_.2
## 3 _ERGS[Phospho (STY)]PVSGR_.2
## 4 _PQSPVIQATAGS[Phospho (STY)]PK_.2
## 5 _QSLs[Phospho (STY)]SADNLEPDVQGHQVAAR_.3
## 6 _ELEKPM[Oxidation (M)]QSKPQS[Phospho (STY)]PVIQAT[Phospho (STY)]AGSPK_.3
## PearsonCorrelation p.Standard q.Standard
## 1 -0.43553296 NaN 1
## 2 -0.25315597 NaN 1
## 3 0.03173034 NaN 1
## 4 -0.05579011 NaN 1
## 5 0.26961245 NaN 1
## 6 -0.15698126 NaN 1
```

## Step 5.

- Now export “StandardGeneScreeningResults” to filter in excel if  $\text{abs}(r) < 0.5$ .
- Import nw data frame (df3\_expr)
- Transpose for network construction

```
# First we need to save the results as a csv
write.csv(StandardPeptideScreeningResults, "C:/Users/Marcu/OneDrive/Documents/WGCNA_StandardGeneScreeningResults.csv")
# Note: due to the small n number for the study, no pvalues were attributable, only pearson r therefore

## Import new filtered dataset
df3_expr <- read_excel("C:/Users/Marcu/OneDrive/Documents/Proteomic dataset and metadataset_Marcus.xlsx",
                      sheet = "p-4ODPI expression filtered df");

## Transpose proteomic/expression of filtered data to have genes in columns and samples as rows
df3_expr <- column_to_rownames(df3_expr, "PhosName");
df3_expr_transposed <- data.frame(t(df3_expr))

head(df3_expr)
```

```
## Blast rTg4510 3
## _RKPGAGGS[Phospho (STY)]PALAR_.3 8.238760
## _IVHSES[Phospho (STY)]QPEKESR_.2 6.232174
## _TDPGS[Phospho (STY)]IENLC[Carbamidomethyl (C)]PGK_.2 8.986573
## _TGGECS[Phospho (STY)]LDEEAEGSKK_.2 4.265219
## _S[Phospho (STY)]MDSLCL[Carbamidomethyl (C)]SVPVEGK_.2 4.289535
## _SNS[Phospho (STY)]QENVEASHPSQDGKR_.3 7.910812
## Blast rTg4510 4
## _RKPGAGGS[Phospho (STY)]PALAR_.3 8.928654
## _IVHSES[Phospho (STY)]QPEKESR_.2 6.598271
## _TDPGS[Phospho (STY)]IENLC[Carbamidomethyl (C)]PGK_.2 3.758421
## _TGGECS[Phospho (STY)]LDEEAEGSKK_.2 3.737585
## _S[Phospho (STY)]MDSLCL[Carbamidomethyl (C)]SVPVEGK_.2 4.530391
## _SNS[Phospho (STY)]QENVEASHPSQDGKR_.3 8.126560
## Blast rTg4510 1
## _RKPGAGGS[Phospho (STY)]PALAR_.3 7.615425
## _IVHSES[Phospho (STY)]QPEKESR_.2 5.575043
## _TDPGS[Phospho (STY)]IENLC[Carbamidomethyl (C)]PGK_.2 4.598085
## _TGGECS[Phospho (STY)]LDEEAEGSKK_.2 3.300677
```



|                                                          |          |            |                      |
|----------------------------------------------------------|----------|------------|----------------------|
| ## _S[Phospho (STY)]MDSLC[Carbamidomethyl (C)]SVPVEGK_.2 | 3.826115 |            |                      |
| ## _SNS[Phospho (STY)]QENVEASHPSQDGKR_.3                 | 7.609041 |            |                      |
| ##                                                       |          | Blast      | rTg4510 2            |
| ## _RKPGAGGS[Phospho (STY)]PALAR_.3                      | 8.154468 |            |                      |
| ## _IVHSES[Phospho (STY)]QPEKESR_.2                      | 3.822685 |            |                      |
| ## _TDPGS[Phospho (STY)]IENLC[Carbamidomethyl (C)]PGK_.2 | 4.023560 |            |                      |
| ## _TGGECS[Phospho (STY)]LDEEAEGSKK_.2                   | 3.424170 |            |                      |
| ## _S[Phospho (STY)]MDSLC[Carbamidomethyl (C)]SVPVEGK_.2 | 3.294690 |            |                      |
| ## _SNS[Phospho (STY)]QENVEASHPSQDGKR_.3                 | 7.948428 |            |                      |
| ##                                                       |          | Blast      | rTg4510 5            |
| ## _RKPGAGGS[Phospho (STY)]PALAR_.3                      | 7.255080 |            |                      |
| ## _IVHSES[Phospho (STY)]QPEKESR_.2                      | 5.815416 |            |                      |
| ## _TDPGS[Phospho (STY)]IENLC[Carbamidomethyl (C)]PGK_.2 | 3.767603 |            |                      |
| ## _TGGECS[Phospho (STY)]LDEEAEGSKK_.2                   | 3.602941 |            |                      |
| ## _S[Phospho (STY)]MDSLC[Carbamidomethyl (C)]SVPVEGK_.2 | 2.995633 |            |                      |
| ## _SNS[Phospho (STY)]QENVEASHPSQDGKR_.3                 | 7.238229 |            |                      |
| ##                                                       |          | Sham       | rTg4510 3            |
| ## _RKPGAGGS[Phospho (STY)]PALAR_.3                      | 7.559636 |            |                      |
| ## _IVHSES[Phospho (STY)]QPEKESR_.2                      | 4.509915 |            |                      |
| ## _TDPGS[Phospho (STY)]IENLC[Carbamidomethyl (C)]PGK_.2 | 3.800942 |            |                      |
| ## _TGGECS[Phospho (STY)]LDEEAEGSKK_.2                   | 3.827025 |            |                      |
| ## _S[Phospho (STY)]MDSLC[Carbamidomethyl (C)]SVPVEGK_.2 | 3.028972 |            |                      |
| ## _SNS[Phospho (STY)]QENVEASHPSQDGKR_.3                 | 7.742838 |            |                      |
| ##                                                       |          | Sham       | rTg4510 4            |
| ## _RKPGAGGS[Phospho (STY)]PALAR_.3                      | 8.641213 |            |                      |
| ## _IVHSES[Phospho (STY)]QPEKESR_.2                      | 5.366398 |            |                      |
| ## _TDPGS[Phospho (STY)]IENLC[Carbamidomethyl (C)]PGK_.2 | 3.280498 |            |                      |
| ## _TGGECS[Phospho (STY)]LDEEAEGSKK_.2                   | 3.938133 |            |                      |
| ## _S[Phospho (STY)]MDSLC[Carbamidomethyl (C)]SVPVEGK_.2 | 4.052468 |            |                      |
| ## _SNS[Phospho (STY)]QENVEASHPSQDGKR_.3                 | 7.715931 |            |                      |
| ##                                                       |          | Sham       | rTg4510 5            |
| ## _RKPGAGGS[Phospho (STY)]PALAR_.3                      | 8.533593 |            |                      |
| ## _IVHSES[Phospho (STY)]QPEKESR_.2                      | 5.639189 |            |                      |
| ## _TDPGS[Phospho (STY)]IENLC[Carbamidomethyl (C)]PGK_.2 | 3.786346 |            |                      |
| ## _TGGECS[Phospho (STY)]LDEEAEGSKK_.2                   | 4.300083 |            |                      |
| ## _S[Phospho (STY)]MDSLC[Carbamidomethyl (C)]SVPVEGK_.2 | 4.515215 |            |                      |
| ## _SNS[Phospho (STY)]QENVEASHPSQDGKR_.3                 | 7.794398 |            |                      |
| ##                                                       |          | Sham       | rTg4510 1            |
| ## _RKPGAGGS[Phospho (STY)]PALAR_.3                      | 7.604037 |            |                      |
| ## _IVHSES[Phospho (STY)]QPEKESR_.2                      | 4.530955 |            |                      |
| ## _TDPGS[Phospho (STY)]IENLC[Carbamidomethyl (C)]PGK_.2 | 3.200704 |            |                      |
| ## _TGGECS[Phospho (STY)]LDEEAEGSKK_.2                   | 4.169271 |            |                      |
| ## _S[Phospho (STY)]MDSLC[Carbamidomethyl (C)]SVPVEGK_.2 | 3.972674 |            |                      |
| ## _SNS[Phospho (STY)]QENVEASHPSQDGKR_.3                 | 7.446234 |            |                      |
| ##                                                       |          | Sham       | rTg4510 2 Blast NC 3 |
| ## _RKPGAGGS[Phospho (STY)]PALAR_.3                      | 8.792485 | 7.930930   |                      |
| ## _IVHSES[Phospho (STY)]QPEKESR_.2                      | 7.393740 | 5.324989   |                      |
| ## _TDPGS[Phospho (STY)]IENLC[Carbamidomethyl (C)]PGK_.2 | 9.014376 | 8.701669   |                      |
| ## _TGGECS[Phospho (STY)]LDEEAEGSKK_.2                   | 4.471540 | 4.371601   |                      |
| ## _S[Phospho (STY)]MDSLC[Carbamidomethyl (C)]SVPVEGK_.2 | 4.100130 | 3.451314   |                      |
| ## _SNS[Phospho (STY)]QENVEASHPSQDGKR_.3                 | 8.177623 | 7.695513   |                      |
| ##                                                       |          | Blast NC 4 | Blast NC 5           |
| ## _RKPGAGGS[Phospho (STY)]PALAR_.3                      | 8.294293 | 8.677245   |                      |
| ## _IVHSES[Phospho (STY)]QPEKESR_.2                      | 5.432989 | 5.951327   |                      |

```
## _TDPGS[Phospho (STY)]IENLC[Carbamidomethyl (C)]PGK_.2 3.484541 3.591541
## _TGGECS[Phospho (STY)]LDEEAEGSKK_.2 3.627032 4.105278
## _S[Phospho (STY)]MDSLC[Carbamidomethyl (C)]SVPVEGK_.2 4.256511 4.138116
## _SNS[Phospho (STY)]QENVEASHPSQDGKR_.3 7.447561 8.318089
## Blast NC 6 Blast NC 1
## _RKPGAGGS[Phospho (STY)]PALAR_.3 8.674047 7.550161
## _IVHSES[Phospho (STY)]QPEKESR_.2 5.900654 4.160454
## _TDPGS[Phospho (STY)]IENLC[Carbamidomethyl (C)]PGK_.2 3.135309 3.305870
## _TGGECS[Phospho (STY)]LDEEAEGSKK_.2 3.649046 3.515330
## _S[Phospho (STY)]MDSLC[Carbamidomethyl (C)]SVPVEGK_.2 3.864178 4.077840
## _SNS[Phospho (STY)]QENVEASHPSQDGKR_.3 8.093542 7.609236
## Blast NC 2 Sham NC 3
## _RKPGAGGS[Phospho (STY)]PALAR_.3 7.970520 7.815962
## _IVHSES[Phospho (STY)]QPEKESR_.2 6.097862 5.464425
## _TDPGS[Phospho (STY)]IENLC[Carbamidomethyl (C)]PGK_.2 4.423620 3.283576
## _TGGECS[Phospho (STY)]LDEEAEGSKK_.2 3.109278 3.797314
## _S[Phospho (STY)]MDSLC[Carbamidomethyl (C)]SVPVEGK_.2 3.651650 4.012446
## _SNS[Phospho (STY)]QENVEASHPSQDGKR_.3 7.830169 7.668289
## Sham NC 4 Sham NC 1
## _RKPGAGGS[Phospho (STY)]PALAR_.3 8.554644 7.960728
## _IVHSES[Phospho (STY)]QPEKESR_.2 6.053357 5.689051
## _TDPGS[Phospho (STY)]IENLC[Carbamidomethyl (C)]PGK_.2 3.865864 4.164917
## _TGGECS[Phospho (STY)]LDEEAEGSKK_.2 3.352127 3.651180
## _S[Phospho (STY)]MDSLC[Carbamidomethyl (C)]SVPVEGK_.2 3.136995 3.436048
## _SNS[Phospho (STY)]QENVEASHPSQDGKR_.3 7.898524 8.032992
## Sham NC 2
## _RKPGAGGS[Phospho (STY)]PALAR_.3 7.693437
## _IVHSES[Phospho (STY)]QPEKESR_.2 5.986509
## _TDPGS[Phospho (STY)]IENLC[Carbamidomethyl (C)]PGK_.2 4.313431
## _TGGECS[Phospho (STY)]LDEEAEGSKK_.2 3.326329
## _S[Phospho (STY)]MDSLC[Carbamidomethyl (C)]SVPVEGK_.2 3.541460
## _SNS[Phospho (STY)]QENVEASHPSQDGKR_.3 7.835881
```

## Step 6.

- Construction of a weighted peptide co-expression network and network modules. Note: The adjacency matrix, also called the connection matrix, is a matrix containing rows and columns which is used to represent a simple labelled graph, with 0 or 1 in the position of  $(V_i, V_j)$  according to the condition whether  $V_i$  and  $V_j$  are adjacent or not. Defining a weighted peptide co-expression network here we define the adjacency matrix using soft thresholding with  $\beta=8$  (unsigned = 6, signed = 12).
- Define k-connectivity measure
- Test adjacency network set to  $\beta = 8$  for scale free-topology
- Plot results (Histogram and Scatter plot with trend line)

```
ADJ1=abs(cor(df3_expr_transposed,use="p"))^8

# When you have relatively few genes (<5000) use the following code:
k=as.vector(apply(ADJ1,2,sum, na.rm=T))
# When you have a lot of genes use the following code: "k=softConnectivity(datE=datExpr,power=6); this

# Plot a histogram of k and a scale free topology plot
sizeGrWindow(10,5)
par(mfrow=c(1,2))
```

```
k_histogram <- hist(k)
scale_free_plot <- scaleFreePlot(k, main="Check scale free topology\n")
plot(scale_free_plot)
```

*## Note: k-Histogram and scale free topology explained: The approximate straight line relationship ( $r^2$ )*

Figure. Histogram and scatter plot to assess network for scale-free topology Impression: Beta = 8 was the only beta that created scale free topology in data

## Step 7.

- Convert adjacency similarity matrix to a dissimilarity matrix (dissADJ)
- Convert topological overlap matrix to a dissimilarity matrix (dissTOM)
- Define modules using topological overlap dissimilarity
- Plot results.

```
# Comparing various module detection methods
# Definition of clustering dissimilarity from adjacency
# Many clustering procedures require a dissimilarity matrix as input.
# We define a dissimilarity based on adjacency:
# Turn adjacency into a measure of dissimilarity:
dissADJ=1-ADJ1

# Use of topological overlap to define dissimilarity
# Adjacency can be used to define a separate measure of similarity,
# the Topological Overlap Matrix(TOM).
# We will convert the TOM matrix to a dissimilarity matrix as well (dissTOM)
dissTOM=TOMdist(ADJ1)
```

```
## ..connectivity..
## ..matrix multiplication (system BLAS)..
## ..normalization..
## ..done.
```

```
simTOM=1-(TOMdist(ADJ1))
```

```
## ..connectivity..
## ..matrix multiplication (system BLAS)..
## ..normalization..
## ..done.
```

```
collectGarbage()
```

```
# Module definition using the topological overlap based dissimilarity.
# We now use the topological overlap based dissimilarity as input to the
# clustering methods.
# Calculate the dendrogram:
hierTOM = hclust(as.dist(dissTOM),method="average");
```

```

# We will compare three different tree-cutting methods:
colorStaticTOM = as.character(cutreeStaticColor(hierTOM, cutHeight=.99, minSize=20))
colorDynamicTOM = labels2colors (cutreeDynamic(hierTOM,method="tree"))
colorDynamicHybridTOM = labels2colors(cutreeDynamic(hierTOM, distM= dissTOM , cutHeight = 0.998,
                                                    deepSplit=2, pamRespectsDendro = FALSE))

## ..done.

# Now we plot the results
sizeGrWindow(10,5)
plotDendroAndColors(hierTOM,
                    colors=data.frame(colorStaticTOM,
                                      colorDynamicTOM, colorDynamicHybridTOM),
                    dendroLabels = FALSE, marAll = c(1, 8, 3, 1),
                    main = "Gene dendrogram and module colors, TOM dissimilarity")

```

## Gene dendrogram and module colors, TOM dissimilarity

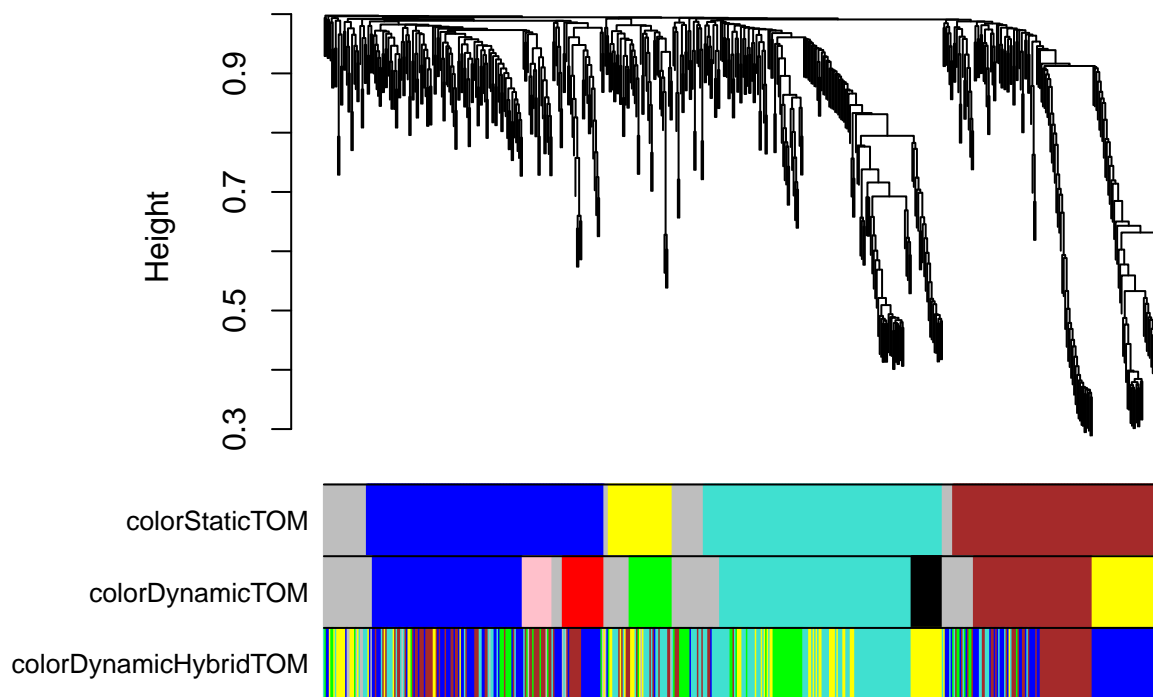

Figure. Weighted peptide coexpression-network

### Step 8.

- Compile the module assignment (colors) into a single list (colorsh1)
- Compute module eigenpeptides for animal's phosphopeptidome
- Relating modules and module-eigenpeptides to learning index
- Calculate Peptide significance (i.e., analogous to gene significance)

```

# Since the "colorDynamicTOM" tree cutting method captures most of the data
# and has very similar results to other tree cutting methods,
# will use this method for defining modules (colors at bottom of dendrogram)
# We define a shorter name for the module assignment of choice,
# remove unneeded variables and save the results for use in subsequent
# sessions.
colorh1= colorDynamicTOM

# remove the dissimilarities, adjacency matrices etc to free up space
rm(ADJ1); rm(dissADJ);
collectGarbage()

# Representing modules by eigenpeptides and relating eigenpeptides to one another
# to get a sense of how related the modules are one can summarize each module by # its eigenpeptides (f
datME=moduleEigengenes(df3_expr_transposed, colorh1)$eigengenes
signif(cor(datME, use="p"), 2)

```

```

##           MEblack MEblue MEbrown MEgreen MEgrey MEpink MERed MEturquoise
## MEblack      1.00  0.34   0.55   0.47   0.60  0.23  0.20         0.86
## MEblue       0.34  1.00   0.70   0.58   0.81  0.83  0.68         0.55
## MEbrown      0.55  0.70   1.00   0.59   0.71  0.53  0.51         0.69
## MEgreen      0.47  0.58   0.59   1.00   0.71  0.48  0.43         0.55
## MEgrey       0.60  0.81   0.71   0.71   1.00  0.65  0.64         0.74
## MEpink       0.23  0.83   0.53   0.48   0.65  1.00  0.62         0.44
## MERed        0.20  0.68   0.51   0.43   0.64  0.62  1.00         0.37
## MEturquoise  0.86  0.55   0.69   0.55   0.74  0.44  0.37         1.00
## MEyellow     0.29  0.54   0.82   0.35   0.55  0.35  0.49         0.43
##           MEyellow
## MEblack      0.29
## MEblue       0.54
## MEbrown      0.82
## MEgreen      0.35
## MEgrey       0.55
## MEpink       0.35
## MERed        0.49
## MEturquoise  0.43
## MEyellow     1.00

```

```

# We define a dissimilarity measure between the module eigenpeptides
# that keeps track of the sign of the correlation between the module
# eigenpeptides, and use # it to cluster the eigenpeptide:
dissimME=(1-t(cor(datME, method="p")))/2
hclustdatME=hclust(as.dist(dissimME), method="average" )

# Plot the eigenpeptide dendrogram
par(mfrow=c(1,1))
plot(hclustdatME, main="Clustering tree based of the module eigengenes")

```

## Clustering tree based of the module

eigengenes

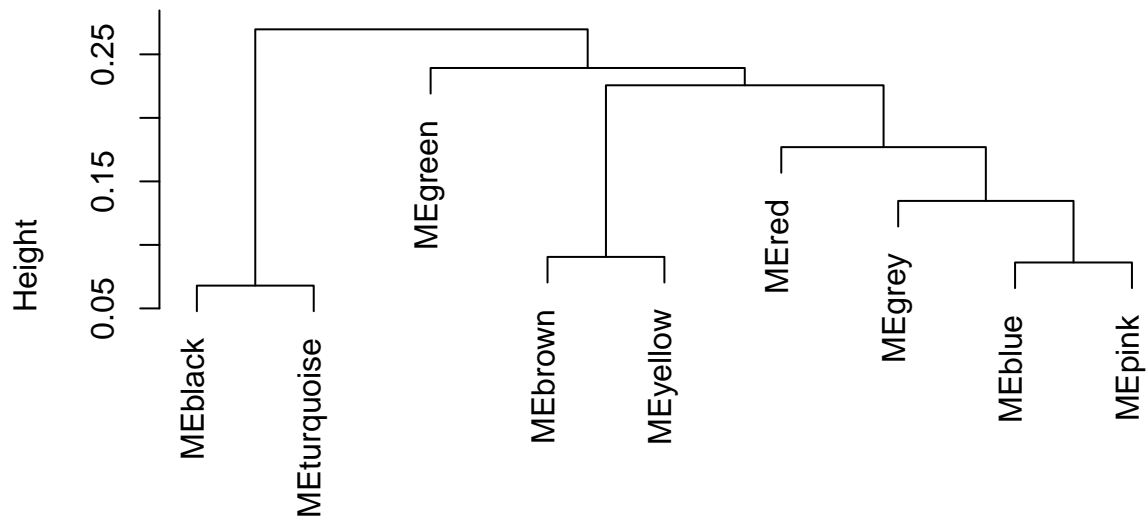

```
as.dist(dissimME)
hclust (*, "average")
```

*# Impression: The (I) blue and yellow eigengenes,  
# and the (II) brown and turquoise eigenpeptide are highly related, as  
# evidenced by their elevated merging height.*

*# Pairwise scatter plots of mice (n = 20) phenotypes (learning index) # and module eigenpeptides.*  
PW\_scatt\_initLL <- plotMEpairs(datME, y=df2\_trait\$`Learning Index`, )

## Relationship between module eigengenes

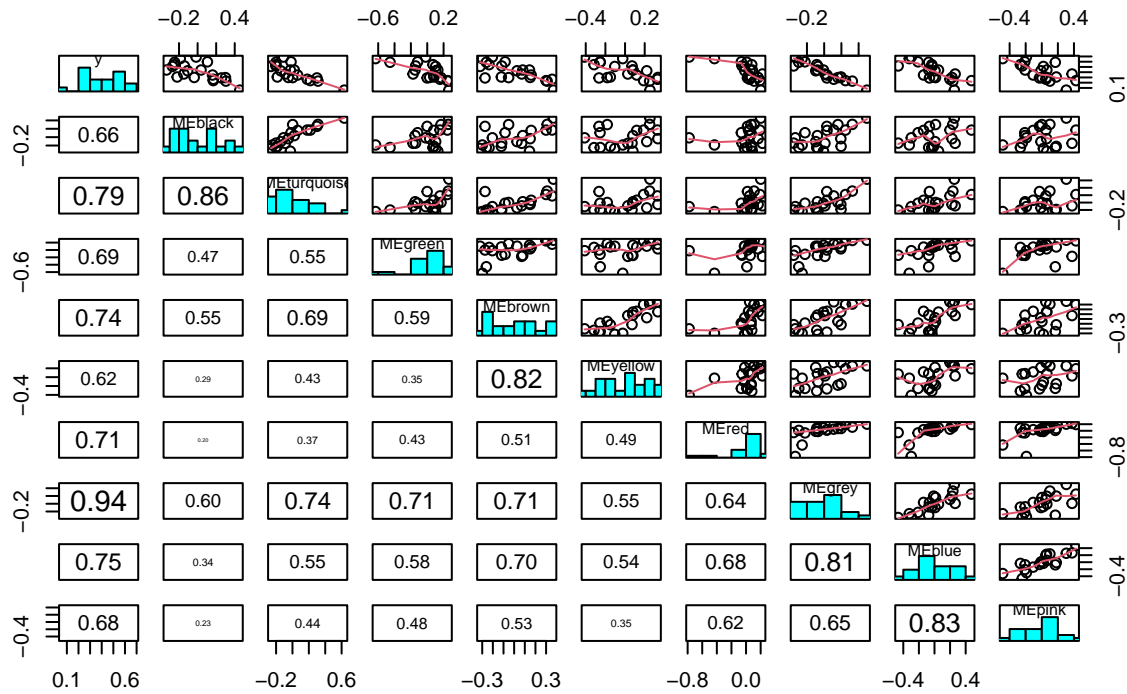

```
# The module eigenpeptides (first PC) of different modules may be
# highly correlated. WpCNA can be interpreted as a biologically
# motivated data reduction scheme that allows for dependency between
# the resulting components. In contrast, principal component analysis # imposes orthogonality between t
# Since modules may represent biological pathways there is no
# biological reason why modules should be orthogonal to each other.
GS1=as.numeric(cor(df2_trait$`Learning Index`,df3_expr_transposed, use="p"))
GeneSignificance=abs(GS1)
```

```
# Next module significance is defined as average gene significance.
ModuleSignificance=apply(GeneSignificance, colorh1, mean, na.rm=T)
```

```
# To plot module significance, one can use the following code:
par(mfrow = c(1,1))
plotModuleSignificance(GeneSignificance,colorh1, boxplot = TRUE)
```

## Gene significance across modules, p-value=3.4e-05

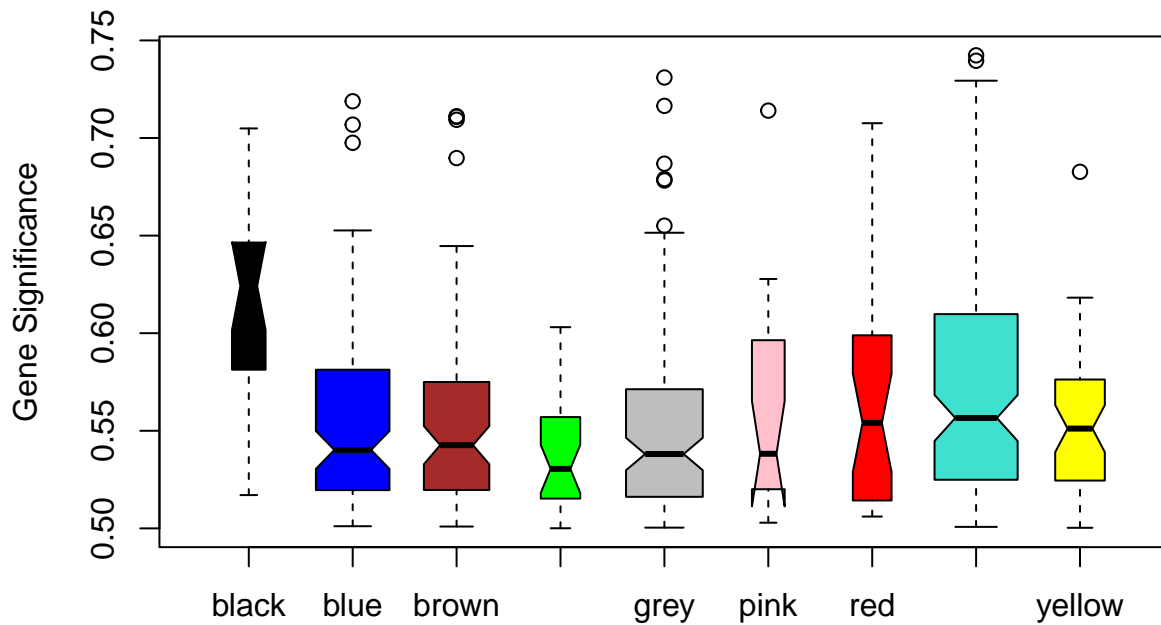

### Step 9.

- Compute intramodular connectivity
- Evaluate relationship between peptide significance and intramodular connectivity
- Compute module membership for each module
- Evaluate relationship between module membership and intramodular connectivity

```
# Module membership and intramodular connectivity: We begin by calculating the
# intramodular connectivity for each peptide. (In network literature,
# connectivity is often referred to as "degree".) The function
# intramodularConnectivity computes the whole network connectivity kTotal, the
# within module connectivity kWithin, kOut=kTotal-kWithin, and
# kDiff=kIn-kOut=2*kIn-kTotal.
ADJ1=abs(cor(df3_expr_transposed,use="p"))^6
Alldegrees1=intramodularConnectivity(ADJ1, colorh1)
head(Alldegrees1)
```

```
##
## kTotal kWithin
## X_RKPGAGGS.Phospho..STY..PALAR_.3 13.169946 7.829837
## X_IVHSES.Phospho..STY..QPEKESR_.2 5.157729 1.661596
## X_TDPGS.Phospho..STY..IENLC.Carbamidomethyl..C..PGK_.2 6.854629 4.934478
## X_TGGEYS.Phospho..STY..LDEEAEGSKK_.2 33.558267 23.776103
## X_S.Phospho..STY..MDSLC.Carbamidomethyl..C..SVPVEGK_.2 27.156917 22.248421
## X_SNS.Phospho..STY..QENVEASHPSQDGKR_.3 10.217091 5.959858
```



```
##
## X_RKPGAGGS.Phospho..STY..PALAR_.3      5.340109  2.489728
## X_IVHSES.Phospho..STY..QPEKESR_.2      3.496133 -1.834537
## X_TDPGS.Phospho..STY..IENLC.Carbamidomethyl..C..PGK_.2 1.920151  3.014327
## X_TGGEYS.Phospho..STY..LDEEAEGSKK_.2    9.782164 13.993940
## X_S.Phospho..STY..MDSL.C.Carbamidomethyl..C..SVPVEGK_.2 4.908496 17.339925
## X_SNS.Phospho..STY..QENVEASHPSQDGKR_.3  4.257233  1.702625
```

```
# Relationship between peptide significance and intramodular connectivity:
# We plot the peptide significance against intramodular connectivity.
colorlevels=unique(colorh1)
sizeGrWindow(9,6)
par(mfrow=c(2,as.integer(0.5+length(colorlevels)/2)))
par(mar = c(4,5,3,1))
for (i in c(1:length(colorlevels)))
{
  whichmodule=colorlevels[[i]];
  restrict1 = (colorh1==whichmodule);
  verboseScatterplot(Alldegrees1$kWithin[restrict1],
    GeneSignificance[restrict1], col=colorh1[restrict1],
    main=whichmodule,
    xlab = "Connectivity", ylab = "Peptide Significance", abline = TRUE)
}
```

**blue cor=0.034, p=0.74**

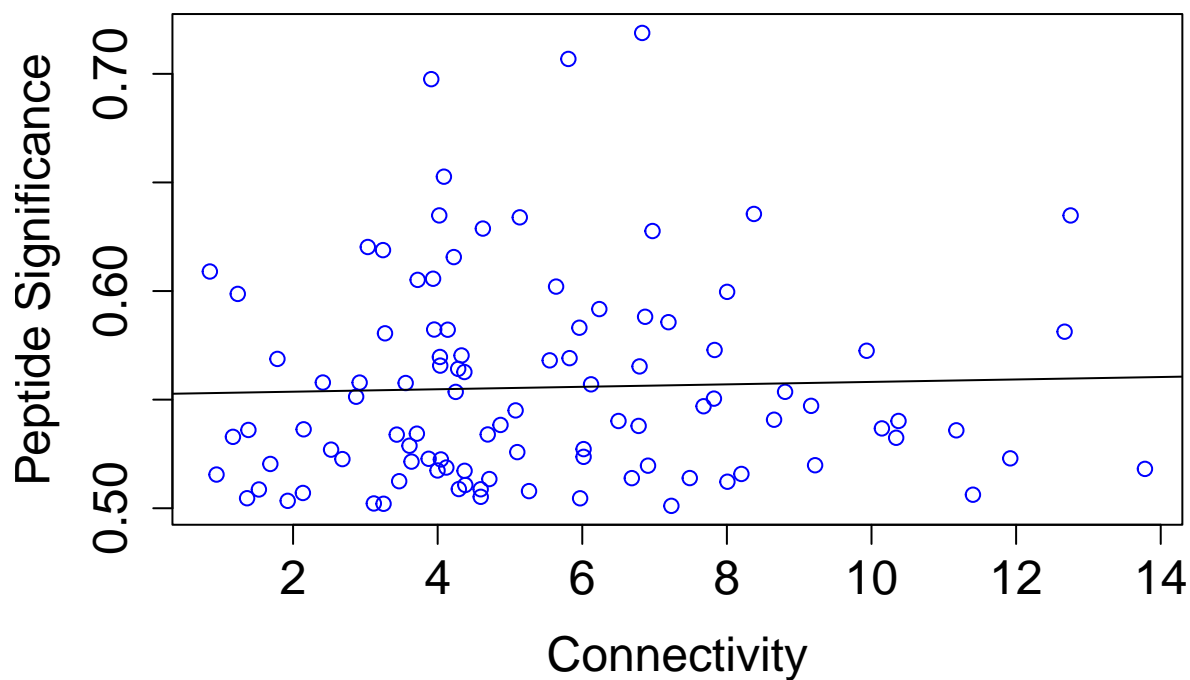

**grey cor=0.41, p=8.7e-06**

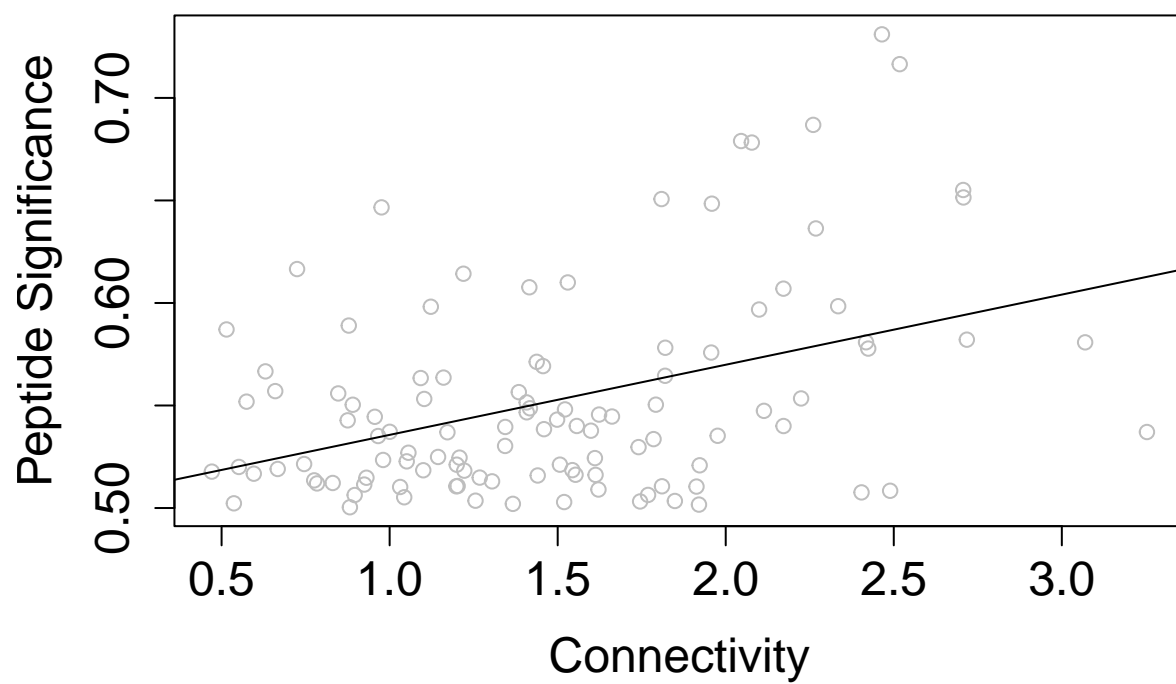

**turquoise cor=0.48, p=8.6e-09**

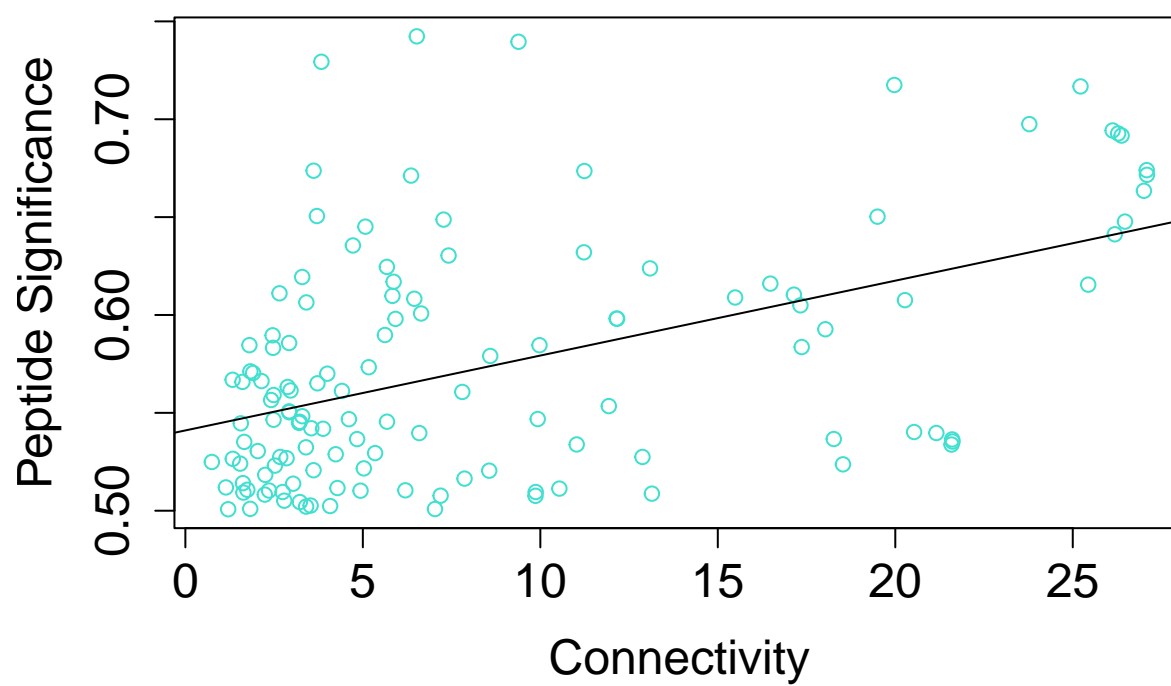

**yellow cor=0.074, p=0.63**

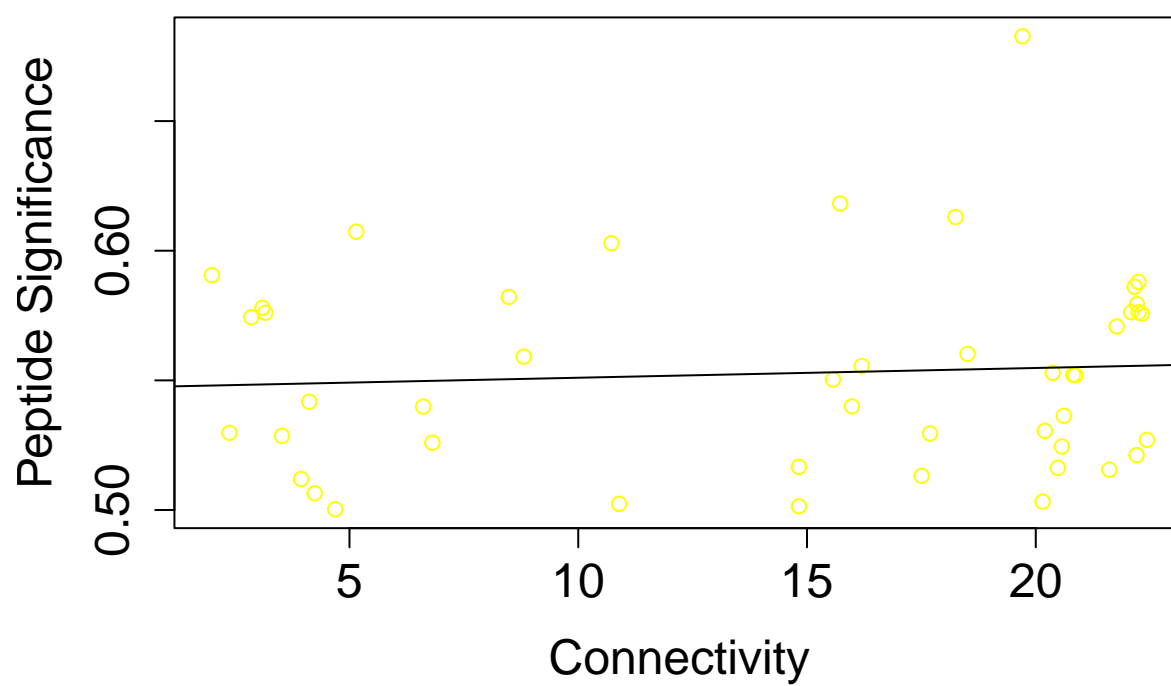

**pink cor=-0.0064, p=0.98**

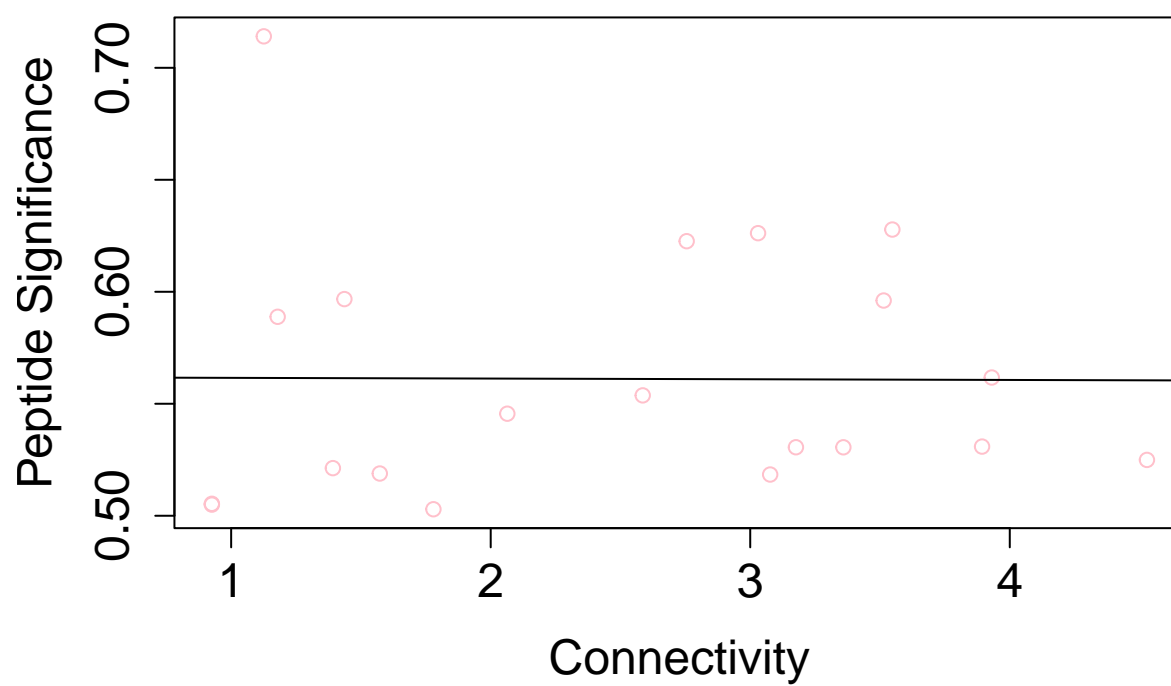

**black cor=0.69, p=0.00054**

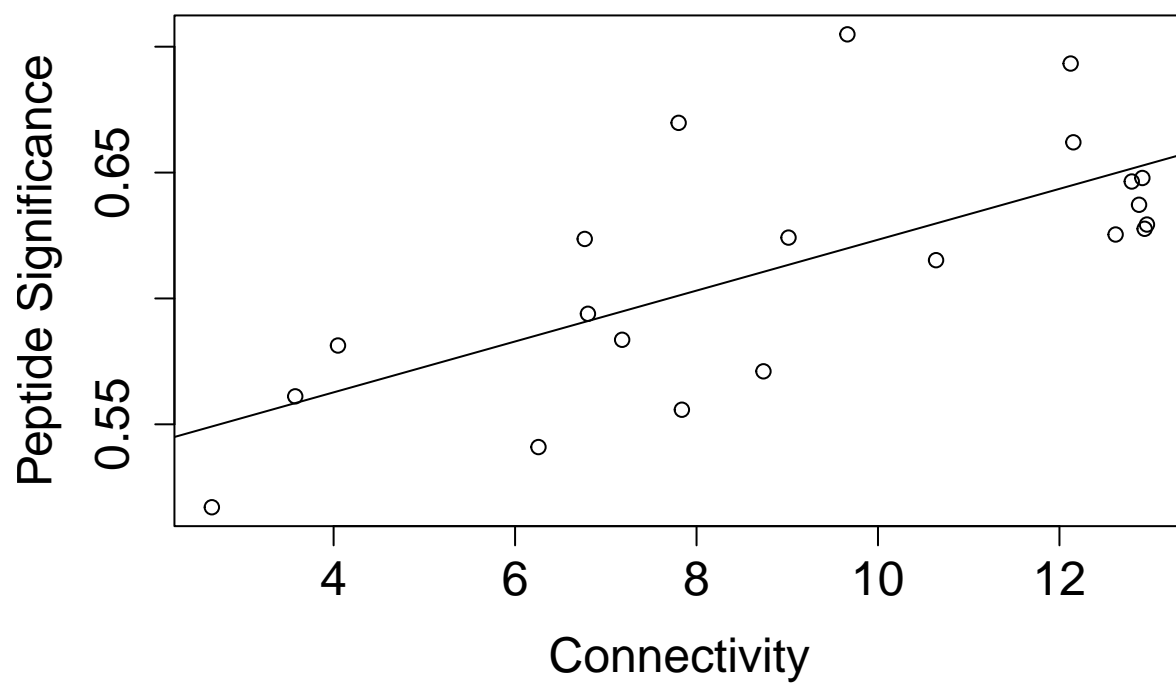

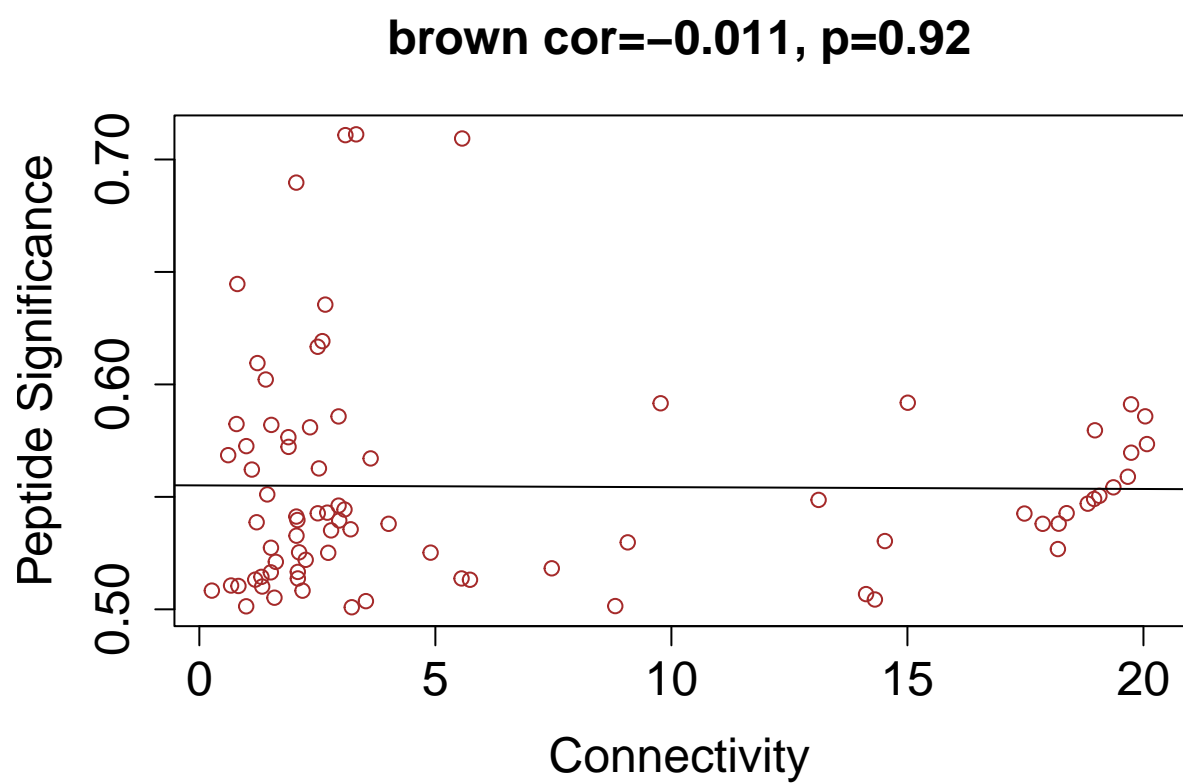

**green cor=-0.089, p=0.65**

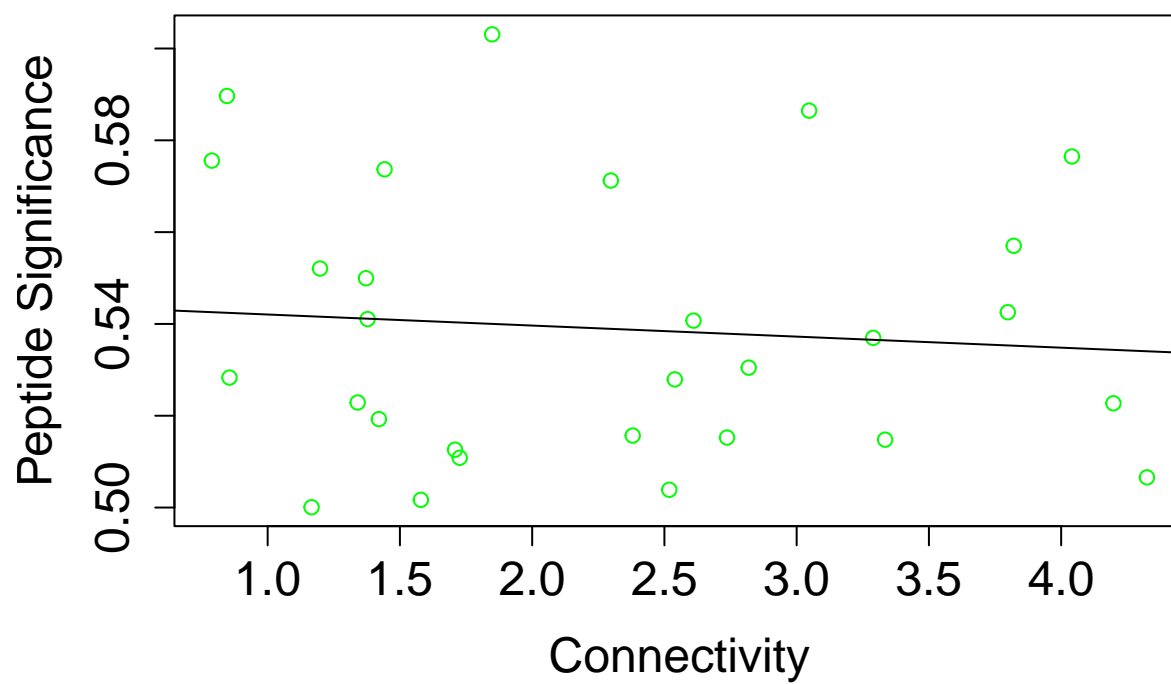



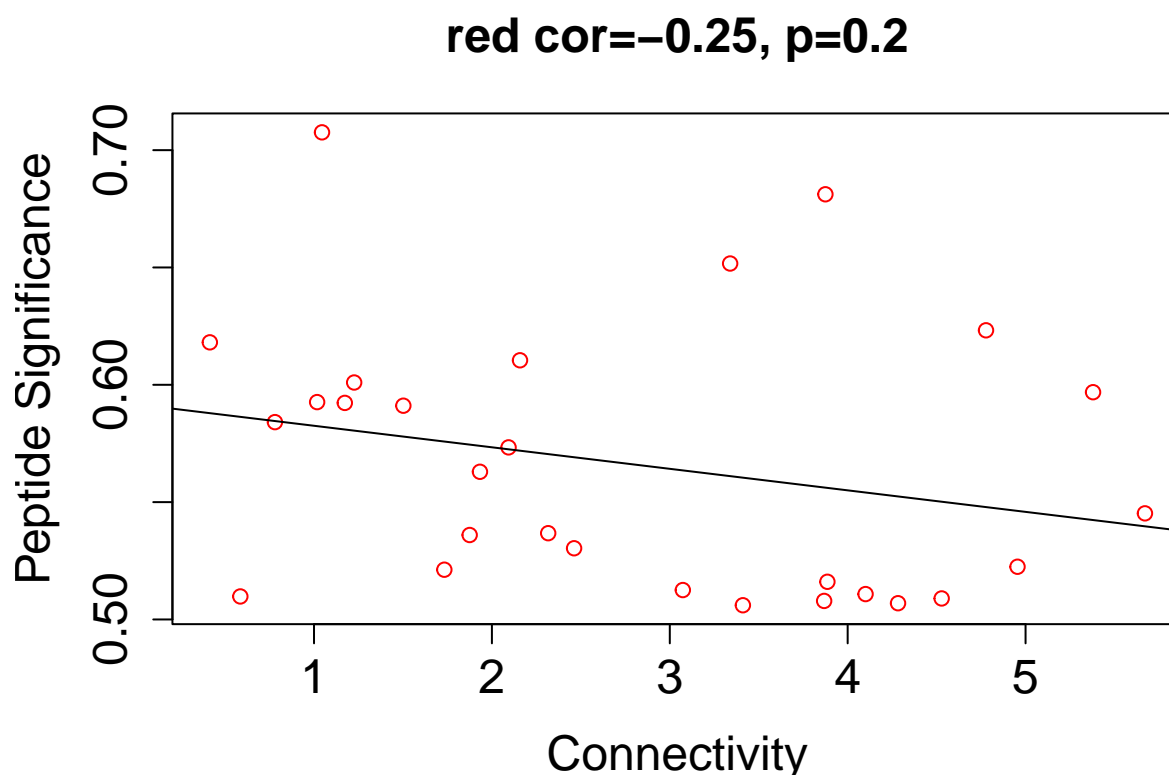

Figure. Peptide significance vs intramodular connectivity

```
# Define a module eigenpeptide-based connectivity measure for each peptide as the
# correlation between a the peptide expression and the module eigenpeptide.
# Specifically, kMEbrown(i) = cor(xi, MEbrown), where xi is the peptide
# expression profile of peptide i and MEbrown is the module eigenpeptide of the
# brown module. Note that the definition does not require that peptide i is a
# member of the brown module. We define a data frame containing the module
# membership (MM) values for each module. In the past, we called the module
# membership values kME.
```

```
datKME=signedKME(df3_expr_transposed, datME, outputColumnName="MM.")
head(datKME)
```

```
##                                     MM.black  MM.blue
## X_RKPGAGGS.Phospho..STY..PALAR_.3  0.2151763 0.7867407
## X_IVHSES.Phospho..STY..QPEKESR_.2  0.2829994 0.6062450
## X_TDPGS.Phospho..STY..IENLC.Carbamidomethyl..C..PGK_.2 0.5995808 0.2356841
## X_TGGEYS.Phospho..STY..LDEEAEGSKK_.2 0.8297820 0.4553535
## X_S.Phospho..STY..MDSLC.Carbamidomethyl..C..SVPVEGK_.2 0.2052835 0.4864796
## X_SNS.Phospho..STY..QENVEASHPSQDGKR_.3 0.2465135 0.7563672
##                                     MM.brown  MM.green
## X_RKPGAGGS.Phospho..STY..PALAR_.3  0.5416833 0.2871711
## X_IVHSES.Phospho..STY..QPEKESR_.2  0.3798168 0.5246010
## X_TDPGS.Phospho..STY..IENLC.Carbamidomethyl..C..PGK_.2 0.1569356 0.2775329
## X_TGGEYS.Phospho..STY..LDEEAEGSKK_.2 0.7307644 0.4792520
## X_S.Phospho..STY..MDSLC.Carbamidomethyl..C..SVPVEGK_.2 0.7296602 0.2922138
## X_SNS.Phospho..STY..QENVEASHPSQDGKR_.3 0.3785909 0.2517185
```

```
##
## X_RKPGAGGS.Phospho..STY..PALAR_.3      MM.grey  MM.pink
## X_IVHSES.Phospho..STY..QPEKESR_.2      0.5738522 0.5283085
## X_TDPGS.Phospho..STY..IENLC.Carbamidomethyl..C..PGK_.2 0.7160377 0.3604438
## X_TGGEYS.Phospho..STY..LDEEAEGSKK_.2 0.5290195 0.1945320
## X_TGGEYS.Phospho..STY..LDEEAEGSKK_.2 0.5858764 0.3272709
## X_S.Phospho..STY..MDSLC.Carbamidomethyl..C..SVPVEGK_.2 0.4818338 0.3001532
## X_SNS.Phospho..STY..QENVEASHPSQDGKR_.3 0.6404675 0.6769100
##
## MM.red MM.turquoise
## X_RKPGAGGS.Phospho..STY..PALAR_.3      0.6800069 0.3882324
## X_IVHSES.Phospho..STY..QPEKESR_.2      0.1919280 0.4315670
## X_TDPGS.Phospho..STY..IENLC.Carbamidomethyl..C..PGK_.2 0.1427152 0.7129611
## X_TGGEYS.Phospho..STY..LDEEAEGSKK_.2 0.3332141 0.9276358
## X_S.Phospho..STY..MDSLC.Carbamidomethyl..C..SVPVEGK_.2 0.4523361 0.3442287
## X_SNS.Phospho..STY..QENVEASHPSQDGKR_.3 0.7186990 0.3616790
##
## MM.yellow
## X_RKPGAGGS.Phospho..STY..PALAR_.3      0.55823609
## X_IVHSES.Phospho..STY..QPEKESR_.2      0.32494908
## X_TDPGS.Phospho..STY..IENLC.Carbamidomethyl..C..PGK_.2 0.08284898
## X_TGGEYS.Phospho..STY..LDEEAEGSKK_.2 0.47654669
## X_S.Phospho..STY..MDSLC.Carbamidomethyl..C..SVPVEGK_.2 0.97617547
## X_SNS.Phospho..STY..QENVEASHPSQDGKR_.3 0.29395250
```

```
# We now have a module membership value for each peptide in each module.
```

```
# Relationship between the module membership measures (e.g. MM.turquoise) and
# intramodular connectivity. We now explore the relationship between the module
# membership measures (e.g. MM.turquoise) and intramodular connectivity.
# We choose 2 modules to plot: turquoise, black
# For simplicity we write the code out explicitly for each module.
which.color="turquoise"
restrictGenes=which.h1==which.color
verboseScatterplot(Alldegrees1$kWithin[ restrictGenes],
  (datKME[restrictGenes, paste("MM.", which.color, sep="")])^8,
  col=which.color,
  xlab="Intramodular Connectivity",
  ylab="(Module Membership)^8")
```

**cor=0.97, p=7.2e-80**

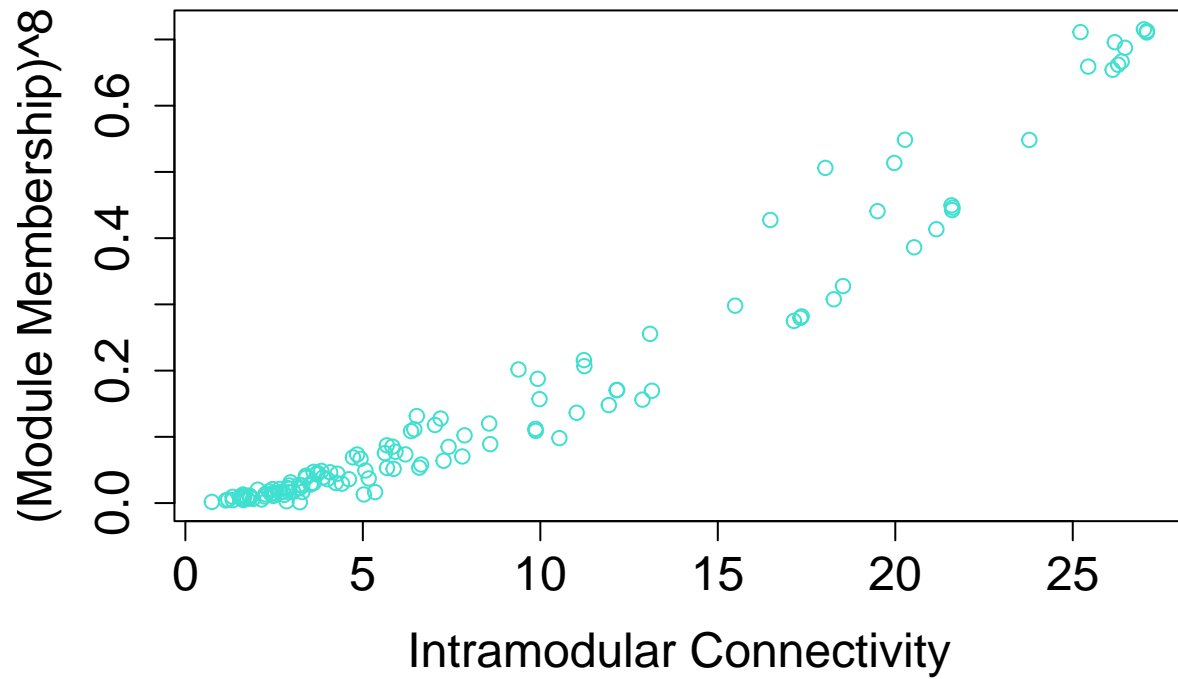

```
which.color="black"
restrictGenes=colorh1==which.color
verboseScatterplot(Alldegrees1$kWithin[ restrictGenes],
  (datKME[restrictGenes, paste("MM.", which.color, sep="")])^8,
  col=which.color,
  xlab="Intramodular Connectivity",
  ylab="(Module Membership)^8")
```

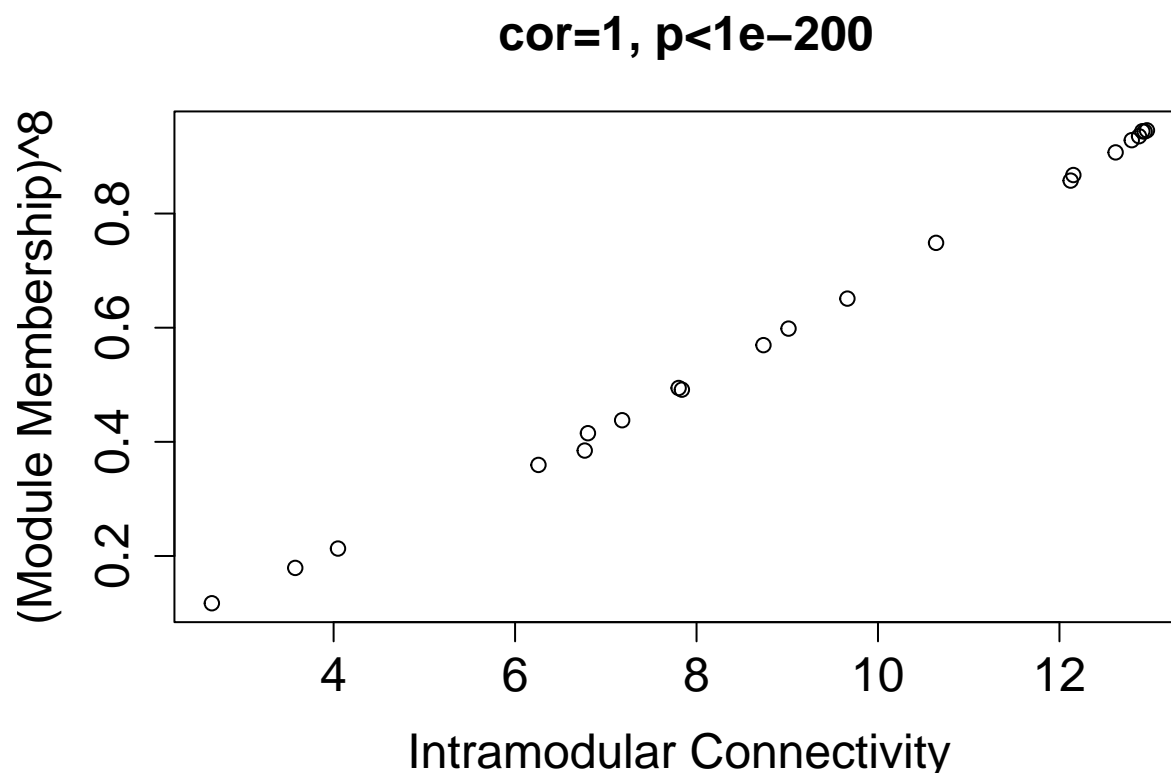

Figure. Intramodular Connectivity vs Module Membership for turquoise and black modules Impression: Module membership raised to Beta-power 8 (y-axis) vs. intramodular connectivity (x-axis) plotted separately for selected modules in the dataset. After raising the module membership to a power of 8, it is highly correlated with the intramodular connectivity (kWithin).

## Step 10.

- Multi-dimensional scaling (MDS) plots
- Visualize topological overlap matrix

```
# In this section we visualize peptide co-expression networks. We begin with a multi-dimensional scaling.
cmd1=cmdscale(as.dist(dissTOM),2)
```

```
# We now create a TOM plot, a heatmap plot depicting the topological overlap
# matrix supplemented by hierarchical clustering dendrograms and the module
# colors. For large peptide sets, say more than 2000 peptides, this will take a
# long time. We will remove the "grey" module (un-clustered phosphopeptides) to
# save computation time.
```

```
power=8
color1=colorDynamicTOM
restGenes= (color1 != "grey")
diss1=1-TOMsimilarityFromExpr( df3_expr_transposed[, restGenes], power = 8)
```

```
## TOM calculation: adjacency..
```

```
## ..will not use multithreading.  
## Fraction of slow calculations: 0.000000  
## ..connectivity..  
## ..matrix multiplication (system BLAS)..  
## ..normalization..  
## ..done.
```

```
hier1=hclust(as.dist(diss1), method="average")  
diag(diss1) = NA
```

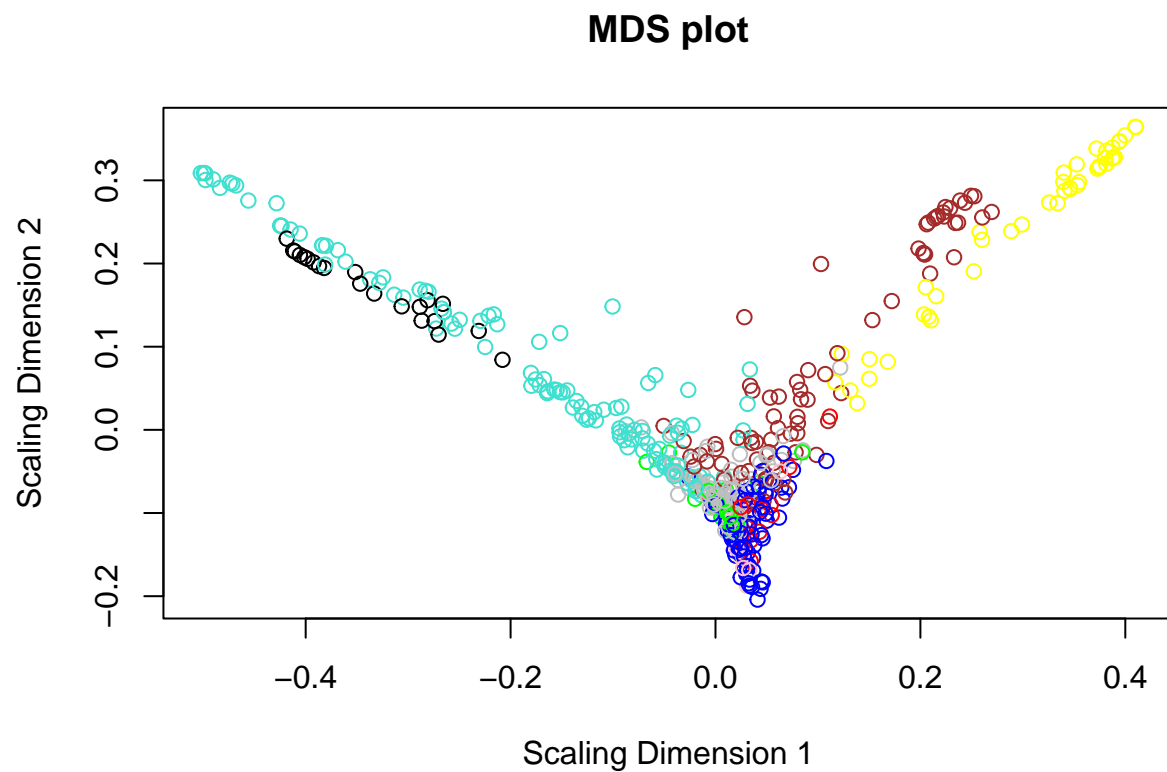

Figure. Multi-dimensional scaling plot

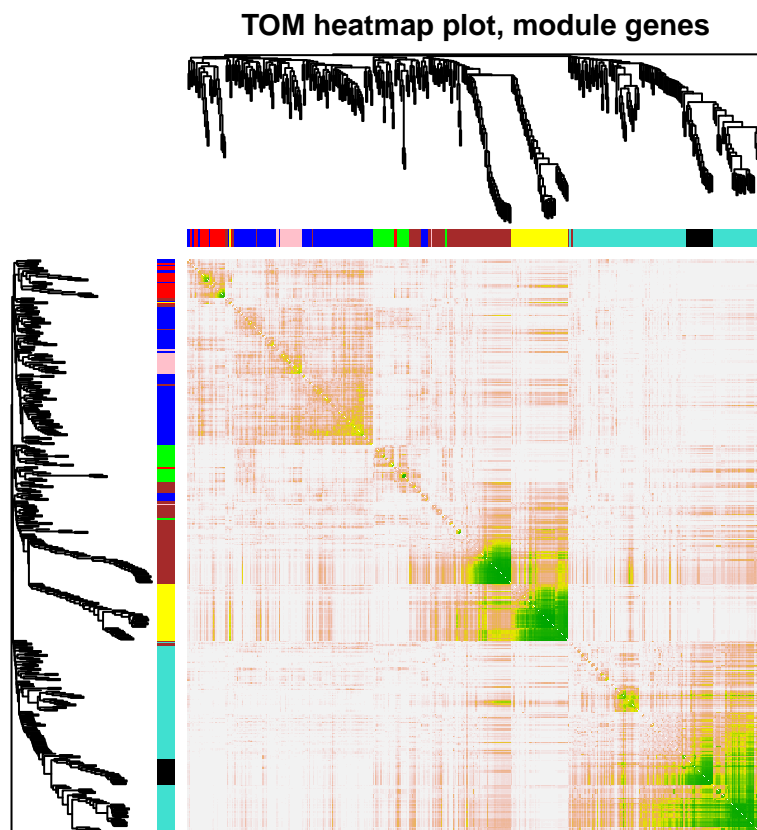

Figure. Topological overlap matrix
