# Supplementary material for: The Chronic Effects of a Single Low-Intensity Blast Exposure on Phosphoproteome Networks and Cognitive Function Influenced by Mutant Tau Overexpression
Source: MDPI journal article supplement (doi:10.3390/ijms25063338), 2024-03-15
Supplement: s1 [file s1]

**Supplementary Table S6. Module eigenpeptides for each animal**

| Group           | MEblack    | MEblue   | MEbrown  | MEgreen  | MEgrey   | MEpink   |
|-----------------|------------|----------|----------|----------|----------|----------|
| Blast NC 1      | 0.14236454 | 0.465605 | 0.11698  | 0.142551 | 0.354514 | 0.243125 |
| Blast NC 2      | 0.27099925 | 0.031235 | 0.320044 | 0.102538 | 0.071733 | 0.019664 |
| Blast NC 3      | 0.25775529 | 0.064419 | 0.273287 | 0.001449 | 0.030882 | 0.028504 |
| Blast NC 4      | 0.10680082 | 0.007188 | 0.026704 | 0.103323 | 0.097757 | 0.01042  |
| Blast NC 5      | 0.16863997 | 0.474705 | 0.299861 | 0.246551 | 0.247745 | 0.425627 |
| Blast NC 6      | 0.14776993 | 0.265158 | 0.070764 | 0.173421 | 0.009145 | 0.376104 |
| Blast rTg4510 1 | 0.18707839 | 0.322887 | 0.298467 | 0.632364 | 0.255881 | 0.486014 |
| Blast rTg4510 2 | 0.24743609 | 0.07482  | 0.261329 | 0.454802 | 0.294503 | 0.168188 |
| Blast rTg4510 3 | 0.30486868 | 0.235942 | 0.309988 | 0.257521 | 0.326909 | 0.10077  |
| Blast rTg4510 4 | 0.03669218 | 0.224841 | 0.150341 | 0.030119 | 0.193568 | 0.059894 |
| Blast rTg4510 5 | 0.01581643 | 0.297603 | 0.204685 | 0.019188 | 0.335537 | 0.191285 |
| Sham NC 1       | 0.30038764 | 0.013339 | 0.051806 | 0.168581 | 0.160183 | 0.001878 |
| Sham NC 2       | 0.22024769 | 0.010613 | 0.12033  | 0.082023 | 0.196421 | 0.180184 |
| Sham NC 3       | 0.33496403 | 0.051659 | 0.14398  | 0.129326 | 0.008419 | 0.063179 |
| Sham NC 4       | 0.24986357 | 0.03391  | 0.23551  | 0.070075 | 0.086414 | 0.266119 |
| Sham rTg4510 1  | 0.16100741 | 0.139891 | 0.15984  | 0.07883  | 0.033633 | 0.107124 |
| Sham rTg4510 2  | 0.45466143 | 0.254441 | 0.368559 | 0.264546 | 0.497061 | 0.304843 |
| Sham rTg4510 3  | 0.10576707 | 0.210932 | 0.08493  | 0.117763 | 0.222694 | 0.211342 |
| Sham rTg4510 4  | 0.03716639 | 0.073802 | 0.080803 | 0.148297 | 0.078895 | 0.207736 |
| Sham rTg4510 5  | 0.16977903 | 0.198445 | 0.356528 | 0.156402 | 0.110803 | 0.051338 |

| MEred    | MEturquoi | MEyellow |
|----------|-----------|----------|
| 0.05374  | 0.20106   | 0.071054 |
| 0.020737 | 0.261683  | 0.104263 |
| 0.019243 | 0.298837  | 0.264721 |
| 0.016728 | 0.143155  | 0.22095  |
| 0.189671 | 0.217829  | 0.189293 |
| 0.224661 | 0.087951  | 0.028228 |
| 0.432442 | 0.243183  | 0.02348  |
| 0.011568 | 0.201923  | 0.252487 |
| 0.111323 | 0.311866  | 0.250383 |
| 0.165845 | 0.051437  | 0.334639 |
| 0.779569 | 0.109275  | 0.411708 |
| 0.069478 | 0.00259   | 0.181141 |
| 0.069307 | 0.184726  | 0.14981  |
| 0.085633 | 0.025689  | 0.080035 |
| 0.078242 | 0.202527  | 0.315628 |
| 0.034409 | 0.062754  | 0.118712 |
| 0.201878 | 0.633402  | 0.253652 |
| 0.064223 | 0.017701  | 0.25433  |
| 0.057124 | 0.022497  | 0.080064 |
| 0.049055 | 0.180537  | 0.330558 |
