# Supplementary material for: The Chronic Effects of a Single Low-Intensity Blast Exposure on Phosphoproteome Networks and Cognitive Function Influenced by Mutant Tau Overexpression
Source: MDPI journal article supplement (doi:10.3390/ijms25063338), 2024-03-15
Supplement: s1 [file s1]

Supplementary Table S7. Network Screening

| PG.Genes | Phospep Name                                                                                         | Phos site              | p.Weighted | q.Weighted | cor.Weighted | Z.Weighted | p.Standard | q.Standard | cor.Standard | Z.Standard |
|----------|------------------------------------------------------------------------------------------------------|------------------------|------------|------------|--------------|------------|------------|------------|--------------|------------|
| Atp6v1a  | _ALDEYDVKHFTFVPLR_3                                                                                  | #N/A                   | 7.63E-06   | NA         | -8.25E-01    | -6.19E+00  | 3.56E-04   | NA         | -7.19E-01    | -4.39E+00  |
| Rubcn    | _KQES[Phospho (STY)]PLLVTK_2                                                                         | Q80U62_S198_M1_Rubcn   | 2.07E-05   | NA         | -8.03E-01    | -5.71E+00  | 3.77E-04   | NA         | -7.17E-01    | -4.36E+00  |
| Itsn1    | _DQFS[Phospho (STY)]PDDFLGR_2                                                                        | Q9Z0R4_S1663_M1_Itsn1  | 3.38E-05   | NA         | -7.90E-01    | -5.47E+00  | 3.69E-04   | NA         | -7.18E-01    | -4.37E+00  |
| Pcm1     | _KAS[Phospho (STY)]AQASLASK_2                                                                        | Q9R0L6_S1280_M1_Pcm1   | 3.74E-05   | NA         | -7.88E-01    | -5.42E+00  | 6.83E-04   | NA         | -6.94E-01    | -4.09E+00  |
| Dlgap2   | _DGS[Phospho (STY)]WFLK_2                                                                            | Q8BJ42_S873_M1_Dlgap2  | 3.76E-05   | NA         | -7.88E-01    | -5.42E+00  | 7.10E-04   | NA         | -6.93E-01    | -4.08E+00  |
| Bcl11b   | _VSEPVEIGIQVTPDEDDHLLS[Phospho (STY)]PTK_3                                                           | Q99PV8_S128_M1_Bcl11b  | 3.77E-05   | NA         | -7.87E-01    | -5.42E+00  | 7.30E-04   | NA         | -6.92E-01    | -4.06E+00  |
| Gng12    | _ASADLM[Oxidation (M)]SYC[Carbamidomethyl (C)]EEHAR_2                                                | #N/A                   | 3.84E-05   | NA         | -7.87E-01    | -5.41E+00  | 4.61E-04   | NA         | -7.09E-01    | -4.27E+00  |
| Eif5b    | _KTS[Phospho (STY)]FDENDS[Phospho (STY)]EELEDKDSK_3                                                  | Q05D44_S108_M2_Eif5b   | 4.50E-05   | NA         | -7.83E-01    | -5.34E+00  | 1.78E-04   | NA         | -7.42E-01    | -4.70E+00  |
| Speg     | _QRS[Phospho (STY)]ATS[Phospho (STY)]DLELR_2                                                         | Q62407_S490_M2_Speg    | 4.54E-05   | NA         | -7.83E-01    | -5.33E+00  | 1.12E-03   | NA         | -6.74E-01    | -3.87E+00  |
| Rims2    | _IPDSTHAQLESSSSSFES[Phospho (STY)]QK_3                                                               | Q9EQZ7_S788_M1_Rims2   | 4.72E-05   | NA         | -7.82E-01    | -5.32E+00  | 1.18E-03   | NA         | -6.72E-01    | -3.85E+00  |
| Palm3    | _TGGEGS[Phospho (STY)]LDEEAEGSKK_2                                                                   | A2TJV2_S565_M1_Palm3   | 5.14E-05   | NA         | -7.79E-01    | -5.27E+00  | 6.29E-04   | NA         | -6.98E-01    | -4.13E+00  |
| Pgrmc1   | _EGEETVYYS[Phospho (STY)]DDEEPKDETARK_4                                                              | O55022_S181_M1_Pgrmc1  | 5.44E-05   | NA         | -7.78E-01    | -5.25E+00  | 1.43E-03   | NA         | -6.63E-01    | -3.76E+00  |
| Cct2     | _VQDDEVGDGTTSVTVLAAELLR_2                                                                            | #N/A                   | 6.23E-05   | NA         | -7.74E-01    | -5.19E+00  | 2.64E-03   | NA         | -6.35E-01    | -3.49E+00  |
| Map6d1   | _AGS[Phospho (STY)]RDAAQERPSGPGGR_3                                                                  | Q14BB9_S82_M1_Map6d1   | 7.26E-05   | NA         | -7.70E-01    | -5.11E+00  | 6.28E-04   | NA         | -6.98E-01    | -4.13E+00  |
| Cyb5b    | _RNS[Phospho (STY)]AEETWM[Oxidation (M)]VIHGR_3                                                      | Q9CQX2_S33_M1_Cyb5b    | 7.42E-05   | NA         | -7.69E-01    | -5.10E+00  | 9.44E-04   | NA         | -6.81E-01    | -3.95E+00  |
| Lgi1     | _SLIHLSLANNLQTLPK_3                                                                                  | #N/A                   | 8.33E-05   | NA         | -7.66E-01    | -5.05E+00  | 2.51E-04   | NA         | -7.31E-01    | -4.54E+00  |
| Syt15    | _DLNS[Phospho (STY)]LEDTEGDVDLVSSR_2                                                                 | Q80T23_S358_M1_Syt15   | 8.63E-05   | NA         | -7.65E-01    | -5.03E+00  | 2.31E-03   | NA         | -6.91E-01    | -3.55E+00  |
| Nlgn3    | _LTALPDYTLTLR_2                                                                                      | #N/A                   | 9.06E-05   | NA         | 7.63E-01     | 5.01E+00   | 2.63E-04   | NA         | 7.29E-01     | 4.52E+00   |
| Atp1a2   | _M[Oxidation (M)]TVAHM[Oxidation (M)]WFDNQIHEADTTDQSGATFDKR_4                                        | #N/A                   | 1.05E-04   | NA         | -7.59E-01    | -4.94E+00  | 2.02E-03   | NA         | -6.48E-01    | -3.61E+00  |
| Ubqln2   | _SQTDQLVLIFAGK_2                                                                                     | #N/A                   | 1.06E-04   | NA         | 7.59E-01     | 4.94E+00   | 3.80E-04   | NA         | 7.16E-01     | 4.36E+00   |
| Atxn2    | _TNS[Phospho (STY)]PSIS[Phospho (STY)]PSMLSNAEHRK_3                                                  | O70305_S832_M2_Atxn2   | 1.13E-04   | NA         | -7.57E-01    | -4.91E+00  | 7.00E-04   | NA         | -6.93E-01    | -4.08E+00  |
| Prkar2a  | _VSVVC[Carbamidomethyl (C)]AETFNPDDEEEDNDPR_2                                                        | #N/A                   | 1.18E-04   | NA         | -7.55E-01    | -4.89E+00  | 5.19E-04   | NA         | -7.05E-01    | -4.22E+00  |
| Bclaf1   | _QKFHDS[Phospho (STY)]EGDDTEETEDYR_3                                                                 | Q8K019_S395_M1_Bclaf1  | 1.40E-04   | NA         | -7.50E-01    | -4.81E+00  | 4.93E-04   | NA         | -7.07E-01    | -4.24E+00  |
| Eif5     | _GLTSL[Phospho (STY)]DDLRL_2                                                                         | P59325_S227_M1_Eif5    | 1.45E-04   | NA         | -7.49E-01    | -4.80E+00  | 1.94E-04   | NA         | -7.40E-01    | -4.66E+00  |
| Camkv    | _SAT[Phospho (STY)]PATDGR_2                                                                          | Q3UHL1_T438_M1_Camkv   | 1.53E-04   | NA         | -7.47E-01    | -4.77E+00  | 1.13E-03   | NA         | -6.74E-01    | -3.87E+00  |
| Sptbn1   | _VAHM[Oxidation (M)]EFC[Carbamidomethyl (C)]YQELC[Carbamidomethyl (C)]QLAAER_3                       | #N/A                   | 1.61E-04   | NA         | -7.46E-01    | -4.75E+00  | 8.22E-04   | NA         | -6.87E-01    | -4.01E+00  |
| Actb     | _C[Carbamidomethyl (C)]PEALFQPSFLGM[Oxidation (M)]ESC[Carbamidomethyl (C)]GIHETTFNSIM[Oxidation (M)] | #N/A                   | 1.63E-04   | NA         | -7.45E-01    | -4.74E+00  | 2.60E-03   | NA         | -6.35E-01    | -3.49E+00  |
| Ctnna1   | _LESISGAALM[Oxidation (M)]ADSSC[Carbamidomethyl (C)]TR_2                                             | #N/A                   | 1.80E-04   | NA         | -7.42E-01    | -4.70E+00  | 1.91E-03   | NA         | -6.50E-01    | -3.63E+00  |
| Cobl     | _S[Phospho (STY)]PPTRKDDAAPNLHSEAR_4                                                                 | Q5NBX1_S982_M1_Cobl    | 1.95E-04   | NA         | -7.39E-01    | -4.66E+00  | 1.47E-03   | NA         | -6.62E-01    | -3.75E+00  |
| Hspa8    | _VC[Carbamidomethyl (C)]NPIITK_2                                                                     | #N/A                   | 2.16E-04   | NA         | 7.36E-01     | 4.61E+00   | 1.72E-03   | NA         | 6.55E-01     | 3.68E+00   |
| Ppp2r1a  | _MAGDPVANVR_2                                                                                        | #N/A                   | 2.16E-04   | NA         | 7.36E-01     | 4.61E+00   | 1.86E-03   | NA         | 6.51E-01     | 3.64E+00   |
| Slmap    | _AKESDLSDTLSPS[Phospho (STY)]KEK_2                                                                   | Q3URD3_S471_M1_Slmap   | 2.18E-04   | NA         | -7.36E-01    | -4.61E+00  | 3.87E-03   | NA         | -6.16E-01    | -3.31E+00  |
| Pabir1   | _RNS[Phospho (STY)]TTFPSR_2                                                                          | Q9DB52_S59_M1_Pabir1   | 2.77E-04   | NA         | -7.28E-01    | -4.50E+00  | 2.01E-03   | NA         | -6.48E-01    | -3.61E+00  |
| Dennd1a  | _S[Phospho (STY)]LEDLRAPK_2                                                                          | Q8K382_S592_M1_Dennd1a | 2.78E-04   | NA         | -7.27E-01    | -4.50E+00  | 7.19E-03   | NA         | -5.81E-01    | -3.03E+00  |
| Dlg4     | _HC[Carbamidomethyl (C)]LDVSAHAVR_2                                                                  | #N/A                   | 3.12E-04   | NA         | 7.23E-01     | 4.45E+00   | 4.39E-04   | NA         | 7.11E-01     | 4.29E+00   |
| Slc4a10  | _ERDSGLEDGRES[Phospho (STY)]PSFDTPSQR_4                                                              | Q5DTL9_S89_M1_Slc4a10  | 3.15E-04   | NA         | -7.23E-01    | -4.44E+00  | 4.83E-04   | NA         | -7.08E-01    | -4.25E+00  |
| Nefh     | _AQUALQEEC[Carbamidomethyl (C)]GYLR_2                                                                | #N/A                   | 3.28E-04   | NA         | 7.22E-01     | 4.42E+00   | 3.05E-03   | NA         | 6.28E-01     | 3.42E+00   |
| Mars1    | _NNSPELLNNGFINR_2                                                                                    | #N/A                   | 3.30E-04   | NA         | -7.22E-01    | -4.42E+00  | 4.43E-04   | NA         | -7.11E-01    | -4.29E+00  |
| Gpi      | _TFTTQETTINAETAKWFLAAK_3                                                                             | #N/A                   | 3.70E-04   | NA         | -7.17E-01    | -4.37E+00  | 4.06E-04   | NA         | -7.14E-01    | -4.33E+00  |
| Sugp2    | _GRS[Phospho (STY)]LNIADQEGTLGK_3                                                                    | Q8CH09_S206_M1_Sugp2   | 3.91E-04   | NA         | -7.15E-01    | -4.34E+00  | 1.85E-03   | NA         | -6.52E-01    | -3.65E+00  |
| Sptan1   | _VAEDLESEGLM[Oxidation (M)]AAEVQAAVQQEVYGAM[Oxidation (M)]PR_3                                       | #N/A                   | 4.03E-04   | NA         | -7.14E-01    | -4.33E+00  | 4.97E-03   | NA         | -6.02E-01    | -3.20E+00  |
| Palm     | _ENSAAPS[Phospho (STY)]PGRPQASPAK_2                                                                  | Q9Z0P4_S116_M1_Palm    | 4.05E-04   | NA         | -7.14E-01    | -4.33E+00  | 7.66E-04   | NA         | -6.90E-01    | -4.04E+00  |
| Igsf9b   | _APS[Phospho (STY)]JESS[Phospho (STY)]DDQGQPAAK_2                                                    | E9PZ19_S794_M2_Igsf9b  | 4.07E-04   | NA         | -7.14E-01    | -4.33E+00  | 2.07E-03   | NA         | -6.46E-01    | -3.59E+00  |
| Aftph    | _S[Phospho (STY)]PDPTGTGNALDDSAASKM_2                                                                | Q80WT5_S395_M1_Aftph   | 4.22E-04   | NA         | -7.13E-01    | -4.31E+00  | 3.27E-03   | NA         | -6.24E-01    | -3.39E+00  |
| Hnrrnpm  | _MGLAMGGAGGAS[Phospho (STY)]FDR_2                                                                    | Q9DDE1_S617_M1_Hnrrnpm | 4.30E-04   | NA         | -7.12E-01    | -4.30E+00  | 2.95E-03   | NA         | -6.29E-01    | -3.44E+00  |
| Ctnnd1   | _TLDRS[Phospho (STY)]GDLGDMPLK_3                                                                     | P30999_S920_M1_Ctnnd1  | 4.30E-04   | NA         | -7.12E-01    | -4.30E+00  | 3.05E-03   | NA         | -6.28E-01    | -3.42E+00  |
| Ppfia2   | _KMOVSEGS[Phospho (STY)]TES[Phospho (STY)]EHLEGMEAGQK_3                                              | Q8B5S9_S236_M2_Ppfia2  | 4.35E-04   | NA         | -7.11E-01    | -4.30E+00  | 9.11E-04   | NA         | -6.83E-01    | -3.96E+00  |
| Aldh2    | _LLC[Carbamidomethyl (C)]GGGAAADR_2                                                                  | #N/A                   | 4.39E-04   | NA         | 7.11E-01     | 4.29E+00   | 1.19E-03   | NA         | 6.71E-01     | 3.84E+00   |
| Map4k2   | _ASDPHLGLTS[Phospho (STY)]PEDSELETHDMFPDTHSR_4                                                       | Q61161_S298_M1_Map4k2  | 4.61E-04   | NA         | -7.09E-01    | -4.27E+00  | 2.51E-03   | NA         | -6.37E-01    | -3.51E+00  |
| Hint1    | _C[Carbamidomethyl (C)]AADLGLK_2                                                                     | #N/A                   | 4.66E-04   | NA         | -7.09E-01    | -4.27E+00  | 6.05E-03   | NA         | -5.91E-01    | -3.11E+00  |
| Hook3    | _LNQSDSIEDPNS[Phospho (STY)]PAGRR_2                                                                  | Q8BUK6_S238_M1_Hook3   | 4.66E-04   | NA         | -7.09E-01    | -4.26E+00  | 8.34E-03   | NA         | -5.73E-01    | -2.96E+00  |
| Tkt      | _VYC[Carbamidomethyl (C)]M[Oxidation (M)]LGDGEVSEGSVWEAM[Oxidation (M)]AFAGIYK_3                     | #N/A                   | 4.66E-04   | NA         | -7.09E-01    | -4.26E+00  | 7.40E-03   | NA         | -5.80E-01    | -3.02E+00  |
| Sybu     | _SGSS[Phospho (STY)]PPS[Phospho (STY)]PR_2                                                           | Q8BHS8_S199_M2_Sybu    | 4.79E-04   | NA         | -7.08E-01    | -4.25E+00  | 6.65E-03   | NA         | -5.86E-01    | -3.07E+00  |
| Cln6     | _ES[Phospho (STY)]RTPEELTILGETQEEDEILPR_3                                                            | O35454_S23_M1_Cln6     | 4.96E-04   | NA         | -7.07E-01    | -4.24E+00  | 3.19E-03   | NA         | -6.25E-01    | -3.40E+00  |

|          |                                                                                             |                         |             |           |           |             |           |           |
|----------|---------------------------------------------------------------------------------------------|-------------------------|-------------|-----------|-----------|-------------|-----------|-----------|
| Leo1     | _LNS[Phospho (STY)]DEEGESSGKR_2                                                             | Q5XJIE5_S631_M1_Leo1    | 5.21E-04 NA | -7.05E-01 | -4.21E+00 | 1.24E-03 NA | -6.70E-01 | -3.83E+00 |
| Tnr      | _DKEEDM[Oxidation (M)]LEVLLDATKR_3                                                          | #N/A                    | 5.28E-04 NA | -7.04E-01 | -4.21E+00 | 3.04E-03 NA | -6.28E-01 | -3.42E+00 |
| Kiaa1107 | _SSVSRSQ[Phospho (STY)]DENVTR_2                                                             | Q80TKO_S353_M1_Kiaa1107 | 5.66E-04 NA | -7.02E-01 | -4.18E+00 | 8.20E-03 NA | -5.73E-01 | -2.97E+00 |
| Sptbn1   | _TLETAAQM[Oxidation (M)]EGFLNR_2                                                            | #N/A                    | 5.79E-04 NA | -7.01E-01 | -4.17E+00 | 5.20E-03 NA | -6.00E-01 | -3.18E+00 |
| Cacnb3   | _QAWTGS[Phospho (STY)]QR_2                                                                  | P54285_S418_M1_Cacnb3   | 5.81E-04 NA | -7.00E-01 | -4.16E+00 | 3.83E-03 NA | -6.16E-01 | -3.32E+00 |
| Adam22   | _DVL[Carbamidomethyl (C)]GYLLC[Carbamidomethyl (C)]TNIGNIPR_2                               | #N/A                    | 6.03E-04 NA | -6.99E-01 | -4.15E+00 | 4.65E-03 NA | -6.06E-01 | -3.23E+00 |
| Tacc1    | _ESC[Carbamidomethyl (C)]DS5[Phospho (STY)]PGLAEPAKQESR_3                                   | Q6Y685_S82_M1_Tacc1     | 6.31E-04 NA | -6.97E-01 | -4.13E+00 | 5.98E-03 NA | -5.92E-01 | -3.12E+00 |
| Sec22b   | _DLQQYQSQAK_2                                                                               | #N/A                    | 7.73E-04 NA | 6.89E-01  | 4.04E+00  | 1.89E-03 NA | 6.51E-01  | 3.64E+00  |
| Rem2     | _RRGS[Phospho (STY)]M[Oxidation (M)]PVPYK_3                                                 | Q8VEL9_S69_M1_Rem2      | 7.91E-04 NA | -6.88E-01 | -4.03E+00 | 8.74E-03 NA | -5.70E-01 | -2.94E+00 |
| Add1     | _YFDRVDENNPYLR_3                                                                            | #N/A                    | 8.07E-04 NA | -6.88E-01 | -4.02E+00 | 2.64E-03 NA | -6.35E-01 | -3.49E+00 |
| Dtd1     | _AKGPSESS[Phospho (STY)]KER_2                                                               | Q9DD18_S182_M1_Dtd1     | 8.08E-04 NA | -6.88E-01 | -4.02E+00 | 1.04E-02 NA | -5.59E-01 | -2.86E+00 |
| Dlg3     | _VNEVDVSEVVHSR_3                                                                            | #N/A                    | 8.63E-04 NA | -6.85E-01 | -3.99E+00 | 1.12E-02 NA | -5.54E-01 | -2.83E+00 |
| Pde4d    | _QHEVEIPSPT[Phospho (STY)]QKEK_3                                                            | Q01063_T289_M1_Pde4d    | 8.82E-04 NA | -6.84E-01 | -3.98E+00 | 4.49E-03 NA | -6.08E-01 | -3.25E+00 |
| Sgip1    | _GKHFY[Phospho (STY)]SS[Phospho (STY)]S[Phospho (STY)]ES[Phospho (STY)]EEEEESHKK_3          | Q8VD37_S104_M3_Sgip1    | 8.96E-04 NA | -6.83E-01 | -3.97E+00 | 4.38E-03 NA | -6.09E-01 | -3.26E+00 |
| Srrm2    | _SS[Phospho (STY)]PELTR_2                                                                   | Q8BTI8_S1650_M1_Srrm2   | 9.20E-04 NA | -6.82E-01 | -3.96E+00 | 1.19E-02 NA | -5.50E-01 | -2.80E+00 |
| Tex2     | _SLS[Phospho (STY)]TEVEPK_2                                                                 | Q6ZPJ0_S195_M1_Tex2     | 9.33E-04 NA | -6.82E-01 | -3.95E+00 | 3.30E-03 NA | -6.24E-01 | -3.38E+00 |
| Mapk8ip3 | _LFSSSSS[Phospho (STY)]PPPAK_2                                                              | Q9ESN9_S586_M1_Mapk8ip3 | 9.39E-04 NA | -6.81E-01 | -3.95E+00 | 1.13E-03 NA | -6.74E-01 | -3.87E+00 |
| Sipa1l3  | _SSS[Phospho (STY)]EITLSEC[Carbamidomethyl (C)]DVEEPGDPR_2                                  | G3X9J0_S166_M1_Sipa1l3  | 9.45E-04 NA | -6.81E-01 | -3.95E+00 | 1.22E-02 NA | -5.49E-01 | -2.79E+00 |
| Snca     | _TKEQVTNVGGAVVTGVTAVAQK_3                                                                   | #N/A                    | 9.80E-04 NA | -6.80E-01 | -3.93E+00 | 3.14E-03 NA | -6.26E-01 | -3.41E+00 |
| Snta1    | _YLEIC[Carbamidomethyl (C)]AADGQDAVFLR_2                                                    | #N/A                    | 9.94E-04 NA | -6.79E-01 | -3.92E+00 | 1.26E-02 NA | -5.47E-01 | -2.77E+00 |
| Shank2   | _S[Phospho (STY)]KSM[Oxidation (M)]TAELEELGLSLVDK_3                                         | Q80Z38_S370_M1_Shank2   | 1.00E-03 NA | -6.79E-01 | -3.92E+00 | 5.89E-03 NA | -5.93E-01 | -3.12E+00 |
| Atp1a3   | _M[Oxidation (M)]TVAHM[Oxidation (M)]WFDNQIHEADTTEDQSGTSFDK_4                               | #N/A                    | 1.02E-03 NA | -6.78E-01 | -3.91E+00 | 6.57E-03 NA | -5.86E-01 | -3.07E+00 |
| Dlg1     | _EQM[Oxidation (M)]M[Oxidation (M)]NSVSSSGSGS[Phospho (STY)]LR_2                            | Q811D0_S575_M1_Dlg1     | 1.06E-03 NA | -6.76E-01 | -3.89E+00 | 7.09E-03 NA | -5.82E-01 | -3.04E+00 |
| Sorbs1   | _YS[Phospho (STY)]FSDDTKSPSLSVPR_3                                                          | Q62417_S254_M1_Sorbs1   | 1.07E-03 NA | -6.76E-01 | -3.89E+00 | 1.34E-02 NA | -5.43E-01 | -2.74E+00 |
| Ctnnal1  | _S[Phospho (STY)]AAELEELTVLK_2                                                              | O88327_S373_M1_Ctnnal1  | 1.09E-03 NA | -6.75E-01 | -3.88E+00 | 2.79E-03 NA | -6.32E-01 | -3.46E+00 |
| Sipa1l1  | _EYGS[Phospho (STY)]TSSIDK_2                                                                | Q8C0T5_S208_M1_Sipa1l1  | 1.13E-03 NA | -6.73E-01 | -3.86E+00 | 1.97E-03 NA | -6.49E-01 | -3.62E+00 |
| Tomm70   | _SDEKDKEGEALEVK_3                                                                           | #N/A                    | 1.14E-03 NA | -6.73E-01 | -3.86E+00 | 3.89E-03 NA | -6.15E-01 | -3.31E+00 |
| Rbx1     | _I[Acetyl (Protein N-term)]AAAMDVDTPSGTNSGAGK_2                                             | #N/A                    | 1.19E-03 NA | 6.71E-01  | 3.84E+00  | 4.88E-03 NA | 6.03E-01  | 3.21E+00  |
| Fam102b  | _SAS[Phospho (STY)]VPDELGAWGHSR_2                                                           | Q8BQS4_S162_M1_Fam102b  | 1.21E-03 NA | -6.71E-01 | -3.84E+00 | 3.29E-03 NA | -6.24E-01 | -3.39E+00 |
| Map4     | _VGS[Phospho (STY)]TENIK_2                                                                  | P27546_S914_M1_Map4     | 1.23E-03 NA | -6.70E-01 | -3.83E+00 | 1.44E-02 NA | -5.38E-01 | -2.71E+00 |
| Kcna2    | _IPS[Phospho (STY)]S[Phospho (STY)]PDLK_2                                                   | P63141_S440_M2_Kcna2    | 1.25E-03 NA | -6.69E-01 | -3.82E+00 | 4.26E-03 NA | -6.10E-01 | -3.27E+00 |
| Tcp1     | _DDKHGS[Phospho (STY)]YENAVHSGALDD_3                                                        | P11983_S544_M1_Tcp1     | 1.26E-03 NA | -6.69E-01 | -3.82E+00 | 2.69E-03 NA | -6.34E-01 | -3.48E+00 |
| Sptan1   | _DC[Carbamidomethyl (C)]EQAENWM[Oxidation (M)]AAR_2                                         | #N/A                    | 1.26E-03 NA | 6.69E-01  | 3.82E+00  | 7.63E-03 NA | 5.78E-01  | 3.00E+00  |
| Actn1    | _ILAGDKNYTEDEL_3                                                                            | #N/A                    | 1.26E-03 NA | -6.69E-01 | -3.82E+00 | 1.99E-03 NA | -6.48E-01 | -3.61E+00 |
| Kctd16   | _TLTSGS[Phospho (STY)]RESNISSK_2                                                            | Q5DITY9_S372_M1_Kctd16  | 1.32E-03 NA | -6.67E-01 | -3.80E+00 | 1.49E-02 NA | -5.36E-01 | -2.69E+00 |
| Cnp      | _ERLDQLFEM[Oxidation (M)]ADQYQYQVVLVEPK_3                                                   | #N/A                    | 1.32E-03 NA | -6.67E-01 | -3.80E+00 | 4.72E-03 NA | -6.05E-01 | -3.22E+00 |
| Ctnnd2   | _SPS[Phospho (STY)]IDSIQKDPR_2                                                              | O35927_S531_M1_Ctnnd2   | 1.37E-03 NA | -6.65E-01 | -3.78E+00 | 6.66E-03 NA | -5.86E-01 | -3.07E+00 |
| Myh9     | _GTGDC[Carbamidomethyl (C)]S[Phospho (STY)]DEEVDGKADGADAK_2                                 | #N/A                    | 1.40E-03 NA | -6.64E-01 | -3.77E+00 | 1.81E-03 NA | -6.53E-01 | -3.65E+00 |
| Camk2g   | _SLLNKS[Phospho (STY)]DGGVK_2                                                               | Q923T9_S325_M1_Camk2g   | 1.41E-03 NA | -6.64E-01 | -3.77E+00 | 2.98E-03 NA | -6.29E-01 | -3.43E+00 |
| Cd200    | _EVIC[Carbamidomethyl (C)]QVLYGNVIDYK_2                                                     | #N/A                    | 1.42E-03 NA | -6.64E-01 | -3.76E+00 | 1.01E-03 NA | -6.78E-01 | -3.92E+00 |
| Ndufs7   | _KVYDQM[Oxidation (M)]PEPR_2                                                                | #N/A                    | 1.47E-03 NA | -6.62E-01 | -3.75E+00 | 2.13E-03 NA | -6.45E-01 | -3.58E+00 |
| Map1a    | _KVAELEEEQS[Phospho (STY)]QGSSSYSDWVK_3                                                     | Q9QYR6_S114_M1_Map1a    | 1.53E-03 NA | -6.60E-01 | -3.73E+00 | 5.99E-03 NA | -5.92E-01 | -3.11E+00 |
| Syn1     | _VKVDNQHDQDIASVVALTK_3                                                                      | #N/A                    | 1.54E-03 NA | -6.60E-01 | -3.73E+00 | 5.54E-03 NA | -5.96E-01 | -3.15E+00 |
| Septin5  | _M[Oxidation (M)]ES[Phospho (STY)]PIPLPLPTDAETEK_2                                          | Q9Z2Q6_S327_M1_Septin5  | 1.54E-03 NA | -6.60E-01 | -3.73E+00 | 1.80E-02 NA | -5.23E-01 | -2.60E+00 |
| Dnm1     | _VYSPHVLNLTLDLPGM[Oxidation (M)]ITK_3                                                       | #N/A                    | 1.56E-03 NA | -6.60E-01 | -3.72E+00 | 7.24E-03 NA | -5.81E-01 | -3.03E+00 |
| Pex5l    | _NHS[Phospho (STY)]LEEEFER_2                                                                | Q8C437_S202_M1_Pex5l    | 1.56E-03 NA | -6.60E-01 | -3.72E+00 | 9.95E-03 NA | -5.62E-01 | -2.88E+00 |
| Cbx3     | _C[Carbamidomethyl (C)]PQ[VIIFYEER_2                                                        | #N/A                    | 1.60E-03 NA | -6.58E-01 | -3.71E+00 | 8.54E-03 NA | -5.71E-01 | -2.95E+00 |
| Dync1h1  | _LALESIC[Carbamidomethyl (C)]LLLGESTTDWK_2                                                  | #N/A                    | 1.66E-03 NA | -6.57E-01 | -3.69E+00 | 1.70E-02 NA | -5.27E-01 | -2.63E+00 |
| Snap91   | _GLGSDLOSSLASLVGNLISGTTSK_2                                                                 | #N/A                    | 1.71E-03 NA | -6.55E-01 | -3.68E+00 | 8.97E-03 NA | -5.68E-01 | -2.93E+00 |
| Tubb2a   | _ESESC[Carbamidomethyl (C)]DC[Carbamidomethyl (C)]LQGFQLTHSLGGGTGSGM[Oxidation (M)]GTLISK_3 | #N/A                    | 1.71E-03 NA | -6.55E-01 | -3.68E+00 | 6.00E-03 NA | -5.92E-01 | -3.11E+00 |
| Stxbp1   | _M[Oxidation (M)]TDIM[Oxidation (M)]TEGTIVEDINKR_3                                          | #N/A                    | 1.72E-03 NA | -6.55E-01 | -3.68E+00 | 1.13E-02 NA | -5.54E-01 | -2.82E+00 |
| Dmtn     | _HLS[Phospho (STY)]AEDFSR_2                                                                 | Q9WV69_S372_M1_Dmtn     | 1.76E-03 NA | -6.54E-01 | -3.67E+00 | 1.25E-02 NA | -5.47E-01 | -2.77E+00 |
| Dclk2    | _YSGRS[Phospho (STY)]PGFSR_2                                                                | Q6PGN3_S307_M1_Dclk2    | 1.76E-03 NA | -6.54E-01 | -3.67E+00 | 5.35E-03 NA | -5.98E-01 | -3.17E+00 |
| Akr1a1   | _YDSTHYK_2                                                                                  | #N/A                    | 1.80E-03 NA | -6.53E-01 | -3.66E+00 | 6.90E-03 NA | -5.84E-01 | -3.05E+00 |
| Akap5    | _SSAIQM[Oxidation (M)]GT[Phospho (STY)]PELEKETK_2                                           | D3YVF0_T220_M1_Akap5    | 1.80E-03 NA | -6.53E-01 | -3.66E+00 | 1.75E-02 NA | -5.25E-01 | -2.62E+00 |
| Rock2    | _TLTSDVANLANEKEELNNK_3                                                                      | #N/A                    | 1.83E-03 NA | -6.52E-01 | -3.65E+00 | 1.93E-02 NA | -5.18E-01 | -2.57E+00 |
| Ssh2     | _EM[Oxidation (M)]TTS[Phospho (STY)]ADQIAEVK_2                                              | Q5SW75_S487_M1_Ssh2     | 1.88E-03 NA | -6.51E-01 | -3.64E+00 | 3.33E-03 NA | -6.23E-01 | -3.38E+00 |

|          |                                                                                               |                        |             |           |           |             |           |           |
|----------|-----------------------------------------------------------------------------------------------|------------------------|-------------|-----------|-----------|-------------|-----------|-----------|
| Cdk17    | _RLS[Phospho (STY)]LPADIR_2                                                                   | Q8K0D0_S146_M1_Cdk17   | 1.91E-03 NA | -6.50E-01 | -3.63E+00 | 6.38E-03 NA | -5.88E-01 | -3.09E+00 |
| Ndufv1   | _GAGAYIC[Carbamidomethyl (C)]GEETALIESIEGK_2                                                  | #N/A                   | 1.93E-03 NA | -6.50E-01 | -3.63E+00 | 1.61E-02 NA | -5.31E-01 | -2.66E+00 |
| Stip1    | _DPQALSEHLK_2                                                                                 | #N/A                   | 2.03E-03 NA | 6.47E-01  | 3.60E+00  | 7.06E-03 NA | 5.82E-01  | 3.04E+00  |
| Pc       | _EGPEGFAR_2                                                                                   | #N/A                   | 2.11E-03 NA | 6.46E-01  | 3.59E+00  | 1.44E-02 NA | 5.38E-01  | 2.71E+00  |
| Atp6v0d1 | _AGVLSQADYLNLVQC[Carbamidomethyl (C)]ETLEDLK_3                                                | #N/A                   | 2.14E-03 NA | -6.45E-01 | -3.58E+00 | 1.44E-02 NA | -5.38E-01 | -2.71E+00 |
| Ankib1   | _GVAPADS[Phospho (STY)]PDAPRR_2                                                               | Q6ZPS6_S738_M1_Ankib1  | 2.16E-03 NA | -6.45E-01 | -3.58E+00 | 2.28E-02 NA | -5.06E-01 | -2.49E+00 |
| Ccdc115  | _ADAQT[Phospho (STY)]PEEVGPSEASLR_2                                                           | Q8VE99_T90_M1_Ccdc115  | 2.17E-03 NA | -6.44E-01 | -3.57E+00 | 4.26E-03 NA | -6.10E-01 | -3.27E+00 |
| Top2b    | _KTSFDQDS[Phospho (STY)]DVIDFSDTFSEPPALPR_3                                                   | Q64511_S1568_M1_Top2b  | 2.18E-03 NA | -6.44E-01 | -3.57E+00 | 1.34E-02 NA | -5.43E-01 | -2.74E+00 |
| Sgip1    | _RST[Phospho (STY)]PT[Phospho (STY)]PELTSK_2                                                  | Q8VD37_T180_M2_Sgip1   | 2.22E-03 NA | -6.43E-01 | -3.56E+00 | 1.19E-02 NA | -5.50E-01 | -2.80E+00 |
| Ppp3r1   | _LDLNSGSLSVVEEFM[Oxidation (M)]SLPELQQNPLVQR_3                                                | #N/A                   | 2.24E-03 NA | -6.43E-01 | -3.56E+00 | 1.15E-02 NA | -5.53E-01 | -2.82E+00 |
| Sgip1    | _HVPS[Phospho (STY)]PLNLEEVQKK_3                                                              | Q8VD37_S371_M1_Sgip1   | 2.26E-03 NA | -6.42E-01 | -3.56E+00 | 1.47E-02 NA | -5.37E-01 | -2.70E+00 |
| Slc17a7  | _C[Carbamidomethyl (C)]GFVGHDLQAGS[Phospho (STY)]DES[Phospho (STY)]EMEDEAEPPGAPPAPPPSYGATHSTV | Q3TXX4_S519_M2_Slc17a7 | 2.29E-03 NA | -6.42E-01 | -3.55E+00 | 1.16E-02 NA | -5.52E-01 | -2.81E+00 |
| Myl12b   | _ATSNVFAM[Oxidation (M)]FDQSQIQEFK_2                                                          | #N/A                   | 2.30E-03 NA | -6.42E-01 | -3.55E+00 | 4.51E-03 NA | -6.07E-01 | -3.24E+00 |
| Actn1    | _MLDAEDIVGTARPDEK_3                                                                           | #N/A                   | 2.31E-03 NA | -6.41E-01 | -3.55E+00 | 1.16E-02 NA | -5.52E-01 | -2.81E+00 |
| Prrt2    | _HPS[Phospho (STY)]SQLAGPGVEGGEGTKQPR_3                                                       | E9PUL5_S254_M1_Prrt2   | 2.32E-03 NA | -6.41E-01 | -3.54E+00 | 3.78E-03 NA | -6.17E-01 | -3.32E+00 |
| Ccm2     | _GIITDS[Phospho (STY)]FGR_2                                                                   | Q8K2Y9_S393_M1_Ccm2    | 2.39E-03 NA | 6.40E-01  | 3.53E+00  | 5.09E-03 NA | 6.01E-01  | 3.19E+00  |
| H1-2     | _Acetyl (Protein N-term)]S[Phospho (STY)]EAAPAAPAAAPAEKAPAK_2                                 | P15864_S2_M1_H1-2      | 2.44E-03 NA | -6.39E-01 | -3.52E+00 | 1.41E-02 NA | -5.40E-01 | -2.72E+00 |
| Rab5a    | _GAQAANVVYDITNEESFAR_2                                                                        | #N/A                   | 2.47E-03 NA | -6.38E-01 | -3.52E+00 | 2.89E-03 NA | -6.30E-01 | -3.45E+00 |
| Clasp1   | _RS[Phospho (STY)]PTGSTASR_2                                                                  | Q80TV8_S572_M1_Clasp1  | 2.48E-03 NA | -6.38E-01 | -3.51E+00 | 4.05E-03 NA | -6.13E-01 | -3.29E+00 |
| Nktr     | _TC[Carbamidomethyl (C)]DEGSS[Phospho (STY)]PSKPK_2                                           | P30415_S1060_M1_Nktr   | 2.49E-03 NA | -6.38E-01 | -3.51E+00 | 1.10E-02 NA | -5.56E-01 | -2.83E+00 |
| Camk2b   | _TTEQLIEAVNNGDFEAYAK_2                                                                        | #N/A                   | 2.51E-03 NA | -6.37E-01 | -3.51E+00 | 1.88E-02 NA | -5.20E-01 | -2.58E+00 |
| Dctn2    | _VHQLYETIQR_2                                                                                 | #N/A                   | 2.57E-03 NA | 6.36E-01  | 3.50E+00  | 3.53E-03 NA | 6.20E-01  | 3.36E+00  |
| Actr1b   | _KEYEEDGSR_2                                                                                  | #N/A                   | 2.58E-03 NA | -6.36E-01 | -3.50E+00 | 1.19E-02 NA | -5.50E-01 | -2.80E+00 |
| Senp3    | _GS[Phospho (STY)]PPVPSGPPMEEDGLR_2                                                           | Q9EP97_S206_M1_Senp3   | 2.60E-03 NA | -6.36E-01 | -3.49E+00 | 5.35E-03 NA | -5.98E-01 | -3.17E+00 |
| Tomm70   | _NSERKT[Phospho (STY)]PEGR_2                                                                  | Q9CZW5_T88_M1_Tomm70   | 2.61E-03 NA | -6.35E-01 | -3.49E+00 | 5.33E-03 NA | -5.98E-01 | -3.17E+00 |
| Apba1    | _SNS[Phospho (STY)]QENVEASHPSQDGKR_3                                                          | B2RUJ5_S573_M1_Apba1   | 2.66E-03 NA | -6.34E-01 | -3.48E+00 | 6.96E-03 NA | -5.83E-01 | -3.05E+00 |
| Hnnpnm   | _INEILSNALK_2                                                                                 | #N/A                   | 2.67E-03 NA | 6.34E-01  | 3.48E+00  | 3.86E-03 NA | 6.16E-01  | 3.31E+00  |
| Pdcd5    | _VSEQGLIELEK_2                                                                                | #N/A                   | 2.70E-03 NA | 6.34E-01  | 3.47E+00  | 4.70E-03 NA | 6.05E-01  | 3.22E+00  |
| Plec     | _LLDAQSLSTGGVDPISK_2                                                                          | #N/A                   | 2.74E-03 NA | -6.33E-01 | -3.47E+00 | 6.79E-03 NA | -5.85E-01 | -3.06E+00 |
| Cbx1     | _VEEVLEEEEEYVVEK_2                                                                            | #N/A                   | 2.75E-03 NA | -6.33E-01 | -3.47E+00 | 7.89E-03 NA | -5.76E-01 | -2.99E+00 |
| Rem2     | _GHAGGQRPEPS[Phospho (STY)]PDGPAPPTRR_4                                                       | Q8VEL9_S296_M1_Rem2    | 2.80E-03 NA | -6.32E-01 | -3.46E+00 | 9.96E-04 NA | -6.79E-01 | -3.92E+00 |
| Pex5l    | _SALNSES[Phospho (STY)]ASELELVAPAQAR_2                                                        | Q8C437_S172_M1_Pex5l   | 2.82E-03 NA | -6.32E-01 | -3.46E+00 | 2.60E-03 NA | -6.35E-01 | -3.49E+00 |
| Gnb1     | _QTFTHGESDINAI[Carbamidomethyl (C)]FFPNGNAFATGSDDATC[Carbamidomethyl (C)]R_3                  | #N/A                   | 2.86E-03 NA | -6.31E-01 | -3.45E+00 | 1.53E-02 NA | -5.34E-01 | -2.68E+00 |
| Hepacam  | _QNS[Phospho (STY)]LEYM[Oxidation (M)]DQNDRLK_3                                               | Q640R3_S280_M1_Hepacam | 2.89E-03 NA | -6.30E-01 | -3.44E+00 | 7.23E-03 NA | -5.81E-01 | -3.03E+00 |
| Ppp2r1a  | _VKEFC[Carbamidomethyl (C)]ENLSADC[Carbamidomethyl (C)]R_2                                    | #N/A                   | 2.92E-03 NA | -6.30E-01 | -3.44E+00 | 1.50E-02 NA | -5.35E-01 | -2.69E+00 |
| Dnpep    | _SPSPFHVVAEC[Carbamidomethyl (C)]R_3                                                          | #N/A                   | 2.92E-03 NA | -6.30E-01 | -3.44E+00 | 1.61E-02 NA | -5.30E-01 | -2.65E+00 |
| Cs       | _TVVGQITVDM[Oxidation (M)]M[Oxidation (M)]YGGM[Oxidation (M)]R_2                              | #N/A                   | 2.93E-03 NA | -6.30E-01 | -3.44E+00 | 8.52E-03 NA | -5.71E-01 | -2.95E+00 |
| Psmd1    | _TASAVAGKT[Phospho (STY)]PDAS[Phospho (STY)]PEPKDQTLK_3                                       | Q3TXS7_S315_M2_Psmd1   | 2.95E-03 NA | -6.29E-01 | -3.44E+00 | 1.39E-02 NA | -5.40E-01 | -2.72E+00 |
| Arhgef7  | _KPS[Phospho (STY)]DEEFVARK_3                                                                 | Q9ES28_S673_M1_Arhgef7 | 2.95E-03 NA | -6.29E-01 | -3.43E+00 | 1.92E-02 NA | -5.18E-01 | -2.57E+00 |
| Dlgap2   | _GGLYNS[Phospho (STY)]M[Oxidation (M)]DLSLSNK_2                                               | Q8BJ42_S667_M1_Dlgap2  | 2.97E-03 NA | -6.29E-01 | -3.43E+00 | 7.08E-03 NA | -5.82E-01 | -3.04E+00 |
| Pclo     | _IVDSGVQT[Phospho (STY)]DDEETADR_2                                                            | Q9QYX7_T3376_M1_Pclo   | 2.98E-03 NA | -6.29E-01 | -3.43E+00 | 1.57E-02 NA | -5.32E-01 | -2.67E+00 |
| Synrg    | _QLS[Phospho (STY)]LEGAGLAMEEFK_2                                                             | Q5SV85_S744_M1_Synrg   | 2.98E-03 NA | -6.29E-01 | -3.43E+00 | 1.48E-02 NA | -5.36E-01 | -2.70E+00 |
| Dlg4     | _EQLM[Oxidation (M)]NSSLSG[Phospho (STY)]GTASLR_2                                             | Q62108_S418_M1_Dlg4    | 3.00E-03 NA | -6.29E-01 | -3.43E+00 | 2.06E-03 NA | -6.47E-01 | -3.60E+00 |
| Spen     | _S[Phospho (STY)]RSPNRFDAHDPR_4                                                               | Q62504_S188_M1_Spen    | 3.00E-03 NA | -6.28E-01 | -3.43E+00 | 1.90E-03 NA | -6.51E-01 | -3.63E+00 |
| Slc6a9   | _YAPTTTTPS[Phospho (STY)]PEDGFVEQPLHPDK_3                                                     | P28571_S659_M1_Slc6a9  | 3.02E-03 NA | -6.28E-01 | -3.43E+00 | 1.02E-02 NA | -5.60E-01 | -2.87E+00 |
| Wac      | _DAADPS[Phospho (STY)]PPNK_2                                                                  | Q924H7_S53_M1_Wac      | 3.02E-03 NA | -6.28E-01 | -3.43E+00 | 3.37E-03 NA | -6.23E-01 | -3.38E+00 |
| Cisd1    | _HNEETGDNVGLIIK_2                                                                             | #N/A                   | 3.03E-03 NA | -6.28E-01 | -3.42E+00 | 5.34E-03 NA | -5.98E-01 | -3.17E+00 |
| Map1b    | _ASLSPM[Oxidation (M)]DEPVPDSES[Phospho (STY)]PVEK_2                                          | P14873_S1384_M1_Map1b  | 3.09E-03 NA | -6.27E-01 | -3.42E+00 | 1.78E-02 NA | -5.24E-01 | -2.61E+00 |
| Pdhx     | _LTEDEEGNPQLQHQHLYVTM[Oxidation (M)]SSDSR_3                                                   | #N/A                   | 3.14E-03 NA | -6.26E-01 | -3.41E+00 | 1.22E-02 NA | -5.49E-01 | -2.78E+00 |
| Plekhh1  | _SC[Carbamidomethyl (C)]DS[Phospho (STY)]DEDEYAGTGGR_2                                        | Q80TI1_S739_M1_Plekhh1 | 3.15E-03 NA | -6.26E-01 | -3.41E+00 | 4.31E-03 NA | -6.10E-01 | -3.26E+00 |
| Epha4    | _IDTIAADESFTQVDIGDR_2                                                                         | #N/A                   | 3.16E-03 NA | -6.26E-01 | -3.40E+00 | 1.07E-02 NA | -5.57E-01 | -2.85E+00 |
| Slc4a10  | _DSGLEDGRES[Phospho (STY)]PSFDTPSQR_3                                                         | Q5DTL9_S89_M1_Slc4a10  | 3.22E-03 NA | -6.25E-01 | -3.40E+00 | 9.39E-03 NA | -5.65E-01 | -2.91E+00 |
| Stip1    | _LM[Oxidation (M)]DVGLIAIR_2                                                                  | #N/A                   | 3.23E-03 NA | 6.23E-01  | 3.38E+00  | 3.76E-03 NA | 6.17E-01  | 3.33E+00  |
| Uqcrc1   | _TDLTDYLNLR_2                                                                                 | #N/A                   | 3.34E-03 NA | -6.23E-01 | -3.38E+00 | 1.26E-02 NA | -5.47E-01 | -2.77E+00 |
| Septin2  | _TVQIEASTVEIER_2                                                                              | #N/A                   | 3.36E-03 NA | -6.23E-01 | -3.38E+00 | 1.44E-02 NA | -5.38E-01 | -2.71E+00 |
| Ubxn2b   | _FKAFS[Phospho (STY)]GEGQK_2                                                                  | Q0KL01_S216_M1_Ubxn2b  | 3.45E-03 NA | -6.21E-01 | -3.37E+00 | 1.38E-02 NA | -5.41E-01 | -2.73E+00 |
| Lap3     | _ANKPGDVVR_2                                                                                  | #N/A                   | 3.49E-03 NA | 6.21E-01  | 3.36E+00  | 2.56E-03 NA | 6.36E-01  | 3.50E+00  |

|          |                                                                                             |                         |             |           |           |             |           |           |
|----------|---------------------------------------------------------------------------------------------|-------------------------|-------------|-----------|-----------|-------------|-----------|-----------|
| Epb411l  | _KAQEETPQQEAAAATT[Phospho (STY)]PVT[Phospho (STY)]PAGHSHPETNSNEK_4                          | Q9Z2H5_T30_M2_Epb411l   | 3.55E-03 NA | -6.20E-01 | -3.35E+00 | 1.26E-02 NA | -5.47E-01 | -2.77E+00 |
| Chga     | _DDGQSDS[Phospho (STY)]QAAVDGDGK_2                                                          | P26339_S282_M1_Chga     | 3.56E-03 NA | -6.20E-01 | -3.35E+00 | 1.40E-02 NA | -5.40E-01 | -2.72E+00 |
| Map7d1   | _RKPGAGGS[Phospho (STY)]PALAR_3                                                             | A2AJI0_S401_M1_Map7d1   | 3.60E-03 NA | -6.19E-01 | -3.35E+00 | 8.29E-03 NA | -5.73E-01 | -2.97E+00 |
| Rbbp6    | _VDGDREKS[Phospho (STY)]PR_2                                                                | P97868_S1053_M1_Rbbp6   | 3.64E-03 NA | -6.19E-01 | -3.34E+00 | 4.90E-03 NA | -6.03E-01 | -3.21E+00 |
| Safb     | _MSS[Phospho (STY)]VEEDSDTKR_2                                                              | D3YXK2_S406_M1_Safb     | 3.72E-03 NA | -6.18E-01 | -3.33E+00 | 5.76E-03 NA | -5.94E-01 | -3.13E+00 |
| Rap1a    | _QWC[Carbamidomethyl (C)]NC[Carbamidomethyl (C)]AFLESSAK_2                                  | #N/A                    | 3.72E-03 NA | -6.17E-01 | -3.33E+00 | 6.91E-03 NA | -5.84E-01 | -3.05E+00 |
| Cpox     | _SPS[Phospho (STY)]PGRREEDGDELAR_3                                                          | P36552_S101_M1_Cpox     | 3.78E-03 NA | -6.17E-01 | -3.32E+00 | 6.40E-03 NA | -5.88E-01 | -3.08E+00 |
| Palm2    | _LEQEIQALESEESQISAK_2                                                                       | #N/A                    | 3.93E-03 NA | -6.15E-01 | -3.31E+00 | 8.82E-03 NA | -5.69E-01 | -2.94E+00 |
| Phyhipl  | _DNSGSHGSPISGK_2                                                                            | #N/A                    | 4.09E-03 NA | -6.13E-01 | -3.29E+00 | 1.09E-02 NA | -5.56E-01 | -2.84E+00 |
| Rbm15    | _DRT[Phospho (STY)]PPLLYR_2                                                                 | Q0VBL3_T567_M1_Rbm15    | 4.09E-03 NA | -6.13E-01 | -3.29E+00 | 5.47E-03 NA | -5.97E-01 | -3.16E+00 |
| Sorbs2   | _RGS[Phospho (STY)]LPDINSILHR_3                                                             | Q3UTJ2_S829_M1_Sorbs2   | 4.13E-03 NA | -6.12E-01 | -3.28E+00 | 1.39E-02 NA | -5.40E-01 | -2.72E+00 |
| Rgs6     | _SVYGVTDDETQSQS[Phospho (STY)]PVHIPSPQPIRK_3                                                | Q9Z2H2_S244_M1_Rgs6     | 4.16E-03 NA | -6.12E-01 | -3.28E+00 | 8.38E-03 NA | -5.72E-01 | -2.96E+00 |
| U2af2    | _GAKEEHGGLIRS[Phospho (STY)]PR_3                                                            | P26369_S79_M1_U2af2     | 4.18E-03 NA | -6.11E-01 | -3.28E+00 | 1.89E-02 NA | -5.20E-01 | -2.58E+00 |
| Sec62    | _EELEQQT[Phospho (STY)]DGD[Carbamidomethyl (C)]DEEDDDKDGVEPK_3                              | Q8BU14_T375_M1_Sec62    | 4.25E-03 NA | -6.10E-01 | -3.27E+00 | 1.39E-02 NA | -5.40E-01 | -2.72E+00 |
| Nelfe    | _SM[Oxidation (M)]S[Phospho (STY)]ADEDLQEPSR_2                                              | P19426_S115_M1_Nelfe    | 4.53E-03 NA | -6.07E-01 | -3.24E+00 | 1.60E-02 NA | -5.31E-01 | -2.66E+00 |
| Sv2a     | _GGLS[Phospho (STY)]DGEPPGGGGEAQR_2                                                         | Q9JIS5_S127_M1_Sv2a     | 4.63E-03 NA | -6.06E-01 | -3.23E+00 | 2.09E-02 NA | -5.12E-01 | -2.53E+00 |
| Atp2a2   | _IVEFLOSFDITAM[Oxidation (M)]TGDGVNDAPALKK_3                                                | #N/A                    | 4.67E-03 NA | -6.05E-01 | -3.23E+00 | 6.61E-03 NA | -5.86E-01 | -3.07E+00 |
| Ogdh     | _TSFDEM[Oxidation (M)]LPGTHFQR_3                                                            | #N/A                    | 4.73E-03 NA | -6.05E-01 | -3.22E+00 | 7.80E-03 NA | -5.76E-01 | -2.99E+00 |
| Arhgef10 | _T[Phospho (STY)]RSLVSQDHR_3                                                                | Q8C033_T353_M1_Arhgef10 | 4.87E-03 NA | -6.03E-01 | -3.21E+00 | 7.18E-03 NA | -5.81E-01 | -3.03E+00 |
| Uqcrf51  | _EIDQEAAVEVSQLRDPQHDLDR_3                                                                   | #N/A                    | 4.94E-03 NA | -6.02E-01 | -3.20E+00 | 3.62E-03 NA | -6.19E-01 | -3.34E+00 |
| Blvra    | _SQEVDVAYIC[Carbamidomethyl (C)]TESSSHEDYIR_3                                               | #N/A                    | 4.95E-03 NA | -6.02E-01 | -3.20E+00 | 2.44E-02 NA | -5.01E-01 | -2.46E+00 |
| Skp1     | _LQSSDGEIFEVDVEIAK_2                                                                        | #N/A                    | 5.12E-03 NA | -6.00E-01 | -3.19E+00 | 9.34E-03 NA | -5.66E-01 | -2.91E+00 |
| Ccdc85a  | _HALGGS[Phospho (STY)]LEHLPR_3                                                              | Q5SP85_S342_M1_Ccdc85a  | 5.12E-03 NA | -6.00E-01 | -3.19E+00 | 1.29E-02 NA | -5.45E-01 | -2.76E+00 |
| Srrm2    | _MS[Phospho (STY)]C[Carbamidomethyl (C)]FS[Phospho (STY)]RPSM[Oxidation (M)]SPTPLDR_2       | Q8BT18_S2067_M2_Srrm2   | 5.28E-03 NA | -5.99E-01 | -3.17E+00 | 3.67E-03 NA | -6.18E-01 | -3.34E+00 |
| Stx1b    | _QHSAILAAPNPDEK_2                                                                           | #N/A                    | 5.29E-03 NA | 5.99E-01  | 3.17E+00  | 1.53E-02 NA | 5.34E-01  | 2.68E+00  |
| Stmn3    | _ALEENNNFSR_2                                                                               | #N/A                    | 5.31E-03 NA | -5.98E-01 | -3.17E+00 | 6.79E-03 NA | -5.85E-01 | -3.06E+00 |
| Phb2     | _IGGVQQDTILAEGLHFR_3                                                                        | #N/A                    | 5.44E-03 NA | -5.97E-01 | -3.16E+00 | 2.23E-02 NA | -5.08E-01 | -2.50E+00 |
| Dync1i2  | _EIAVGDSGEGQIVYDVGEGIAVPR_3                                                                 | #N/A                    | 5.47E-03 NA | -5.97E-01 | -3.16E+00 | 1.99E-02 NA | -5.16E-01 | -2.55E+00 |
| Gps1     | _SPPREGS[Phospho (STY)]QGLTTPANSQSR_3                                                       | Q99LD4_S454_M1_Gps1     | 5.51E-03 NA | -5.96E-01 | -3.15E+00 | 2.05E-02 NA | -5.14E-01 | -2.54E+00 |
| Lrp1     | _AEGSEYQVLIADDNEIR_2                                                                        | #N/A                    | 5.51E-03 NA | -5.96E-01 | -3.15E+00 | 1.57E-02 NA | -5.32E-01 | -2.67E+00 |
| Hdgf     | _AGDVLED[Phospho (STY)]PKRPK_2                                                              | P51859_S165_M1_Hdgf     | 5.52E-03 NA | -5.96E-01 | -3.15E+00 | 2.14E-02 NA | -5.11E-01 | -2.52E+00 |
| Uqcrc2   | _LPNGLVIASLENYAPLSR_2                                                                       | #N/A                    | 5.53E-03 NA | 5.96E-01  | 3.15E+00  | 2.19E-02 NA | 5.09E-01  | 2.51E+00  |
| Gdap11l  | _DNIISDYDQIDVVER_2                                                                          | #N/A                    | 5.57E-03 NA | -5.96E-01 | -3.15E+00 | 1.43E-02 NA | -5.39E-01 | -2.71E+00 |
| Stmn4    | _RRDPS[Phospho (STY)]LEEIQK_3                                                               | P63042_S90_M1_Stmn4     | 5.63E-03 NA | -5.95E-01 | -3.14E+00 | 6.06E-03 NA | -5.91E-01 | -3.11E+00 |
| Nfix     | _S[Phospho (STY)]IDSEMESPVDVFPYGTGR_2                                                       | P70257_S280_M1_Nfix     | 5.69E-03 NA | -5.95E-01 | -3.14E+00 | 4.96E-03 NA | -6.02E-01 | -3.20E+00 |
| Dpysl2   | _JVNDQSFYADIYM[Oxidation (M)]EDGLIK_2                                                       | #N/A                    | 5.81E-03 NA | -5.93E-01 | -3.13E+00 | 2.10E-02 NA | -5.12E-01 | -2.53E+00 |
| Tjp1     | _SAS[Phospho (STY)]LENKK_2                                                                  | P39447_S1277_M1_Tjp1    | 5.82E-03 NA | -5.93E-01 | -3.13E+00 | 7.79E-03 NA | -5.77E-01 | -2.99E+00 |
| Tubb3    | _M[Oxidation (M)]SSTFIGNSTAIQELFKR_3                                                        | #N/A                    | 5.87E-03 NA | -5.93E-01 | -3.12E+00 | 7.28E-03 NA | -5.81E-01 | -3.02E+00 |
| Lysmd2   | _AHRPSAPS[Phospho (STY)]PPPR_3                                                              | Q9D7V2_S24_M1_Lysmd2    | 5.90E-03 NA | -5.93E-01 | -3.12E+00 | 5.31E-03 NA | -5.98E-01 | -3.17E+00 |
| Hdac5    | _TQS[Phospho (STY)]SPAAPGSMK_2                                                              | Q9Z2V6_S650_M1_Hdac5    | 6.06E-03 NA | -5.91E-01 | -3.11E+00 | 2.33E-02 NA | -5.04E-01 | -2.48E+00 |
| Adss2    | _ELPVNAQNYVR_2                                                                              | #N/A                    | 6.07E-03 NA | 5.91E-01  | 3.11E+00  | 4.43E-03 NA | 6.08E-01  | 3.25E+00  |
| Txnrd1   | _VVYENAYGR_2                                                                                | #N/A                    | 6.15E-03 NA | -5.90E-01 | -3.10E+00 | 1.70E-02 NA | -5.27E-01 | -2.63E+00 |
| Map2     | _YTVPLSPVQDSENLSGESFYEGTDDKVR_3                                                             | #N/A                    | 6.15E-03 NA | -5.90E-01 | -3.10E+00 | 2.26E-02 NA | -5.07E-01 | -2.49E+00 |
| Trim2    | _VFNQEGEFMLK_2                                                                              | #N/A                    | 6.18E-03 NA | -5.90E-01 | -3.10E+00 | 7.43E-03 NA | -5.79E-01 | -3.02E+00 |
| Map1b    | _RSES[Phospho (STY)]PPEGK_2                                                                 | P14873_S1422_M1_Map1b   | 6.19E-03 NA | -5.90E-01 | -3.10E+00 | 8.51E-03 NA | -5.71E-01 | -2.95E+00 |
| Plxna1   | _QTSAYNISNS[Phospho (STY)]STFTK_2                                                           | P70206_S1611_M1_Plxna1  | 6.26E-03 NA | -5.89E-01 | -3.09E+00 | 8.58E-03 NA | -5.71E-01 | -2.95E+00 |
| Slc1a2   | _TQSIY[Phospho (STY)]DDKNHRESNSQC[Carbamidomethyl (C)]VYAAHNSVVIDEC[Carbamidomethyl (C)]K_5 | P43006_Y522_M1_Slc1a2   | 6.34E-03 NA | -5.88E-01 | -3.09E+00 | 3.24E-03 NA | -6.25E-01 | -3.39E+00 |
| Mark3    | _TPVAS[Phospho (STY)]THS[Phospho (STY)]ISSATTPDR_2                                          | Q03141_S540_M2_Mark3    | 6.41E-03 NA | -5.88E-01 | -3.08E+00 | 7.90E-03 NA | -5.76E-01 | -2.99E+00 |
| Rab21    | _DSNGAILVYDVTDEDSFQK_2                                                                      | #N/A                    | 6.45E-03 NA | -5.88E-01 | -3.08E+00 | 2.20E-02 NA | -5.09E-01 | -2.51E+00 |
| Vdac3    | _LTLDTFIVPNTGKK_2                                                                           | #N/A                    | 6.51E-03 NA | -5.87E-01 | -3.08E+00 | 1.43E-02 NA | -5.78E-01 | -2.71E+00 |
| Ctsb     | _GENHC[Carbamidomethyl (C)]GIESEIVAGIPR_3                                                   | #N/A                    | 6.73E-03 NA | 5.85E-01  | 3.06E+00  | 1.51E-02 NA | 5.35E-01  | 2.69E+00  |
| Arhgap31 | _S[Phospho (STY)]MDSLC[Carbamidomethyl (C)]SVPVEGK_2                                        | A6X8Z5_S343_M1_Arhgap31 | 6.73E-03 NA | -5.85E-01 | -3.06E+00 | 7.83E-03 NA | -5.76E-01 | -2.99E+00 |
| Ccny     | _ASTIFLKSQT[Phospho (STY)]DVR_2                                                             | Q8BGU5_T75_M1_Ccny      | 6.79E-03 NA | -5.85E-01 | -3.06E+00 | 1.40E-02 NA | -5.40E-01 | -2.72E+00 |
| Hnrnph1  | _HTGPNS[Phospho (STY)]PDTANDGFVR_2                                                          | Q35737_S104_M1_Hnrnph1  | 6.81E-03 NA | -5.84E-01 | -3.06E+00 | 1.69E-02 NA | -5.27E-01 | -2.63E+00 |
| Wdtd1    | _KDS[Phospho (STY)]SEDEM[Oxidation (M)]VLR_2                                                | Q80ZK9_S511_M1_Wdtd1    | 6.84E-03 NA | -5.84E-01 | -3.05E+00 | 1.80E-02 NA | -5.23E-01 | -2.60E+00 |
| Bdh1     | _AILITGC[Carbamidomethyl (C)]DSGFGFSLAK_2                                                   | #N/A                    | 6.84E-03 NA | -5.84E-01 | -3.05E+00 | 9.65E-03 NA | -5.64E-01 | -2.89E+00 |
| Braf     | _DS[Phospho (STY)]SDDWEPDQGTIVGQR_2                                                         | P28028_S431_M1_Braf     | 6.96E-03 NA | -5.83E-01 | -3.05E+00 | 1.85E-02 NA | -5.21E-01 | -2.59E+00 |

|               |                                                                                               |                           |             |           |           |             |           |           |
|---------------|-----------------------------------------------------------------------------------------------|---------------------------|-------------|-----------|-----------|-------------|-----------|-----------|
| Hspa8         | _HWPFM[Oxidation (M)]VVNDAGRPK_3                                                              | #N/A                      | 6.96E-03 NA | -5.83E-01 | -3.05E+00 | 1.52E-02 NA | -5.34E-01 | -2.68E+00 |
| Trip12        | _DDSLDL[Phospho (STY)]PQGR_2                                                                  | G5E870_S1024_M1_Trip12    | 6.97E-03 NA | 5.83E-01  | 3.04E+00  | 4.20E-03 NA | 6.11E-01  | 3.28E+00  |
| H2az1;H2az2   | _GDEELDSLJK_2                                                                                 | #N/A                      | 7.13E-03 NA | -5.82E-01 | -3.03E+00 | 7.83E-03 NA | -5.76E-01 | -2.99E+00 |
| Sipa111       | _SKS[Phospho (STY)]ETGDSSIFRK_2                                                               | Q8C0T5_S288_M1_Sipa111    | 7.14E-03 NA | -5.82E-01 | -3.03E+00 | 1.50E-02 NA | -5.35E-01 | -2.69E+00 |
| Napg          | _AVQLYQQTANVFENEER_2                                                                          | #N/A                      | 7.31E-03 NA | -5.80E-01 | -3.02E+00 | 8.64E-03 NA | -5.70E-01 | -2.95E+00 |
| Bloc1s4       | _Acetyl (Protein N-term))MEEGPAVGTL[Phospho (STY)]R_2                                         | Q8VED2_S11_M1_Bloc1s4     | 7.41E-03 NA | -5.79E-01 | -3.02E+00 | 1.47E-02 NA | -5.37E-01 | -2.70E+00 |
| Slain2        | _S[Phospho (STY)]LPNLSR_2                                                                     | Q8CI08_S414_M1_Slain2     | 7.50E-03 NA | -5.79E-01 | -3.01E+00 | 1.28E-02 NA | -5.46E-01 | -2.76E+00 |
| Pip5k1c       | _IM[Oxidation (M)]DYSLLGVHNIQDQER_3                                                           | #N/A                      | 7.84E-03 NA | -5.76E-01 | -2.99E+00 | 1.04E-02 NA | -5.59E-01 | -2.86E+00 |
| Wdr1          | _VVTVFSVADGYSENNVFGHHAK_3                                                                     | #N/A                      | 7.86E-03 NA | -5.76E-01 | -2.99E+00 | 5.48E-03 NA | -5.97E-01 | -3.16E+00 |
| Efhd2         | _ELQSTFK_2                                                                                    | #N/A                      | 7.94E-03 NA | 5.75E-01  | 2.99E+00  | 1.92E-02 NA | 5.18E-01  | 2.57E+00  |
| Fra10ac1      | _NAEEEDSAS[Phospho (STY)]DSELWK_2                                                             | Q8BP78_S285_M1_Fra10ac1   | 7.95E-03 NA | -5.75E-01 | -2.98E+00 | 2.43E-02 NA | -5.01E-01 | -2.46E+00 |
| Eif2s2        | _Acetyl (Protein N-term))S[Phospho (STY)]GDEM[Oxidation (M)]IFDPTM[Oxidation (M)]SK_2         | #N/A                      | 8.02E-03 NA | -5.75E-01 | -2.98E+00 | 2.08E-02 NA | -5.13E-01 | -2.53E+00 |
| Prkar1b       | _IVVQGEPEGDDFYIITEGTASVLQR_3                                                                  | #N/A                      | 8.04E-03 NA | 5.75E-01  | 2.98E+00  | 1.38E-02 NA | 5.41E-01  | 2.73E+00  |
| Ogfr11        | _AS[Phospho (STY)]PVPEDHAAAGAEQGGESTEGNAKPK_4                                                 | Q8VE52_S65_M1_Ogfr11      | 8.13E-03 NA | -5.74E-01 | -2.97E+00 | 6.66E-03 NA | -5.86E-01 | -3.07E+00 |
| Gstp1         | _PPYTIVYFVR_2                                                                                 | #N/A                      | 8.14E-03 NA | 5.74E-01  | 2.97E+00  | 2.60E-03 NA | 6.36E-01  | 3.49E+00  |
| Mfap1a;Mfap1b | _KIVEPEVVGES[Phospho (STY)]DS[Phospho (STY)]EVEGDAWR_3                                        | C0HKD8_S116_M2_Mfap1a;M1  | 8.19E-03 NA | -5.74E-01 | -2.97E+00 | 1.53E-02 NA | -5.34E-01 | -2.68E+00 |
| Tubb4b        | _M[Oxidation (M)]SATFIGNSTAIQELFKR_3                                                          | #N/A                      | 8.35E-03 NA | -5.72E-01 | -2.96E+00 | 1.80E-02 NA | -5.23E-01 | -2.60E+00 |
| Rbl2          | _AQPAGS[Phospho (STY)]PSHQIQQR_2                                                              | Q64700_S37_M1_Rbl2        | 8.46E-03 NA | -5.72E-01 | -2.96E+00 | 2.00E-02 NA | -5.16E-01 | -2.55E+00 |
| Sv2b          | _DMC[Carbamidomethyl (C)]LSS[Phospho (STY)]SKK_2                                              | Q8BG39_S144_M1_Sv2b       | 8.49E-03 NA | -5.71E-01 | -2.95E+00 | 2.43E-02 NA | -5.01E-01 | -2.46E+00 |
| Pfkfb2        | _NS[Phospho (STY)]FTPLSSNTIR_2                                                                | P70265_S469_M1_Pfkfb2     | 8.49E-03 NA | -5.71E-01 | -2.95E+00 | 1.06E-02 NA | -5.58E-01 | -2.85E+00 |
| Mif           | _PAQYIAHVVPDQLM[Oxidation (M)]TFSGTNDPC[Carbamidomethyl (C)]ALC[Carbamidomethyl (C)]SLHSIGK_4 | #N/A                      | 8.52E-03 NA | -5.71E-01 | -2.95E+00 | 1.63E-02 NA | -5.30E-01 | -2.65E+00 |
| Ppp1r1b       | _ELGYPQEDDEDEDEDEDEDSQAEVK_3                                                                  | #N/A                      | 8.54E-03 NA | -5.71E-01 | -2.95E+00 | 1.78E-02 NA | -5.24E-01 | -2.61E+00 |
| Pcm1          | _VTNAIS[Phospho (STY)]PESSPGVGR_2                                                             | Q9R0L6_S65_M1_Pcm1        | 8.62E-03 NA | -5.71E-01 | -2.95E+00 | 2.27E-02 NA | -5.06E-01 | -2.49E+00 |
| Ndufa6        | _NAHVTDPR_2                                                                                   | #N/A                      | 8.71E-03 NA | 5.70E-01  | 2.94E+00  | 7.58E-03 NA | 5.78E-01  | 3.01E+00  |
| Abi1          | _TNPPTQKPPS[Phospho (STY)]PPVSGR_2                                                            | Q8CBW3_S183_M1_Abi1       | 8.82E-03 NA | -5.69E-01 | -2.94E+00 | 1.62E-02 NA | -5.30E-01 | -2.65E+00 |
| Aco2          | _GHLDNISNLLIGAINIENGK_3                                                                       | #N/A                      | 8.93E-03 NA | -5.68E-01 | -2.93E+00 | 8.74E-03 NA | -5.70E-01 | -2.94E+00 |
| Actr10        | _RAFS[Phospho (STY)]TEK_2                                                                     | Q9QZB7_S414_M1_Actr10     | 9.01E-03 NA | -5.68E-01 | -2.93E+00 | 4.54E-03 NA | -6.07E-01 | -3.24E+00 |
| Atrx          | _IGKQS[Phospho (STY)]EES[Phospho (STY)]PADDGELRR_3                                            | Q61687_S1287_M2_Atrx      | 9.05E-03 NA | -5.68E-01 | -2.92E+00 | 1.64E-02 NA | -5.29E-01 | -2.65E+00 |
| Ywhaz         | _YDDM[Oxidation (M)]AAC[Carbamidomethyl (C)]M[Oxidation (M)]K_2                               | #N/A                      | 9.13E-03 NA | 5.67E-01  | 2.92E+00  | 1.35E-02 NA | 5.43E-01  | 2.74E+00  |
| Dab2ip        | _QQSSSSKGDS[Phospho (STY)]PELKR_3                                                             | Q3UHC7_S978_M1_Dab2ip     | 9.45E-03 NA | -5.65E-01 | -2.90E+00 | 9.79E-03 NA | -5.63E-01 | -2.89E+00 |
| Bcan          | _C[Carbamidomethyl (C)]SPGWLADGSVR_2                                                          | #N/A                      | 9.51E-03 NA | 5.65E-01  | 2.90E+00  | 2.05E-02 NA | 5.14E-01  | 2.54E+00  |
| Ckb           | _HGGYQPSDEHKTDLPNDLQGGDDLDPNYVLSSR_5                                                          | #N/A                      | 9.54E-03 NA | -5.64E-01 | -2.90E+00 | 1.61E-02 NA | -5.31E-01 | -2.66E+00 |
| Cap2          | _SSEM[Oxidation (M)]NVLVPQDDDYREFPIPEQFK_3                                                    | #N/A                      | 9.84E-03 NA | -5.62E-01 | -2.89E+00 | 2.36E-02 NA | -5.04E-01 | -2.47E+00 |
| Rock2         | _NLLLLANSTEEQK_2                                                                              | #N/A                      | 9.96E-03 NA | 5.62E-01  | 2.88E+00  | 7.85E-03 NA | 5.76E-01  | 2.99E+00  |
| Rock2         | _NDQWNWDNIR_2                                                                                 | #N/A                      | 1.00E-02 NA | -5.61E-01 | -2.88E+00 | 2.31E-02 NA | -5.05E-01 | -2.48E+00 |
| Hnrrnpa2b1    | _NM[Oxidation (M)]GGPYGGGNYGPGSGGS[Phospho (STY)]GGYGGR_3                                     | O88569_S344_M1_Hnrrnpa2b1 | 1.00E-02 NA | -5.61E-01 | -2.88E+00 | 1.49E-02 NA | -5.36E-01 | -2.69E+00 |
| Jcad          | _APQASIC[Carbamidomethyl (C)]SDVDGFPTSQAT[Phospho (STY)]SPEPGKKDEEAK_4                        | Q5DTX6_T1164_M1_Jcad      | 1.01E-02 NA | -5.61E-01 | -2.88E+00 | 1.48E-02 NA | -5.36E-01 | -2.70E+00 |
| Gdi2          | _VLHM[Oxidation (M)]DQNPYYGGESAITPLEDLYK_3                                                    | #N/A                      | 1.02E-02 NA | -5.60E-01 | -2.87E+00 | 4.48E-03 NA | -6.08E-01 | -3.25E+00 |
| Arhgap33      | _S[Phospho (STY)]AKSEESSSQASGAGLQR_3                                                          | Q80YF9_S657_M1_Arhgap33   | 1.08E-02 NA | -5.57E-01 | -2.84E+00 | 1.97E-02 NA | -5.16E-01 | -2.56E+00 |
| Bcas3         | _LTSQDS[Phospho (STY)]YNNFTNNPNPNR_2                                                          | Q8CCN5_S503_M1_Bcas3      | 1.08E-02 NA | -5.57E-01 | -2.84E+00 | 2.15E-03 NA | -6.45E-01 | -3.58E+00 |
| Dzank1        | _FTQGLEDDLS[Phospho (STY)]PPGNR_2                                                             | Q8C008_S768_M1_Dzank1     | 1.09E-02 NA | -5.56E-01 | -2.84E+00 | 2.25E-02 NA | -5.07E-01 | -2.50E+00 |
| Add2          | _LEQEQEGEKDIATEKPGS[Phospho (STY)]JPVK_3                                                      | Q9QYB8_S594_M1_Add2       | 1.09E-02 NA | 5.56E-01  | 2.84E+00  | 1.95E-02 NA | 5.17E-01  | 2.56E+00  |
| MgII          | _ALIFVSHGAGEHC[Carbamidomethyl (C)]GR_3                                                       | #N/A                      | 1.10E-02 NA | 5.55E-01  | 2.83E+00  | 7.08E-03 NA | 5.82E-01  | 3.04E+00  |
| Cox5b         | _LVPHQMAH_2                                                                                   | #N/A                      | 1.11E-02 NA | 5.55E-01  | 2.83E+00  | 2.01E-02 NA | 5.15E-01  | 2.55E+00  |
| Atp1a1        | _M[Oxidation (M)]TVAHM[Oxidation (M)]WFDNQIHEADTTENGSGVSFDK_4                                 | #N/A                      | 1.12E-02 NA | -5.54E-01 | -2.83E+00 | 1.65E-02 NA | -5.29E-01 | -2.64E+00 |
| Map1a         | _ESTFLDEGPNQEITPLQHTPR_3                                                                      | #N/A                      | 1.12E-02 NA | -5.54E-01 | -2.82E+00 | 9.57E-03 NA | -5.64E-01 | -2.90E+00 |
| Amer2         | _AAGPGNLVLPGS[Phospho (STY)]LTAS[Phospho (STY)]LEC[Carbamidomethyl (C)]VKEEPPR_3              | Q8CCJ4_S223_M2_Amer2      | 1.14E-02 NA | -5.53E-01 | -2.82E+00 | 7.61E-03 NA | -5.78E-01 | -3.00E+00 |
| Dnajc6        | _SAATS[Phospho (STY)]PTGSSHGTPPTHQSK_3                                                        | Q80TZ3_S683_M1_Dnajc6     | 1.16E-02 NA | -5.52E-01 | -2.81E+00 | 5.47E-03 NA | -5.97E-01 | -3.16E+00 |
| Snrnp70       | _GGGGS[Phospho (STY)]GQDNGLEGLGSDGR_2                                                         | Q62376_S408_M1_Snrnp70    | 1.17E-02 NA | -5.52E-01 | -2.81E+00 | 1.29E-02 NA | -5.45E-01 | -2.76E+00 |
| Eif4g1        | _SS[Phospho (STY)]LS[Phospho (STY)]RER_2                                                      | Q6NZJ6_S1147_M2_Eif4g1    | 1.19E-02 NA | -5.51E-01 | -2.80E+00 | 1.40E-02 NA | -5.40E-01 | -2.72E+00 |
| Lyst          | _RM[Oxidation (M)]S[Phospho (STY)]QEHPSQASEAELAQ_3                                            | P97412_S2614_M1_Lyst      | 1.21E-02 NA | -5.49E-01 | -2.79E+00 | 2.21E-02 NA | -5.08E-01 | -2.50E+00 |
| Rab7a         | _EAINVEQAFQTIAR_2                                                                             | #N/A                      | 1.22E-02 NA | -5.49E-01 | -2.79E+00 | 2.42E-02 NA | -5.02E-01 | -2.46E+00 |
| Matr3         | _SYS[Phospho (STY)]PDGKES[Phospho (STY)]PSDKK_2                                               | Q8K310_S604_M2_Matr3      | 1.22E-02 NA | -5.49E-01 | -2.79E+00 | 2.22E-02 NA | -5.08E-01 | -2.50E+00 |
| Rpl5          | _YLMEEDEDAYKK_3                                                                               | #N/A                      | 1.22E-02 NA | -5.49E-01 | -2.78E+00 | 2.05E-02 NA | -5.14E-01 | -2.54E+00 |
| Samd14        | _GSASSGTSPTS[Phospho (STY)]C[Carbamidomethyl (C)]SPK_2                                        | Q8K070_T258_M1_Samd14     | 1.23E-02 NA | -5.49E-01 | -2.78E+00 | 9.12E-03 NA | -5.67E-01 | -2.92E+00 |
| Prpf4b        | _S[Phospho (STY)]KS[Phospho (STY)]PVDLRDK_2                                                   | Q61136_S292_M2_Prpf4b     | 1.23E-02 NA | -5.48E-01 | -2.78E+00 | 5.93E-03 NA | -5.92E-01 | -3.12E+00 |
| Nek1          | _SSDVPLPLELLET[Phospho (STY)]GGSPSK_2                                                         | P51954_T615_M1_Nek1       | 1.24E-02 NA | 5.48E-01  | 2.78E+00  | 3.60E-03 NA | 6.19E-01  | 3.35E+00  |

|                   |                                                                                       |                         |             |           |           |             |           |           |
|-------------------|---------------------------------------------------------------------------------------|-------------------------|-------------|-----------|-----------|-------------|-----------|-----------|
| Pebp1             | _EWHHFLVNM[Oxidation (M)]K_2                                                          | #N/A                    | 1.25E-02 NA | -5.47E-01 | -2.77E+00 | 6.20E-03 NA | -5.90E-01 | -3.10E+00 |
| Gda               | _IGLGDVAGGYSYSM[Oxidation (M)]LDAIR_2                                                 | #N/A                    | 1.26E-02 NA | -5.47E-01 | -2.77E+00 | 1.40E-02 NA | -5.40E-01 | -2.72E+00 |
| Micall1           | _APS[Phospho (STY)]AS[Phospho (STY)]PLAIHASR_2                                        | Q8BGT6_S494_M2_Micall1  | 1.28E-02 NA | -5.46E-01 | -2.76E+00 | 7.25E-03 NA | -5.81E-01 | -3.03E+00 |
| Brsk2             | _GS[Phospho (STY)]PLPTPK_2                                                            | Q69Z98_S440_M1_Brsk2    | 1.29E-02 NA | -5.45E-01 | -2.76E+00 | 2.37E-02 NA | -5.03E-01 | -2.47E+00 |
| Vdac1             | _WNTDNLGTEITVEDQLAR_2                                                                 | #N/A                    | 1.30E-02 NA | -5.45E-01 | -2.75E+00 | 6.30E-03 NA | -5.89E-01 | -3.09E+00 |
| Nrcam             | _EPAEGNESSEAPS[Phospho (STY)]PVNAMNSFV_2                                              | Q810U4_S1247_M1_Nrcam   | 1.31E-02 NA | -5.44E-01 | -2.75E+00 | 2.07E-02 NA | -5.13E-01 | -2.54E+00 |
| Phb               | _EFTEAVEAK_2                                                                          | #N/A                    | 1.31E-02 NA | 5.44E-01  | 2.75E+00  | 2.45E-02 NA | 5.01E-01  | 2.46E+00  |
| Psmb5             | _FLHGVIVAADSR_3                                                                       | #N/A                    | 1.33E-02 NA | 5.43E-01  | 2.75E+00  | 1.14E-02 NA | 5.53E-01  | 2.82E+00  |
| H2ac20;Hist2h2aa1 | _NDEELNKLKG_2                                                                         | #N/A                    | 1.33E-02 NA | -5.43E-01 | -2.75E+00 | 1.82E-02 NA | -5.22E-01 | -2.60E+00 |
| Shroom2           | _JVHSES[Phospho (STY)]QPEKESR_2                                                       | A2ALU4_S1089_M1_Shroom2 | 1.35E-02 NA | -5.42E-01 | -2.74E+00 | 1.30E-02 NA | -5.45E-01 | -2.76E+00 |
| Dpysl4            | _GAADMVQAQK_2                                                                         | #N/A                    | 1.36E-02 NA | 5.42E-01  | 2.74E+00  | 1.56E-02 NA | 5.33E-01  | 2.67E+00  |
| Nyap1             | _RPPAKPR_2                                                                            | #N/A                    | 1.37E-02 NA | 5.41E-01  | 2.73E+00  | 1.27E-02 NA | 5.46E-01  | 2.77E+00  |
| Fam135b           | _NTAGFSELDLPSSKENS[Phospho (STY)]PPR_3                                                | Q9DAI6_S805_M1_Fam135b  | 1.38E-02 NA | -5.41E-01 | -2.73E+00 | 1.74E-02 NA | -5.25E-01 | -2.62E+00 |
| Aldoa             | _GGVVGIVKVDK_2                                                                        | #N/A                    | 1.38E-02 NA | -5.41E-01 | -2.73E+00 | 1.17E-02 NA | -5.51E-01 | -2.80E+00 |
| Kctd8             | _IVS[Phospho (STY)]PKQEHEDR_2                                                         | Q50H33_S331_M1_Kctd8    | 1.39E-02 NA | -5.40E-01 | -2.72E+00 | 1.99E-02 NA | -5.16E-01 | -2.55E+00 |
| Psp1              | _QVDTTEEAGM[Oxidation (M)]VTAATASNVKAS[Phospho (STY)]PKR_3                            | #N/A                    | 1.43E-02 NA | -5.38E-01 | -2.71E+00 | 1.74E-02 NA | -5.25E-01 | -2.62E+00 |
| Dync1li1          | _VPGGS[Phospho (STY)]PRT[Phospho (STY)]PNR_2                                          | Q8R1Q8_S405_M2_Dync1li1 | 1.44E-02 NA | -5.38E-01 | -2.71E+00 | 1.86E-02 NA | -5.20E-01 | -2.59E+00 |
| CIta              | _LC[Carbamidomethyl (C)]DFNPK_2                                                       | #N/A                    | 1.45E-02 NA | 5.38E-01  | 2.71E+00  | 9.52E-03 NA | 5.64E-01  | 2.90E+00  |
| Ak1               | _LETYYNATEPVISFYDKR_3                                                                 | #N/A                    | 1.45E-02 NA | 5.38E-01  | 2.70E+00  | 9.80E-03 NA | 5.63E-01  | 2.89E+00  |
| Cdc42bpb          | _ALGNS[Phospho (STY)]NRDKEIK_3                                                        | Q7TT50_S481_M1_Cdc42bpb | 1.46E-02 NA | -5.37E-01 | -2.70E+00 | 1.13E-02 NA | -5.54E-01 | -2.82E+00 |
| Rab3c             | _LVDIIC[Carbamidomethyl (C)]DK_2                                                      | #N/A                    | 1.46E-02 NA | 5.37E-01  | 2.70E+00  | 1.06E-02 NA | 5.58E-01  | 2.85E+00  |
| Ptgds             | _AQGLTEEDIVLPQPDK_2                                                                   | #N/A                    | 1.47E-02 NA | 5.37E-01  | 2.70E+00  | 1.18E-02 NA | 5.51E-01  | 2.80E+00  |
| Fscn1             | _KVTGTLDAAR_2                                                                         | #N/A                    | 1.49E-02 NA | 5.36E-01  | 2.69E+00  | 2.40E-02 NA | 5.02E-01  | 2.47E+00  |
| Mark1             | _SAAYNGPPAS[Phospho (STY)]PSHETGAFAHAR_3                                              | Q8VHJ5_S633_M1_Mark1    | 1.53E-02 NA | 5.34E-01  | 2.68E+00  | 1.31E-02 NA | 5.44E-01  | 2.75E+00  |
| Nav1              | _APEAAVS[Phospho (STY)]DDGKS[Phospho (STY)]DDELLSSK_2                                 | Q8CH77_S197_M2_Nav1     | 1.54E-02 NA | -5.34E-01 | -2.68E+00 | 2.47E-02 NA | -5.00E-01 | -2.45E+00 |
| Aldoc             | _TVPPAVPGVTFLSGGGQSEEAASLNLNAINR_3                                                    | #N/A                    | 1.54E-02 NA | -5.34E-01 | -2.68E+00 | 2.38E-02 NA | -5.03E-01 | -2.47E+00 |
| Sptan1            | _YTEHSTVGLAQWQDLQLGM[Oxidation (M)]JR_3                                               | #N/A                    | 1.54E-02 NA | -5.34E-01 | -2.68E+00 | 8.90E-03 NA | -5.69E-01 | -2.93E+00 |
| Acaca             | _SSM[Oxidation (M)]S[Phospho (STY)]GLHLVK_2                                           | Q5SWU9_S79_M1_Acaca     | 1.56E-02 NA | -5.33E-01 | -2.67E+00 | 1.45E-02 NA | -5.38E-01 | -2.71E+00 |
| Pcm1              | _NVRSS[Phospho (STY)]DVS[Phospho (STY)]DQEEDEESER_2                                   | Q9ROL6_S1766_M2_Pcm1    | 1.58E-02 NA | -5.32E-01 | -2.66E+00 | 1.08E-02 NA | -5.57E-01 | -2.84E+00 |
| Gdi2              | _FLM[Oxidation (M)]ANGQLVK_2                                                          | #N/A                    | 1.58E-02 NA | 5.32E-01  | 2.66E+00  | 7.10E-03 NA | 5.82E-01  | 3.04E+00  |
| Acaa2             | _VGVPTETGALTNR_2                                                                      | #N/A                    | 1.59E-02 NA | 5.31E-01  | 2.66E+00  | 8.69E-03 NA | 5.70E-01  | 2.94E+00  |
| Phf8              | _SSGSSSGLGVSSS[Phospho (STY)]PASQR_2                                                  | Q80TJ7_S768_M1_Phf8     | 1.60E-02 NA | -5.31E-01 | -2.66E+00 | 1.97E-02 NA | -5.17E-01 | -2.56E+00 |
| Ampd2             | _QIS[Phospho (STY)]QDVKLEPDILLR_3                                                     | Q9DBT5_S87_M1_Ampd2     | 1.63E-02 NA | -5.30E-01 | -2.65E+00 | 2.05E-02 NA | -5.14E-01 | -2.54E+00 |
| Lrrc47            | _KQHRES[Phospho (STY)]GEGEEVADSAR_3                                                   | Q505F5_S293_M1_Lrrc47   | 1.63E-02 NA | -5.30E-01 | -2.65E+00 | 1.29E-02 NA | -5.45E-01 | -2.76E+00 |
| Bcas1             | _ROS[Phospho (STY)]LGGFLK_2                                                           | Q80YN3_S601_M1_Bcas1    | 1.65E-02 NA | -5.29E-01 | -2.64E+00 | 2.14E-02 NA | -5.11E-01 | -2.52E+00 |
| Nucks1            | _EEDEAEAS[Phospho (STY)]PPEKK_2                                                       | Q80XU3_S214_M1_Nucks1   | 1.65E-02 NA | -5.29E-01 | -2.64E+00 | 8.23E-03 NA | -5.73E-01 | -2.97E+00 |
| Tomm70            | _EC[Carbamidomethyl (C)]LEDVTAVC[Carbamidomethyl (C)]LEGFQNEQSM[Oxidation (M)]LLADK_3 | #N/A                    | 1.66E-02 NA | -5.29E-01 | -2.64E+00 | 1.76E-02 NA | -5.24E-01 | -2.61E+00 |
| Mark4             | _RS[Phospho (STY)]PTSGDTELKEER_3                                                      | Q8CIP4_S438_M1_Mark4    | 1.66E-02 NA | -5.29E-01 | -2.64E+00 | 1.07E-02 NA | -5.57E-01 | -2.85E+00 |
| Got1              | _QIAAVM[Oxidation (M)]QR_2                                                            | #N/A                    | 1.67E-02 NA | 5.28E-01  | 2.64E+00  | 1.90E-02 NA | 5.19E-01  | 2.58E+00  |
| Gapvd1            | _LQELESC[Carbamidomethyl (C)]SGLGS[Phospho (STY)]TSDOTDVR_2                           | Q6PAR5_S746_M1_Gapvd1   | 1.68E-02 NA | -5.27E-01 | -2.63E+00 | 1.98E-02 NA | -5.16E-01 | -2.56E+00 |
| Pde8a             | _RFS[Phospho (STY)]GNEYLATK_2                                                         | Q88502_S452_M1_Pde8a    | 1.70E-02 NA | 5.27E-01  | 2.63E+00  | 2.20E-02 NA | 5.09E-01  | 2.51E+00  |
| Dnm1              | _NFRPDDPAR_2                                                                          | #N/A                    | 1.71E-02 NA | 5.27E-01  | 2.63E+00  | 1.53E-02 NA | 5.34E-01  | 2.68E+00  |
| Srgap3            | _SSS[Phospho (STY)]SSSSGVGSPAVTPTEK_2                                                 | Q812A2_S1070_M1_Srgap3  | 1.71E-02 NA | -5.27E-01 | -2.63E+00 | 6.11E-03 NA | -5.91E-01 | -3.10E+00 |
| Atg4c             | _DFDFTSTAAS[Phospho (STY)]EEDLFSEDERK_3                                               | Q811C2_S434_M1_Atg4c    | 1.72E-02 NA | 5.26E-01  | 2.62E+00  | 1.68E-02 NA | 5.27E-01  | 2.63E+00  |
| Tcp1              | _M[Oxidation (M)]LVDDIGDVTITNDGATILK_2                                                | #N/A                    | 1.73E-02 NA | -5.26E-01 | -2.62E+00 | 1.73E-02 NA | -5.26E-01 | -2.62E+00 |
| Ctr9              | _NSNS[Phospho (STY)]DS[Phospho (STY)]DDDERPNR_2                                       | Q62018_S1039_M2_Ctr9    | 1.73E-02 NA | -5.26E-01 | -2.62E+00 | 1.61E-02 NA | -5.31E-01 | -2.66E+00 |
| Got2              | _EYLPIGGLAEFC[Carbamidomethyl (C)]K_2                                                 | #N/A                    | 1.73E-02 NA | 5.26E-01  | 2.62E+00  | 1.28E-02 NA | 5.46E-01  | 2.76E+00  |
| Eef1a1            | _M[Oxidation (M)]DSTPEPPYSQK_2                                                        | #N/A                    | 1.78E-02 NA | 5.24E-01  | 2.61E+00  | 1.14E-02 NA | 5.53E-01  | 2.82E+00  |
| Pafah1b2          | _Acetyl (Protein N-term)]SQGDSNPAAIPHAIEDIQGDDRW[Oxidation (M)]SQHNR_4                | #N/A                    | 1.79E-02 NA | -5.23E-01 | -2.60E+00 | 1.40E-02 NA | -5.40E-01 | -2.72E+00 |
| Pfkf              | _TNVLGHLQGGGAPTFDR_3                                                                  | #N/A                    | 1.80E-02 NA | -5.23E-01 | -2.60E+00 | 1.30E-02 NA | -5.45E-01 | -2.76E+00 |
| Rpl23a            | _LAPDYDALDVANK_2                                                                      | #N/A                    | 1.81E-02 NA | -5.23E-01 | -2.60E+00 | 1.91E-02 NA | -5.19E-01 | -2.57E+00 |
| Nf1               | _SAGS[Phospho (STY)]FKR_2                                                             | Q04690_S2831_M1_Nf1     | 1.81E-02 NA | -5.22E-01 | -2.60E+00 | 1.34E-02 NA | -5.43E-01 | -2.74E+00 |
| Dnm1              | _LQSQLLSIEKEVDEYK_3                                                                   | #N/A                    | 1.82E-02 NA | -5.22E-01 | -2.60E+00 | 1.70E-02 NA | -5.27E-01 | -2.63E+00 |
| Pak1              | _STM[Oxidation (M)]VGTPYWM[Oxidation (M)]APEVVTR_2                                    | #N/A                    | 1.82E-02 NA | -5.22E-01 | -2.60E+00 | 1.46E-02 NA | -5.37E-01 | -2.70E+00 |
| Huwe1             | _ESNQPPEDSS[Phospho (STY)]PPASSESSSTR_2                                               | Q7TMY8_S2918_M1_Huwe1   | 1.83E-02 NA | -5.22E-01 | -2.59E+00 | 1.29E-02 NA | -5.45E-01 | -2.76E+00 |
| Acap2             | _FVDKYALLS[Phospho (STY)]PSEQEKR_3                                                    | Q6ZQK5_S521_M1_Acap2    | 1.83E-02 NA | -5.22E-01 | -2.59E+00 | 1.97E-02 NA | -5.17E-01 | -2.56E+00 |
| Arcp1a            | _FC[Carbamidomethyl (C)]TTGIDGAM[Oxidation (M)]TIWDFK_2                               | #N/A                    | 1.94E-02 NA | -5.18E-01 | -2.57E+00 | 1.38E-02 NA | -5.41E-01 | -2.73E+00 |

|          |                                                                                                 |                         |             |           |           |             |           |           |
|----------|-------------------------------------------------------------------------------------------------|-------------------------|-------------|-----------|-----------|-------------|-----------|-----------|
| Fscn1    | _VGKDELFALEQSC[Carbamidomethyl (C)]JAQVVLQAAANER_3                                              | #N/A                    | 1.96E-02 NA | -5.17E-01 | -2.56E+00 | 2.33E-02 NA | -5.05E-01 | -2.48E+00 |
| Prep     | _VFLDPNTLSDDGTVALR_2                                                                            | #N/A                    | 1.97E-02 NA | 5.17E-01  | 2.56E+00  | 1.81E-02 NA | 5.23E-01  | 2.60E+00  |
| Nfrkb    | _SPS[Phospho (STY)]PAVPLR_2                                                                     | Q6PIU4_S228_M1_Nfrkb    | 1.97E-02 NA | -5.17E-01 | -2.56E+00 | 1.01E-02 NA | -5.61E-01 | -2.87E+00 |
| Snap25   | _RADQLADESLESTRR_3                                                                              | #N/A                    | 1.97E-02 NA | -5.17E-01 | -2.56E+00 | 8.87E-03 NA | -5.69E-01 | -2.93E+00 |
| Syngap1  | _VKYEIEHHS[Phospho (STY)]LUK_3                                                                  | F6SEU4_S1201_M1_Syngap1 | 2.02E-02 NA | -5.15E-01 | -2.55E+00 | 4.33E-03 NA | -6.09E-01 | -3.26E+00 |
| Idh2     | _GKLDGNQDLIR_2                                                                                  | #N/A                    | 2.02E-02 NA | -5.15E-01 | -2.55E+00 | 1.16E-02 NA | -5.52E-01 | -2.81E+00 |
| Fabp3    | _NGDTITIK_2                                                                                     | #N/A                    | 2.02E-02 NA | 5.15E-01  | 2.55E+00  | 7.46E-03 NA | 5.79E-01  | 3.01E+00  |
| Suz12    | _ASM[Oxidation (M)]SEFLES[Phospho (STY)]EDGEVEQQR_2                                             | Q80U70_S548_M1_Suz12    | 2.02E-02 NA | -5.15E-01 | -2.55E+00 | 8.52E-03 NA | -5.71E-01 | -2.95E+00 |
| Matr3    | _RRT[Phospho (STY)]EEGPTLSYGR_3                                                                 | Q8K310_T150_M1_Matr3    | 2.07E-02 NA | 5.13E-01  | 2.54E+00  | 9.42E-03 NA | 5.65E-01  | 2.91E+00  |
| Eif3h    | _DFS[Phospho (STY)]PEALKK_2                                                                     | Q91WK2_S183_M1_Eif3h    | 2.07E-02 NA | -5.13E-01 | -2.54E+00 | 8.18E-03 NA | -5.74E-01 | -2.97E+00 |
| Vdac3    | _Acetyl (Protein N-term)[C]Carbamidomethyl (C)JNT[Phospho (STY)]PTYC[Carbamidomethyl (C)]DLGK_2 | Q60931_T4_M1_Vdac3      | 2.08E-02 NA | -5.13E-01 | -2.53E+00 | 2.06E-02 NA | -5.13E-01 | -2.54E+00 |
| Hnrrnpc  | _NEKS[Phospho (STY)]EEEEQSSASVKK_3                                                              | Q9Z204_S241_M1_Hnrrnpc  | 2.09E-02 NA | -5.13E-01 | -2.53E+00 | 2.23E-02 NA | -5.08E-01 | -2.50E+00 |
| Rab39b   | _SGFVPNVHSS[Phospho (STY)]EEVIK_2                                                               | Q8BHC1_S201_M1_Rab39b   | 2.09E-02 NA | -5.12E-01 | -2.53E+00 | 1.95E-02 NA | -5.17E-01 | -2.57E+00 |
| Hnrrnpu  | _DLPEHAVLK_2                                                                                    | #N/A                    | 2.12E-02 NA | 5.11E-01  | 2.52E+00  | 1.86E-02 NA | 5.21E-01  | 2.59E+00  |
| Pip5k1c  | _ITVQVEPVVC[Carbamidomethyl (C)]GJGVVPK_2                                                       | #N/A                    | 2.13E-02 NA | -5.11E-01 | -2.52E+00 | 5.90E-03 NA | -5.93E-01 | -3.12E+00 |
| Kras     | _LVVVGAGVGK_2                                                                                   | #N/A                    | 2.16E-02 NA | 5.10E-01  | 2.51E+00  | 1.04E-02 NA | 5.59E-01  | 2.86E+00  |
| Rps19    | _ELAPYDENWFYTR_2                                                                                | #N/A                    | 2.19E-02 NA | 5.09E-01  | 2.51E+00  | 1.18E-02 NA | 5.51E-01  | 2.80E+00  |
| Fbxo2    | _TDAGSLYELTVR_2                                                                                 | #N/A                    | 2.21E-02 NA | 5.08E-01  | 2.51E+00  | 1.65E-02 NA | 5.29E-01  | 2.64E+00  |
| Rtn4     | _LSAS[Phospho (STY)]PQEVGKPYLESFQPNLHITK_3                                                      | Q99P72_S768_M1_Rtn4     | 2.23E-02 NA | -5.08E-01 | -2.50E+00 | 1.68E-02 NA | -5.27E-01 | -2.63E+00 |
| Map1a    | _M[Oxidation (M)]AS[Phospho (STY)]PPSPGPPSAHTPFHQSPVEEK_4                                       | Q9QYR6_S991_M1_Map1a    | 2.24E-02 NA | -5.07E-01 | -2.50E+00 | 1.48E-02 NA | -5.36E-01 | -2.70E+00 |
| Irs2     | _GPGTGGDEASAAGGS[Phospho (STY)]PPQPPR_2                                                         | P81122_S66_M1_Irs2      | 2.25E-02 NA | -5.07E-01 | -2.50E+00 | 2.17E-02 NA | -5.10E-01 | -2.51E+00 |
| Hba      | _VDPVNFK_2                                                                                      | #N/A                    | 2.27E-02 NA | 5.07E-01  | 2.49E+00  | 9.25E-03 NA | 5.66E-01  | 2.91E+00  |
| Rcsd1    | _S[Phospho (STY)]KDPGSPQLNQEAMADGVEGTPWSAEKPR_4                                                 | Q3UZA1_S211_M1_Rcsd1    | 2.29E-02 NA | -5.06E-01 | -2.49E+00 | 1.69E-02 NA | -5.27E-01 | -2.63E+00 |
| Afg3l2   | _NLETLQQLGIEGENR_2                                                                              | #N/A                    | 2.32E-02 NA | 5.05E-01  | 2.48E+00  | 1.06E-02 NA | 5.58E-01  | 2.85E+00  |
| Prkce    | _SAPTS[Phospho (STY)]PC[Carbamidomethyl (C)]DQELK_2                                             | P16054_S350_M1_Prkce    | 2.33E-02 NA | 5.04E-01  | 2.48E+00  | 4.37E-03 NA | 6.09E-01  | 3.26E+00  |
| Echs1    | _EGMTAFVEK_2                                                                                    | #N/A                    | 2.34E-02 NA | -5.04E-01 | -2.48E+00 | 2.12E-02 NA | -5.11E-01 | -2.52E+00 |
| Uqcrc1   | _M[Oxidation (M)]VLAAGGVEHQQLDLAQK_3                                                            | #N/A                    | 2.35E-02 NA | -5.04E-01 | -2.47E+00 | 2.09E-02 NA | -5.12E-01 | -2.53E+00 |
| Rbbp4    | _Acetyl (Protein N-term)[C]ADKEAAFDVAVEER_2                                                     | #N/A                    | 2.43E-02 NA | -5.01E-01 | -2.46E+00 | 3.68E-03 NA | -6.18E-01 | -3.34E+00 |
| Clec2l   | _SGS[Phospho (STY)]GYEGSTSWK_2                                                                  | POC7M9_S47_M1_Clec2l    | 2.43E-02 NA | -5.01E-01 | -2.46E+00 | 8.81E-03 NA | -5.69E-01 | -2.94E+00 |
| Dpp6     | _HLYSANTVDDFNR_2                                                                                | #N/A                    | 2.45E-02 NA | -5.01E-01 | -2.45E+00 | 1.37E-02 NA | -5.41E-01 | -2.73E+00 |
| Stxbp1   | _M[Oxidation (M)]TDIM[Oxidation (M)]TEGITIVEDINK_2                                              | #N/A                    | 2.46E-02 NA | -5.01E-01 | -2.45E+00 | 1.50E-02 NA | -5.35E-01 | -2.69E+00 |
| Suclg1   | _ISALQSAGVVVSM[Oxidation (M)]SPAQLGTTIYK_3                                                      | #N/A                    | 2.47E-02 NA | 5.00E-01  | 2.45E+00  | 1.01E-02 NA | 5.61E-01  | 2.88E+00  |
| Ak3      | _HLSSGDLRL_2                                                                                    | #N/A                    | 2.48E-02 NA | 5.00E-01  | 2.45E+00  | 2.46E-02 NA | 5.00E-01  | 2.45E+00  |
| Sptbn1   | _HRPDLIDFDK_3                                                                                   | #N/A                    | 2.49E-02 NA | -4.99E-01 | -2.45E+00 | 1.38E-02 NA | -5.41E-01 | -2.73E+00 |
| Septin3  | _AIGHVIEEGVK_2                                                                                  | #N/A                    | 2.59E-02 NA | 4.97E-01  | 2.43E+00  | 4.59E-03 NA | 6.06E-01  | 3.24E+00  |
| Bsn      | _AS[Phospho (STY)]PQAKPLR_2                                                                     | O88737_S600_M1_Bsn      | 2.60E-02 NA | -4.96E-01 | -2.43E+00 | 1.84E-02 NA | -5.21E-01 | -2.59E+00 |
| Ndrg2    | _M[Oxidation (M)]ADSGGQPQLTQPGK_2                                                               | #N/A                    | 2.60E-02 NA | 4.96E-01  | 2.43E+00  | 1.97E-02 NA | 5.16E-01  | 2.56E+00  |
| Pfkl     | _RTL[Phospho (STY)]IDKG_2                                                                       | P12382_S775_M1_Pfkl     | 2.61E-02 NA | -4.96E-01 | -2.42E+00 | 1.80E-02 NA | -5.23E-01 | -2.60E+00 |
| Scg2     | _S[Phospho (STY)]QLGLPDDEENRR_2                                                                 | Q03517_S287_M1_Scg2     | 2.64E-02 NA | -4.95E-01 | -2.42E+00 | 2.40E-02 NA | -5.02E-01 | -2.46E+00 |
| Pacs1    | _GS[Phospho (STY)]LGKDTTSPM[Oxidation (M)]ELAALEK_3                                             | Q8K212_S421_M1_Pacs1    | 2.67E-02 NA | -4.95E-01 | -2.41E+00 | 2.07E-02 NA | -5.13E-01 | -2.54E+00 |
| Hadh     | _DTPGFIVNR_2                                                                                    | #N/A                    | 2.68E-02 NA | -4.94E-01 | -2.41E+00 | 1.81E-02 NA | -5.22E-01 | -2.60E+00 |
| Akr1a1   | _HPDEPVLLPEPVVLALEK_3                                                                           | #N/A                    | 2.69E-02 NA | -4.94E-01 | -2.41E+00 | 5.07E-03 NA | -6.01E-01 | -3.19E+00 |
| Psmad7   | _ALLEVVQSGGK_2                                                                                  | #N/A                    | 2.70E-02 NA | 4.94E-01  | 2.41E+00  | 3.59E-03 NA | 6.19E-01  | 3.35E+00  |
| Cacna2d1 | _SYDYQSV[C[Carbamidomethyl (C)]DPGAAPK_2                                                        | #N/A                    | 2.79E-02 NA | 4.91E-01  | 2.39E+00  | 7.92E-03 NA | 5.76E-01  | 2.99E+00  |
| Elavl2   | _FANNPSQK_2                                                                                     | #N/A                    | 2.80E-02 NA | 4.91E-01  | 2.39E+00  | 6.65E-03 NA | 5.86E-01  | 3.07E+00  |
| Grk2     | _GEVNAADAFDGS[Phospho (STY)]FDEEDTK_2                                                           | Q99MK8_S487_M1_Grk2     | 2.84E-02 NA | -4.90E-01 | -2.38E+00 | 1.36E-02 NA | -5.42E-01 | -2.74E+00 |
| Lrrc7    | _KSQS[Phospho (STY)]IDEIVGYTK_2                                                                 | Q80TE7_S949_M1_Lrrc7    | 2.85E-02 NA | 4.89E-01  | 2.38E+00  | 1.63E-02 NA | 5.30E-01  | 2.65E+00  |
| Raly     | _LS[Phospho (STY)]PVPVPR_2                                                                      | Q64012_S135_M1_Raly     | 2.89E-02 NA | -4.88E-01 | -2.37E+00 | 3.79E-03 NA | -6.17E-01 | -3.32E+00 |
| Pcbp1    | _QGAMINEIR_2                                                                                    | #N/A                    | 2.95E-02 NA | -4.87E-01 | -2.36E+00 | 8.22E-03 NA | -5.73E-01 | -2.97E+00 |
| Psmb4    | _FDGGVVIADFM[Oxidation (M)]LGSYGLSLAR_2                                                         | #N/A                    | 2.95E-02 NA | -4.87E-01 | -2.36E+00 | 1.36E-02 NA | -5.42E-01 | -2.73E+00 |
| Camk2b   | _S[Phospho (STY)]TVASMMHR_2                                                                     | P28652_S276_M1_Camk2b   | 2.96E-02 NA | 4.86E-01  | 2.36E+00  | 2.26E-02 NA | 5.07E-01  | 2.49E+00  |
| Dgkh     | _VPLHLES[Phospho (STY)]PHEER_3                                                                  | D3YXJ0_S1067_M1_Dgkh    | 2.99E-02 NA | -4.86E-01 | -2.36E+00 | 1.85E-02 NA | -5.21E-01 | -2.59E+00 |
| Brsk1    | _FQVDISSGPEPS[Phospho (STY)]PR_2                                                                | Q5RJI5_S676_M1_Brsk1    | 3.00E-02 NA | -4.86E-01 | -2.36E+00 | 2.23E-02 NA | -5.08E-01 | -2.50E+00 |
| Sik3     | _RAS[Phospho (STY)]DGGANIQLHAQQLLK_3                                                            | Q6P4S6_S493_M1_Sik3     | 3.00E-02 NA | -4.85E-01 | -2.36E+00 | 2.40E-02 NA | -5.02E-01 | -2.46E+00 |
| Gab1     | _SSS[Phospho (STY)]LEGFHSQYK_2                                                                  | Q9QYY0_S420_M1_Gab1     | 3.04E-02 NA | -4.85E-01 | -2.35E+00 | 2.15E-02 NA | -5.10E-01 | -2.52E+00 |
| Dst      | _AM[Oxidation (M)]VESQKQS[Phospho (STY)]PVVKR_3                                                 | Q91ZU6_S1381_M1_Dst     | 3.04E-02 NA | -4.85E-01 | -2.35E+00 | 1.81E-02 NA | -5.22E-01 | -2.60E+00 |
| Gls      | _YAIAVNDLGTVEYVHR_2                                                                             | #N/A                    | 3.07E-02 NA | -4.84E-01 | -2.35E+00 | 2.11E-02 NA | -5.12E-01 | -2.53E+00 |

|            |                                                                                                                                                                 |                          |             |           |           |             |           |           |
|------------|-----------------------------------------------------------------------------------------------------------------------------------------------------------------|--------------------------|-------------|-----------|-----------|-------------|-----------|-----------|
| Sptbn1     | _LVSQDNFGFDLPAVEAATK_2                                                                                                                                          | #N/A                     | 3.07E-02 NA | -4.84E-01 | -2.35E+00 | 2.41E-02 NA | -5.02E-01 | -2.46E+00 |
| Numbl      | _SVLWVSADGLR_2                                                                                                                                                  | #N/A                     | 3.07E-02 NA | 4.84E-01  | 2.34E+00  | 1.85E-02 NA | 5.21E-01  | 2.59E+00  |
| Slc35d3    | _KDYLMENEALPs[Phospho (STY)]P_2                                                                                                                                 | Q8BGF8_S421_M1_Slc35d3   | 3.07E-02 NA | 4.84E-01  | 2.34E+00  | 1.61E-02 NA | 5.30E-01  | 2.65E+00  |
| Rufy3      | _Acetyl (Protein N-term))[SALT[Phospho (STY)]PPTDM[Oxidation (M)]PT[Phospho (STY)]PTTDKITQAAM[Oxidation (M)]APAGAGC[Carbamidomethyl (C)]S[Phospho (STY)]PGEPR_2 | Q9D394_T12_M2_Rufy3      | 3.08E-02 NA | -4.83E-01 | -2.34E+00 | 1.46E-02 NA | -5.37E-01 | -2.70E+00 |
| Tnks1bp1   | _NM[Oxidation (M)]APAGAGC[Carbamidomethyl (C)]S[Phospho (STY)]PGEPR_2                                                                                           | P58871_S1290_M1_Tnks1bp1 | 3.12E-02 NA | -4.82E-01 | -2.34E+00 | 2.09E-02 NA | -5.13E-01 | -2.53E+00 |
| Gphn       | _VGVLTVSDSC[Carbamidomethyl (C)]FR_2                                                                                                                            | #N/A                     | 3.12E-02 NA | 4.82E-01  | 2.34E+00  | 1.47E-02 NA | 5.37E-01  | 2.70E+00  |
| Hnrrnpa3   | _IFVGGIKEDTEEYNLR_3                                                                                                                                             | #N/A                     | 3.14E-02 NA | -4.82E-01 | -2.33E+00 | 1.13E-02 NA | -5.54E-01 | -2.82E+00 |
| Cul9       | _AVLETPSTQGQDGS[Phospho (STY)]PESLIR_2                                                                                                                          | Q80TT8_S284_M1_Cul9      | 3.29E-02 NA | -4.78E-01 | -2.31E+00 | 4.29E-03 NA | -6.10E-01 | -3.27E+00 |
| Cfl1       | _SST[Phospho (STY)]PEEVKKR_2                                                                                                                                    | P18760_T25_M1_Cfl1       | 3.40E-02 NA | 4.76E-01  | 2.29E+00  | 9.76E-03 NA | 5.63E-01  | 2.89E+00  |
| Cndp2      | _TGQEIPVNL_2                                                                                                                                                    | #N/A                     | 3.40E-02 NA | 4.76E-01  | 2.29E+00  | 2.36E-02 NA | 5.03E-01  | 2.47E+00  |
| Diras2     | _VAVFGAGGVGK_2                                                                                                                                                  | #N/A                     | 3.44E-02 NA | -4.75E-01 | -2.29E+00 | 1.25E-02 NA | -5.47E-01 | -2.78E+00 |
| Phf24      | _RGT[Phospho (STY)]VEGSVQEVQEEKEASAPVVQEESSINR_4                                                                                                                | Q80TL4_T47_M1_Ph24       | 3.49E-02 NA | -4.74E-01 | -2.28E+00 | 6.95E-03 NA | -5.83E-01 | -3.05E+00 |
| Psat1      | _QVNVFGPGPAK_2                                                                                                                                                  | #N/A                     | 3.54E-02 NA | 4.72E-01  | 2.27E+00  | 1.22E-02 NA | 5.49E-01  | 2.78E+00  |
| Psma6      | _YEAANWK_2                                                                                                                                                      | #N/A                     | 3.55E-02 NA | 4.72E-01  | 2.27E+00  | 2.03E-02 NA | 5.14E-01  | 2.55E+00  |
| Pcdh19     | _DKES[Phospho (STY)]PSVKR_2                                                                                                                                     | Q80TF3_S1134_M1_Pcdh19   | 3.60E-02 NA | -4.71E-01 | -2.27E+00 | 1.72E-02 NA | -5.26E-01 | -2.62E+00 |
| Hgsnat     | _LINSELGS[Phospho (STY)]PSR_2                                                                                                                                   | Q3UDW8_S238_M1_Hgsnat    | 3.68E-02 NA | -4.69E-01 | -2.26E+00 | 1.43E-02 NA | -5.38E-01 | -2.71E+00 |
| Kctd4      | _HNS[Phospho (STY)]VEDAEQ GK_2                                                                                                                                  | Q9D7X1_S20_M1_Kctd4      | 3.69E-02 NA | -4.69E-01 | -2.25E+00 | 1.99E-02 NA | -5.16E-01 | -2.55E+00 |
| Camk2a     | _S[Phospho (STY)]TVASC[Carbamidomethyl (C)]M[Oxidation (M)]HR_2                                                                                                 | P11798_S275_M1_Camk2a    | 3.75E-02 NA | 4.68E-01  | 2.25E+00  | 2.41E-02 NA | 5.02E-01  | 2.46E+00  |
| Uqcrc2     | _ENM[Oxidation (M)]AYTVEGIR_2                                                                                                                                   | #N/A                     | 3.78E-02 NA | 4.67E-01  | 2.24E+00  | 1.33E-02 NA | 5.43E-01  | 2.74E+00  |
| Anks1b     | _LIFQSC[Carbamidomethyl (C)]DYK_2                                                                                                                               | #N/A                     | 3.79E-02 NA | 4.67E-01  | 2.24E+00  | 8.33E-03 NA | 5.73E-01  | 2.96E+00  |
| Atp6v1b2   | _NVLSQPR_2                                                                                                                                                      | #N/A                     | 3.79E-02 NA | 4.67E-01  | 2.24E+00  | 1.30E-02 NA | 5.45E-01  | 2.76E+00  |
| Atxn1      | _RWS[Phospho (STY)]APET_2                                                                                                                                       | P54254_S751_M1_Atxn1     | 3.80E-02 NA | -4.67E-01 | -2.24E+00 | 2.02E-02 NA | -5.15E-01 | -2.55E+00 |
| Atg9a      | _LEASYS[Phospho (STY)]PPGEEDLLVHVAEGSK_3                                                                                                                        | Q68FE2_S18_M1_Atg9a      | 3.87E-02 NA | -4.65E-01 | -2.23E+00 | 2.28E-02 NA | -5.06E-01 | -2.49E+00 |
| Ag2        | _S[Phospho (STY)]TQSLSLQR_2                                                                                                                                     | Q3UPL5_S217_M1_Ag2       | 3.91E-02 NA | -4.64E-01 | -2.23E+00 | 6.22E-03 NA | -5.90E-01 | -3.10E+00 |
| Homer1     | _HWEAELATLK_2                                                                                                                                                   | #N/A                     | 3.92E-02 NA | -4.64E-01 | -2.22E+00 | 1.76E-02 NA | -5.25E-01 | -2.61E+00 |
| Hsp90aa1   | _DNSTM[Oxidation (M)]GYMAAK_2                                                                                                                                   | #N/A                     | 3.99E-02 NA | 4.63E-01  | 2.21E+00  | 1.20E-02 NA | 5.50E-01  | 2.79E+00  |
| Prrc2c     | _SESS[Phospho (STY)]DFEVVPK_2                                                                                                                                   | Q3TLH4_S1222_M1_Prrc2c   | 4.03E-02 NA | -4.62E-01 | -2.21E+00 | 1.23E-02 NA | -5.48E-01 | -2.78E+00 |
| Add2       | _EQDHFLISPK_2                                                                                                                                                   | #N/A                     | 4.03E-02 NA | 4.62E-01  | 2.21E+00  | 1.41E-02 NA | 5.40E-01  | 2.72E+00  |
| Bcl2l13    | _S[Phospho (STY)]HTGEAAVR_2                                                                                                                                     | P59017_S387_M1_Bcl2l13   | 4.04E-02 NA | -4.62E-01 | -2.21E+00 | 1.96E-02 NA | -5.17E-01 | -2.56E+00 |
| Aldh7a1    | _VNLLSFTGSTQVGK_2                                                                                                                                               | #N/A                     | 4.06E-02 NA | 4.61E-01  | 2.21E+00  | 1.48E-02 NA | 5.36E-01  | 2.69E+00  |
| D10Wsu102e | _IEILDS[Phospho (STY)]PASK_2                                                                                                                                    | Q9CX66_S177_M1_D10Wsu10  | 4.06E-02 NA | -4.61E-01 | -2.21E+00 | 1.19E-02 NA | -5.50E-01 | -2.80E+00 |
| Atp6v1a    | _LAEM[Oxidation (M)]PADSGYPAYLGAR_2                                                                                                                             | #N/A                     | 4.08E-02 NA | 4.61E-01  | 2.20E+00  | 2.13E-02 NA | 5.11E-01  | 2.52E+00  |
| Hrh2       | _LNNS[Phospho (STY)]LLSR_2                                                                                                                                      | P97292_S321_M1_Hrh2      | 4.16E-02 NA | -4.59E-01 | -2.19E+00 | 1.85E-02 NA | -5.21E-01 | -2.59E+00 |
| Crad       | _VNLS[Phospho (STY)]PVTPAK_2                                                                                                                                    | Q5PR69_S552_M1_Crad      | 4.18E-02 NA | -4.59E-01 | -2.19E+00 | 2.39E-02 NA | -5.03E-01 | -2.47E+00 |
| Ogt        | _SDLGNLLK_2                                                                                                                                                     | #N/A                     | 4.30E-02 NA | -4.57E-01 | -2.18E+00 | 3.96E-03 NA | -6.14E-01 | -3.30E+00 |
| Opalin     | _S[Phospho (STY)]ENPRRSPTHEM[Oxidation (M)]NPR_4                                                                                                                | Q7M750_S84_M1_Opalin     | 4.31E-02 NA | -4.56E-01 | -2.18E+00 | 1.47E-02 NA | -5.37E-01 | -2.70E+00 |
| Crk        | _IHYLDTTLIEPVAR_3                                                                                                                                               | #N/A                     | 4.31E-02 NA | 4.56E-01  | 2.18E+00  | 1.08E-02 NA | 5.57E-01  | 2.84E+00  |
| Omg        | _LESPLAQLPR_2                                                                                                                                                   | #N/A                     | 4.31E-02 NA | 4.56E-01  | 2.18E+00  | 2.14E-02 NA | 5.11E-01  | 2.52E+00  |
| Bnip2      | _KGS[Phospho (STY)]ITEYTATEEK_2                                                                                                                                 | O54940_S114_M1_Bnip2     | 4.31E-02 NA | -4.56E-01 | -2.18E+00 | 1.54E-02 NA | -5.34E-01 | -2.68E+00 |
| Srrm2      | _DKFS[Phospho (STY)]PTQDRPESSTVLK_3                                                                                                                             | Q8BTI8_S1151_M1_Srrm2    | 4.32E-02 NA | -4.56E-01 | -2.17E+00 | 2.19E-02 NA | -5.09E-01 | -2.51E+00 |
| Elmo1      | _IAFDAESEPNSSGS[Phospho (STY)]M[Oxidation (M)]EK_2                                                                                                              | Q8BPU7_S344_M1_Elmo1     | 4.39E-02 NA | -4.55E-01 | -2.17E+00 | 9.31E-03 NA | -5.66E-01 | -2.91E+00 |
| Cap2       | _THTPSPTS[Phospho (STY)]PK_2                                                                                                                                    | Q9CYT6_S311_M1_Cap2      | 4.43E-02 NA | -4.54E-01 | -2.16E+00 | 2.42E-02 NA | -5.02E-01 | -2.46E+00 |
| Ufm1       | _VLSVPSTPFTAVLK_2                                                                                                                                               | #N/A                     | 4.49E-02 NA | 4.53E-01  | 2.16E+00  | 5.29E-03 NA | 5.99E-01  | 3.17E+00  |
| Eef1d      | _Acetyl (Protein N-term))[ATNFLAHEK_2                                                                                                                           | #N/A                     | 4.50E-02 NA | 4.53E-01  | 2.15E+00  | 1.26E-02 NA | 5.47E-01  | 2.77E+00  |
| Hmgcl      | _EVSVFGAVSELFTR_2                                                                                                                                               | #N/A                     | 4.51E-02 NA | -4.53E-01 | -2.15E+00 | 2.41E-02 NA | -5.02E-01 | -2.46E+00 |
| Cox7a2l    | _LTSSVTAVDYSGK_2                                                                                                                                                | #N/A                     | 4.52E-02 NA | 4.52E-01  | 2.15E+00  | 1.17E-02 NA | 5.51E-01  | 2.80E+00  |
| Nrcam      | _DSTGTYTC[Carbamidomethyl (C)]VAR_2                                                                                                                             | #N/A                     | 4.61E-02 NA | 4.51E-01  | 2.14E+00  | 1.19E-02 NA | 5.50E-01  | 2.80E+00  |
| Nckap1     | _NAYHAVYK_2                                                                                                                                                     | #N/A                     | 4.62E-02 NA | -4.51E-01 | -2.14E+00 | 2.16E-02 NA | -5.10E-01 | -2.52E+00 |
| Atp6v1c1   | _VQENLLASGVDLVYITR_3                                                                                                                                            | #N/A                     | 4.67E-02 NA | -4.50E-01 | -2.14E+00 | 2.25E-02 NA | -5.07E-01 | -2.50E+00 |
| Ube2v2     | _GVGDGTVSWGLEDDEDM[Oxidation (M)]TLTR_2                                                                                                                         | #N/A                     | 4.68E-02 NA | -4.50E-01 | -2.14E+00 | 2.20E-02 NA | -5.09E-01 | -2.51E+00 |
| Pak1       | _LTDGFGC[Carbamidomethyl (C)]AQITPEQSK_2                                                                                                                        | #N/A                     | 4.71E-02 NA | 4.49E-01  | 2.13E+00  | 1.40E-02 NA | 5.40E-01  | 2.72E+00  |
| Lrrc7      | _SYS[Phospho (STY)]JTESYGASQTR_2                                                                                                                                | Q80TE7_S1206_M1_Lrrc7    | 4.80E-02 NA | -4.47E-01 | -2.12E+00 | 1.84E-02 NA | -5.21E-01 | -2.59E+00 |
| Gdi2       | _AYDATTHFETTC[Carbamidomethyl (C)]DDIKDIYKR_4                                                                                                                   | #N/A                     | 4.95E-02 NA | -4.45E-01 | -2.11E+00 | 2.43E-02 NA | -5.01E-01 | -2.46E+00 |
| Etfa       | _GLLPEELTPULETK_2                                                                                                                                               | #N/A                     | 4.99E-02 NA | 4.44E-01  | 2.10E+00  | 1.61E-02 NA | 5.30E-01  | 2.65E+00  |
| Arhgap33   | _QQS[Phospho (STY)]DGLSLVR_2                                                                                                                                    | Q80YF9_S995_M1_Arhgap33  | 5.04E-02 NA | -4.43E-01 | -2.10E+00 | 2.15E-02 NA | -5.10E-01 | -2.52E+00 |
| Macf1      | _AM[Oxidation (M)]DATLS[Phospho (STY)]PTKTETVK_2                                                                                                                | Q9QXZ0_S4458_M1_Macf1    | 5.26E-02 NA | 4.39E-01  | 2.08E+00  | 1.66E-02 NA | 5.28E-01  | 2.64E+00  |
| Xkr7       | _TKEGS[Phospho (STY)]AELVPR_2                                                                                                                                   | Q5GH64_S154_M1_Xkr7      | 5.27E-02 NA | 4.39E-01  | 2.07E+00  | 8.08E-03 NA | 5.74E-01  | 2.98E+00  |



|          |                                                                                  |                        |             |           |           |             |           |           |
|----------|----------------------------------------------------------------------------------|------------------------|-------------|-----------|-----------|-------------|-----------|-----------|
| Adcy6    | _NAEPPS[Phospho (STY)]PTPAAHTR_2                                                 | Q01341_S53_M1_Adcy6    | 5.31E-02 NA | -4.38E-01 | -2.07E+00 | 2.10E-02 NA | -5.12E-01 | -2.53E+00 |
| Ndr3     | _HQTMEVS[Phospho (STY)]C[Carbamidomethyl (C)]_2                                  | Q9QYF9_S374_M1_Ndr3    | 5.48E-02 NA | 4.36E-01  | 2.05E+00  | 1.67E-02 NA | 5.28E-01  | 2.64E+00  |
| Sorbs1   | _S[Phospho (STY)]AESLLESTK_2                                                     | Q62417_S722_M1_Sorbs1  | 5.50E-02 NA | -4.35E-01 | -2.05E+00 | 2.22E-02 NA | -5.08E-01 | -2.50E+00 |
| Enah     | _NSRPS[Phospho (STY)]PVNTPSSQPPAAK_3                                             | Q03173_S355_M1_Enah    | 5.52E-02 NA | -4.35E-01 | -2.05E+00 | 1.98E-02 NA | -5.16E-01 | -2.56E+00 |
| Wnk3     | _EGETTVMETSS[Phospho (STY)]PK_2                                                  | Q80XP9_S1039_M1_Wnk3   | 5.62E-02 NA | -4.33E-01 | -2.04E+00 | 1.97E-02 NA | -5.17E-01 | -2.56E+00 |
| Pgls     | _TGALC[Carbamidomethyl (C)]WFLDEAAAR_2                                           | #N/A                   | 5.67E-02 NA | -4.33E-01 | -2.04E+00 | 2.32E-02 NA | -5.05E-01 | -2.48E+00 |
| Stx7     | _Acetyl (Protein N-term)]S[Phospho (STY)]YTPGIGGDSAQLAQR_2                       | O70439_S2_M1_Stx7      | 5.70E-02 NA | -4.32E-01 | -2.03E+00 | 8.64E-03 NA | -5.70E-01 | -2.95E+00 |
| Cep170   | _SDS[Phospho (STY)]EATISR_2                                                      | Q6A065_S1157_M1_Cep170 | 5.73E-02 NA | -4.32E-01 | -2.03E+00 | 2.37E-02 NA | -5.03E-01 | -2.47E+00 |
| Igsf8    | _VASGDLQVQR_2                                                                    | #N/A                   | 5.77E-02 NA | 4.31E-01  | 2.03E+00  | 1.00E-02 NA | 5.61E-01  | 2.88E+00  |
| Ly6h     | _QC[Carbamidomethyl (C)]QPTDTVC[Carbamidomethyl (C)]ASVR_2                       | #N/A                   | 5.77E-02 NA | 4.31E-01  | 2.03E+00  | 1.83E-02 NA | 5.22E-01  | 2.59E+00  |
| Hnrnp1   | _ISRPGDS[Phospho (STY)]DDSR_2                                                    | Q8R081_S182_M1_Hnrnp1  | 5.86E-02 NA | -4.30E-01 | -2.02E+00 | 1.84E-02 NA | -5.21E-01 | -2.59E+00 |
| Atp1b2   | _SC[Carbamidomethyl (C)]GQVVEWKEFVWNP_3                                          | #N/A                   | 5.90E-02 NA | -4.29E-01 | -2.02E+00 | 1.49E-02 NA | -5.36E-01 | -2.69E+00 |
| Cpne1    | _APPT[Phospho (STY)]PGKGPAQAPQA_2                                                | Q8C166_T525_M1_Cpne1   | 5.92E-02 NA | 4.29E-01  | 2.01E+00  | 2.45E-02 NA | 5.01E-01  | 2.46E+00  |
| Irf2bpl  | _S[Phospho (STY)]PGPPPPVGVK_2                                                    | Q8K3X4_S69_M1_Irf2bpl  | 5.94E-02 NA | -4.29E-01 | -2.01E+00 | 9.69E-03 NA | -5.63E-01 | -2.89E+00 |
| Plppr4   | _DSESC[Carbamidomethyl (C)]ESLKD5FGS[Phospho (STY)]GDR_2                         | Q7TME0_S685_M1_Plppr4  | 5.98E-02 NA | 4.28E-01  | 2.01E+00  | 6.29E-03 NA | 5.89E-01  | 3.09E+00  |
| Purb     | _DSLGDIEHYAQLGPS[Phospho (STY)]PEQLAAGAEEGGPR_4                                  | O35295_S113_M1_Purb    | 6.00E-02 NA | -4.28E-01 | -2.01E+00 | 1.87E-02 NA | -5.20E-01 | -2.59E+00 |
| Sptan1   | _VNEVSQFAAK_2                                                                    | #N/A                   | 6.02E-02 NA | 4.27E-01  | 2.01E+00  | 6.21E-03 NA | 5.90E-01  | 3.10E+00  |
| Nmt1     | _SGLS[Phospho (STY)]PANDTGAKK_2                                                  | O70310_S47_M1_Nmt1     | 6.07E-02 NA | -4.27E-01 | -2.00E+00 | 1.34E-02 NA | -5.43E-01 | -2.74E+00 |
| Ppp6r1   | _EQM[Oxidation (M)]IQGQDS[Phospho (STY)]PEPDQLLATLEK_3                           | Q7T5I3_S232_M1_Ppp6r1  | 6.09E-02 NA | -4.26E-01 | -2.00E+00 | 7.05E-03 NA | -5.82E-01 | -3.04E+00 |
| Pak1     | _MSDEIELEK_2                                                                     | #N/A                   | 6.14E-02 NA | 4.26E-01  | 2.00E+00  | 2.14E-02 NA | 5.11E-01  | 2.52E+00  |
| Plxdc2   | _RGS[Phospho (STY)]GHPAYAEVPEVGEK_3                                              | Q9DC11_S507_M1_Plxdc2  | 6.14E-02 NA | -4.26E-01 | -1.99E+00 | 1.00E-02 NA | -5.61E-01 | -2.88E+00 |
| Ppip5k1  | _TDPGS[Phospho (STY)]ENLC[Carbamidomethyl (C)]PGK_2                              | A2ARP1_S939_M1_Ppip5k1 | 6.19E-02 NA | -4.25E-01 | -1.99E+00 | 2.15E-02 NA | -5.10E-01 | -2.52E+00 |
| Stard8   | _SLS[Phospho (STY)]IESLC[Carbamidomethyl (C)]PDEGR_2                             | Q8K031_S234_M1_Stard8  | 6.29E-02 NA | -4.23E-01 | -1.98E+00 | 1.26E-02 NA | -5.47E-01 | -2.77E+00 |
| Smg9     | _WKPEGSSGPQLS[Phospho (STY)]GPGGR_3                                              | Q9DB90_S32_M1_Smg9     | 6.41E-02 NA | -4.22E-01 | -1.97E+00 | 2.31E-02 NA | -5.05E-01 | -2.48E+00 |
| Rasa3    | _T[Phospho (STY)]RYGSEQHPIGDK_3                                                  | Q60790_T805_M1_Rasa3   | 6.60E-02 NA | -4.19E-01 | -1.96E+00 | 2.14E-02 NA | -5.11E-01 | -2.52E+00 |
| Hspa9    | _QAVTNPNNTFYATK_2                                                                | #N/A                   | 6.67E-02 NA | 4.18E-01  | 1.95E+00  | 1.24E-02 NA | 5.48E-01  | 2.78E+00  |
| Srrm1    | _VS[Phospho (STY)]VS[Phospho (STY)]PGR_2                                         | Q52KI8_S427_M2_Srrm1   | 6.77E-02 NA | -4.16E-01 | -1.94E+00 | 1.40E-02 NA | -5.40E-01 | -2.72E+00 |
| Cobl     | _KSS[Phospho (STY)]LGNDETDKEK_2                                                  | Q5NBX1_S235_M1_Cobl    | 6.86E-02 NA | -4.15E-01 | -1.94E+00 | 1.79E-02 NA | -5.23E-01 | -2.61E+00 |
| Epn1     | _TALPTSGS[Phospho (STY)]STGELELLAGEVPAR_2                                        | Q80VP1_S418_M1_Epn1    | 6.94E-02 NA | -4.14E-01 | -1.93E+00 | 1.92E-02 NA | -5.18E-01 | -2.57E+00 |
| Tpd52l2  | _HSIS[Phospho (STY)]M[Oxidation (M)]PVM[Oxidation (M)]R_2                        | Q9CYZ2_S168_M1_Tpd52l2 | 6.96E-02 NA | -4.14E-01 | -1.93E+00 | 1.98E-02 NA | -5.16E-01 | -2.56E+00 |
| Gnb5     | _VIVWDSFTTNK_2                                                                   | #N/A                   | 7.06E-02 NA | -4.13E-01 | -1.92E+00 | 1.85E-02 NA | -5.21E-01 | -2.59E+00 |
| Txn1     | _QHLENDPGS[Phospho (STY)]NEDADIPK_2                                              | Q8CDN6_S113_M1_Txn1    | 7.09E-02 NA | -4.12E-01 | -1.92E+00 | 2.19E-02 NA | -5.09E-01 | -2.51E+00 |
| Ina      | _SNVASTAAC[Carbamidomethyl (C)]SSASSLGLGLAYR_2                                   | #N/A                   | 7.20E-02 NA | -4.11E-01 | -1.91E+00 | 2.33E-02 NA | -5.05E-01 | -2.48E+00 |
| Pdhb     | _TYYM[Oxidation (M)]SAGLQVPVIVFR_2                                               | #N/A                   | 7.20E-02 NA | -4.11E-01 | -1.91E+00 | 1.91E-02 NA | -5.19E-01 | -2.58E+00 |
| Cct3     | _NVLLDPQLVPGGASEM[Oxidation (M)]AVAHALTEK_3                                      | #N/A                   | 7.26E-02 NA | -4.10E-01 | -1.91E+00 | 2.07E-02 NA | -5.13E-01 | -2.54E+00 |
| Stxbp1   | _HIAEVSQEVTR_2                                                                   | #N/A                   | 7.32E-02 NA | 4.09E-01  | 1.90E+00  | 2.18E-02 NA | 5.09E-01  | 2.51E+00  |
| Rab3ip   | _TLVLSSTPS[Phospho (STY)]PTQEPLAAAK_2                                            | Q68EF0_S218_M1_Rab3ip  | 7.45E-02 NA | -4.07E-01 | -1.89E+00 | 1.46E-02 NA | -5.37E-01 | -2.70E+00 |
| Rabgta   | _ELLLC[Carbamidomethyl (C)]NNR_2                                                 | #N/A                   | 7.53E-02 NA | 4.07E-01  | 1.89E+00  | 1.80E-02 NA | 5.23E-01  | 2.60E+00  |
| Terf2    | _DLVLANLASSP[Phospho (STY)]PAHK_2                                                | O35144_S367_M1_Terf2   | 7.55E-02 NA | -4.06E-01 | -1.89E+00 | 2.36E-02 NA | -5.04E-01 | -2.47E+00 |
| Gap43    | _EGDGSATTDAAPATS[Phospho (STY)]PKAEPSKAGDAPSEEK_4                                | #N/A                   | 7.57E-02 NA | -4.06E-01 | -1.88E+00 | 1.71E-02 NA | -5.27E-01 | -2.63E+00 |
| Ezr      | _QLLTLSNELSQAR_2                                                                 | #N/A                   | 7.61E-02 NA | 4.06E-01  | 1.88E+00  | 1.74E-02 NA | 5.25E-01  | 2.62E+00  |
| Crad     | _ETAQTD[Phospho (STY)]PQPQER_2                                                   | Q5PR69_S487_M1_Crad    | 7.67E-02 NA | 4.05E-01  | 1.88E+00  | 1.31E-02 NA | 5.44E-01  | 2.75E+00  |
| Pdlim4   | _IHIDPESQDC[Carbamidomethyl (C)]S[Phospho (STY)]PATSR_2                          | P70271_S111_M1_Pdlim4  | 7.70E-02 NA | -4.04E-01 | -1.88E+00 | 1.14E-02 NA | -5.53E-01 | -2.82E+00 |
| Ranbp3   | _S[Phospho (STY)]PSESAEETHLEEK_2                                                 | Q9CT10_S146_M1_Ranbp3  | 7.75E-02 NA | 4.04E-01  | 1.87E+00  | 1.56E-02 NA | 5.33E-01  | 2.67E+00  |
| Ywhab    | _QTTVSNSQQAQEAIFEIK_2                                                            | #N/A                   | 7.77E-02 NA | -4.03E-01 | -1.87E+00 | 1.92E-02 NA | -5.18E-01 | -2.57E+00 |
| Pikfyve  | _Acetyl (Protein N-term)]ATDDKSS[Phospho (STY)]PTLDSANDLPR_2                     | Q9Z1T6_S8_M1_Pikfyve   | 7.84E-02 NA | -4.03E-01 | -1.87E+00 | 6.85E-03 NA | -5.48E-01 | -3.05E+00 |
| Srrm1    | _RRT[Phospho (STY)]AS[Phospho (STY)]PPPPK_2                                      | Q52KI8_S635_M2_Srrm1   | 7.92E-02 NA | -4.02E-01 | -1.86E+00 | 1.63E-02 NA | -5.30E-01 | -2.65E+00 |
| Tspyl5   | _AAAEADAWHDEKPPQS[Phospho (STY)]PR_3                                             | Q69ZB3_S41_M1_Tspyl5   | 7.97E-02 NA | -4.01E-01 | -1.86E+00 | 1.07E-02 NA | -5.57E-01 | -2.85E+00 |
| Hspa4    | _VLATAFDTTLGGR_2                                                                 | #N/A                   | 8.06E-02 NA | 4.00E-01  | 1.85E+00  | 2.21E-02 NA | 5.08E-01  | 2.50E+00  |
| Hspa5    | _AKFEELNM[Oxidation (M)]DLFR_3                                                   | #N/A                   | 8.08E-02 NA | -4.00E-01 | -1.85E+00 | 2.09E-02 NA | -5.12E-01 | -2.53E+00 |
| Ttc1     | _AAAEHPQDDHVEEC[Carbamidomethyl (C)]FHDCC[Carbamidomethyl (C)]SASFEEQPGAHVAGSK_5 | #N/A                   | 8.26E-02 NA | -3.98E-01 | -1.84E+00 | 1.35E-02 NA | -5.42E-01 | -2.74E+00 |
| Ccdc6    | _LDQPVSAPPS[Phospho (STY)]PR_2                                                   | D3YZP9_S237_M1_Ccdc6   | 8.32E-02 NA | -3.97E-01 | -1.83E+00 | 2.15E-02 NA | -5.10E-01 | -2.52E+00 |
| Gas2l1   | _TGTF[Phospho (STY)]PQR_2                                                        | Q8JZP9_S292_M1_Gas2l1  | 8.38E-02 NA | -3.96E-01 | -1.83E+00 | 1.19E-02 NA | -5.50E-01 | -2.80E+00 |
| Grin2a   | _DKGS[Phospho (STY)]PHSEGSORYR_3                                                 | P35436_S1198_M1_Grin2a | 8.42E-02 NA | -3.96E-01 | -1.83E+00 | 2.45E-02 NA | -5.01E-01 | -2.45E+00 |
| Atp6v0a1 | _KANIPIMDTGENPEVPFPR_3                                                           | #N/A                   | 8.48E-02 NA | 3.95E-01  | 1.82E+00  | 2.35E-02 NA | 5.04E-01  | 2.47E+00  |
| Pcbp2    | _LVVPASQC[Carbamidomethyl (C)]GSLIGK_2                                           | #N/A                   | 8.50E-02 NA | 3.95E-01  | 1.82E+00  | 1.77E-02 NA | 5.24E-01  | 2.61E+00  |
| Pclo     | _KSS[Phospho (STY)]TS[Phospho (STY)]FDDDAGR_2                                    | Q9QYX7_S1551_M2_Pclo   | 8.61E-02 NA | -3.93E-01 | -1.82E+00 | 1.70E-02 NA | -5.27E-01 | -2.63E+00 |

|          |                                                                 |                         |             |           |           |             |           |           |
|----------|-----------------------------------------------------------------|-------------------------|-------------|-----------|-----------|-------------|-----------|-----------|
| Tbr1     | _S[Phospho (STY)]PPQYC[Carbamidomethyl (C)]GAK_2                | Q64336_S549_M1_Tbr1     | 8.64E-02 NA | 3.93E-01  | 1.81E+00  | 1.64E-02 NA | 5.29E-01  | 2.65E+00  |
| Cacnb4   | _HSNHS[Phospho (STY)]ITENS[Phospho (STY)]PIERR_3                | Q8R0S4_S443_M2_Cacnb4   | 8.75E-02 NA | -3.92E-01 | -1.81E+00 | 2.02E-02 NA | -5.15E-01 | -2.55E+00 |
| Csde1    | _ATNIEVLSNTFQFTNEAR_2                                           | #N/A                    | 8.87E-02 NA | 3.91E-01  | 1.80E+00  | 1.92E-02 NA | 5.18E-01  | 2.57E+00  |
| Gstm1    | _RPWFAGDK_2                                                     | #N/A                    | 9.05E-02 NA | 3.88E-01  | 1.79E+00  | 2.00E-02 NA | 5.16E-01  | 2.55E+00  |
| Mpp2     | _DNNLELVQEILR_2                                                 | #N/A                    | 9.07E-02 NA | 3.88E-01  | 1.79E+00  | 2.47E-02 NA | 5.00E-01  | 2.45E+00  |
| Oxr1     | _KATGV[S[Phospho (STY)]JAEDADPR_2                               | Q4KMM3_S308_M1_Oxr1     | 9.08E-02 NA | -3.88E-01 | -1.79E+00 | 9.72E-03 NA | -5.63E-01 | -2.89E+00 |
| Cct7     | _ATISNDGATILK_2                                                 | #N/A                    | 9.11E-02 NA | 3.88E-01  | 1.79E+00  | 2.17E-02 NA | 5.10E-01  | 2.51E+00  |
| Rab11b   | _NEFNLESK_2                                                     | #N/A                    | 9.33E-02 NA | -3.85E-01 | -1.77E+00 | 1.76E-02 NA | -5.24E-01 | -2.61E+00 |
| Atp6v1a  | _DDFLQONGYTPYDR_2                                               | #N/A                    | 9.35E-02 NA | 3.85E-01  | 1.77E+00  | 2.30E-02 NA | 5.05E-01  | 2.48E+00  |
| Cnrip1   | _JQPNDBGVPVFK_2                                                 | #N/A                    | 9.42E-02 NA | -3.84E-01 | -1.77E+00 | 2.36E-02 NA | -5.03E-01 | -2.47E+00 |
| Gprin1   | _KTDPEFSGKLT[Phospho (STY)]PGSSGK_3                             | Q3UNH4_T256_M1_Gprin1   | 9.47E-02 NA | 3.84E-01  | 1.76E+00  | 1.62E-02 NA | 5.30E-01  | 2.65E+00  |
| Git1     | _ARS[Phospho (STY)]M[Oxidation (M)]DSSDLSDGAVTLQEYLELKK_3       | Q68FF6_S419_M1_Git1     | 9.50E-02 NA | -3.84E-01 | -1.76E+00 | 2.21E-02 NA | -5.08E-01 | -2.50E+00 |
| Grk2     | _SLEGLLQR_2                                                     | #N/A                    | 9.57E-02 NA | 3.83E-01  | 1.76E+00  | 2.06E-02 NA | 5.13E-01  | 2.54E+00  |
| Ppp2r1a  | _LSTIALALGVER_2                                                 | #N/A                    | 9.61E-02 NA | -3.82E-01 | -1.76E+00 | 1.80E-02 NA | -5.23E-01 | -2.60E+00 |
| Rap1a    | _INVNEIFYDLVR_2                                                 | #N/A                    | 9.76E-02 NA | 3.81E-01  | 1.75E+00  | 1.88E-02 NA | 5.20E-01  | 2.58E+00  |
| Hba      | _M[Oxidation (M)]FASFPTTK_2                                     | #N/A                    | 9.78E-02 NA | 3.81E-01  | 1.75E+00  | 1.70E-02 NA | 5.27E-01  | 2.63E+00  |
| Pdhx     | _HSLDASQGTATGPR_2                                               | #N/A                    | 1.01E-01 NA | 3.78E-01  | 1.73E+00  | 2.05E-02 NA | 5.14E-01  | 2.54E+00  |
| Prkra    | _AEAPPLQREDS[Phospho (STY)]GTFSLGK_3                            | Q9WTX2_S18_M1_Prkra     | 1.03E-01 NA | -3.75E-01 | -1.72E+00 | 9.15E-03 NA | -5.67E-01 | -2.92E+00 |
| Sars1    | _ELVSC[Carbamidomethyl (C)]SN[C[Carbamidomethyl (C)]TDYQAR_2    | #N/A                    | 1.03E-01 NA | 3.75E-01  | 1.72E+00  | 2.31E-02 NA | 5.05E-01  | 2.48E+00  |
| Cct4     | _ALIAGGGAPEIELALR_2                                             | #N/A                    | 1.06E-01 NA | 3.73E-01  | 1.70E+00  | 1.27E-02 NA | 5.46E-01  | 2.77E+00  |
| Eef2     | _FT[Phospho (STY)]DTRKDEQER_2                                   | P58252_T57_M1_Eef2      | 1.06E-01 NA | 3.72E-01  | 1.70E+00  | 1.50E-02 NA | 5.35E-01  | 2.69E+00  |
| Plppr4   | _QQGVLCSS[Phospho (STY)]PK_2                                    | Q7TME0_S594_M1_Plppr4   | 1.07E-01 NA | -3.71E-01 | -1.70E+00 | 9.19E-03 NA | -5.67E-01 | -2.92E+00 |
| Sphkap   | _RAS[Phospho (STY)]TDLGK_2                                      | Q6NSW3_S841_M1_Sphkap   | 1.15E-01 NA | -3.64E-01 | -1.66E+00 | 1.98E-02 NA | -5.16E-01 | -2.56E+00 |
| Ddt      | _FFPLEAWQIGK_2                                                  | #N/A                    | 1.18E-01 NA | 3.61E-01  | 1.64E+00  | 2.04E-02 NA | 5.14E-01  | 2.54E+00  |
| Sorbs2   | _SFISSPSS[Phospho (STY)]PSR_2                                   | Q3UTJ2_S382_M1_Sorbs2   | 1.22E-01 NA | -3.58E-01 | -1.62E+00 | 9.89E-03 NA | -5.62E-01 | -2.88E+00 |
| Rtn4     | _EHGYLGNLSAVASTGTEIETLNEASR_3                                   | #N/A                    | 1.22E-01 NA | -3.57E-01 | -1.62E+00 | 2.40E-02 NA | -5.02E-01 | -2.46E+00 |
| Glul     | _ITGTNAEVM[Oxidation (M)]PAQWEFQIGPC[Carbamidomethyl (C)]JGIR_3 | #N/A                    | 1.24E-01 NA | -3.56E-01 | -1.62E+00 | 2.02E-02 NA | -5.15E-01 | -2.55E+00 |
| Gripap1  | _KQES[Phospho (STY)]JFC[Carbamidomethyl (C)]JR_2                | Q8VDD4_S237_M1_Gripap1  | 1.27E-01 NA | -3.53E-01 | -1.60E+00 | 1.75E-02 NA | -5.25E-01 | -2.62E+00 |
| Pcbp2    | _QVTITGSAASISLAQYUNVR_2                                         | #N/A                    | 1.28E-01 NA | -3.52E-01 | -1.59E+00 | 2.27E-02 NA | -5.06E-01 | -2.49E+00 |
| Srrm4    | _SAS[Phospho (STY)]PLAATR_2                                     | Q8BKA3_S271_M1_Srrm4    | 1.30E-01 NA | -3.50E-01 | -1.59E+00 | 1.46E-02 NA | -5.37E-01 | -2.70E+00 |
| Lrrc8c   | _SGT[Phospho (STY)]QSGPEGNLVR_2                                 | Q8R502_T198_M1_Lrrc8c   | 1.35E-01 NA | -3.46E-01 | -1.57E+00 | 1.92E-02 NA | -5.18E-01 | -2.57E+00 |
| Arhgef6  | _KAS[Phospho (STY)]EEEEYVR_2                                    | Q8K4I3_S639_M1_Arhgef6  | 1.40E-01 NA | -3.42E-01 | -1.54E+00 | 1.09E-02 NA | -5.56E-01 | -2.84E+00 |
| Dennd5a  | _FNS[Phospho (STY)]YDISR_2                                      | Q6PAL8_S193_M1_Dennd5a  | 1.41E-01 NA | -3.41E-01 | -1.54E+00 | 2.07E-02 NA | -5.13E-01 | -2.54E+00 |
| Hapln1   | _LLVEAEQAK_2                                                    | #N/A                    | 1.44E-01 NA | -3.39E-01 | -1.53E+00 | 1.34E-02 NA | -5.43E-01 | -2.74E+00 |
| Basp1    | _AGEASAESTGAADGAAPEEGEAKTEAPAAAGPEAK_4                          | #N/A                    | 1.44E-01 NA | -3.38E-01 | -1.53E+00 | 6.50E-03 NA | -5.87E-01 | -3.08E+00 |
| Actn1    | _ASIHEAWTDGK_2                                                  | #N/A                    | 1.45E-01 NA | 3.38E-01  | 1.52E+00  | 2.15E-02 NA | 5.10E-01  | 2.52E+00  |
| Synpo    | _PKPNQNLSEASGK_3                                                | #N/A                    | 1.52E-01 NA | 3.32E-01  | 1.49E+00  | 1.66E-02 NA | 5.29E-01  | 2.64E+00  |
| Ncam1    | _AAHFVFR_2                                                      | #N/A                    | 1.55E-01 NA | 3.30E-01  | 1.48E+00  | 2.15E-02 NA | 5.10E-01  | 2.52E+00  |
| Hmgcl    | _LLEAGDFIC[Carbamidomethyl (C)]QALNR_2                          | #N/A                    | 1.58E-01 NA | 3.28E-01  | 1.47E+00  | 2.14E-02 NA | 5.11E-01  | 2.52E+00  |
| Begain   | _YGGGGGGGAAGGGS[Phospho (STY)]PGDKAEGR_3                        | Q68EF6_S463_M1_Begain   | 1.58E-01 NA | -3.28E-01 | -1.47E+00 | 2.14E-02 NA | -5.11E-01 | -2.52E+00 |
| Pclo     | _GSVPAAAAES[Phospho (STY)]PSM[Oxidation (M)]HR_2                | Q9QYX7_S75_M1_Pclo      | 1.70E-01 NA | -3.19E-01 | -1.43E+00 | 2.38E-02 NA | -5.03E-01 | -2.47E+00 |
| Tnks1bp1 | _RDS[Phospho (STY)]LGSFSTR_2                                    | P58871_S866_M1_Tnks1bp1 | 1.74E-01 NA | -3.17E-01 | -1.42E+00 | 1.16E-02 NA | -5.52E-01 | -2.81E+00 |
| Tjp1     | _AVPVS[Phospho (STY)]PSAVEEDEDEDGHTVVATAR_3                     | P39447_S1614_M1_Tjp1    | 1.80E-01 NA | -3.12E-01 | -1.39E+00 | 2.10E-02 NA | -5.12E-01 | -2.53E+00 |
| Ywhah    | _EAFEISK_2                                                      | #N/A                    | 1.99E-01 NA | -3.00E-01 | -1.33E+00 | 2.17E-02 NA | -5.10E-01 | -2.51E+00 |
| Bod1l    | _KLS[Phospho (STY)]SQPSTDVSTDKER_3                              | E9Q6J5_S236_M1_Bod1l    | 2.05E-01 NA | -2.96E-01 | -1.31E+00 | 2.33E-02 NA | -5.04E-01 | -2.48E+00 |
| Plppr3   | _QPGM[Oxidation (M)]GPGS[Phospho (STY)]PVSDVDQEEPR_2            | Q7TPB0_S641_M1_Plppr3   | 2.05E-01 NA | -2.96E-01 | -1.31E+00 | 2.21E-02 NA | -5.08E-01 | -2.50E+00 |
| Pcmt1    | _ELVDDISITNVKK_3                                                | #N/A                    | 2.26E-01 NA | 2.83E-01  | 1.25E+00  | 1.84E-02 NA | 5.21E-01  | 2.59E+00  |
| Madd     | _S[Phospho (STY)]PTENVNTPVGKDPGLAGR_2                           | Q80U28_S1058_M1_Madd    | 2.37E-01 NA | 2.77E-01  | 1.22E+00  | 2.31E-02 NA | 5.05E-01  | 2.48E+00  |
| Otub1    | _GEGGTTNPHVPEGSEPK_3                                            | #N/A                    | 2.37E-01 NA | 2.77E-01  | 1.22E+00  | 1.75E-02 NA | 5.25E-01  | 2.62E+00  |
| Cct7     | _TC[Carbamidomethyl (C)]TIILR_2                                 | #N/A                    | 2.54E-01 NA | -2.67E-01 | -1.18E+00 | 1.90E-02 NA | -5.19E-01 | -2.58E+00 |
| Clcc1    | _EVSPDS[Phospho (STY)]SEAEELSDC[Carbamidomethyl (C)]LHR_3       | Q99LI2_S58_M1_Clcc1     | 2.63E-01 NA | -2.63E-01 | -1.16E+00 | 2.27E-02 NA | -5.06E-01 | -2.49E+00 |
| Gnai2    | _QLFALSC[Carbamidomethyl (C)]AAEEQGM[Oxidation (M)]LPEDLSGVIR_3 | #N/A                    | 2.73E-01 NA | 2.57E-01  | 1.13E+00  | 2.44E-02 NA | 5.01E-01  | 2.46E+00  |
| Rpl13    | _TIGISVDR_2                                                     | #N/A                    | 2.80E-01 NA | 2.54E-01  | 1.11E+00  | 1.94E-02 NA | 5.18E-01  | 2.57E+00  |
| Stk39    | _RVPGSS[Phospho (STY)]GHLHK_3                                   | Q9Z1W9_S383_M1_Stk39    | 3.18E-01 NA | -2.35E-01 | -1.03E+00 | 2.12E-02 NA | -5.11E-01 | -2.53E+00 |
