# Supplementary material for: The Chronic Effects of a Single Low-Intensity Blast Exposure on Phosphoproteome Networks and Cognitive Function Influenced by Mutant Tau Overexpression
Source: Int J Mol Sci. 2024 Mar 15;25(6):3338. doi: 10.3390/ijms25063338 (PMC10970429; doi:10.3390/ijms25063338)
Supplement: Supplementary file 1 [file ijms-25-03338-s001.zip]

Archive with 13 entries (13 files):
- Supplementary File S3- WpCNA code in RMarkdown.pdf
- Supplementary File S9- Blast experiment result.pdf
- Supplementary Table S1a- MS2 raw data.pdf
- Supplementary Table S1a- MS2 raw data_non-carriers.pdf
- Supplementary Table S1a- MS2 raw data_rTg4510.pdf
- Supplementary Table S1b- MS2 significant phosphopeptides_non-carriers.pdf
- Supplementary Table S1b- MS2 significant phosphopeptides_rTg4510.pdf
- Supplementary Table S2- Cogwall data.pdf
- Supplementary Table S4- Standard Peptide screening results.pdf
- Supplementary Table S5- Phospep module assigment.pdf
- Supplementary Table S6- Module eigenpeptides for each animal.pdf
- Supplementary Table S7- Network Screening.pdf
- Supplementary Table S8- Black and turquoise module GO.pdf
